# Supplementary material for: Tailor-made spatial patterns for hydrological model parameters combining regionalisation methods
Source: Copernicus journal article supplement (doi:10.5194/hess-2018-342), 2018-06-29

# c\_monh (156.84 km²) – année 1981–1982

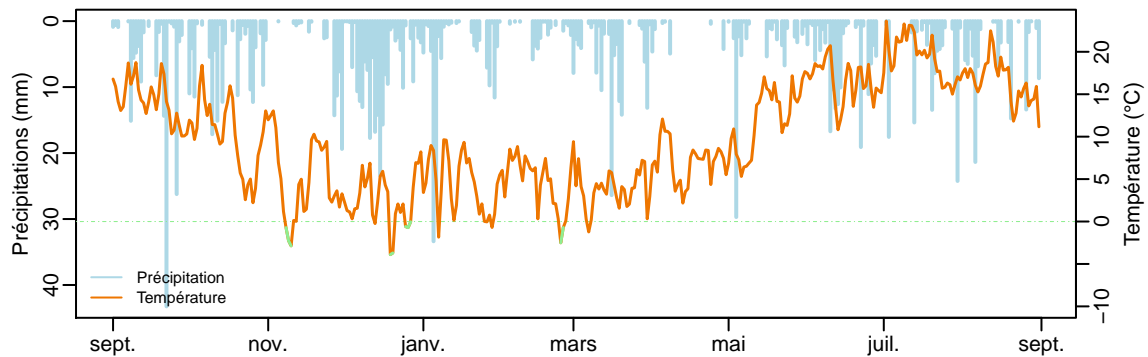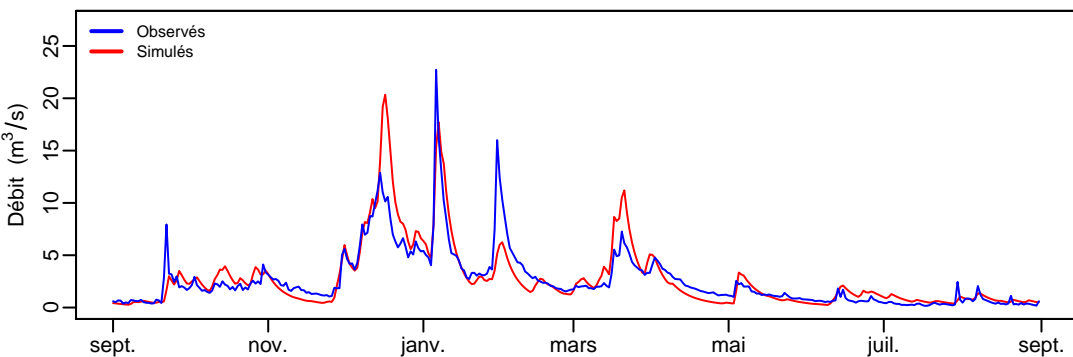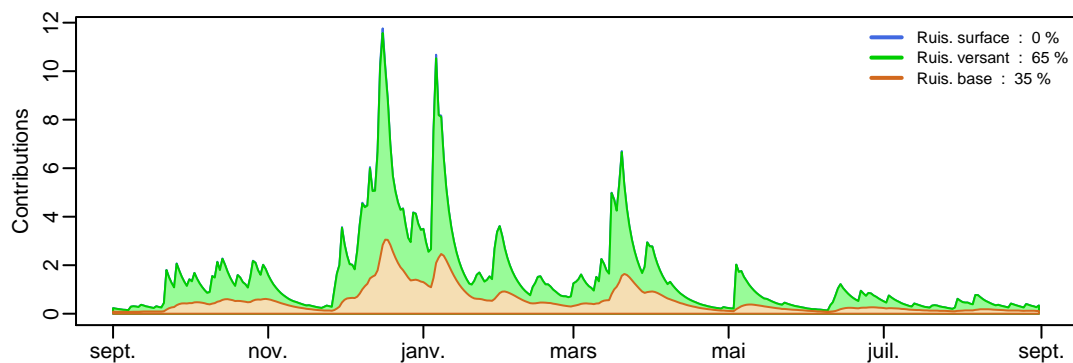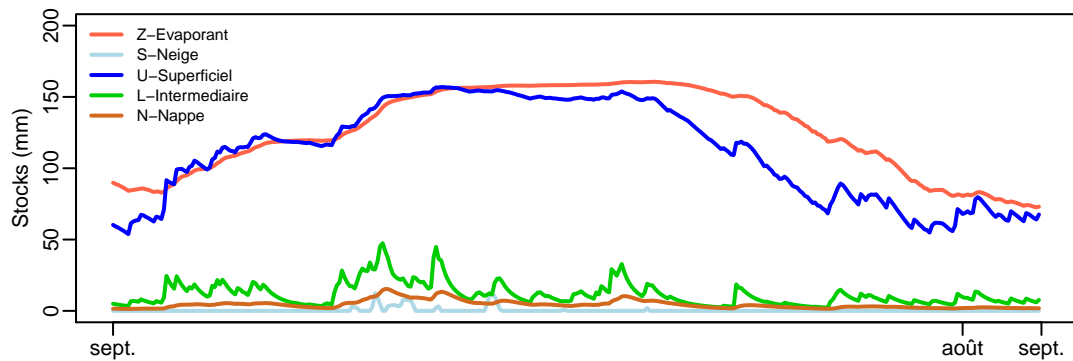

# c\_monh (156.84 km²) – année 1982–1983

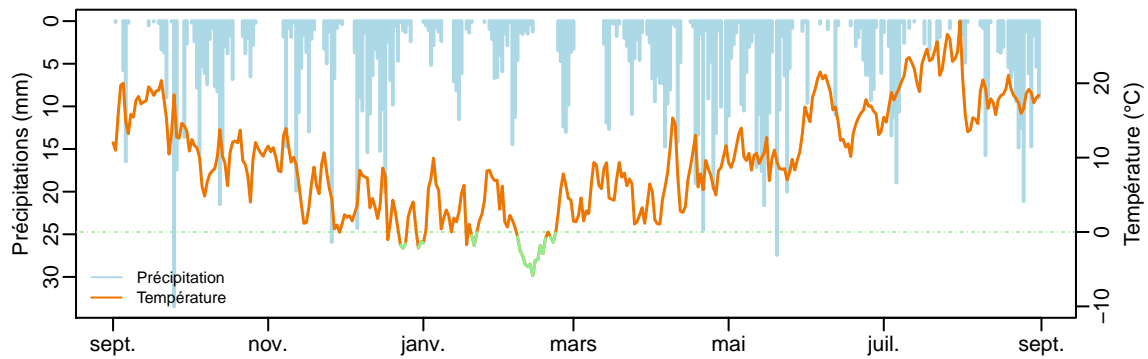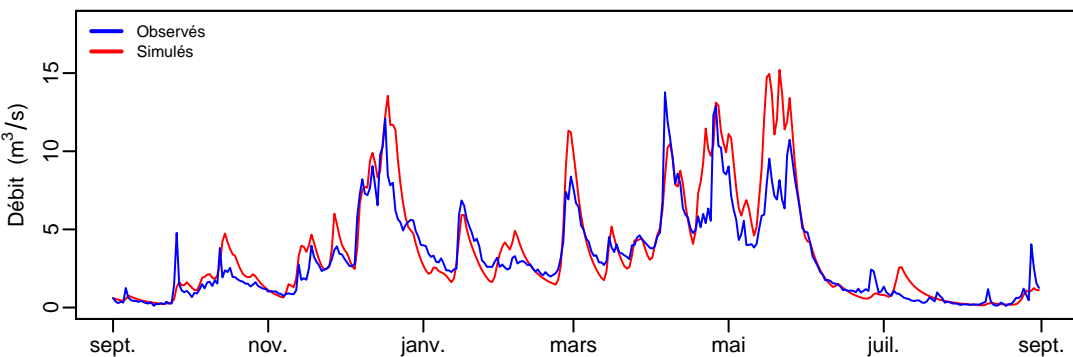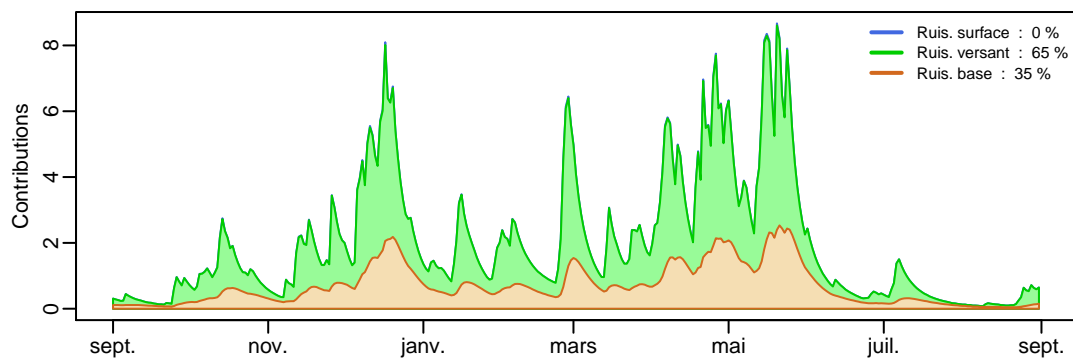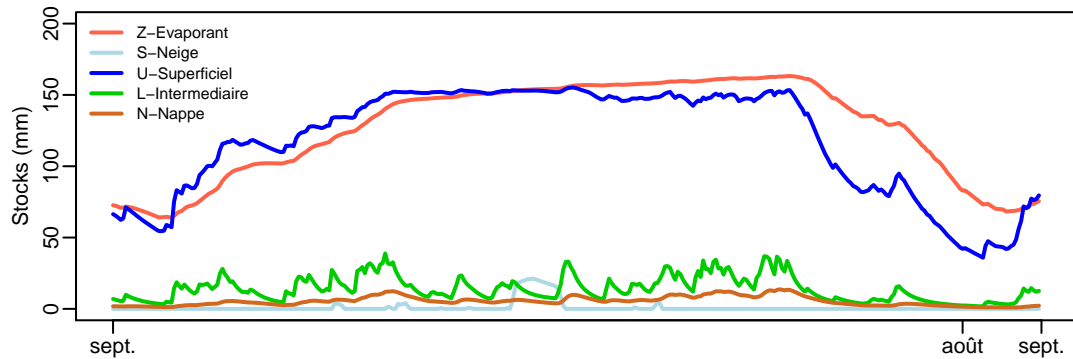



# c\_monh (156.84 km²) – année 1983–1984

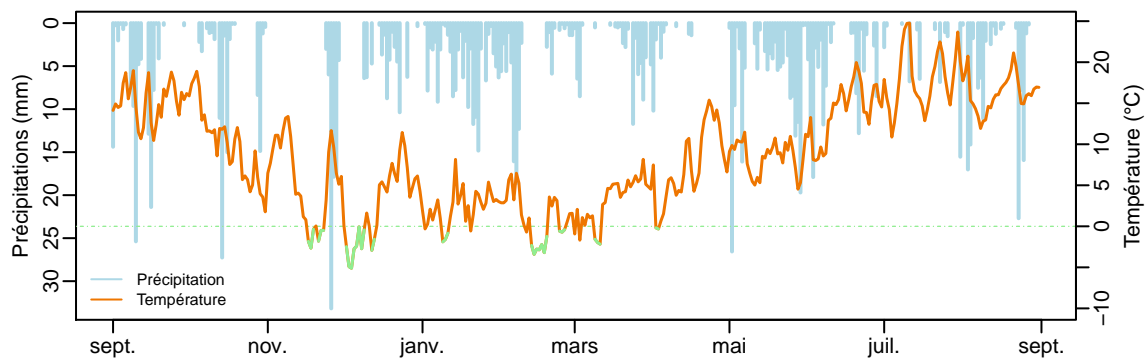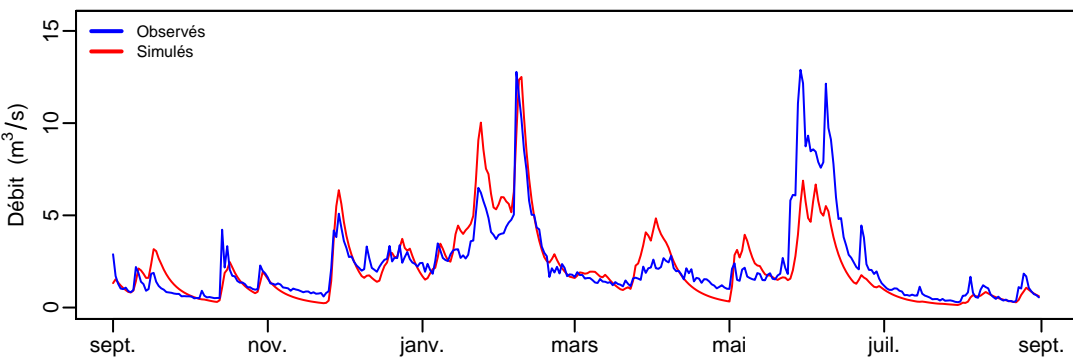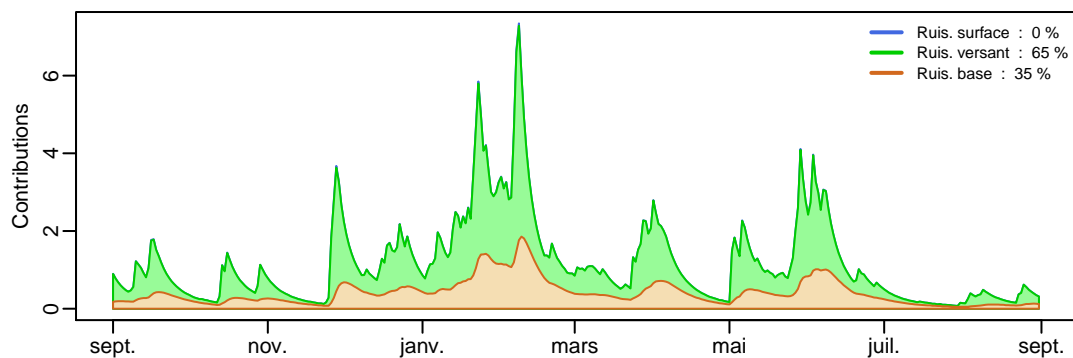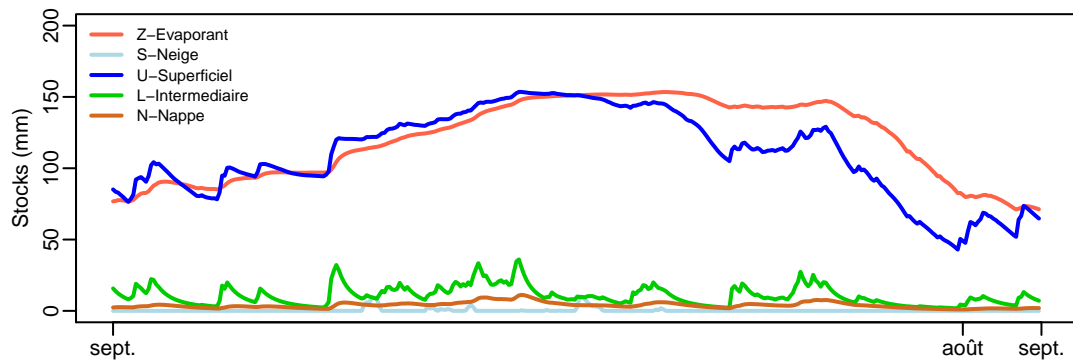

# c\_monh (156.84 km²) – année 1984–1985

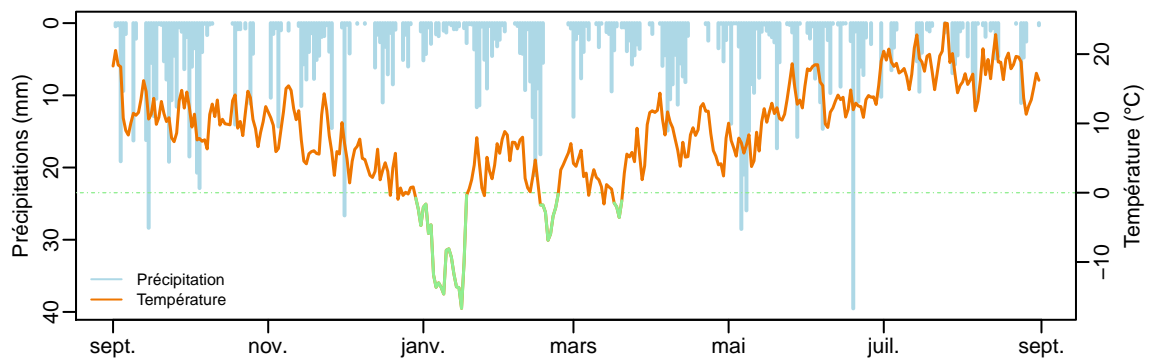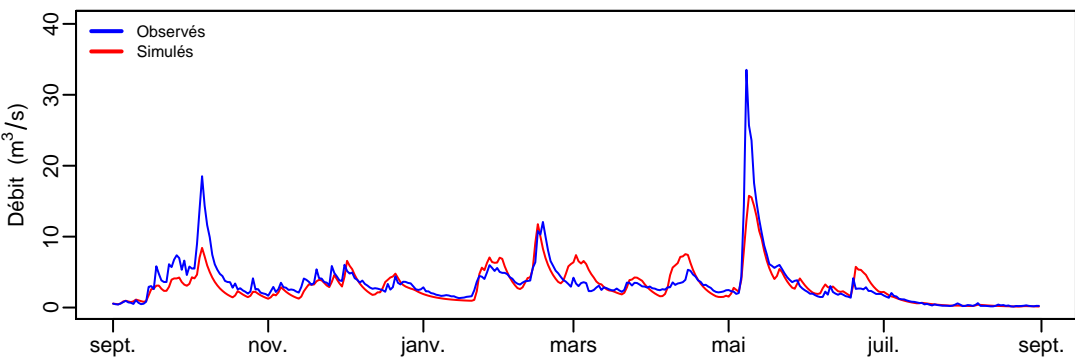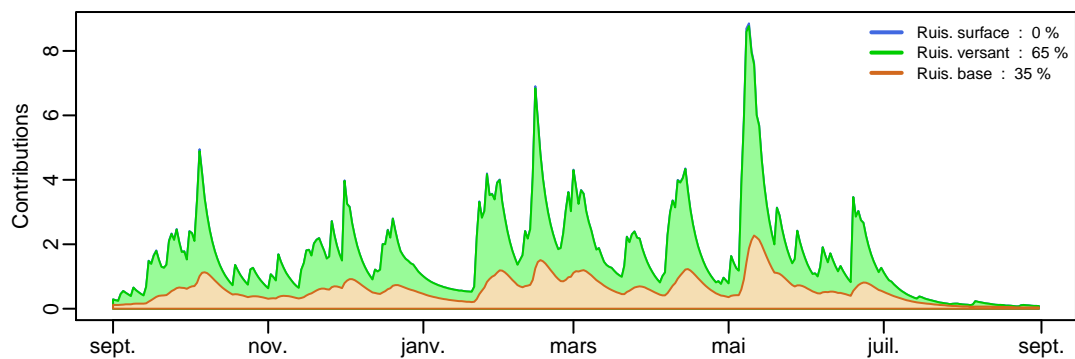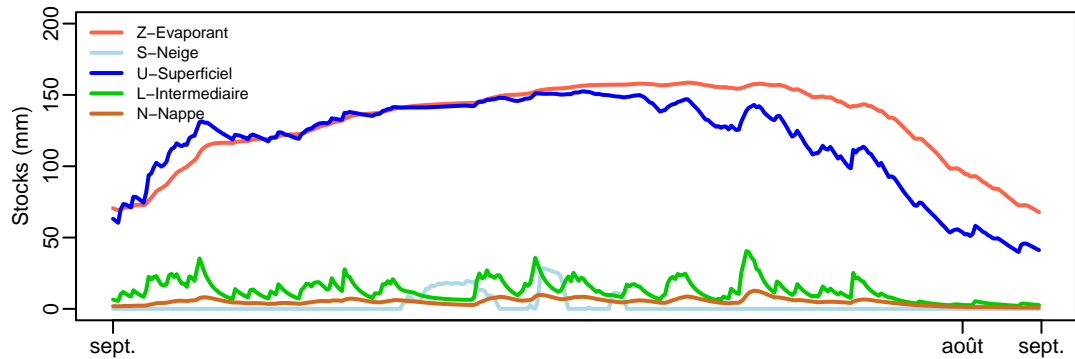

# c\_monh (156.84 km<sup>2</sup>) – année 1985–1986

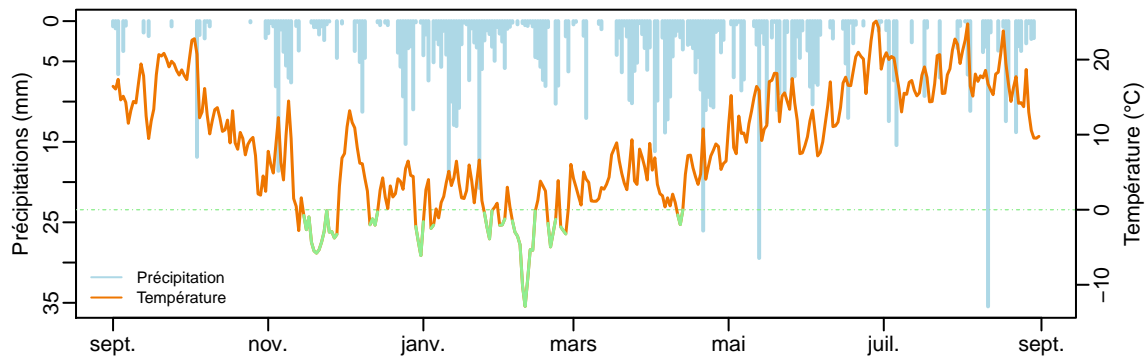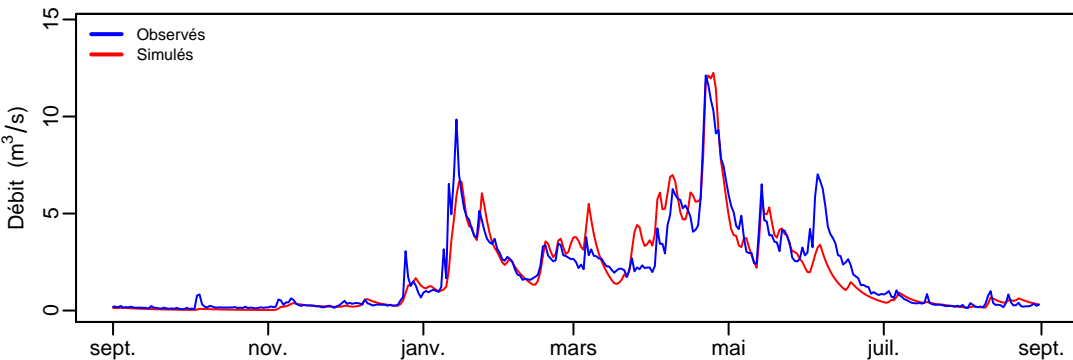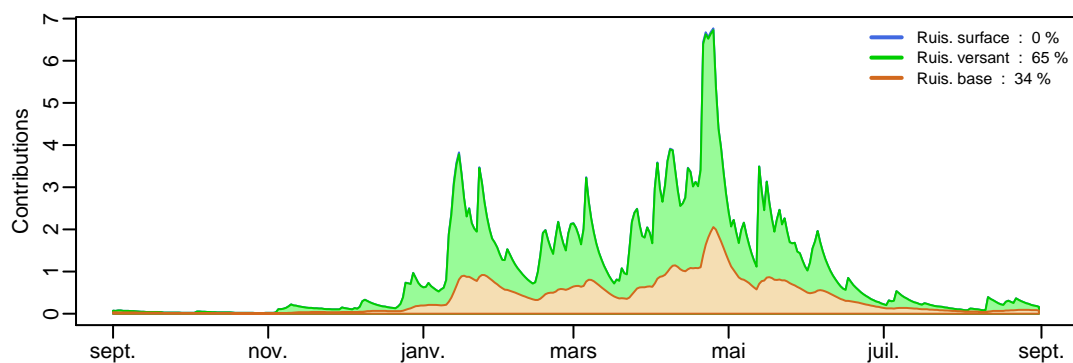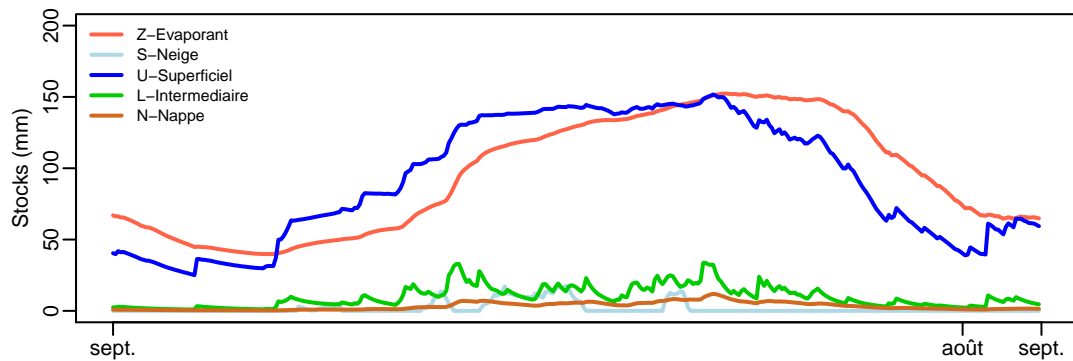

# c\_monh (156.84 km<sup>2</sup>) – année 1986–1987

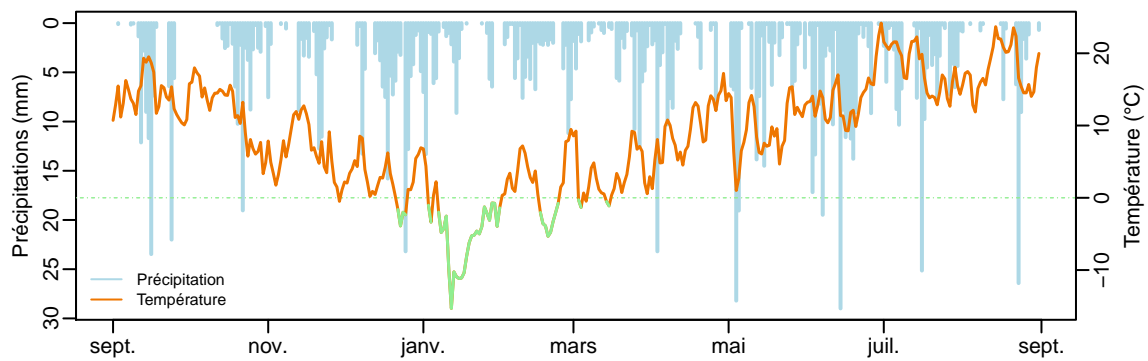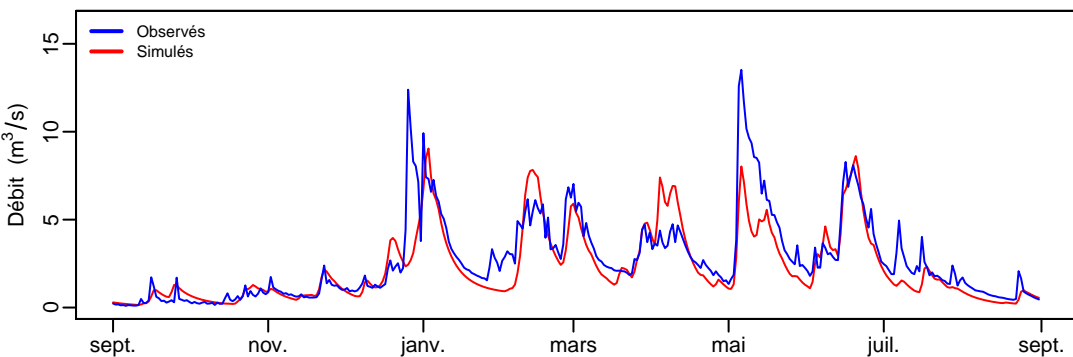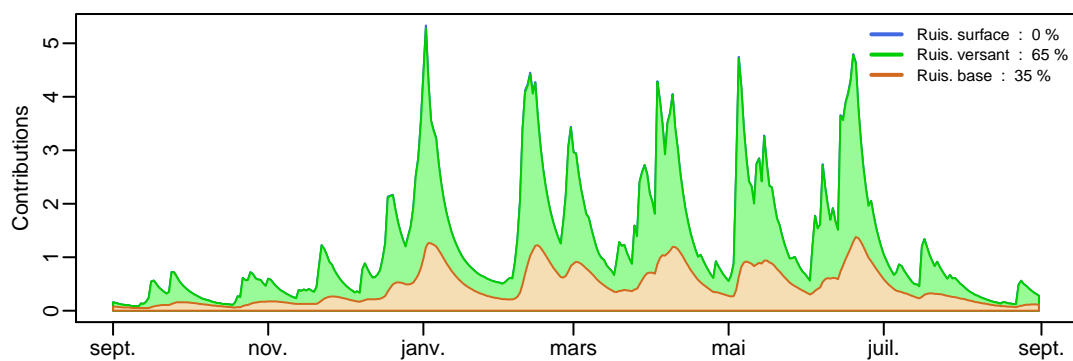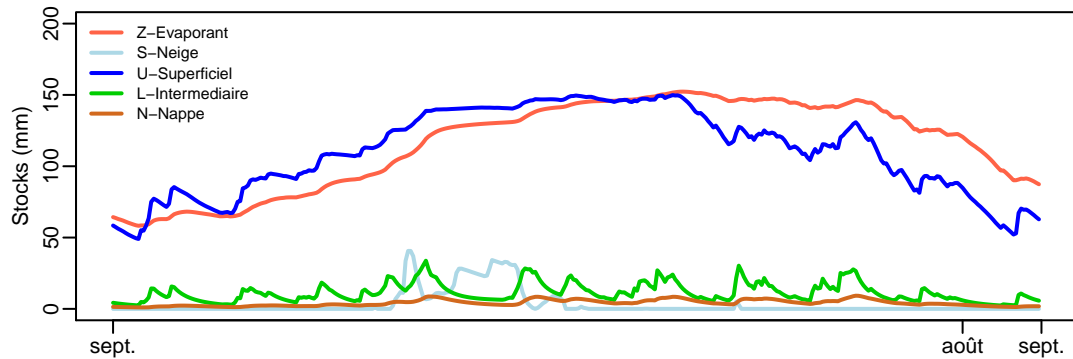

# c\_monh (156.84 km<sup>2</sup>) – année 1987–1988

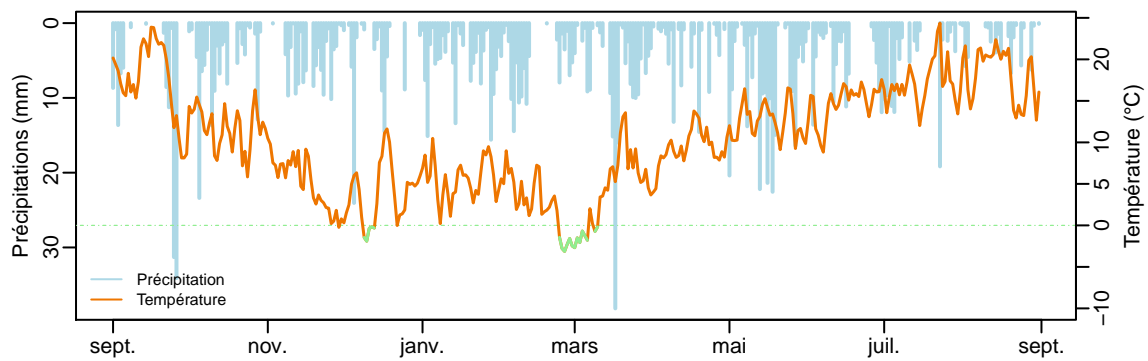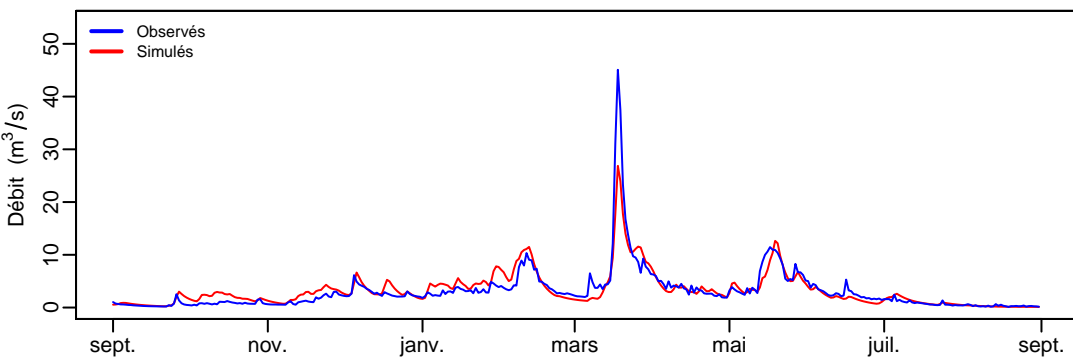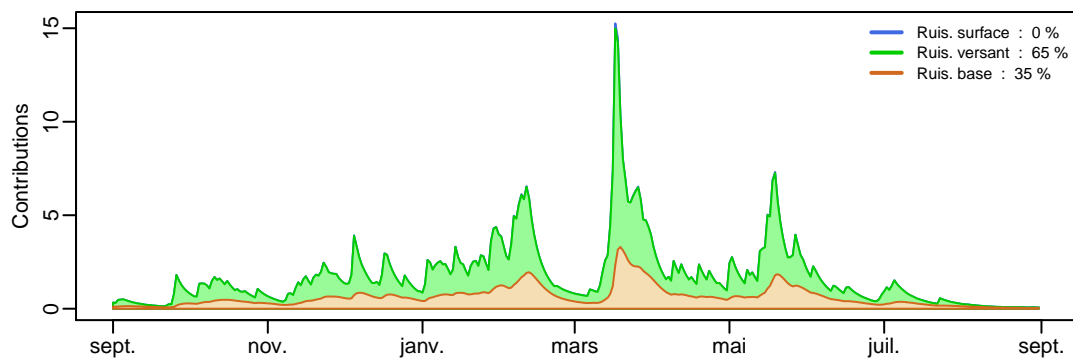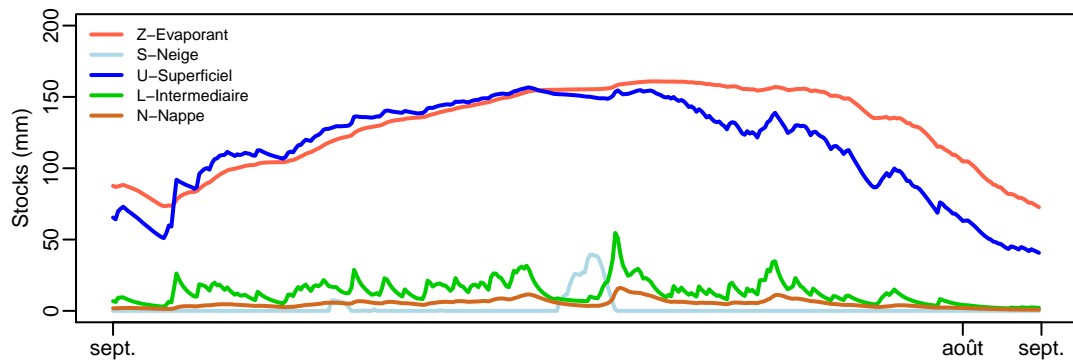

# c\_monh (156.84 km²) – année 1988–1989

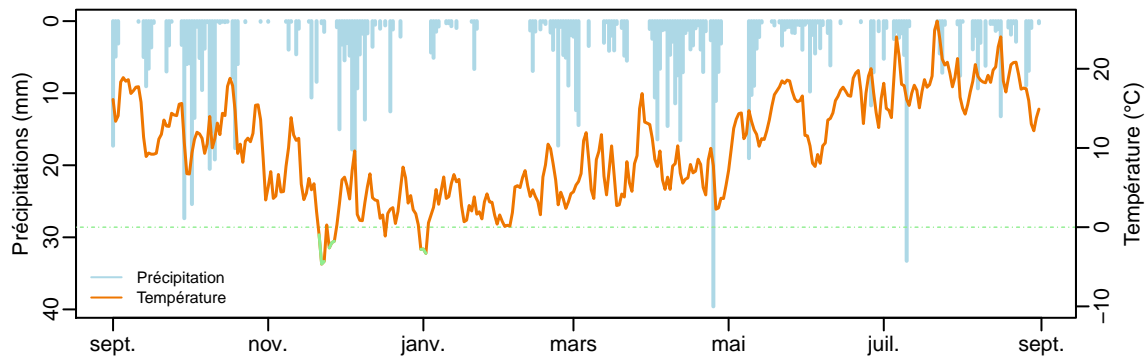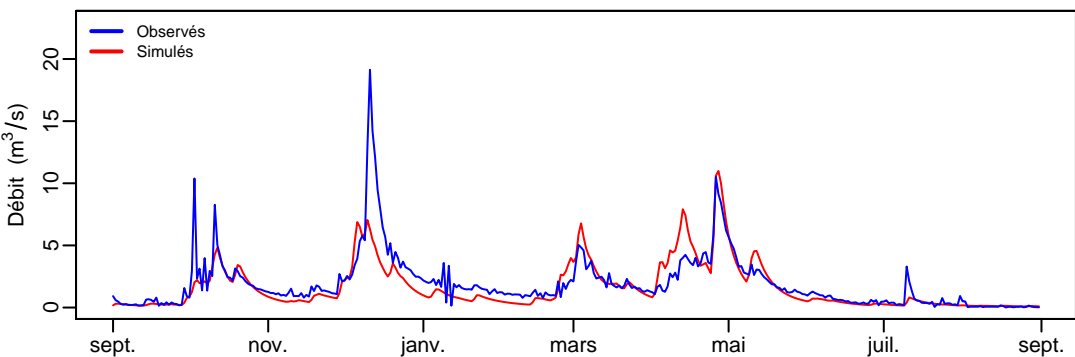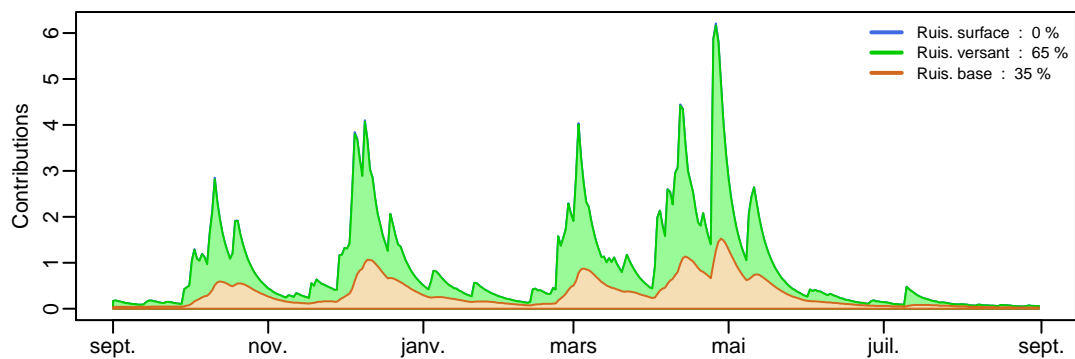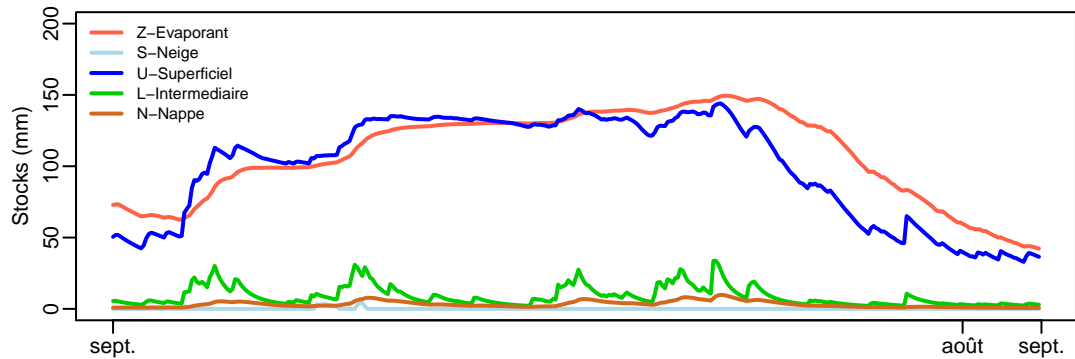

# c\_monh (156.84 km<sup>2</sup>) – année 1989–1990

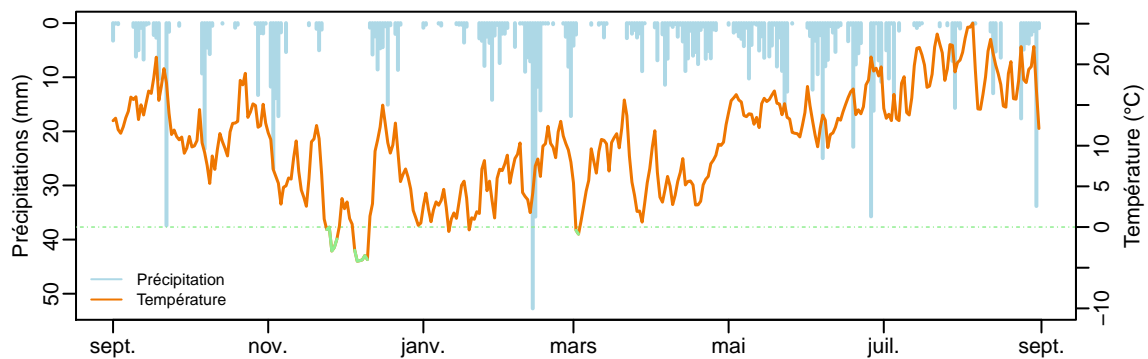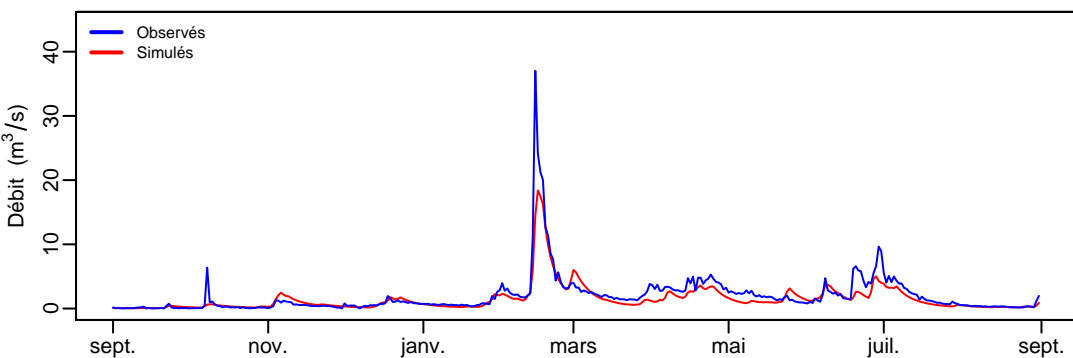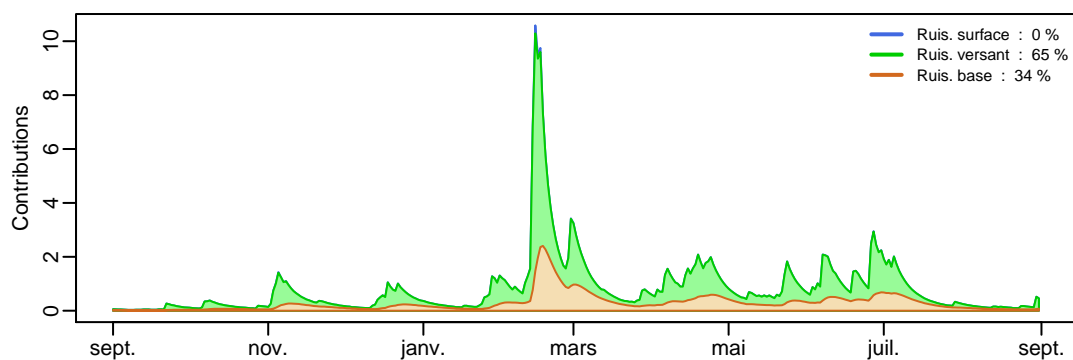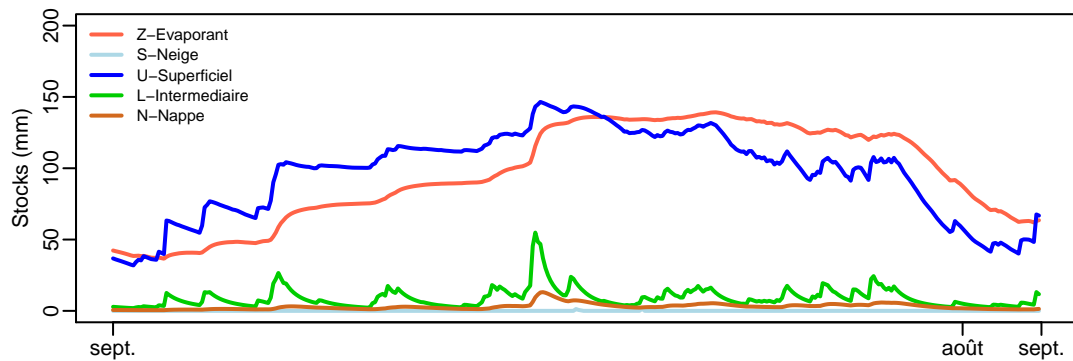

# c\_monh (156.84 km<sup>2</sup>) – année 1990–1991

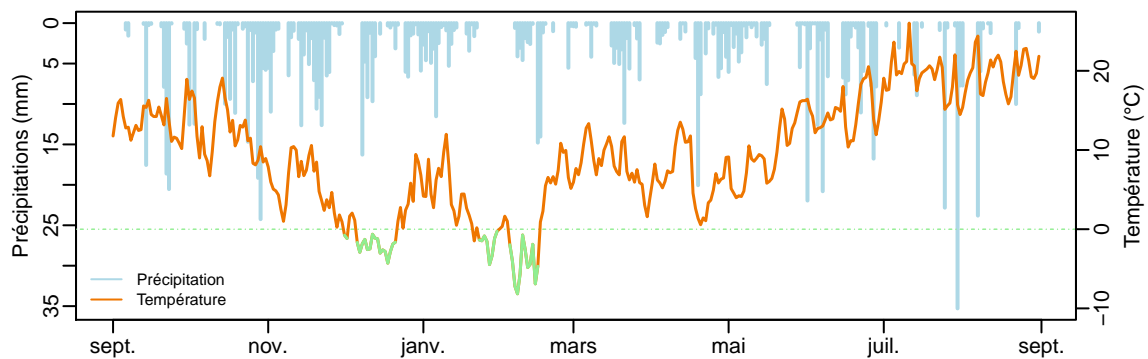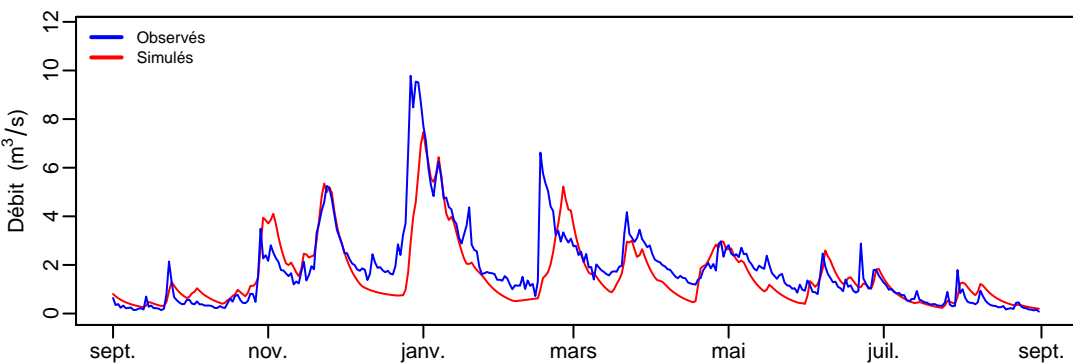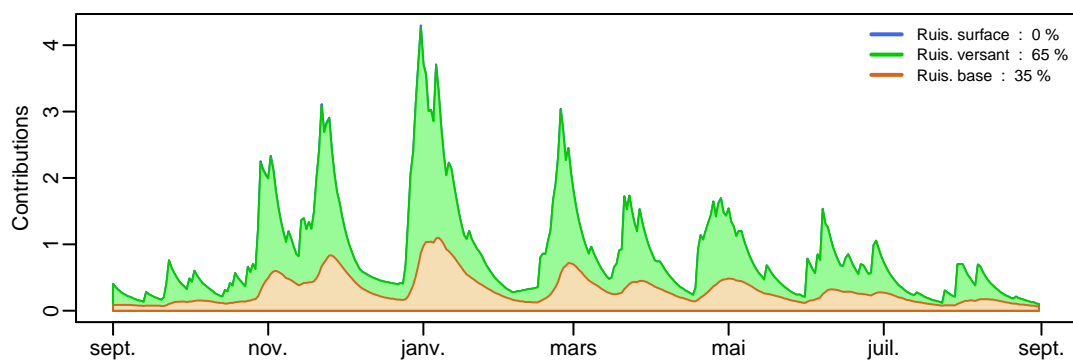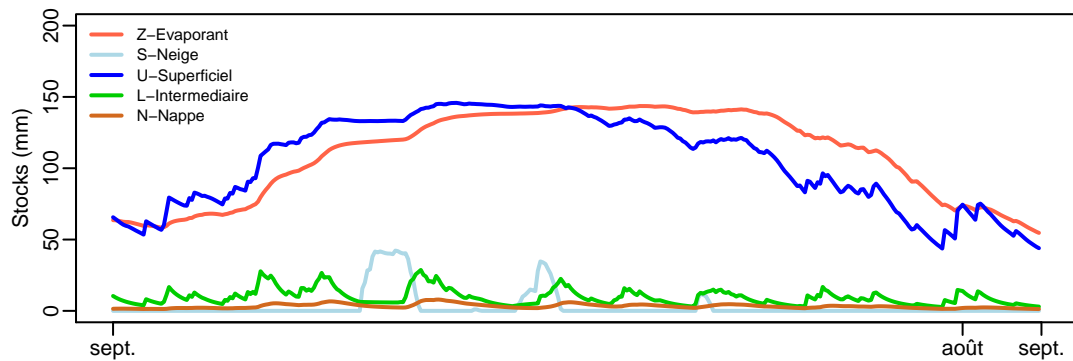



# c\_monh (156.84 km<sup>2</sup>) – année 1991–1992

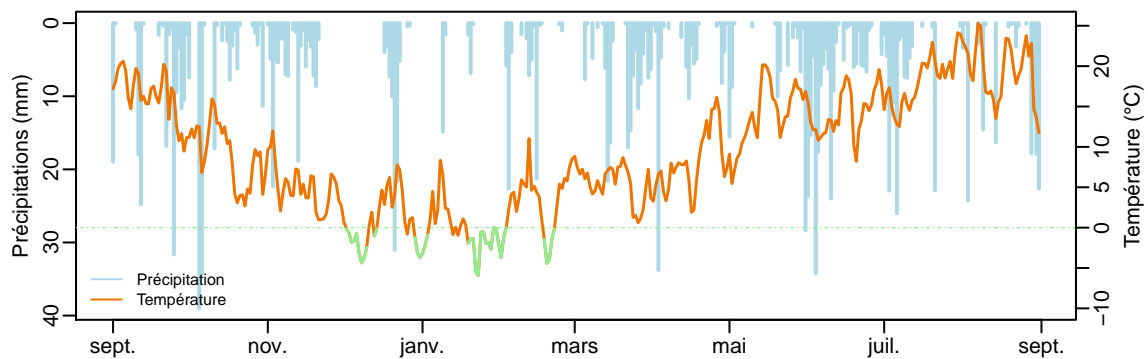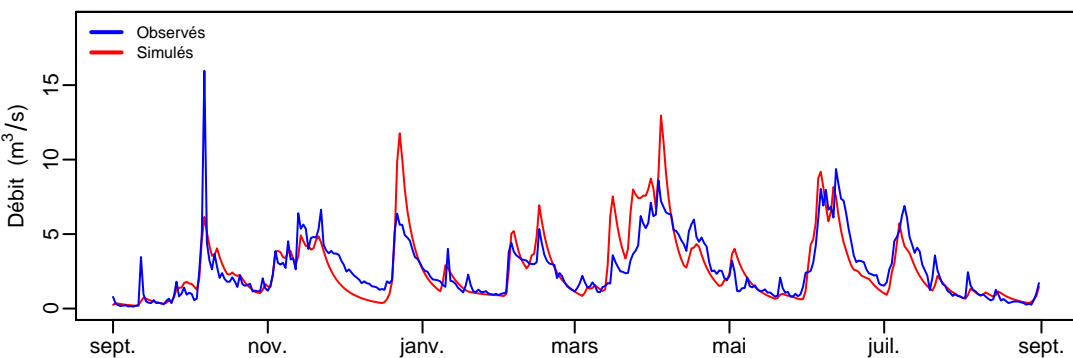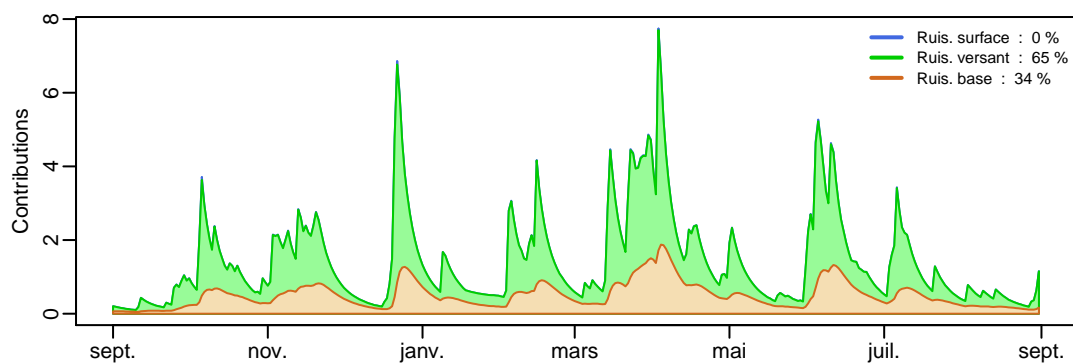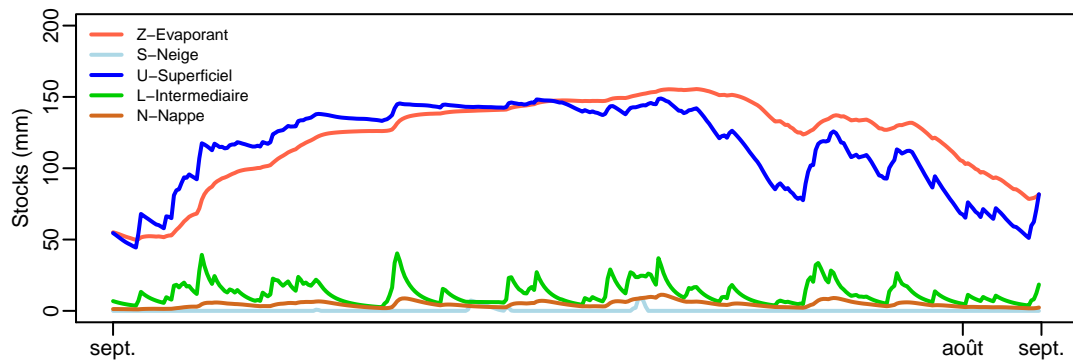

# c\_monh (156.84 km<sup>2</sup>) – année 1992–1993

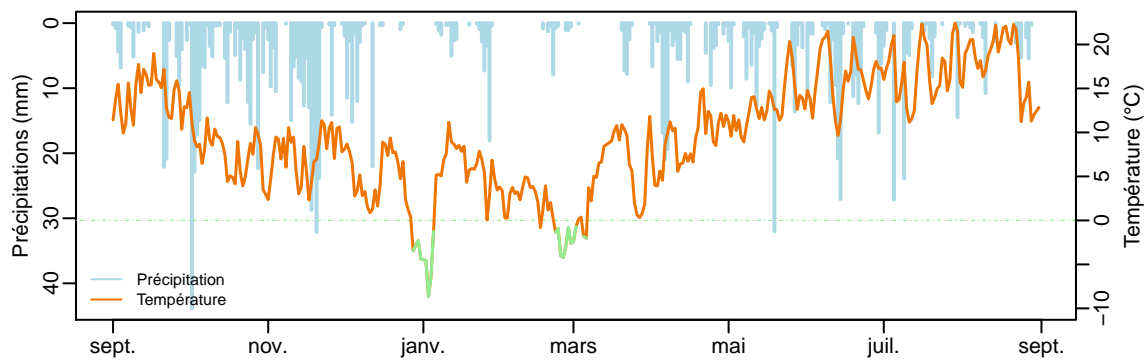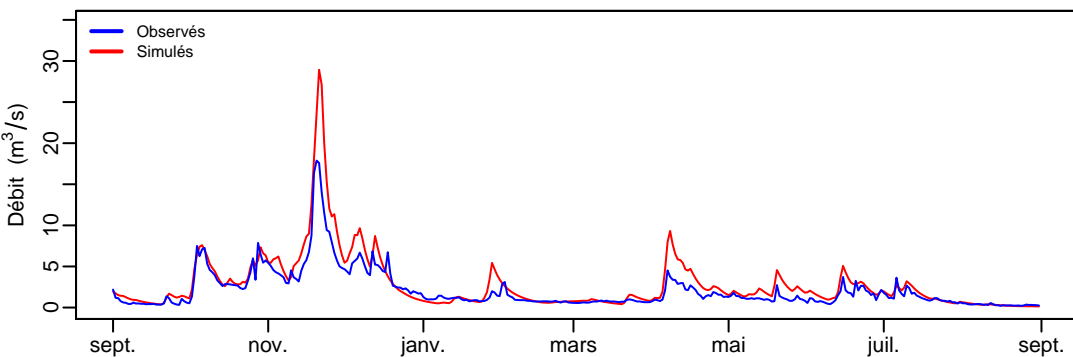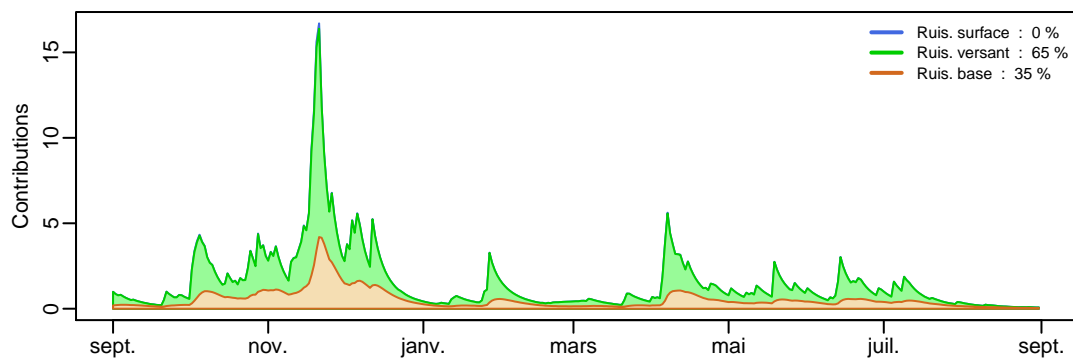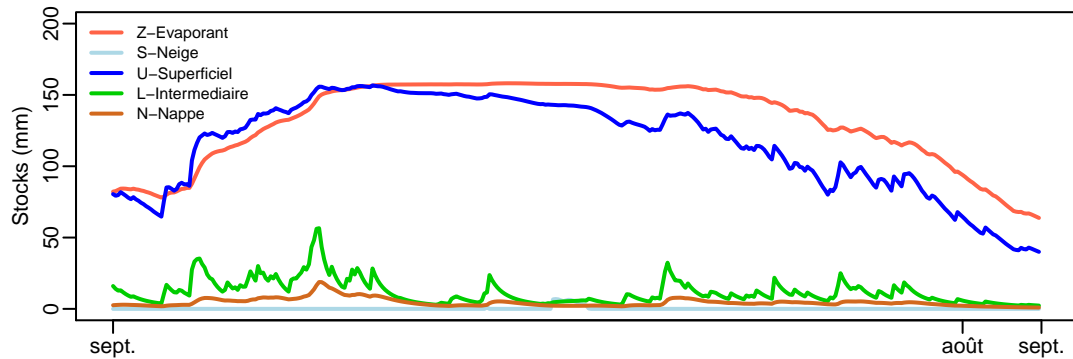

# c\_monh (156.84 km<sup>2</sup>) – année 1993–1994

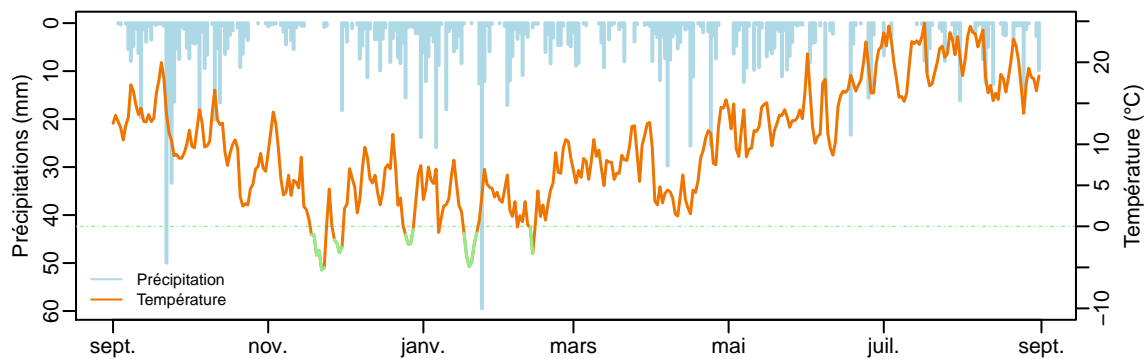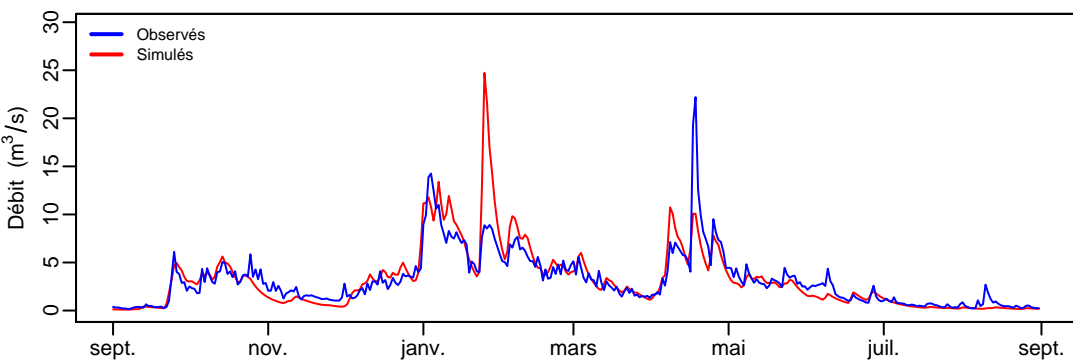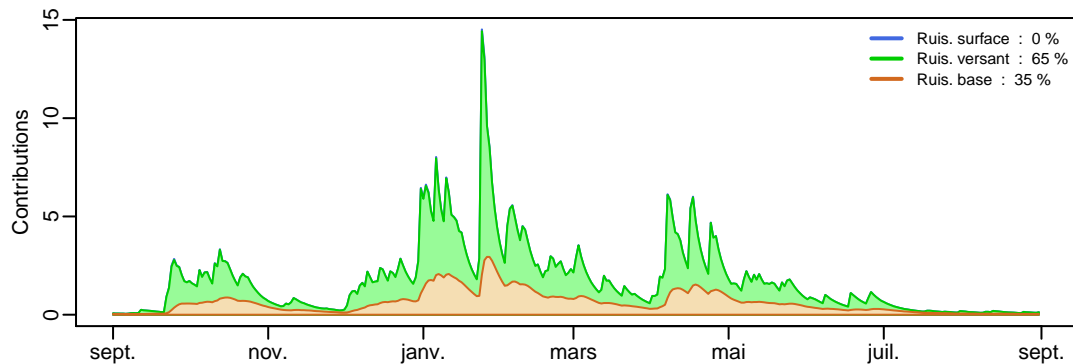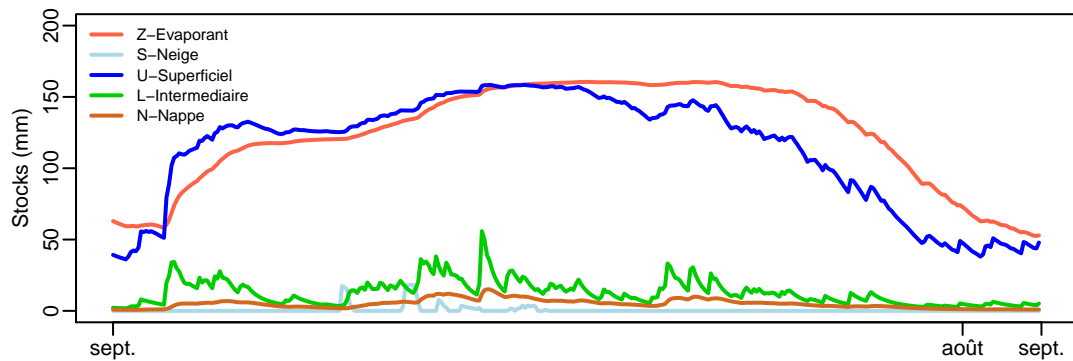

# c\_monh (156.84 km<sup>2</sup>) – année 1994–1995

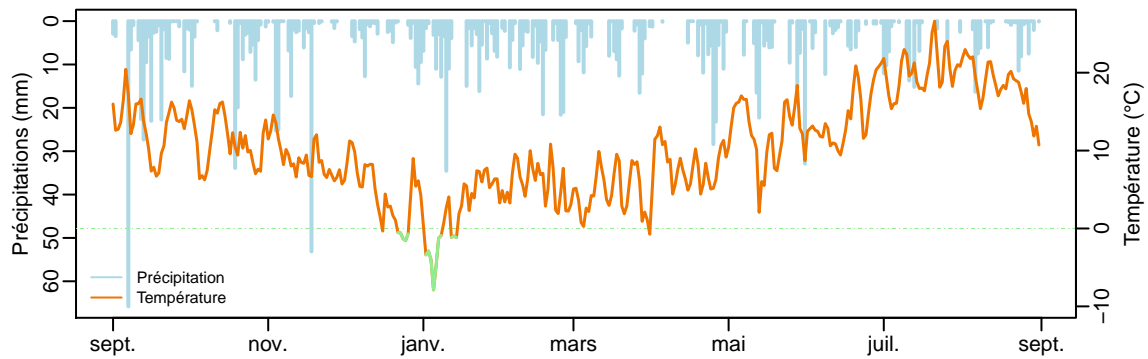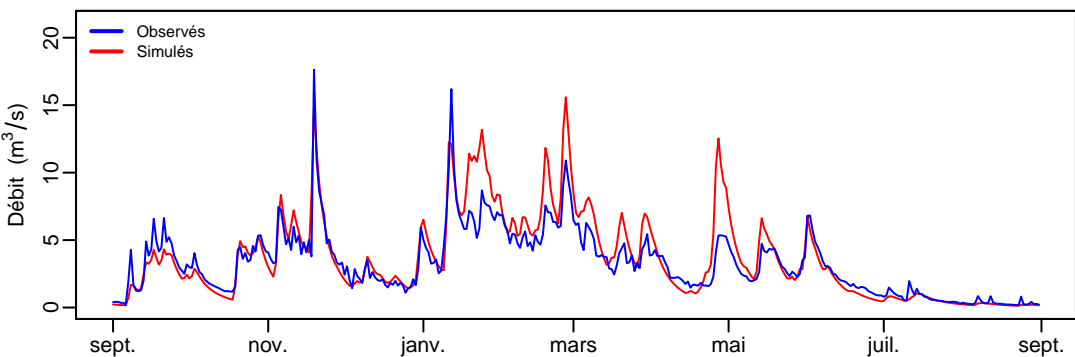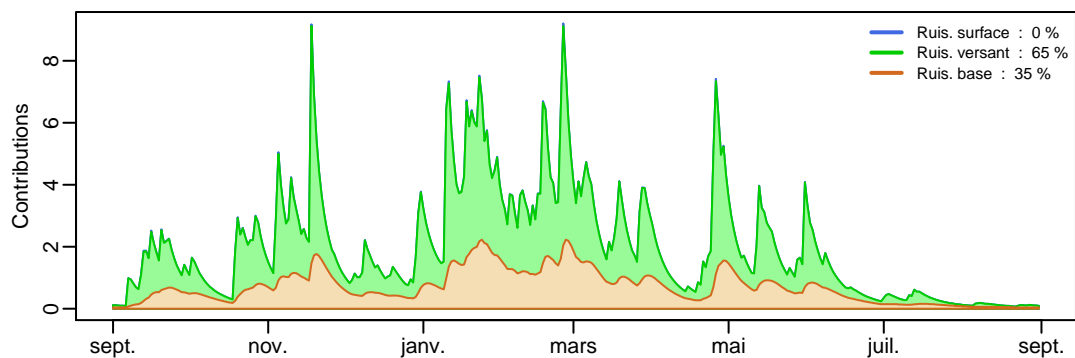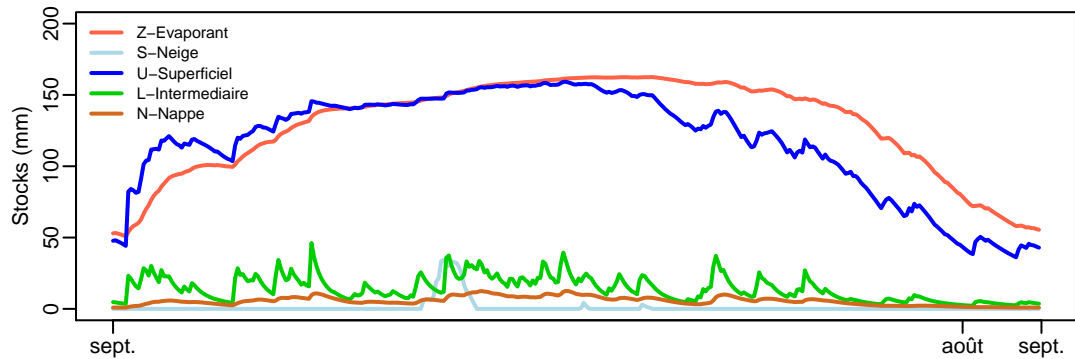

# c\_monh (156.84 km<sup>2</sup>) – année 1995–1996

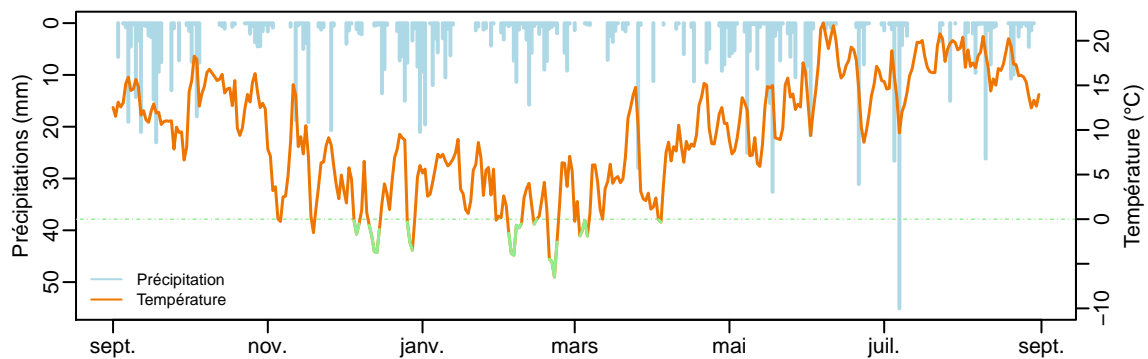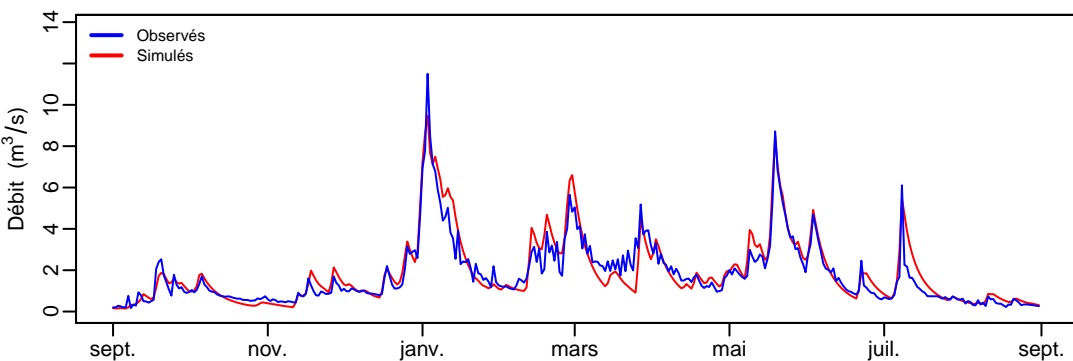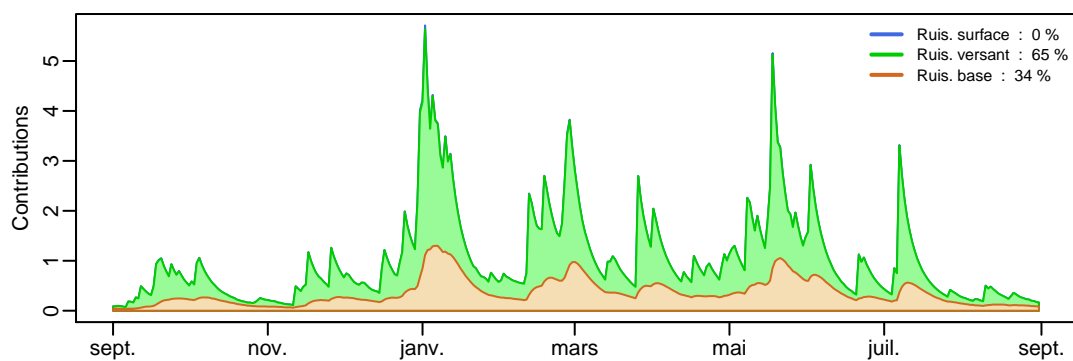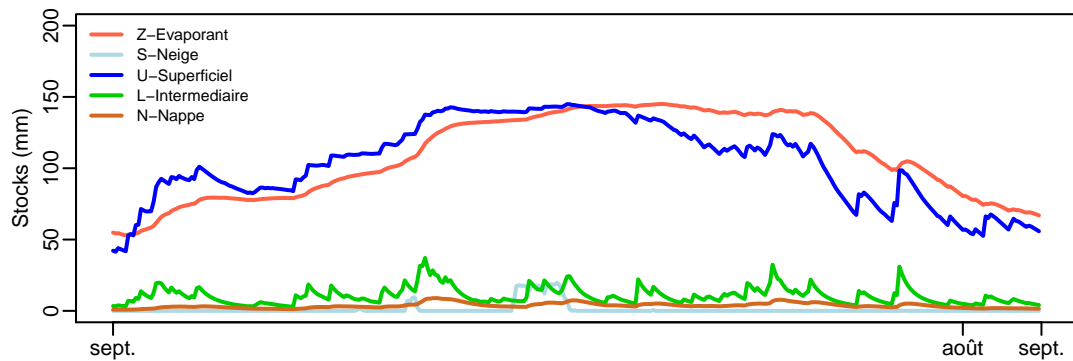

# c\_monh (156.84 km<sup>2</sup>) – année 1996–1997

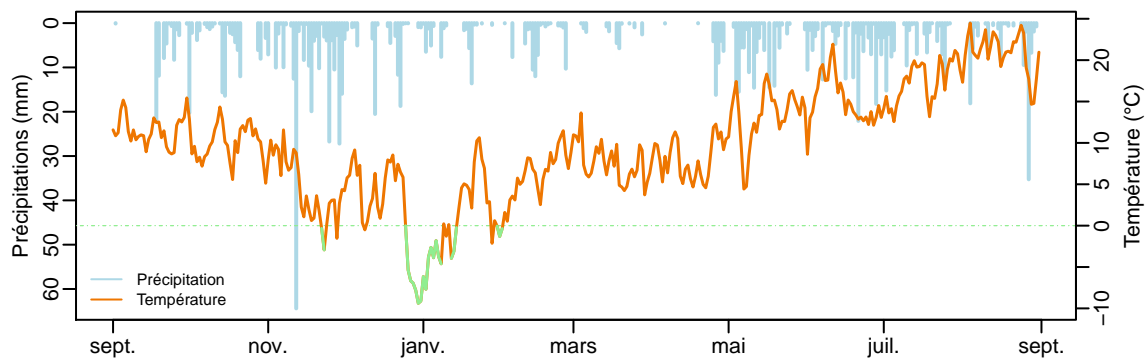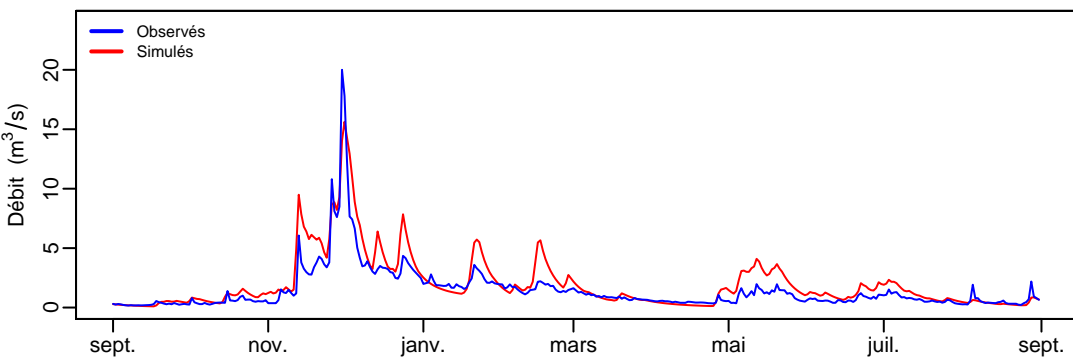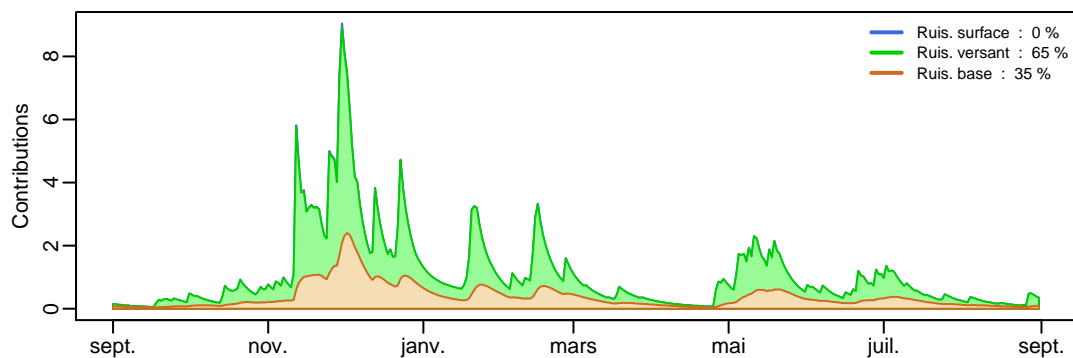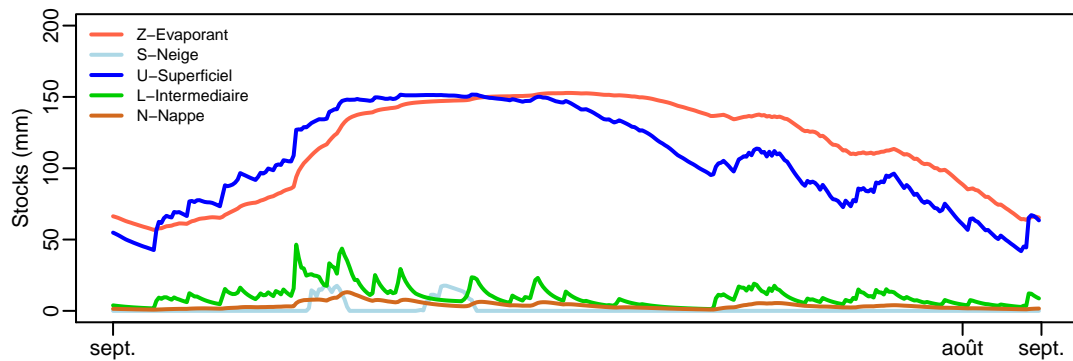

# c\_monh (156.84 km<sup>2</sup>) – année 1997–1998

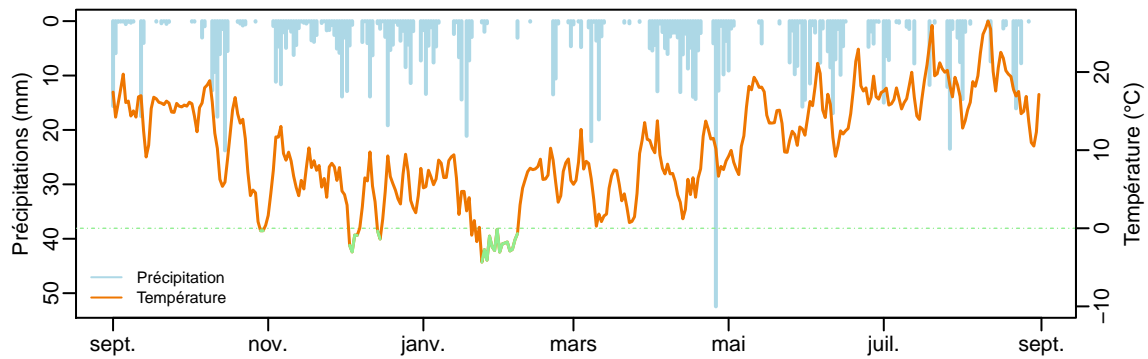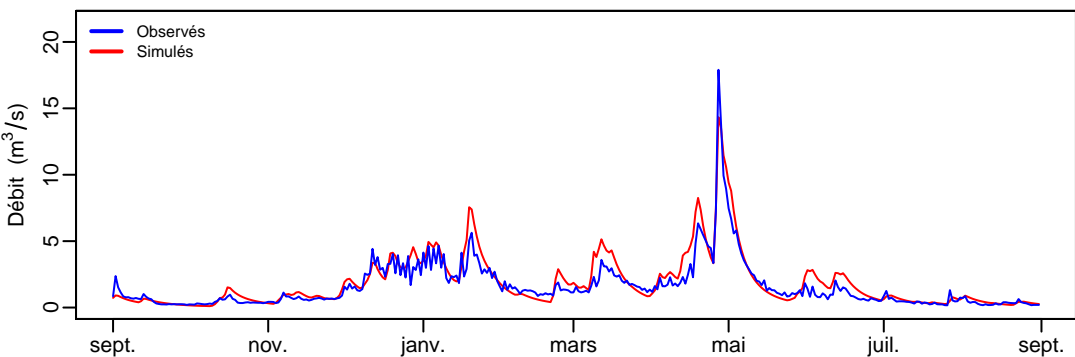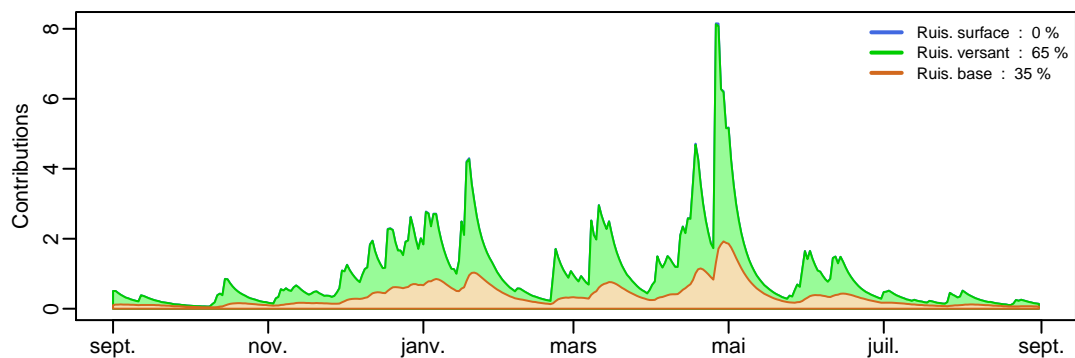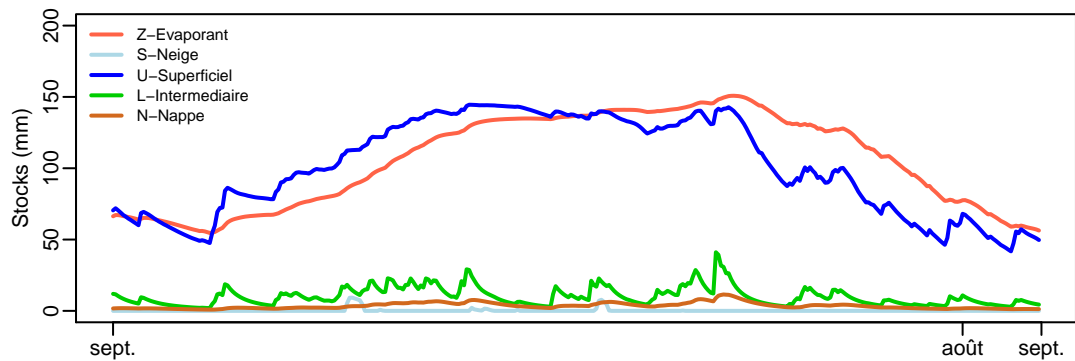

# c\_monh (156.84 km<sup>2</sup>) – année 1998–1999

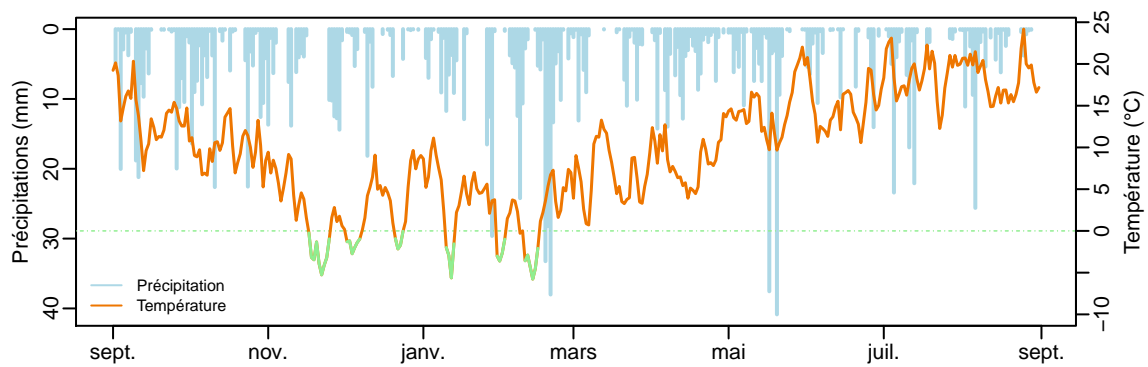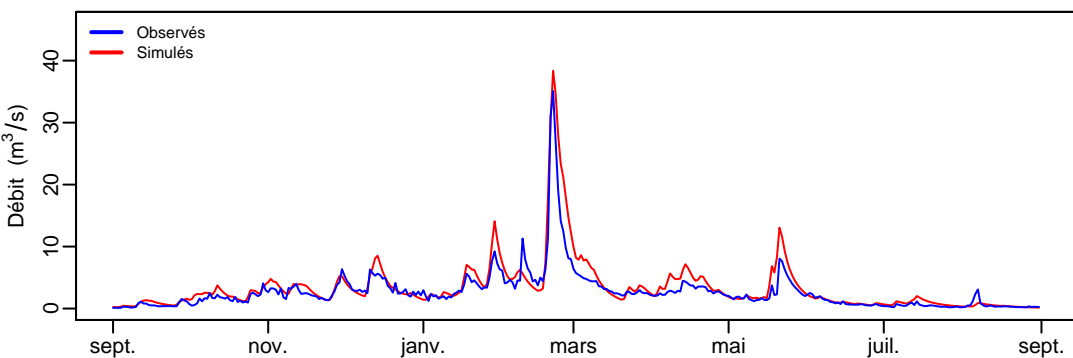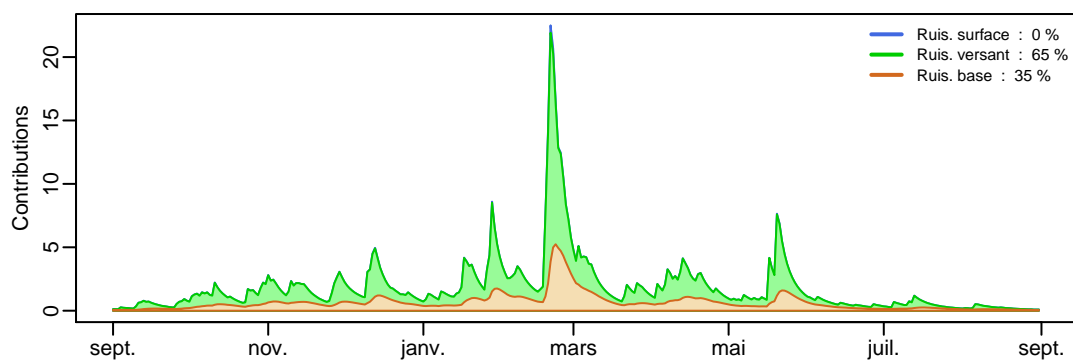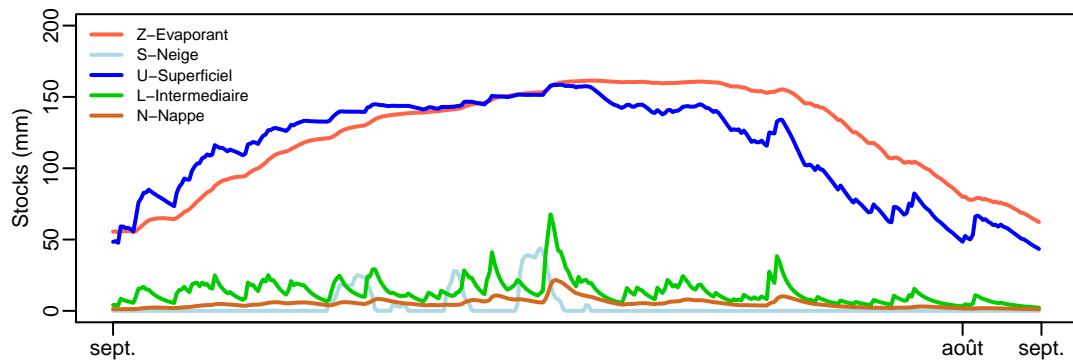



# c\_monh (156.84 km²) – année 1999–2000

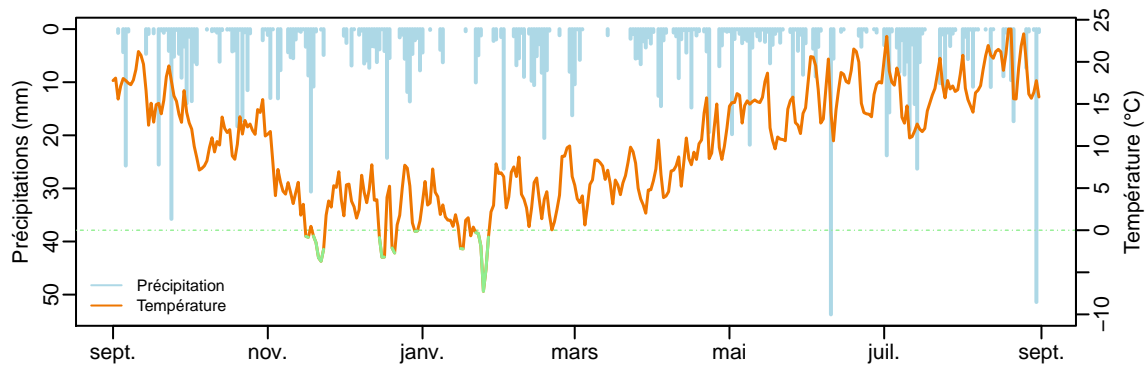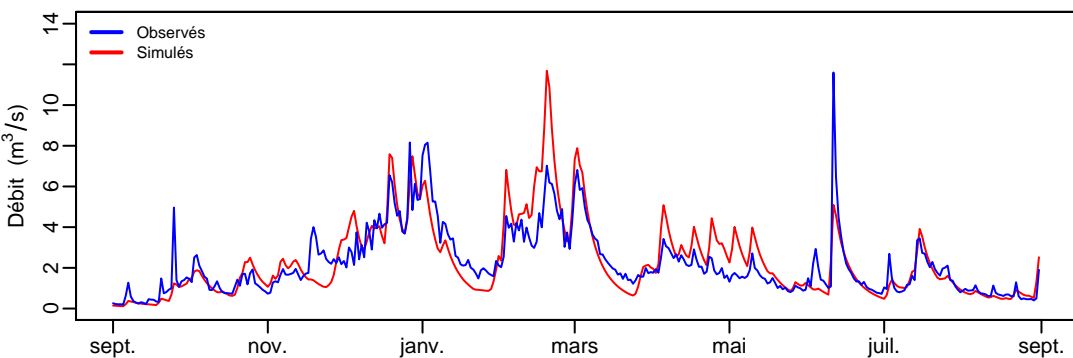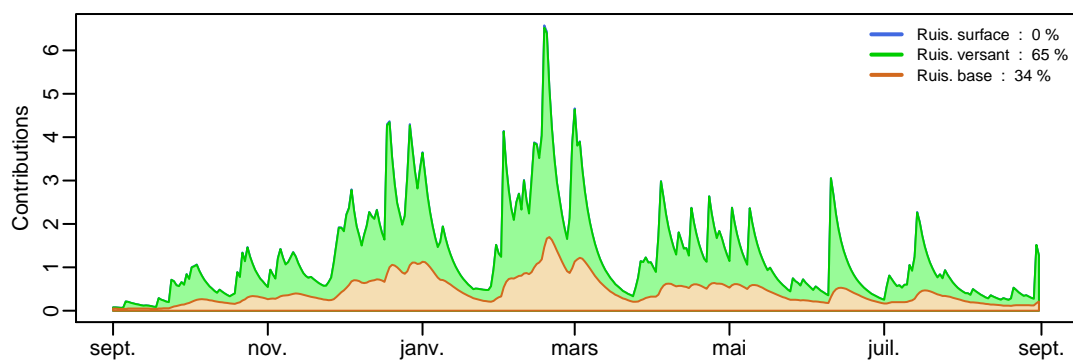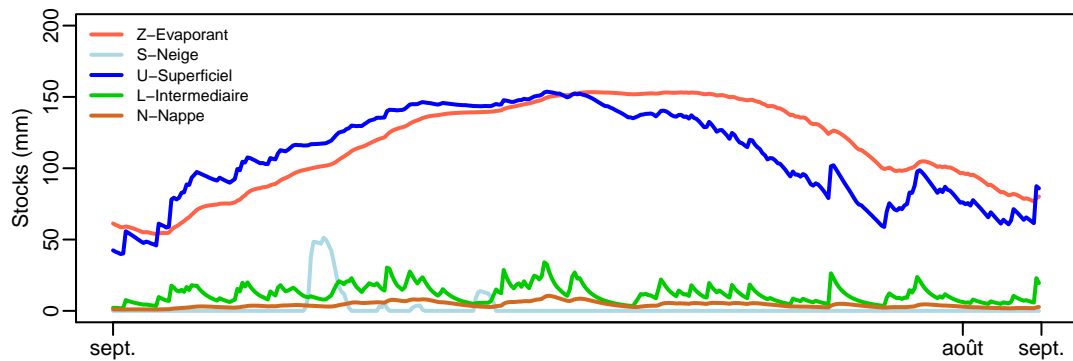

# c\_monh (156.84 km²) – année 2000–2001

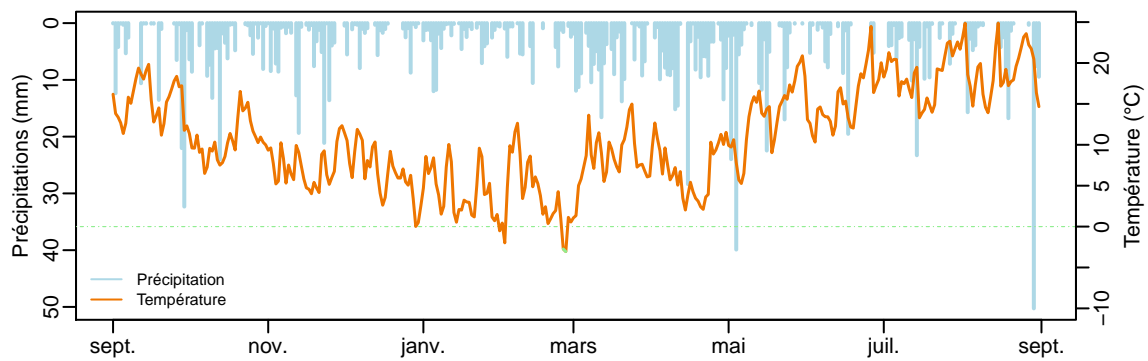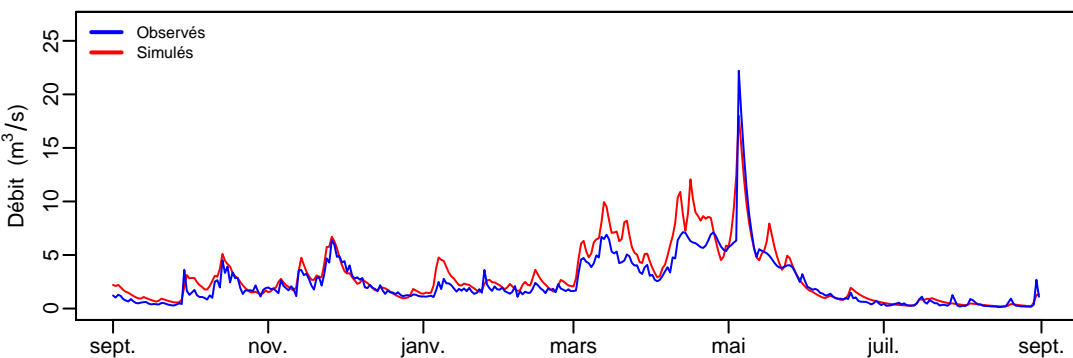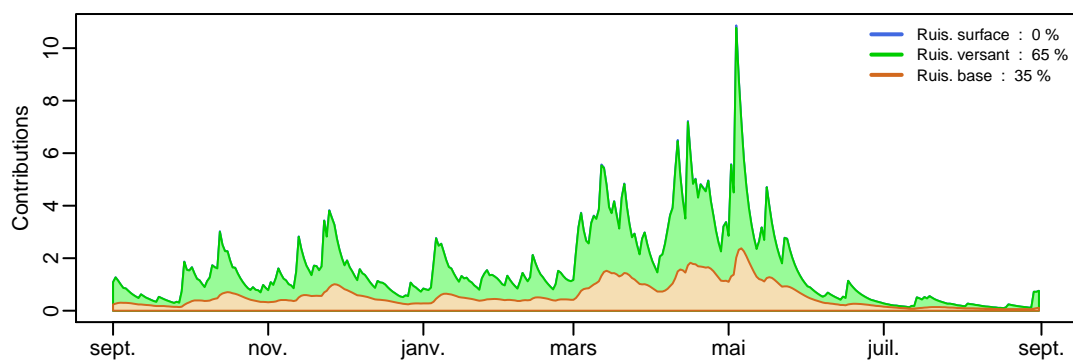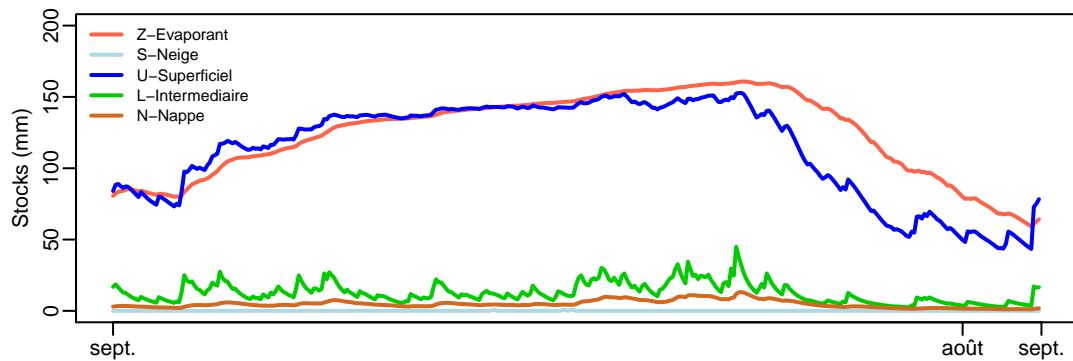

# c\_monh (156.84 km²) – année 2001–2002

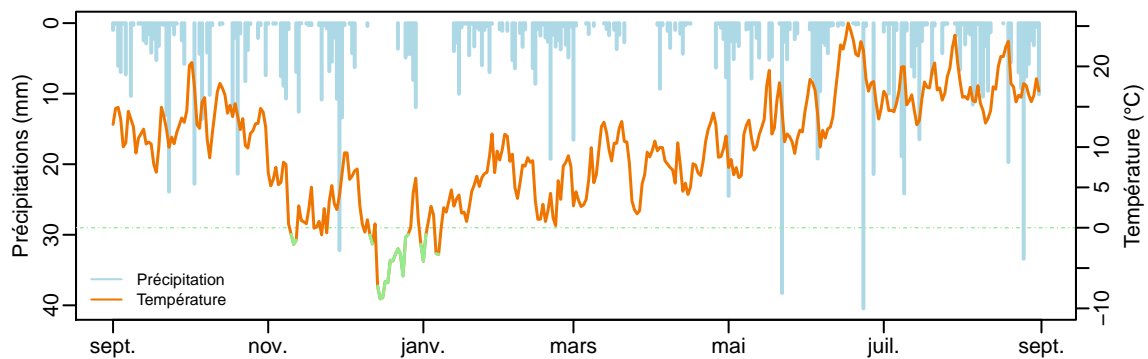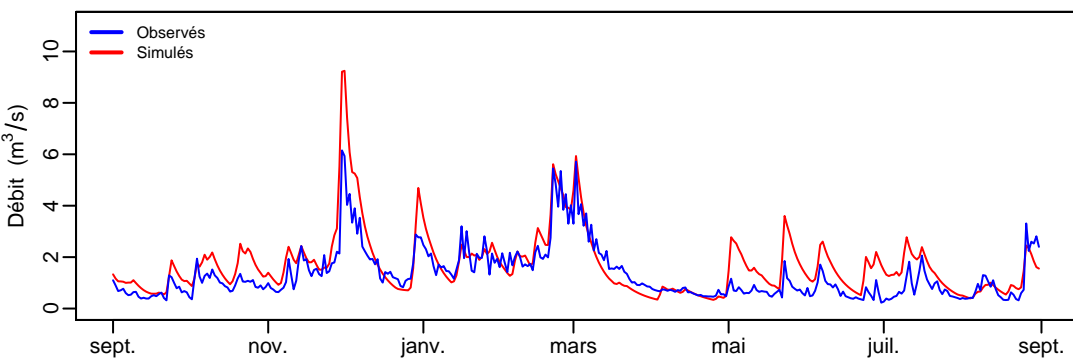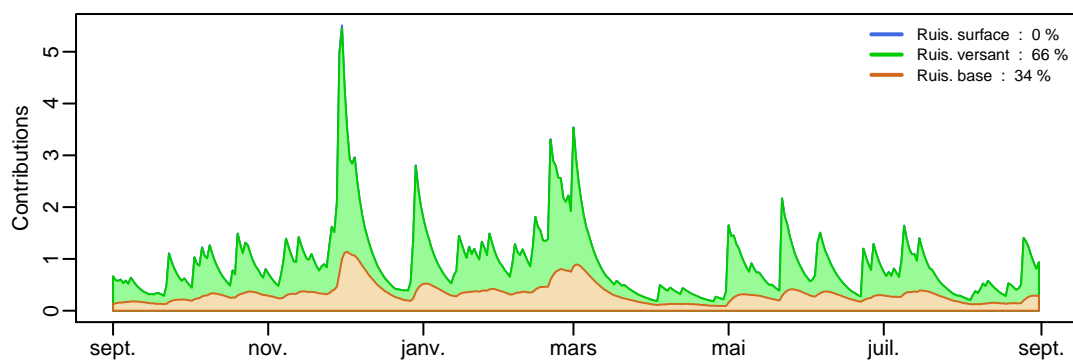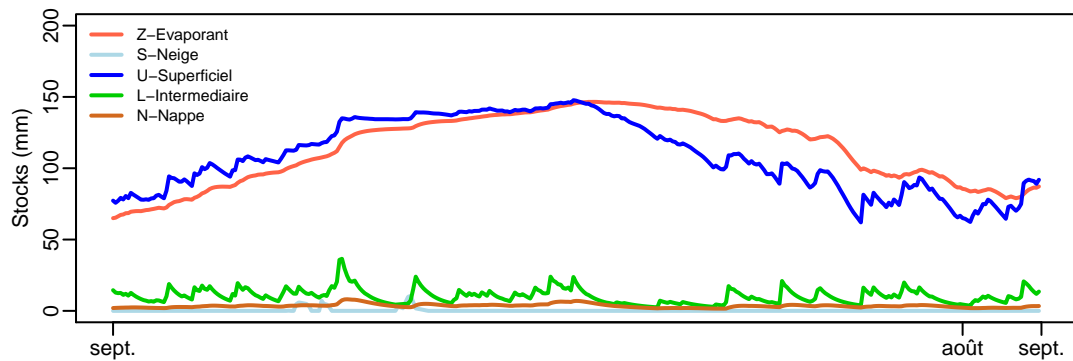

# c\_monh (156.84 km<sup>2</sup>) – année 2002–2003

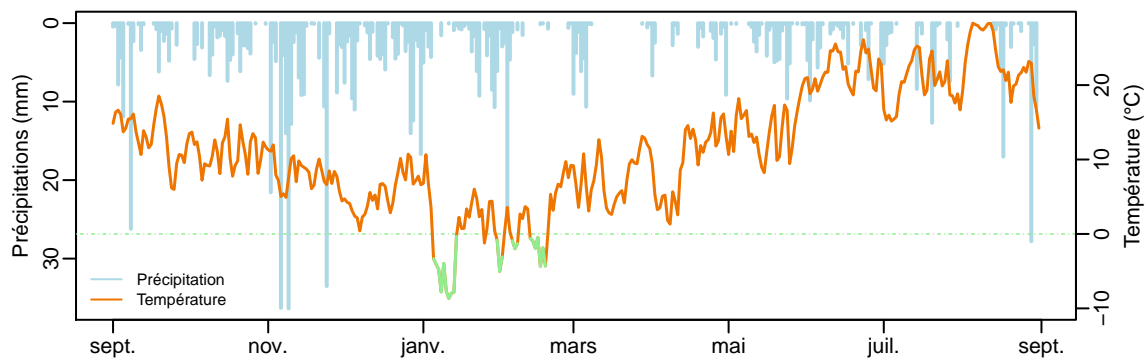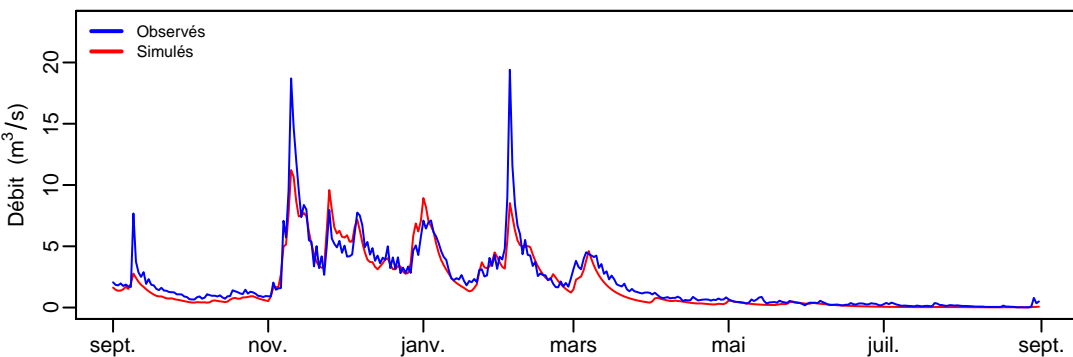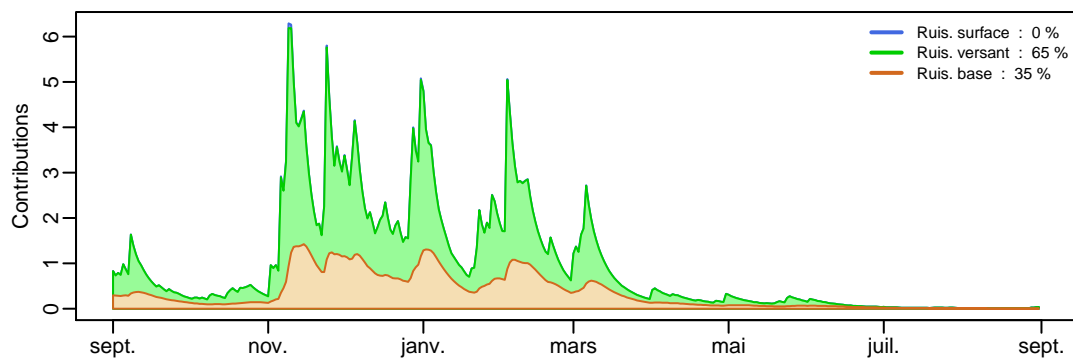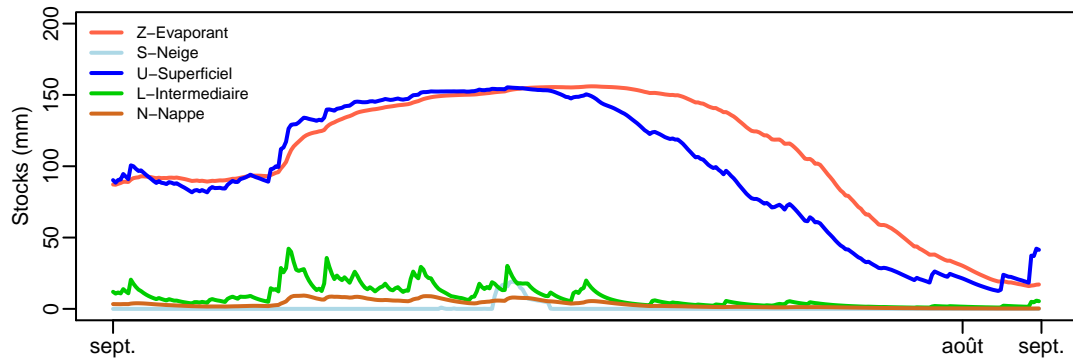

# c\_monh (156.84 km²) – année 2003–2004

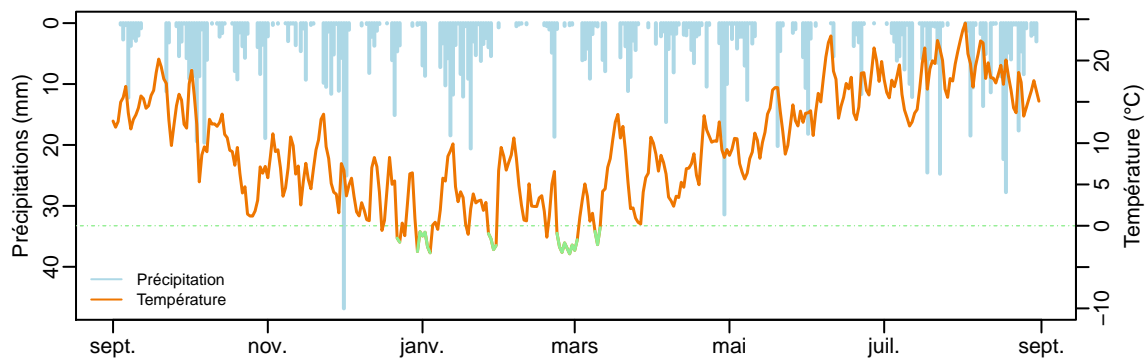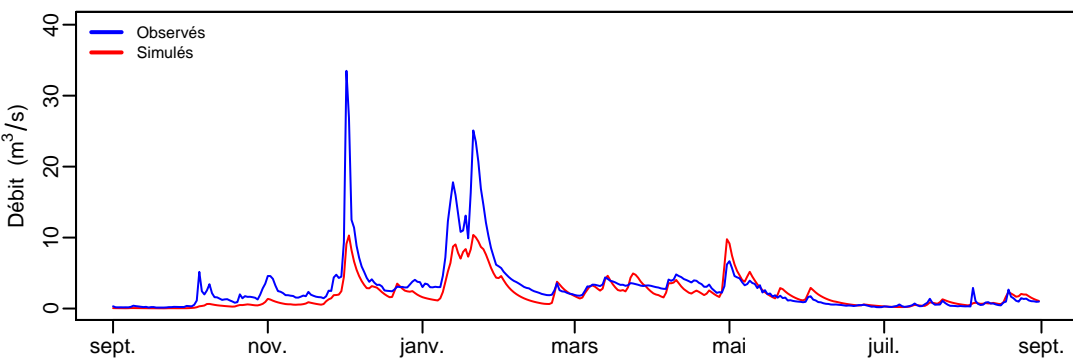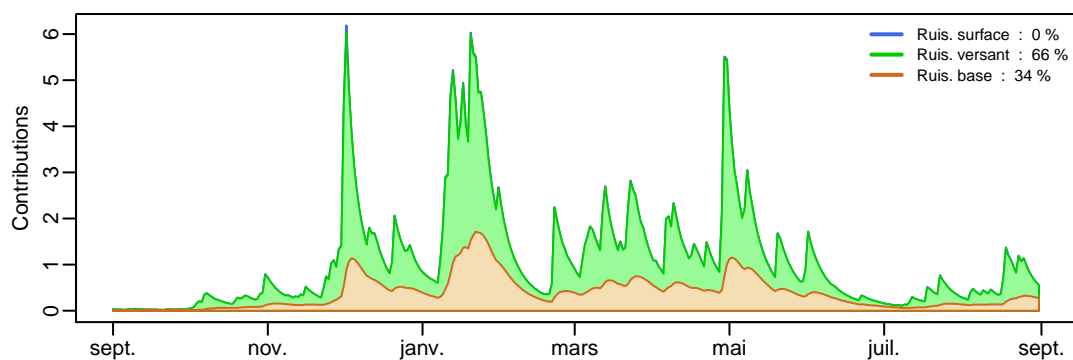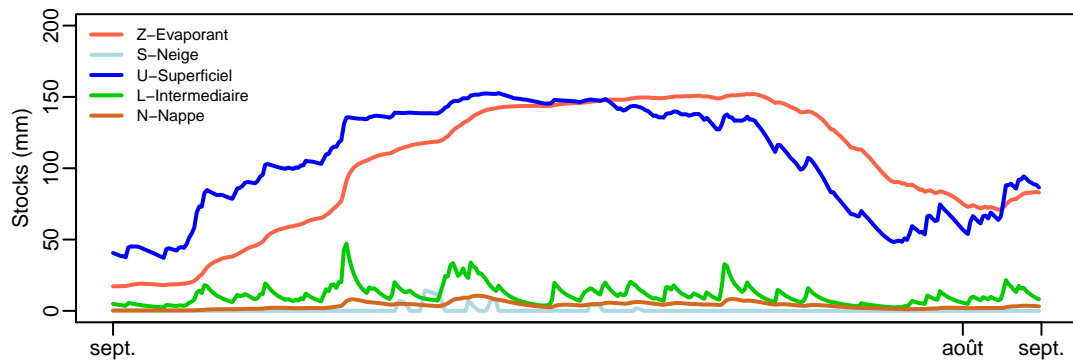

# c\_monh (156.84 km²) – année 2004–2005

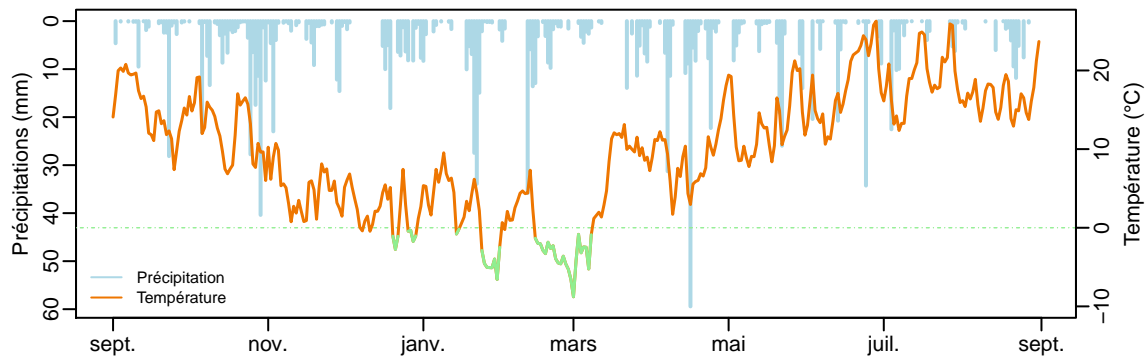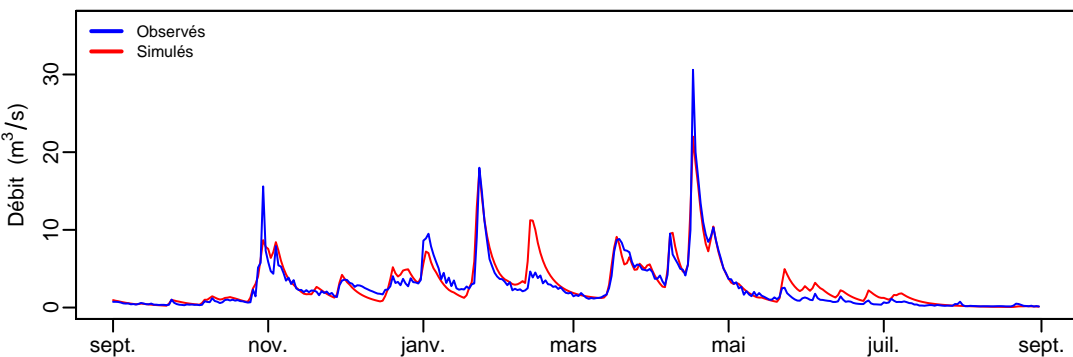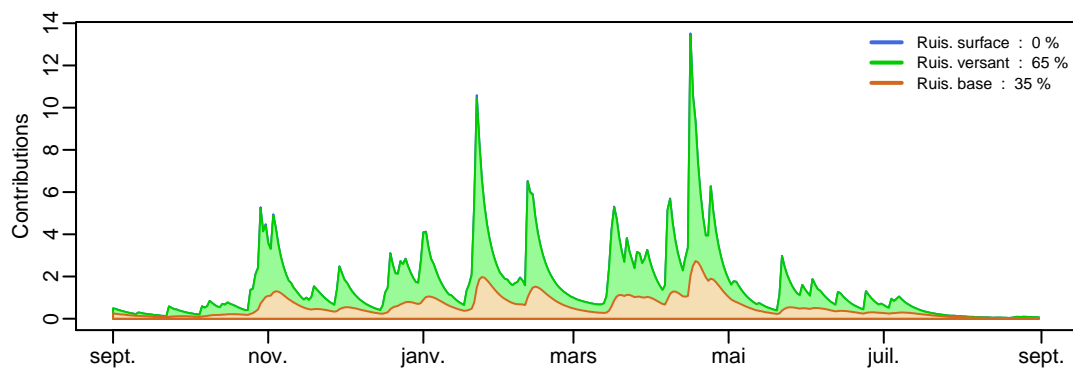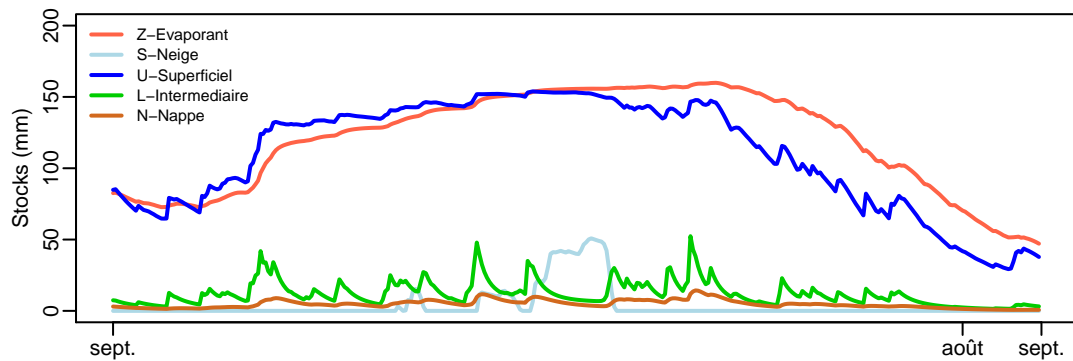

# c\_monh (156.84 km²) – année 2005–2006

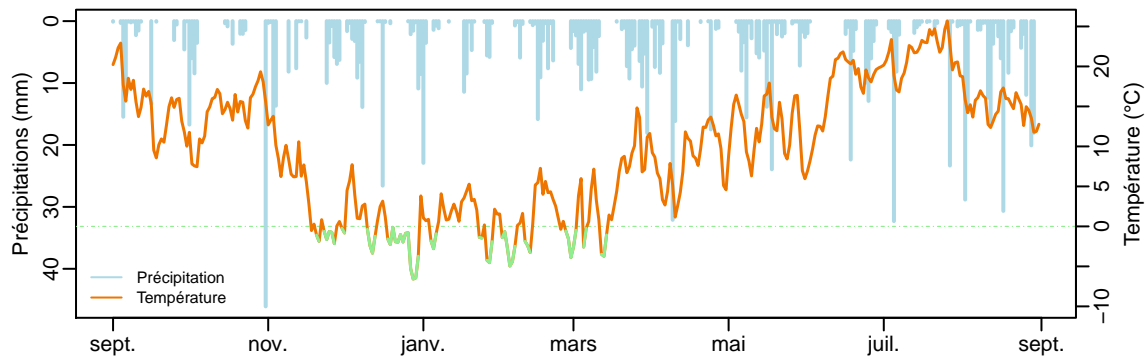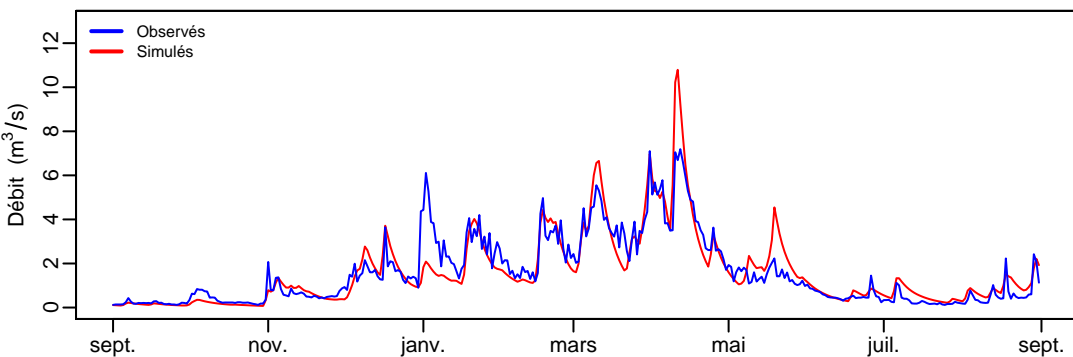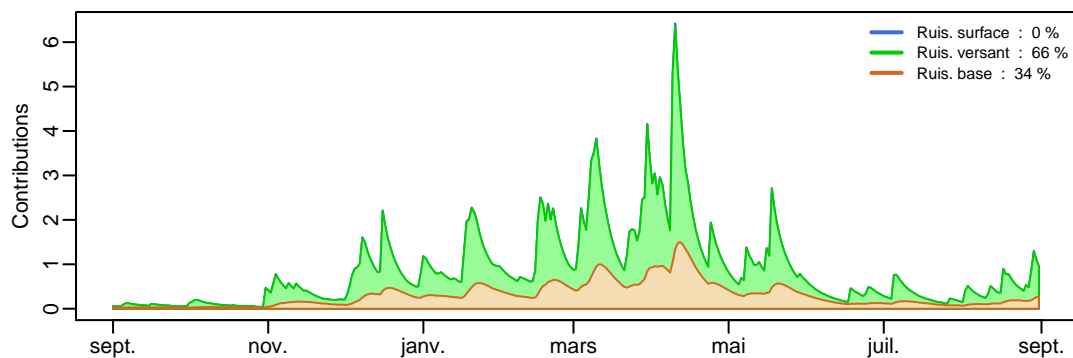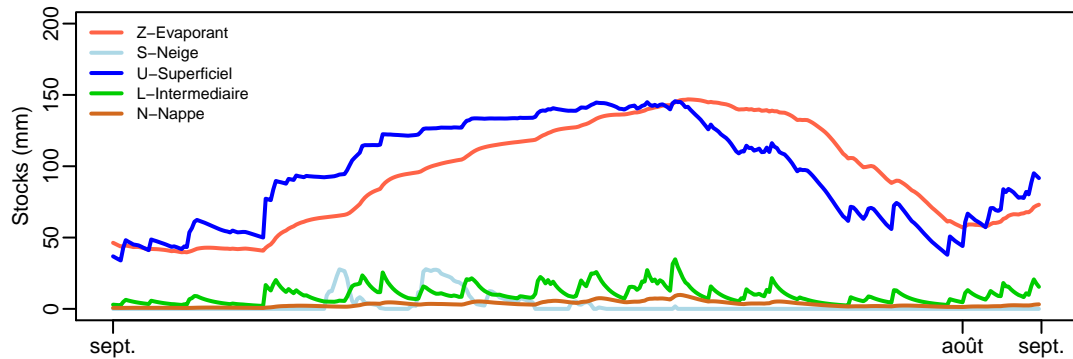

# c\_monh (156.84 km²) – année 2006–2007

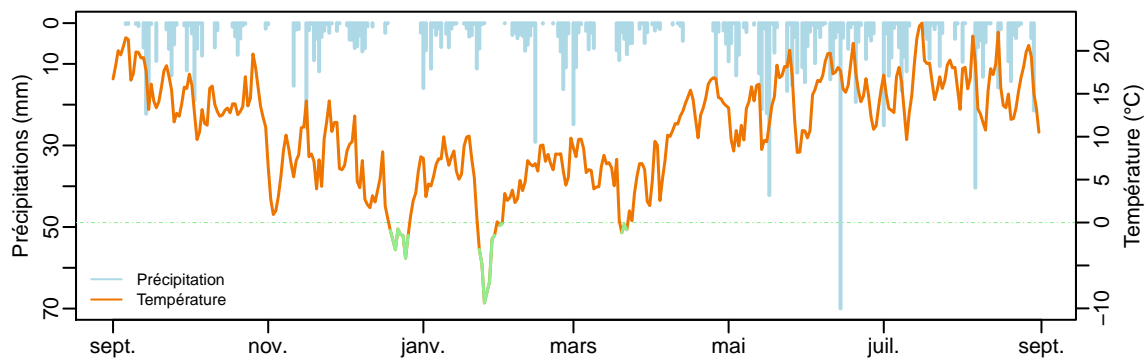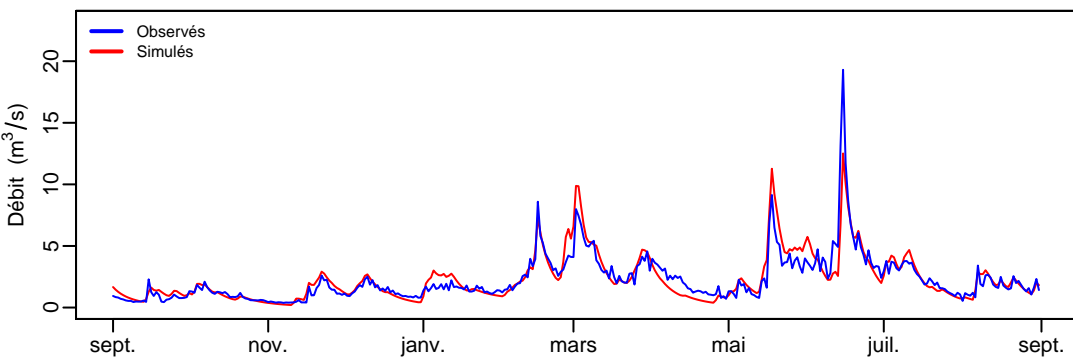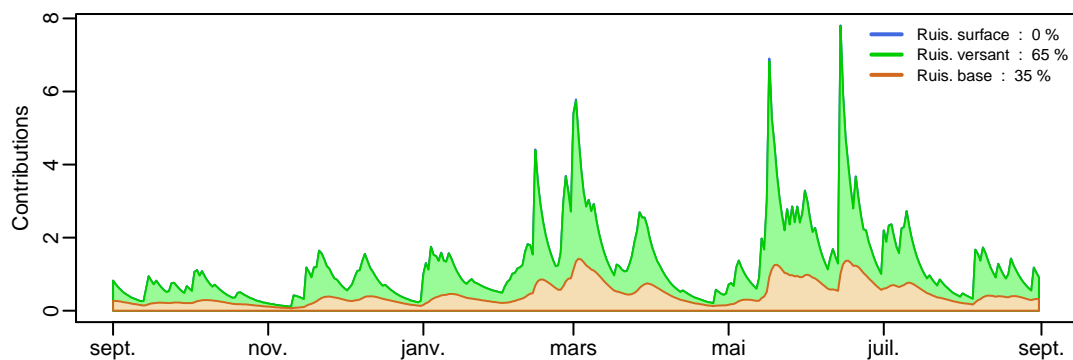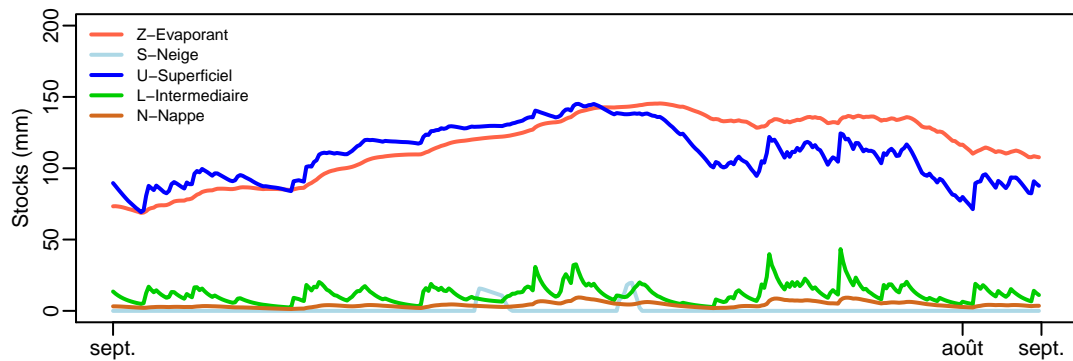



# c\_monh (156.84 km²) – année 2007–2008

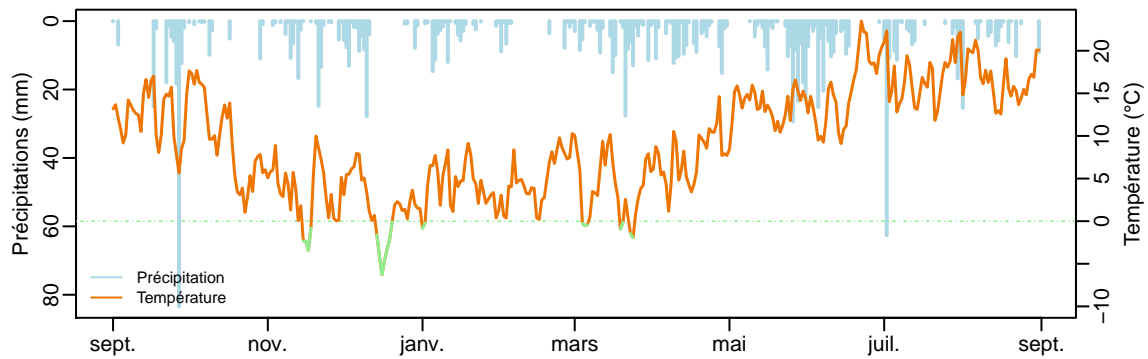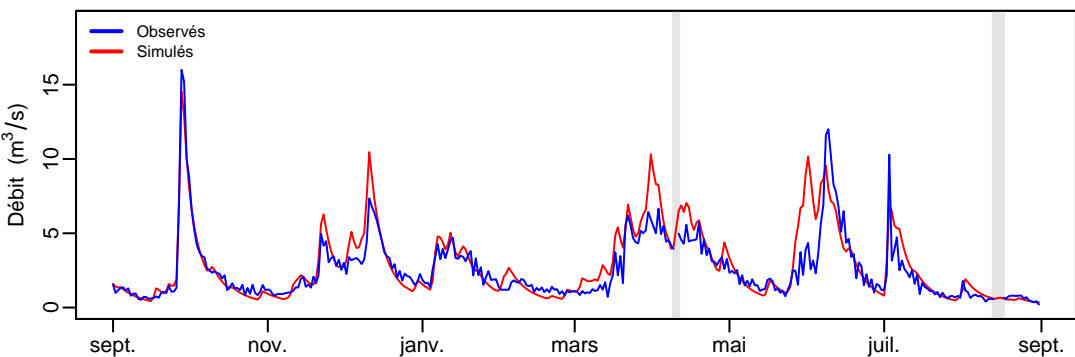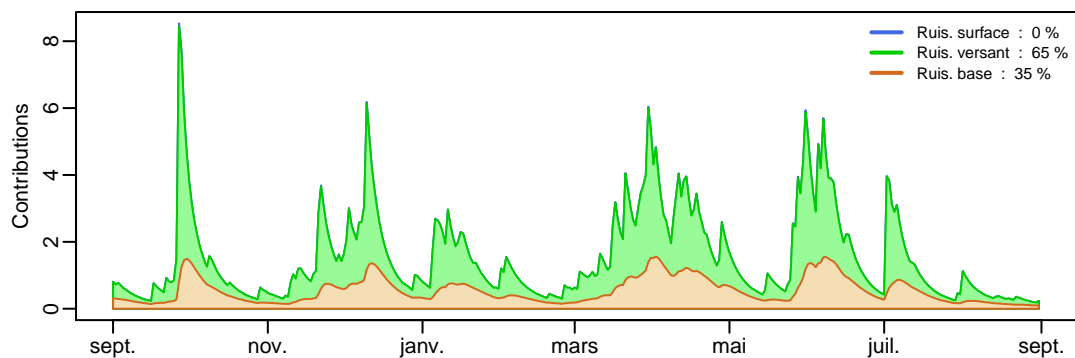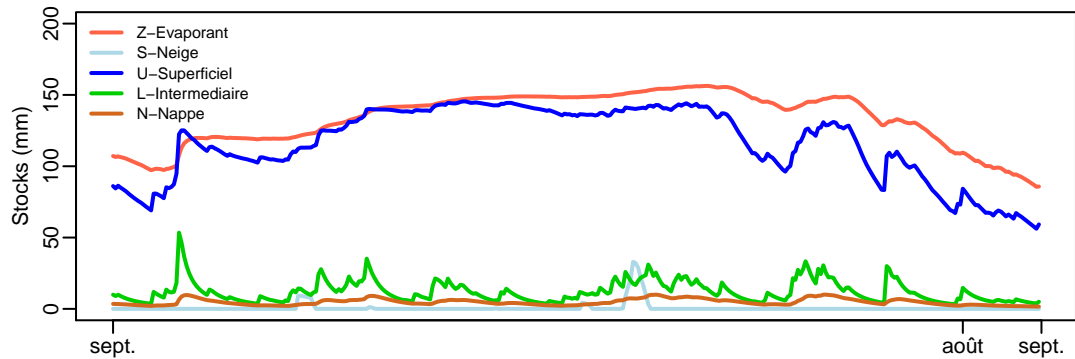

# c\_monh (156.84 km<sup>2</sup>) – année 2008–2009

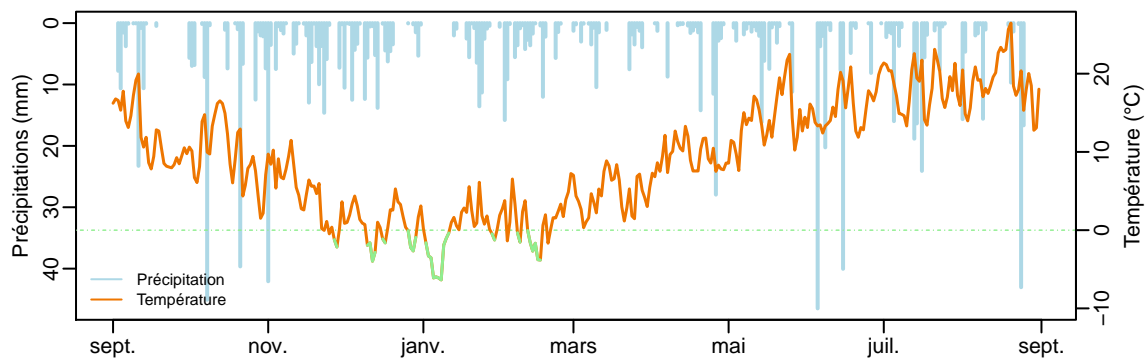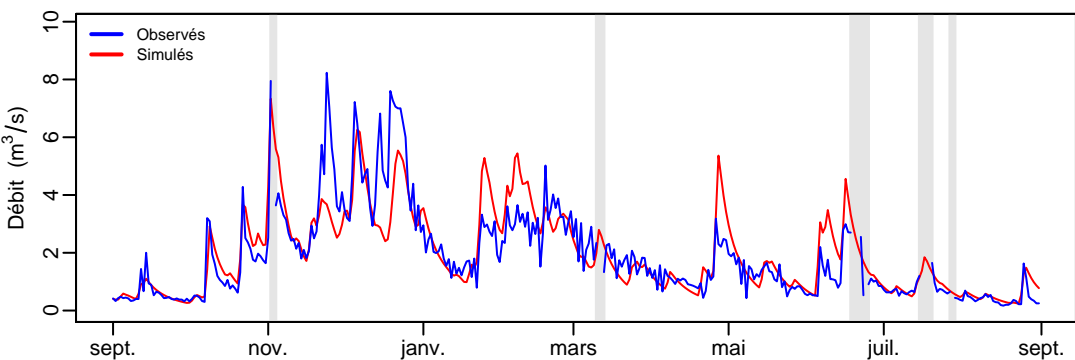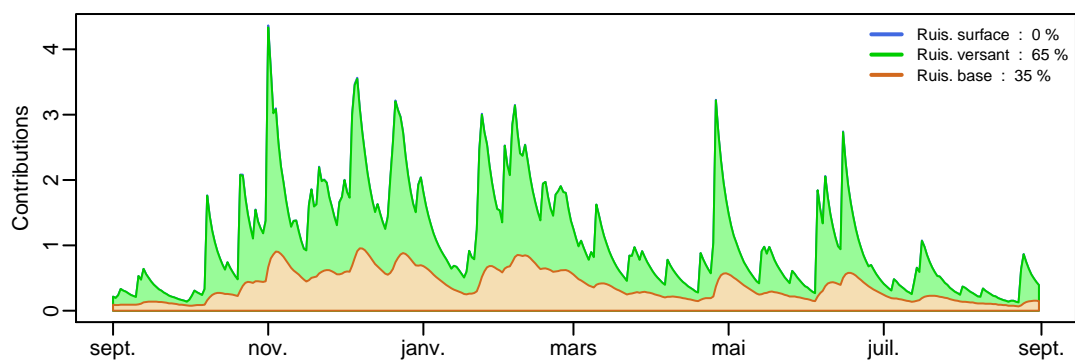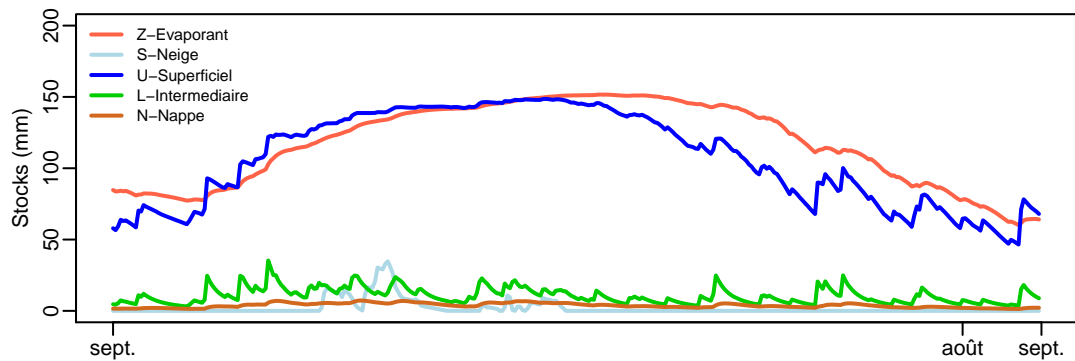

# c\_monh (156.84 km<sup>2</sup>) – année 2009–2010

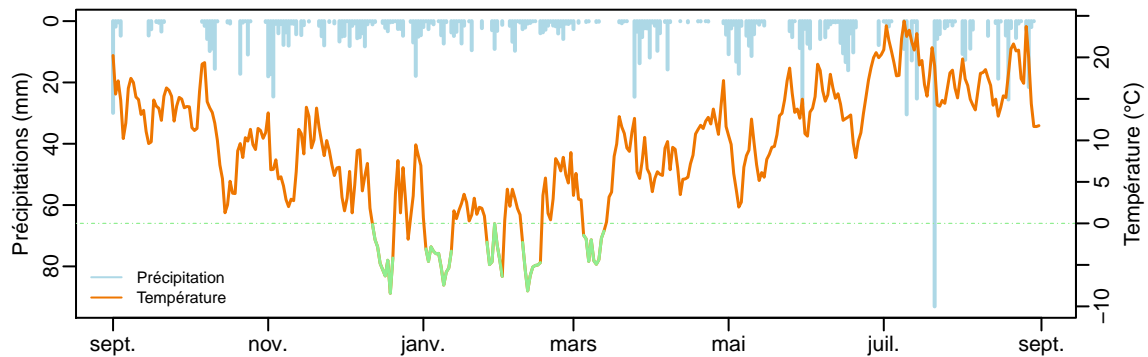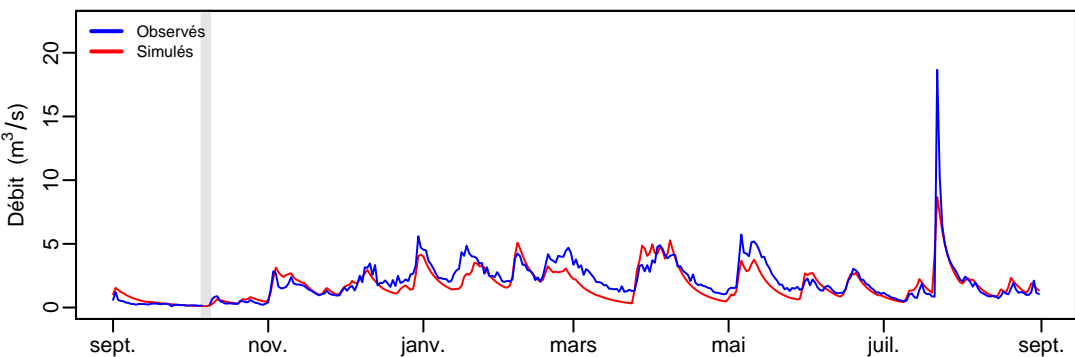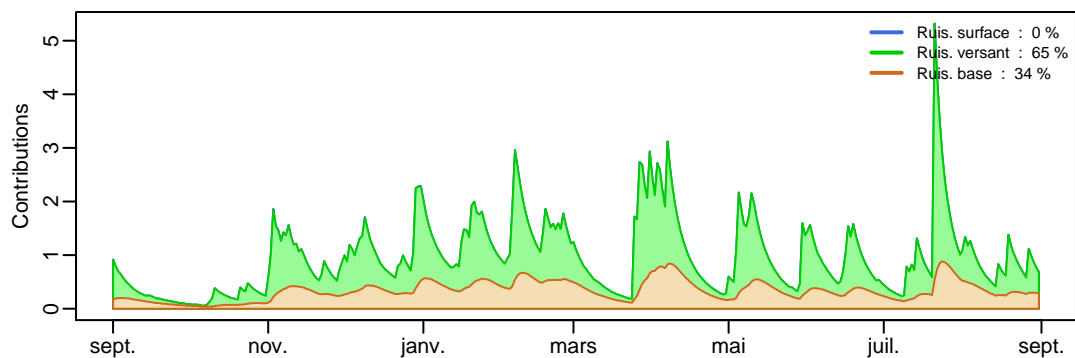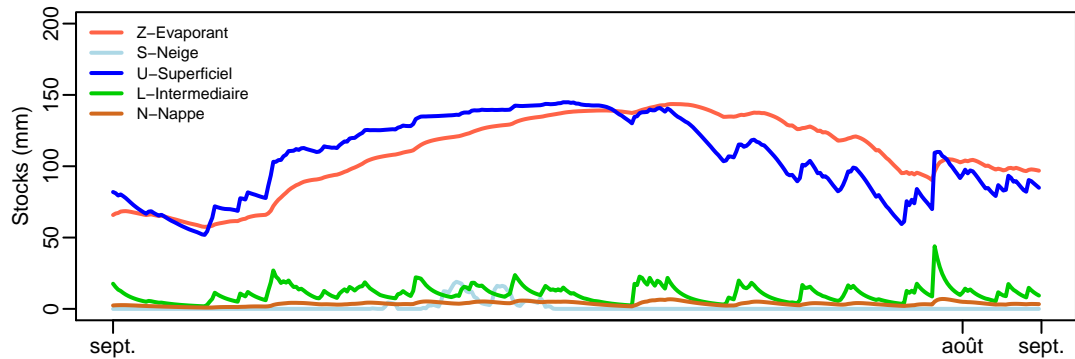

# fade5h (1361.27 km<sup>2</sup>) – année 1981–1982

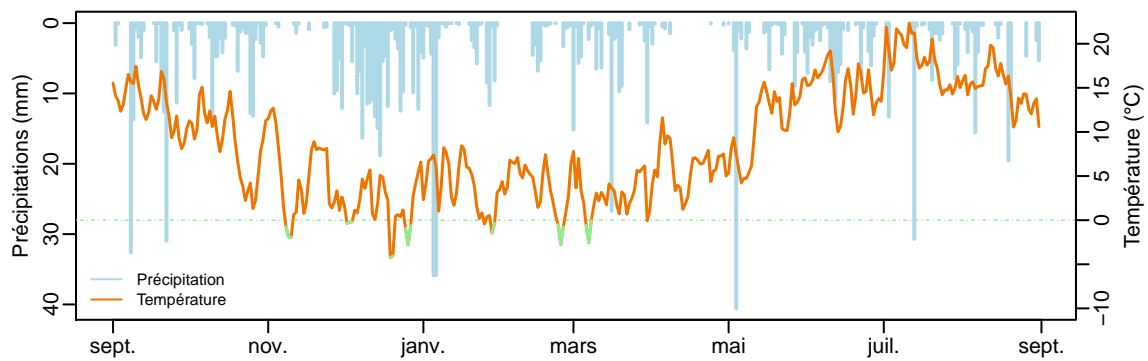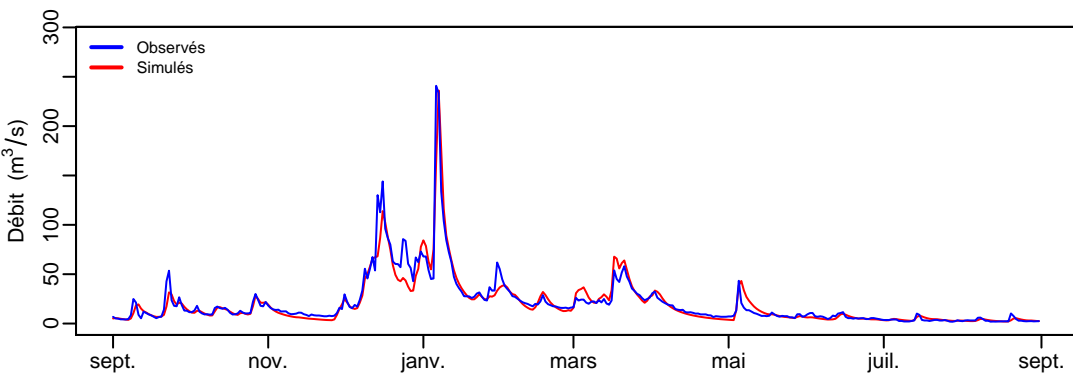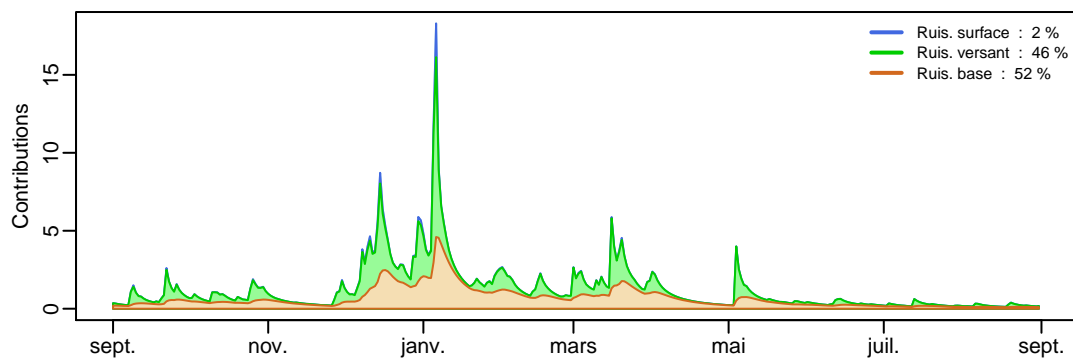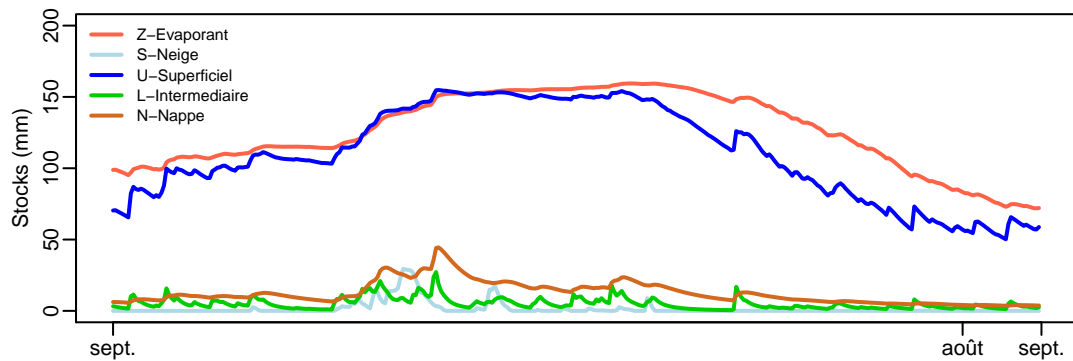

# fade5h (1361.27 km<sup>2</sup>) – année 1982–1983

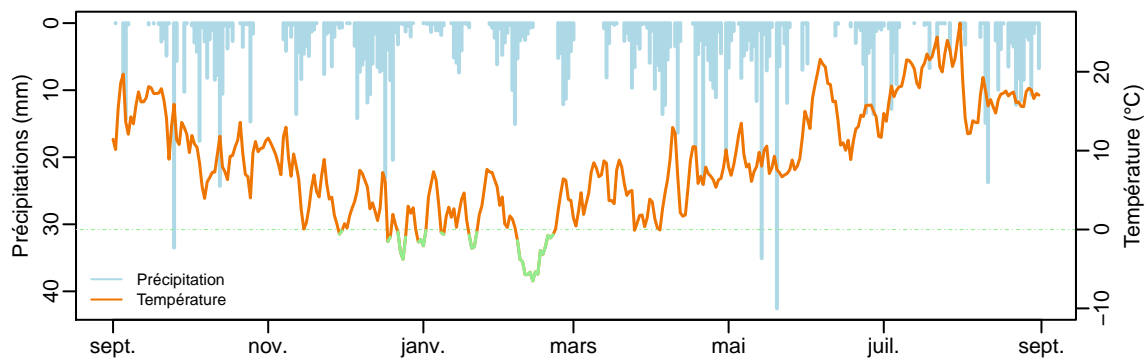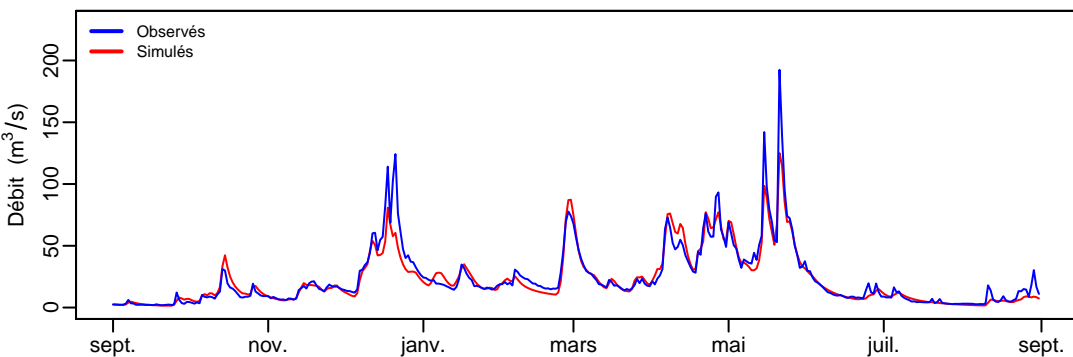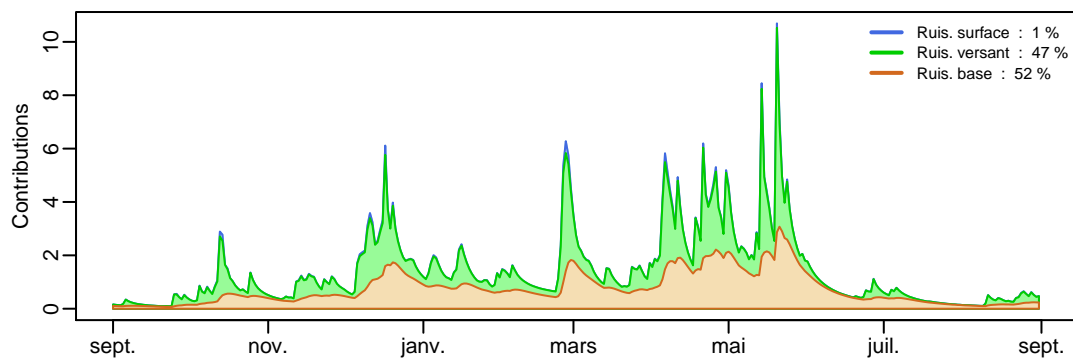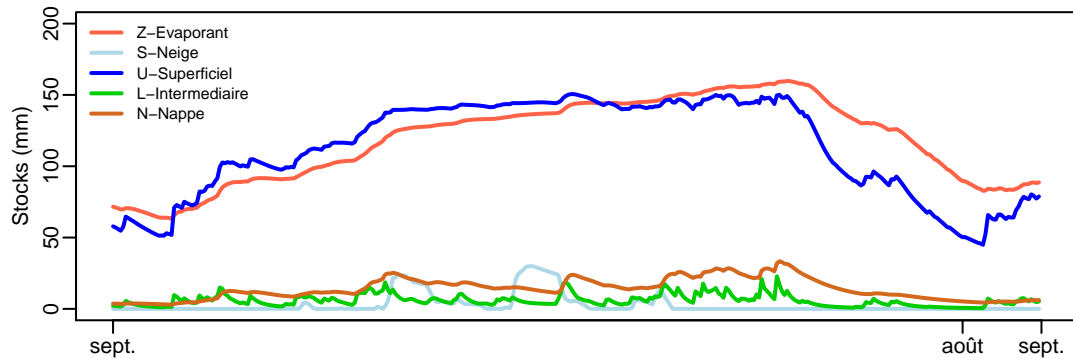

# fade5h (1361.27 km<sup>2</sup>) – année 1983–1984

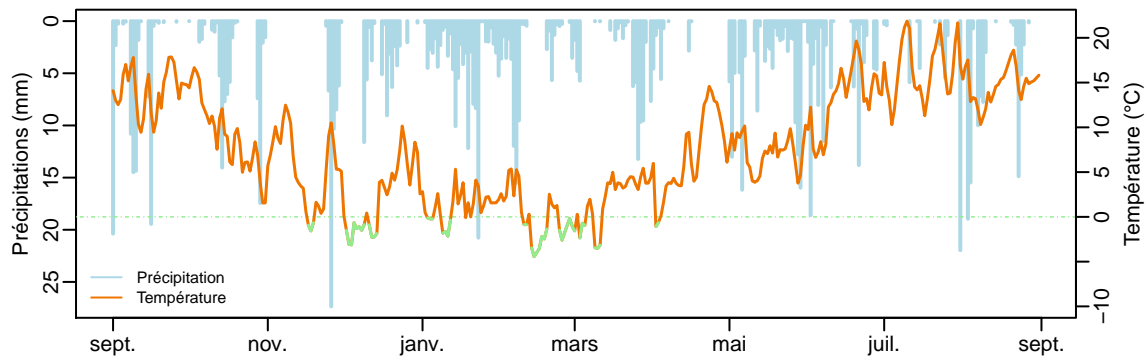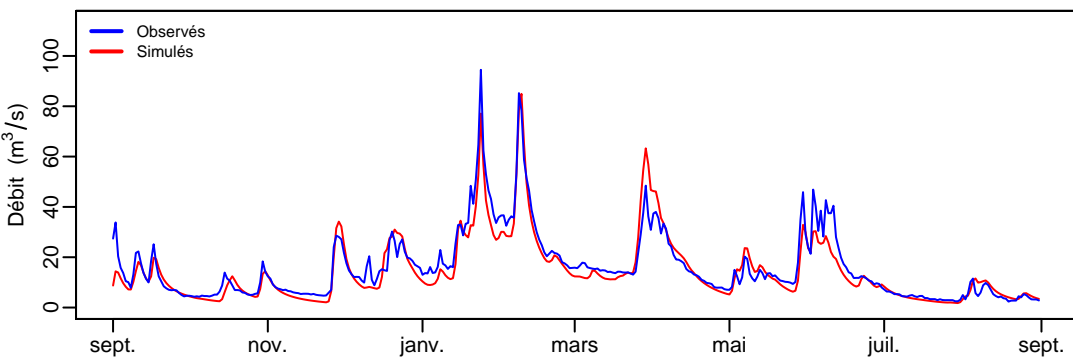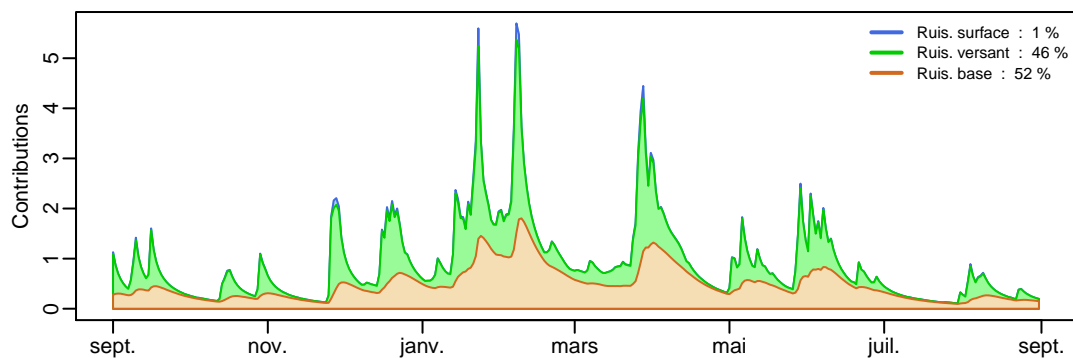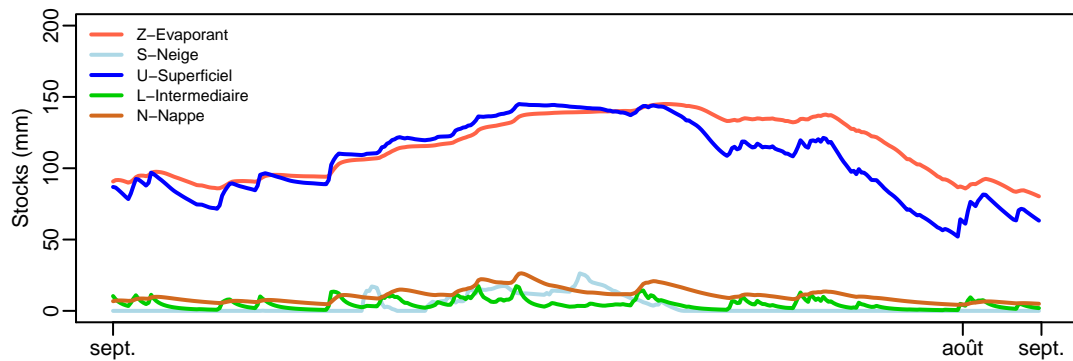

# fade5h (1361.27 km<sup>2</sup>) – année 1984–1985

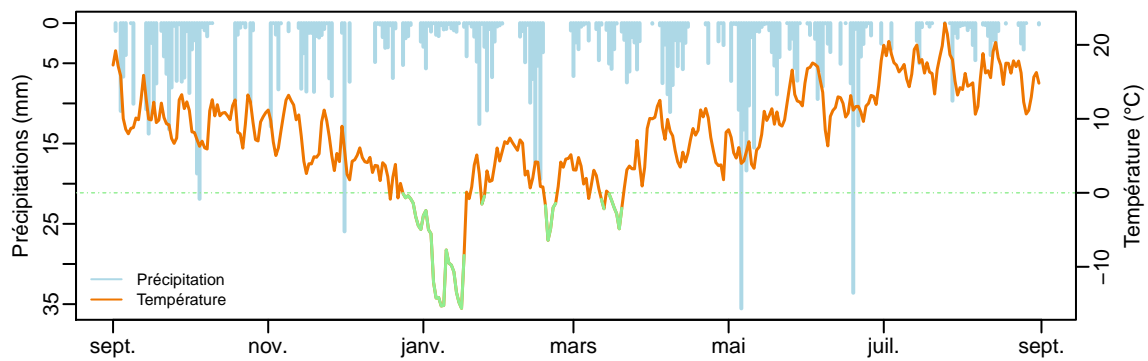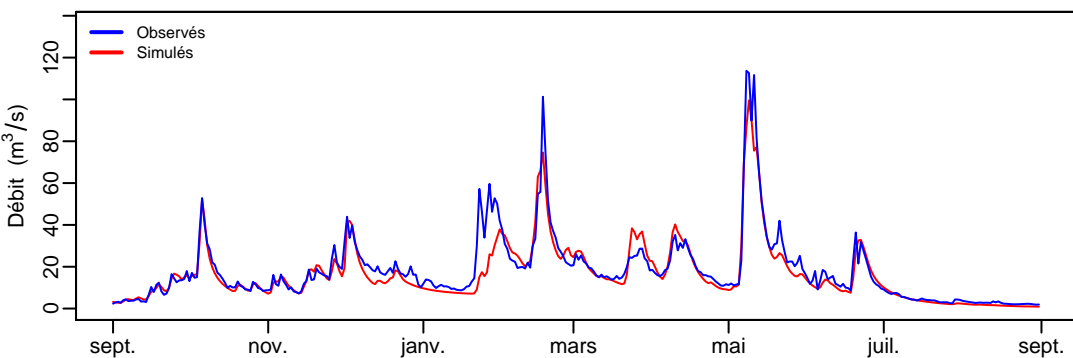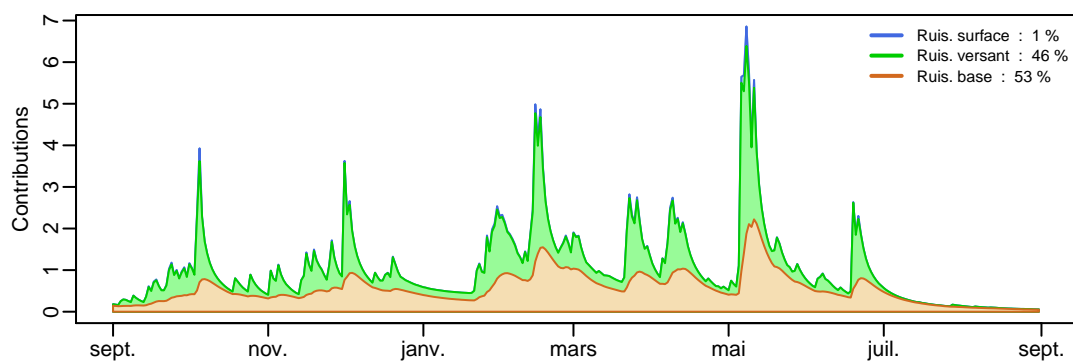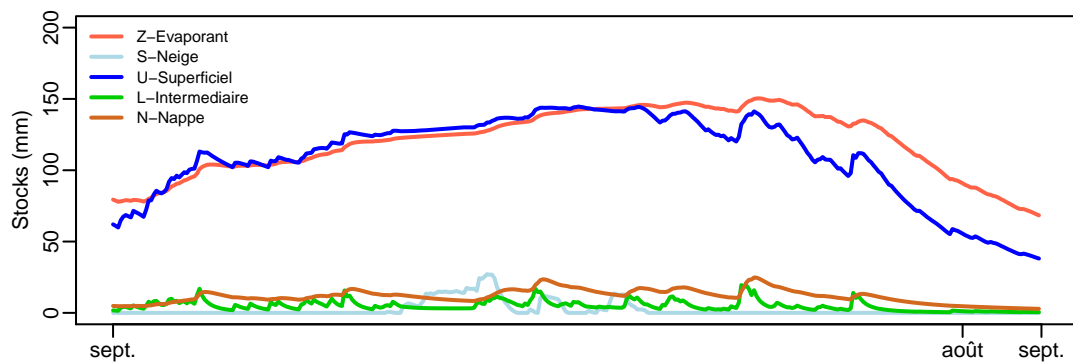

# fade5h (1361.27 km<sup>2</sup>) – année 1985–1986

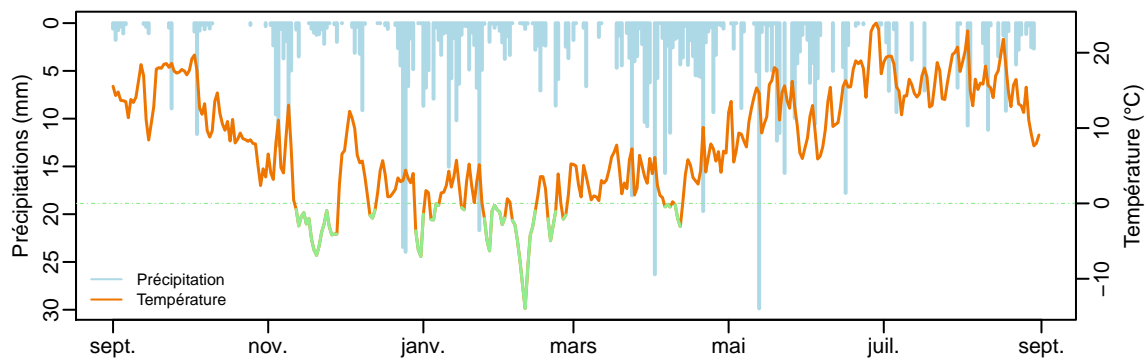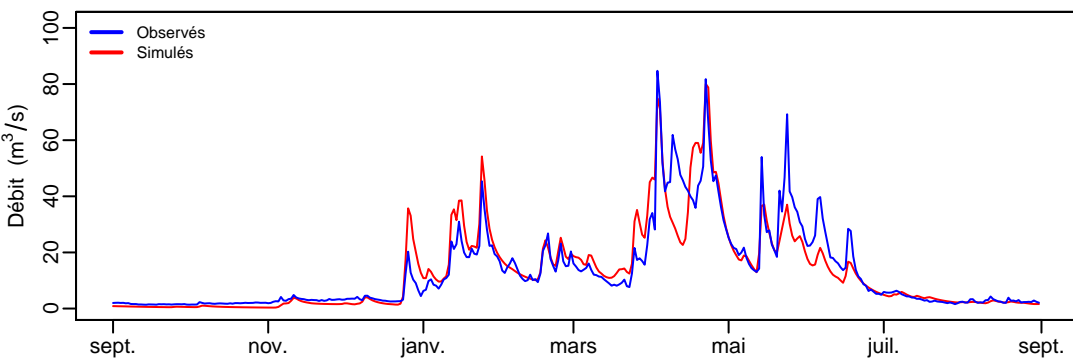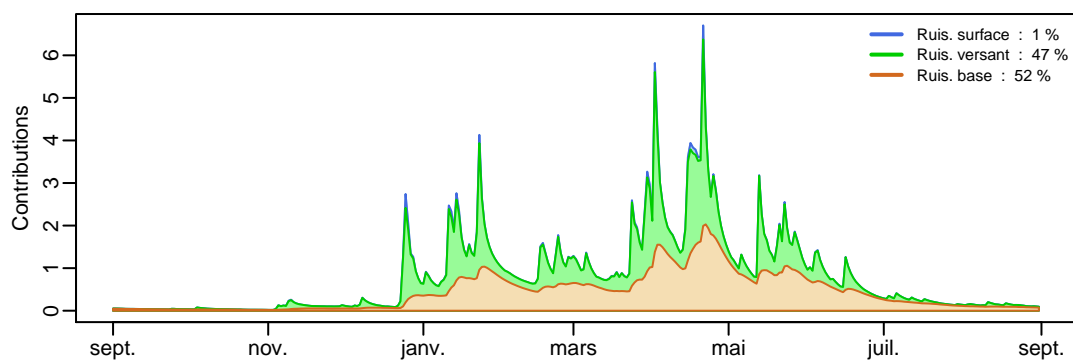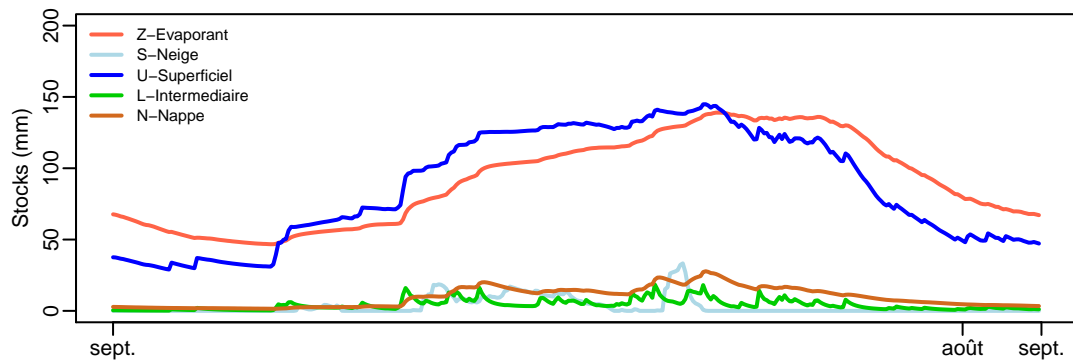



# fade5h (1361.27 km<sup>2</sup>) – année 1986–1987

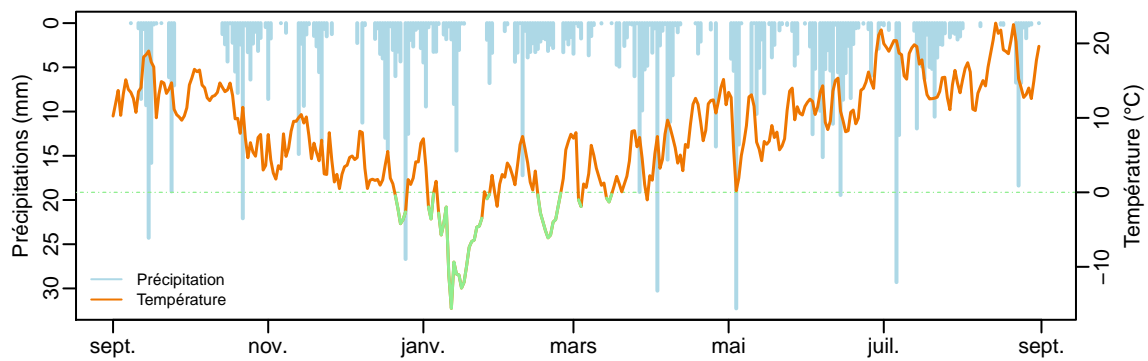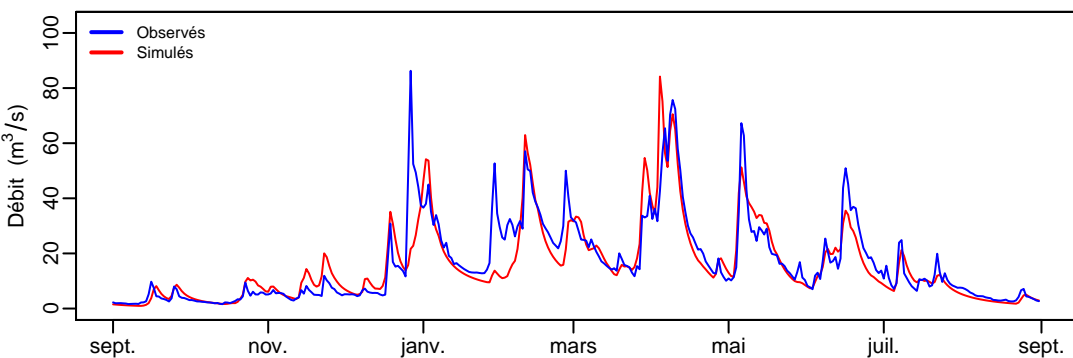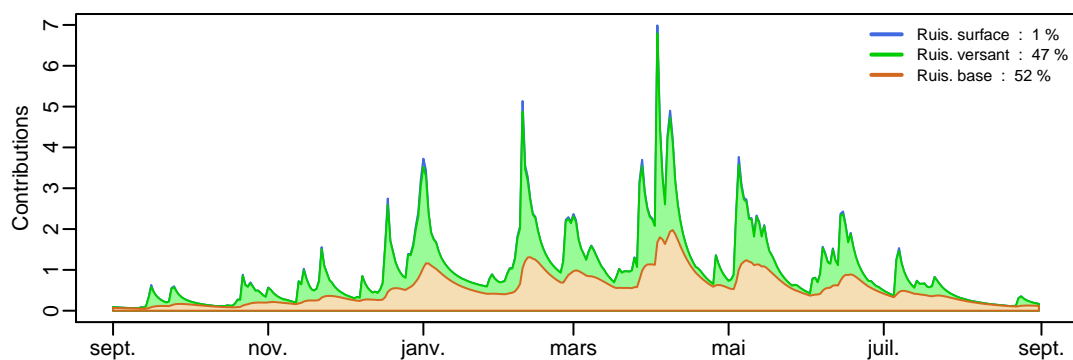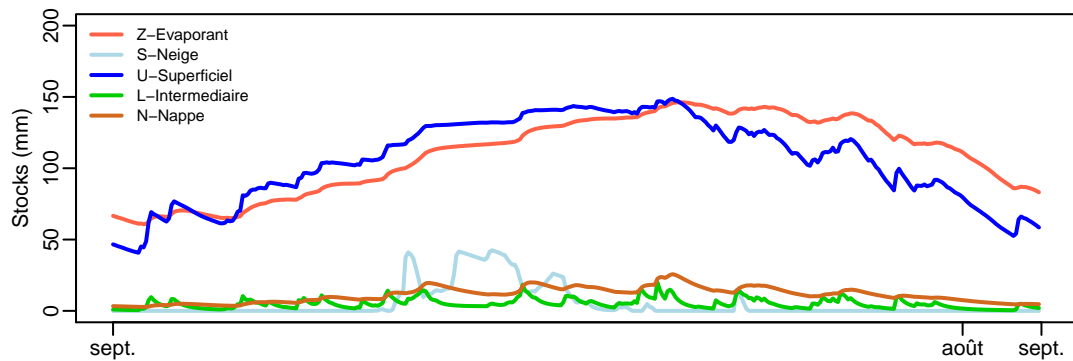

# fade5h (1361.27 km<sup>2</sup>) – année 1987–1988

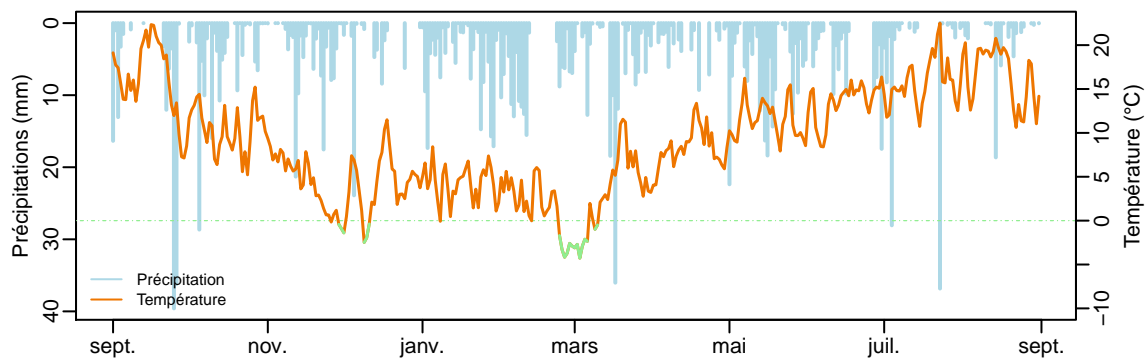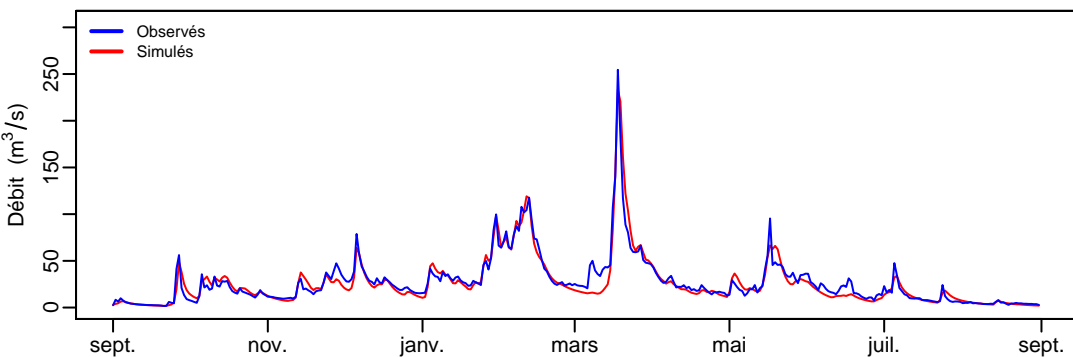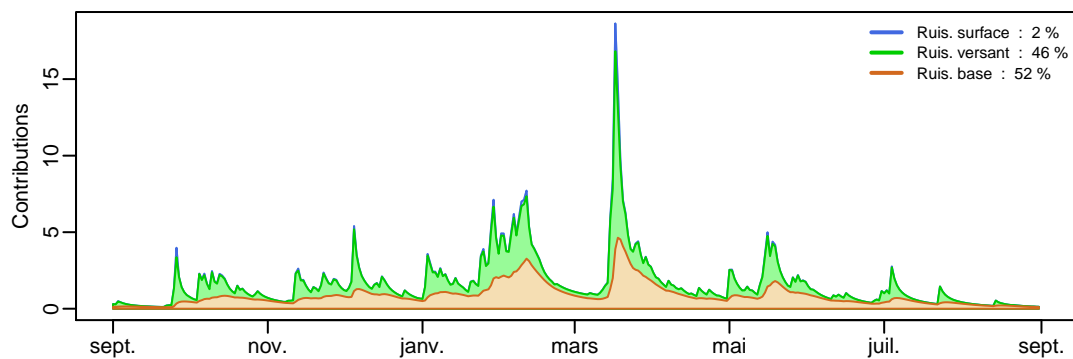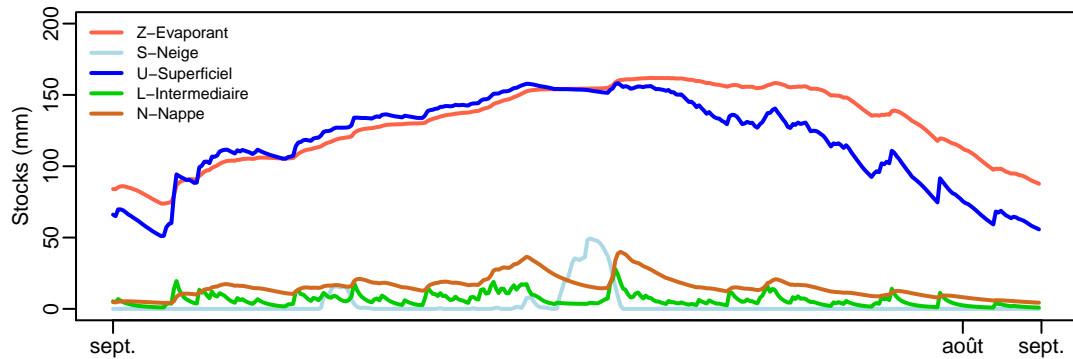

# fade5h (1361.27 km<sup>2</sup>) – année 1988–1989

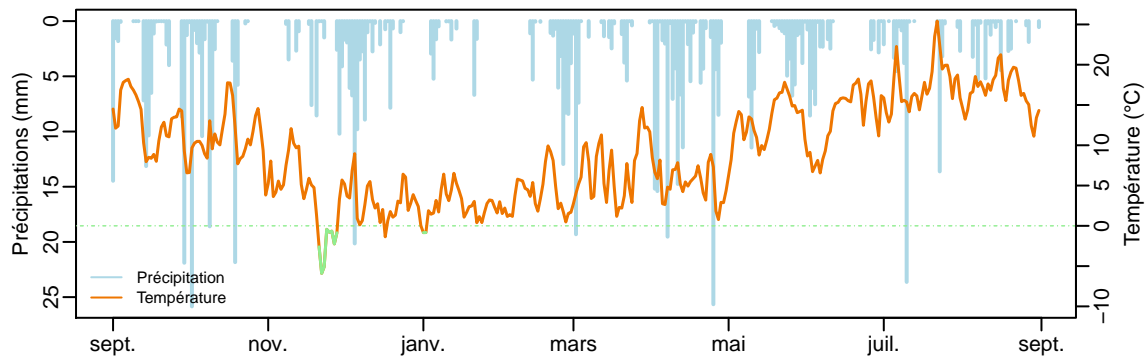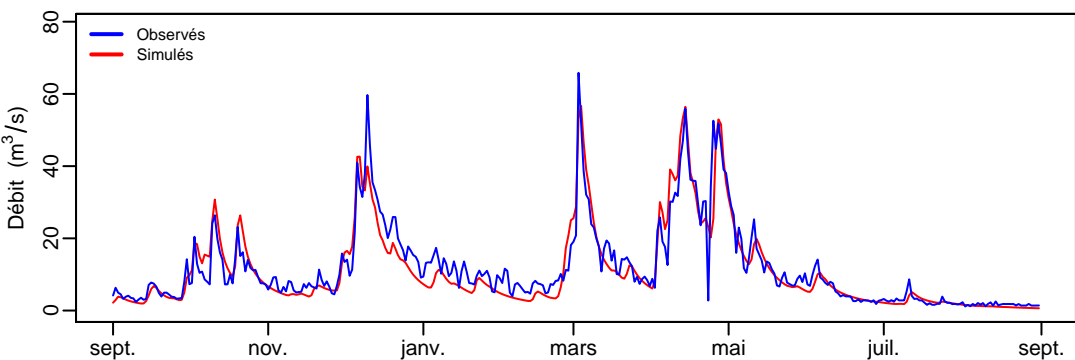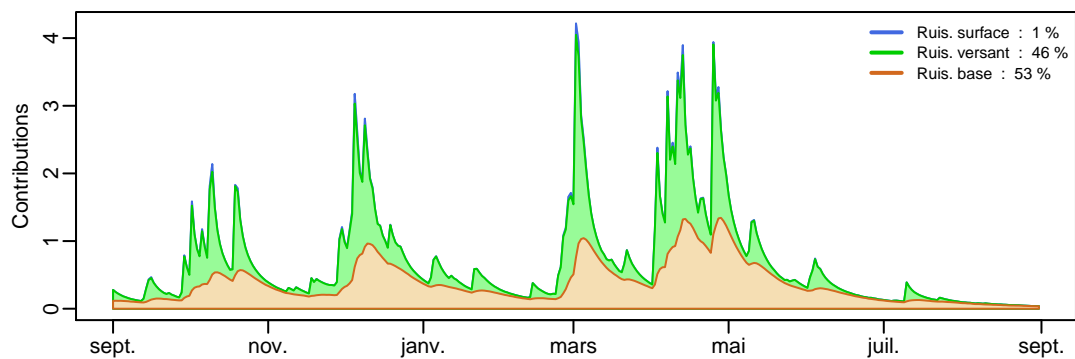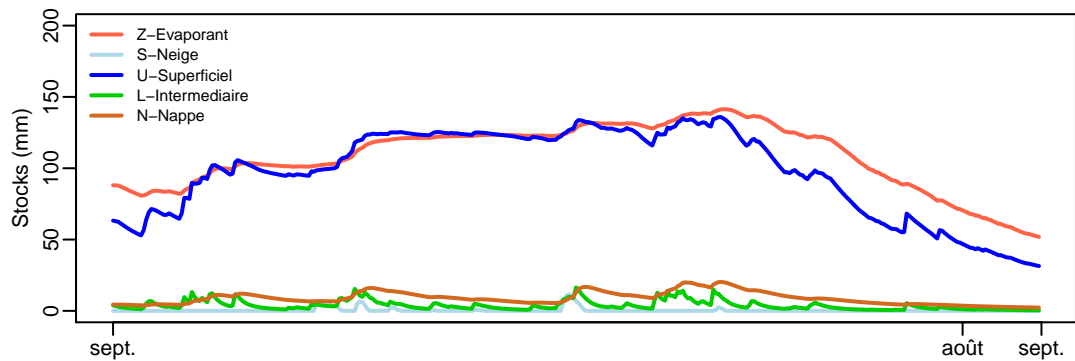

# fade5h (1361.27 km<sup>2</sup>) – année 1989–1990

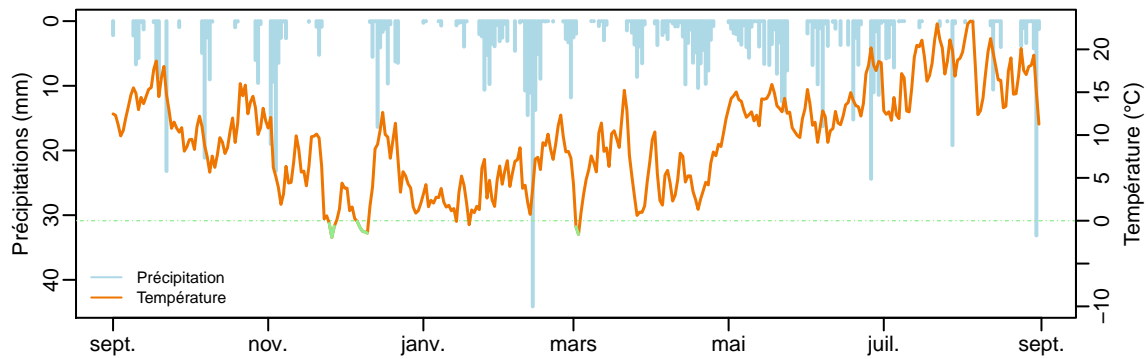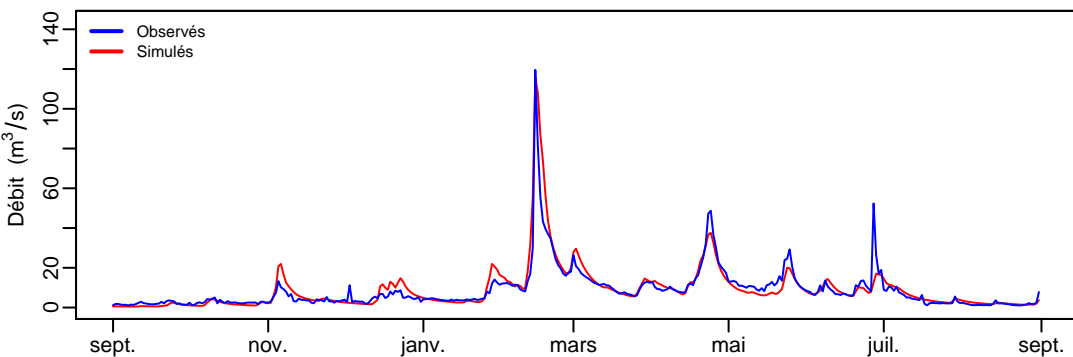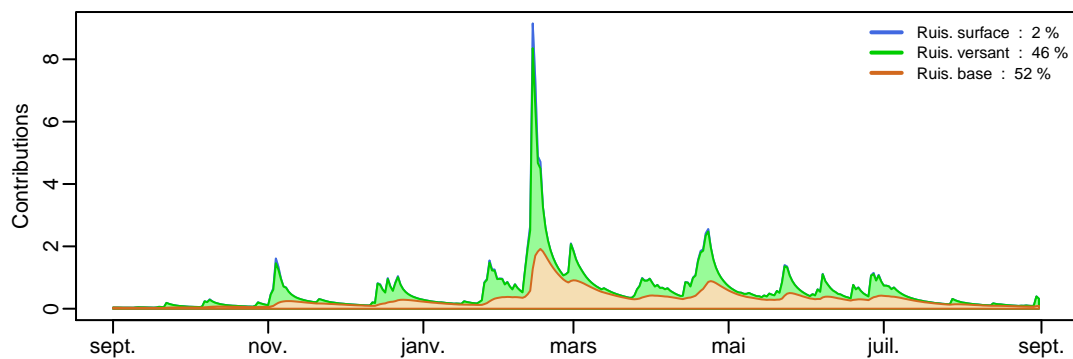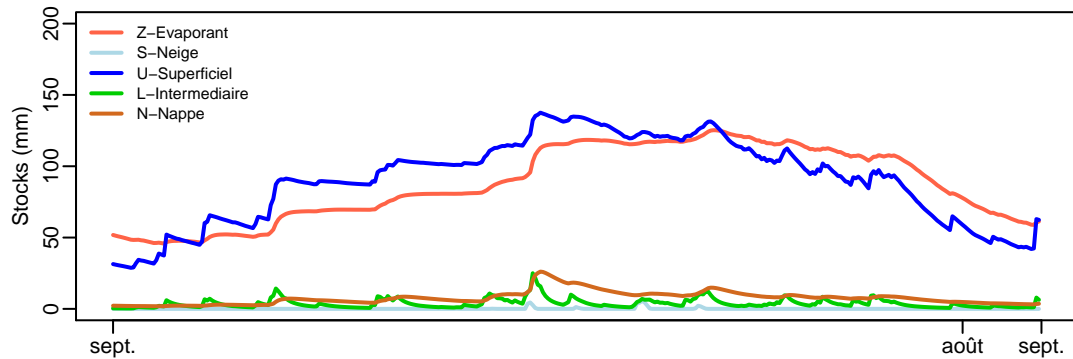

# fade5h (1361.27 km²) – année 1990–1991

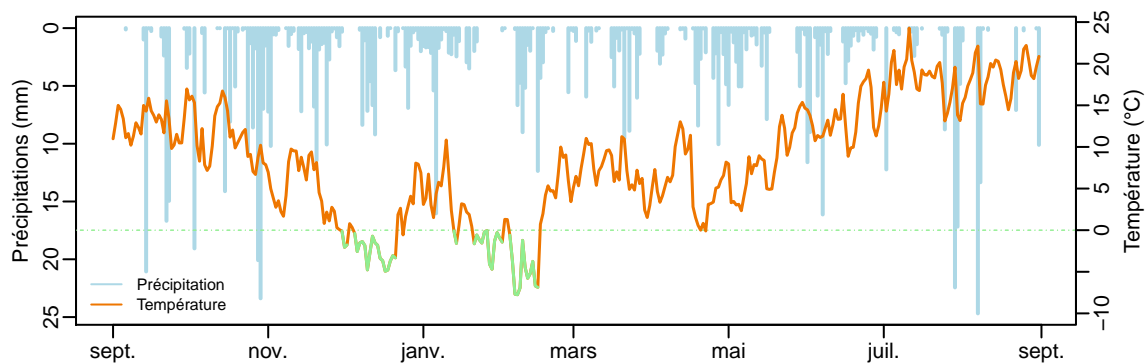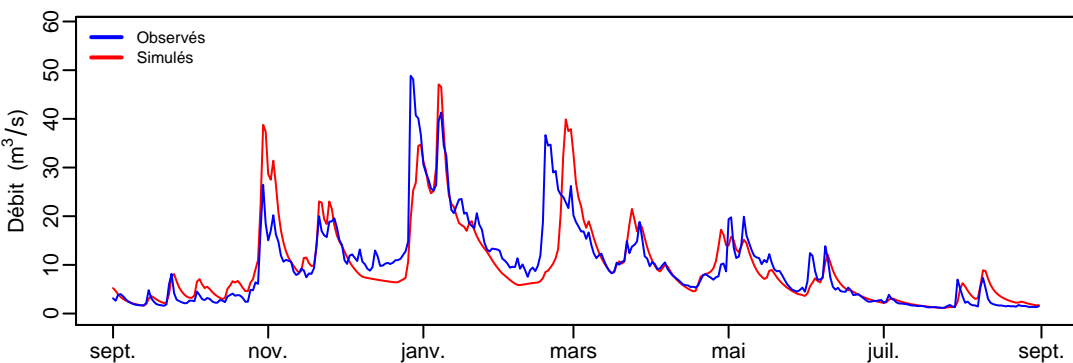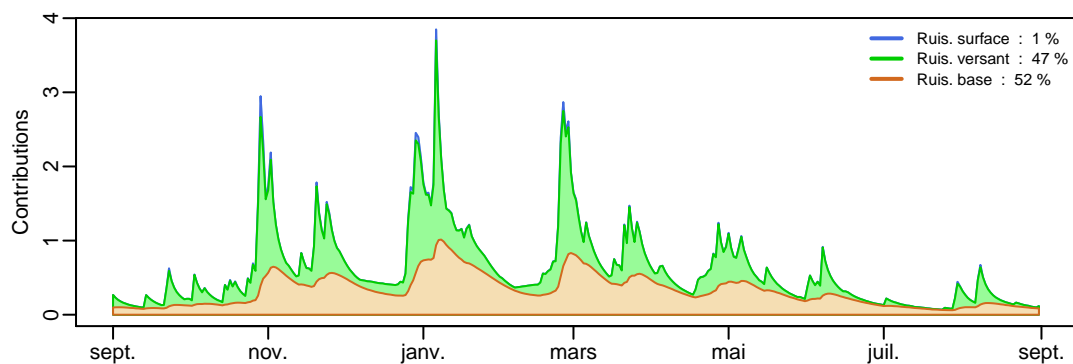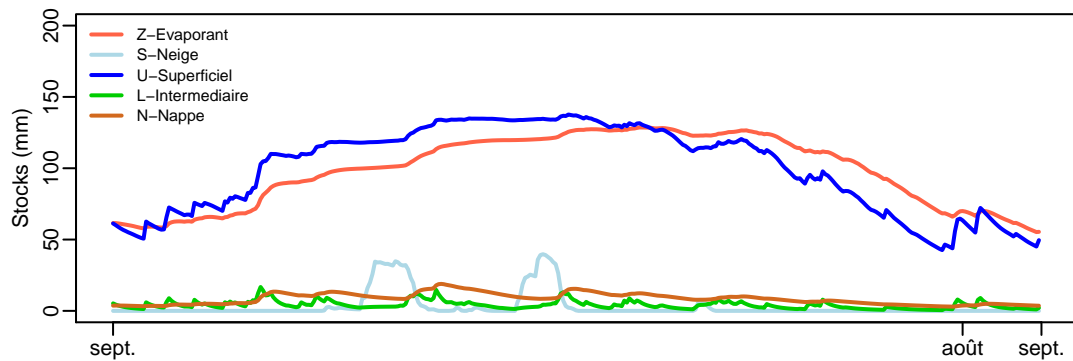

# fade5h (1361.27 km<sup>2</sup>) – année 1991–1992

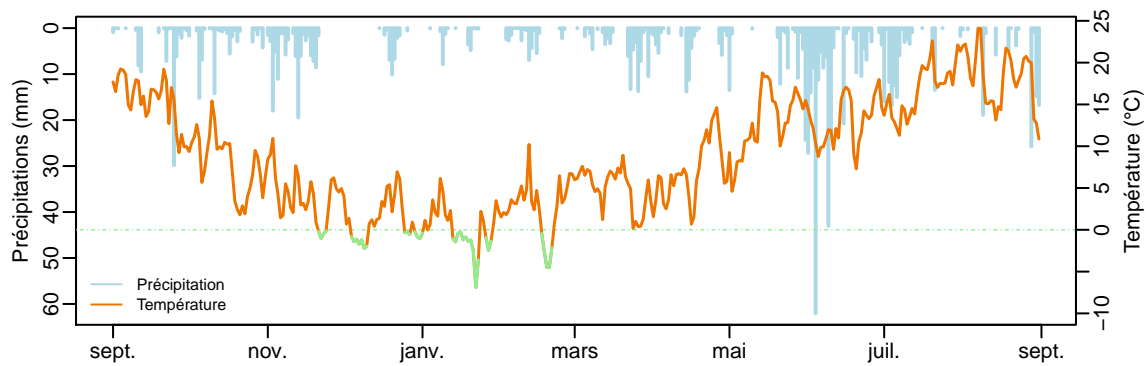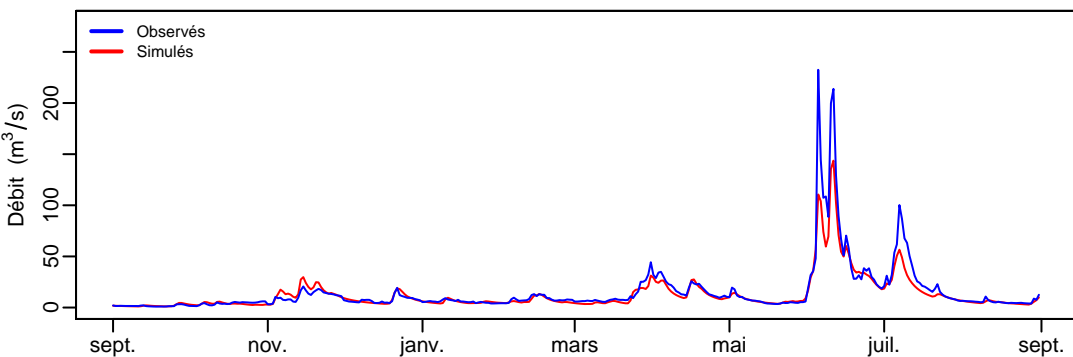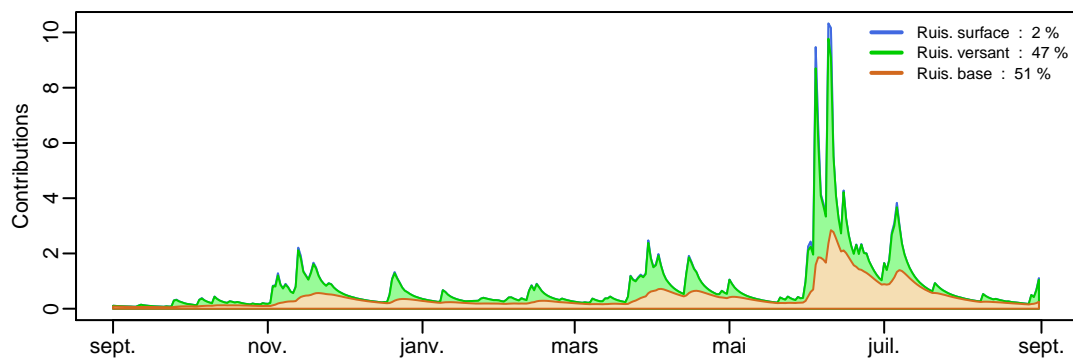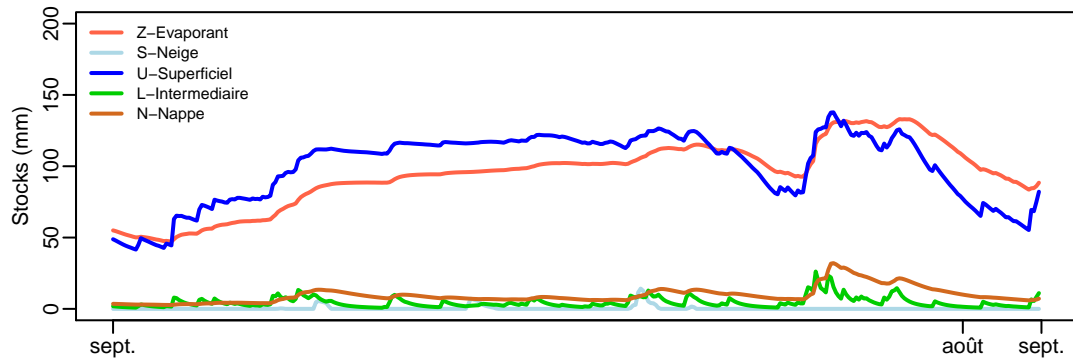

# fade5h (1361.27 km²) – année 1992–1993

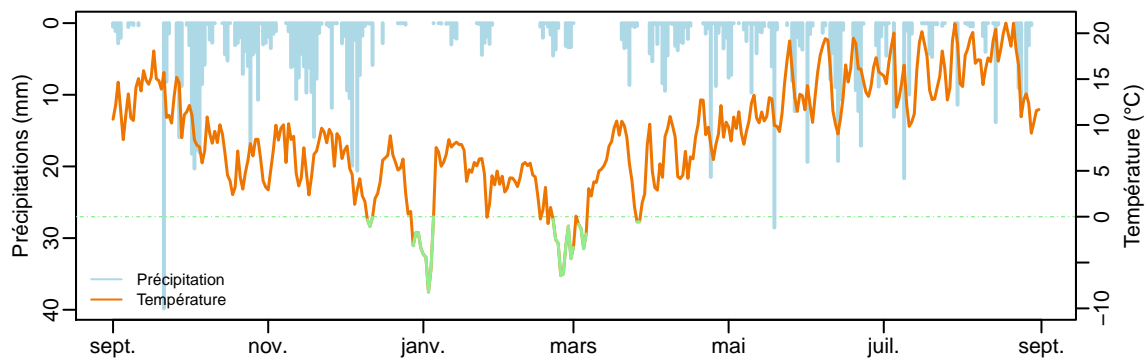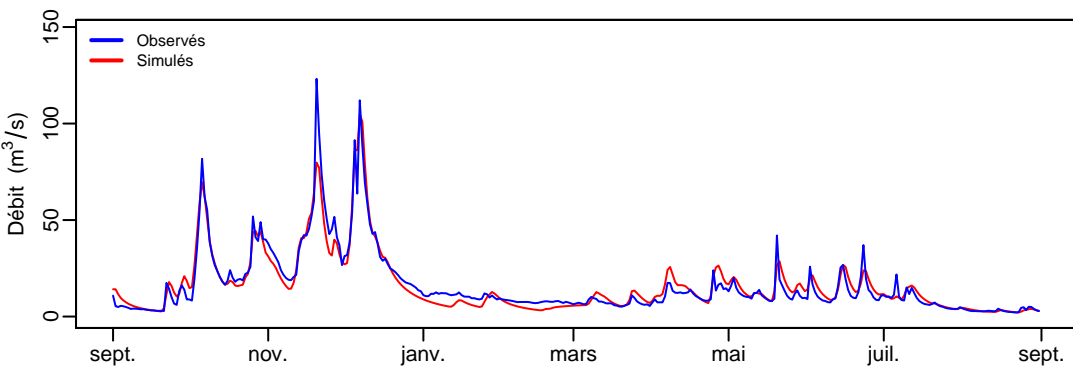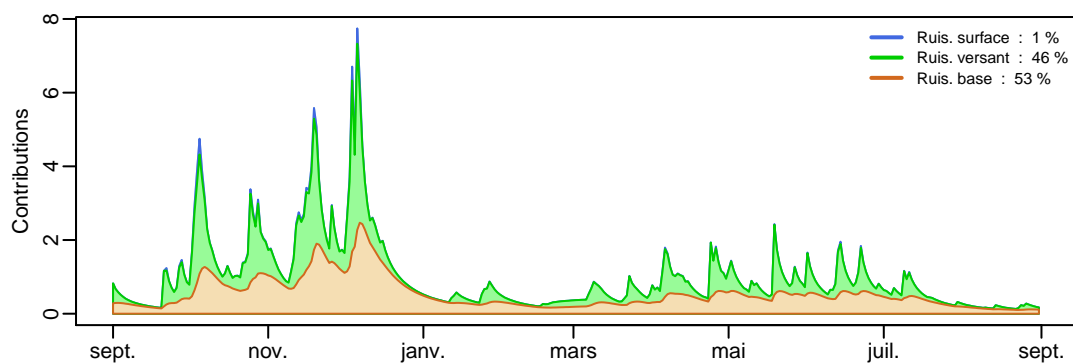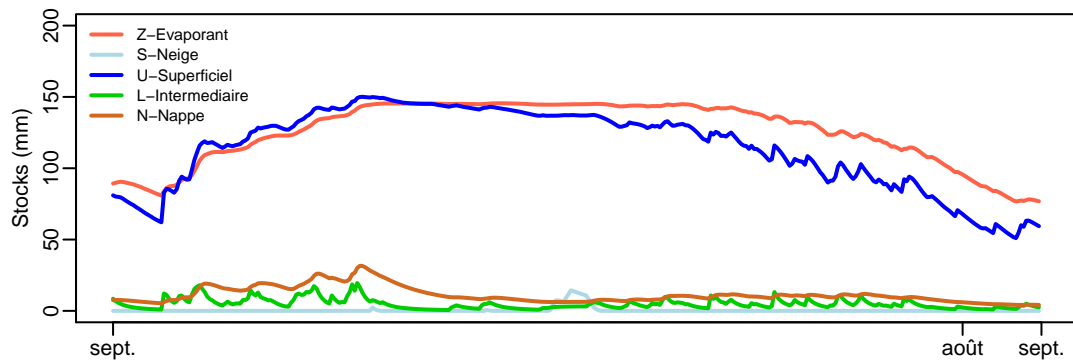

# fade5h (1361.27 km²) – année 1993–1994

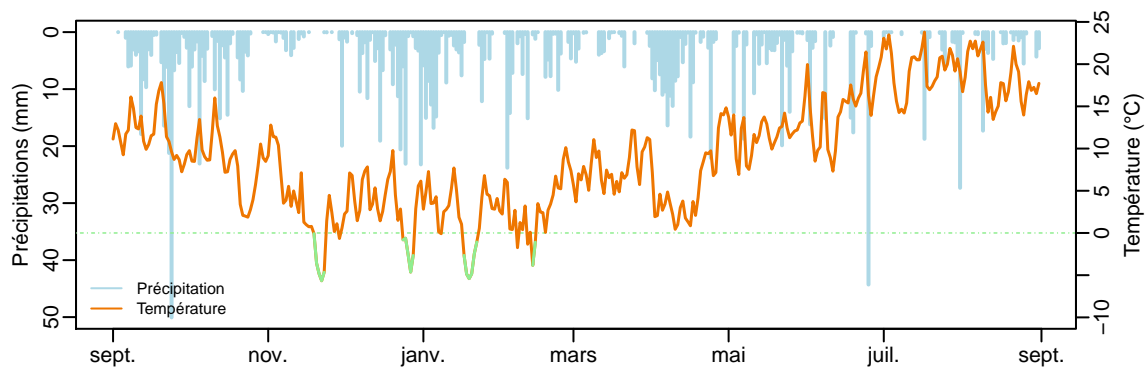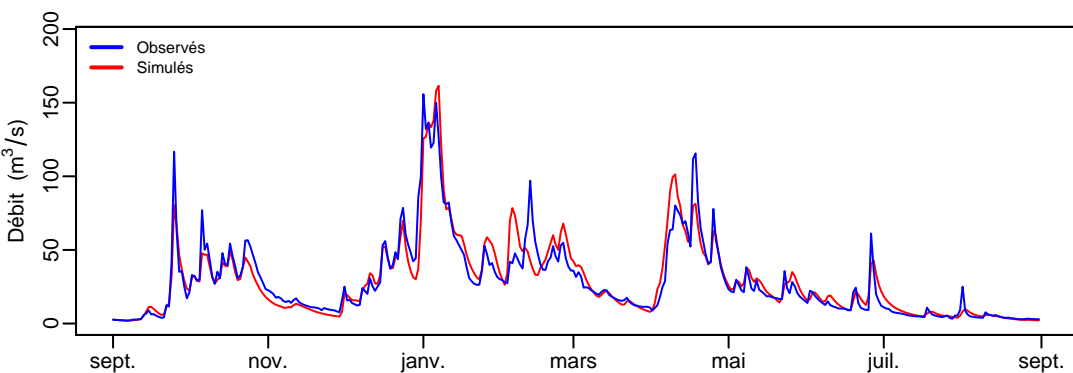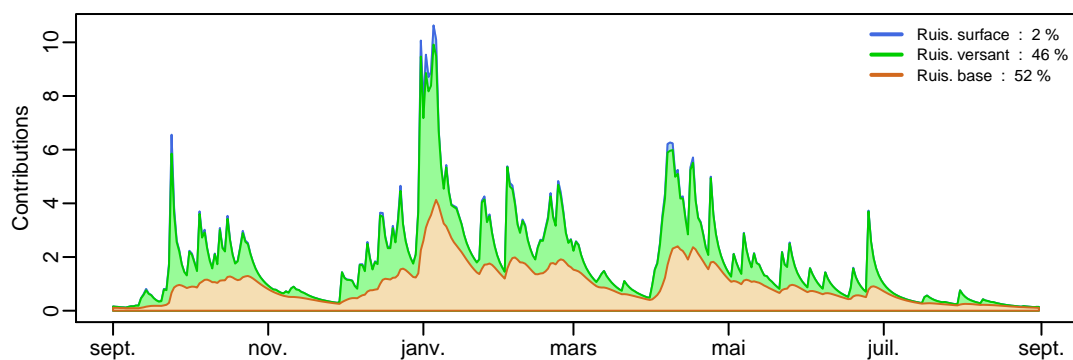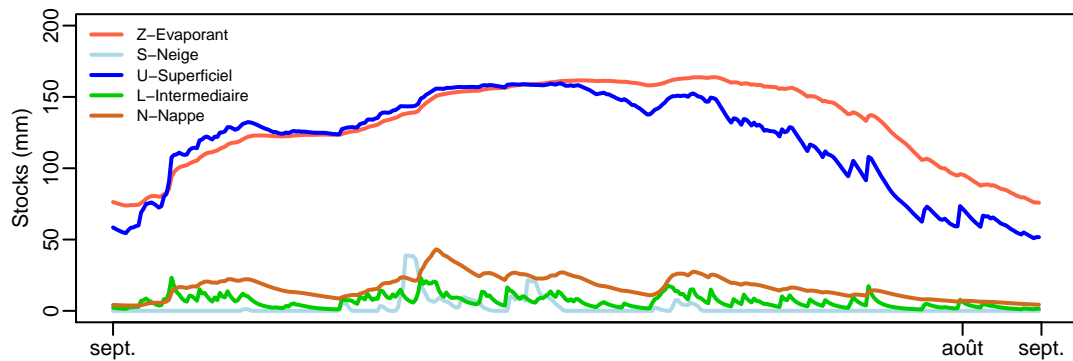



# fade5h (1361.27 km<sup>2</sup>) – année 1994–1995

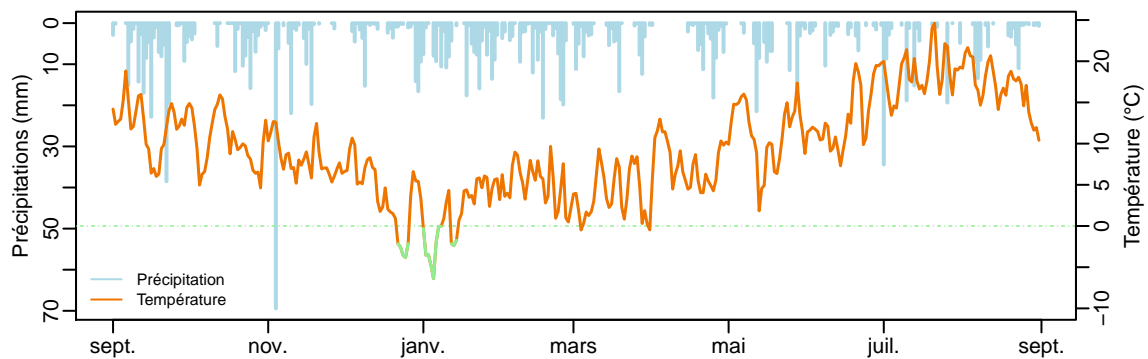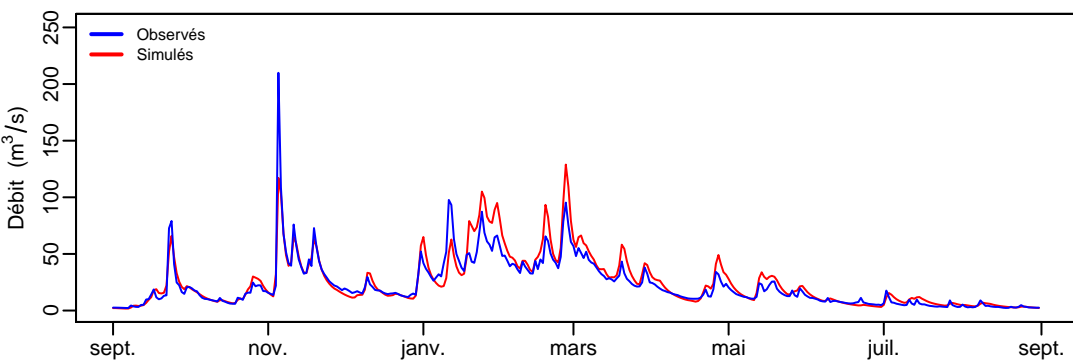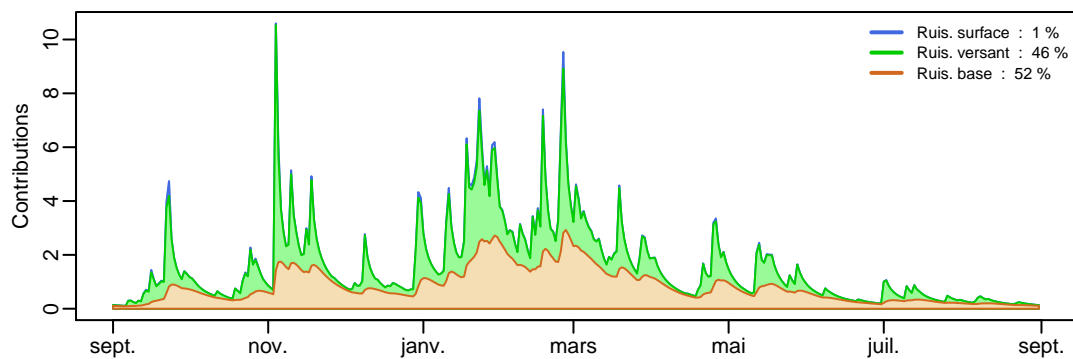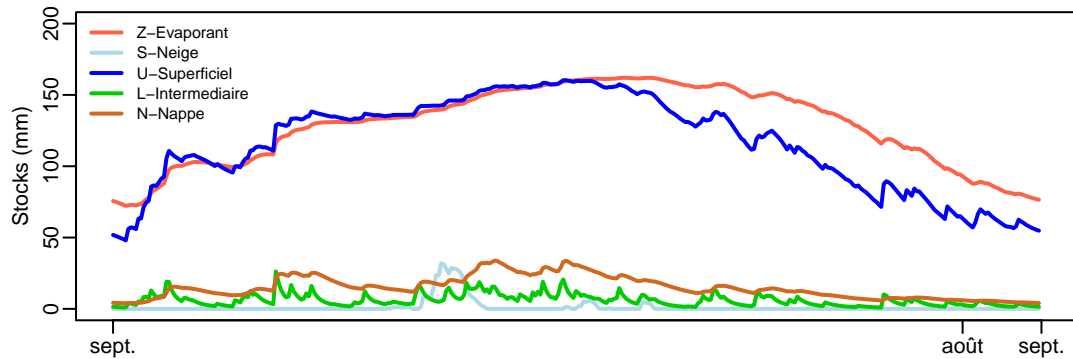

# fade5h (1361.27 km²) – année 1995–1996

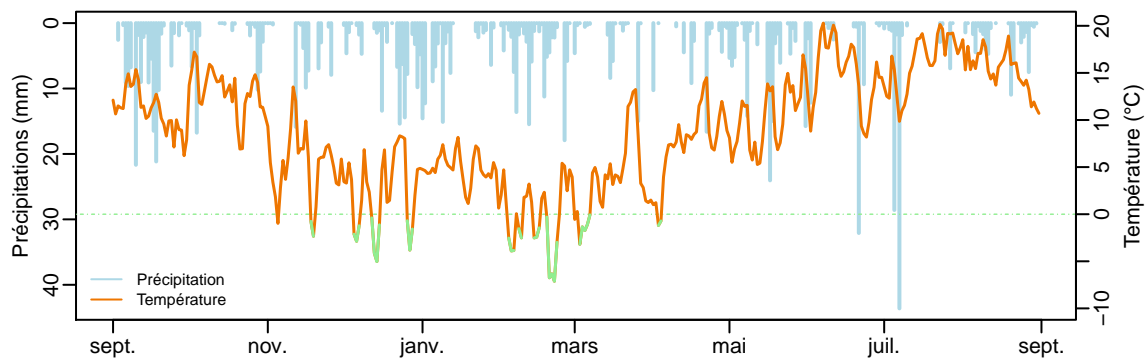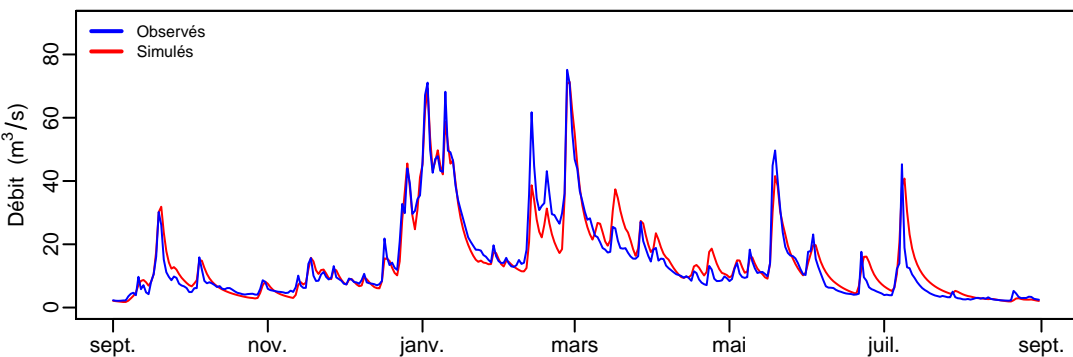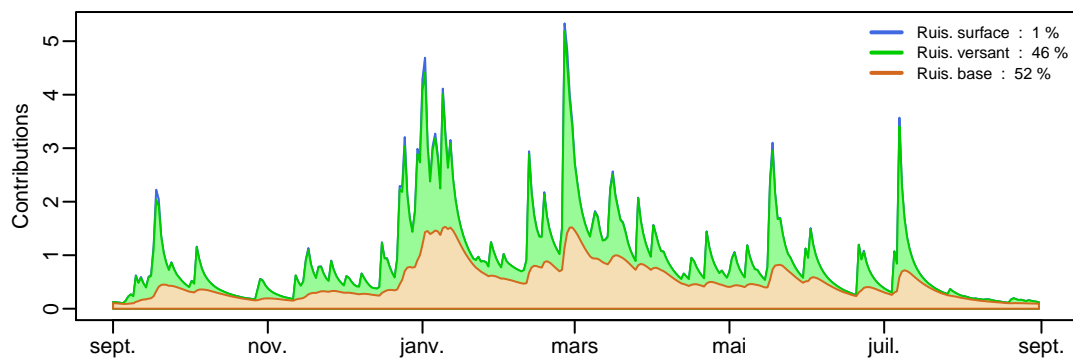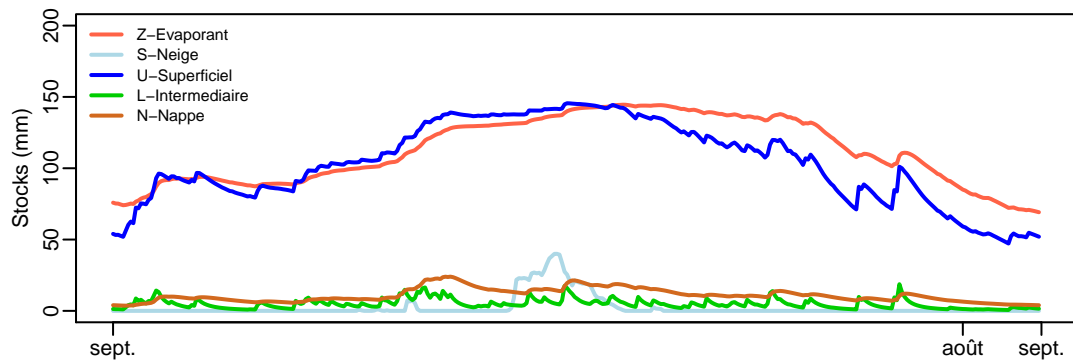

# fade5h (1361.27 km²) – année 1996–1997

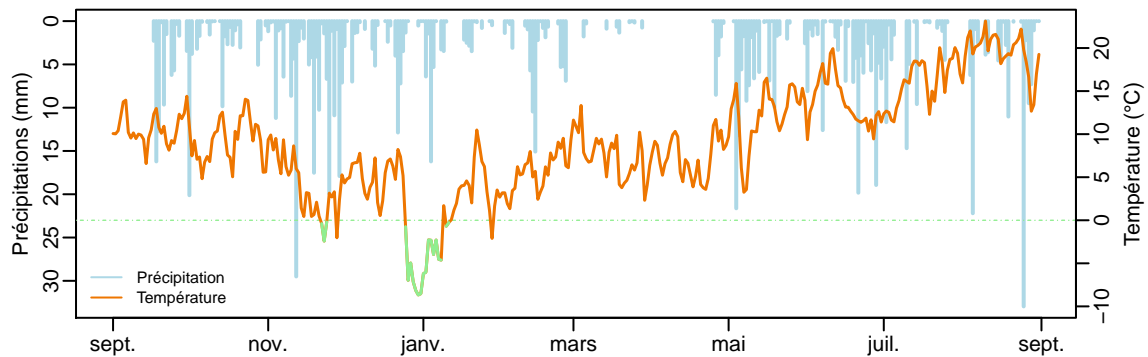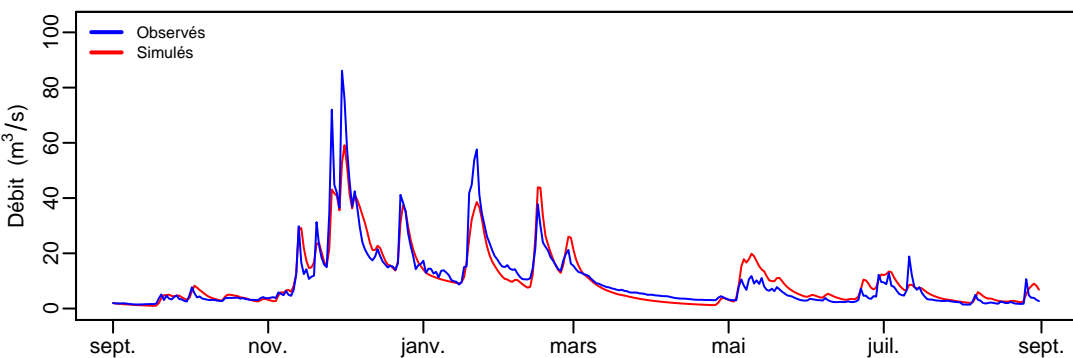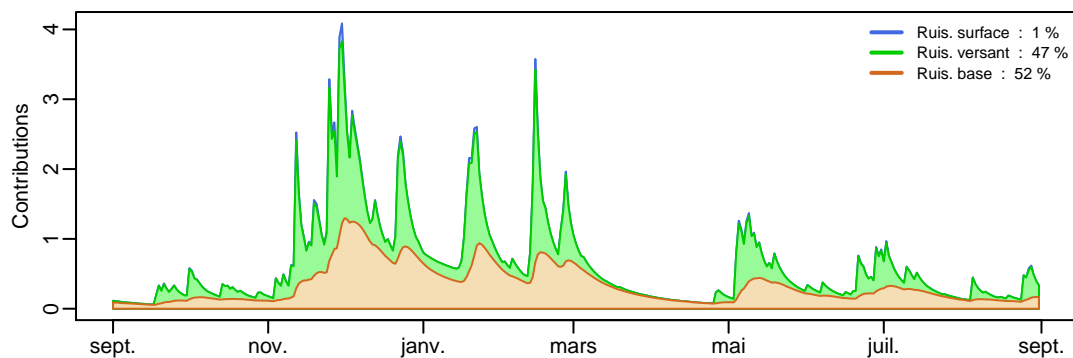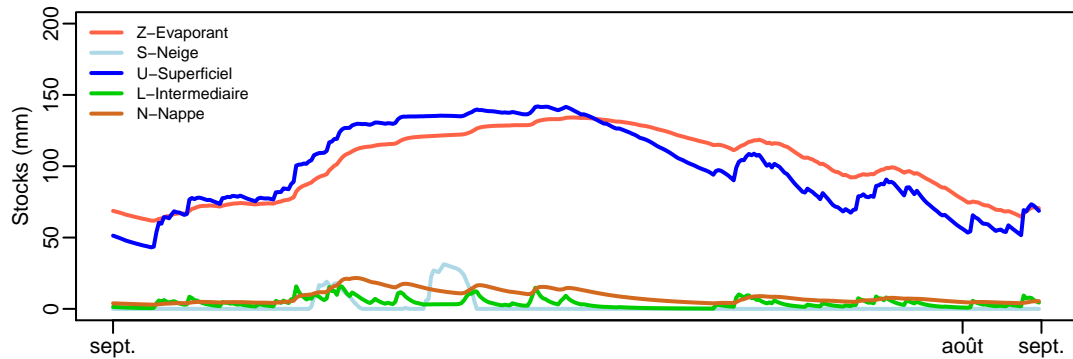

# fade5h (1361.27 km<sup>2</sup>) – année 1997–1998

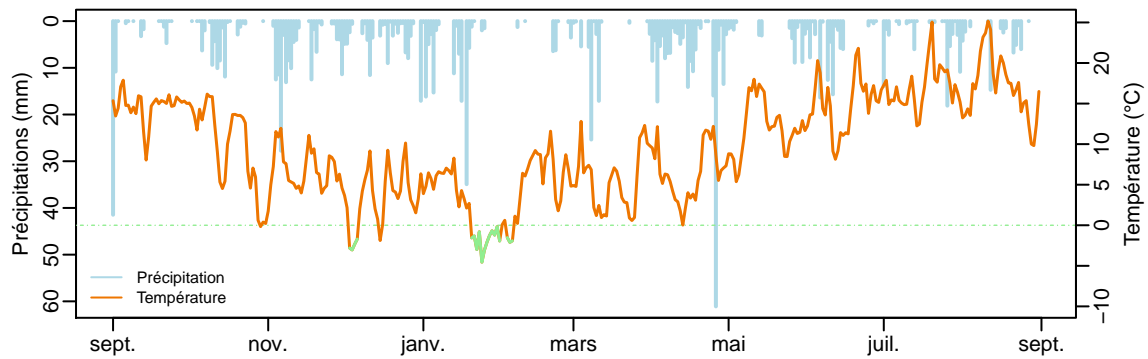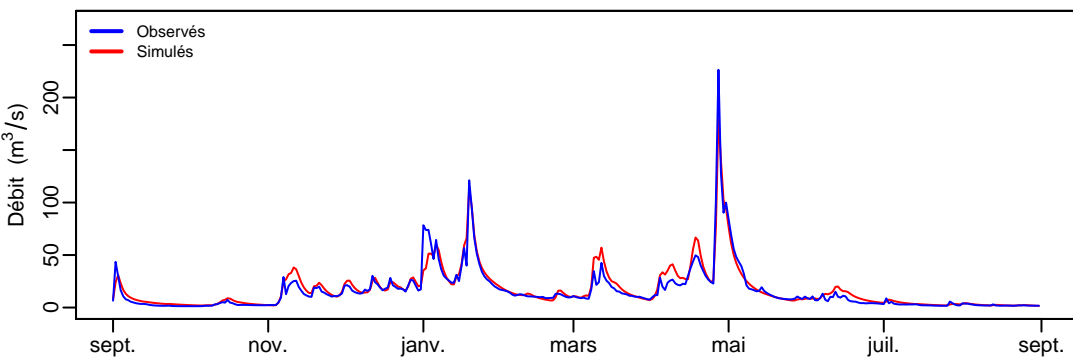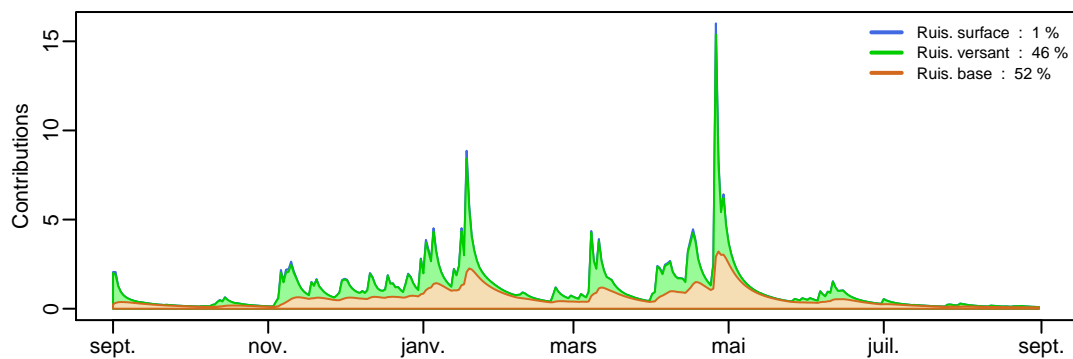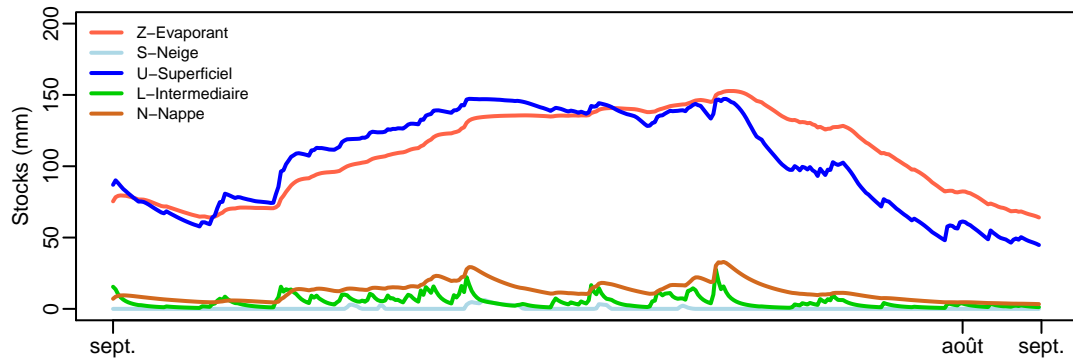

# fade5h (1361.27 km<sup>2</sup>) – année 1998–1999

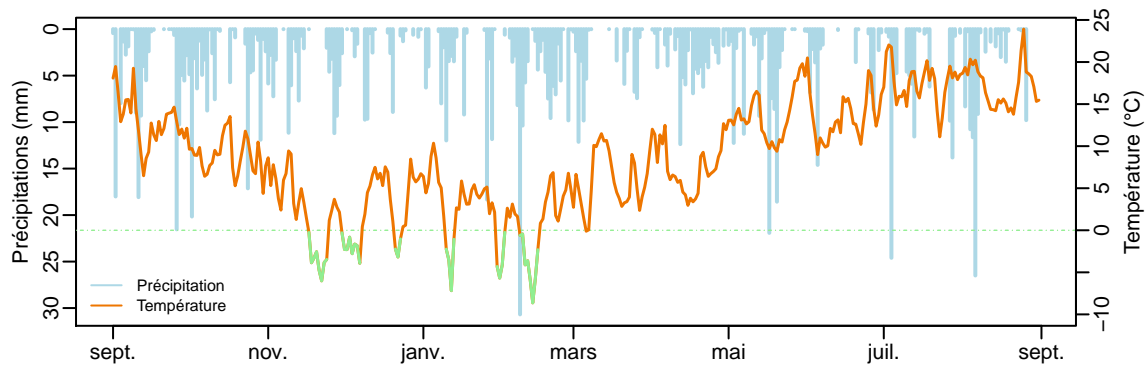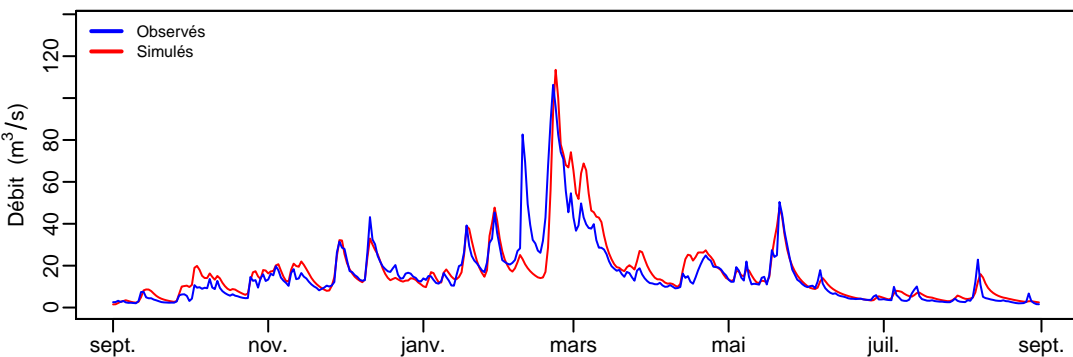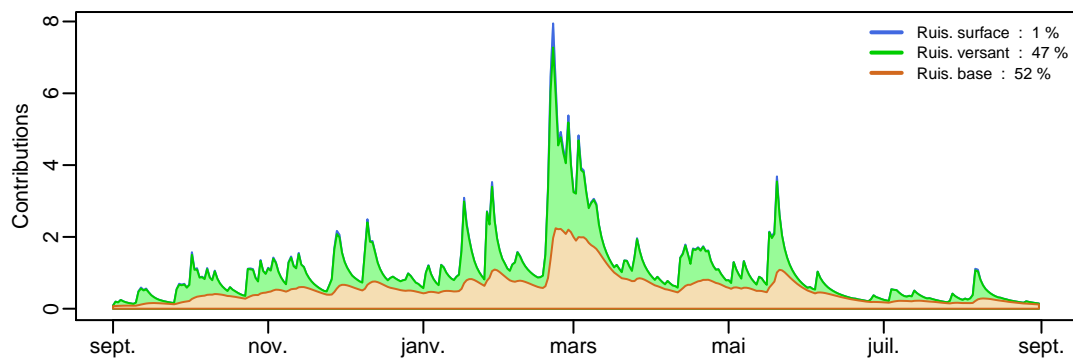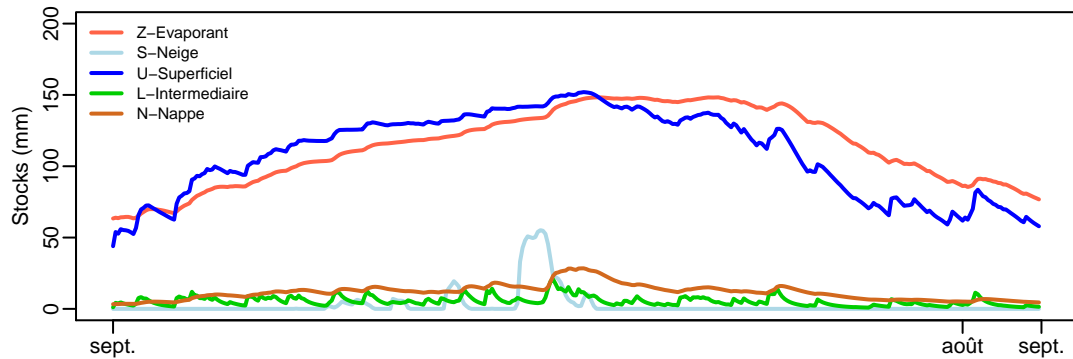

# fade5h (1361.27 km<sup>2</sup>) – année 1999–2000

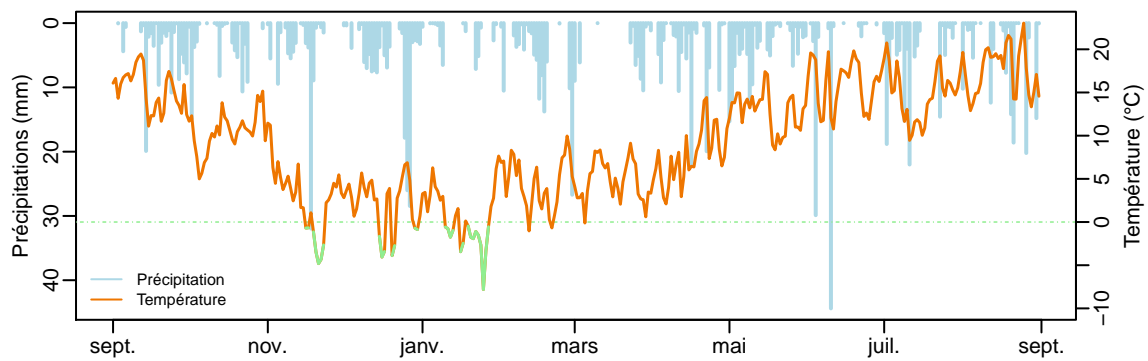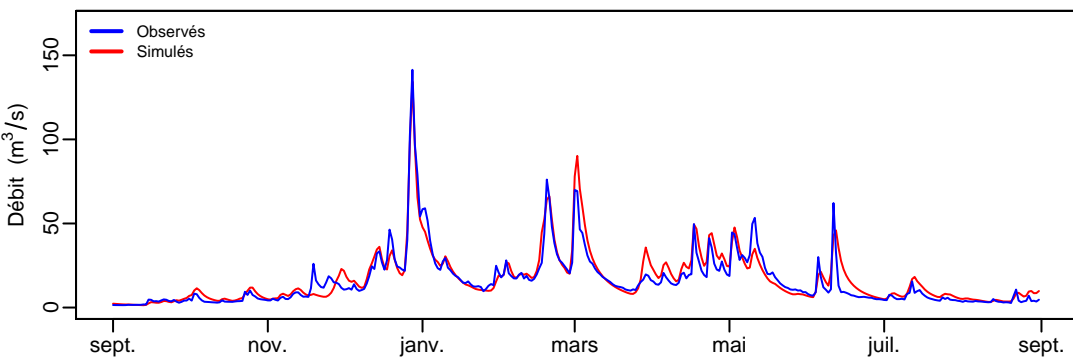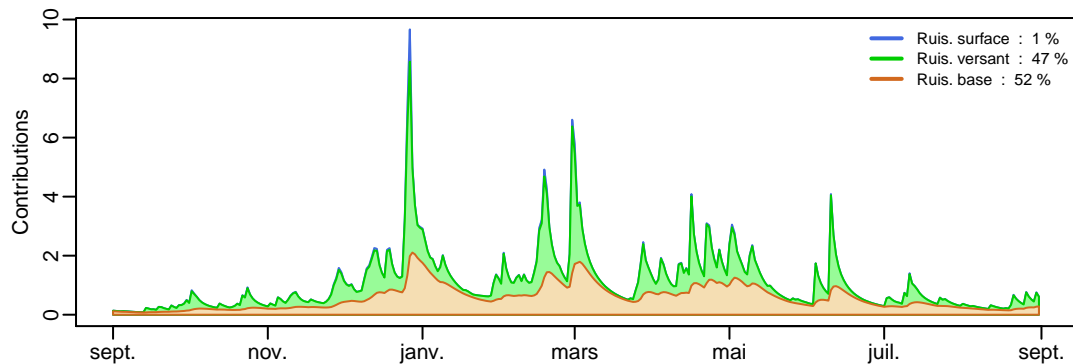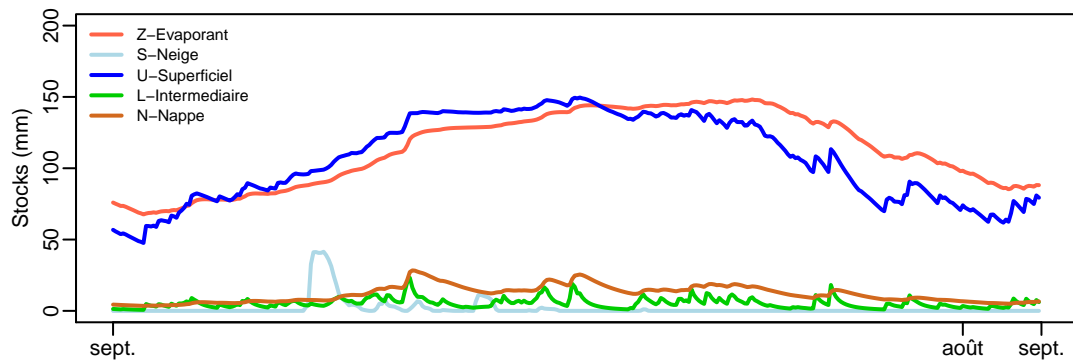

# fade5h (1361.27 km²) – année 2000–2001

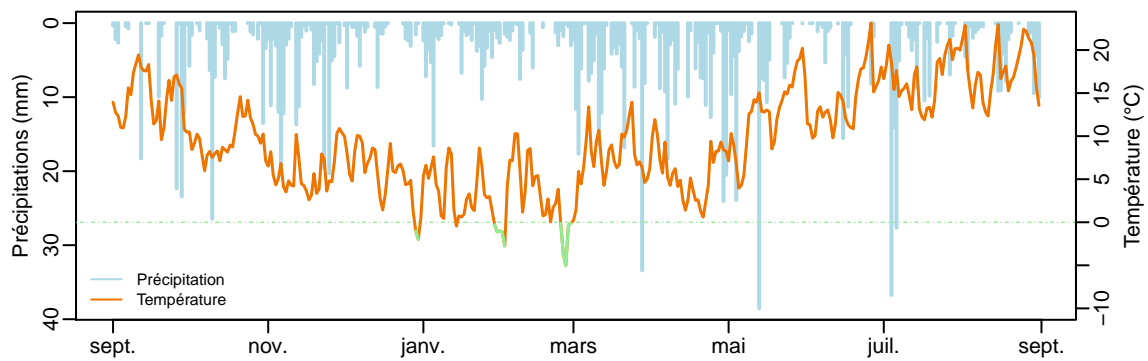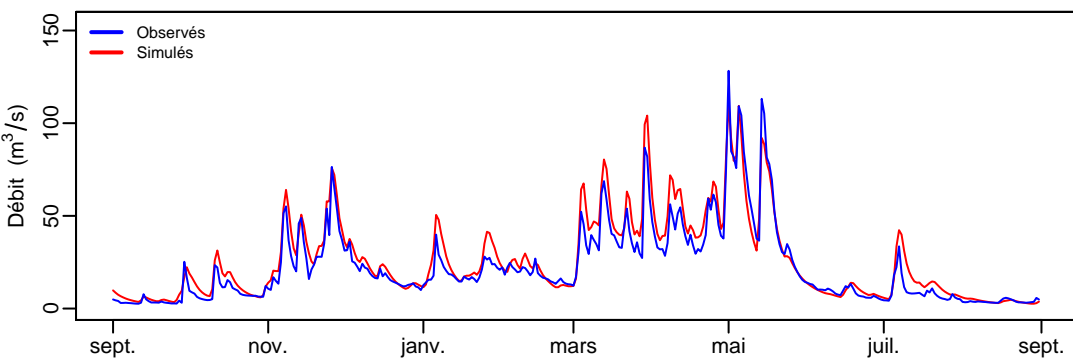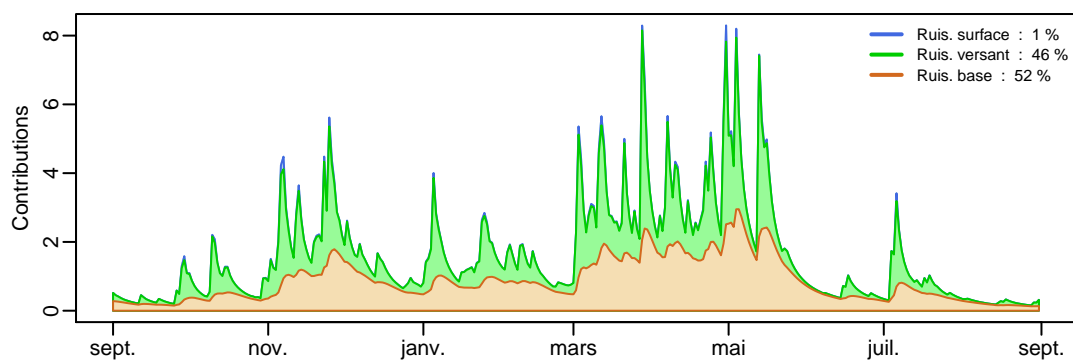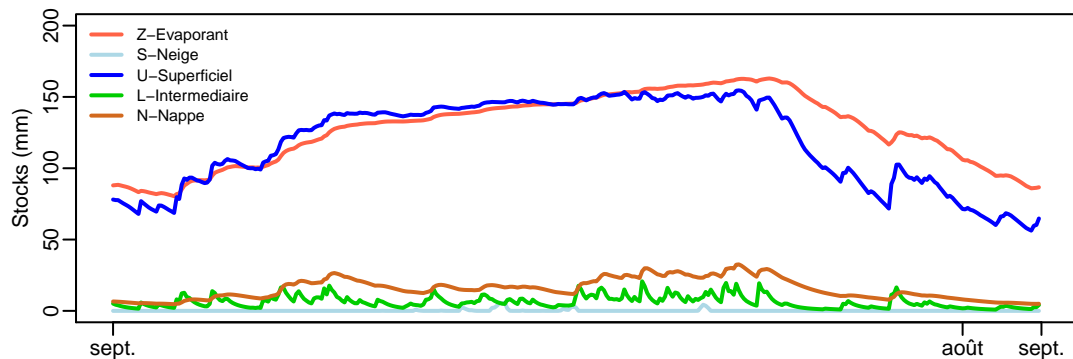

# fade5h (1361.27 km<sup>2</sup>) – année 2001–2002

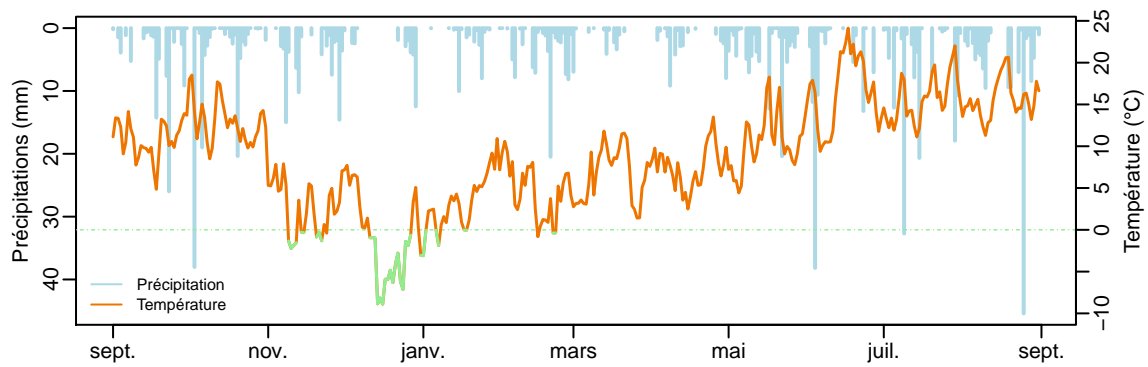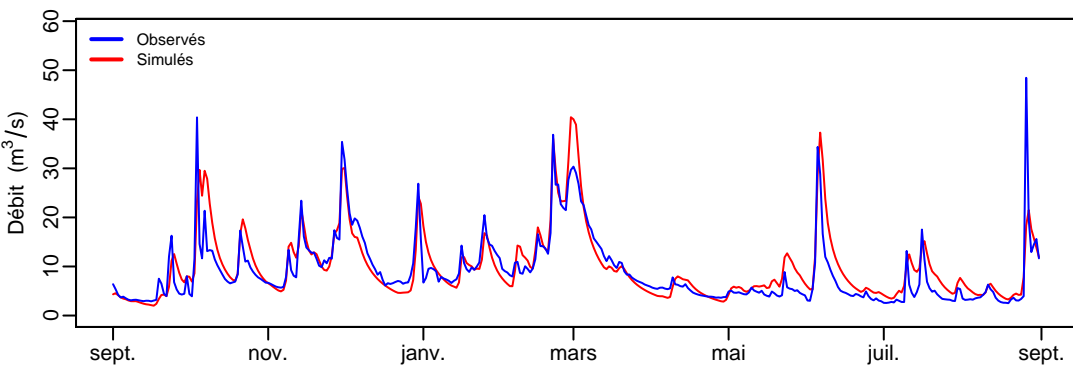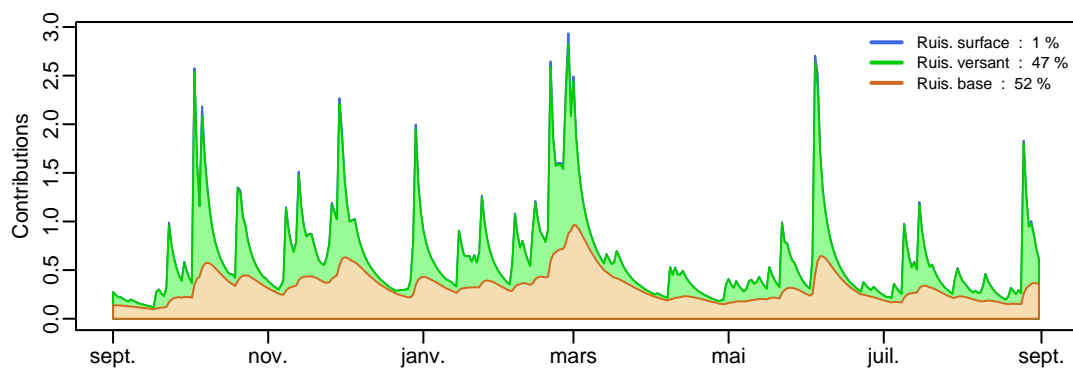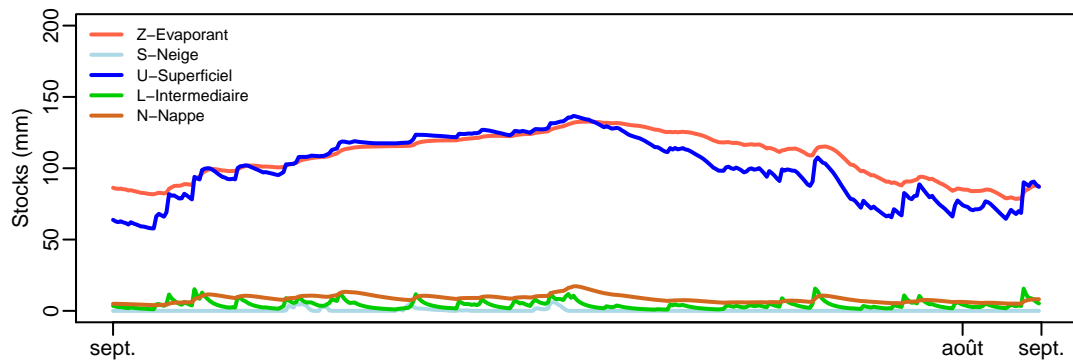



# fade5h (1361.27 km<sup>2</sup>) – année 2002–2003

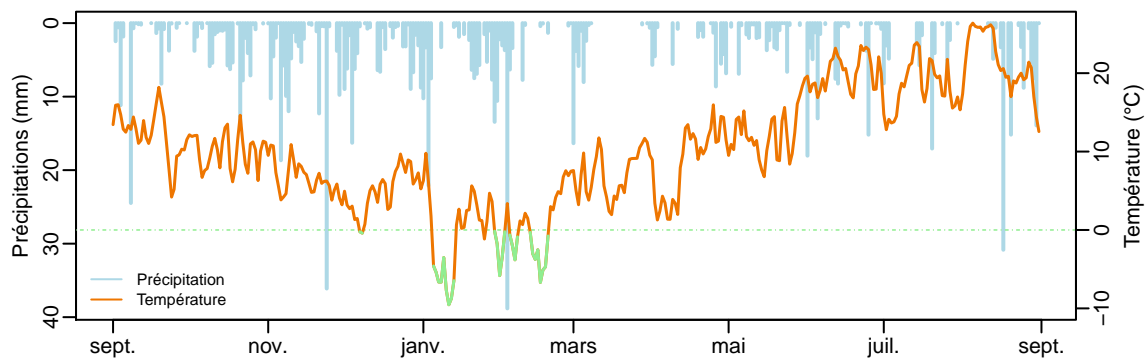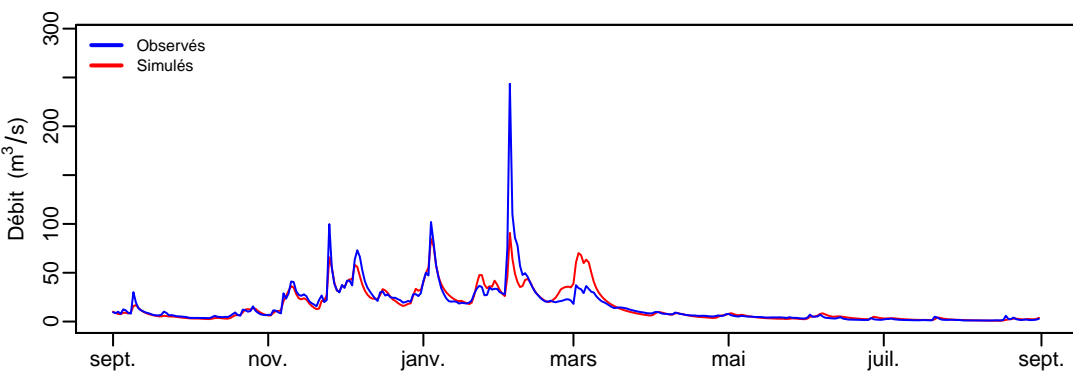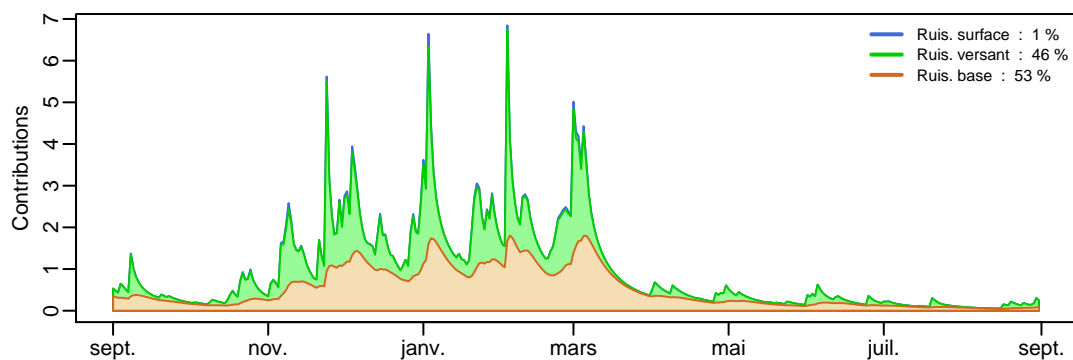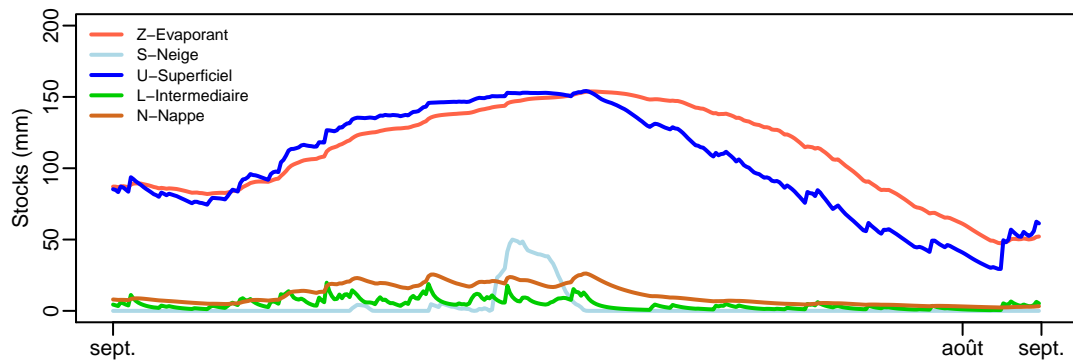

# fade5h (1361.27 km<sup>2</sup>) – année 2003–2004

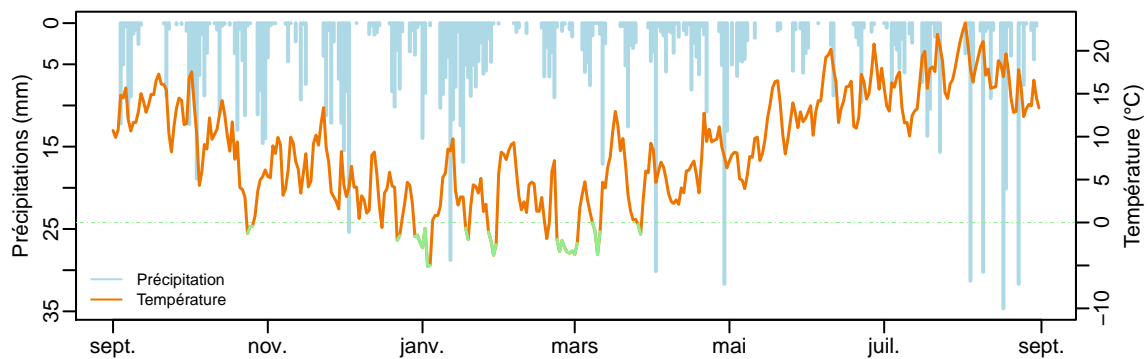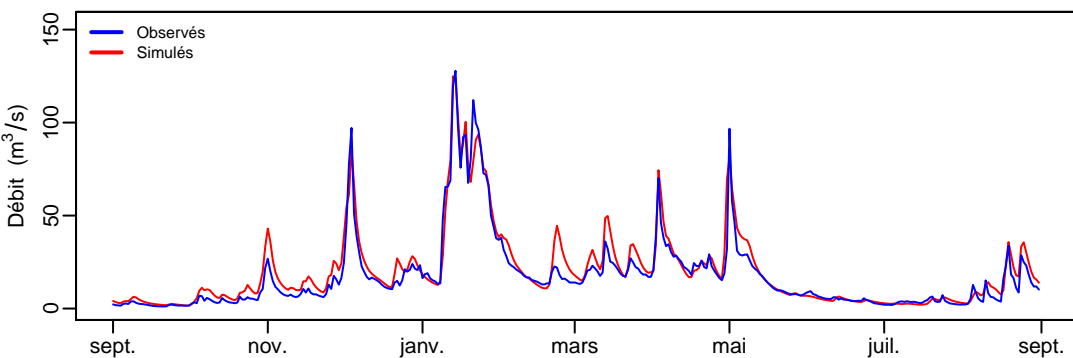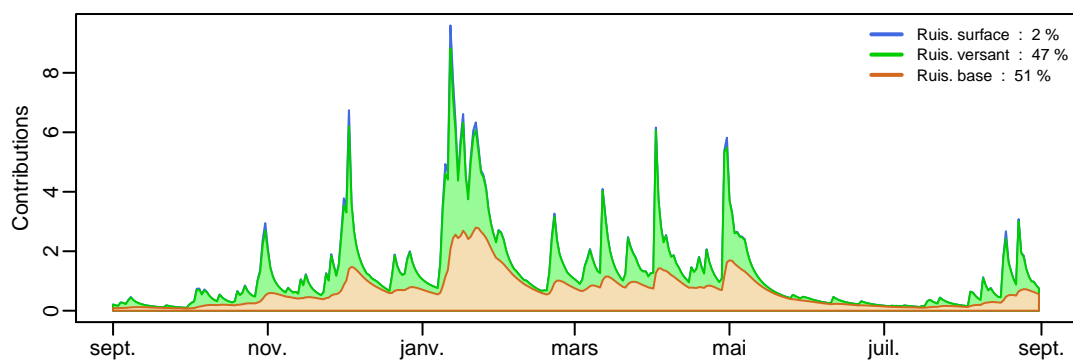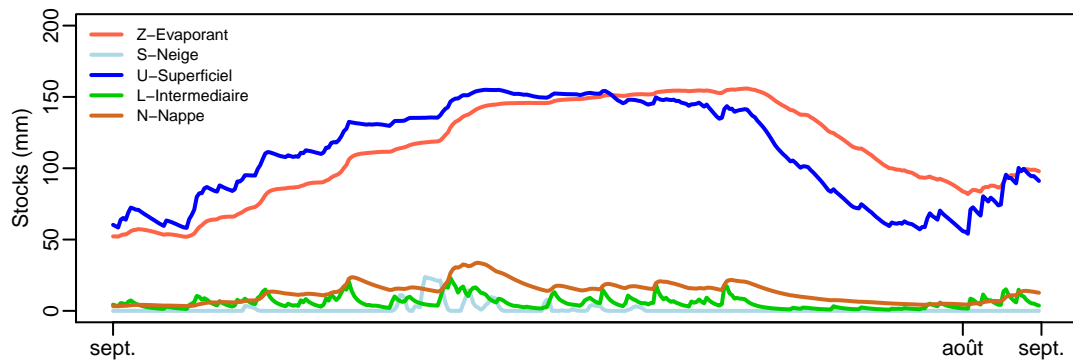

# fade5h (1361.27 km<sup>2</sup>) – année 2004–2005

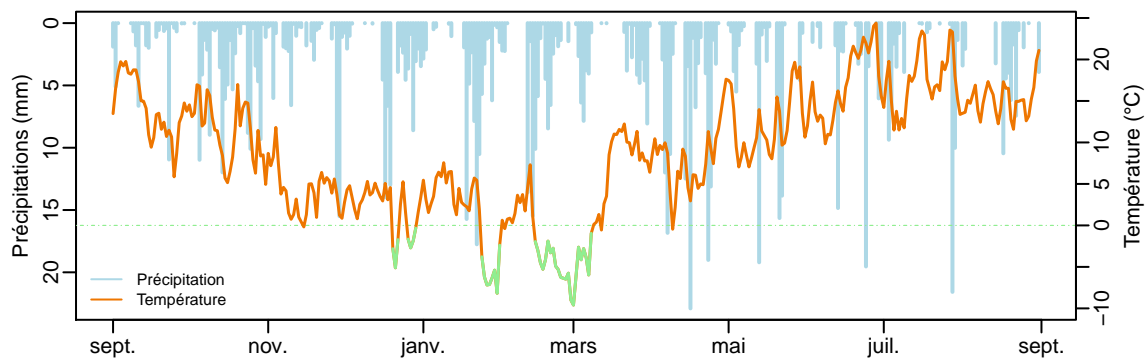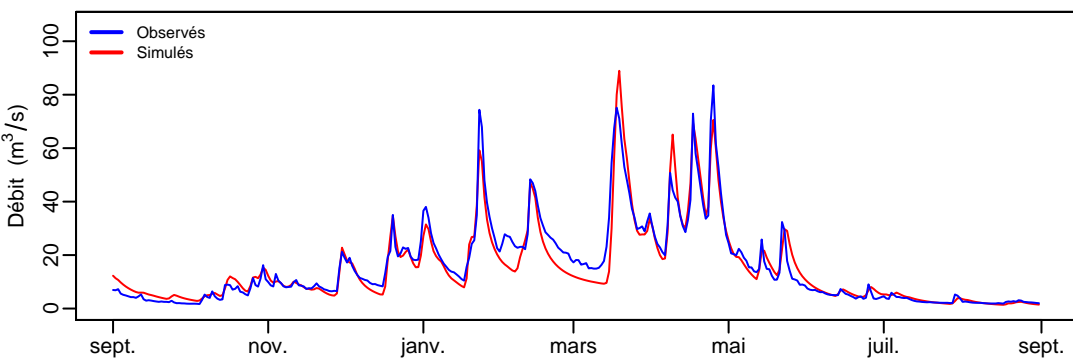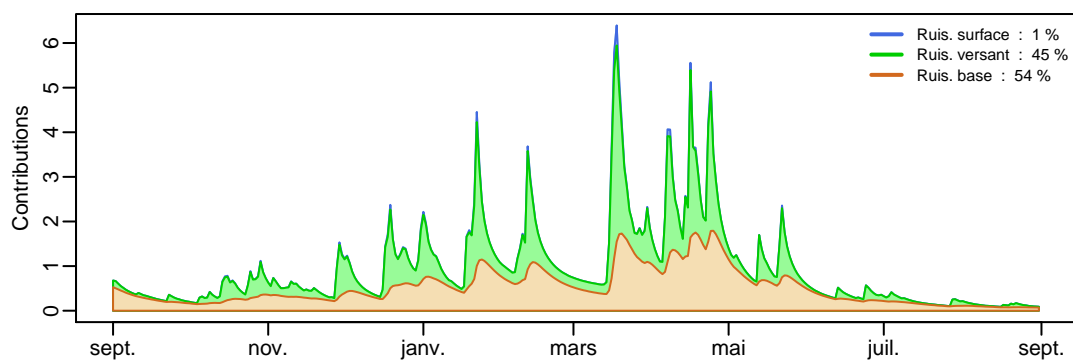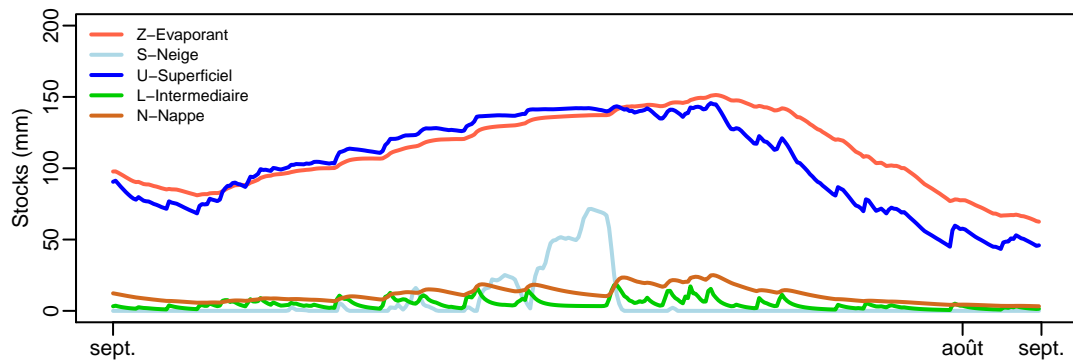

# fade5h (1361.27 km<sup>2</sup>) – année 2005–2006

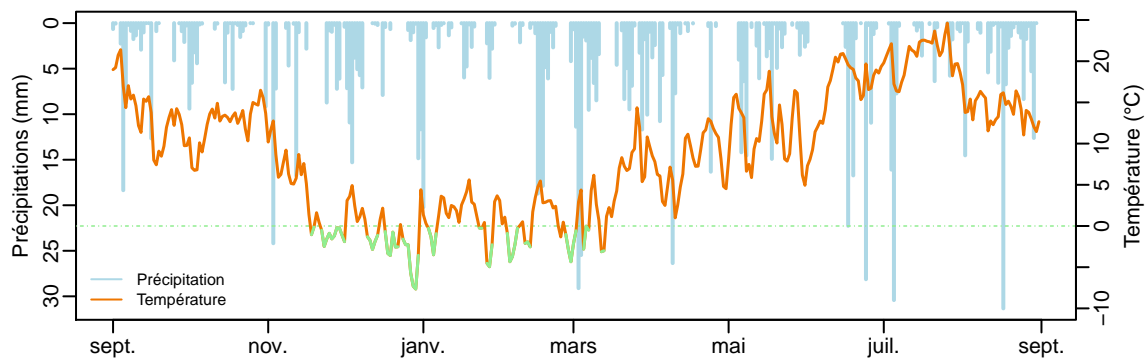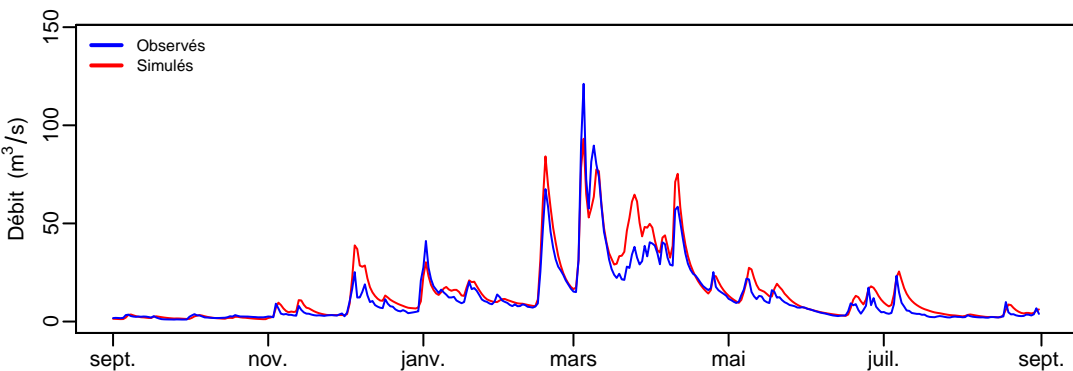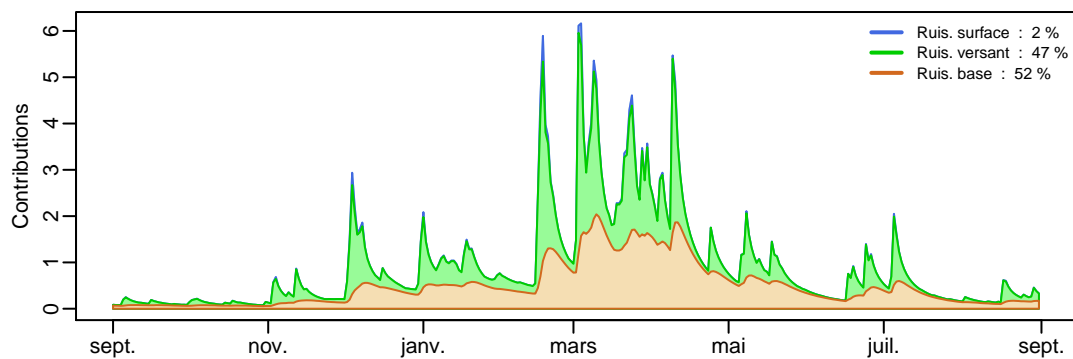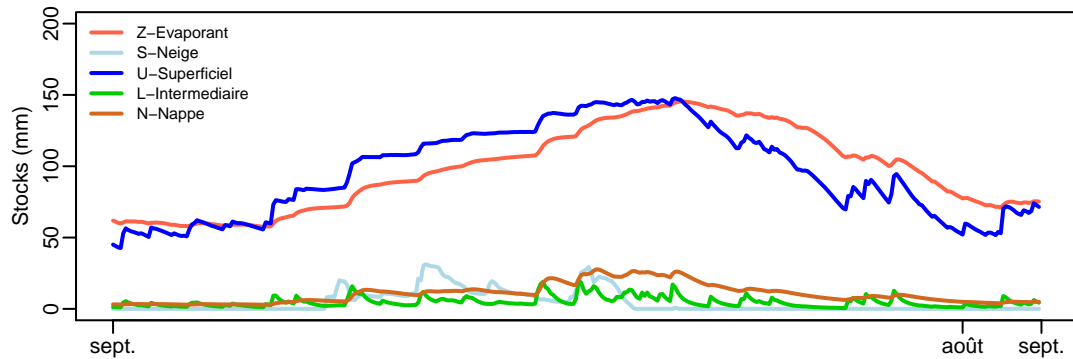

# fade5h (1361.27 km²) – année 2006–2007

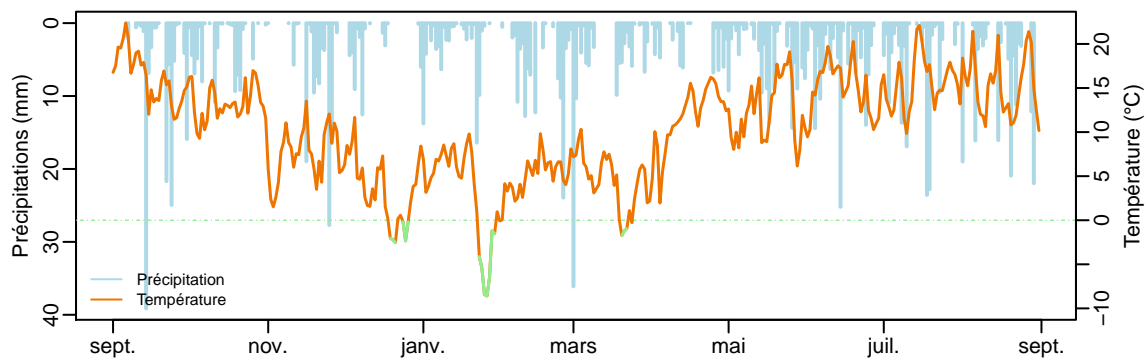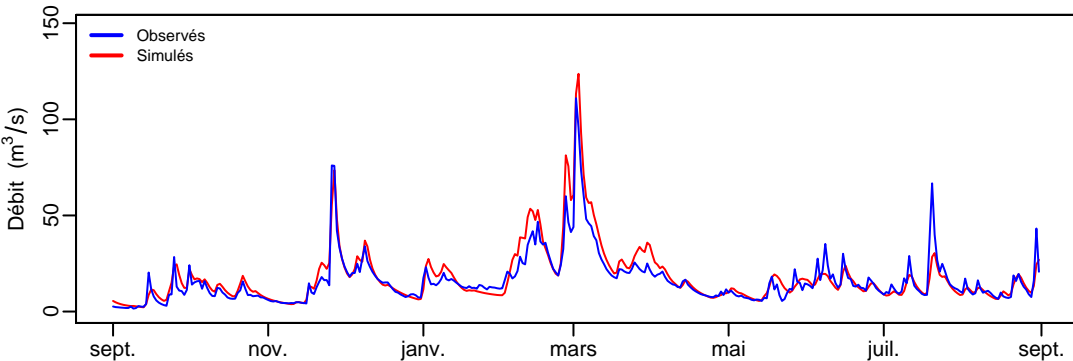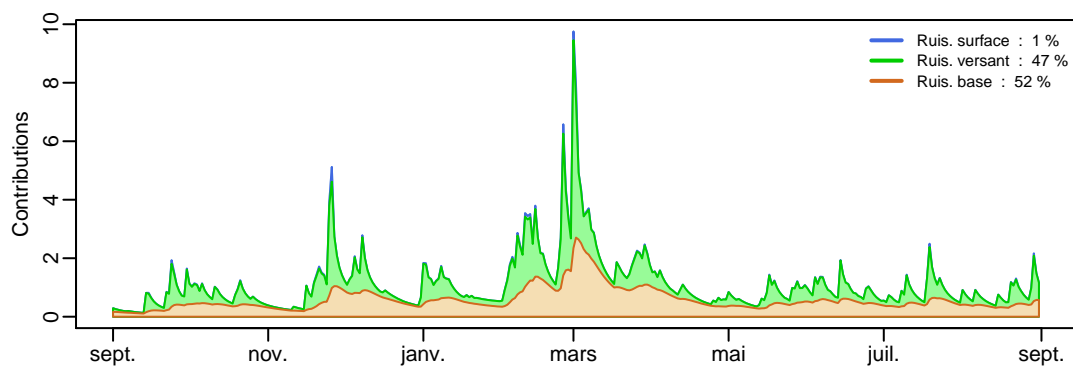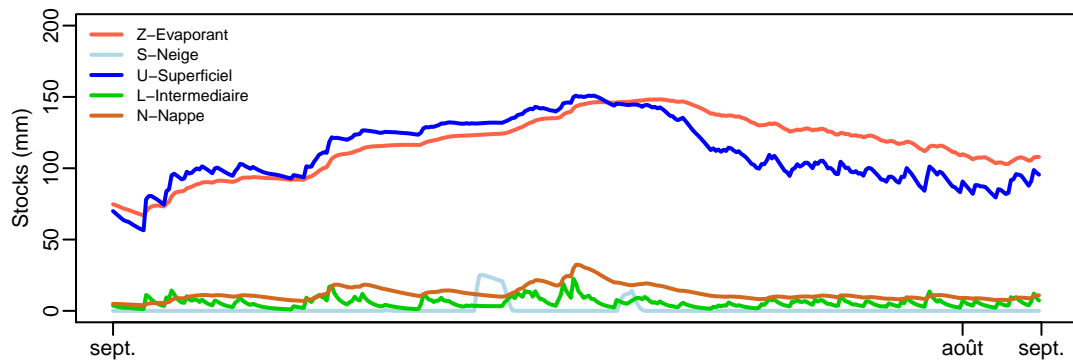

# fade5h (1361.27 km<sup>2</sup>) – année 2007–2008

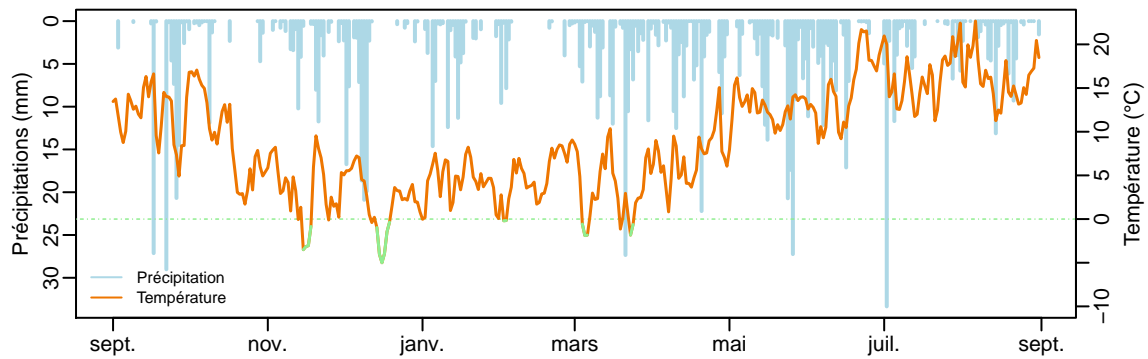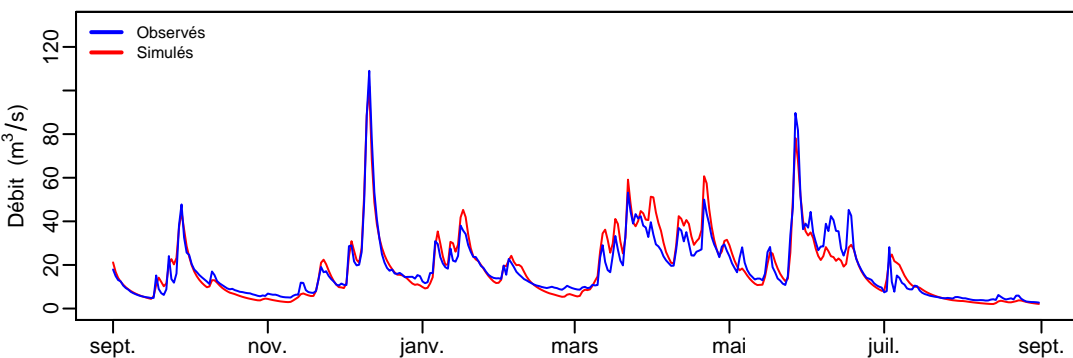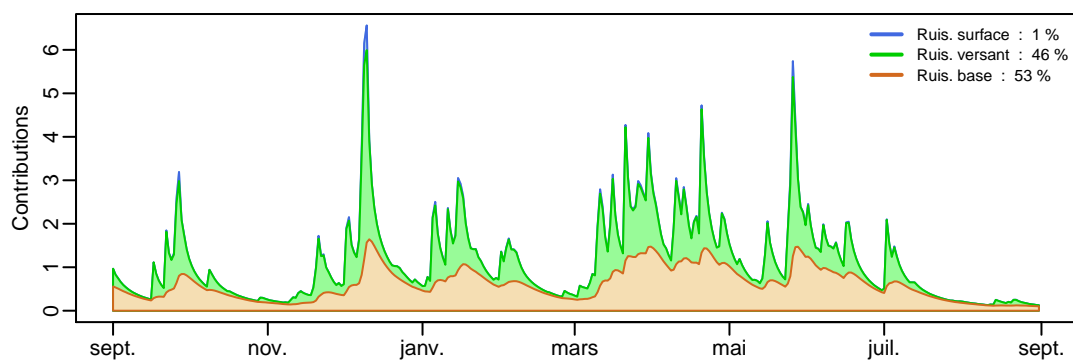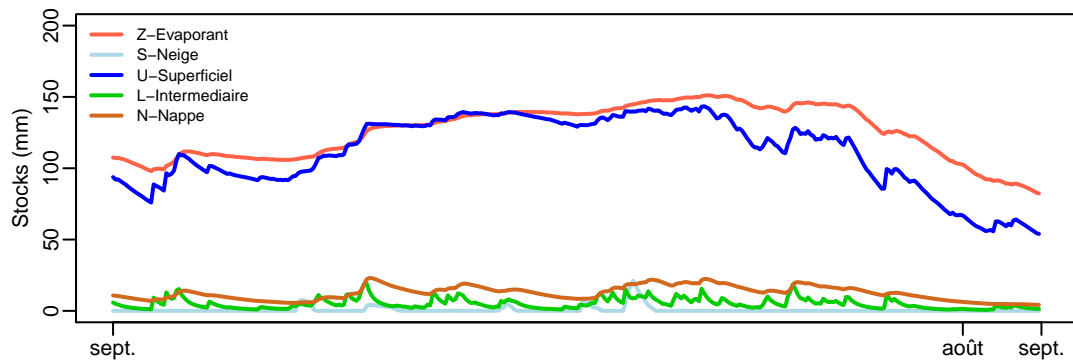

# fade5h (1361.27 km²) – année 2008–2009

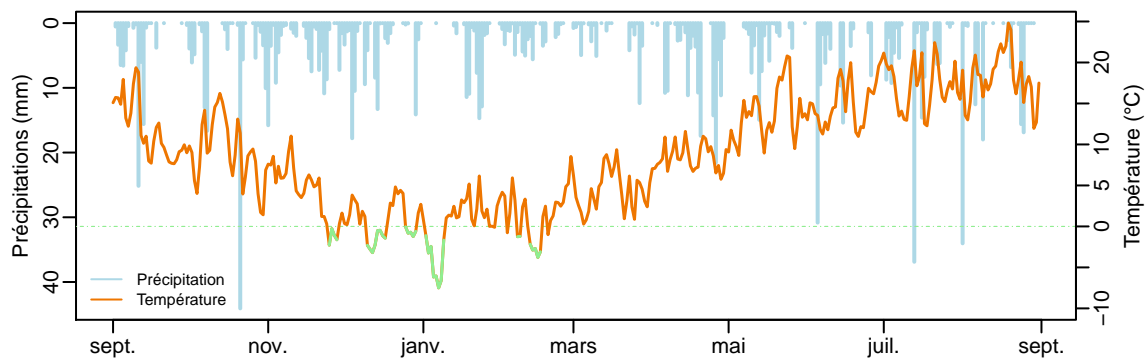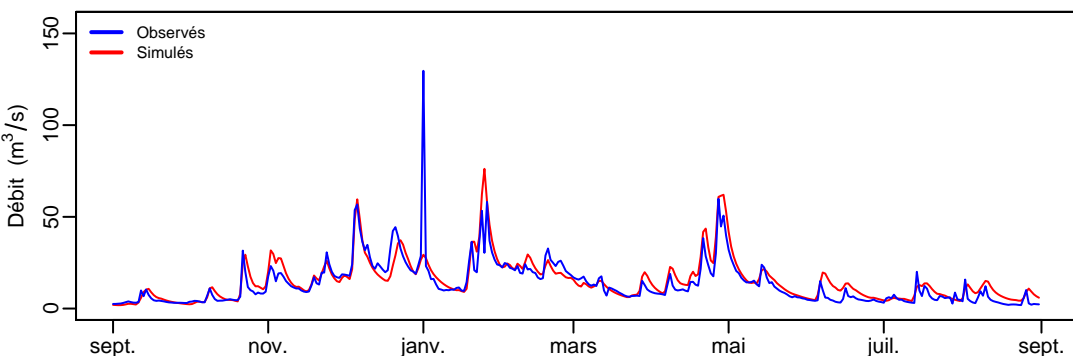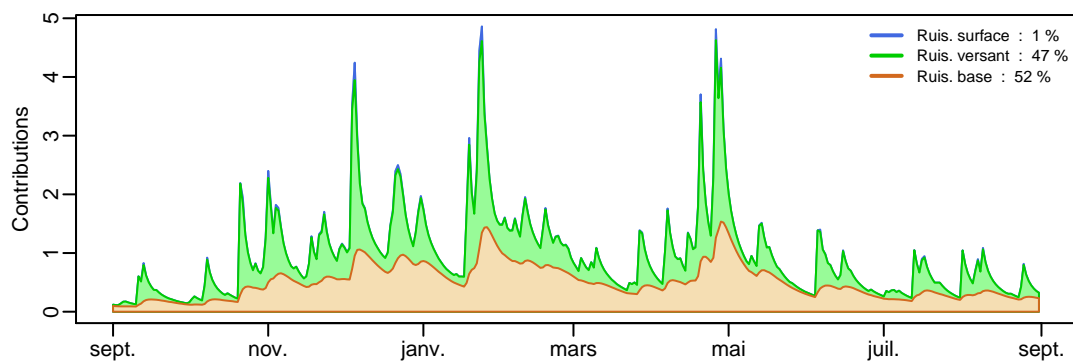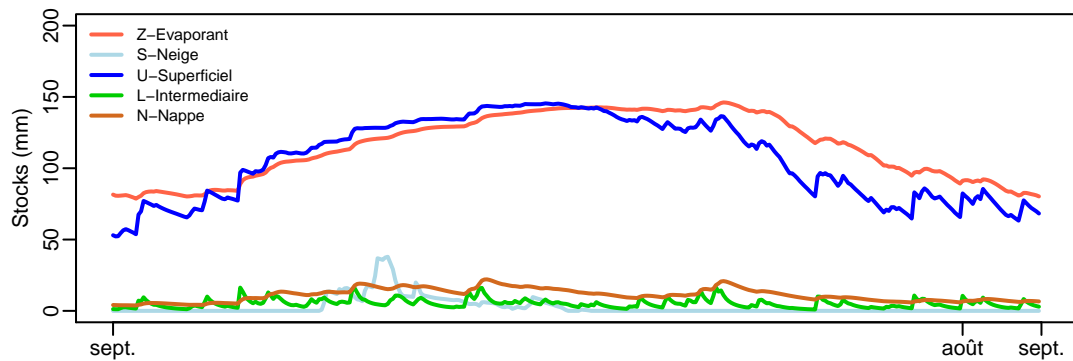

# fade5h (1361.27 km²) – année 2009–2010

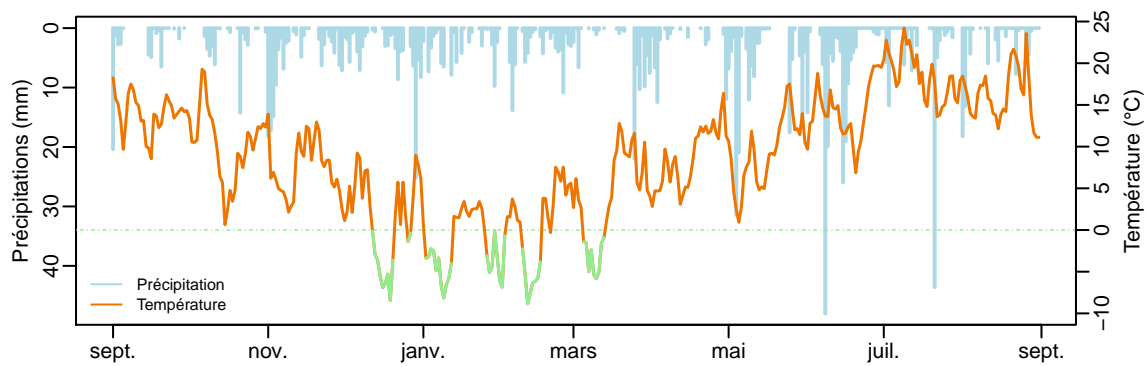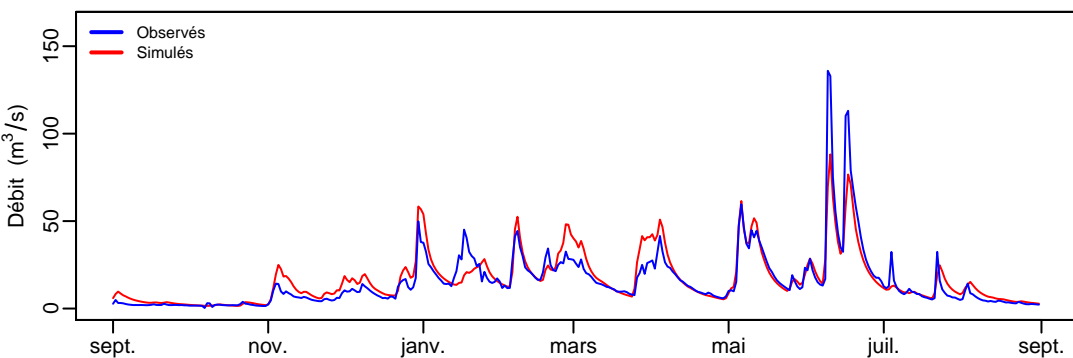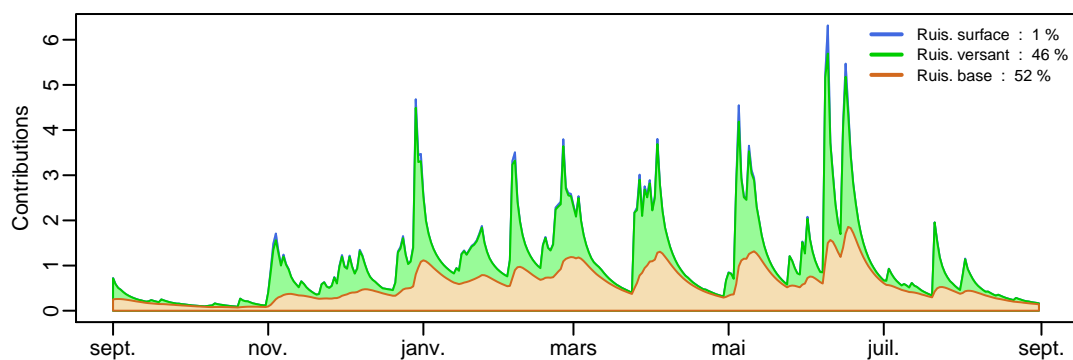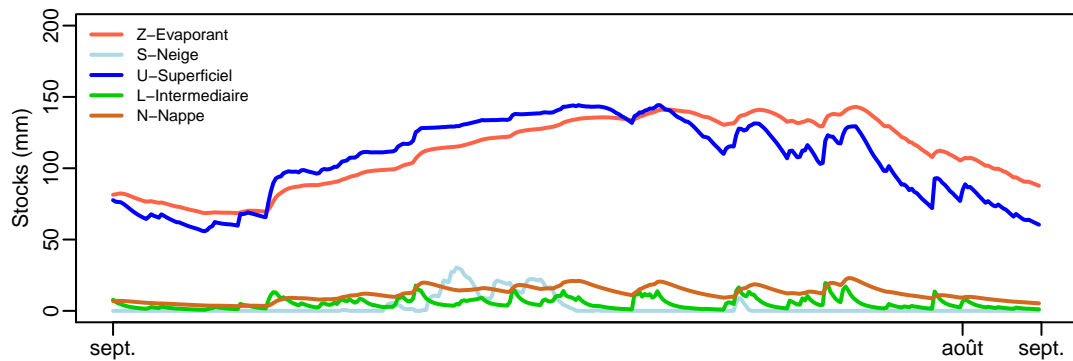



# fade5h (1361.27 km<sup>2</sup>) – année 2010–2011

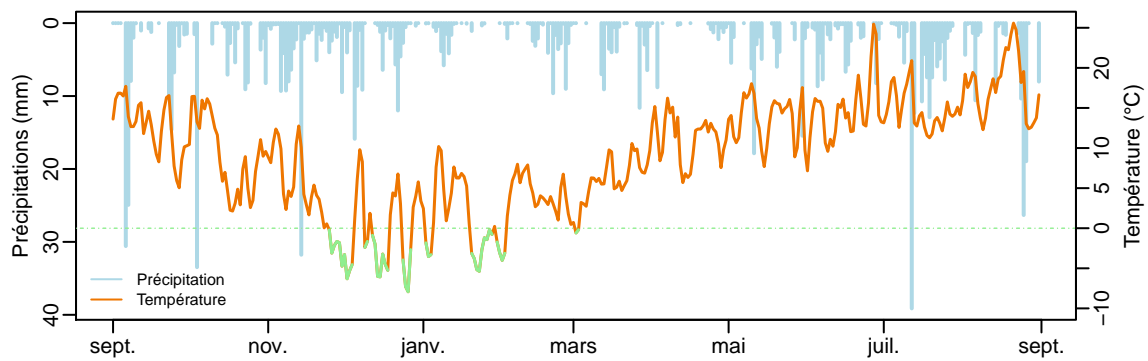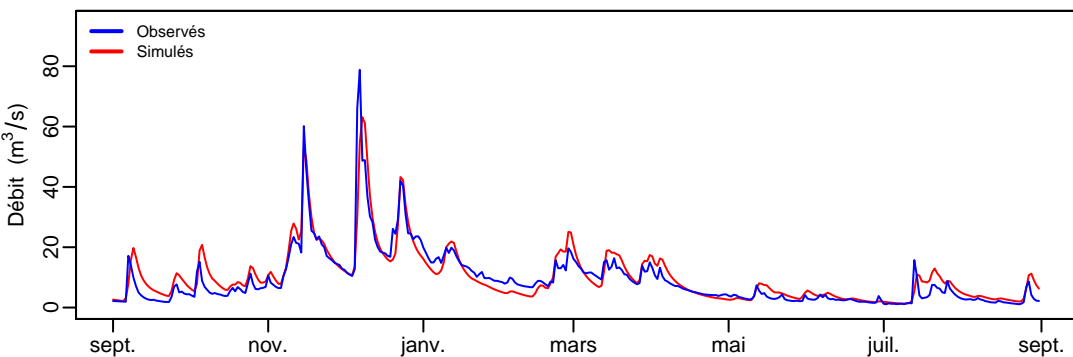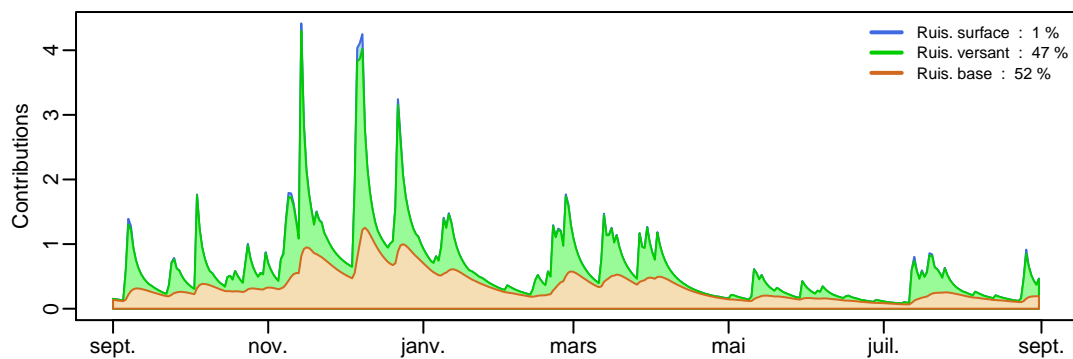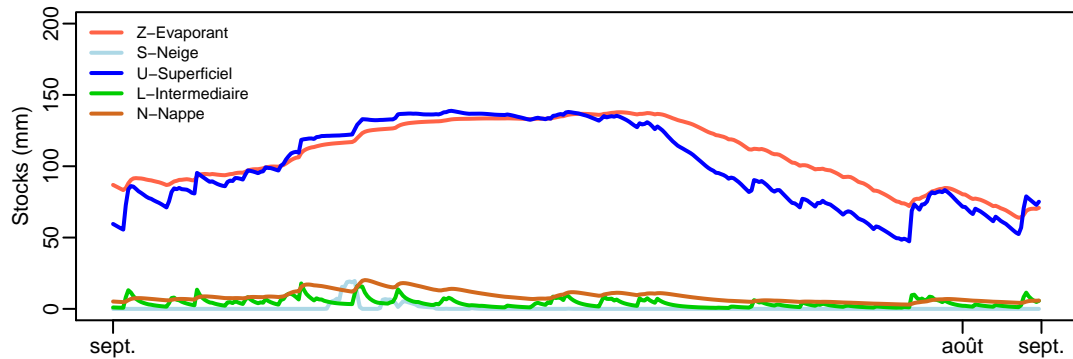

# fade5h (1361.27 km²) – année 2011–2012

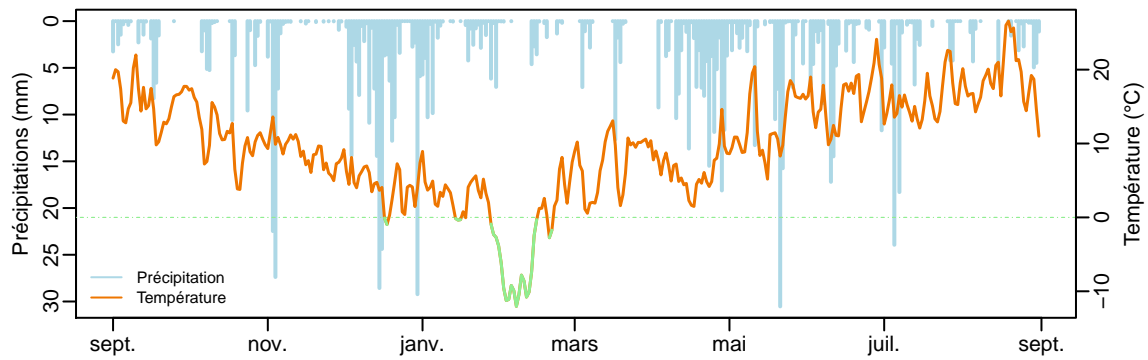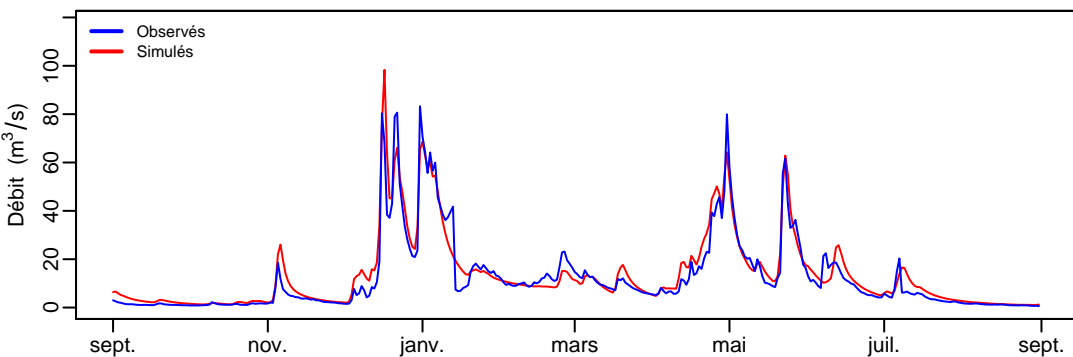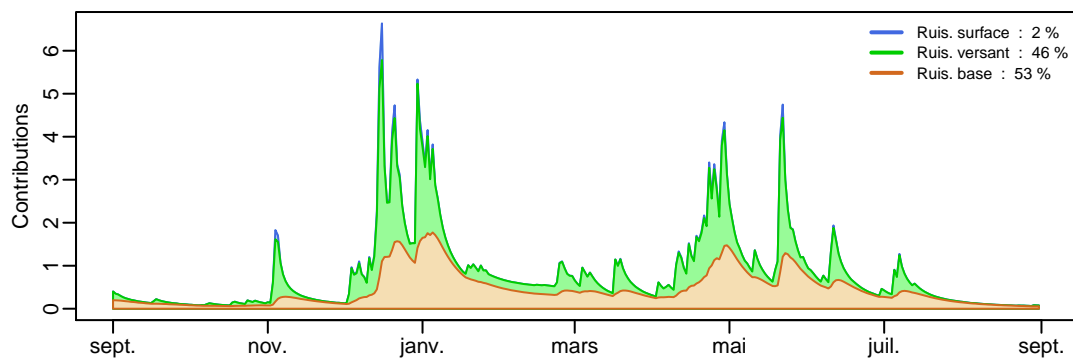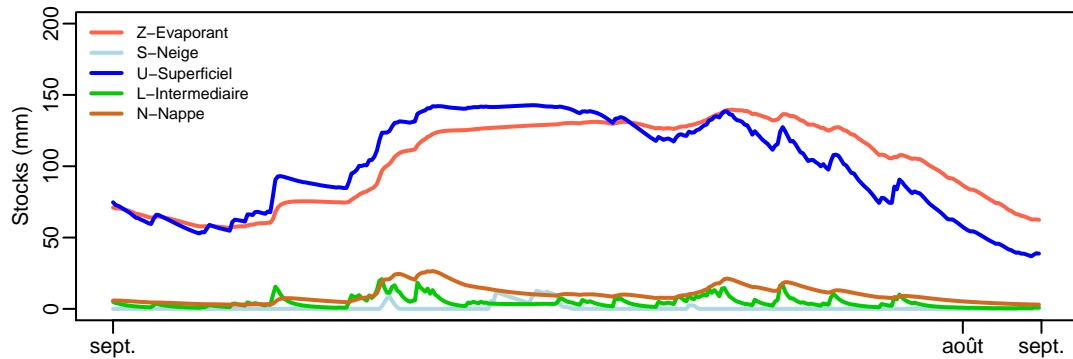

# k0100020 (442.57 km<sup>2</sup>) – année 1982–1983

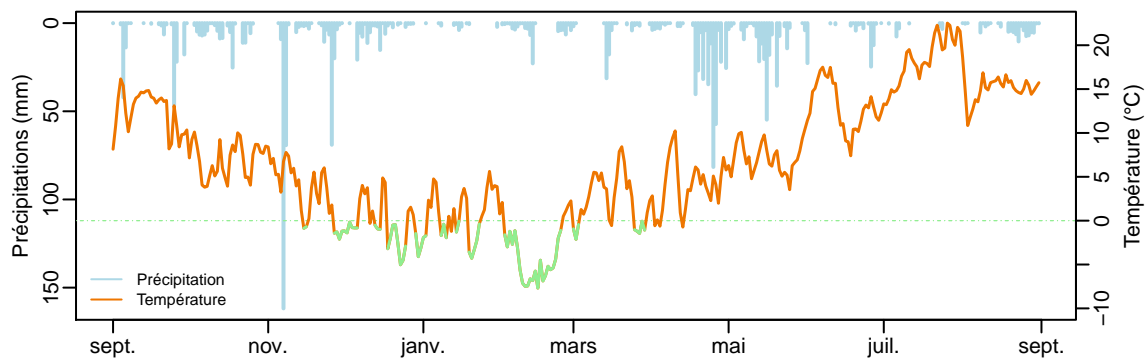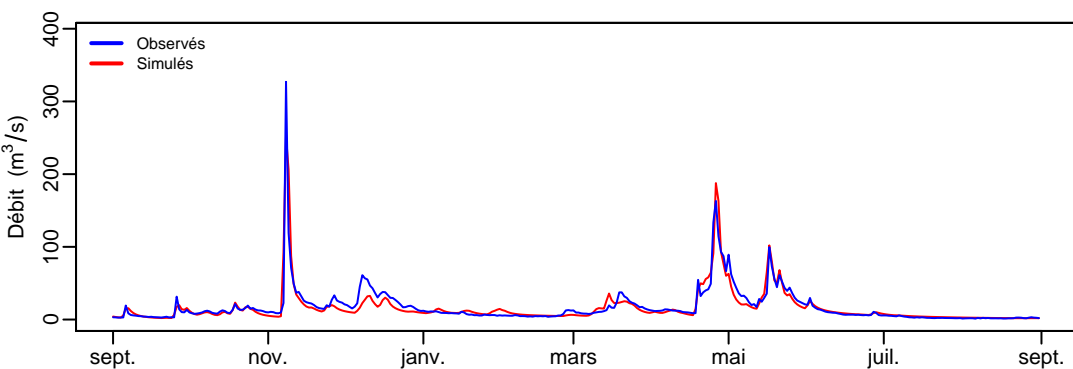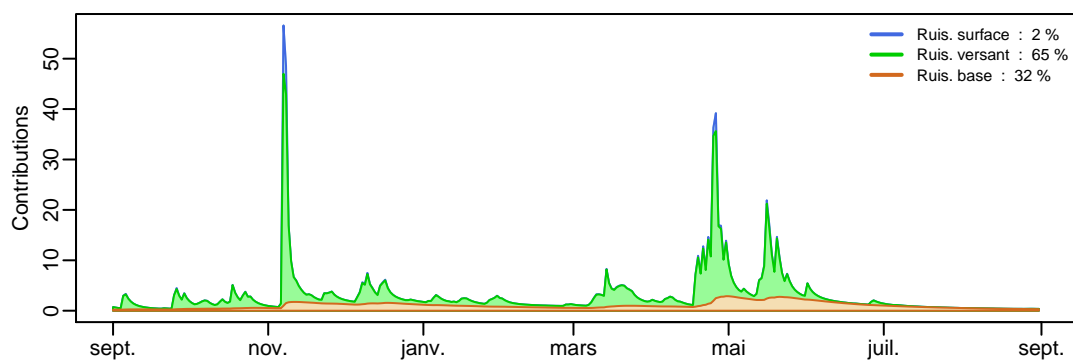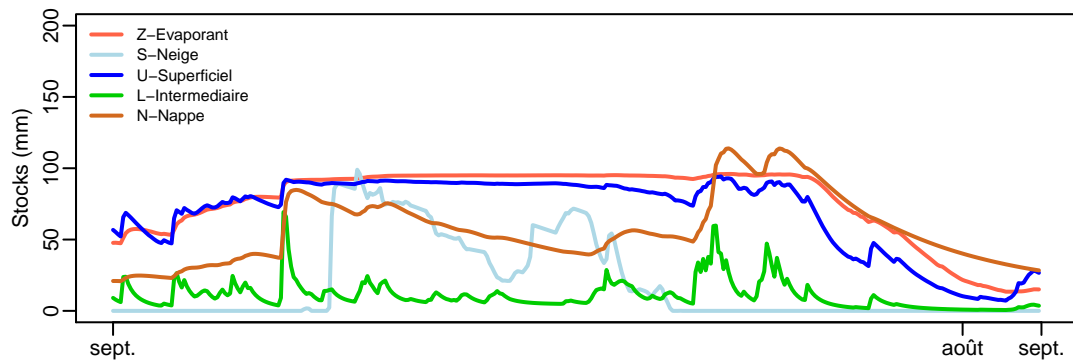

# k0100020 (442.57 km<sup>2</sup>) – année 1983–1984

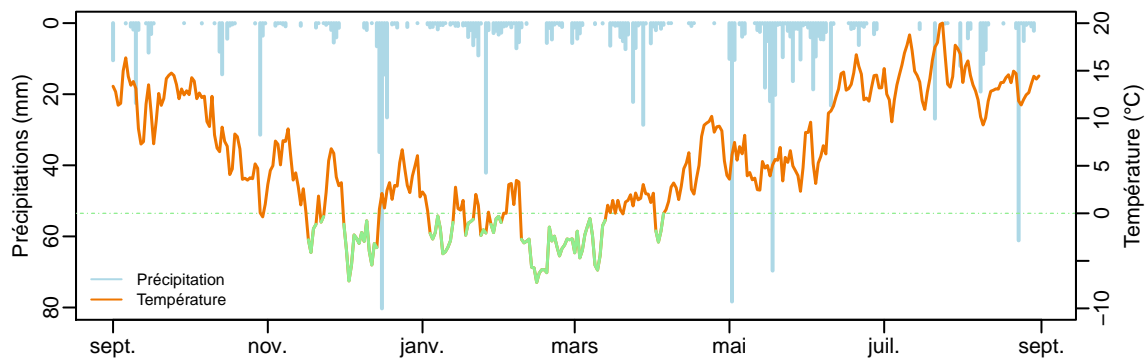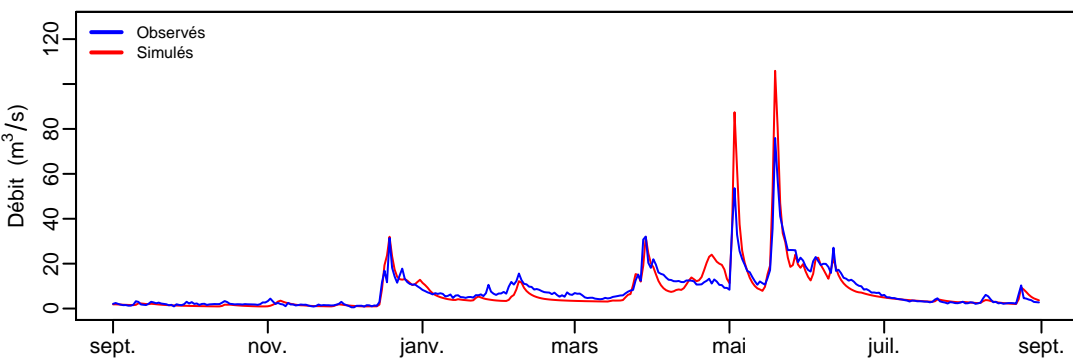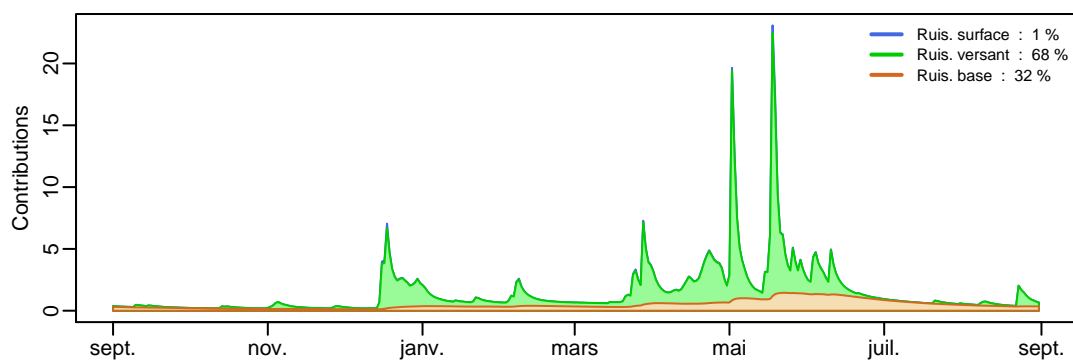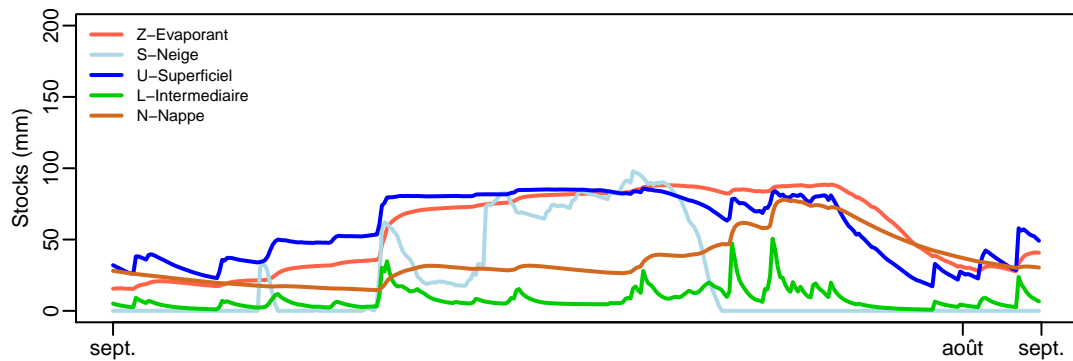

# k0100020 (442.57 km<sup>2</sup>) – année 1984–1985

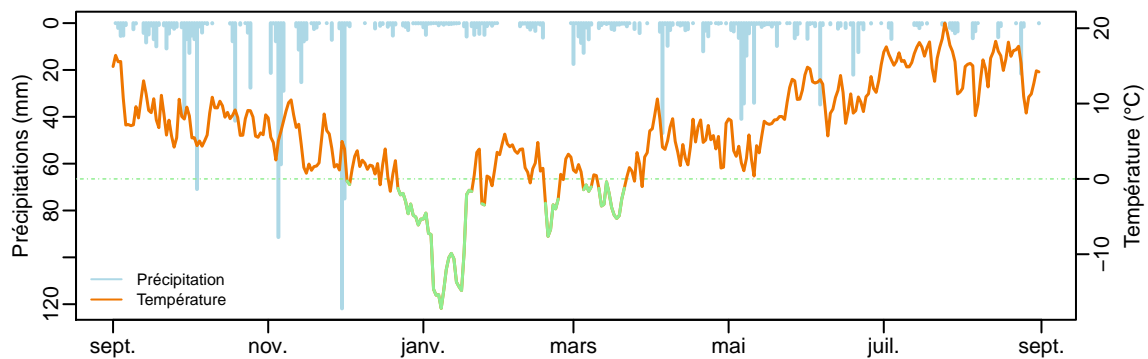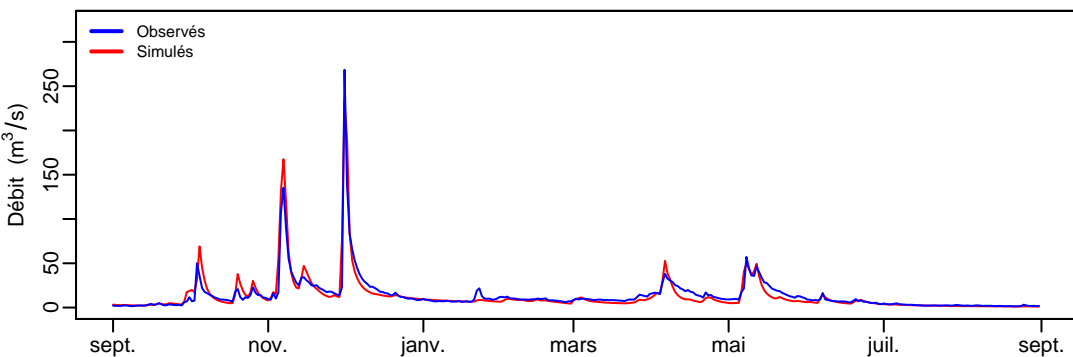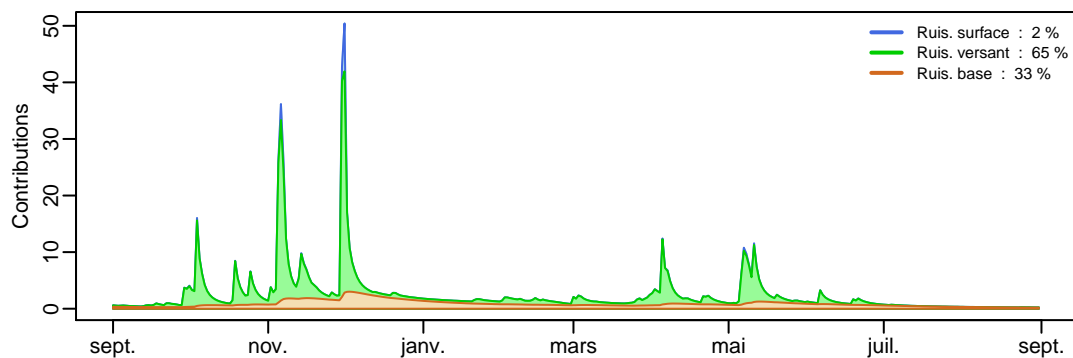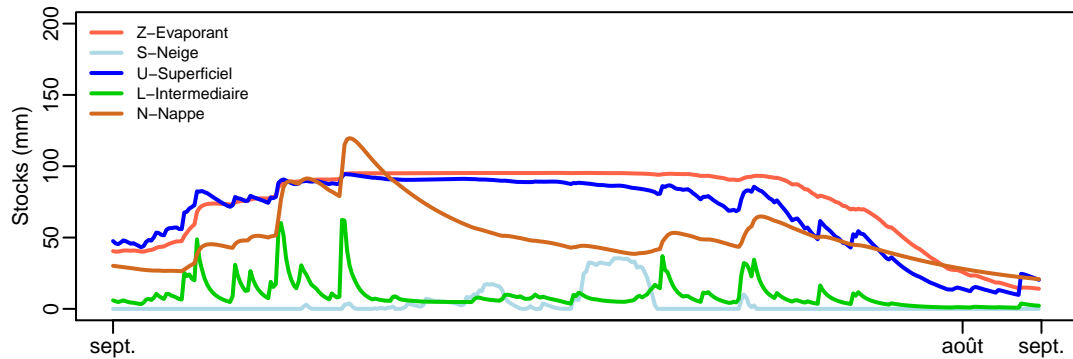

# k0100020 (442.57 km<sup>2</sup>) – année 1985–1986

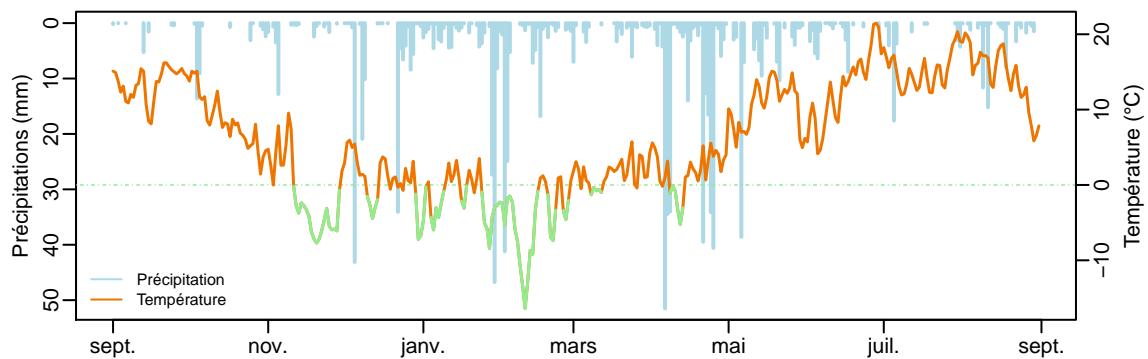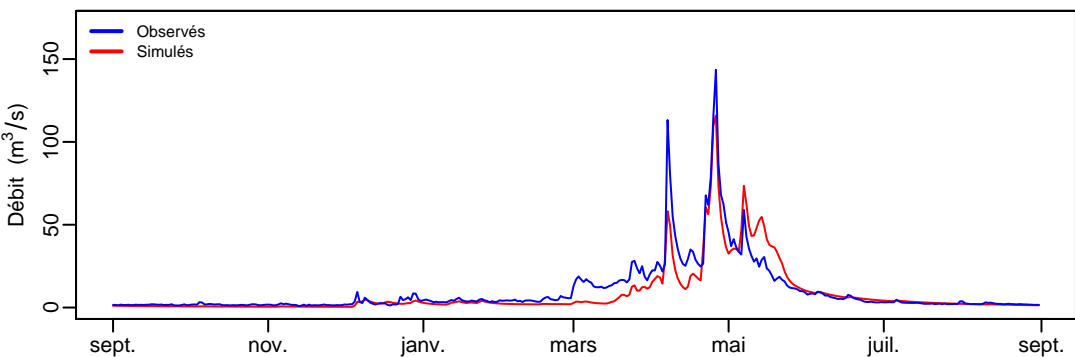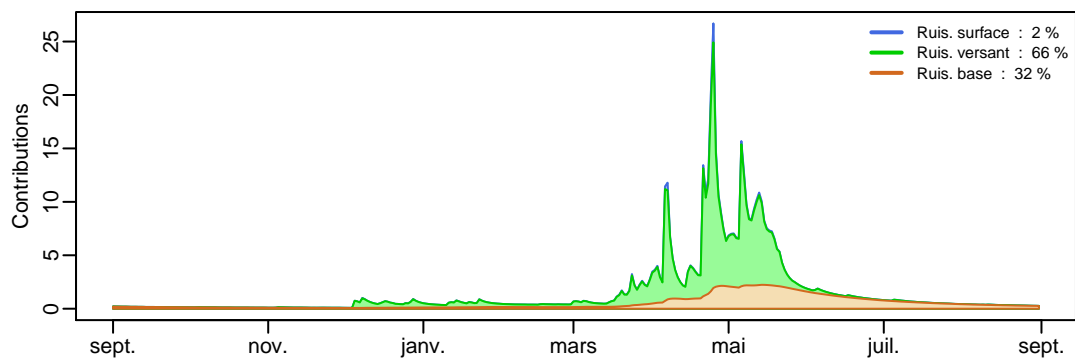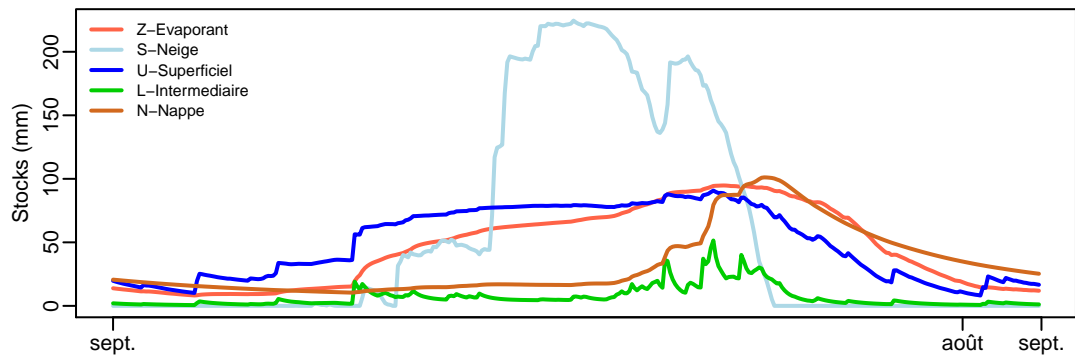

# k0100020 (442.57 km<sup>2</sup>) – année 1986–1987

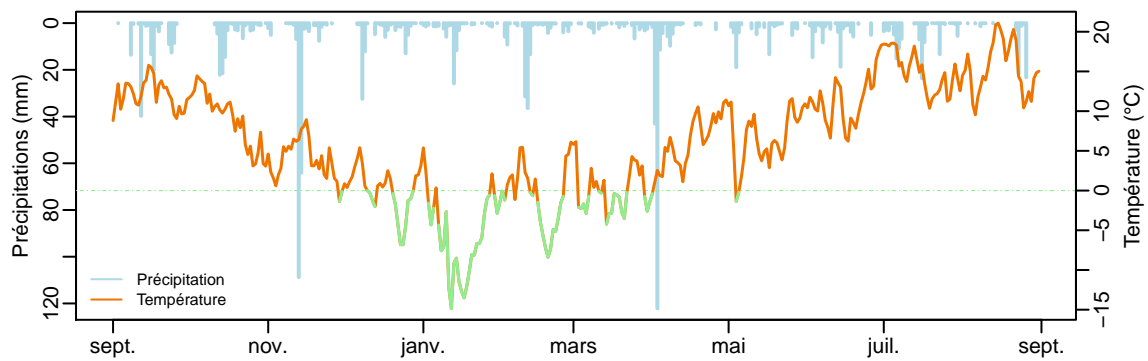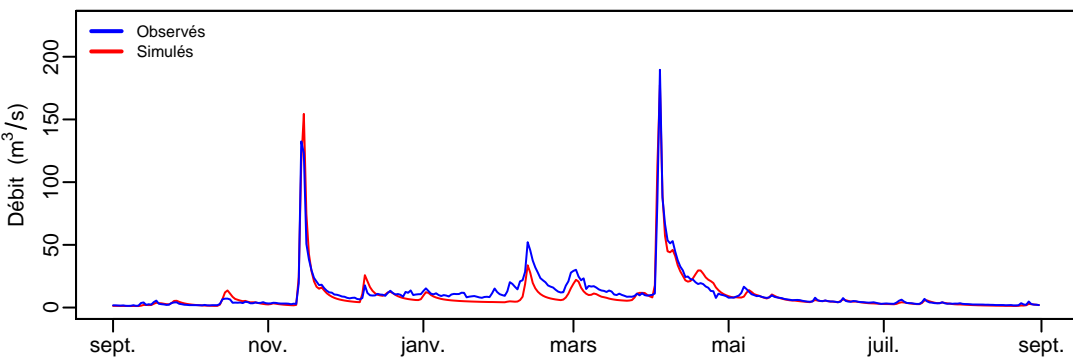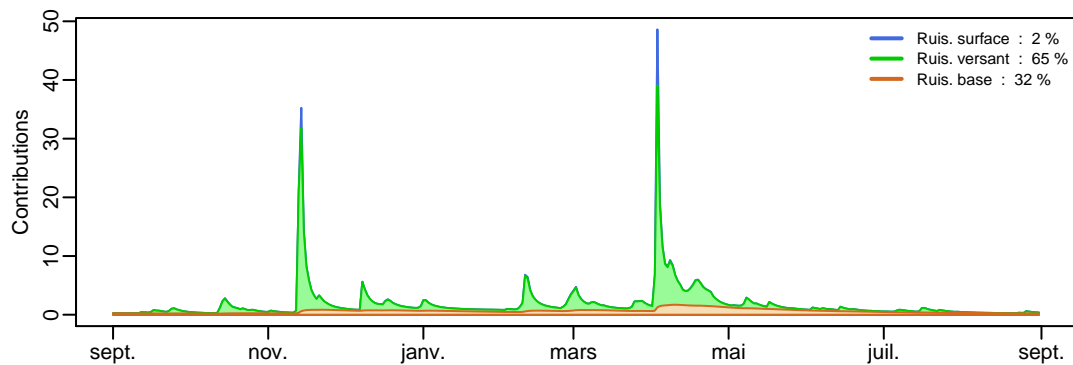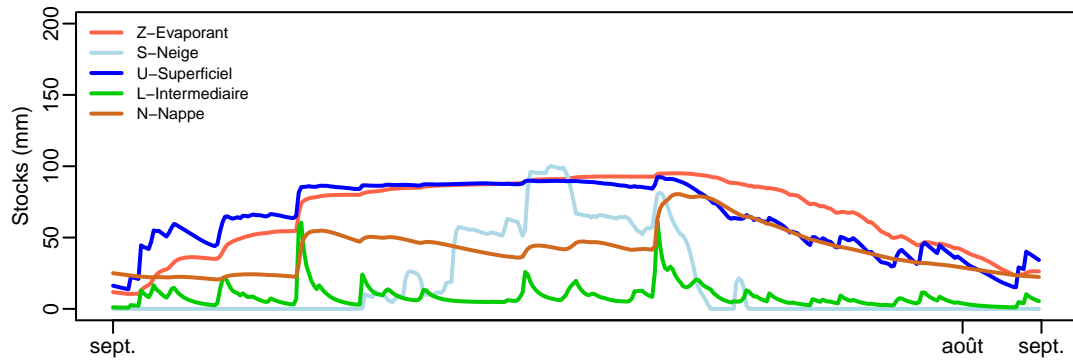

# k0100020 (442.57 km<sup>2</sup>) – année 1987–1988

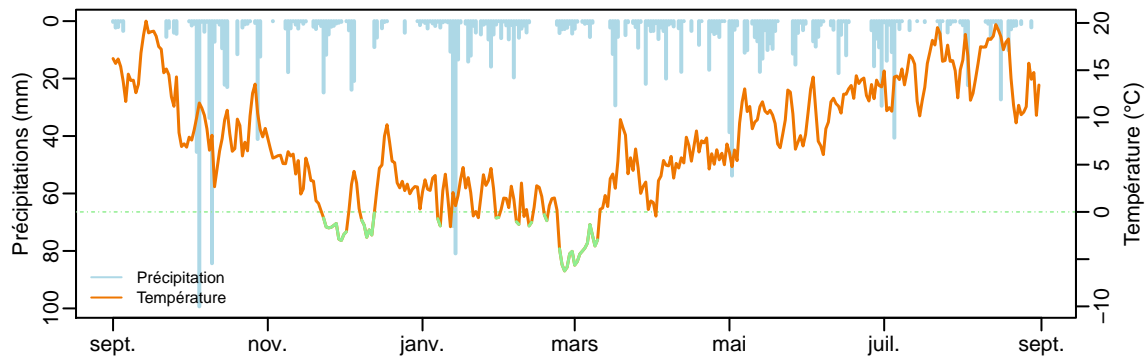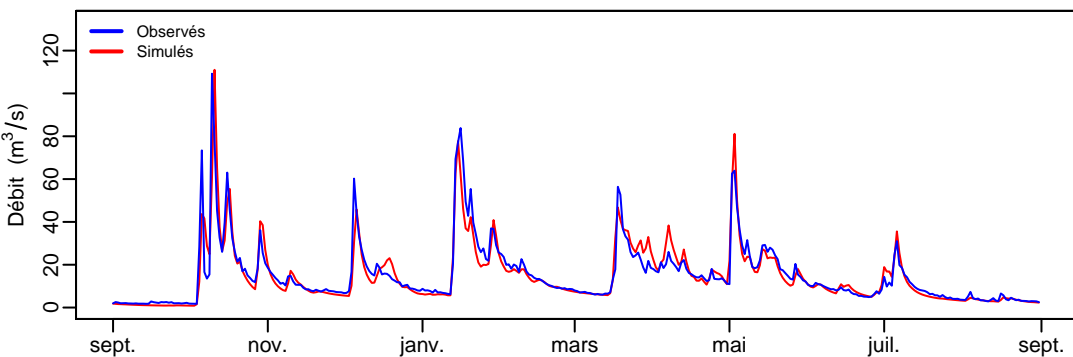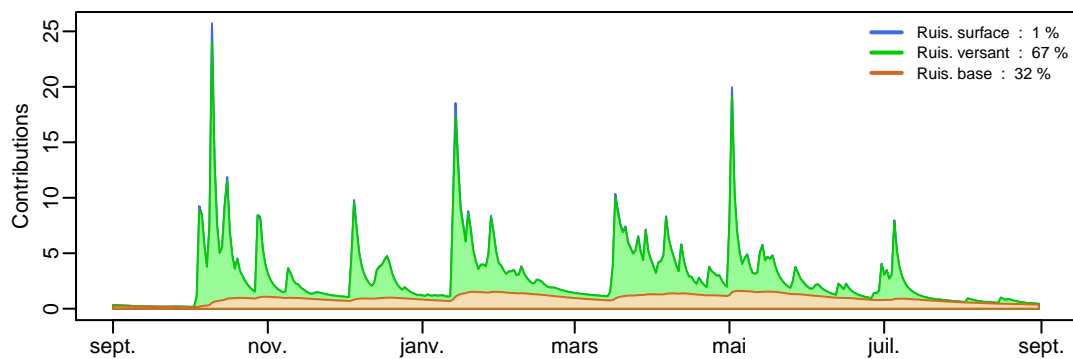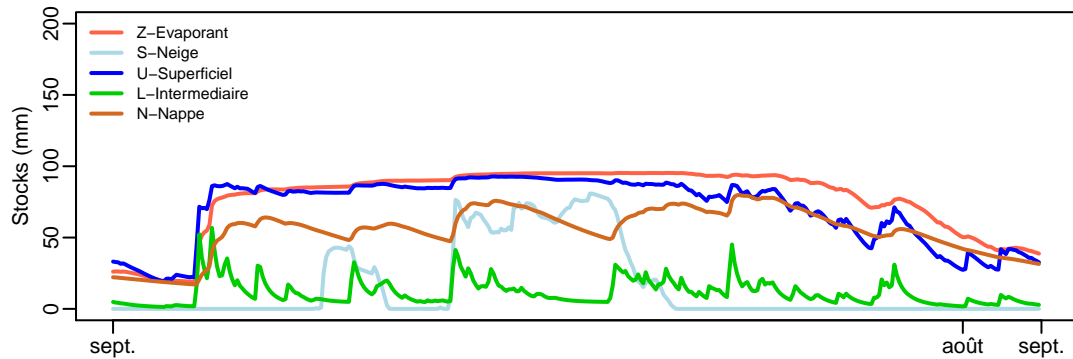



# k0100020 (442.57 km<sup>2</sup>) – année 1988–1989

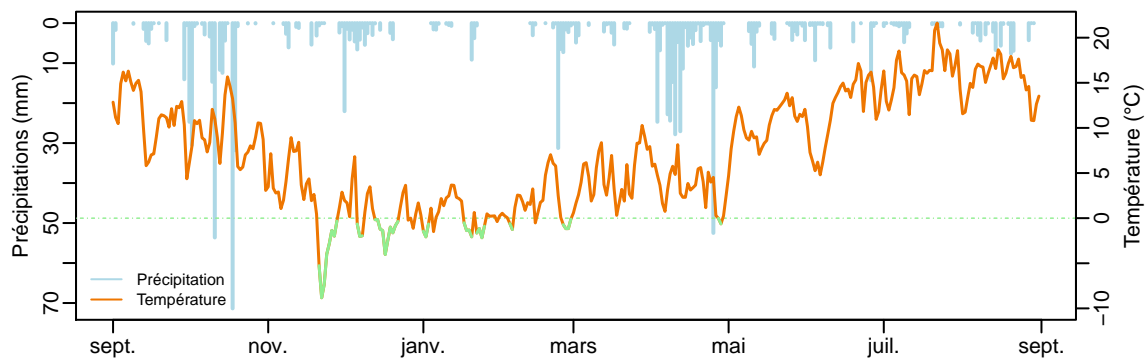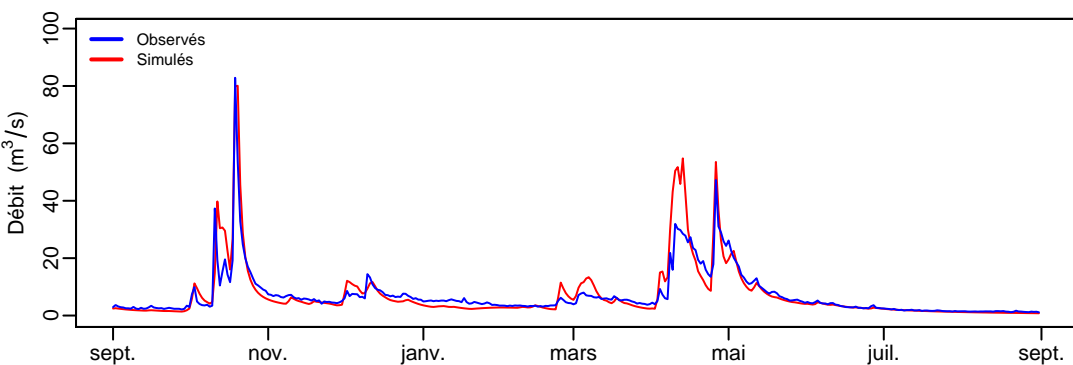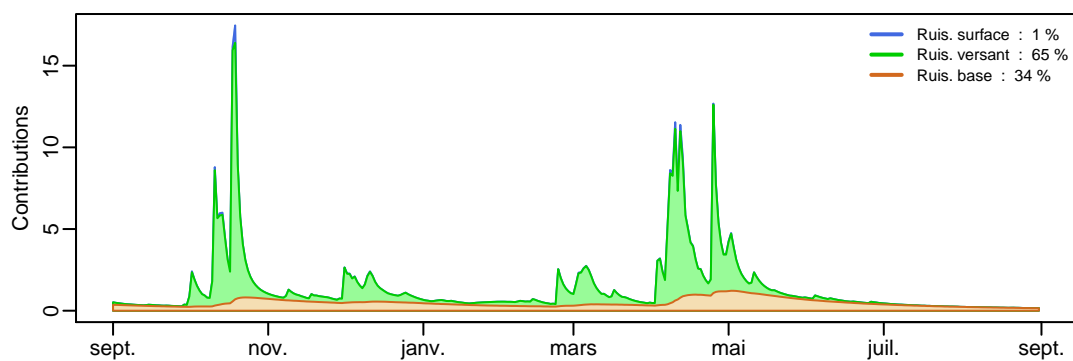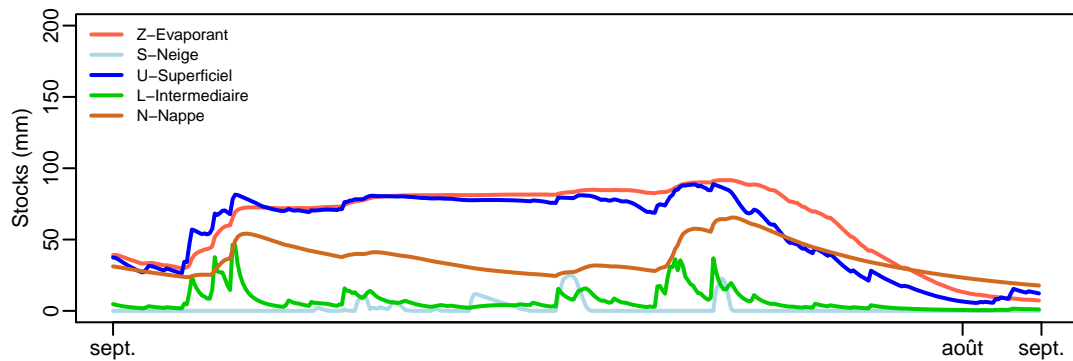

# k0100020 (442.57 km<sup>2</sup>) – année 1989–1990

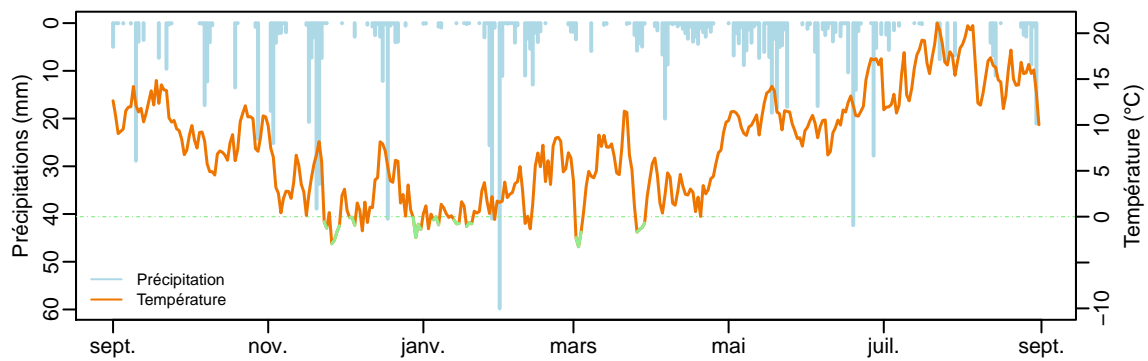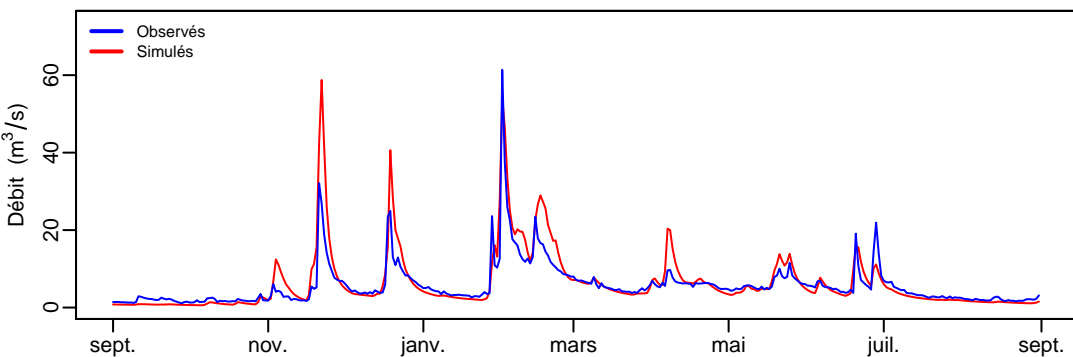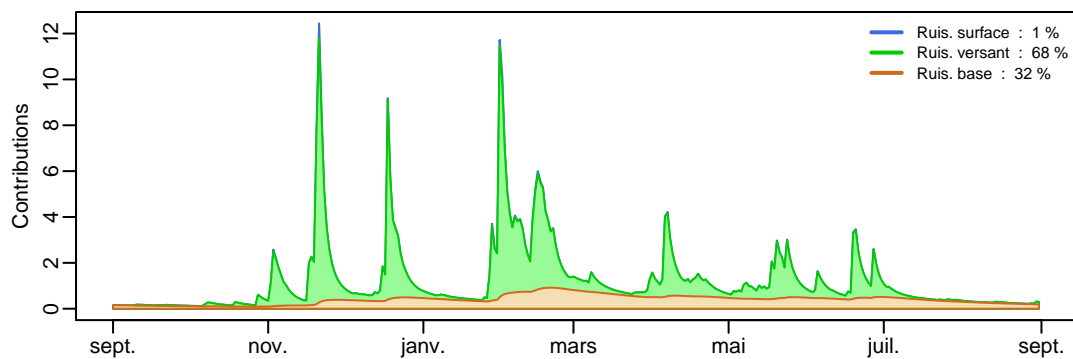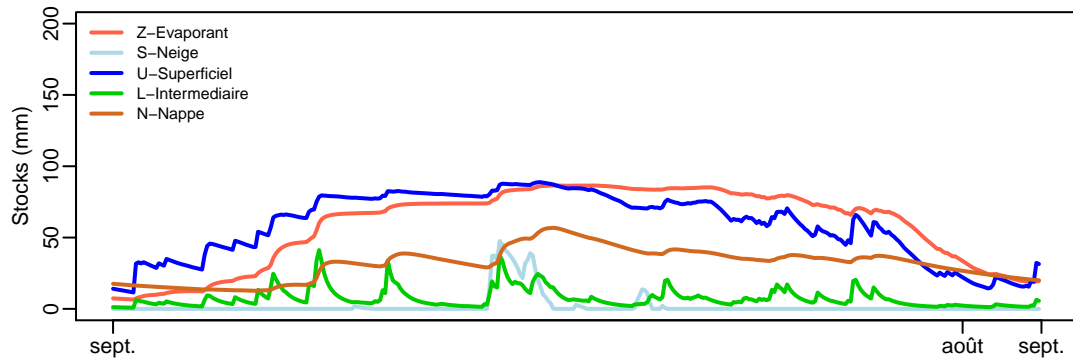

# k0100020 (442.57 km²) – année 1990–1991

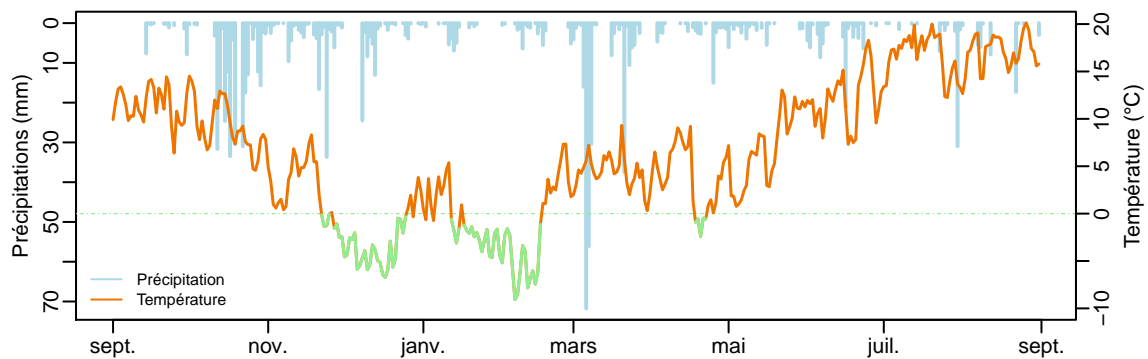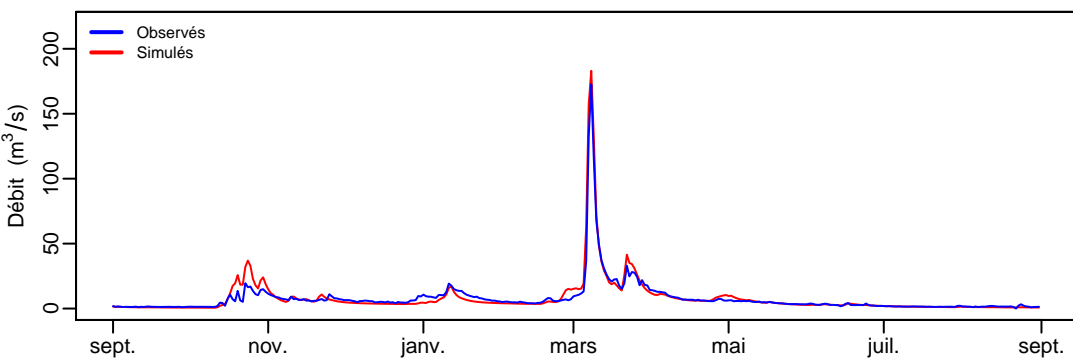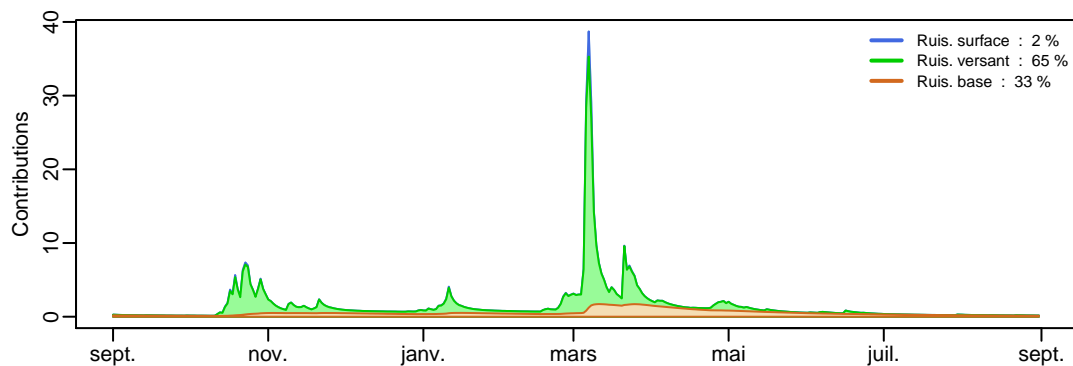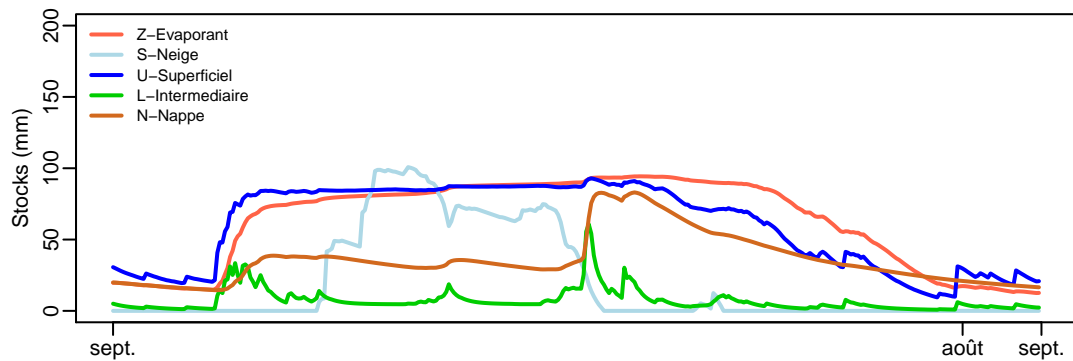

# k0100020 (442.57 km<sup>2</sup>) – année 1991–1992

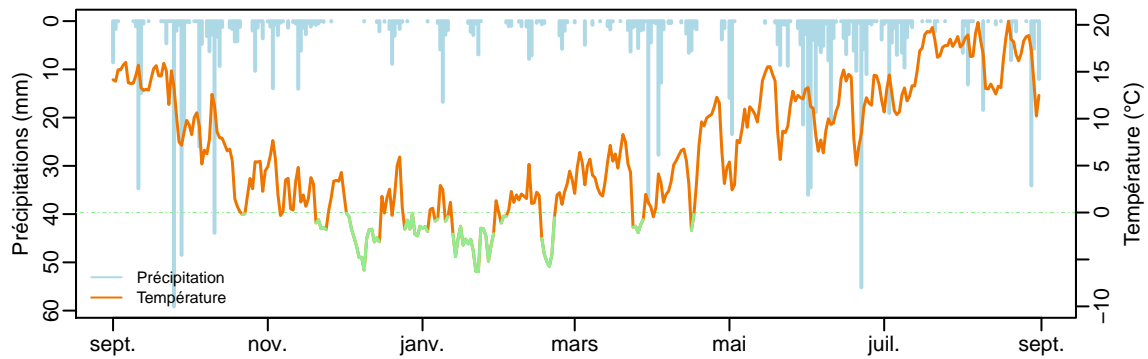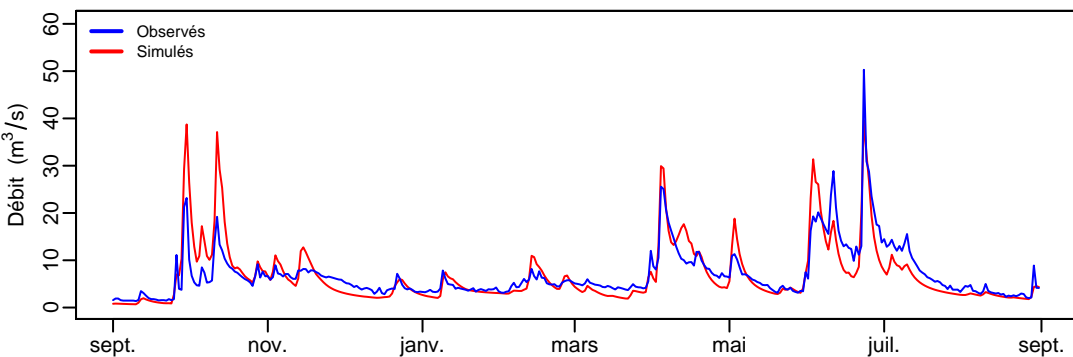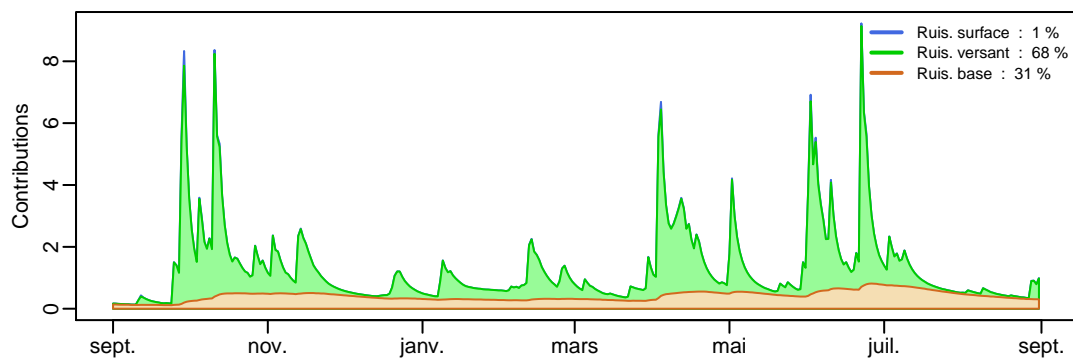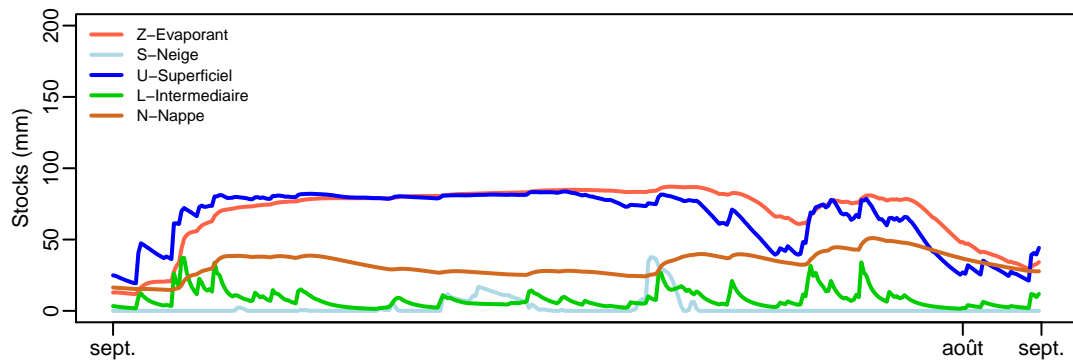

# k0100020 (442.57 km<sup>2</sup>) – année 1992–1993

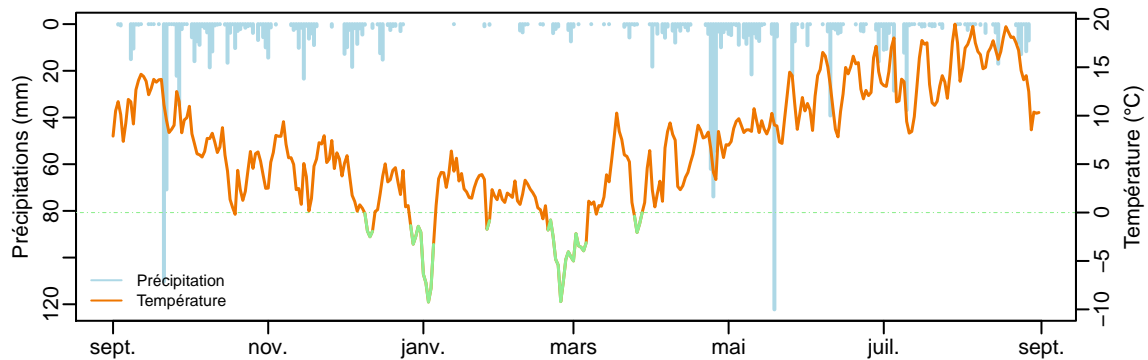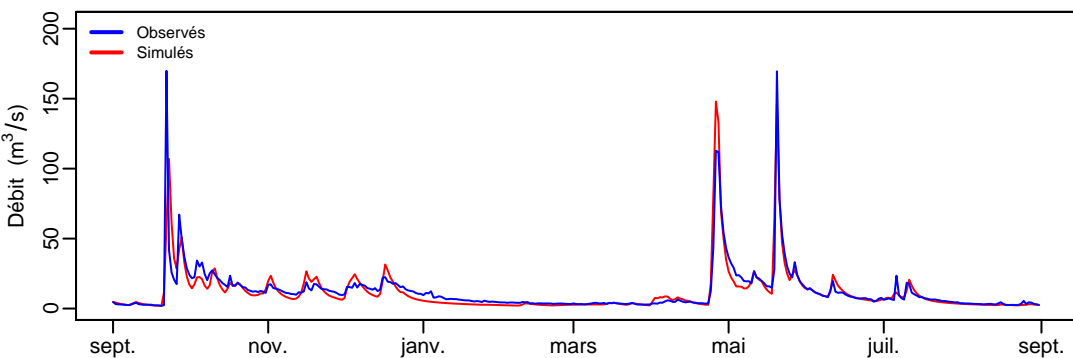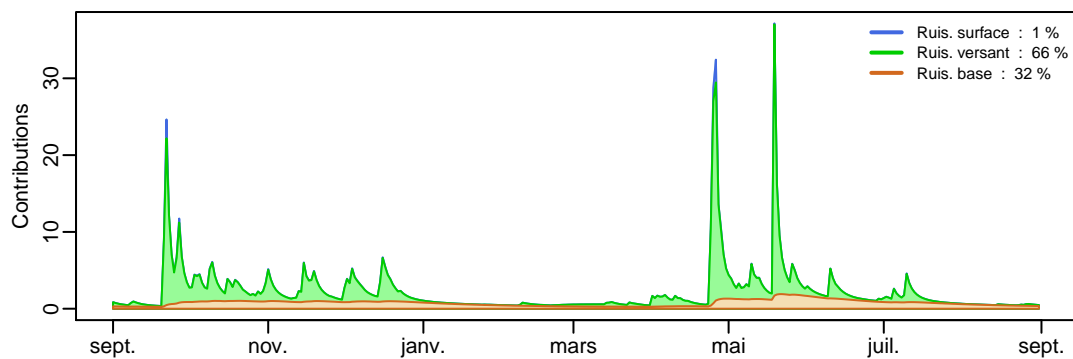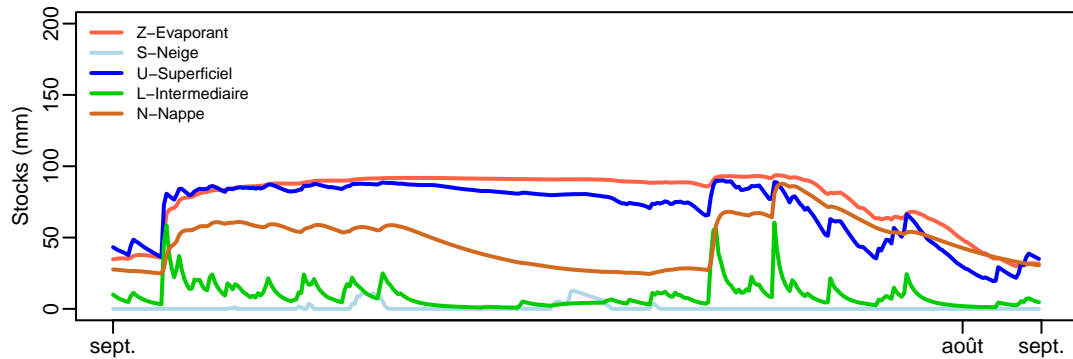

# k0100020 (442.57 km<sup>2</sup>) – année 1993–1994

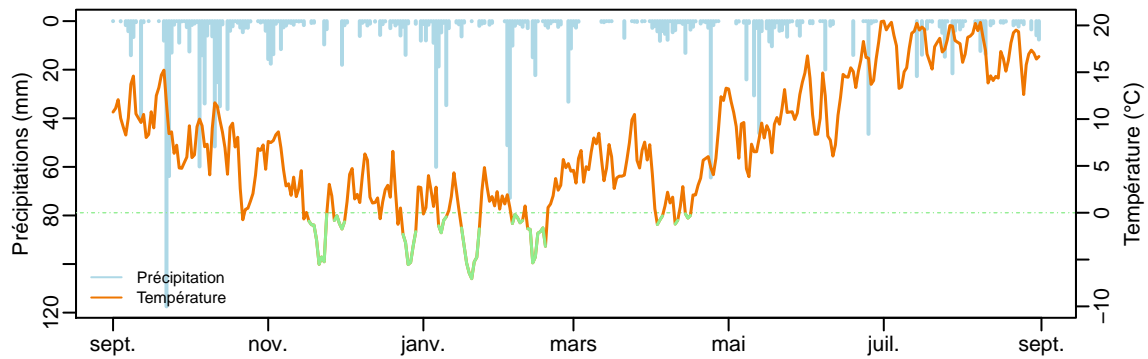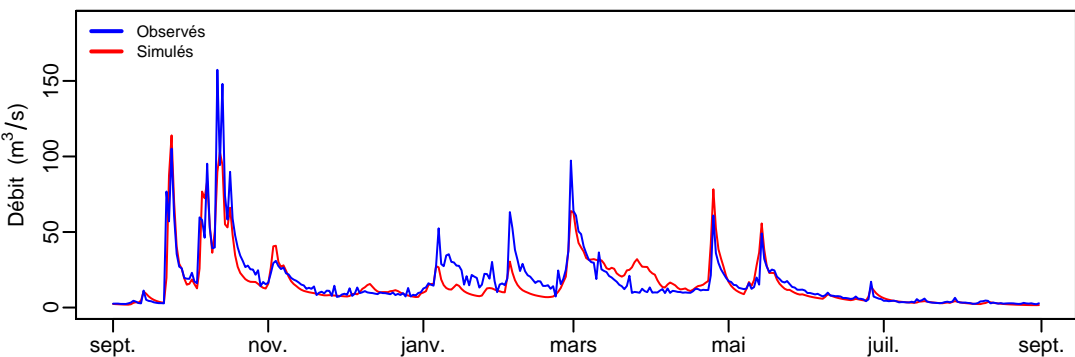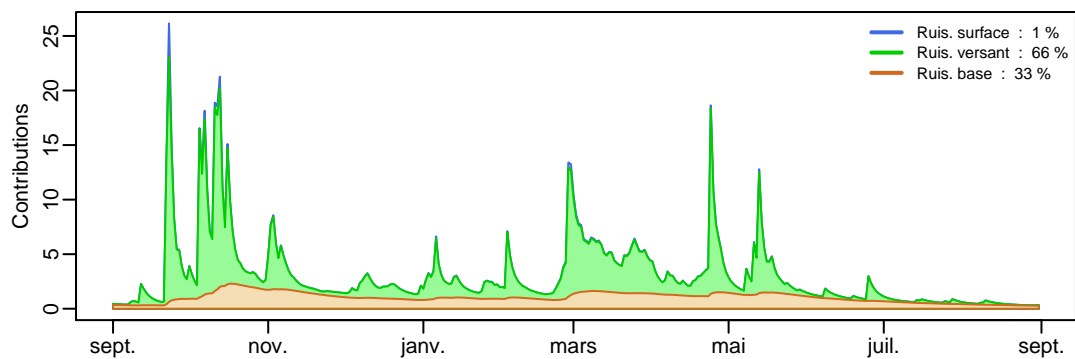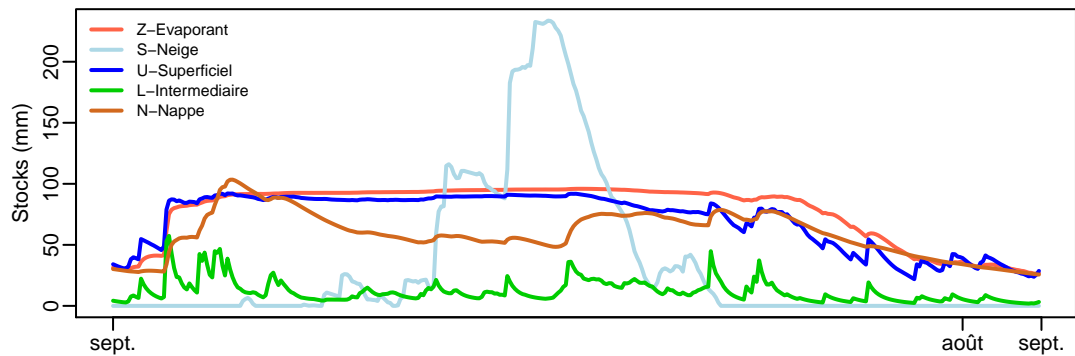

# k0100020 (442.57 km<sup>2</sup>) – année 1994–1995

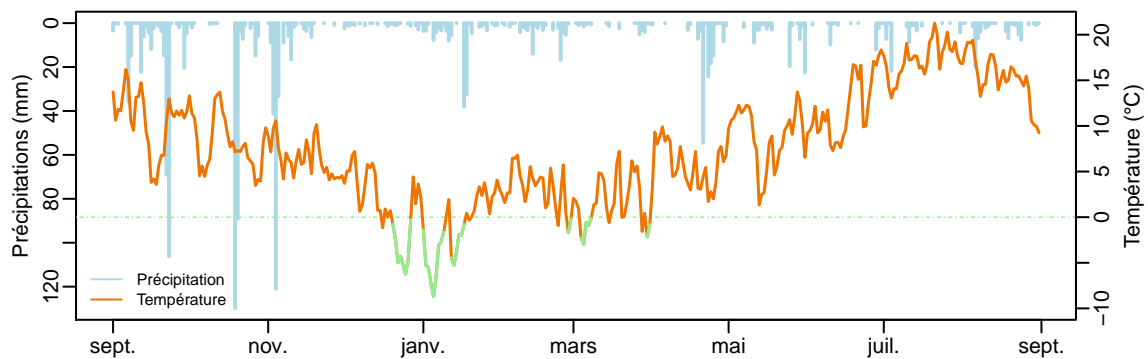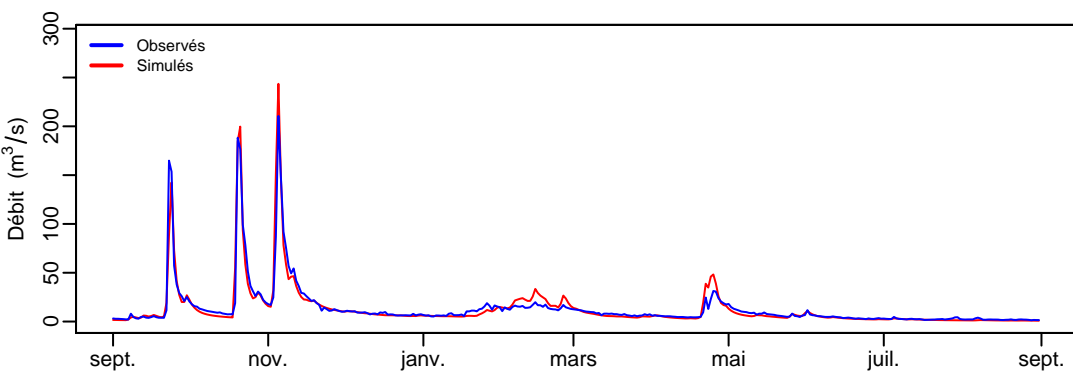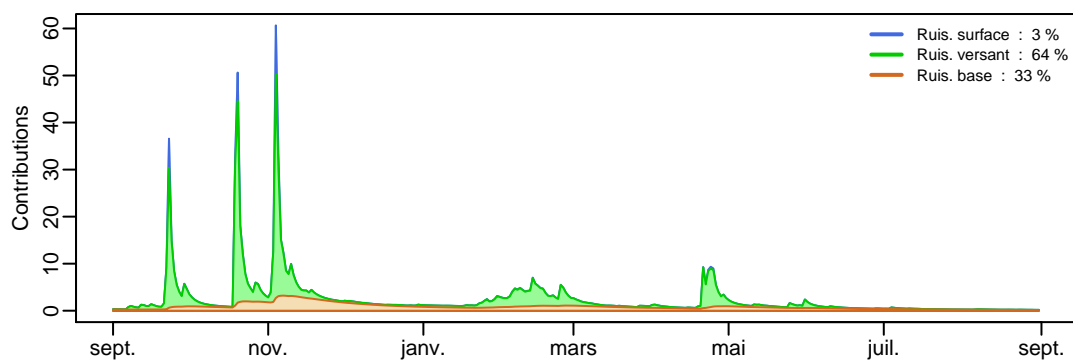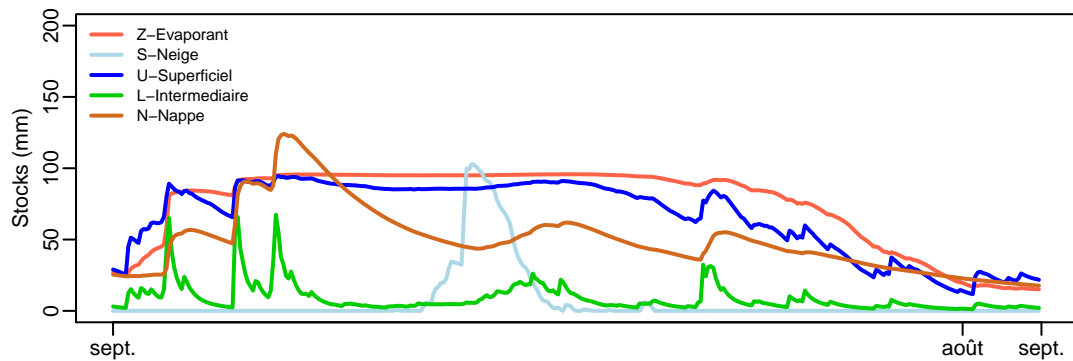

# k0100020 (442.57 km<sup>2</sup>) – année 1995–1996

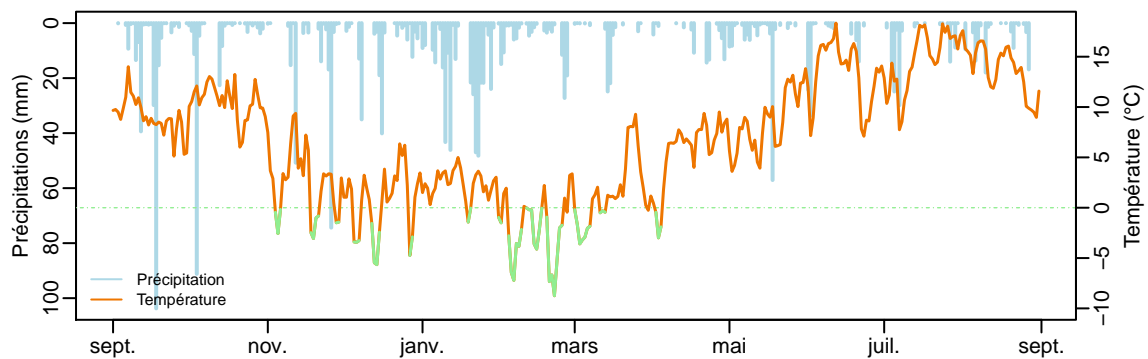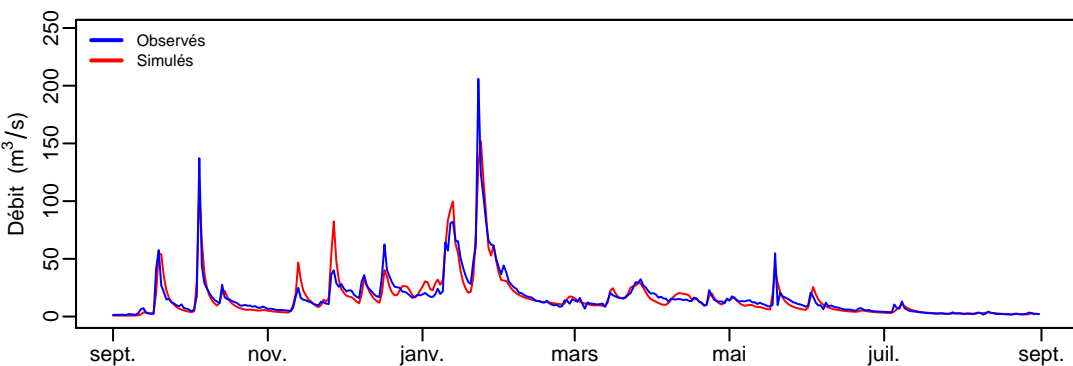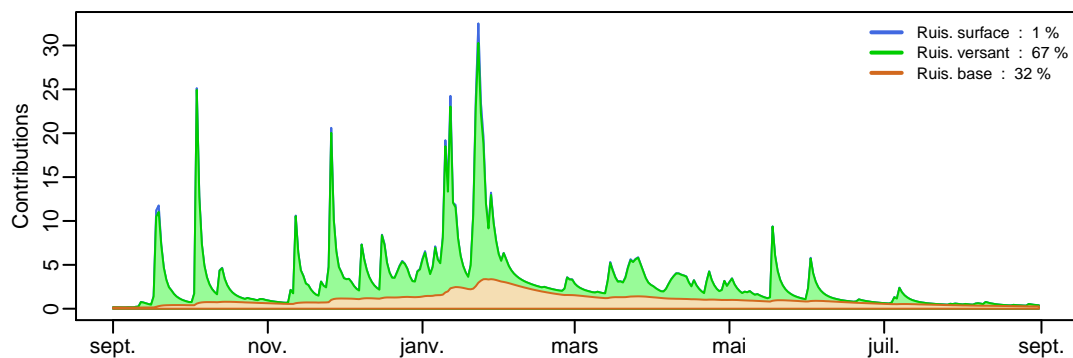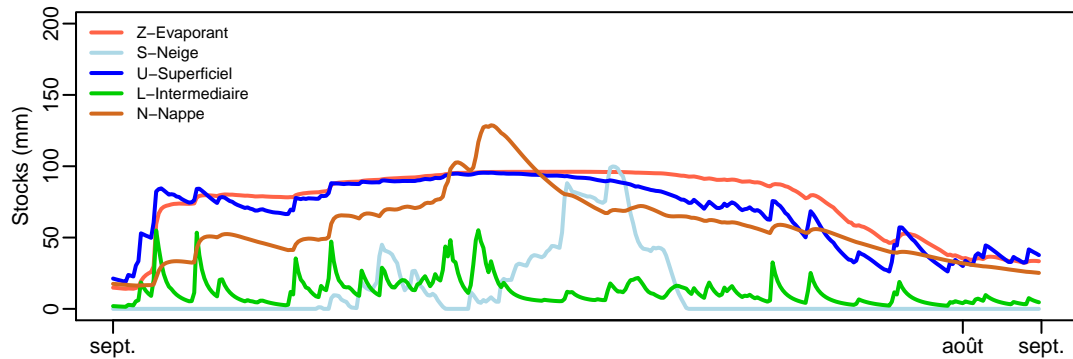



# k0100020 (442.57 km<sup>2</sup>) – année 1996–1997

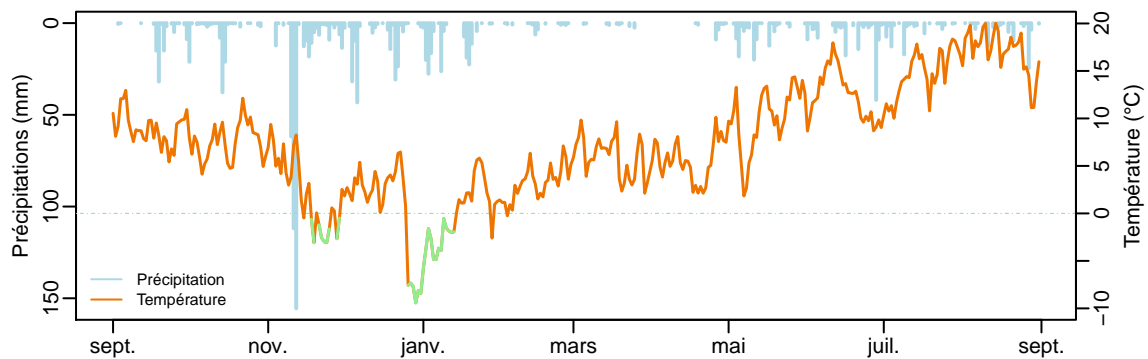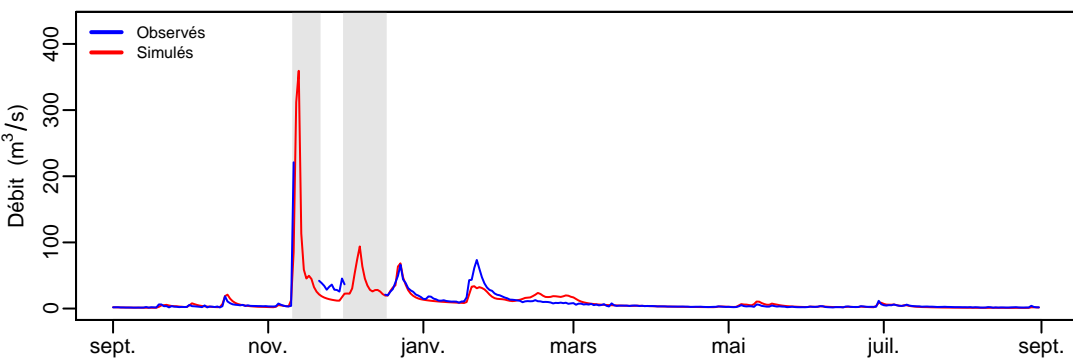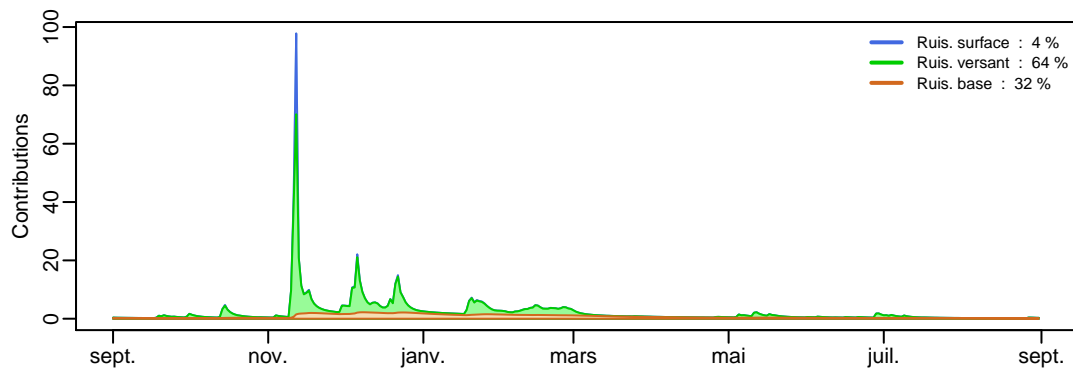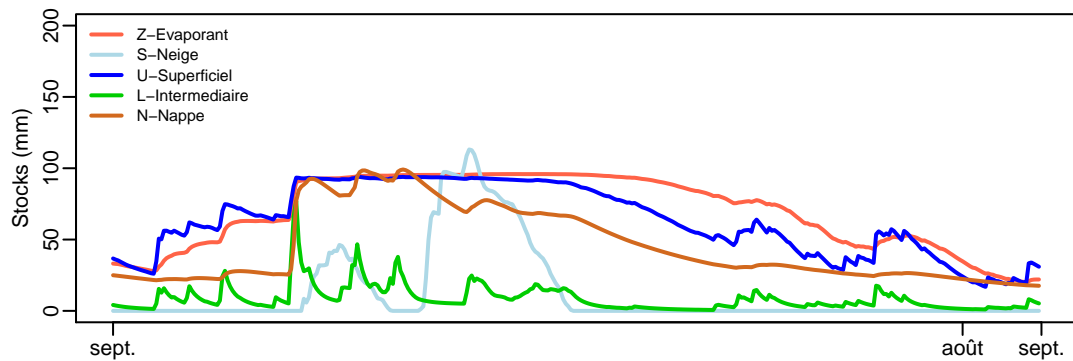

# k0100020 (442.57 km<sup>2</sup>) – année 1997–1998

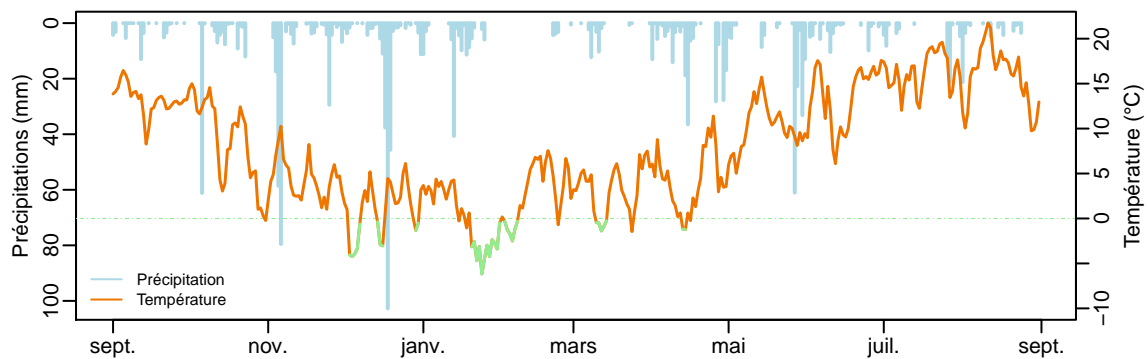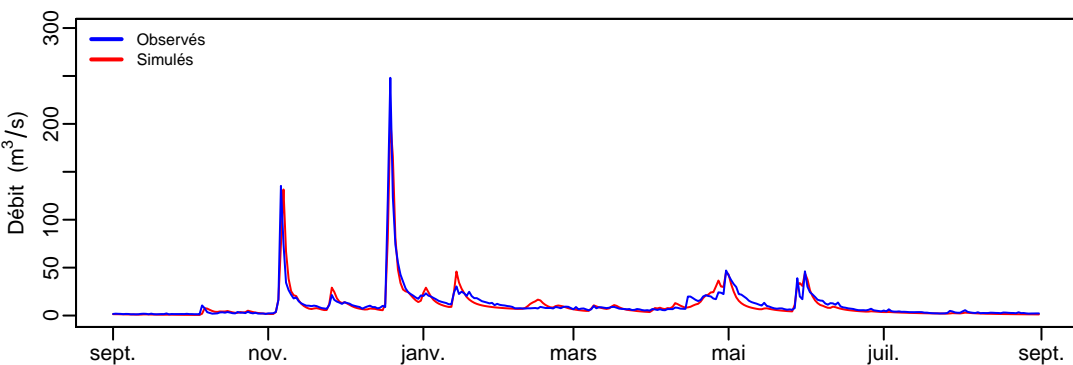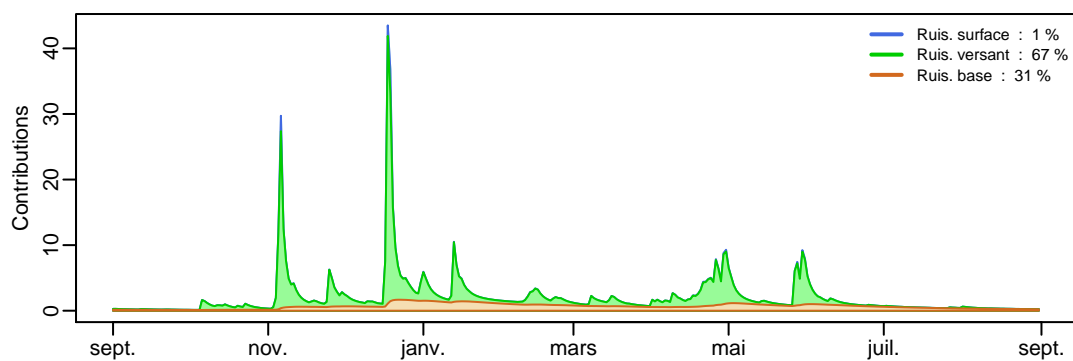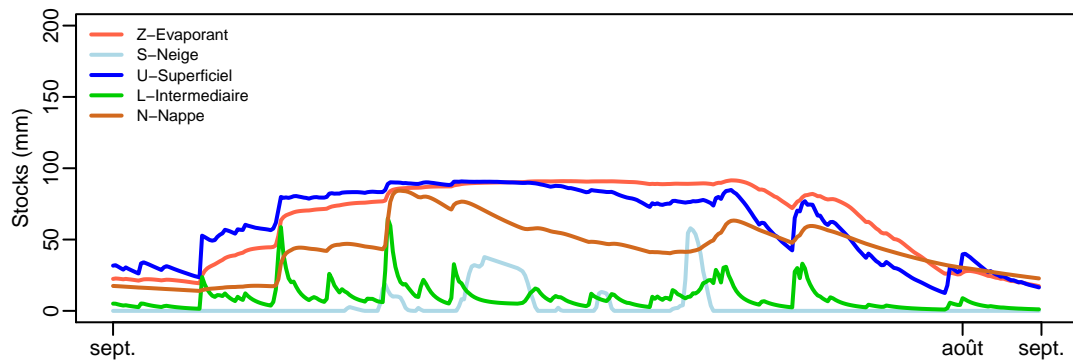

# k0100020 (442.57 km<sup>2</sup>) – année 1998–1999

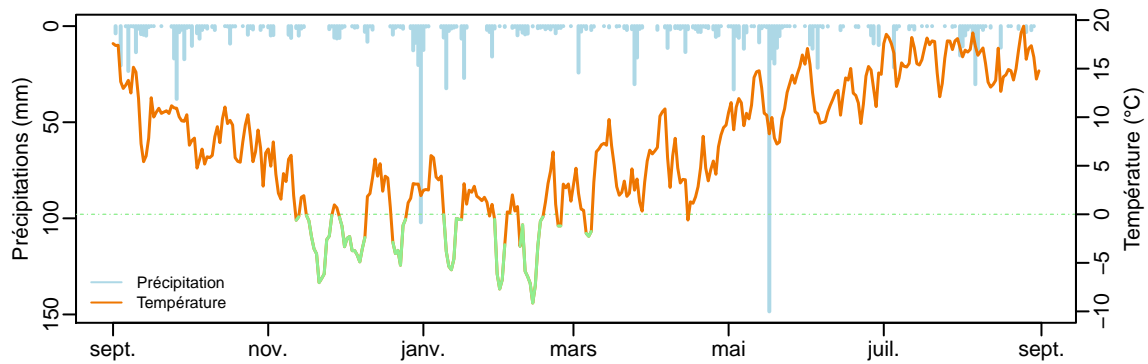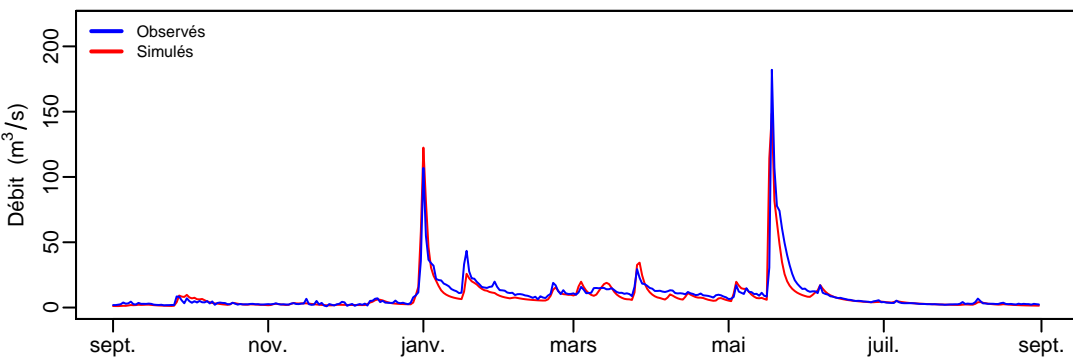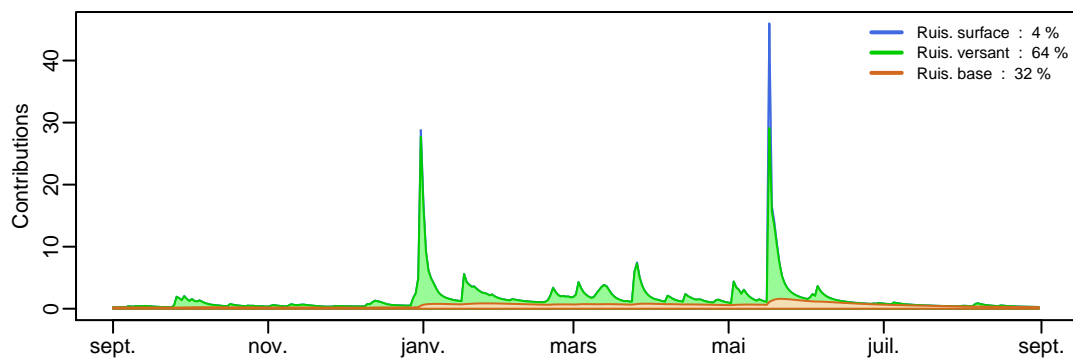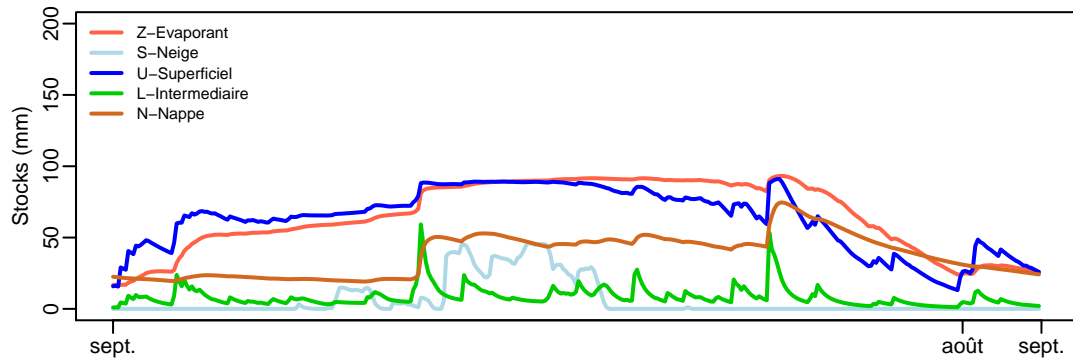

# k0100020 (442.57 km<sup>2</sup>) – année 1999–2000

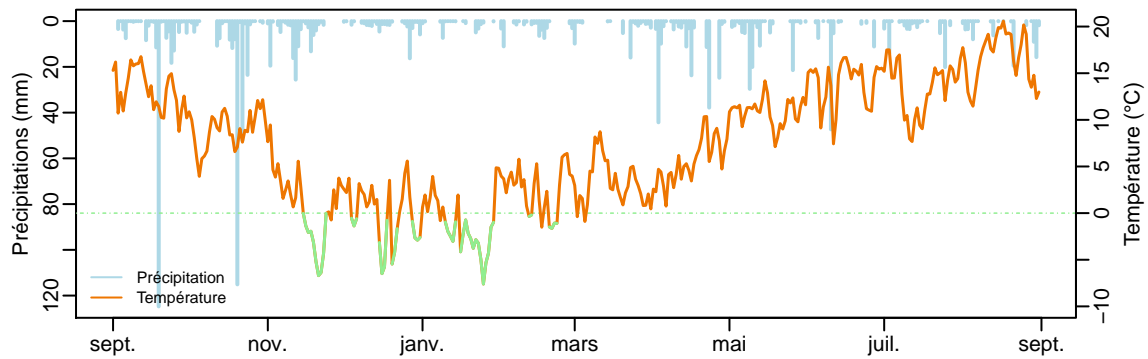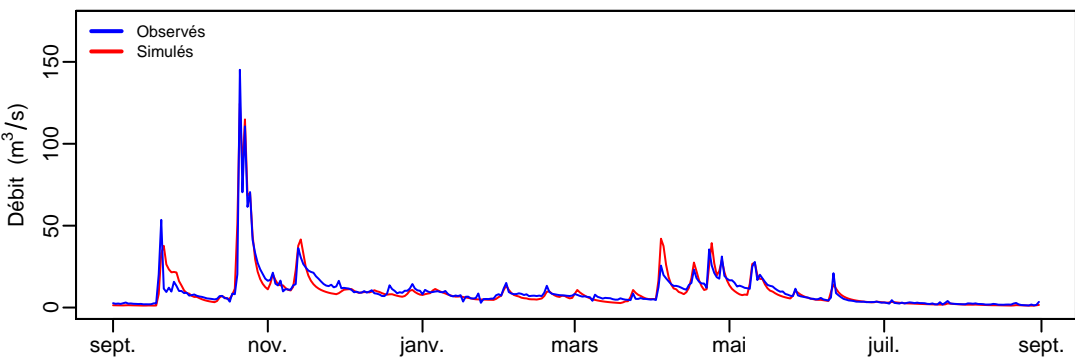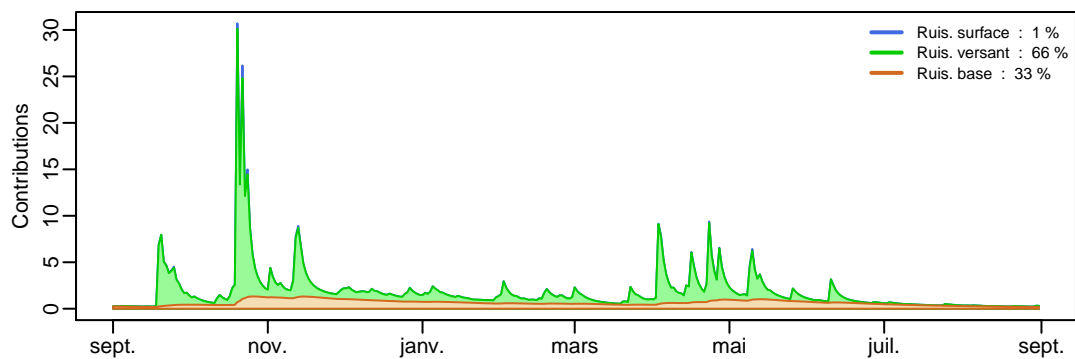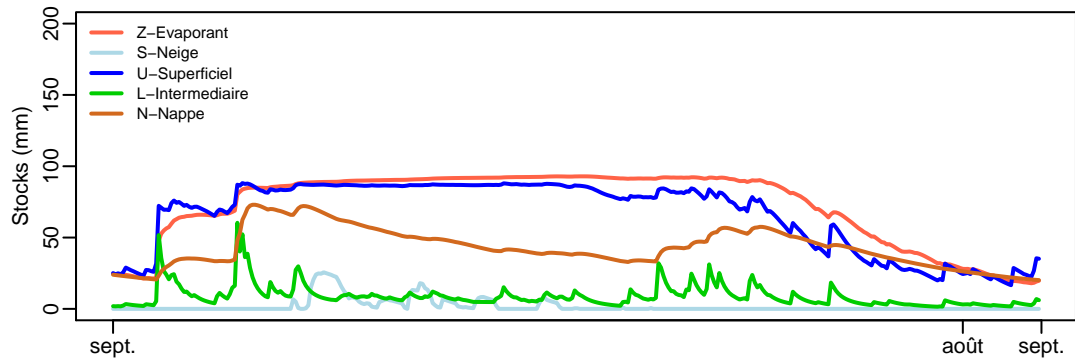

# k0100020 (442.57 km<sup>2</sup>) – année 2000–2001

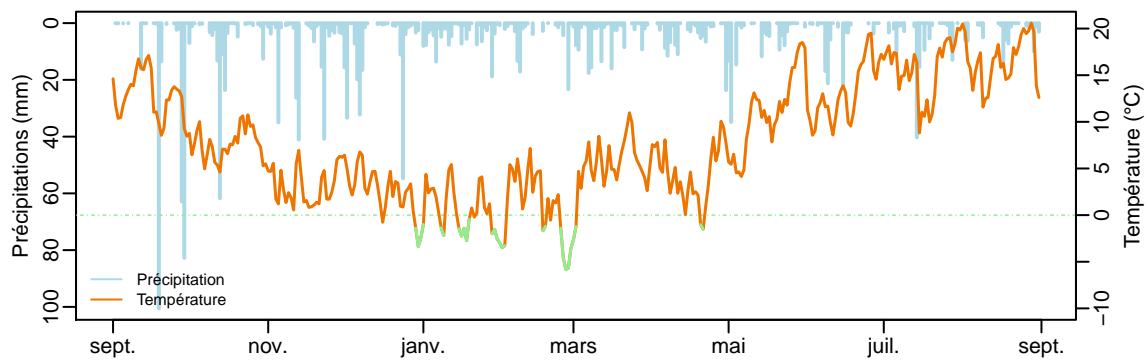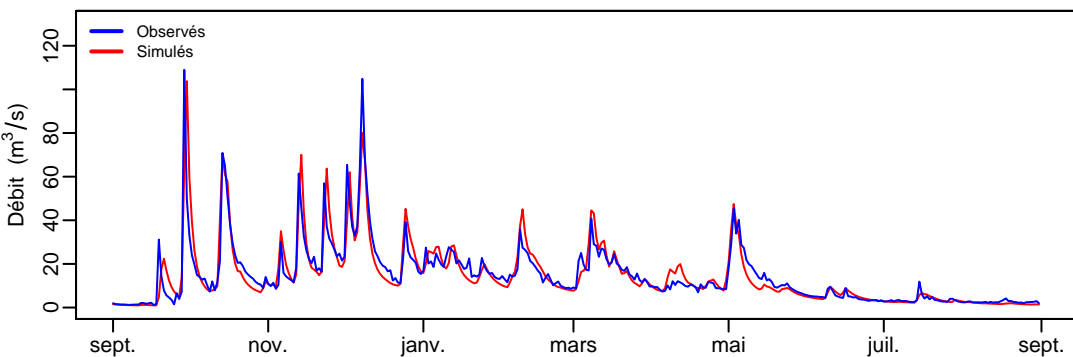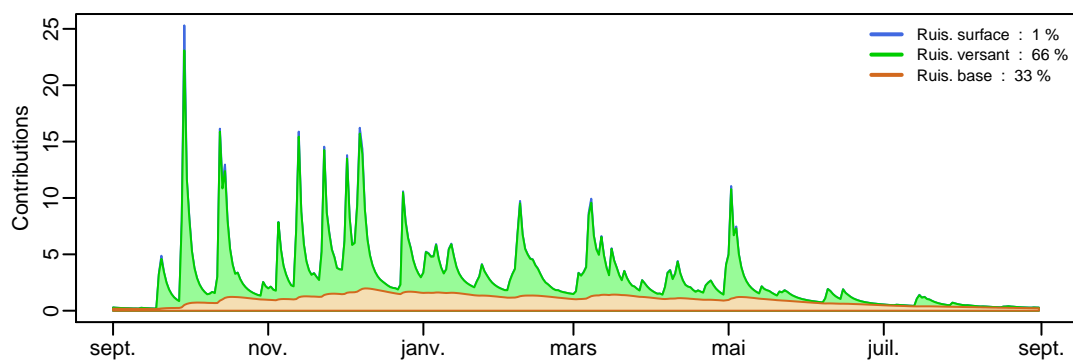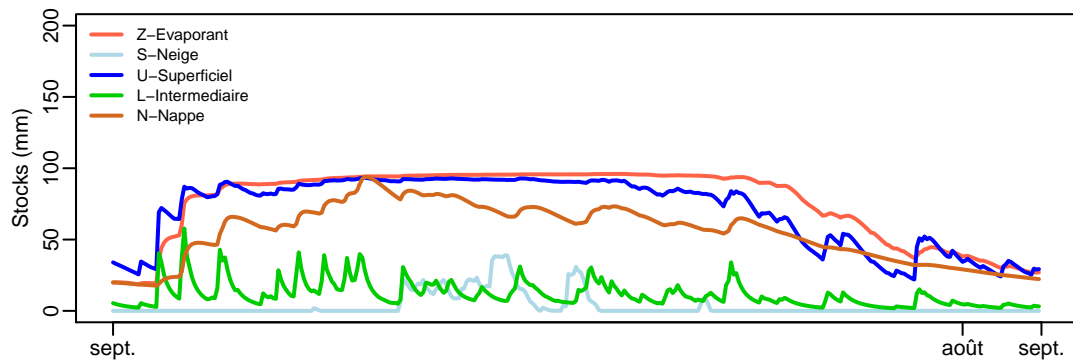

# k0100020 (442.57 km<sup>2</sup>) – année 2001–2002

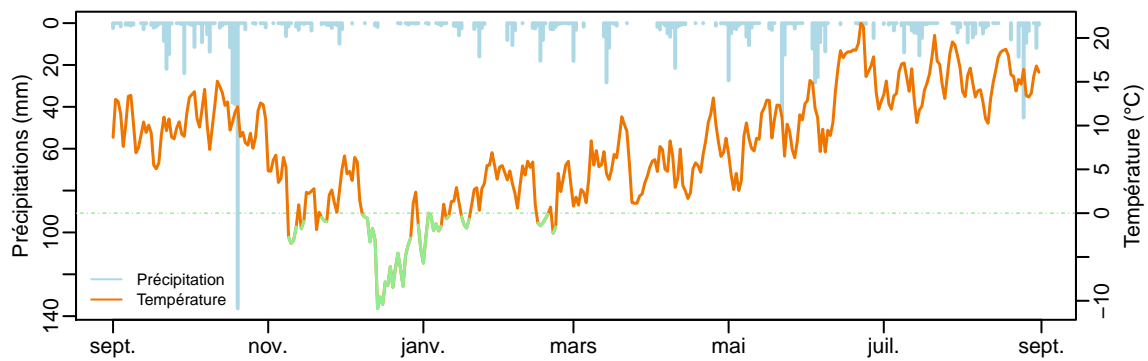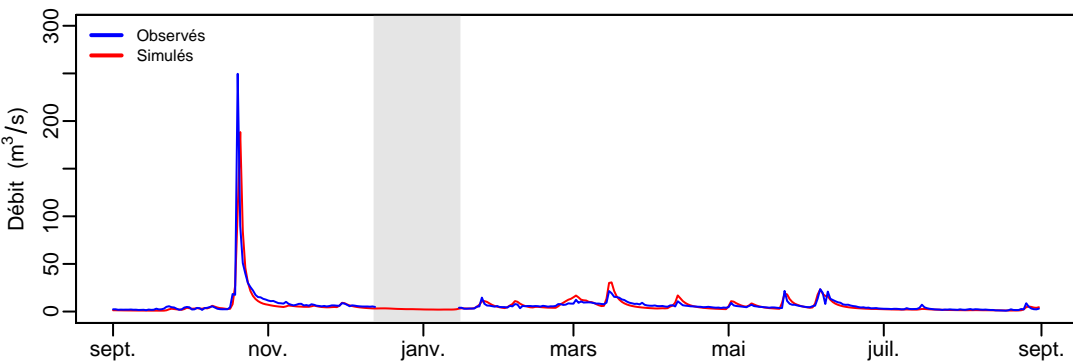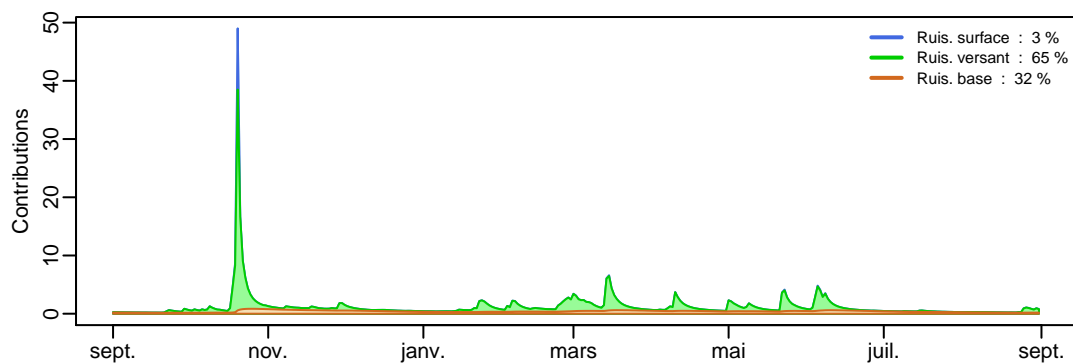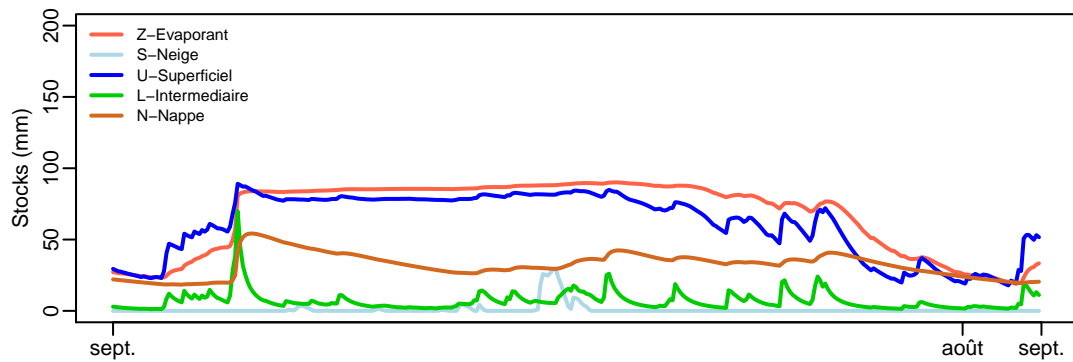

# k0100020 (442.57 km<sup>2</sup>) – année 2002–2003

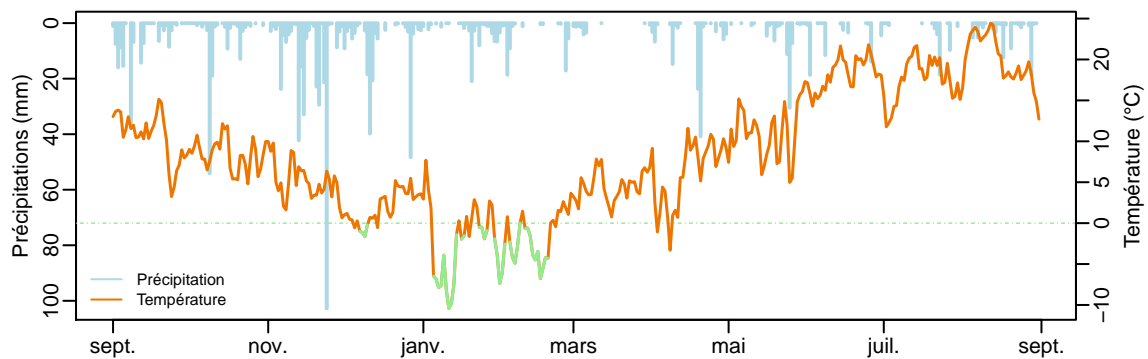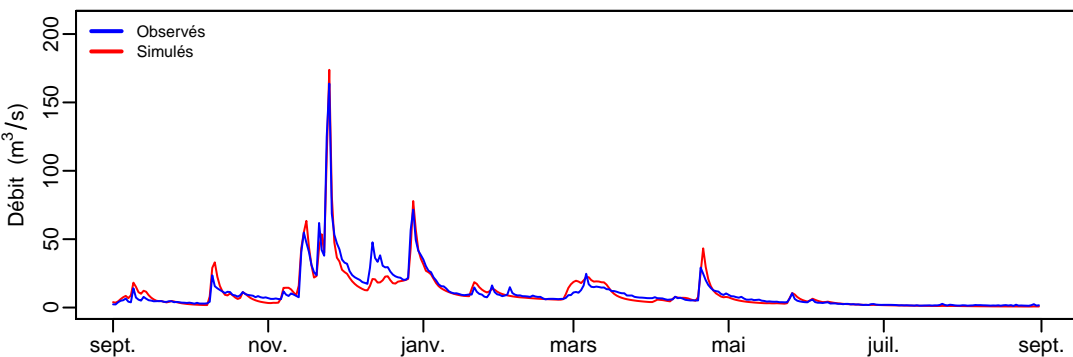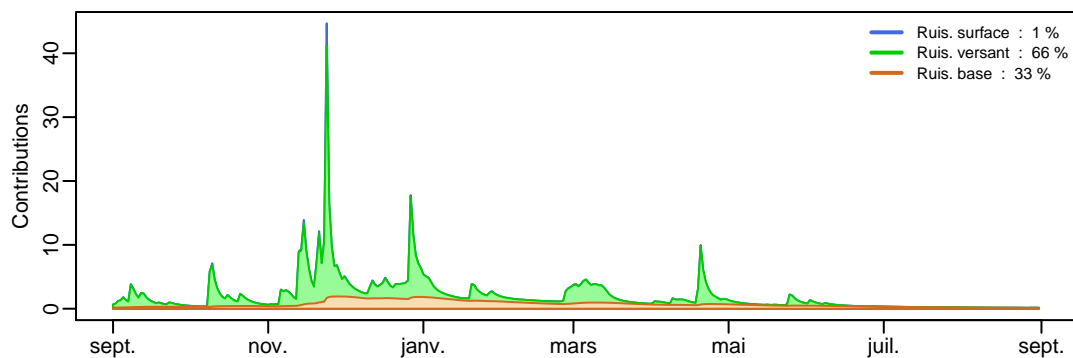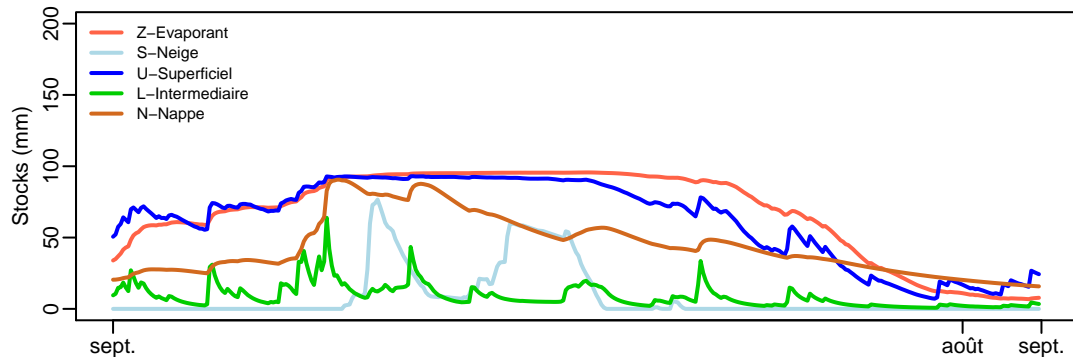

# k0100020 (442.57 km<sup>2</sup>) – année 2003–2004

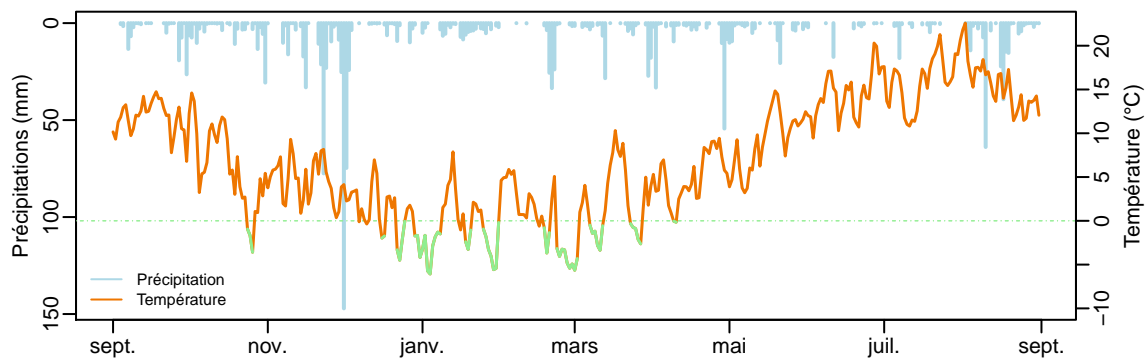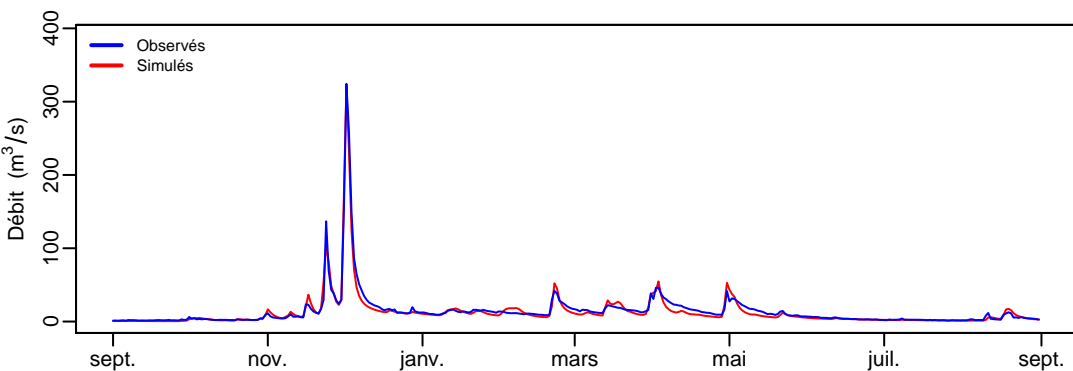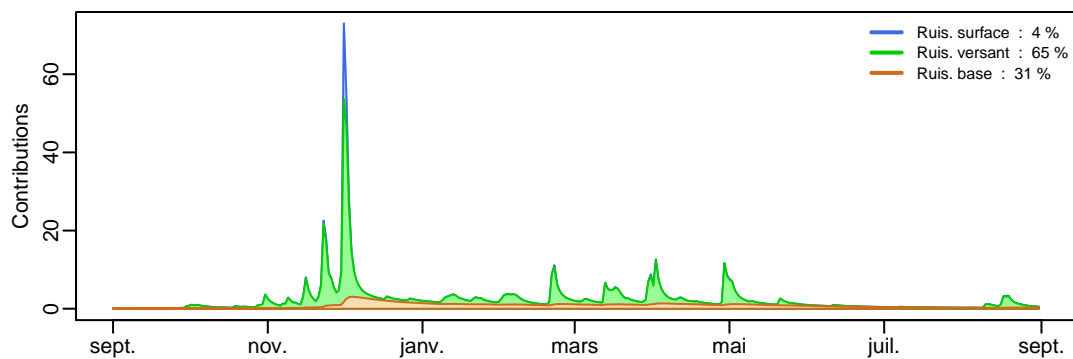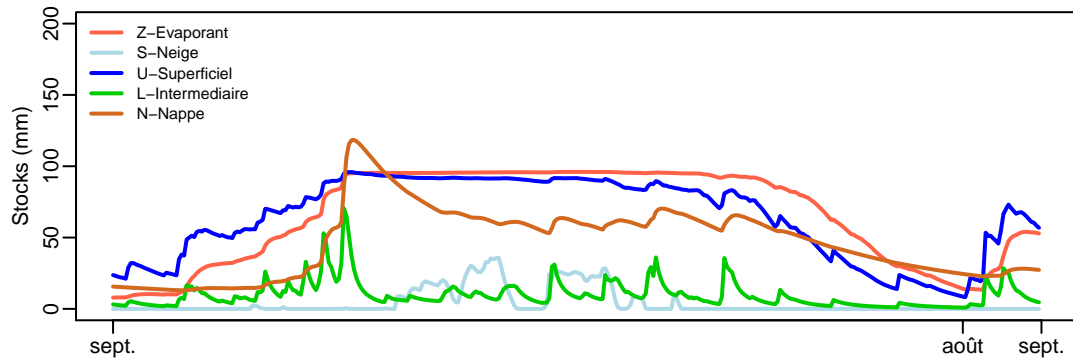



# k0100020 (442.57 km<sup>2</sup>) – année 2004–2005

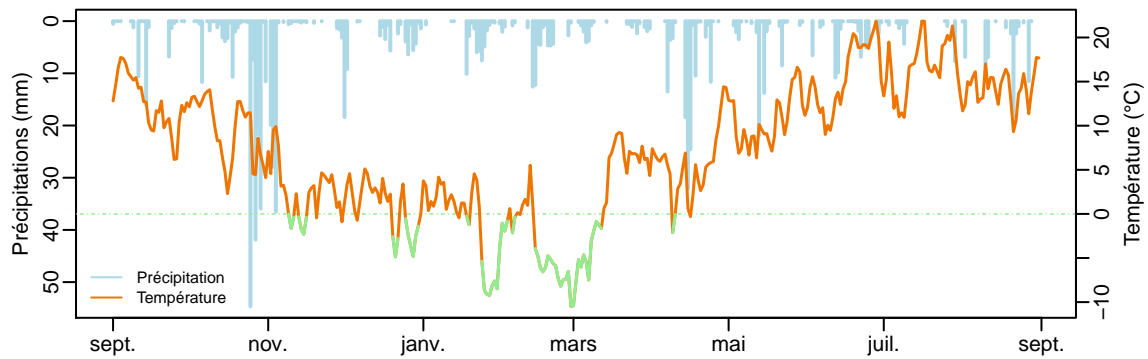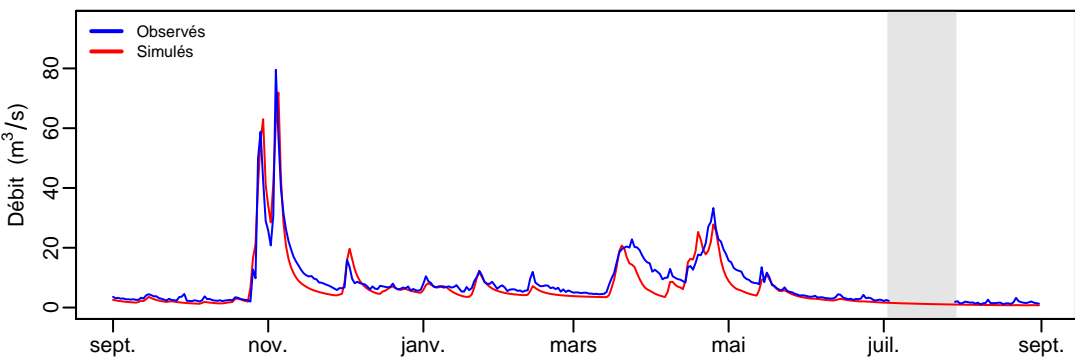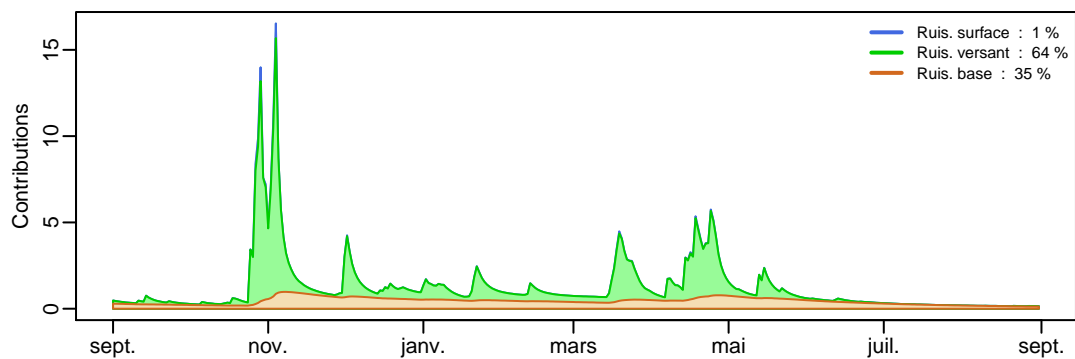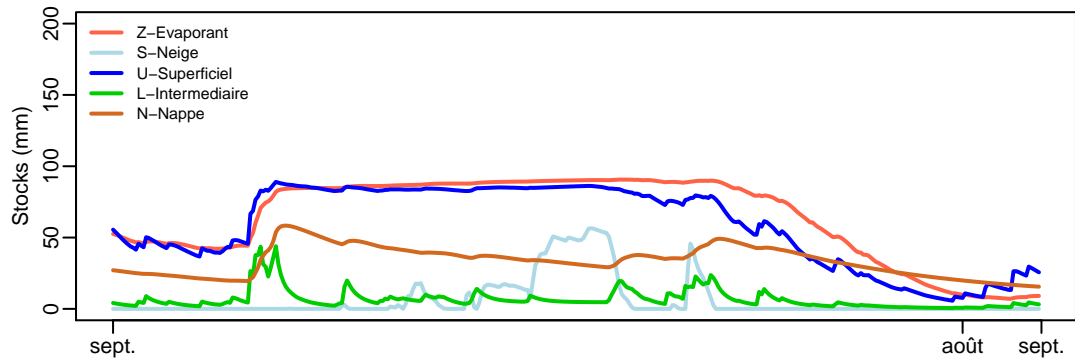

# k0100020 (442.57 km<sup>2</sup>) – année 2005–2006

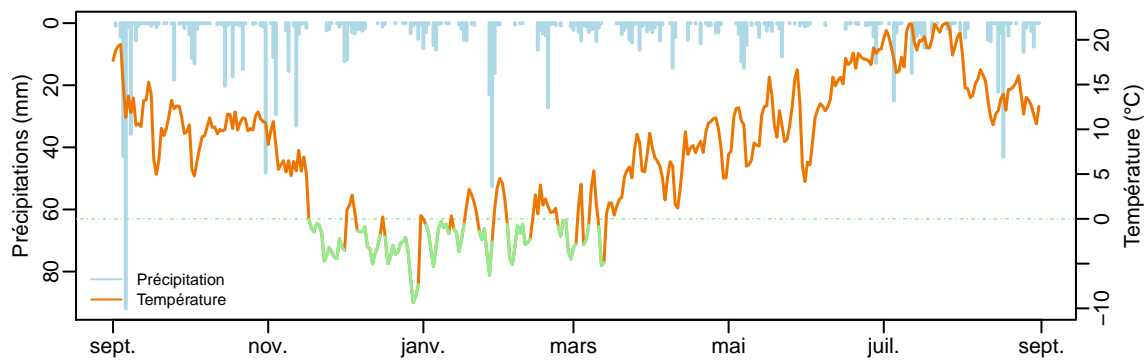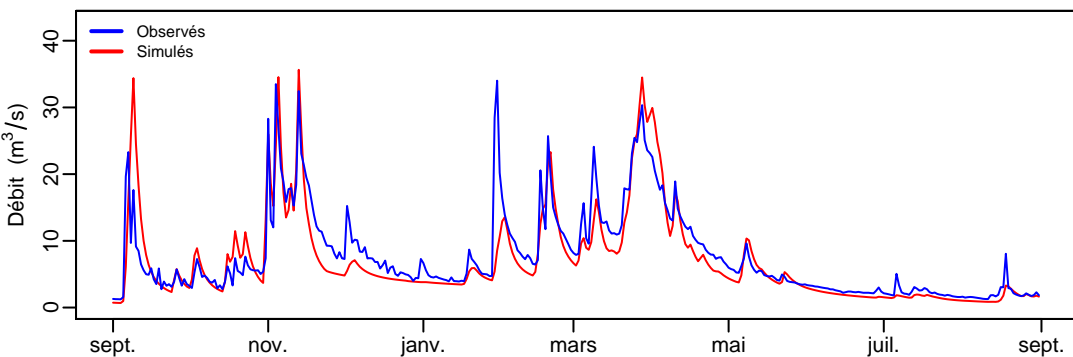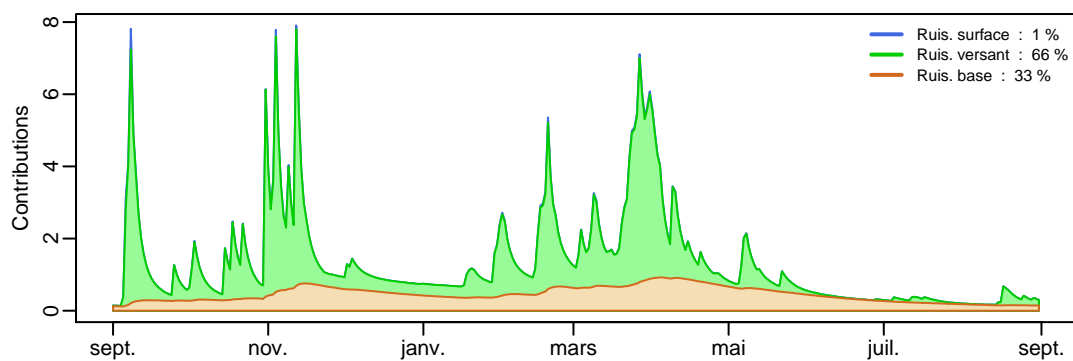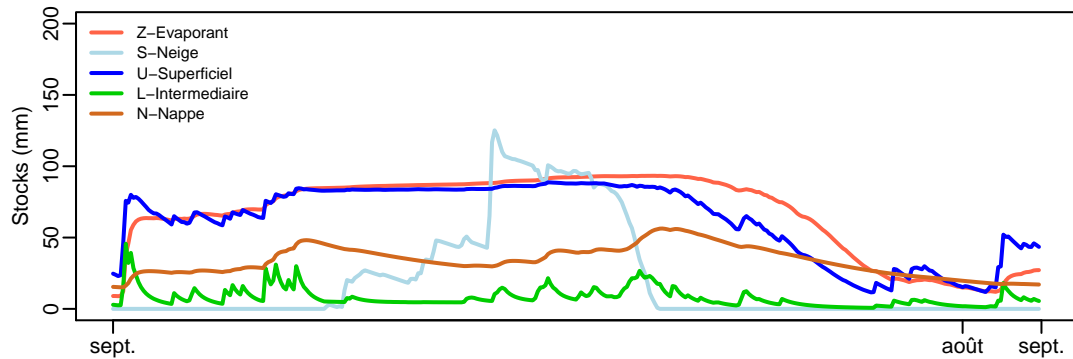

# k0100020 (442.57 km<sup>2</sup>) – année 2006–2007

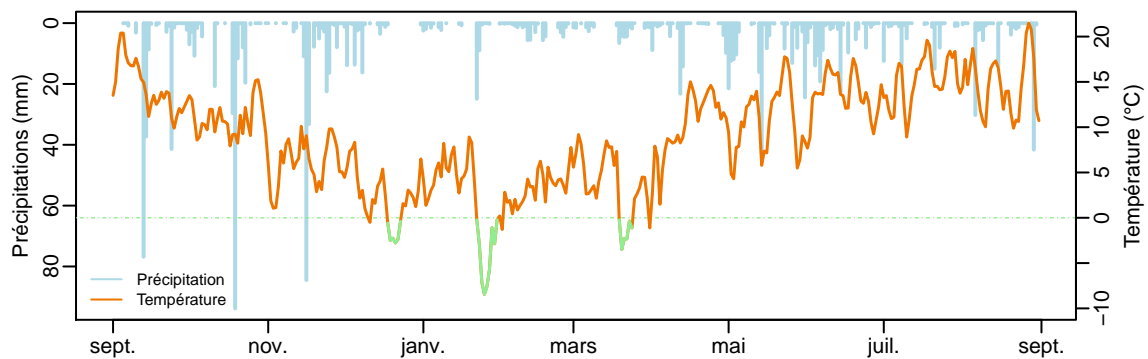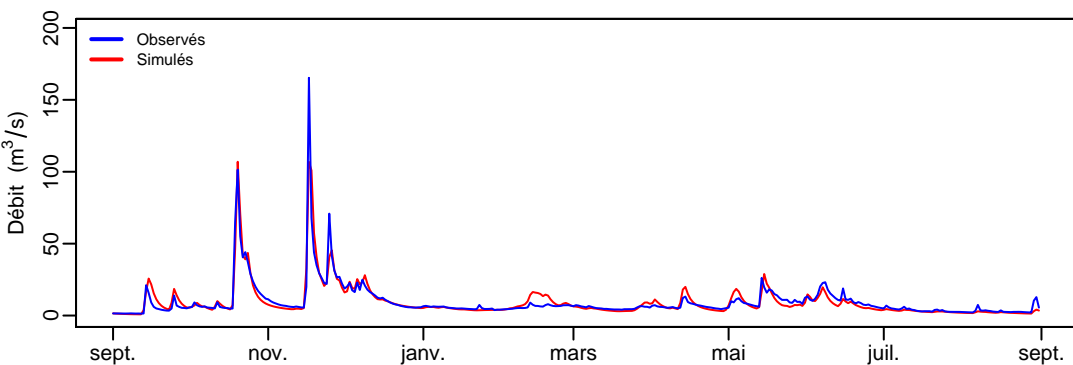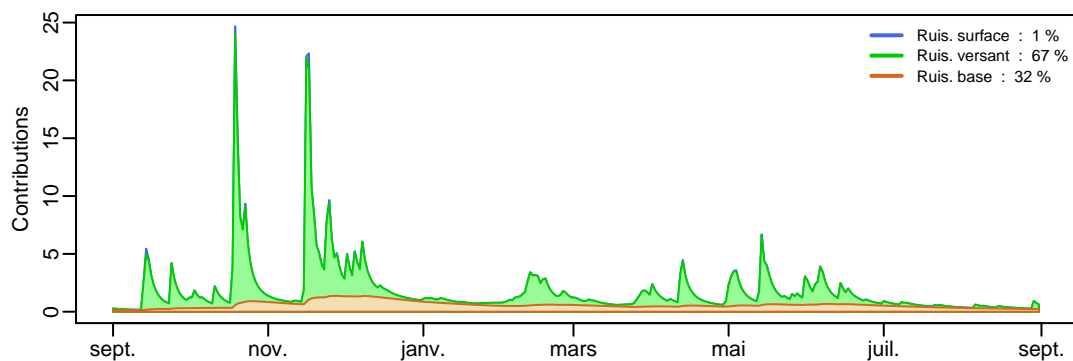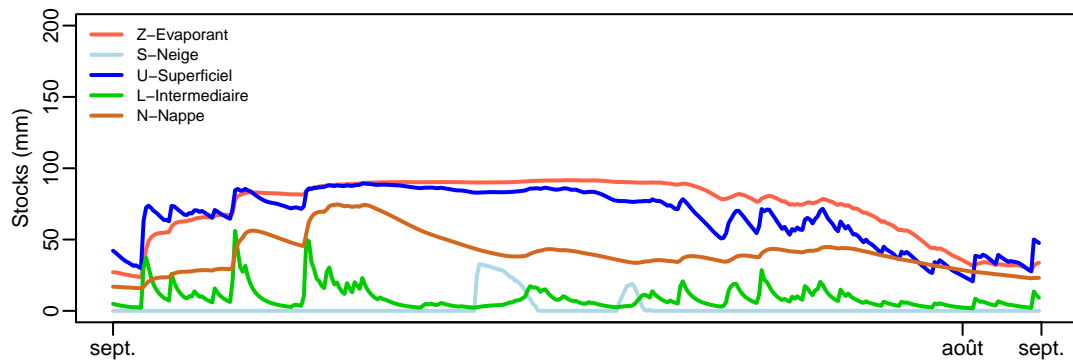

# k0100020 (442.57 km<sup>2</sup>) – année 2007–2008

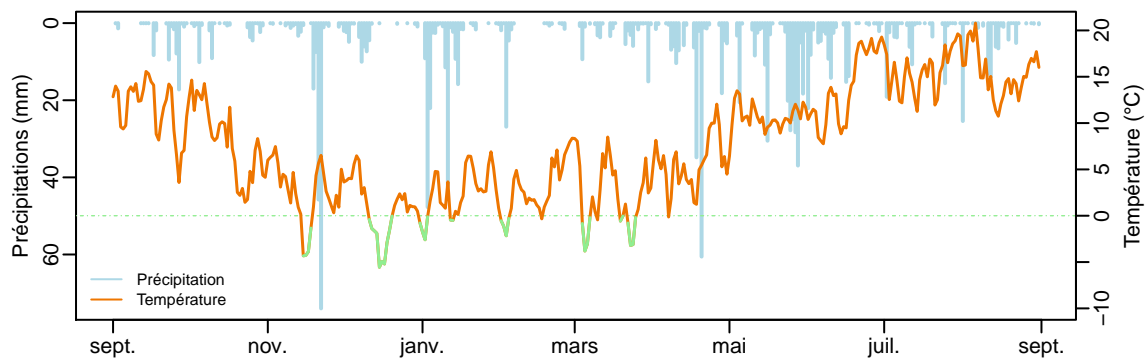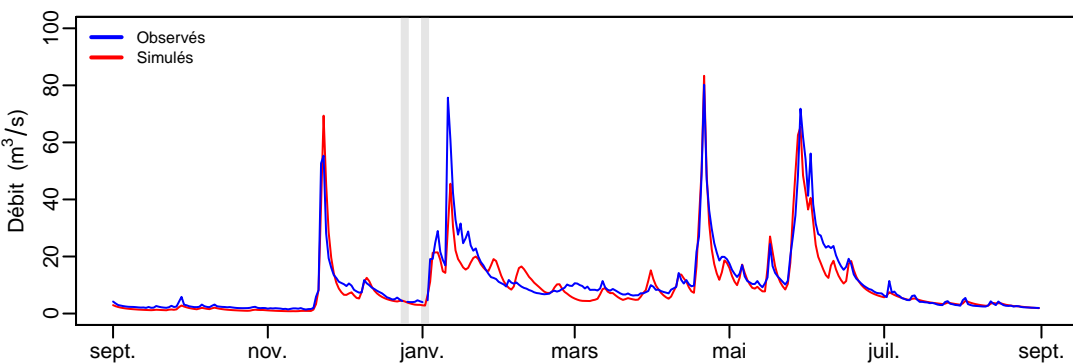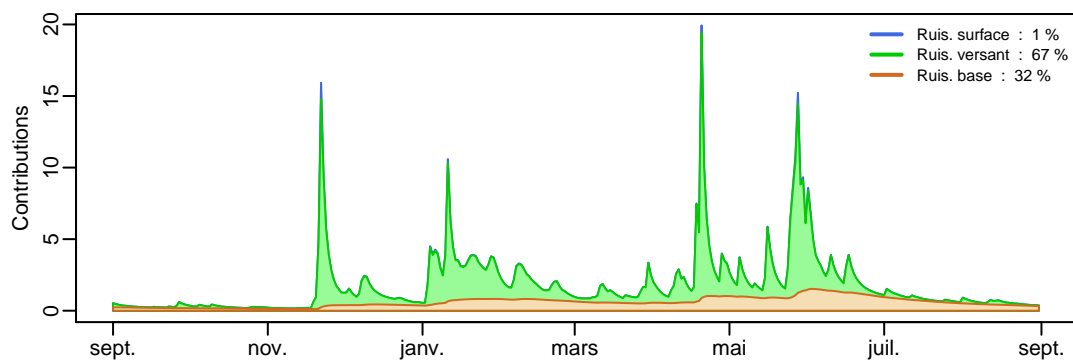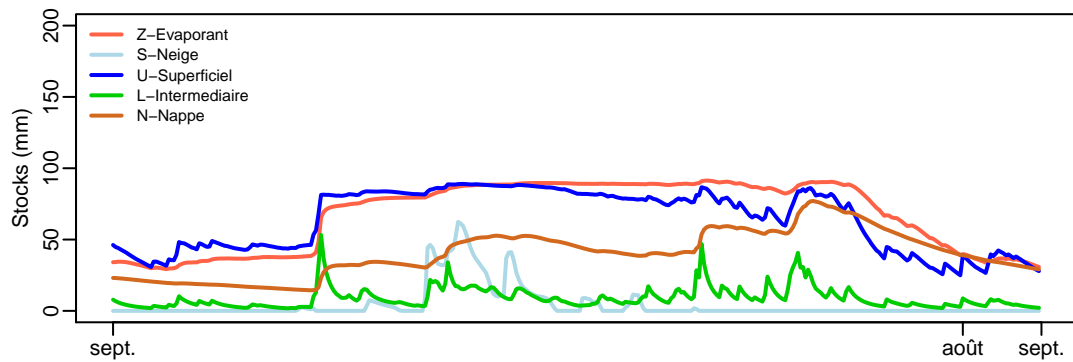

# k0120020 (696.37 km<sup>2</sup>) – année 1999–2000

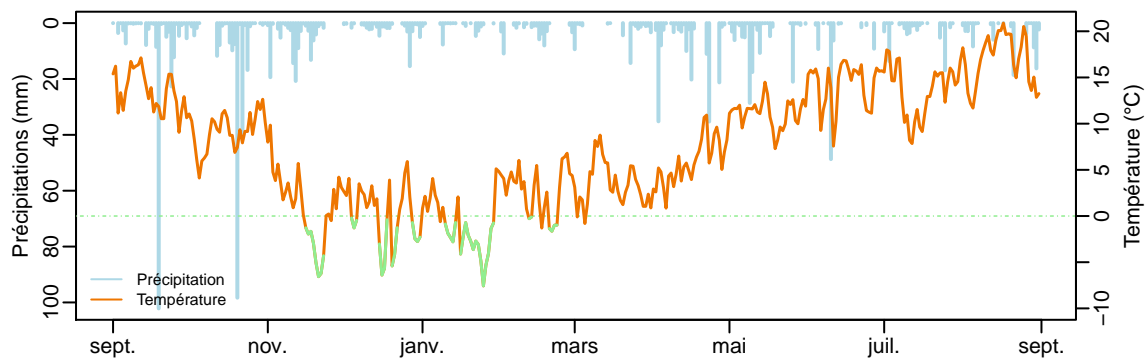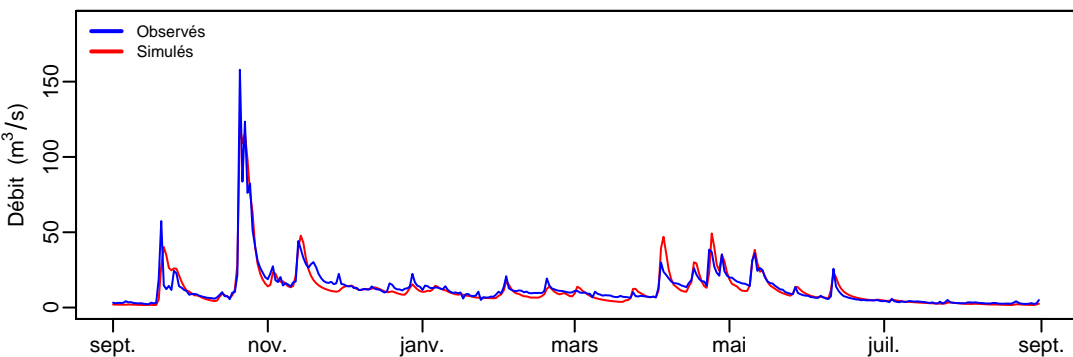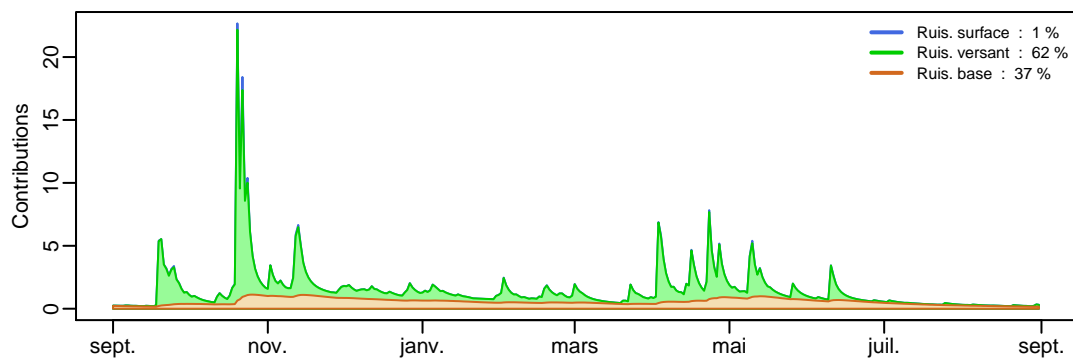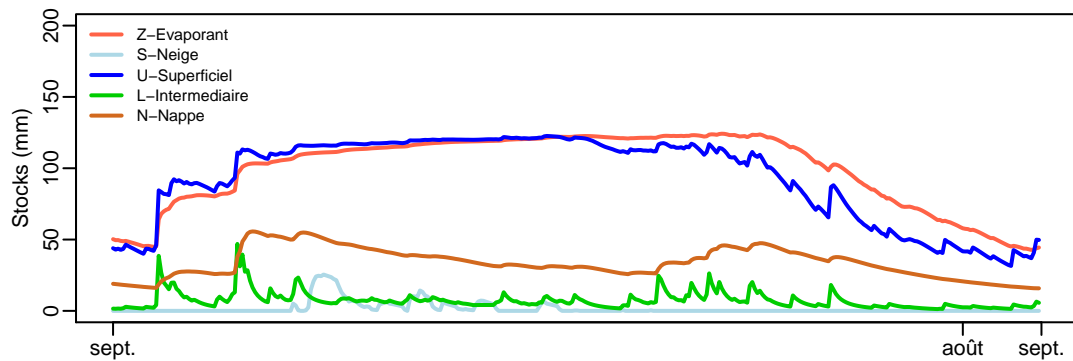

# k0120020 (696.37 km<sup>2</sup>) – année 2000–2001

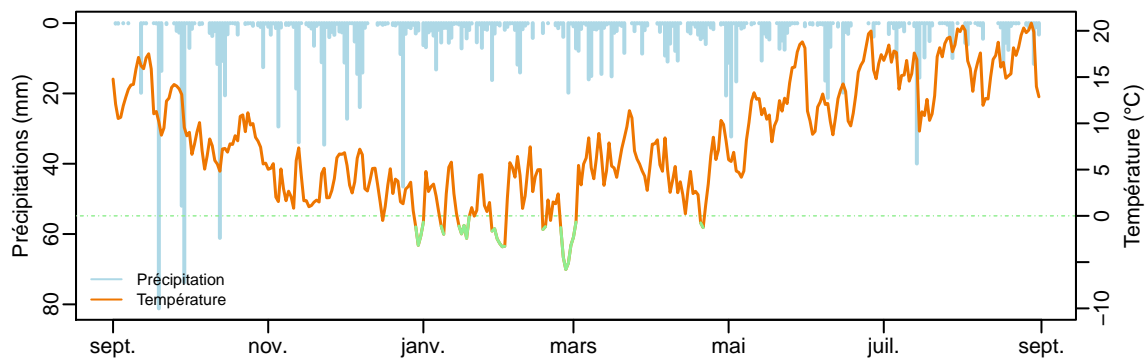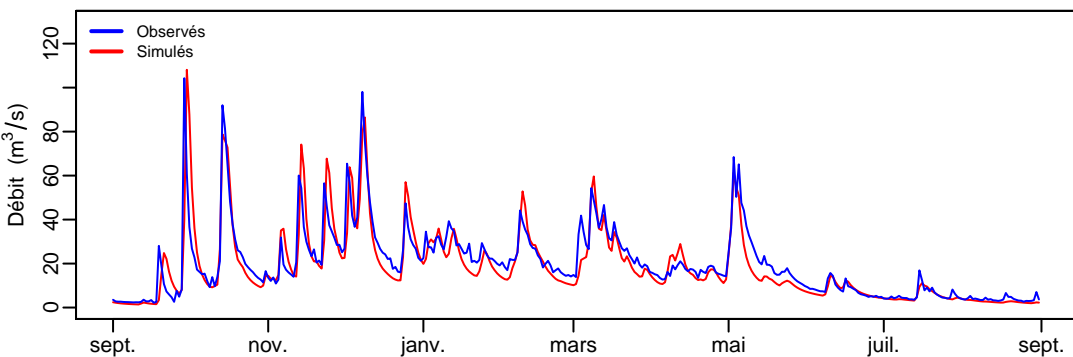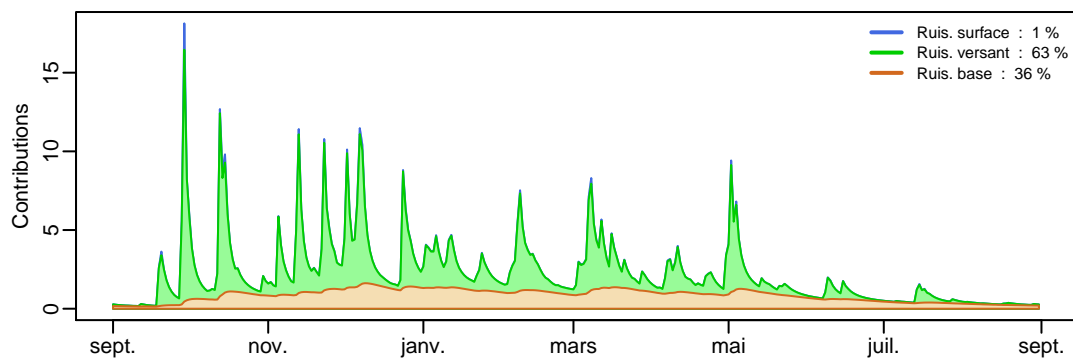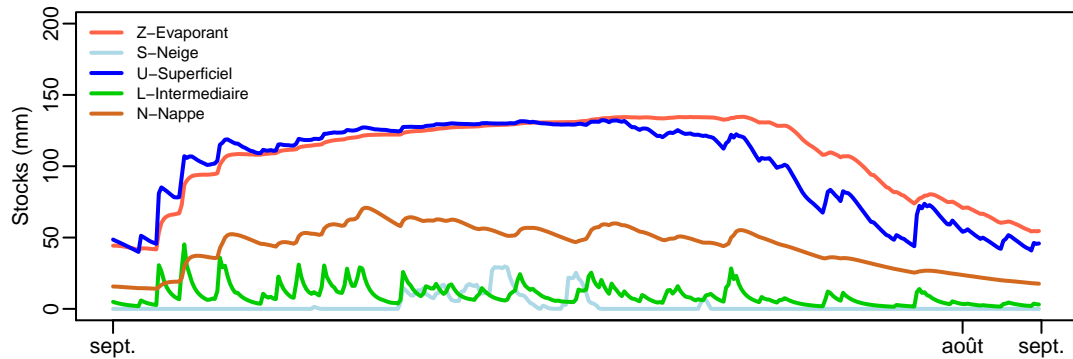

# k0120020 (696.37 km<sup>2</sup>) – année 2001–2002

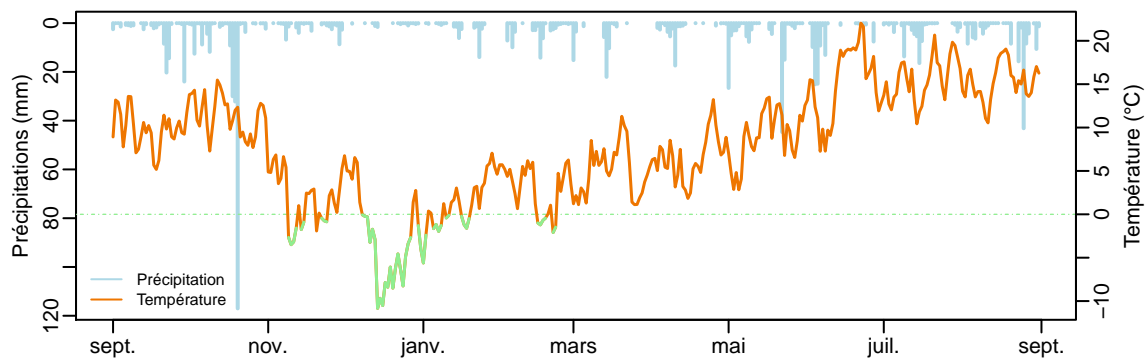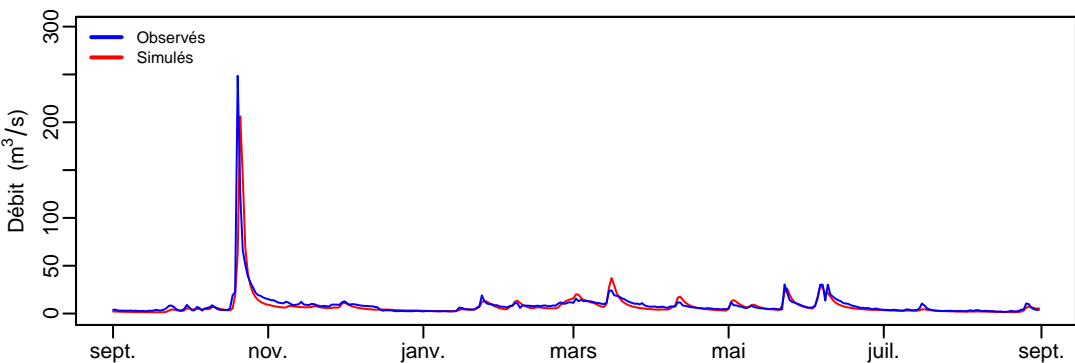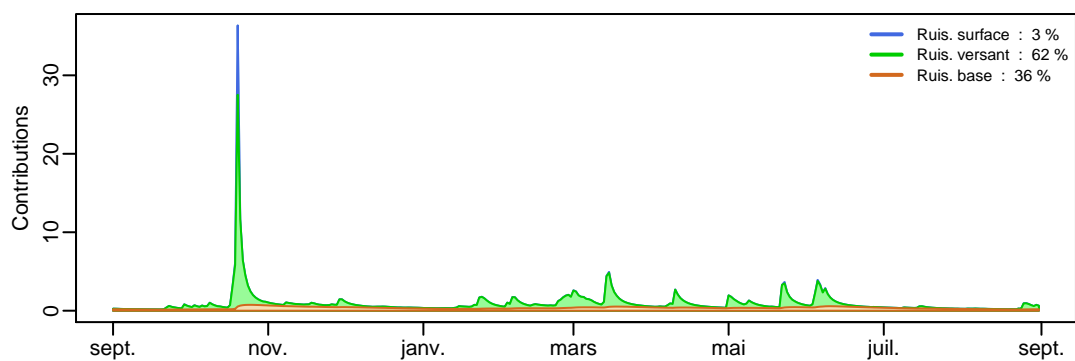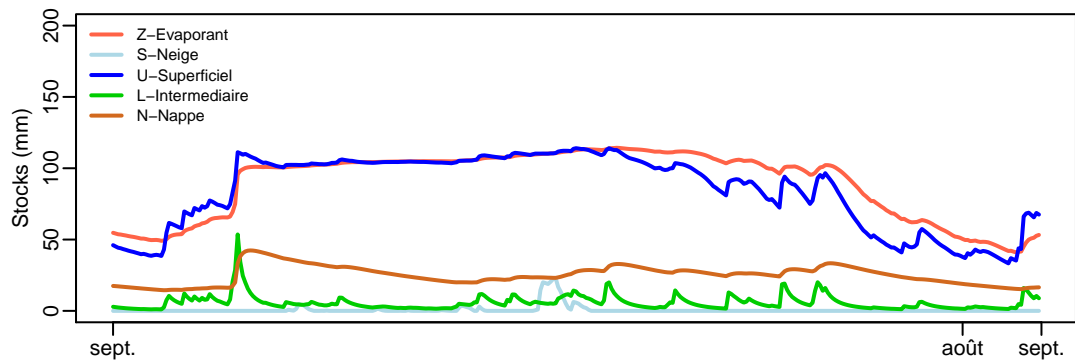

# k0120020 (696.37 km<sup>2</sup>) – année 2002–2003

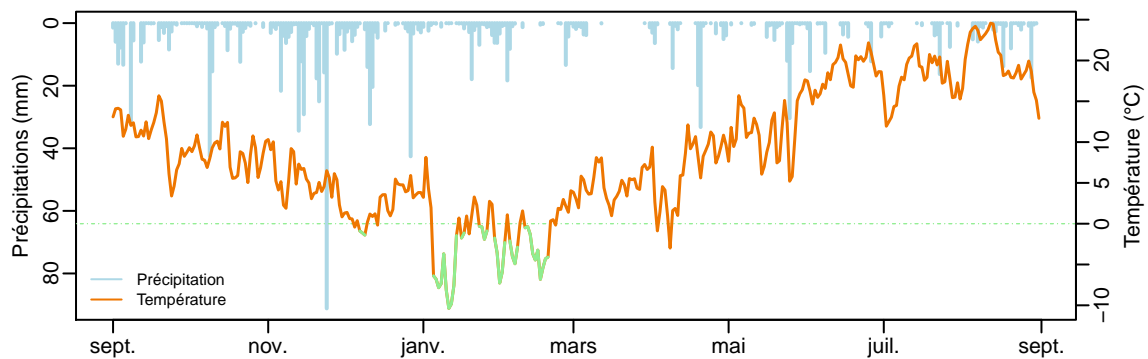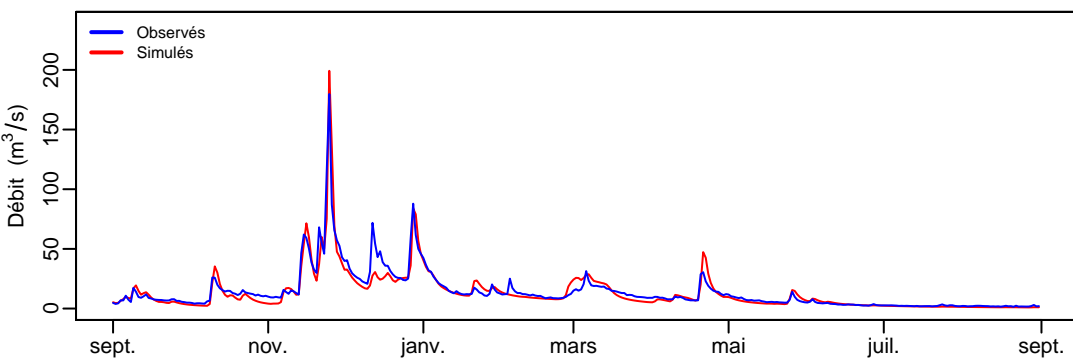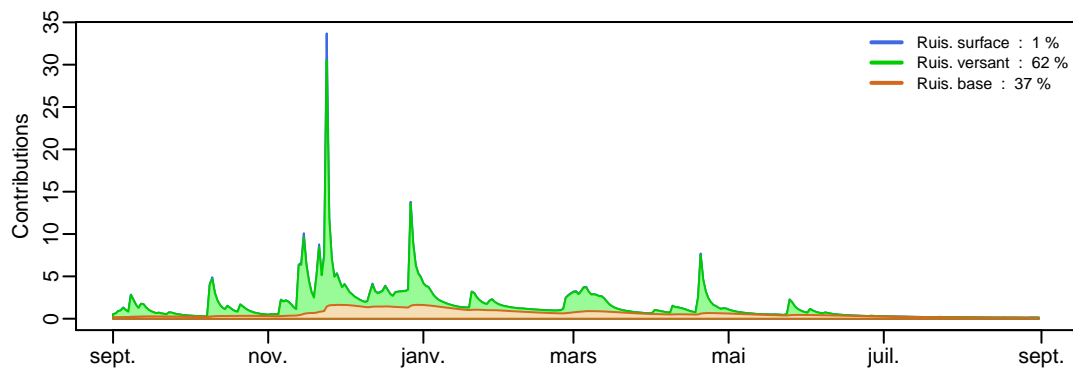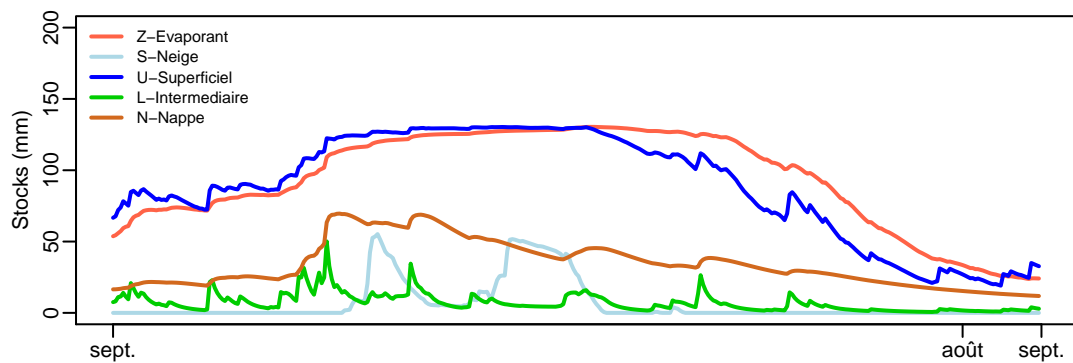



# k0120020 (696.37 km<sup>2</sup>) – année 2003–2004

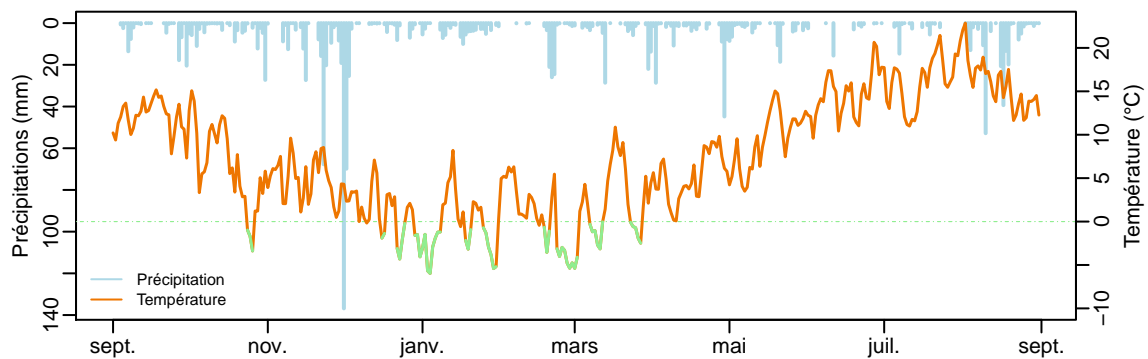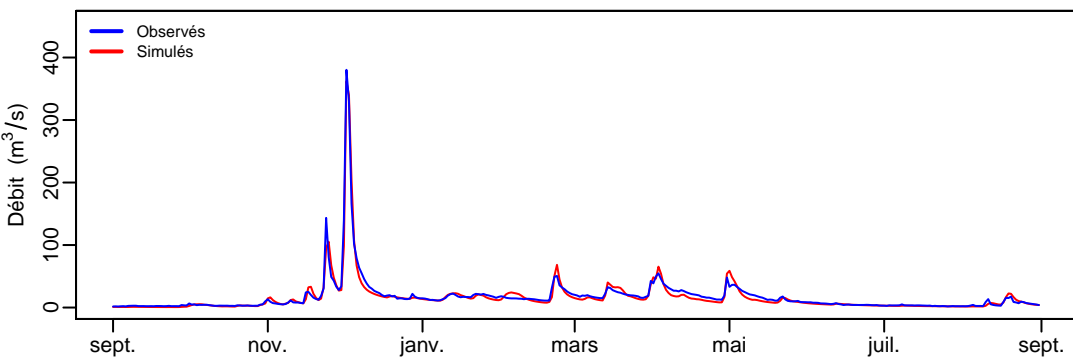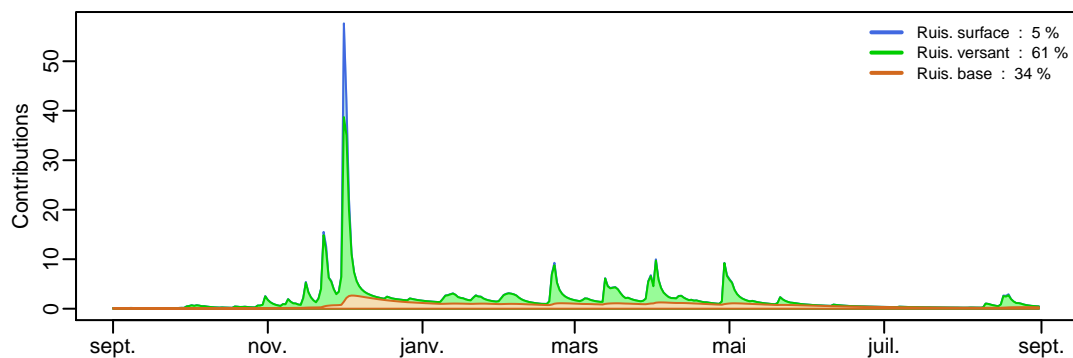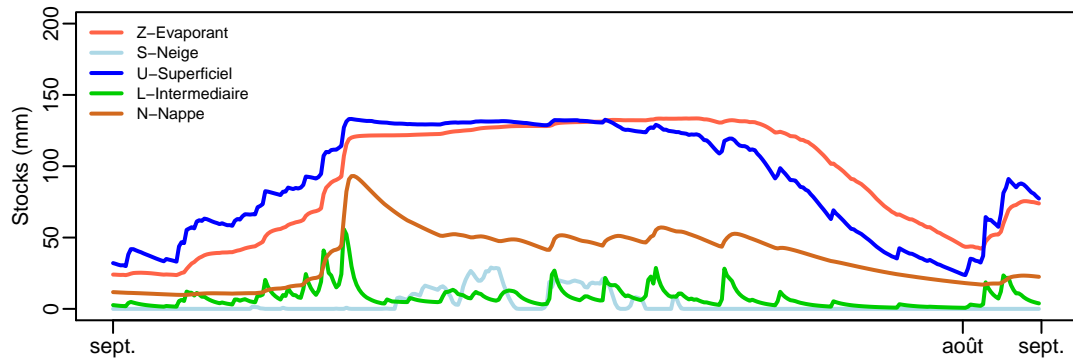

# k0120020 (696.37 km<sup>2</sup>) – année 2004–2005

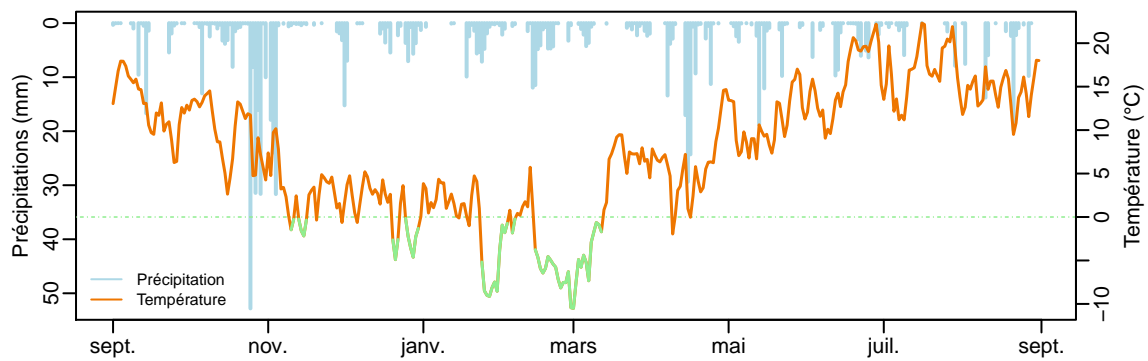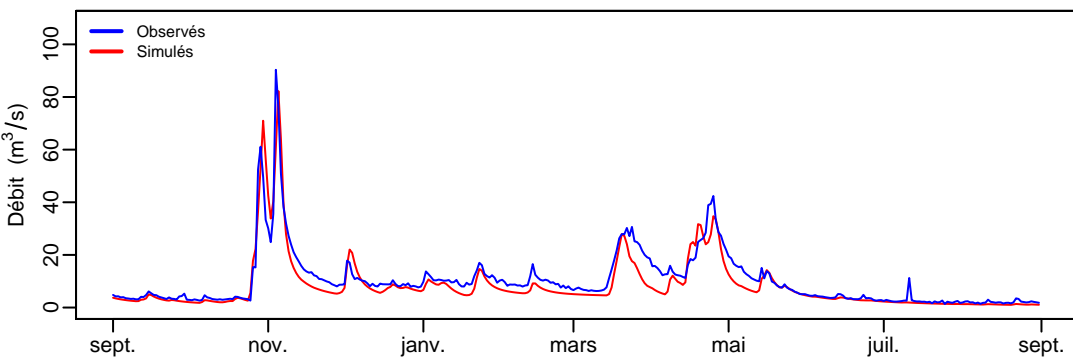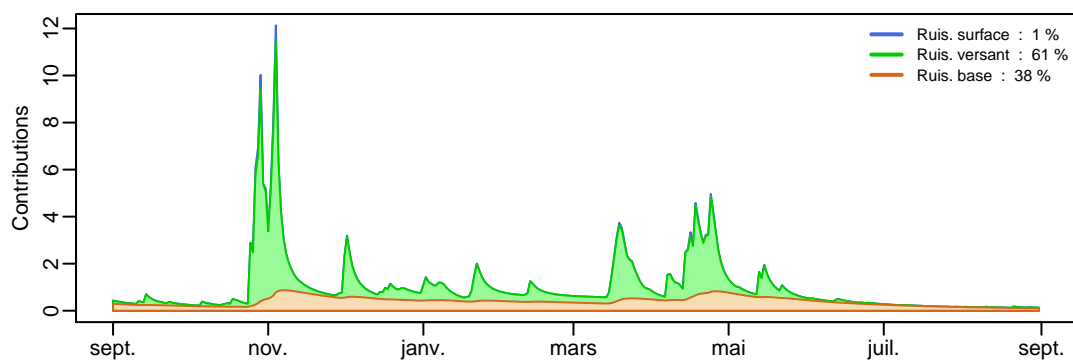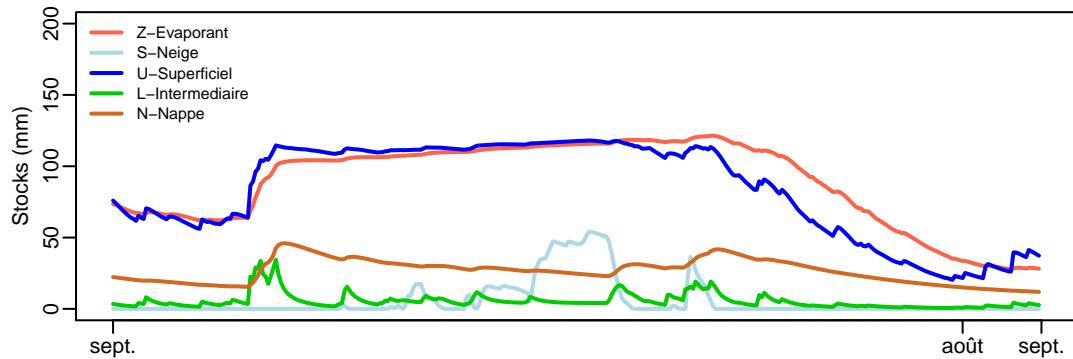

# k0120020 (696.37 km<sup>2</sup>) – année 2005–2006

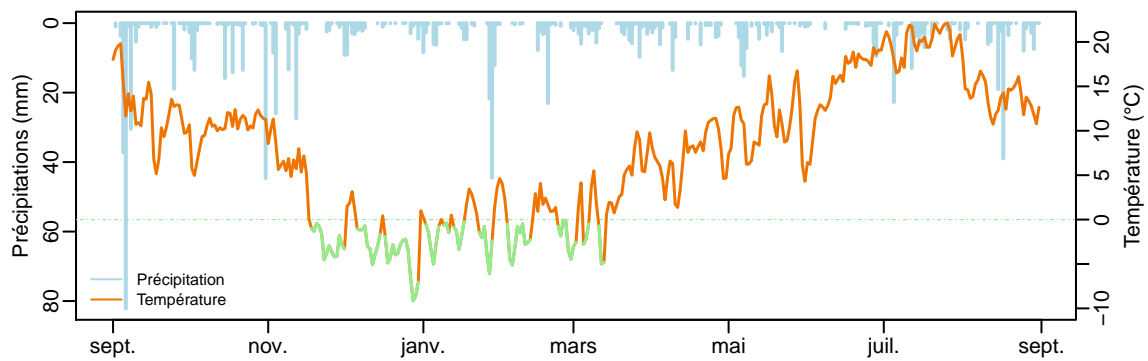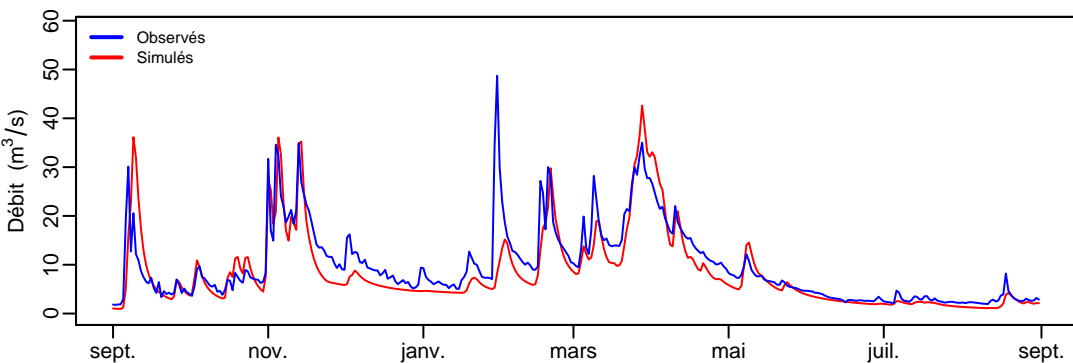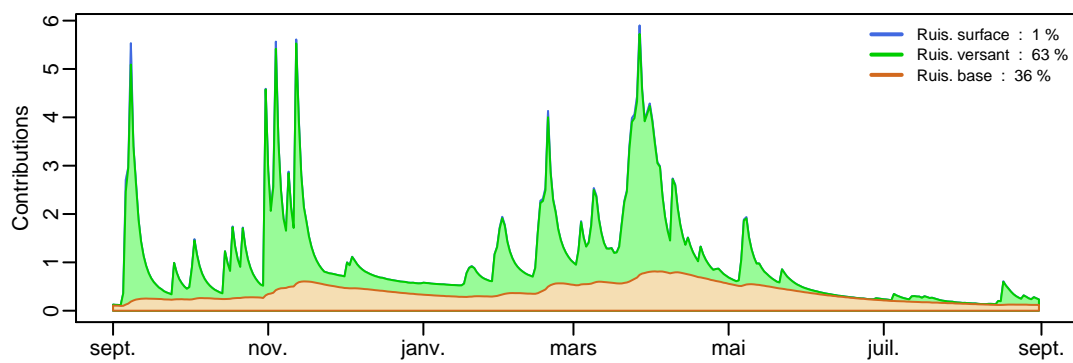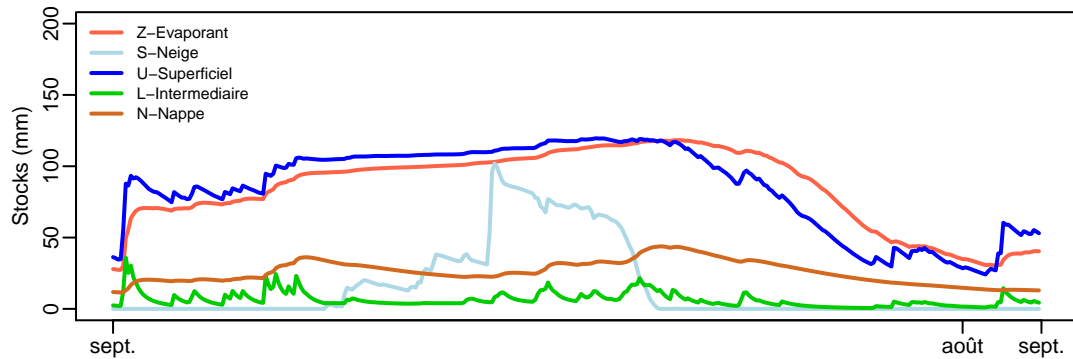

# k0120020 (696.37 km<sup>2</sup>) – année 2006–2007

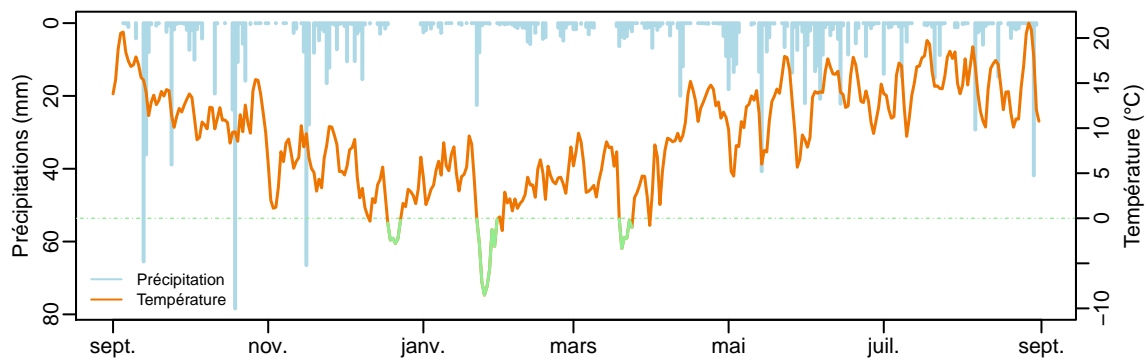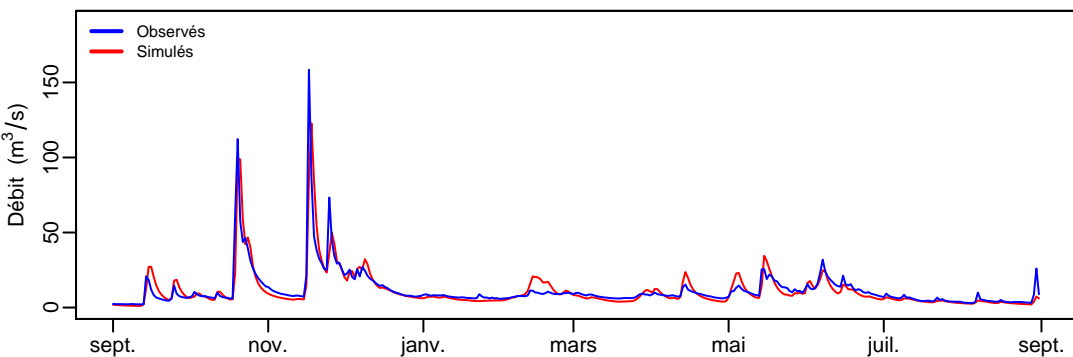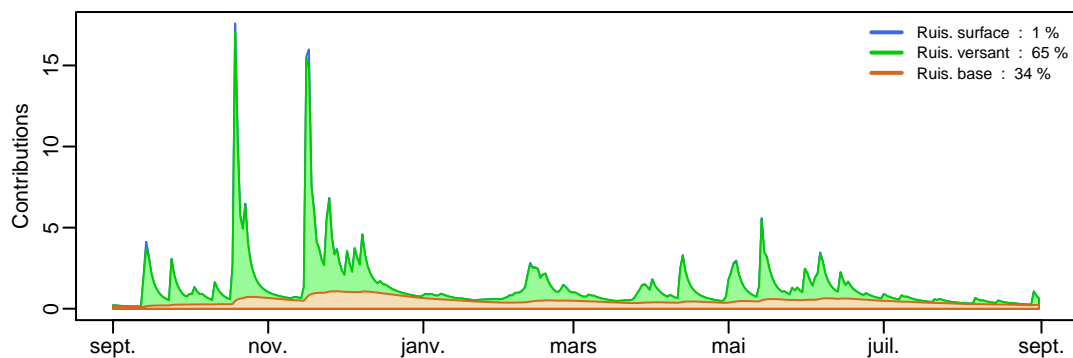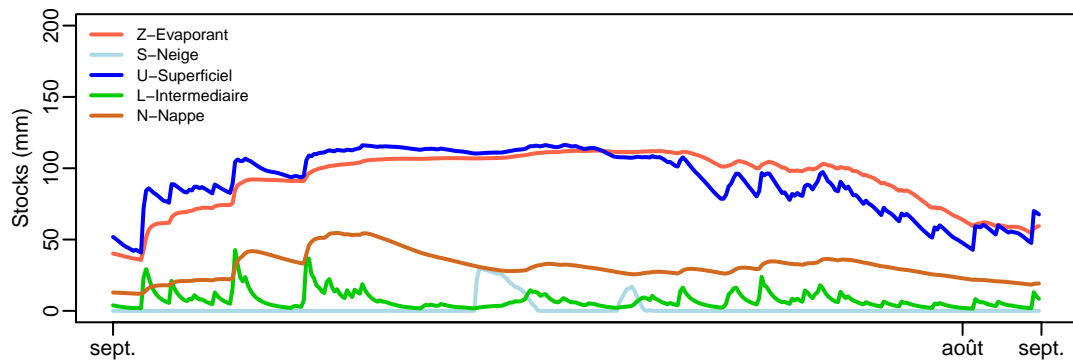

# k0120020 (696.37 km<sup>2</sup>) – année 2007–2008

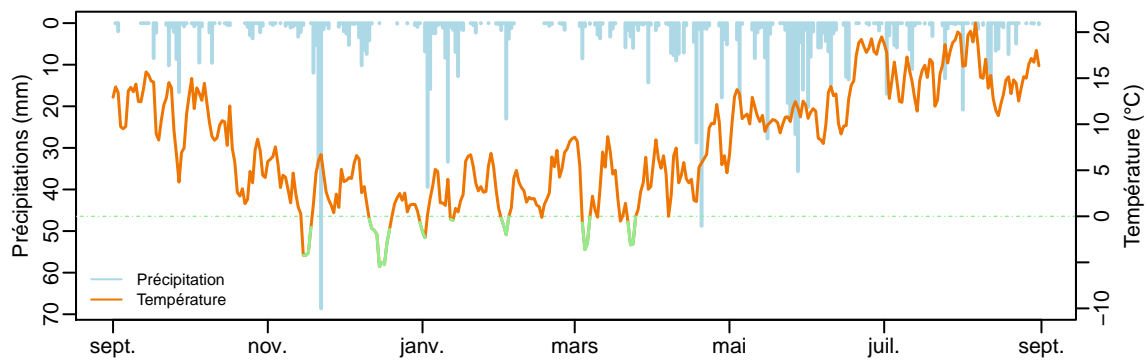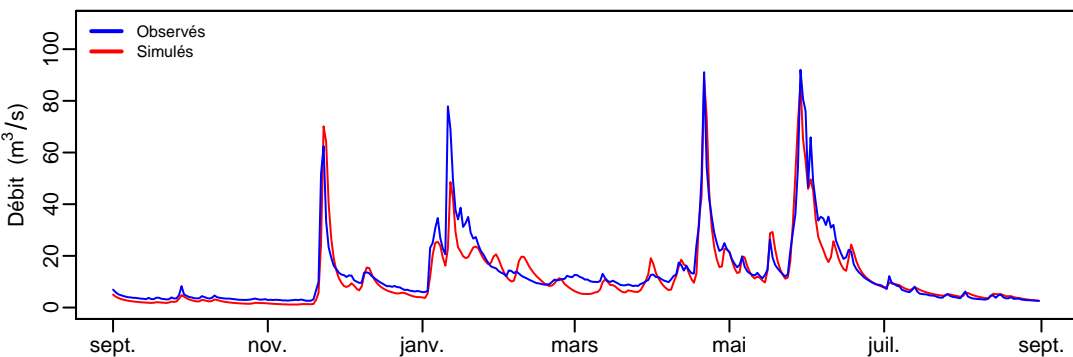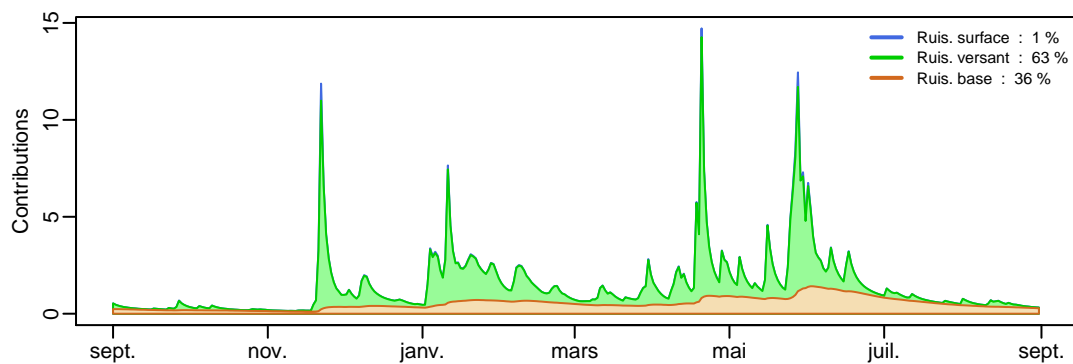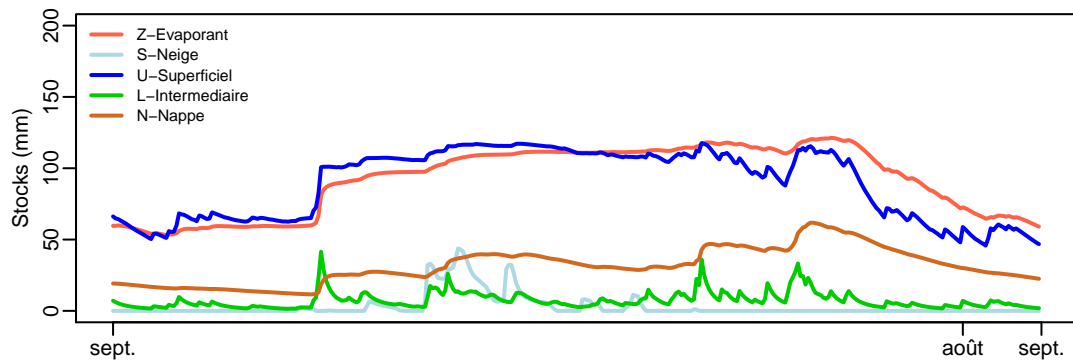

# k0120020 (696.37 km<sup>2</sup>) – année 2008–2009

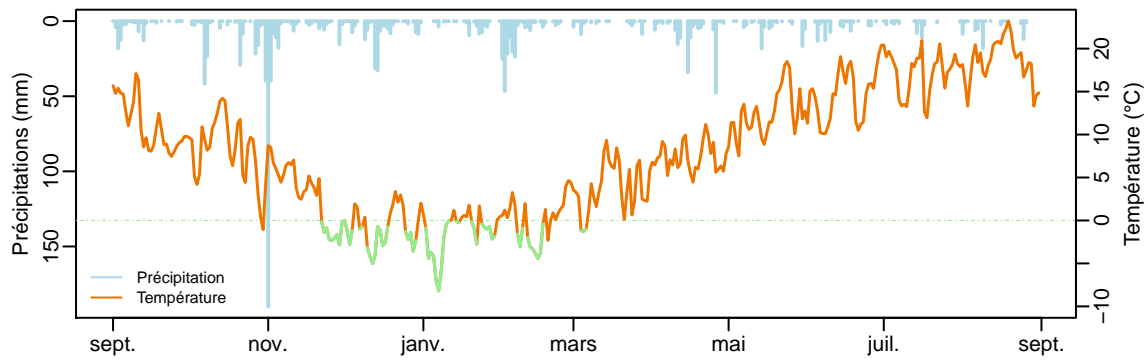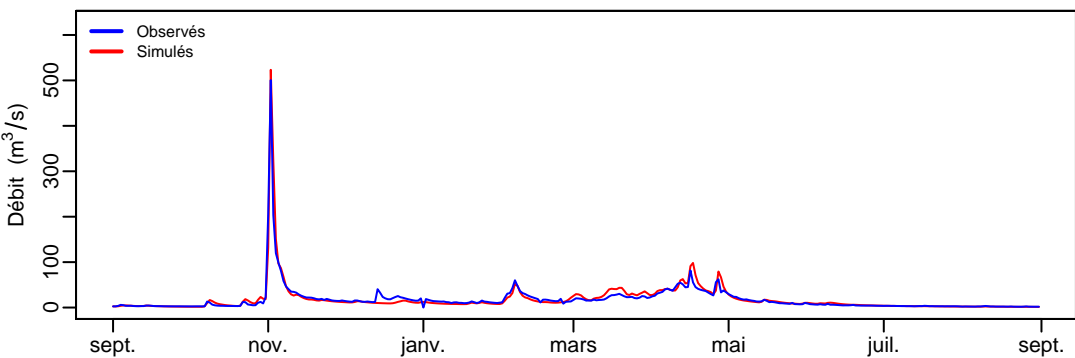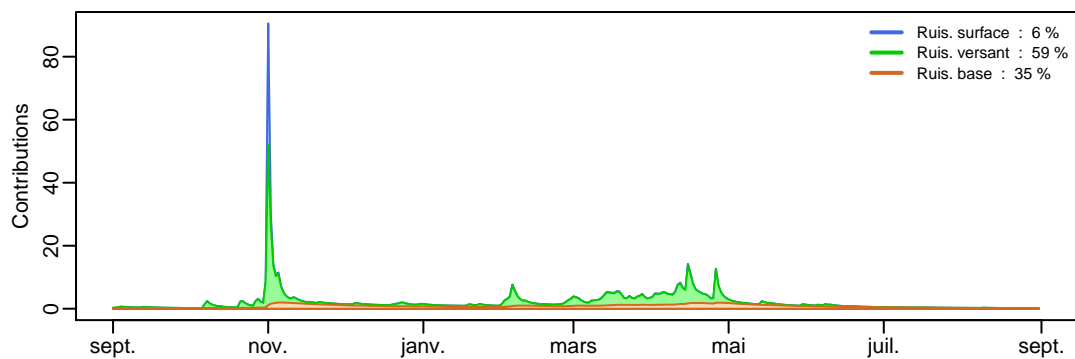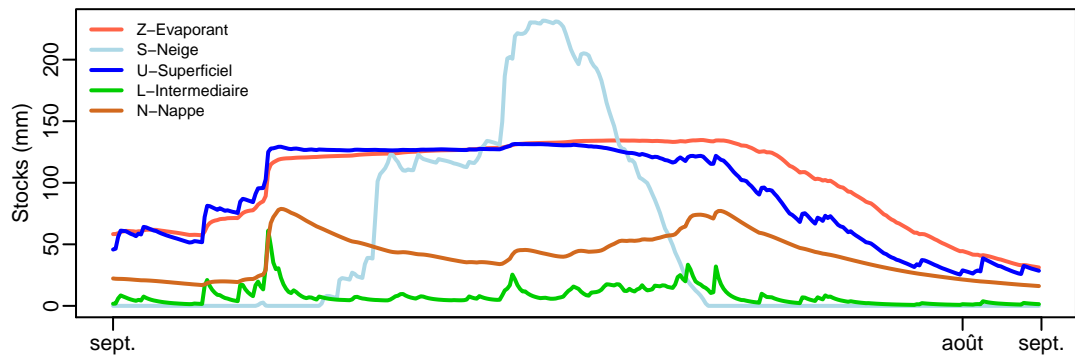

# k0120020 (696.37 km<sup>2</sup>) – année 2009–2010

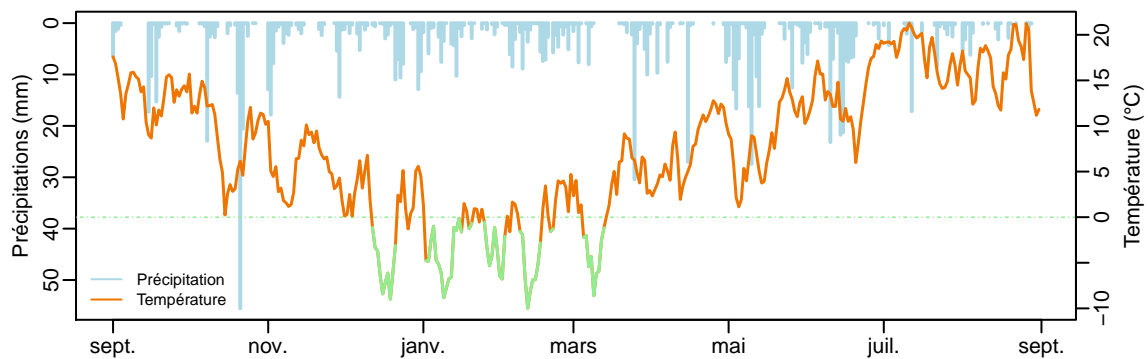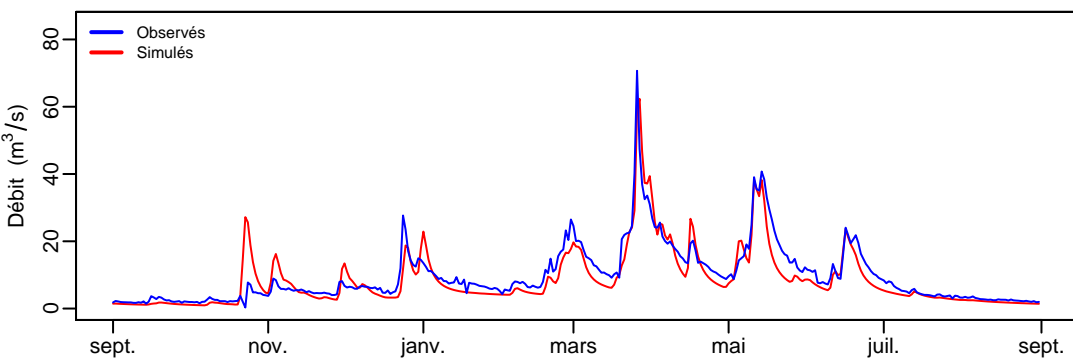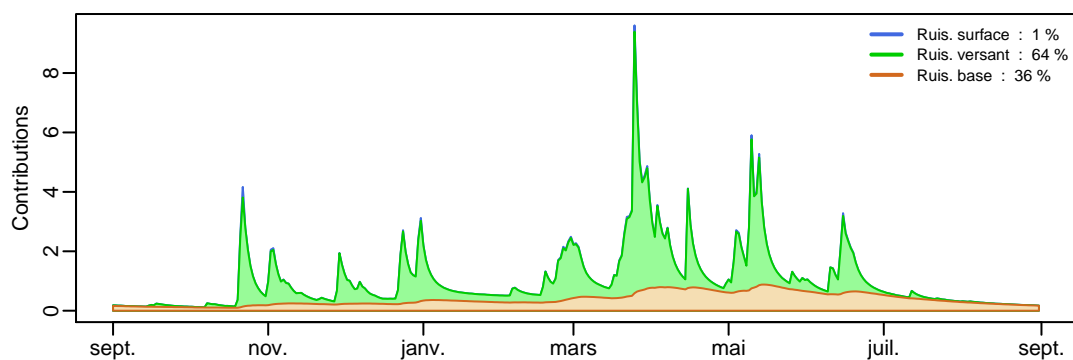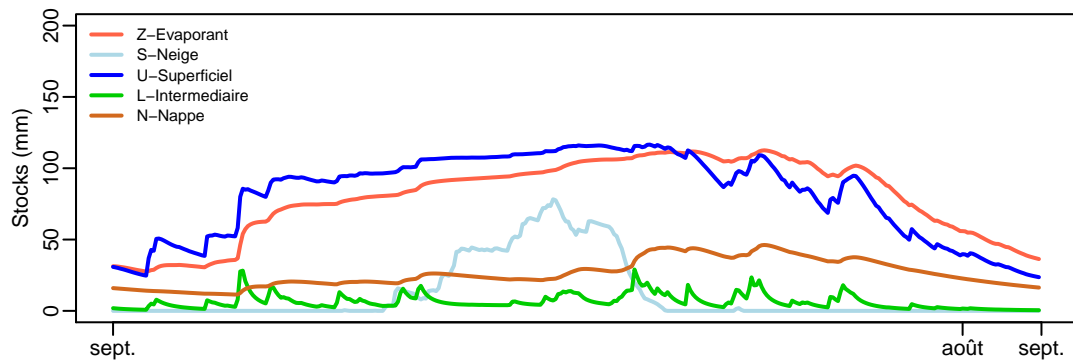

# k0120020 (696.37 km<sup>2</sup>) – année 2010–2011

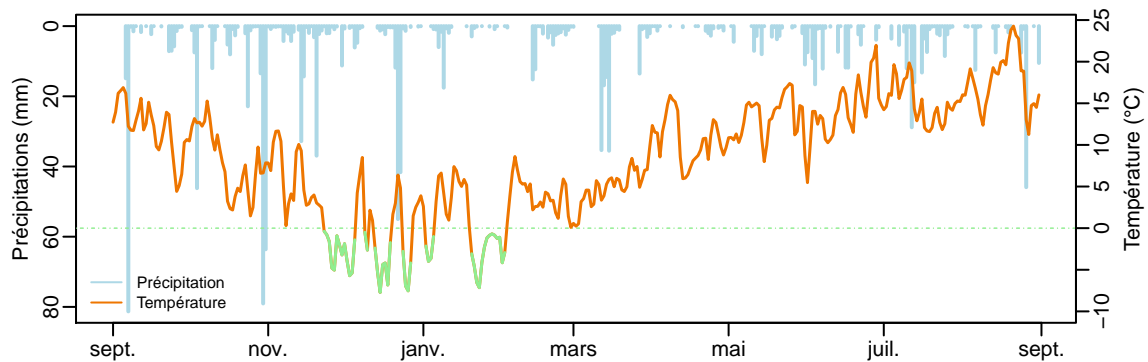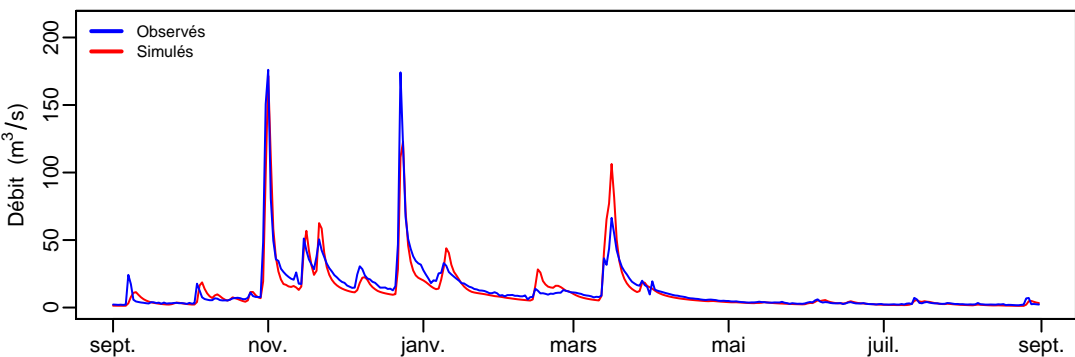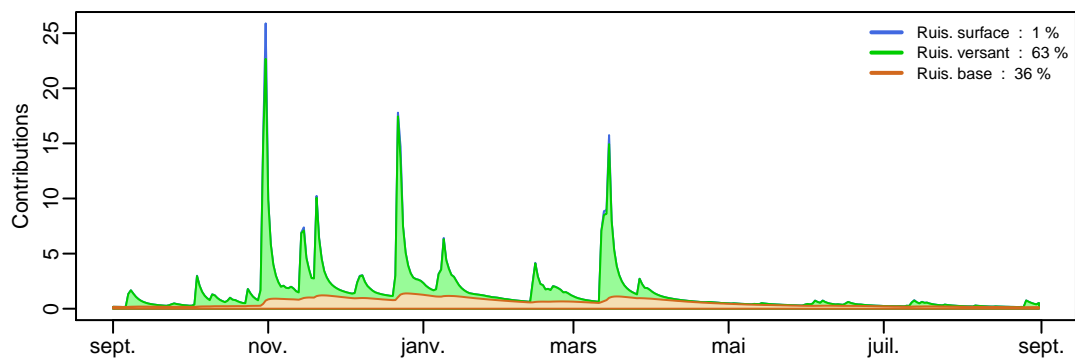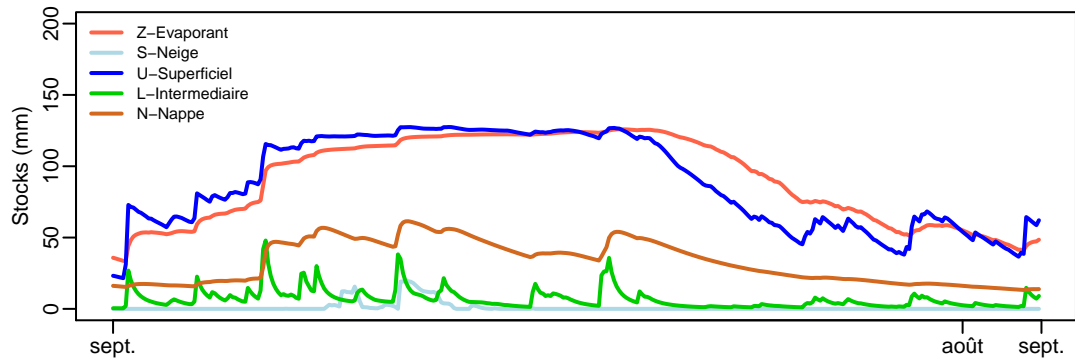



# k0120020 (696.37 km<sup>2</sup>) – année 2011–2012

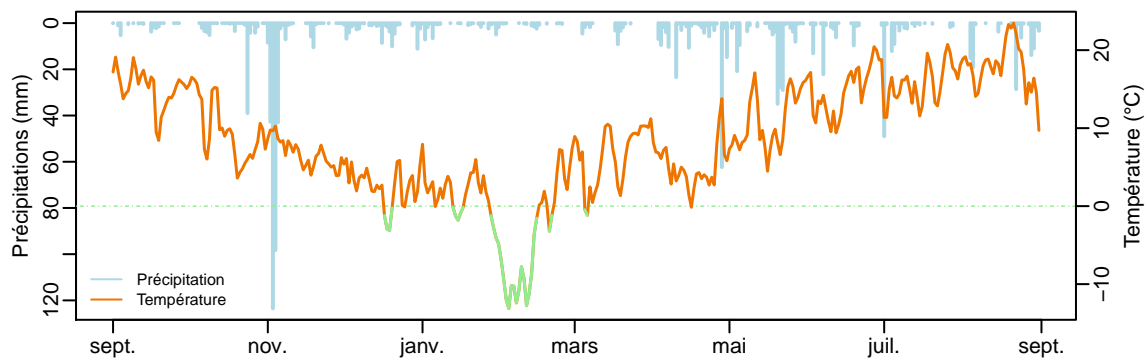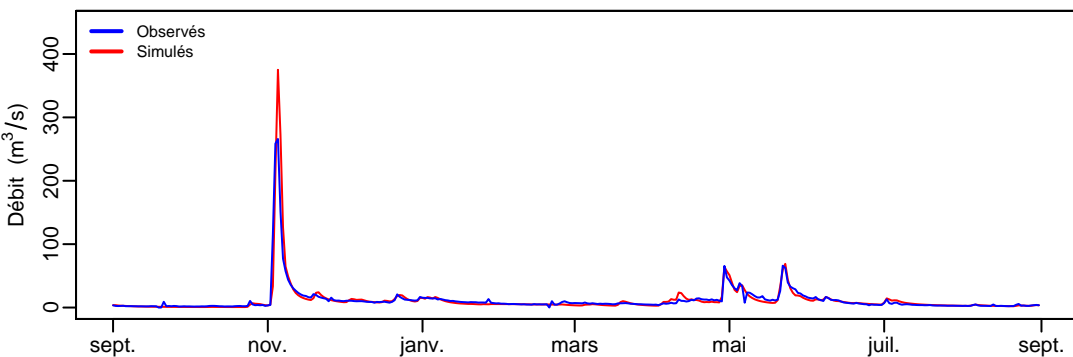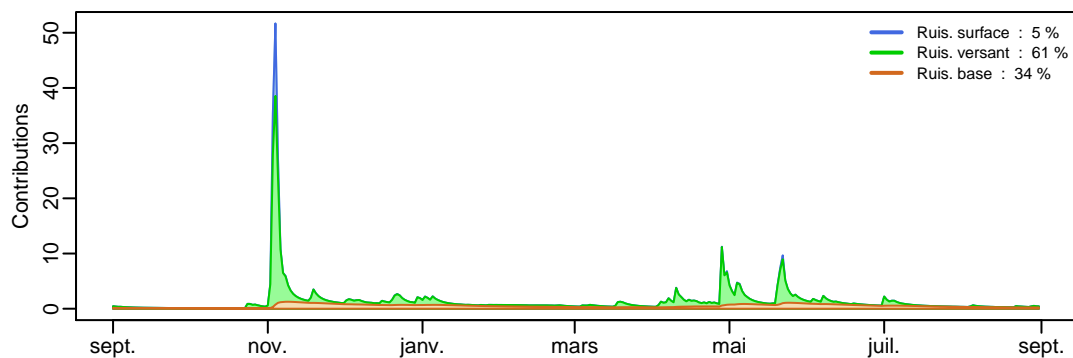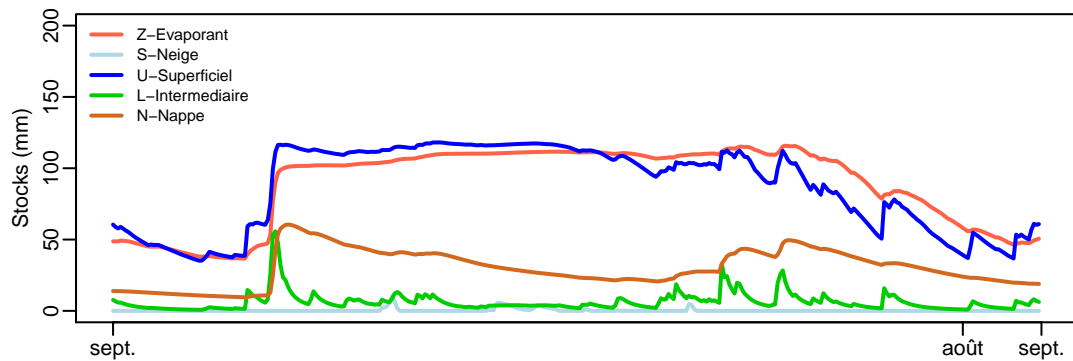

# k0214010 (106.95 km<sup>2</sup>) – année 1998–1999

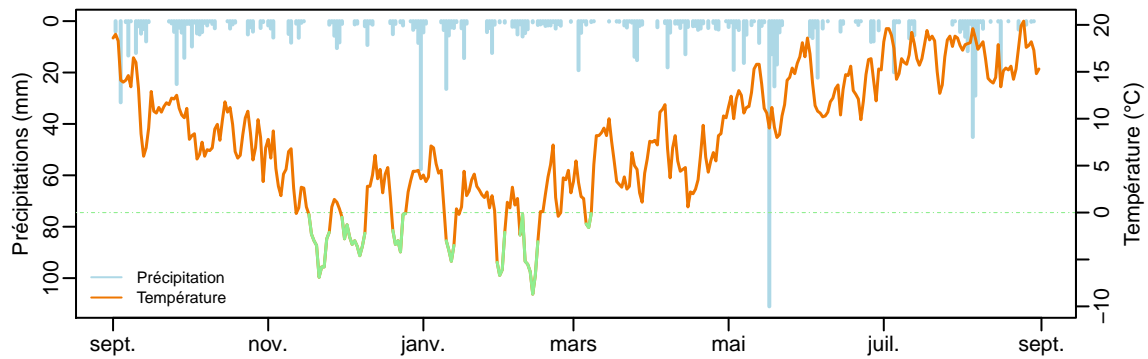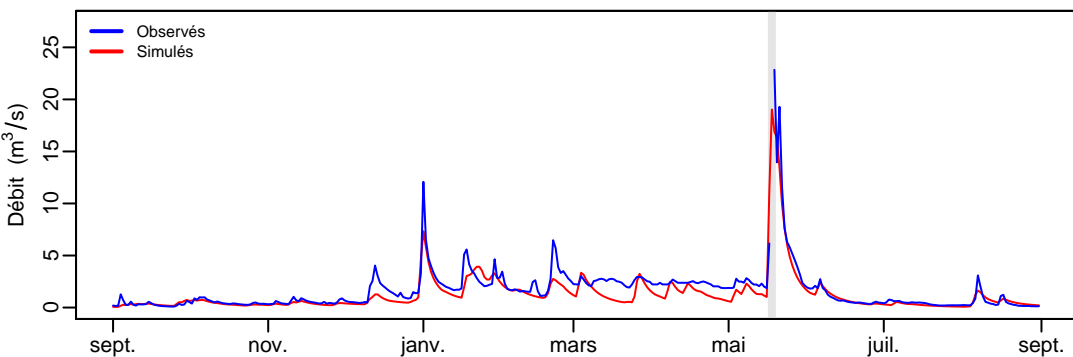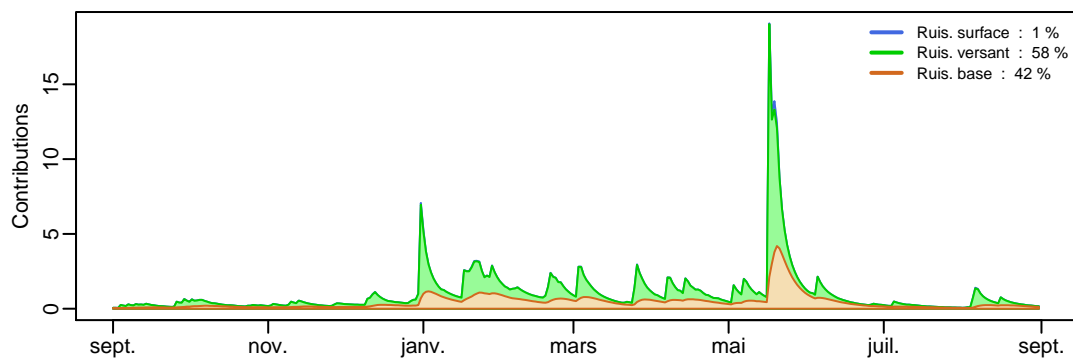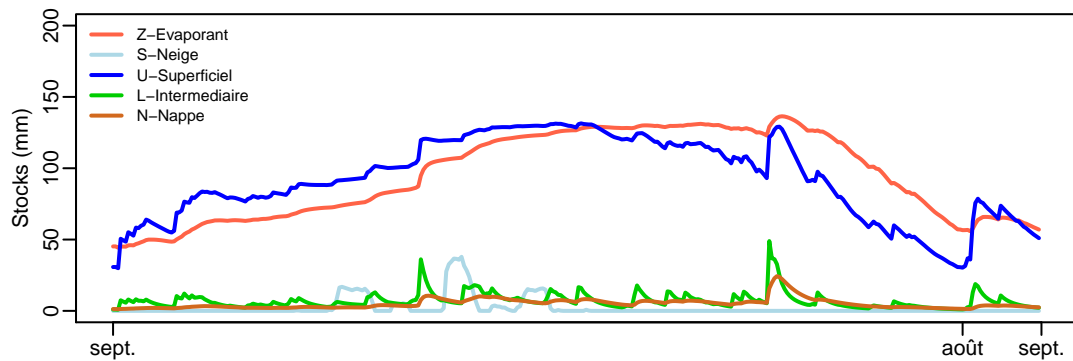

# k0214010 (106.95 km<sup>2</sup>) – année 1999–2000

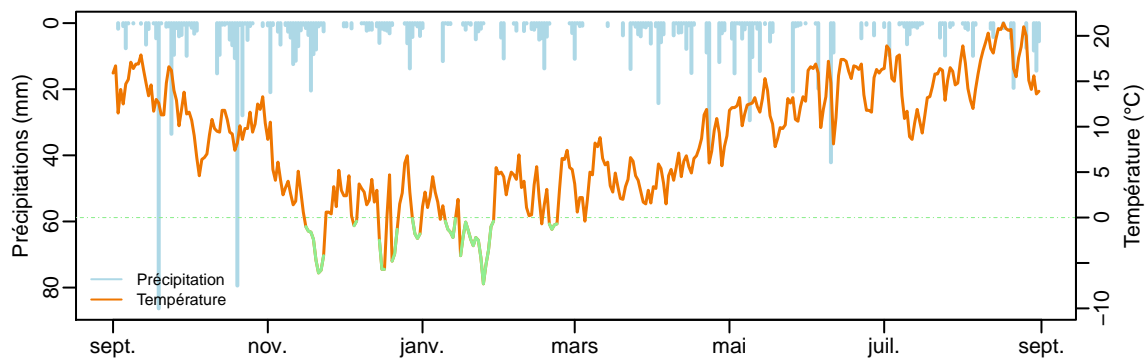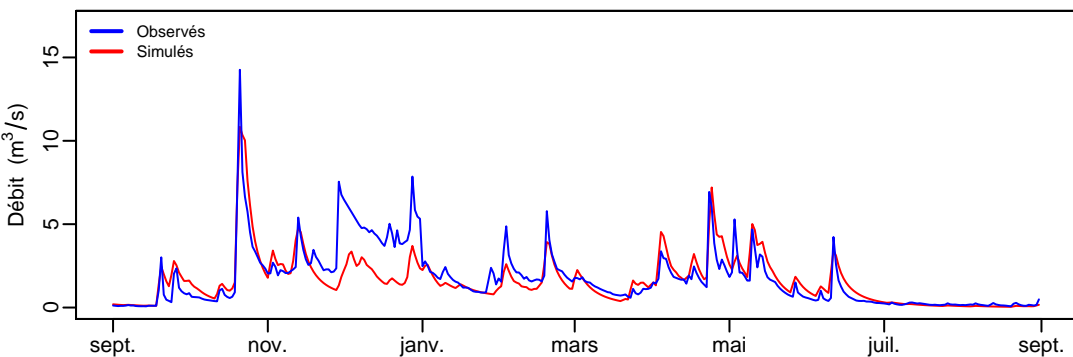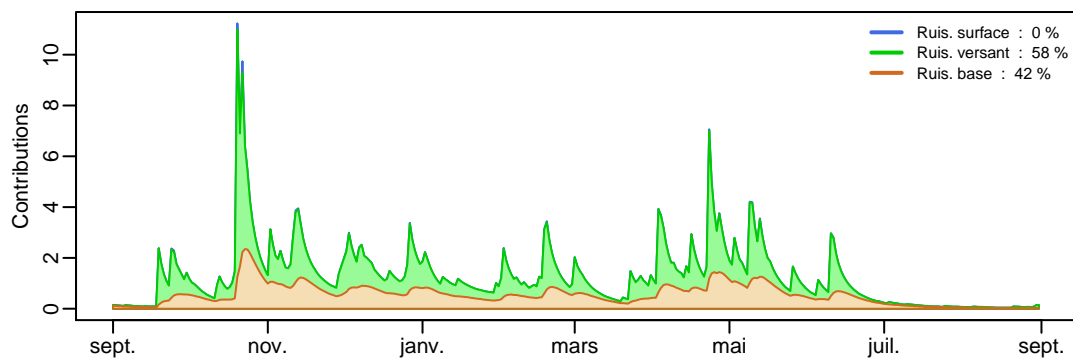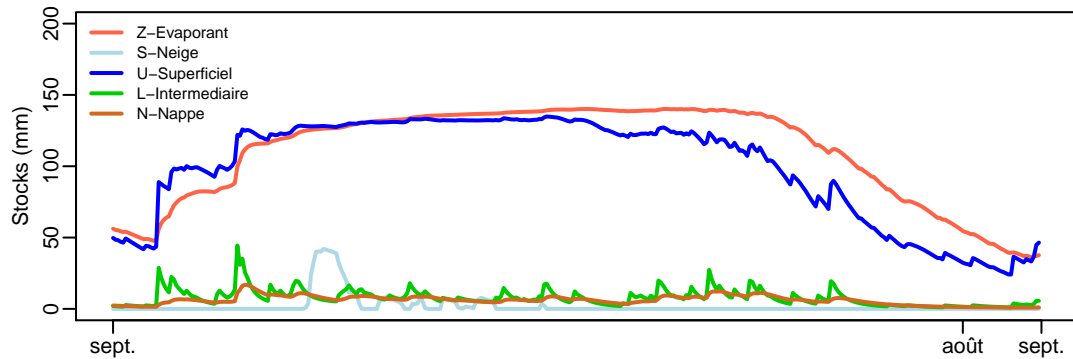

# k0214010 (106.95 km<sup>2</sup>) – année 2000–2001

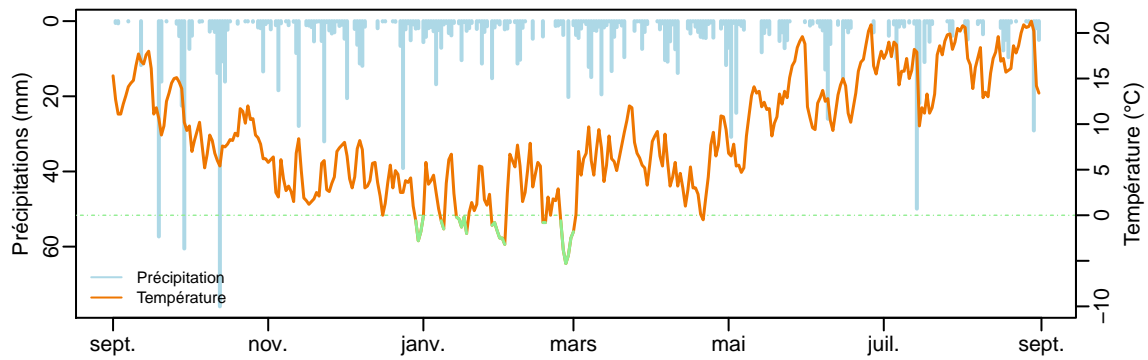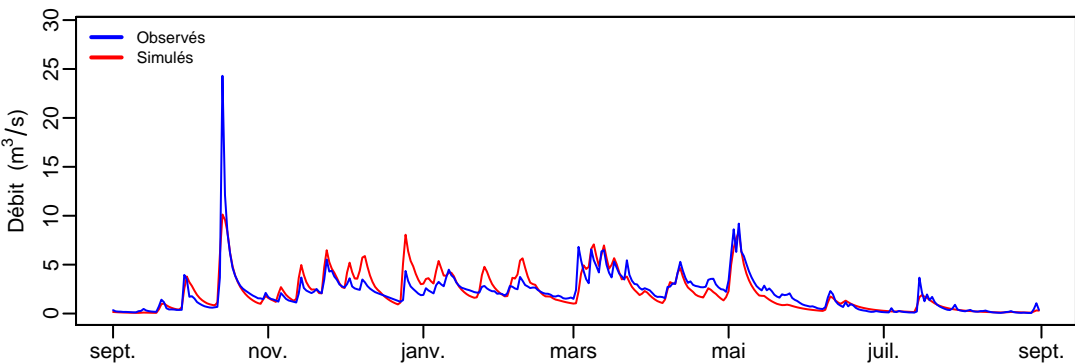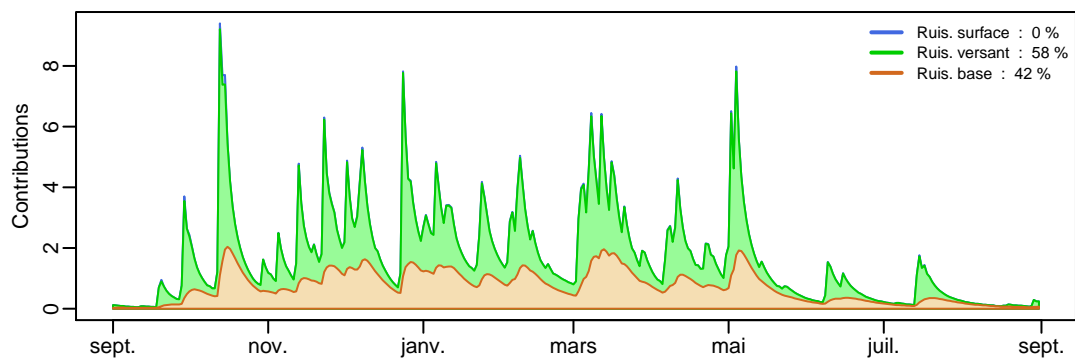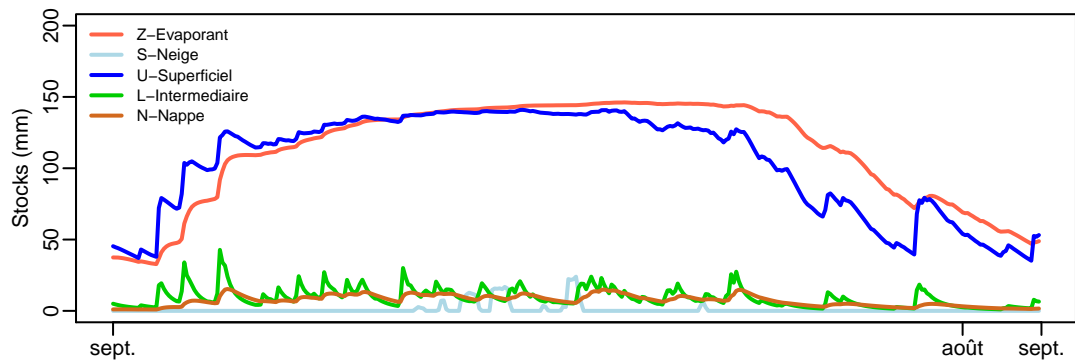

# k0214010 (106.95 km<sup>2</sup>) – année 2001–2002

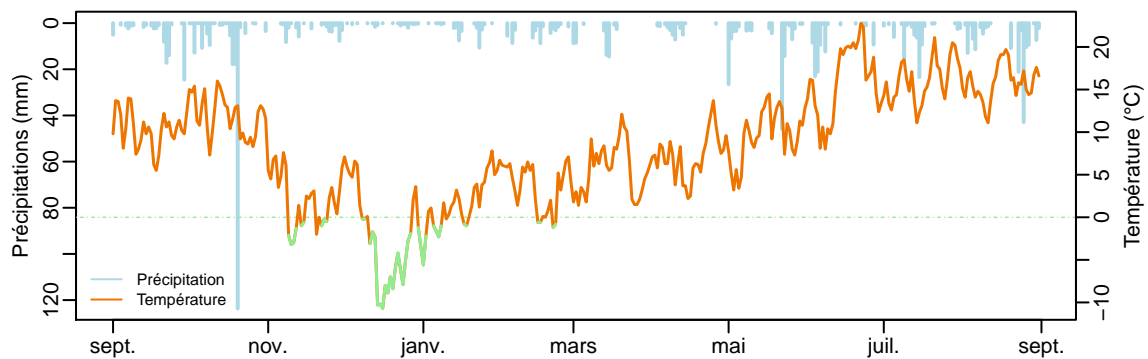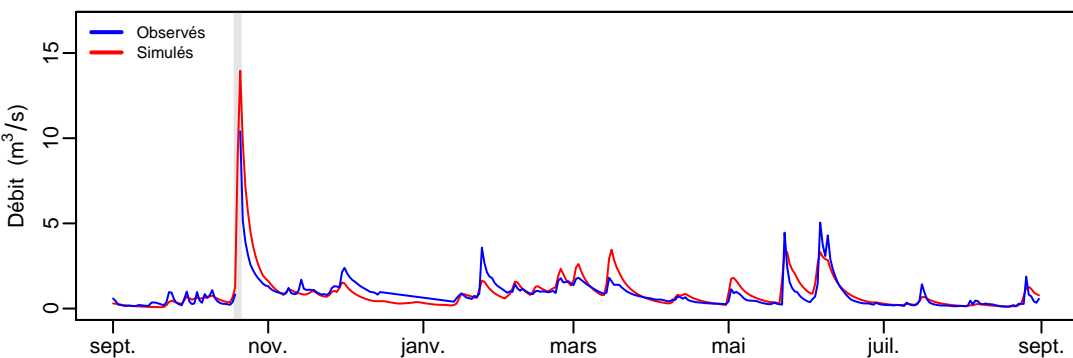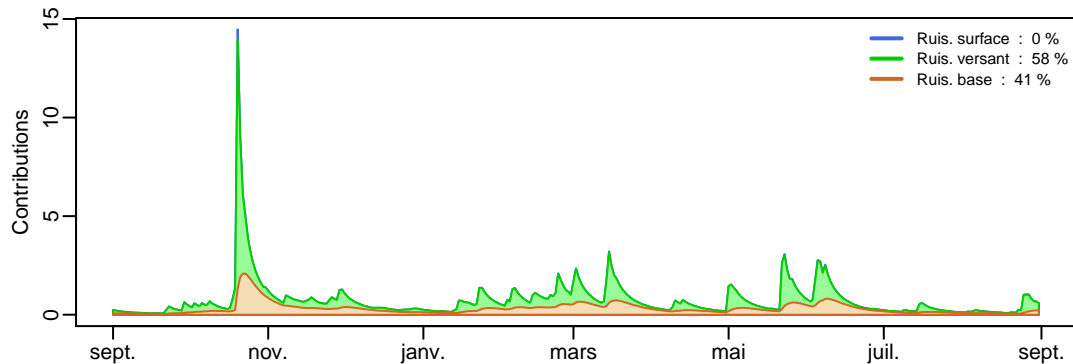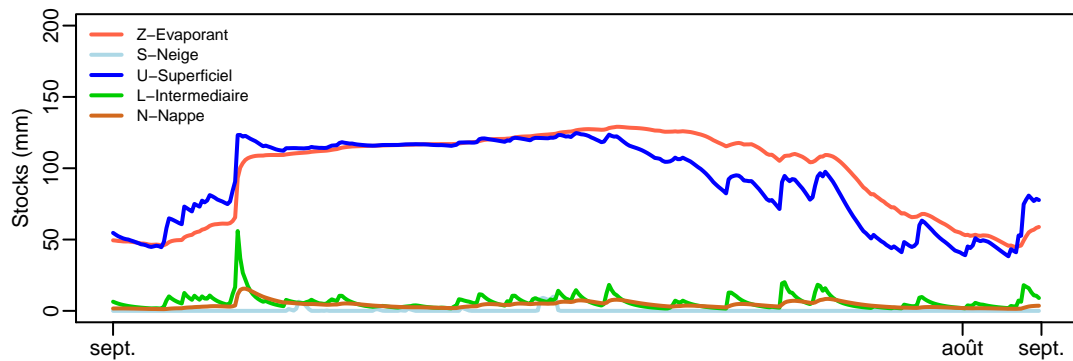

# k0214010 (106.95 km<sup>2</sup>) – année 2002–2003

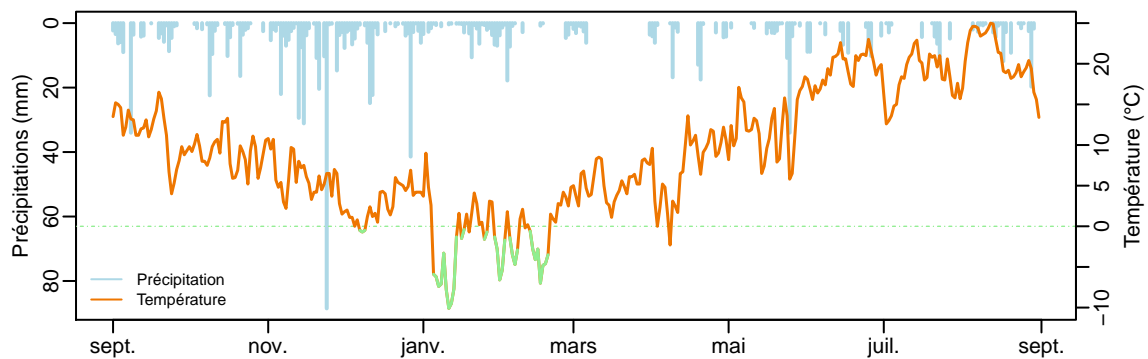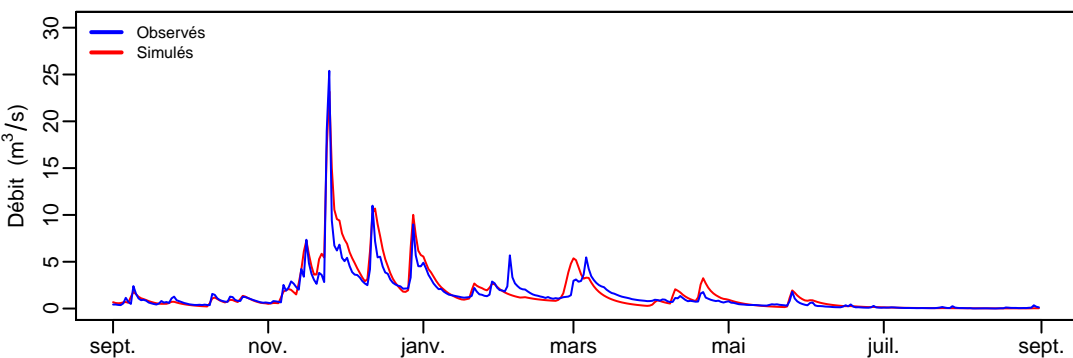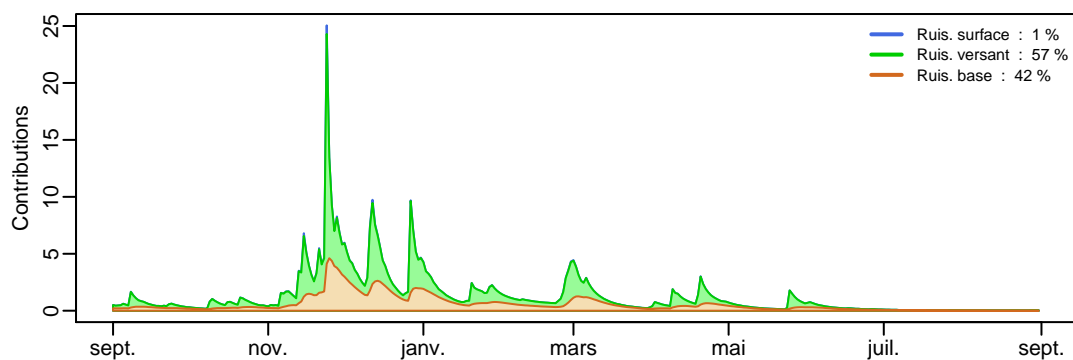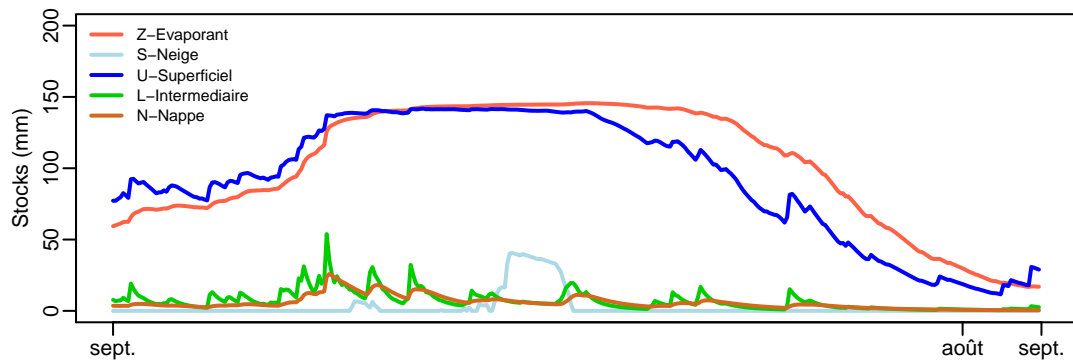

# k0214010 (106.95 km<sup>2</sup>) – année 2003–2004

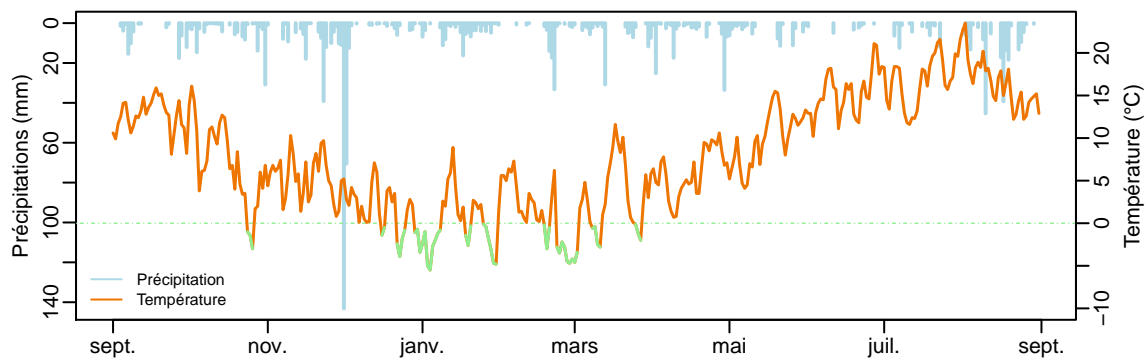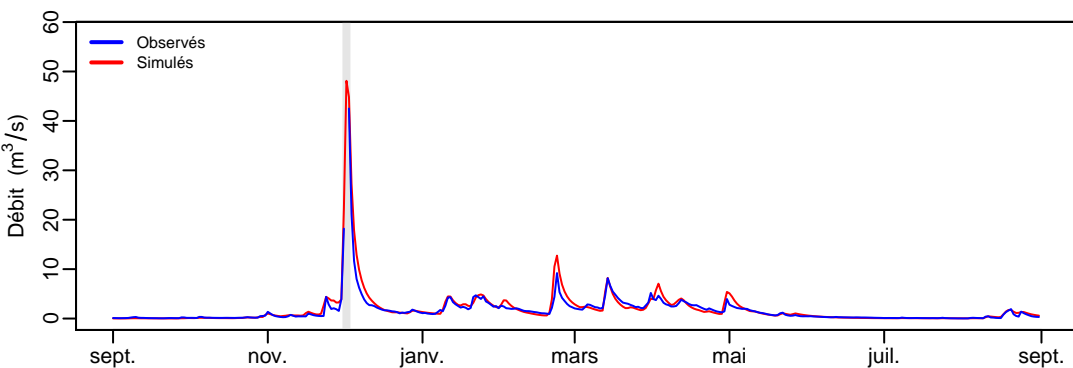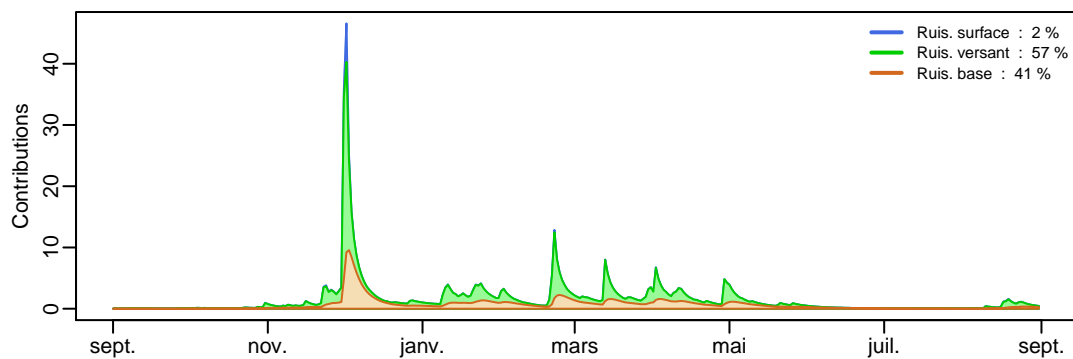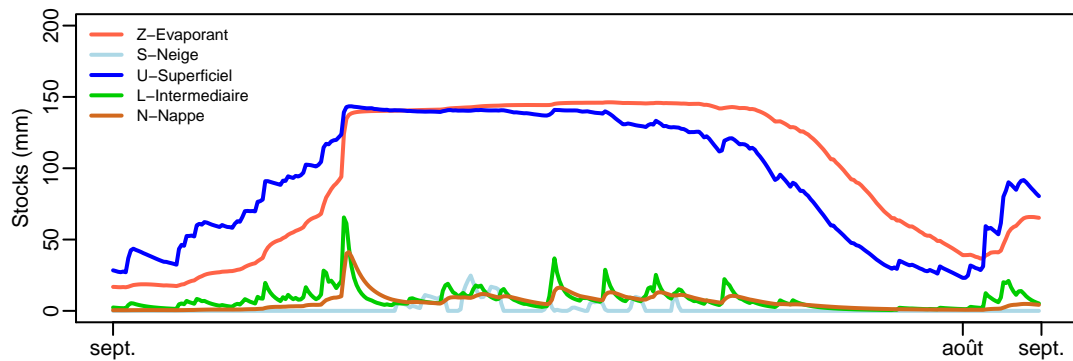

# k0214010 (106.95 km<sup>2</sup>) – année 2004–2005

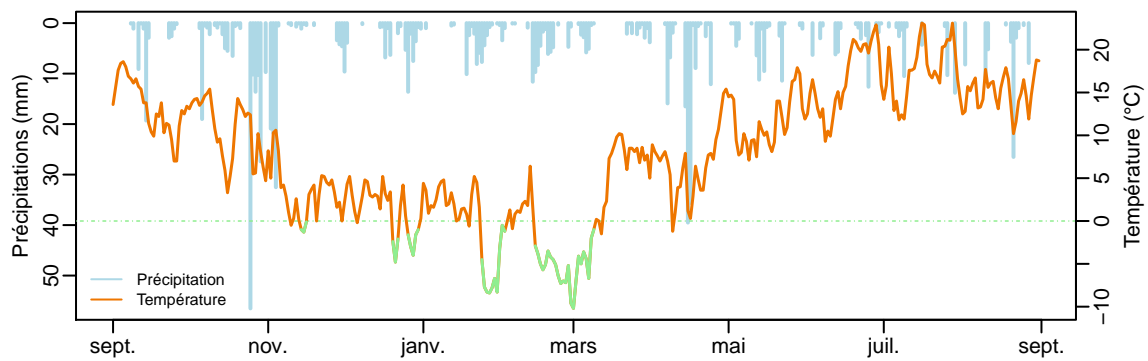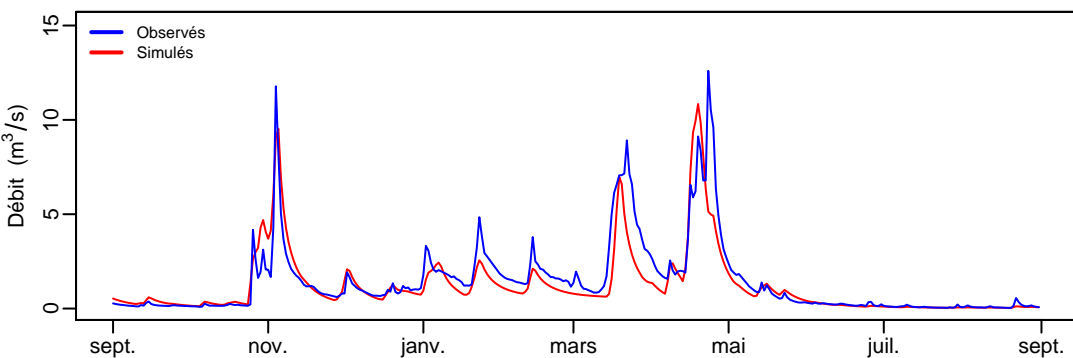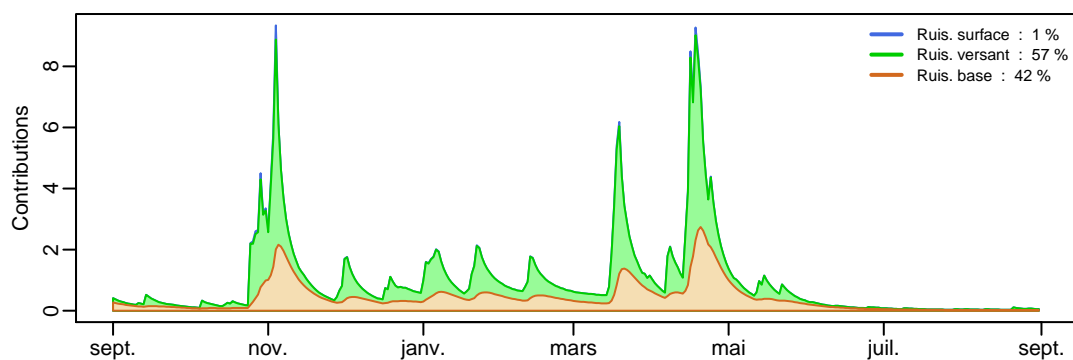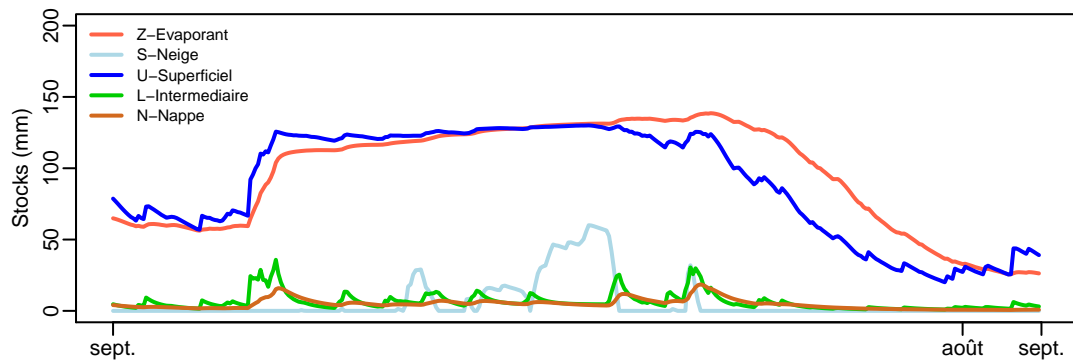



# k0214010 (106.95 km<sup>2</sup>) – année 2005–2006

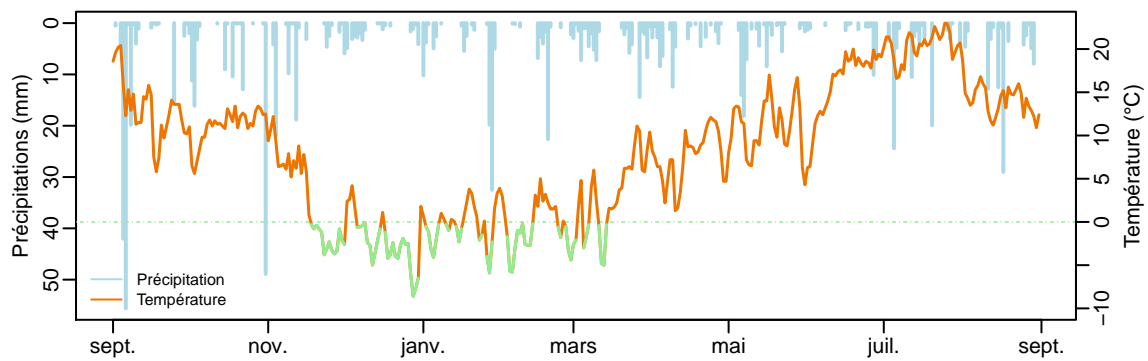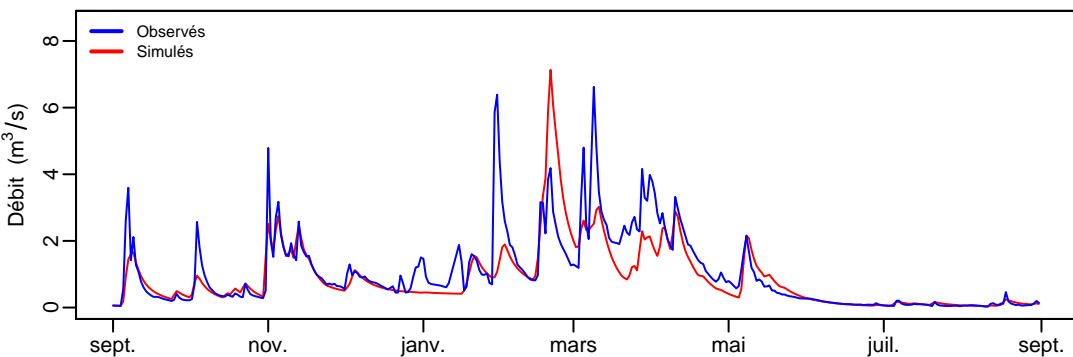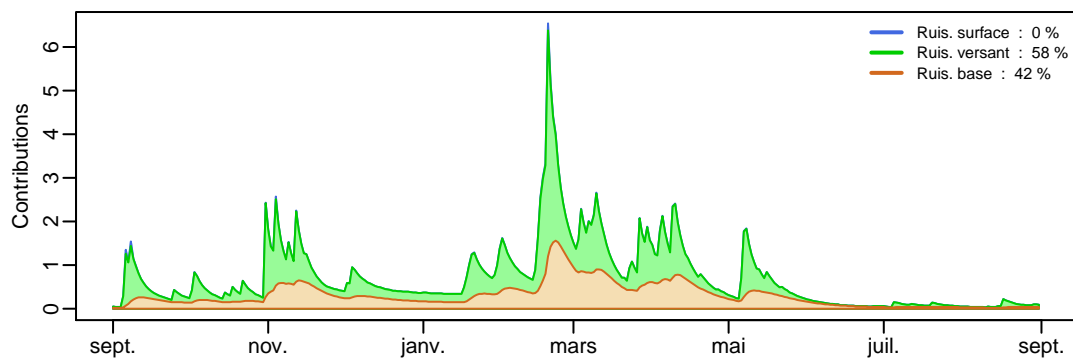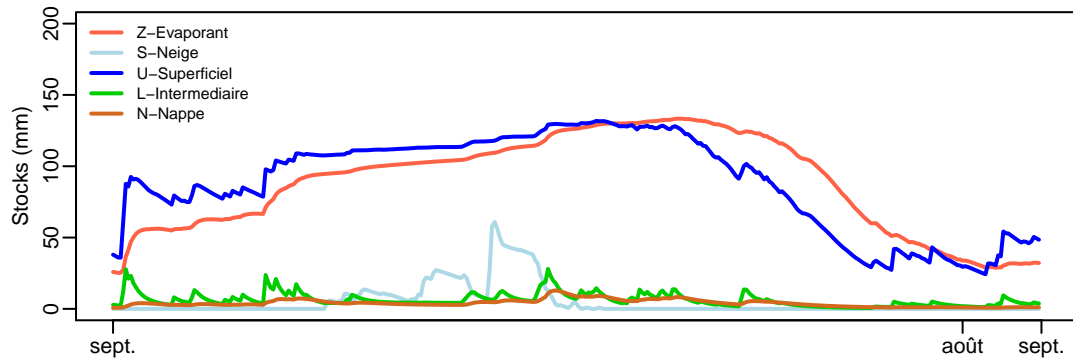

# k0214010 (106.95 km<sup>2</sup>) – année 2006–2007

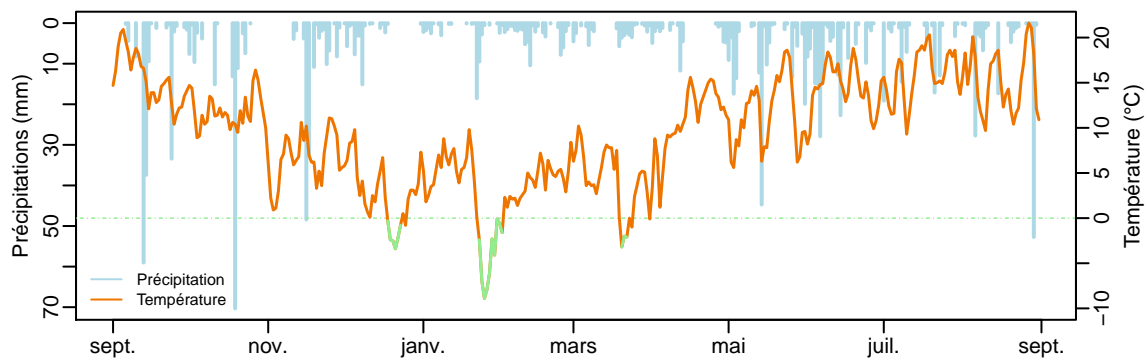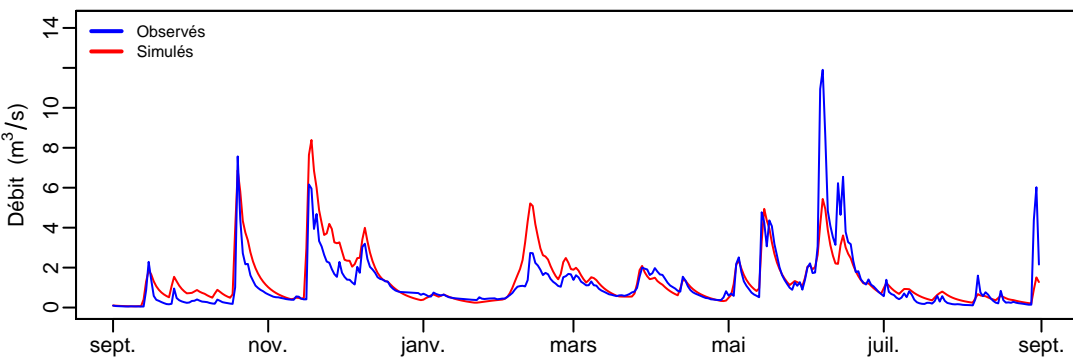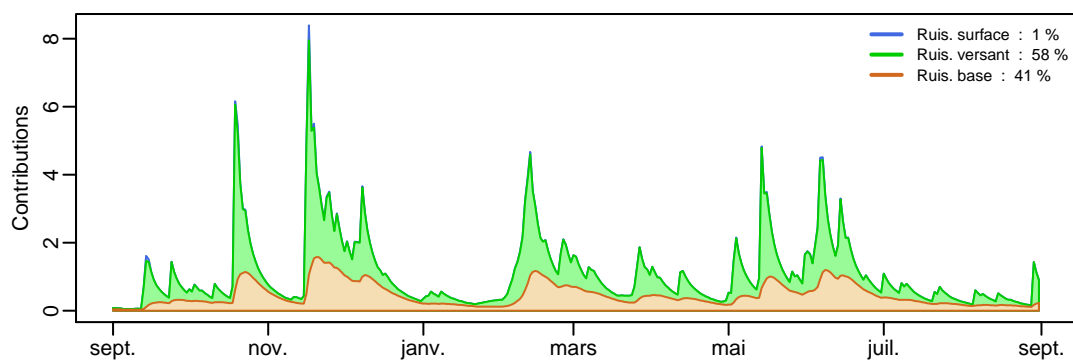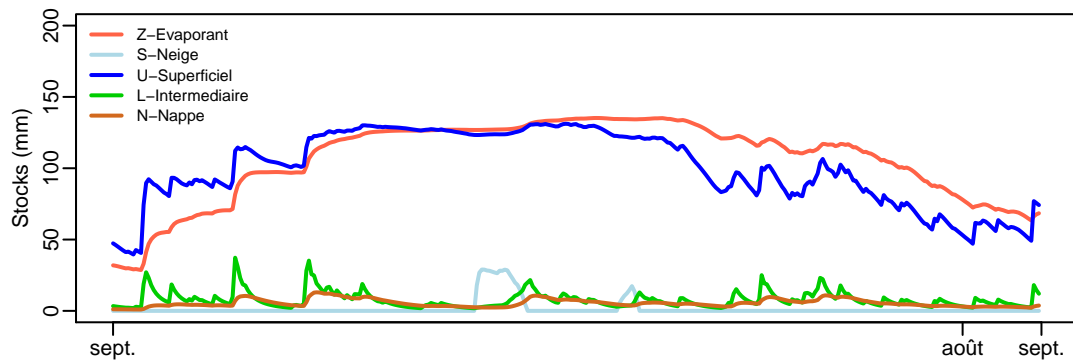

# k0214010 (106.95 km<sup>2</sup>) – année 2007–2008

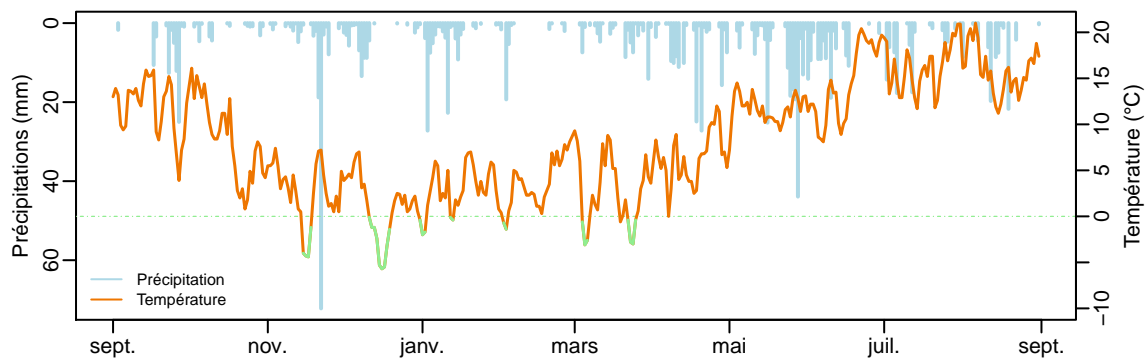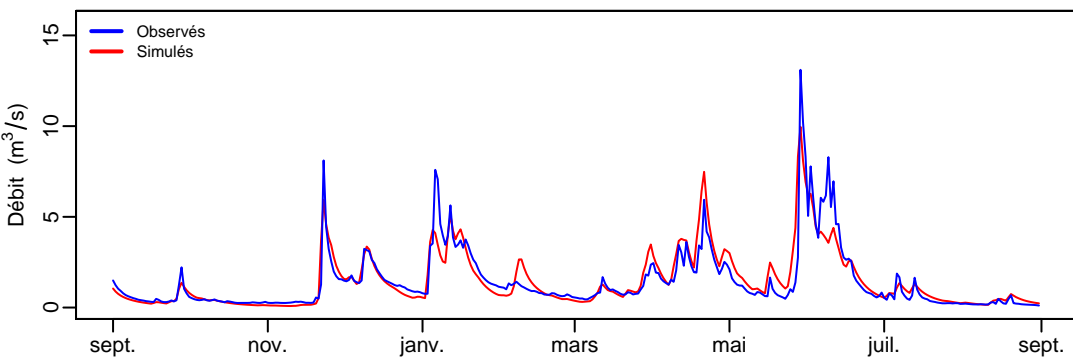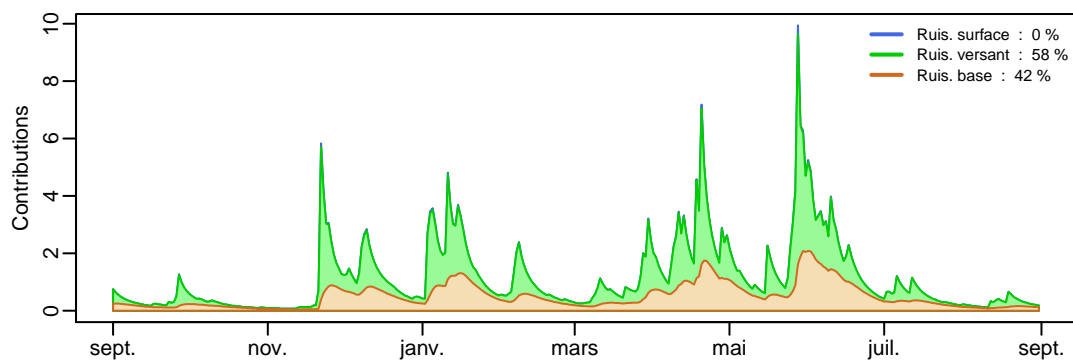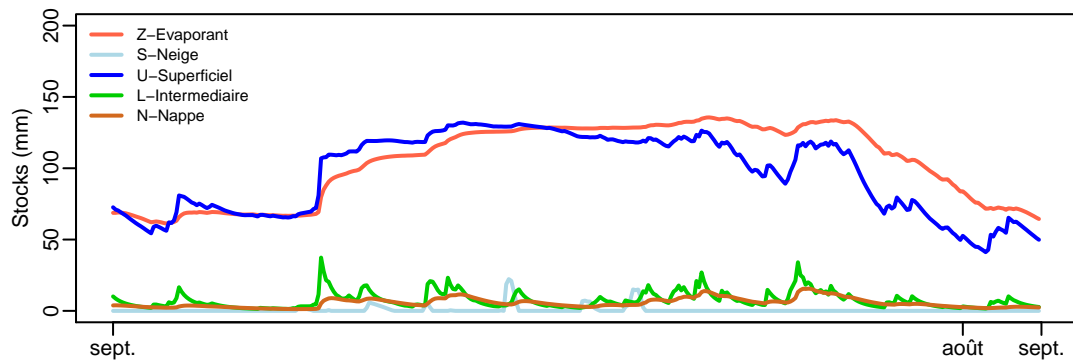

# k0214010 (106.95 km<sup>2</sup>) – année 2008–2009

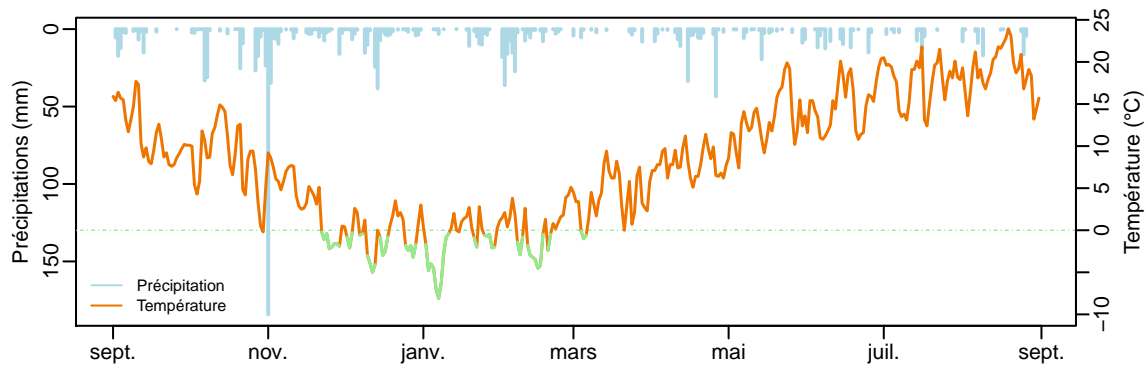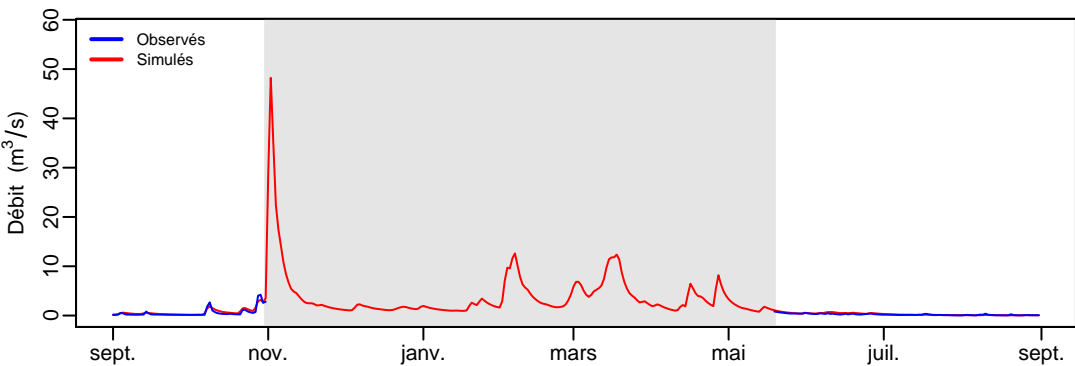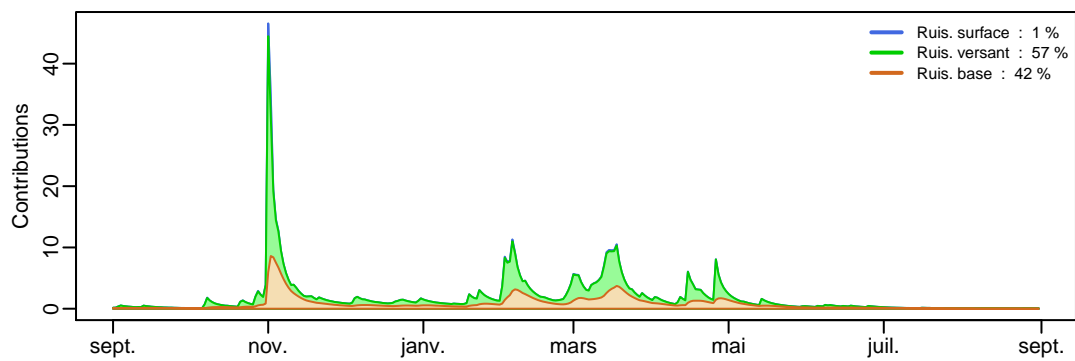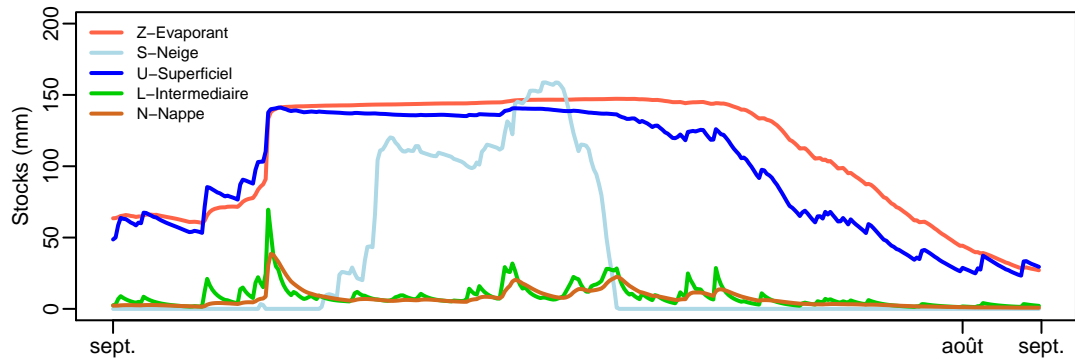

# k0214010 (106.95 km<sup>2</sup>) – année 2009–2010

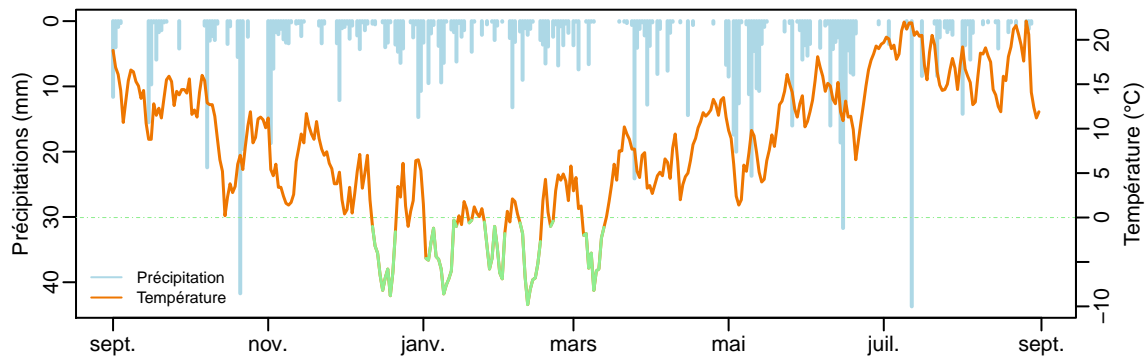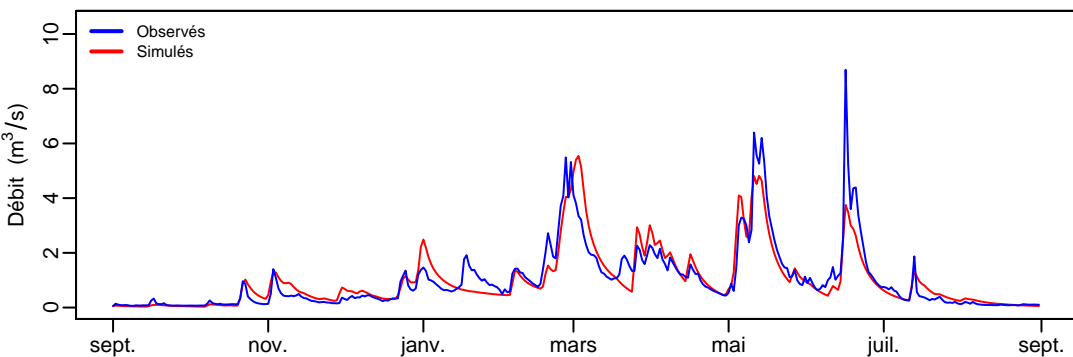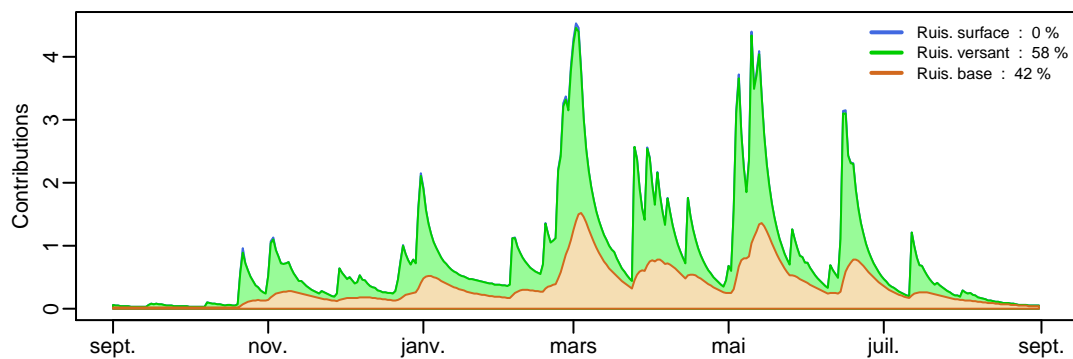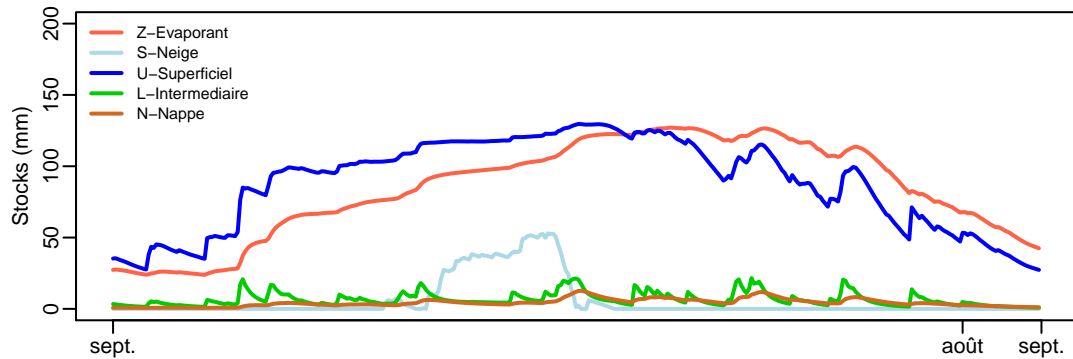

# k0214010 (106.95 km<sup>2</sup>) – année 2010–2011

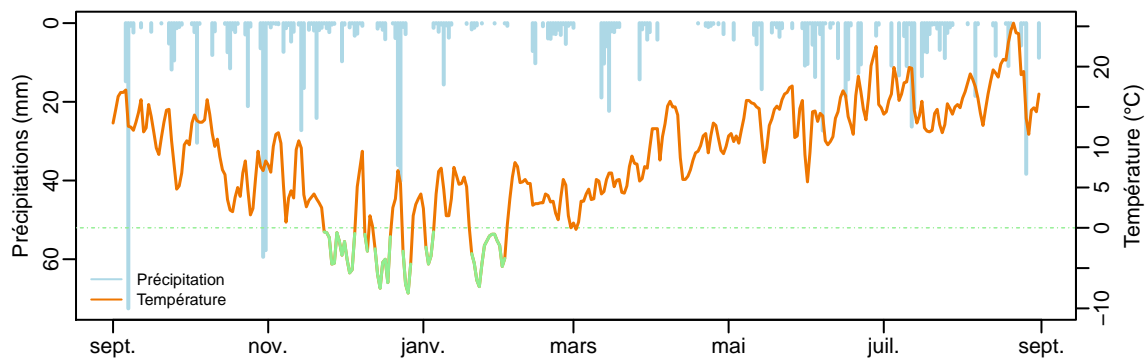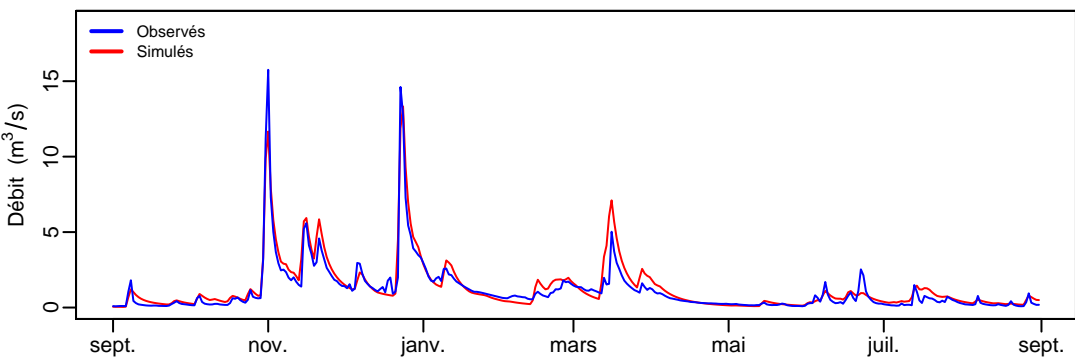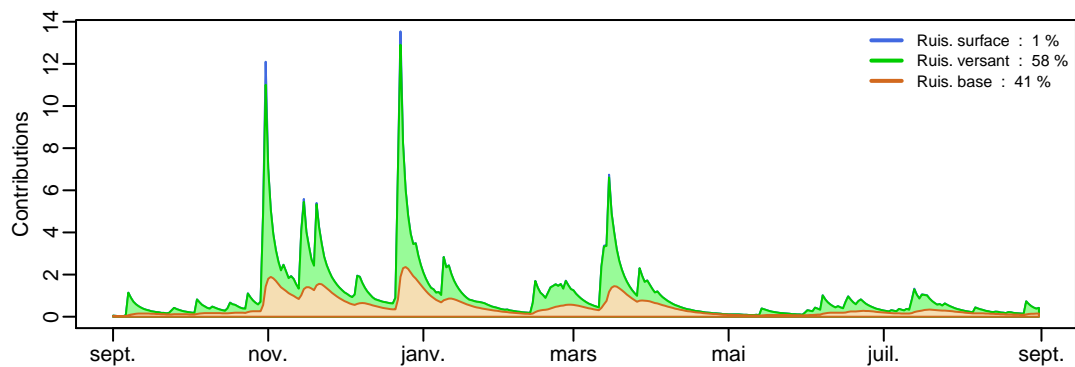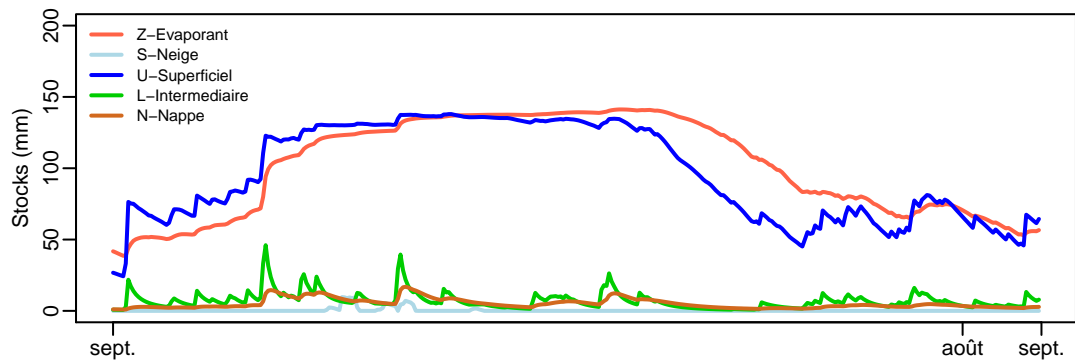

# k0214010 (106.95 km<sup>2</sup>) – année 2011–2012

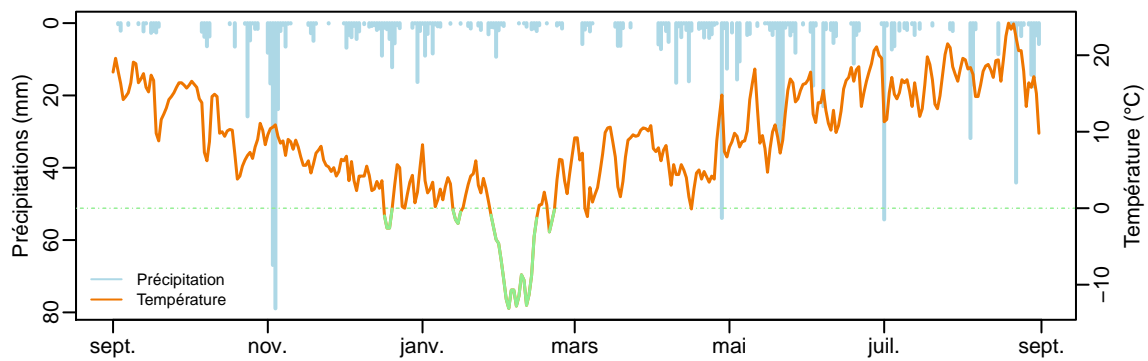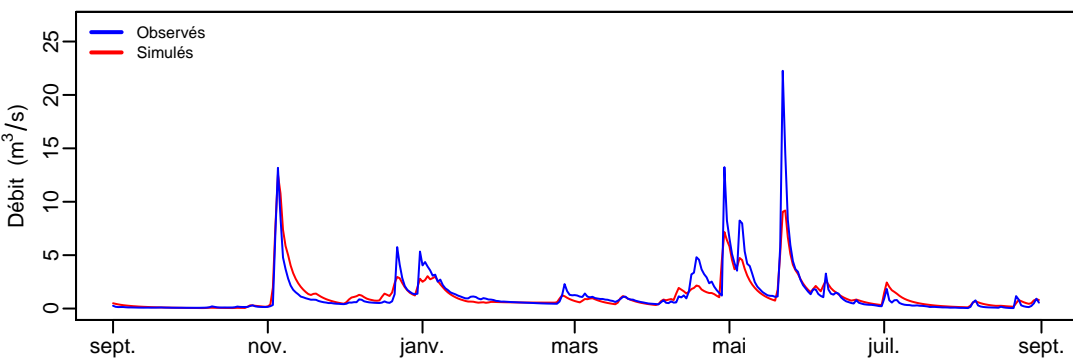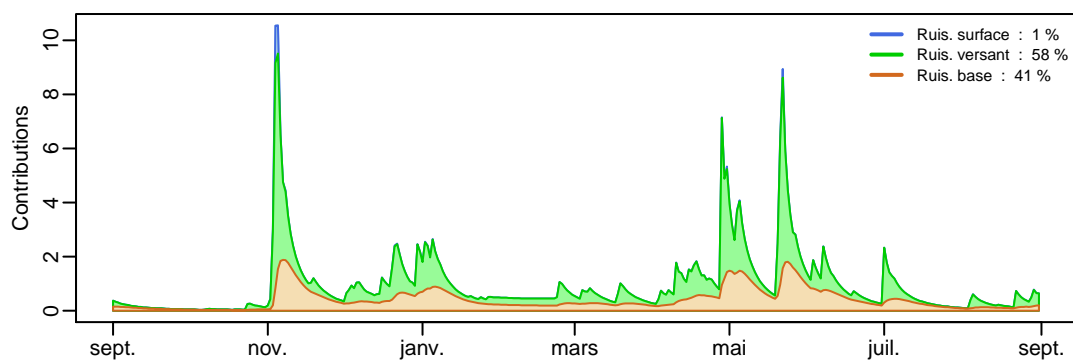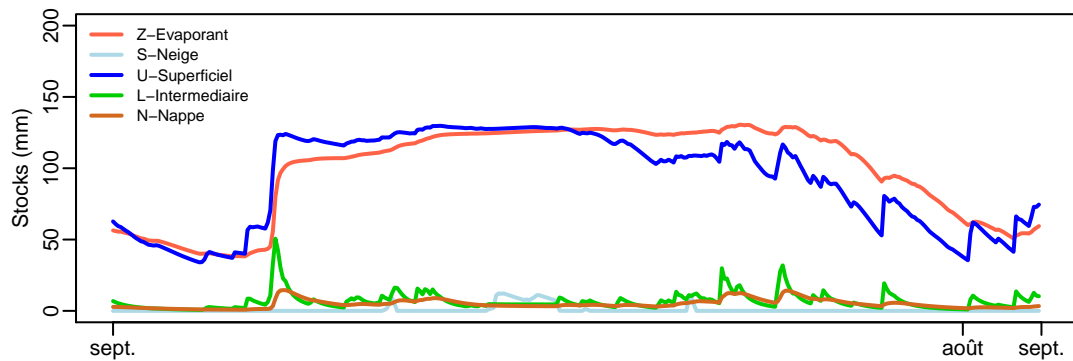

# k0243010 (149.41 km<sup>2</sup>) – année 2003–2004

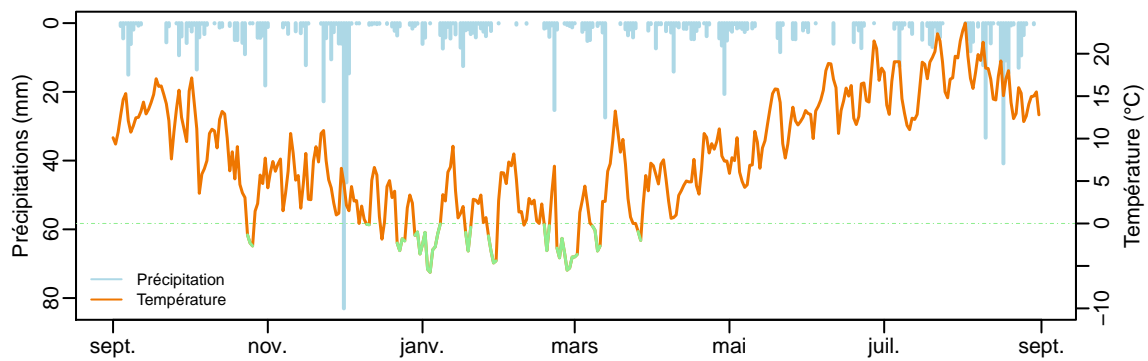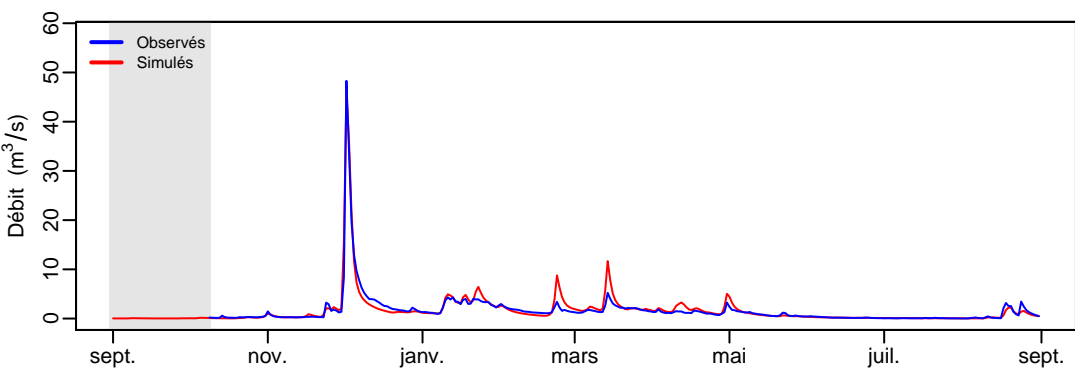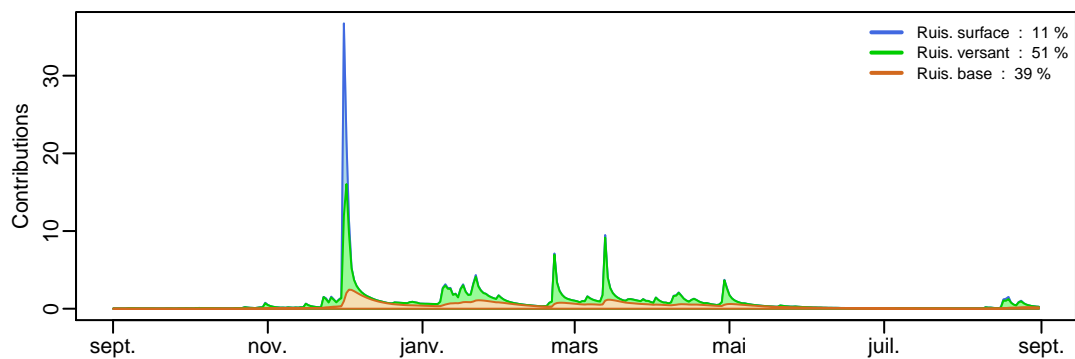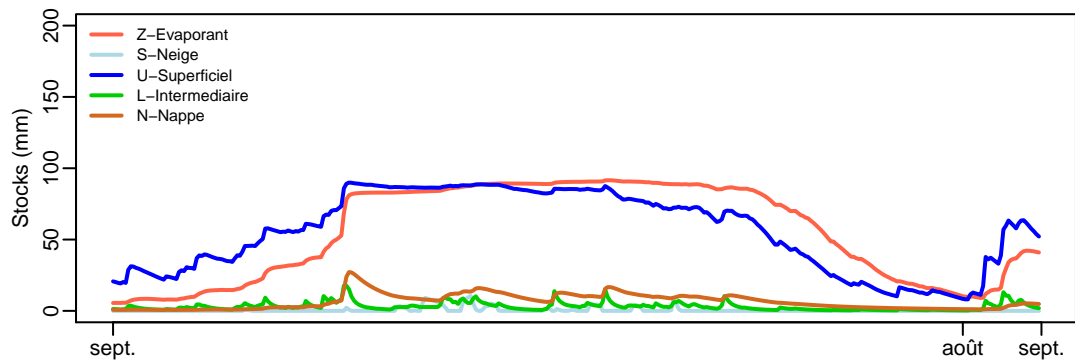



# k0243010 (149.41 km<sup>2</sup>) – année 2004–2005

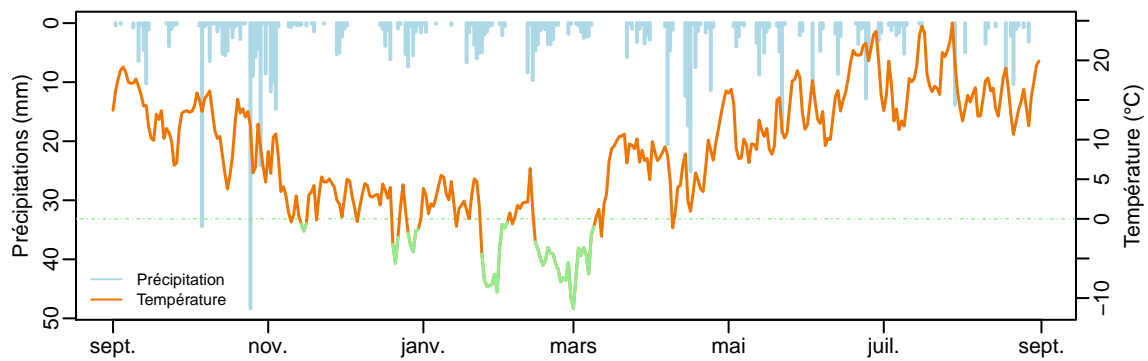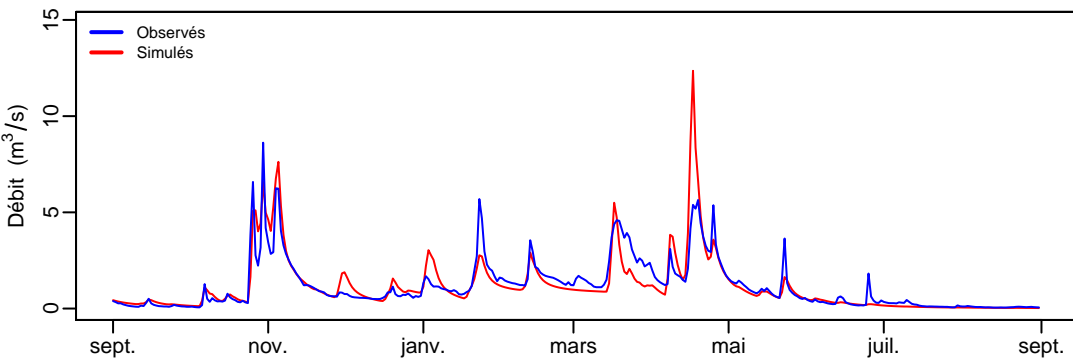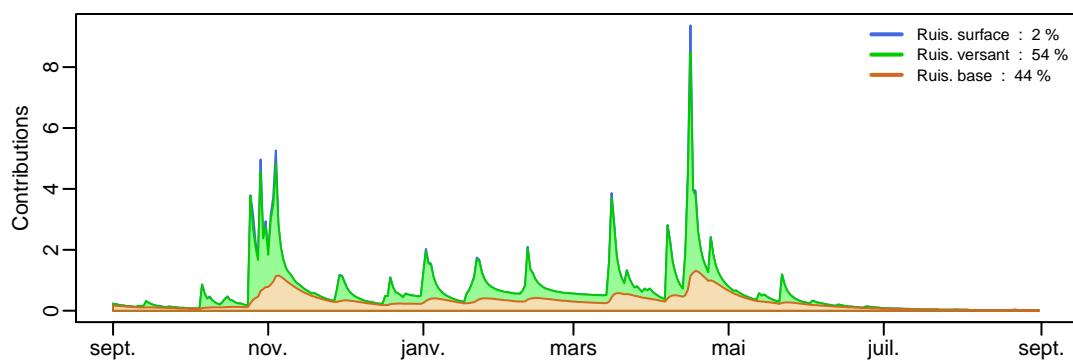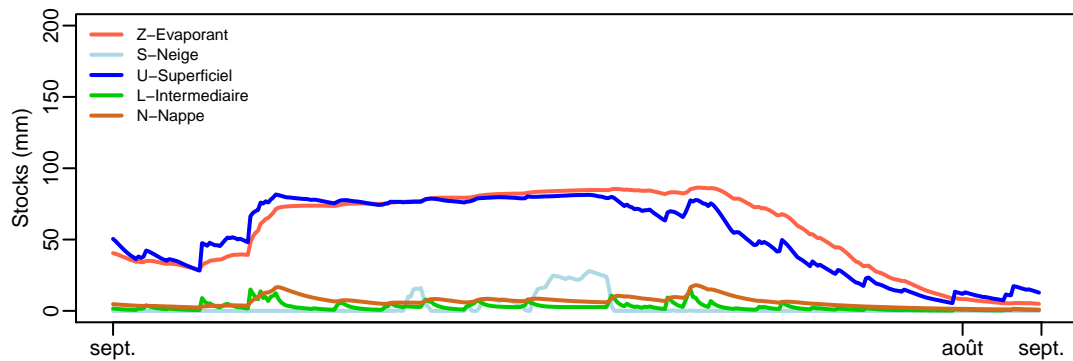

# k0243010 (149.41 km<sup>2</sup>) – année 2005–2006

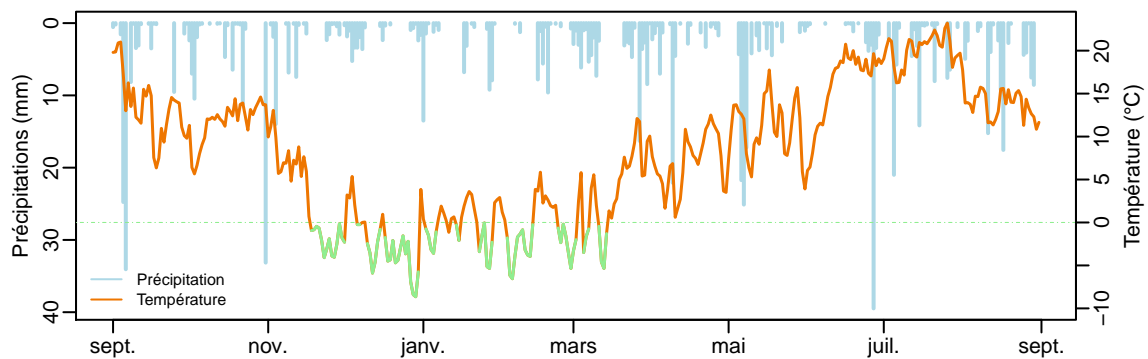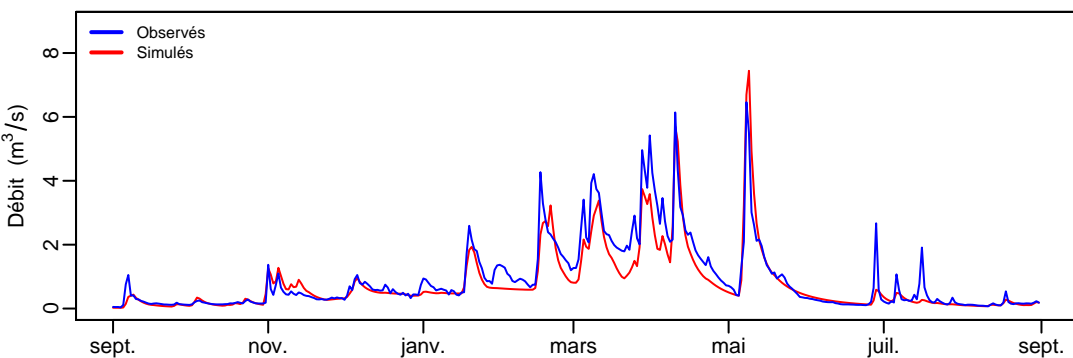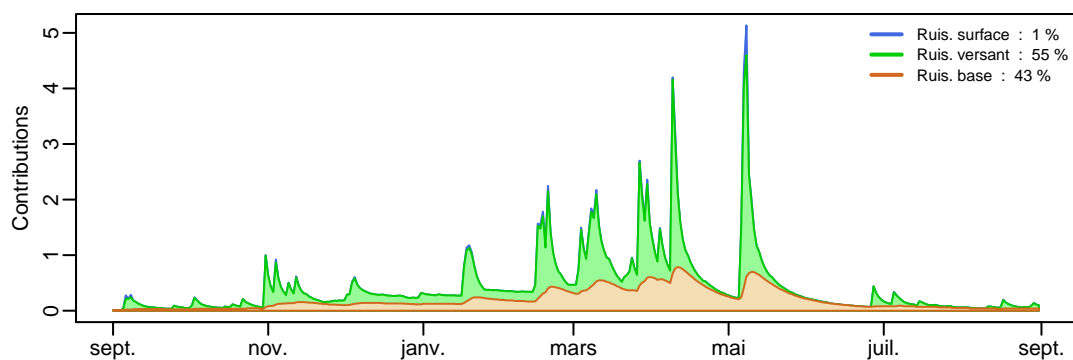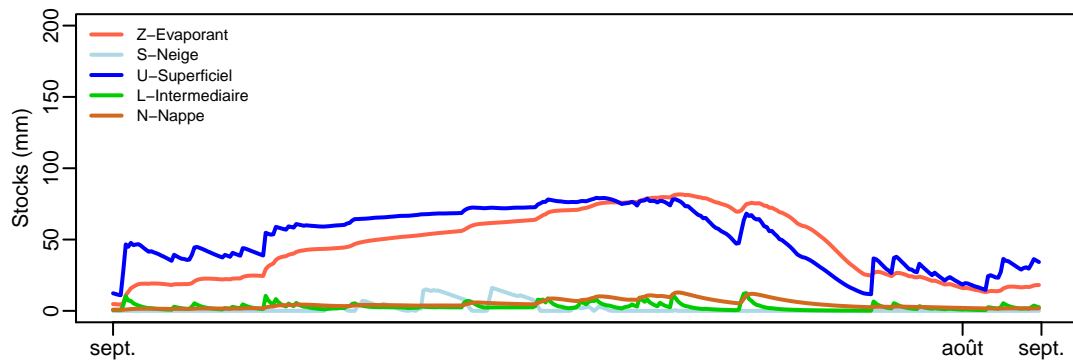

# k0243010 (149.41 km<sup>2</sup>) – année 2006–2007

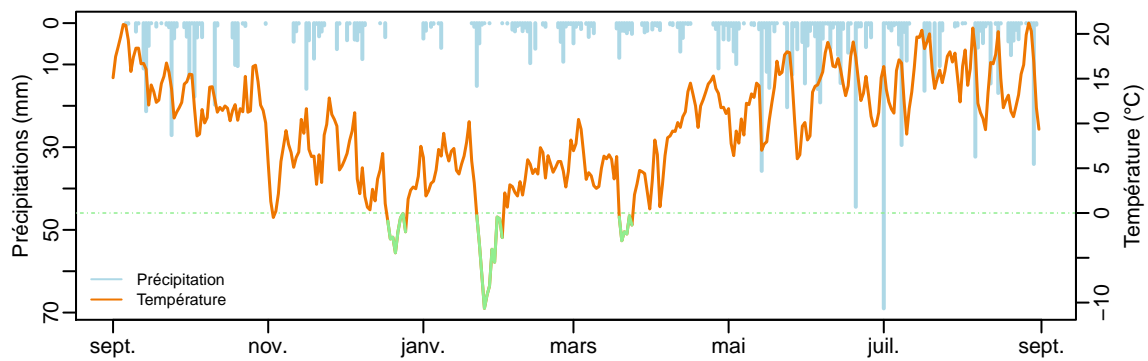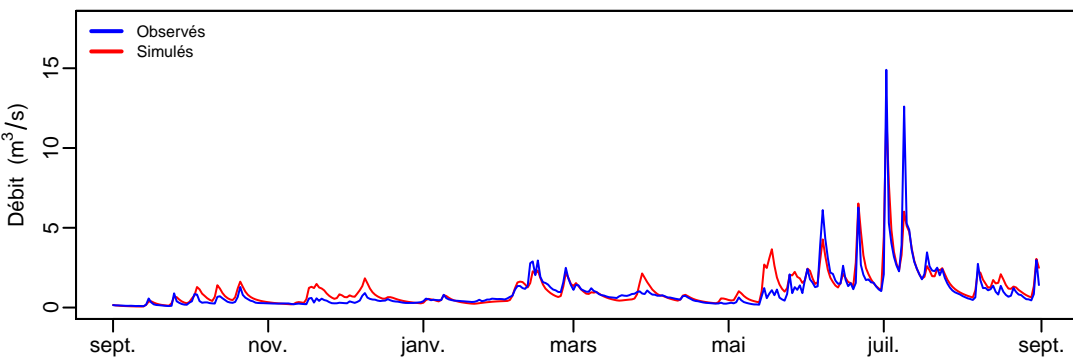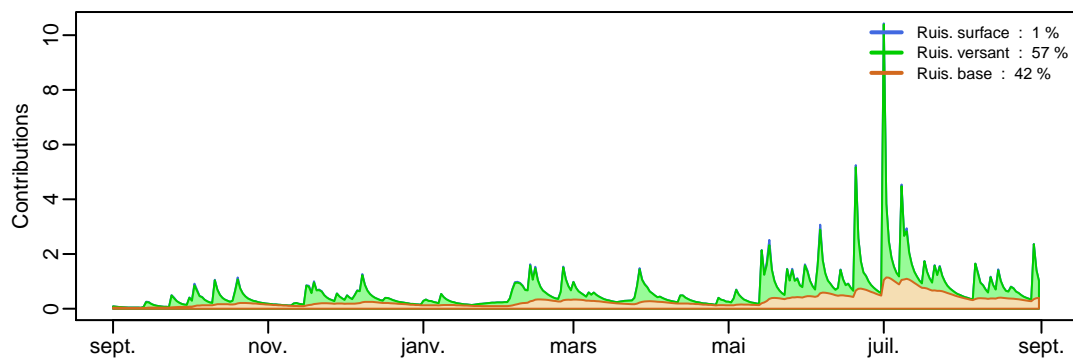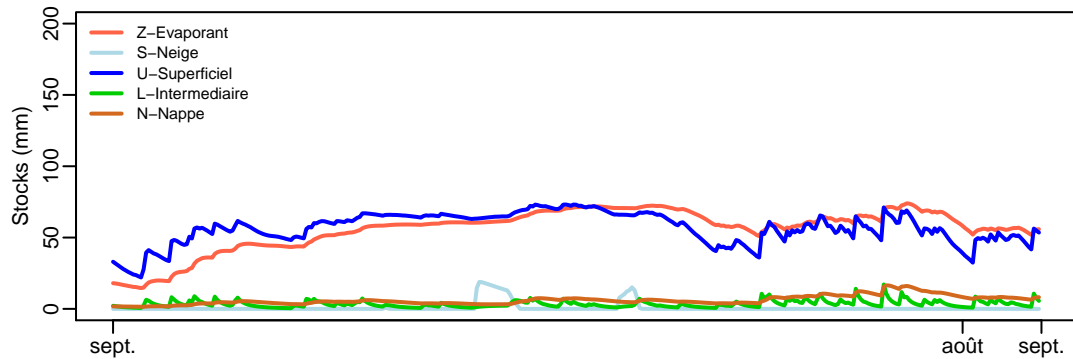

# k0243010 (149.41 km<sup>2</sup>) – année 2007–2008

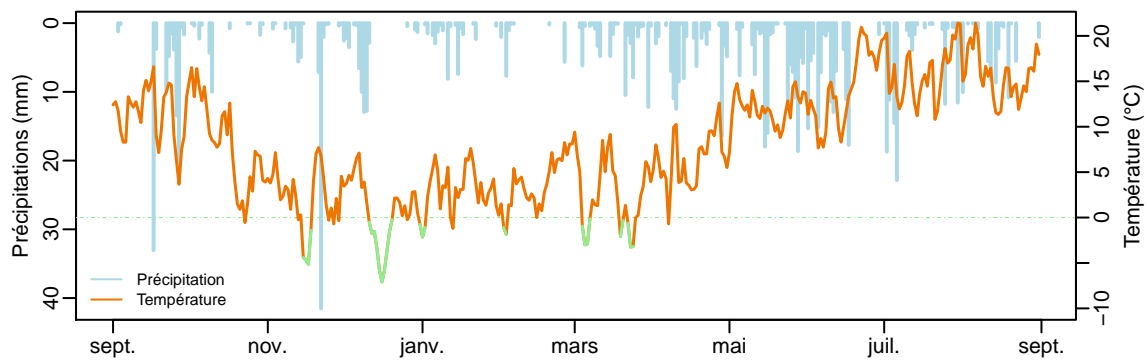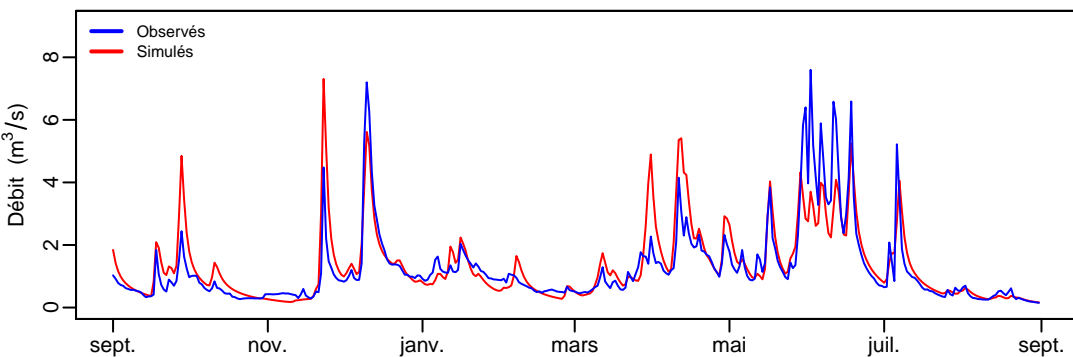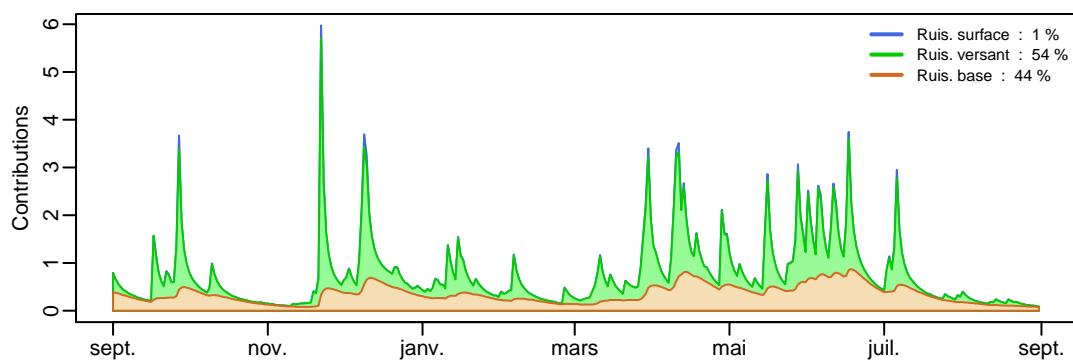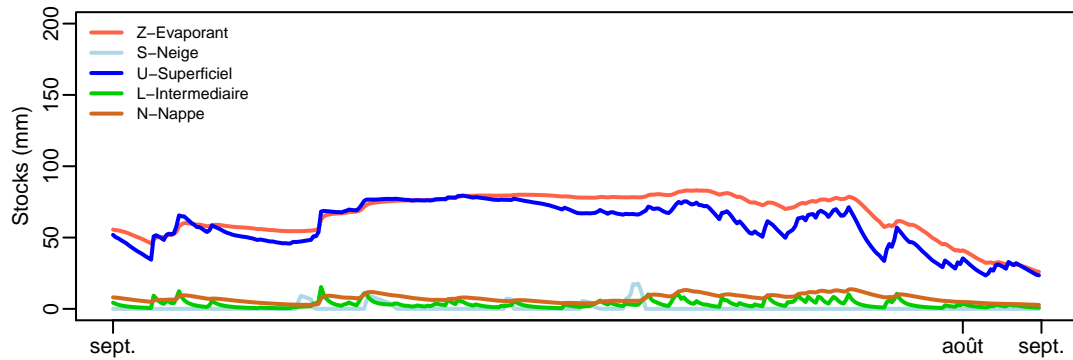

# k0243010 (149.41 km<sup>2</sup>) – année 2008–2009

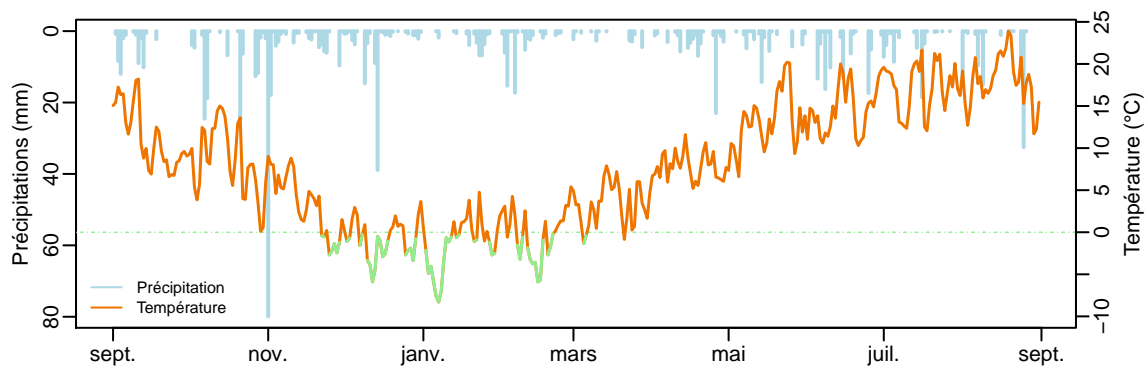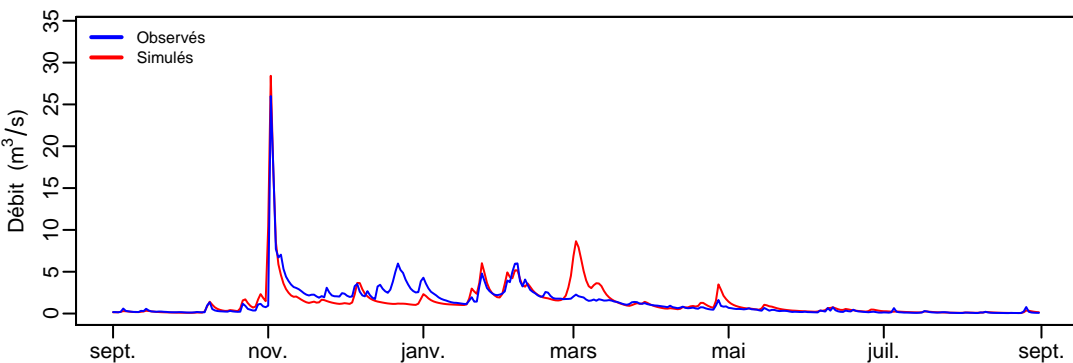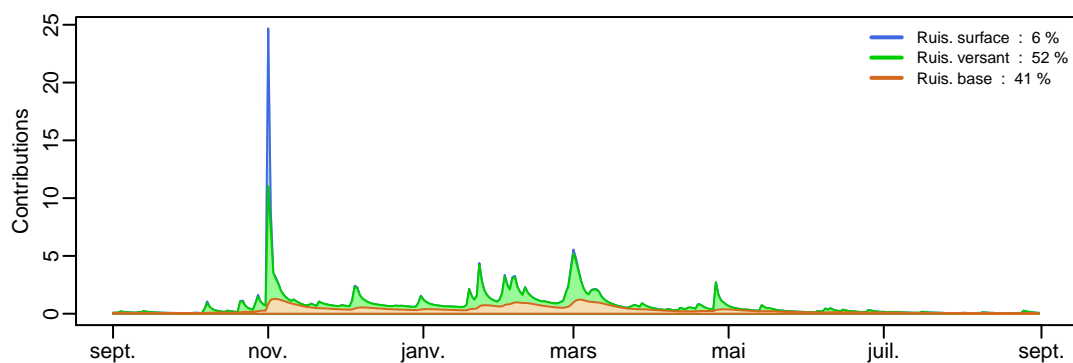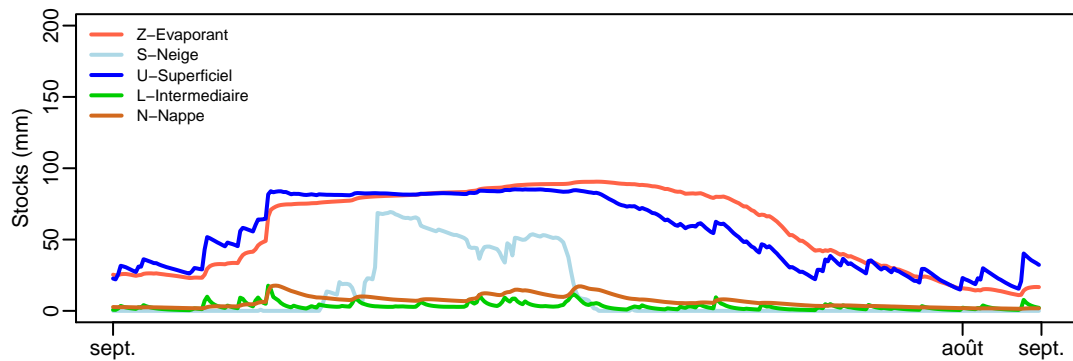

# k0243010 (149.41 km<sup>2</sup>) – année 2009–2010

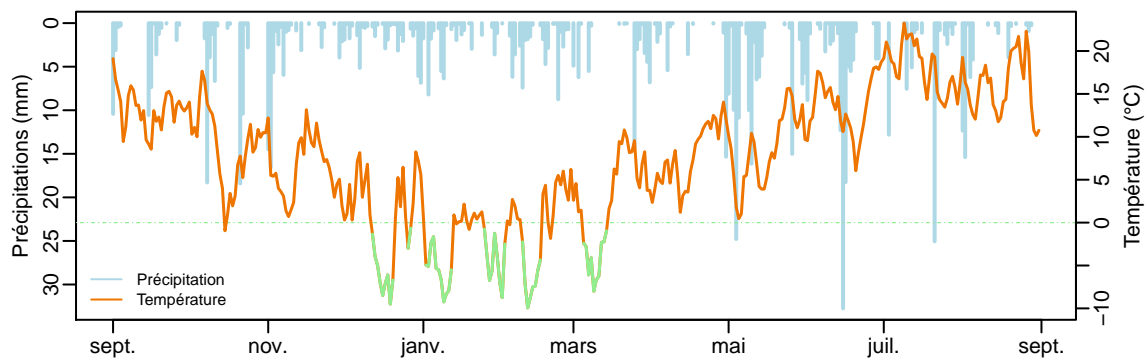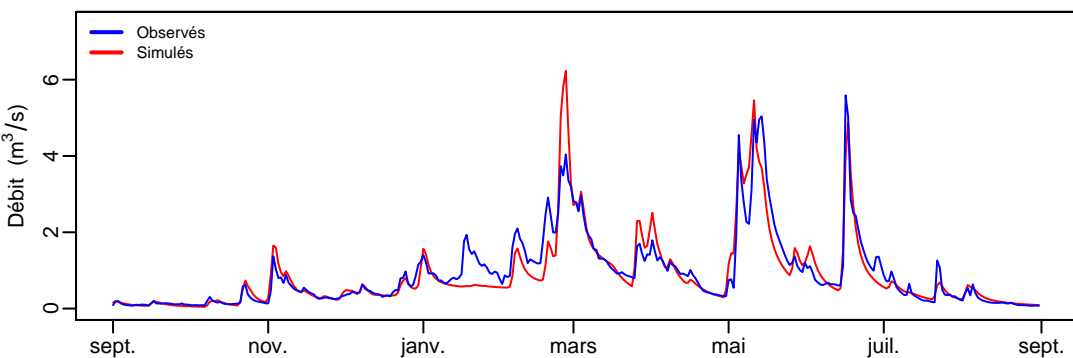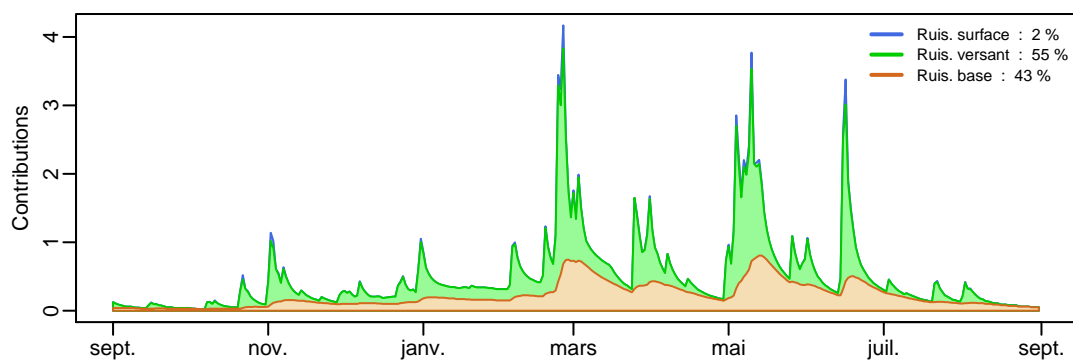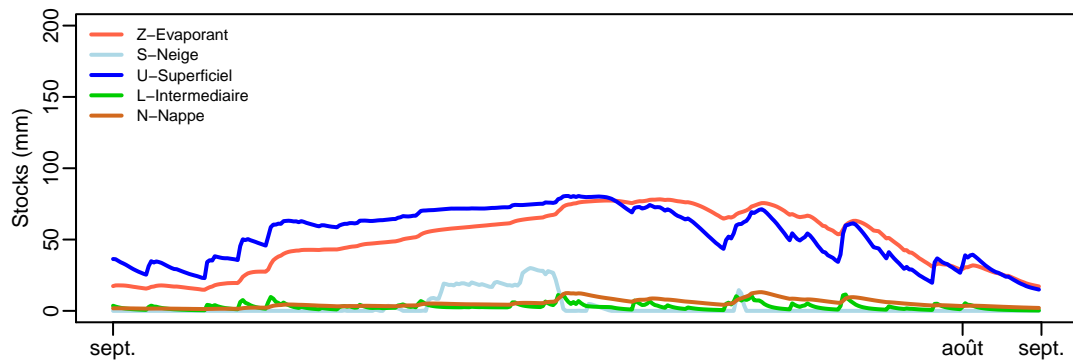

# k0243010 (149.41 km<sup>2</sup>) – année 2010–2011

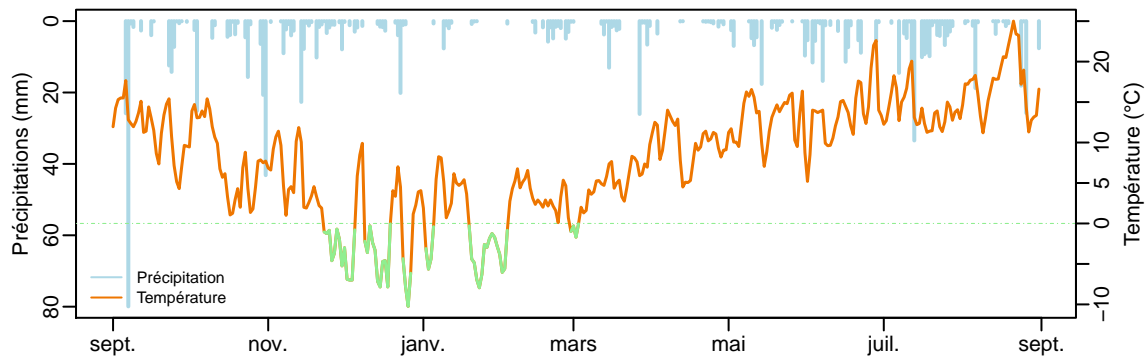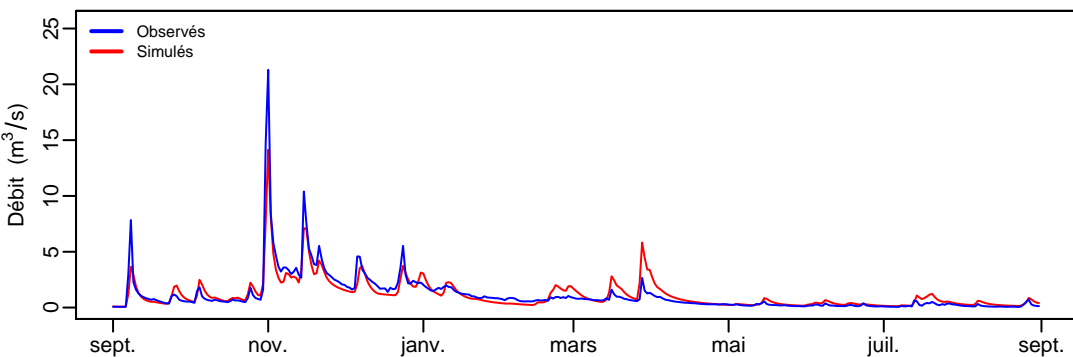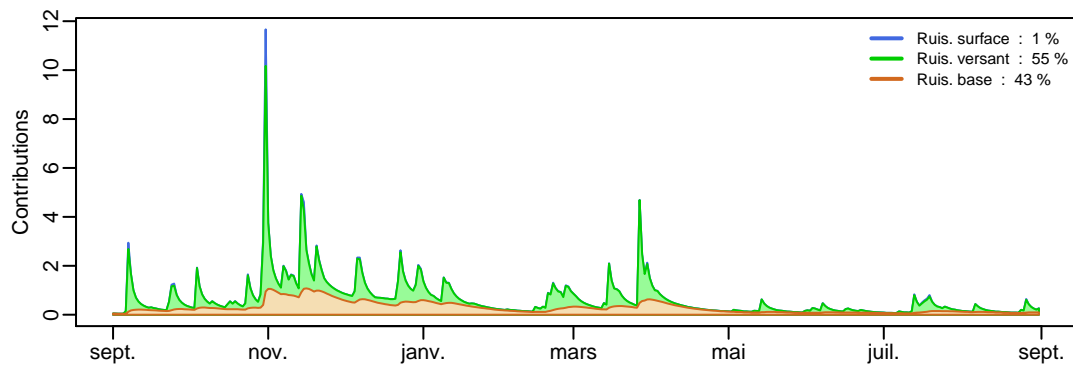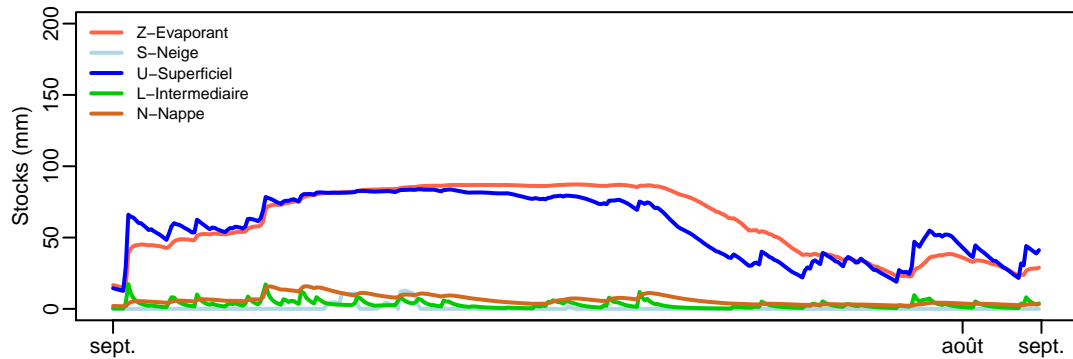

# k0243010 (149.41 km<sup>2</sup>) – année 2011–2012

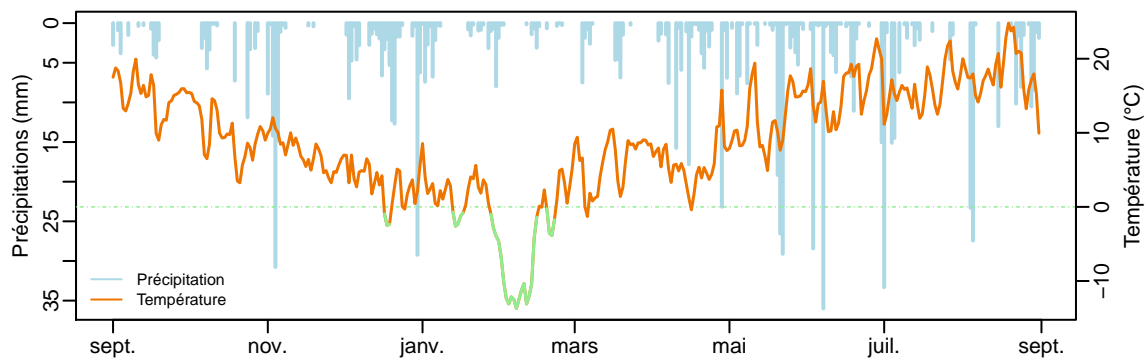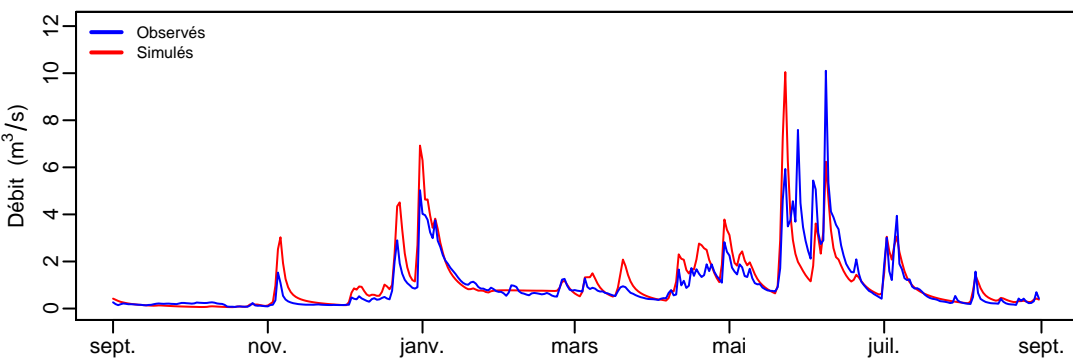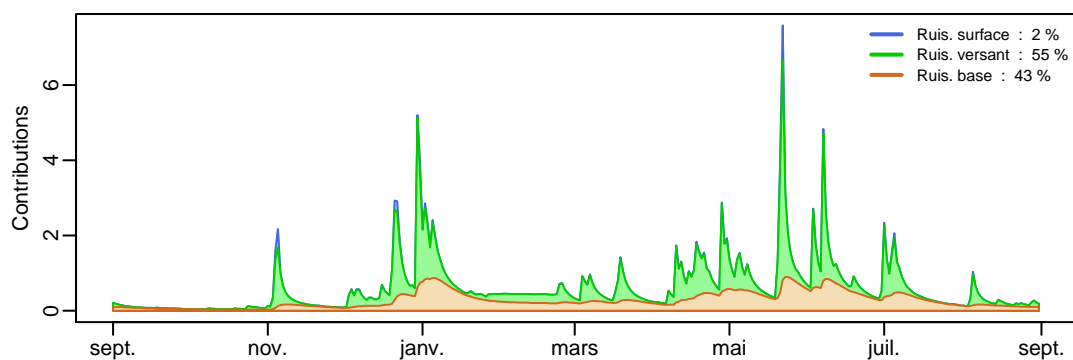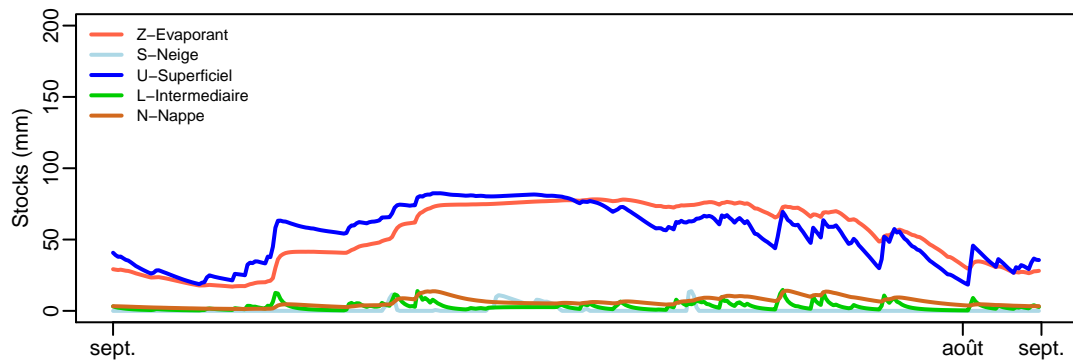



# k0253020 (359.91 km<sup>2</sup>) – année 1990–1991

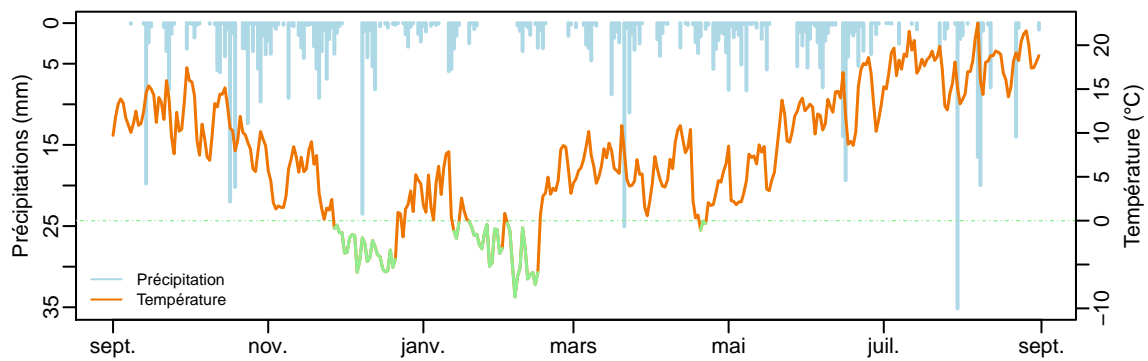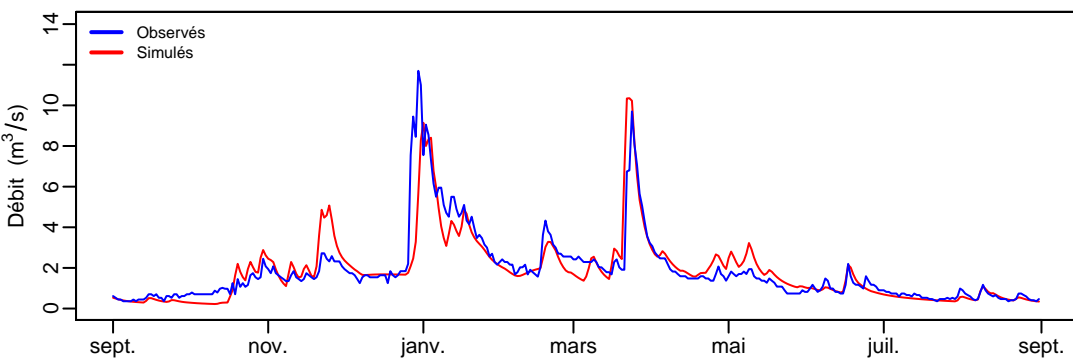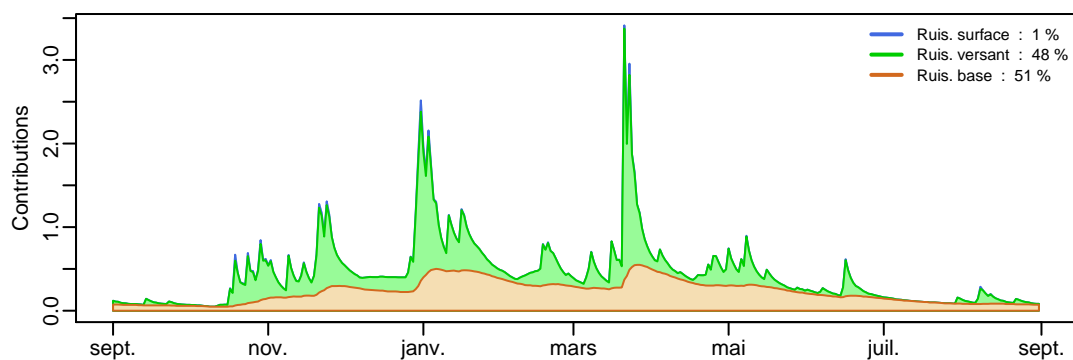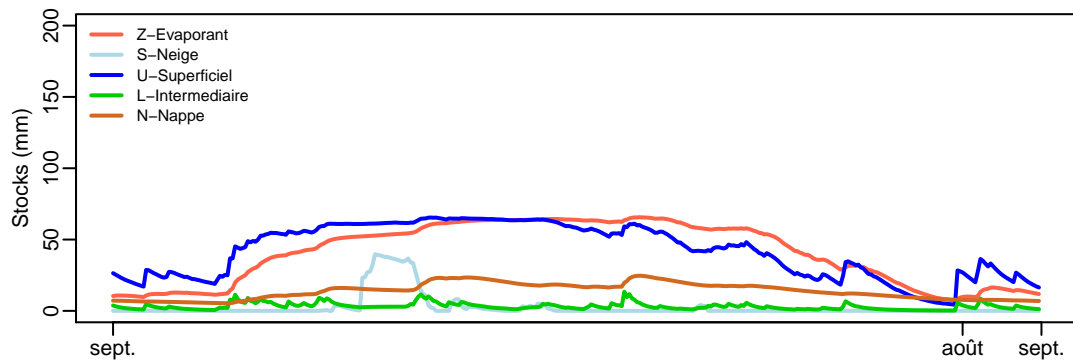

# k0253020 (359.91 km<sup>2</sup>) – année 1991–1992

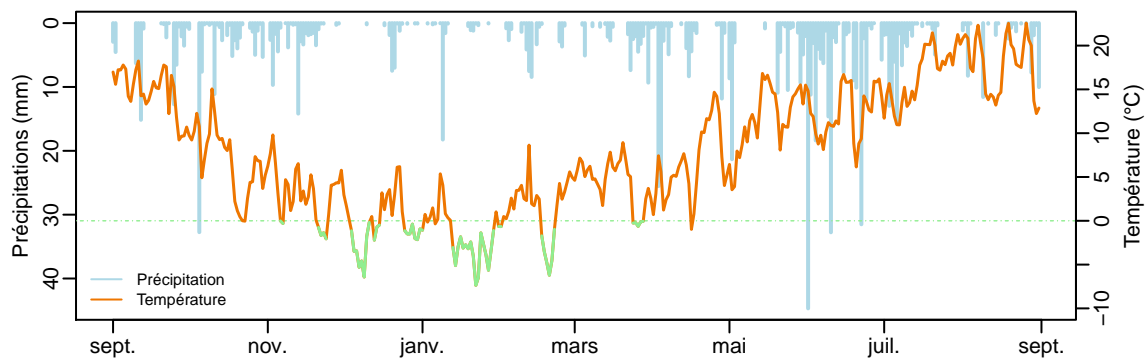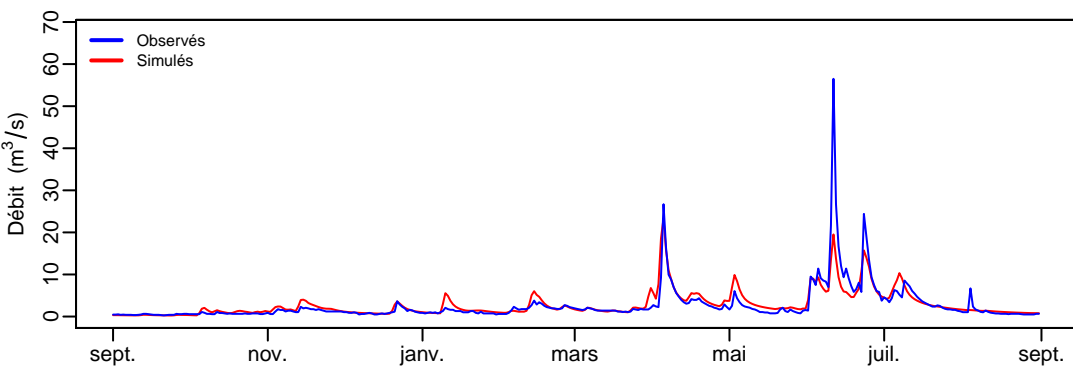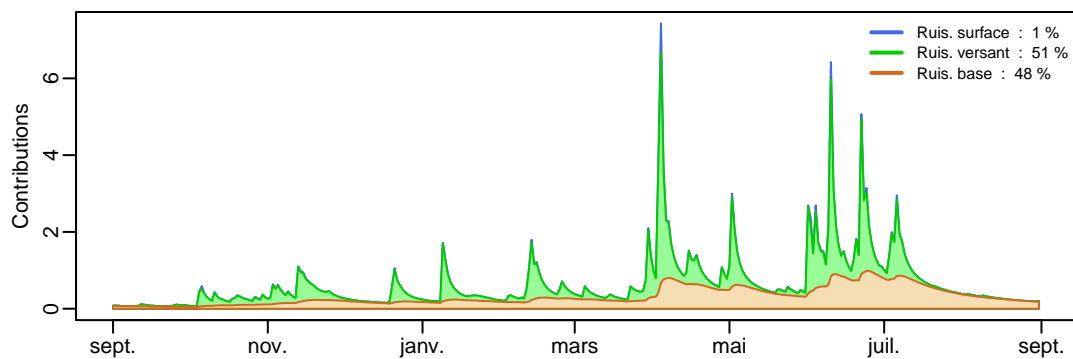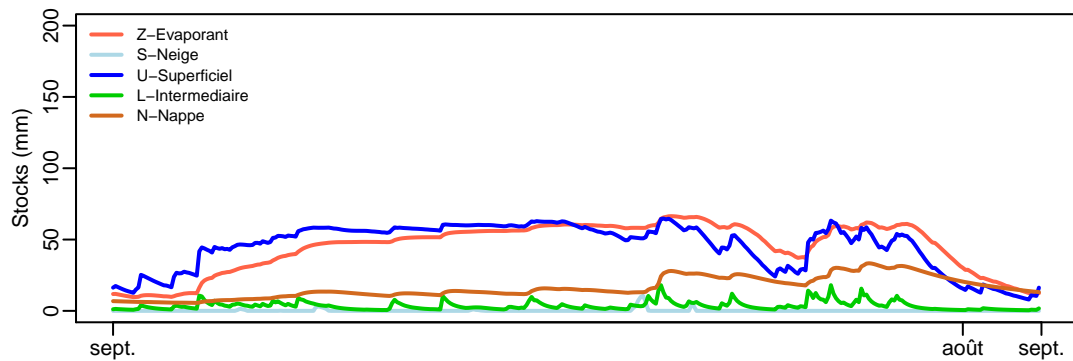

# k0253020 (359.91 km<sup>2</sup>) – année 1992–1993

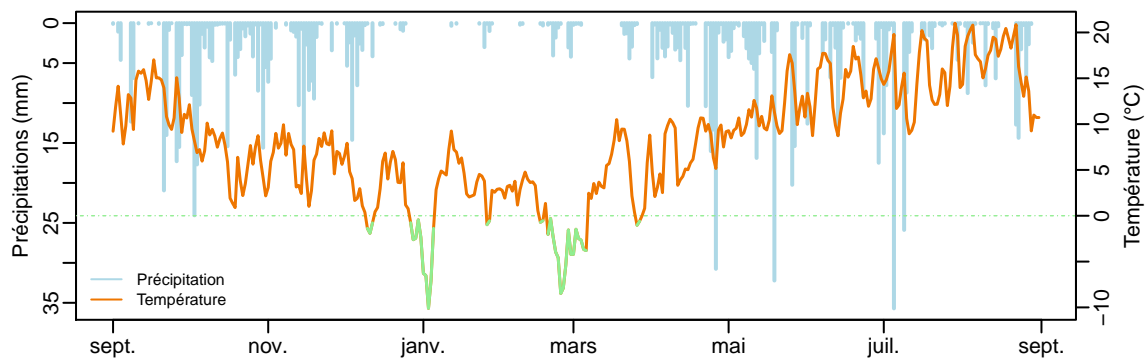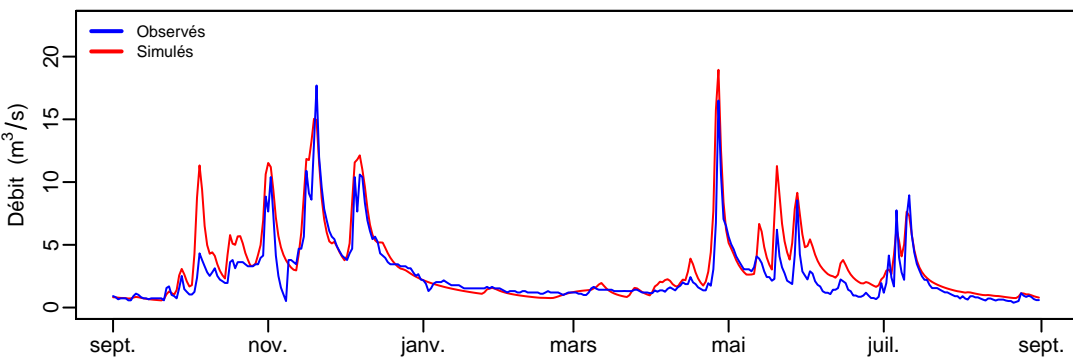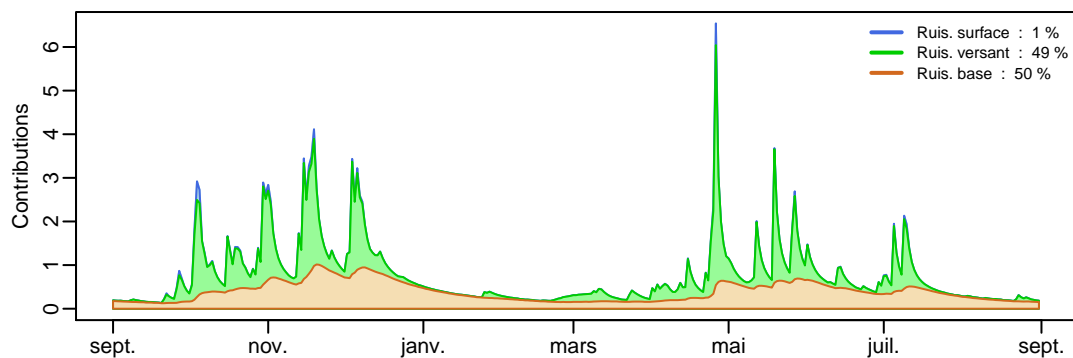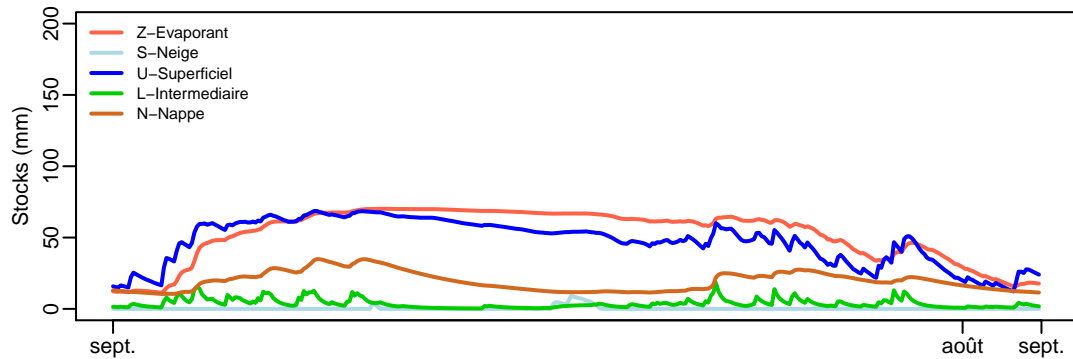

# k0253020 (359.91 km<sup>2</sup>) – année 1993–1994

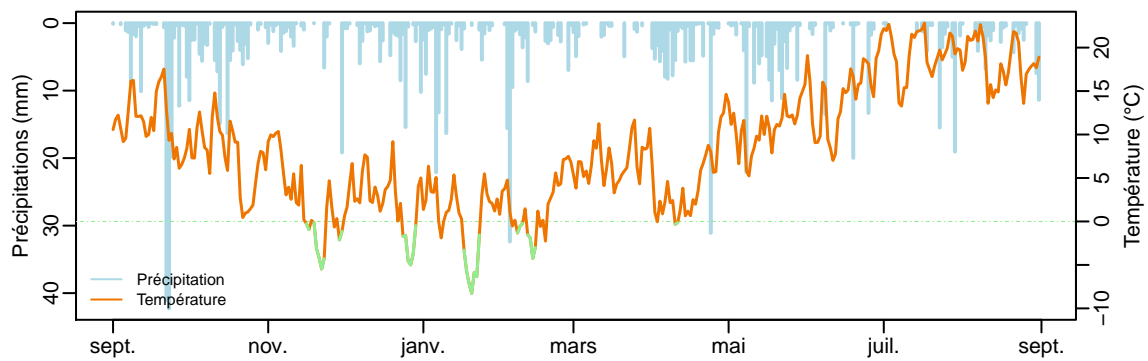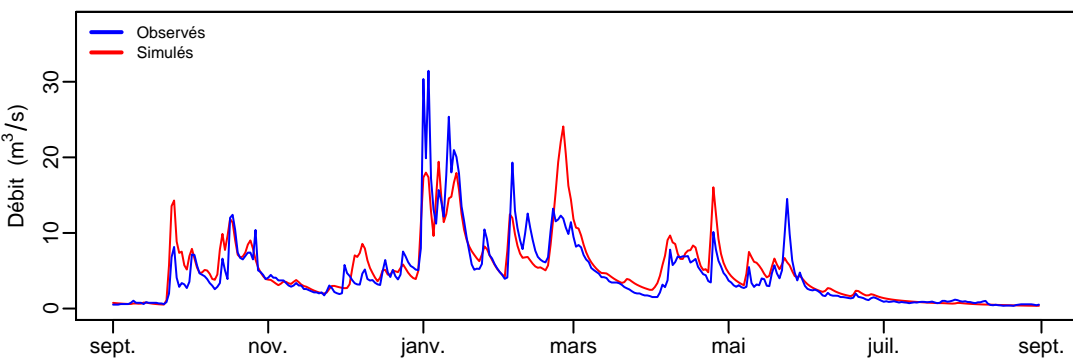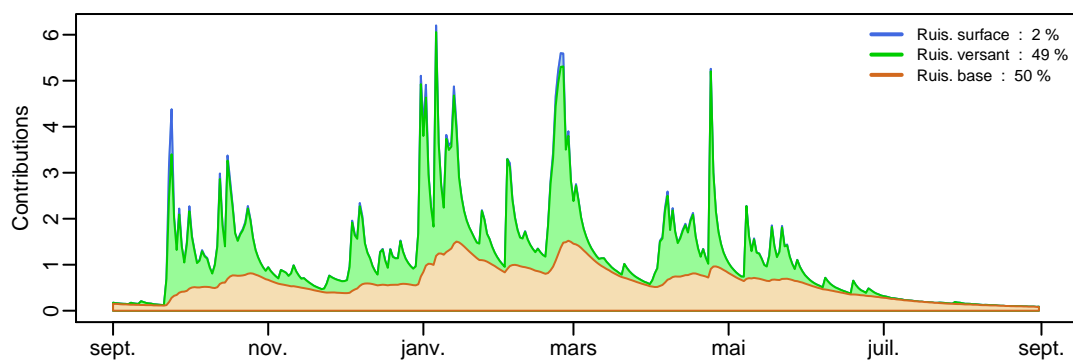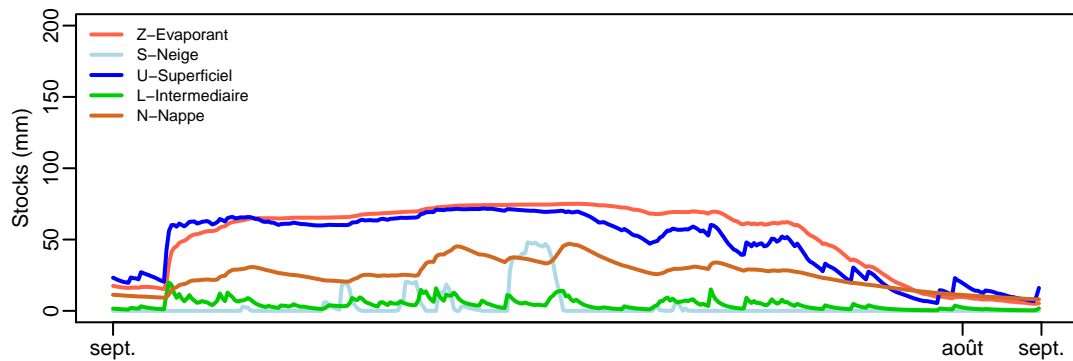

# k0253020 (359.91 km<sup>2</sup>) – année 1994–1995

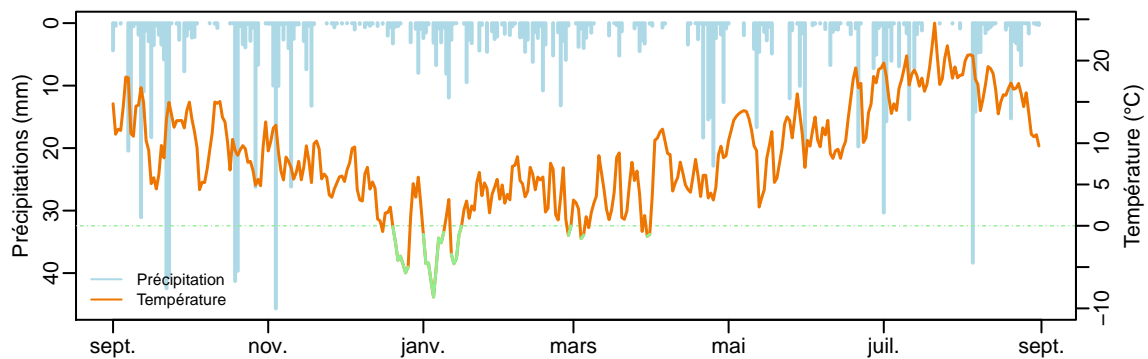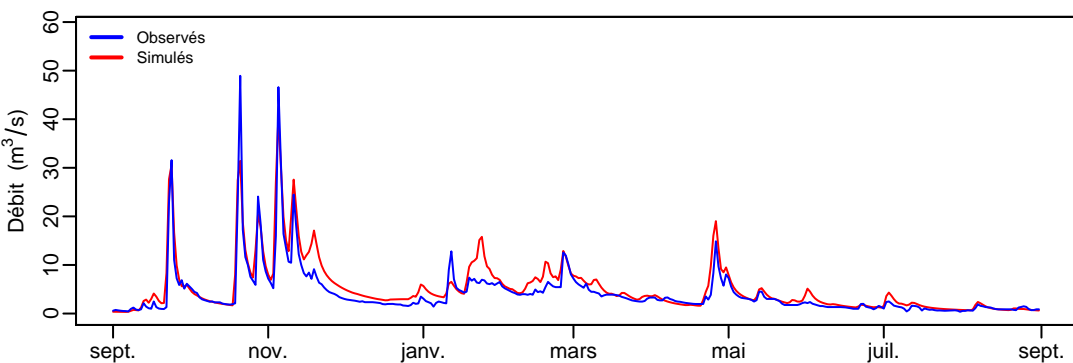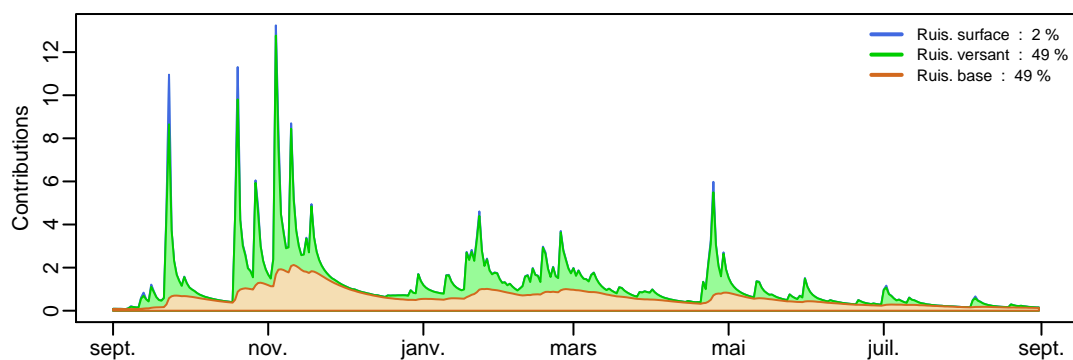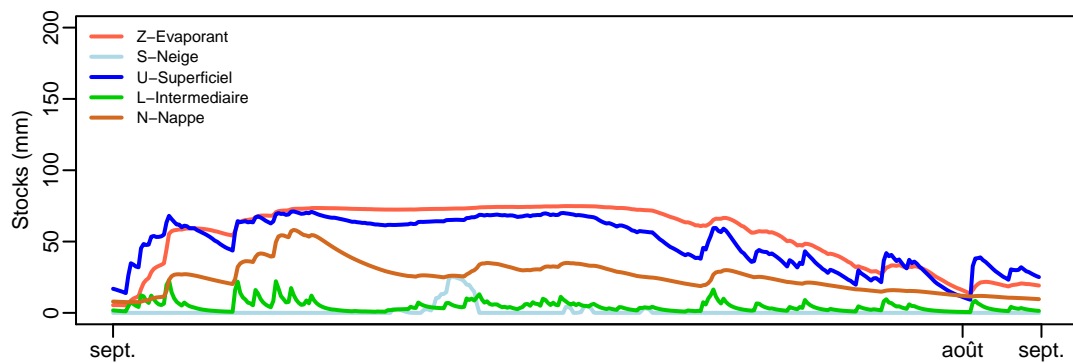

# k0253020 (359.91 km<sup>2</sup>) – année 1995–1996

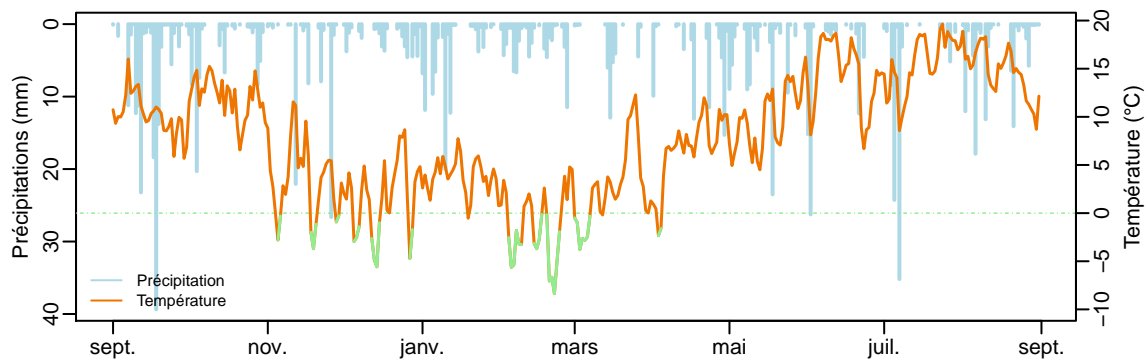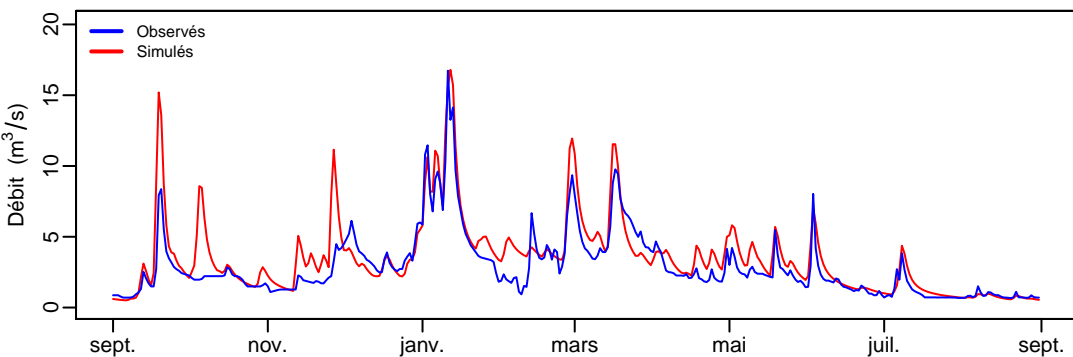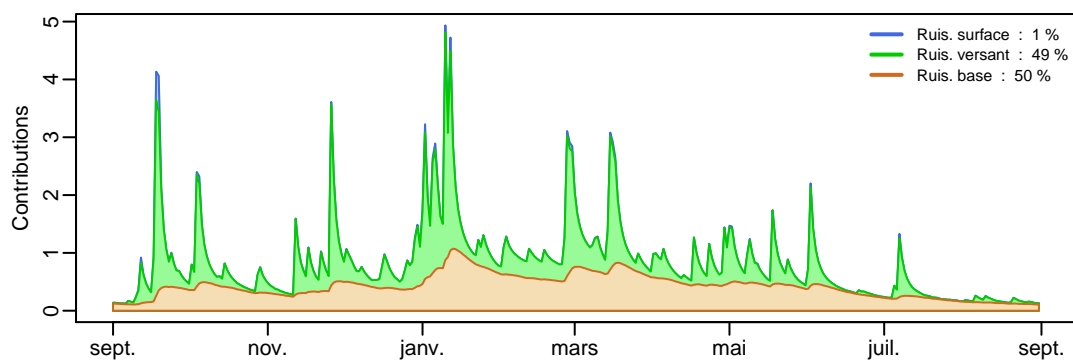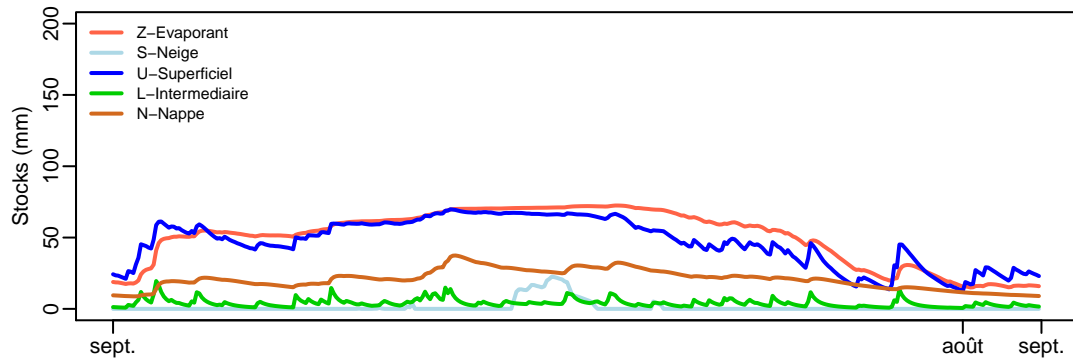

# k0253020 (359.91 km<sup>2</sup>) – année 1996–1997

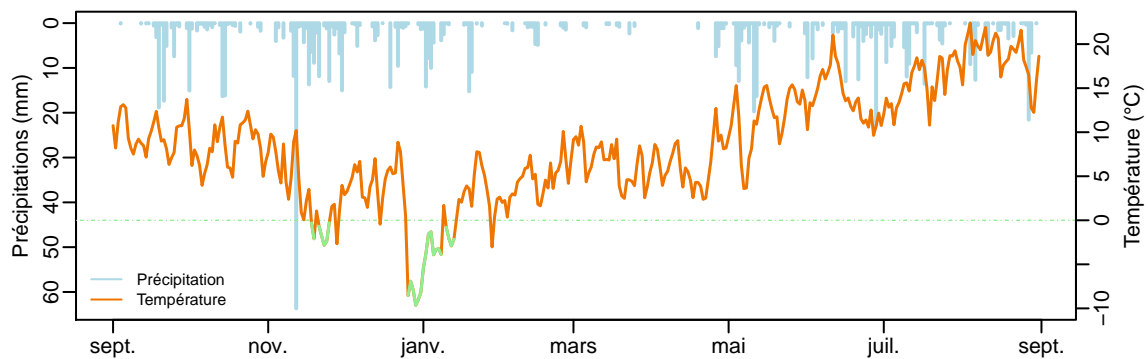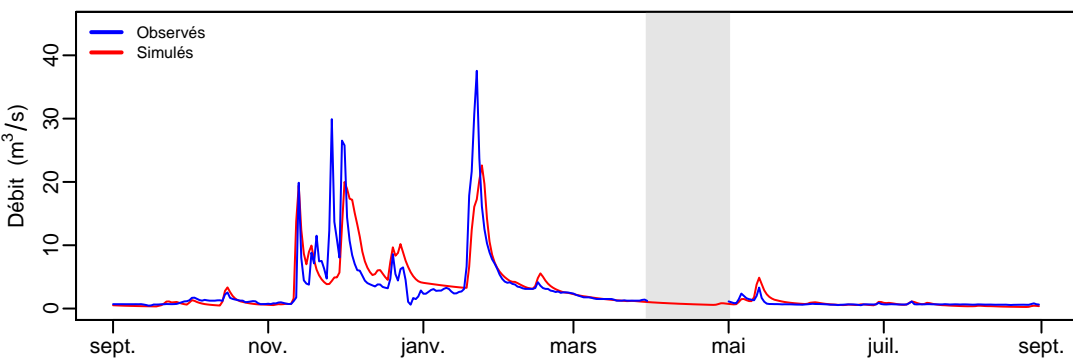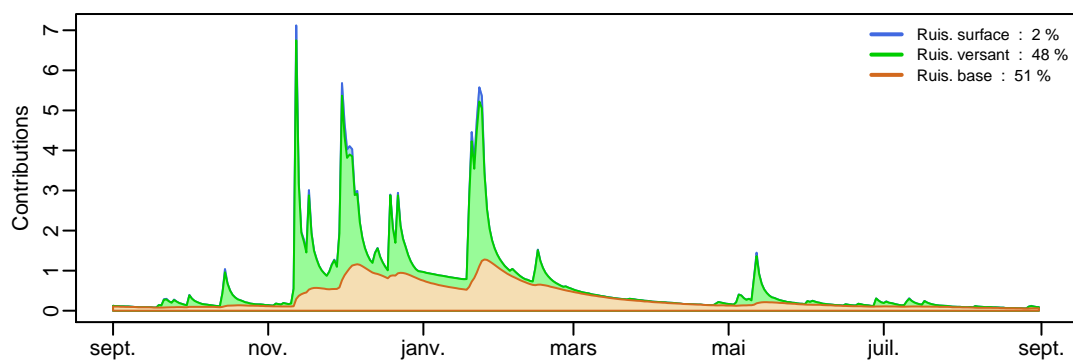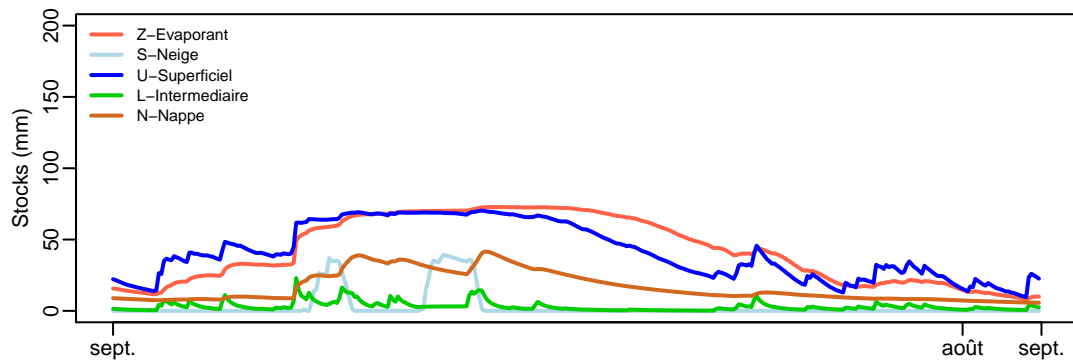

# k0253020 (359.91 km<sup>2</sup>) – année 1997–1998

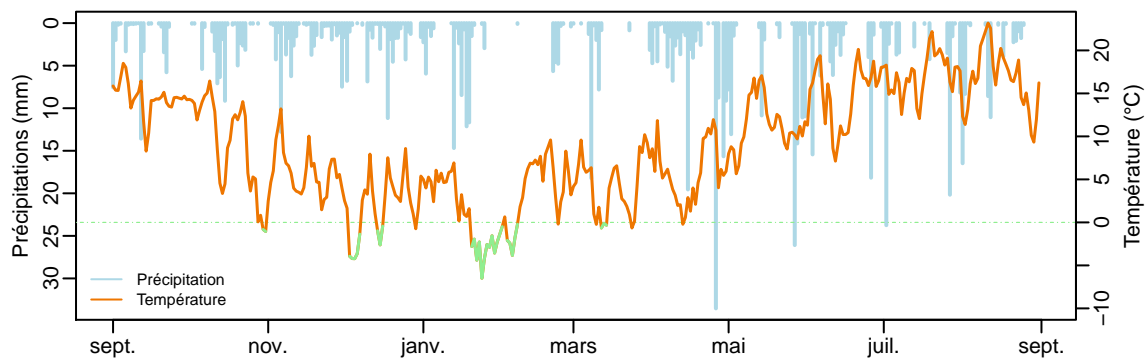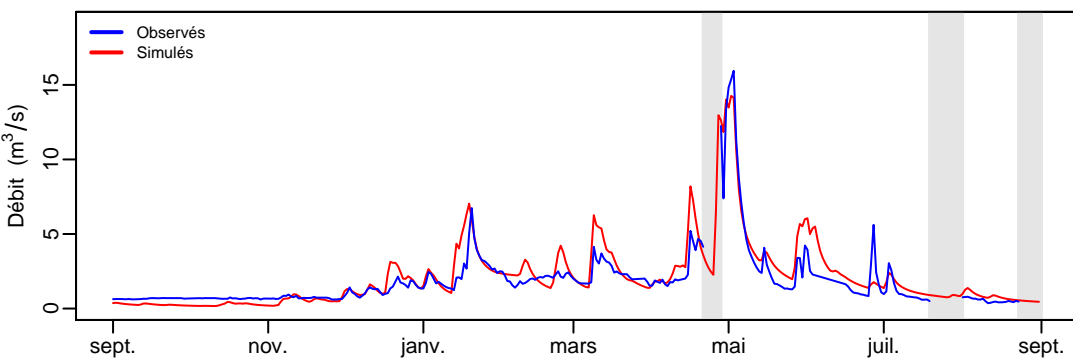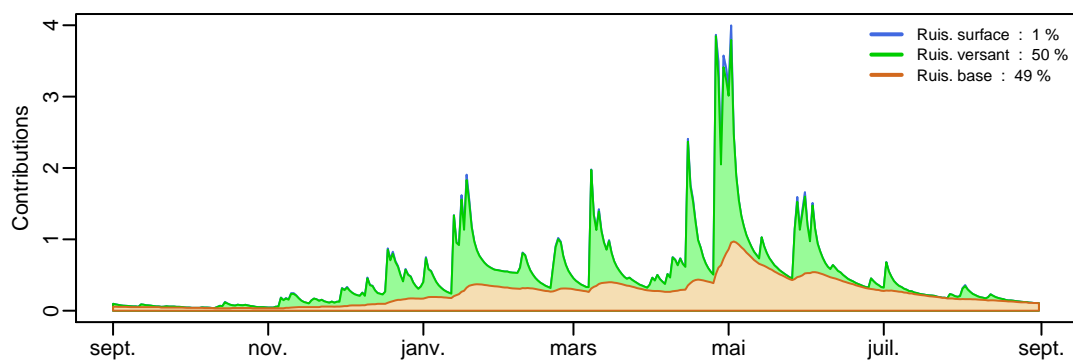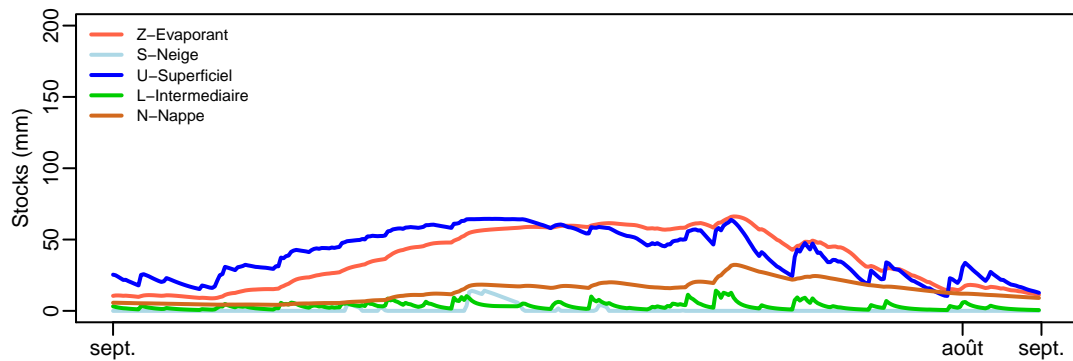



# k0253020 (359.91 km<sup>2</sup>) – année 1998–1999

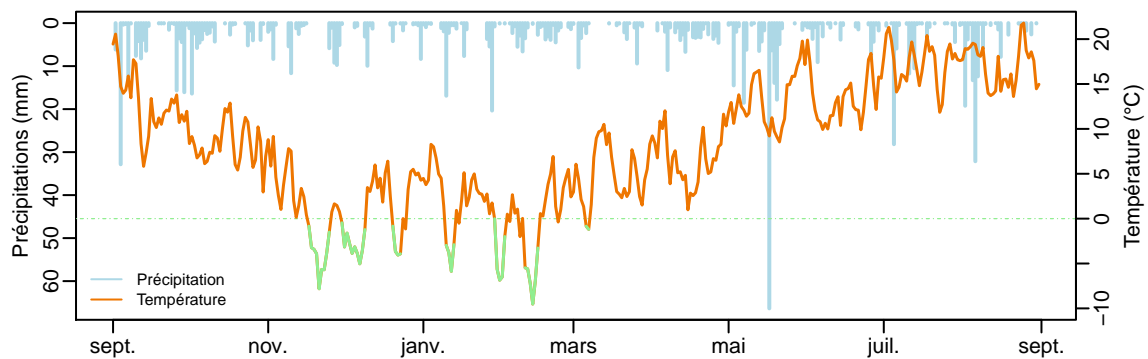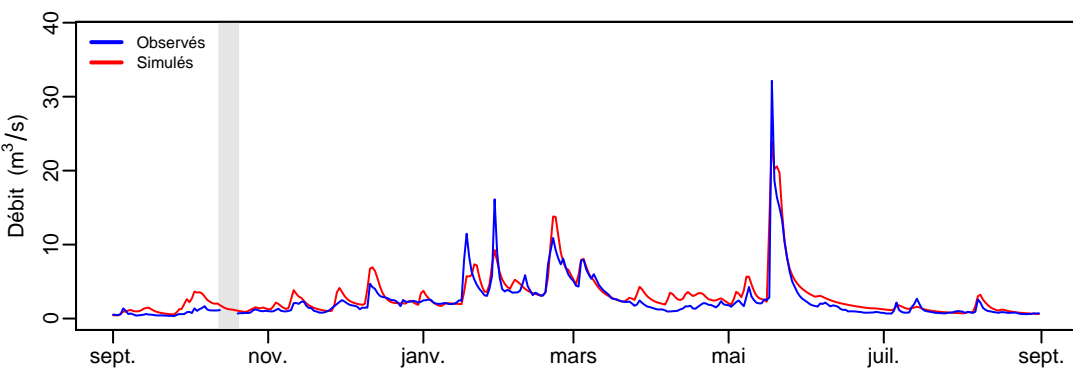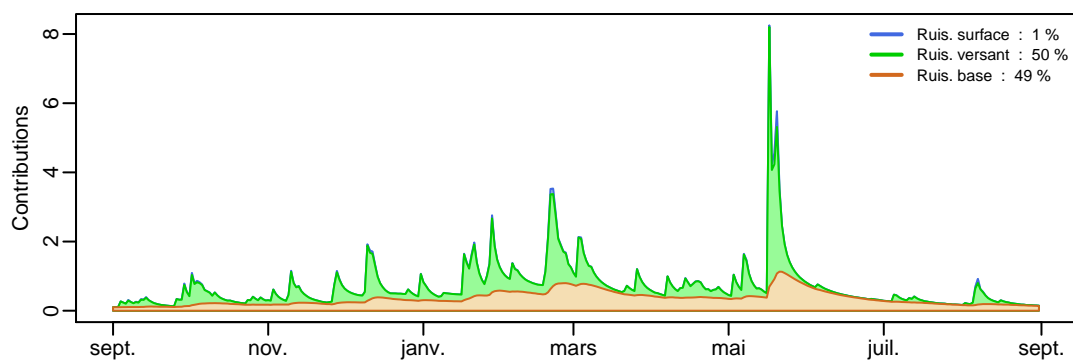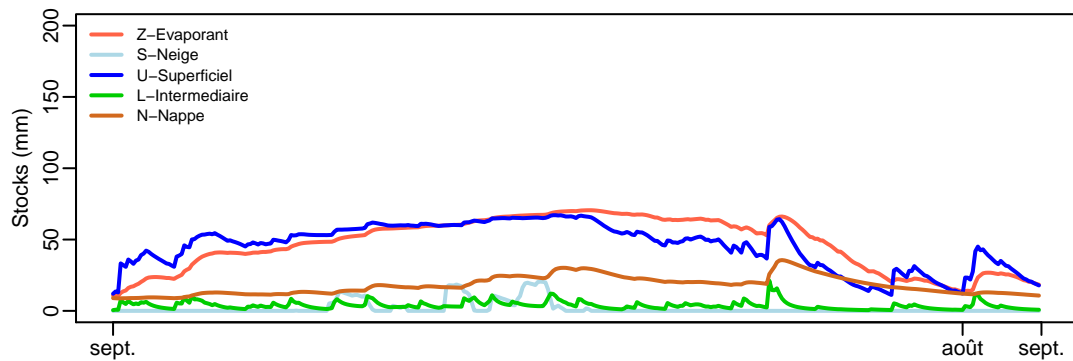

# k0253020 (359.91 km<sup>2</sup>) – année 1999–2000

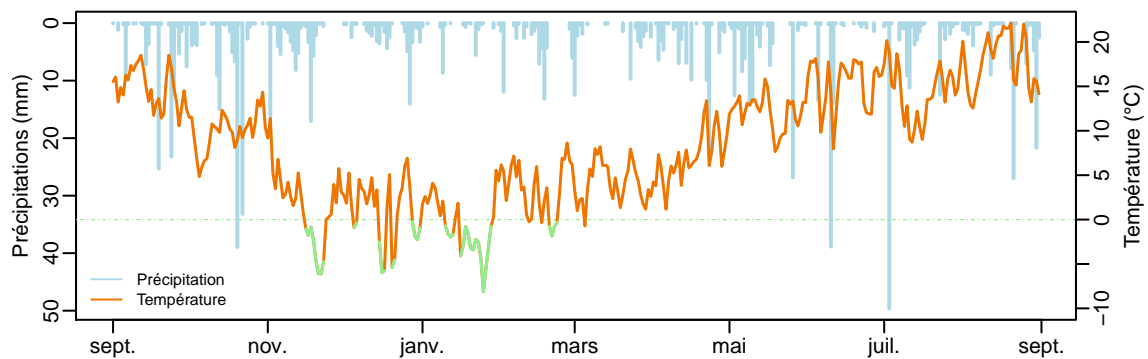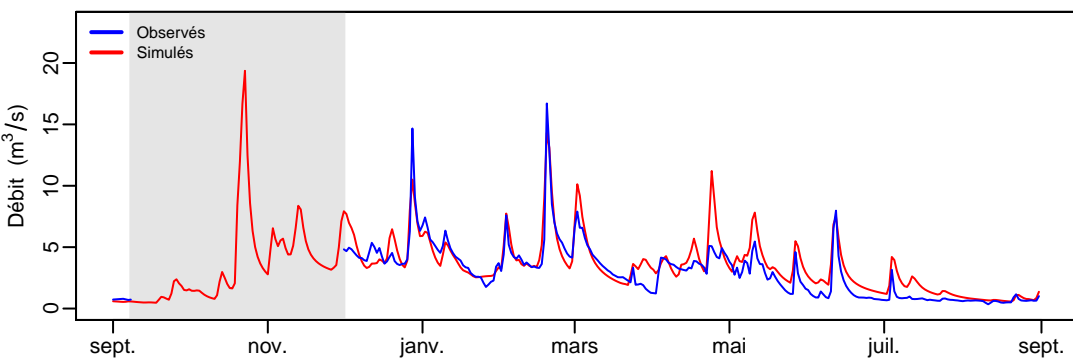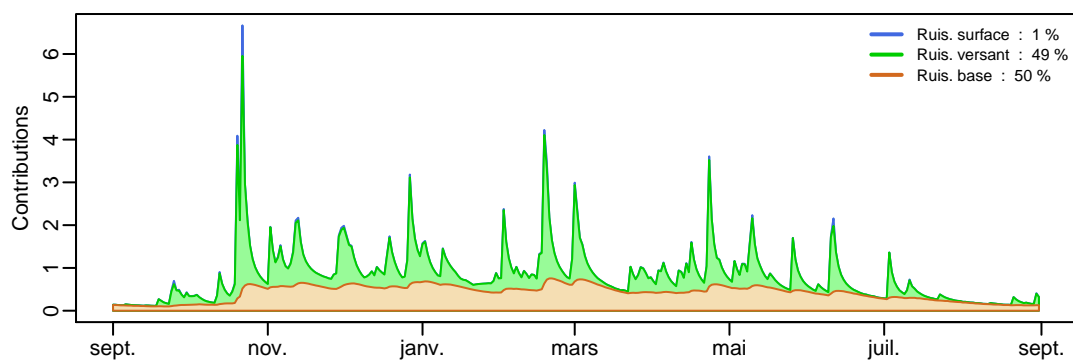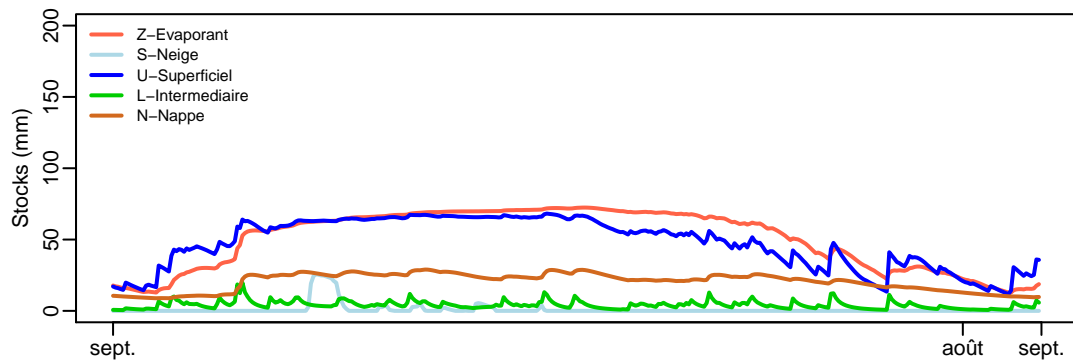

# k0253020 (359.91 km<sup>2</sup>) – année 2000–2001

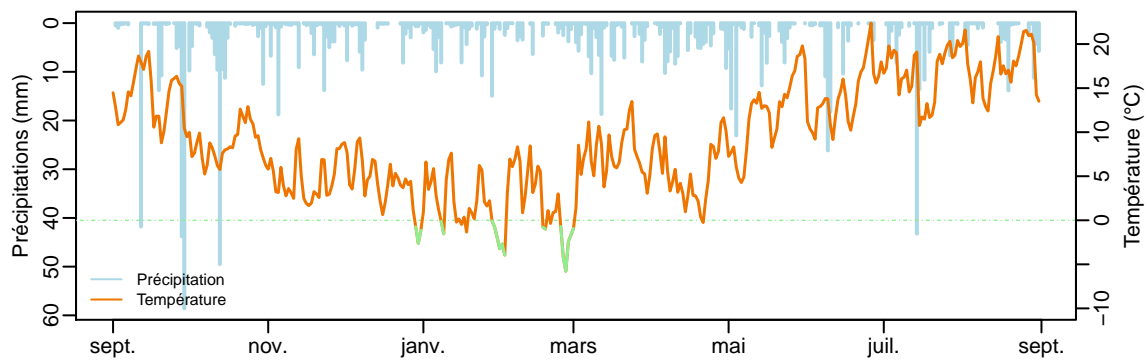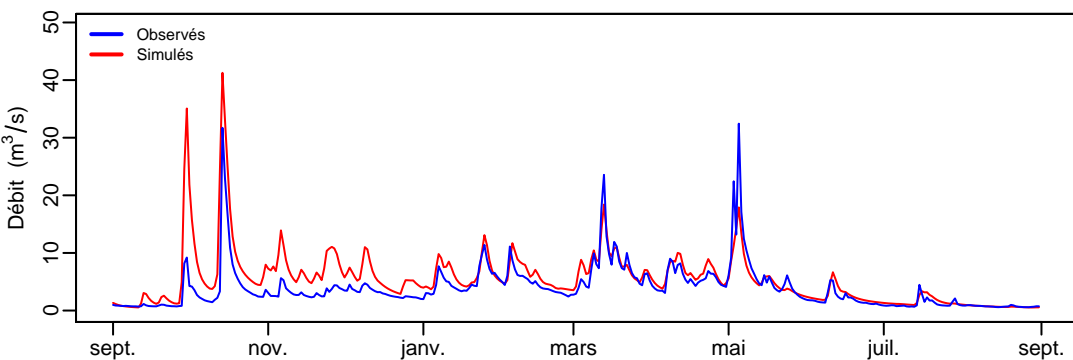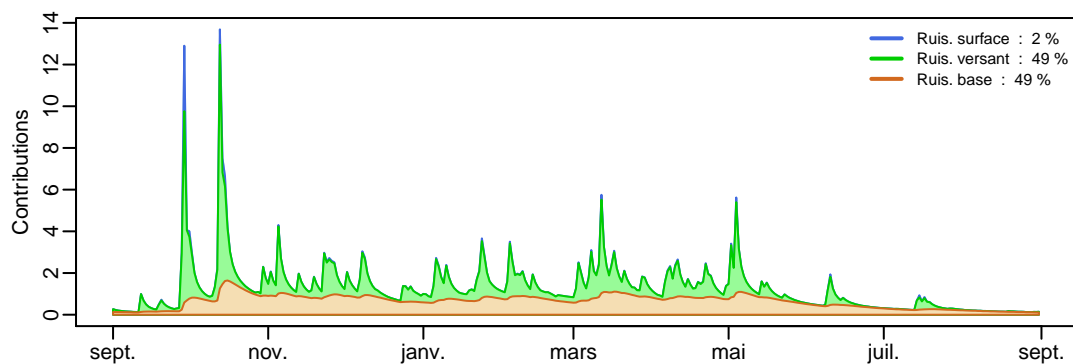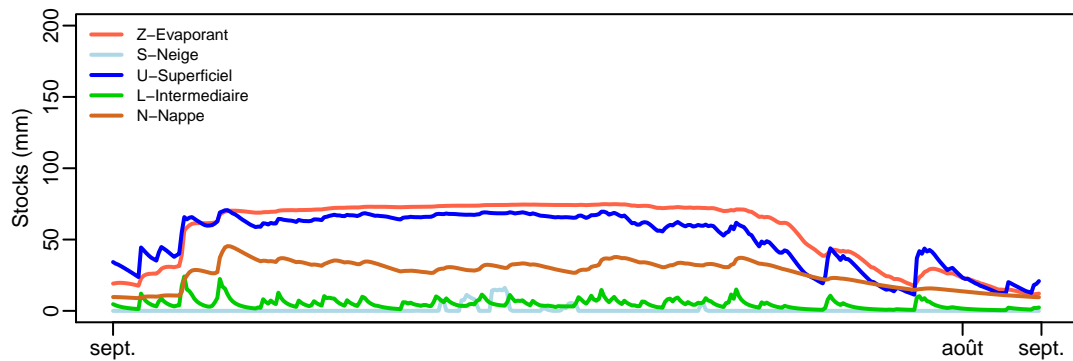

# k0253020 (359.91 km<sup>2</sup>) – année 2001–2002

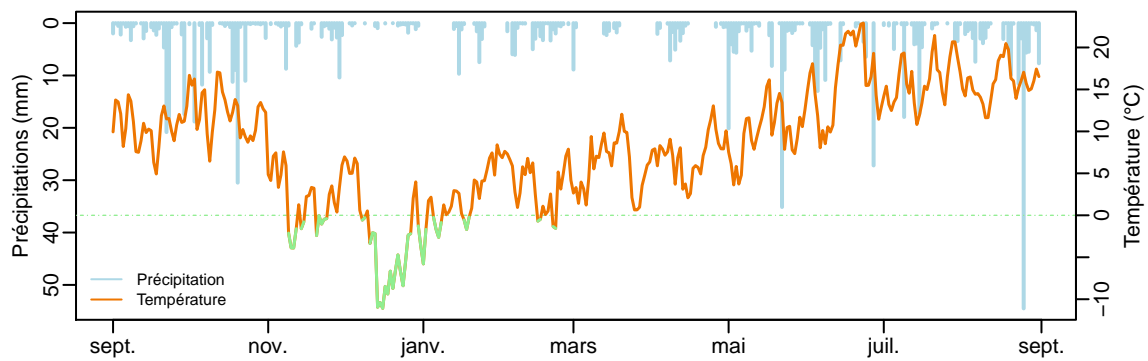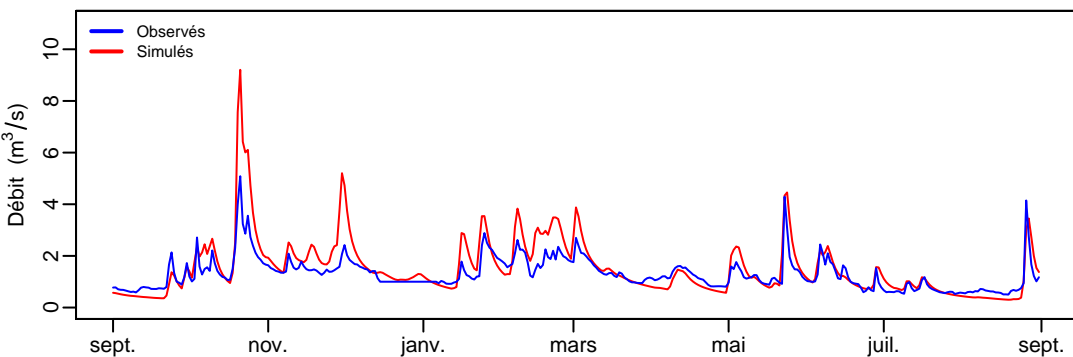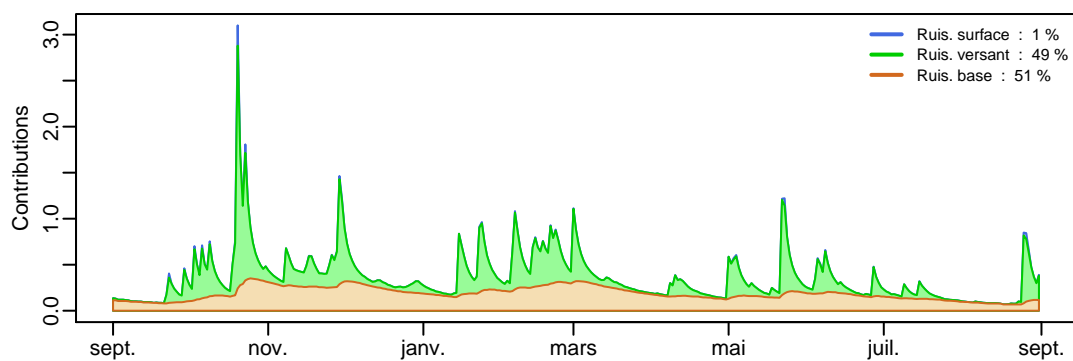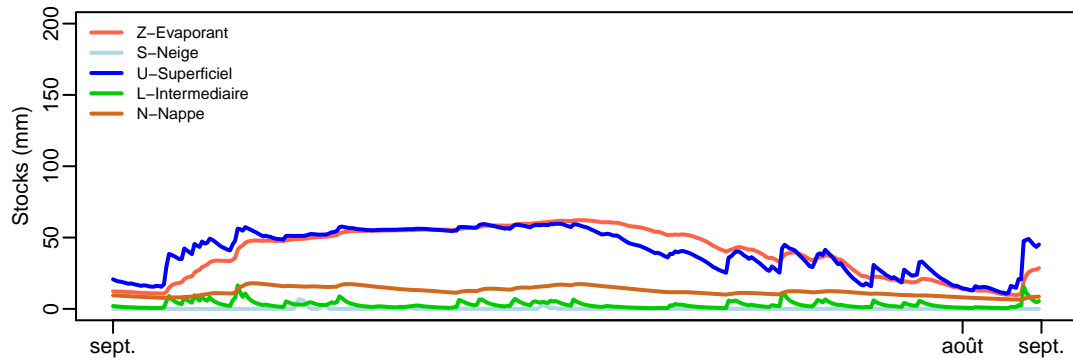

# k0253020 (359.91 km<sup>2</sup>) – année 2002–2003

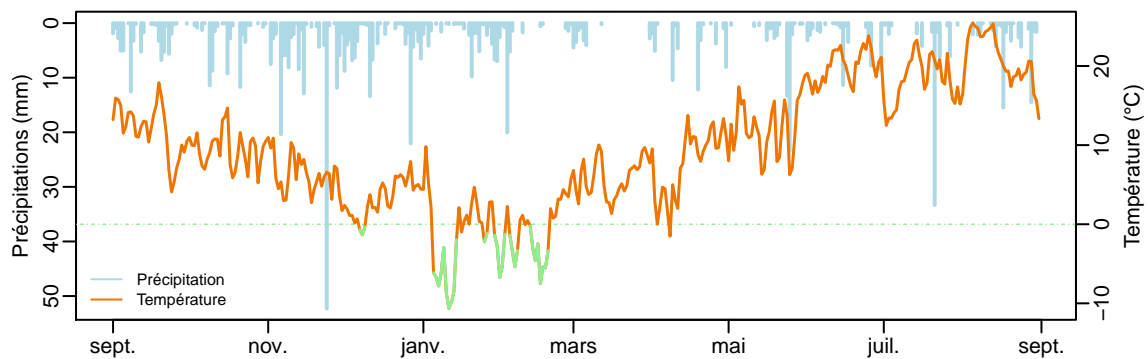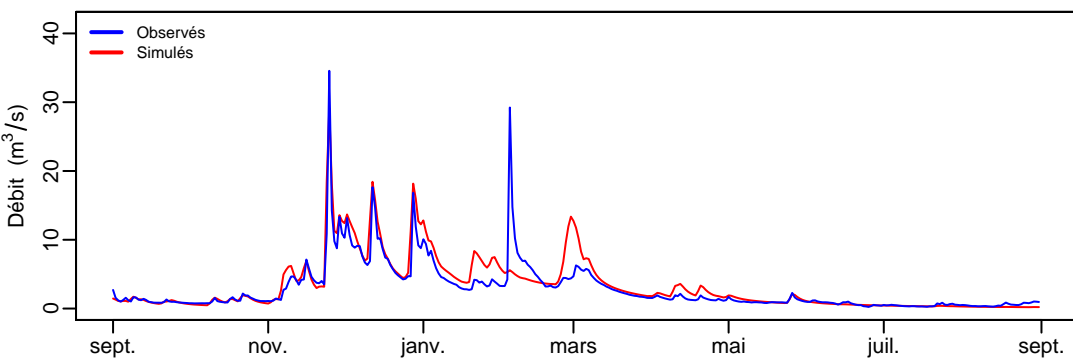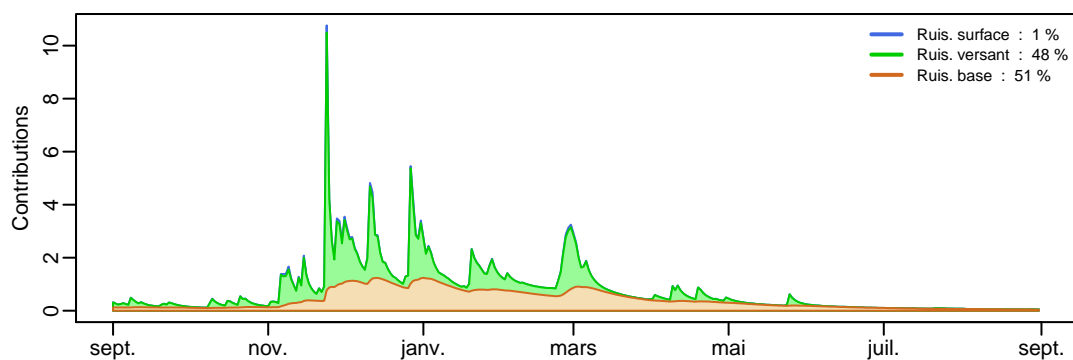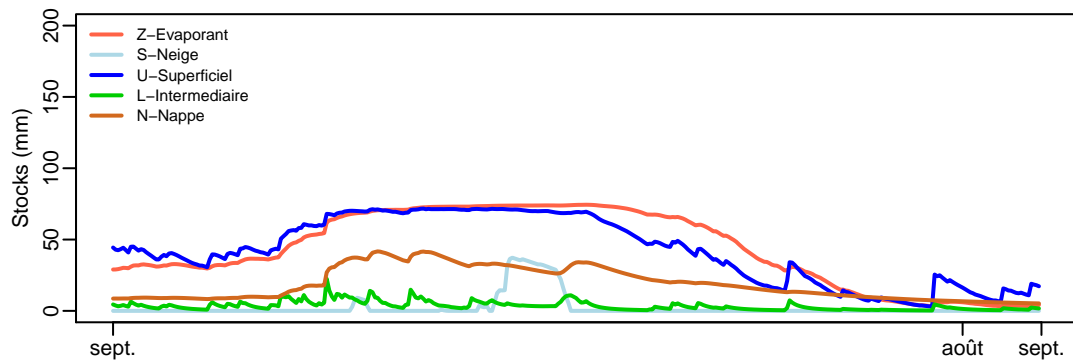

# k0253020 (359.91 km<sup>2</sup>) – année 2003–2004

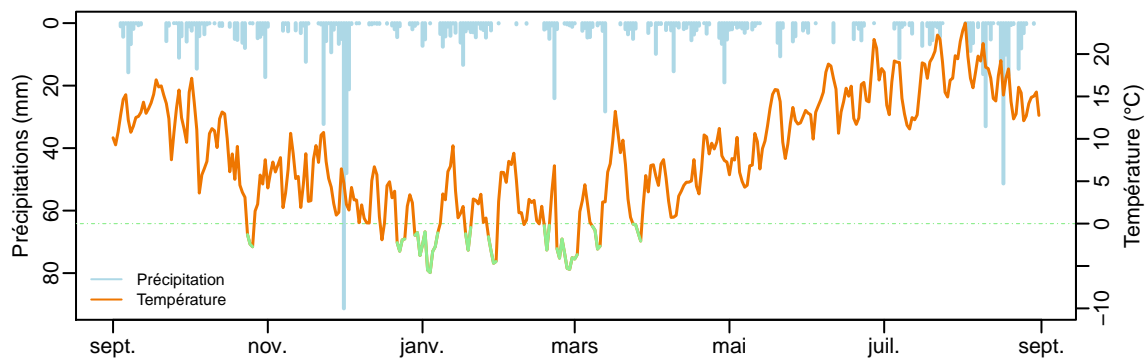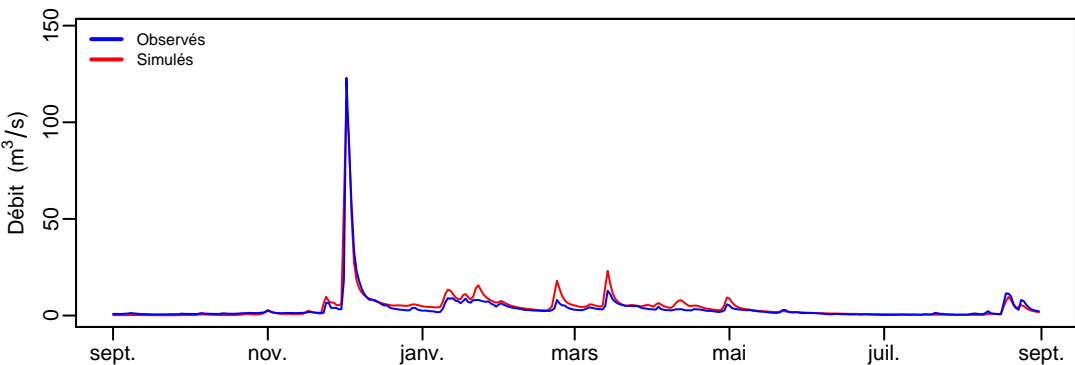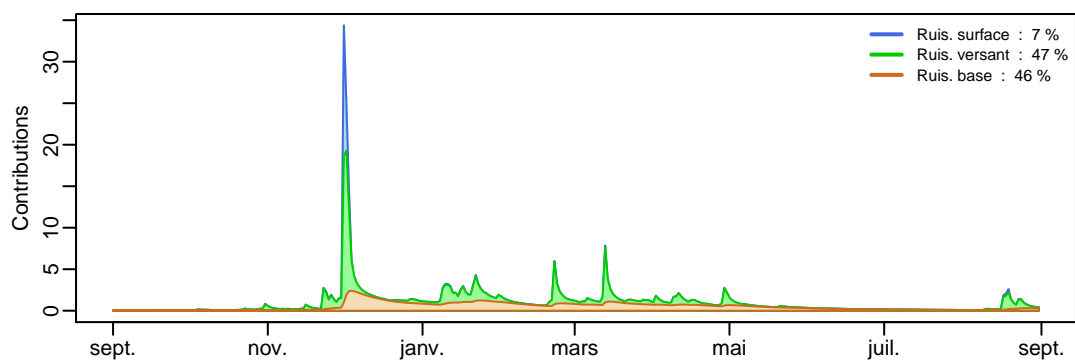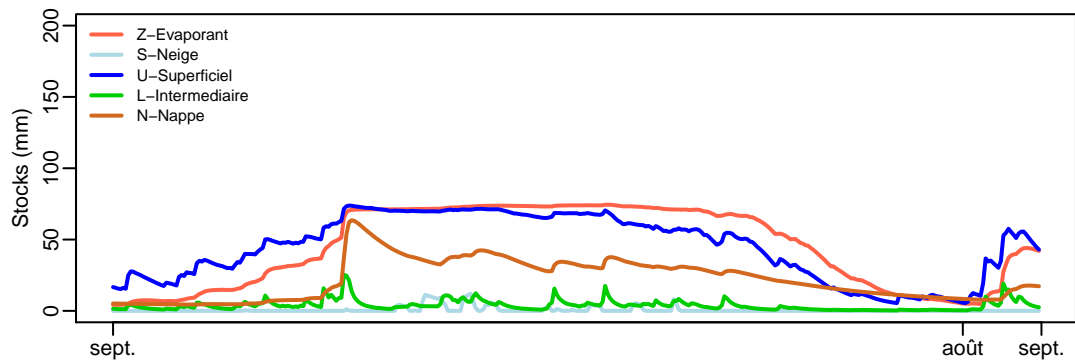

# k0253020 (359.91 km<sup>2</sup>) – année 2004–2005

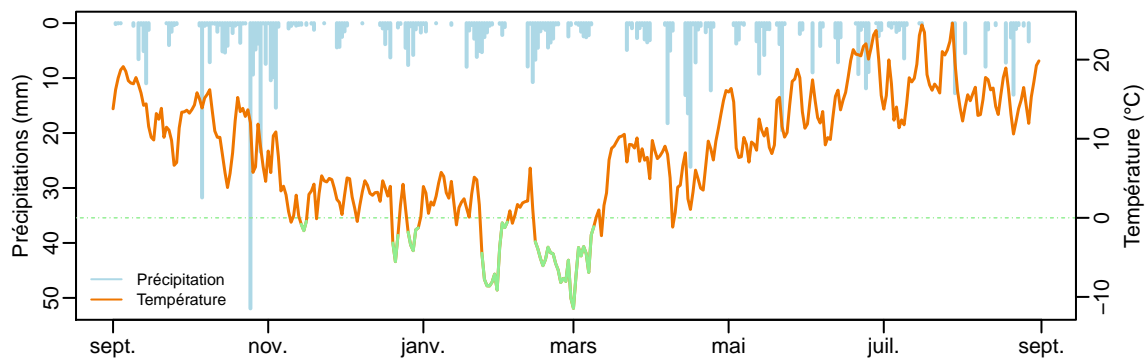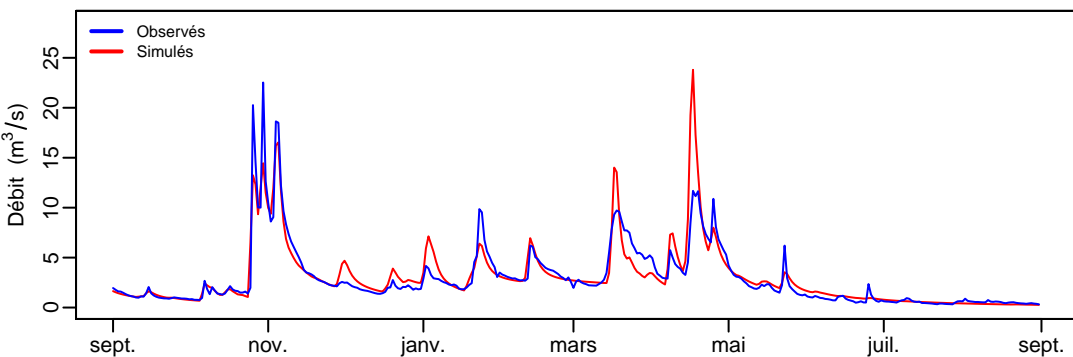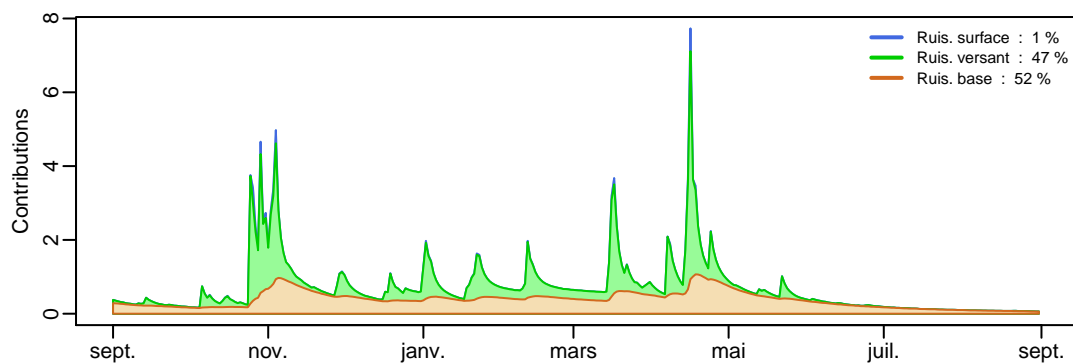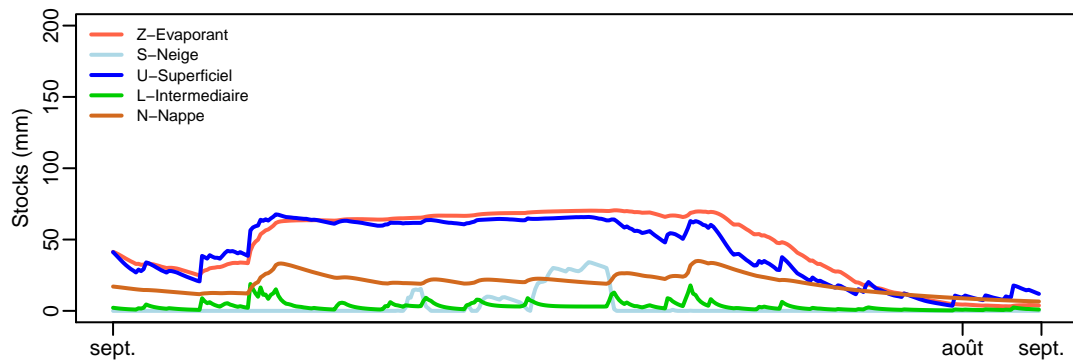

# k0253020 (359.91 km<sup>2</sup>) – année 2005–2006

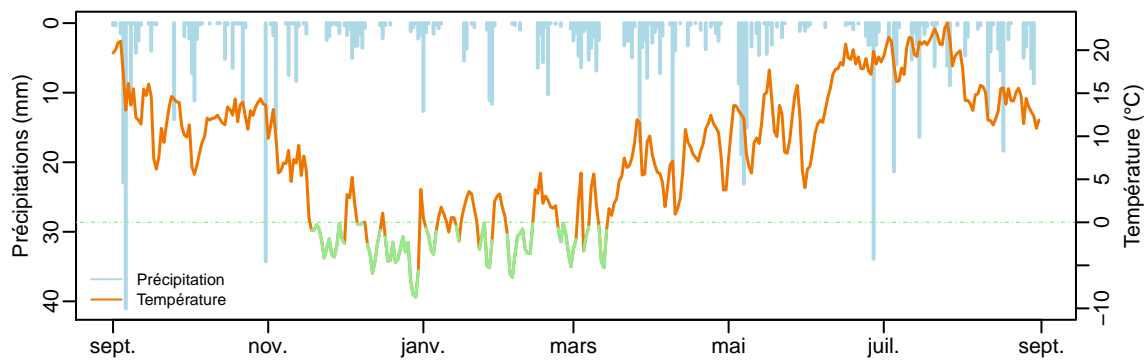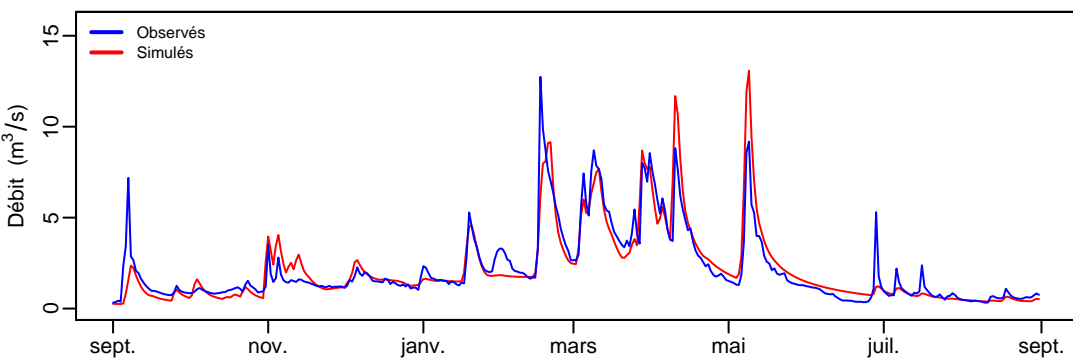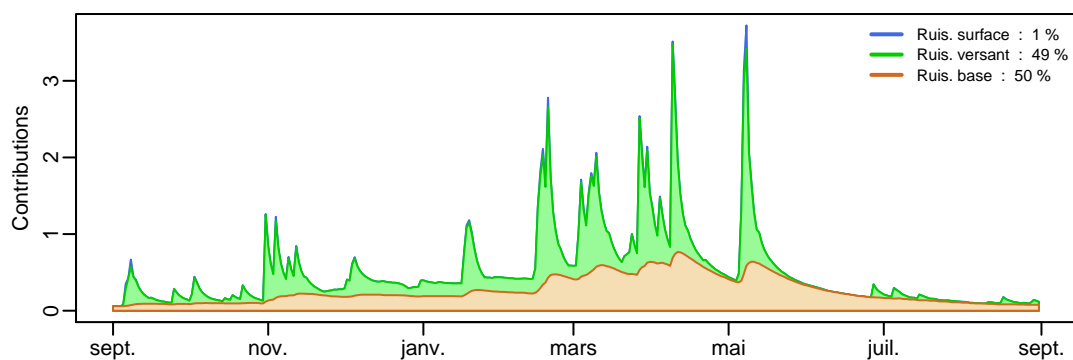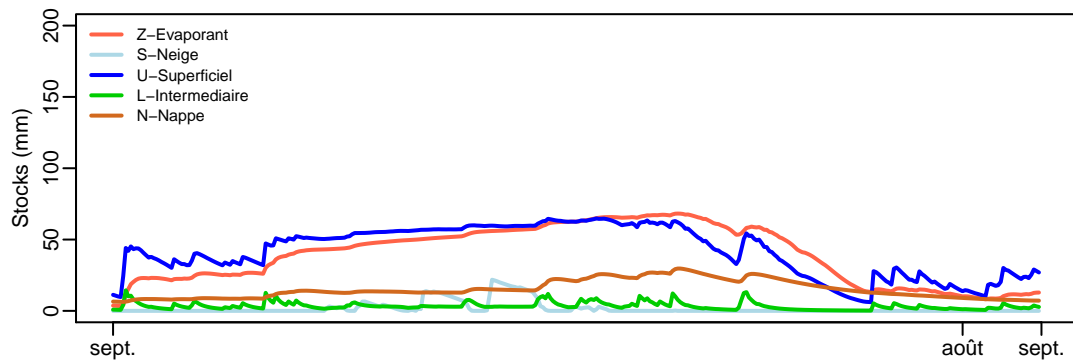



# k0253020 (359.91 km<sup>2</sup>) – année 2006–2007

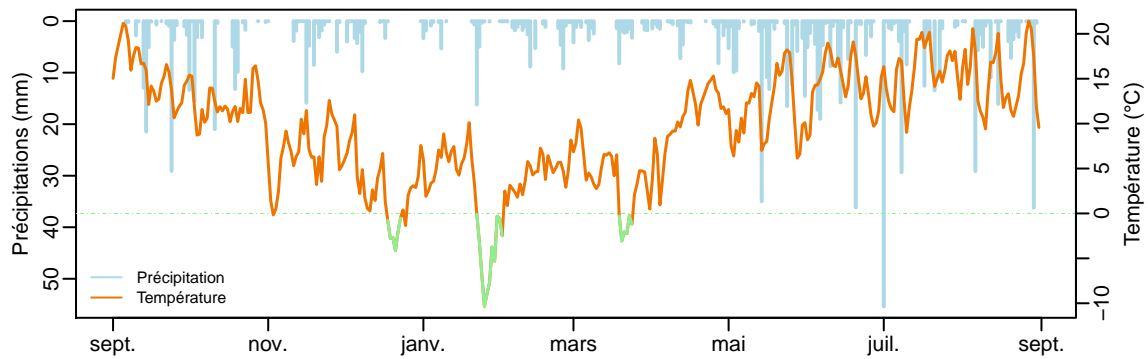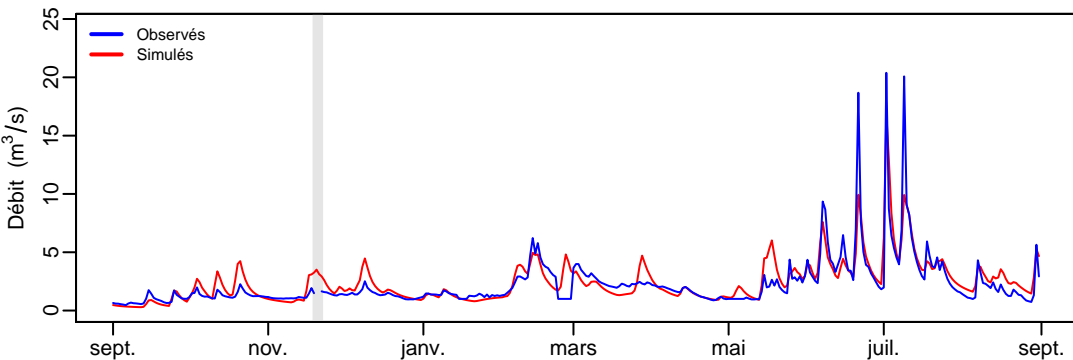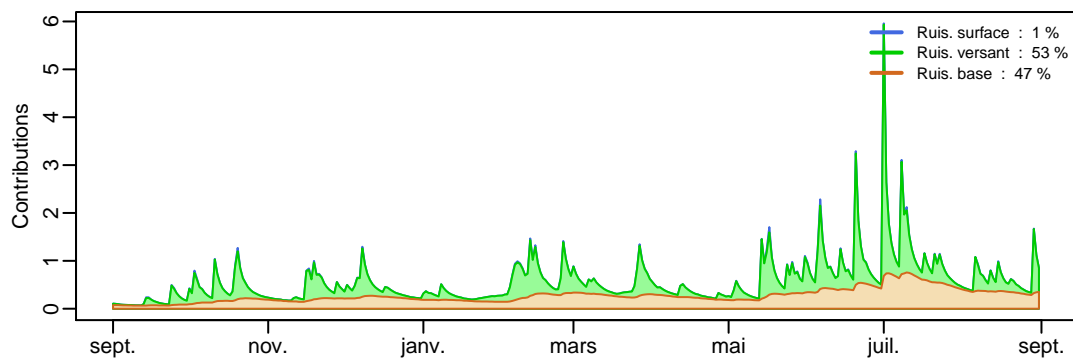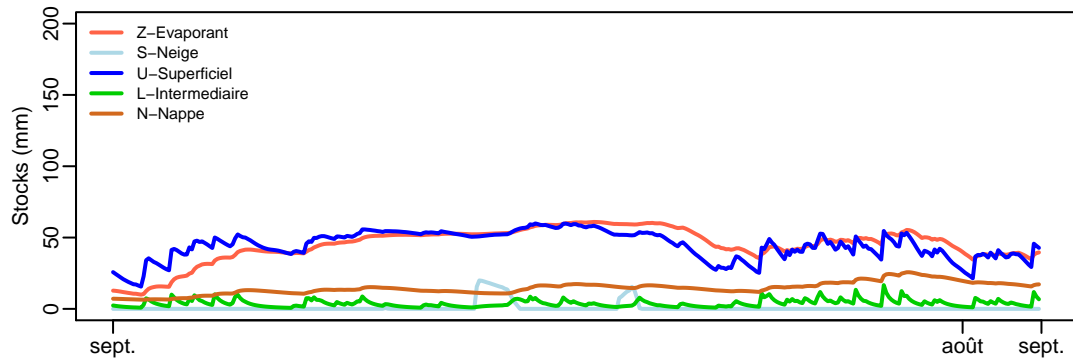

# k0253020 (359.91 km<sup>2</sup>) – année 2007–2008

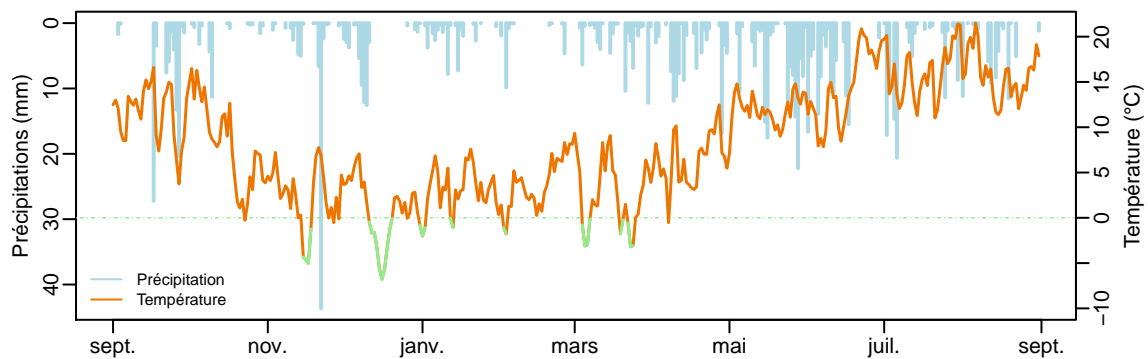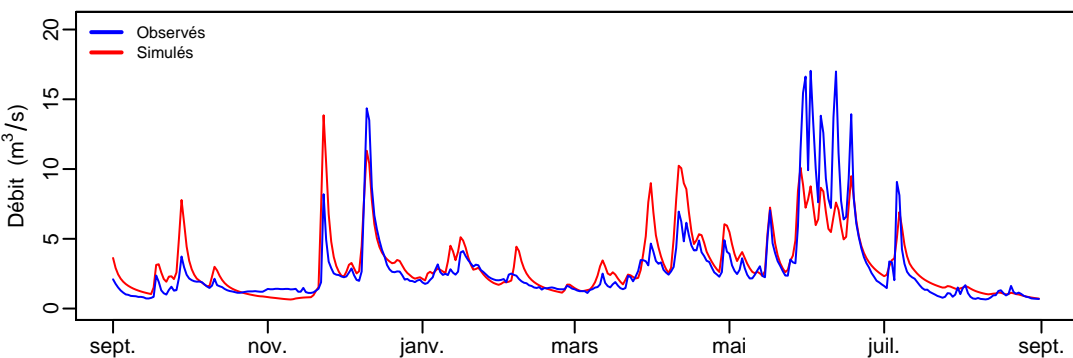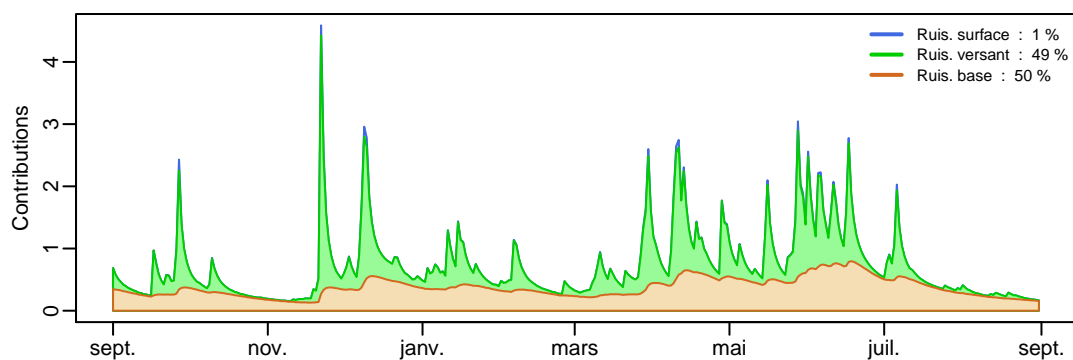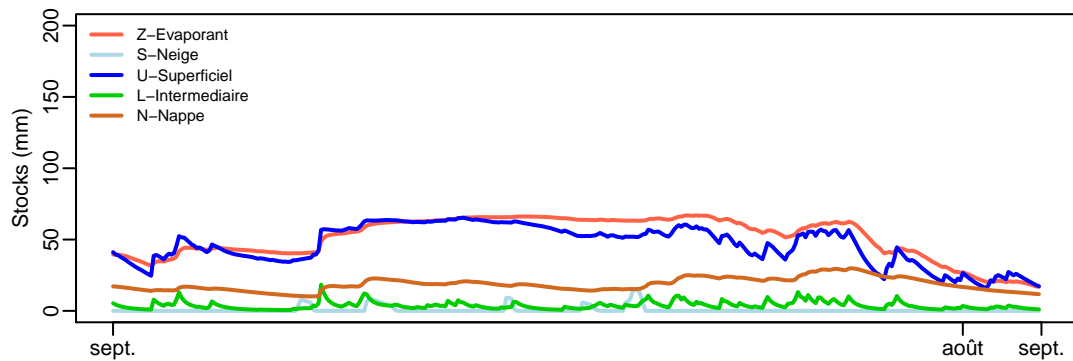

# k0253020 (359.91 km<sup>2</sup>) – année 2008–2009

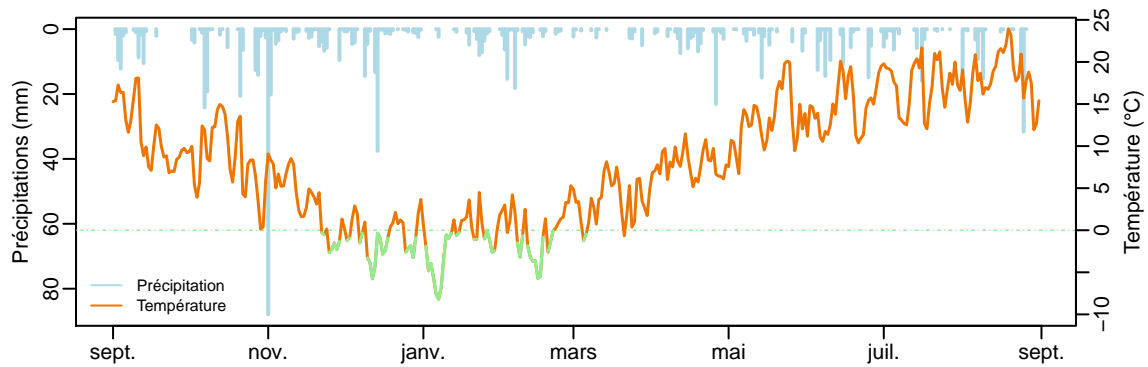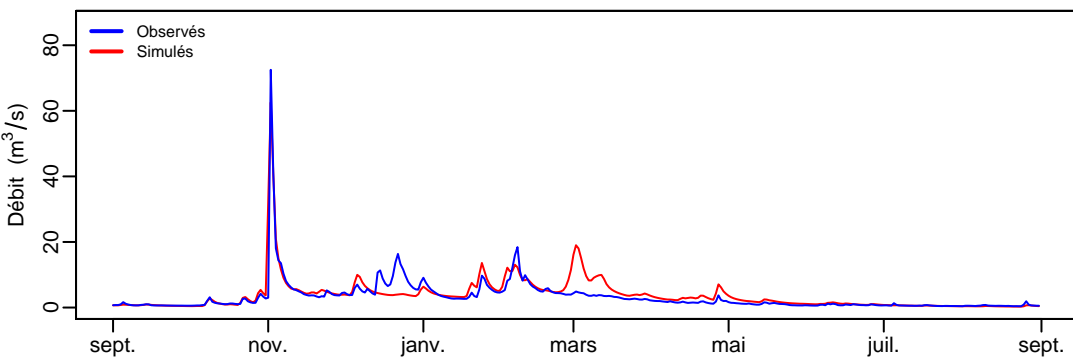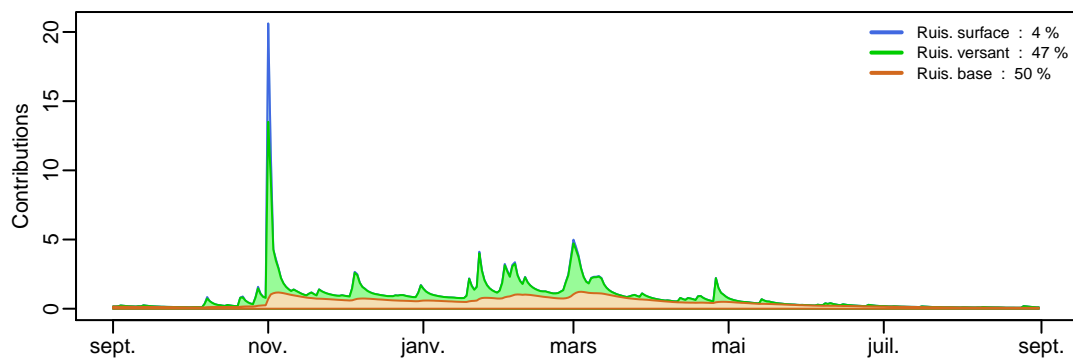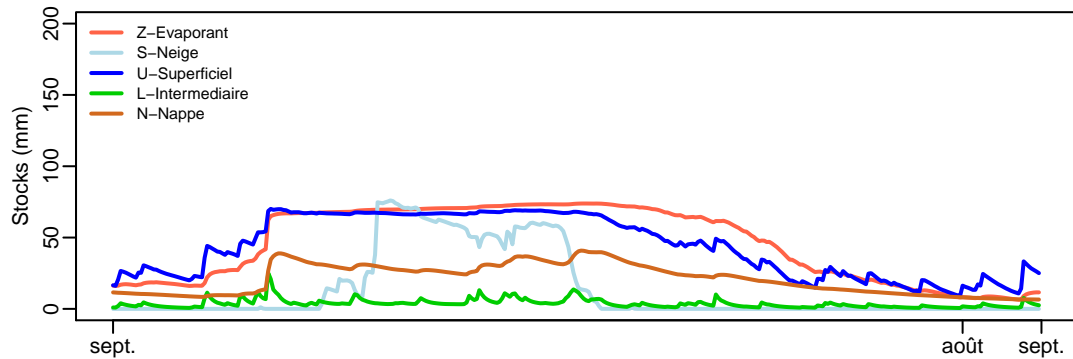

# k0260020 (1325.7 km<sup>2</sup>) – année 1998–1999

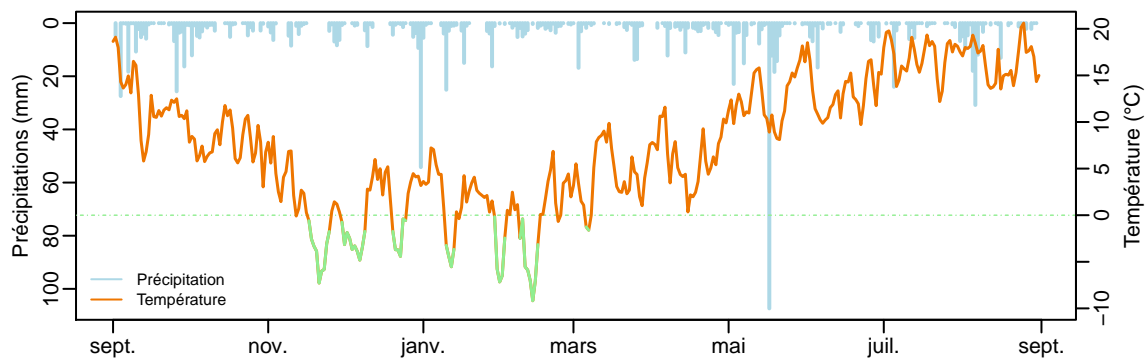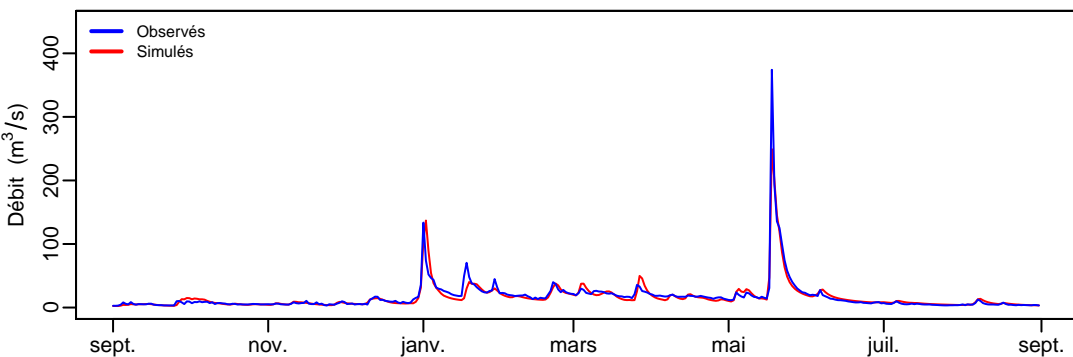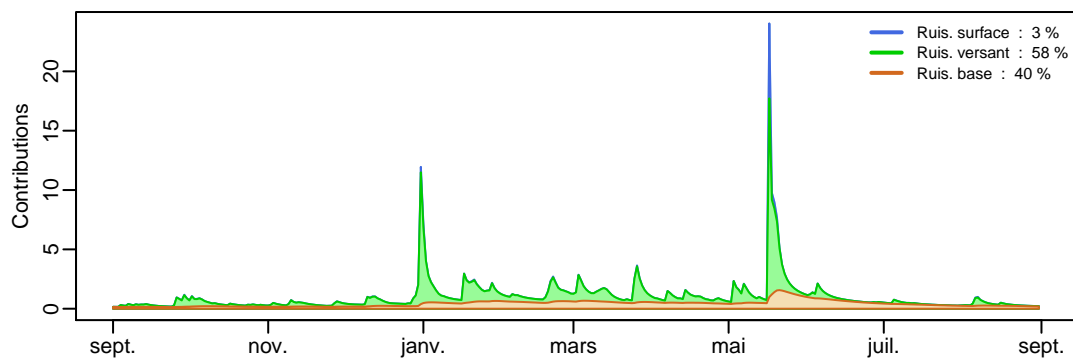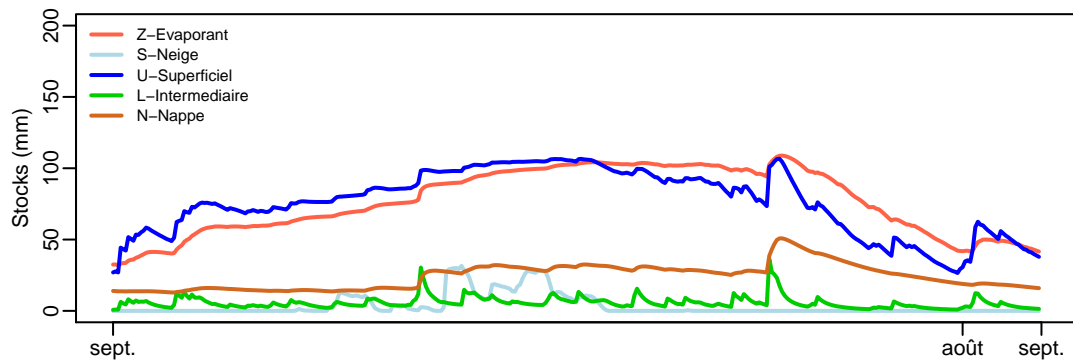

# k0260020 (1325.7 km<sup>2</sup>) – année 1999–2000

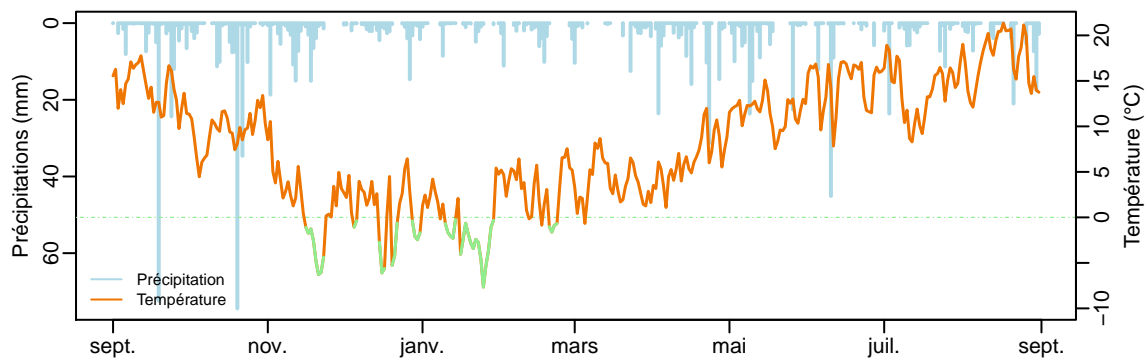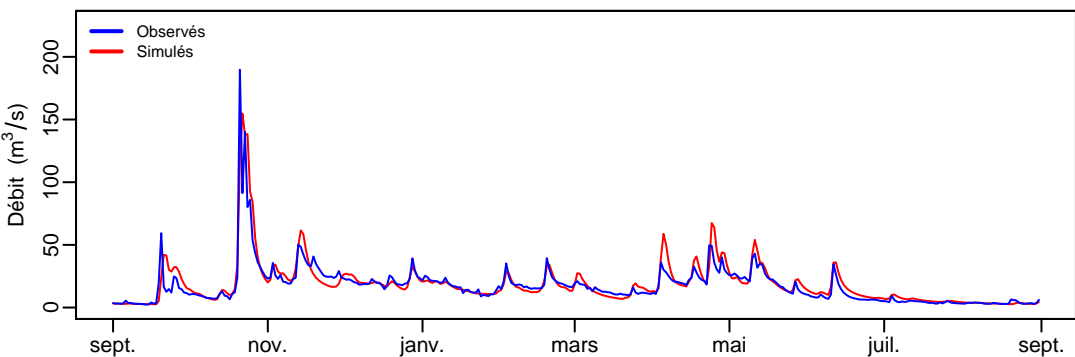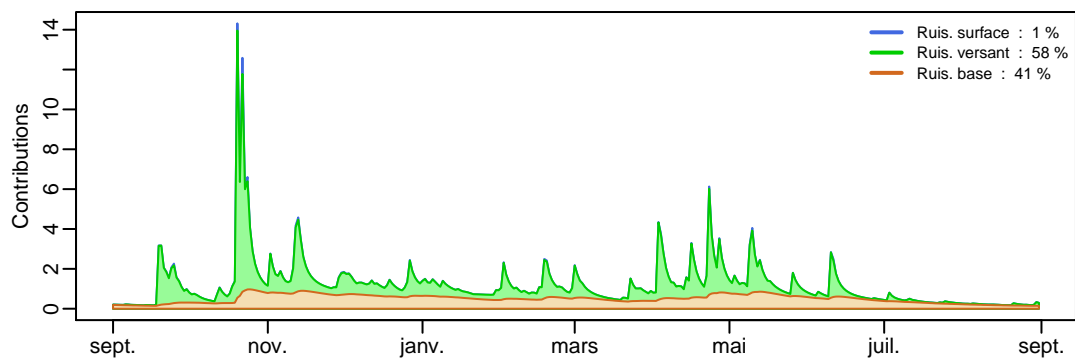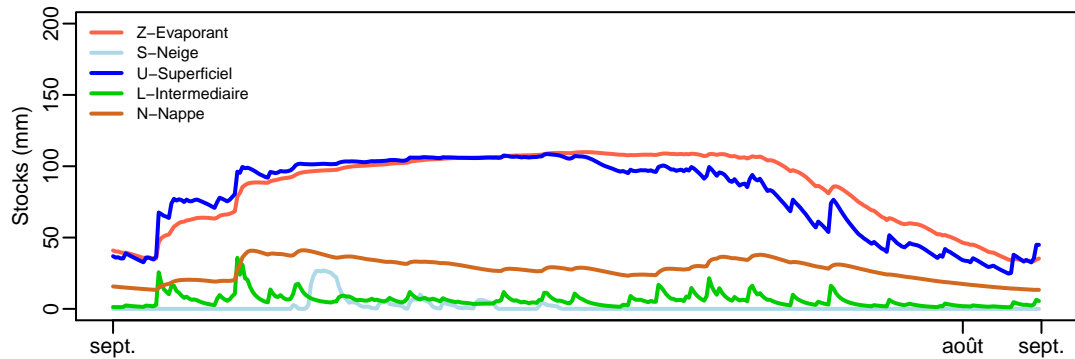

# k0260020 (1325.7 km<sup>2</sup>) – année 2000–2001

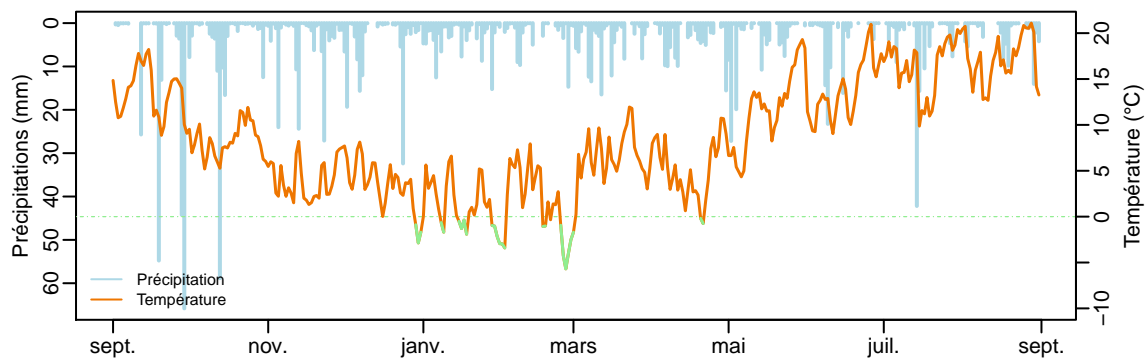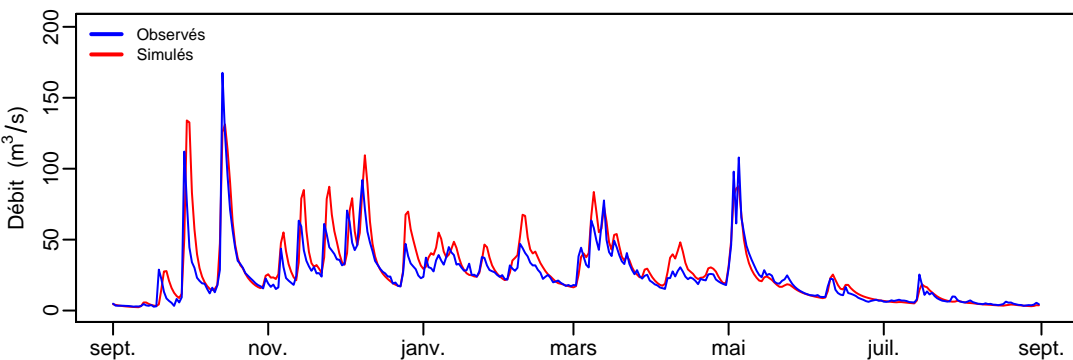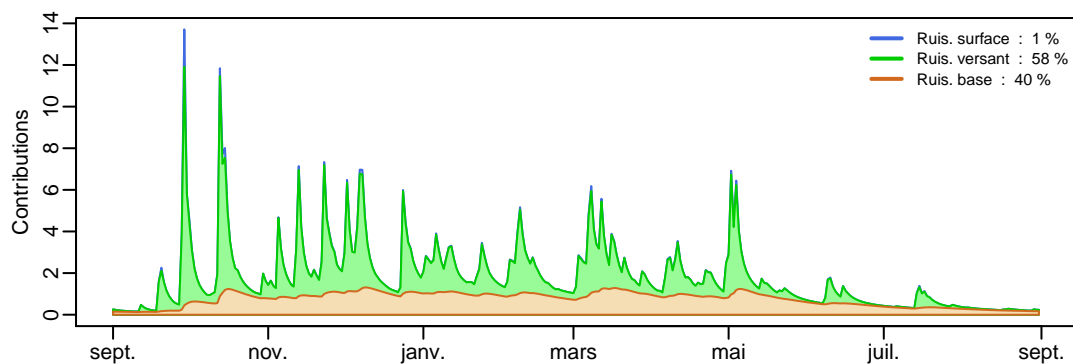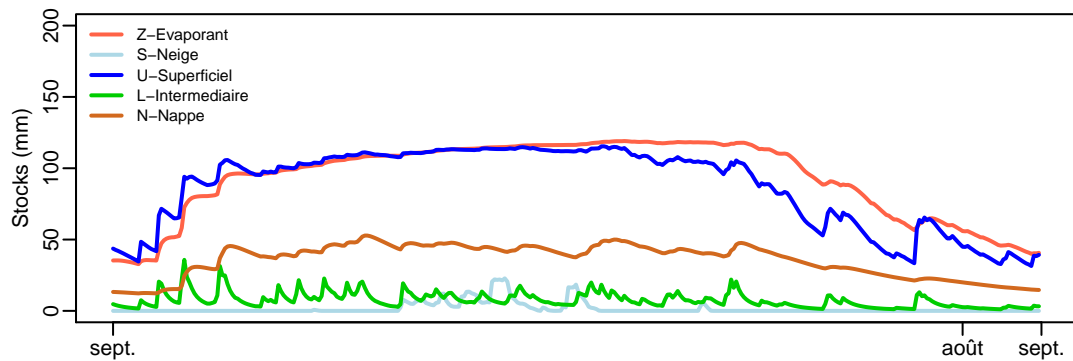

# k0260020 (1325.7 km<sup>2</sup>) – année 2001–2002

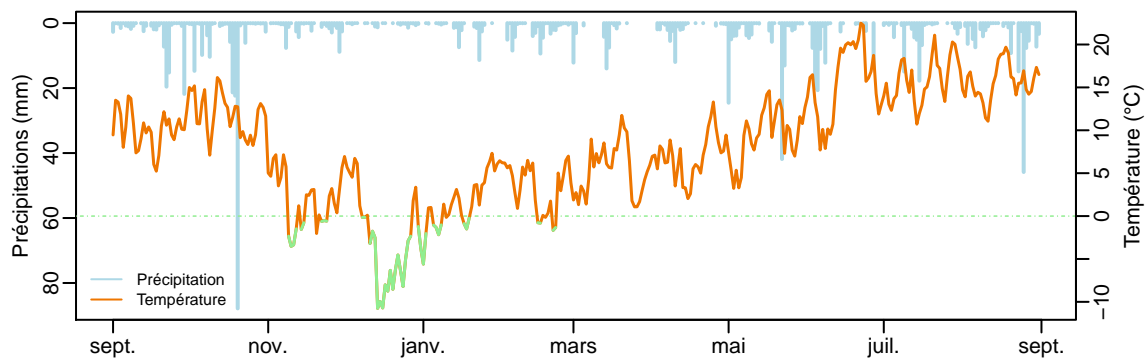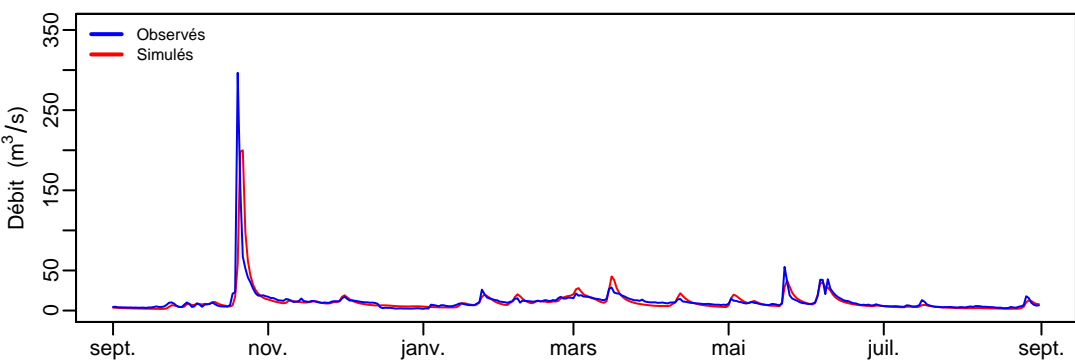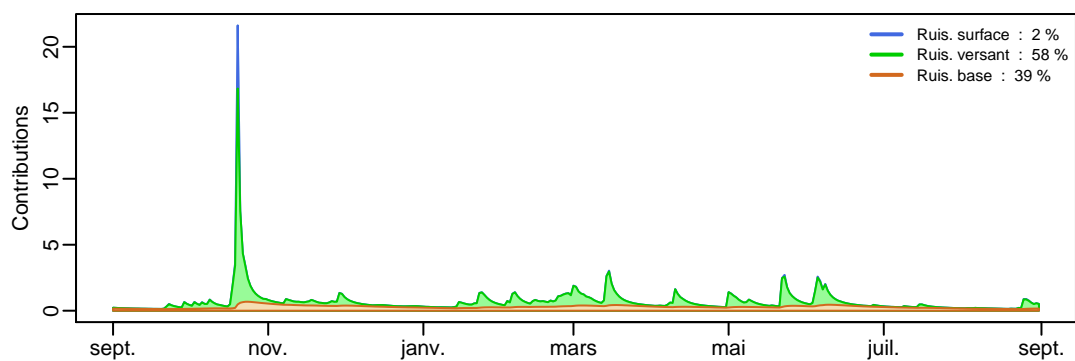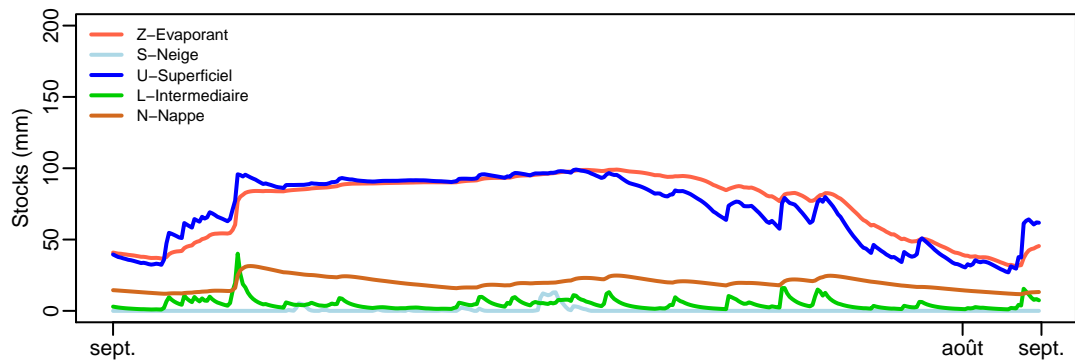

# k0260020 (1325.7 km<sup>2</sup>) – année 2002–2003

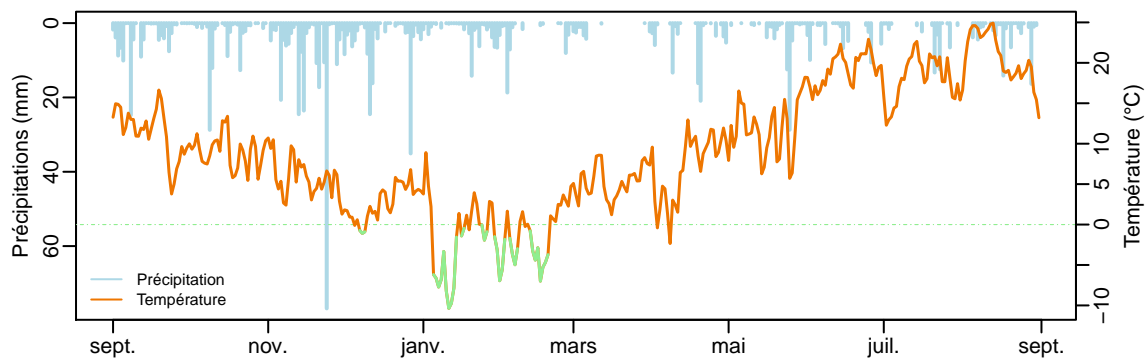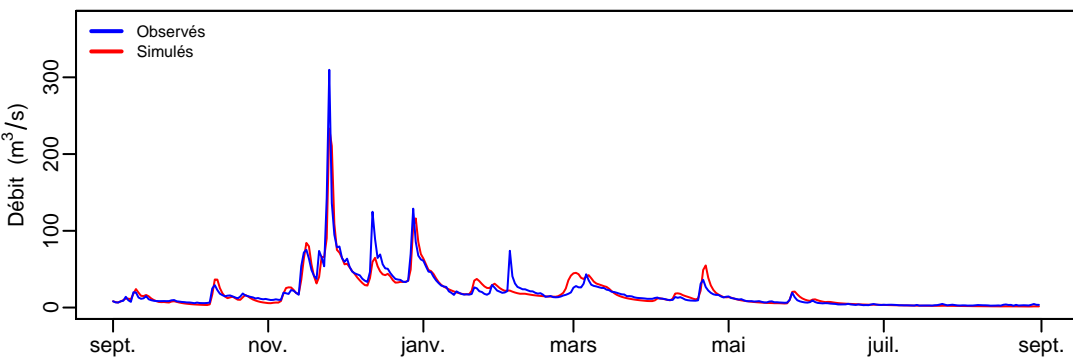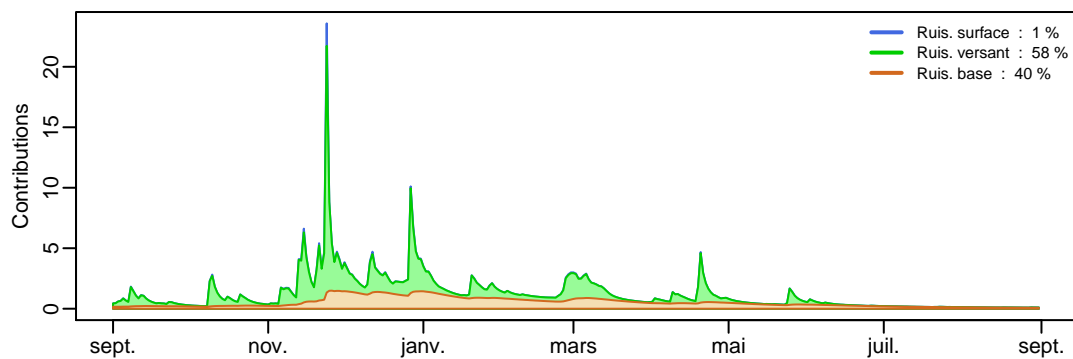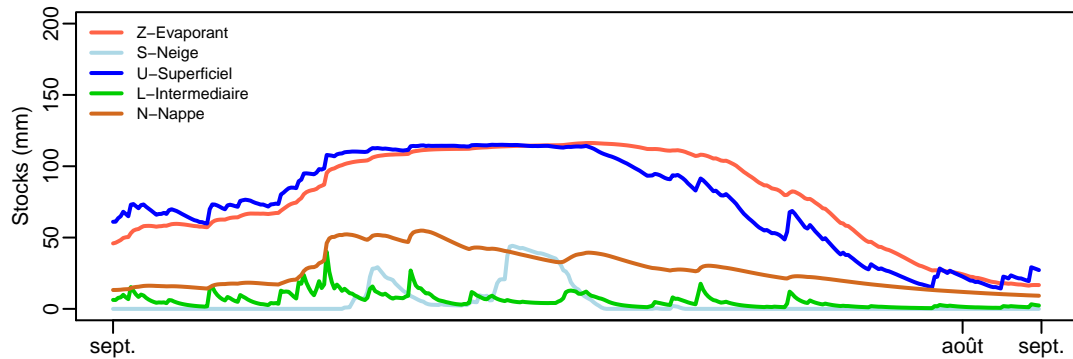



# k0260020 (1325.7 km<sup>2</sup>) – année 2003–2004

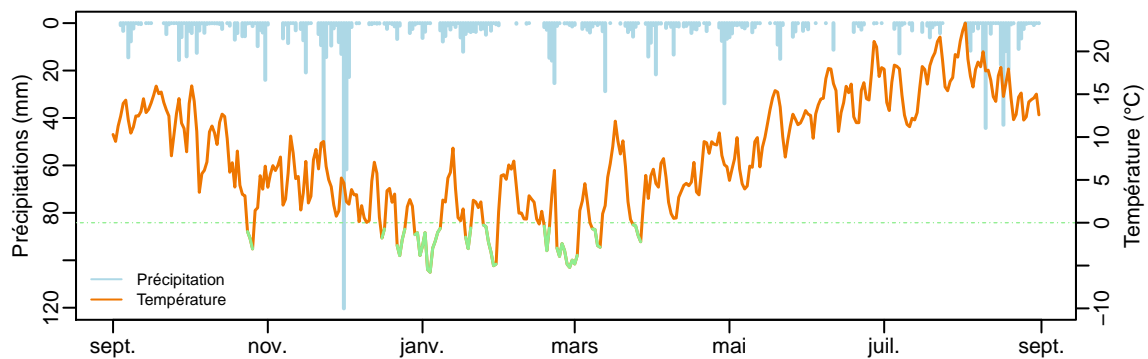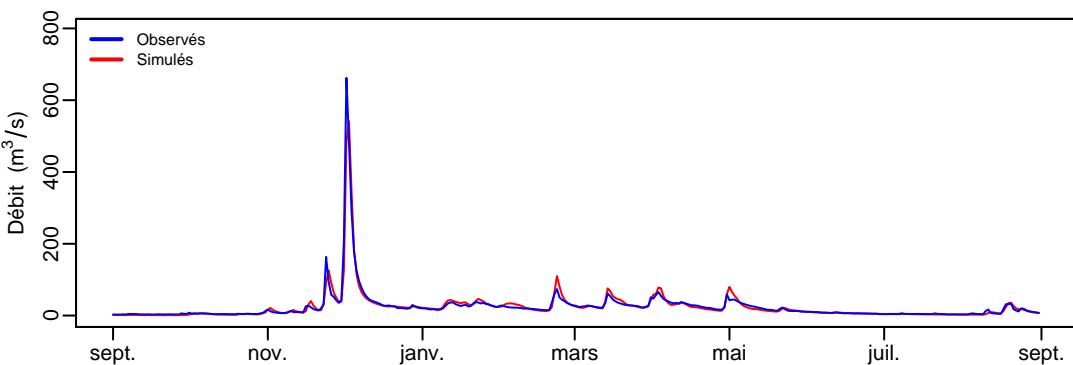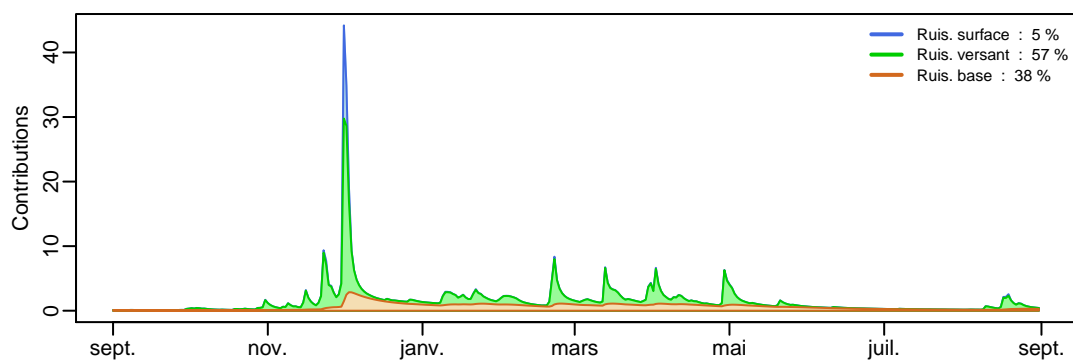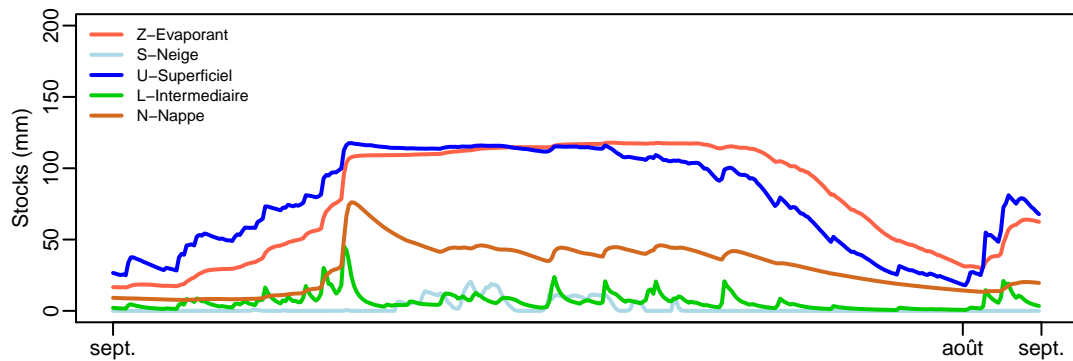

# k0260020 (1325.7 km<sup>2</sup>) – année 2004–2005

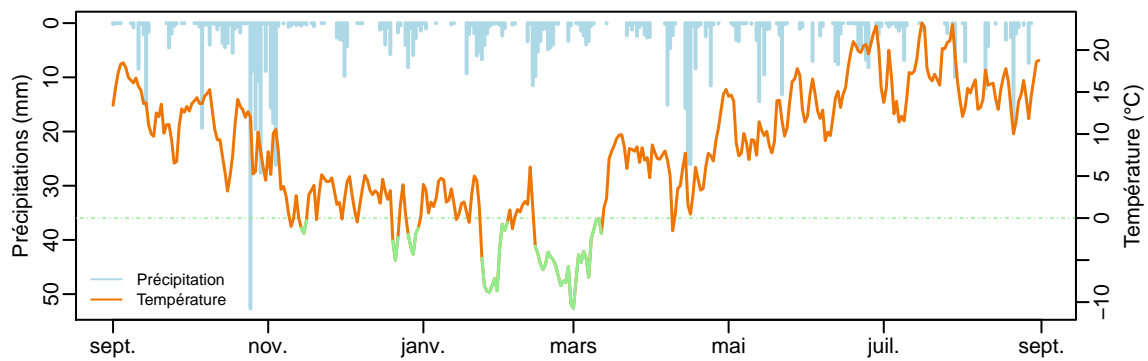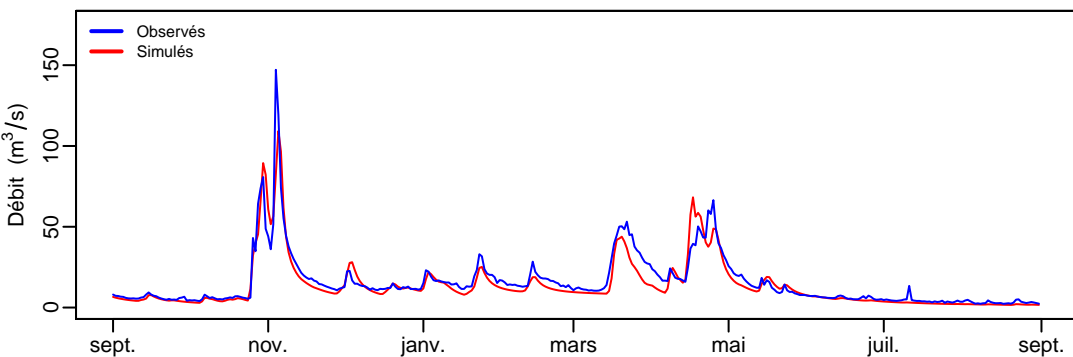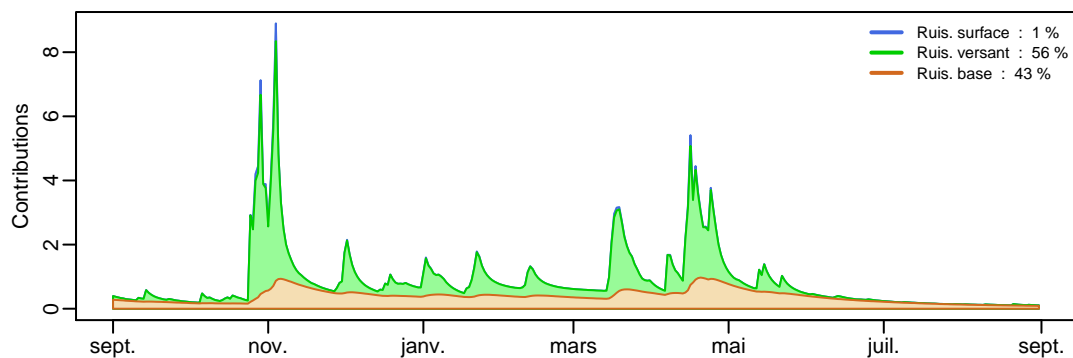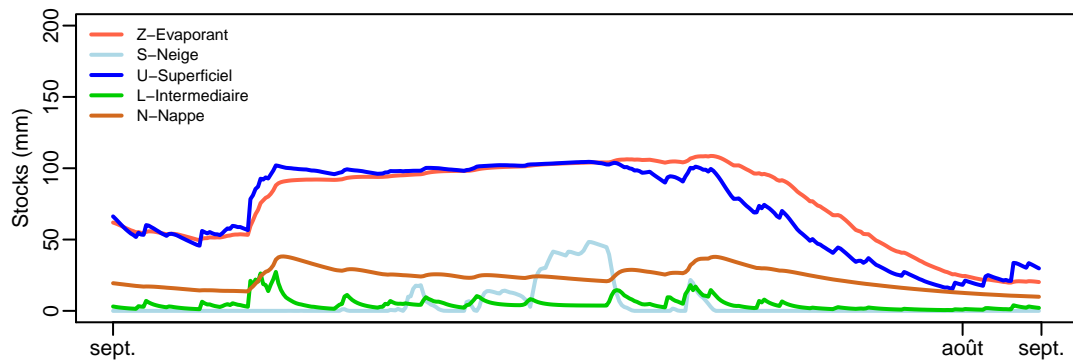

# k0260020 (1325.7 km<sup>2</sup>) – année 2005–2006

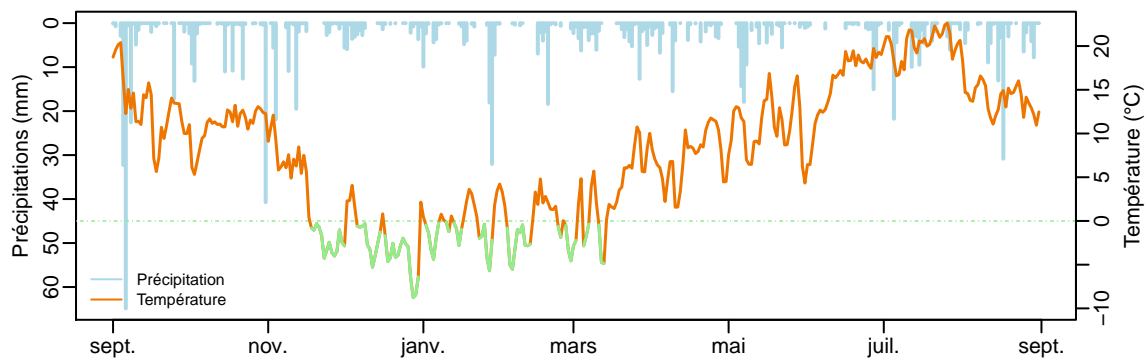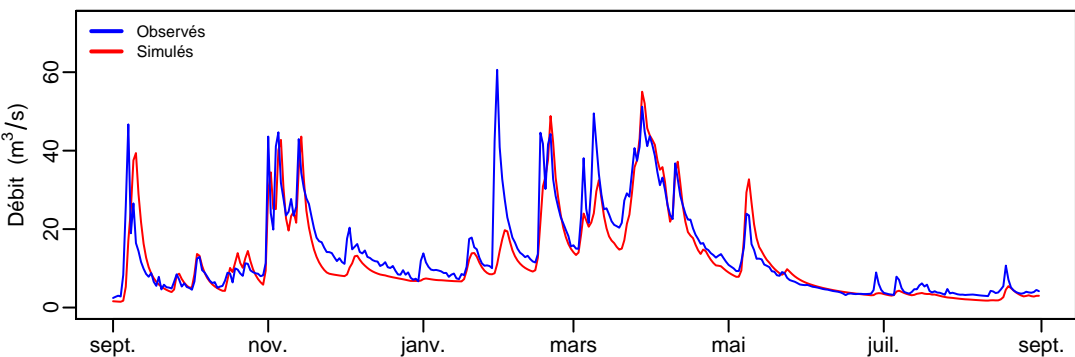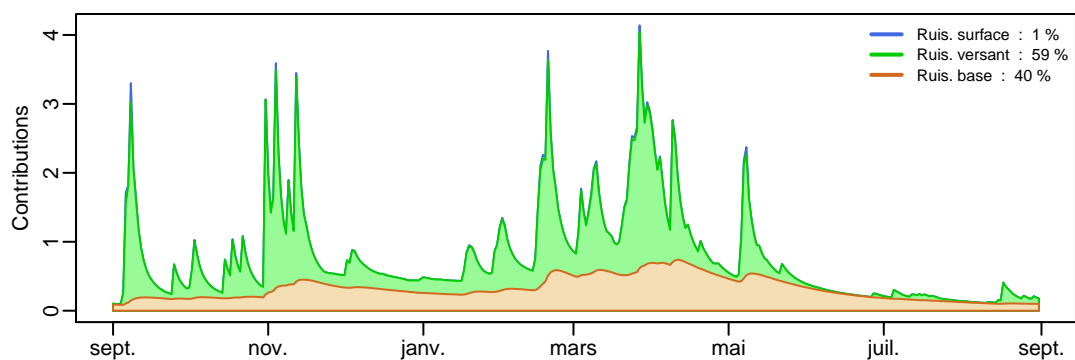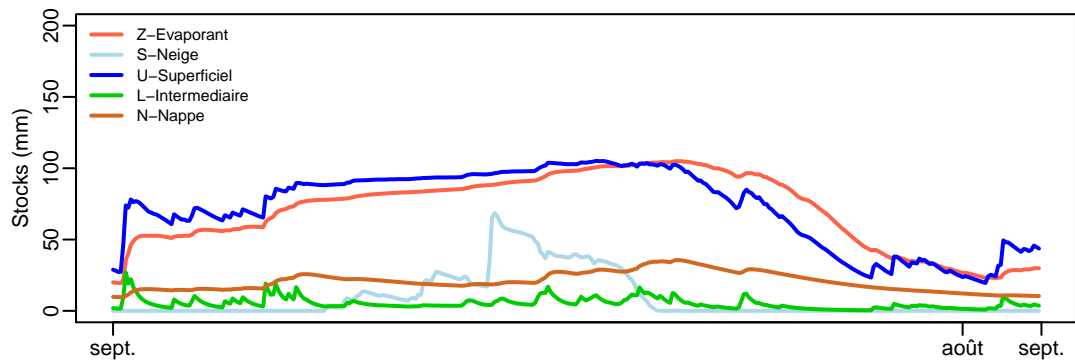

# k0260020 (1325.7 km<sup>2</sup>) – année 2006–2007

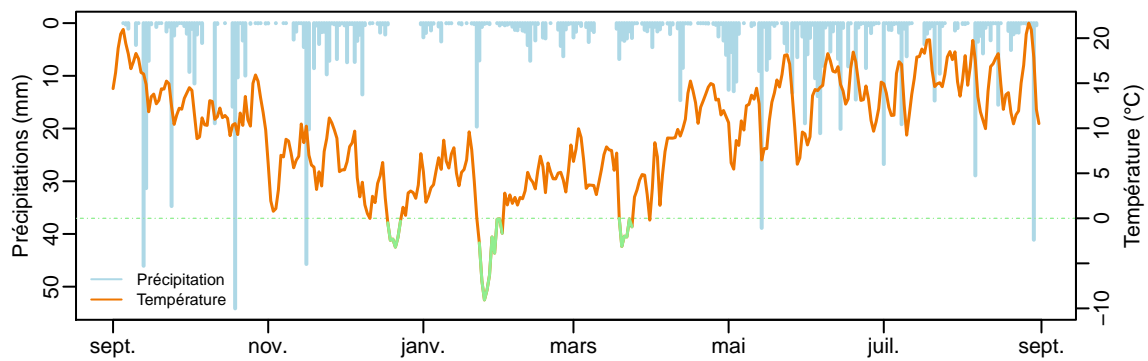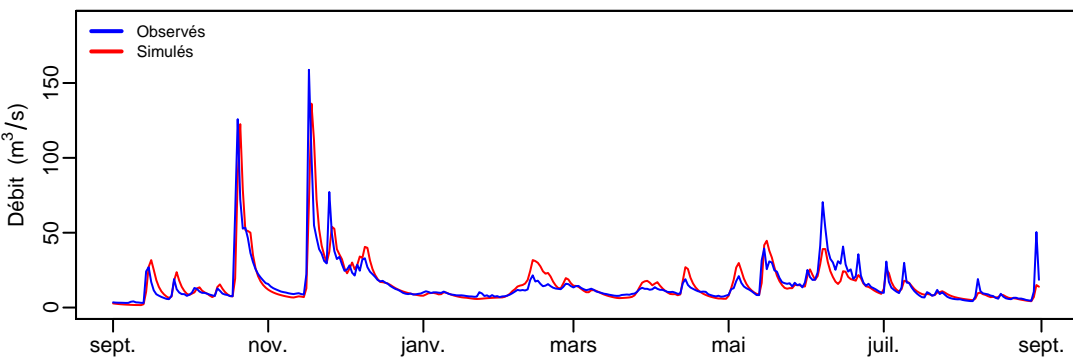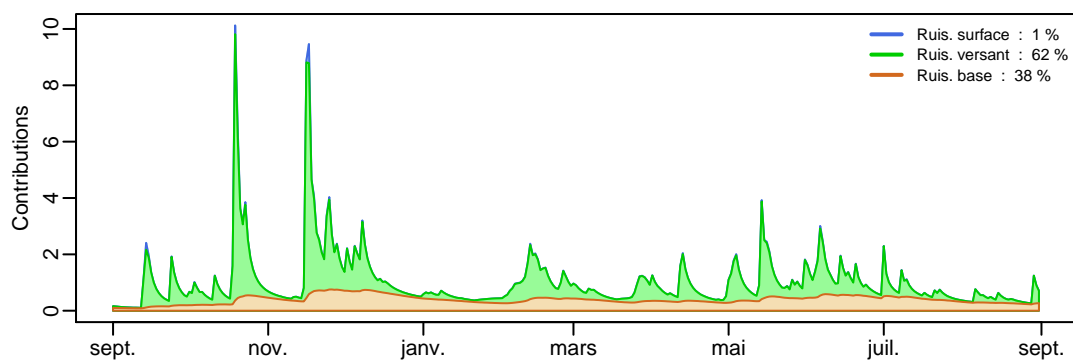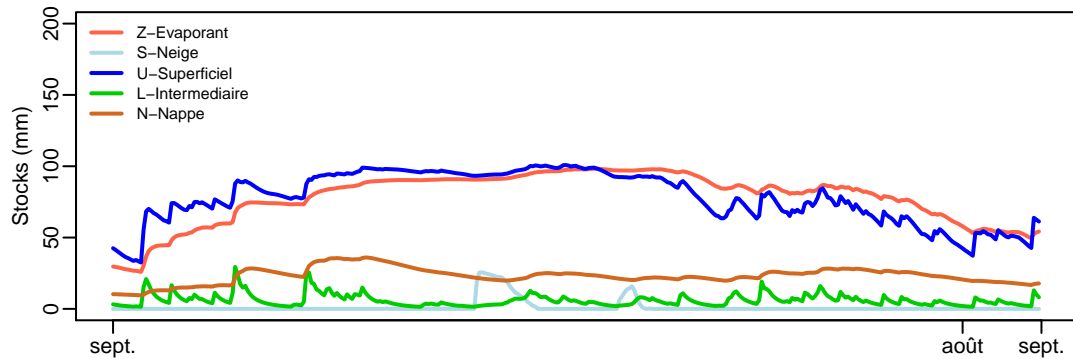

# k0260020 (1325.7 km<sup>2</sup>) – année 2007–2008

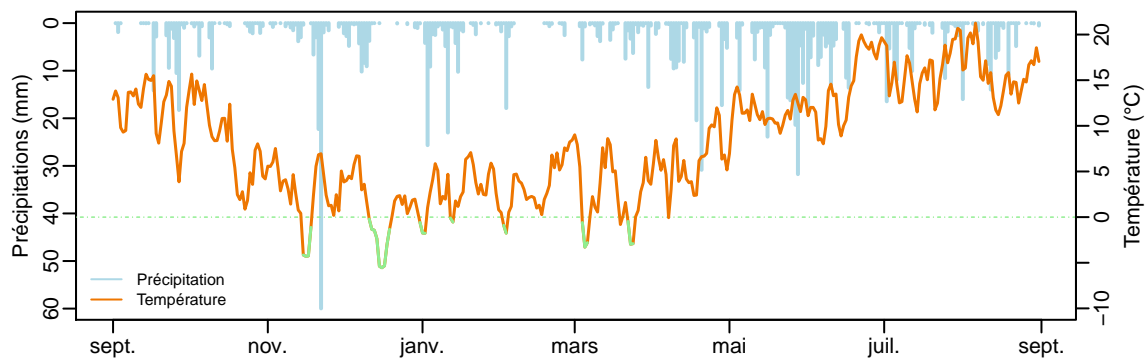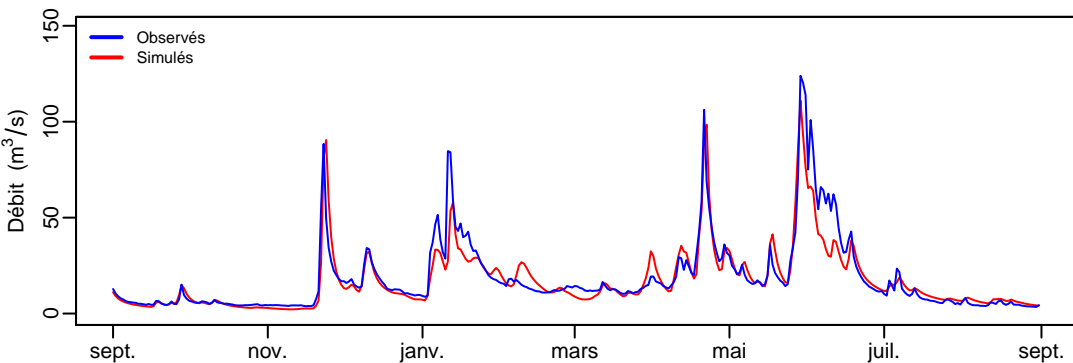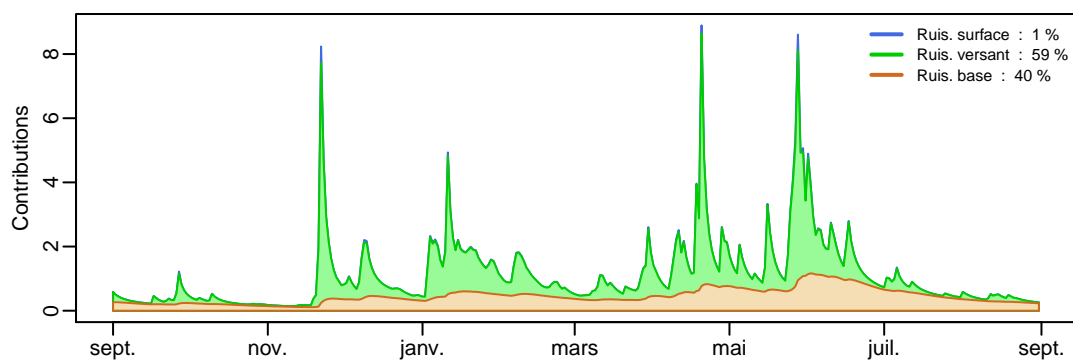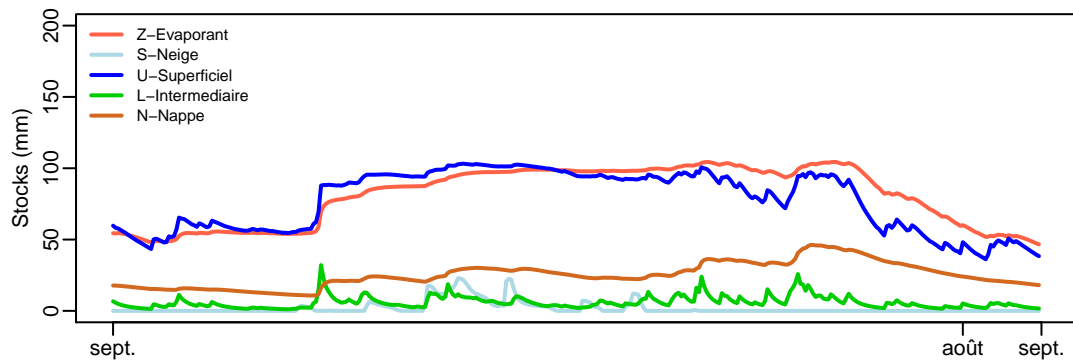

# k0260020 (1325.7 km<sup>2</sup>) – année 2008–2009

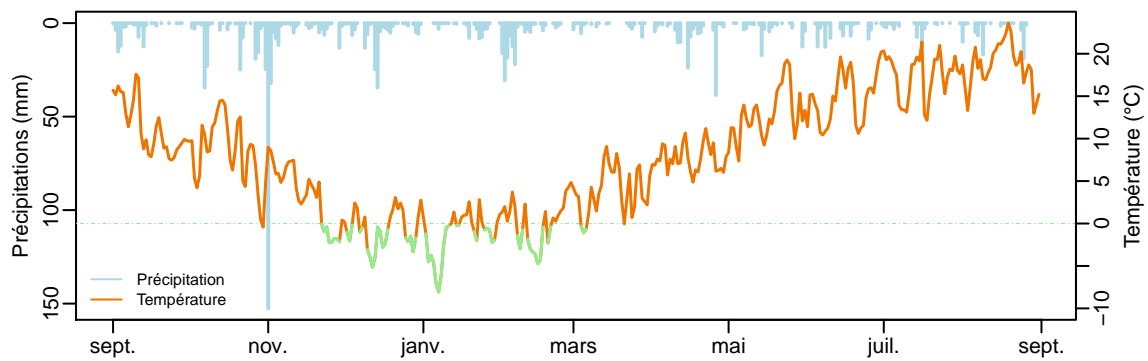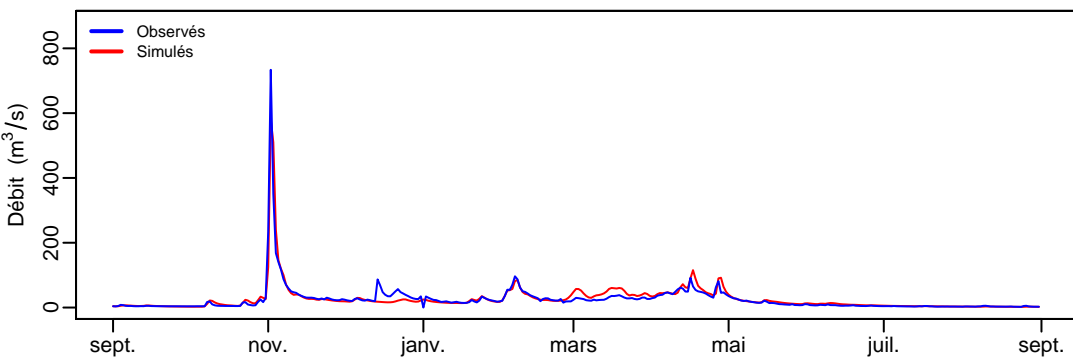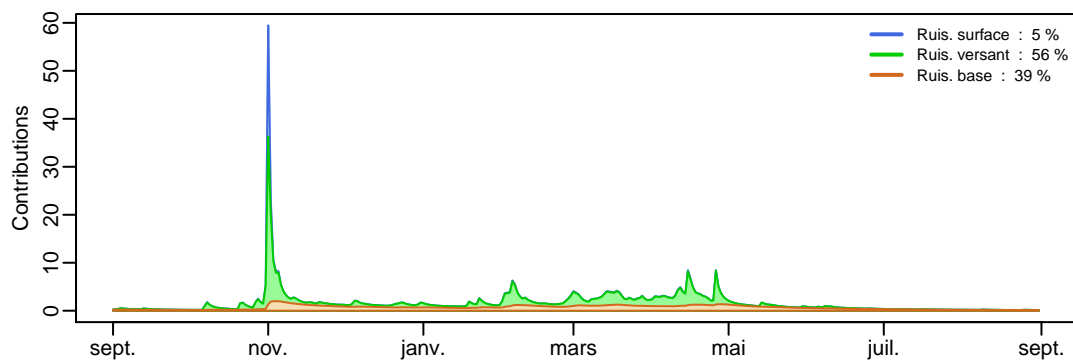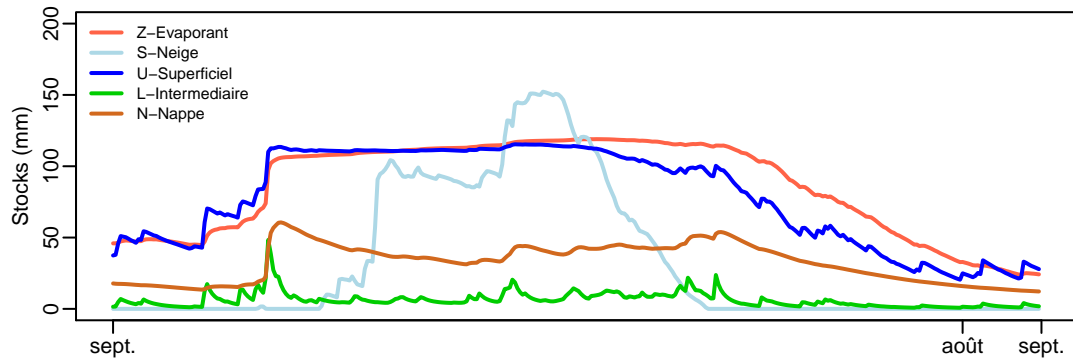

# k0260020 (1325.7 km<sup>2</sup>) – année 2009–2010

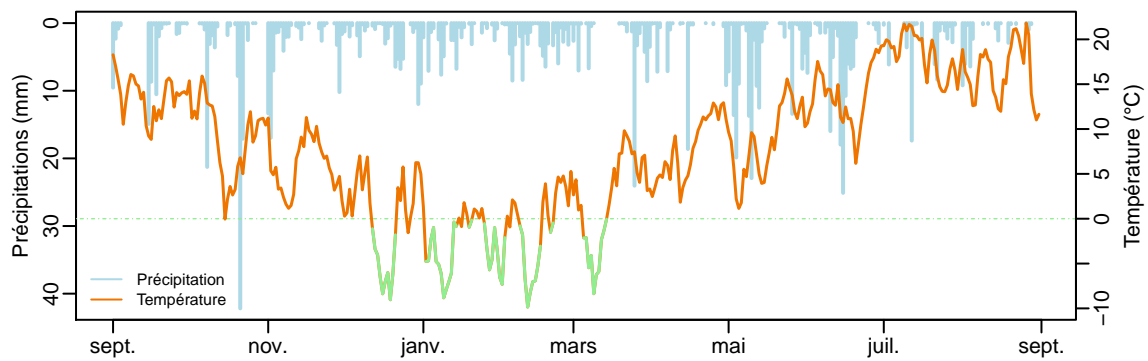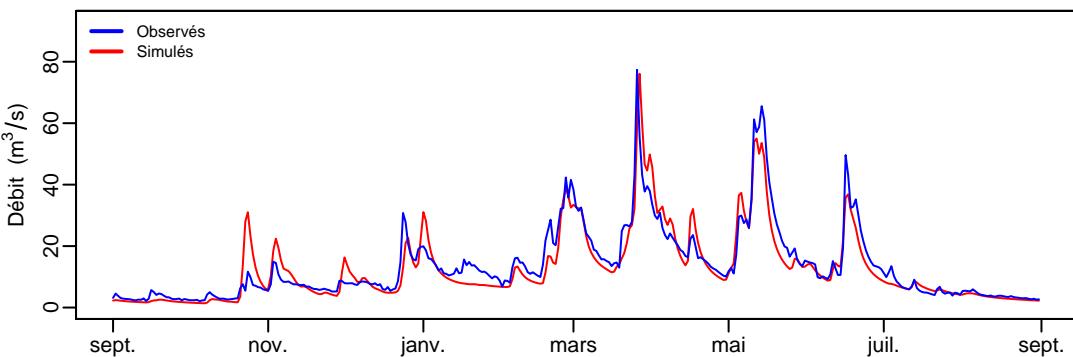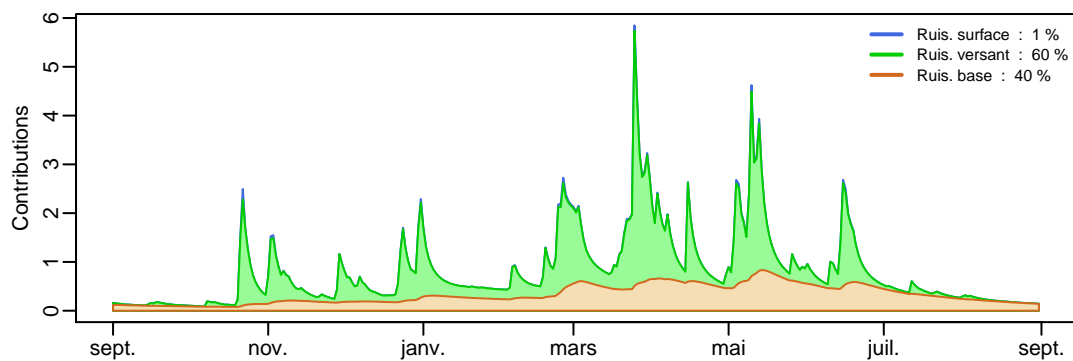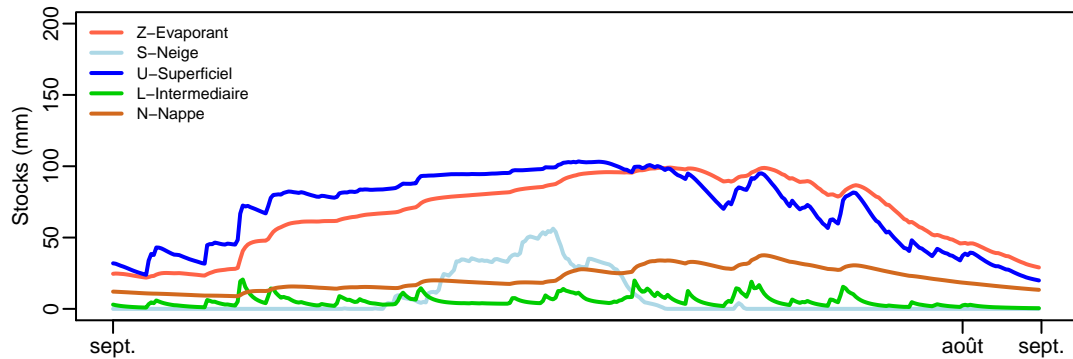

# k0260020 (1325.7 km<sup>2</sup>) – année 2010–2011

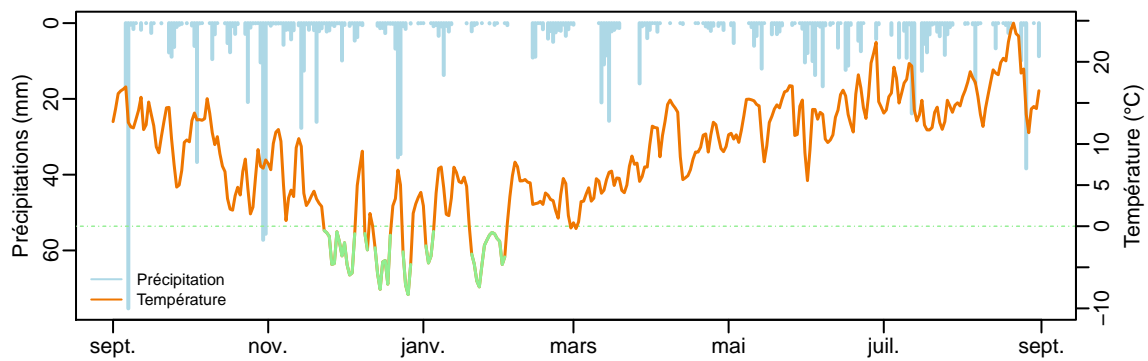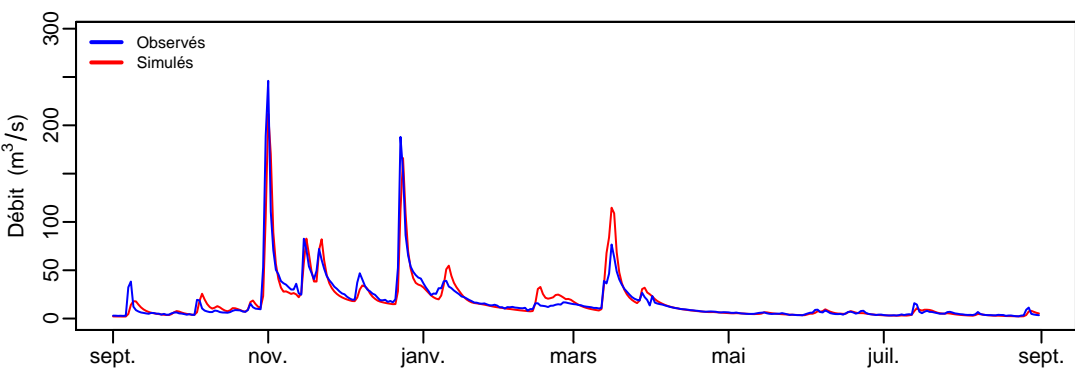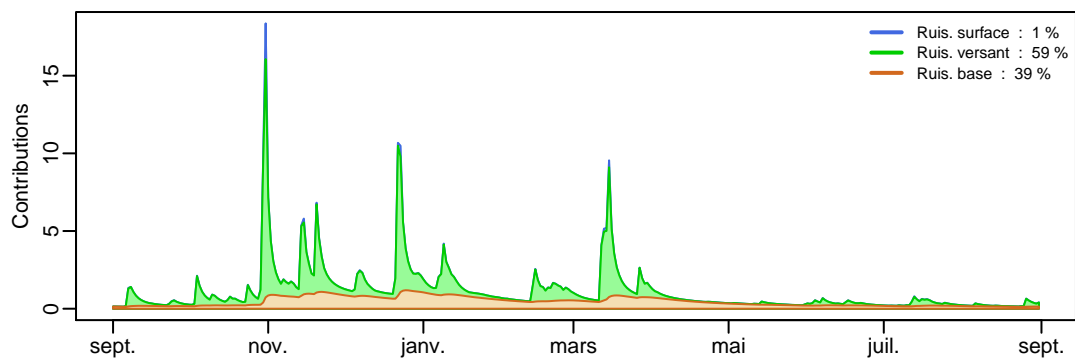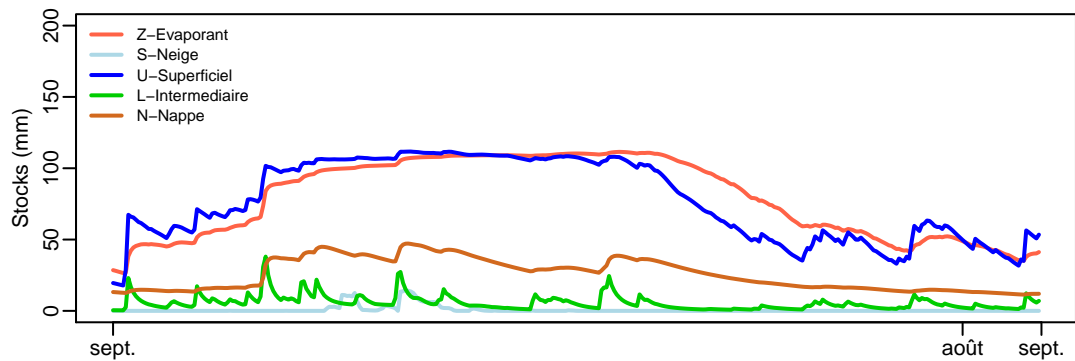



# k0260020 (1325.7 km<sup>2</sup>) – année 2011–2012

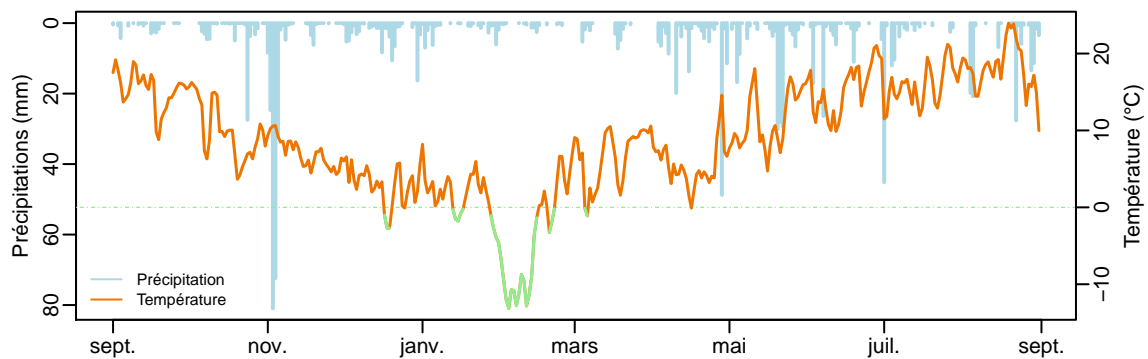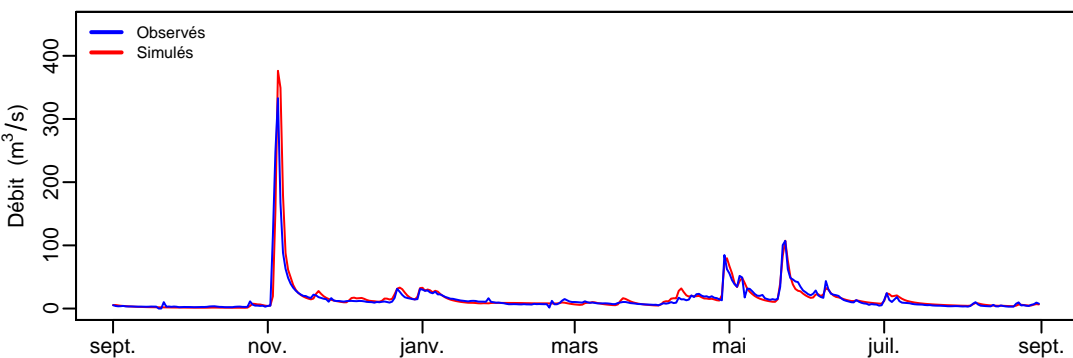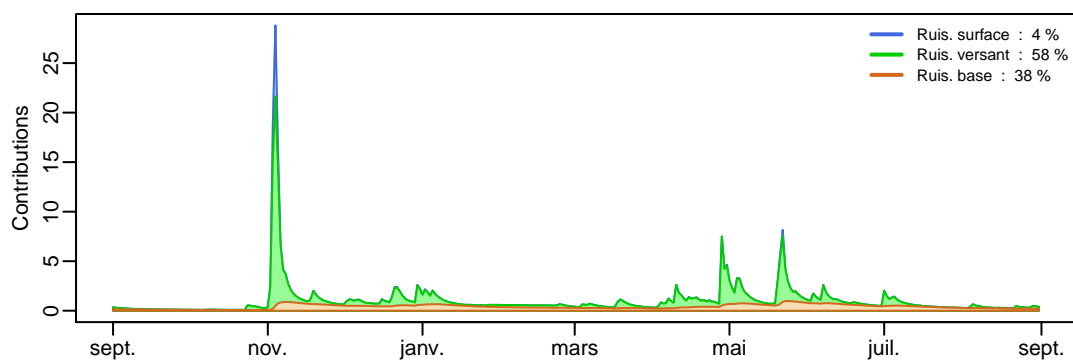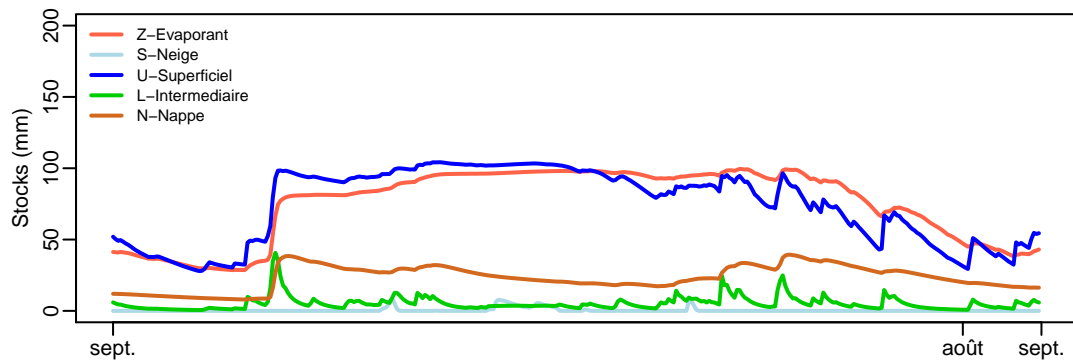

# k0403010 (137.93 km<sup>2</sup>) – année 1981–1982

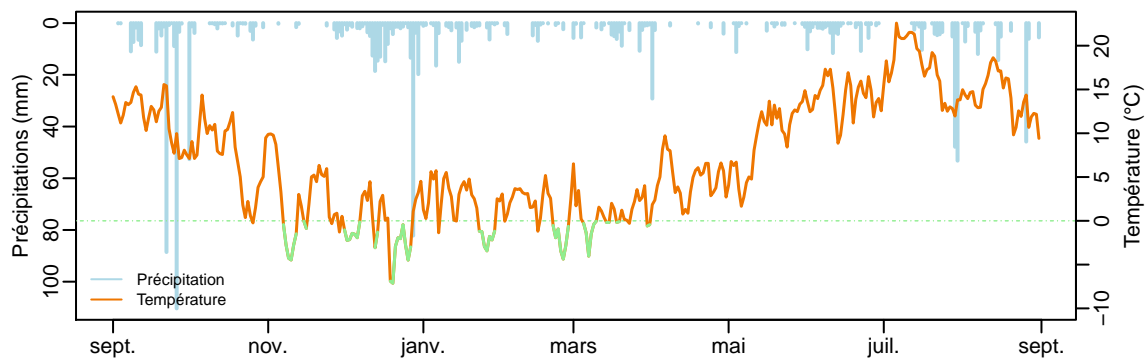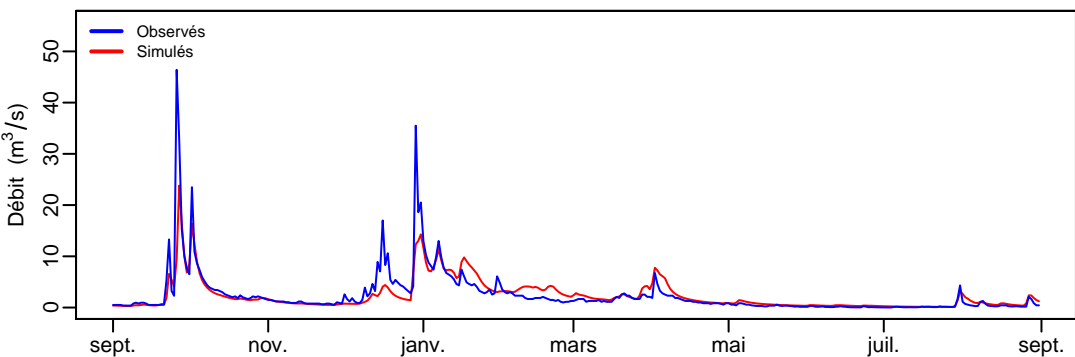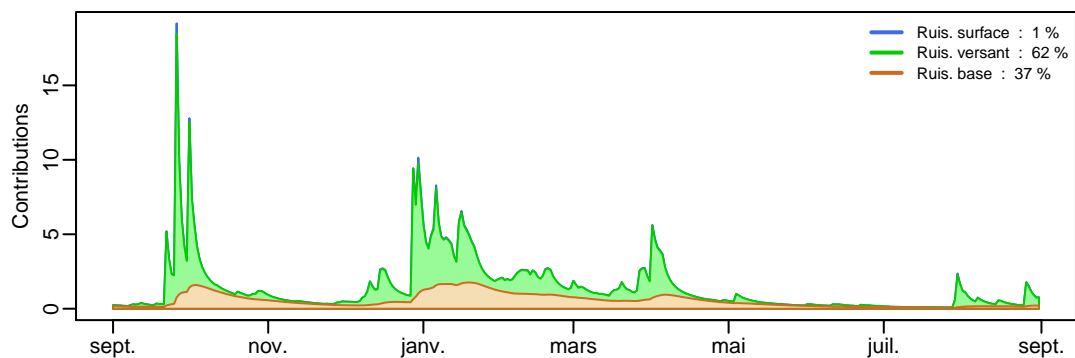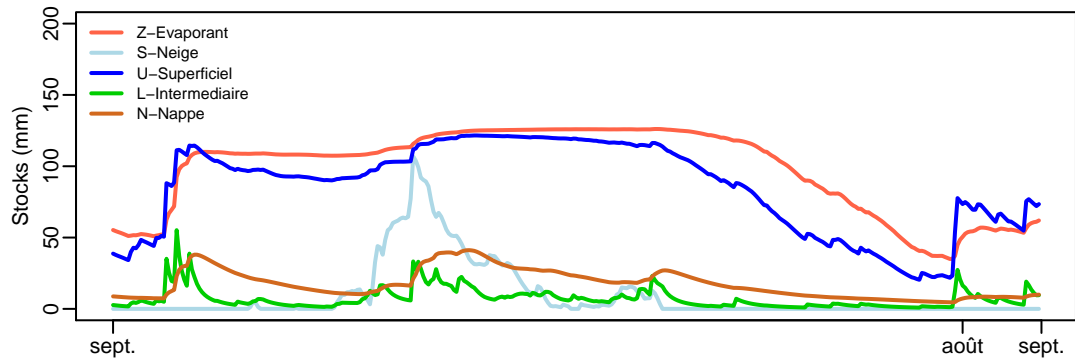

# k0403010 (137.93 km<sup>2</sup>) – année 1982–1983

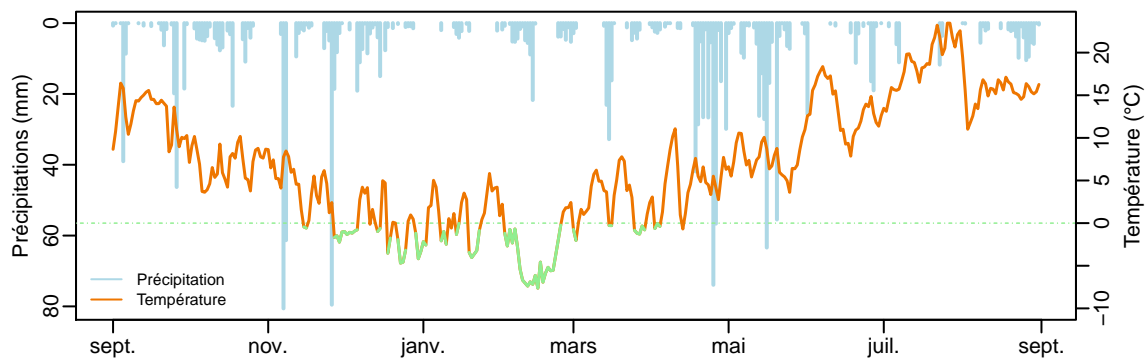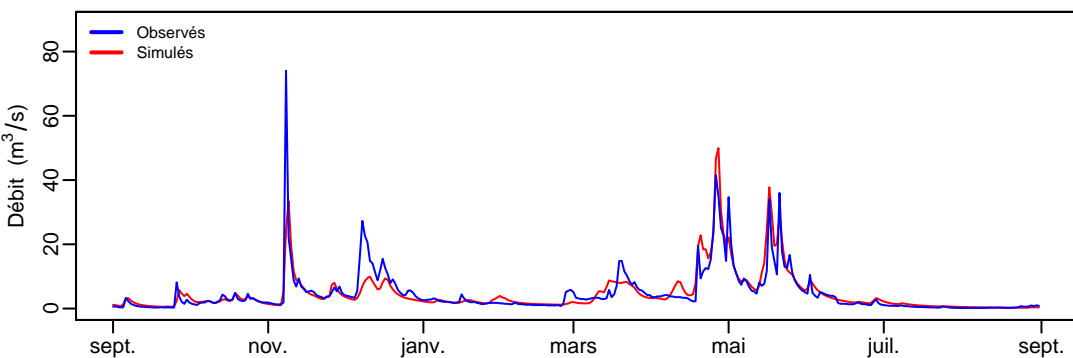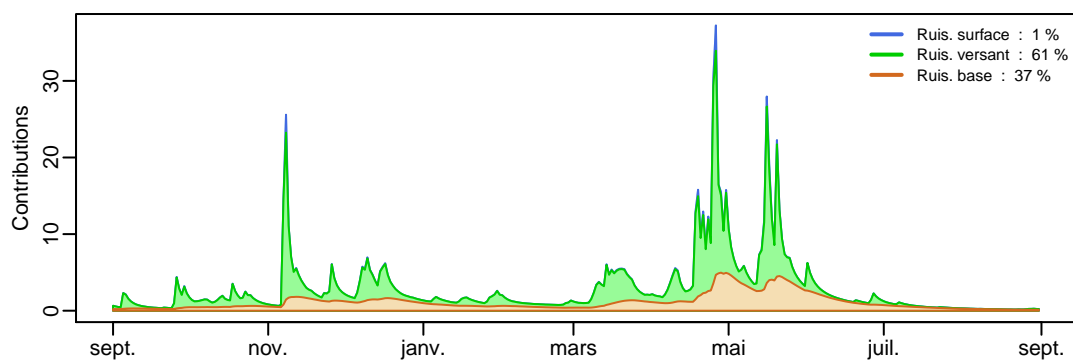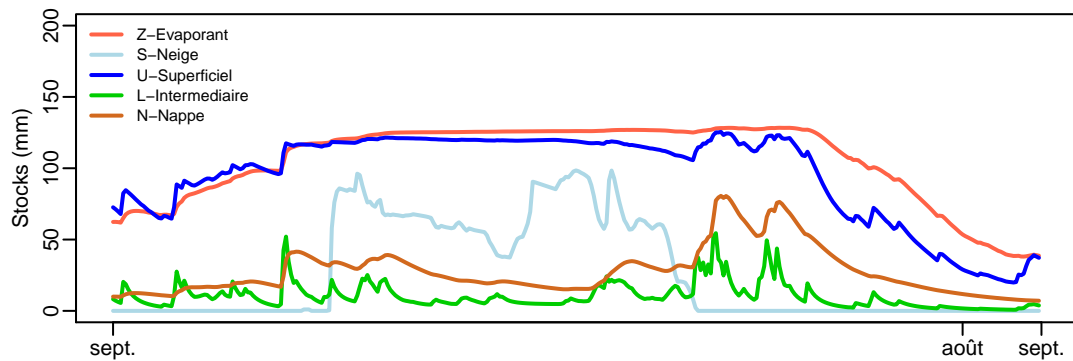

# k0403010 (137.93 km<sup>2</sup>) – année 1983–1984

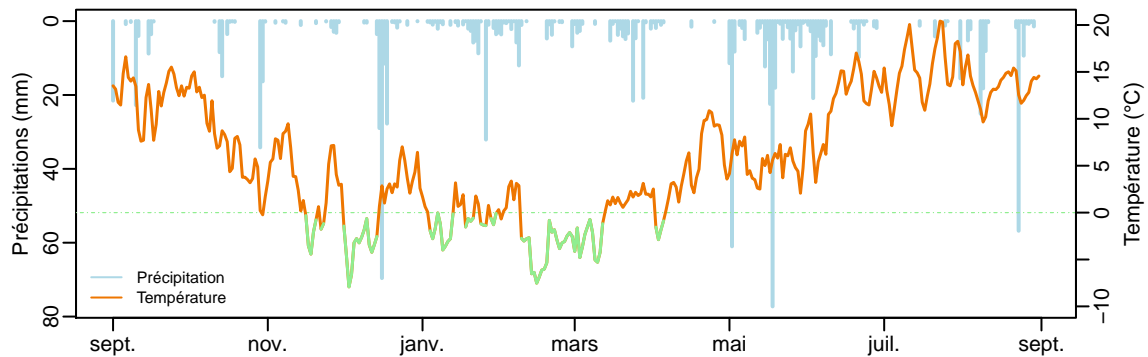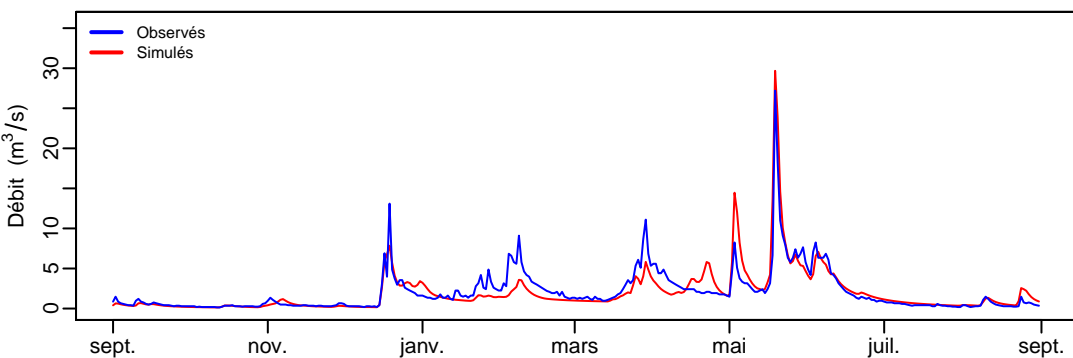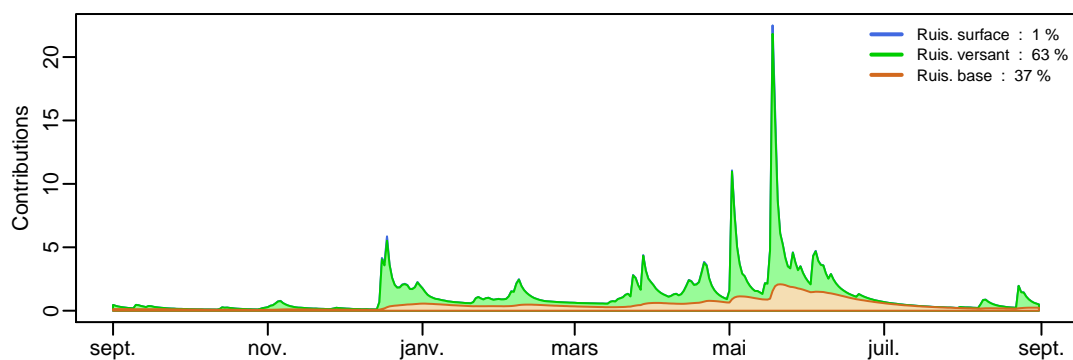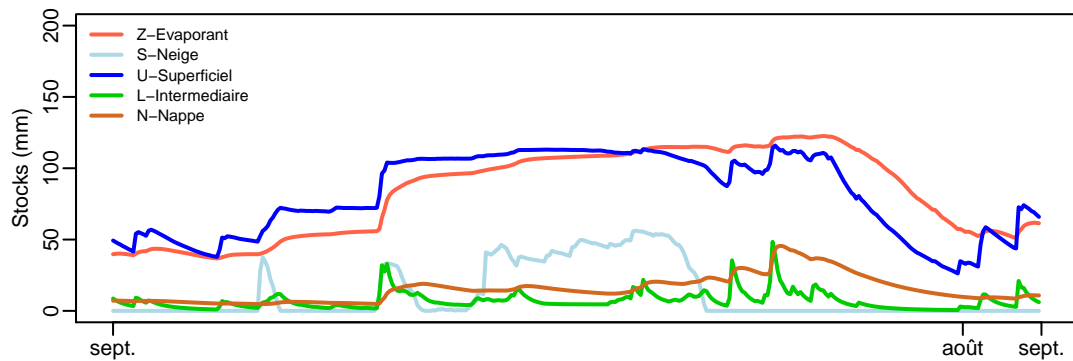

# k0403010 (137.93 km<sup>2</sup>) – année 1984–1985

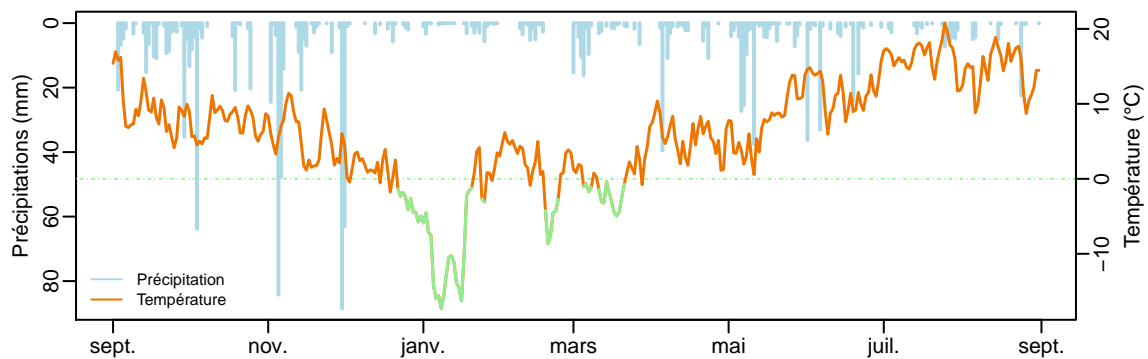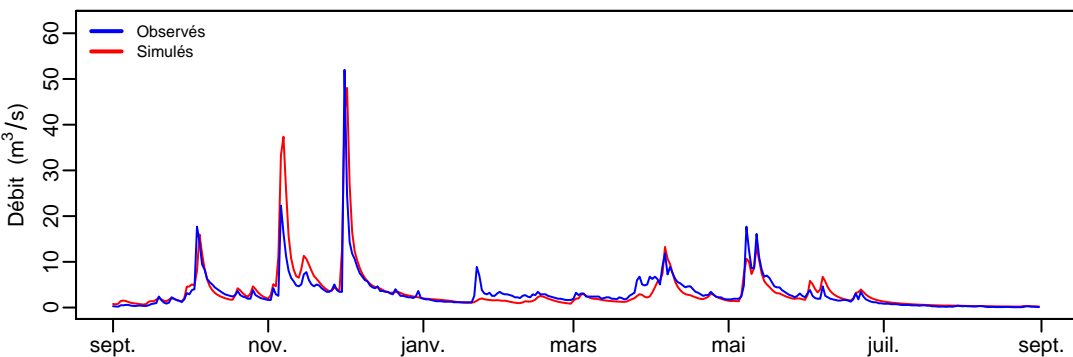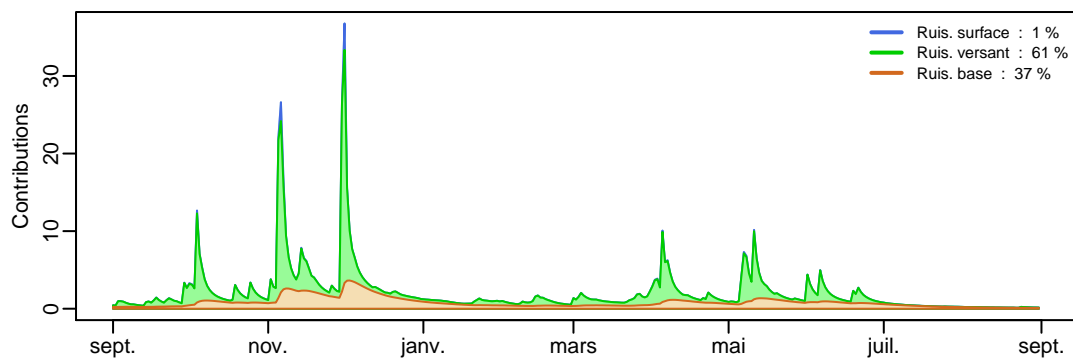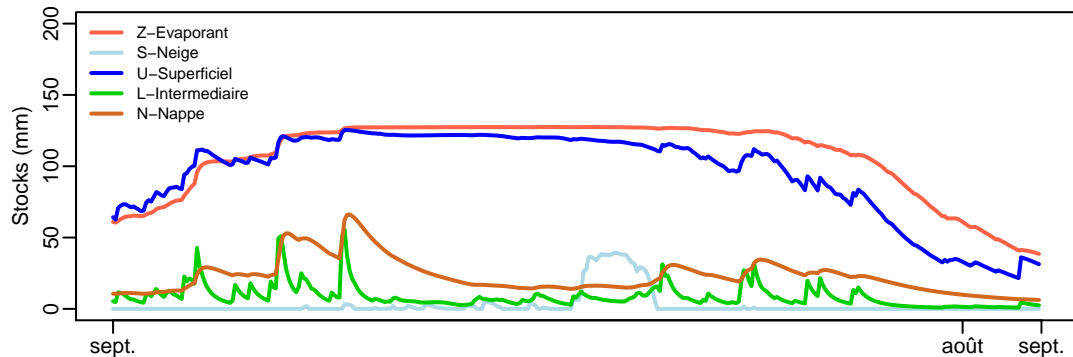

# k0403010 (137.93 km<sup>2</sup>) – année 1985–1986

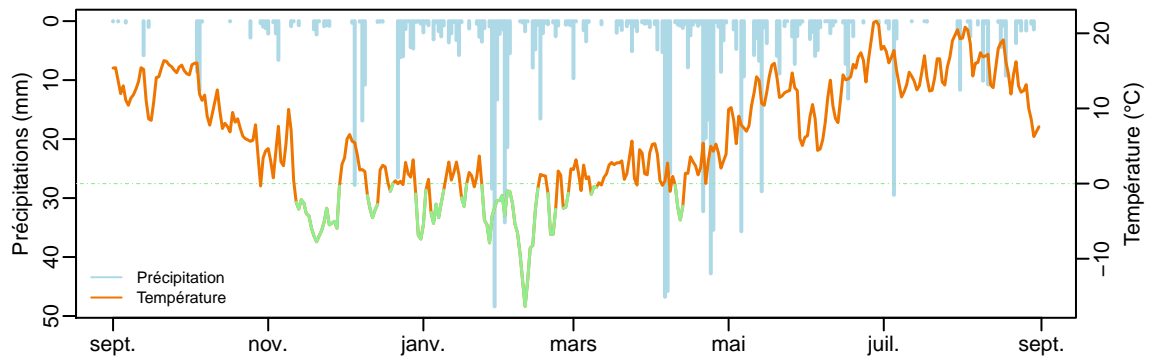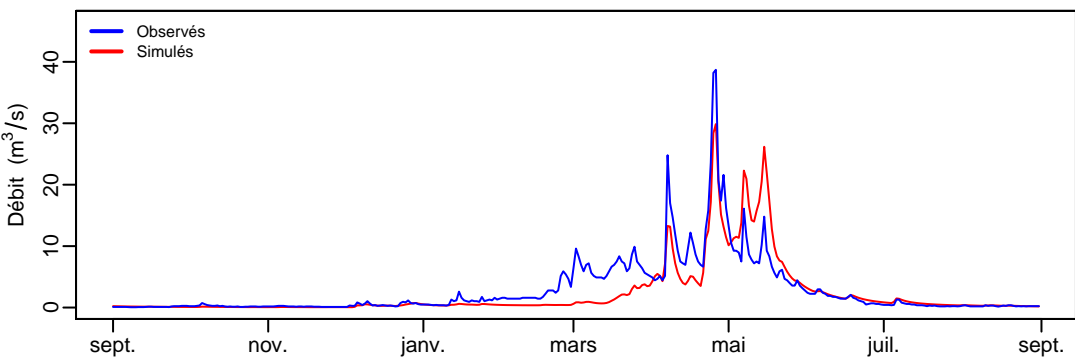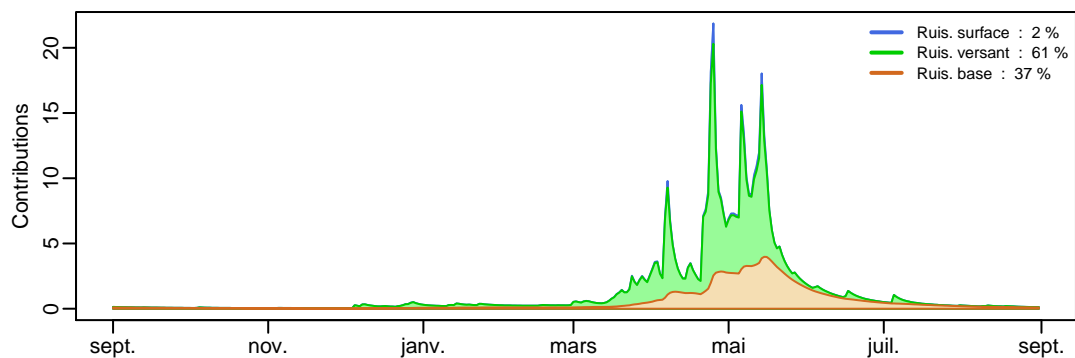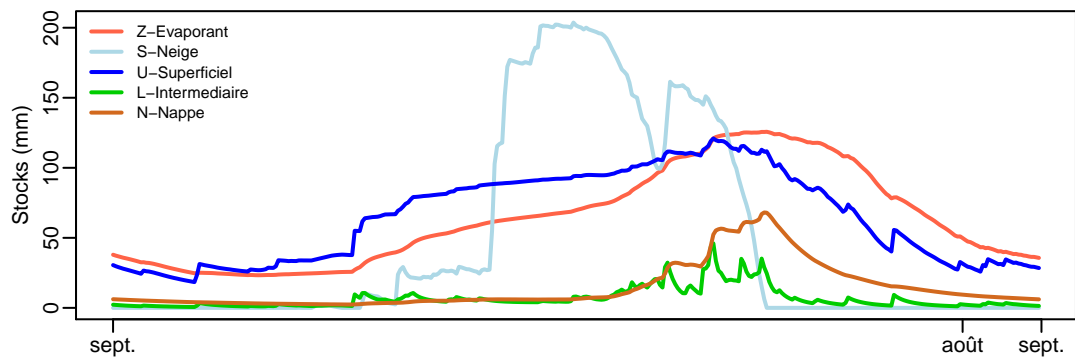

# k0403010 (137.93 km<sup>2</sup>) – année 1986–1987

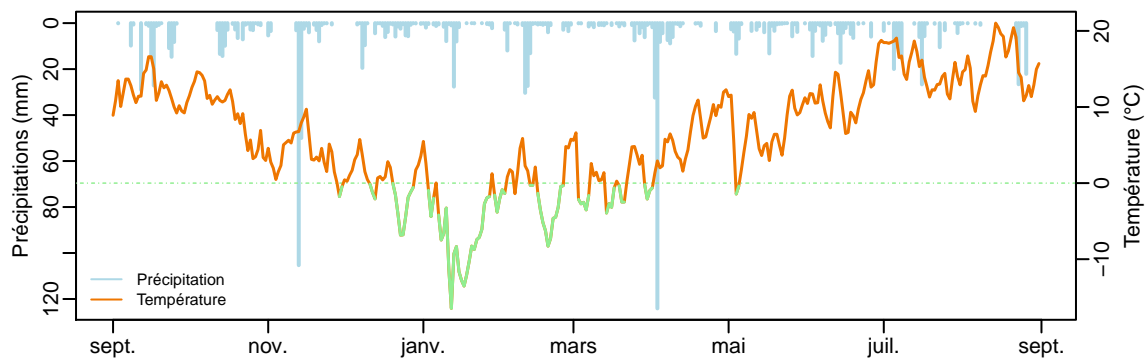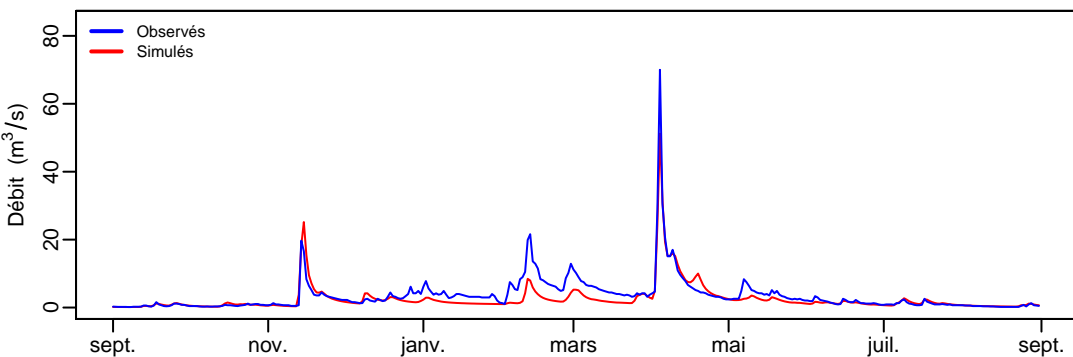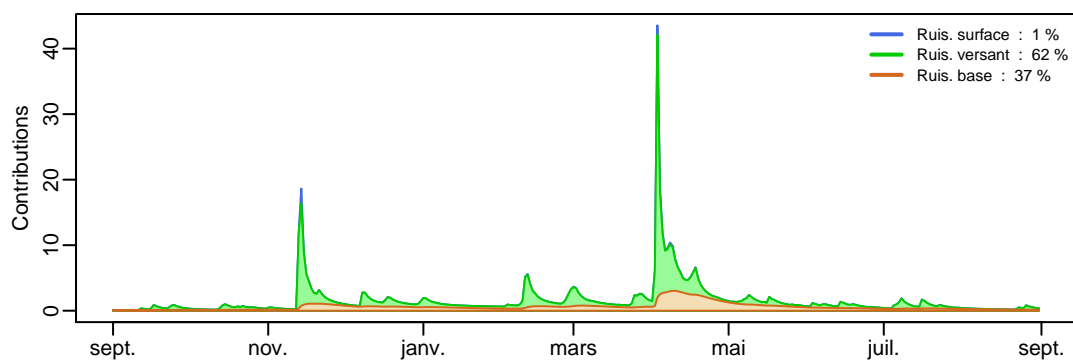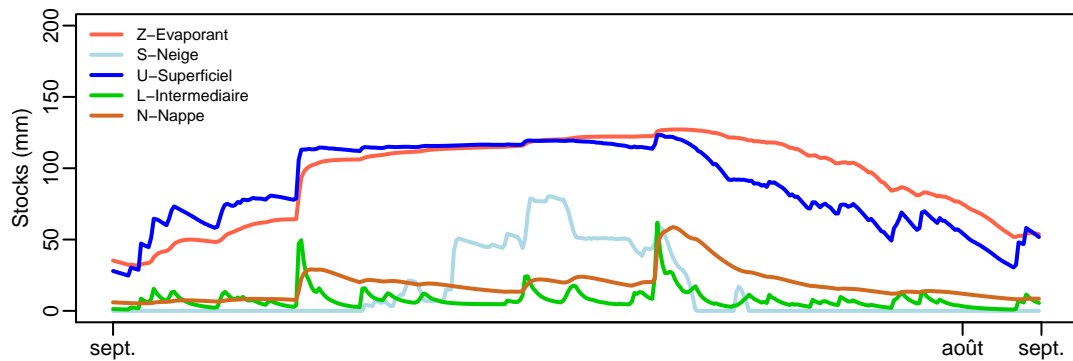

# k0403010 (137.93 km<sup>2</sup>) – année 1987–1988

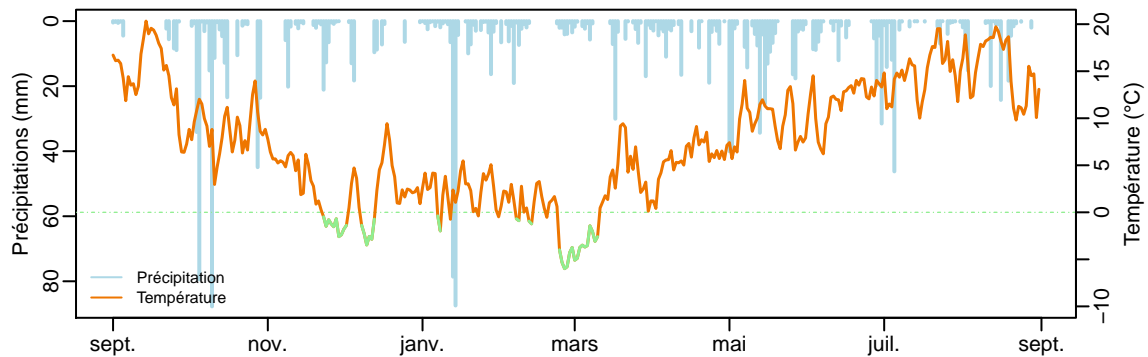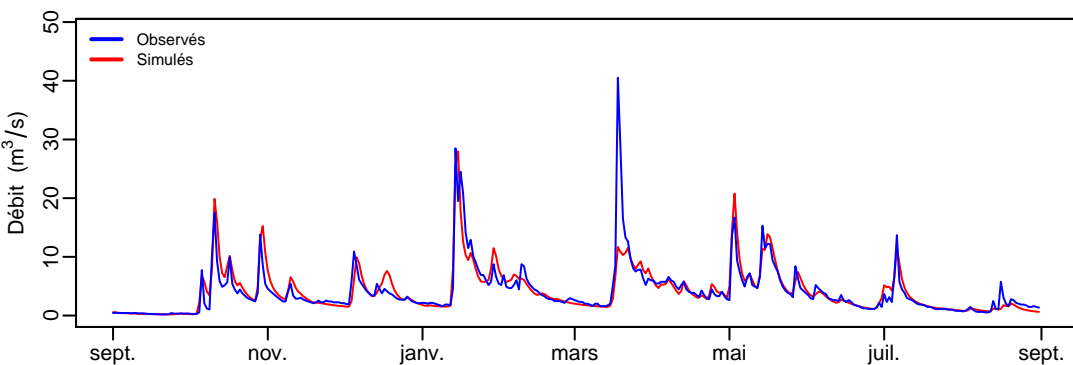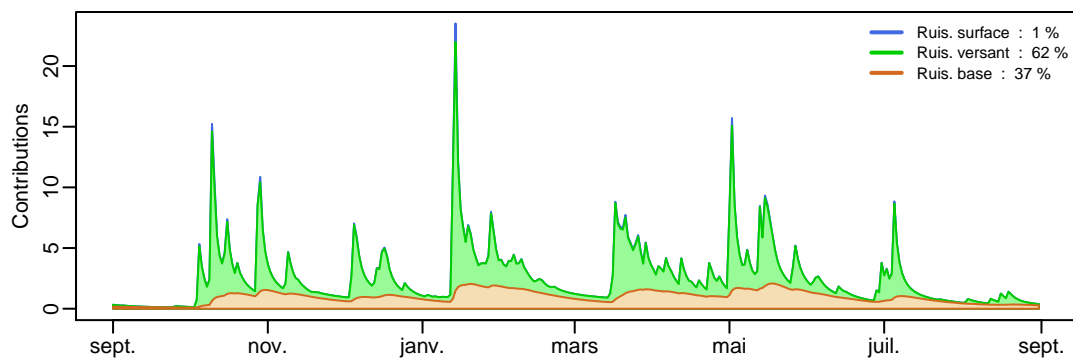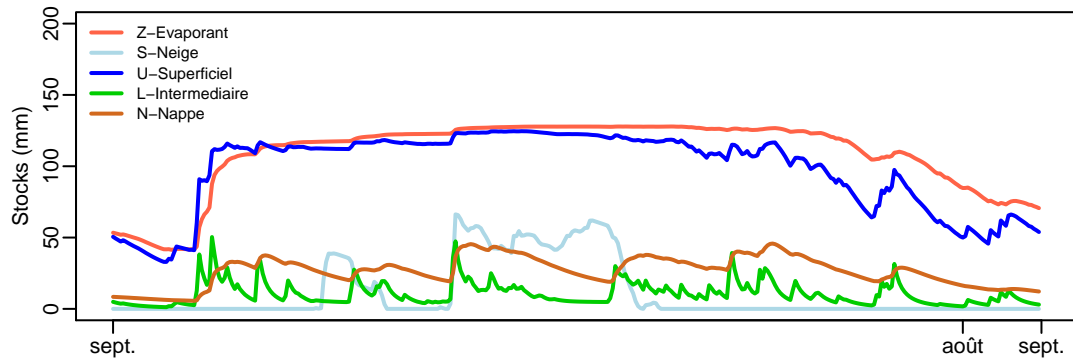



# k0403010 (137.93 km<sup>2</sup>) – année 1988–1989

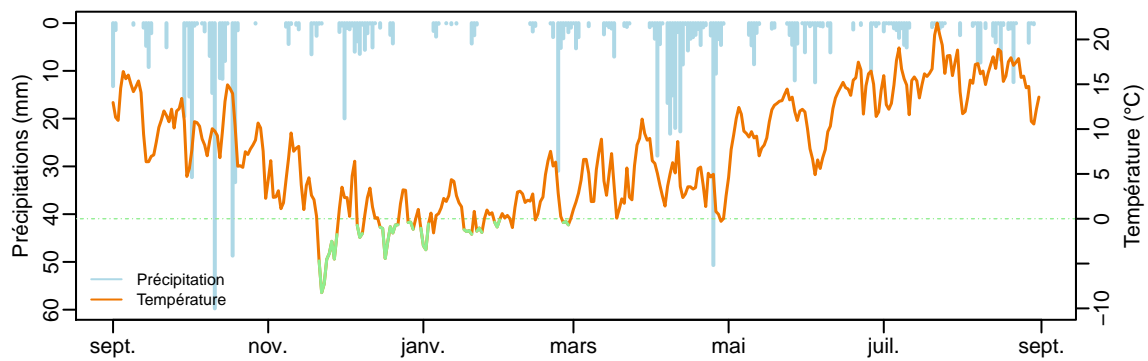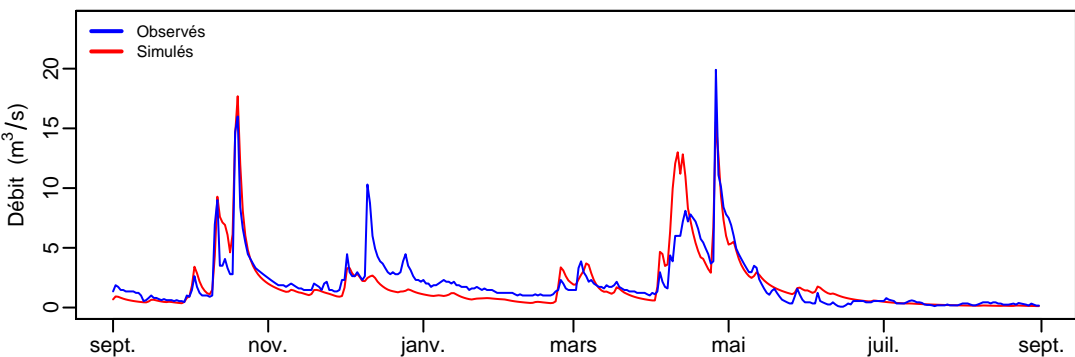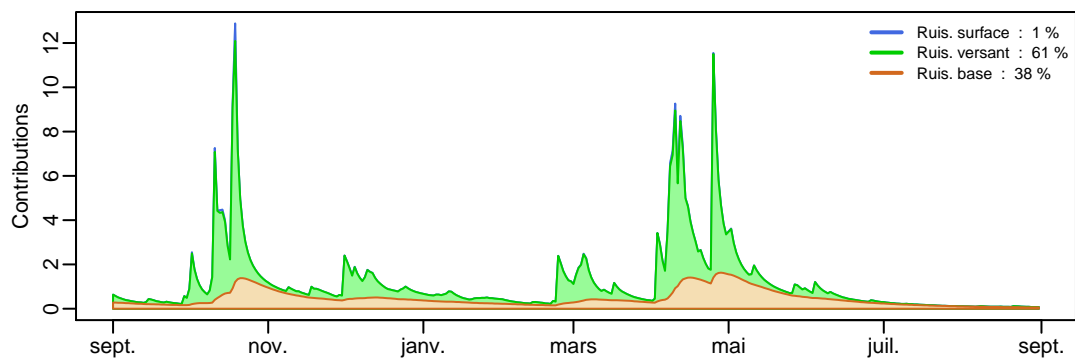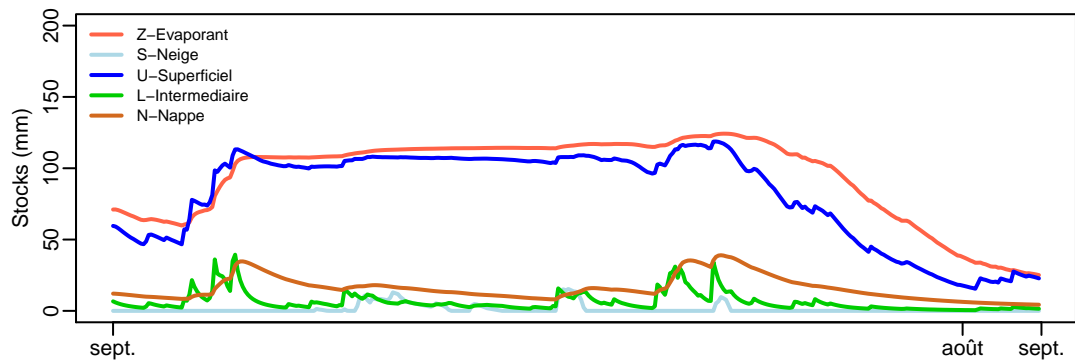

# k0403010 (137.93 km<sup>2</sup>) – année 1989–1990

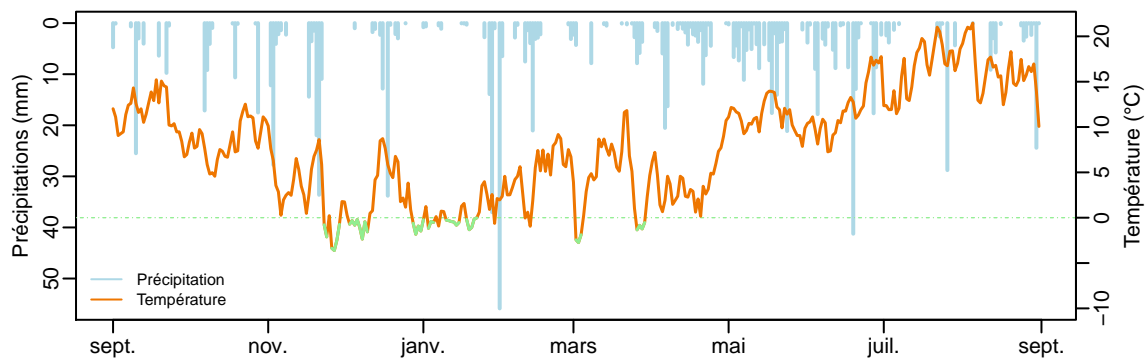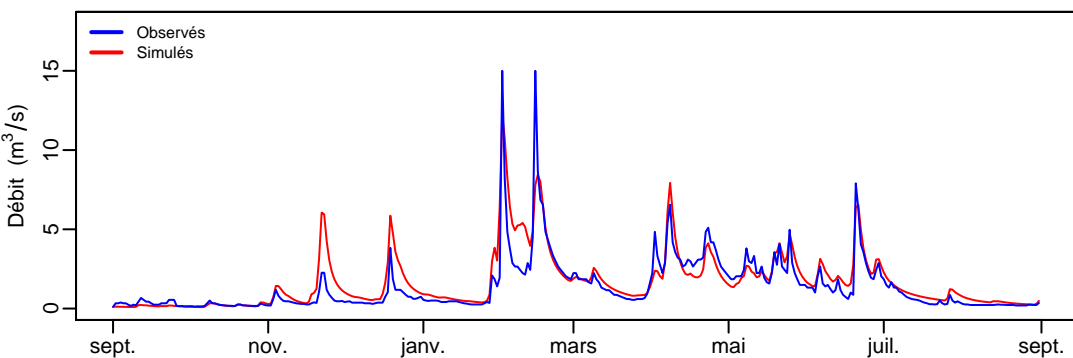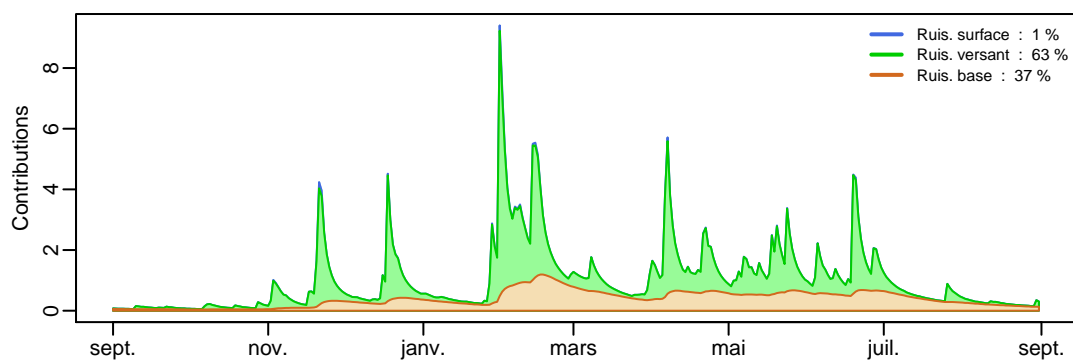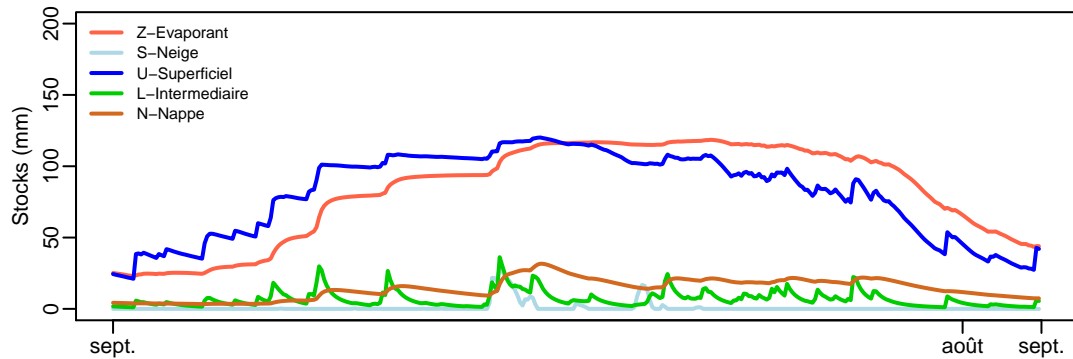

# k0403010 (137.93 km<sup>2</sup>) – année 1990–1991

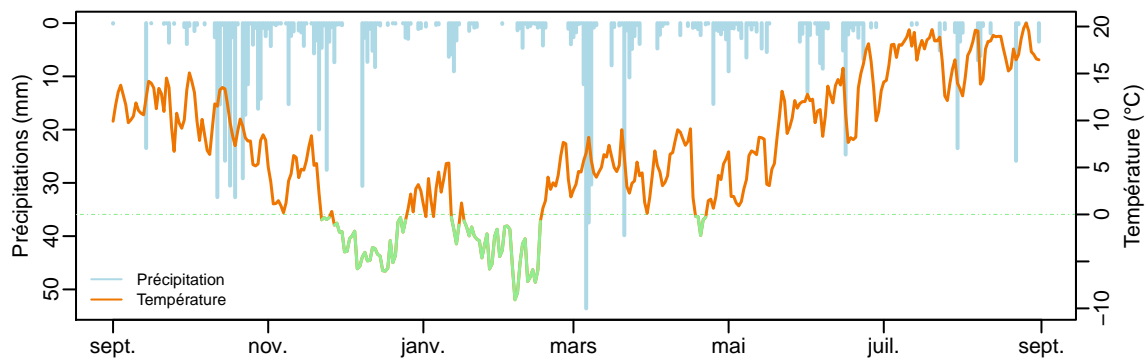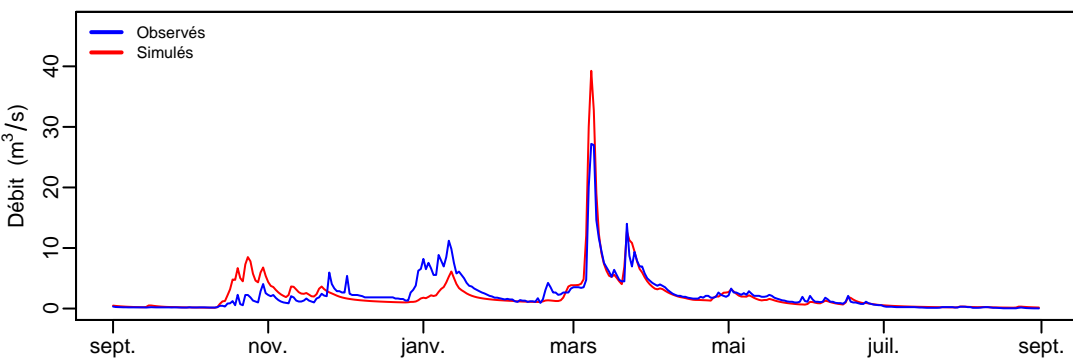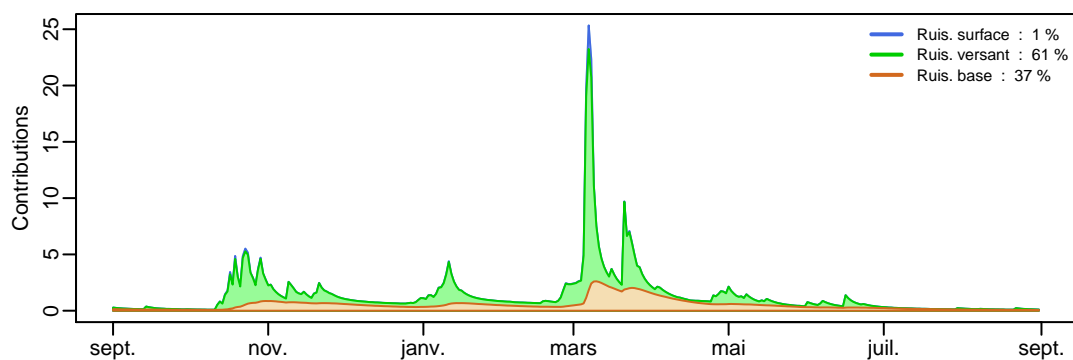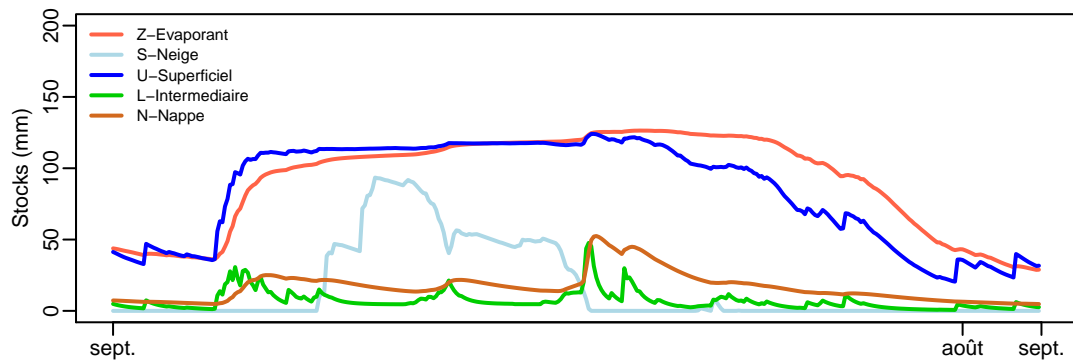

# k0403010 (137.93 km<sup>2</sup>) – année 1991–1992

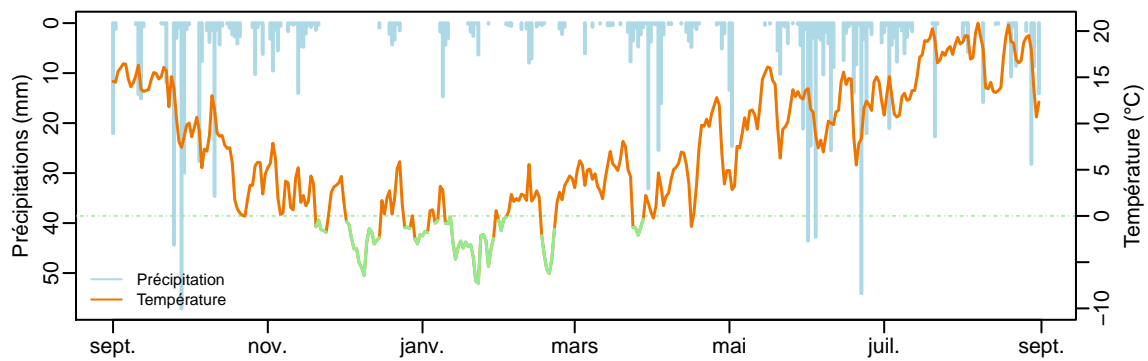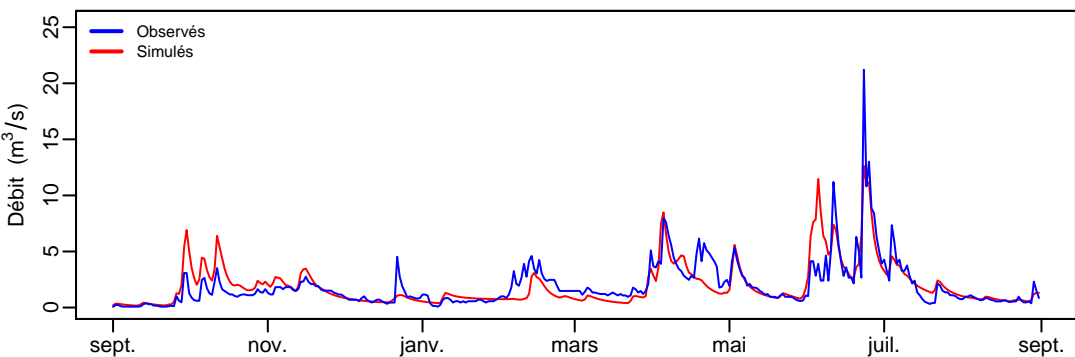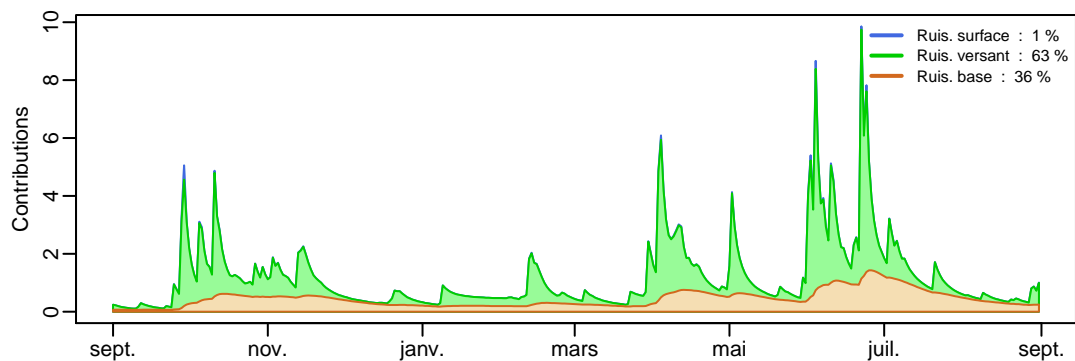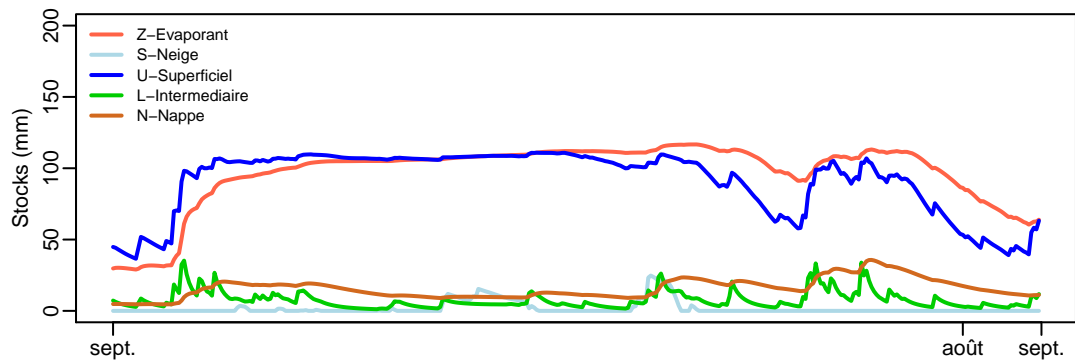

# k0403010 (137.93 km<sup>2</sup>) – année 1992–1993

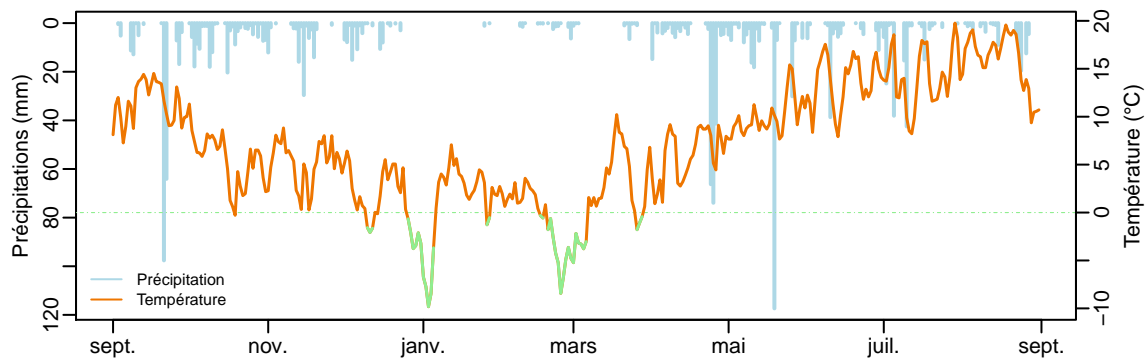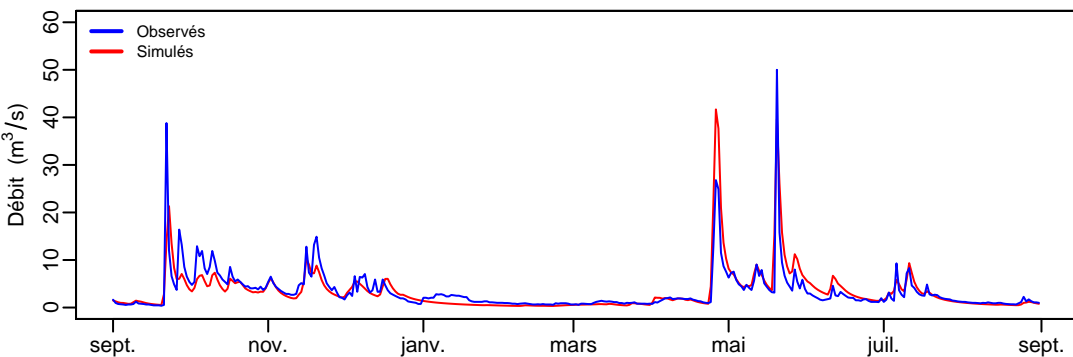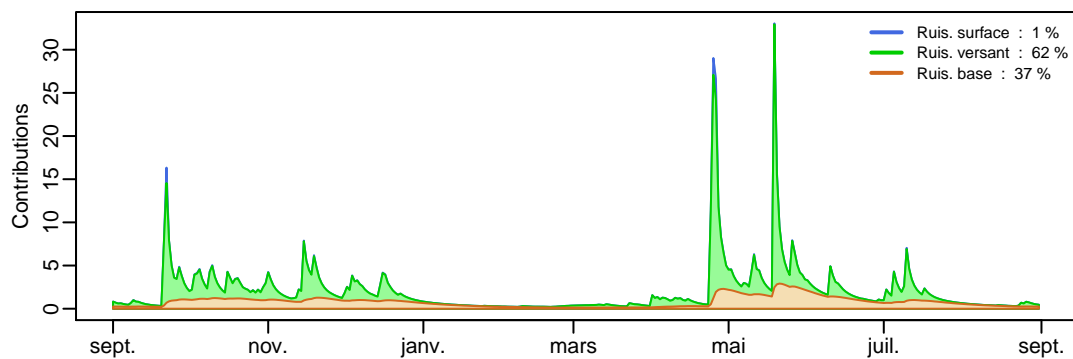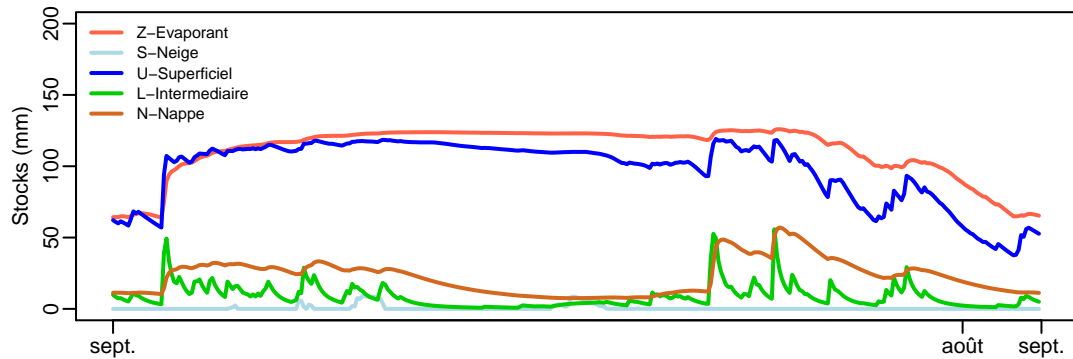

# k0403010 (137.93 km<sup>2</sup>) – année 1993–1994

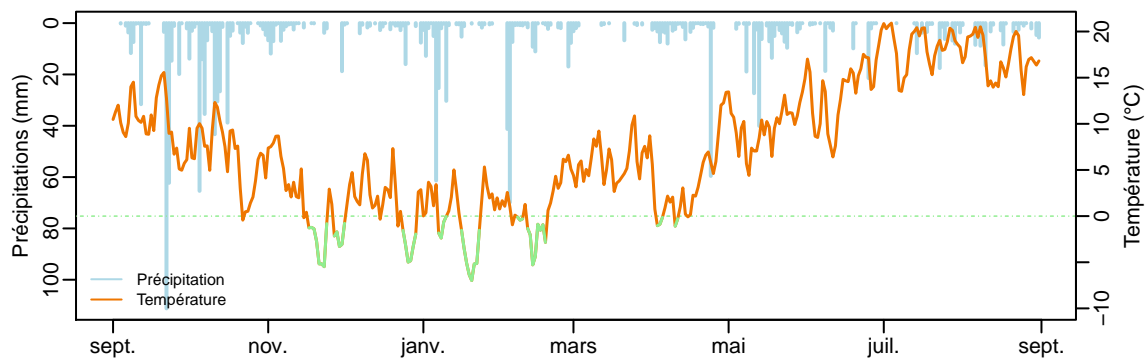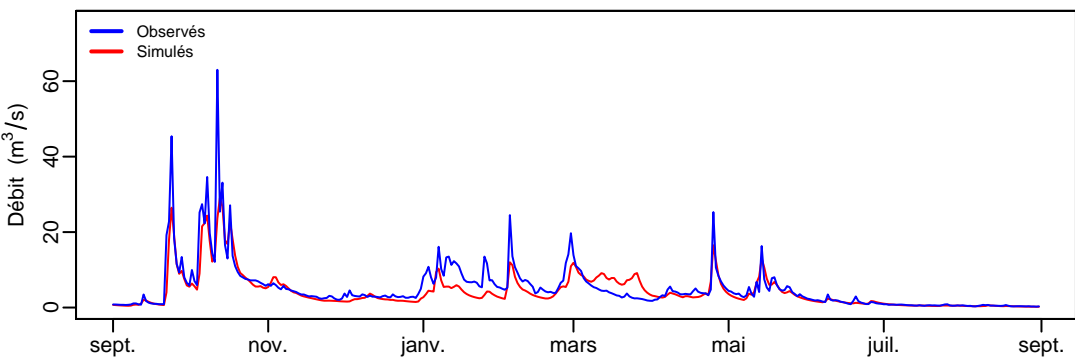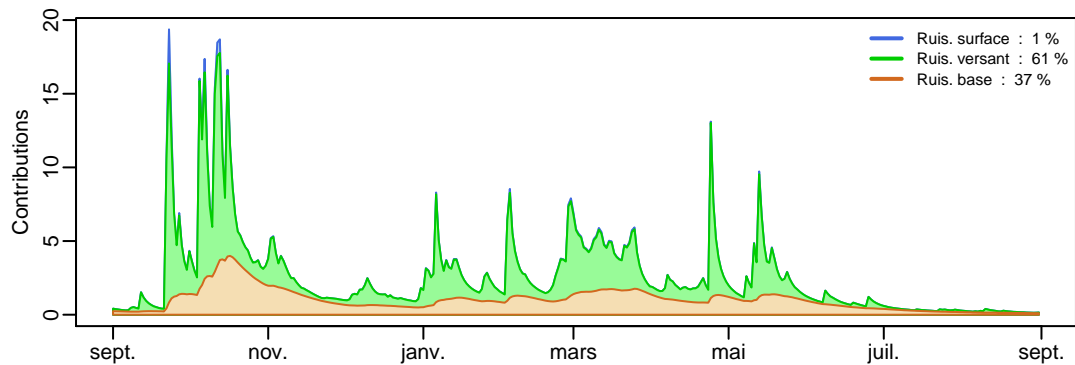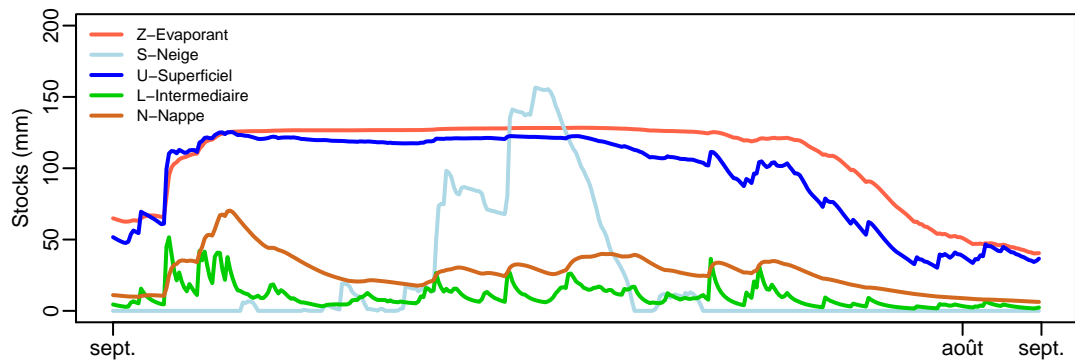

# k0403010 (137.93 km<sup>2</sup>) – année 1994–1995

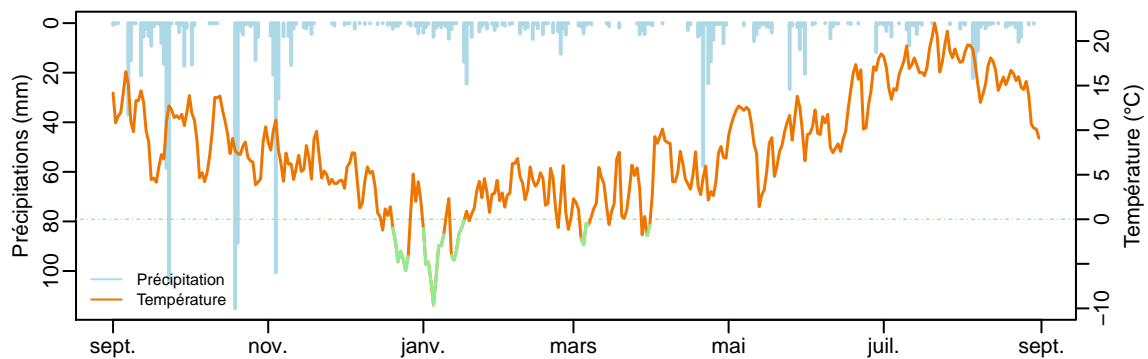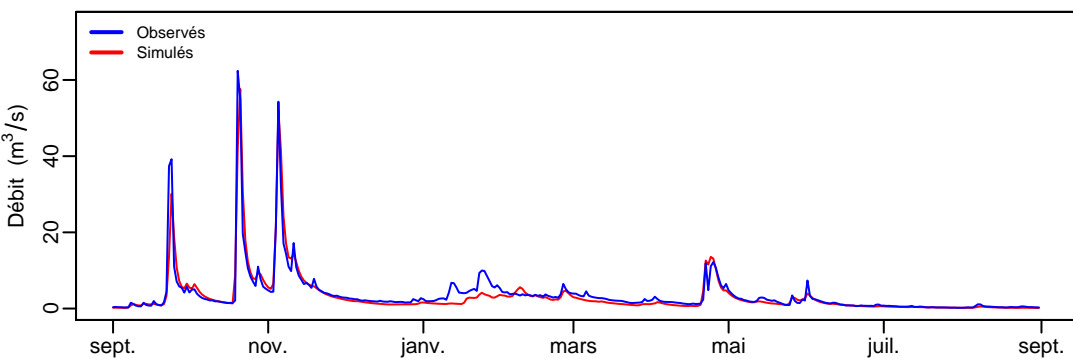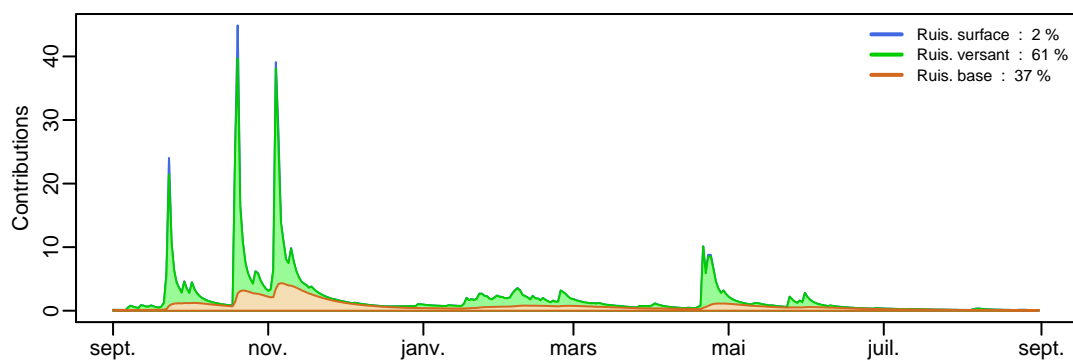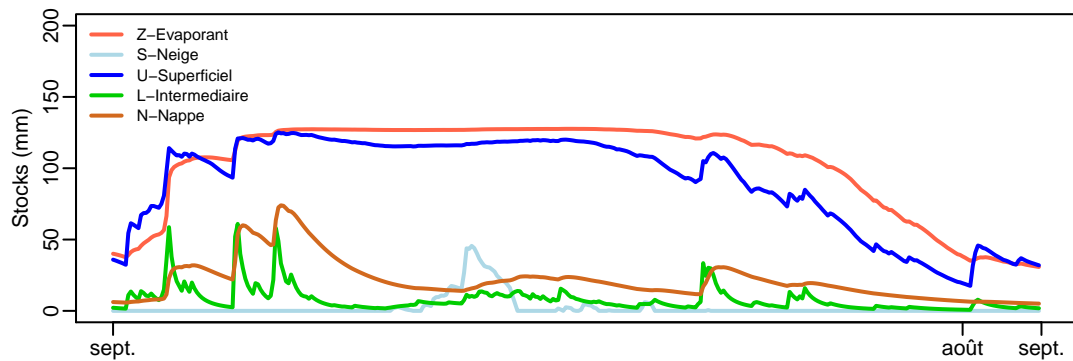

# k0403010 (137.93 km<sup>2</sup>) – année 1995–1996

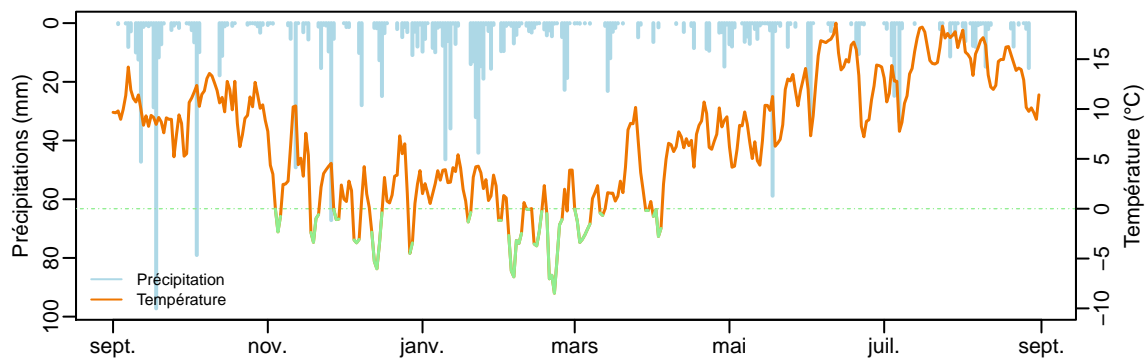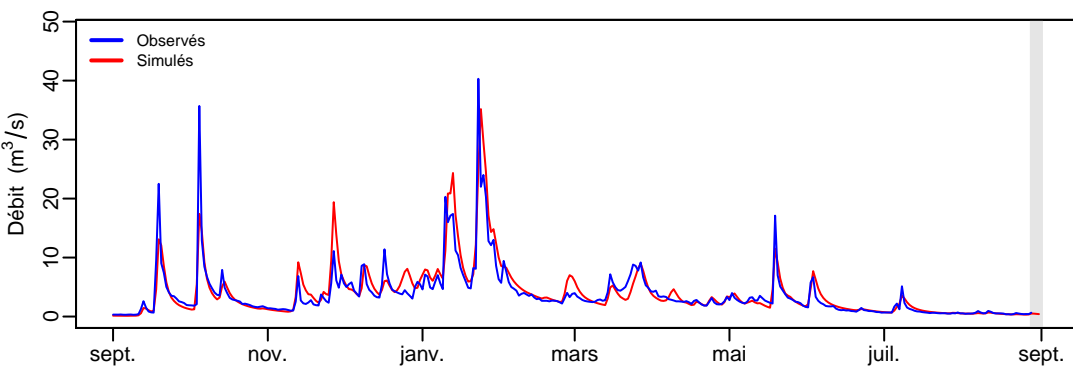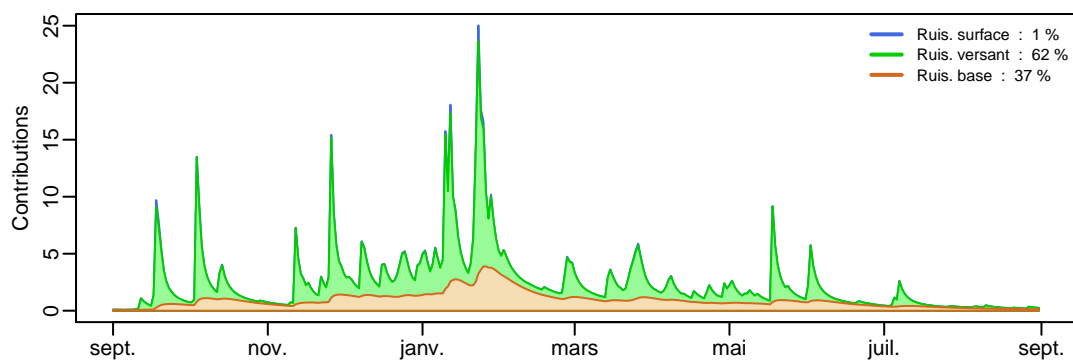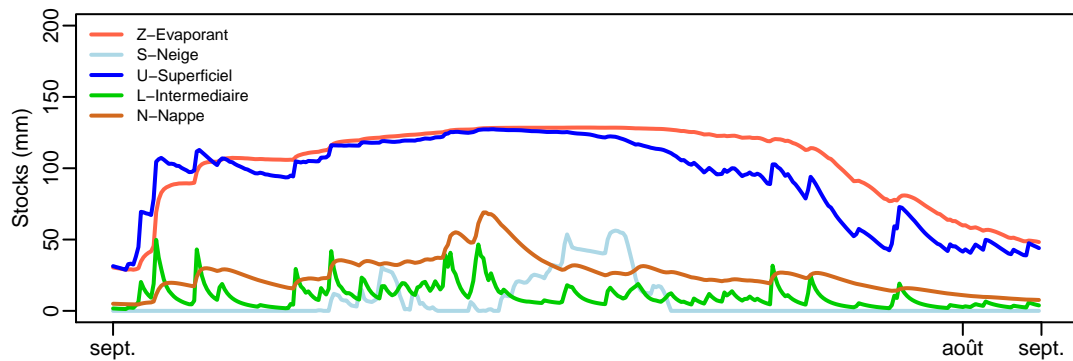



# k0403010 (137.93 km<sup>2</sup>) – année 1996–1997

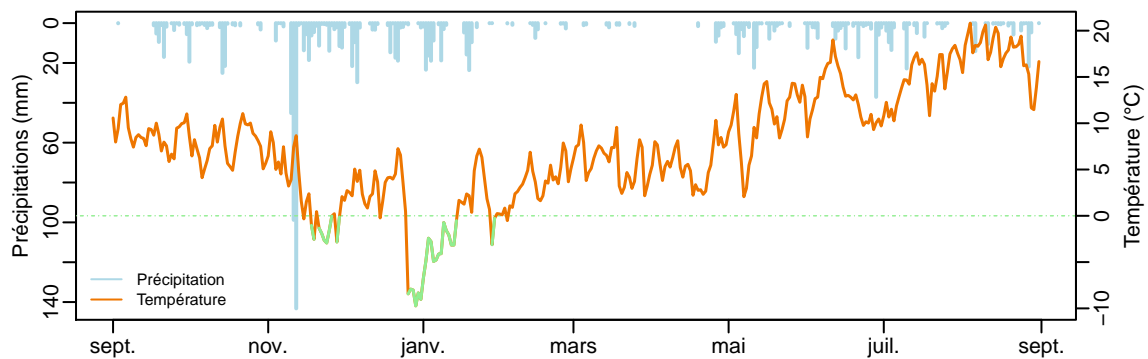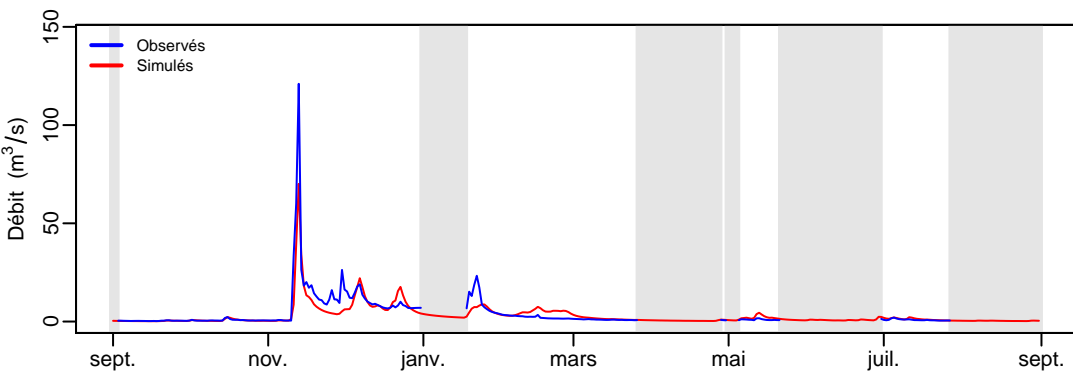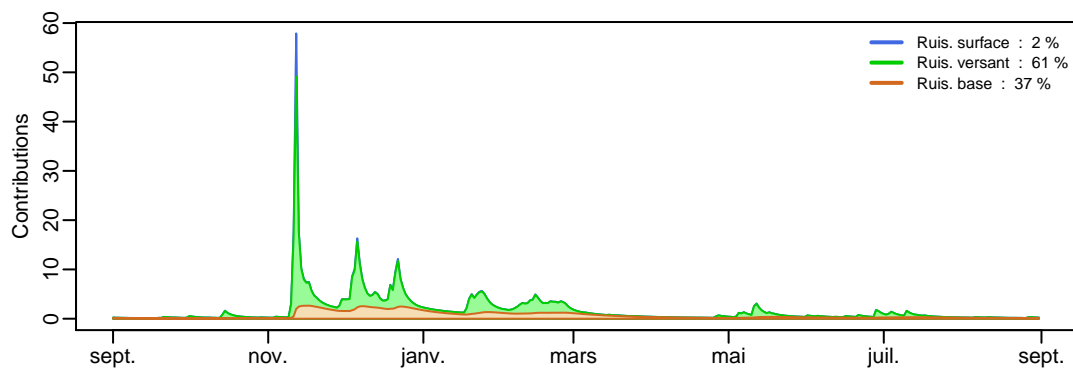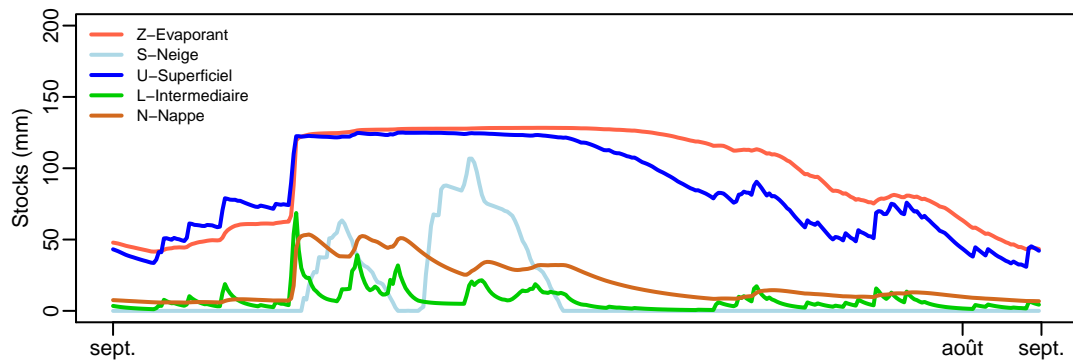

# k0403010 (137.93 km<sup>2</sup>) – année 1997–1998

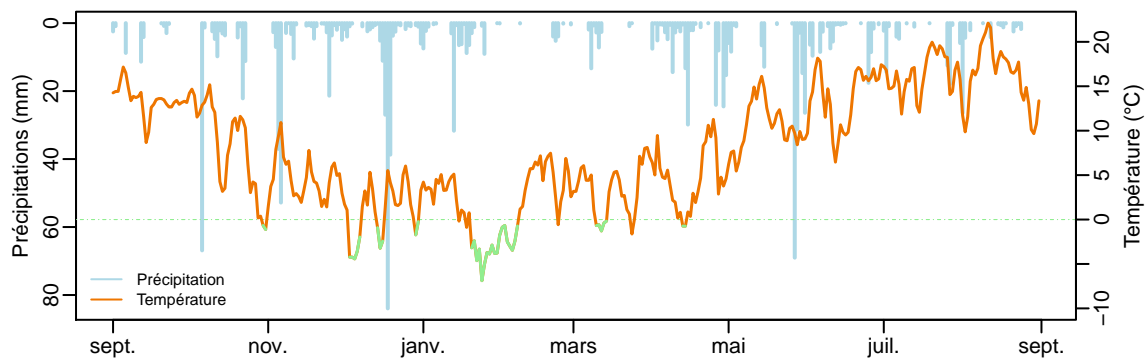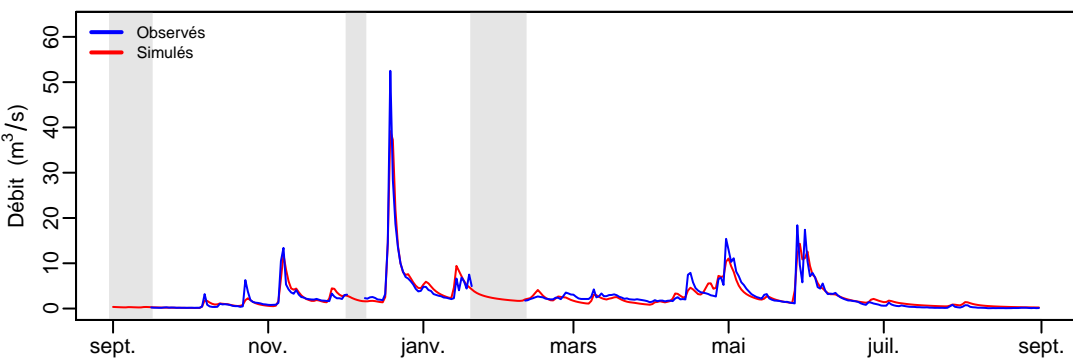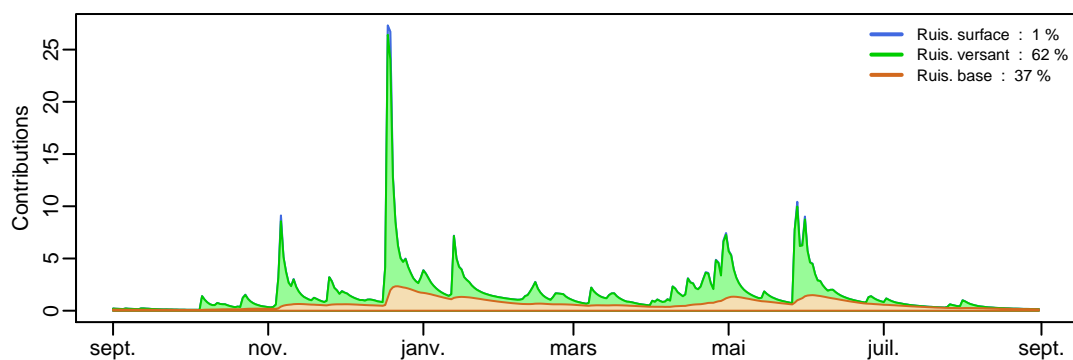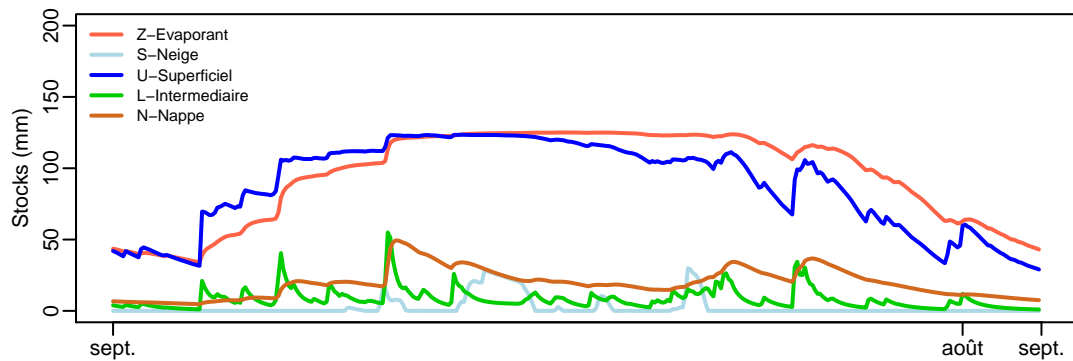

# k0403010 (137.93 km<sup>2</sup>) – année 1998–1999

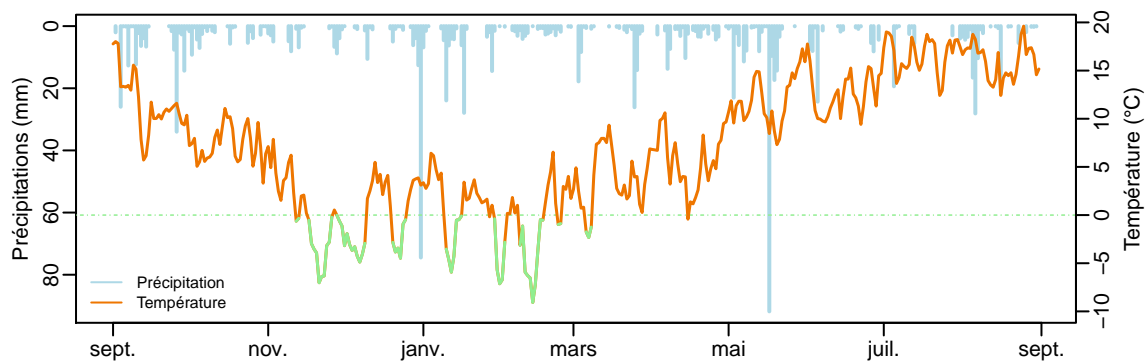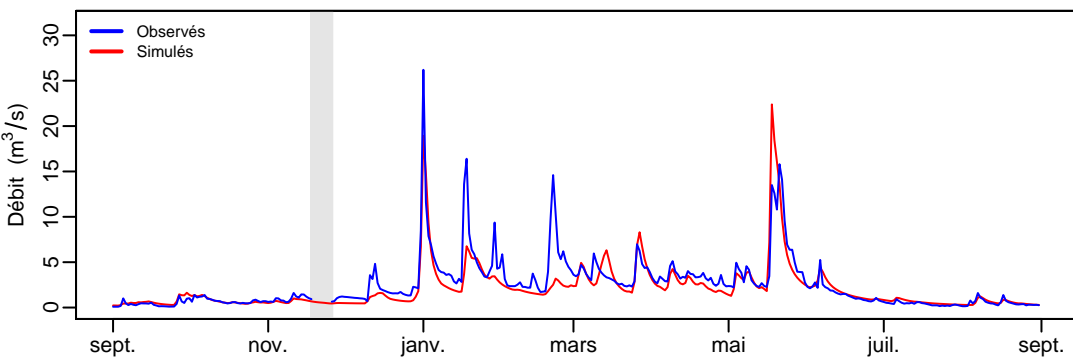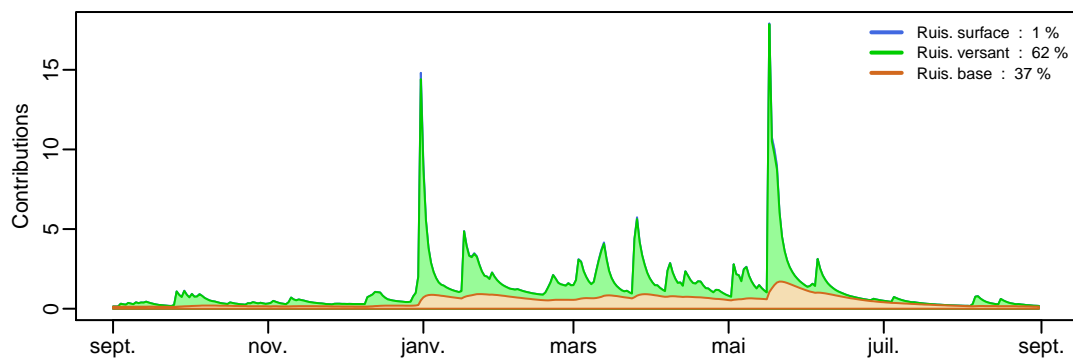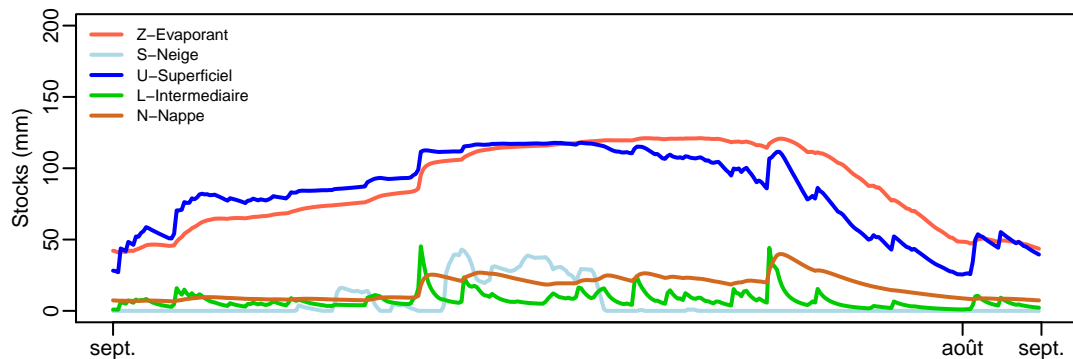

# k0403010 (137.93 km<sup>2</sup>) – année 1999–2000

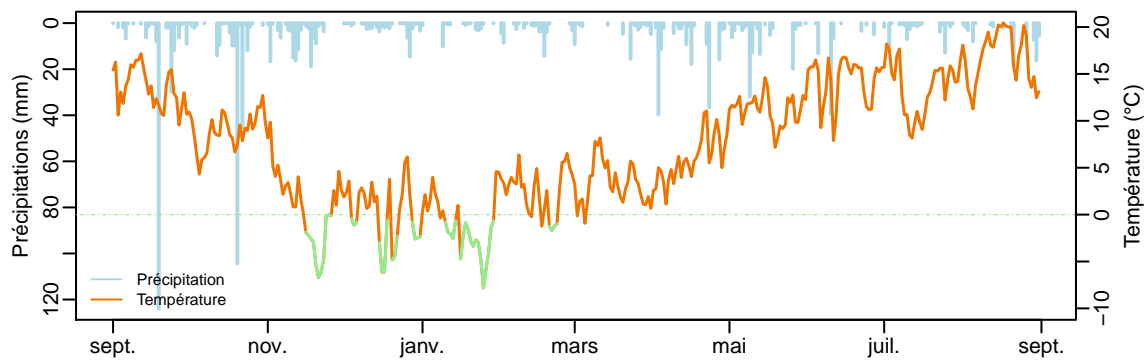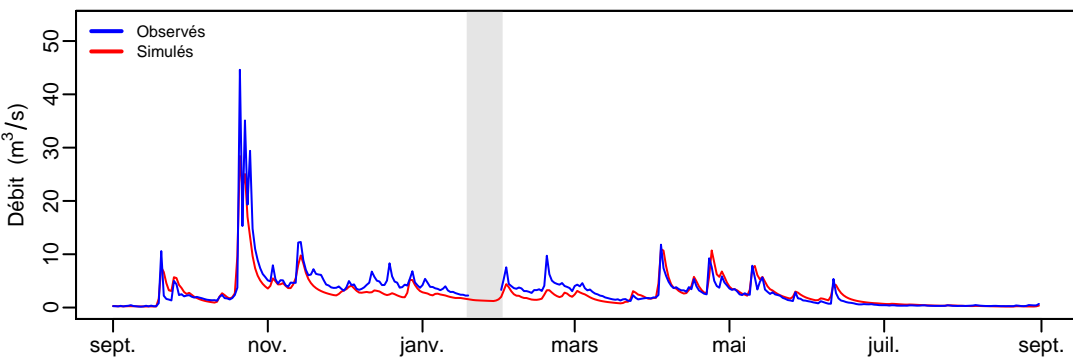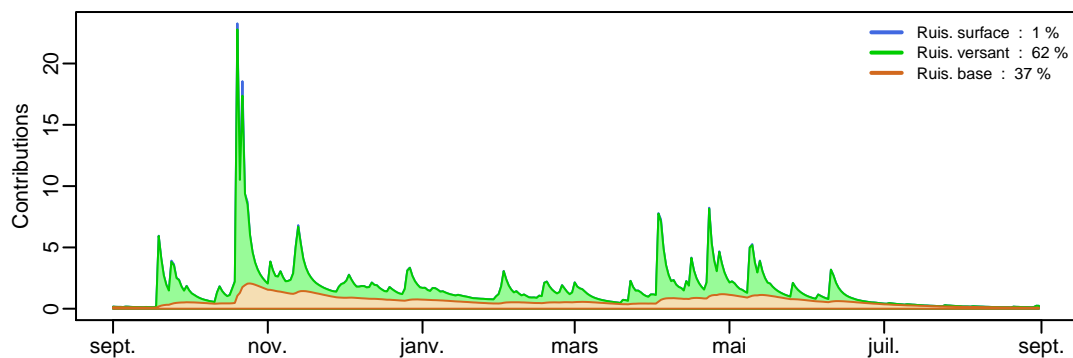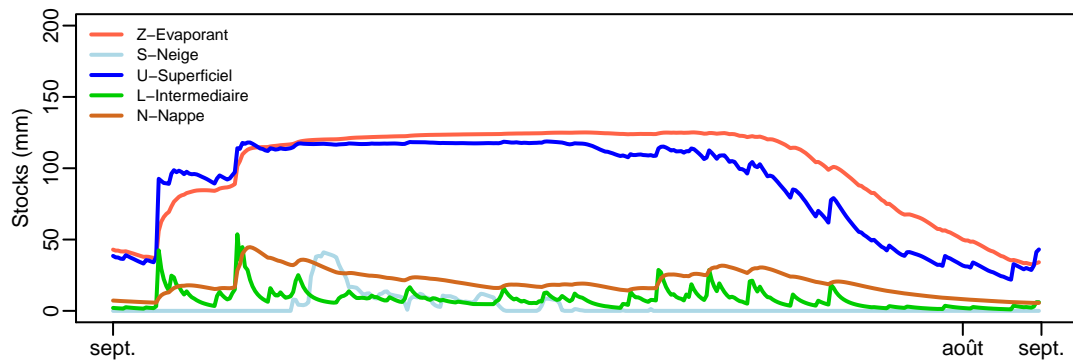

# k0403010 (137.93 km<sup>2</sup>) – année 2000–2001

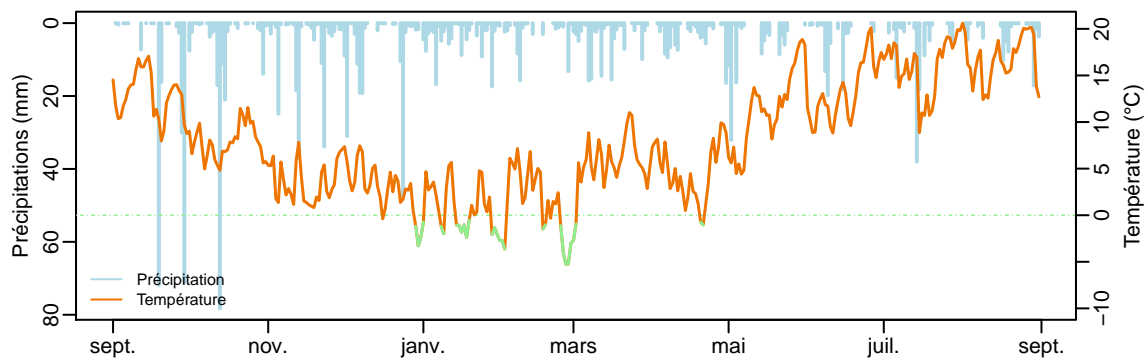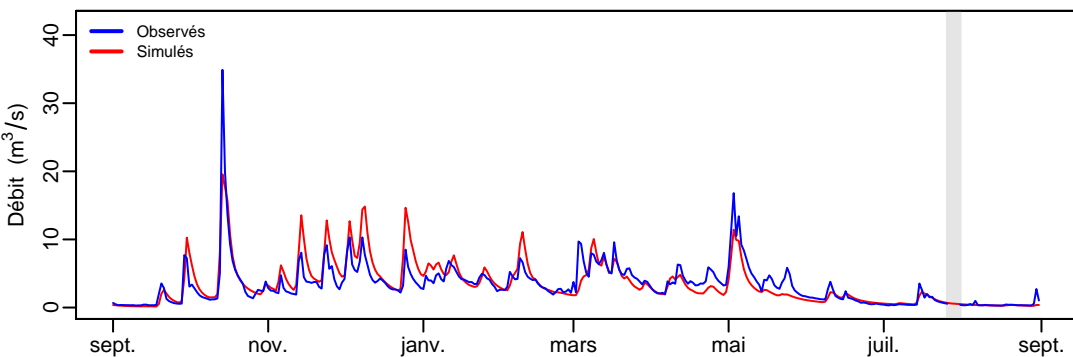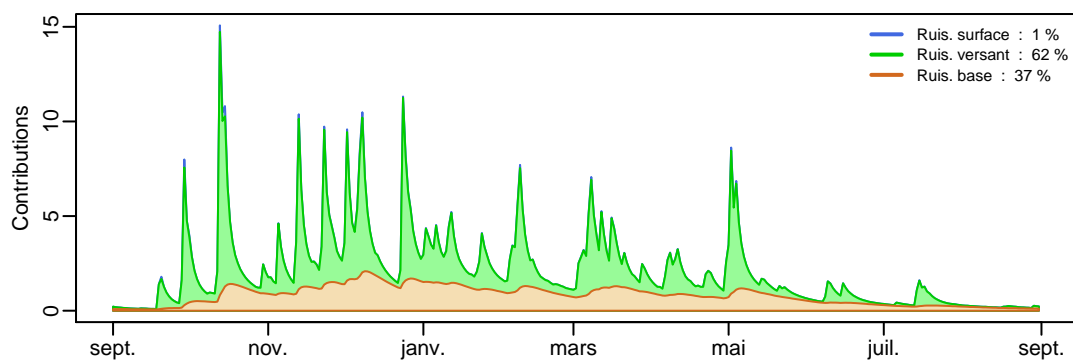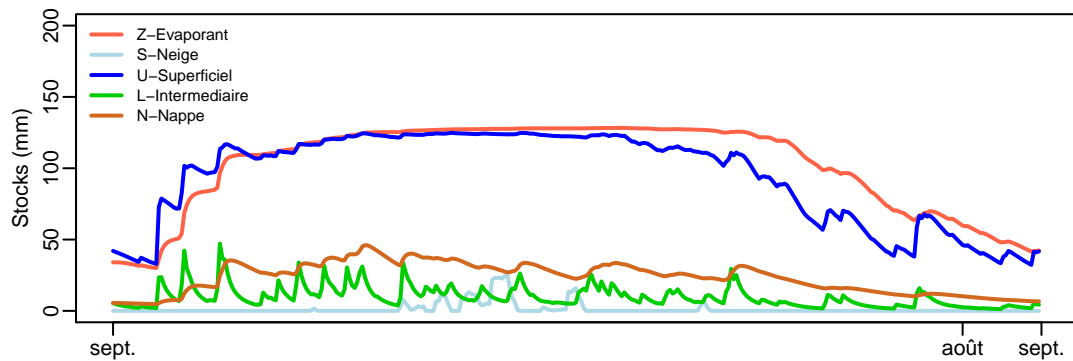

# k0403010 (137.93 km<sup>2</sup>) – année 2001–2002

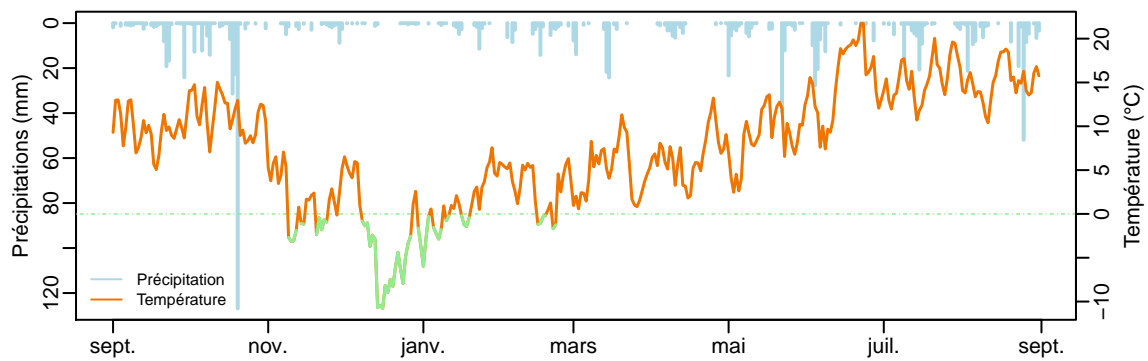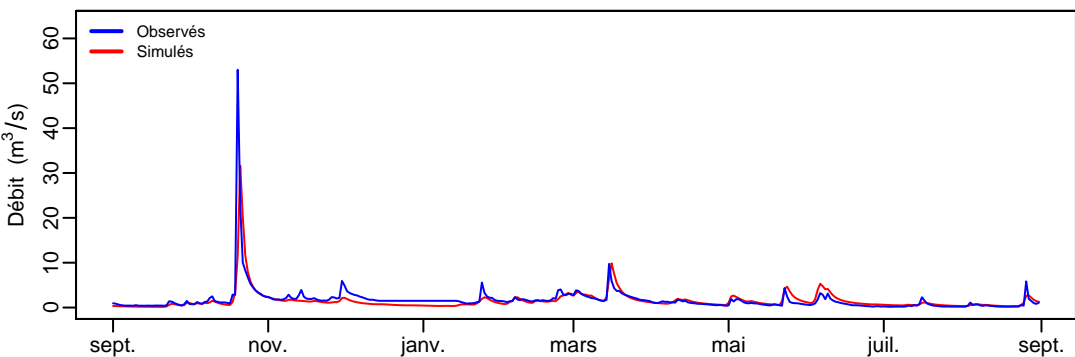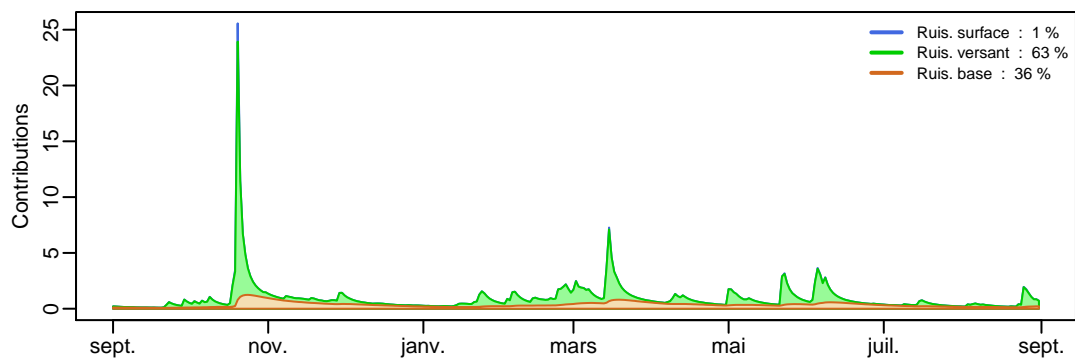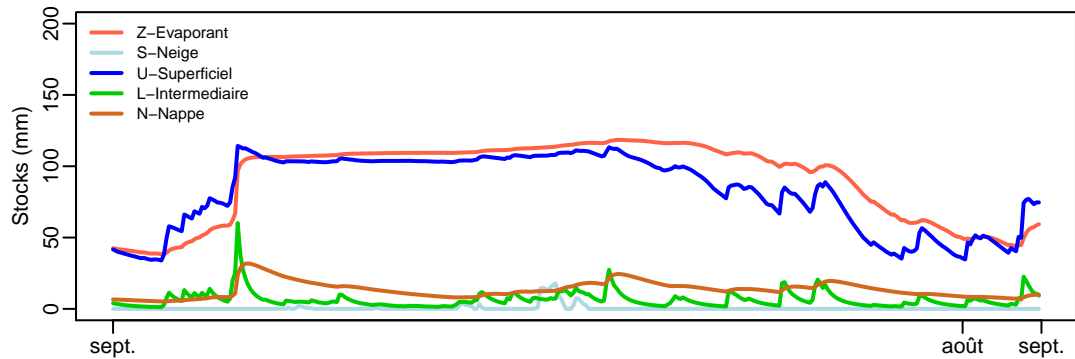

# k0403010 (137.93 km<sup>2</sup>) – année 2002–2003

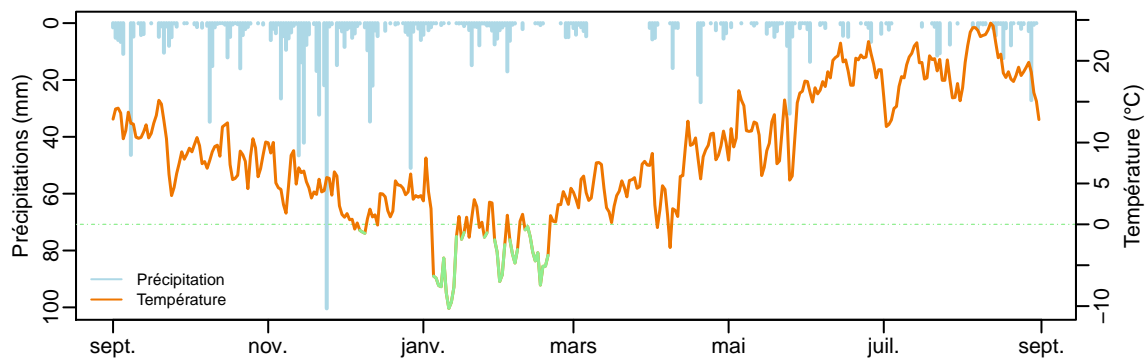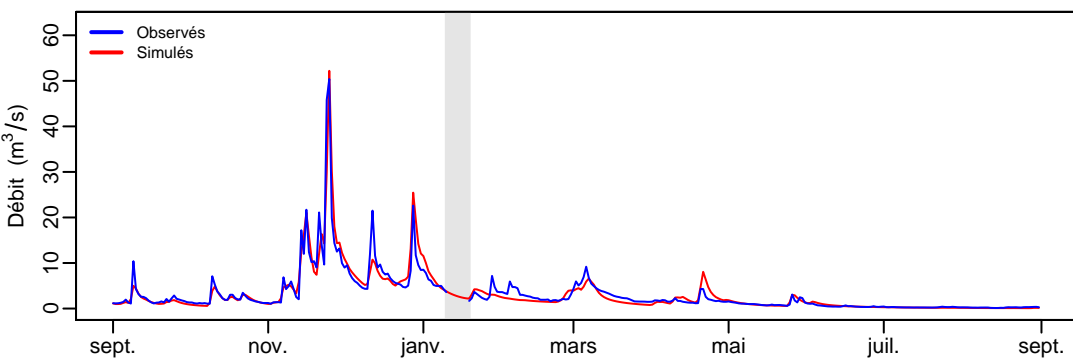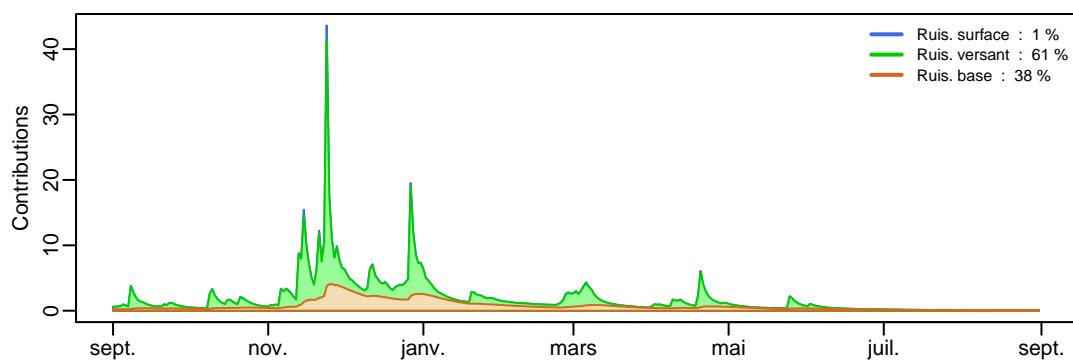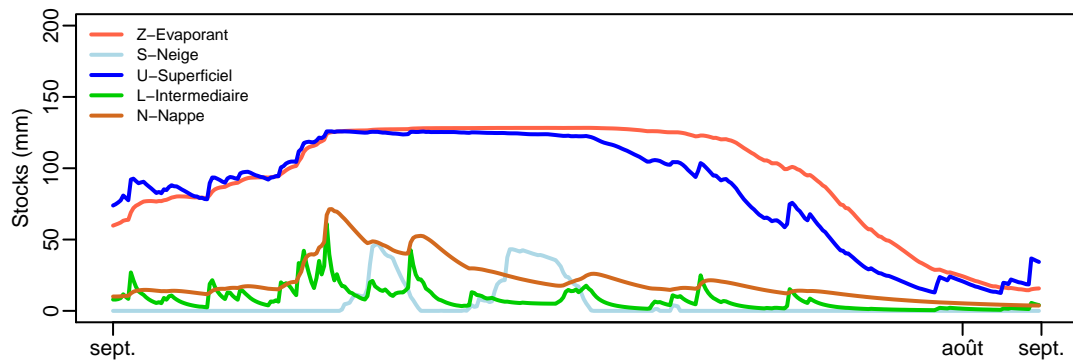

# k0403010 (137.93 km<sup>2</sup>) – année 2003–2004

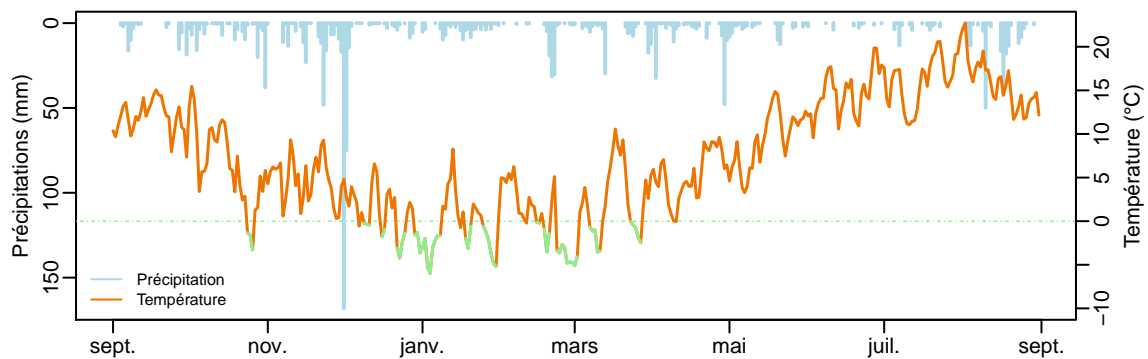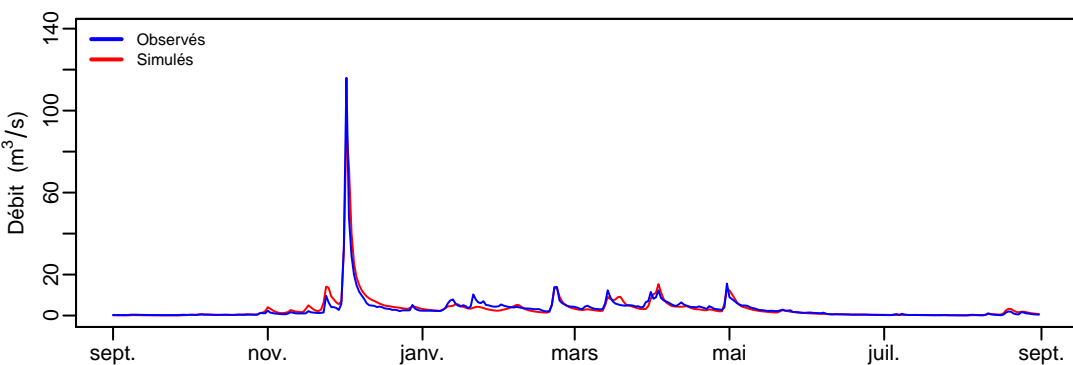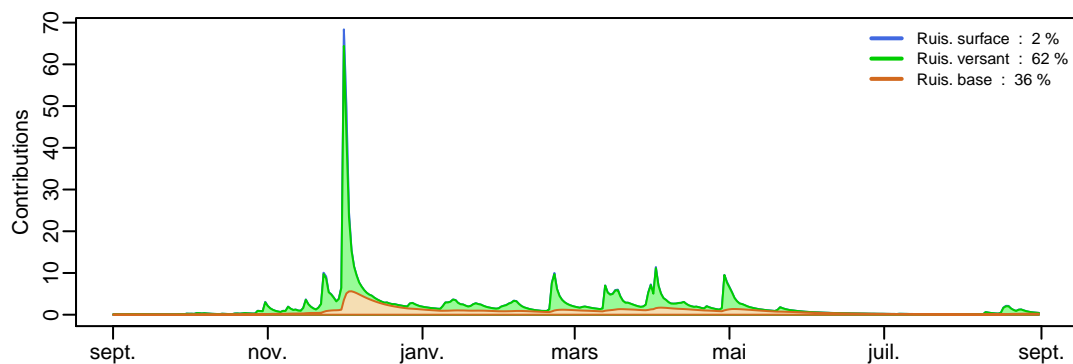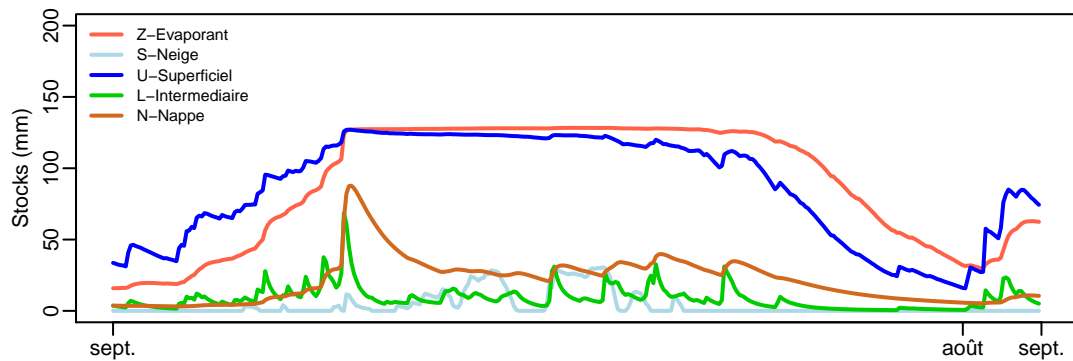



# k0403010 (137.93 km<sup>2</sup>) – année 2004–2005

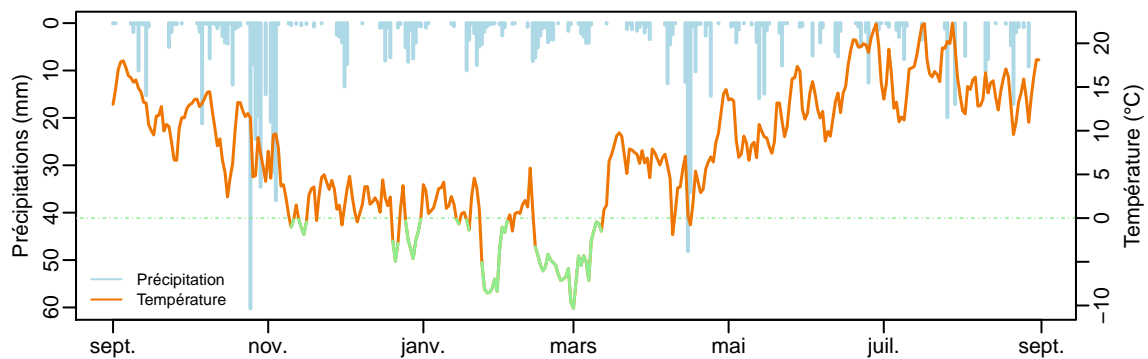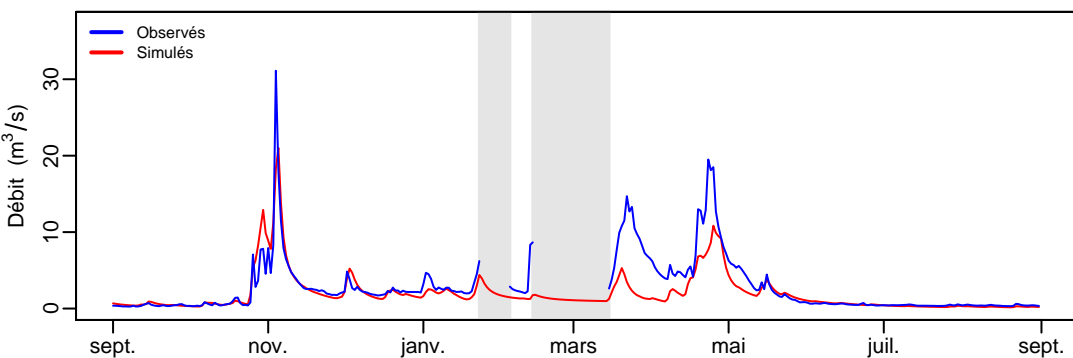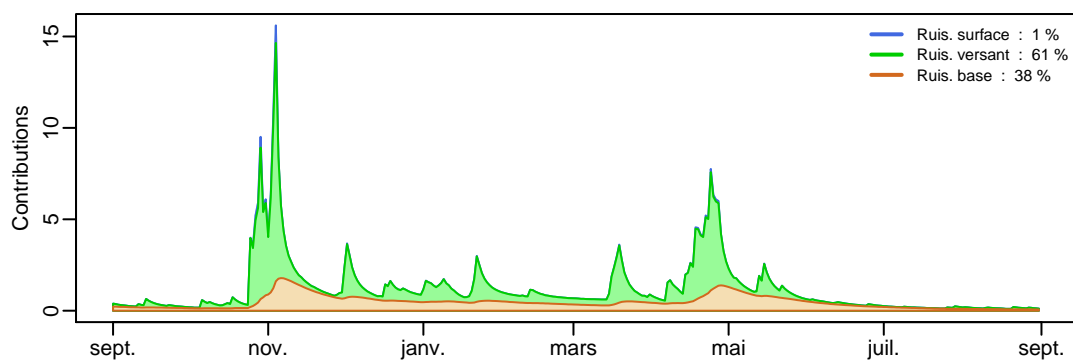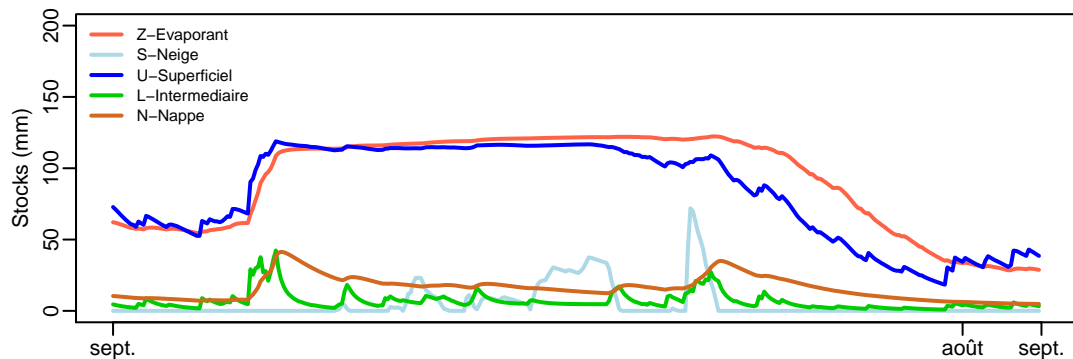

# k0403010 (137.93 km<sup>2</sup>) – année 2005–2006

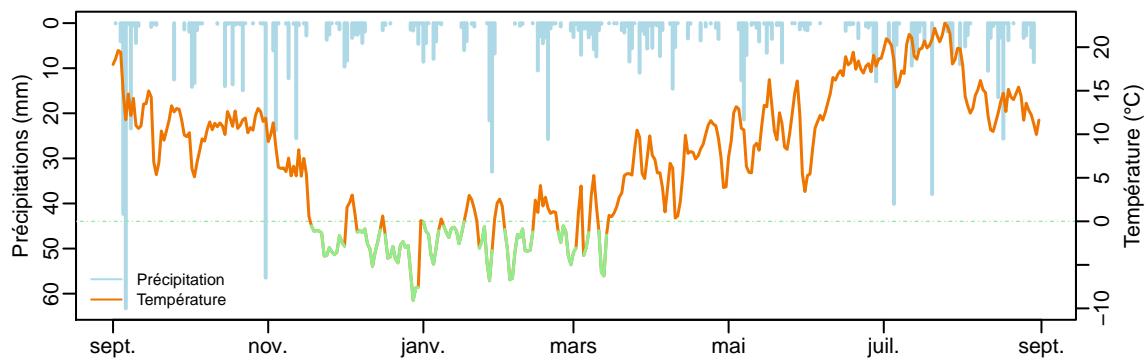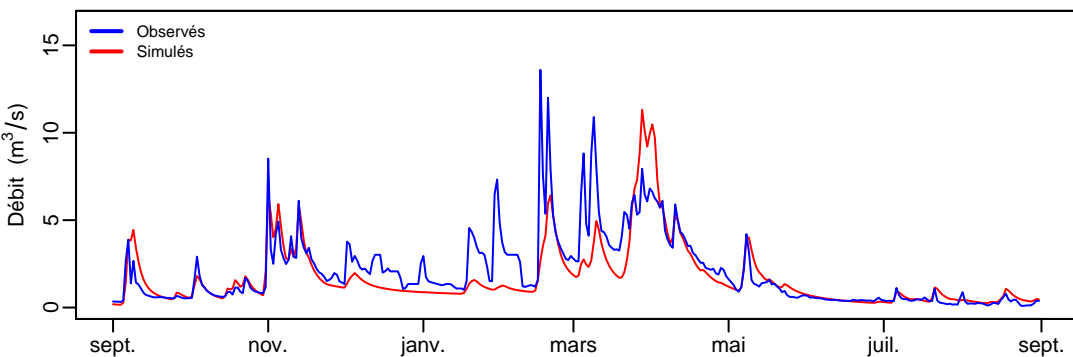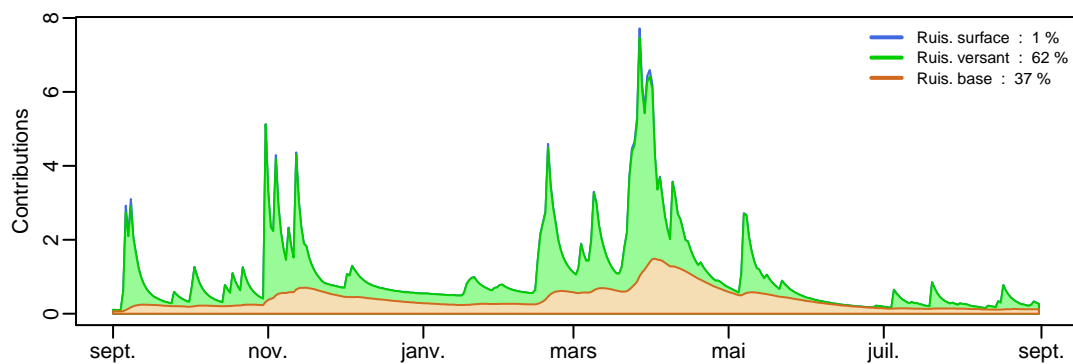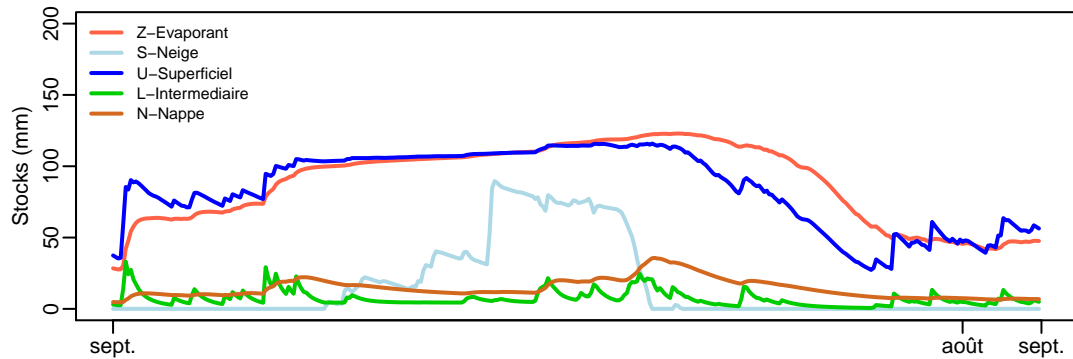

# k0403010 (137.93 km<sup>2</sup>) – année 2006–2007

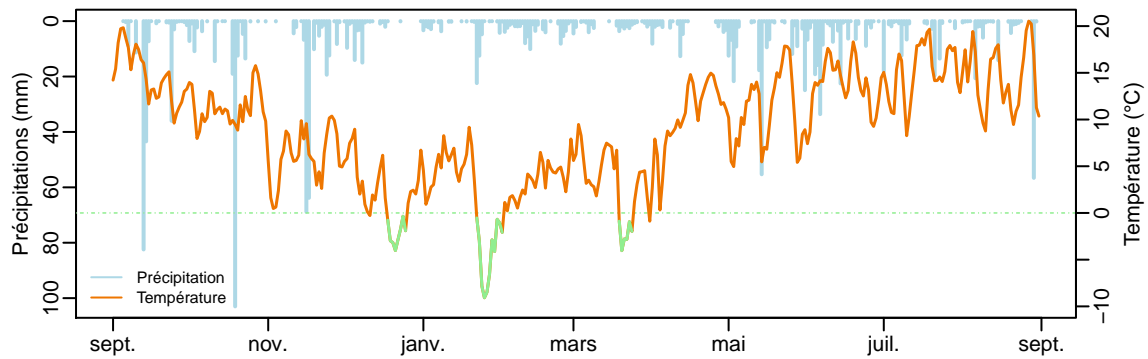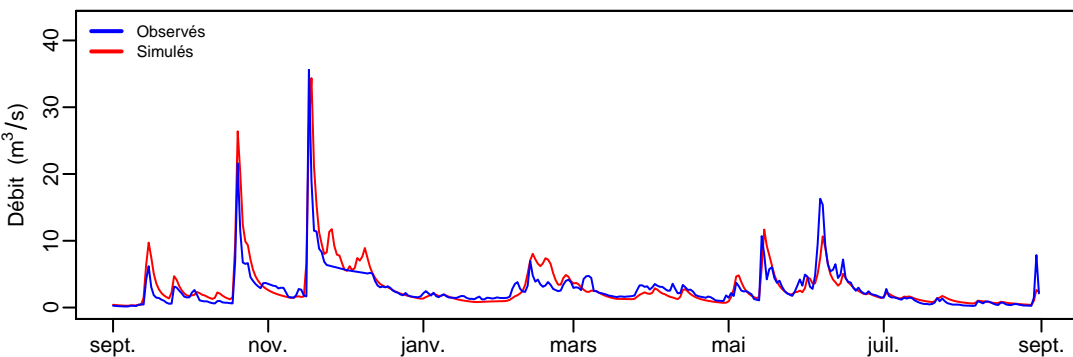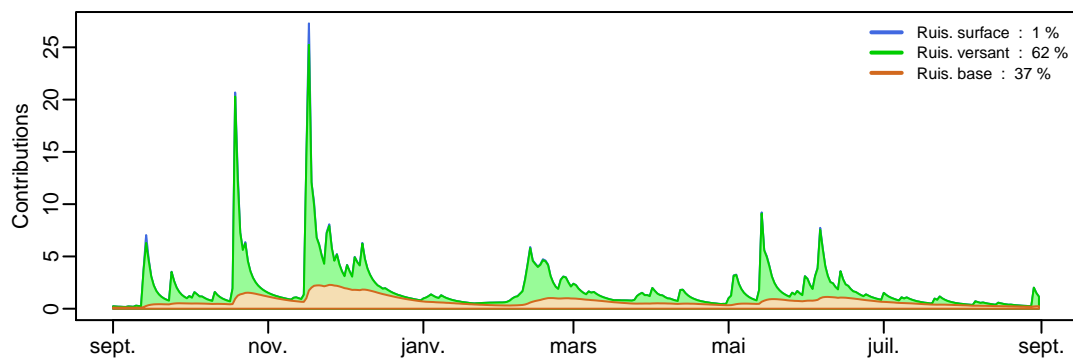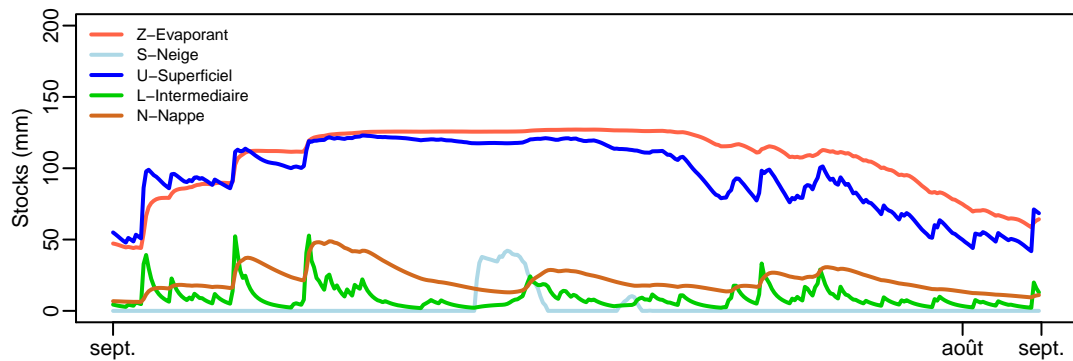

# k0403010 (137.93 km<sup>2</sup>) – année 2007–2008

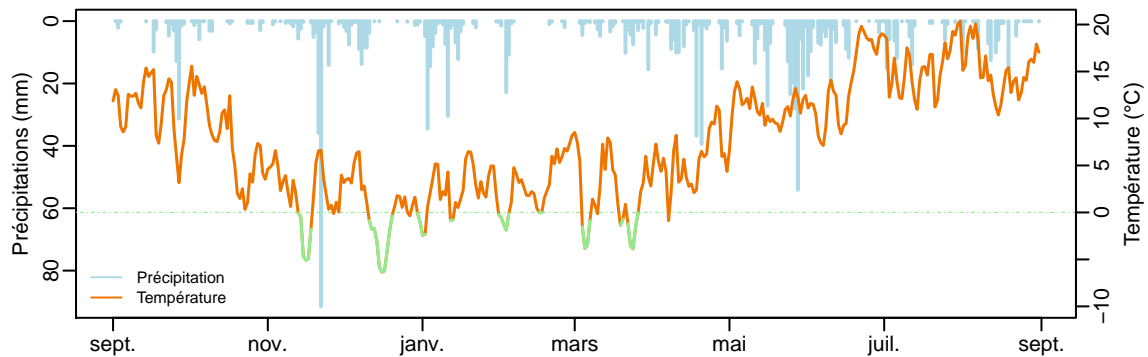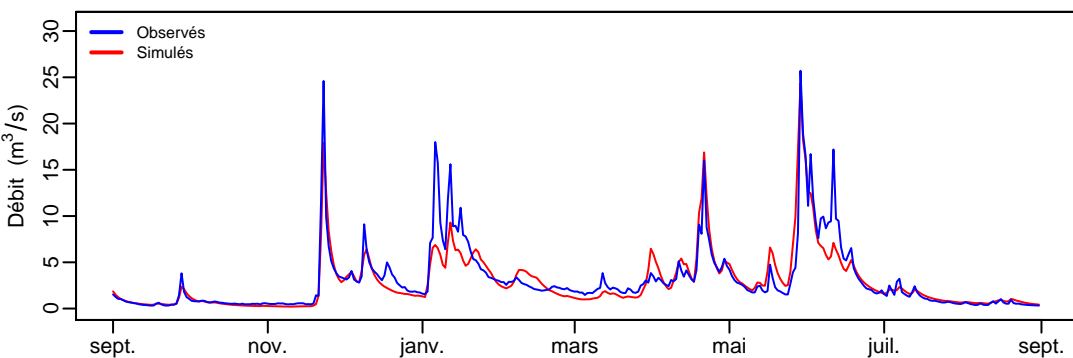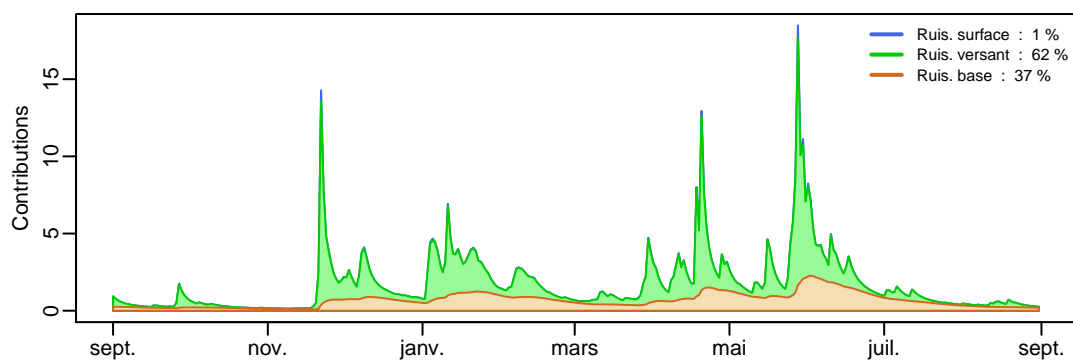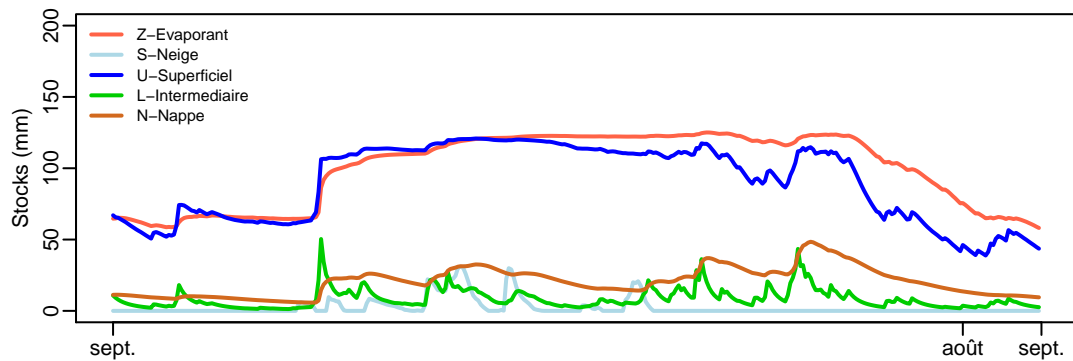

# k0403010 (137.93 km<sup>2</sup>) – année 2008–2009

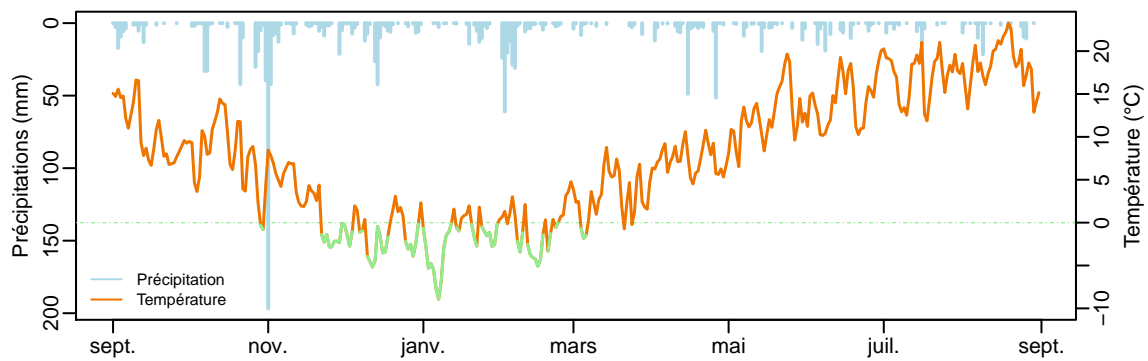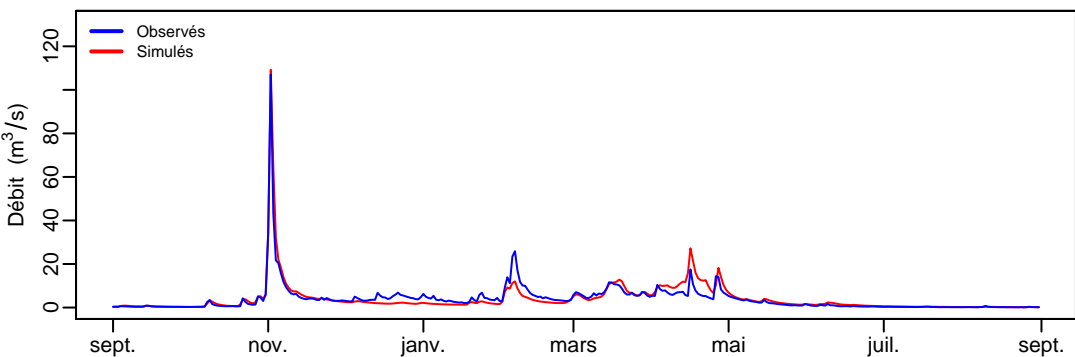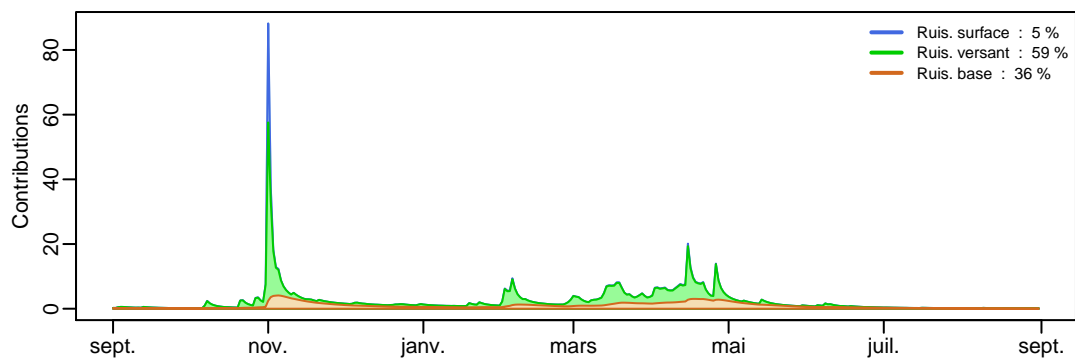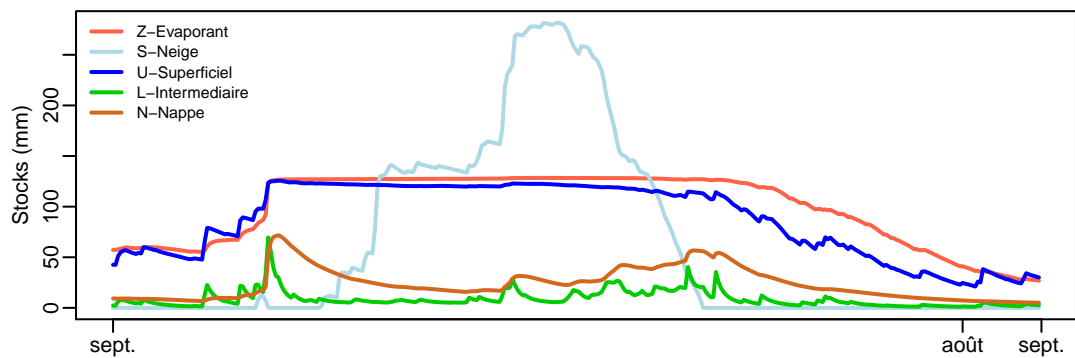

# k0403010 (137.93 km<sup>2</sup>) – année 2009–2010

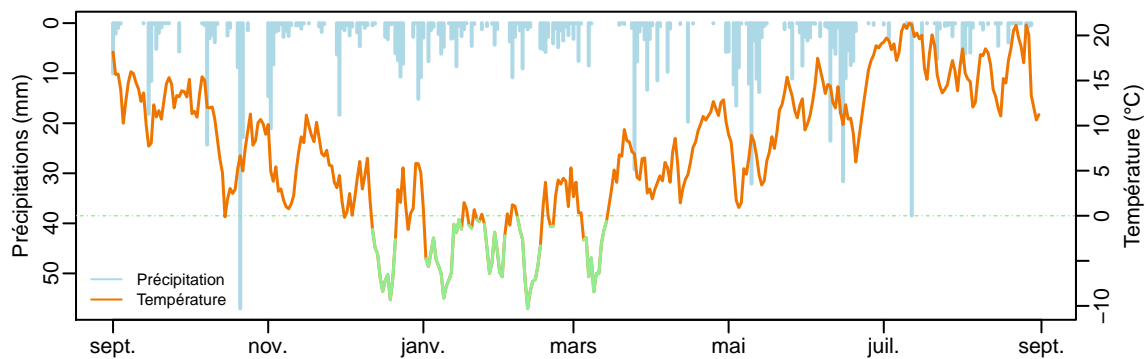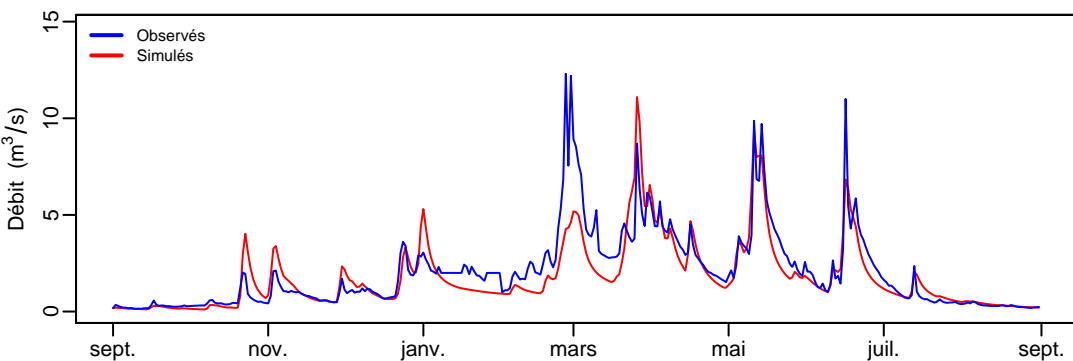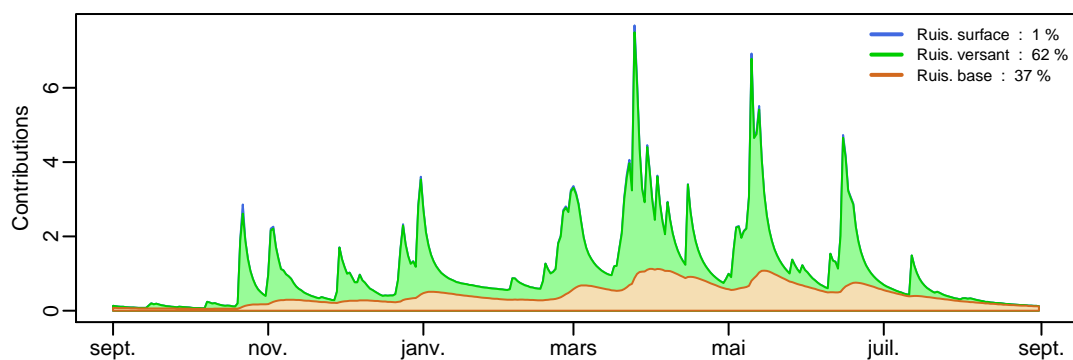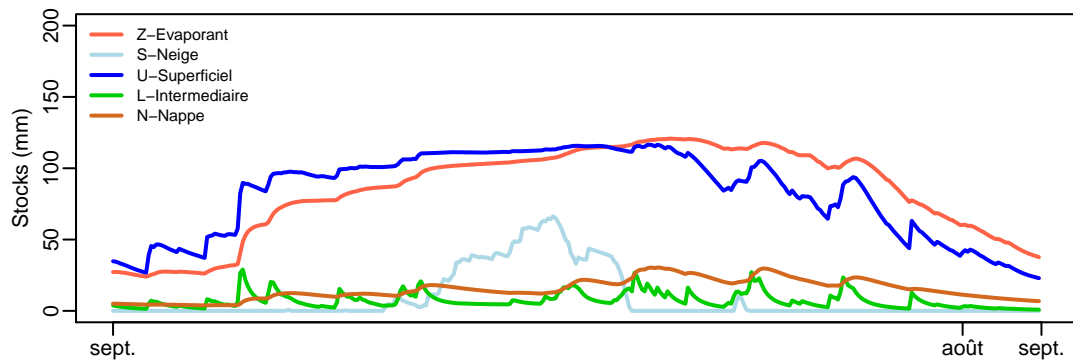

# k0403010 (137.93 km<sup>2</sup>) – année 2010–2011

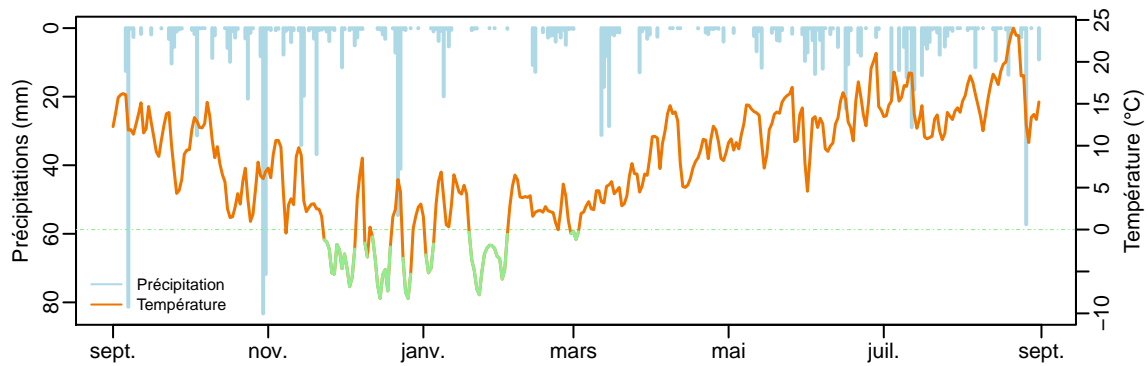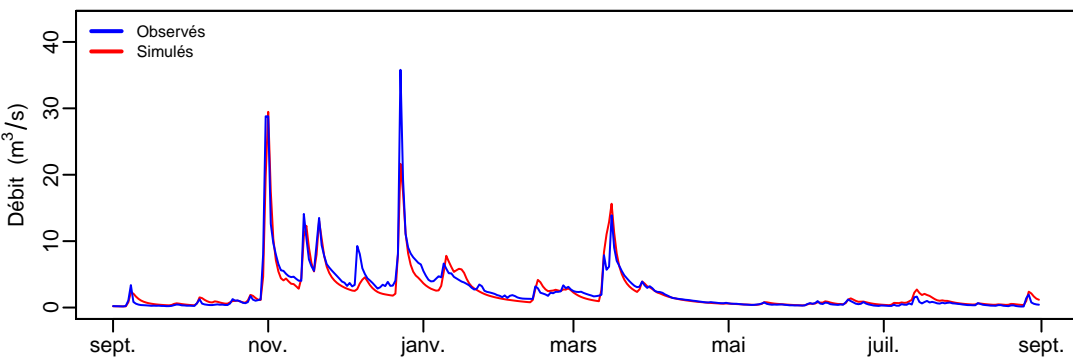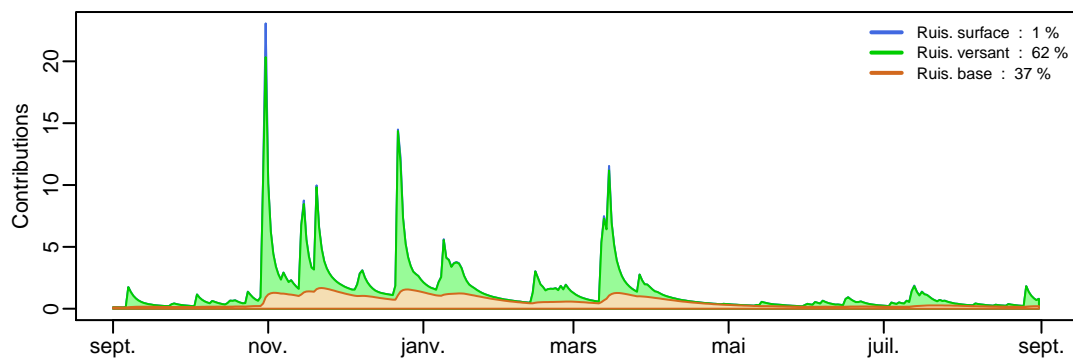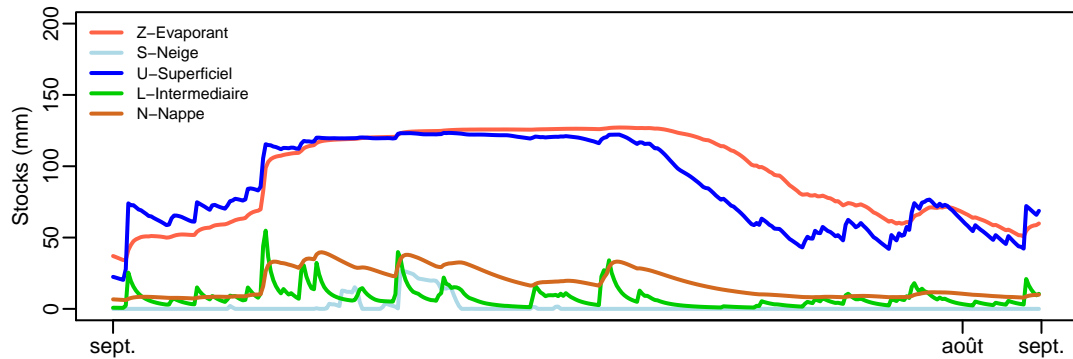

# k0403010 (137.93 km<sup>2</sup>) – année 2011–2012

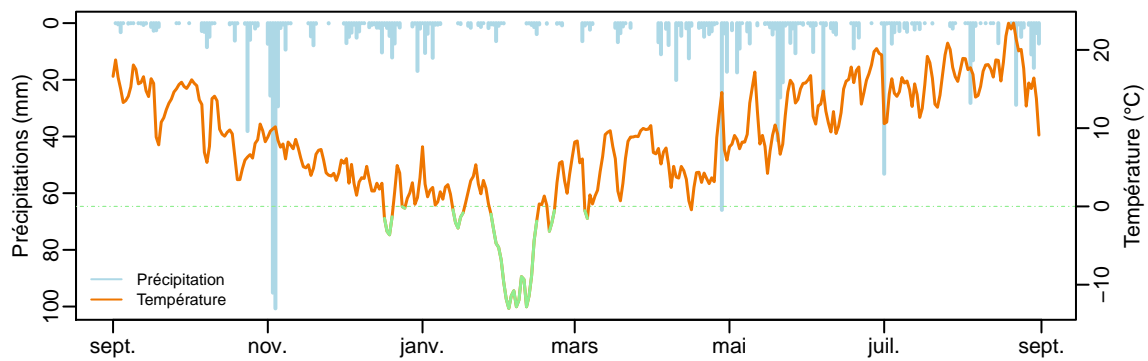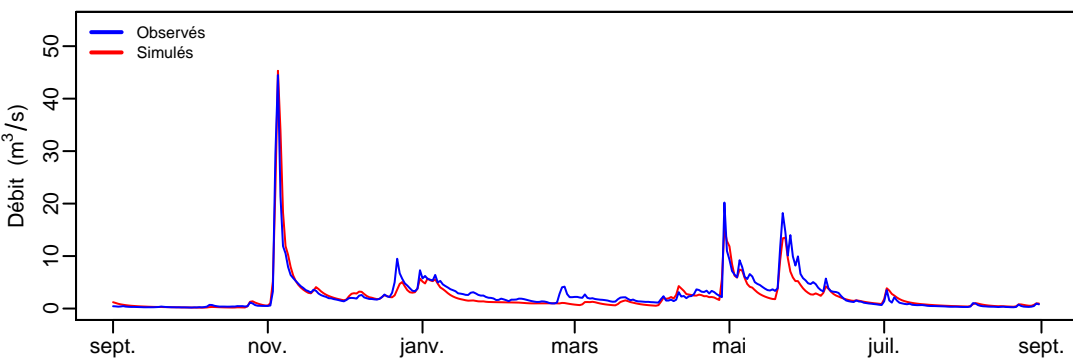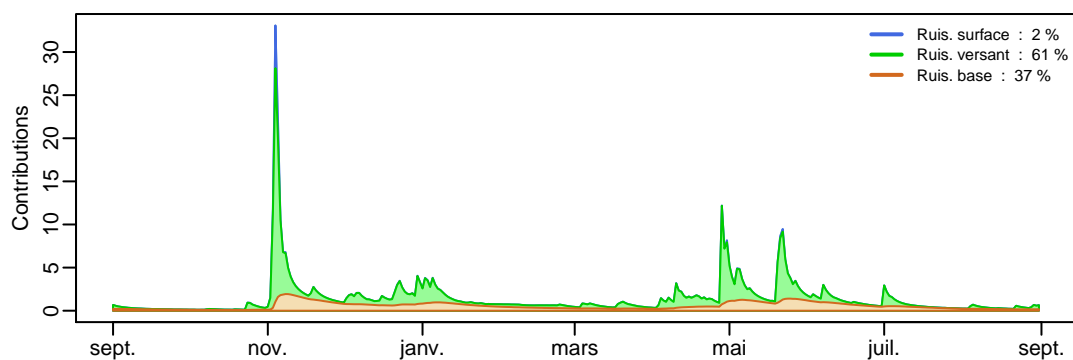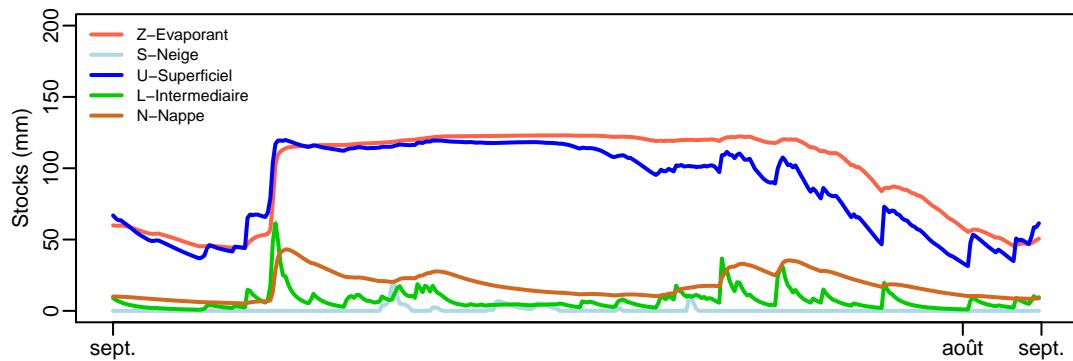



# k0454010 (228.77 km<sup>2</sup>) – année 1981–1982

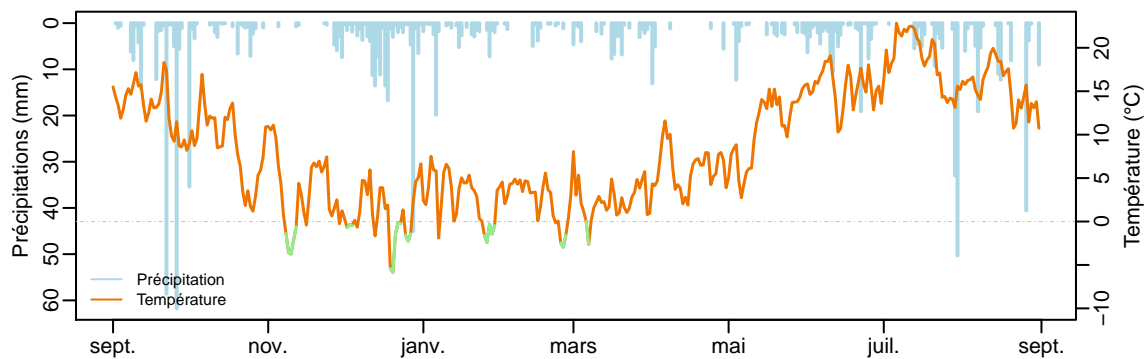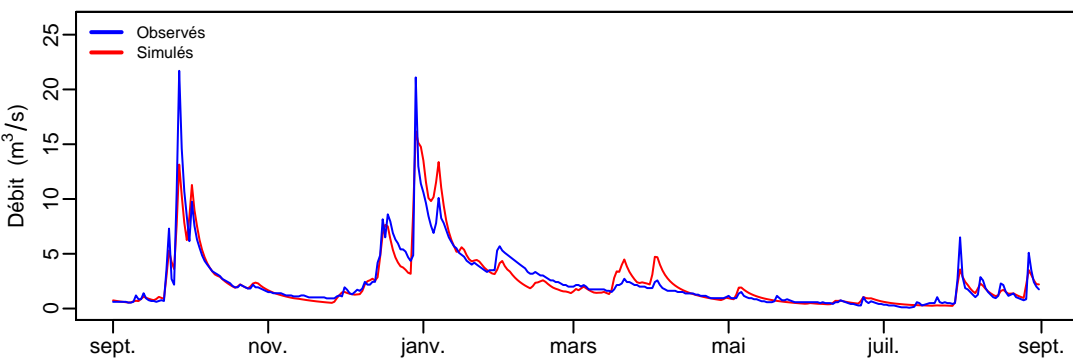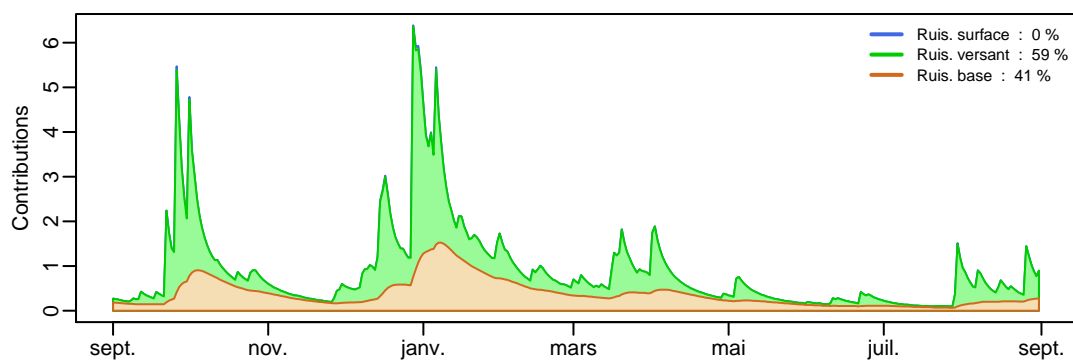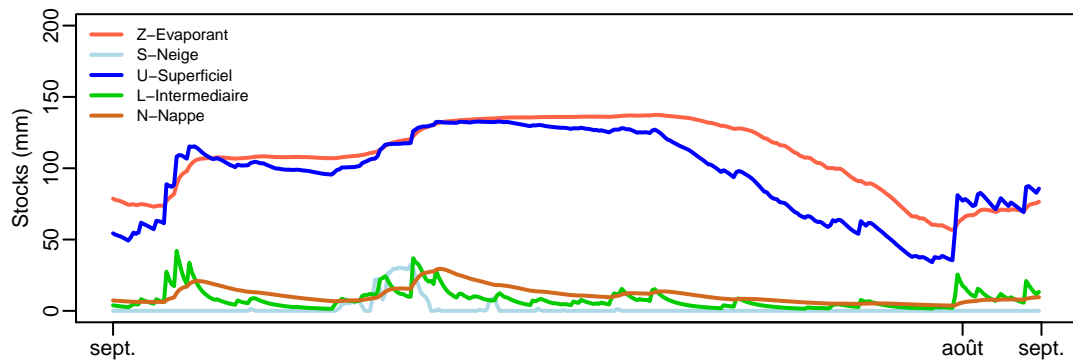

# k0454010 (228.77 km<sup>2</sup>) – année 1982–1983

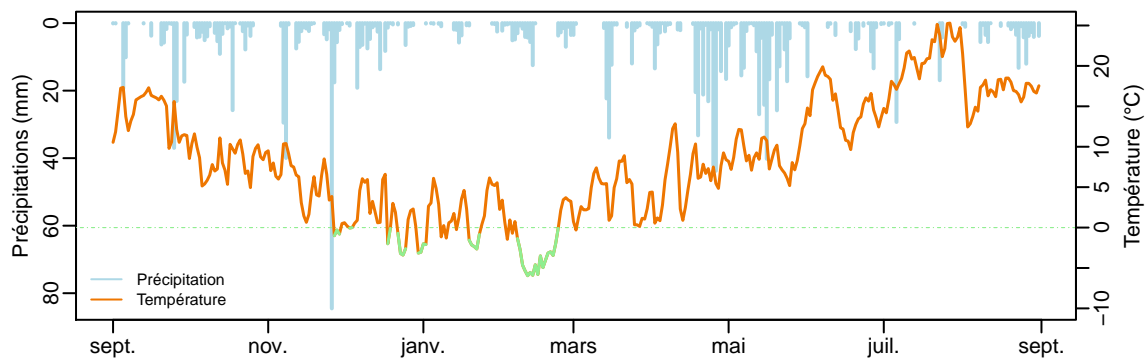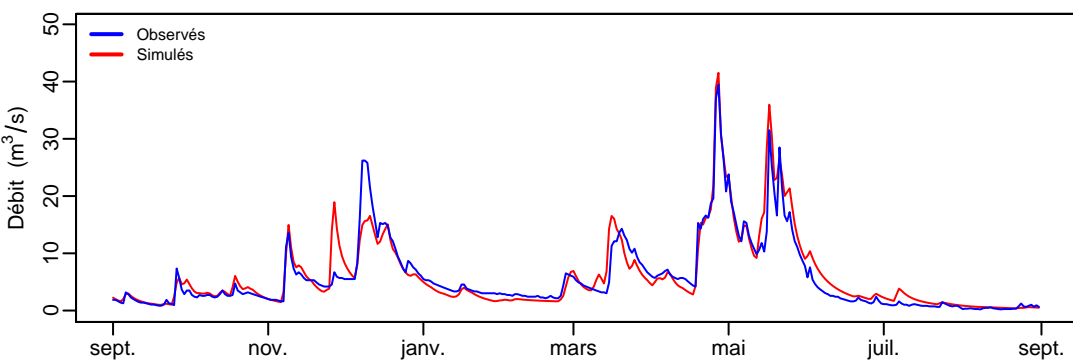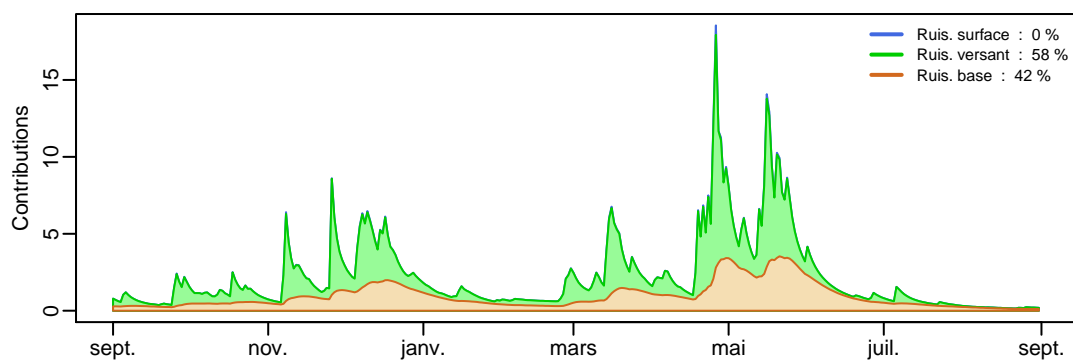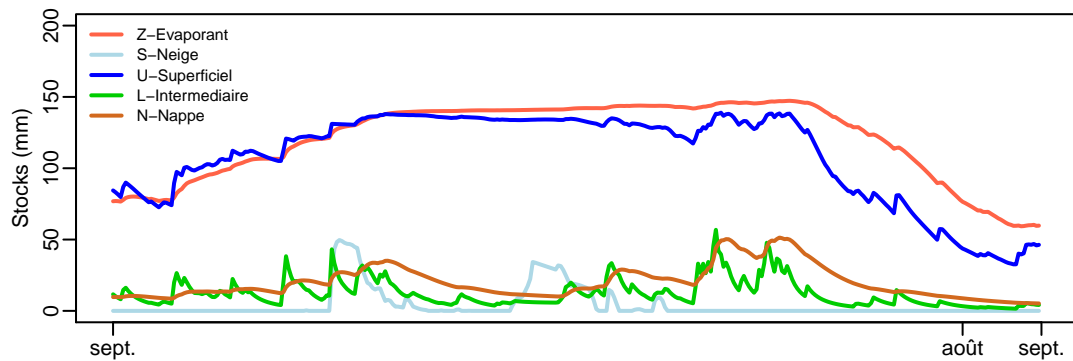

# k0454010 (228.77 km<sup>2</sup>) – année 1983–1984

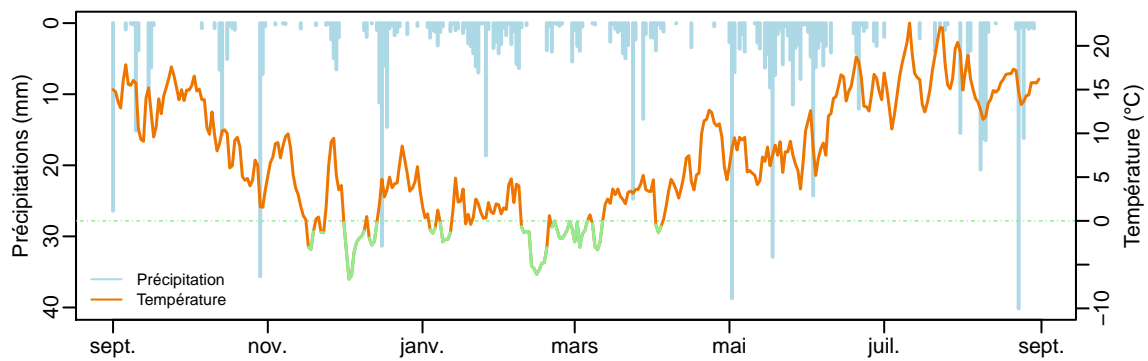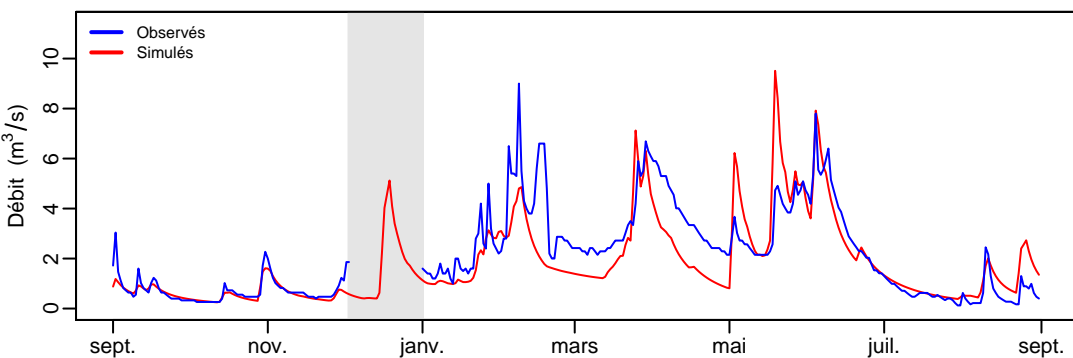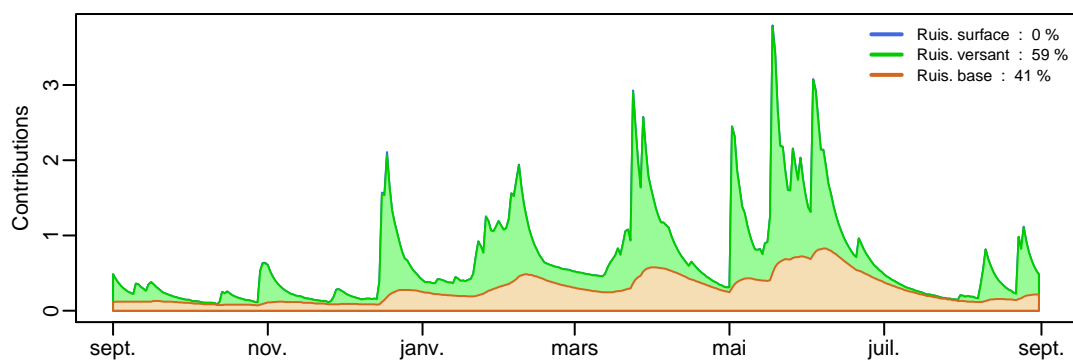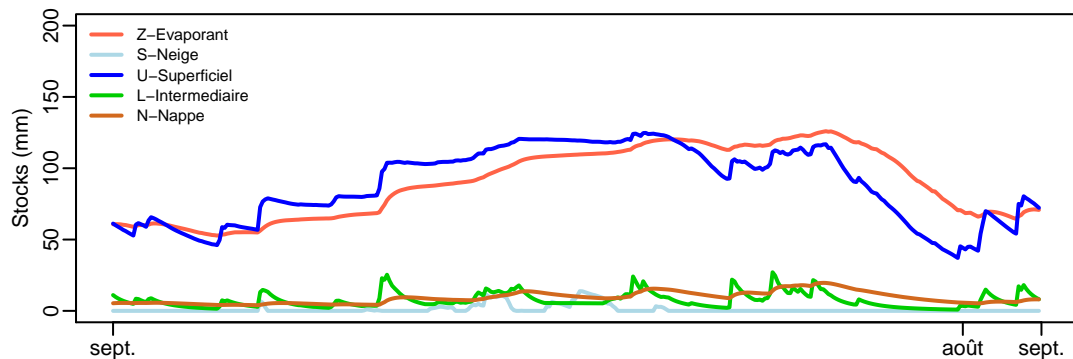

# k0454010 (228.77 km<sup>2</sup>) – année 1984–1985

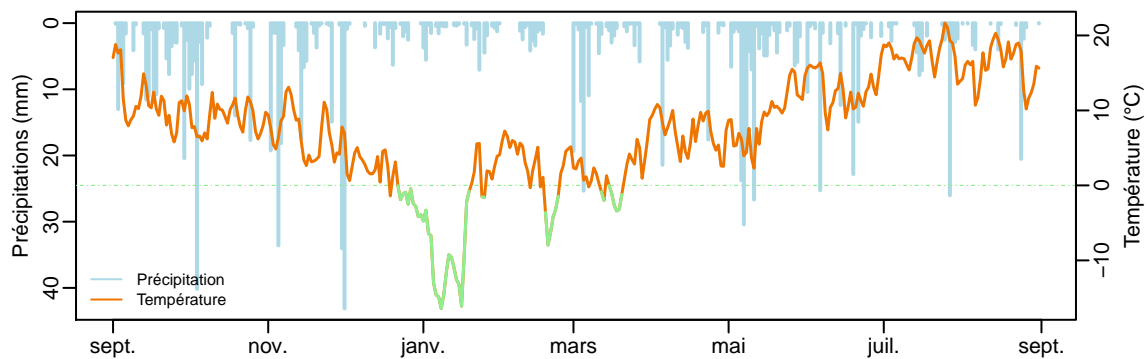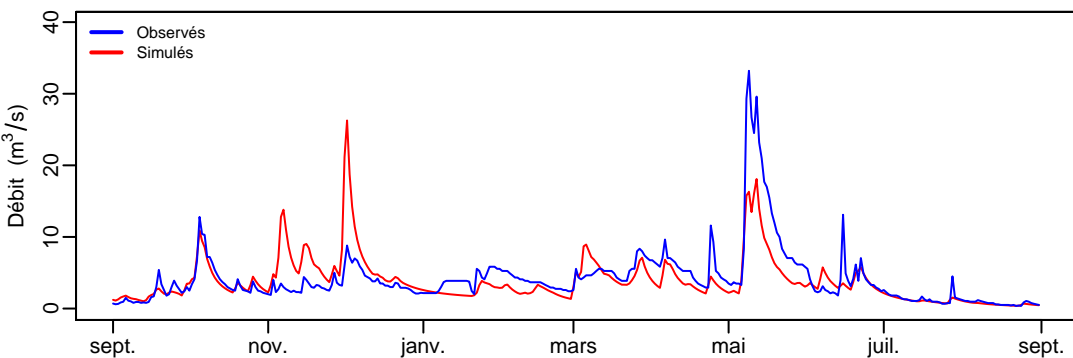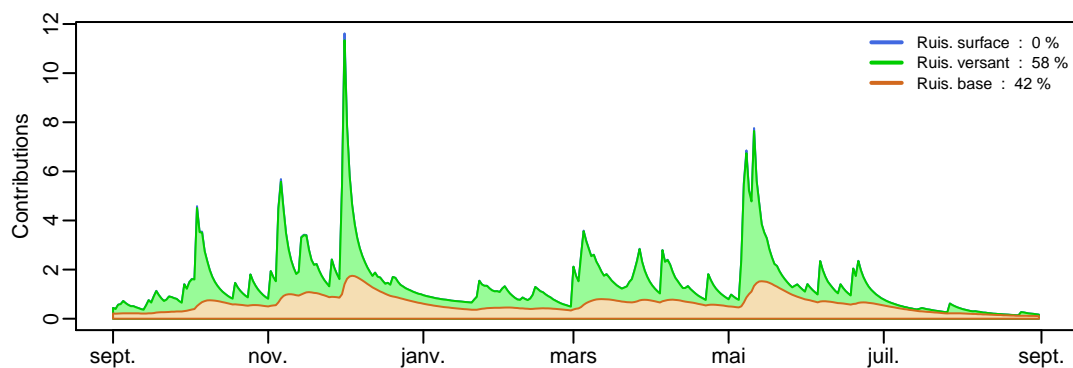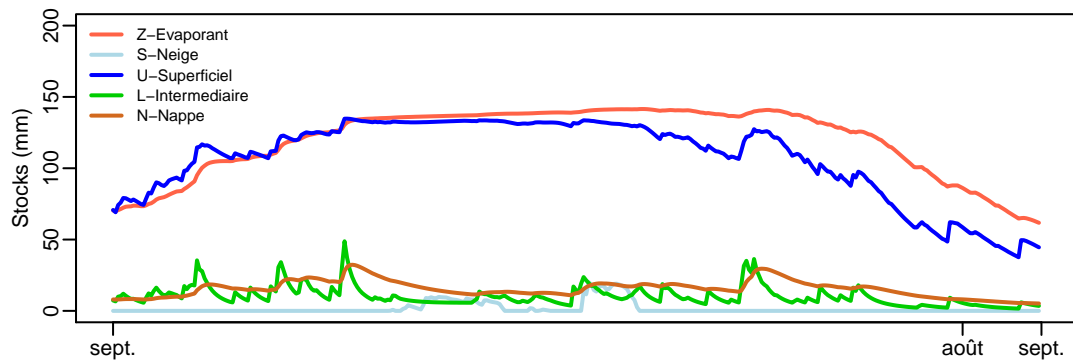

# k0454010 (228.77 km<sup>2</sup>) – année 1985–1986

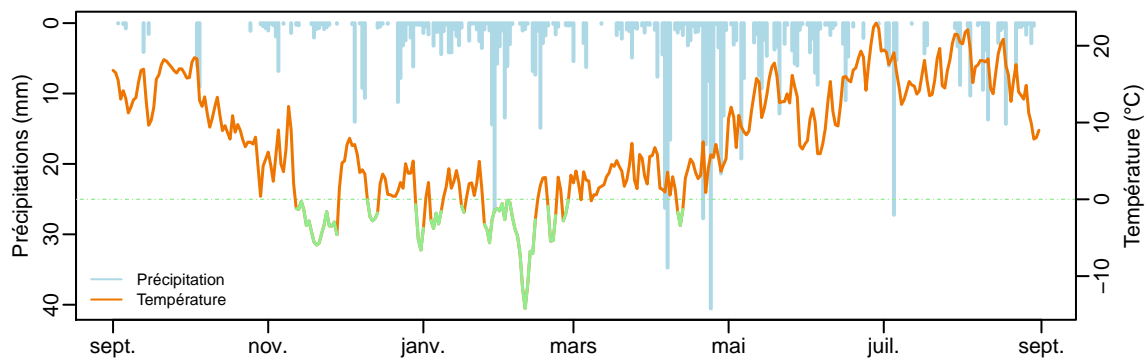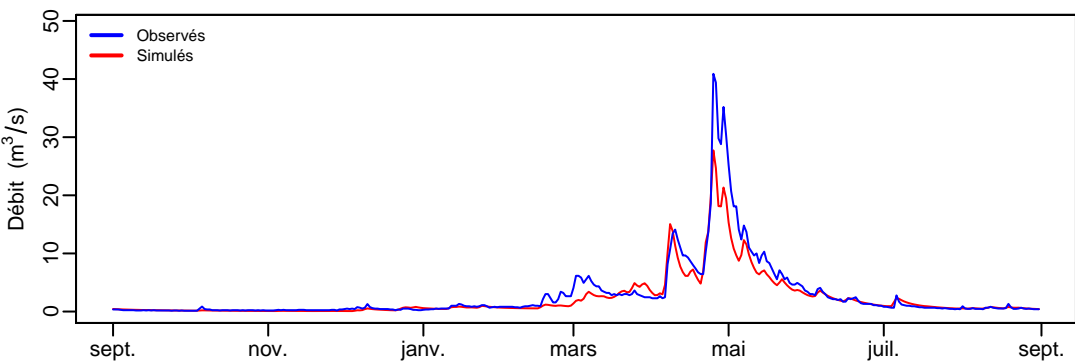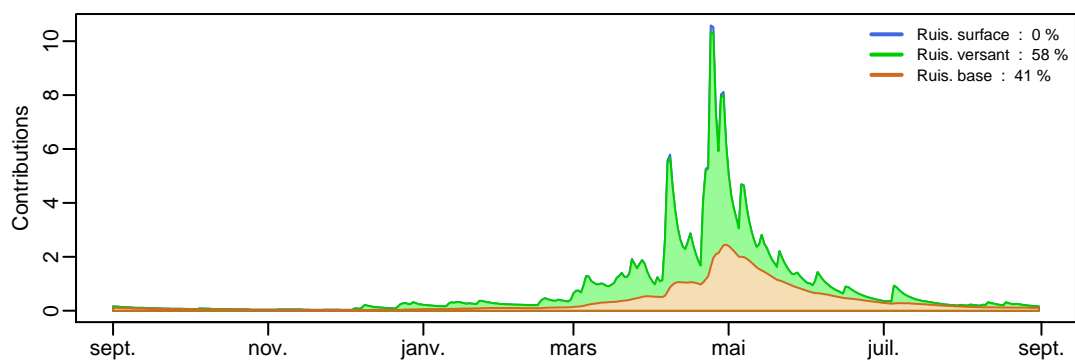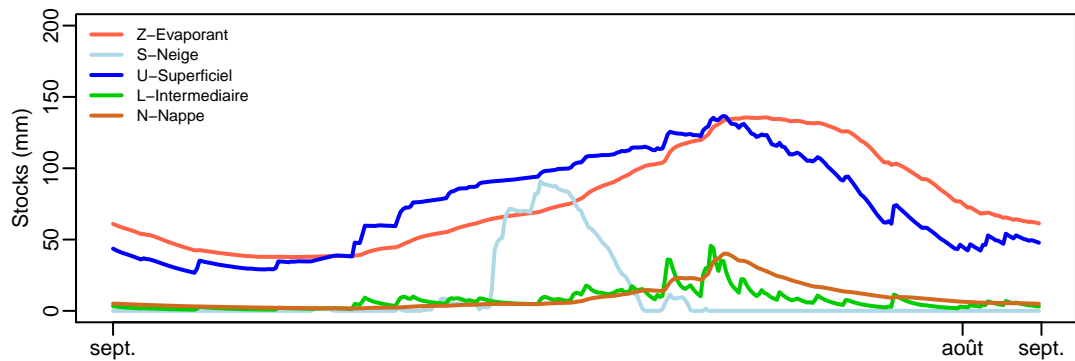

# k0454010 (228.77 km<sup>2</sup>) – année 1986–1987

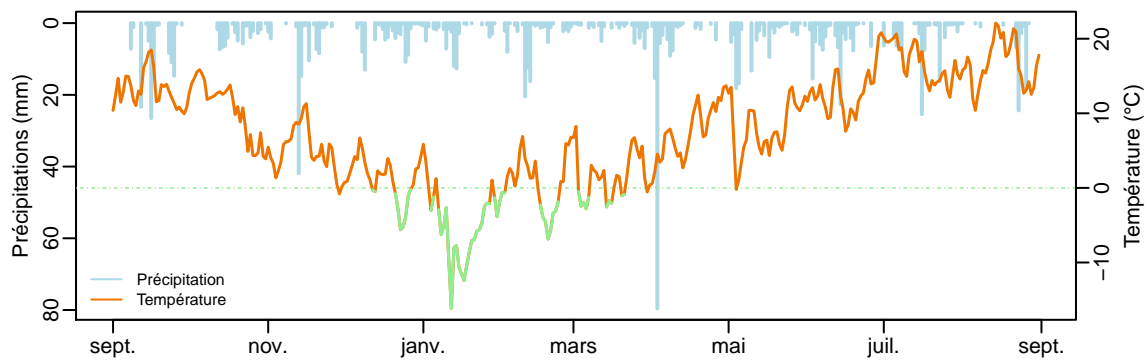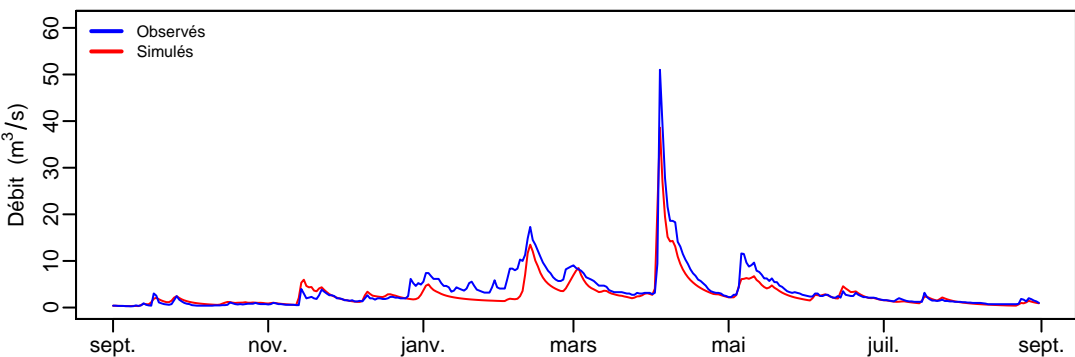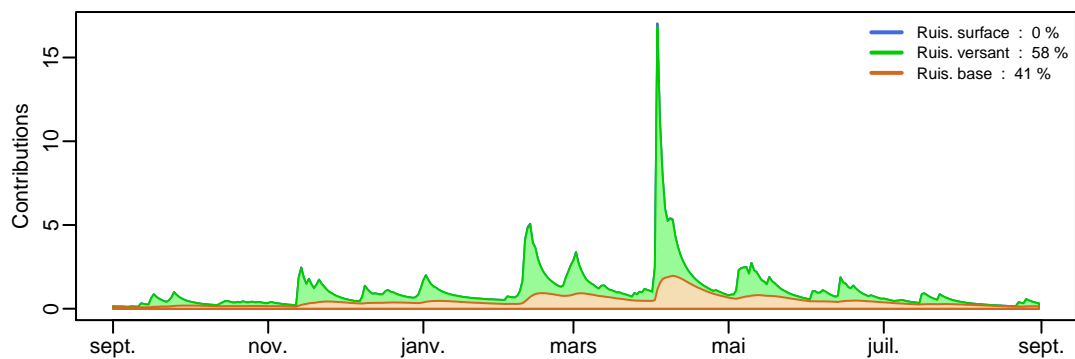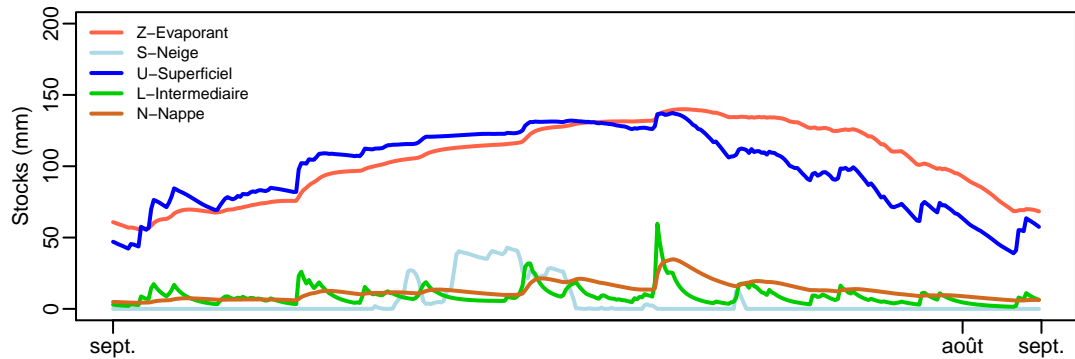

# k0454010 (228.77 km<sup>2</sup>) – année 1987–1988

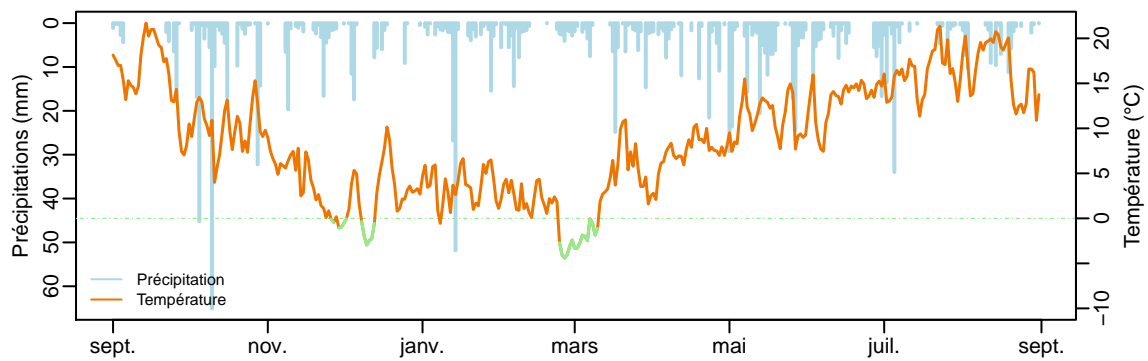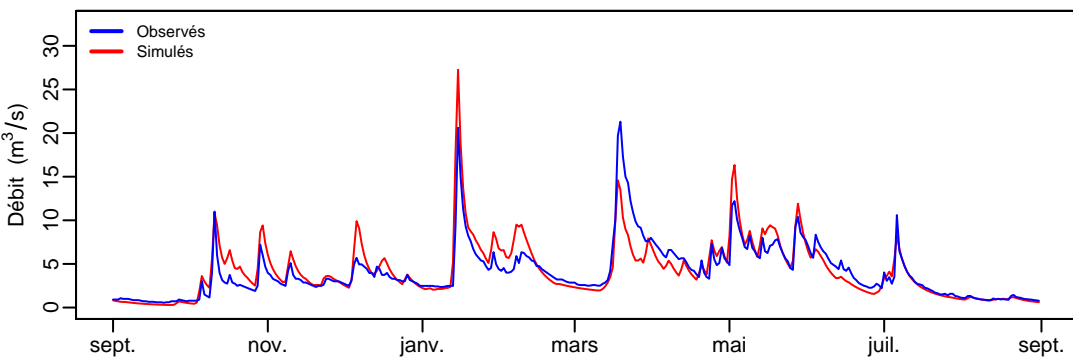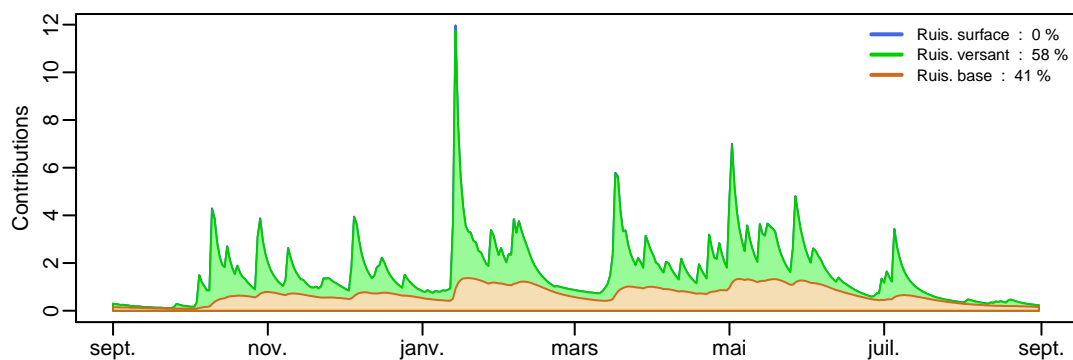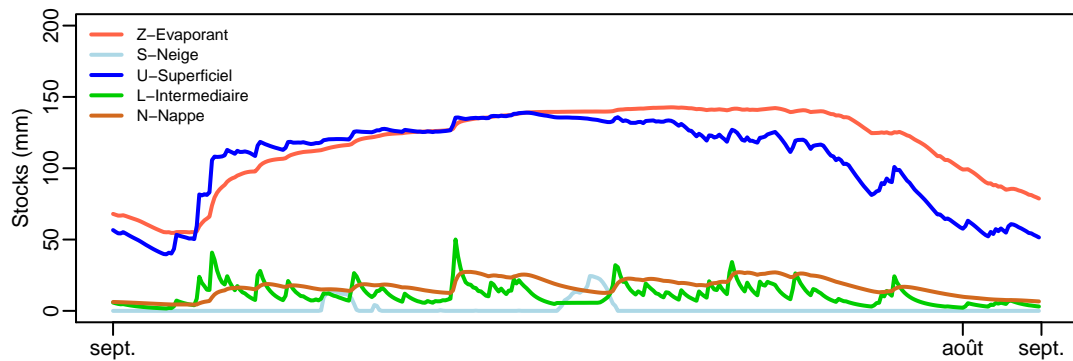

# k0454010 (228.77 km<sup>2</sup>) – année 1988–1989

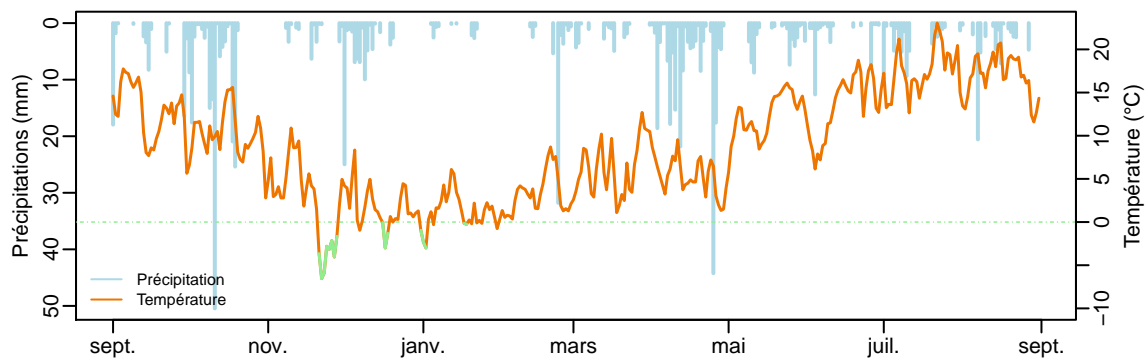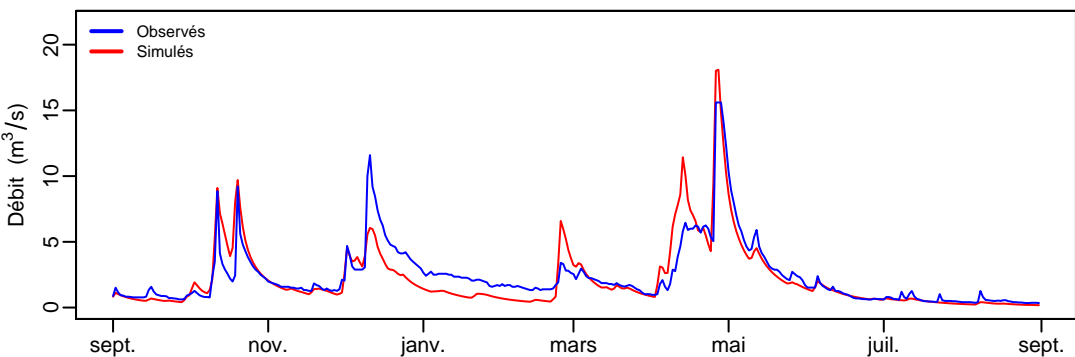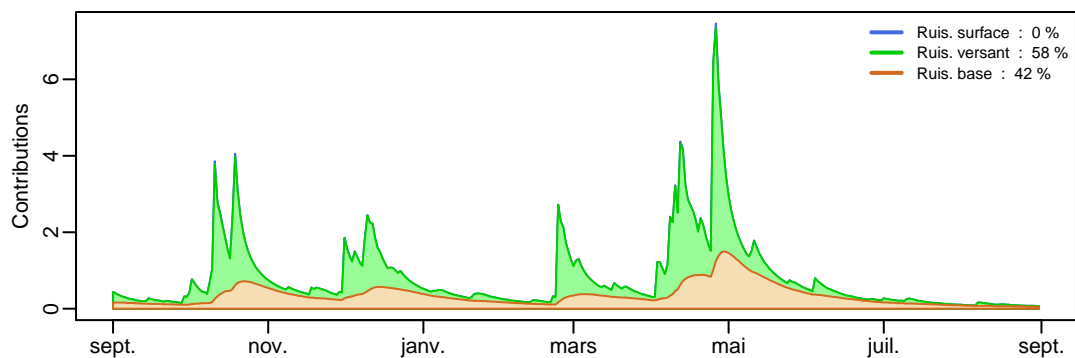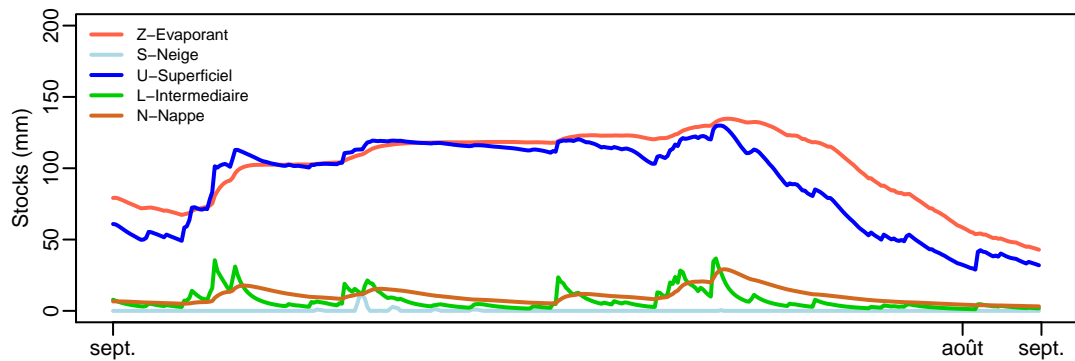



# k0454010 (228.77 km<sup>2</sup>) – année 1989–1990

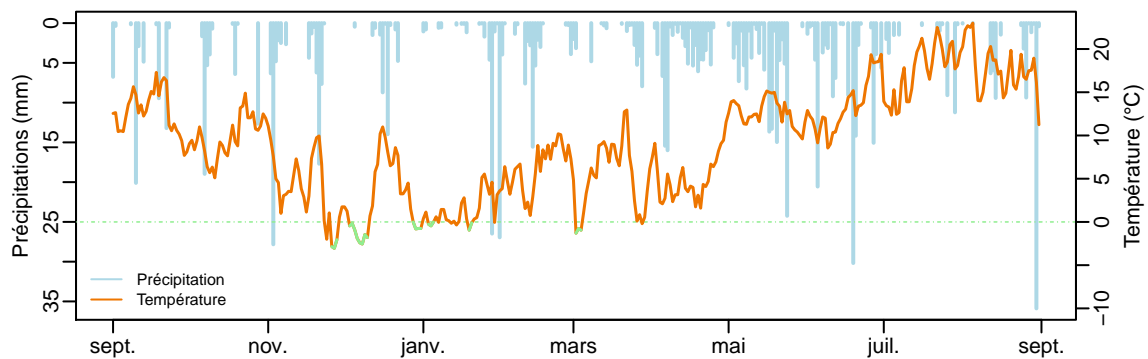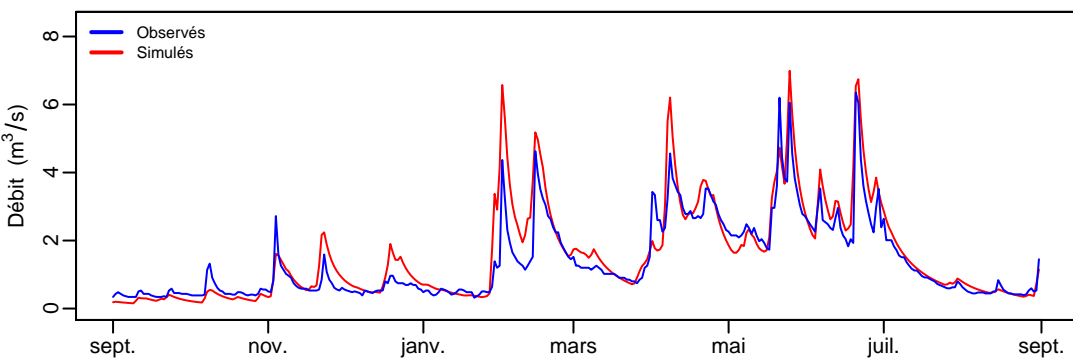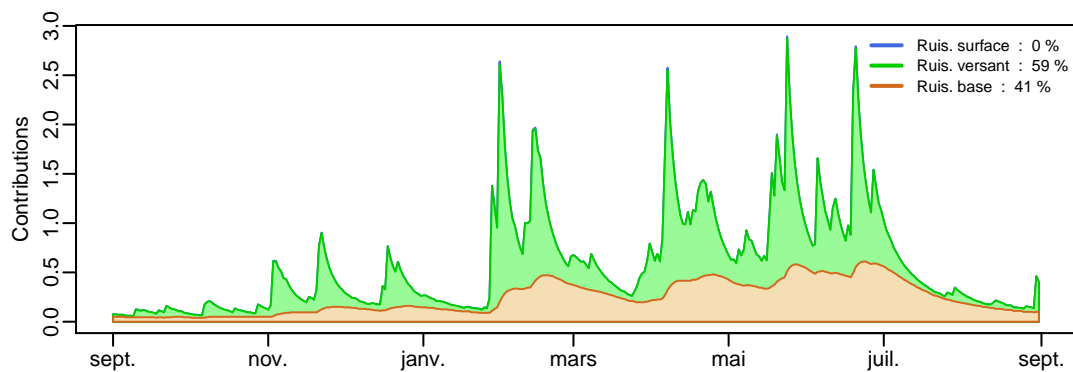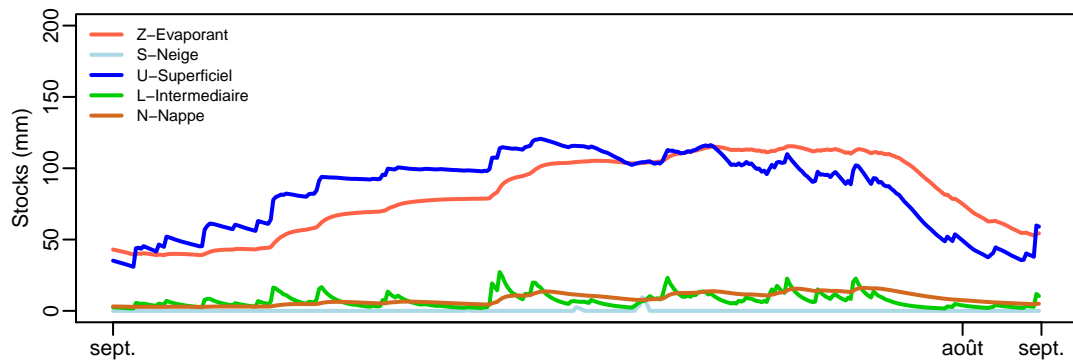

# k0454010 (228.77 km<sup>2</sup>) – année 1990–1991

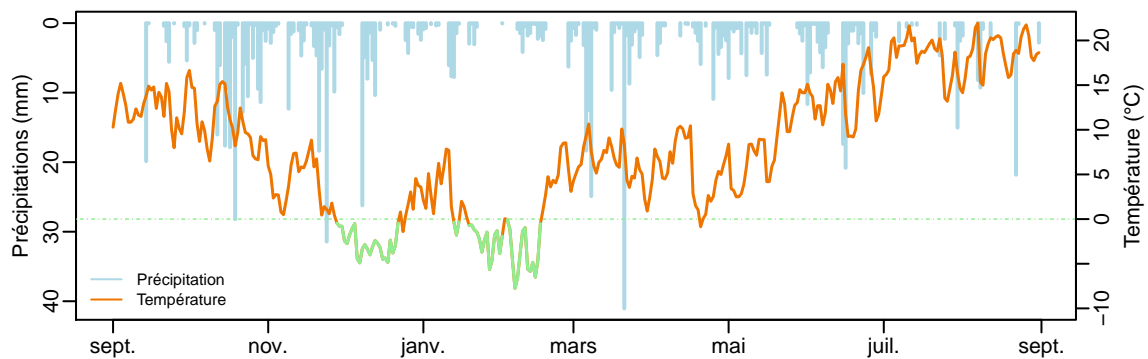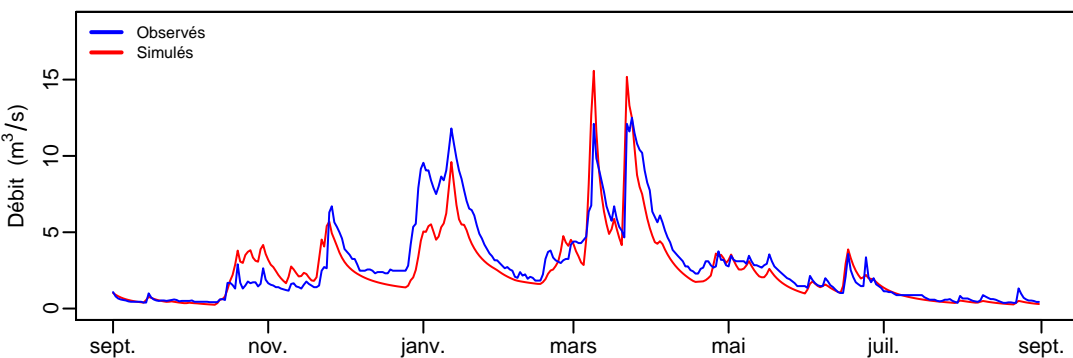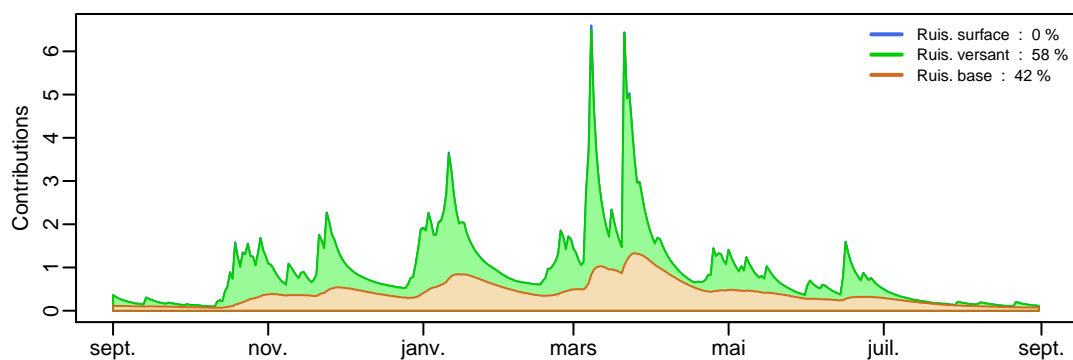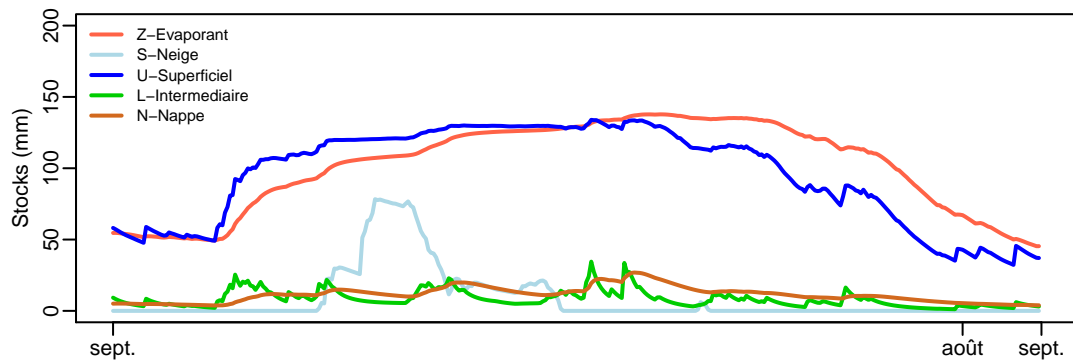

# k0454010 (228.77 km<sup>2</sup>) – année 1991–1992

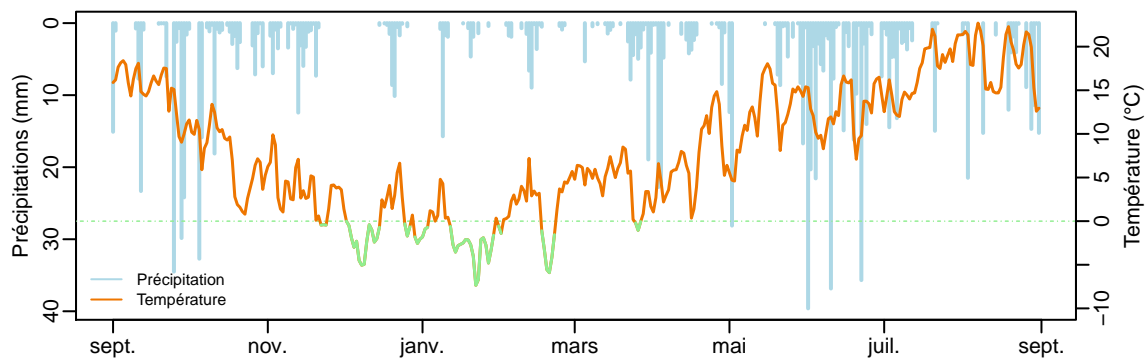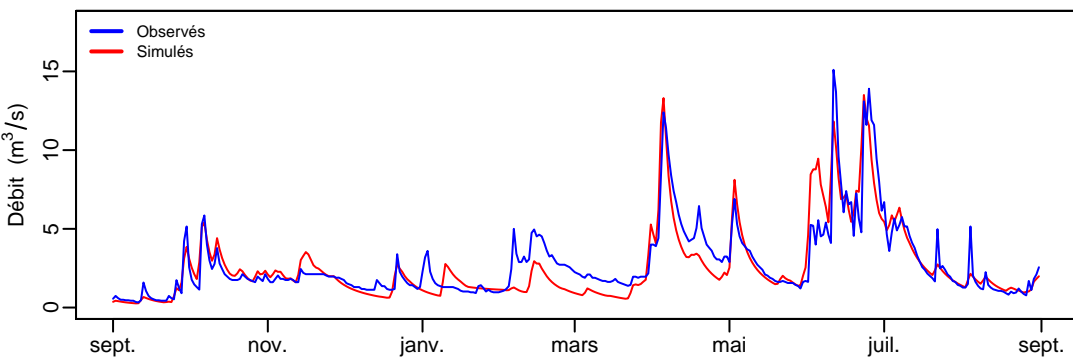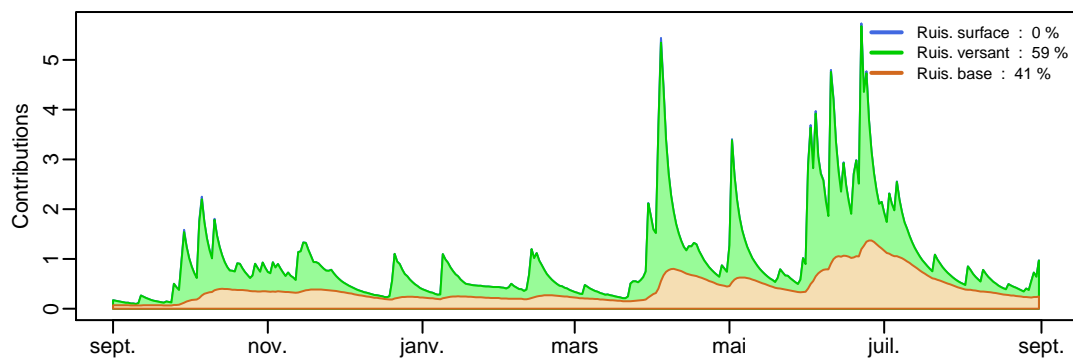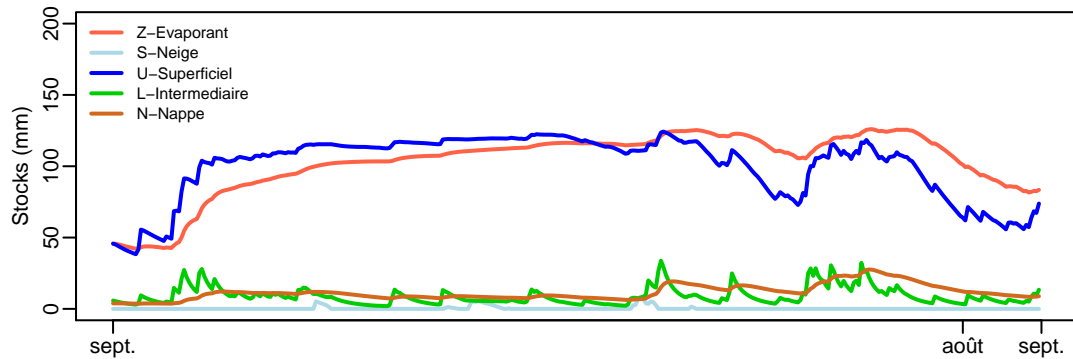

# k0454010 (228.77 km<sup>2</sup>) – année 1992–1993

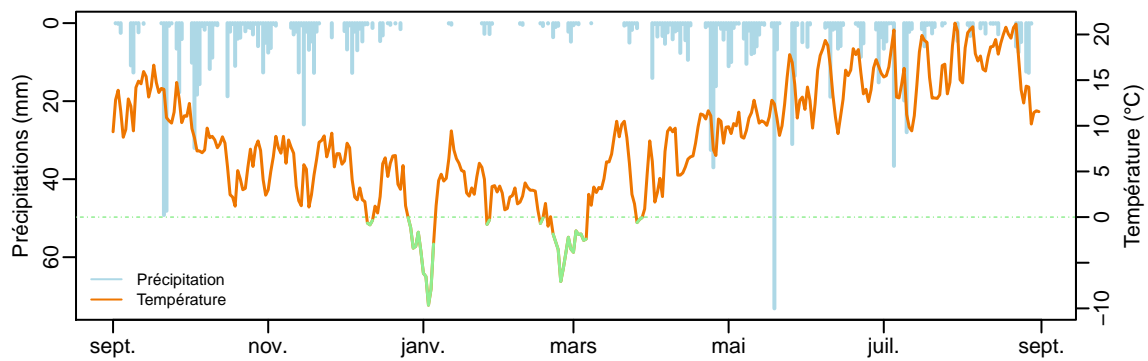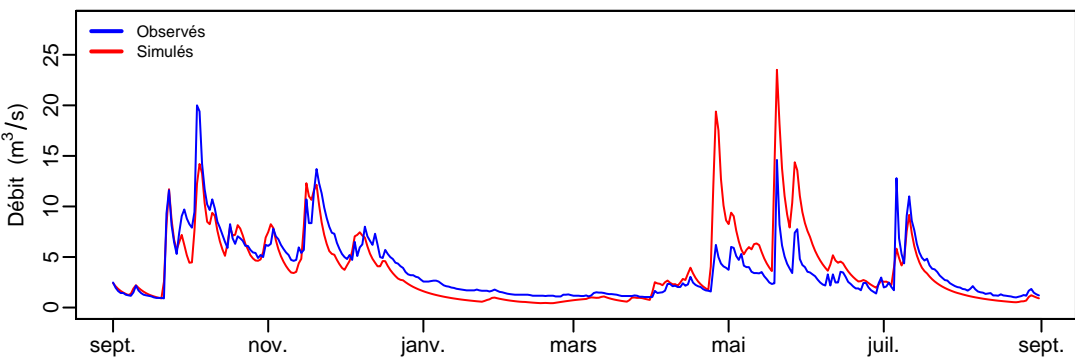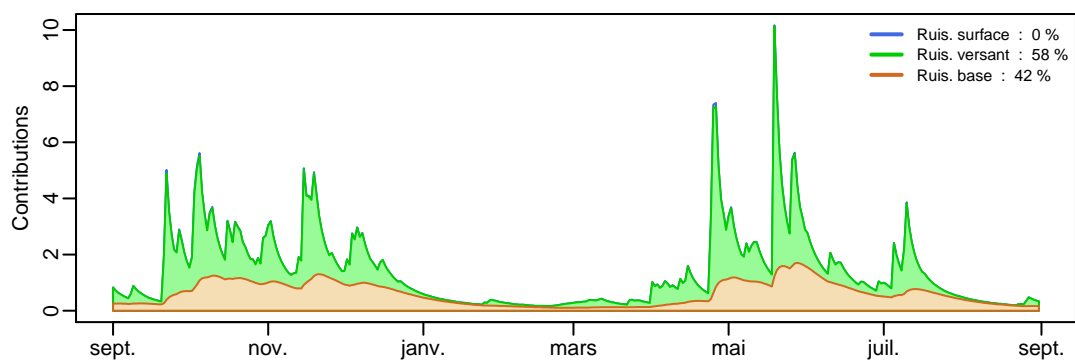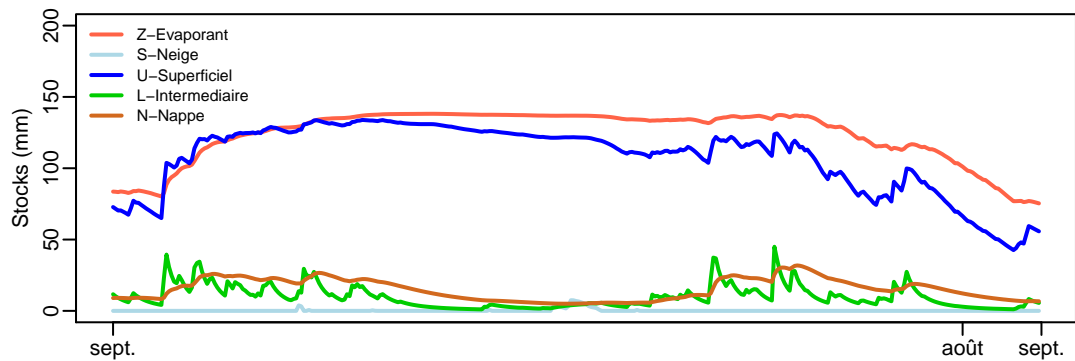

# k0454010 (228.77 km<sup>2</sup>) – année 1993–1994

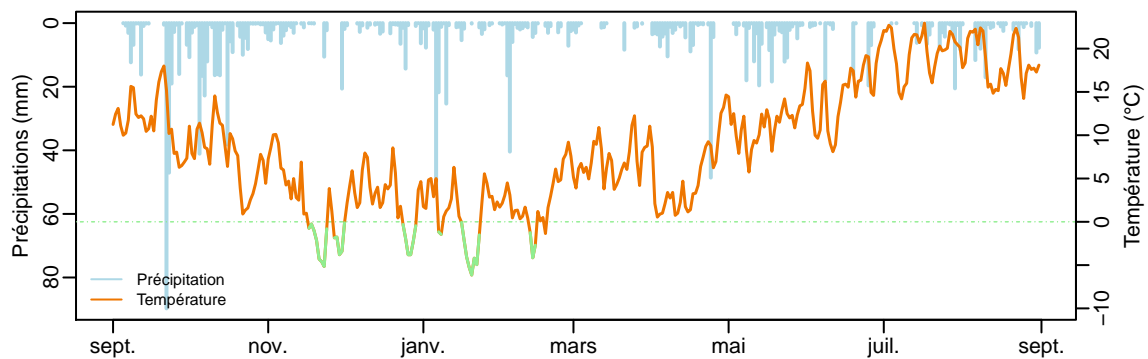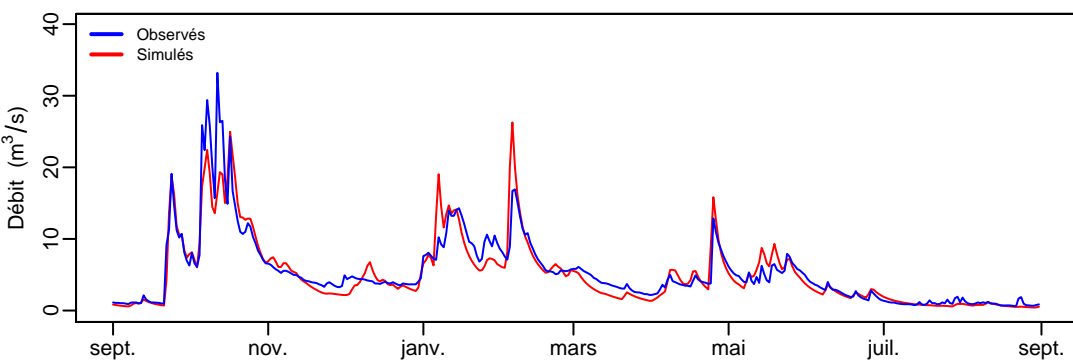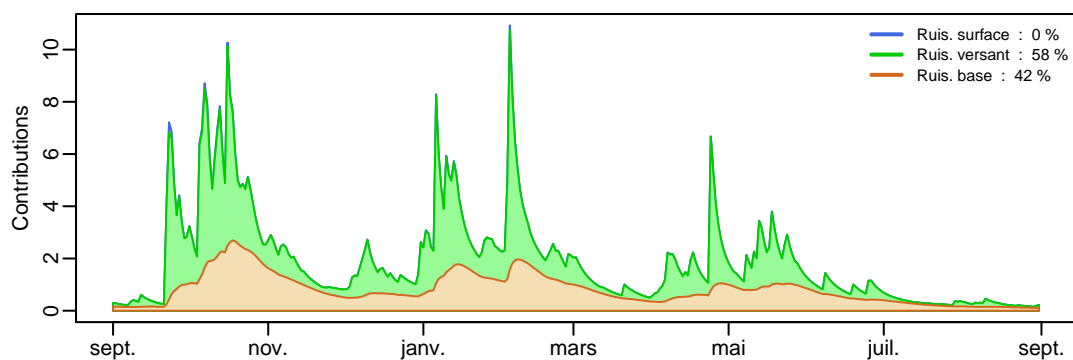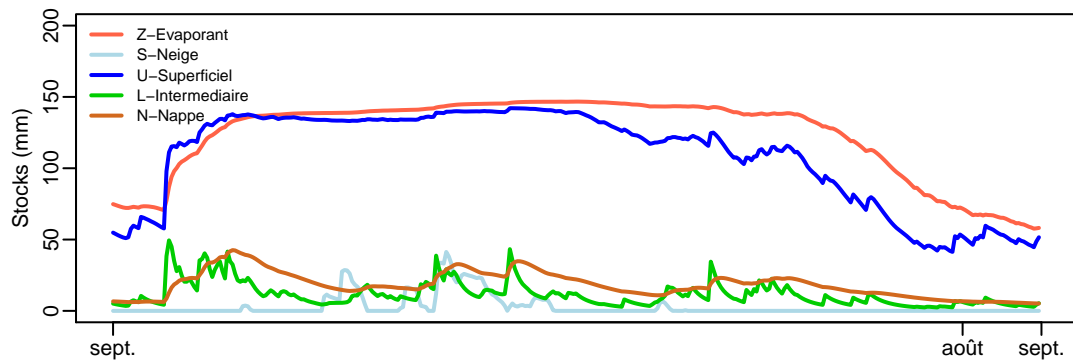

# k0454010 (228.77 km<sup>2</sup>) – année 1994–1995

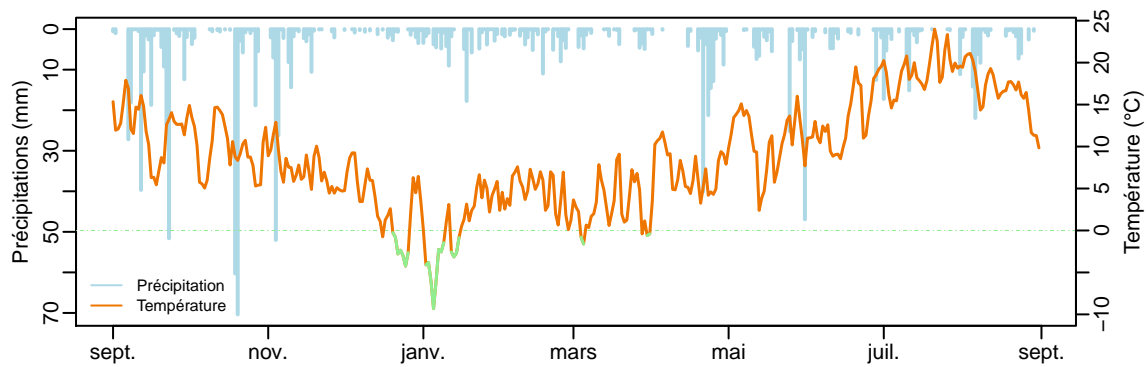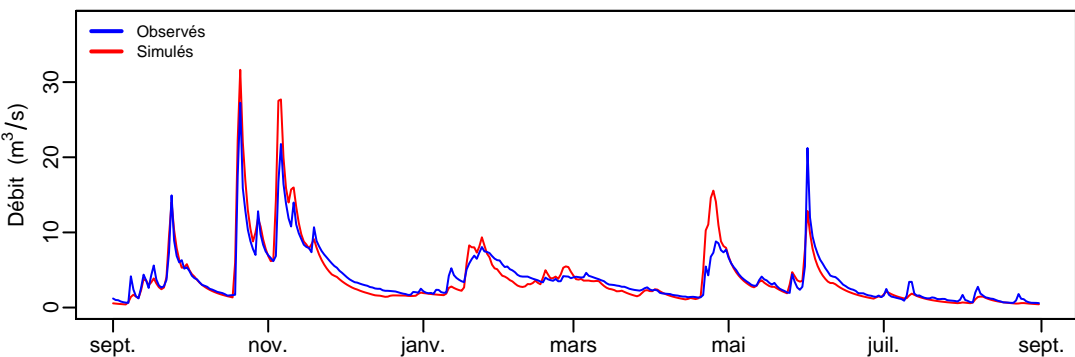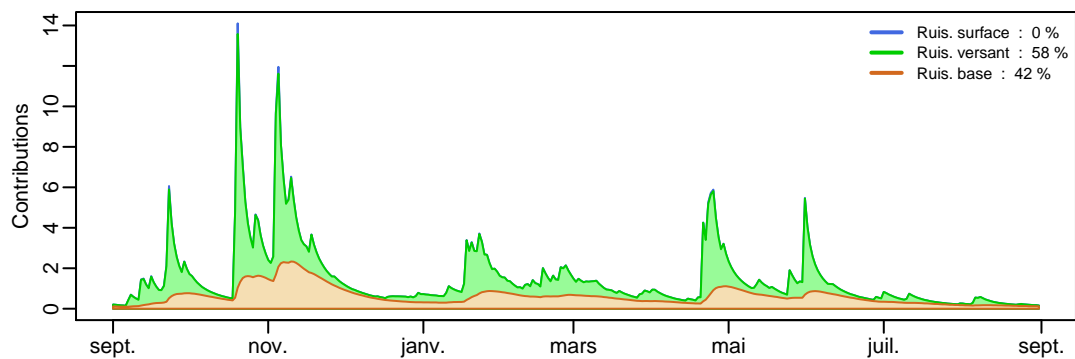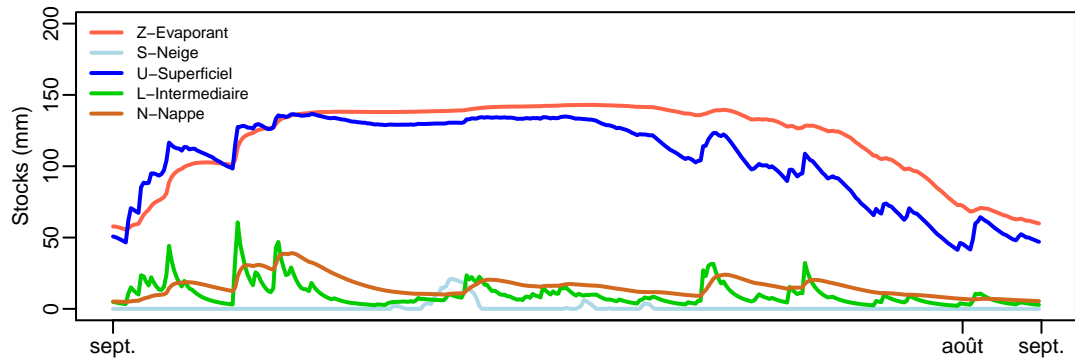

# k0454010 (228.77 km<sup>2</sup>) – année 1995–1996

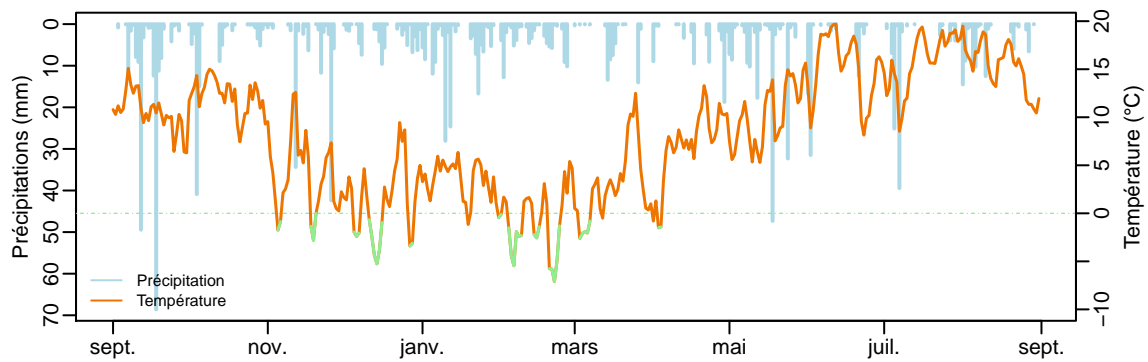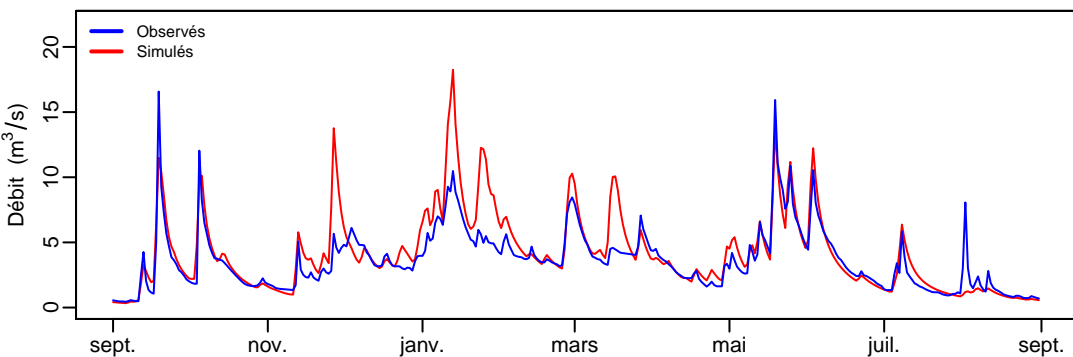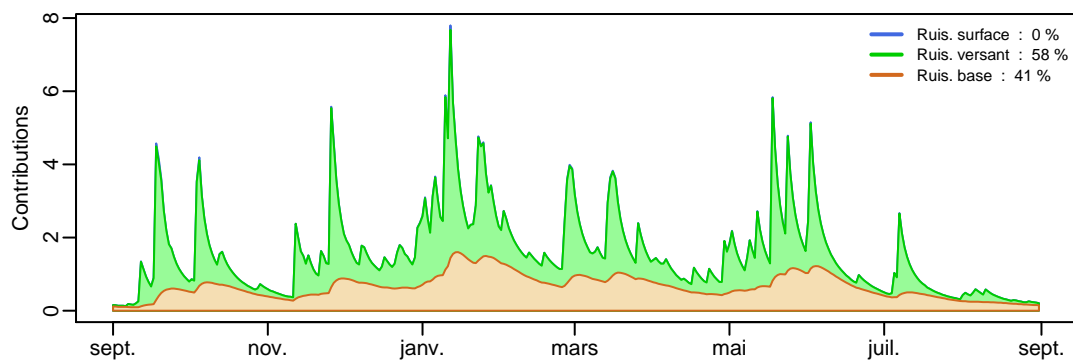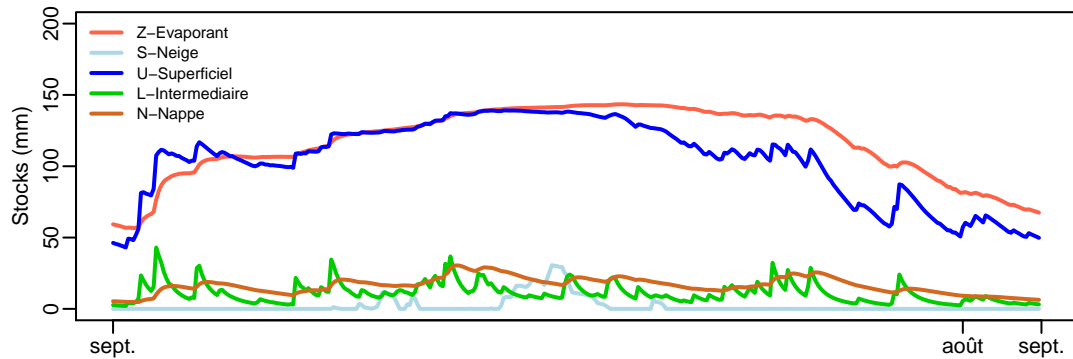

# k0454010 (228.77 km<sup>2</sup>) – année 1996–1997

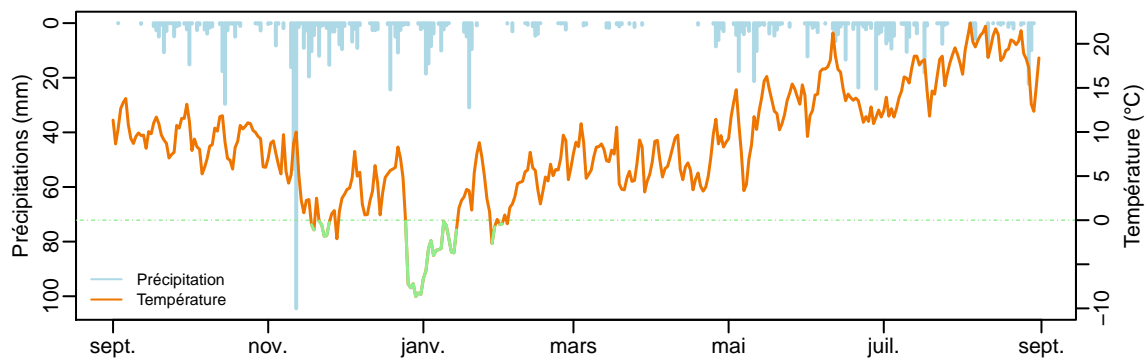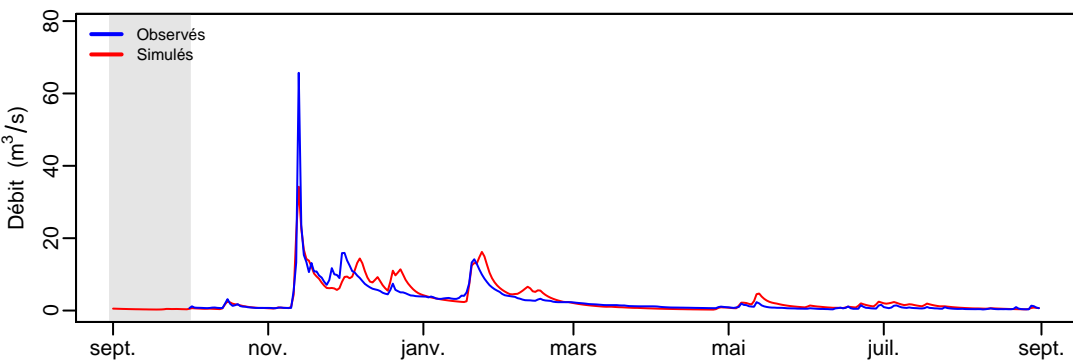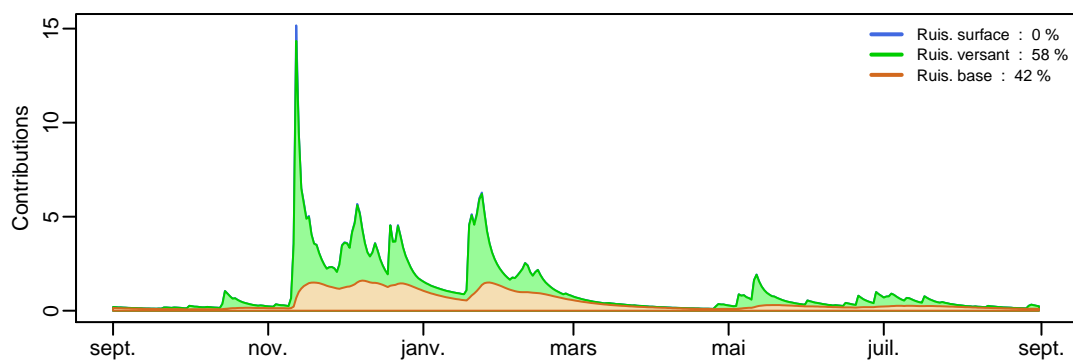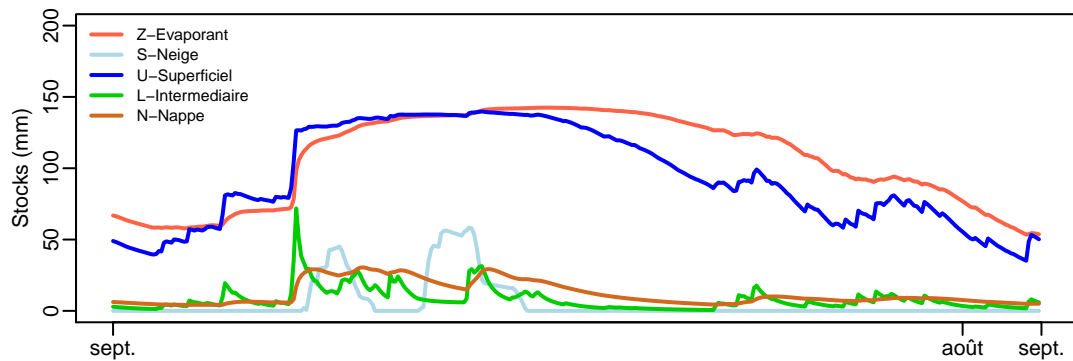



# k0454010 (228.77 km<sup>2</sup>) – année 1997–1998

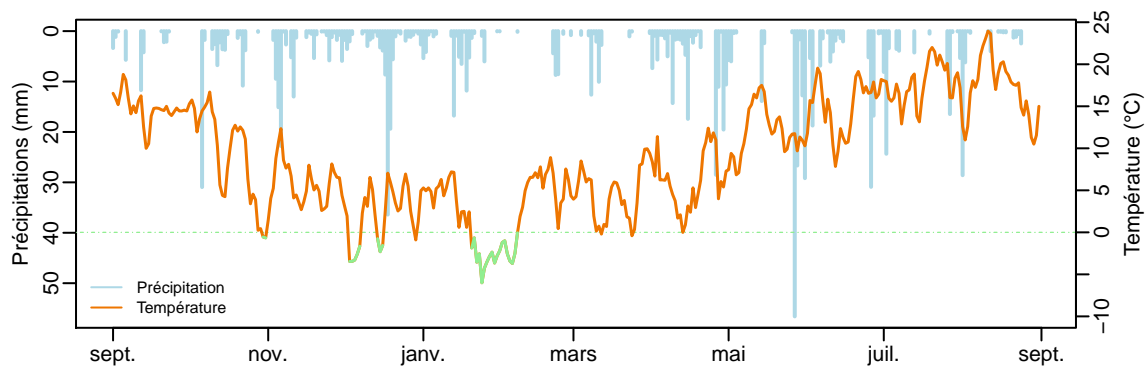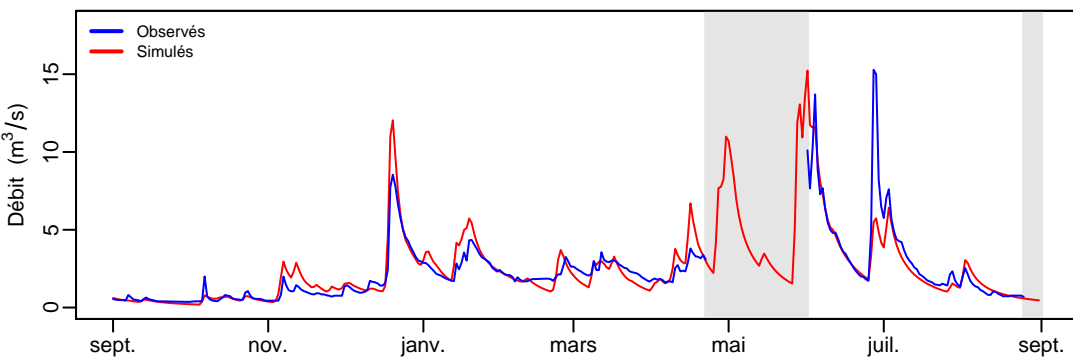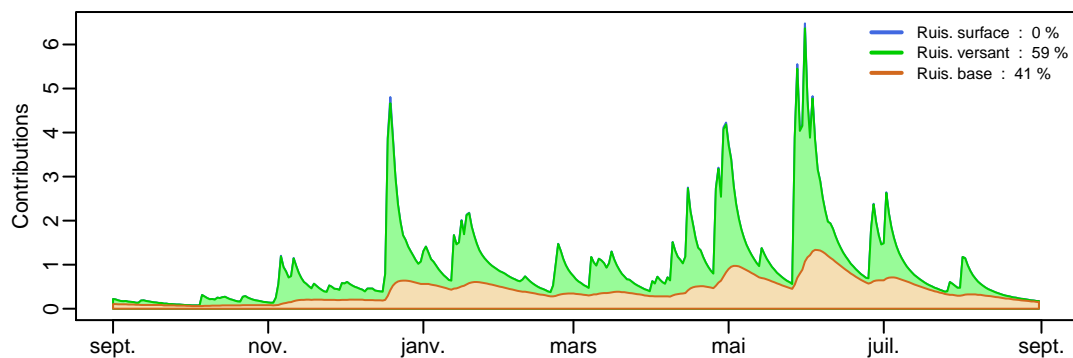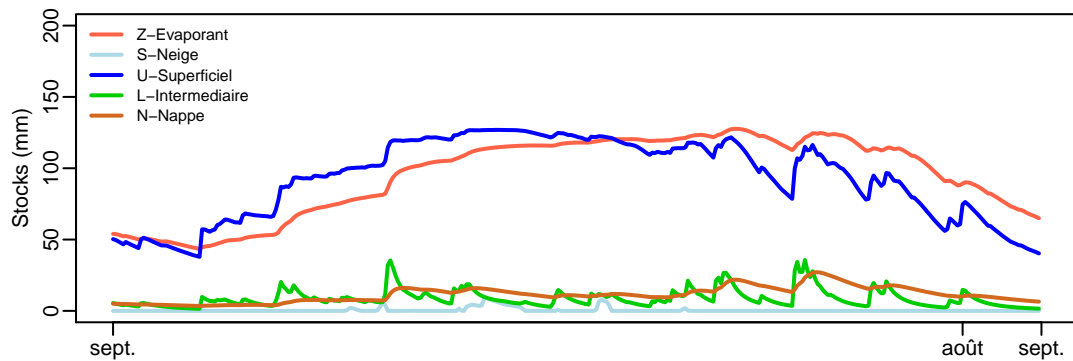

# k0454010 (228.77 km<sup>2</sup>) – année 1998–1999

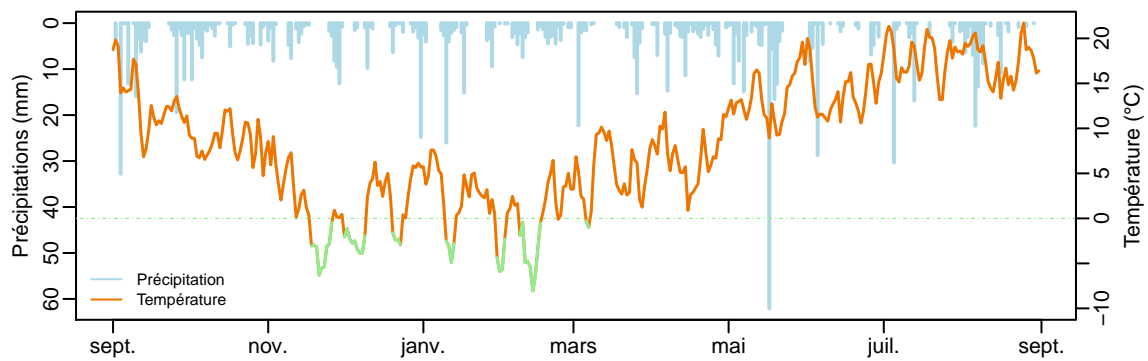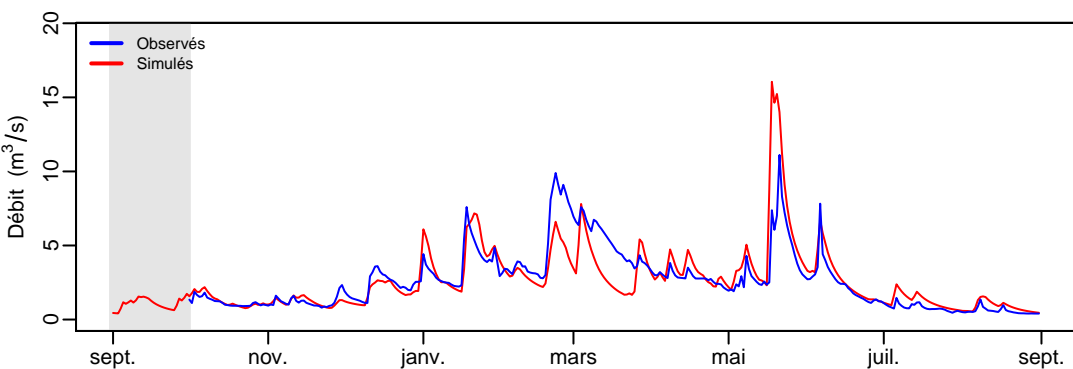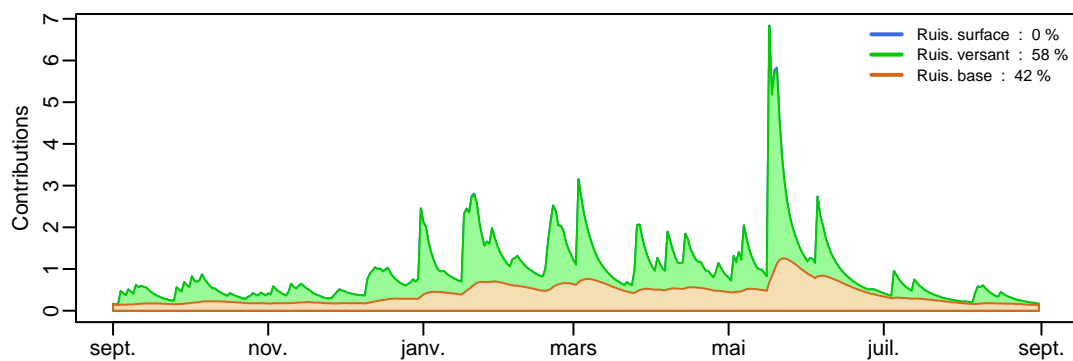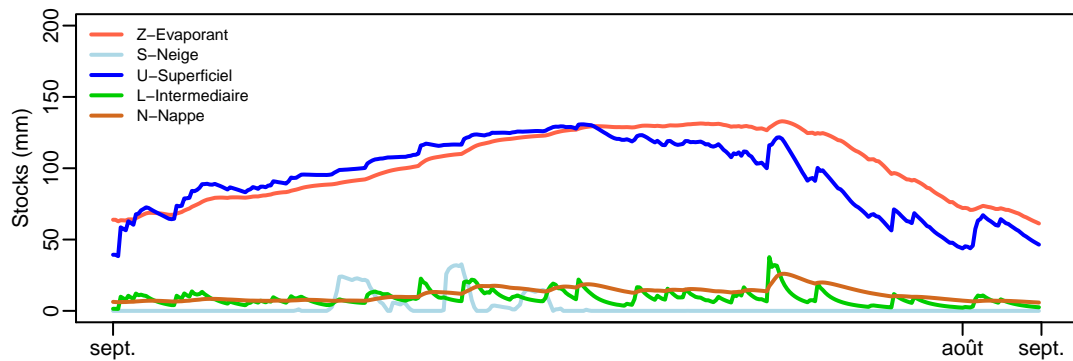

# k0454010 (228.77 km<sup>2</sup>) – année 1999–2000

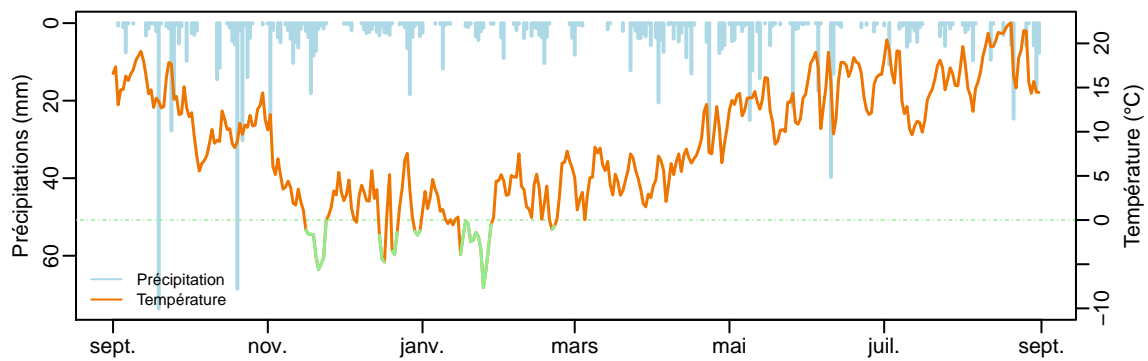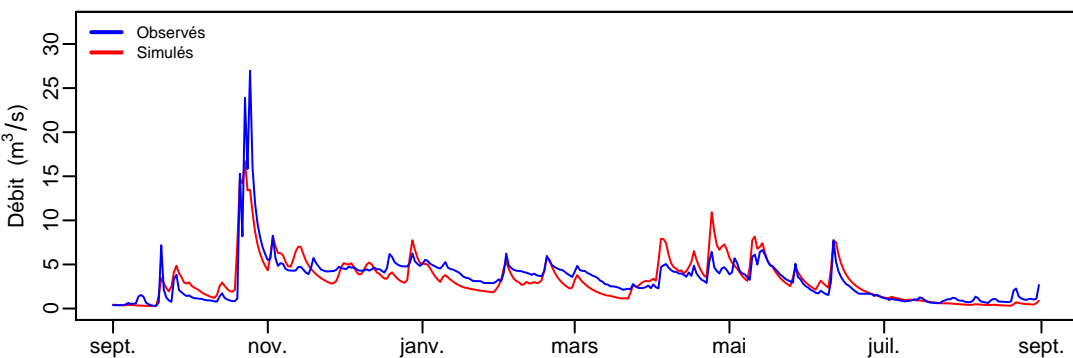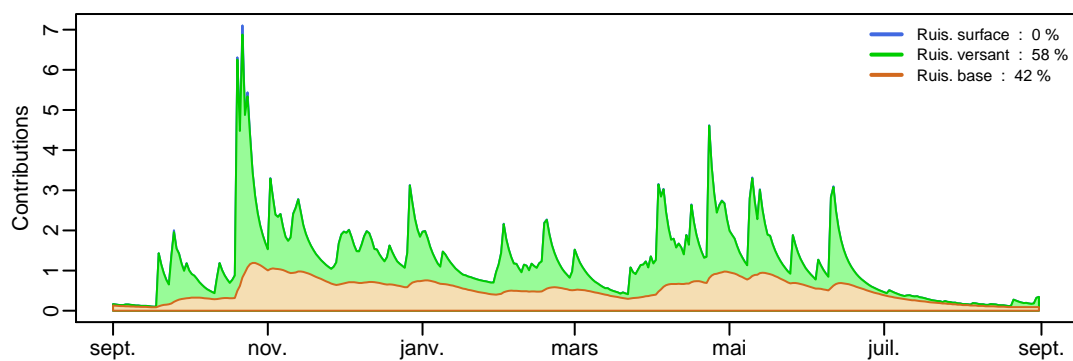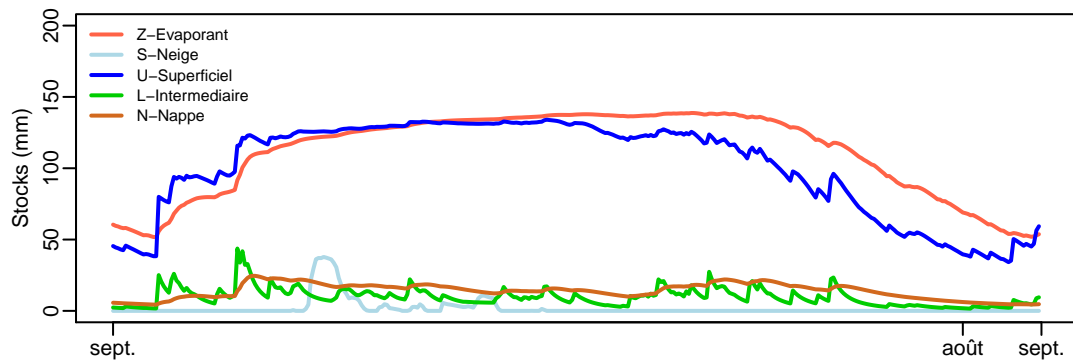

# k0454010 (228.77 km<sup>2</sup>) – année 2000–2001

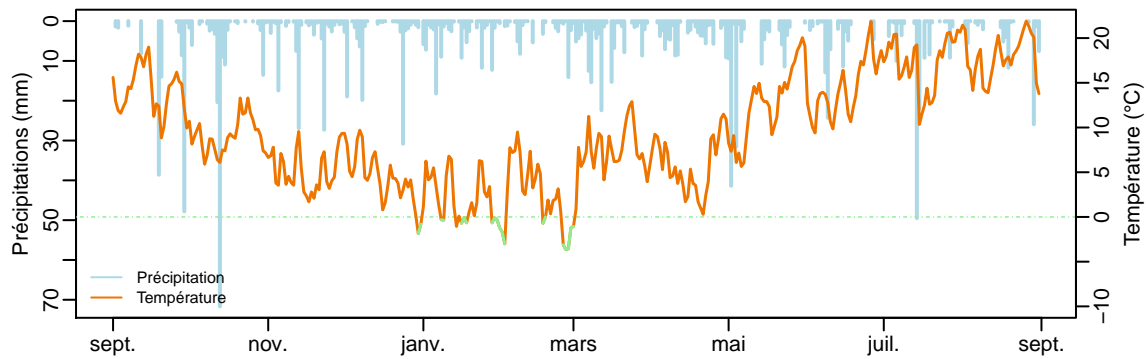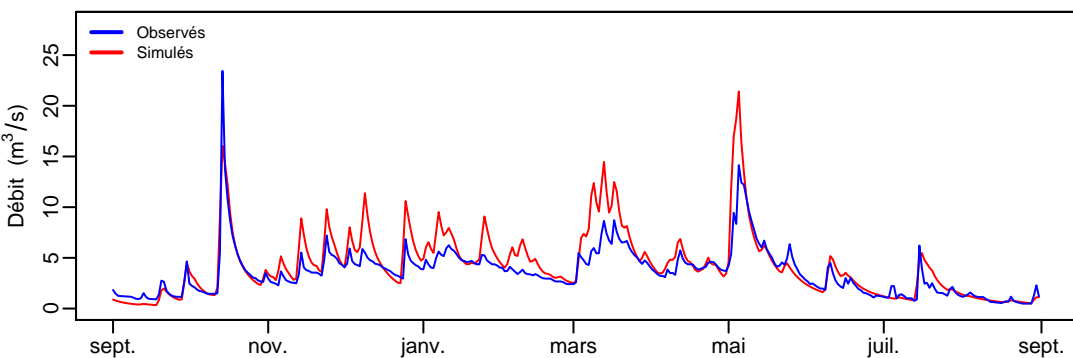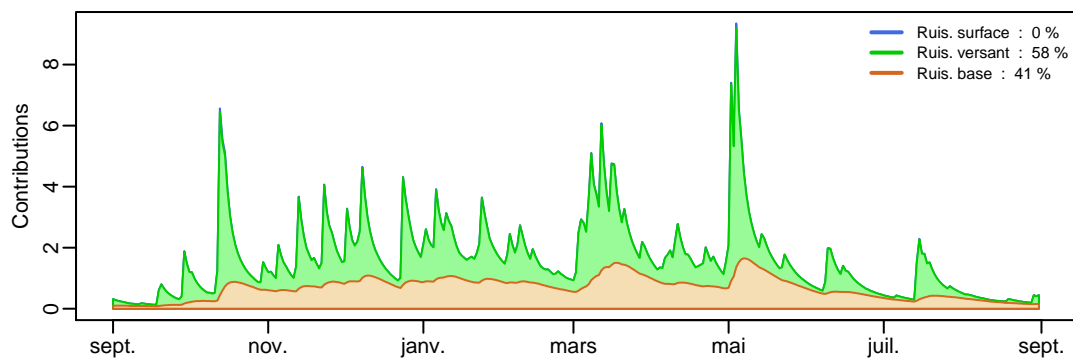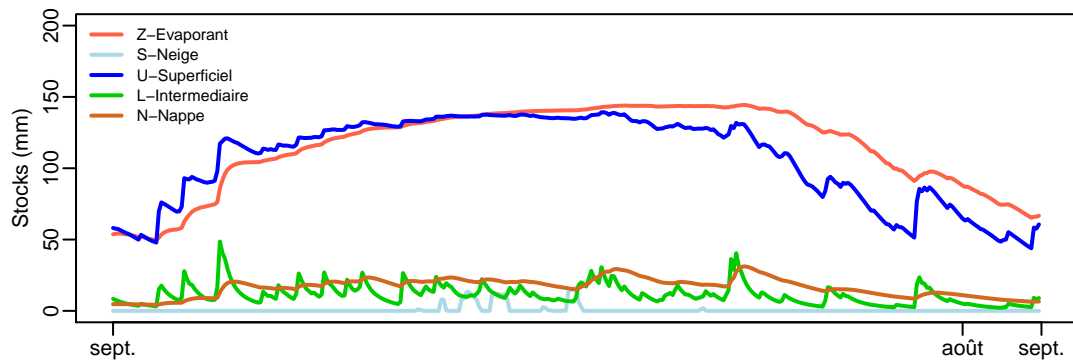

# k0454010 (228.77 km<sup>2</sup>) – année 2001–2002

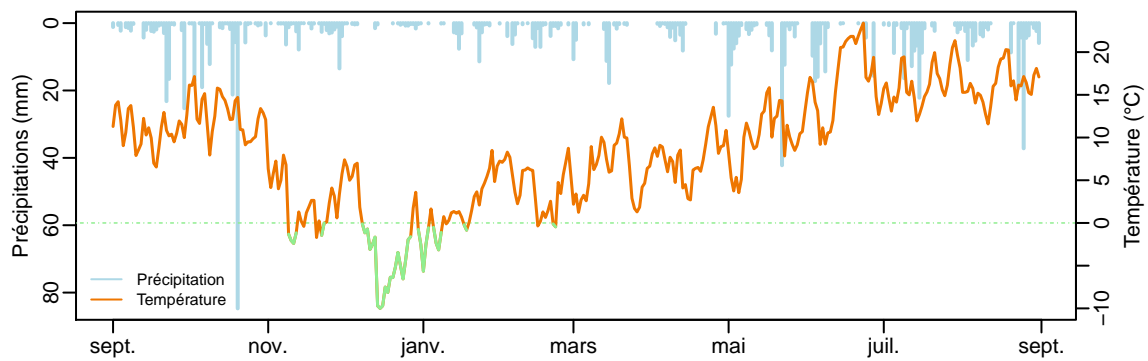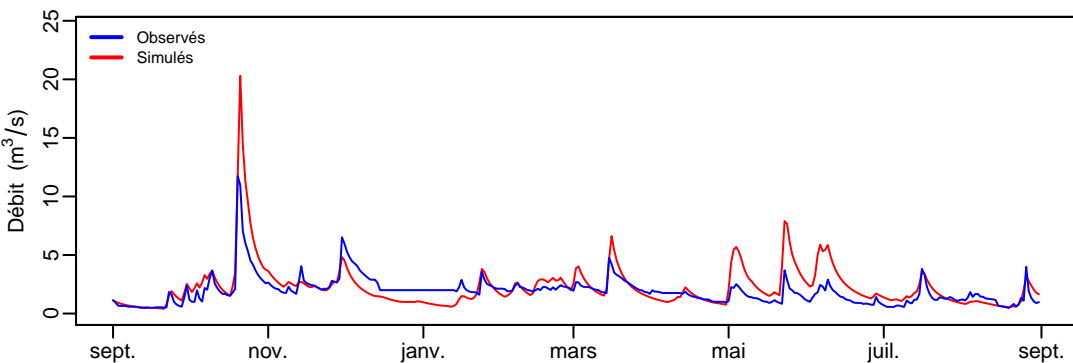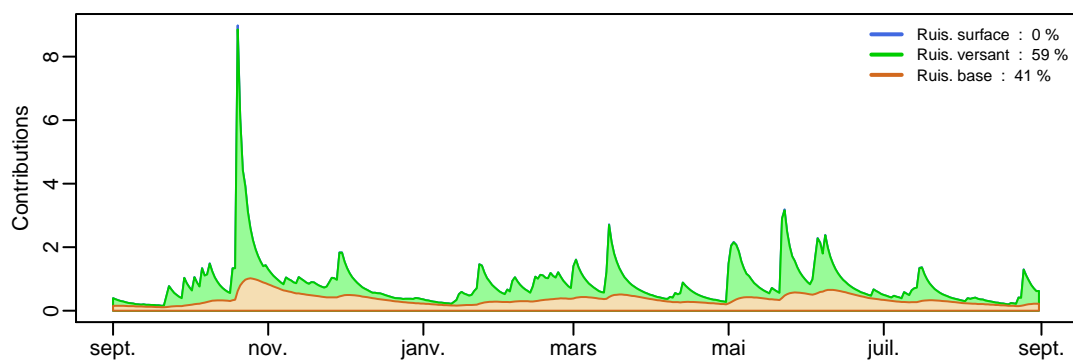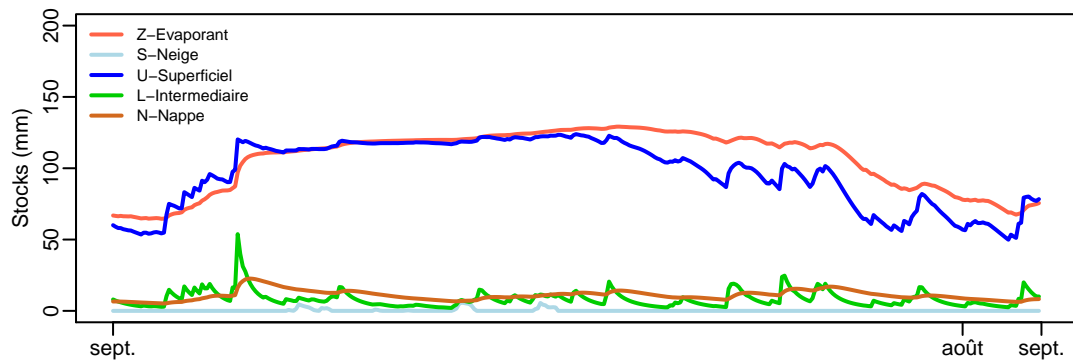

# k0454010 (228.77 km<sup>2</sup>) – année 2002–2003

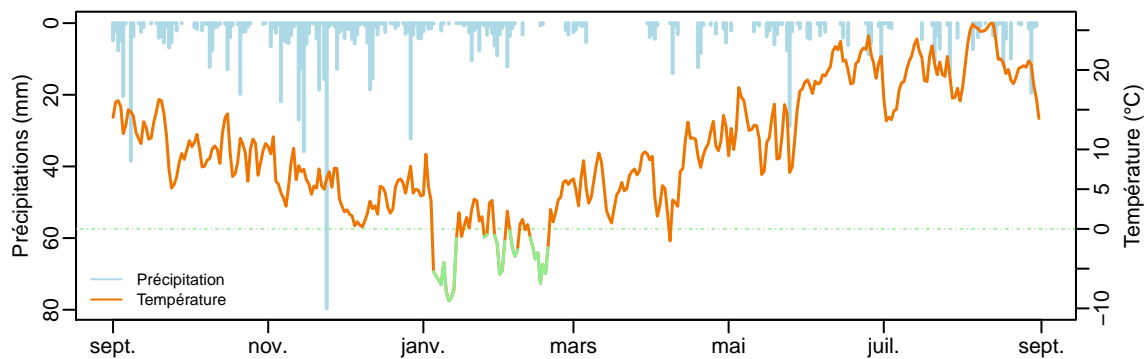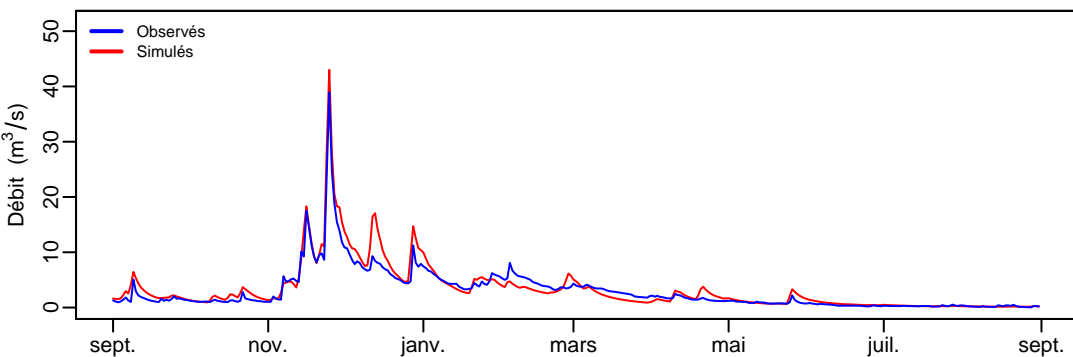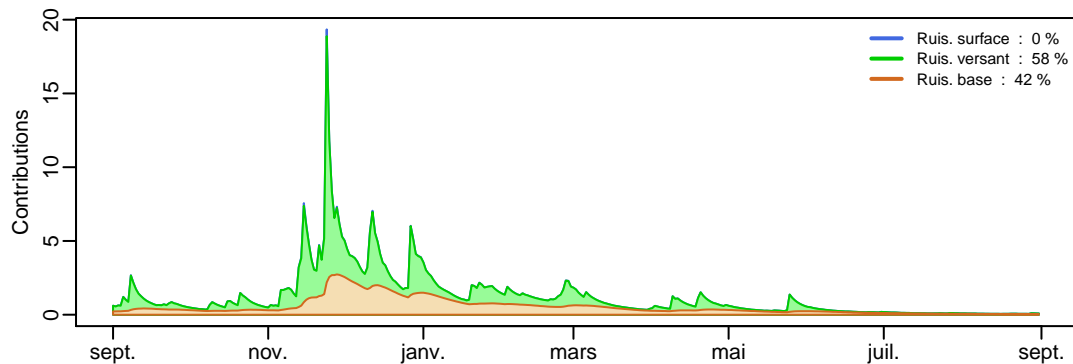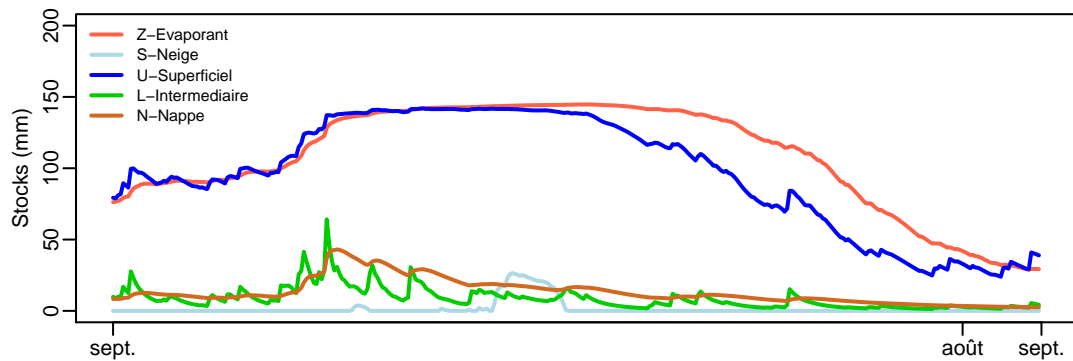

# k0454010 (228.77 km<sup>2</sup>) – année 2003–2004

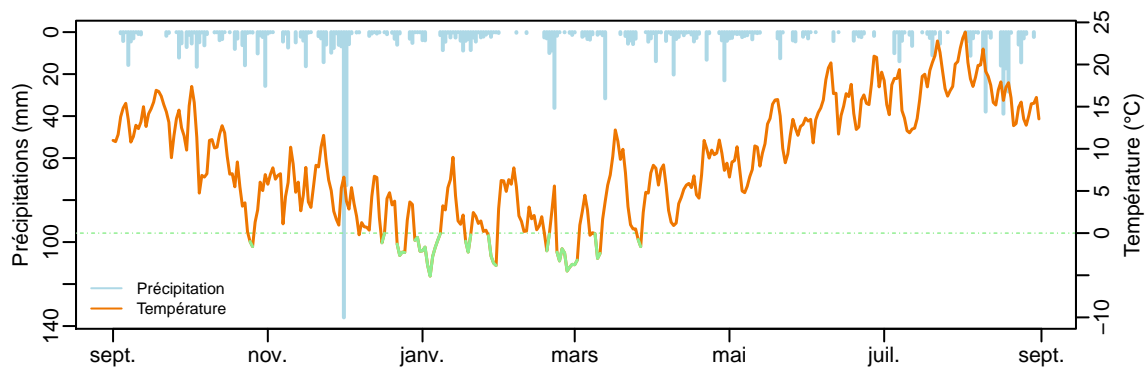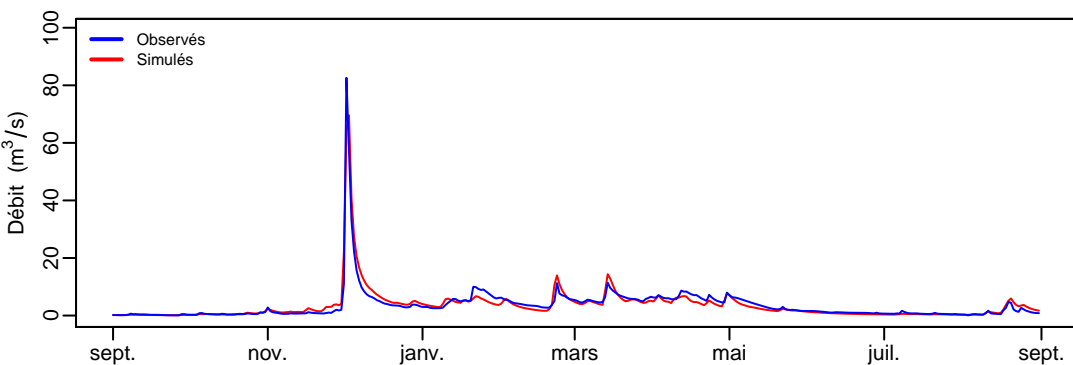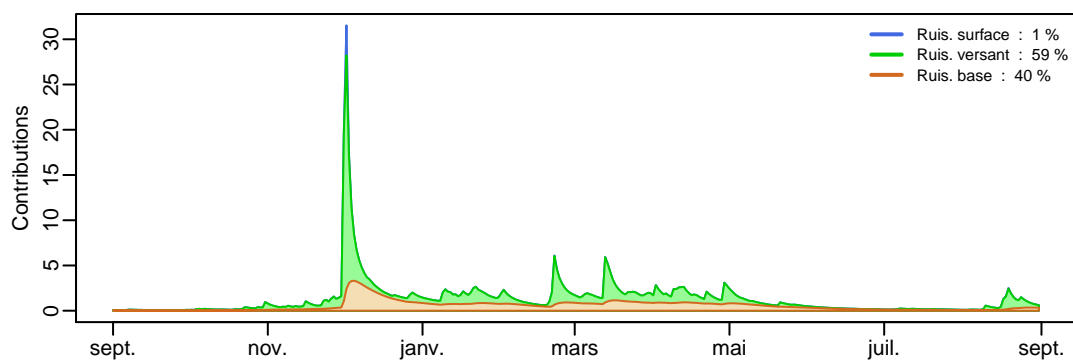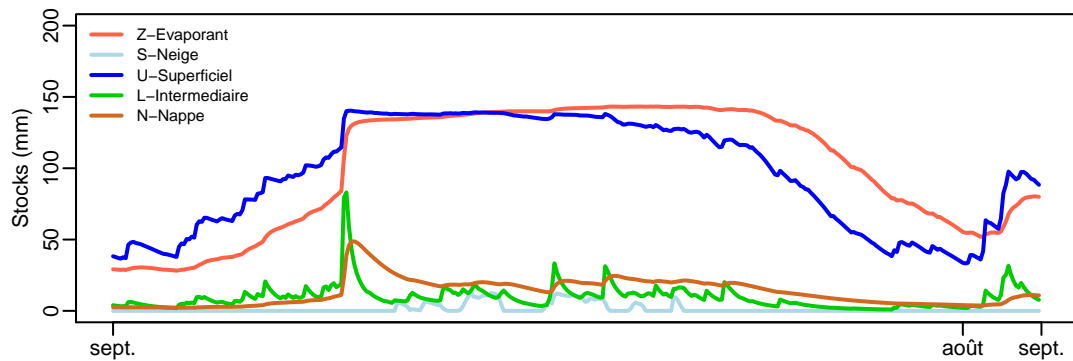

# k0454010 (228.77 km<sup>2</sup>) – année 2004–2005

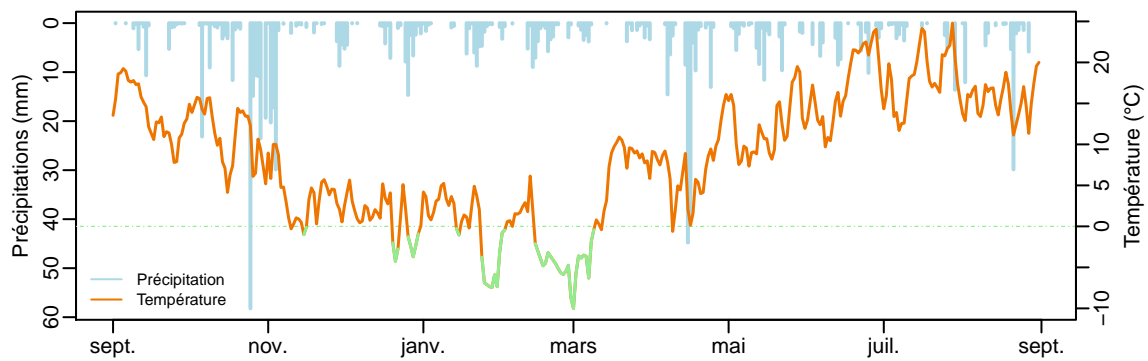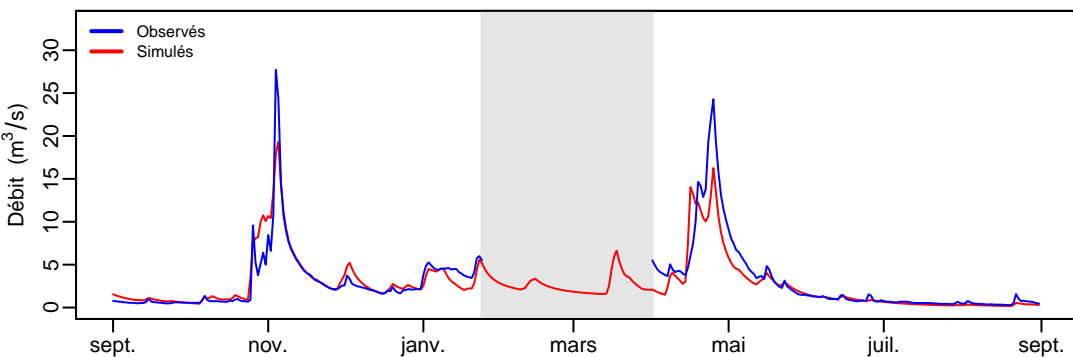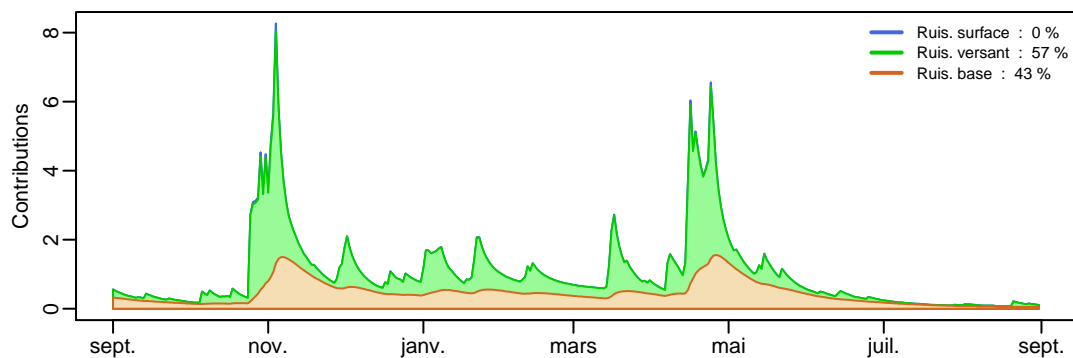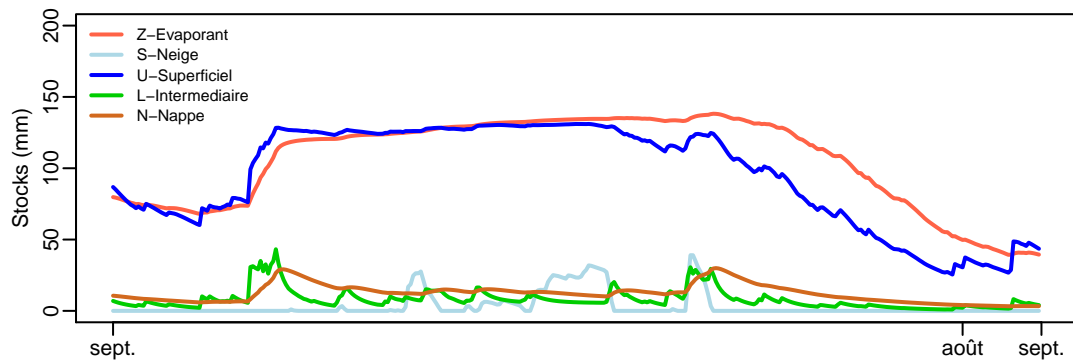



# k0454010 (228.77 km<sup>2</sup>) – année 2005–2006

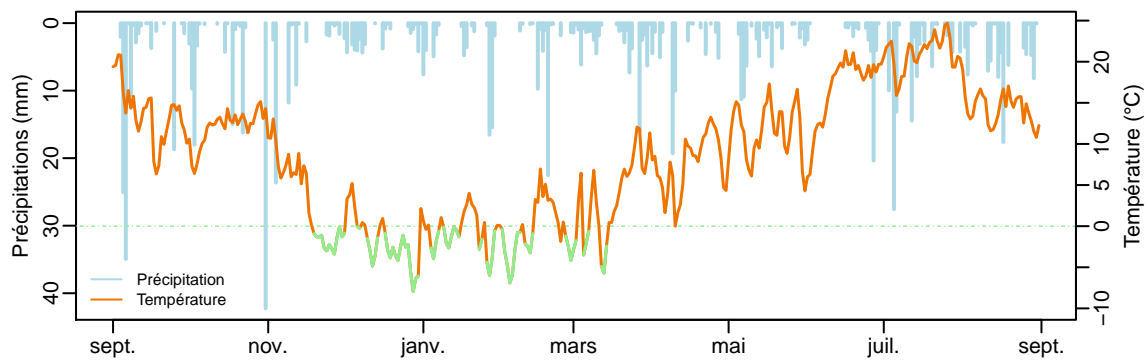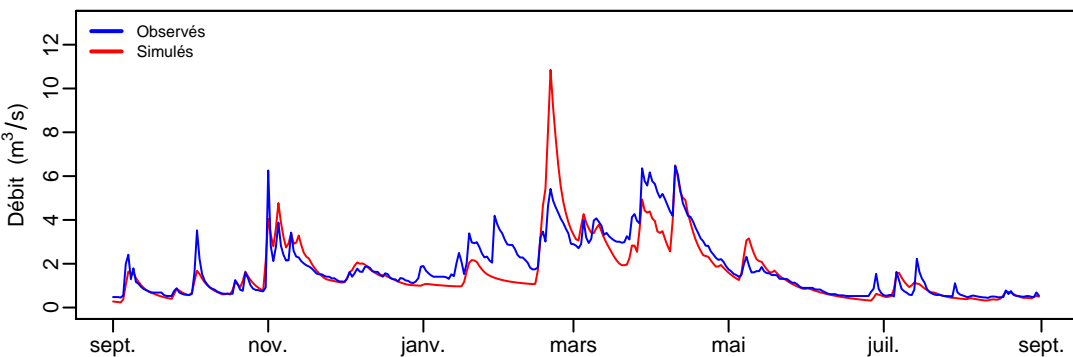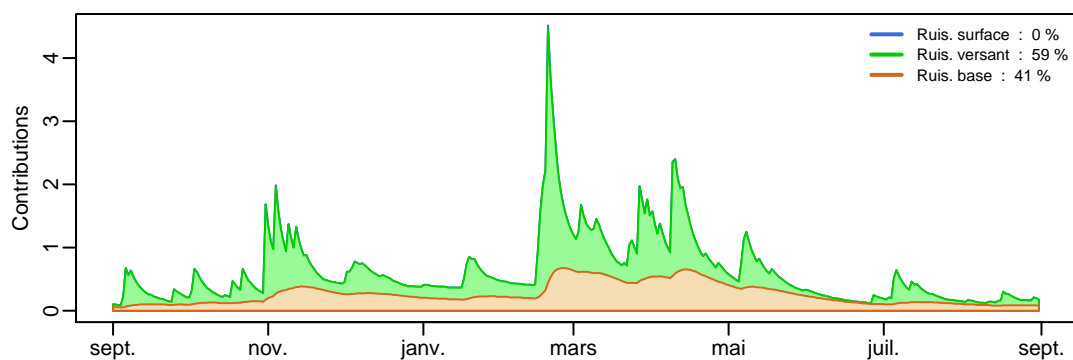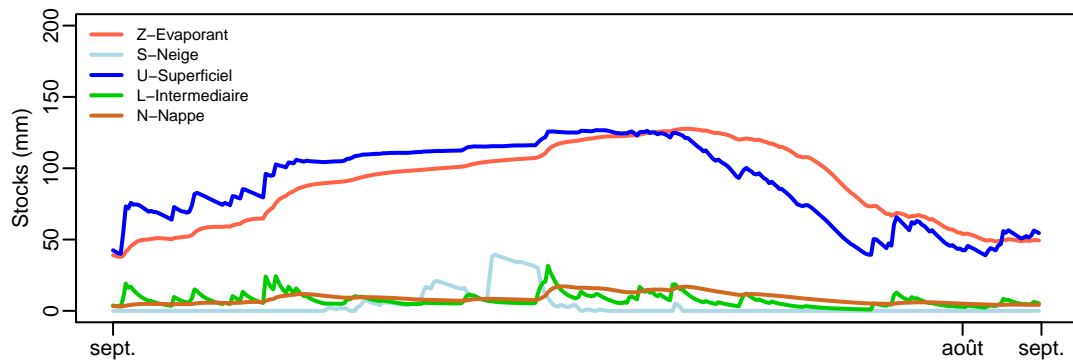

# k0454010 (228.77 km<sup>2</sup>) – année 2006–2007

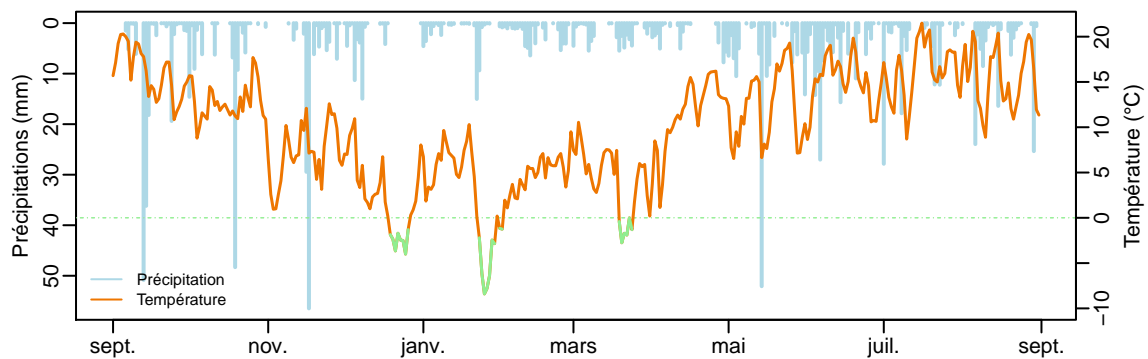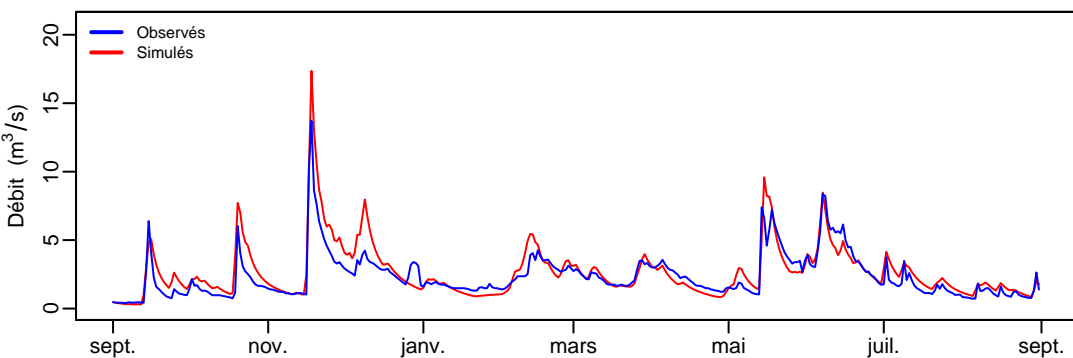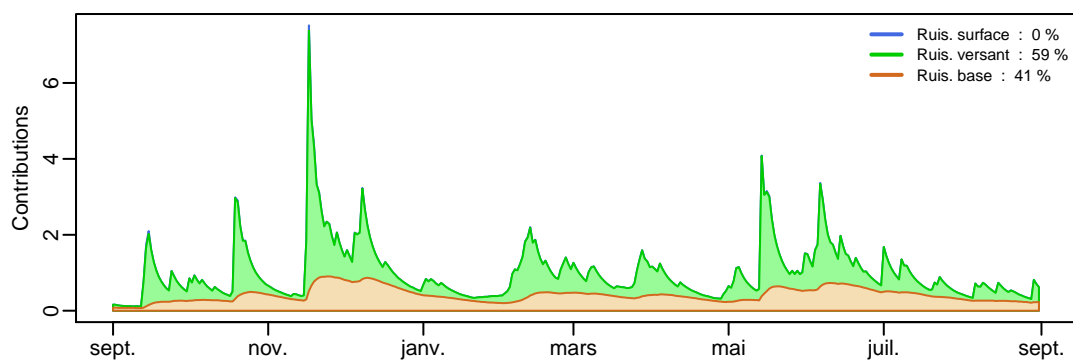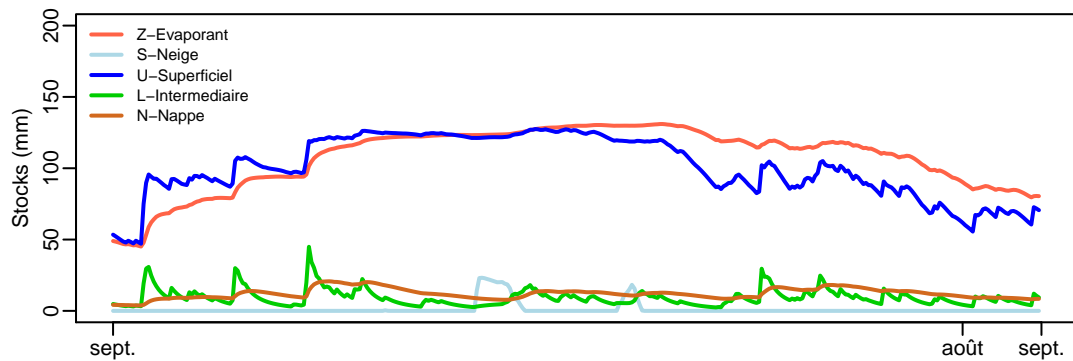

# k0454010 (228.77 km<sup>2</sup>) – année 2007–2008

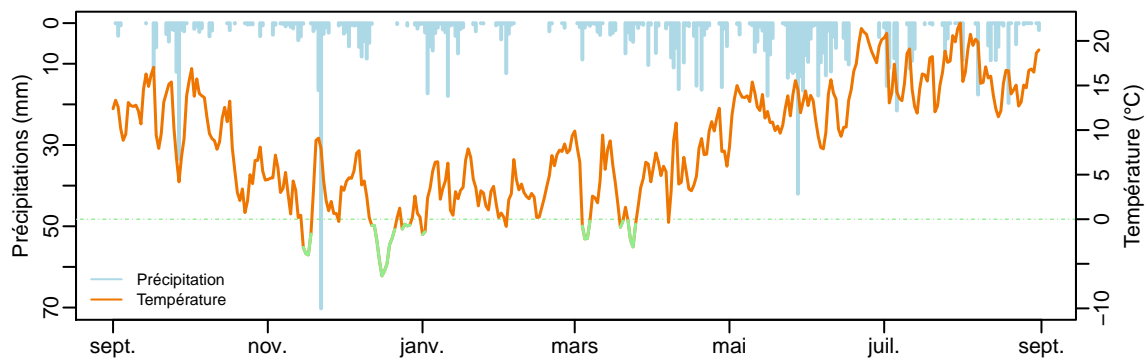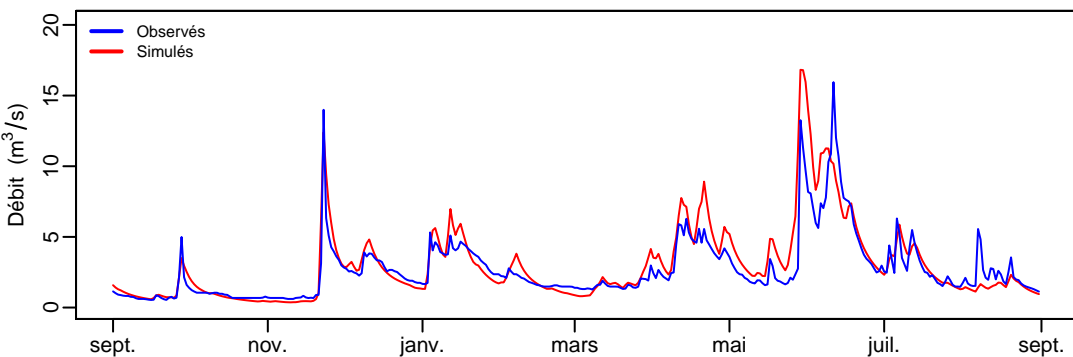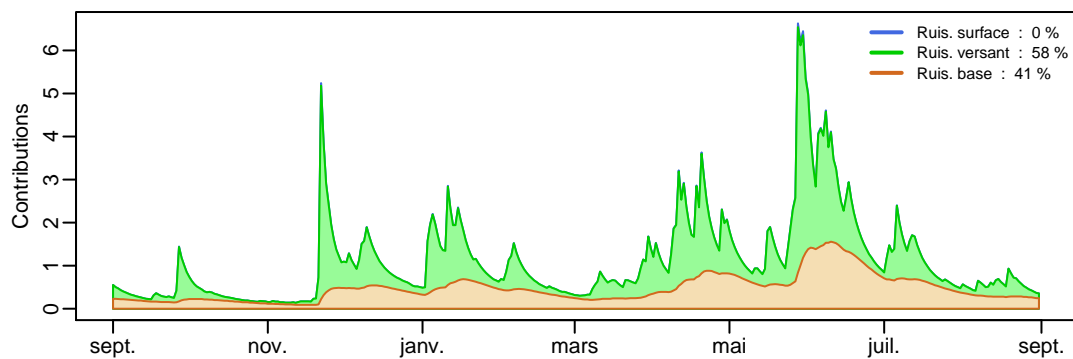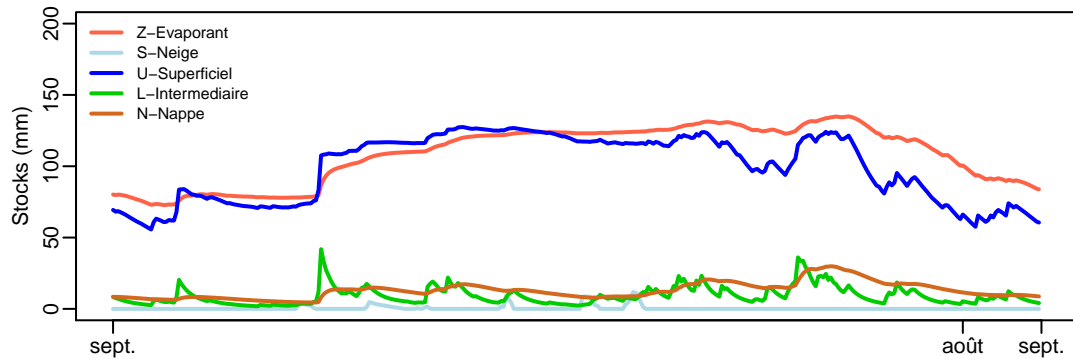

# k0454010 (228.77 km<sup>2</sup>) – année 2008–2009

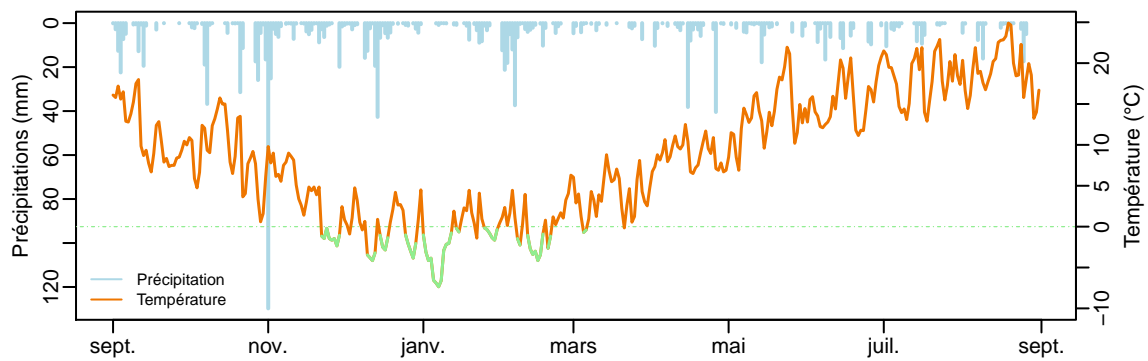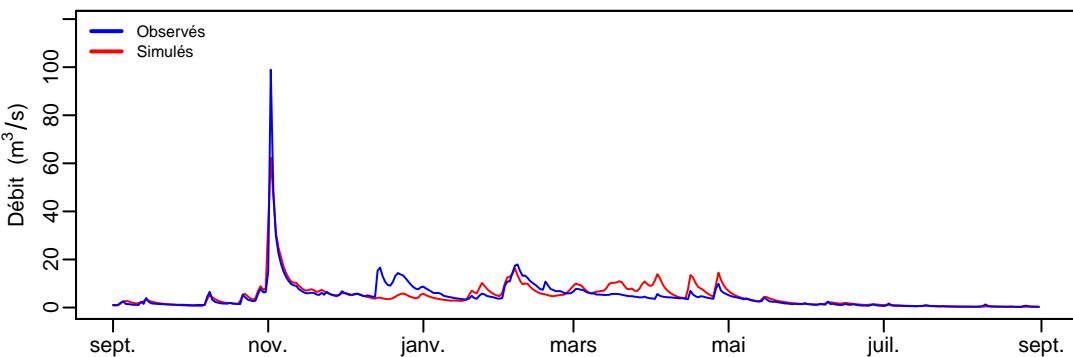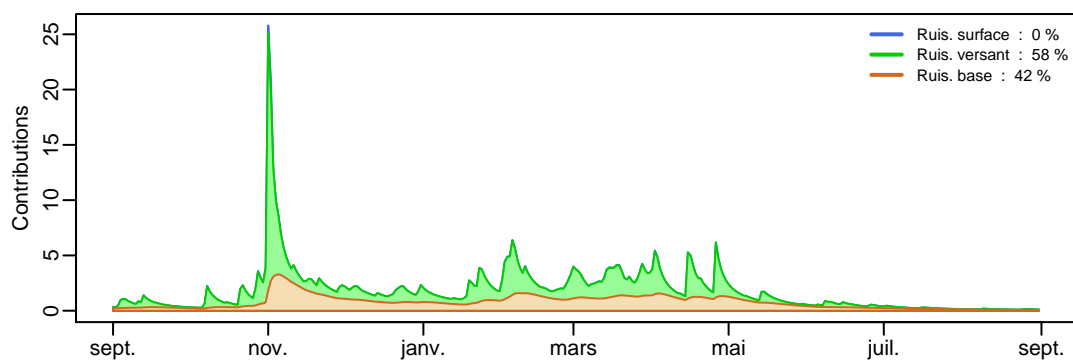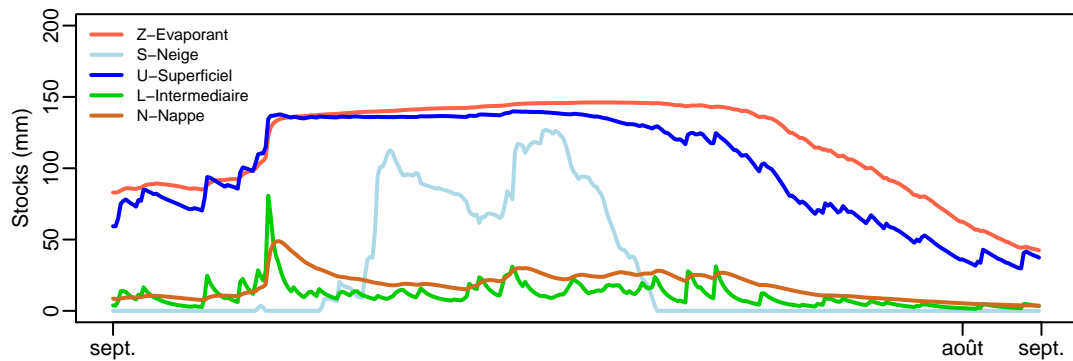

# k0513010 (192.61 km<sup>2</sup>) – année 1990–1991

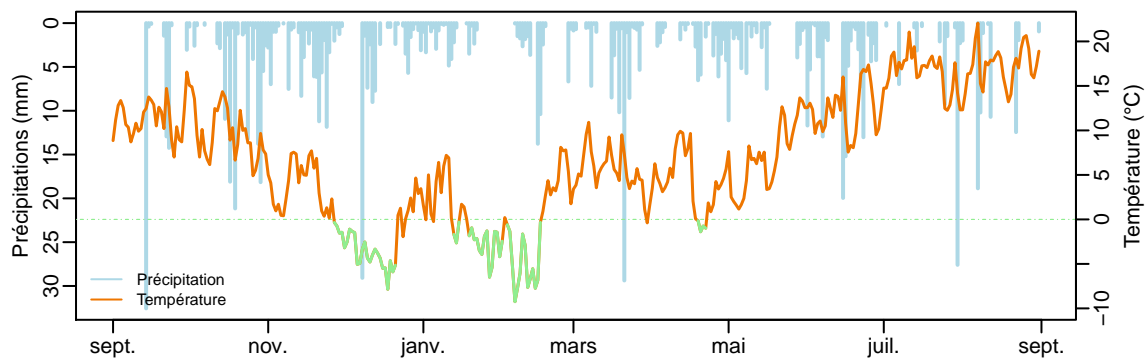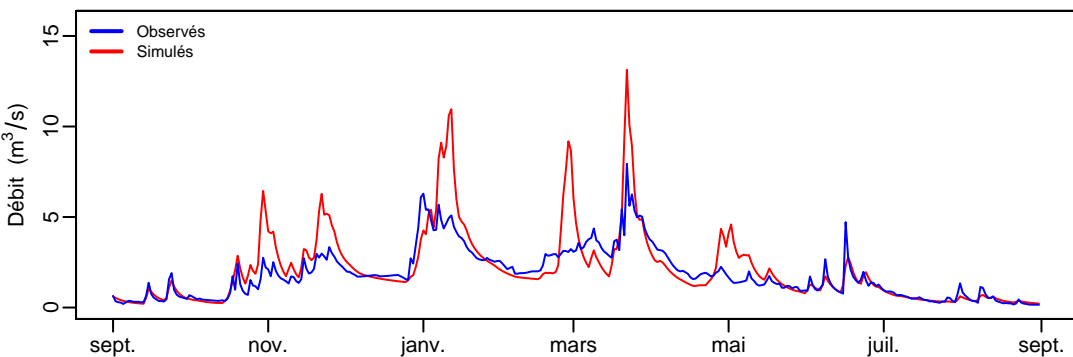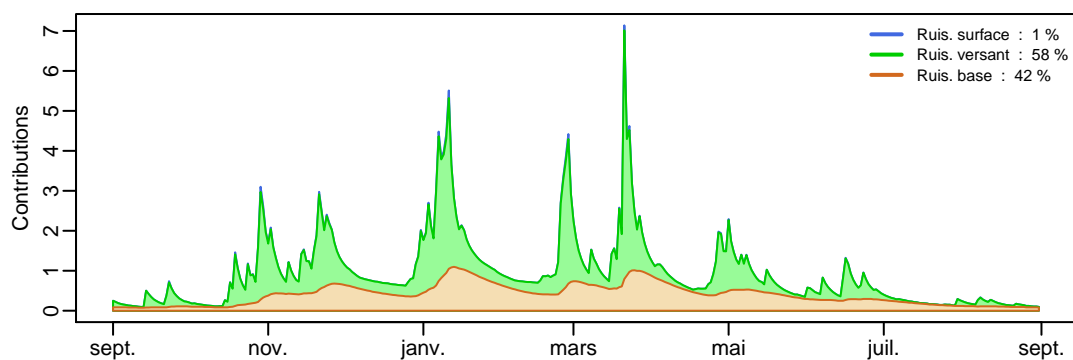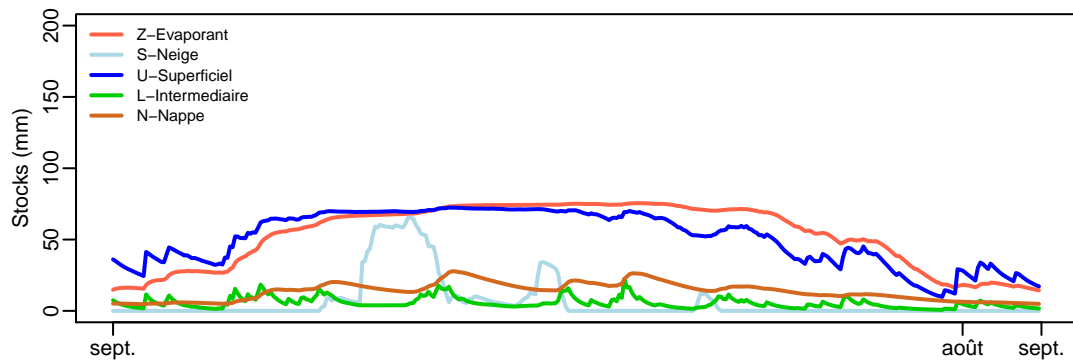

# k0513010 (192.61 km<sup>2</sup>) – année 1991–1992

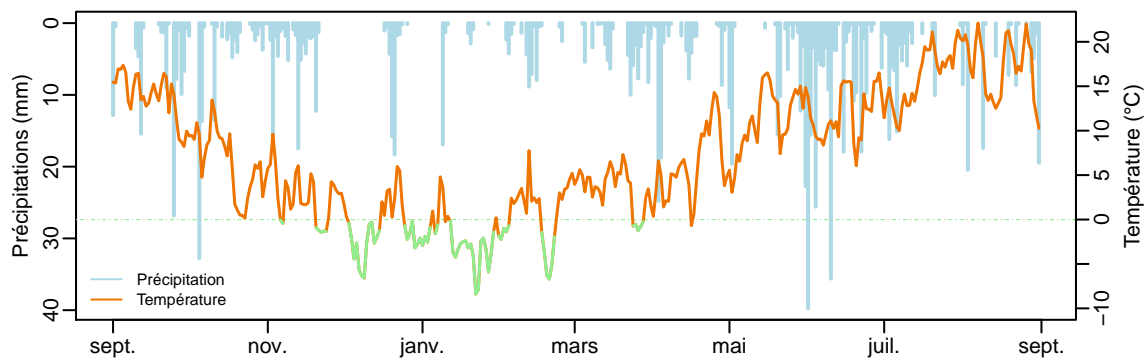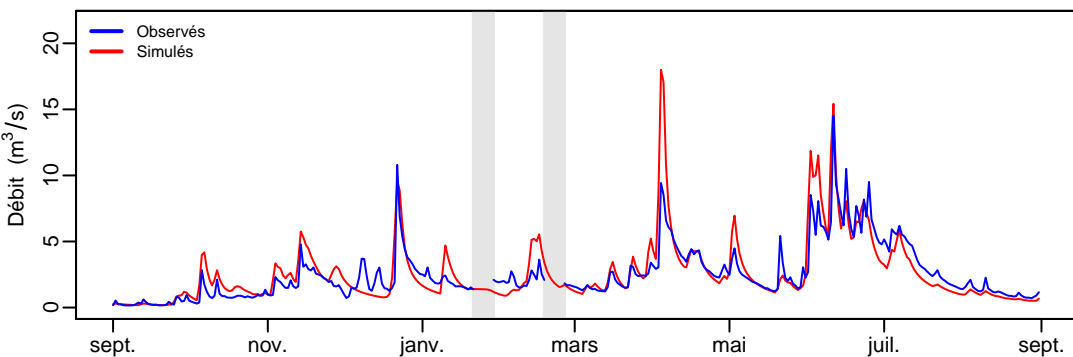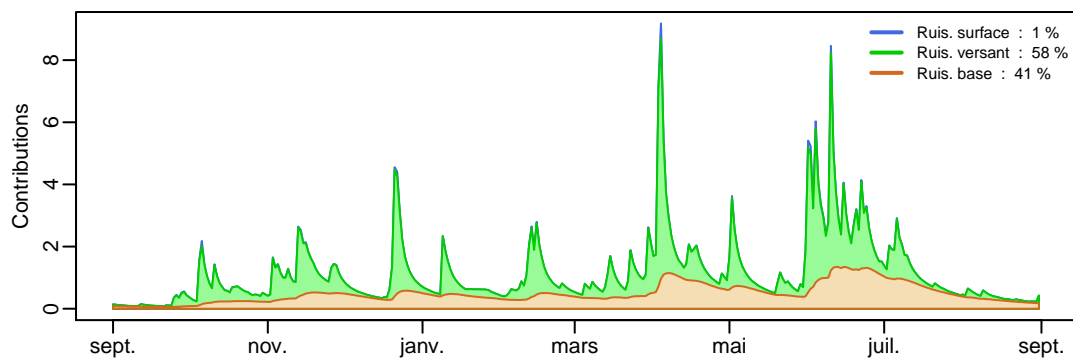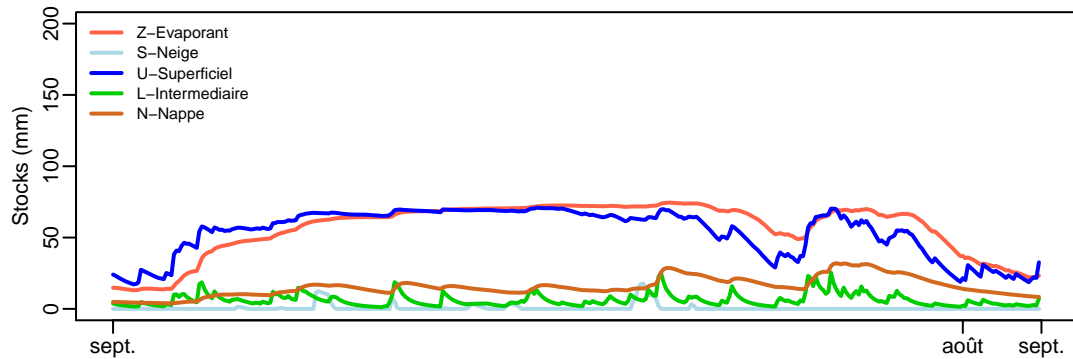

# k0513010 (192.61 km<sup>2</sup>) – année 1992–1993

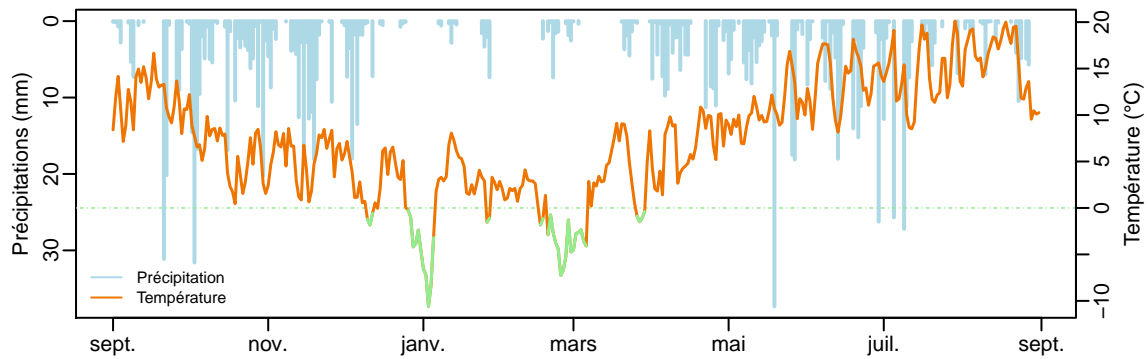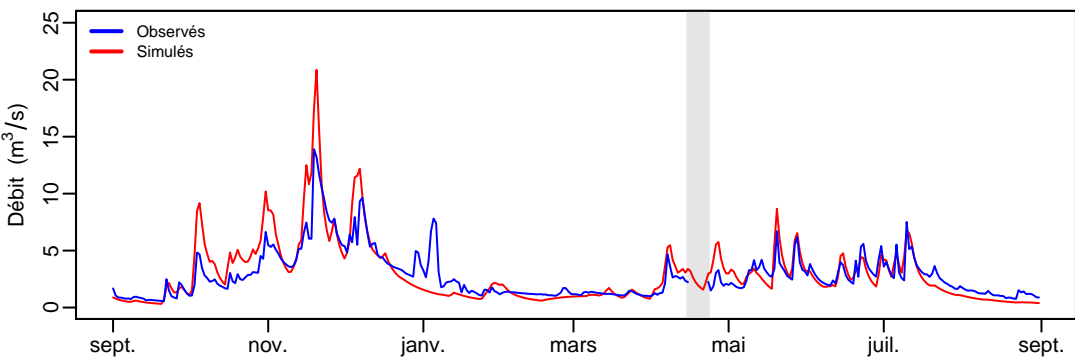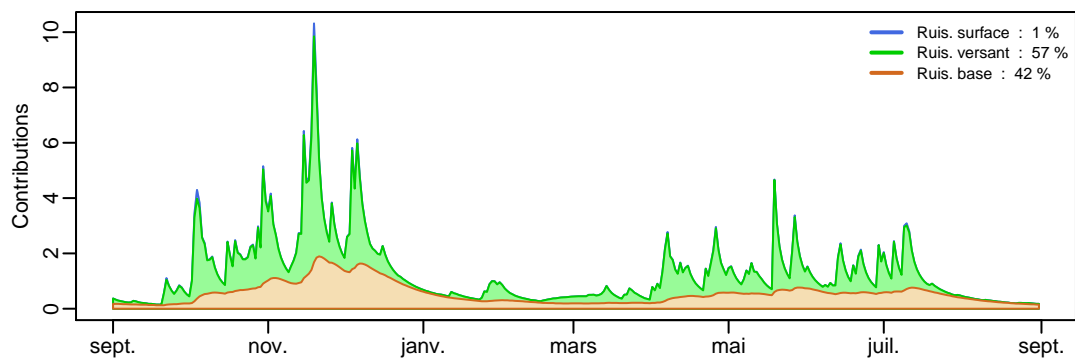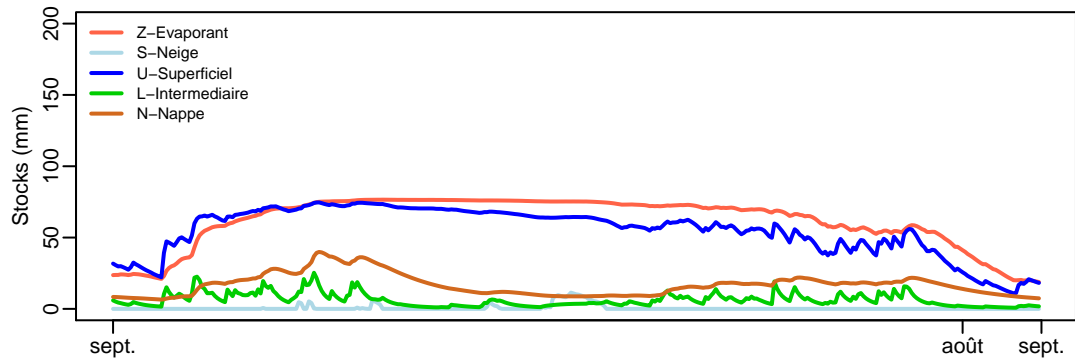

# k0513010 (192.61 km<sup>2</sup>) – année 1993–1994

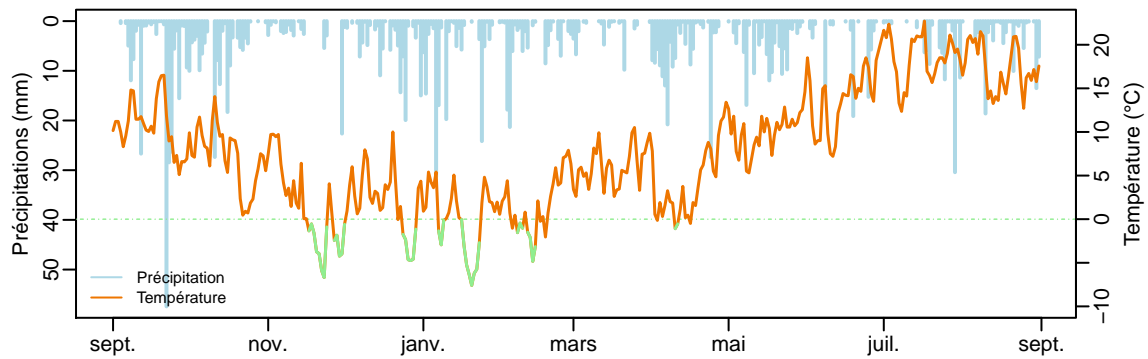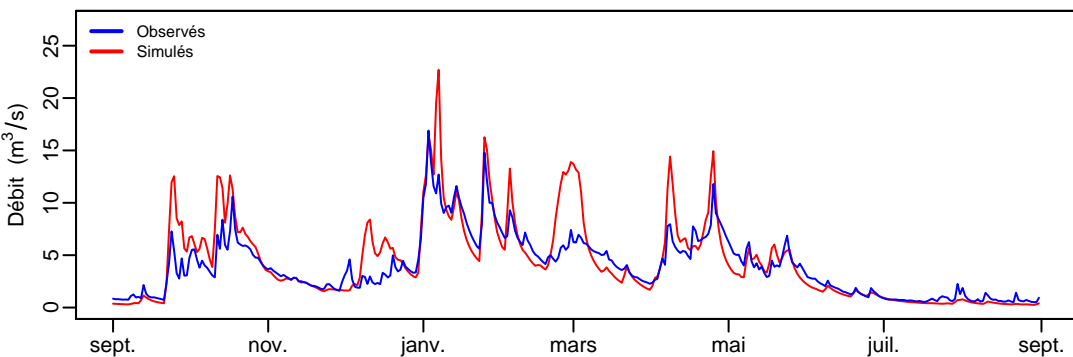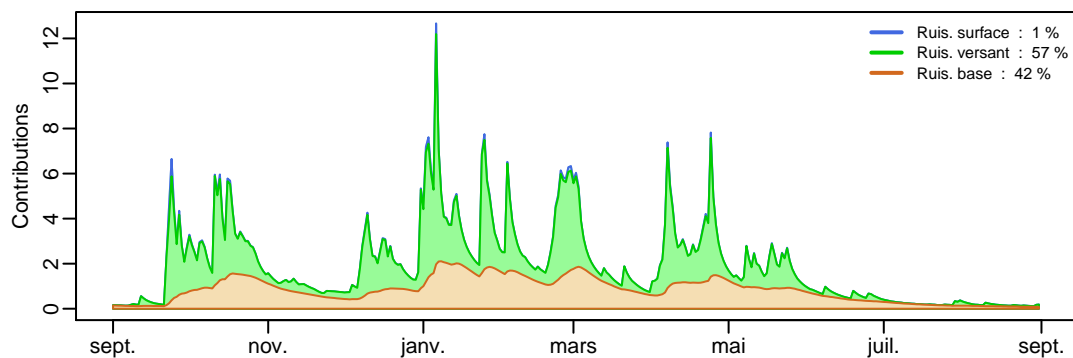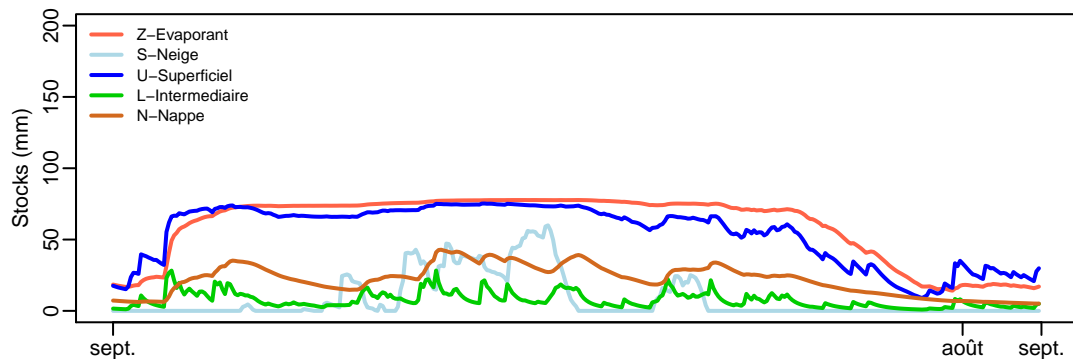



# k0513010 (192.61 km<sup>2</sup>) – année 1994–1995

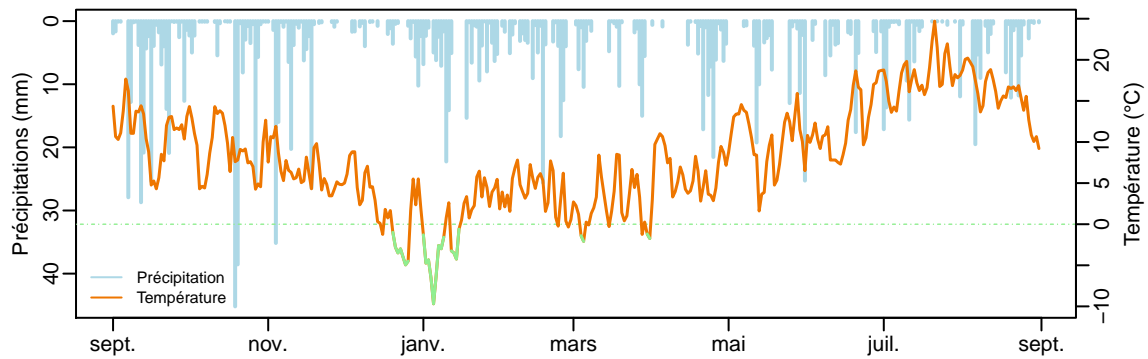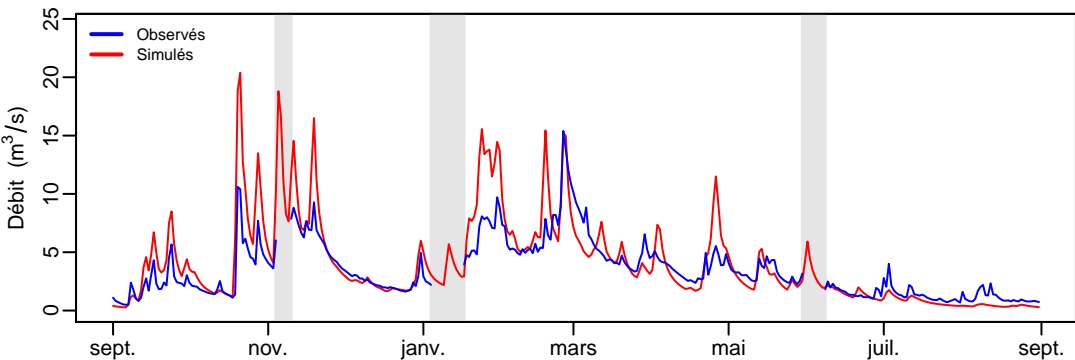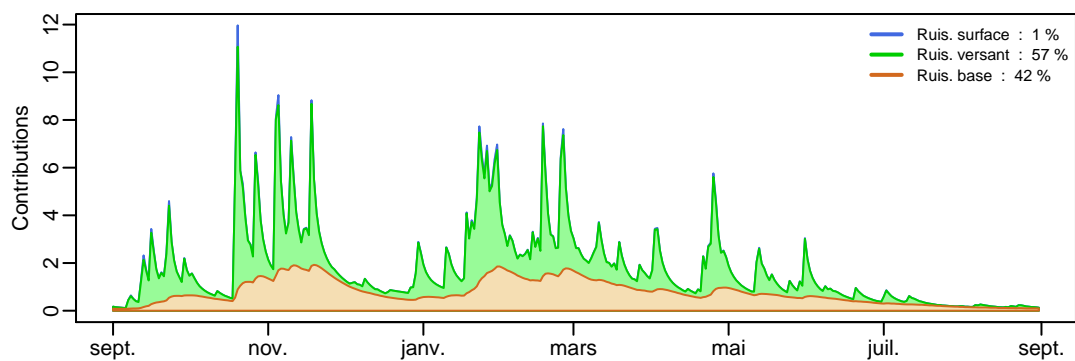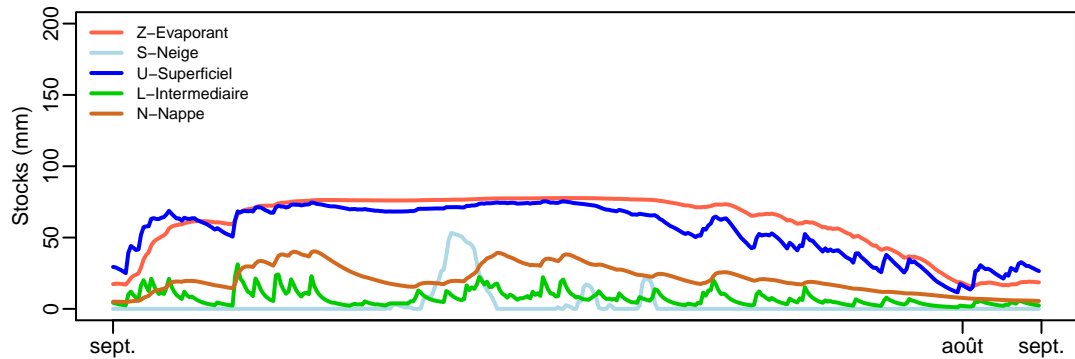

# k0513010 (192.61 km<sup>2</sup>) – année 1995–1996

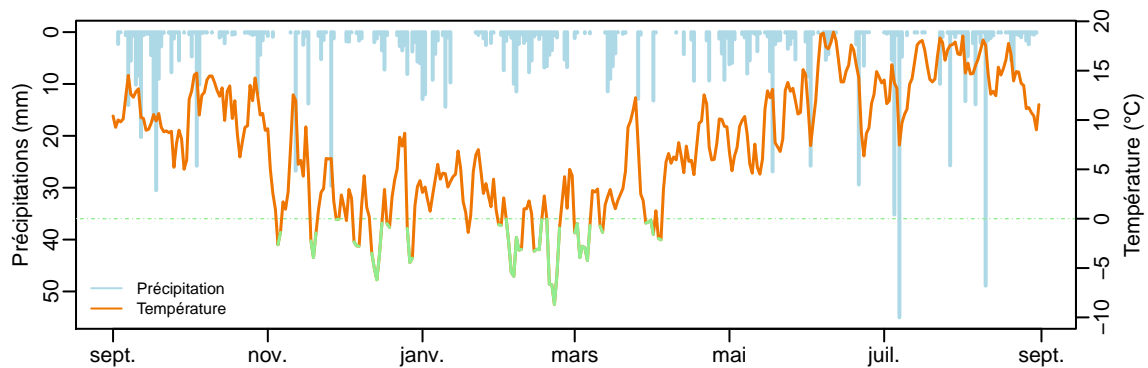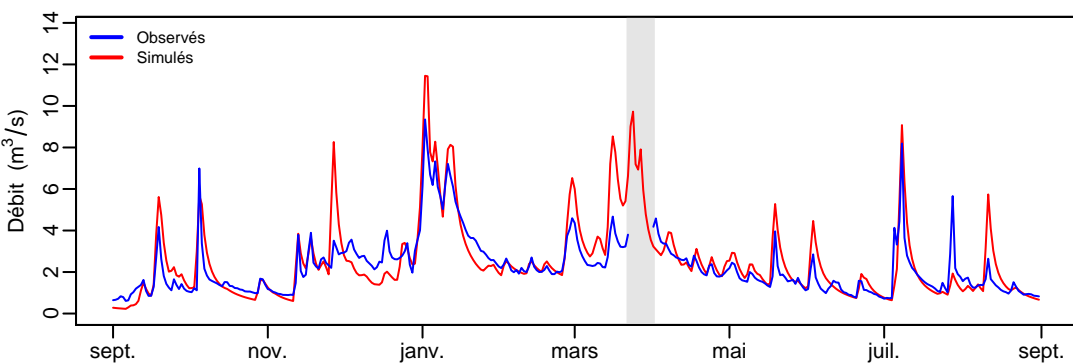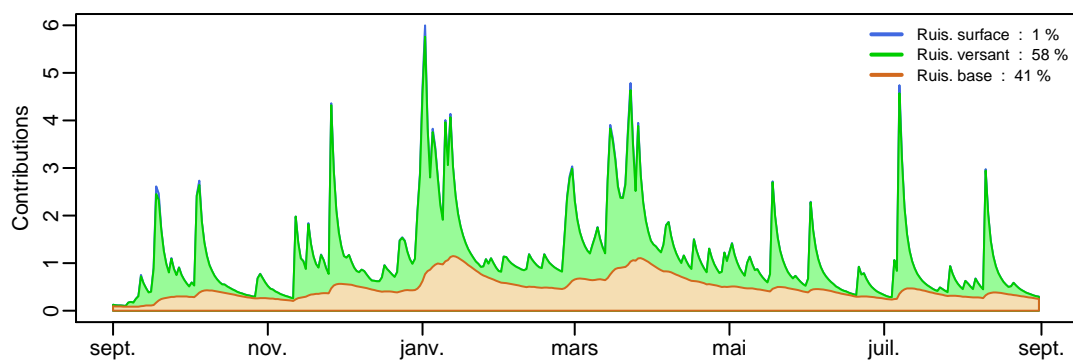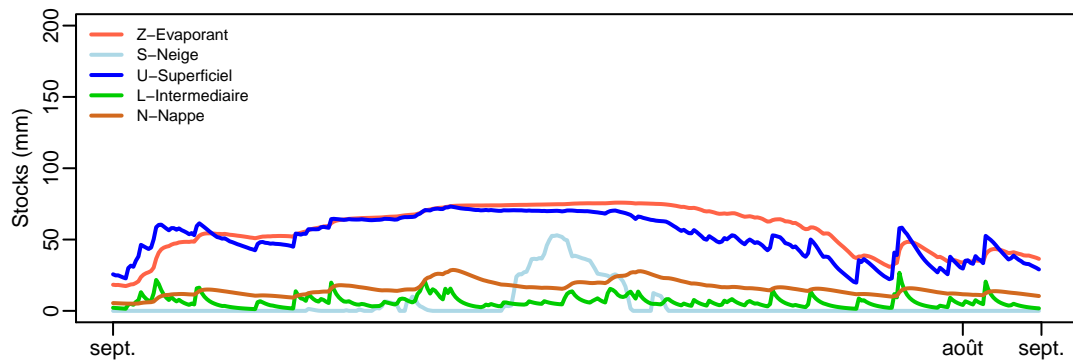

# k0513010 (192.61 km<sup>2</sup>) – année 1996–1997

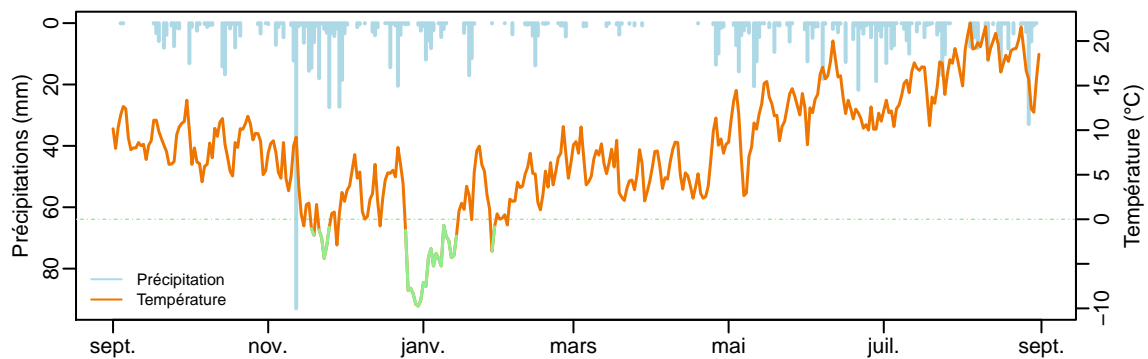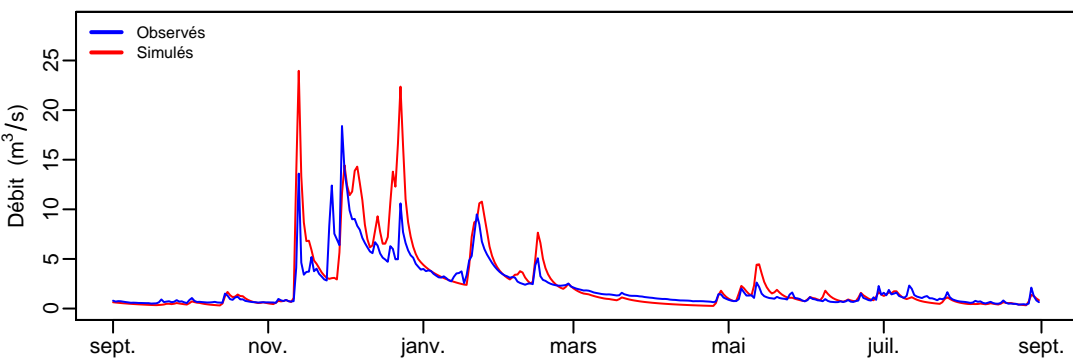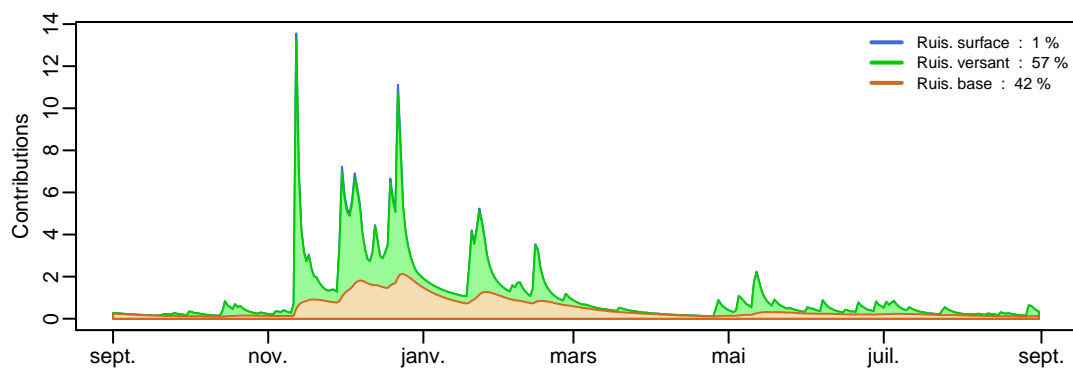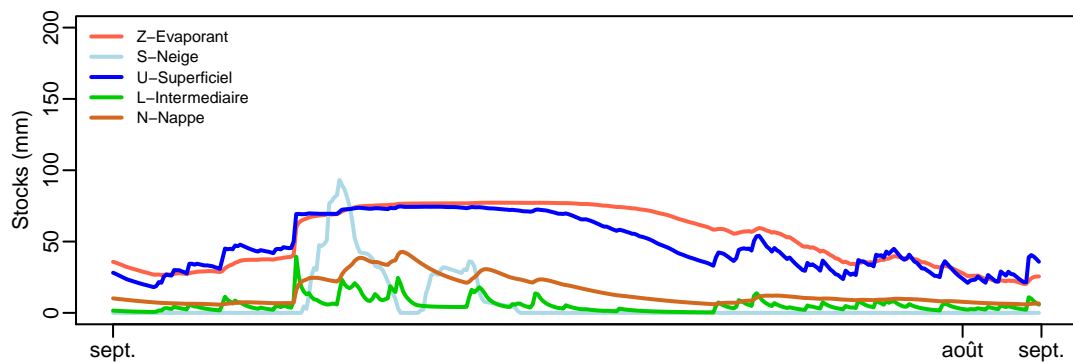

# k0513010 (192.61 km<sup>2</sup>) – année 1997–1998

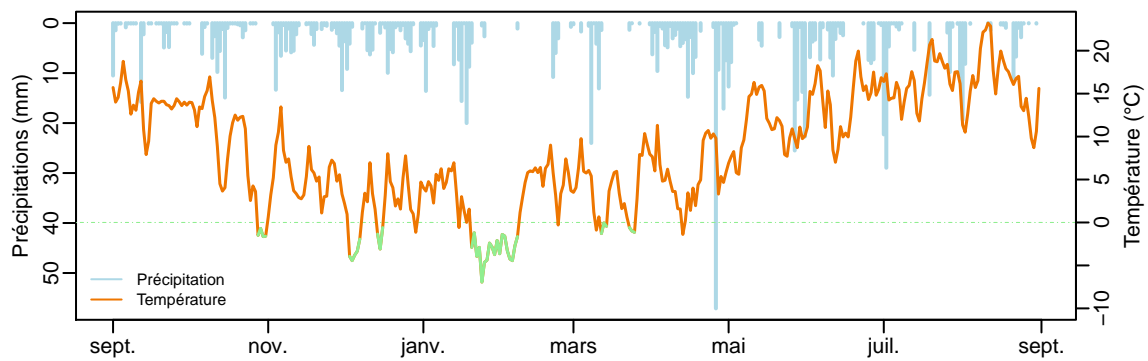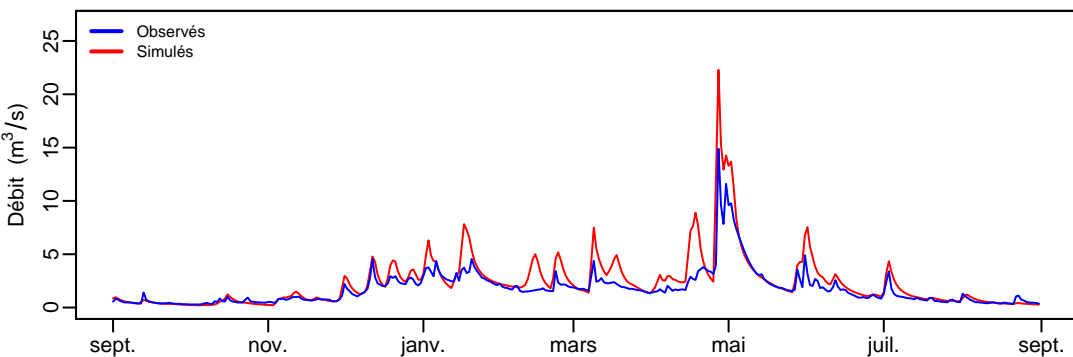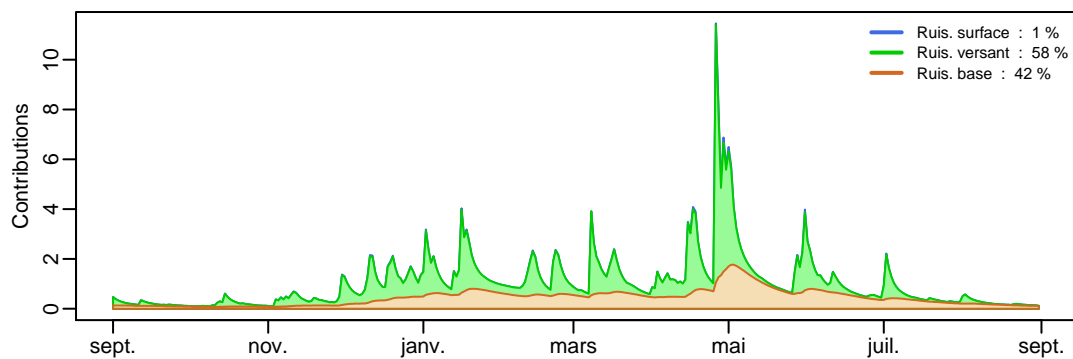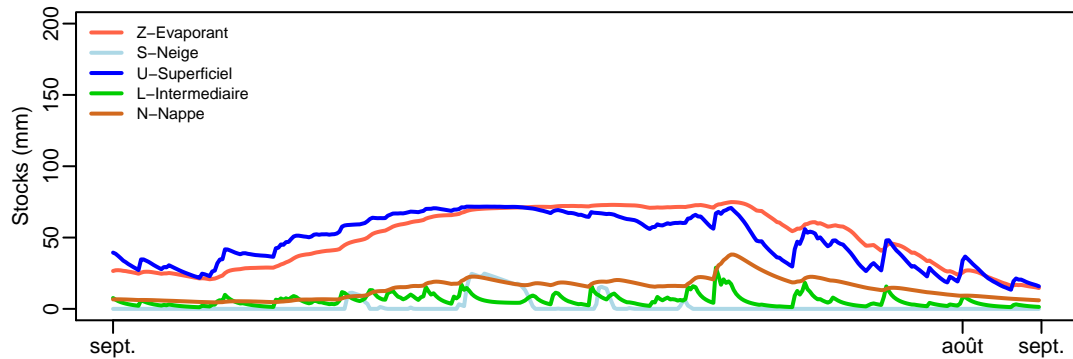

# k0513010 (192.61 km<sup>2</sup>) – année 1998–1999

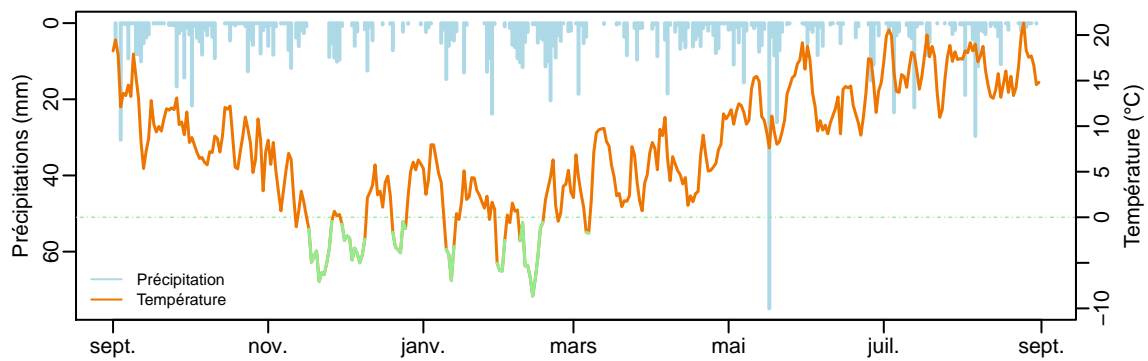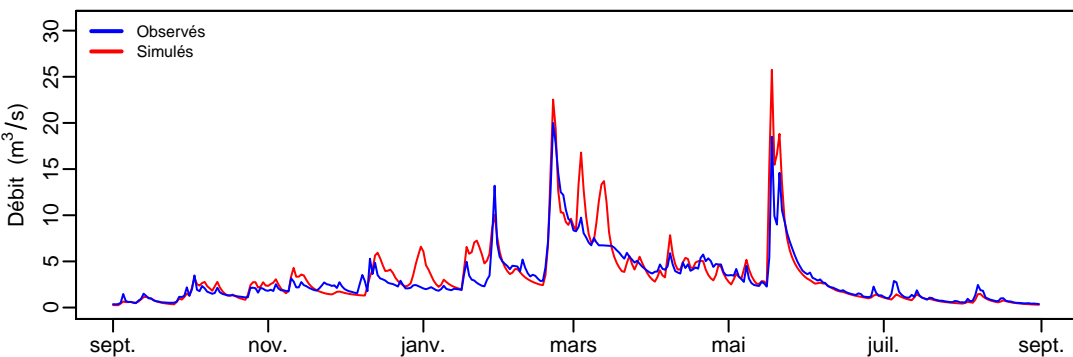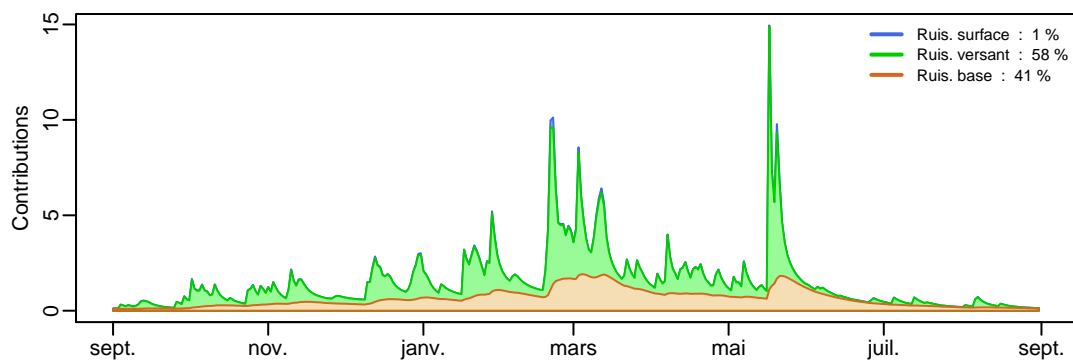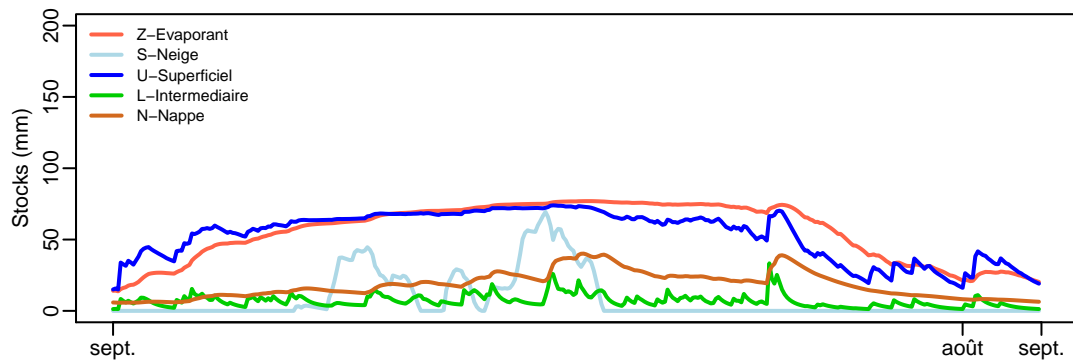

# k0513010 (192.61 km<sup>2</sup>) – année 1999–2000

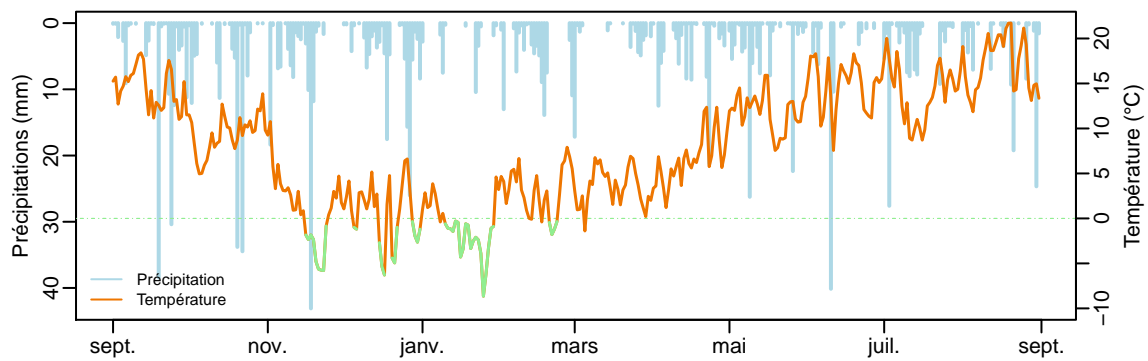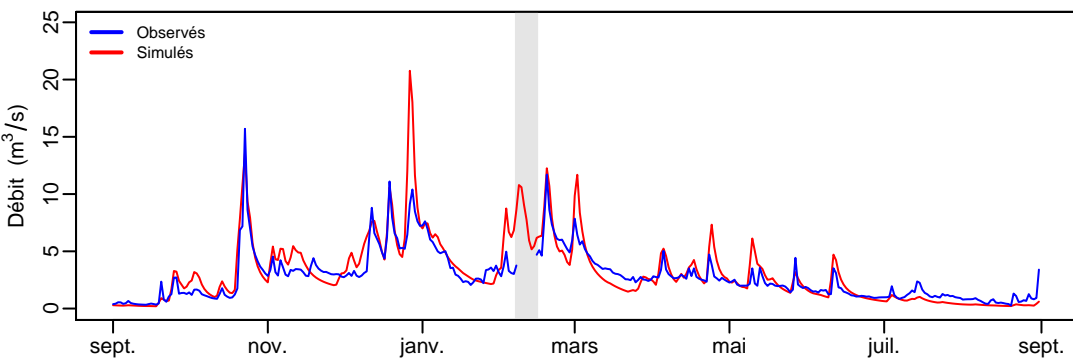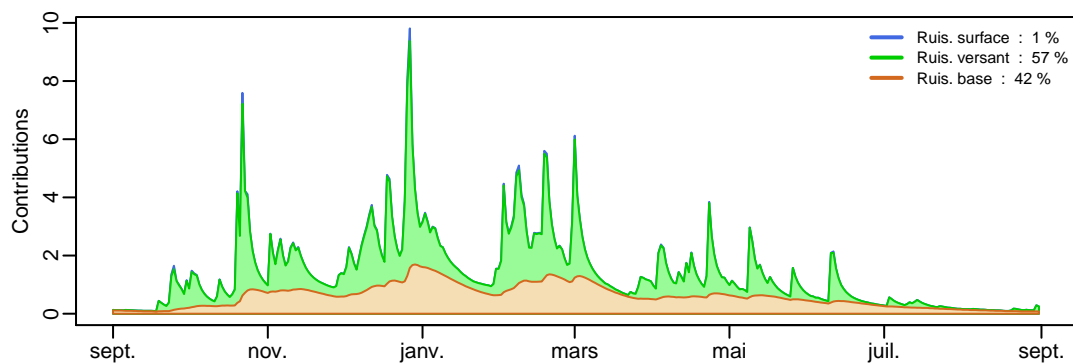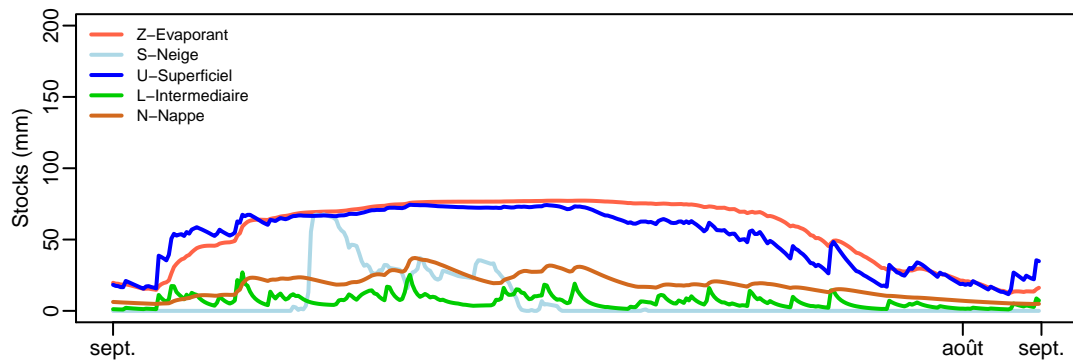

# k0513010 (192.61 km<sup>2</sup>) – année 2000–2001

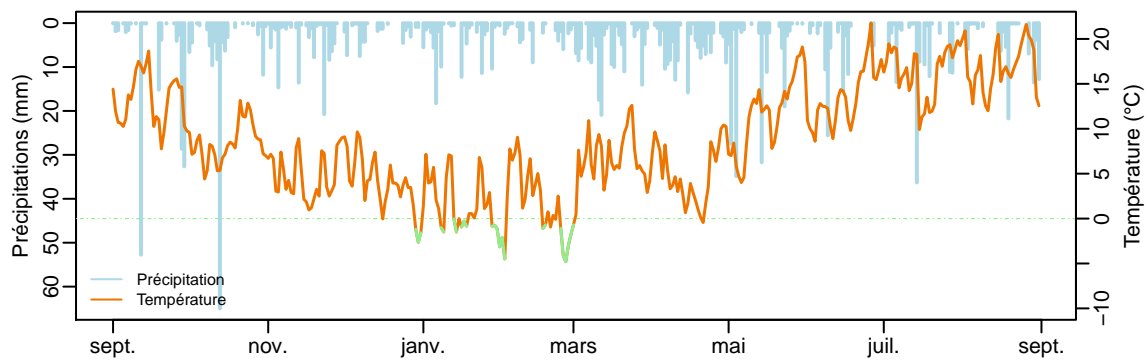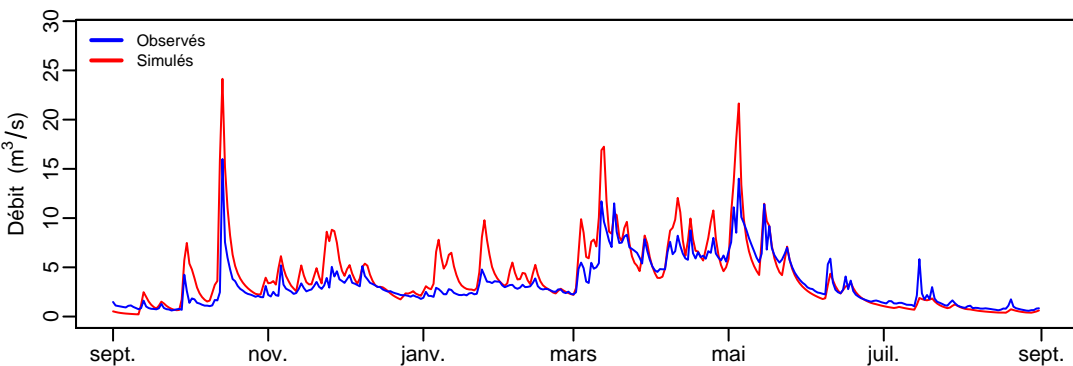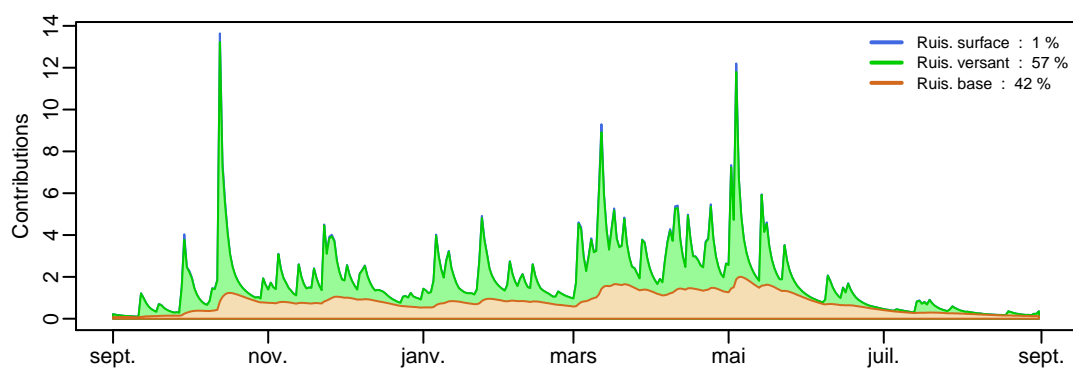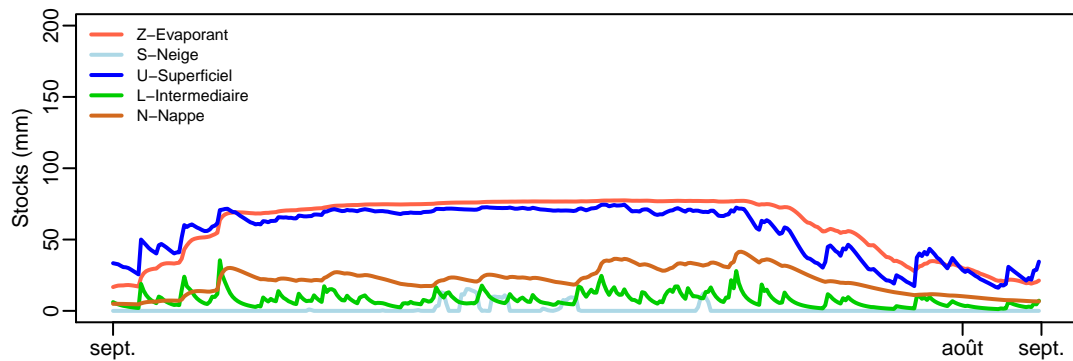

# k0513010 (192.61 km<sup>2</sup>) – année 2001–2002

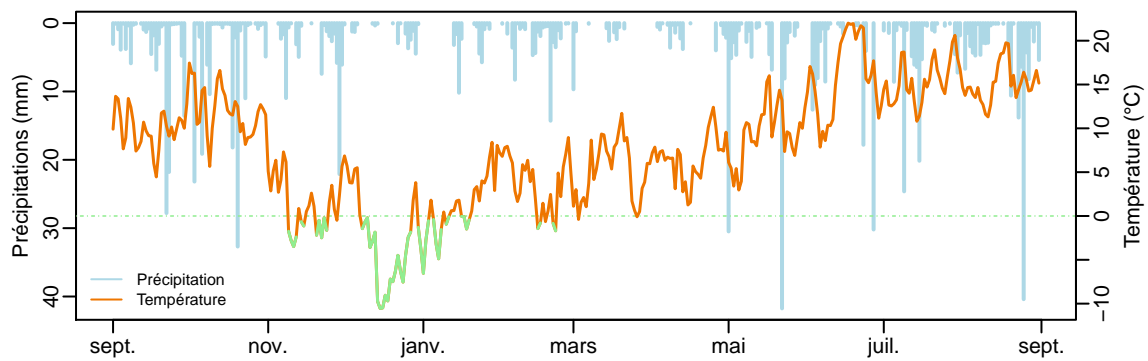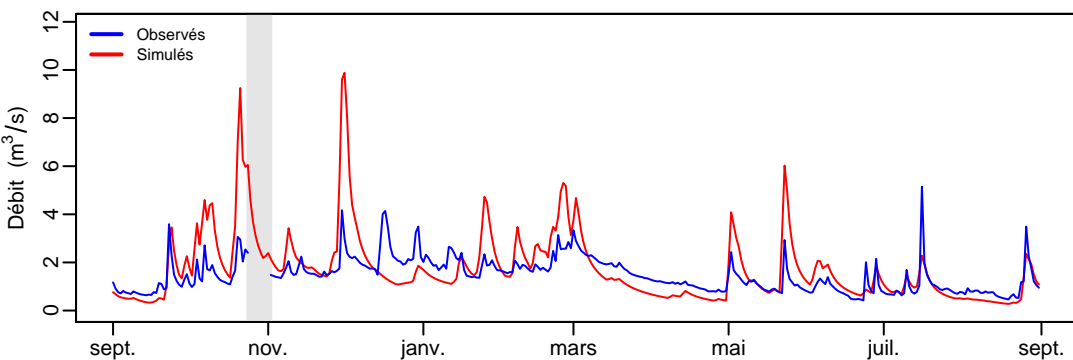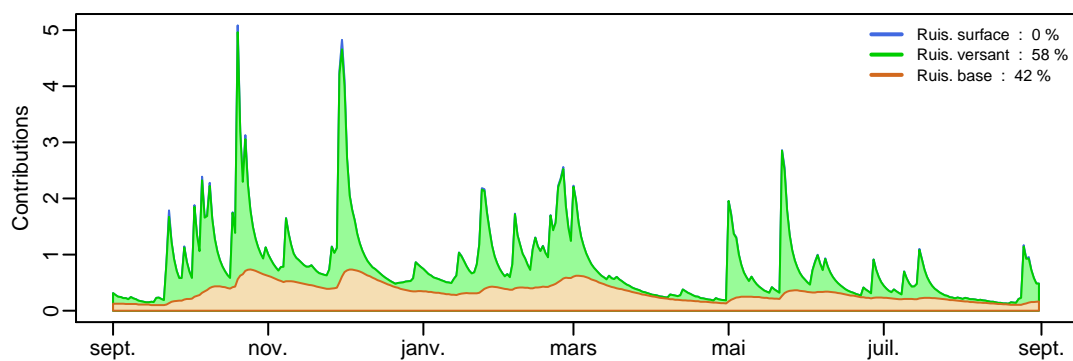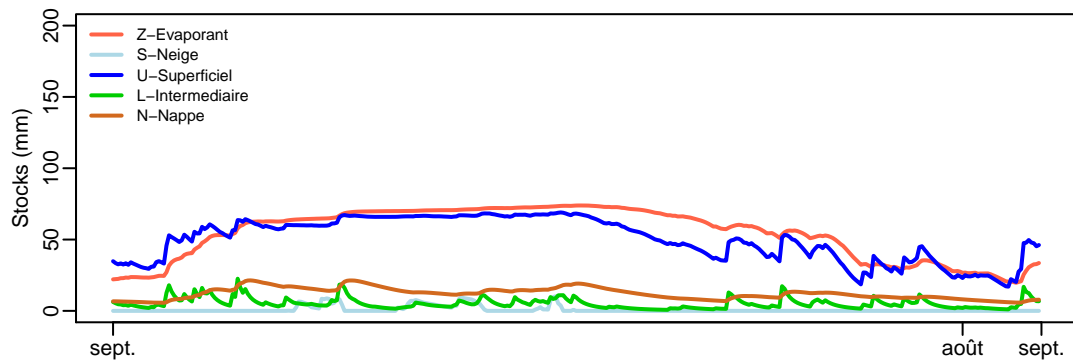



# k0513010 (192.61 km<sup>2</sup>) – année 2002–2003

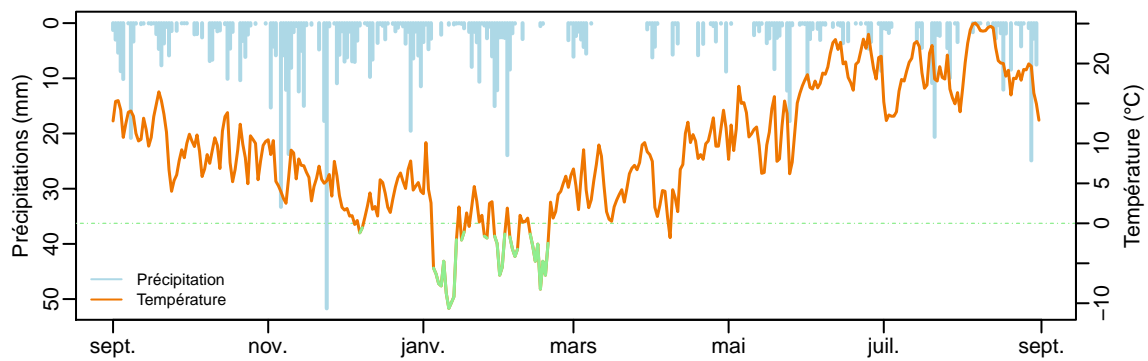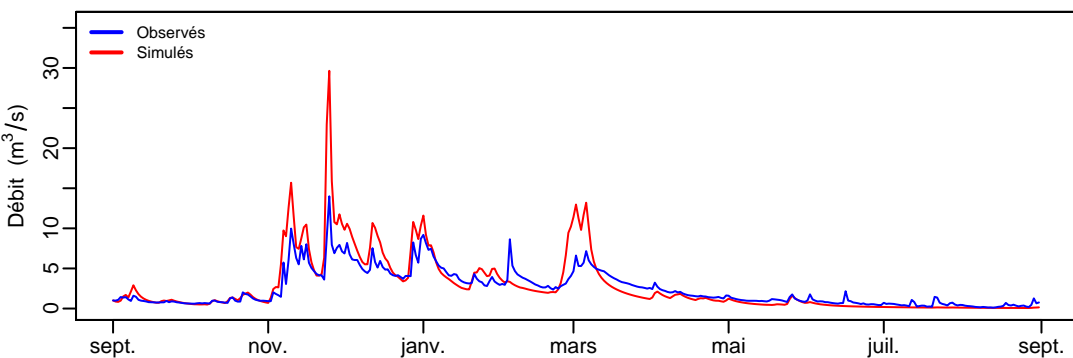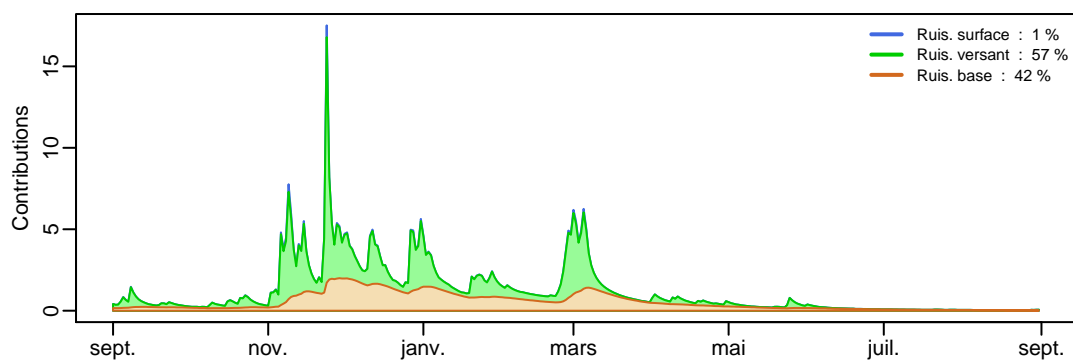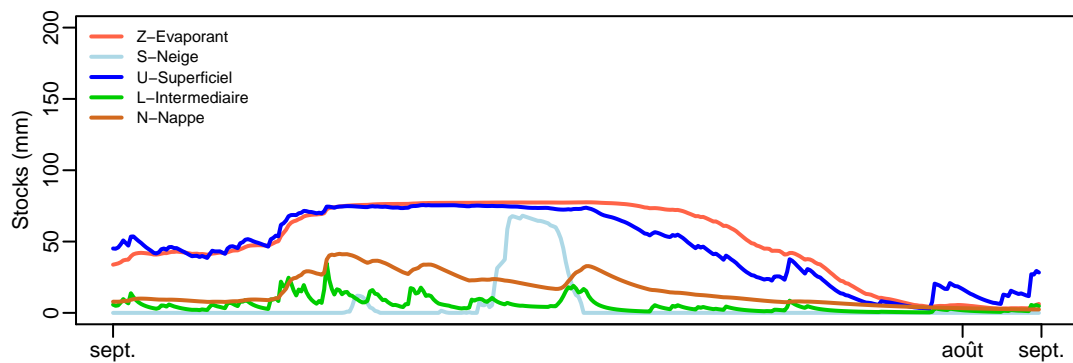

# k0513010 (192.61 km<sup>2</sup>) – année 2003–2004

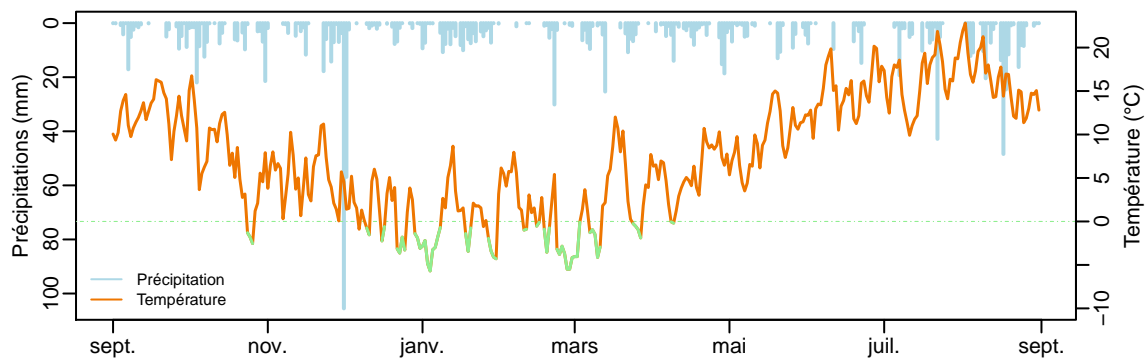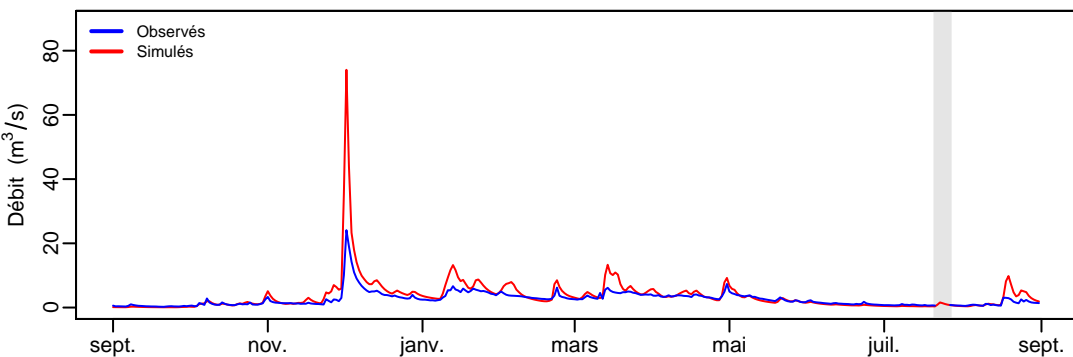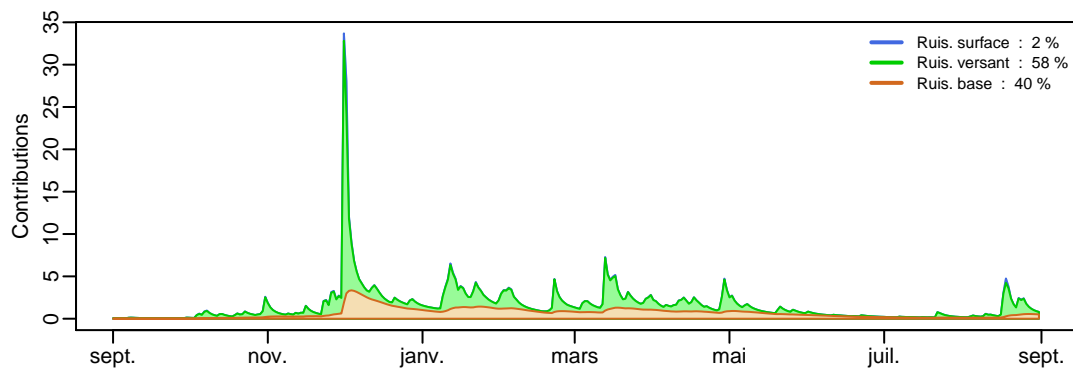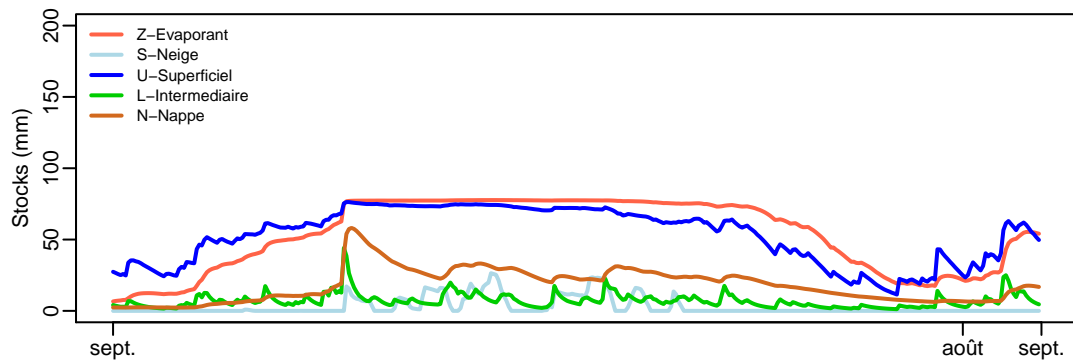

# k0513010 (192.61 km²) – année 2004–2005

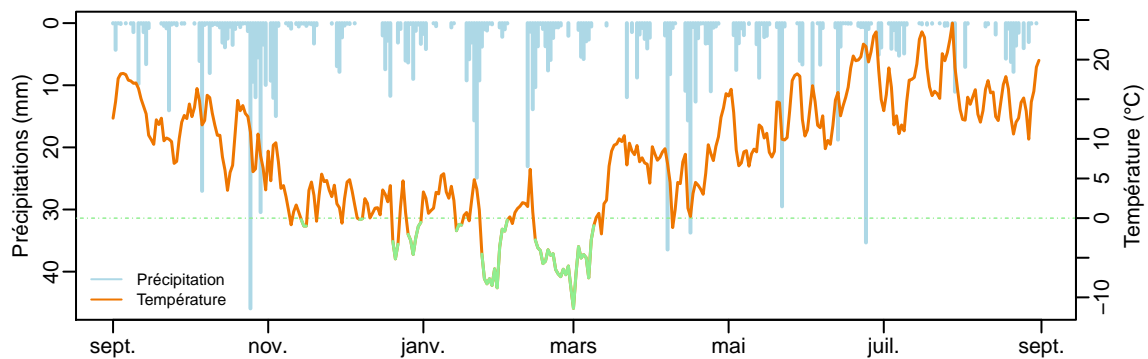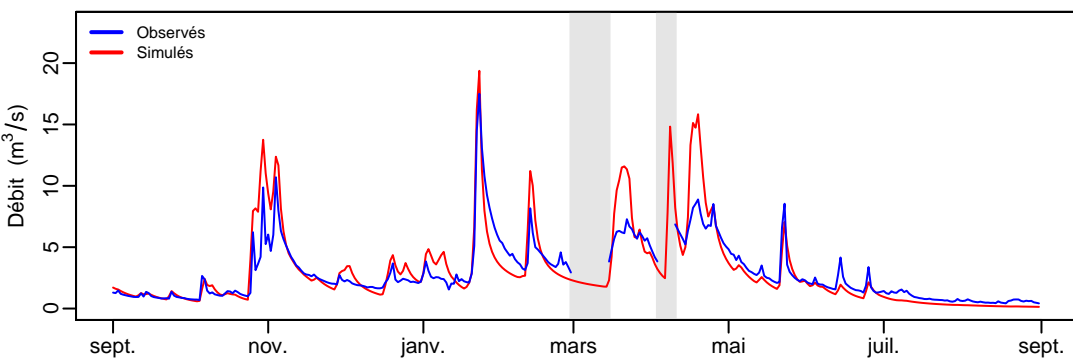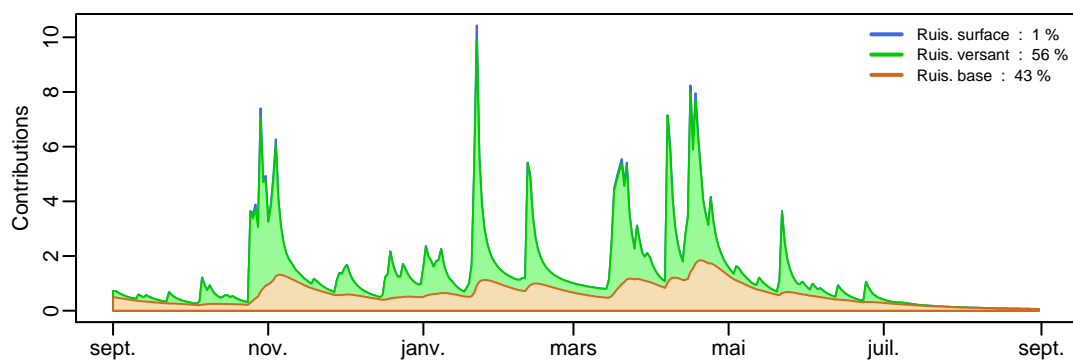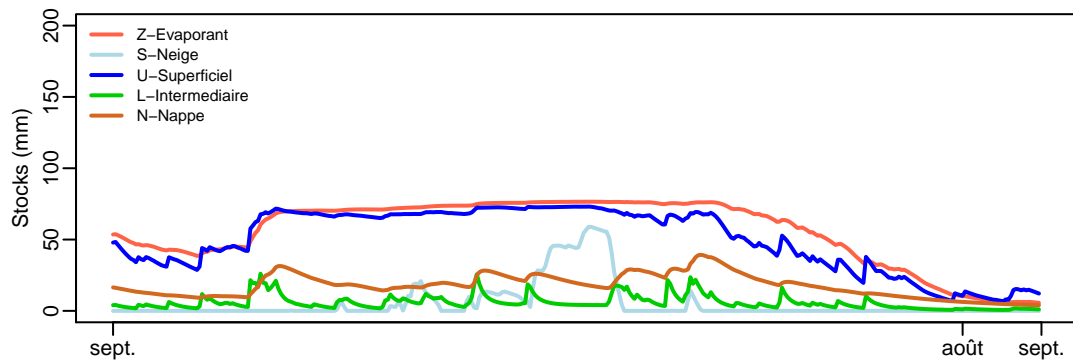

# k0513010 (192.61 km<sup>2</sup>) – année 2005–2006

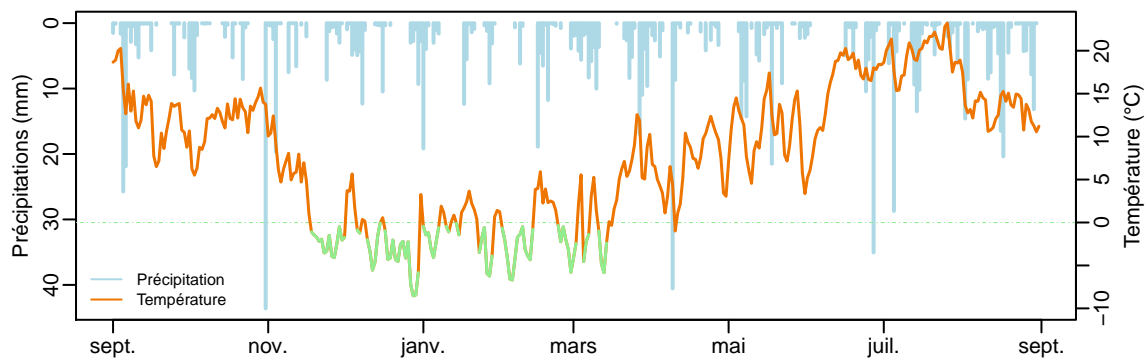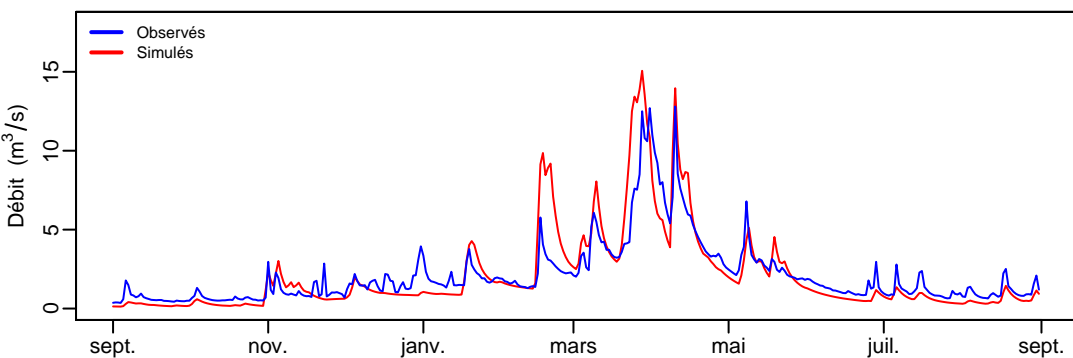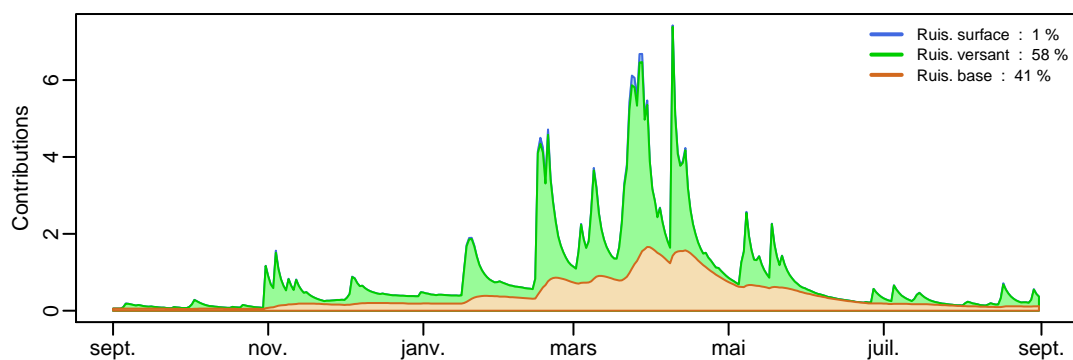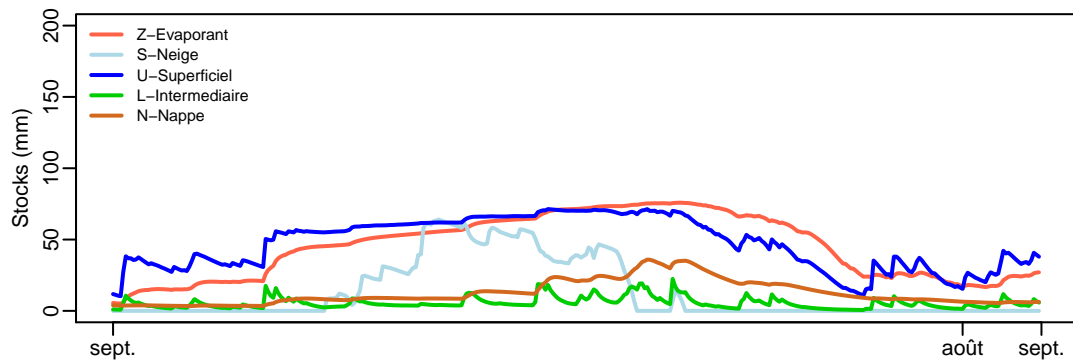

# k0513010 (192.61 km<sup>2</sup>) – année 2006–2007

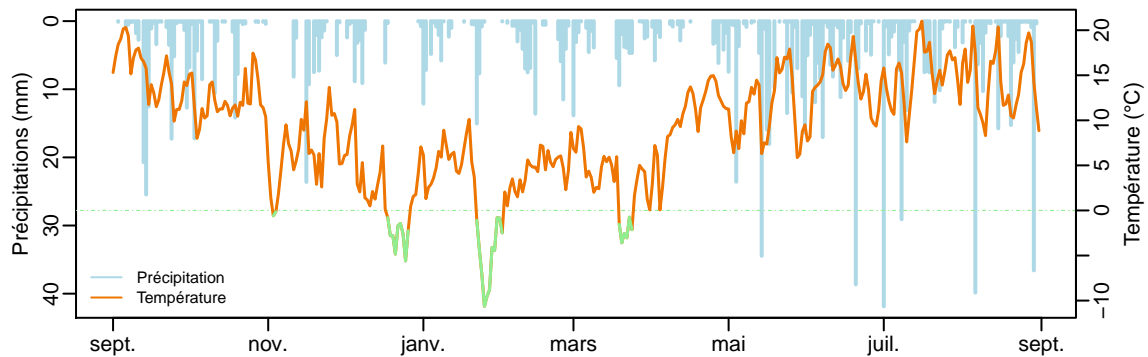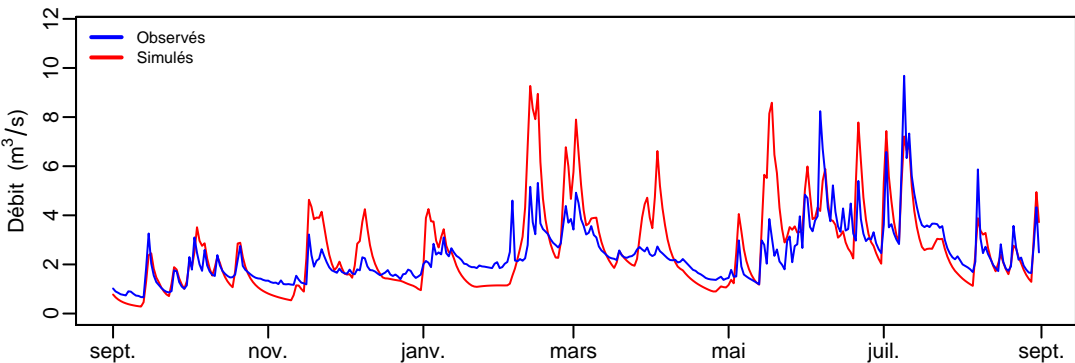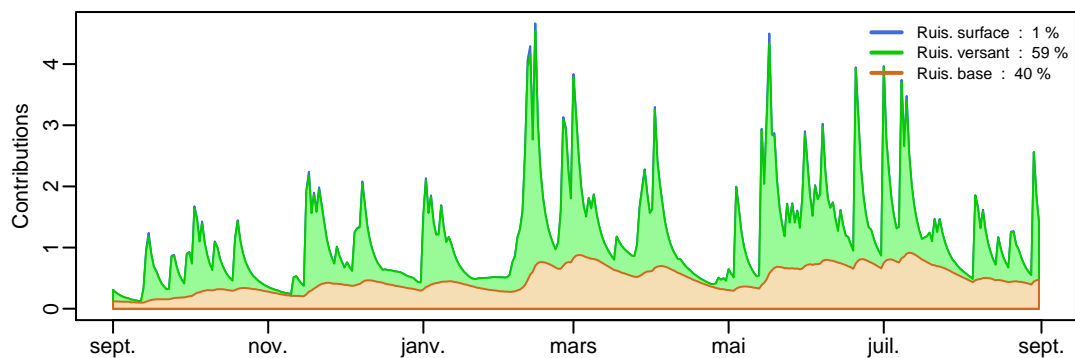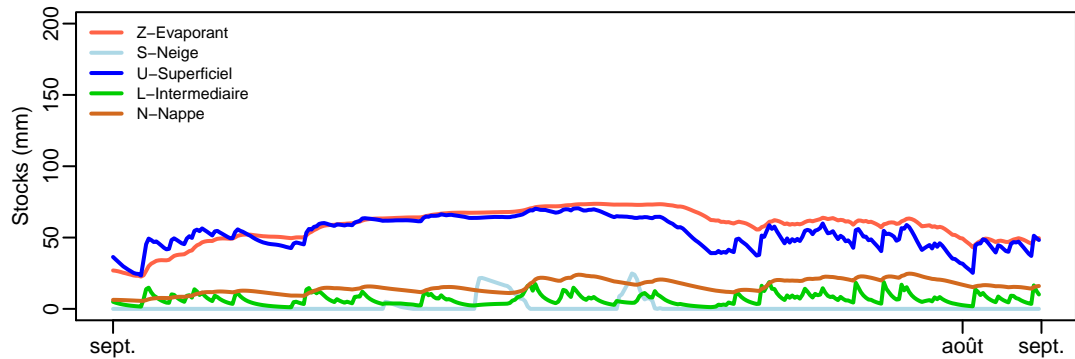

# k0513010 (192.61 km<sup>2</sup>) – année 2007–2008

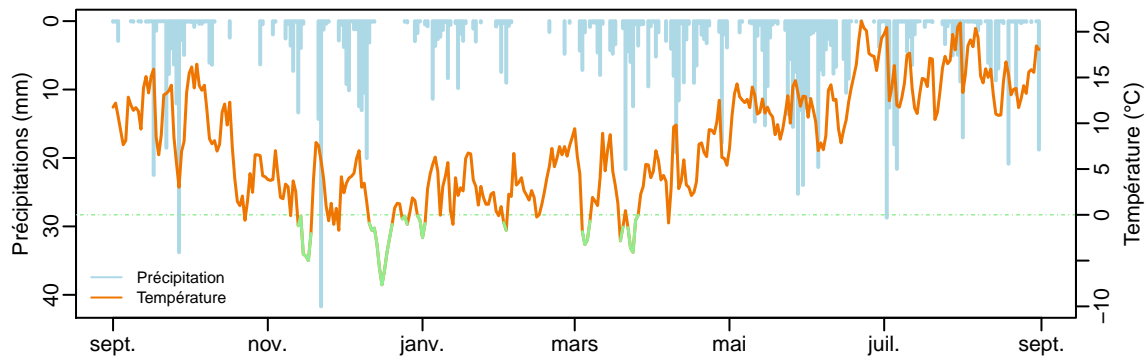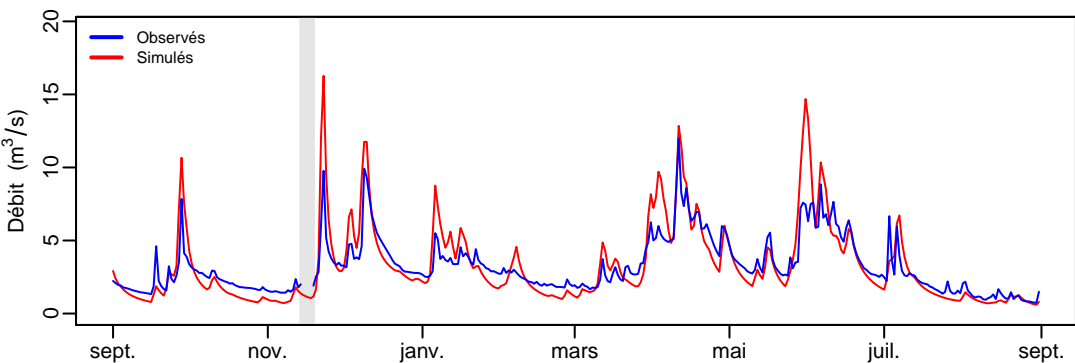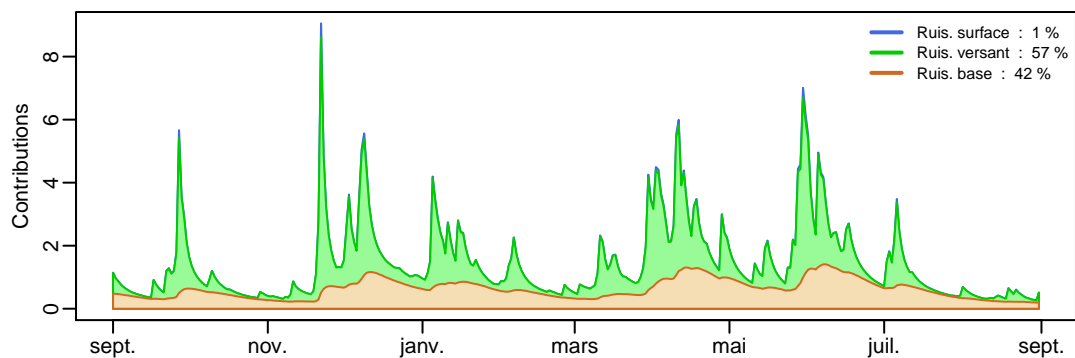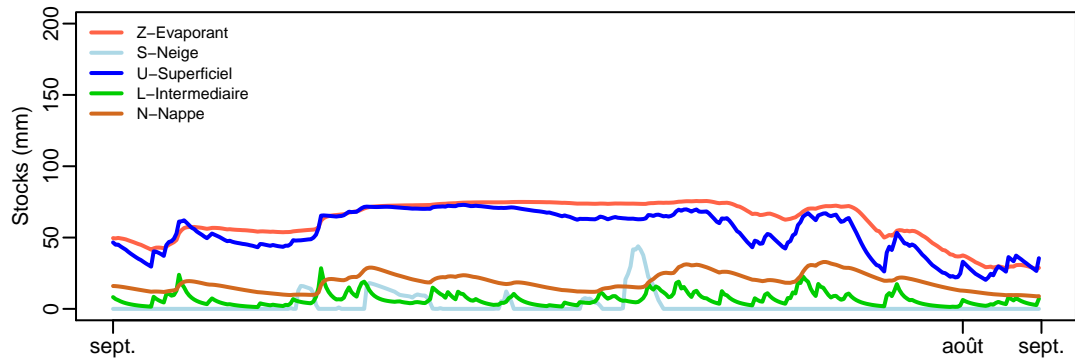

# k0513010 (192.61 km<sup>2</sup>) – année 2008–2009

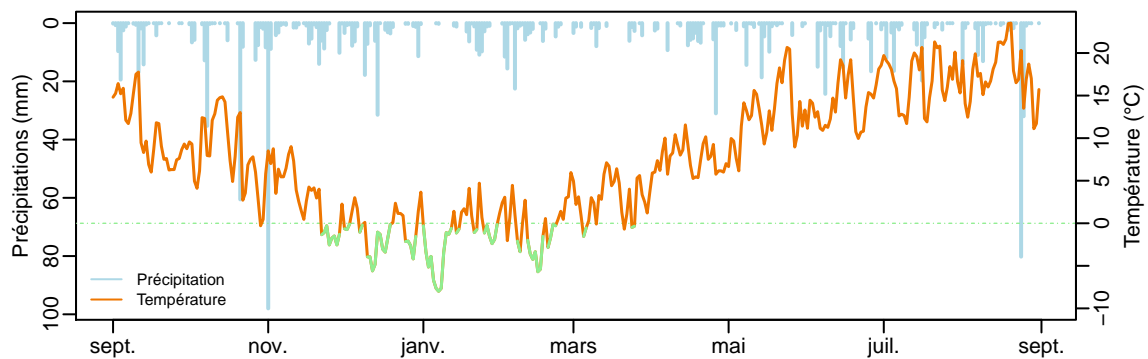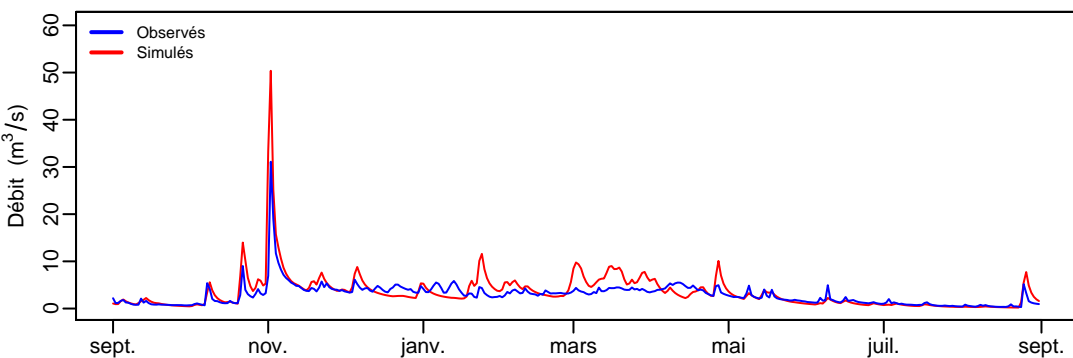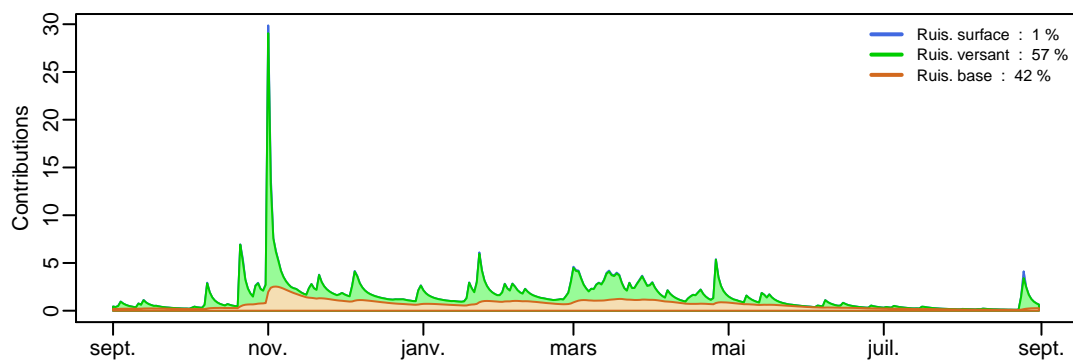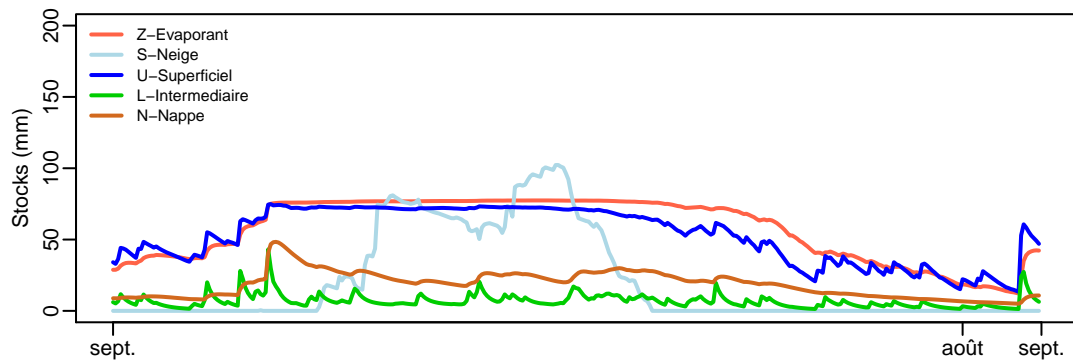

# k0513010 (192.61 km<sup>2</sup>) – année 2009–2010

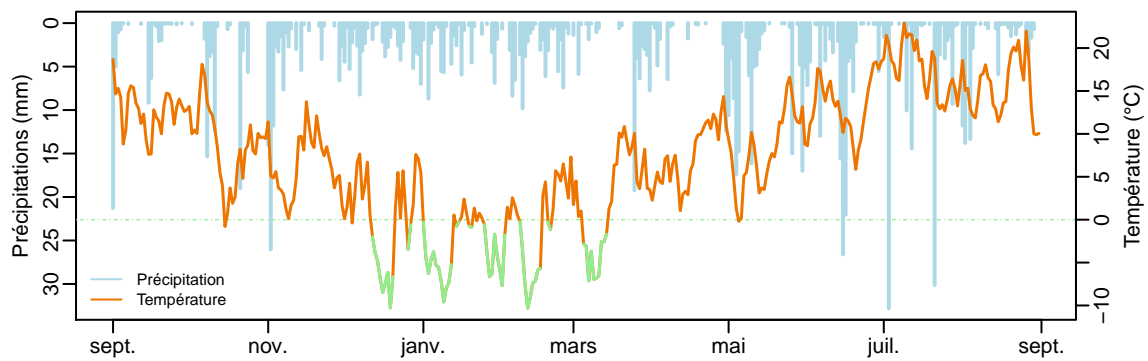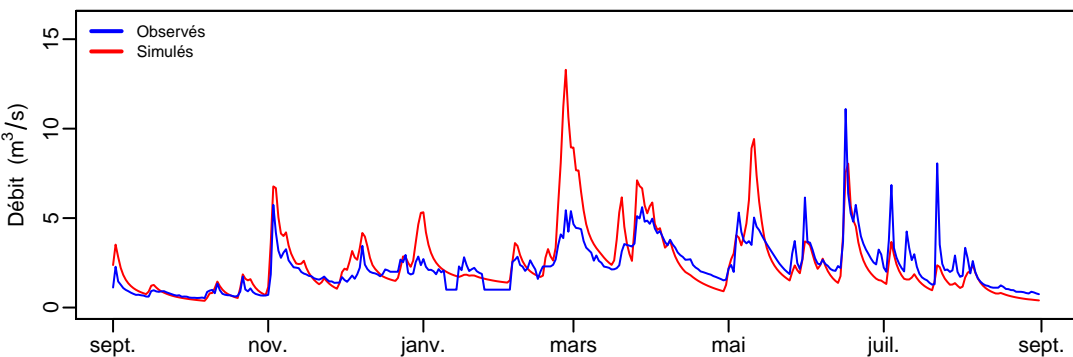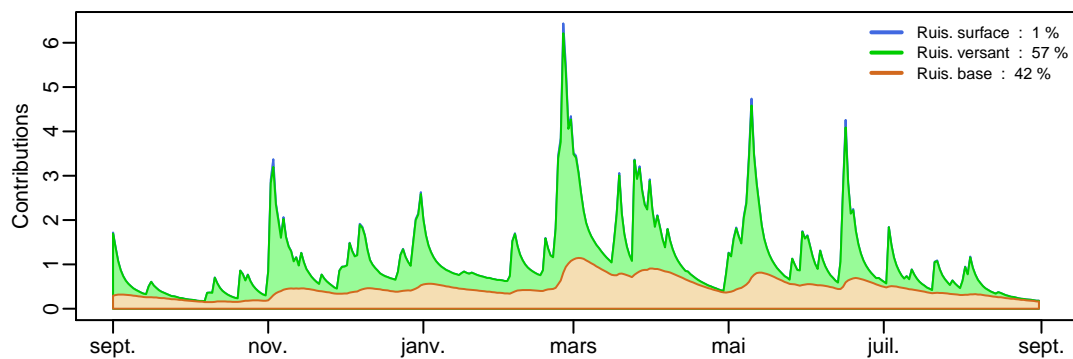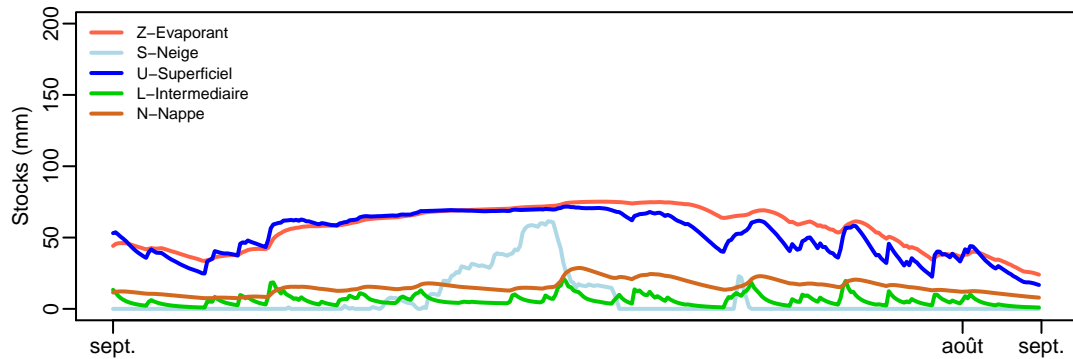



# k0513010 (192.61 km<sup>2</sup>) – année 2010–2011

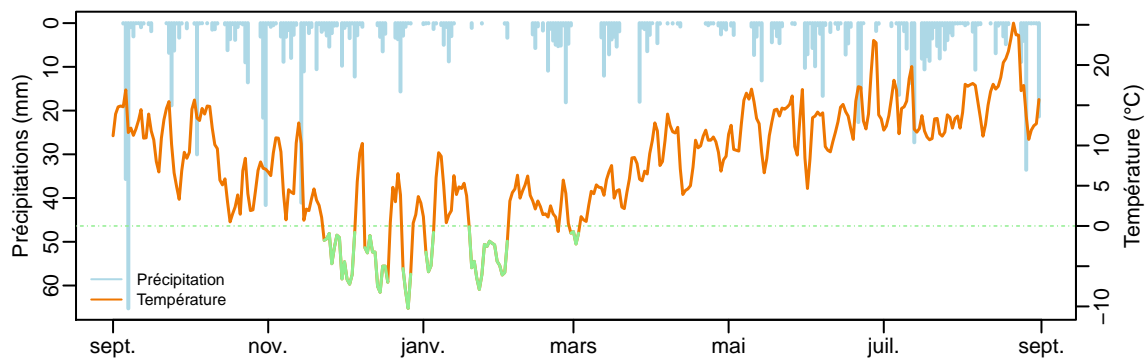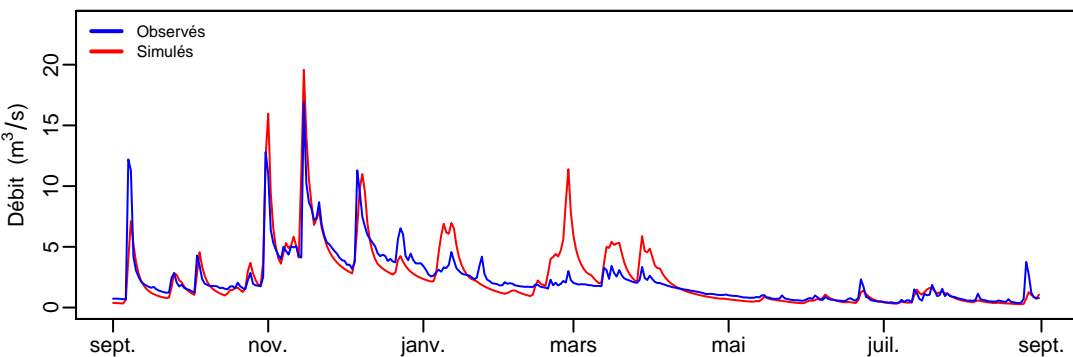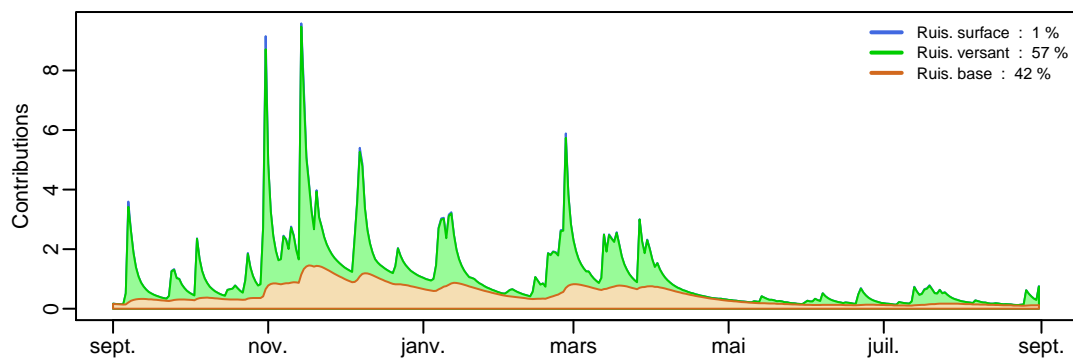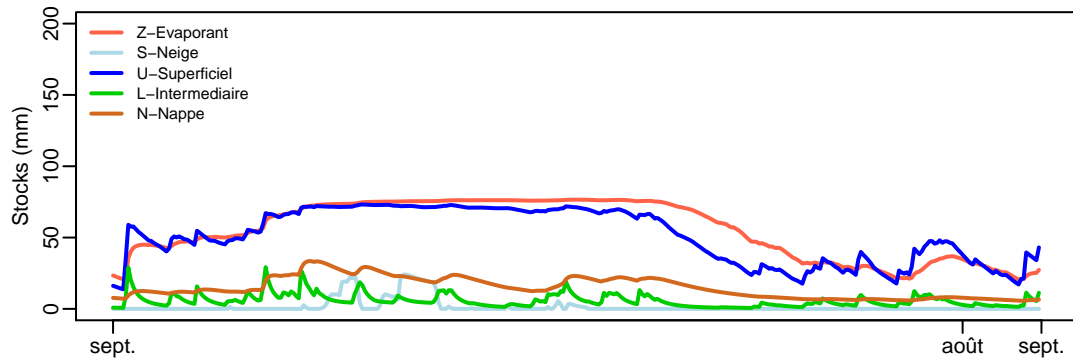

# k0513010 (192.61 km<sup>2</sup>) – année 2011–2012

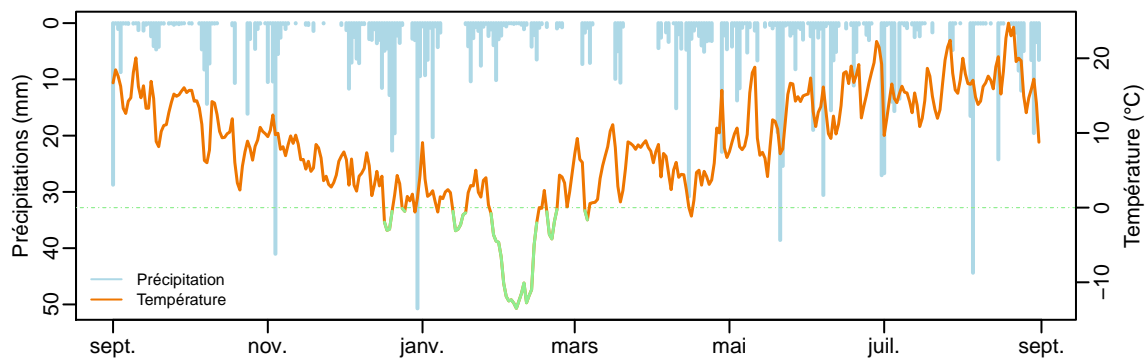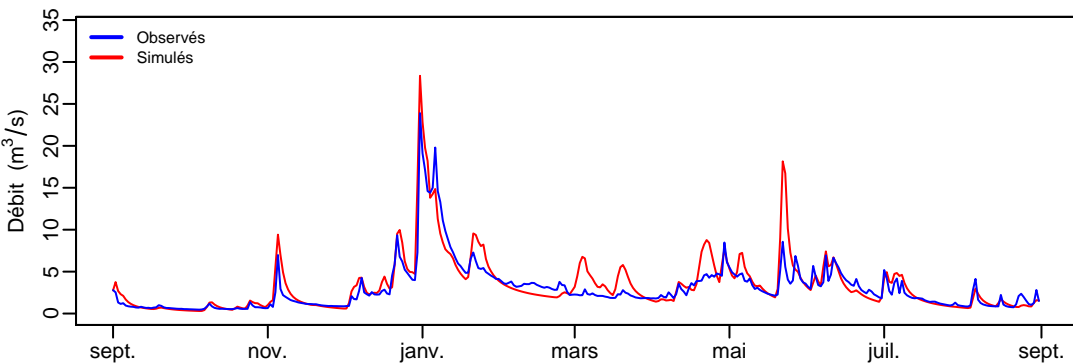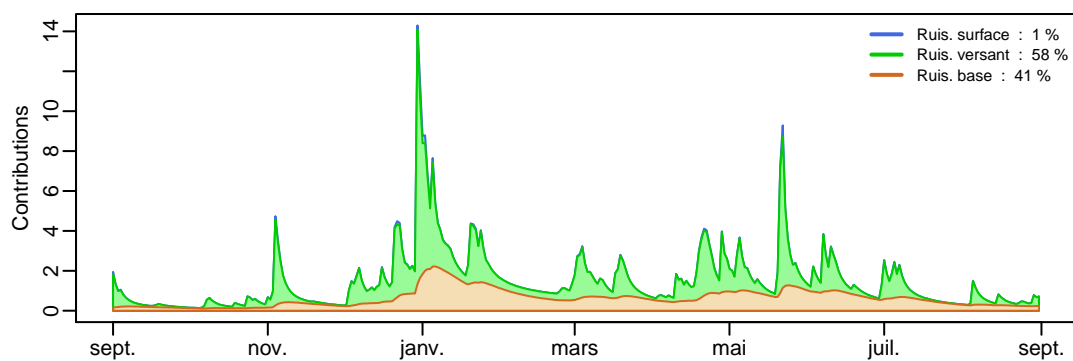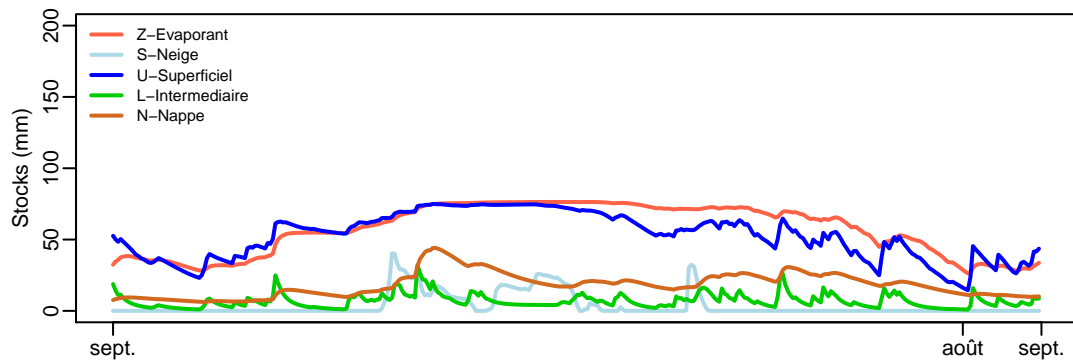

# k0550010 (3259.82 km<sup>2</sup>) – année 1981–1982

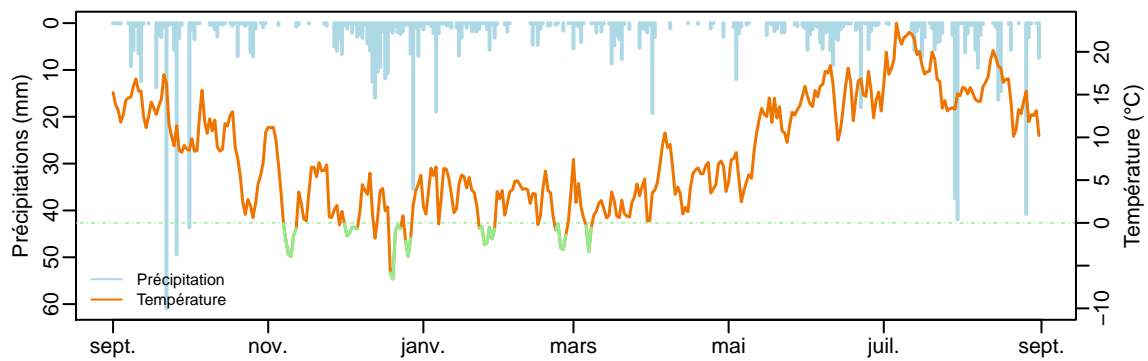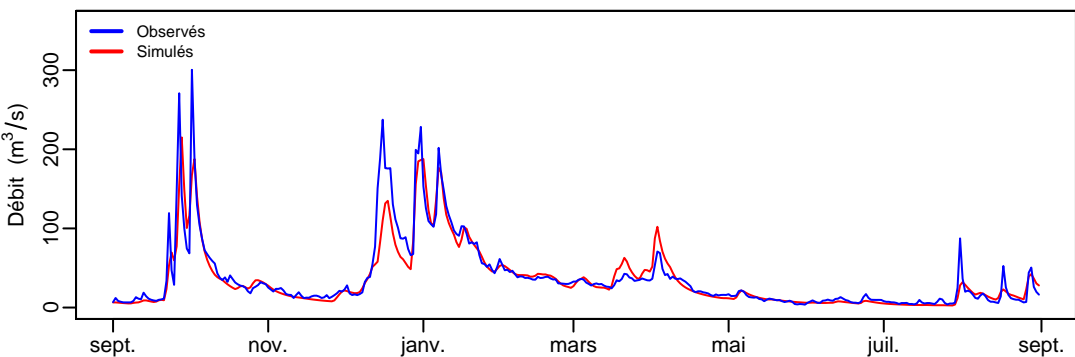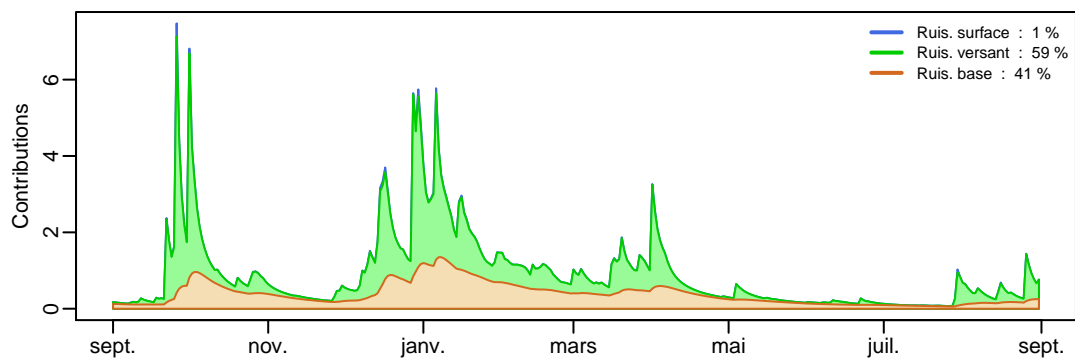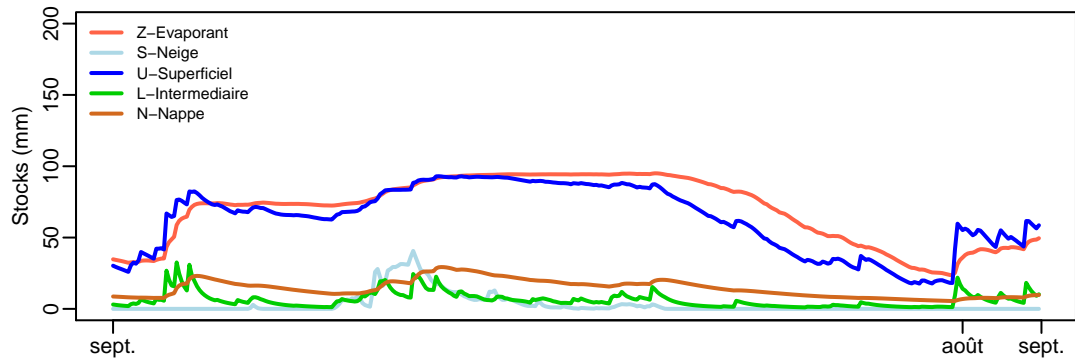

# k0550010 (3259.82 km<sup>2</sup>) – année 1982–1983

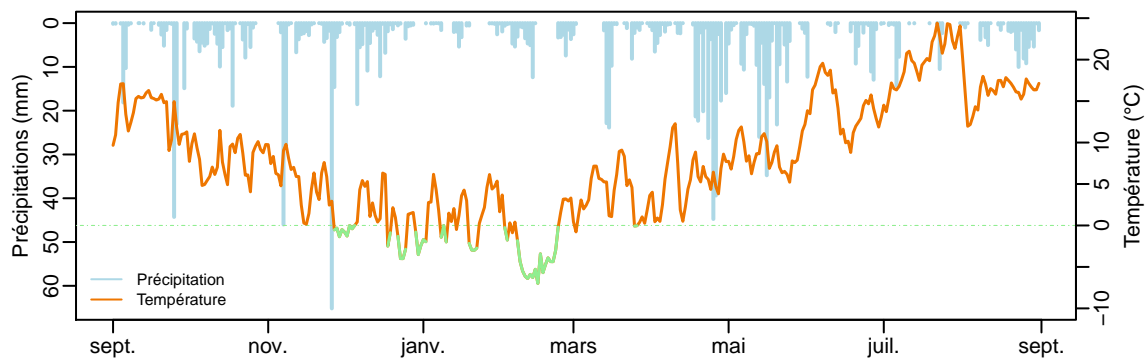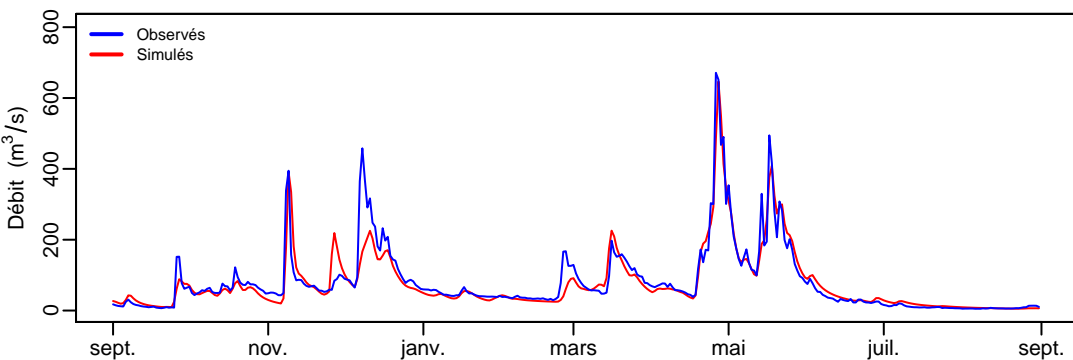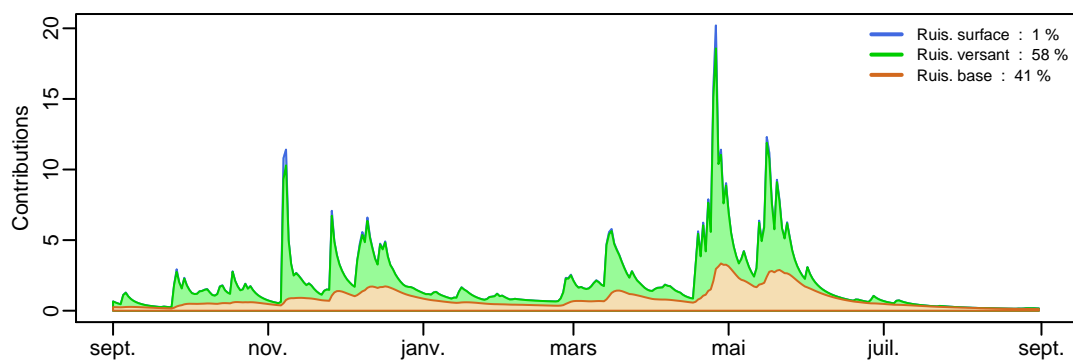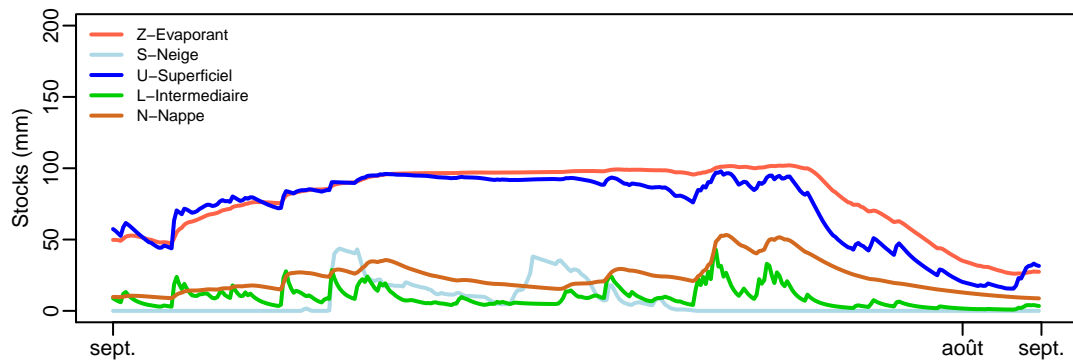

# k0550010 (3259.82 km<sup>2</sup>) – année 1983–1984

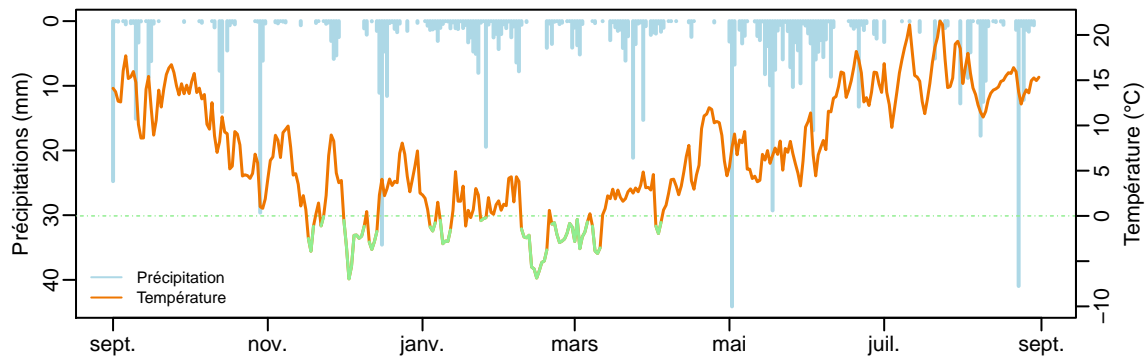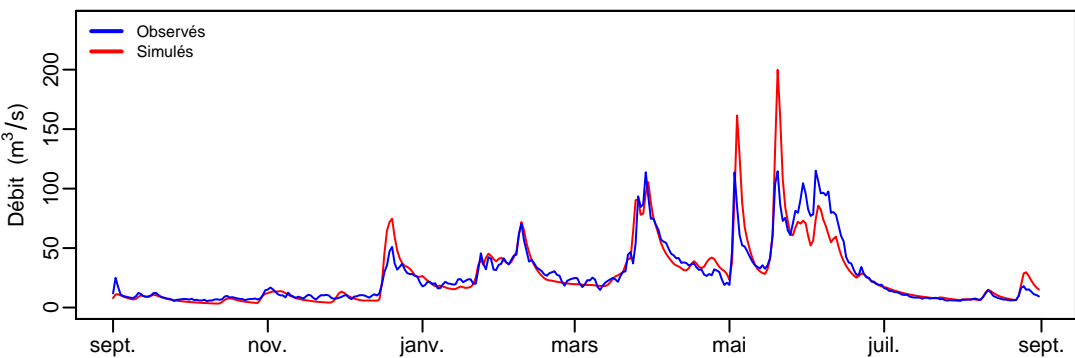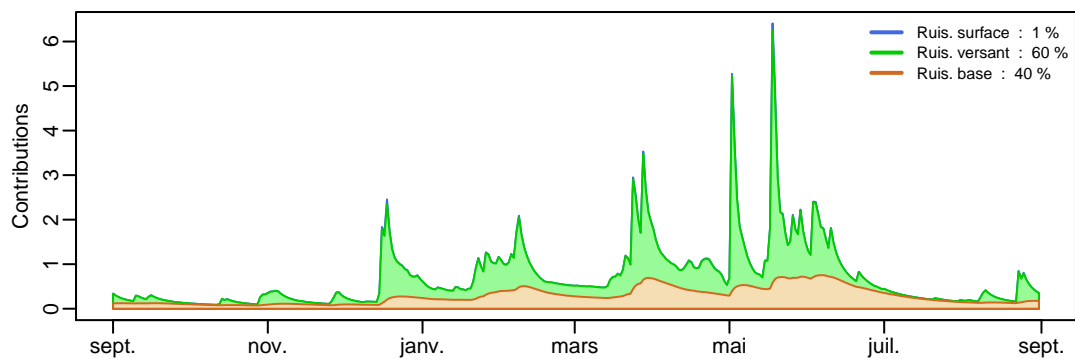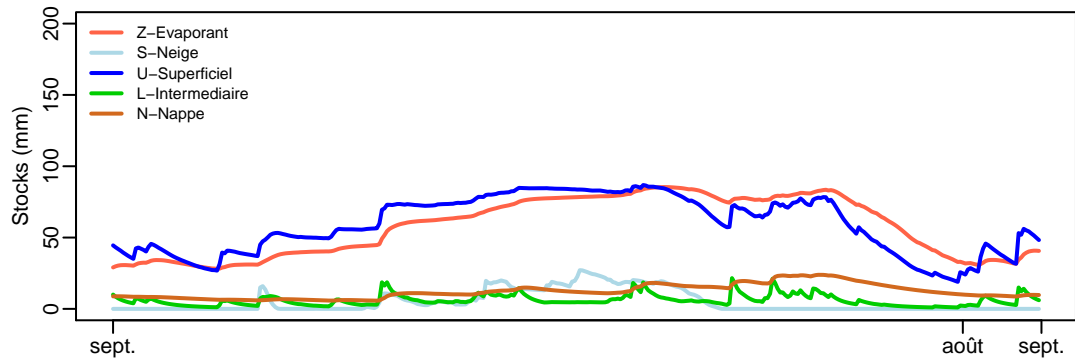

# k0550010 (3259.82 km<sup>2</sup>) – année 1984–1985

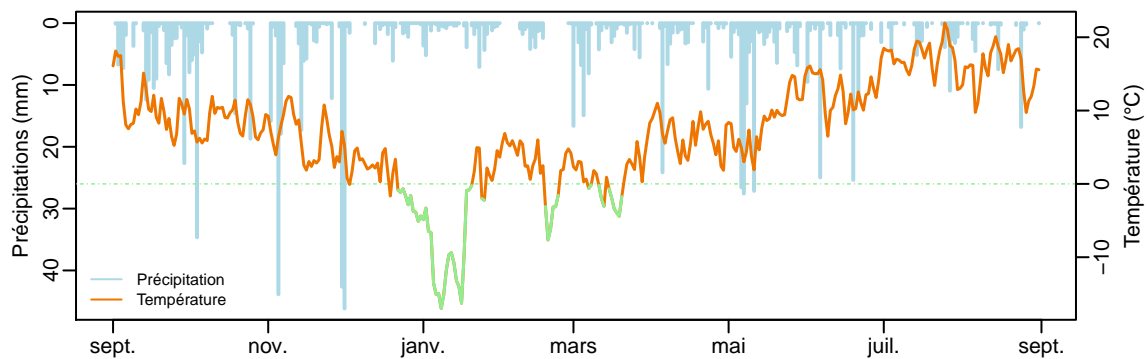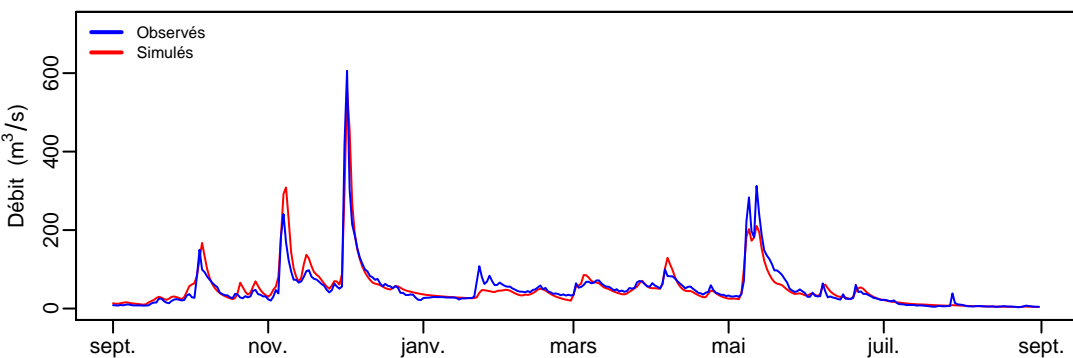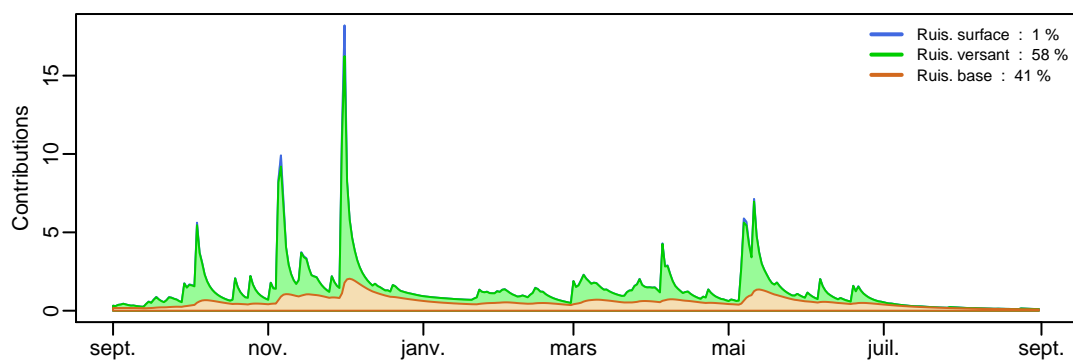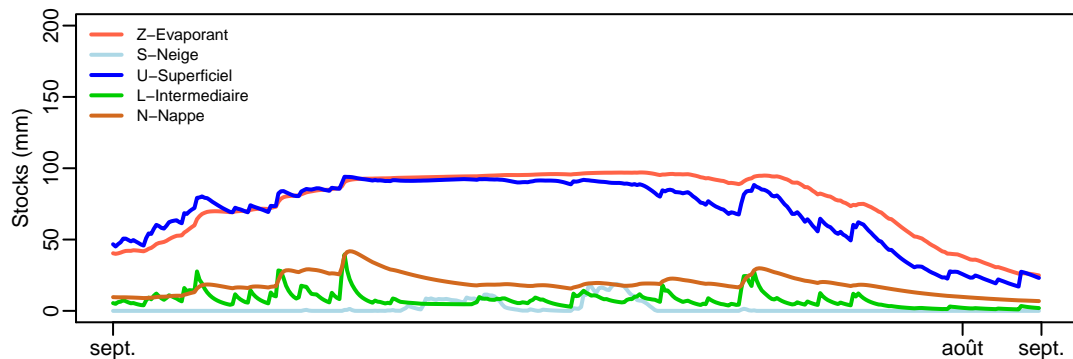

# k0550010 (3259.82 km<sup>2</sup>) – année 1985–1986

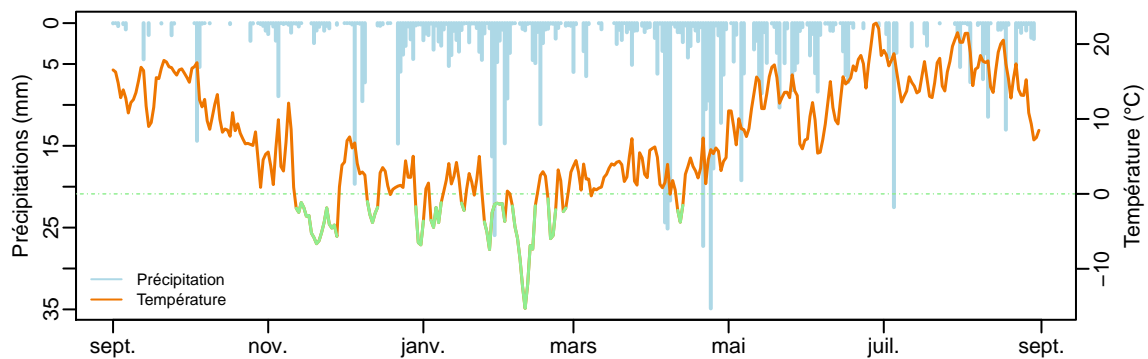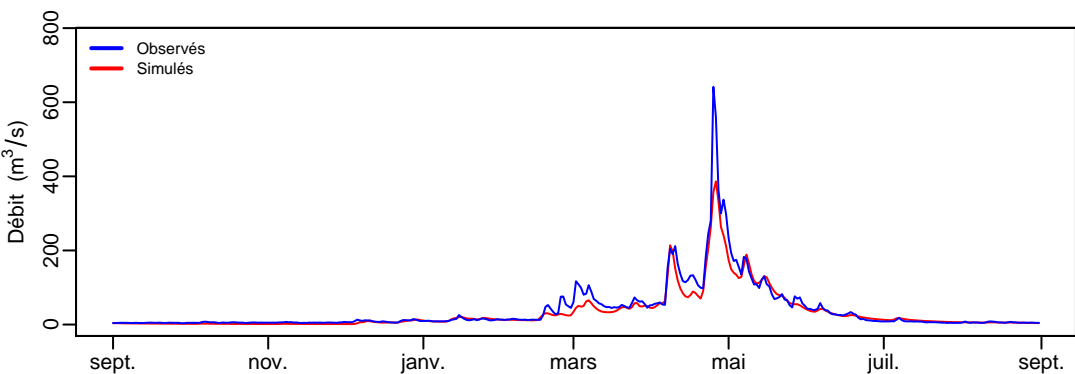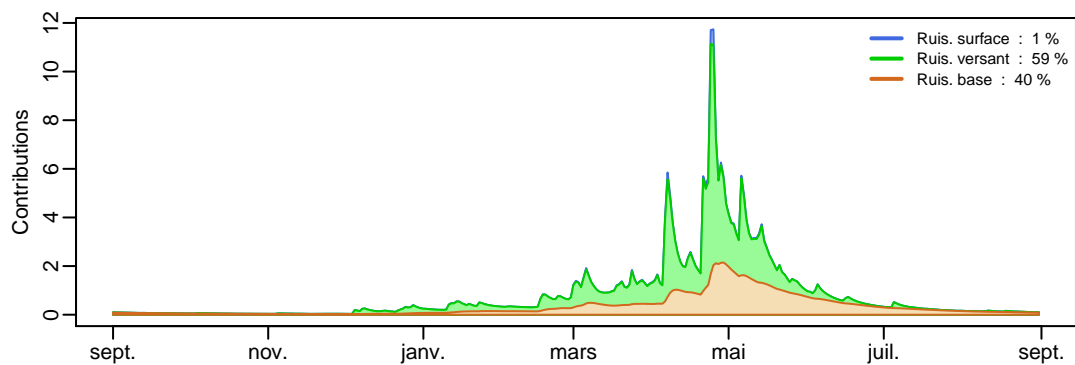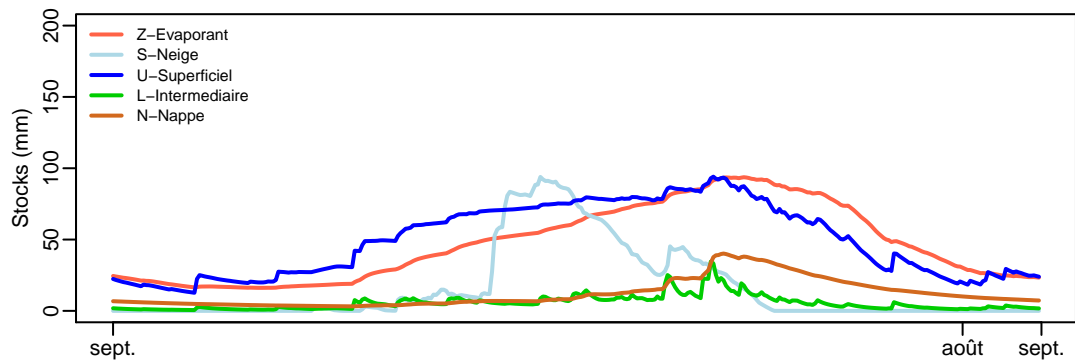

# k0550010 (3259.82 km<sup>2</sup>) – année 1986–1987

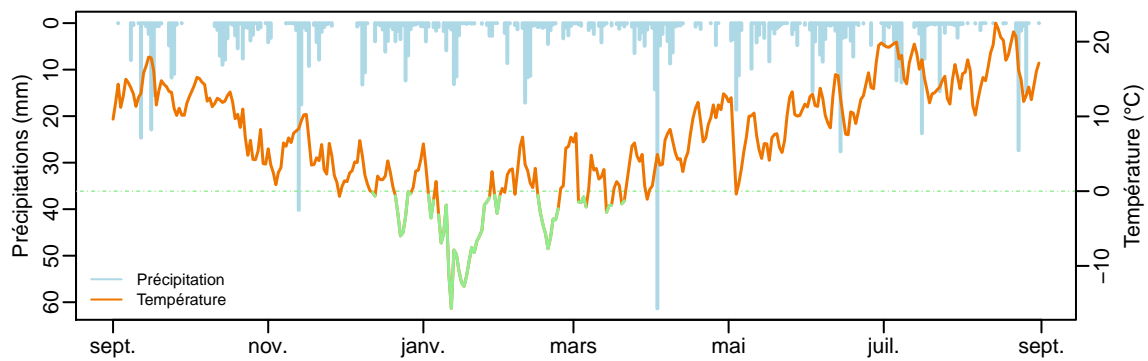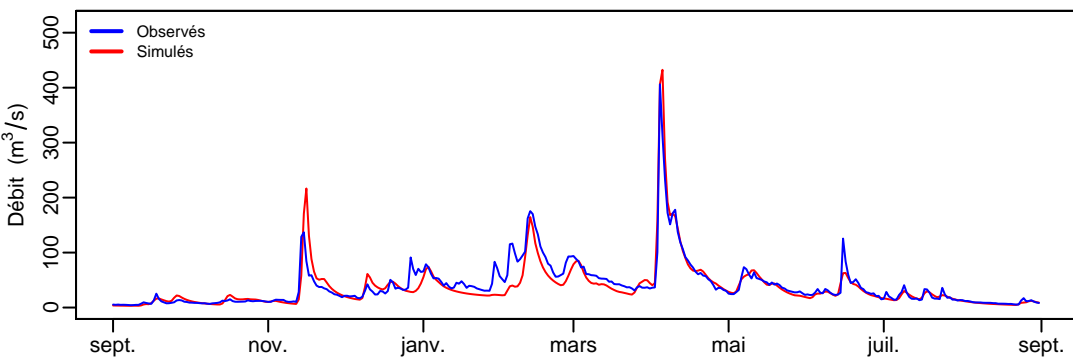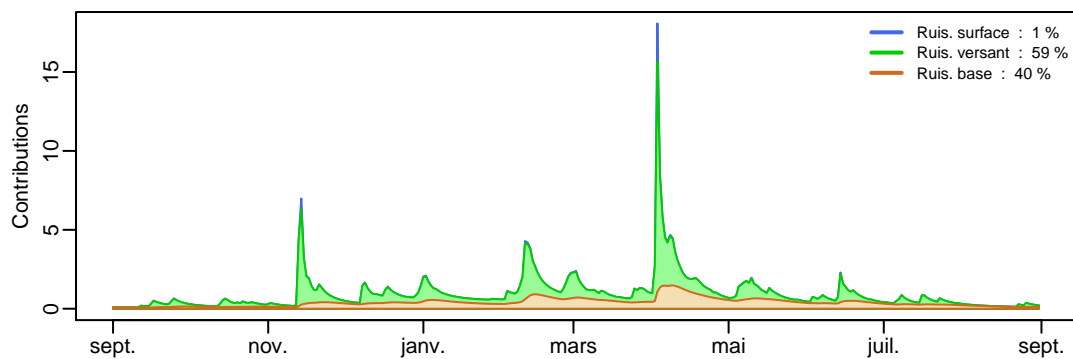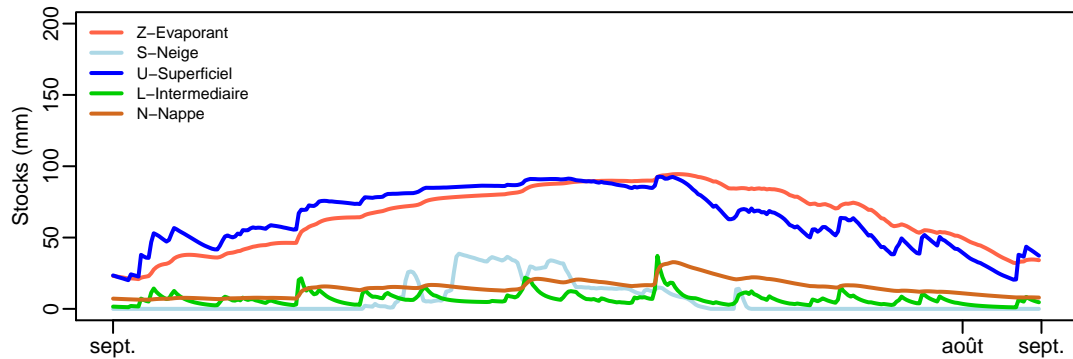



# k0550010 (3259.82 km<sup>2</sup>) – année 1987–1988

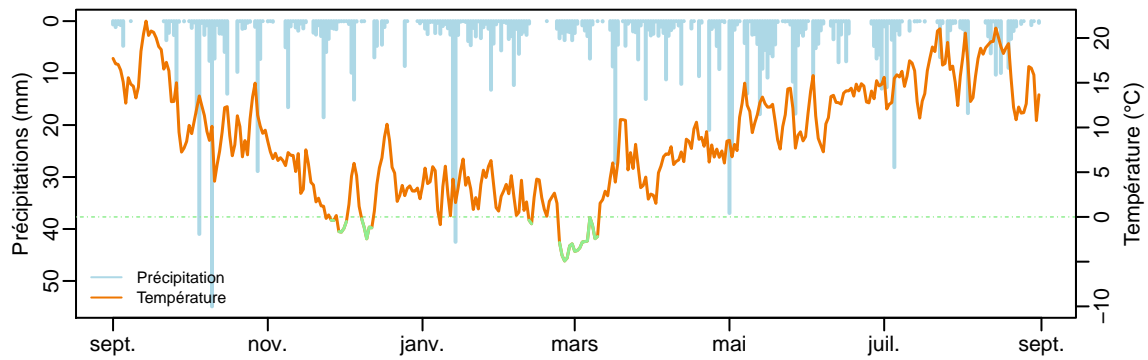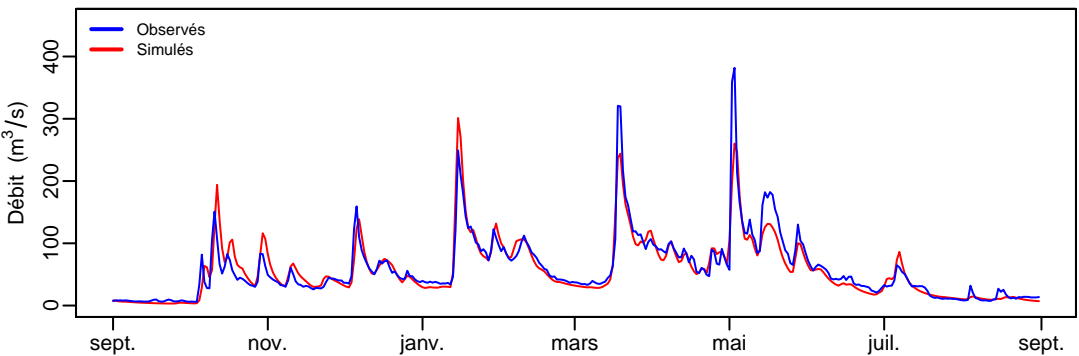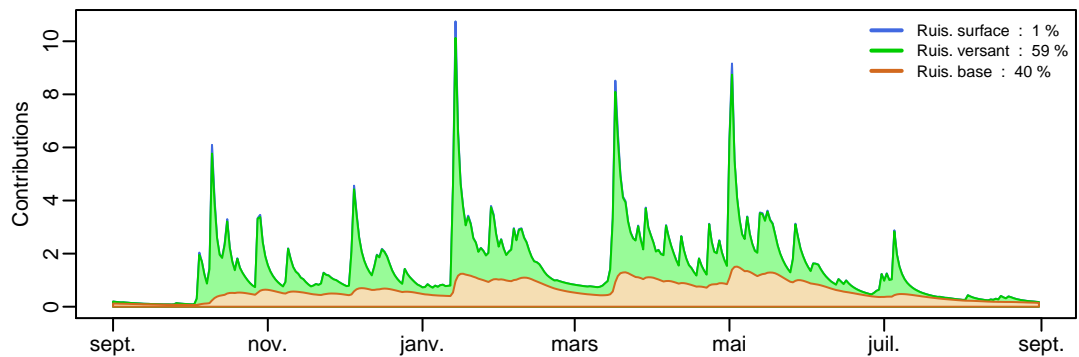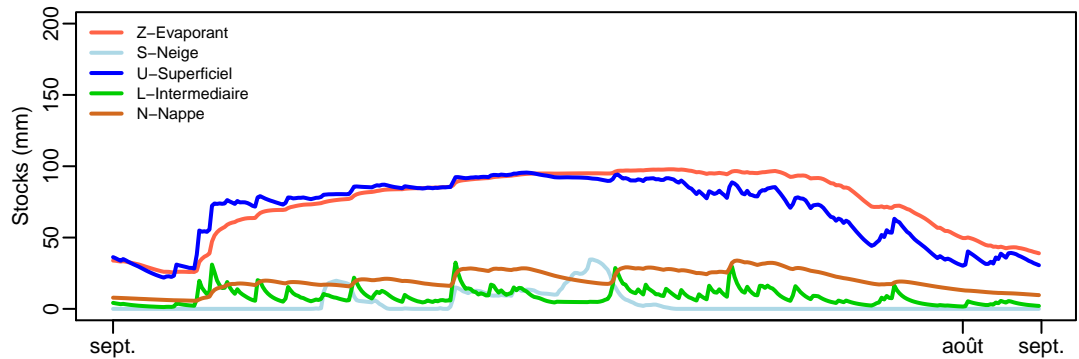

# k0550010 (3259.82 km<sup>2</sup>) – année 1988–1989

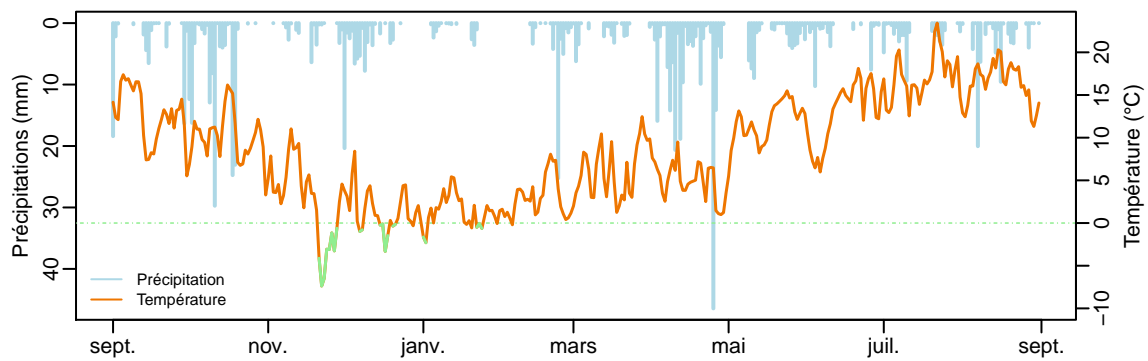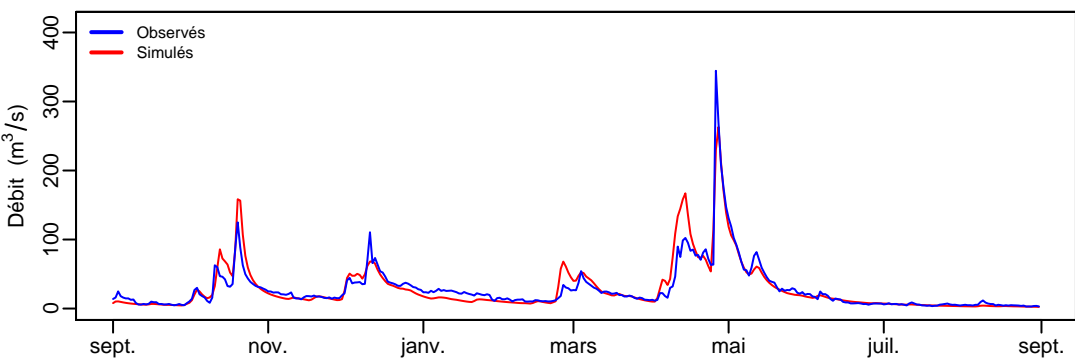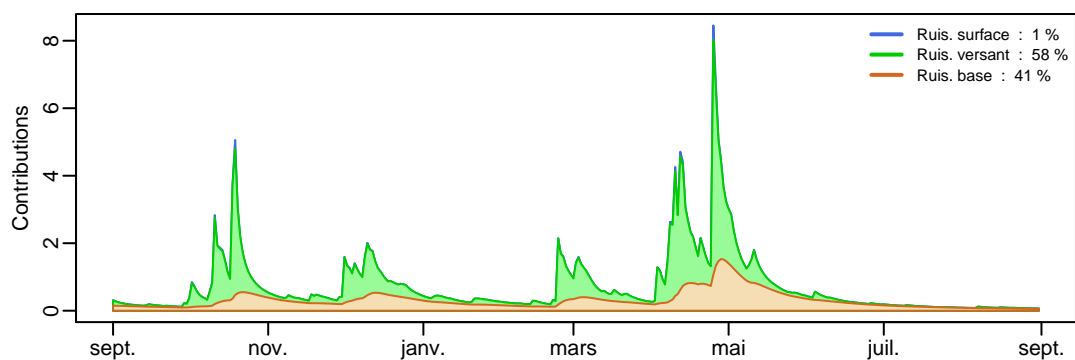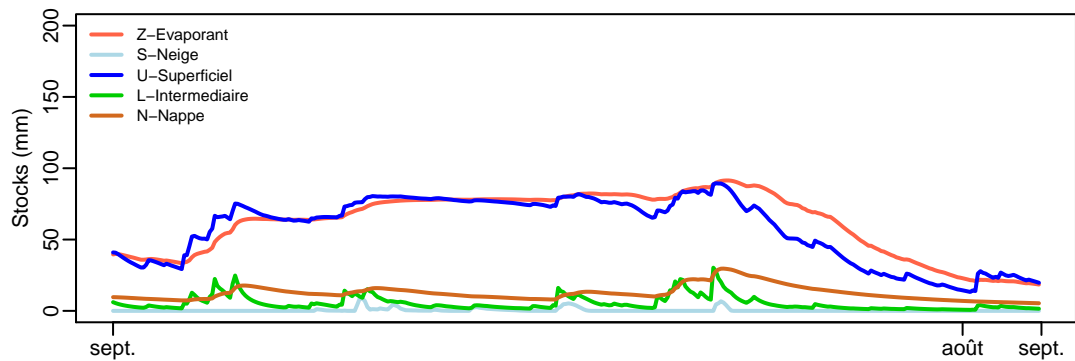

# k0550010 (3259.82 km<sup>2</sup>) – année 1989–1990

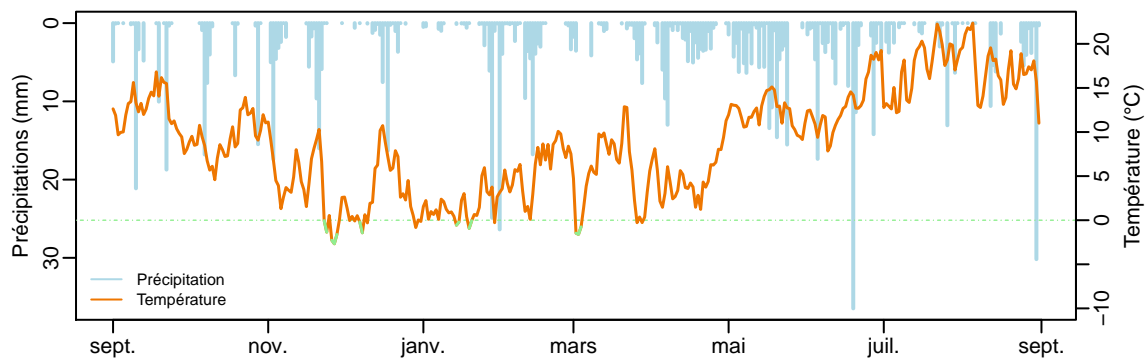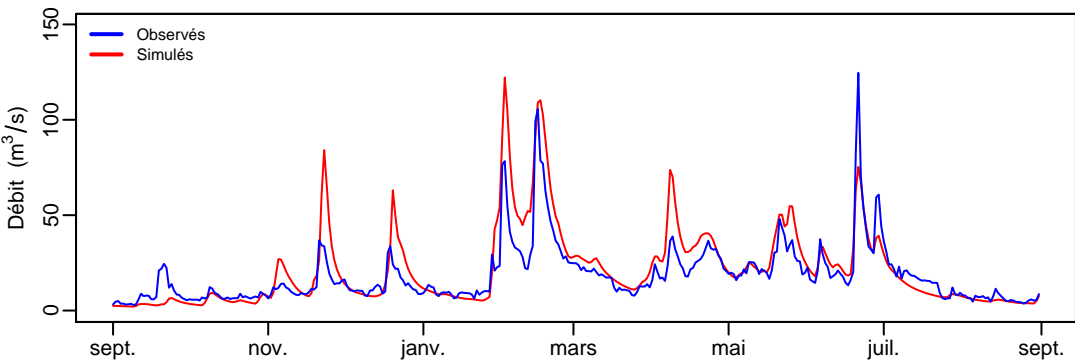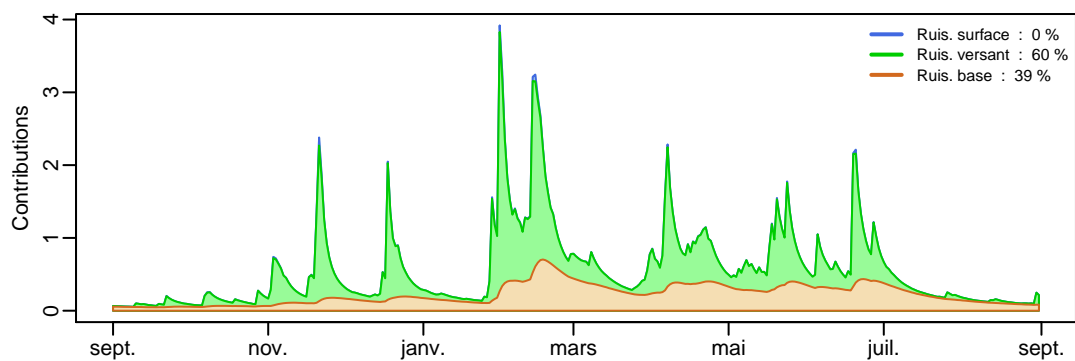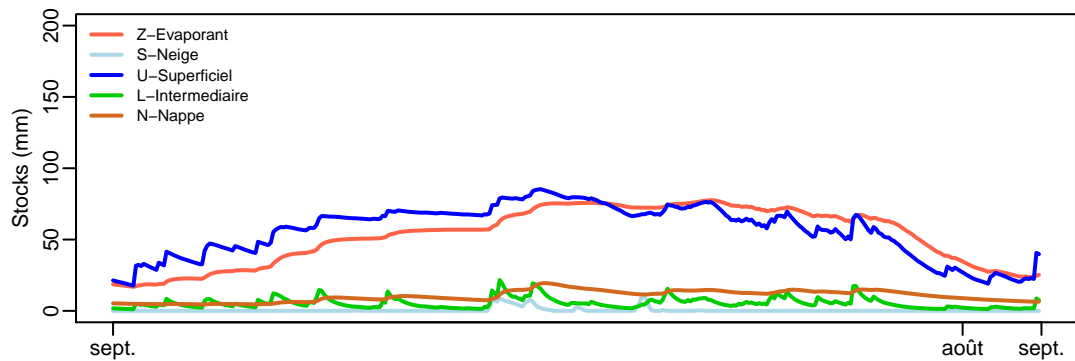

# k0550010 (3259.82 km<sup>2</sup>) – année 1990–1991

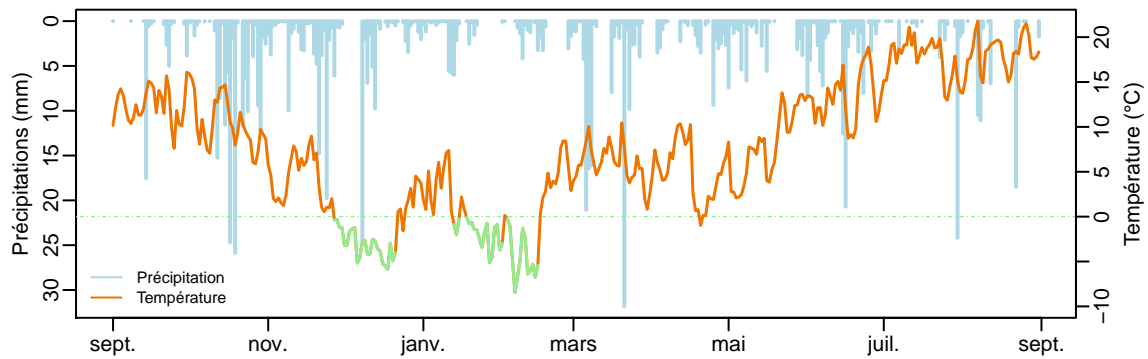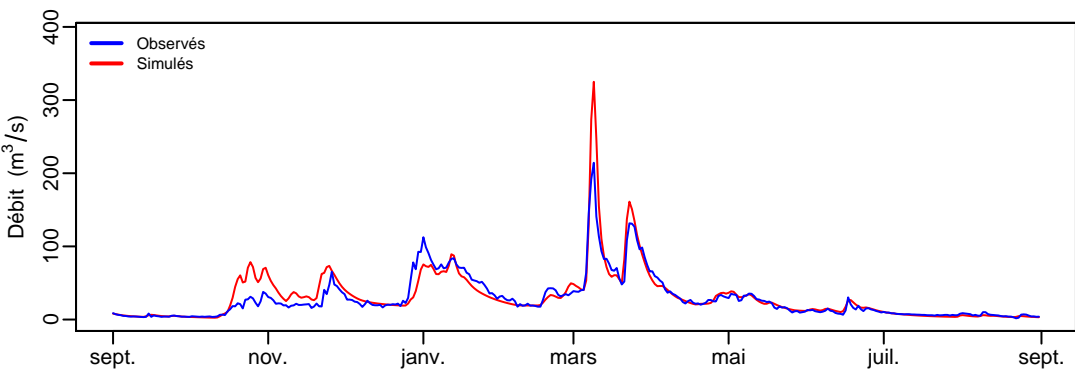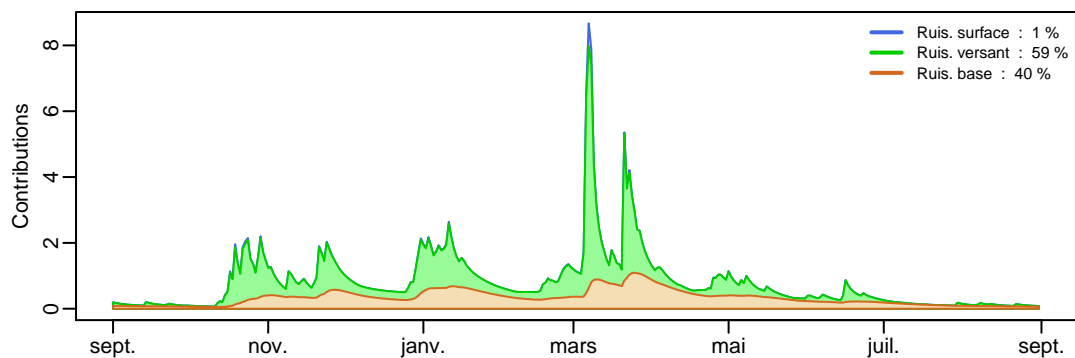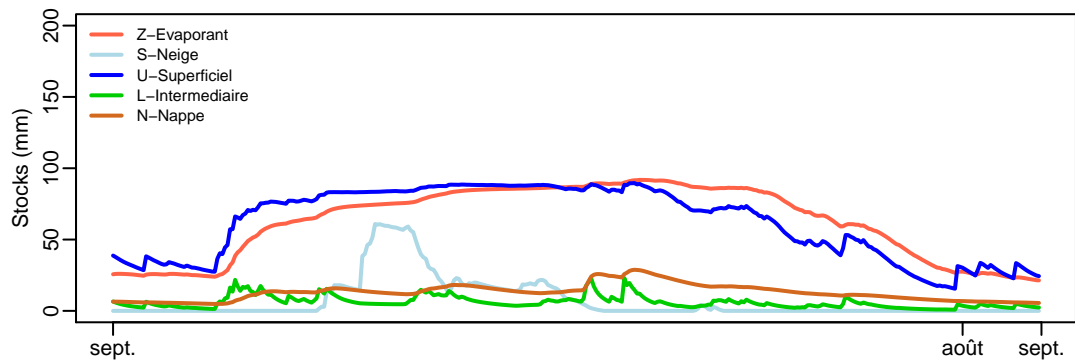

# k0550010 (3259.82 km<sup>2</sup>) – année 1991–1992

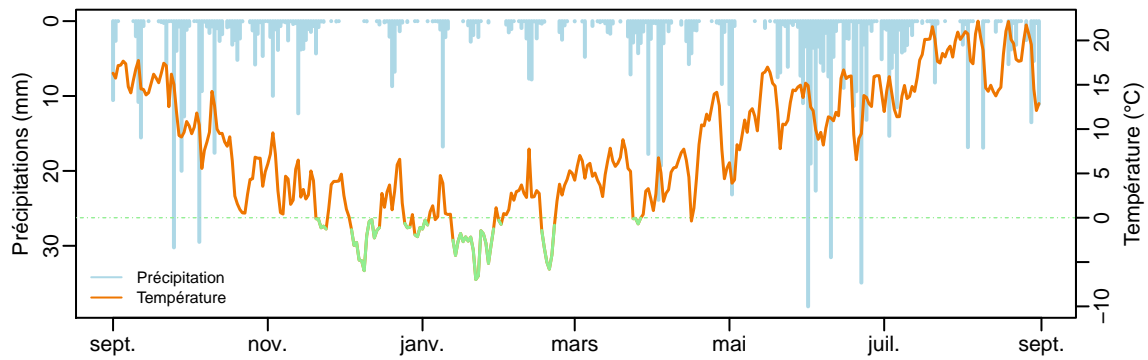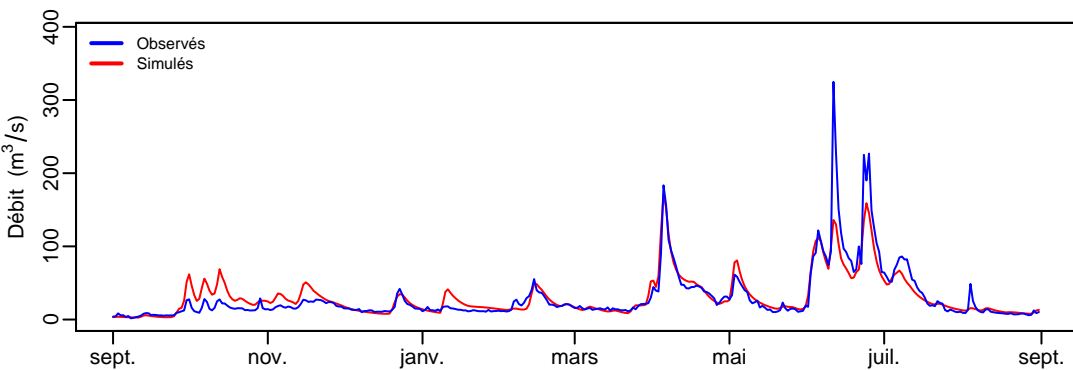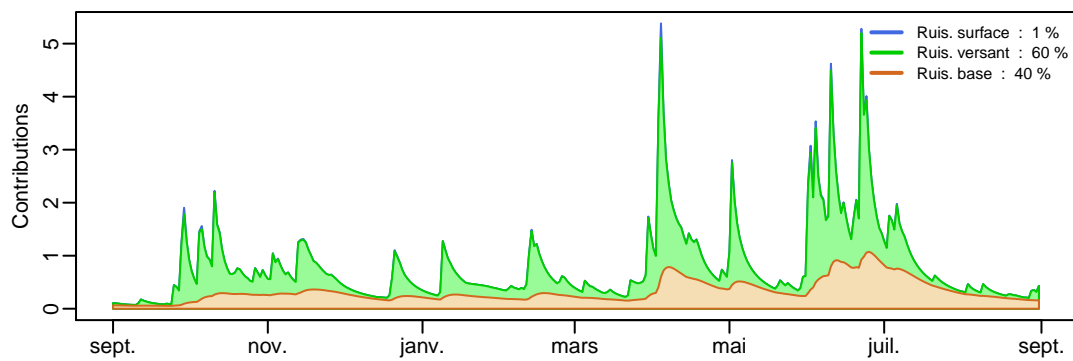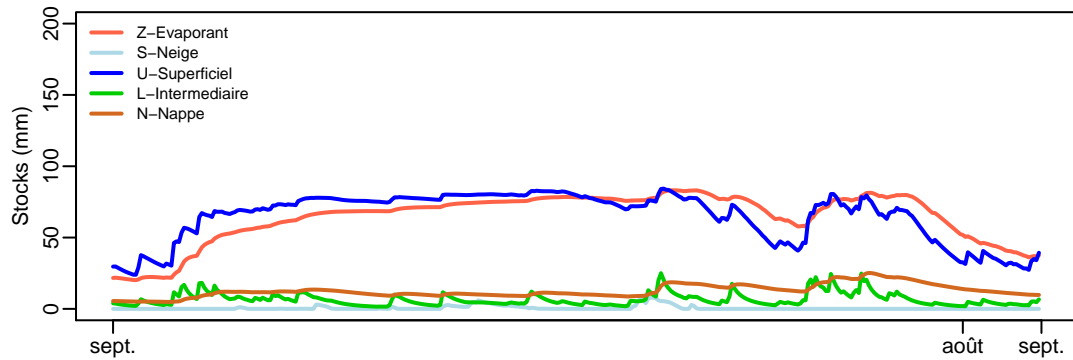

# k0550010 (3259.82 km<sup>2</sup>) – année 1992–1993

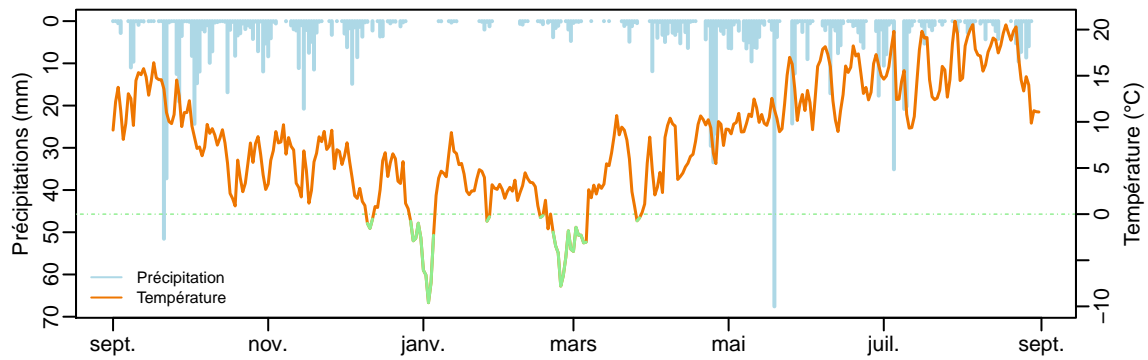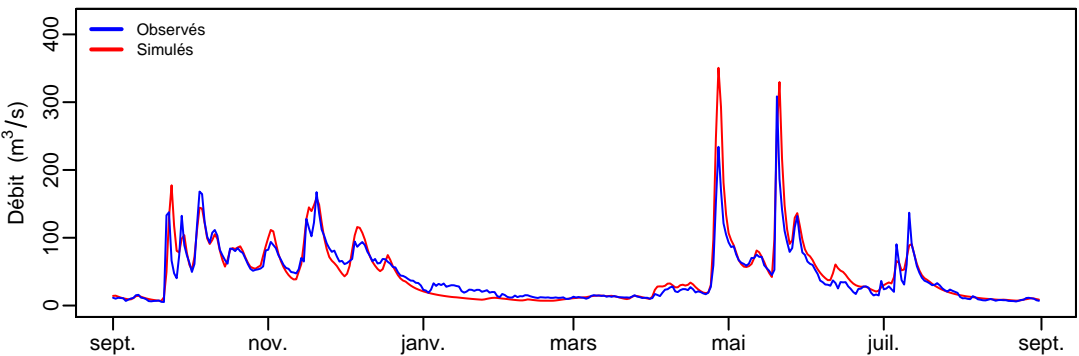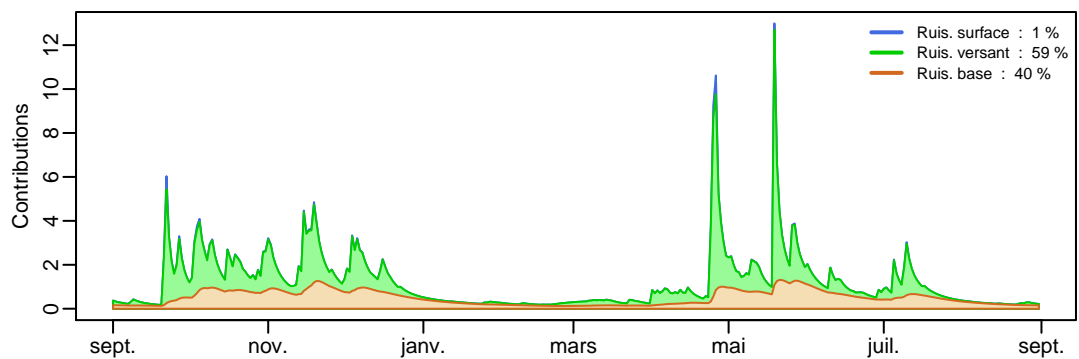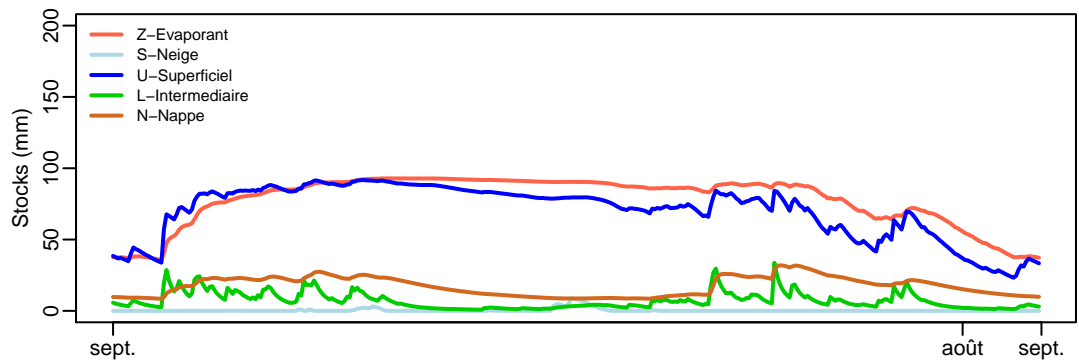

# k0550010 (3259.82 km<sup>2</sup>) – année 1993–1994

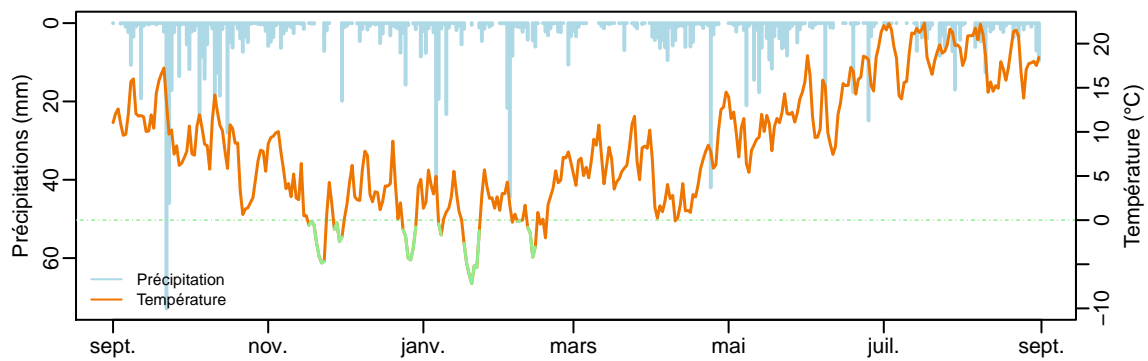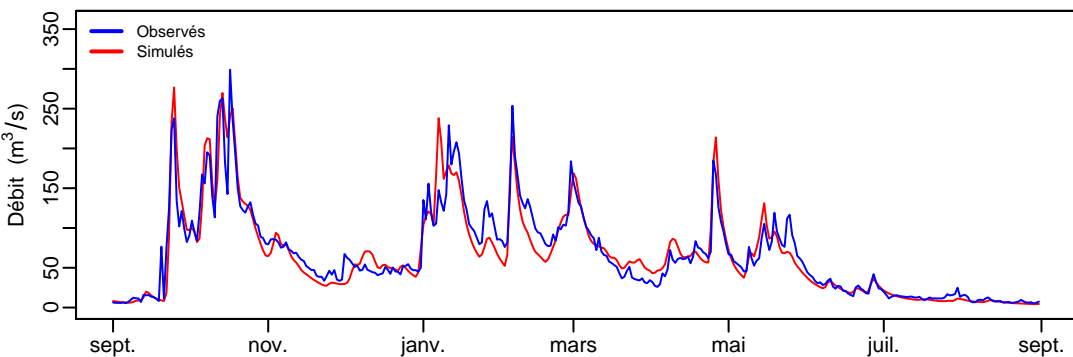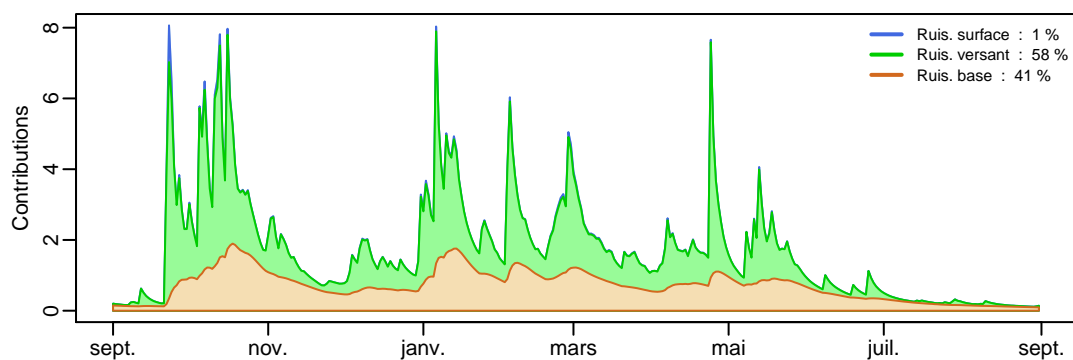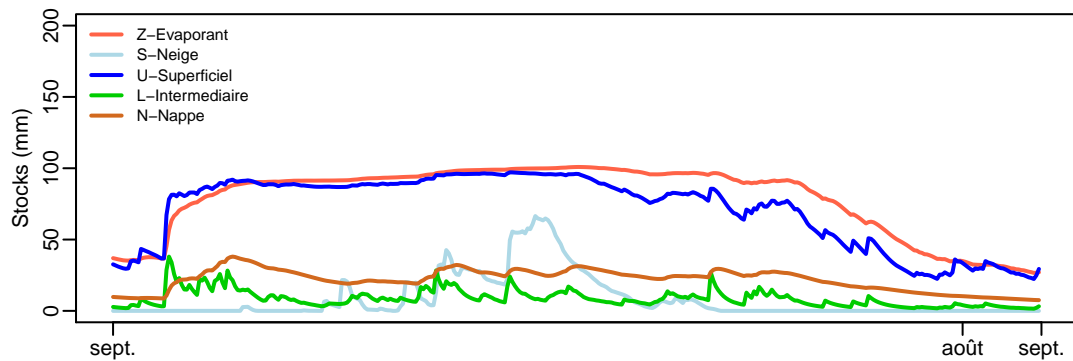

# k0550010 (3259.82 km<sup>2</sup>) – année 1994–1995

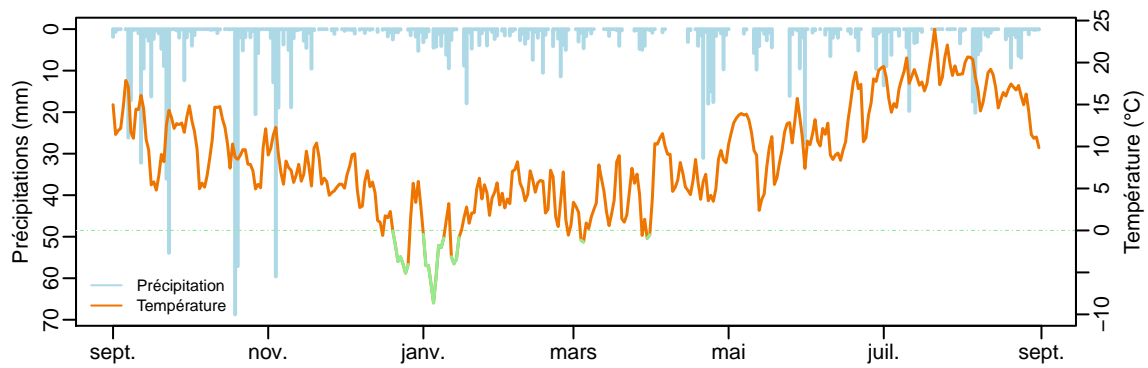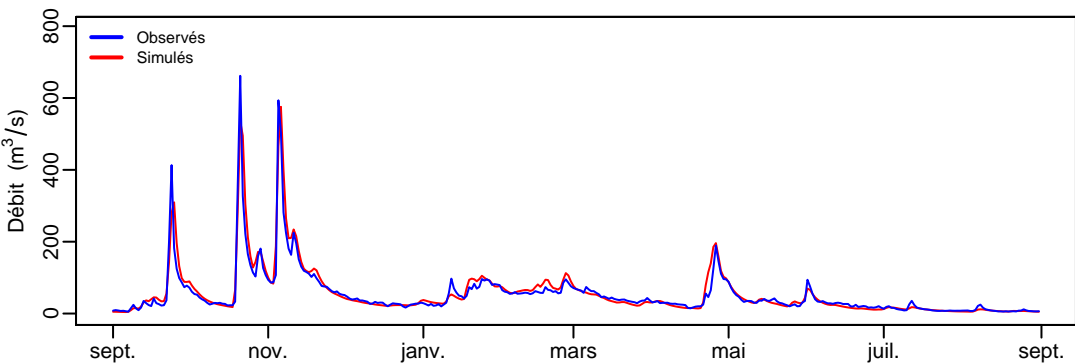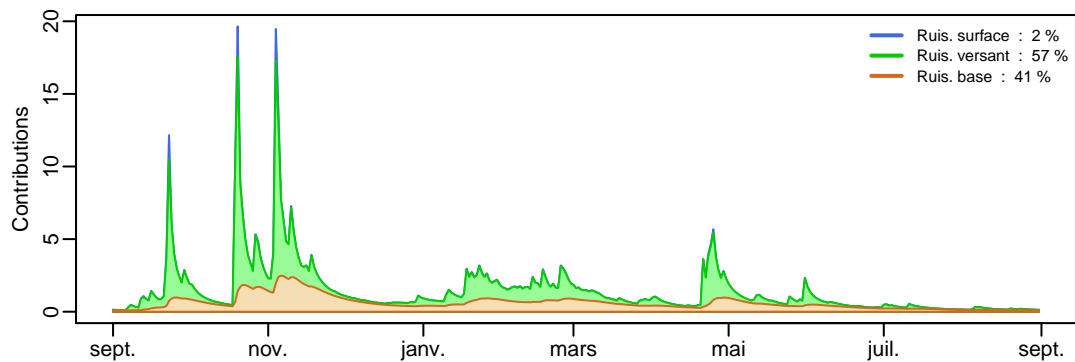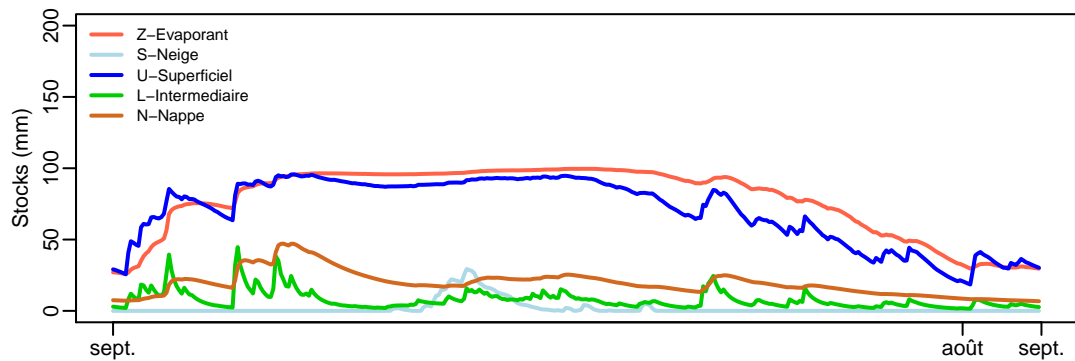



# k0550010 (3259.82 km<sup>2</sup>) – année 1995–1996

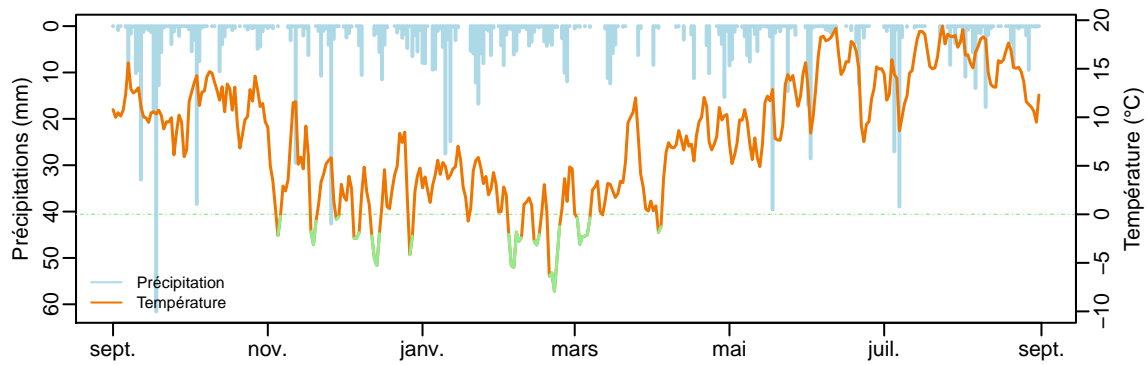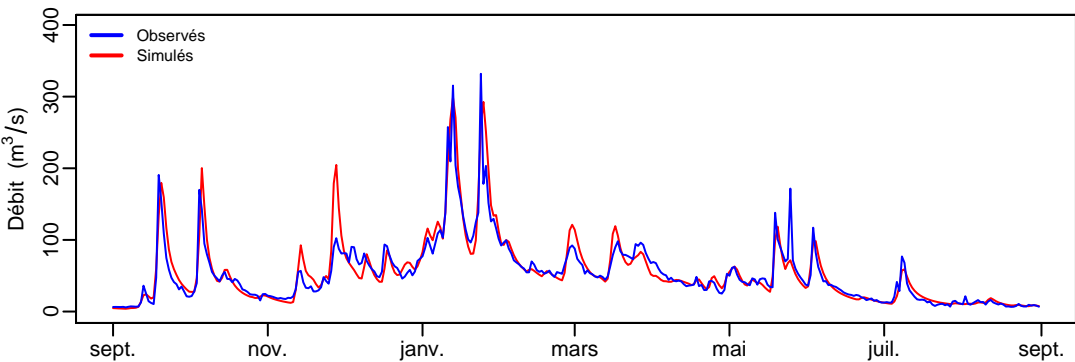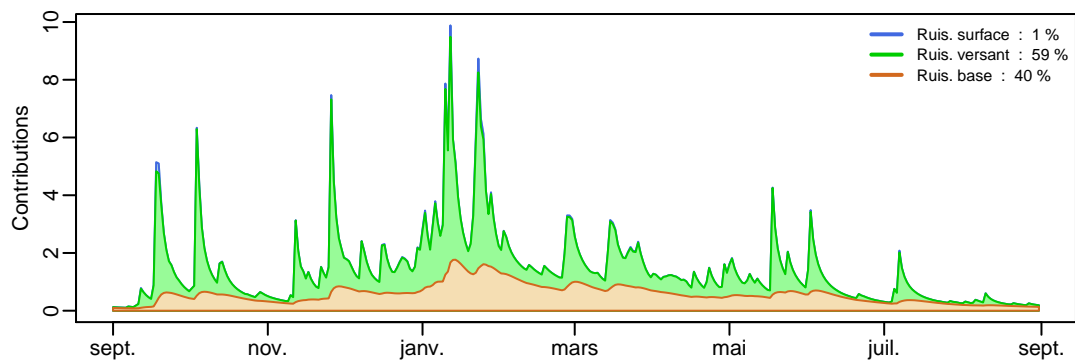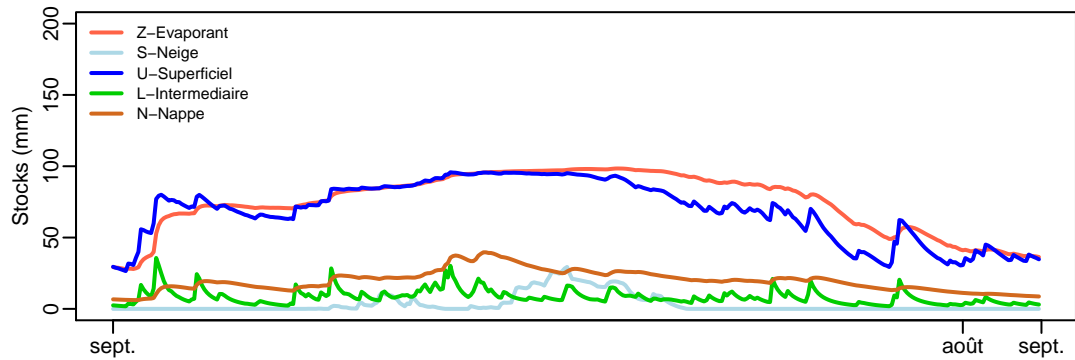

# k0550010 (3259.82 km<sup>2</sup>) – année 1996–1997

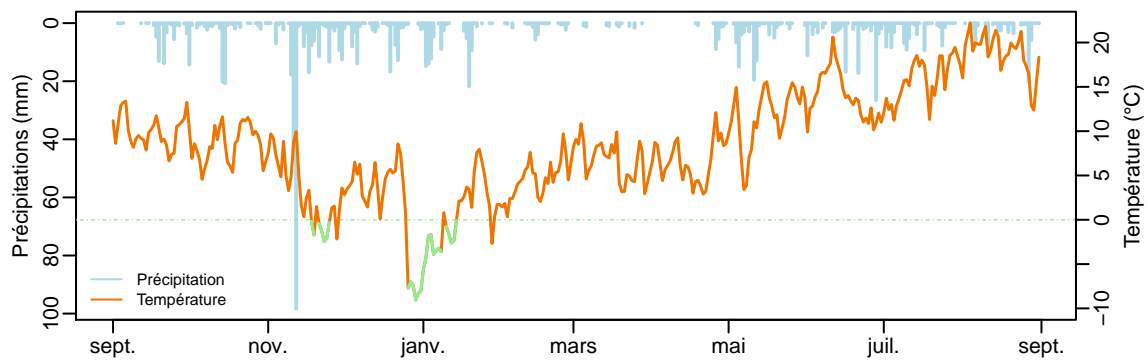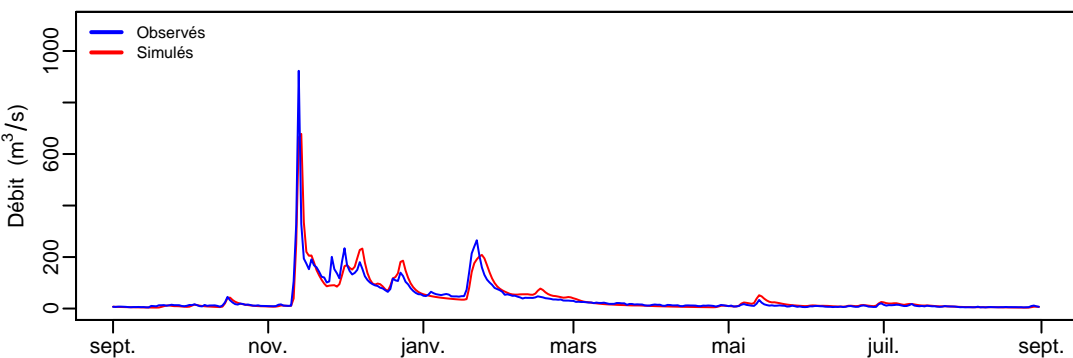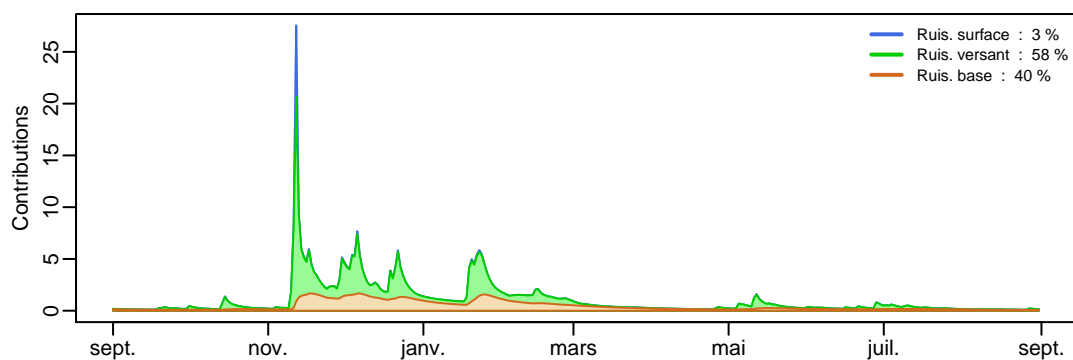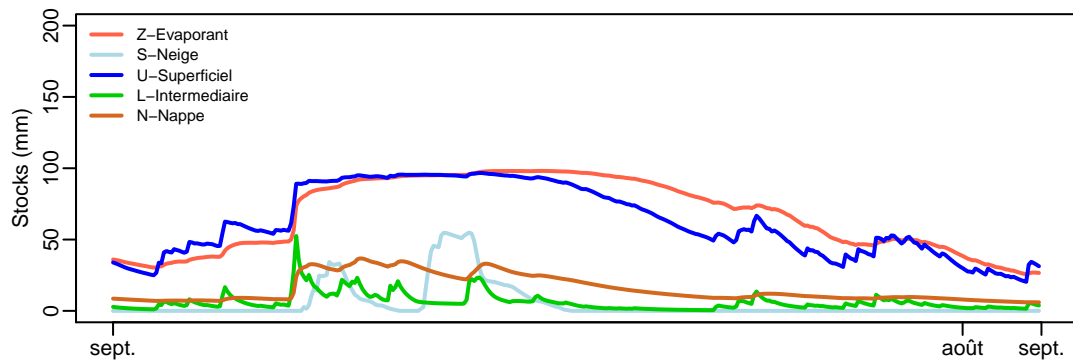

# k0550010 (3259.82 km<sup>2</sup>) – année 1997–1998

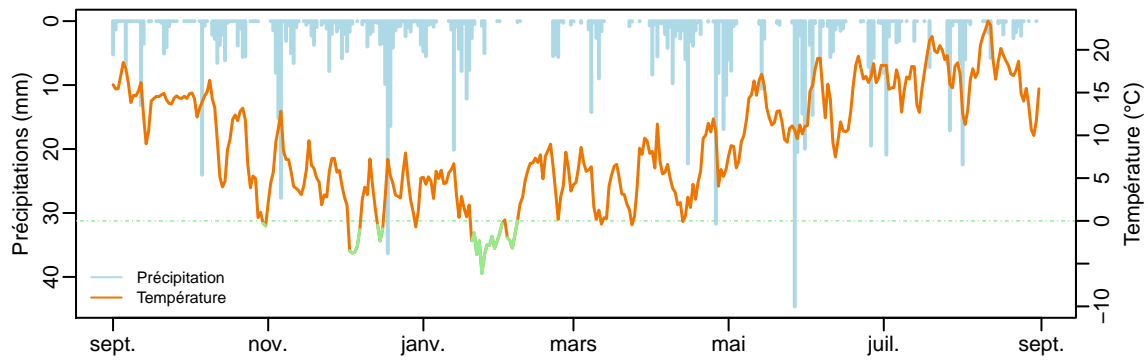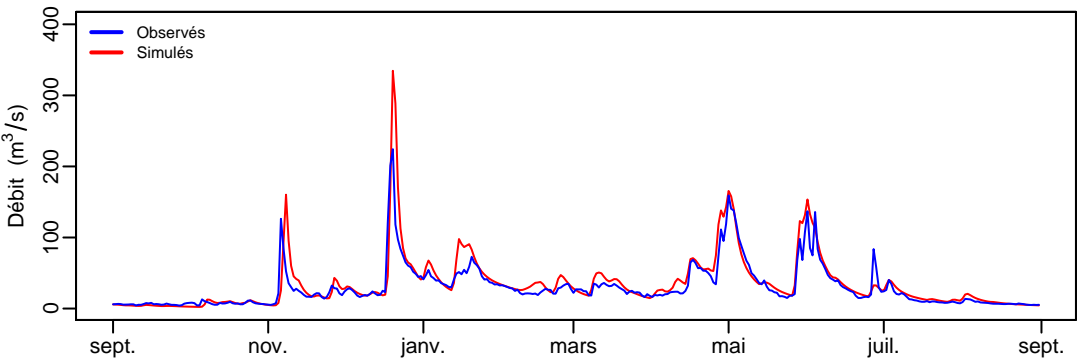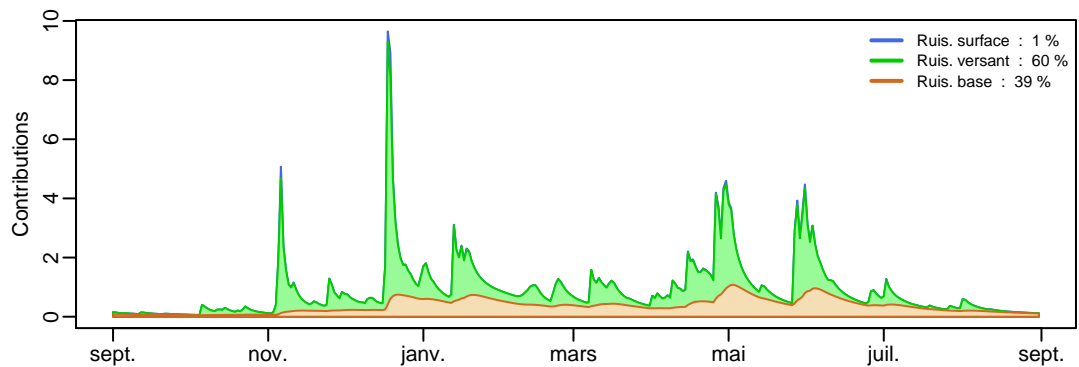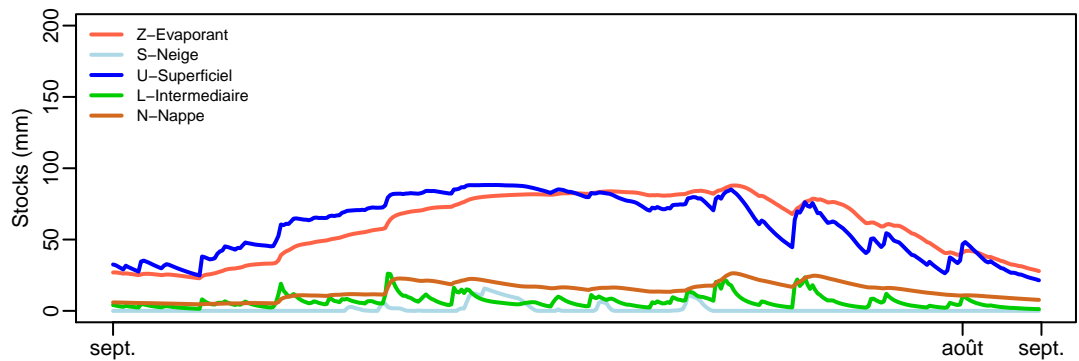

# k0550010 (3259.82 km<sup>2</sup>) – année 1998–1999

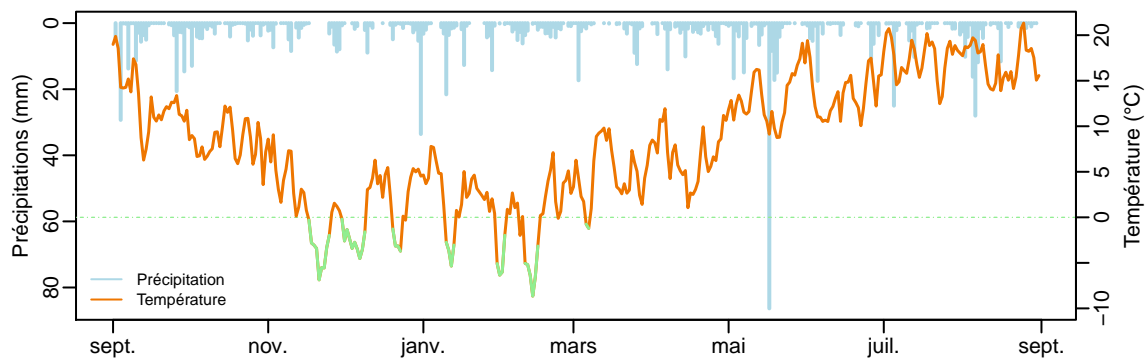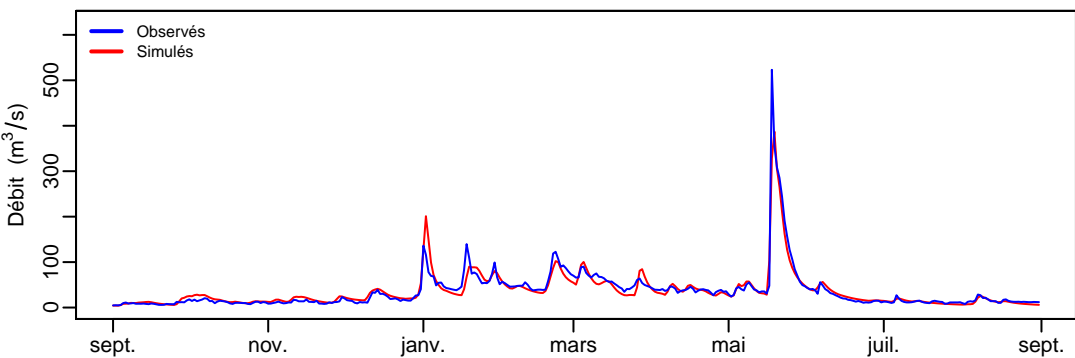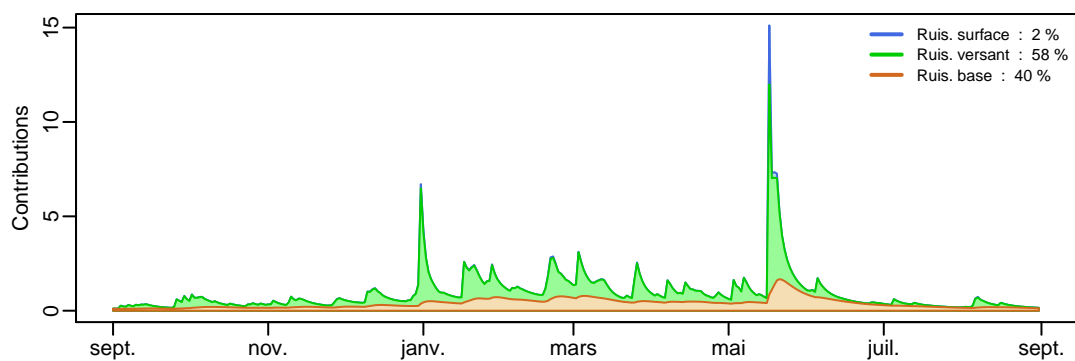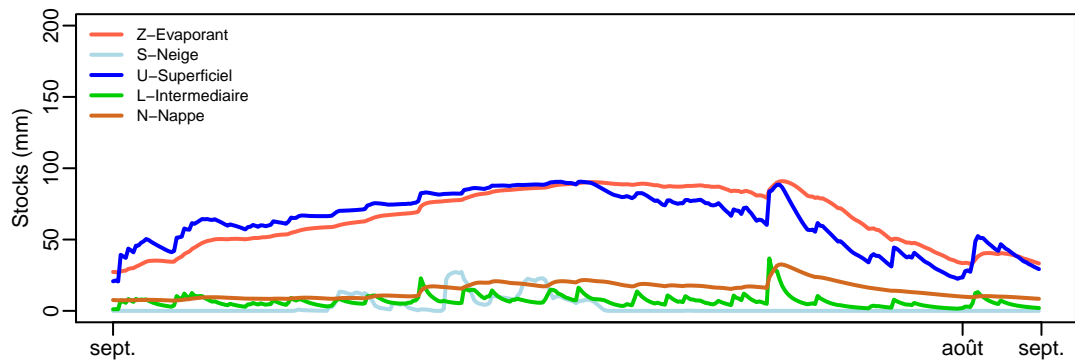

# k0550010 (3259.82 km<sup>2</sup>) – année 1999–2000

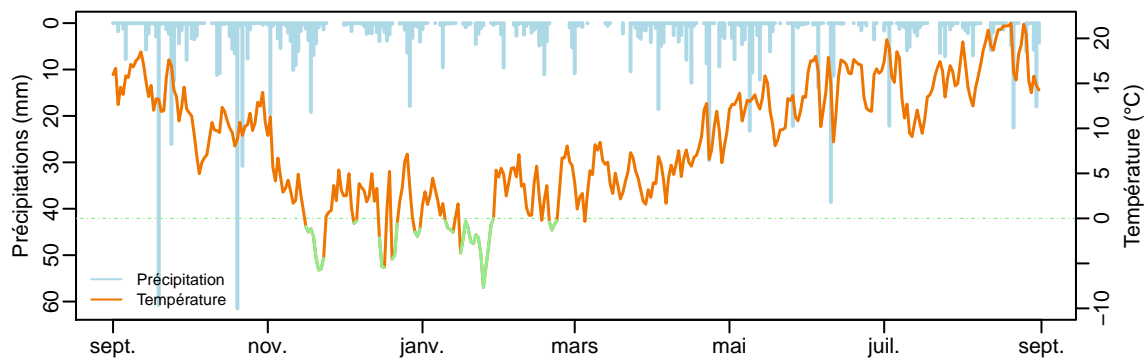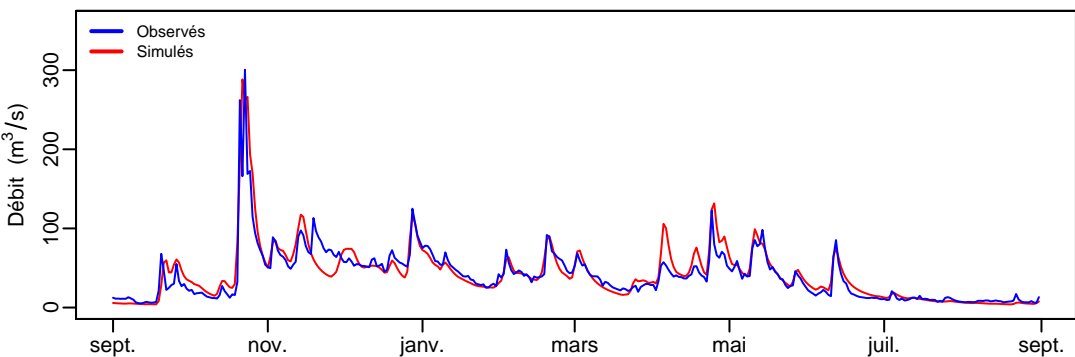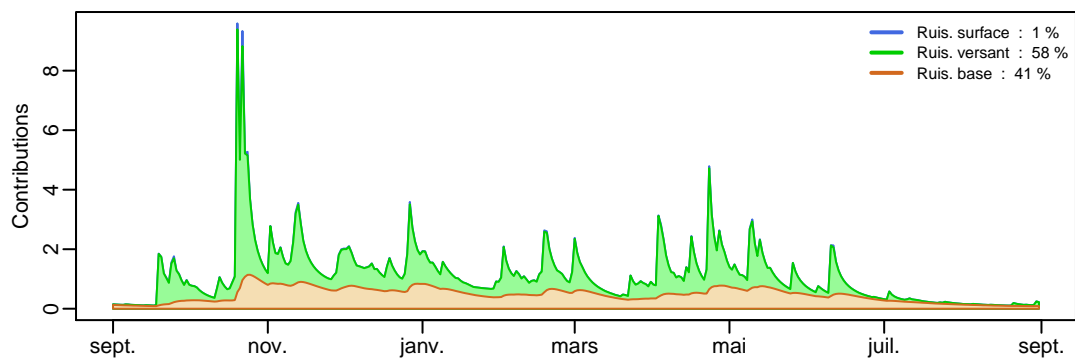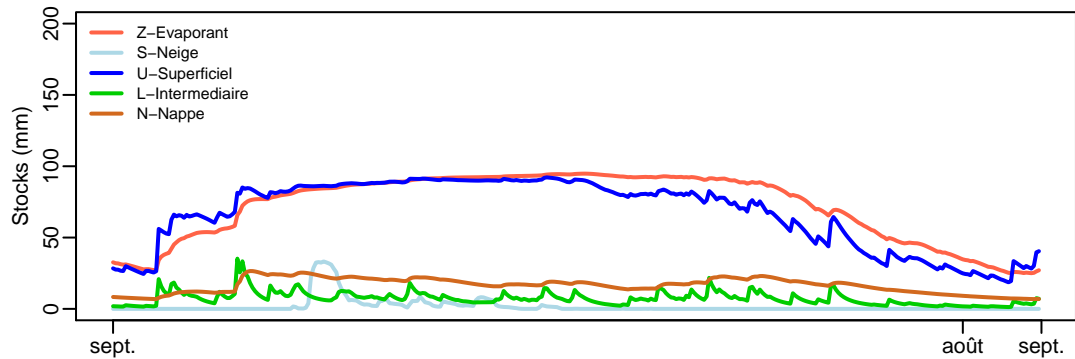

# k0550010 (3259.82 km<sup>2</sup>) – année 2000–2001

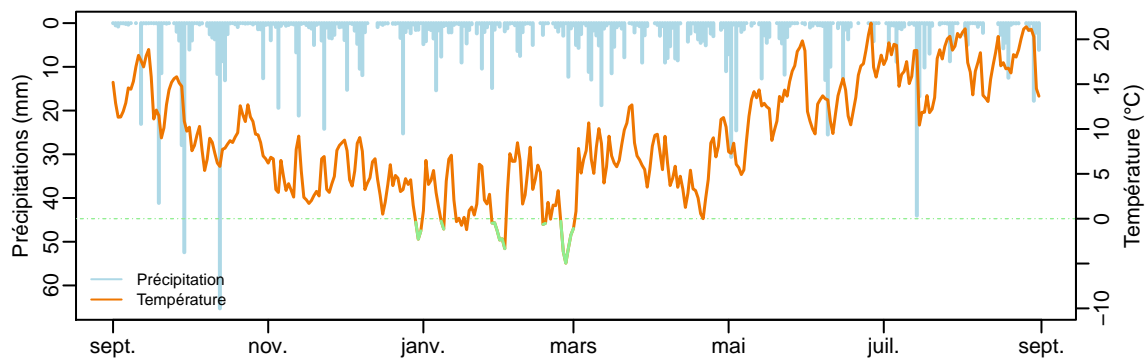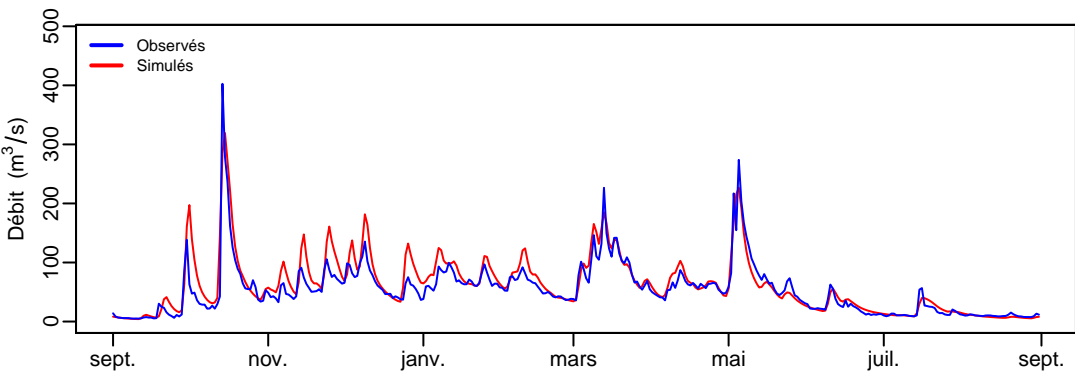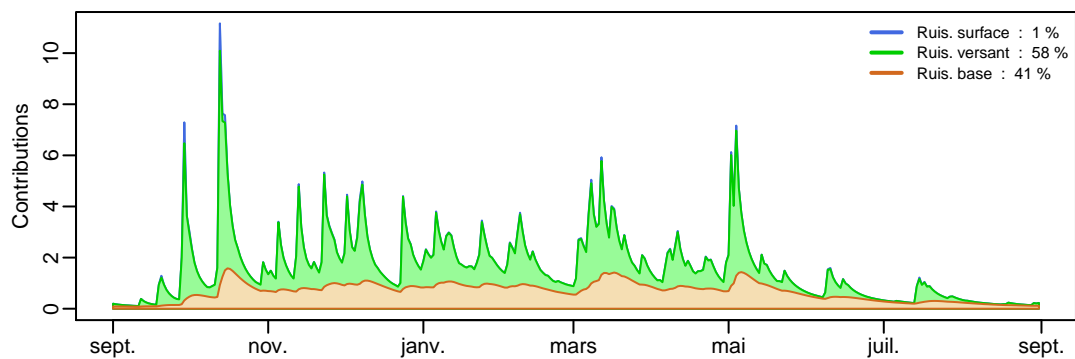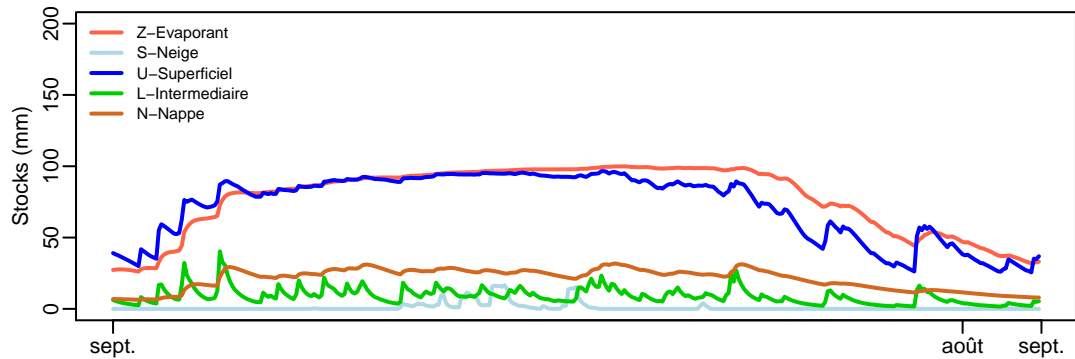

# k0550010 (3259.82 km²) – année 2001–2002

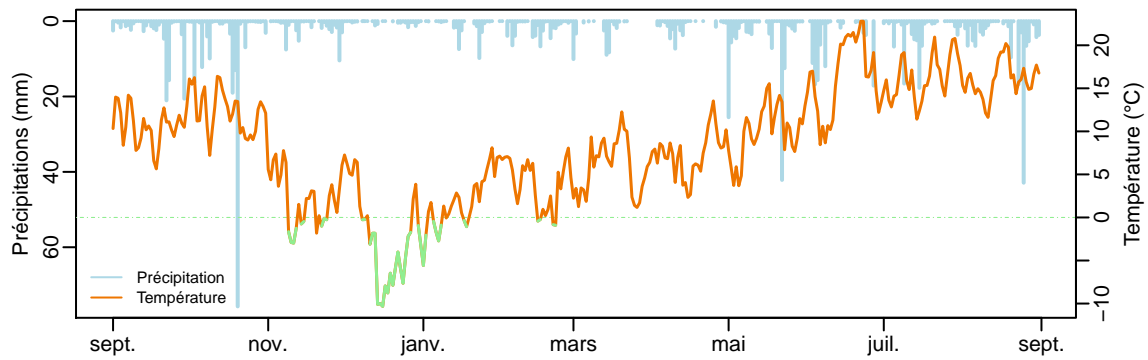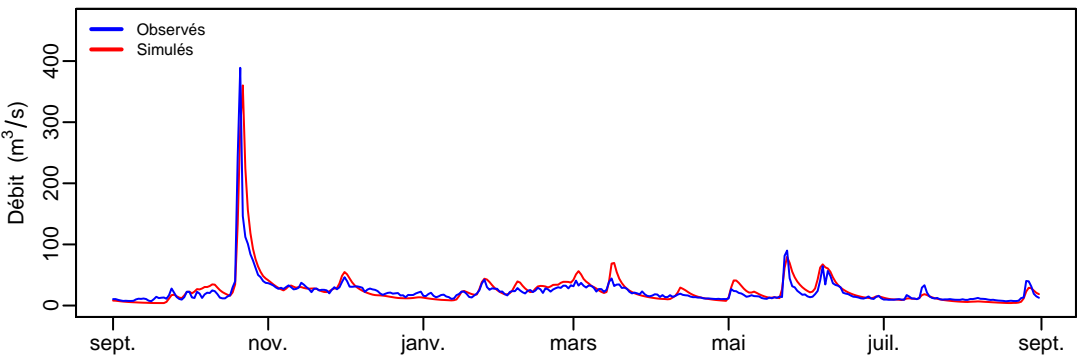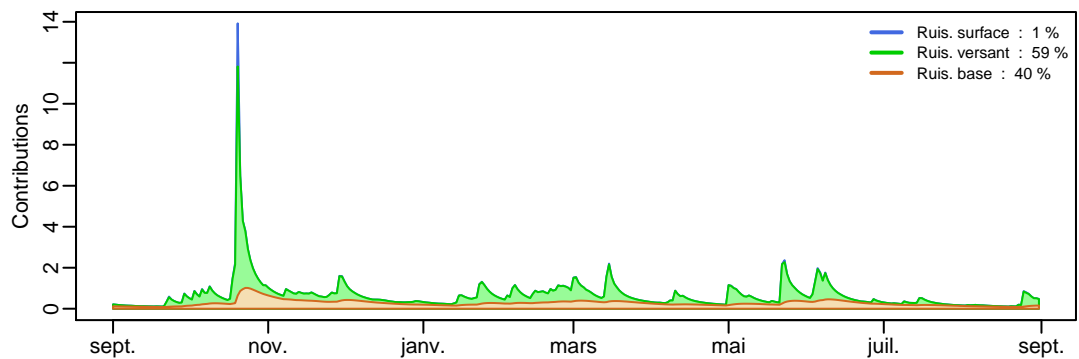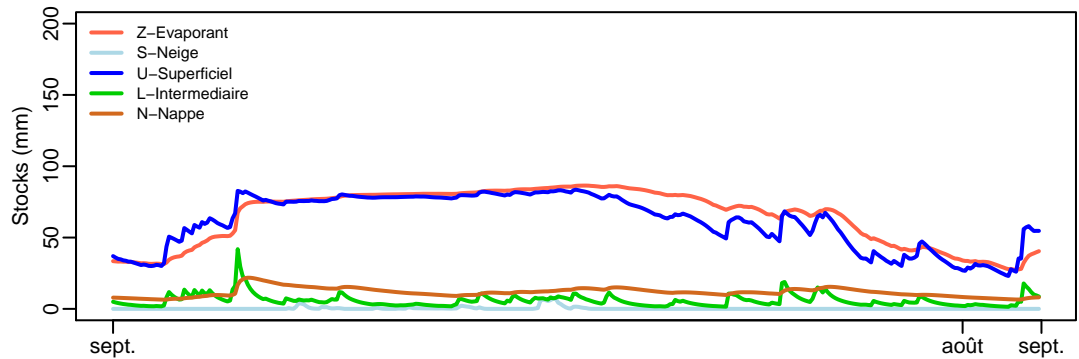

# k0550010 (3259.82 km<sup>2</sup>) – année 2002–2003

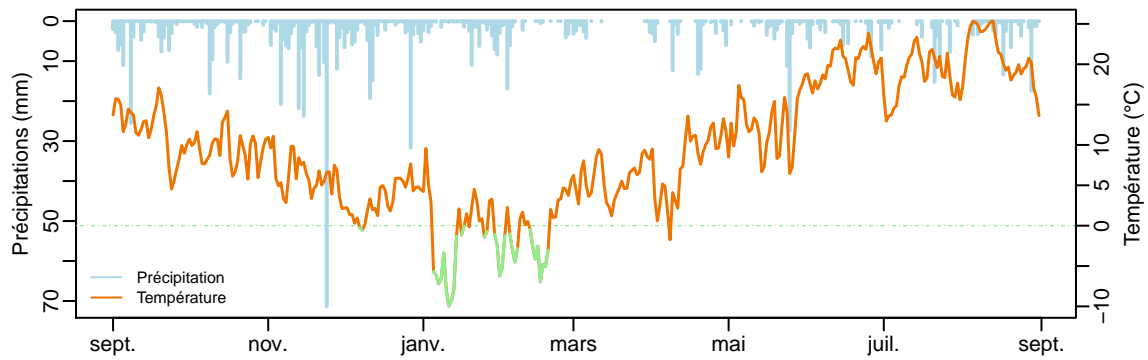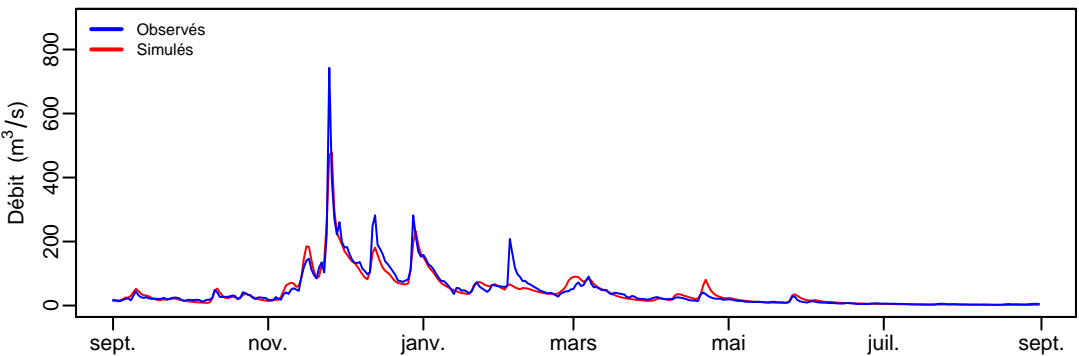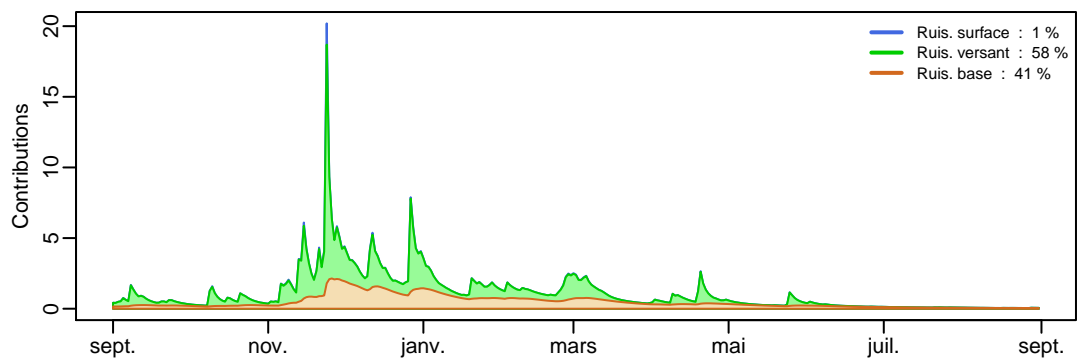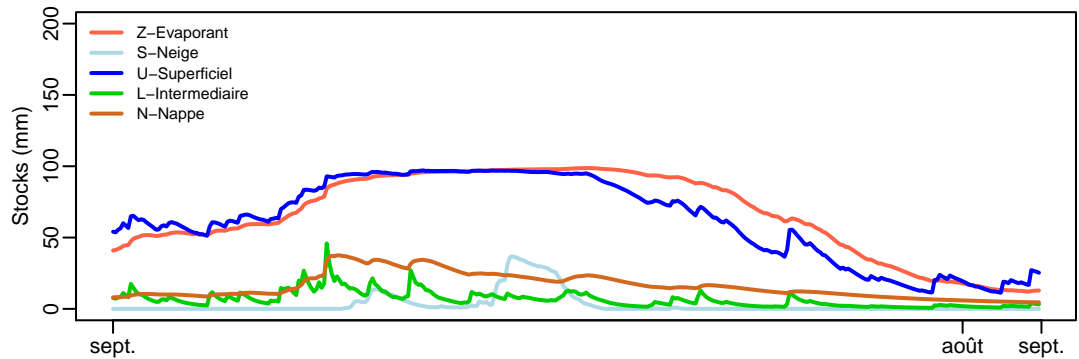



# k0550010 (3259.82 km<sup>2</sup>) – année 2003–2004

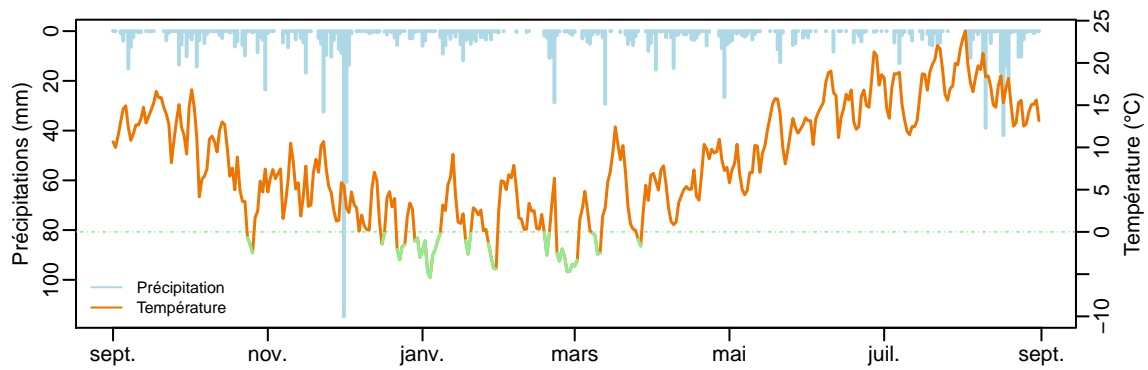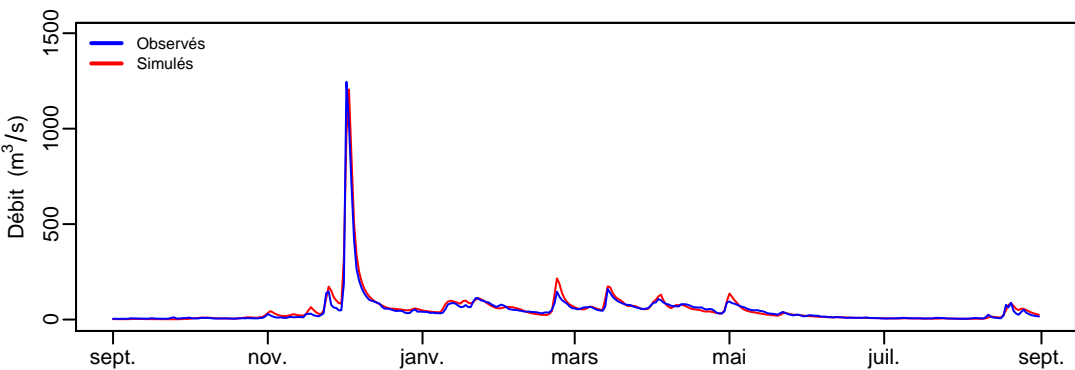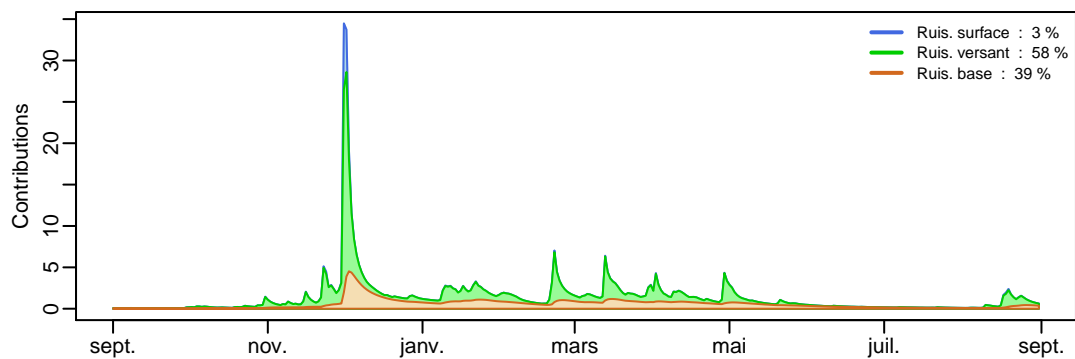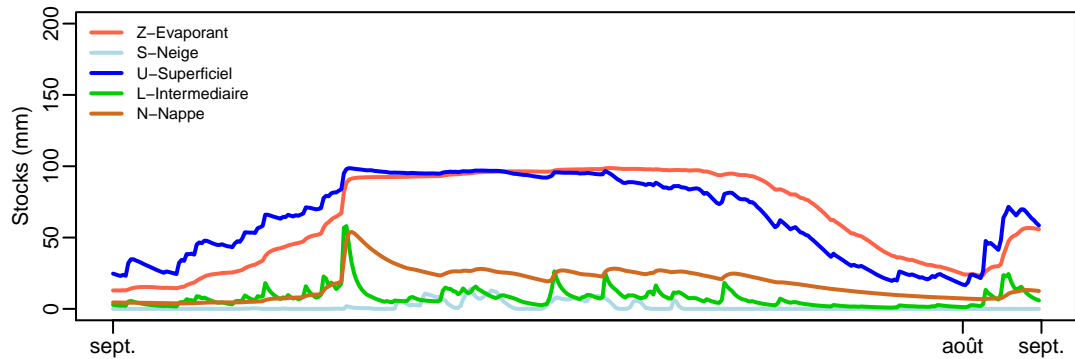

# k0550010 (3259.82 km<sup>2</sup>) – année 2004–2005

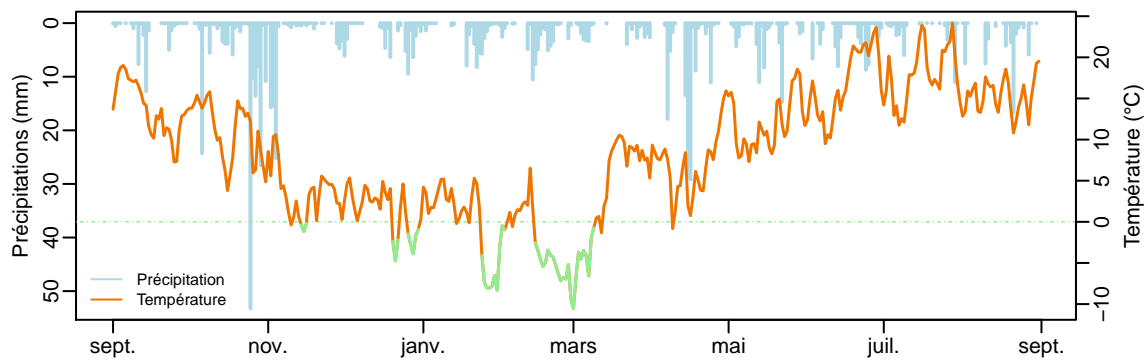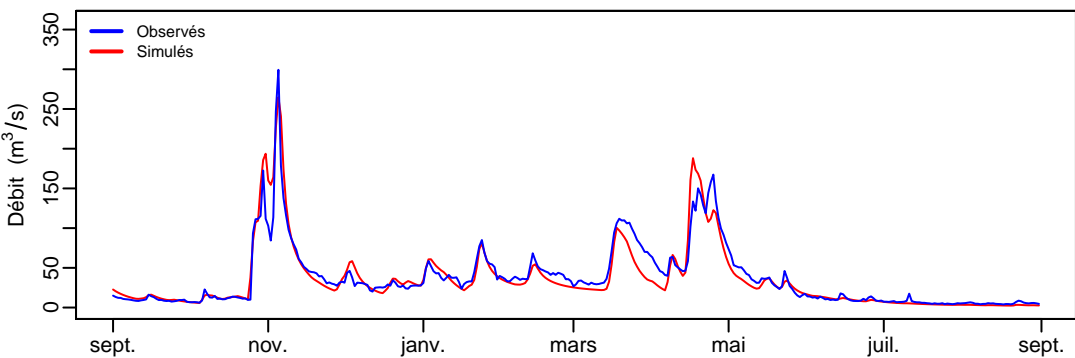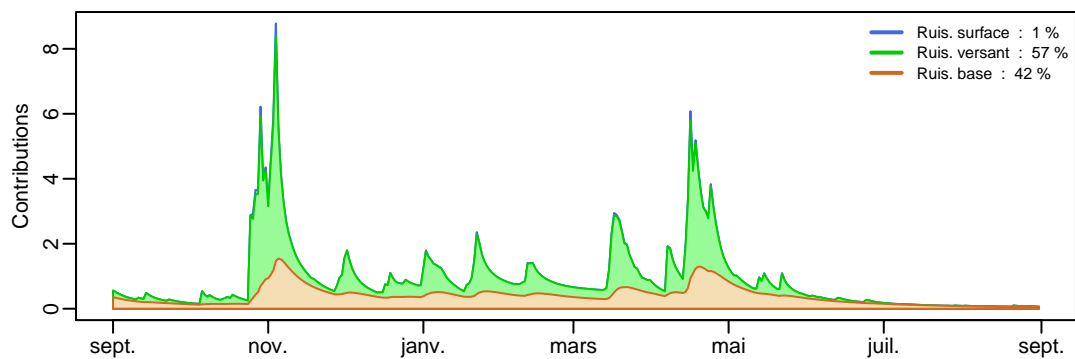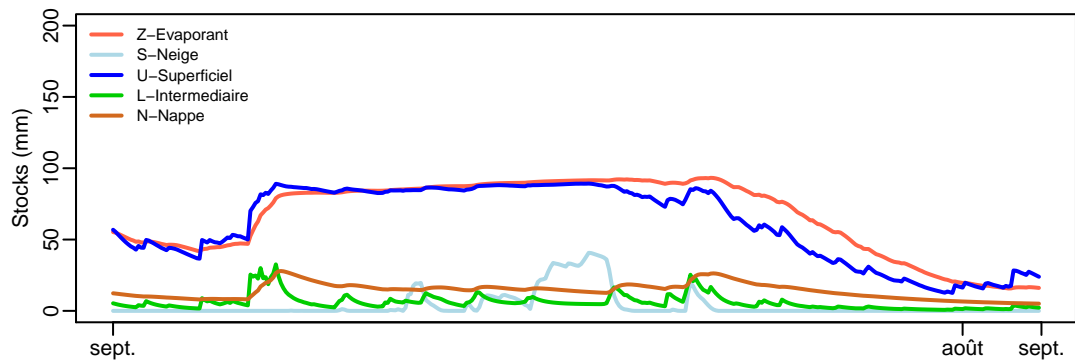

# k0550010 (3259.82 km<sup>2</sup>) – année 2005–2006

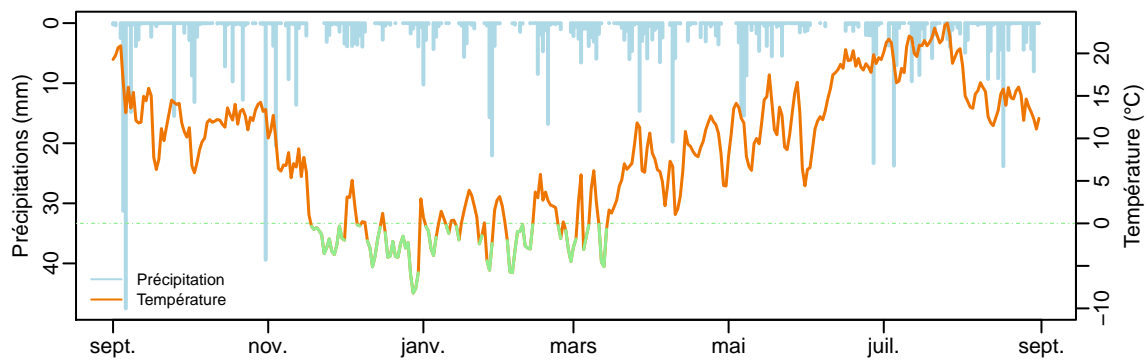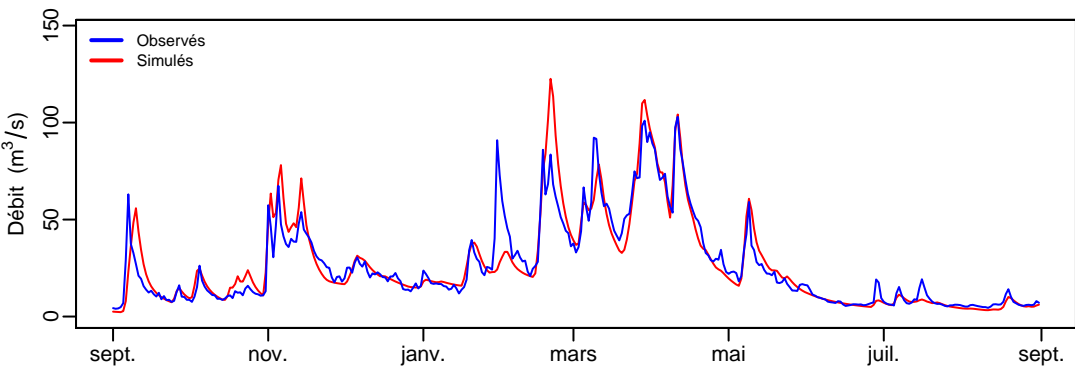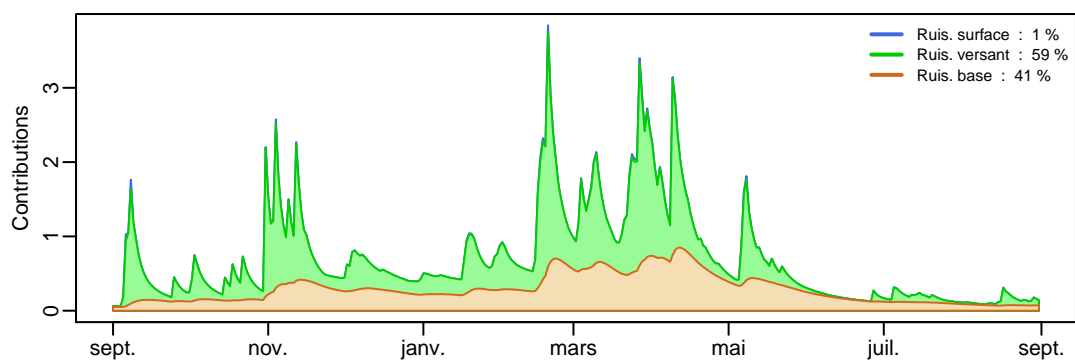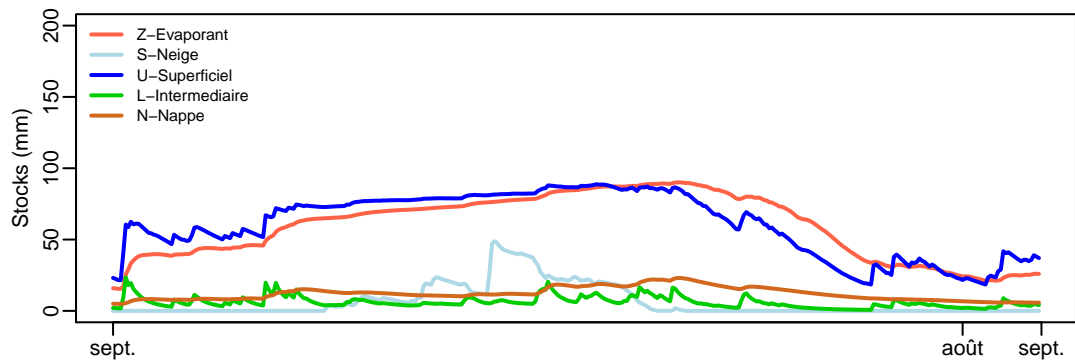

# k0550010 (3259.82 km<sup>2</sup>) – année 2006–2007

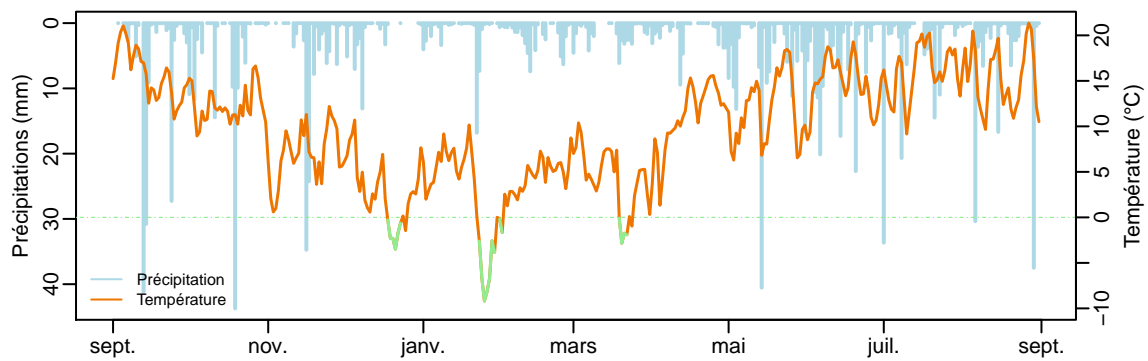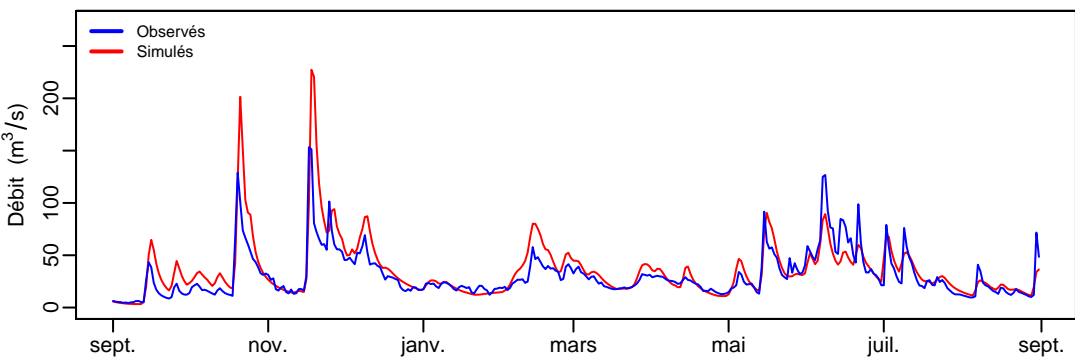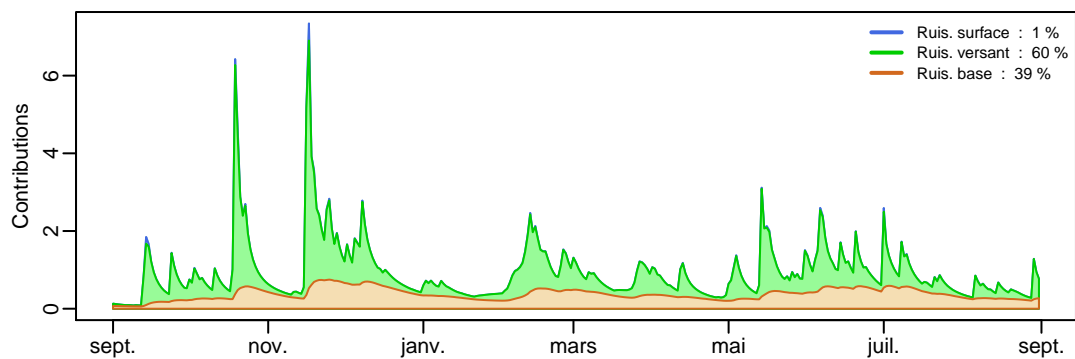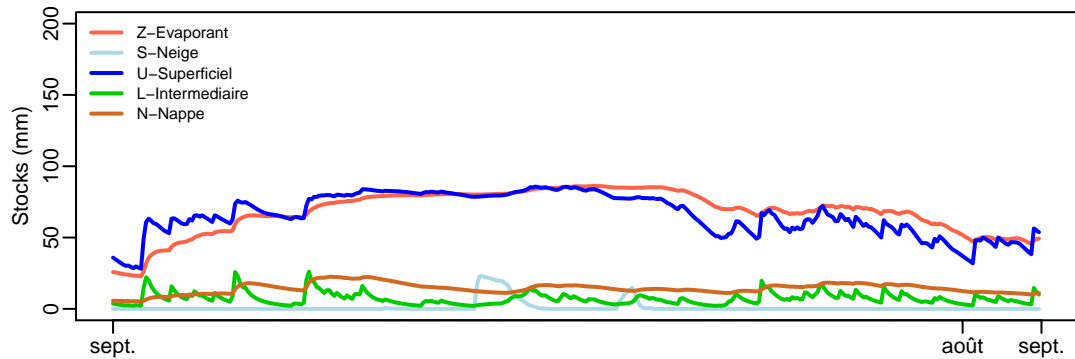

# k0550010 (3259.82 km²) – année 2007–2008

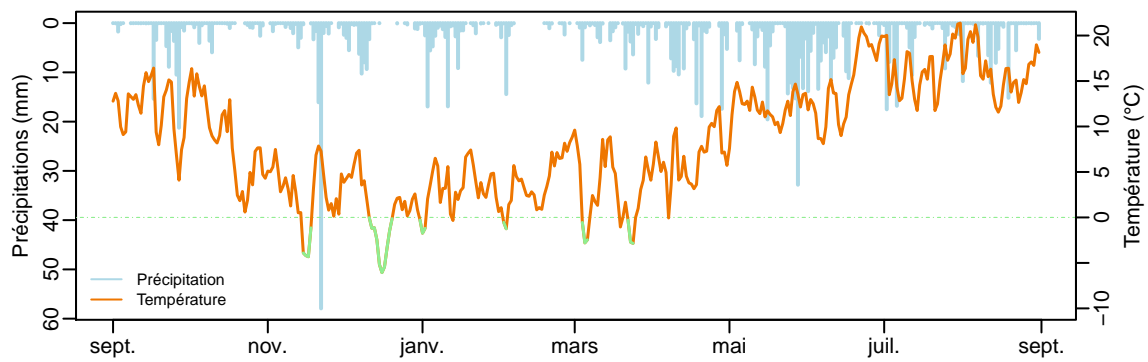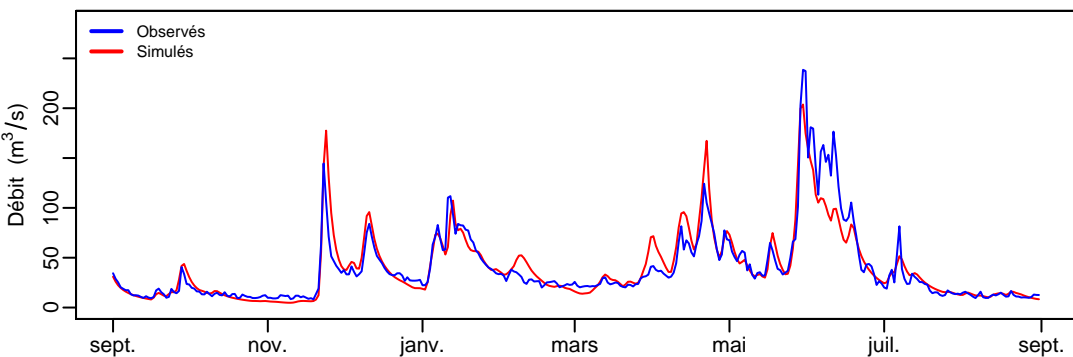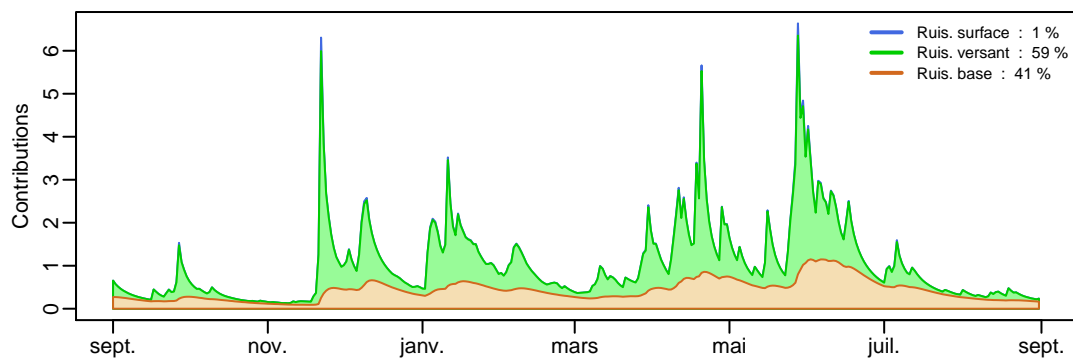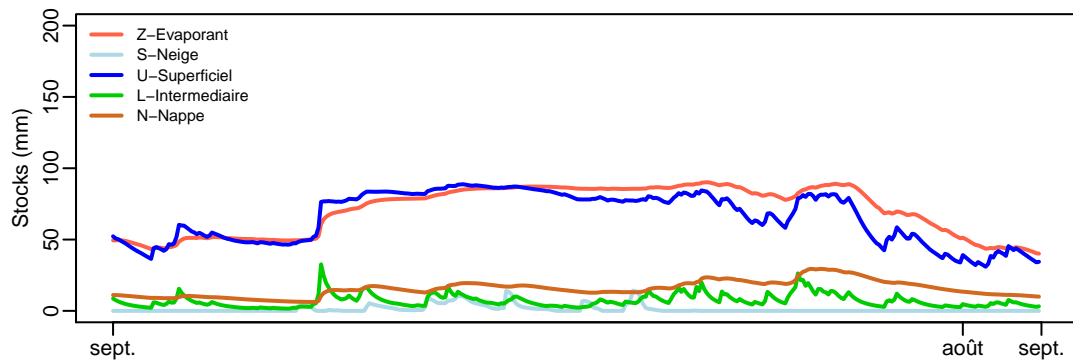

# k0550010 (3259.82 km<sup>2</sup>) – année 2008–2009

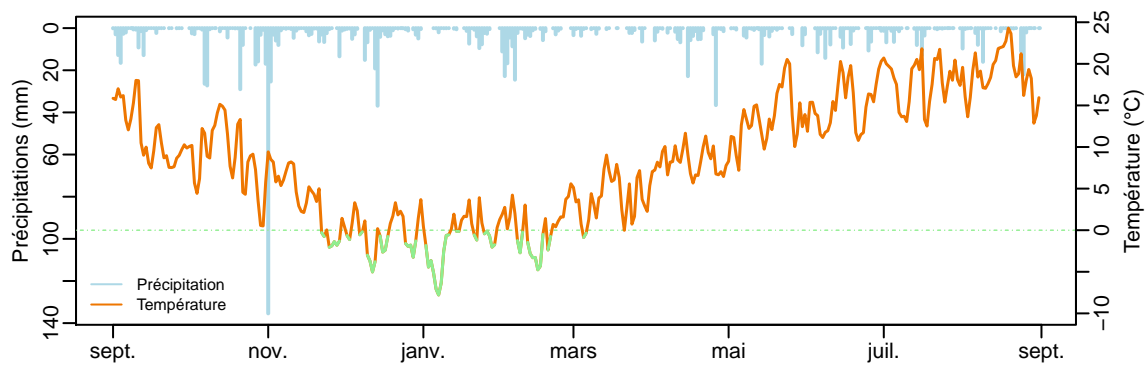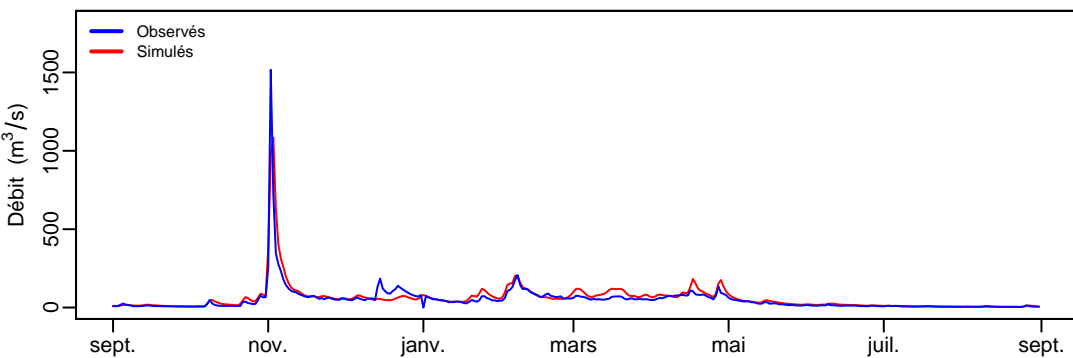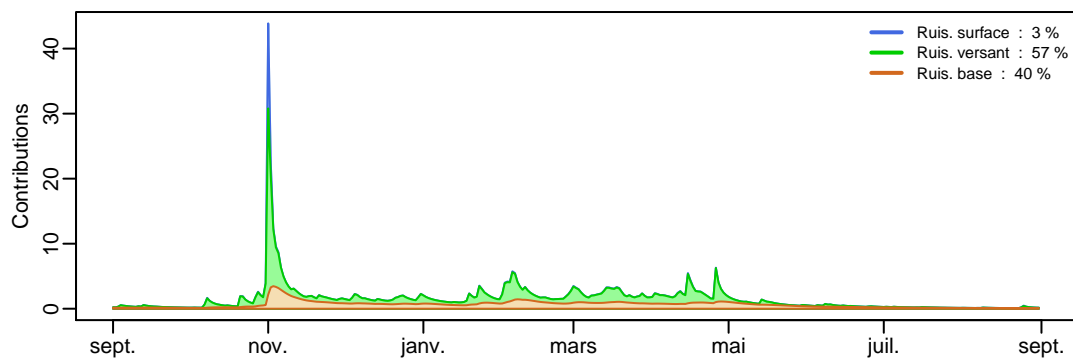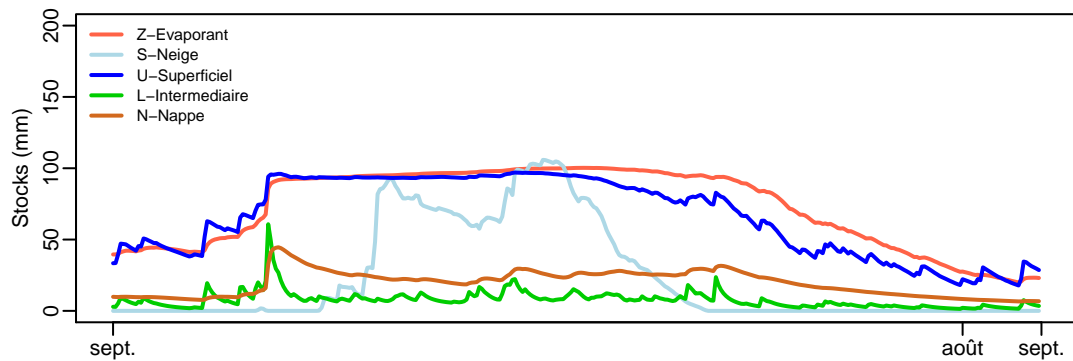

# k0550010 (3259.82 km<sup>2</sup>) – année 2009–2010

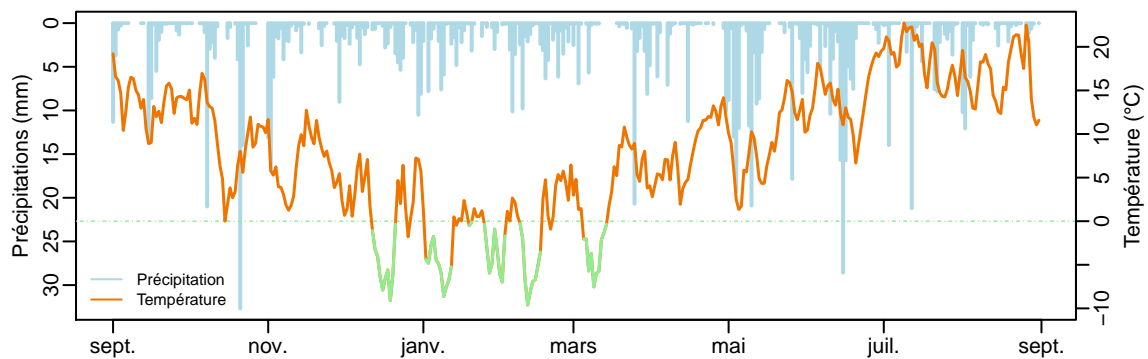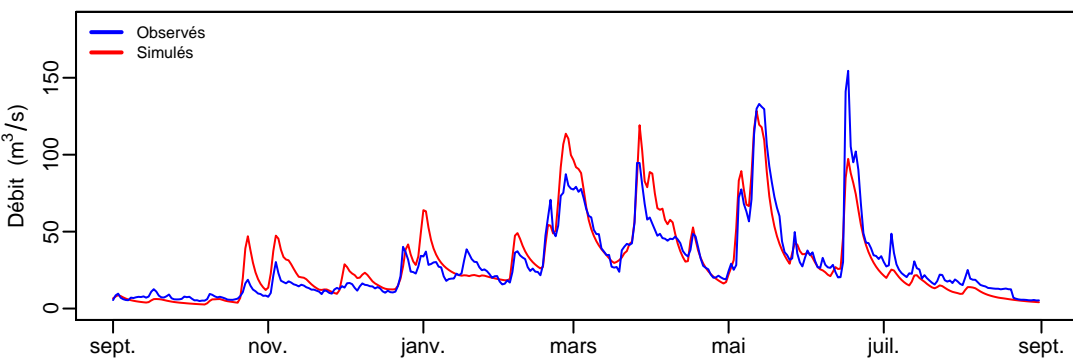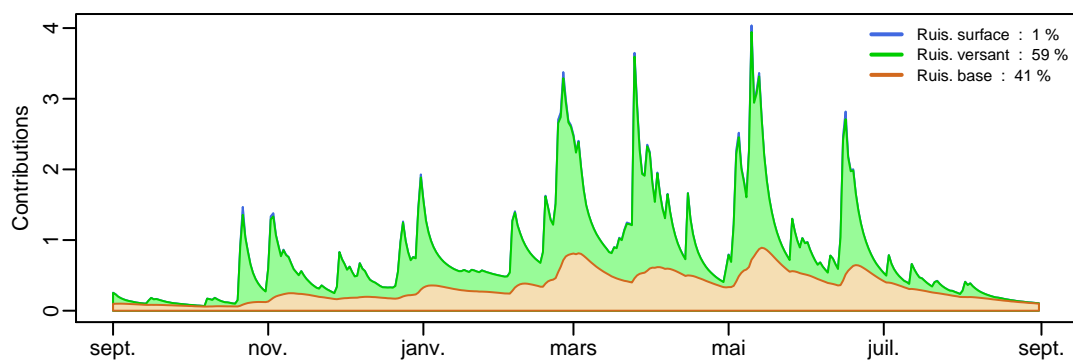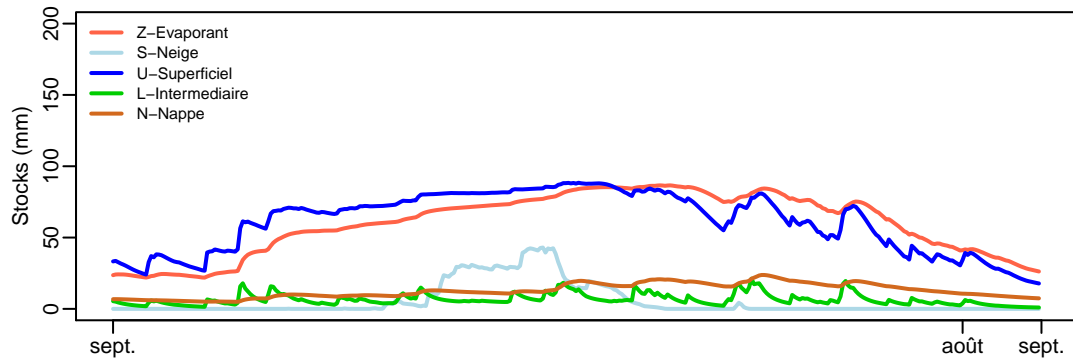

# k0550010 (3259.82 km<sup>2</sup>) – année 2010–2011

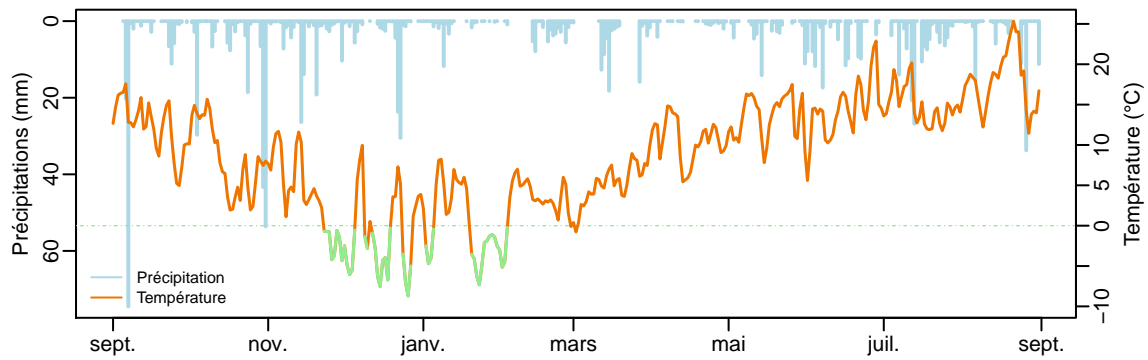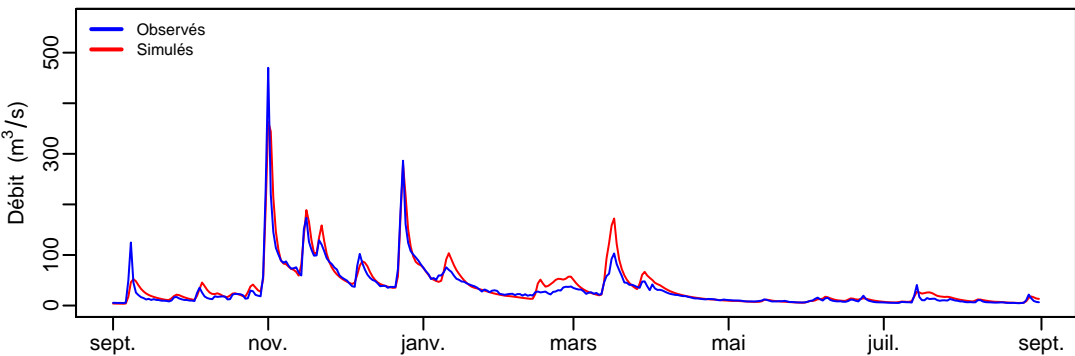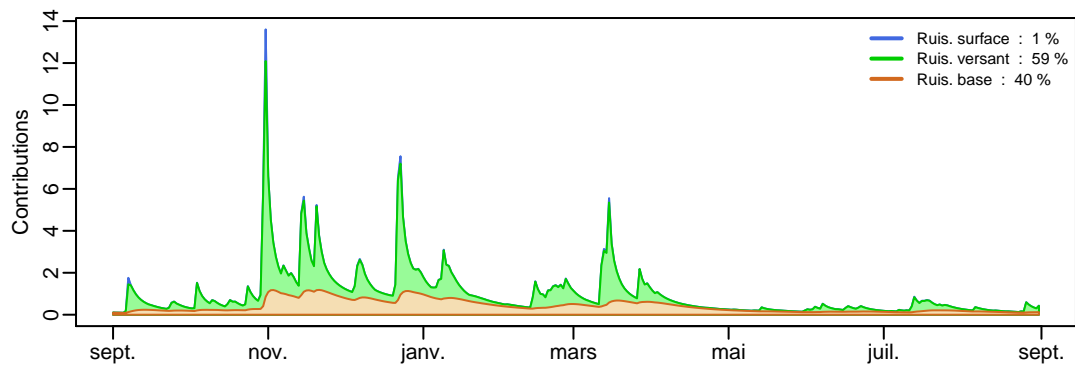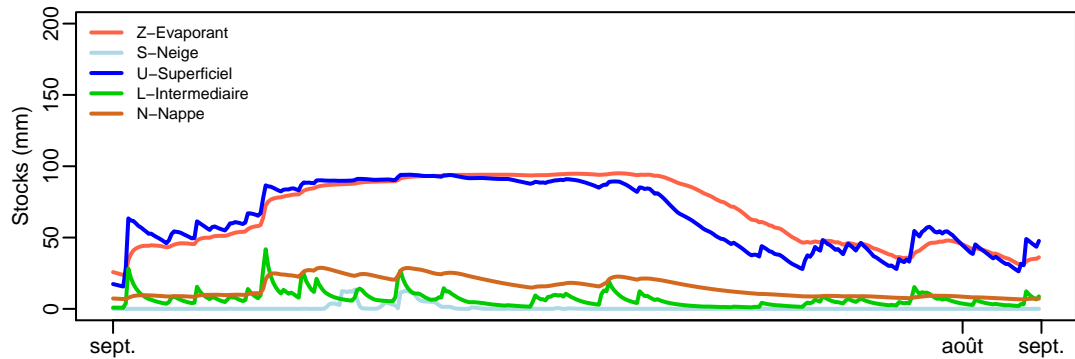



# k0550010 (3259.82 km<sup>2</sup>) – année 2011–2012

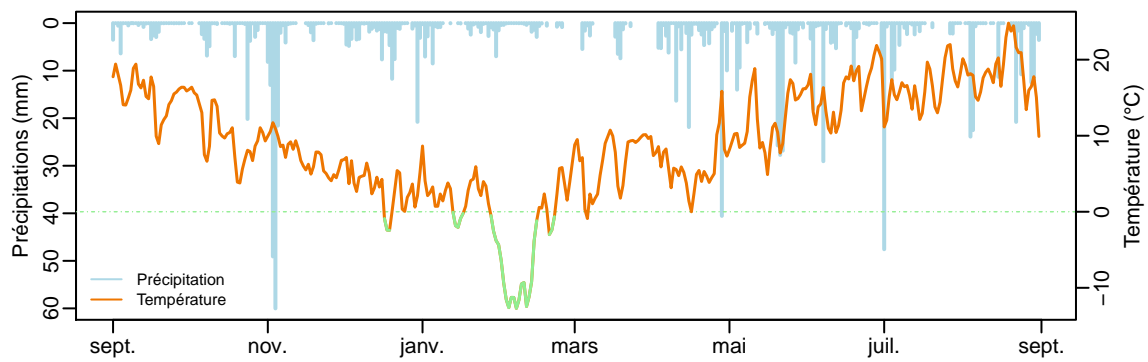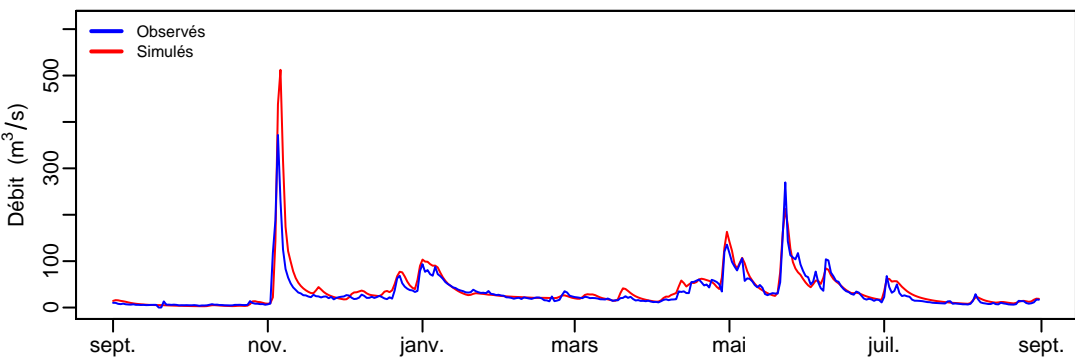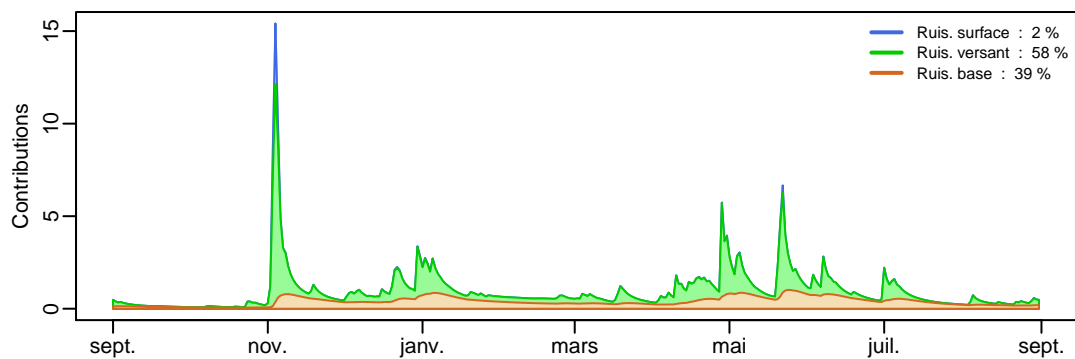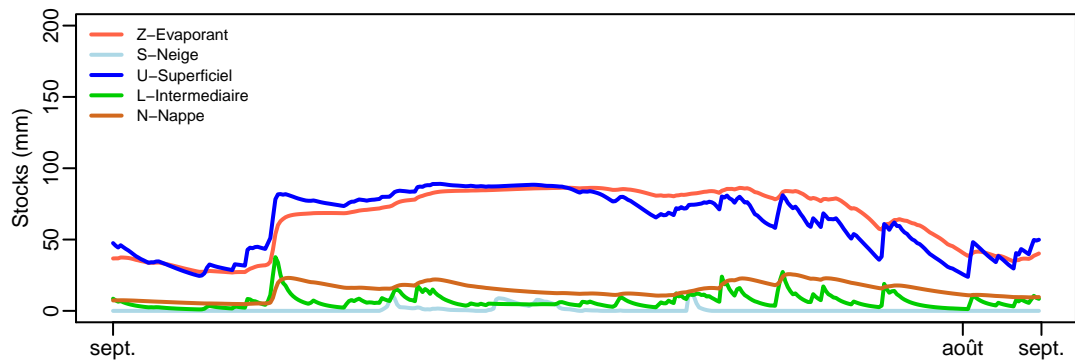

# k0567520 (131.88 km<sup>2</sup>) – année 1981–1982

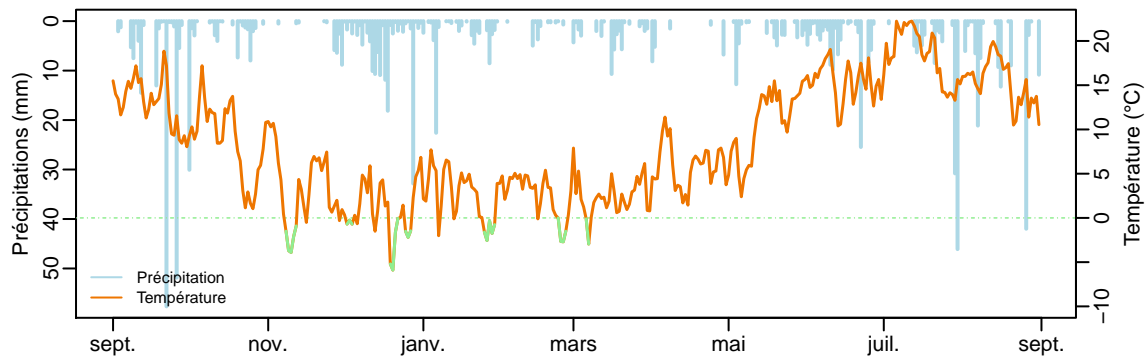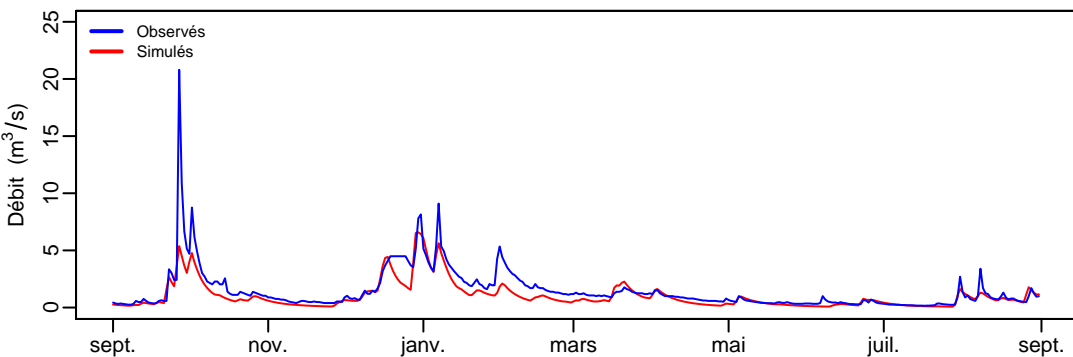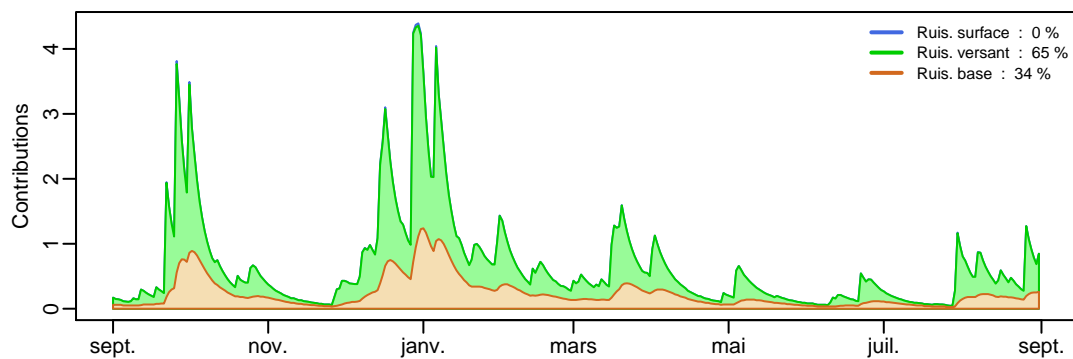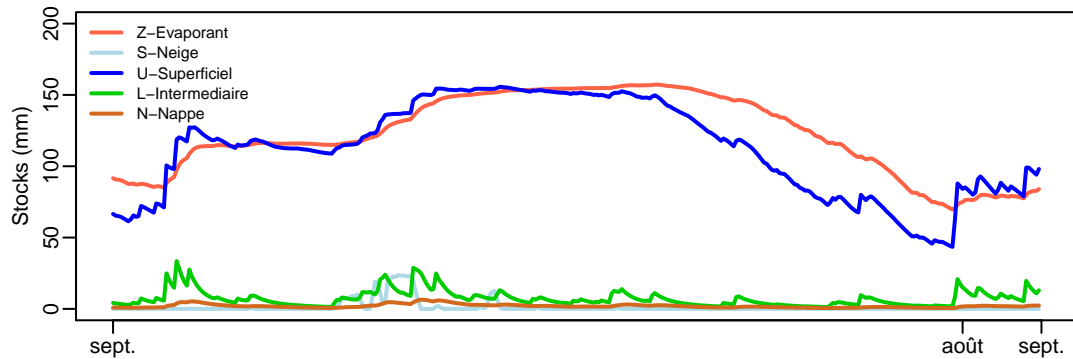

# k0567520 (131.88 km<sup>2</sup>) – année 1982–1983

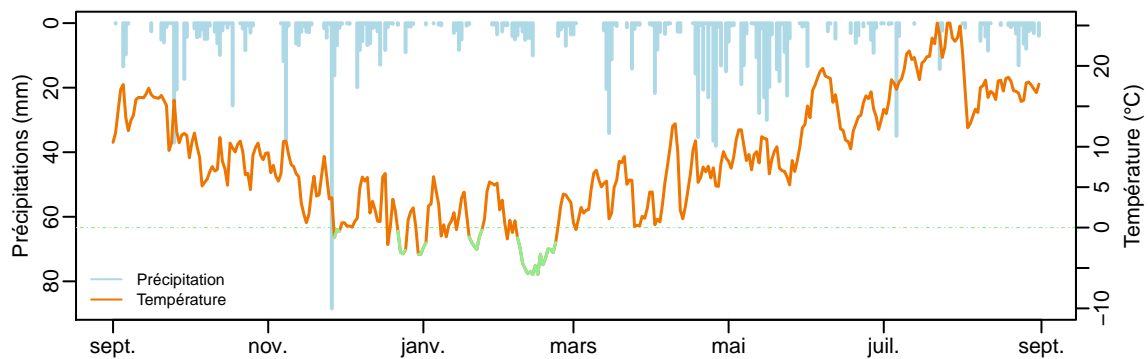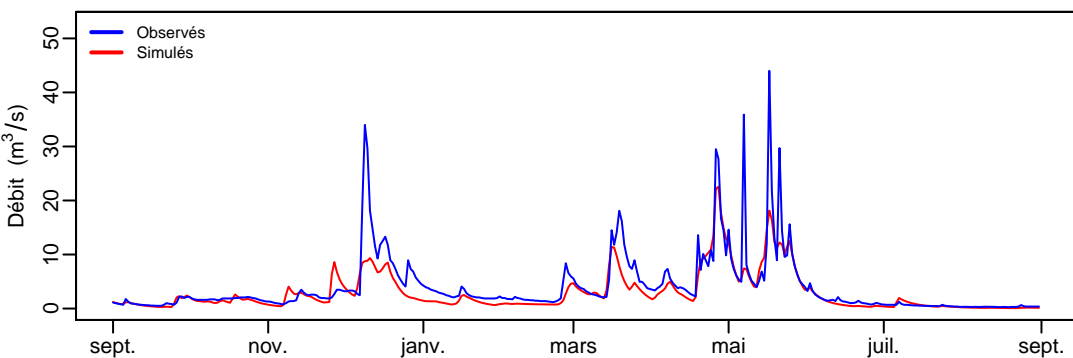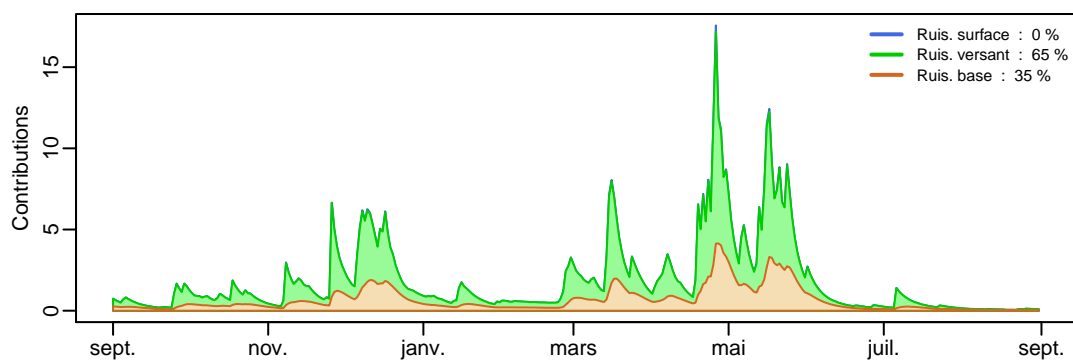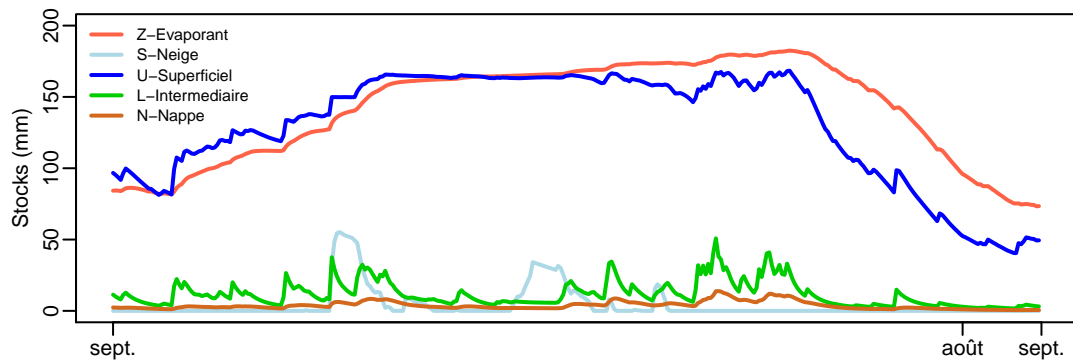

# k0567520 (131.88 km<sup>2</sup>) – année 1983–1984

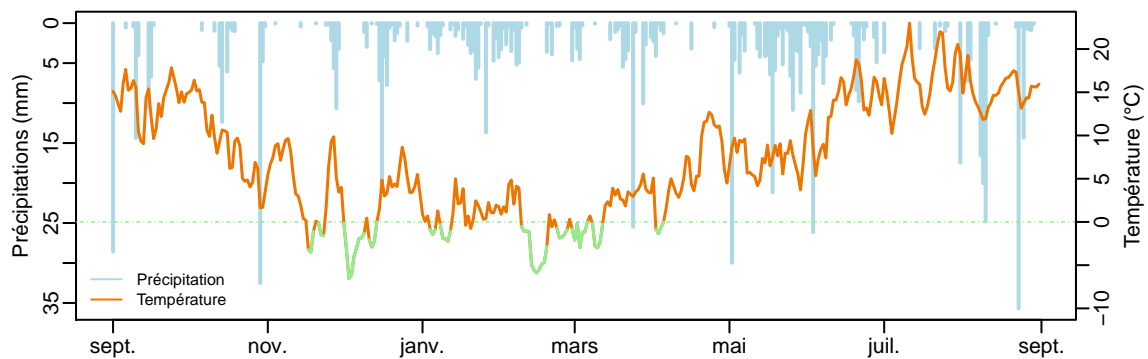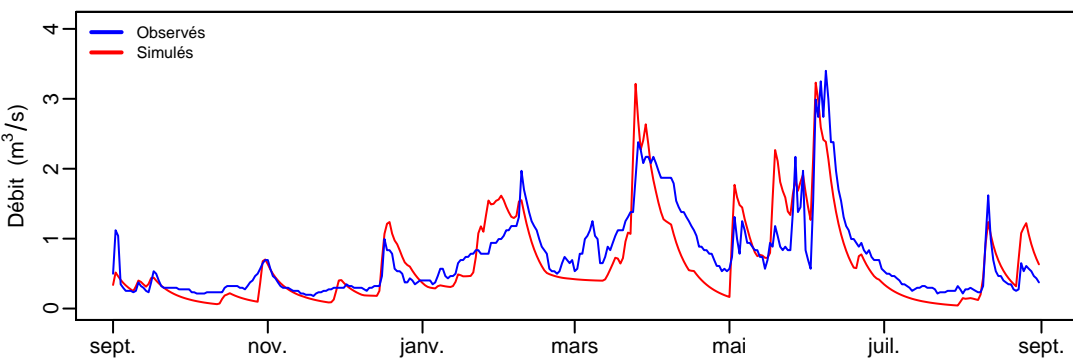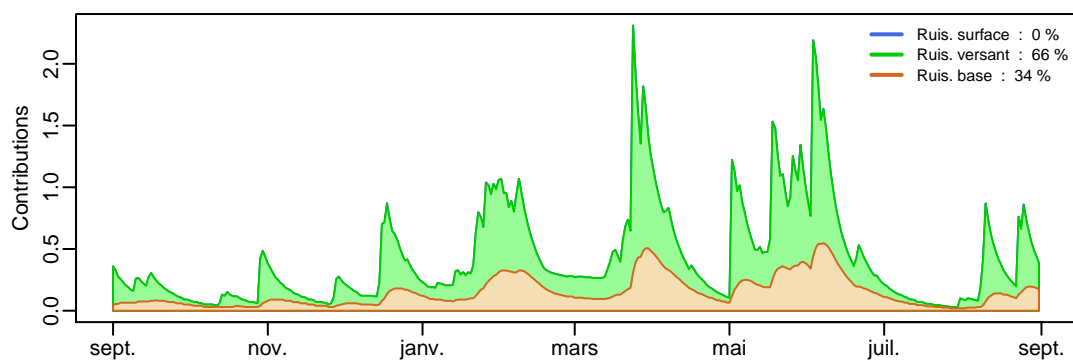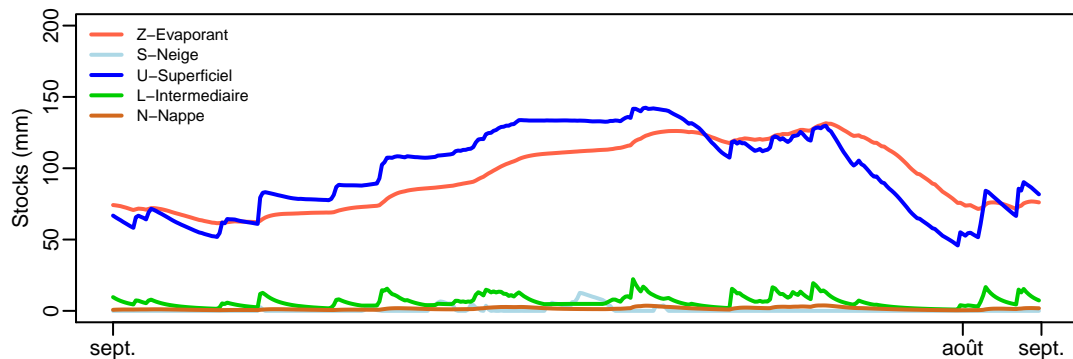

# k0567520 (131.88 km<sup>2</sup>) – année 1984–1985

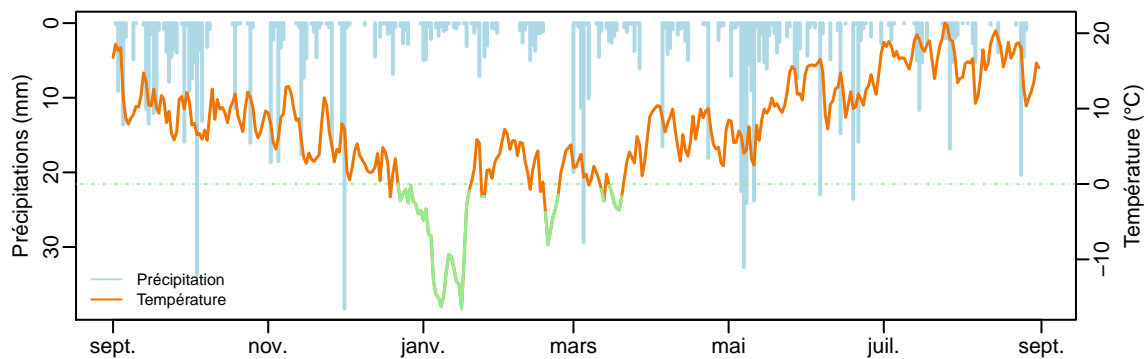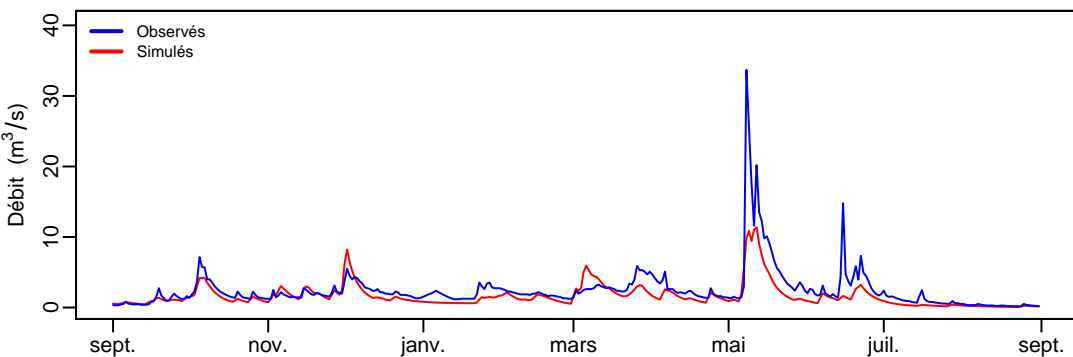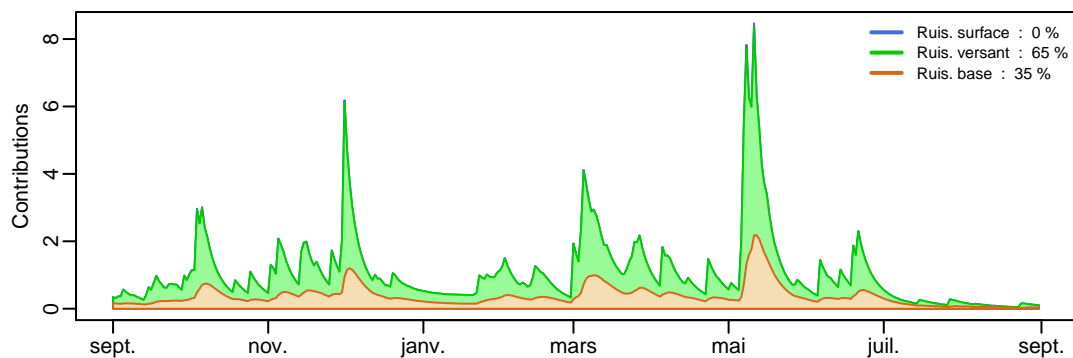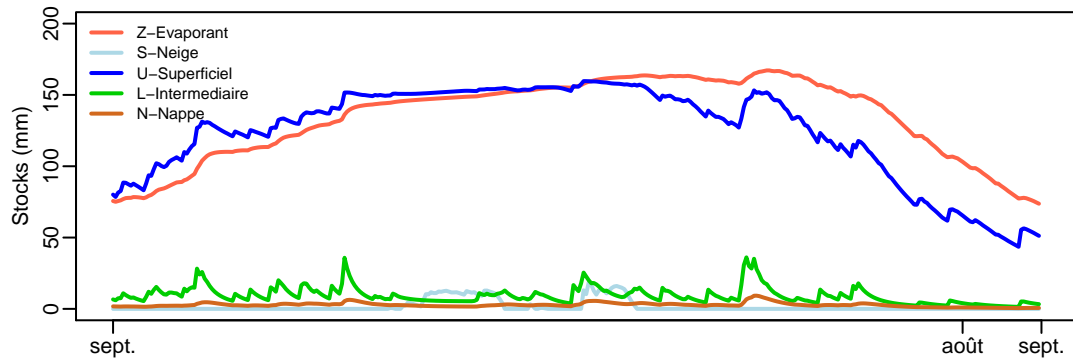

# k0567520 (131.88 km<sup>2</sup>) – année 1985–1986

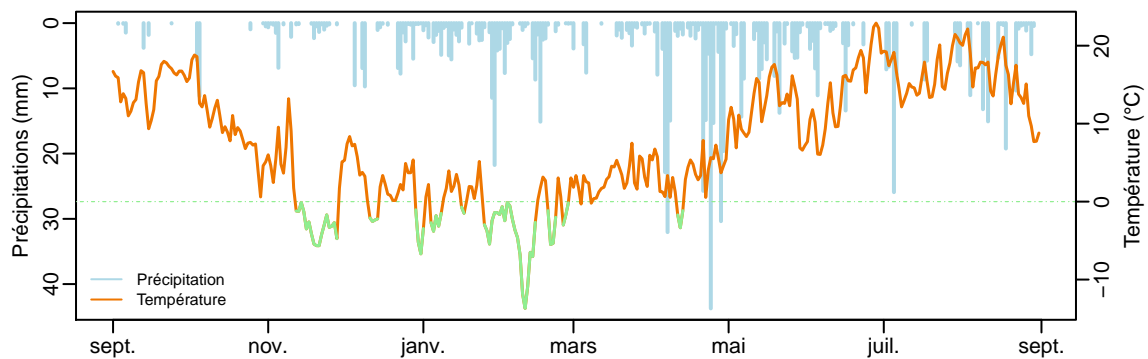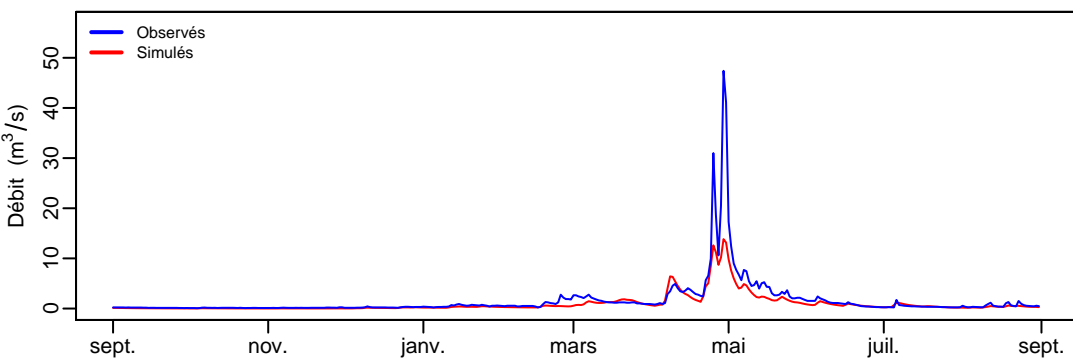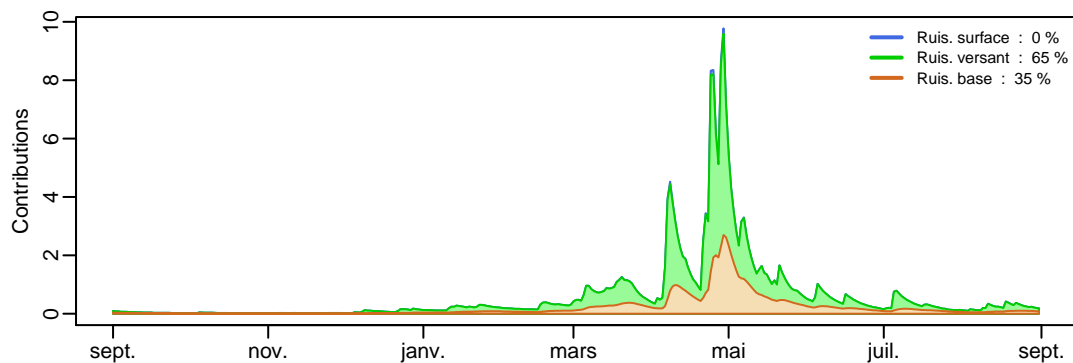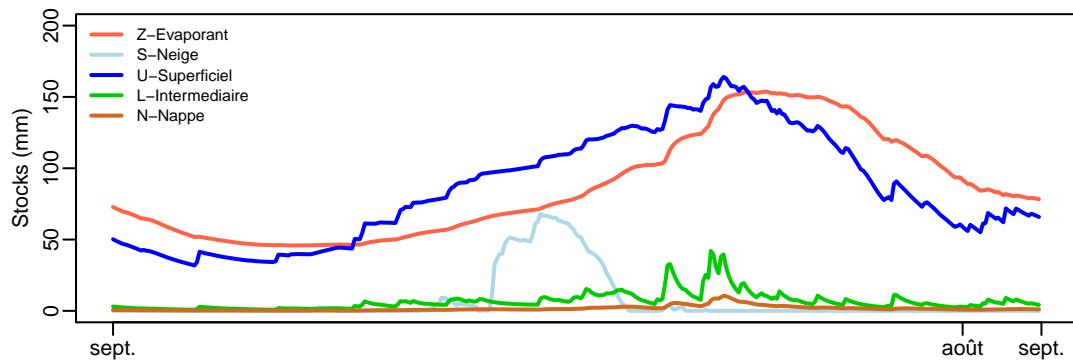

# k0567520 (131.88 km<sup>2</sup>) – année 1986–1987

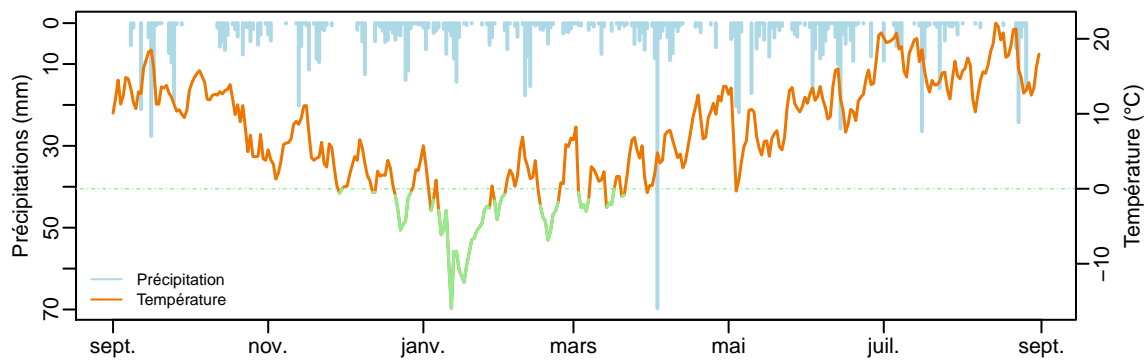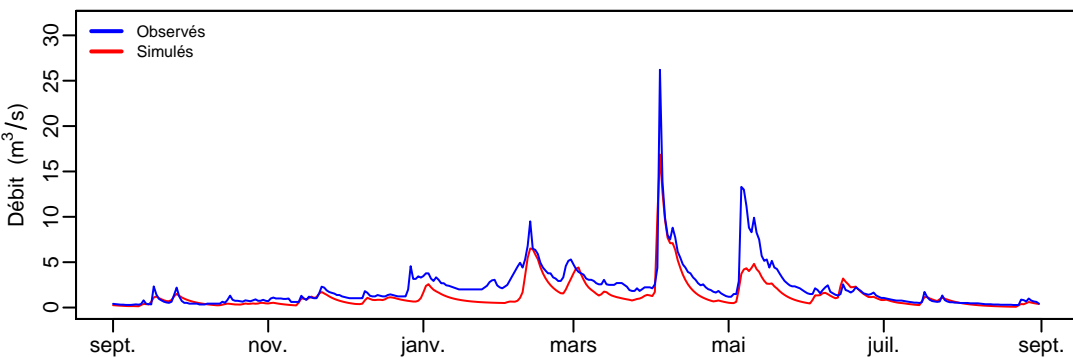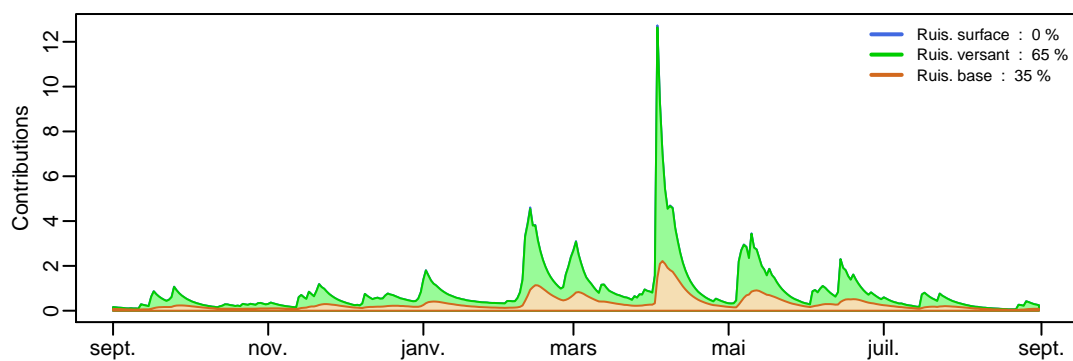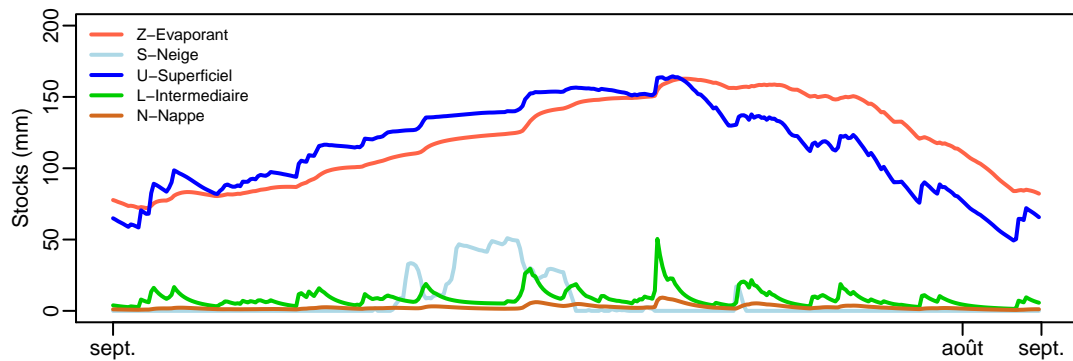

# k0567520 (131.88 km<sup>2</sup>) – année 1987–1988

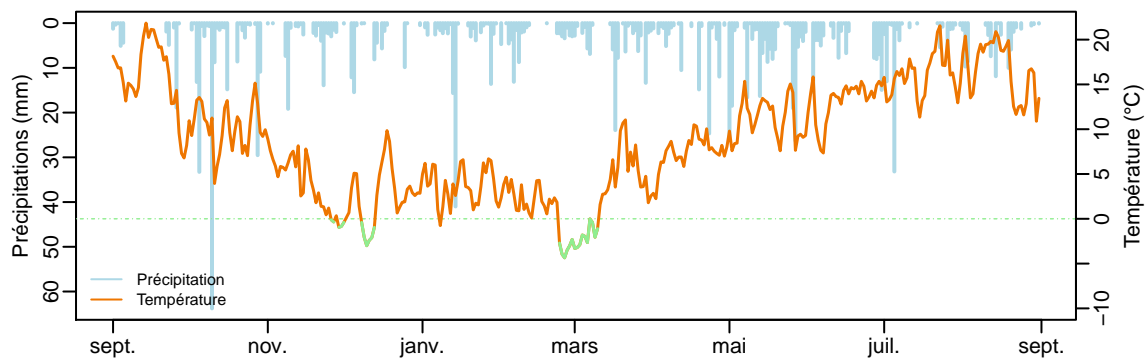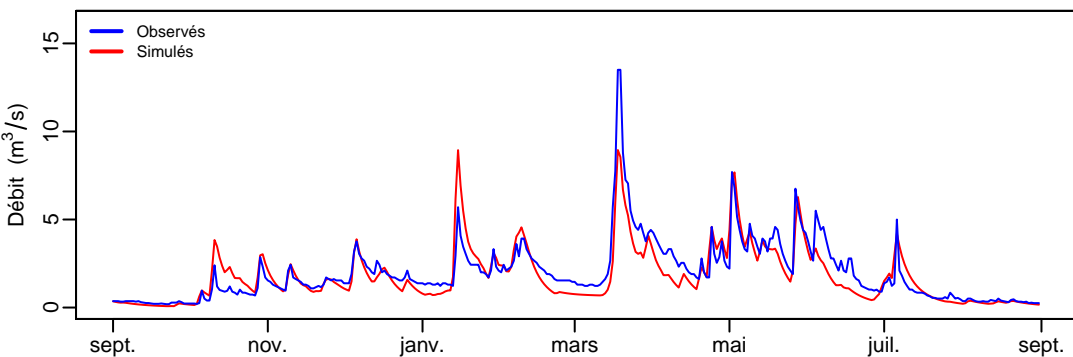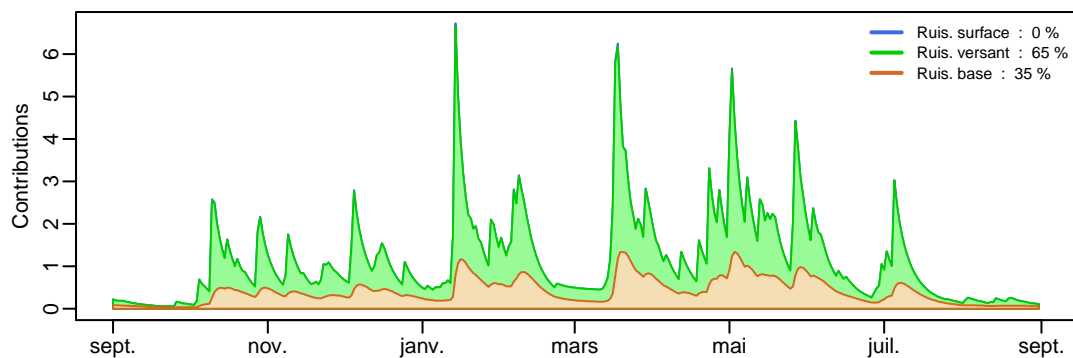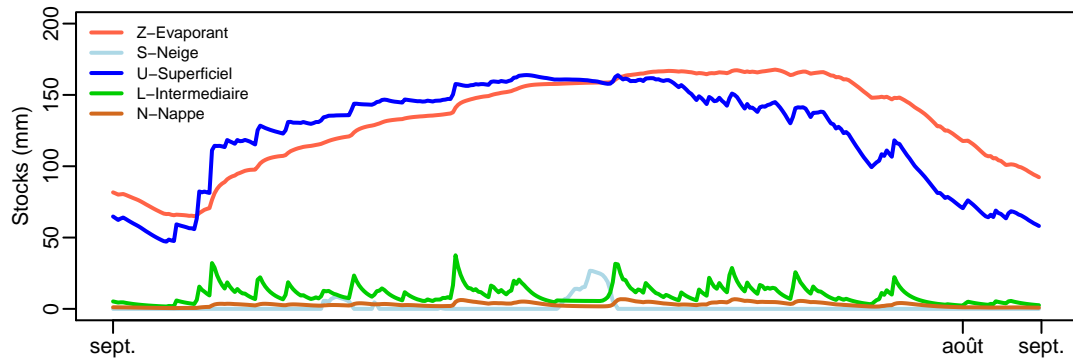



# k0567520 (131.88 km<sup>2</sup>) – année 1988–1989

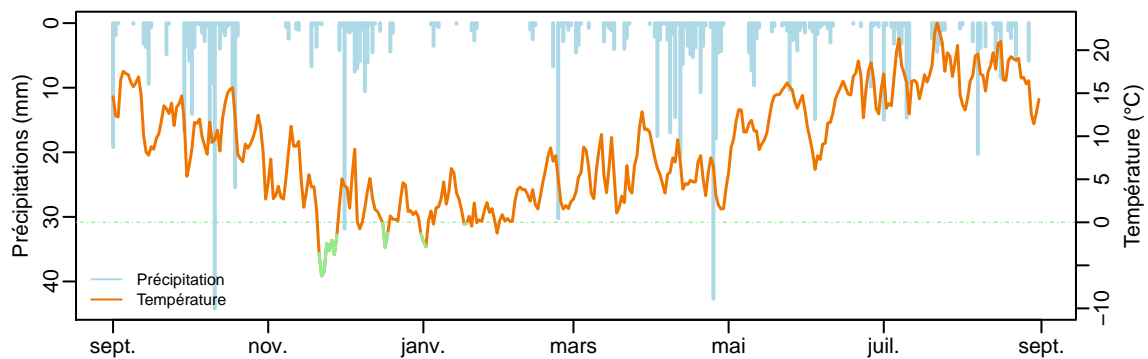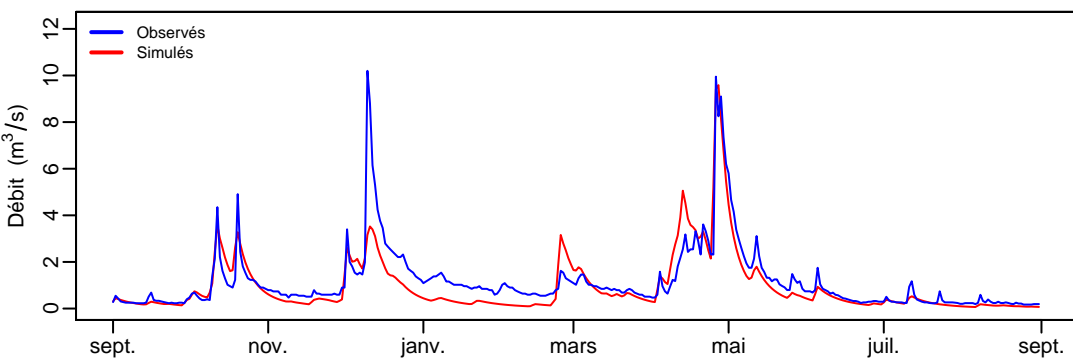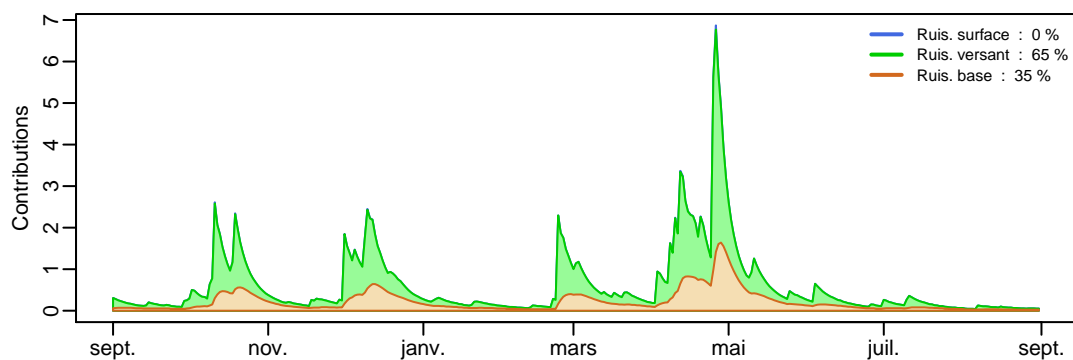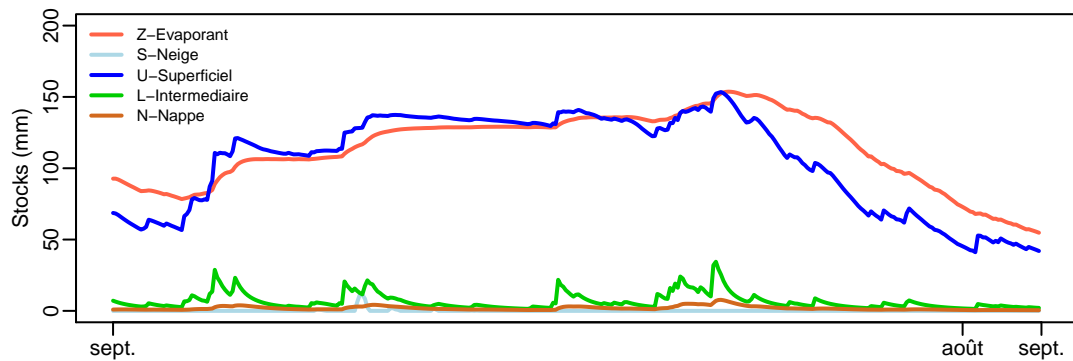

# k0567520 (131.88 km<sup>2</sup>) – année 1989–1990

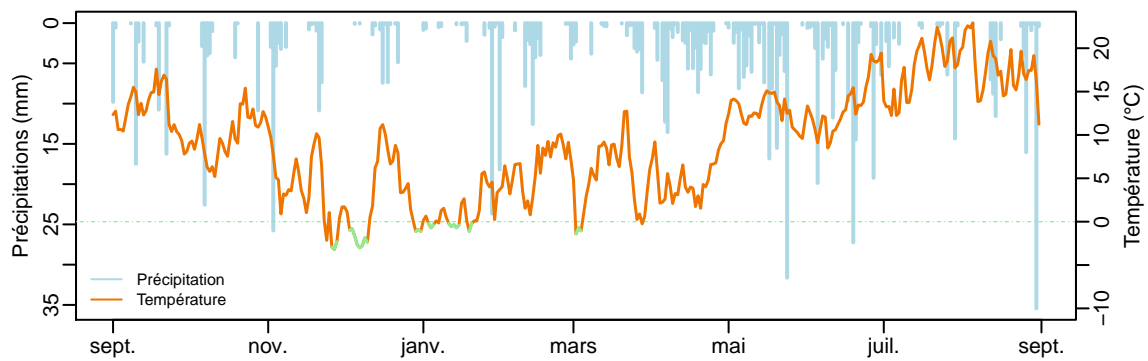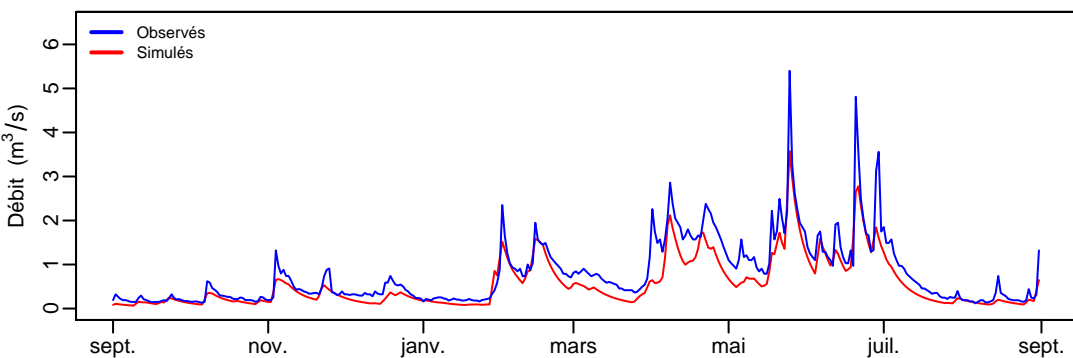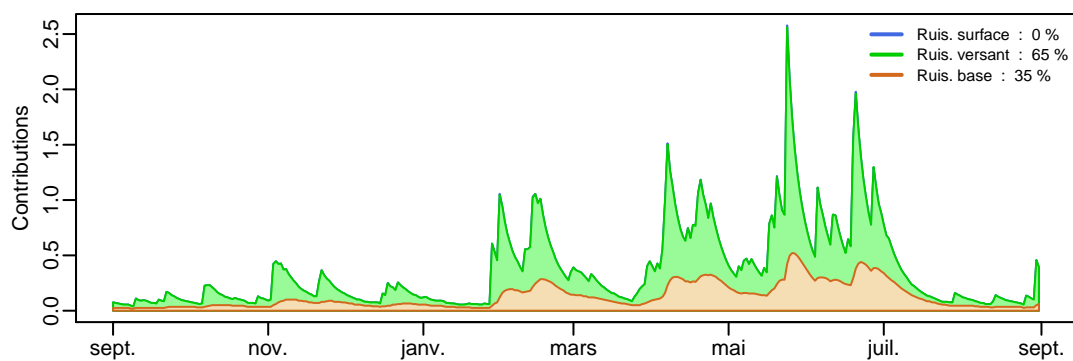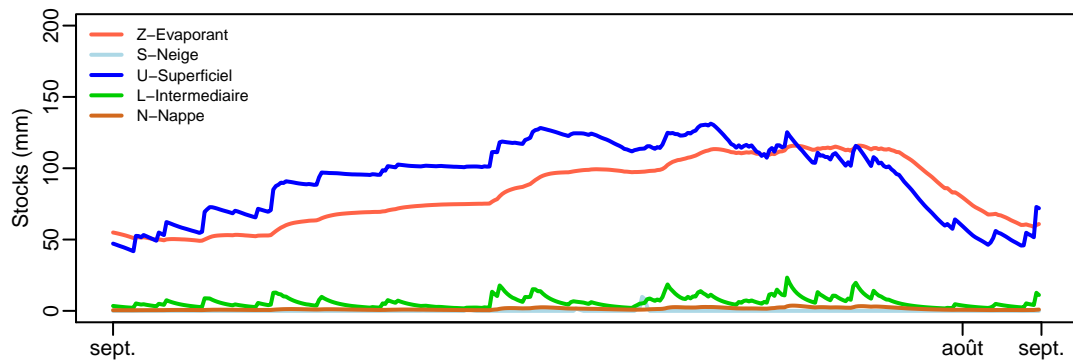

# k0567520 (131.88 km<sup>2</sup>) – année 1990–1991

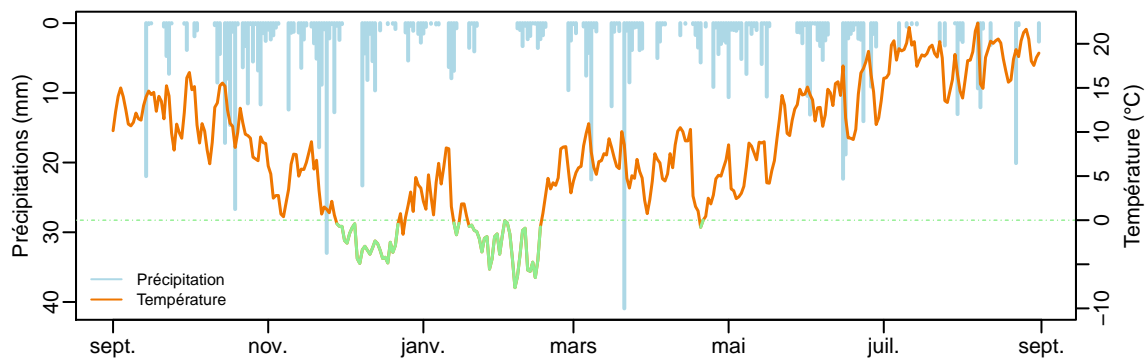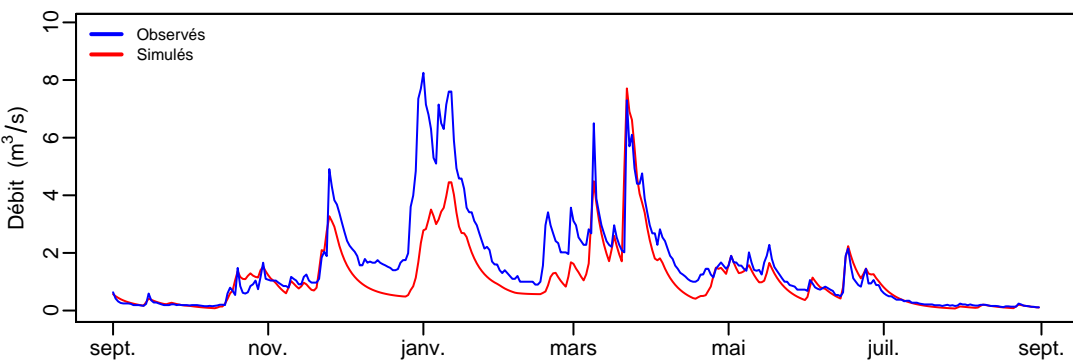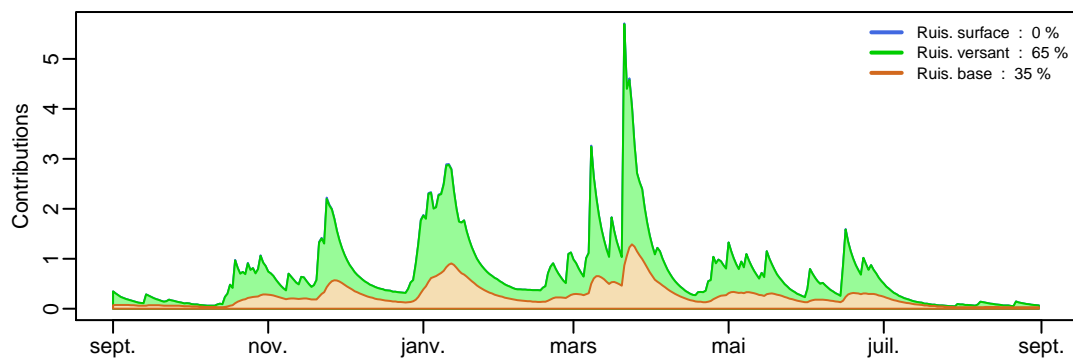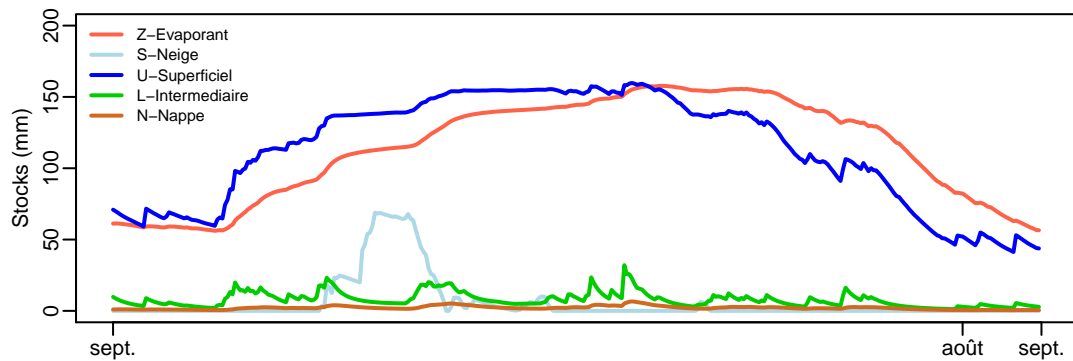

# k0567520 (131.88 km<sup>2</sup>) – année 1991–1992

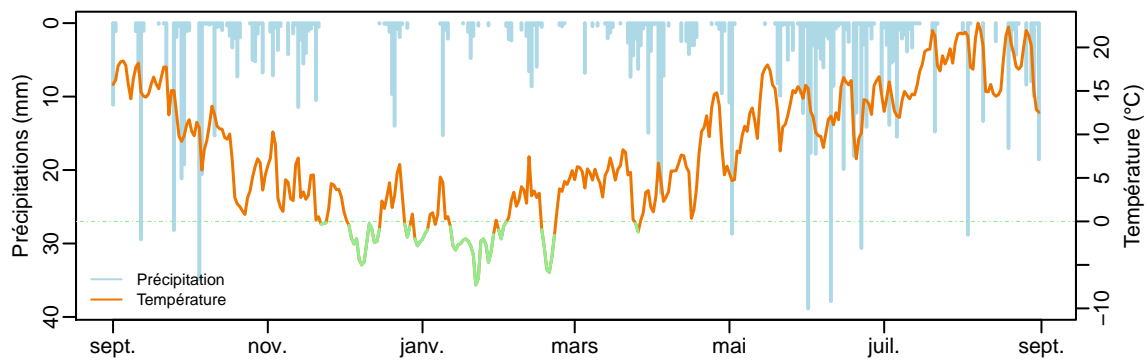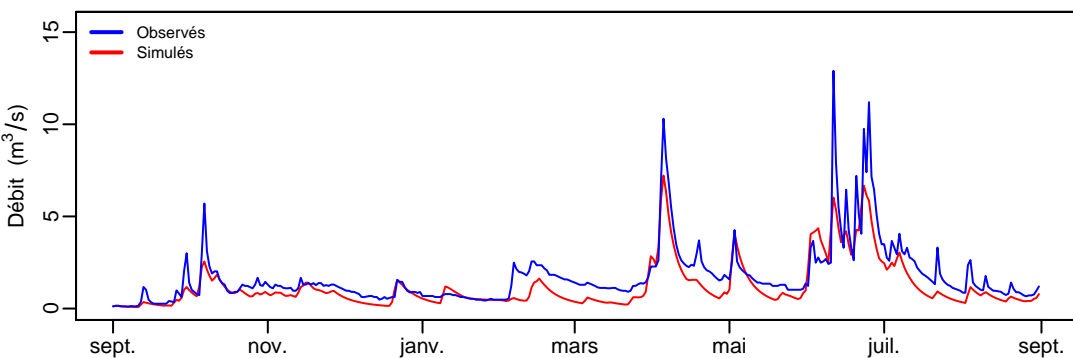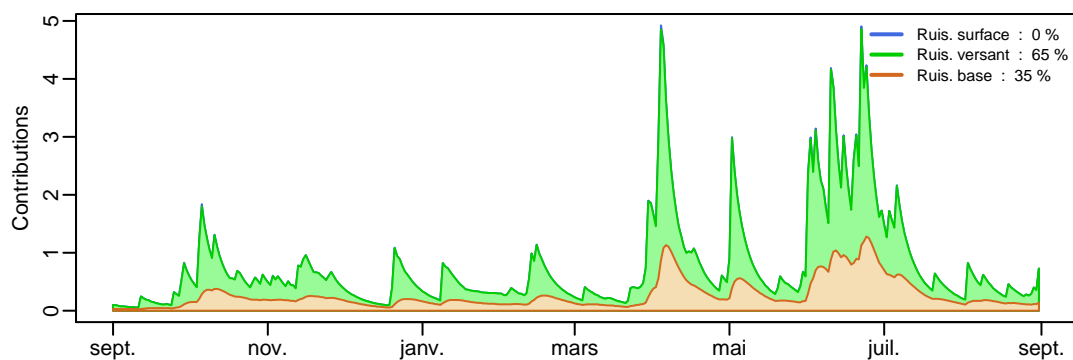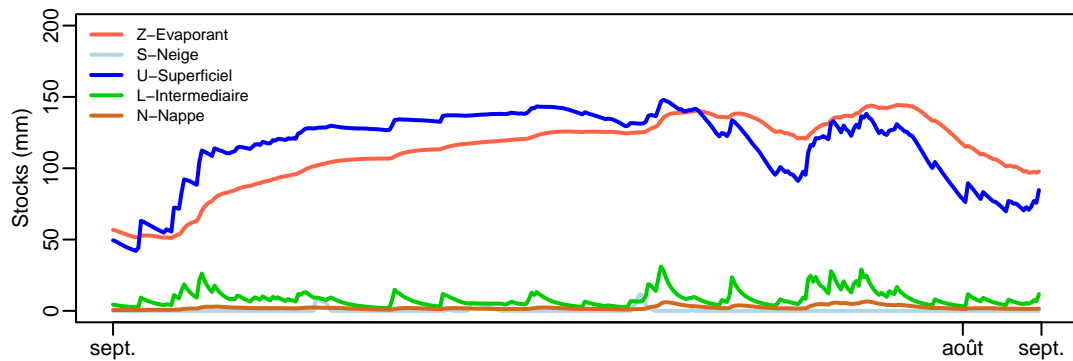

# k0567520 (131.88 km<sup>2</sup>) – année 1992–1993

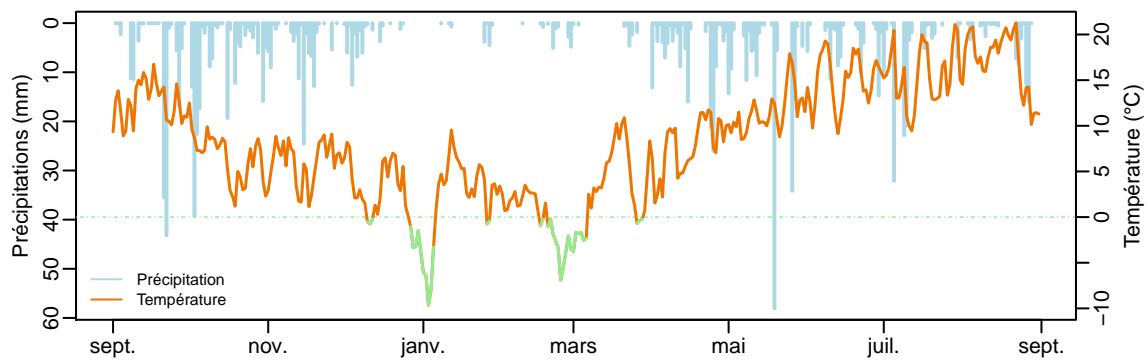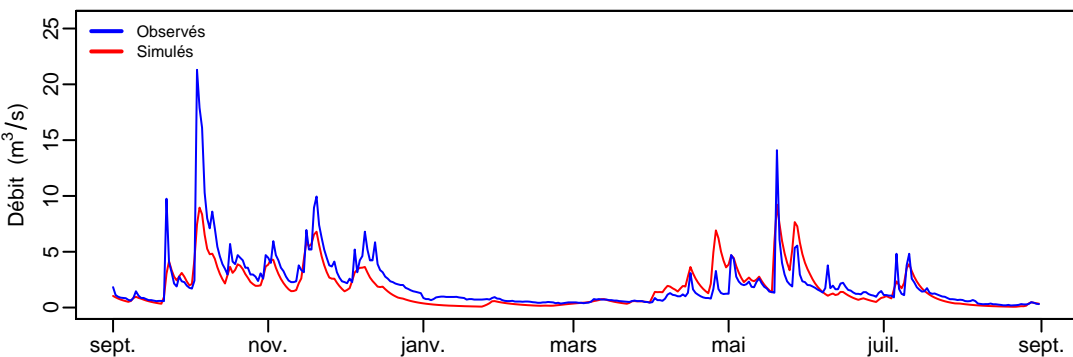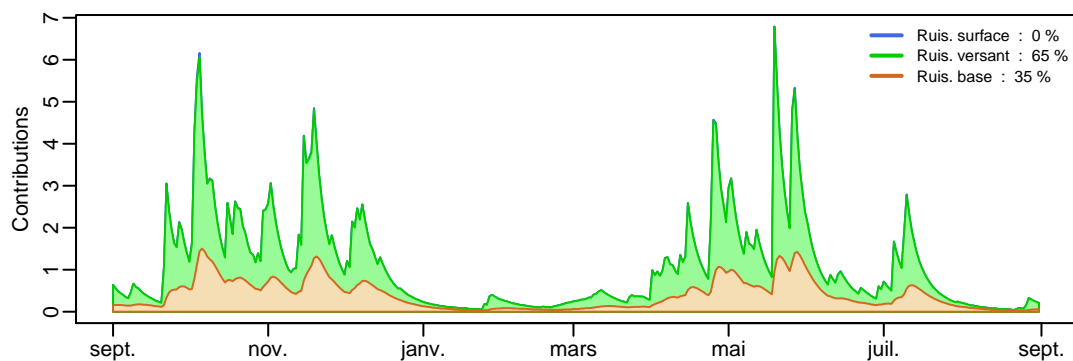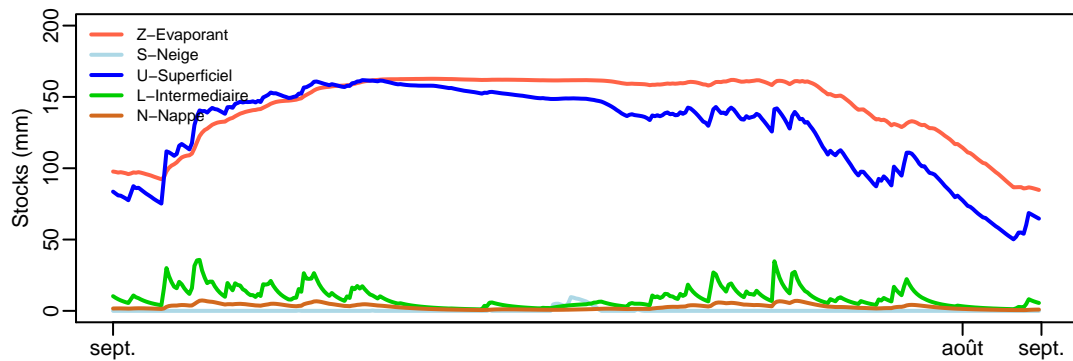

# k0567520 (131.88 km<sup>2</sup>) – année 1993–1994

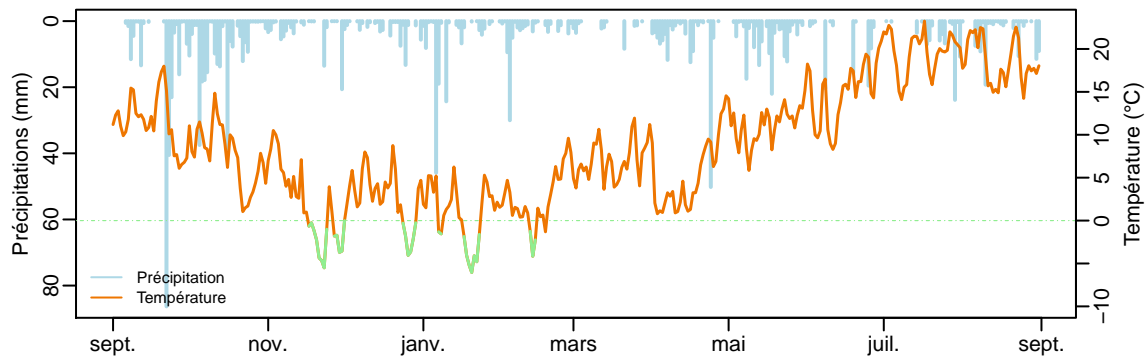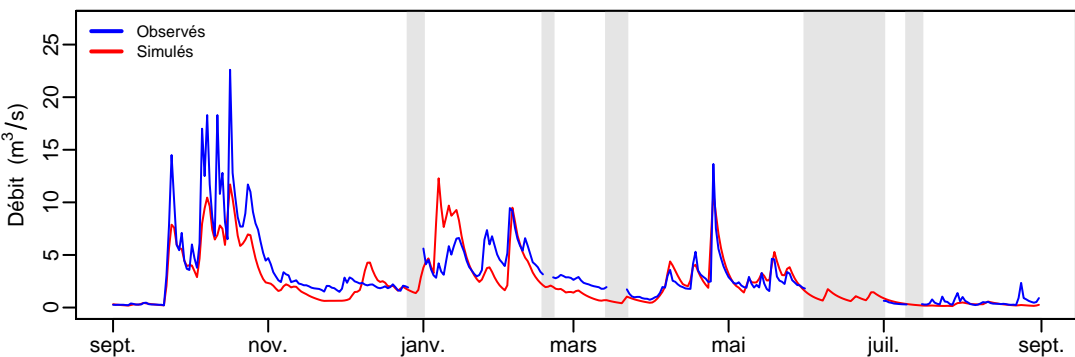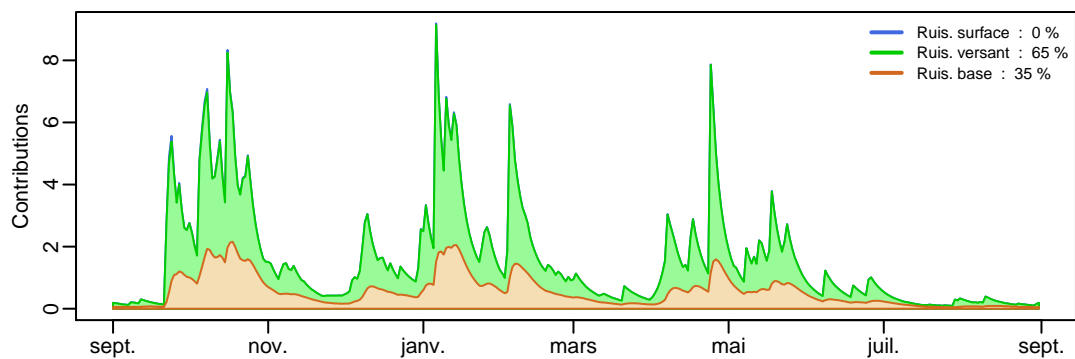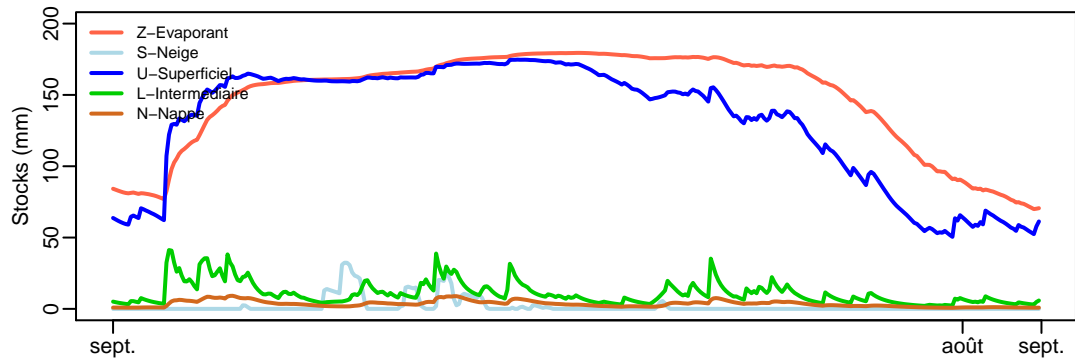

# k0567520 (131.88 km<sup>2</sup>) – année 1994–1995

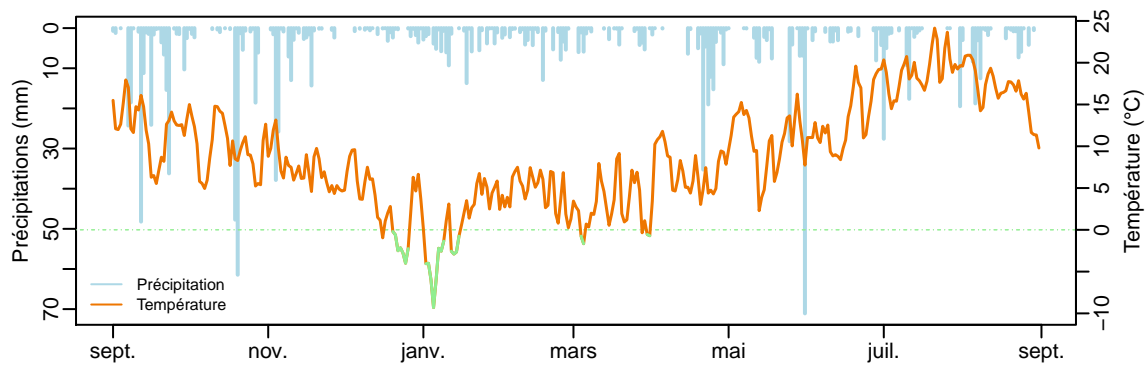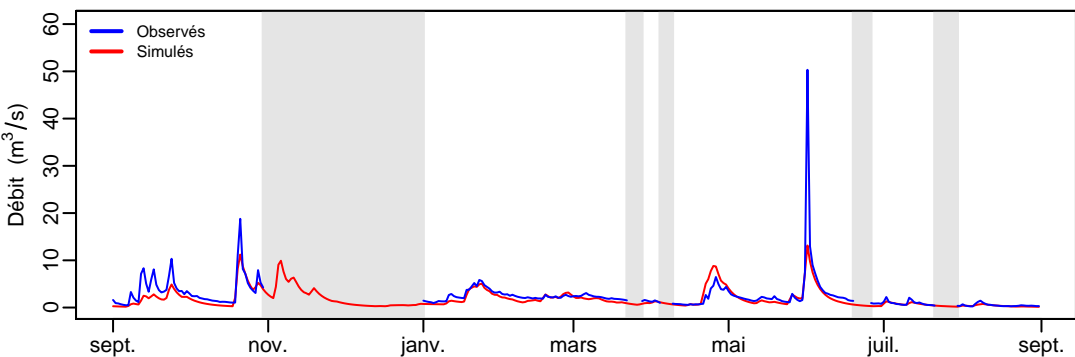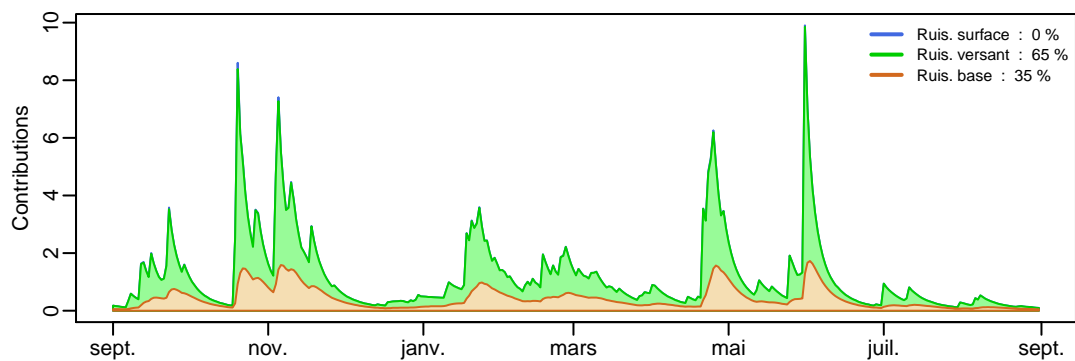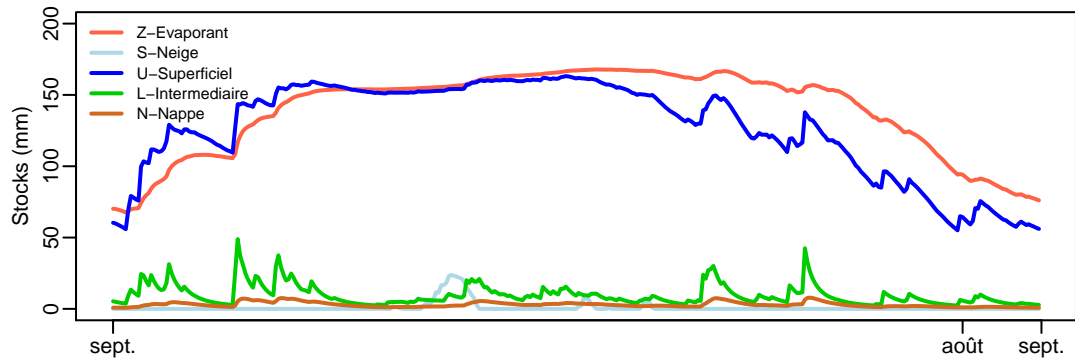

# k0567520 (131.88 km<sup>2</sup>) – année 1995–1996

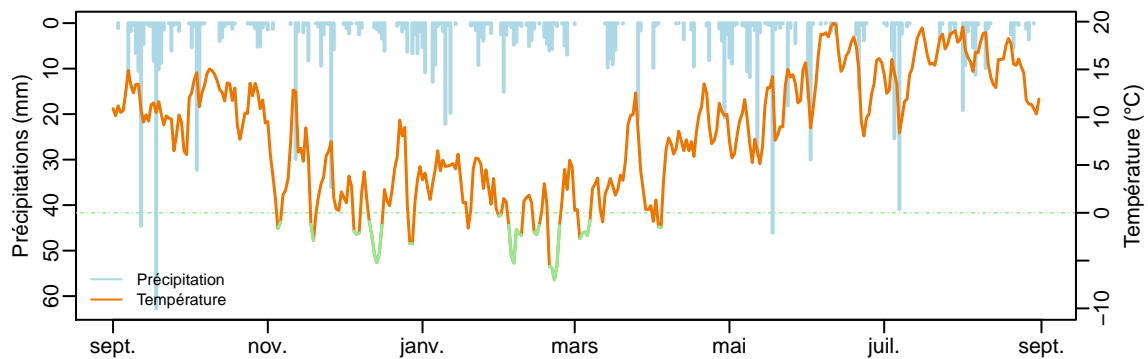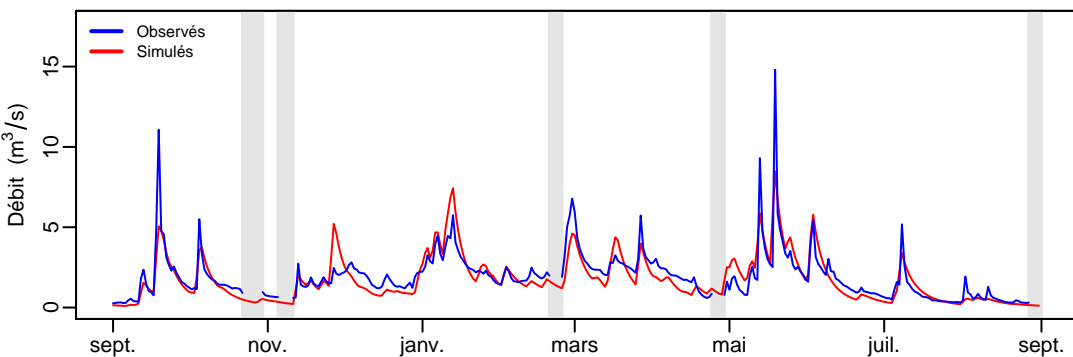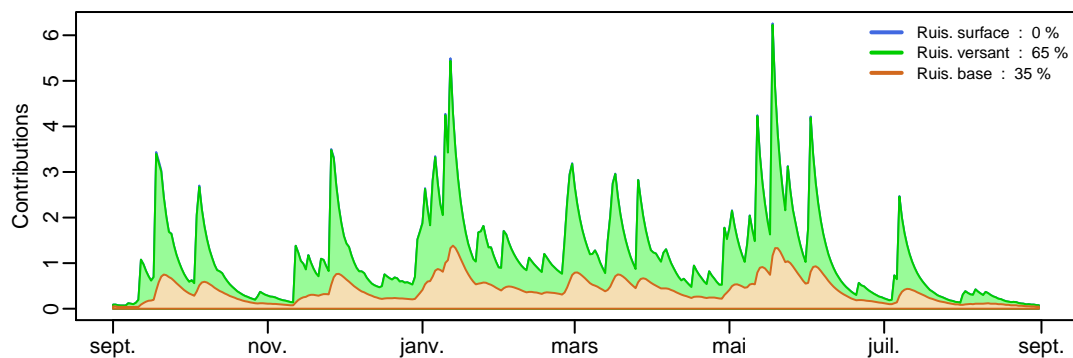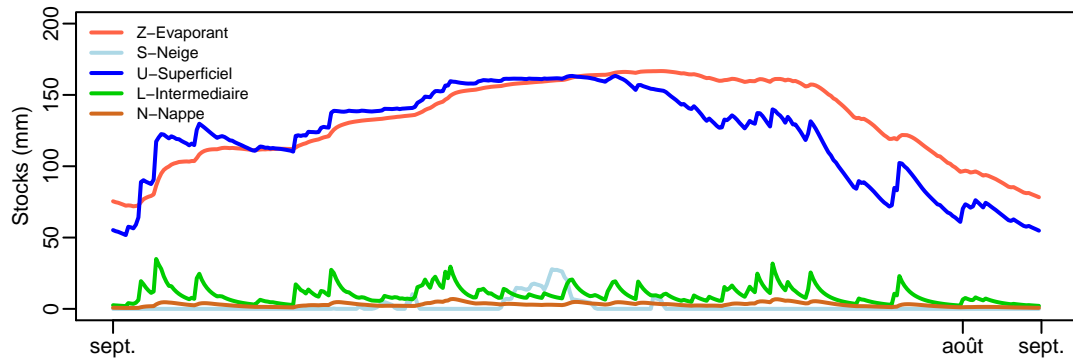



# k0567520 (131.88 km<sup>2</sup>) – année 1996–1997

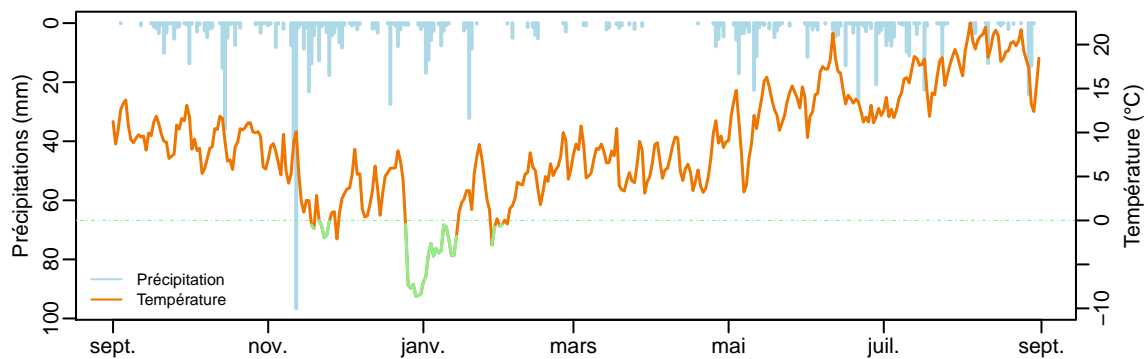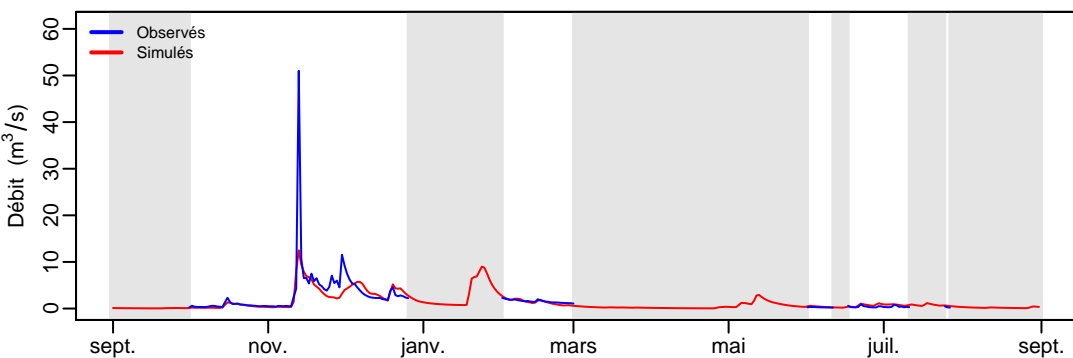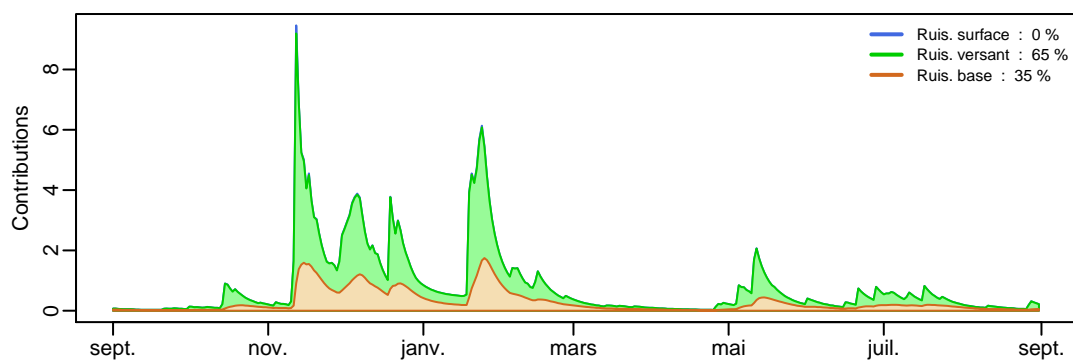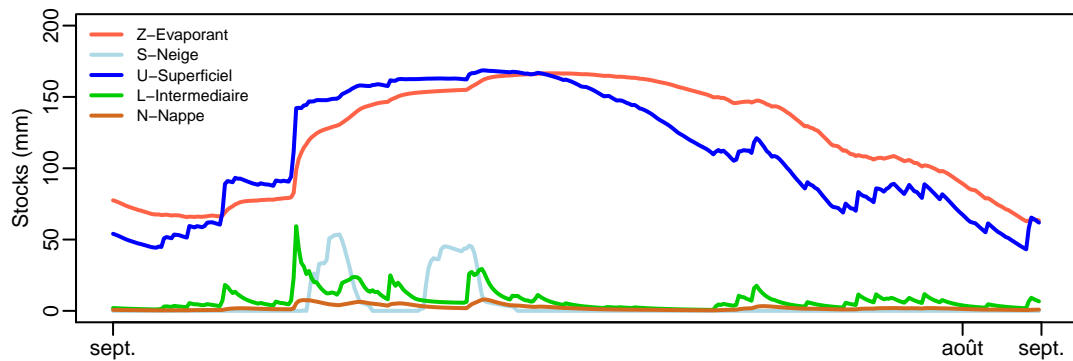

# k0567520 (131.88 km<sup>2</sup>) – année 1997–1998

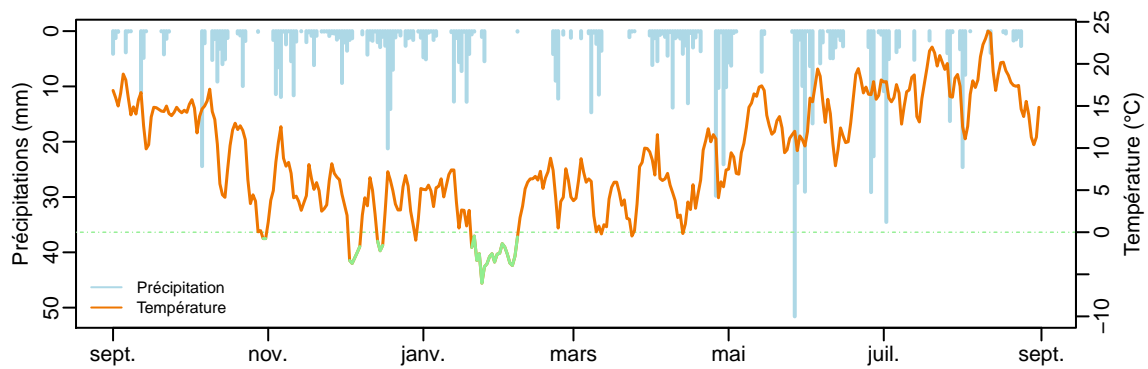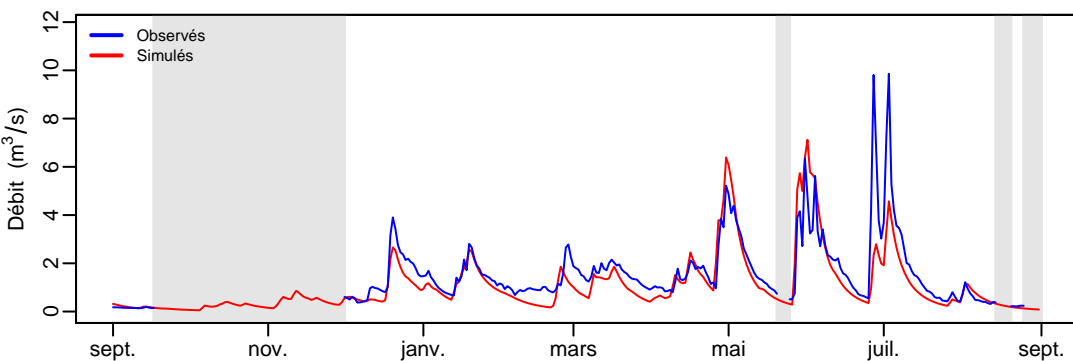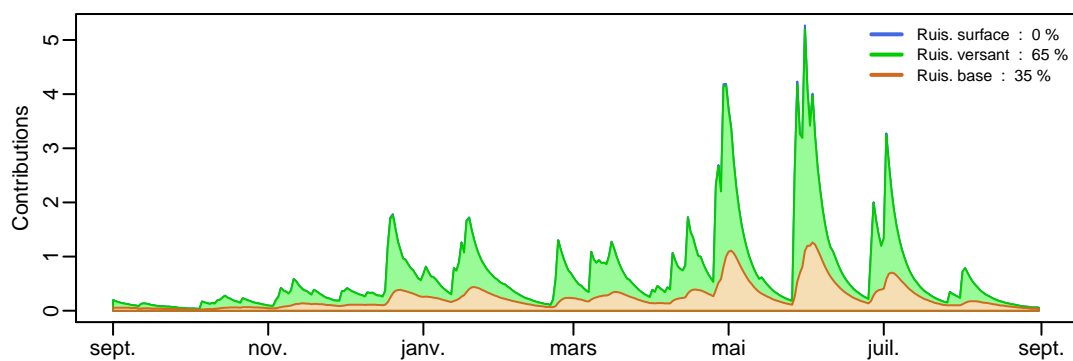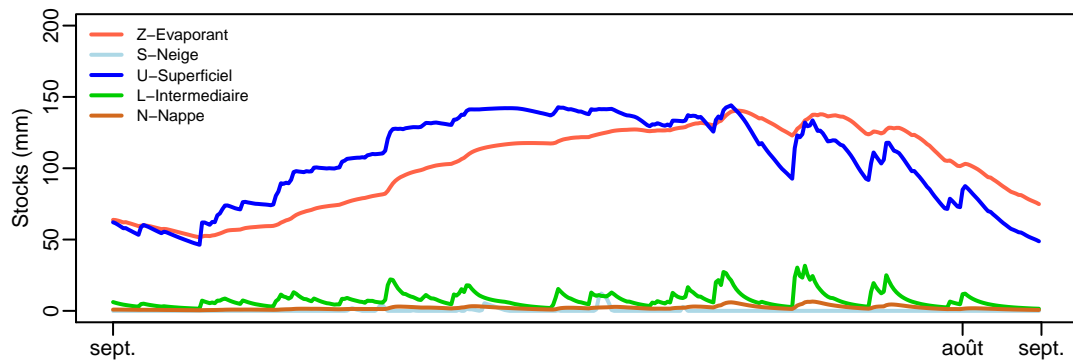

# k0567520 (131.88 km<sup>2</sup>) – année 1998–1999

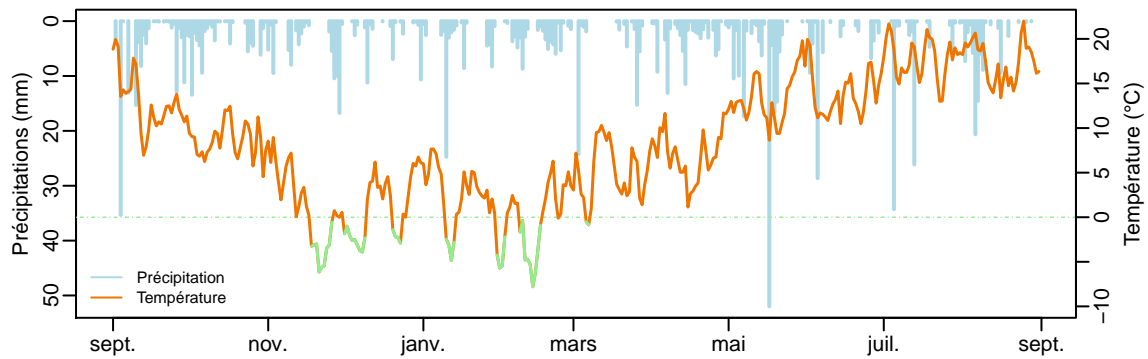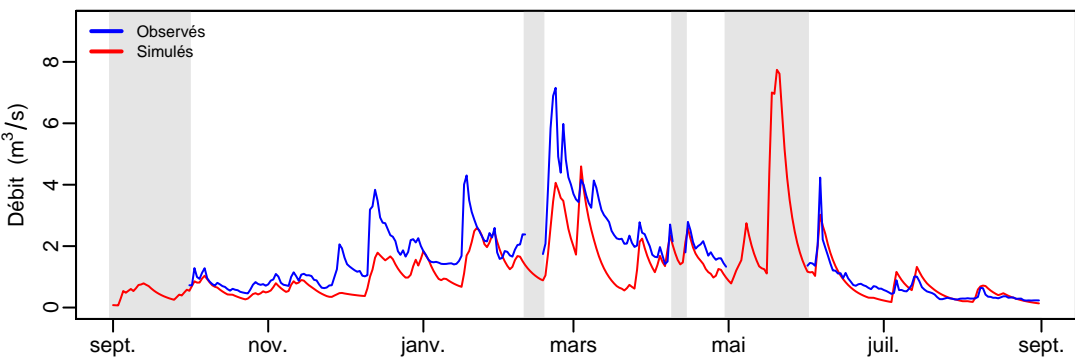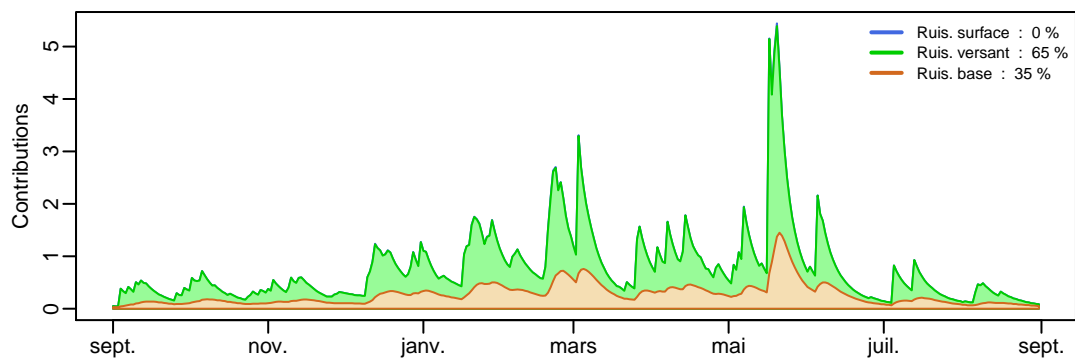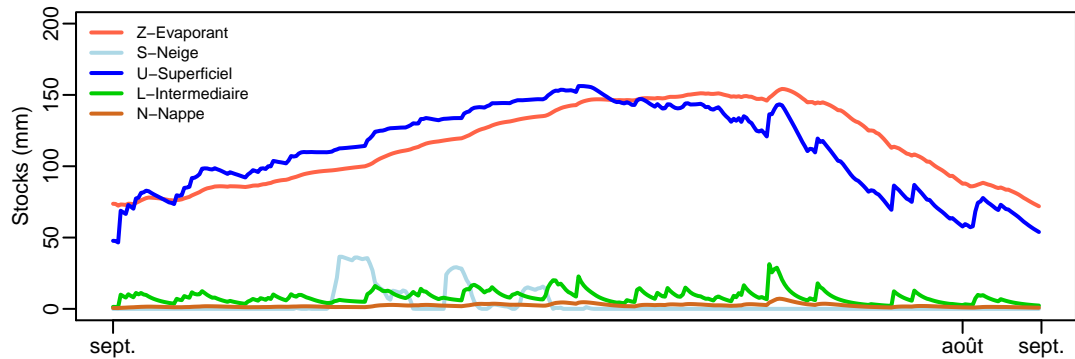

# k0567520 (131.88 km<sup>2</sup>) – année 1999–2000

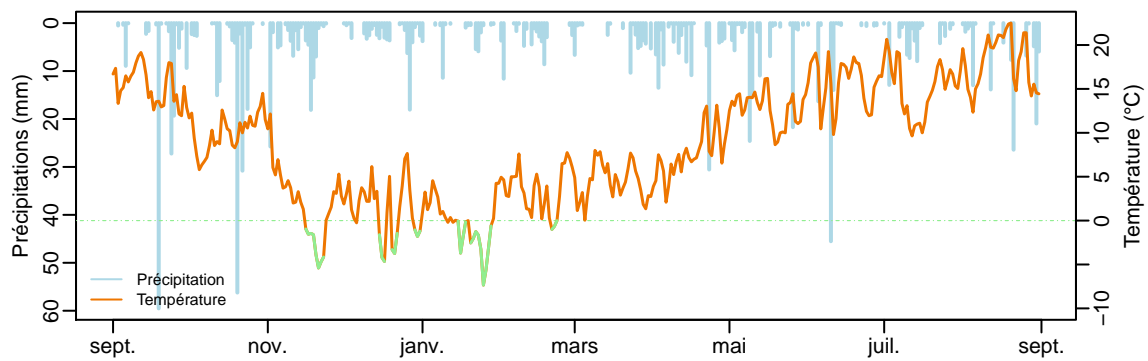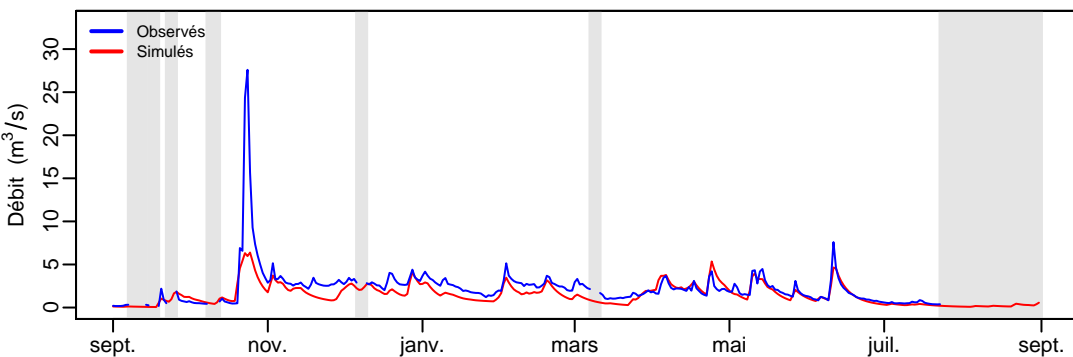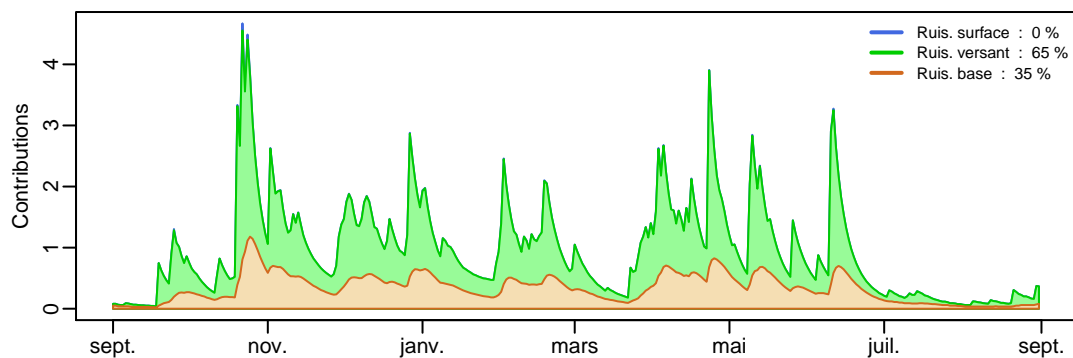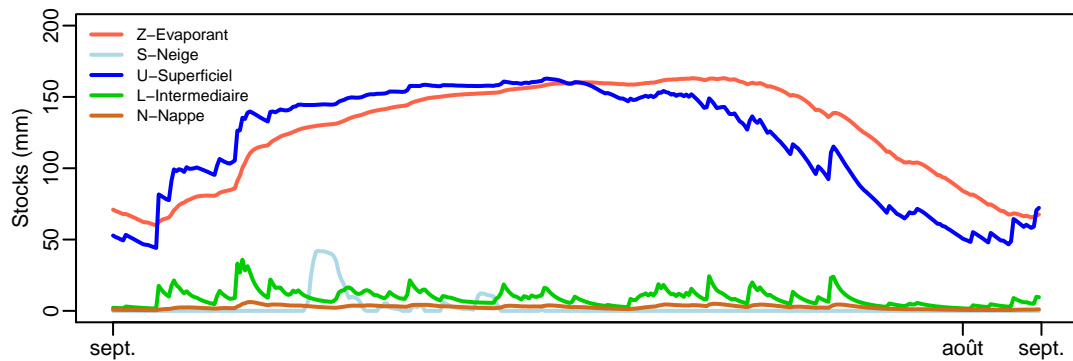

# k0567520 (131.88 km<sup>2</sup>) – année 2000–2001

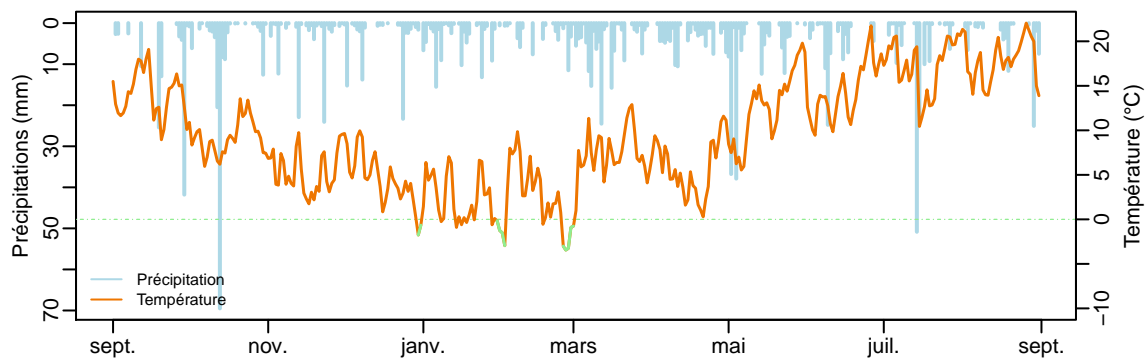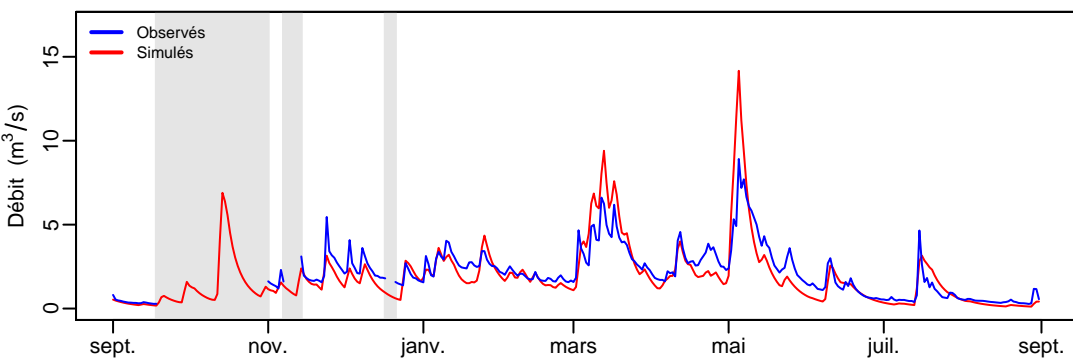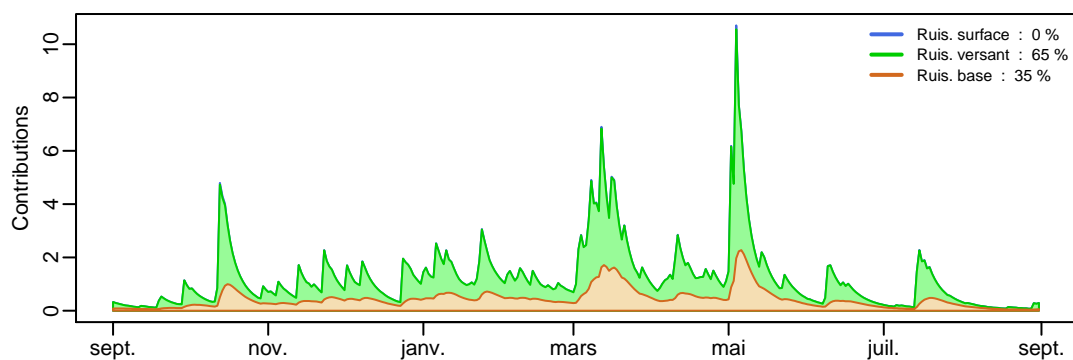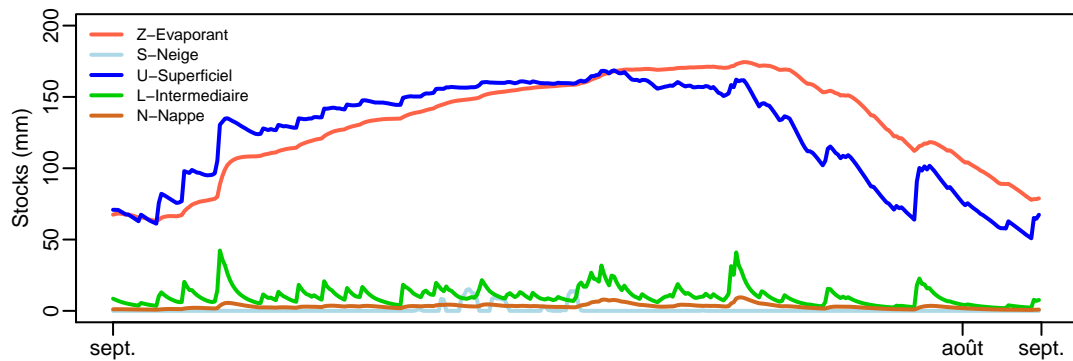

# k0567520 (131.88 km<sup>2</sup>) – année 2001–2002

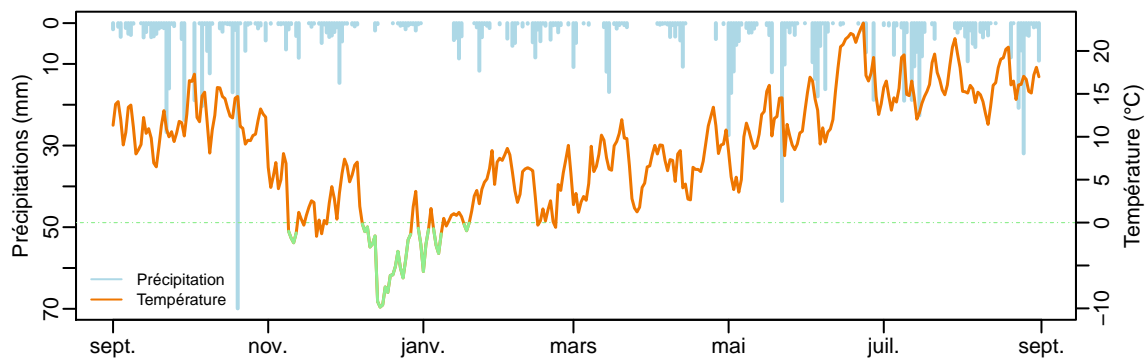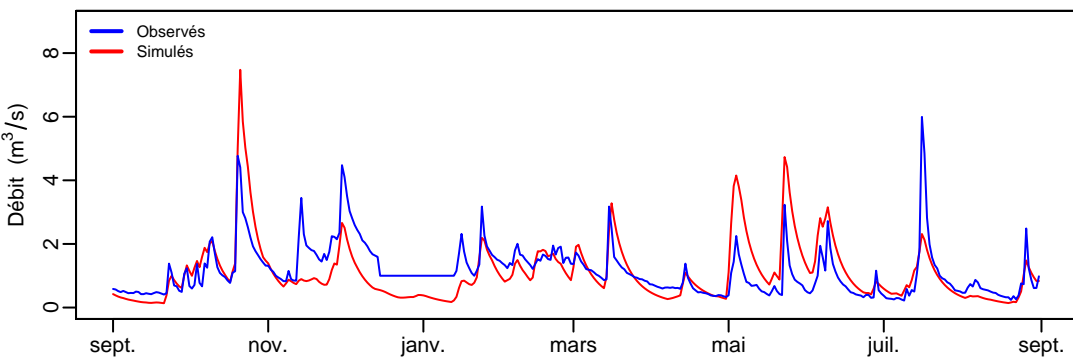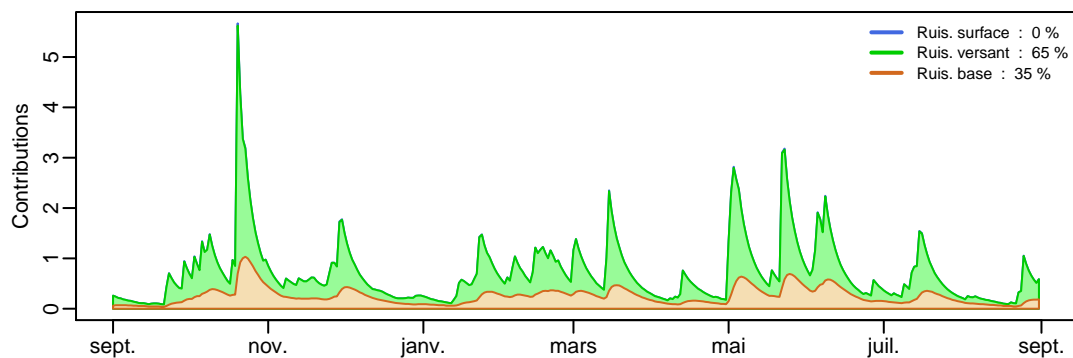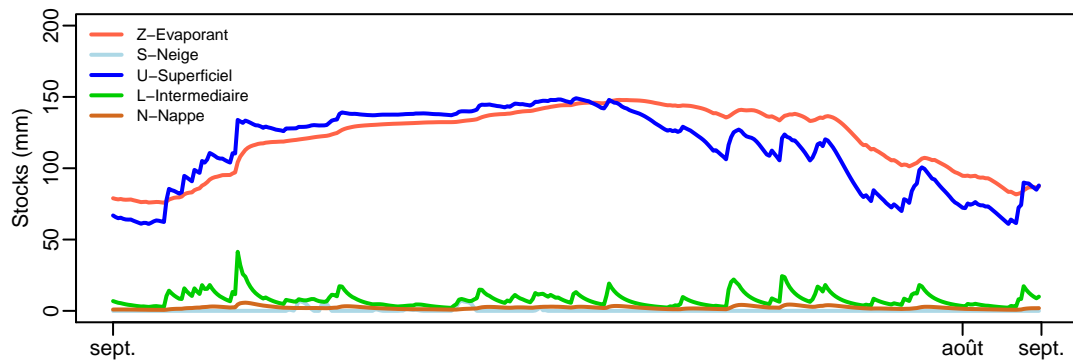

# k0567520 (131.88 km<sup>2</sup>) – année 2002–2003

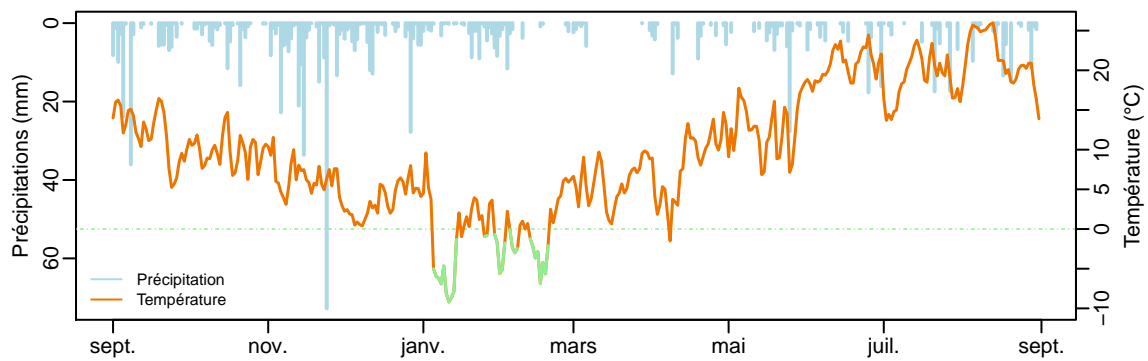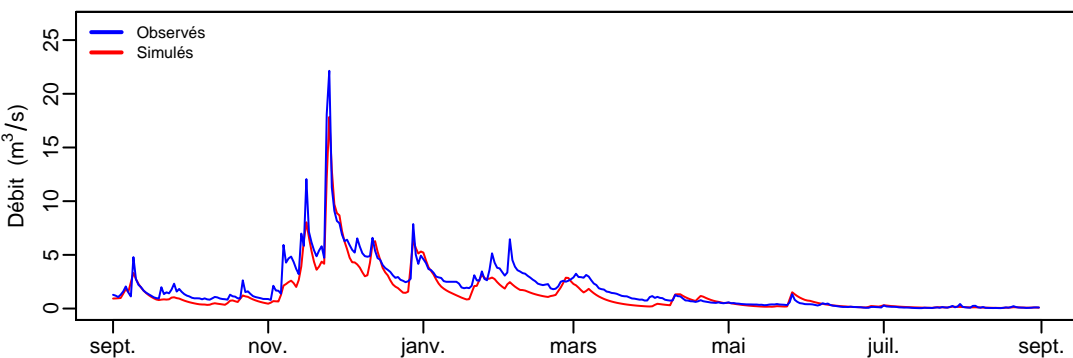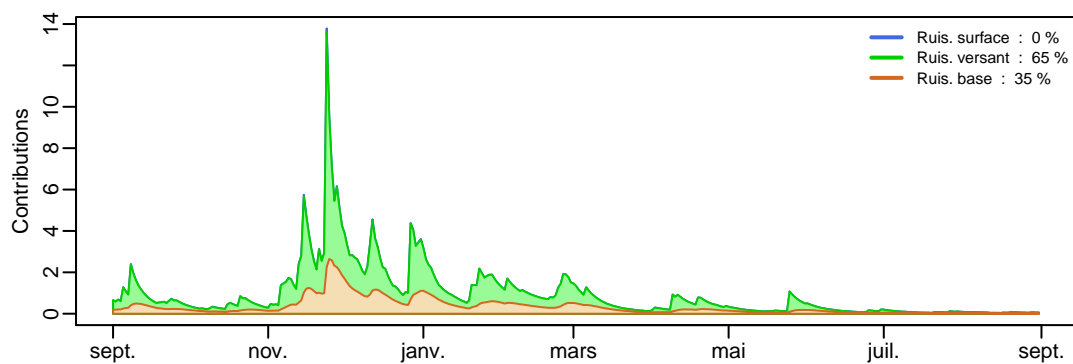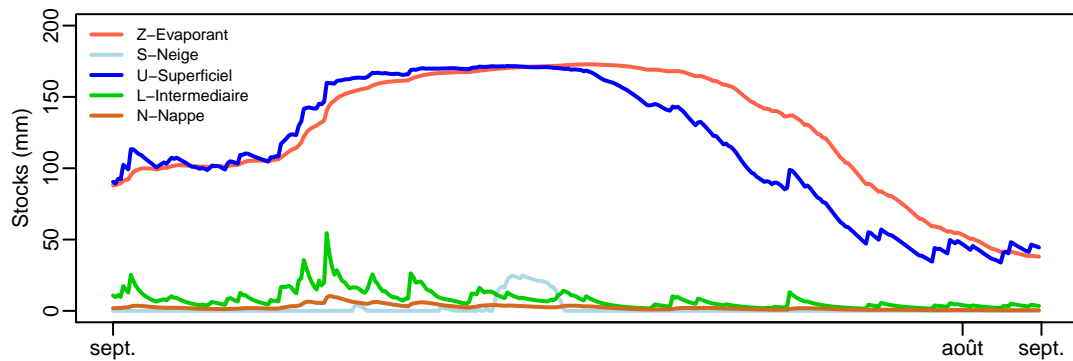

# k0567520 (131.88 km<sup>2</sup>) – année 2003–2004

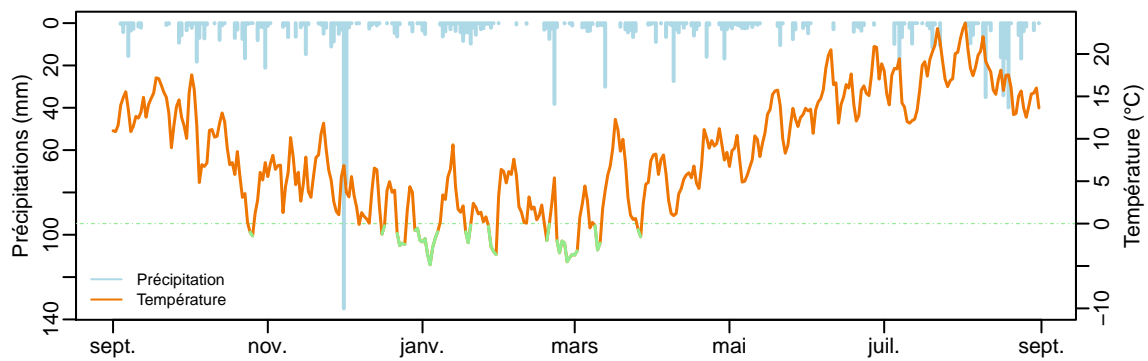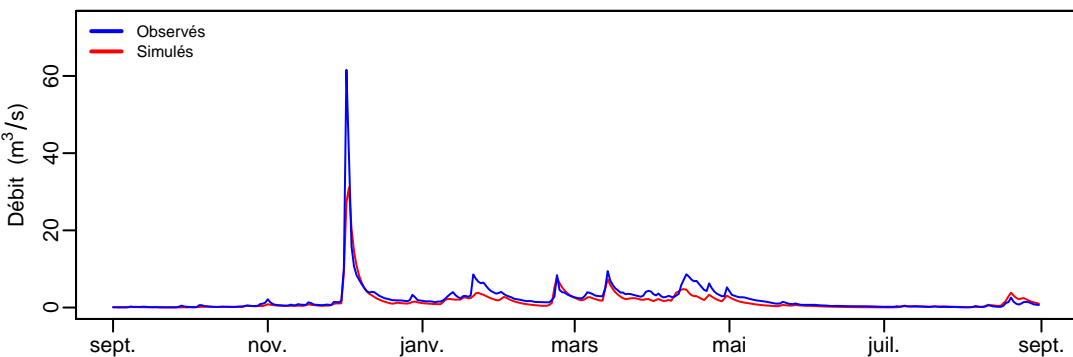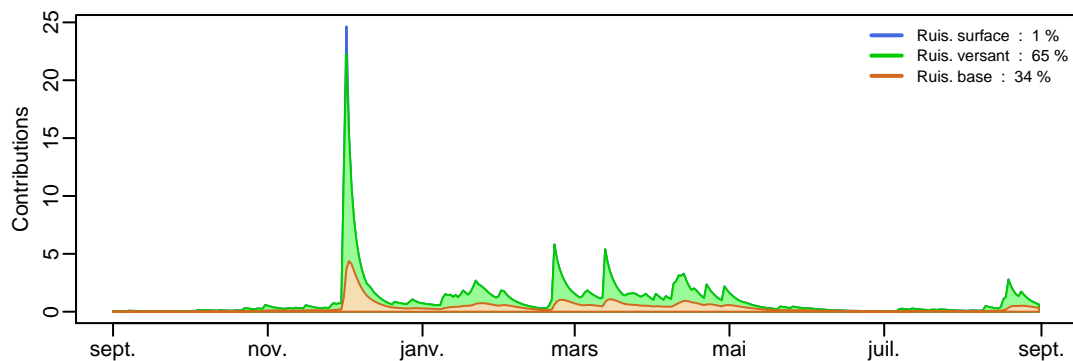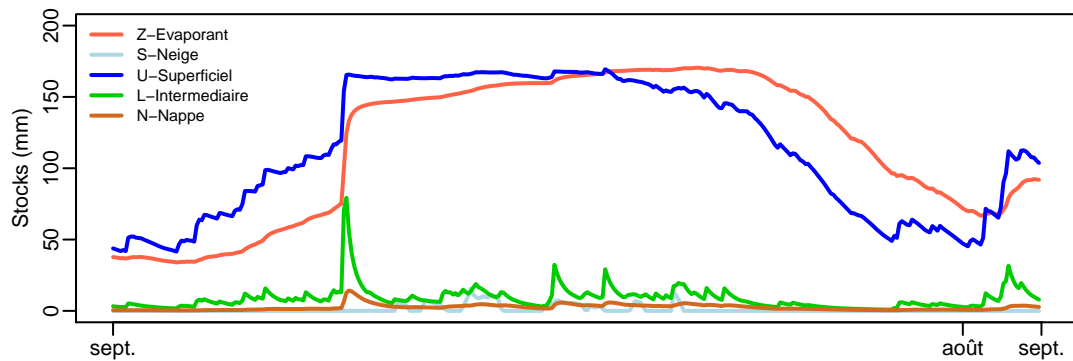



# k0567520 (131.88 km<sup>2</sup>) – année 2004–2005

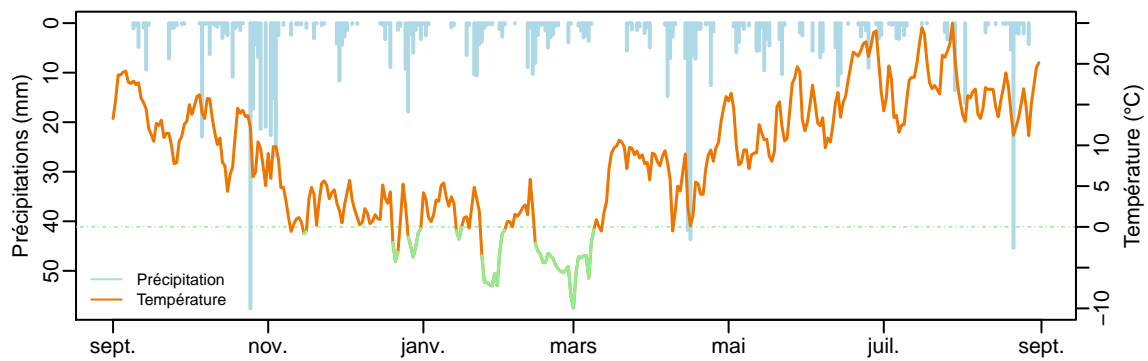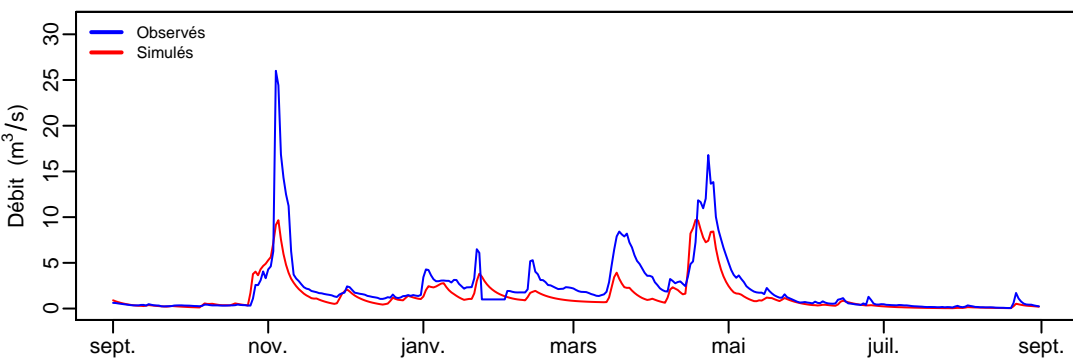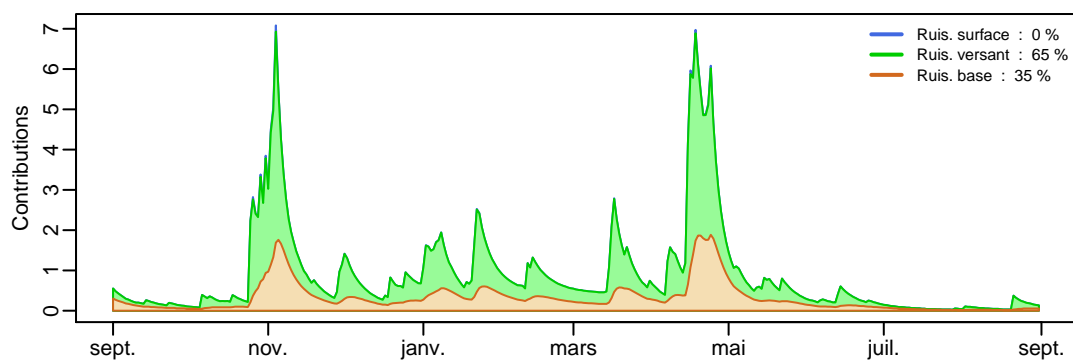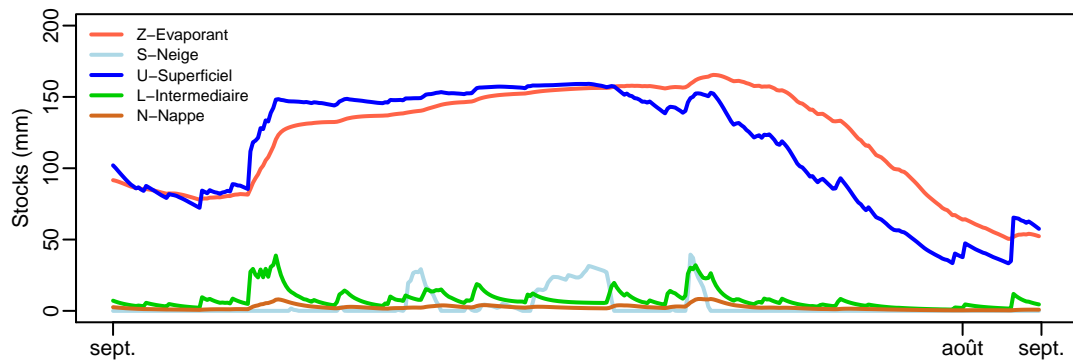

# k0567520 (131.88 km<sup>2</sup>) – année 2005–2006

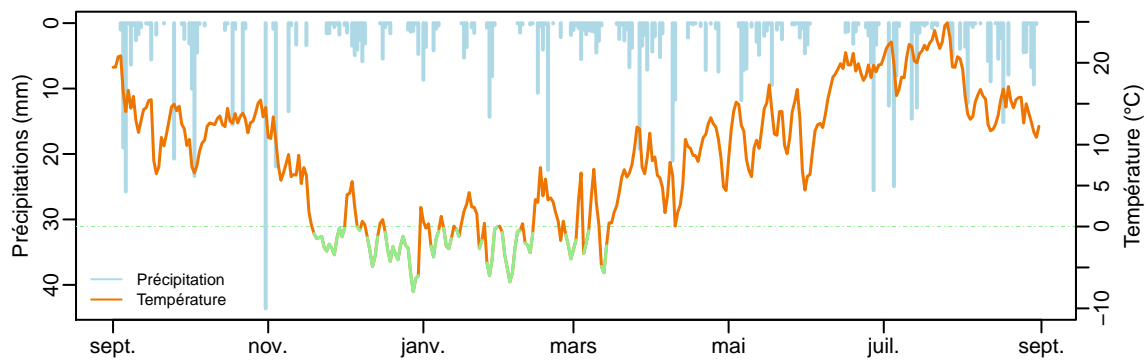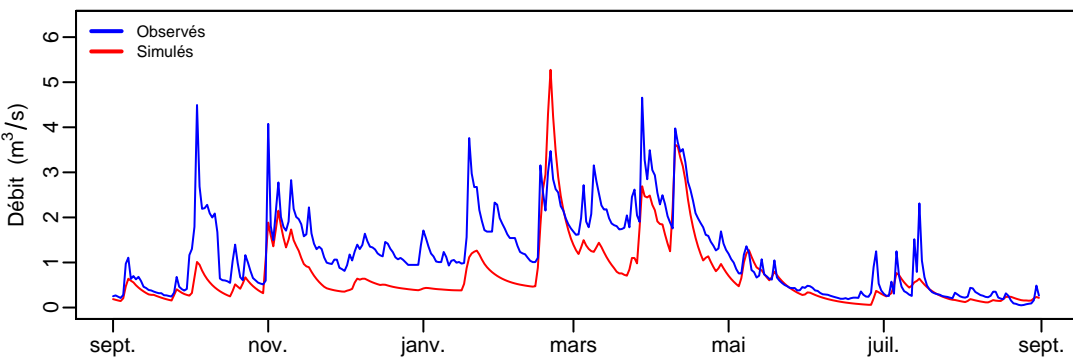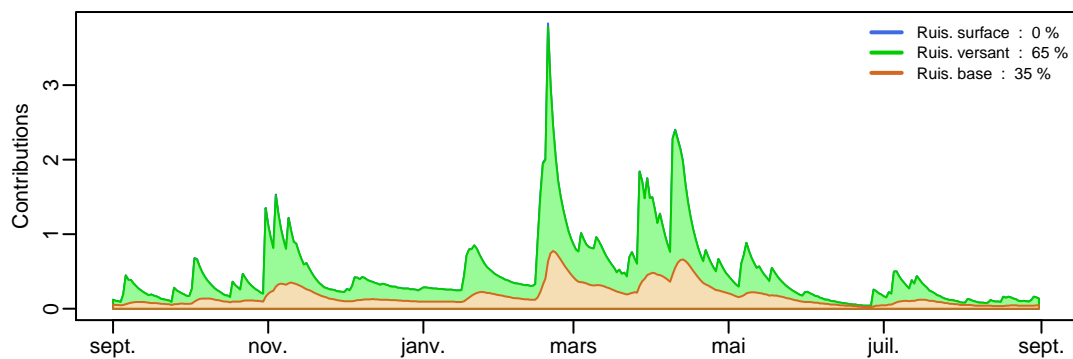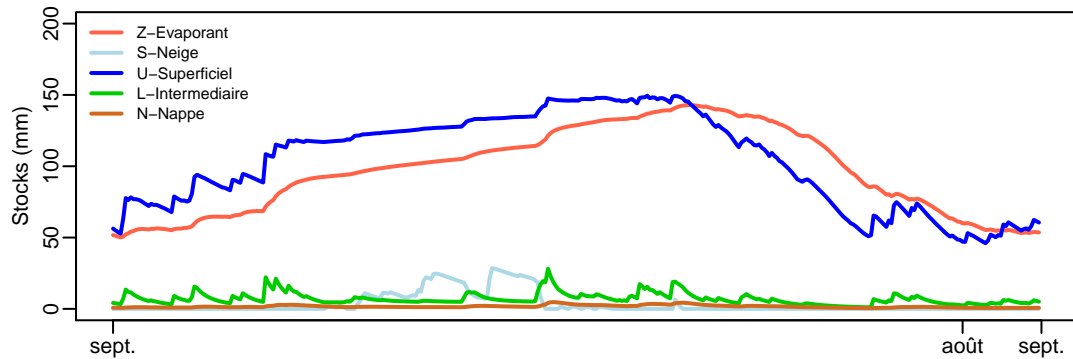

# k0567520 (131.88 km<sup>2</sup>) – année 2006–2007

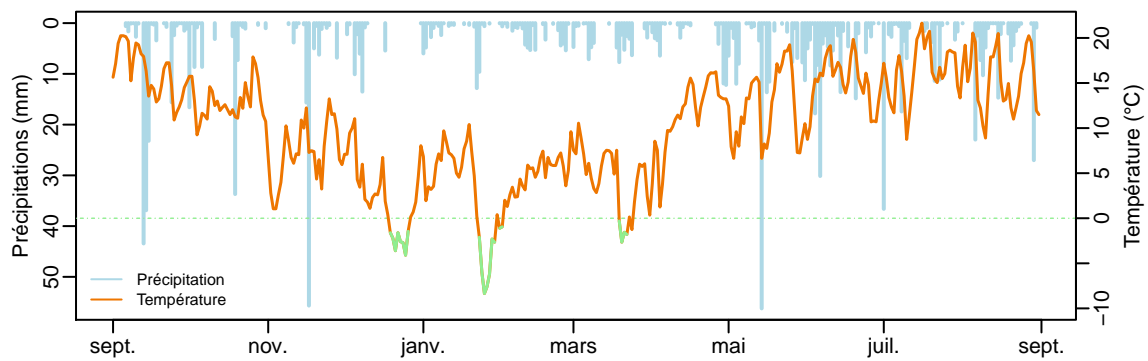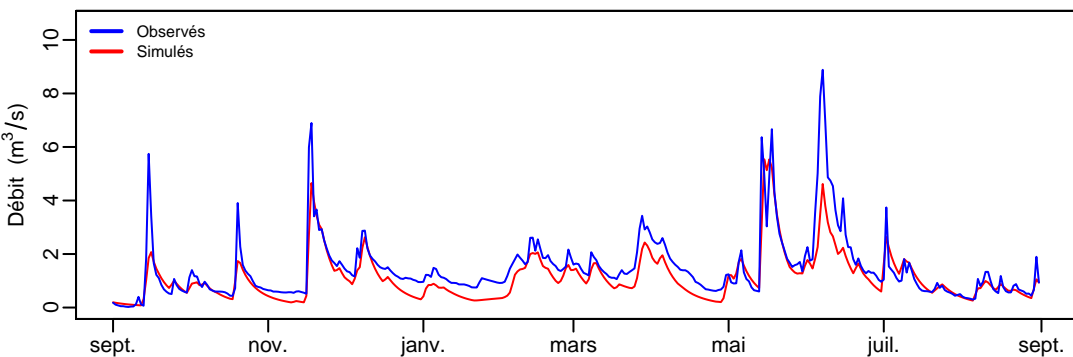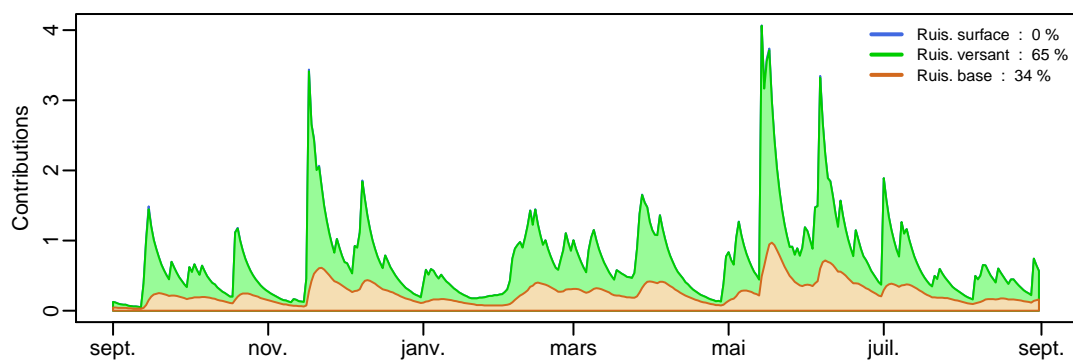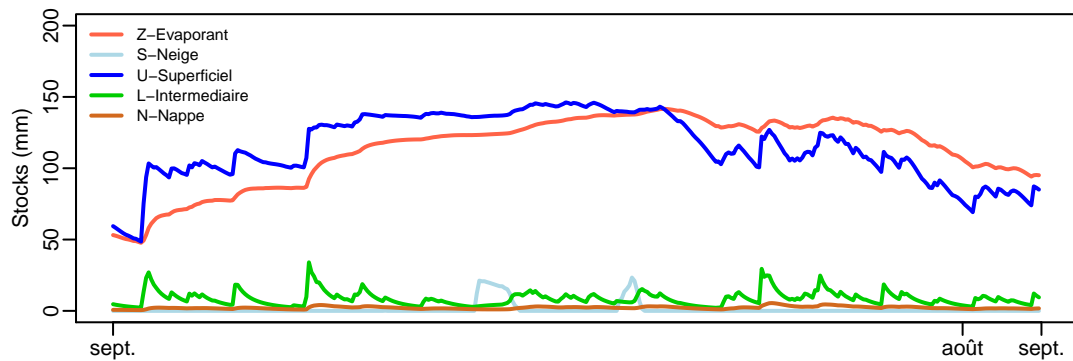

# k0567520 (131.88 km<sup>2</sup>) – année 2007–2008

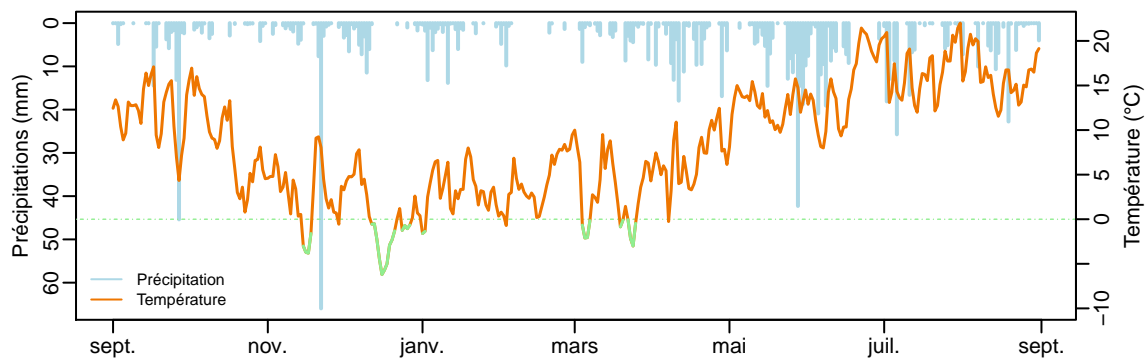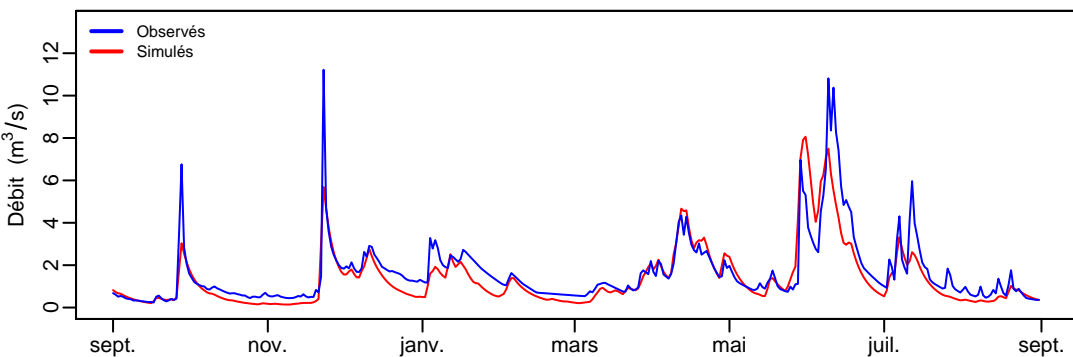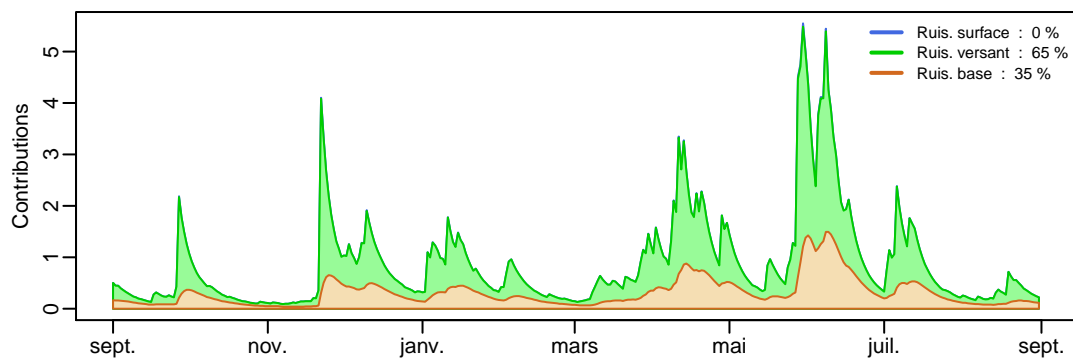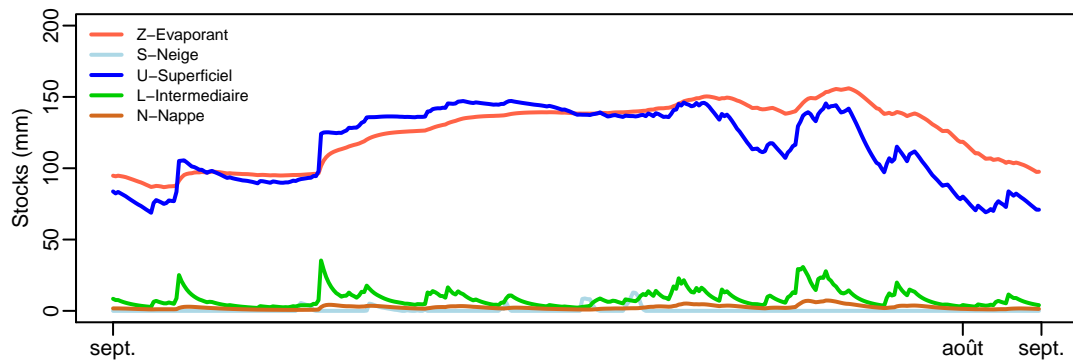

# k0624510 (104.69 km<sup>2</sup>) – année 1981–1982

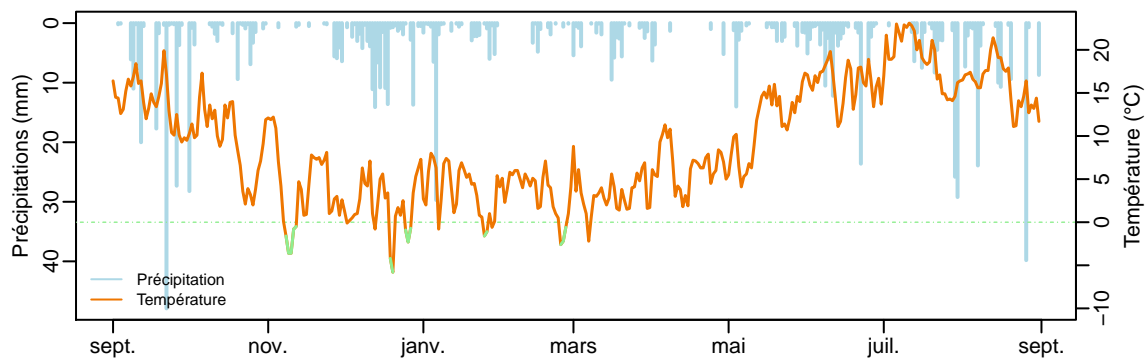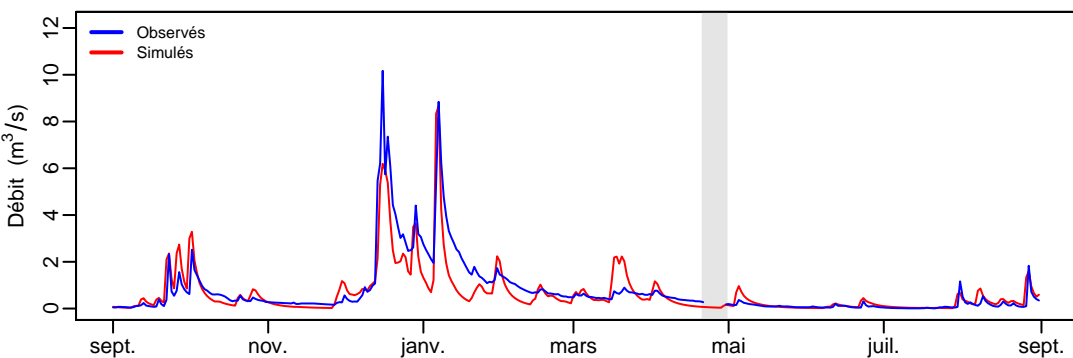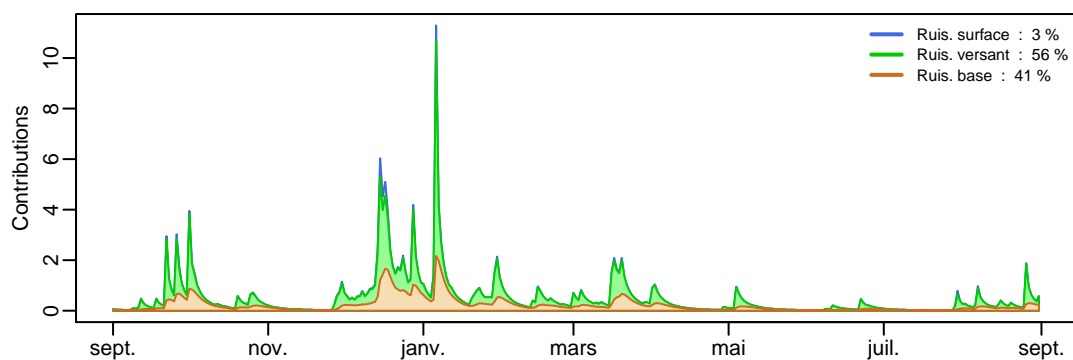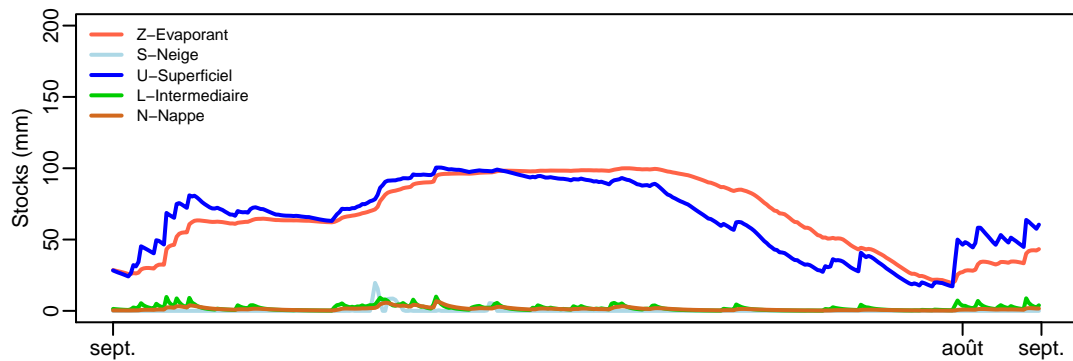

# k0624510 (104.69 km<sup>2</sup>) – année 1982–1983

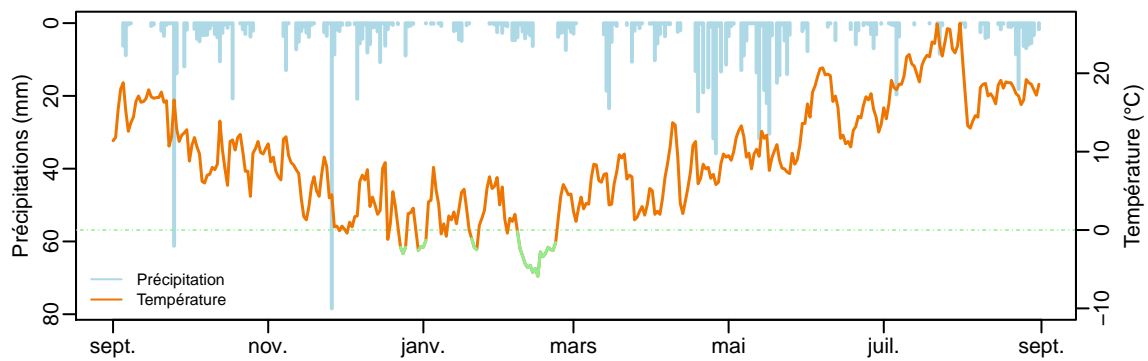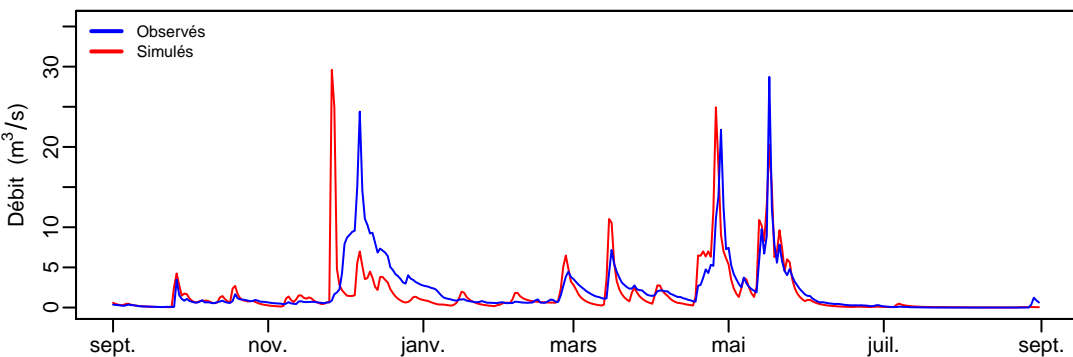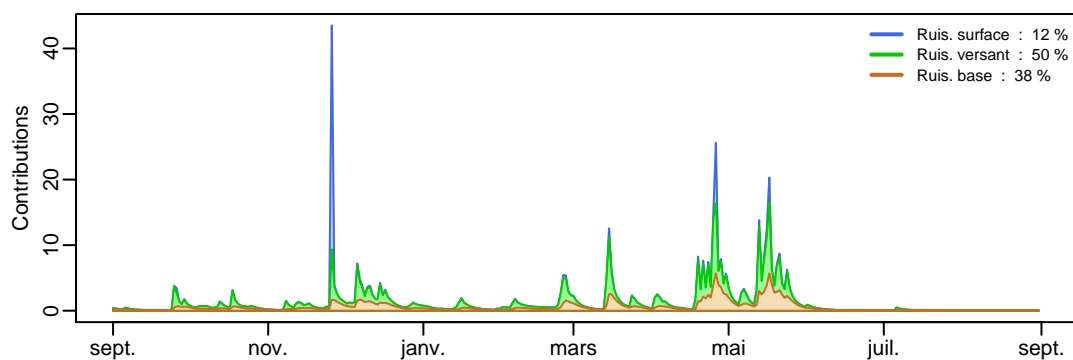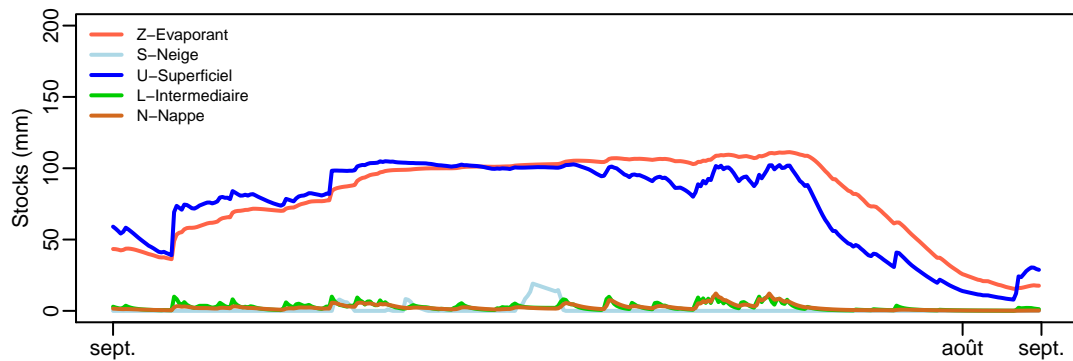

# k0624510 (104.69 km<sup>2</sup>) – année 1983–1984

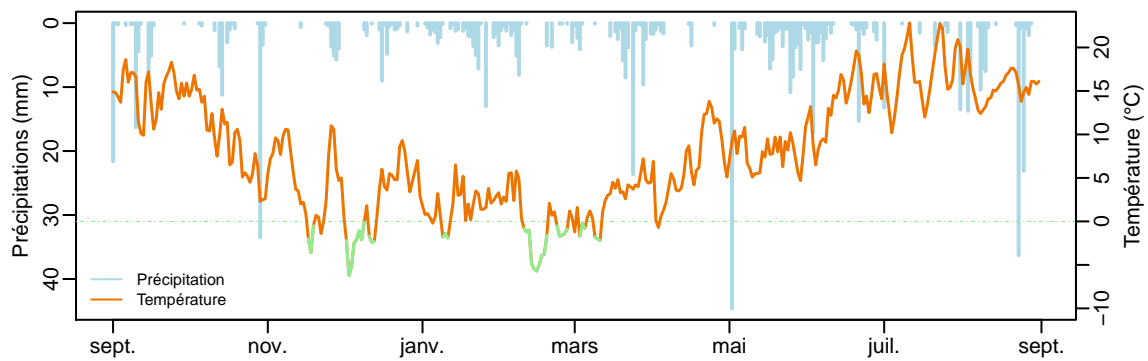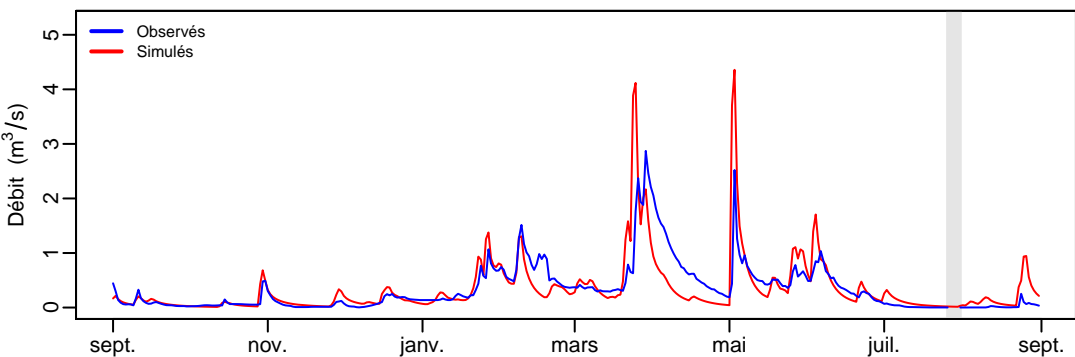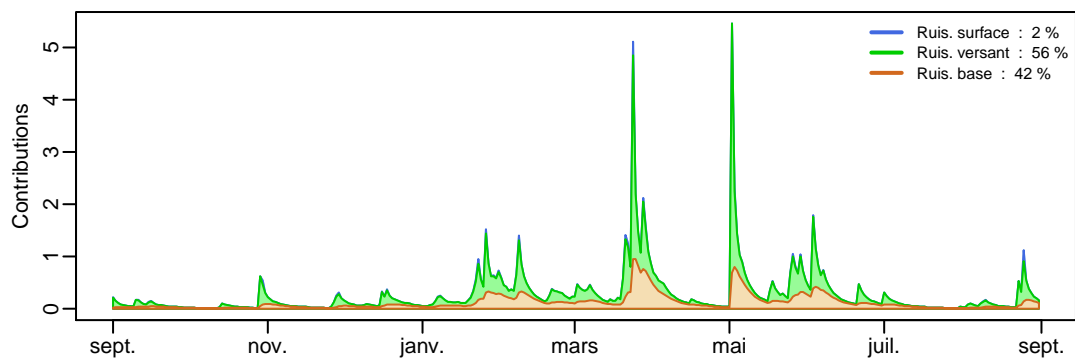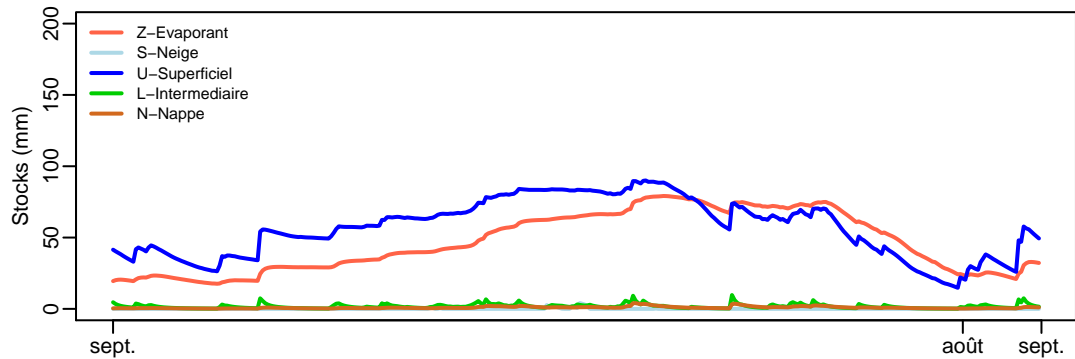

# k0624510 (104.69 km<sup>2</sup>) – année 1984–1985

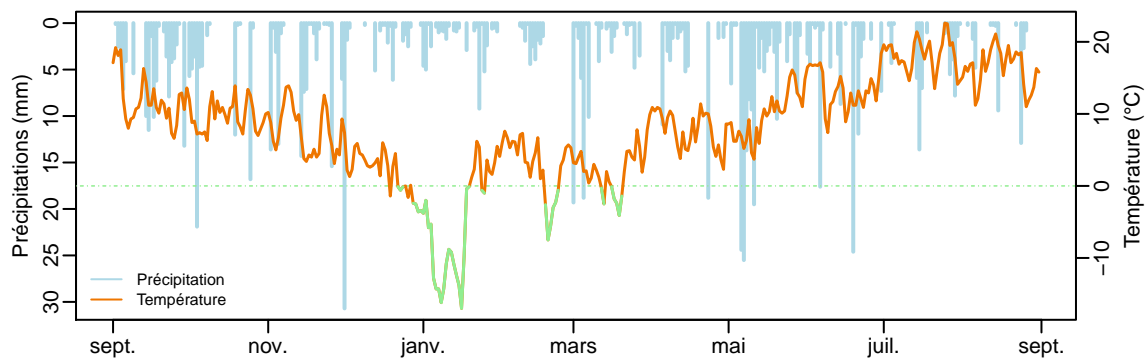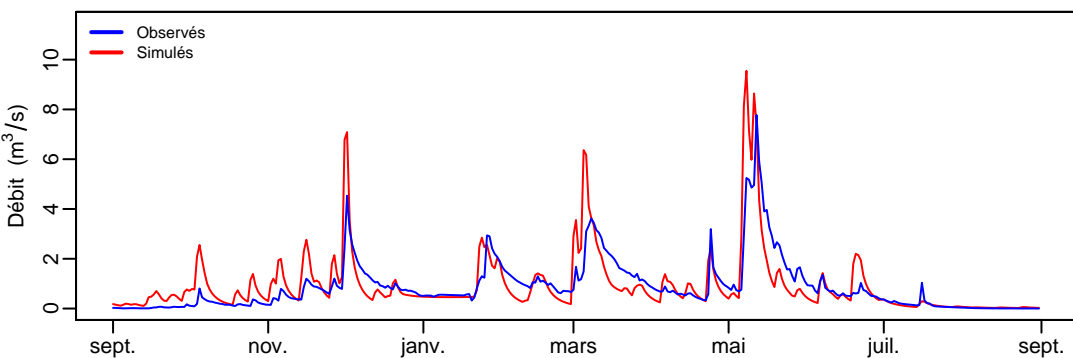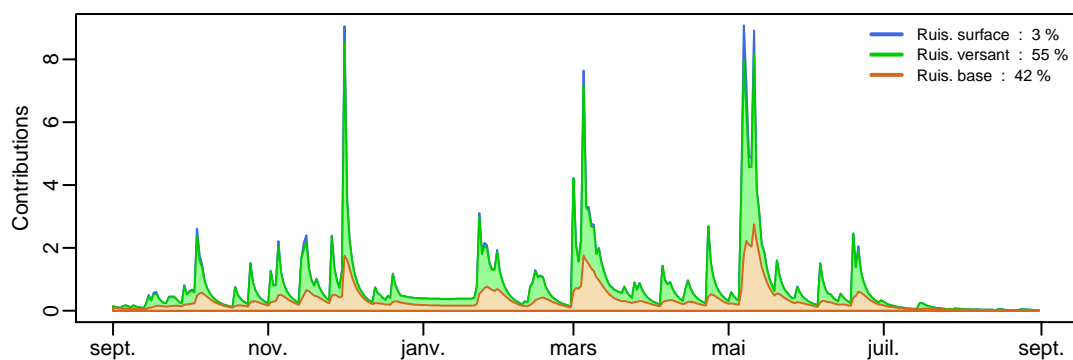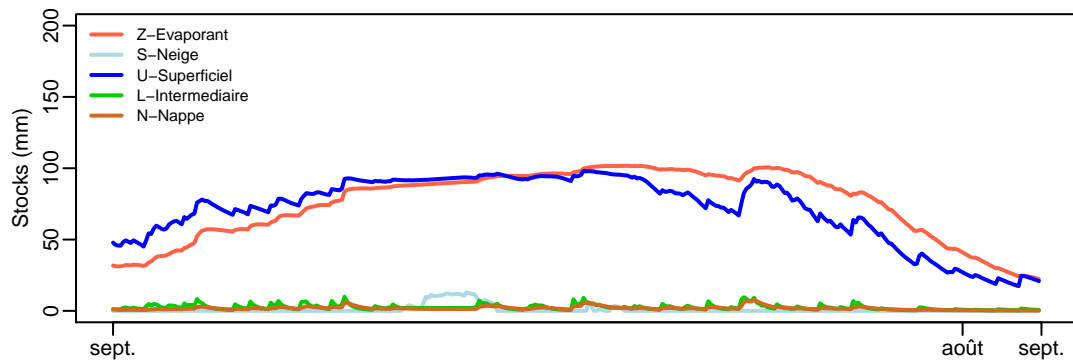



# k0624510 (104.69 km<sup>2</sup>) – année 1985–1986

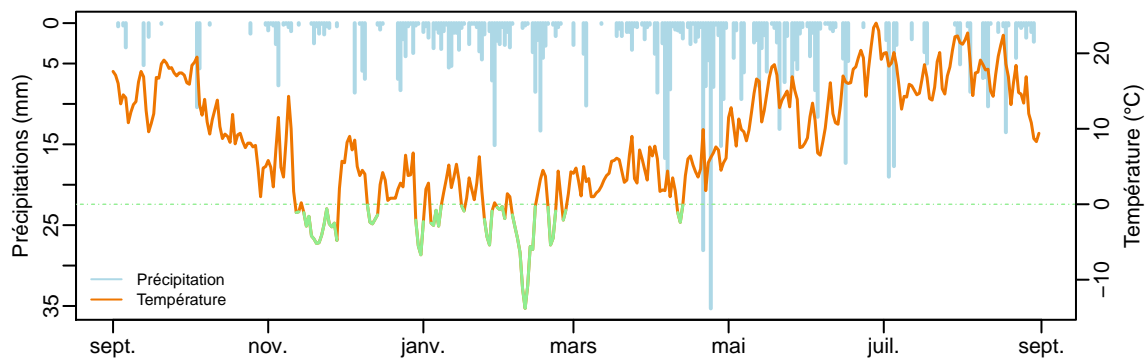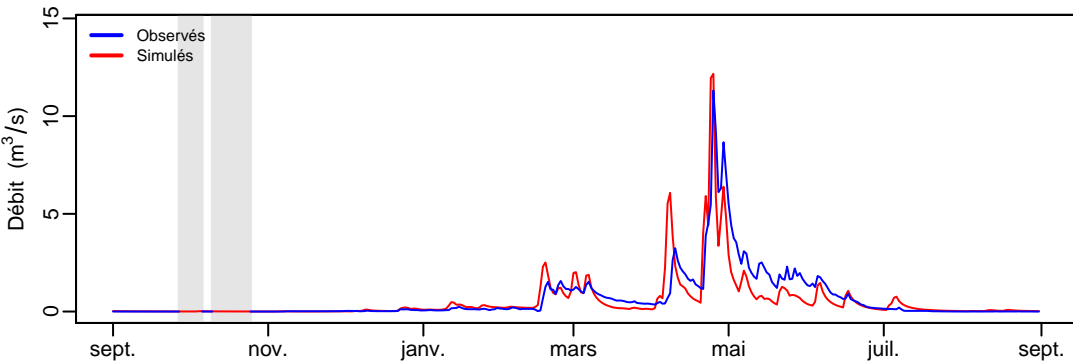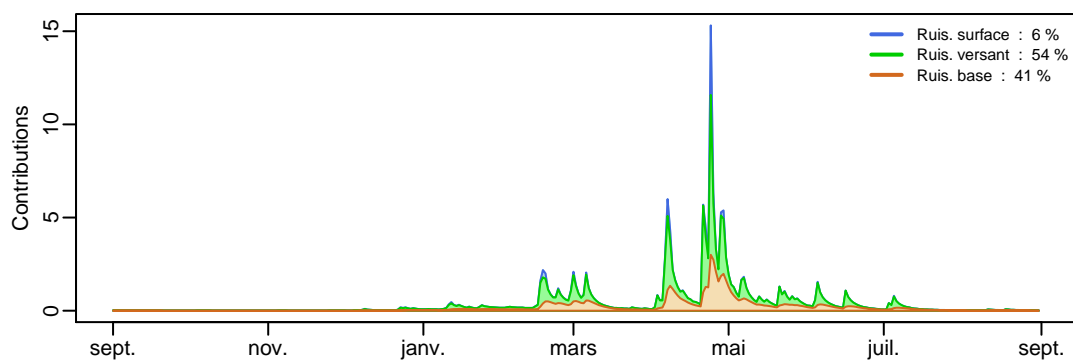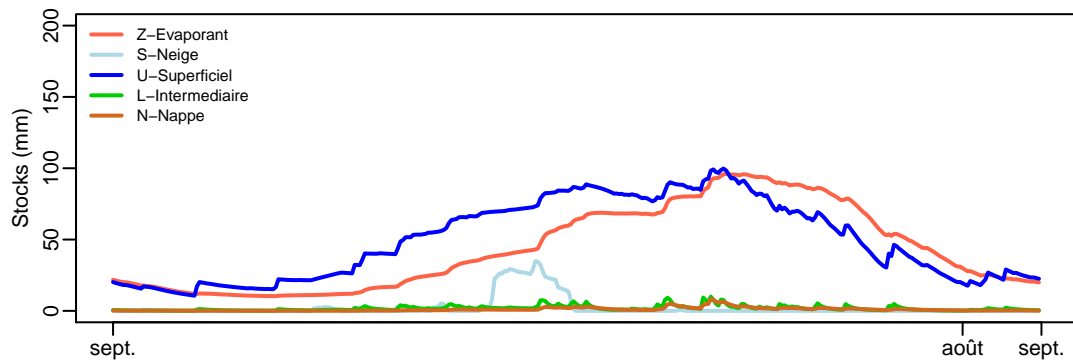

# k0624510 (104.69 km<sup>2</sup>) – année 1986–1987

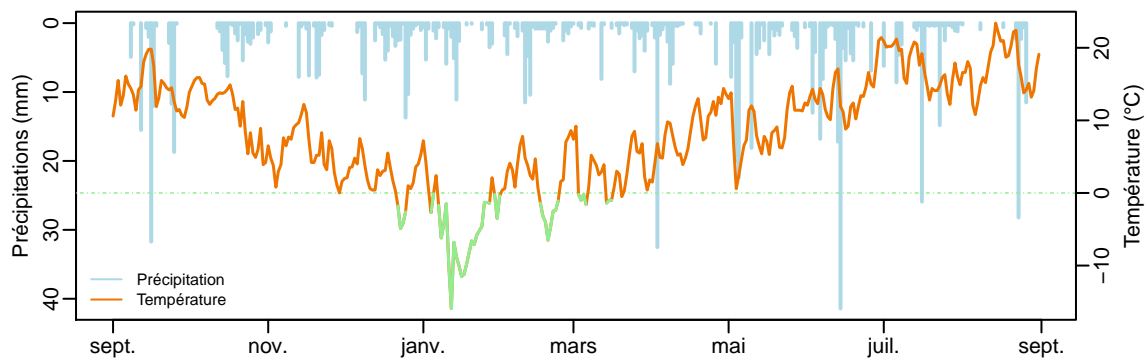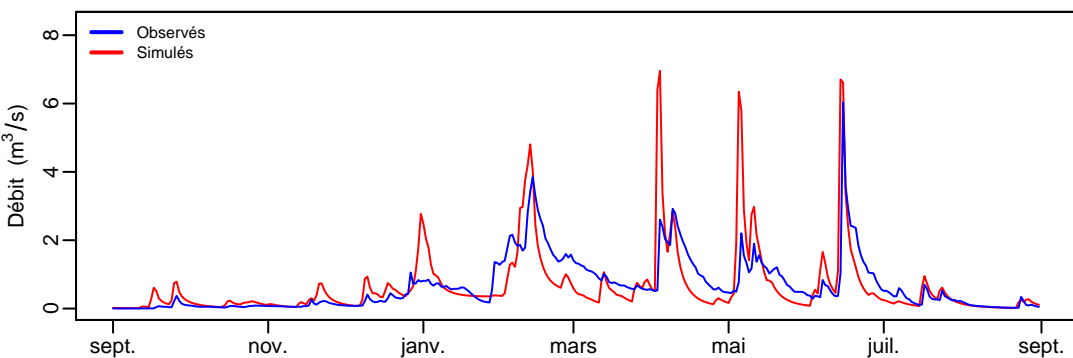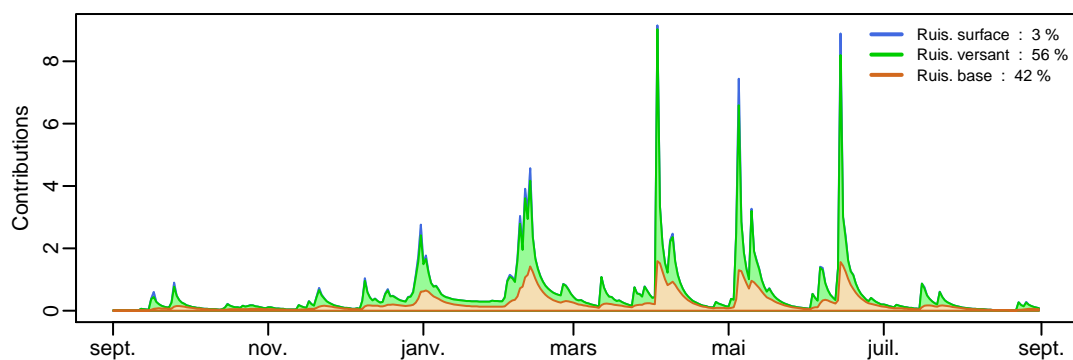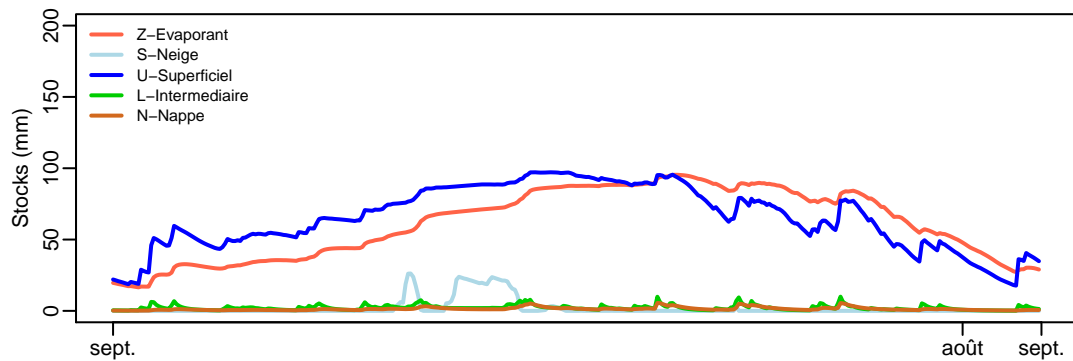

# k0624510 (104.69 km<sup>2</sup>) – année 1987–1988

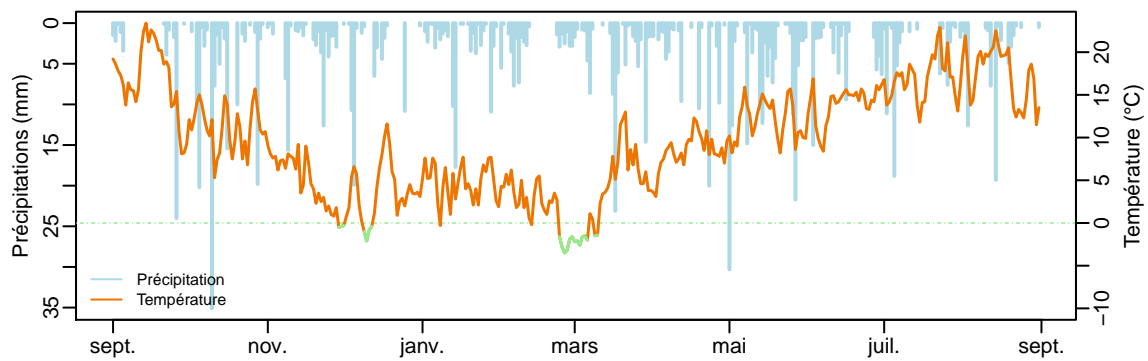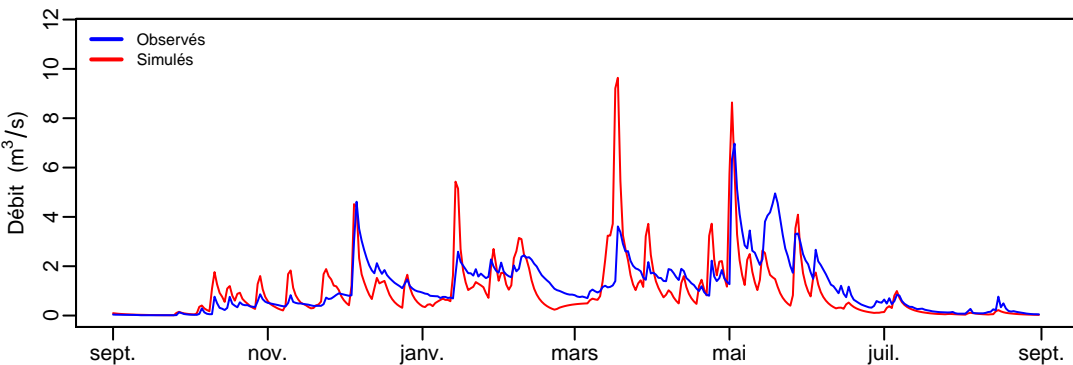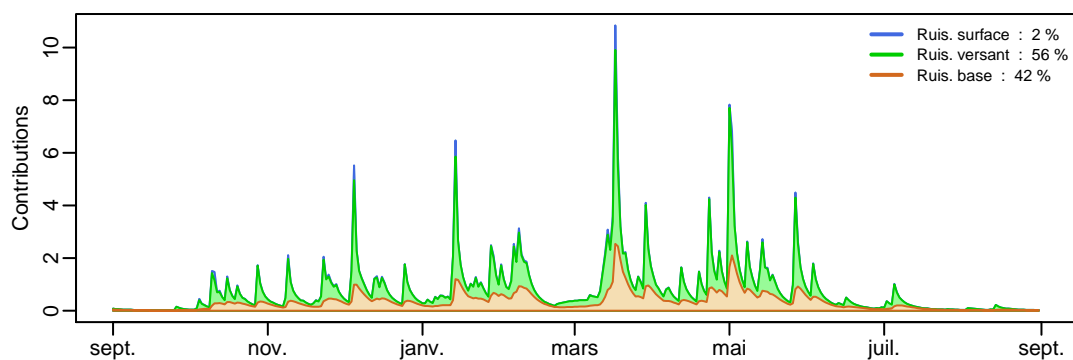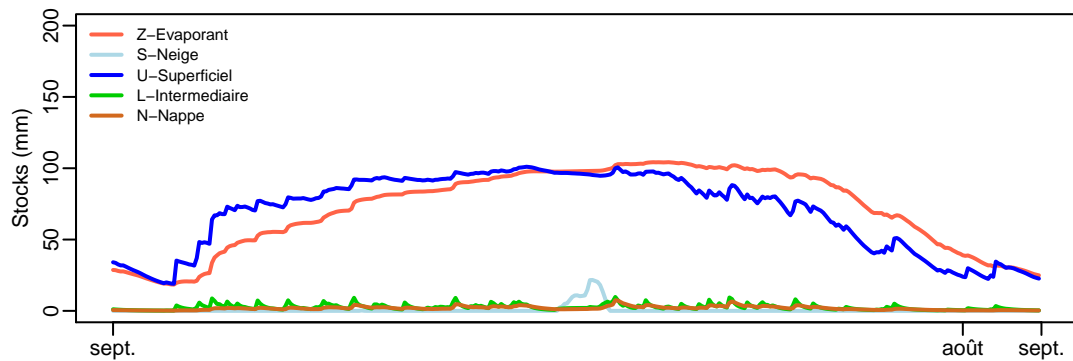

# k0624510 (104.69 km<sup>2</sup>) – année 1988–1989

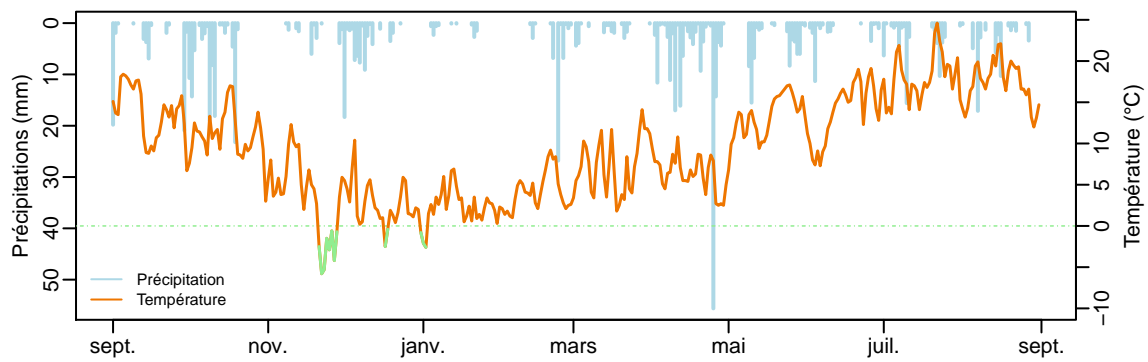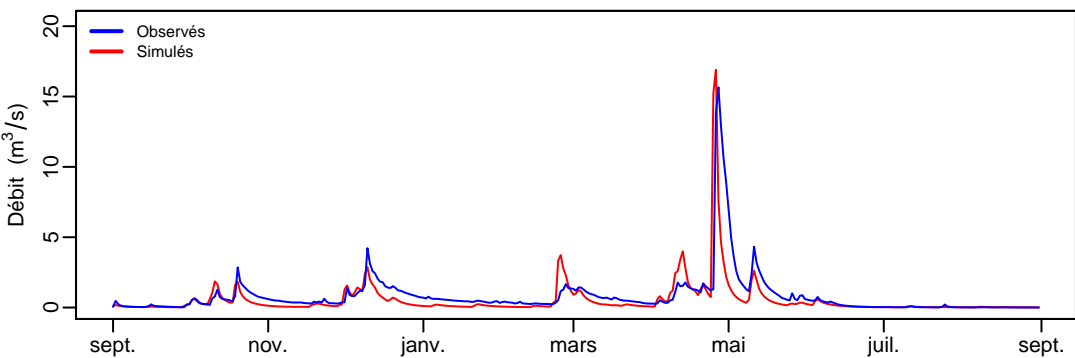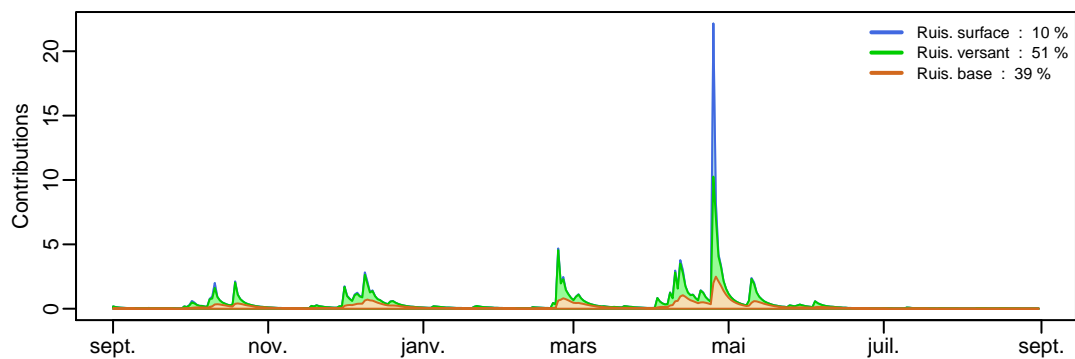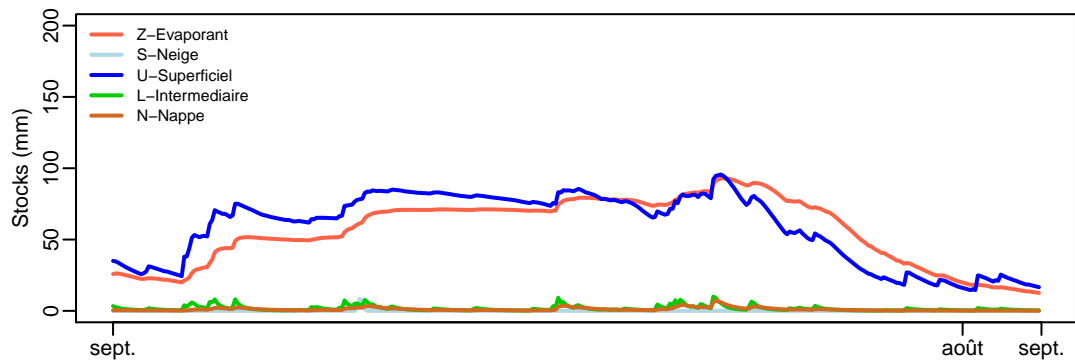

# k0624510 (104.69 km<sup>2</sup>) – année 1989–1990

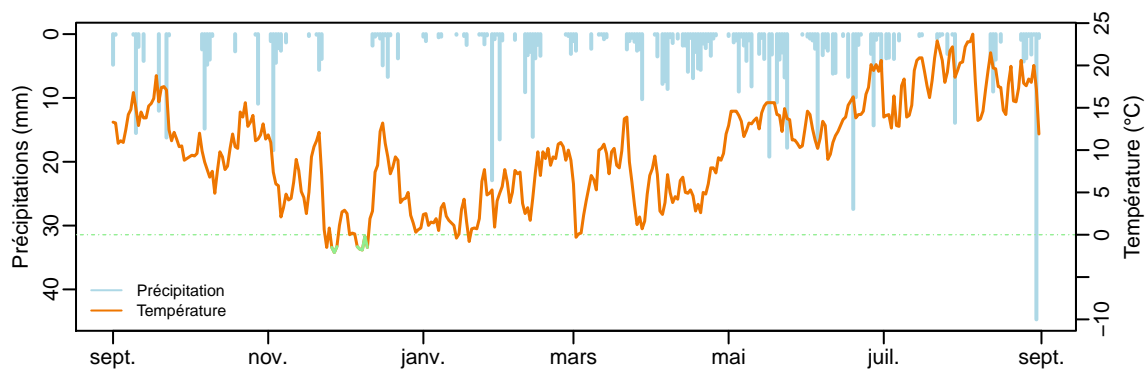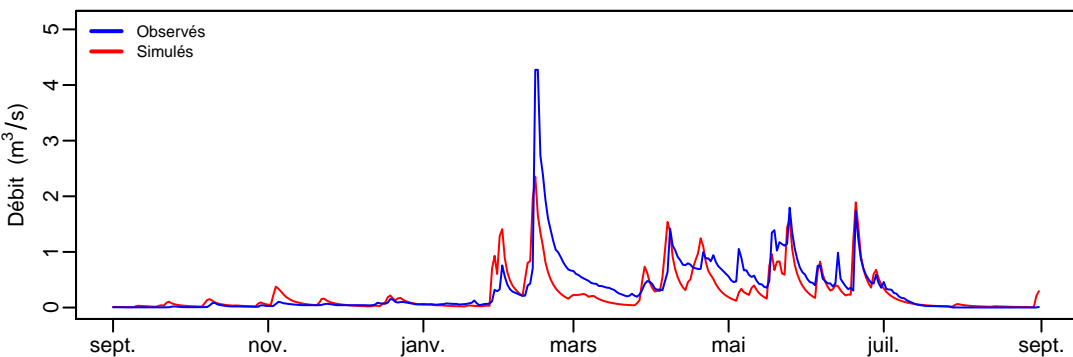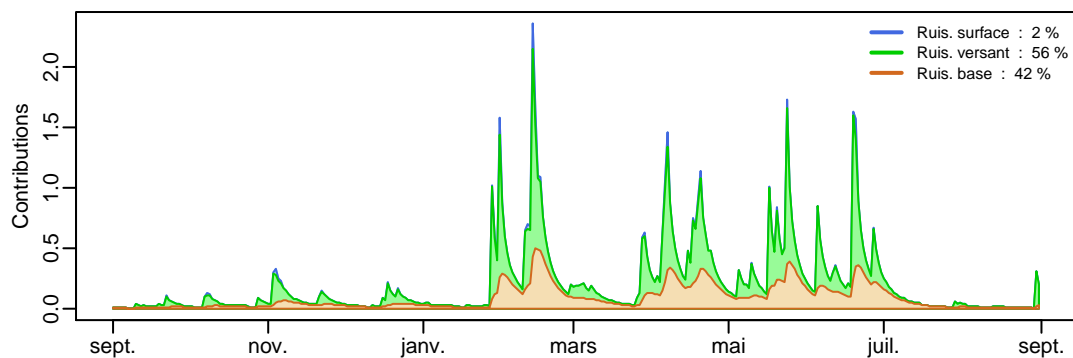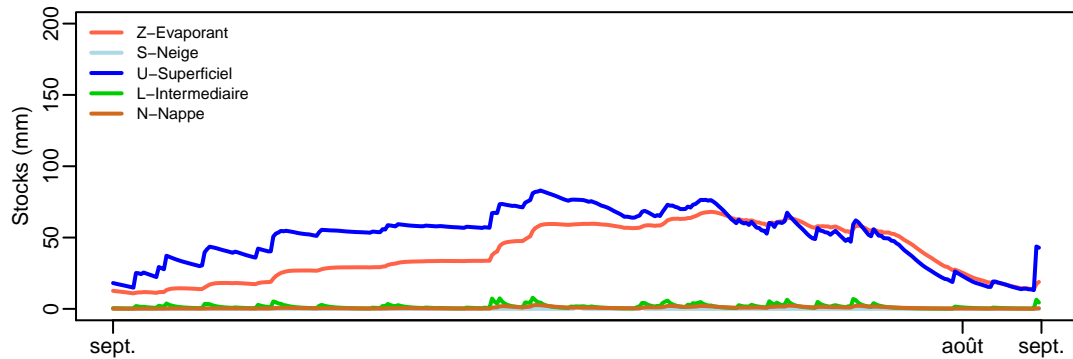

# k0624510 (104.69 km<sup>2</sup>) – année 1990–1991

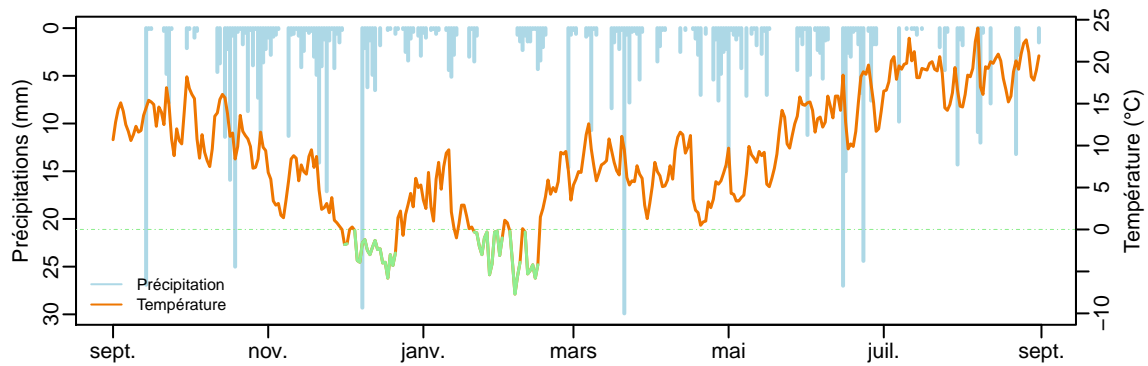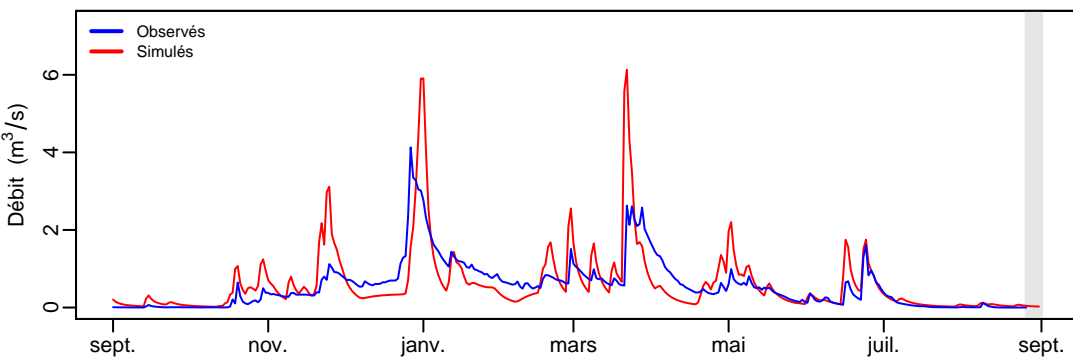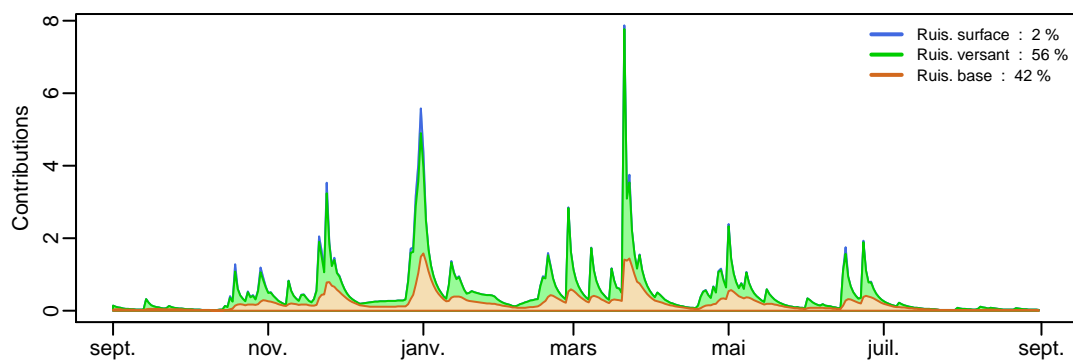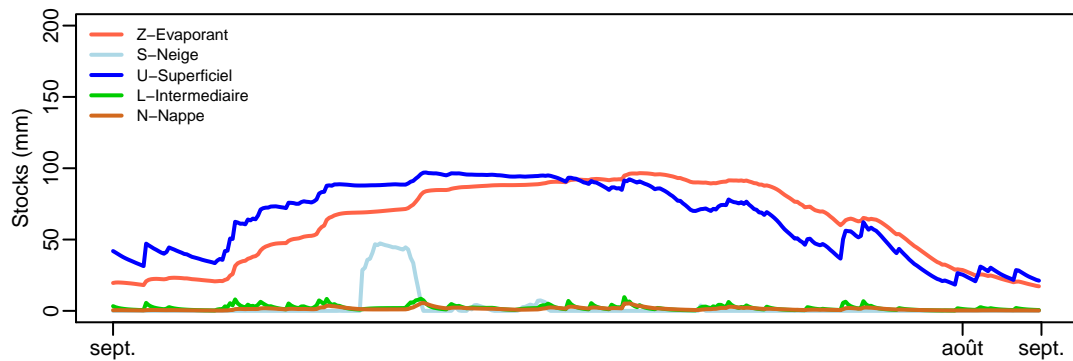

# k0624510 (104.69 km<sup>2</sup>) – année 1991–1992

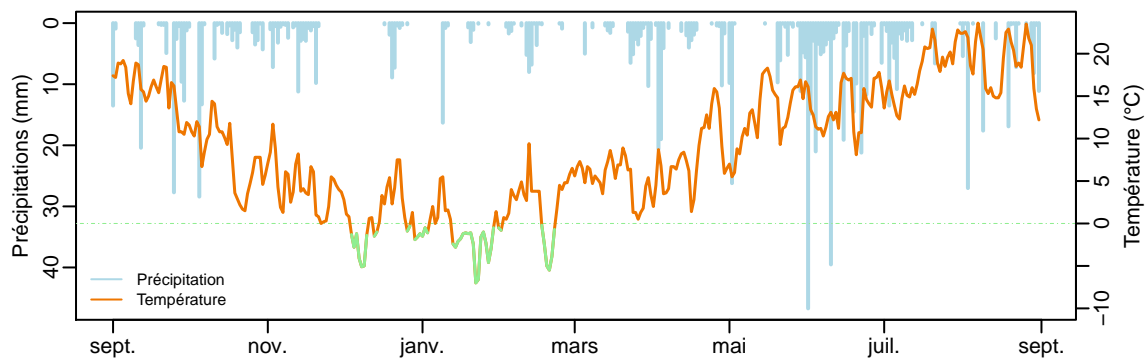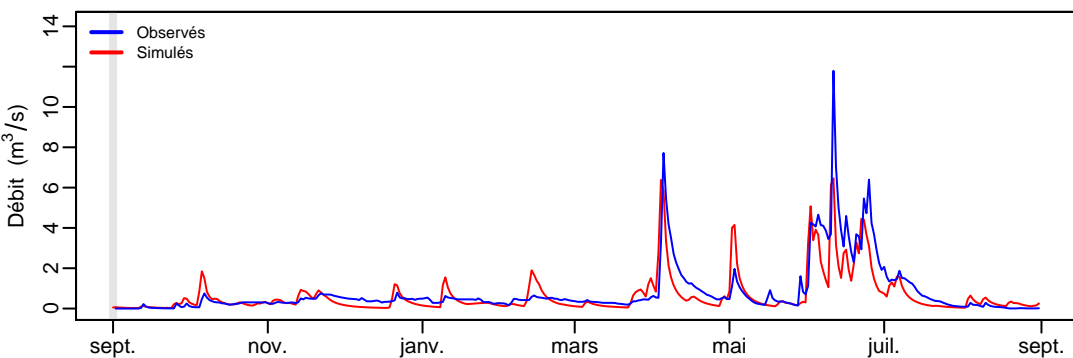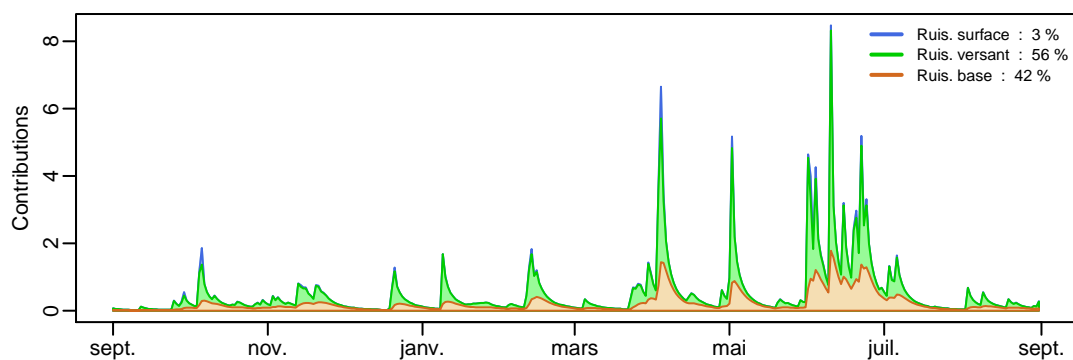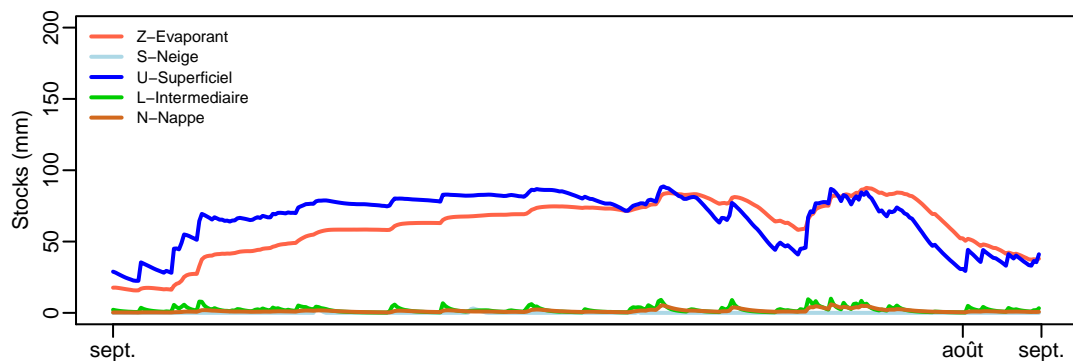

# k0624510 (104.69 km<sup>2</sup>) – année 1992–1993

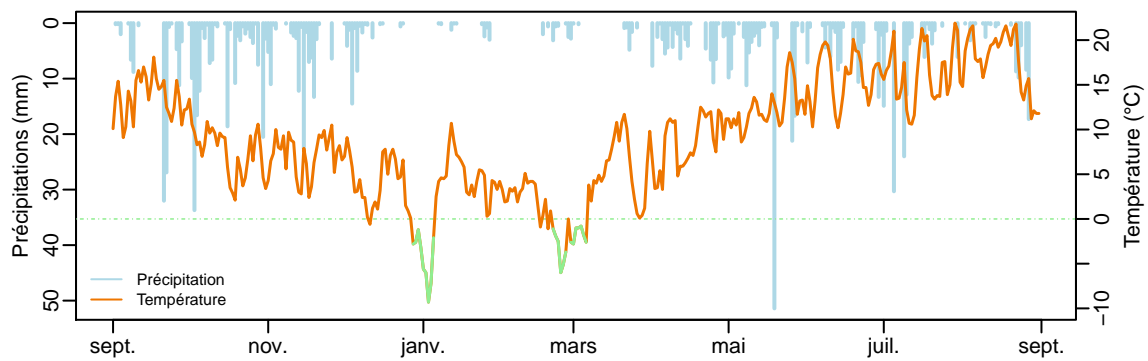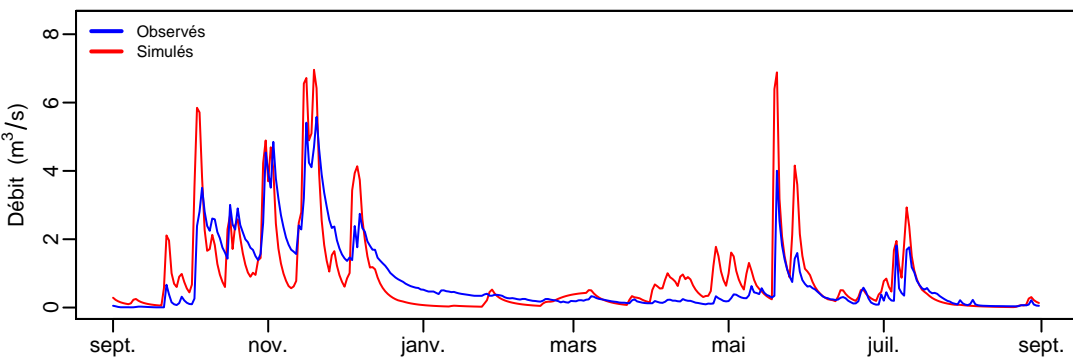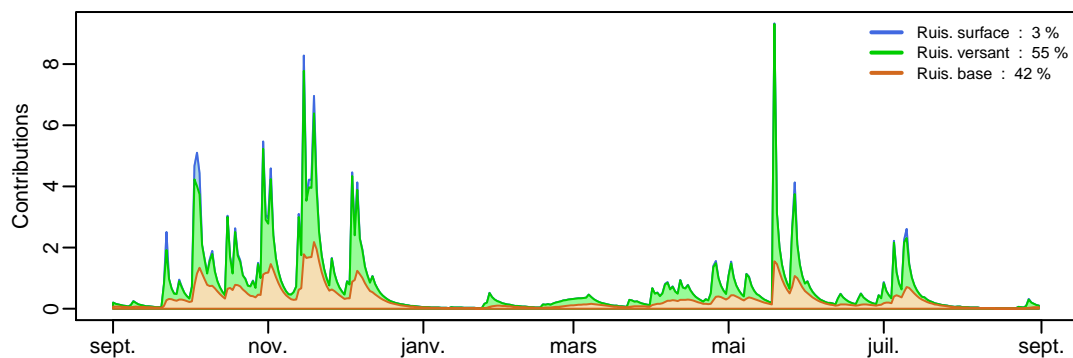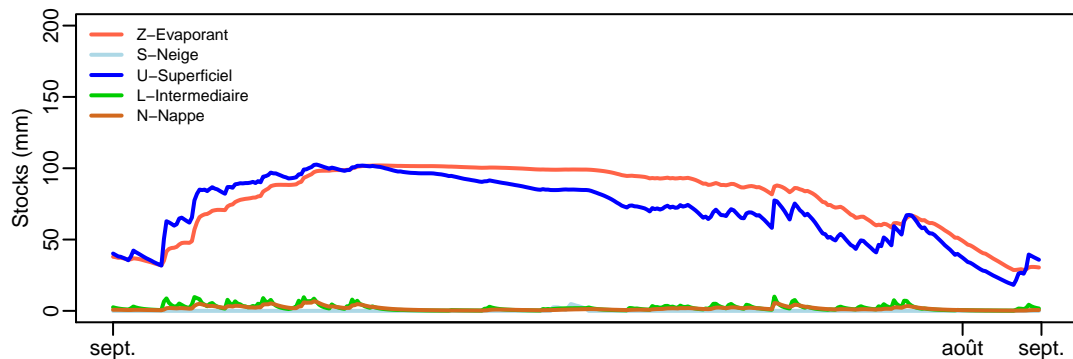



# k0624510 (104.69 km<sup>2</sup>) – année 1993–1994

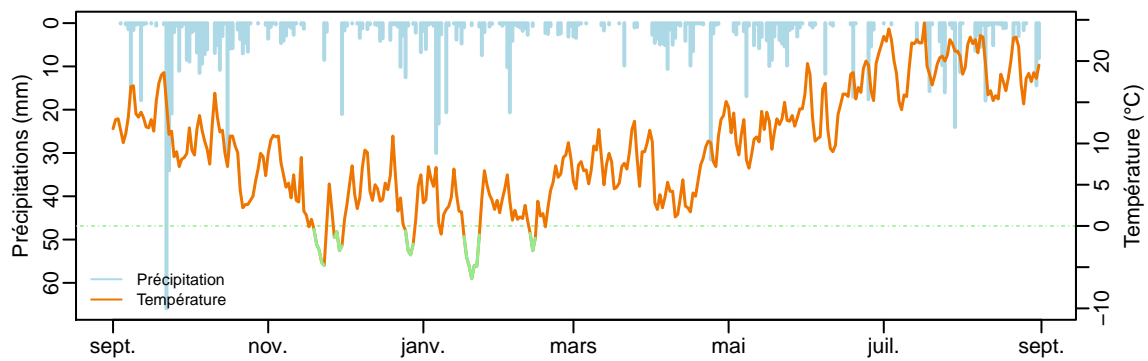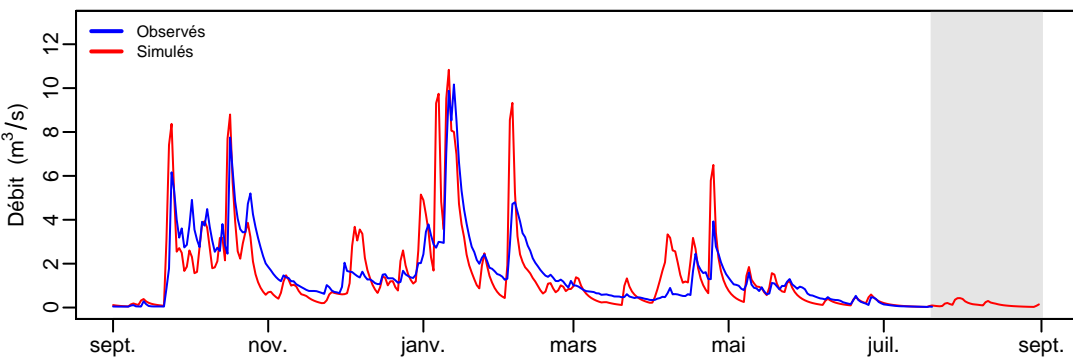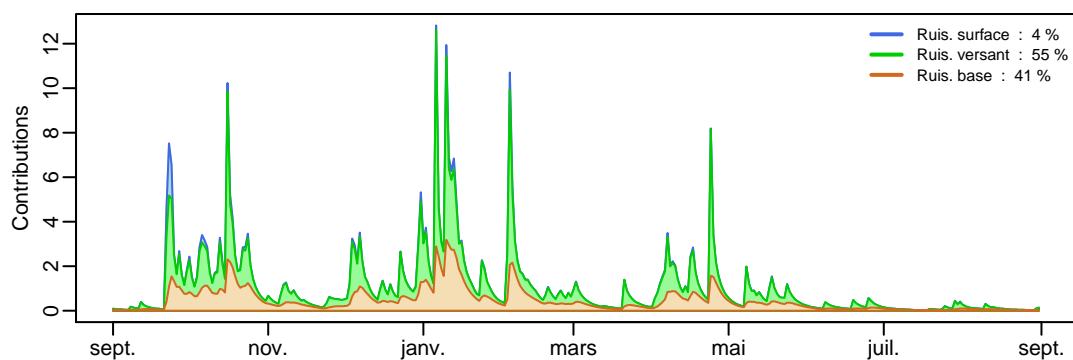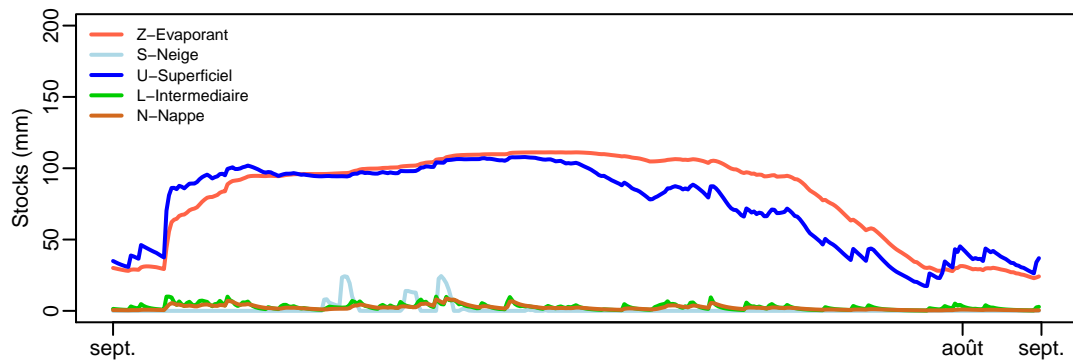

# k0624510 (104.69 km<sup>2</sup>) – année 1994–1995

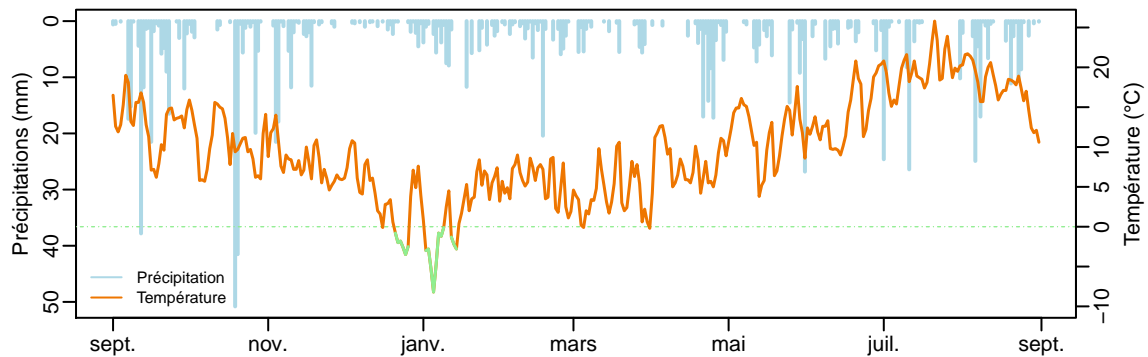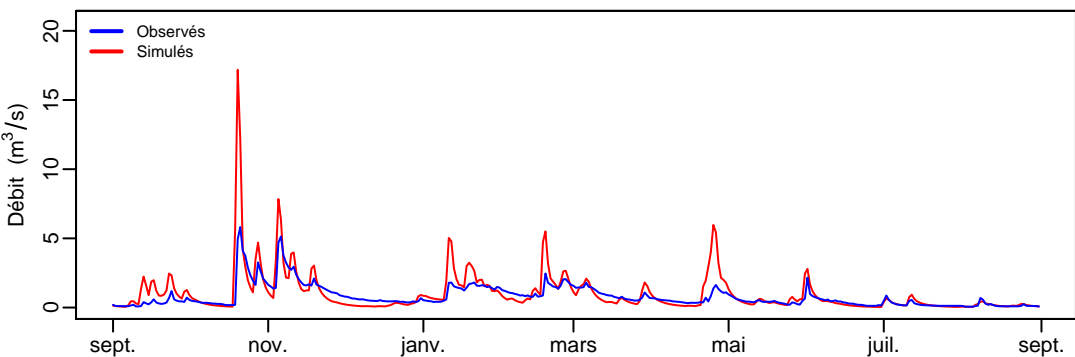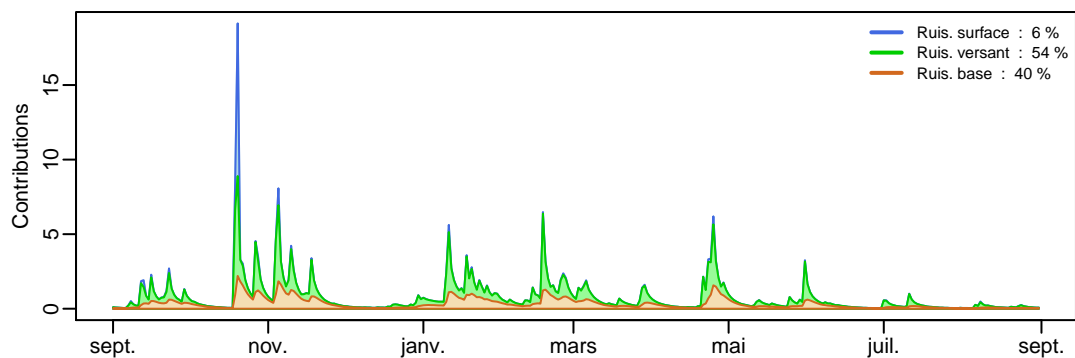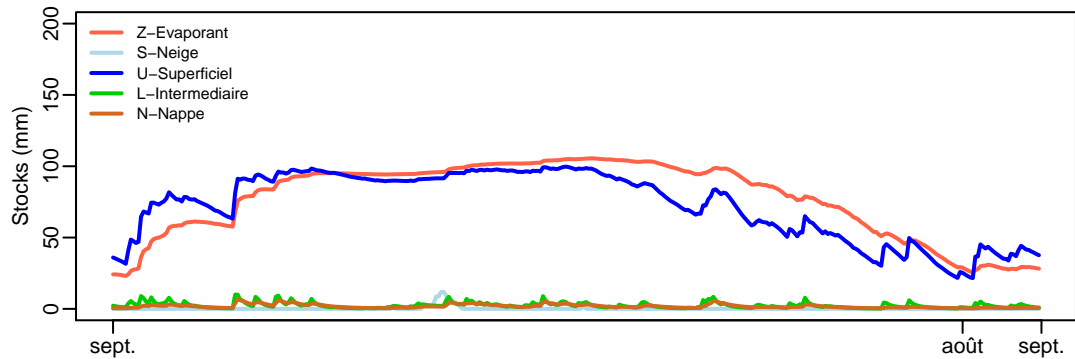

# k0624510 (104.69 km<sup>2</sup>) – année 1995–1996

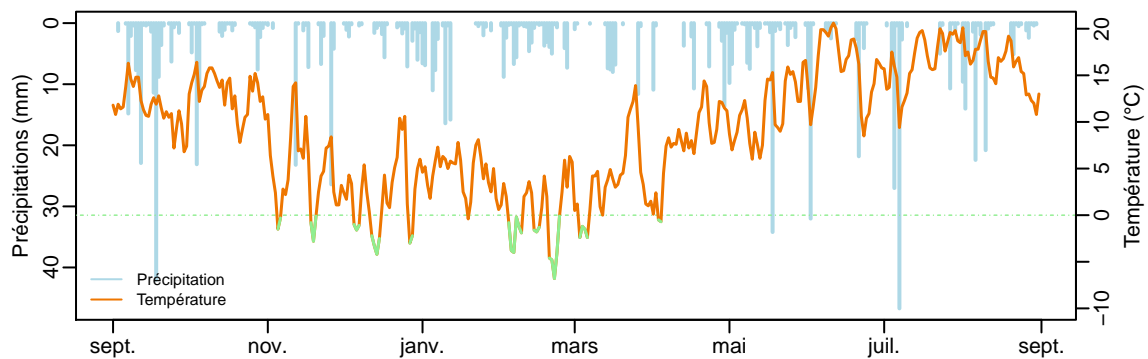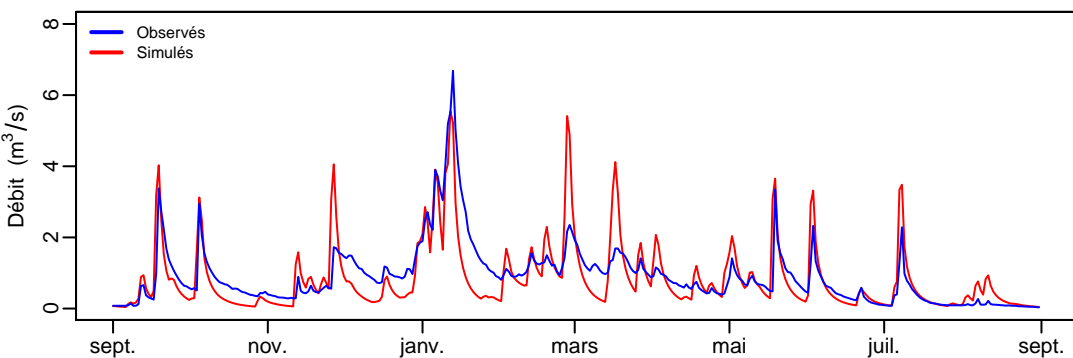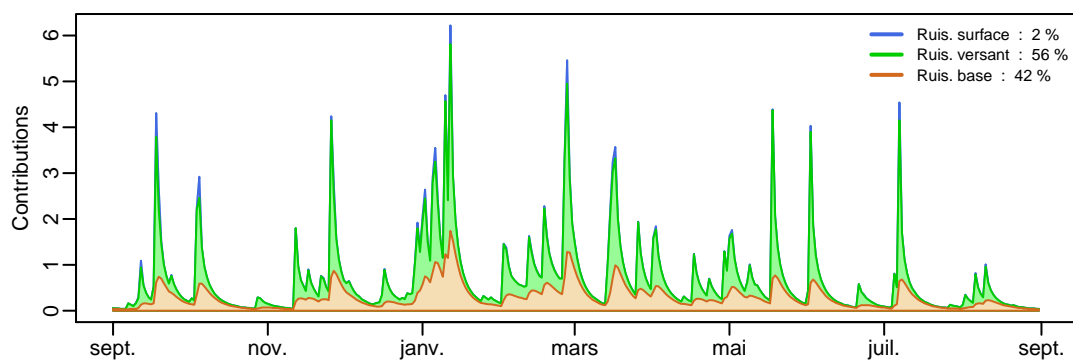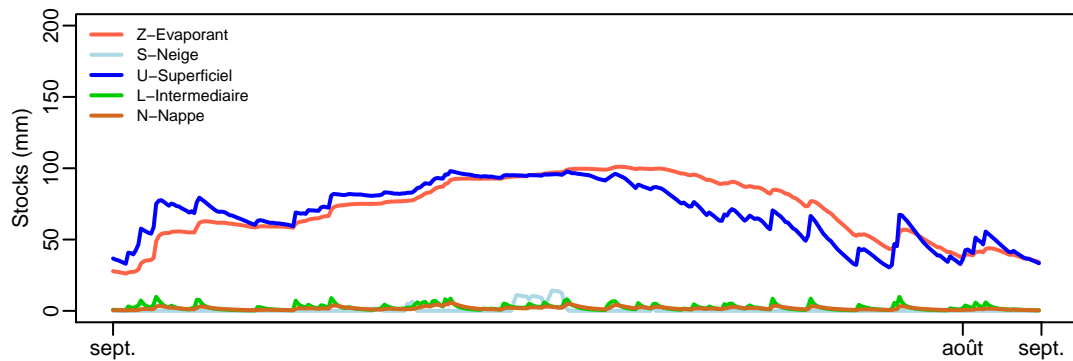

# k0624510 (104.69 km<sup>2</sup>) – année 1996–1997

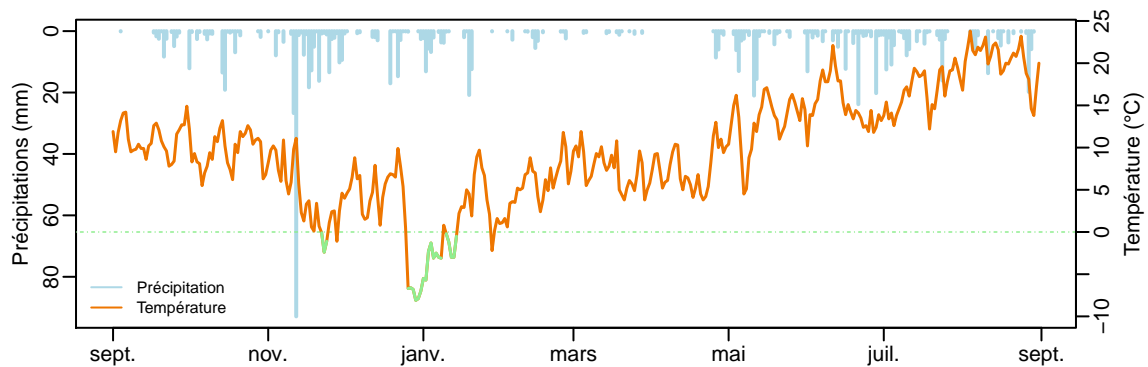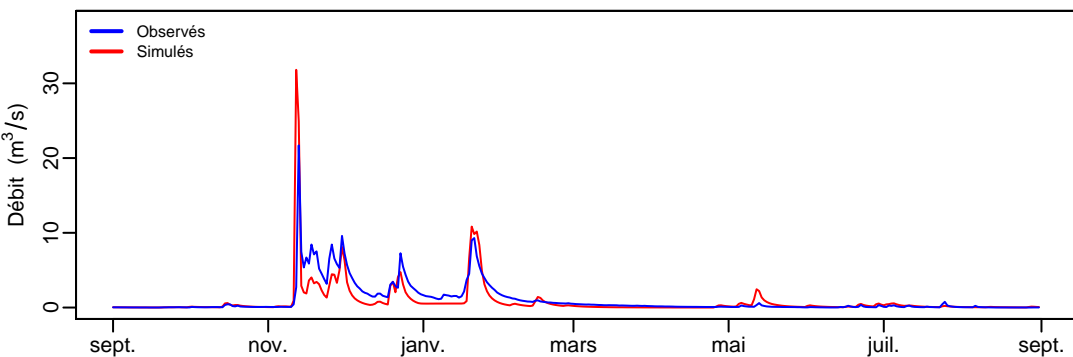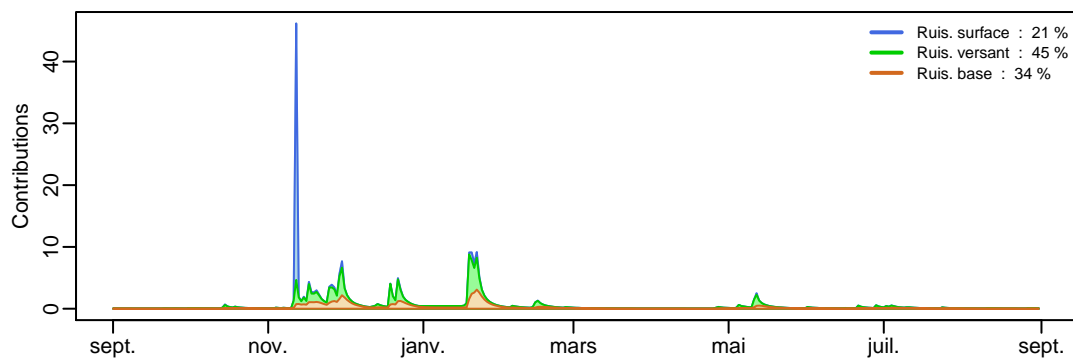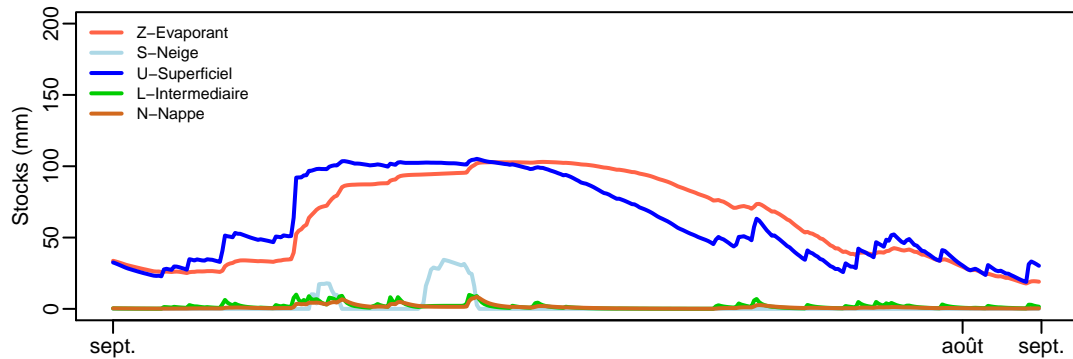

# k0624510 (104.69 km<sup>2</sup>) – année 1997–1998

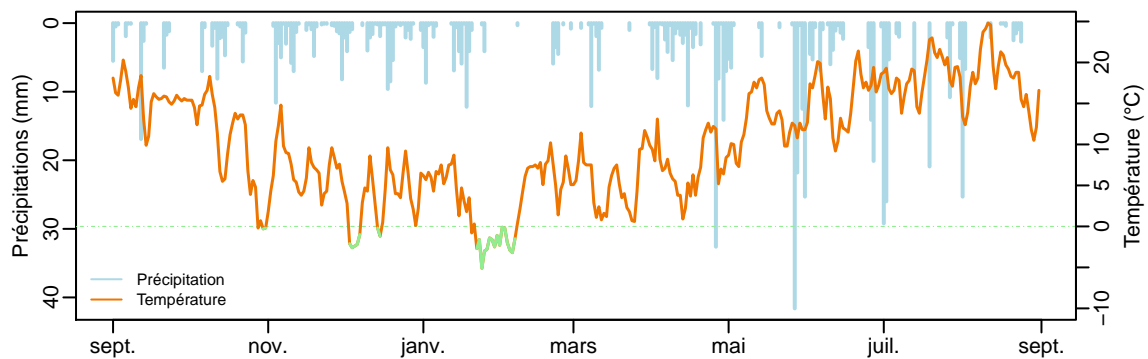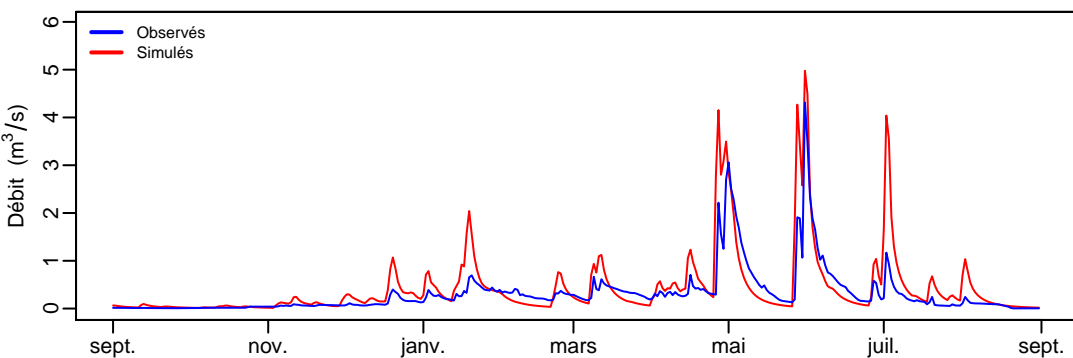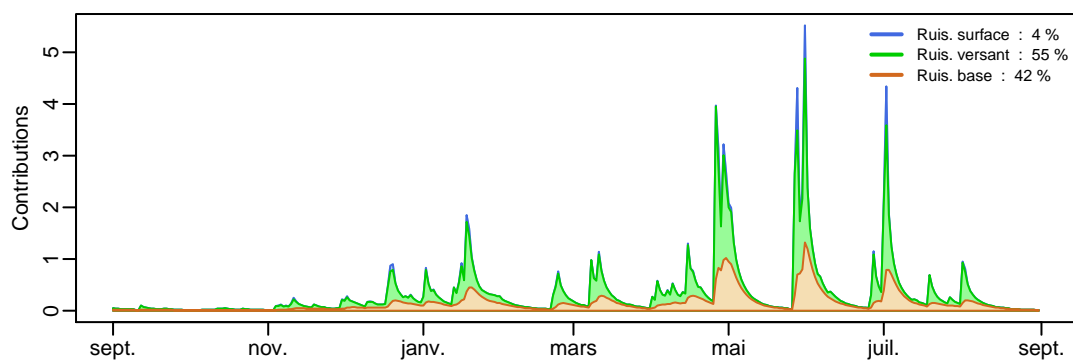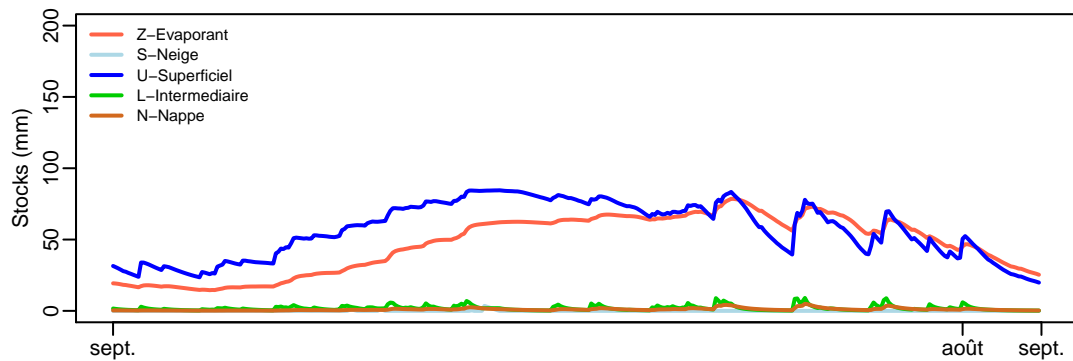

# k0624510 (104.69 km<sup>2</sup>) – année 1998–1999

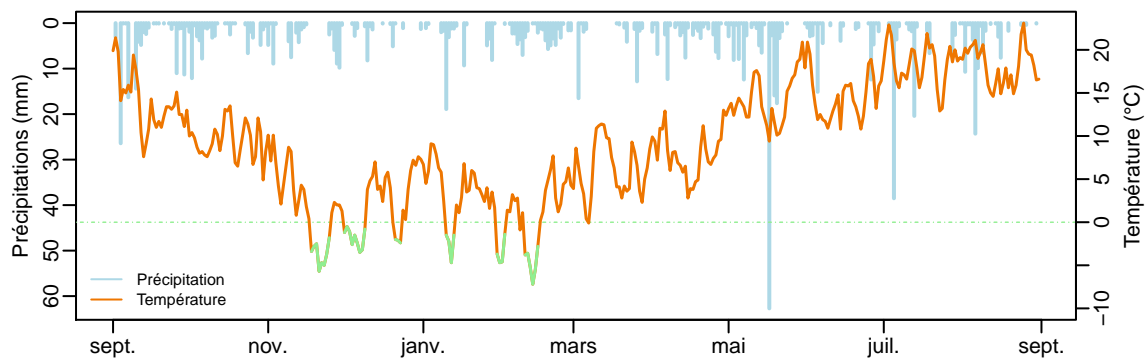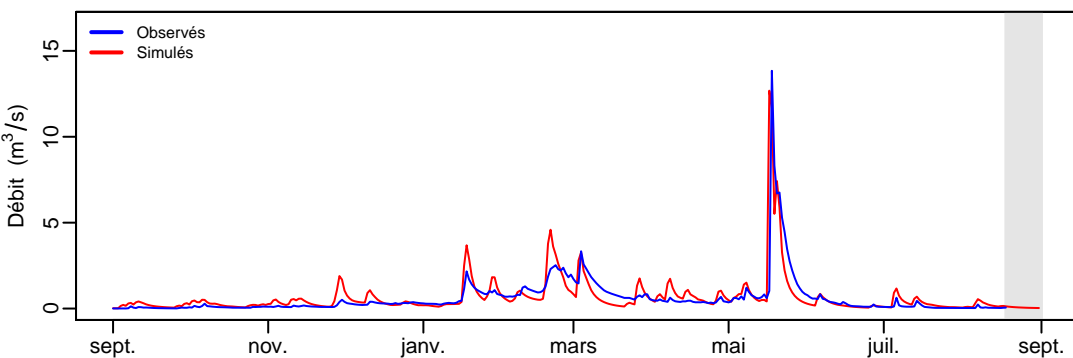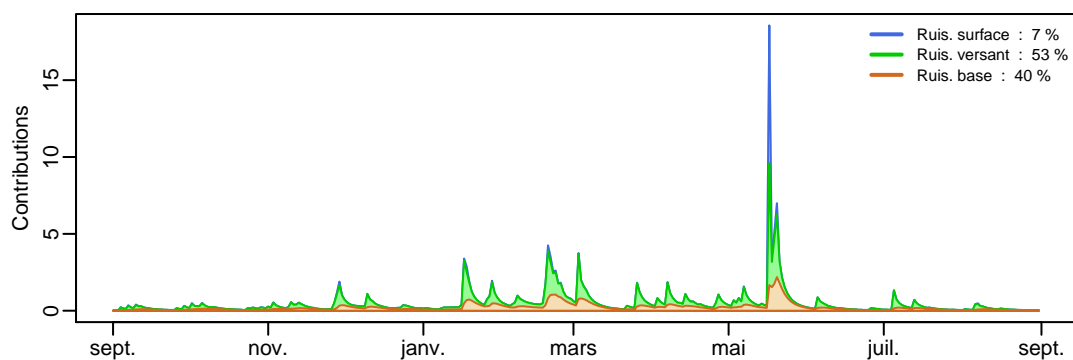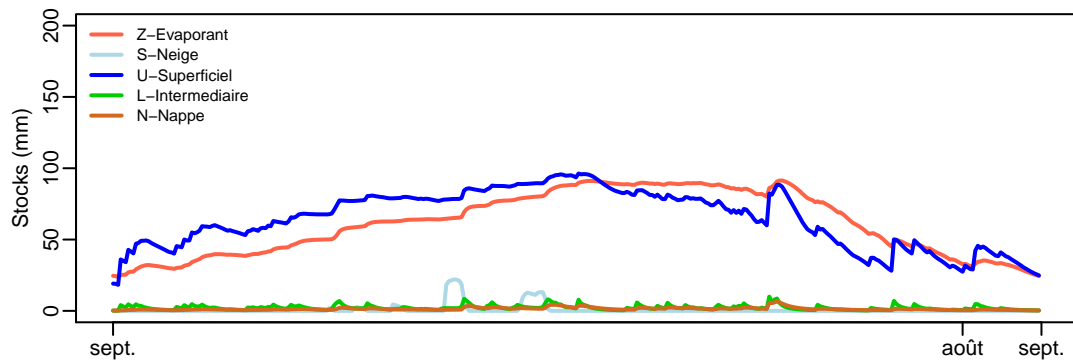

# k0624510 (104.69 km<sup>2</sup>) – année 1999–2000

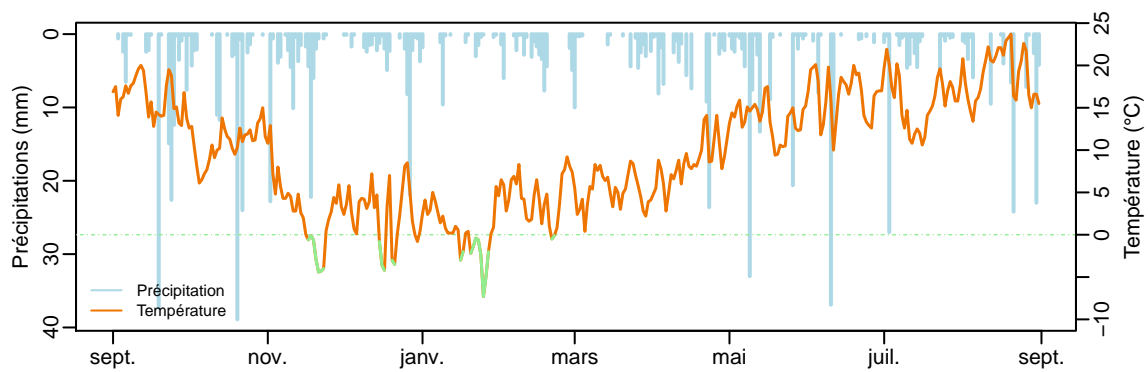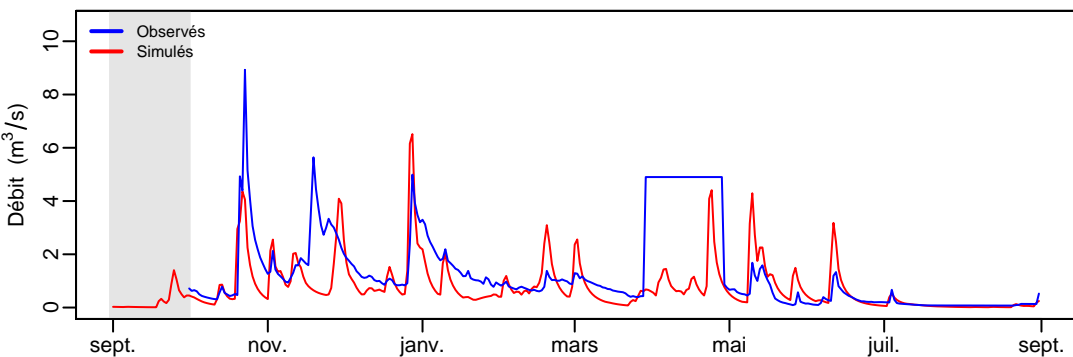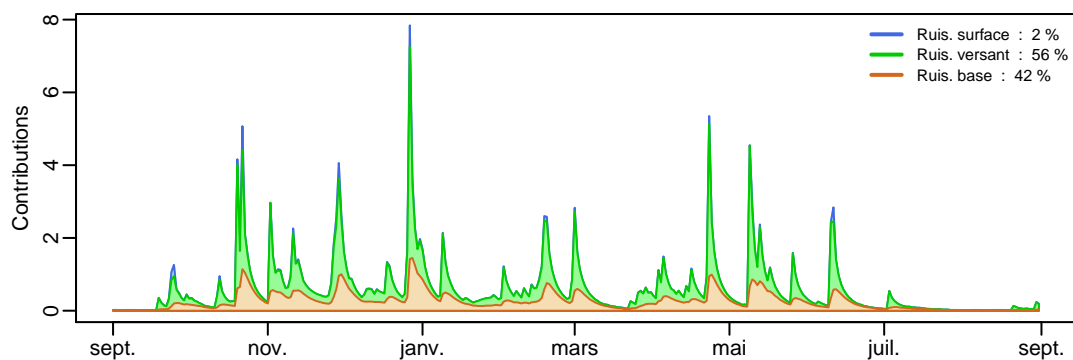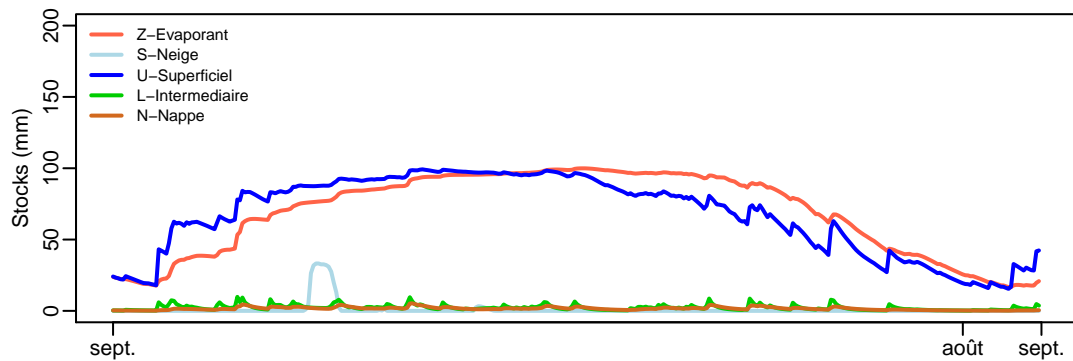

# k0624510 (104.69 km<sup>2</sup>) – année 2000–2001

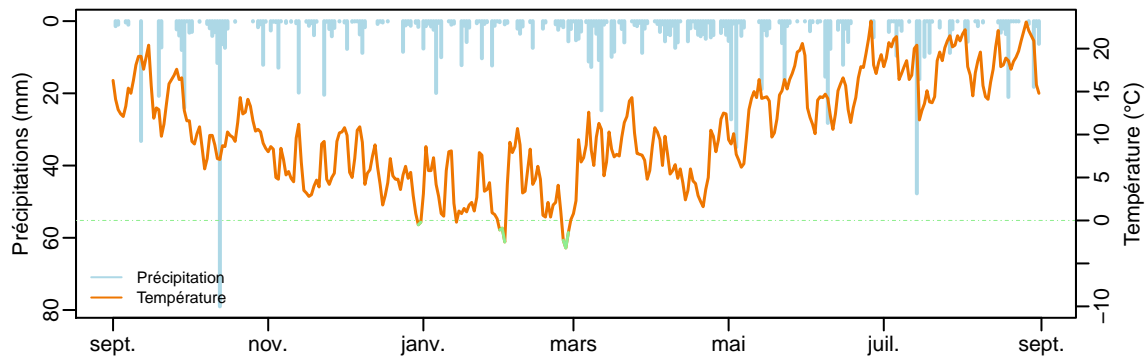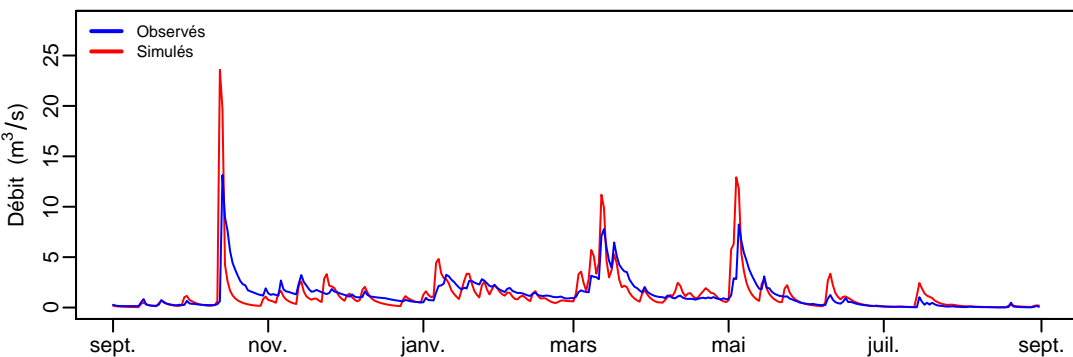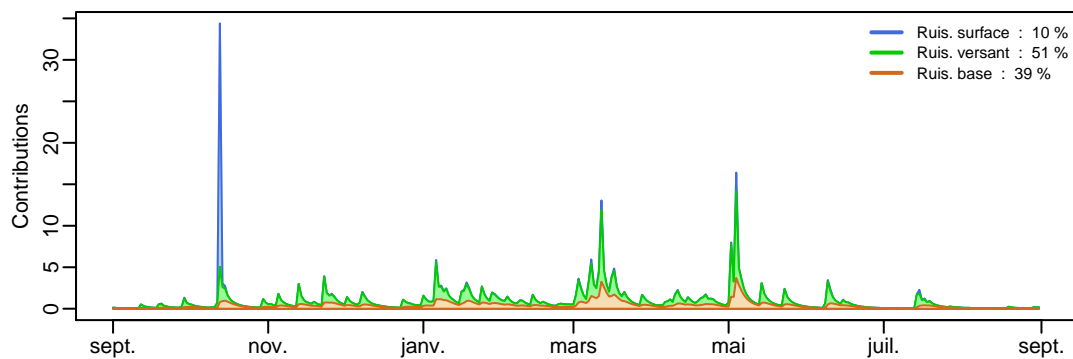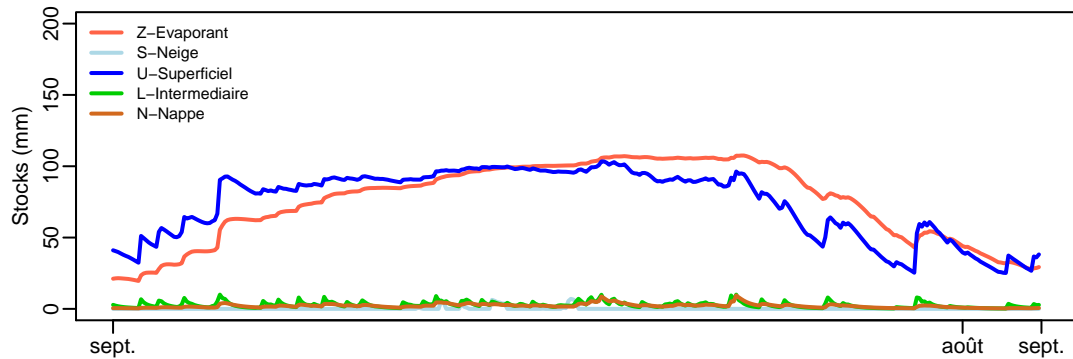



# k0624510 (104.69 km<sup>2</sup>) – année 2001–2002

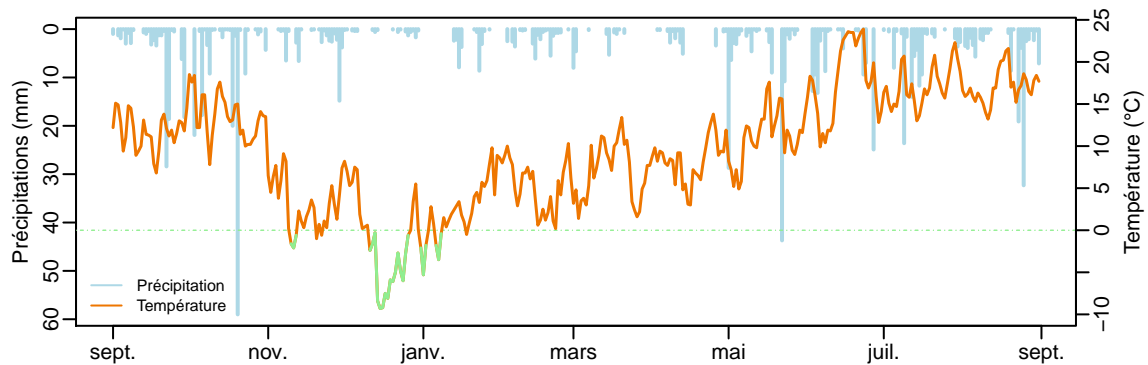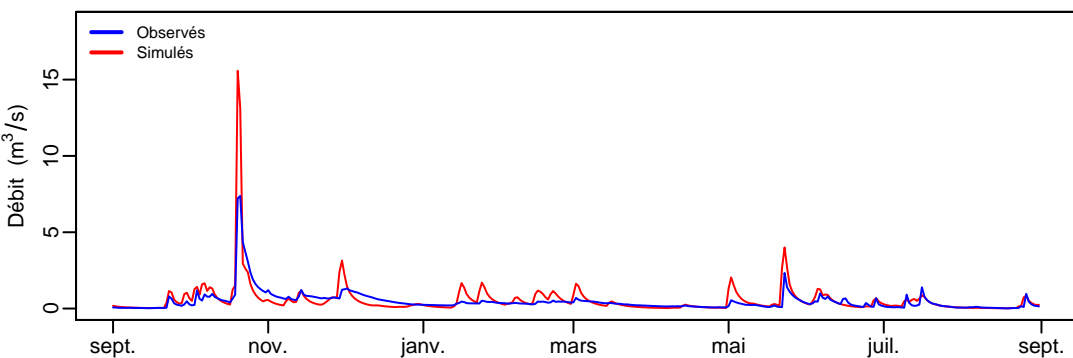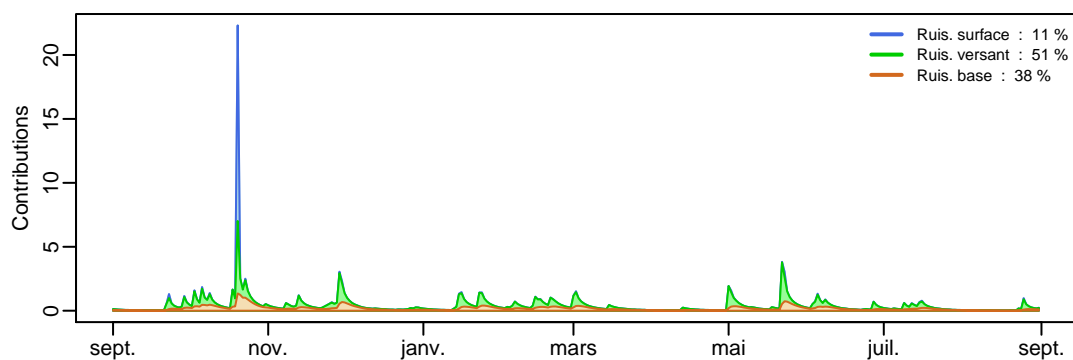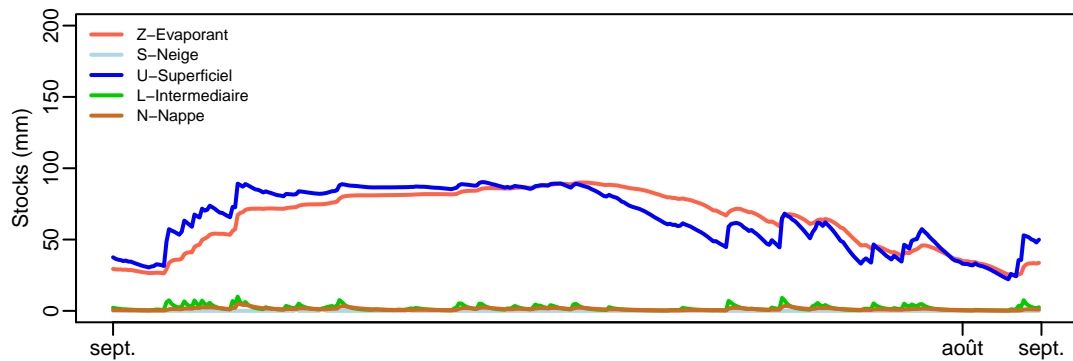

# k0624510 (104.69 km<sup>2</sup>) – année 2002–2003

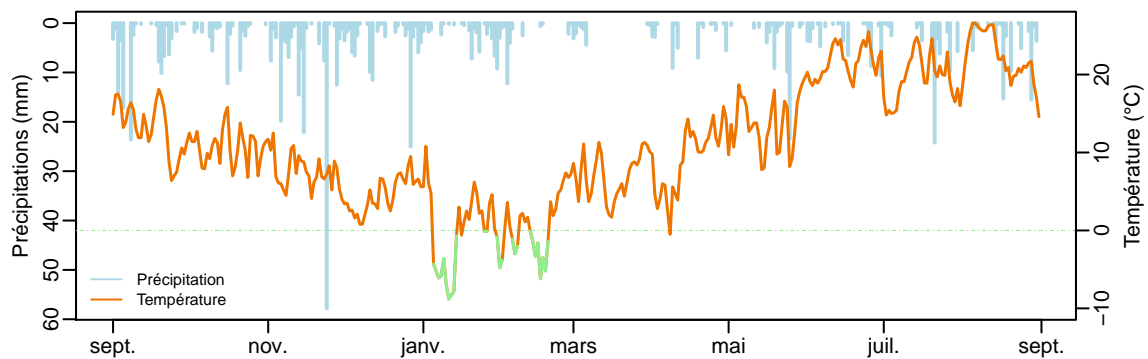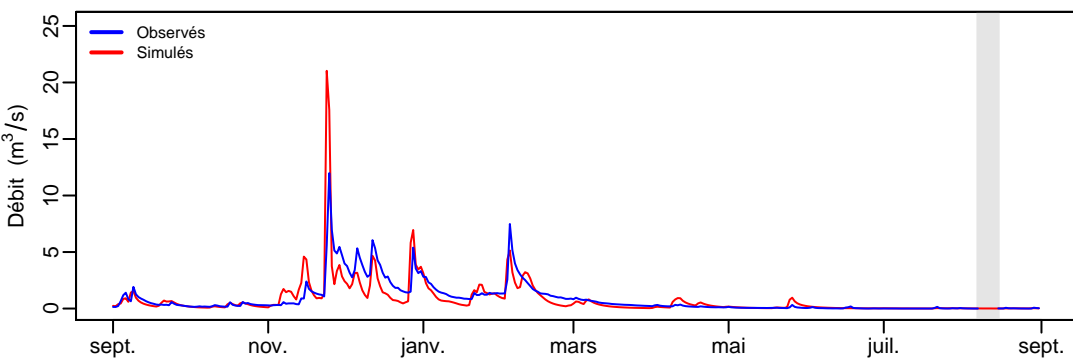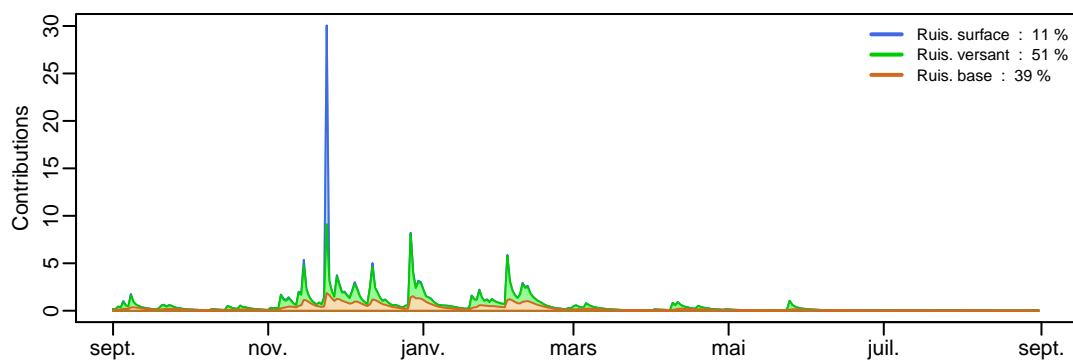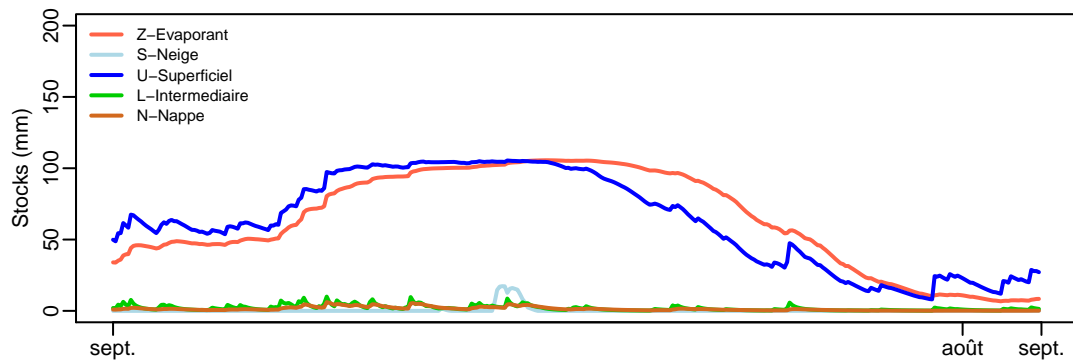

# k0624510 (104.69 km<sup>2</sup>) – année 2003–2004

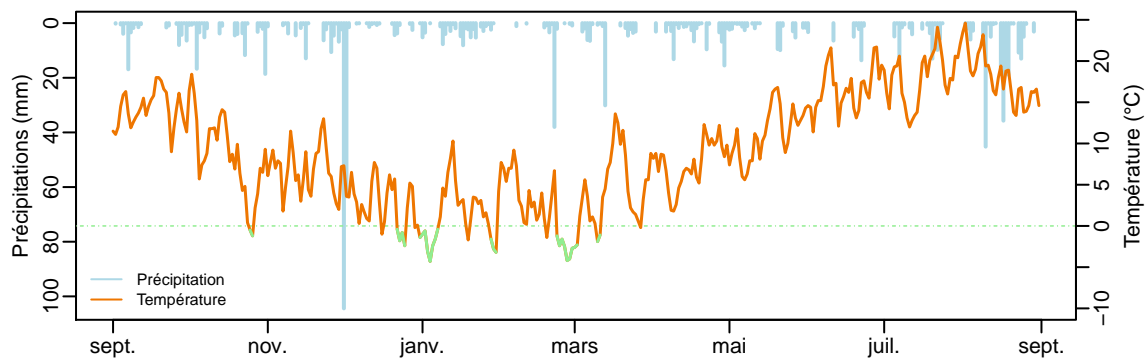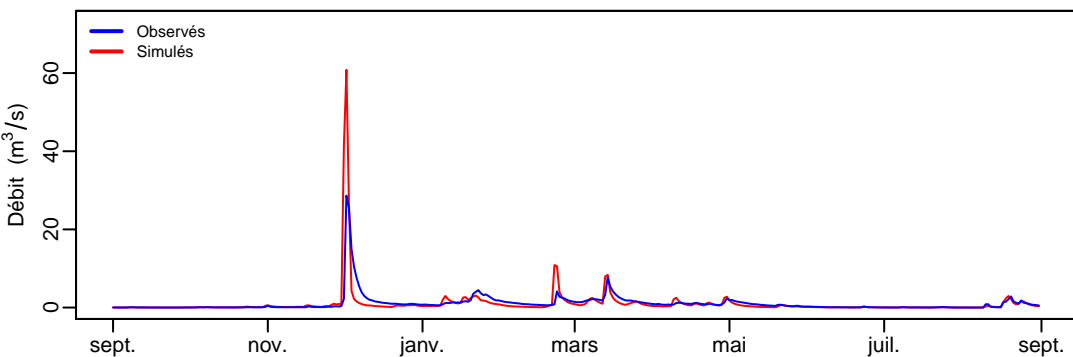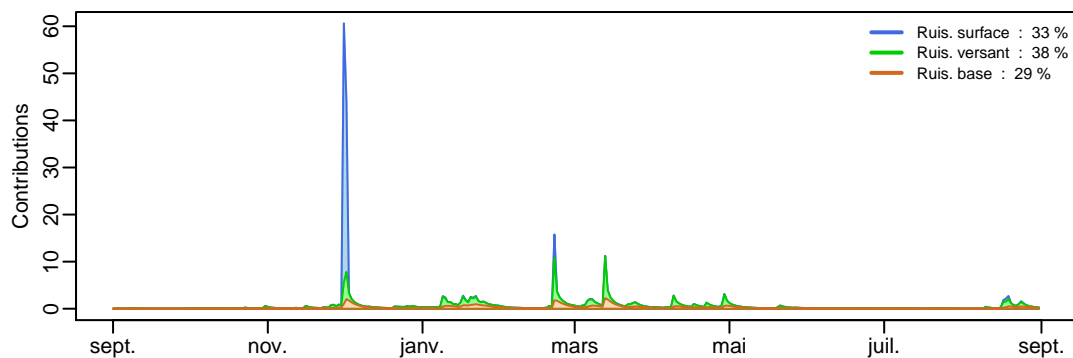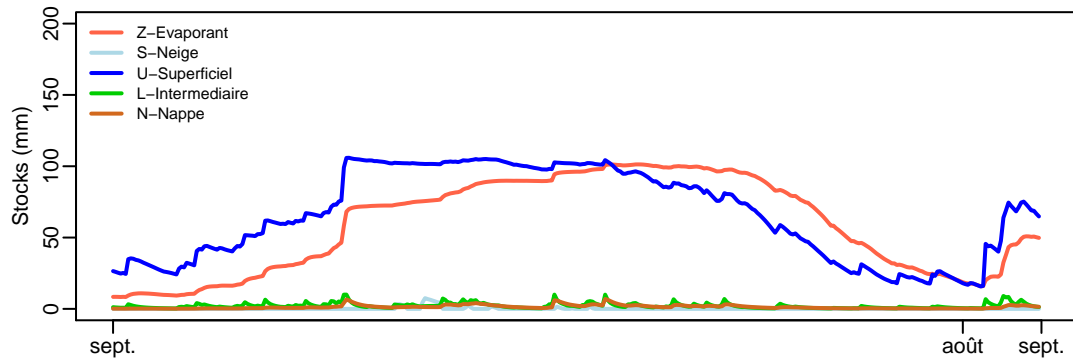

# k0624510 (104.69 km<sup>2</sup>) – année 2004–2005

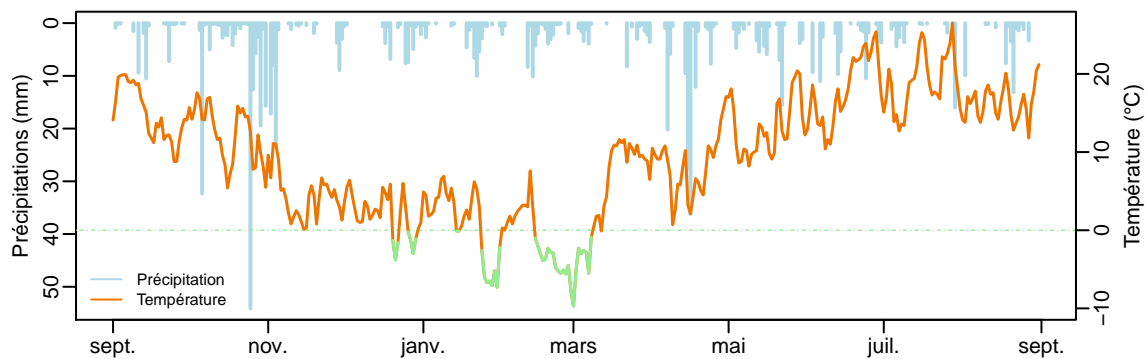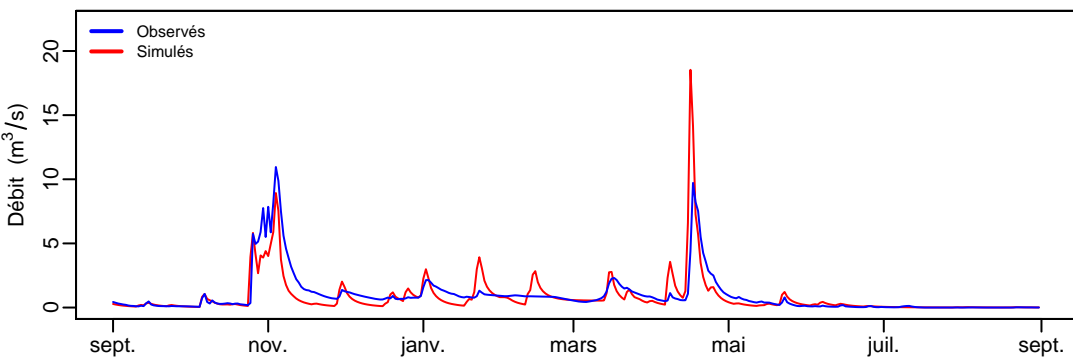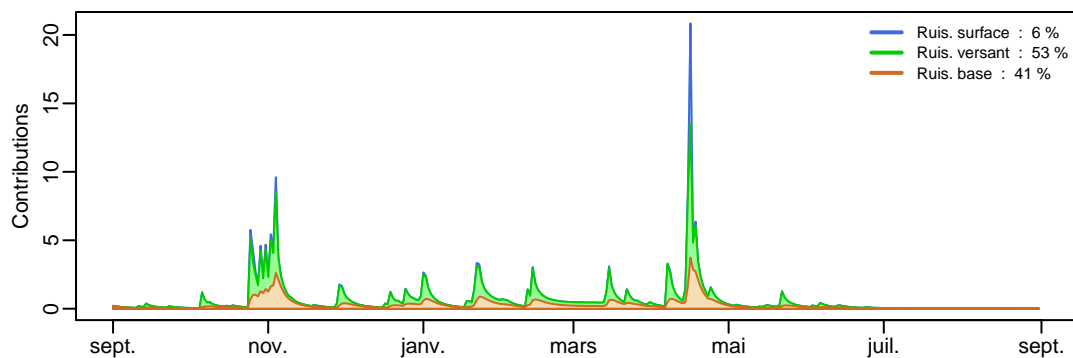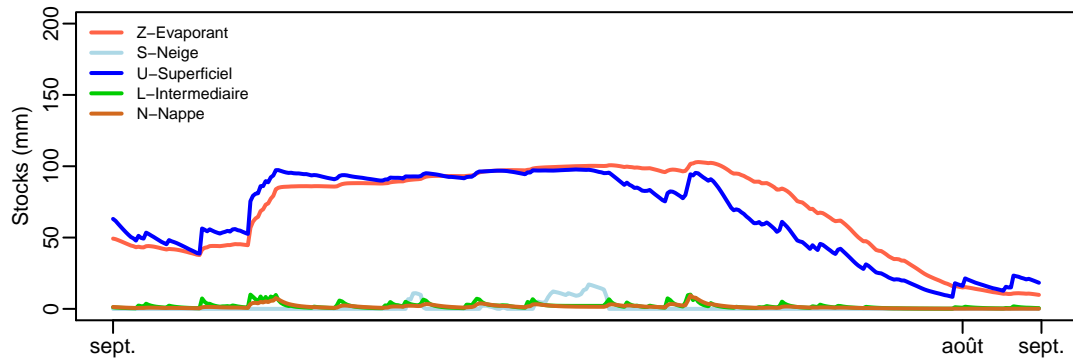

# k0624510 (104.69 km<sup>2</sup>) – année 2005–2006

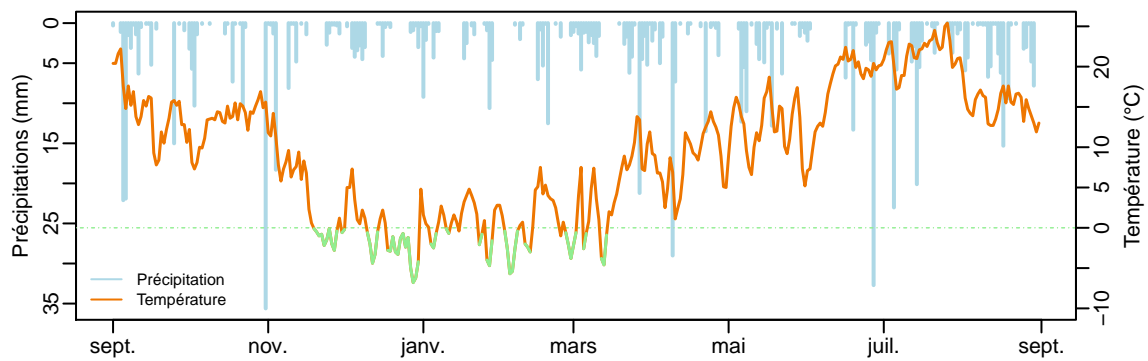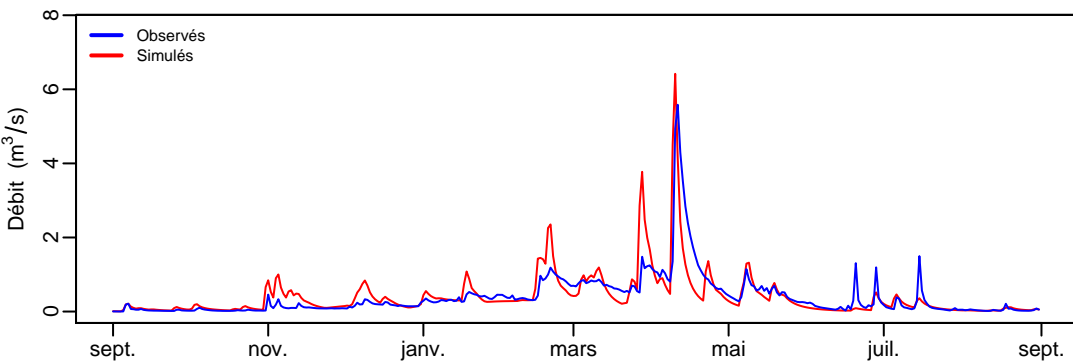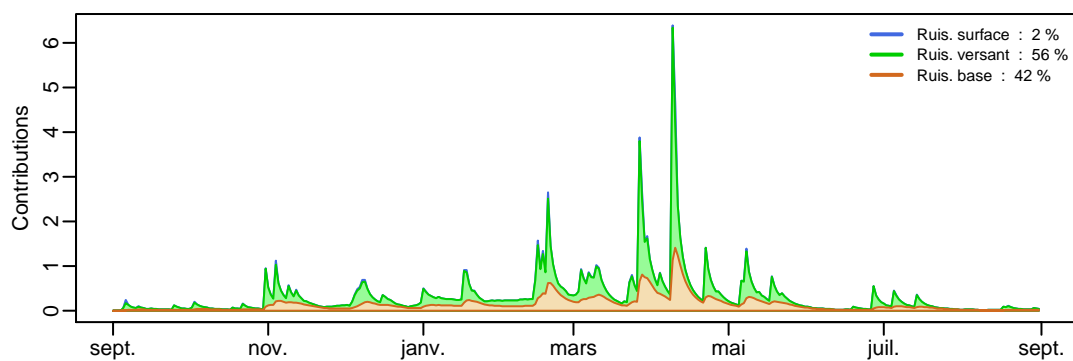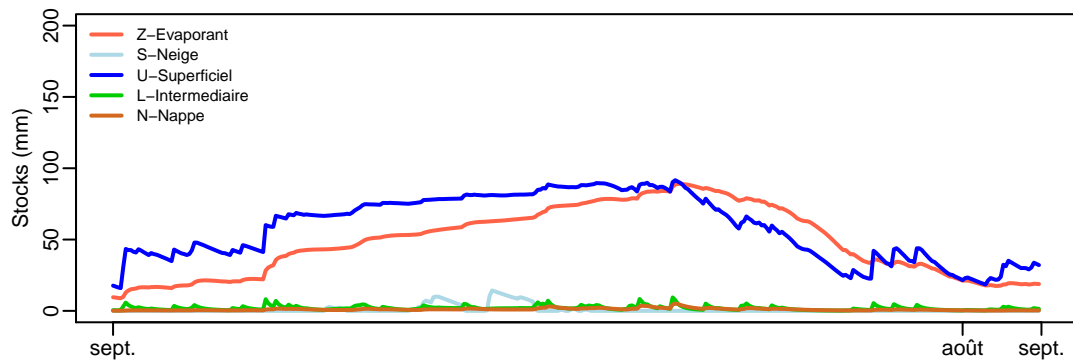

# k0624510 (104.69 km<sup>2</sup>) – année 2006–2007

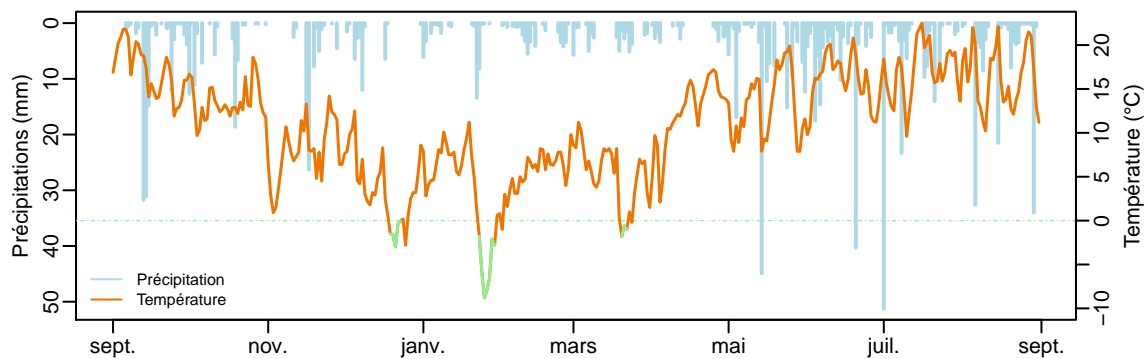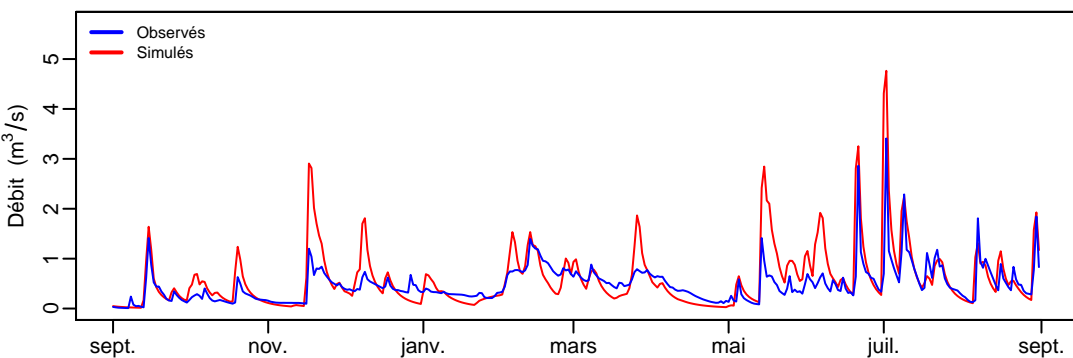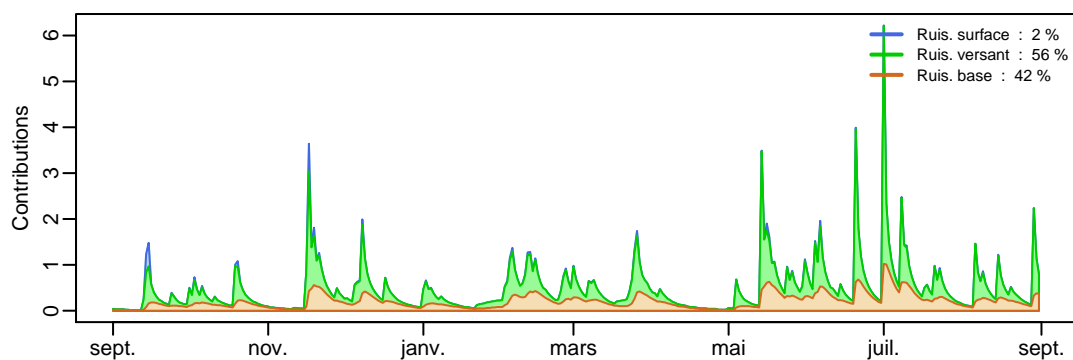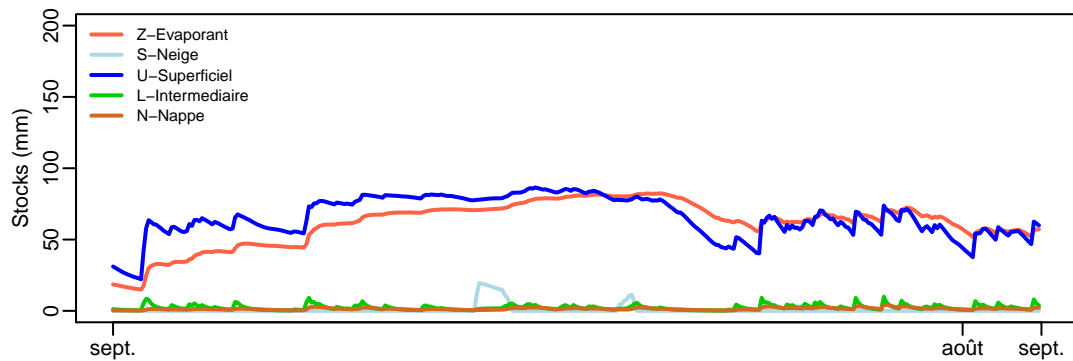

# k0624510 (104.69 km<sup>2</sup>) – année 2007–2008

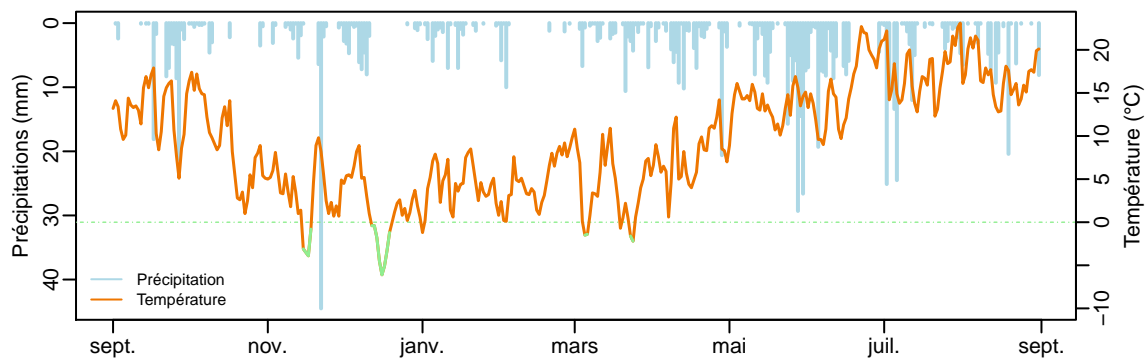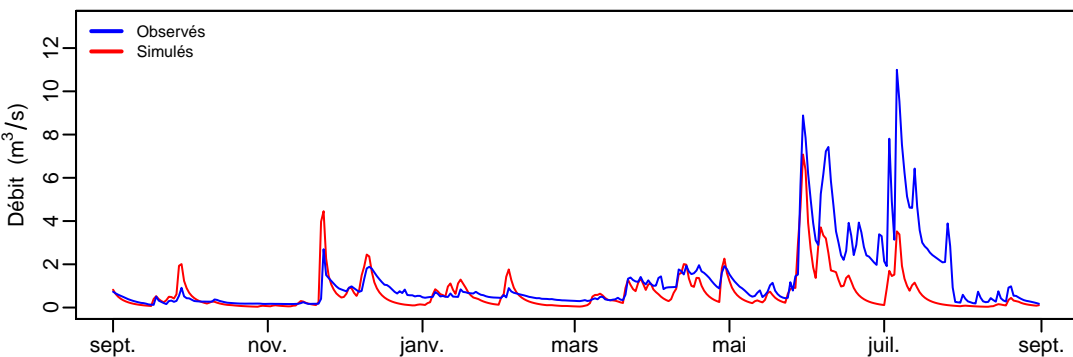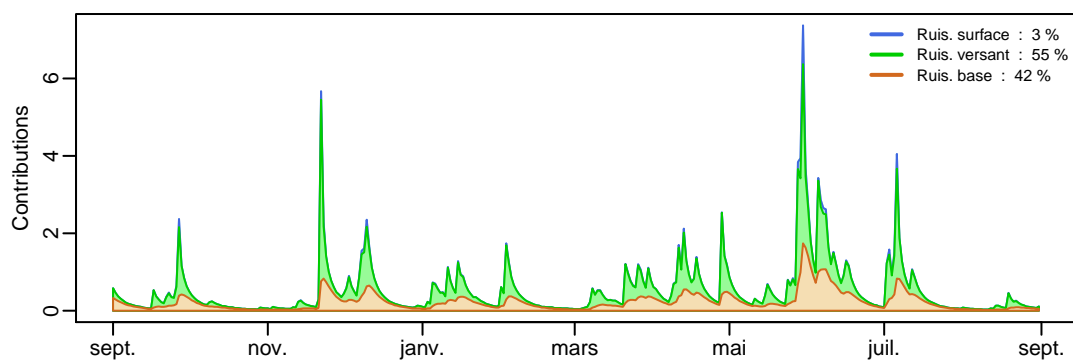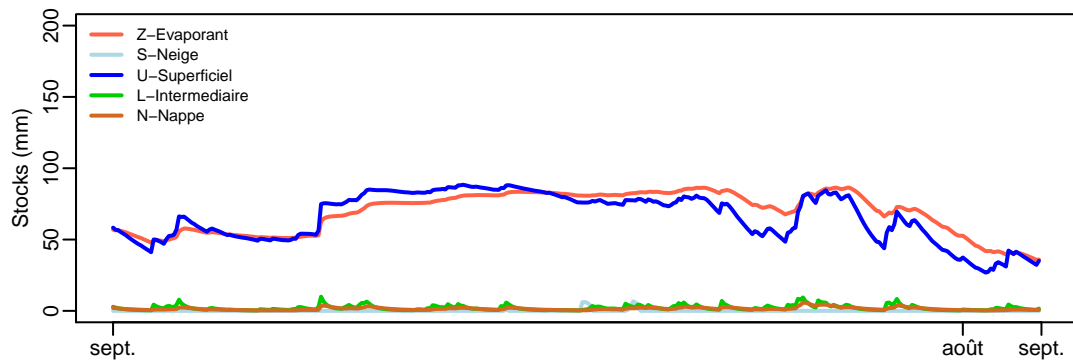

# k0673310 (180.52 km<sup>2</sup>) – année 1981–1982

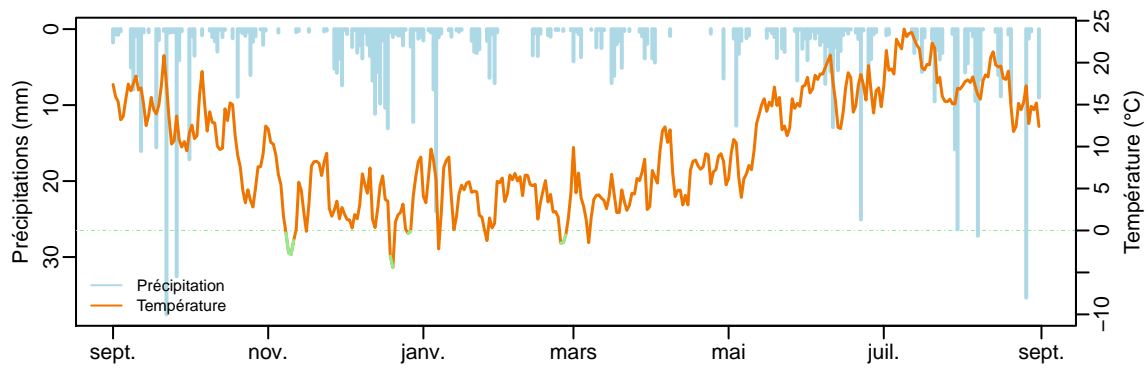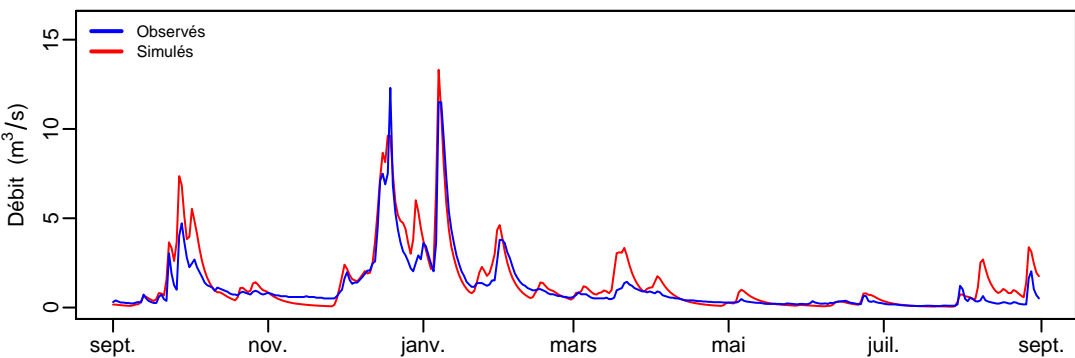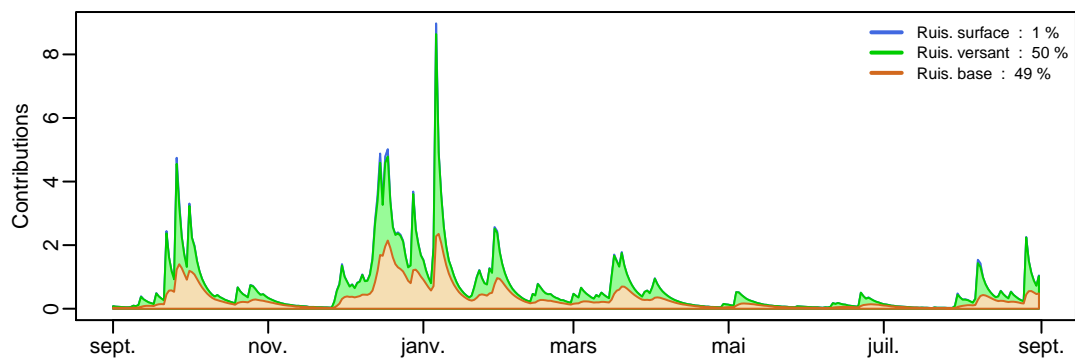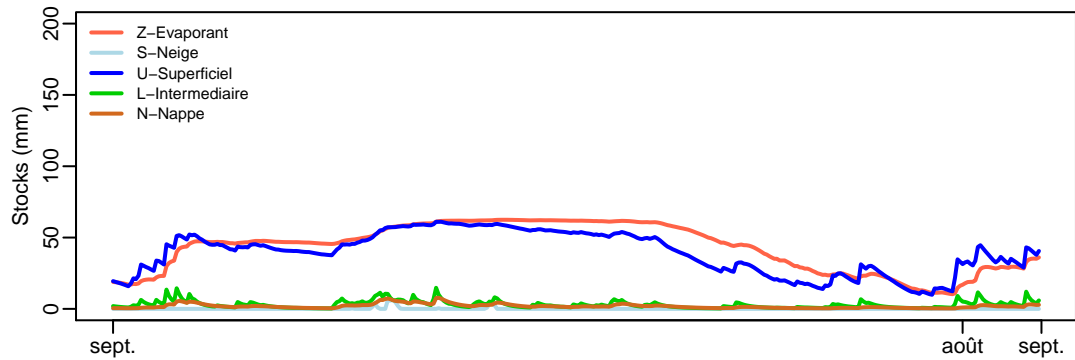



# k0673310 (180.52 km<sup>2</sup>) – année 1982–1983

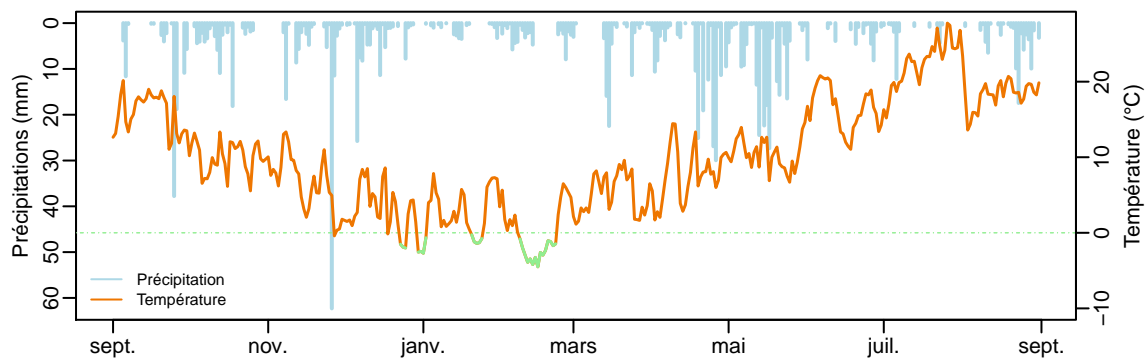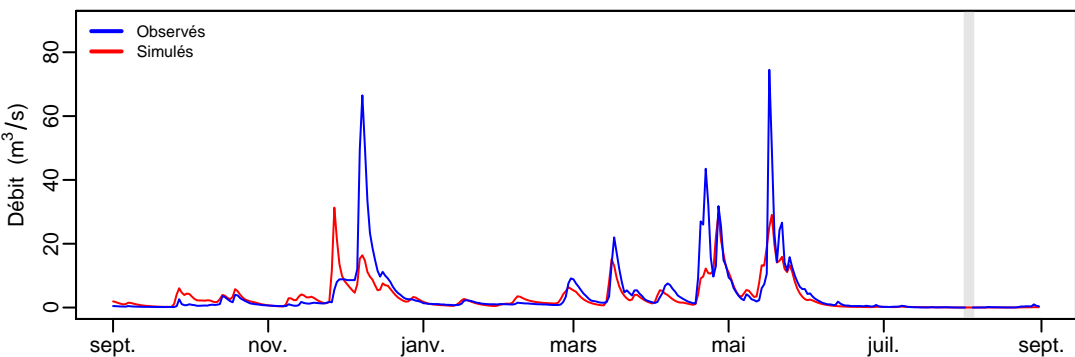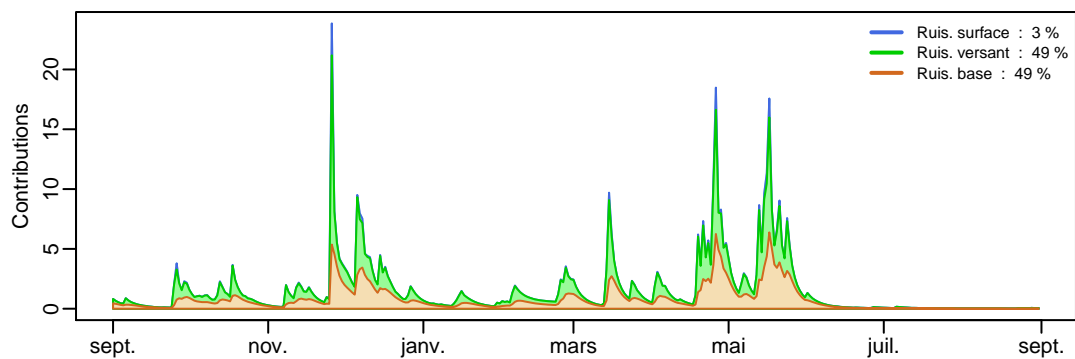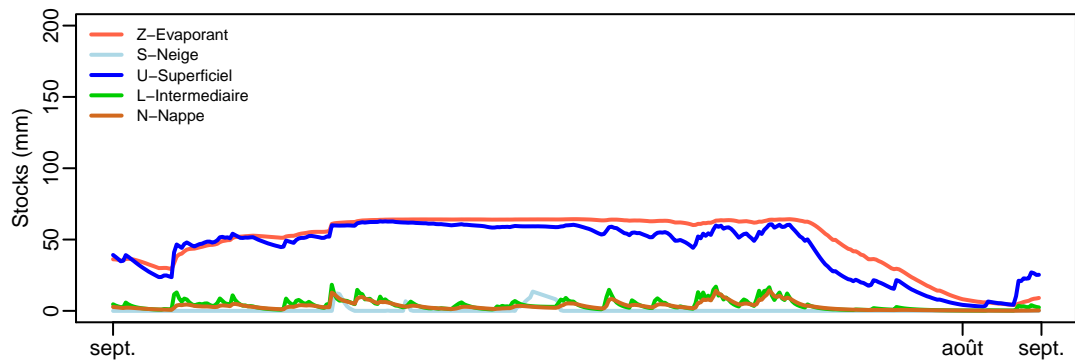

# k0673310 (180.52 km<sup>2</sup>) – année 1983–1984

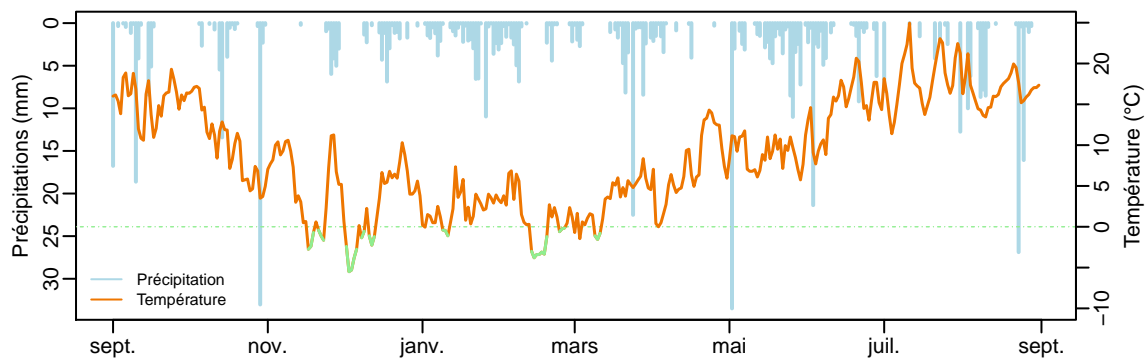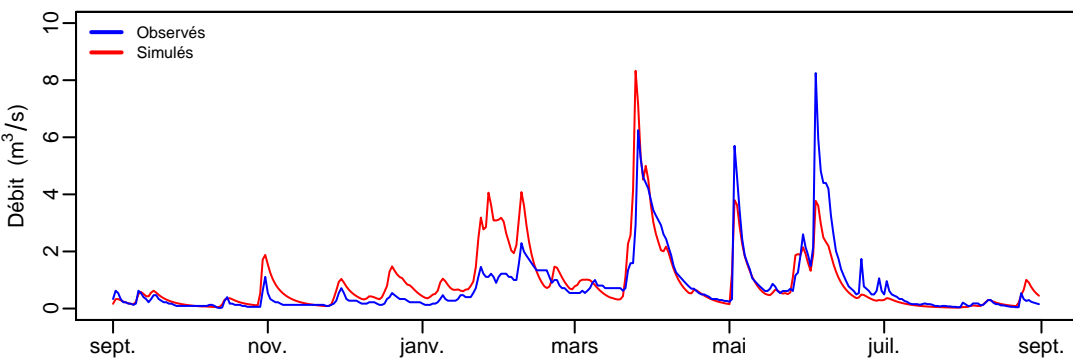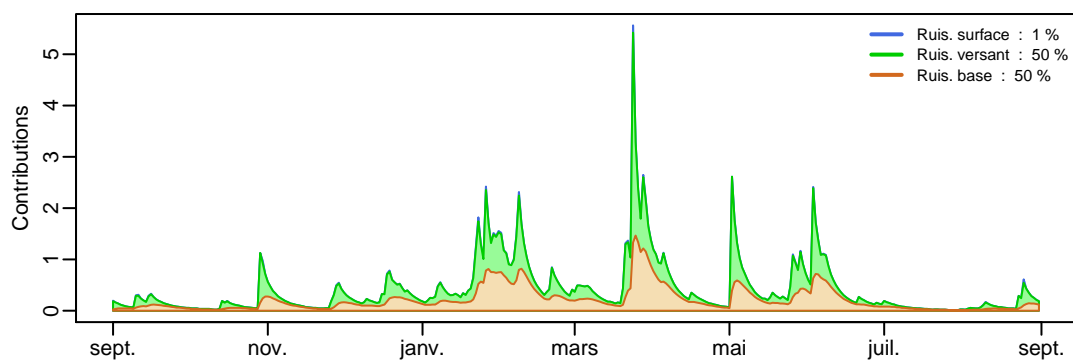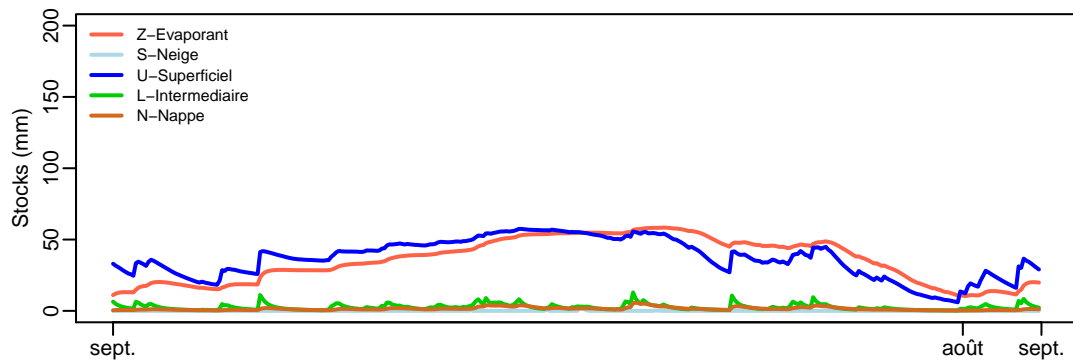

# k0673310 (180.52 km<sup>2</sup>) – année 1984–1985

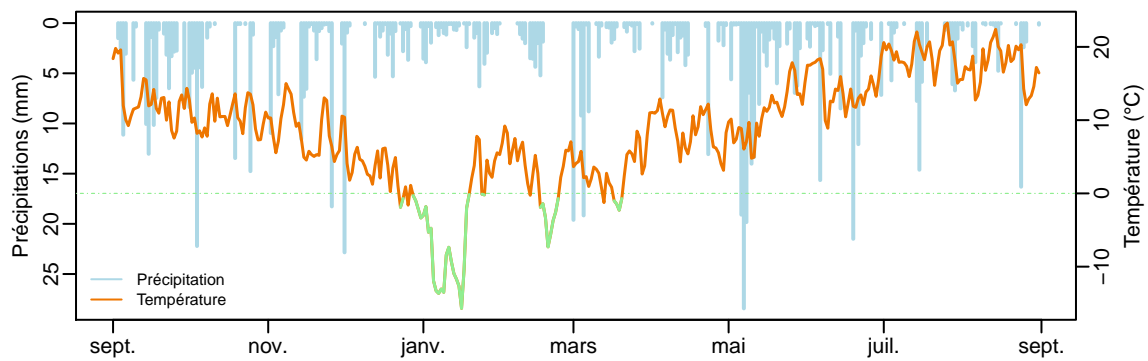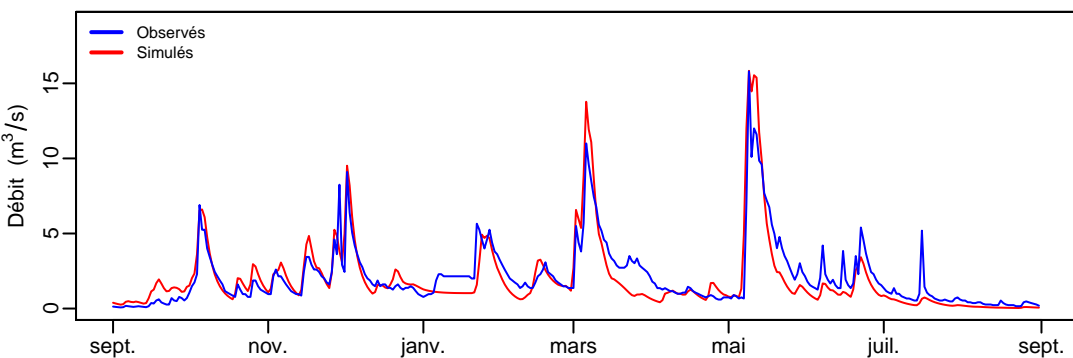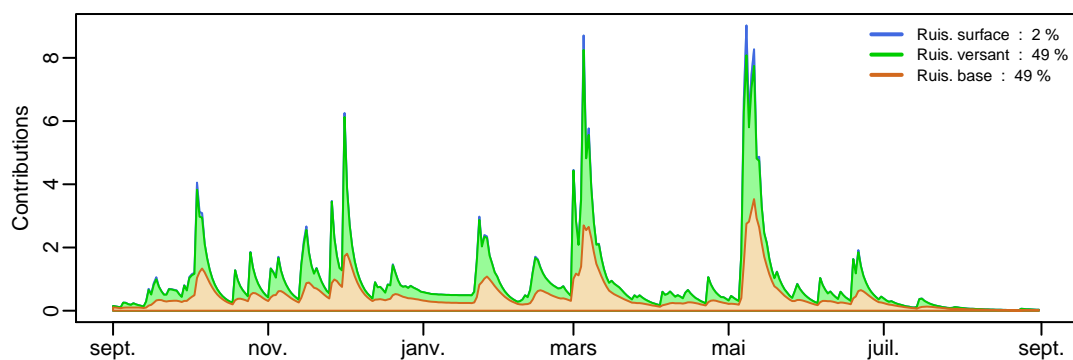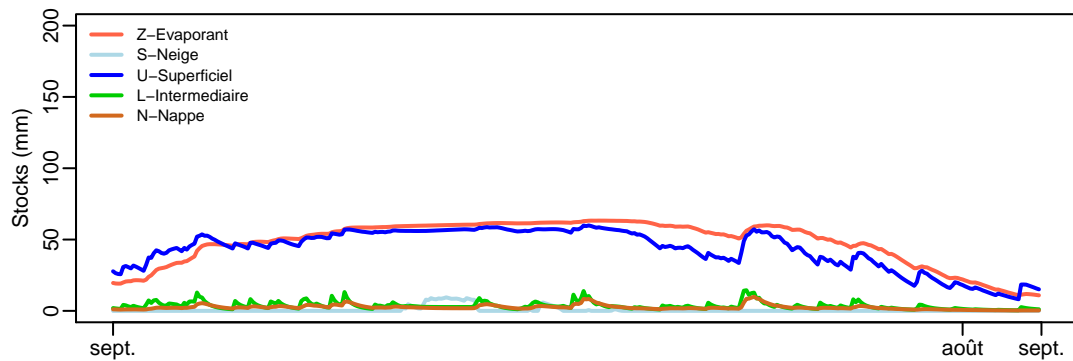

# k0673310 (180.52 km<sup>2</sup>) – année 1985–1986

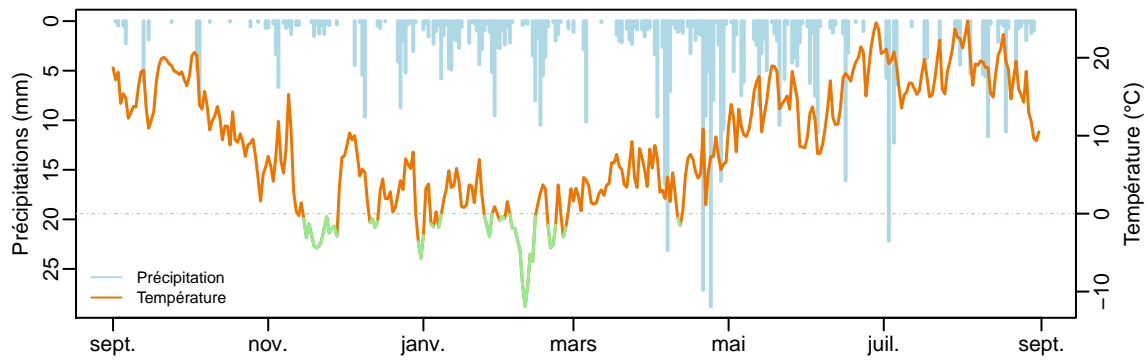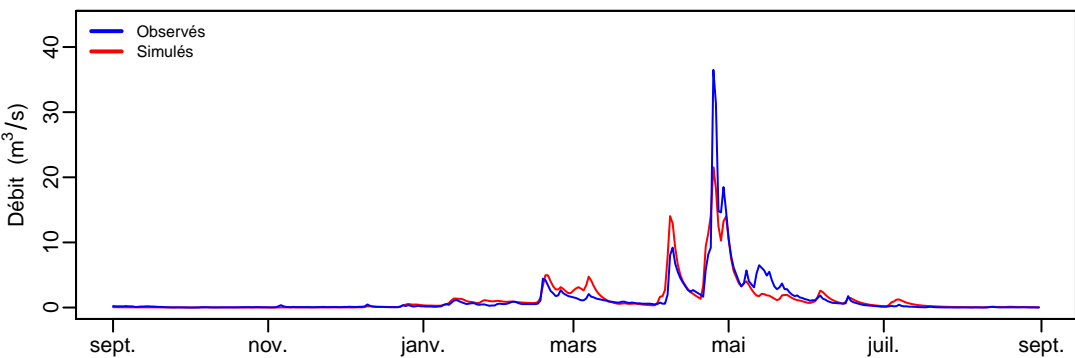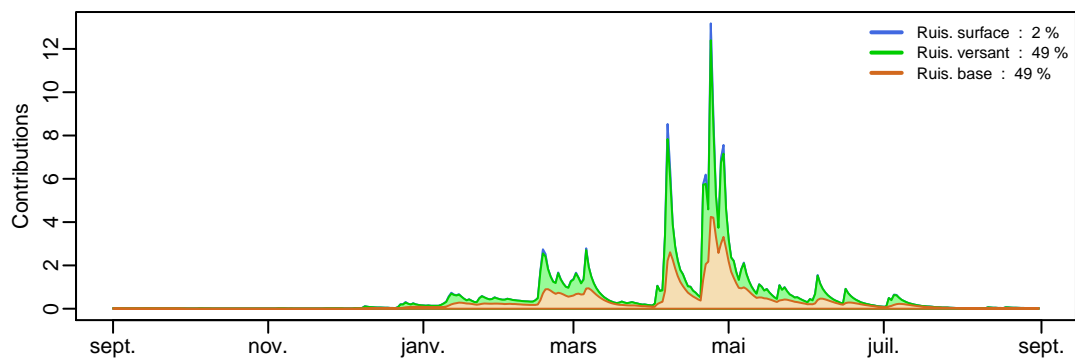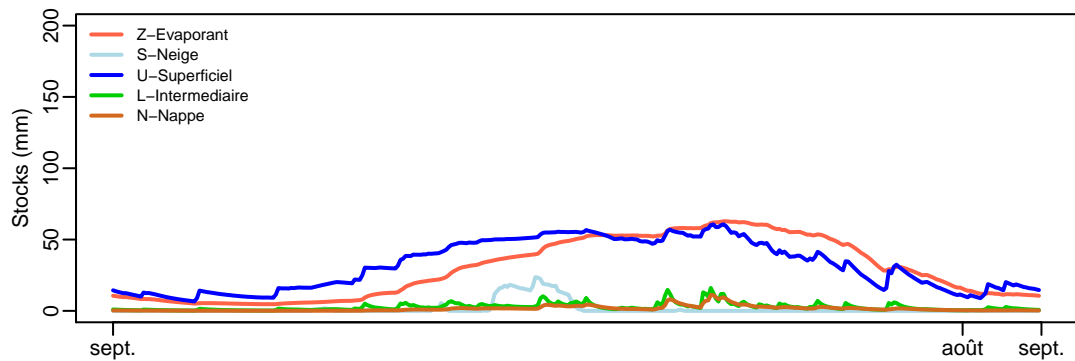

# k0673310 (180.52 km<sup>2</sup>) – année 1986–1987

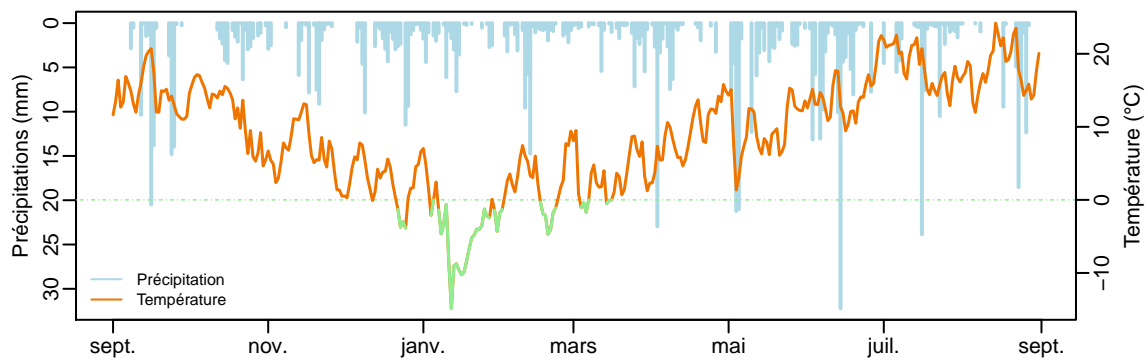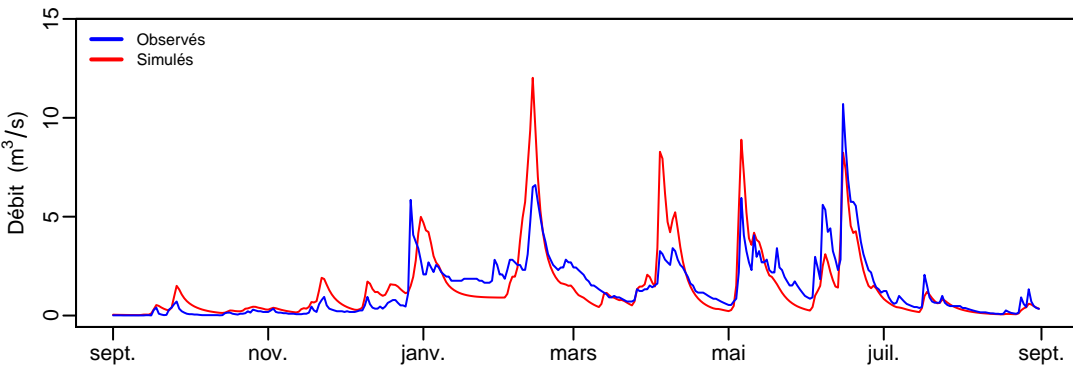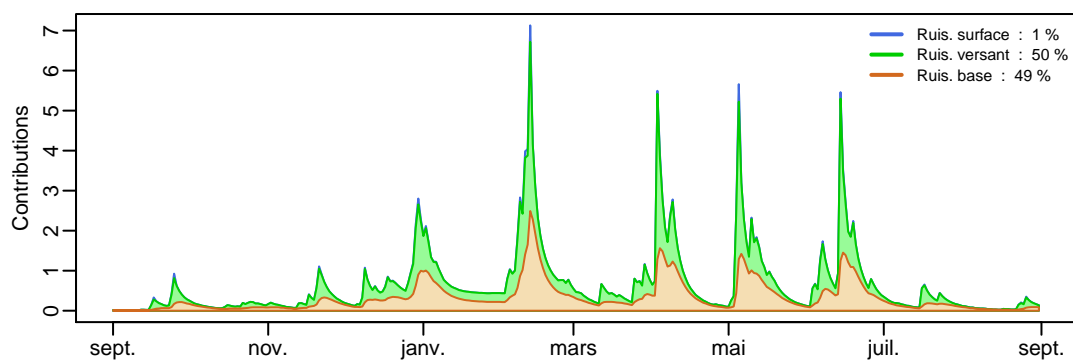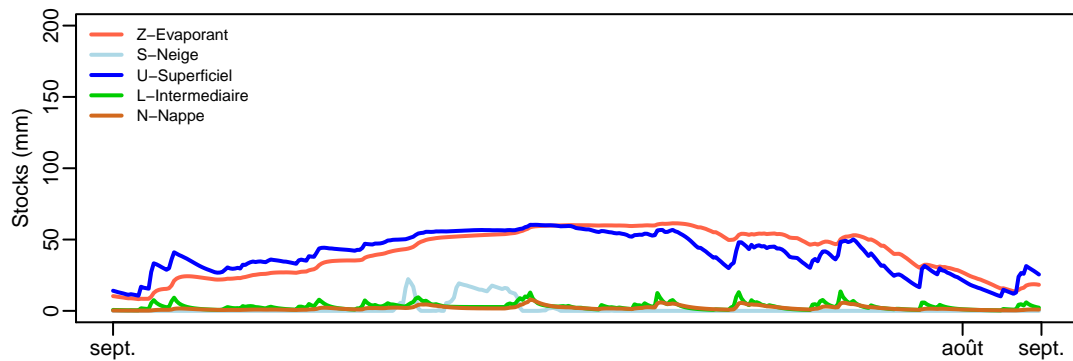

# k0673310 (180.52 km<sup>2</sup>) – année 1987–1988

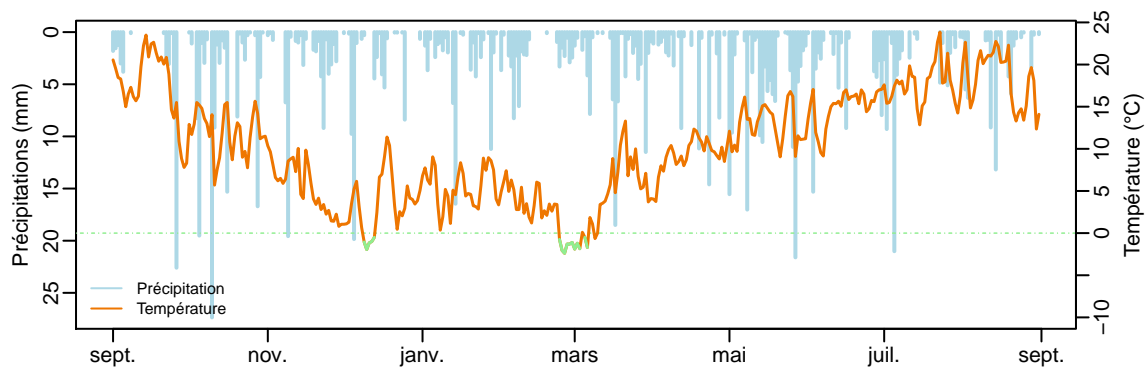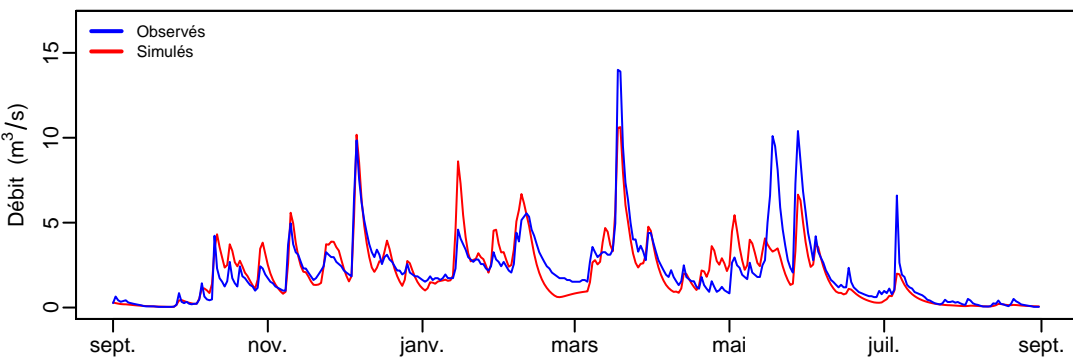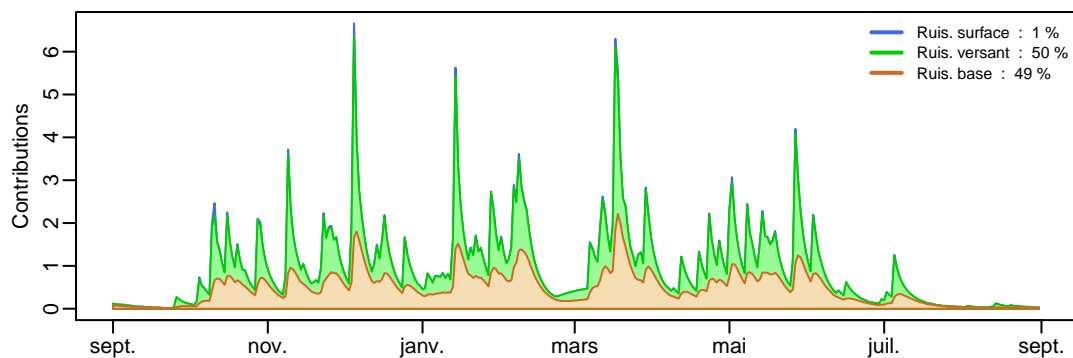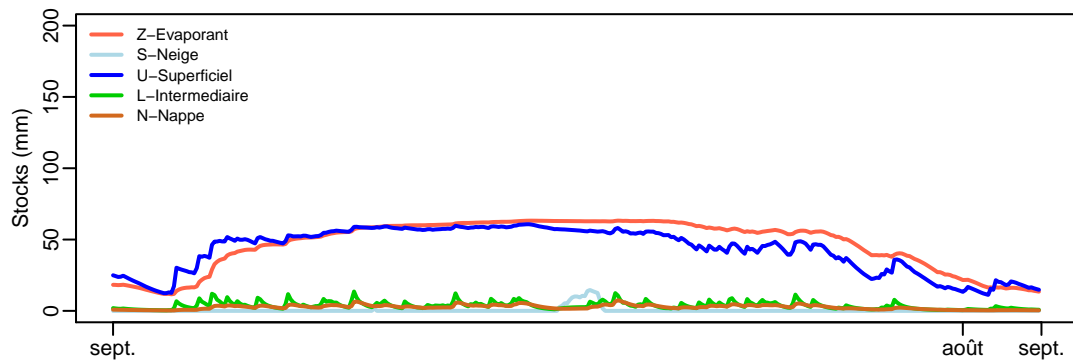

# k0673310 (180.52 km<sup>2</sup>) – année 1988–1989

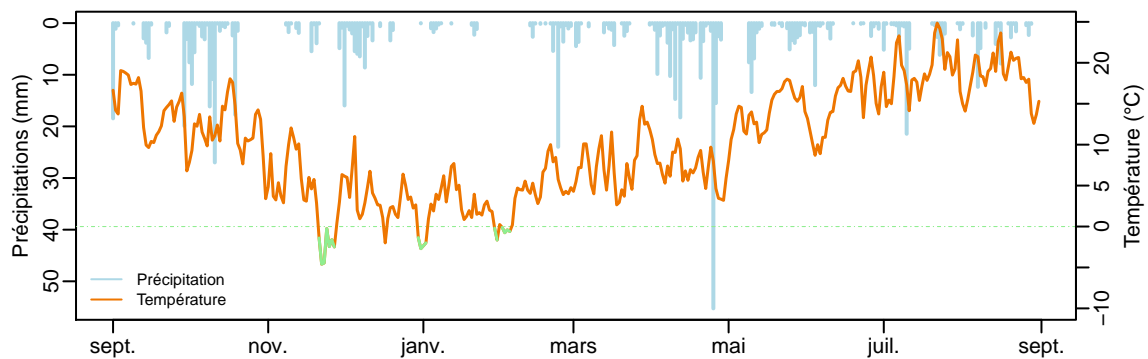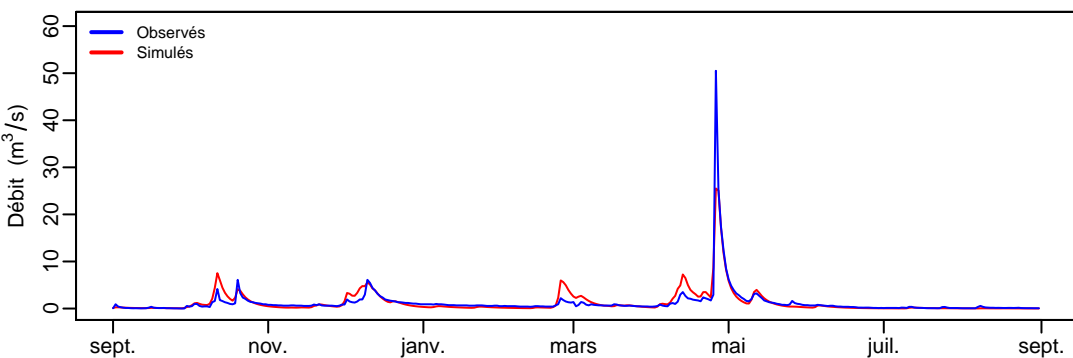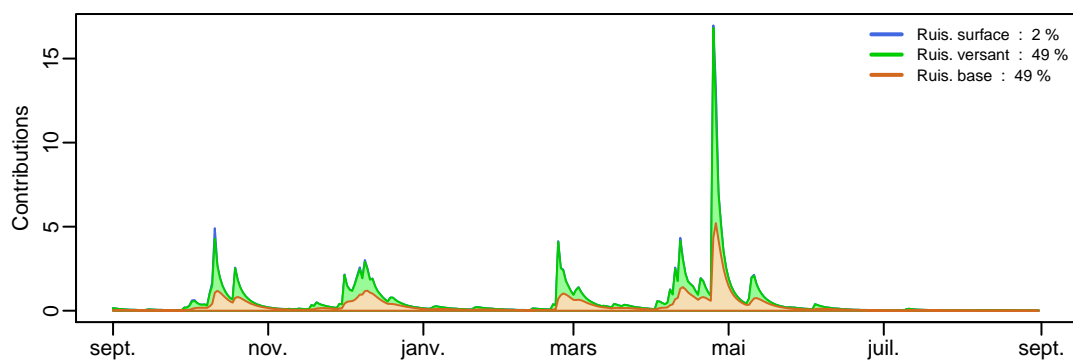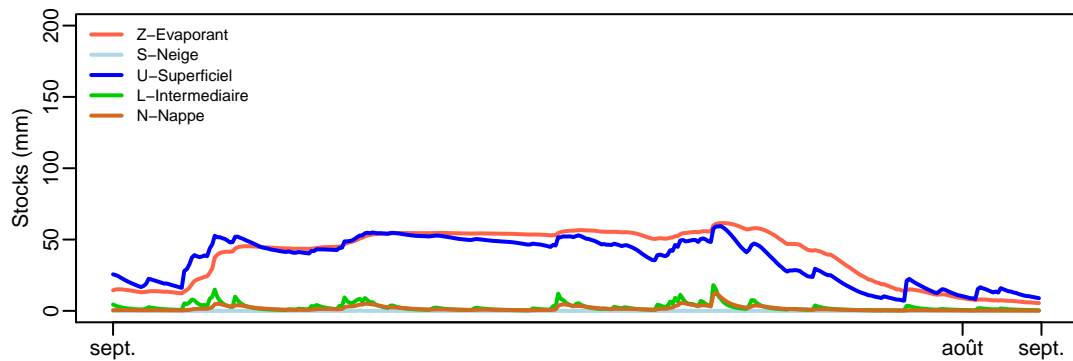

# k0673310 (180.52 km<sup>2</sup>) – année 1989–1990

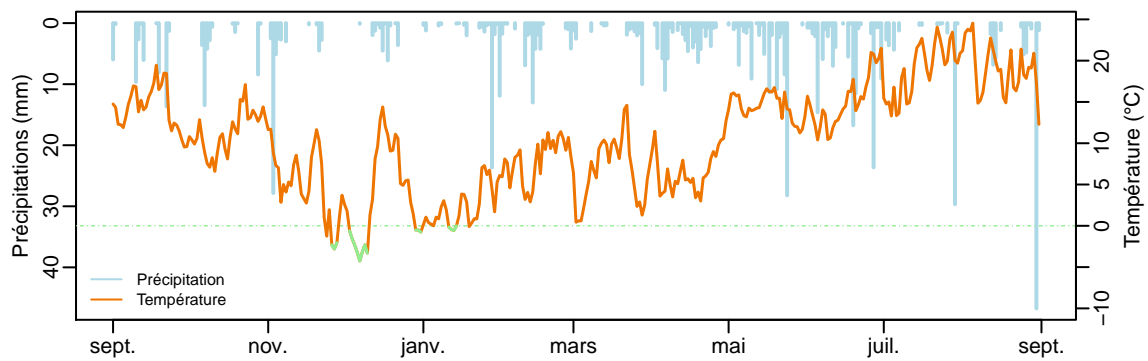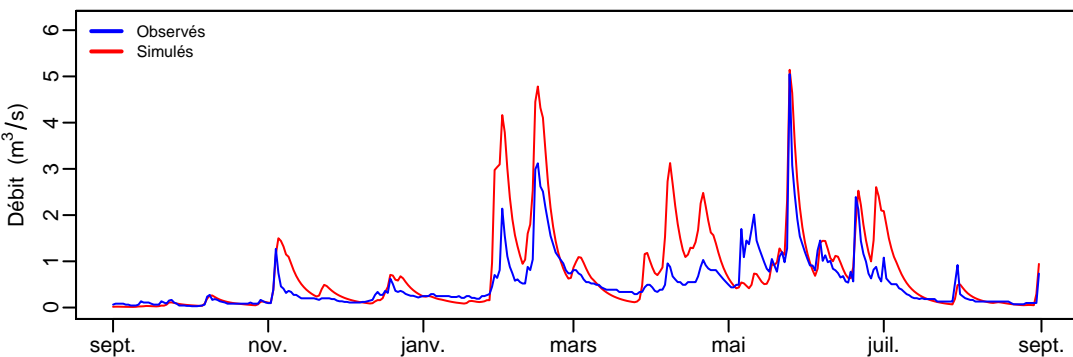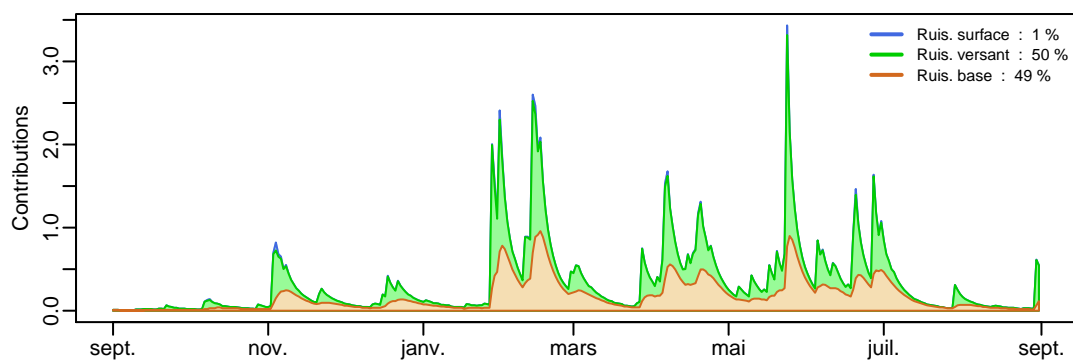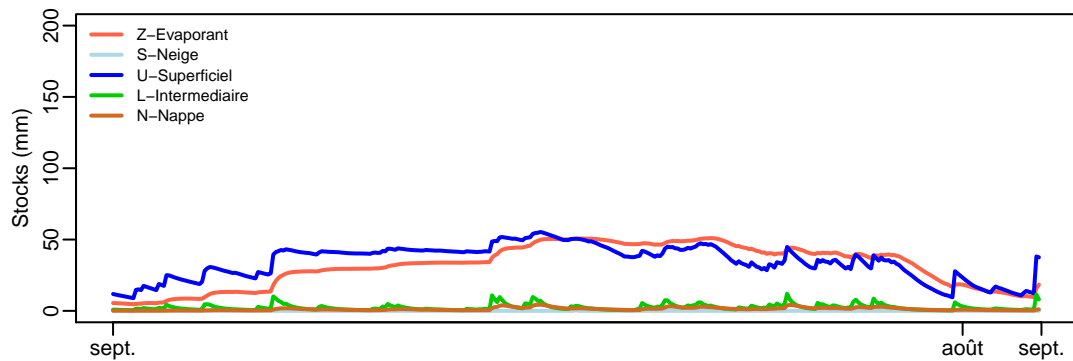



# k0673310 (180.52 km<sup>2</sup>) – année 1990–1991

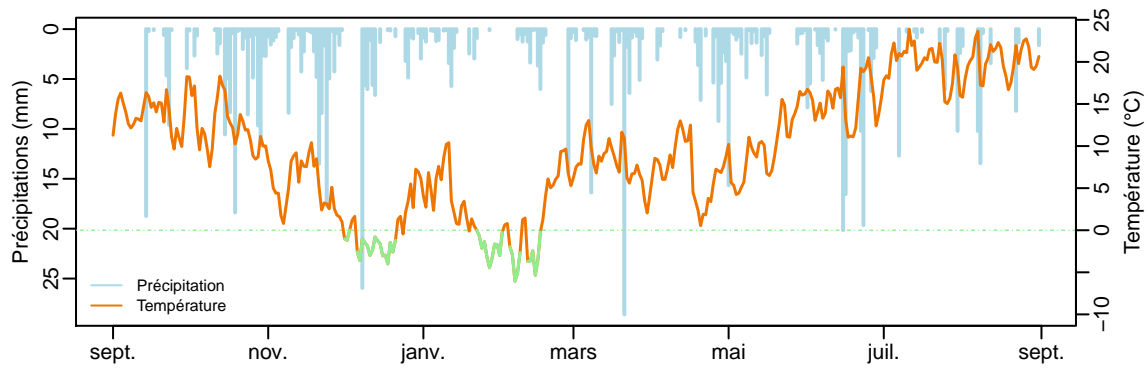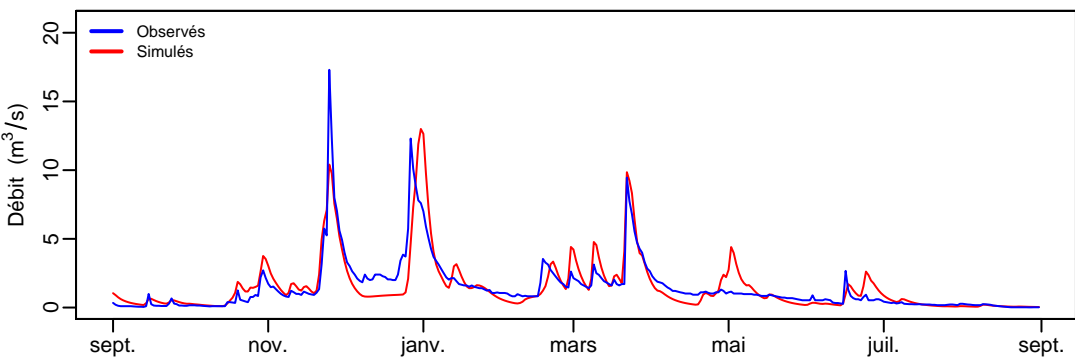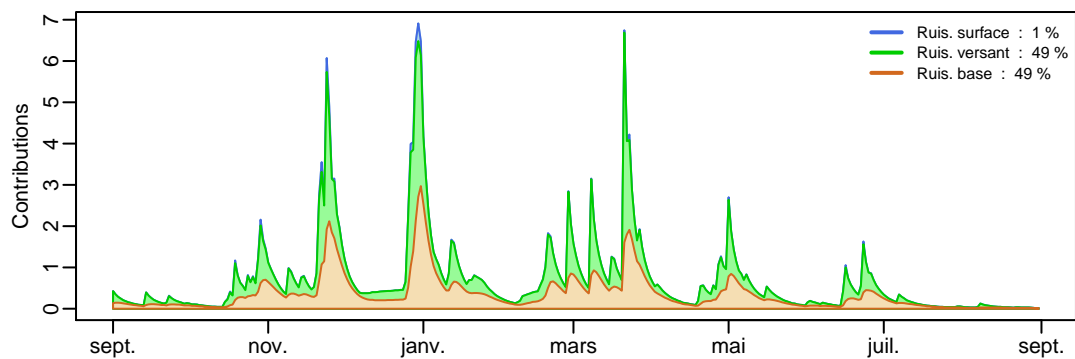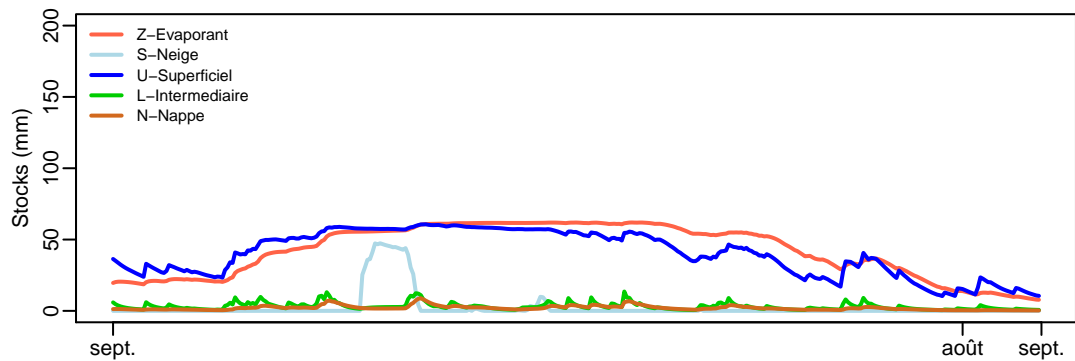

# k0673310 (180.52 km<sup>2</sup>) – année 1991–1992

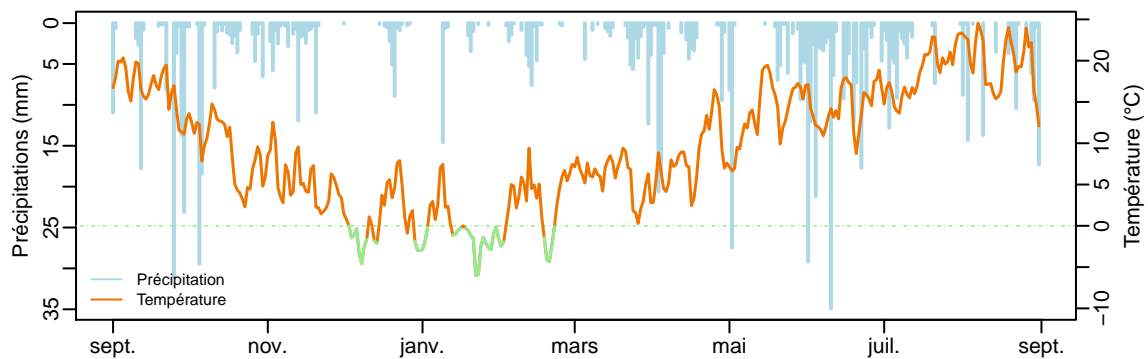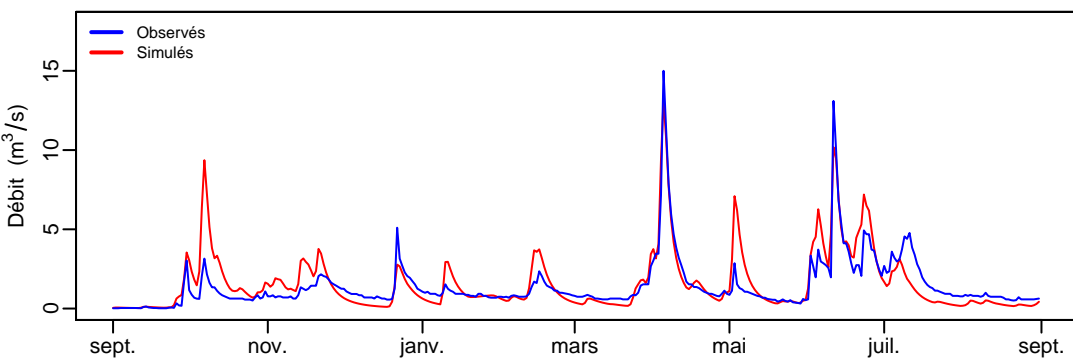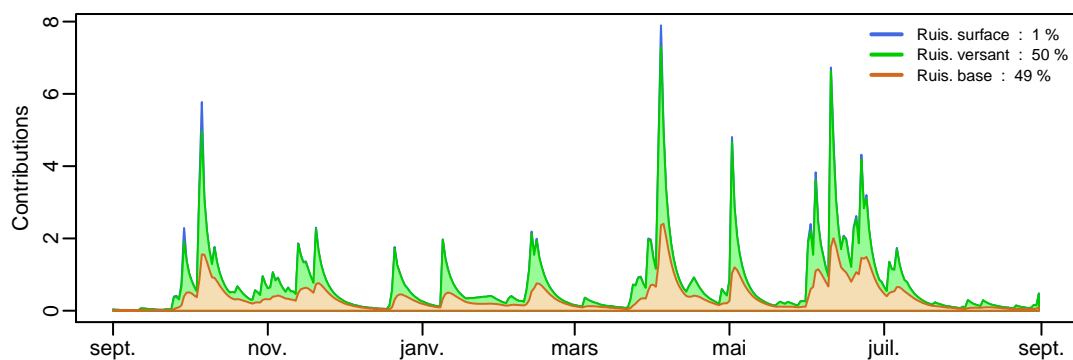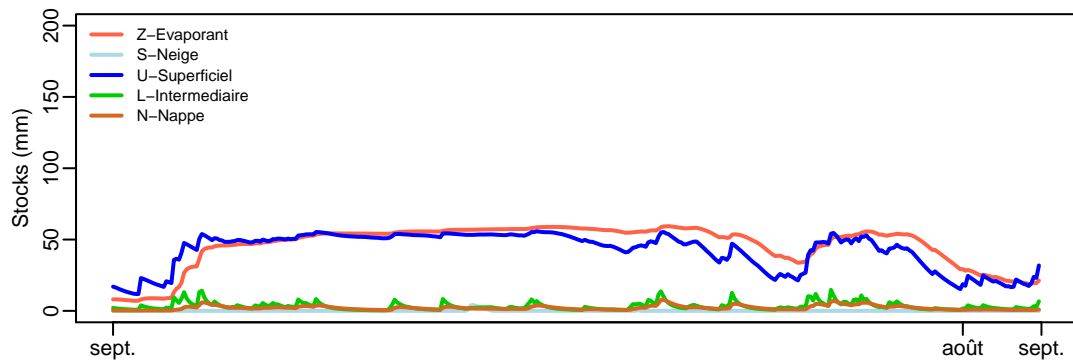

# k0673310 (180.52 km<sup>2</sup>) – année 1992–1993

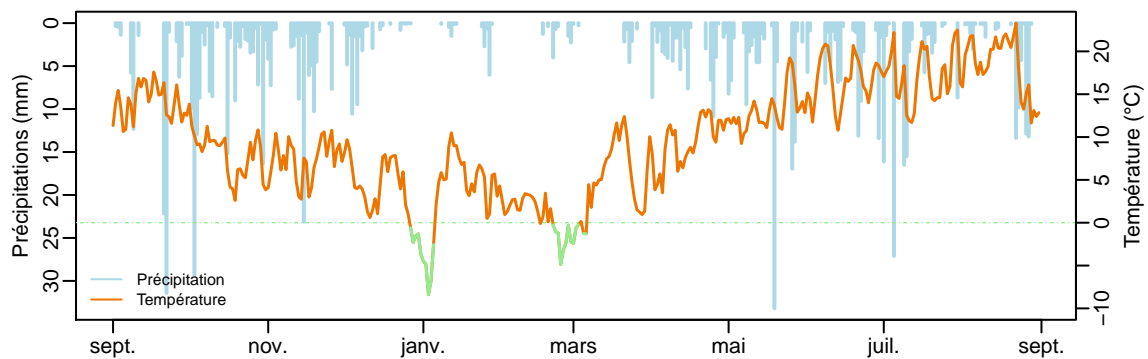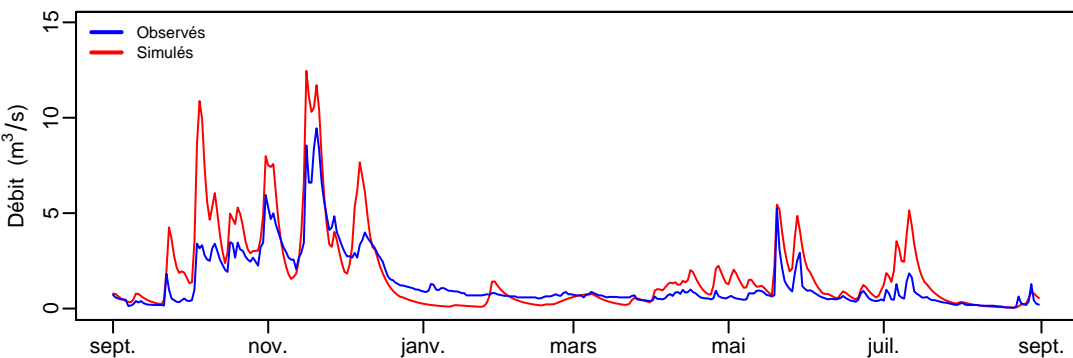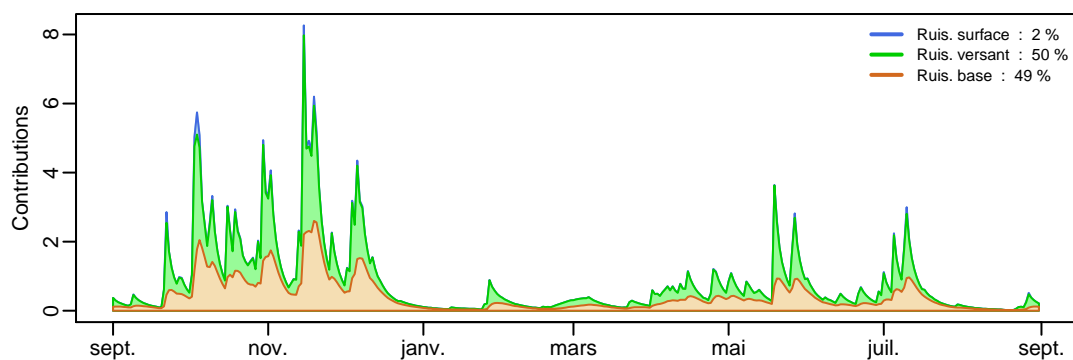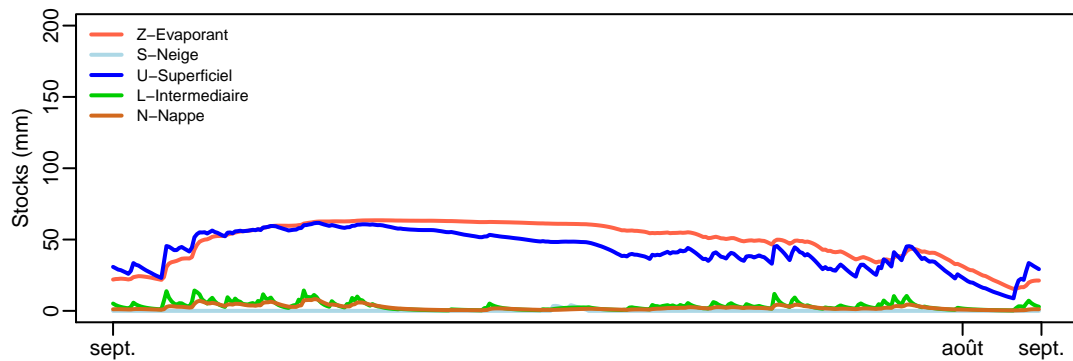

# k0673310 (180.52 km<sup>2</sup>) – année 1993–1994

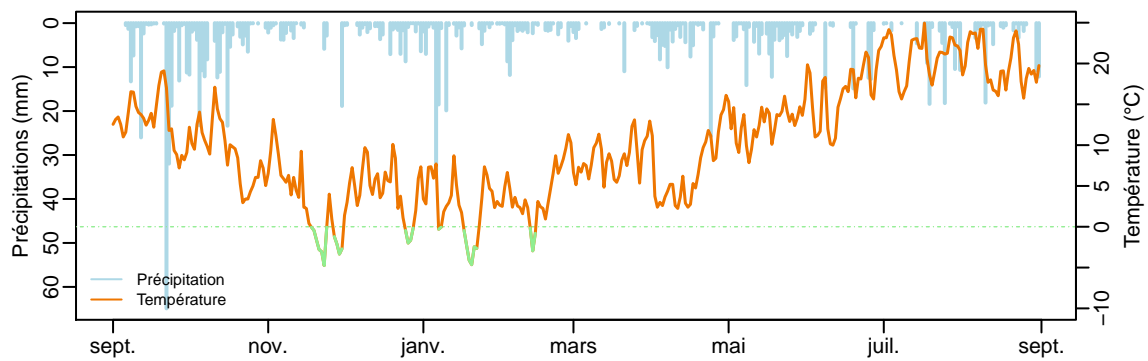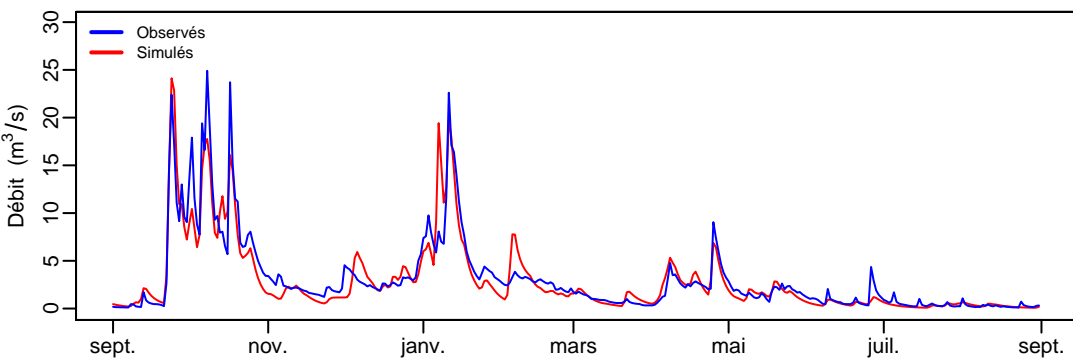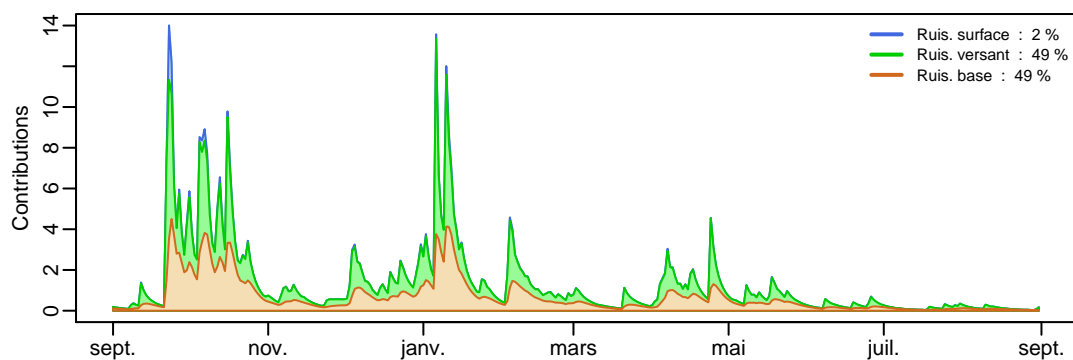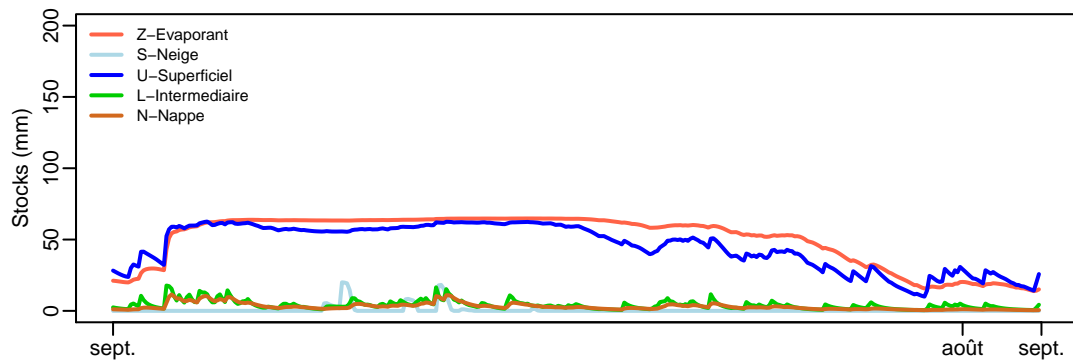

# k0673310 (180.52 km<sup>2</sup>) – année 1994–1995

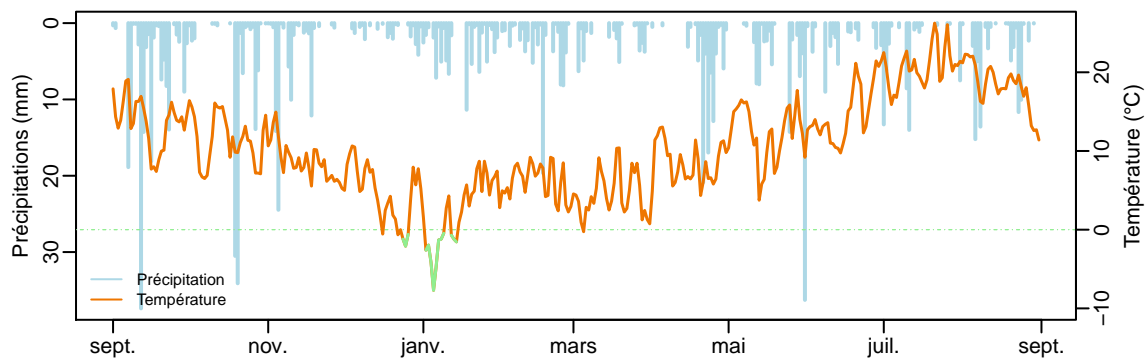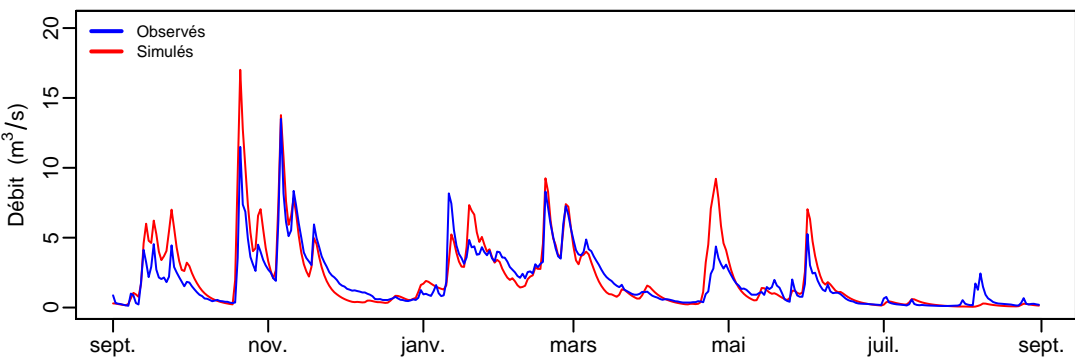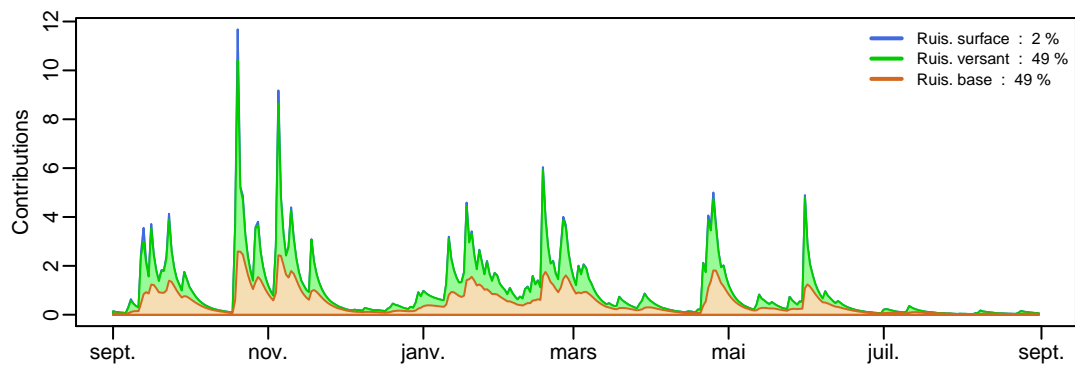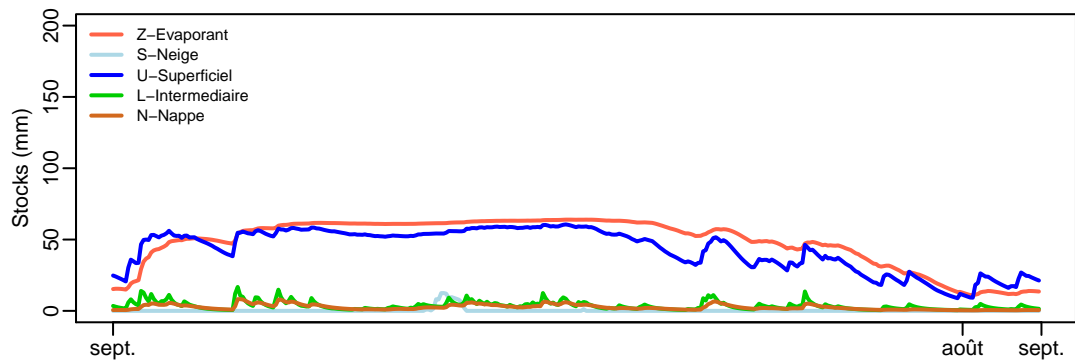

# k0673310 (180.52 km<sup>2</sup>) – année 1995–1996

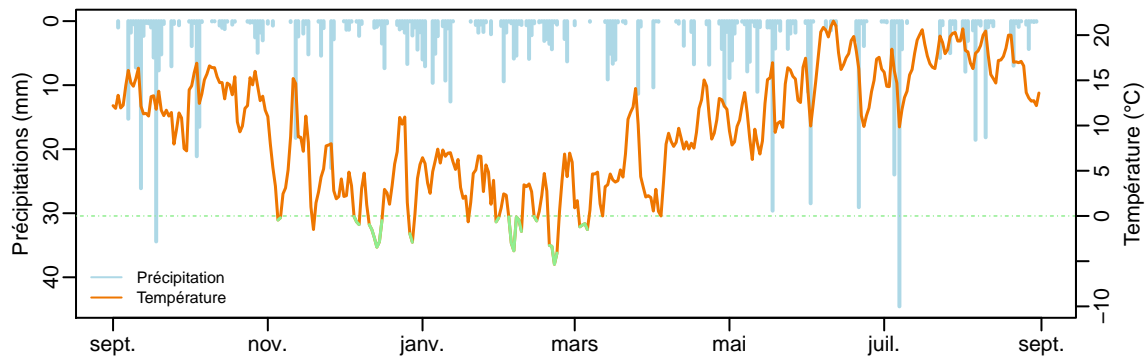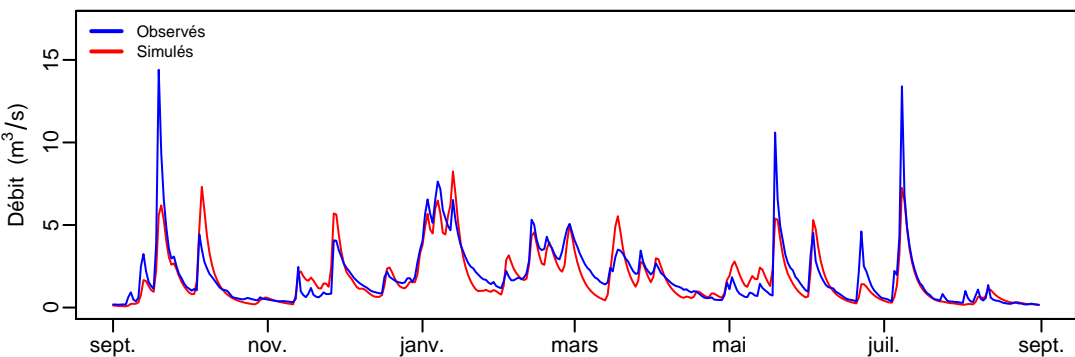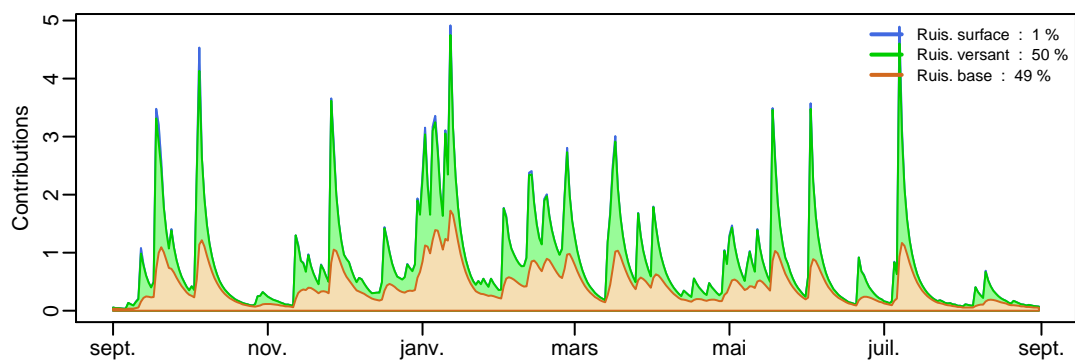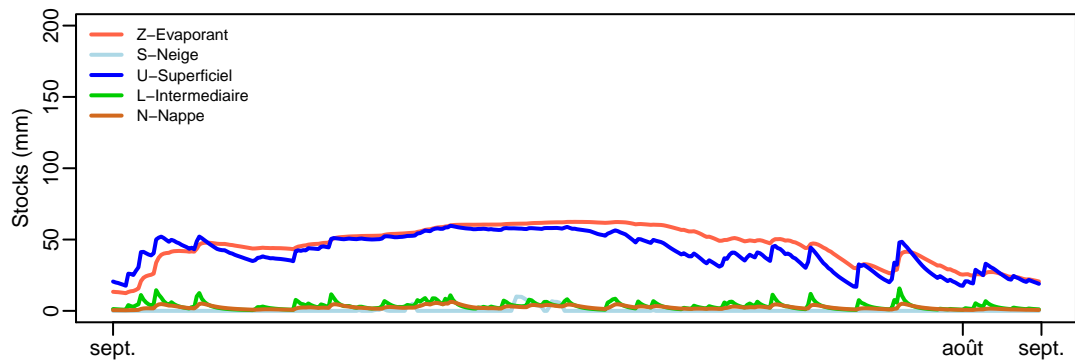

# k0673310 (180.52 km<sup>2</sup>) – année 1996–1997

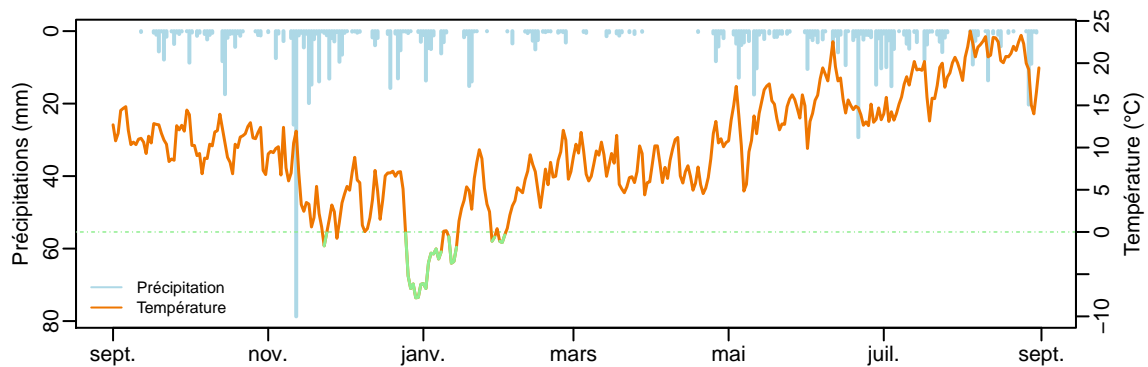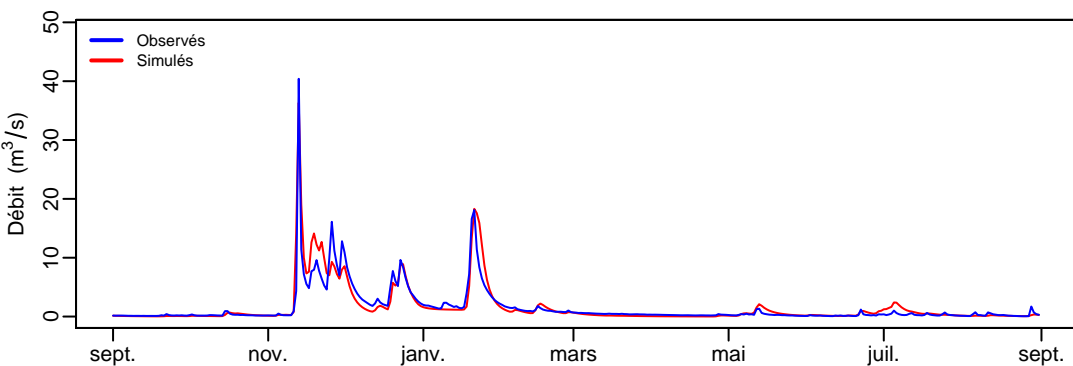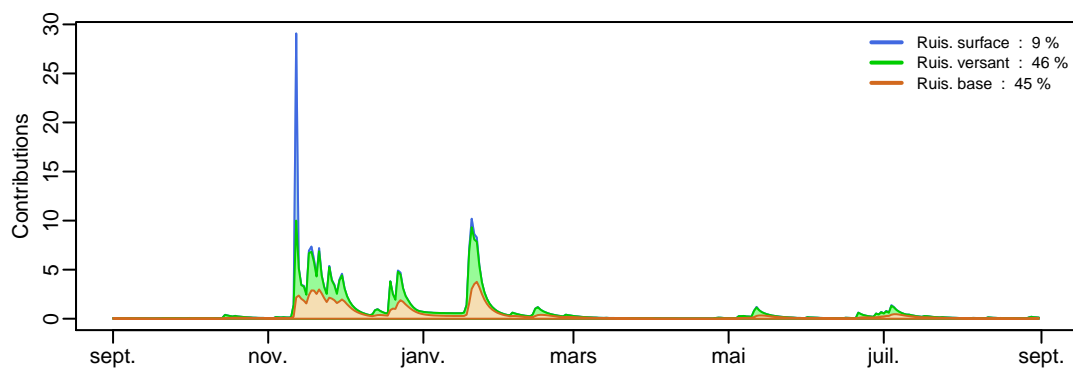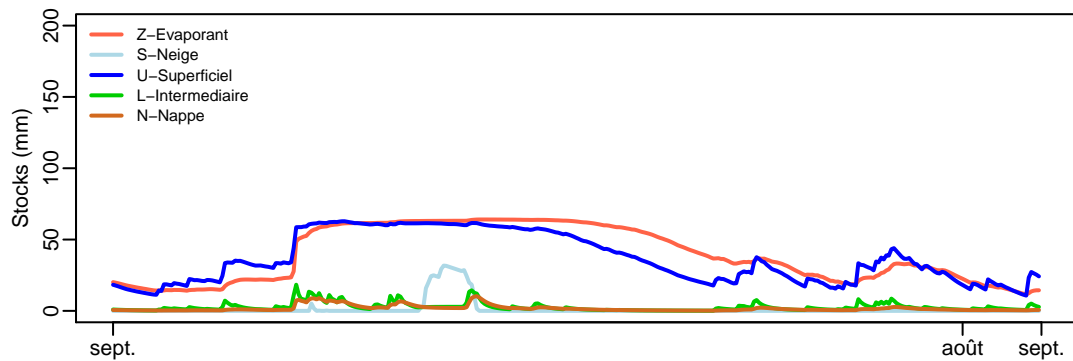

# k0673310 (180.52 km<sup>2</sup>) – année 1997–1998

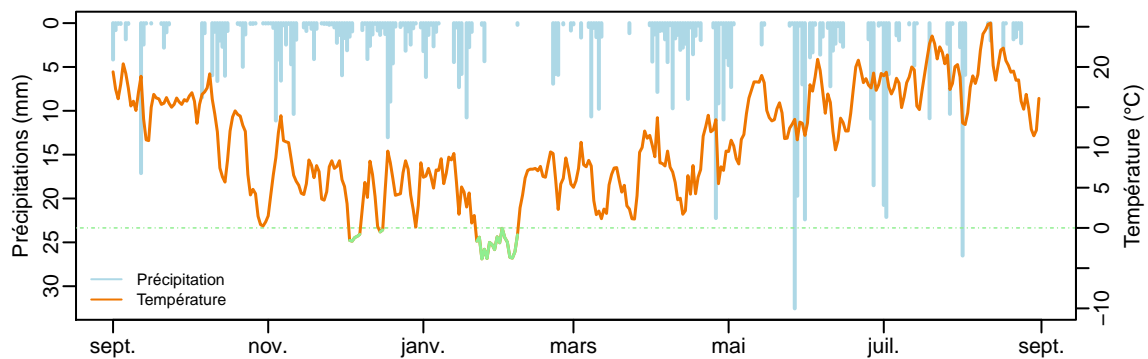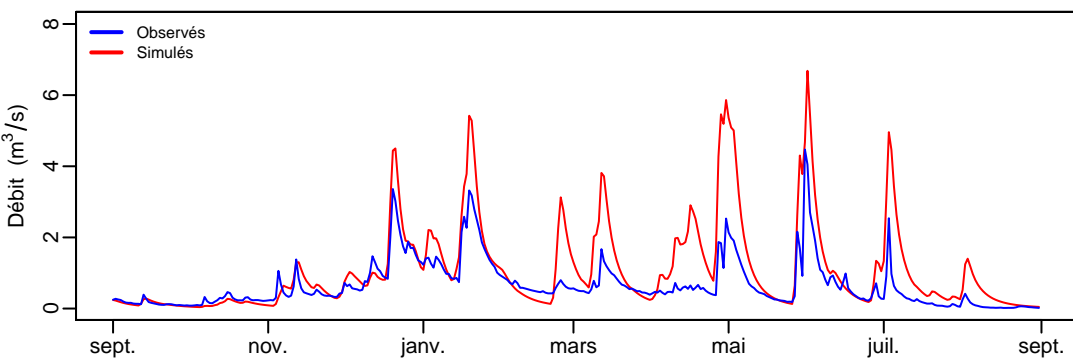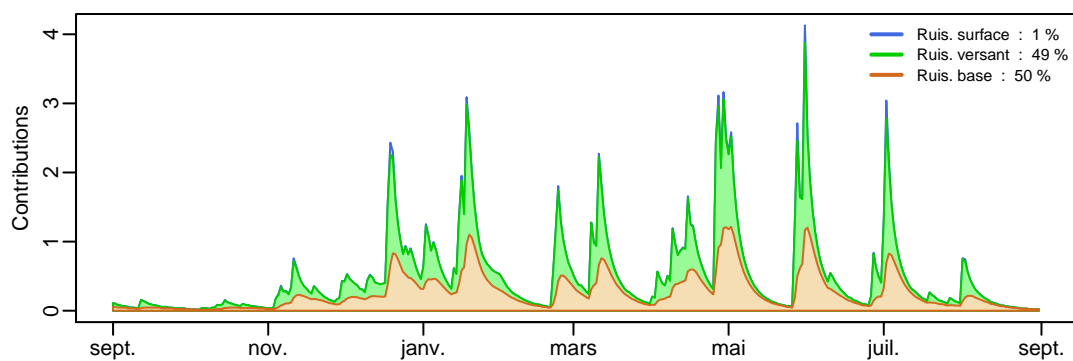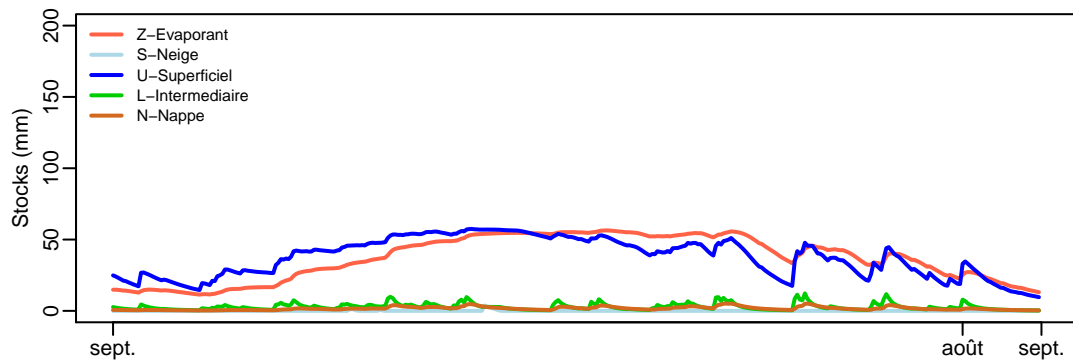



# k0673310 (180.52 km<sup>2</sup>) – année 1998–1999

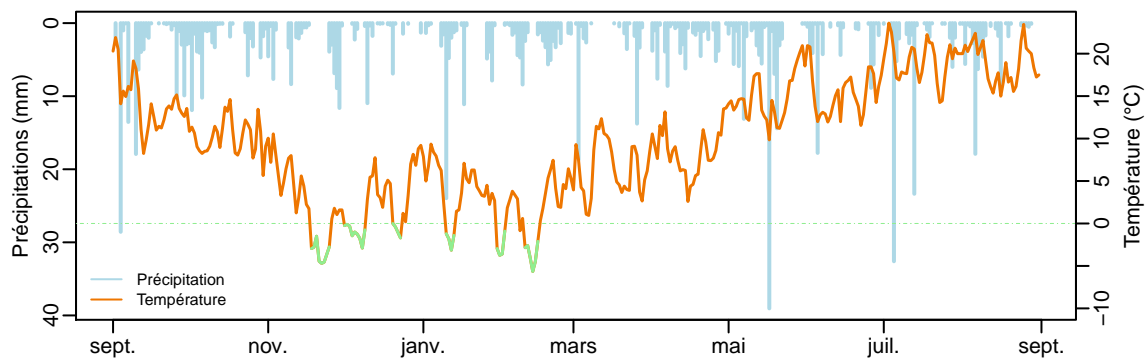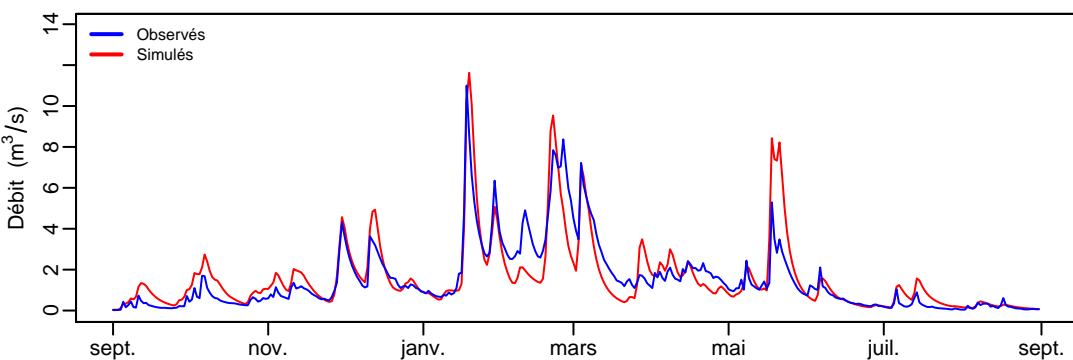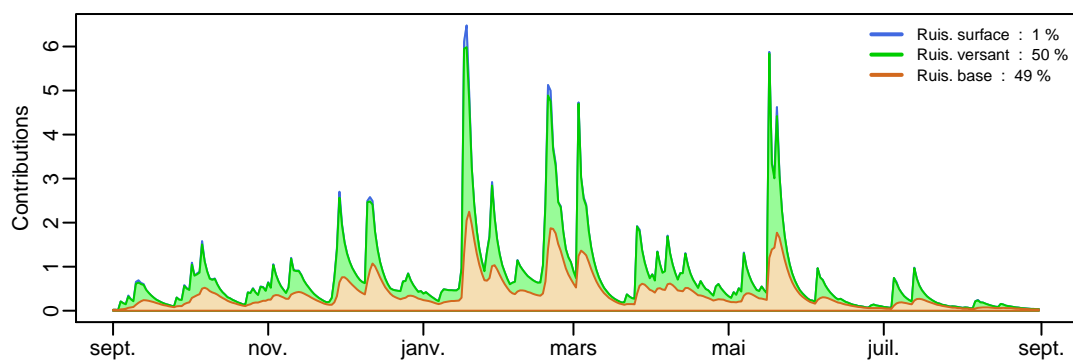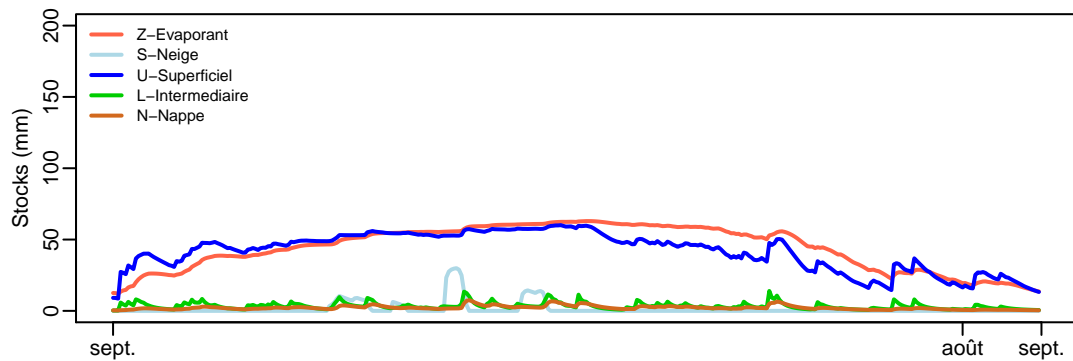

# k0673310 (180.52 km<sup>2</sup>) – année 1999–2000

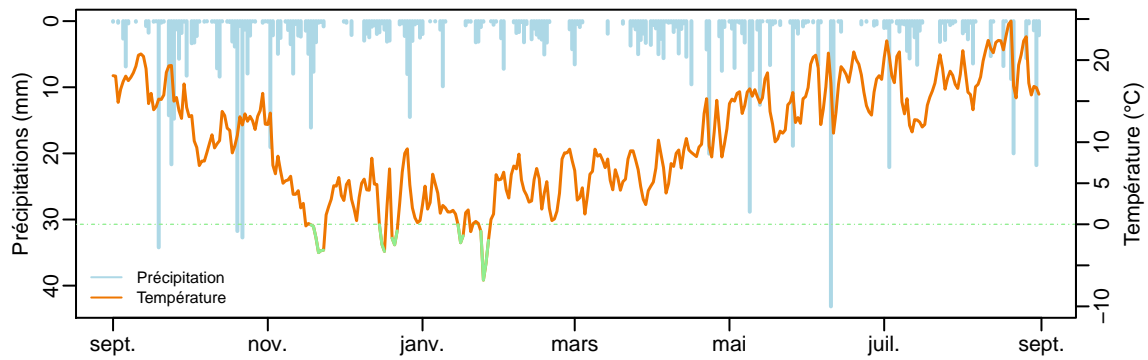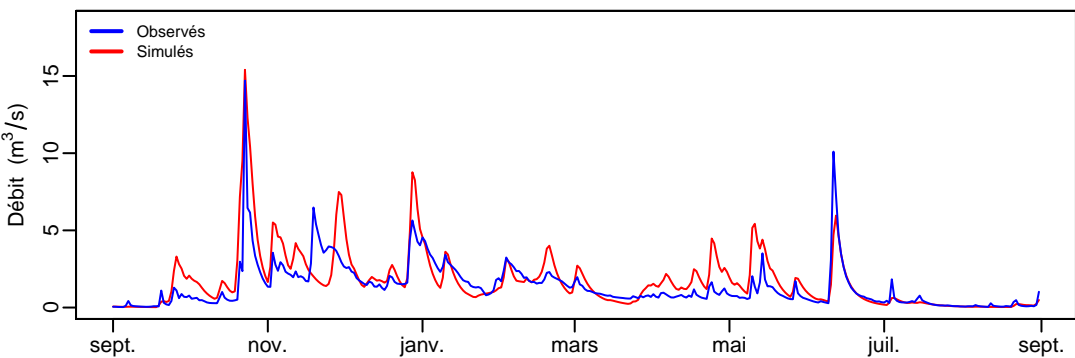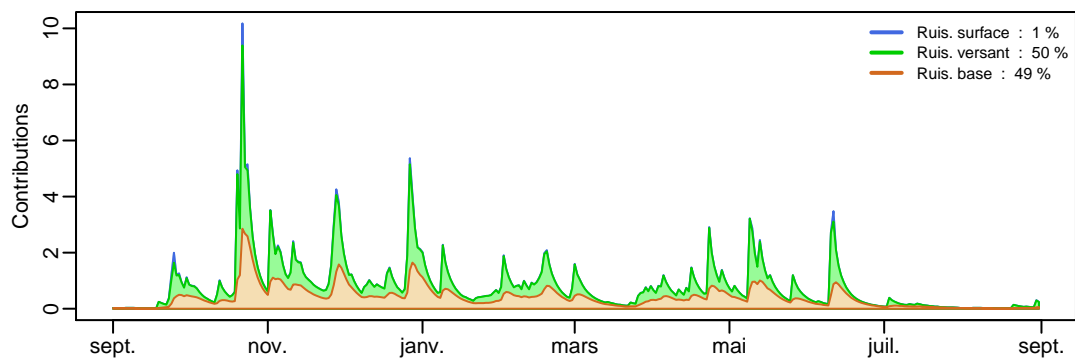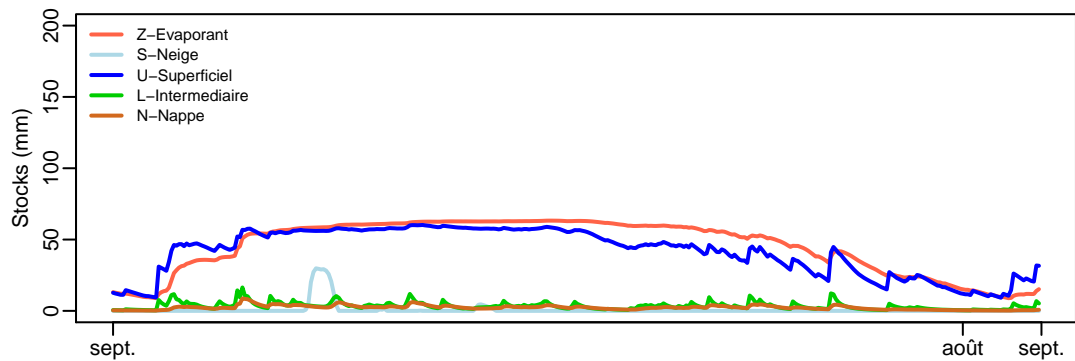

# k0690010 (4800.12 km<sup>2</sup>) – année 1984–1985

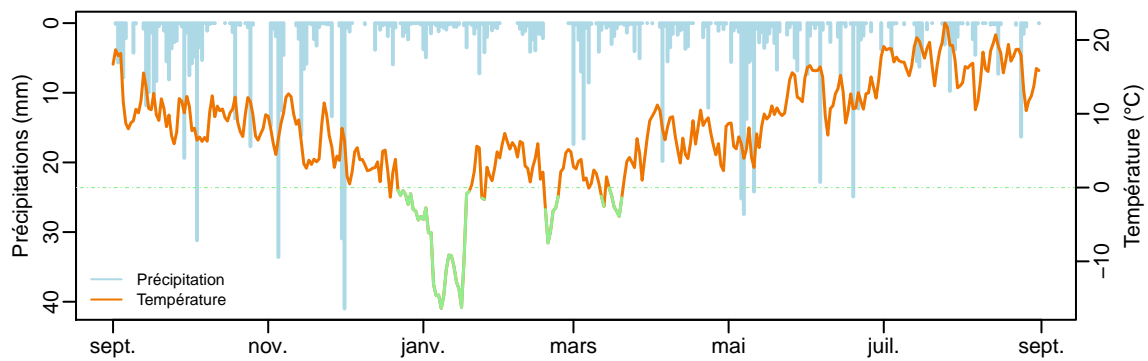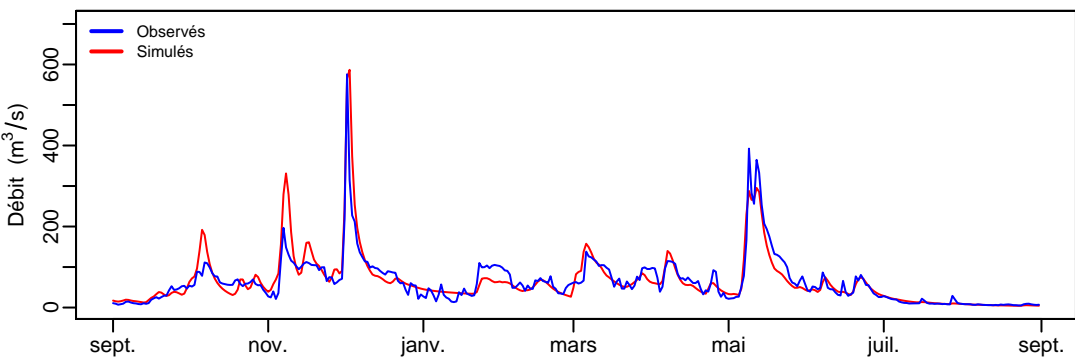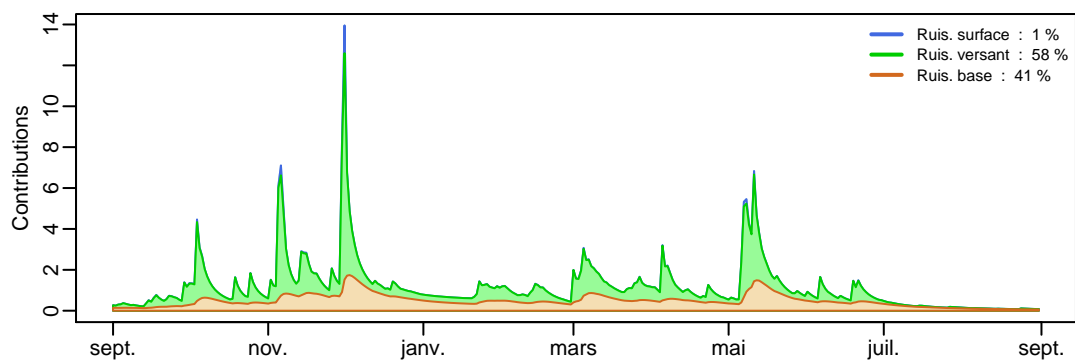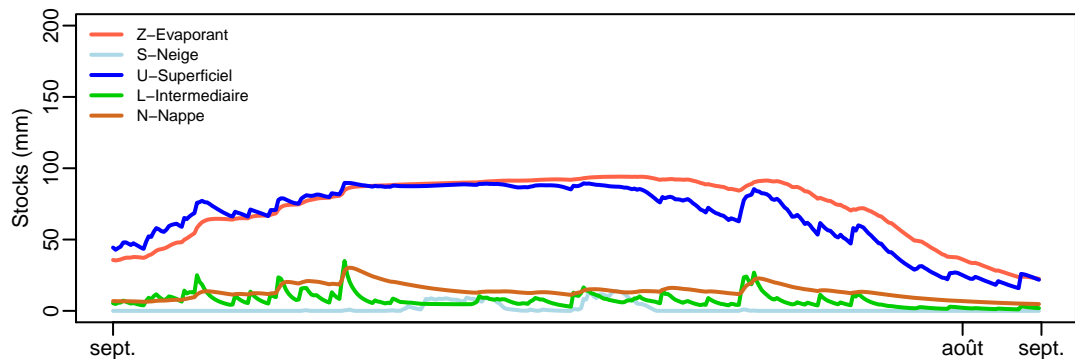

# k0690010 (4800.12 km<sup>2</sup>) – année 1985–1986

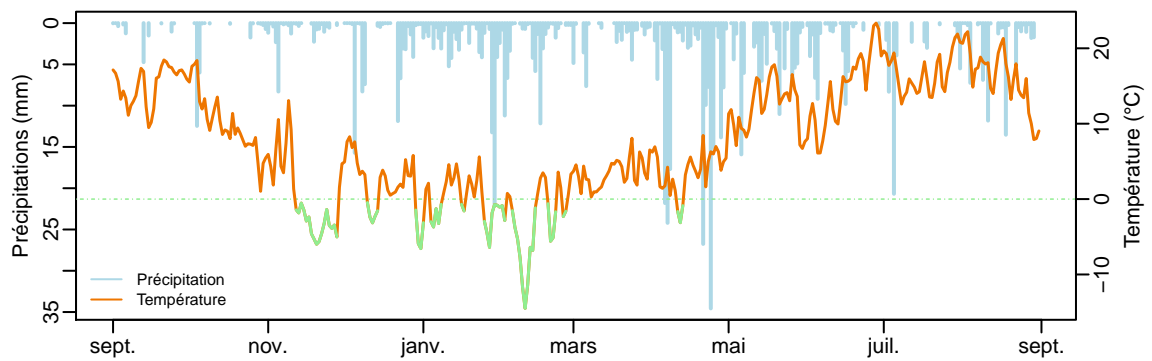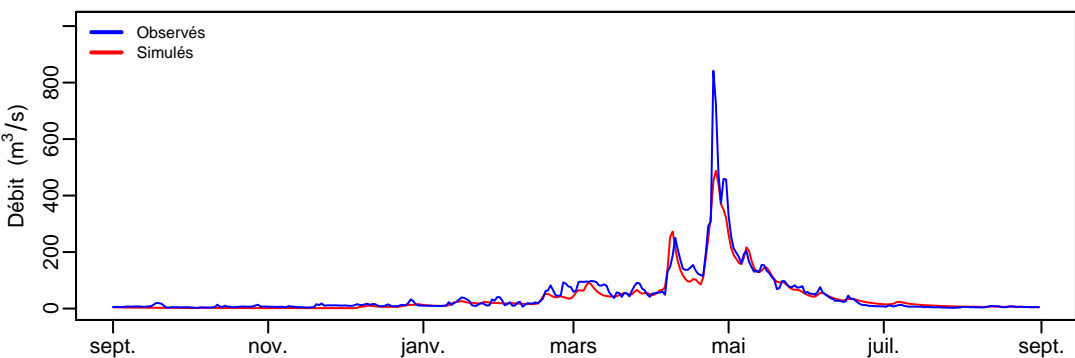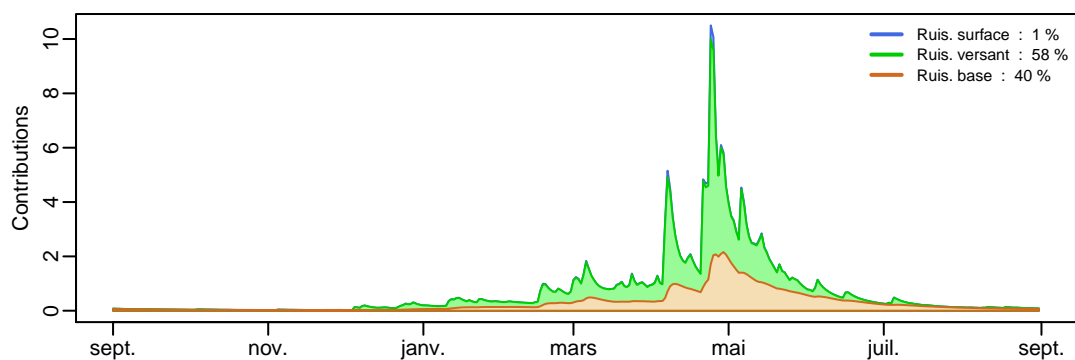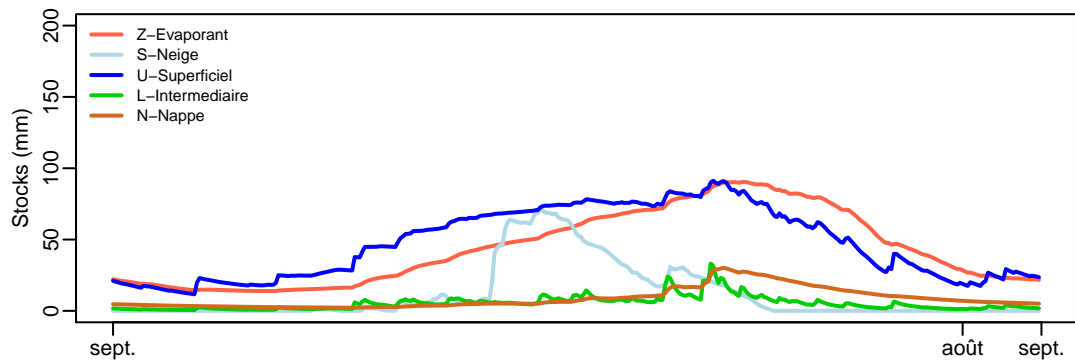

# k0690010 (4800.12 km<sup>2</sup>) – année 1986–1987

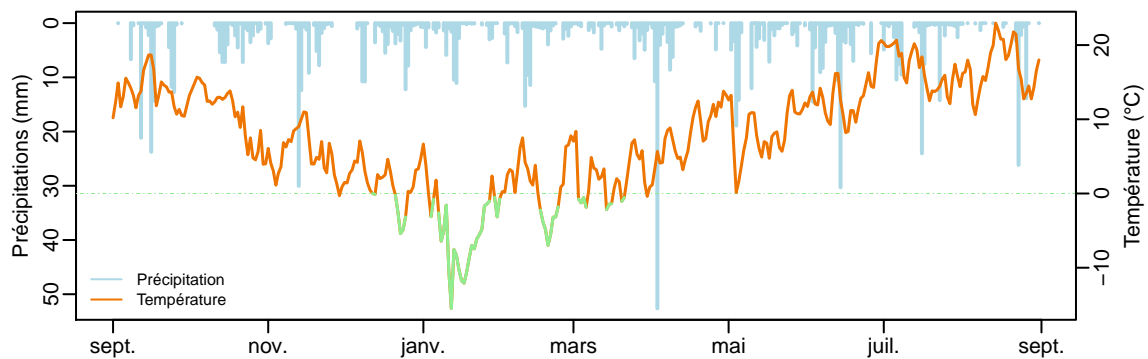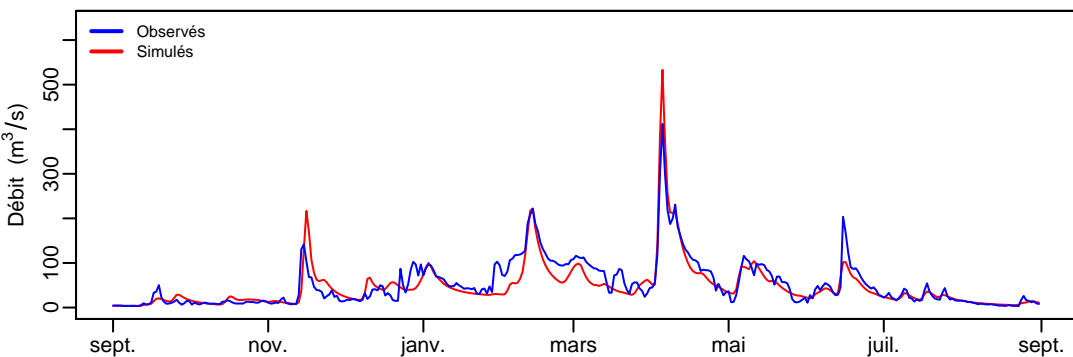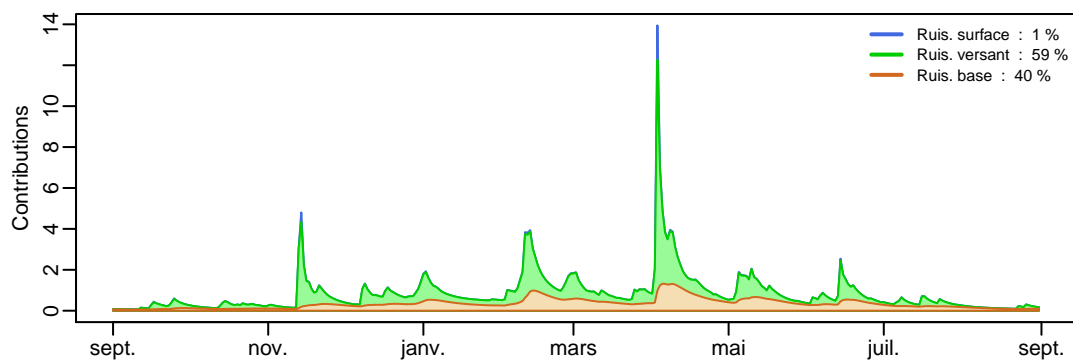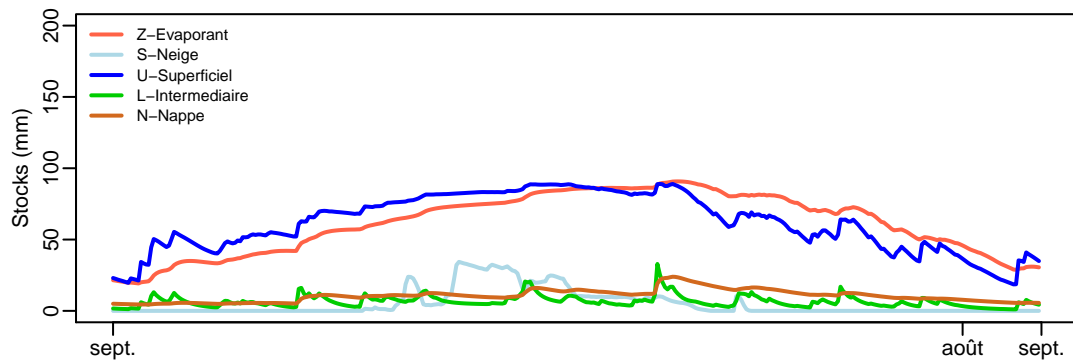

# k0690010 (4800.12 km²) – année 1987–1988

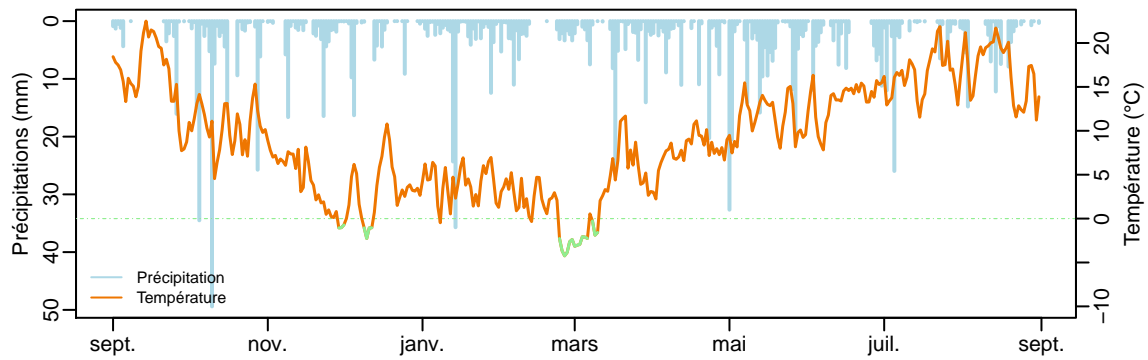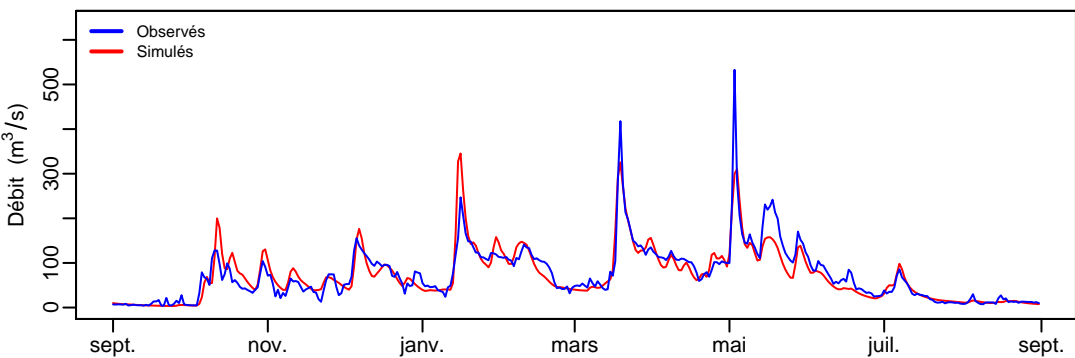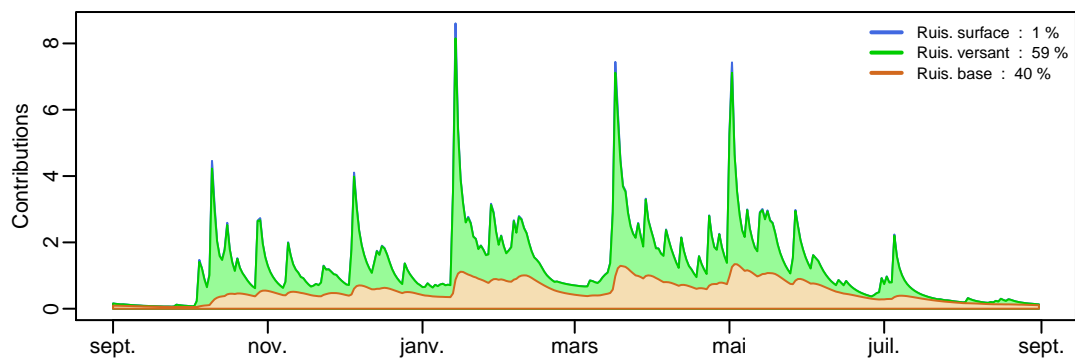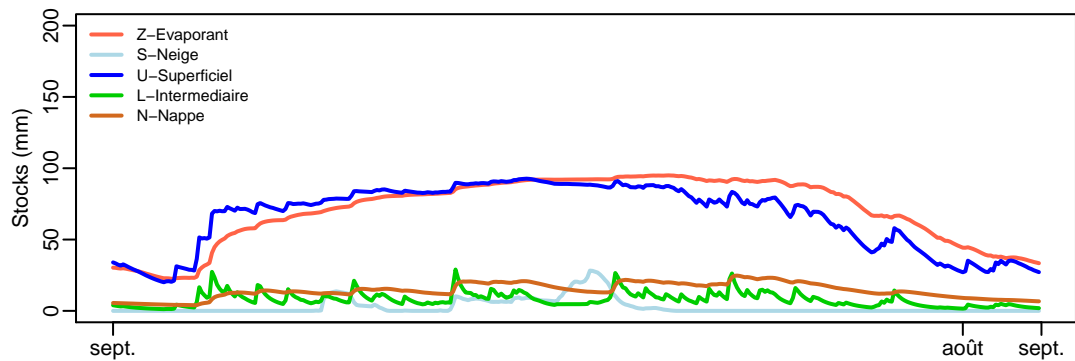

# k0690010 (4800.12 km²) – année 1988–1989

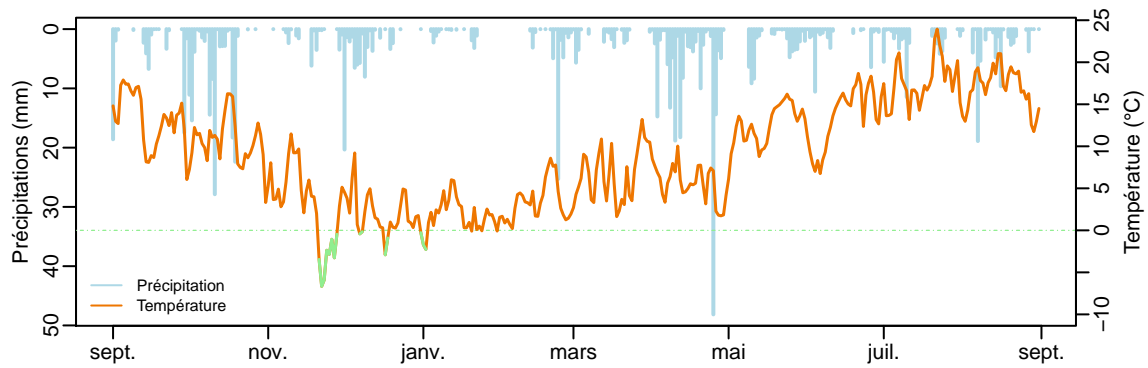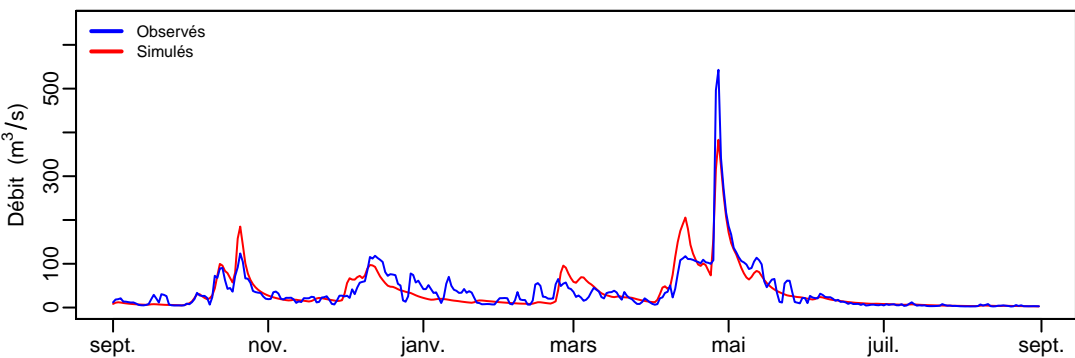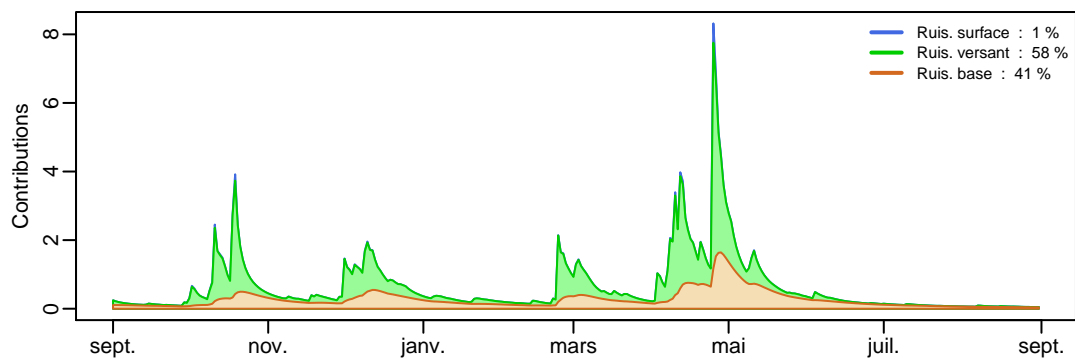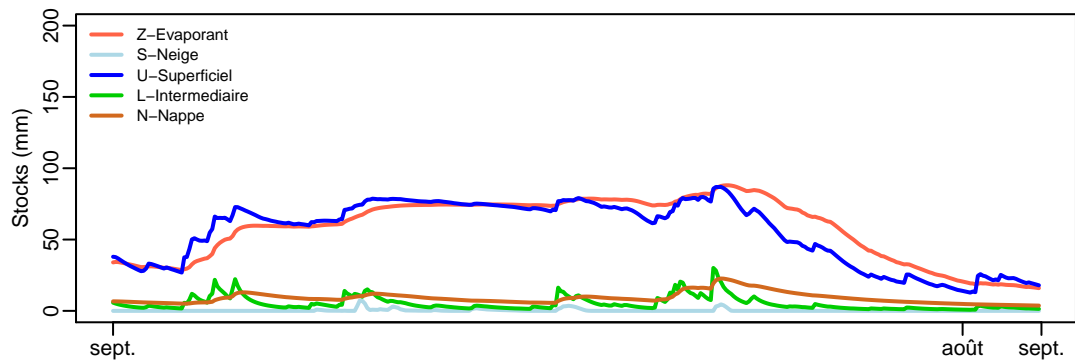

# k0690010 (4800.12 km<sup>2</sup>) – année 1989–1990

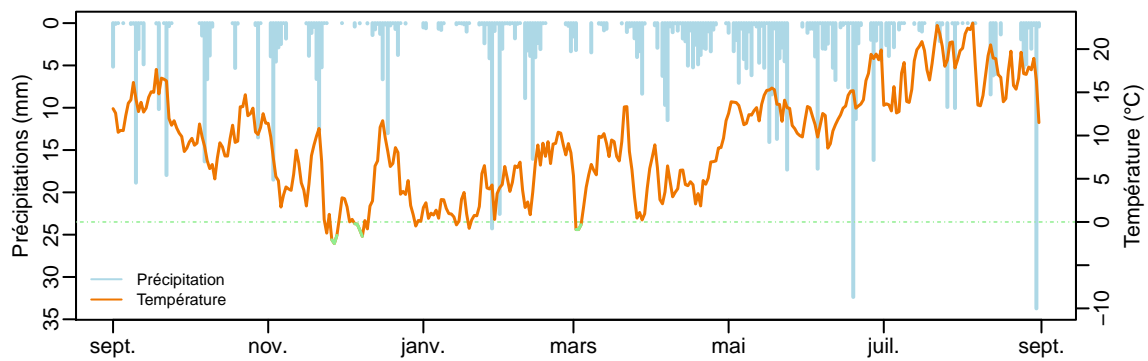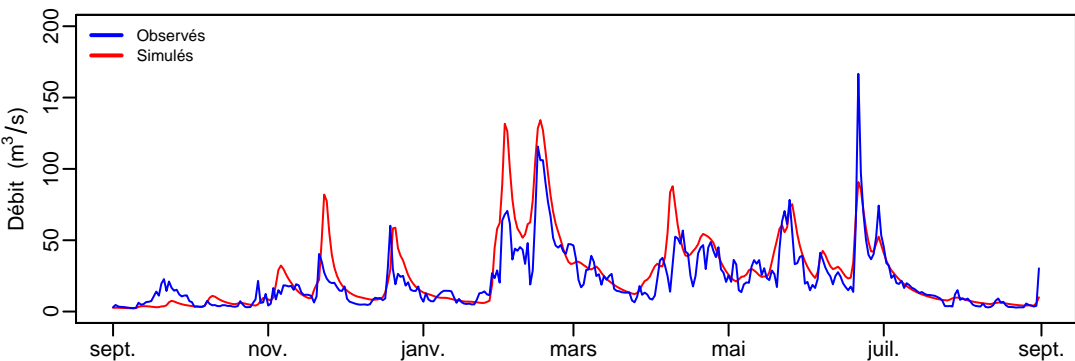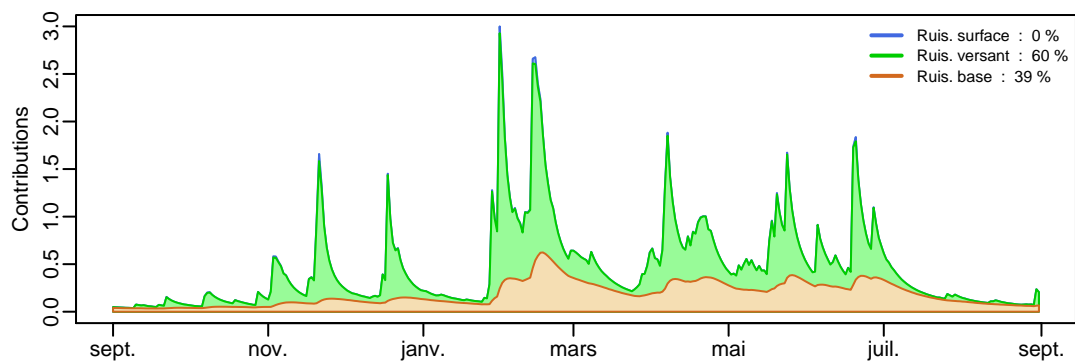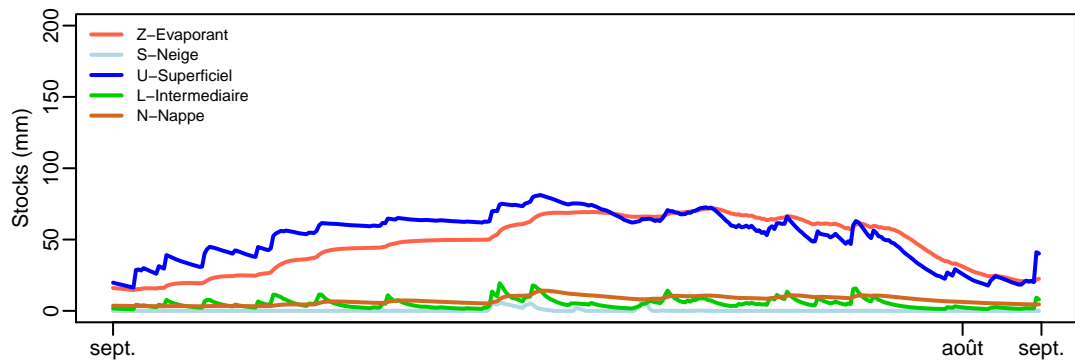



# k0690010 (4800.12 km<sup>2</sup>) – année 1990–1991

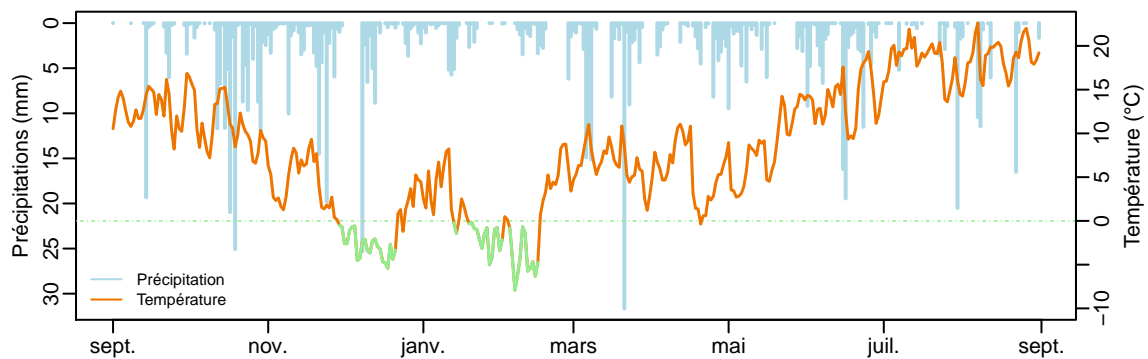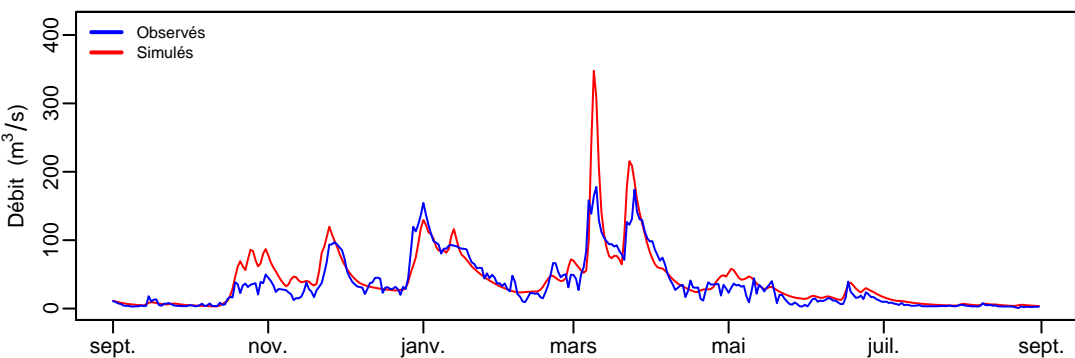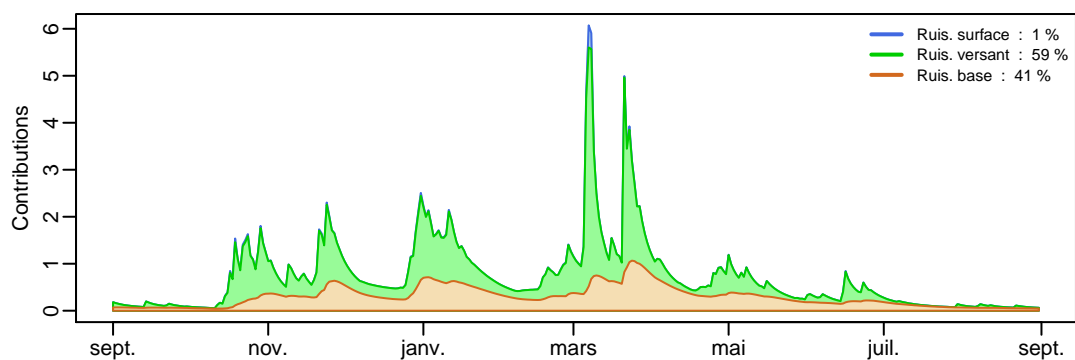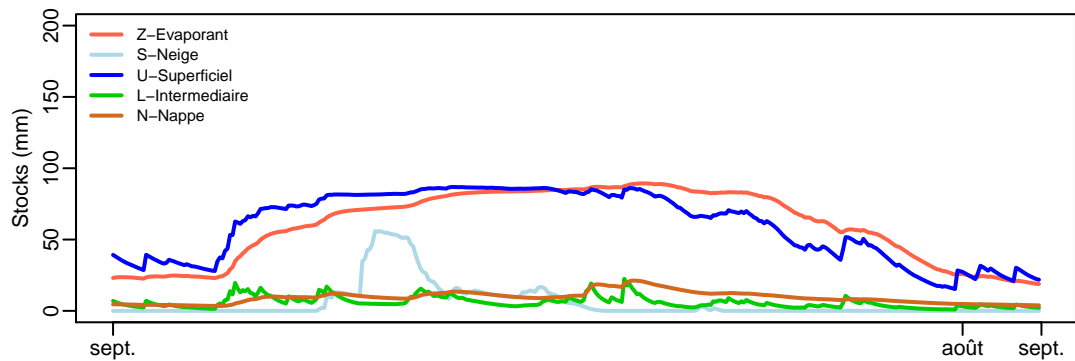

# k0690010 (4800.12 km²) – année 1991–1992

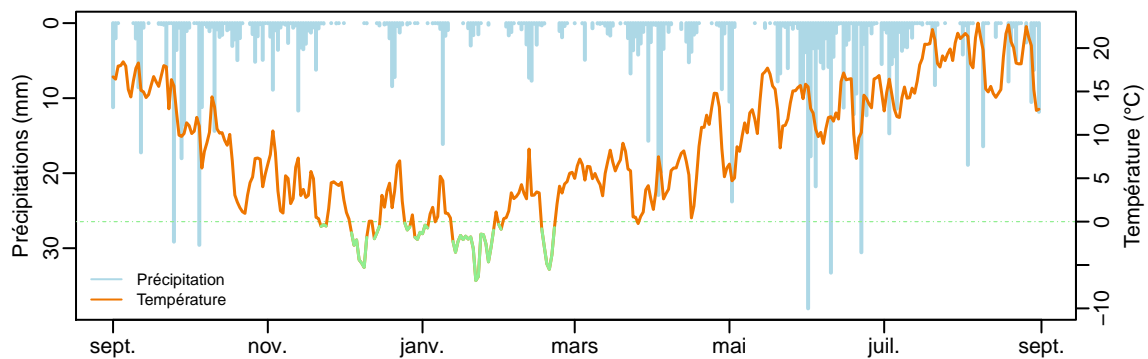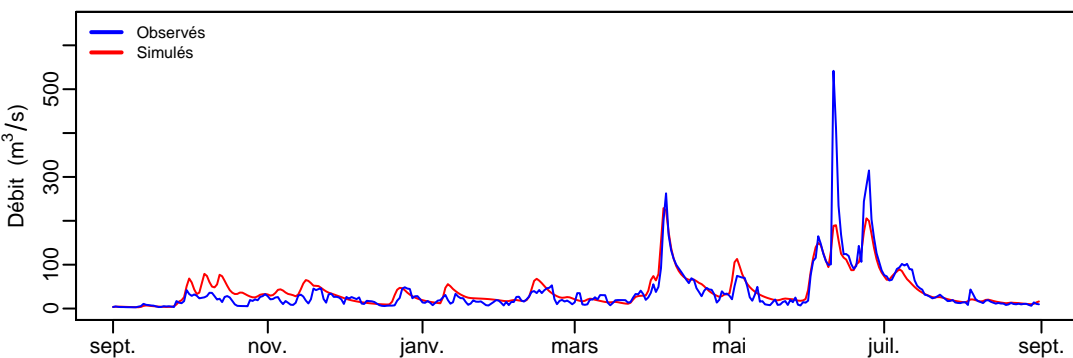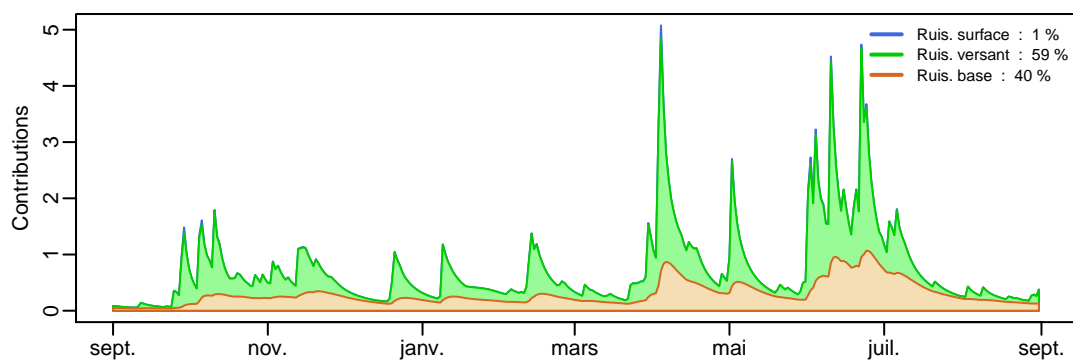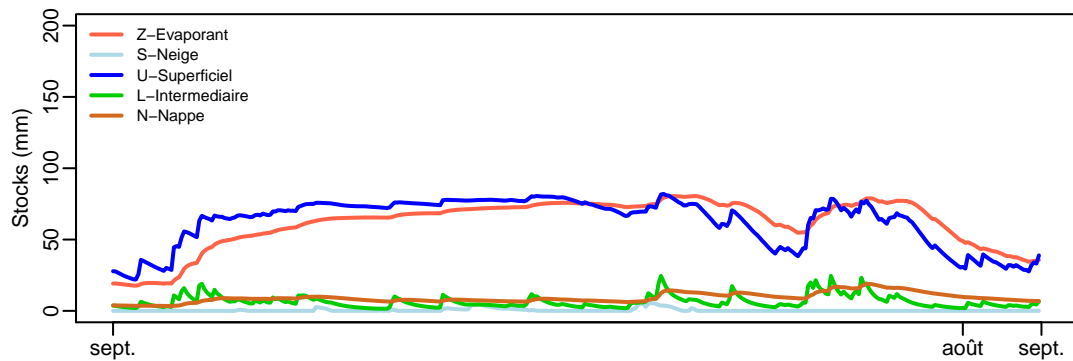

# k0690010 (4800.12 km<sup>2</sup>) – année 1992–1993

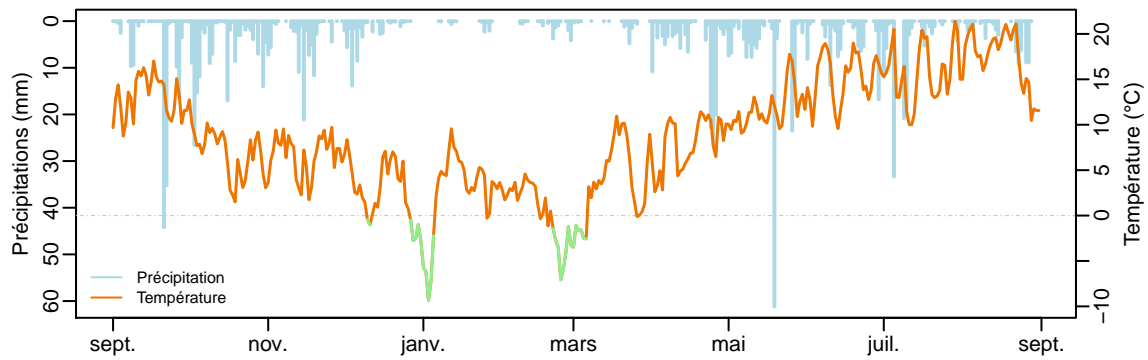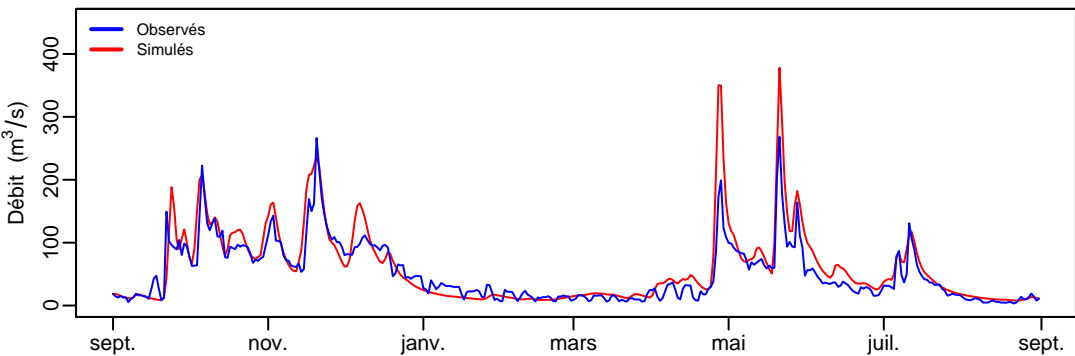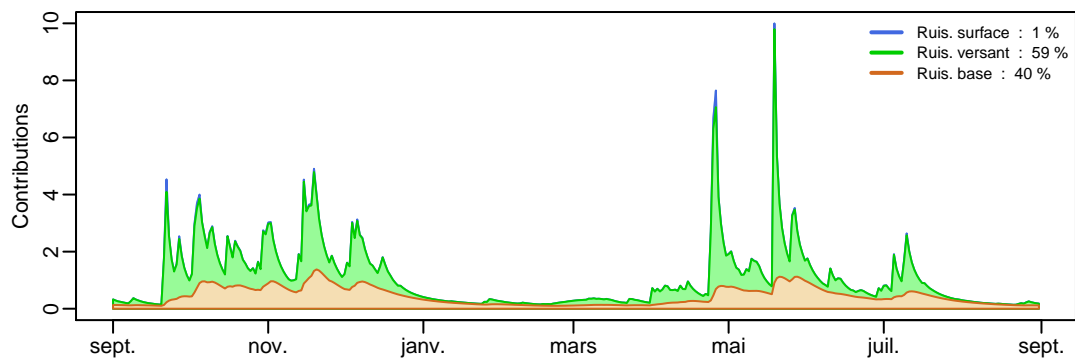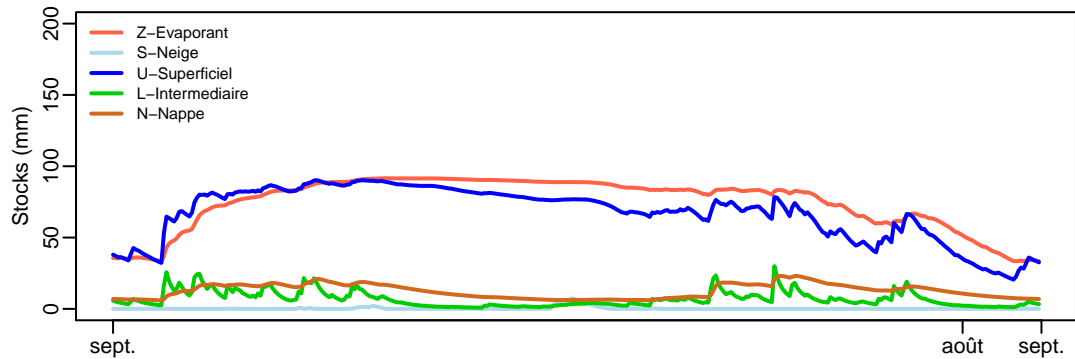

# k0690010 (4800.12 km<sup>2</sup>) – année 1993–1994

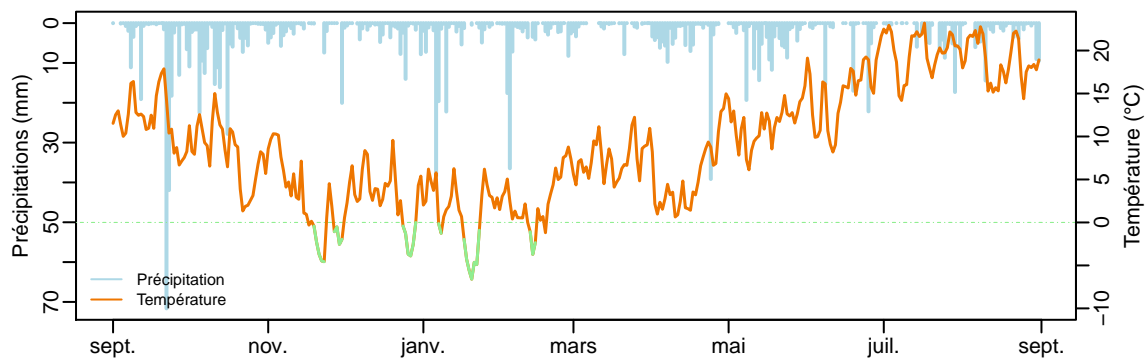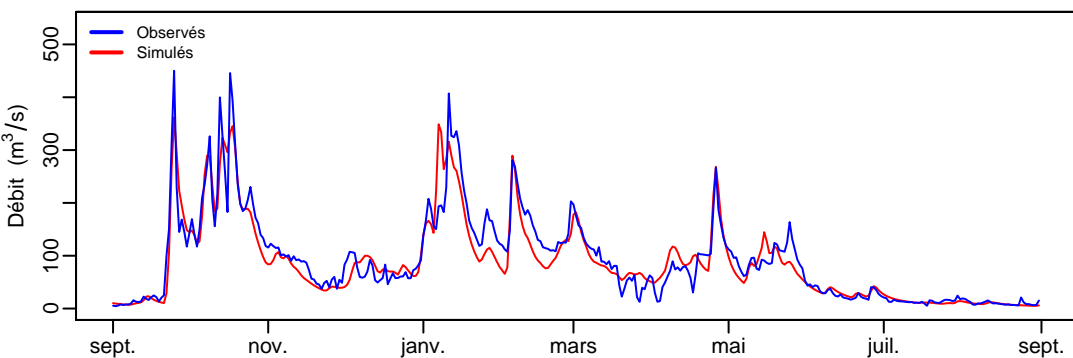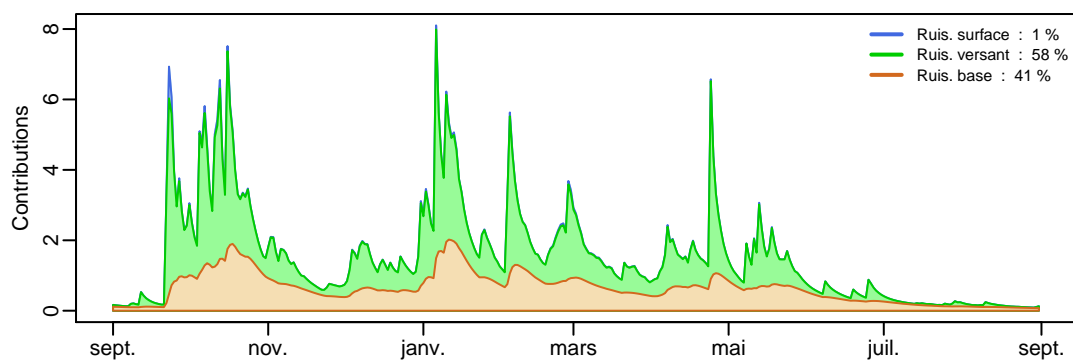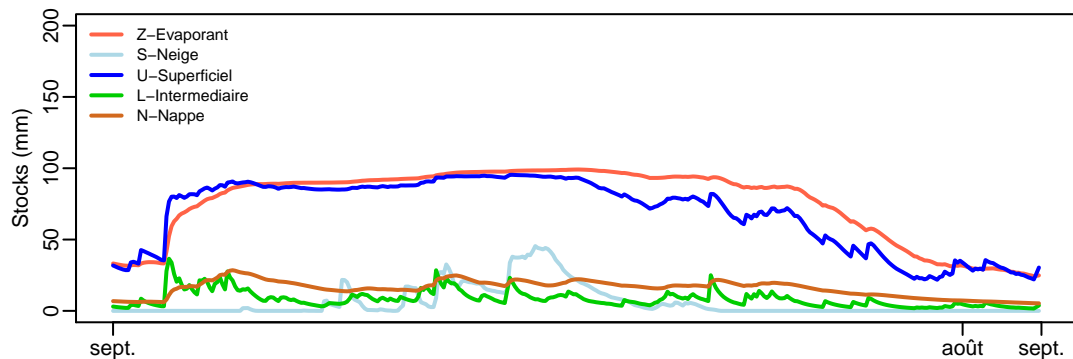

# k0690010 (4800.12 km<sup>2</sup>) – année 1994–1995

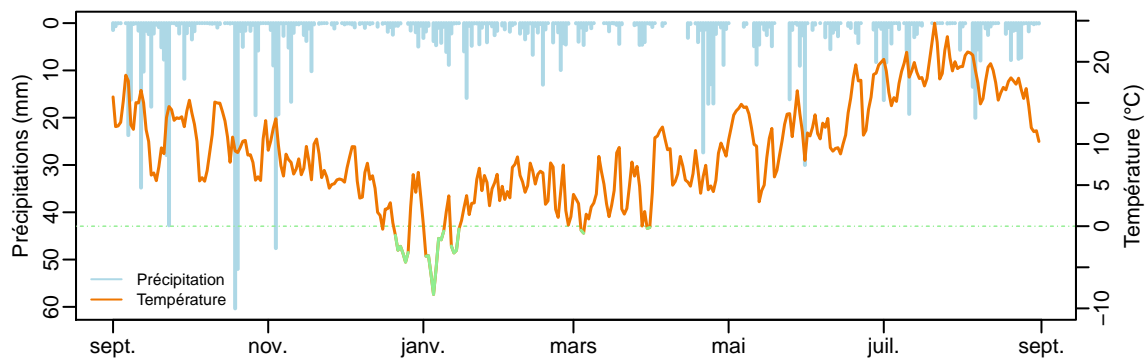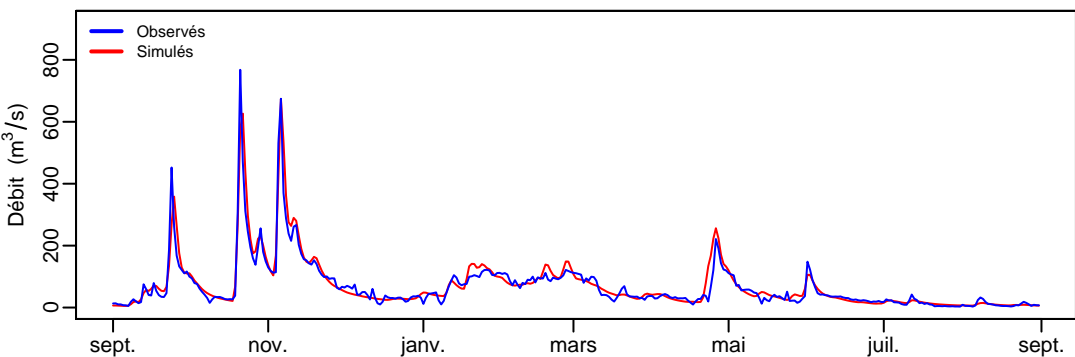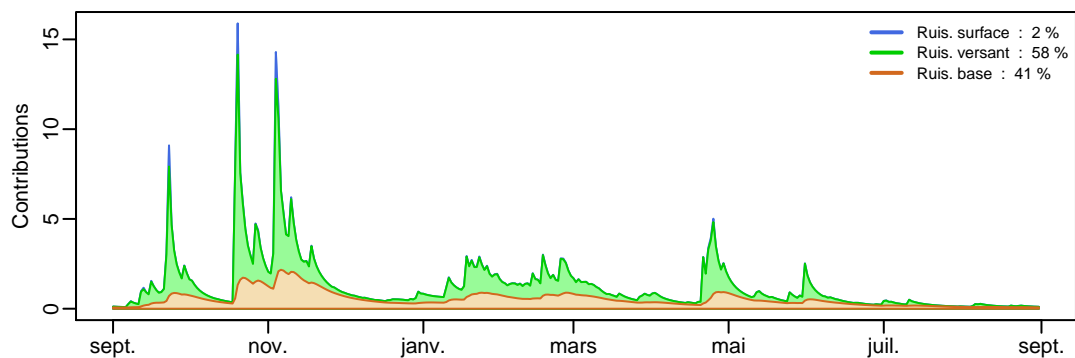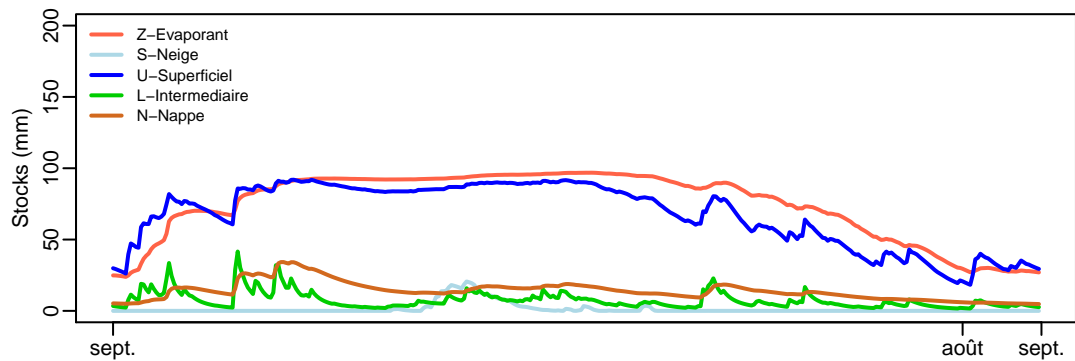

# k0690010 (4800.12 km²) – année 1995–1996

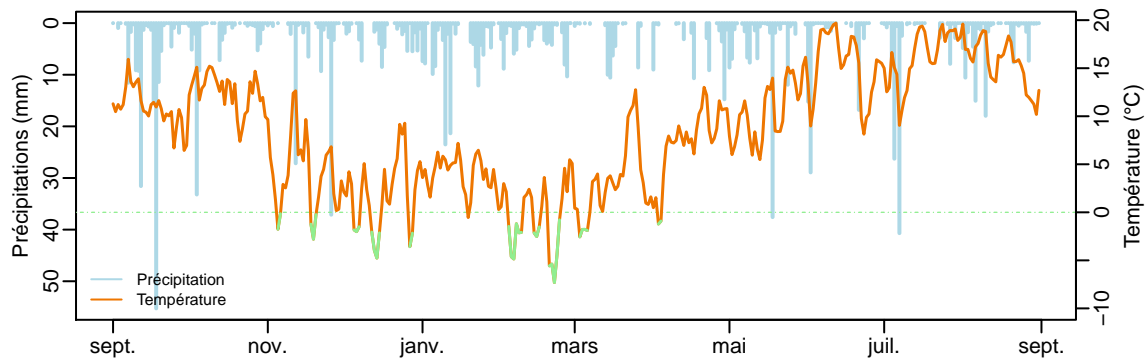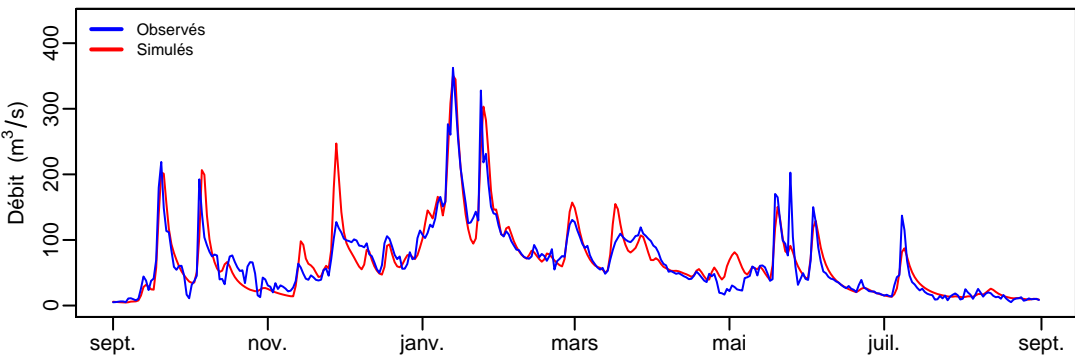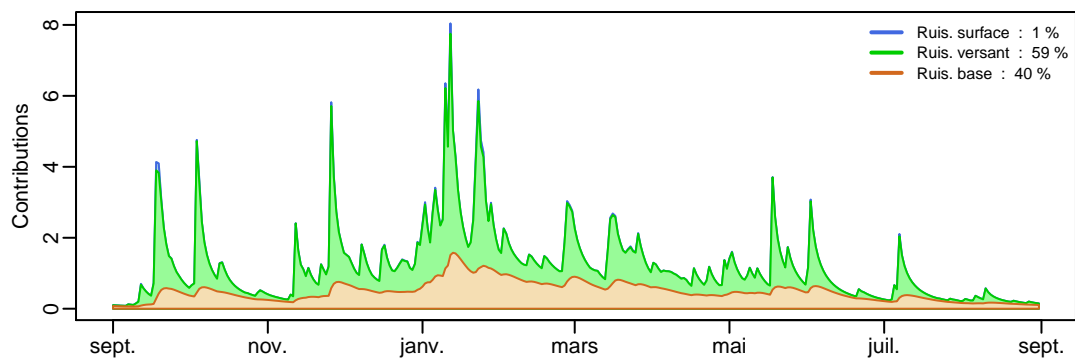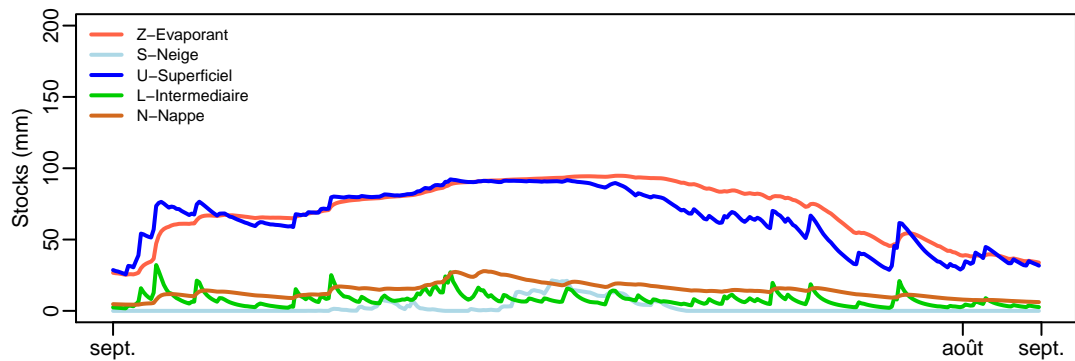

# k0690010 (4800.12 km<sup>2</sup>) – année 1996–1997

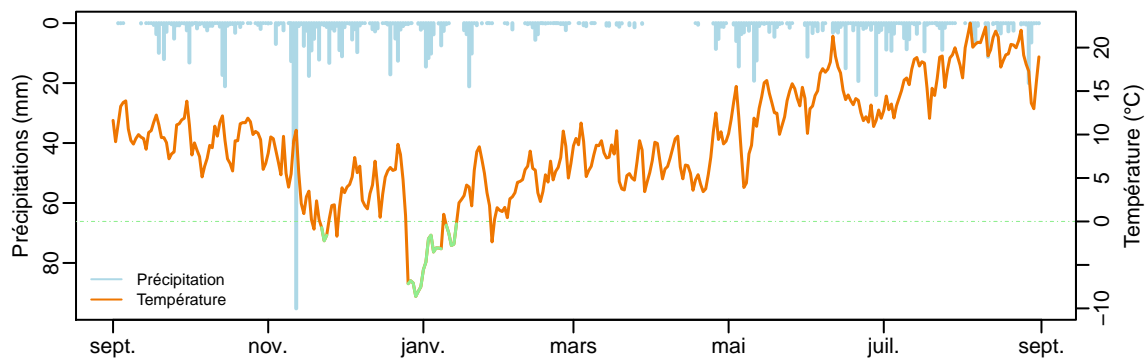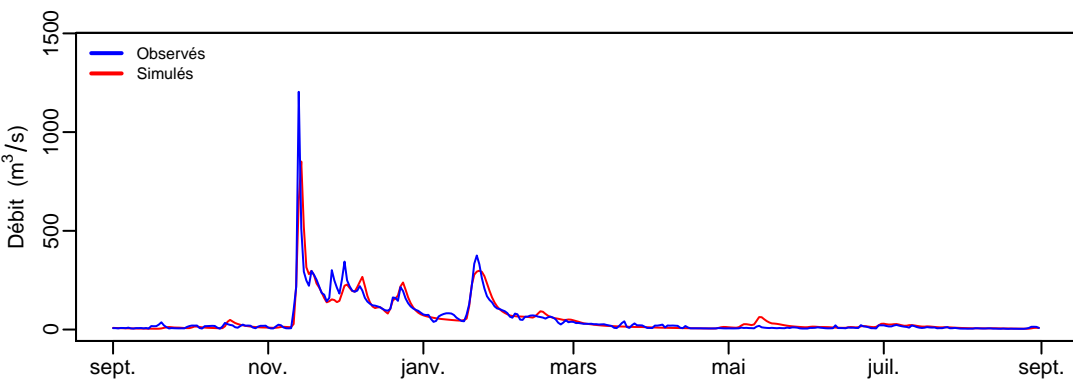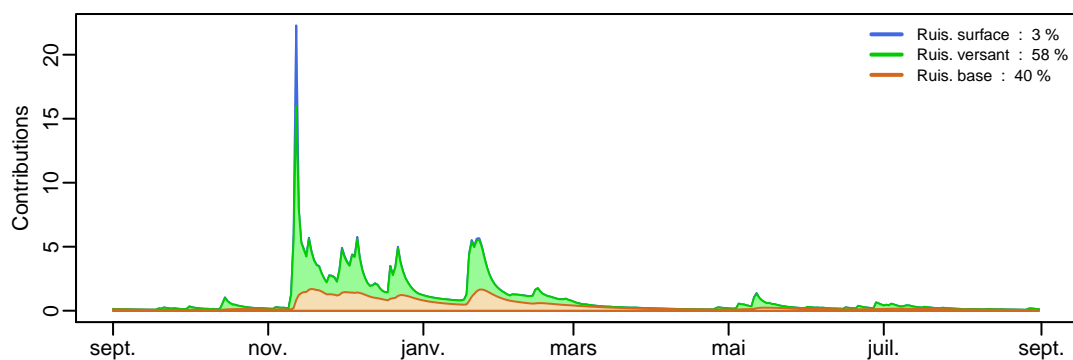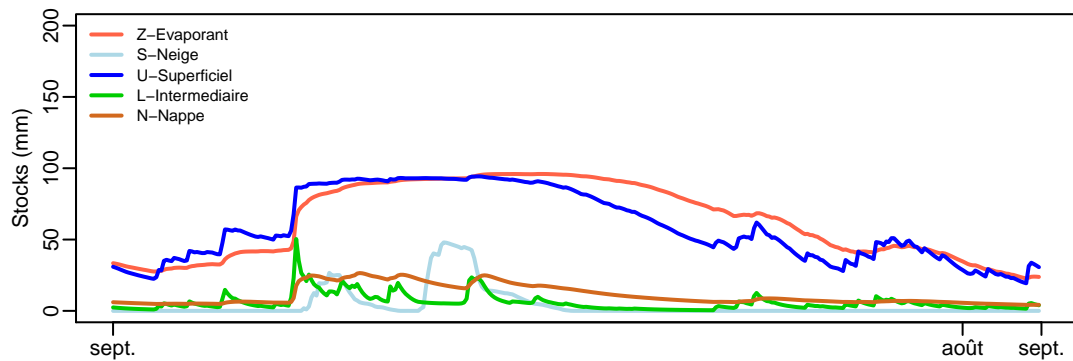

# k0690010 (4800.12 km<sup>2</sup>) – année 1997–1998

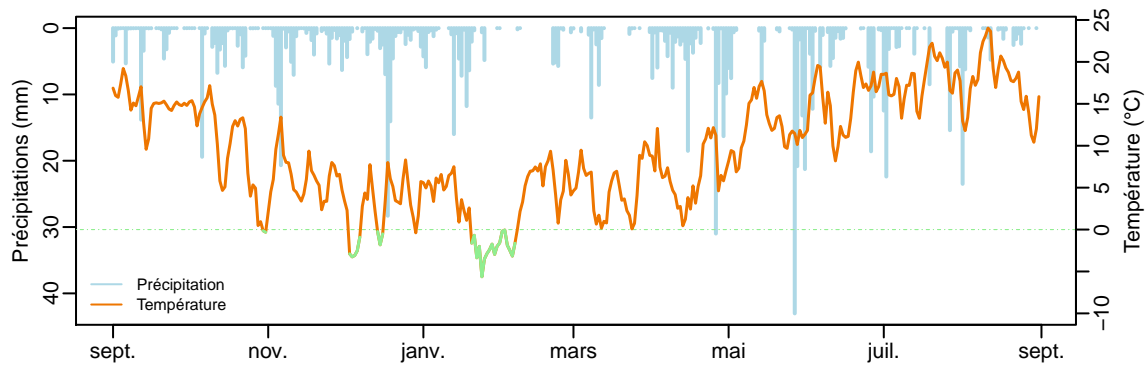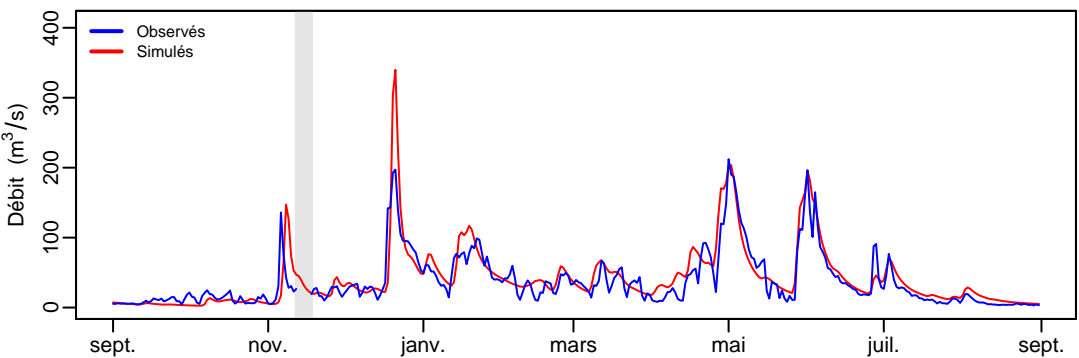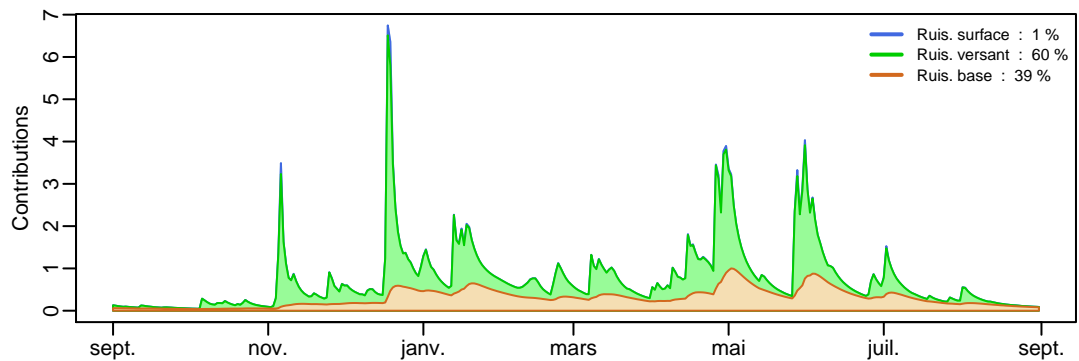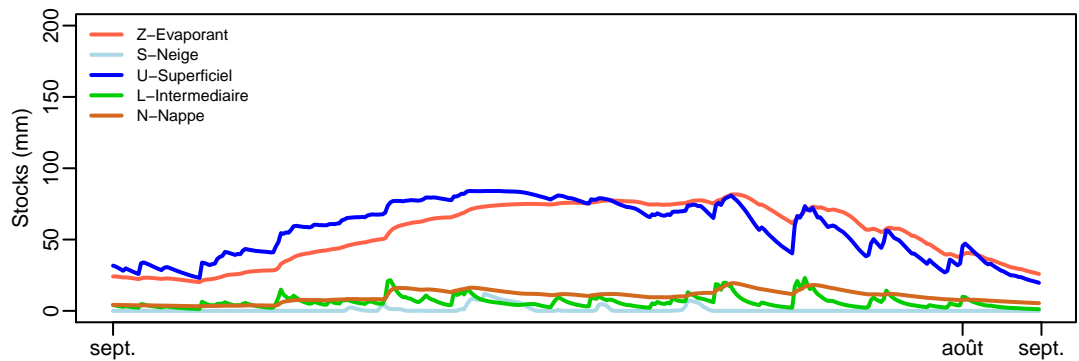



# k0690010 (4800.12 km<sup>2</sup>) – année 1998–1999

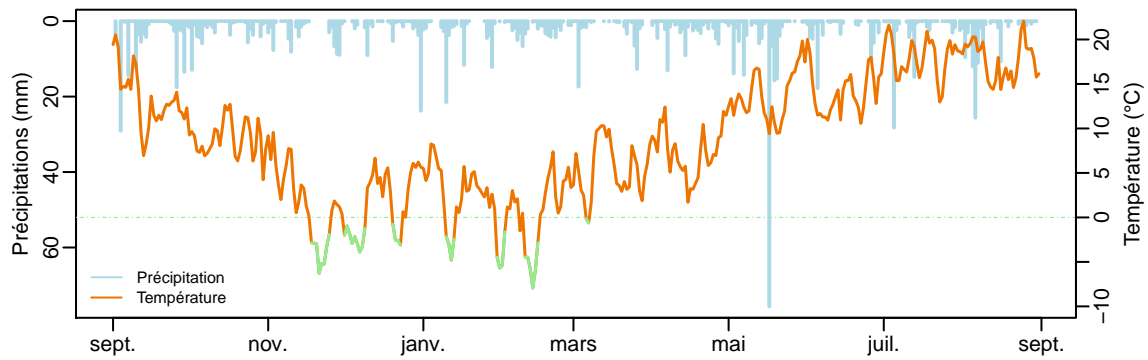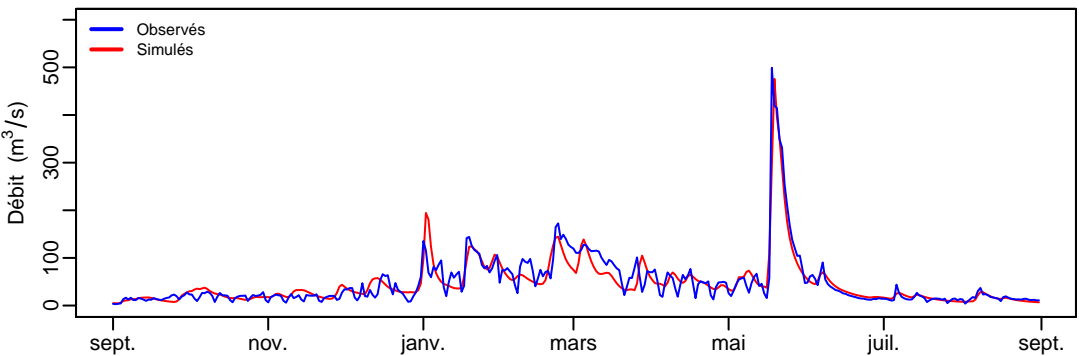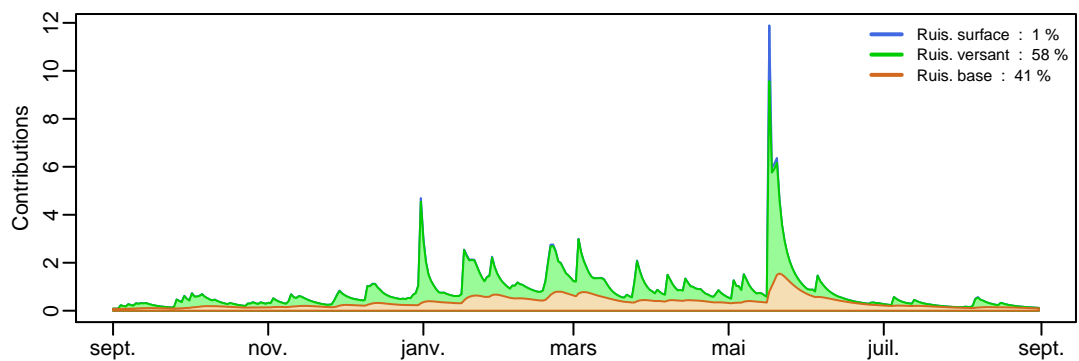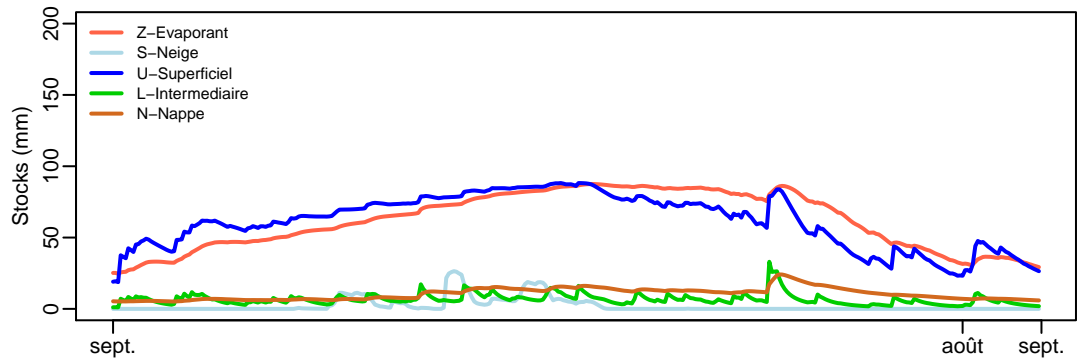

# k0690010 (4800.12 km²) – année 1999–2000

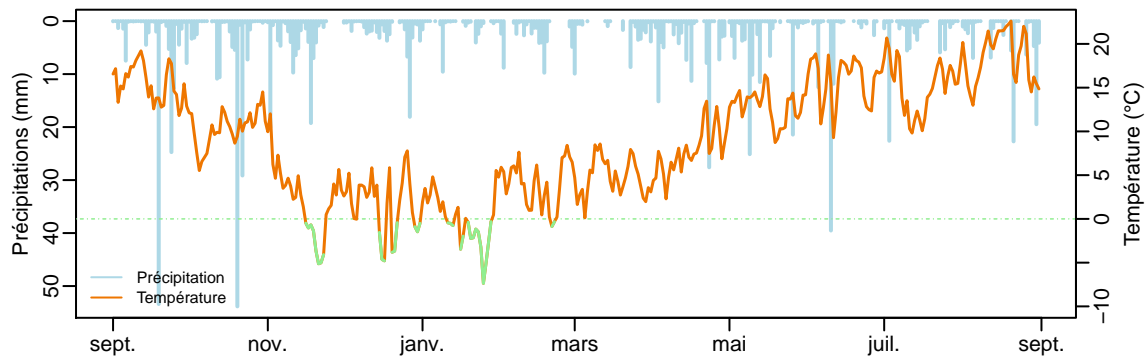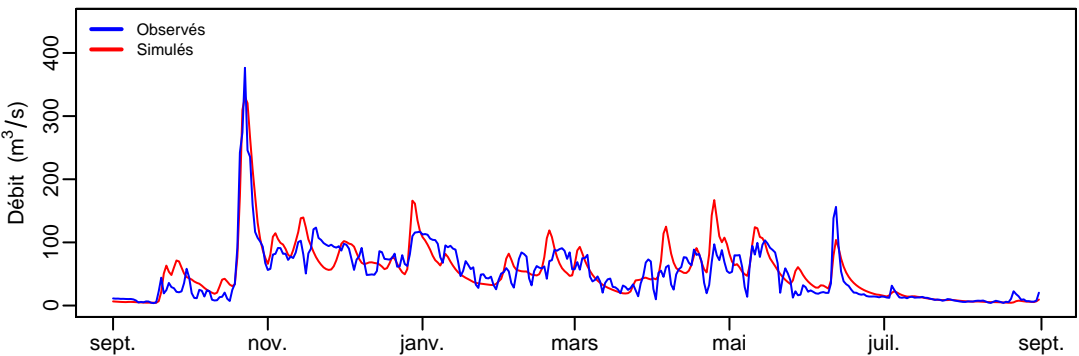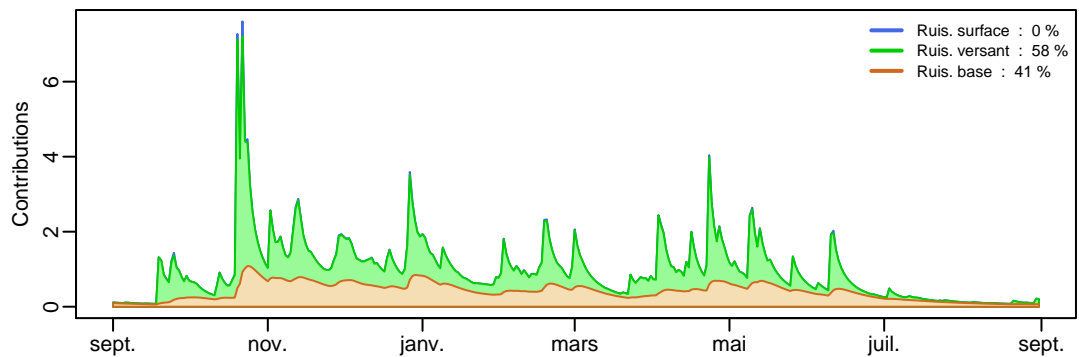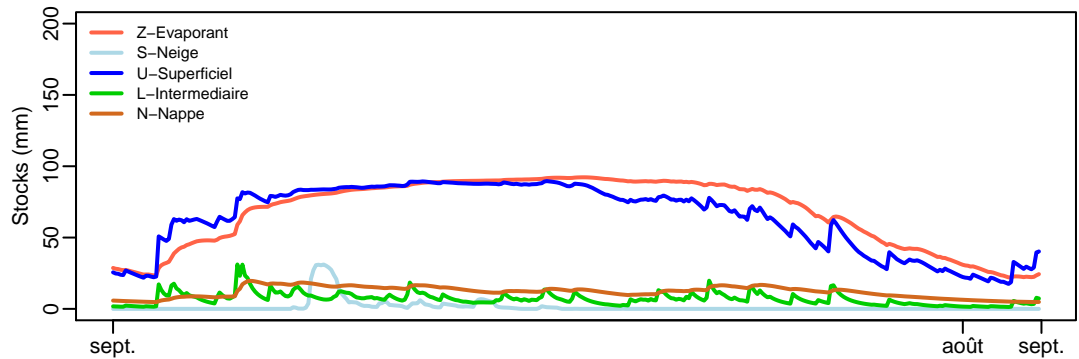

# k0690010 (4800.12 km<sup>2</sup>) – année 2000–2001

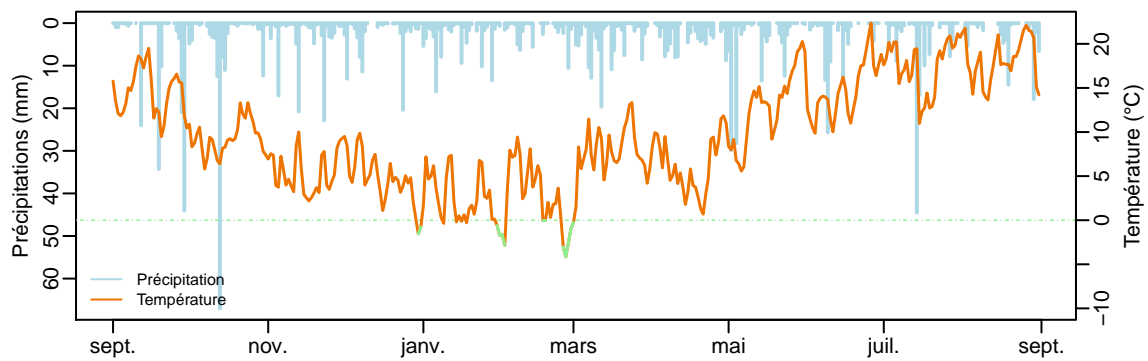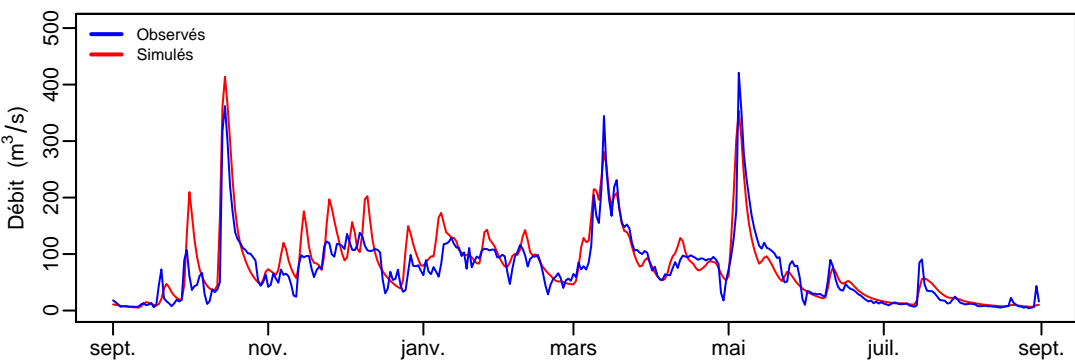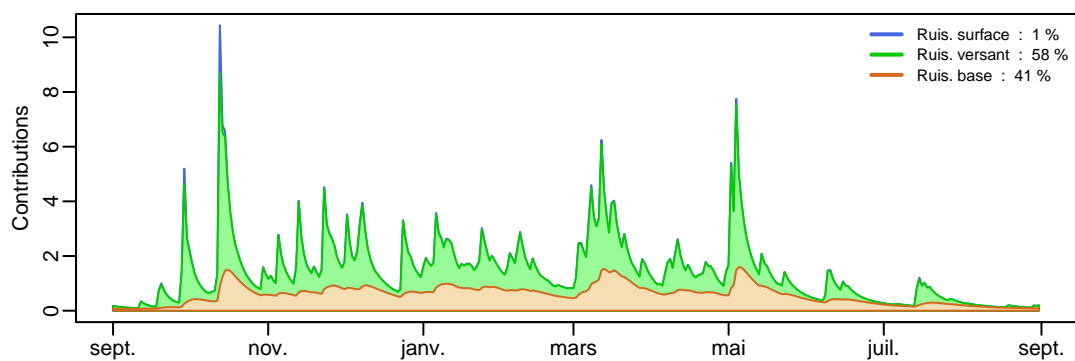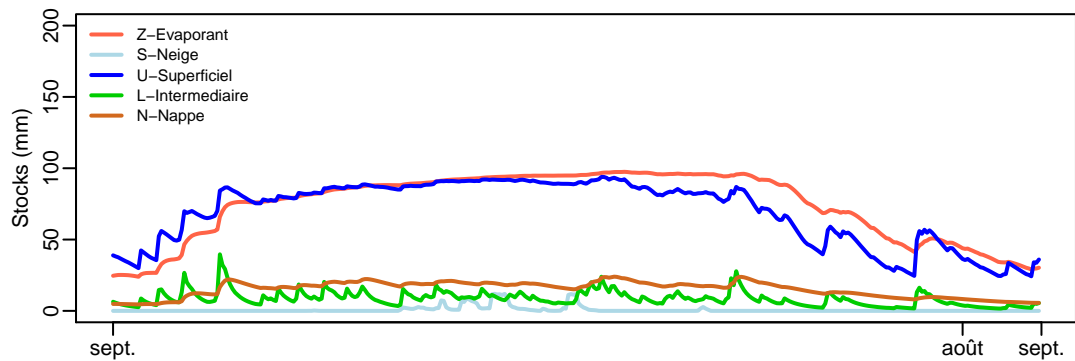

# k0690010 (4800.12 km<sup>2</sup>) – année 2001–2002

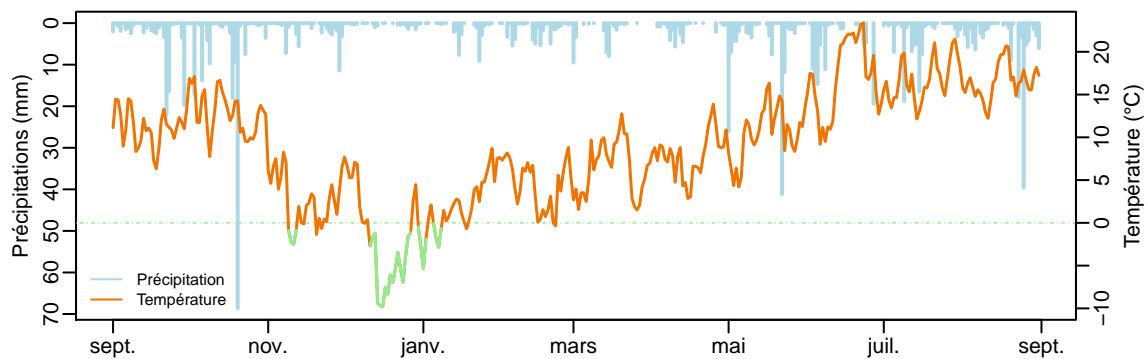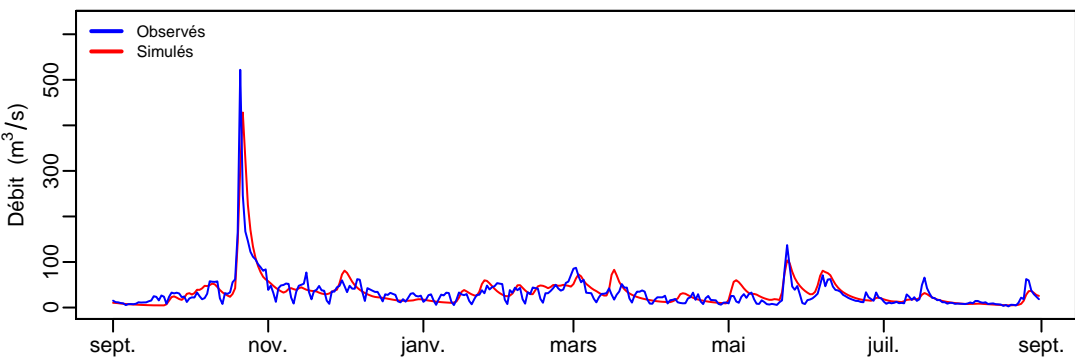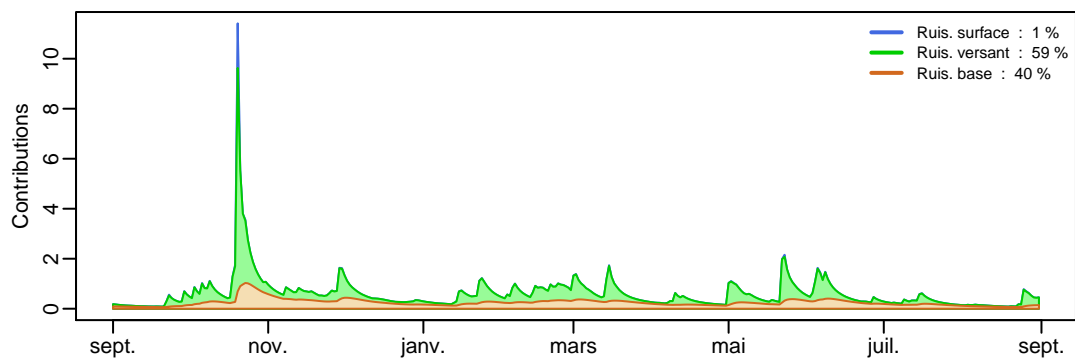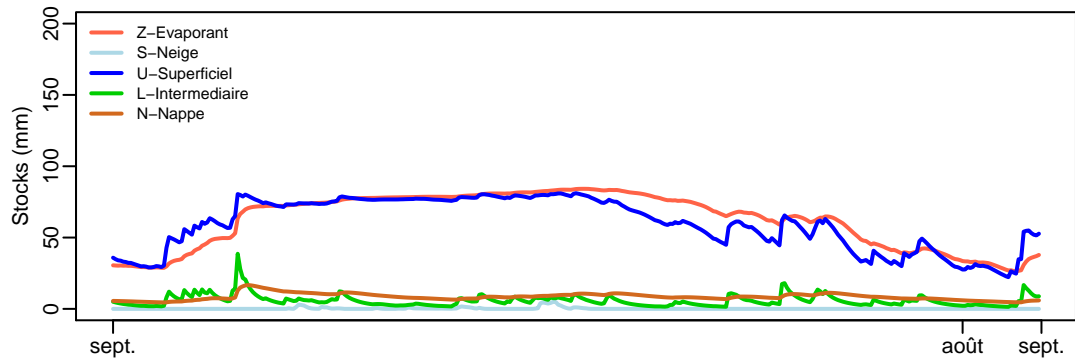

# k0690010 (4800.12 km<sup>2</sup>) – année 2002–2003

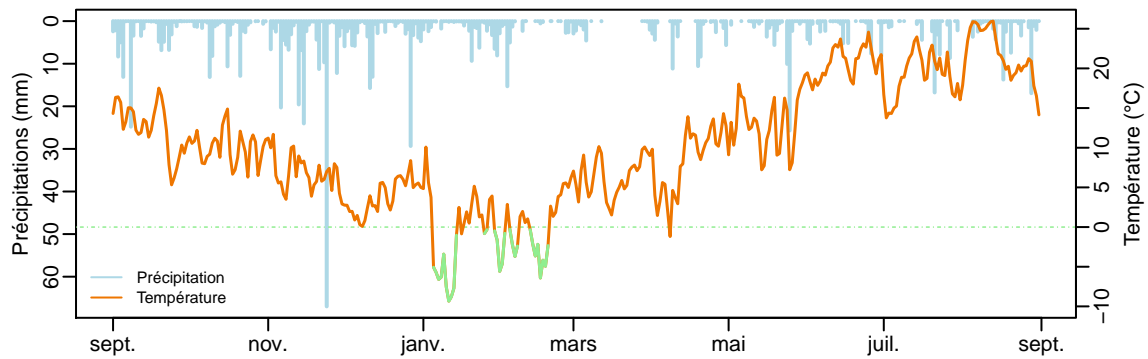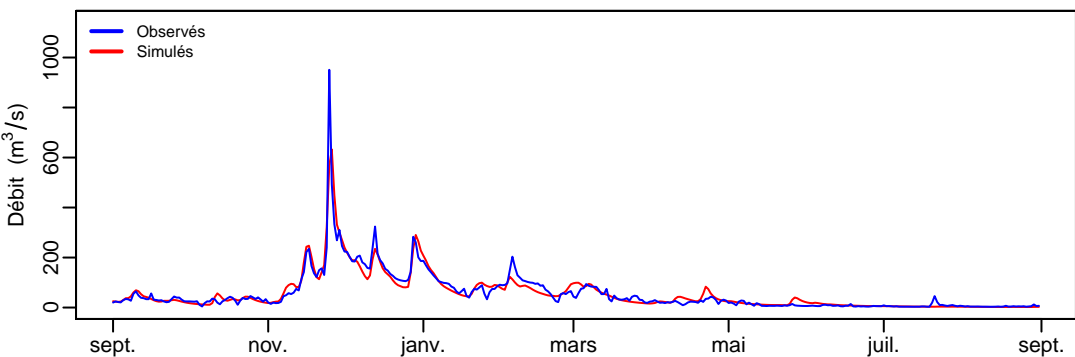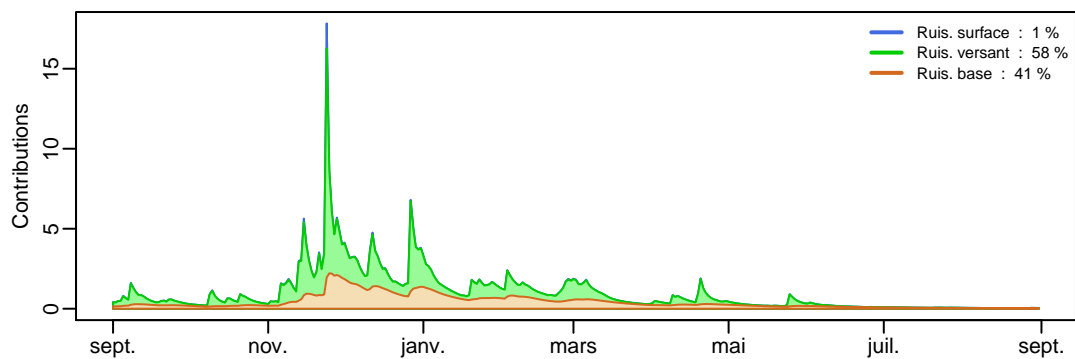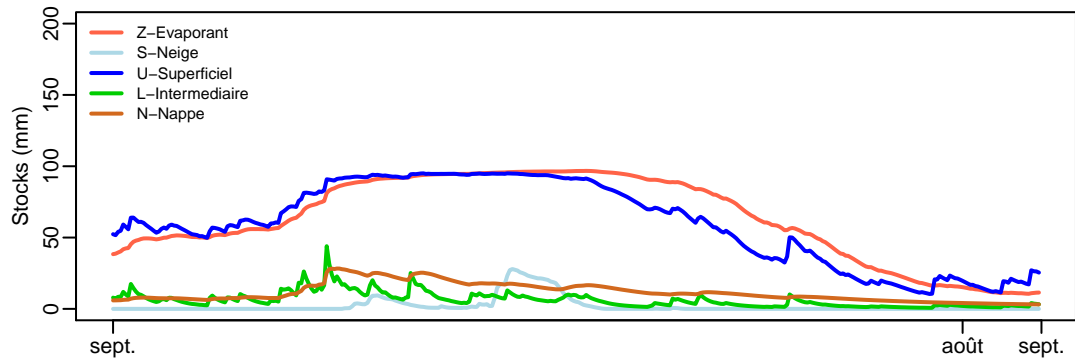

# k0690010 (4800.12 km<sup>2</sup>) – année 2003–2004

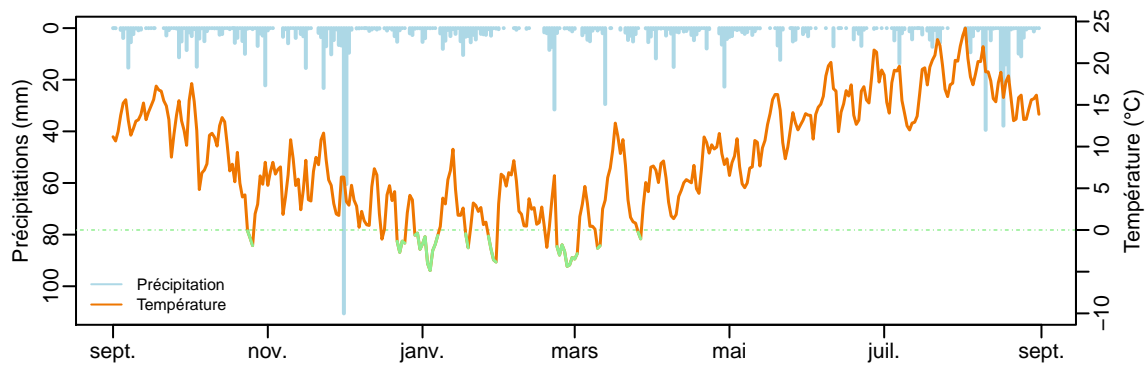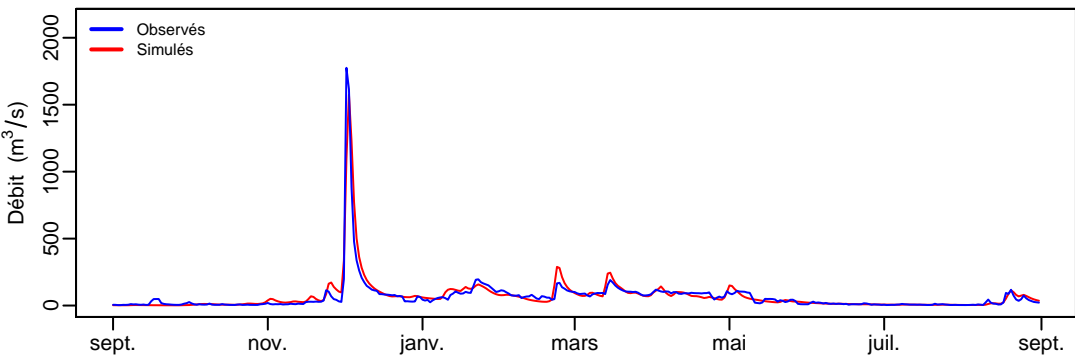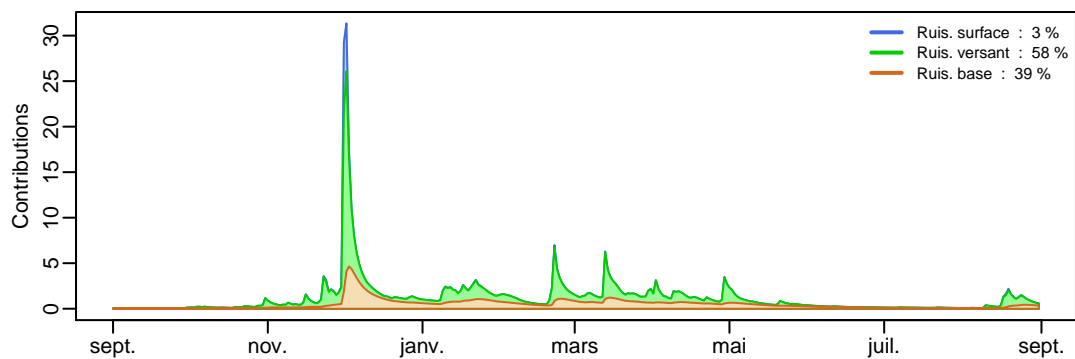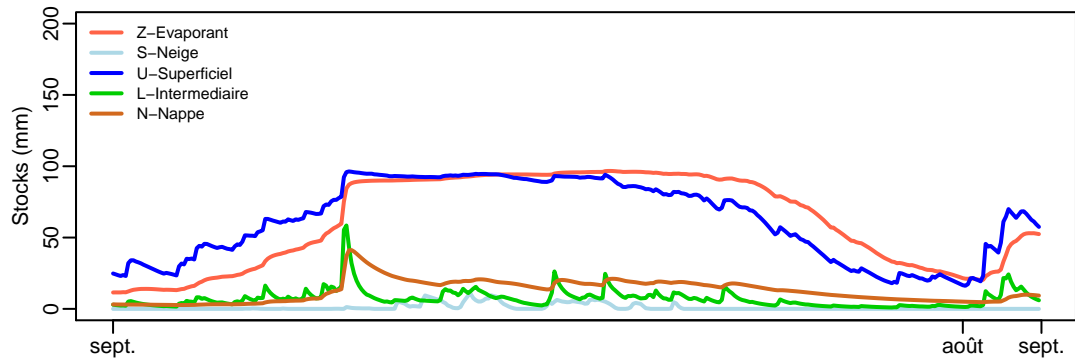

# k0690010 (4800.12 km<sup>2</sup>) – année 2004–2005

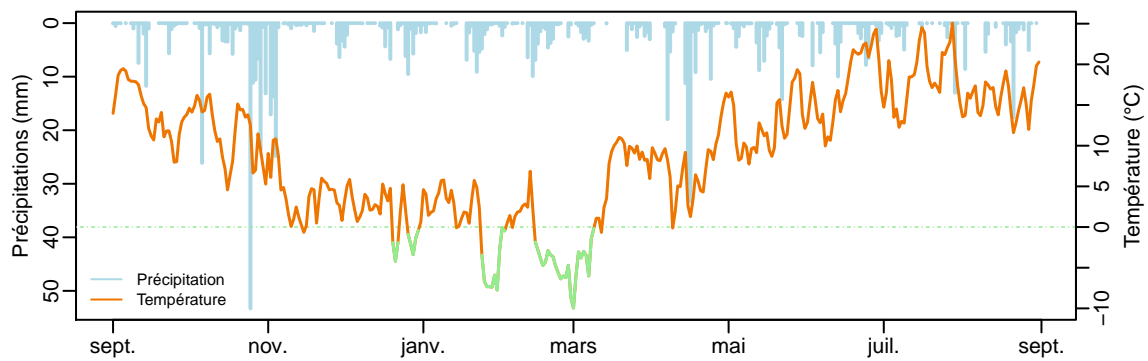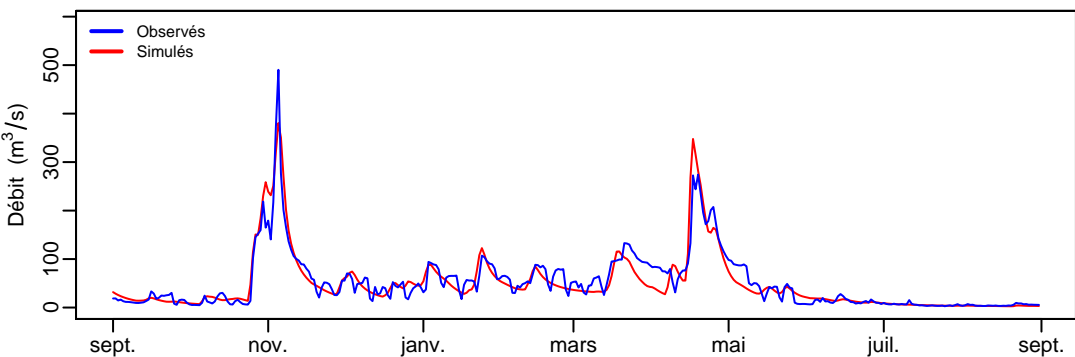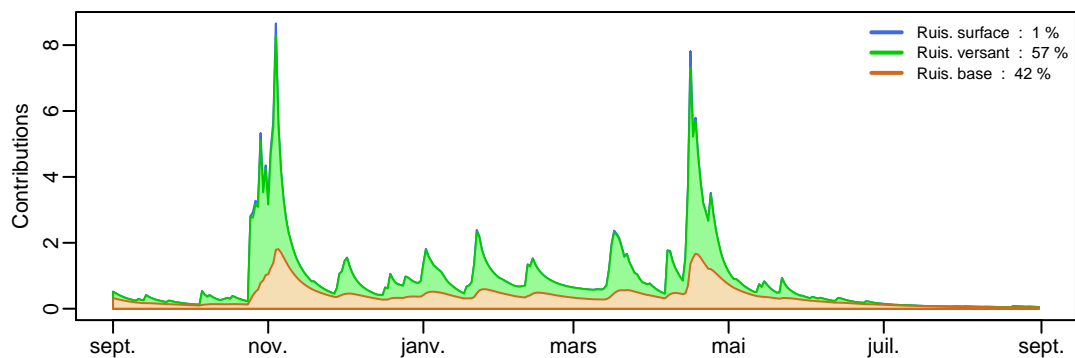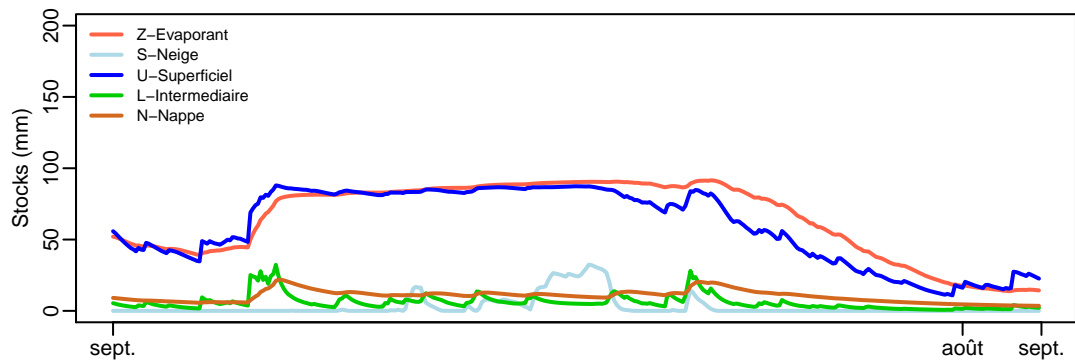

# k0690010 (4800.12 km<sup>2</sup>) – année 2005–2006

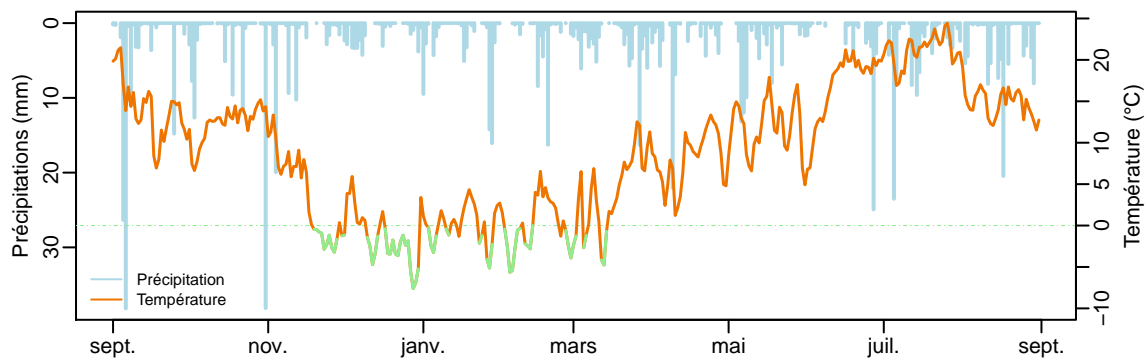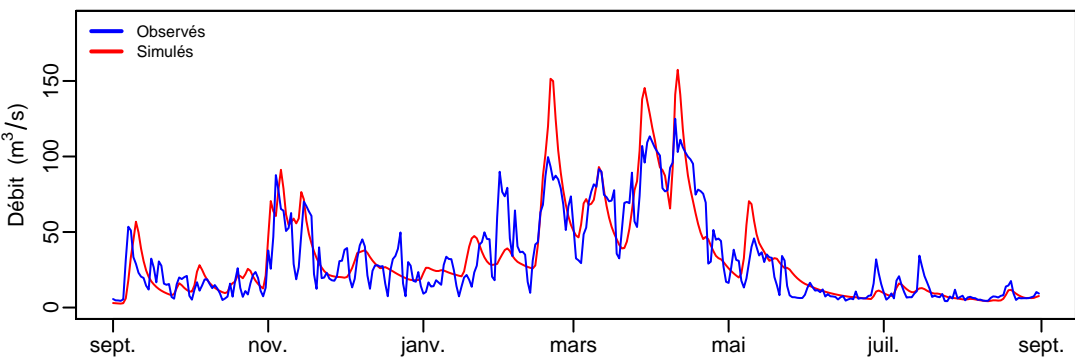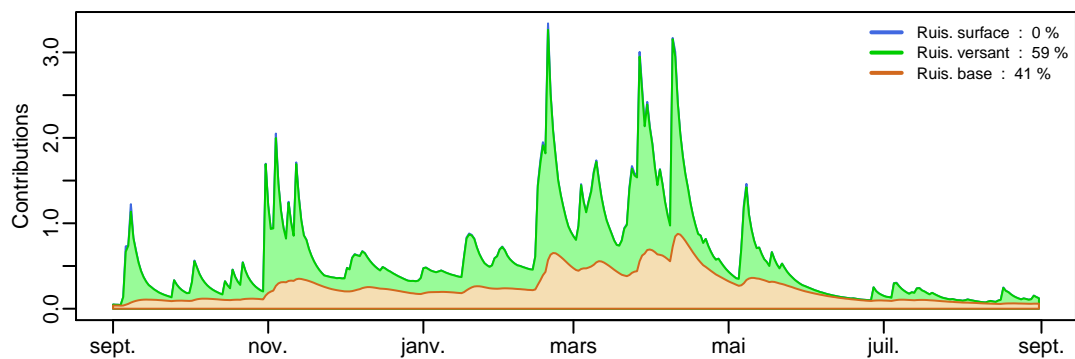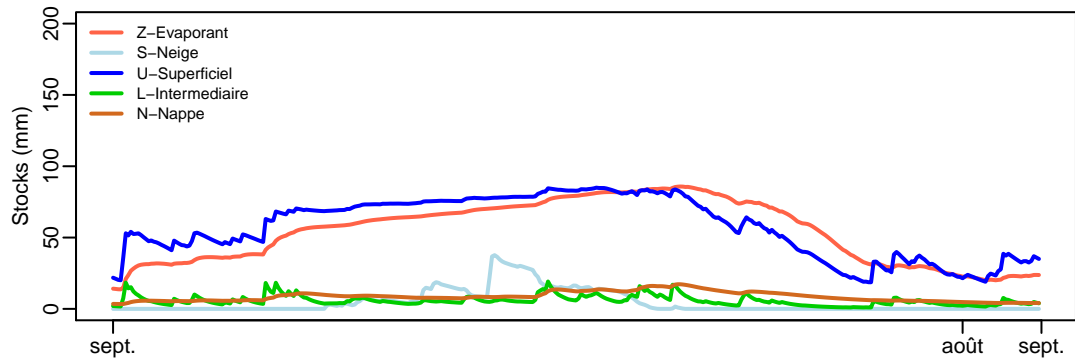



# k0690010 (4800.12 km<sup>2</sup>) – année 2006–2007

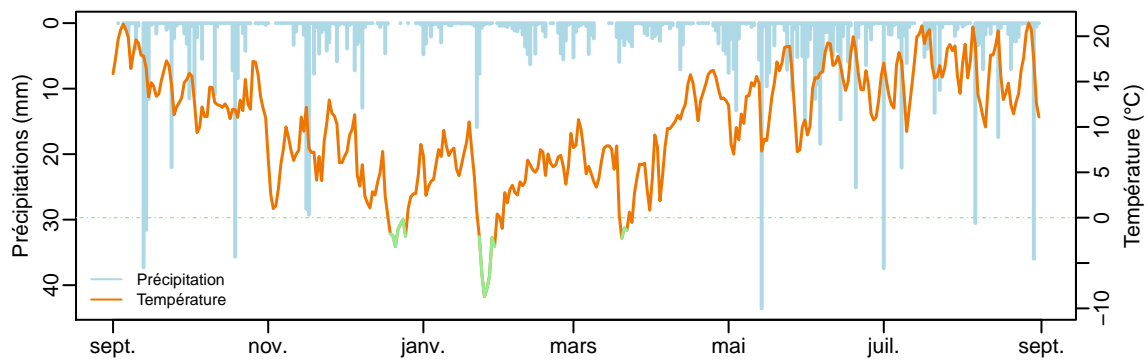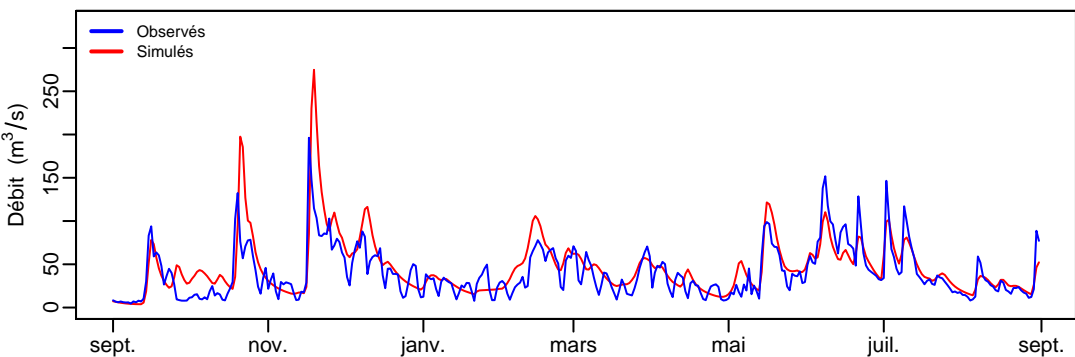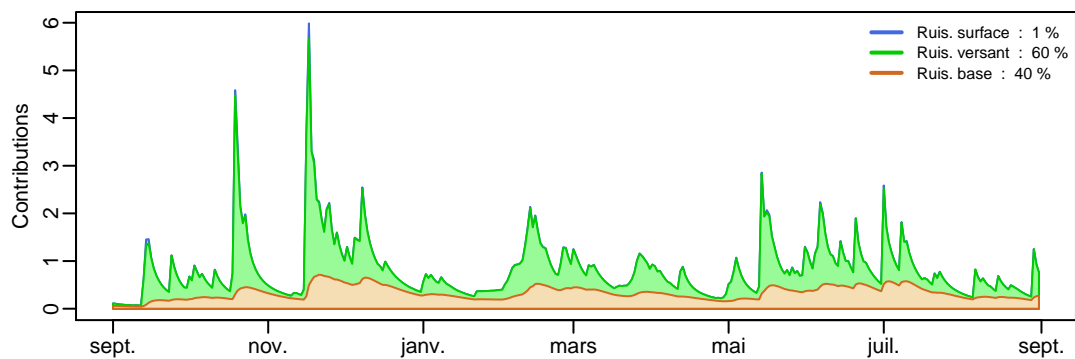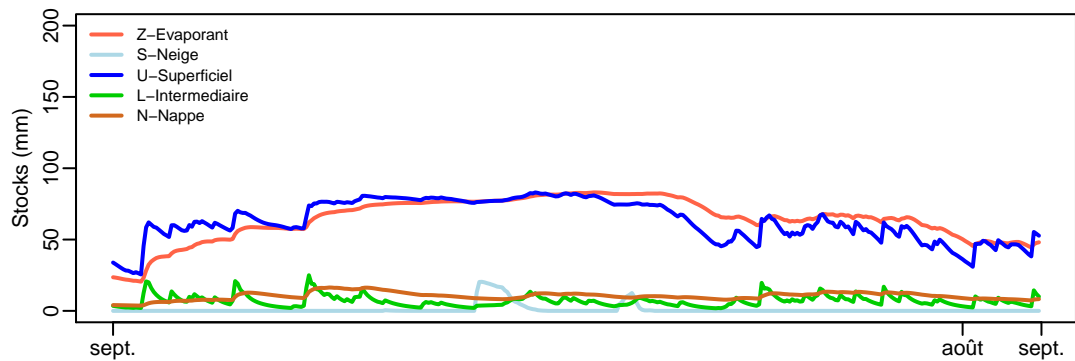

# k0690010 (4800.12 km²) – année 2007–2008

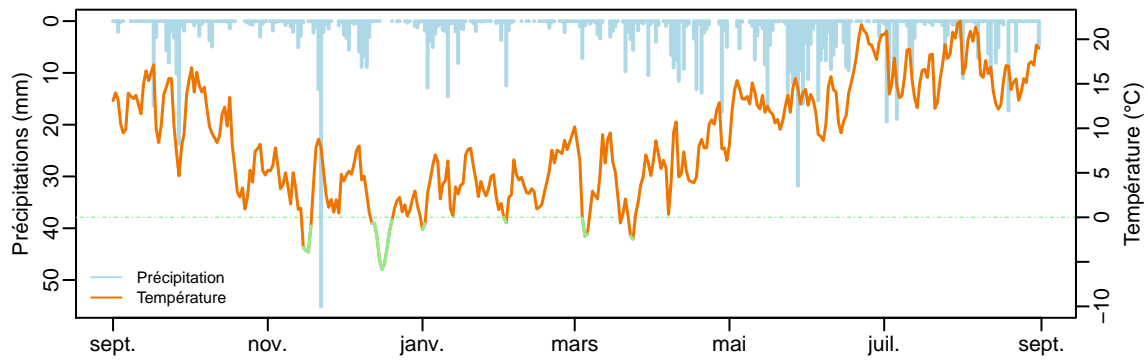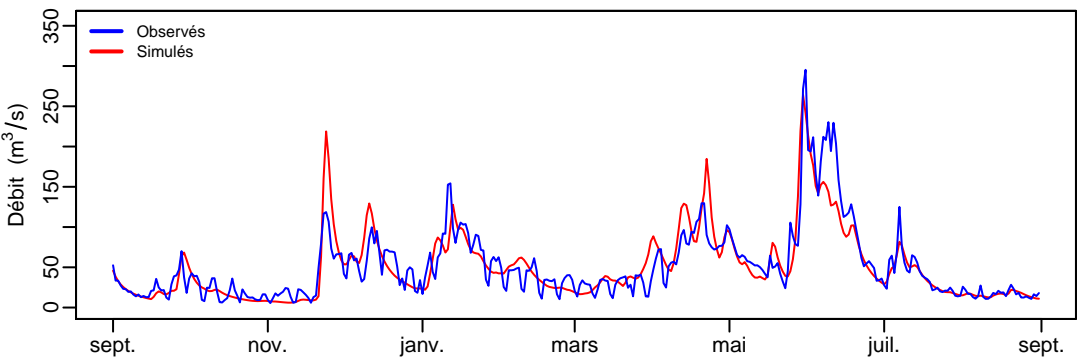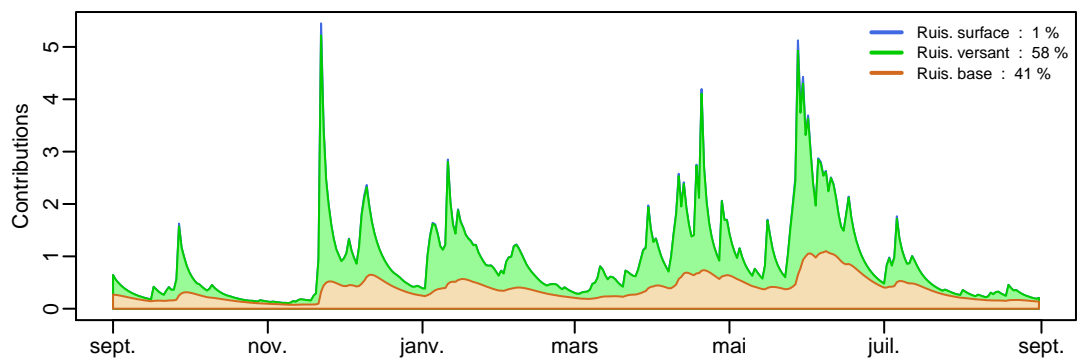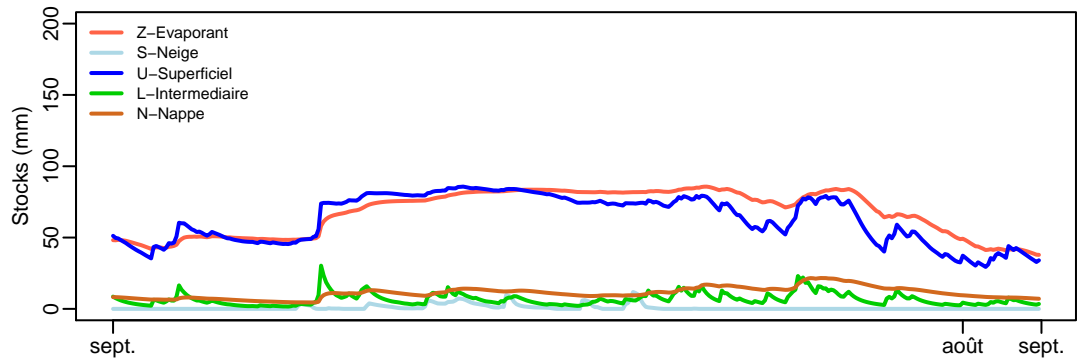

# k0690010 (4800.12 km²) – année 2008–2009

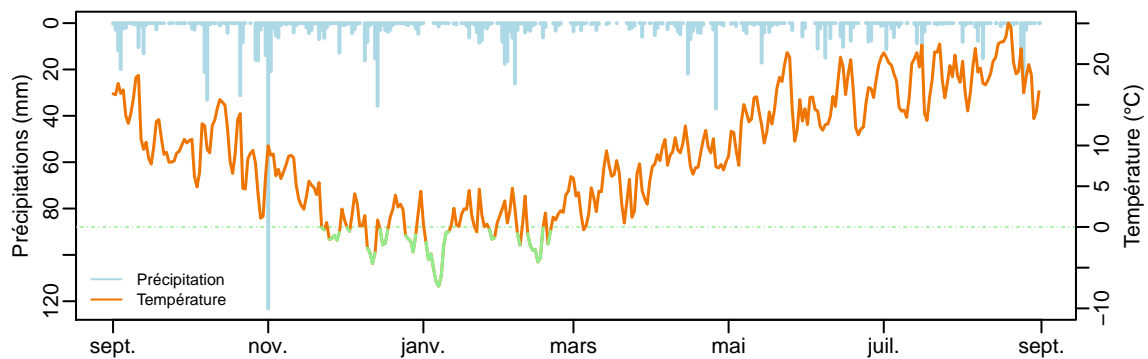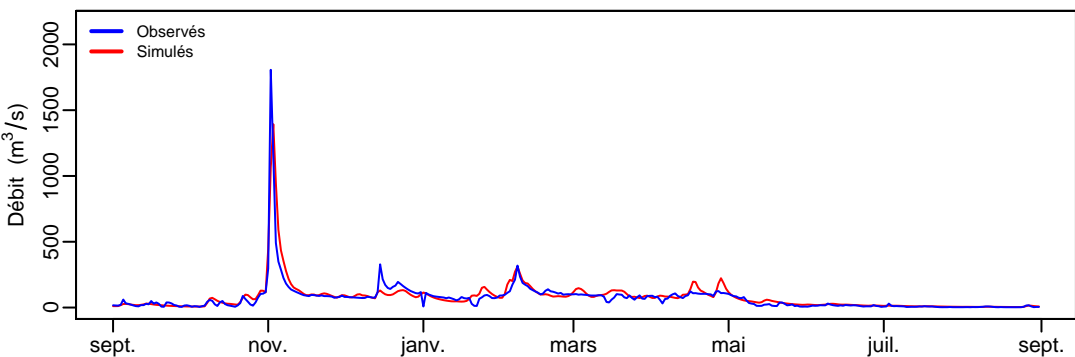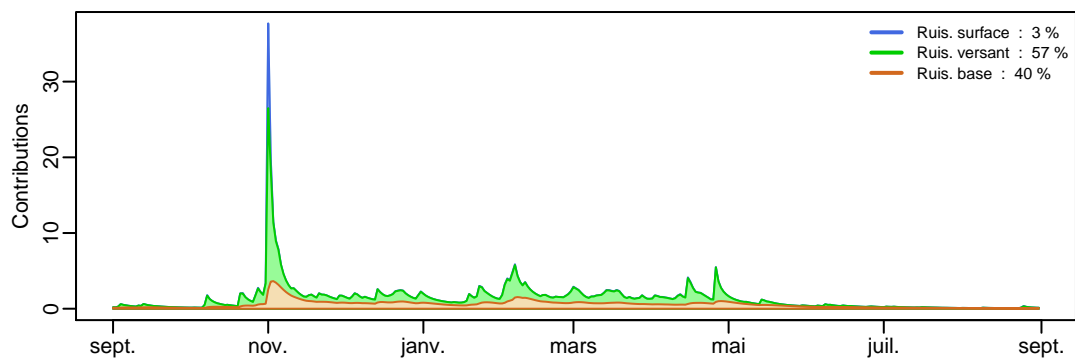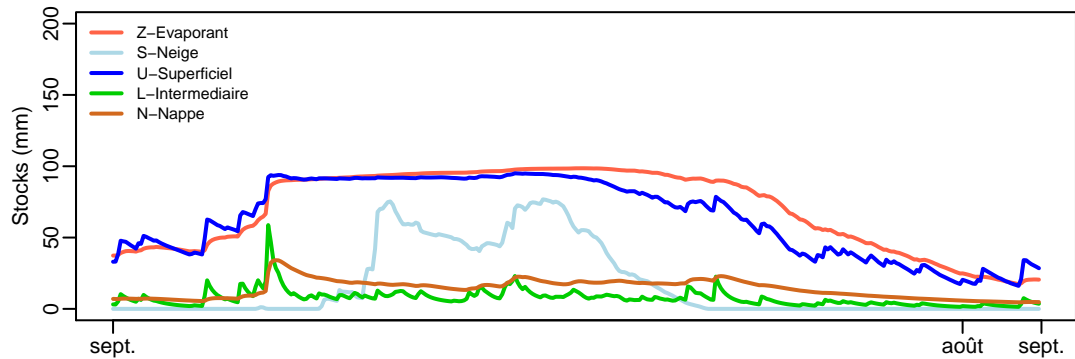

# k0690010 (4800.12 km²) – année 2009–2010

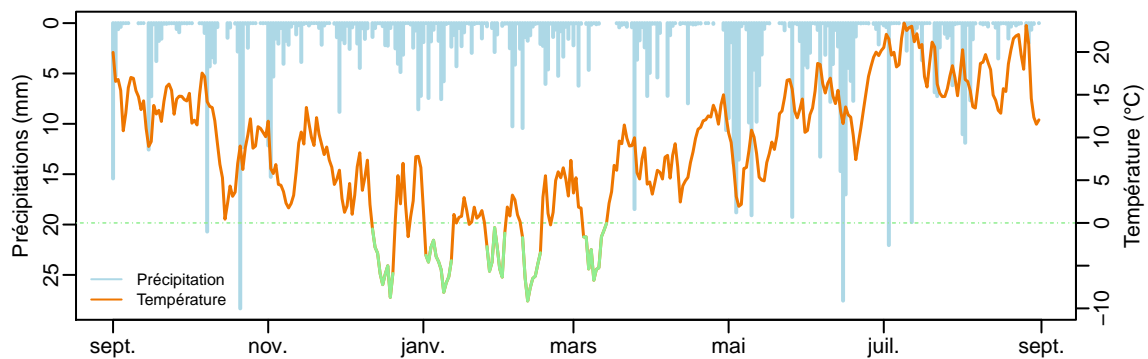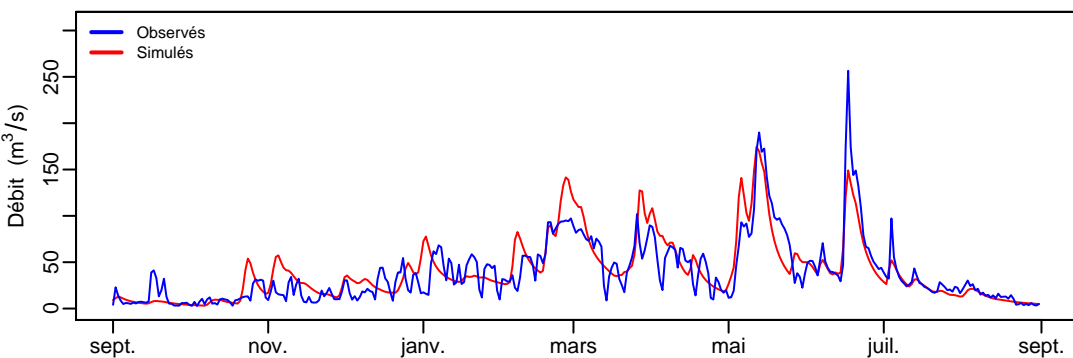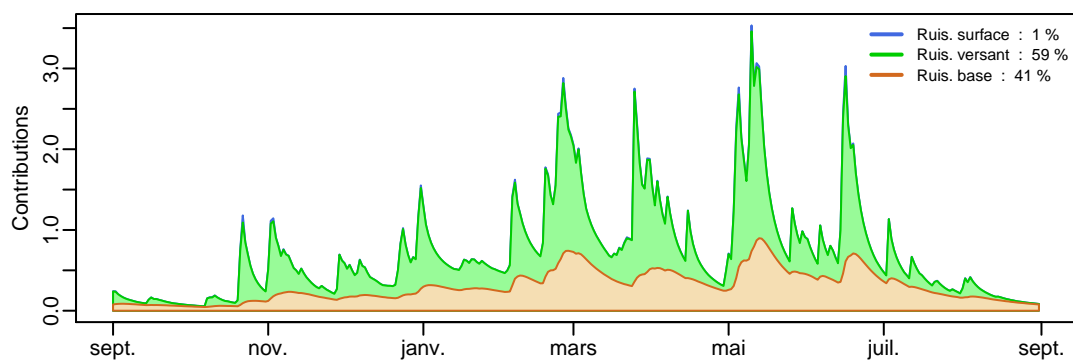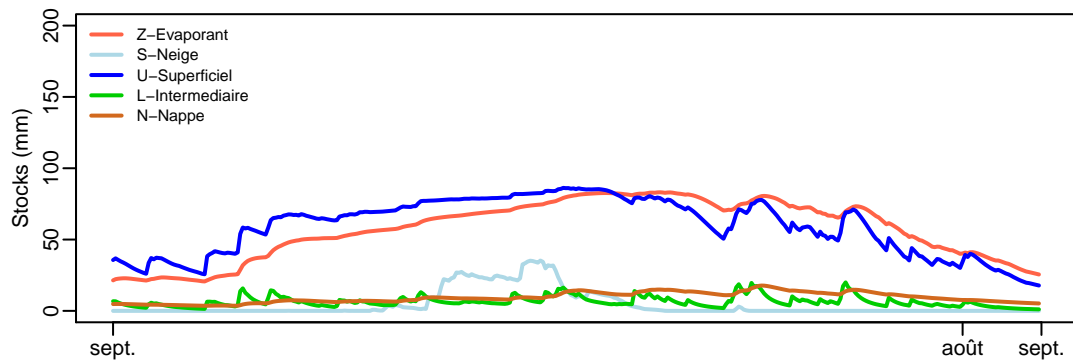

# k0690010 (4800.12 km<sup>2</sup>) – année 2010–2011

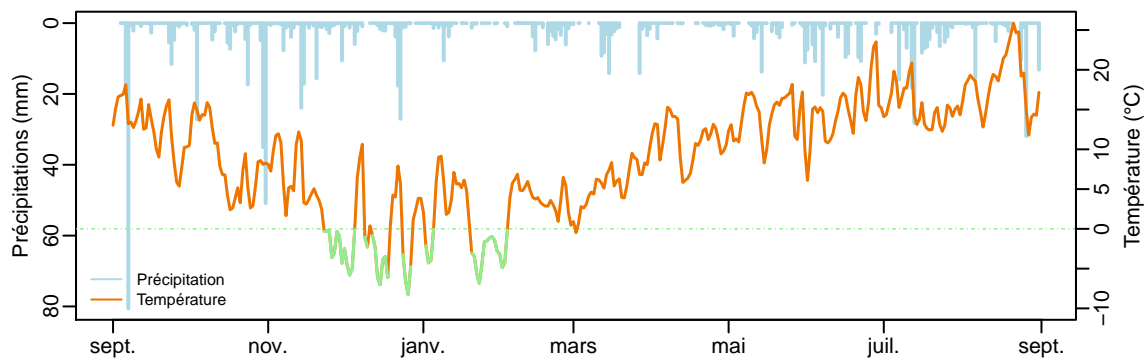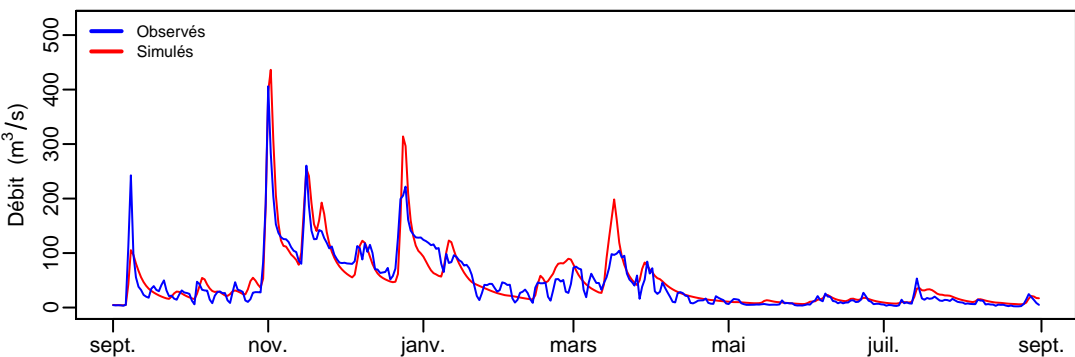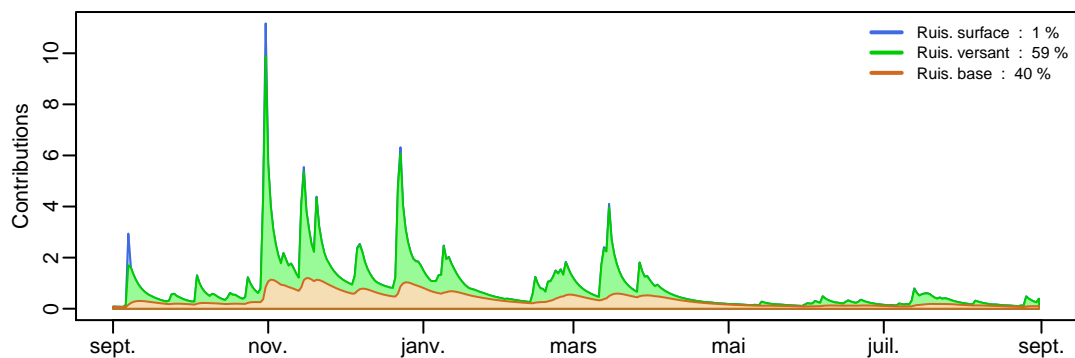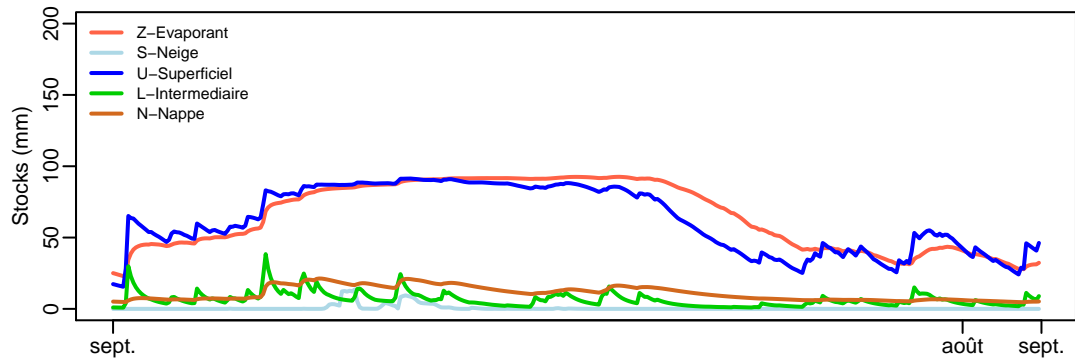

# k0690010 (4800.12 km²) – année 2011–2012

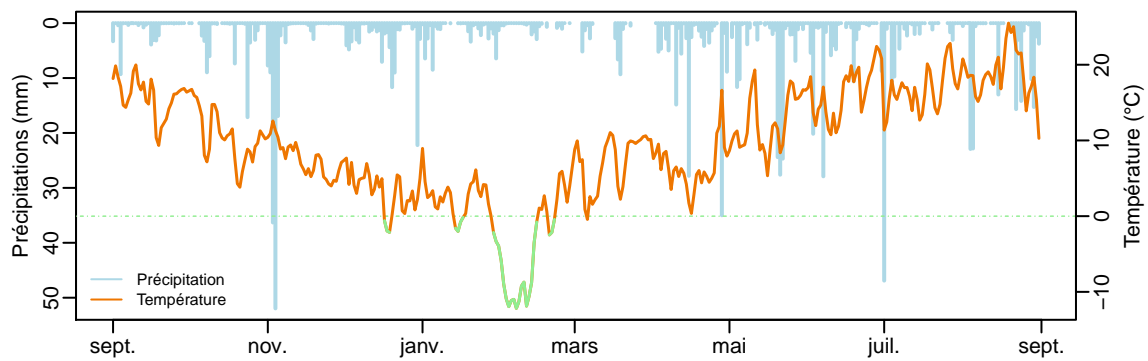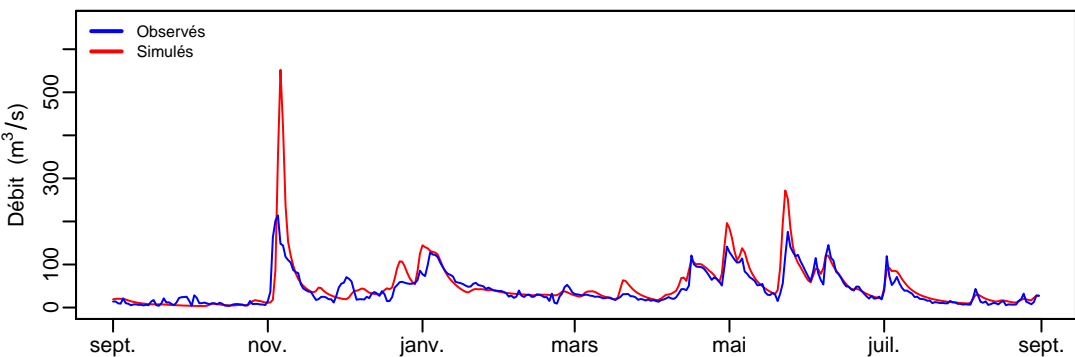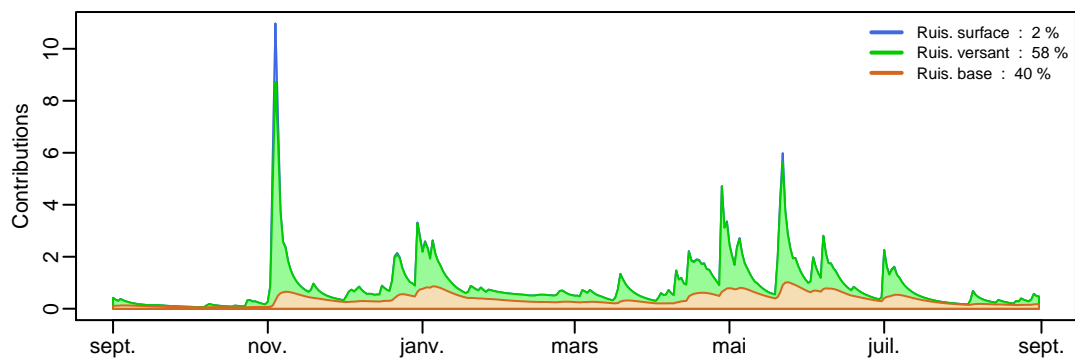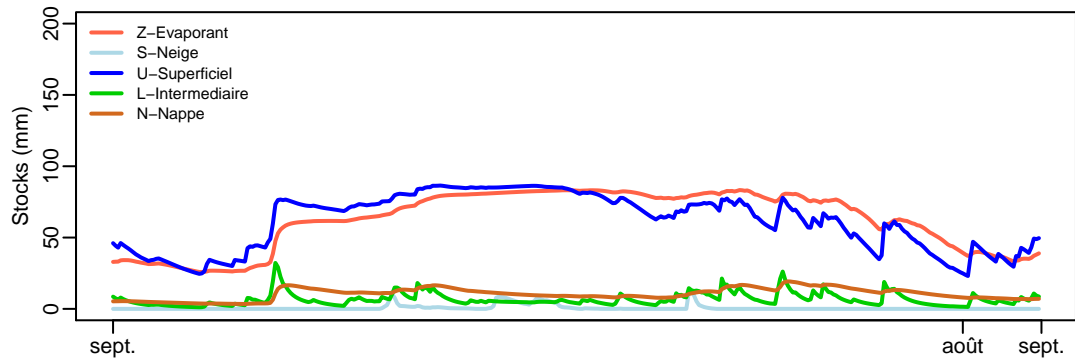

# k0700010 (4974.26 km<sup>2</sup>) – année 1984–1985

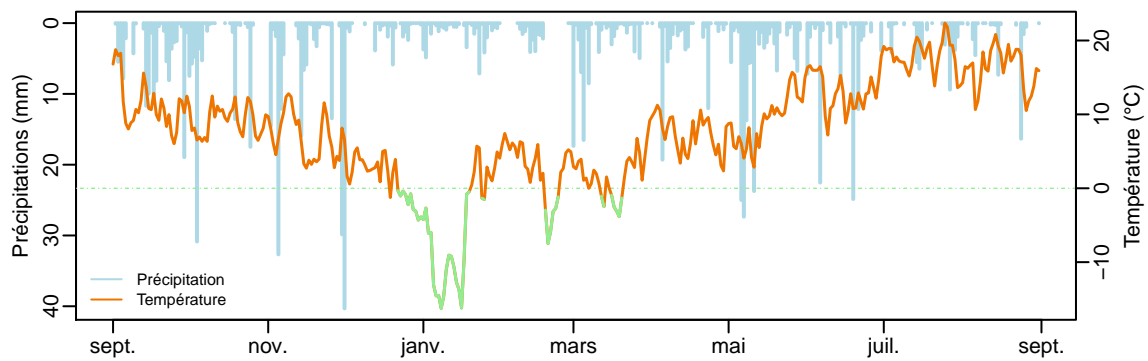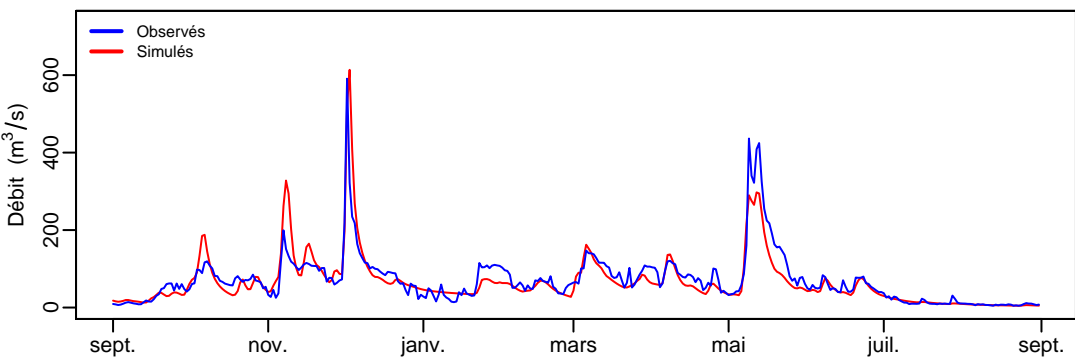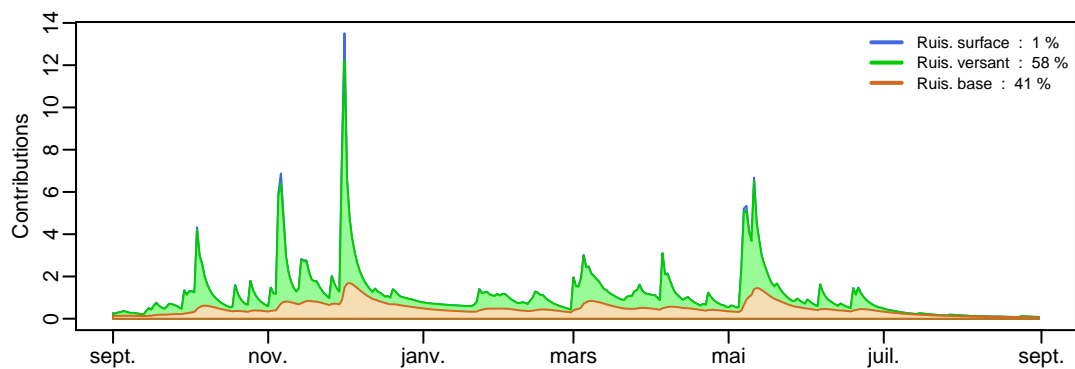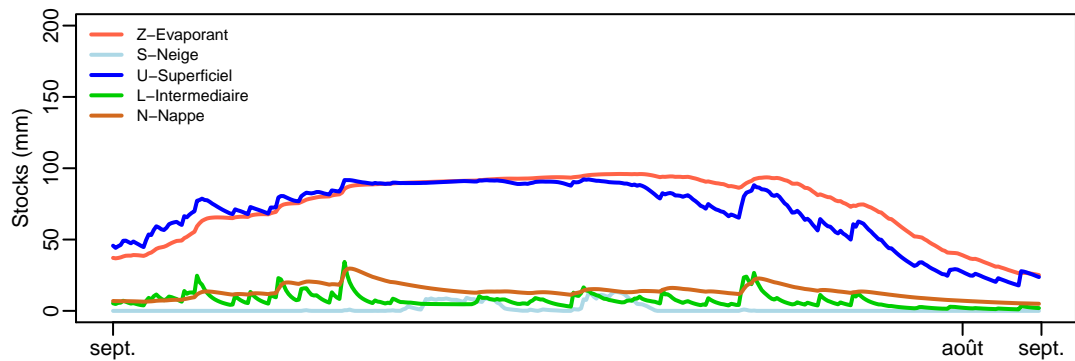

# k0700010 (4974.26 km<sup>2</sup>) – année 1985–1986

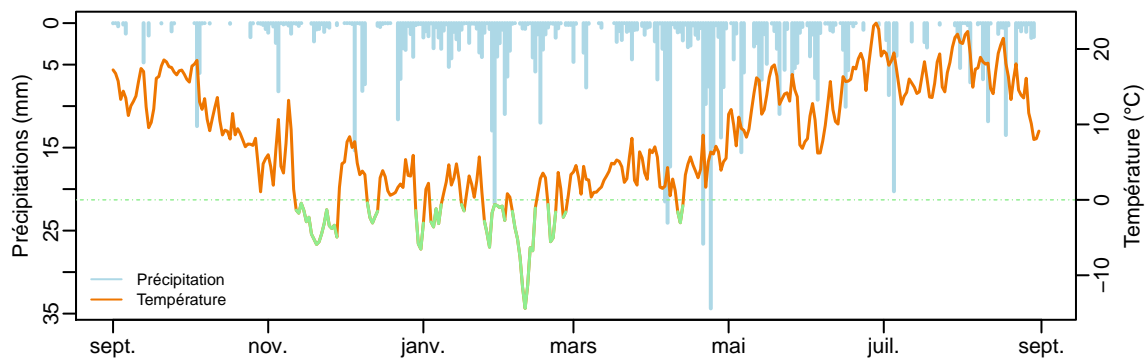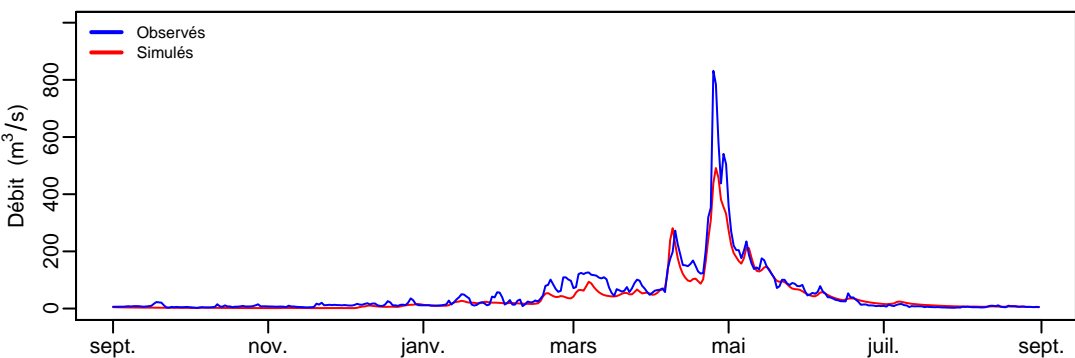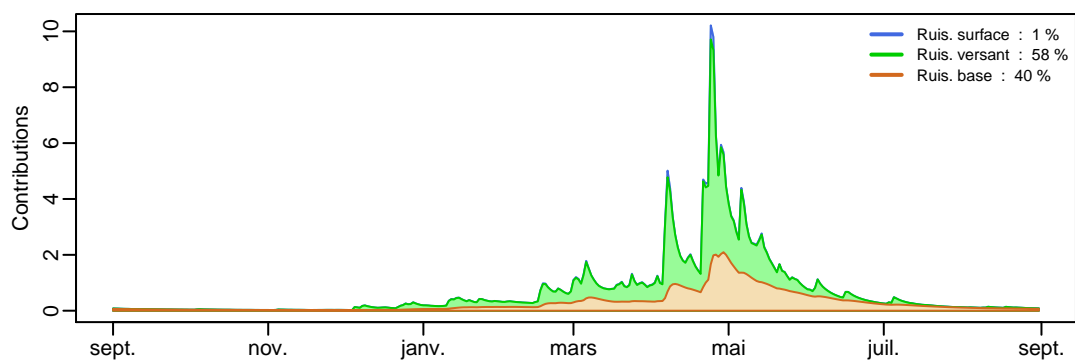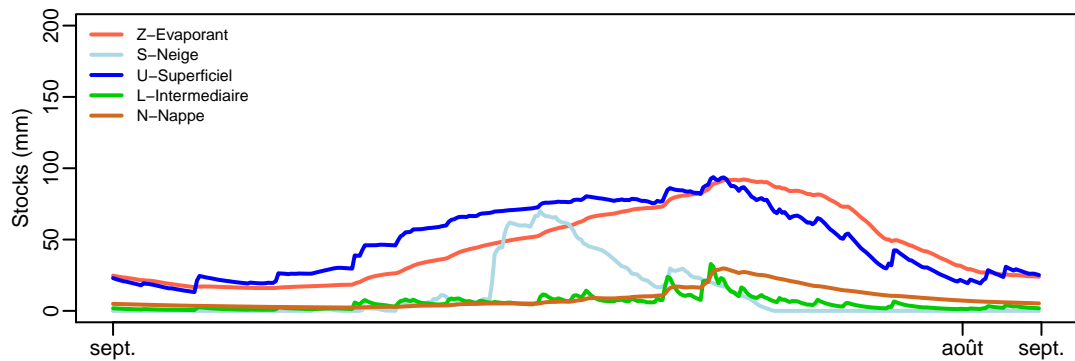



# k0700010 (4974.26 km<sup>2</sup>) – année 1986–1987

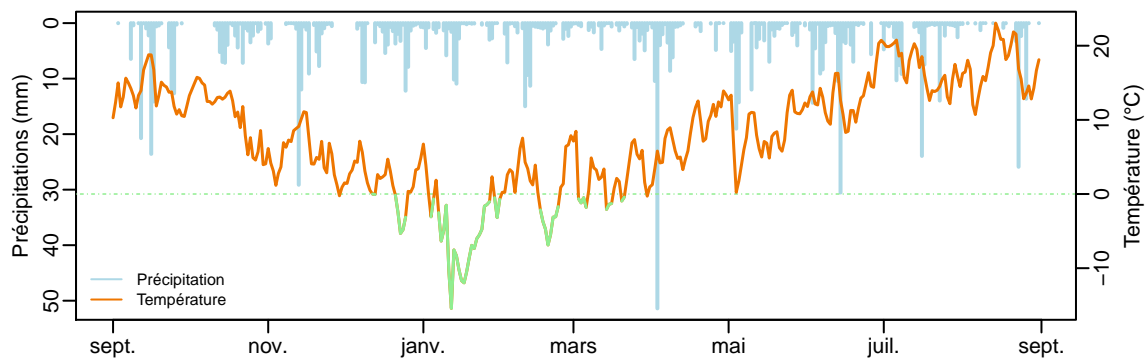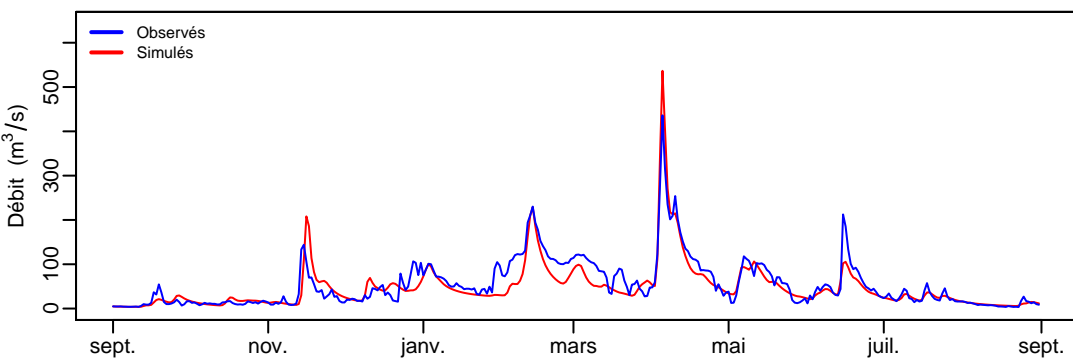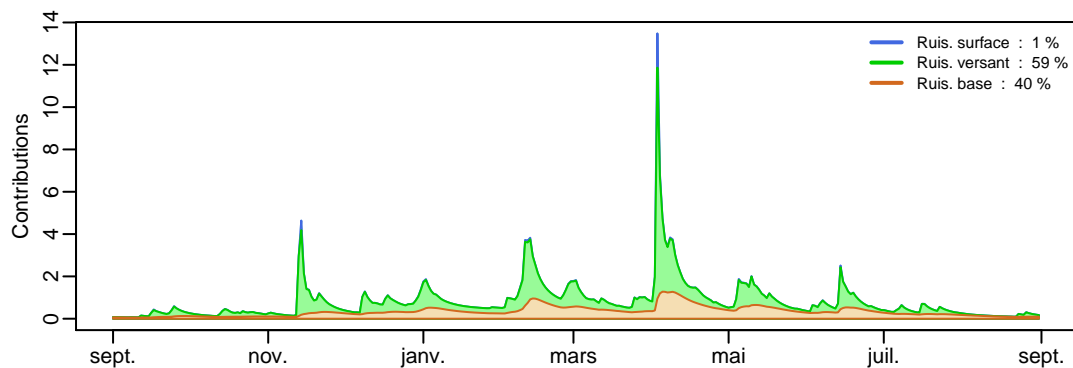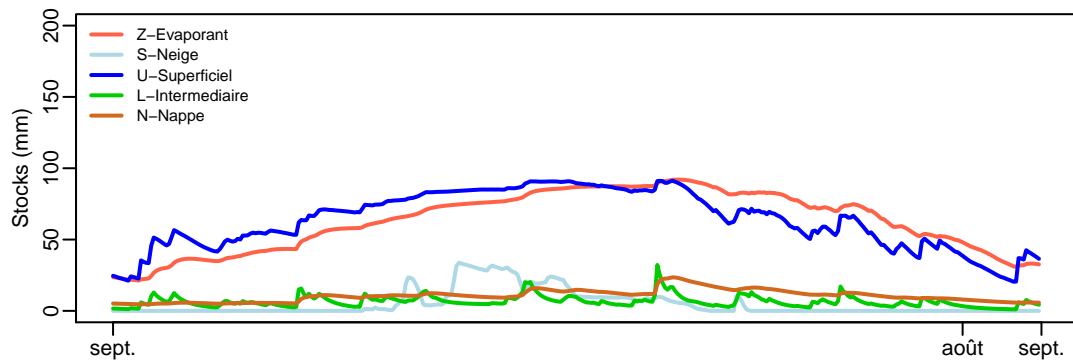

# k0700010 (4974.26 km<sup>2</sup>) – année 1987–1988

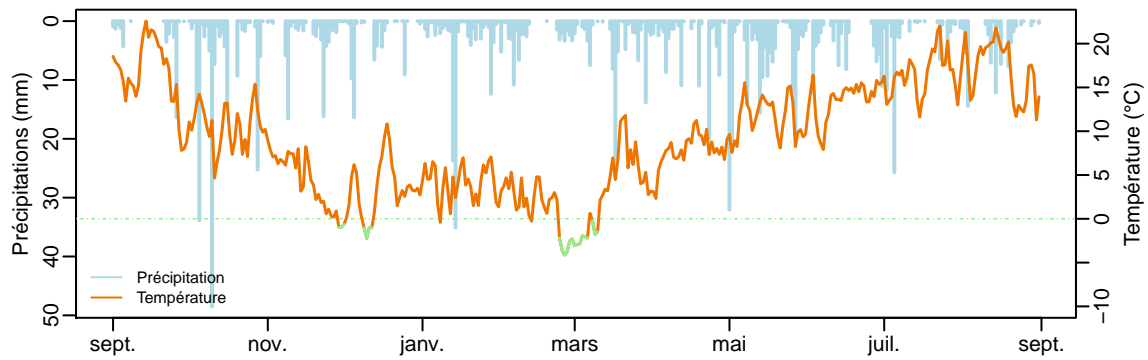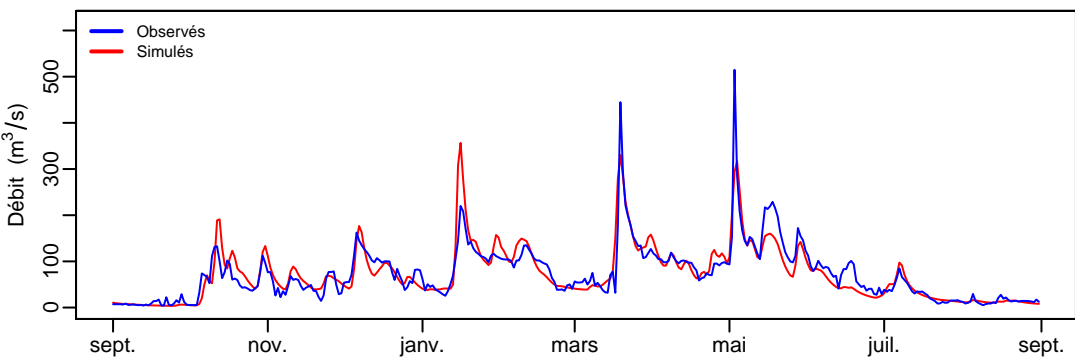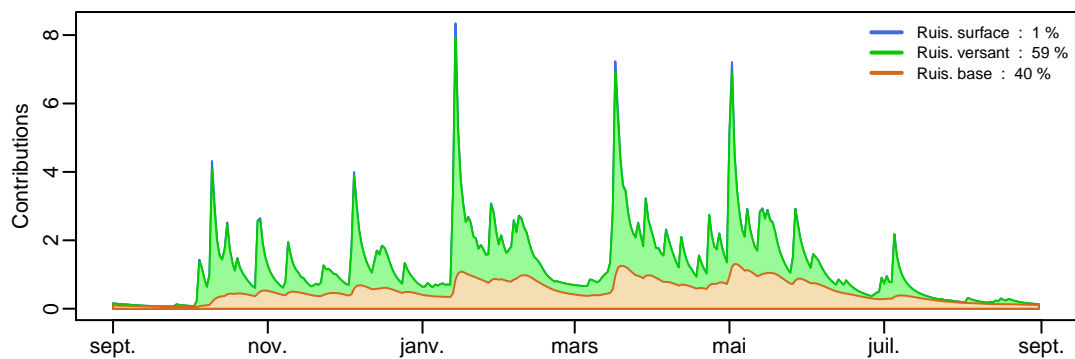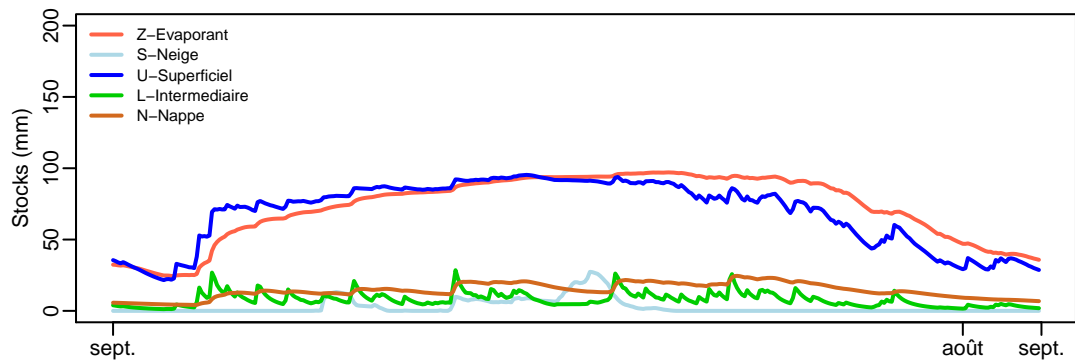

# k0700010 (4974.26 km<sup>2</sup>) – année 1988–1989

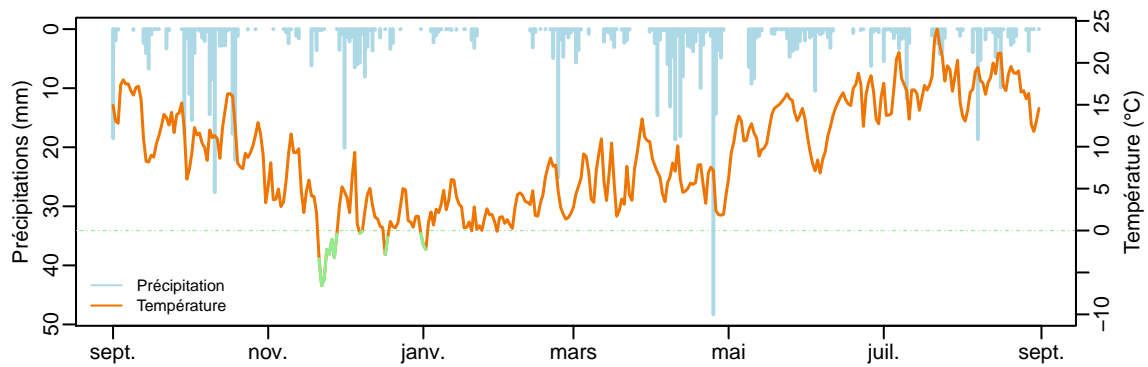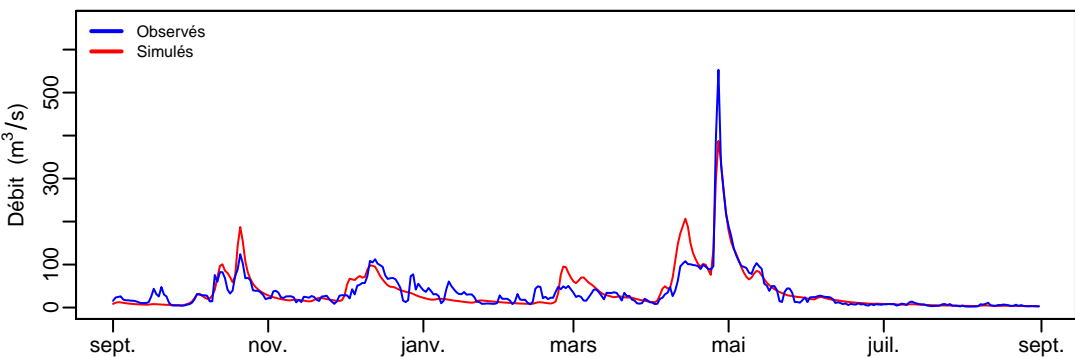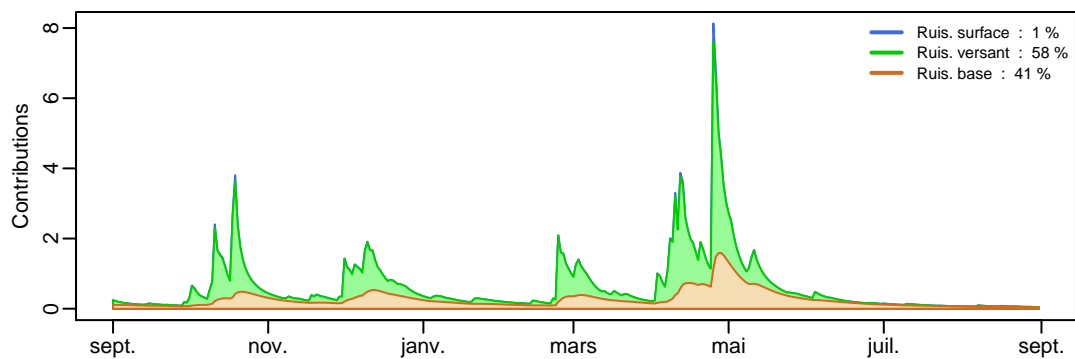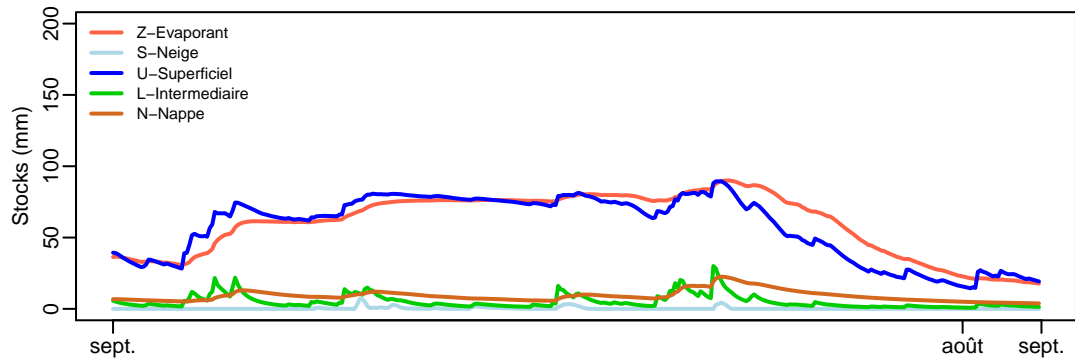

# k0700010 (4974.26 km<sup>2</sup>) – année 1989–1990

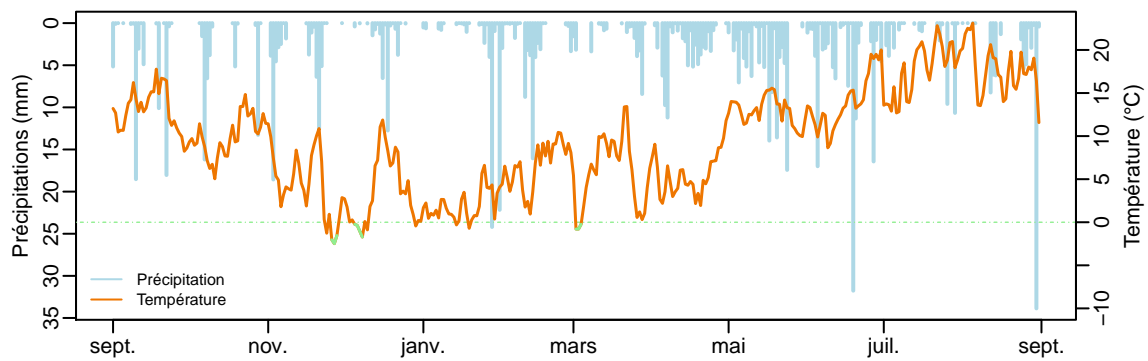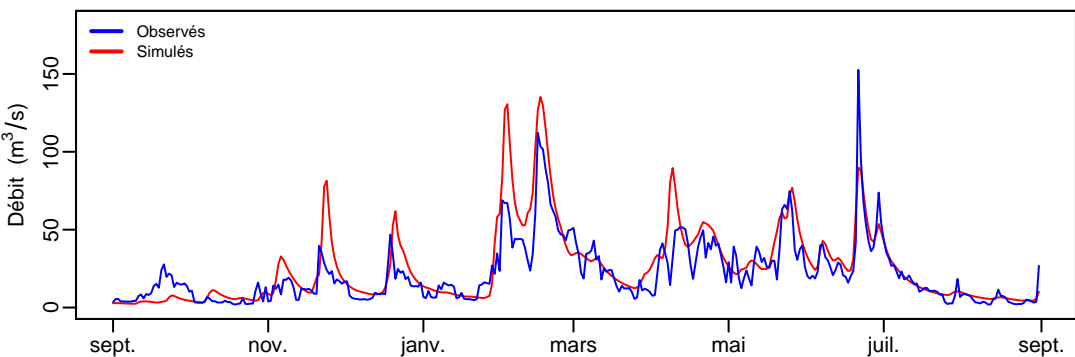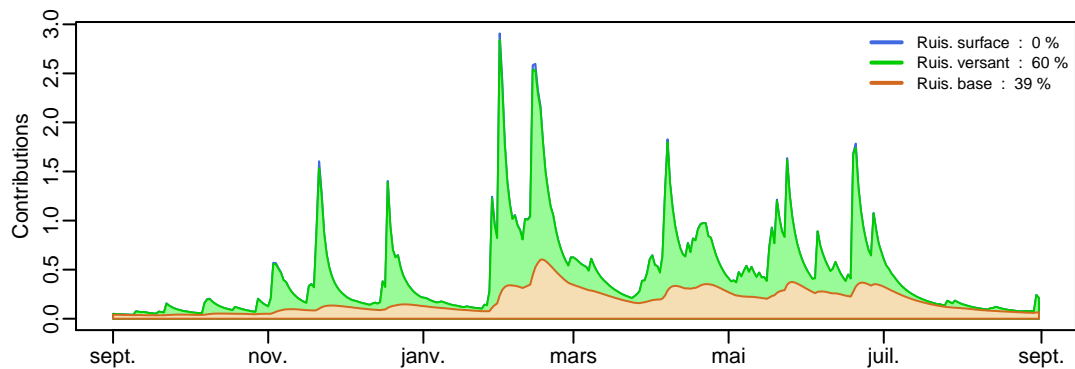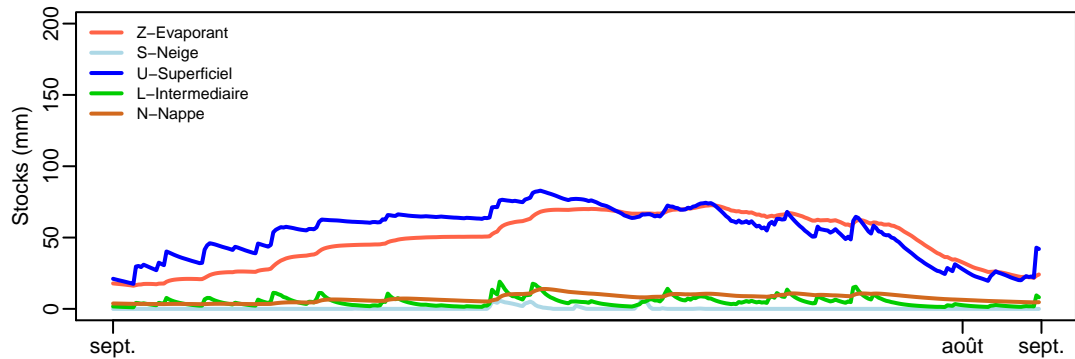

# k0700010 (4974.26 km<sup>2</sup>) – année 1990–1991

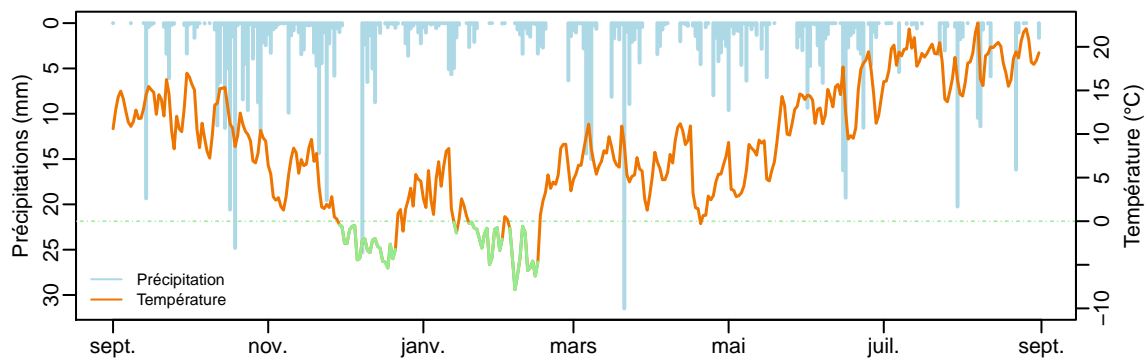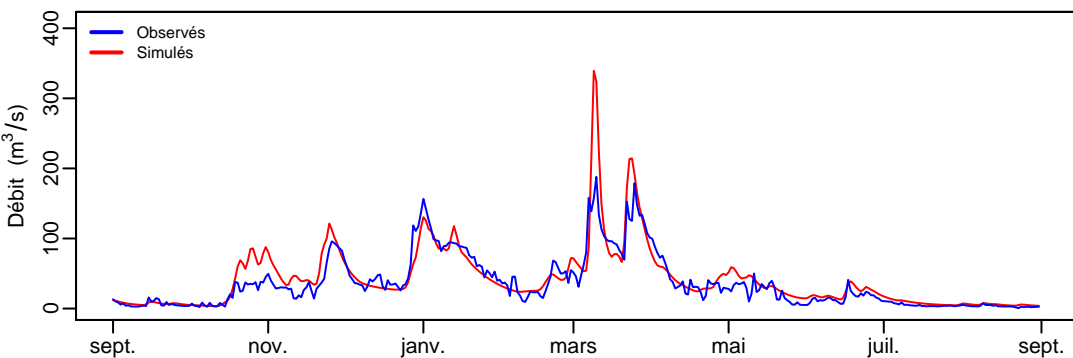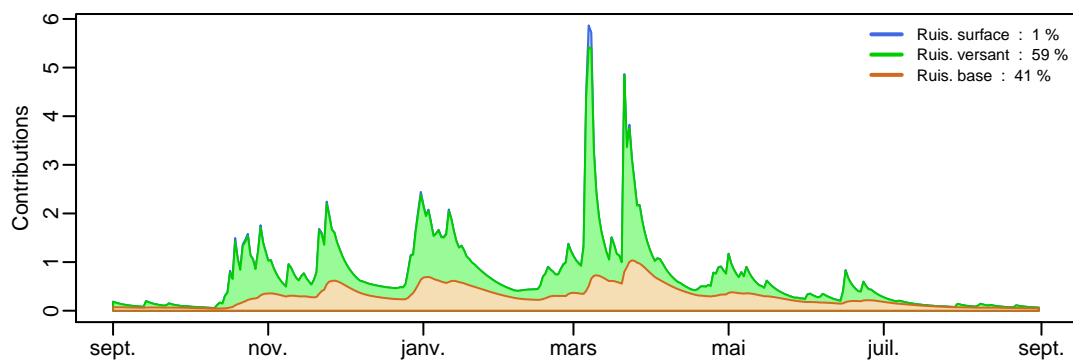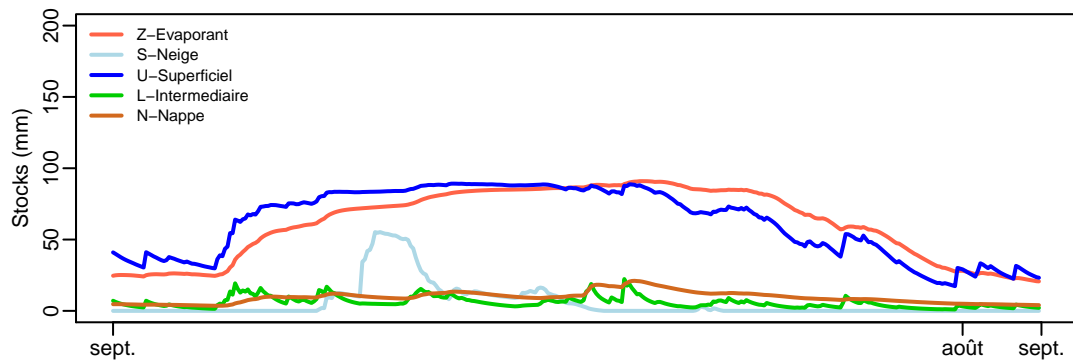

# k0700010 (4974.26 km²) – année 1991–1992

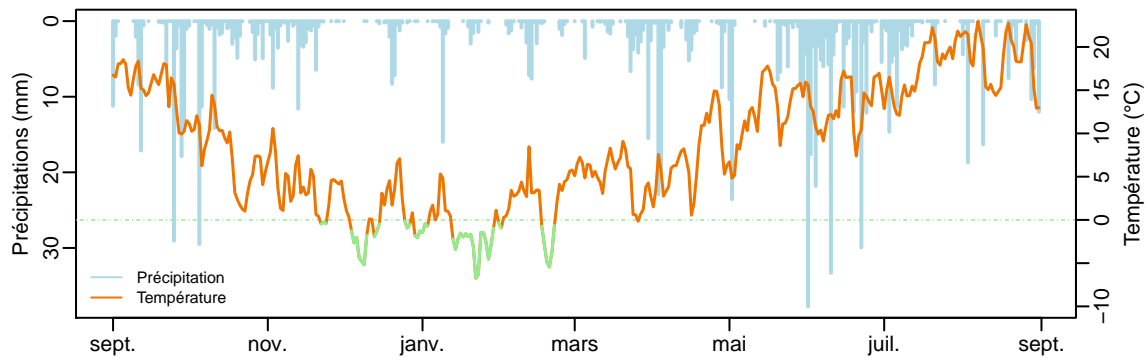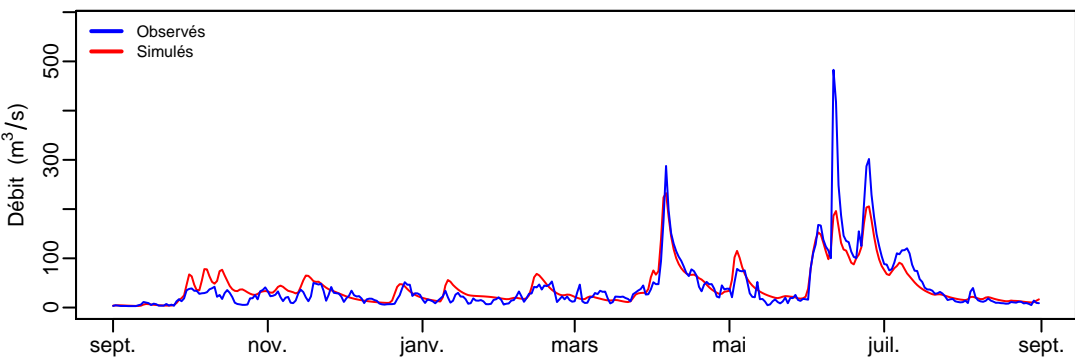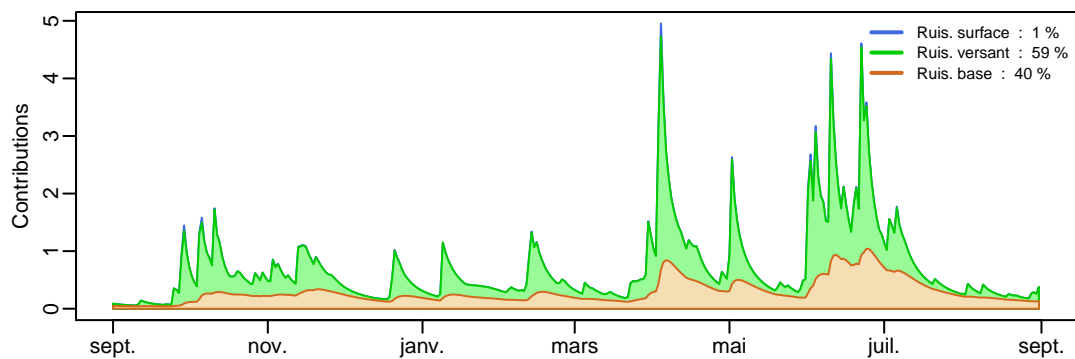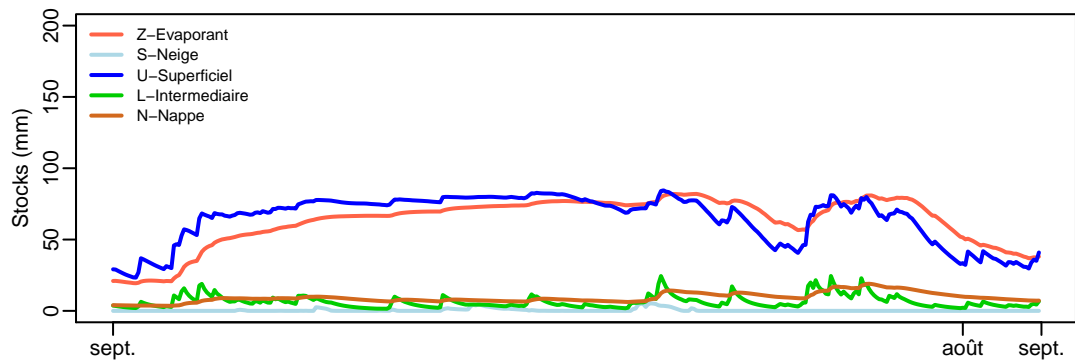

# k0700010 (4974.26 km<sup>2</sup>) – année 1992–1993

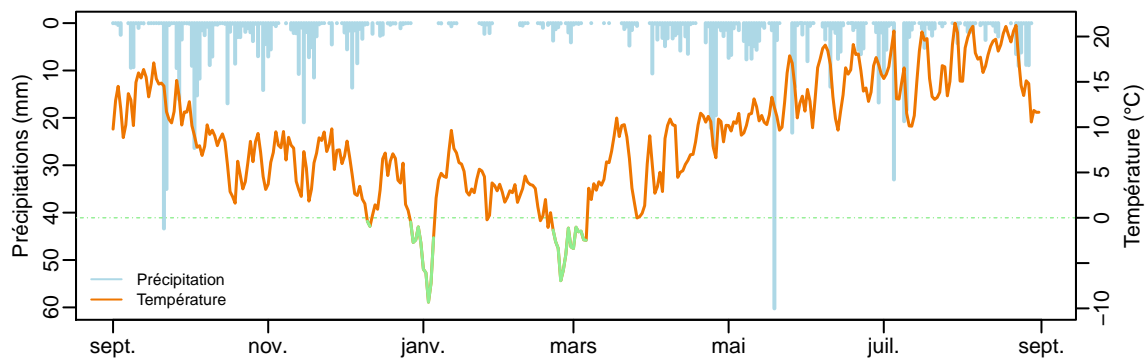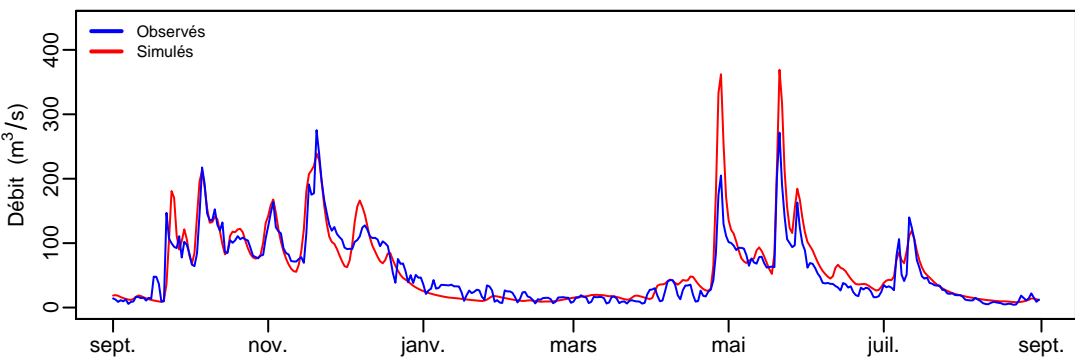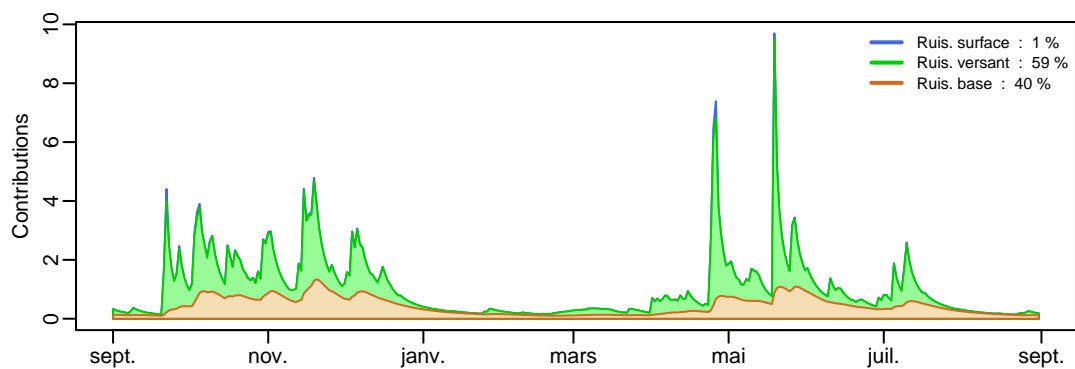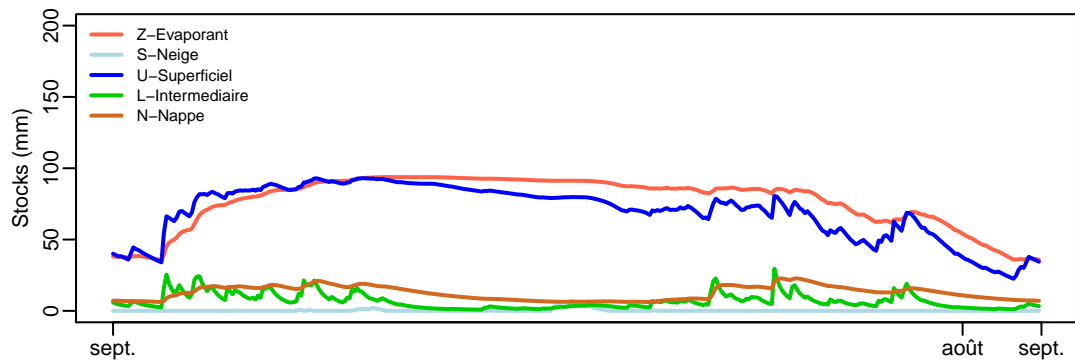

# k0700010 (4974.26 km<sup>2</sup>) – année 1993–1994

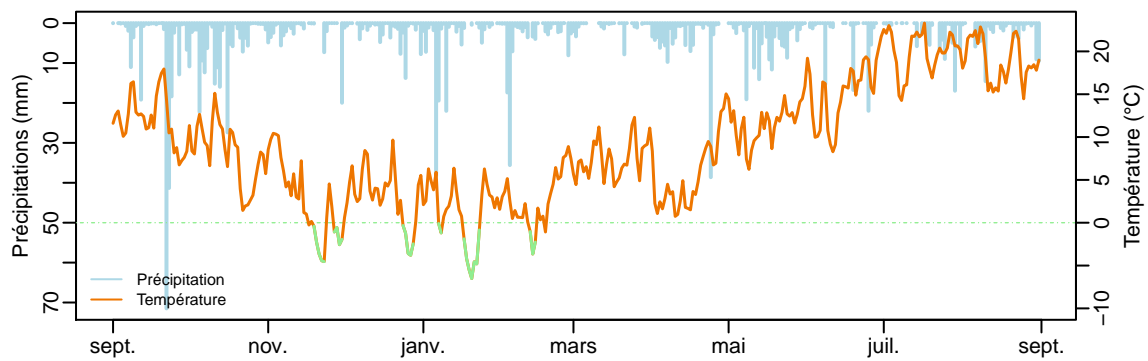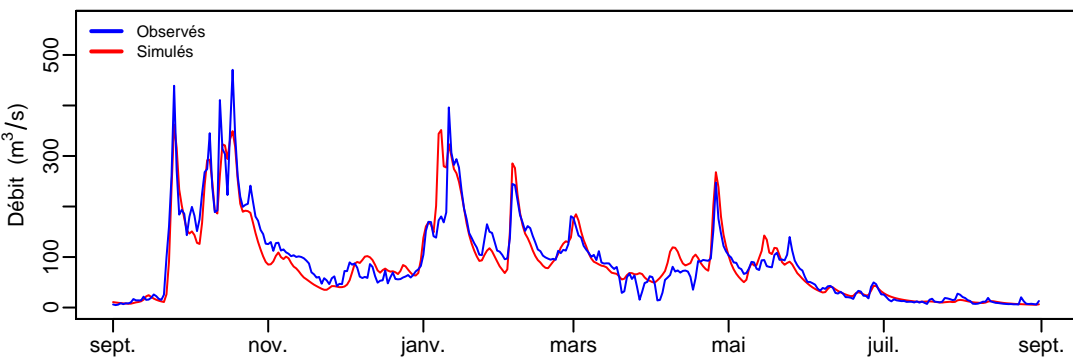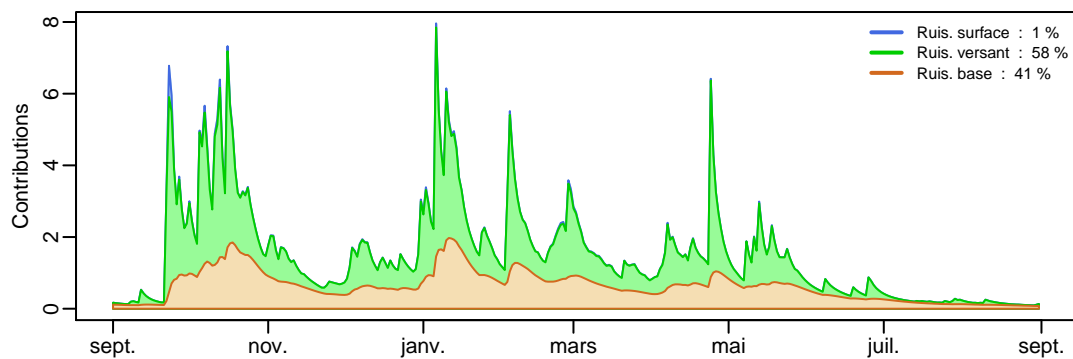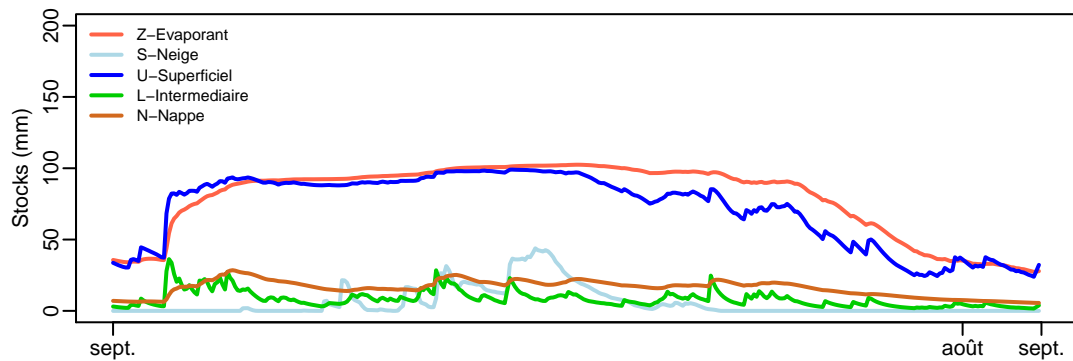



# k0700010 (4974.26 km<sup>2</sup>) – année 1994–1995

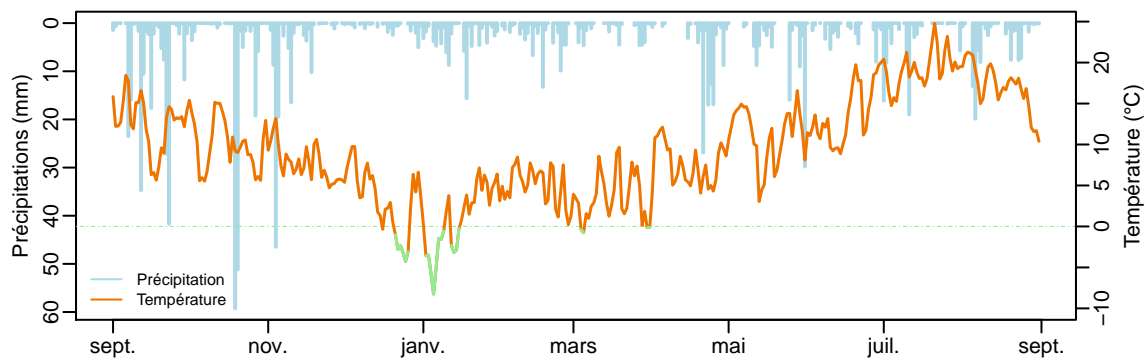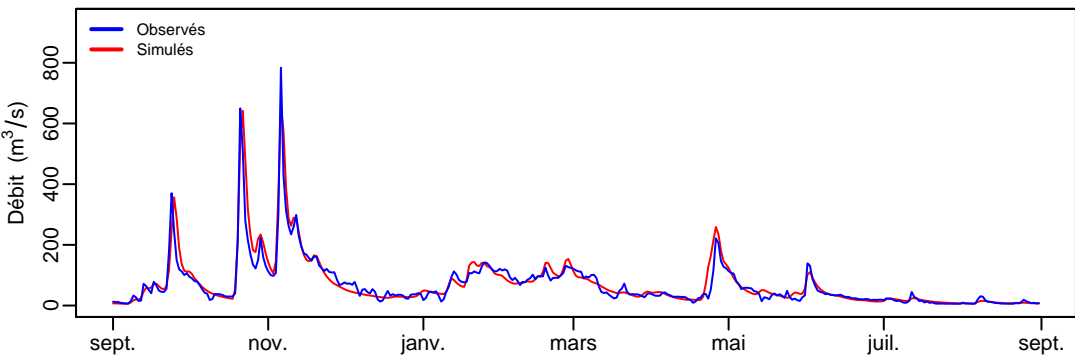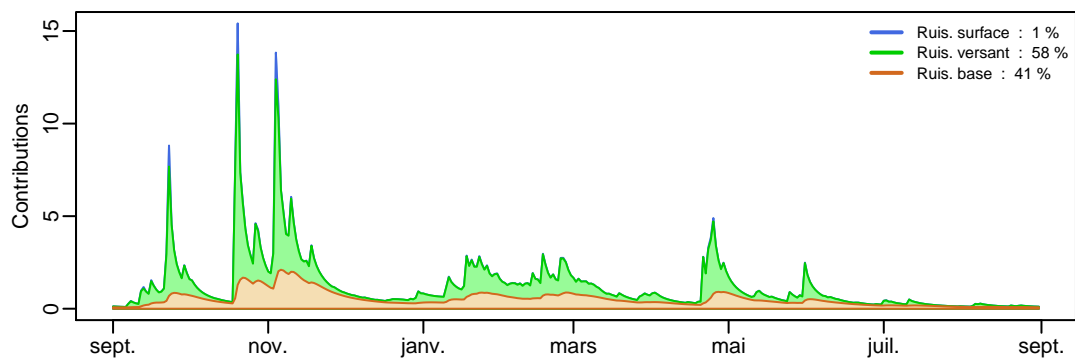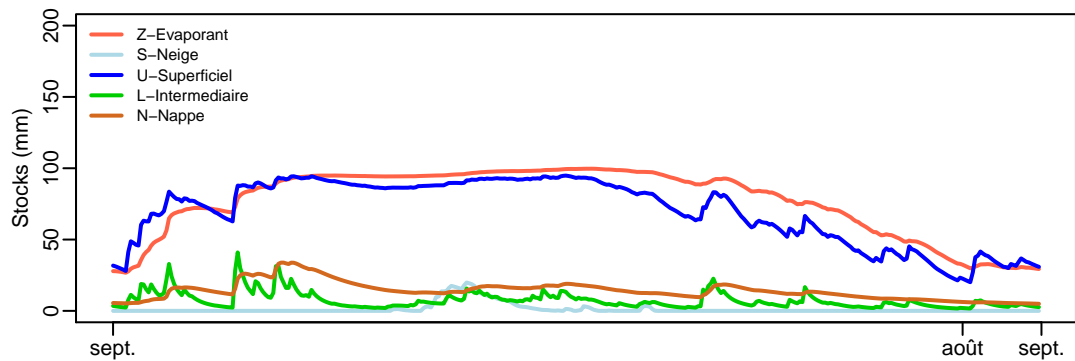

# k0700010 (4974.26 km<sup>2</sup>) – année 1995–1996

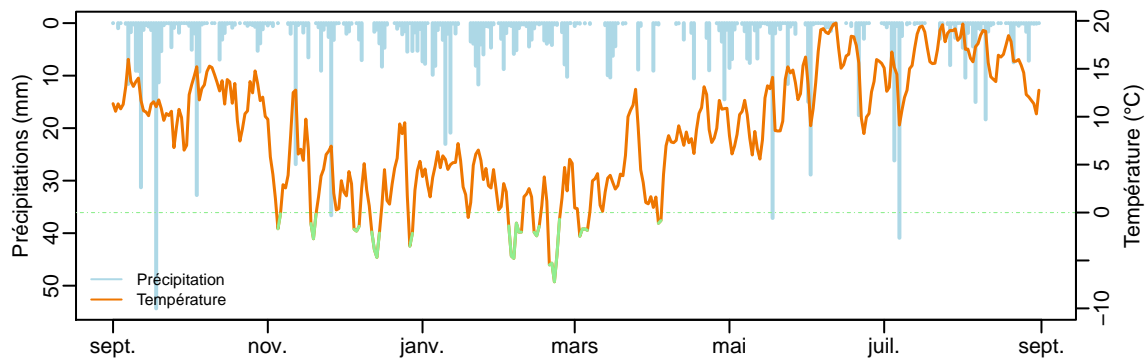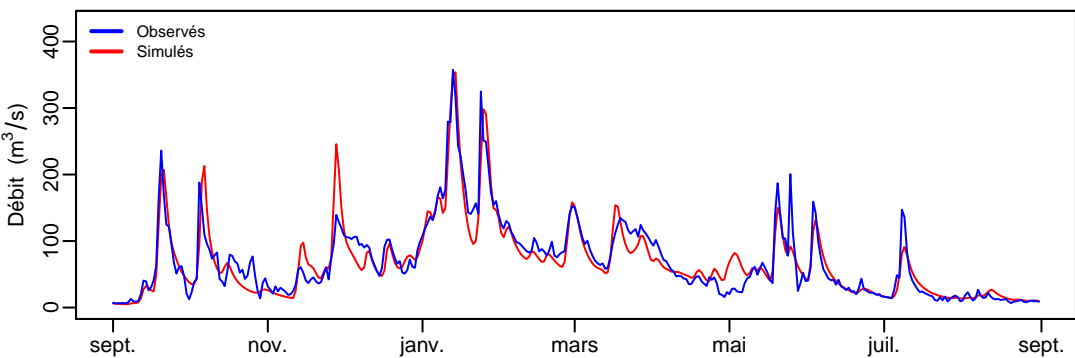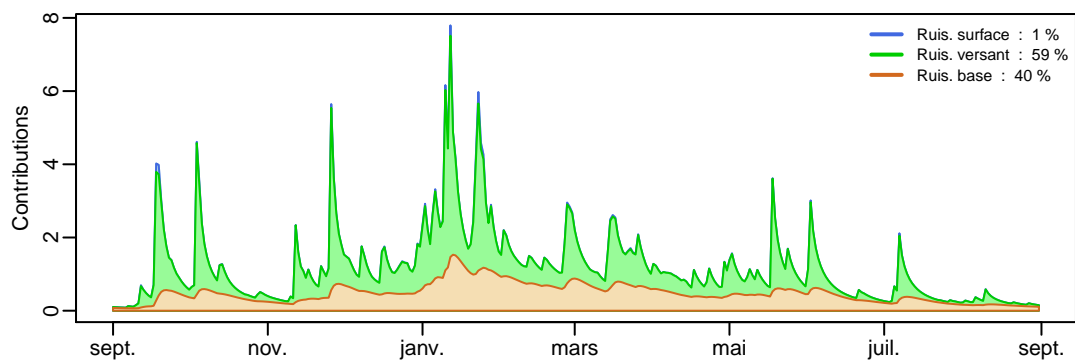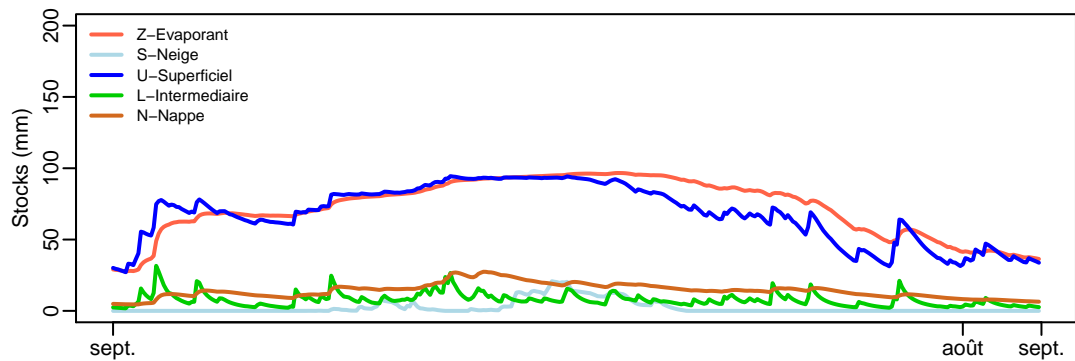

# k0700010 (4974.26 km<sup>2</sup>) – année 1996–1997

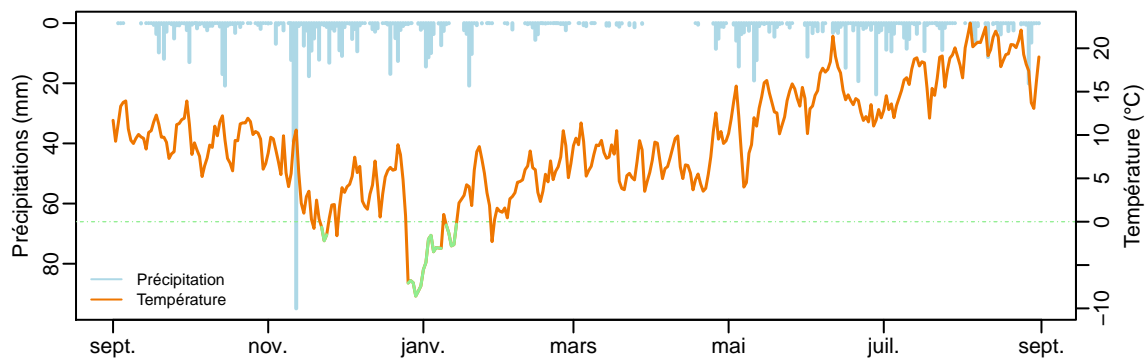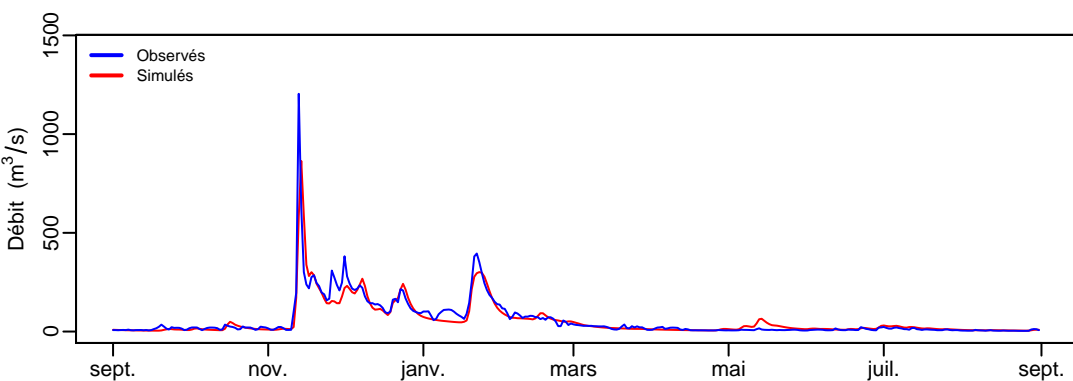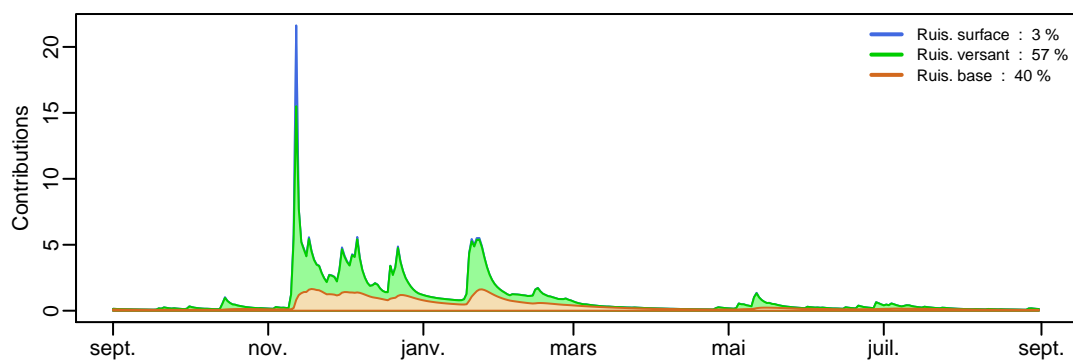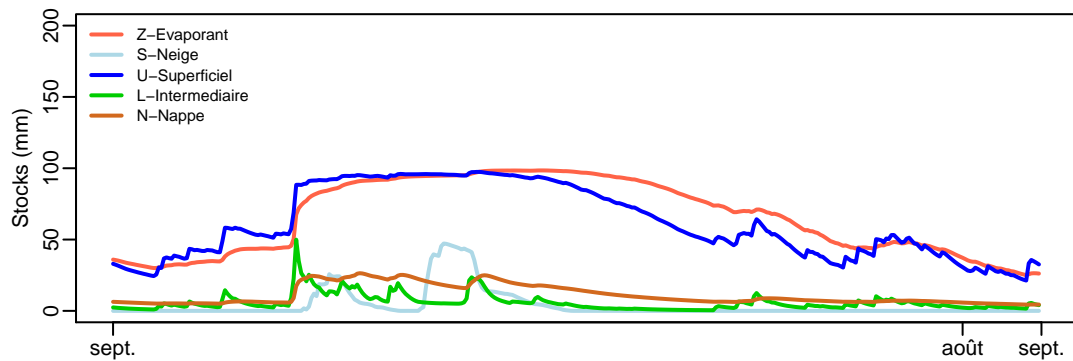

# k0700010 (4974.26 km²) – année 1997–1998

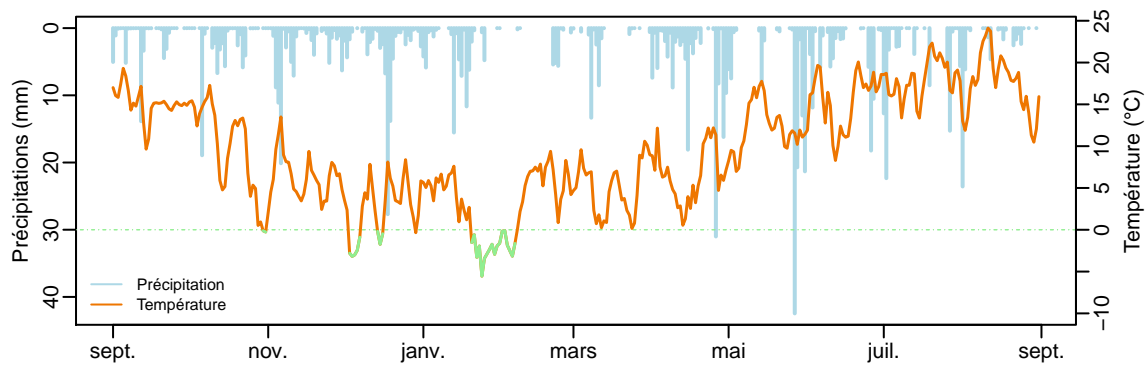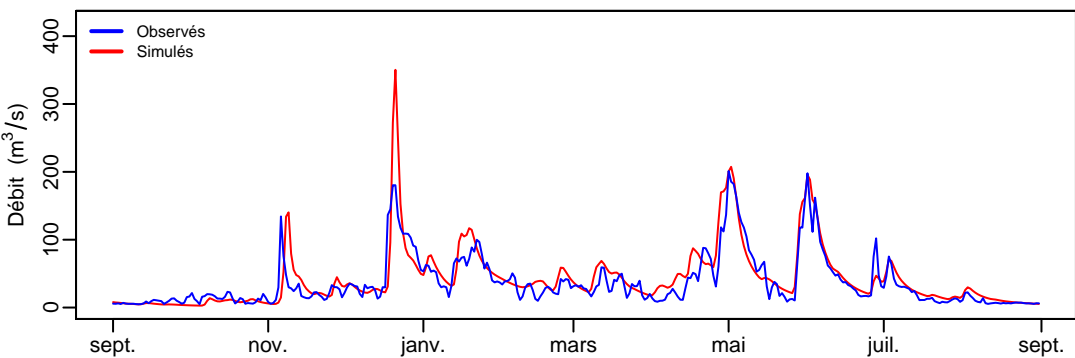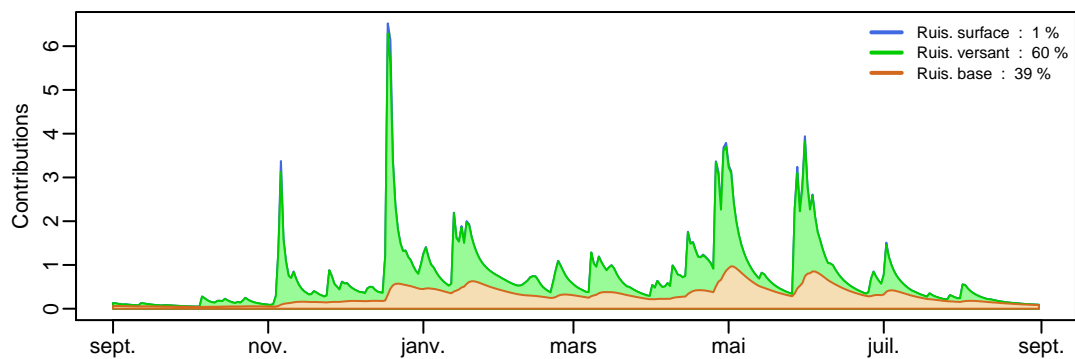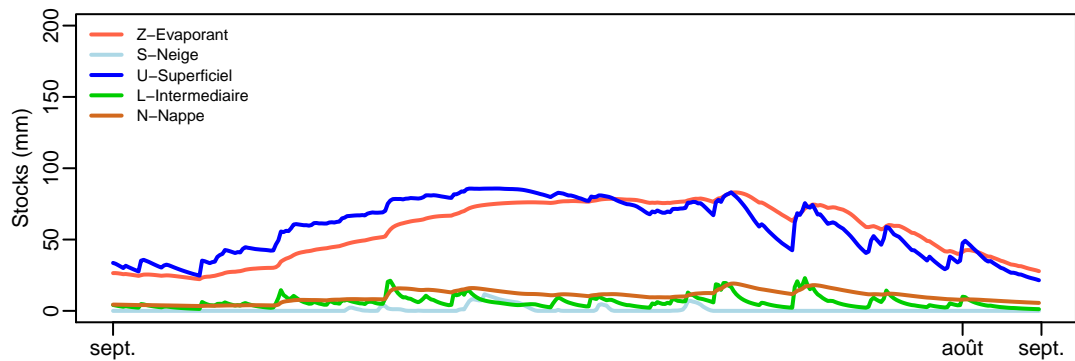

# k0700010 (4974.26 km<sup>2</sup>) – année 1998–1999

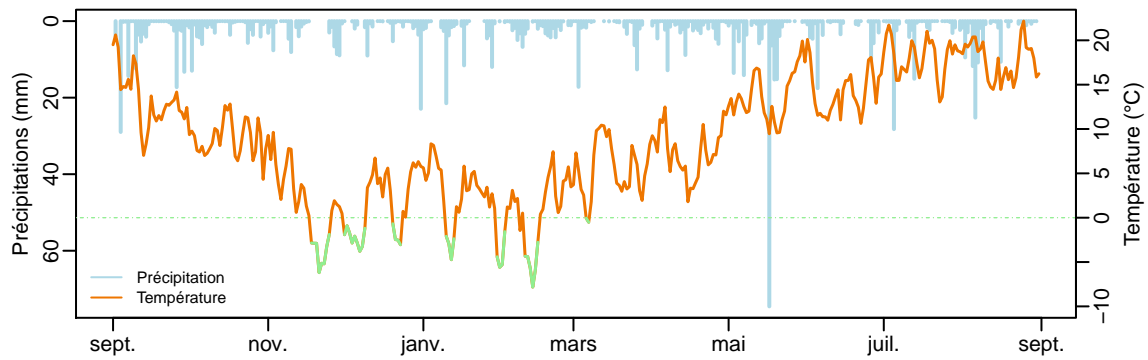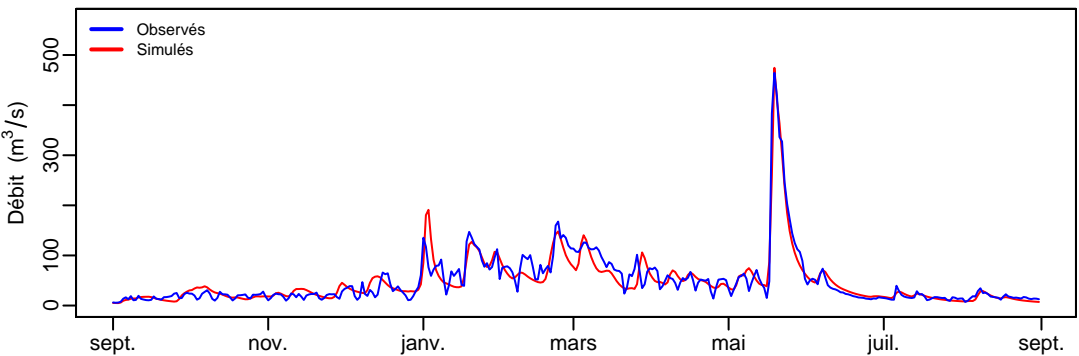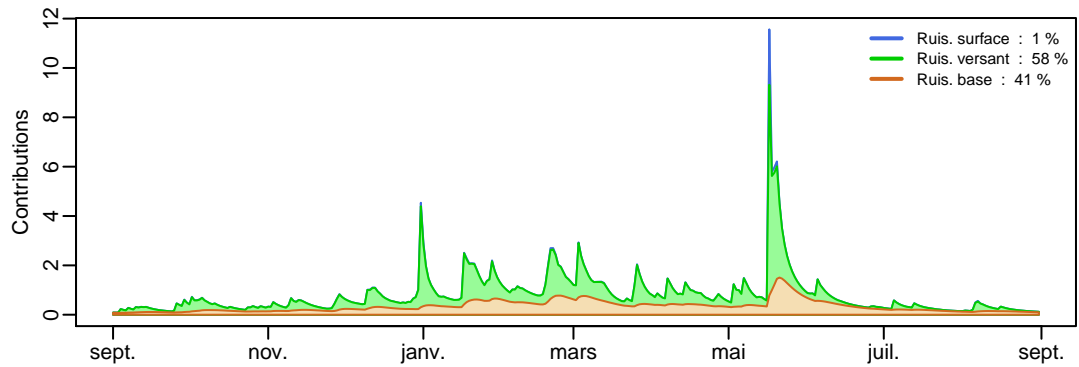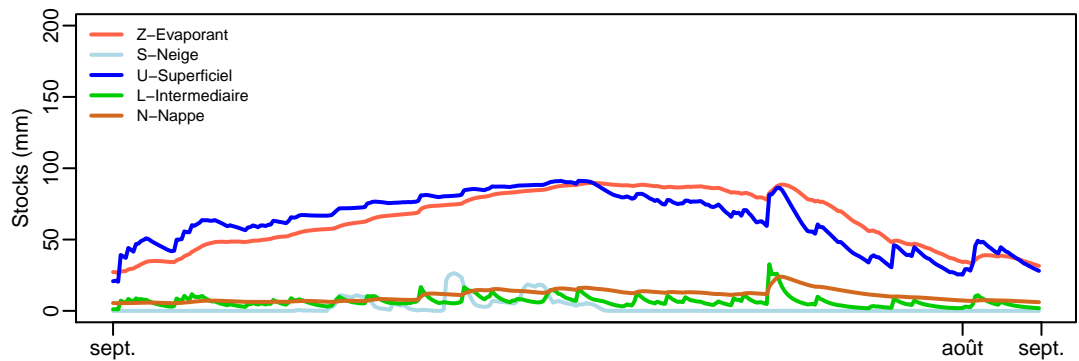

# k0700010 (4974.26 km²) – année 1999–2000

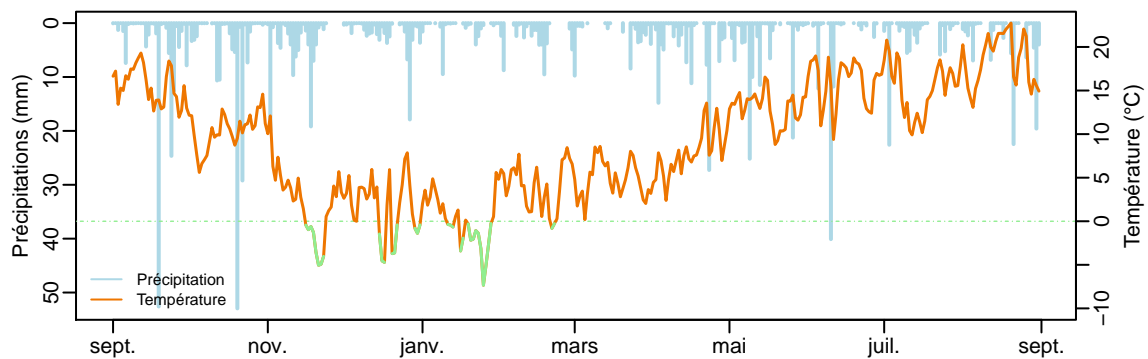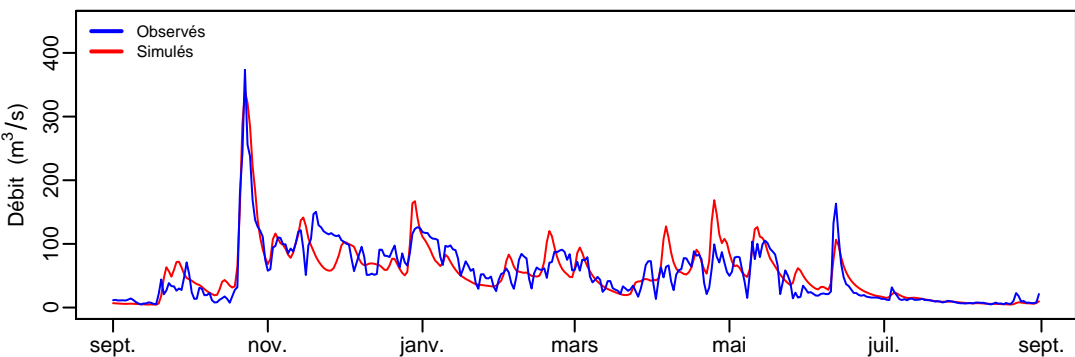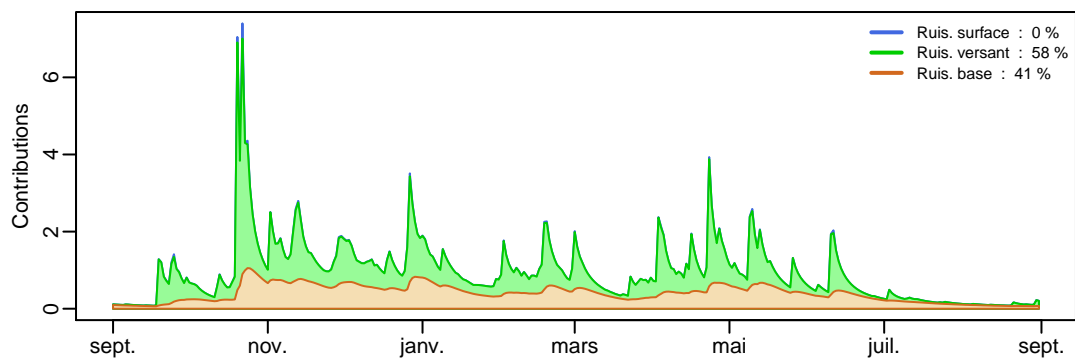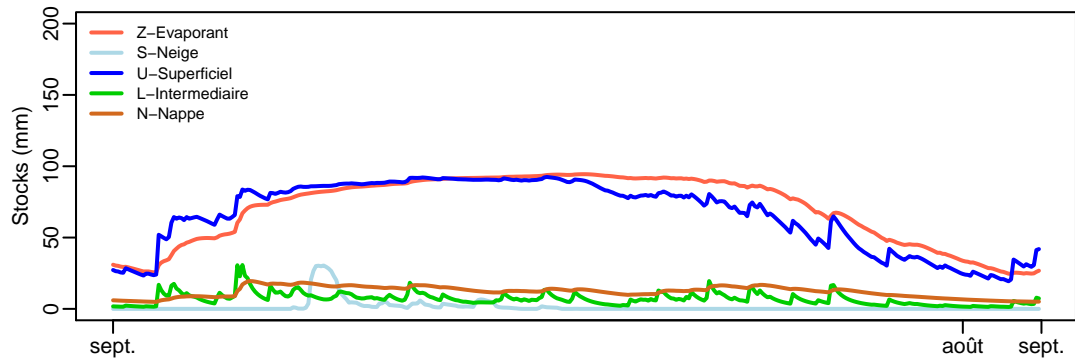

# k0700010 (4974.26 km<sup>2</sup>) – année 2000–2001

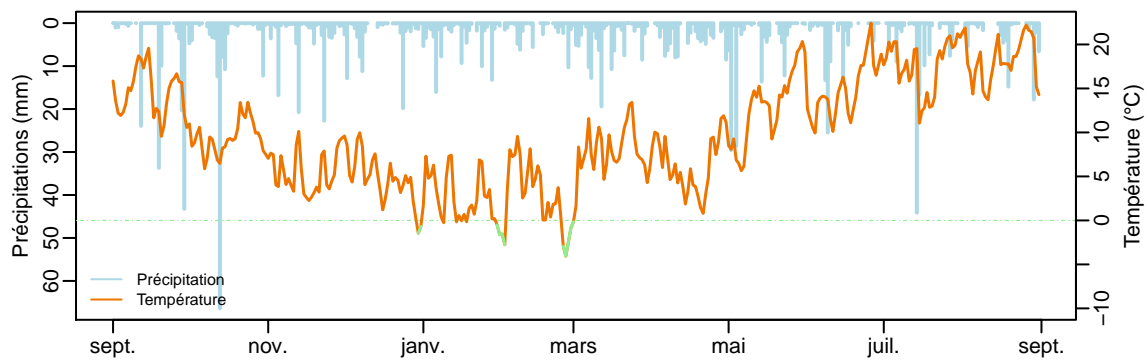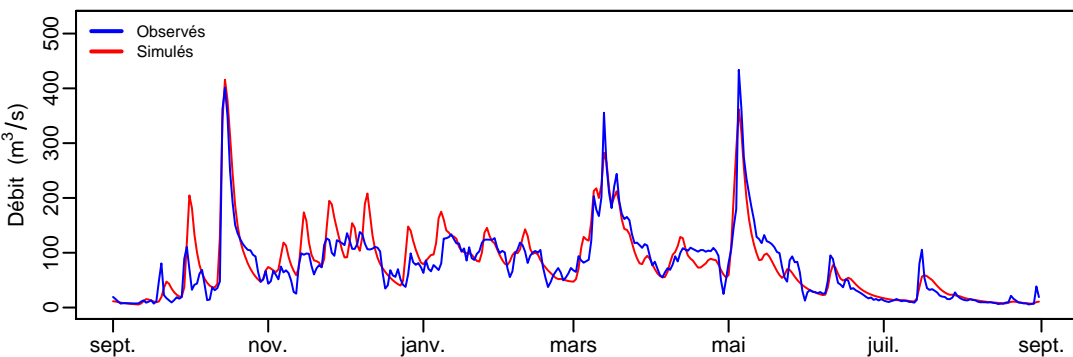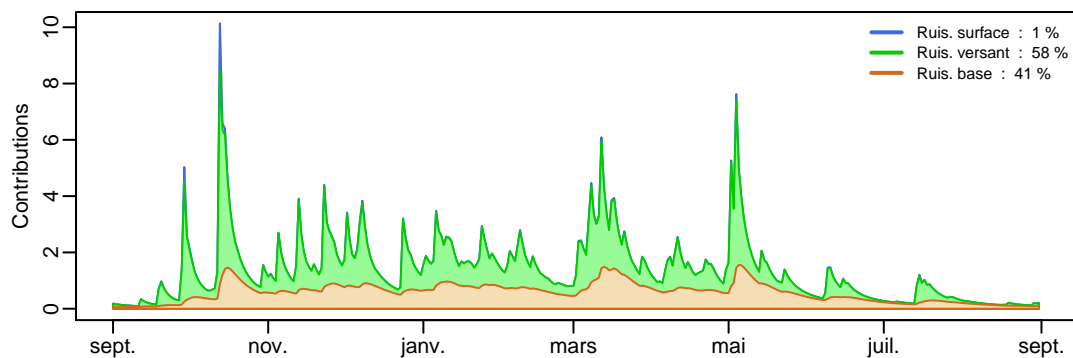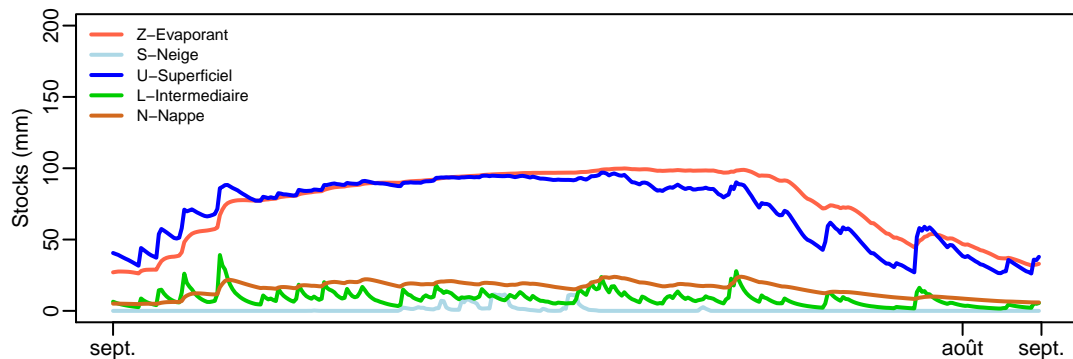

# k0700010 (4974.26 km<sup>2</sup>) – année 2001–2002

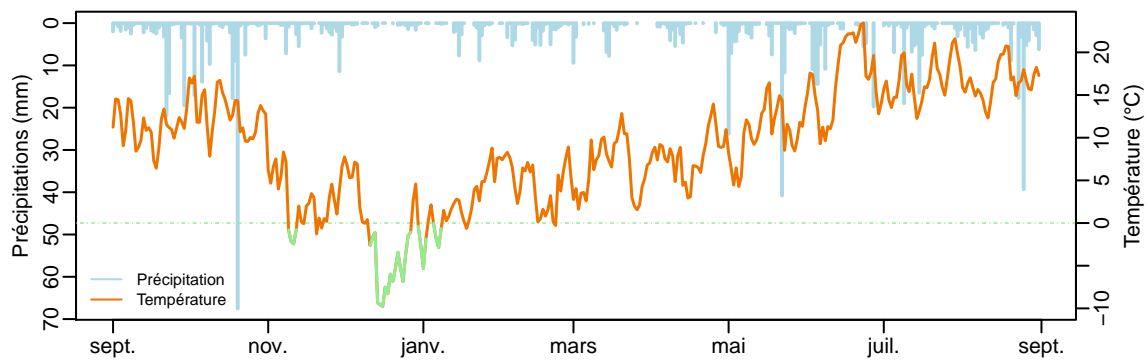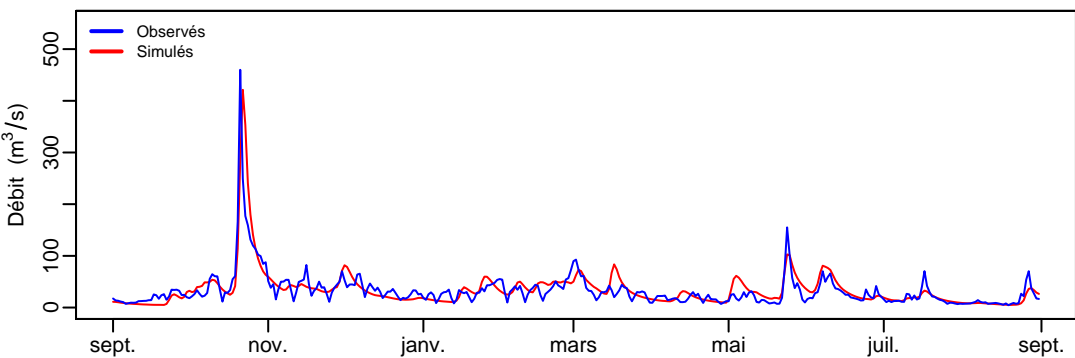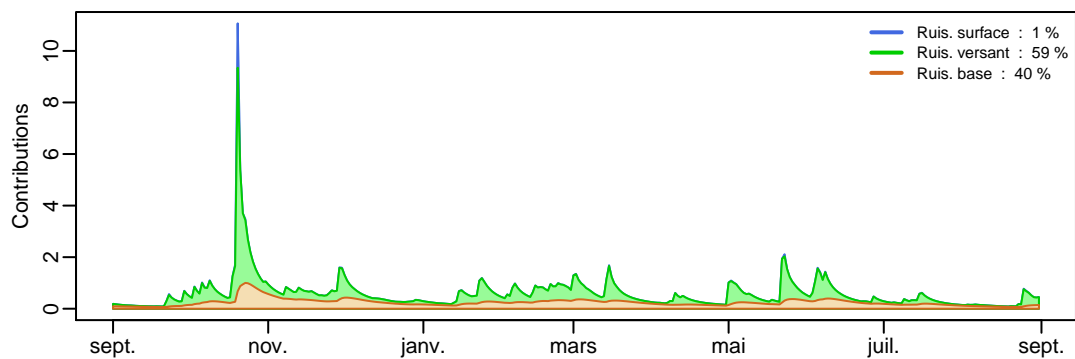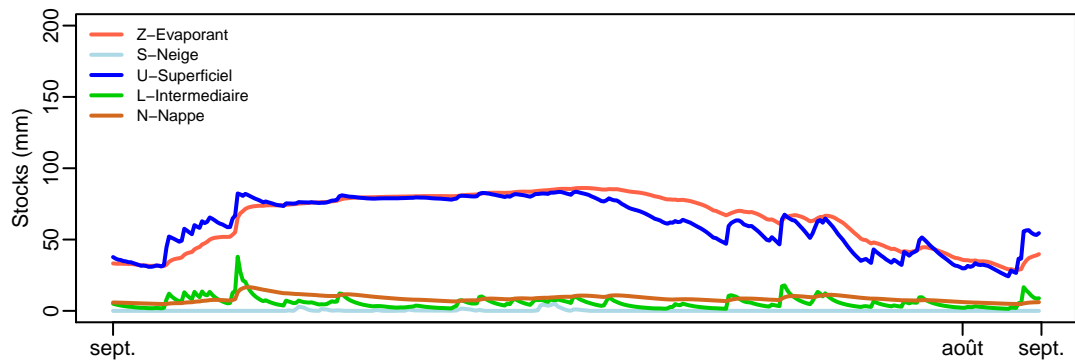



# k0700010 (4974.26 km<sup>2</sup>) – année 2002–2003

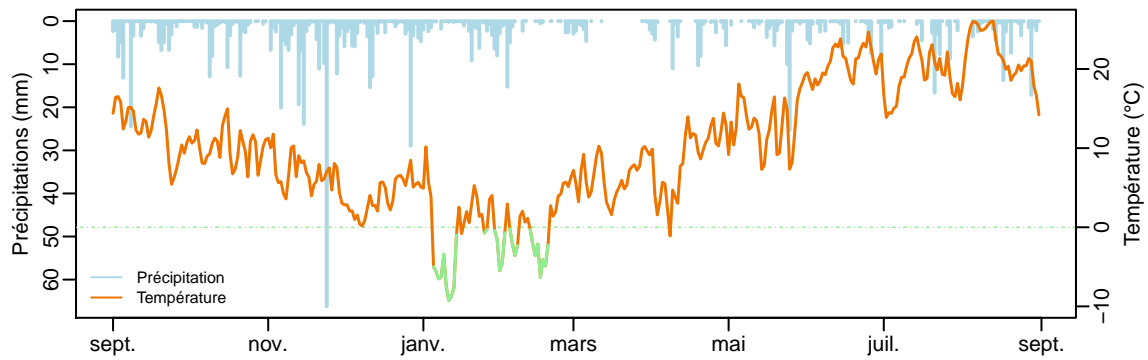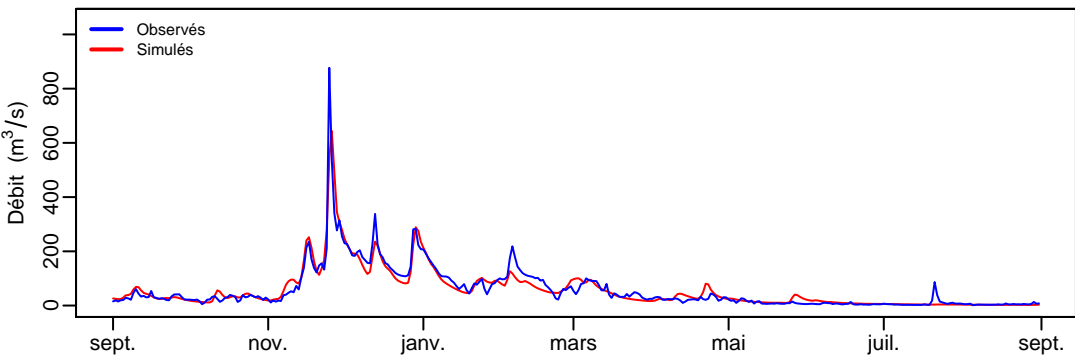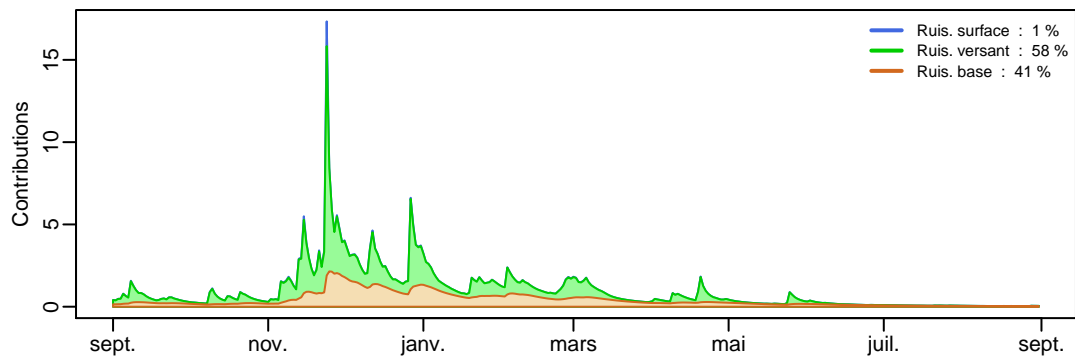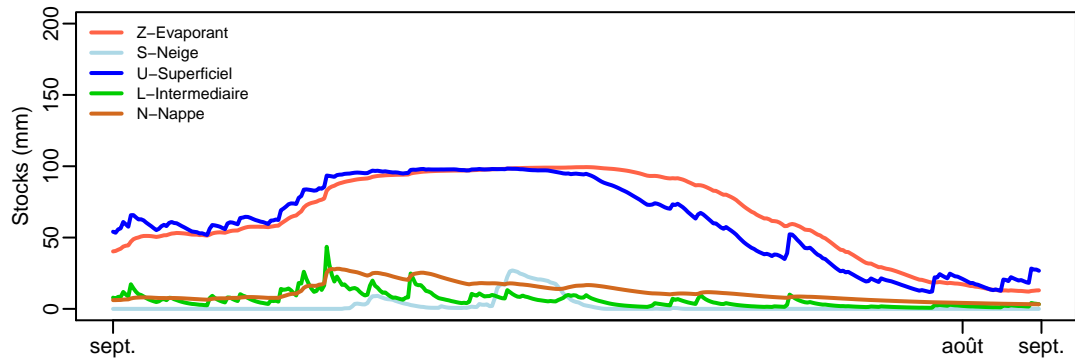

# k0700010 (4974.26 km<sup>2</sup>) – année 2003–2004

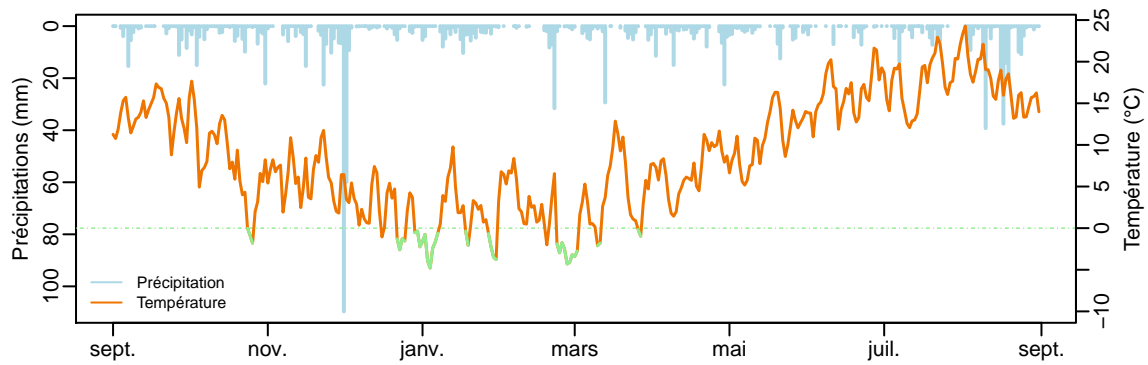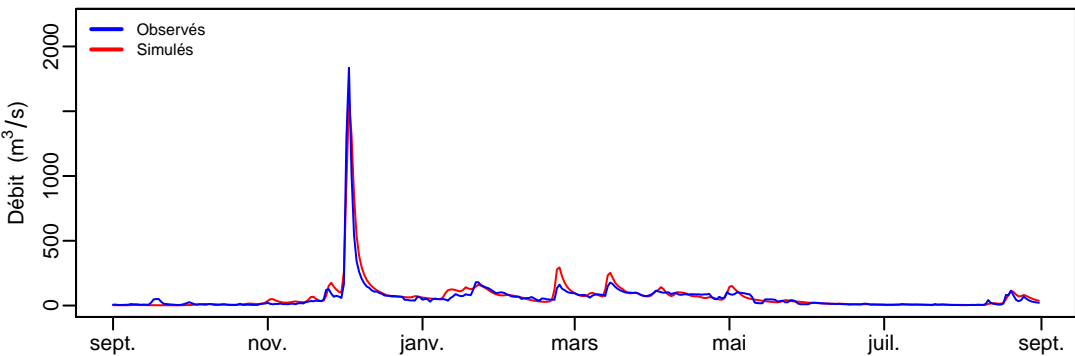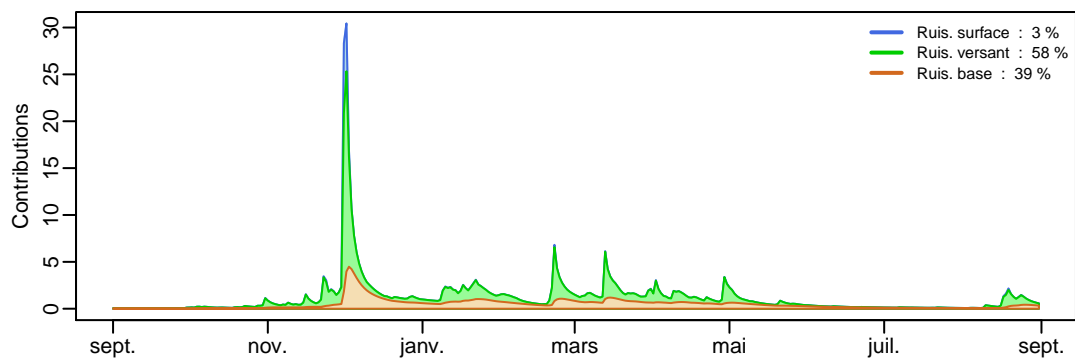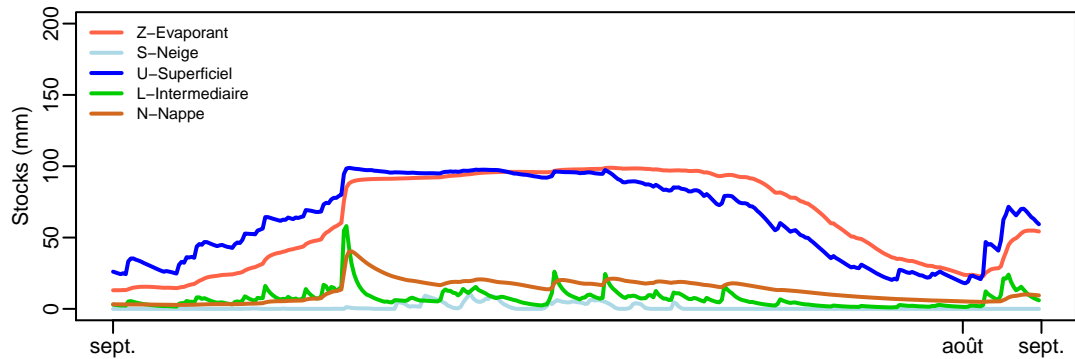

# k0700010 (4974.26 km<sup>2</sup>) – année 2004–2005

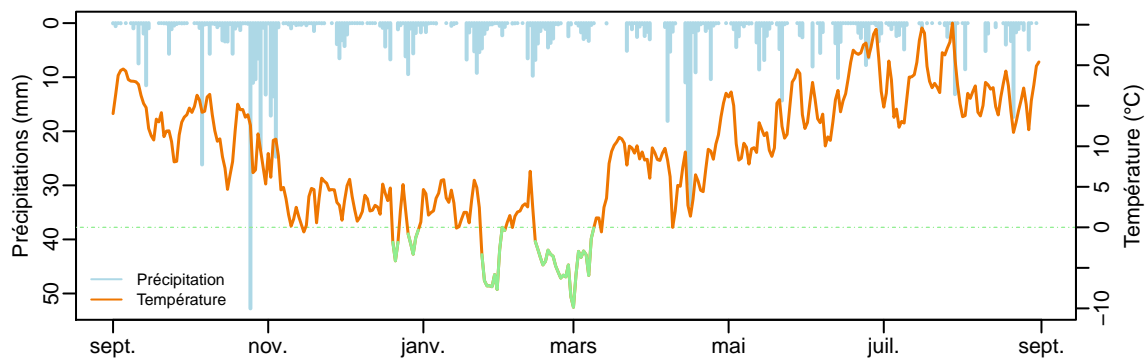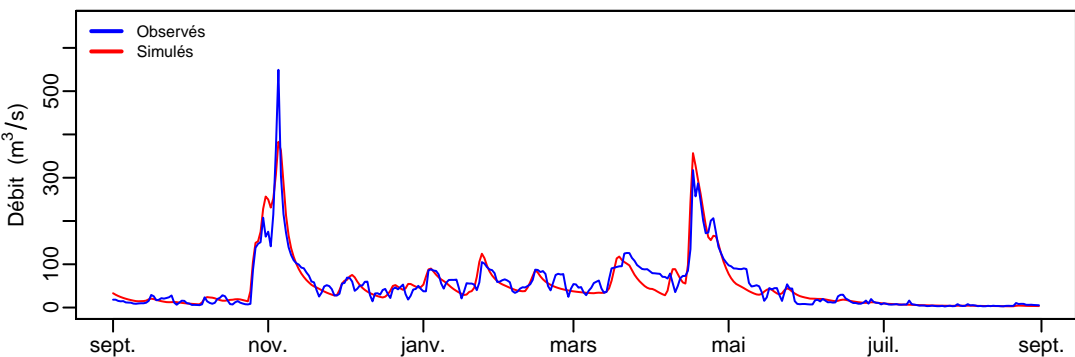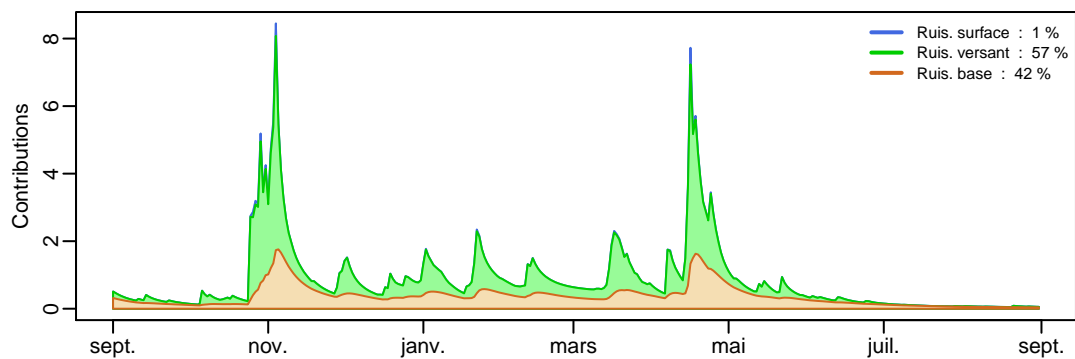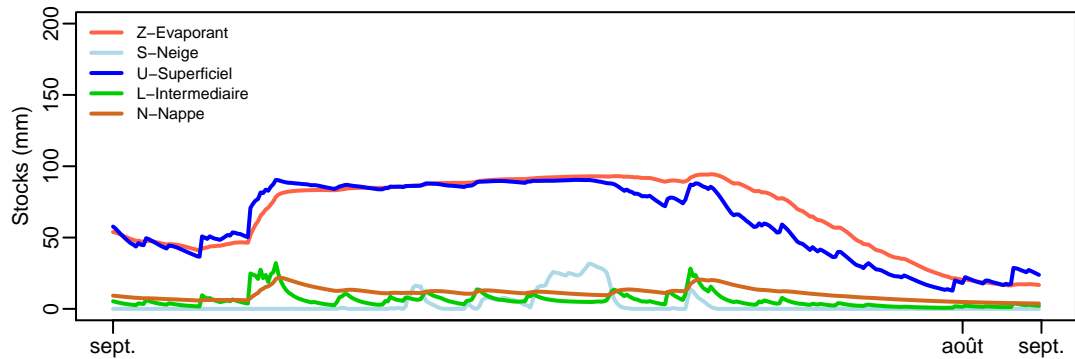

# k0700010 (4974.26 km<sup>2</sup>) – année 2005–2006

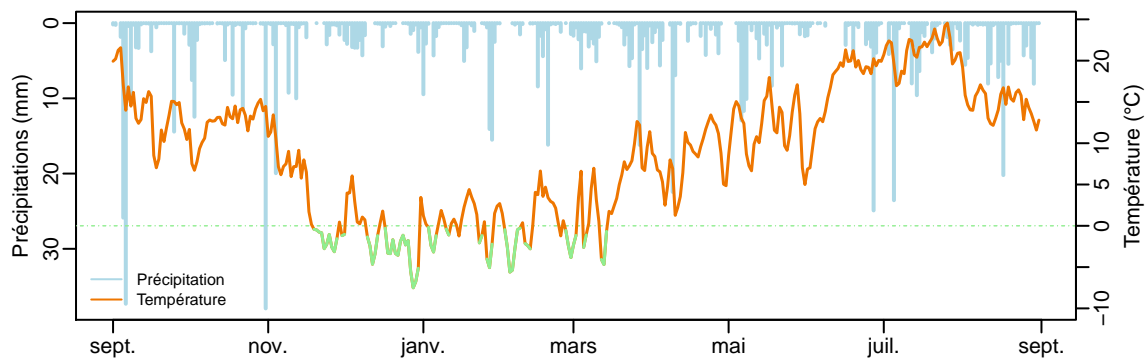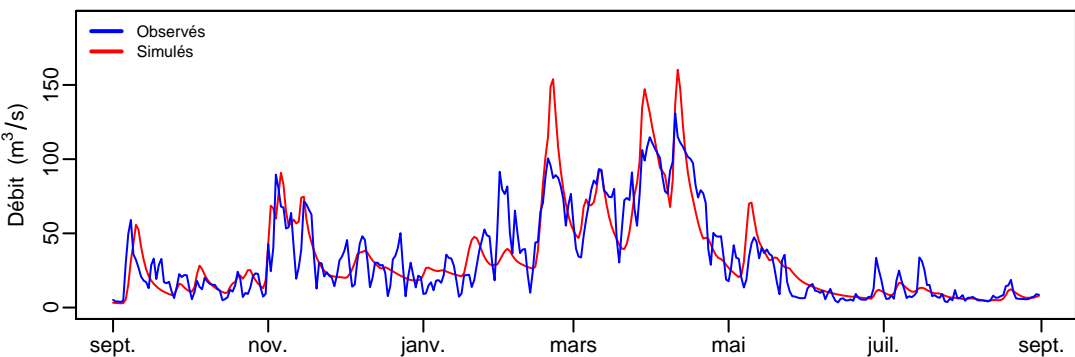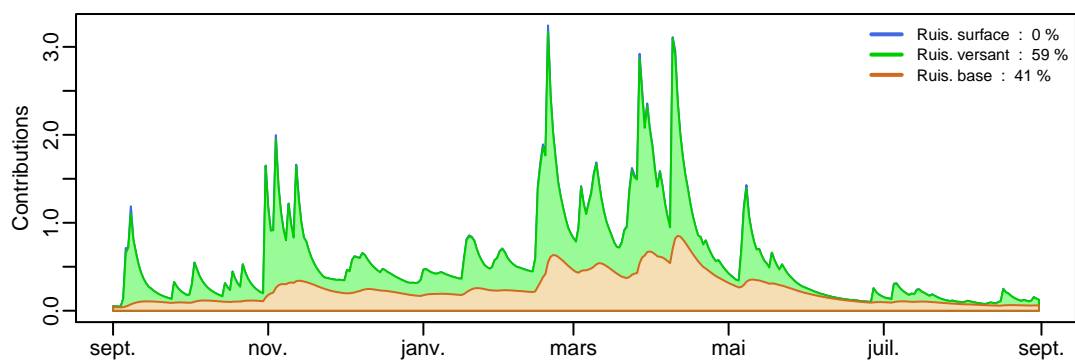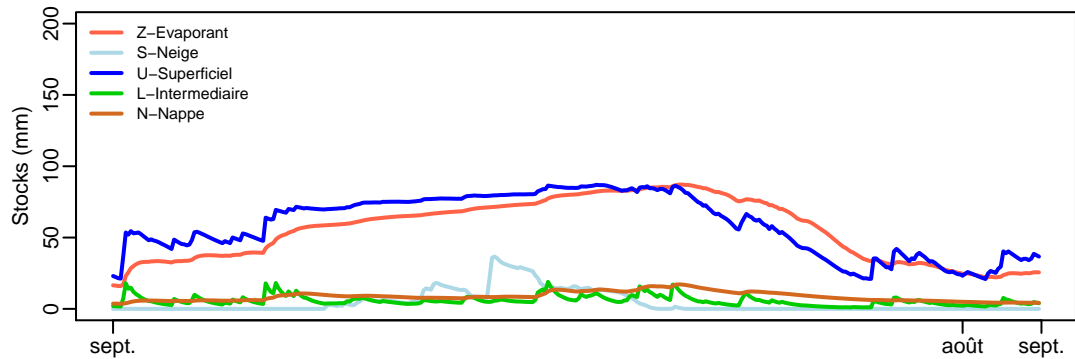

# k0700010 (4974.26 km<sup>2</sup>) – année 2006–2007

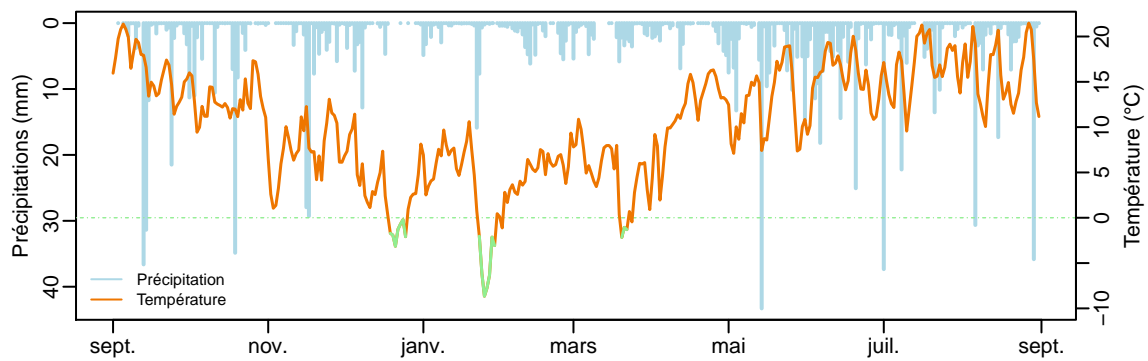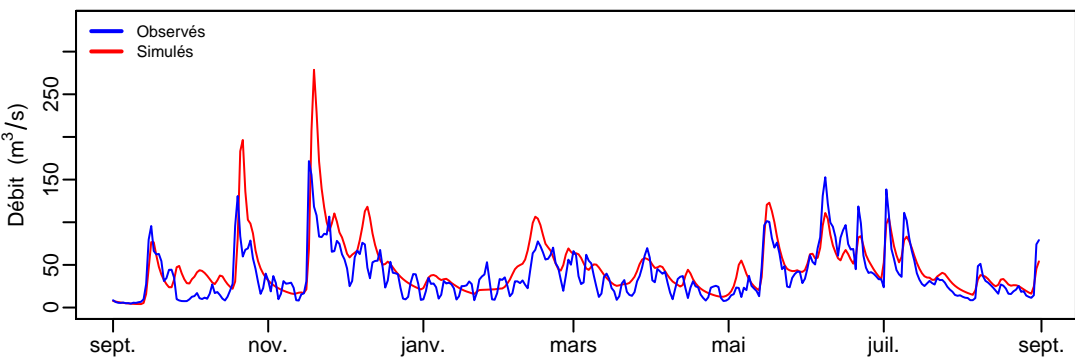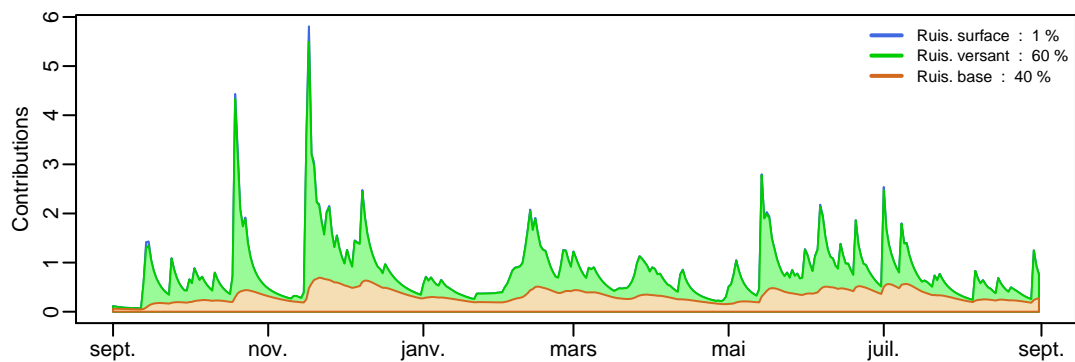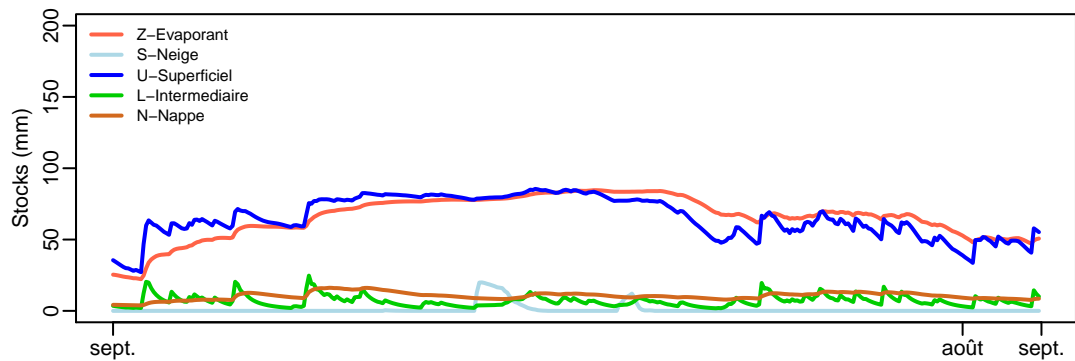

# k0700010 (4974.26 km²) – année 2007–2008

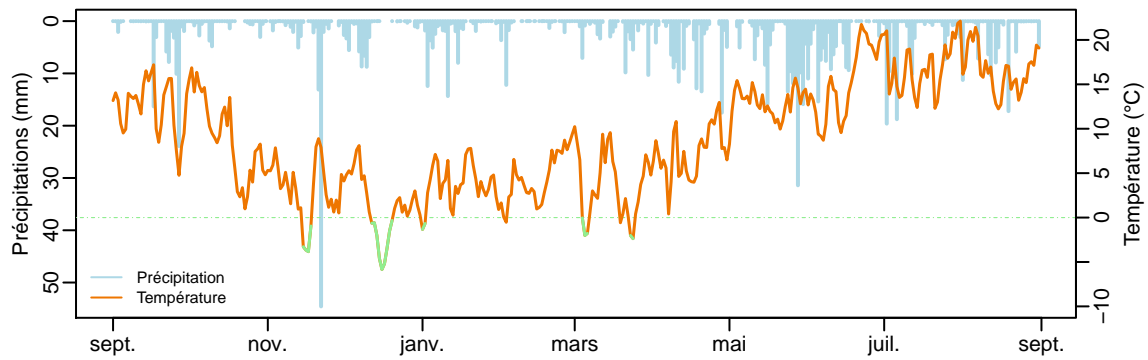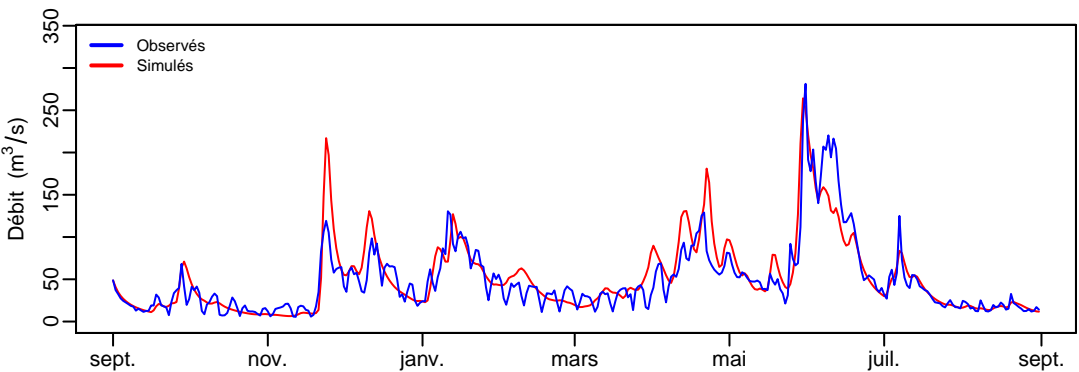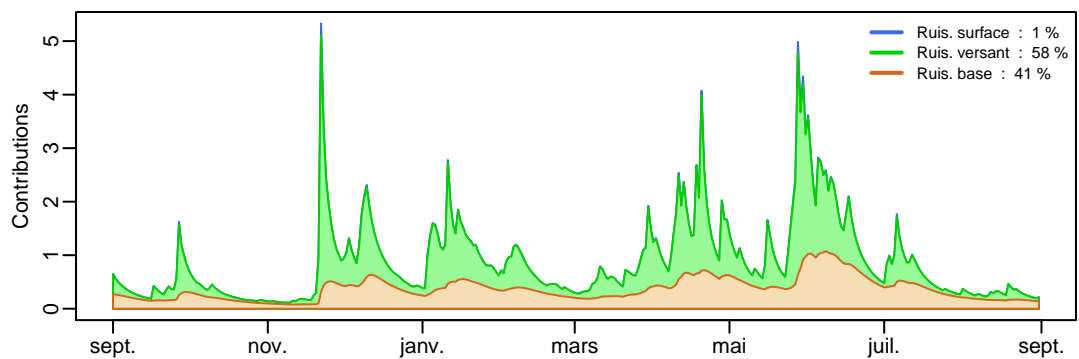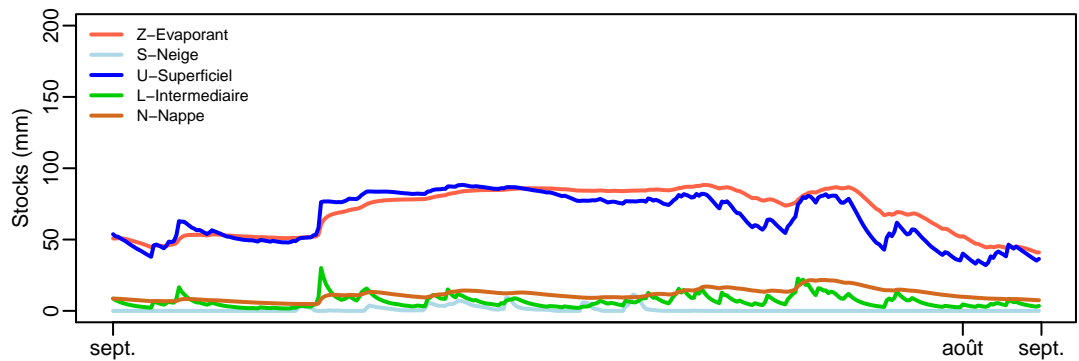

# k0700010 (4974.26 km<sup>2</sup>) – année 2008–2009

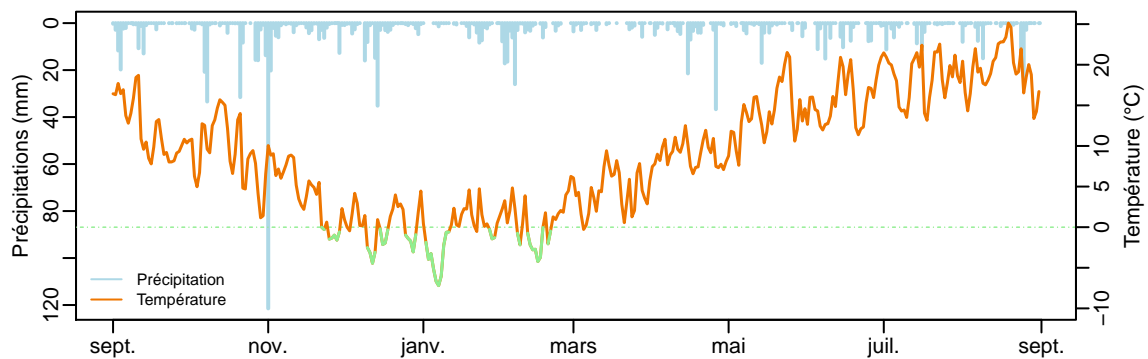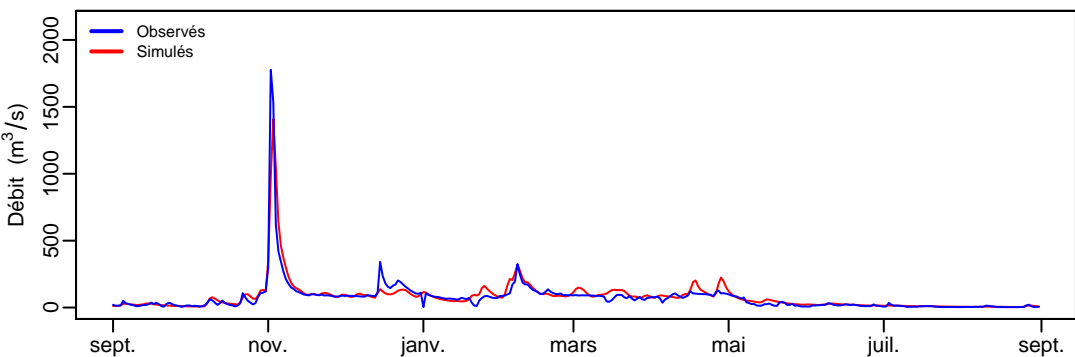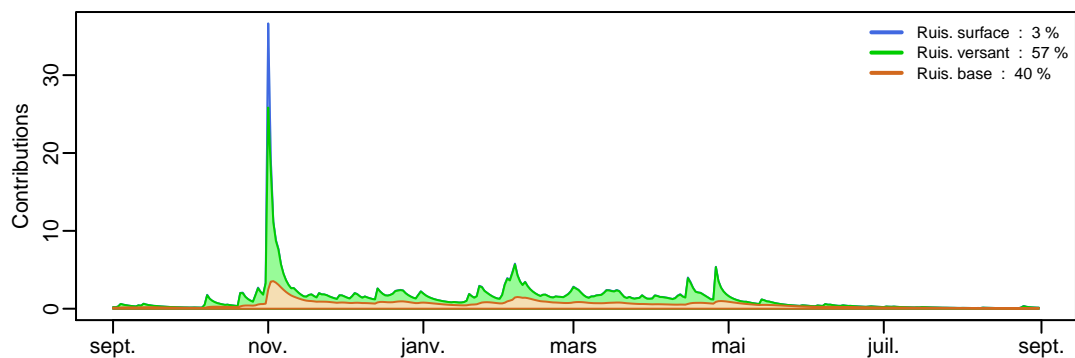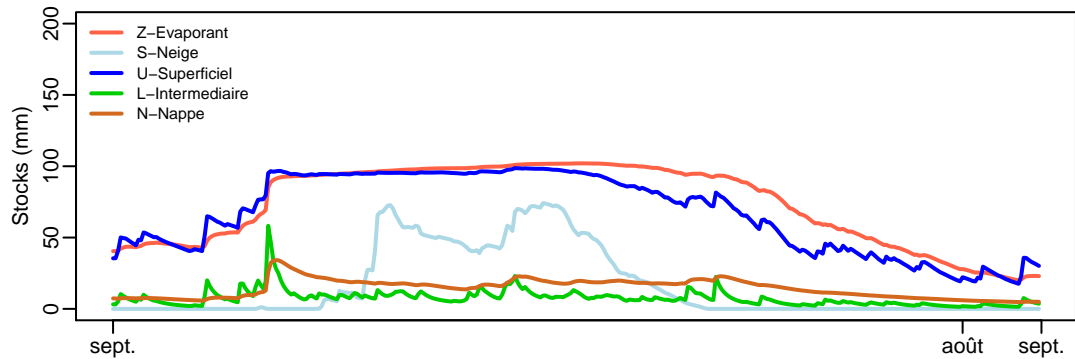

# k0700010 (4974.26 km<sup>2</sup>) – année 2009–2010

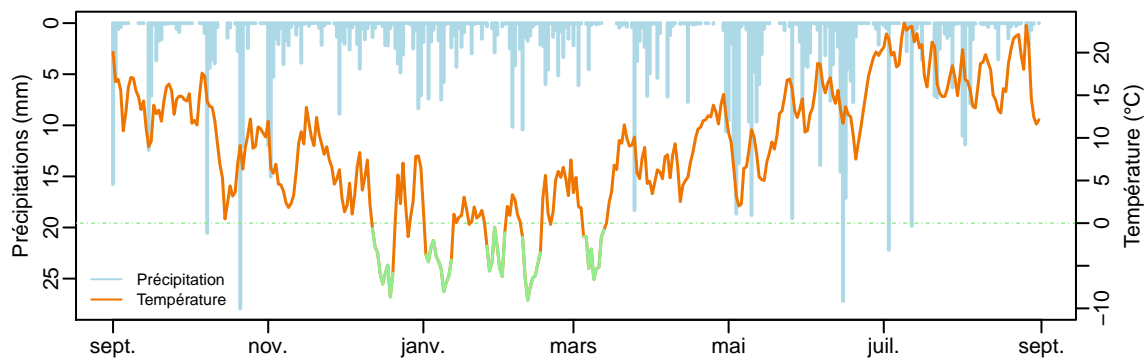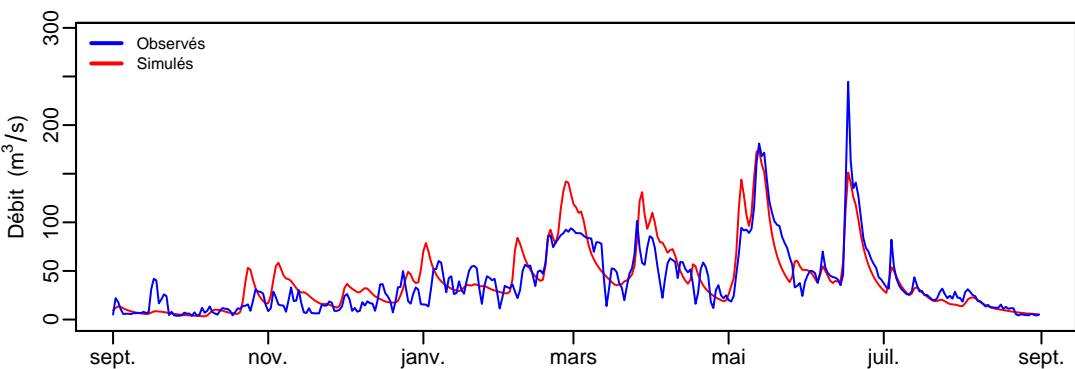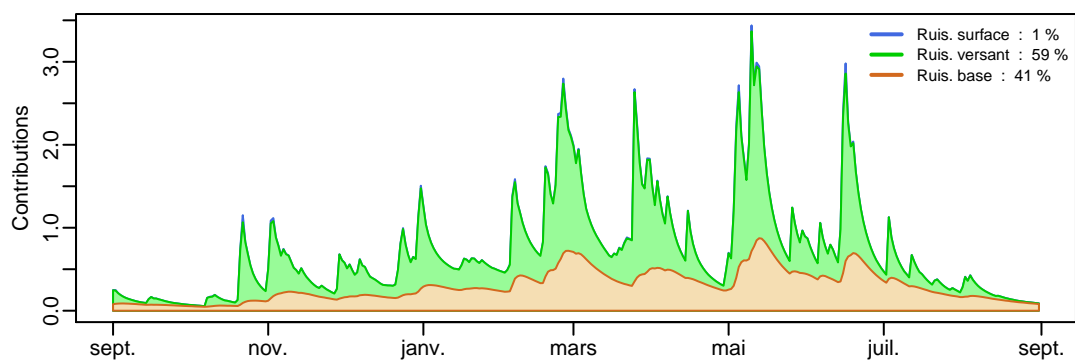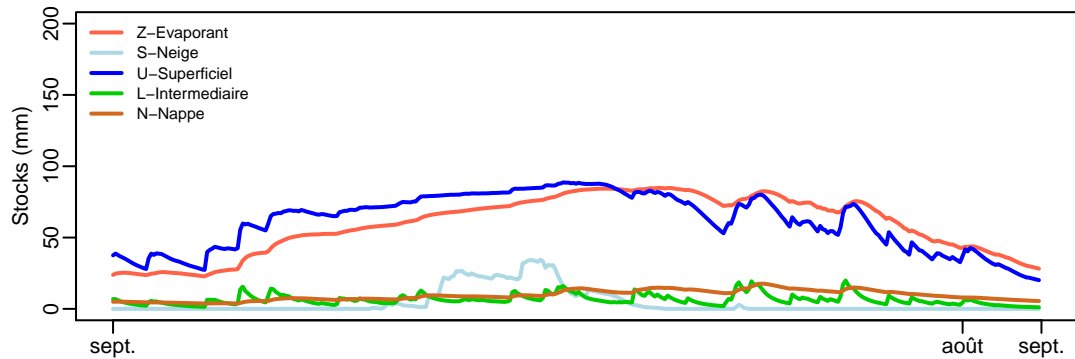



# k0700010 (4974.26 km<sup>2</sup>) – année 2010–2011

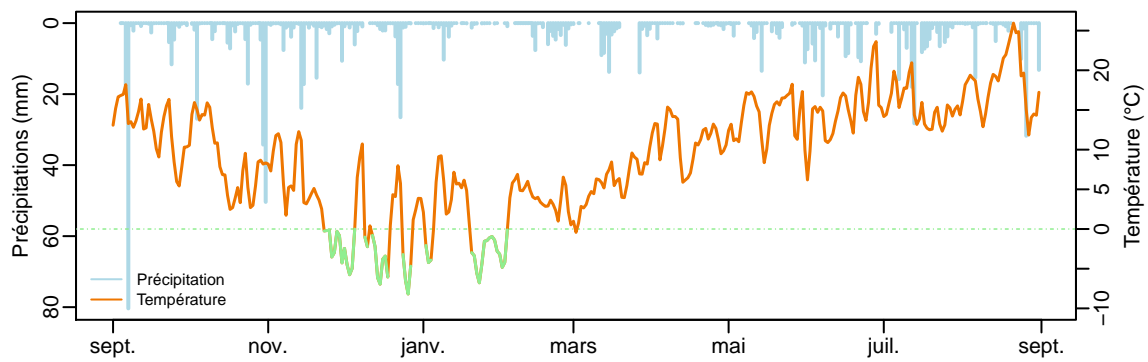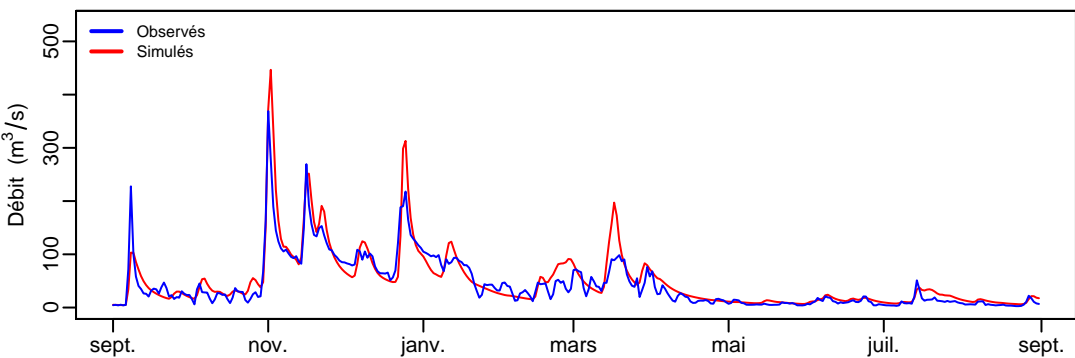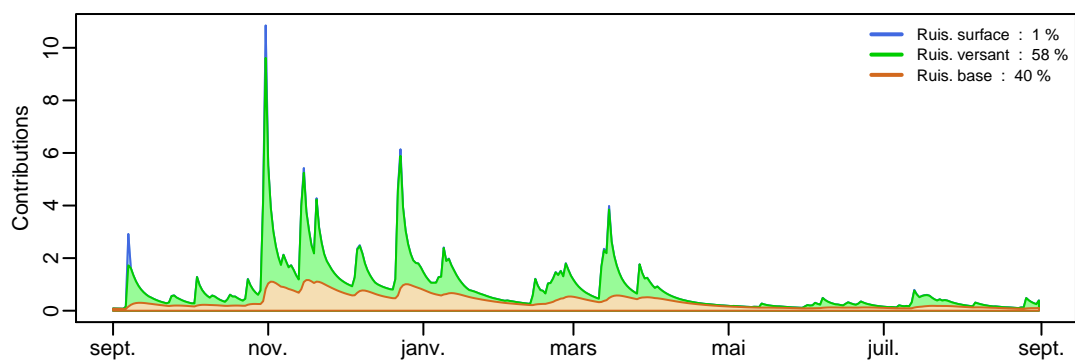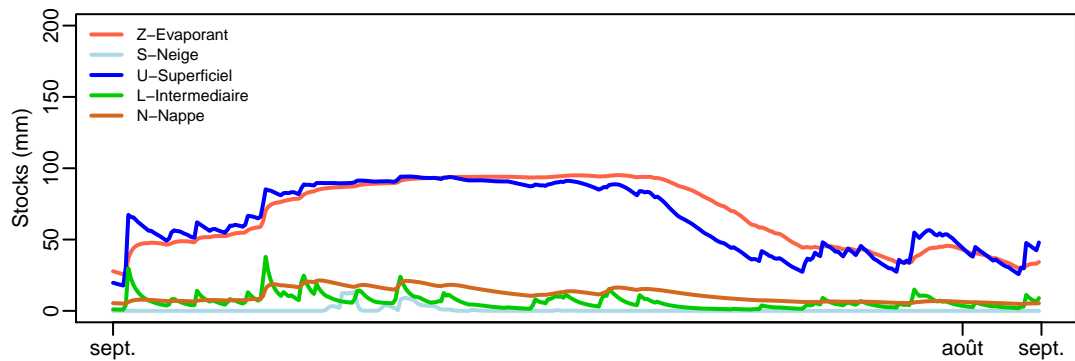

# k0700010 (4974.26 km<sup>2</sup>) – année 2011–2012

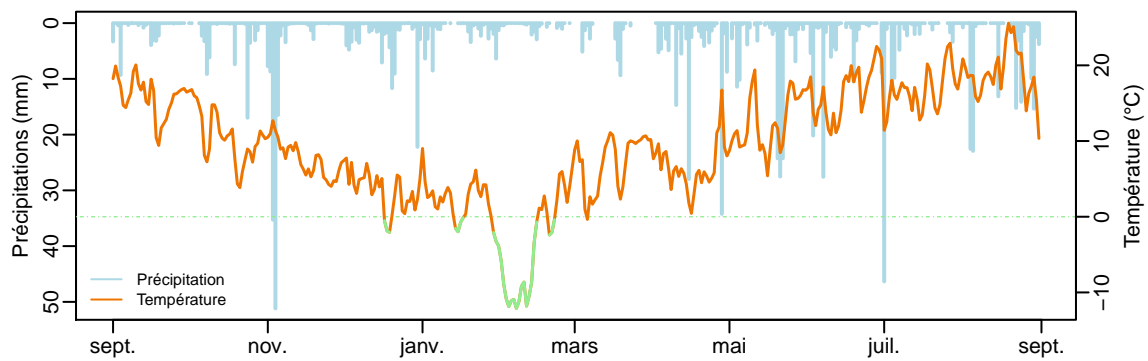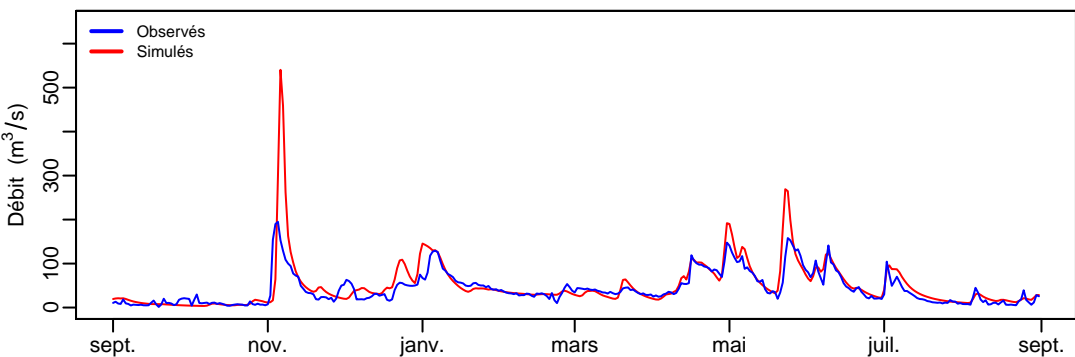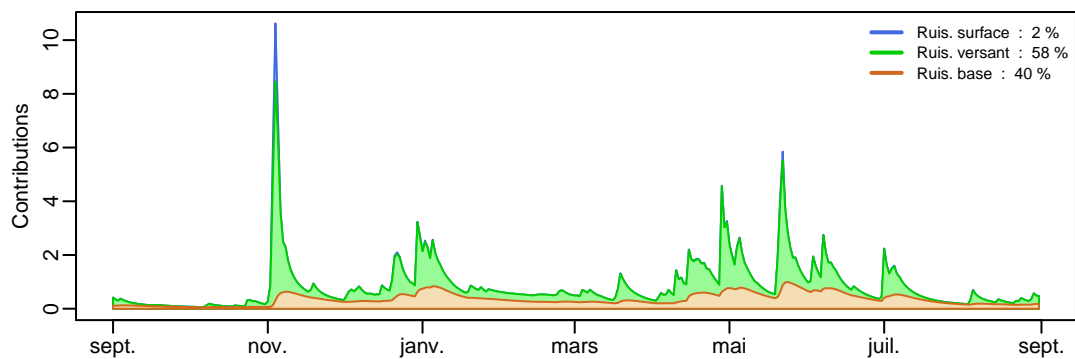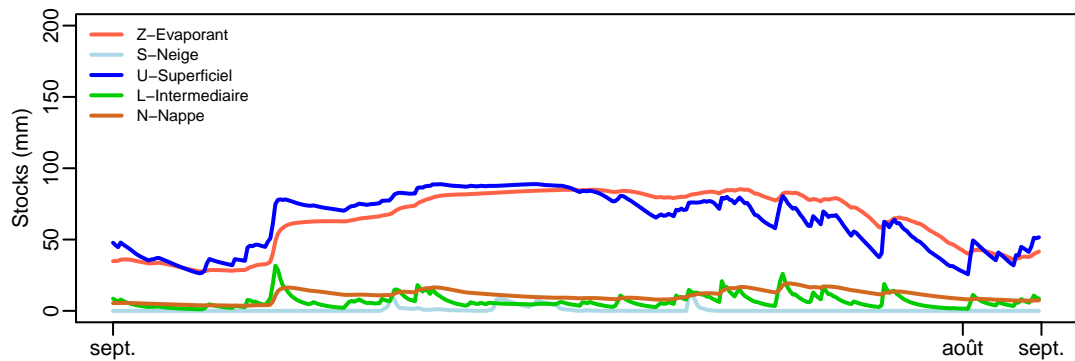

# k0744010 (180.28 km<sup>2</sup>) – année 1993–1994

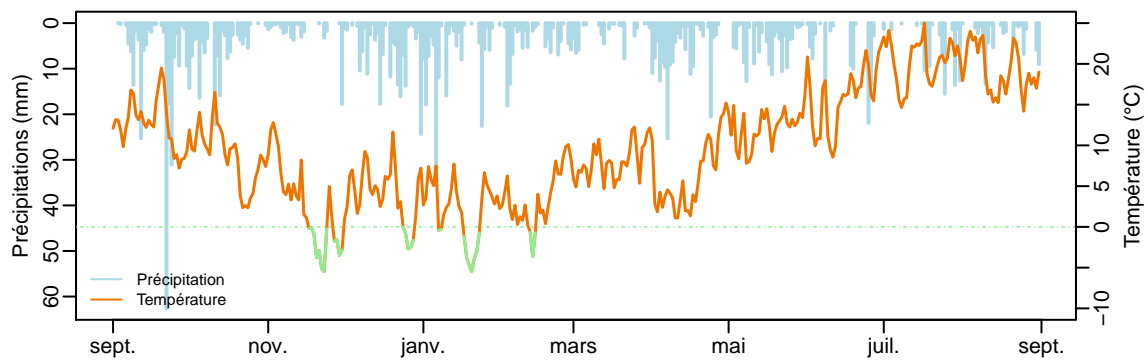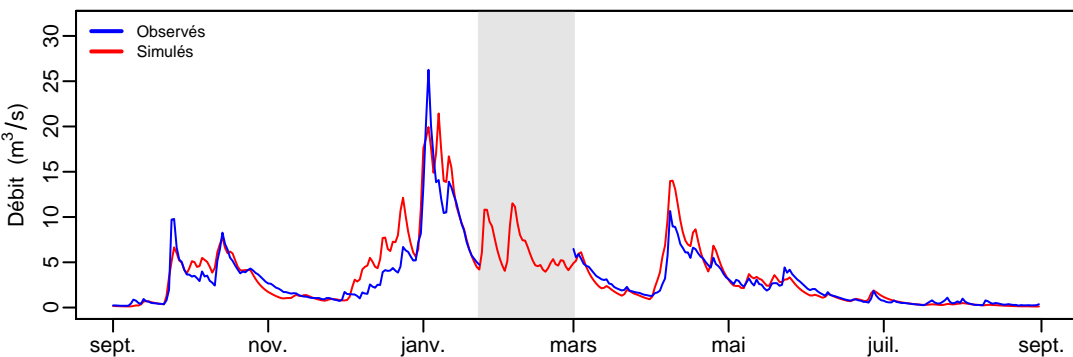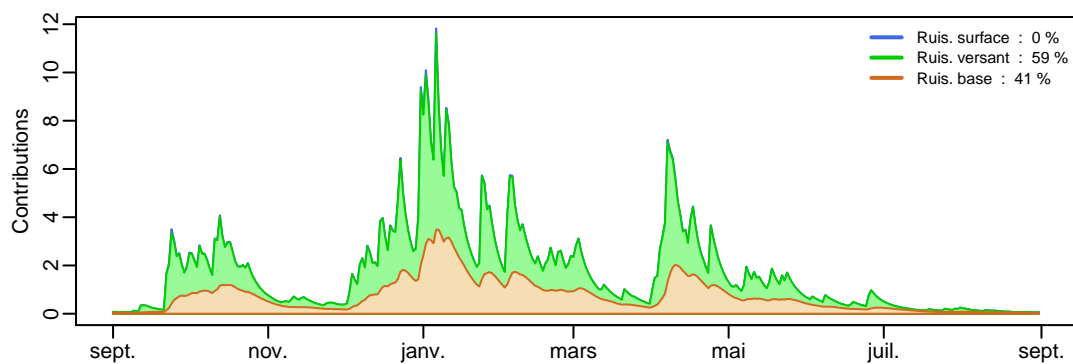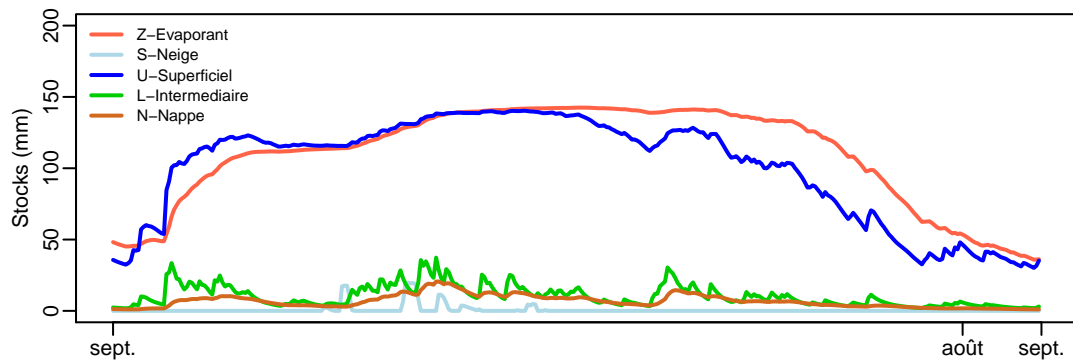

# k0744010 (180.28 km<sup>2</sup>) – année 1994–1995

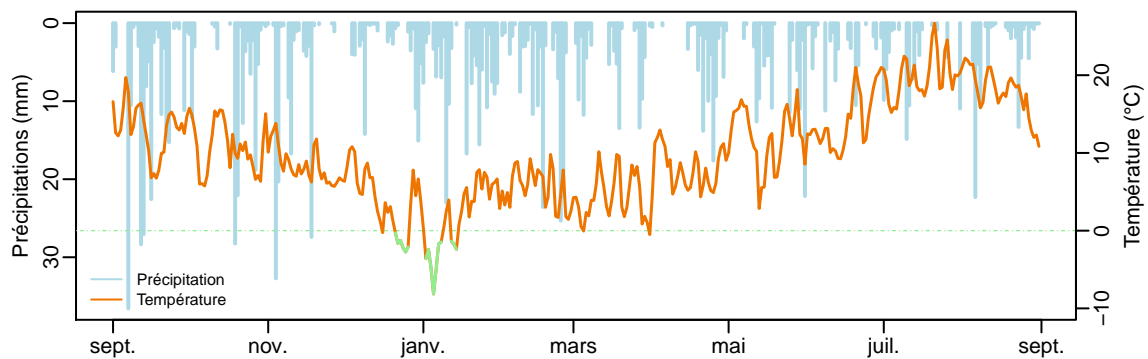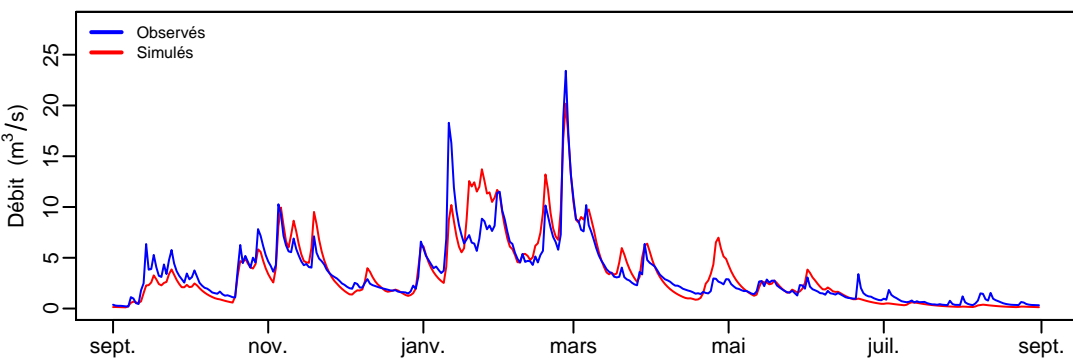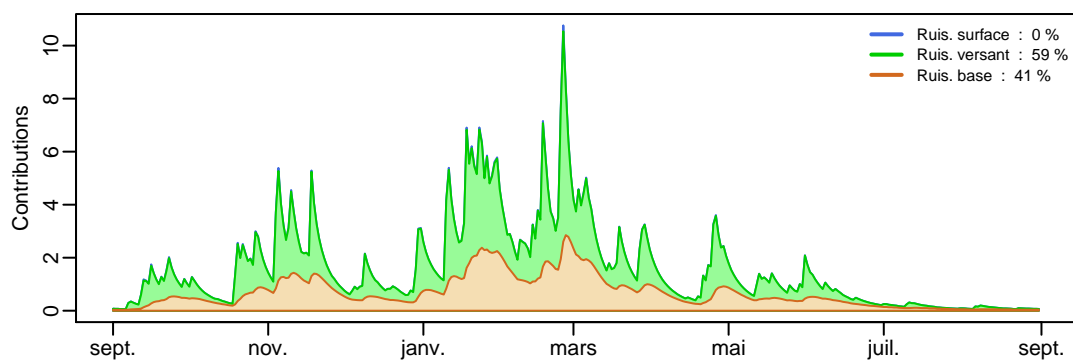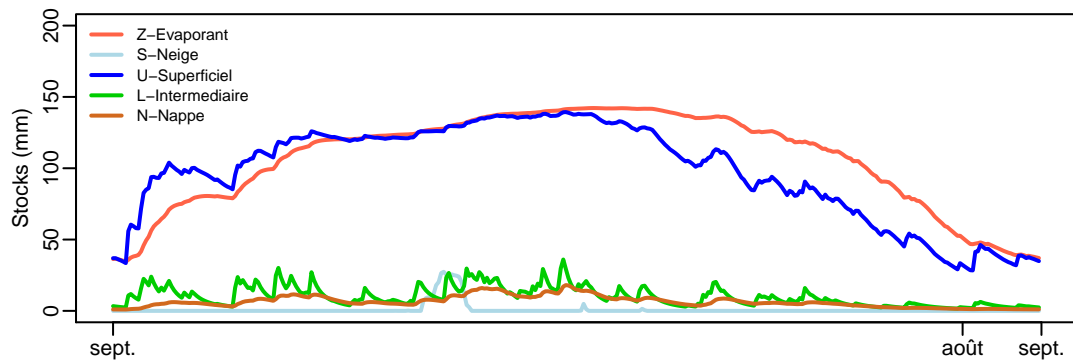

# k0744010 (180.28 km<sup>2</sup>) – année 1995–1996

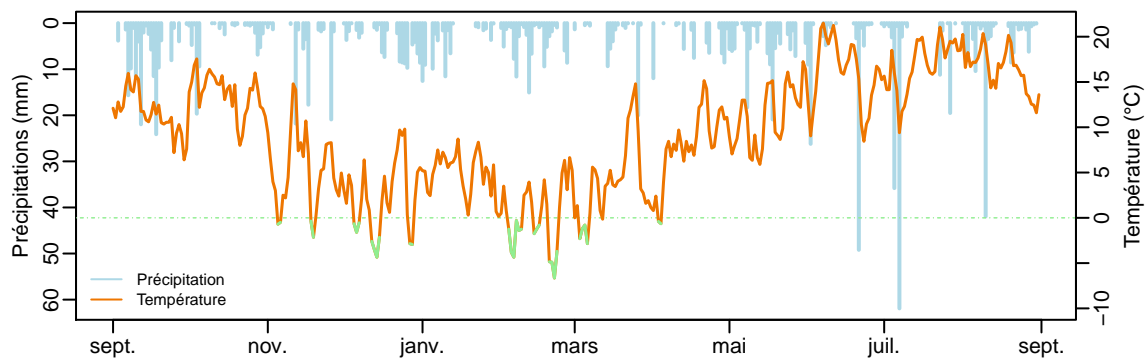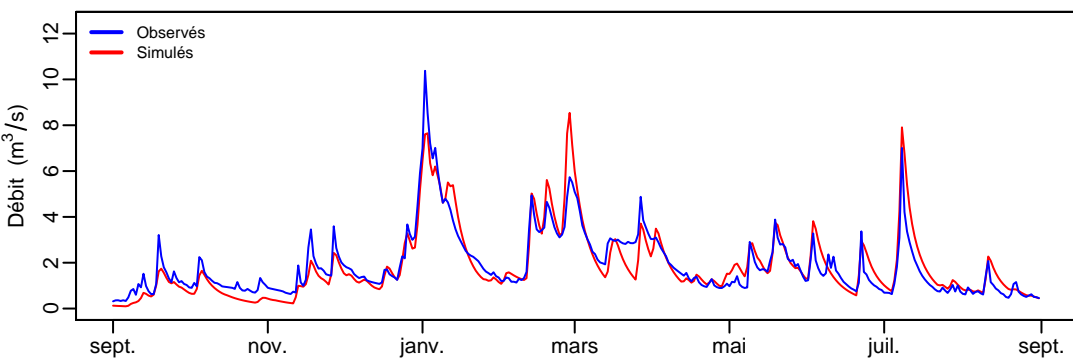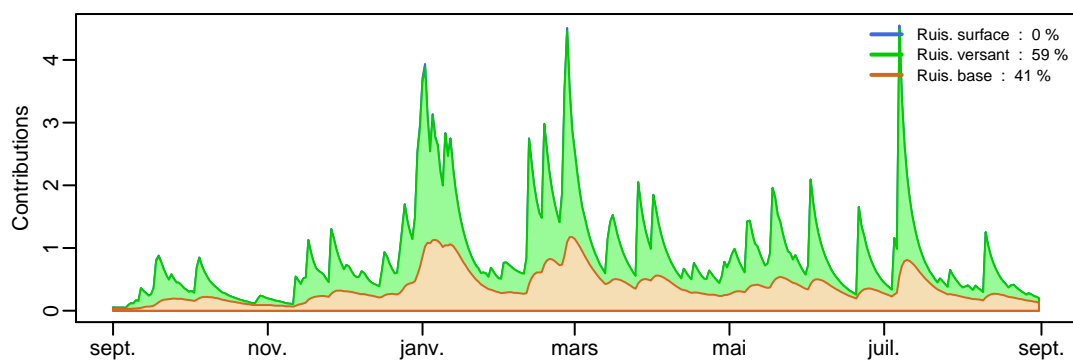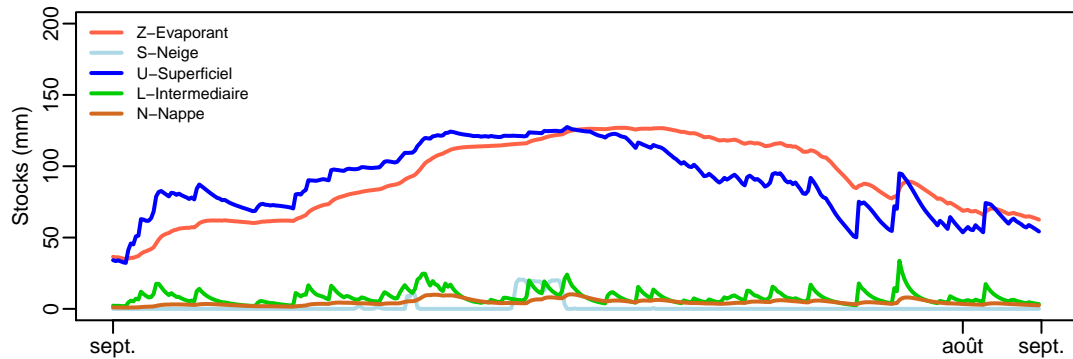

# k0744010 (180.28 km<sup>2</sup>) – année 1996–1997

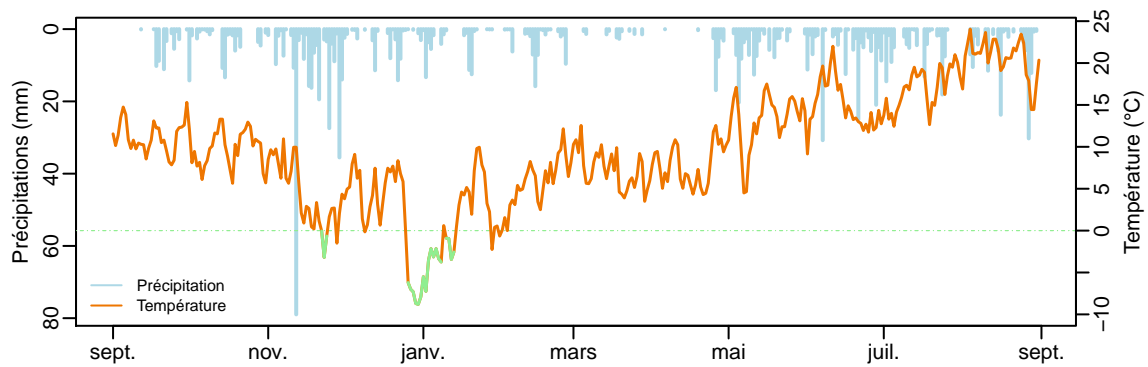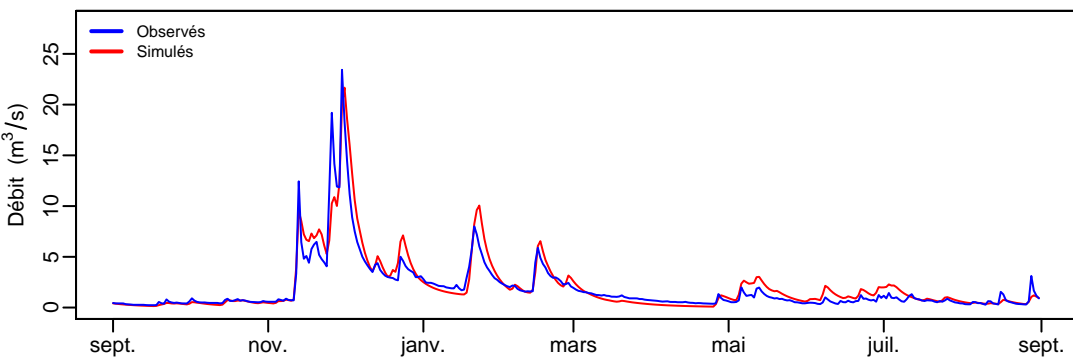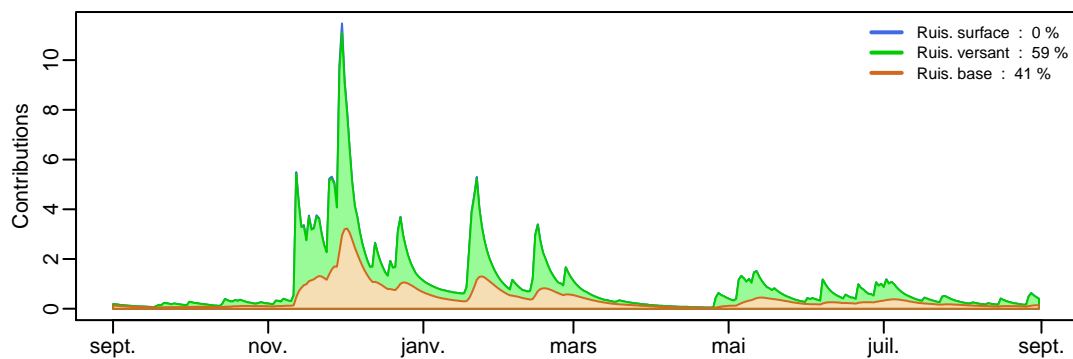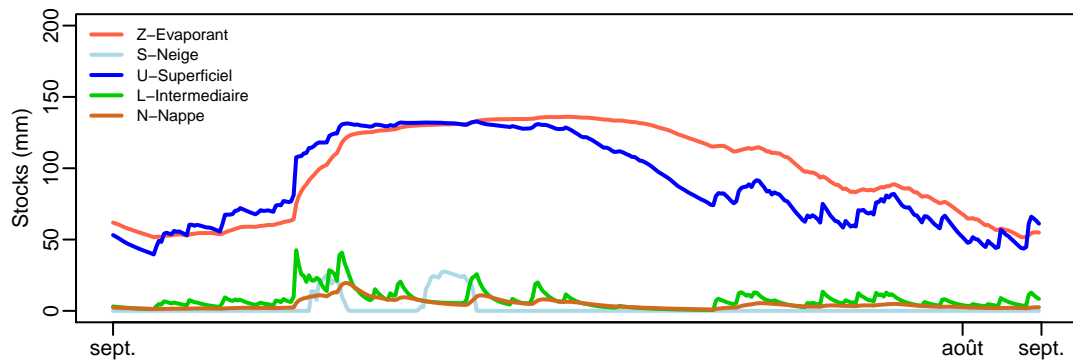

# k0744010 (180.28 km<sup>2</sup>) – année 1997–1998

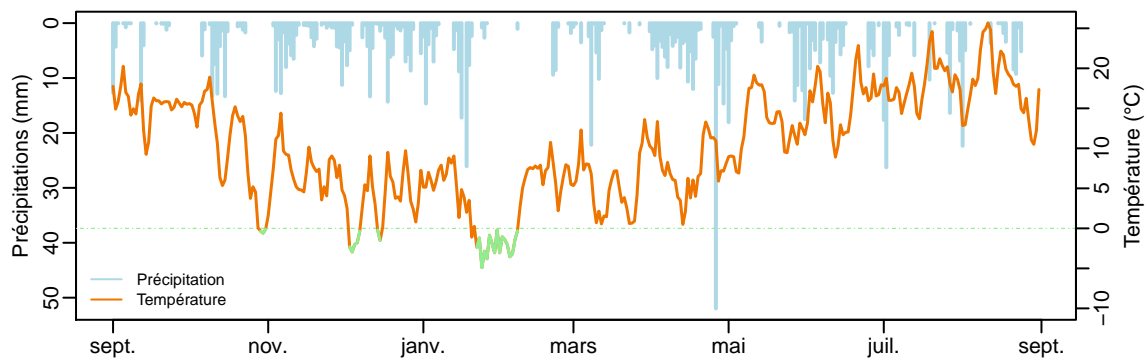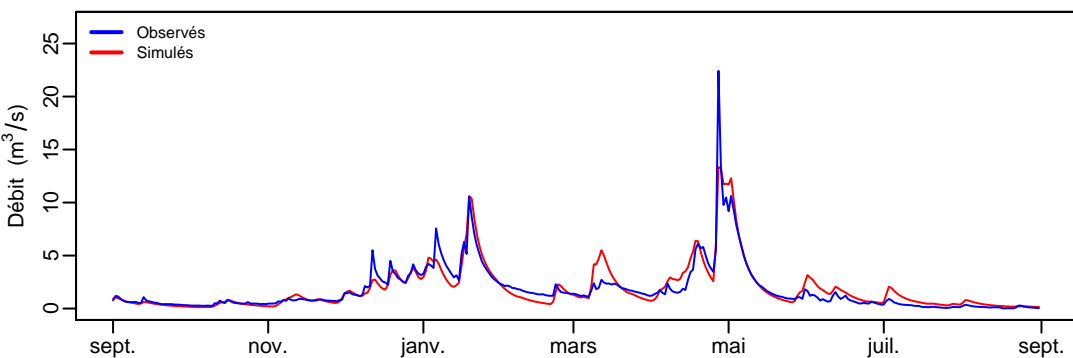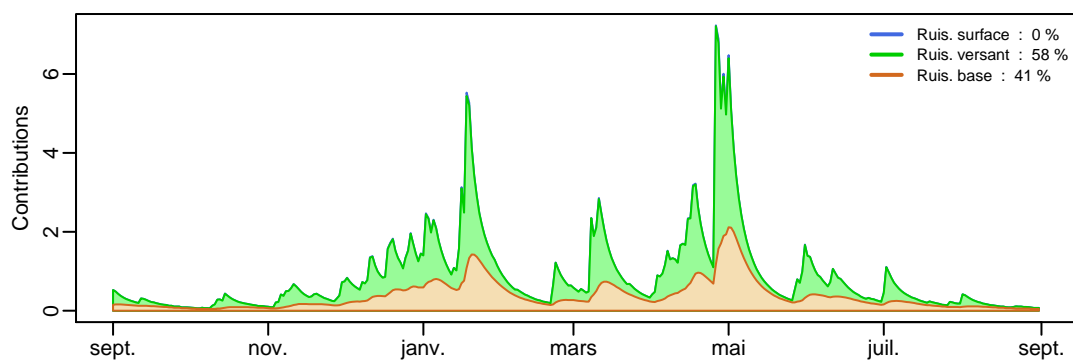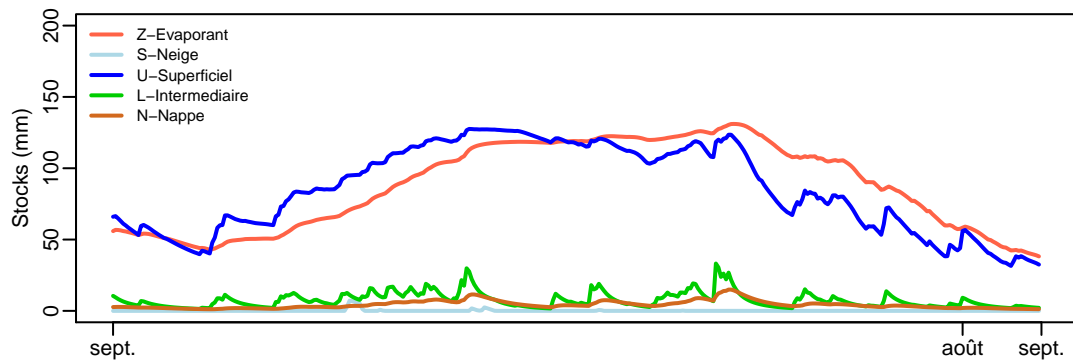

# k0744010 (180.28 km<sup>2</sup>) – année 1998–1999

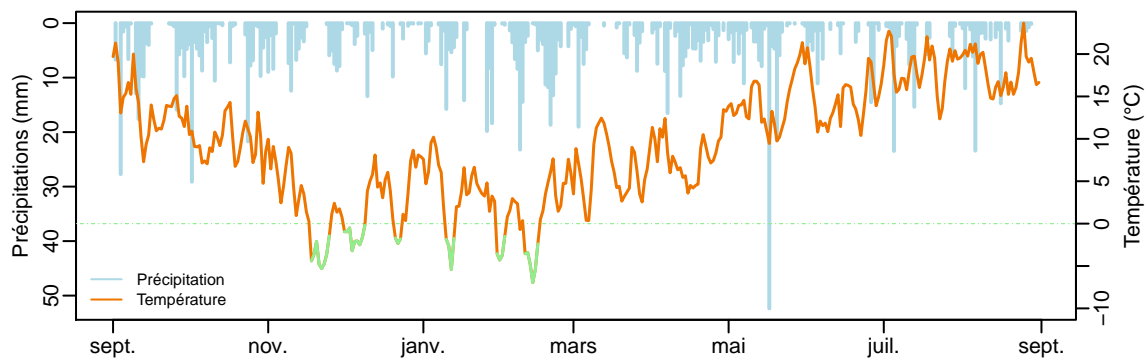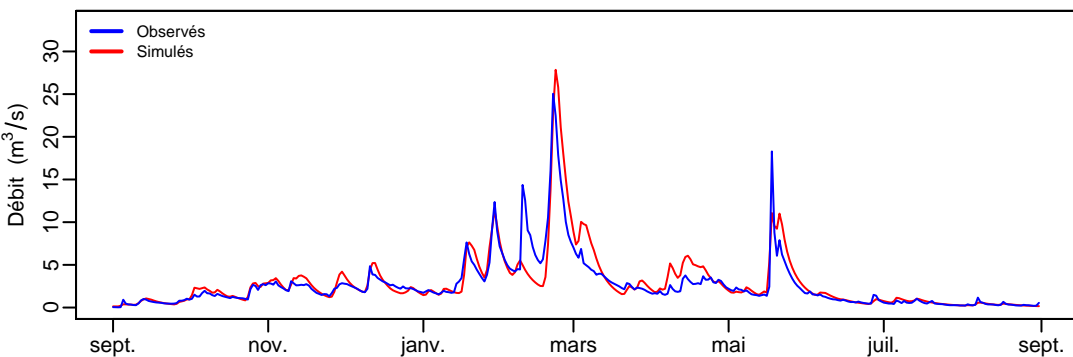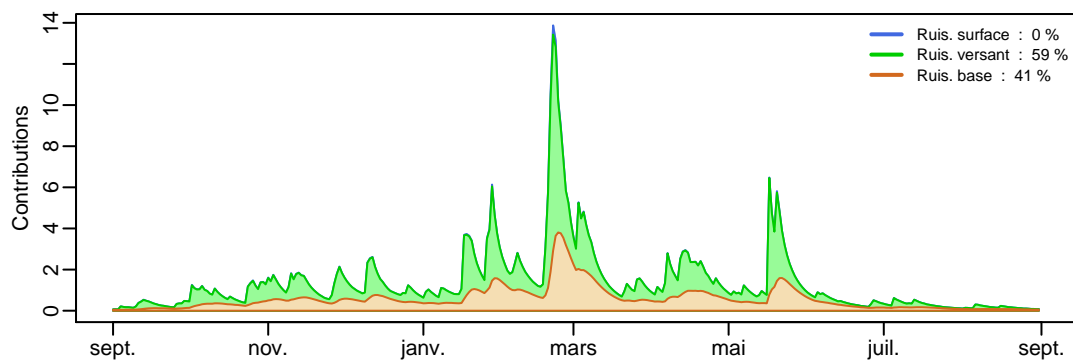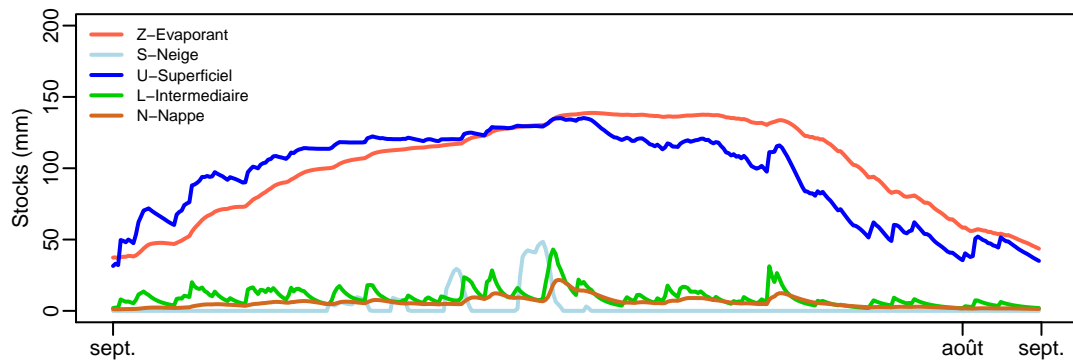



# k0744010 (180.28 km<sup>2</sup>) – année 1999–2000

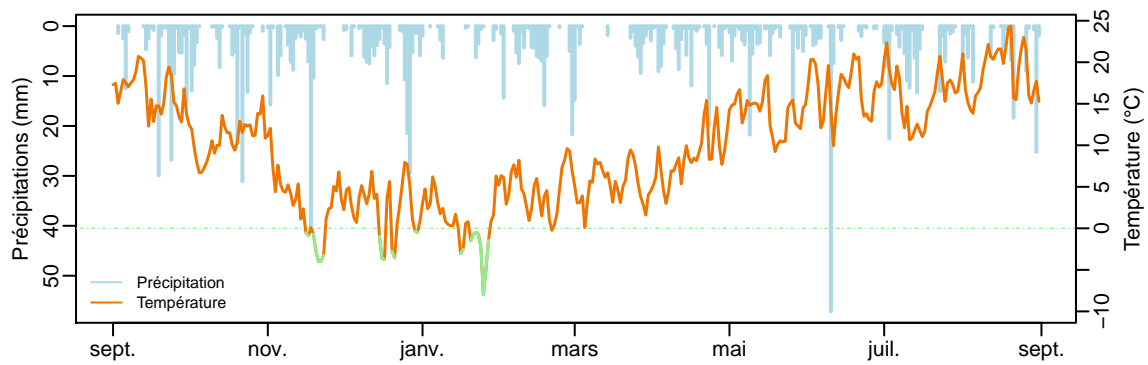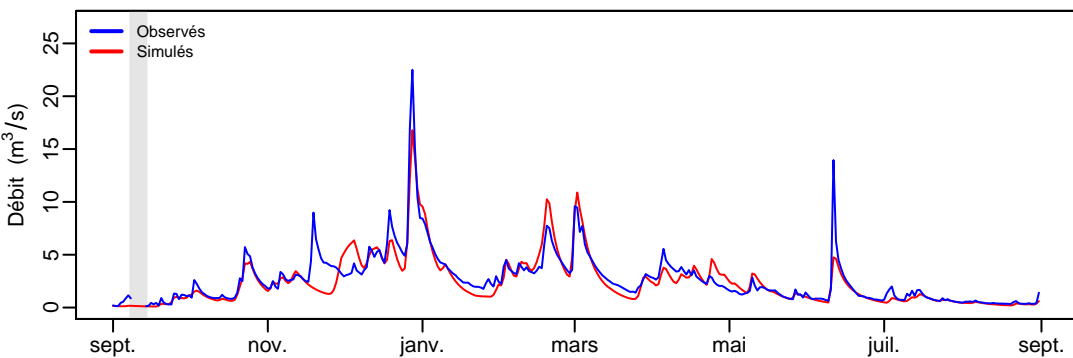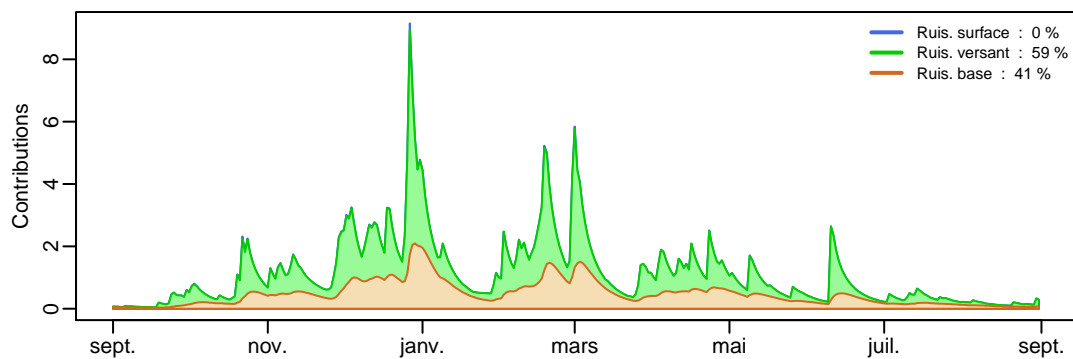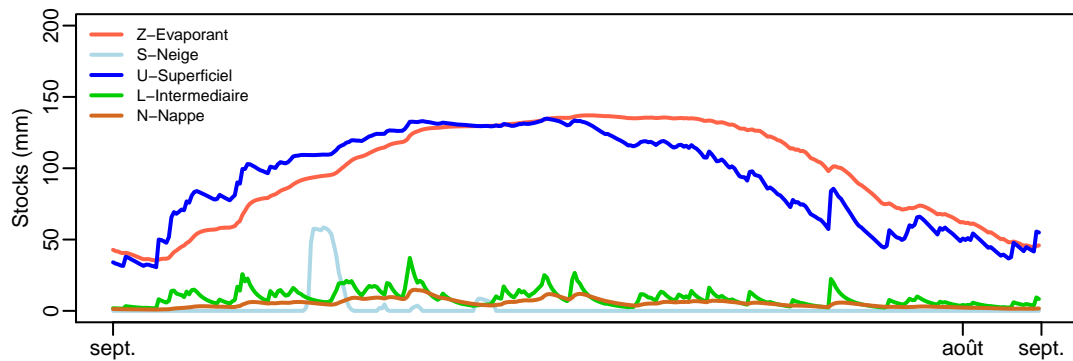

# k0744010 (180.28 km<sup>2</sup>) – année 2000–2001

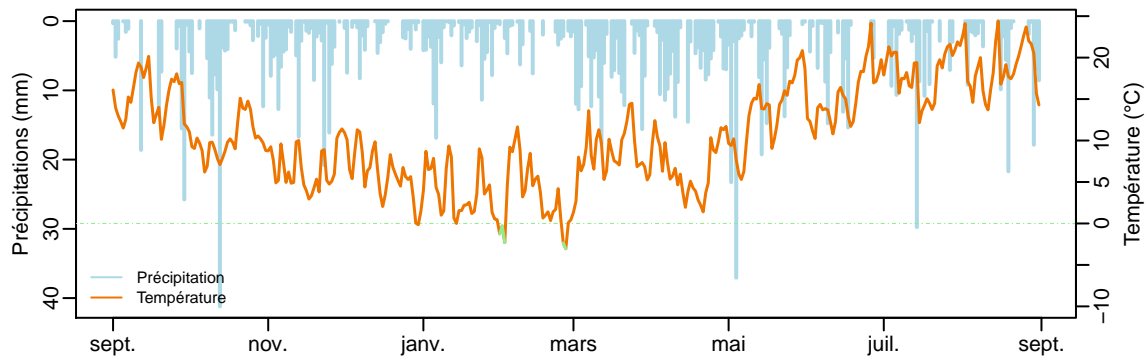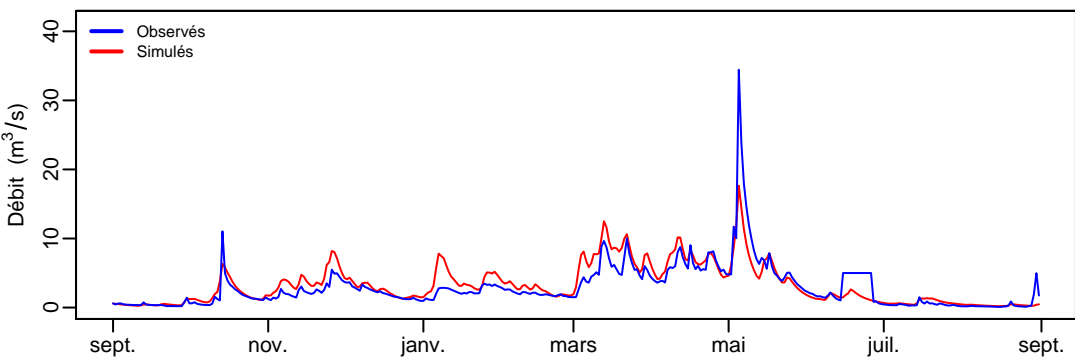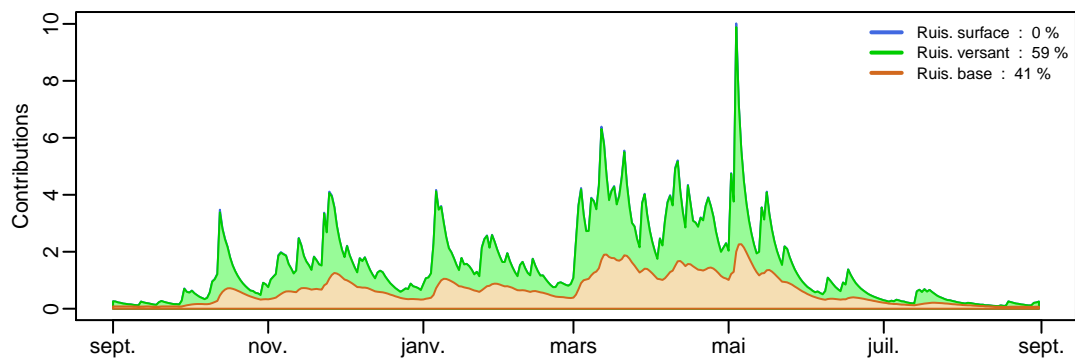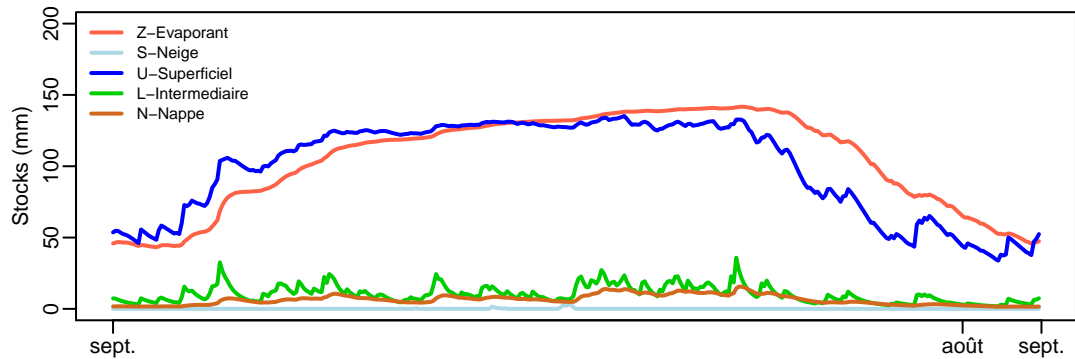

# k0744010 (180.28 km<sup>2</sup>) – année 2001–2002

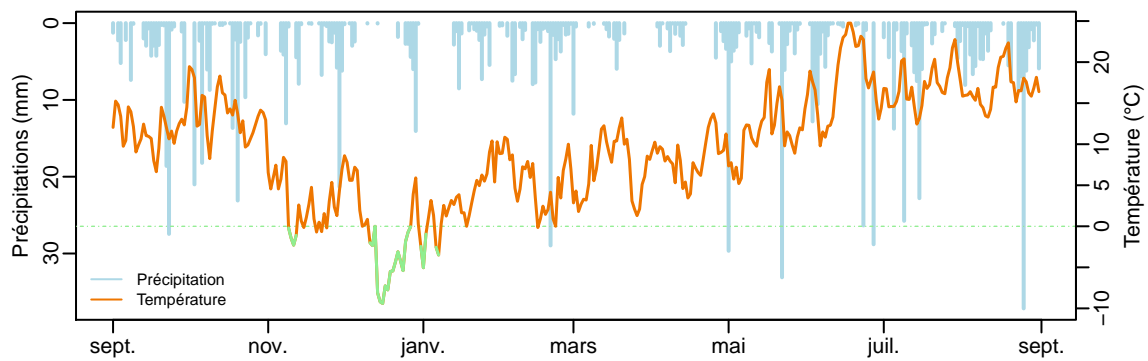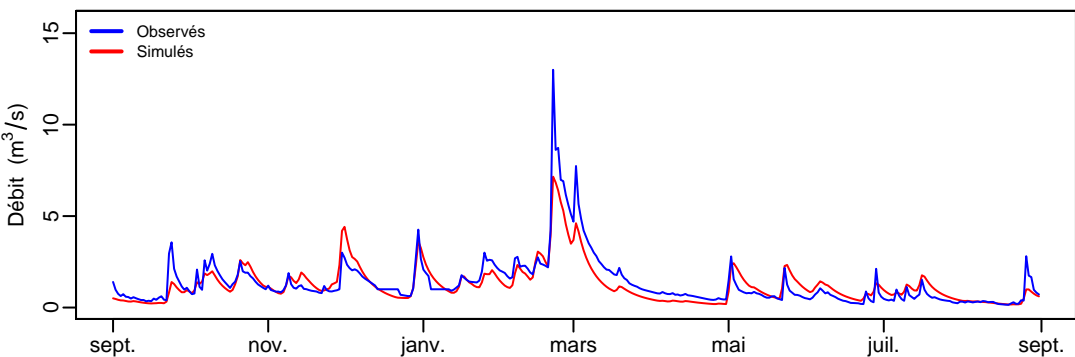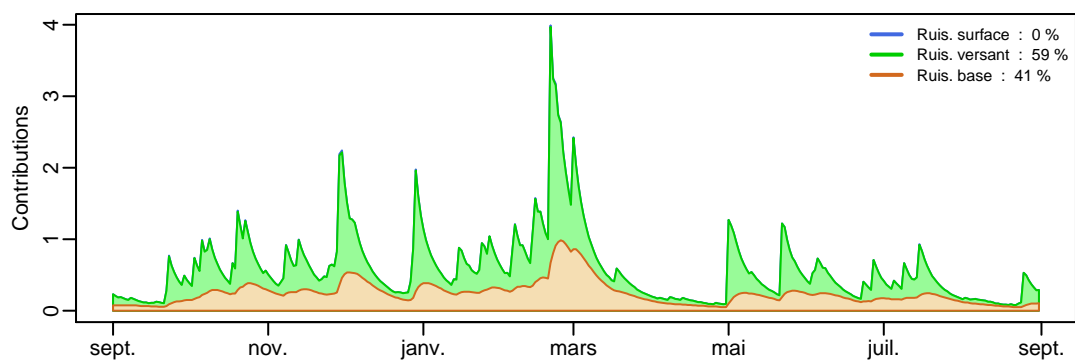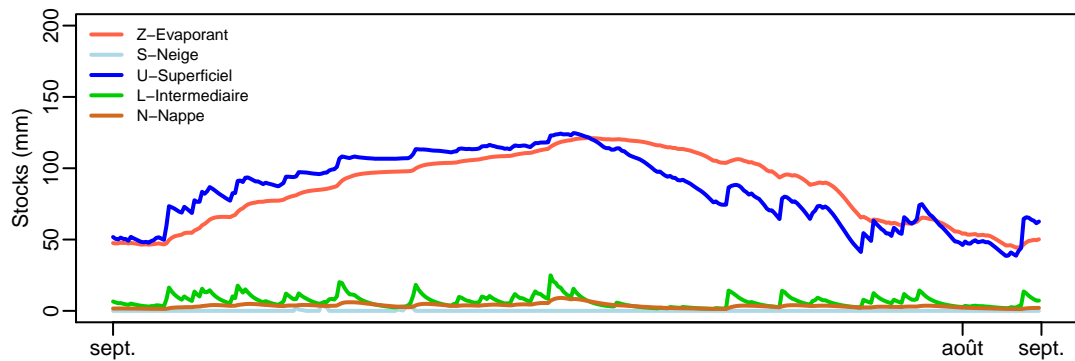

# k0744010 (180.28 km<sup>2</sup>) – année 2002–2003

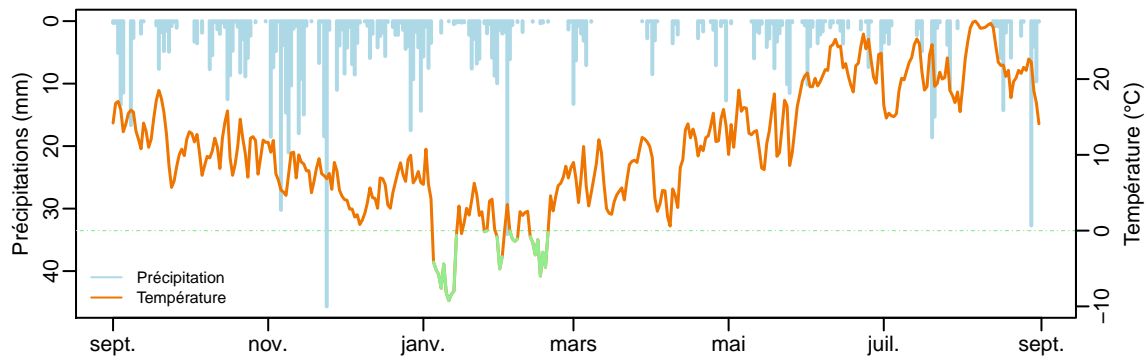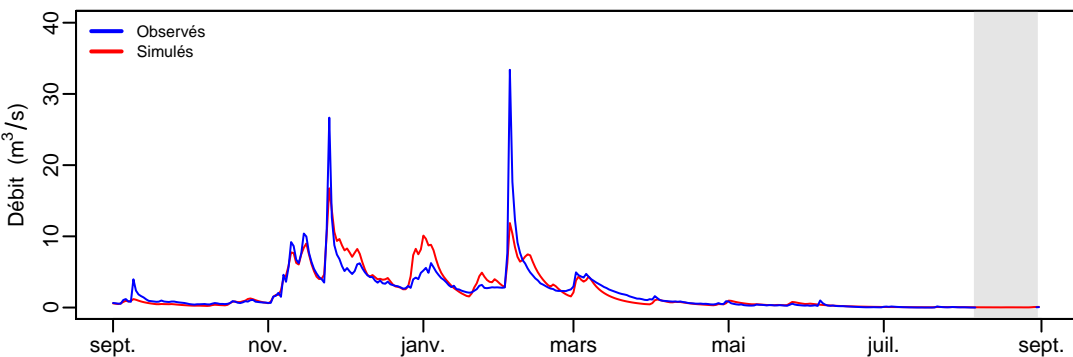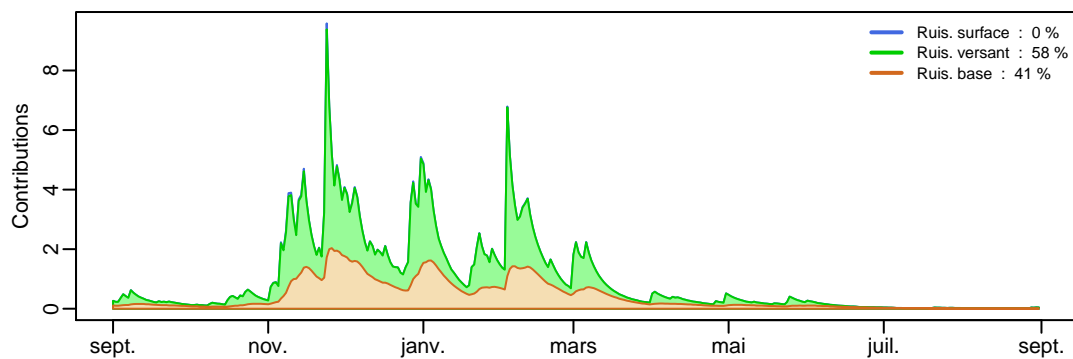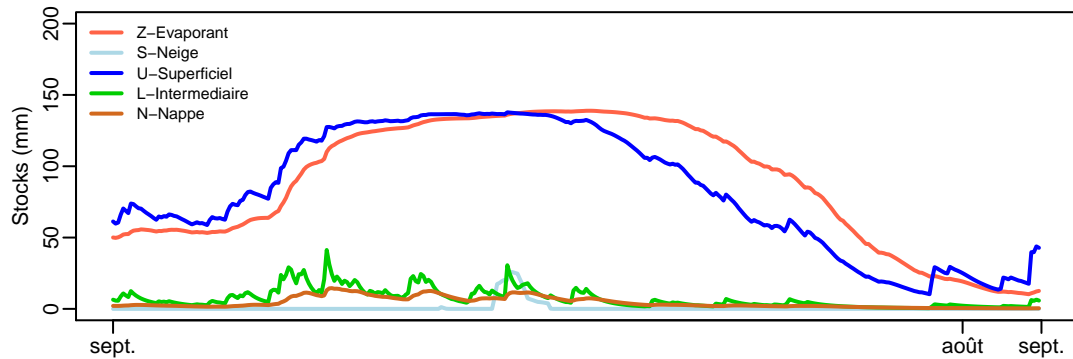

# k0744010 (180.28 km<sup>2</sup>) – année 2003–2004

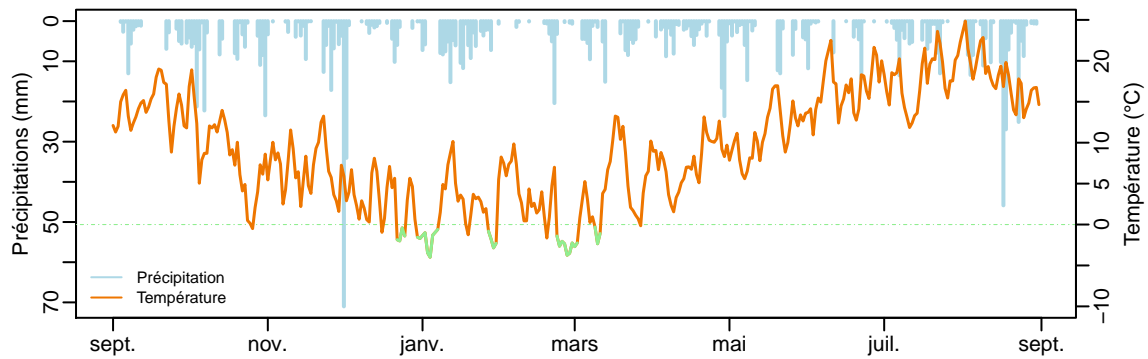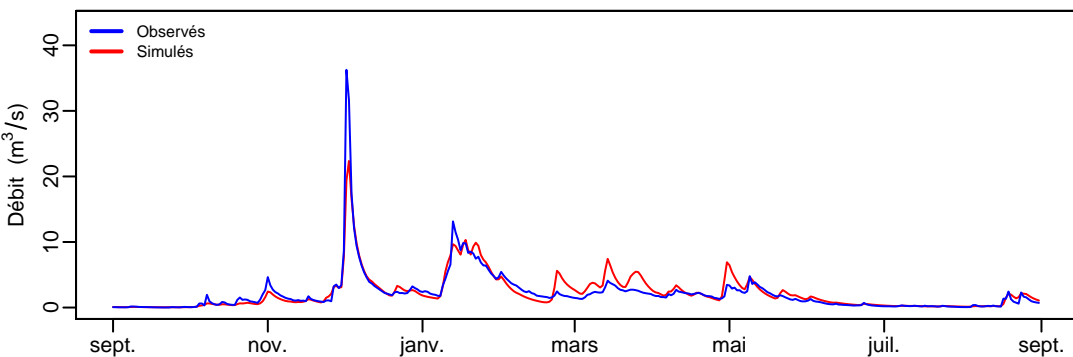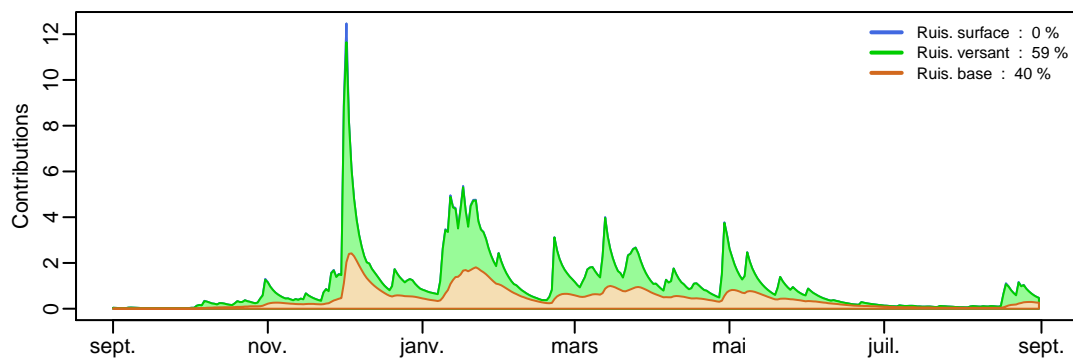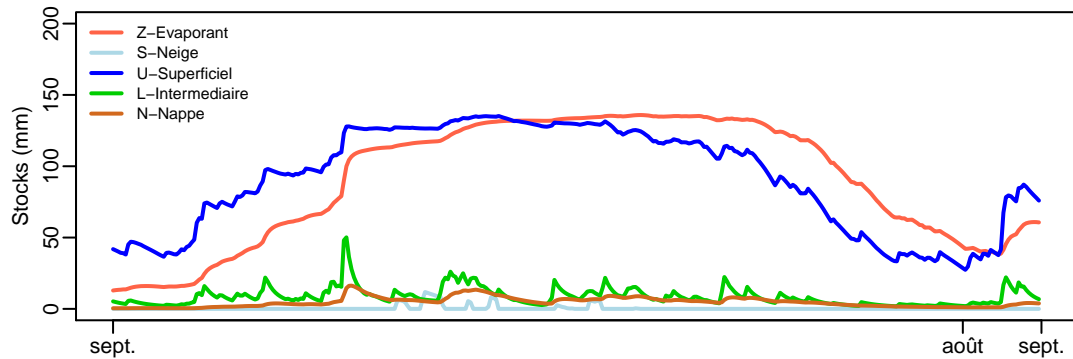

# k0744010 (180.28 km<sup>2</sup>) – année 2004–2005

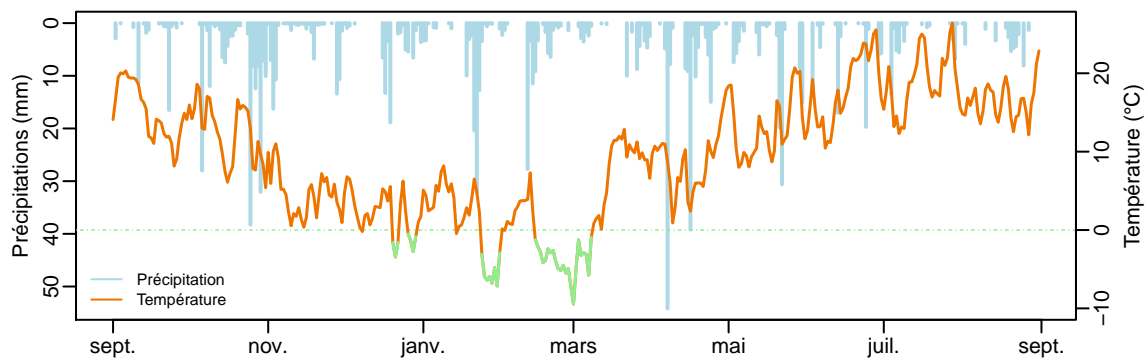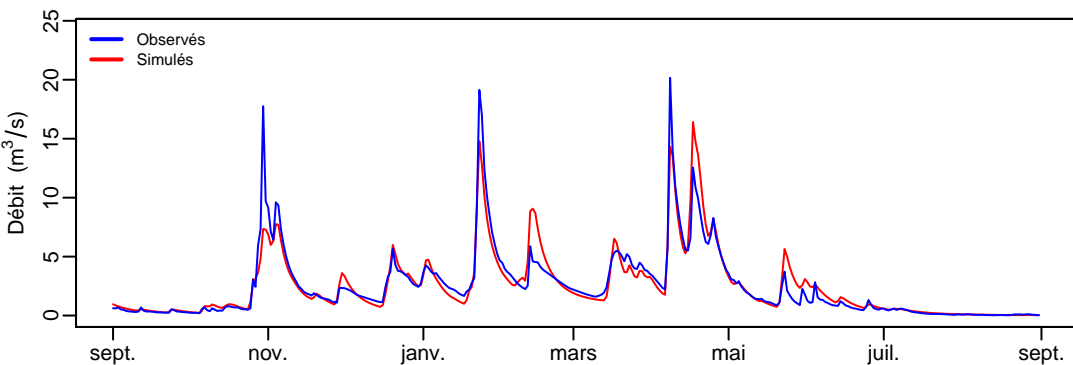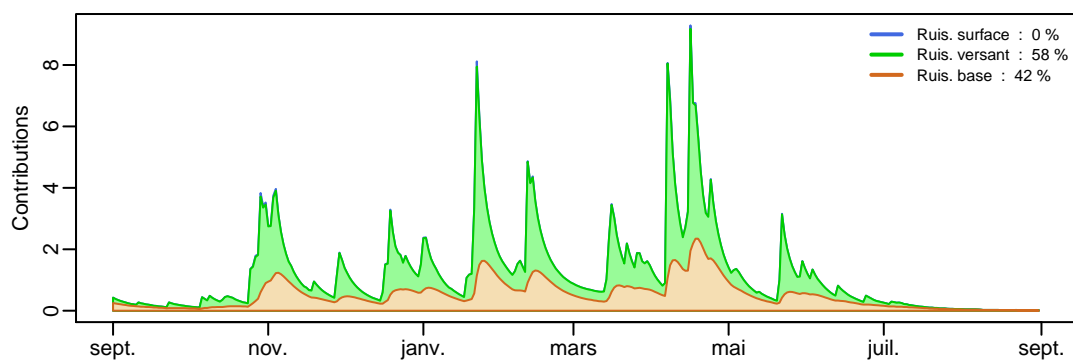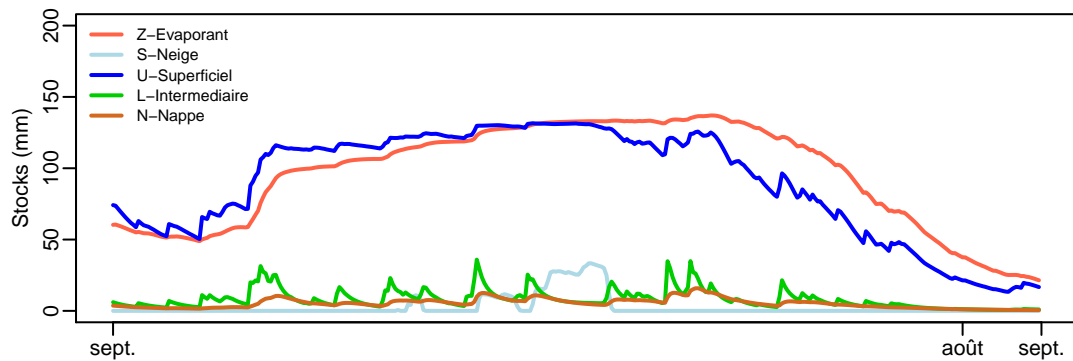

# k0744010 (180.28 km<sup>2</sup>) – année 2005–2006

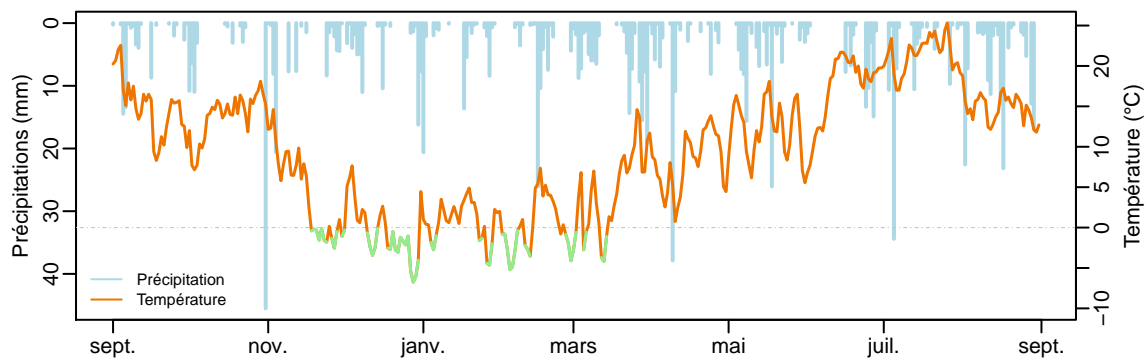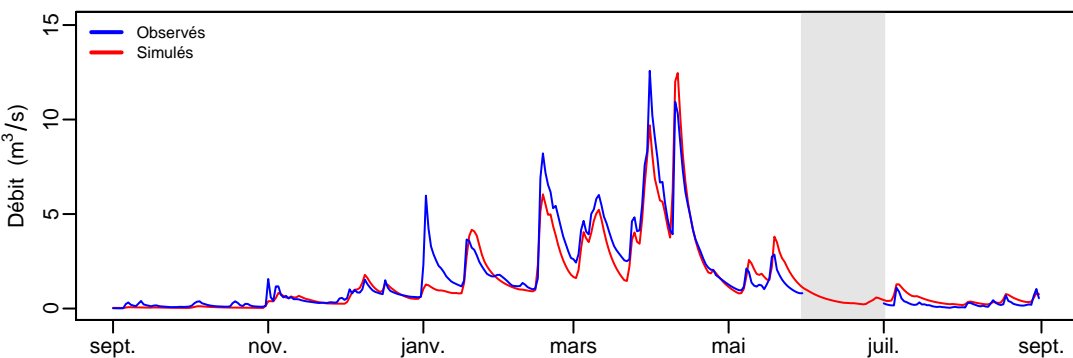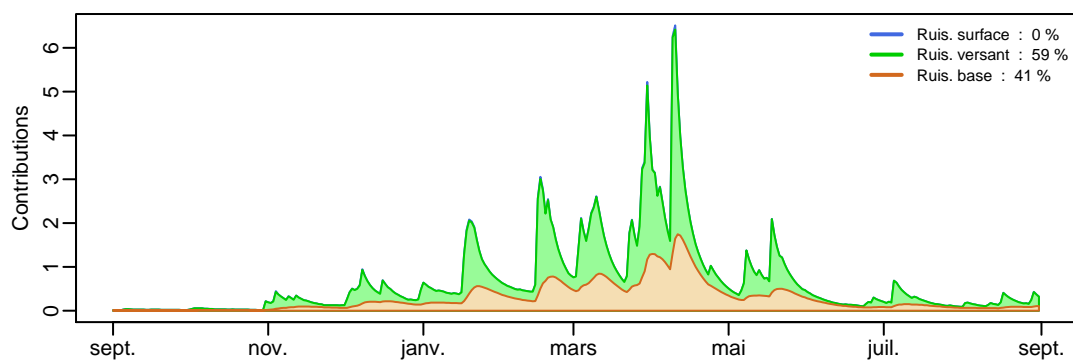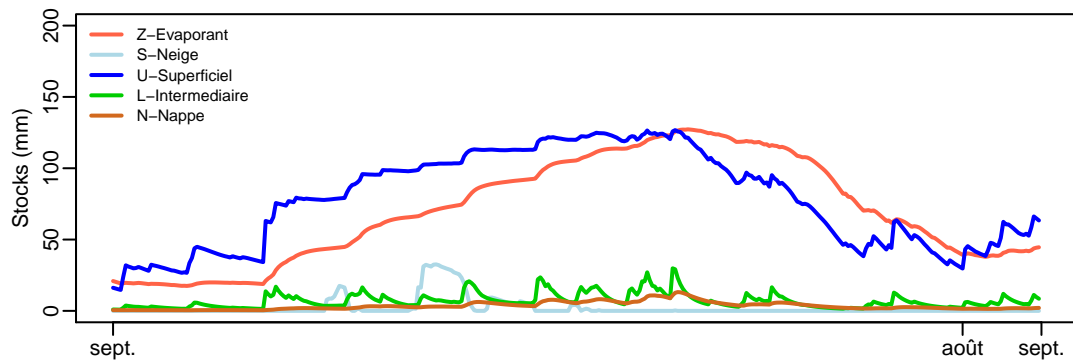

# k0744010 (180.28 km<sup>2</sup>) – année 2006–2007

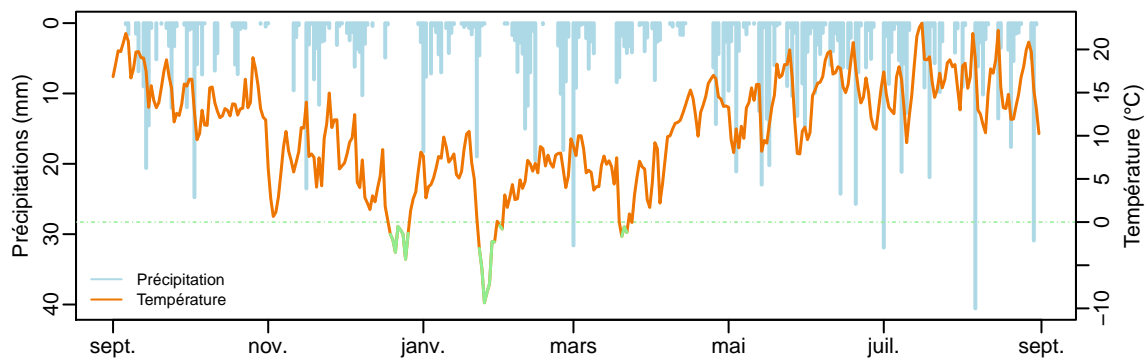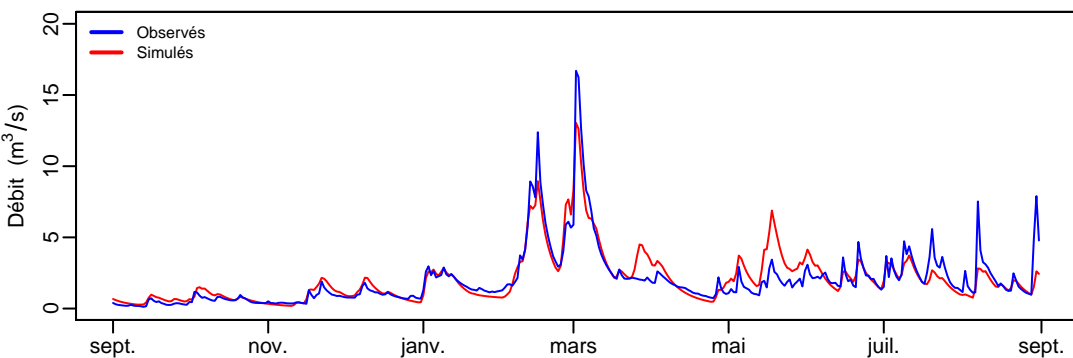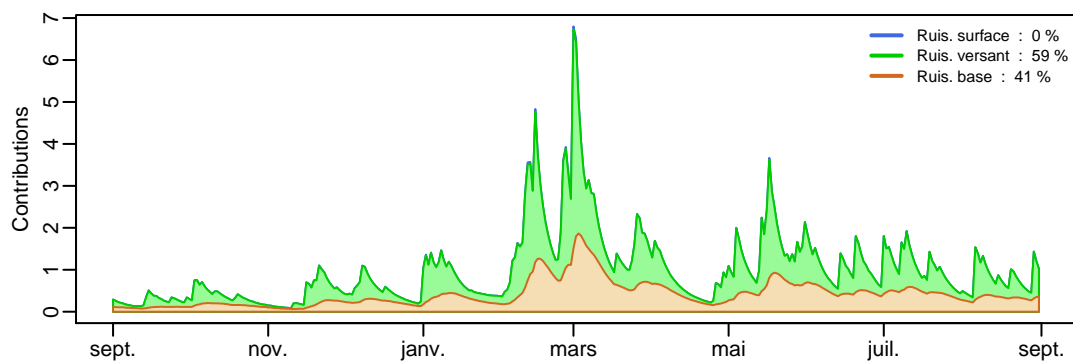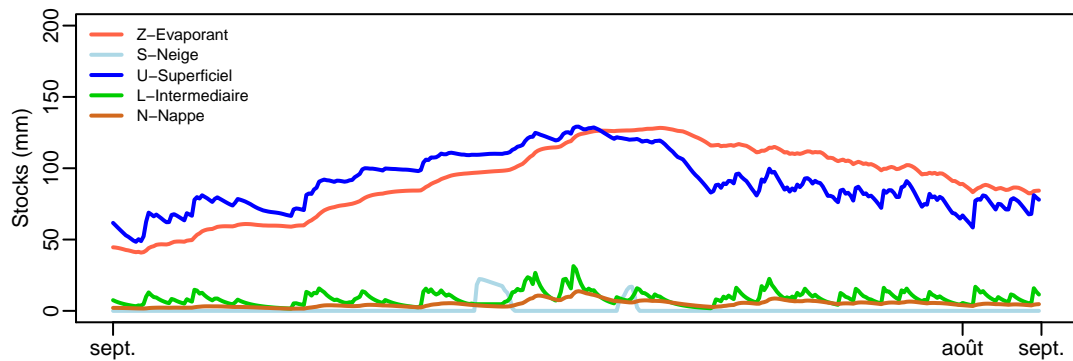



# k0744010 (180.28 km<sup>2</sup>) – année 2007–2008

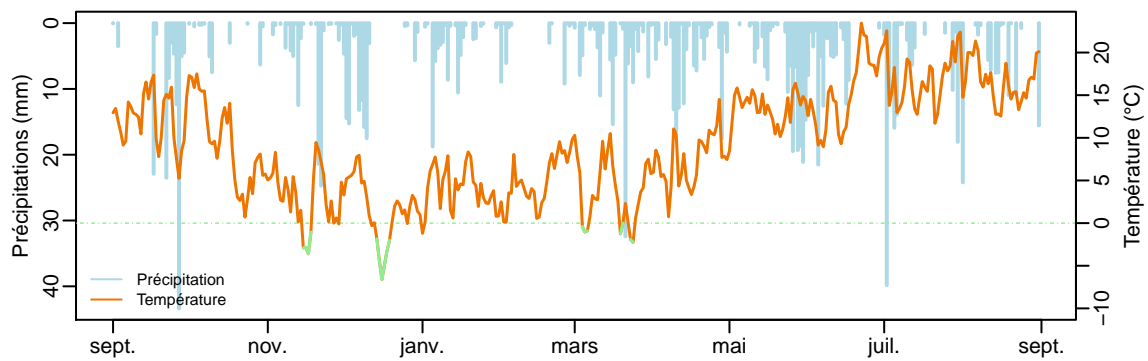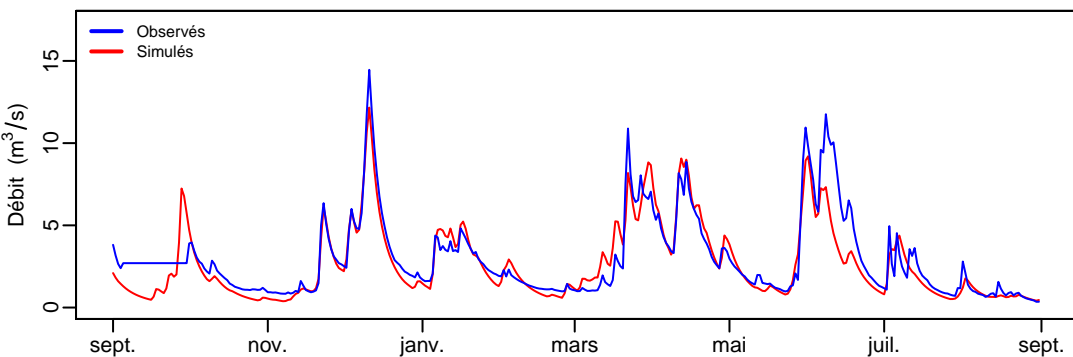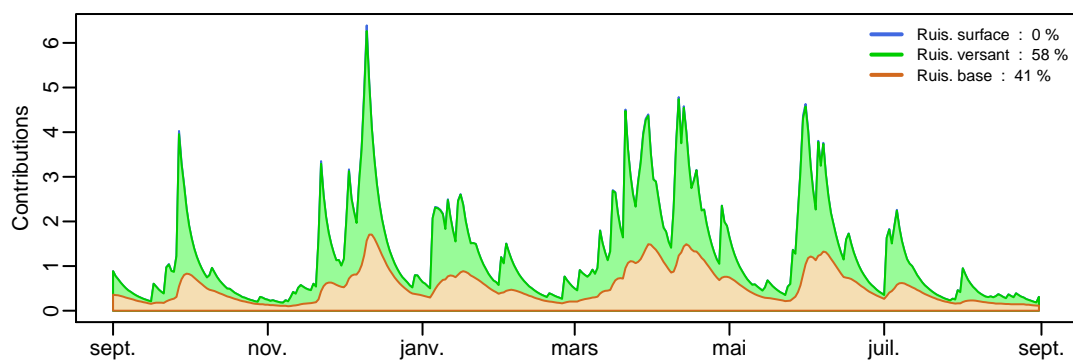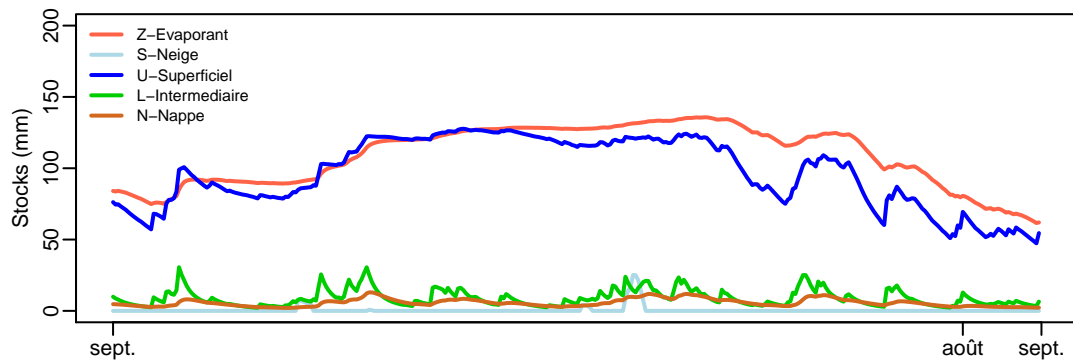

# k0744010 (180.28 km<sup>2</sup>) – année 2008–2009

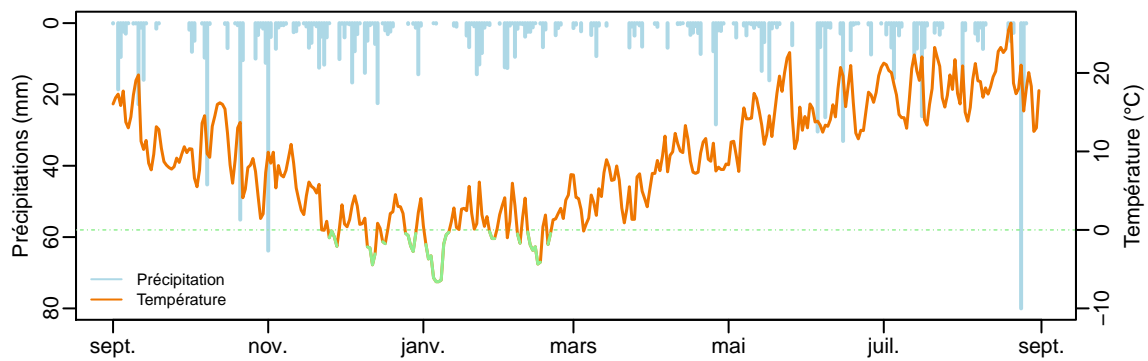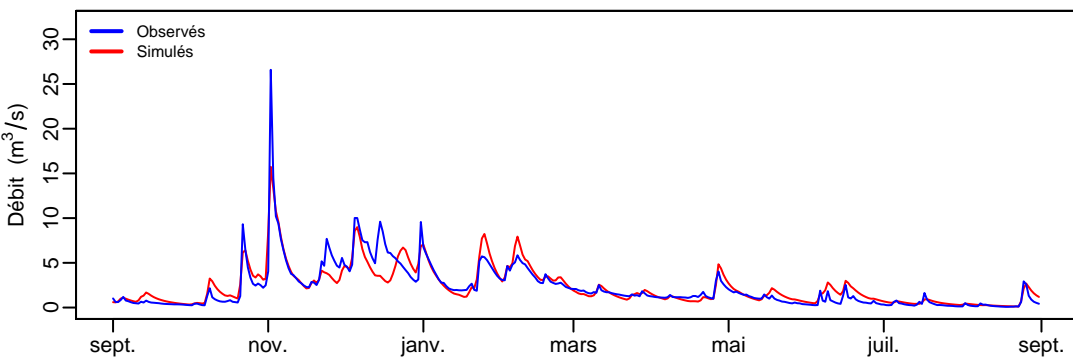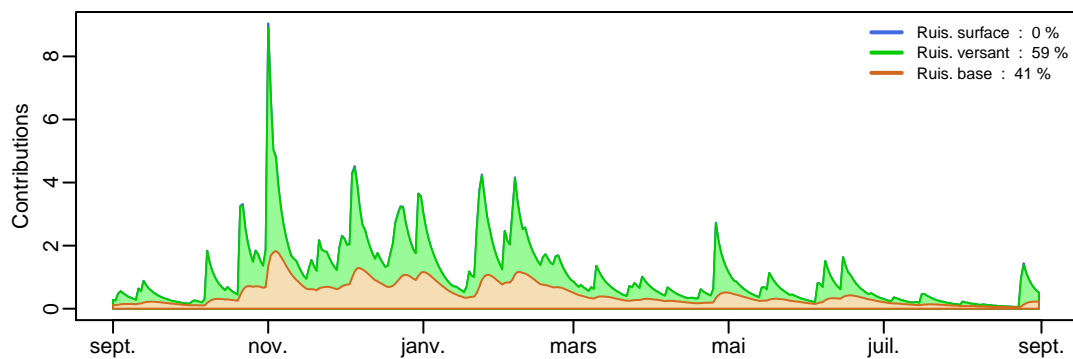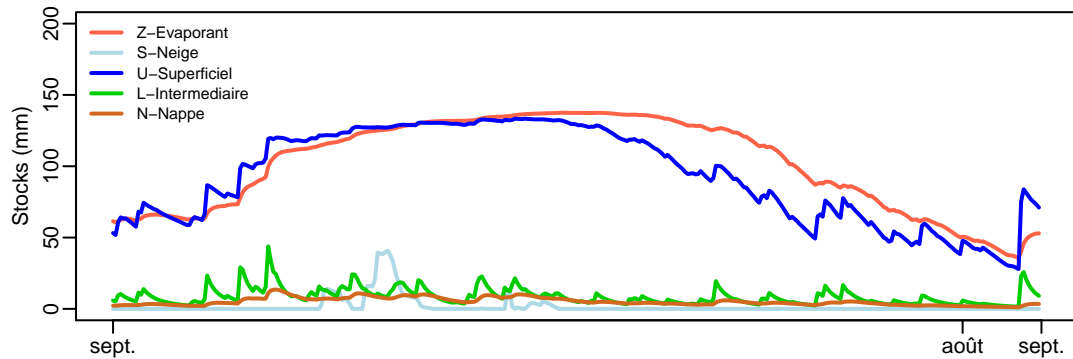

# k0753210 (372.37 km<sup>2</sup>) – année 1982–1983

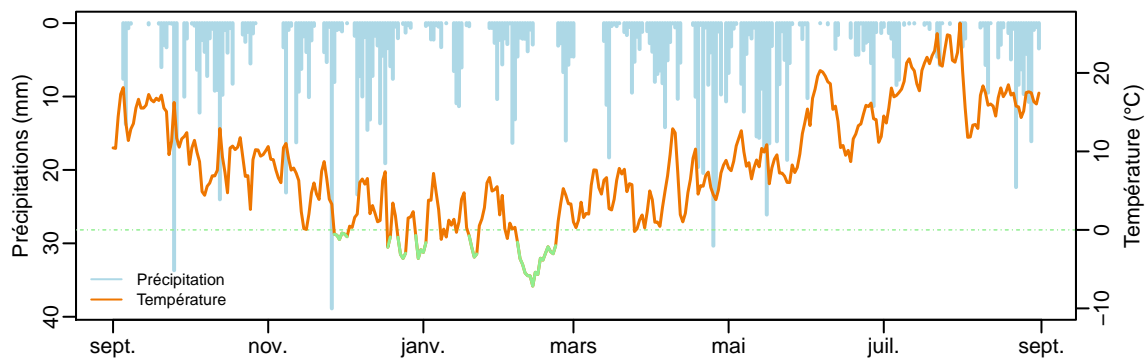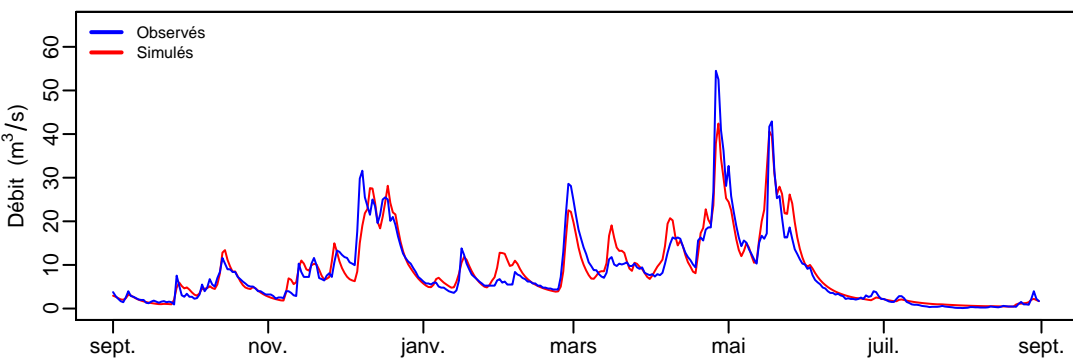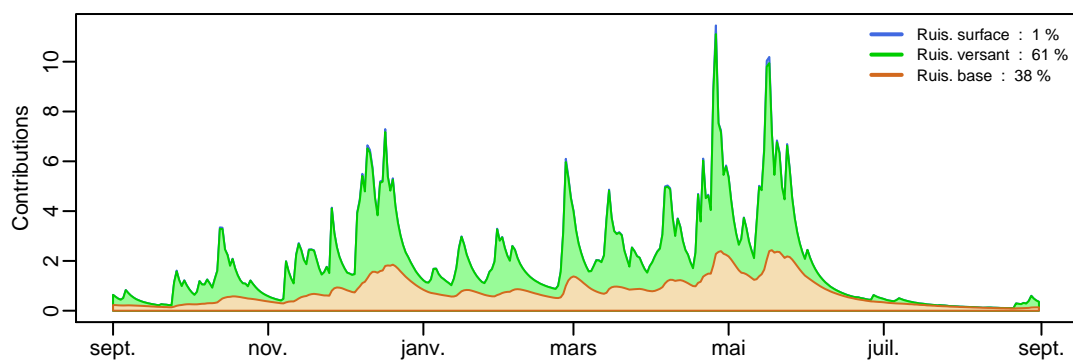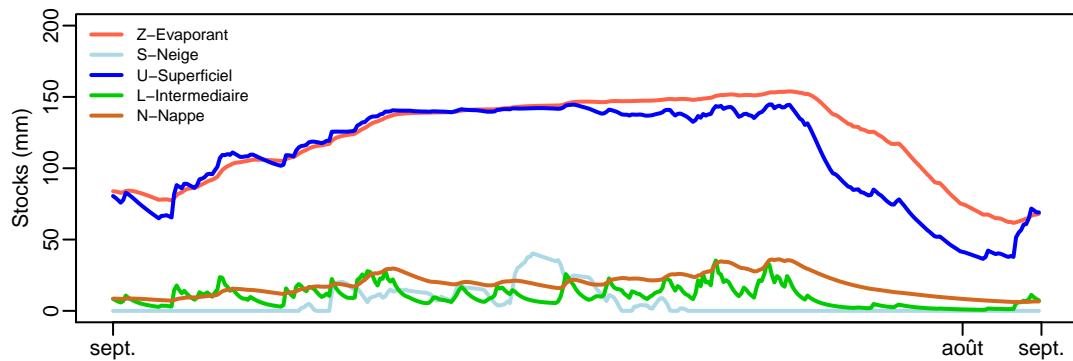

# k0753210 (372.37 km<sup>2</sup>) – année 1983–1984

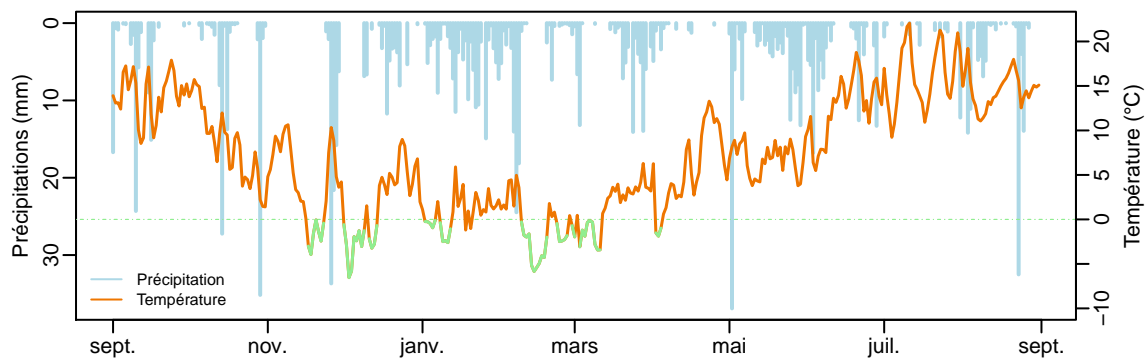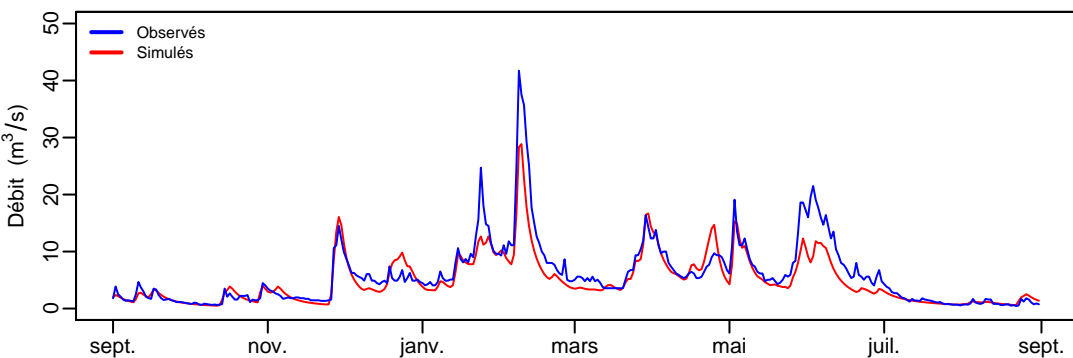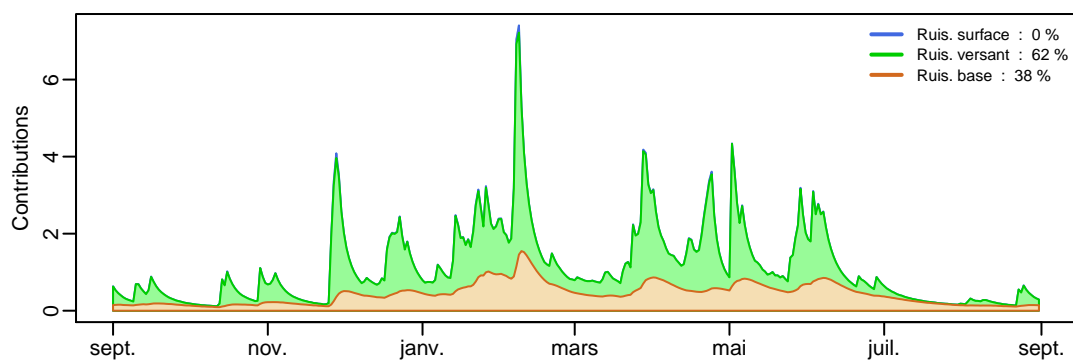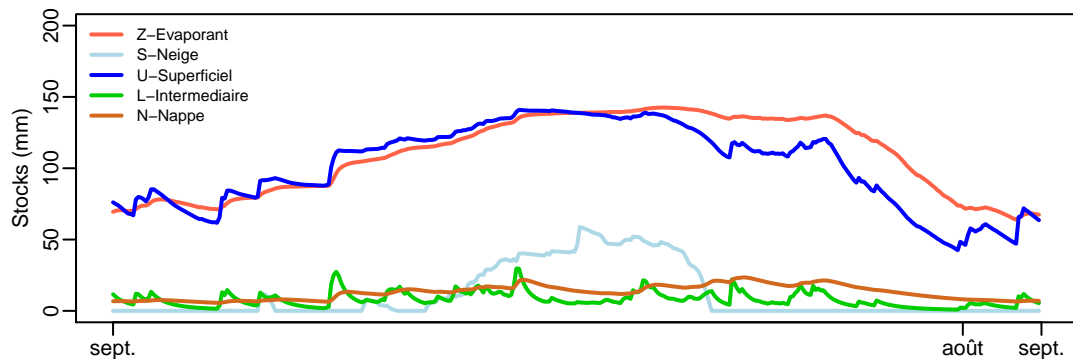

# k0753210 (372.37 km<sup>2</sup>) – année 1984–1985

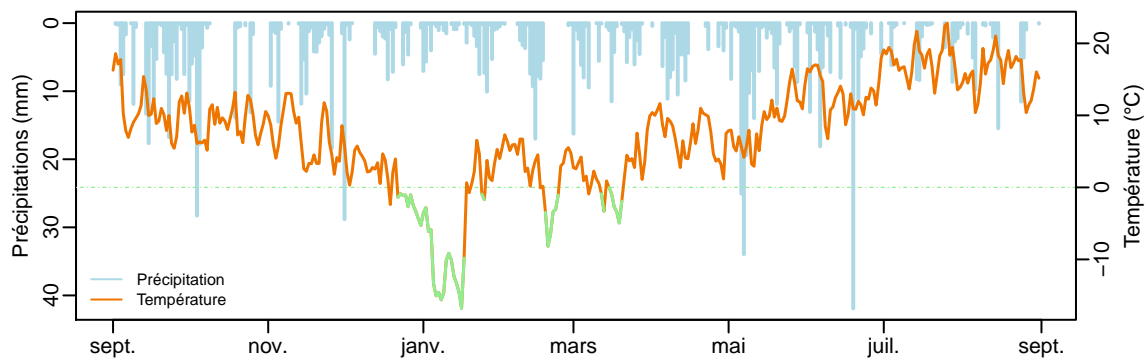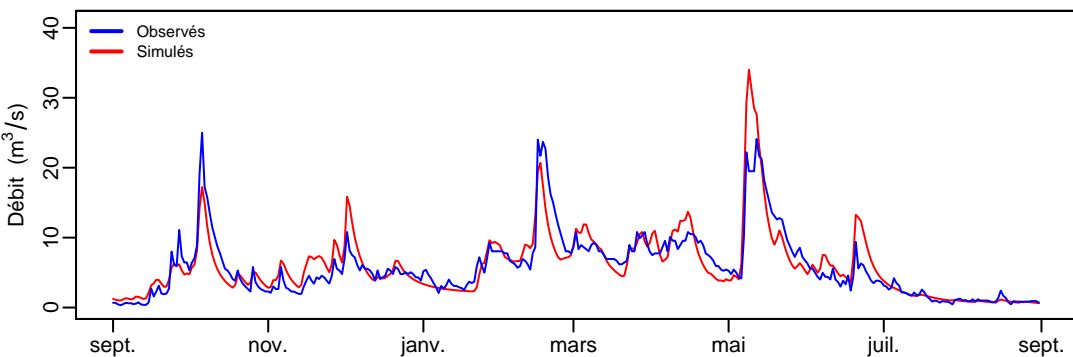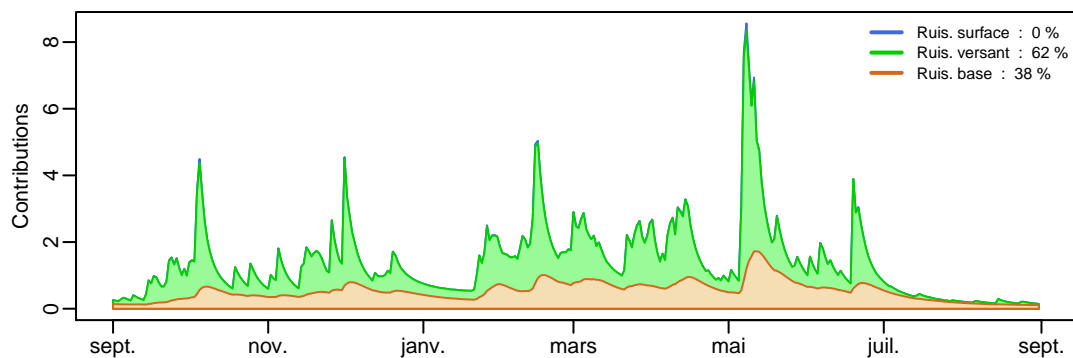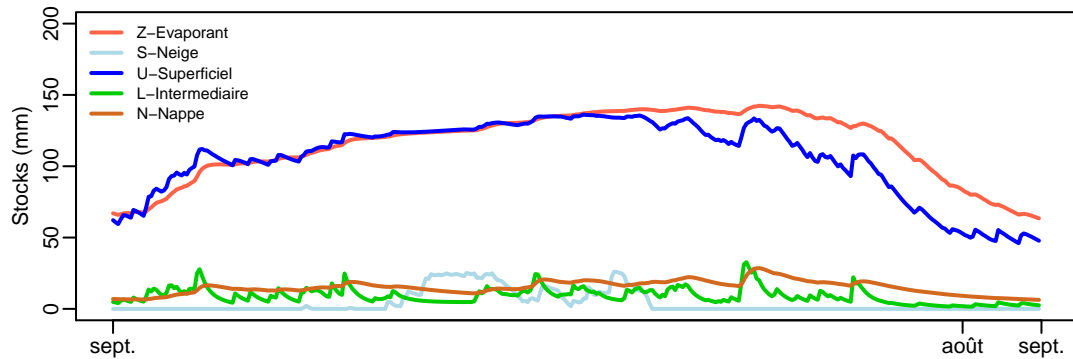

# k0753210 (372.37 km<sup>2</sup>) – année 1985–1986

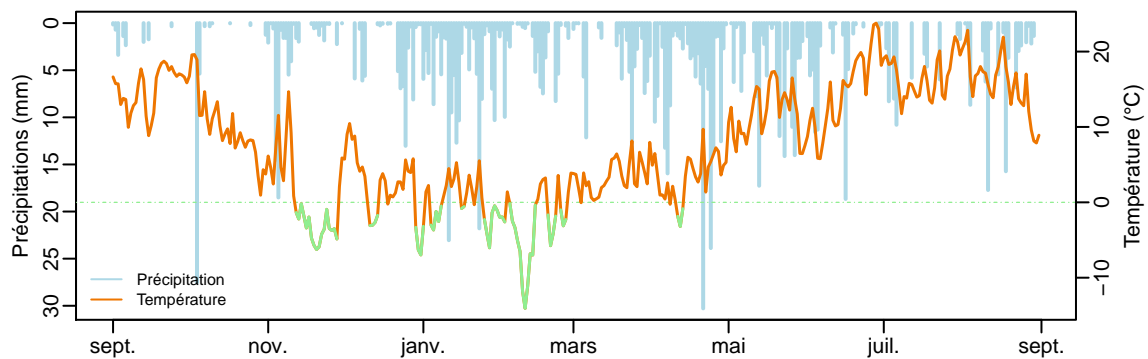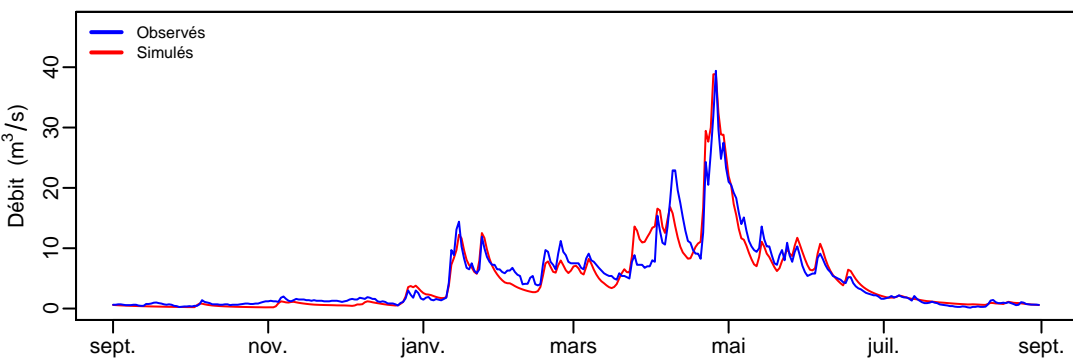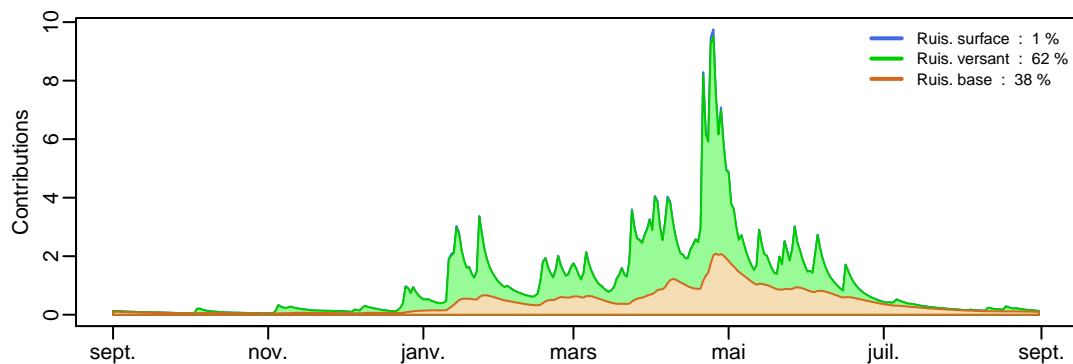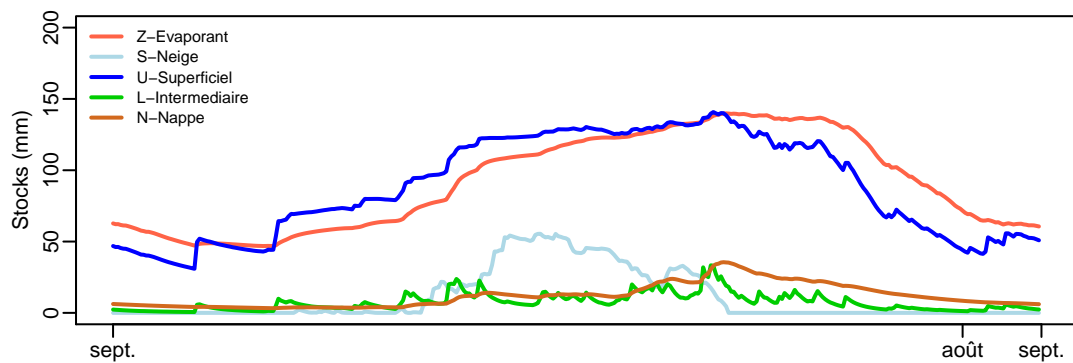

# k0753210 (372.37 km<sup>2</sup>) – année 1986–1987

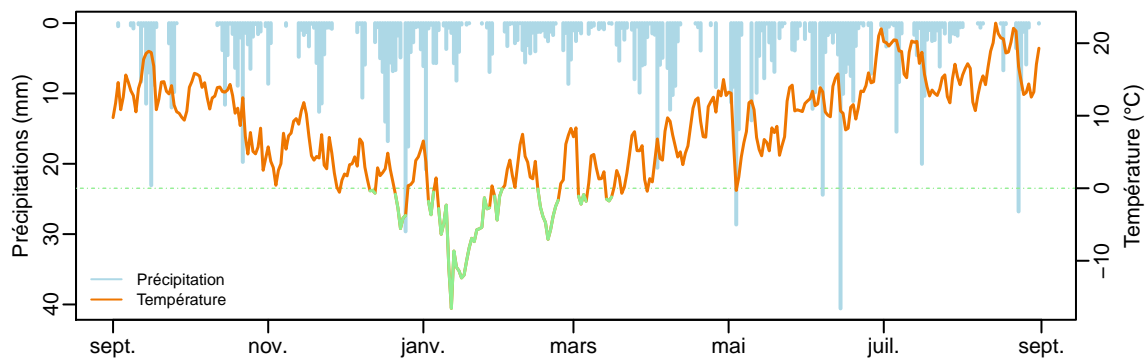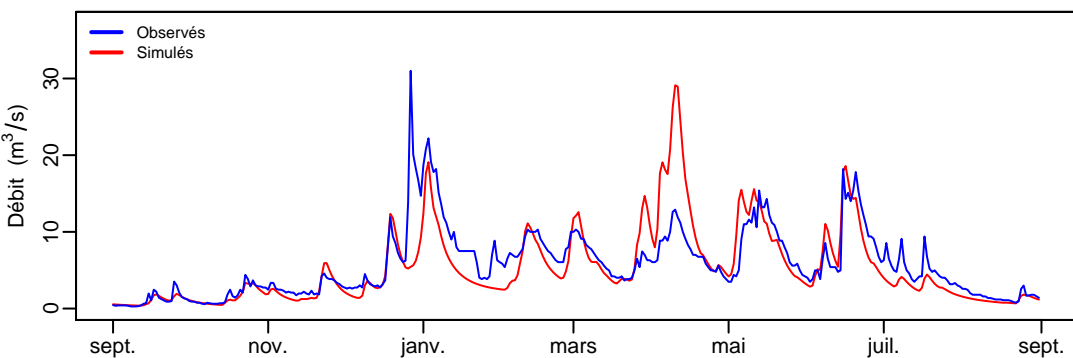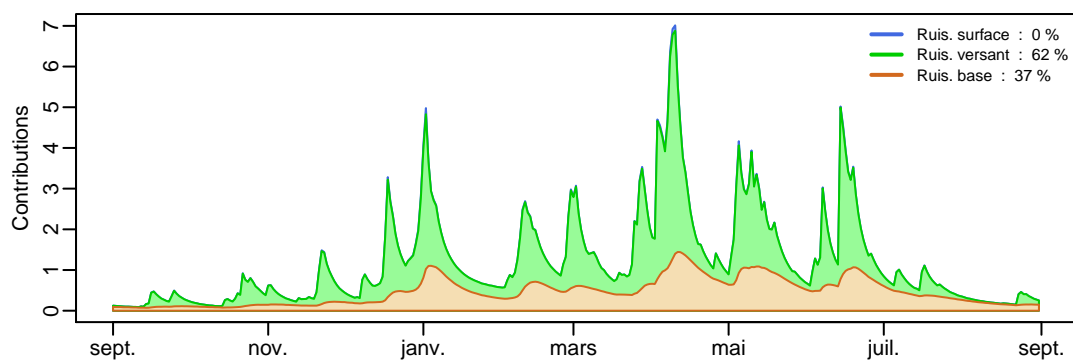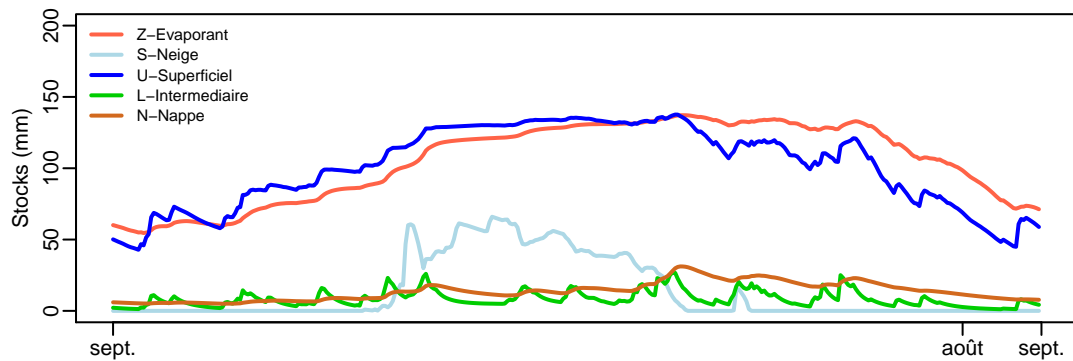

# k0753210 (372.37 km<sup>2</sup>) – année 1987–1988

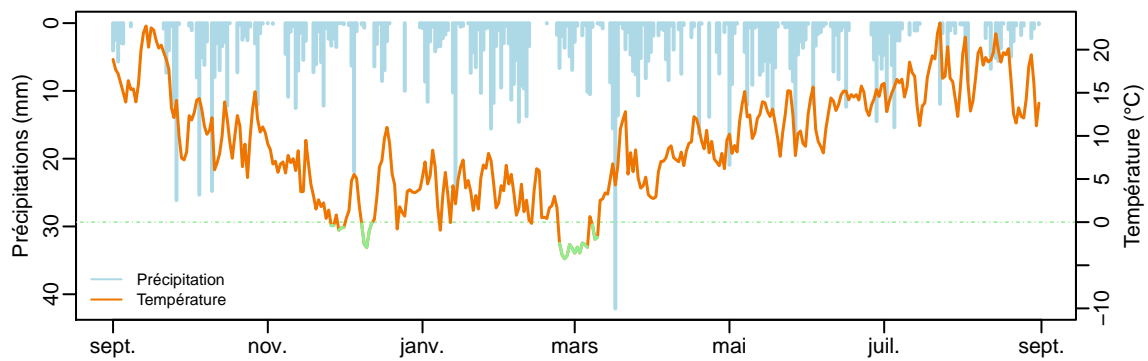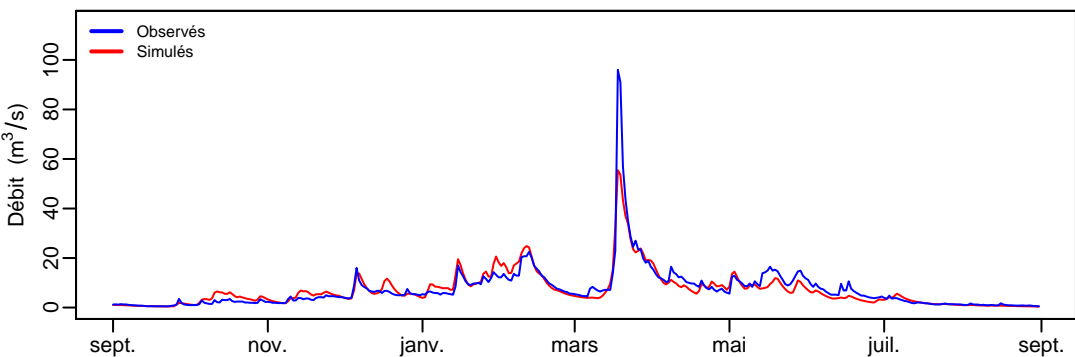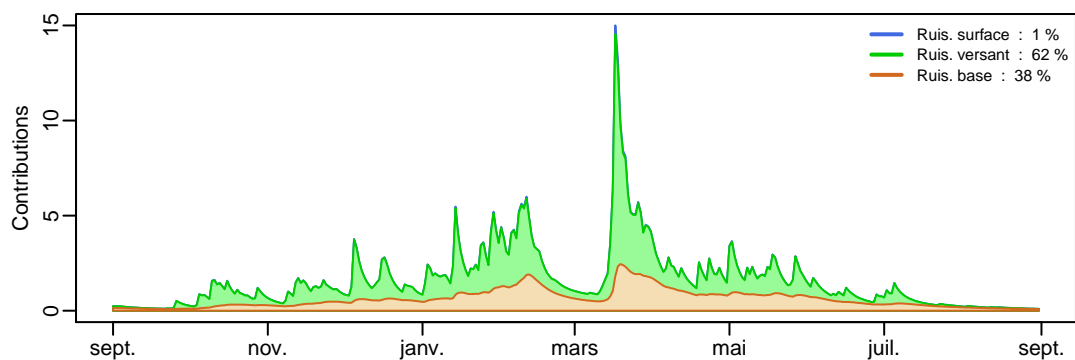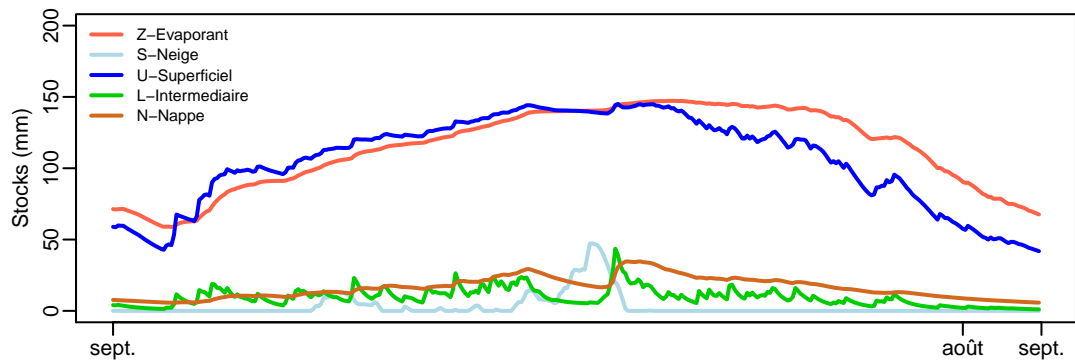



# k0753210 (372.37 km<sup>2</sup>) – année 1988–1989

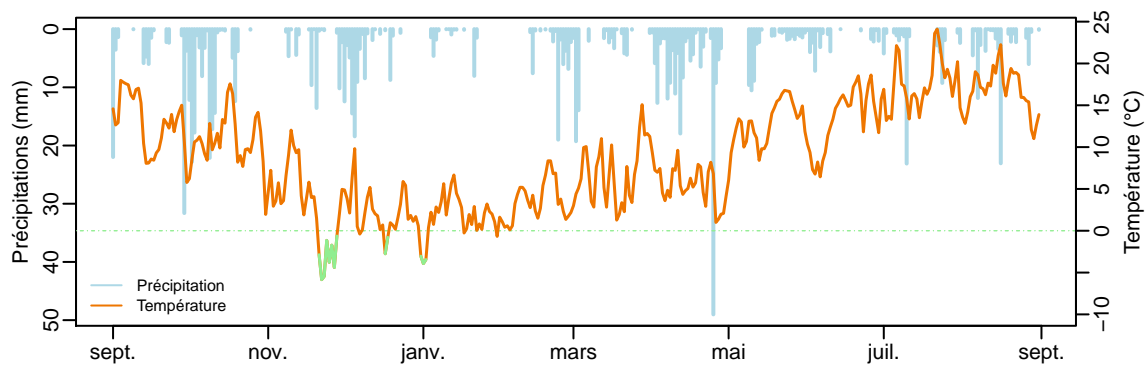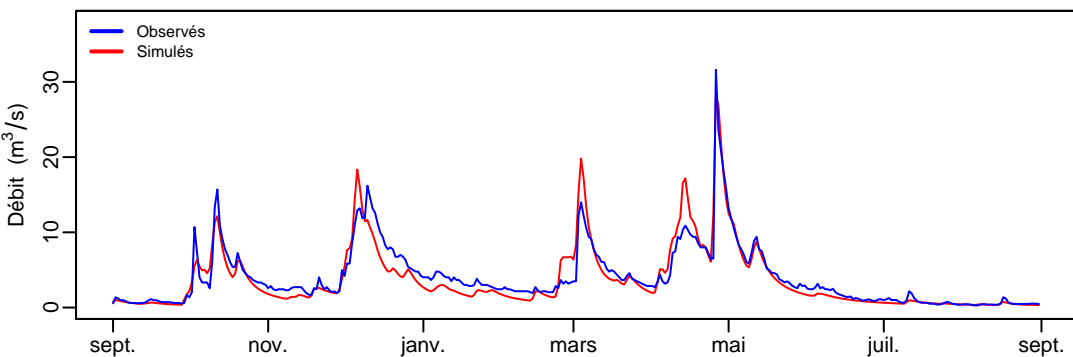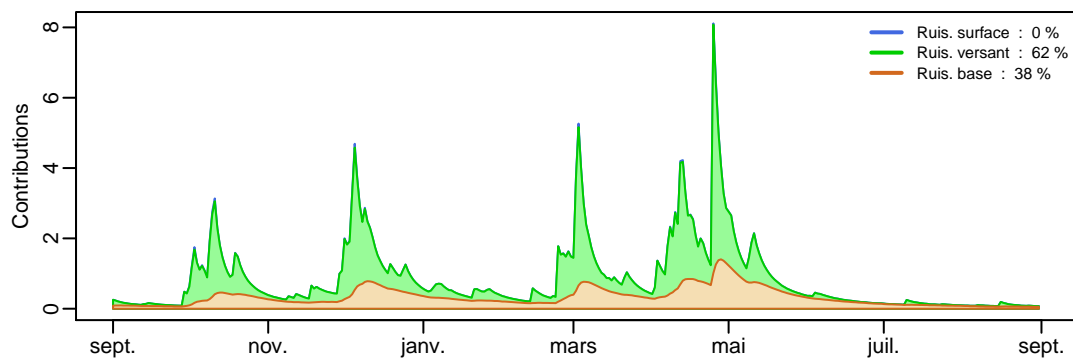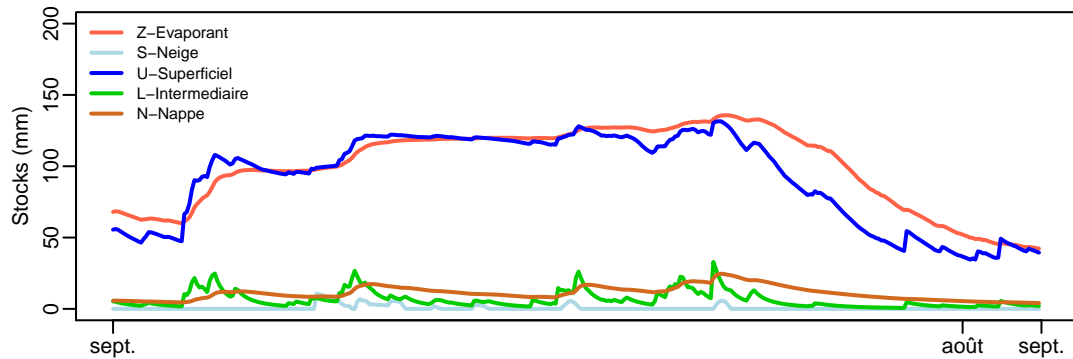

# k0753210 (372.37 km<sup>2</sup>) – année 1989–1990

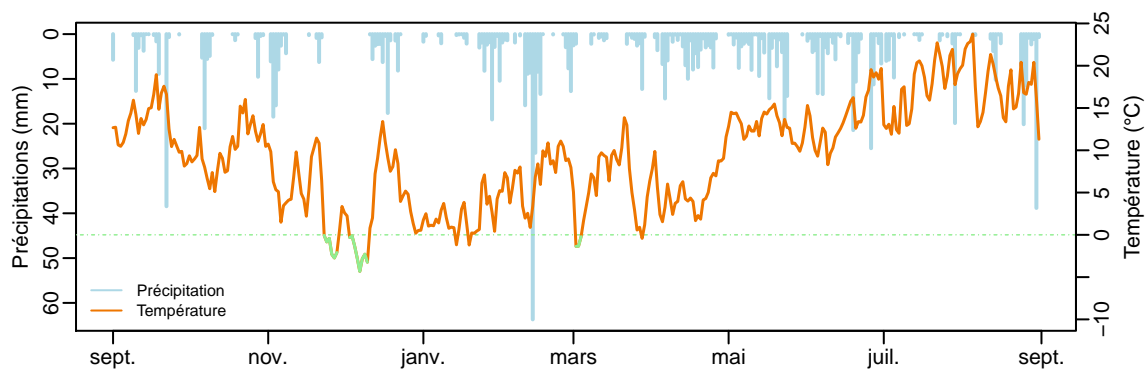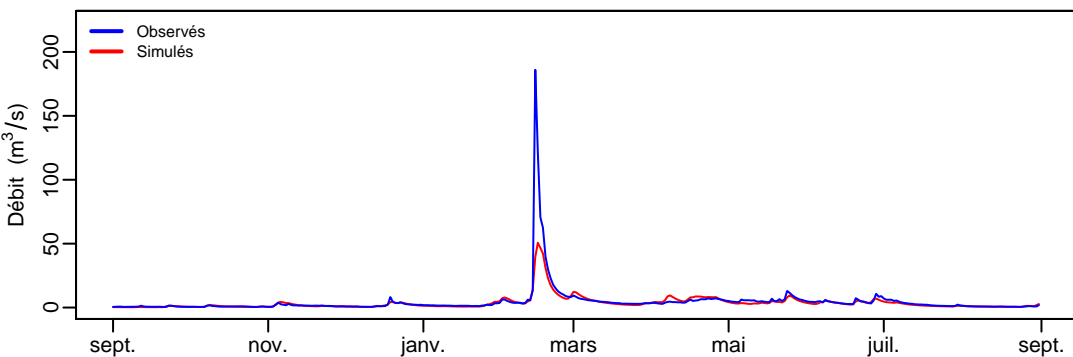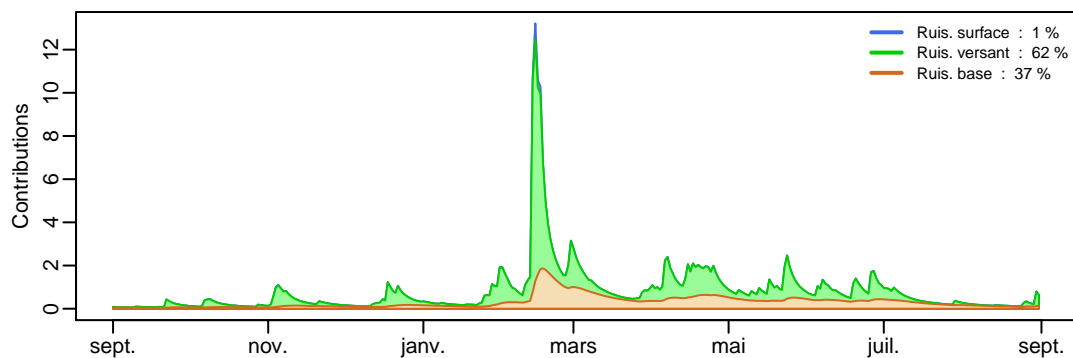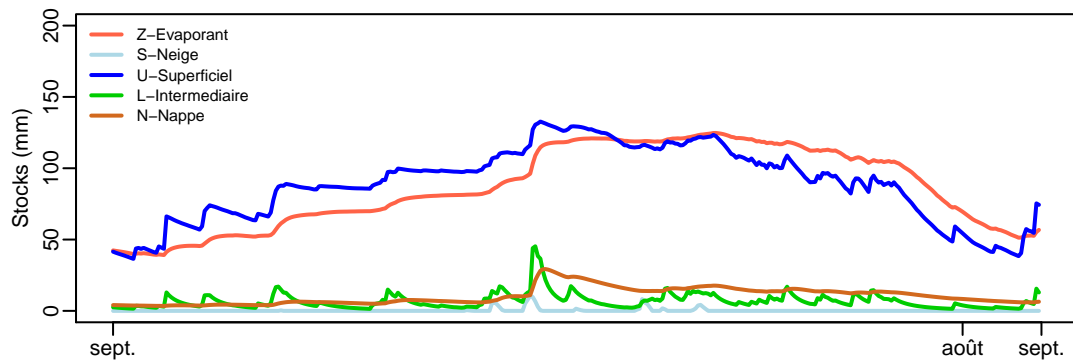

# k0753210 (372.37 km<sup>2</sup>) – année 1990–1991

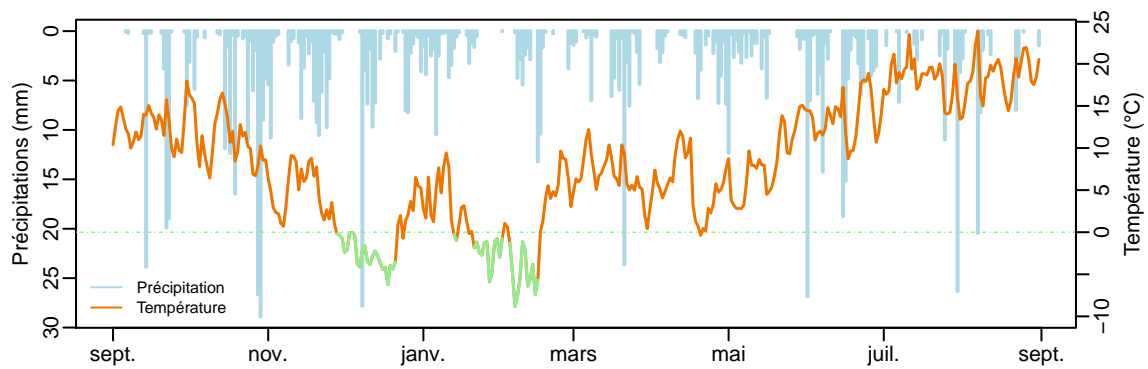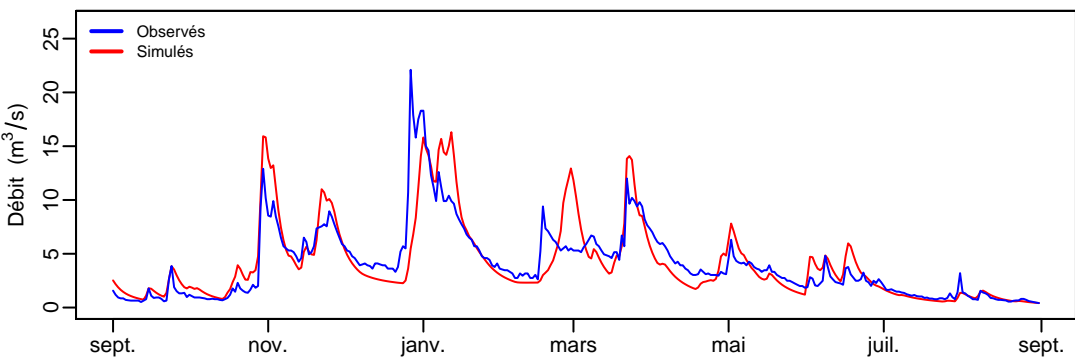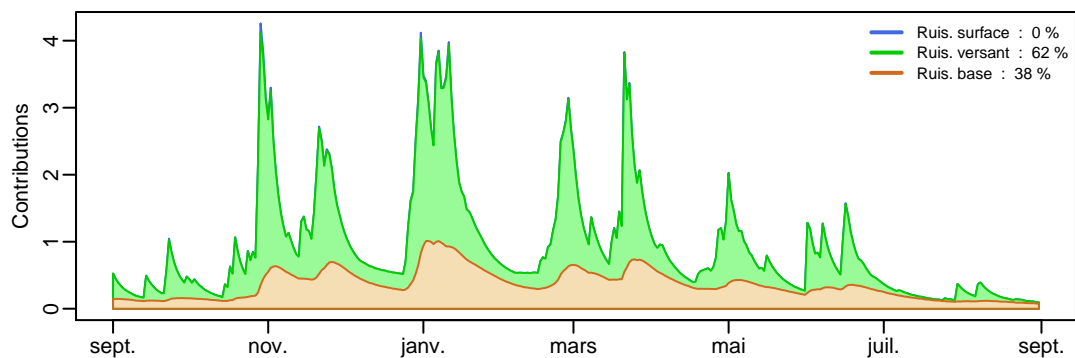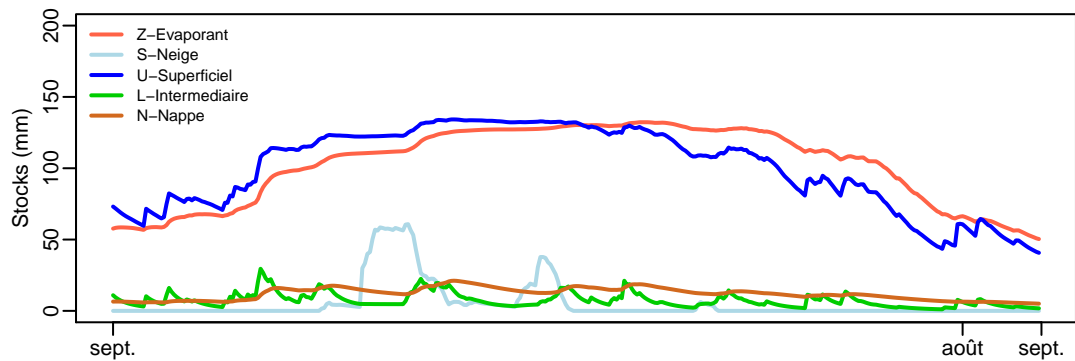

# k0753210 (372.37 km<sup>2</sup>) – année 1991–1992

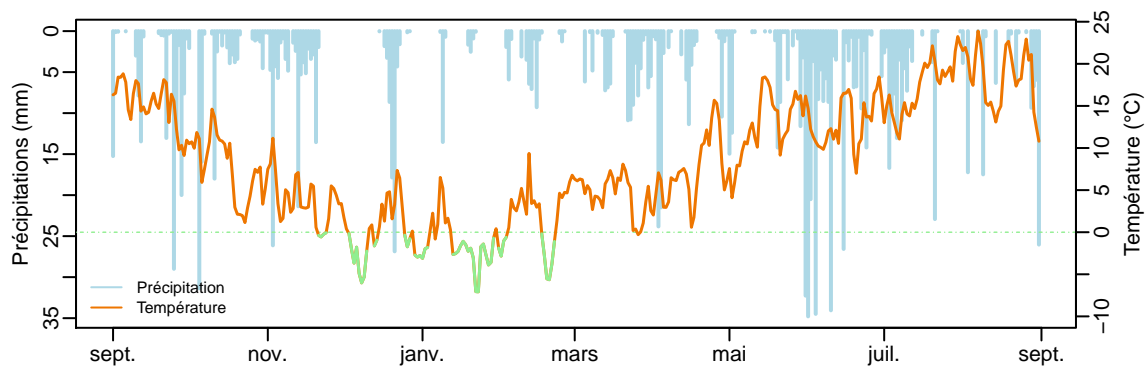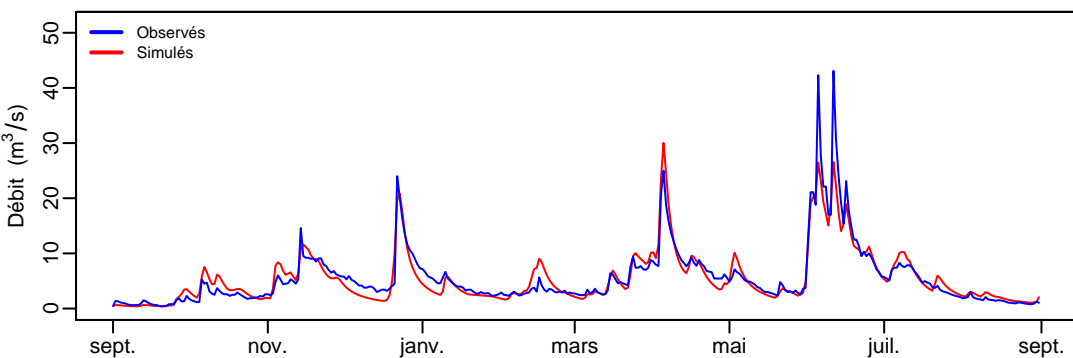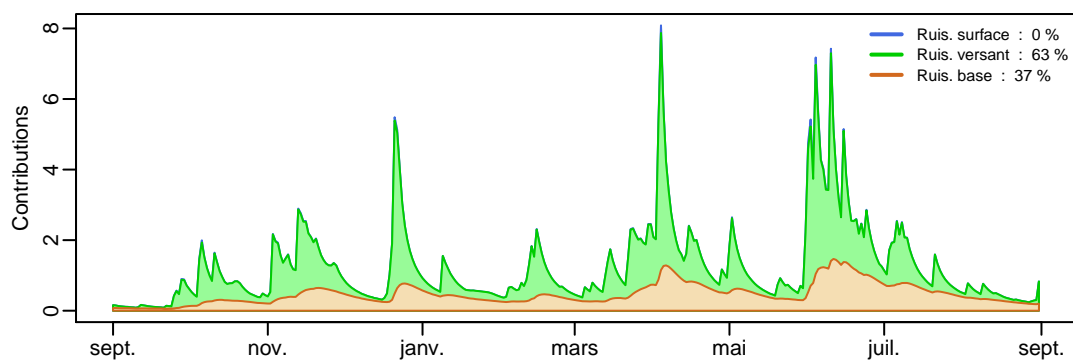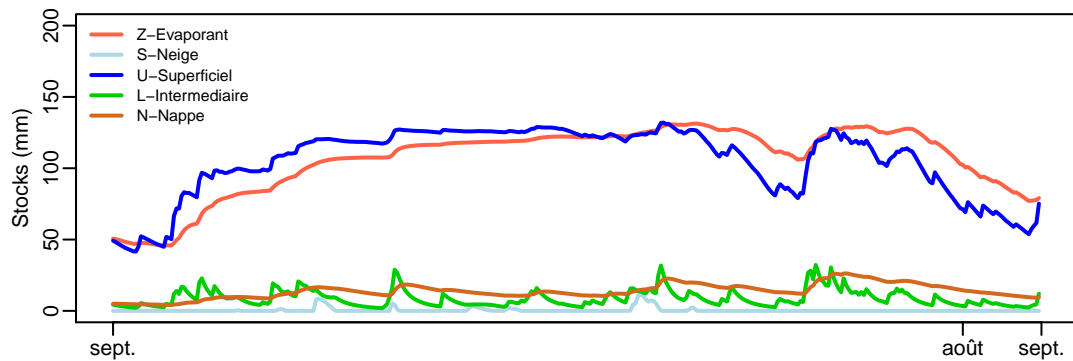

# k0753210 (372.37 km<sup>2</sup>) – année 1992–1993

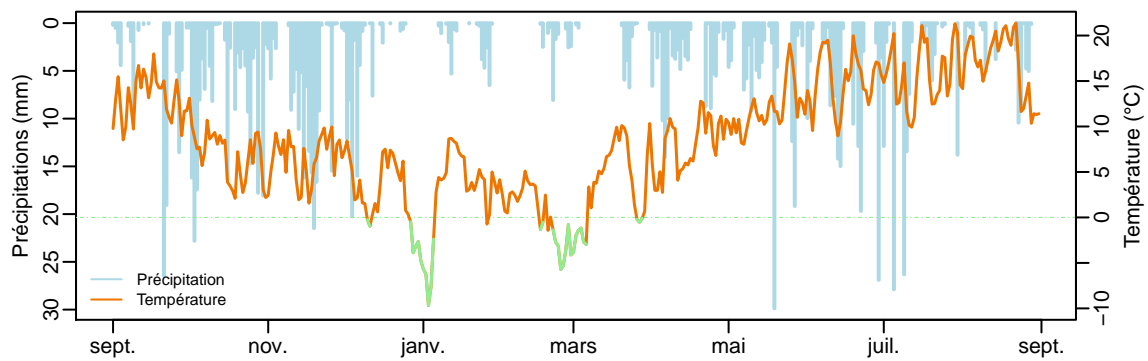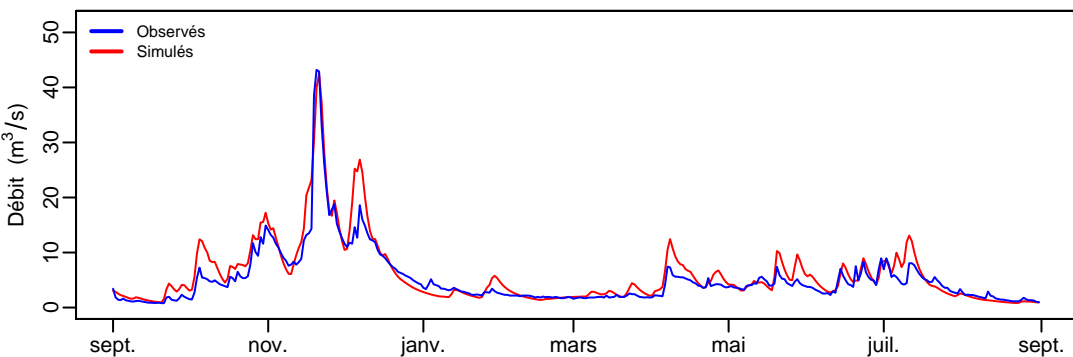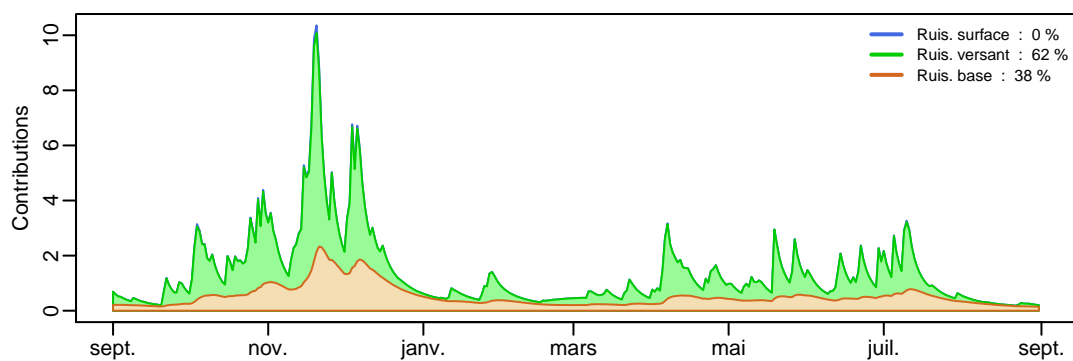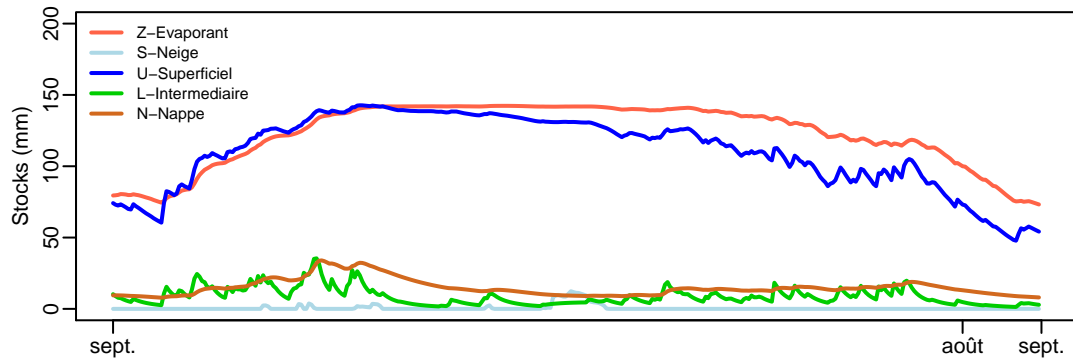

# k0753210 (372.37 km<sup>2</sup>) – année 1993–1994

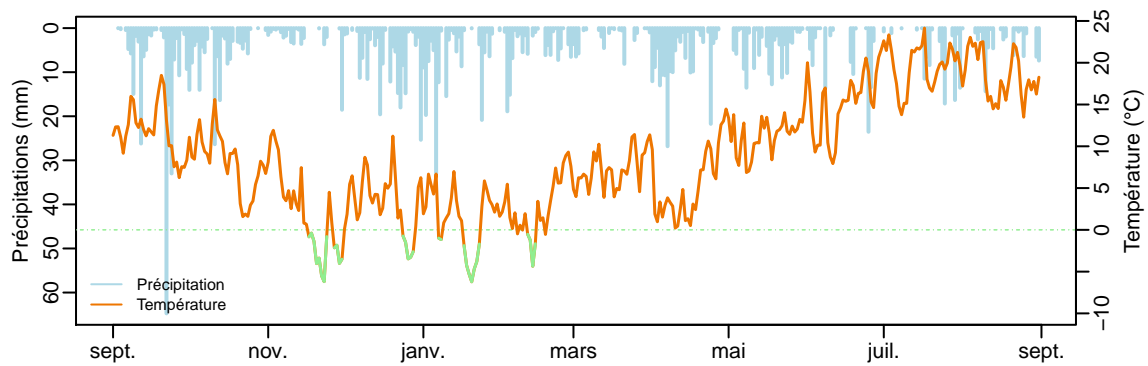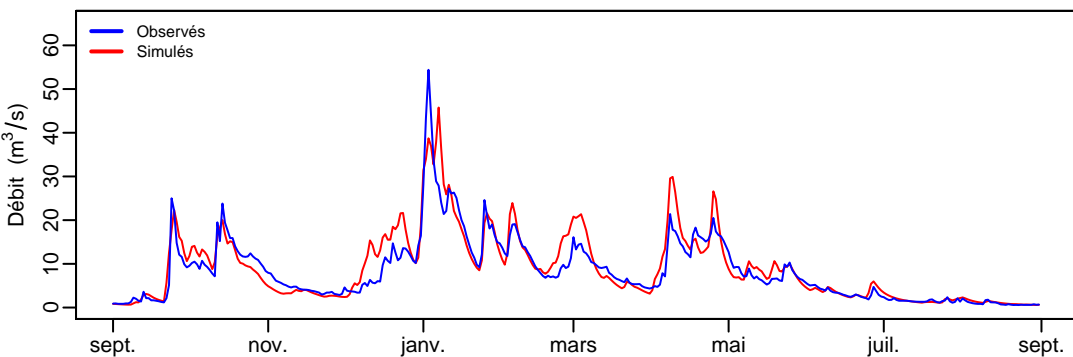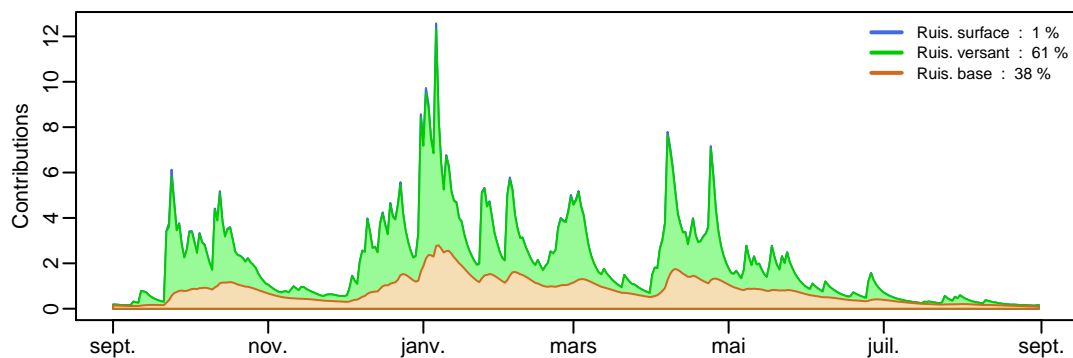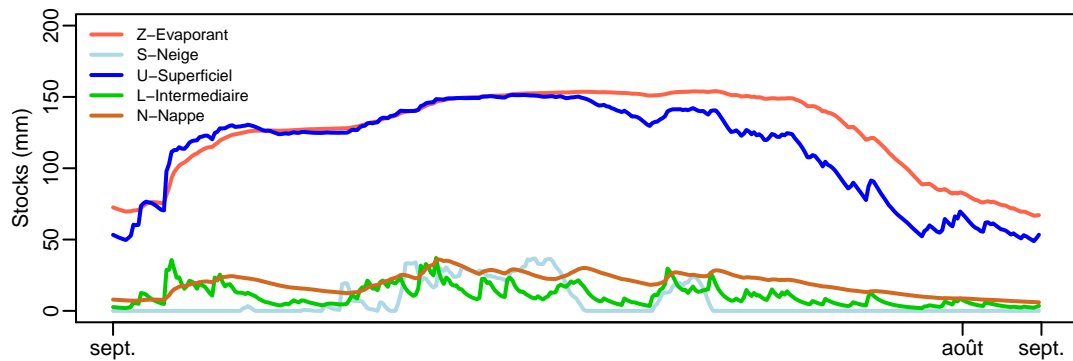

# k0753210 (372.37 km<sup>2</sup>) – année 1994–1995

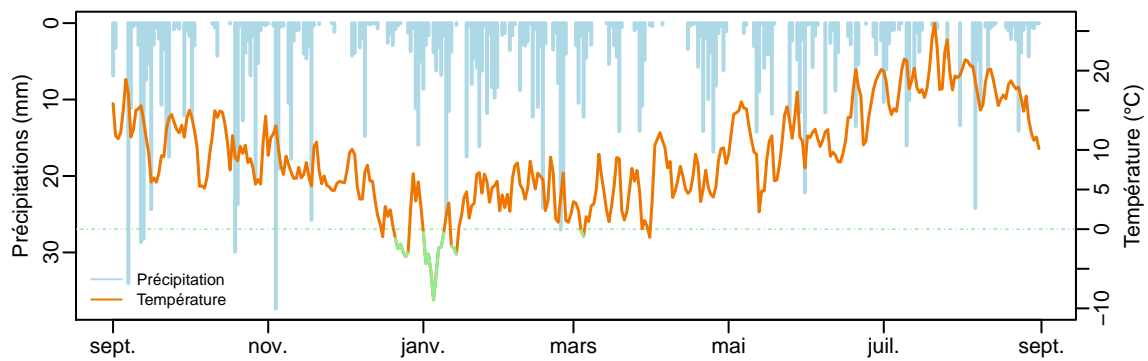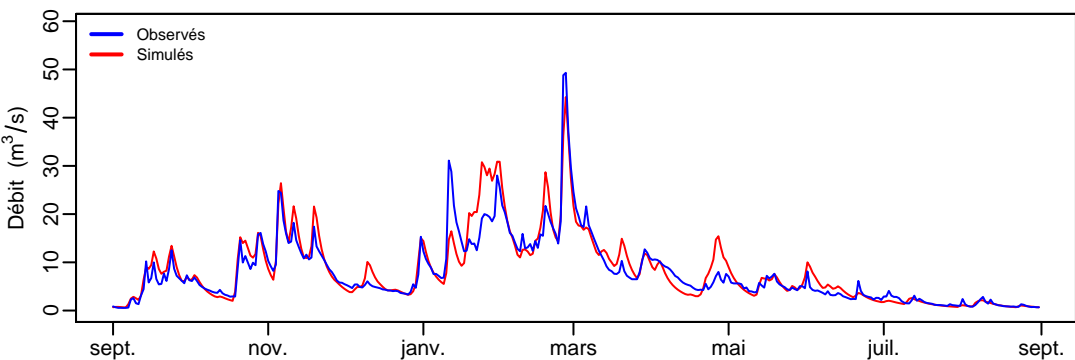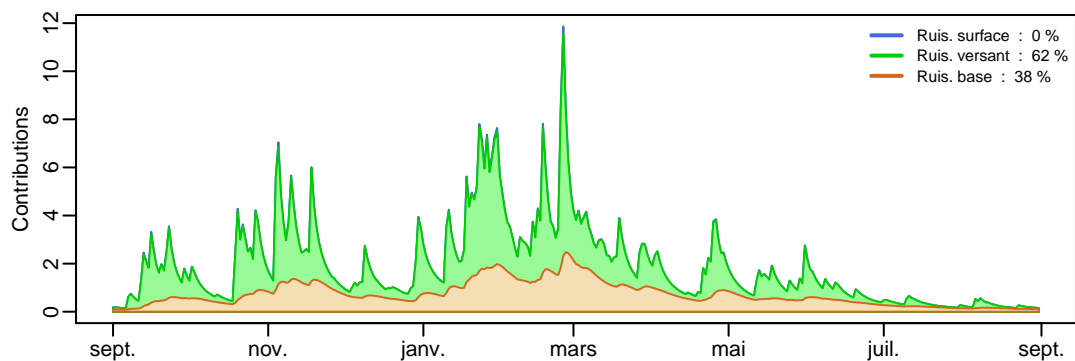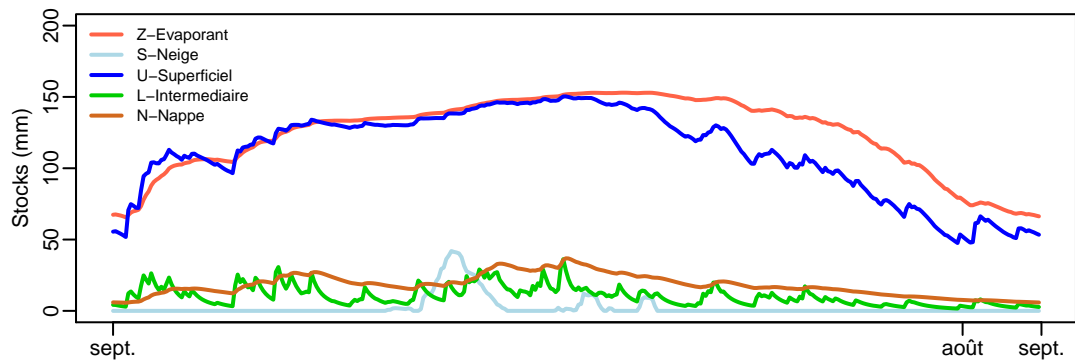

# k0753210 (372.37 km<sup>2</sup>) – année 1995–1996

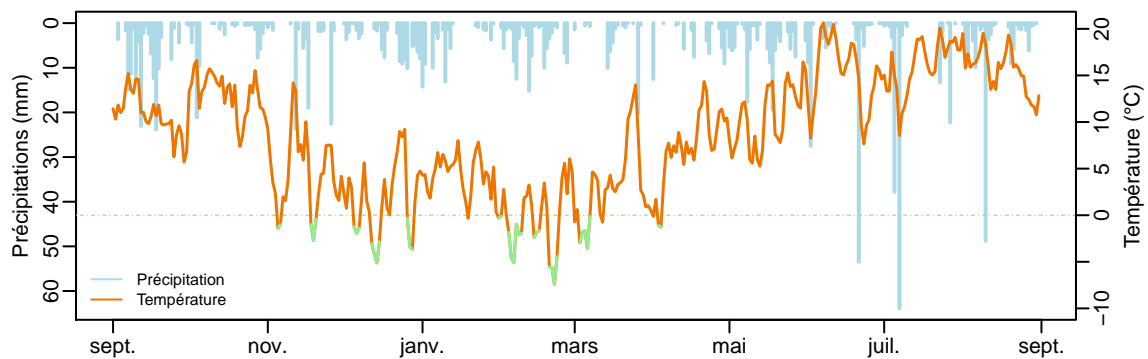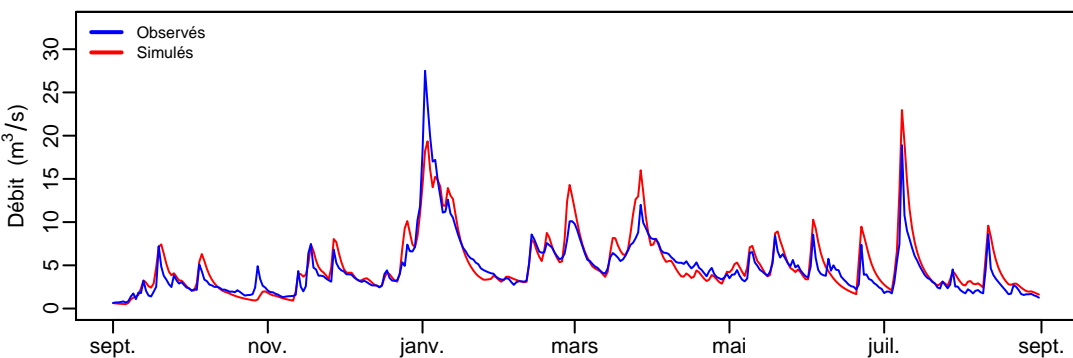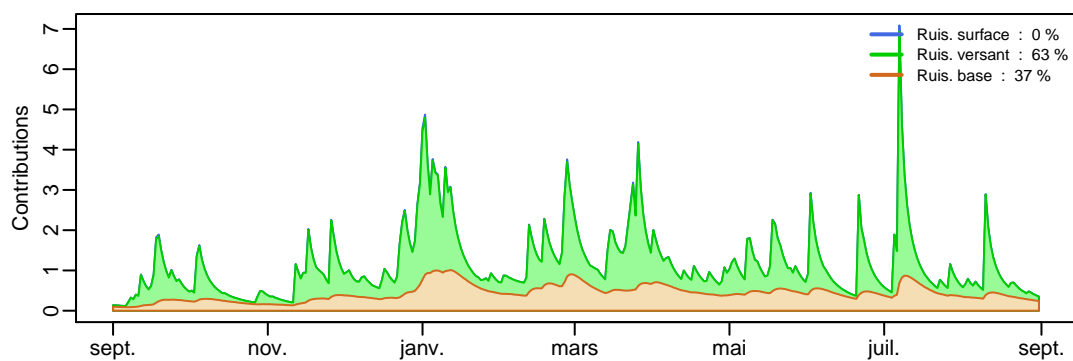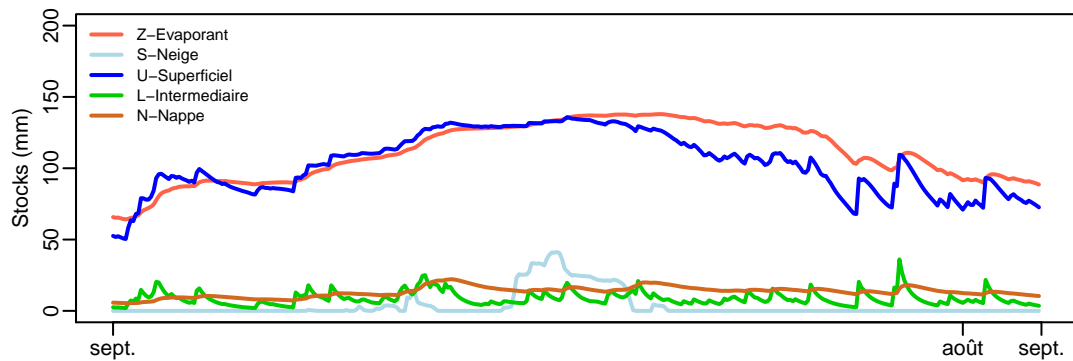



# k0753210 (372.37 km<sup>2</sup>) – année 1996–1997

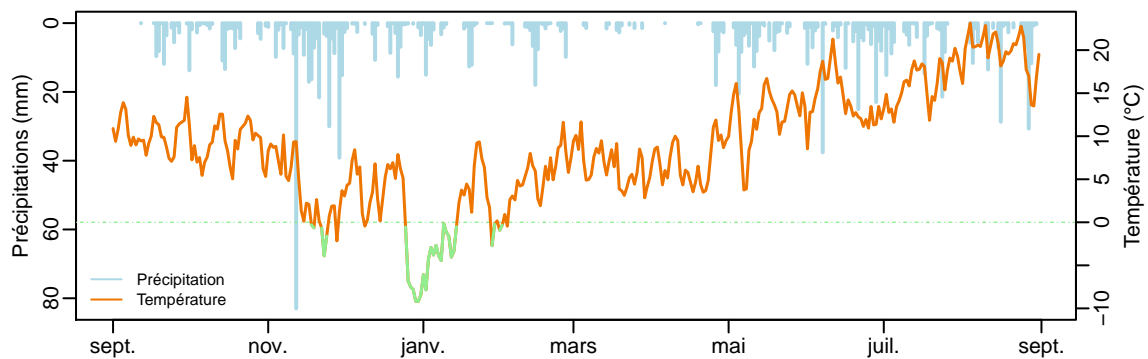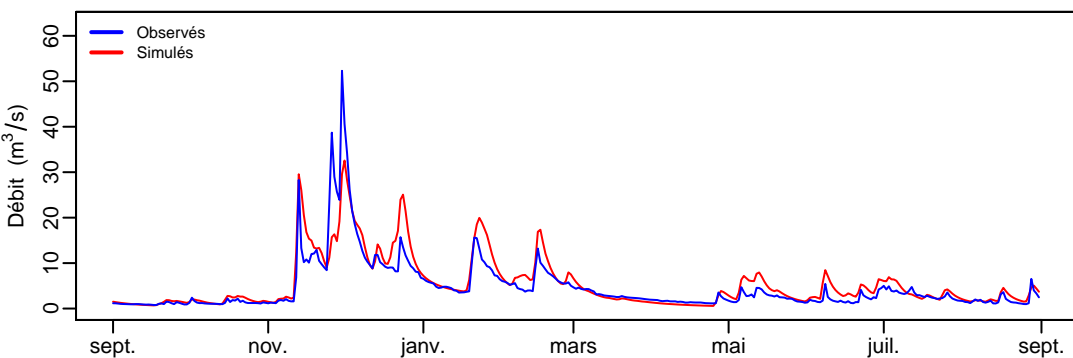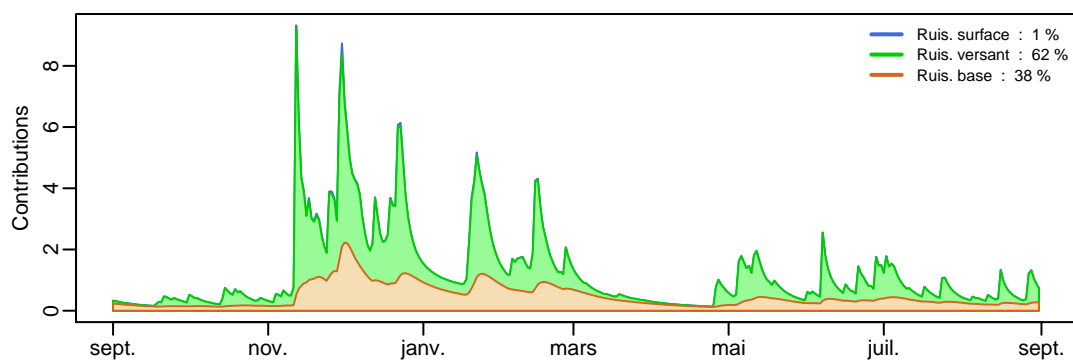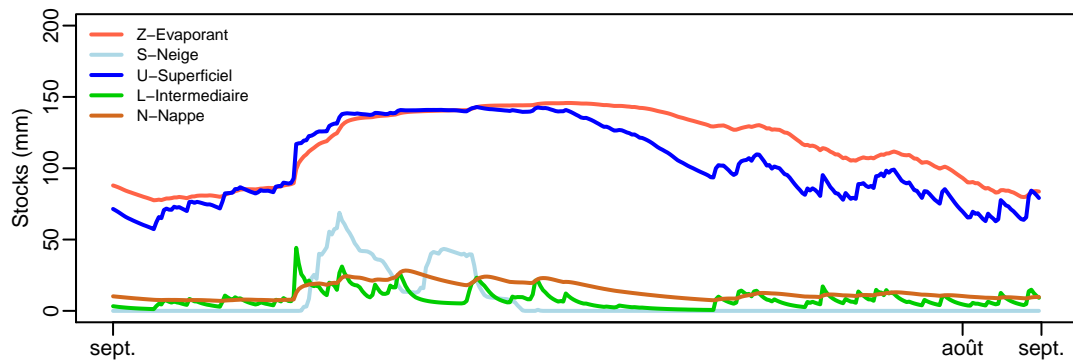

# k0753210 (372.37 km<sup>2</sup>) – année 1997–1998

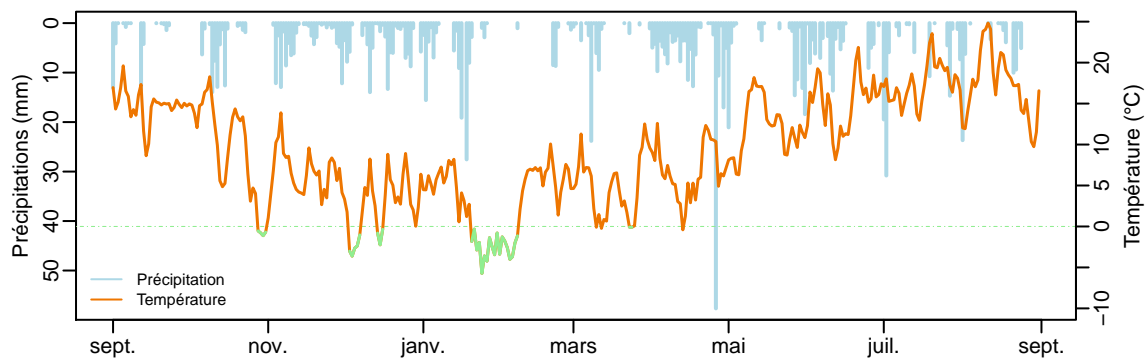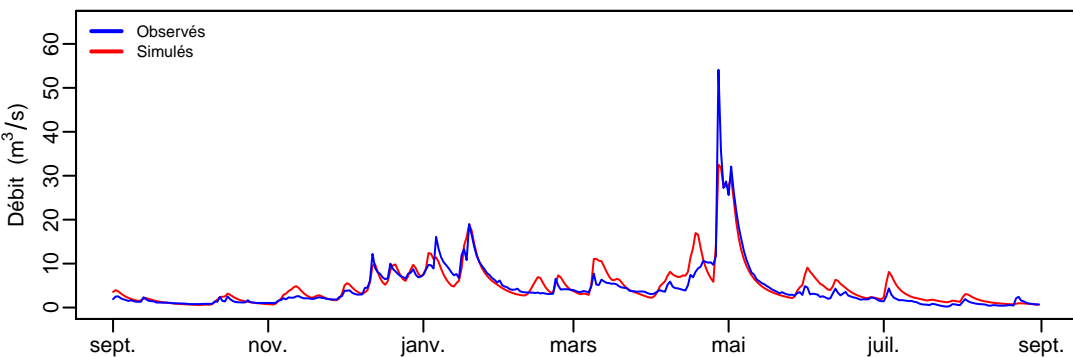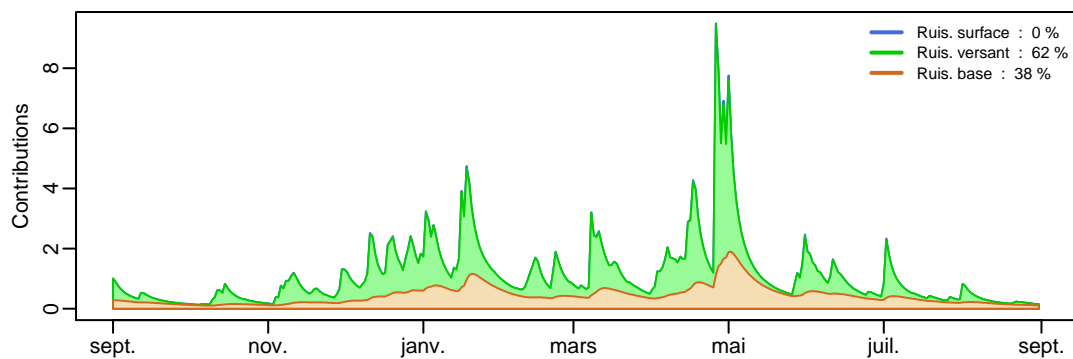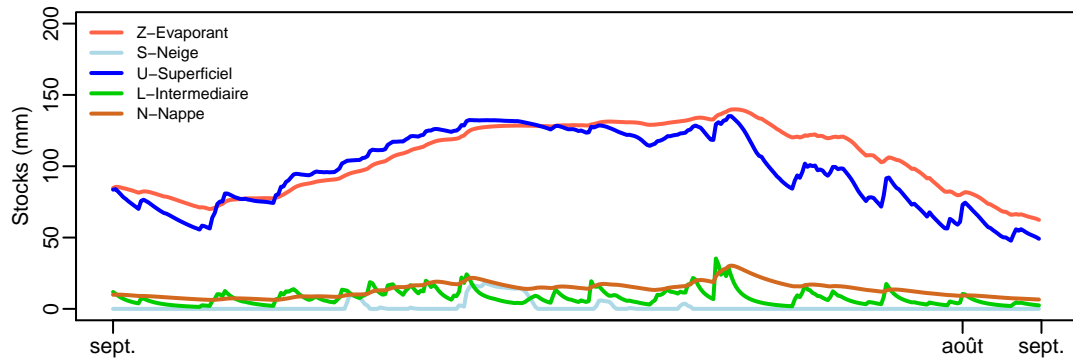

# k0753210 (372.37 km<sup>2</sup>) – année 1998–1999

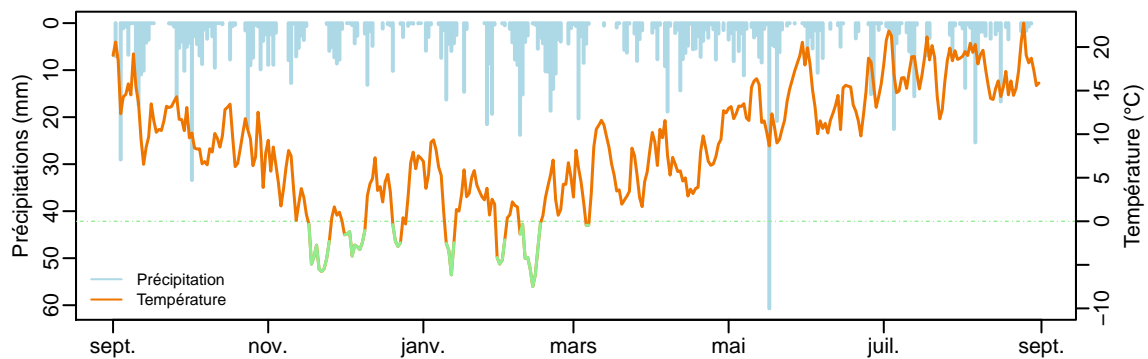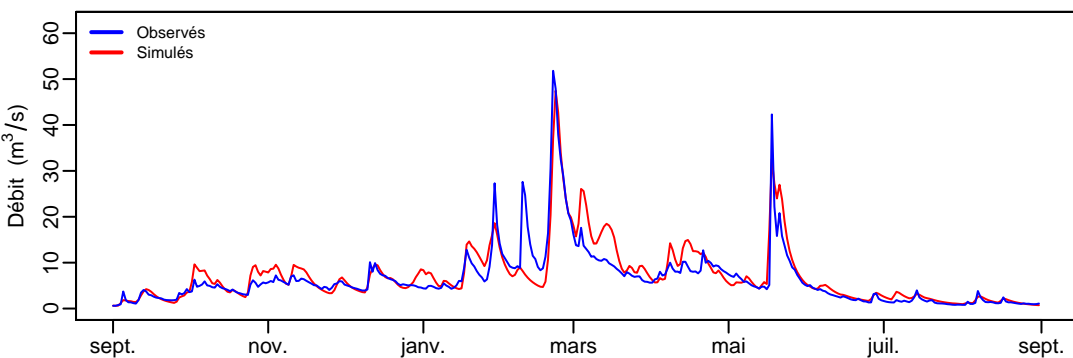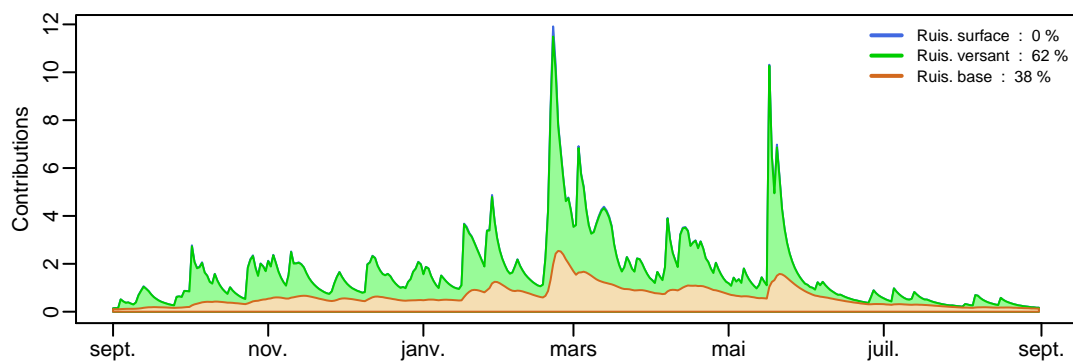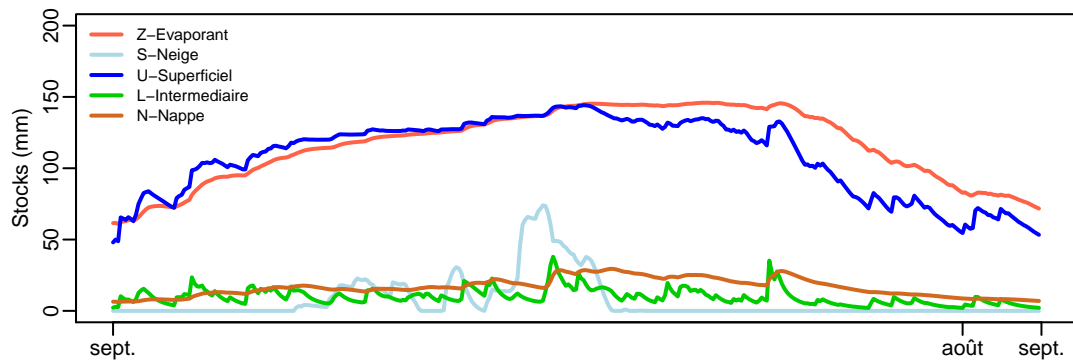

# k0753210 (372.37 km<sup>2</sup>) – année 1999–2000

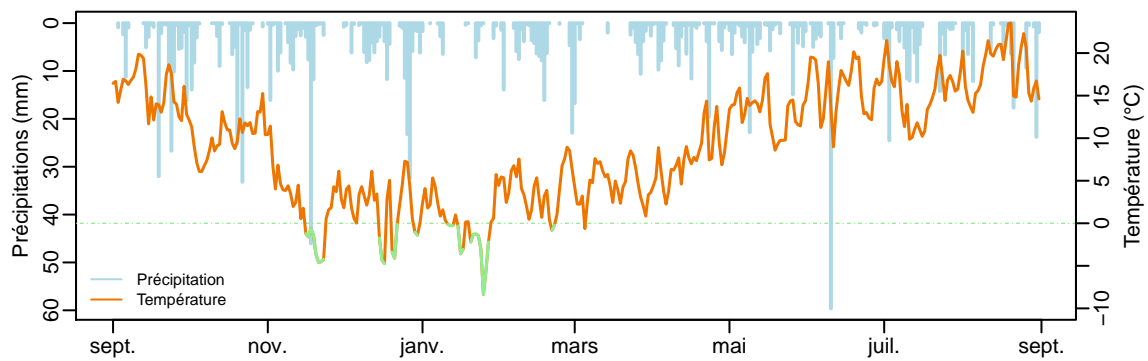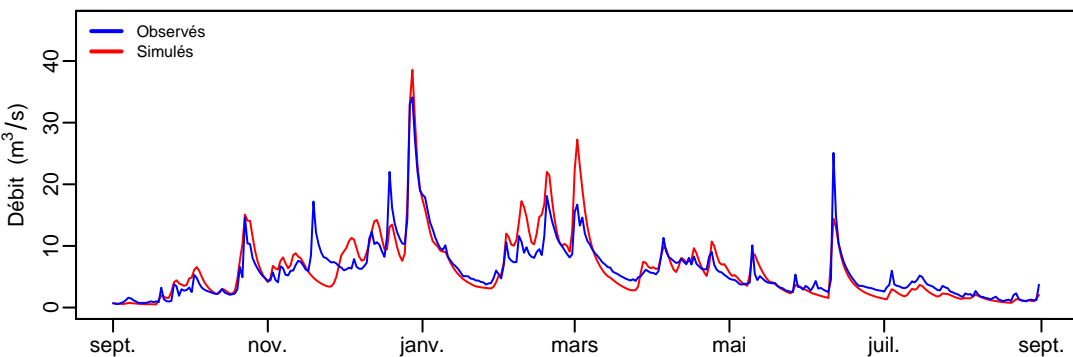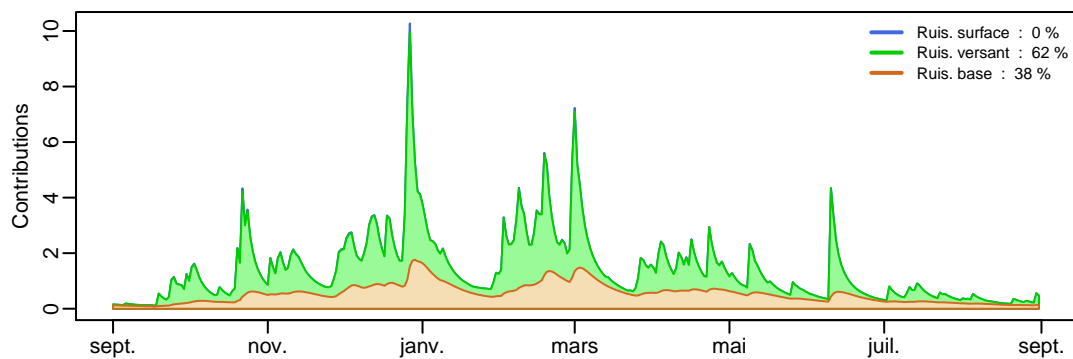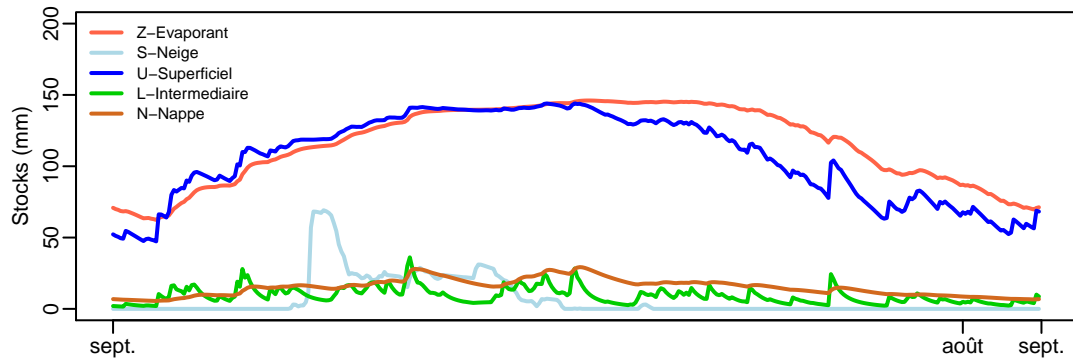

# k0753210 (372.37 km<sup>2</sup>) – année 2000–2001

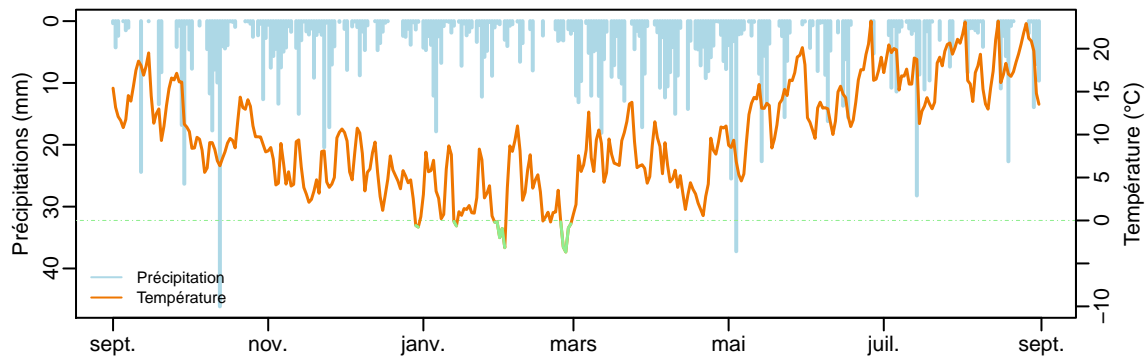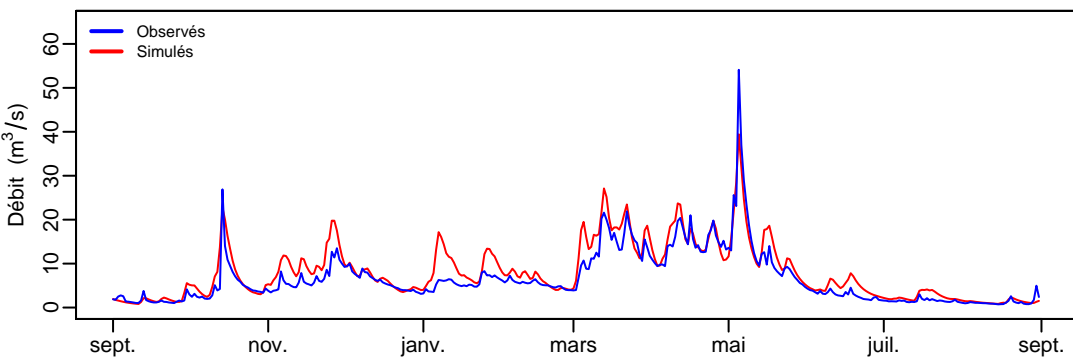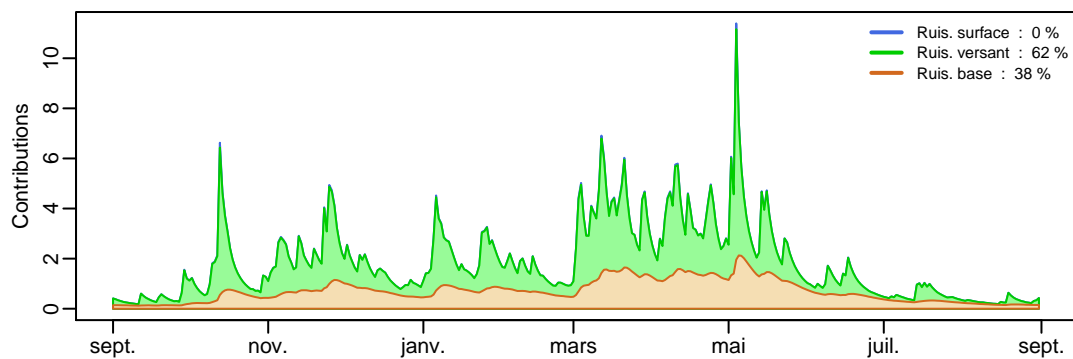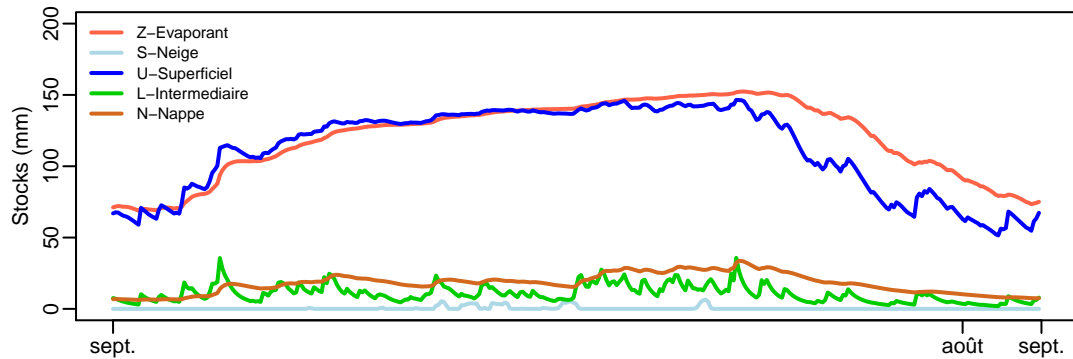

# k0753210 (372.37 km<sup>2</sup>) – année 2001–2002

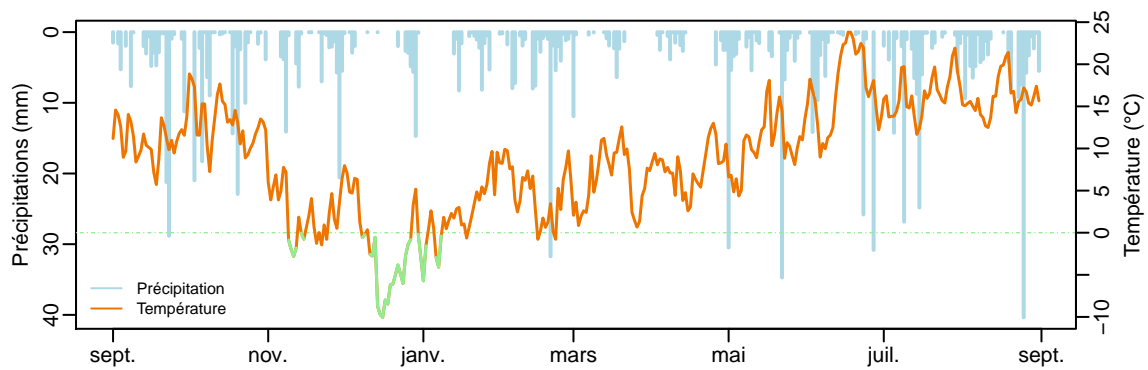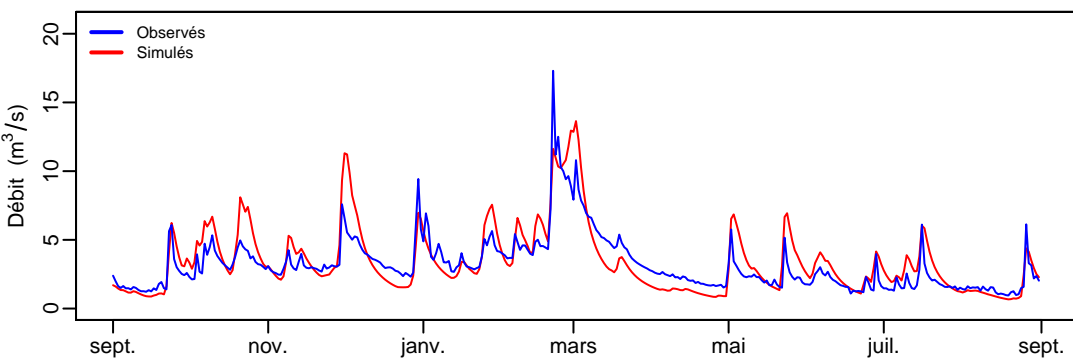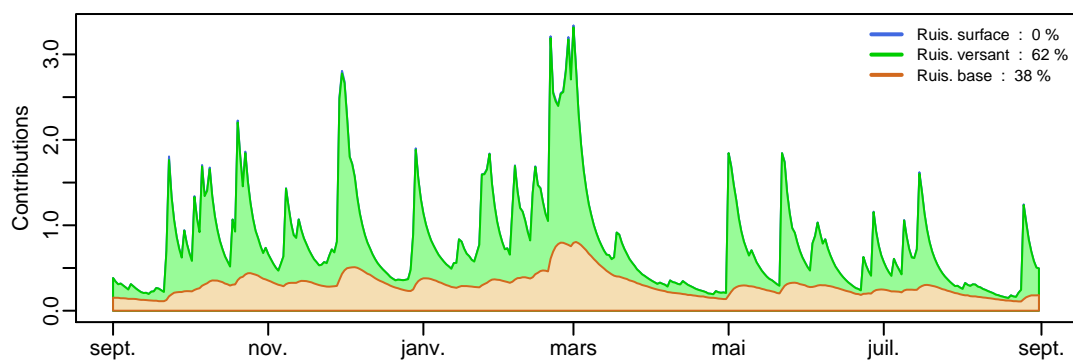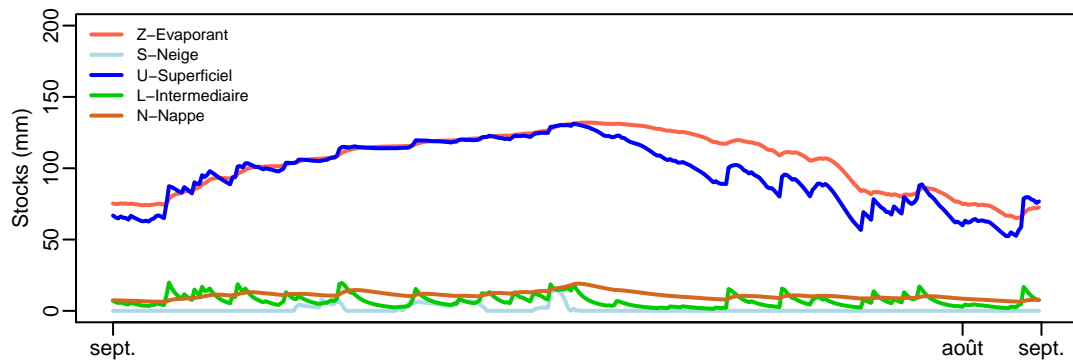

# k0753210 (372.37 km<sup>2</sup>) – année 2002–2003

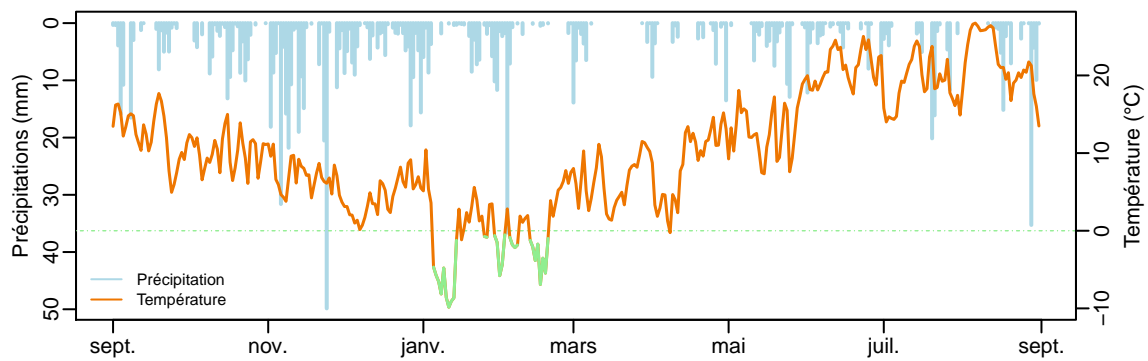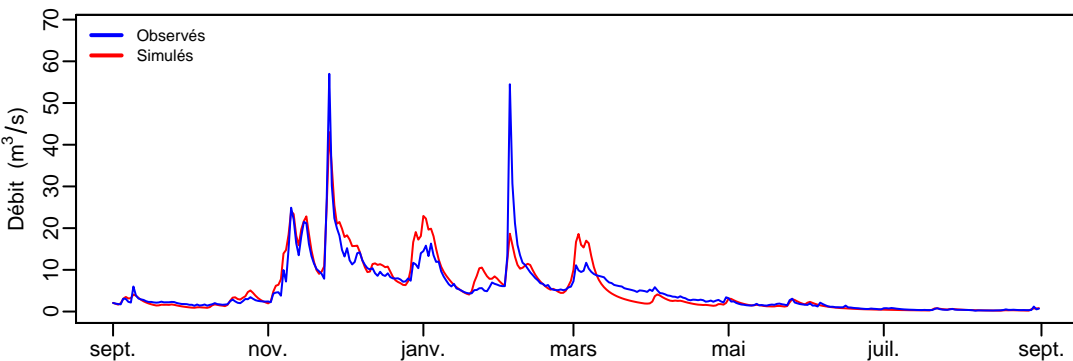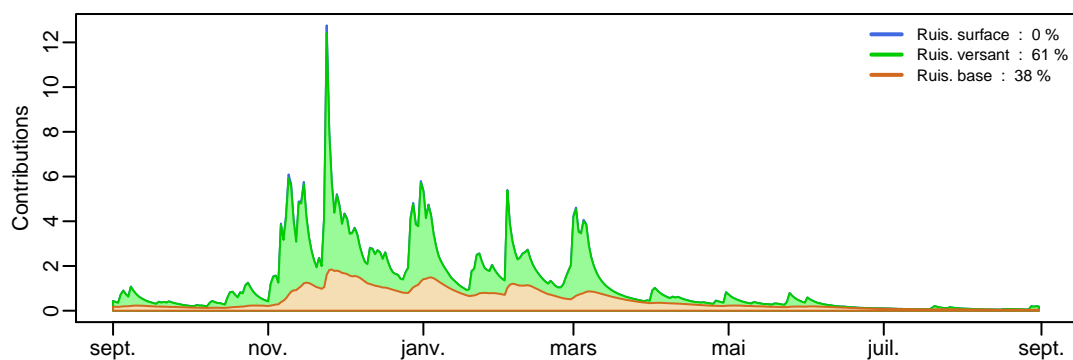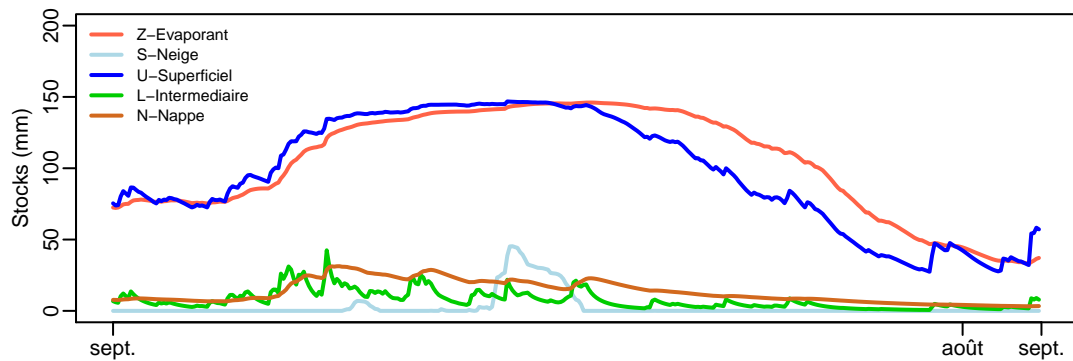

# k0753210 (372.37 km<sup>2</sup>) – année 2003–2004

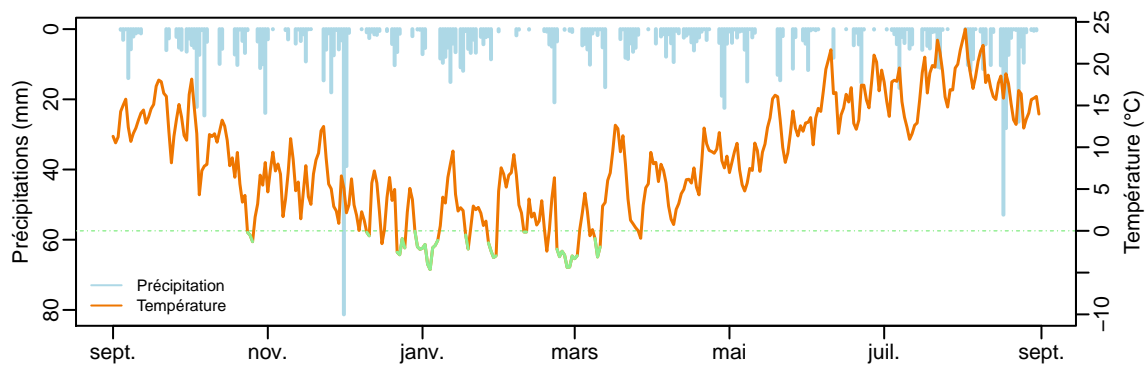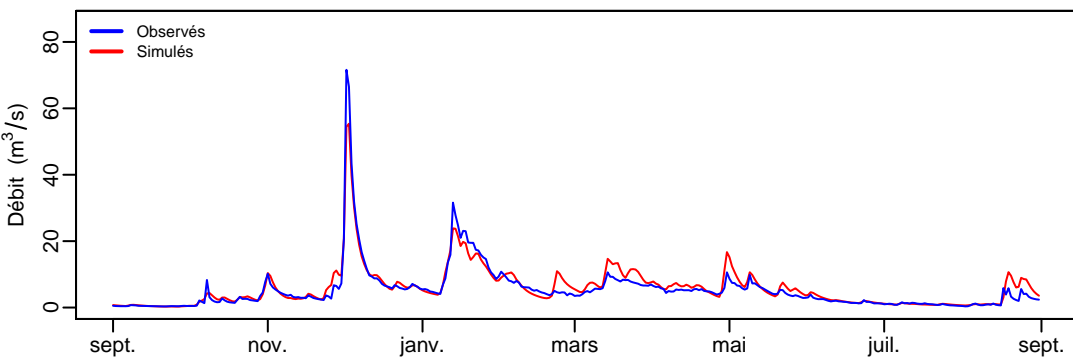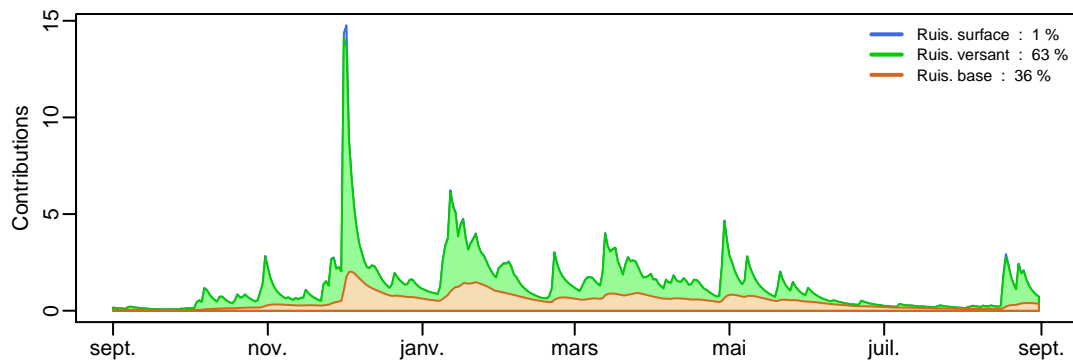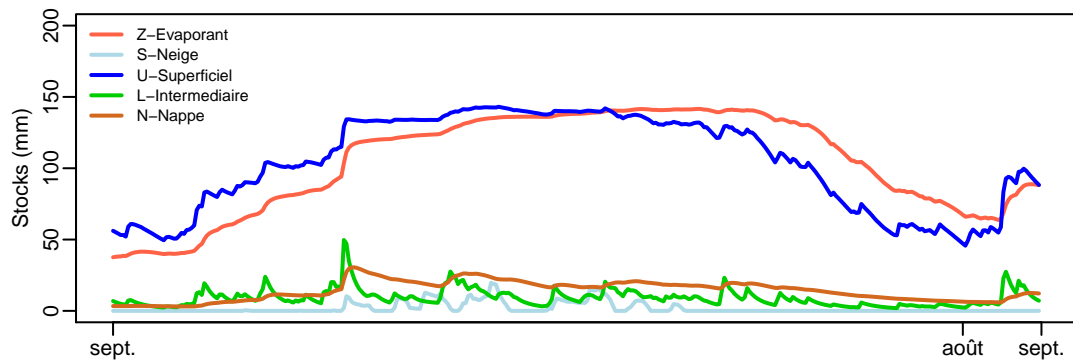



# k0753210 (372.37 km<sup>2</sup>) – année 2004–2005

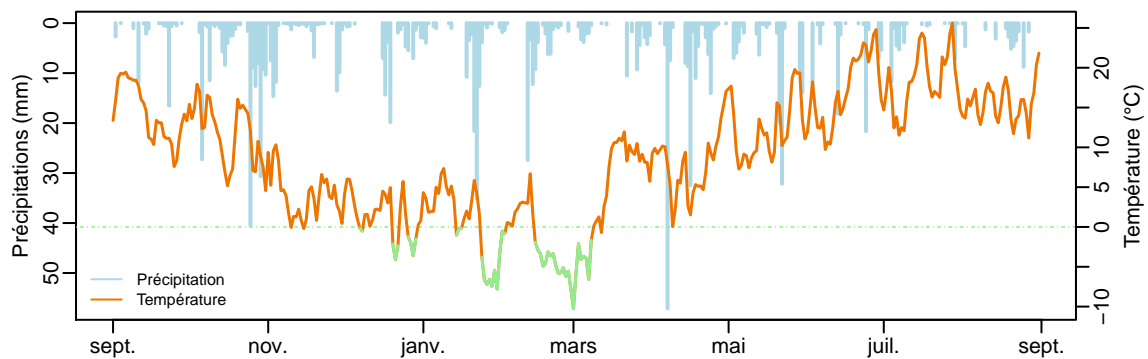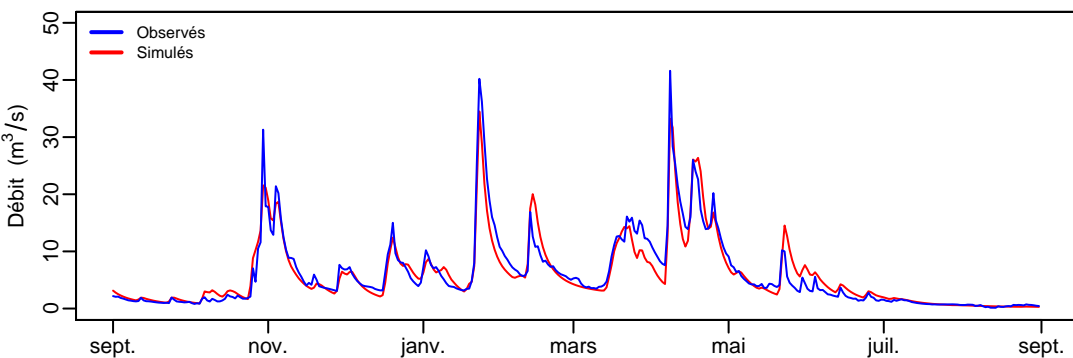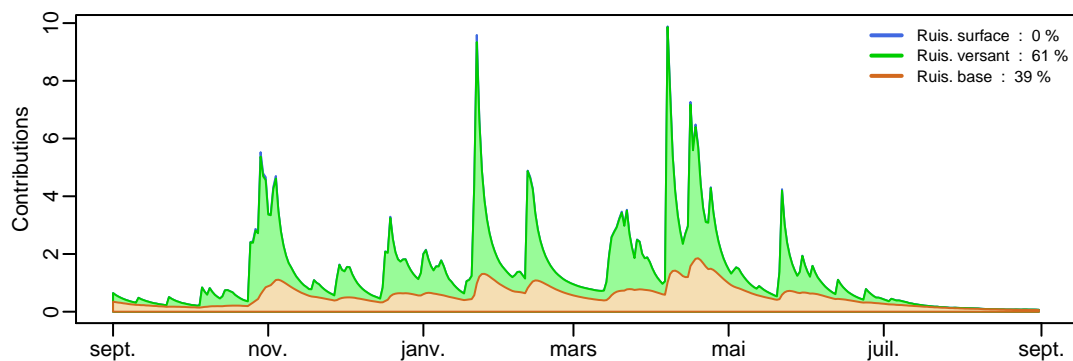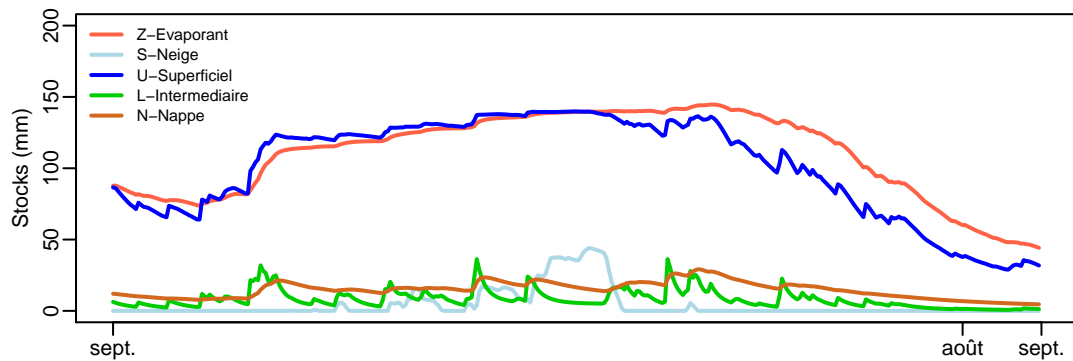

# k0753210 (372.37 km<sup>2</sup>) – année 2005–2006

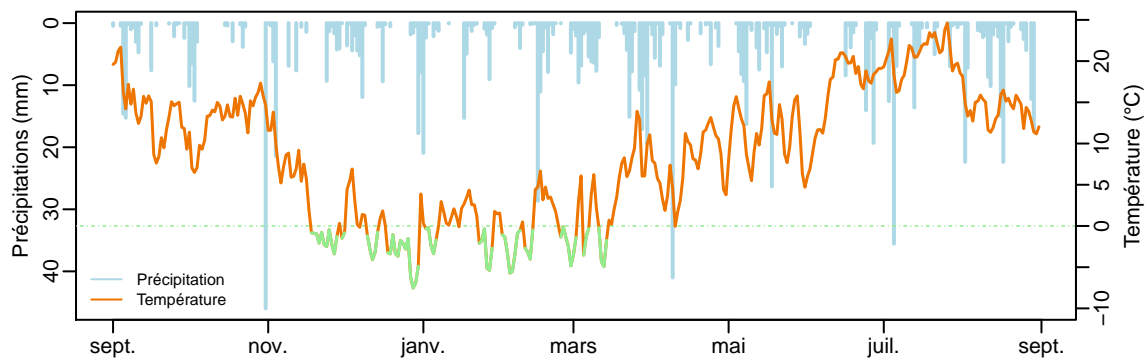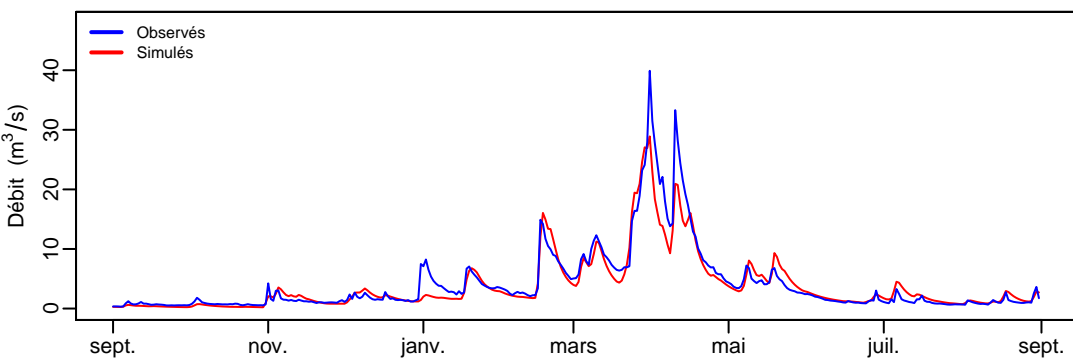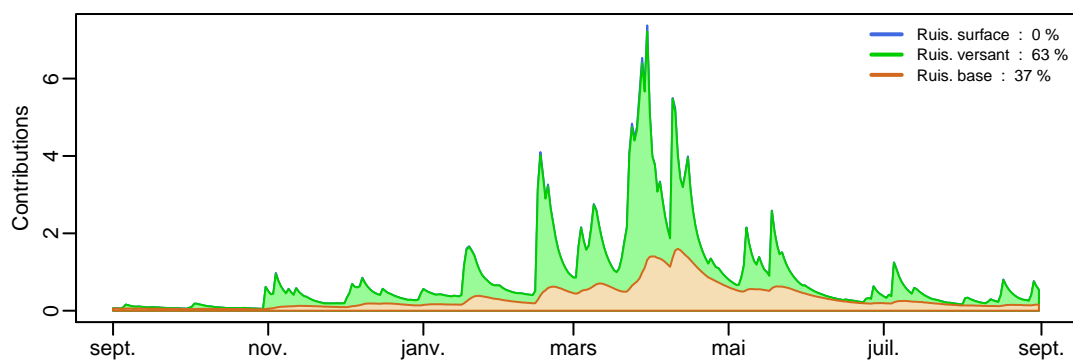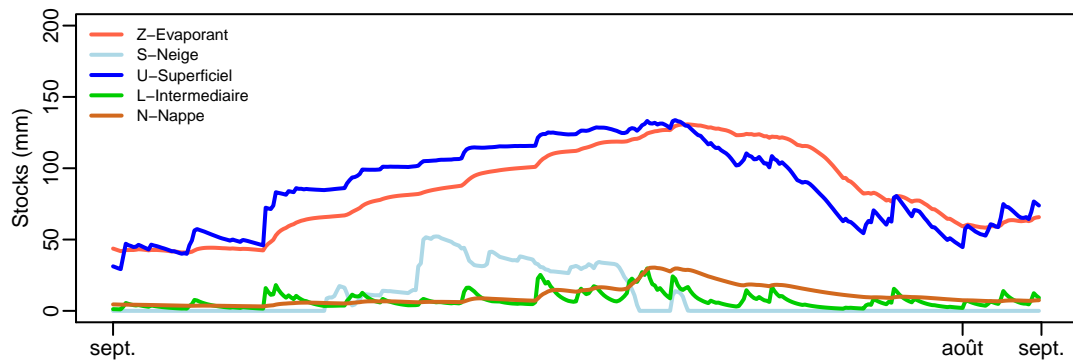

# k0753210 (372.37 km<sup>2</sup>) – année 2006–2007

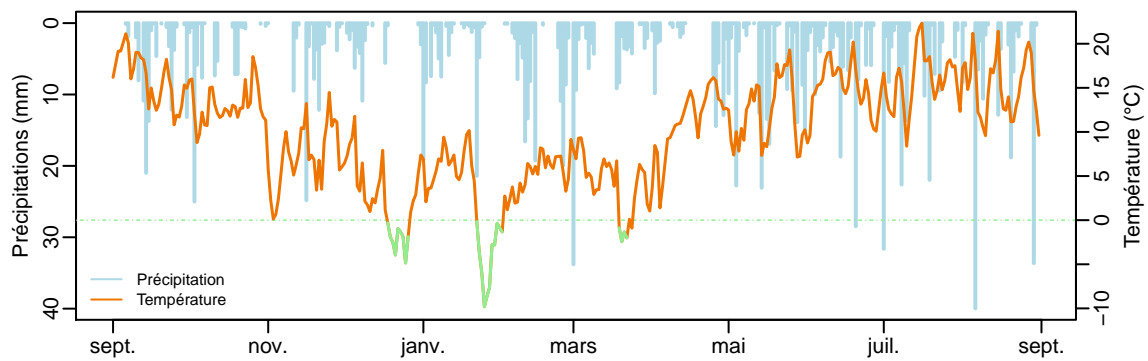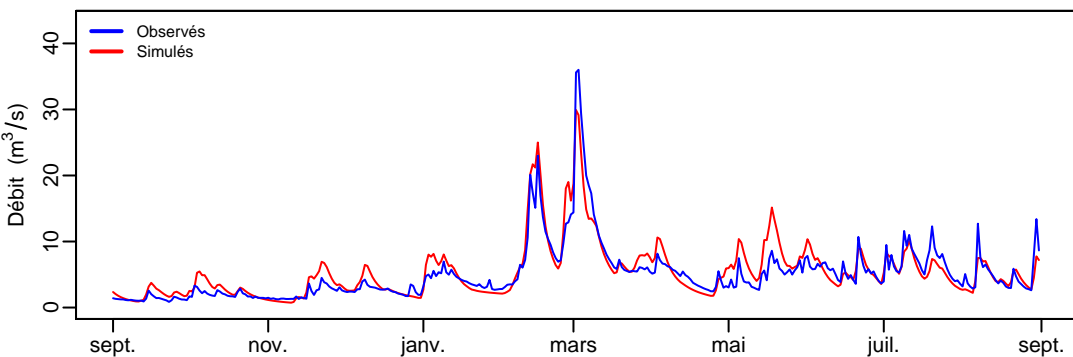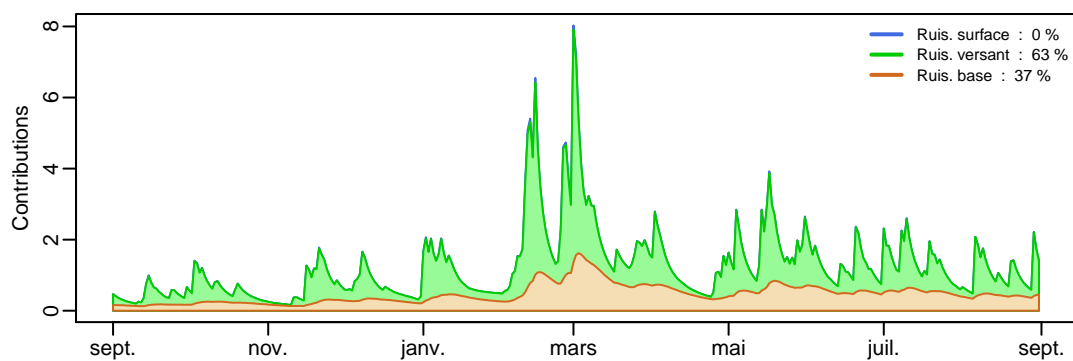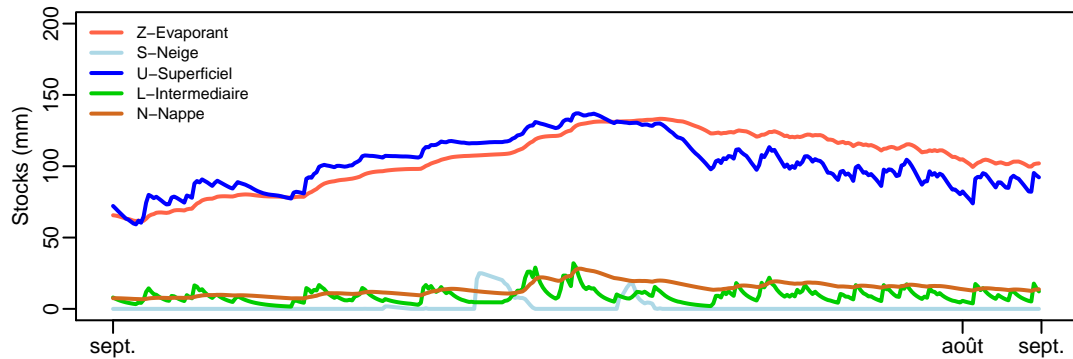

# k0753210 (372.37 km<sup>2</sup>) – année 2007–2008

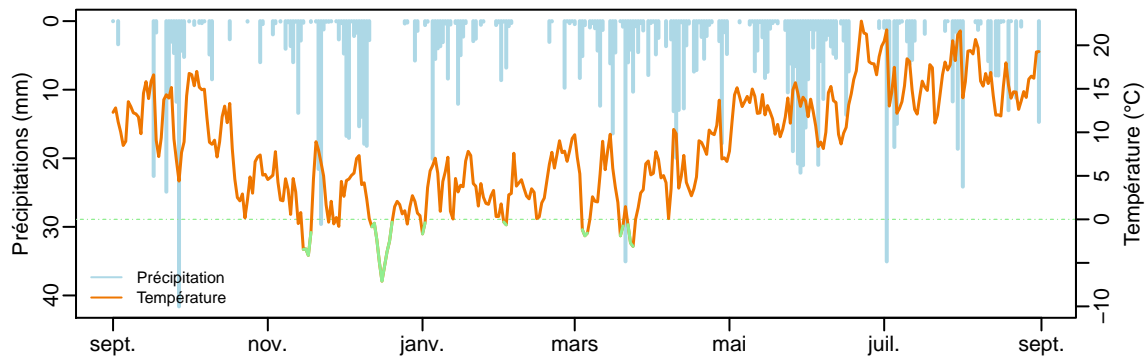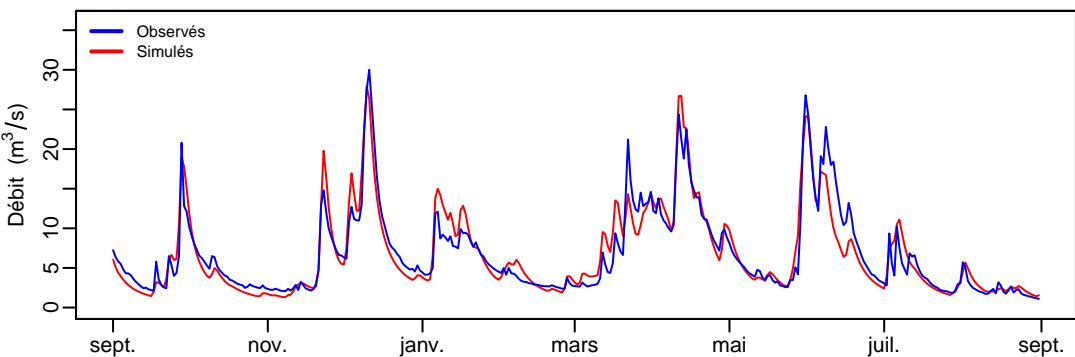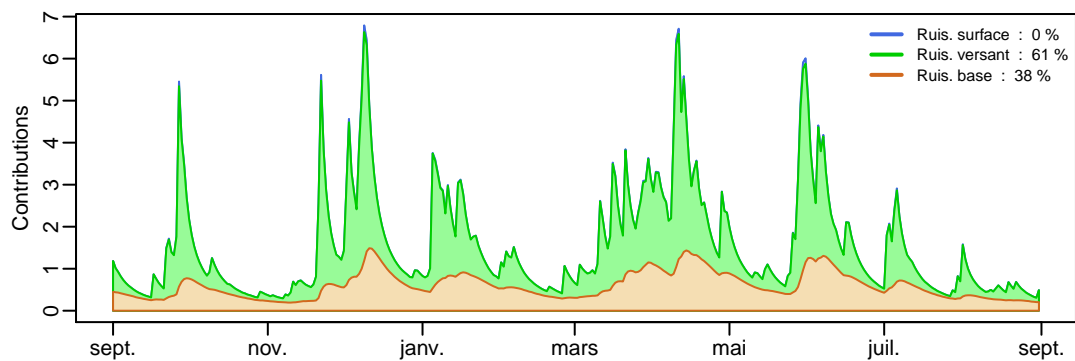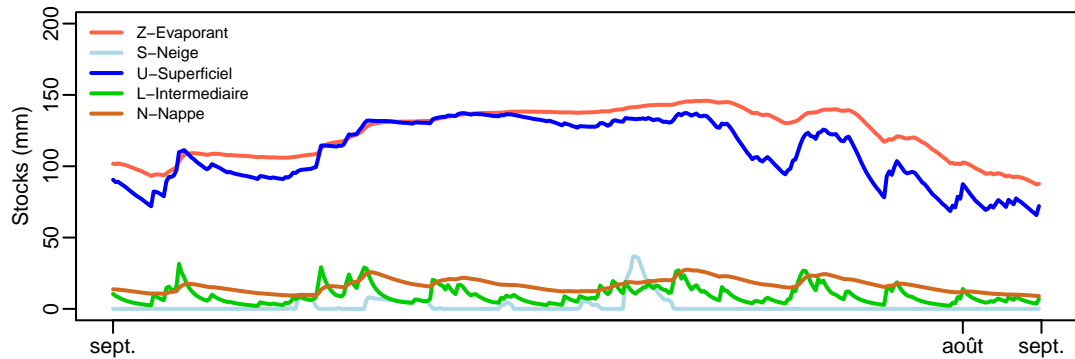

# k0753210 (372.37 km<sup>2</sup>) – année 2008–2009

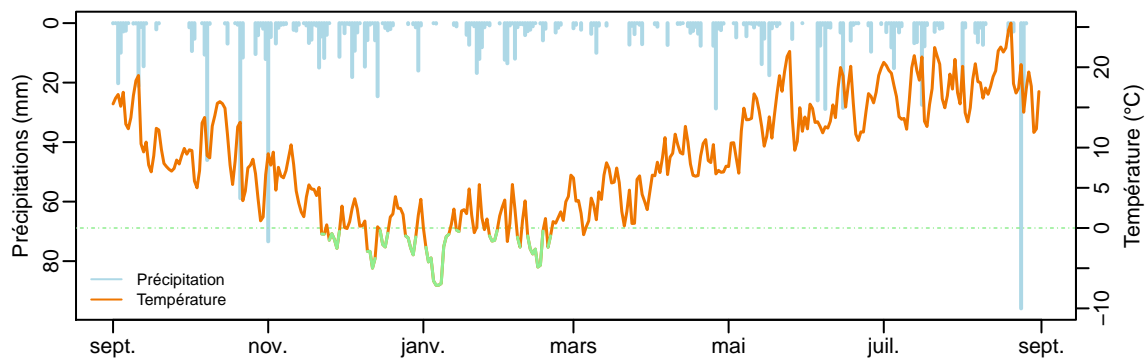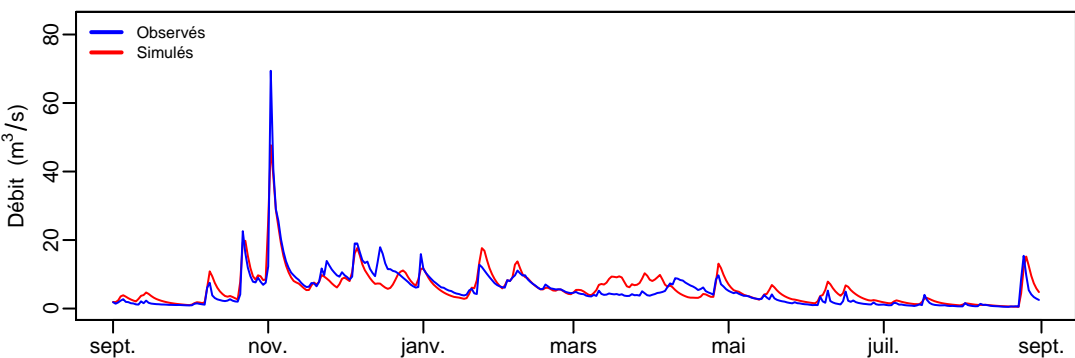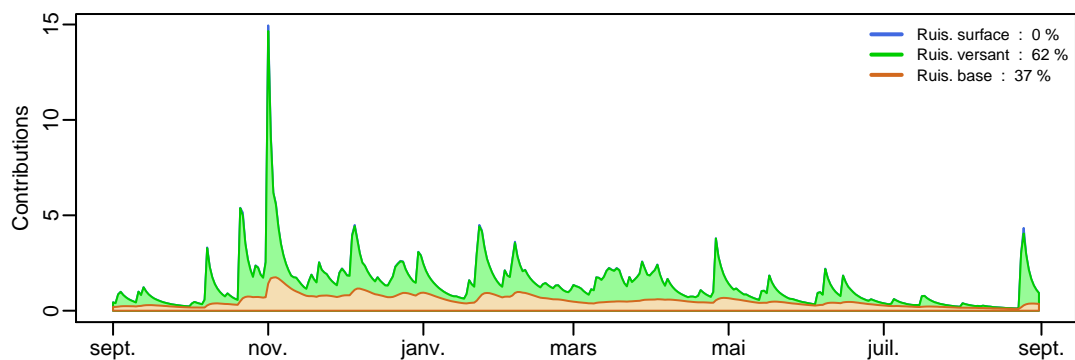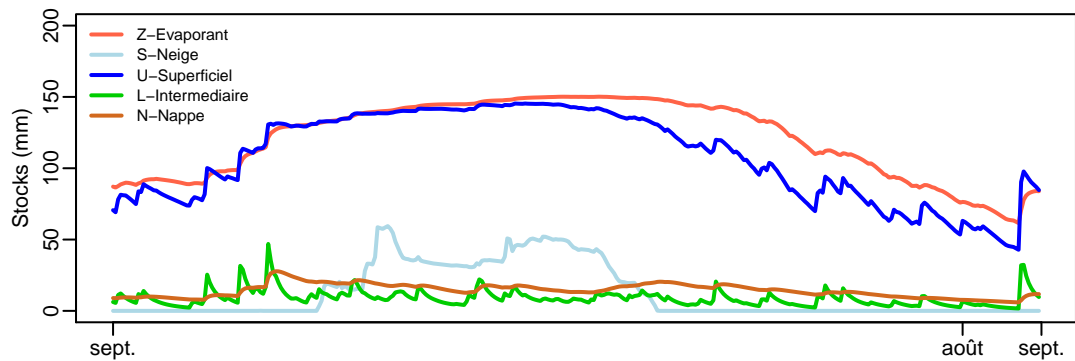

# k0753210 (372.37 km<sup>2</sup>) – année 2009–2010

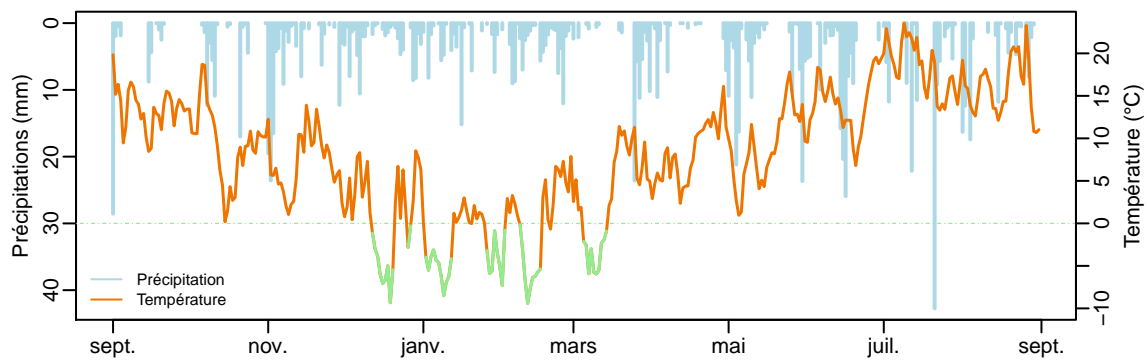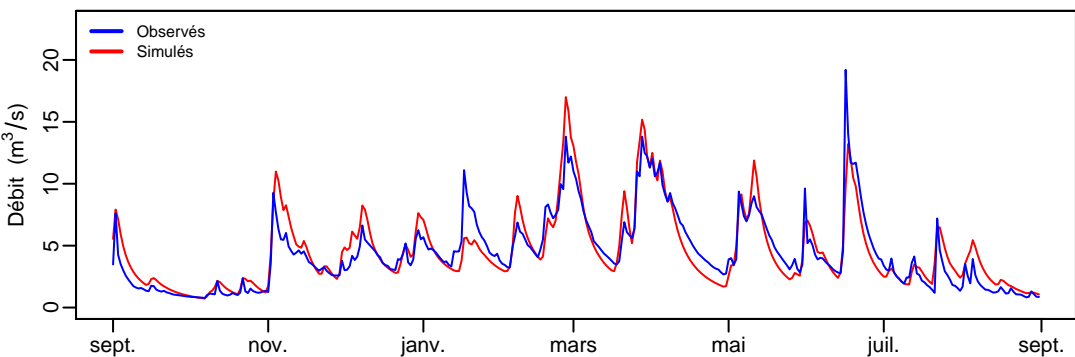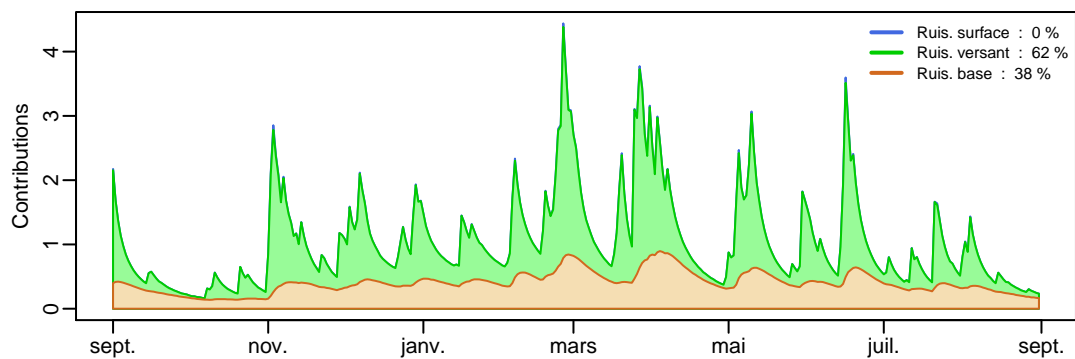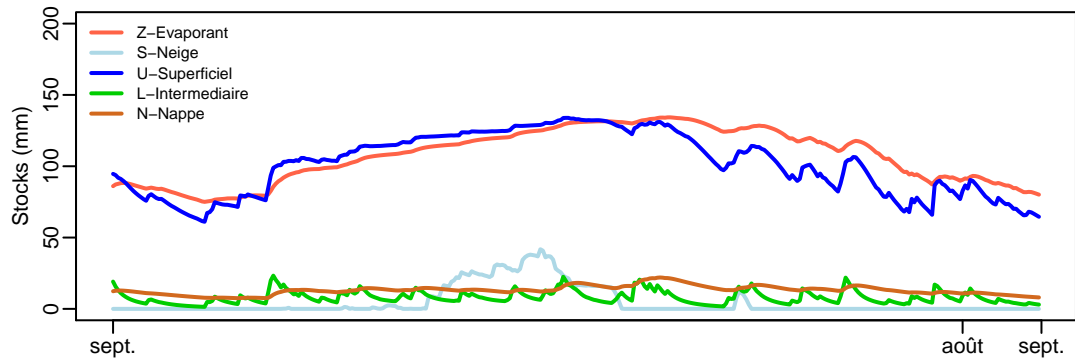

# k0753210 (372.37 km<sup>2</sup>) – année 2010–2011

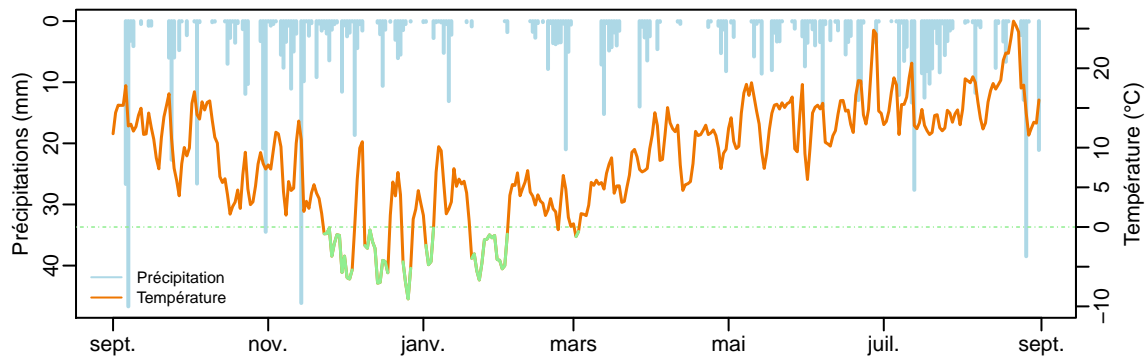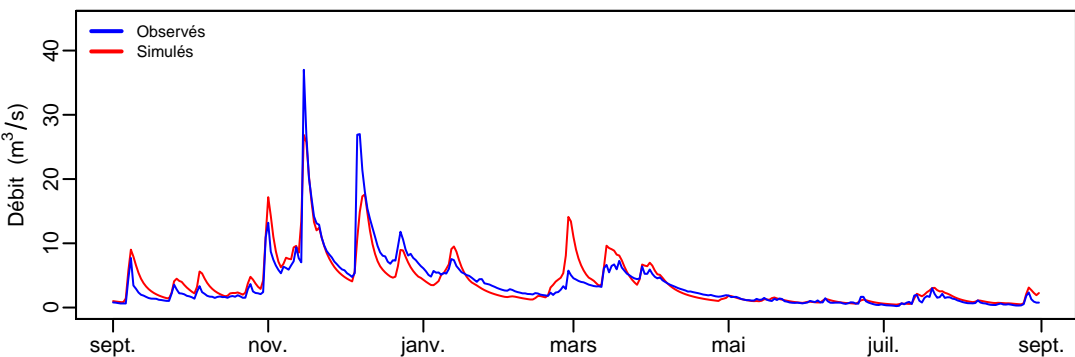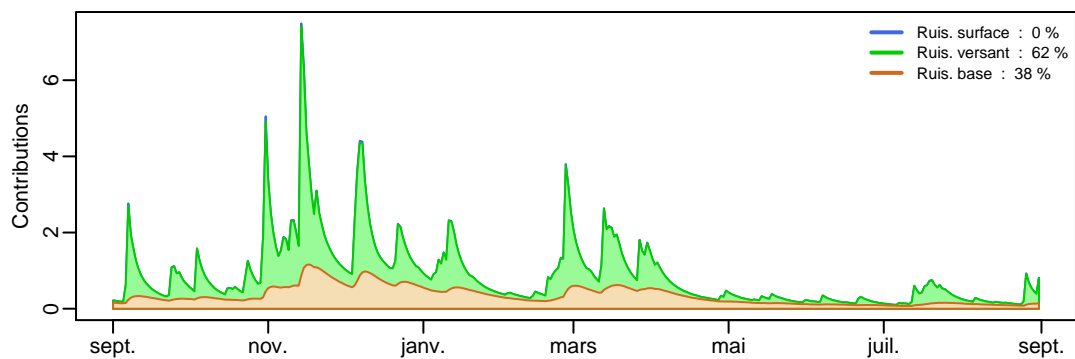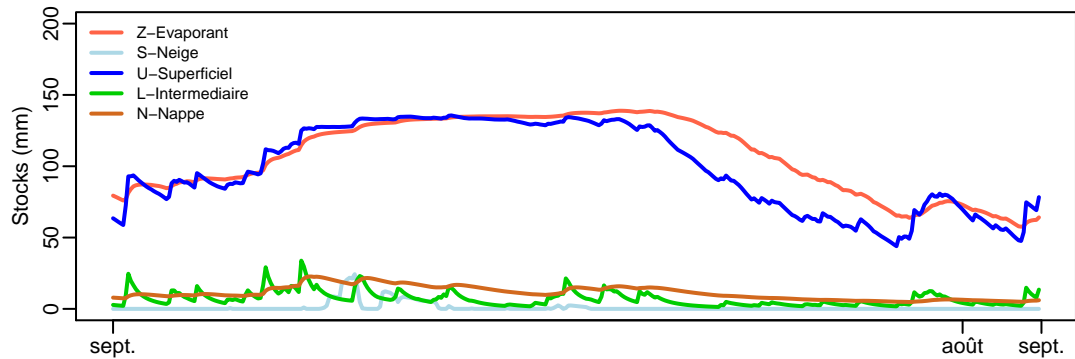

# k0753210 (372.37 km<sup>2</sup>) – année 2011–2012

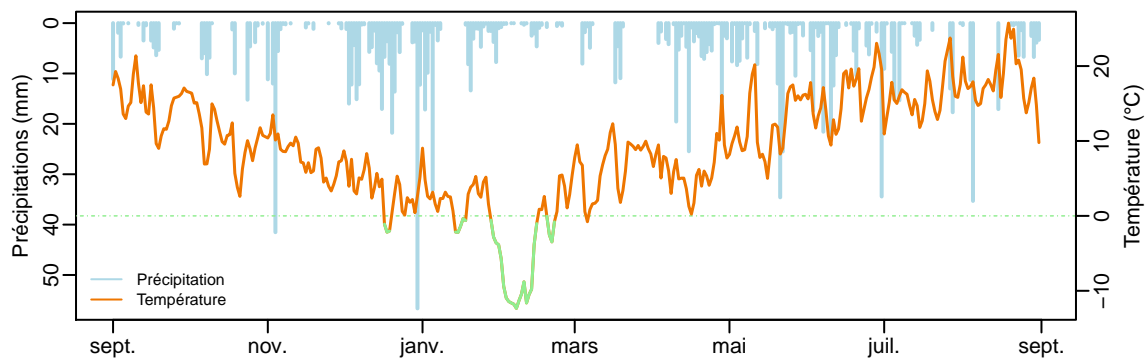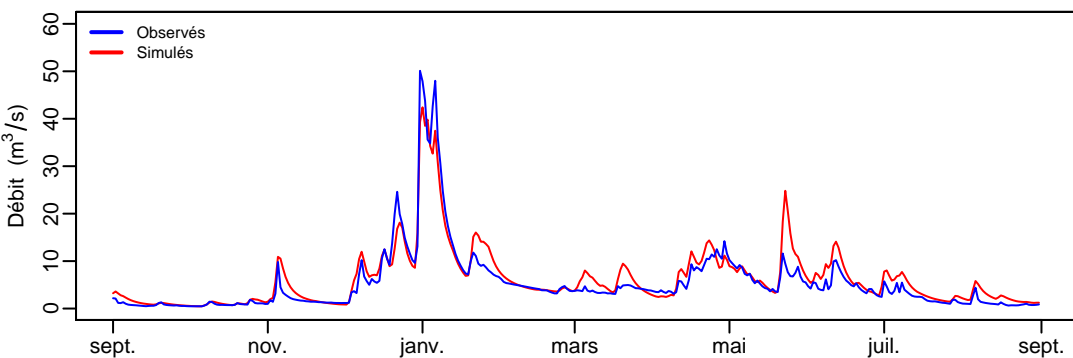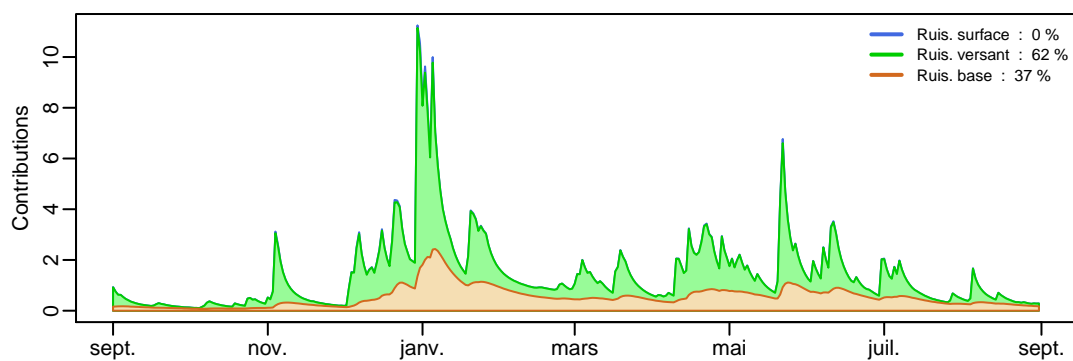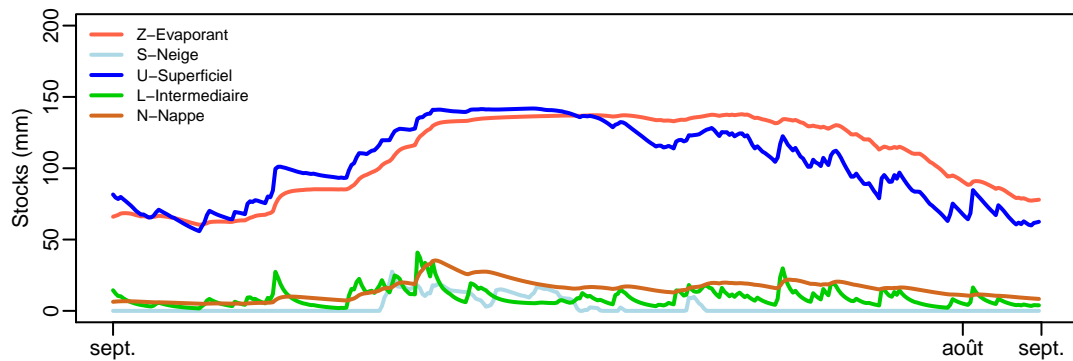



# k0773220 (662.11 km<sup>2</sup>) – année 1986–1987

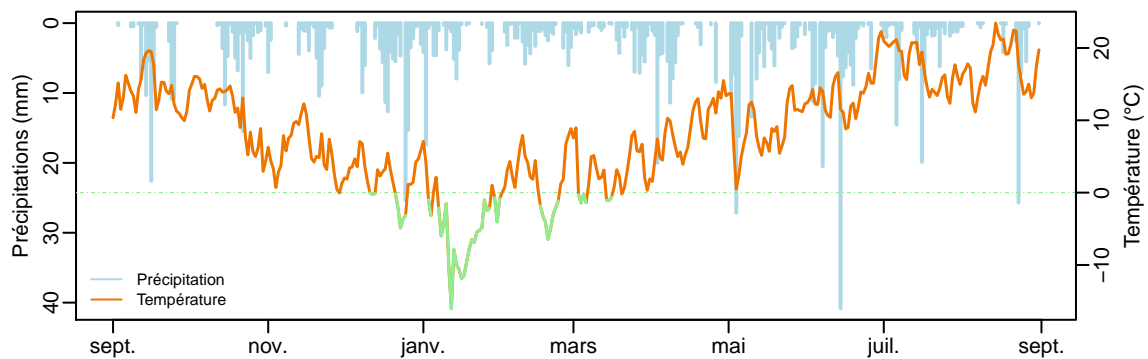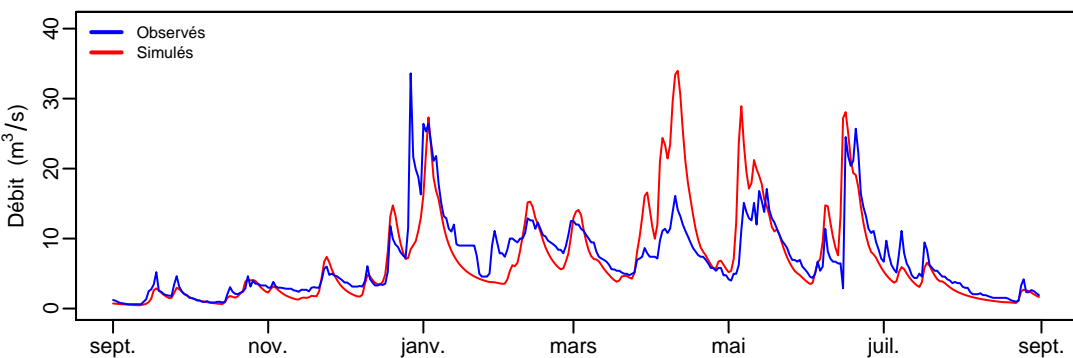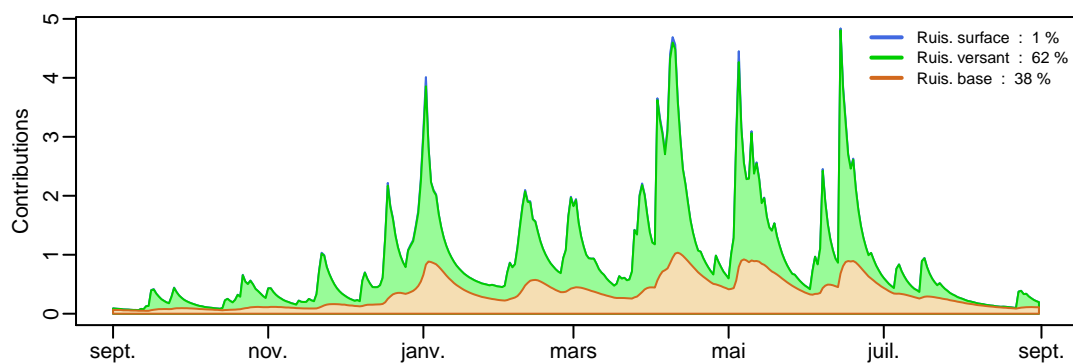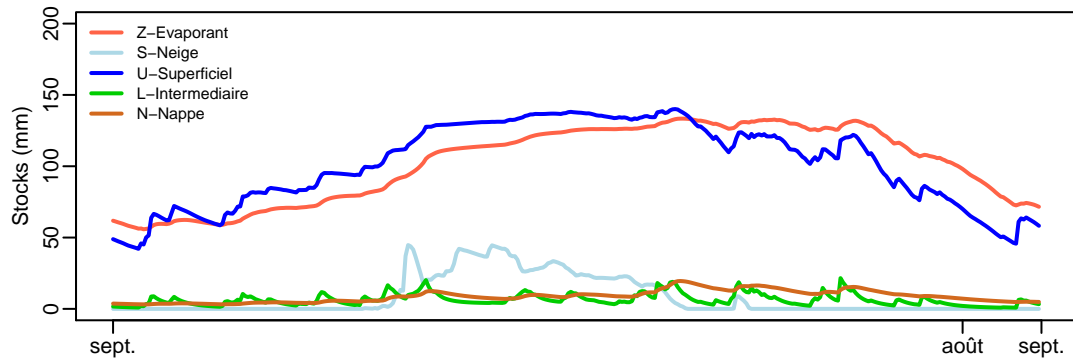

# k0773220 (662.11 km<sup>2</sup>) – année 1987–1988

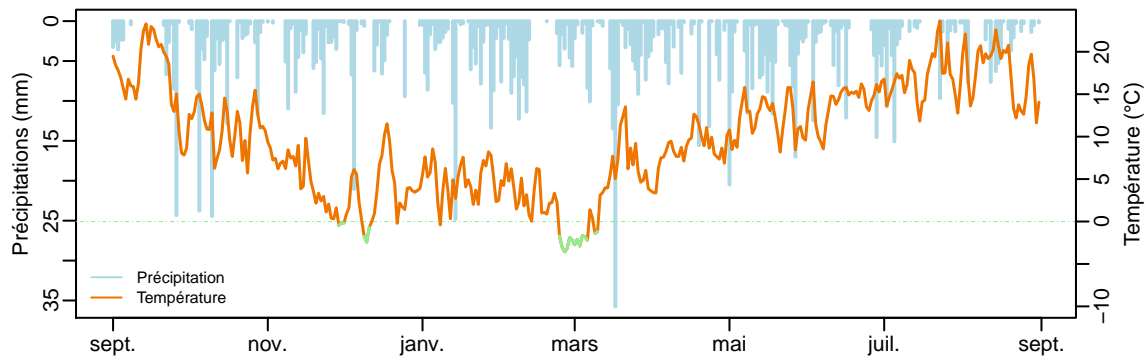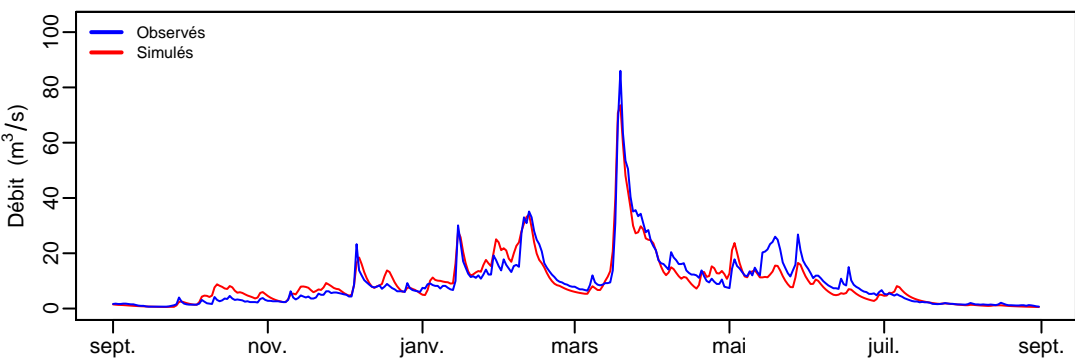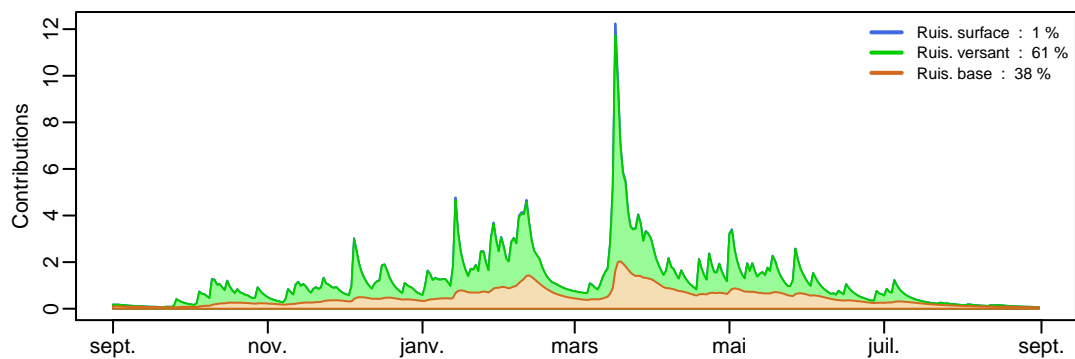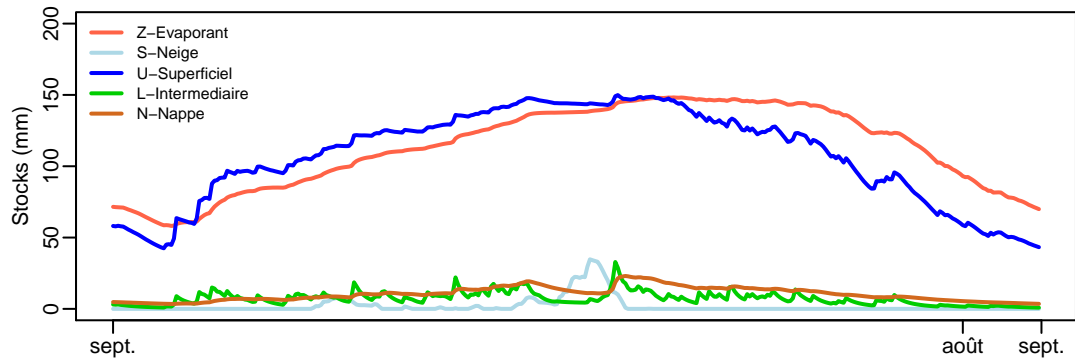

# k0773220 (662.11 km<sup>2</sup>) – année 1988–1989

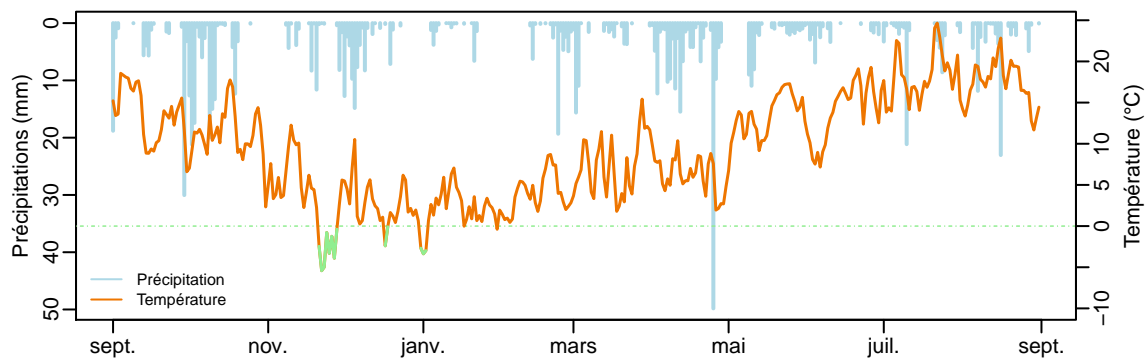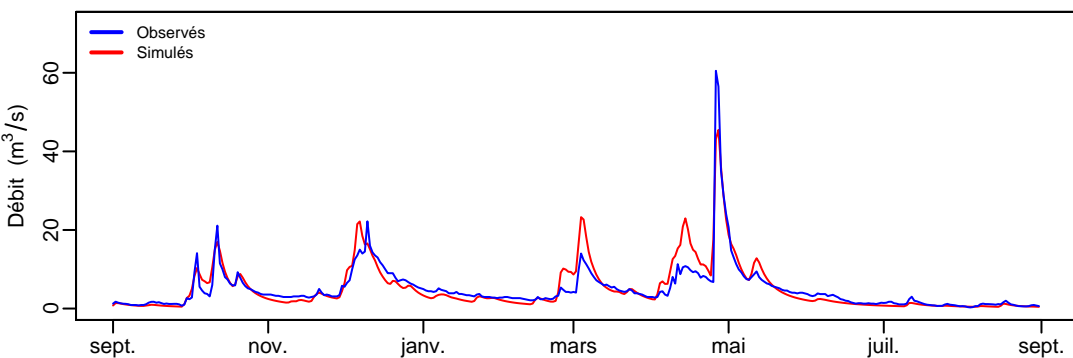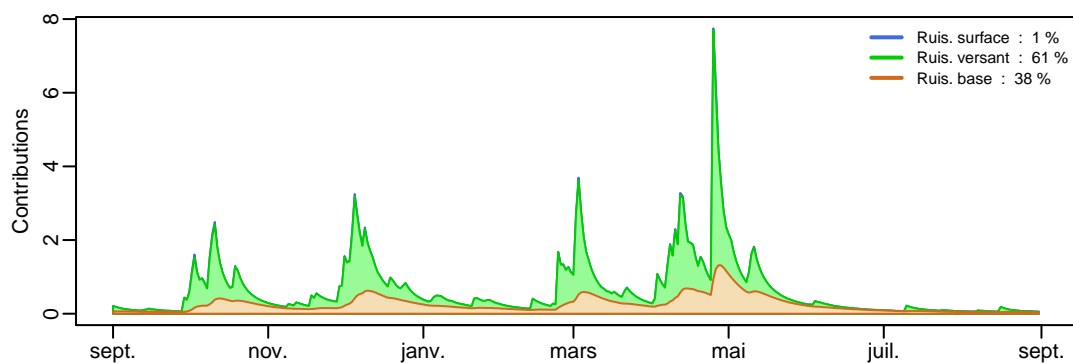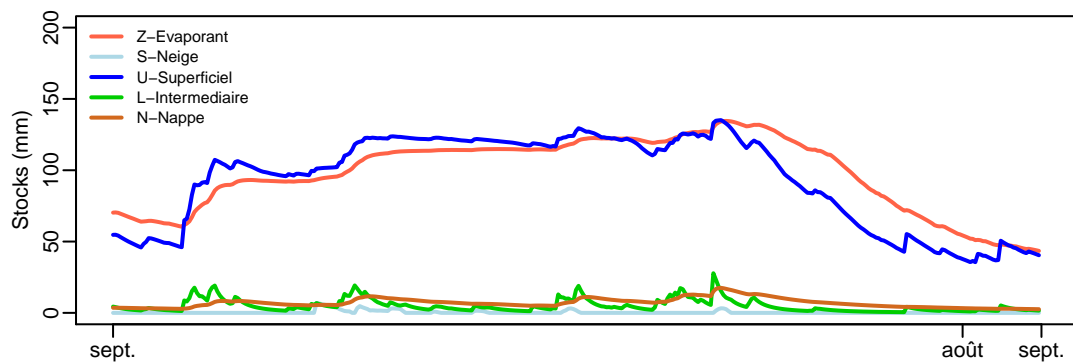

# k0773220 (662.11 km<sup>2</sup>) – année 1989–1990

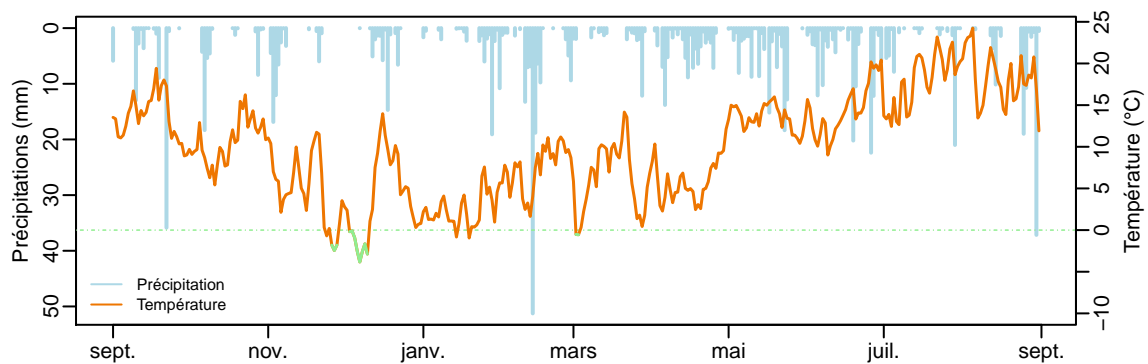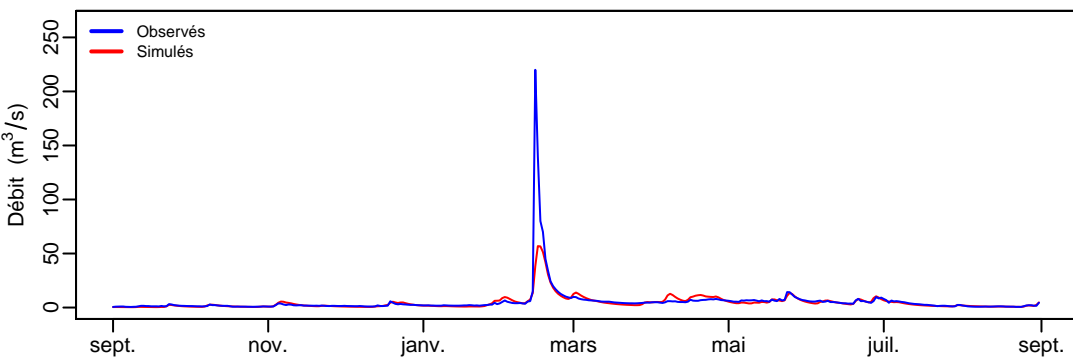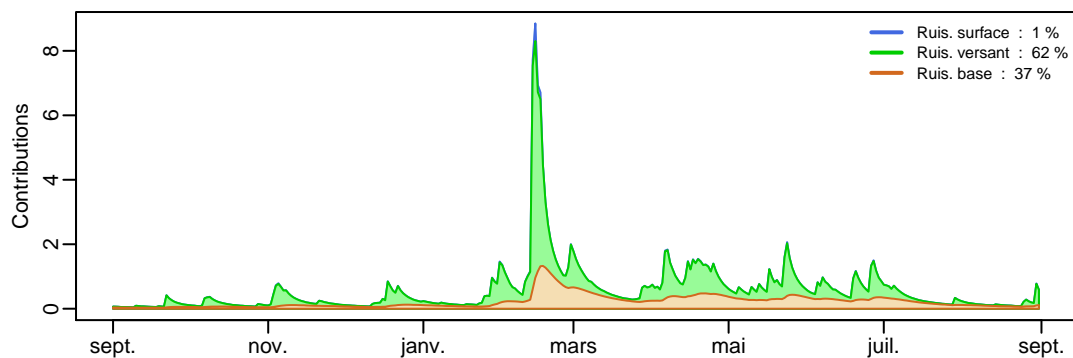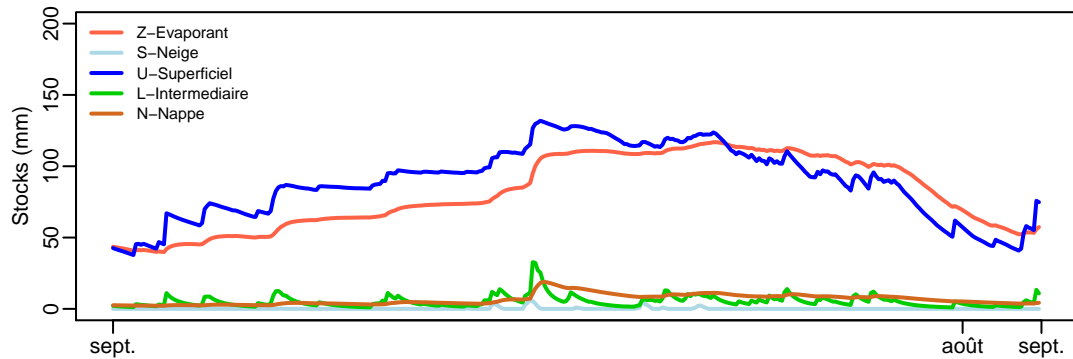

# k0773220 (662.11 km<sup>2</sup>) – année 1990–1991

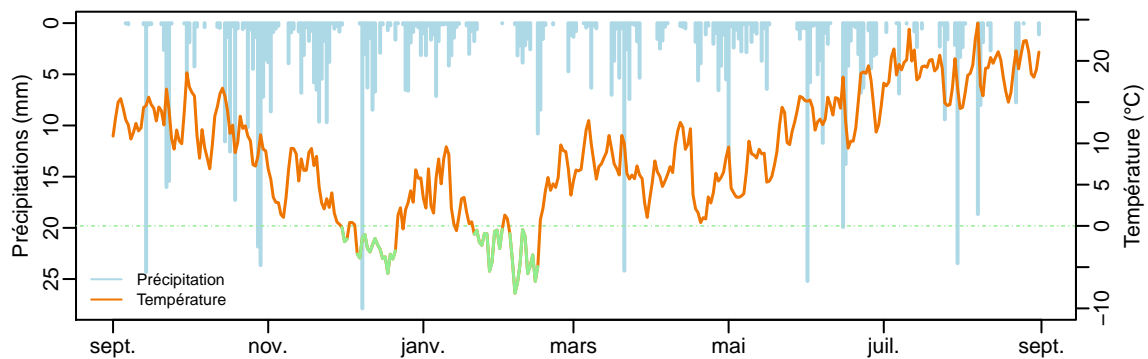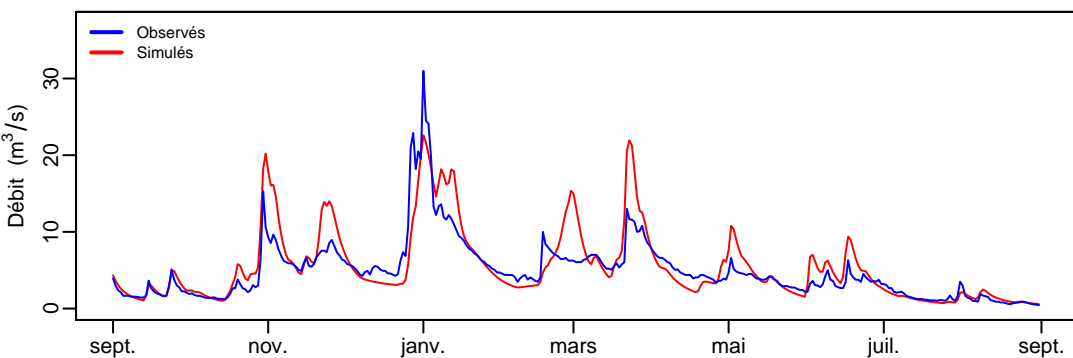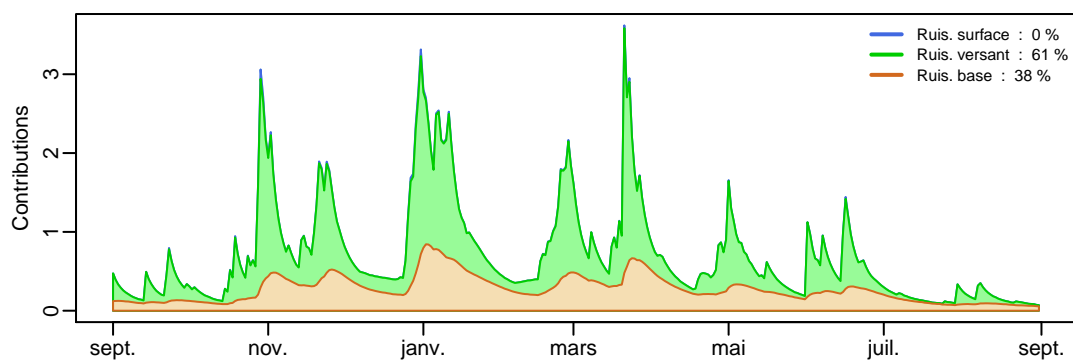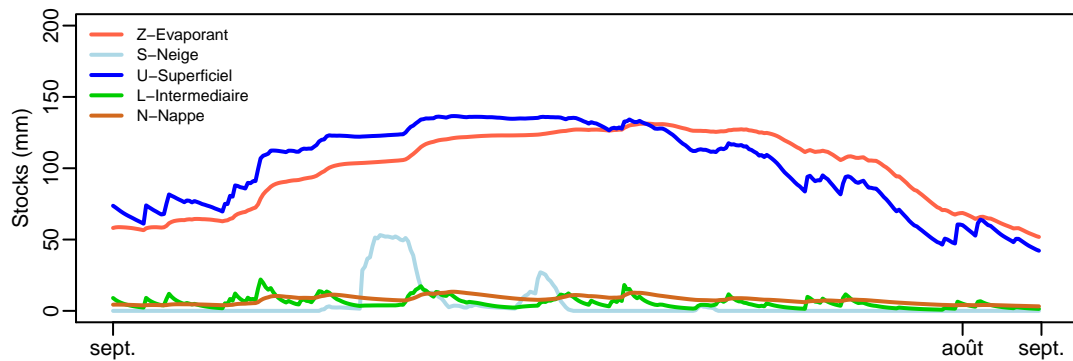

# k0773220 (662.11 km<sup>2</sup>) – année 1991–1992

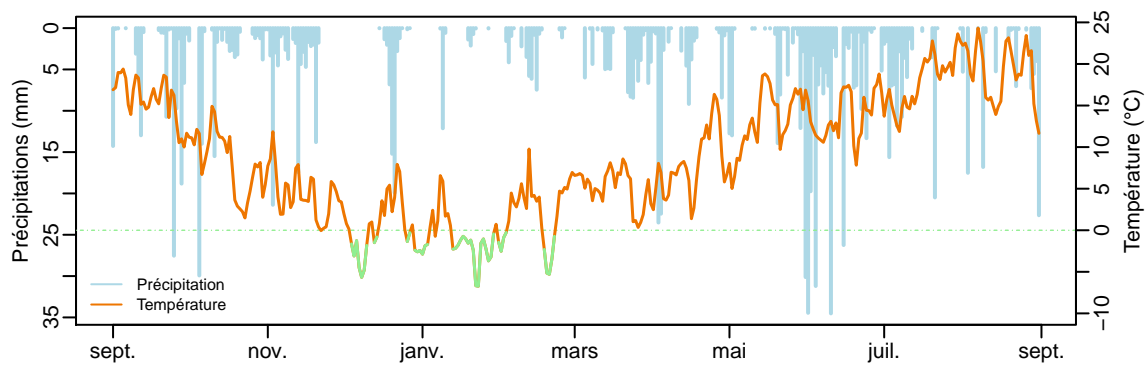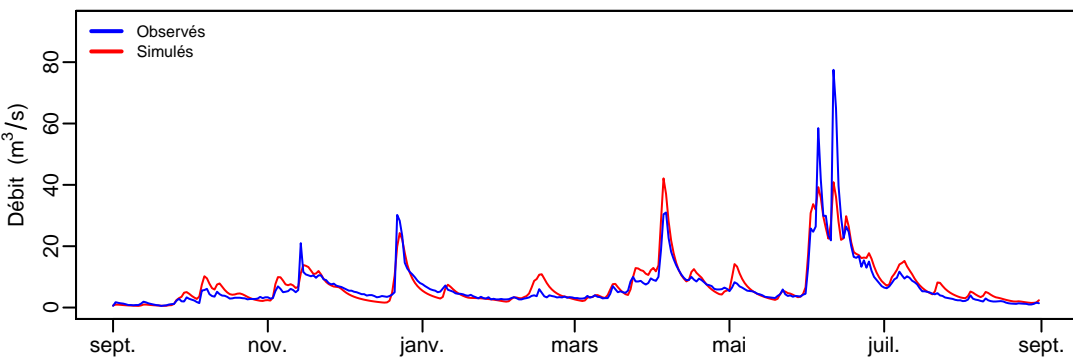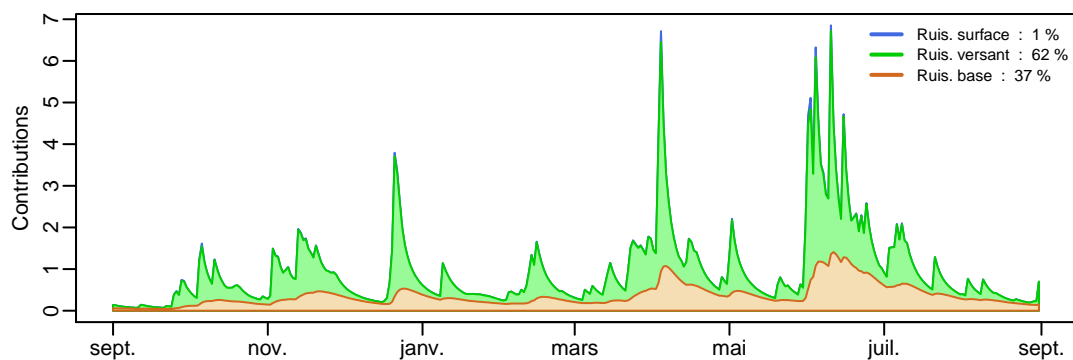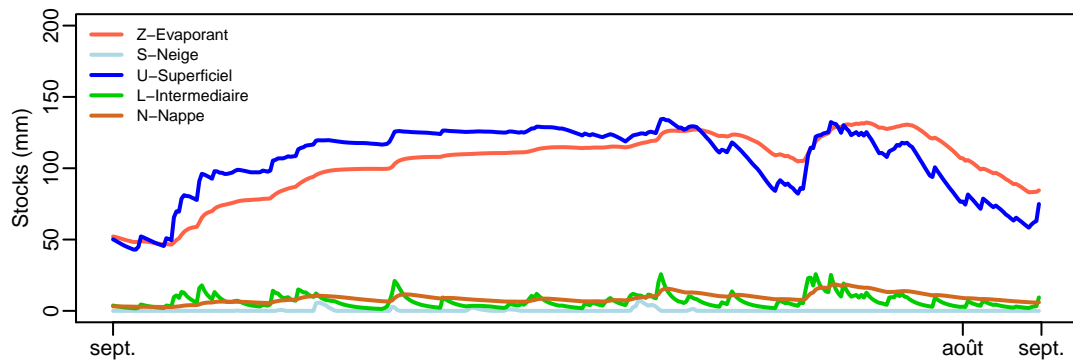

# k0773220 (662.11 km<sup>2</sup>) – année 1992–1993

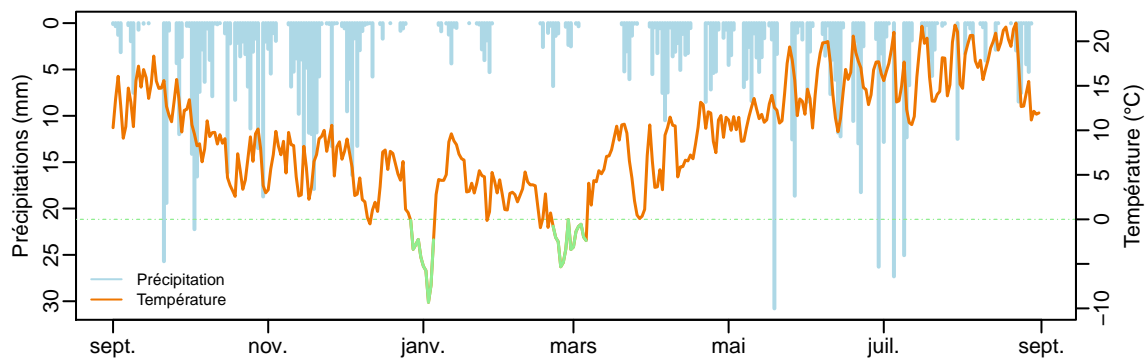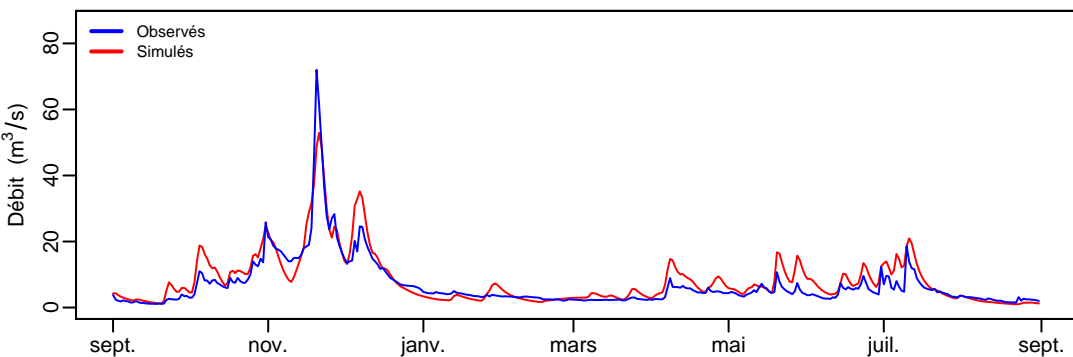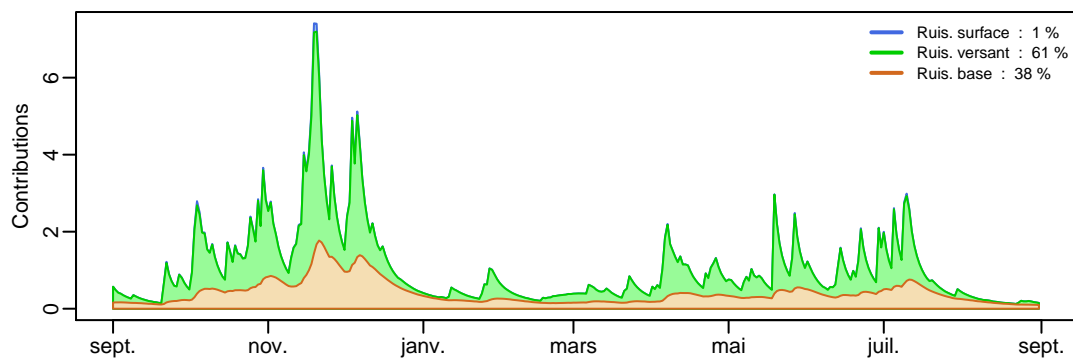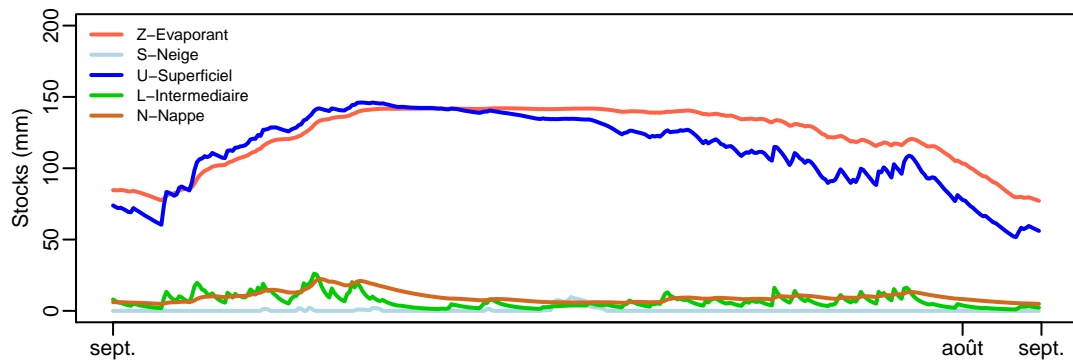

# k0773220 (662.11 km<sup>2</sup>) – année 1993–1994

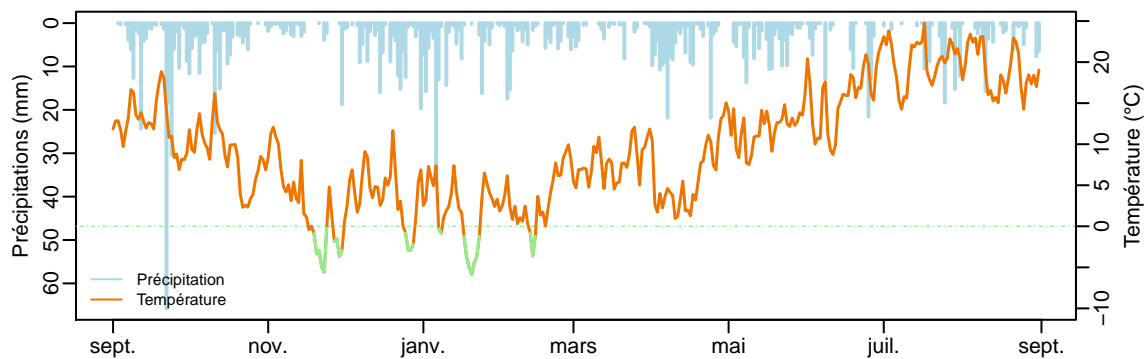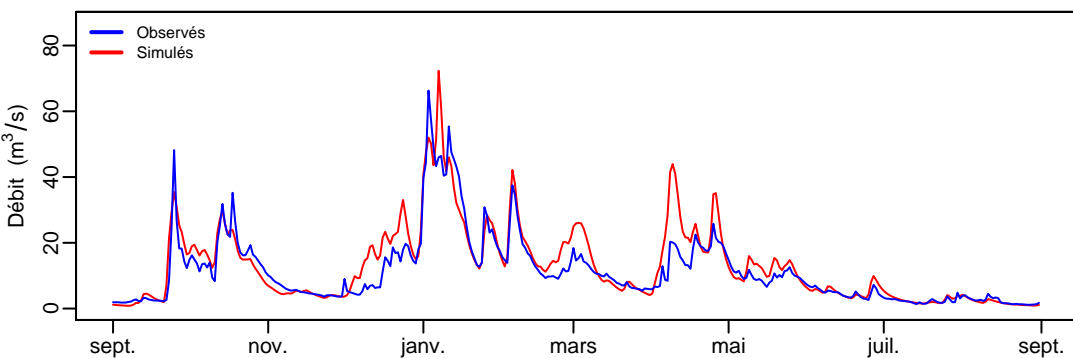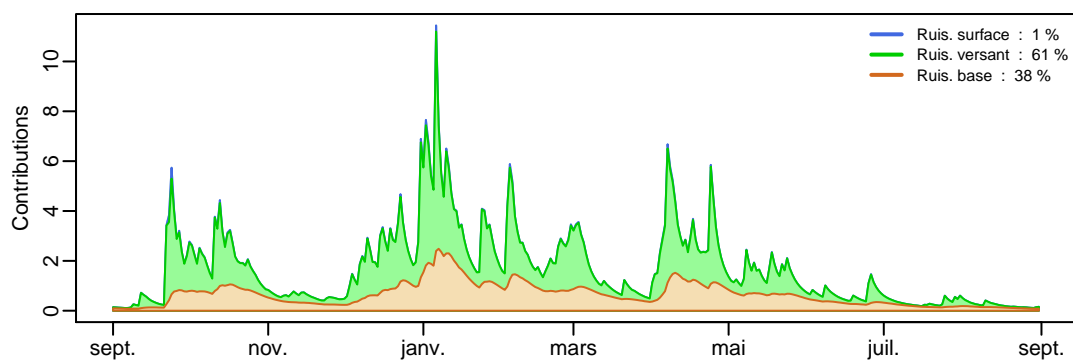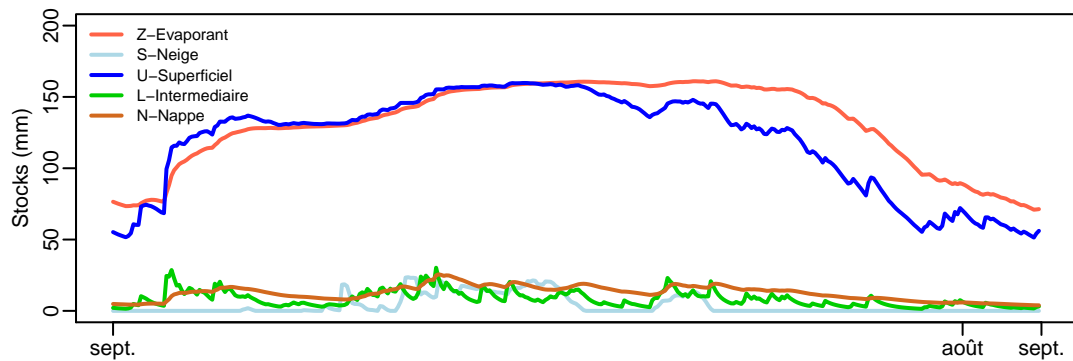



# k0773220 (662.11 km<sup>2</sup>) – année 1994–1995

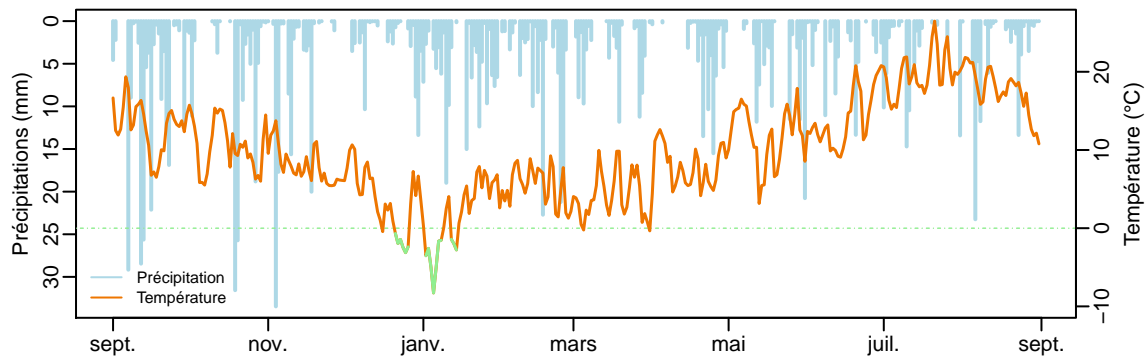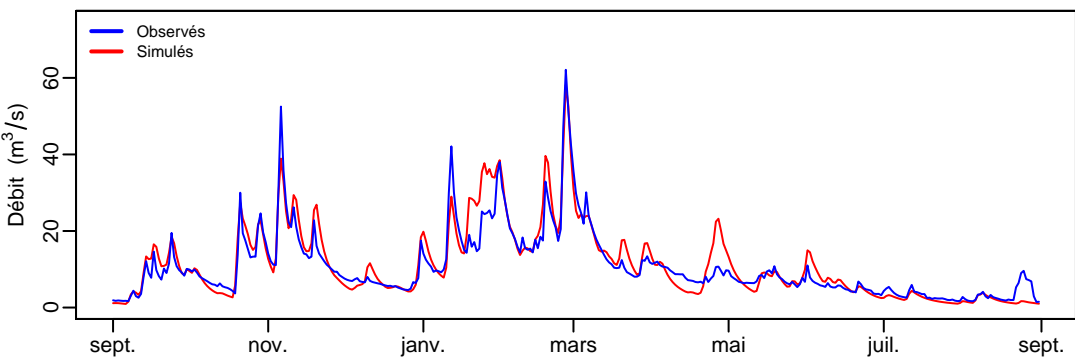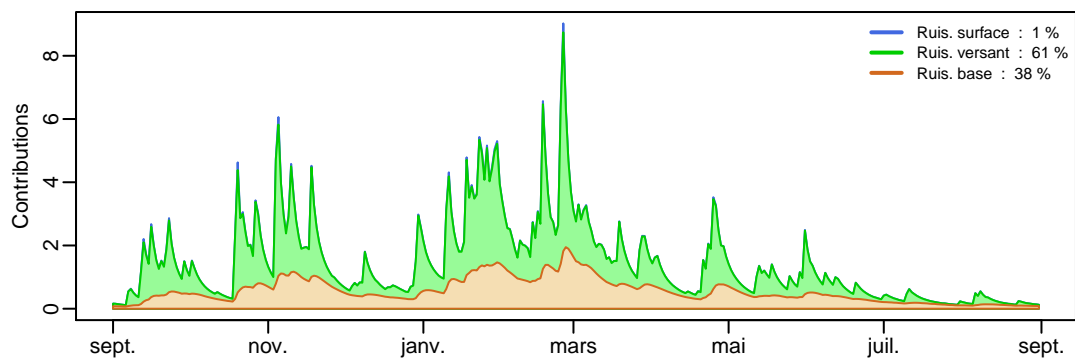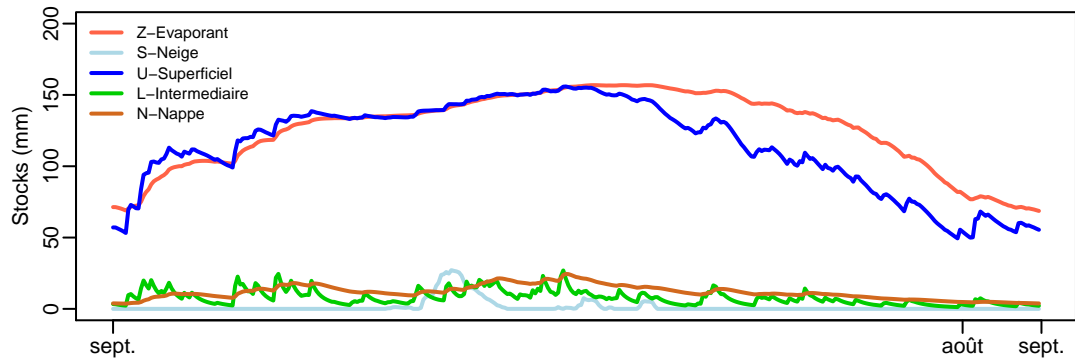

# k0773220 (662.11 km<sup>2</sup>) – année 1995–1996

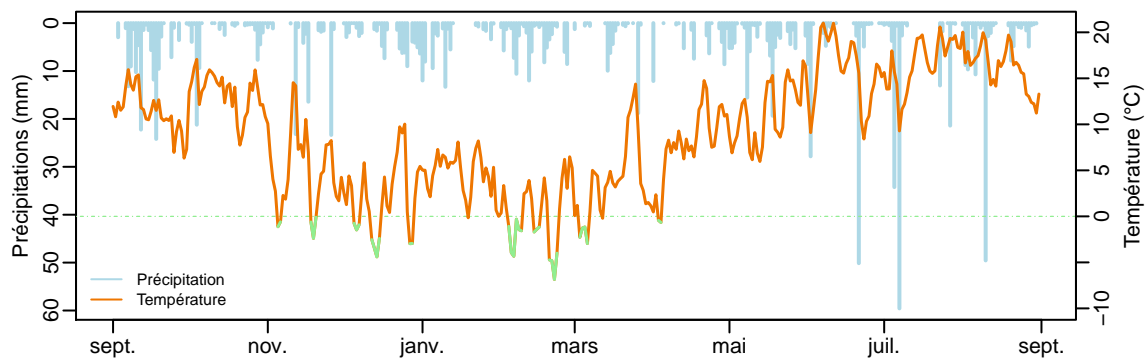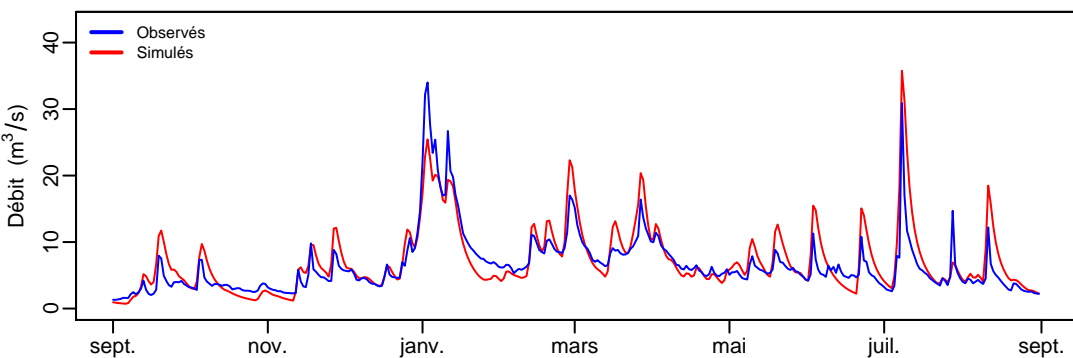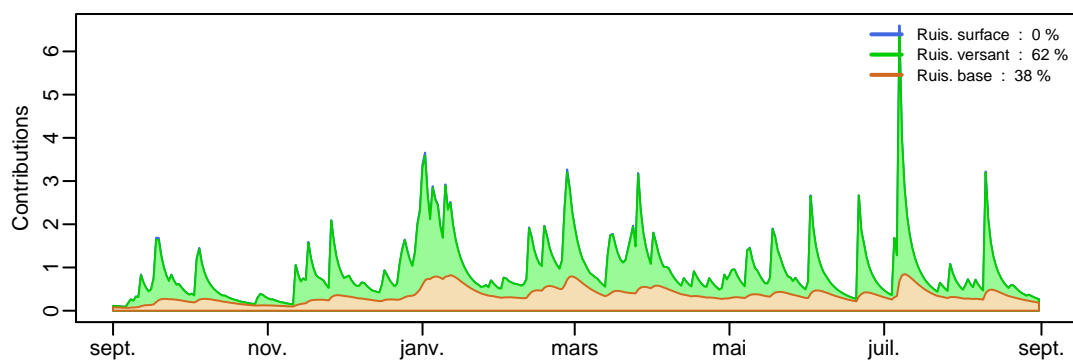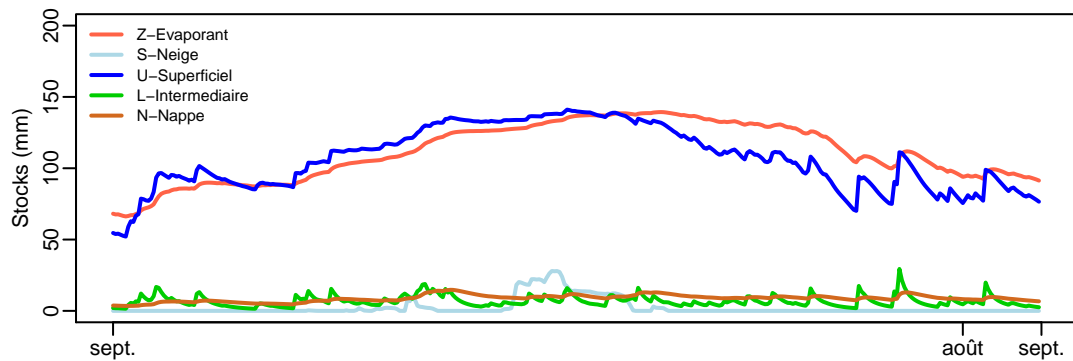

# k0773220 (662.11 km<sup>2</sup>) – année 1996–1997

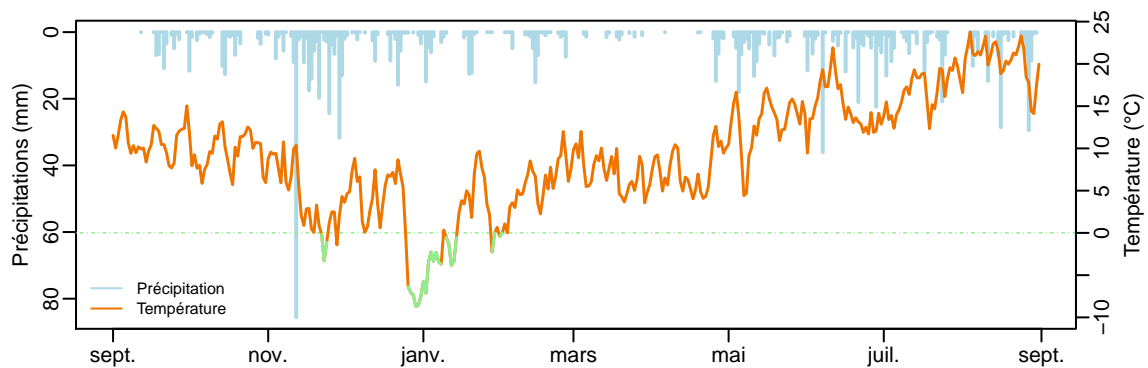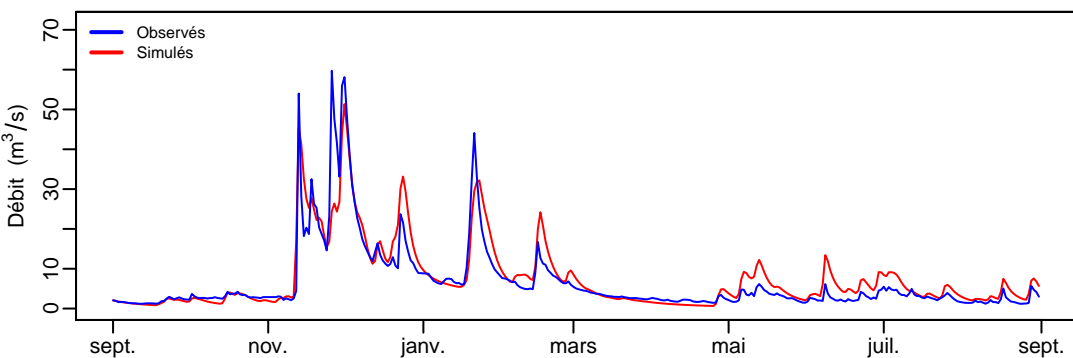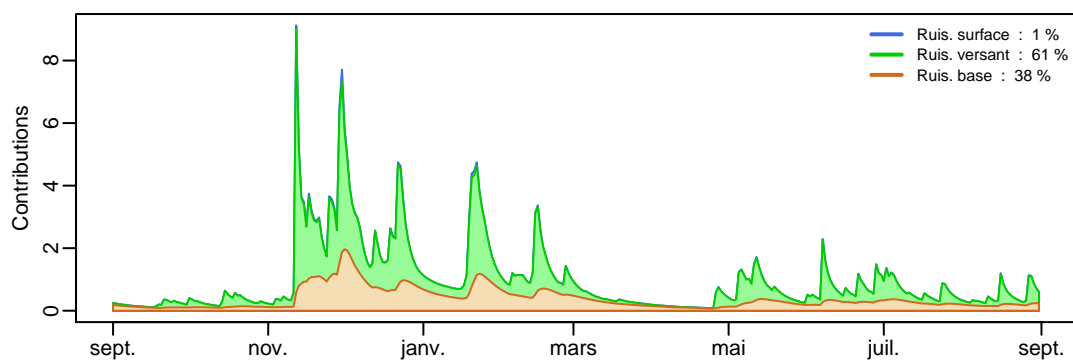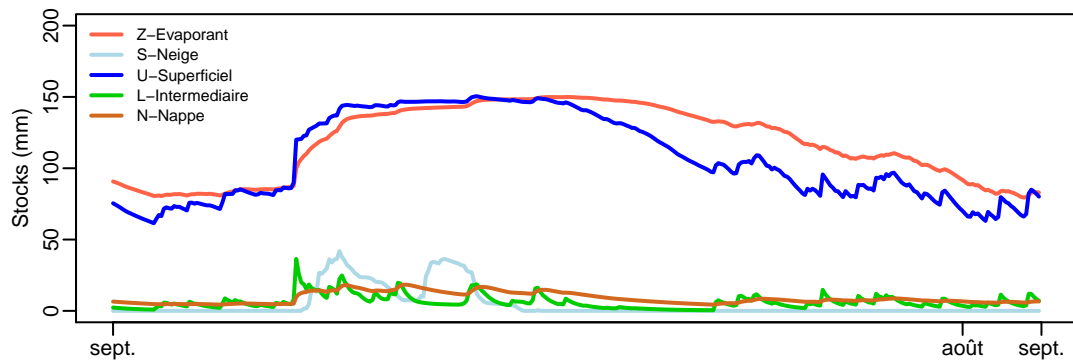

# k0773220 (662.11 km<sup>2</sup>) – année 1997–1998

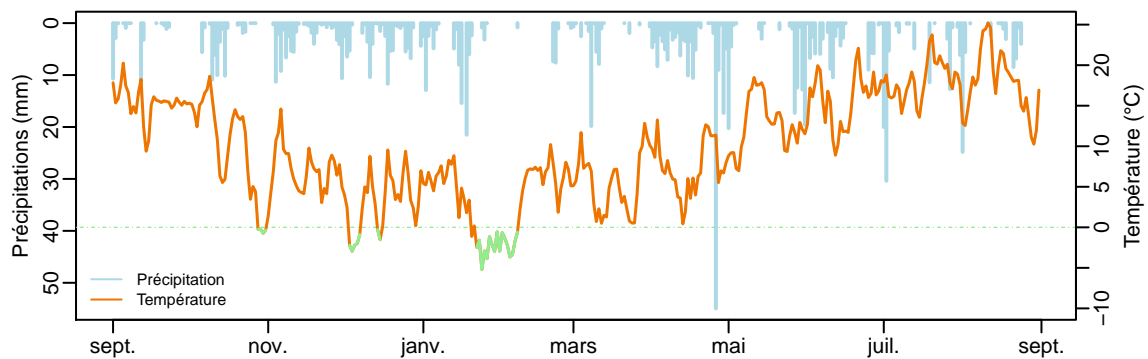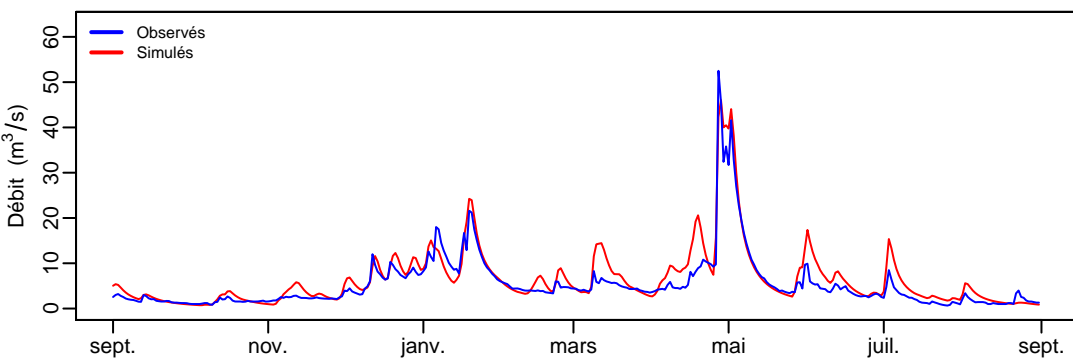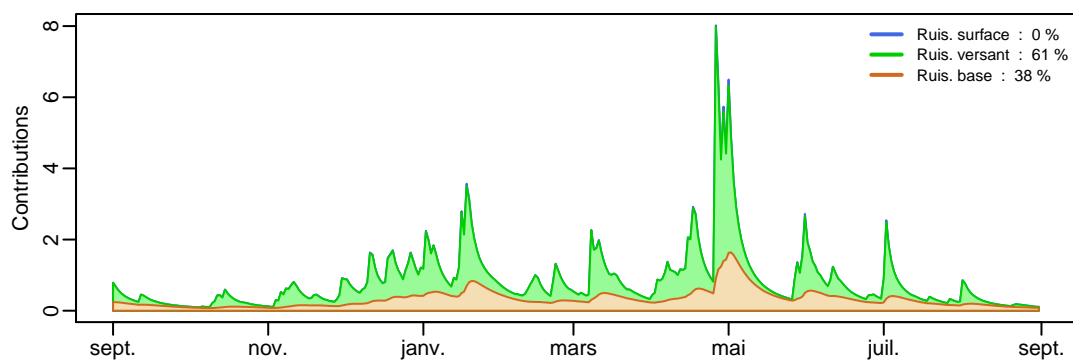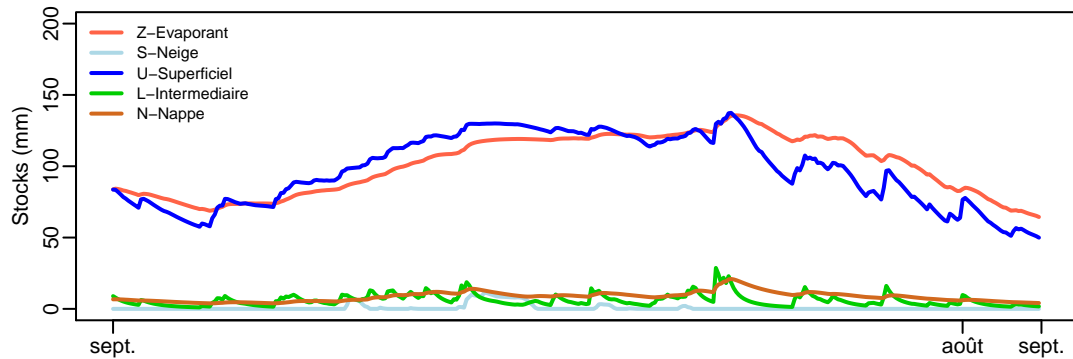

# k0773220 (662.11 km<sup>2</sup>) – année 1998–1999

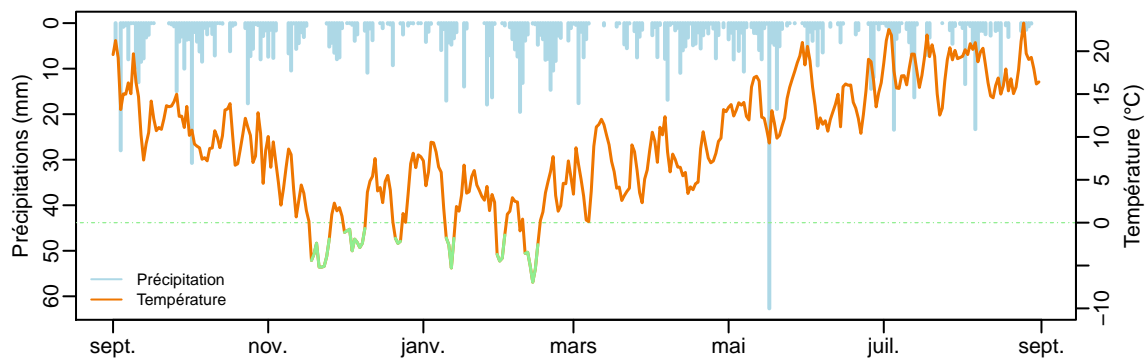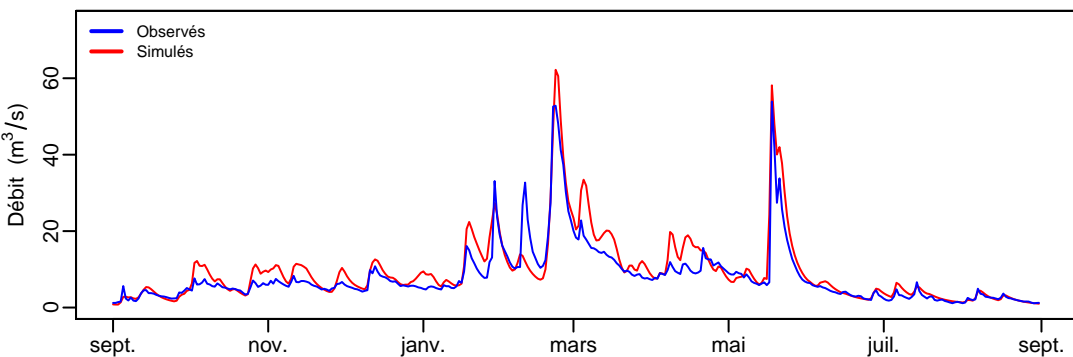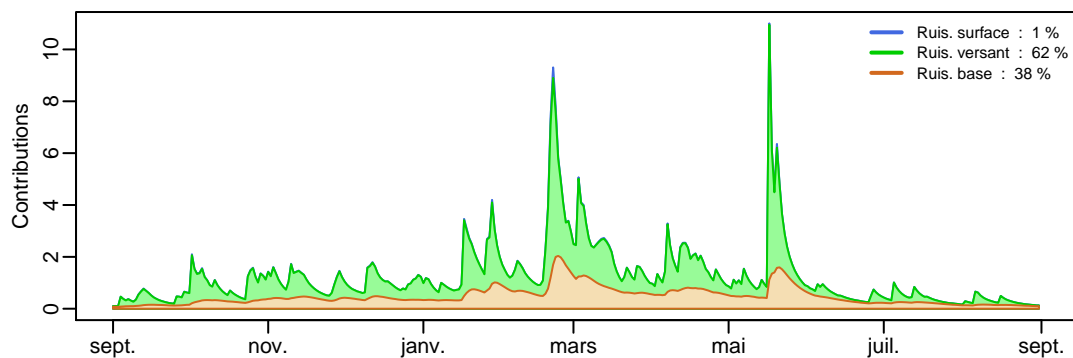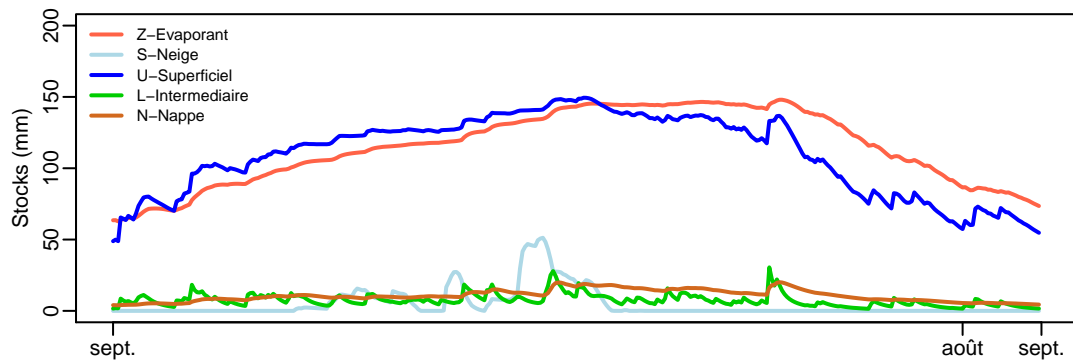

# k0773220 (662.11 km<sup>2</sup>) – année 1999–2000

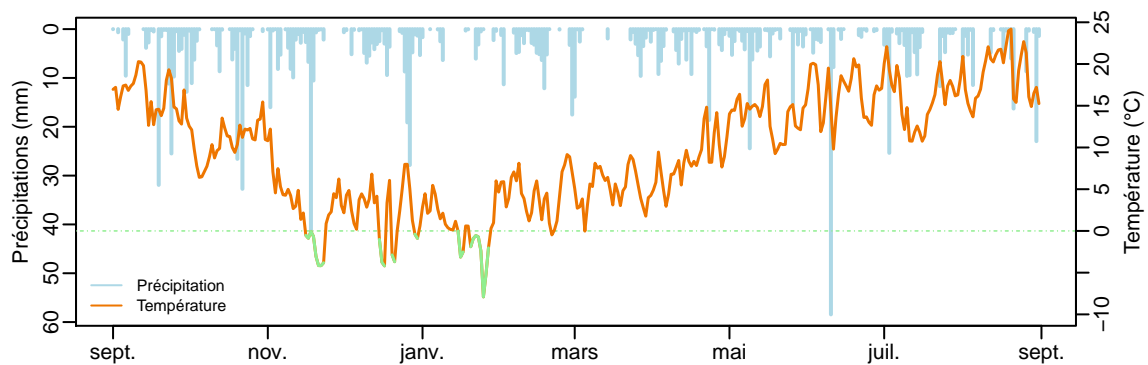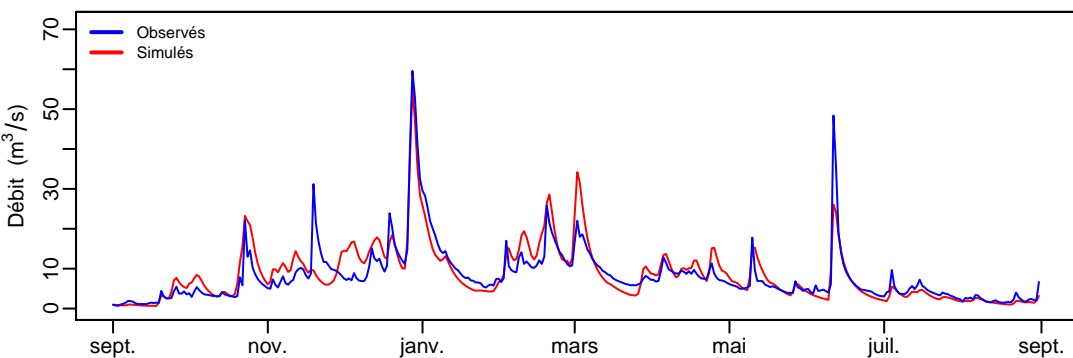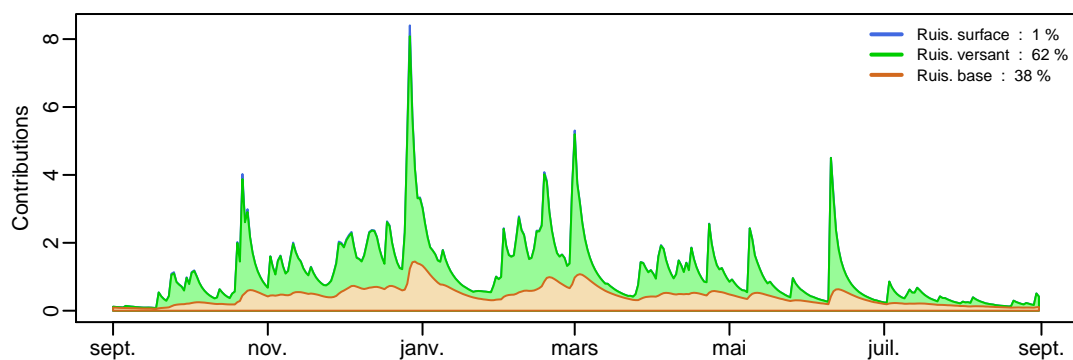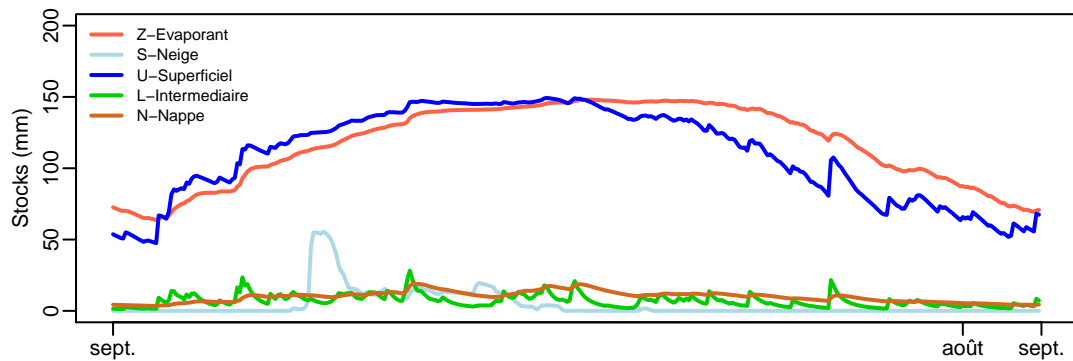

# k0773220 (662.11 km<sup>2</sup>) – année 2000–2001

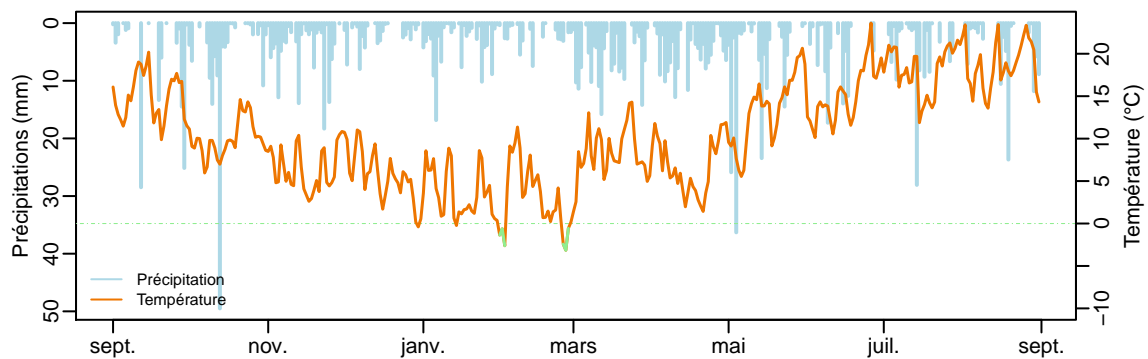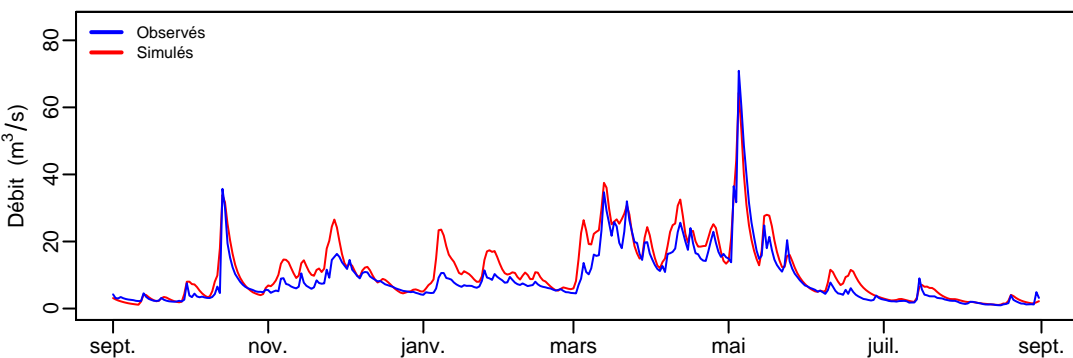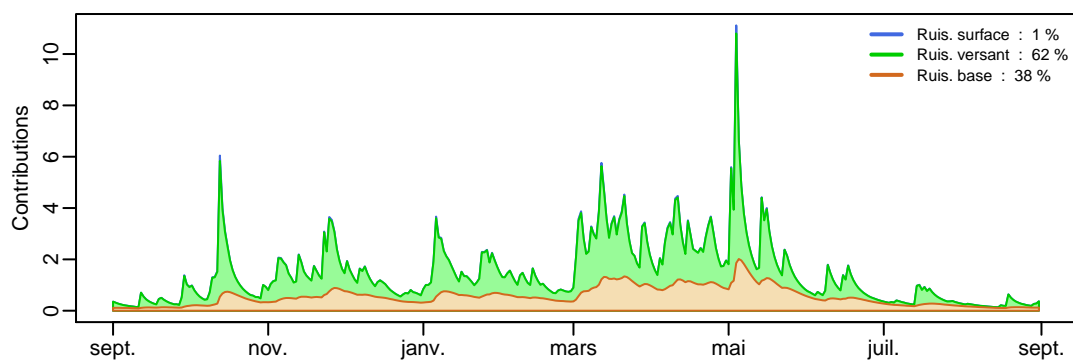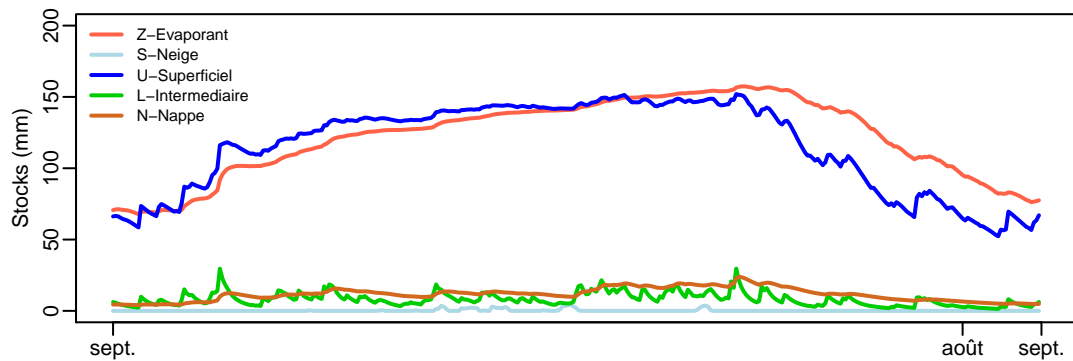

# k0773220 (662.11 km<sup>2</sup>) – année 2001–2002

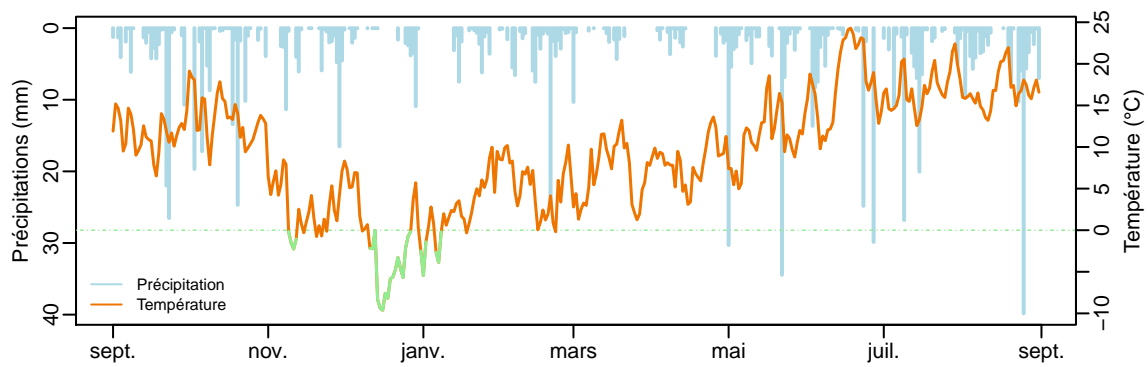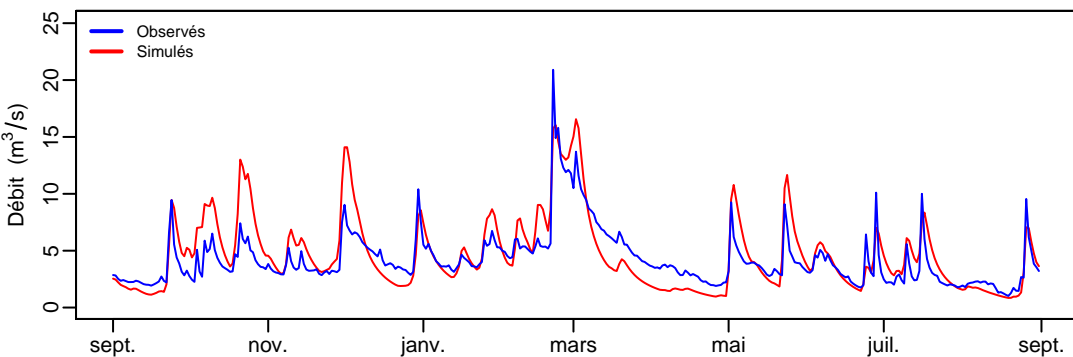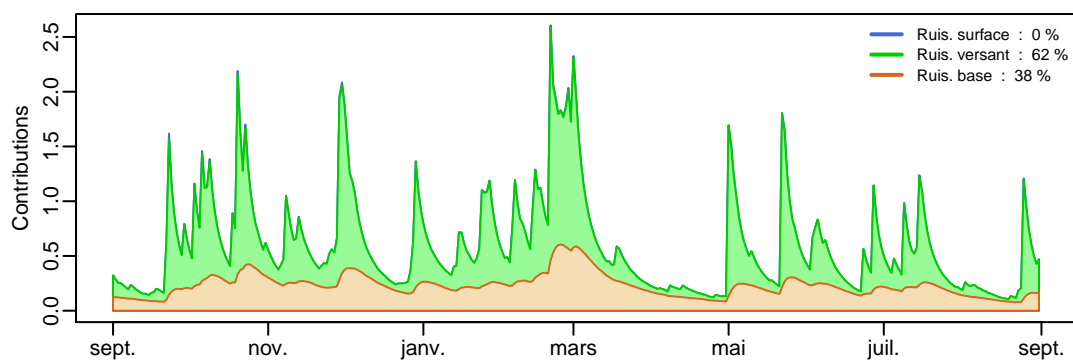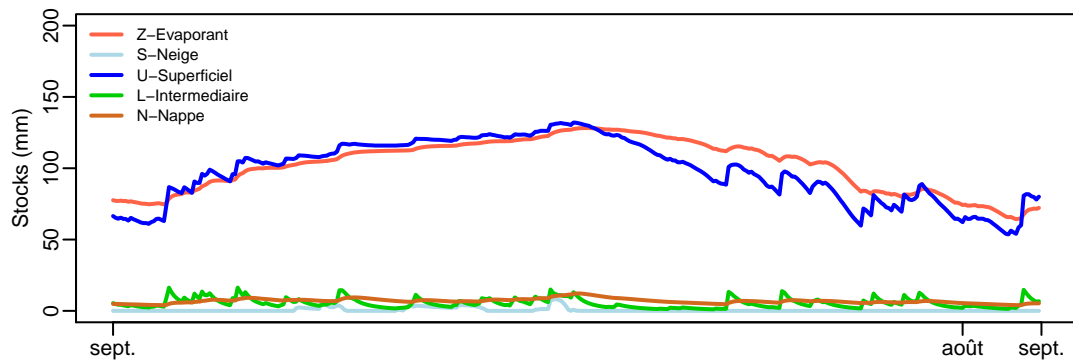



# k0773220 (662.11 km<sup>2</sup>) – année 2002–2003

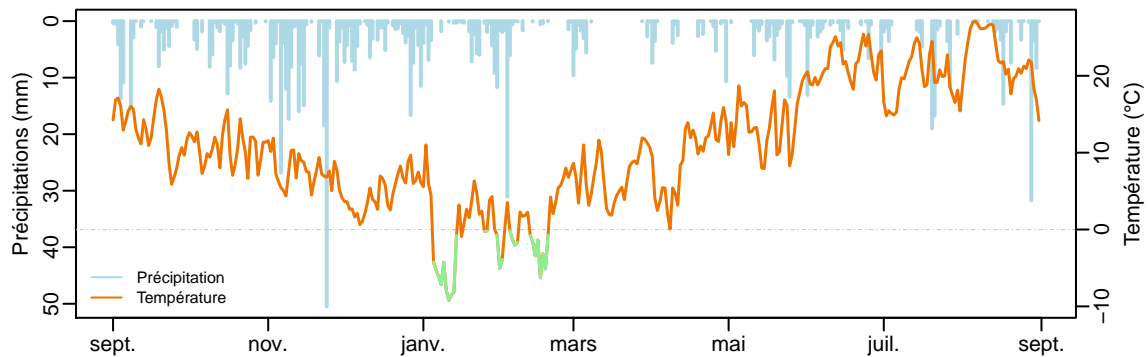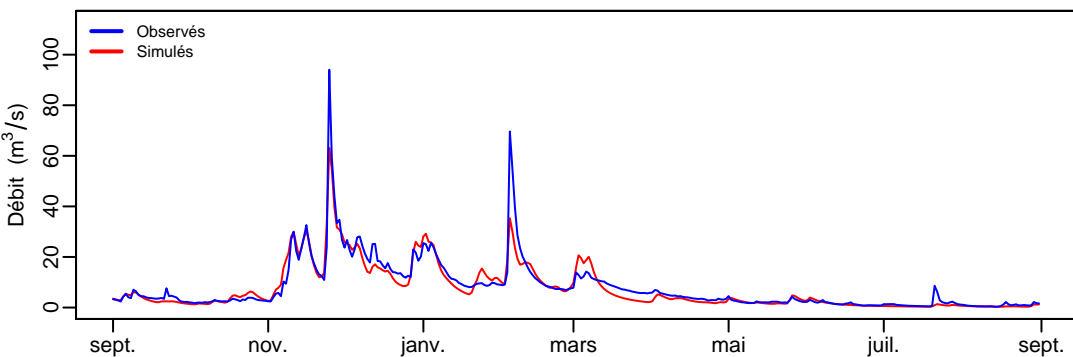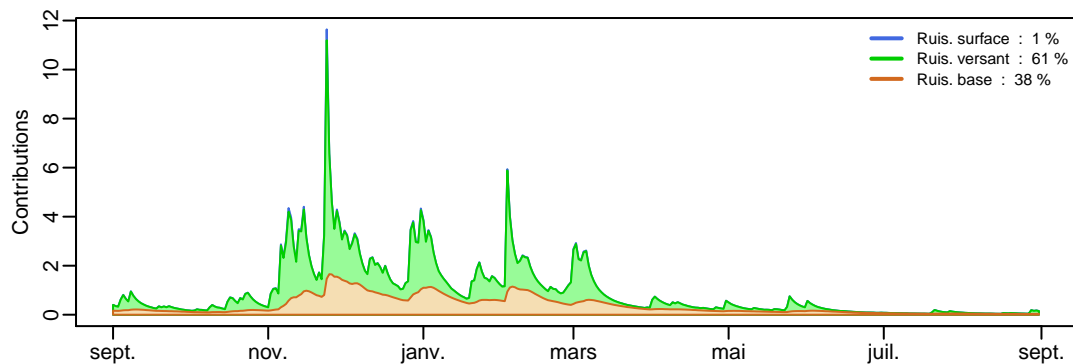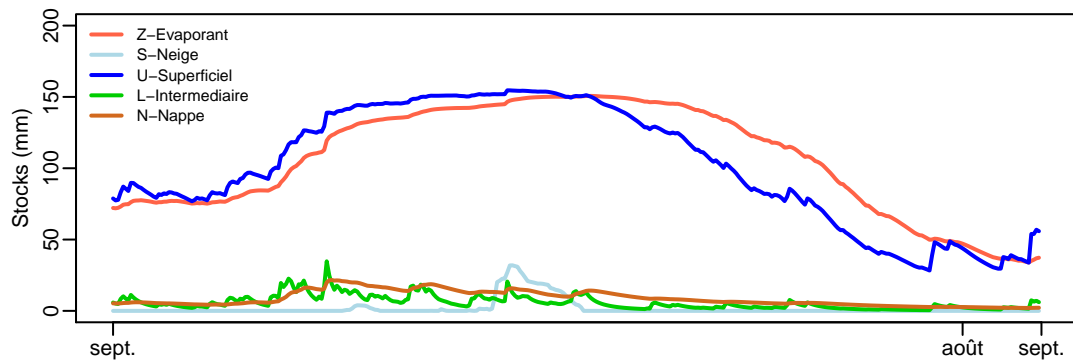

# k0773220 (662.11 km<sup>2</sup>) – année 2003–2004

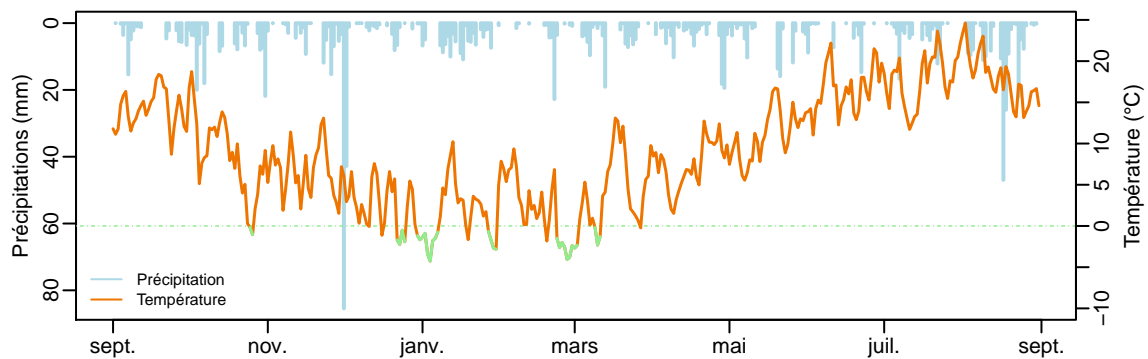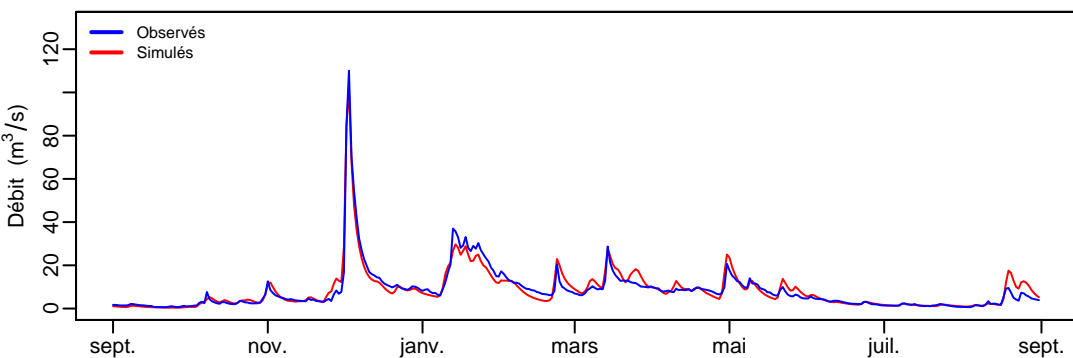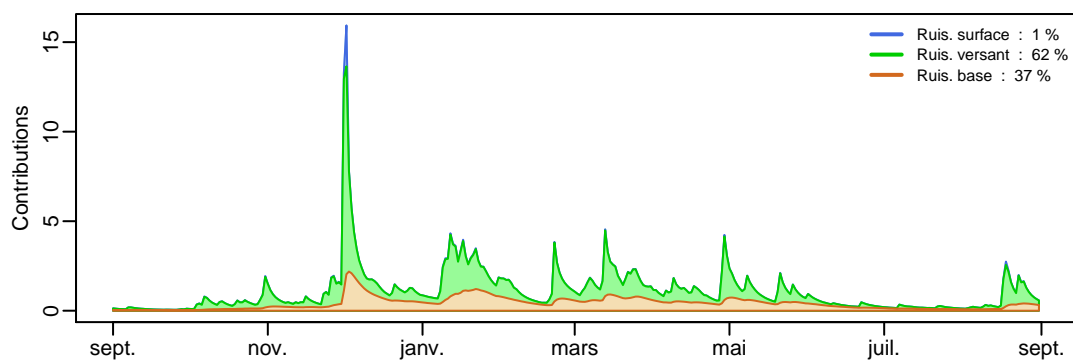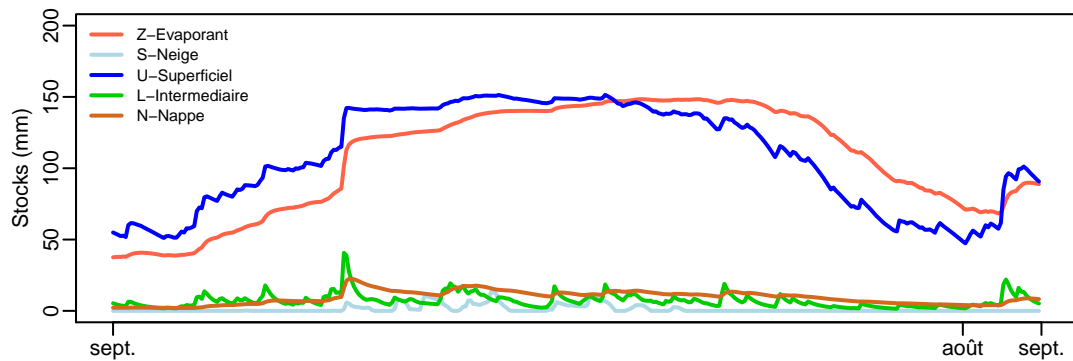

# k0773220 (662.11 km<sup>2</sup>) – année 2004–2005

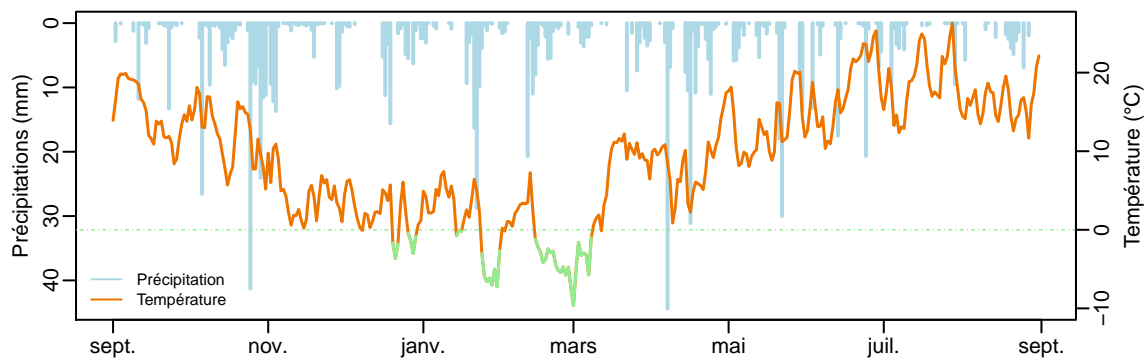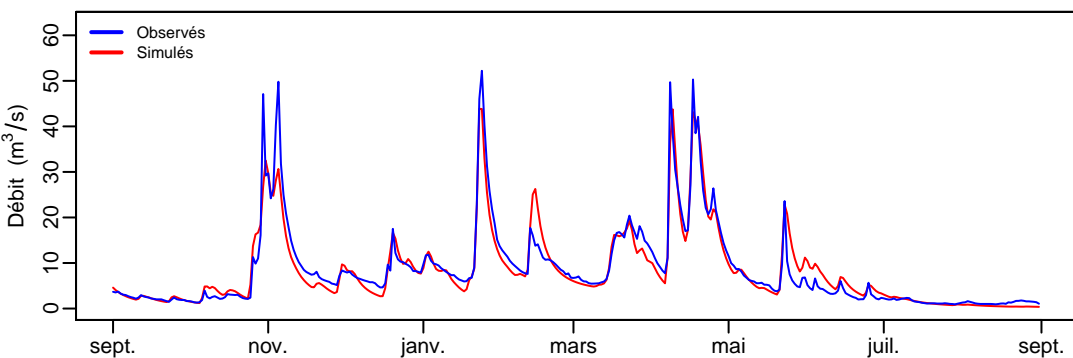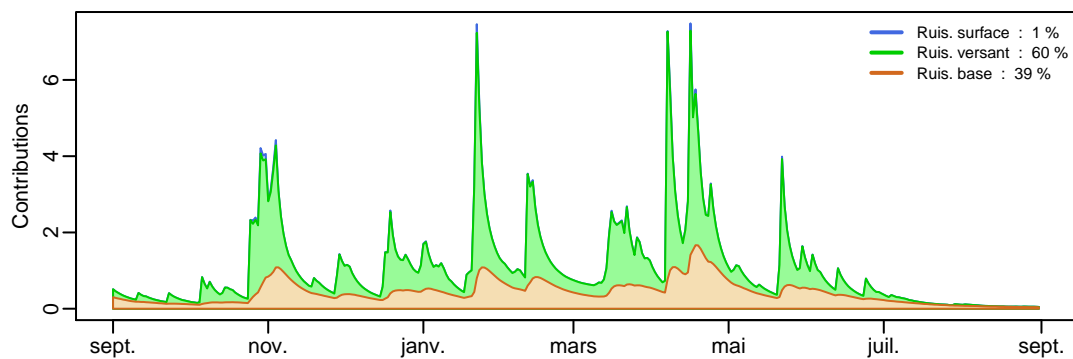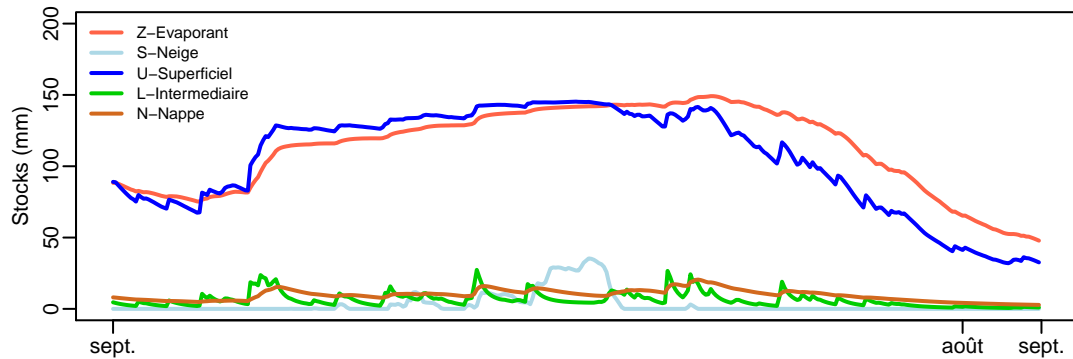

# k0773220 (662.11 km<sup>2</sup>) – année 2005–2006

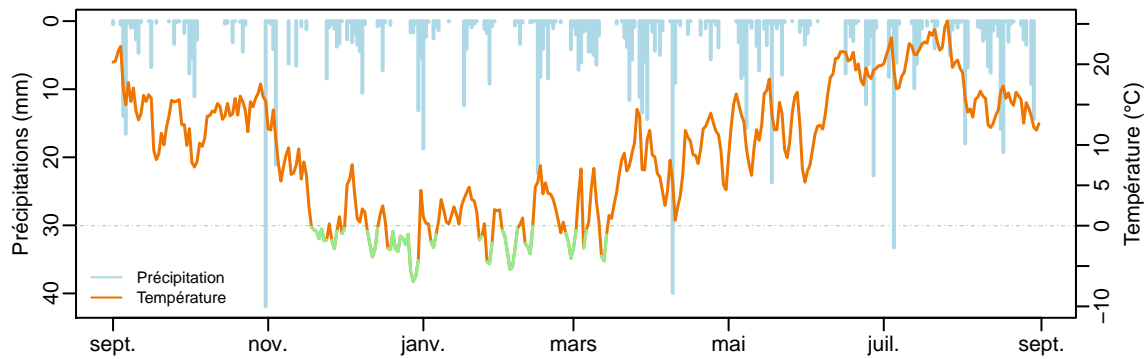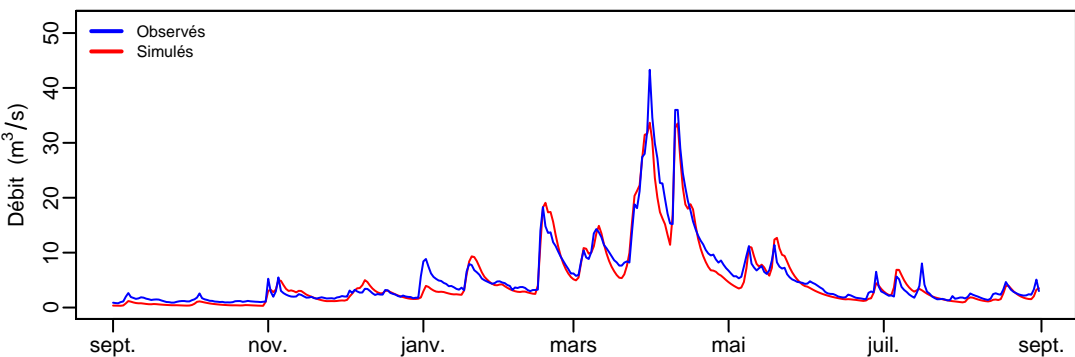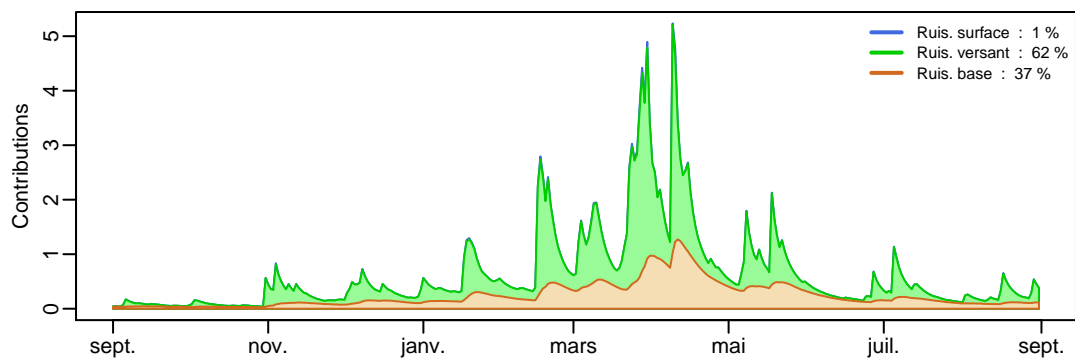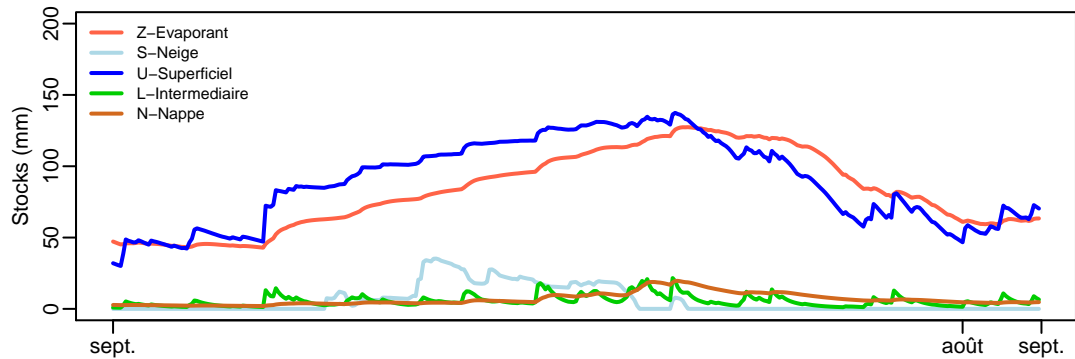

# k0773220 (662.11 km<sup>2</sup>) – année 2006–2007

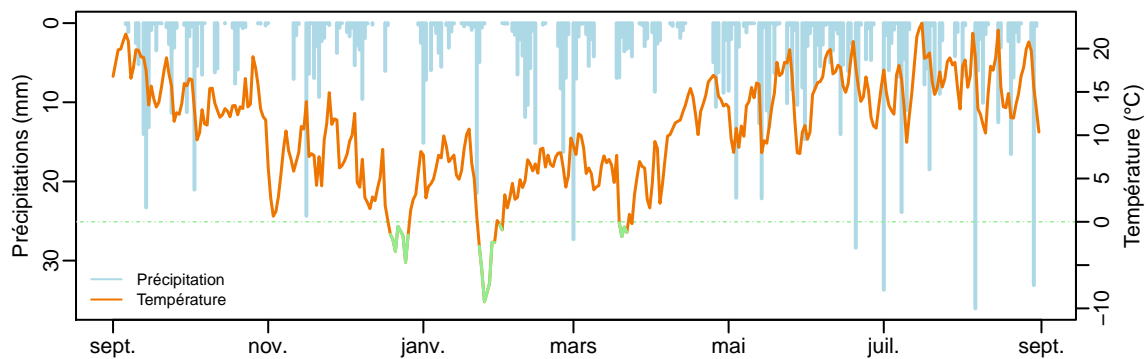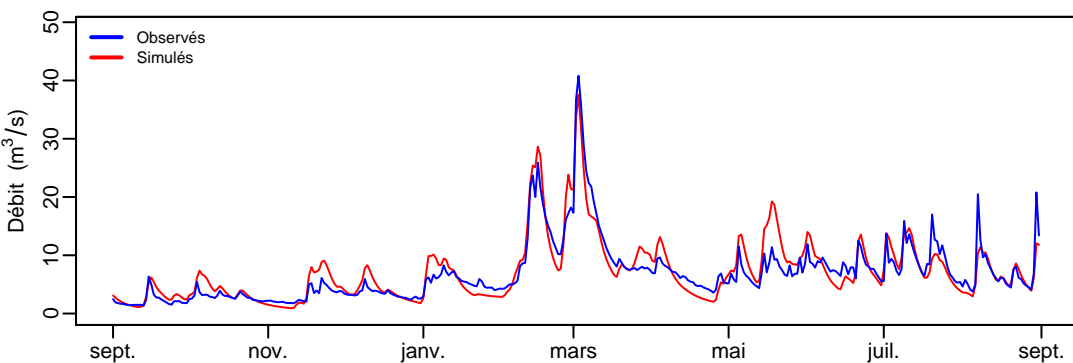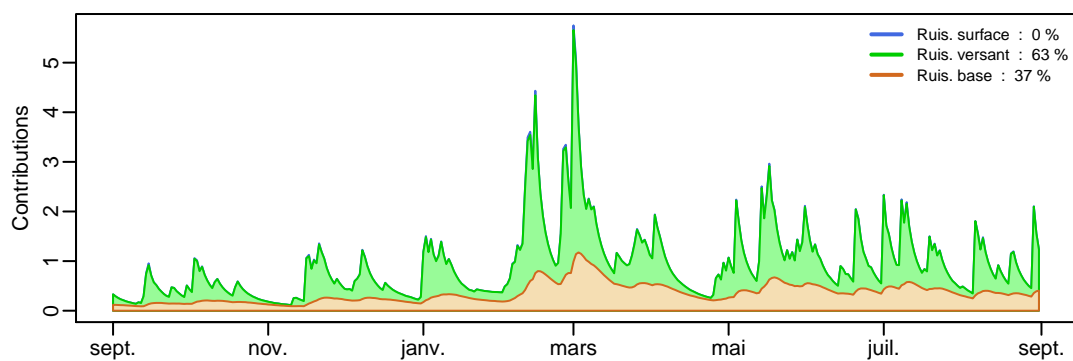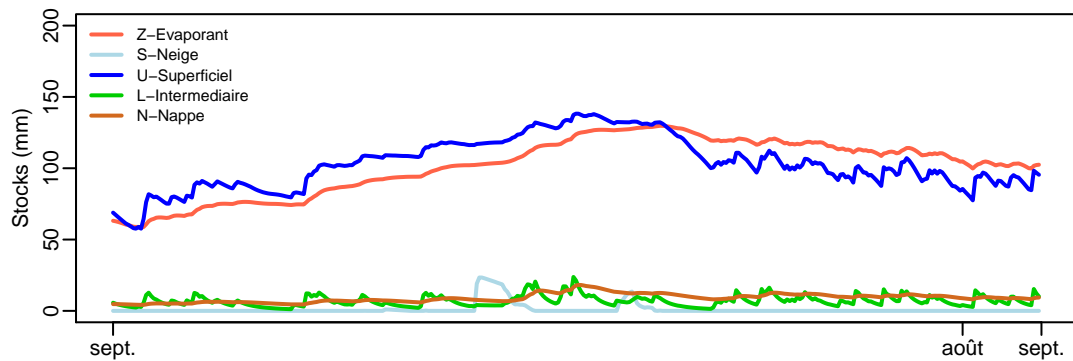

# k0773220 (662.11 km<sup>2</sup>) – année 2007–2008

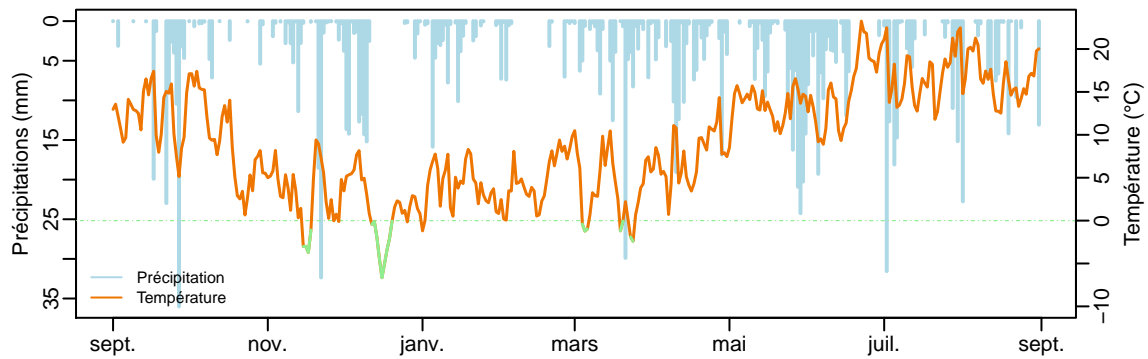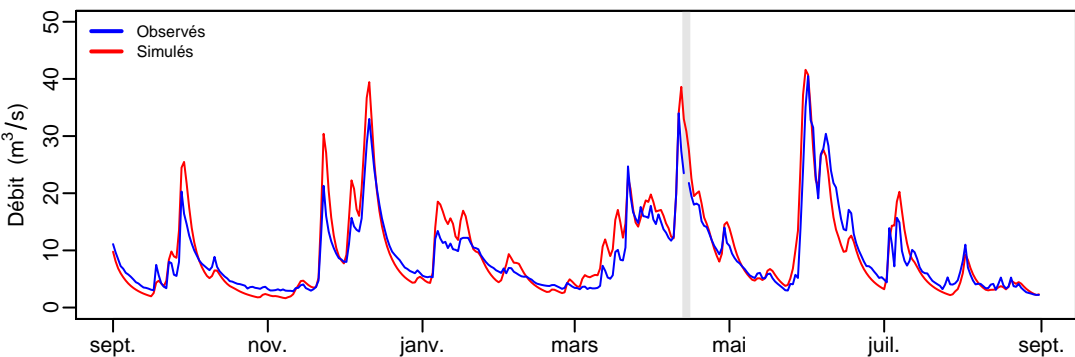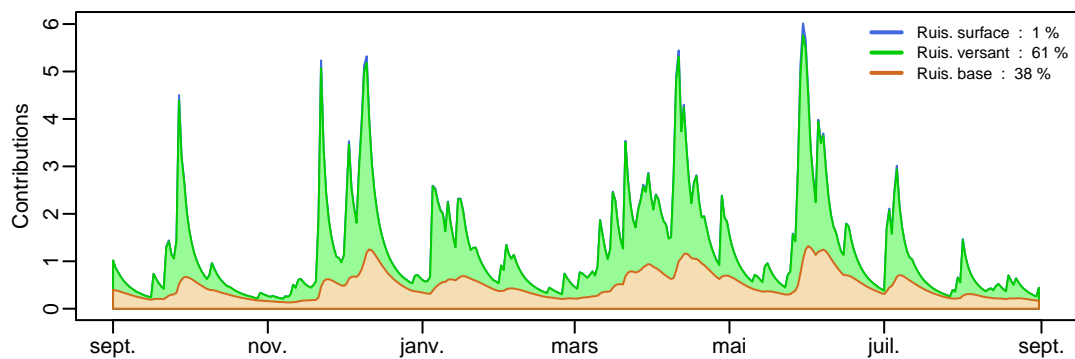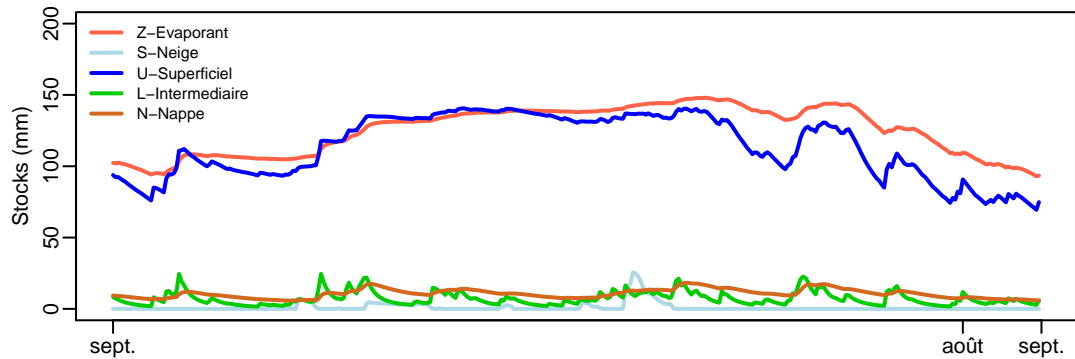

# k0773220 (662.11 km<sup>2</sup>) – année 2008–2009

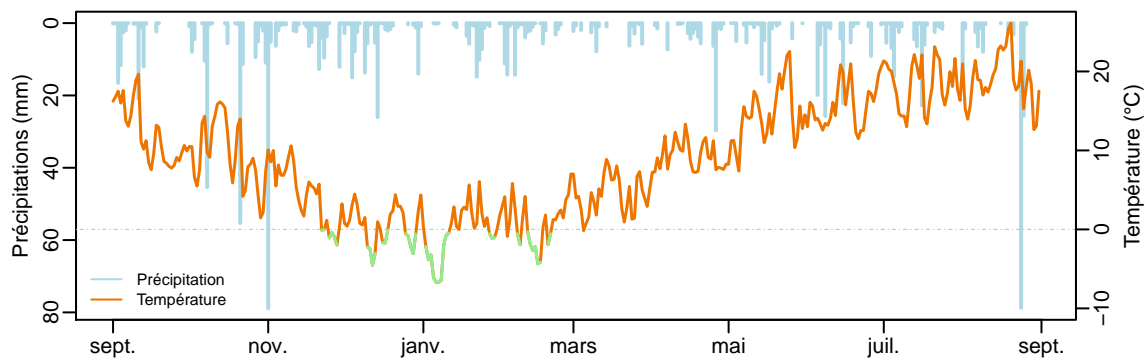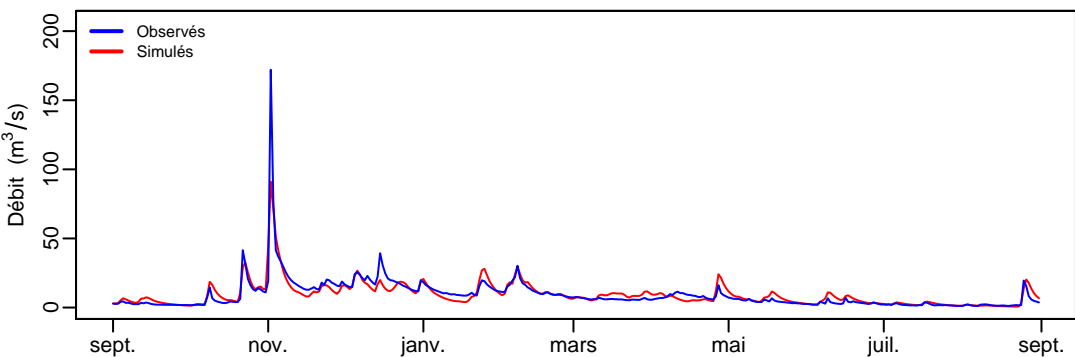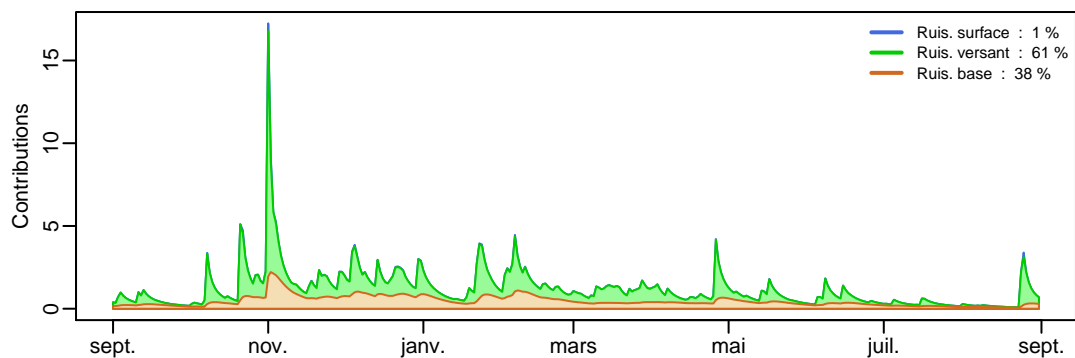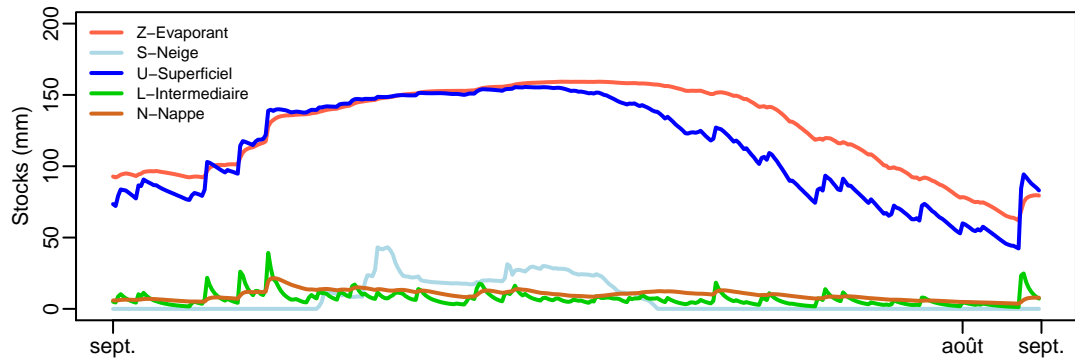

# k0773220 (662.11 km<sup>2</sup>) – année 2009–2010

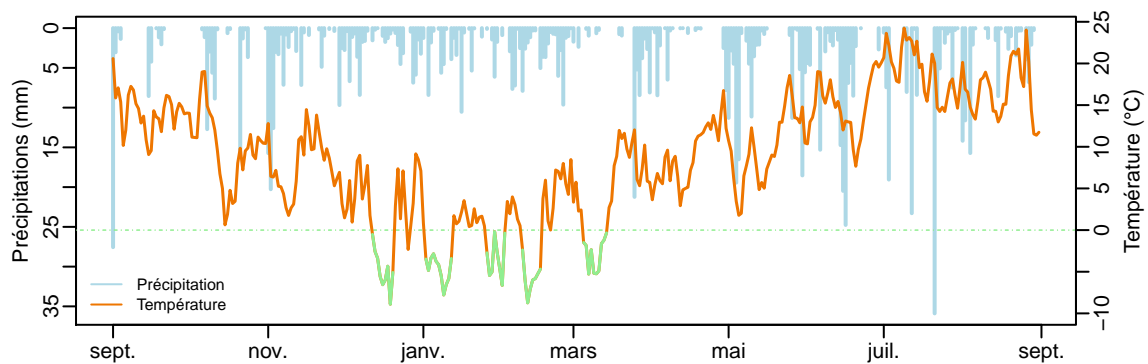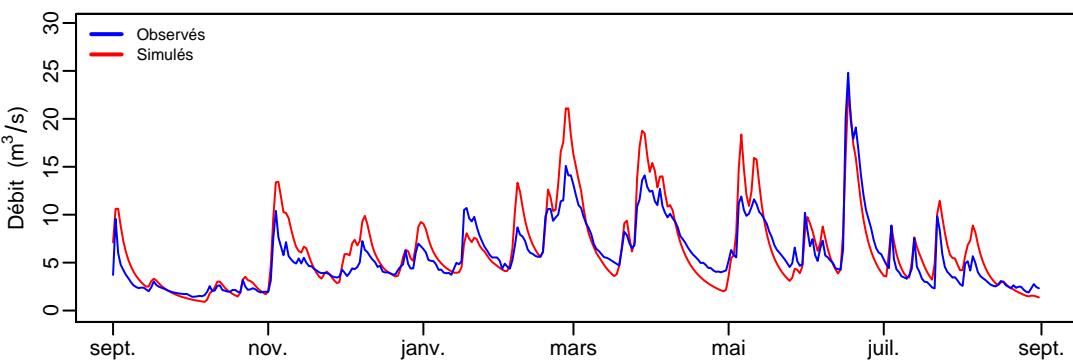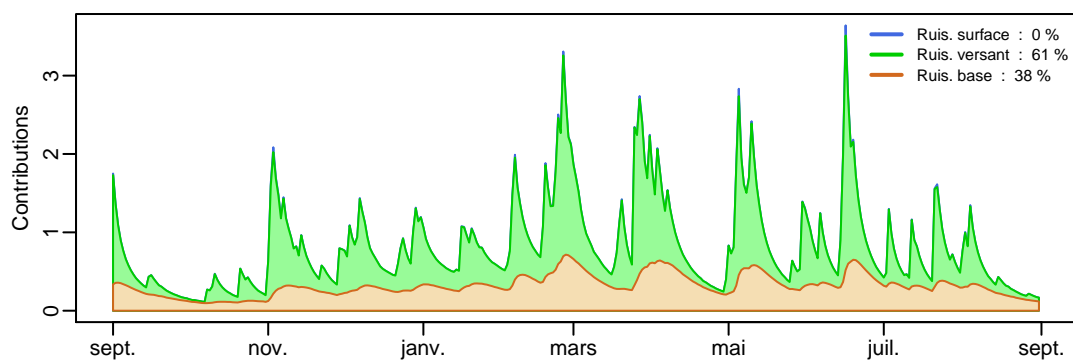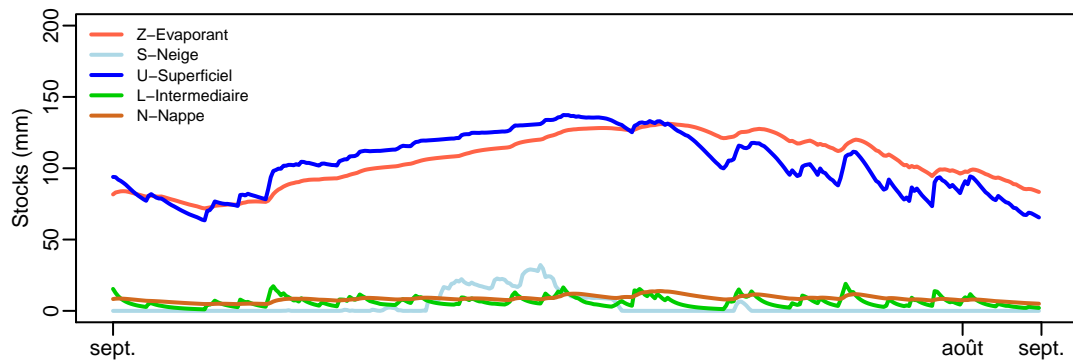



# k0773220 (662.11 km<sup>2</sup>) – année 2010–2011

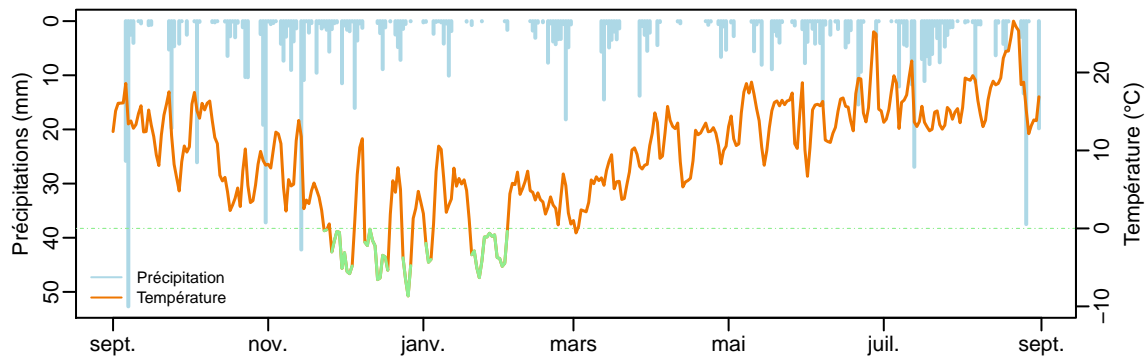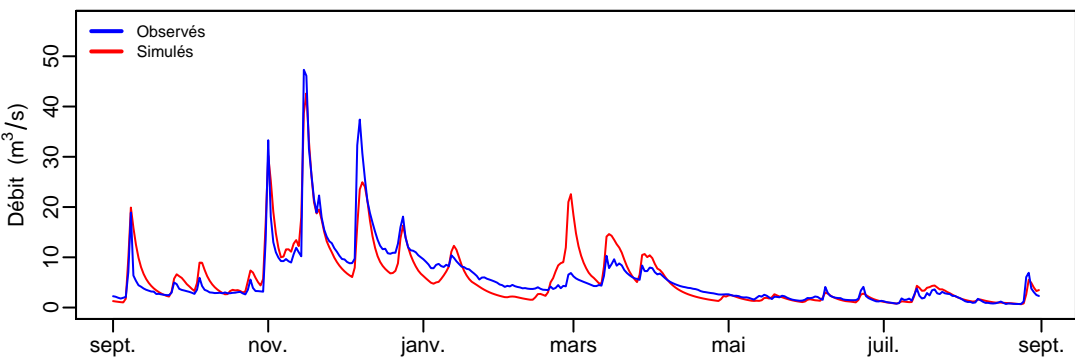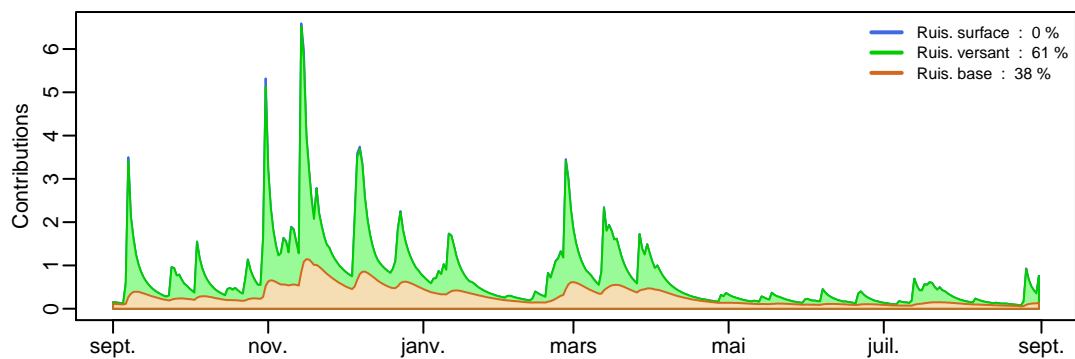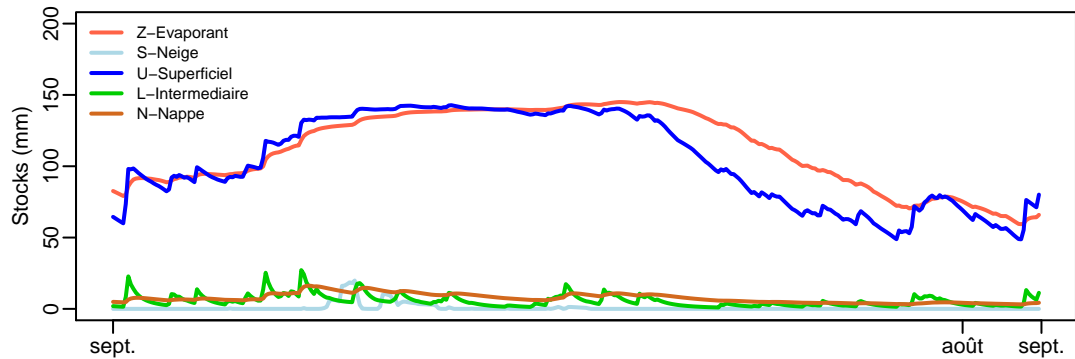

# k0773220 (662.11 km<sup>2</sup>) – année 2011–2012

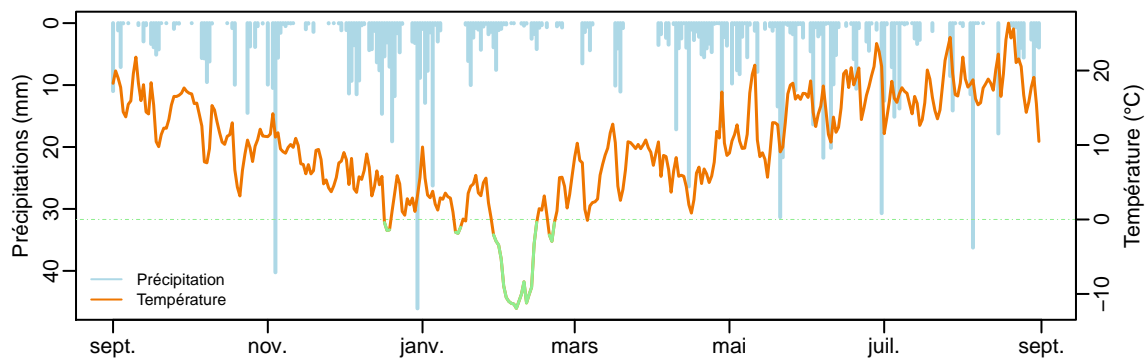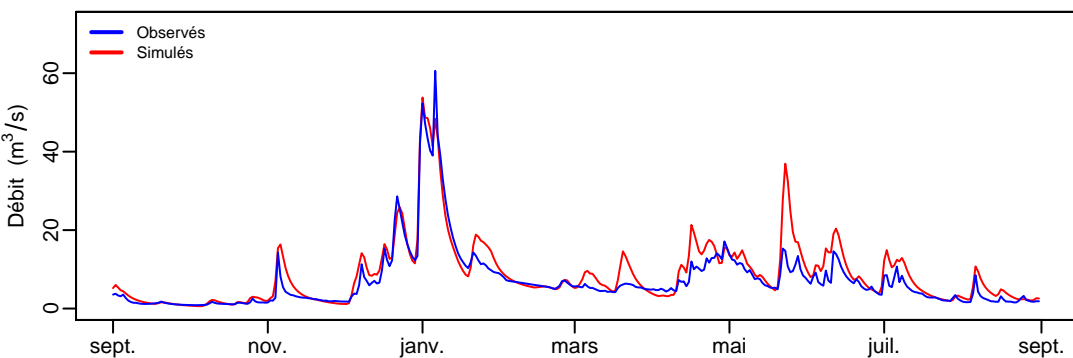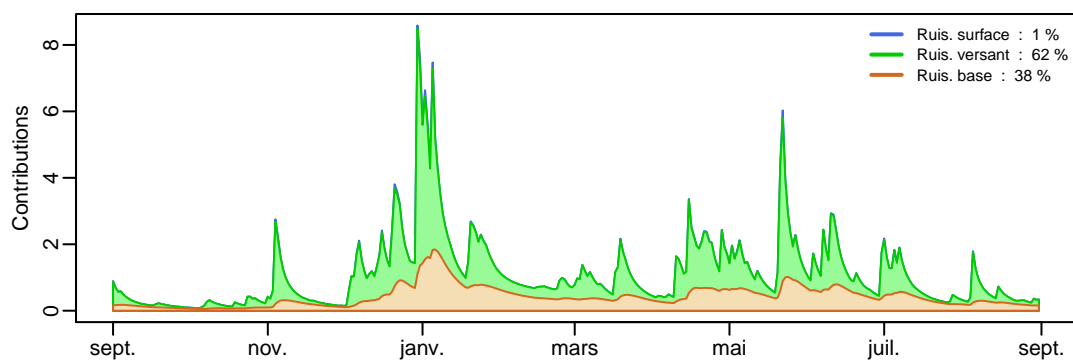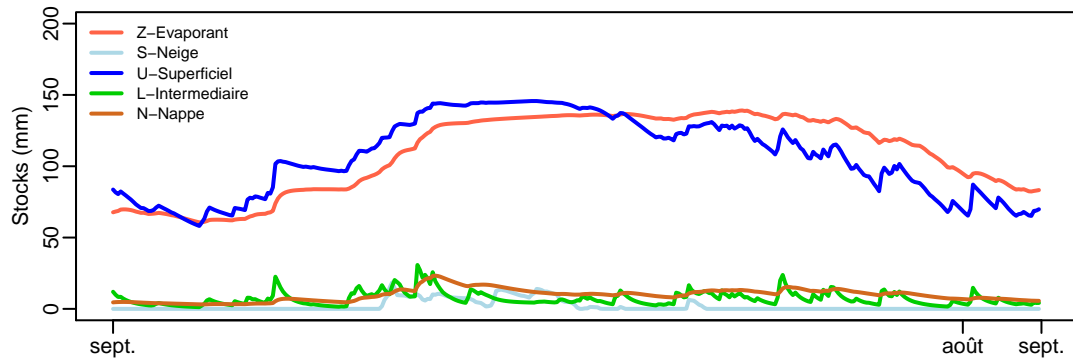

# k0813010 (172.72 km<sup>2</sup>) – année 1981–1982

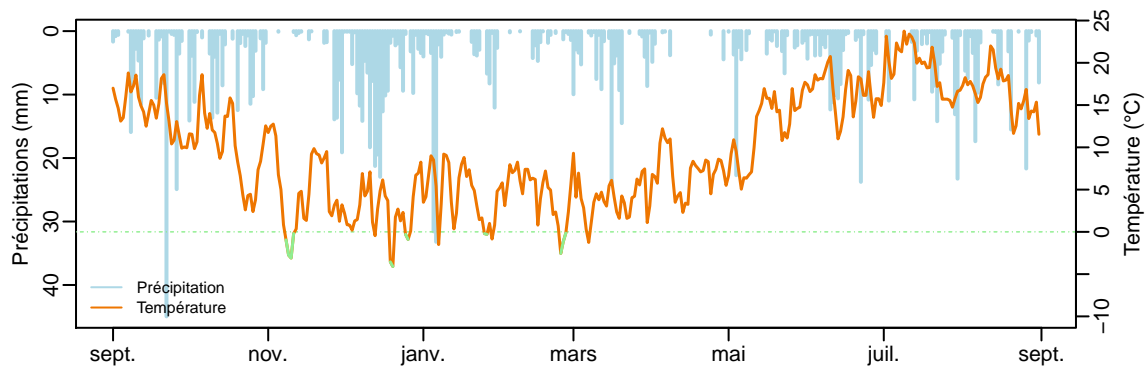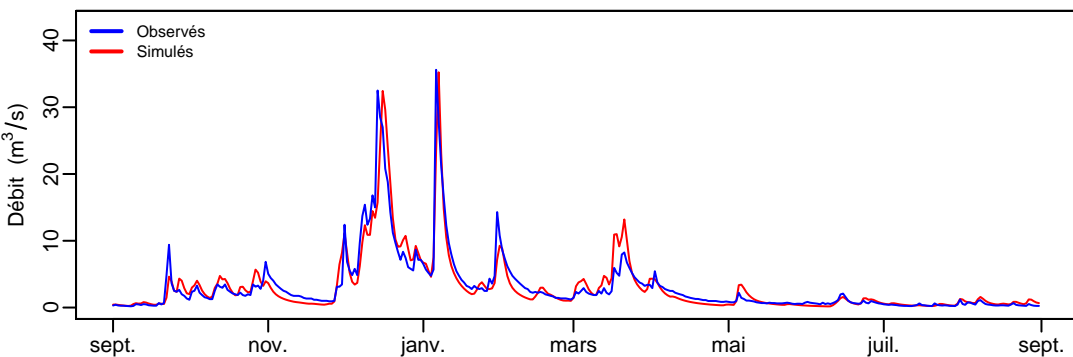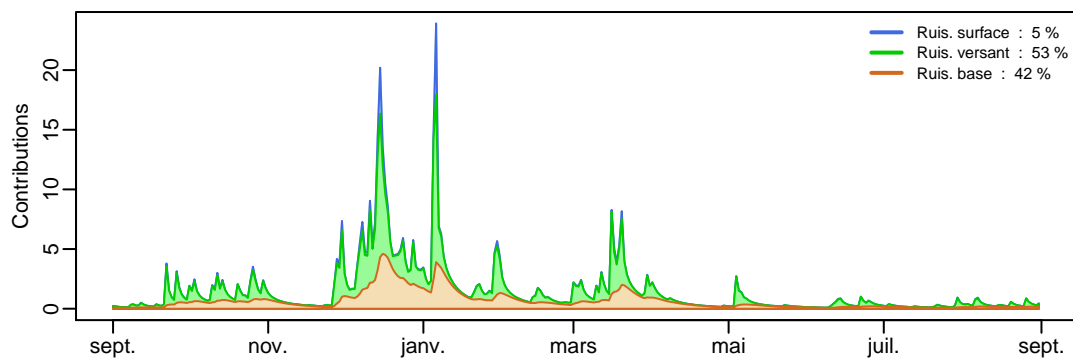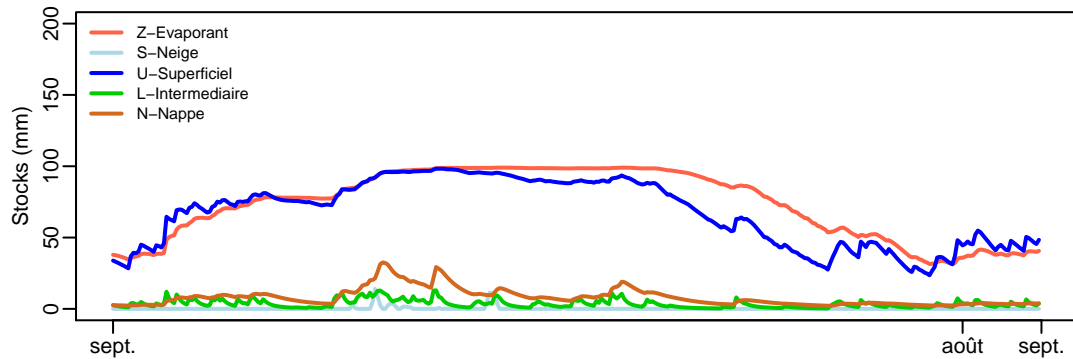

# k0813010 (172.72 km<sup>2</sup>) – année 1982–1983

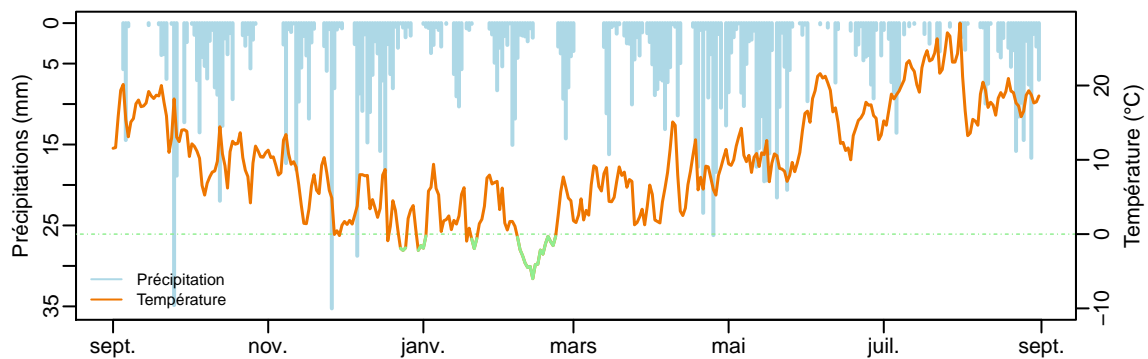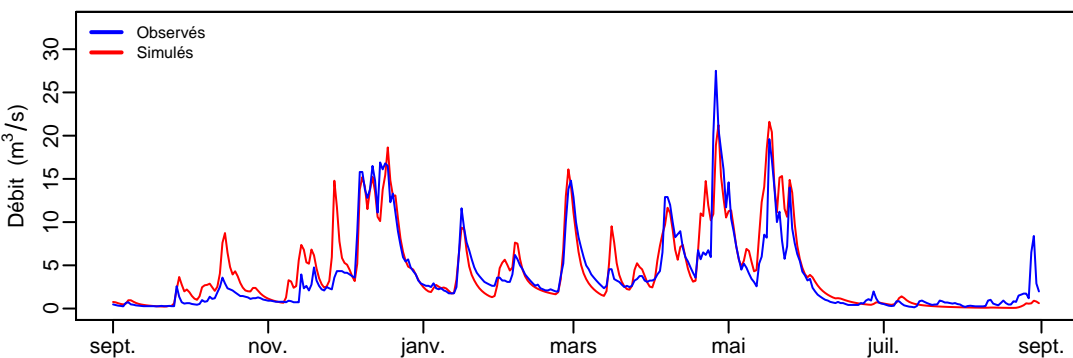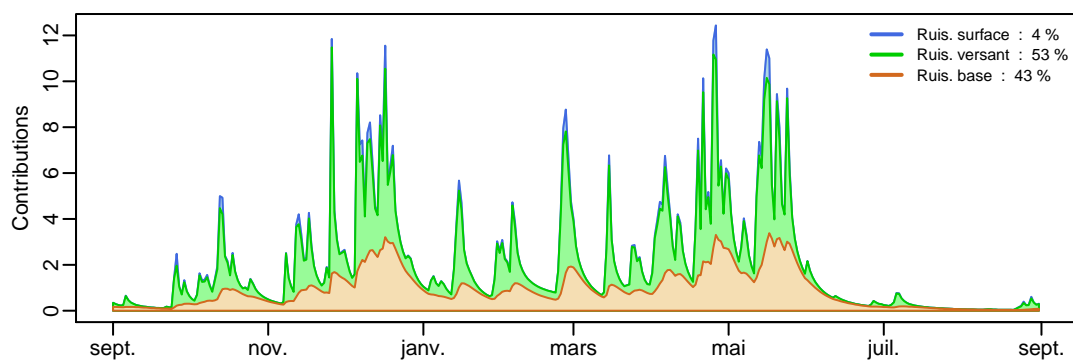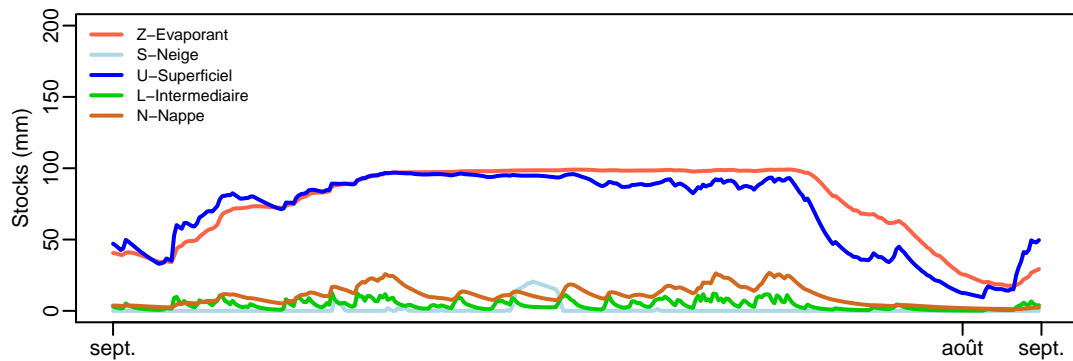

# k0813010 (172.72 km<sup>2</sup>) – année 1983–1984

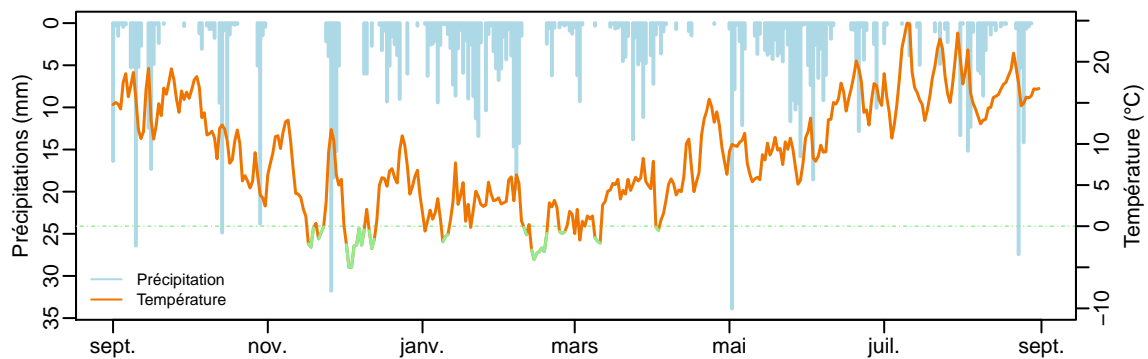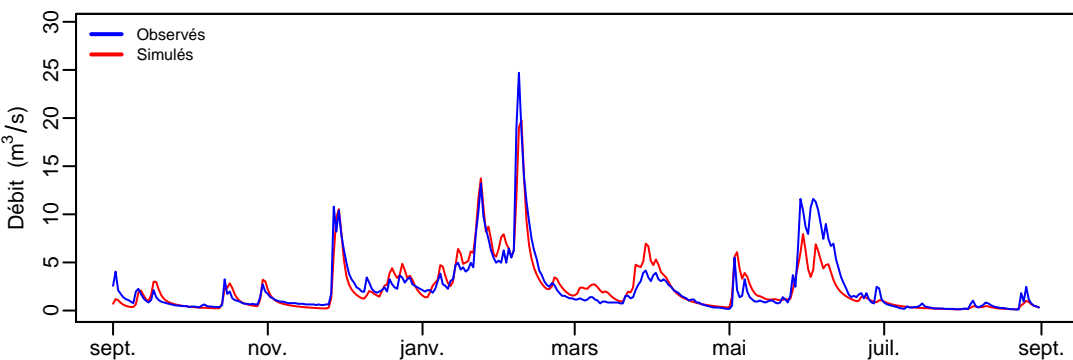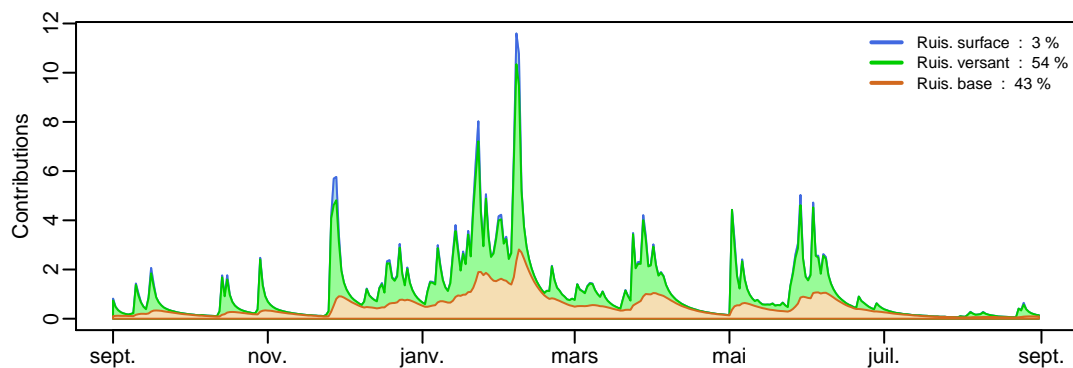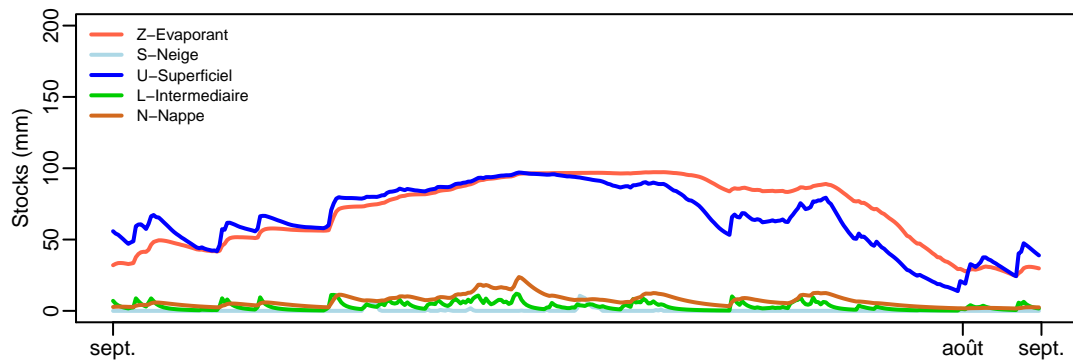

# k0813010 (172.72 km<sup>2</sup>) – année 1984–1985

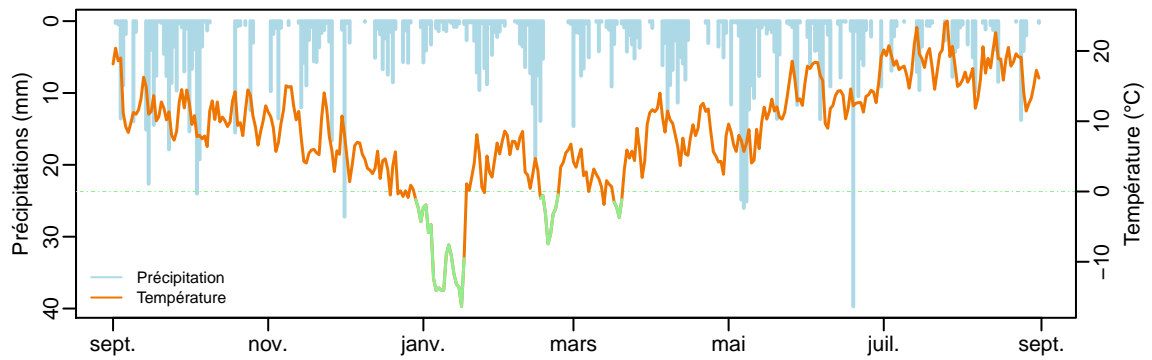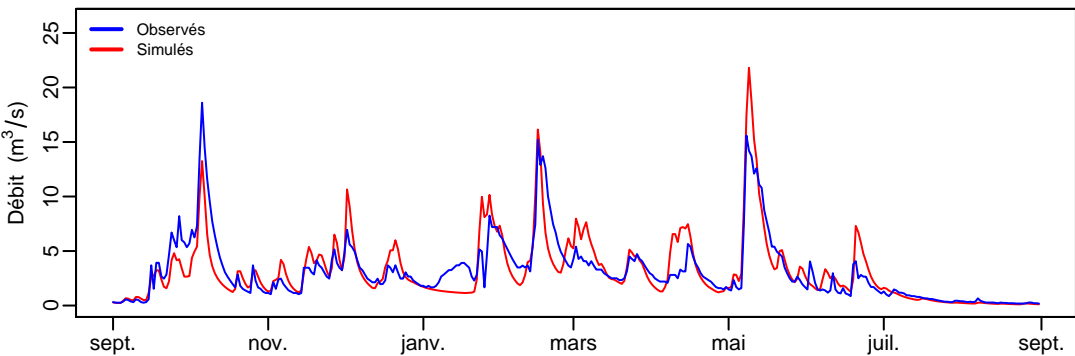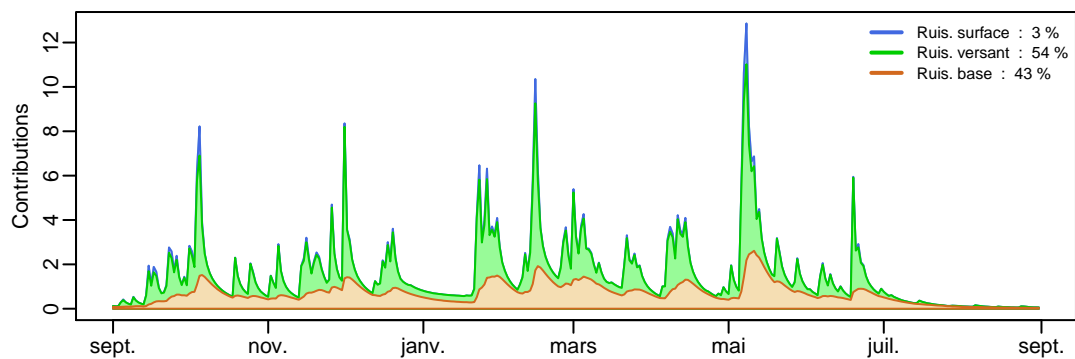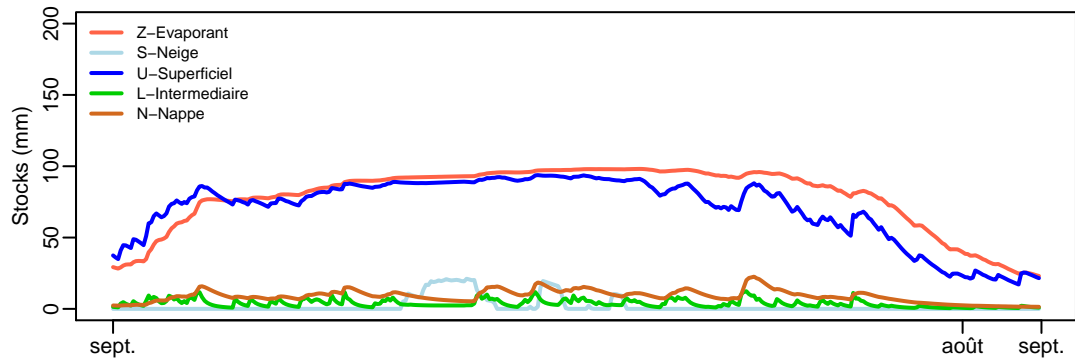

# k0813010 (172.72 km<sup>2</sup>) – année 1985–1986

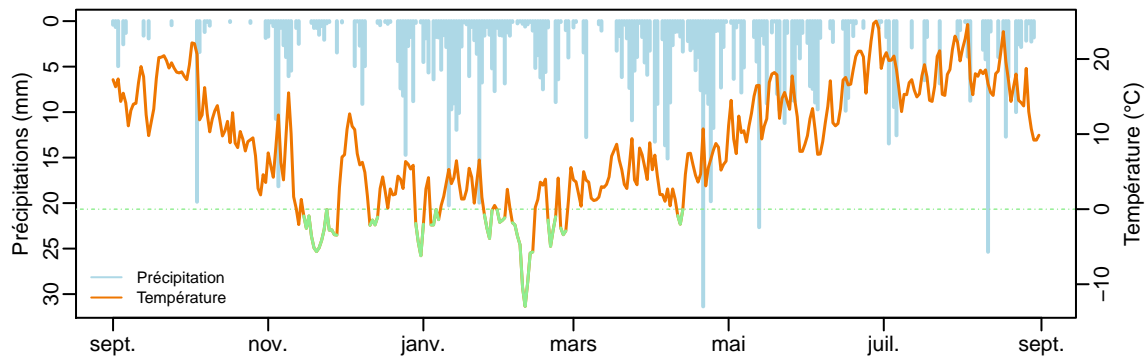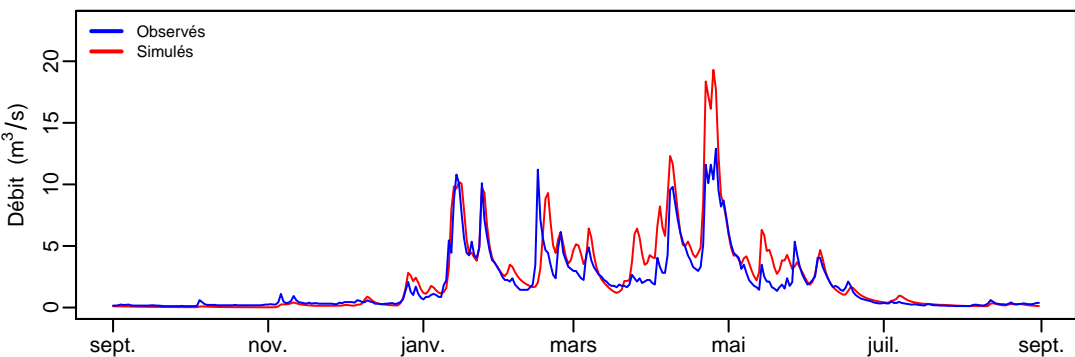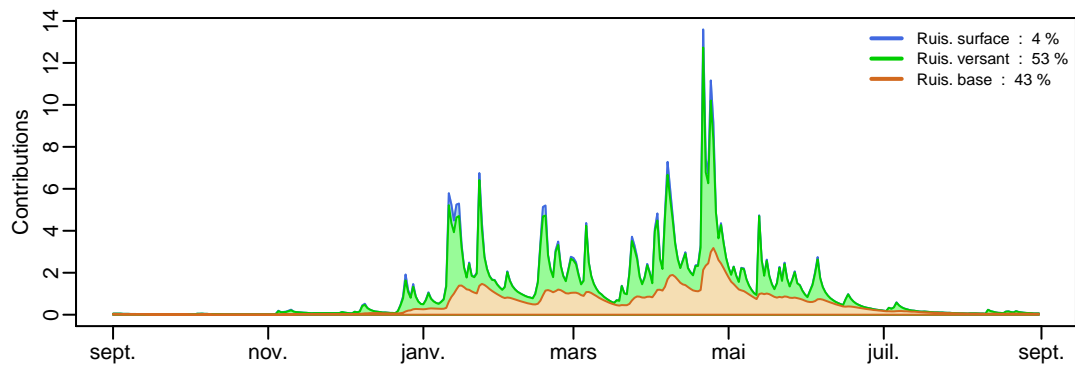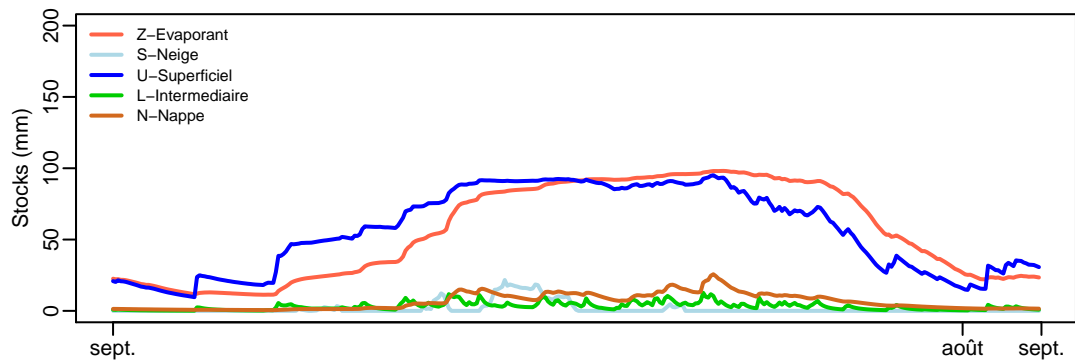

# k0813010 (172.72 km<sup>2</sup>) – année 1986–1987

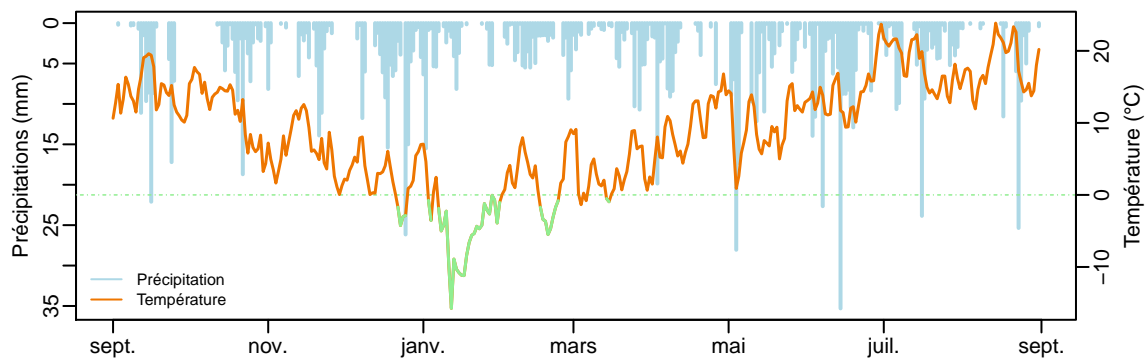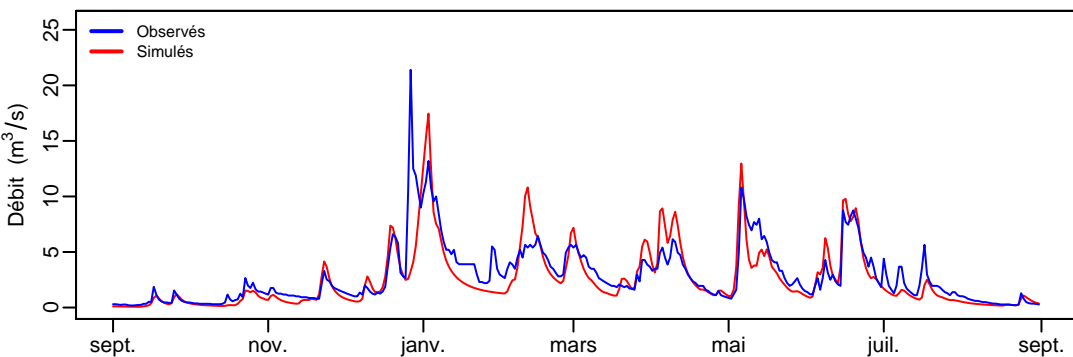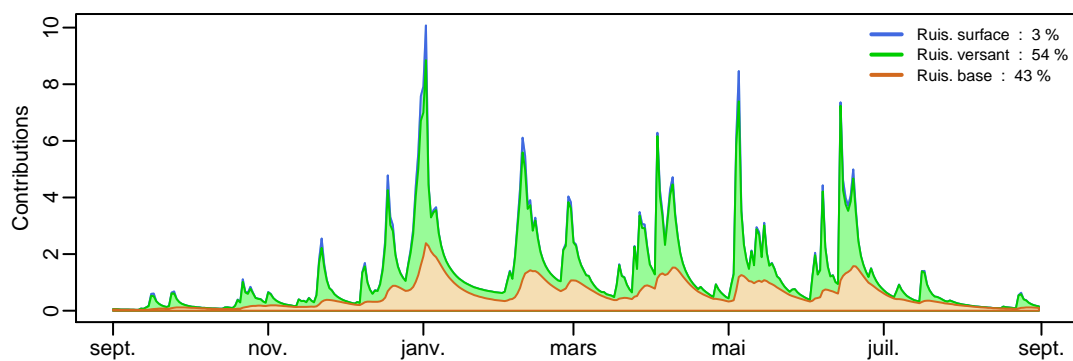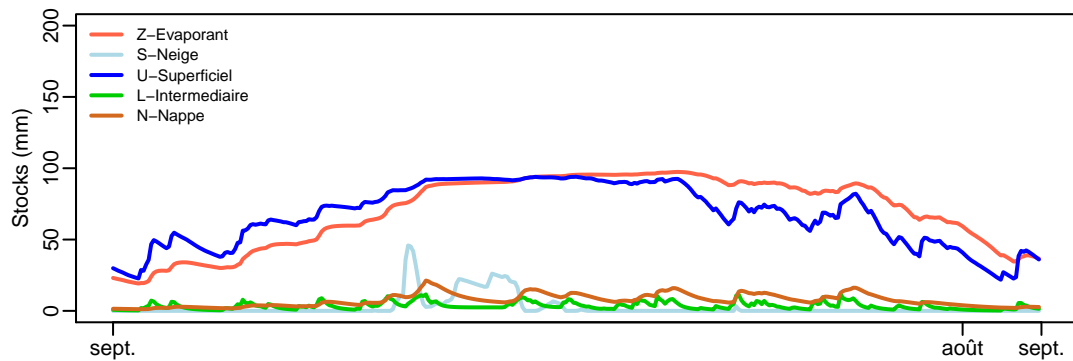



# k0813010 (172.72 km<sup>2</sup>) – année 1987–1988

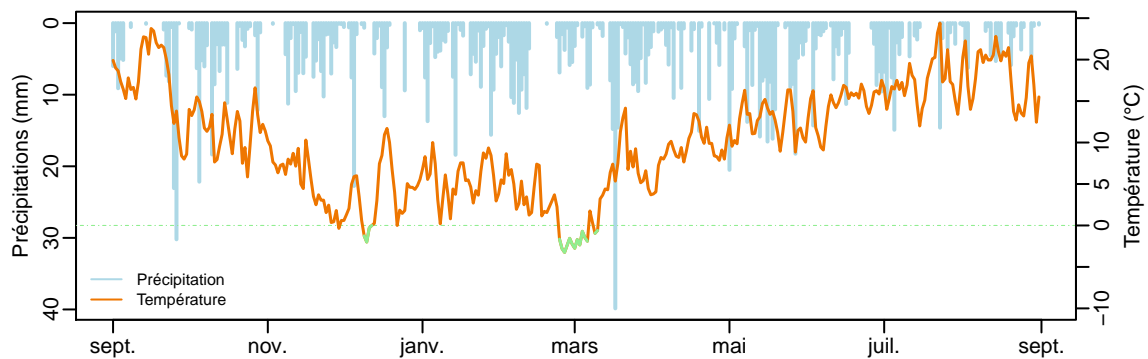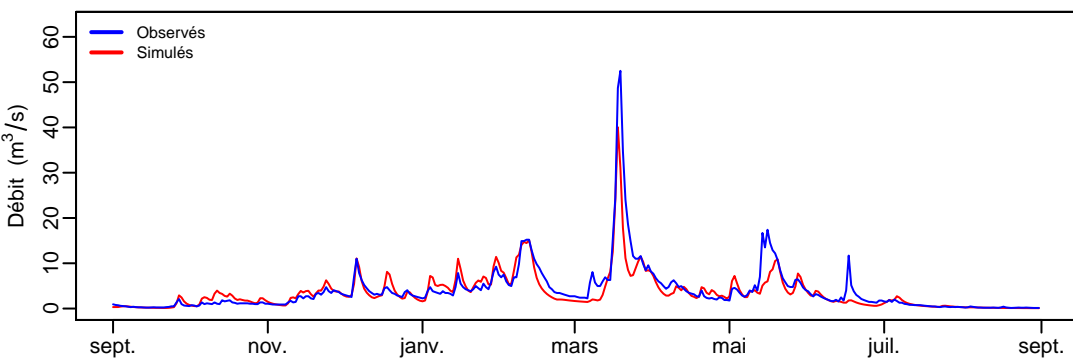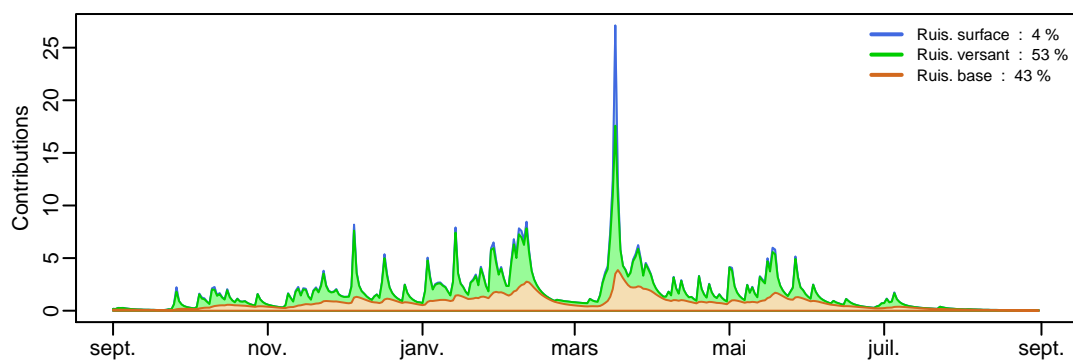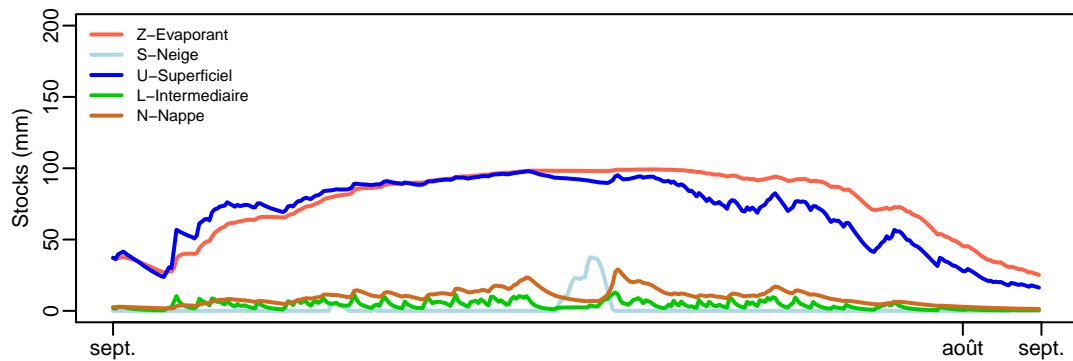

# k0813010 (172.72 km<sup>2</sup>) – année 1988–1989

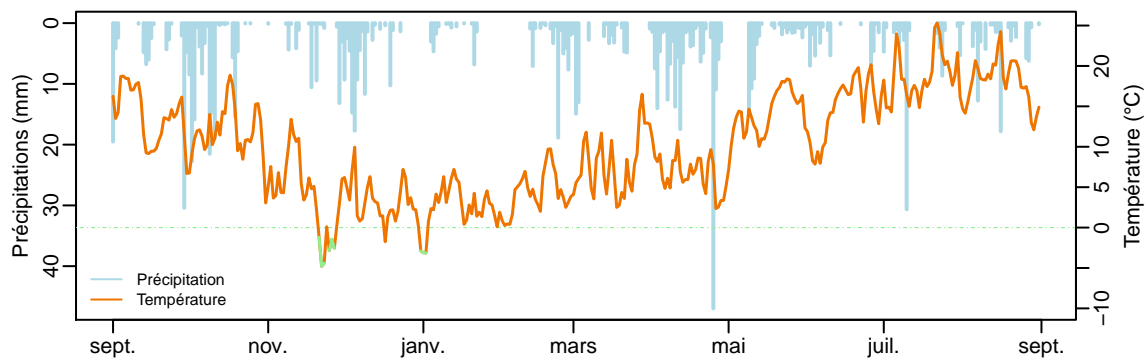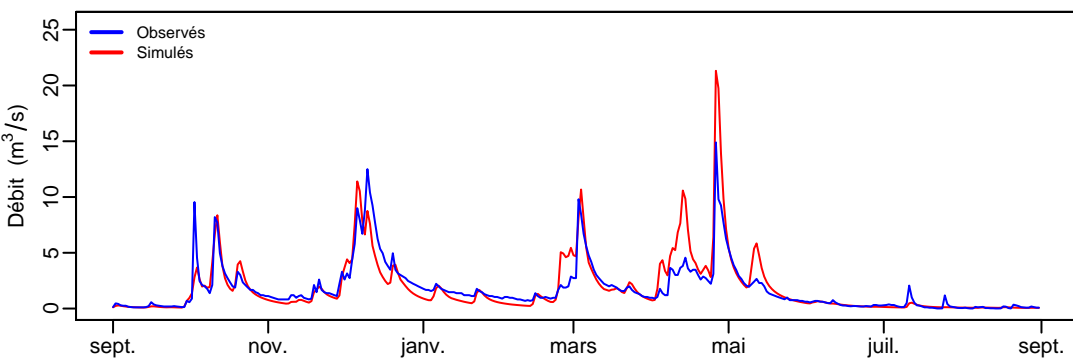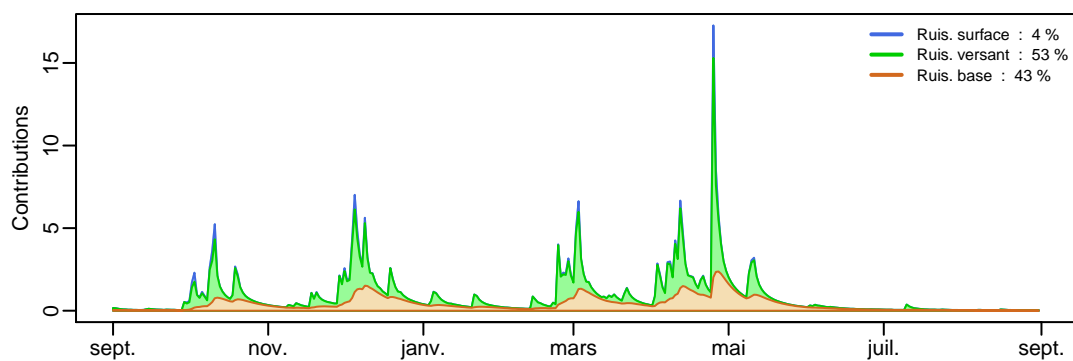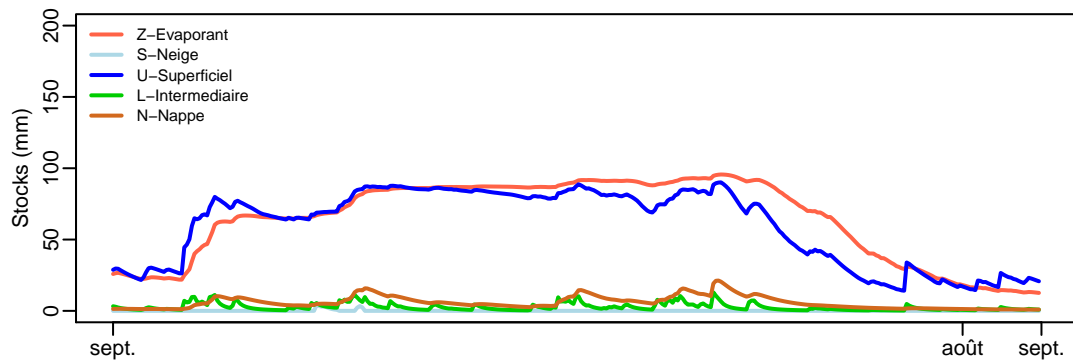

# k0813010 (172.72 km<sup>2</sup>) – année 1989–1990

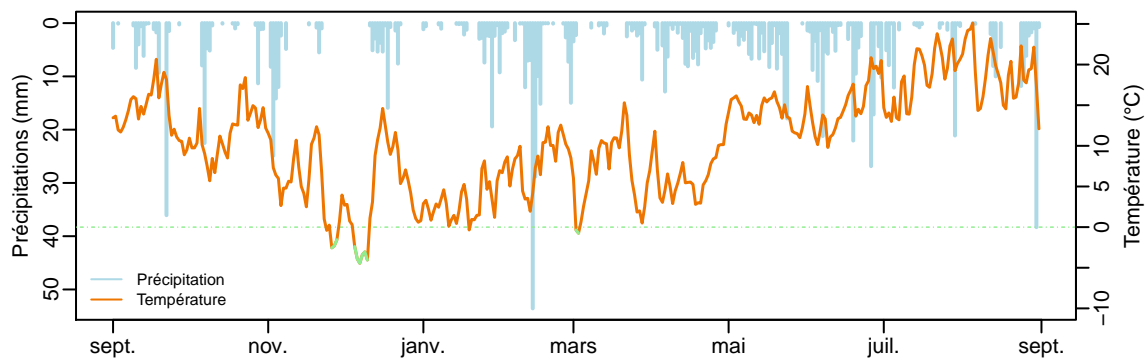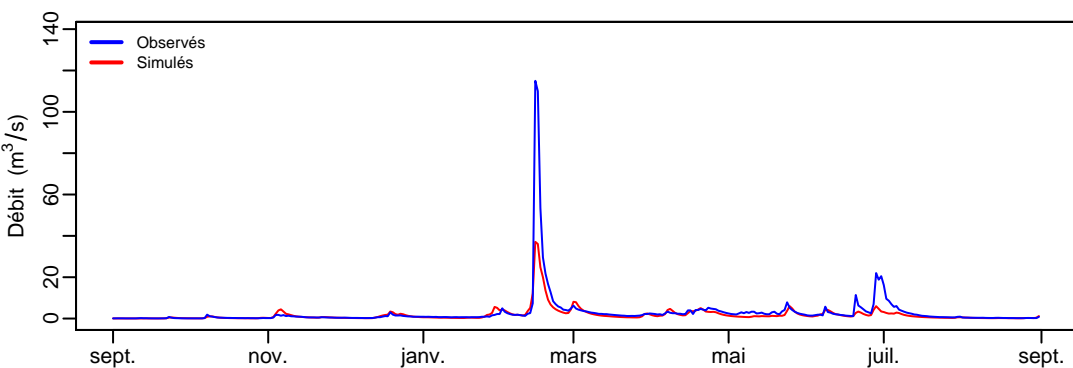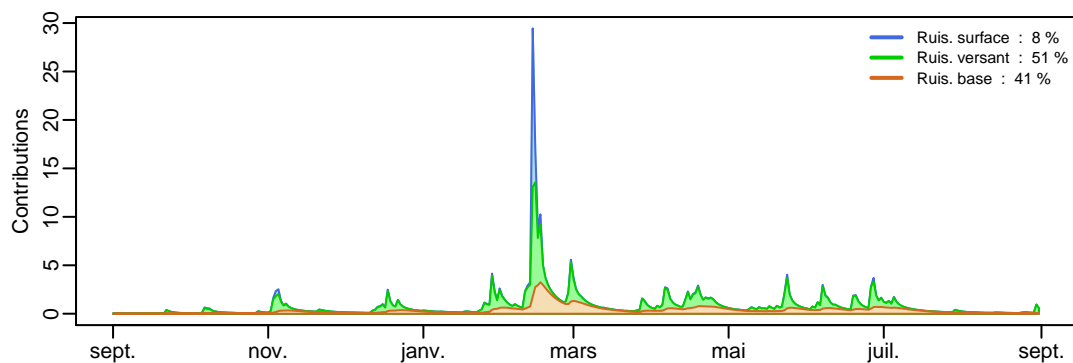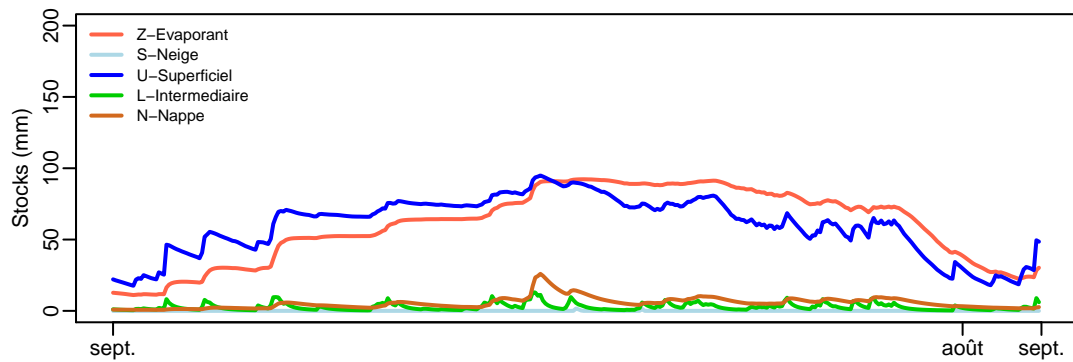

# k0813010 (172.72 km<sup>2</sup>) – année 1990–1991

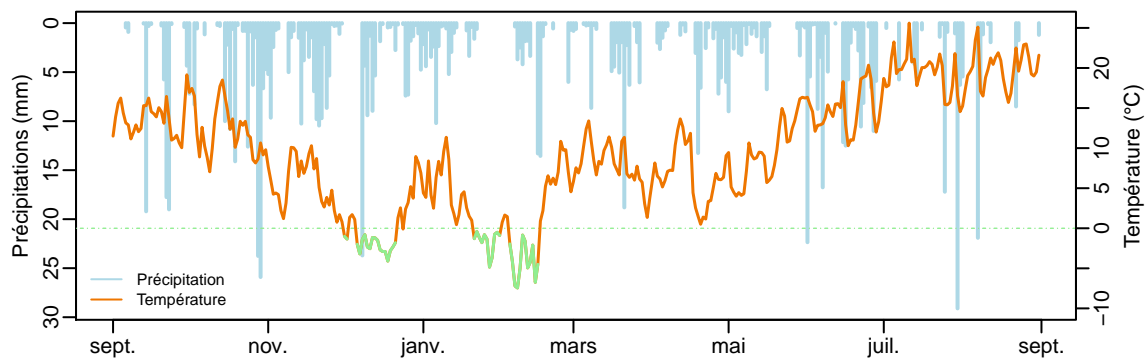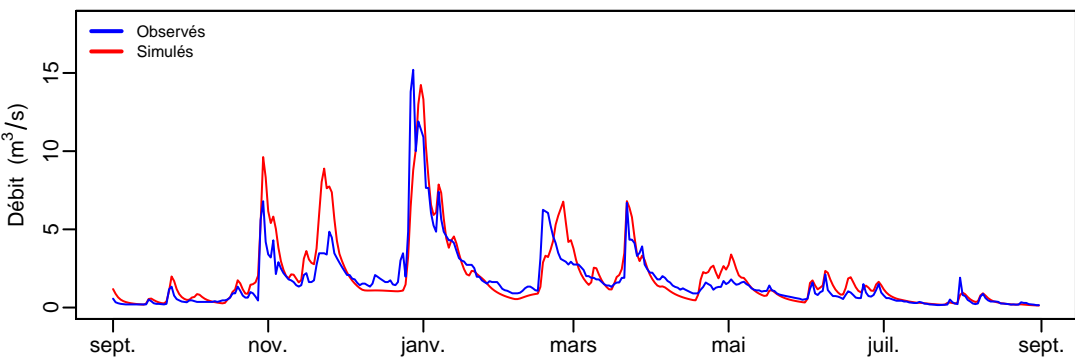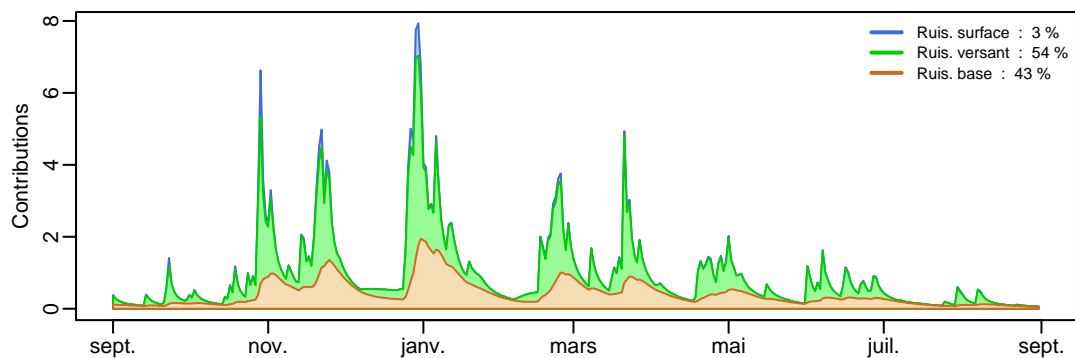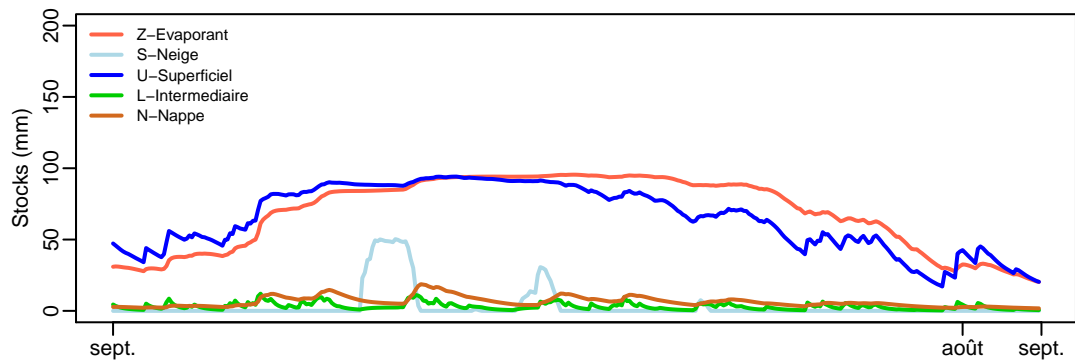

# k0813010 (172.72 km<sup>2</sup>) – année 1991–1992

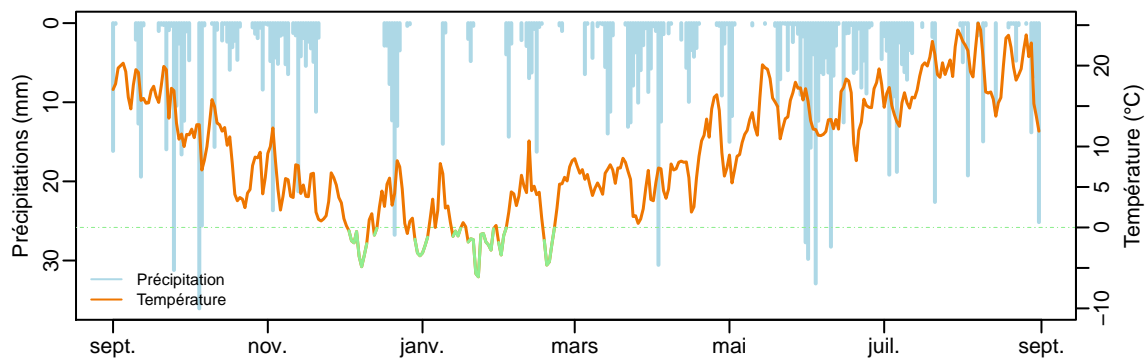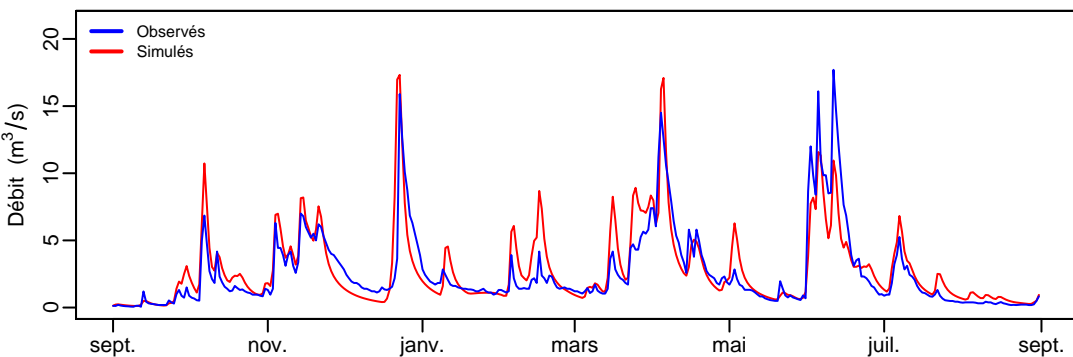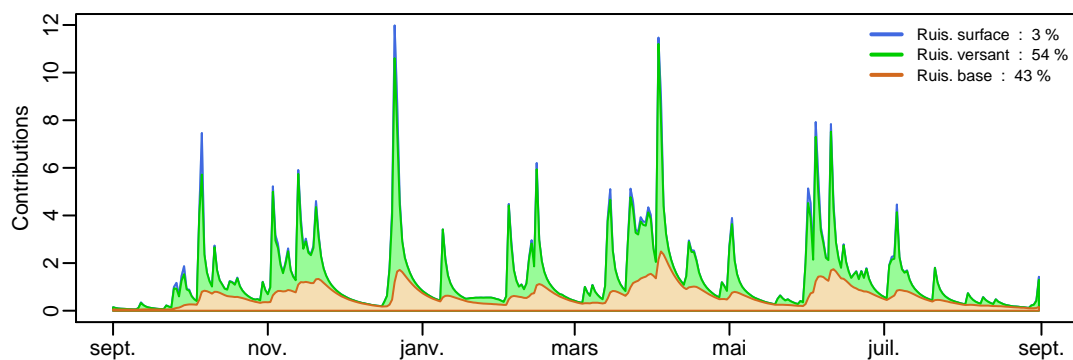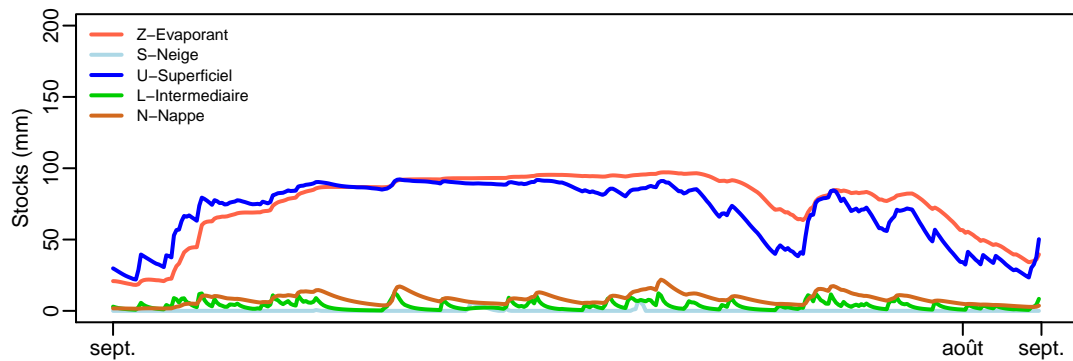

# k0813010 (172.72 km<sup>2</sup>) – année 1992–1993

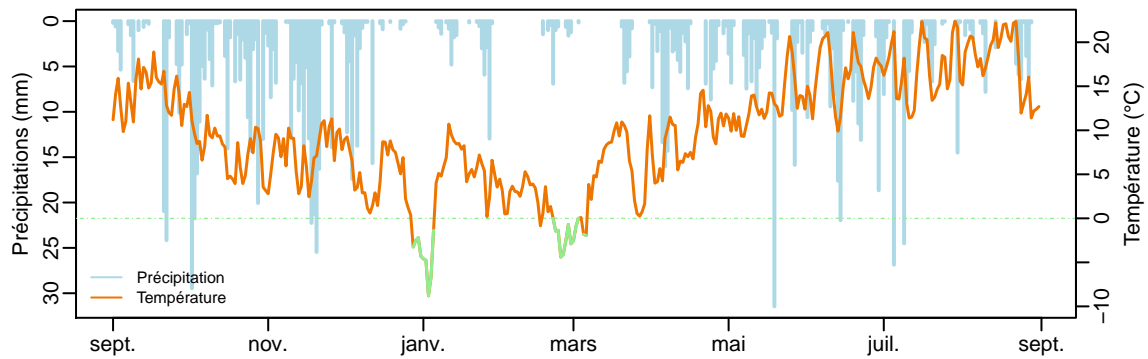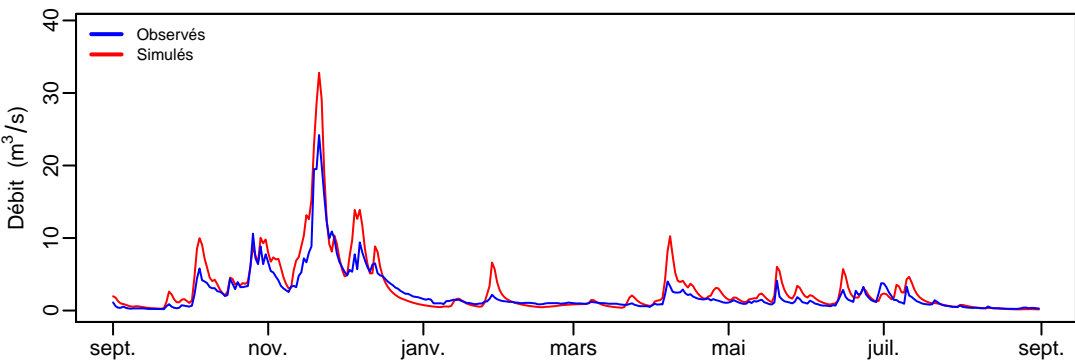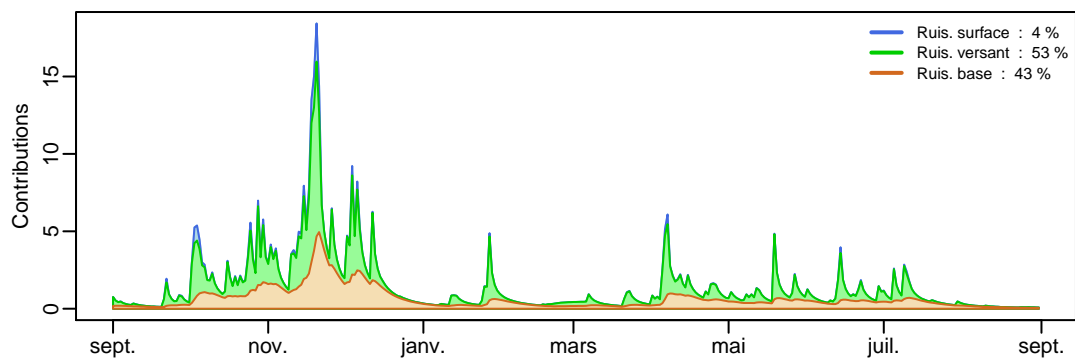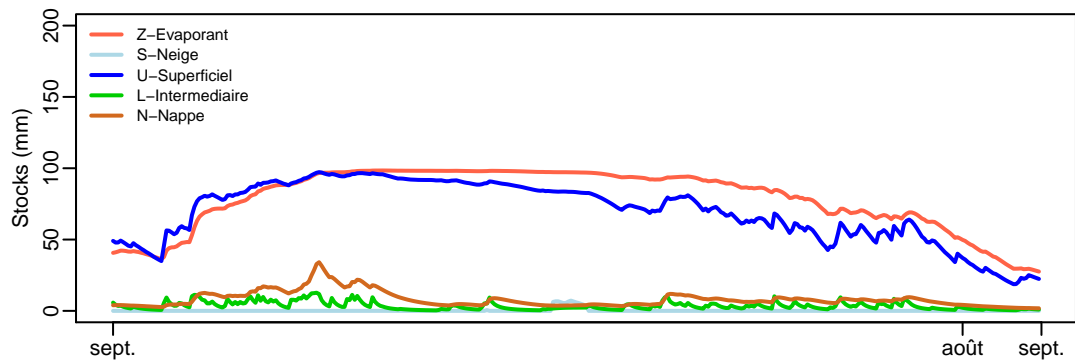

# k0813010 (172.72 km<sup>2</sup>) – année 1993–1994

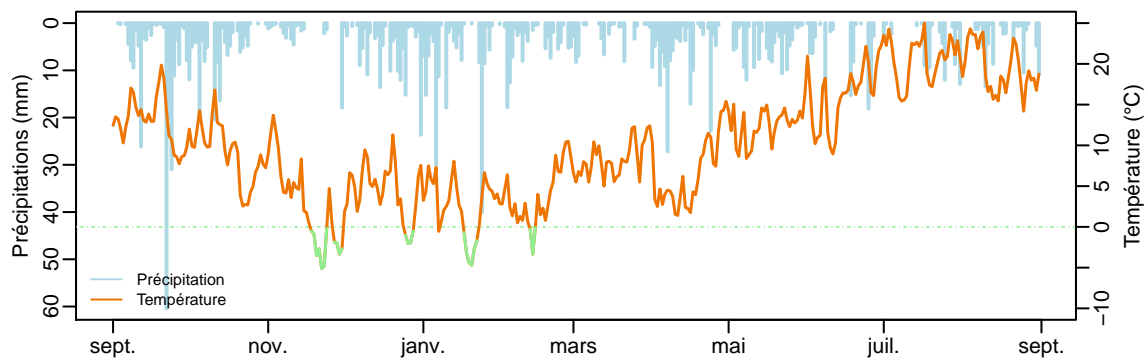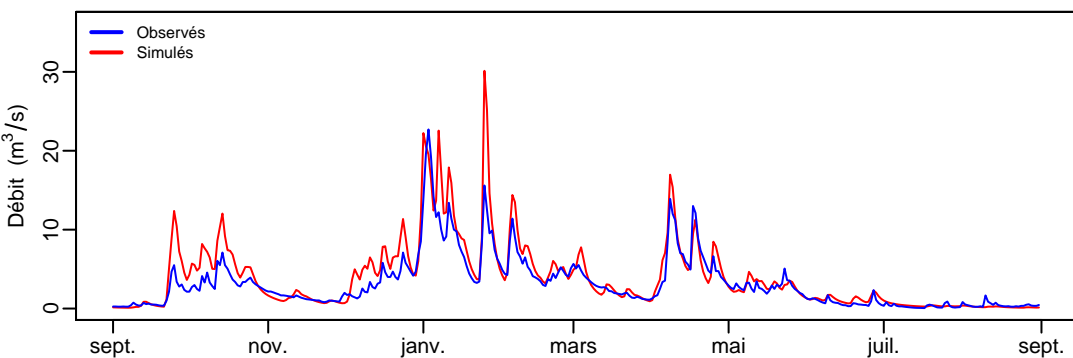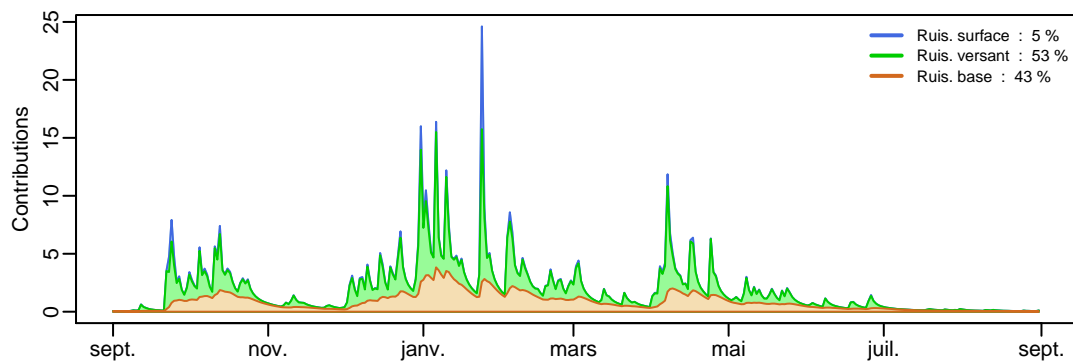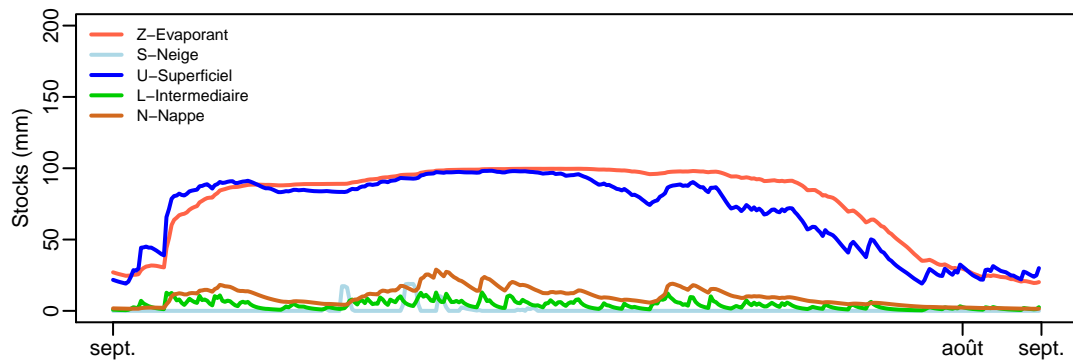

# k0813010 (172.72 km<sup>2</sup>) – année 1994–1995

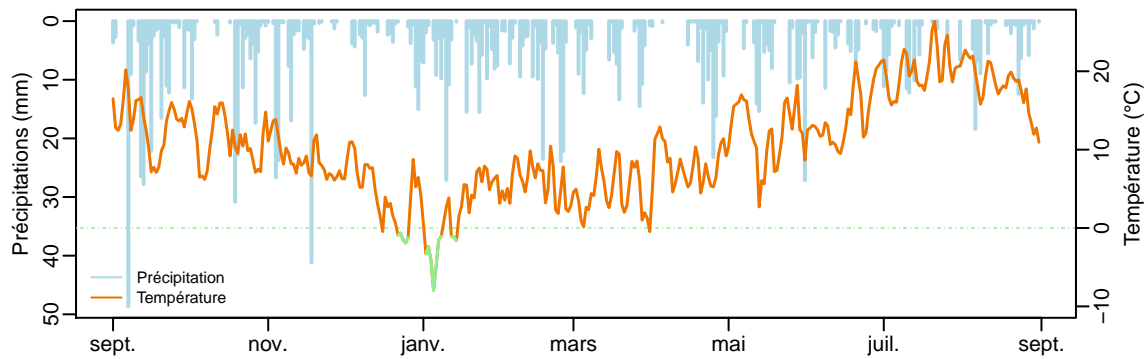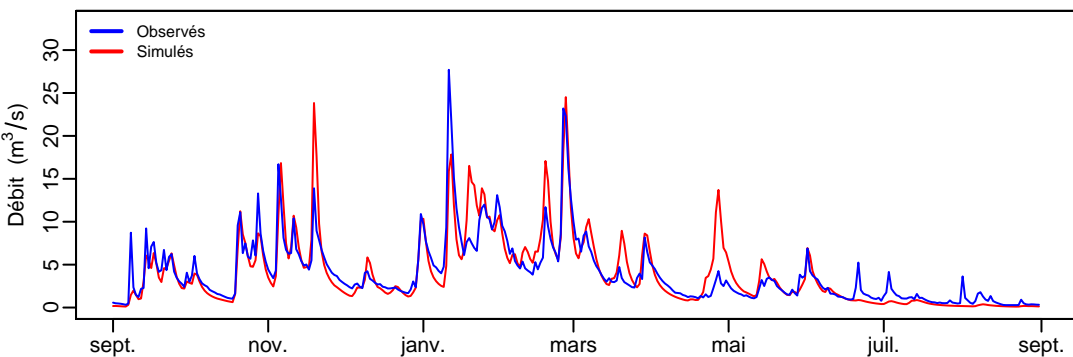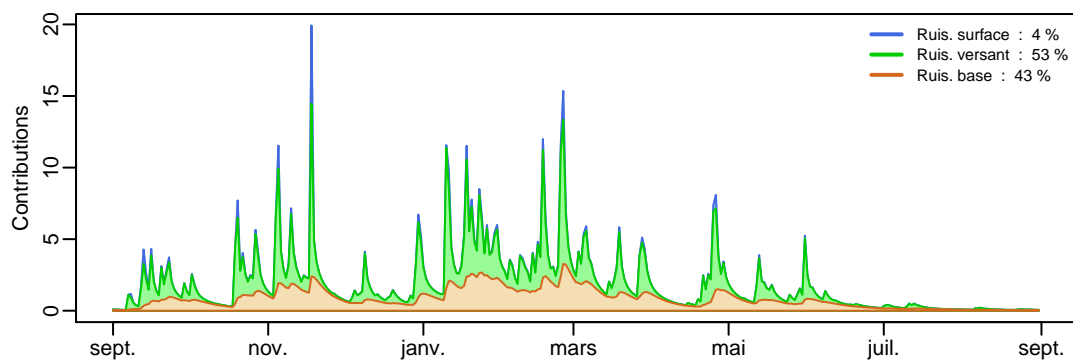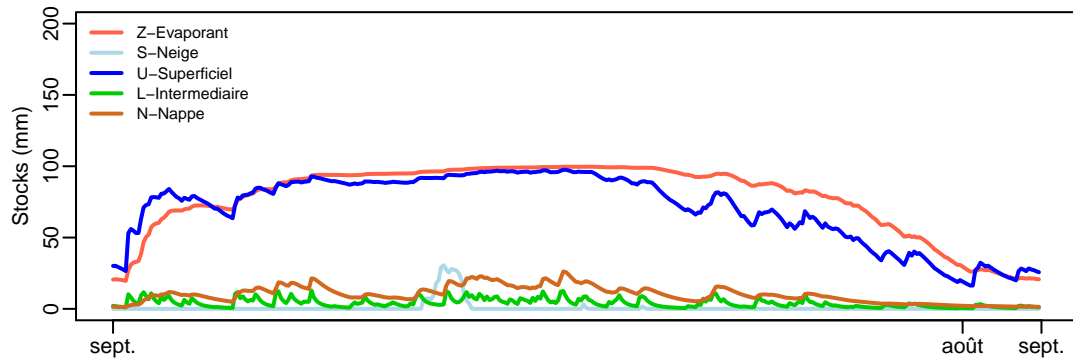



# k0910010 (6610.93 km<sup>2</sup>) – année 1981–1982

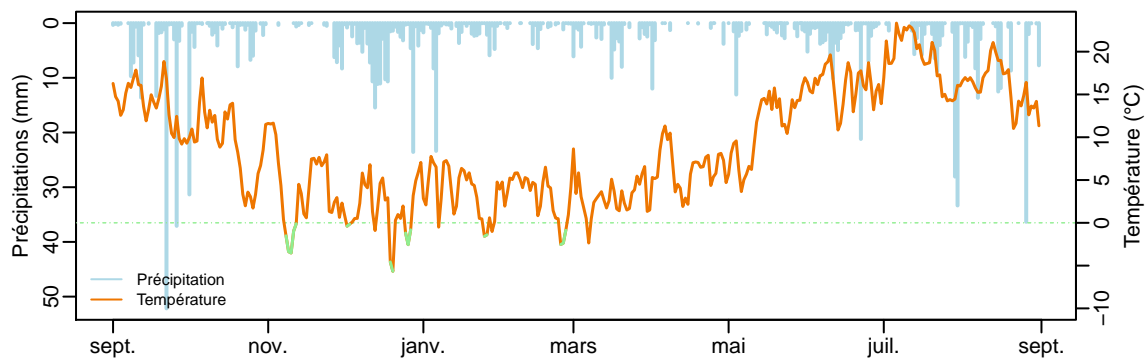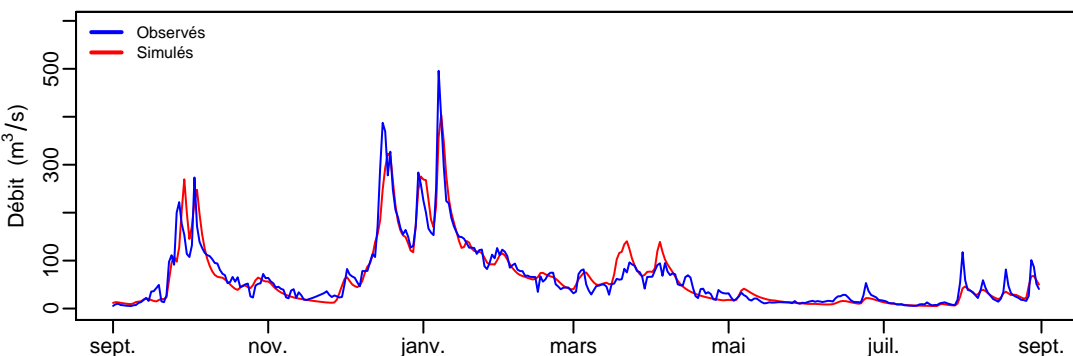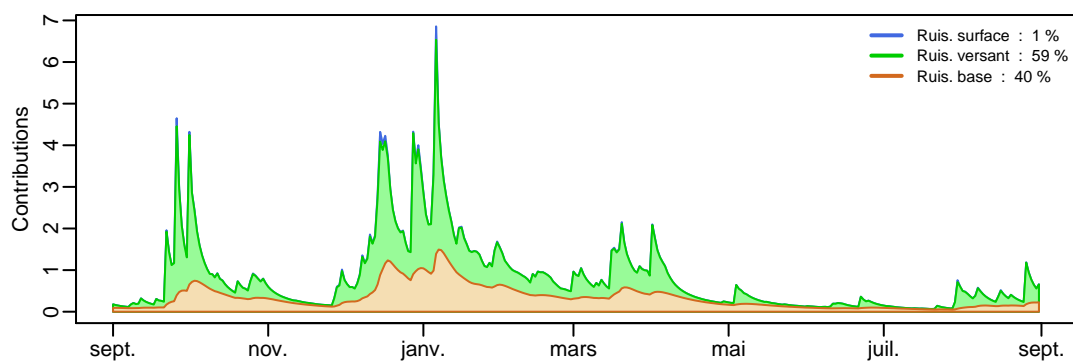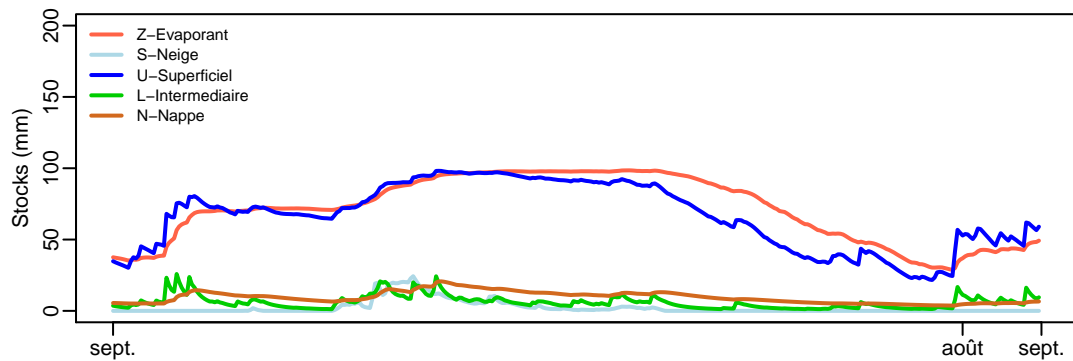

# k0910010 (6610.93 km²) – année 1982–1983

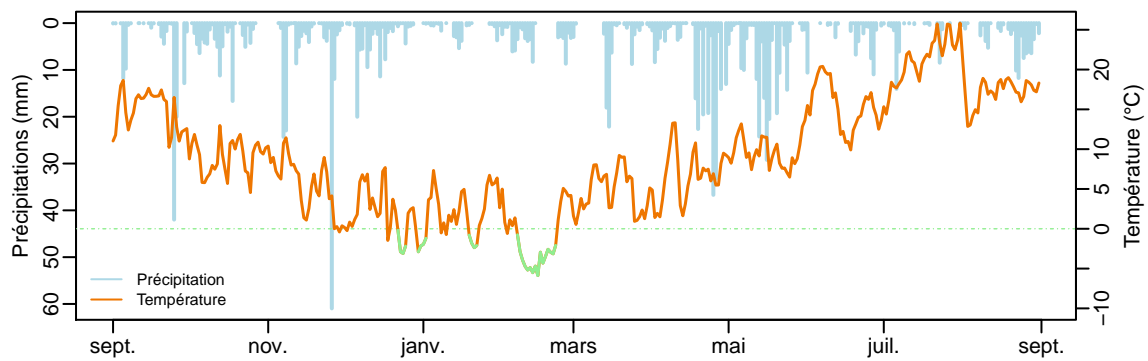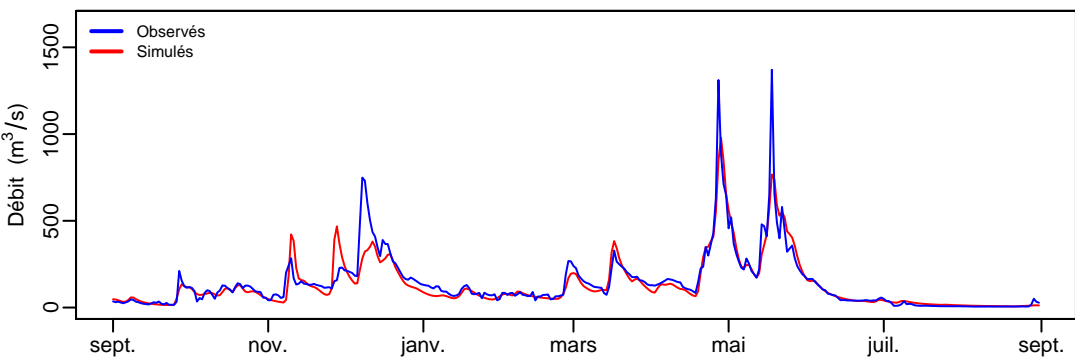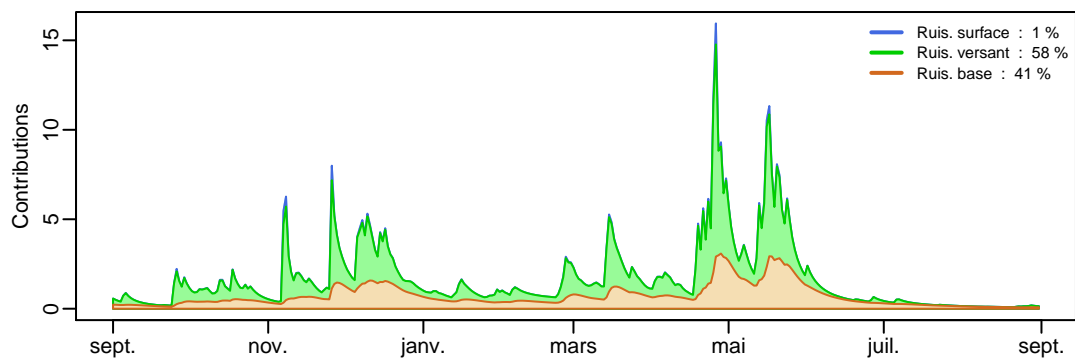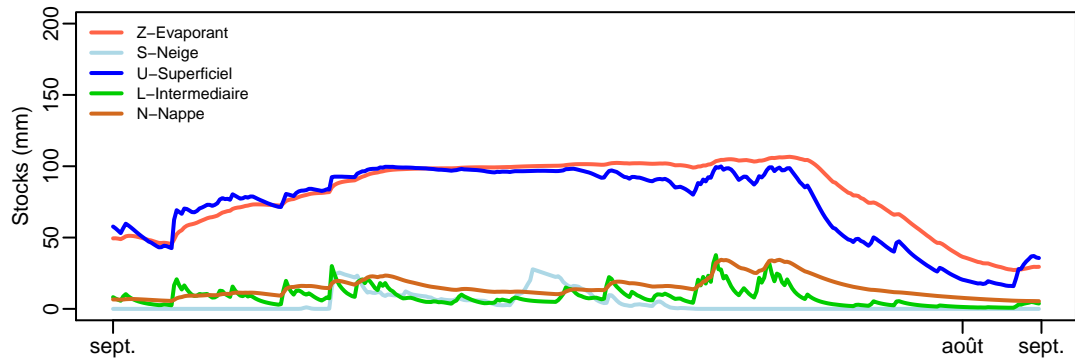

# k0910010 (6610.93 km<sup>2</sup>) – année 1983–1984

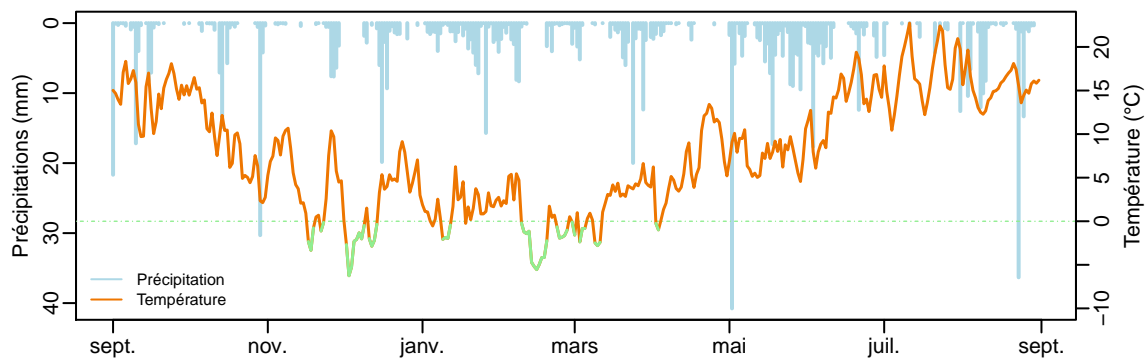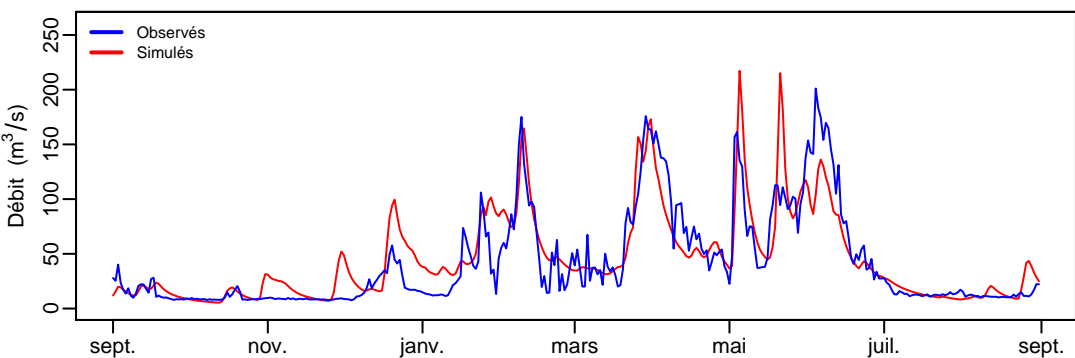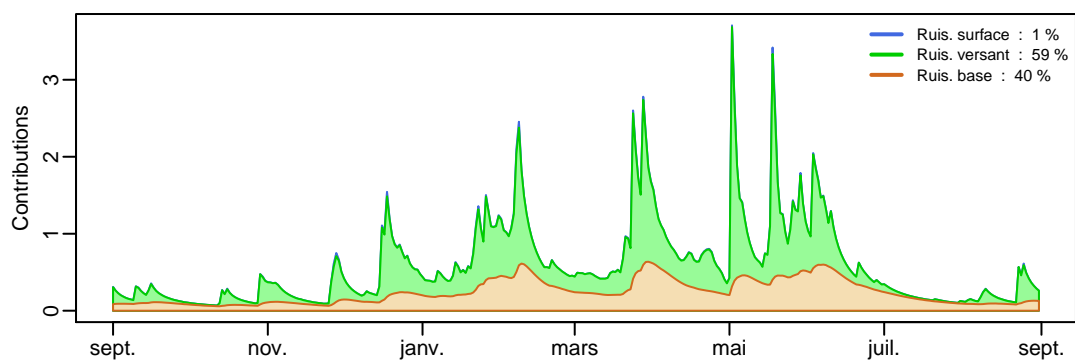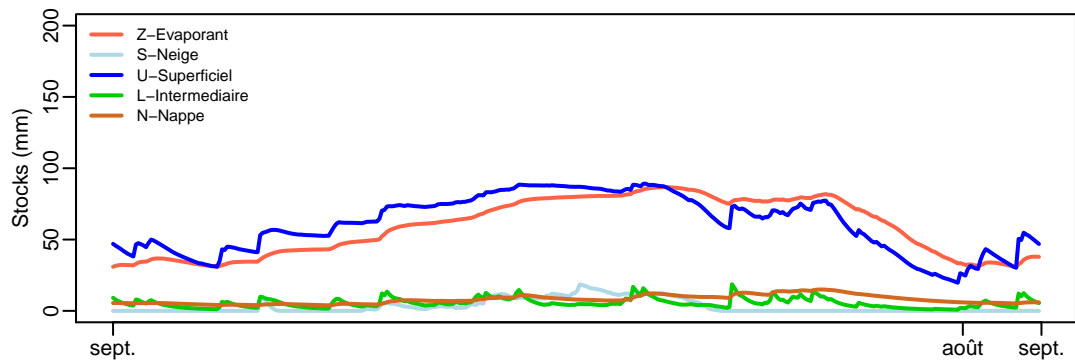

# k0910010 (6610.93 km<sup>2</sup>) – année 1984–1985

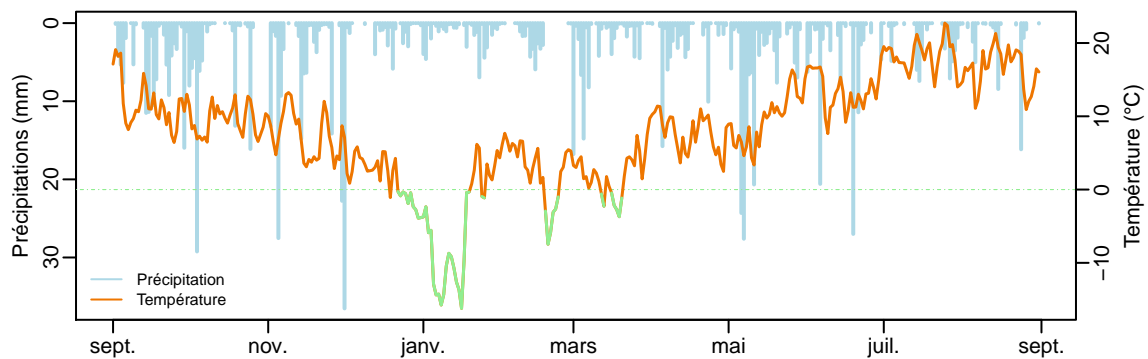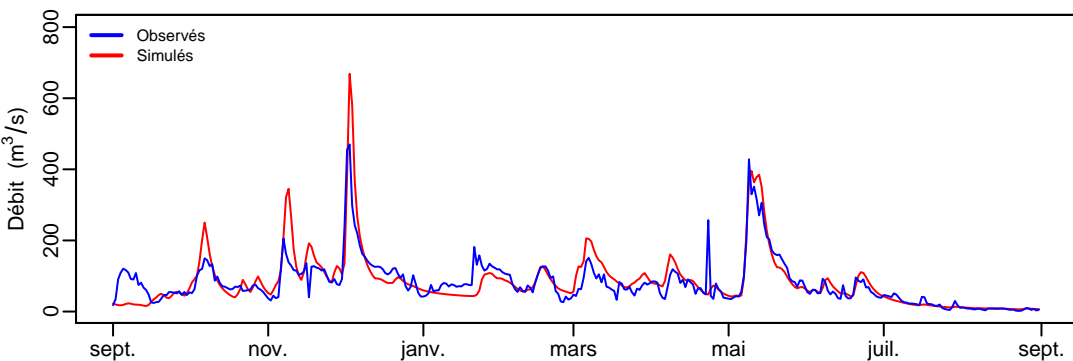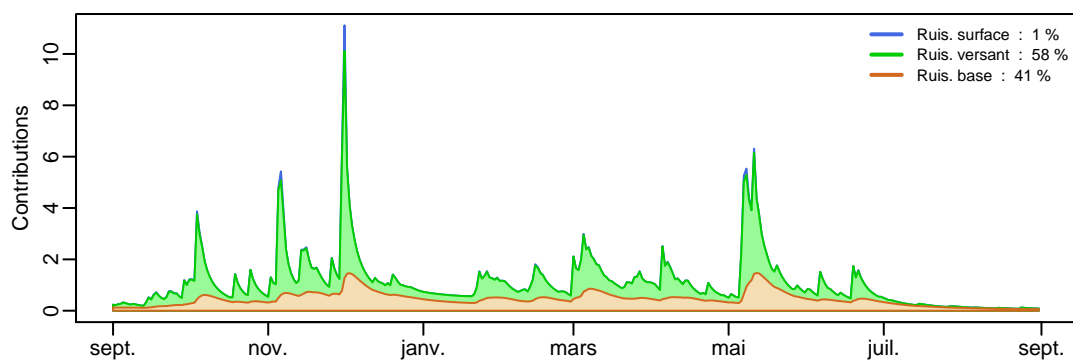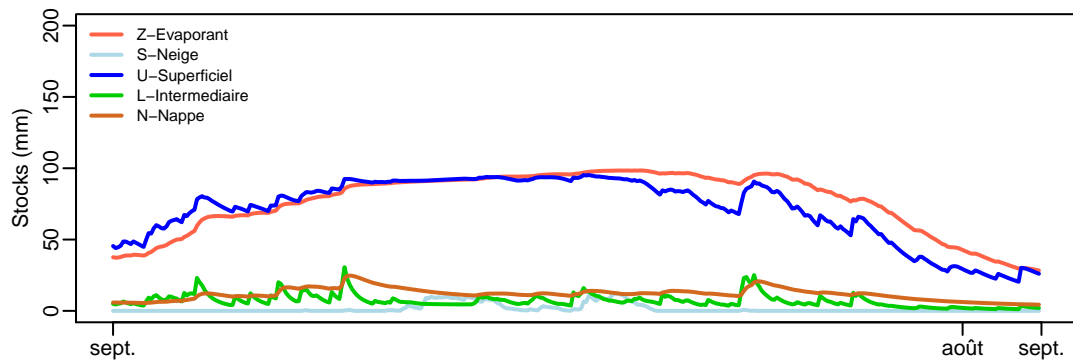

# k0910010 (6610.93 km<sup>2</sup>) – année 1985–1986

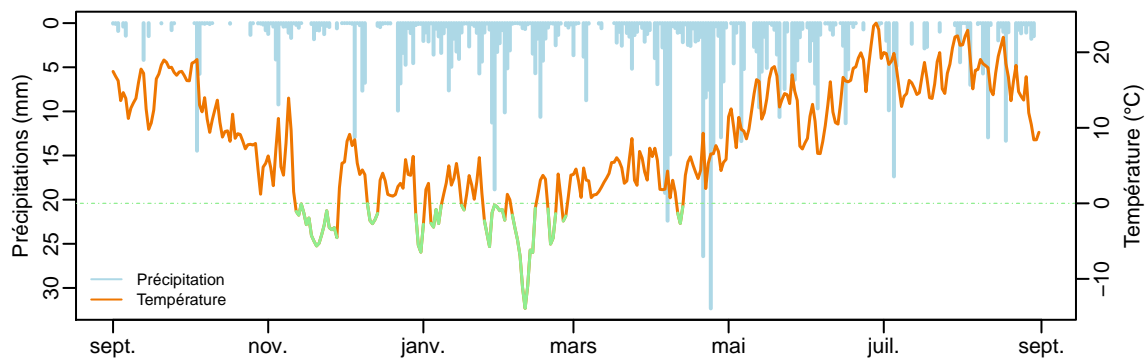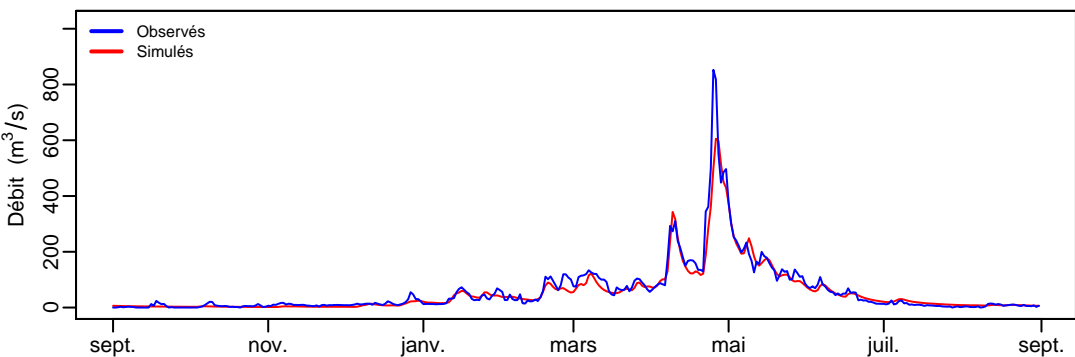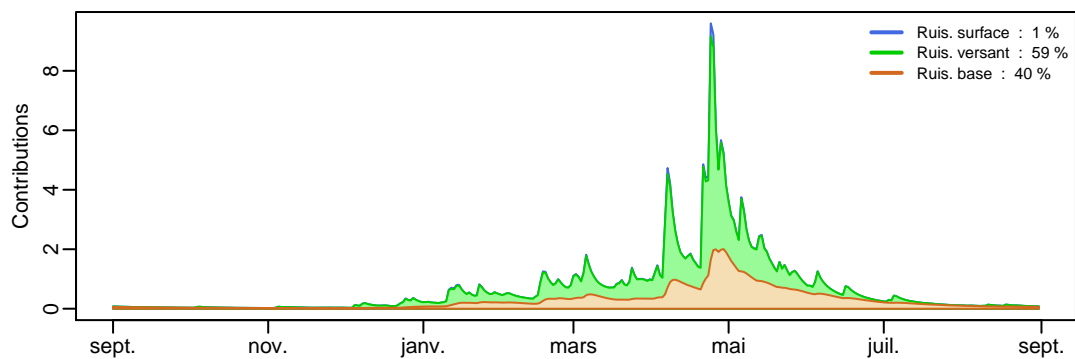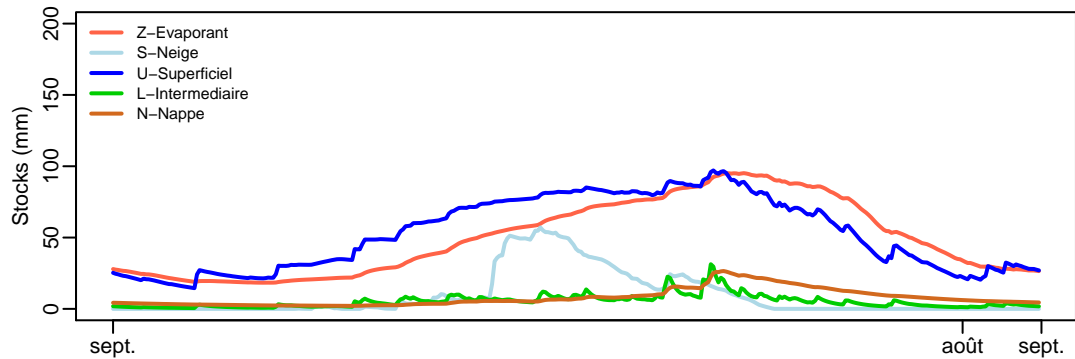

# k0910010 (6610.93 km<sup>2</sup>) – année 1986–1987

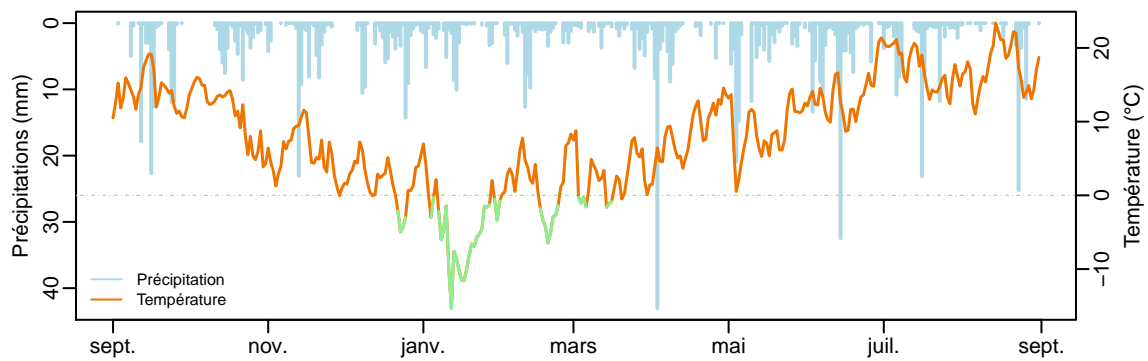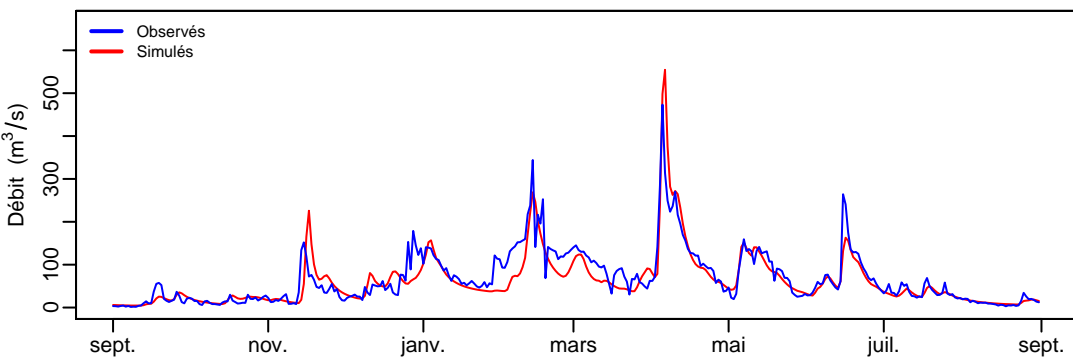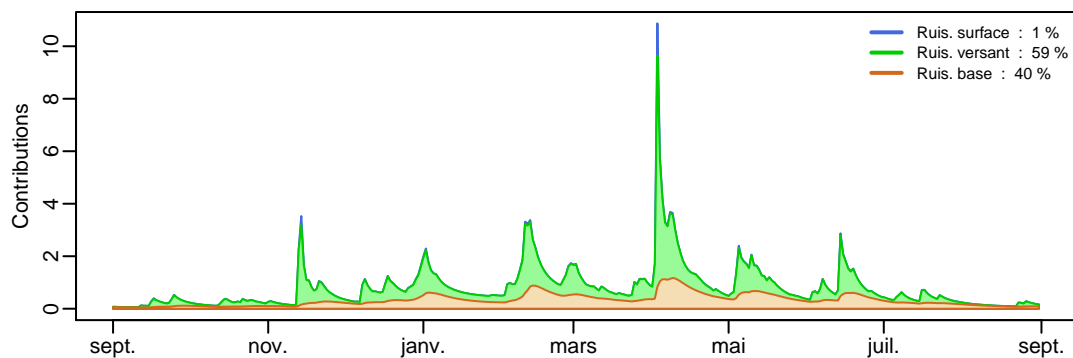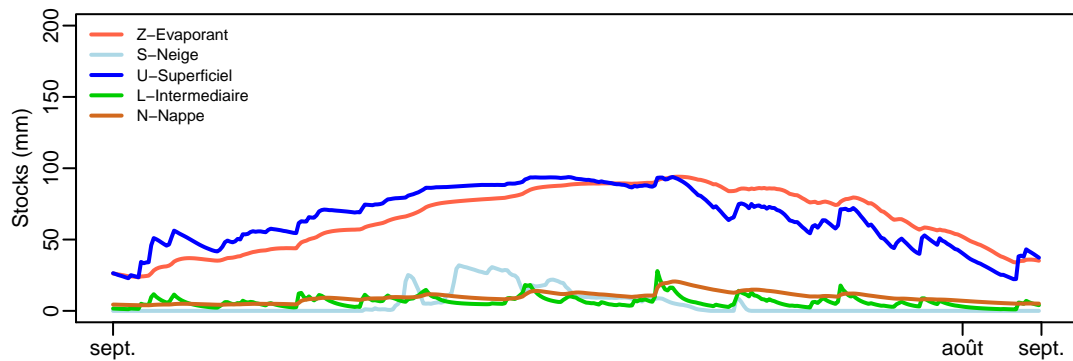

# k0910010 (6610.93 km<sup>2</sup>) – année 1987–1988

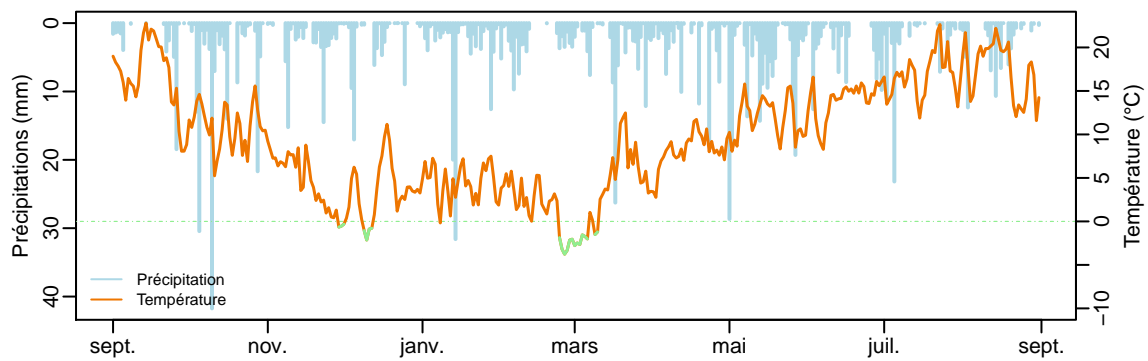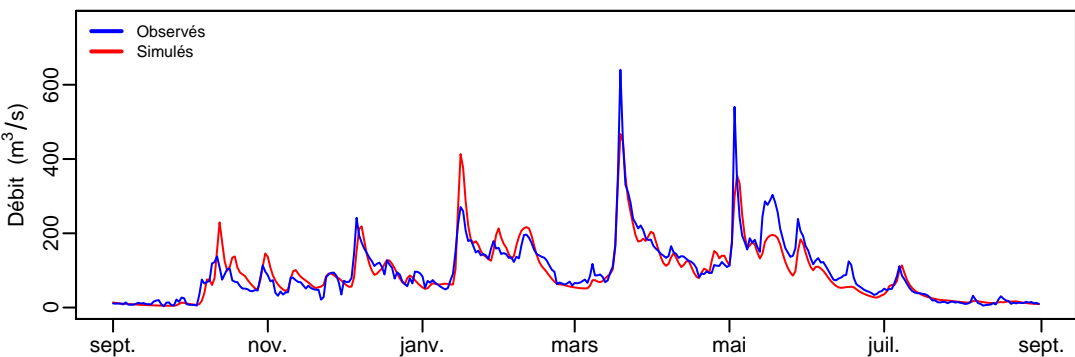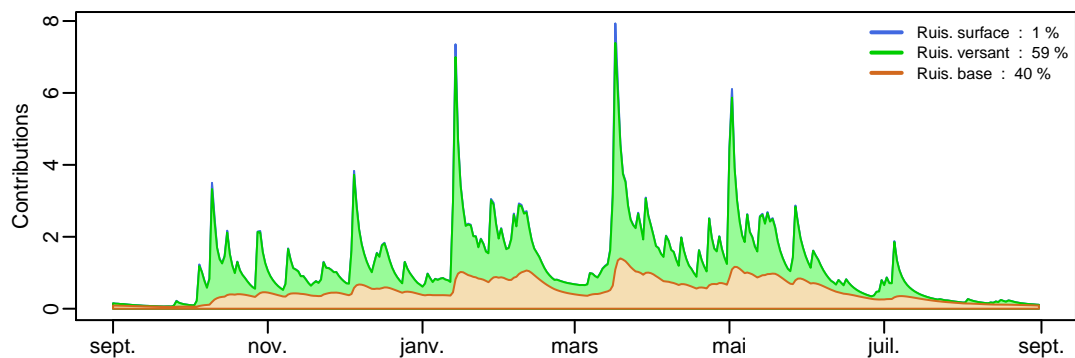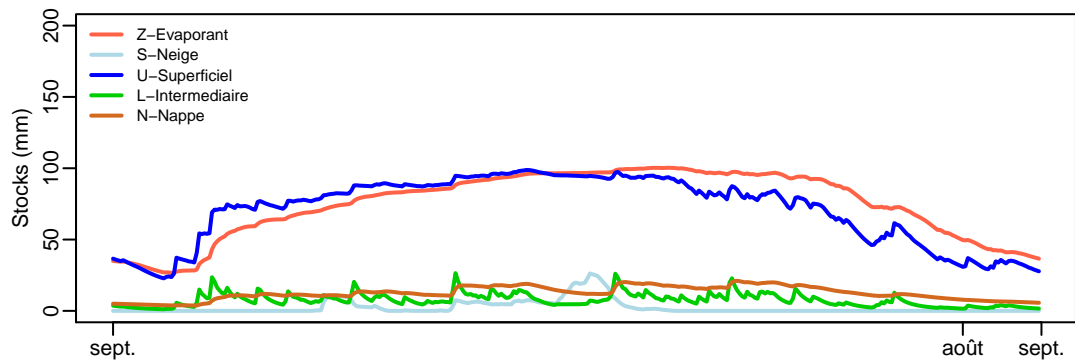

# k0910010 (6610.93 km<sup>2</sup>) – année 1988–1989

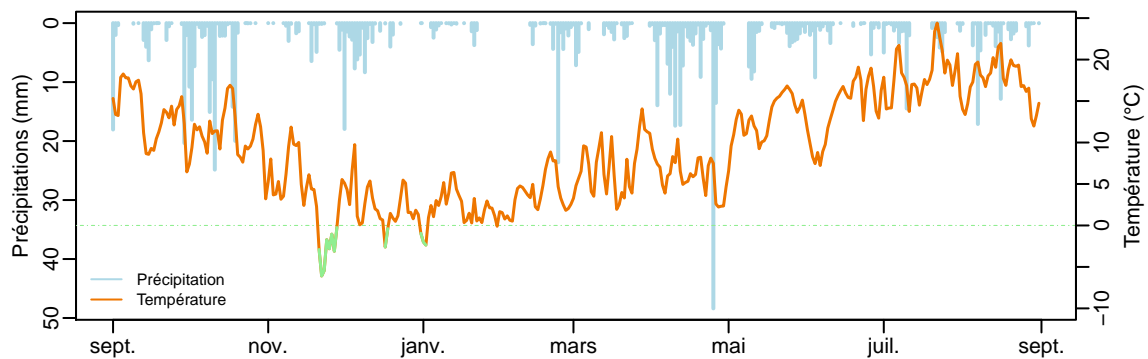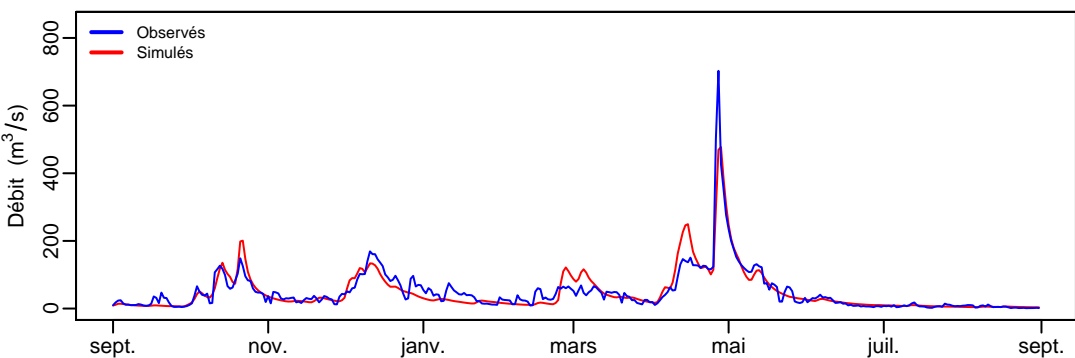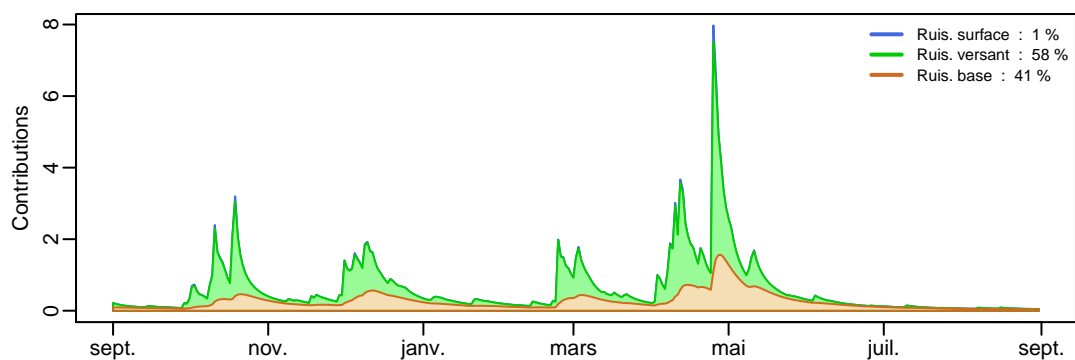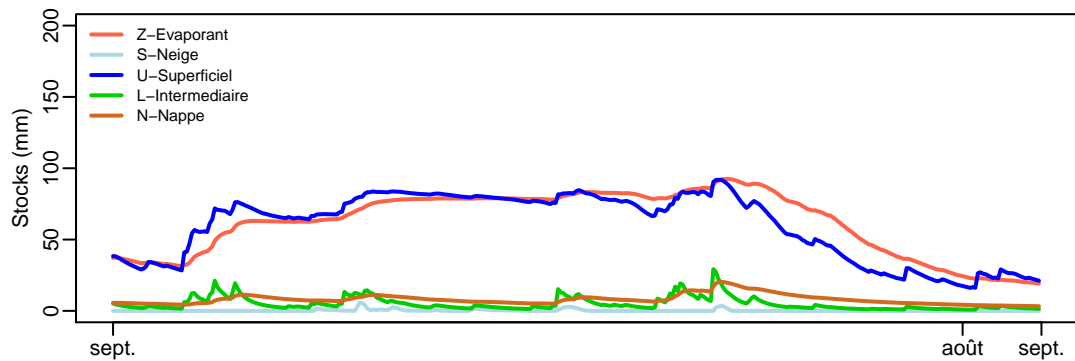



# k0910010 (6610.93 km<sup>2</sup>) – année 1989–1990

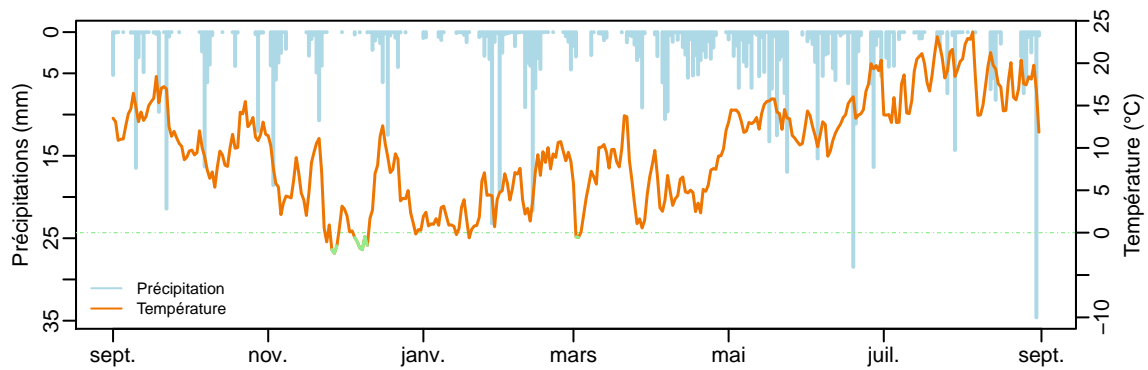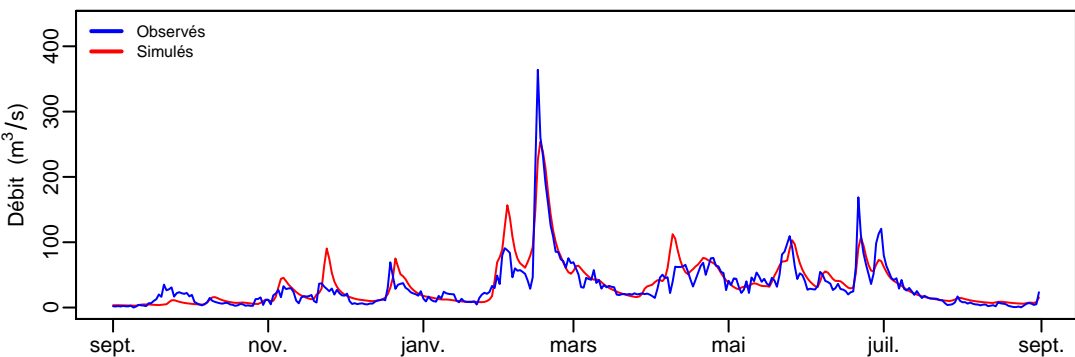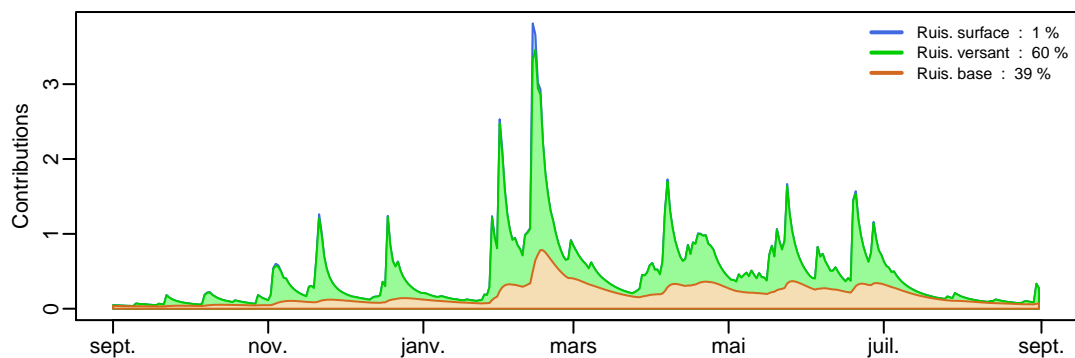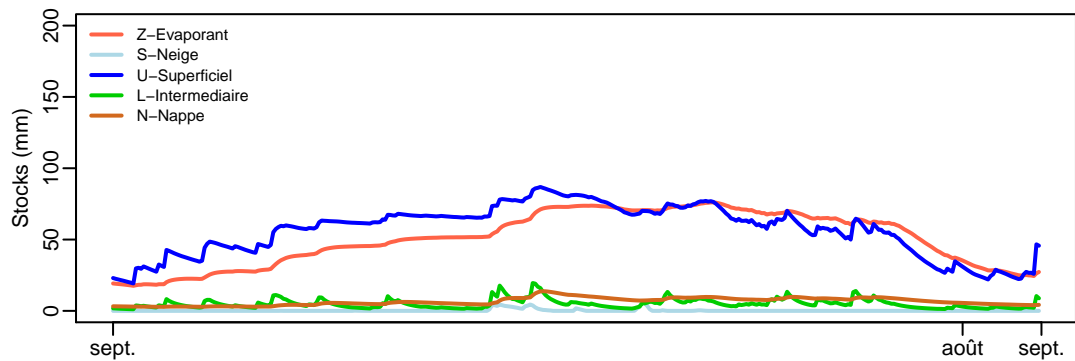

# k0910010 (6610.93 km<sup>2</sup>) – année 1990–1991

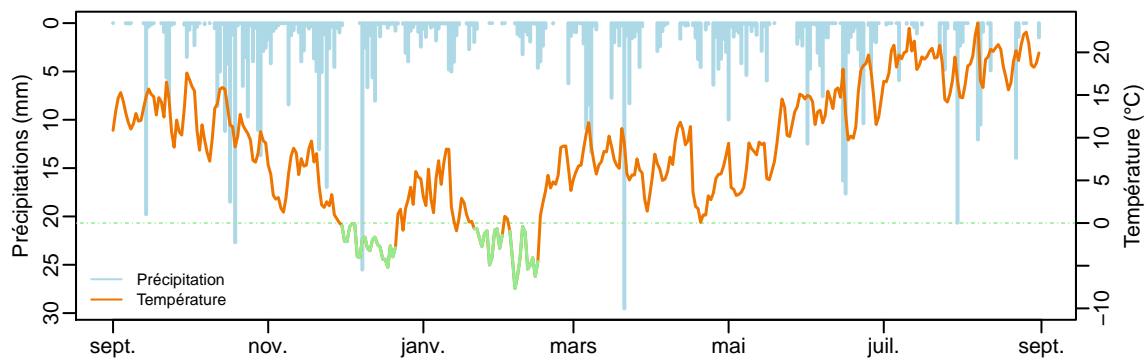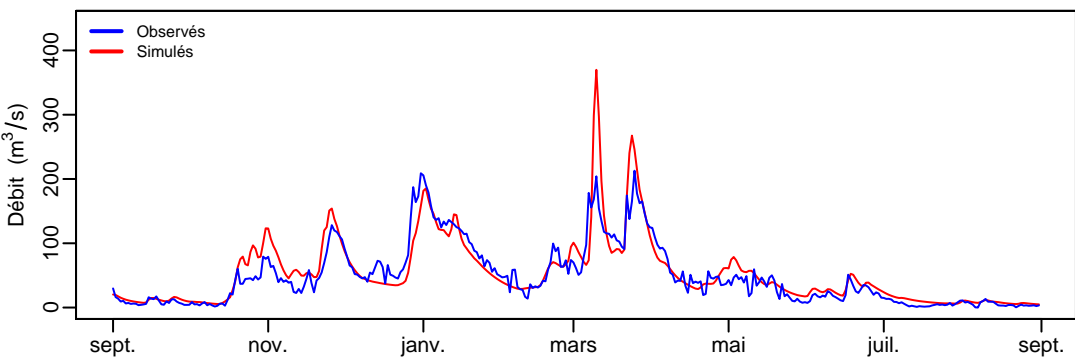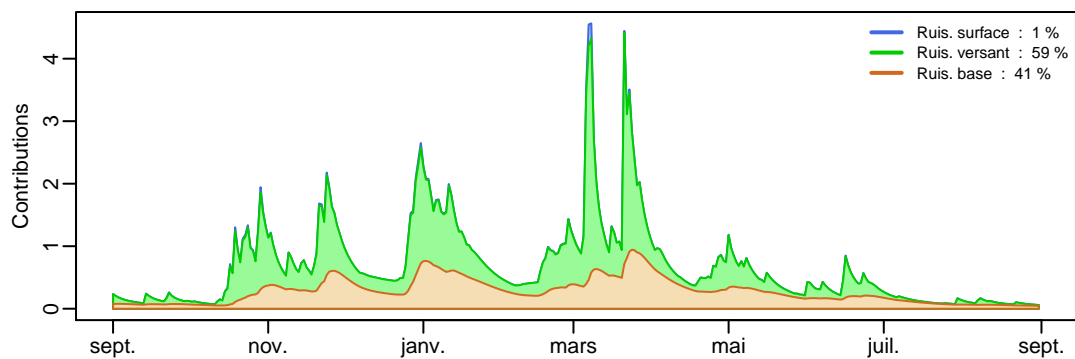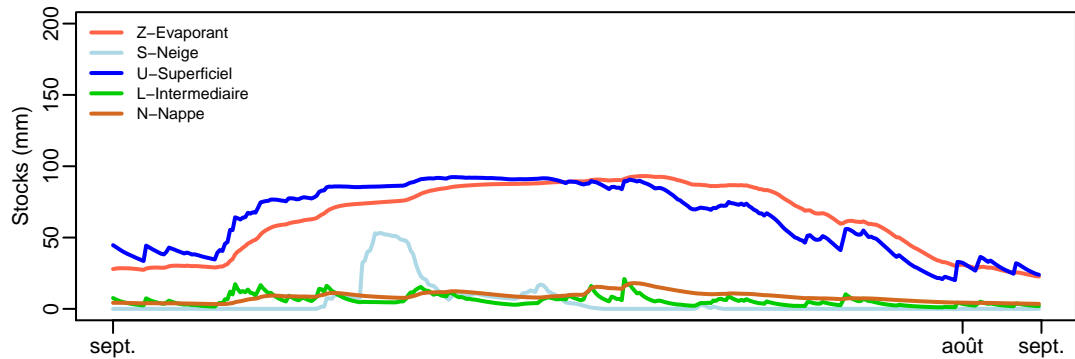

# k0910010 (6610.93 km²) – année 1991–1992

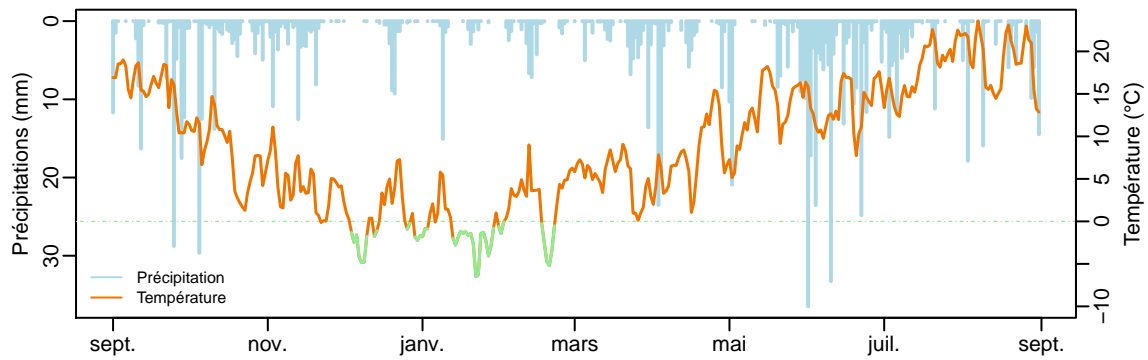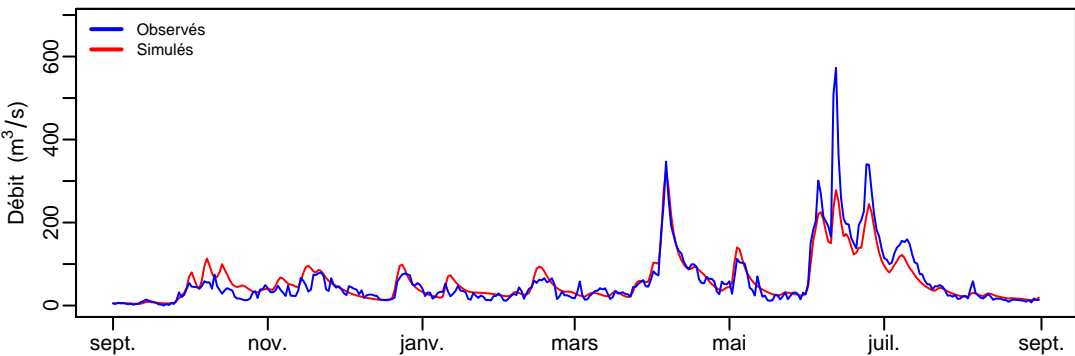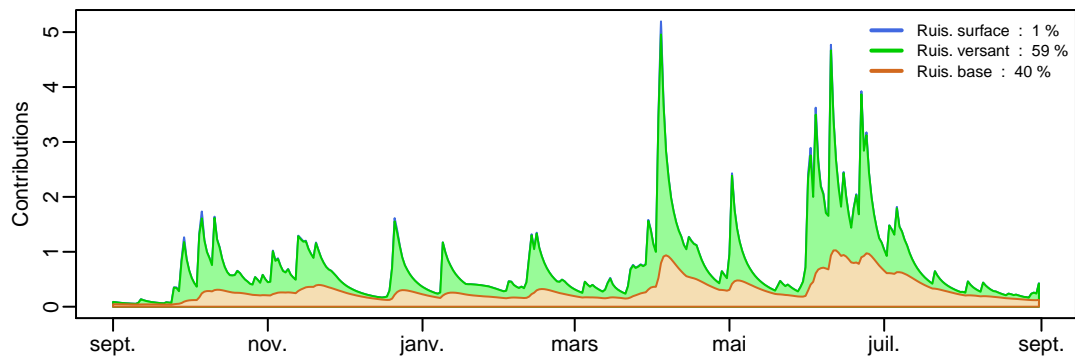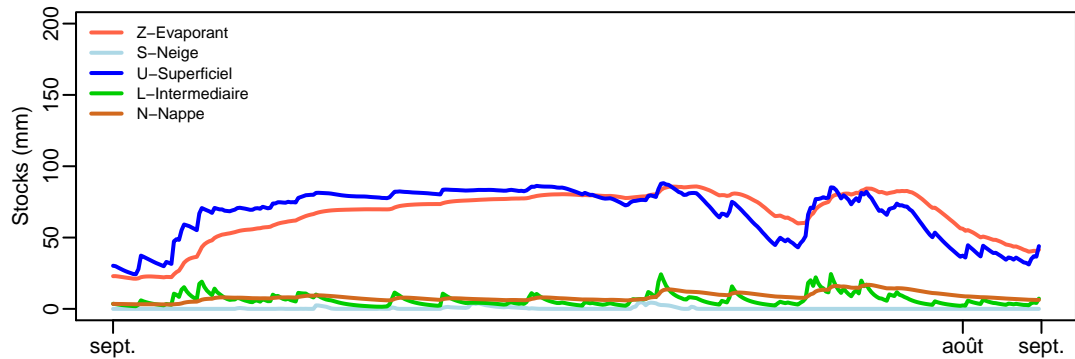

# k0910010 (6610.93 km<sup>2</sup>) – année 1992–1993

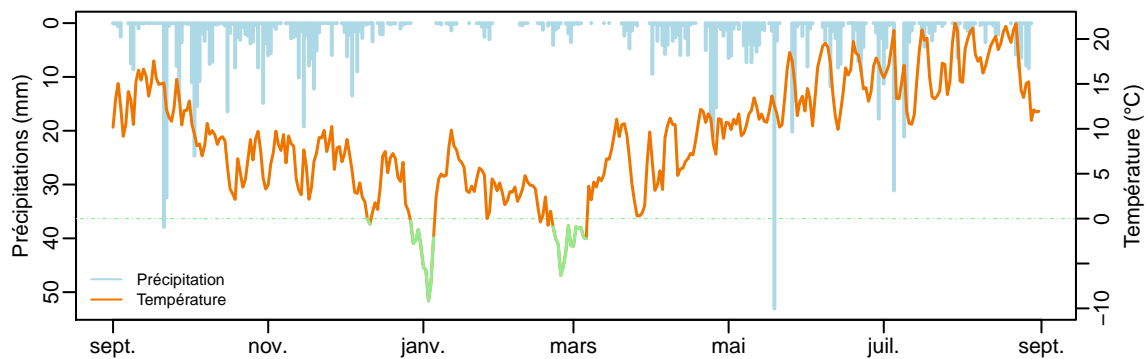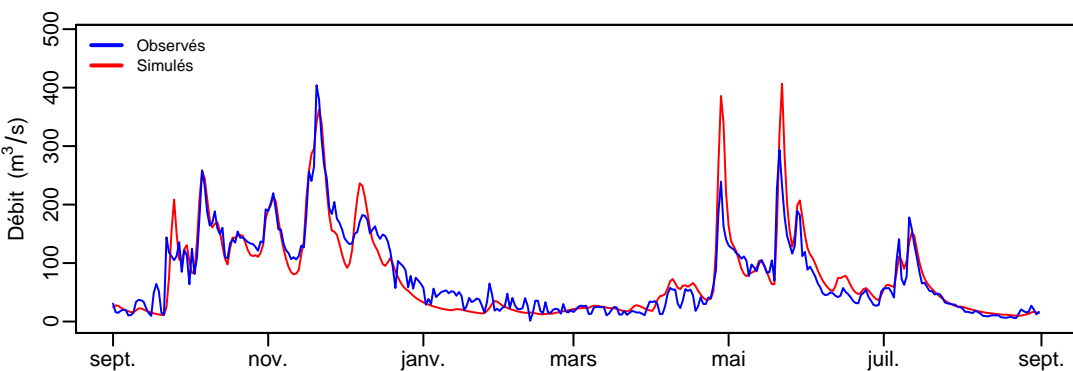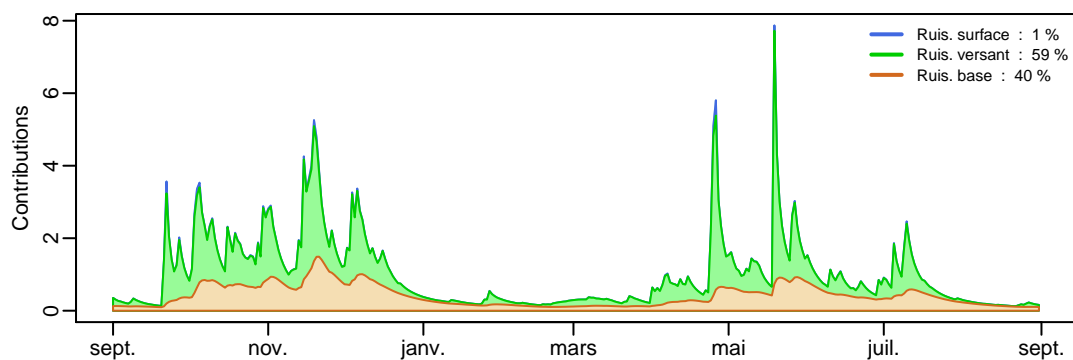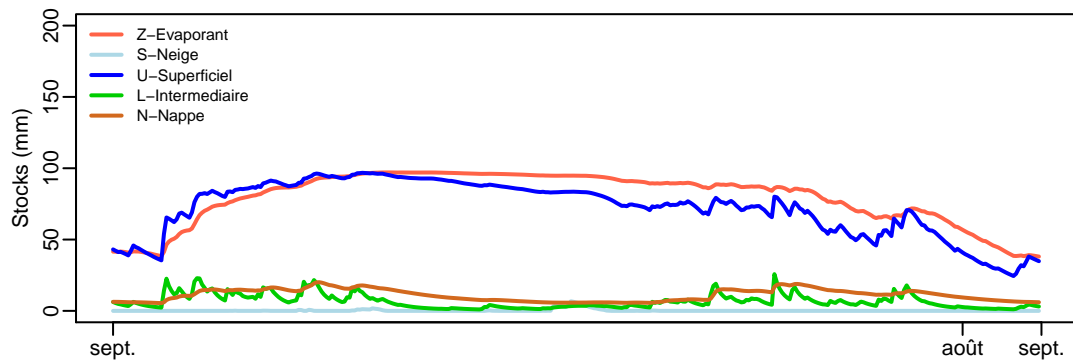

# k0910010 (6610.93 km<sup>2</sup>) – année 1993–1994

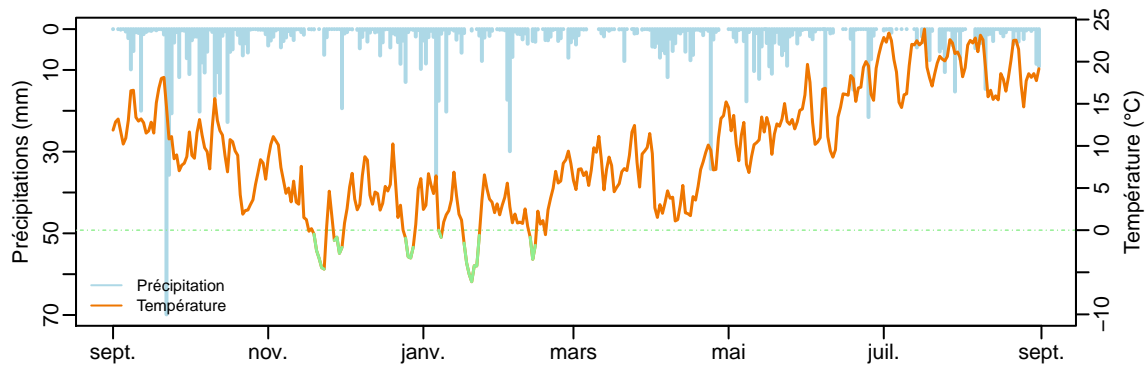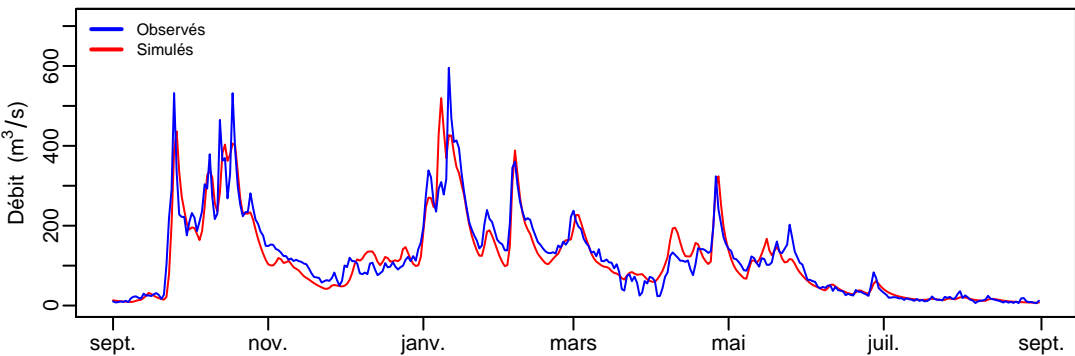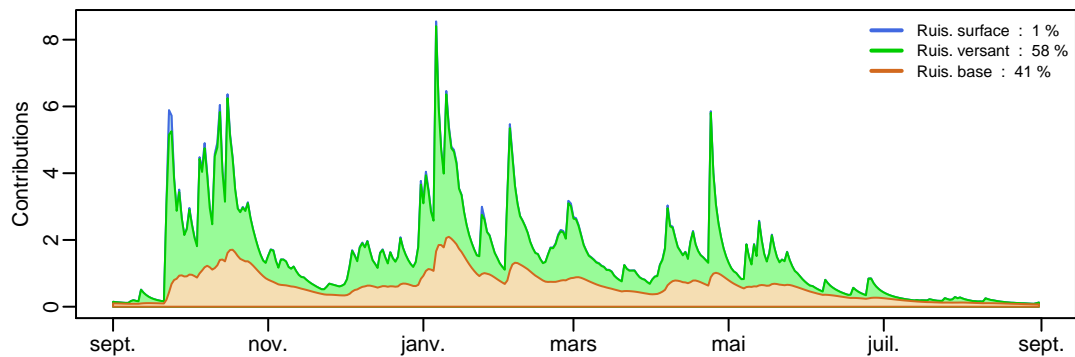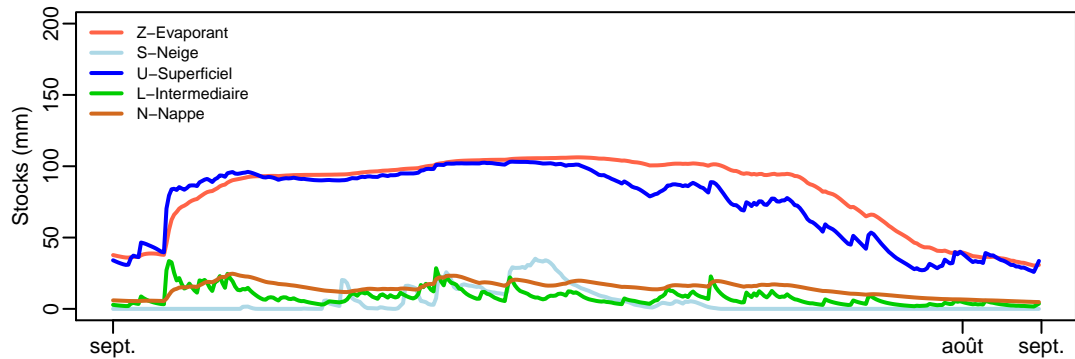

# k0910010 (6610.93 km<sup>2</sup>) – année 1994–1995

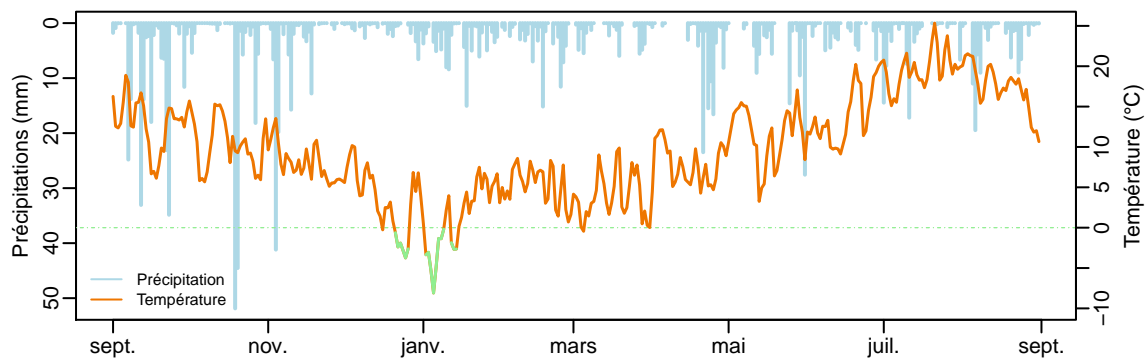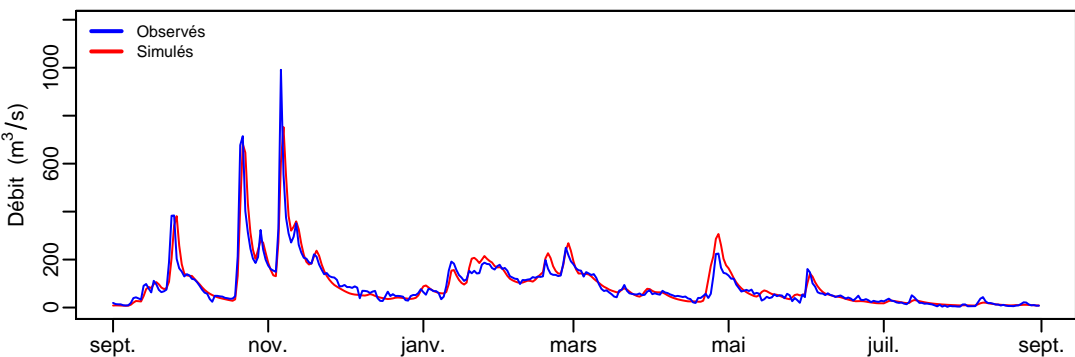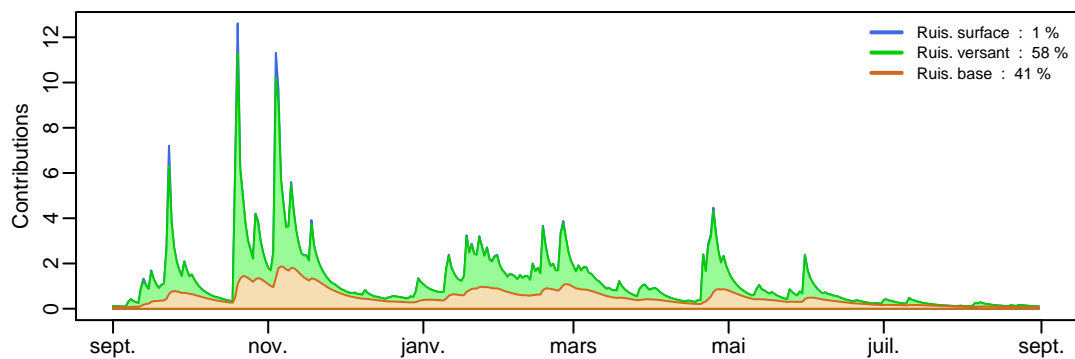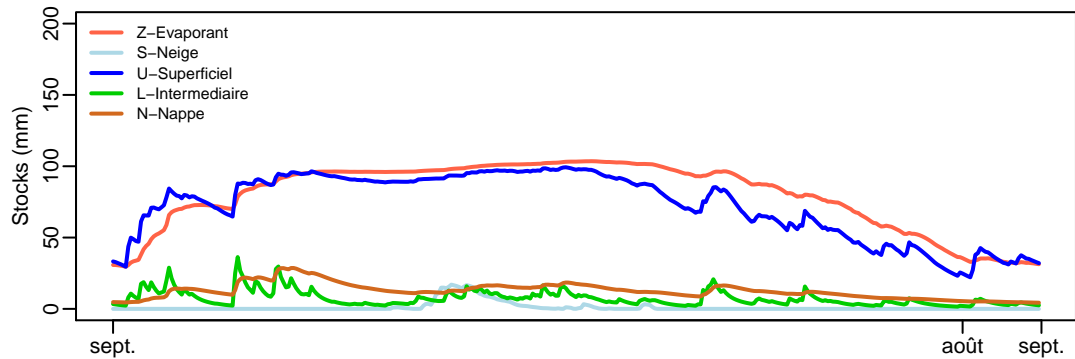

# k0910010 (6610.93 km<sup>2</sup>) – année 1995–1996

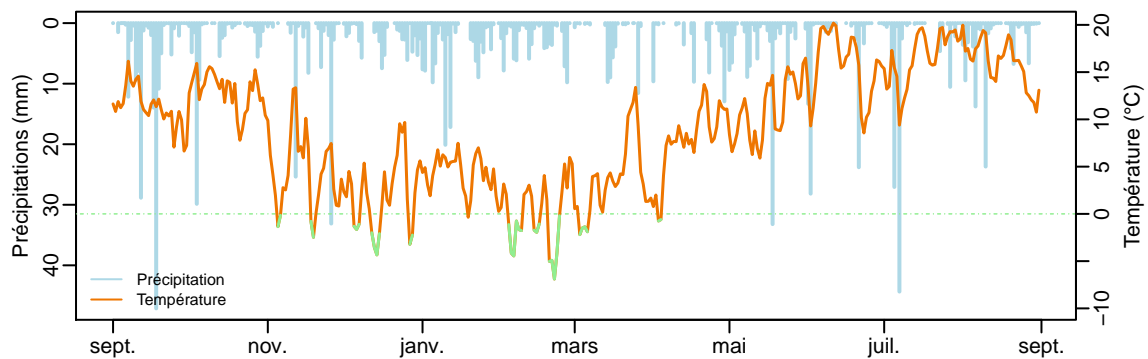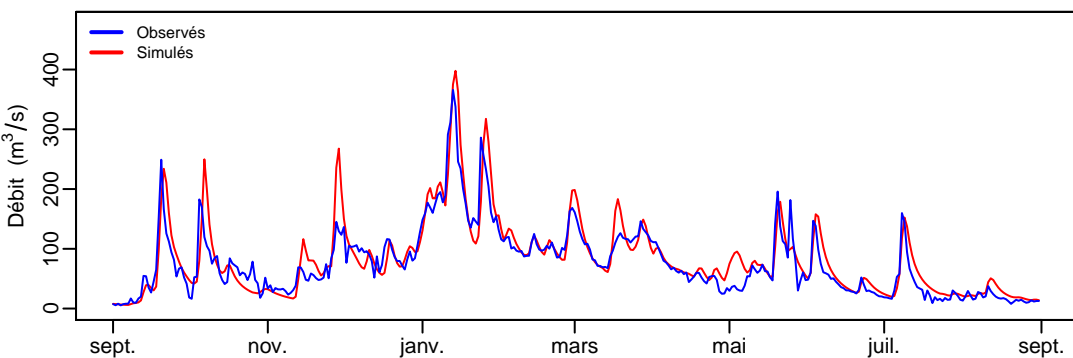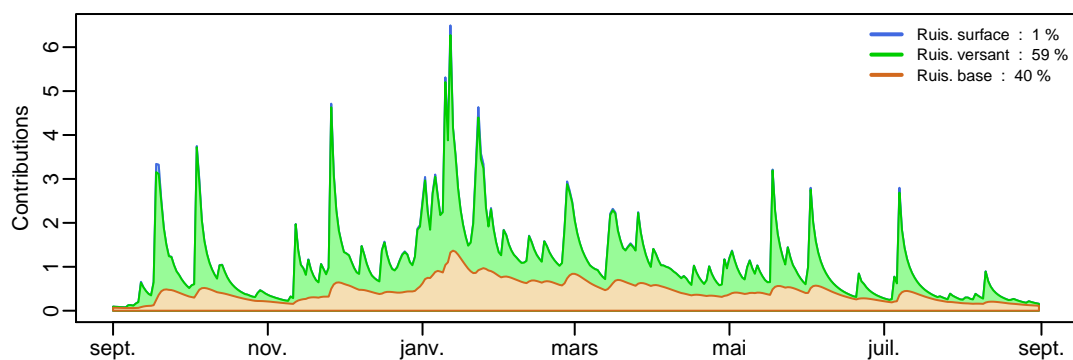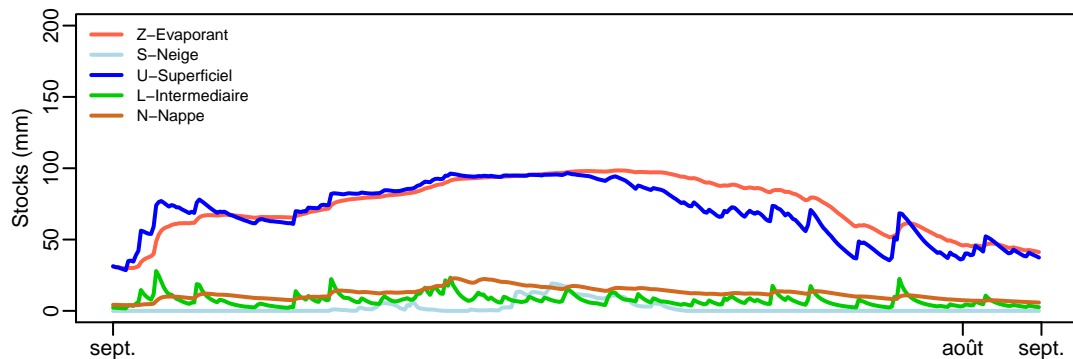

# k0910010 (6610.93 km<sup>2</sup>) – année 1996–1997

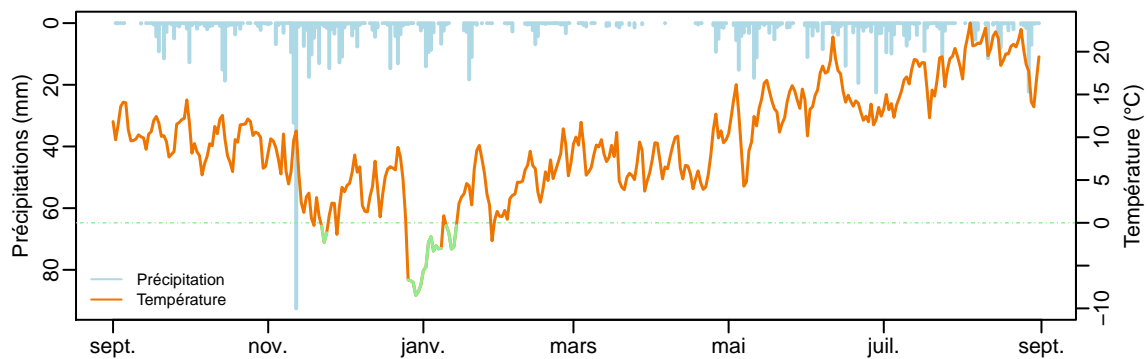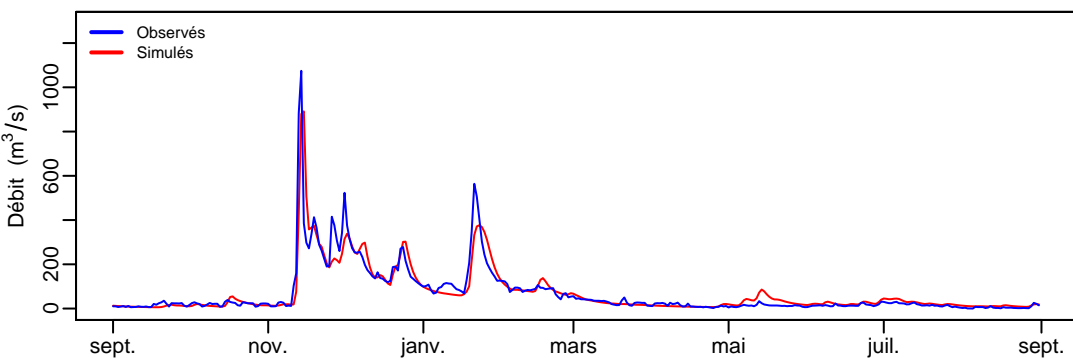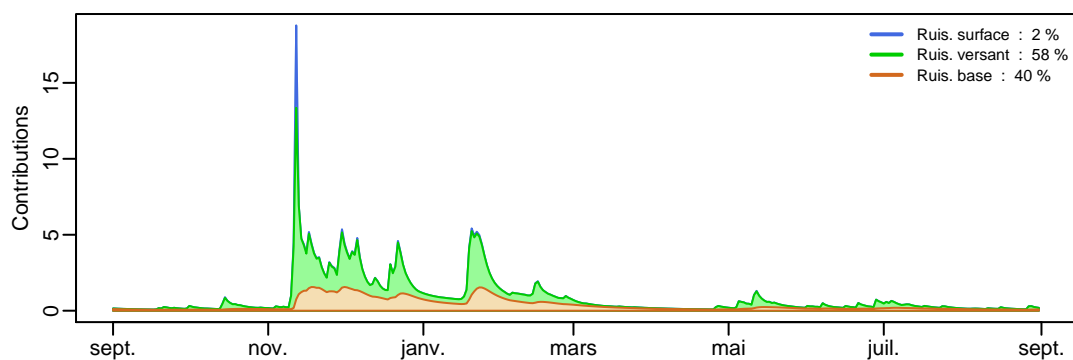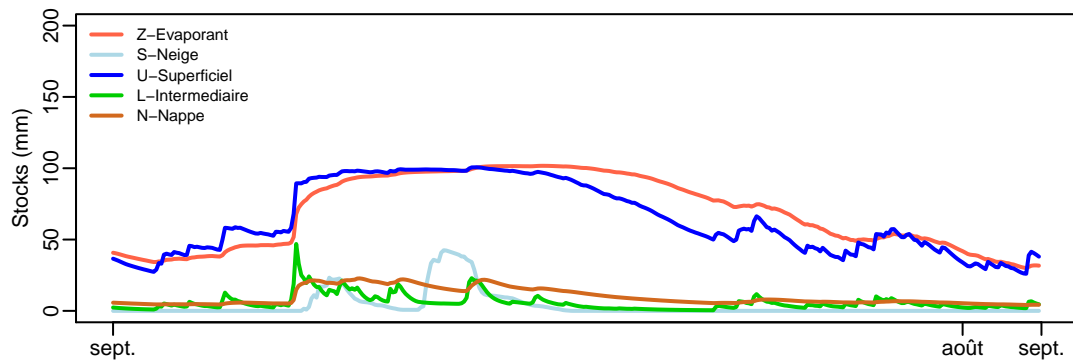



# k0910010 (6610.93 km<sup>2</sup>) – année 1997–1998

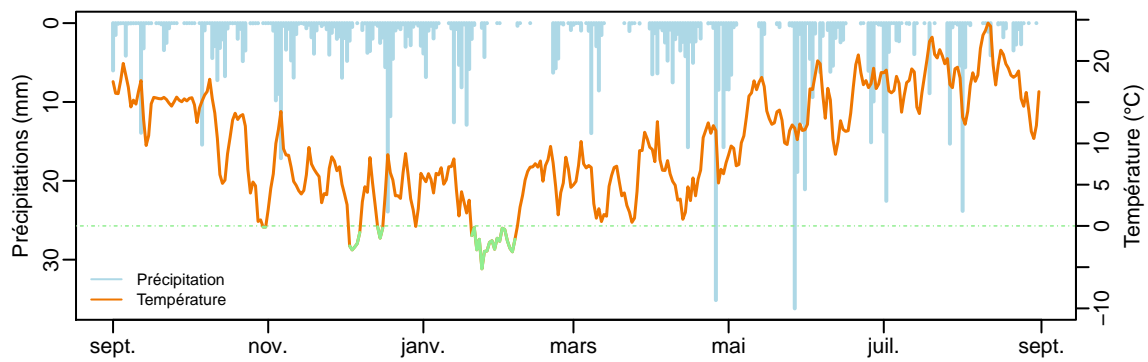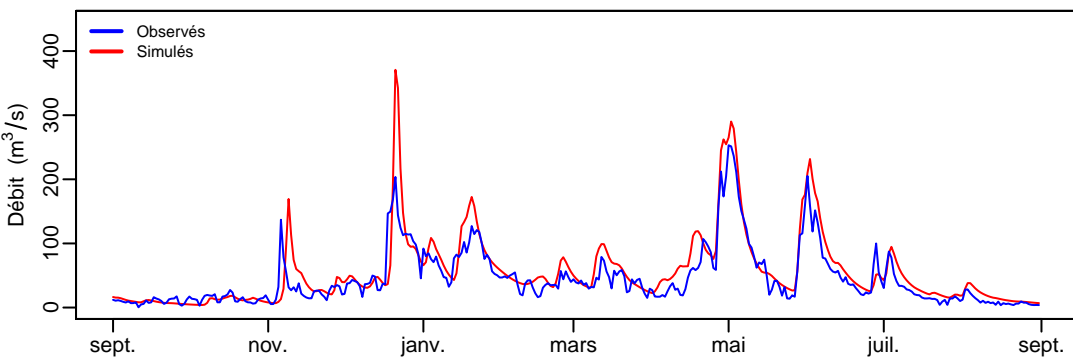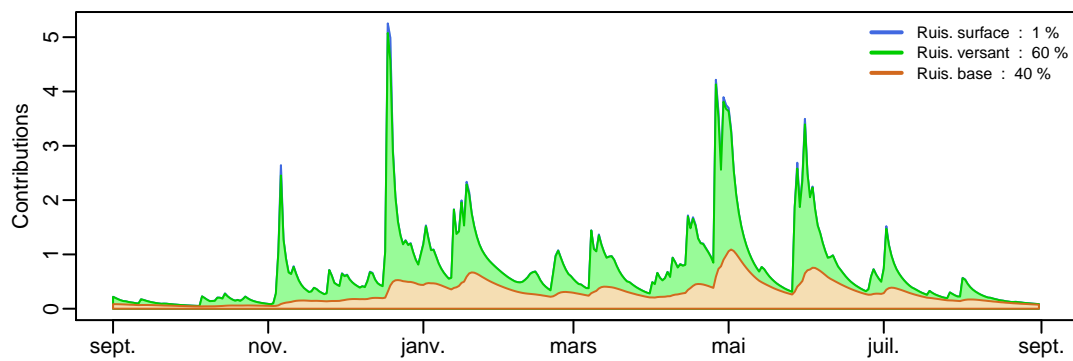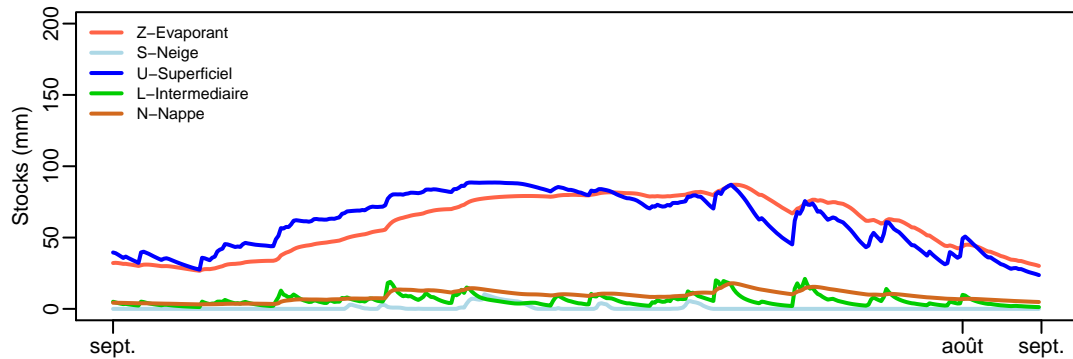

# k0910010 (6610.93 km<sup>2</sup>) – année 1998–1999

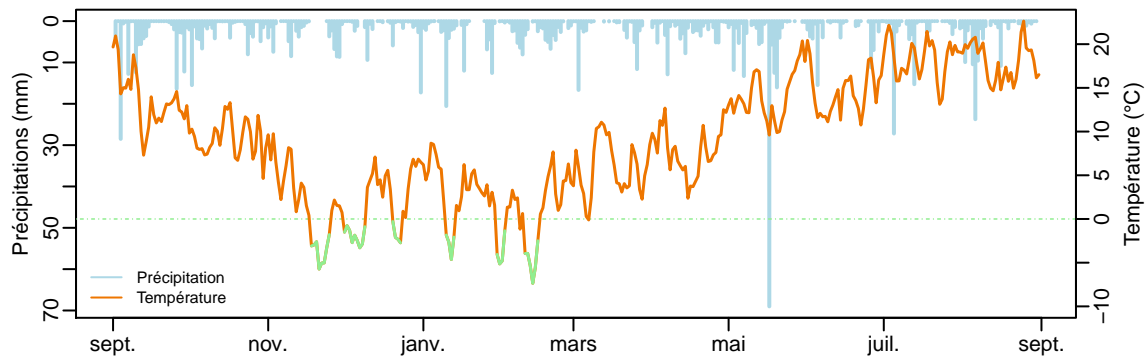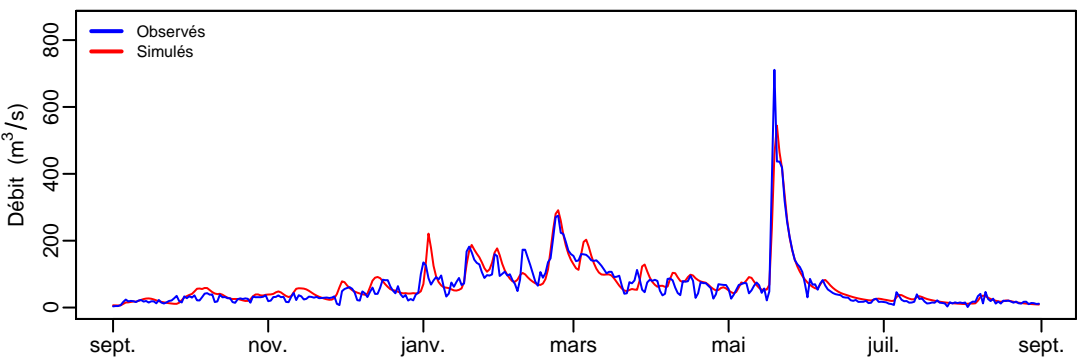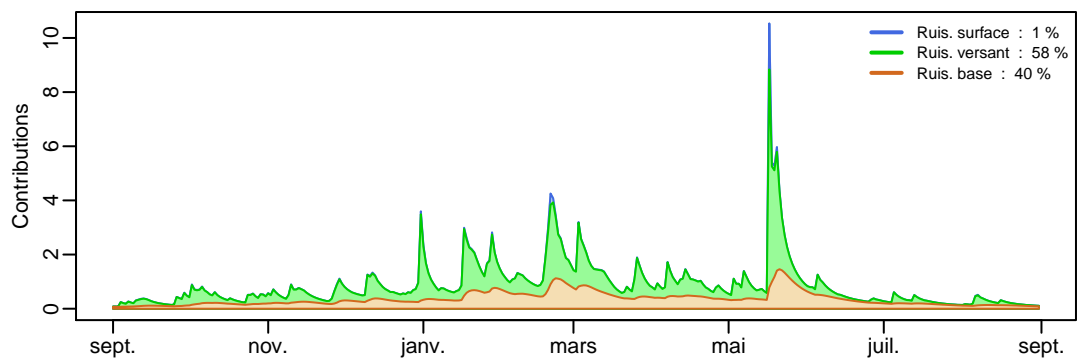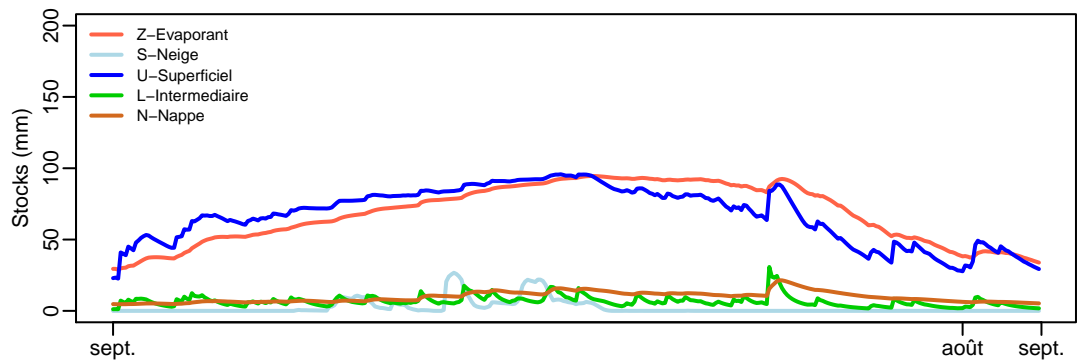

# k0910010 (6610.93 km<sup>2</sup>) – année 1999–2000

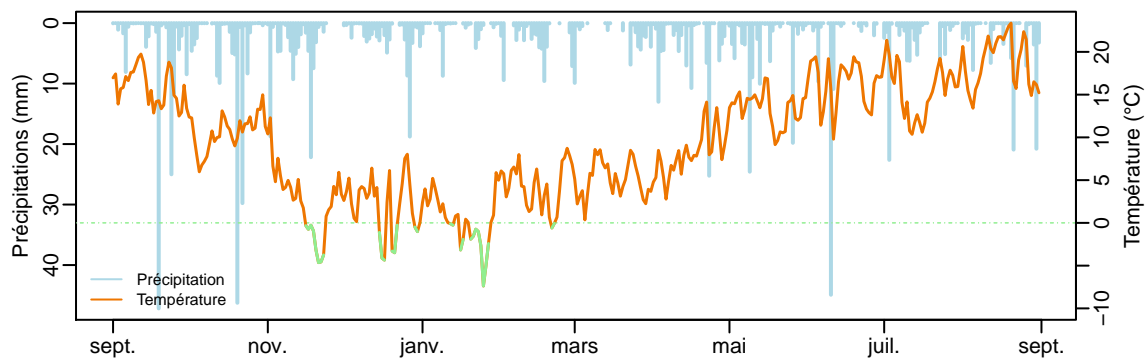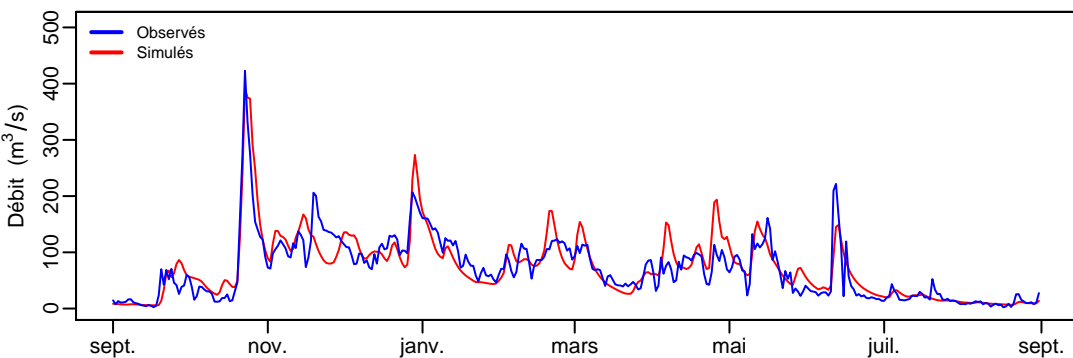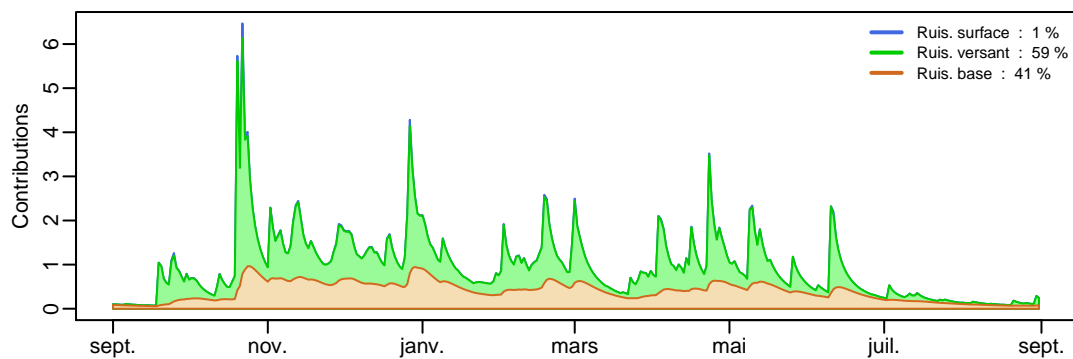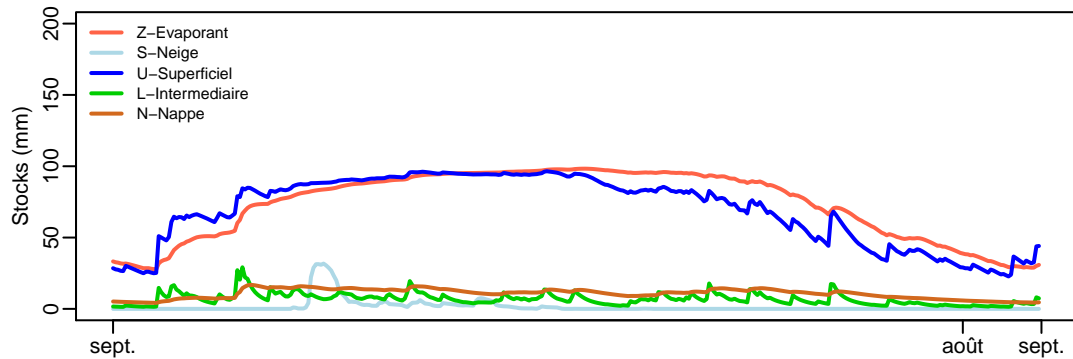

# k0910010 (6610.93 km<sup>2</sup>) – année 2000–2001

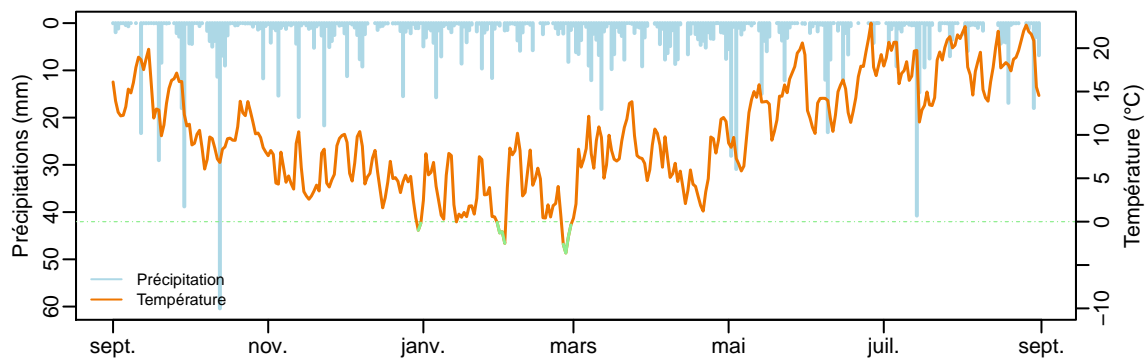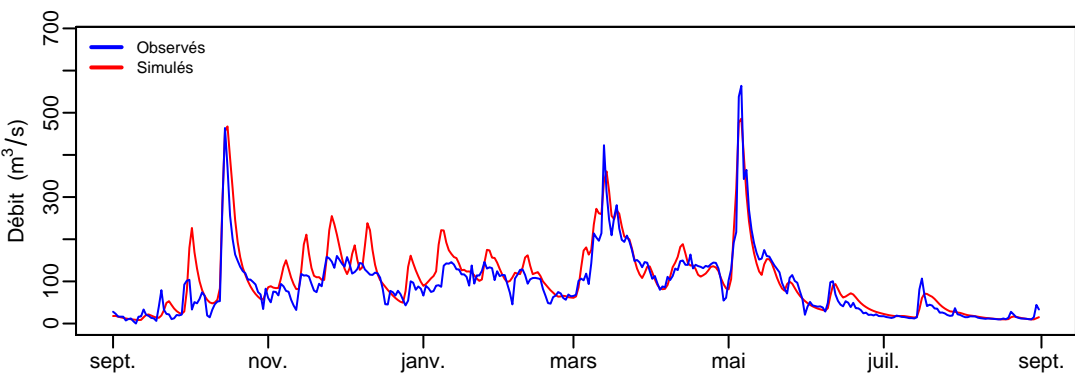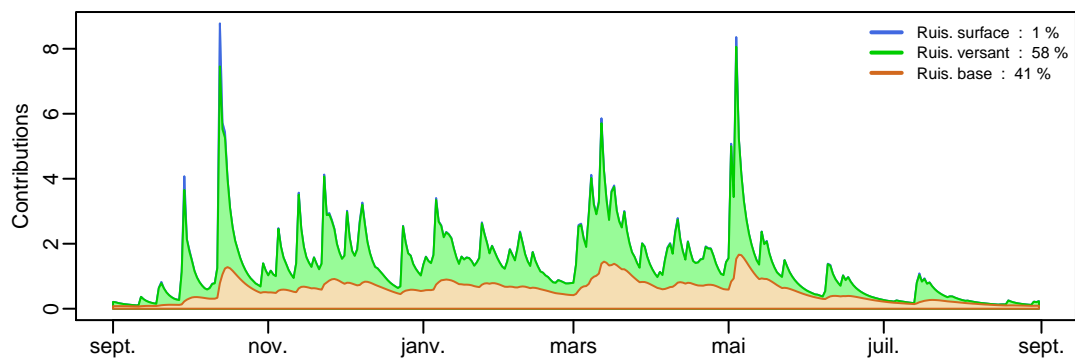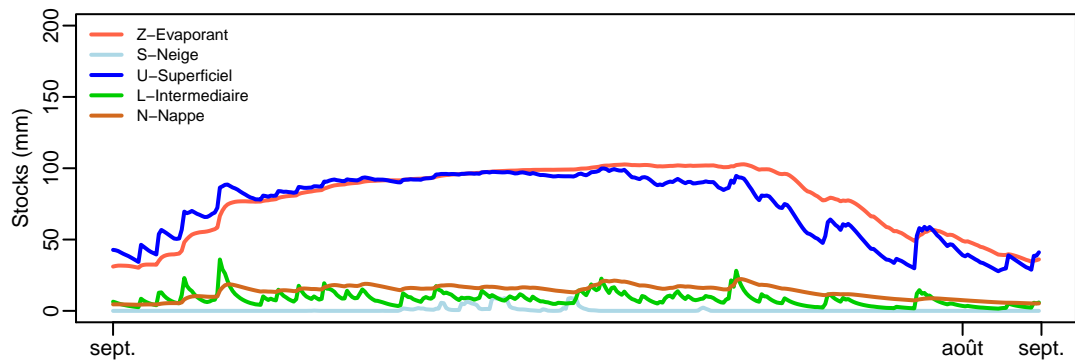

# k0910010 (6610.93 km<sup>2</sup>) – année 2001–2002

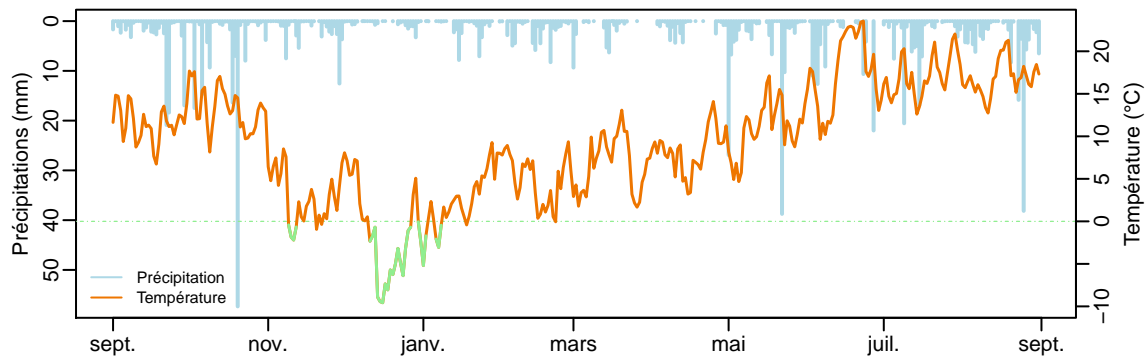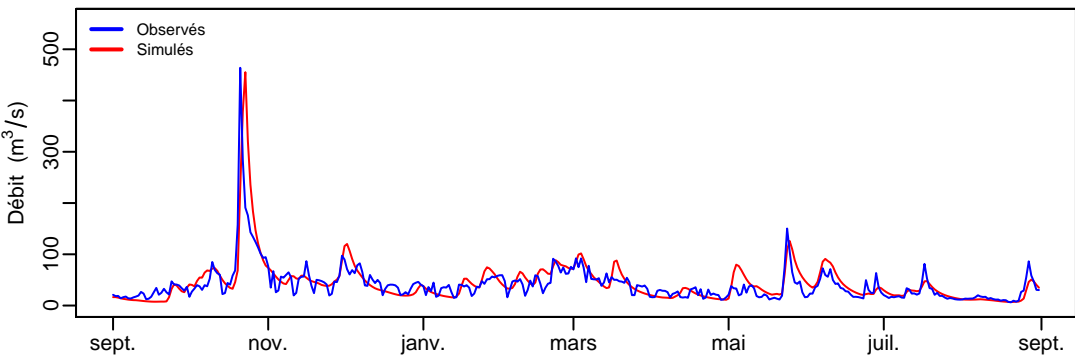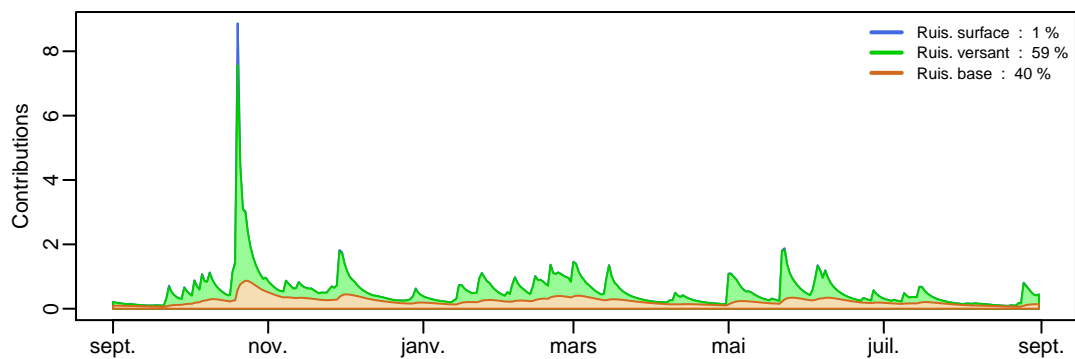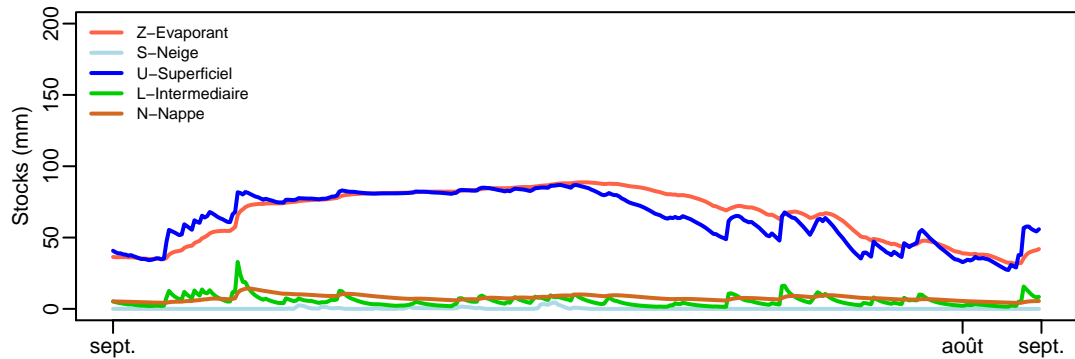

# k0910010 (6610.93 km<sup>2</sup>) – année 2002–2003

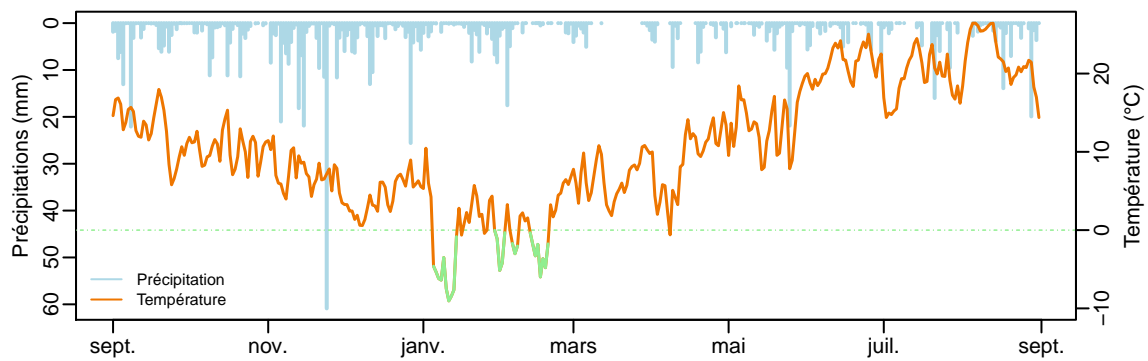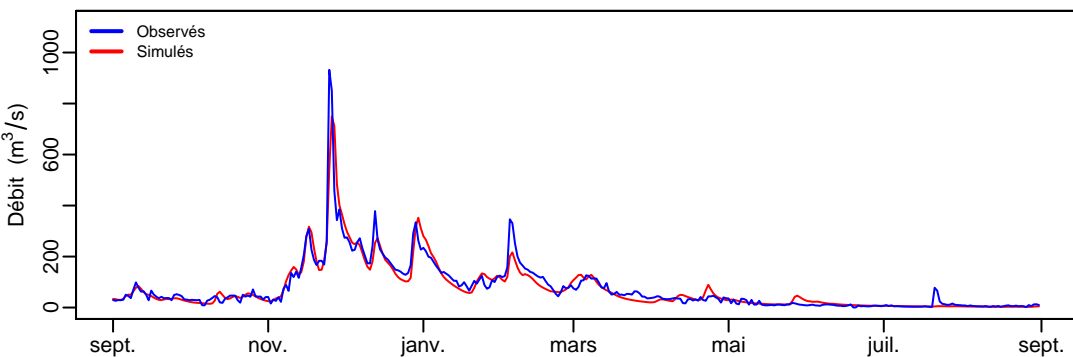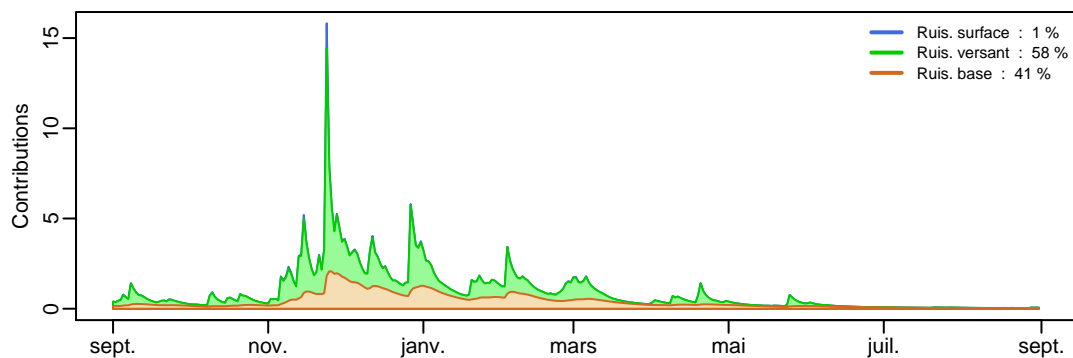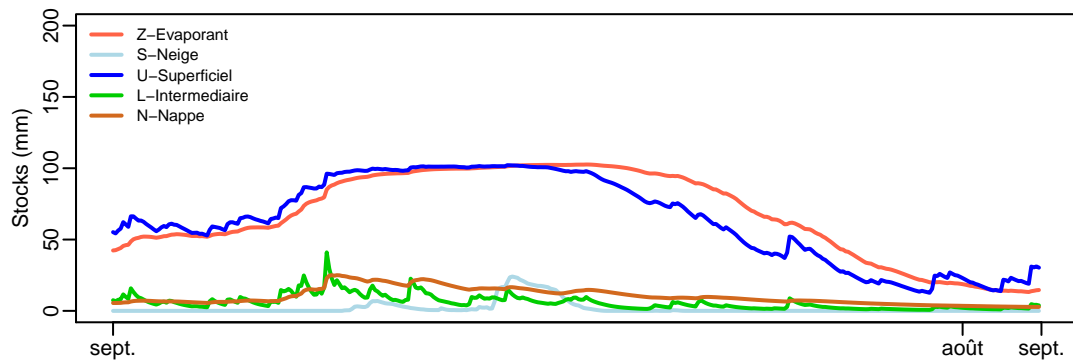

# k0910010 (6610.93 km<sup>2</sup>) – année 2003–2004

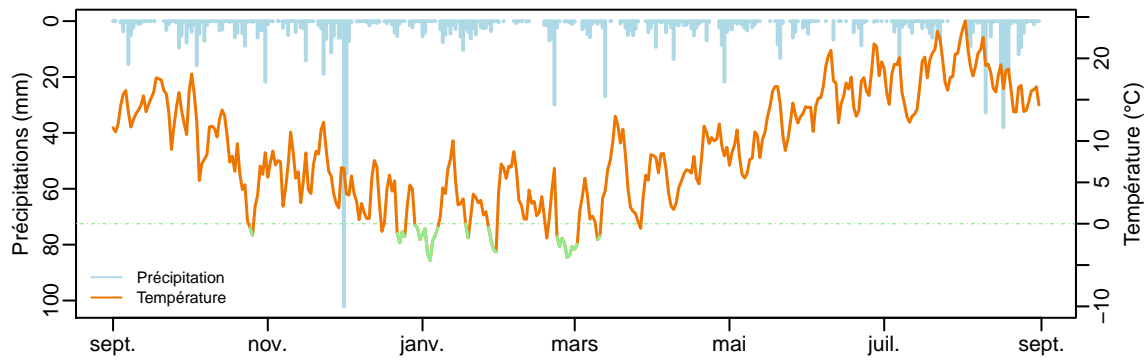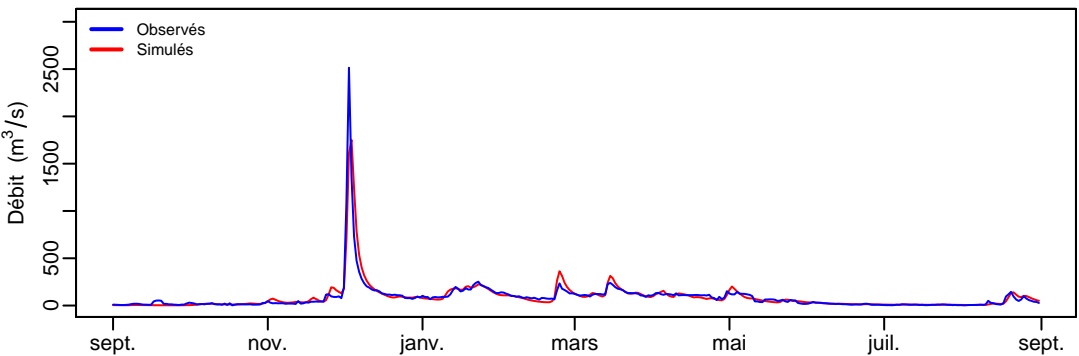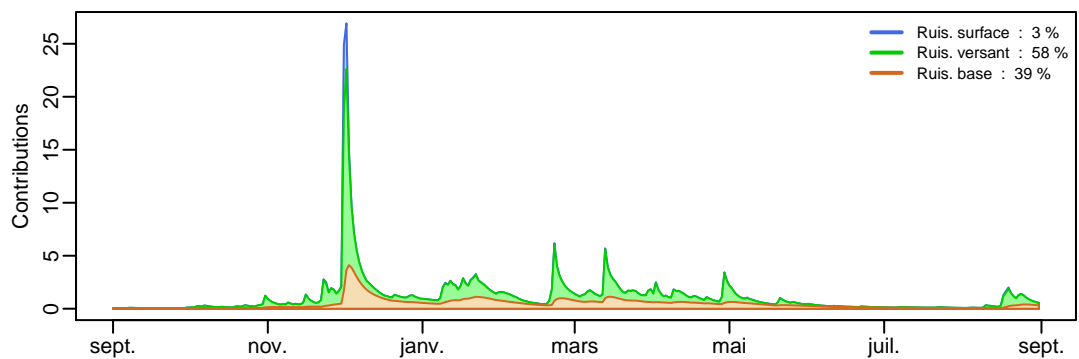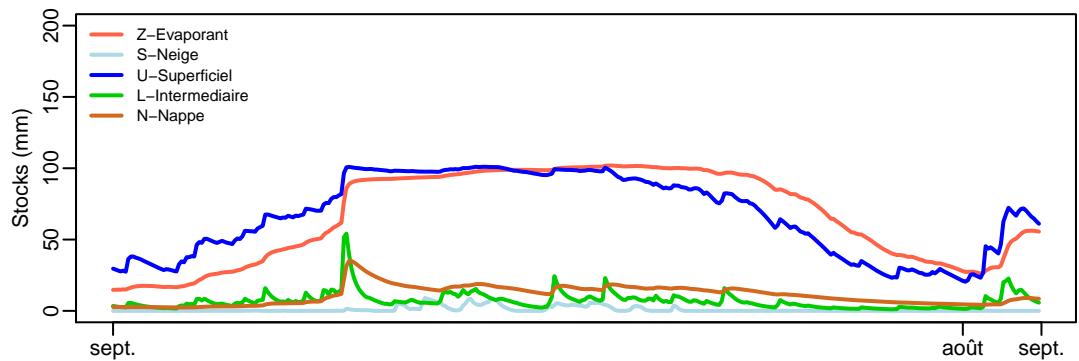

# k0910010 (6610.93 km<sup>2</sup>) – année 2004–2005

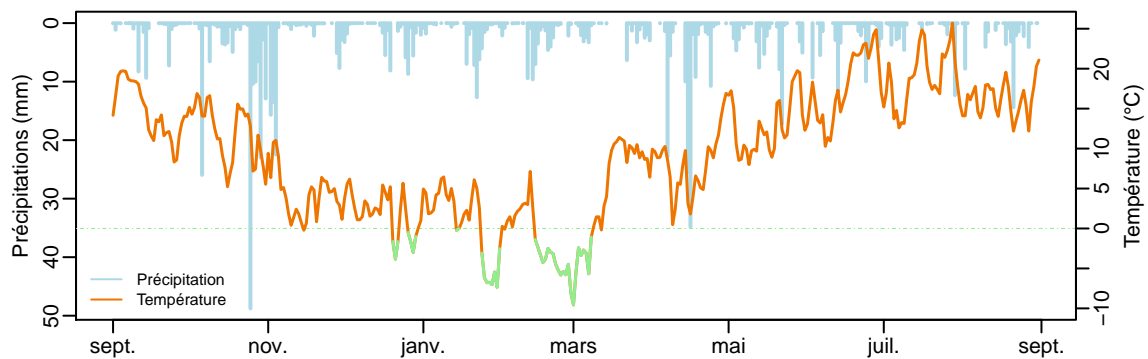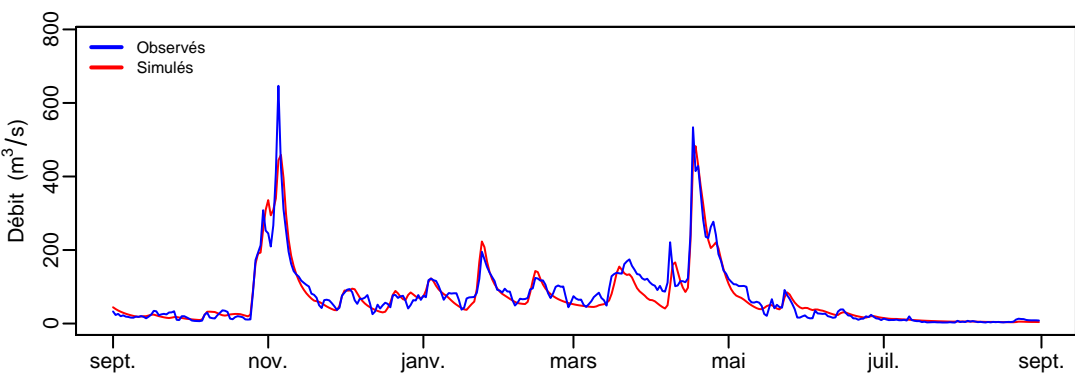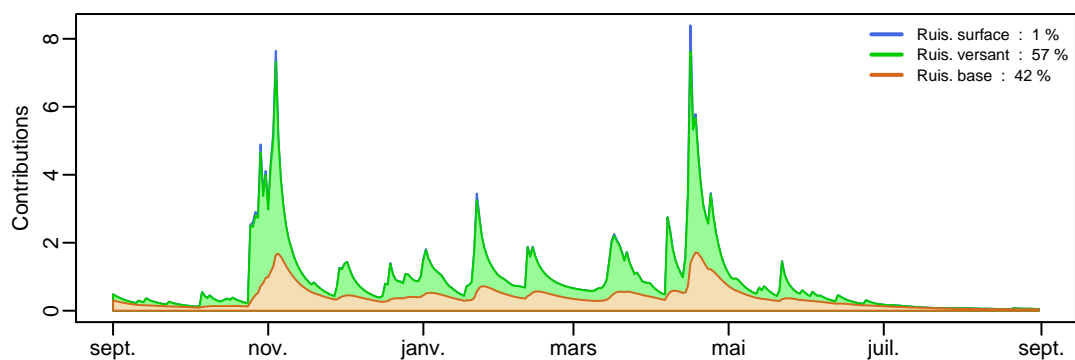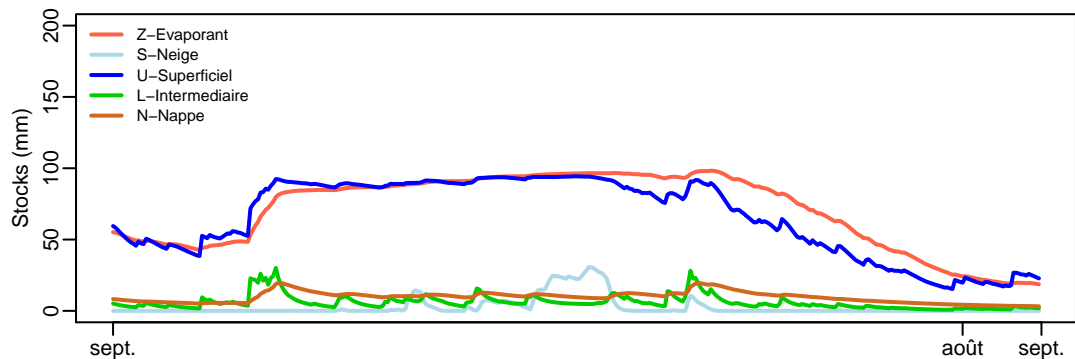



# k0910010 (6610.93 km<sup>2</sup>) – année 2005–2006

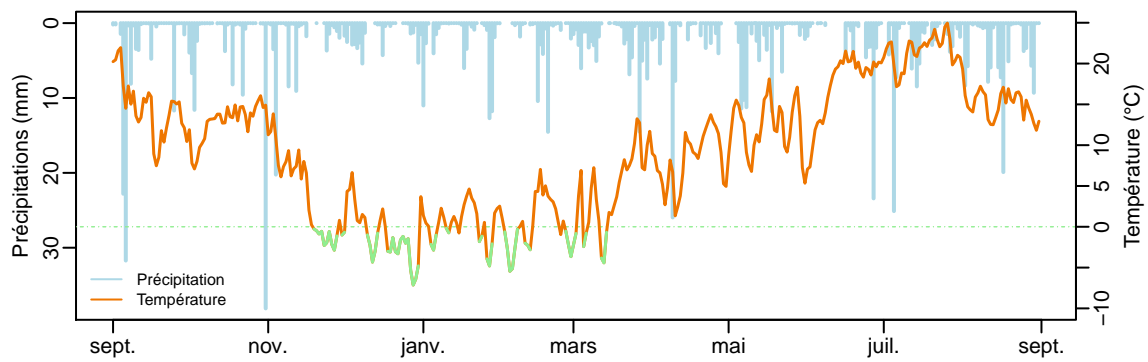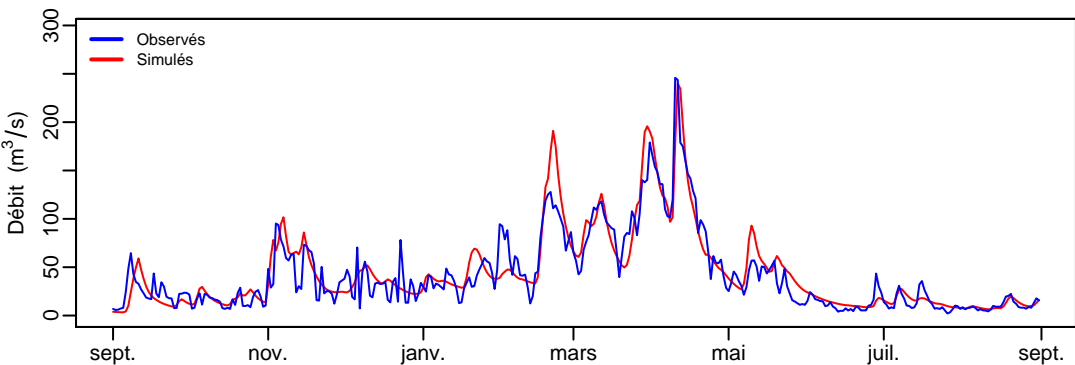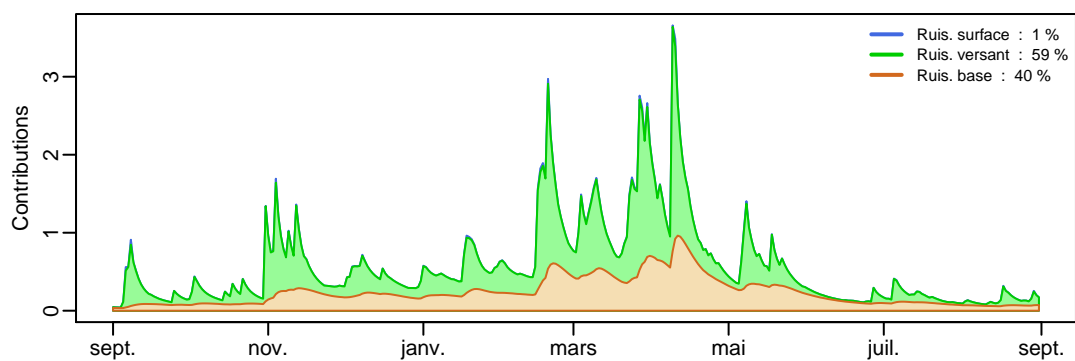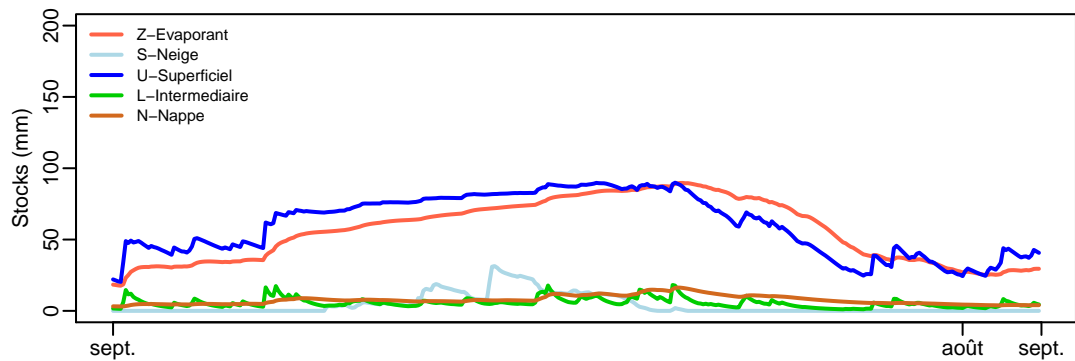

# k0910010 (6610.93 km<sup>2</sup>) – année 2006–2007

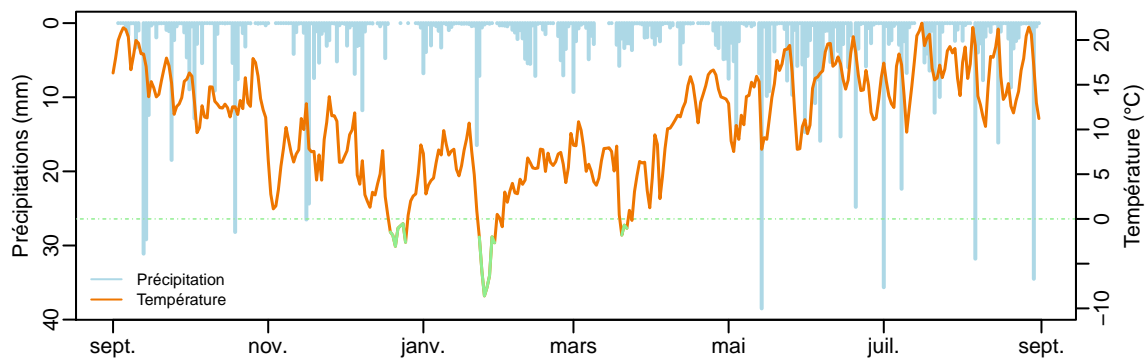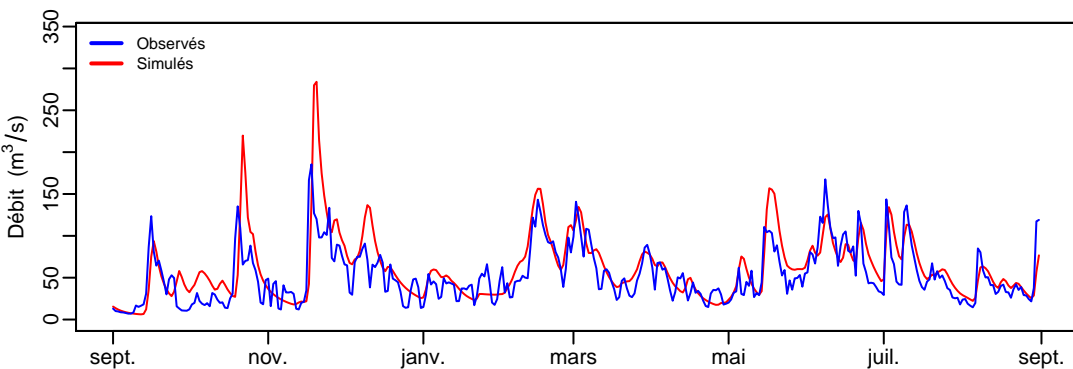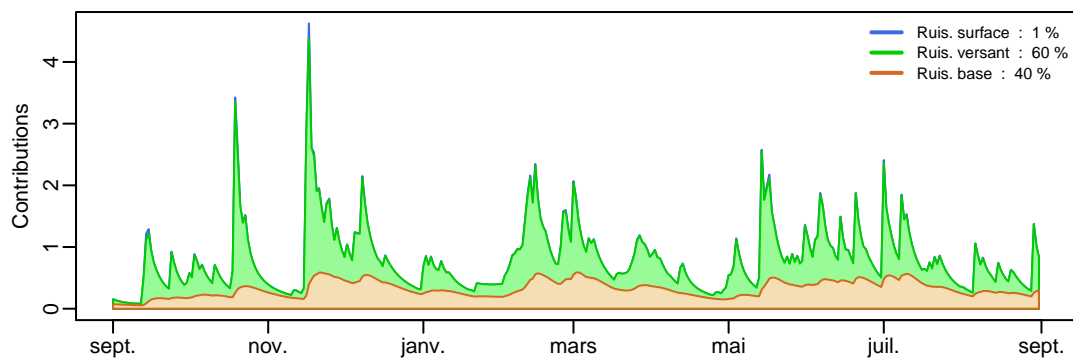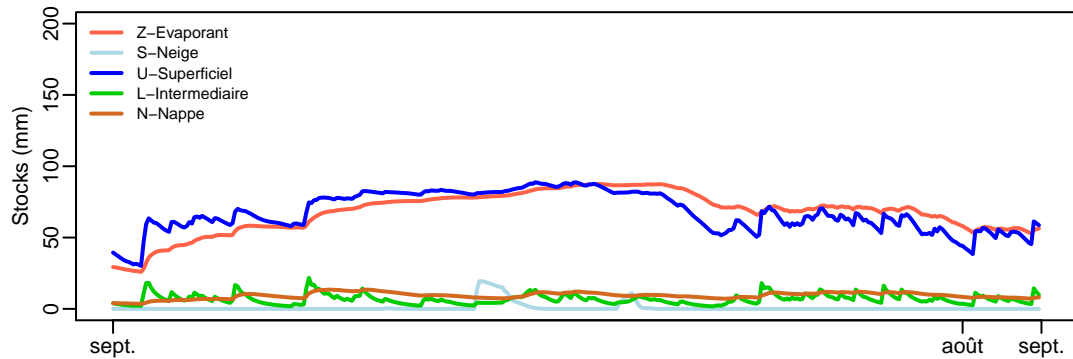

# k0910010 (6610.93 km²) – année 2007–2008

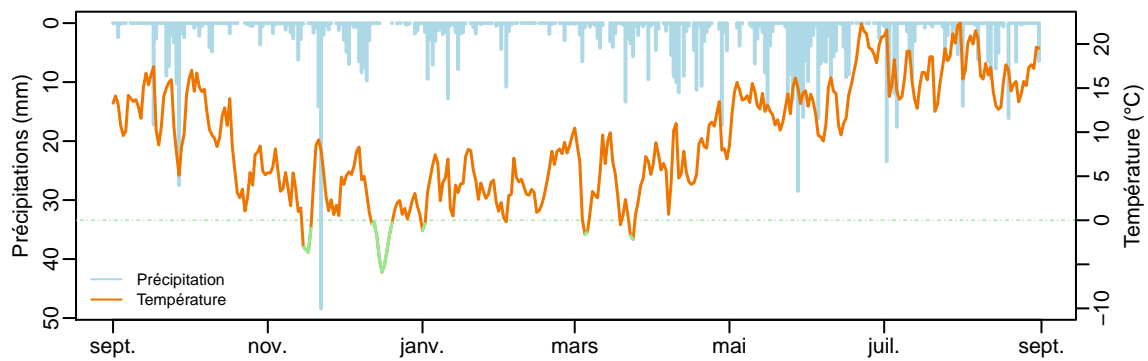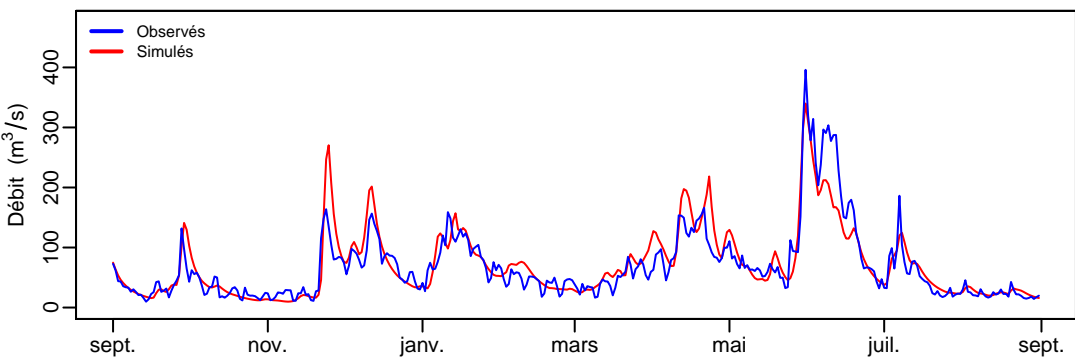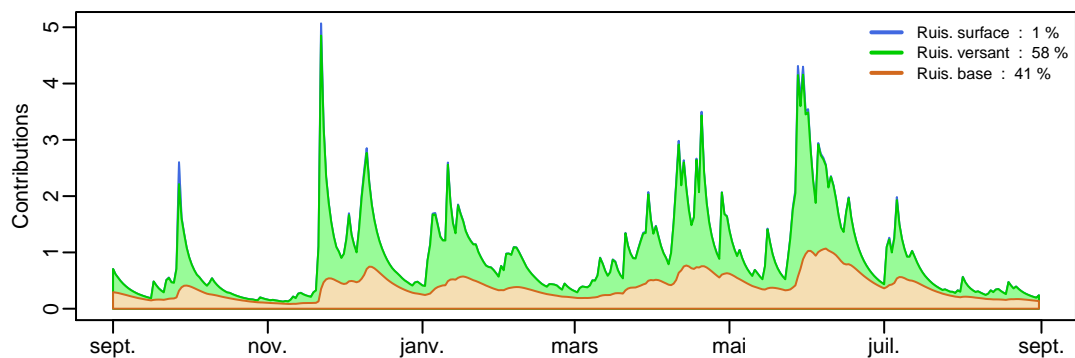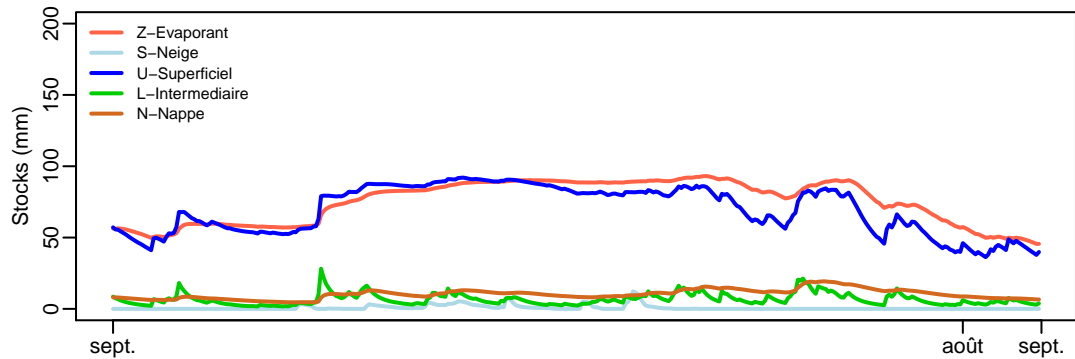

# k0910010 (6610.93 km<sup>2</sup>) – année 2008–2009

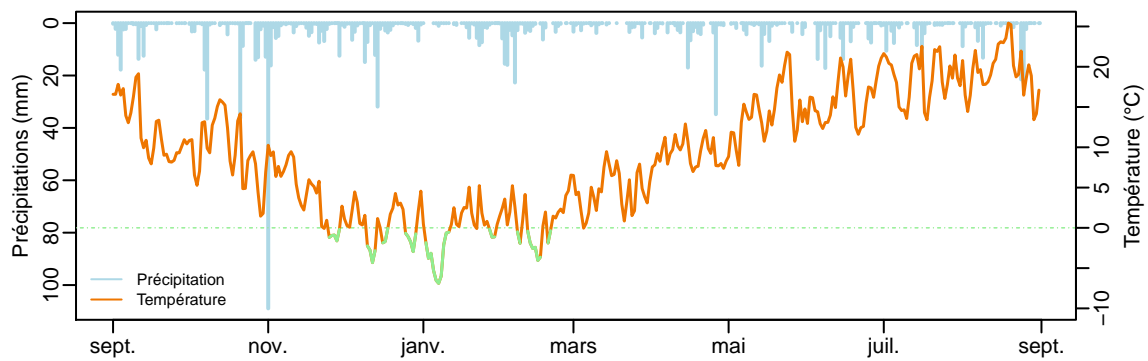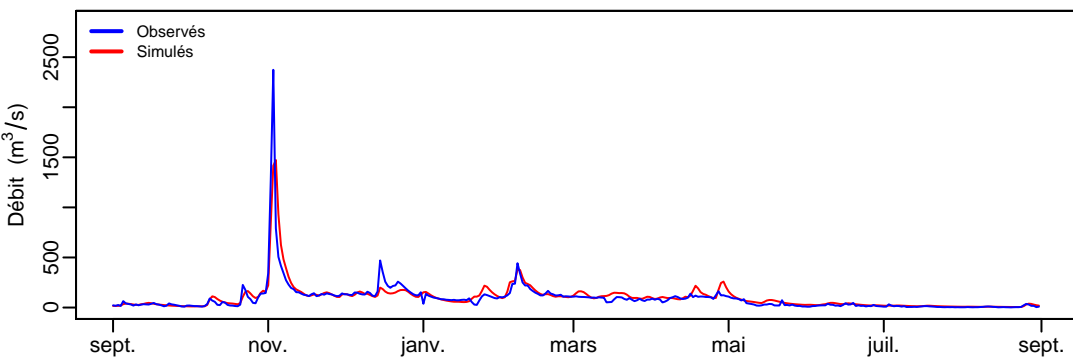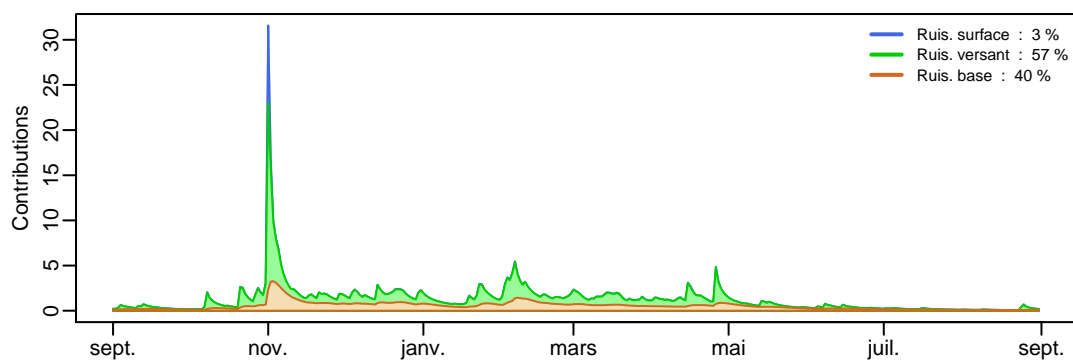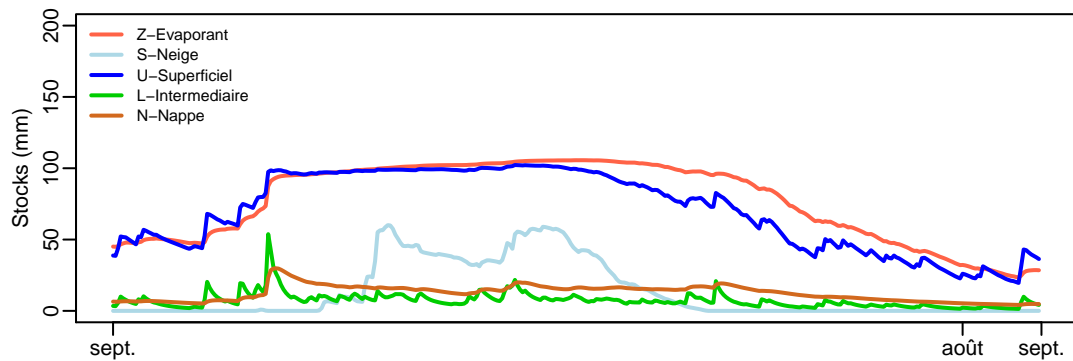

# k0910010 (6610.93 km²) – année 2009–2010

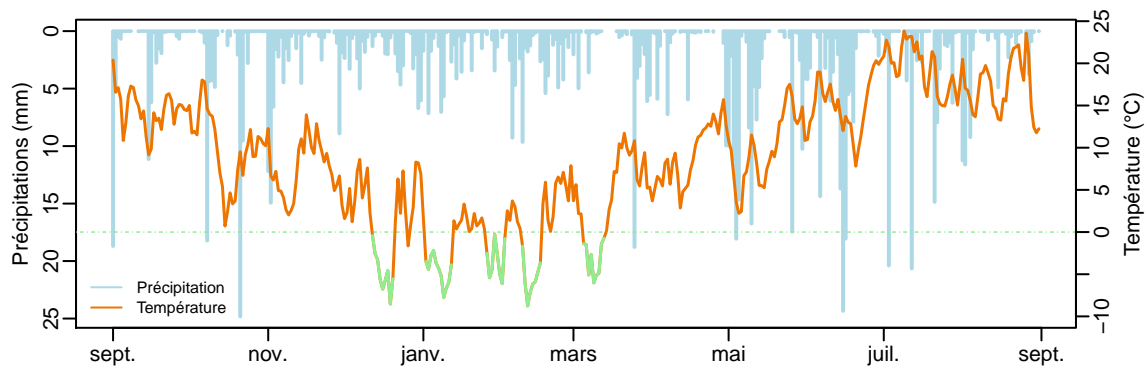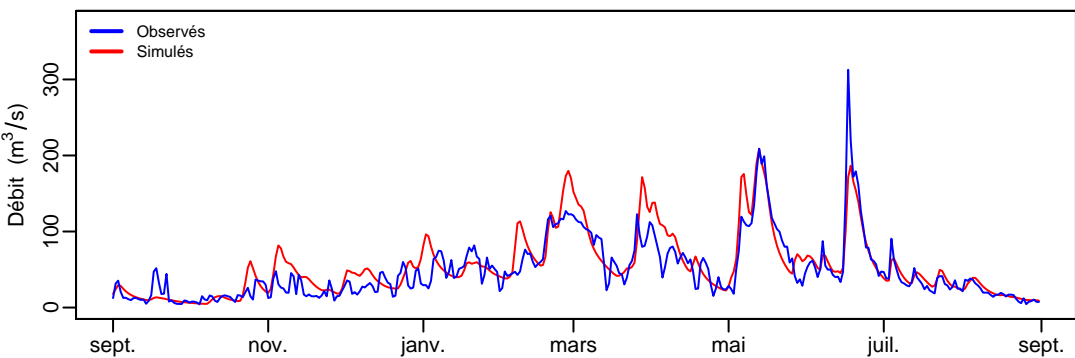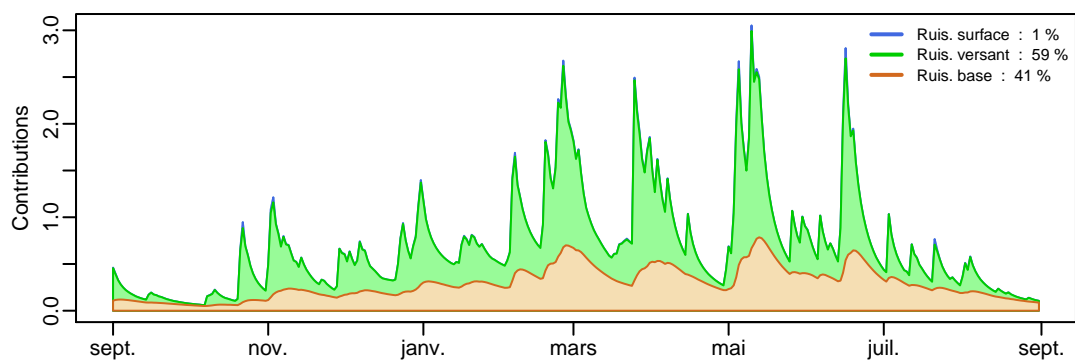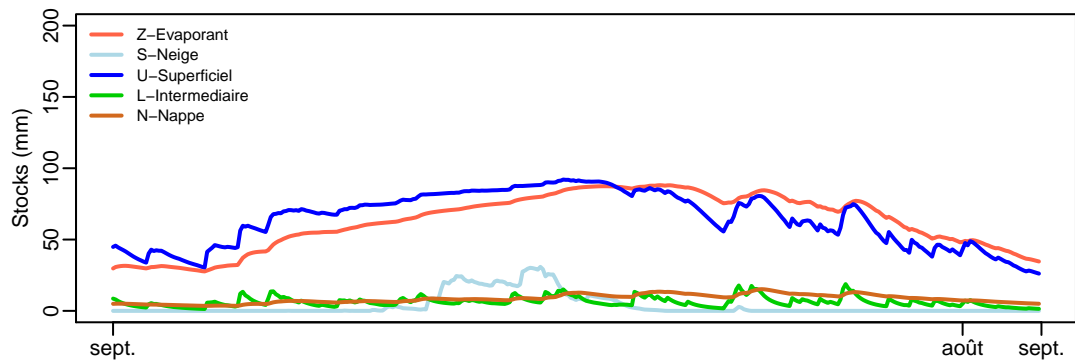

# k0910010 (6610.93 km<sup>2</sup>) – année 2010–2011

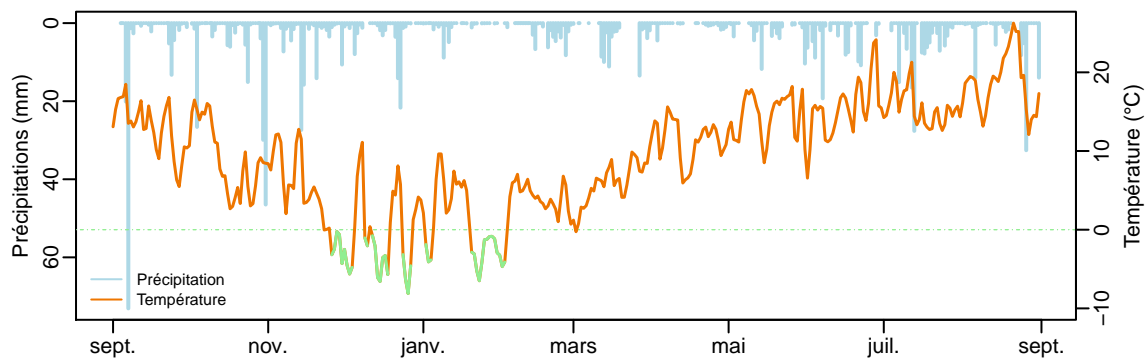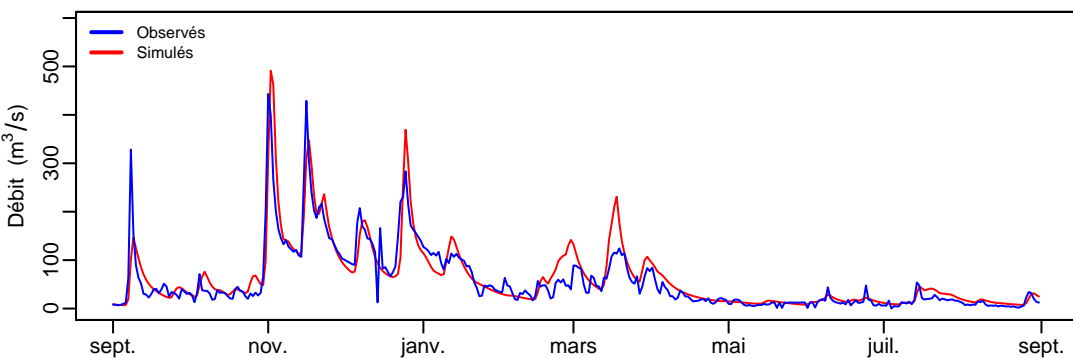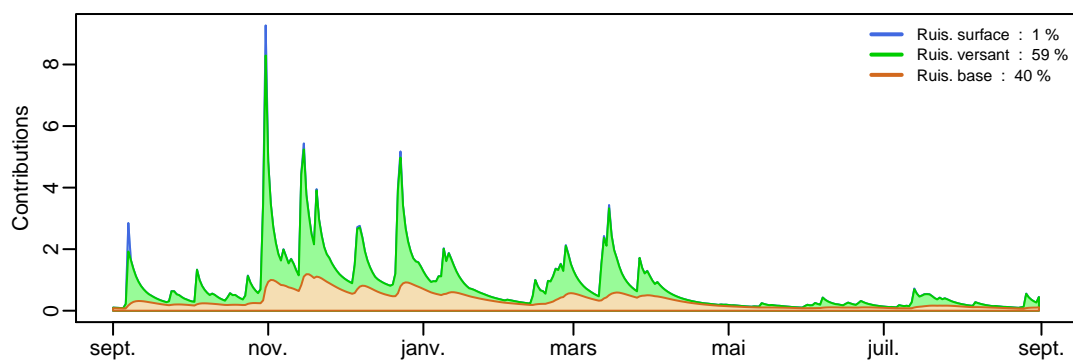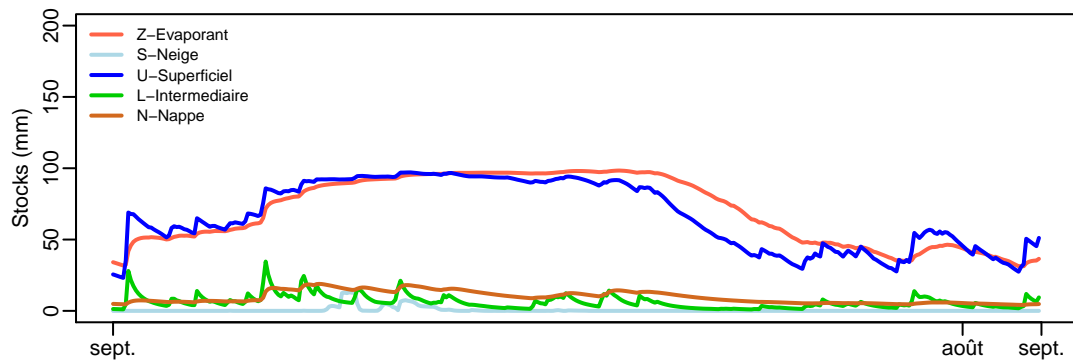

# k0910010 (6610.93 km<sup>2</sup>) – année 2011–2012

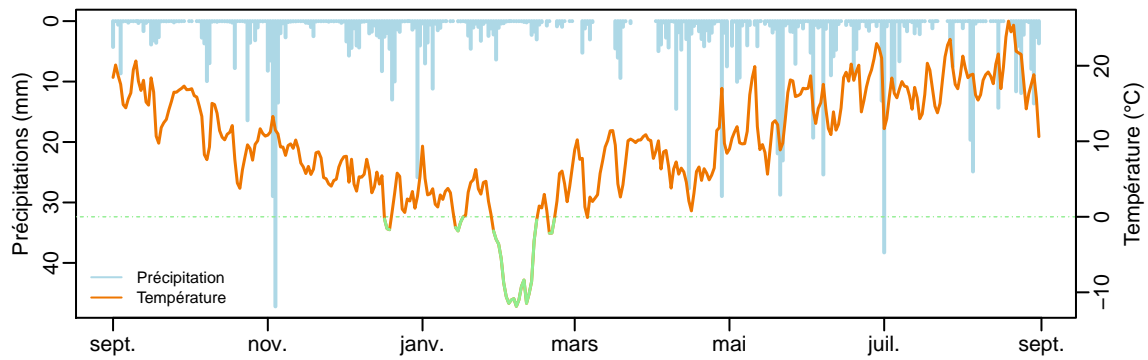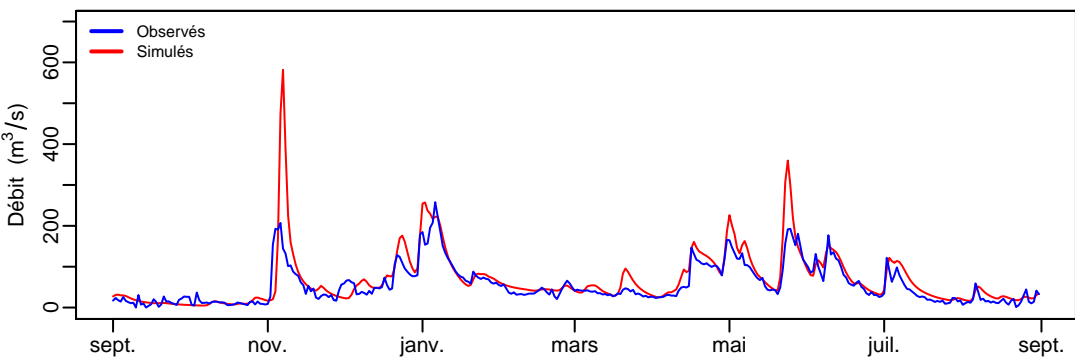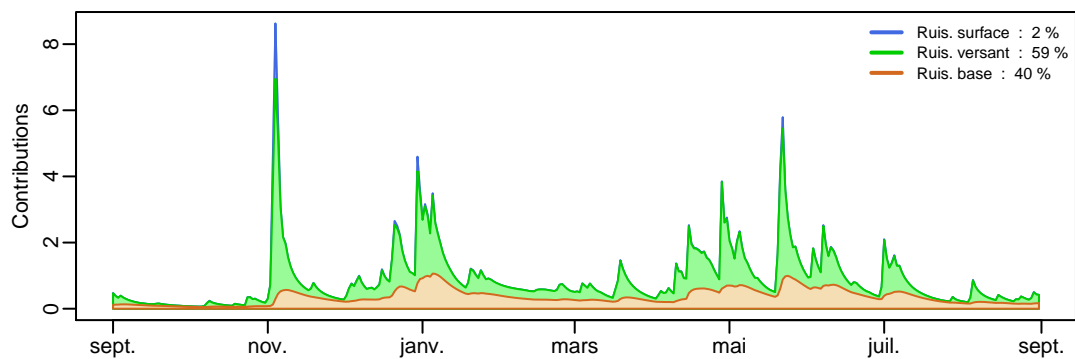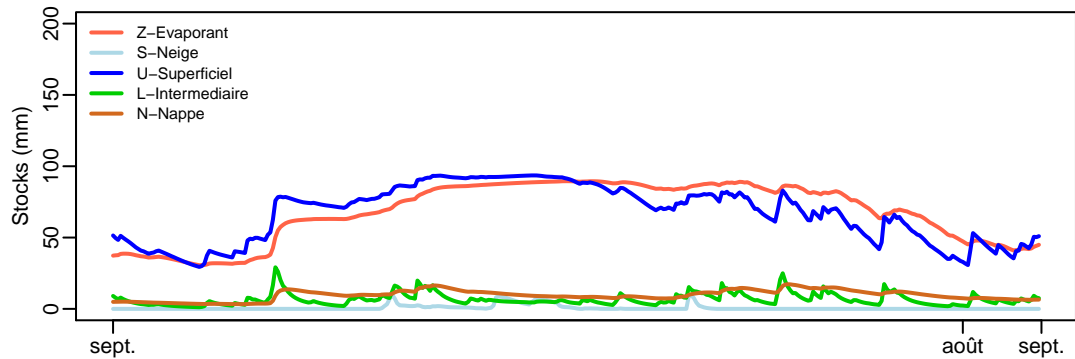

# k0943010 (113.89 km<sup>2</sup>) – année 1988–1989

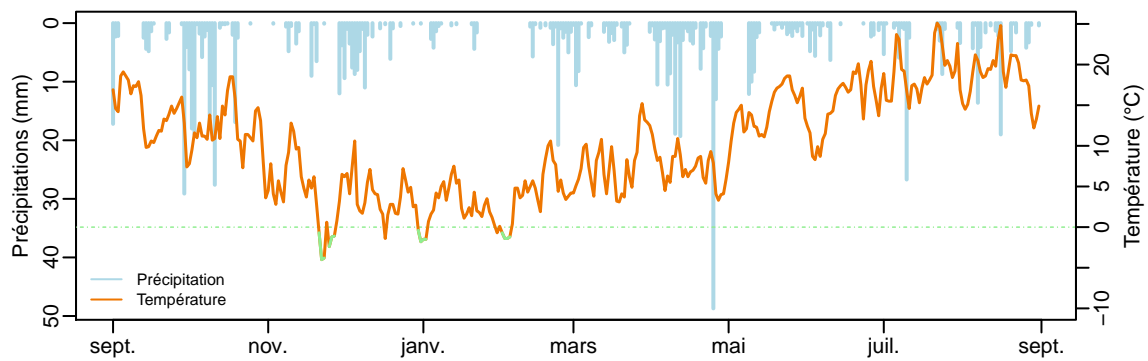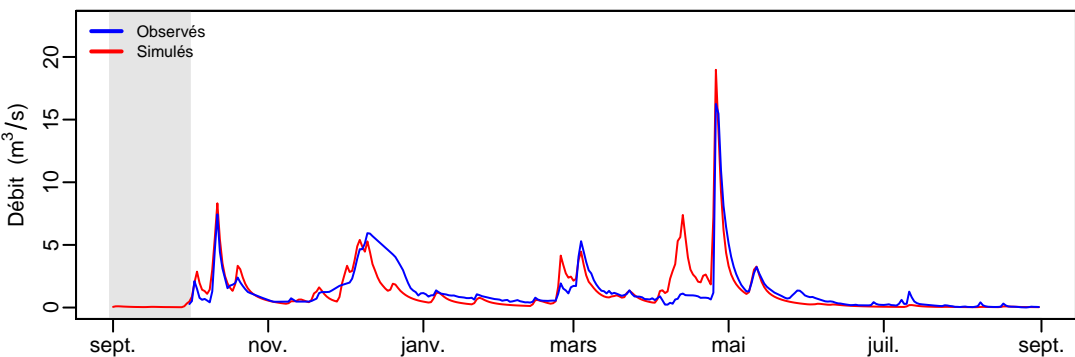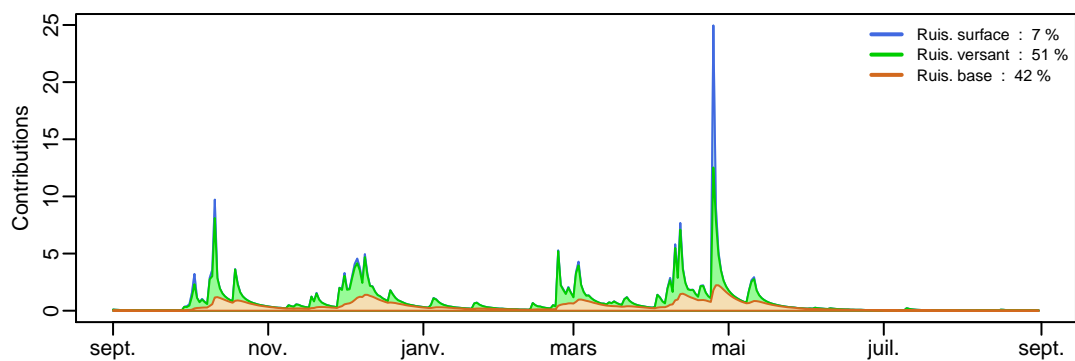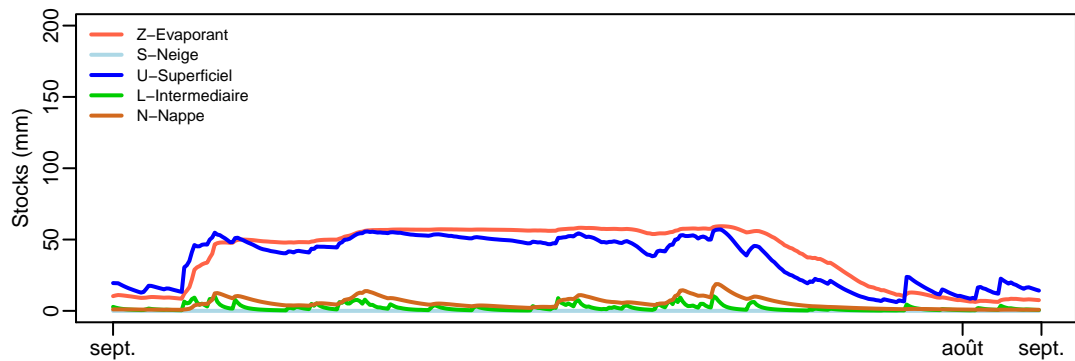



# k0943010 (113.89 km<sup>2</sup>) – année 1989–1990

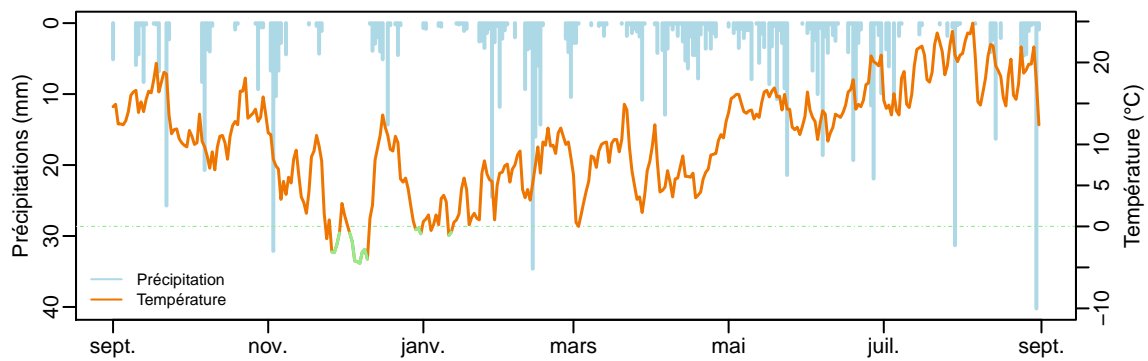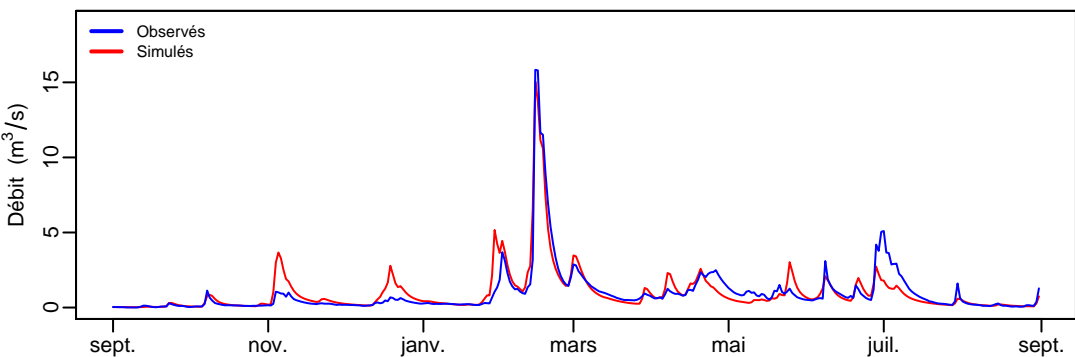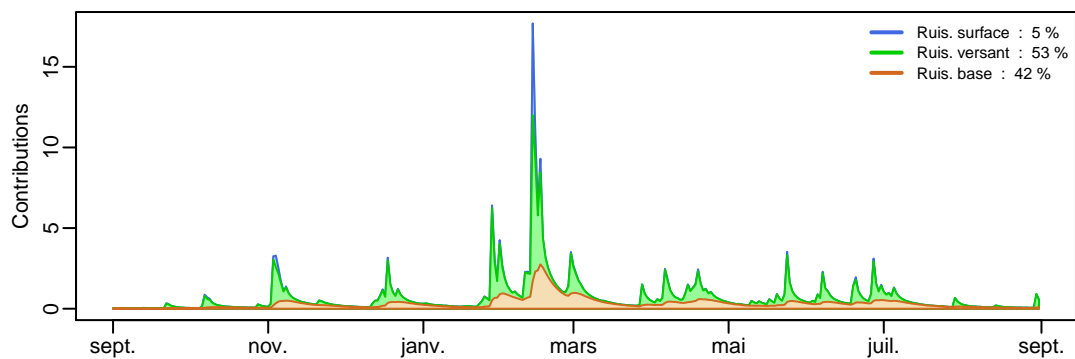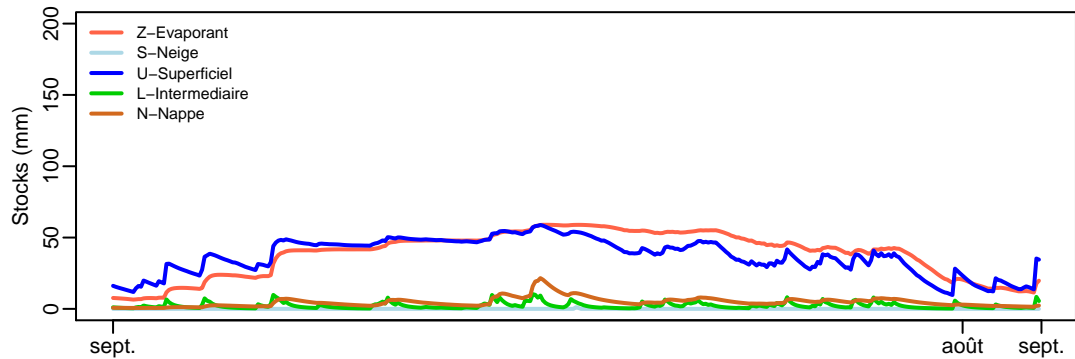

# k0943010 (113.89 km<sup>2</sup>) – année 1990–1991

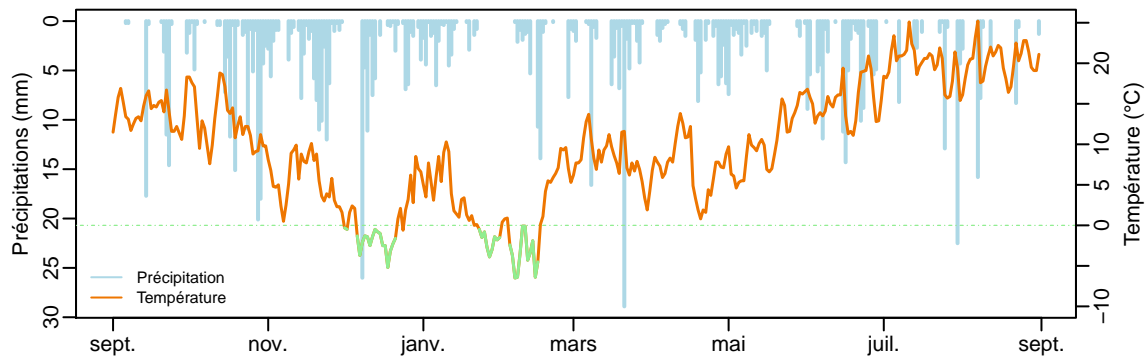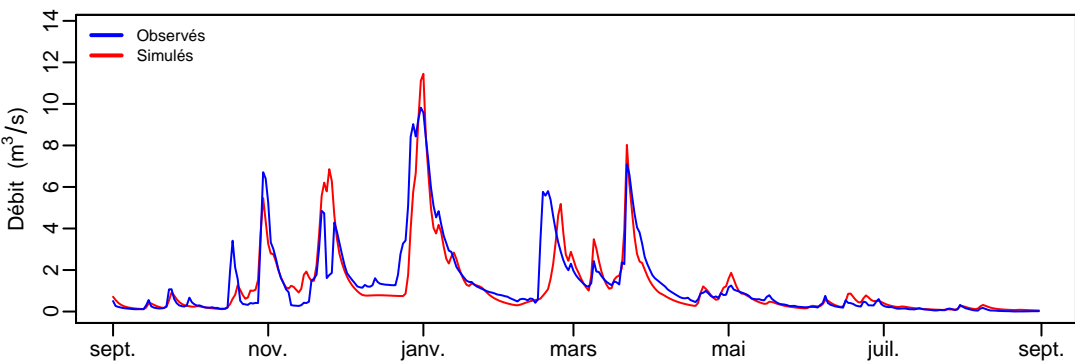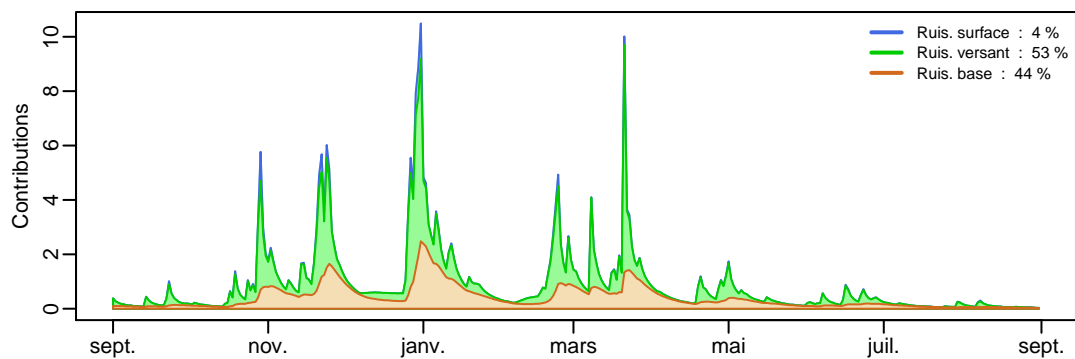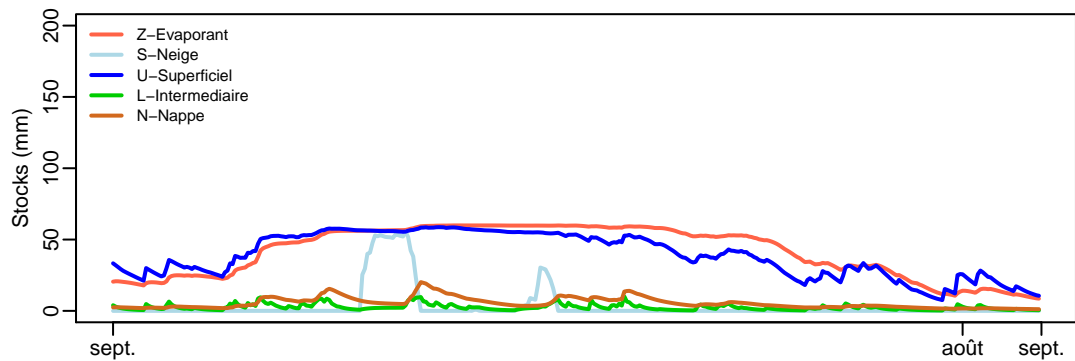

# k0943010 (113.89 km<sup>2</sup>) – année 1991–1992

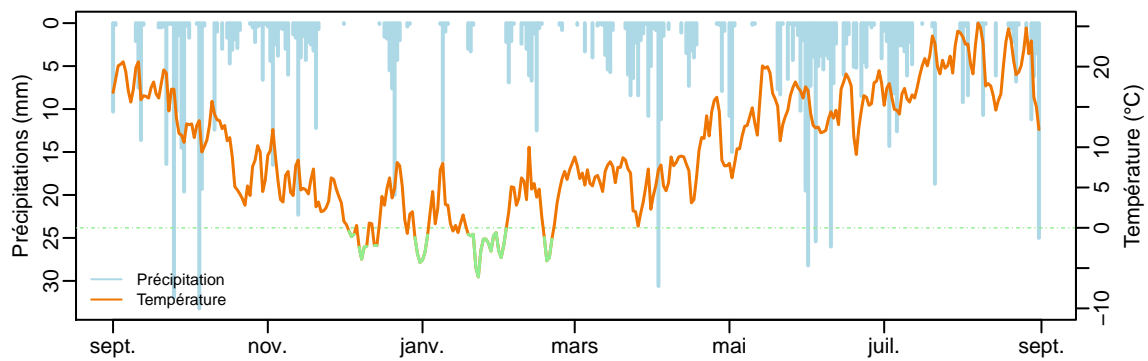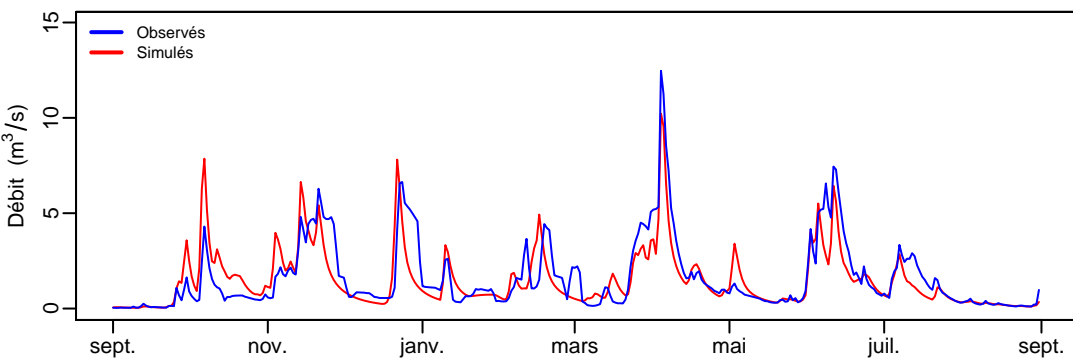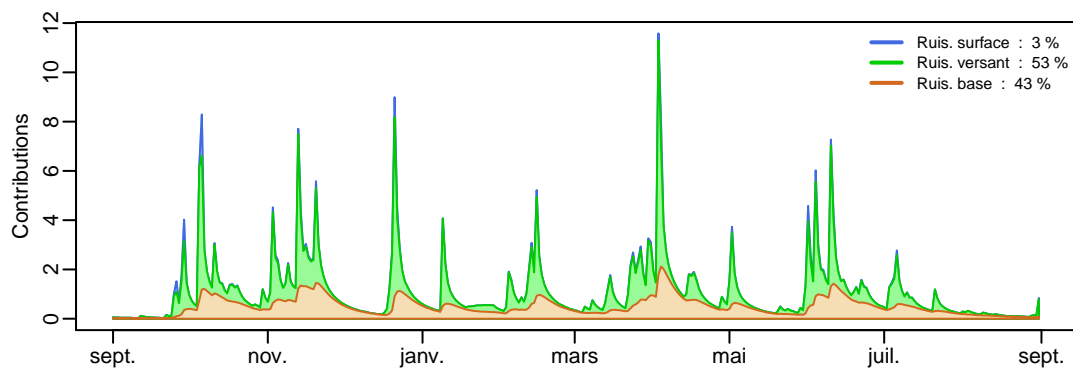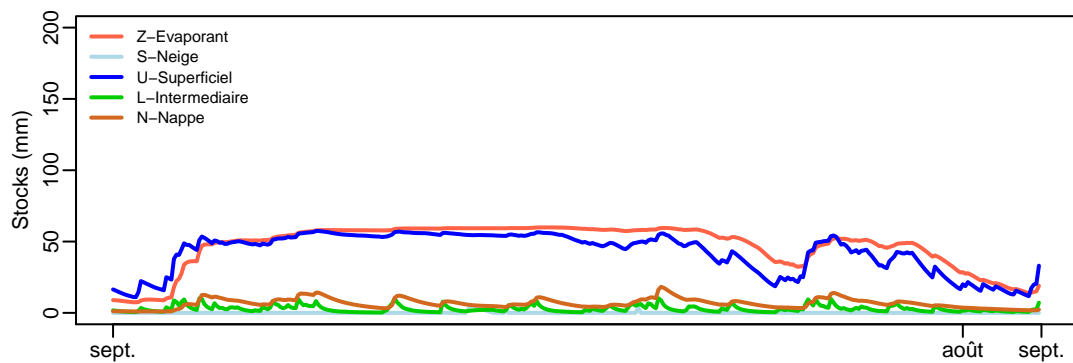

# k0943010 (113.89 km<sup>2</sup>) – année 1992–1993

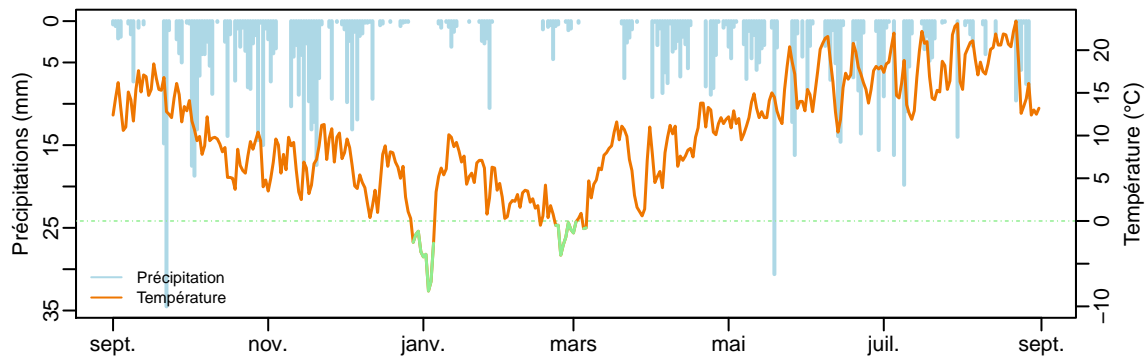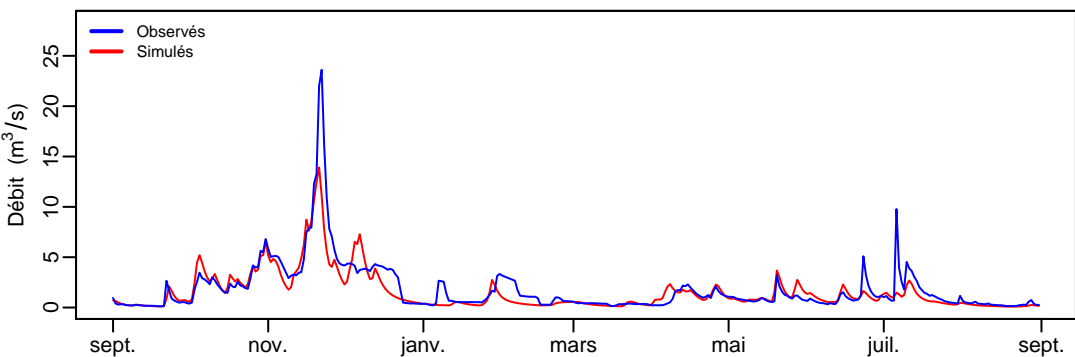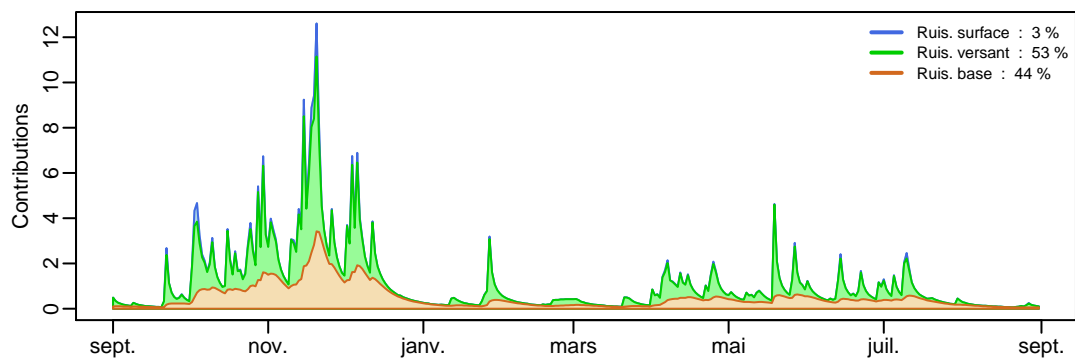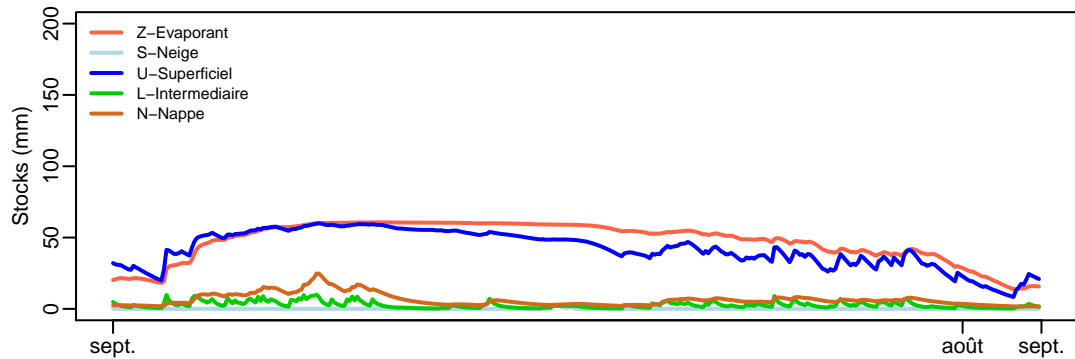

# k0943010 (113.89 km<sup>2</sup>) – année 1993–1994

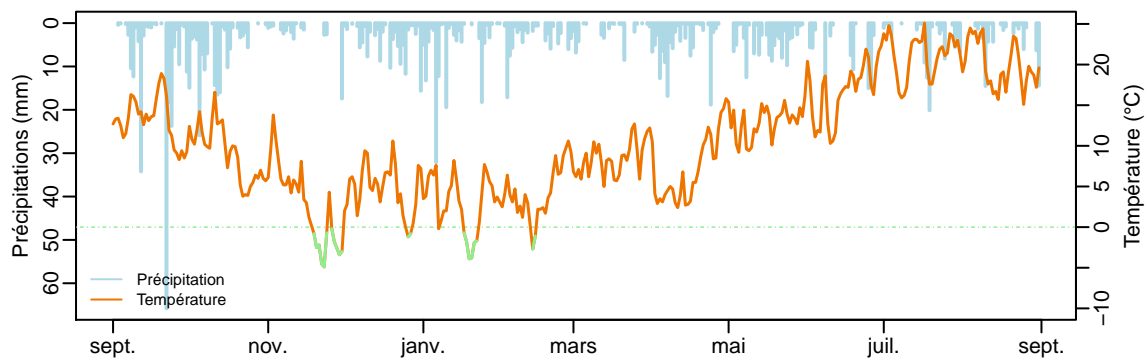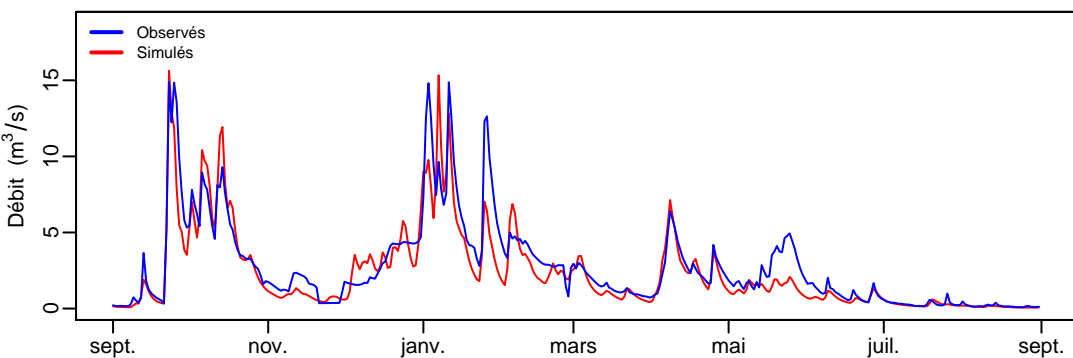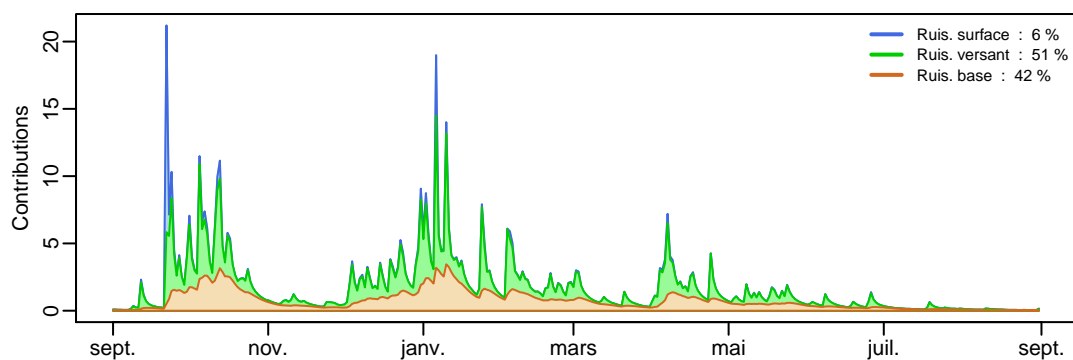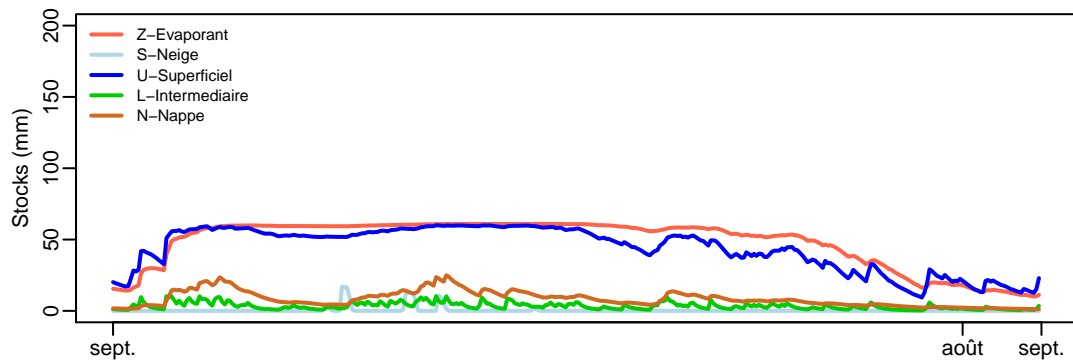

# k0943010 (113.89 km<sup>2</sup>) – année 1994–1995

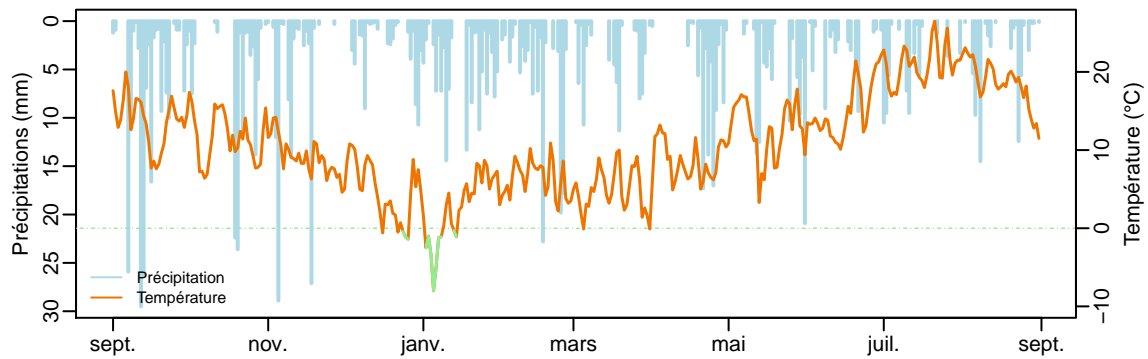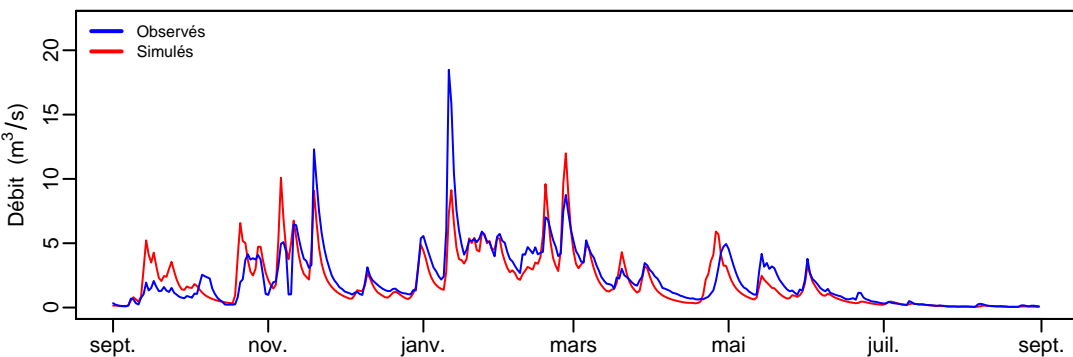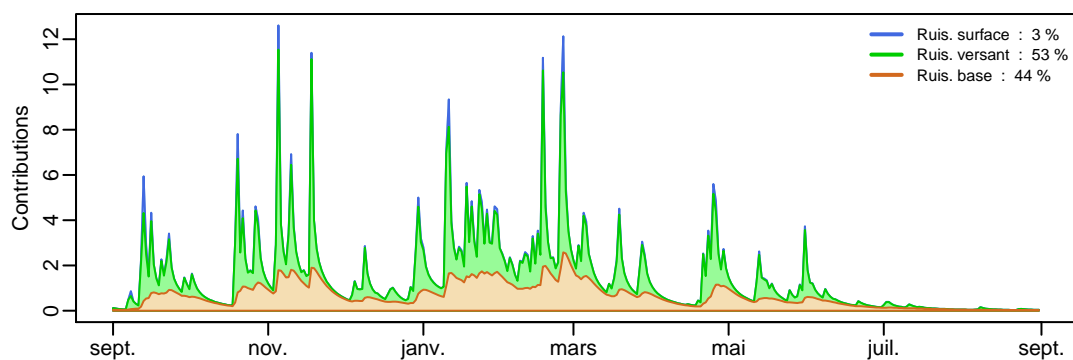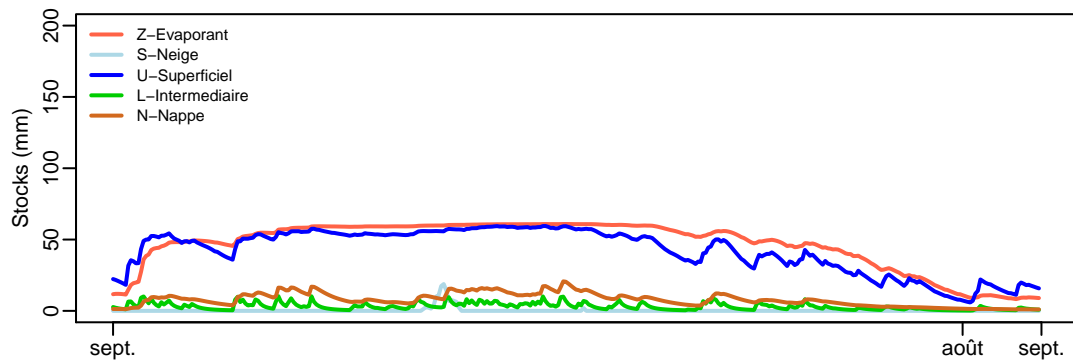

# k0943010 (113.89 km<sup>2</sup>) – année 1995–1996

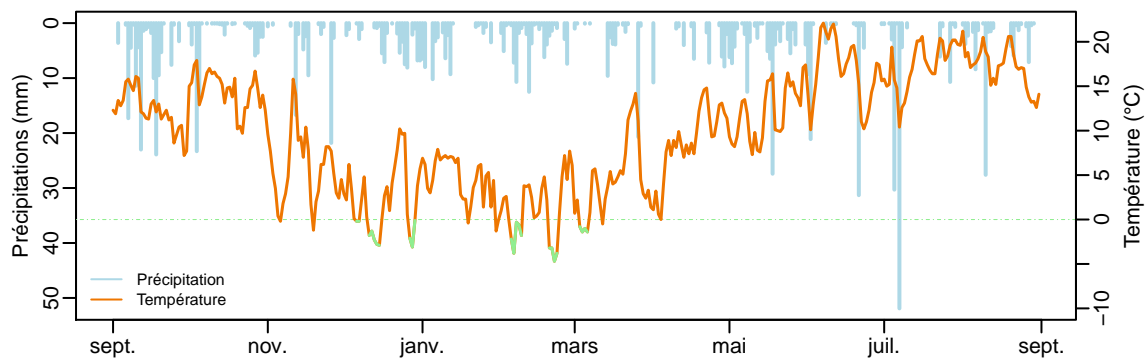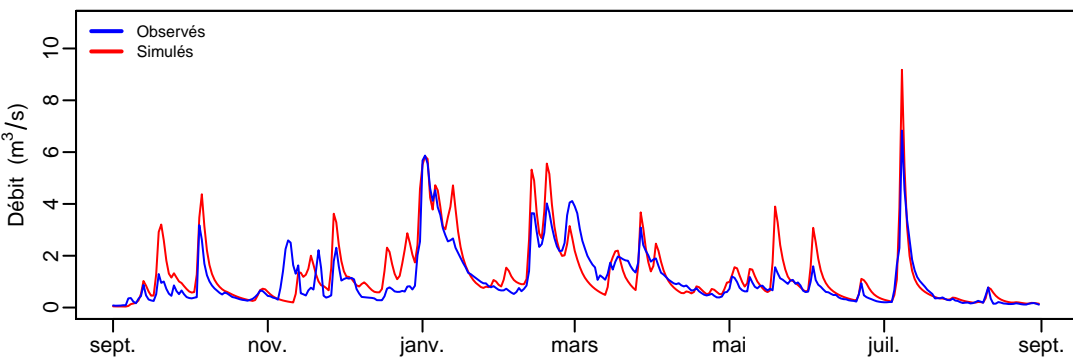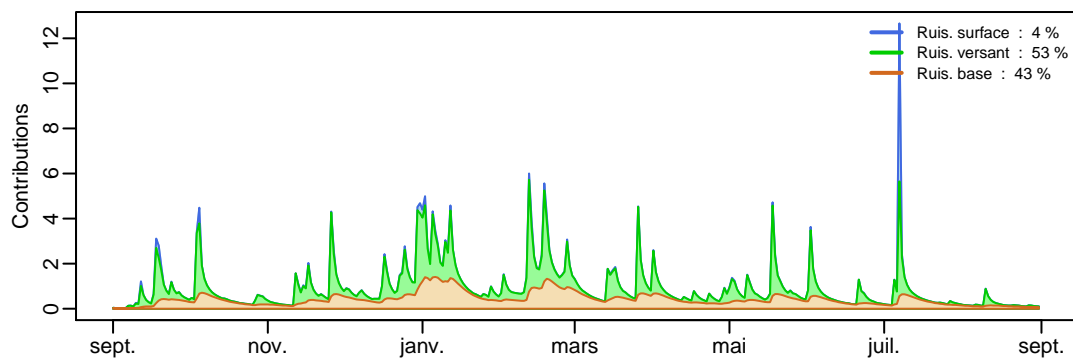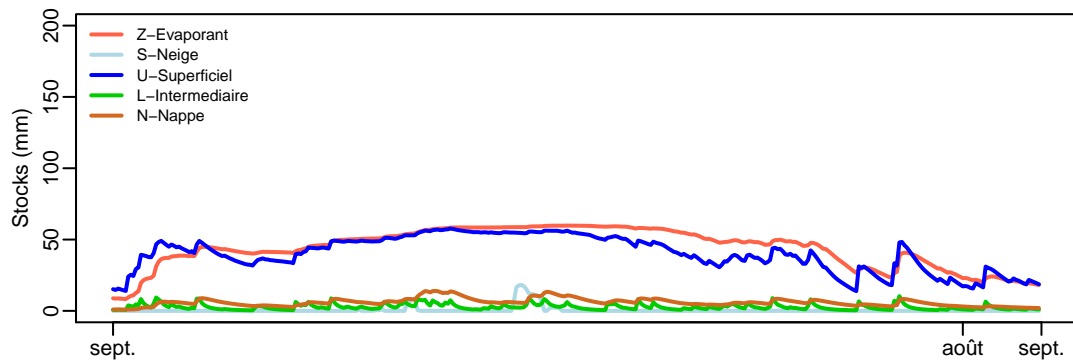

# k0943010 (113.89 km<sup>2</sup>) – année 1996–1997

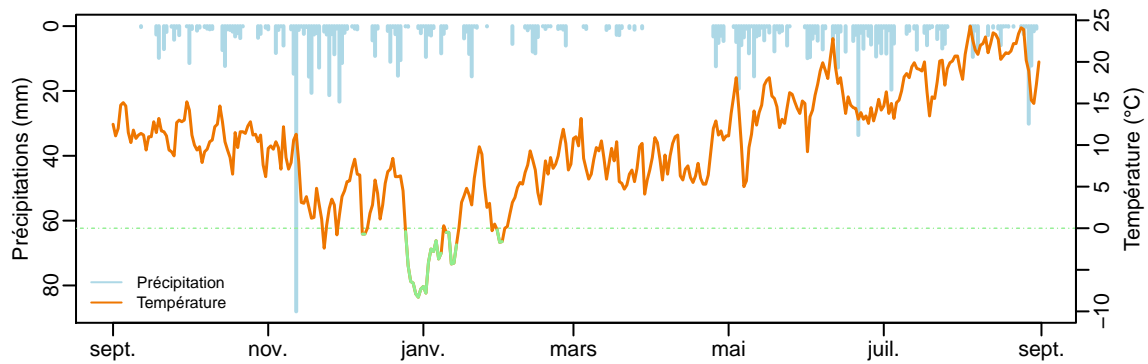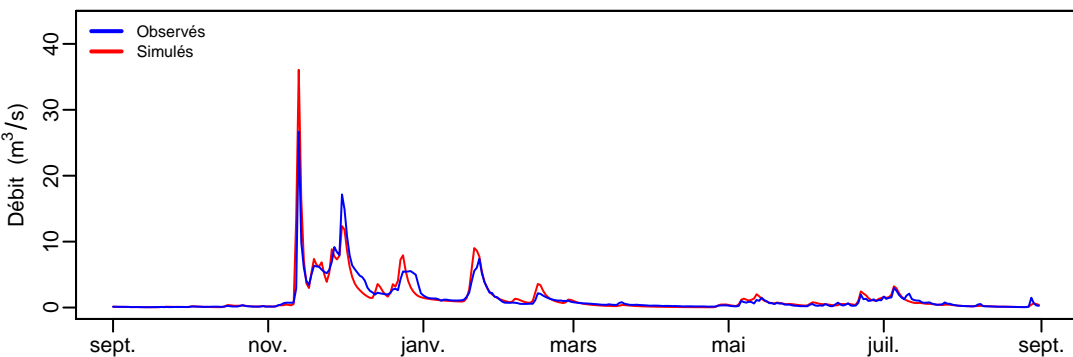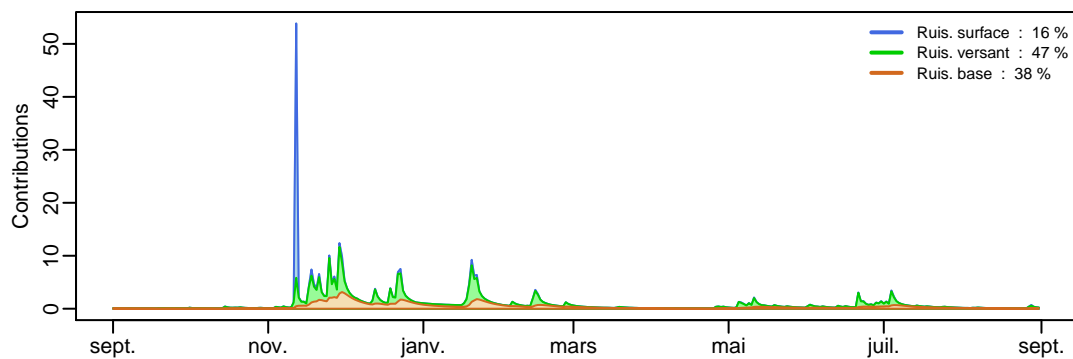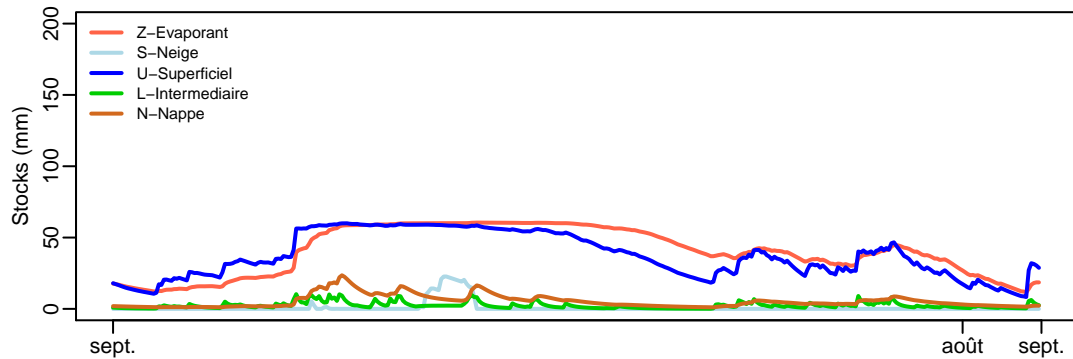



# k0943010 (113.89 km<sup>2</sup>) – année 1997–1998

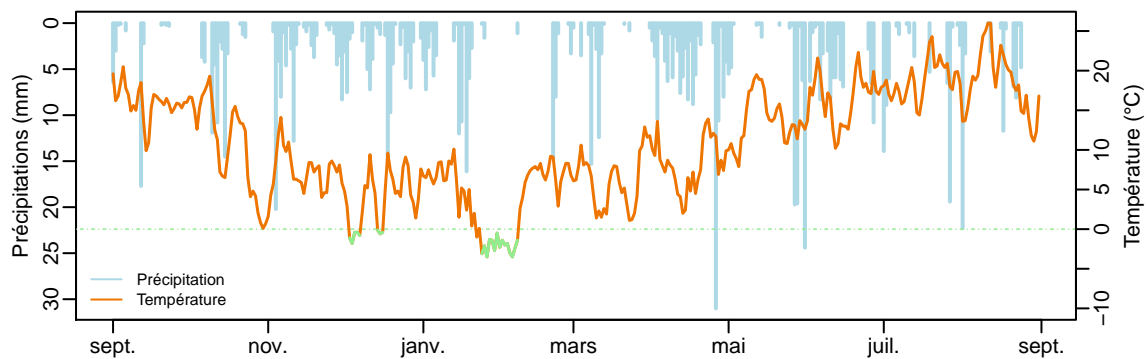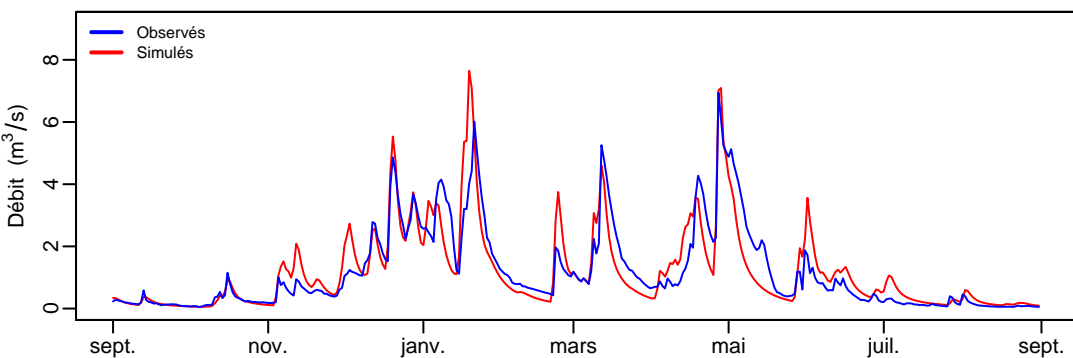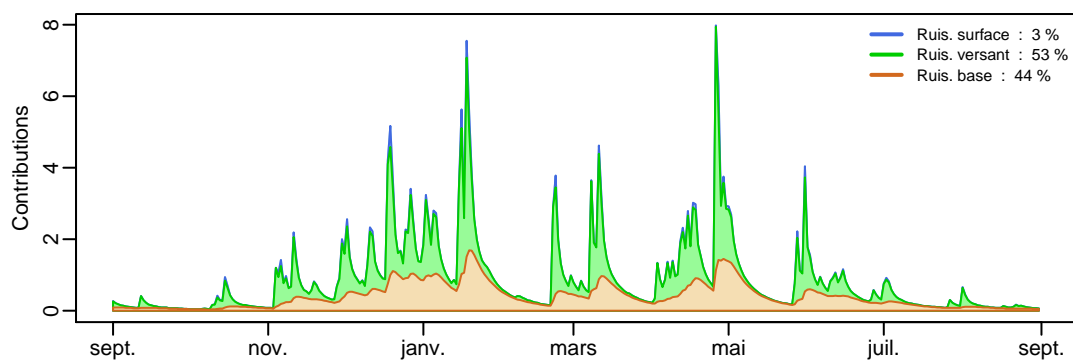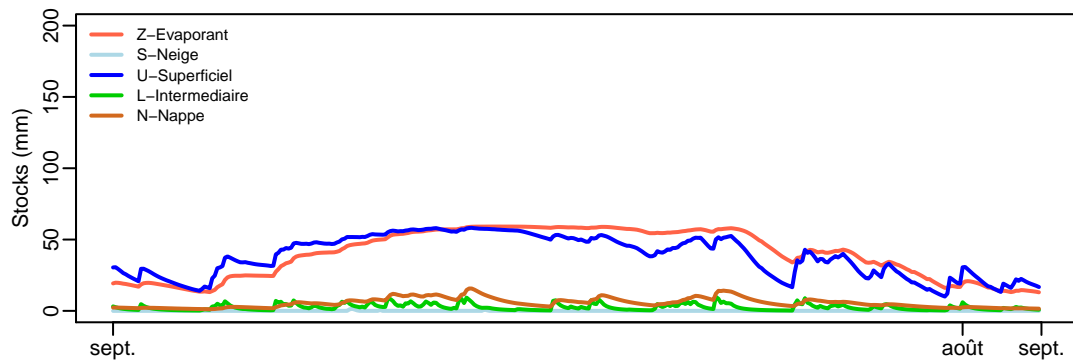

# k0943010 (113.89 km<sup>2</sup>) – année 1998–1999

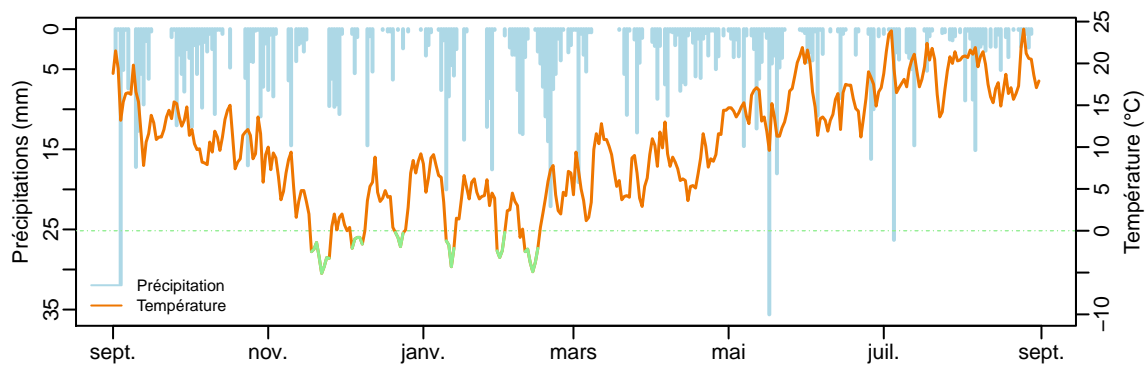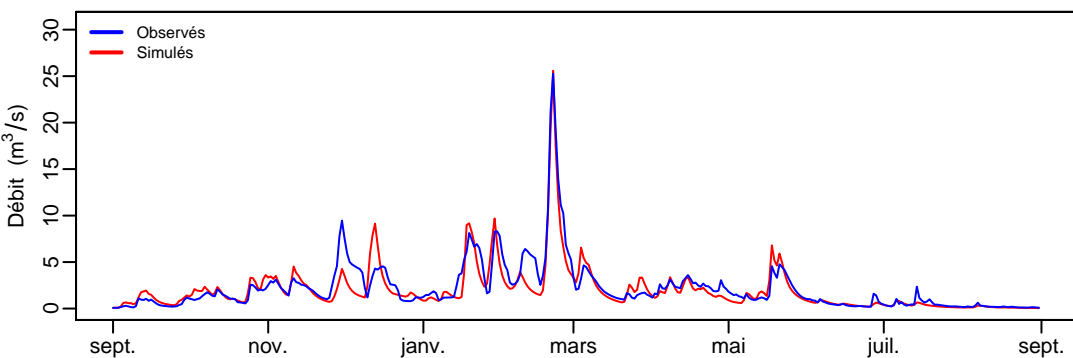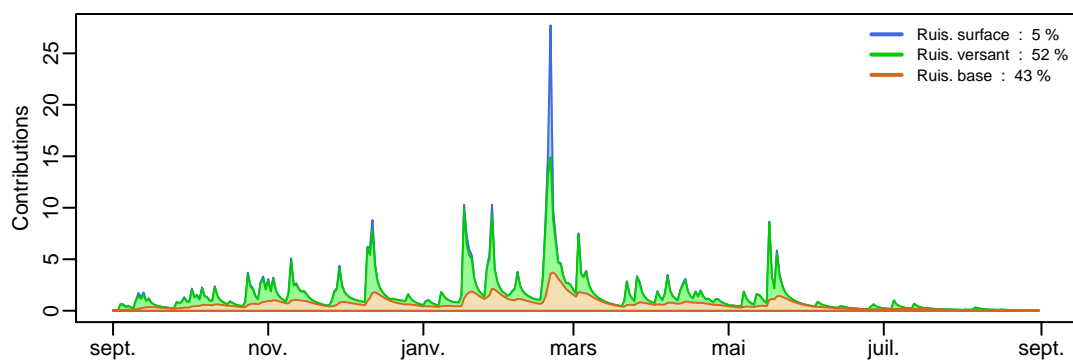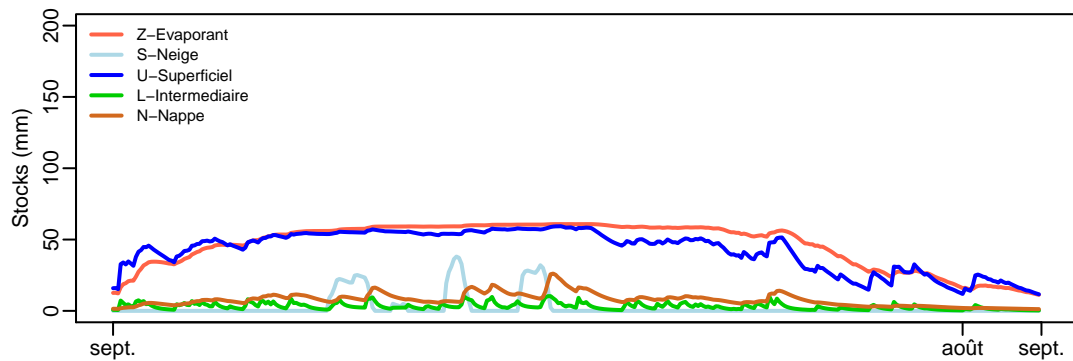

# k0943010 (113.89 km<sup>2</sup>) – année 1999–2000

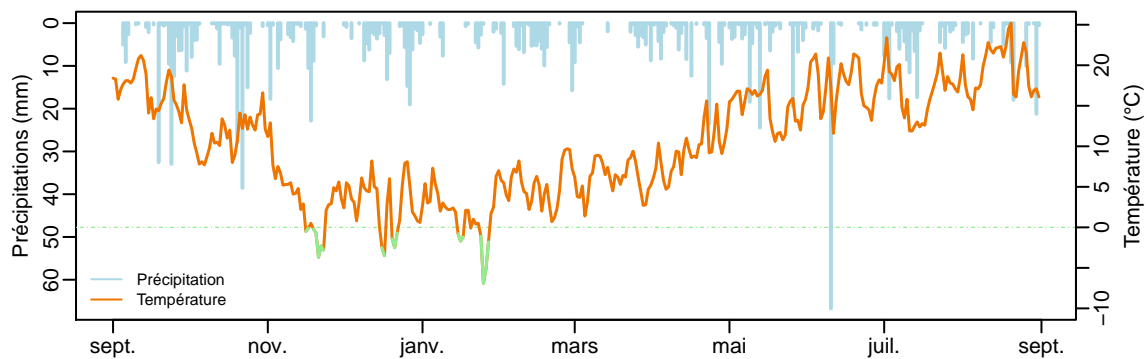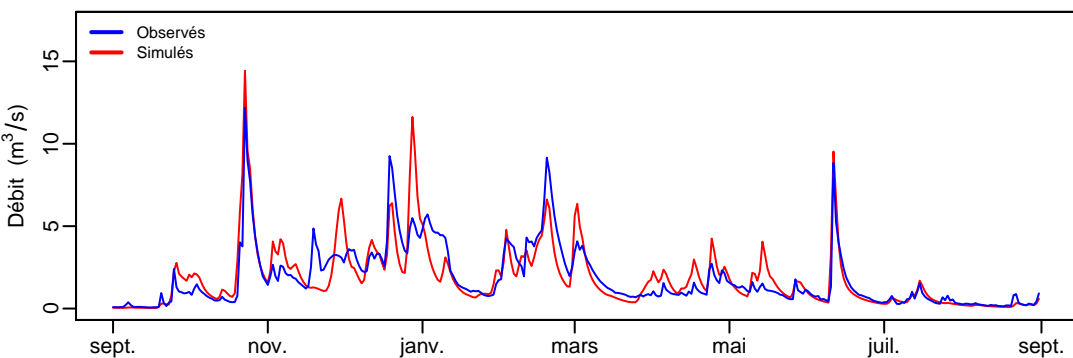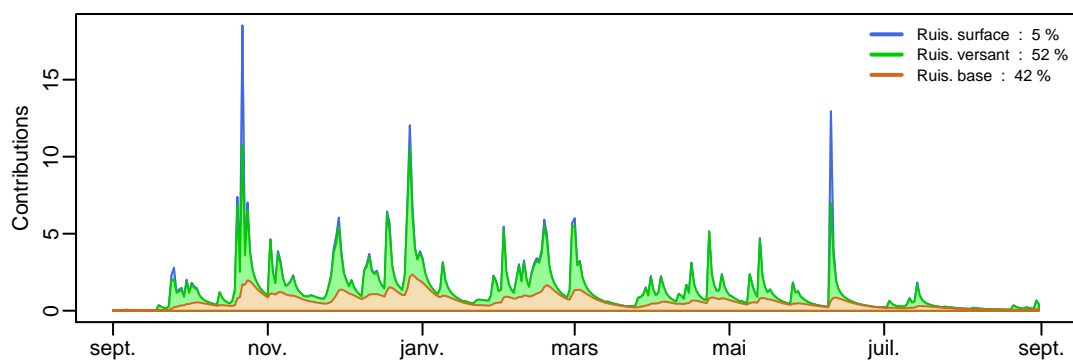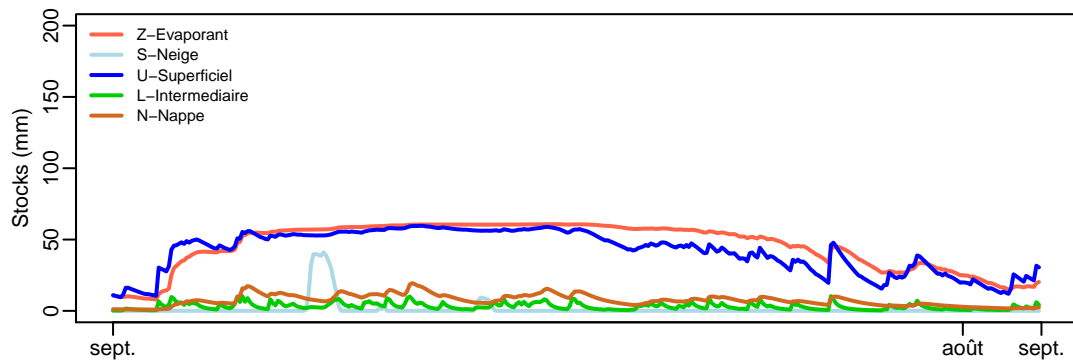

# k0943010 (113.89 km<sup>2</sup>) – année 2000–2001

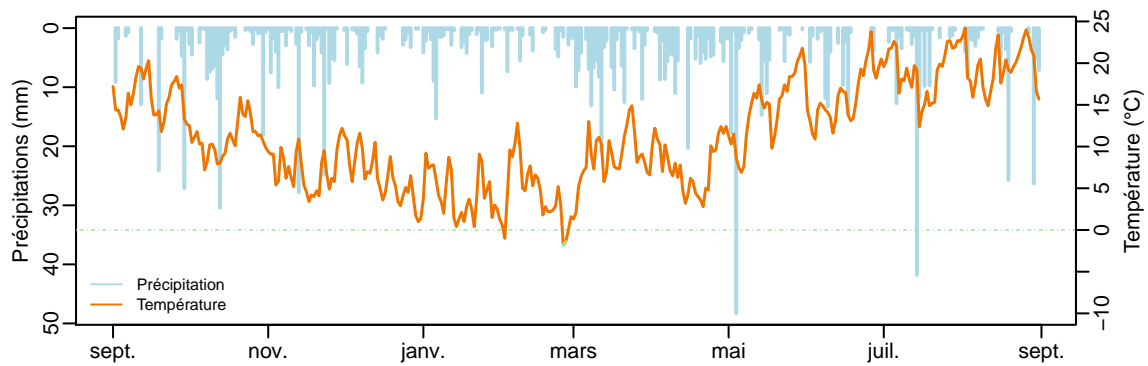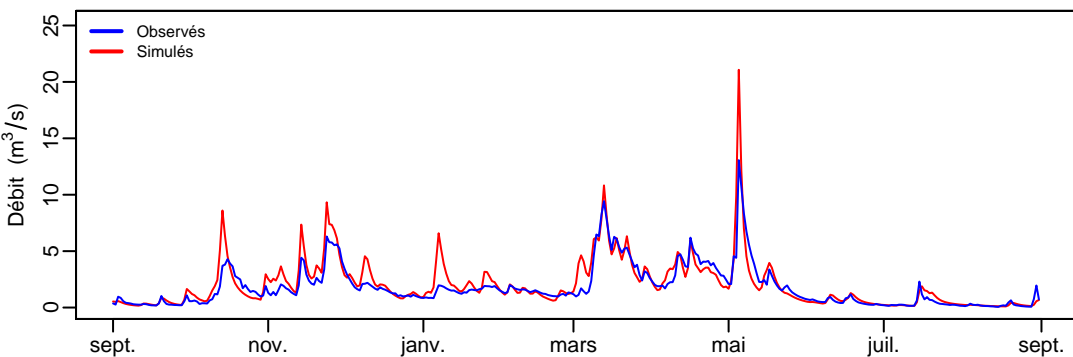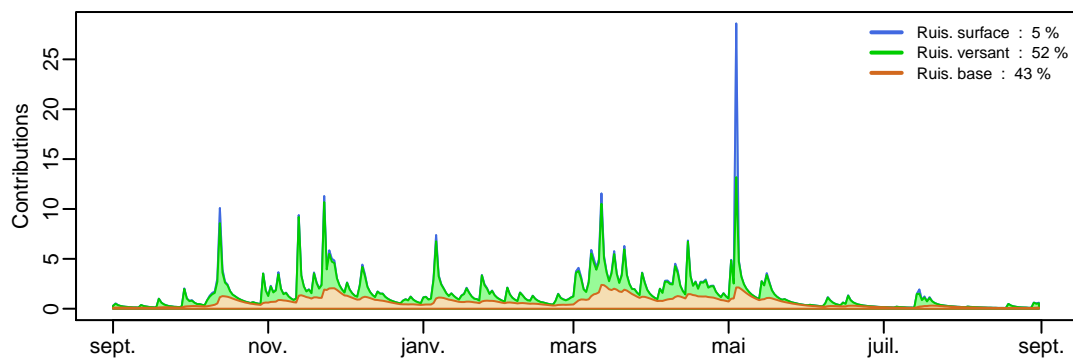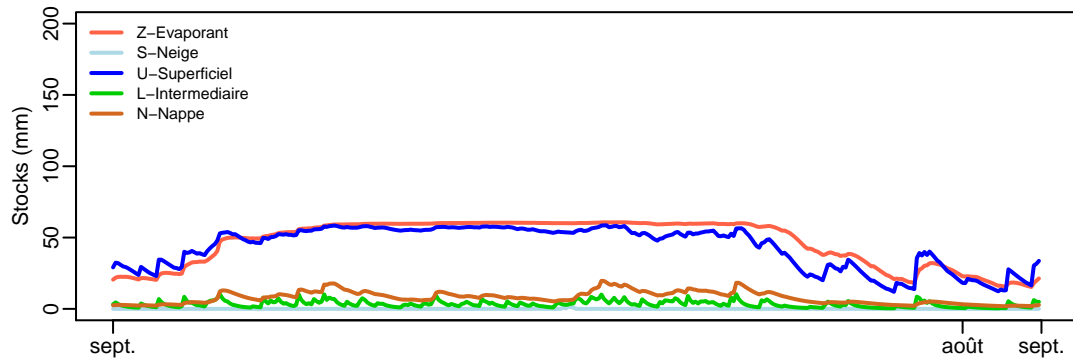

# k0943010 (113.89 km<sup>2</sup>) – année 2001–2002

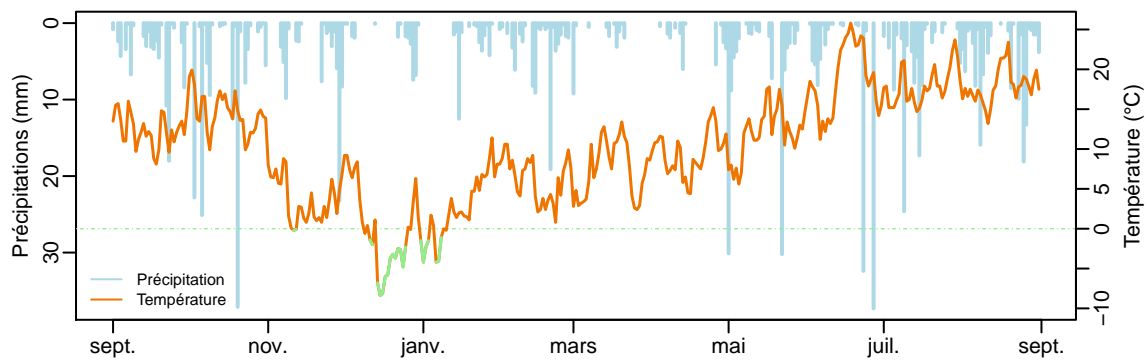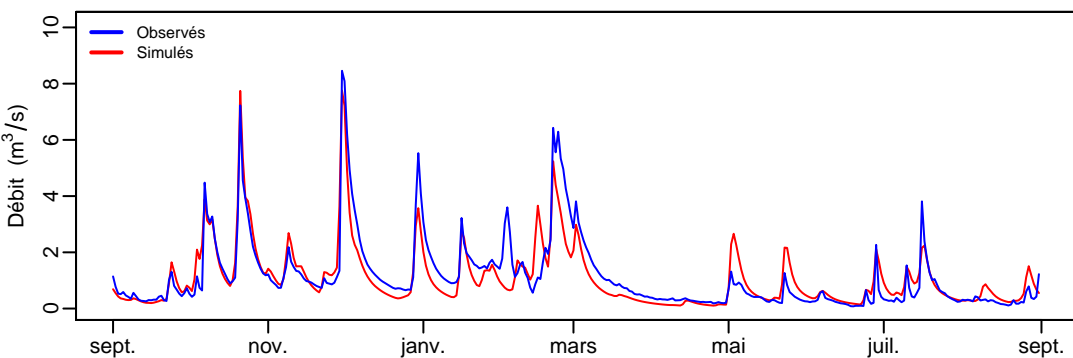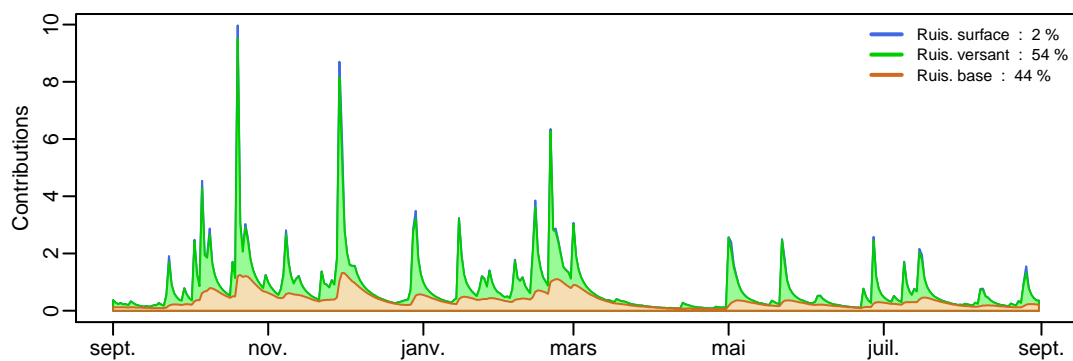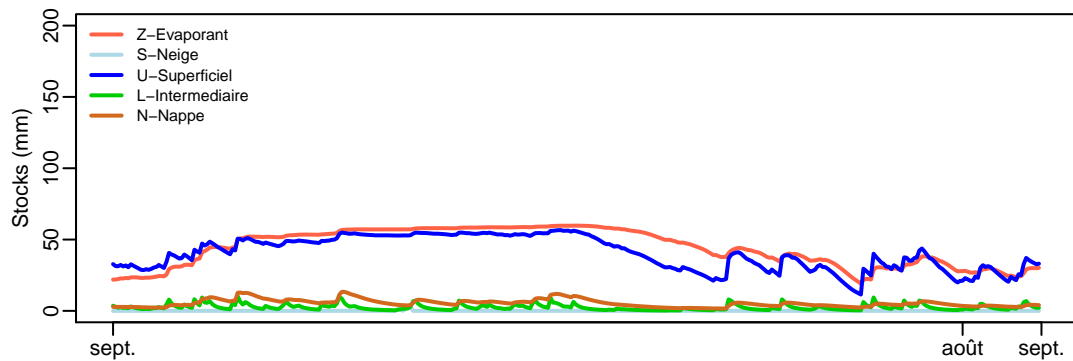

# k0943010 (113.89 km<sup>2</sup>) – année 2002–2003

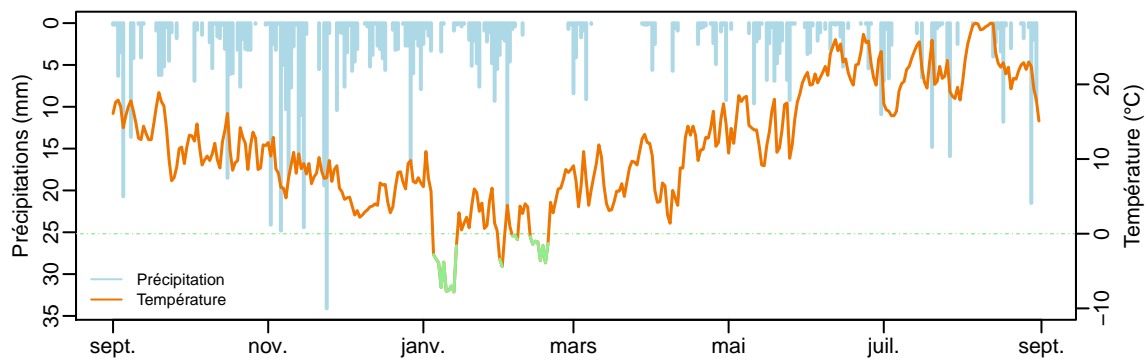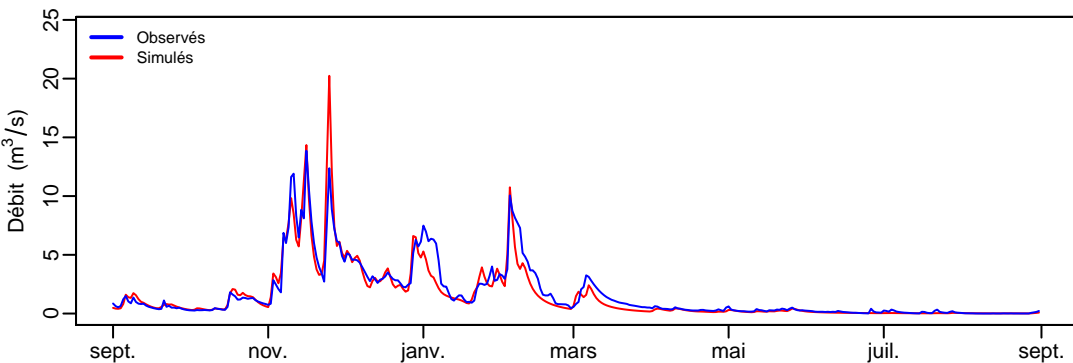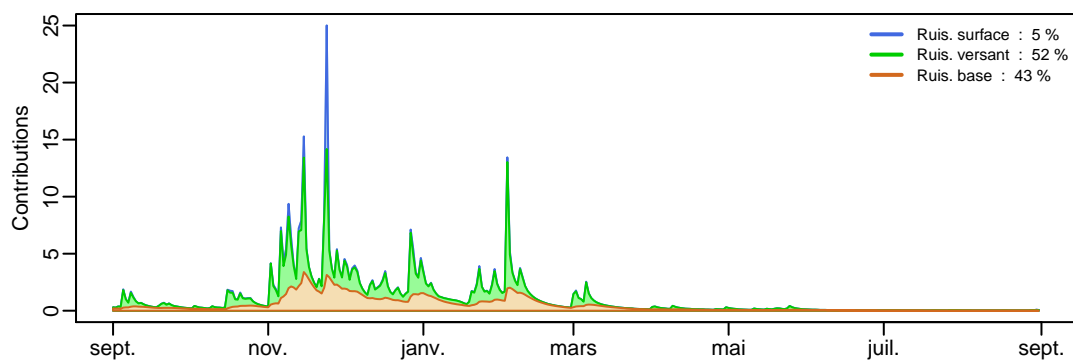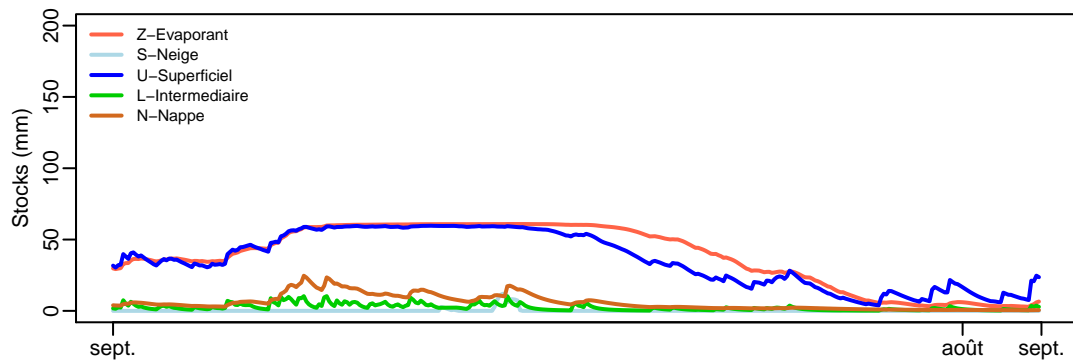

# k0943010 (113.89 km<sup>2</sup>) – année 2003–2004

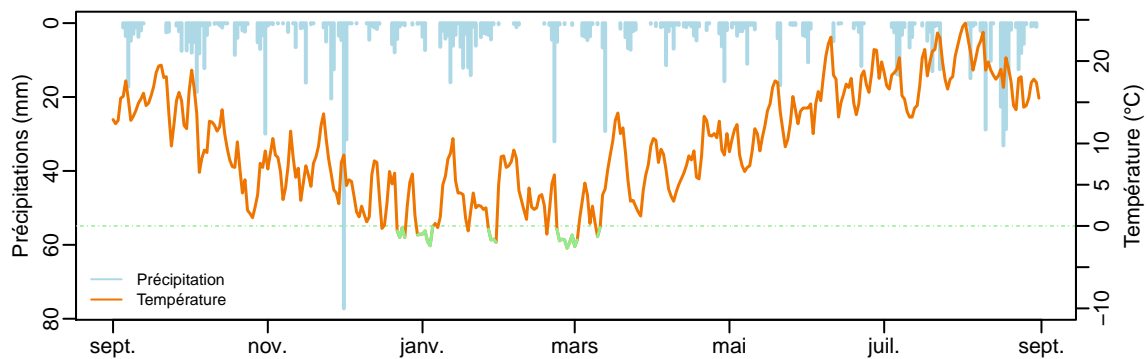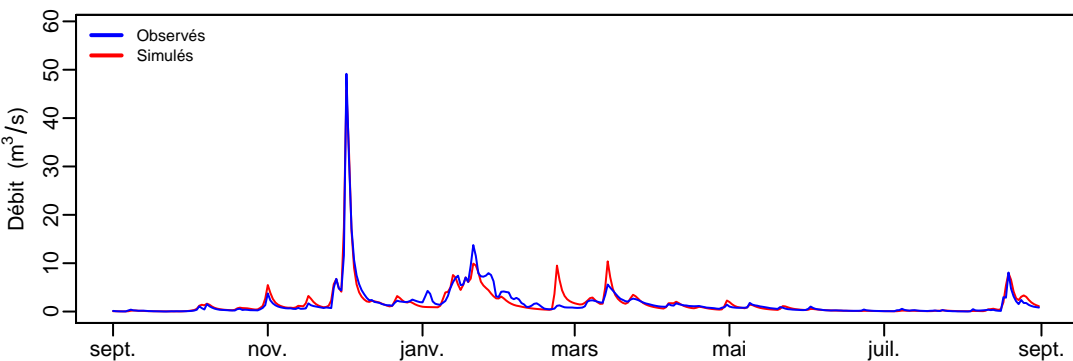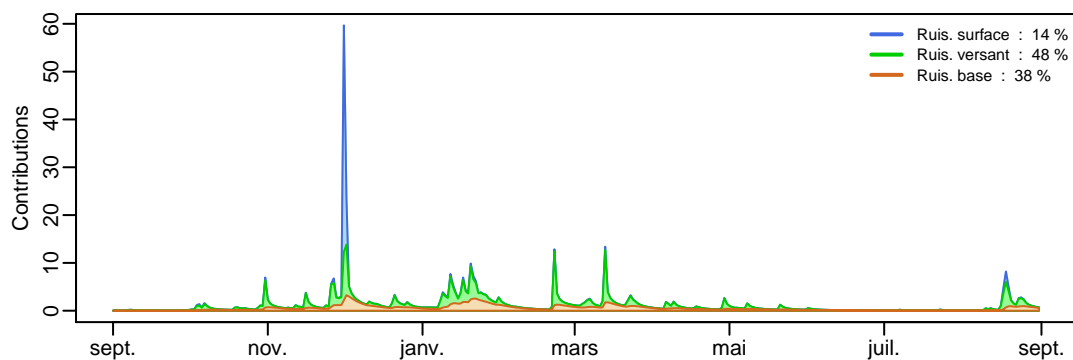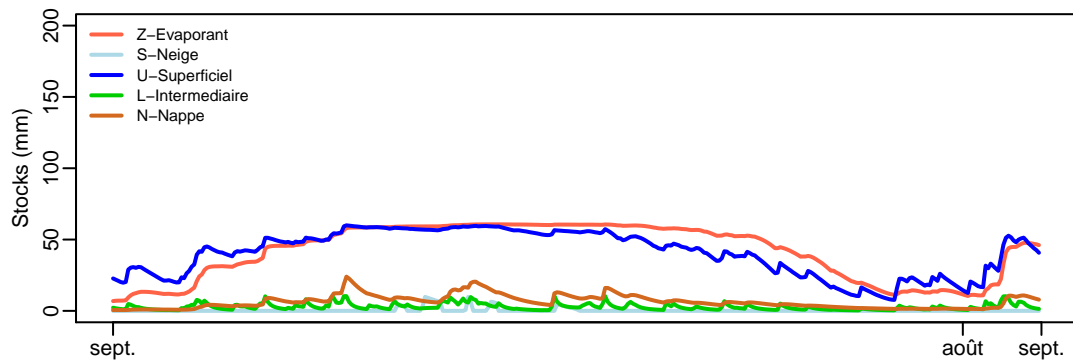

# k0943010 (113.89 km<sup>2</sup>) – année 2004–2005

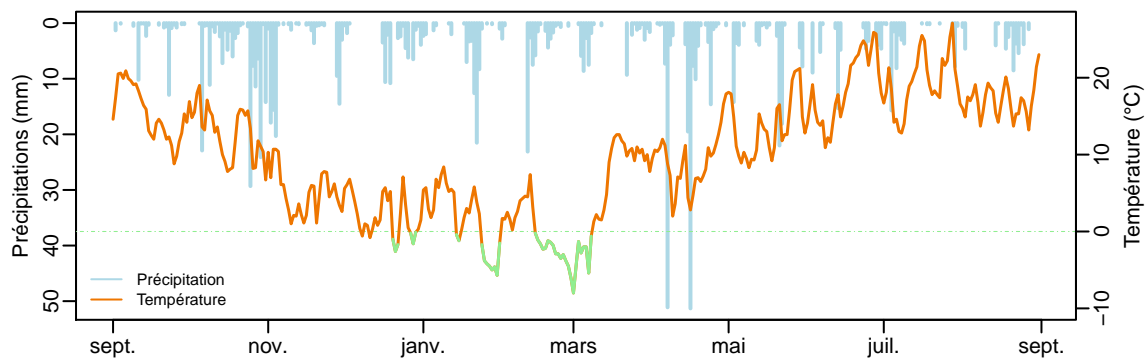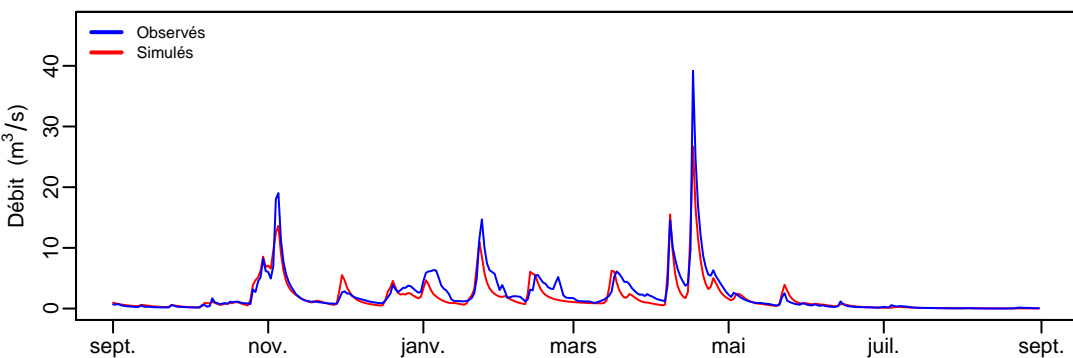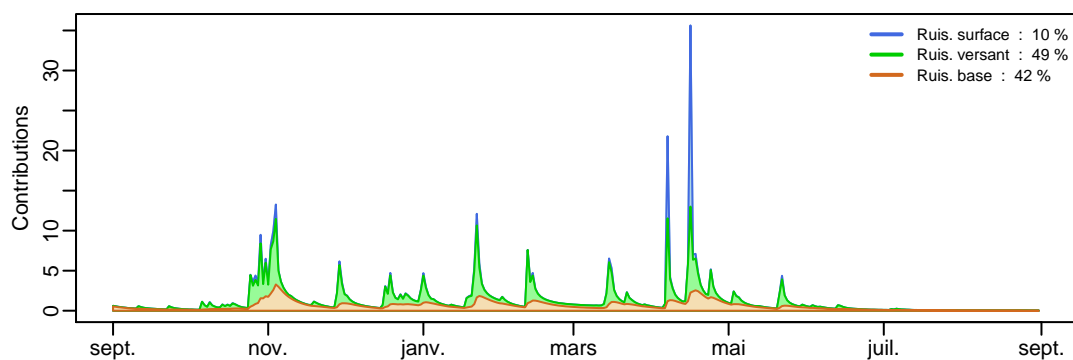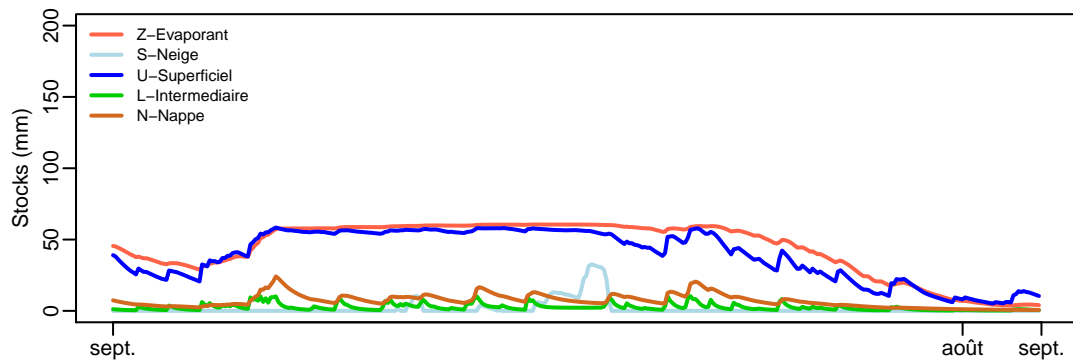



# k0943010 (113.89 km<sup>2</sup>) – année 2005–2006

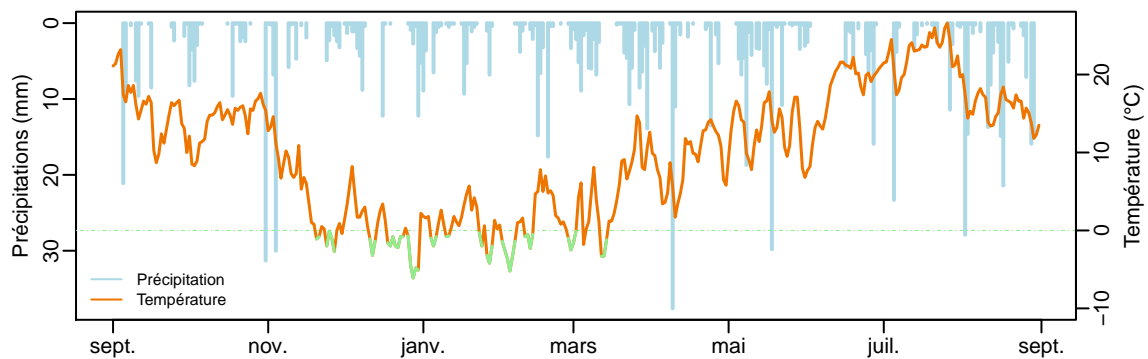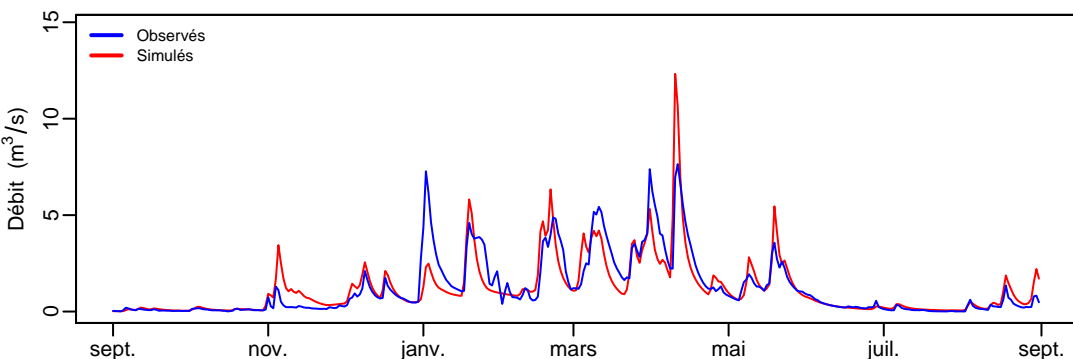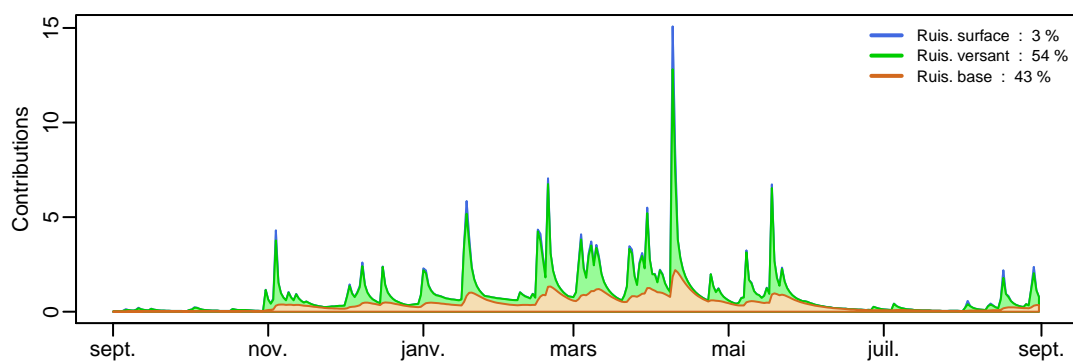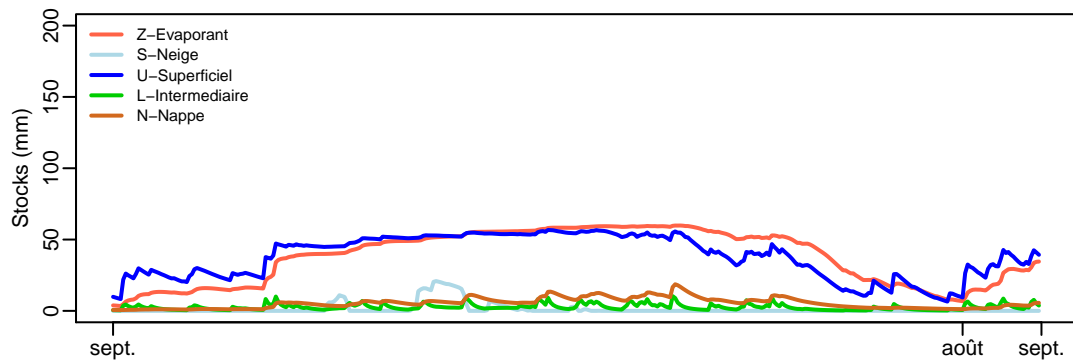

# k0943010 (113.89 km<sup>2</sup>) – année 2006–2007

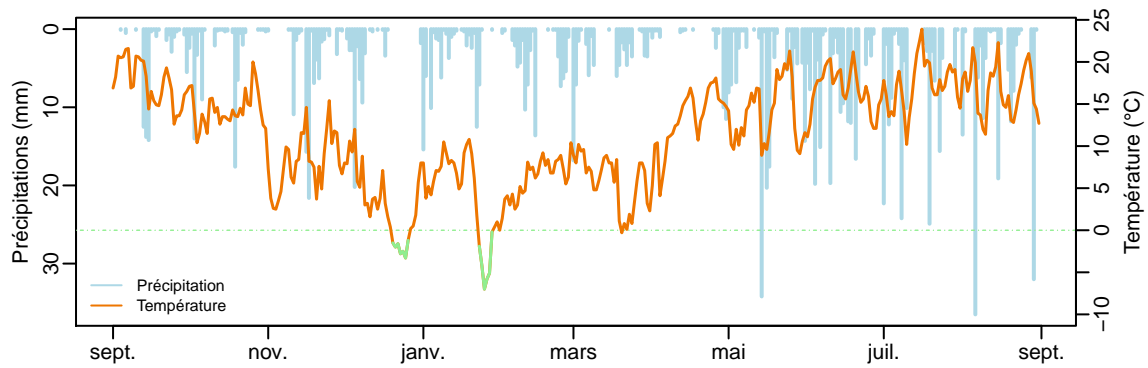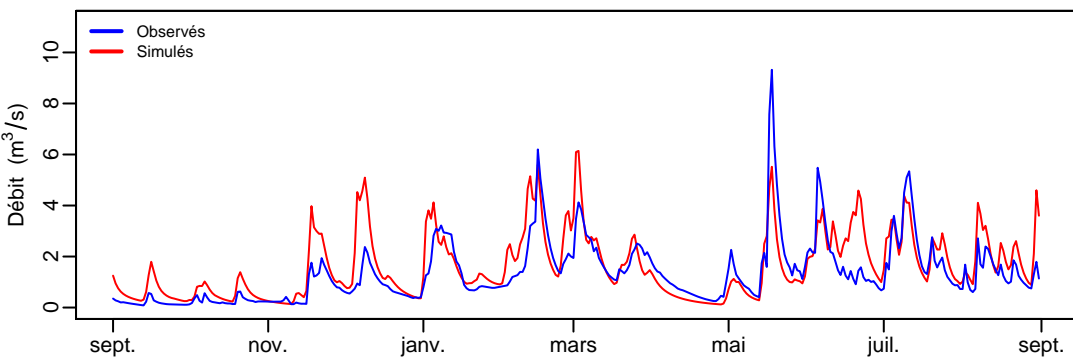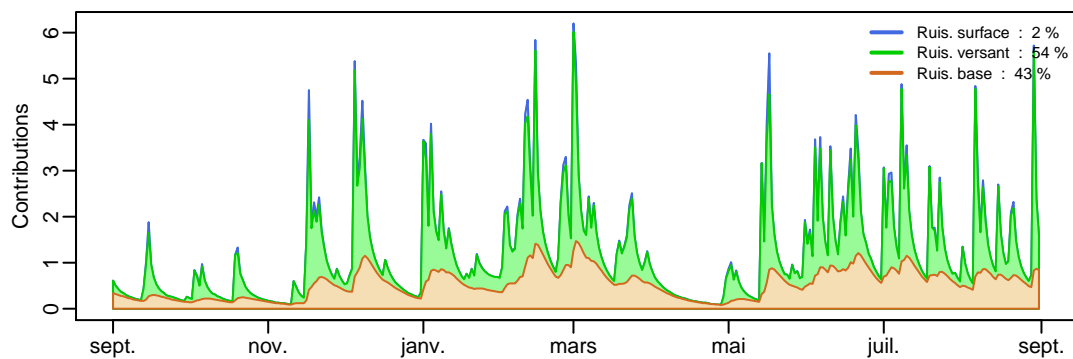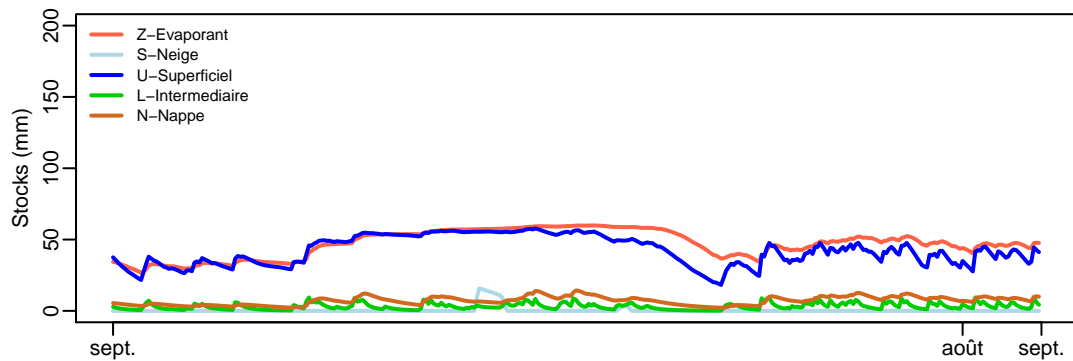

# k0943010 (113.89 km<sup>2</sup>) – année 2007–2008

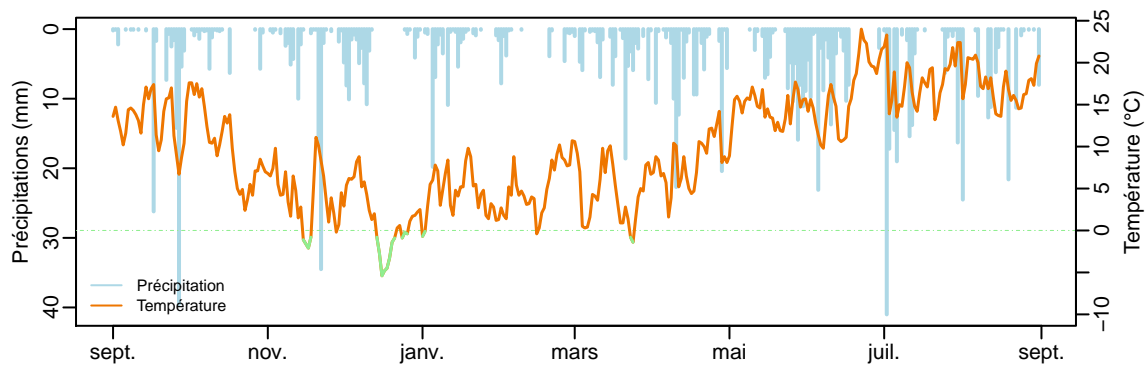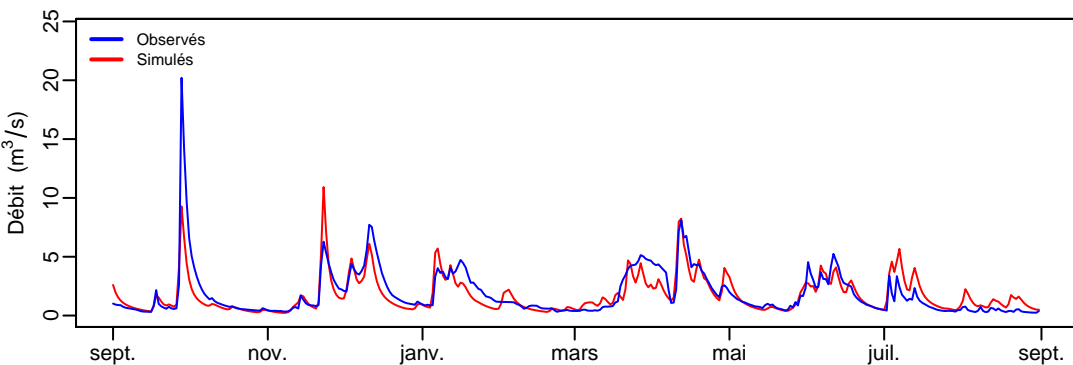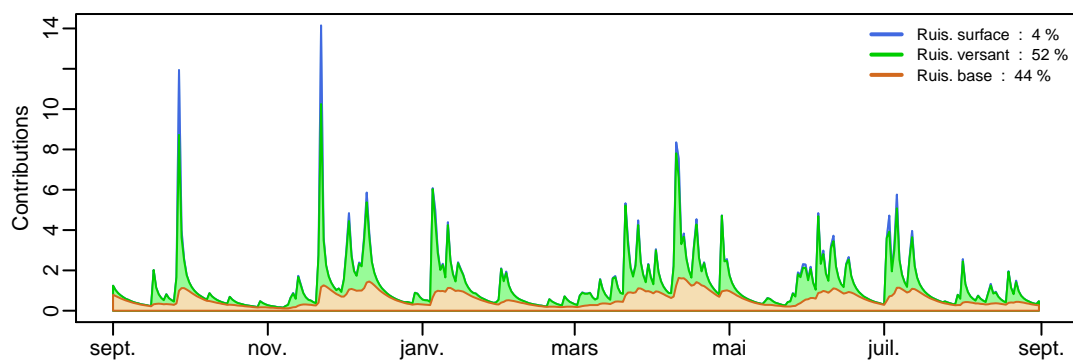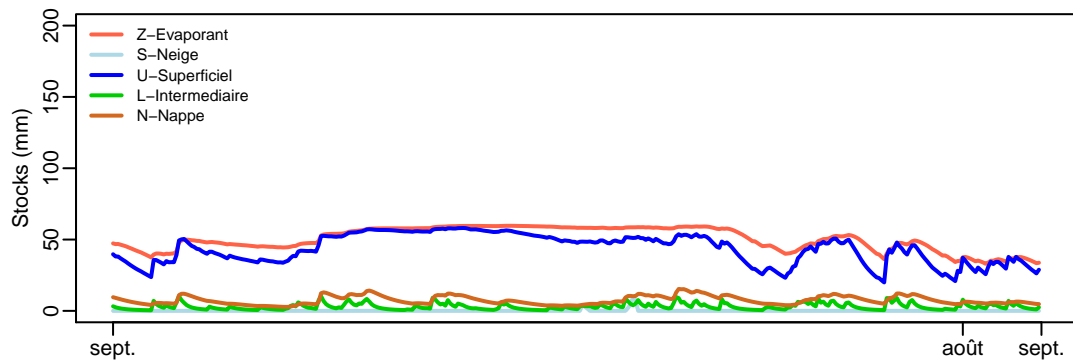

# k0943010 (113.89 km<sup>2</sup>) – année 2008–2009

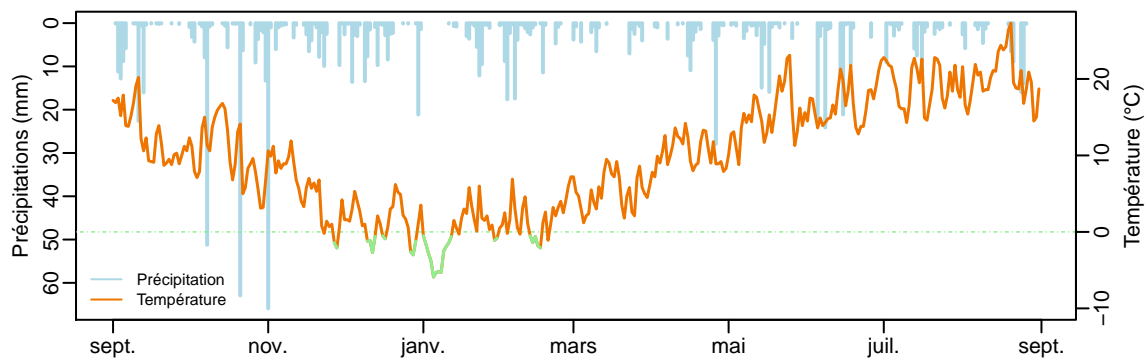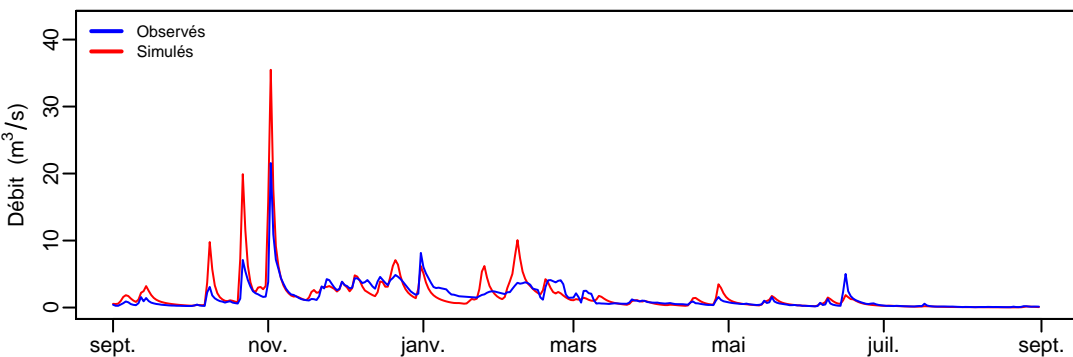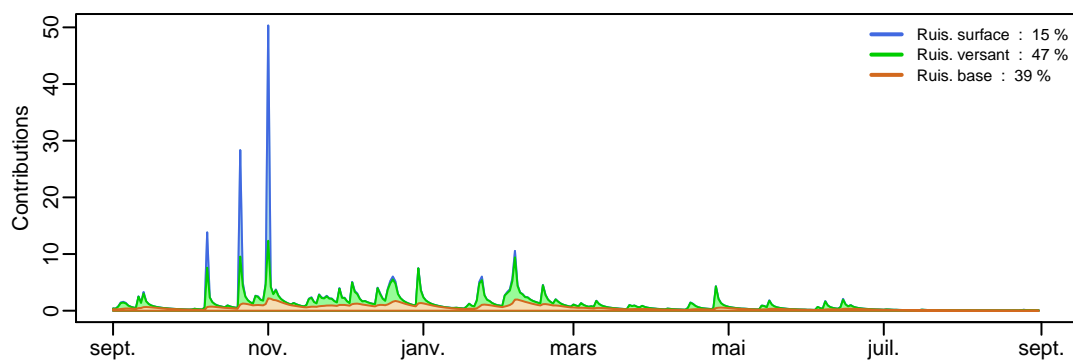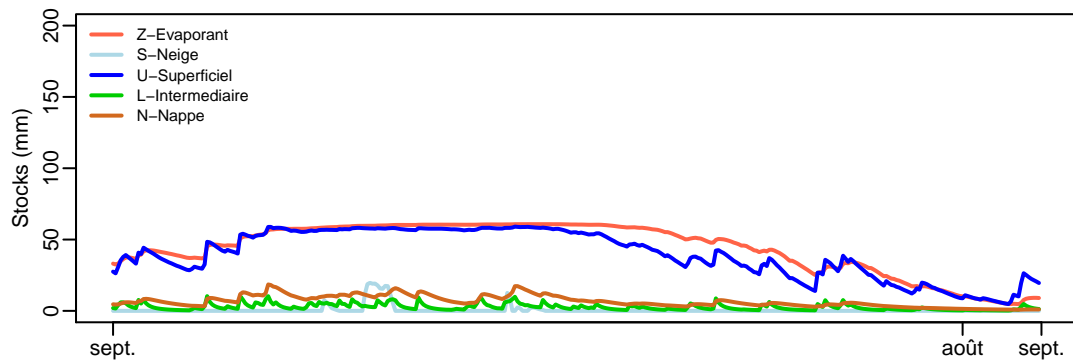

# k0983010 (427.59 km<sup>2</sup>) – année 1988–1989

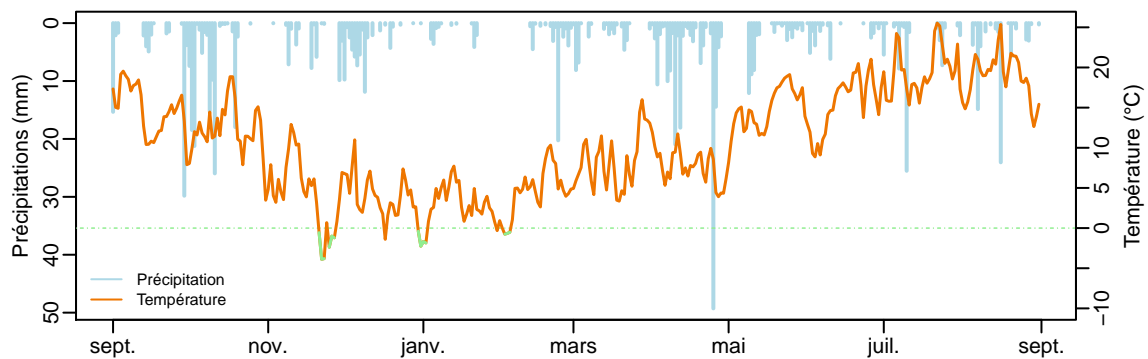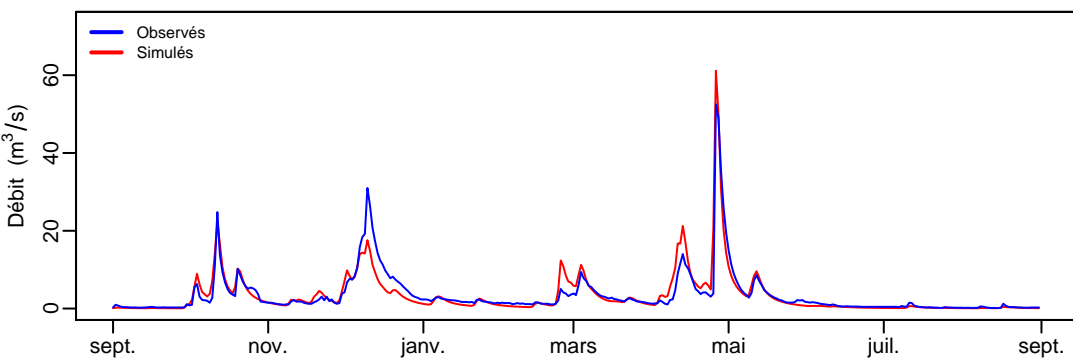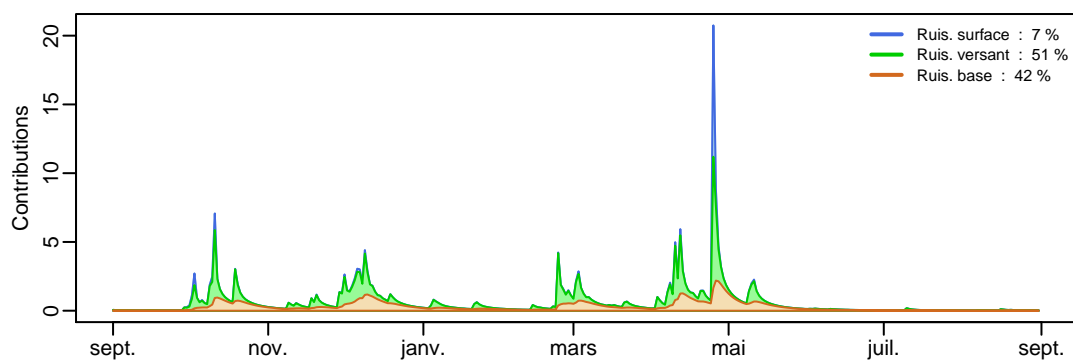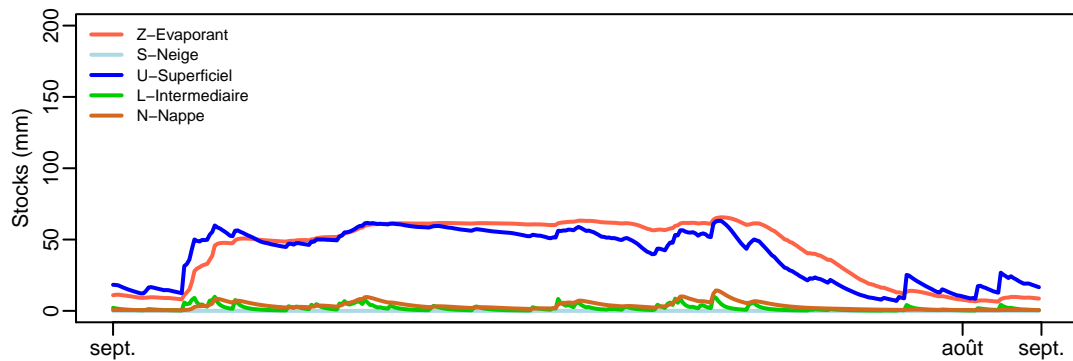

# k0983010 (427.59 km<sup>2</sup>) – année 1989–1990

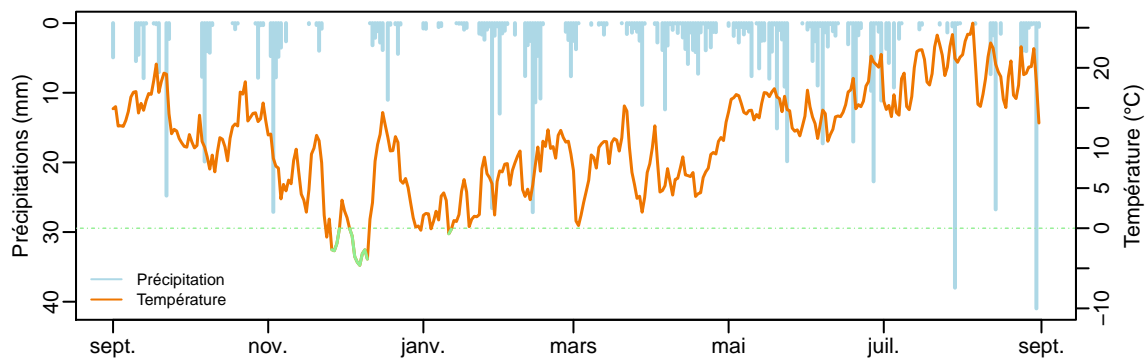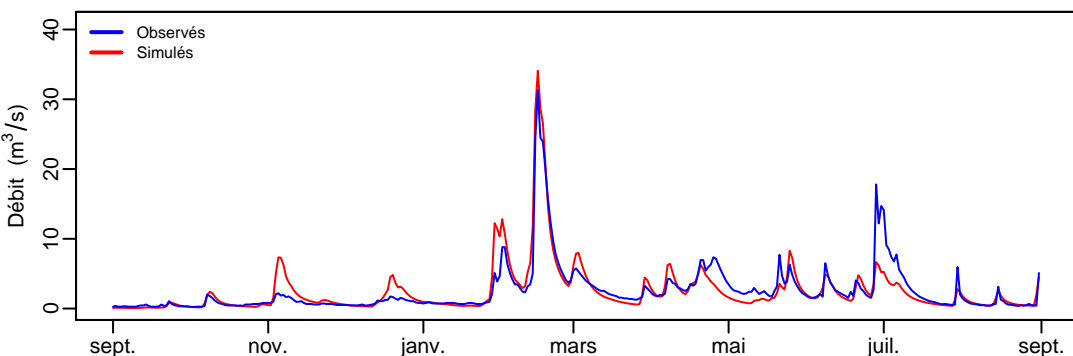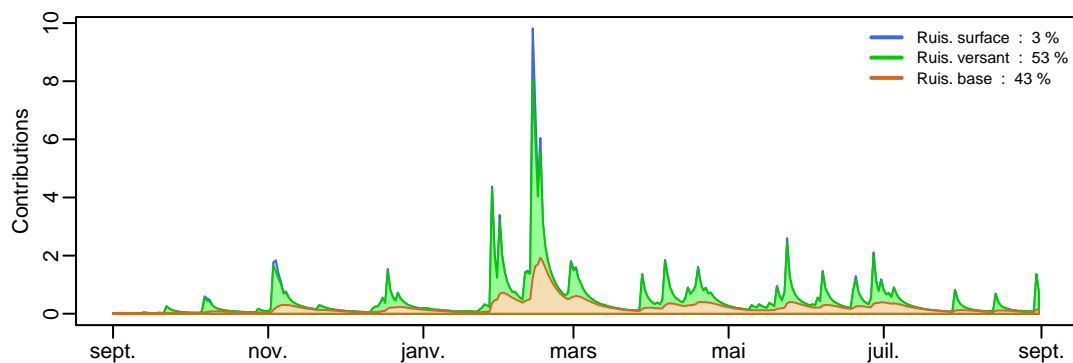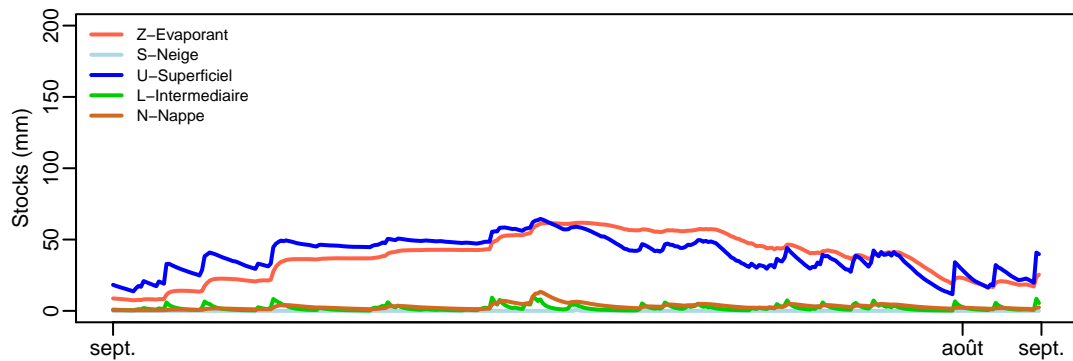

# k0983010 (427.59 km<sup>2</sup>) – année 1990–1991

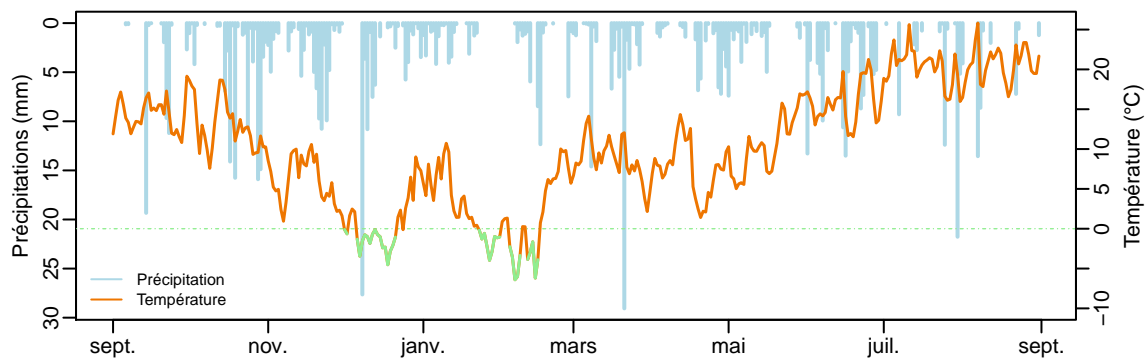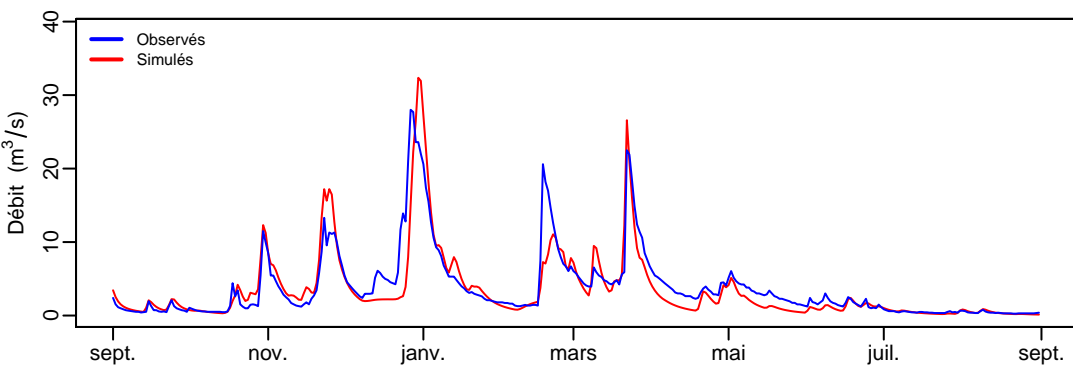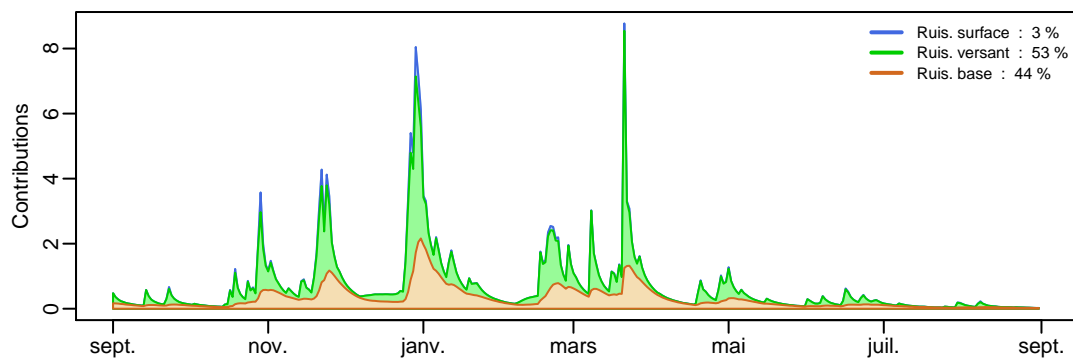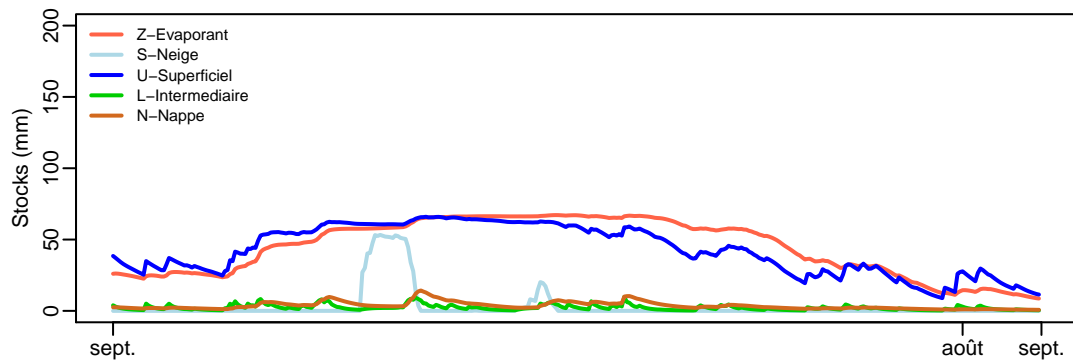

# k0983010 (427.59 km<sup>2</sup>) – année 1991–1992

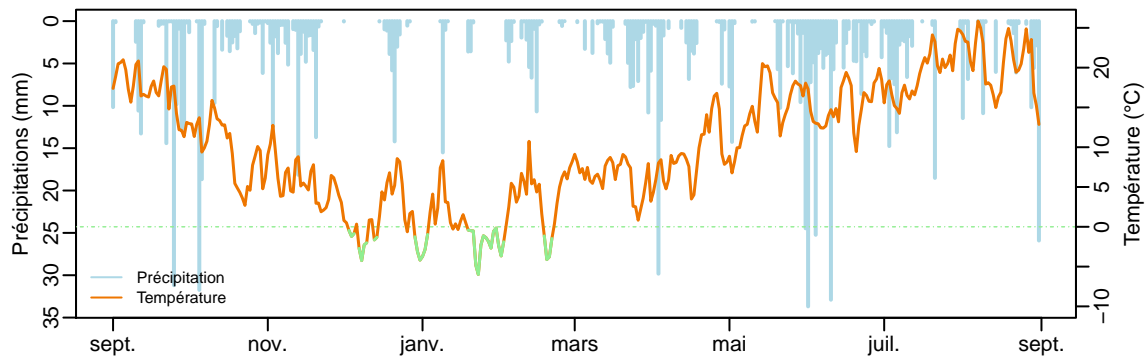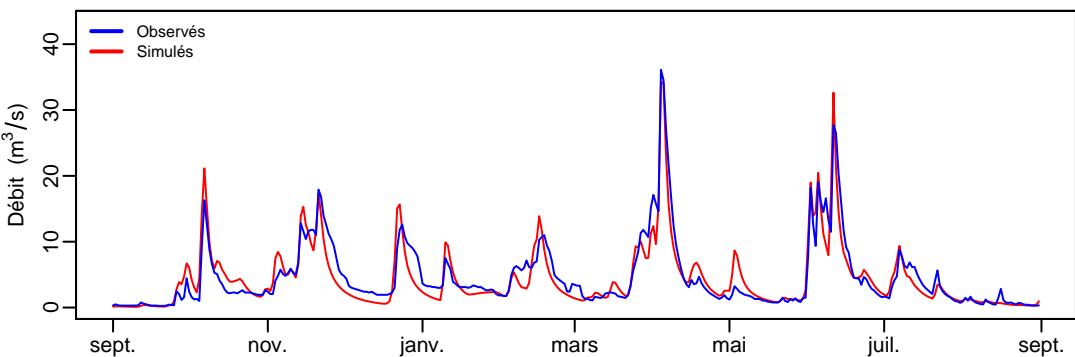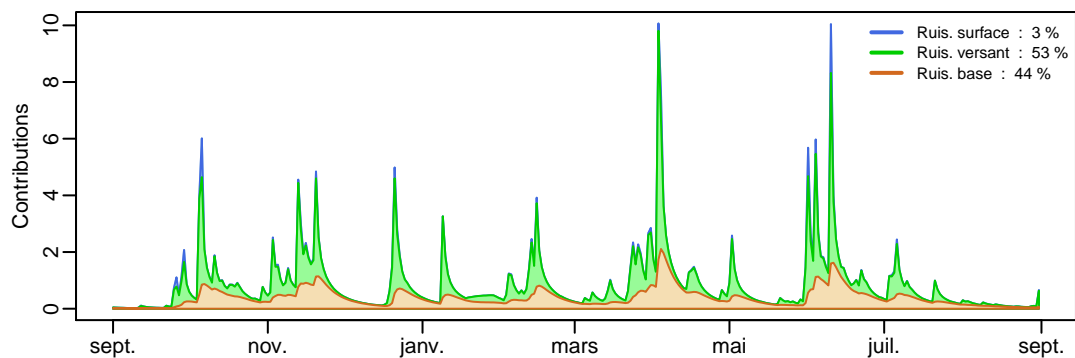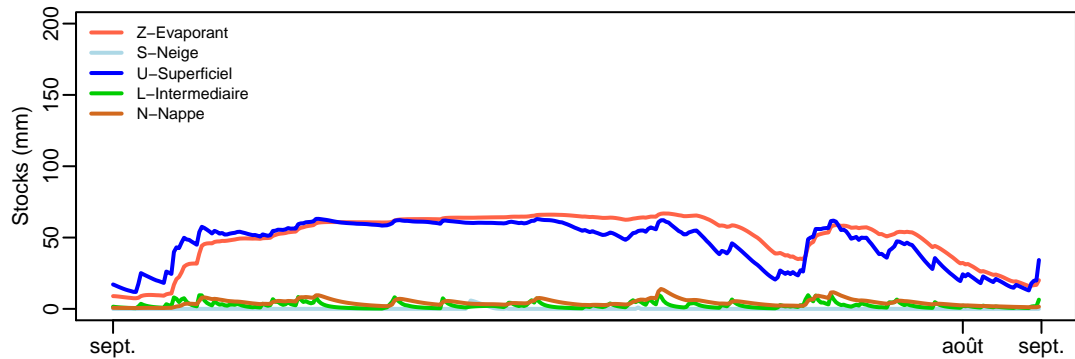



# k0983010 (427.59 km<sup>2</sup>) – année 1992–1993

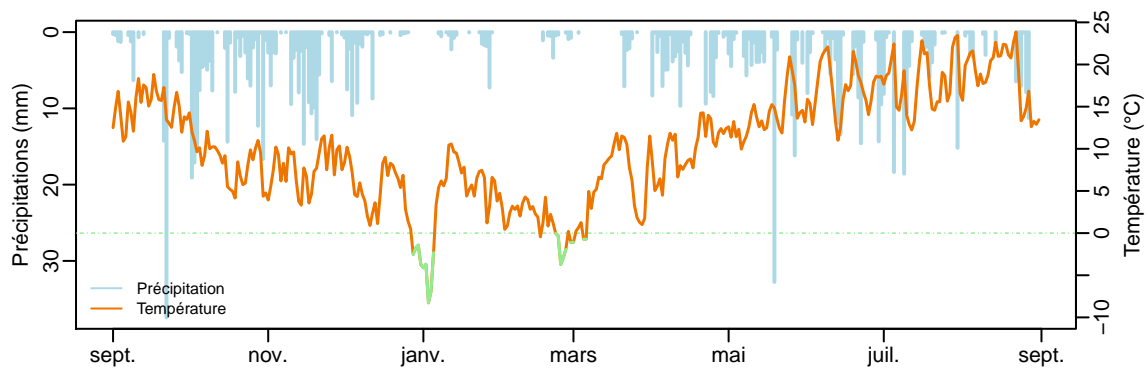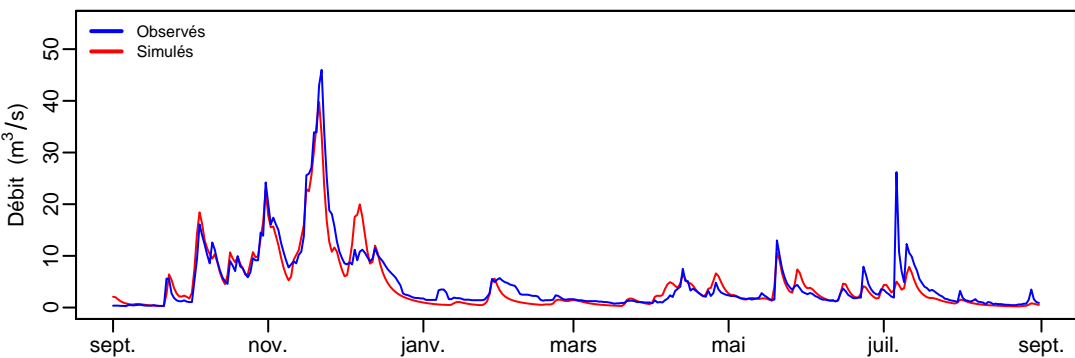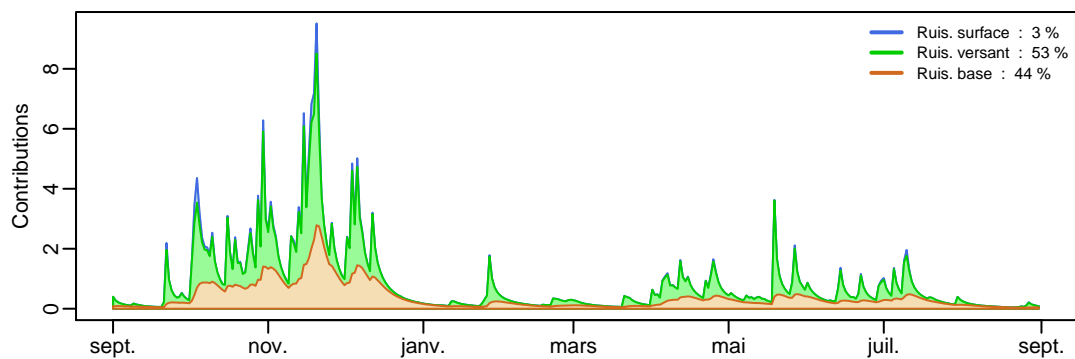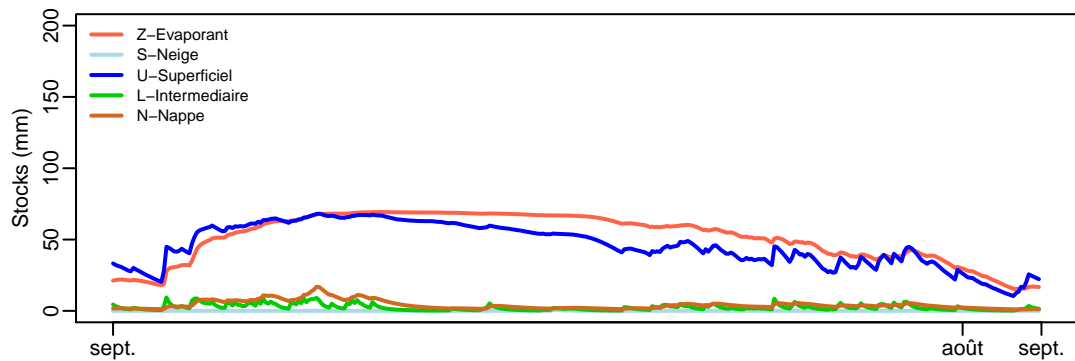

# k0983010 (427.59 km<sup>2</sup>) – année 1993–1994

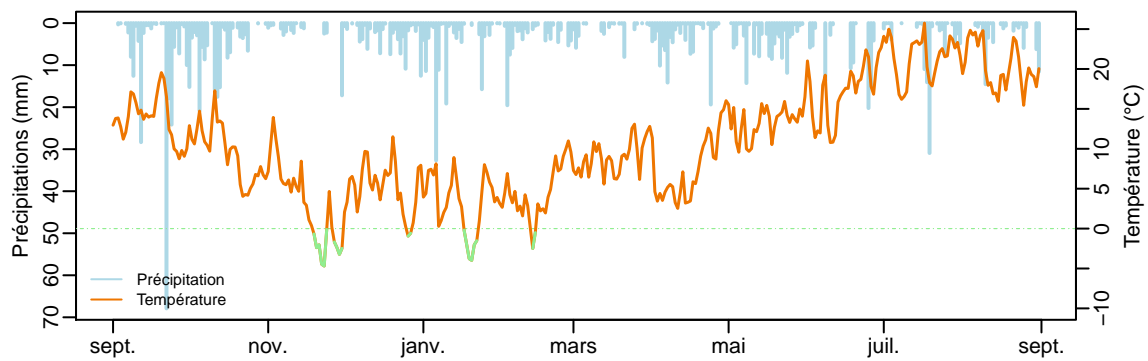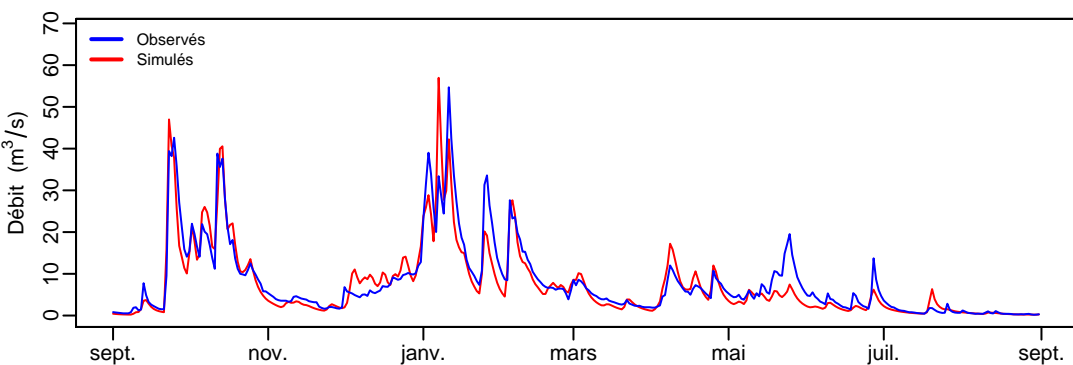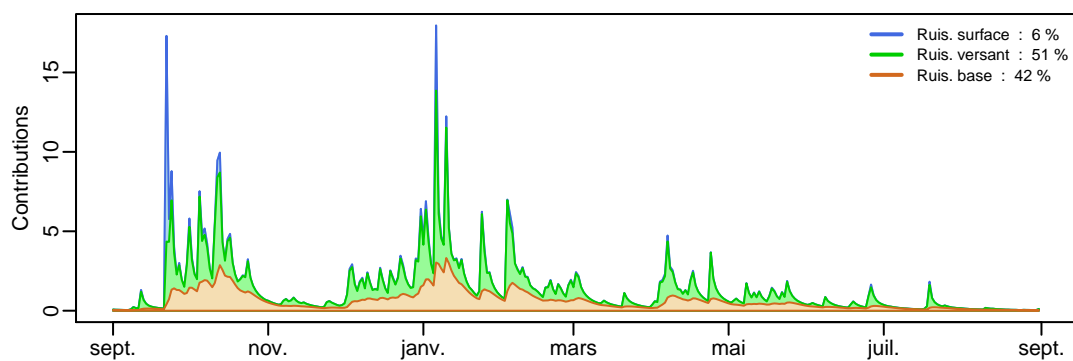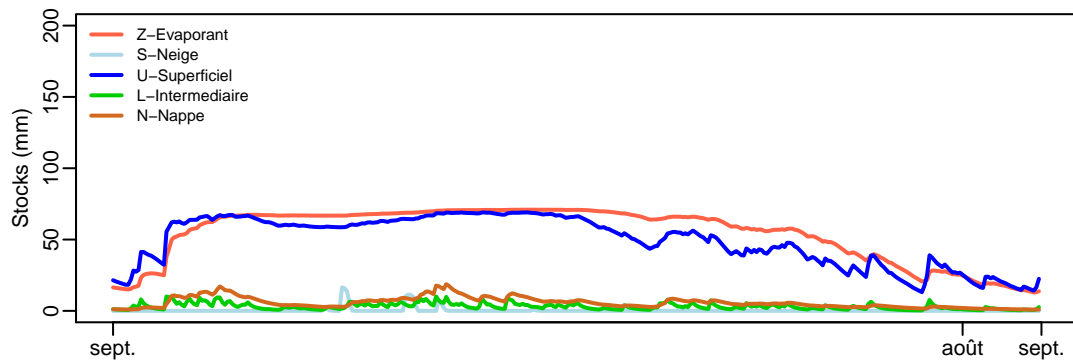

# k0983010 (427.59 km<sup>2</sup>) – année 1994–1995

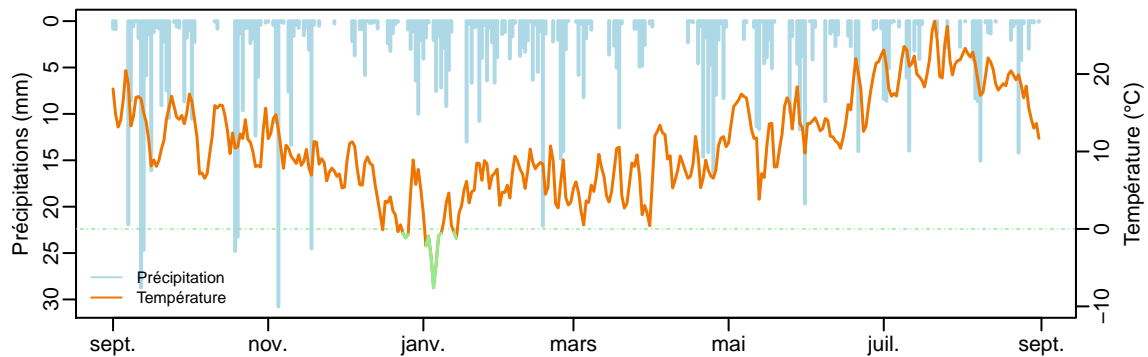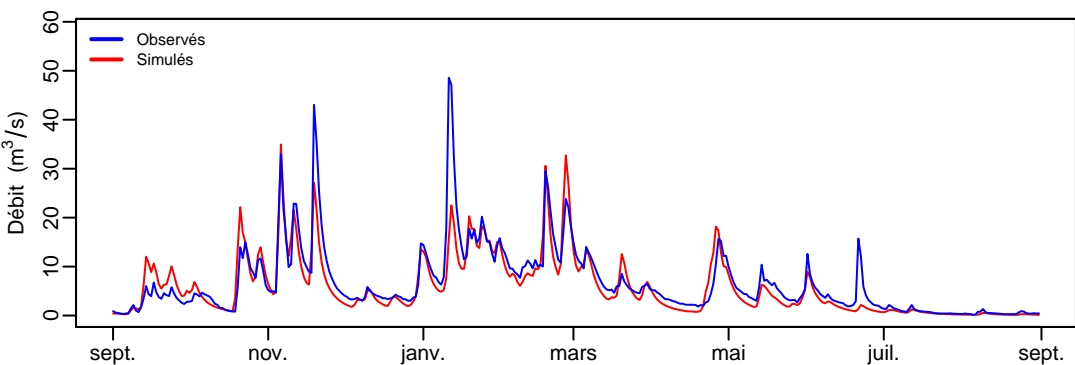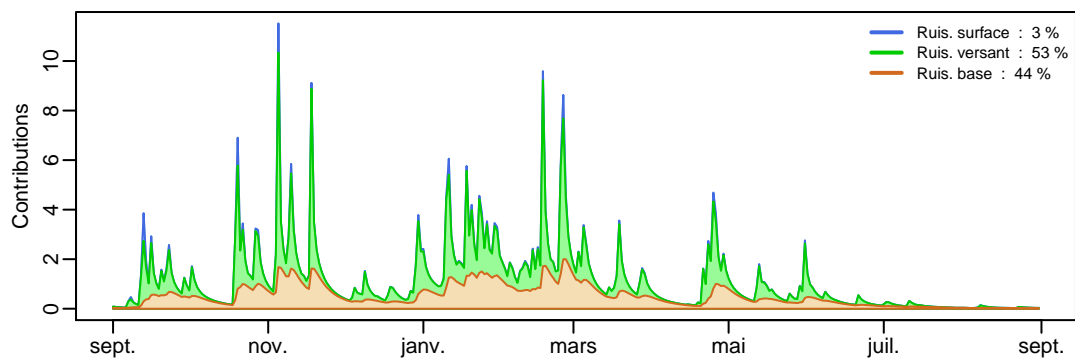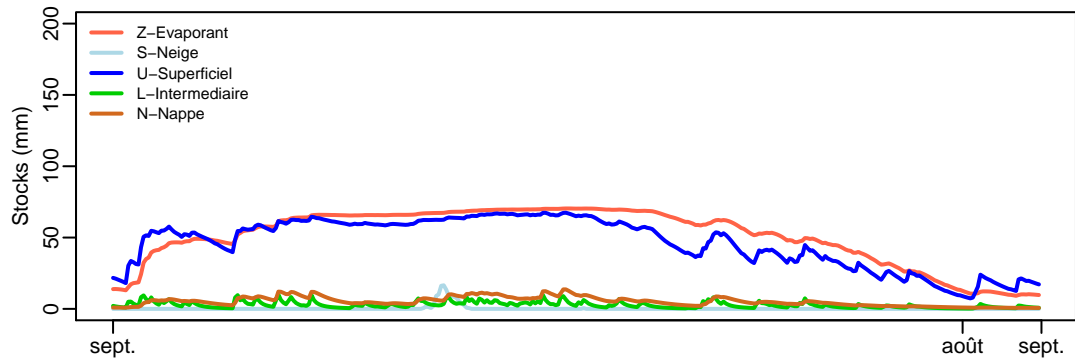

# k0983010 (427.59 km<sup>2</sup>) – année 1995–1996

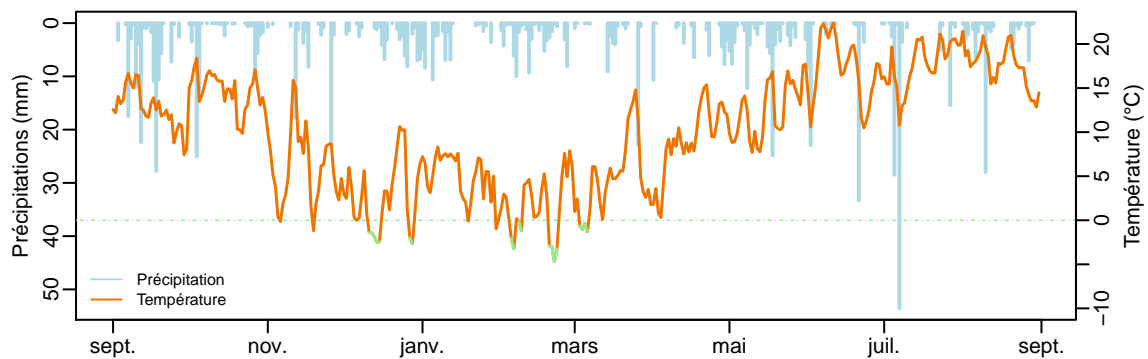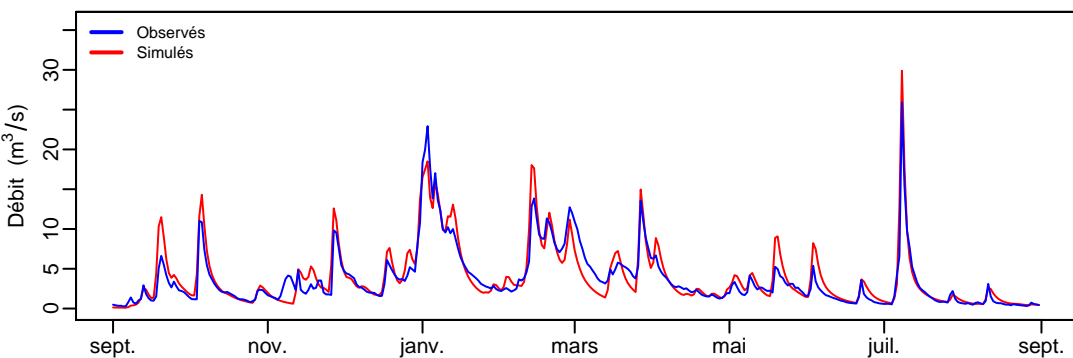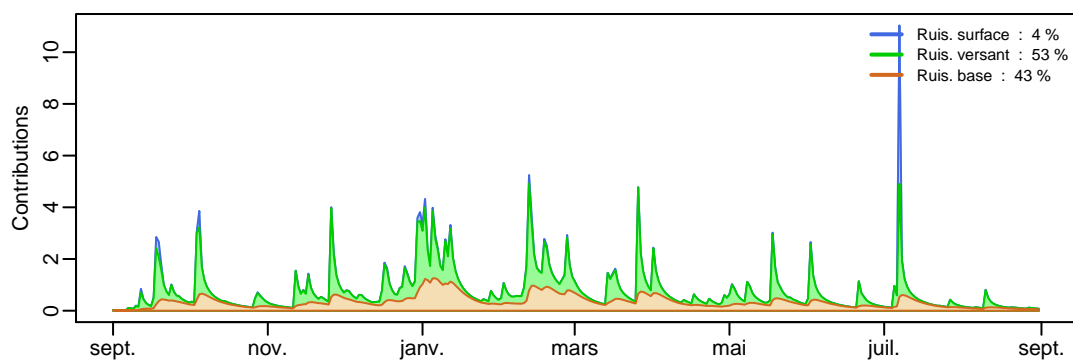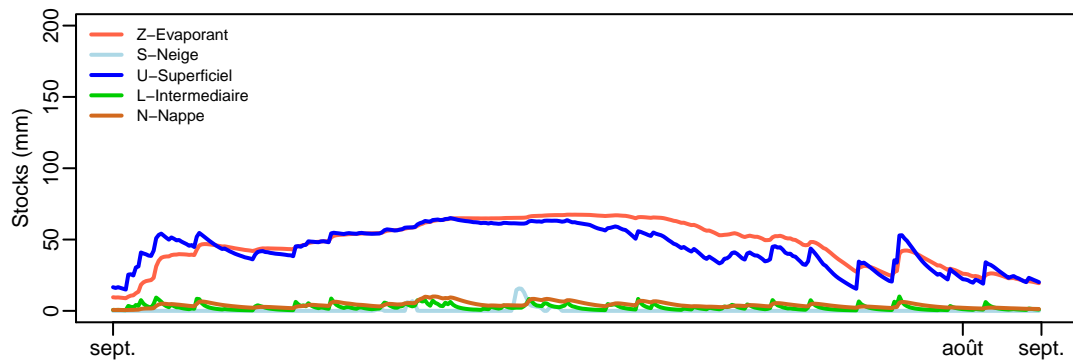

# k0983010 (427.59 km<sup>2</sup>) – année 1996–1997

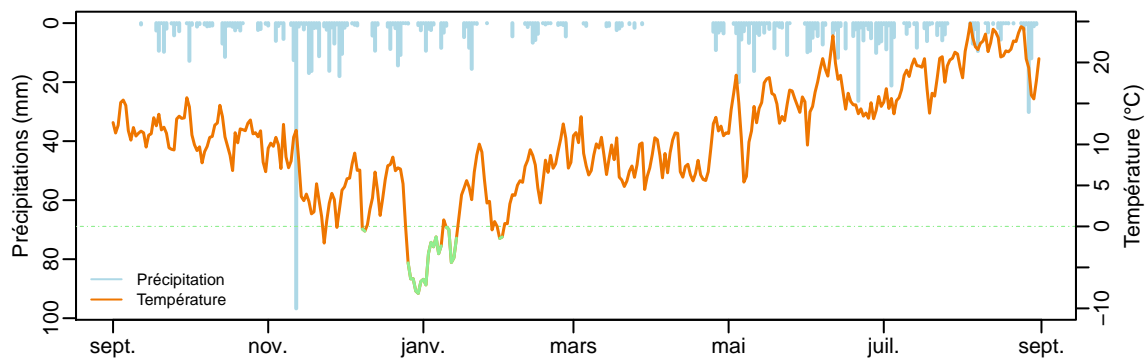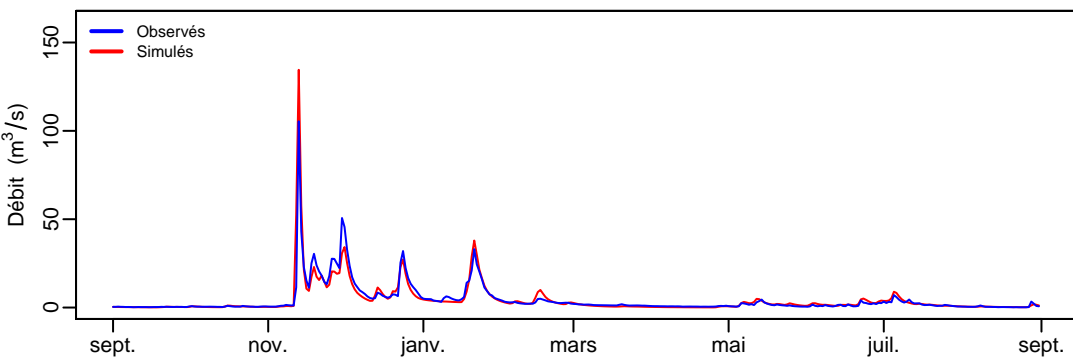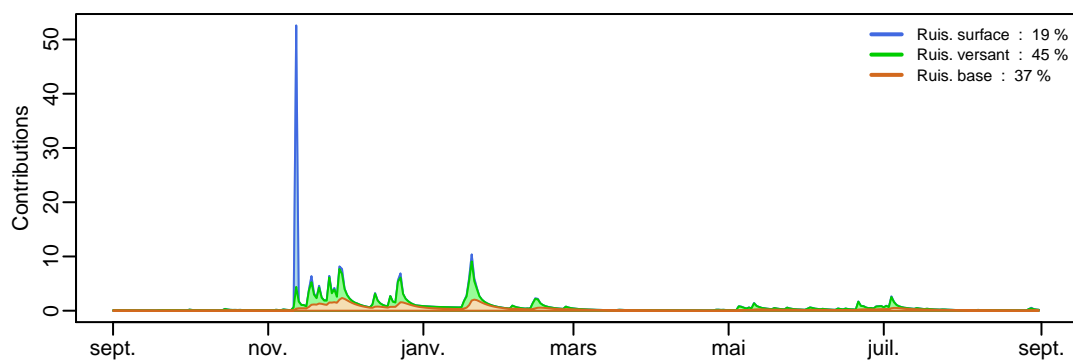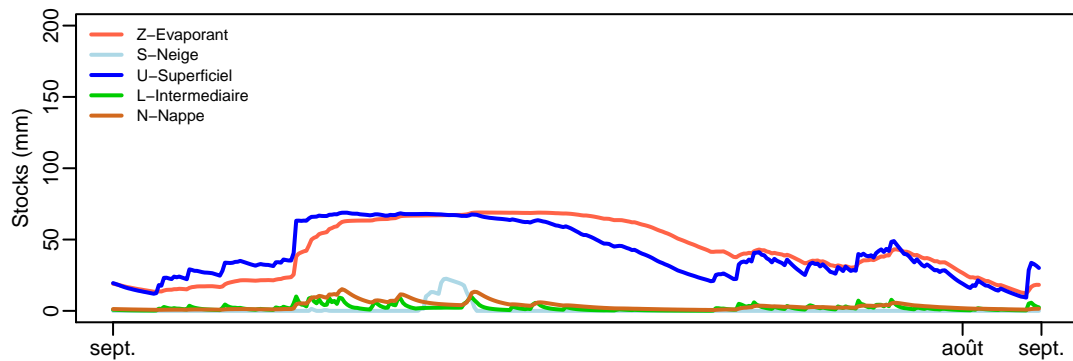

# k0983010 (427.59 km<sup>2</sup>) – année 1997–1998

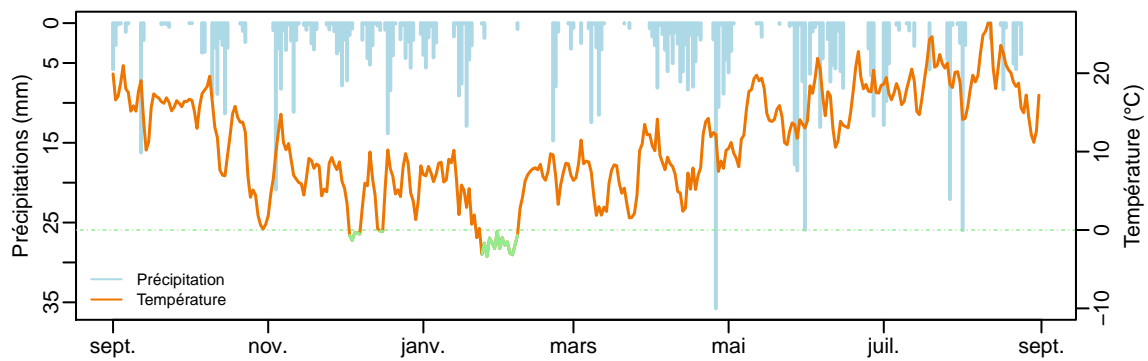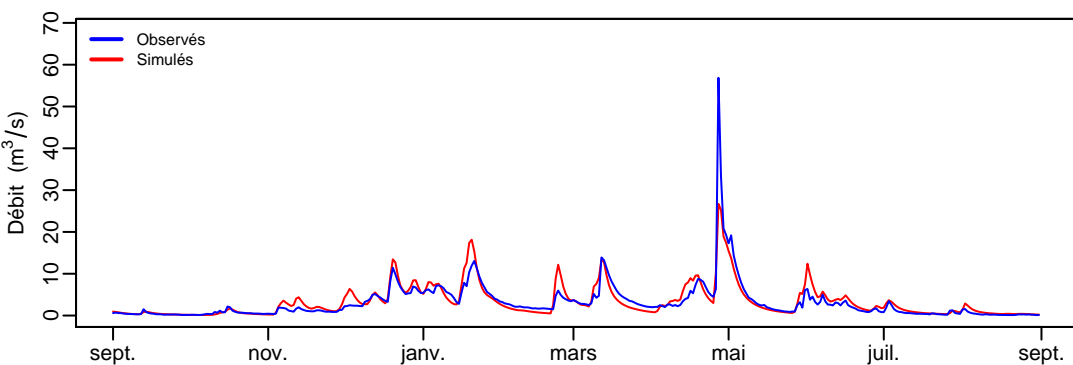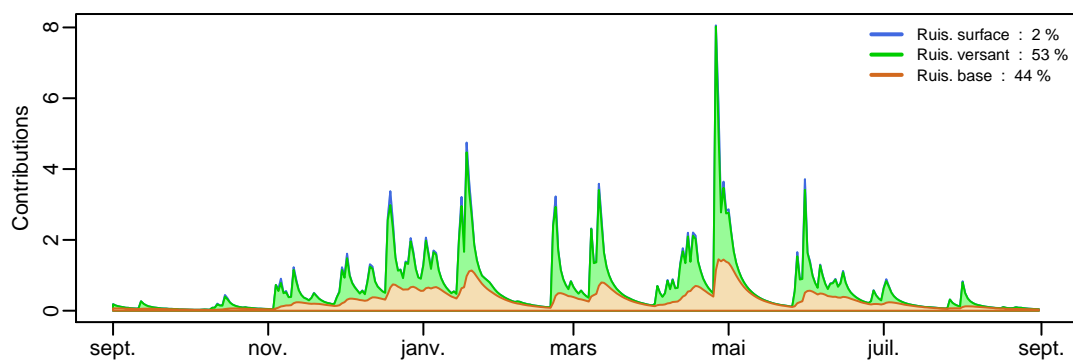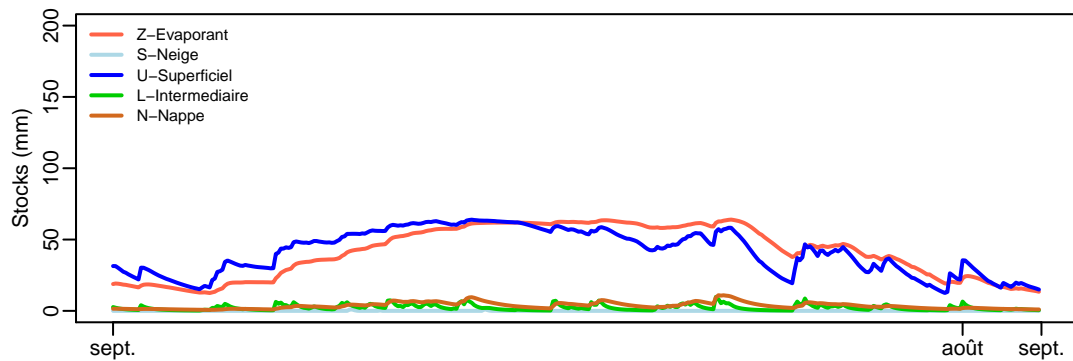

# k0983010 (427.59 km<sup>2</sup>) – année 1998–1999

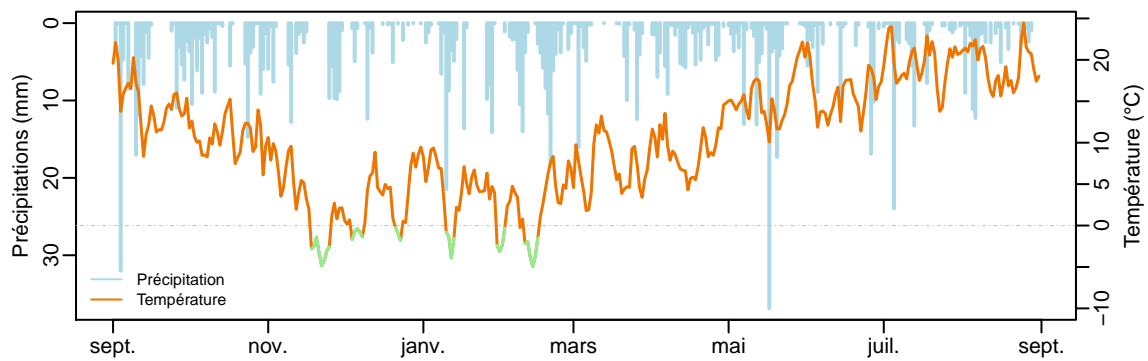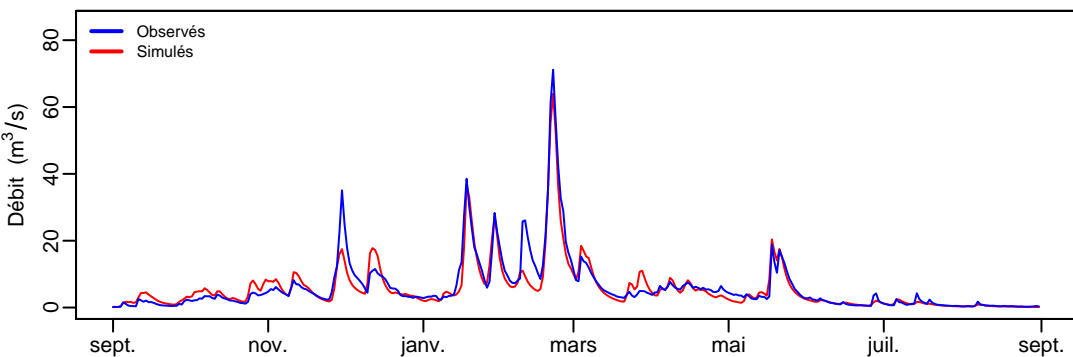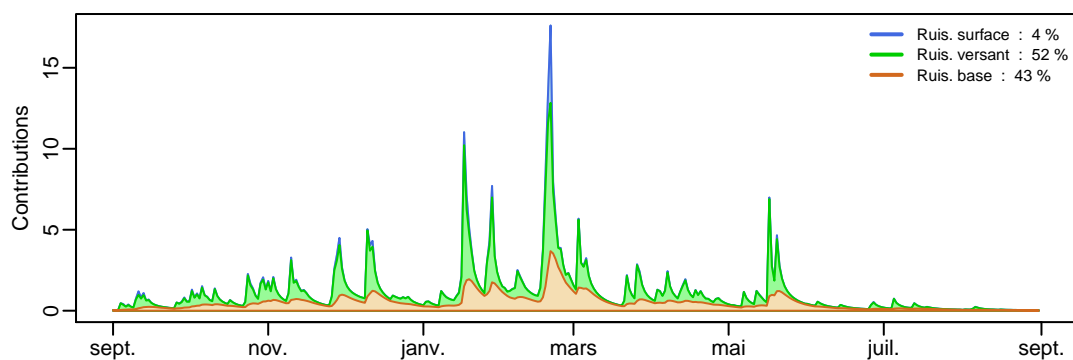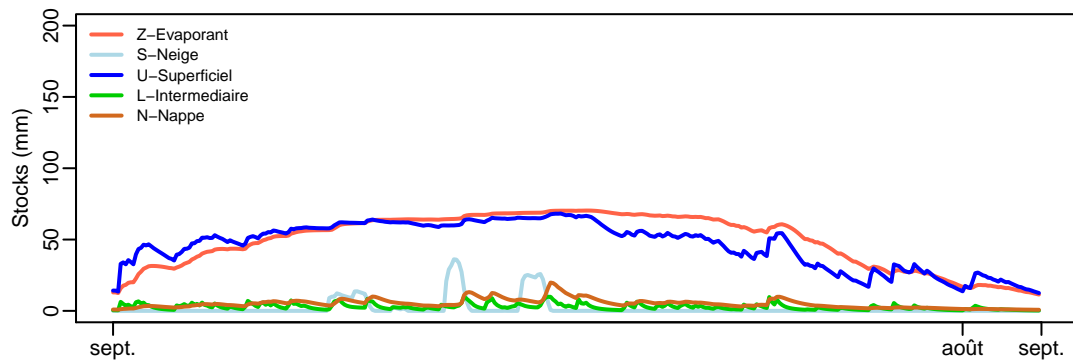

# k0983010 (427.59 km<sup>2</sup>) – année 1999–2000

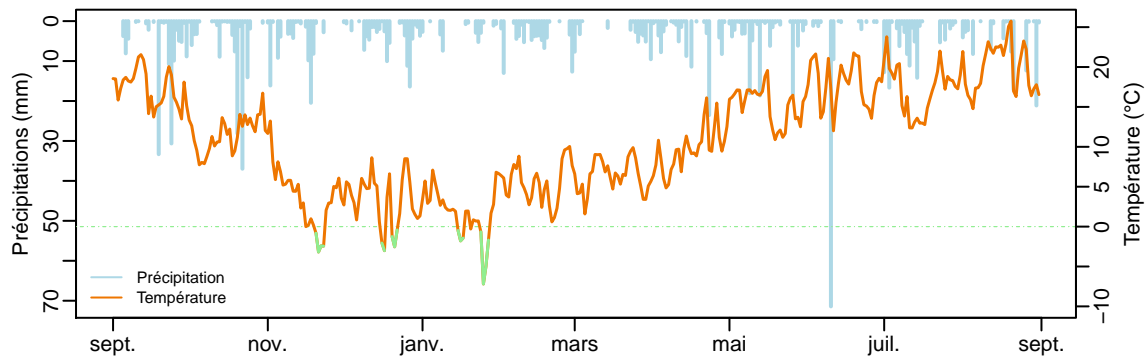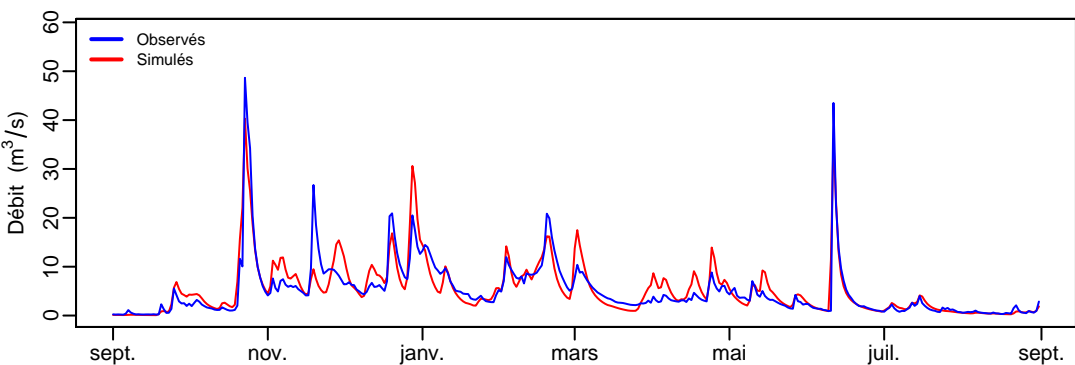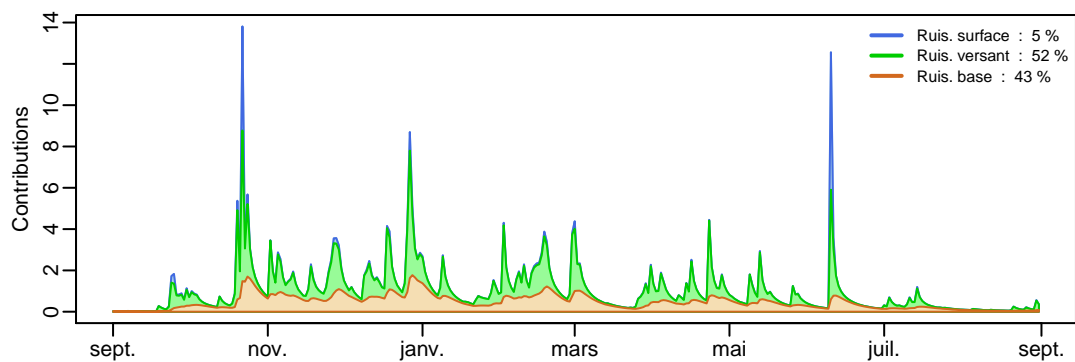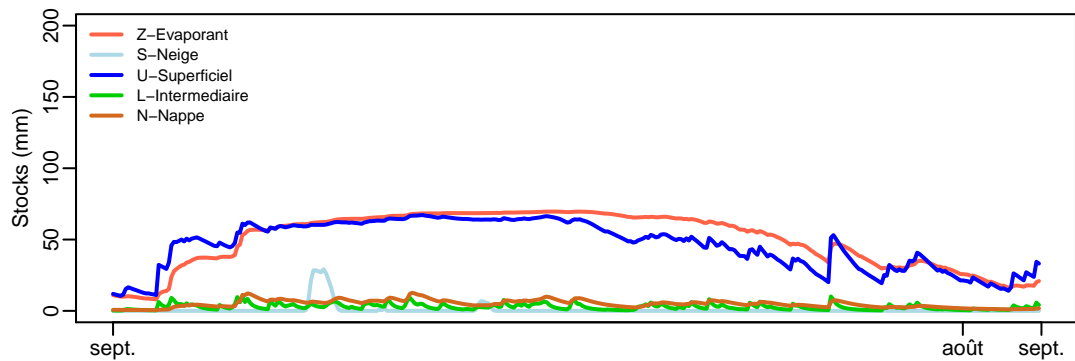



# k0983010 (427.59 km<sup>2</sup>) – année 2000–2001

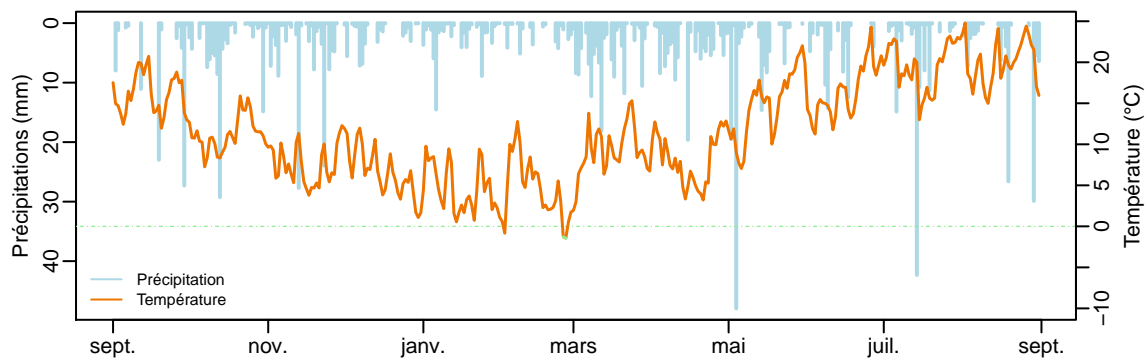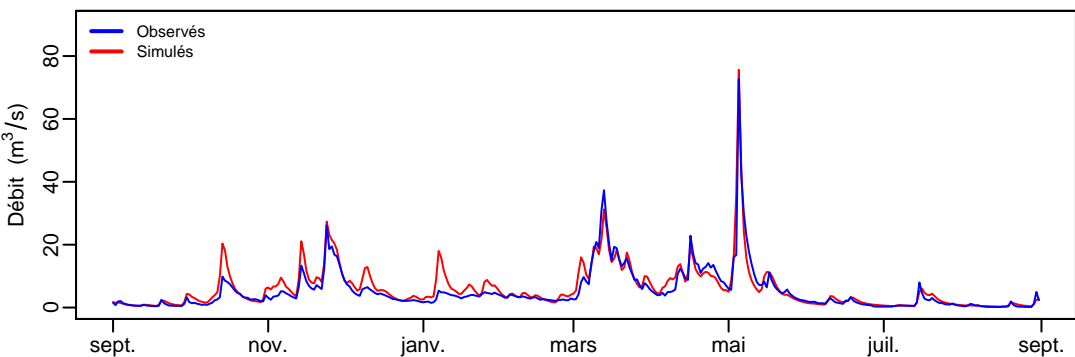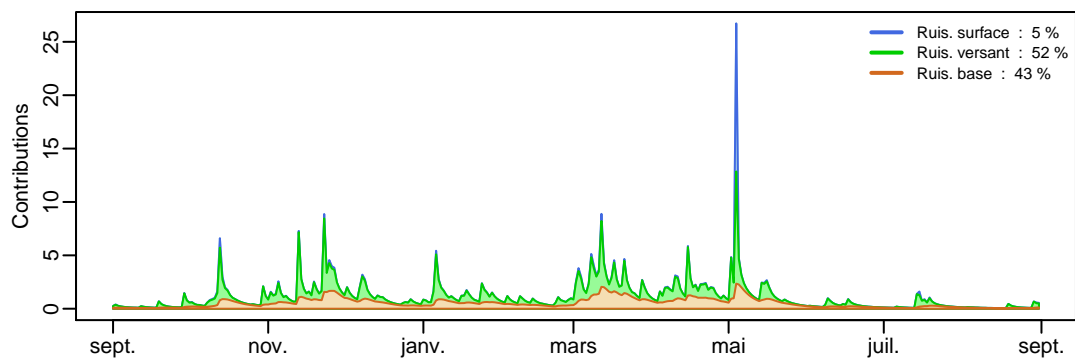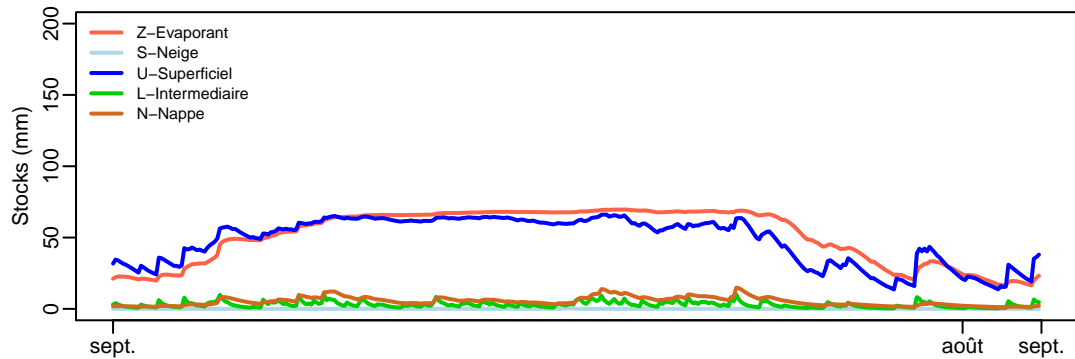

# k0983010 (427.59 km<sup>2</sup>) – année 2001–2002

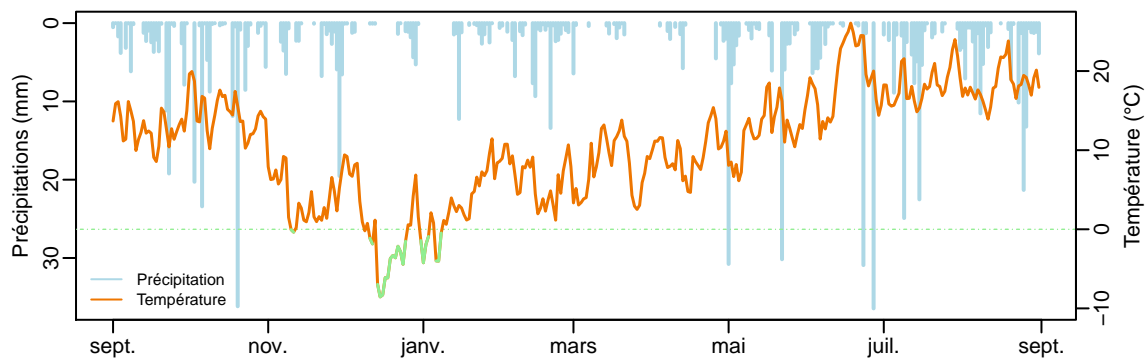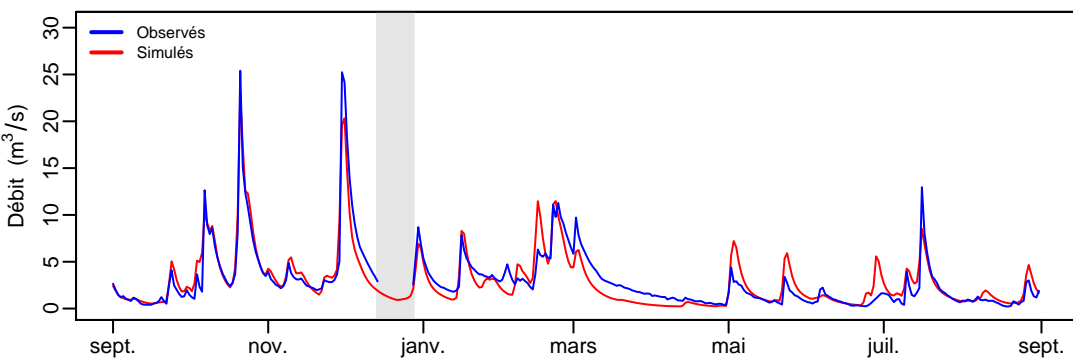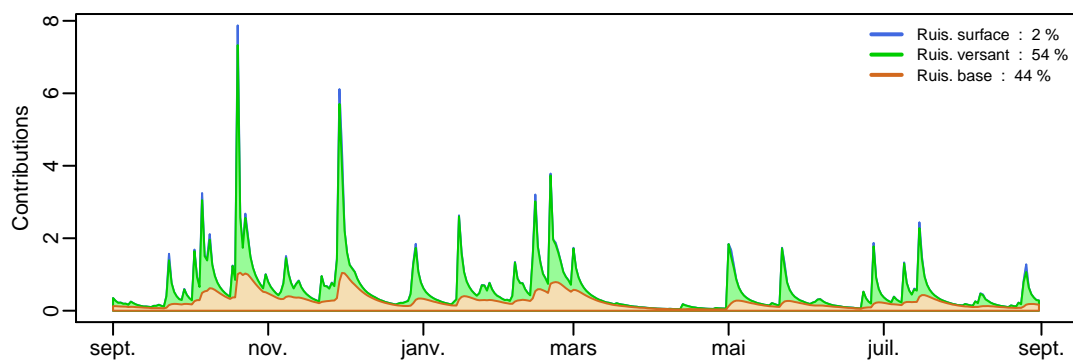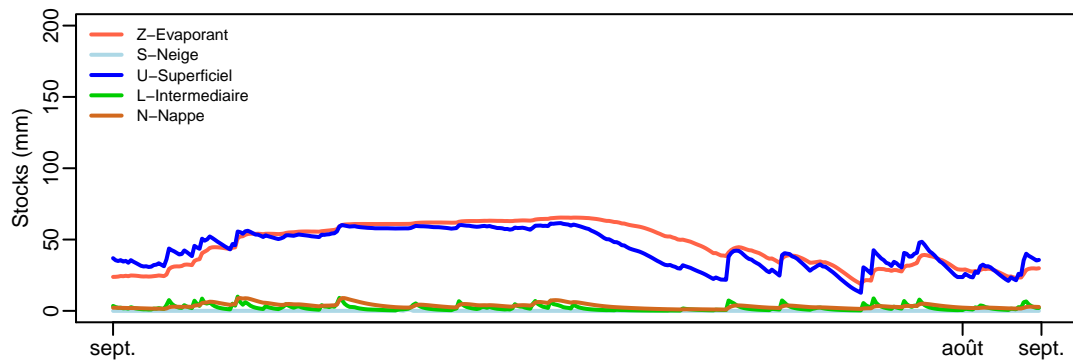

# k0983010 (427.59 km<sup>2</sup>) – année 2002–2003

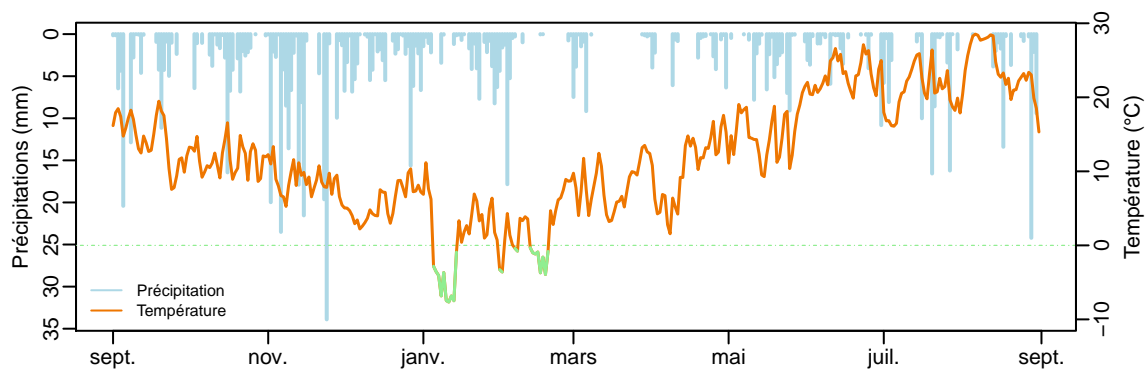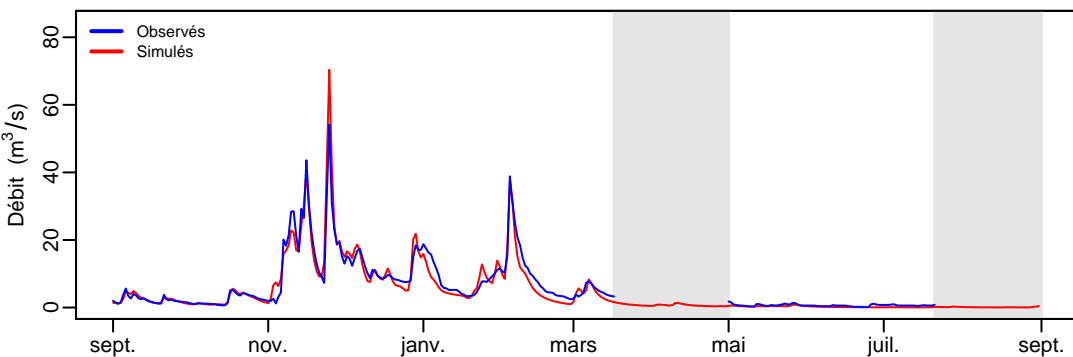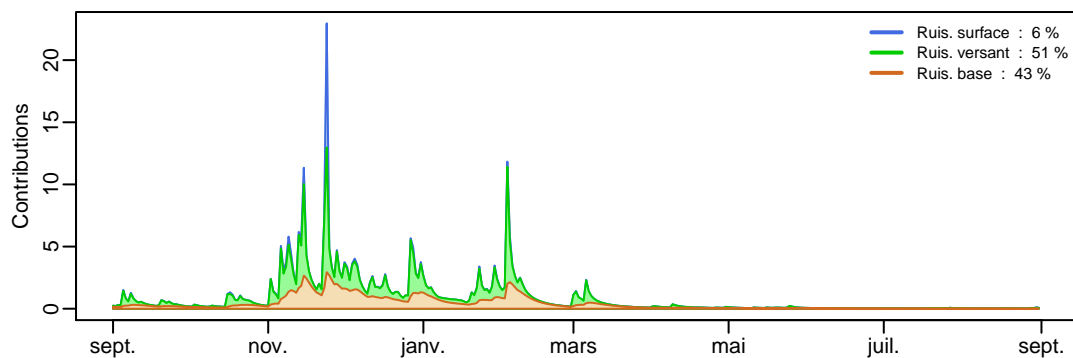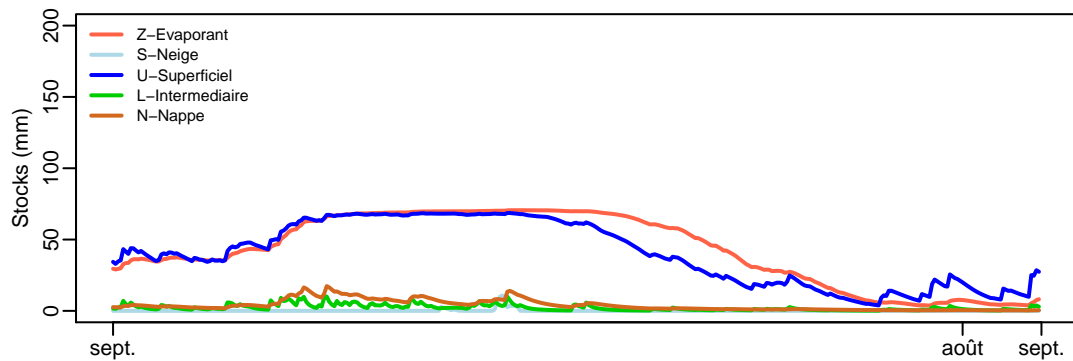

# k0983010 (427.59 km<sup>2</sup>) – année 2003–2004

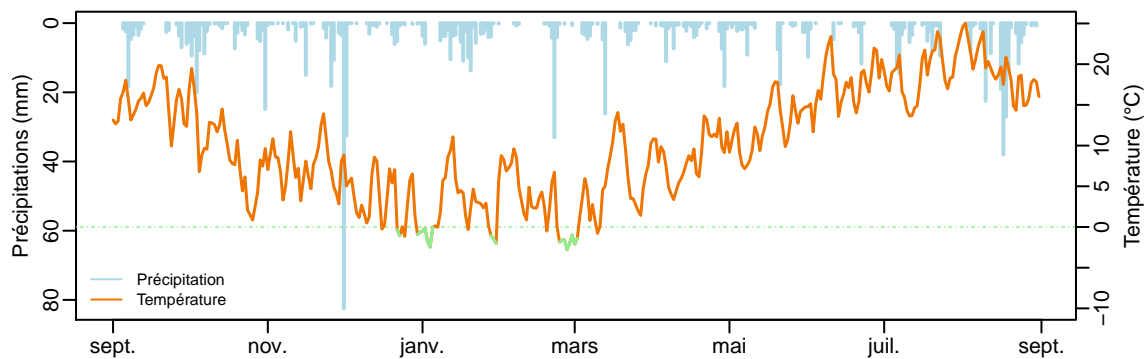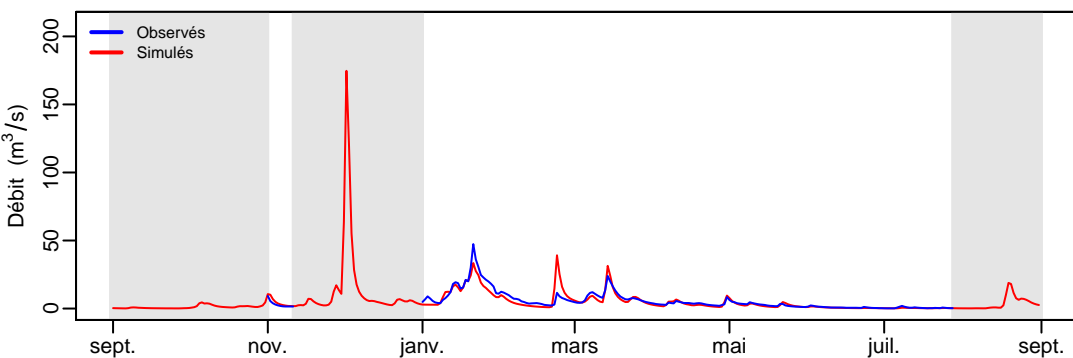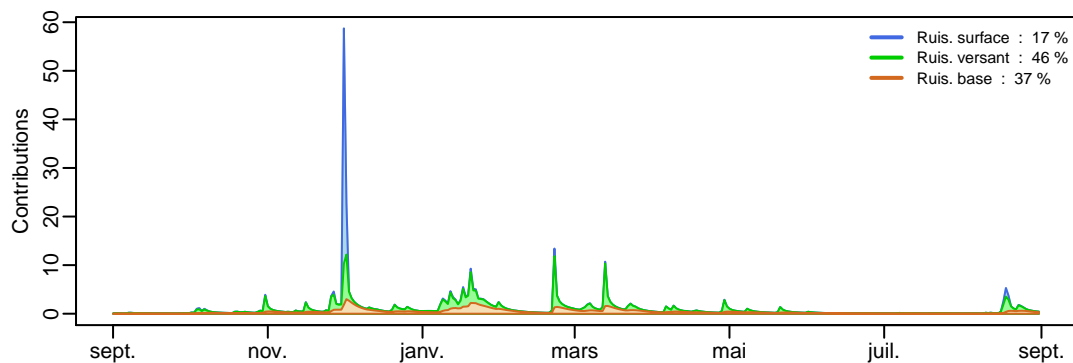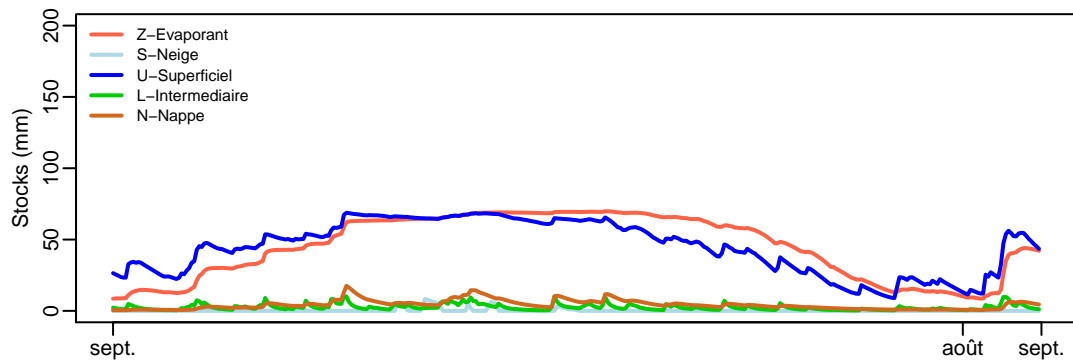

# k0983010 (427.59 km<sup>2</sup>) – année 2004–2005

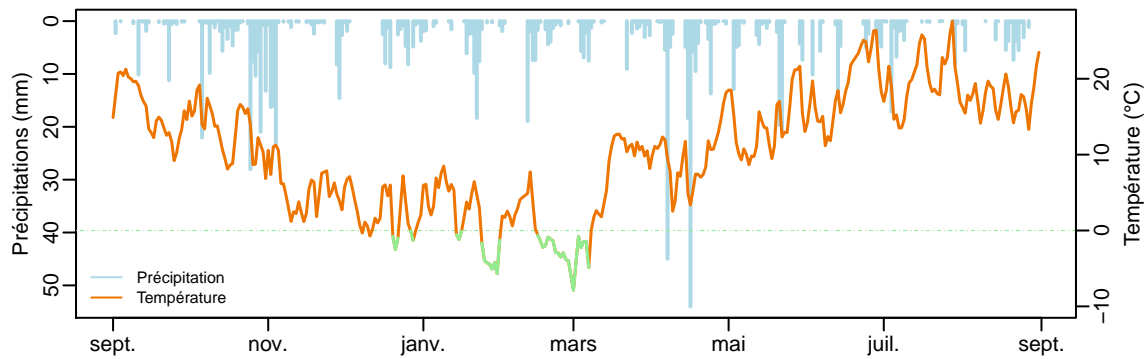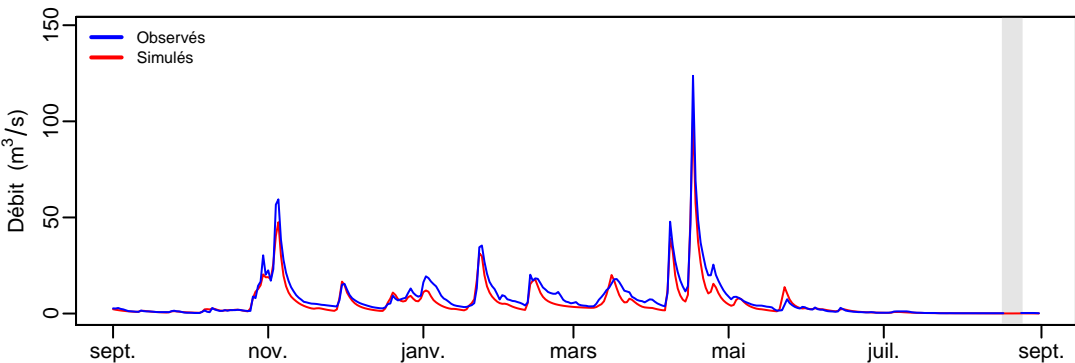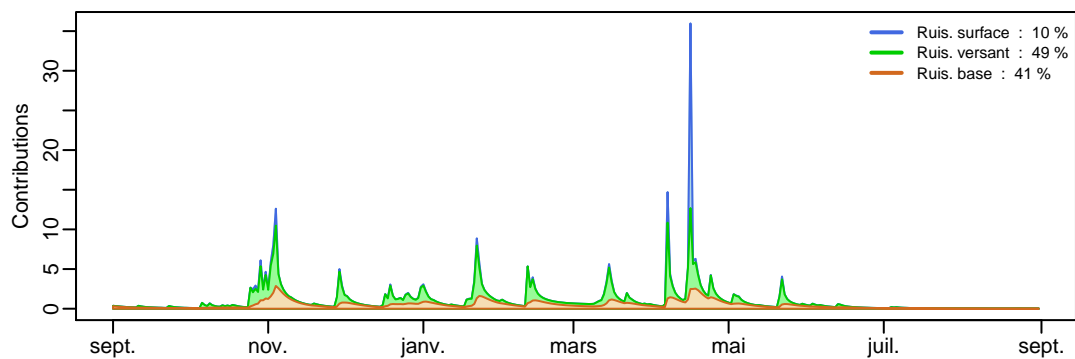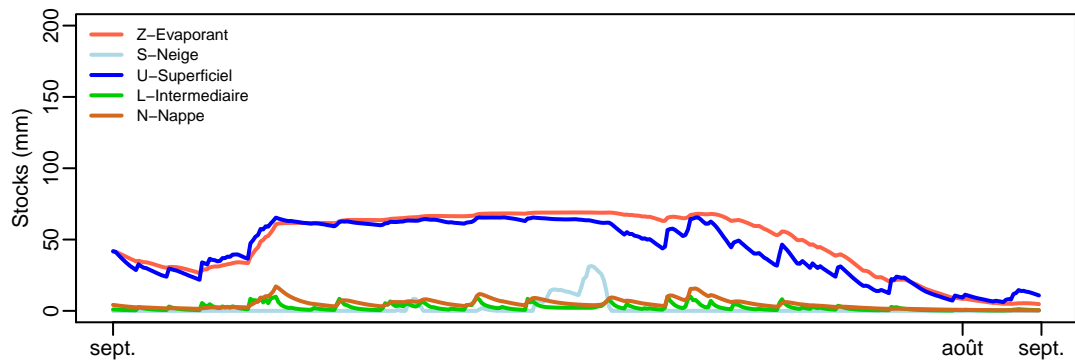

# k0983010 (427.59 km<sup>2</sup>) – année 2005–2006

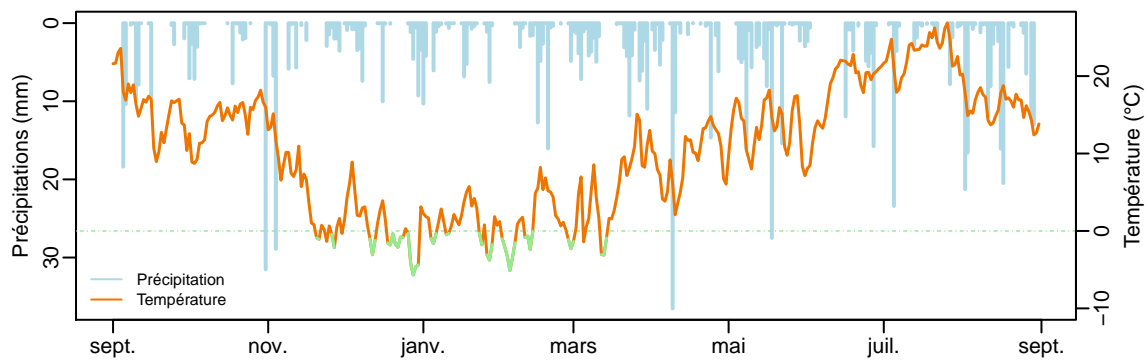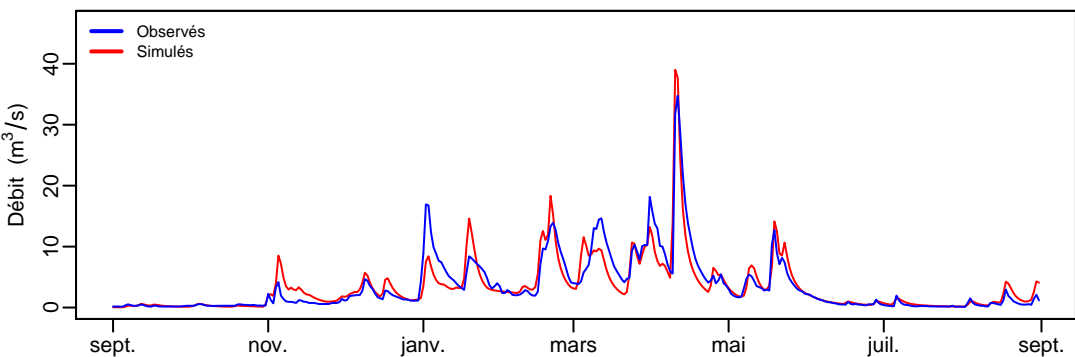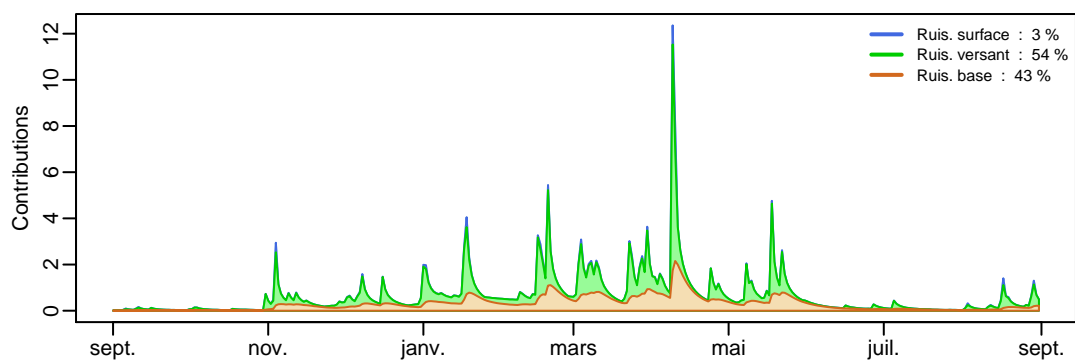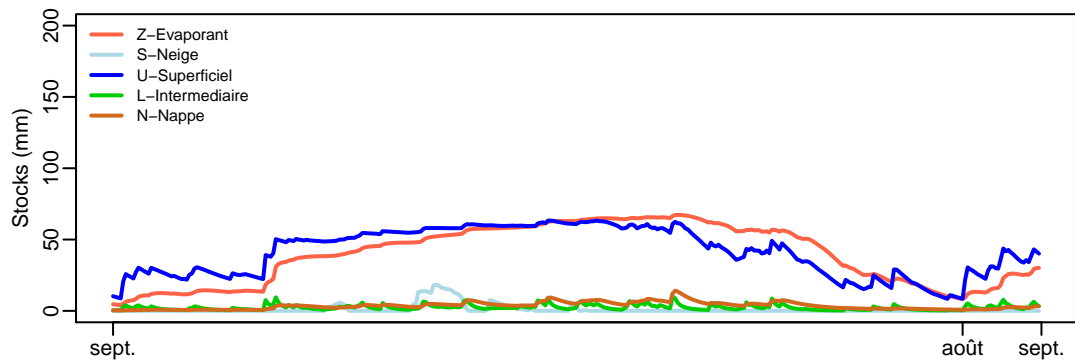

# k0983010 (427.59 km<sup>2</sup>) – année 2006–2007

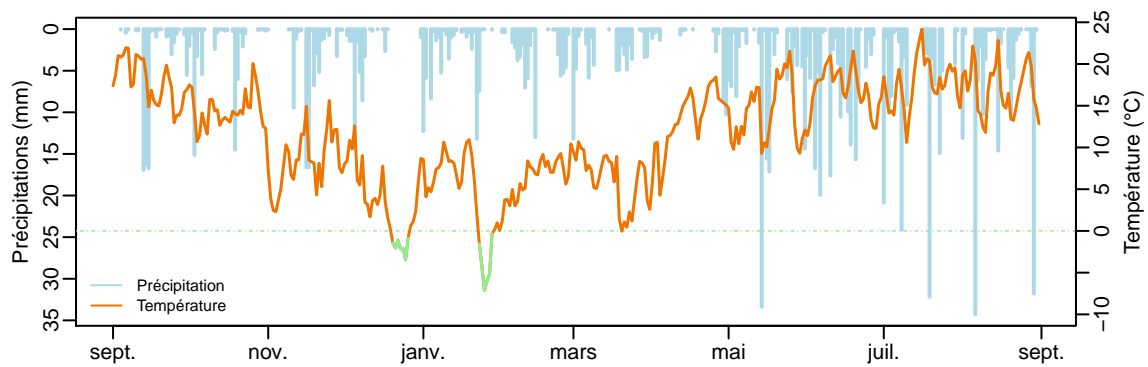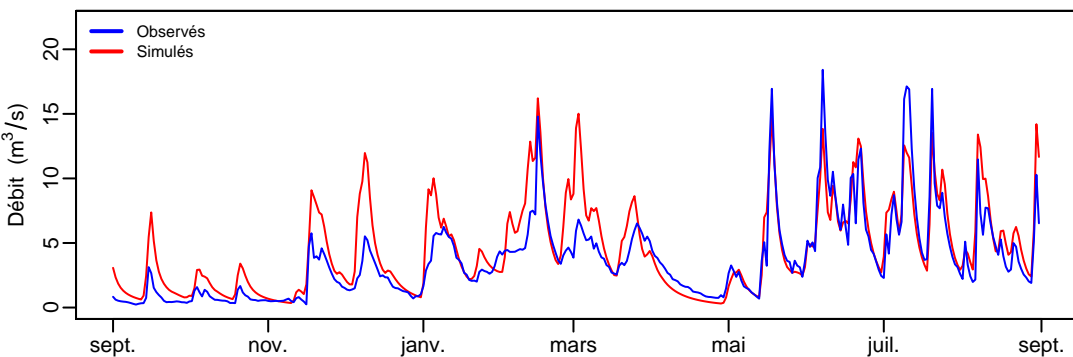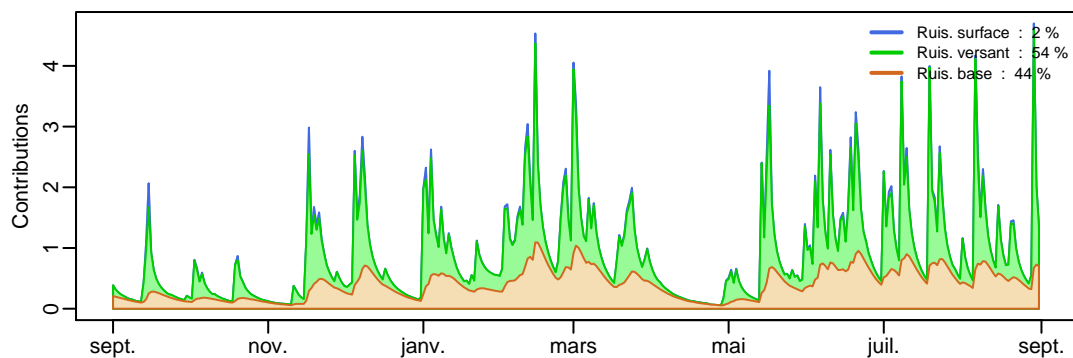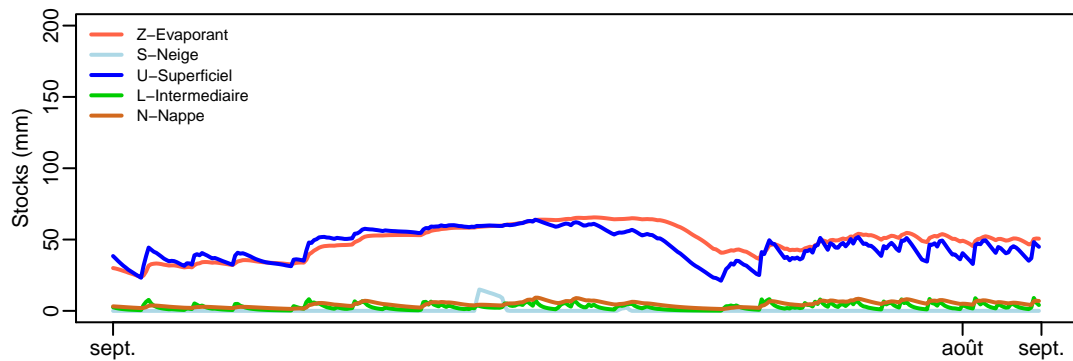

# k0983010 (427.59 km<sup>2</sup>) – année 2007–2008

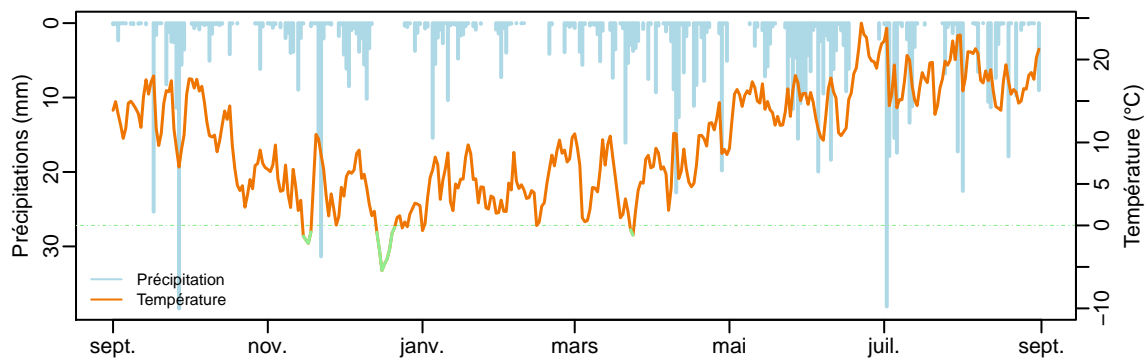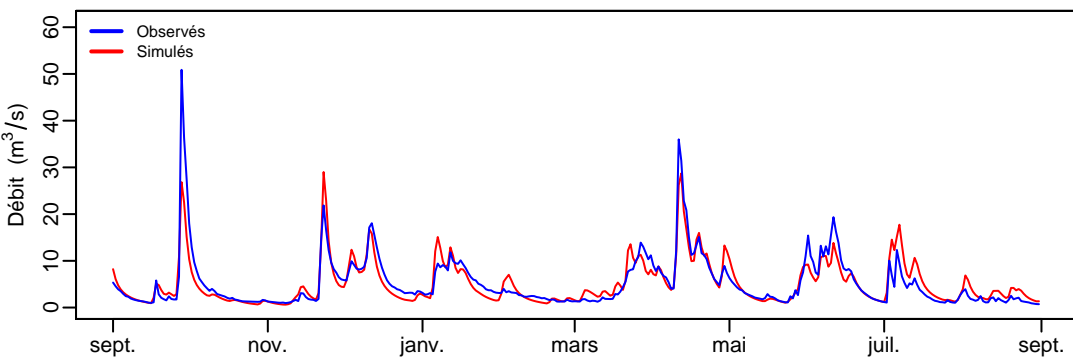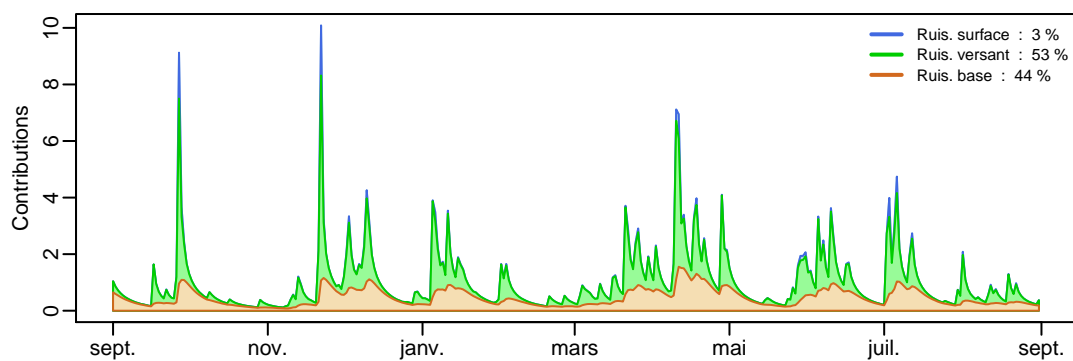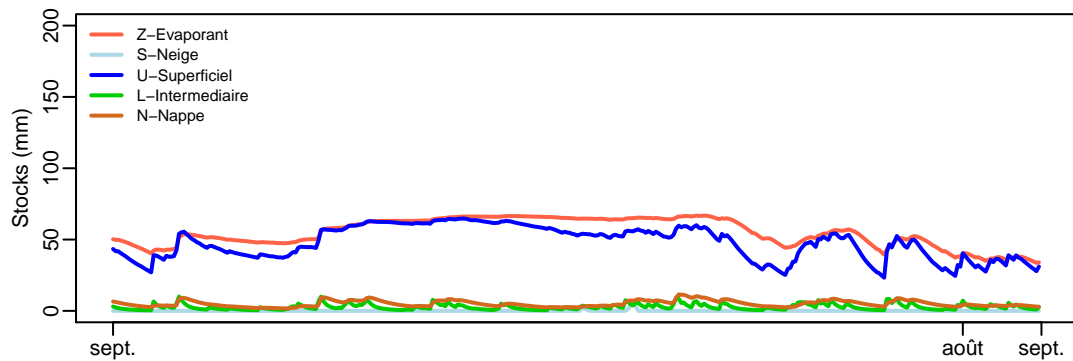



# k0983010 (427.59 km<sup>2</sup>) – année 2008–2009

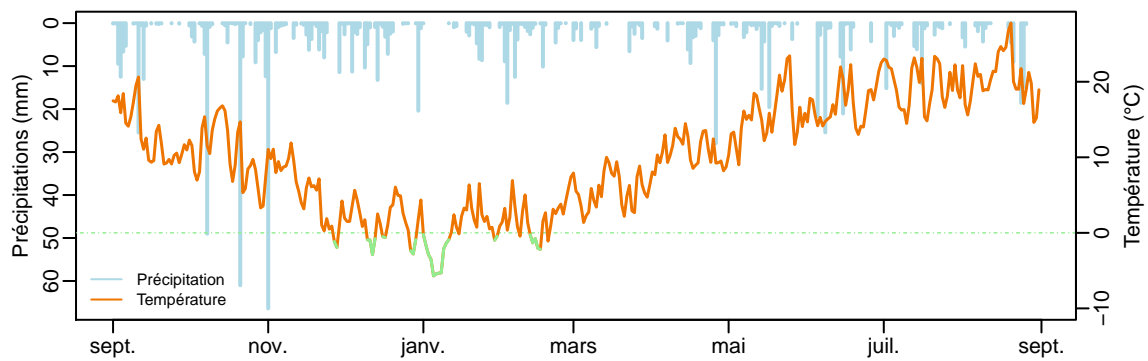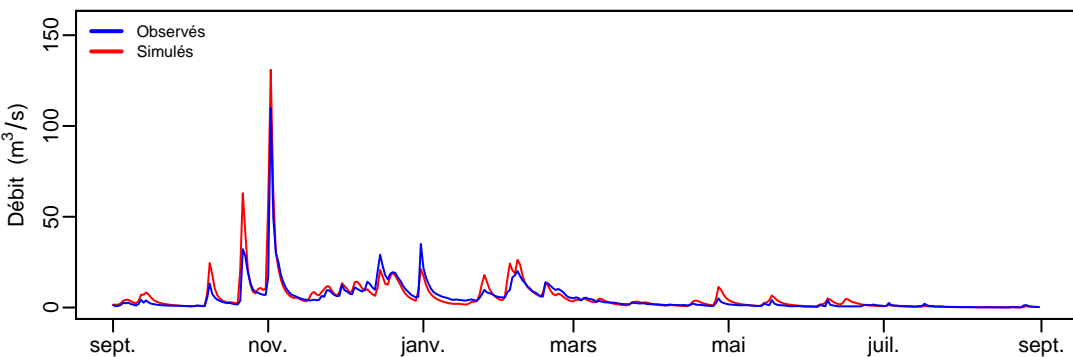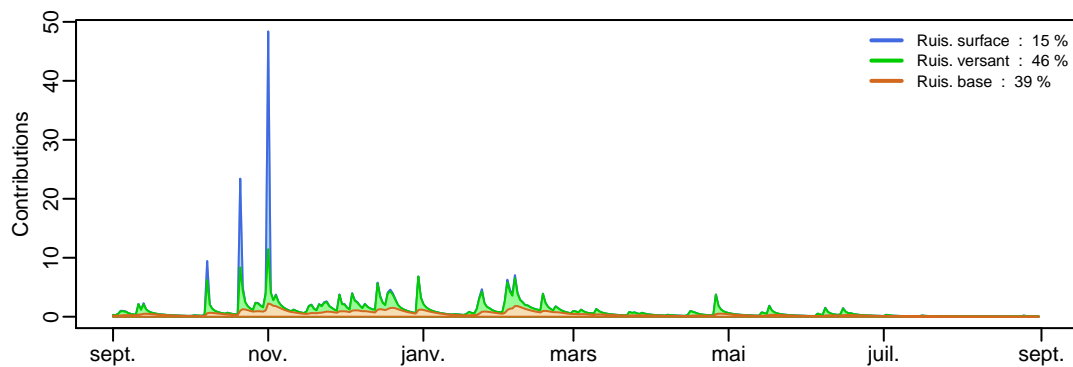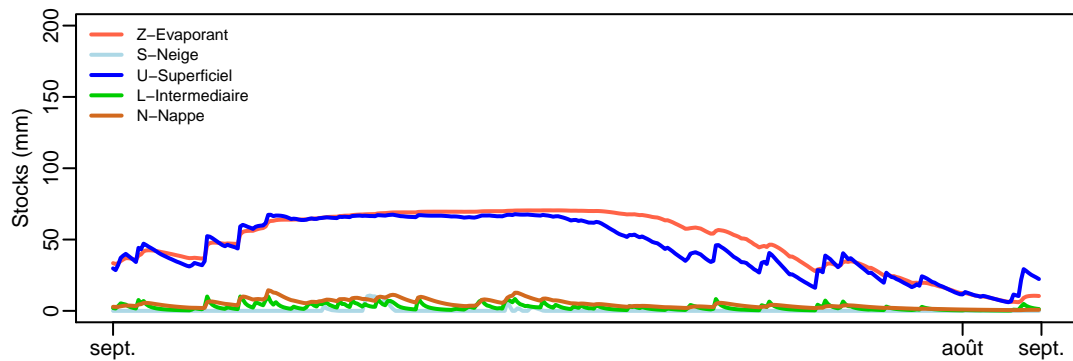

# k1173210 (593.53 km<sup>2</sup>) – année 1981–1982

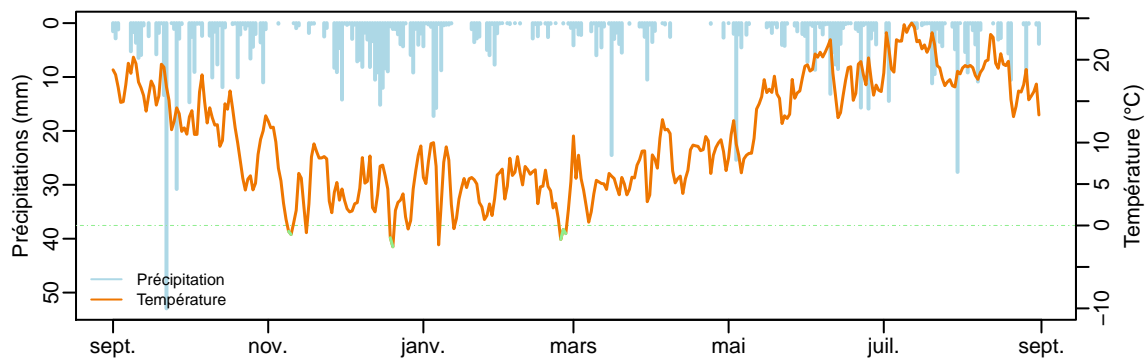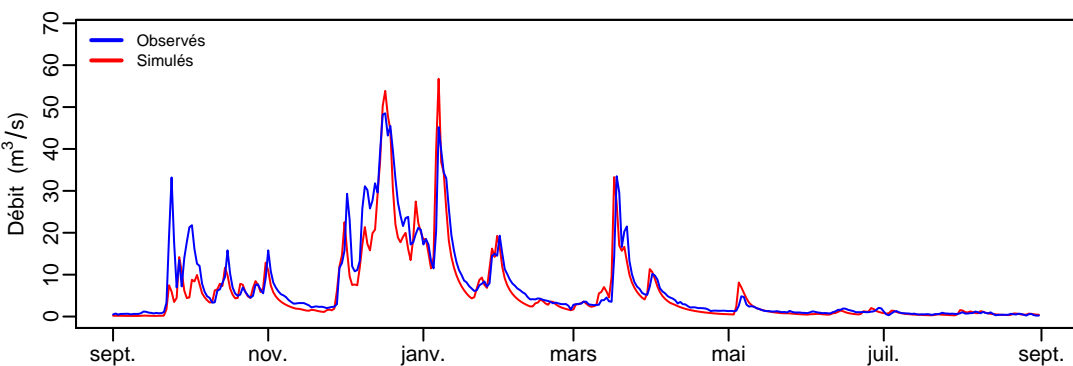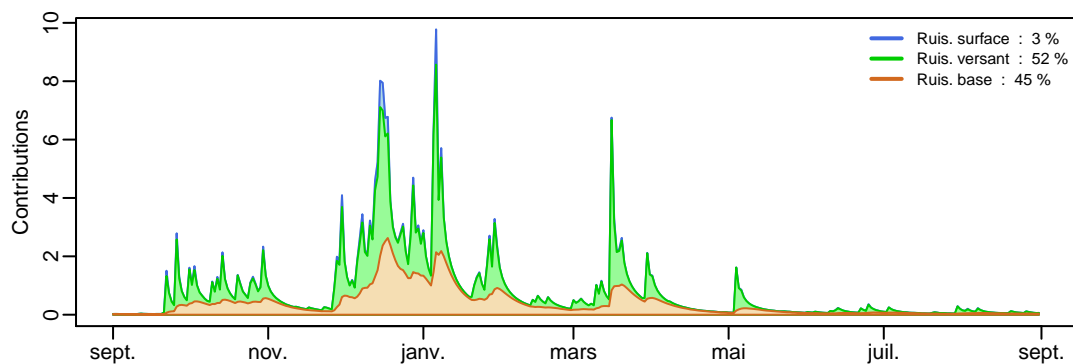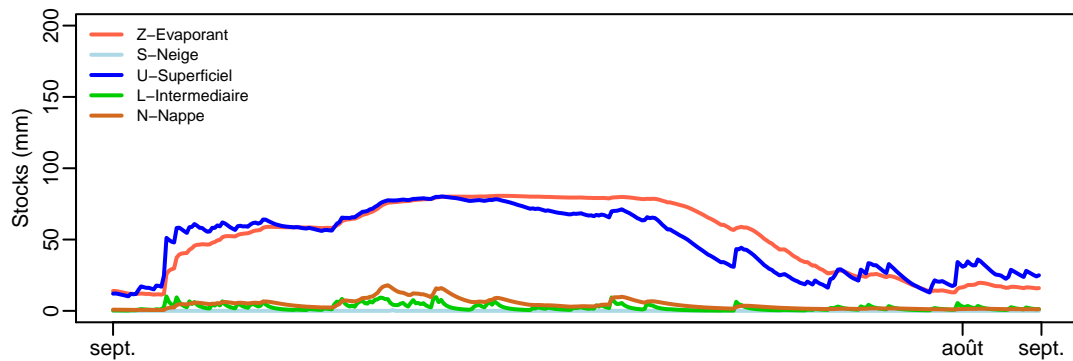

# k1173210 (593.53 km<sup>2</sup>) – année 1982–1983

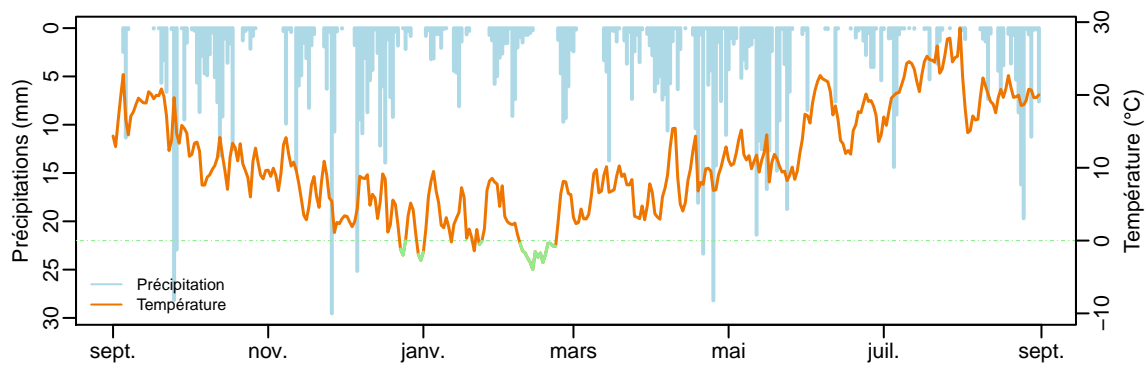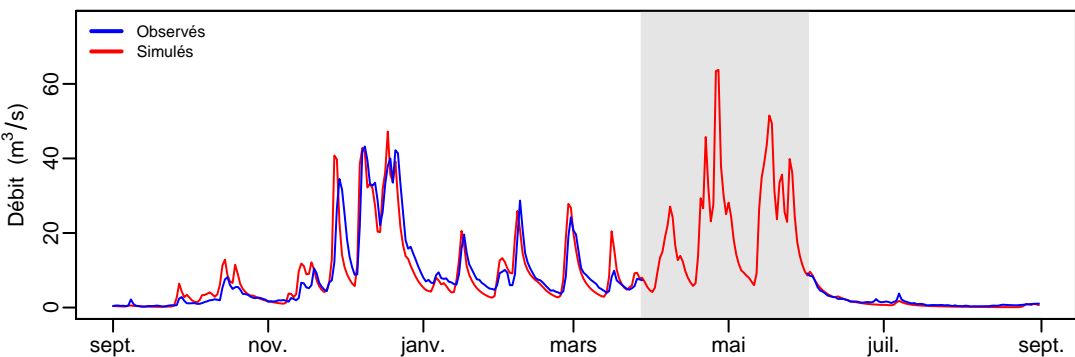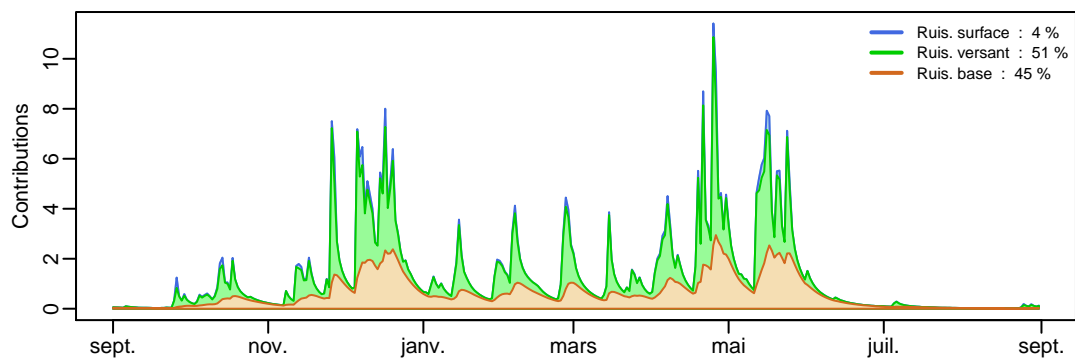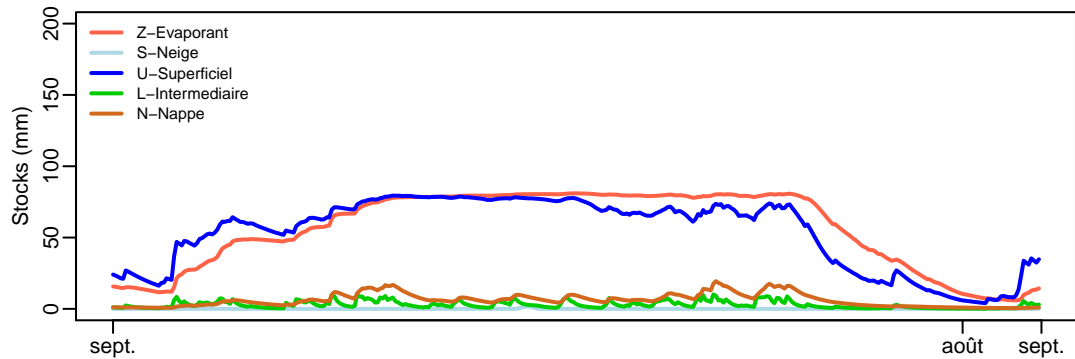

# k1173210 (593.53 km<sup>2</sup>) – année 1983–1984

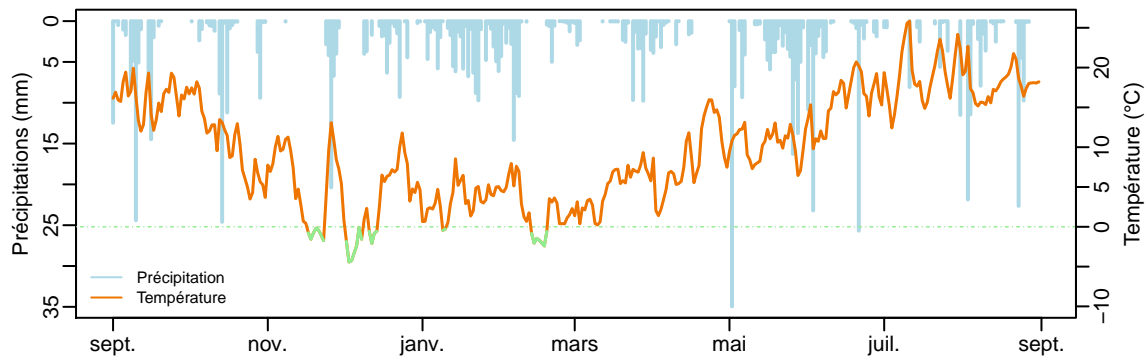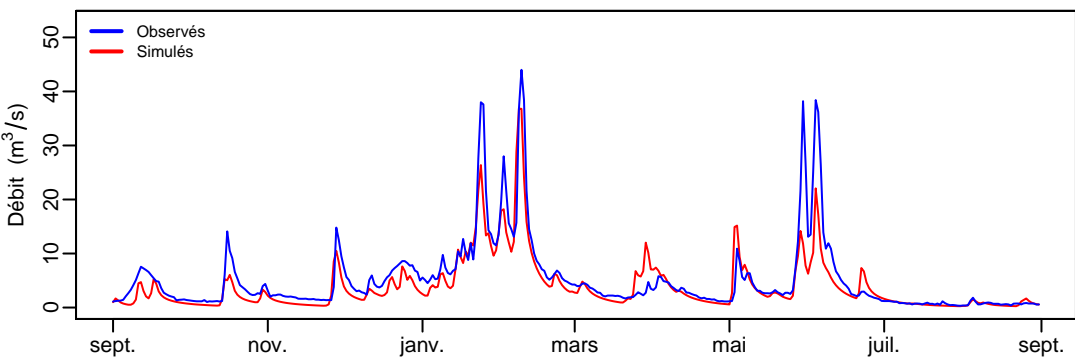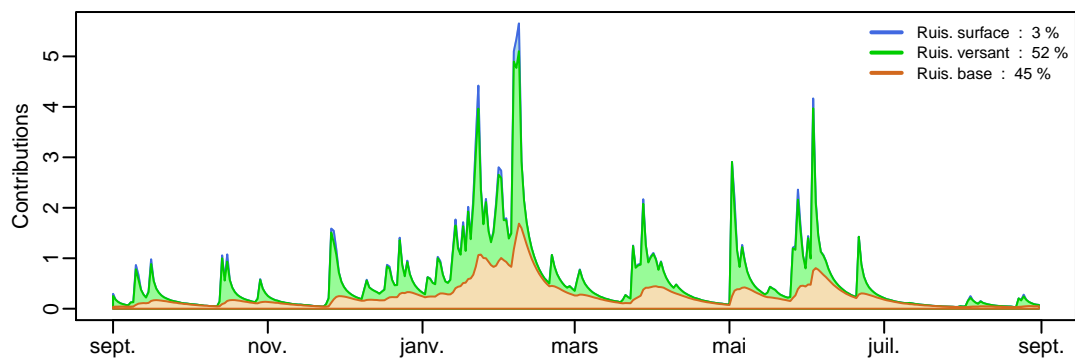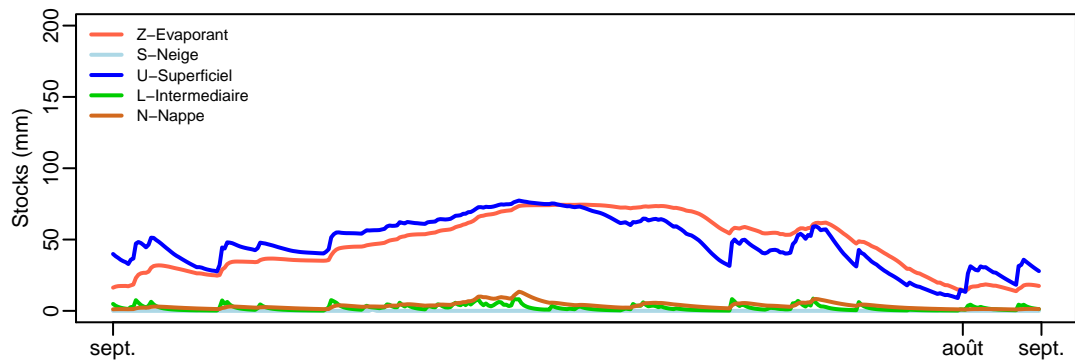

# k1173210 (593.53 km<sup>2</sup>) – année 1984–1985

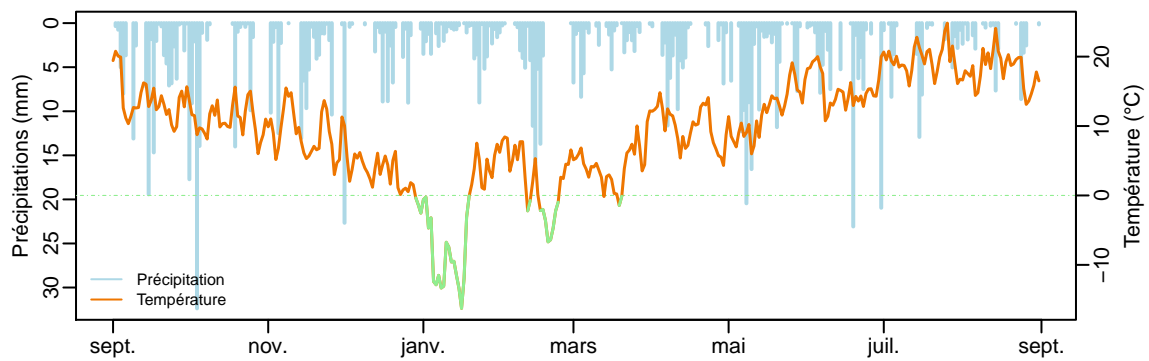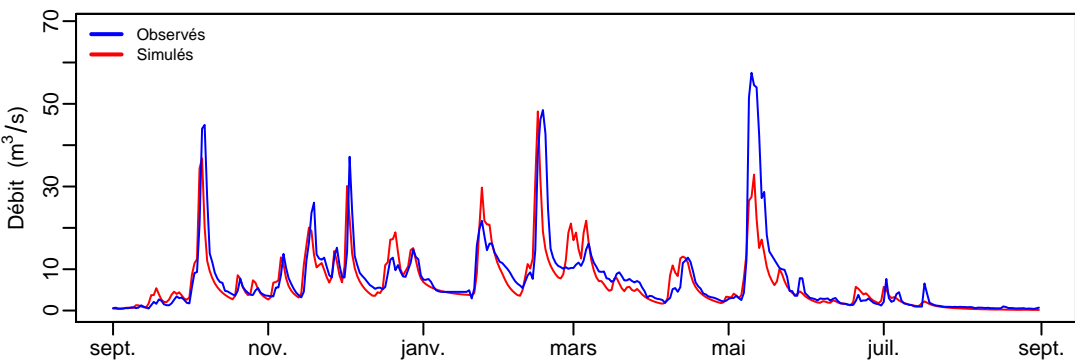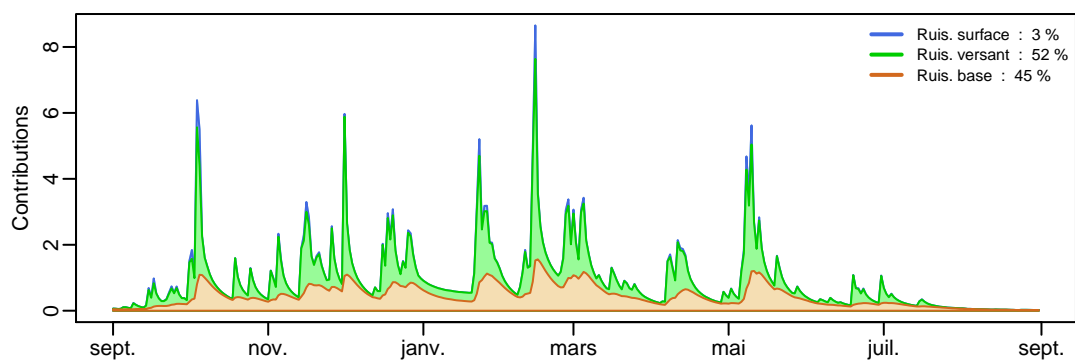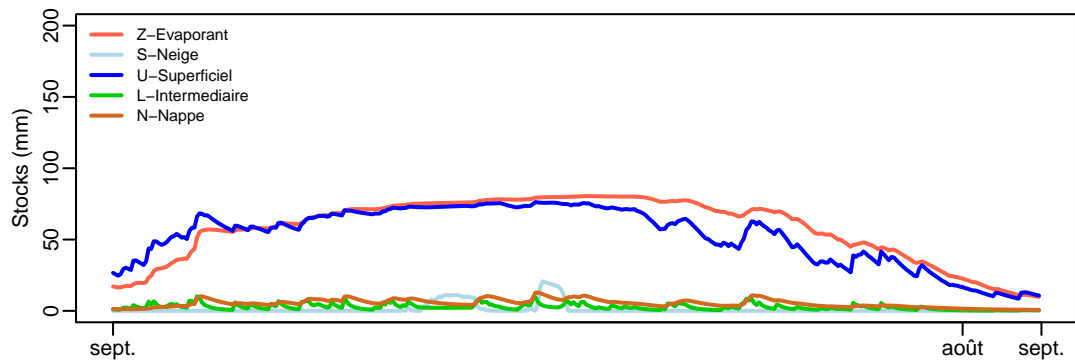

# k1173210 (593.53 km<sup>2</sup>) – année 1985–1986

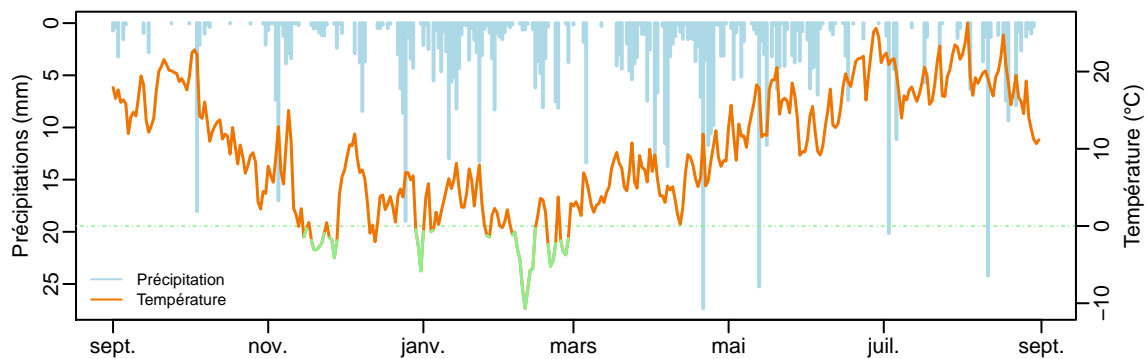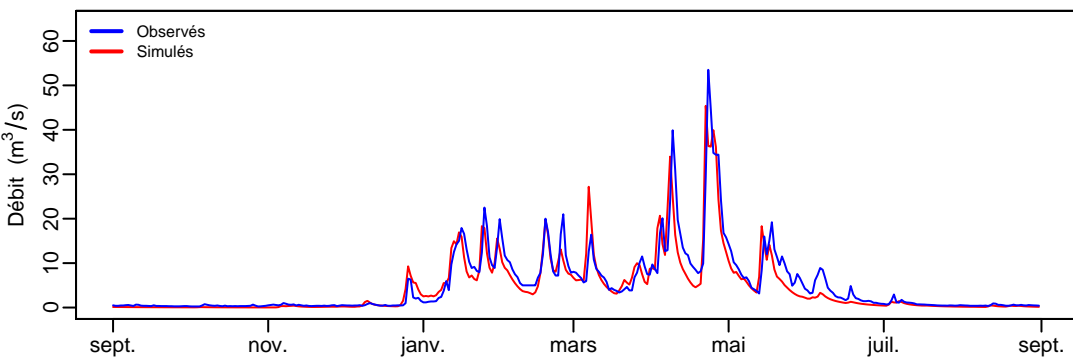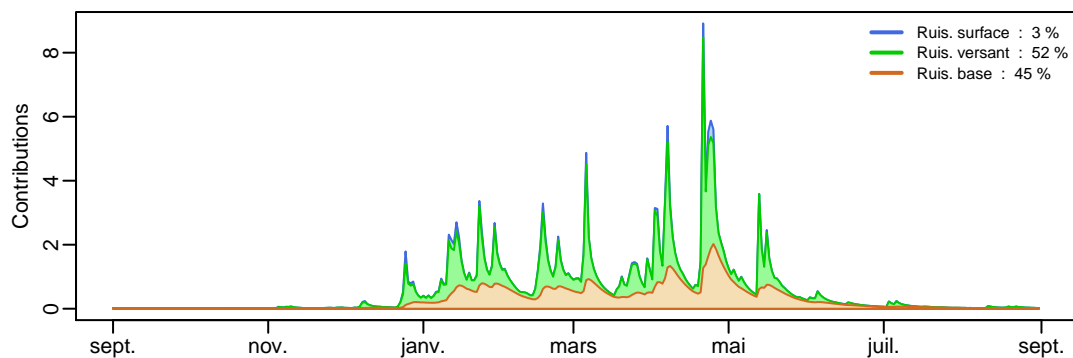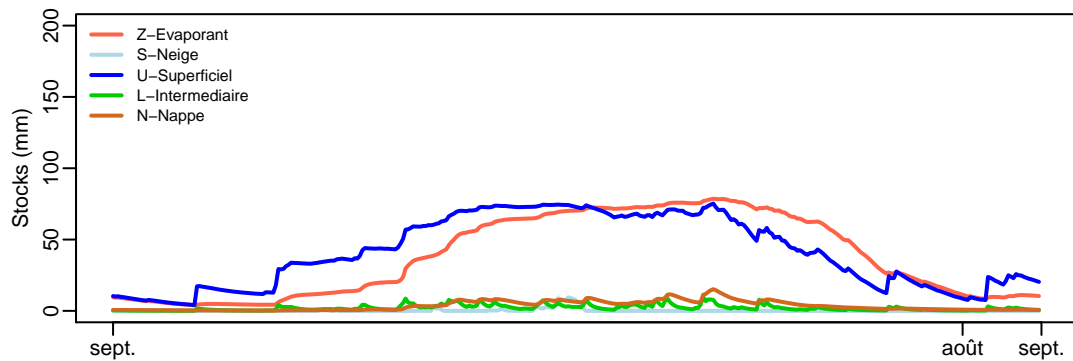

# k1173210 (593.53 km<sup>2</sup>) – année 1986–1987

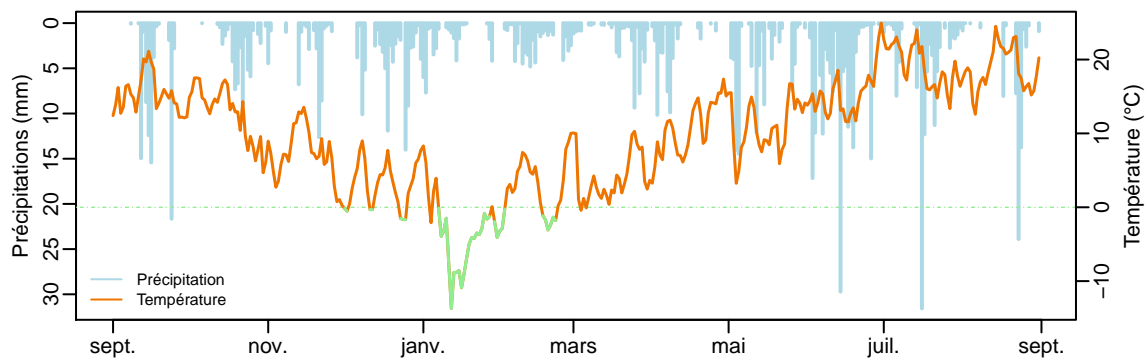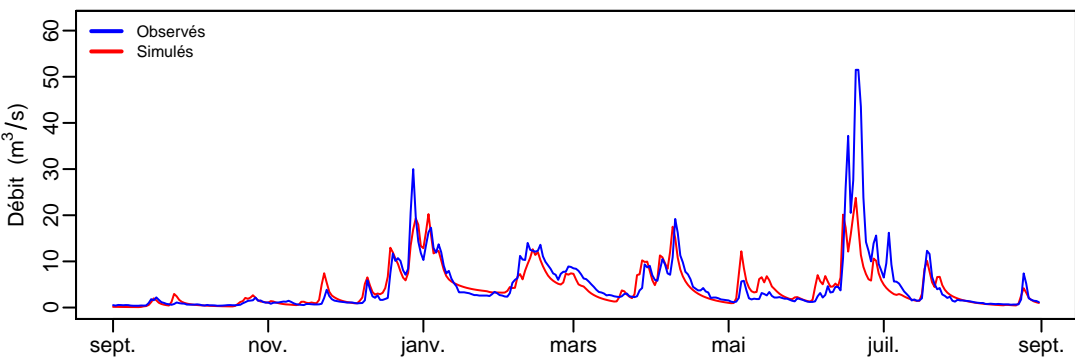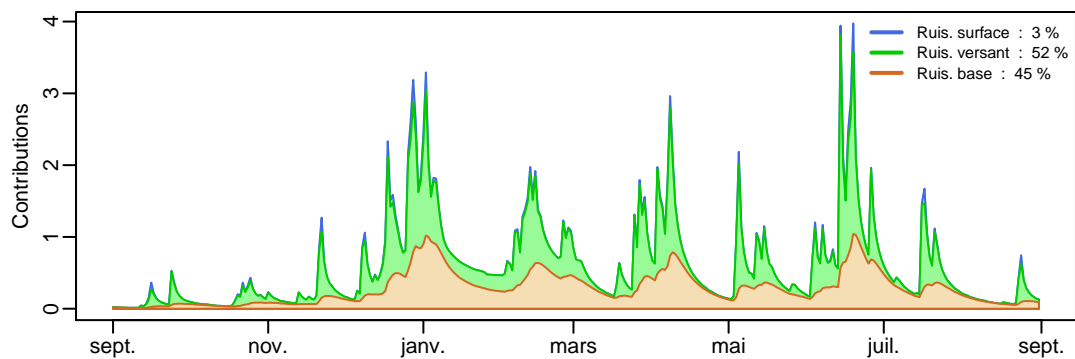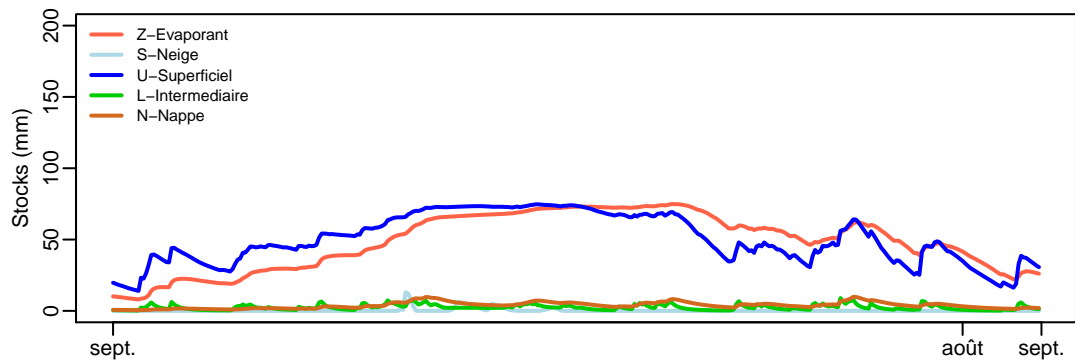

# k1173210 (593.53 km²) – année 1987–1988

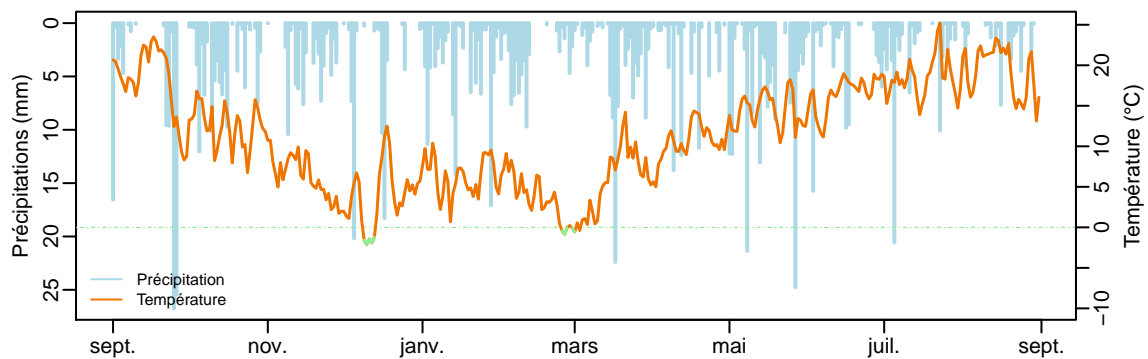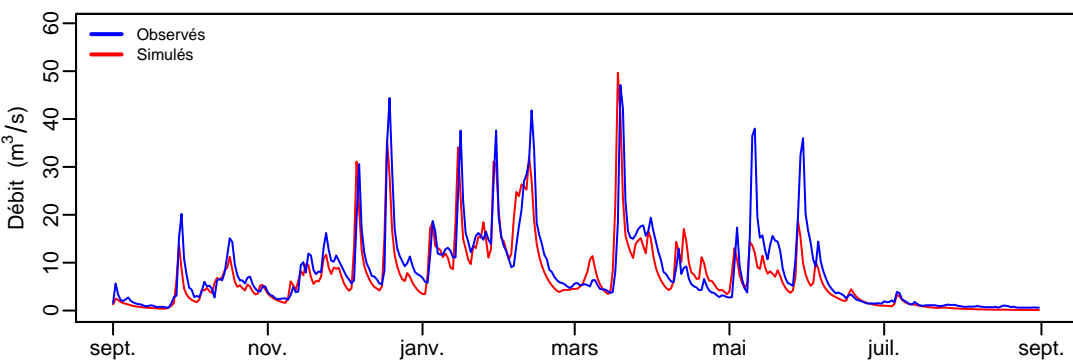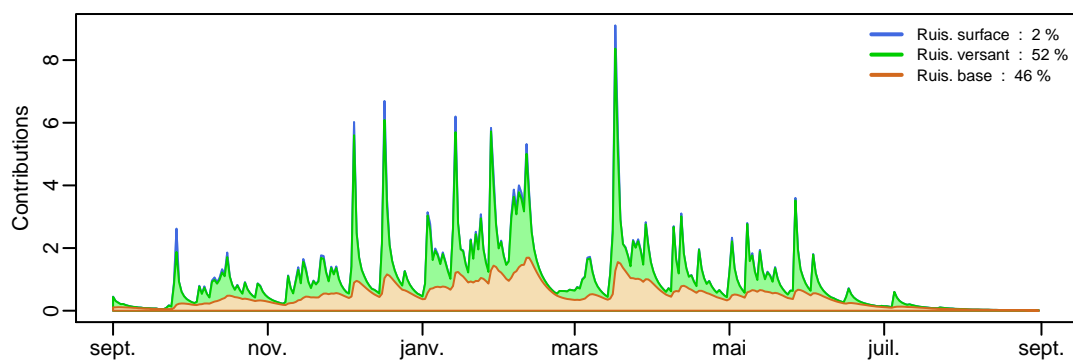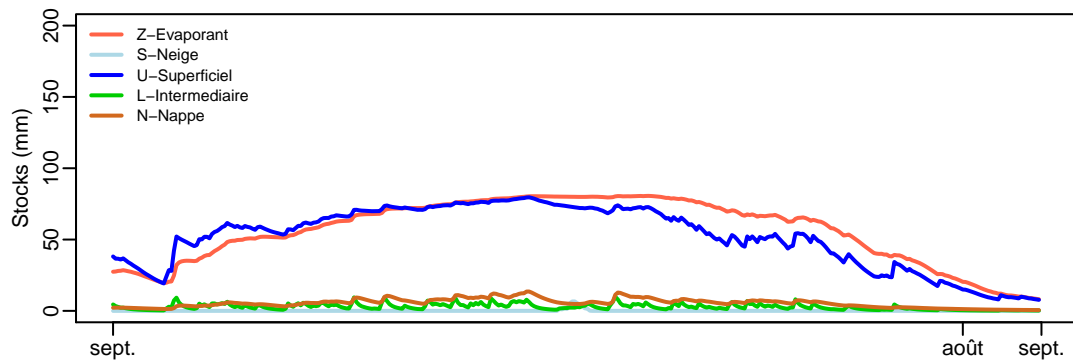



# k1173210 (593.53 km<sup>2</sup>) – année 1988–1989

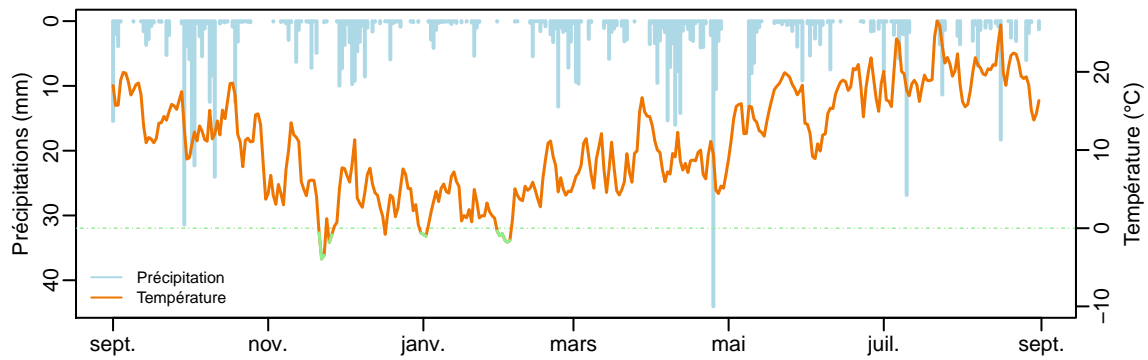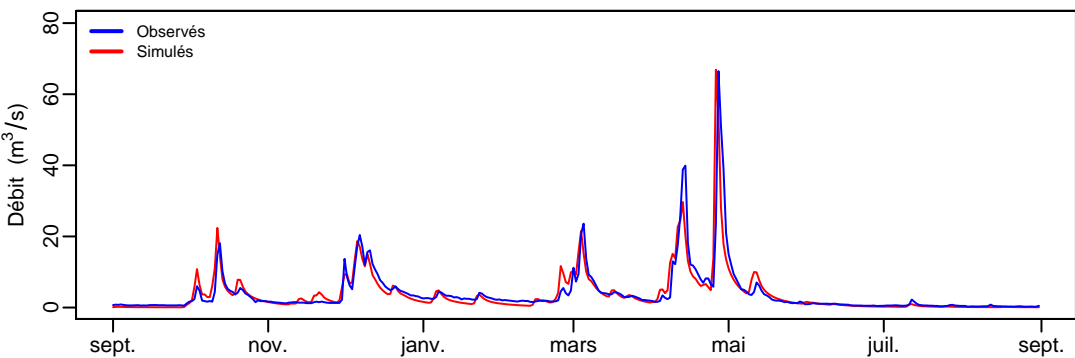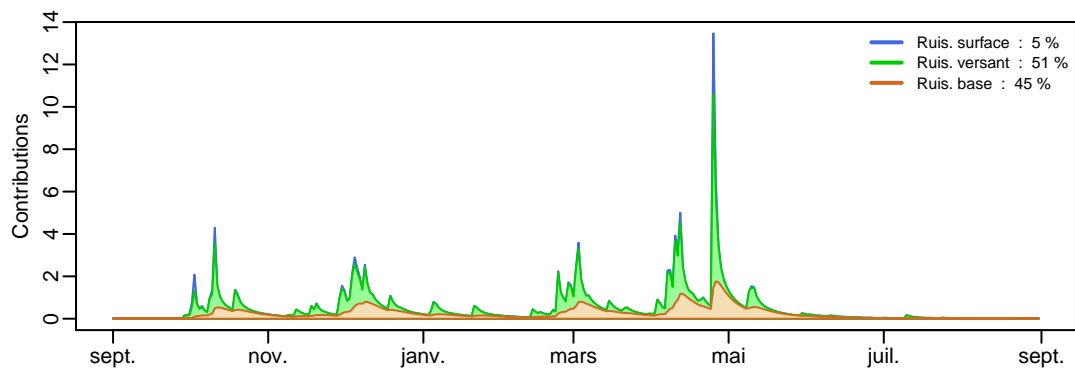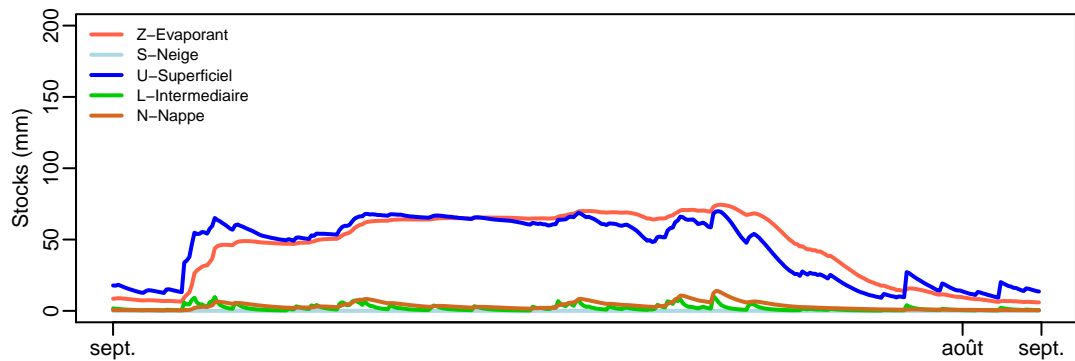

# k1173210 (593.53 km²) – année 1989–1990

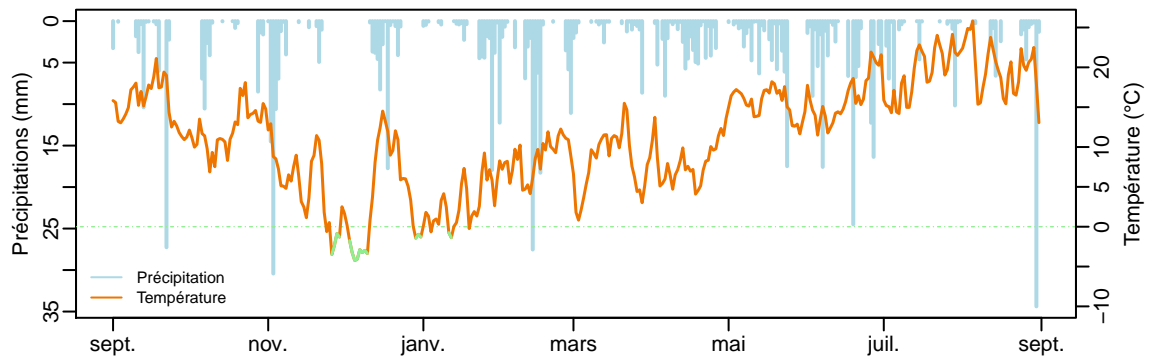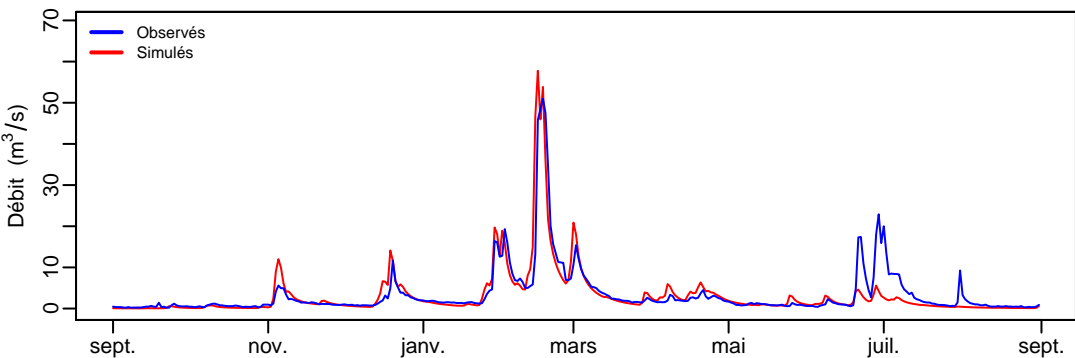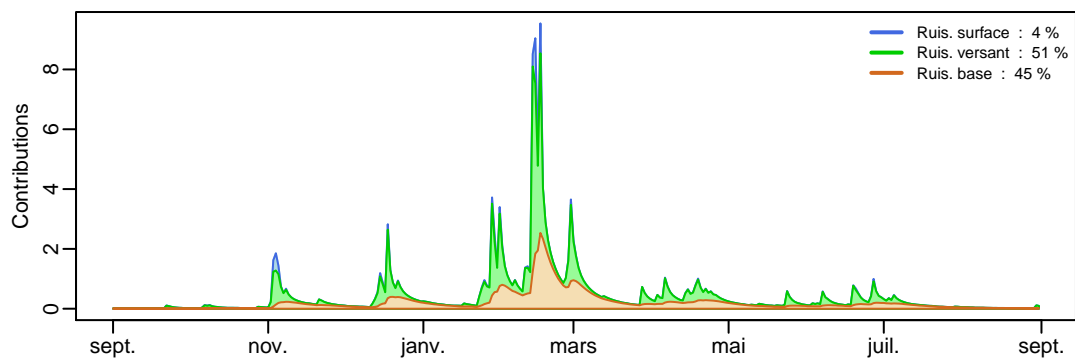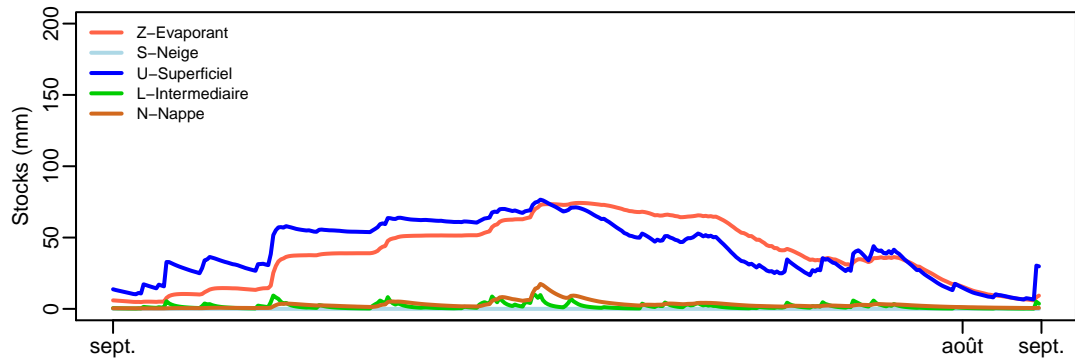

# k1173210 (593.53 km<sup>2</sup>) – année 1990–1991

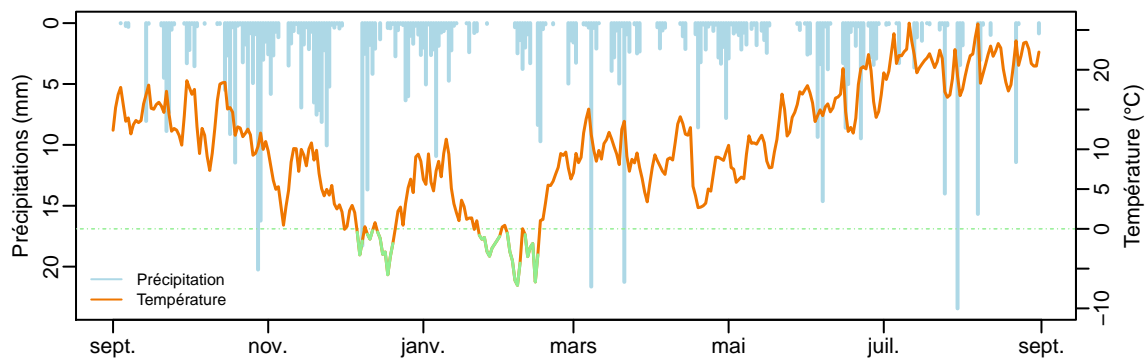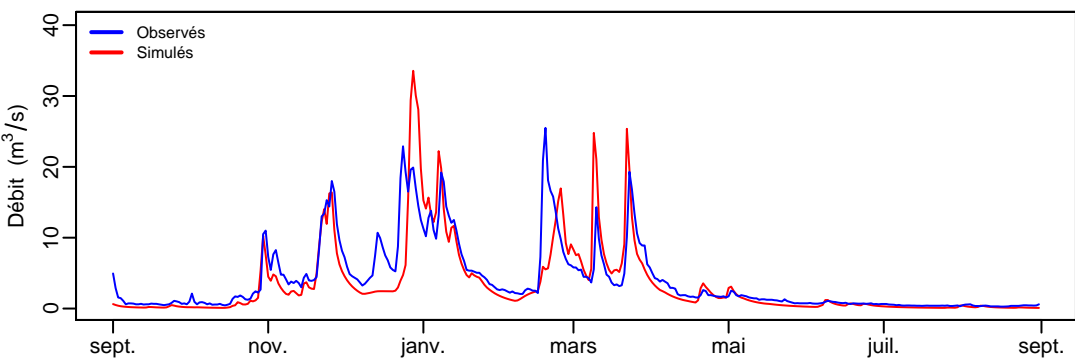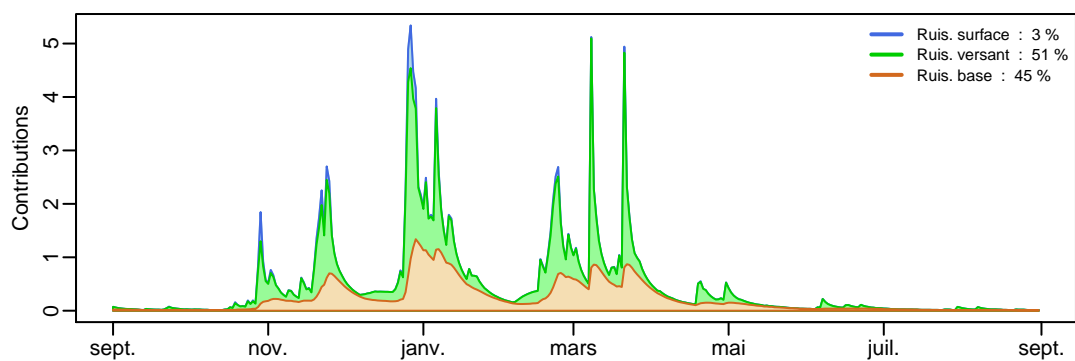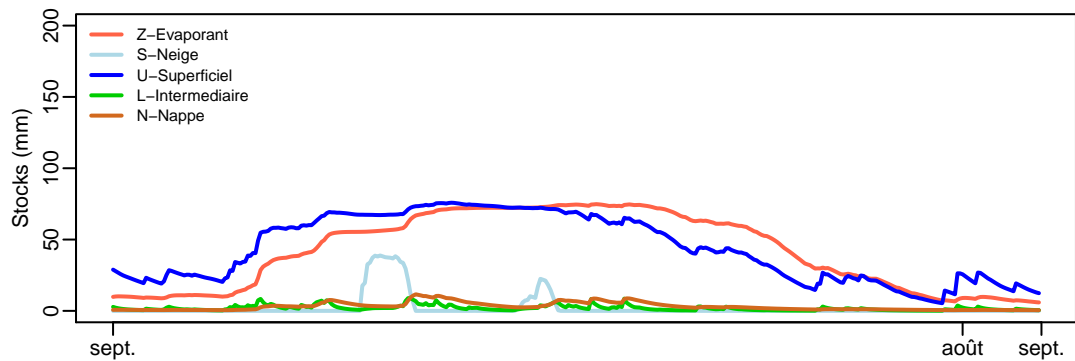

# k1173210 (593.53 km<sup>2</sup>) – année 1991–1992

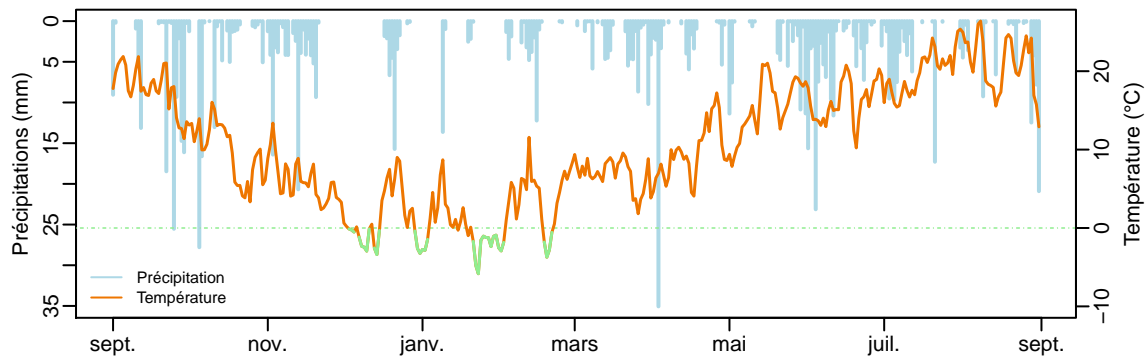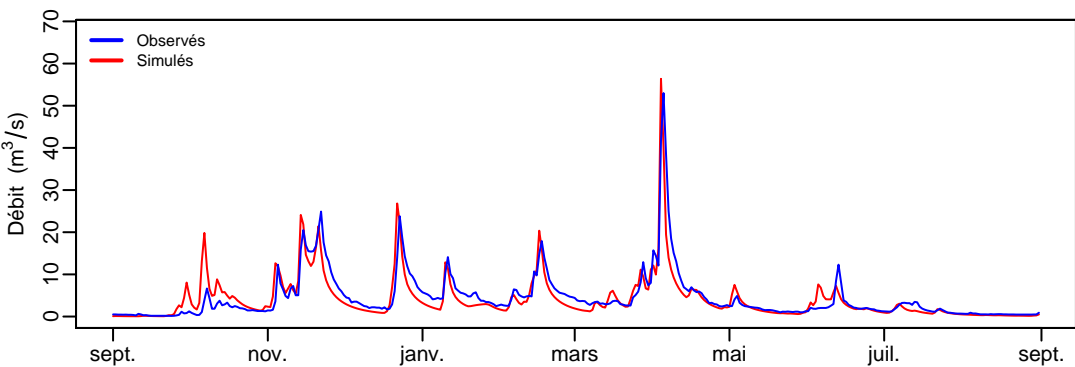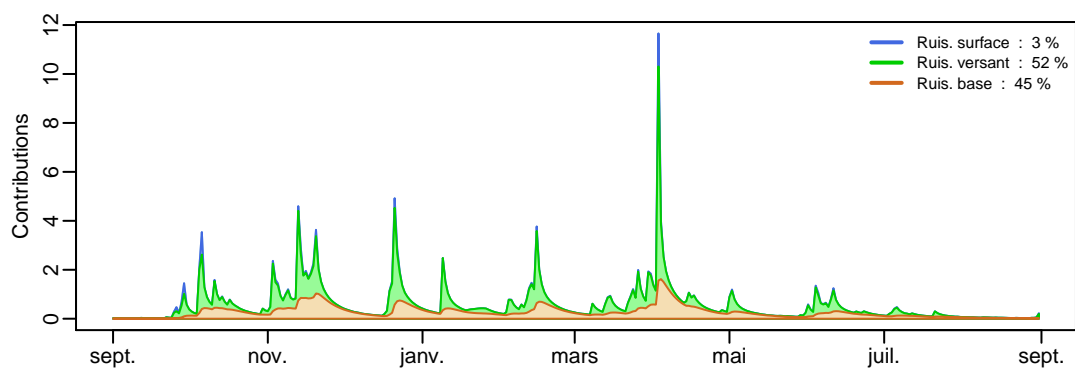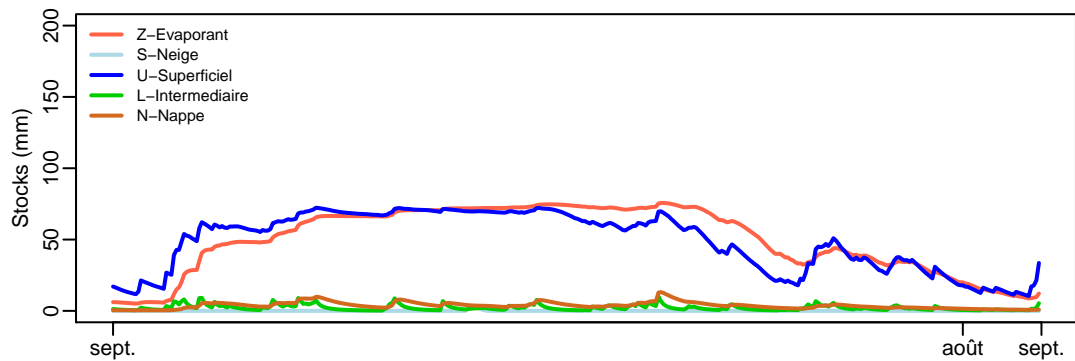

# k1173210 (593.53 km<sup>2</sup>) – année 1992–1993

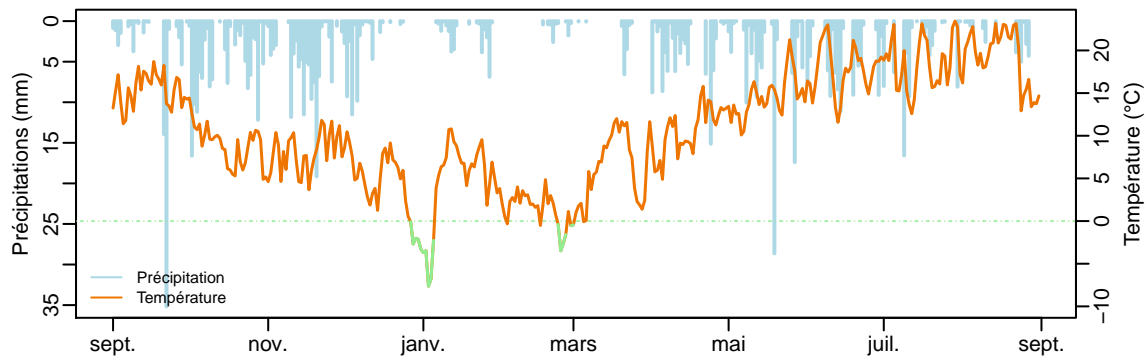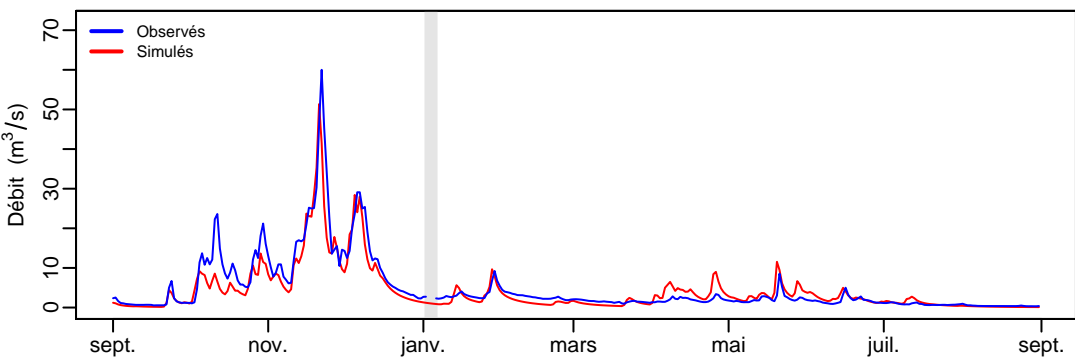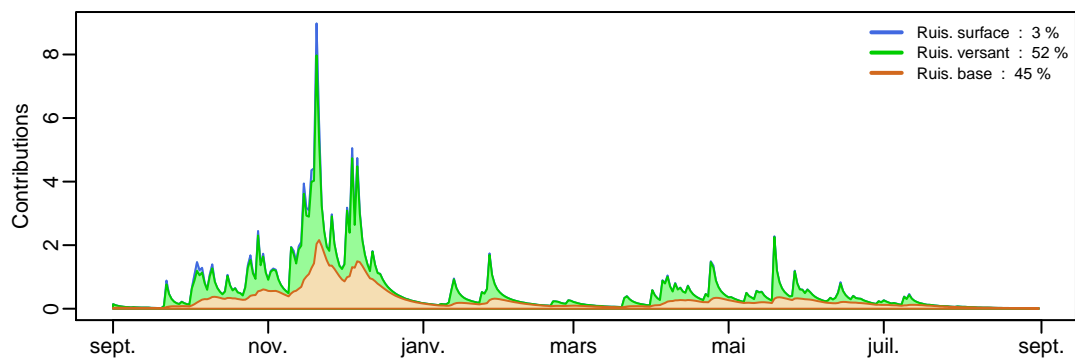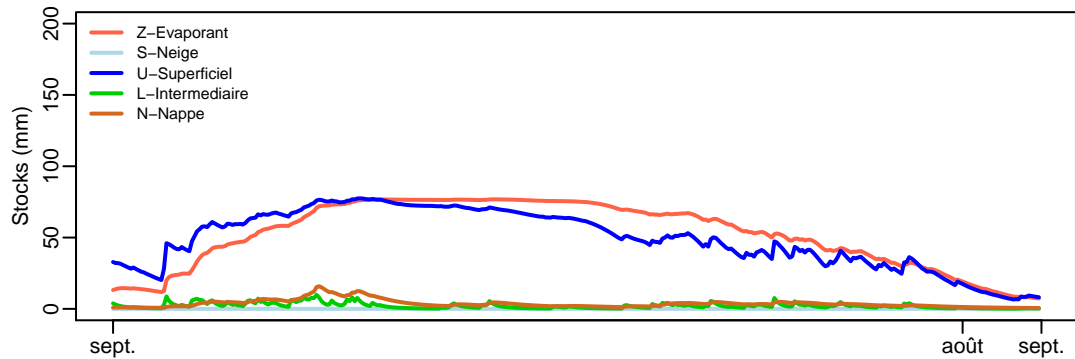

# k1173210 (593.53 km<sup>2</sup>) – année 1993–1994

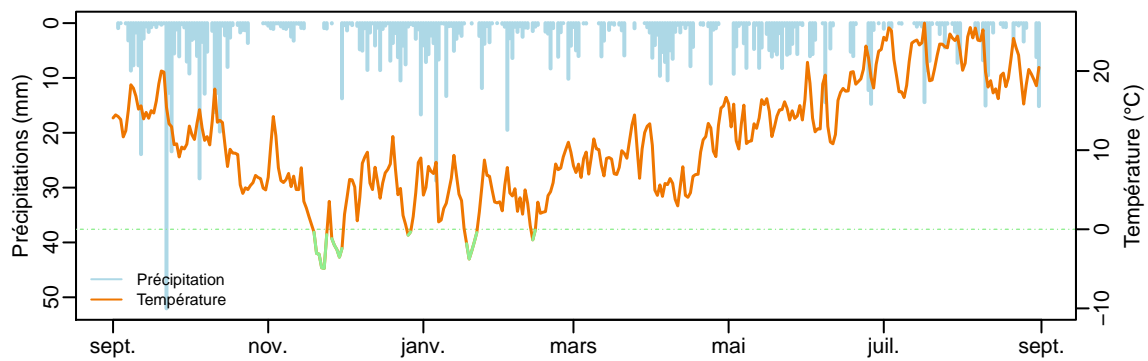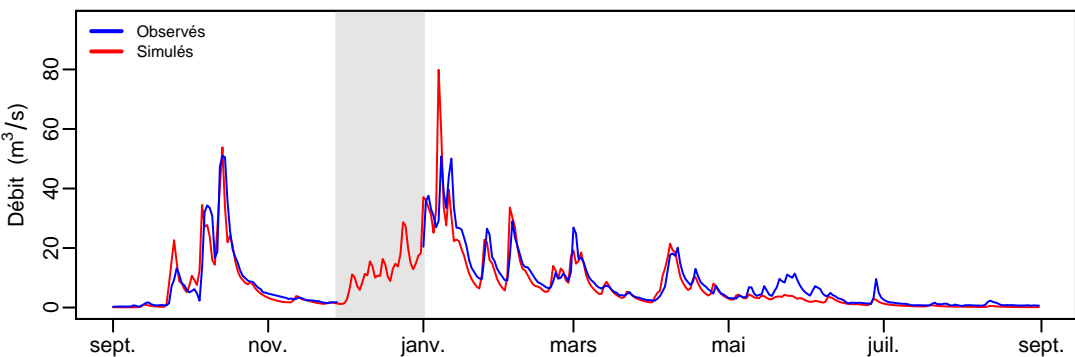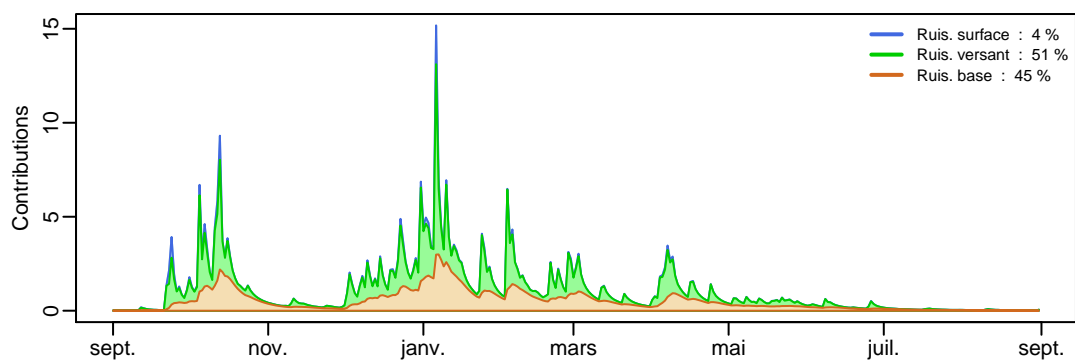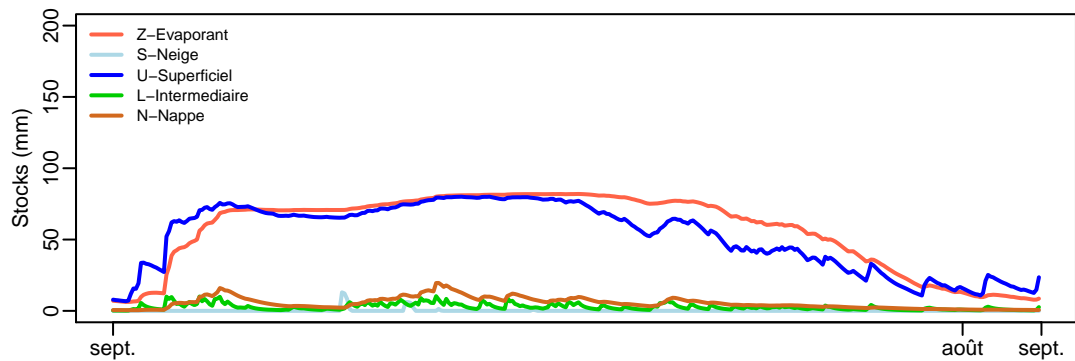

# k1173210 (593.53 km²) – année 1994–1995

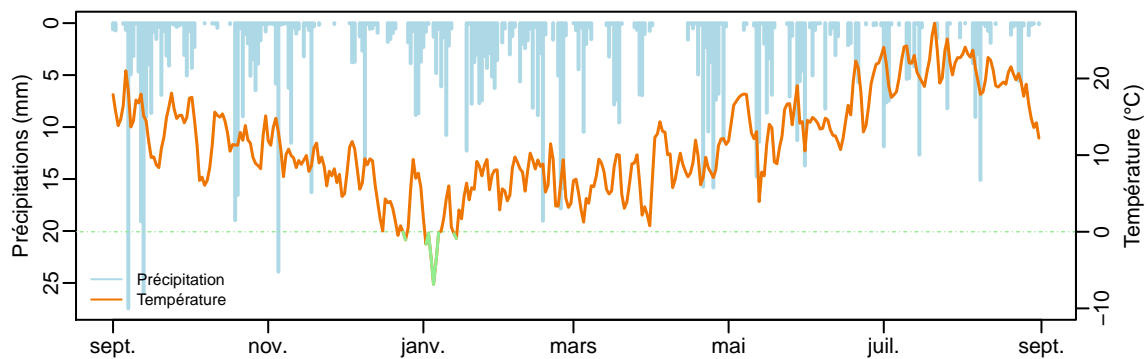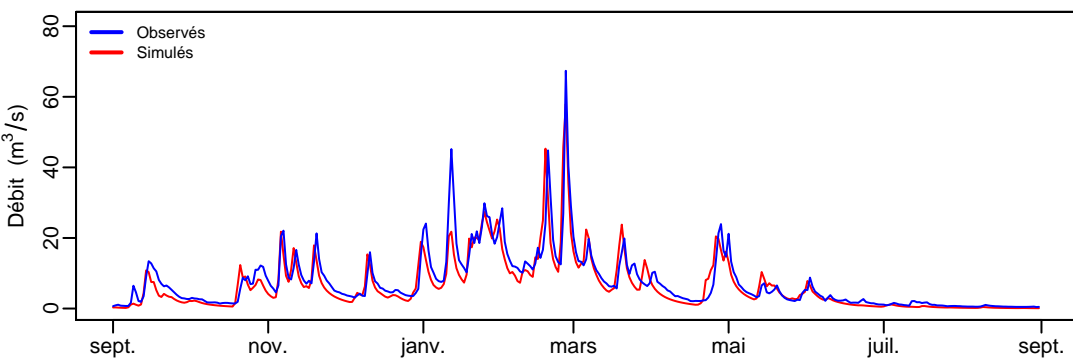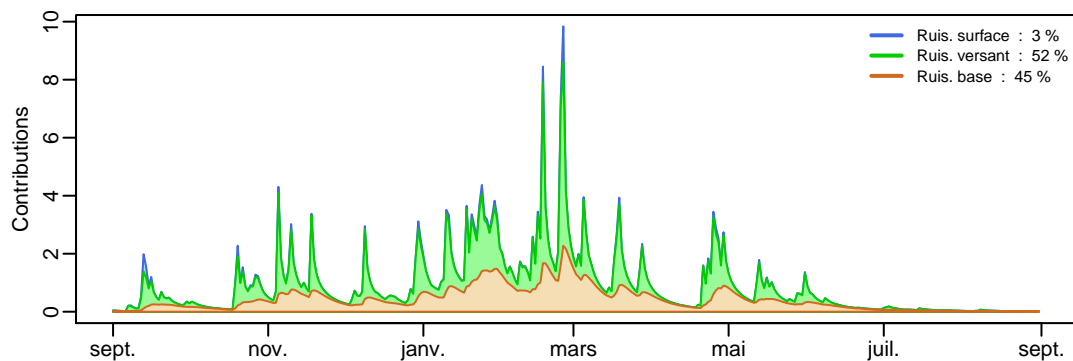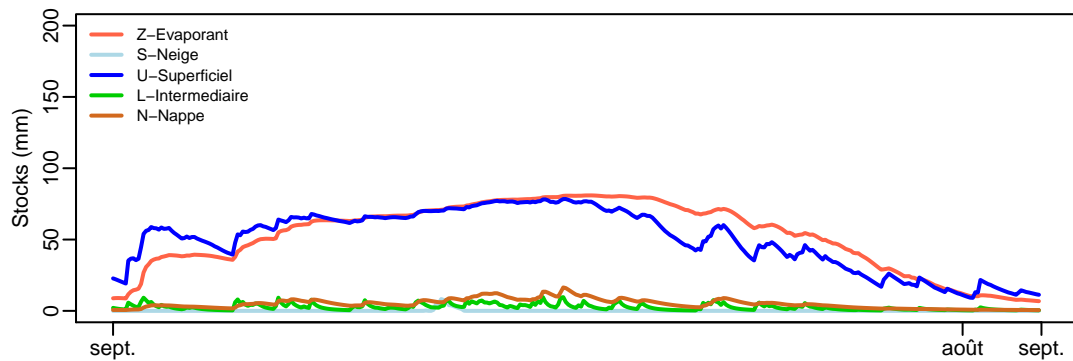

# k1173210 (593.53 km<sup>2</sup>) – année 1995–1996

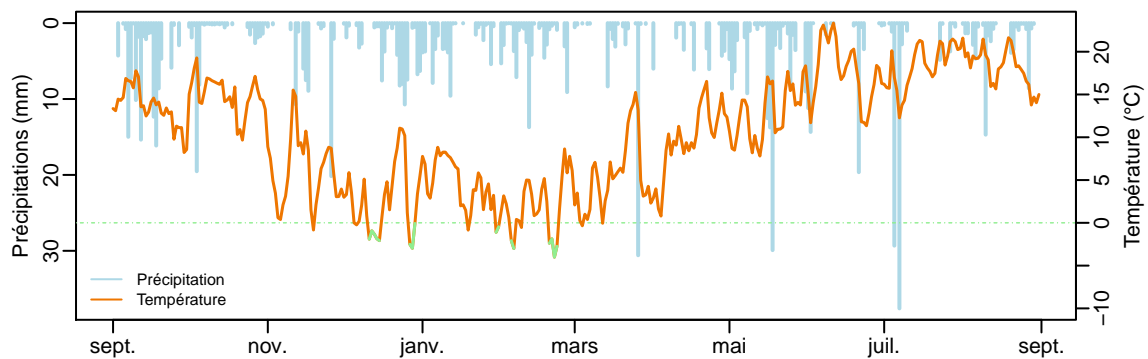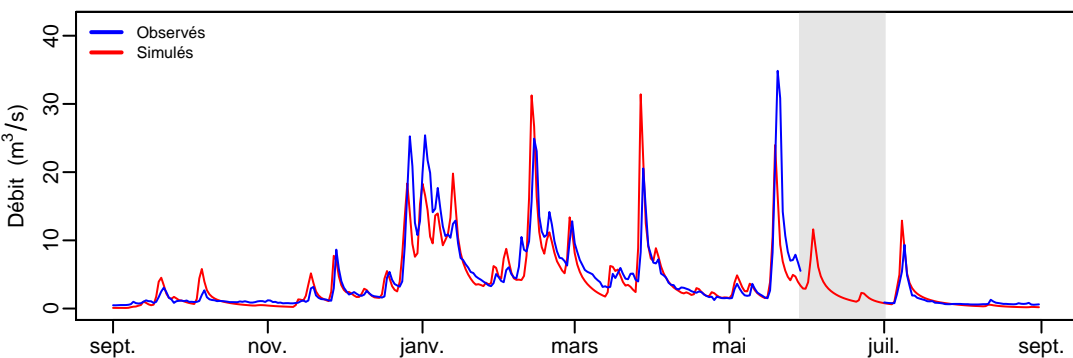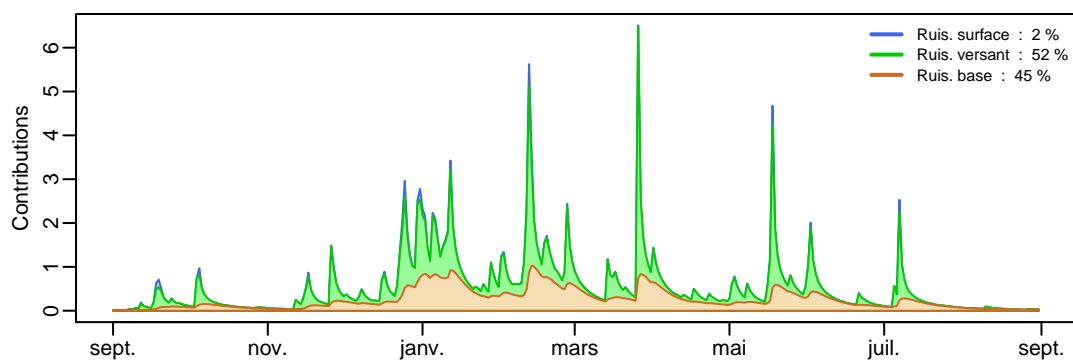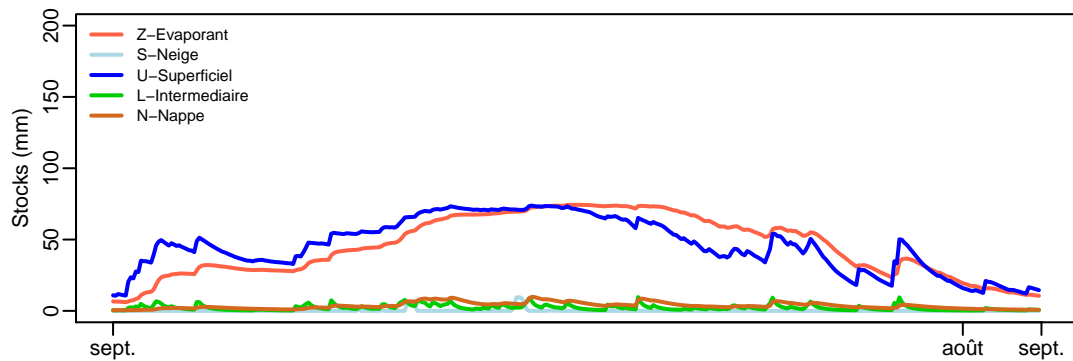



# k1173210 (593.53 km<sup>2</sup>) – année 1996–1997

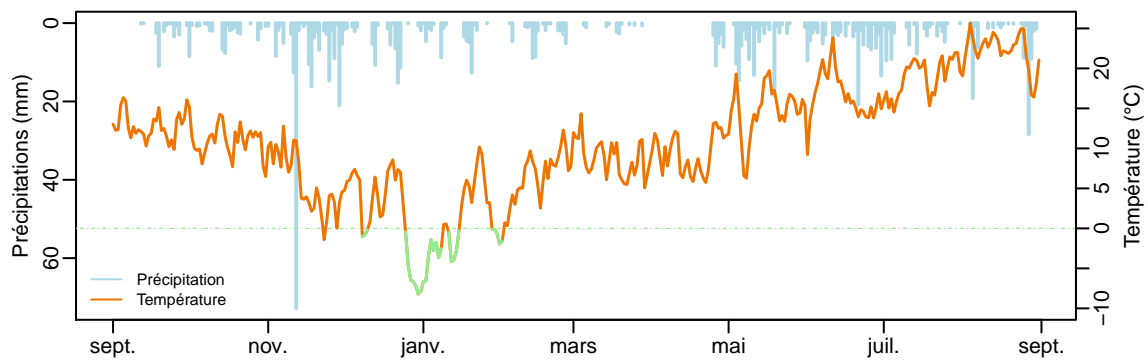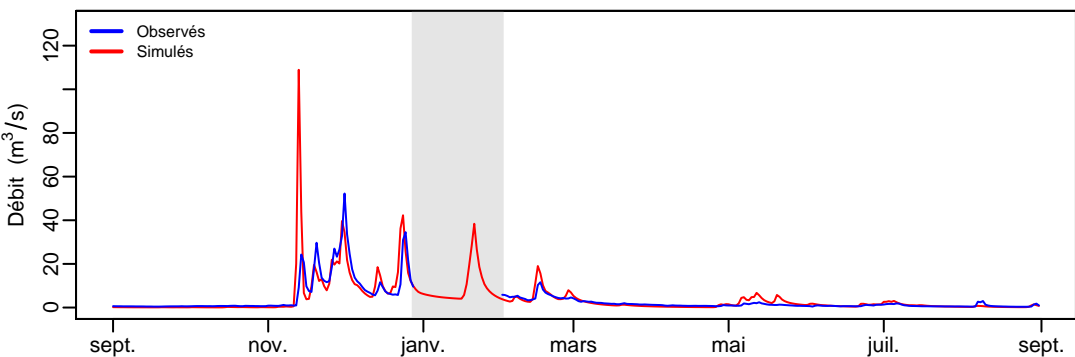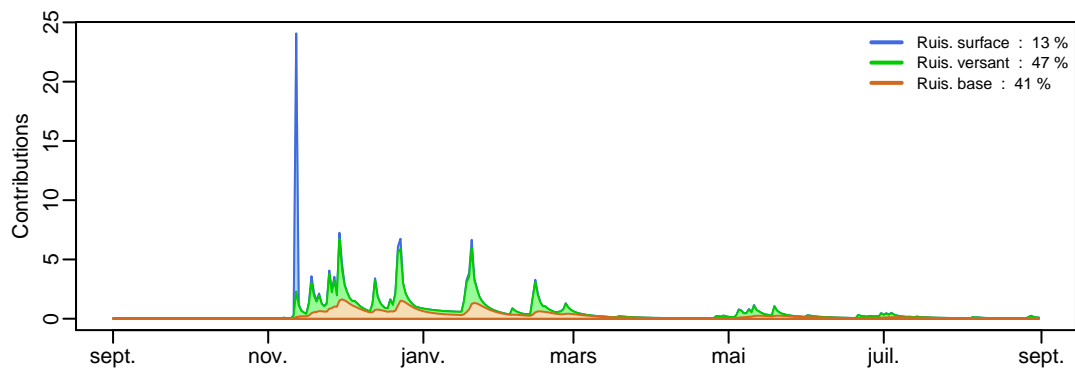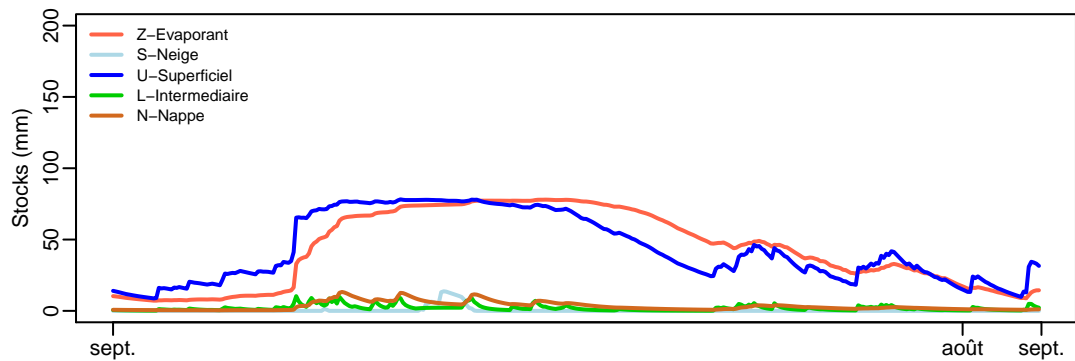

# k1173210 (593.53 km<sup>2</sup>) – année 1997–1998

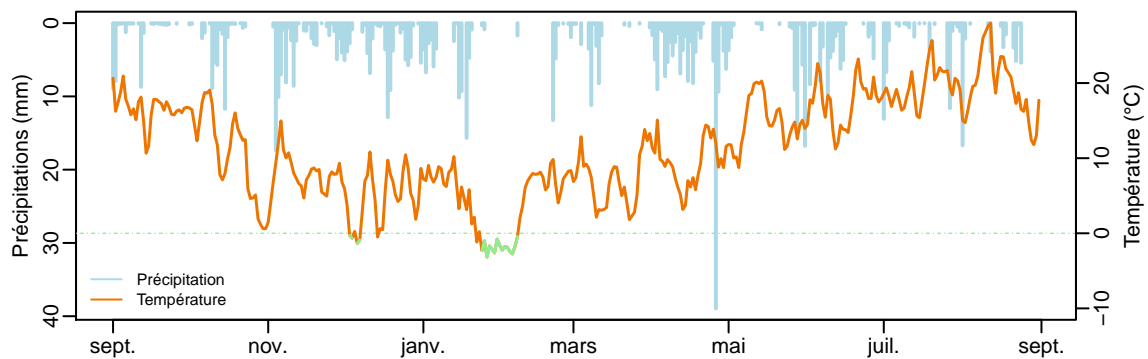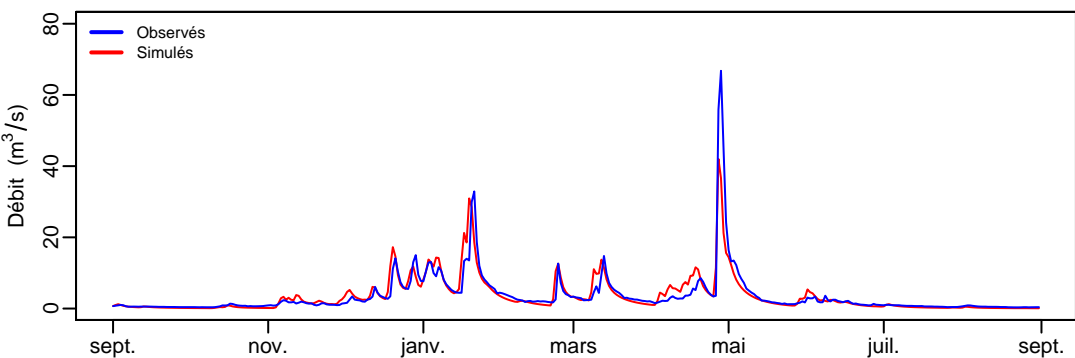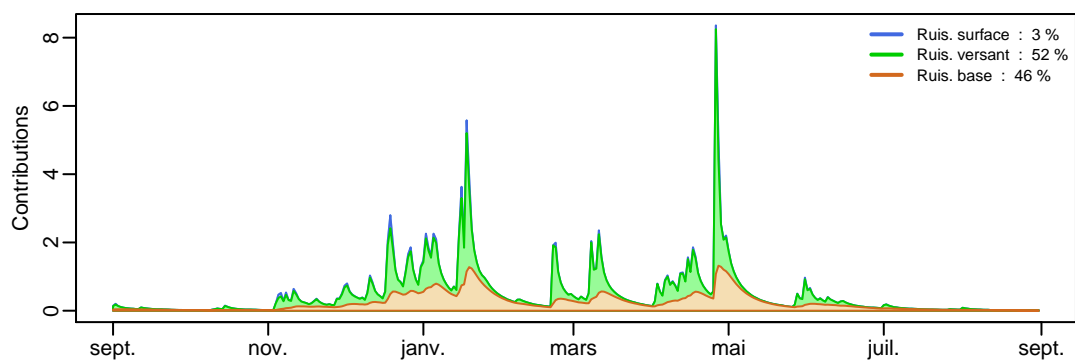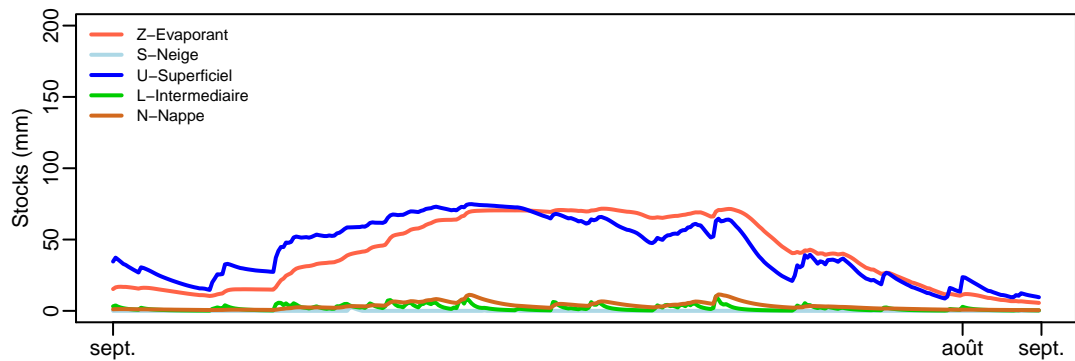

# k1173210 (593.53 km<sup>2</sup>) – année 1998–1999

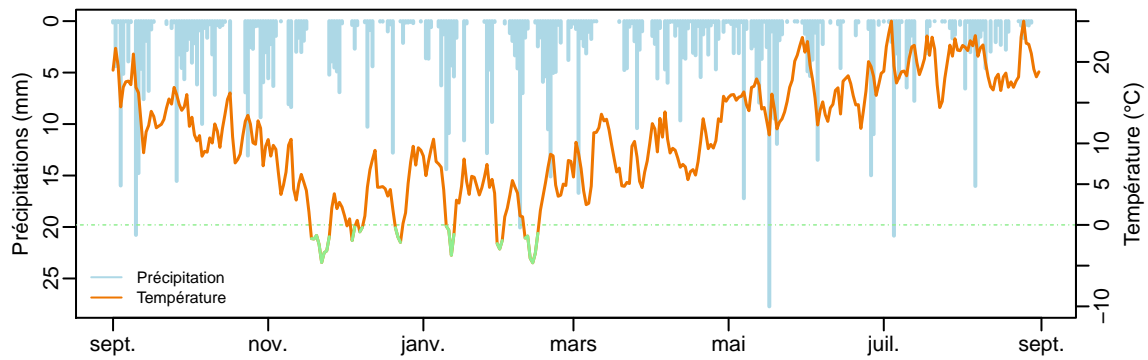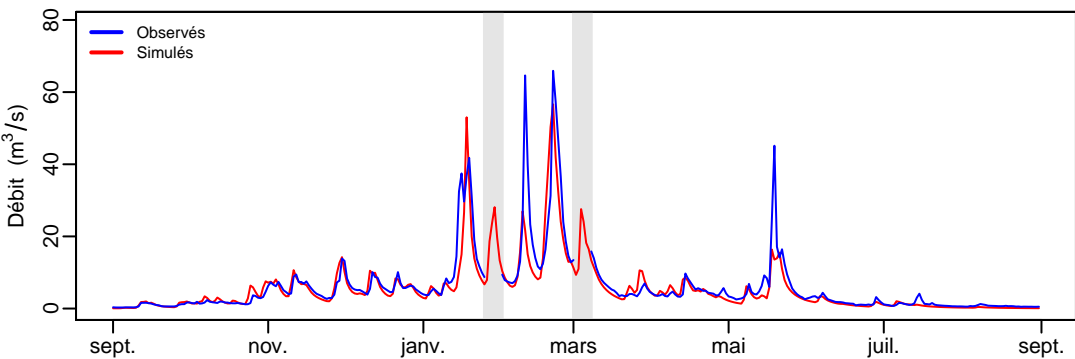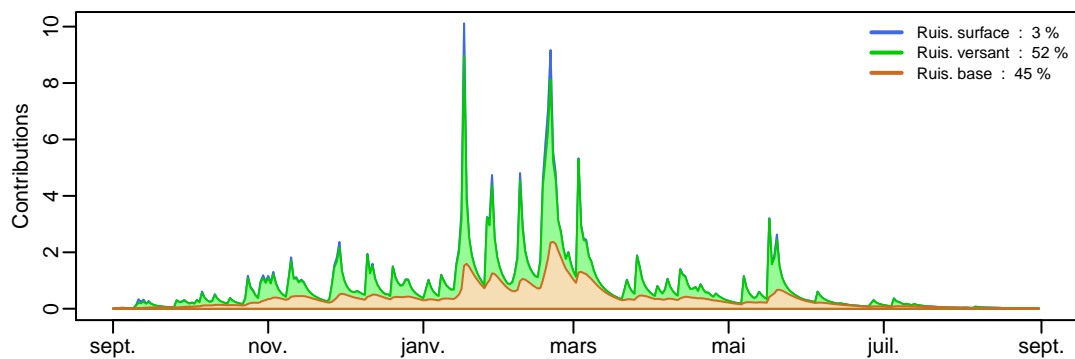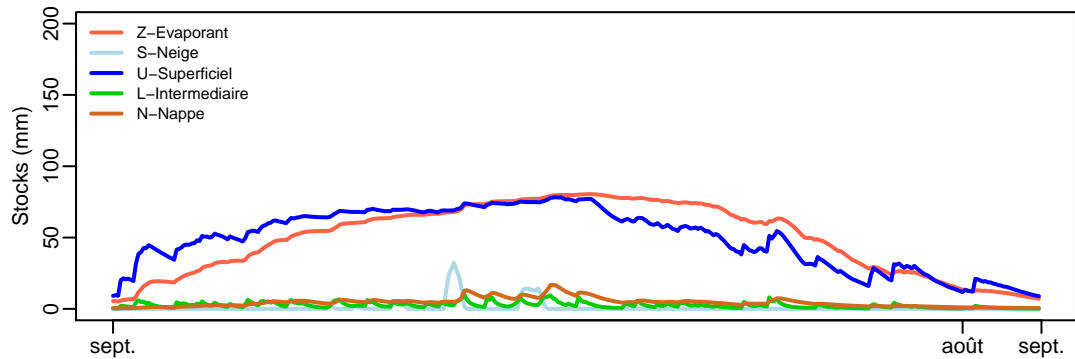

# k1173210 (593.53 km²) – année 1999–2000

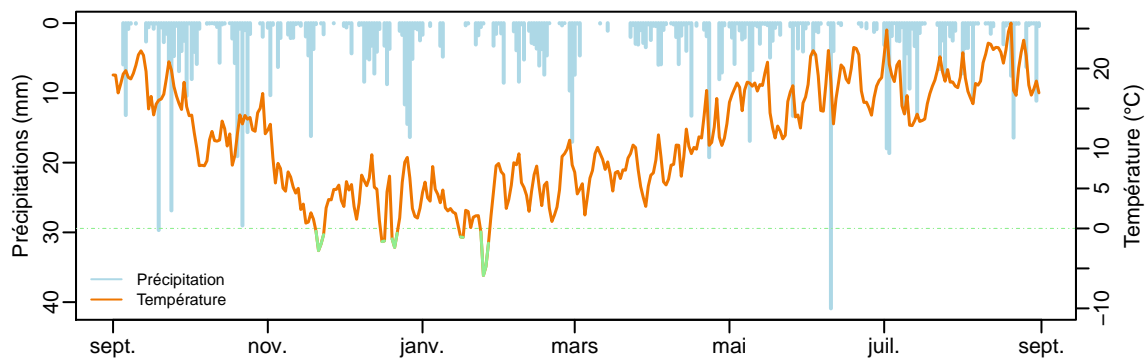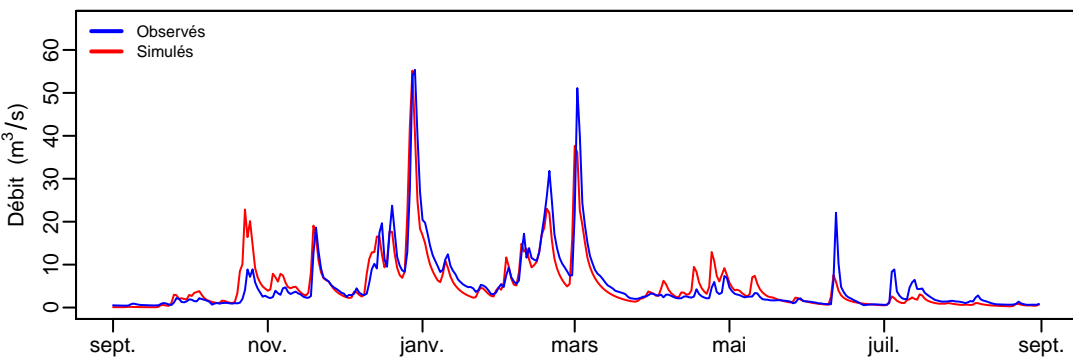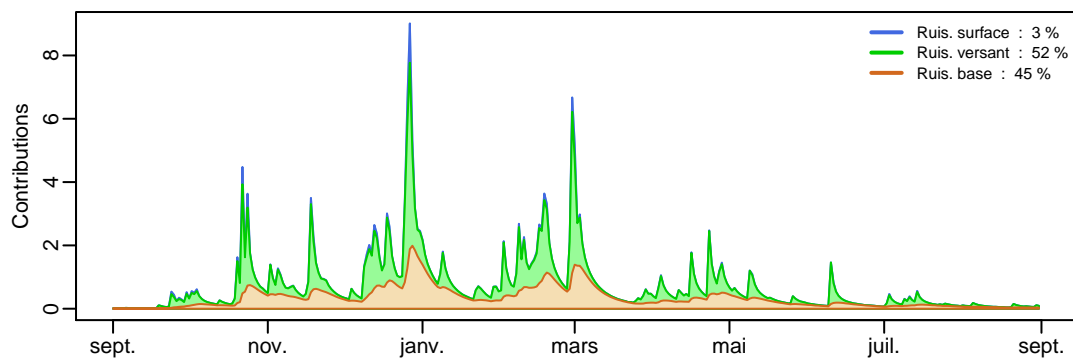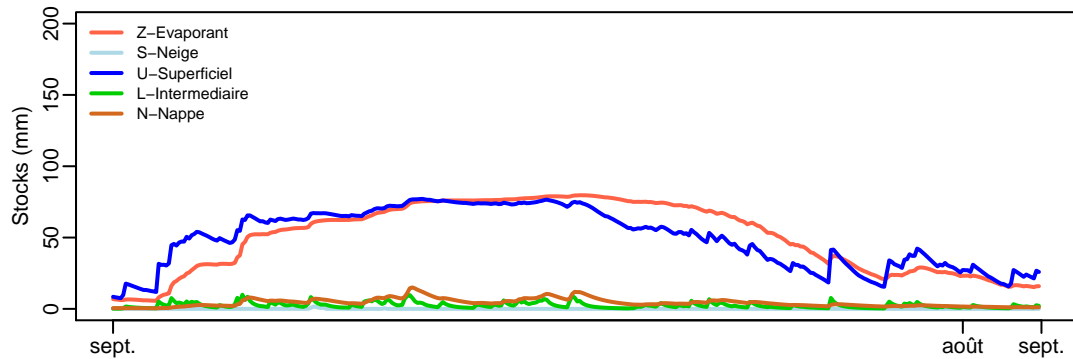

# k1173210 (593.53 km<sup>2</sup>) – année 2000–2001

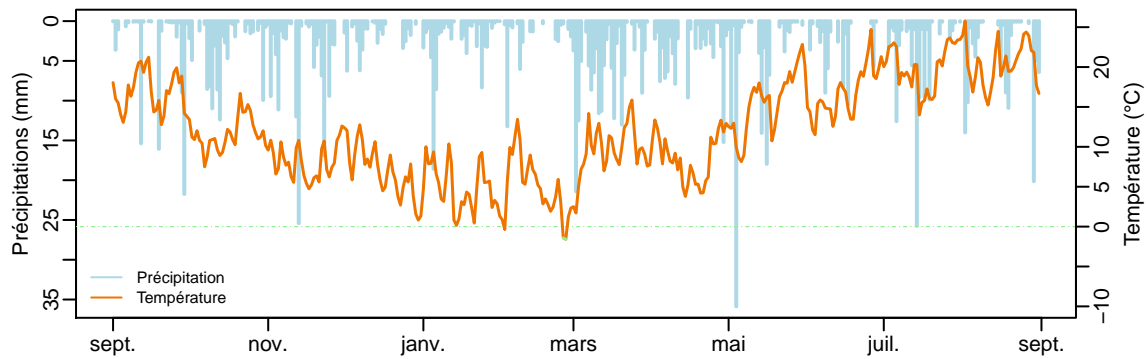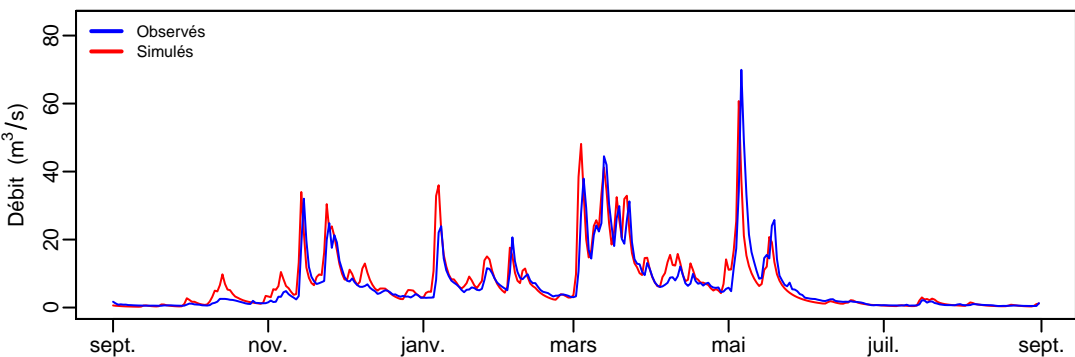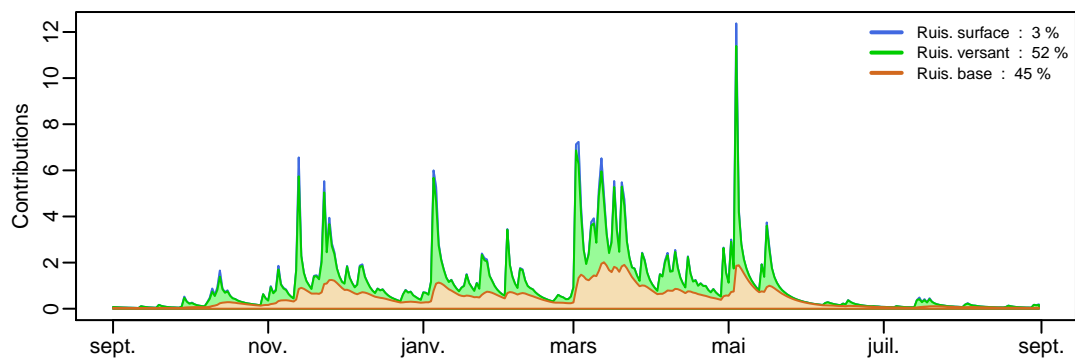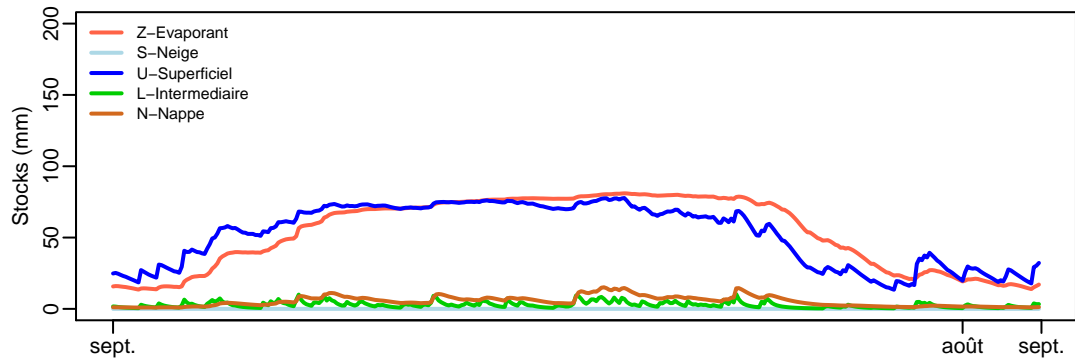

# k1173210 (593.53 km<sup>2</sup>) – année 2001–2002

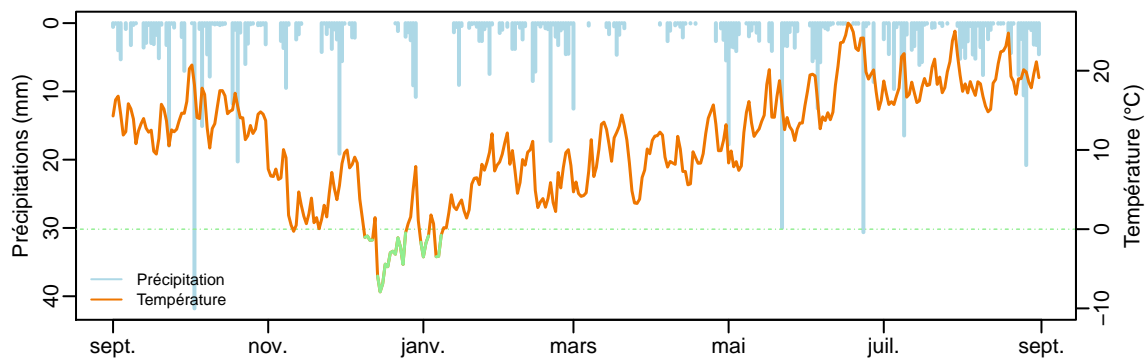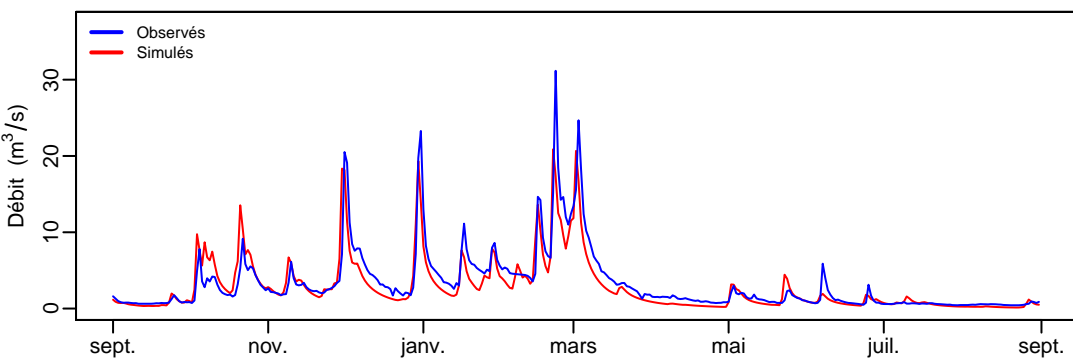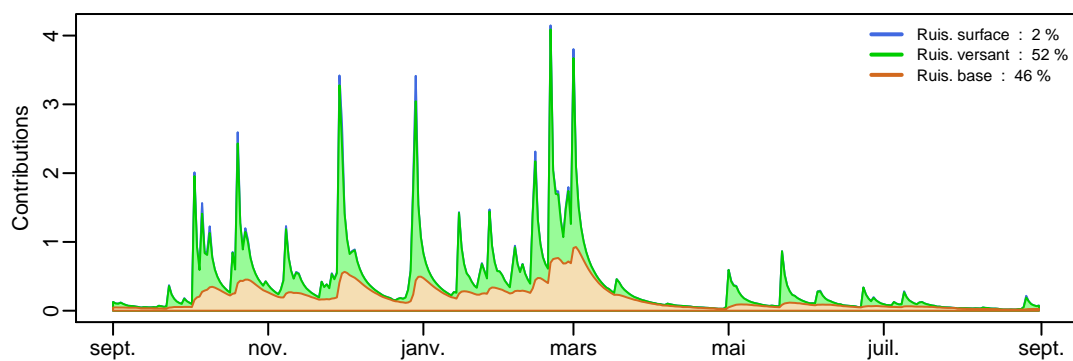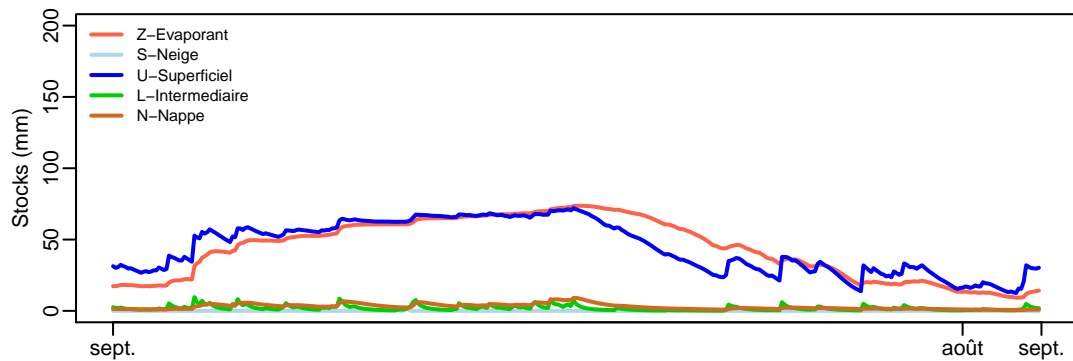

# k1173210 (593.53 km<sup>2</sup>) – année 2002–2003

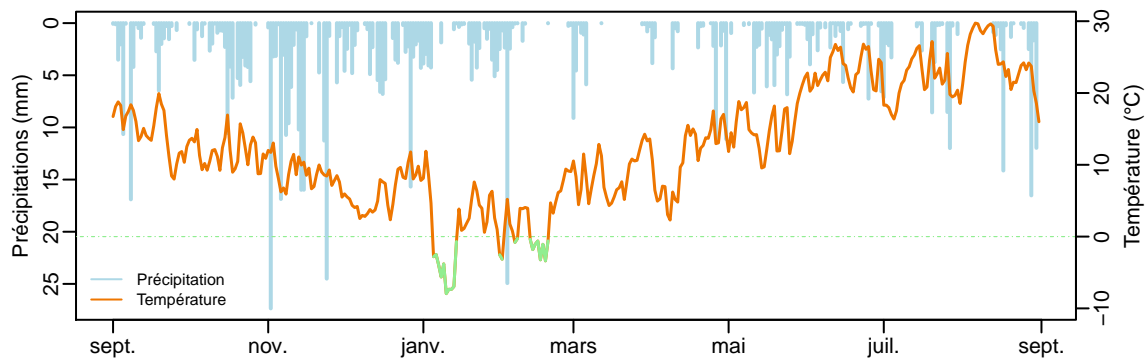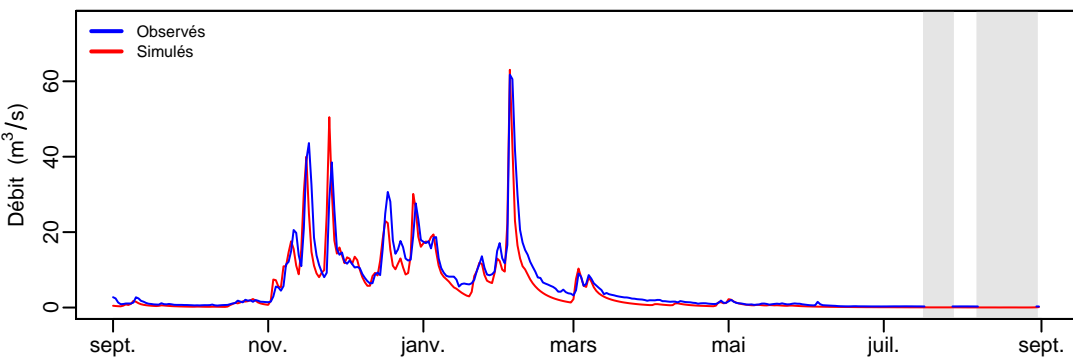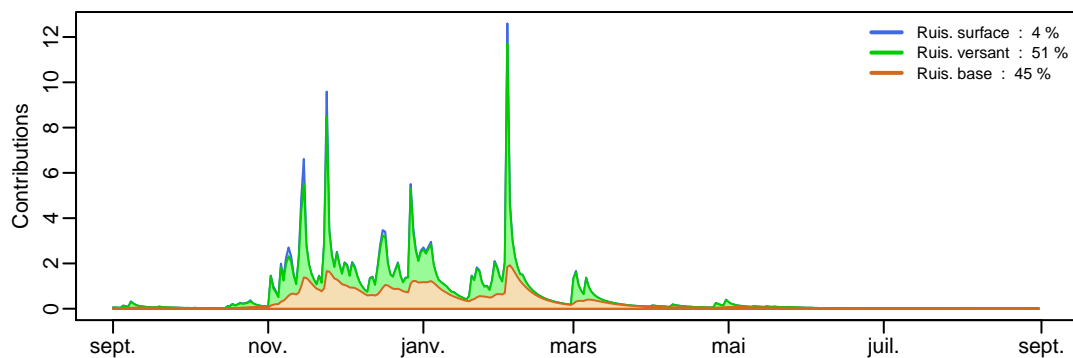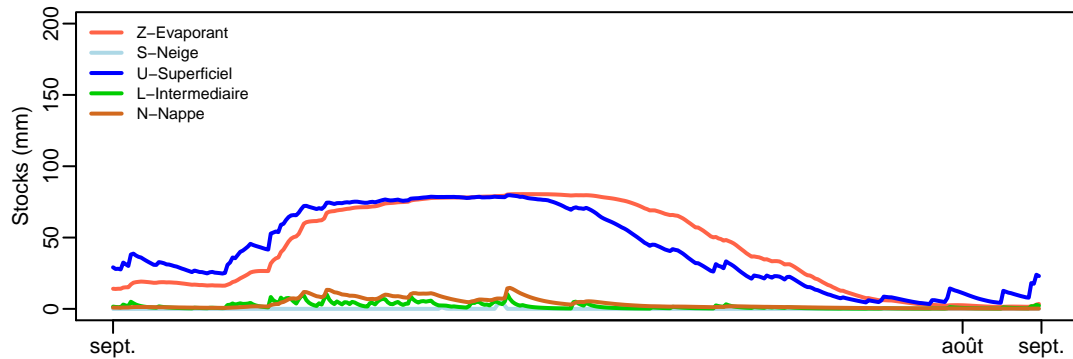

# k1173210 (593.53 km<sup>2</sup>) – année 2003–2004

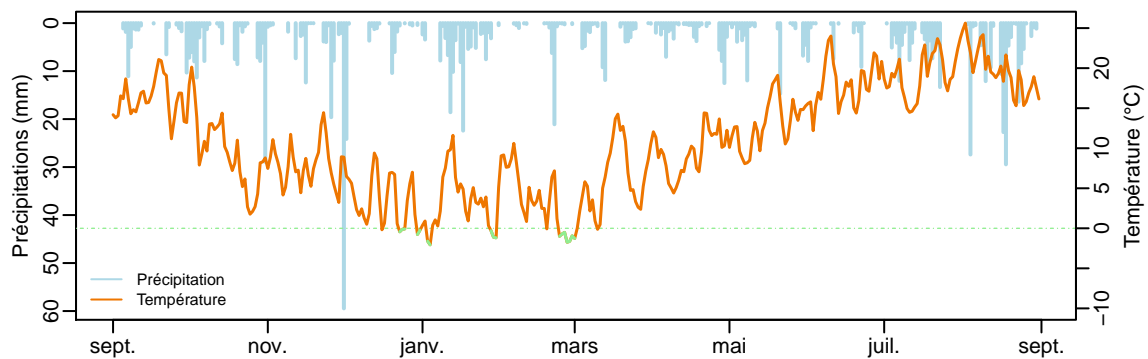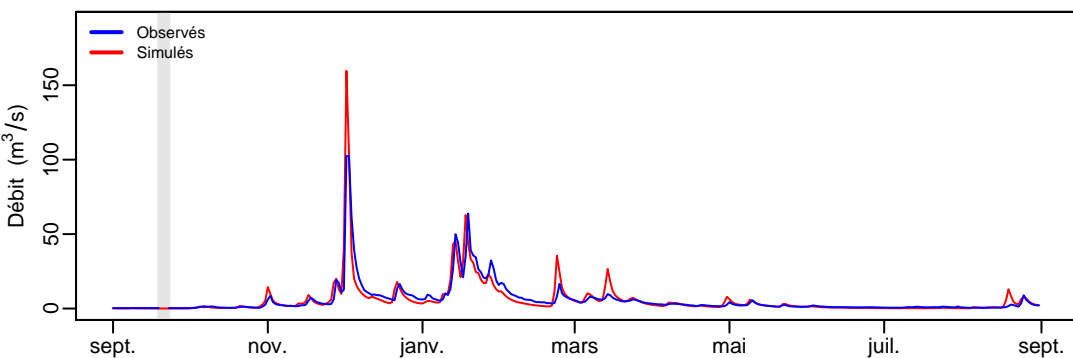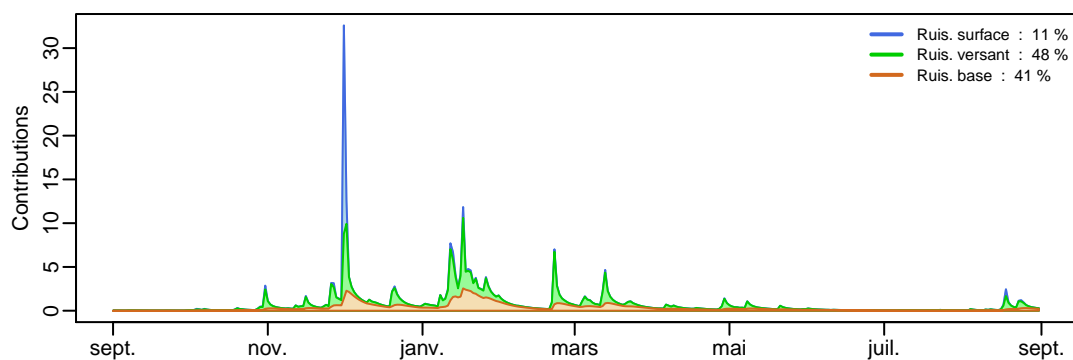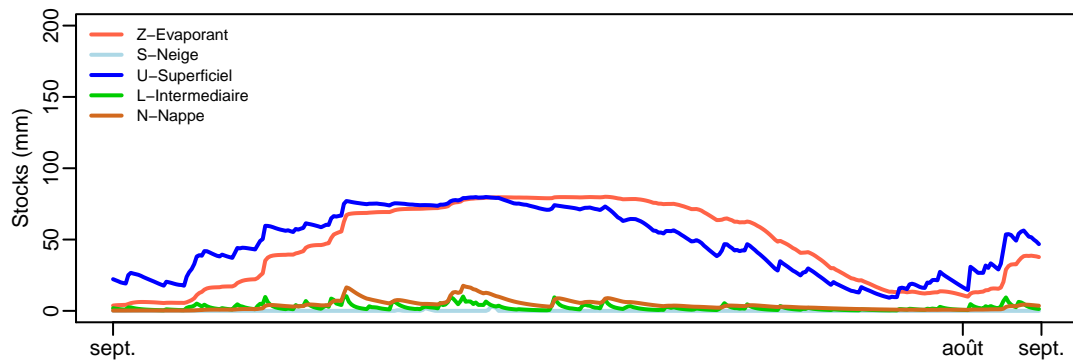



# k1173210 (593.53 km<sup>2</sup>) – année 2004–2005

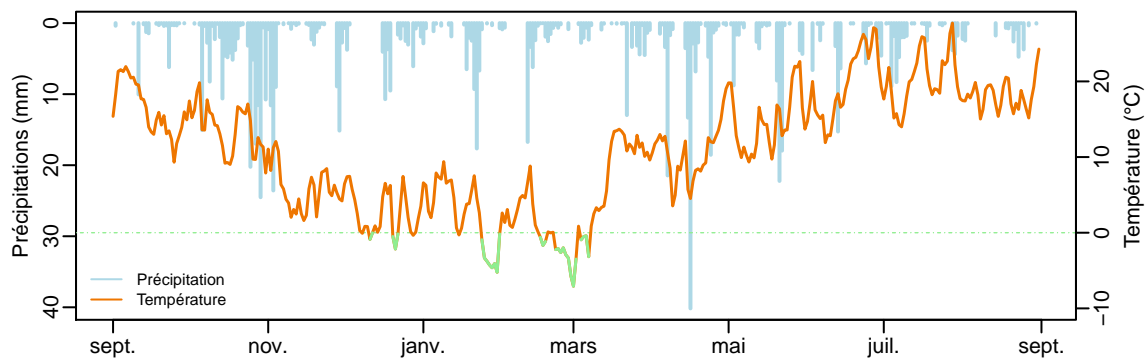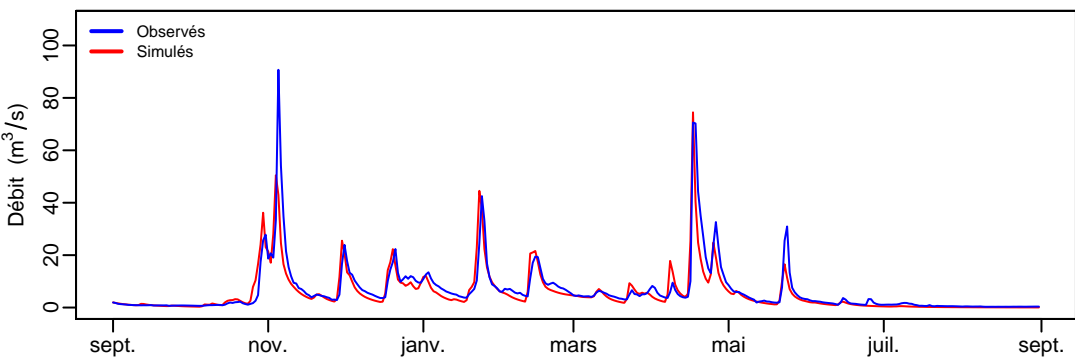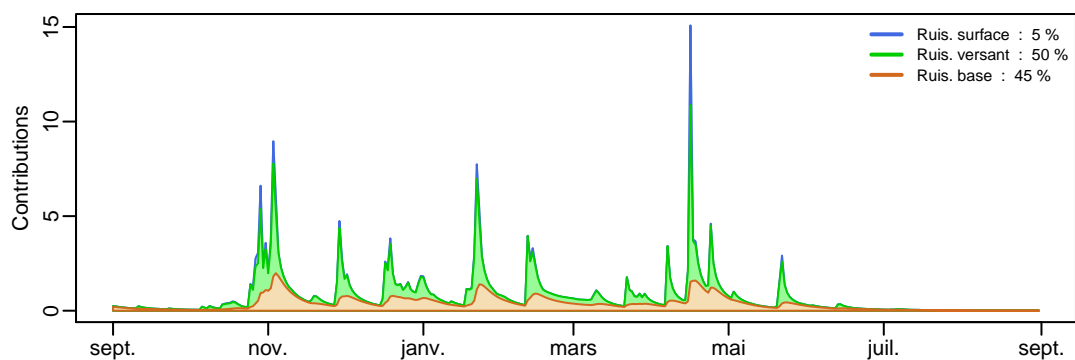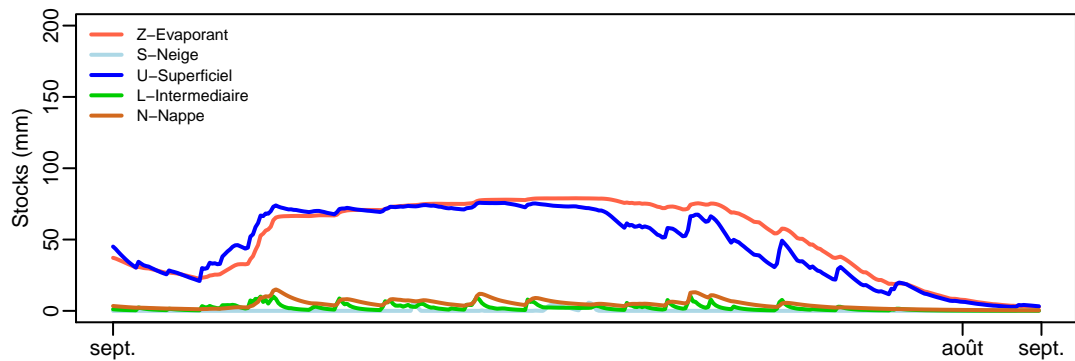

# k1173210 (593.53 km<sup>2</sup>) – année 2005–2006

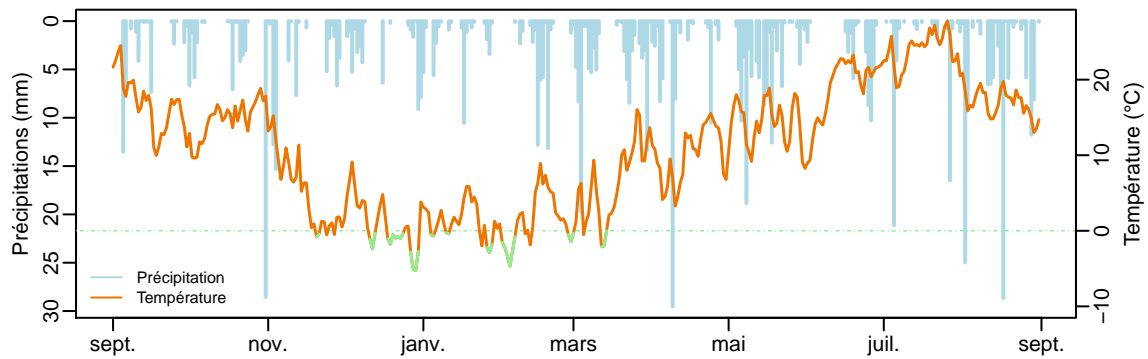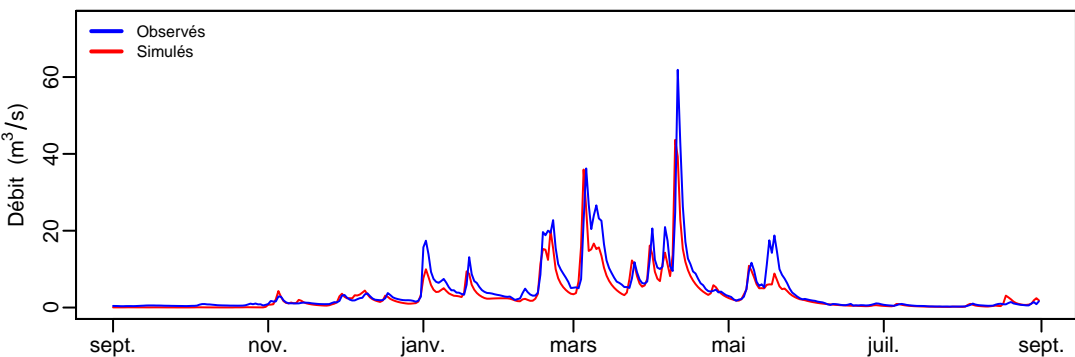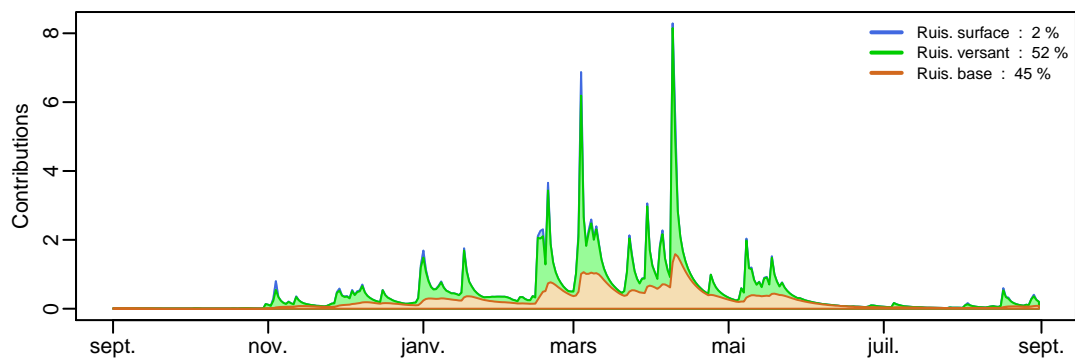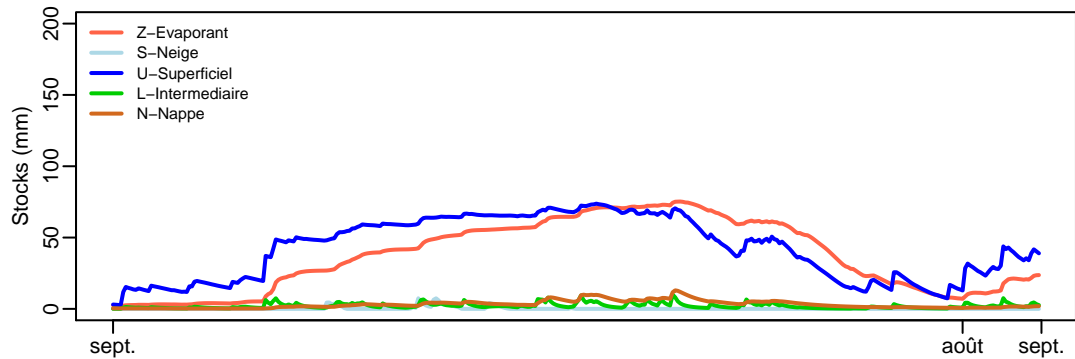

# k1173210 (593.53 km²) – année 2006–2007

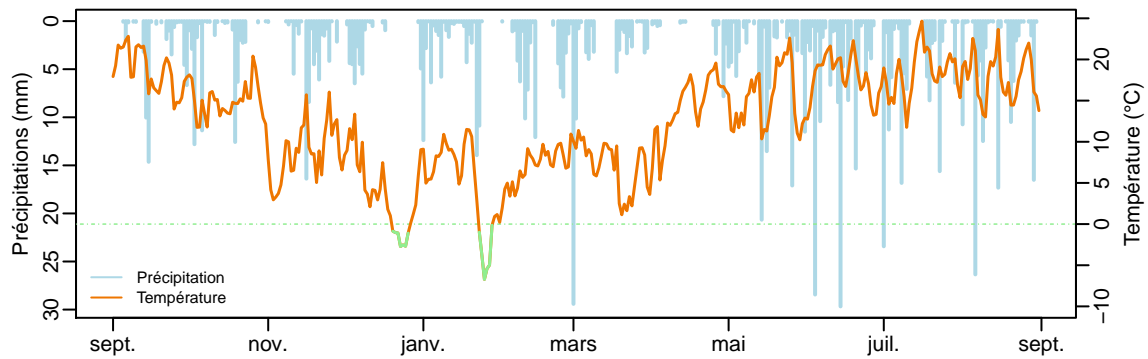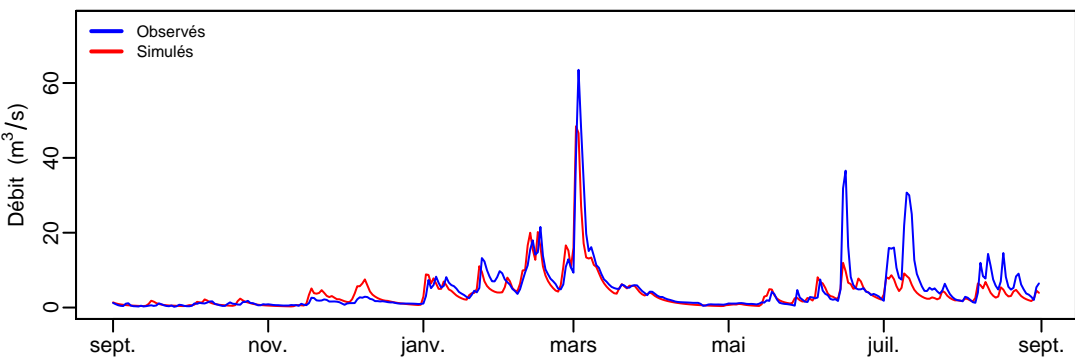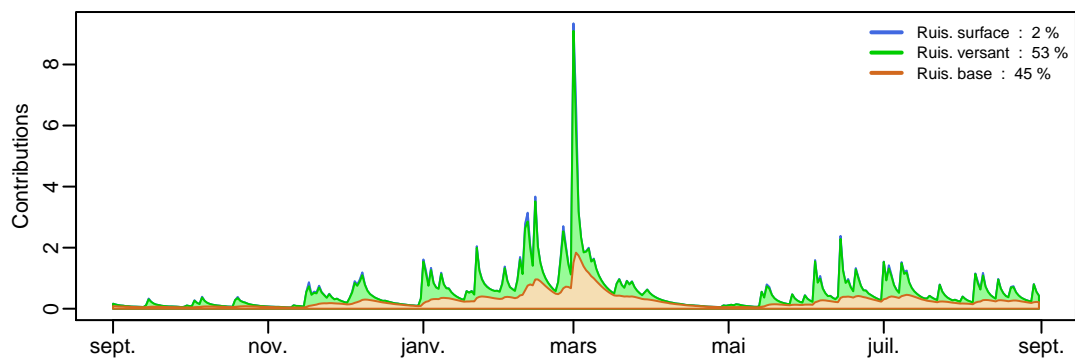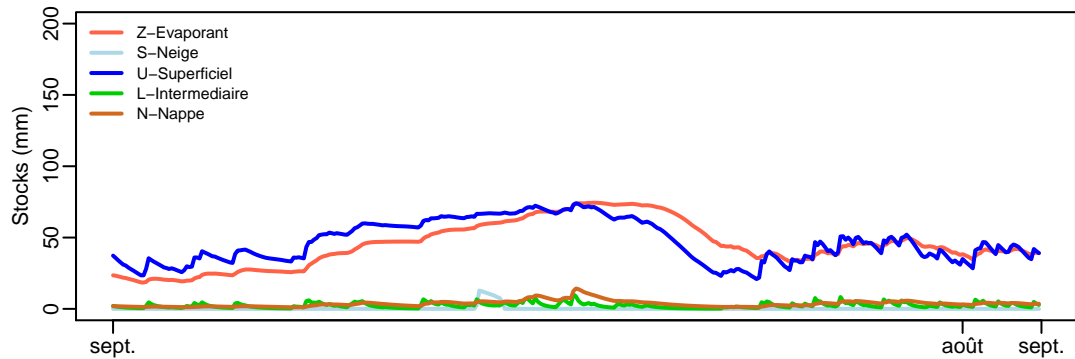

# k1173210 (593.53 km<sup>2</sup>) – année 2007–2008

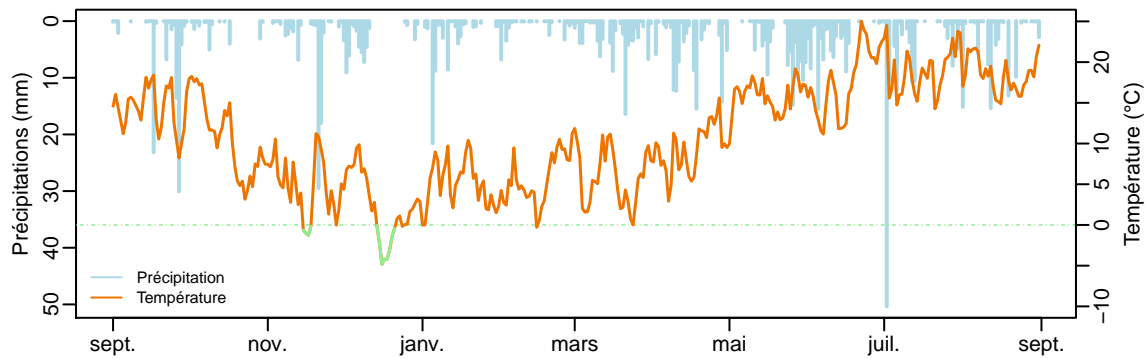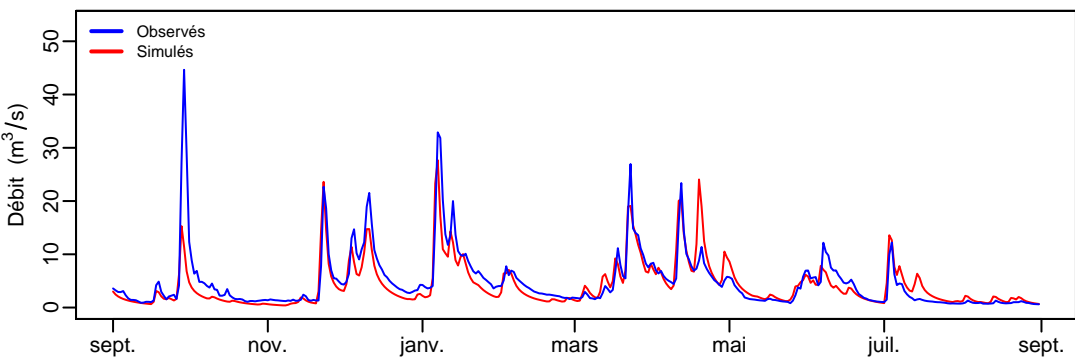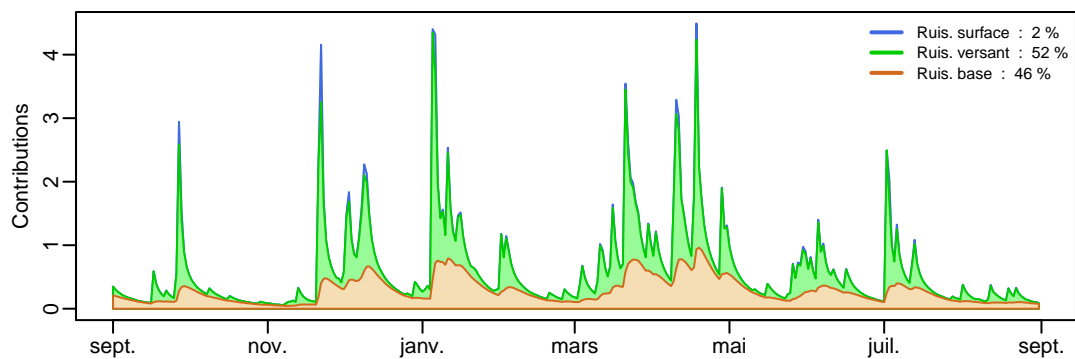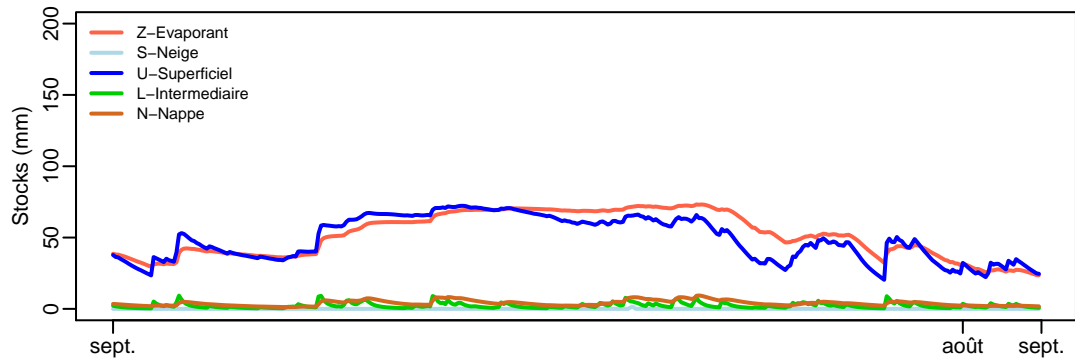

# k1173210 (593.53 km<sup>2</sup>) – année 2008–2009

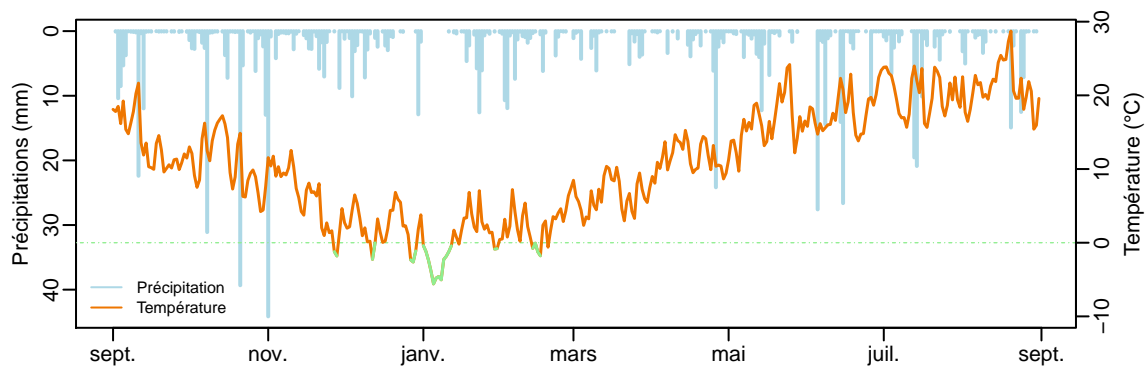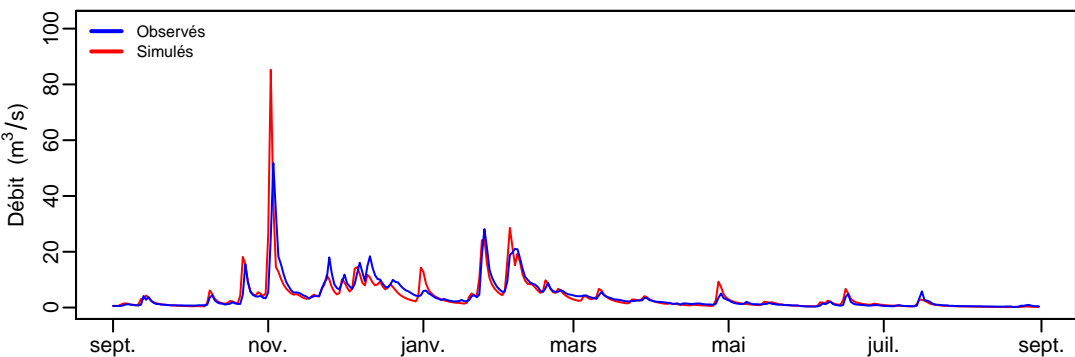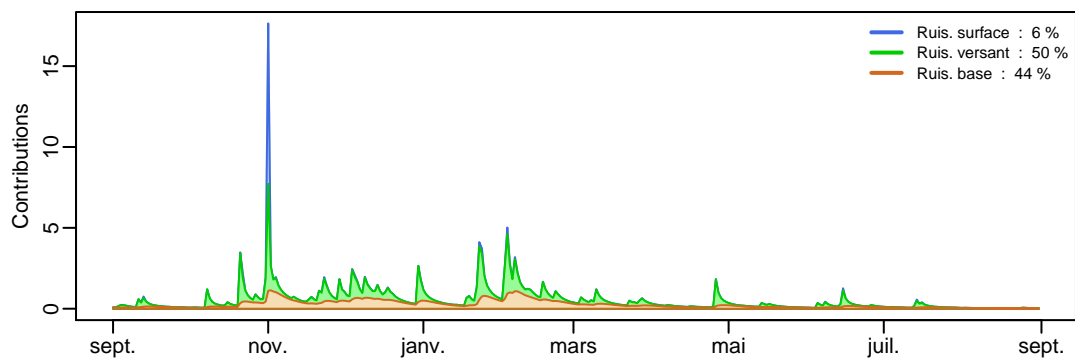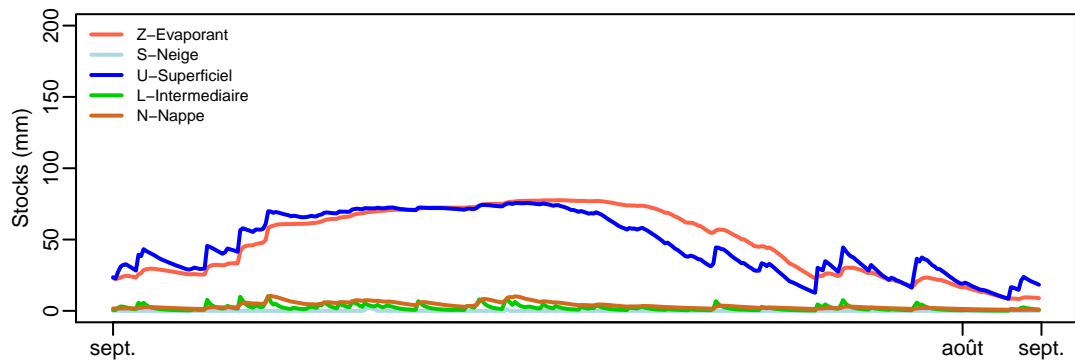

# k1180010 (9338.12 km²) – année 1981–1982

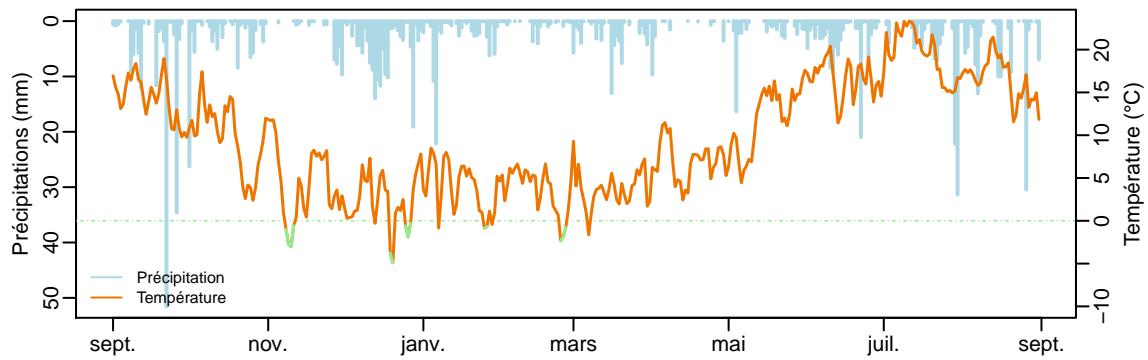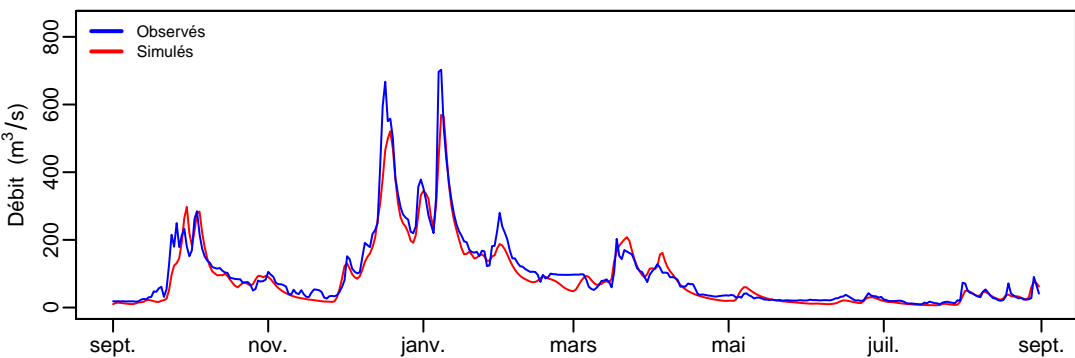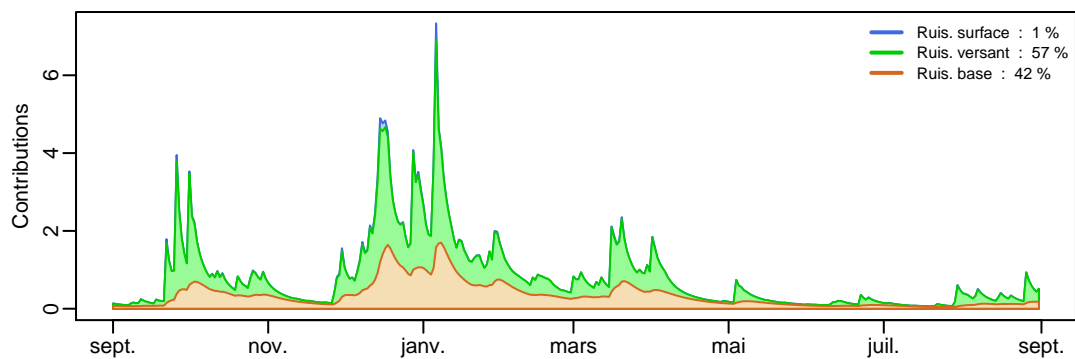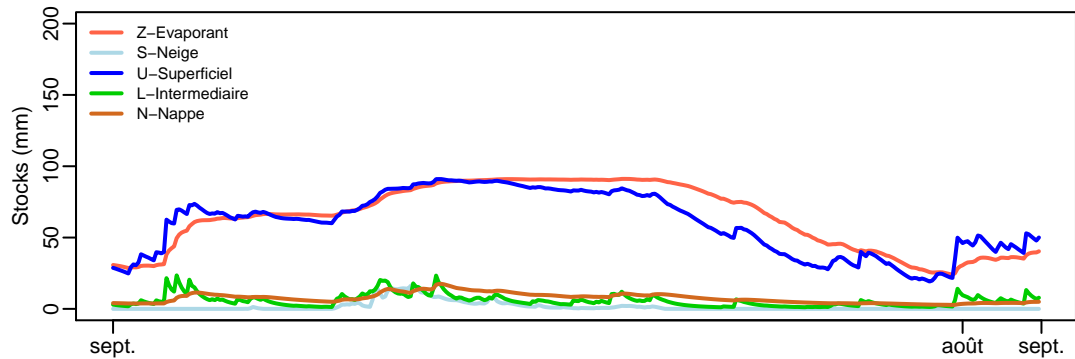

# k1180010 (9338.12 km²) – année 1982–1983

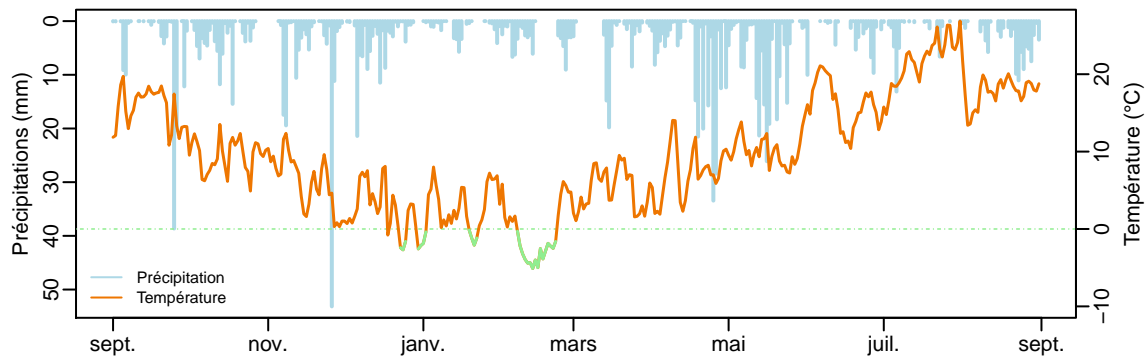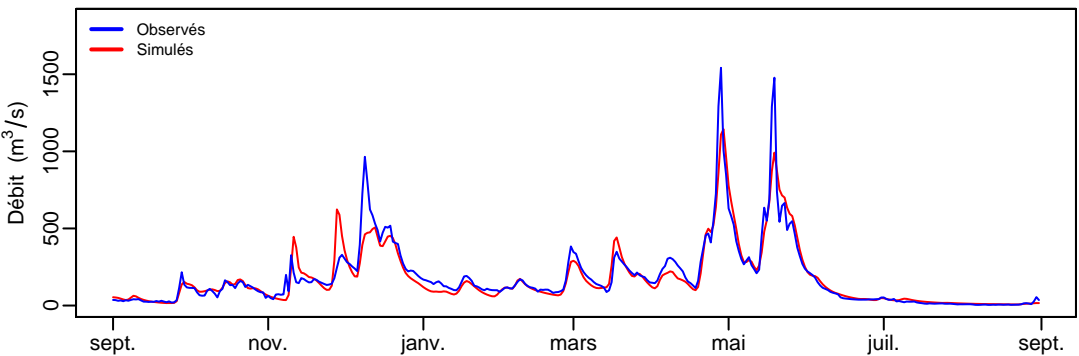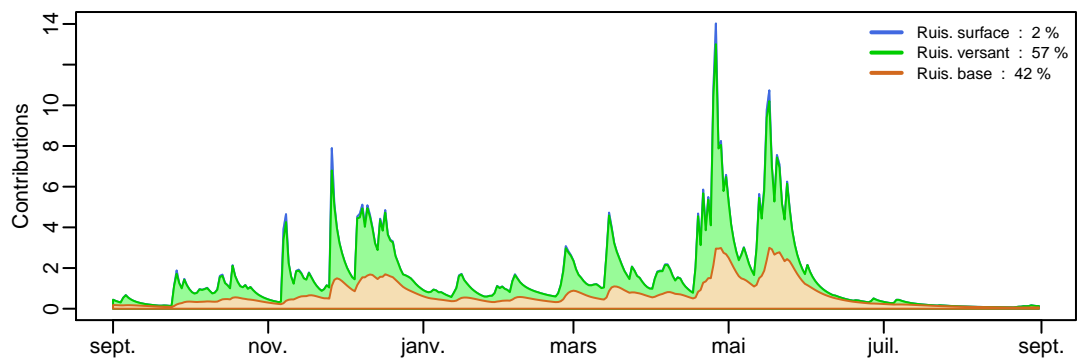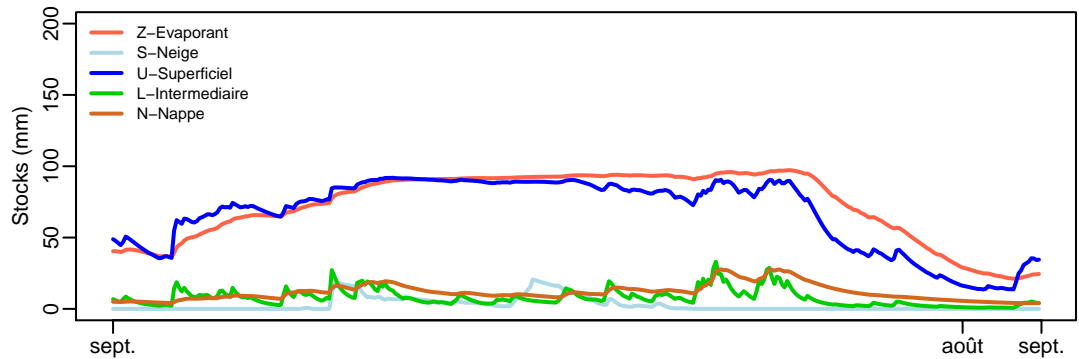

# k1180010 (9338.12 km<sup>2</sup>) – année 1983–1984

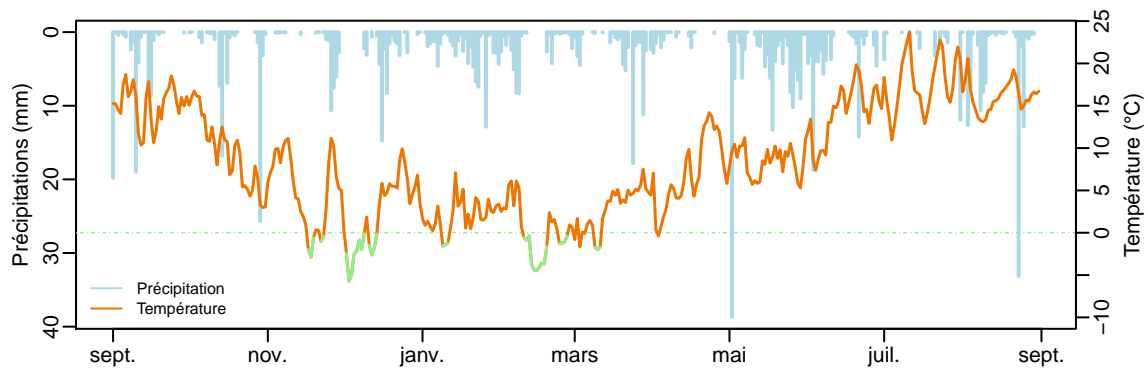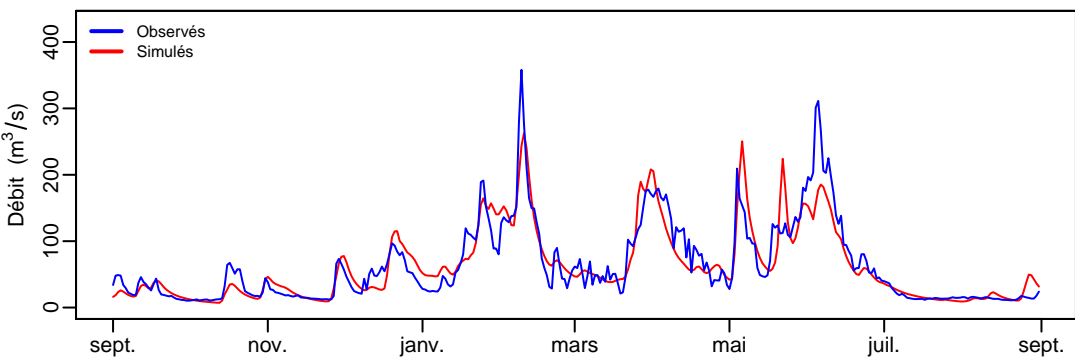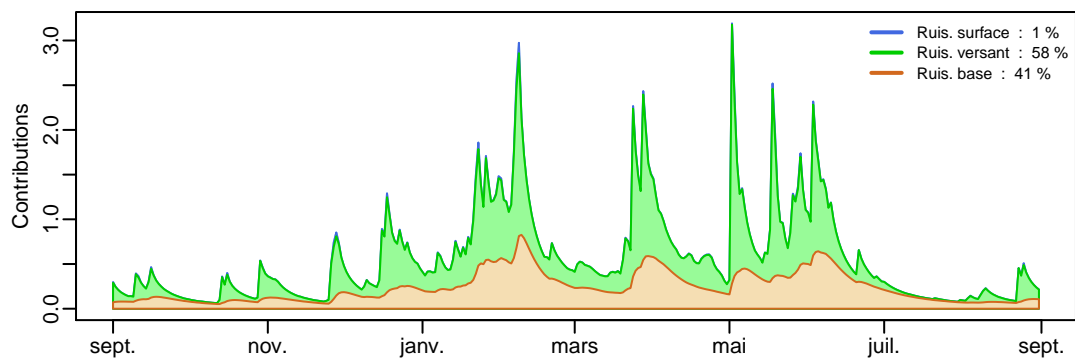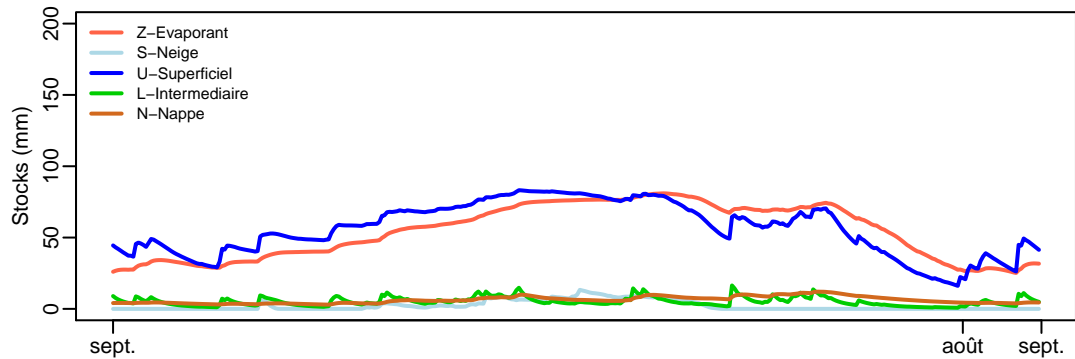



# k1180010 (9338.12 km²) – année 1984–1985

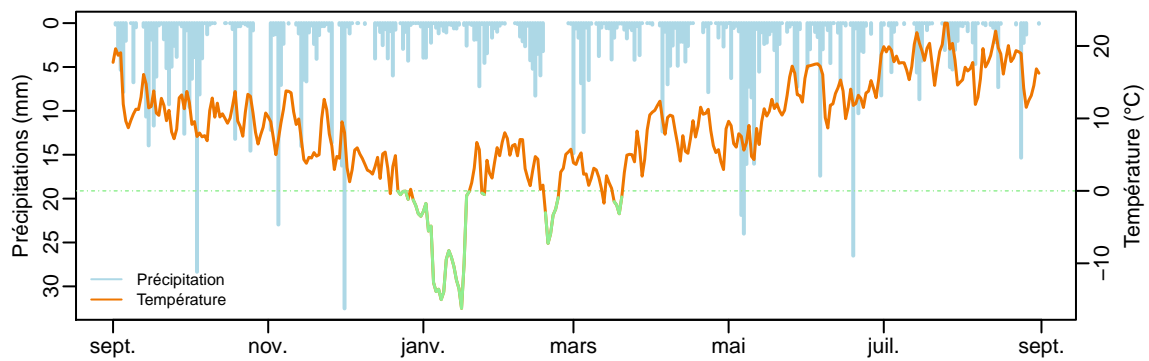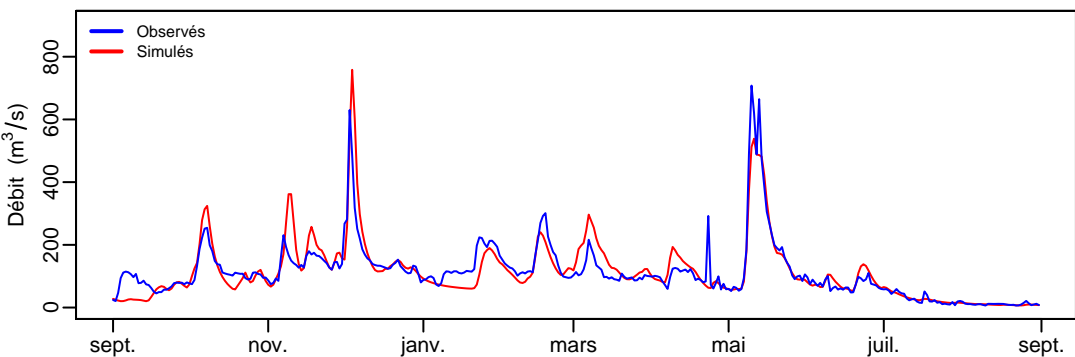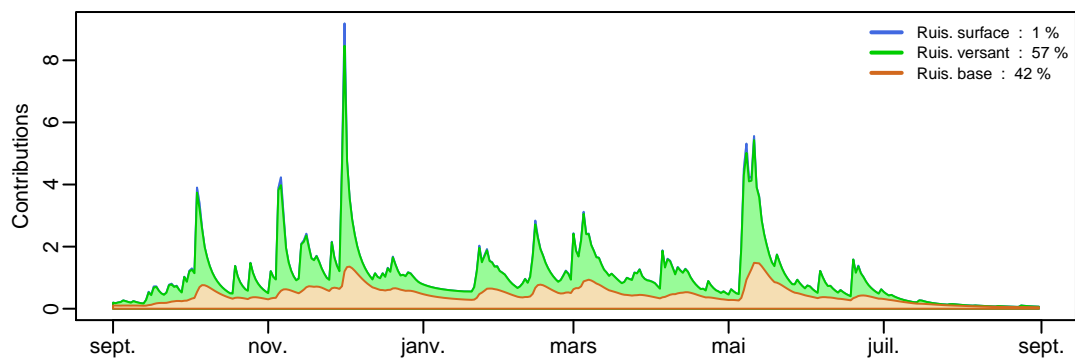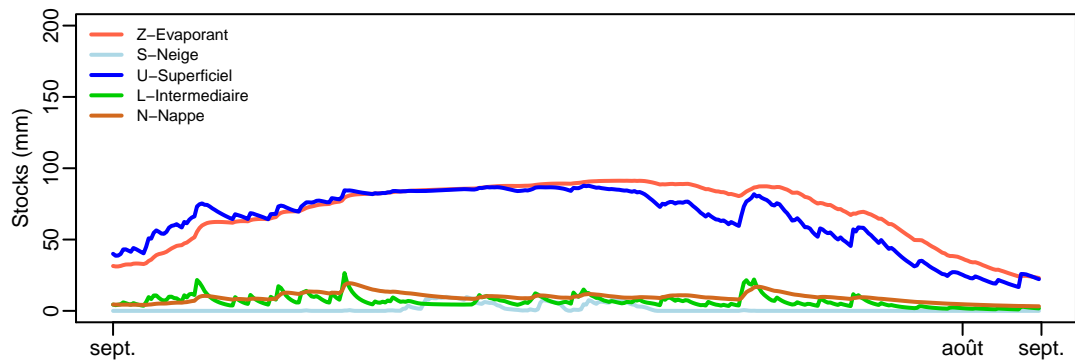

# k1180010 (9338.12 km<sup>2</sup>) – année 1985–1986

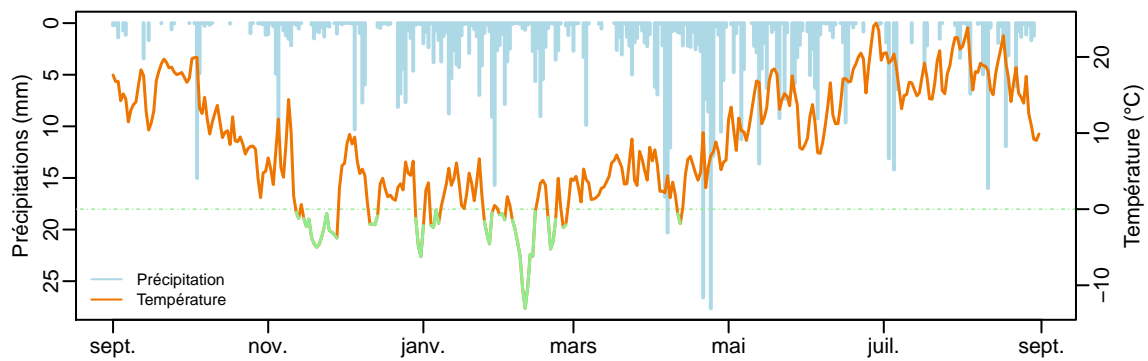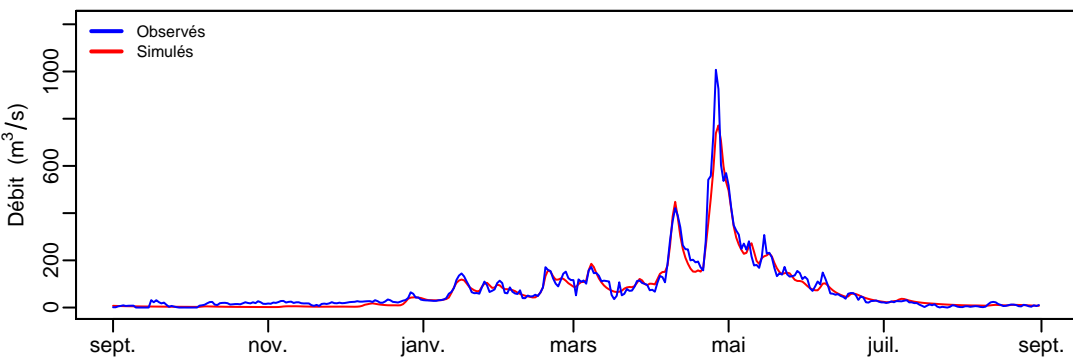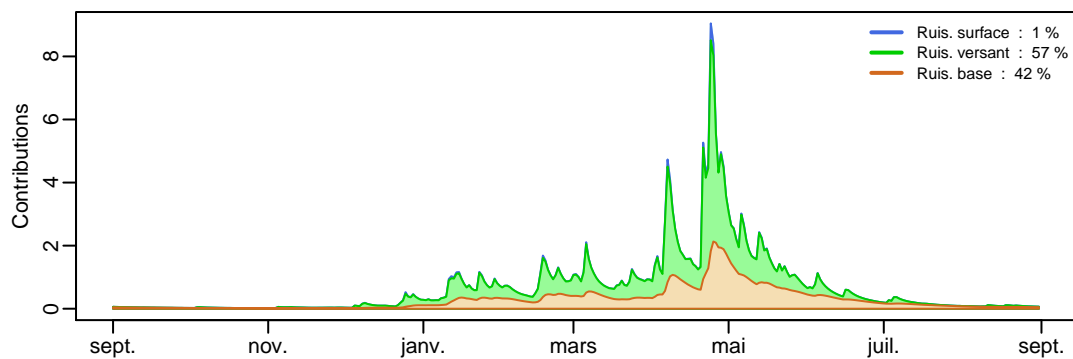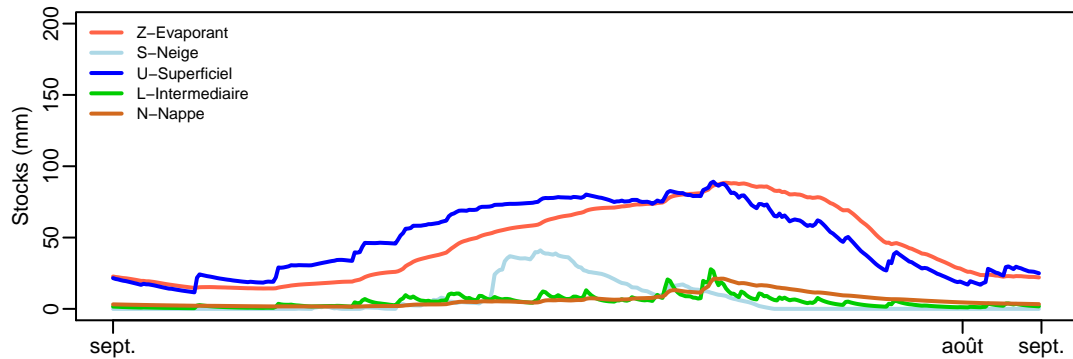

# k1180010 (9338.12 km<sup>2</sup>) – année 1986–1987

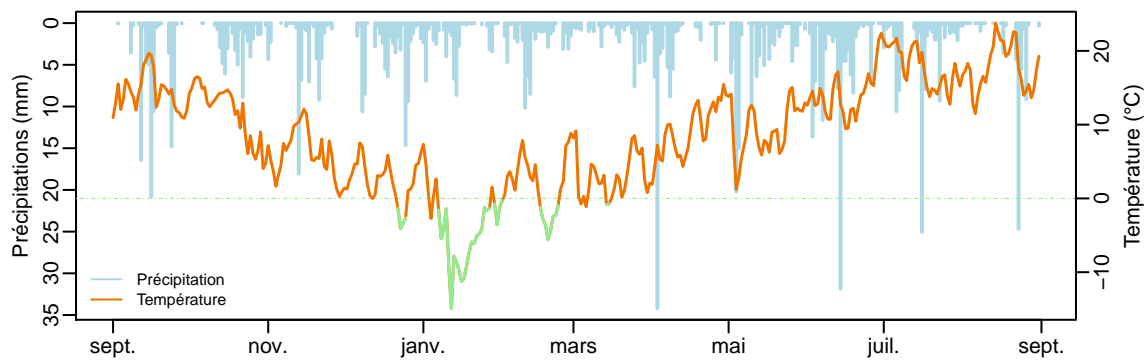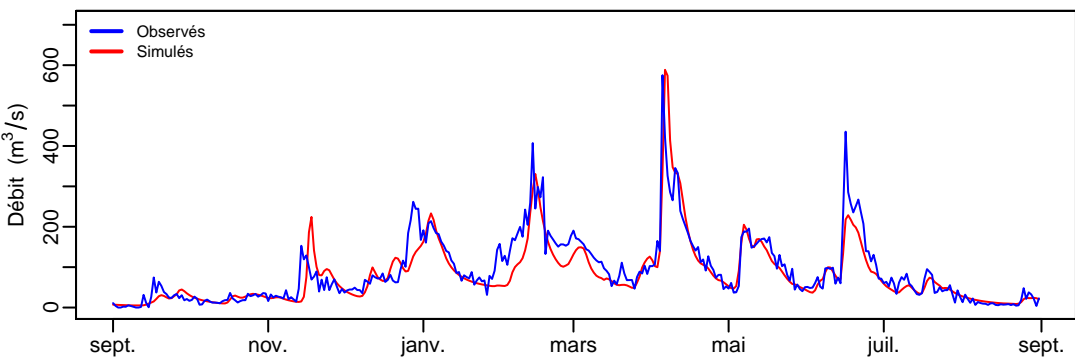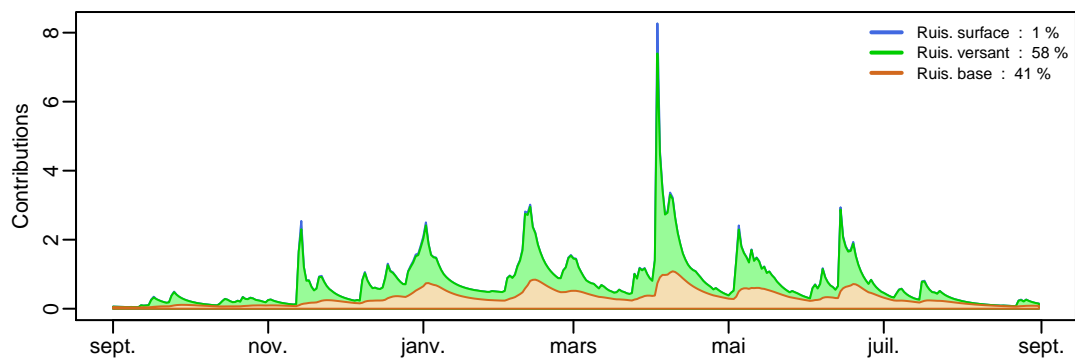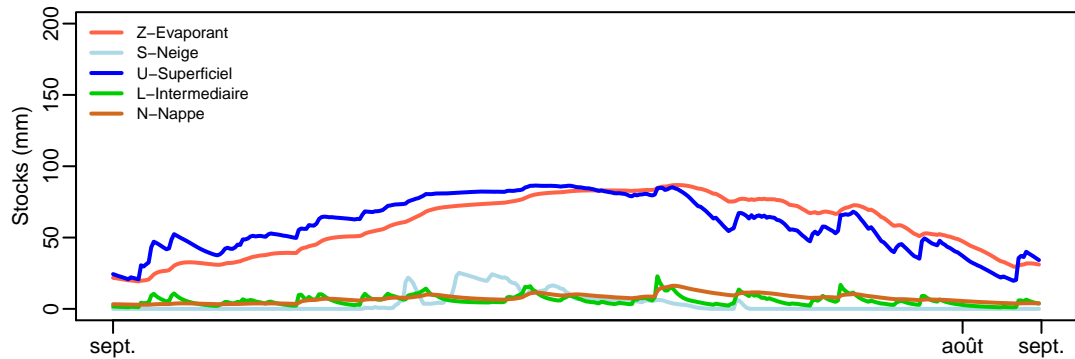

# k1180010 (9338.12 km<sup>2</sup>) – année 1987–1988

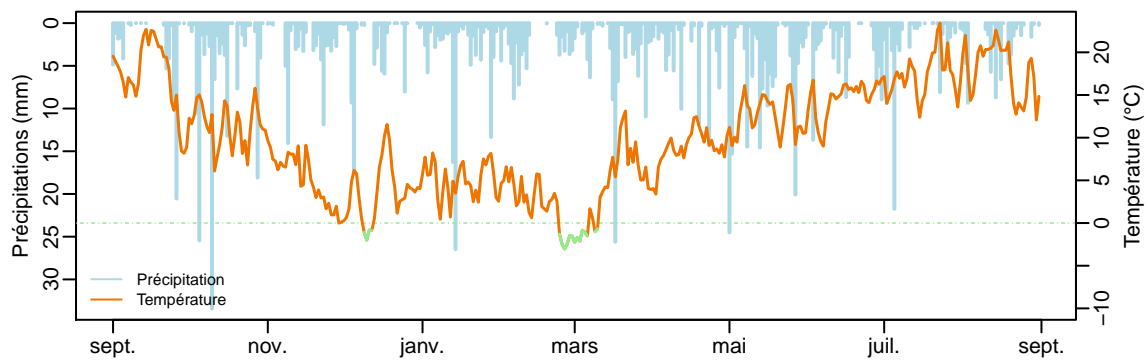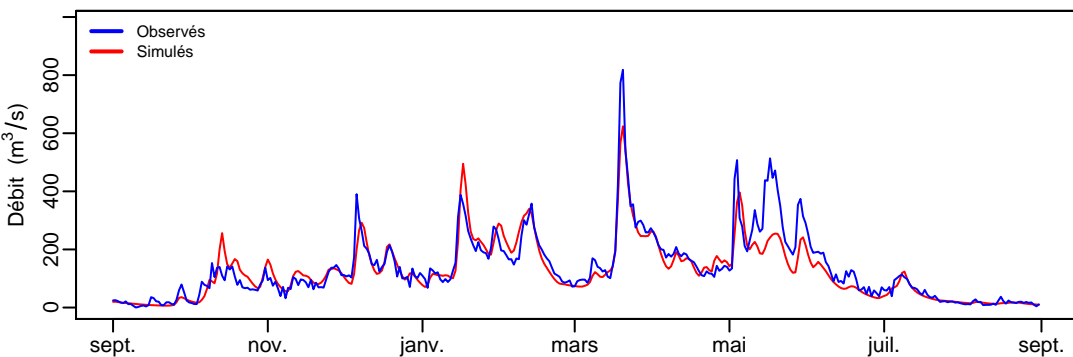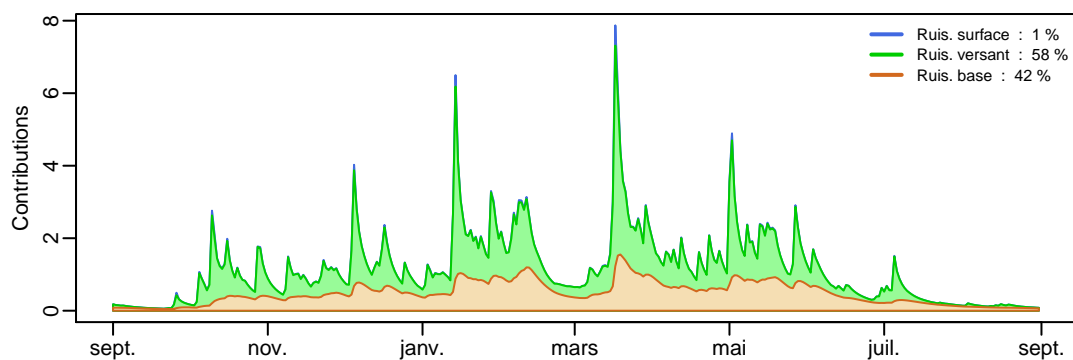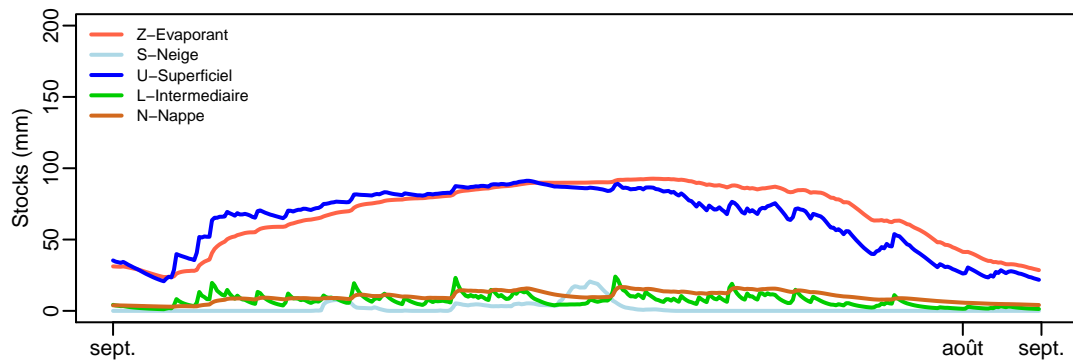

# k1180010 (9338.12 km²) – année 1988–1989

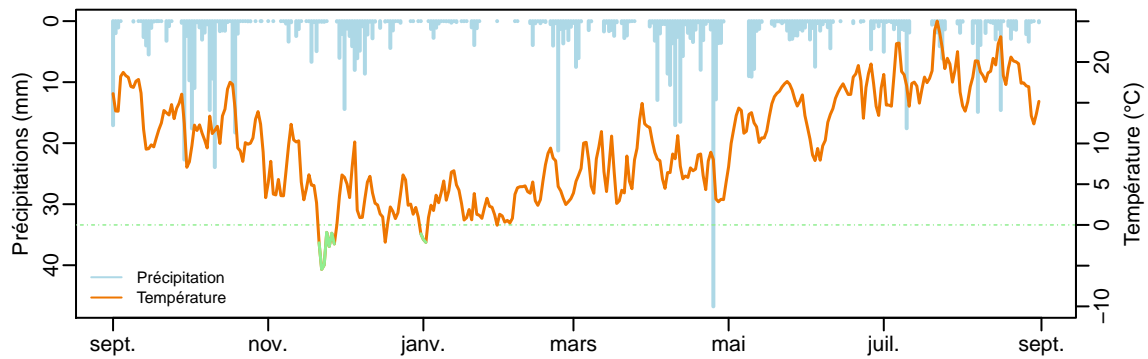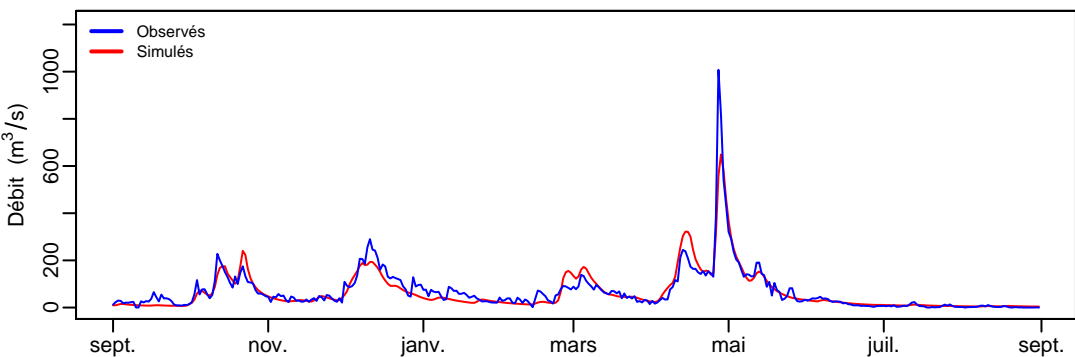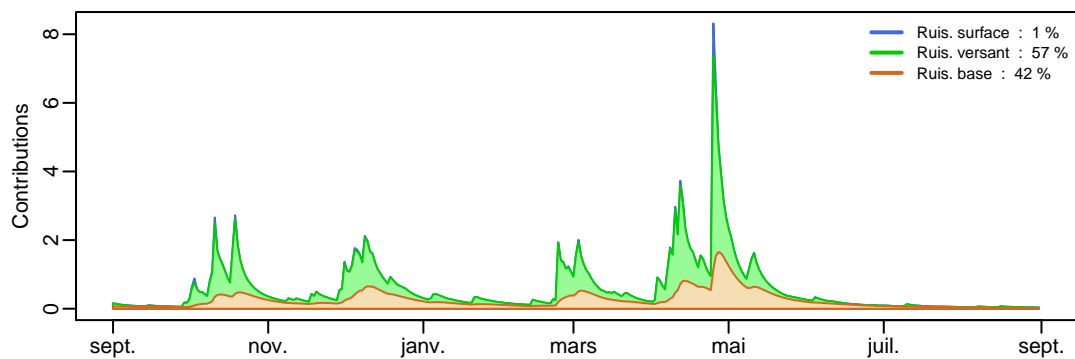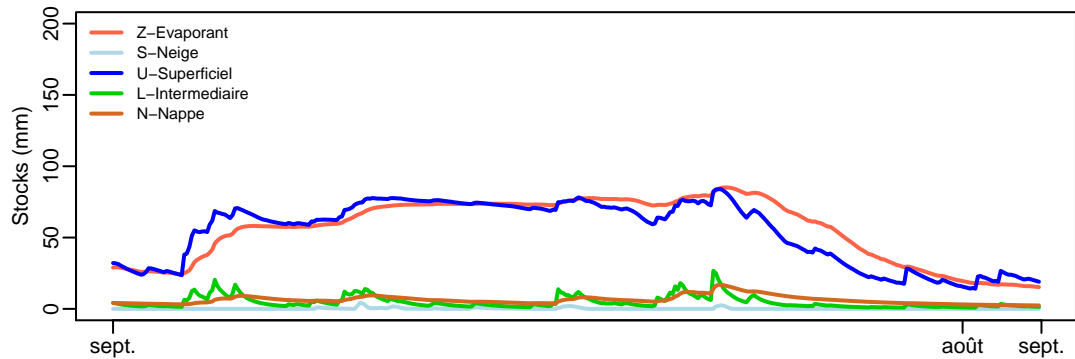

# k1180010 (9338.12 km²) – année 1989–1990

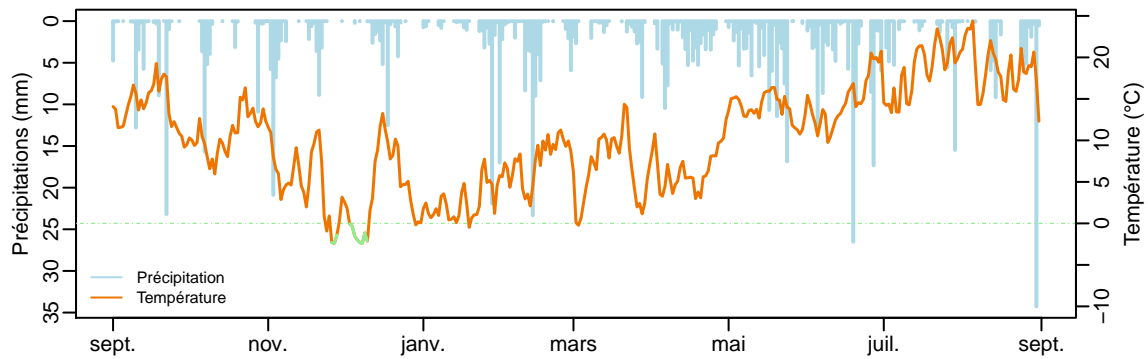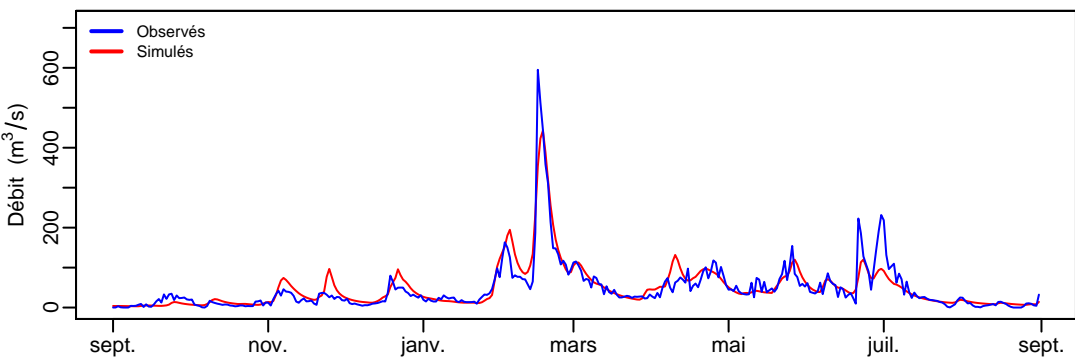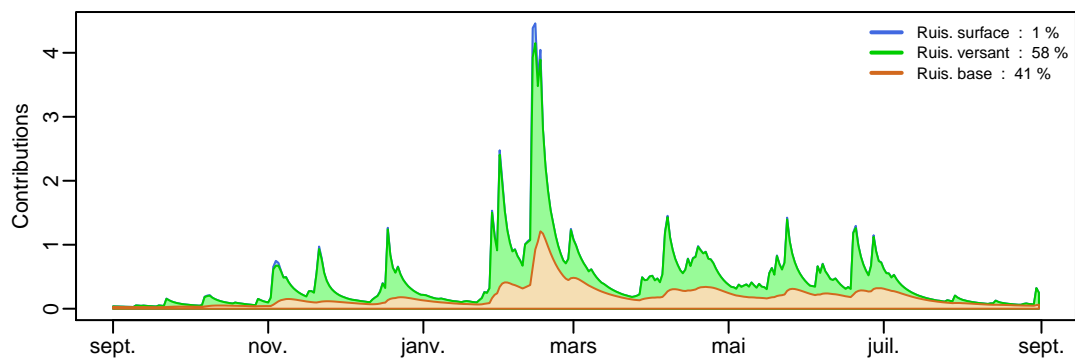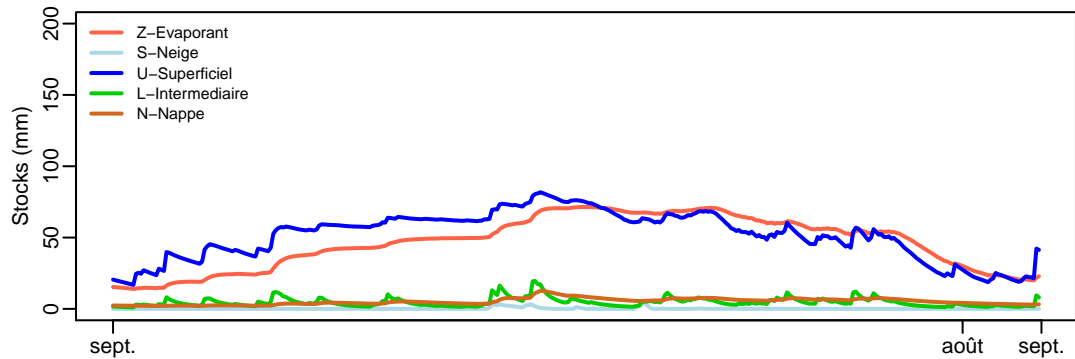

# k1180010 (9338.12 km<sup>2</sup>) – année 1990–1991

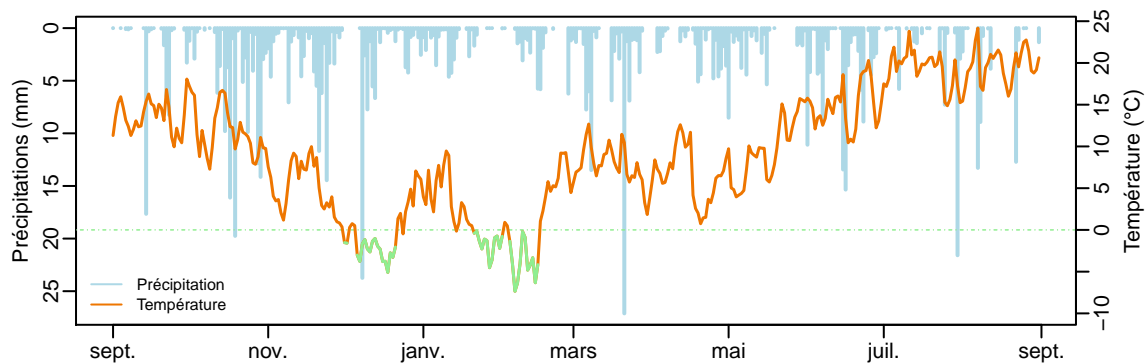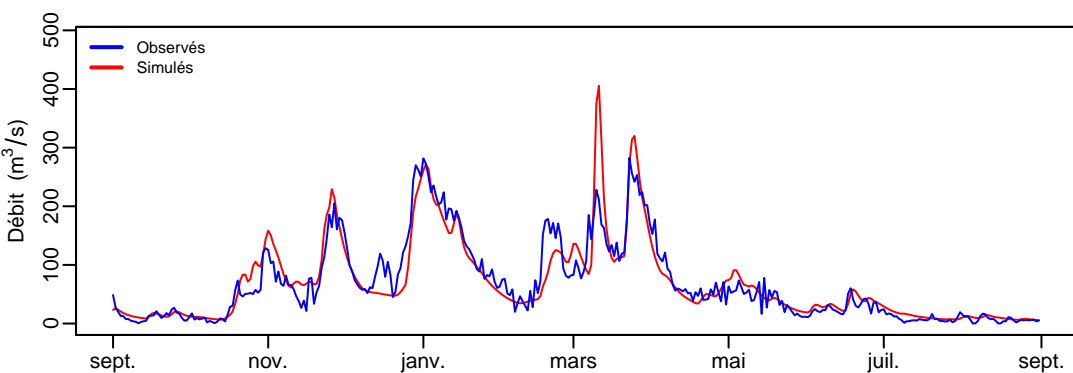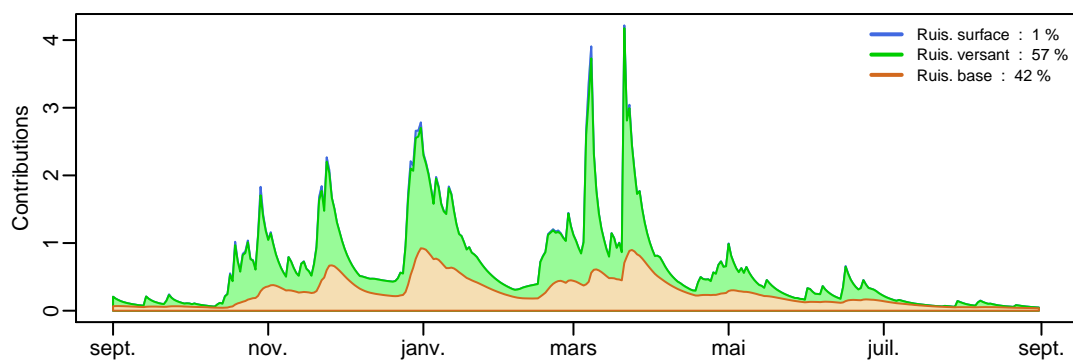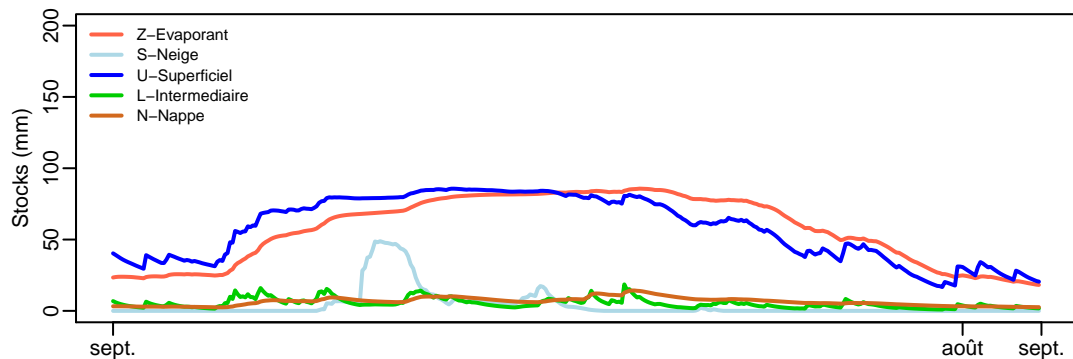

# k1180010 (9338.12 km²) – année 1991–1992

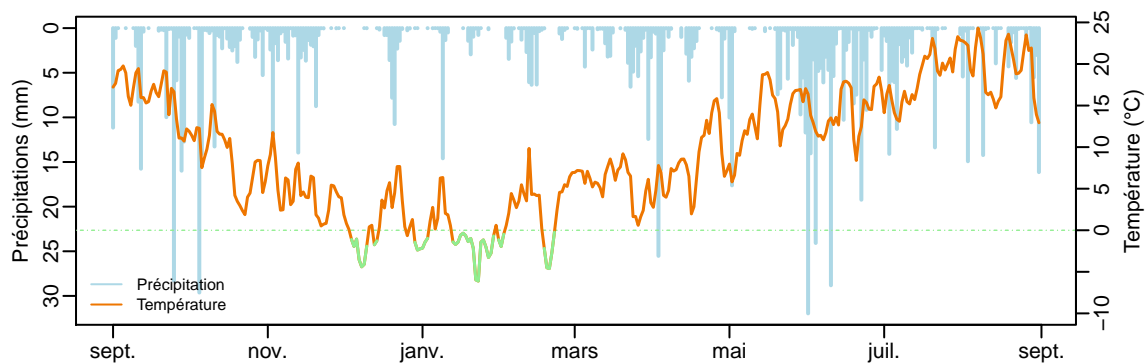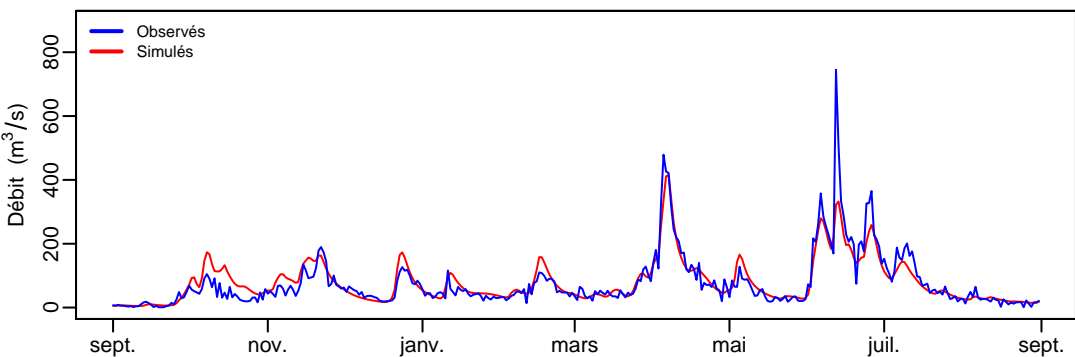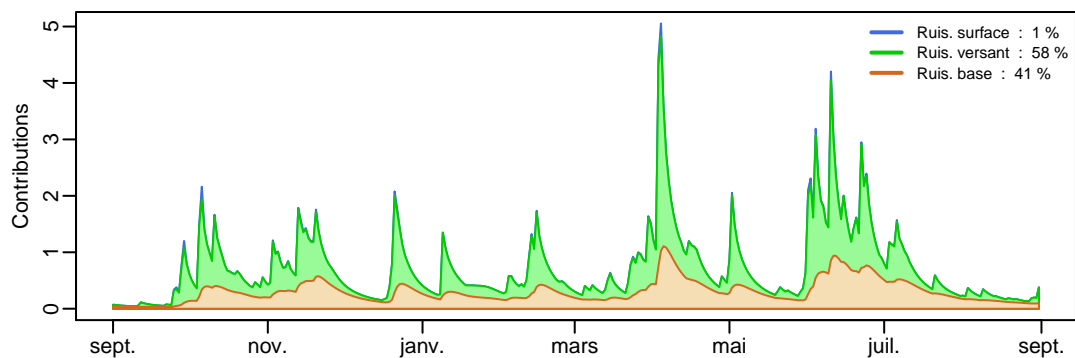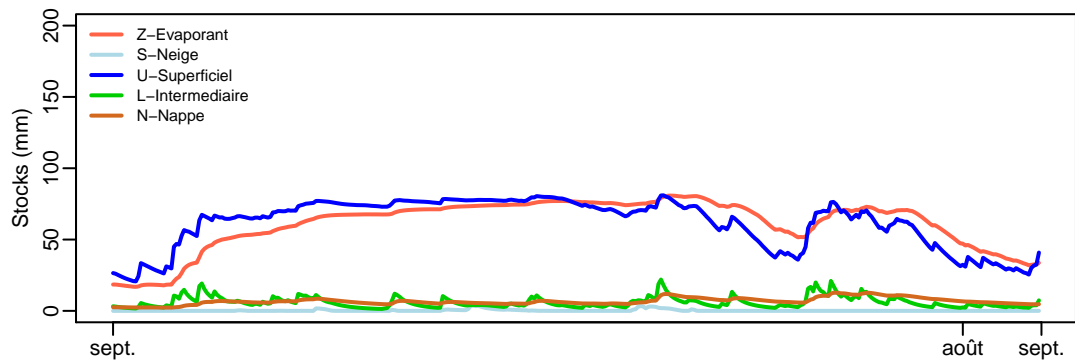



# k1180010 (9338.12 km<sup>2</sup>) – année 1992–1993

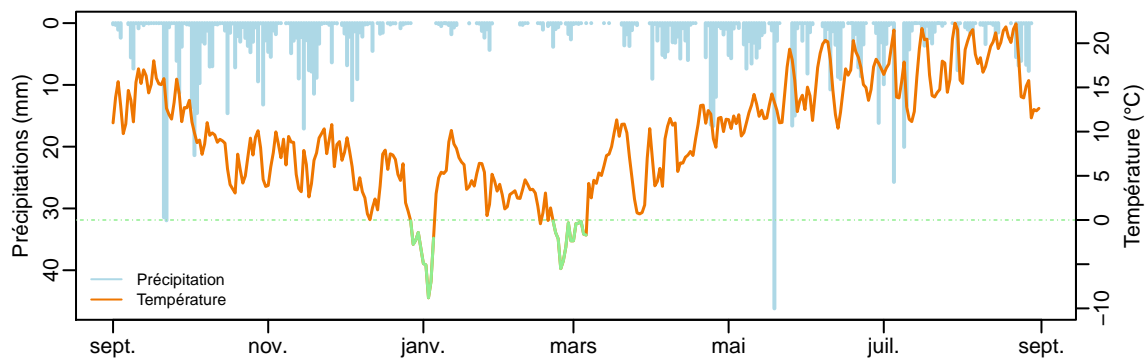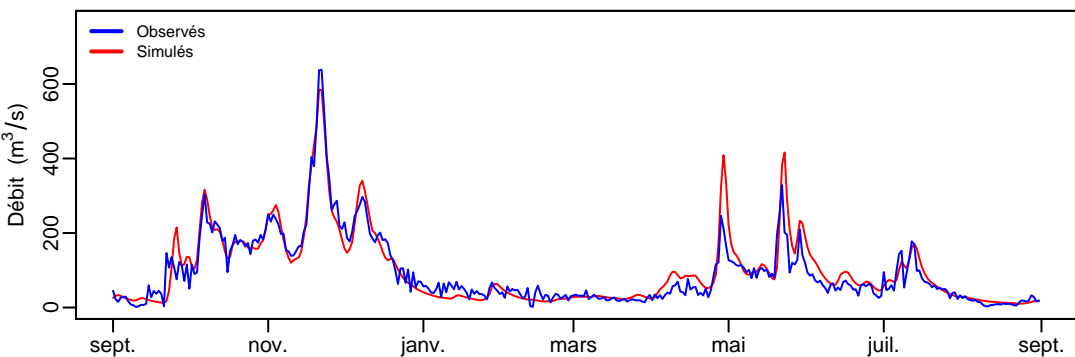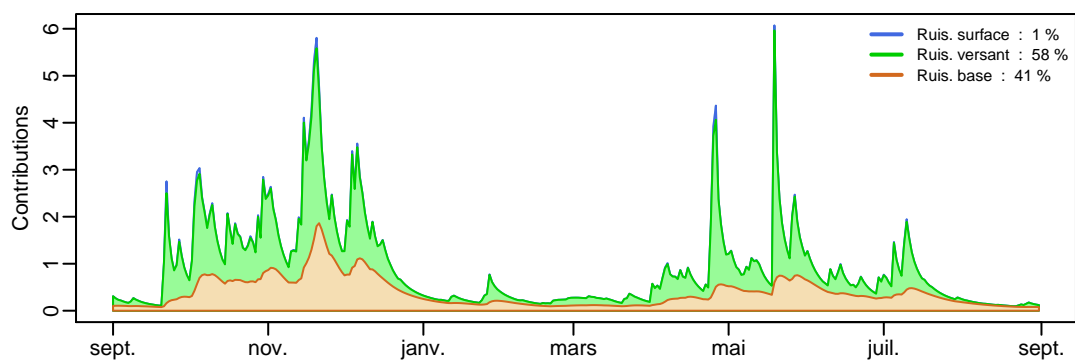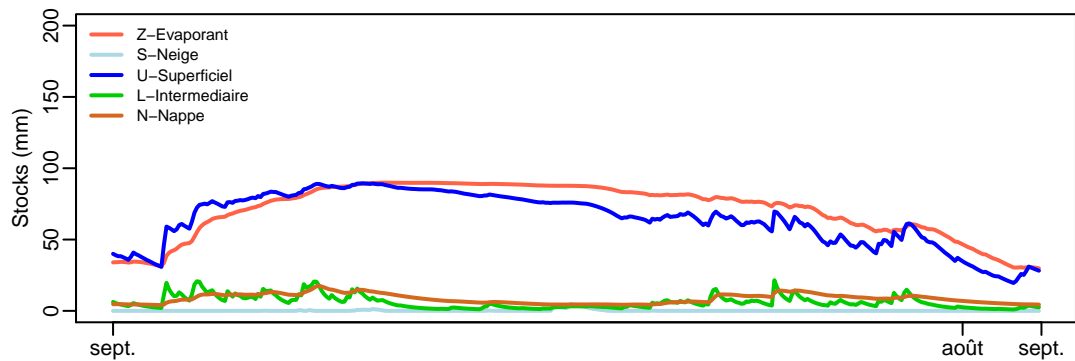

# k1180010 (9338.12 km<sup>2</sup>) – année 1993–1994

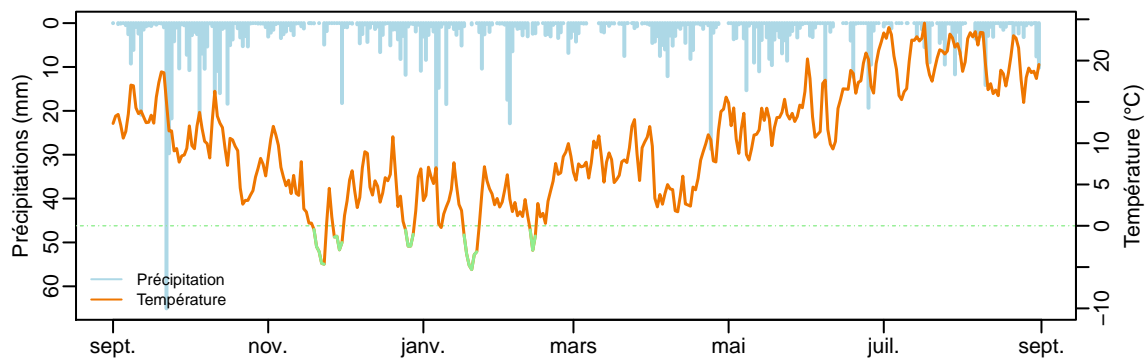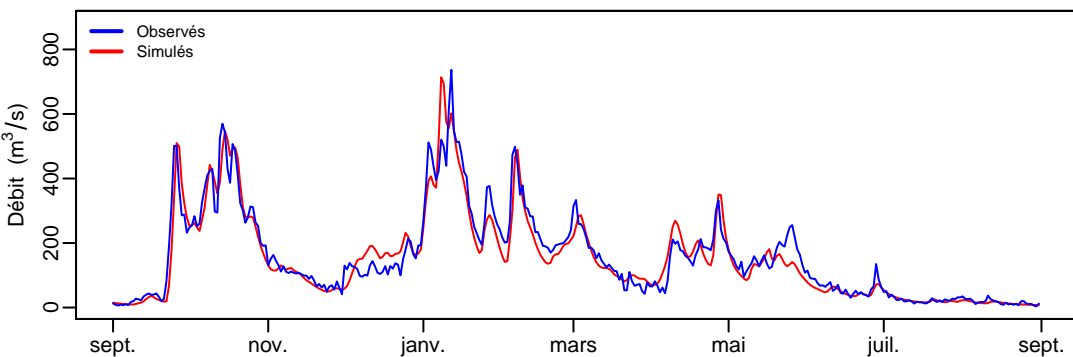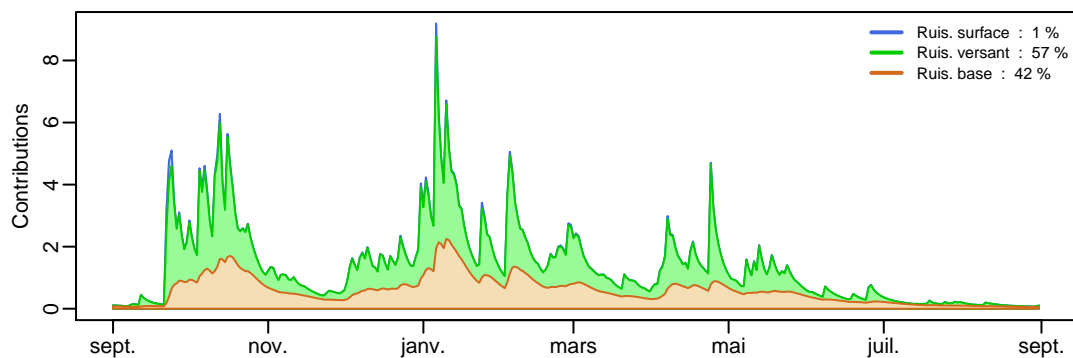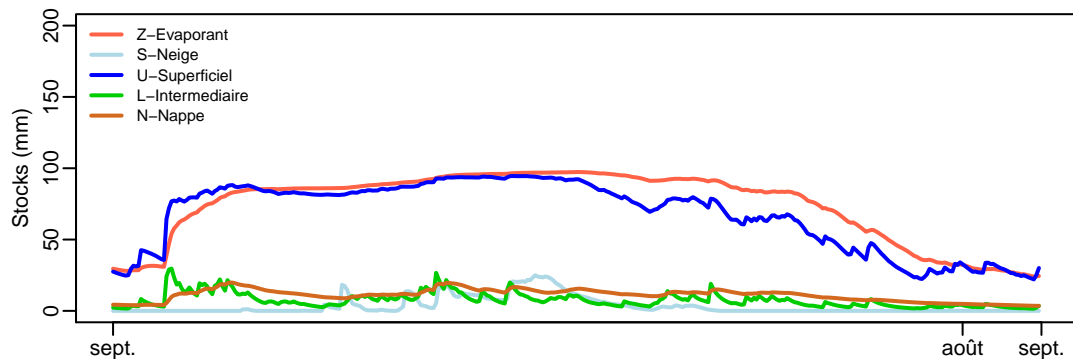

# k1180010 (9338.12 km<sup>2</sup>) – année 1994–1995

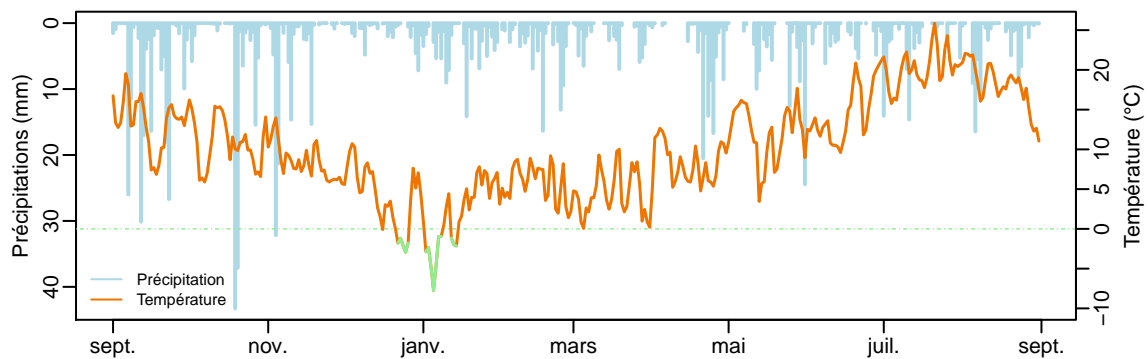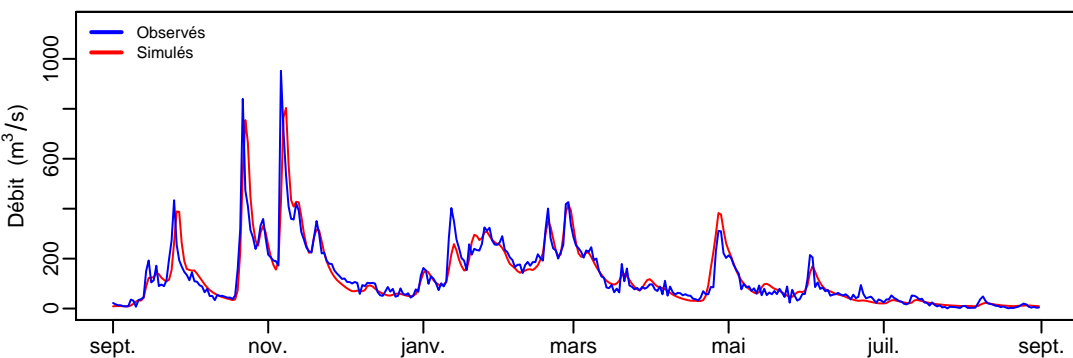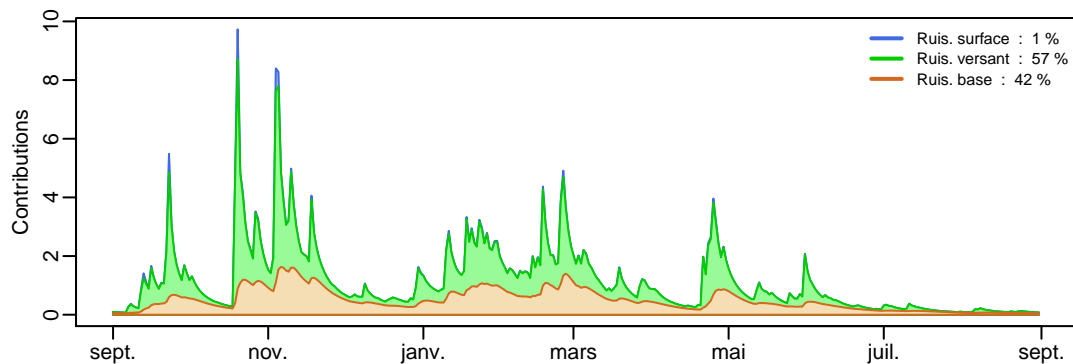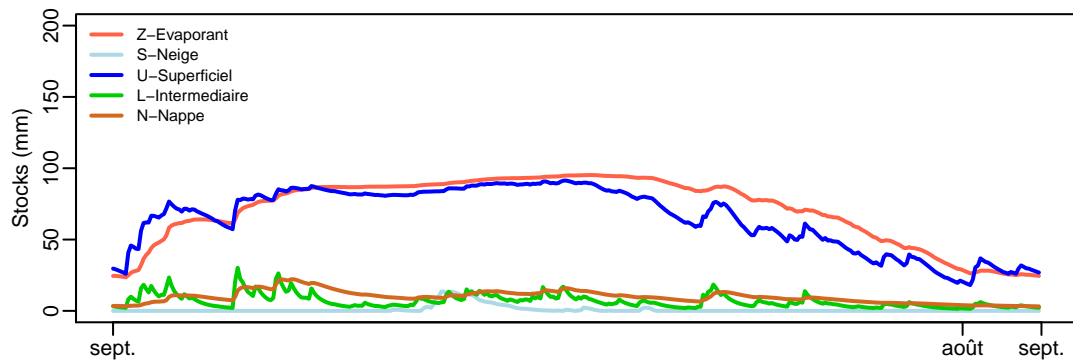

# k1180010 (9338.12 km²) – année 1995–1996

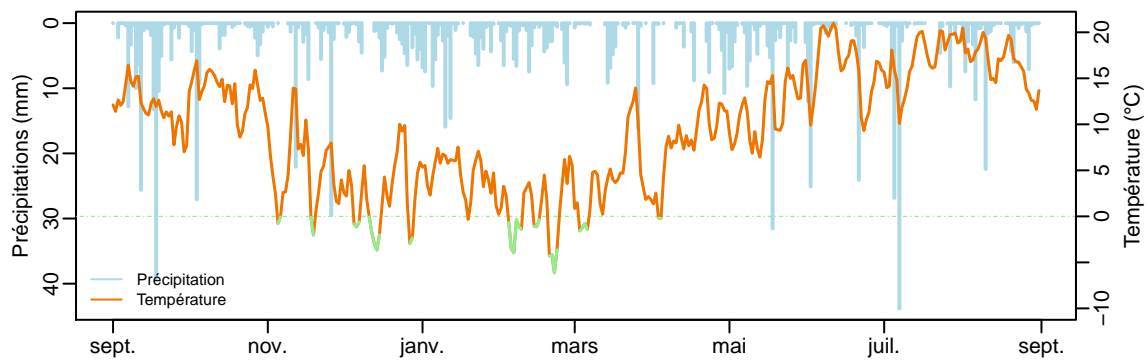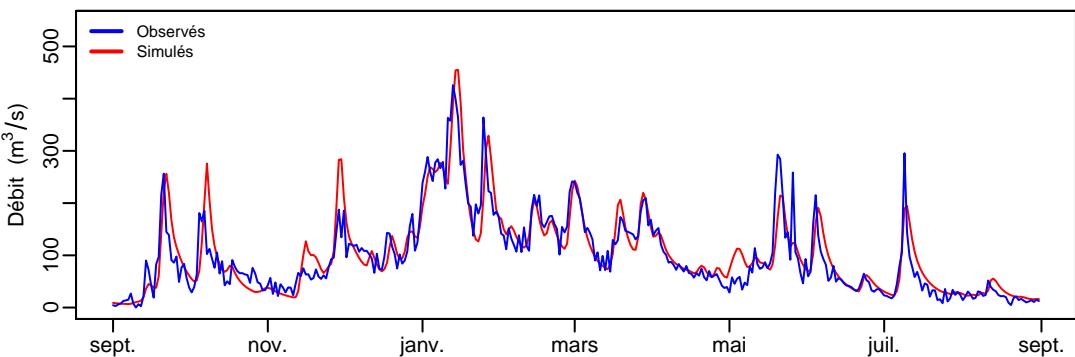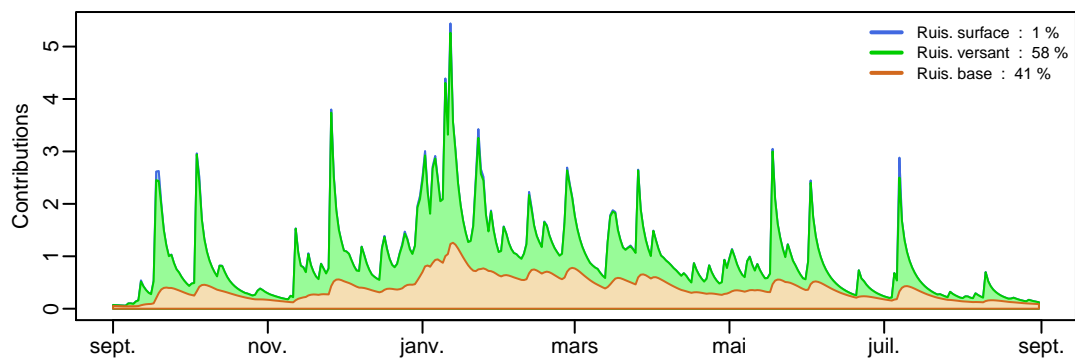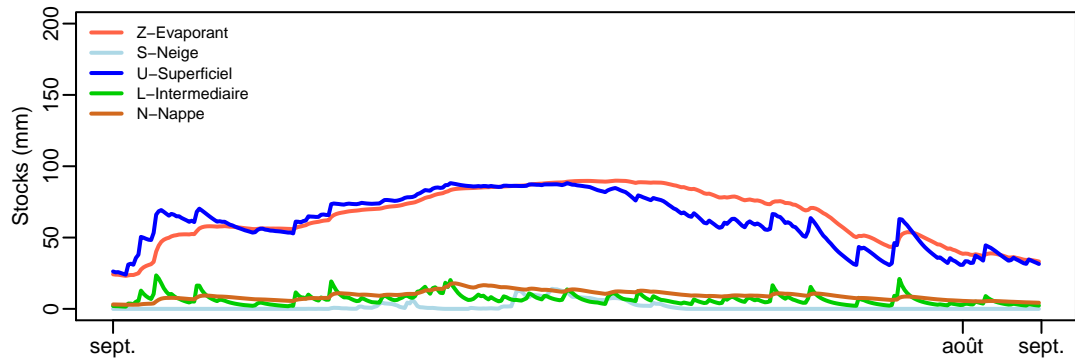

# k1180010 (9338.12 km²) – année 1996–1997

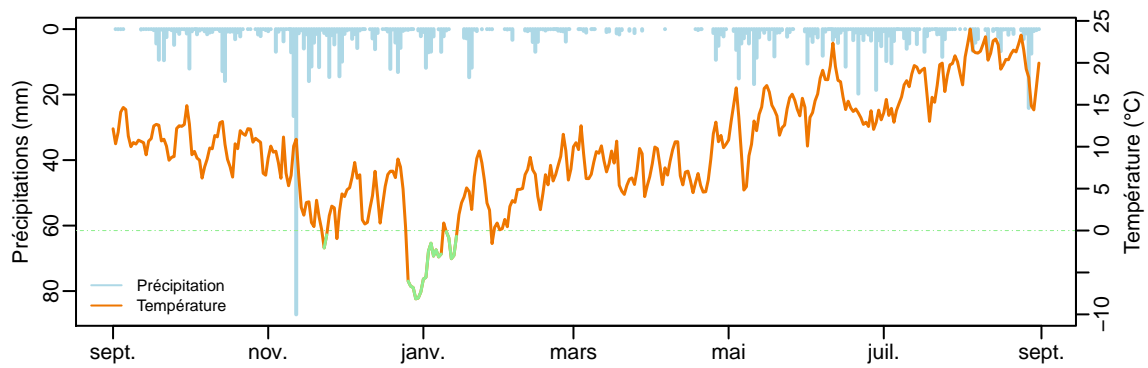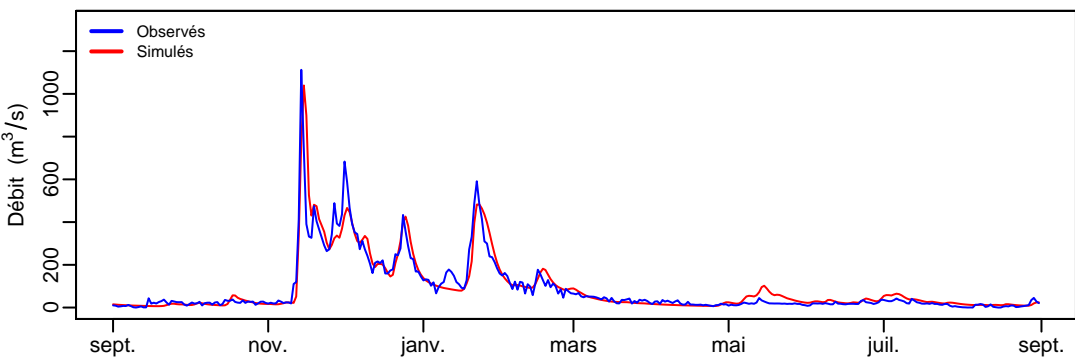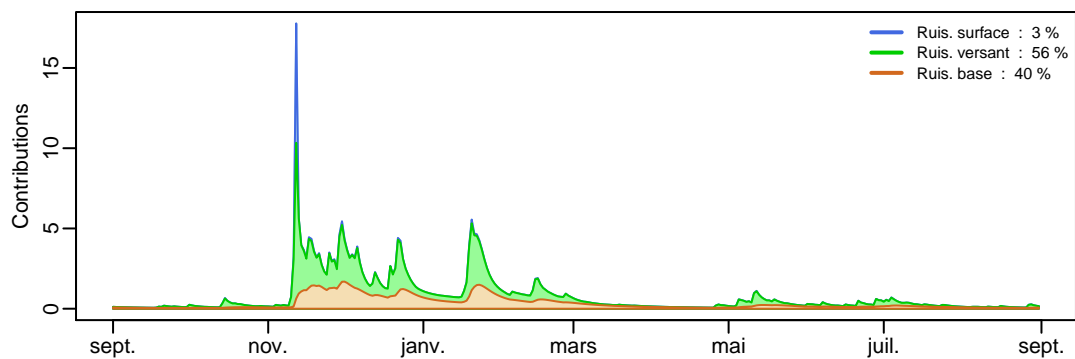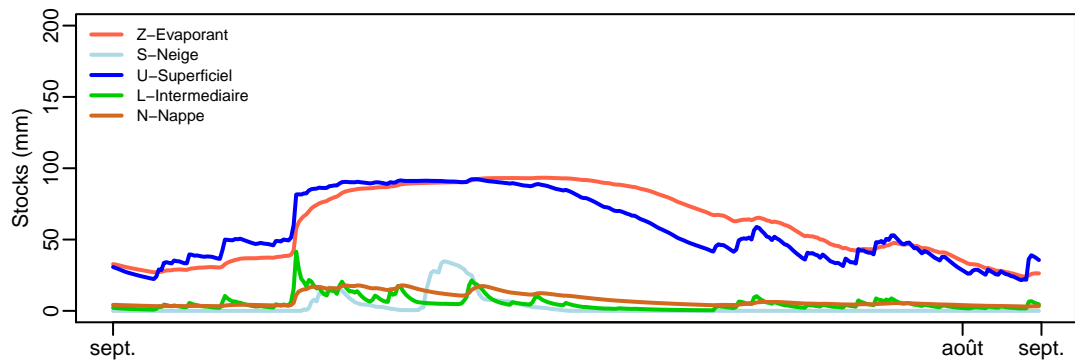

# k1180010 (9338.12 km²) – année 1997–1998

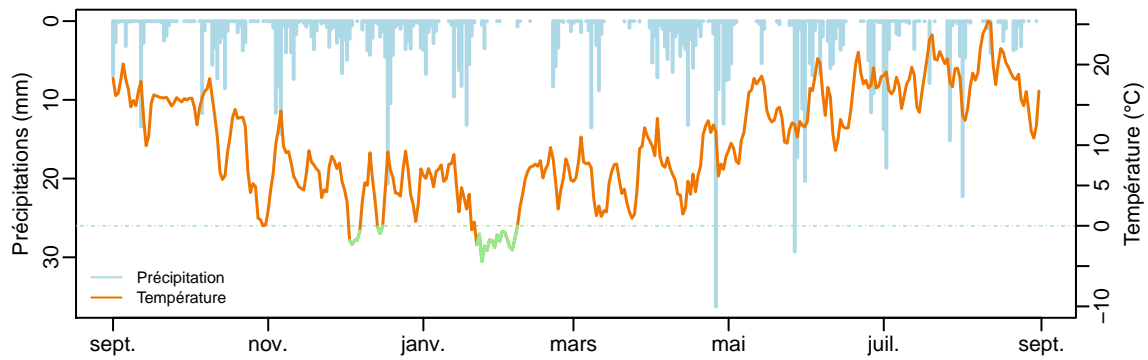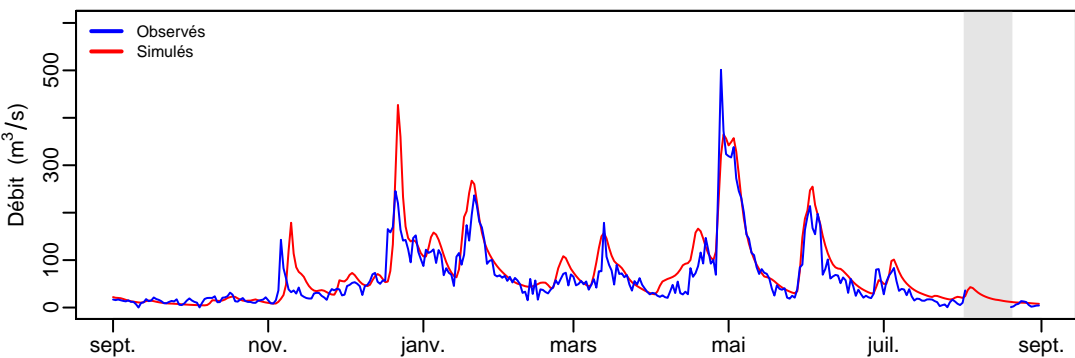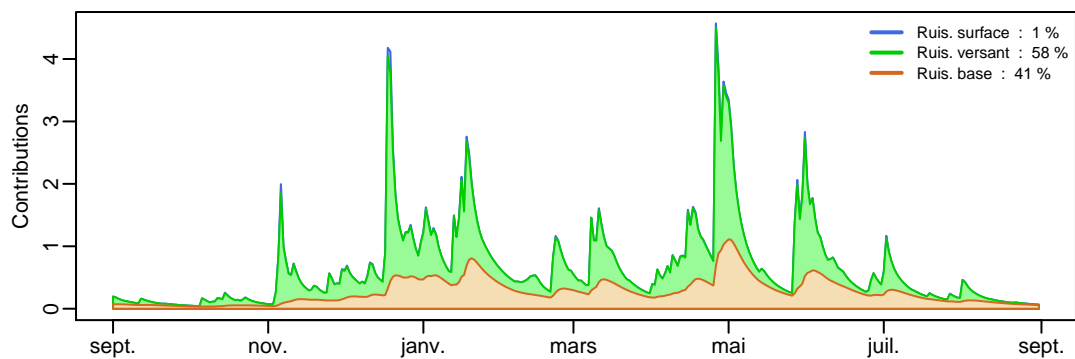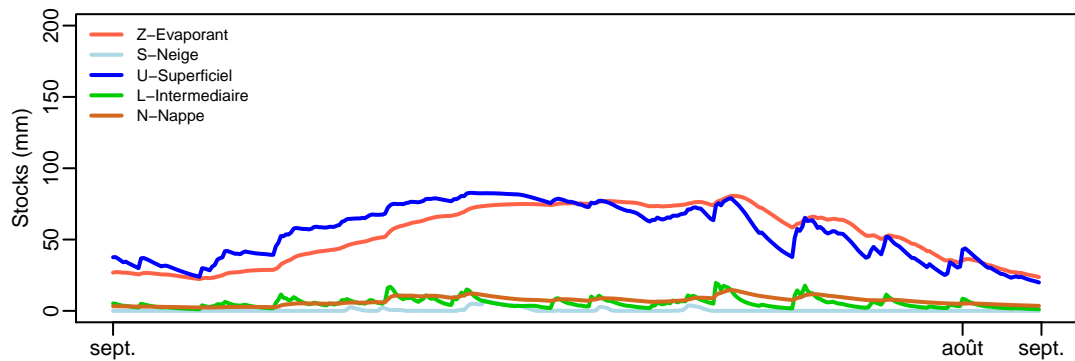

# k1180010 (9338.12 km<sup>2</sup>) – année 1998–1999

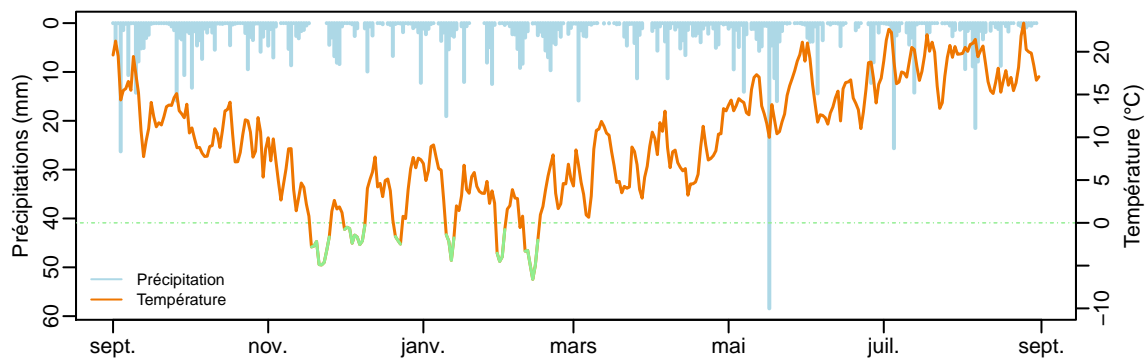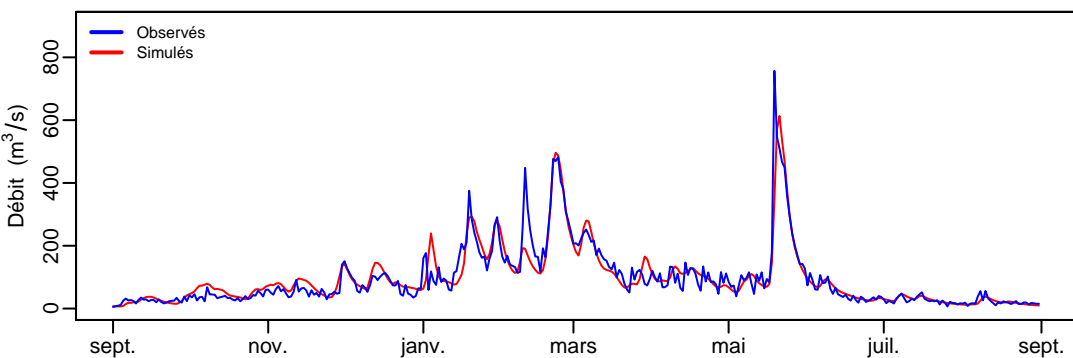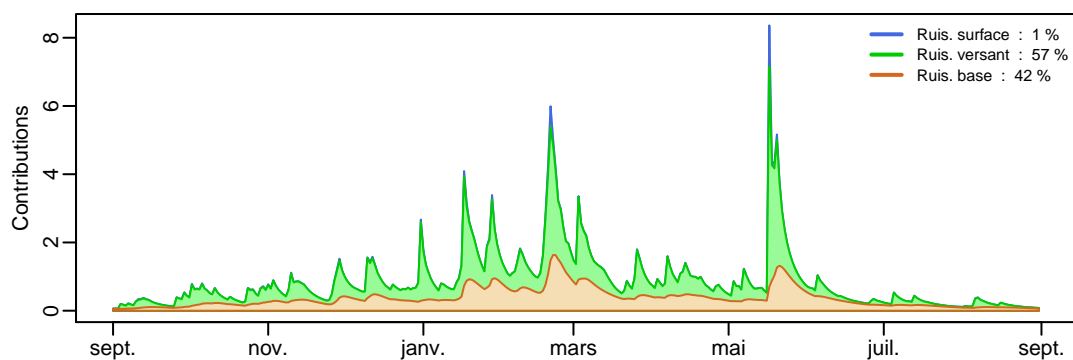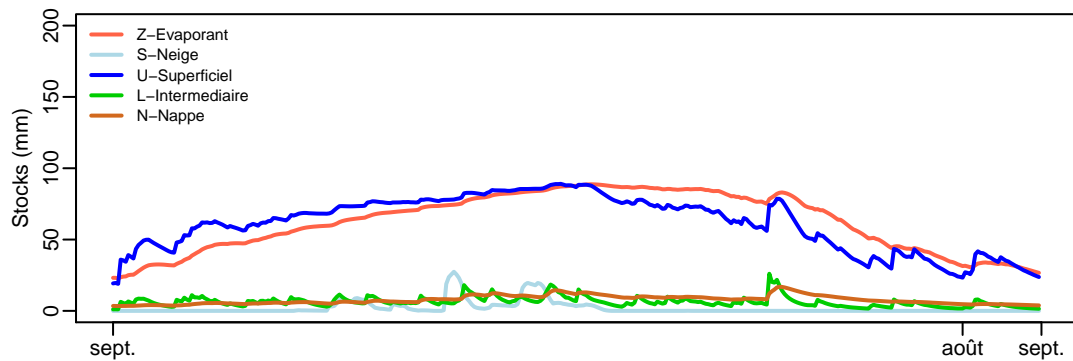

# k1180010 (9338.12 km<sup>2</sup>) – année 1999–2000

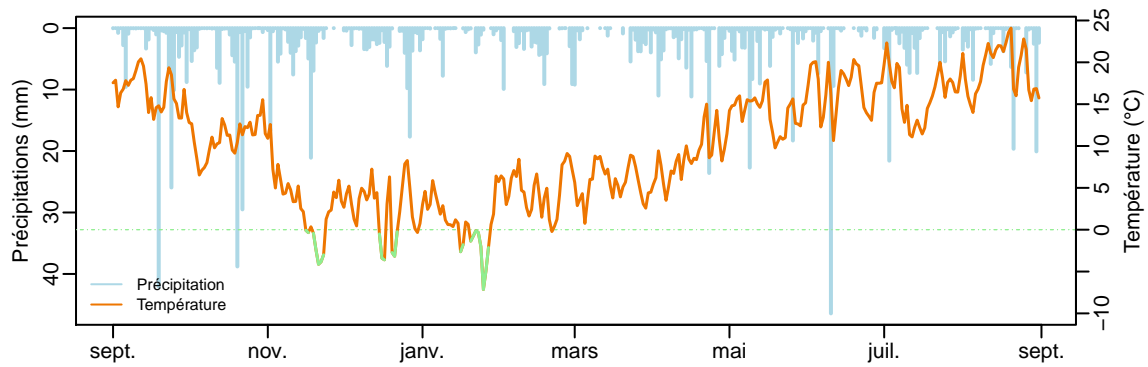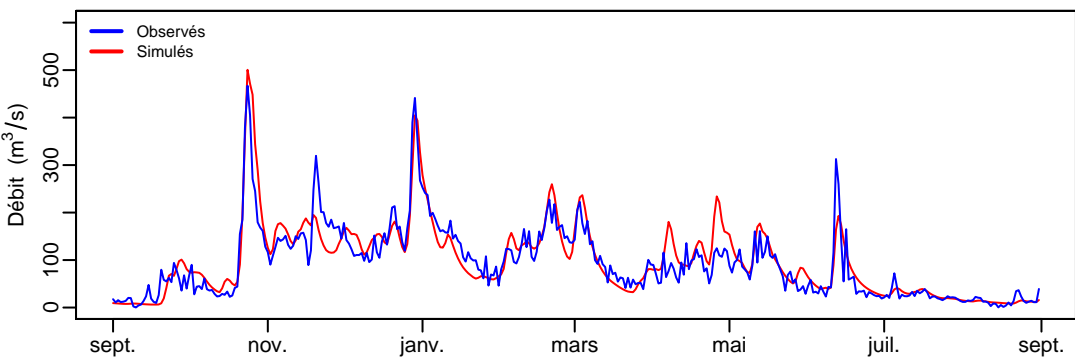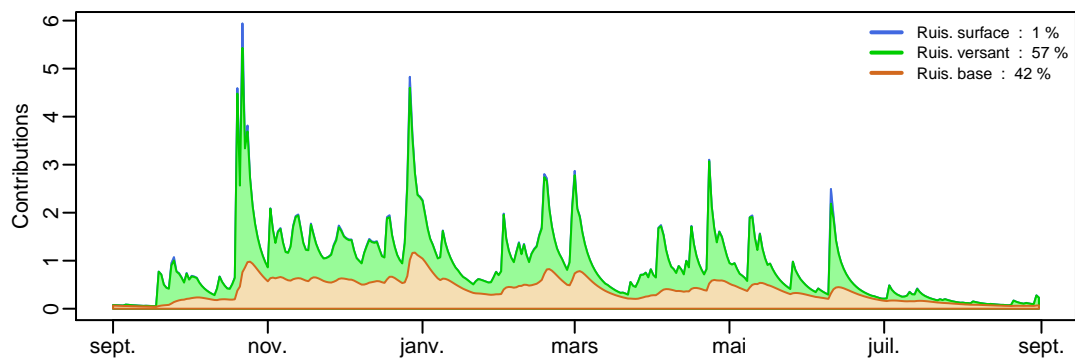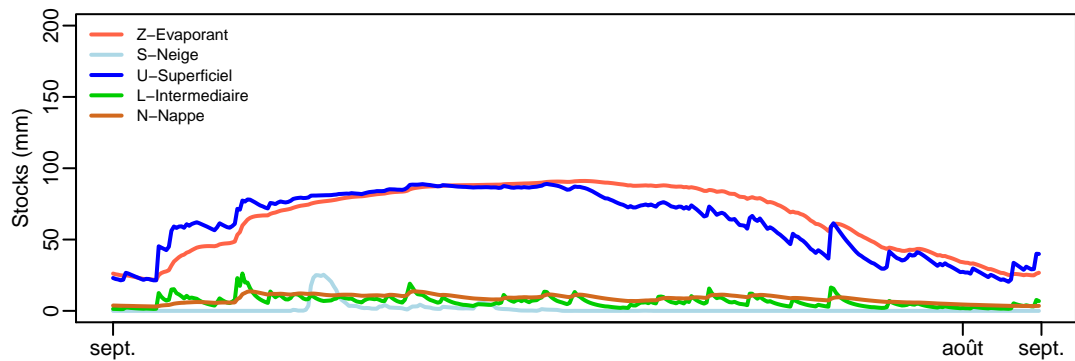



# k1180010 (9338.12 km<sup>2</sup>) – année 2000–2001

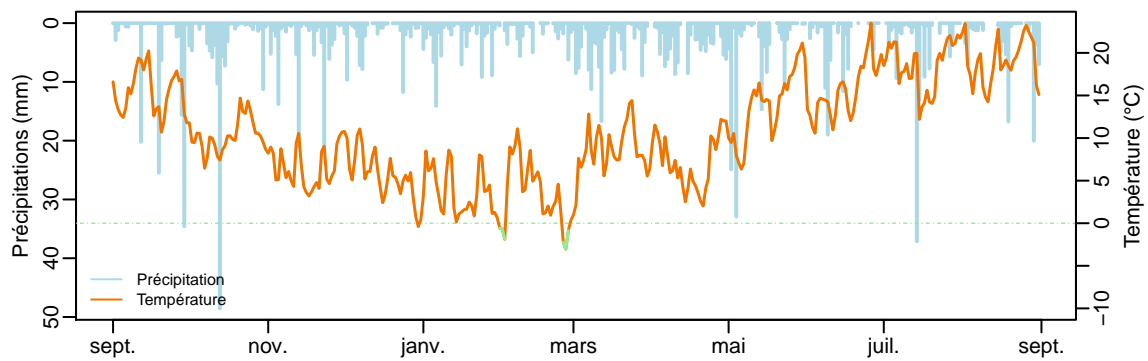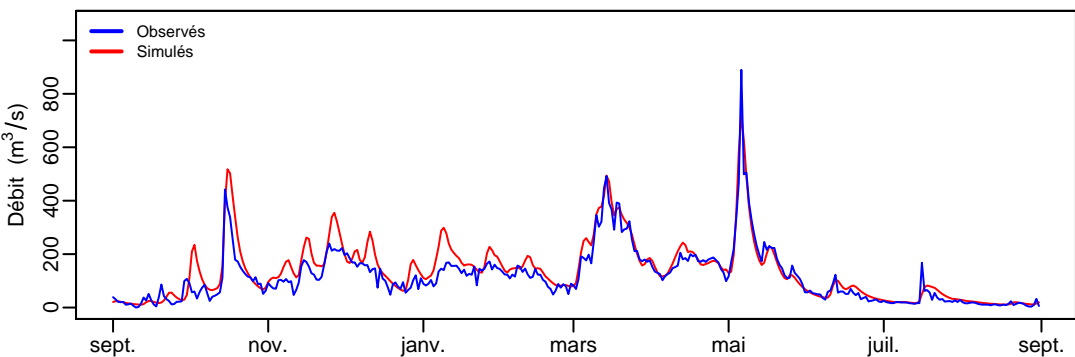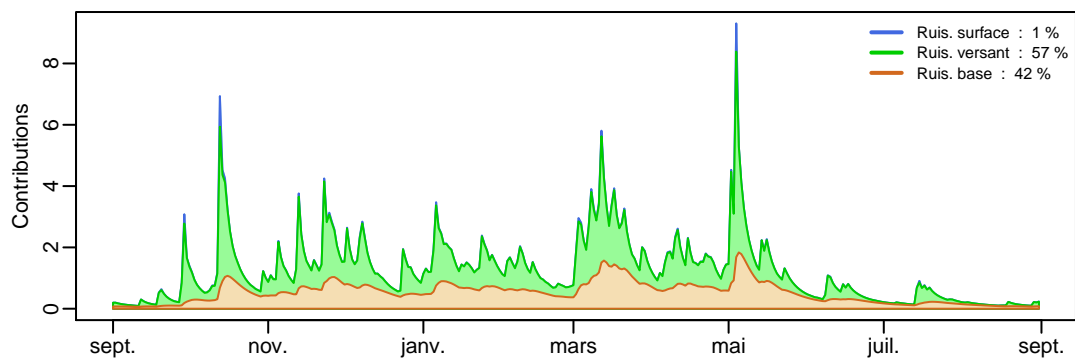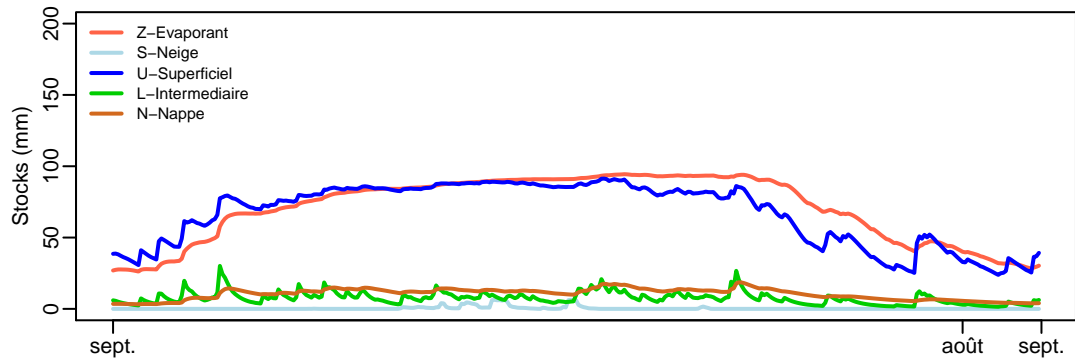

# k1180010 (9338.12 km²) – année 2001–2002

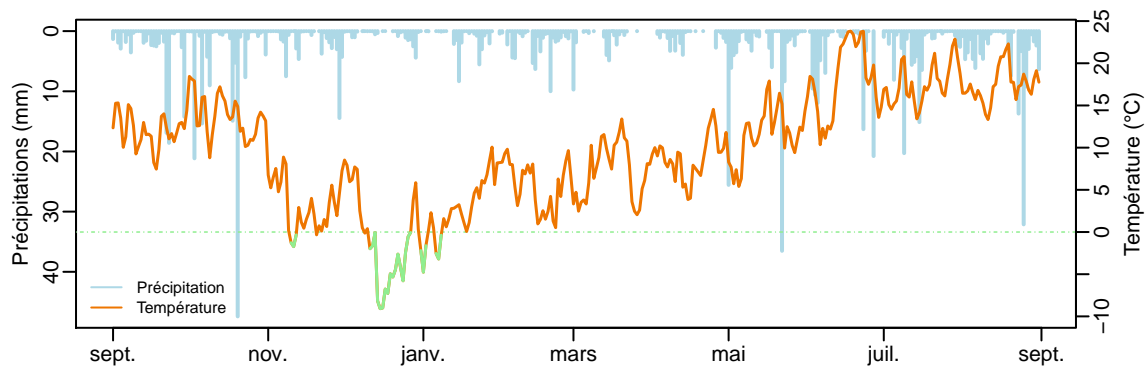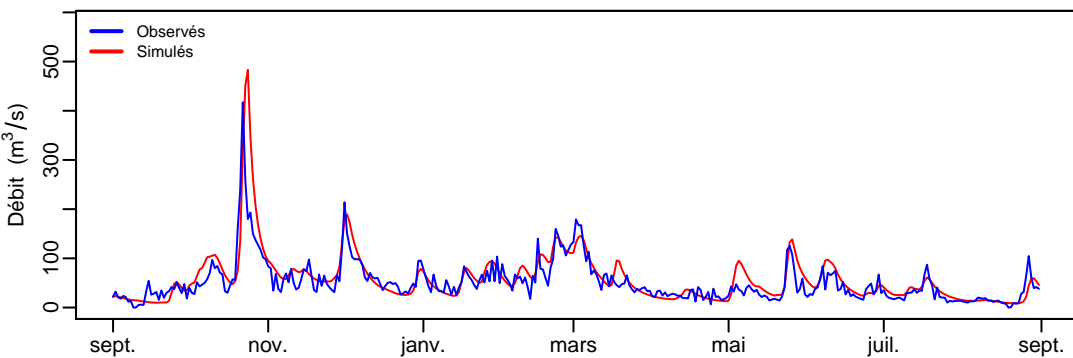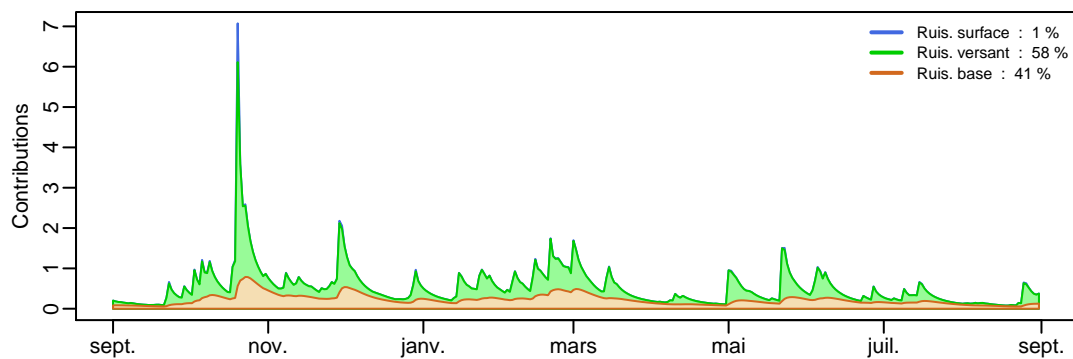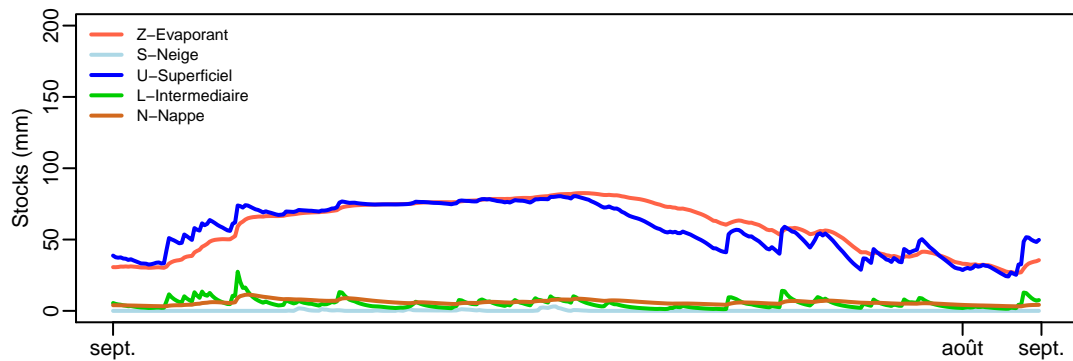

# k1180010 (9338.12 km²) – année 2002–2003

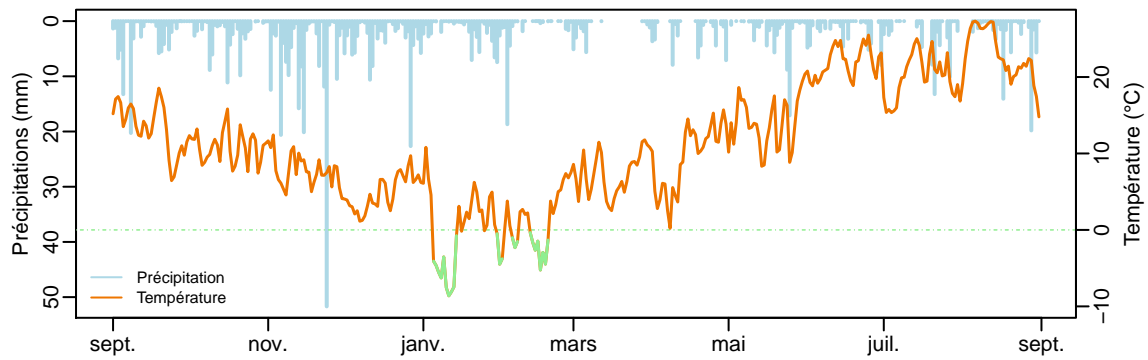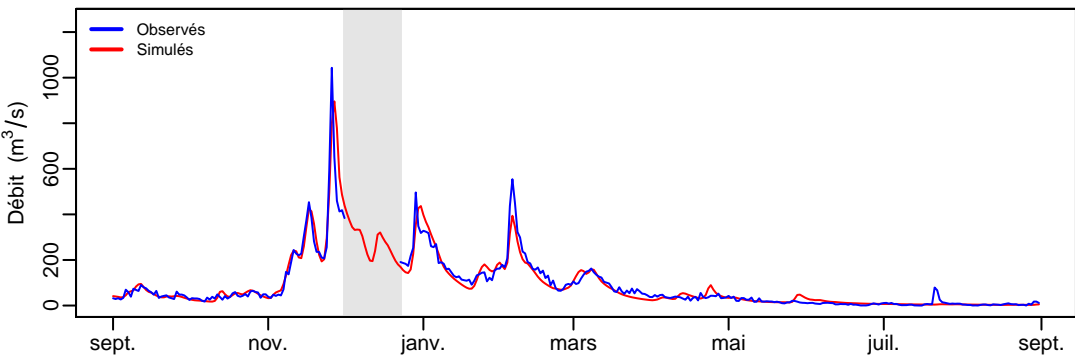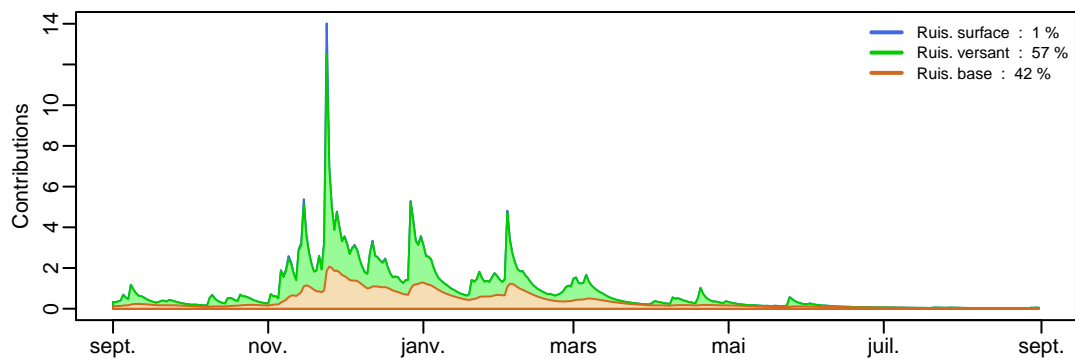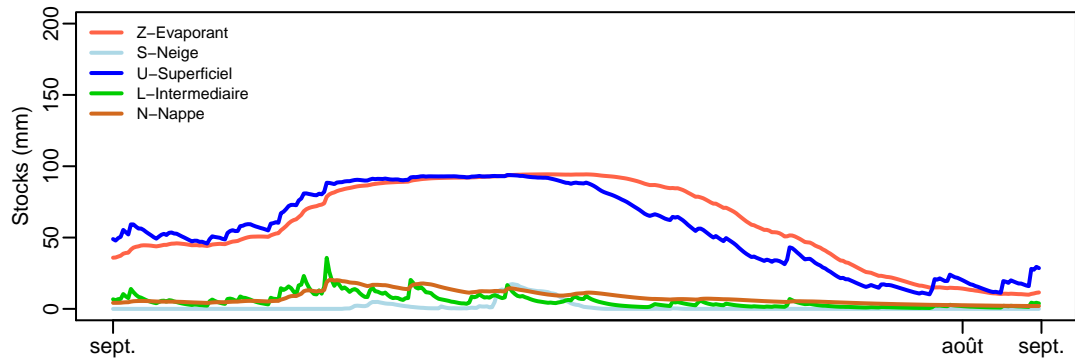

# k1180010 (9338.12 km²) – année 2003–2004

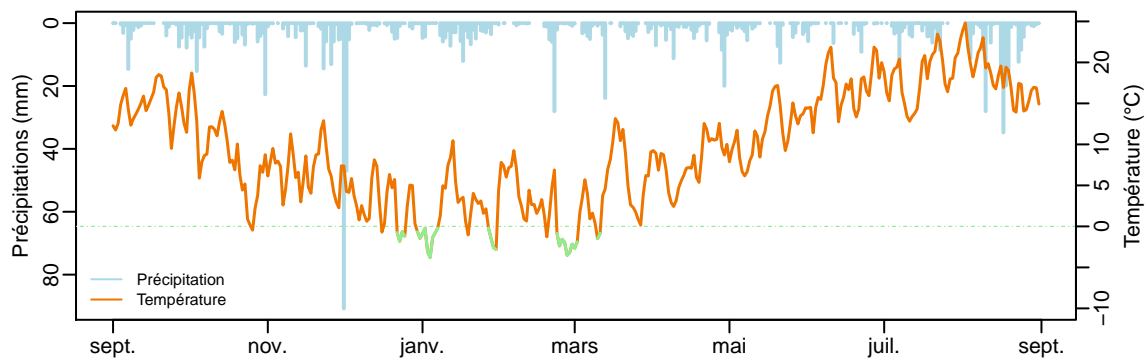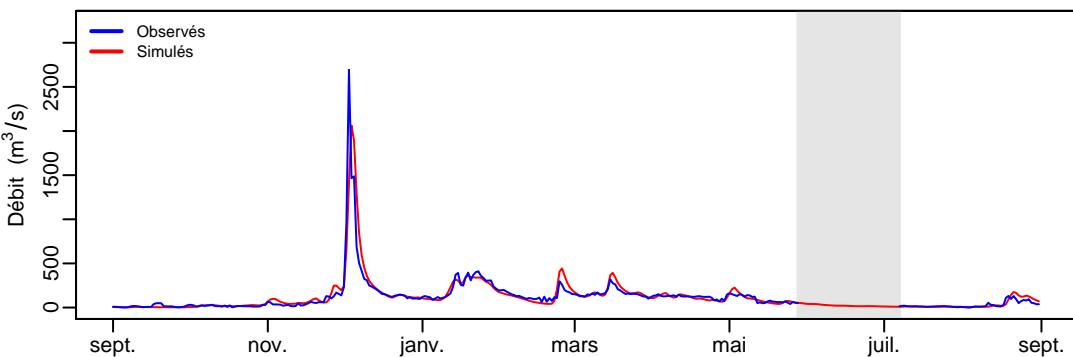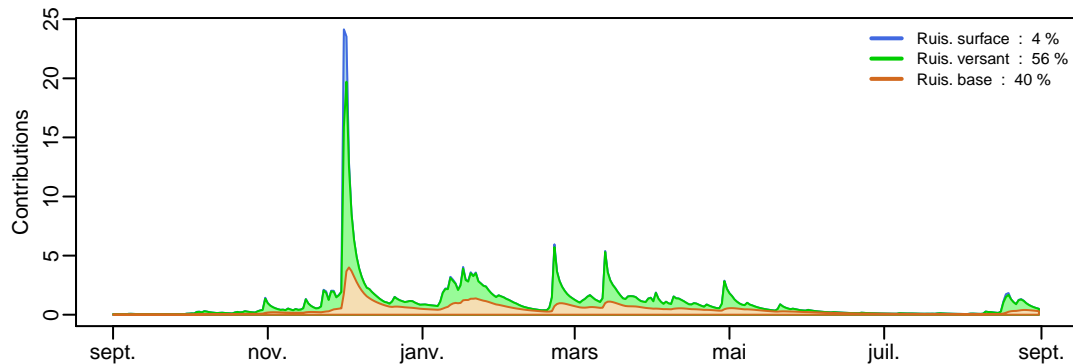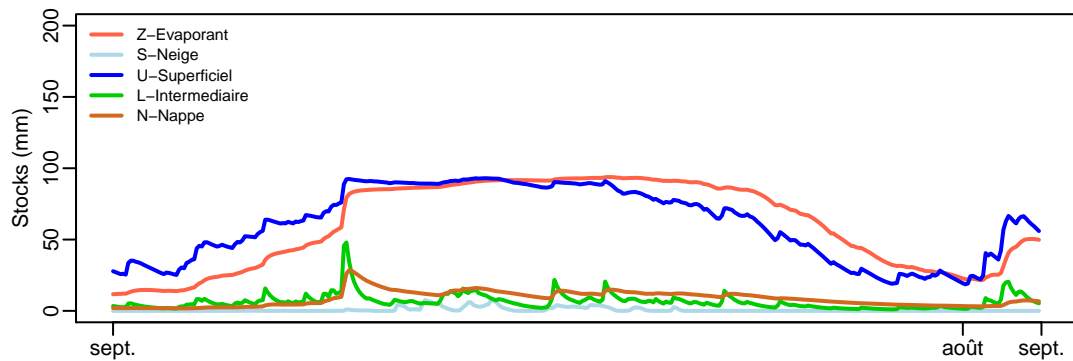

# k1180010 (9338.12 km<sup>2</sup>) – année 2004–2005

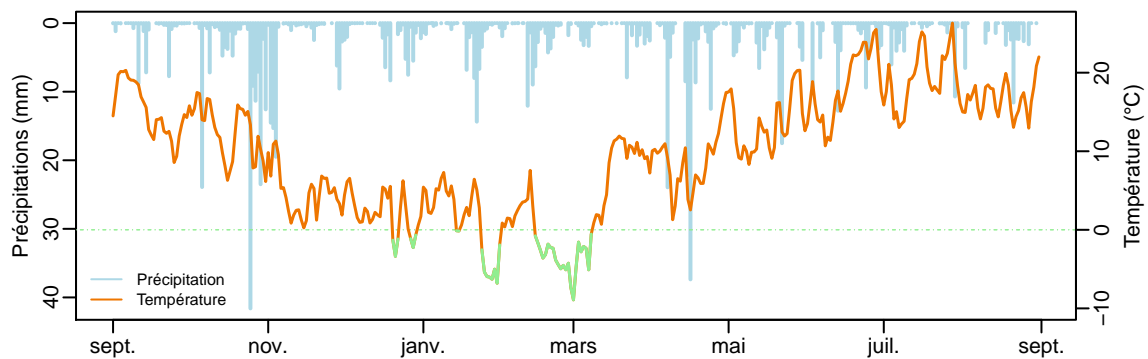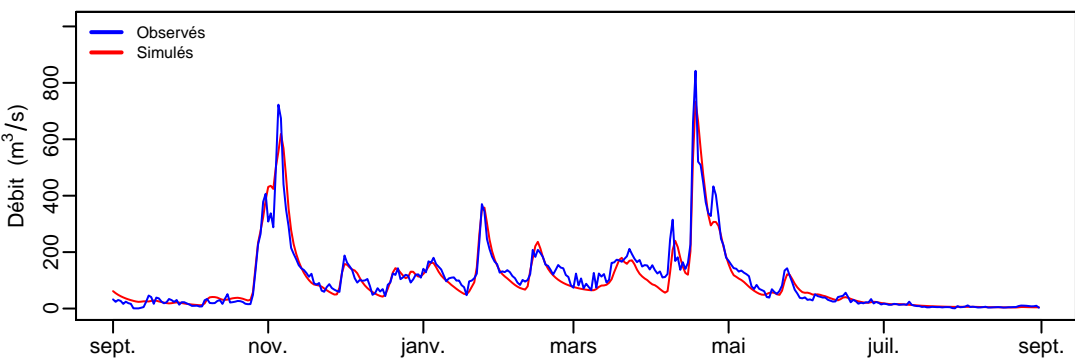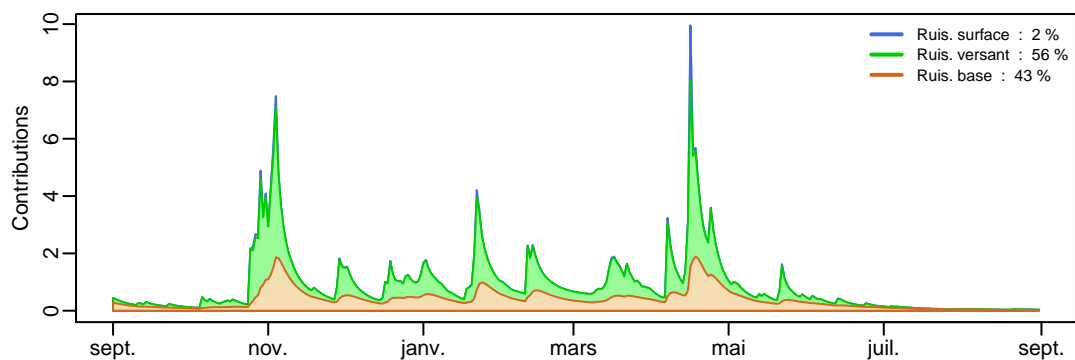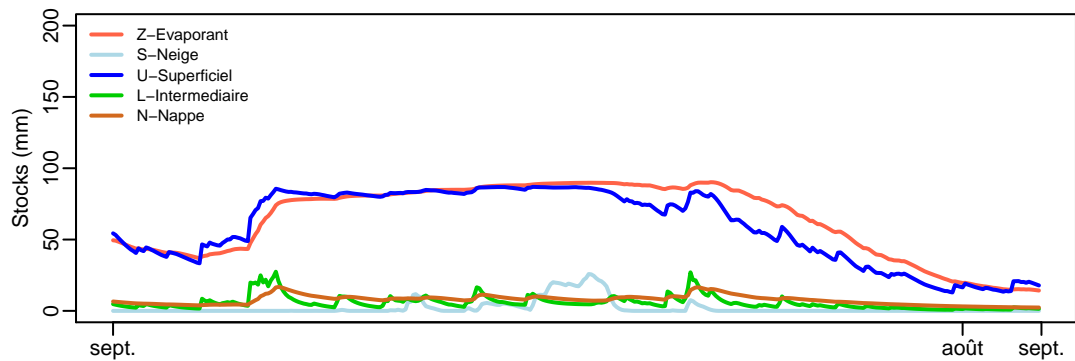

# k1180010 (9338.12 km²) – année 2005–2006

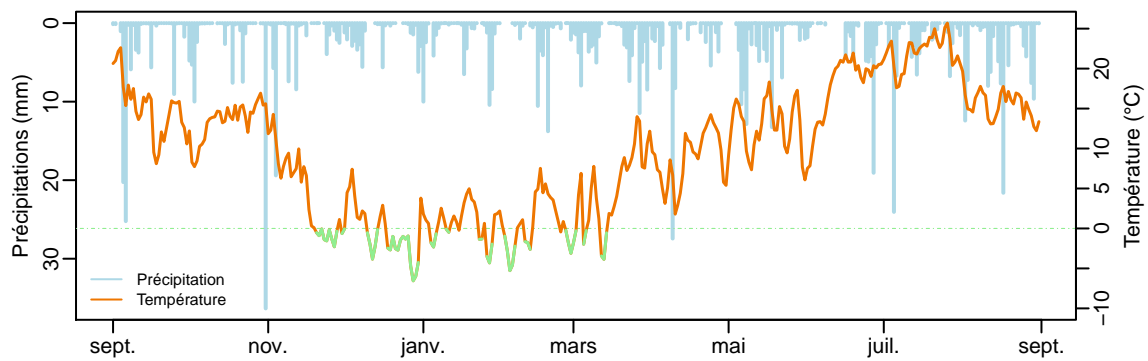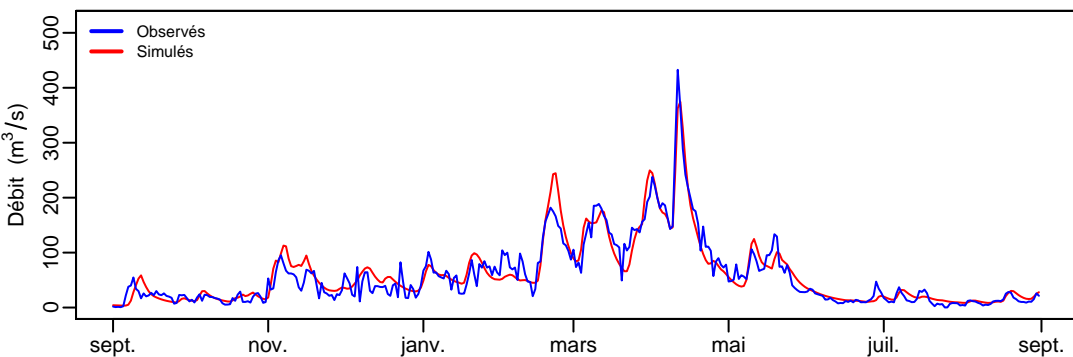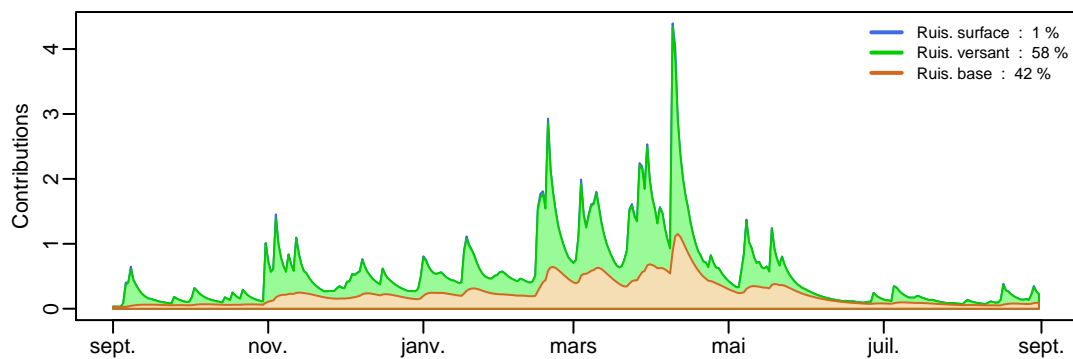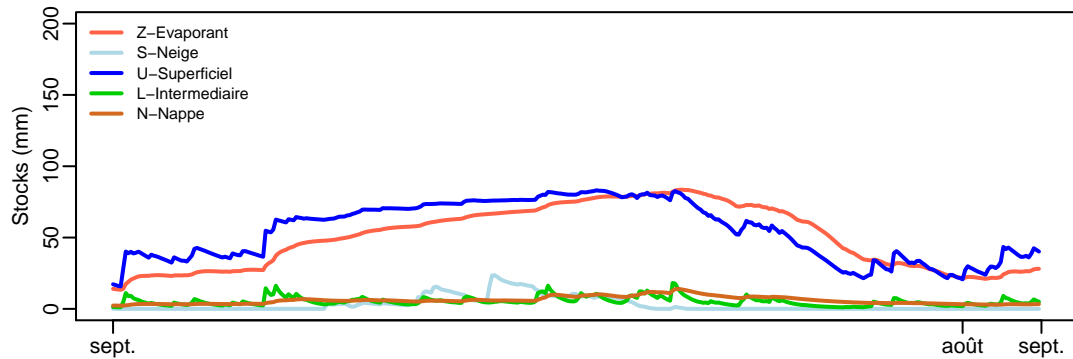

# k1180010 (9338.12 km<sup>2</sup>) – année 2006–2007

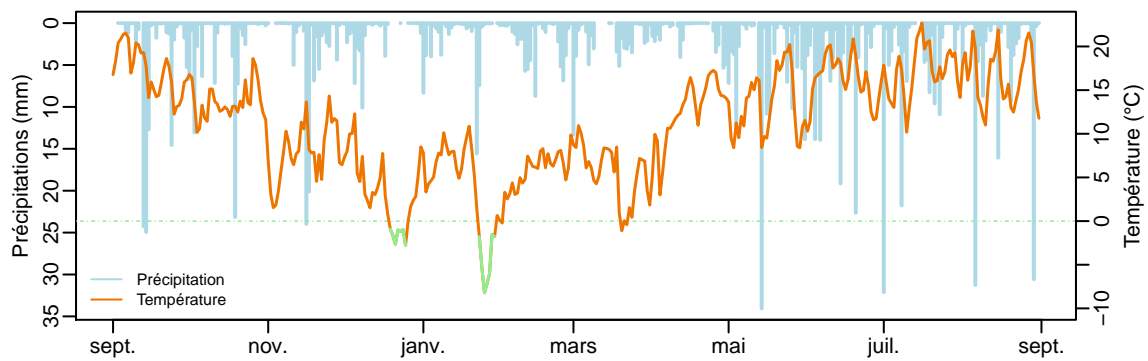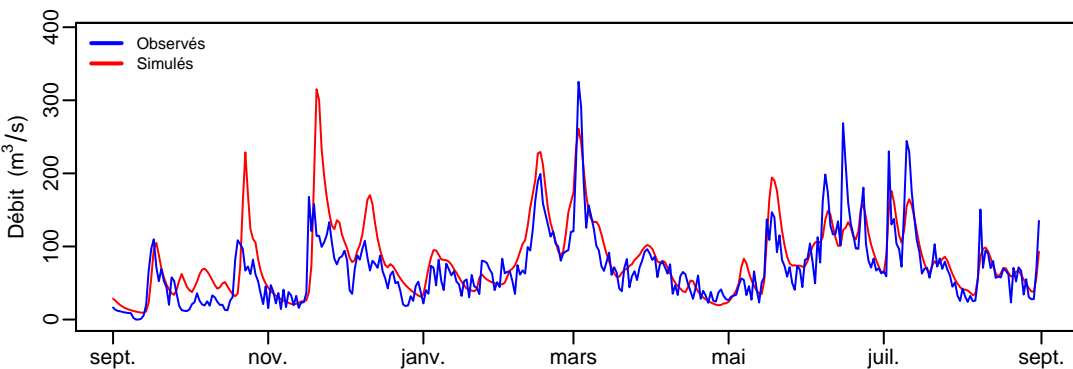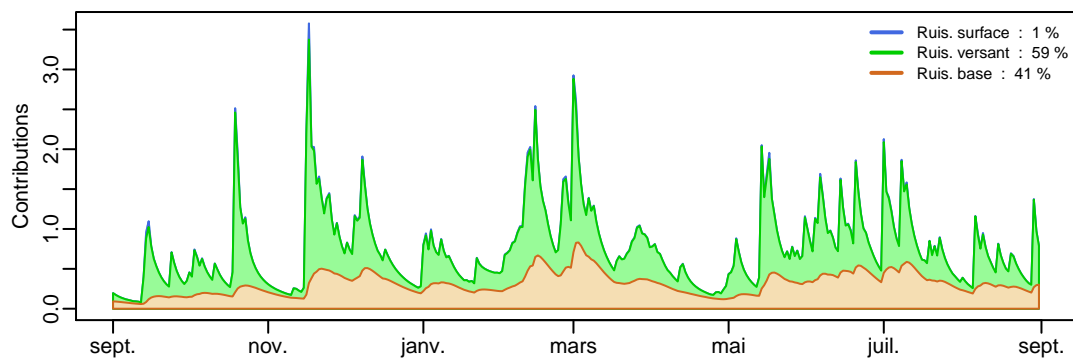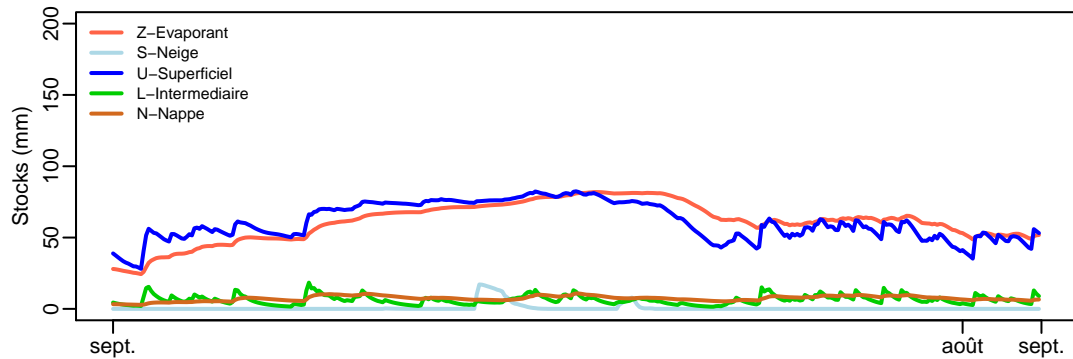

# k1180010 (9338.12 km<sup>2</sup>) – année 2007–2008

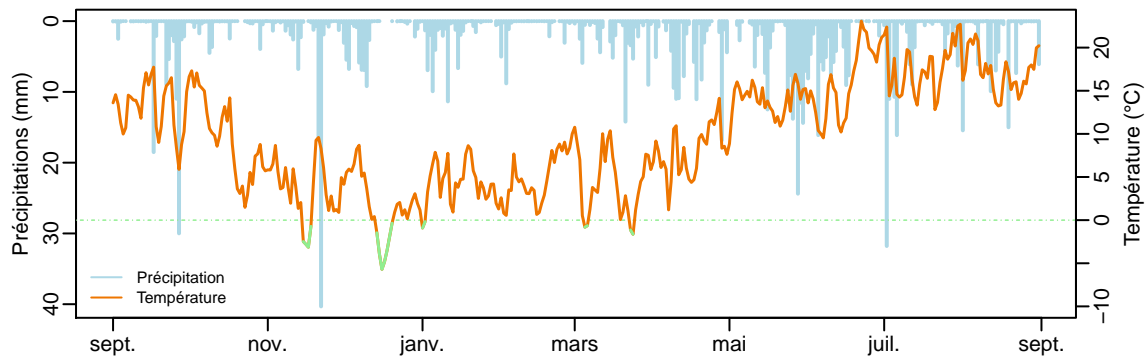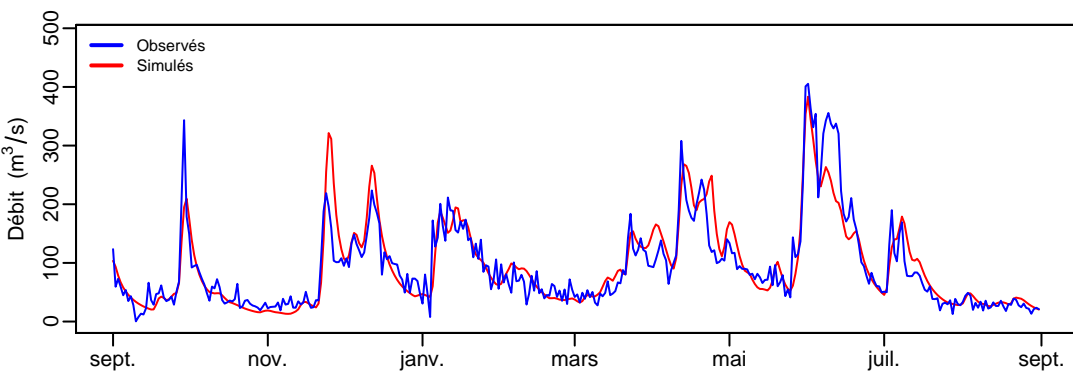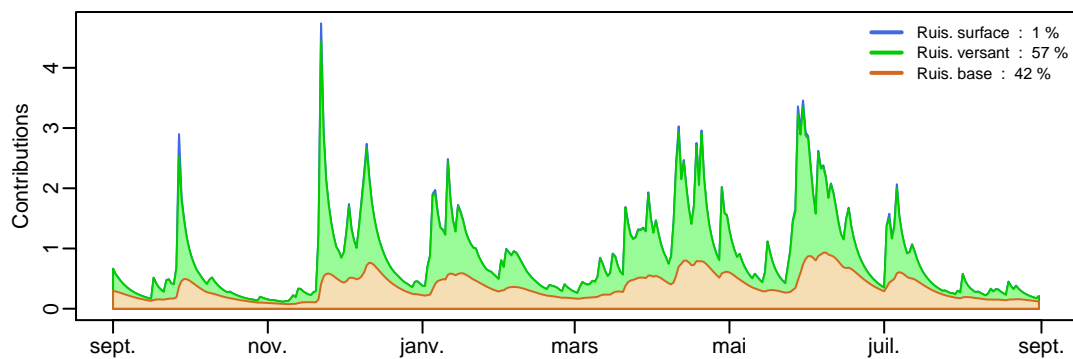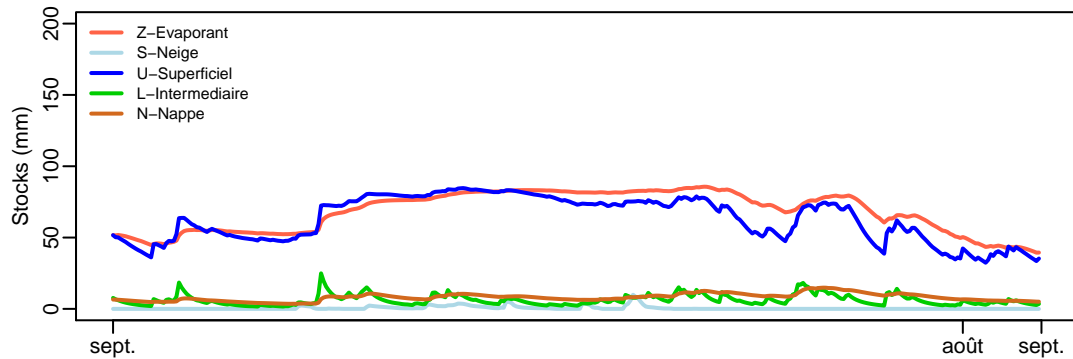



# k1180010 (9338.12 km<sup>2</sup>) – année 2008–2009

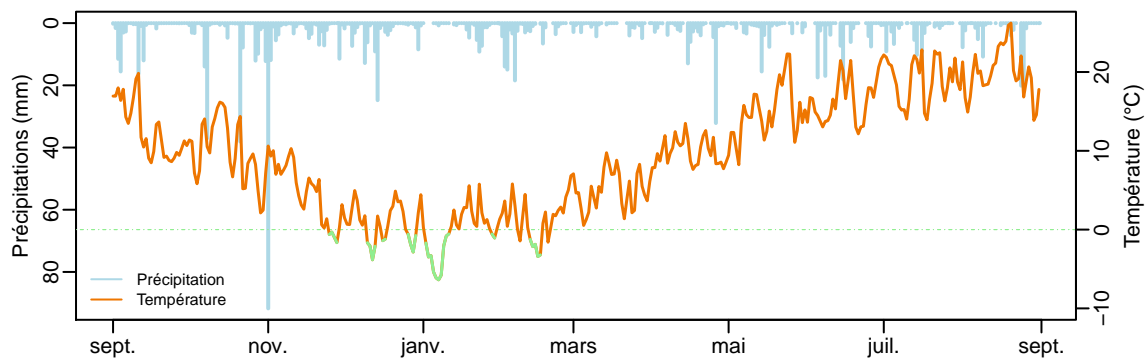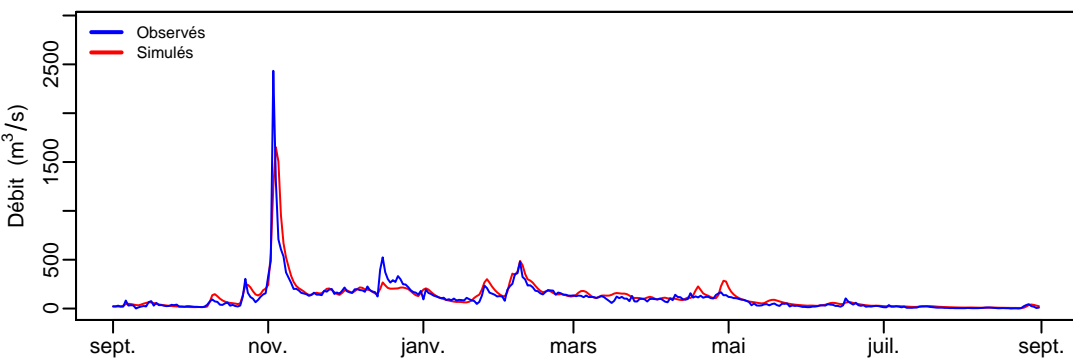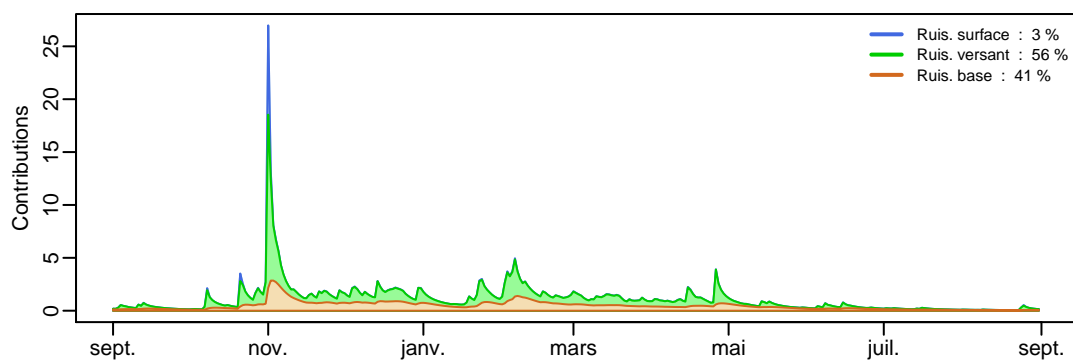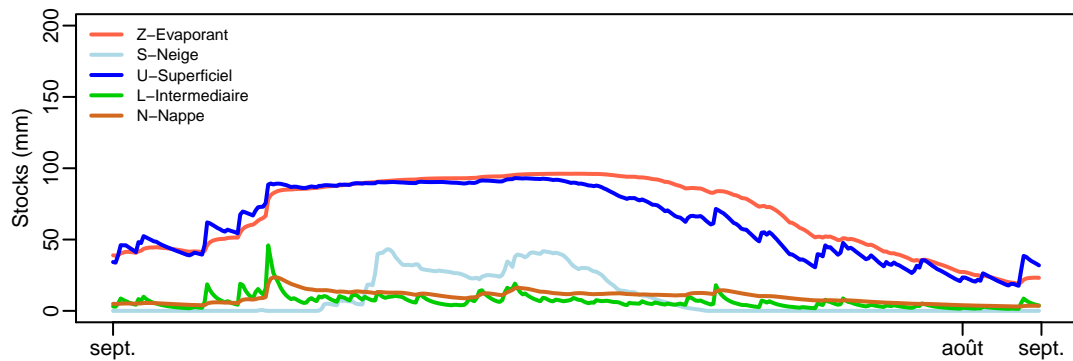

# k1180010 (9338.12 km²) – année 2009–2010

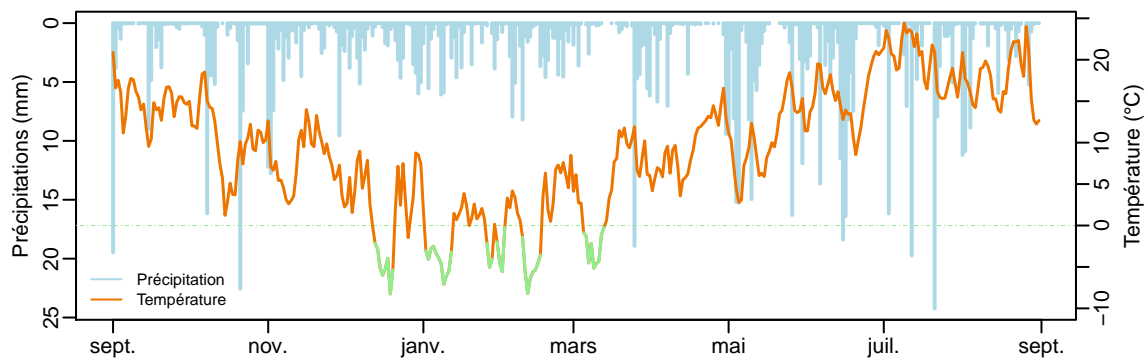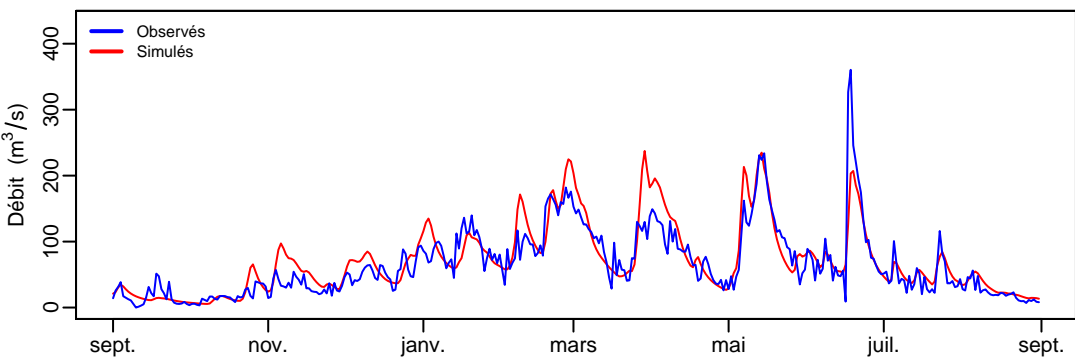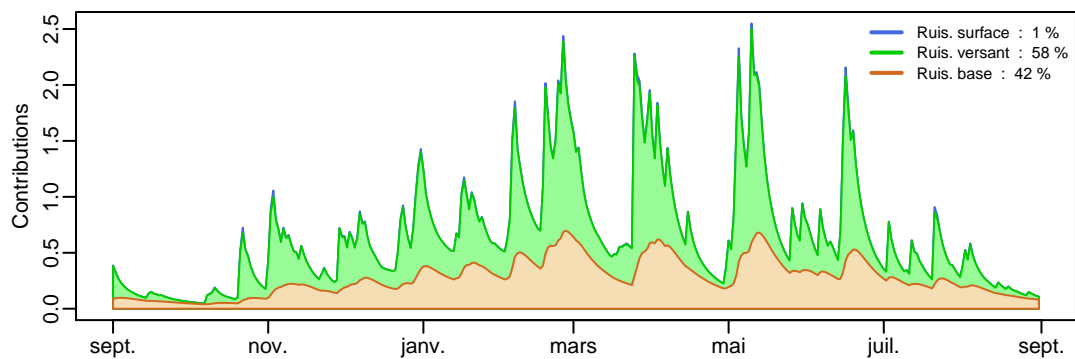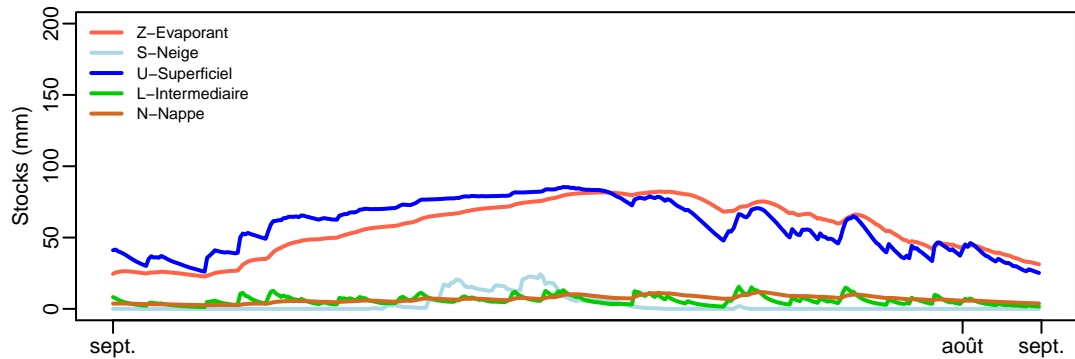

# k1180010 (9338.12 km<sup>2</sup>) – année 2010–2011

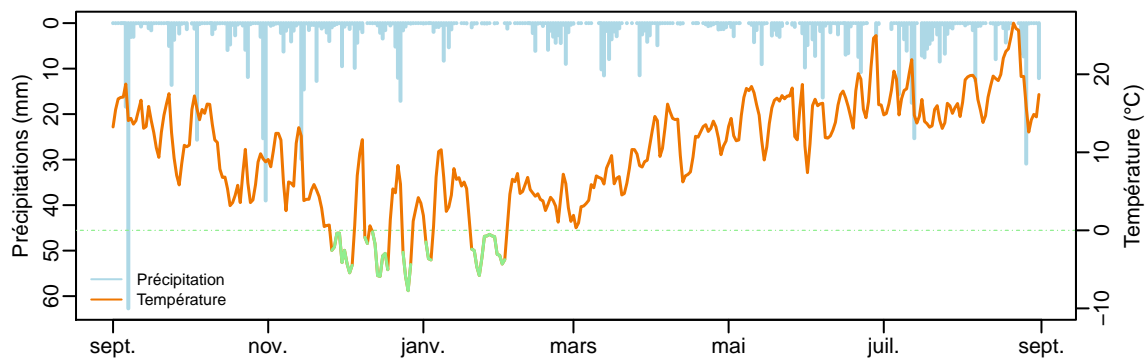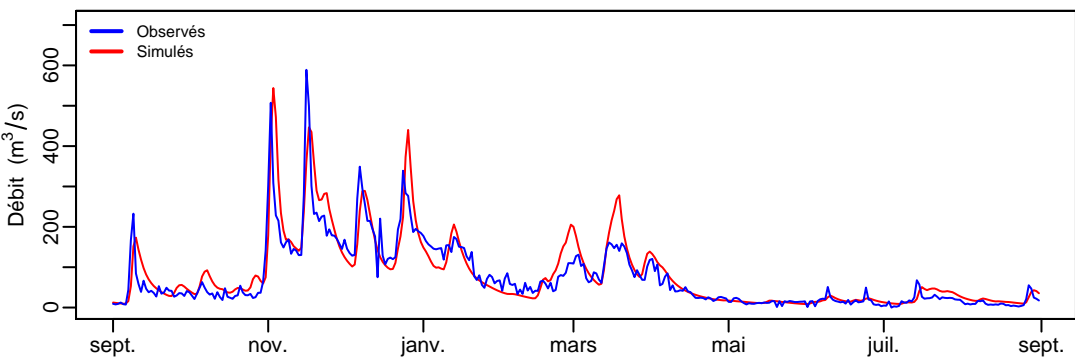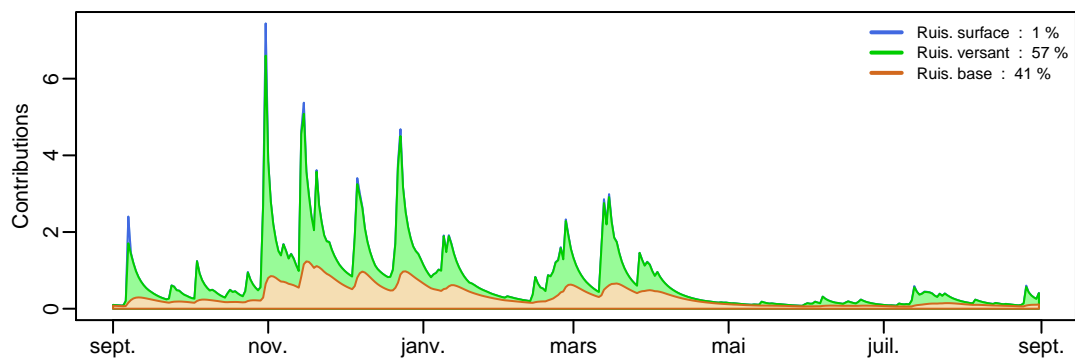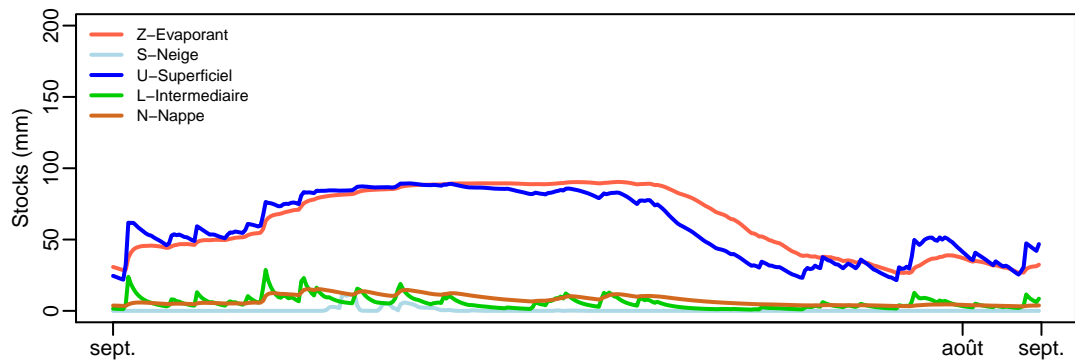

# k1180010 (9338.12 km²) – année 2011–2012

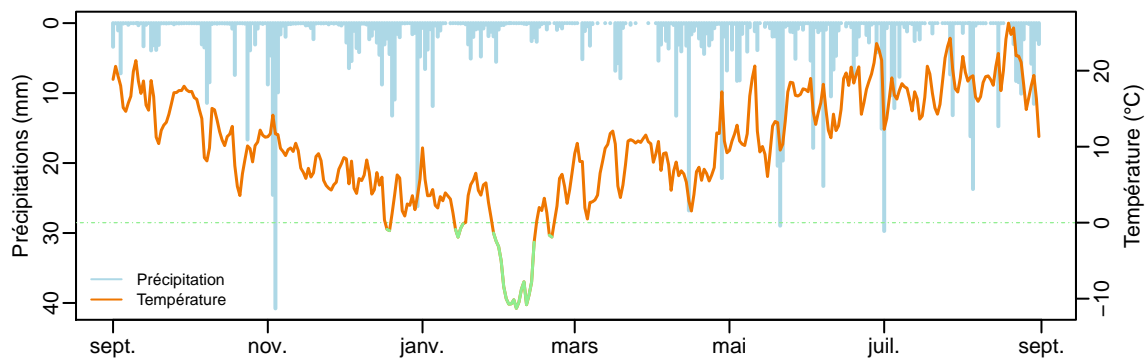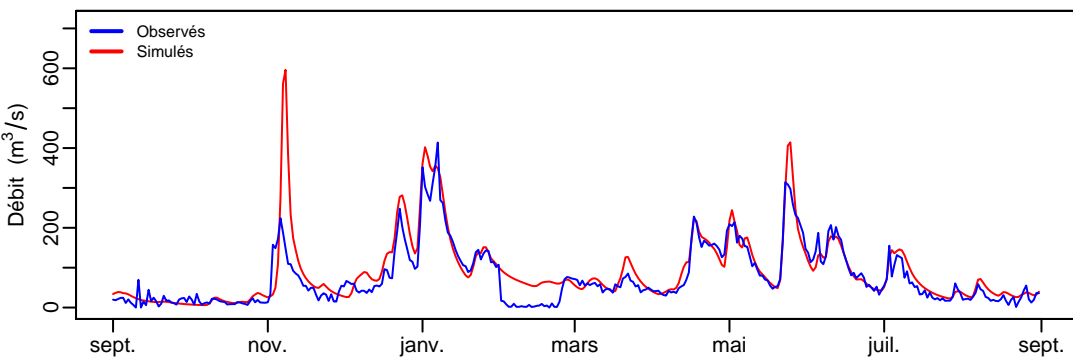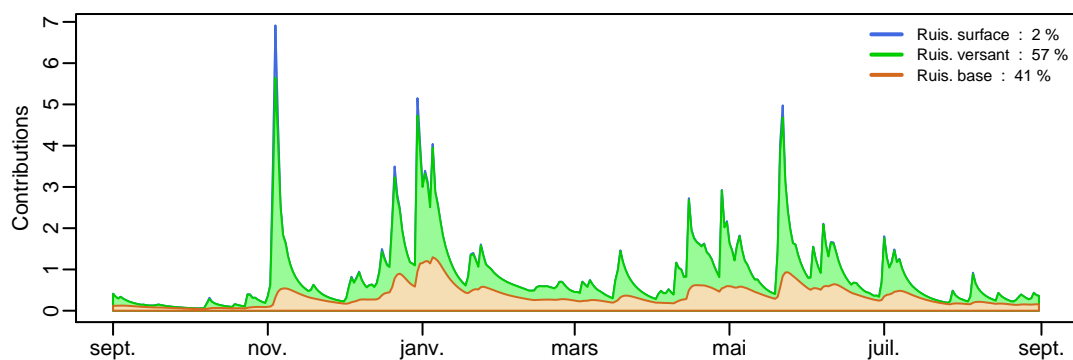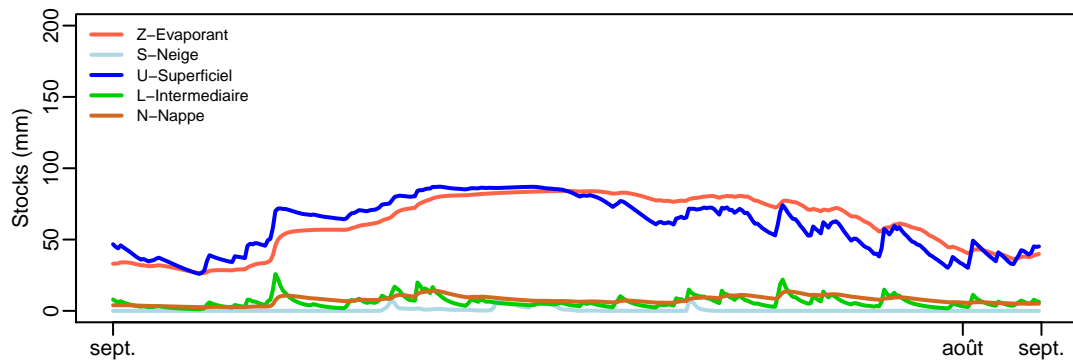

# k1243010 (248.16 km<sup>2</sup>) – année 1997–1998

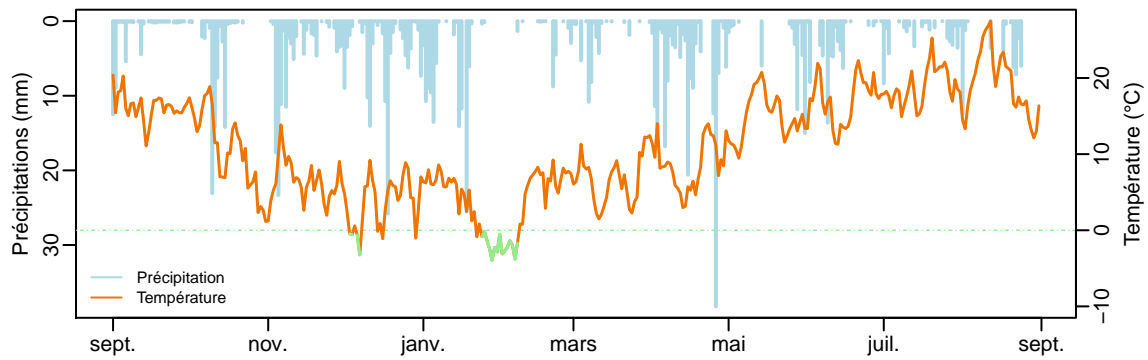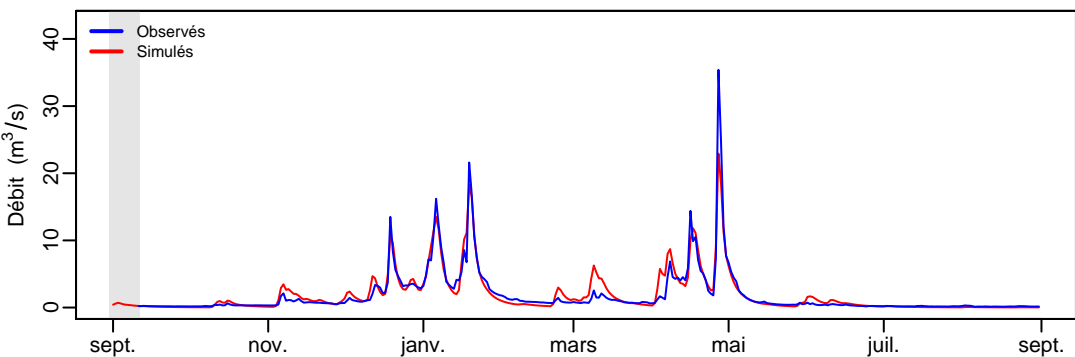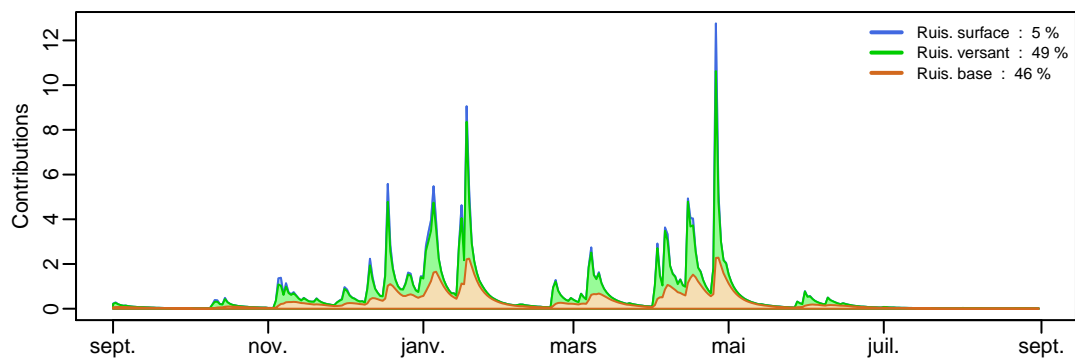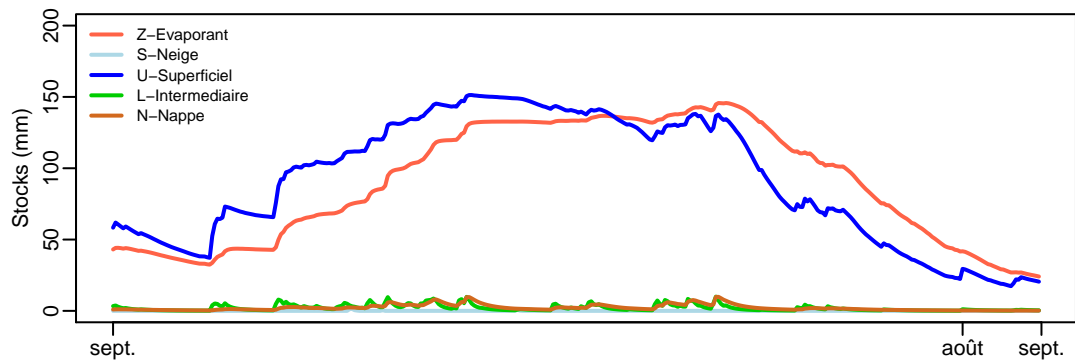

# k1243010 (248.16 km<sup>2</sup>) – année 1998–1999

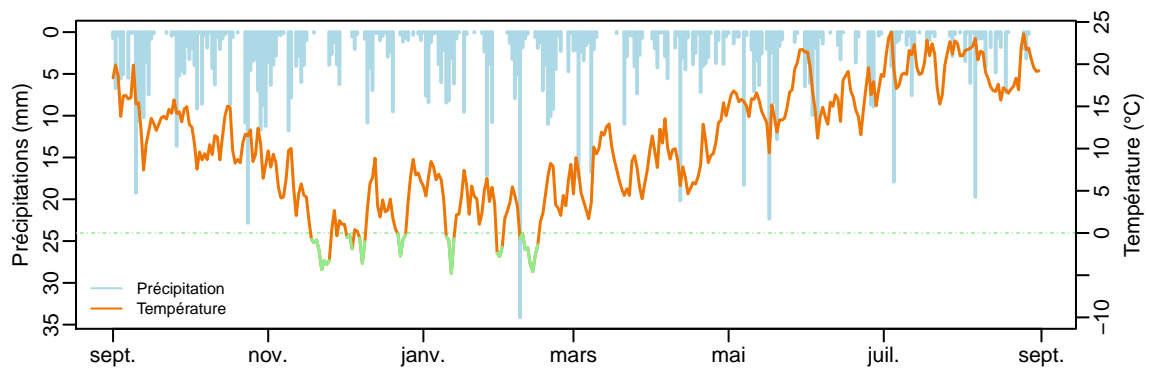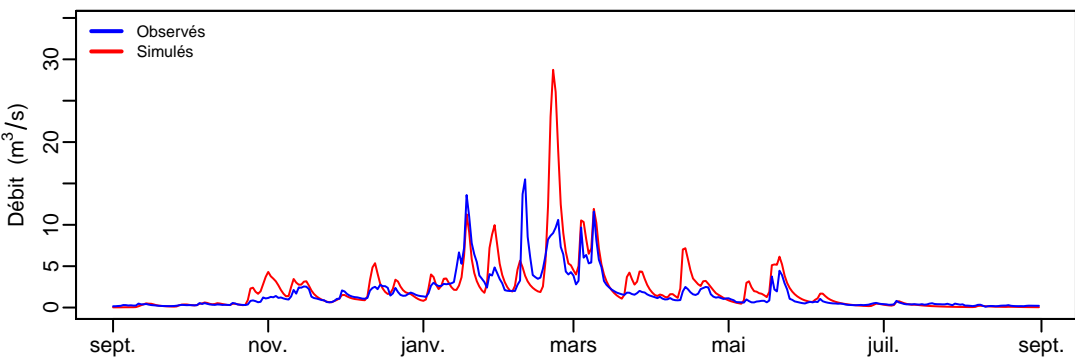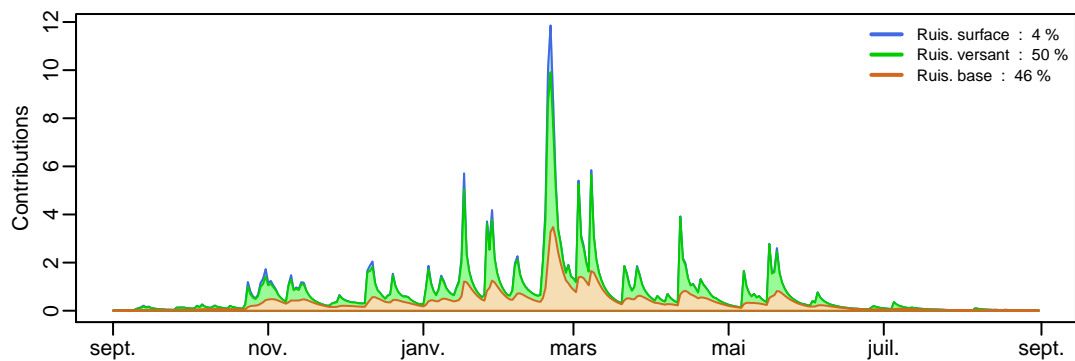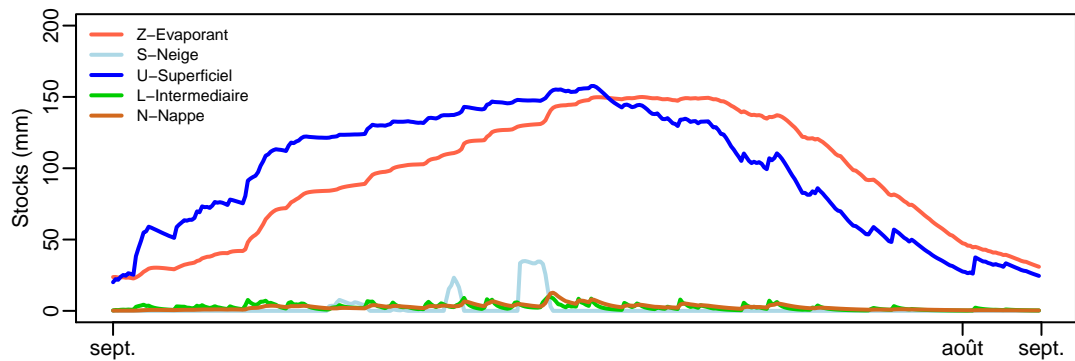

# k1243010 (248.16 km<sup>2</sup>) – année 1999–2000

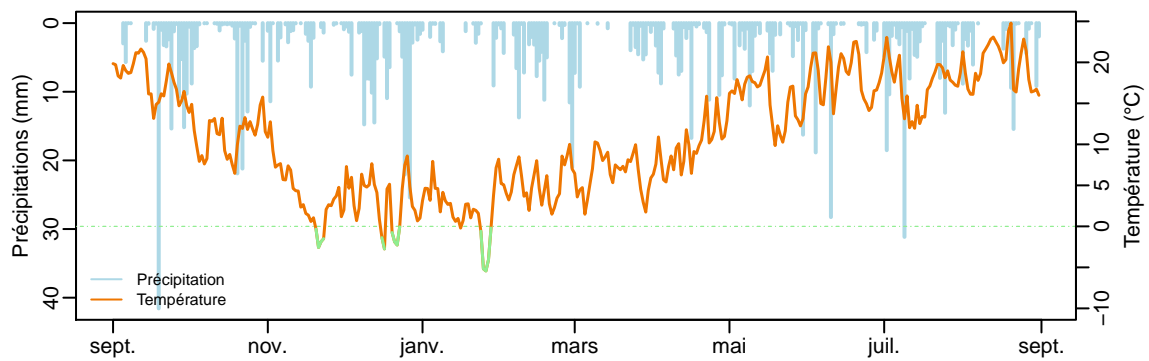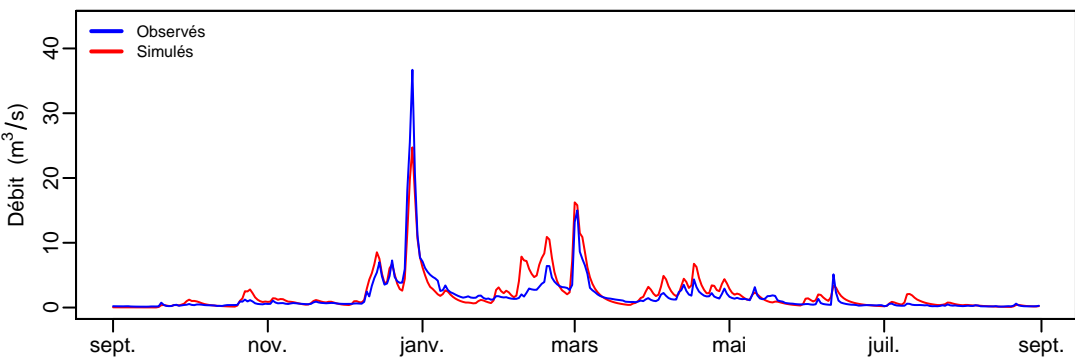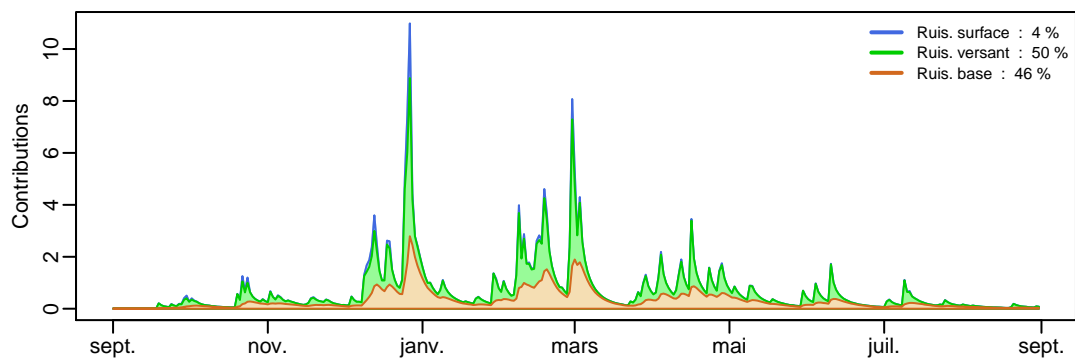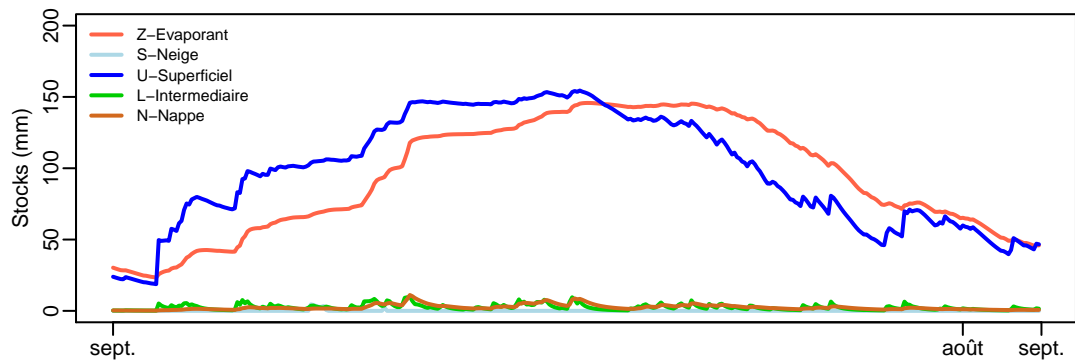

# k1243010 (248.16 km<sup>2</sup>) – année 2000–2001

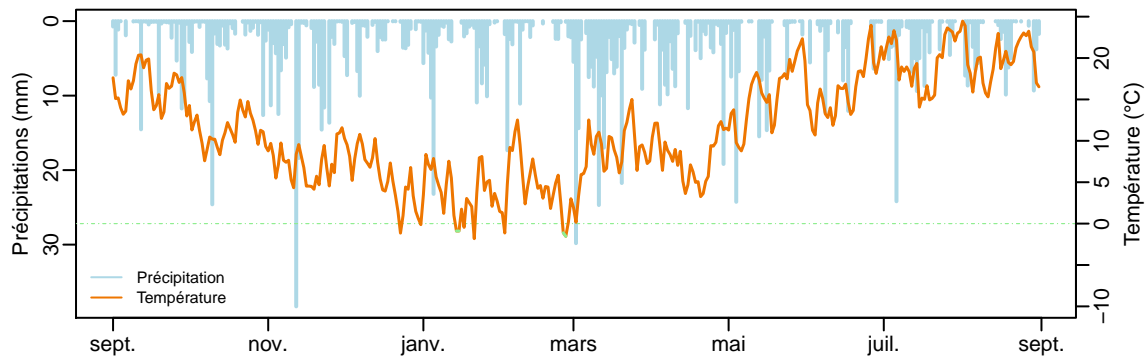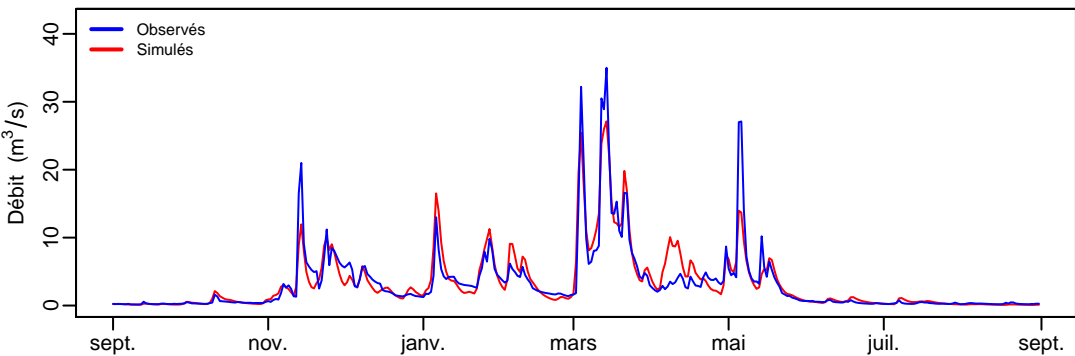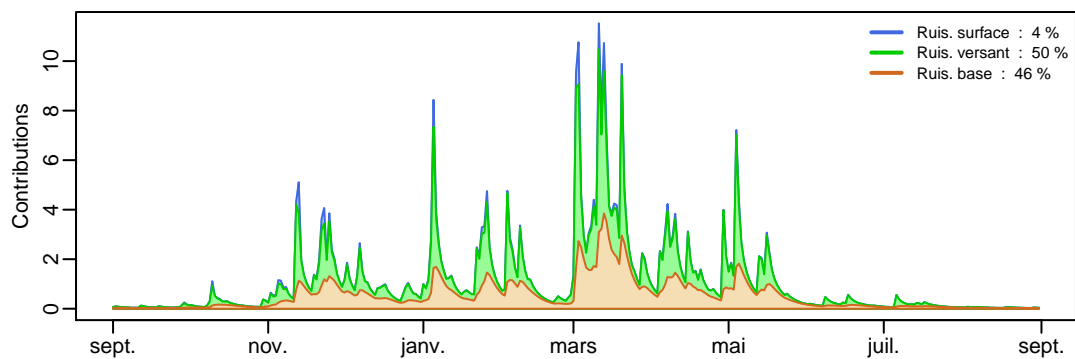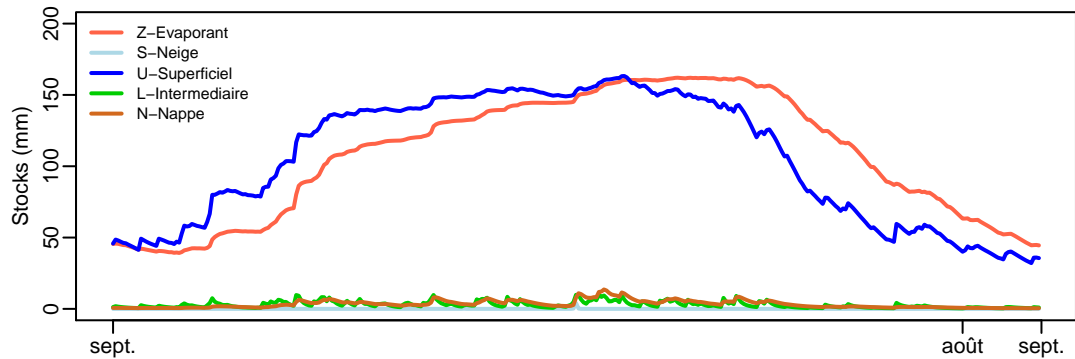



# k1243010 (248.16 km<sup>2</sup>) – année 2001–2002

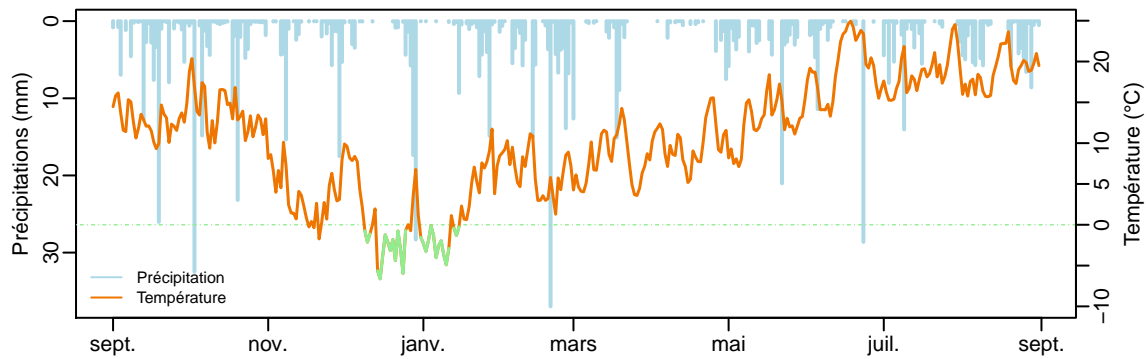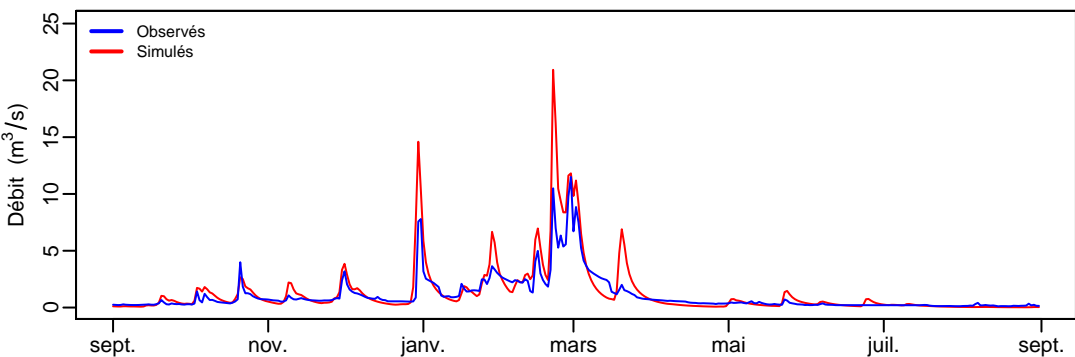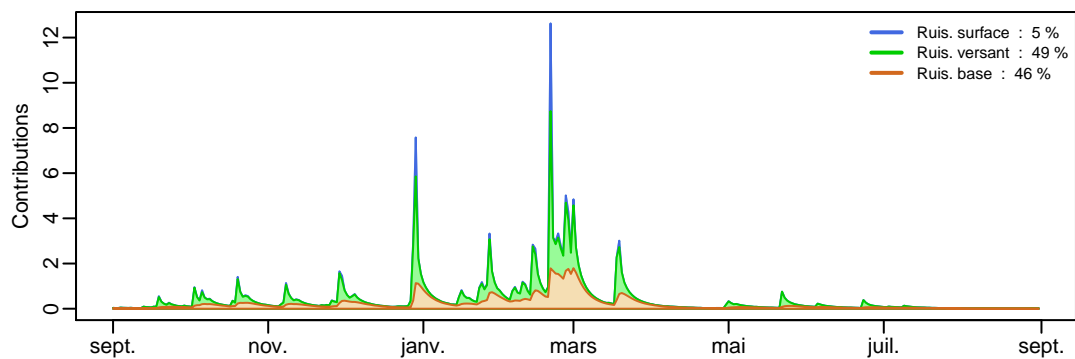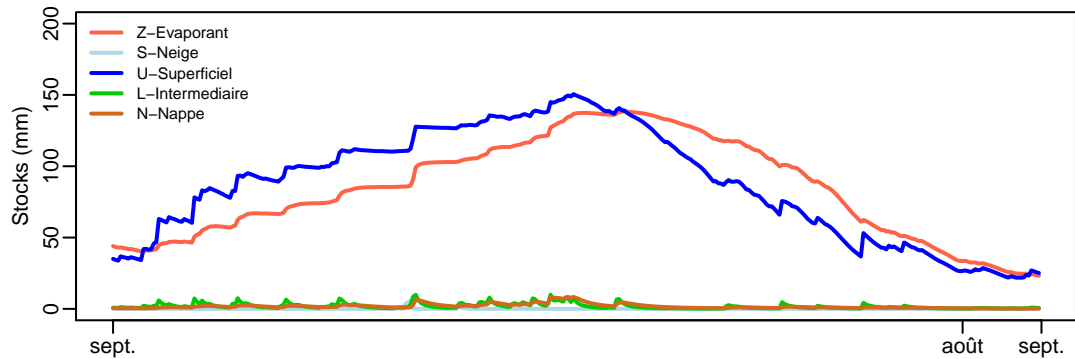

# k1243010 (248.16 km<sup>2</sup>) – année 2002–2003

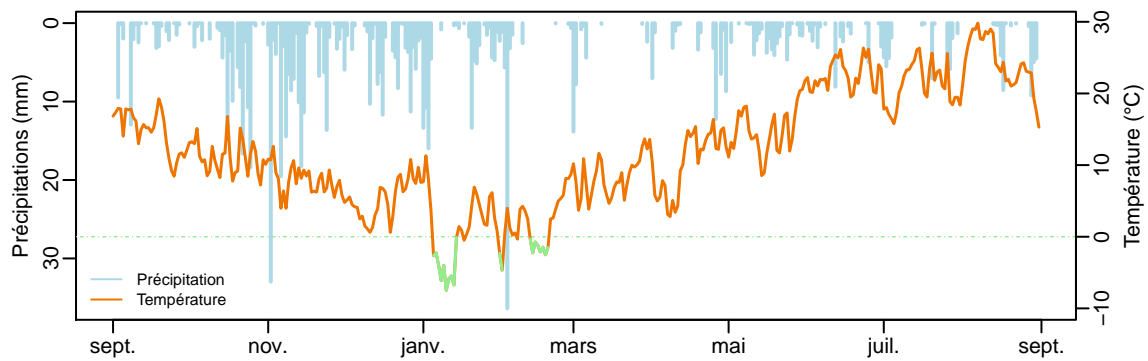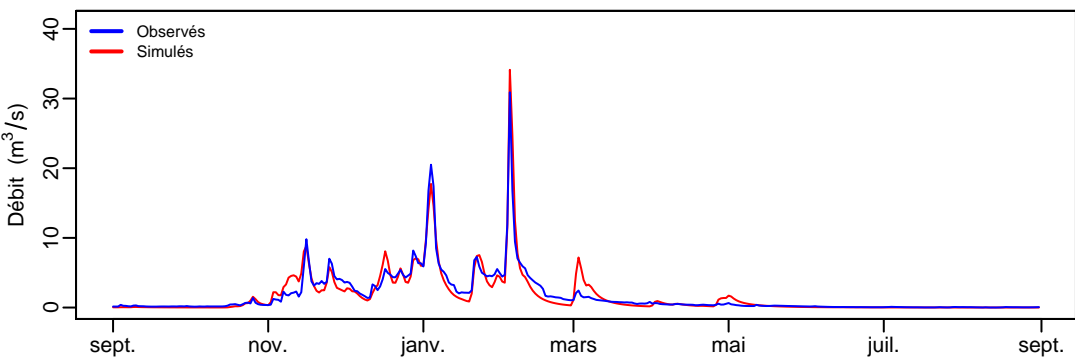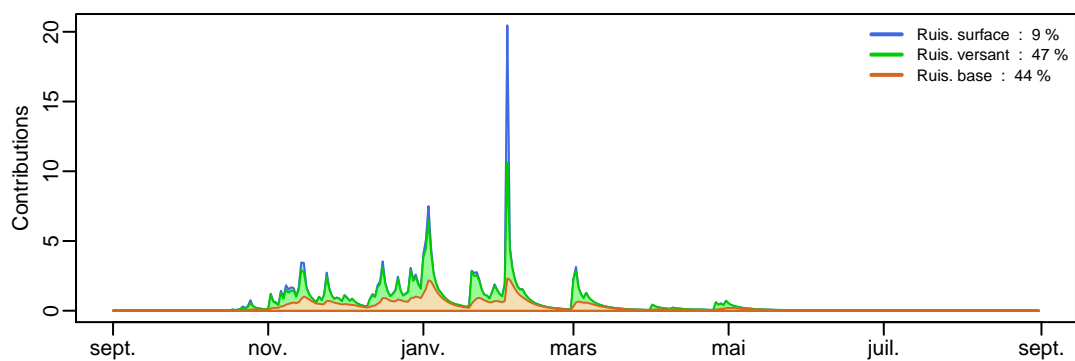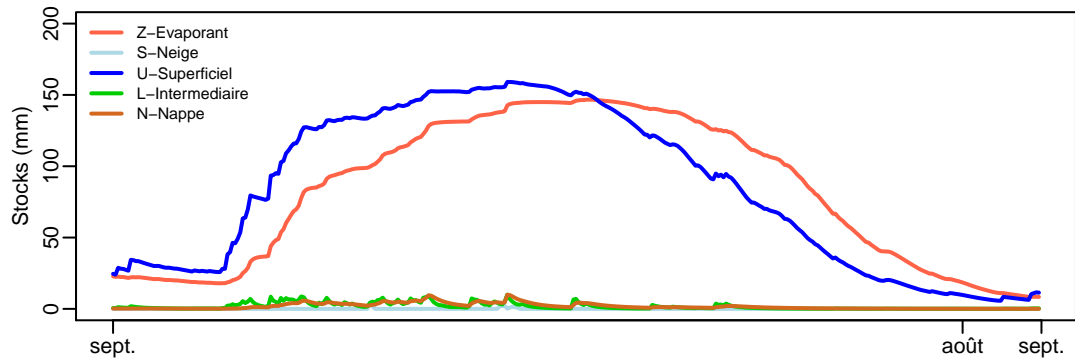

# k1243010 (248.16 km<sup>2</sup>) – année 2003–2004

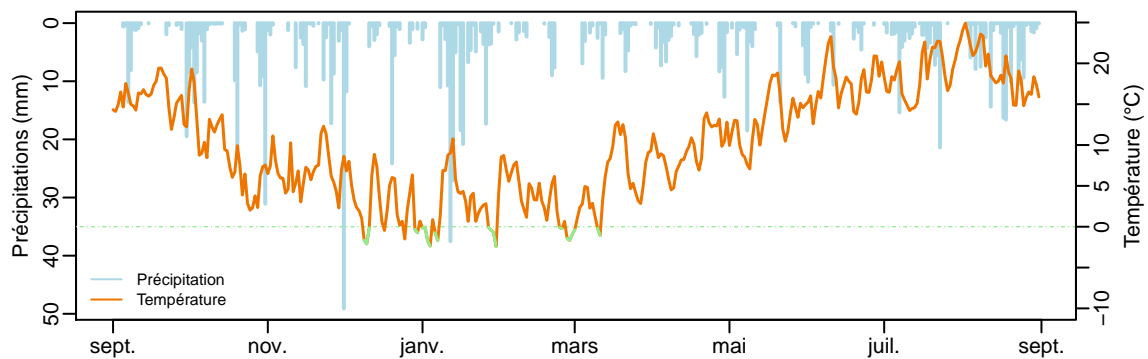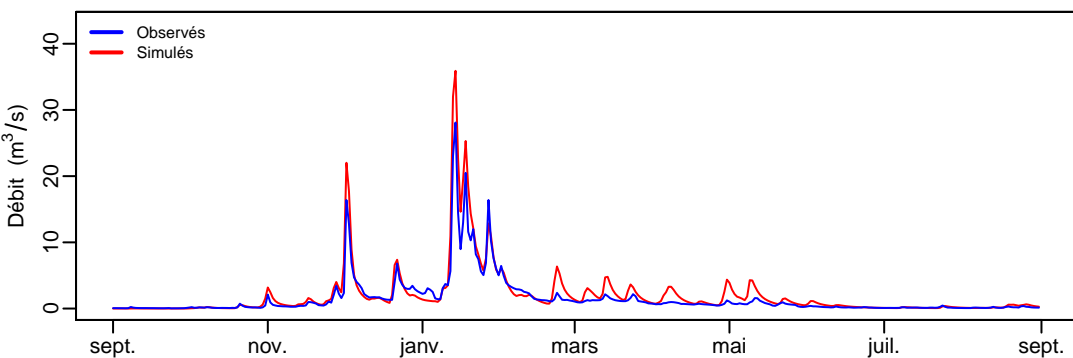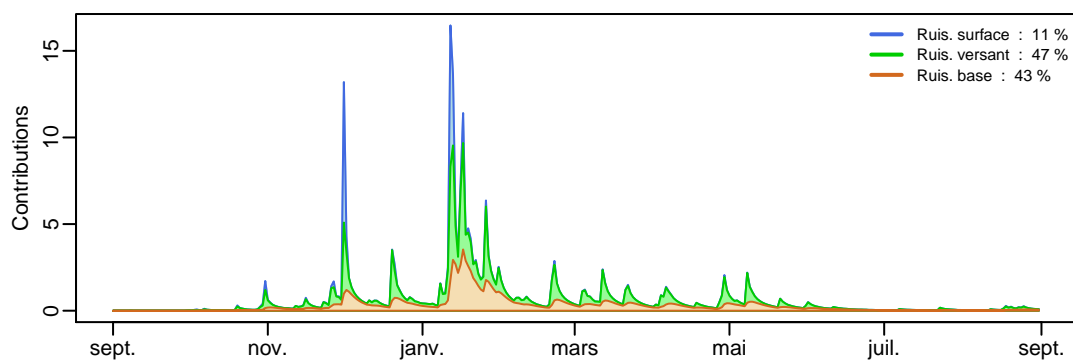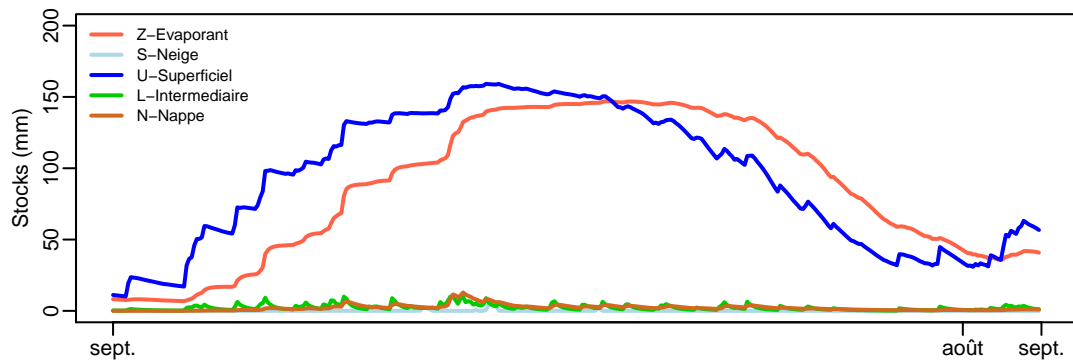

# k1243010 (248.16 km<sup>2</sup>) – année 2004–2005

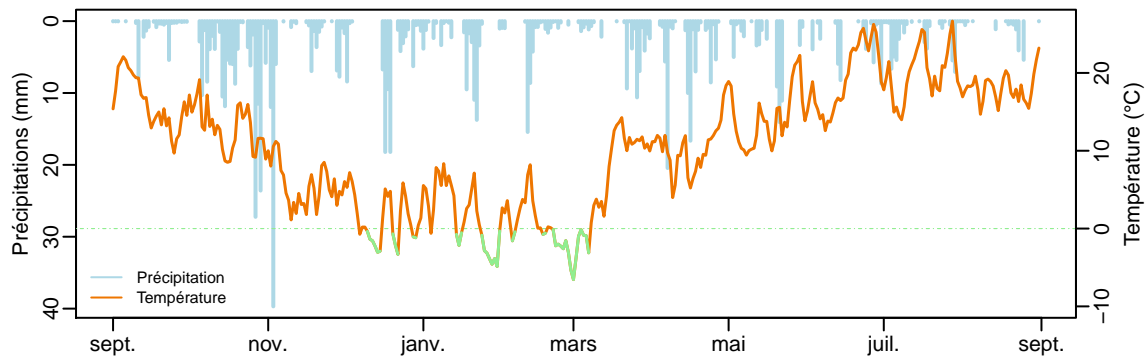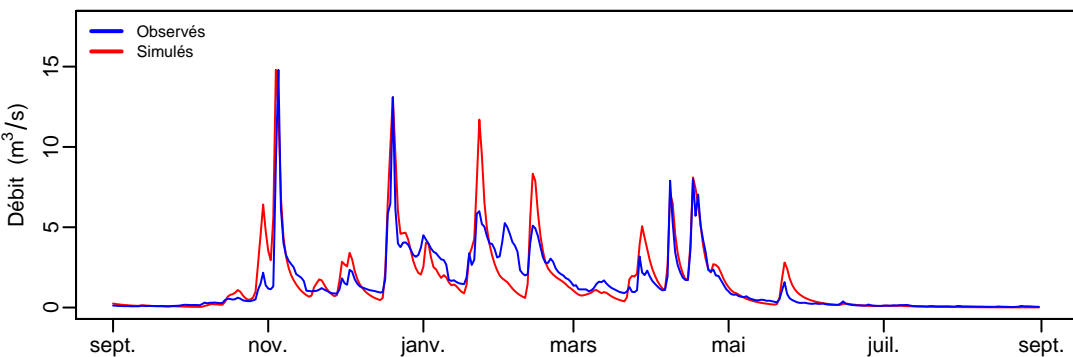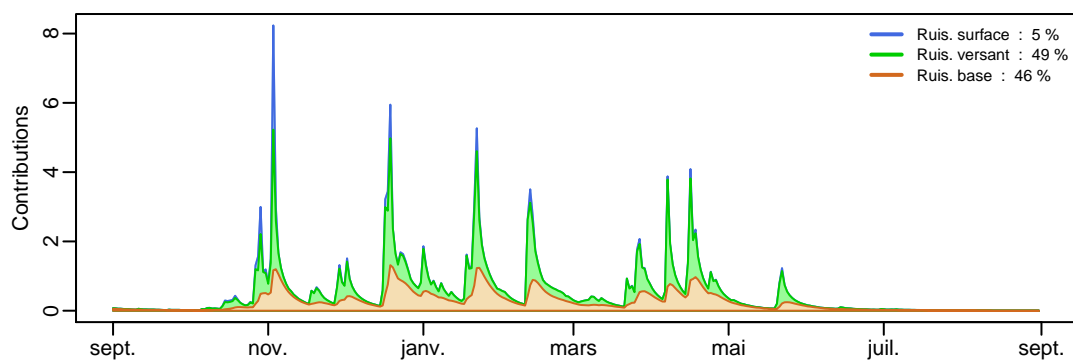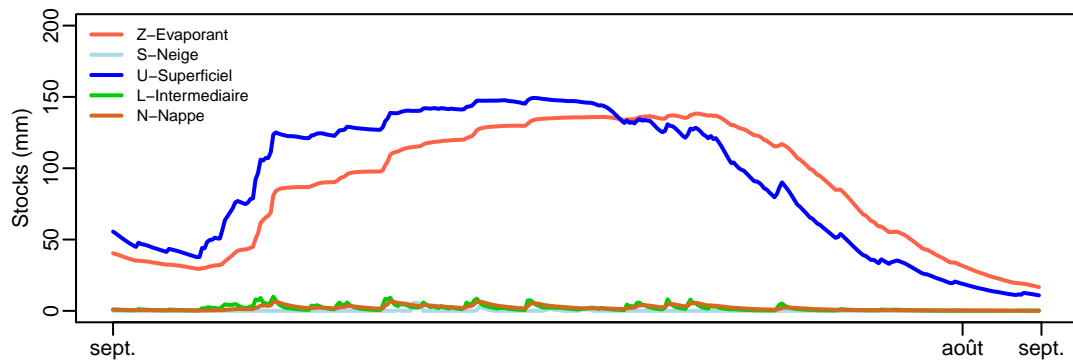

# k1243010 (248.16 km<sup>2</sup>) – année 2005–2006

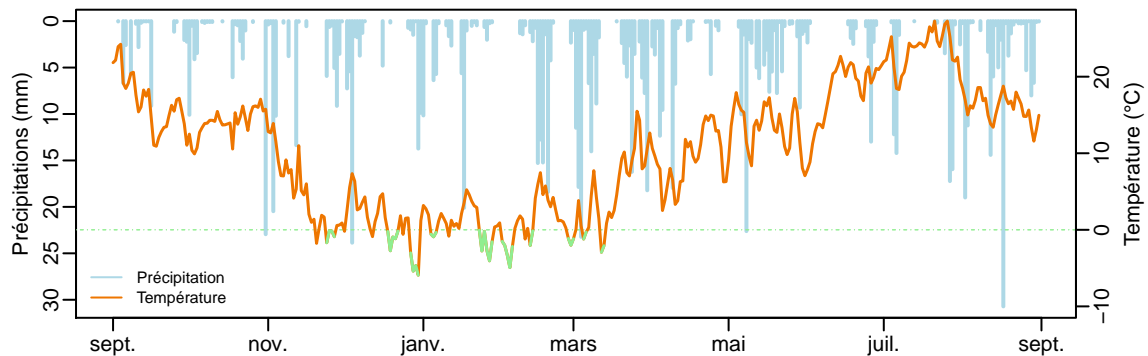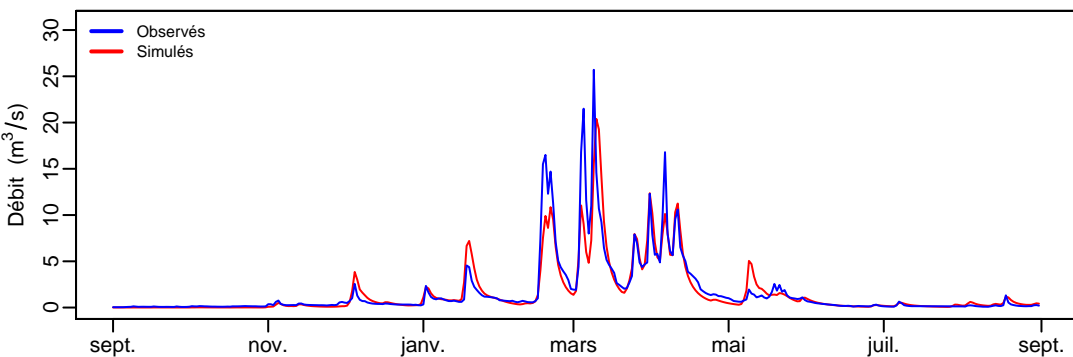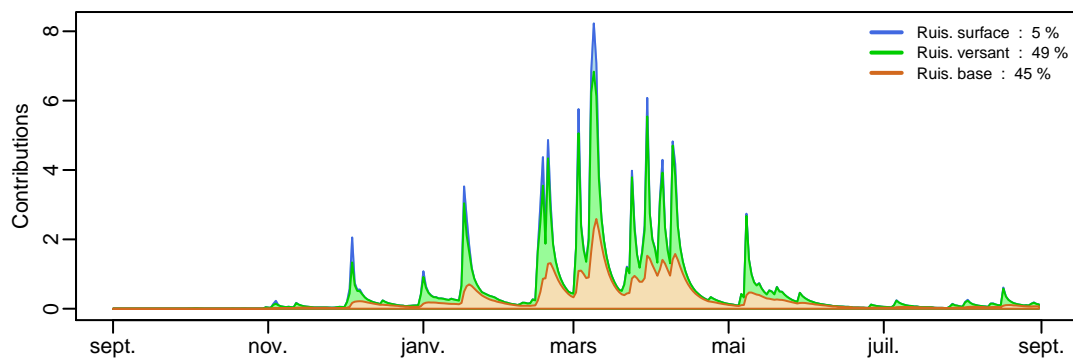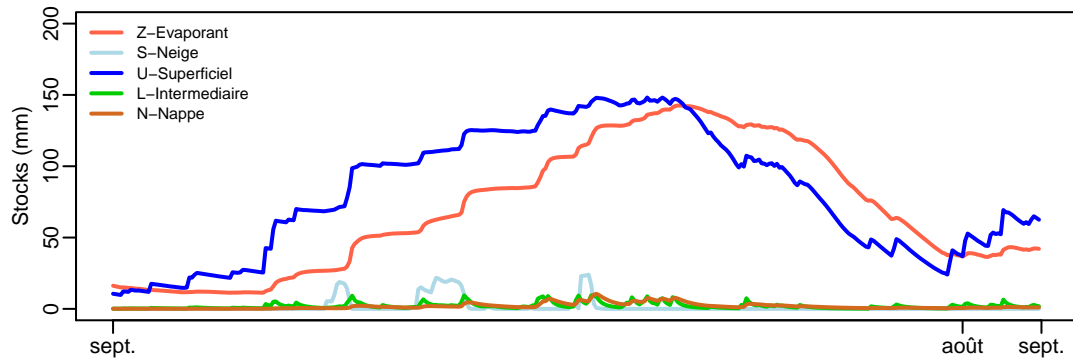

# k1243010 (248.16 km<sup>2</sup>) – année 2006–2007

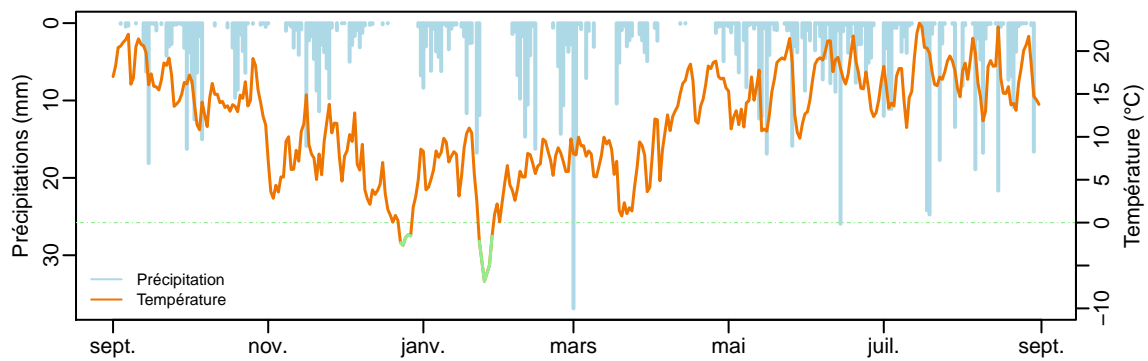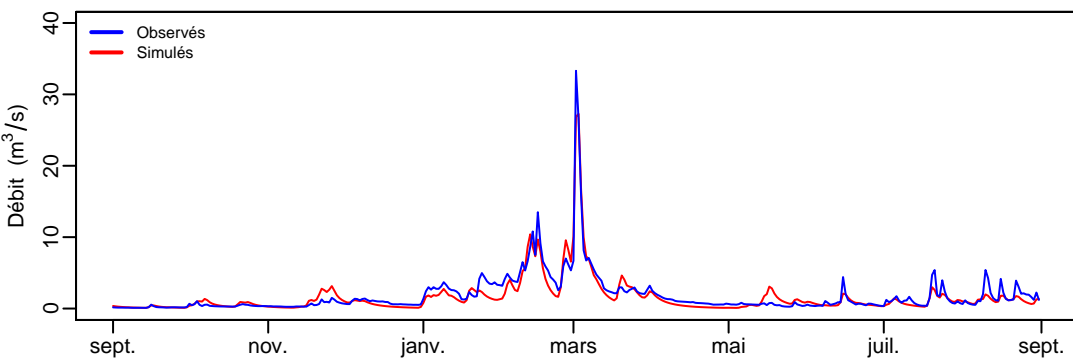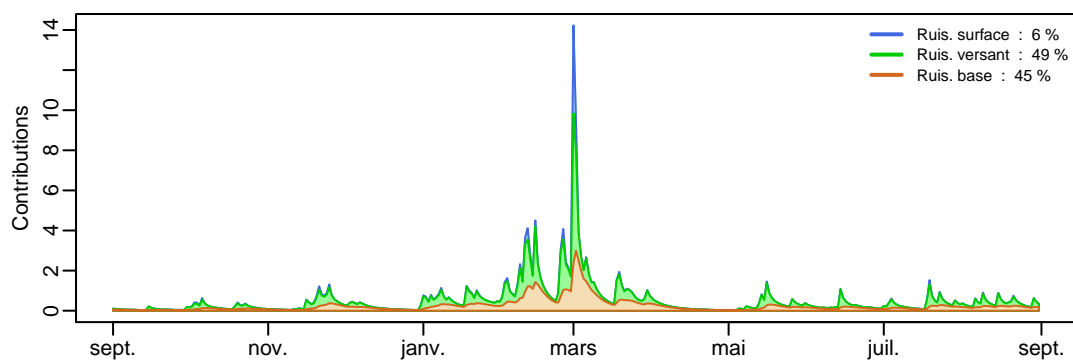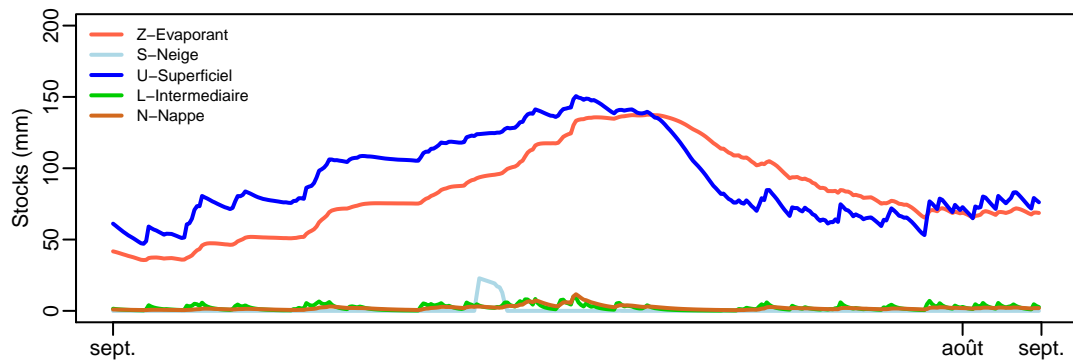

# k1243010 (248.16 km<sup>2</sup>) – année 2007–2008

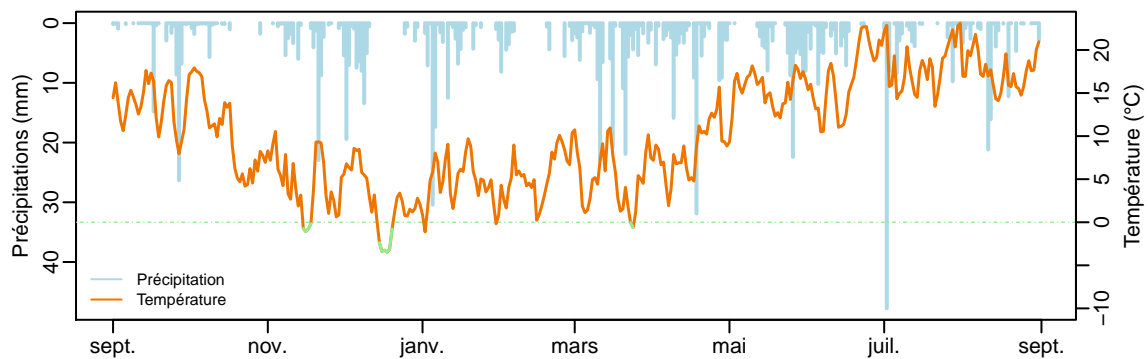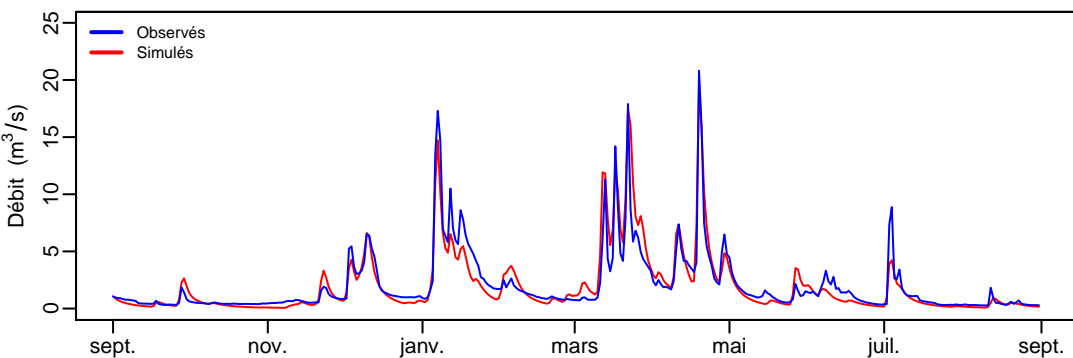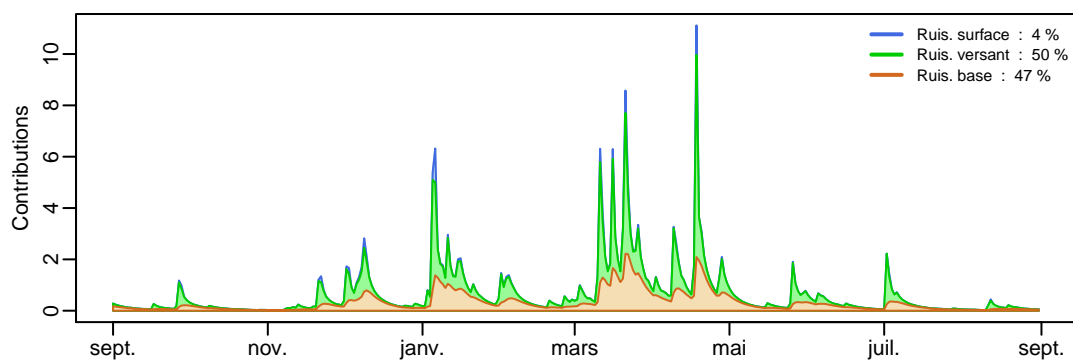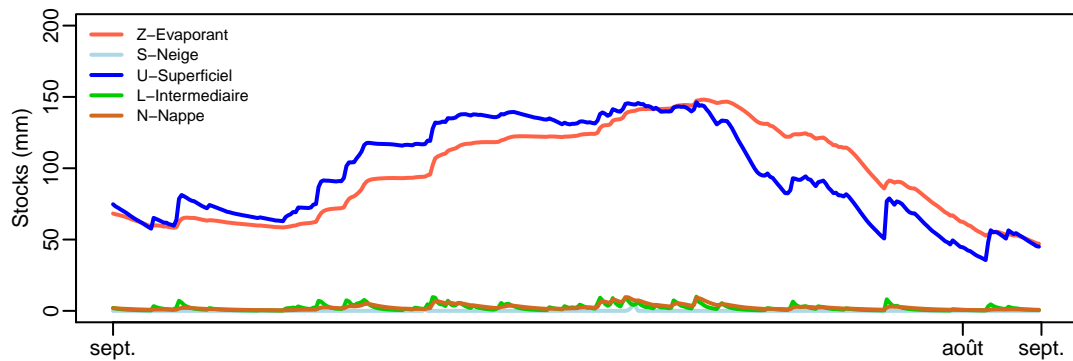

# k1243010 (248.16 km<sup>2</sup>) – année 2008–2009

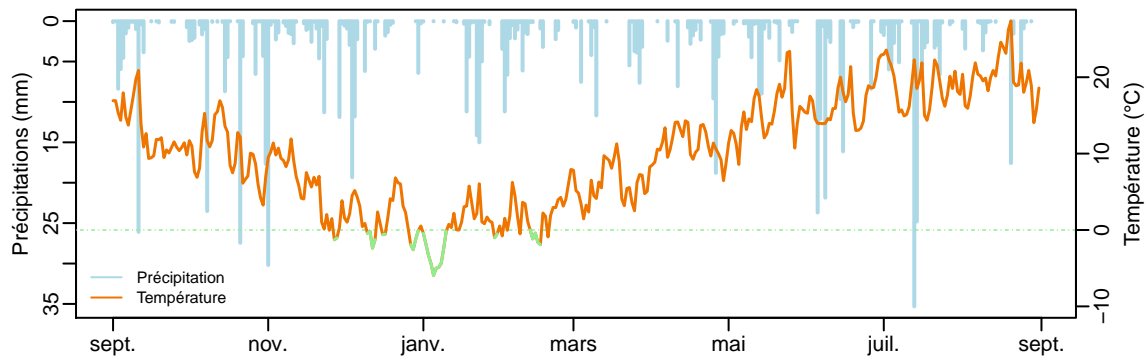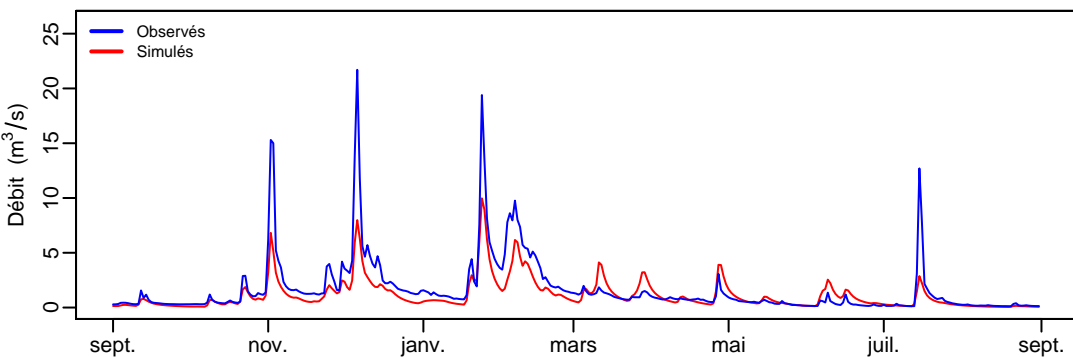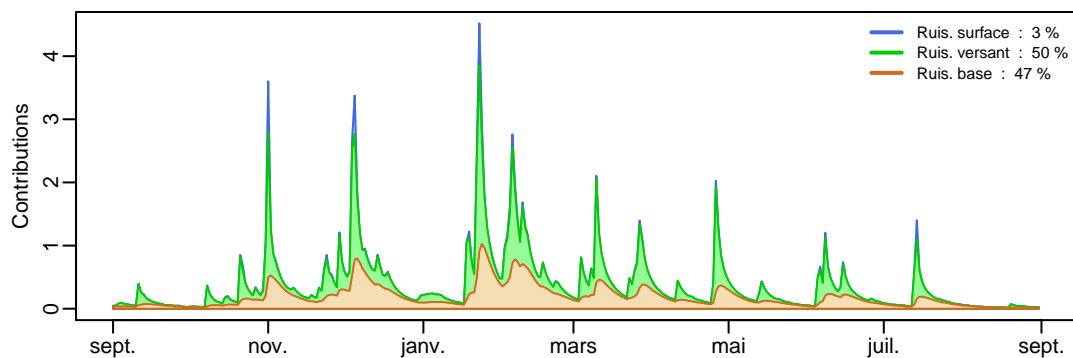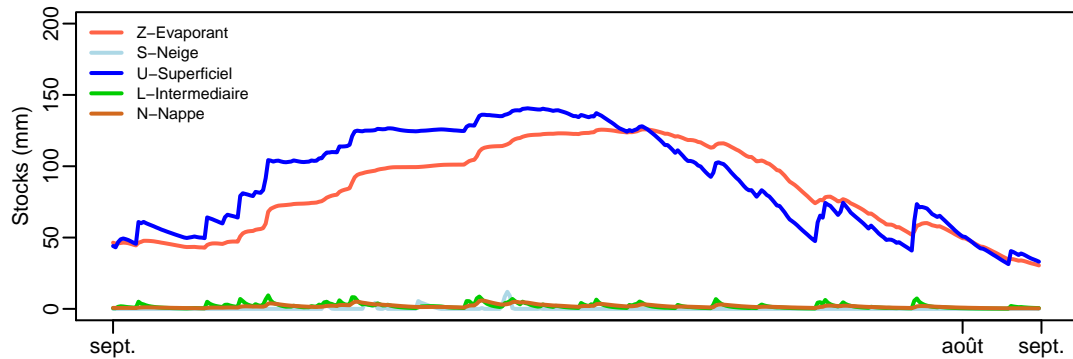



# k1243010 (248.16 km<sup>2</sup>) – année 2009–2010

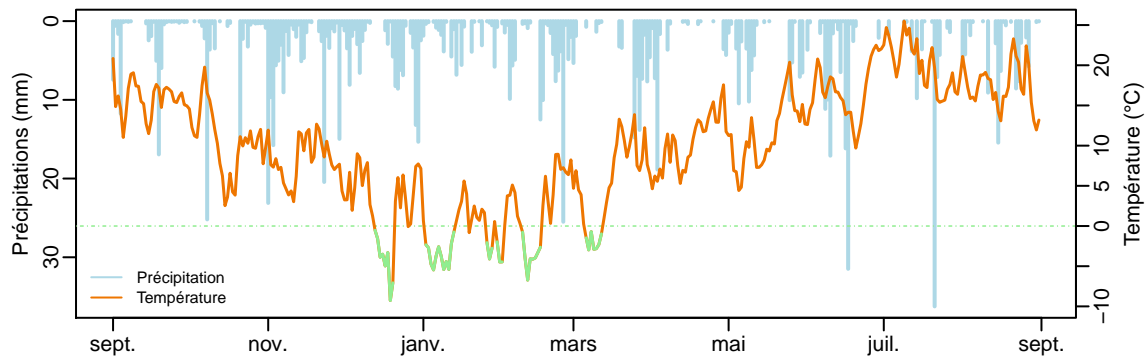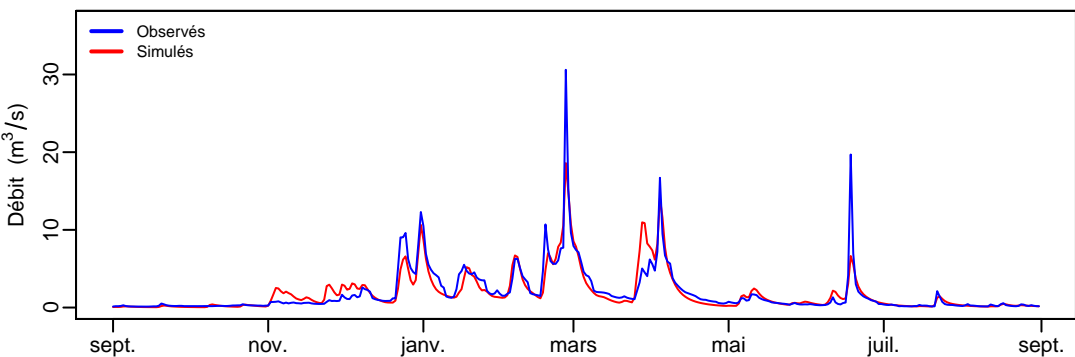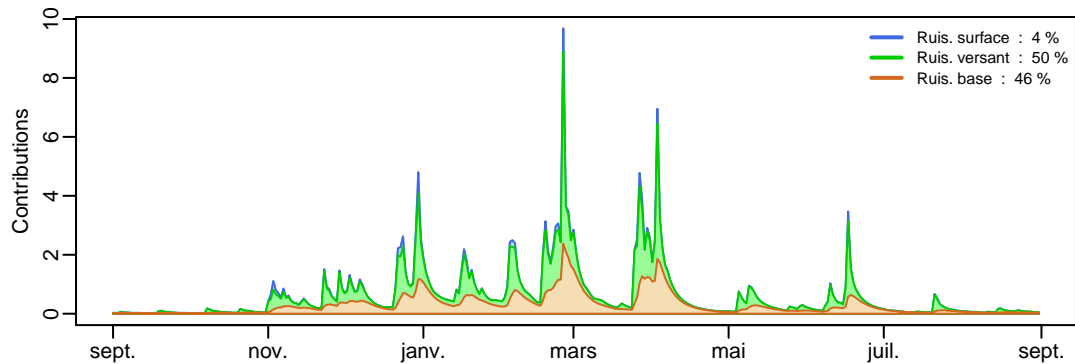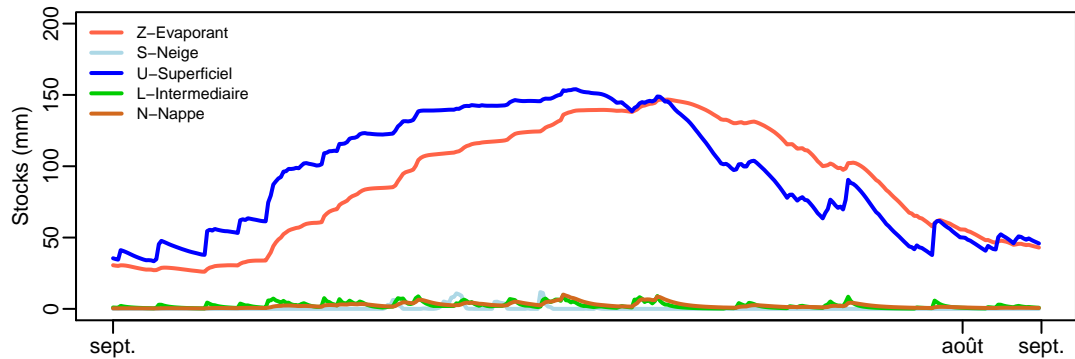

# k1243010 (248.16 km<sup>2</sup>) – année 2010–2011

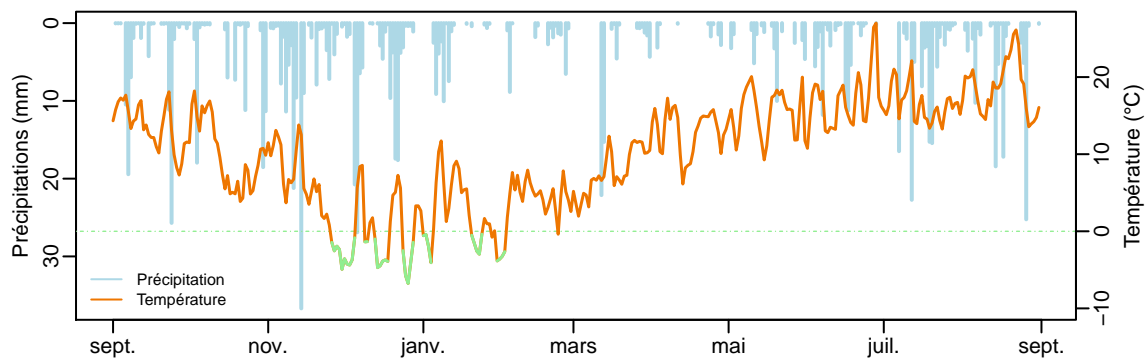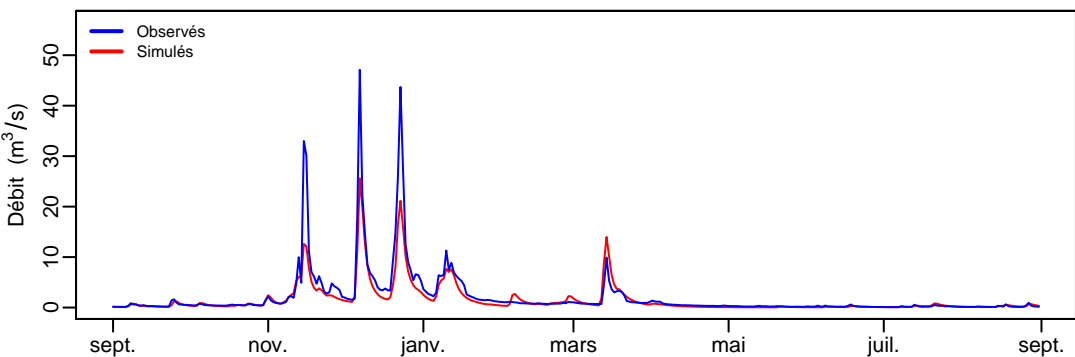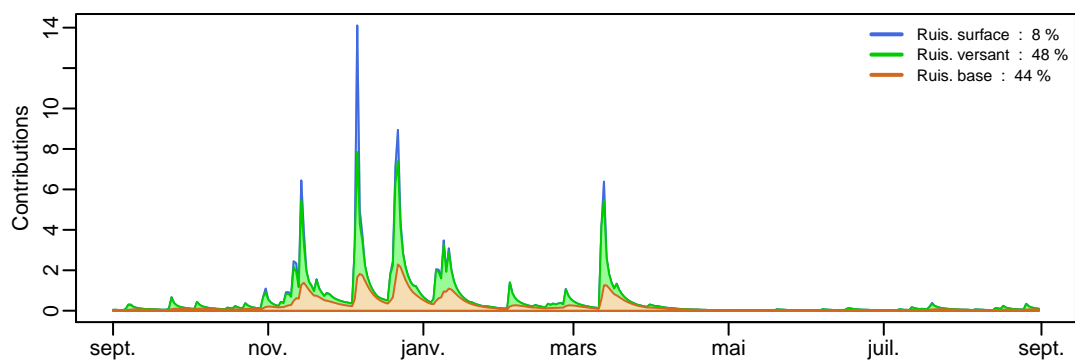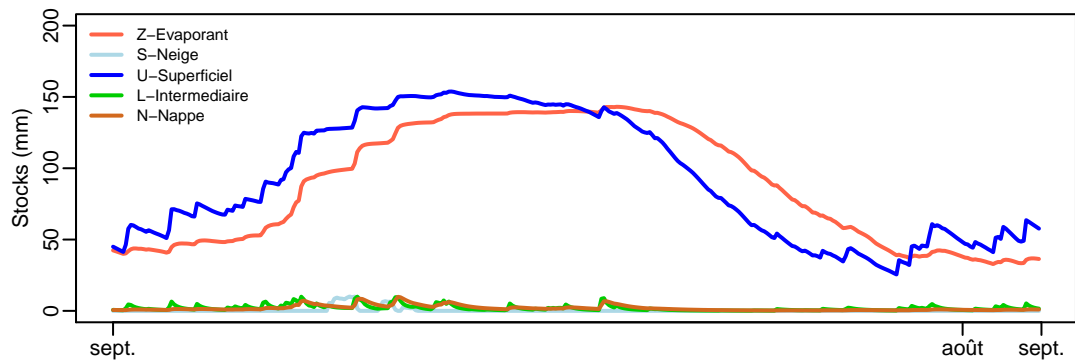

# k1243010 (248.16 km<sup>2</sup>) – année 2011–2012

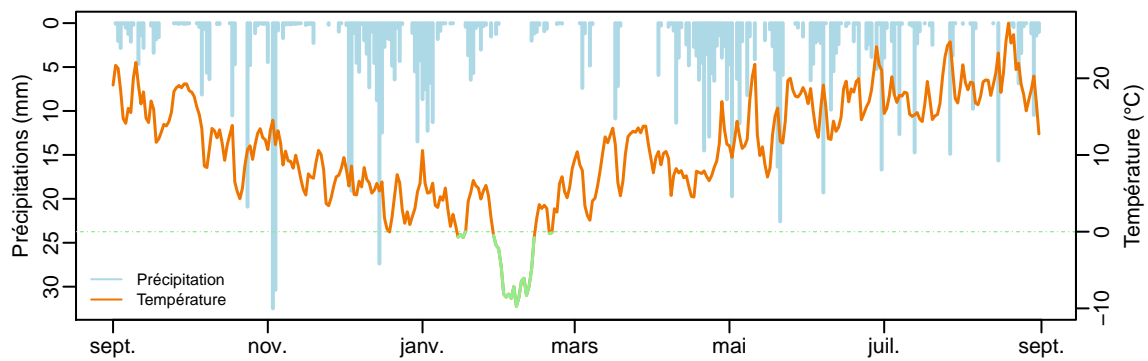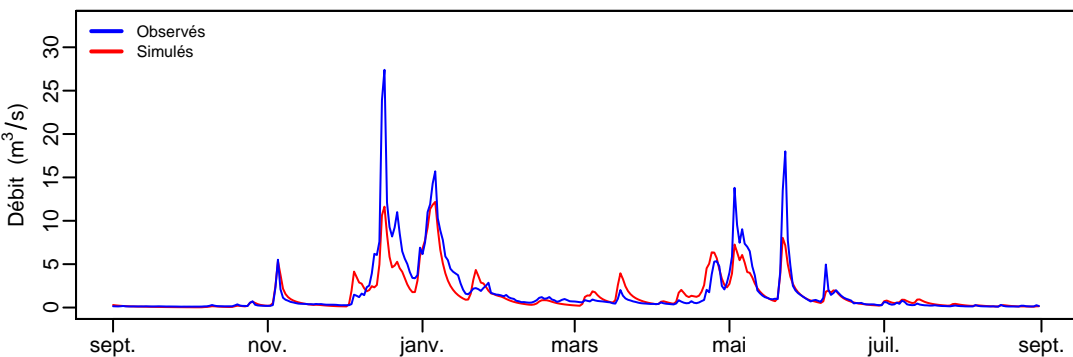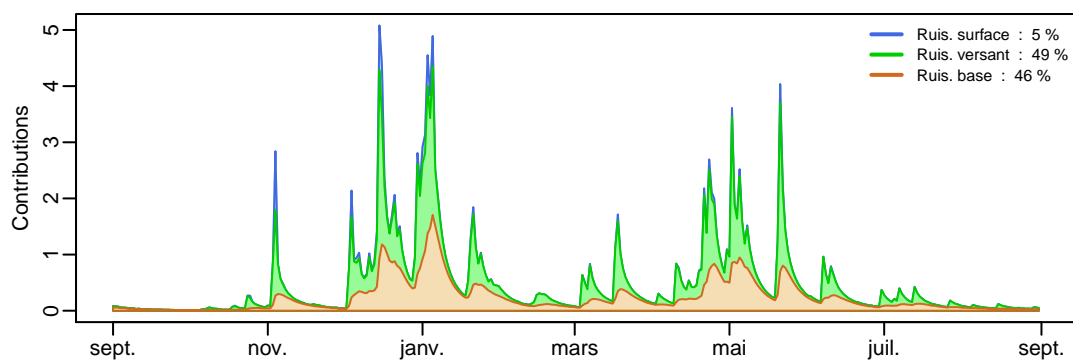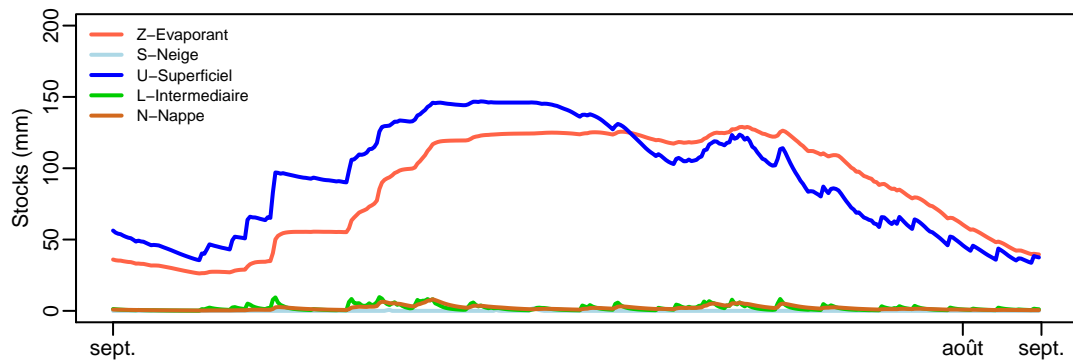

# k1251810 (771.3 km<sup>2</sup>) – année 1984–1985

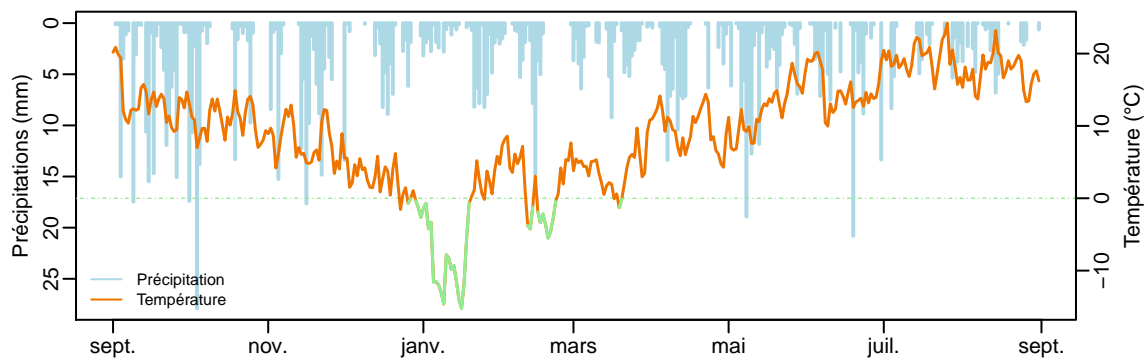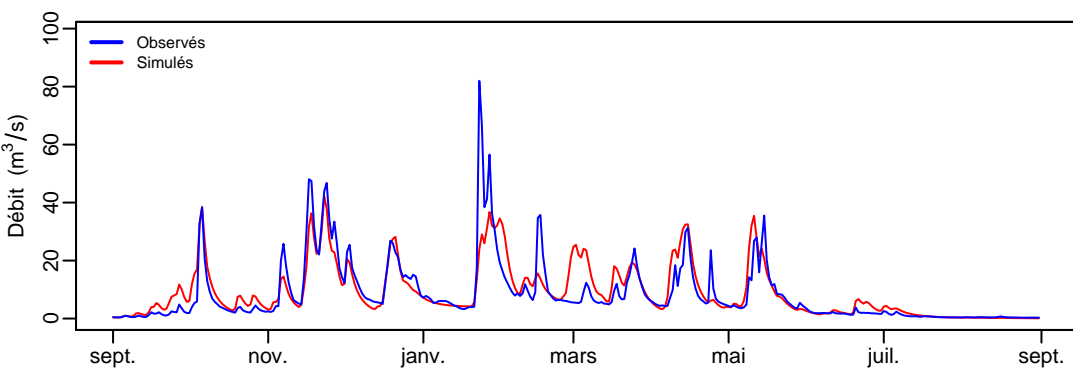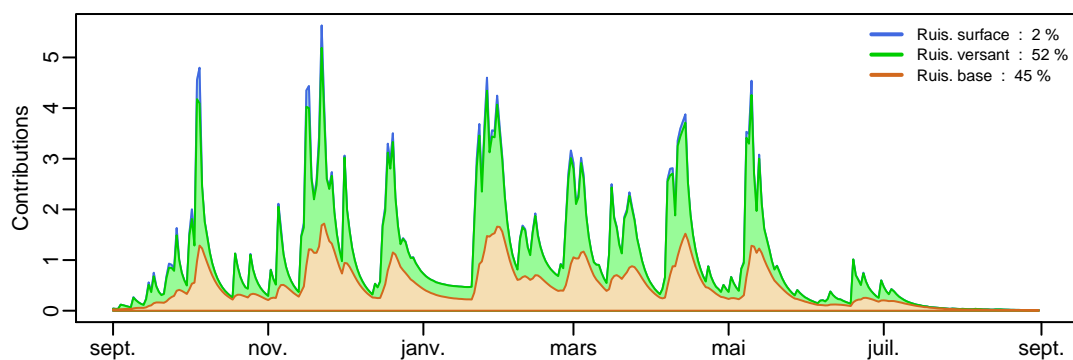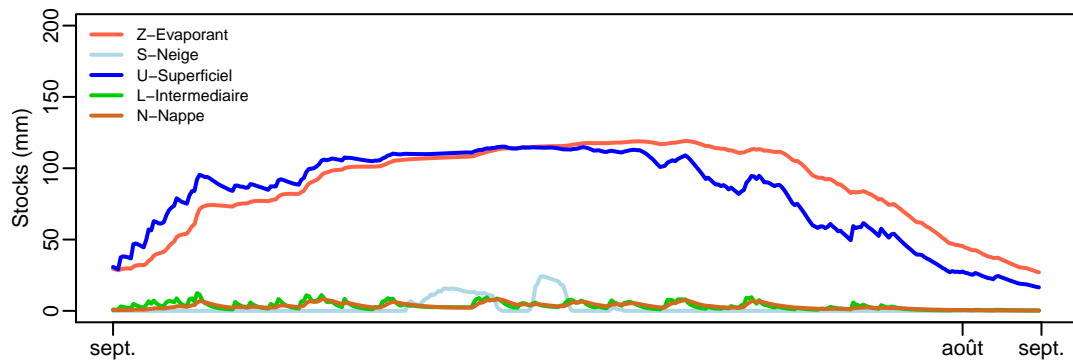

# k1251810 (771.3 km<sup>2</sup>) – année 1985–1986

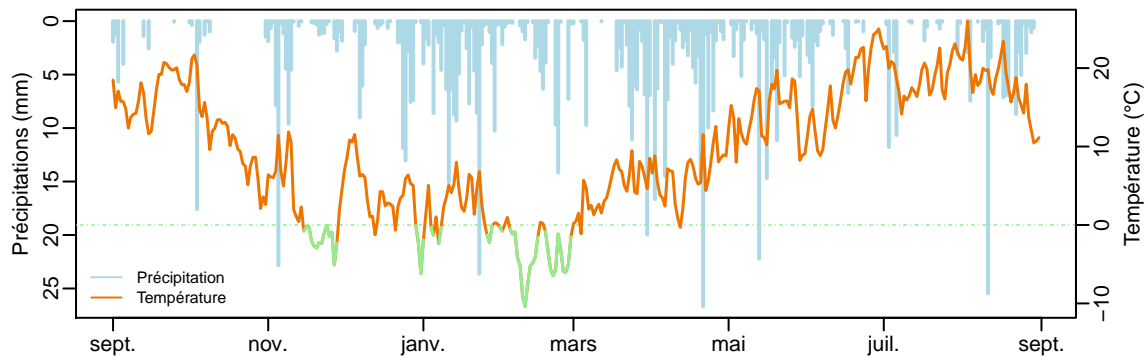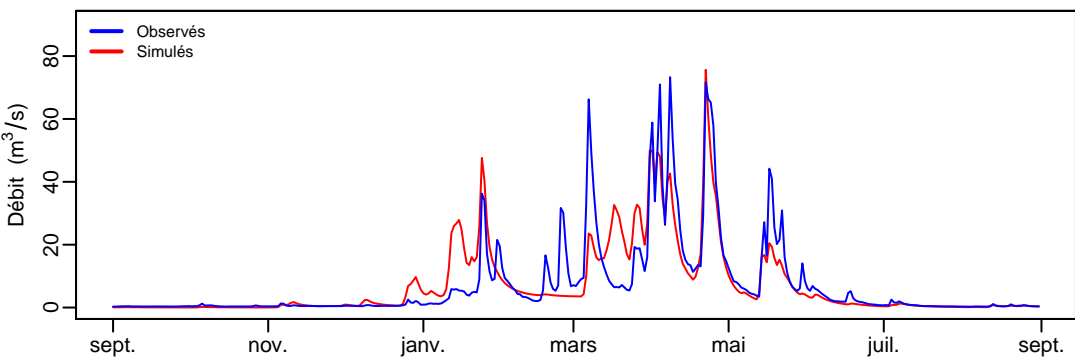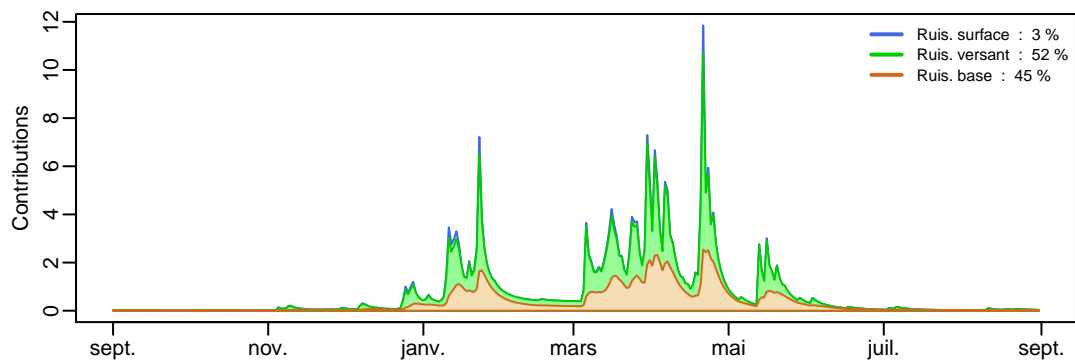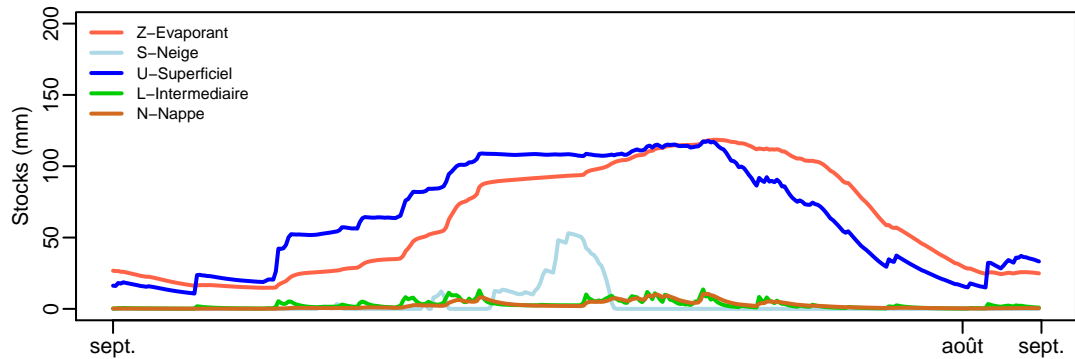

# k1251810 (771.3 km<sup>2</sup>) – année 1986–1987

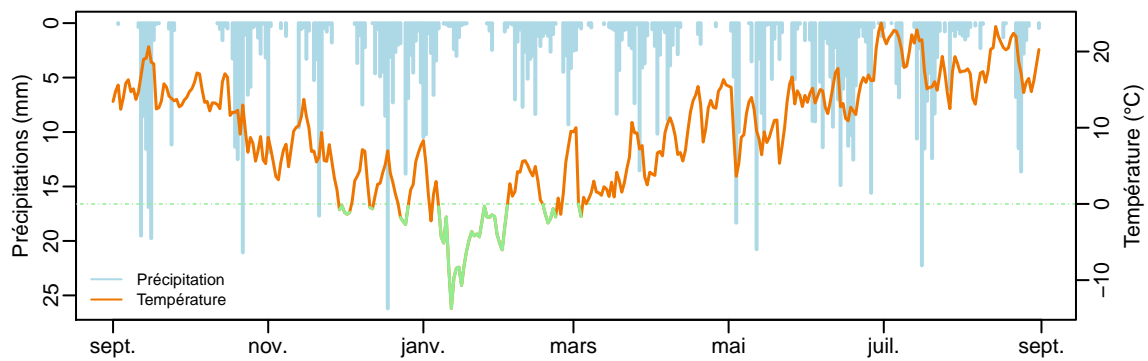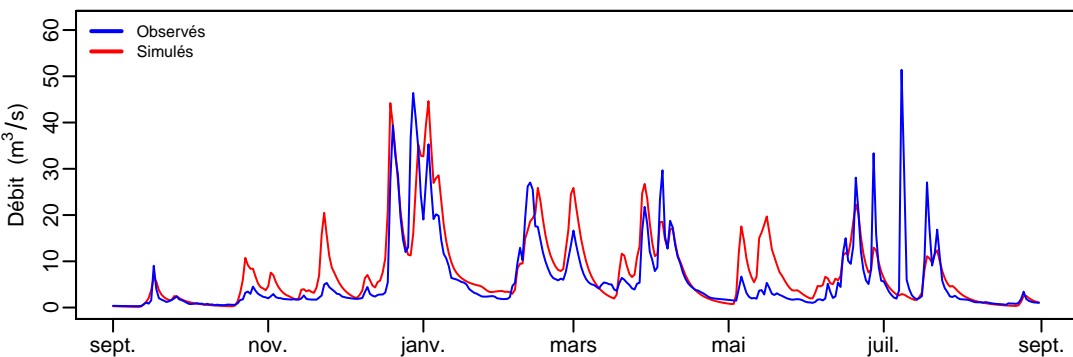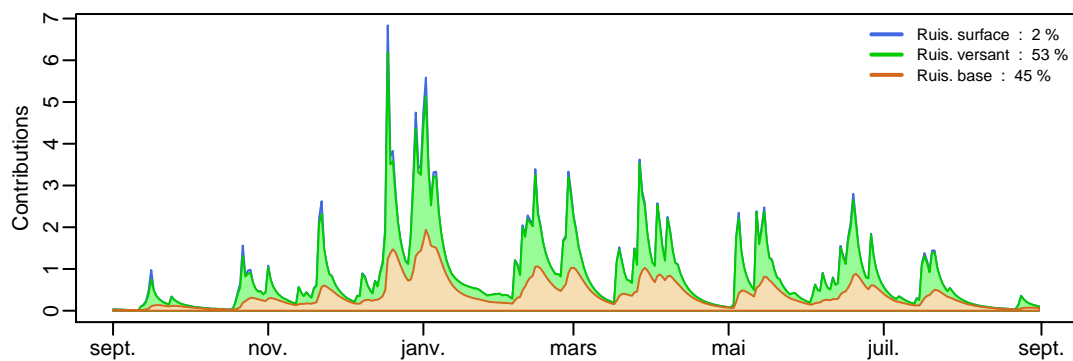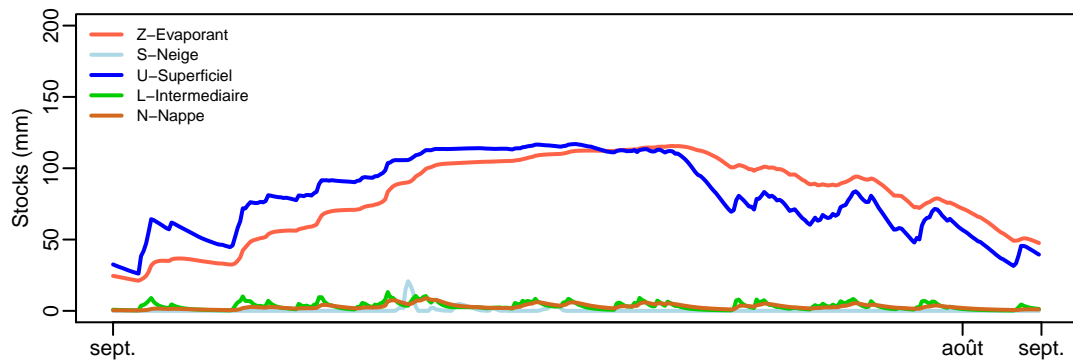

# k1251810 (771.3 km<sup>2</sup>) – année 1987–1988

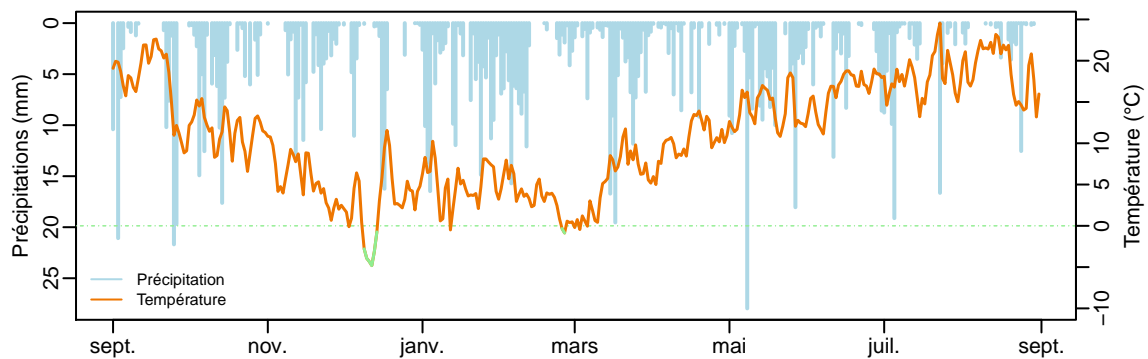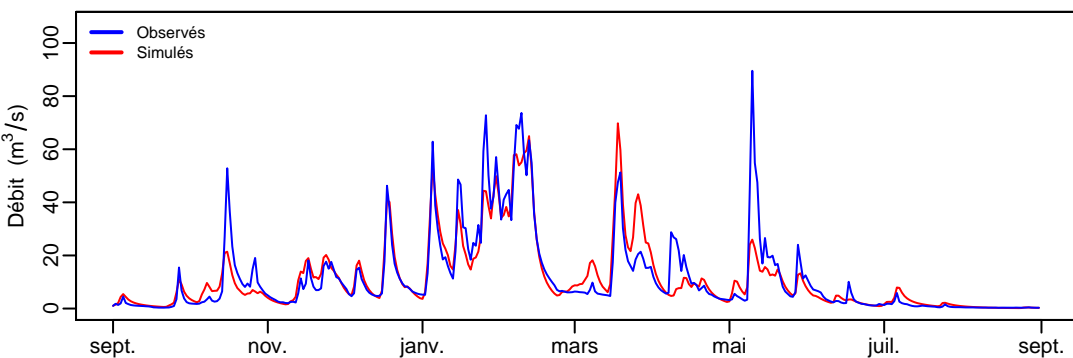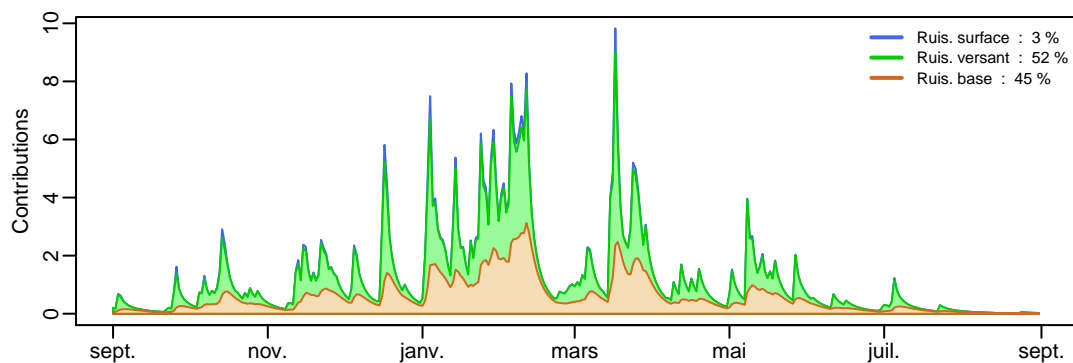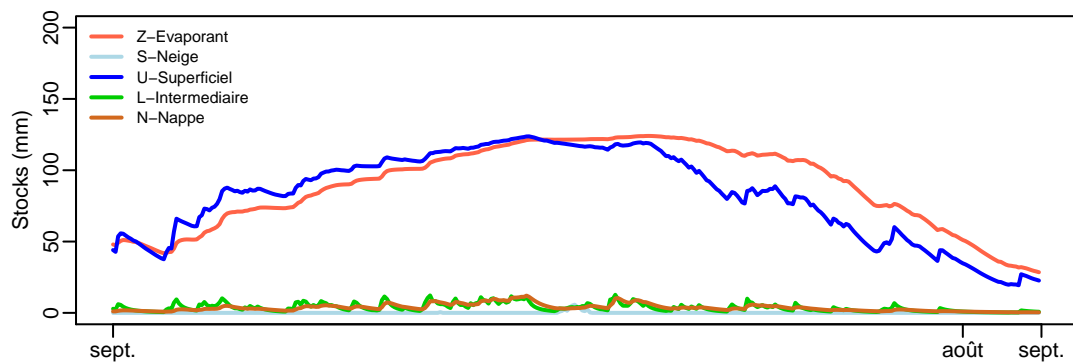

# k1251810 (771.3 km<sup>2</sup>) – année 1988–1989

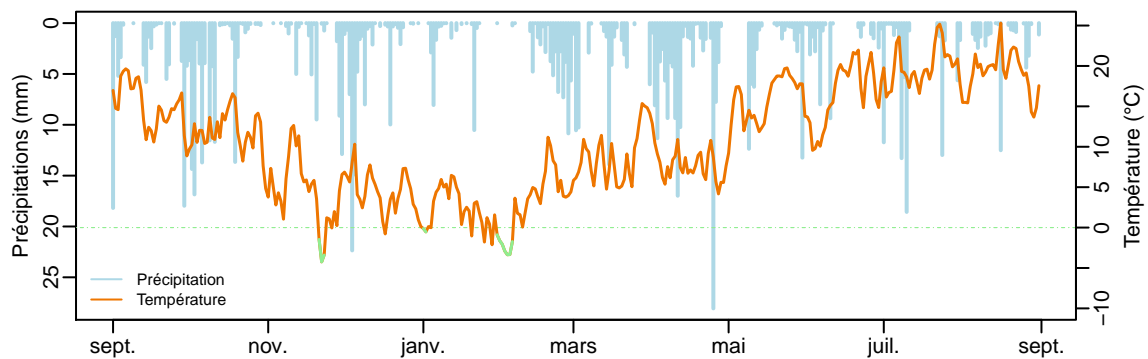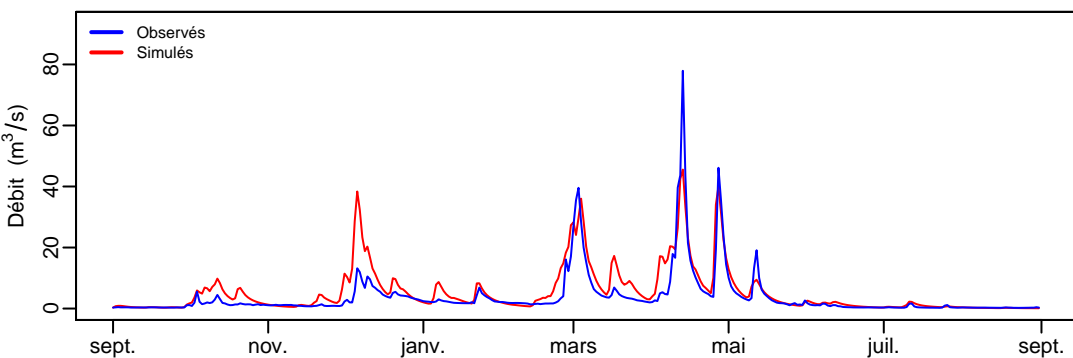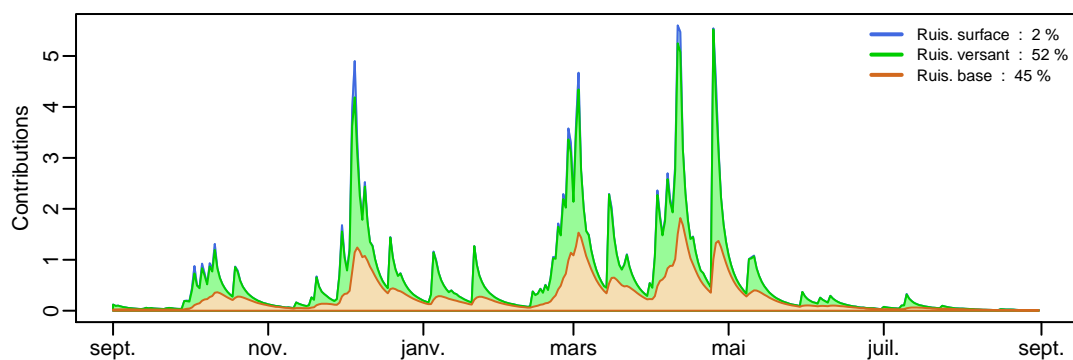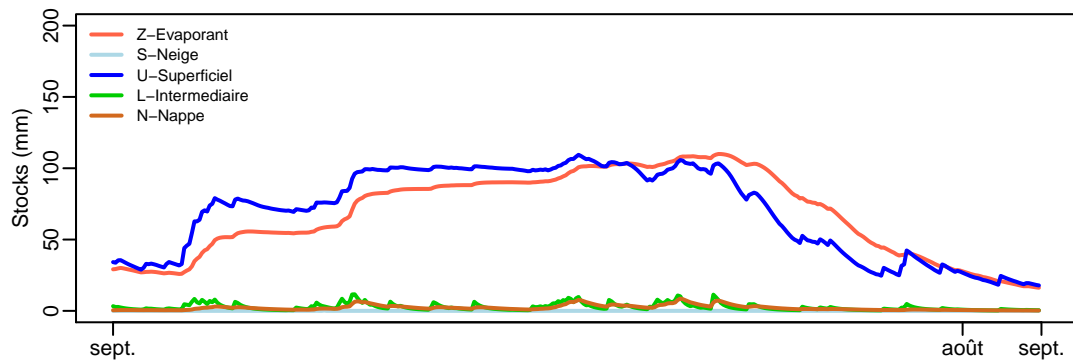



# k1251810 (771.3 km<sup>2</sup>) – année 1989–1990

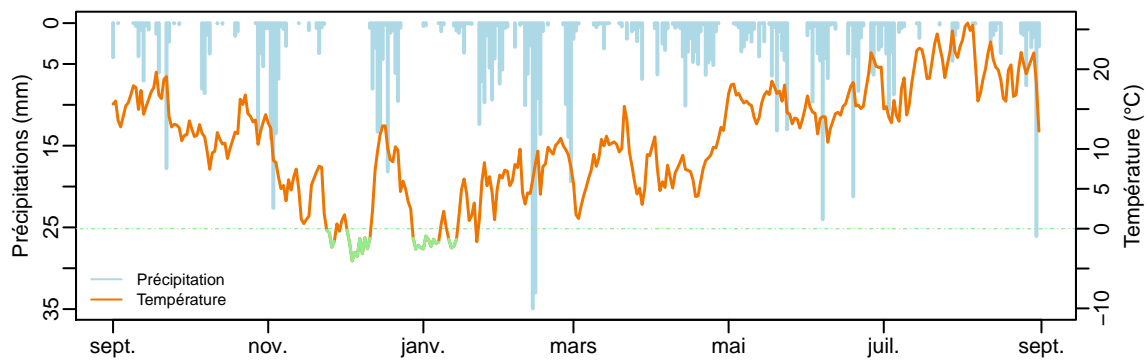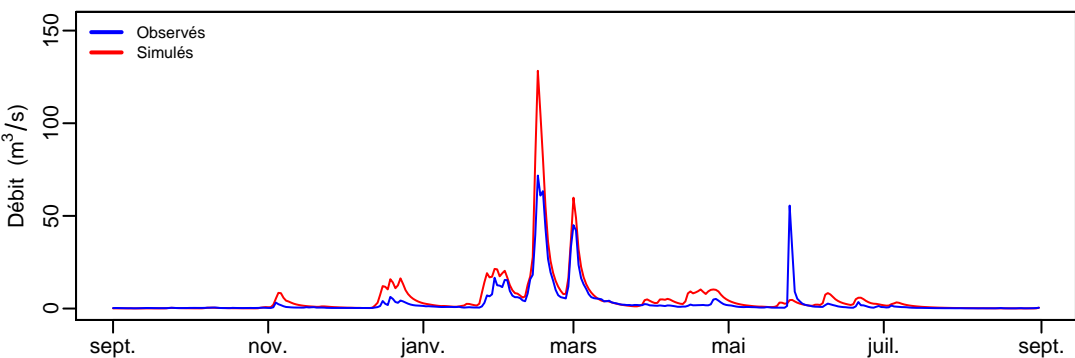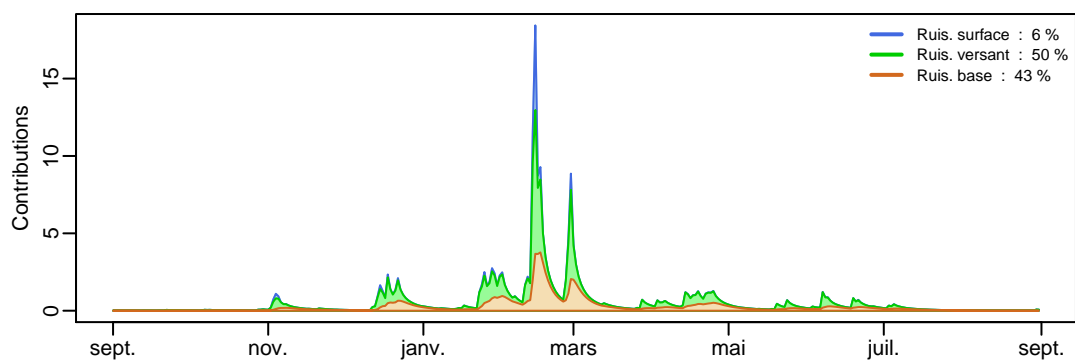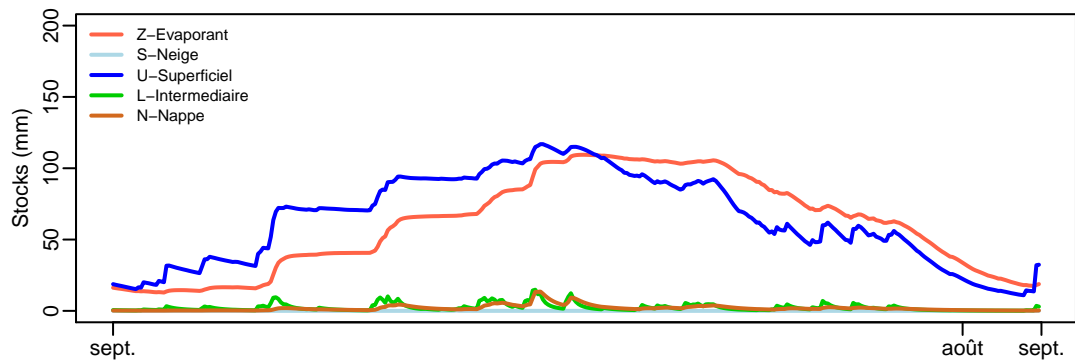

# k1251810 (771.3 km<sup>2</sup>) – année 1990–1991

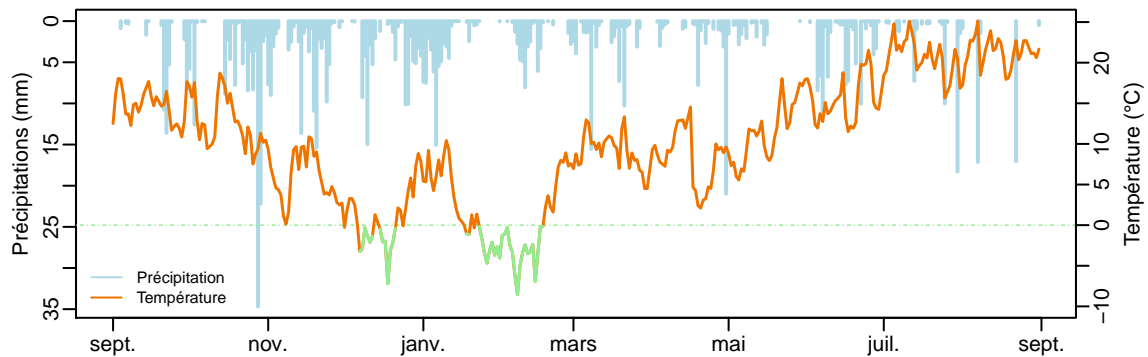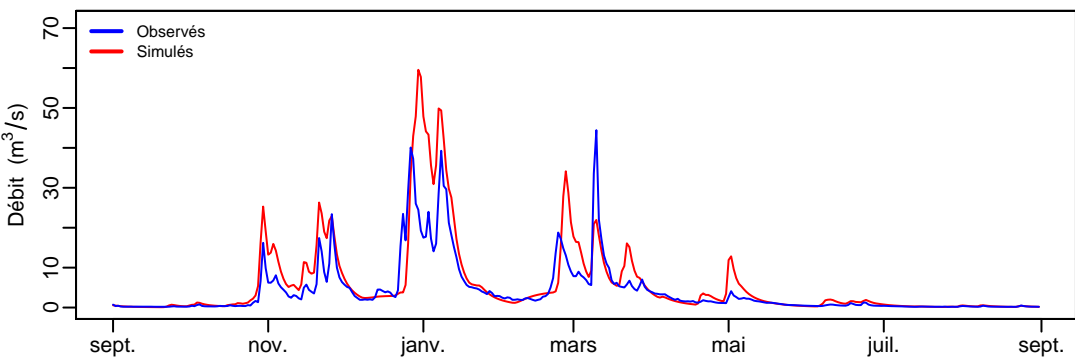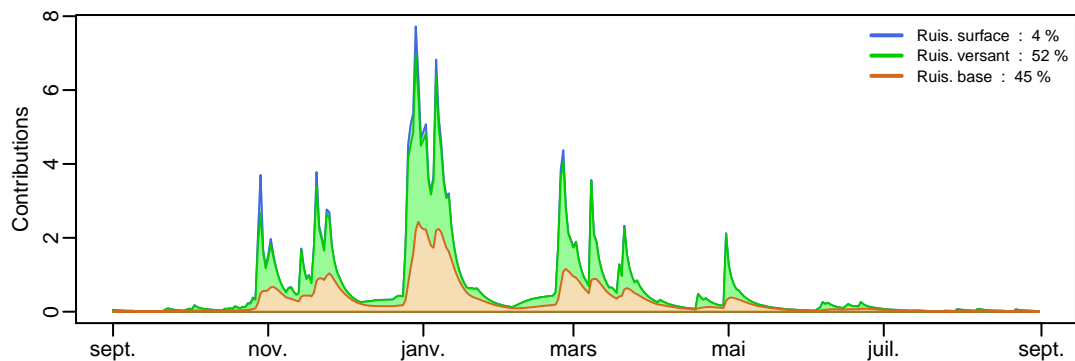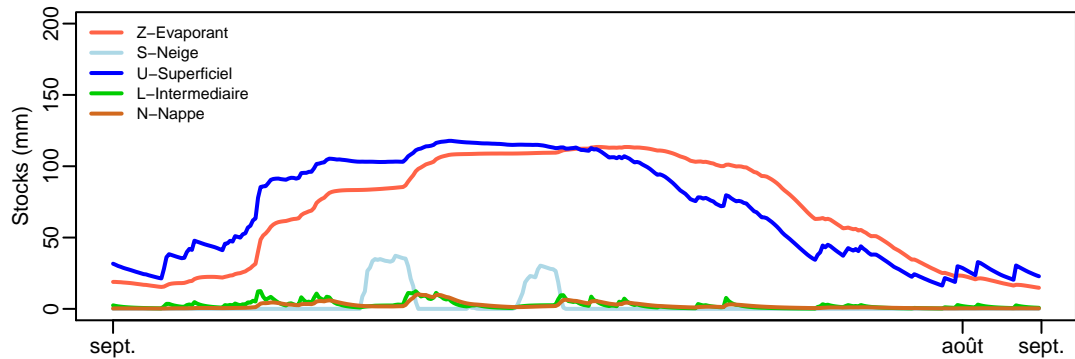

# k1251810 (771.3 km<sup>2</sup>) – année 1991–1992

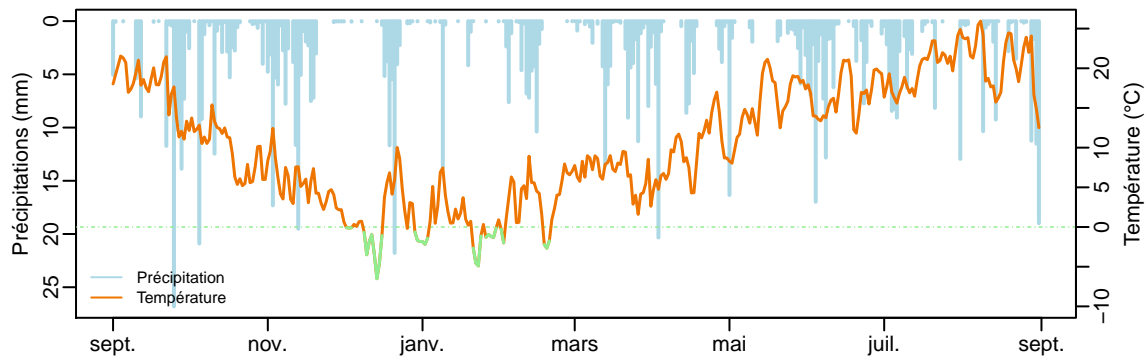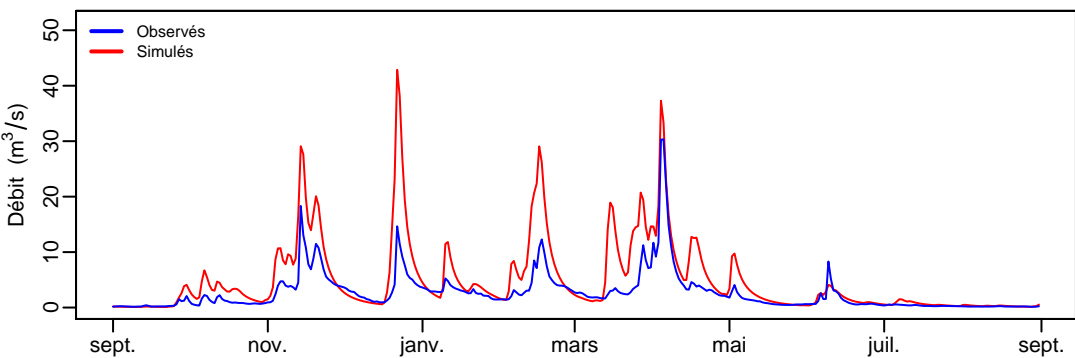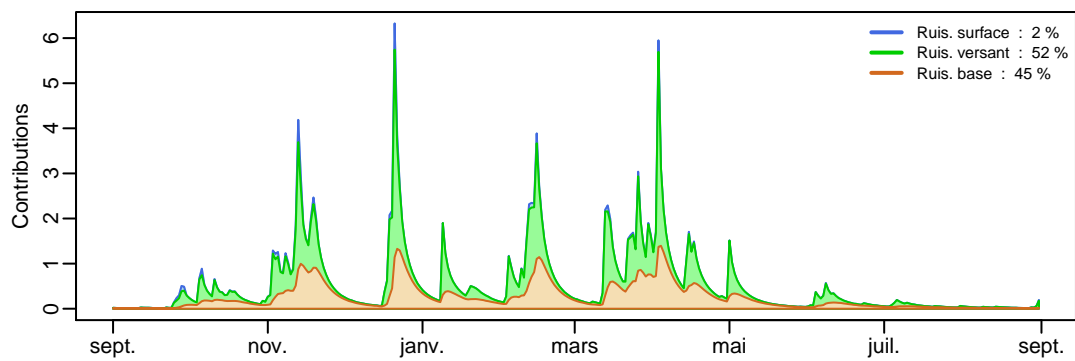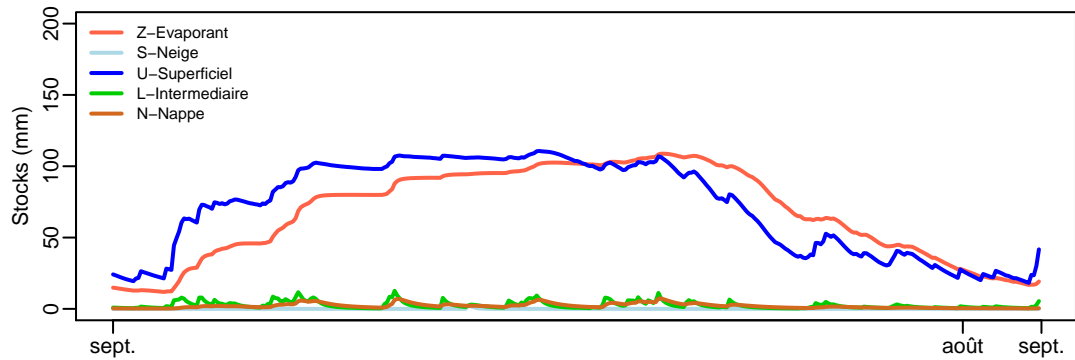

# k1251810 (771.3 km<sup>2</sup>) – année 1992–1993

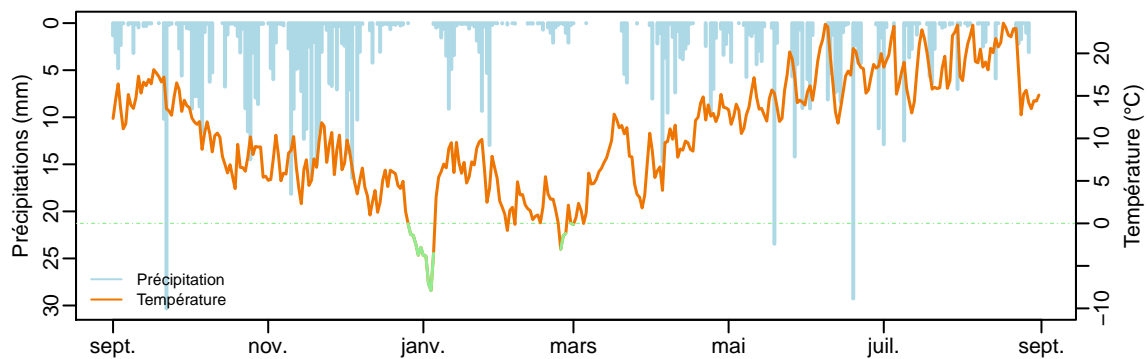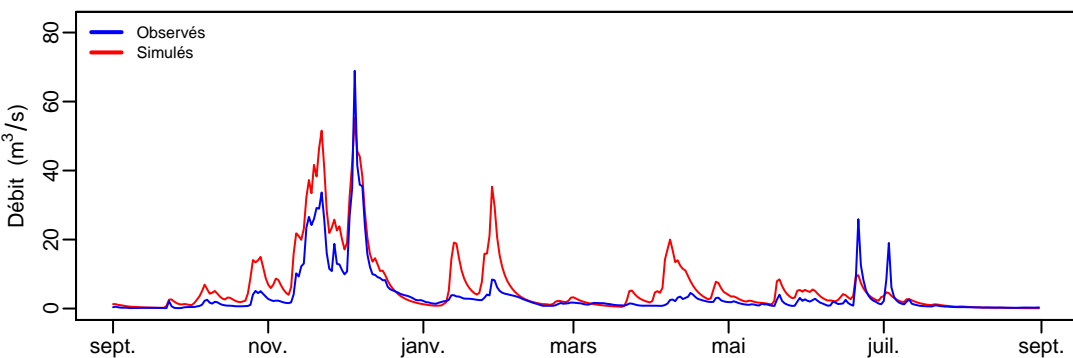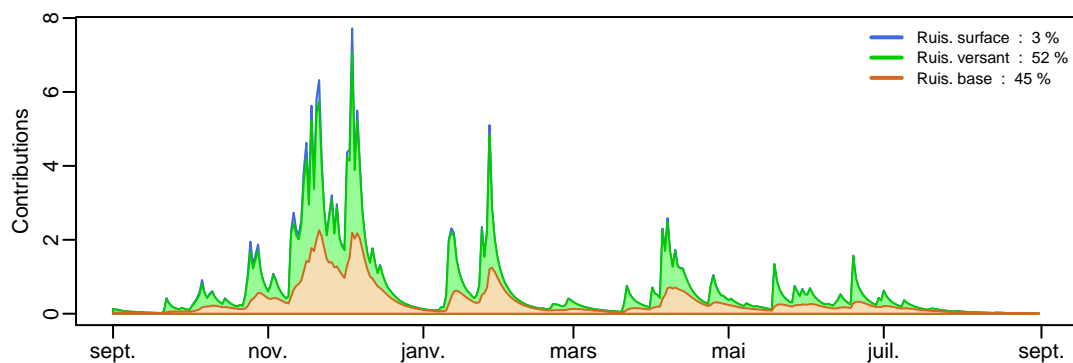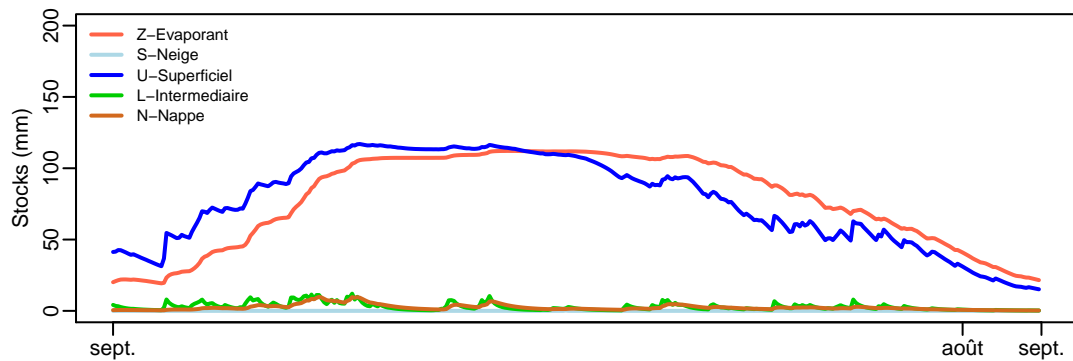

# k1251810 (771.3 km<sup>2</sup>) – année 1993–1994

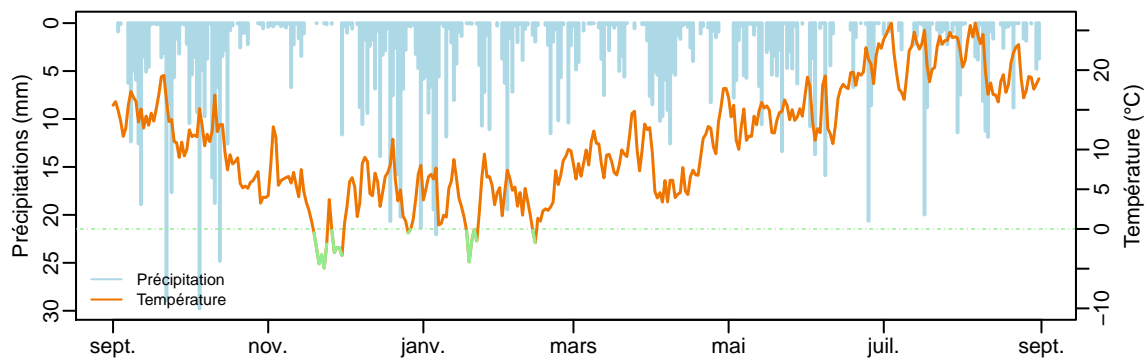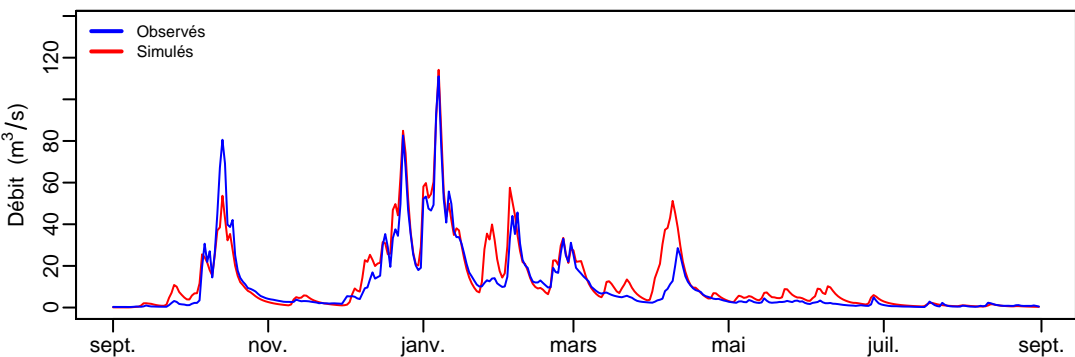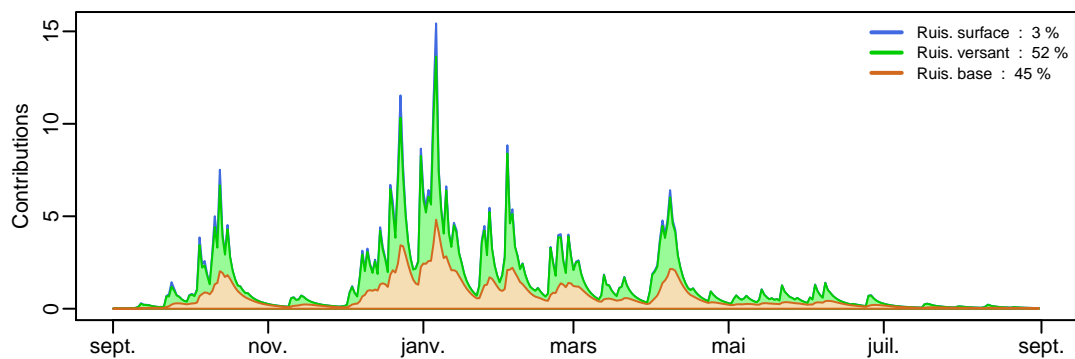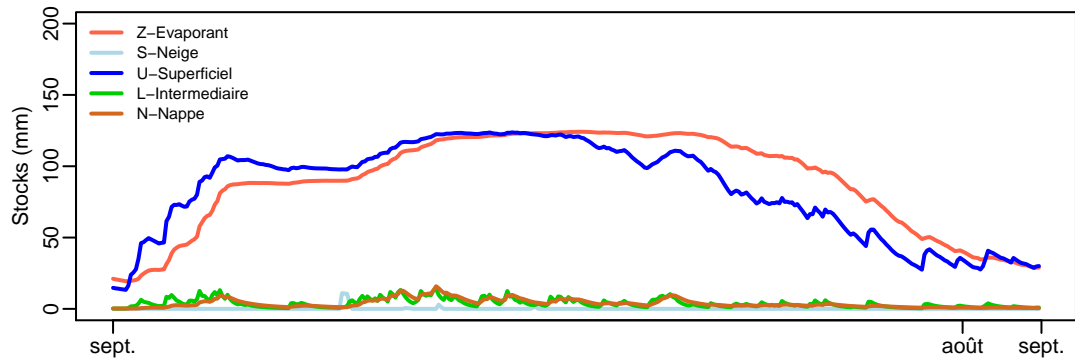

# k1251810 (771.3 km<sup>2</sup>) – année 1994–1995

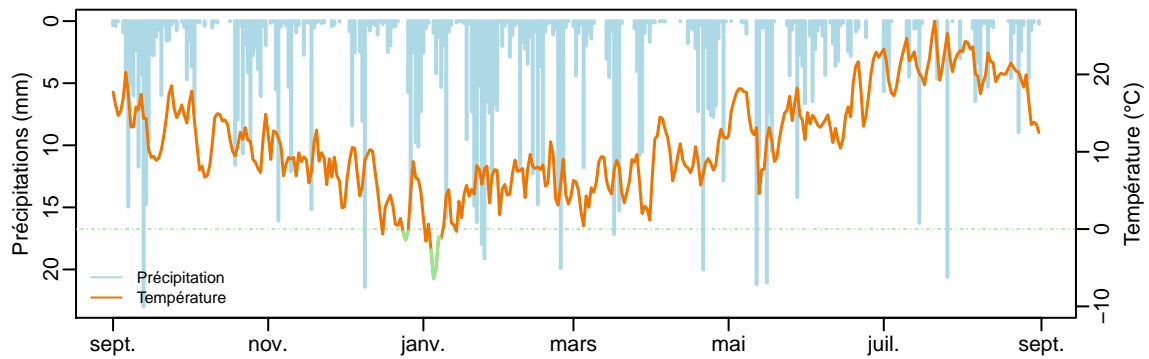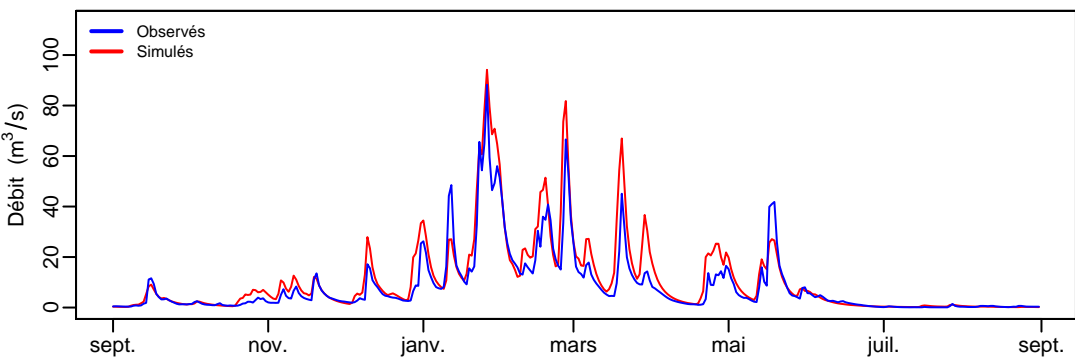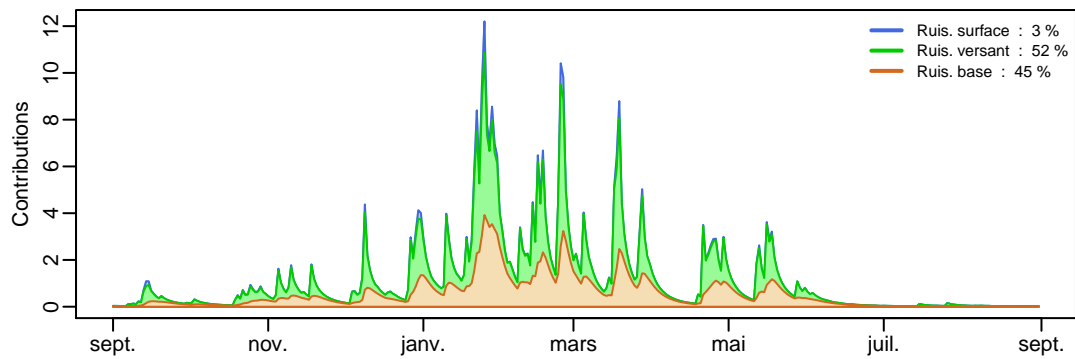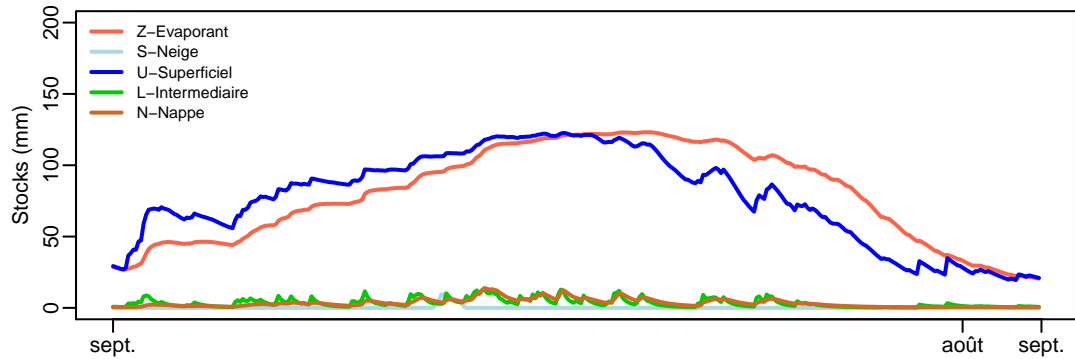

# k1251810 (771.3 km<sup>2</sup>) – année 1995–1996

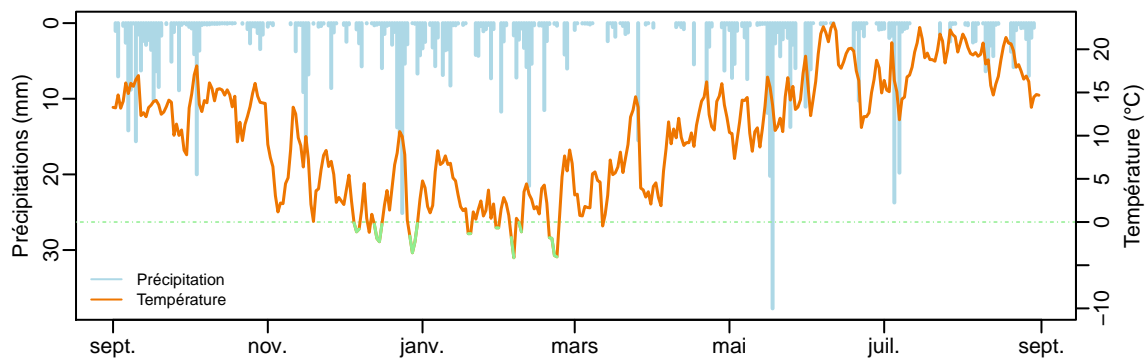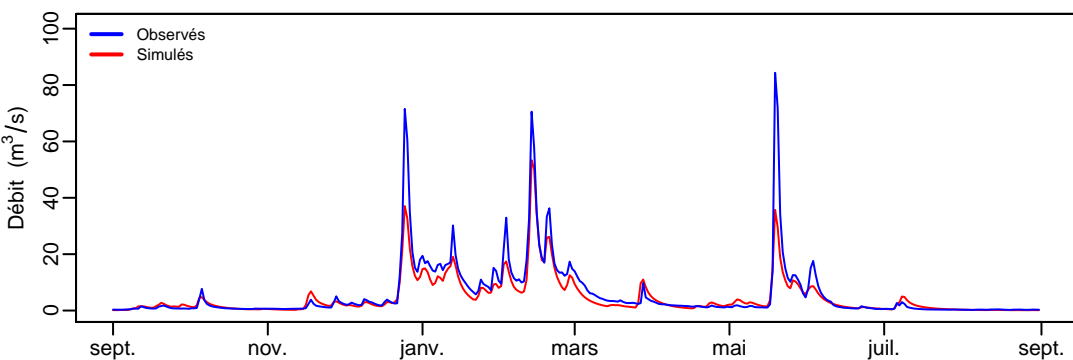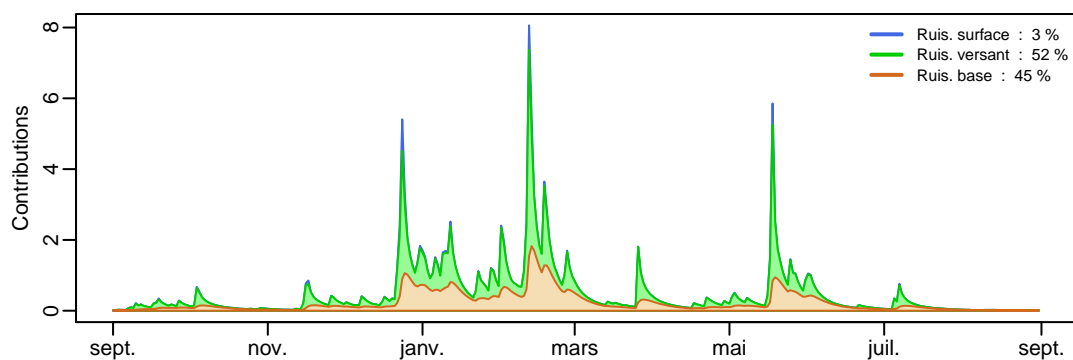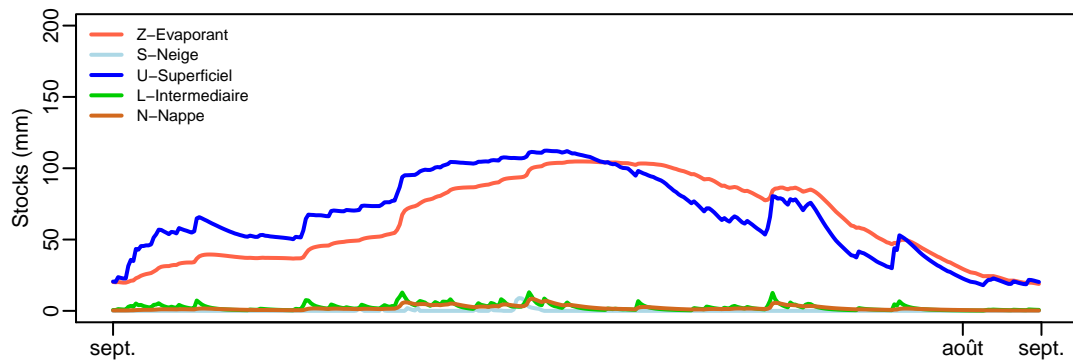

# k1251810 (771.3 km<sup>2</sup>) – année 1996–1997

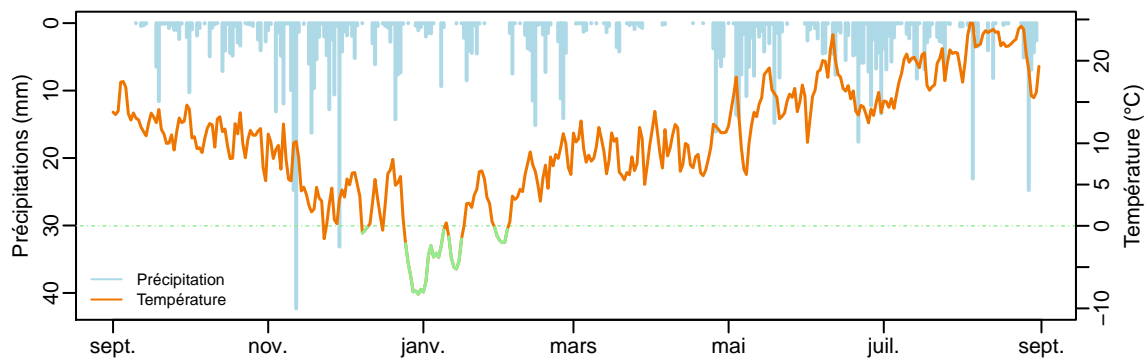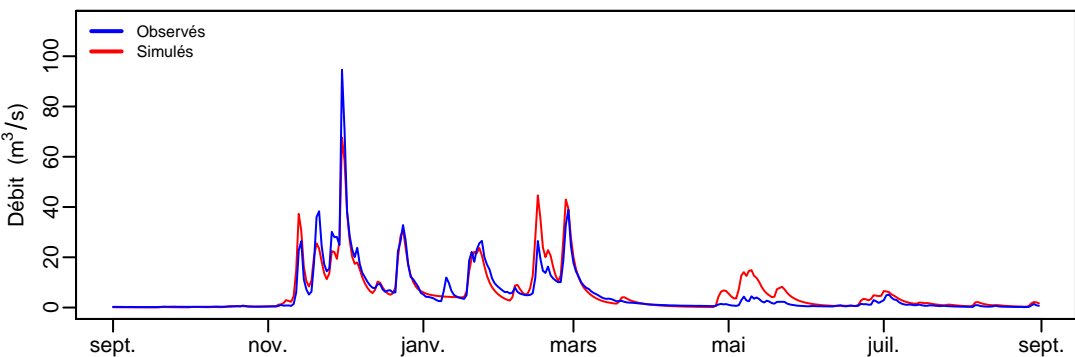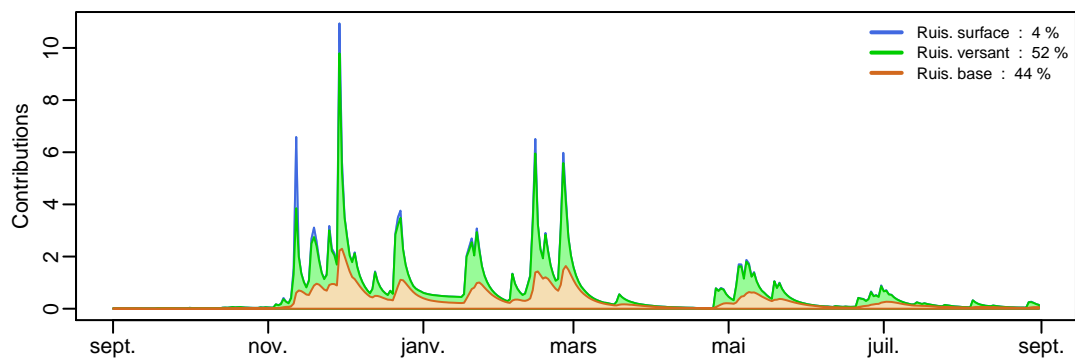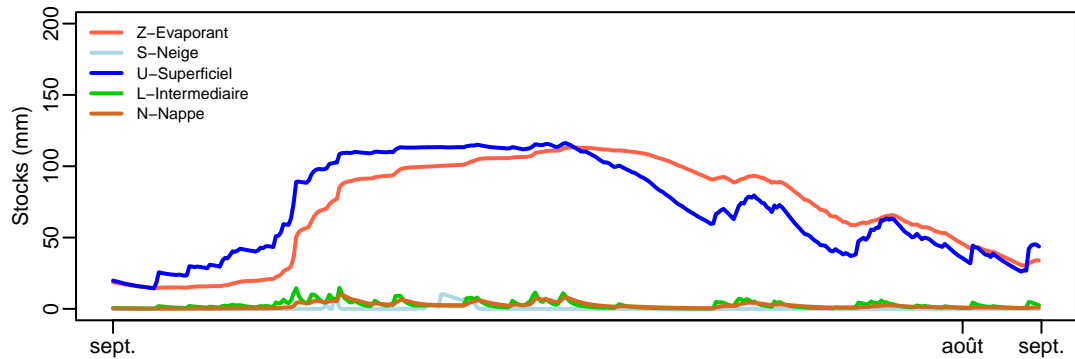



# k1251810 (771.3 km<sup>2</sup>) – année 1997–1998

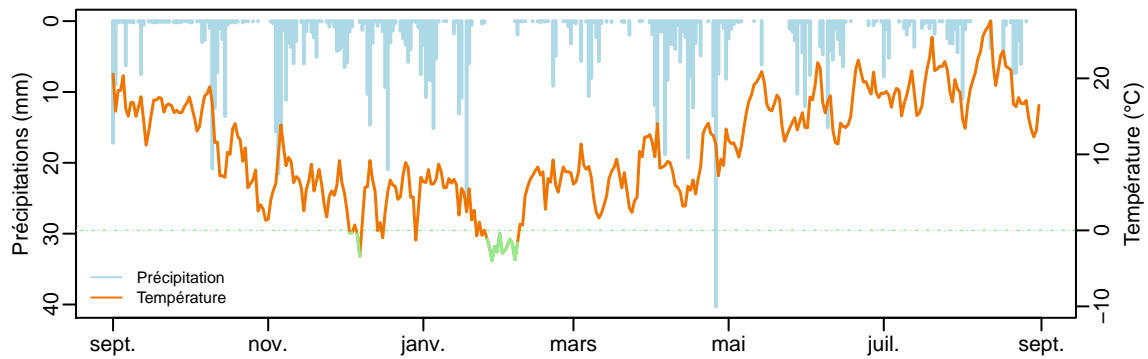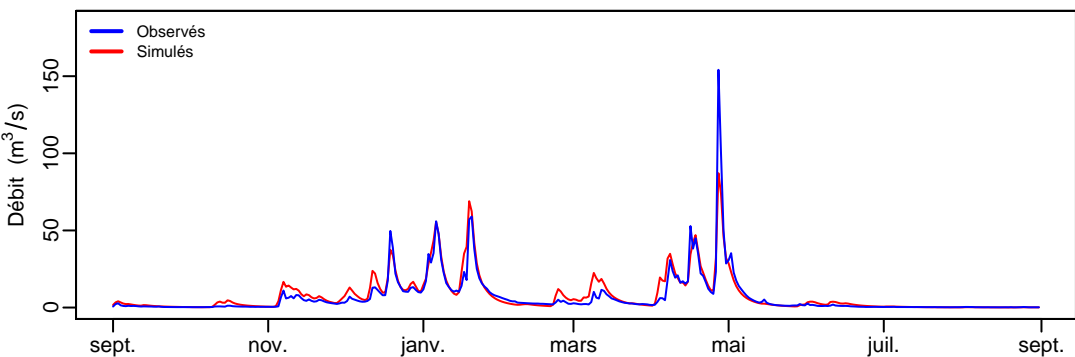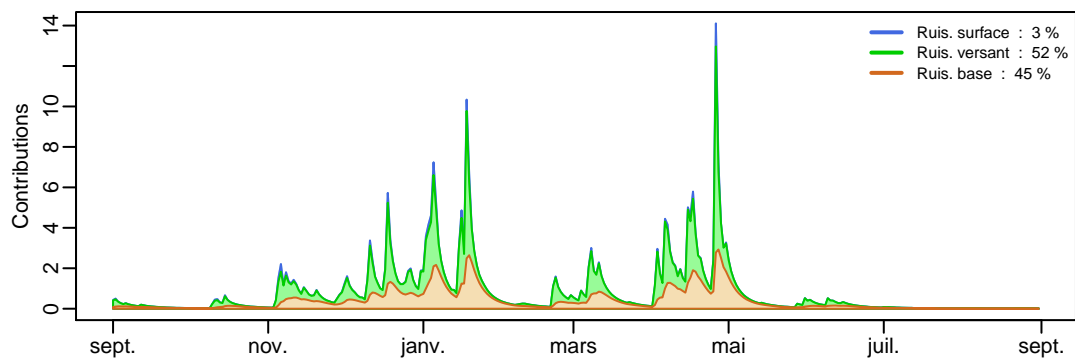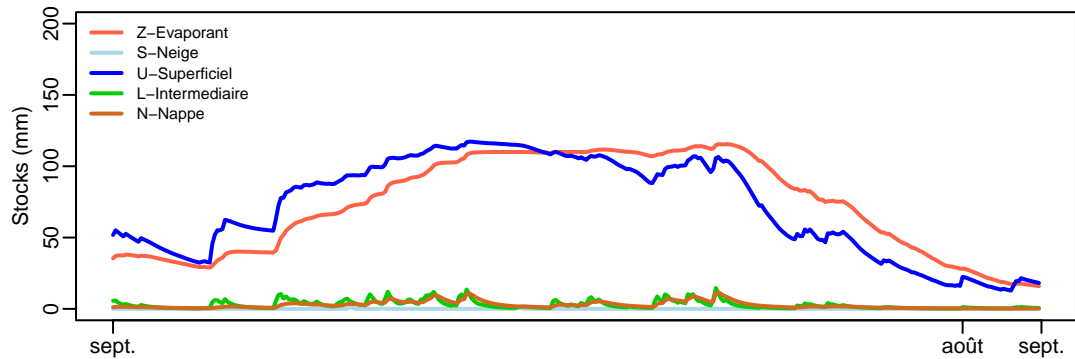

# k1251810 (771.3 km<sup>2</sup>) – année 1998–1999

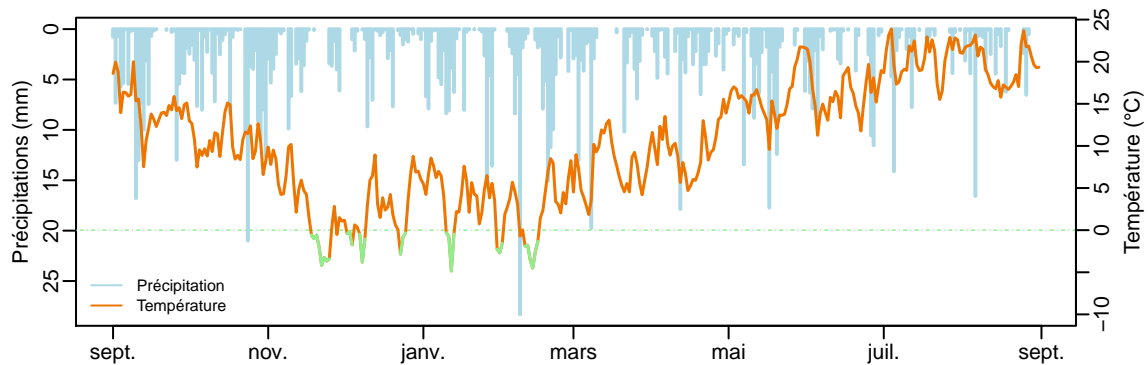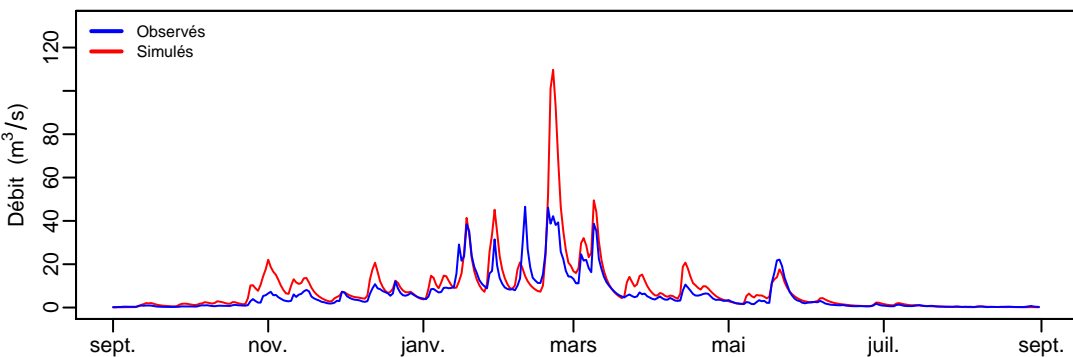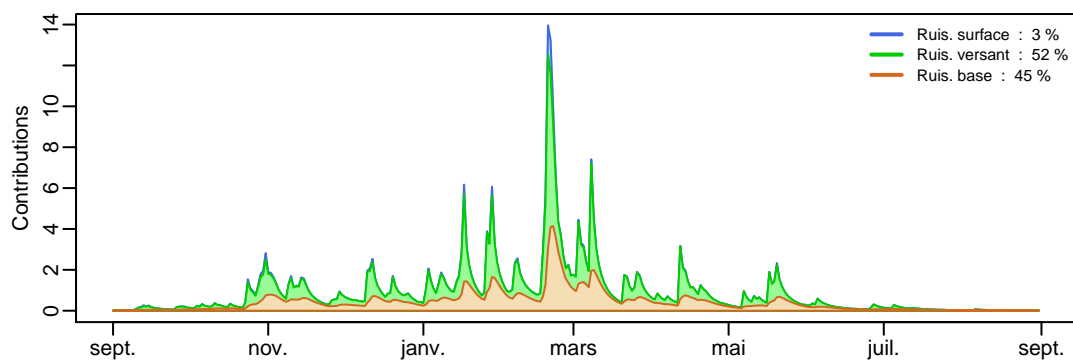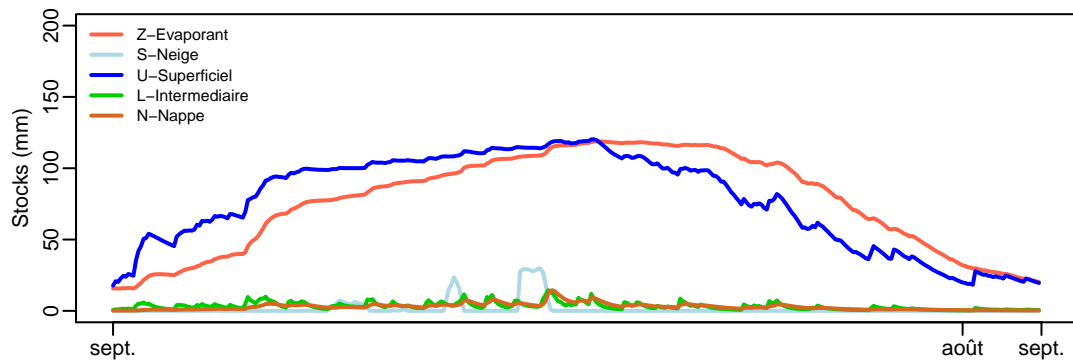

# k1251810 (771.3 km<sup>2</sup>) – année 1999–2000

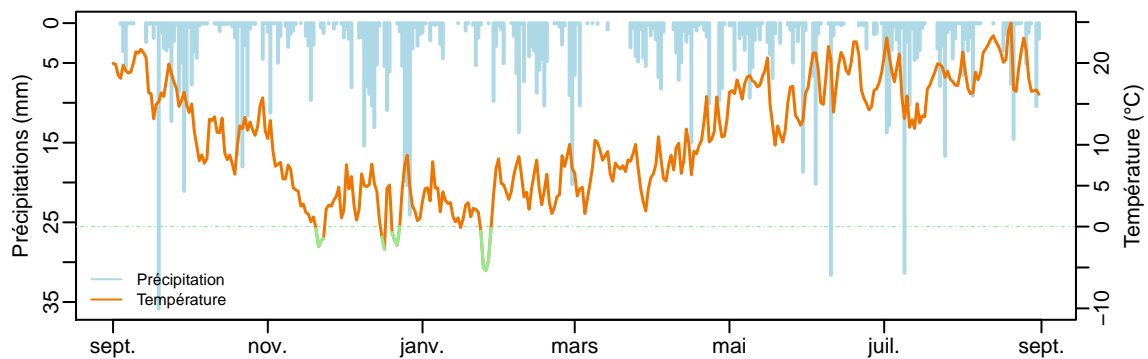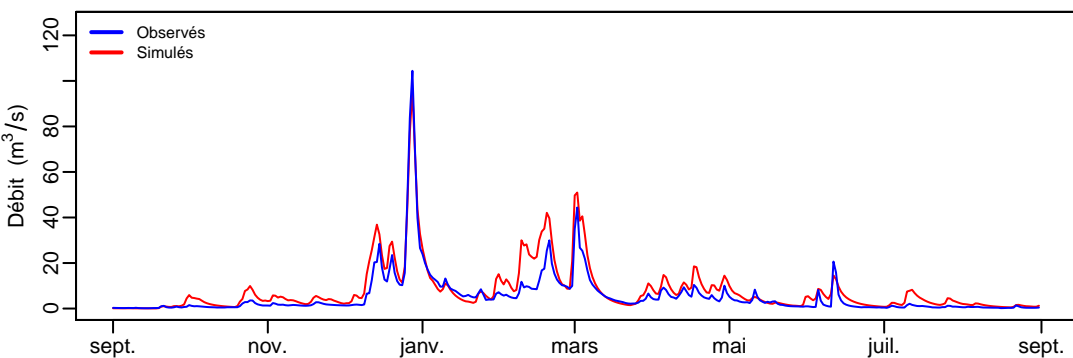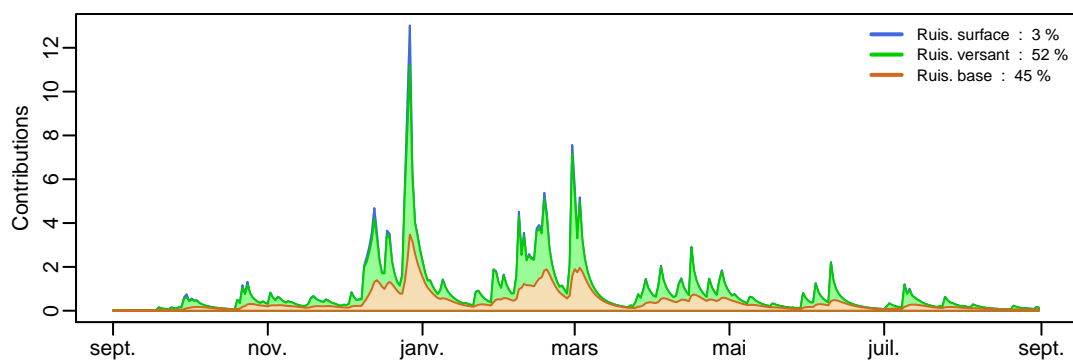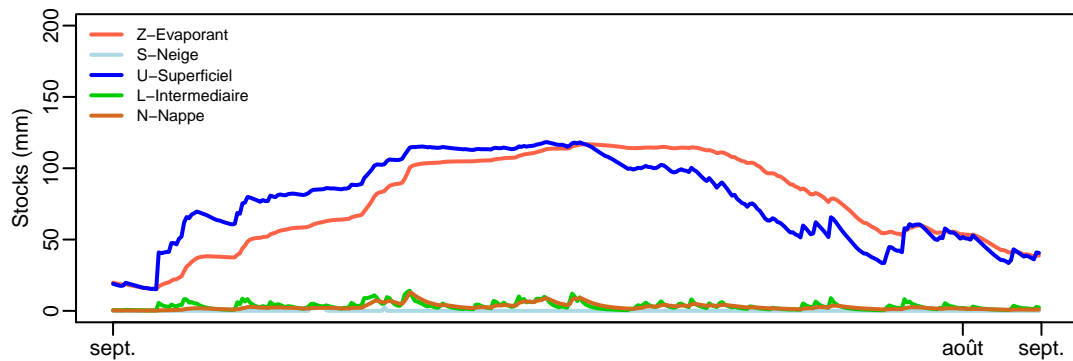

# k1251810 (771.3 km<sup>2</sup>) – année 2000–2001

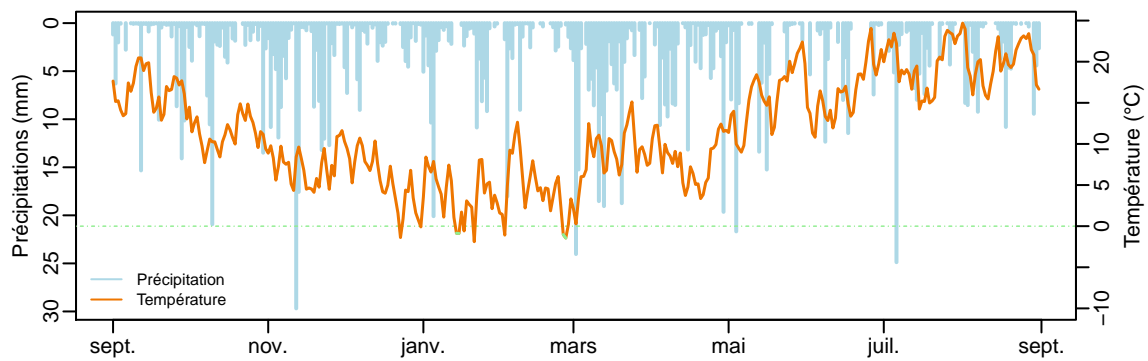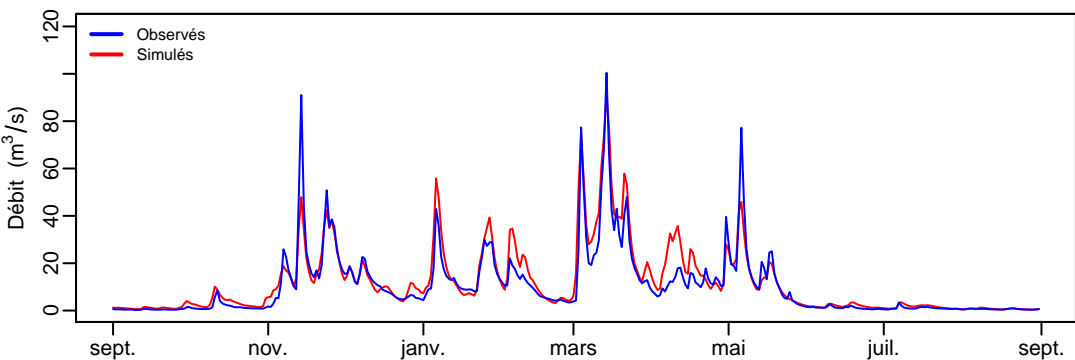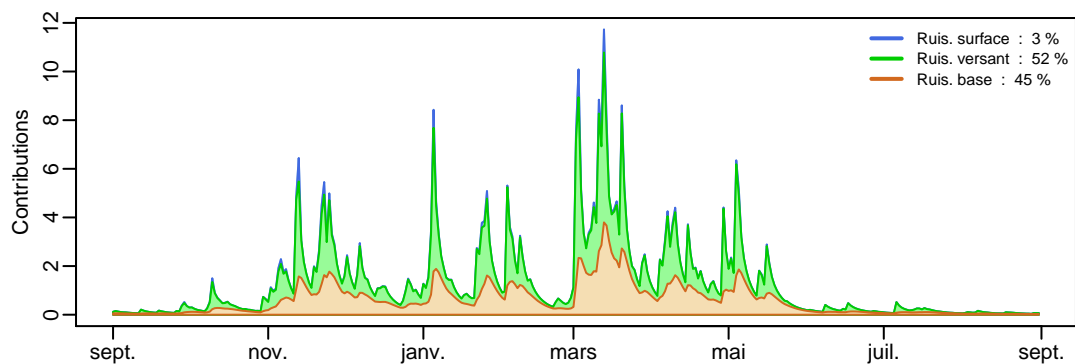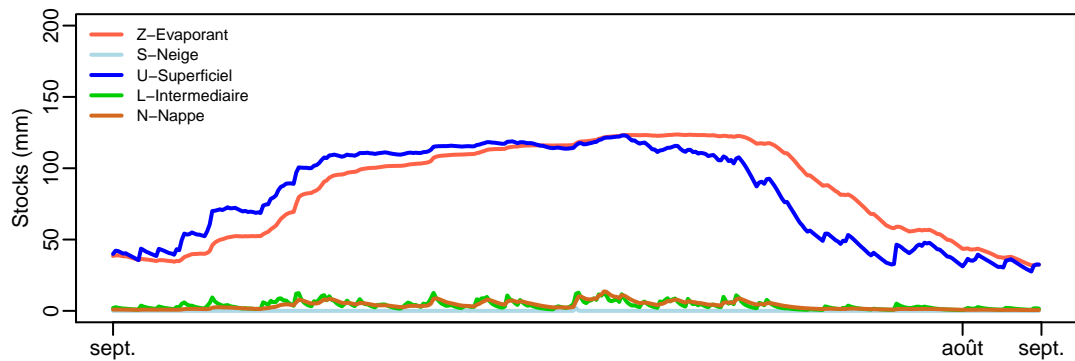

# k1251810 (771.3 km<sup>2</sup>) – année 2001–2002

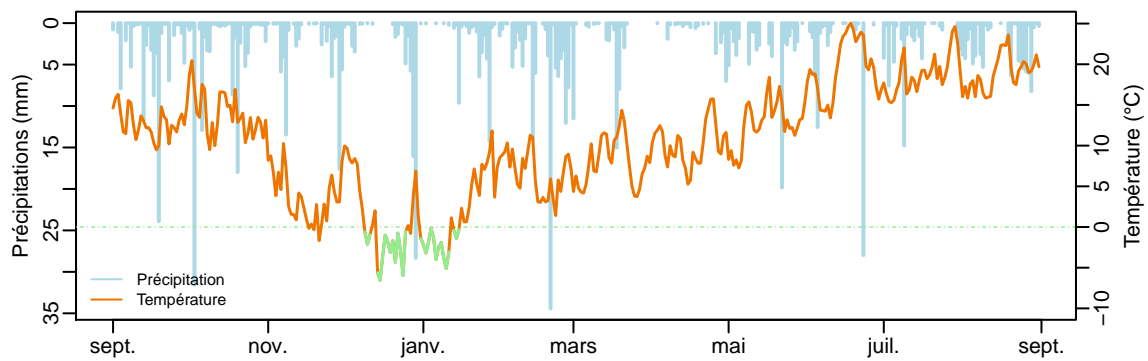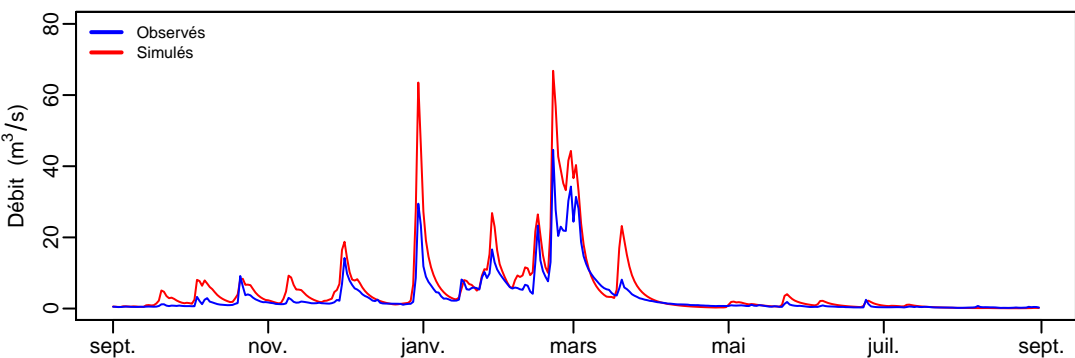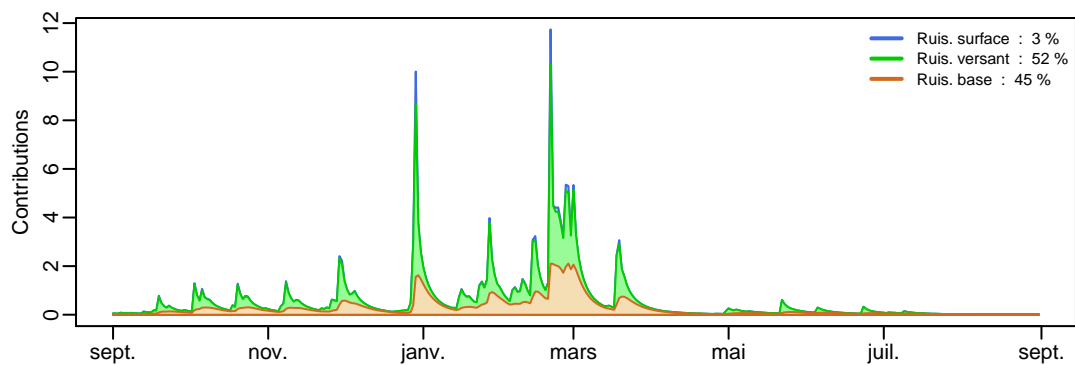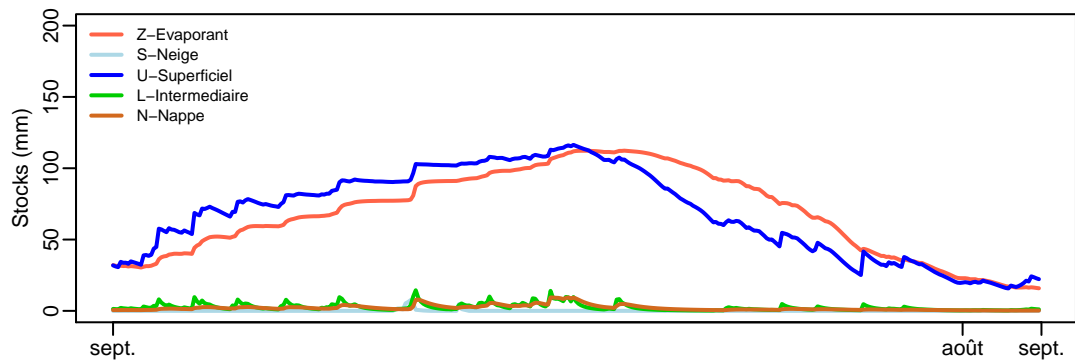

# k1251810 (771.3 km<sup>2</sup>) – année 2002–2003

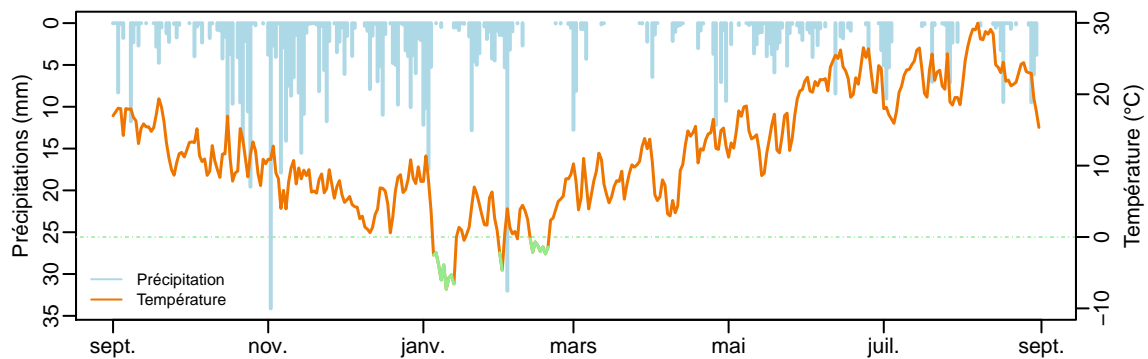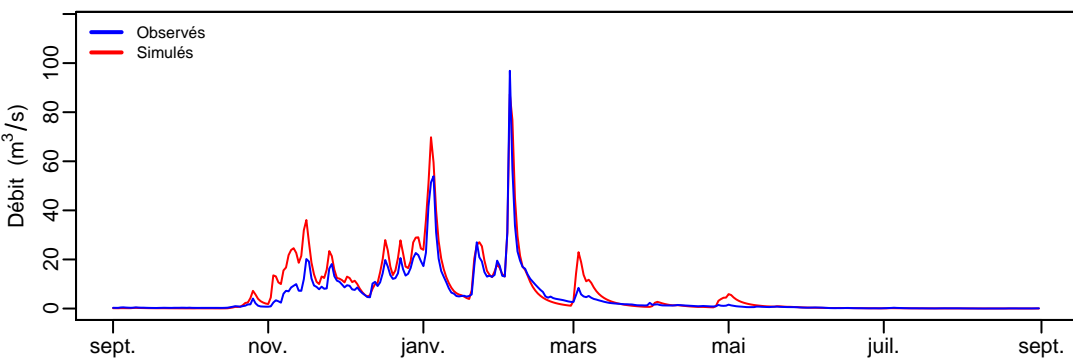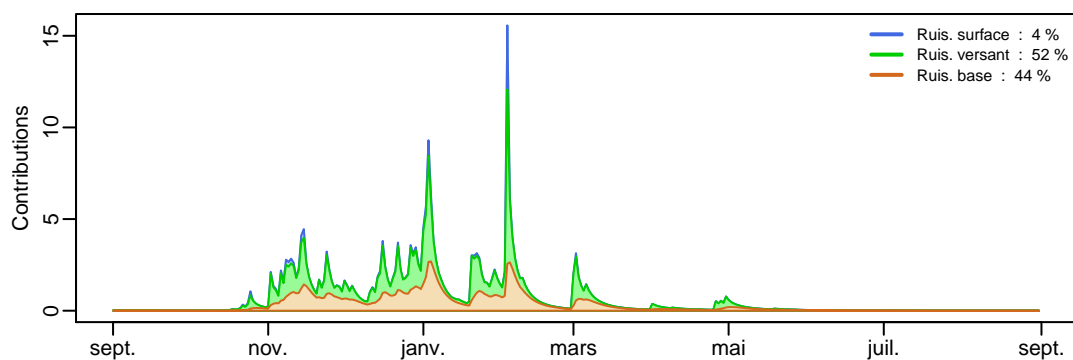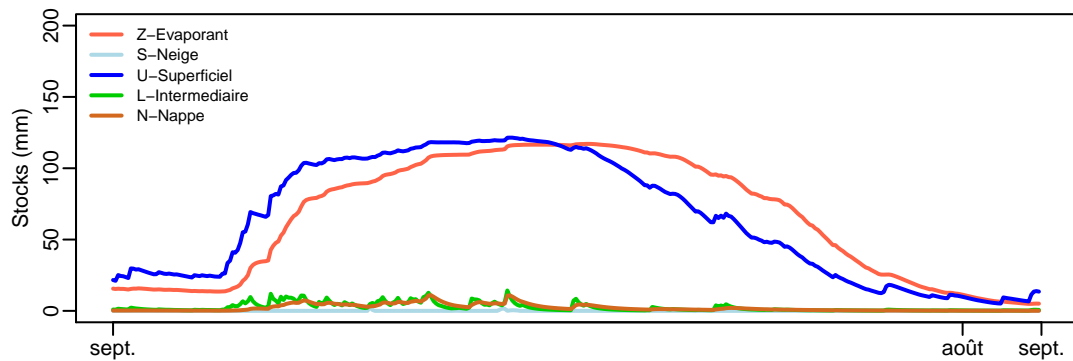

# k1251810 (771.3 km<sup>2</sup>) – année 2003–2004

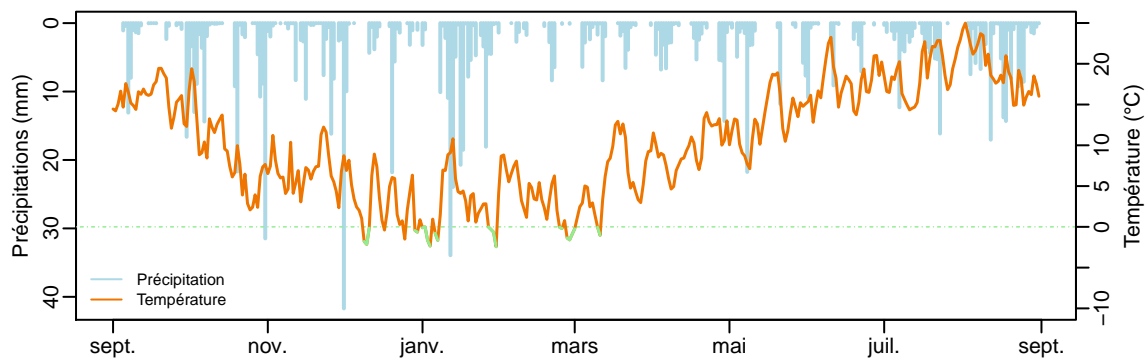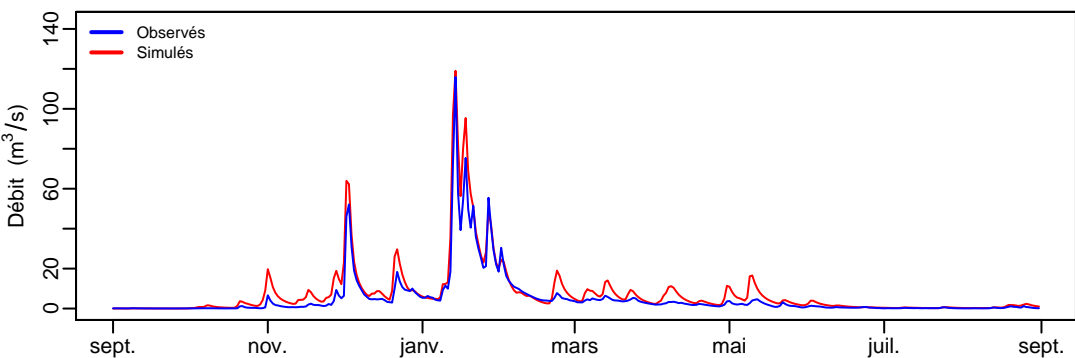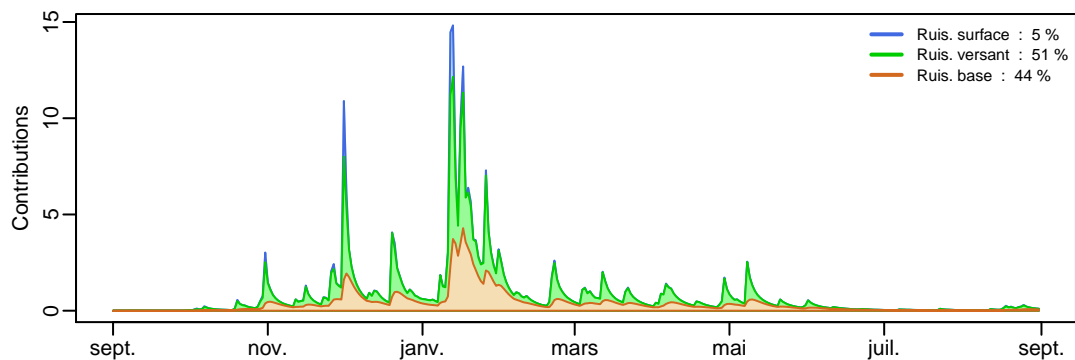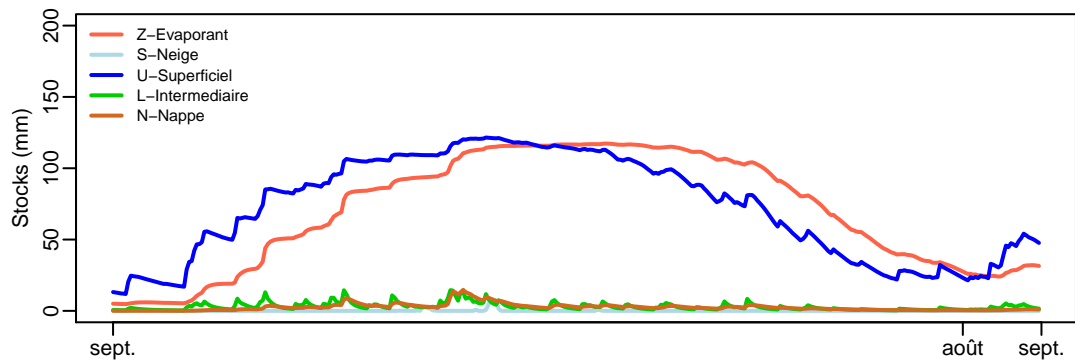

# k1251810 (771.3 km<sup>2</sup>) – année 2004–2005

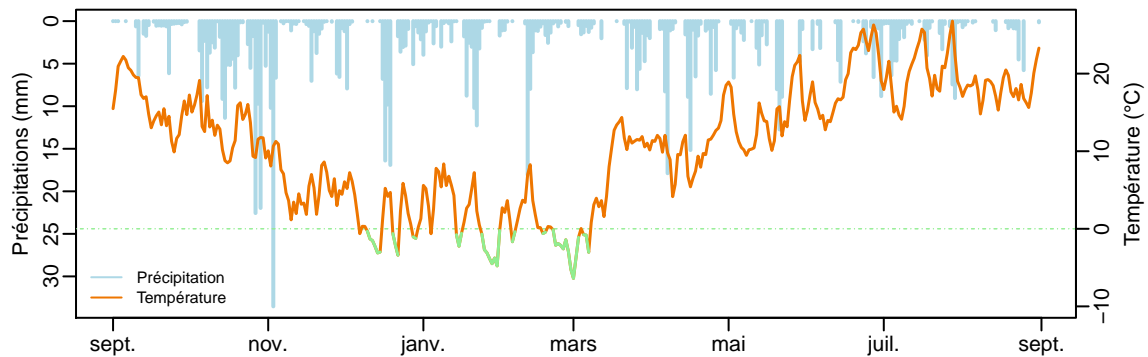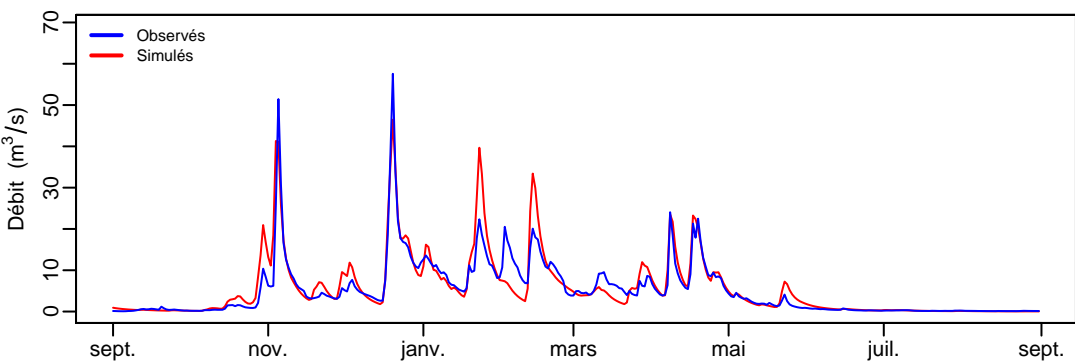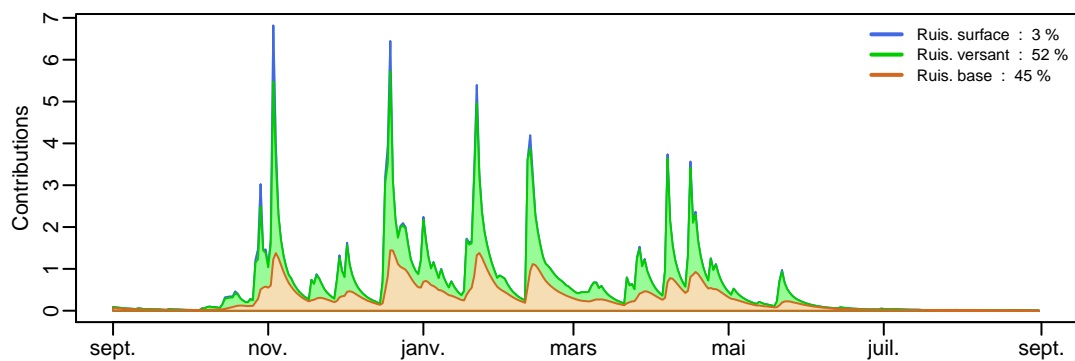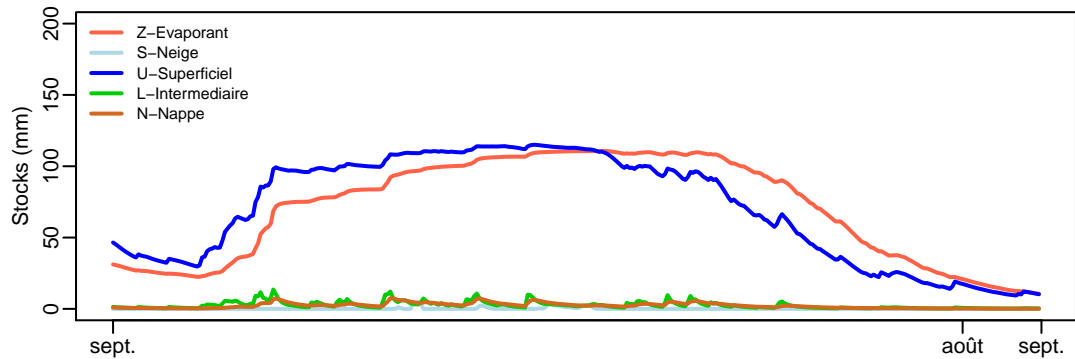



# k1251810 (771.3 km<sup>2</sup>) – année 2005–2006

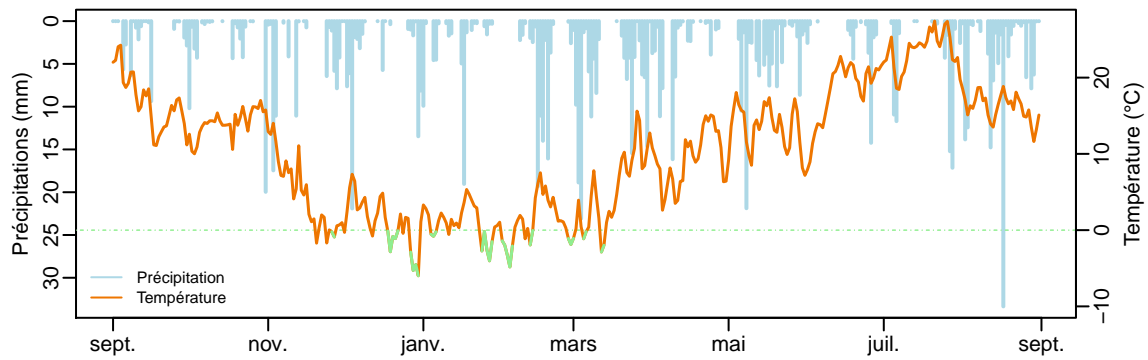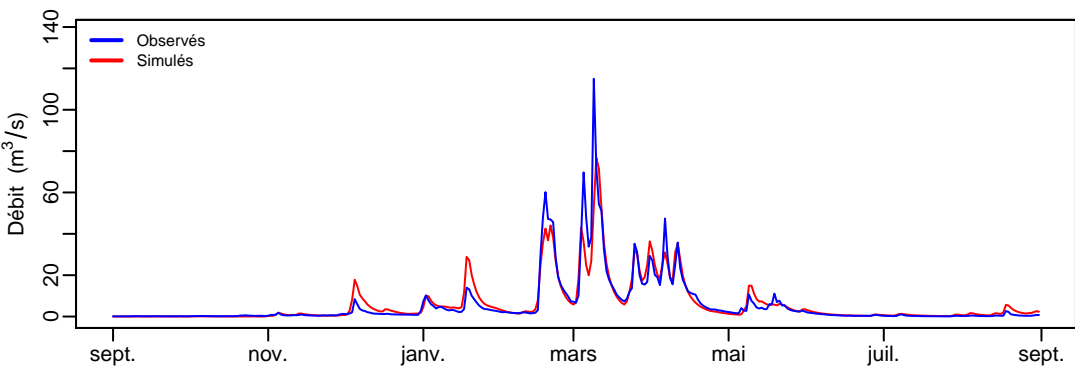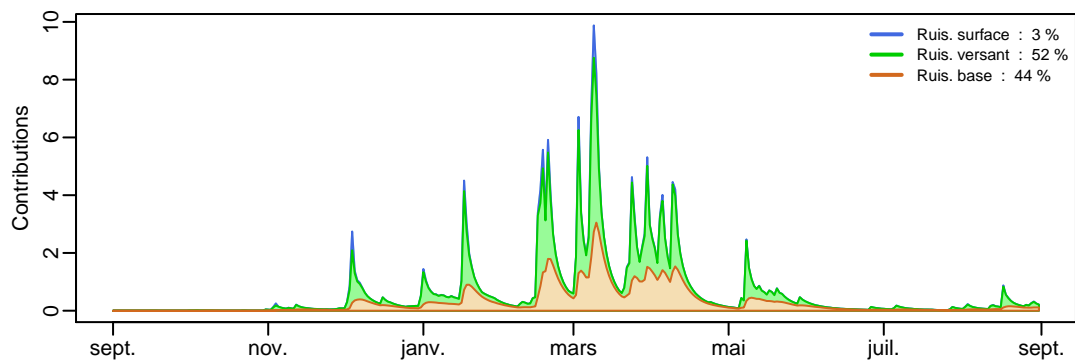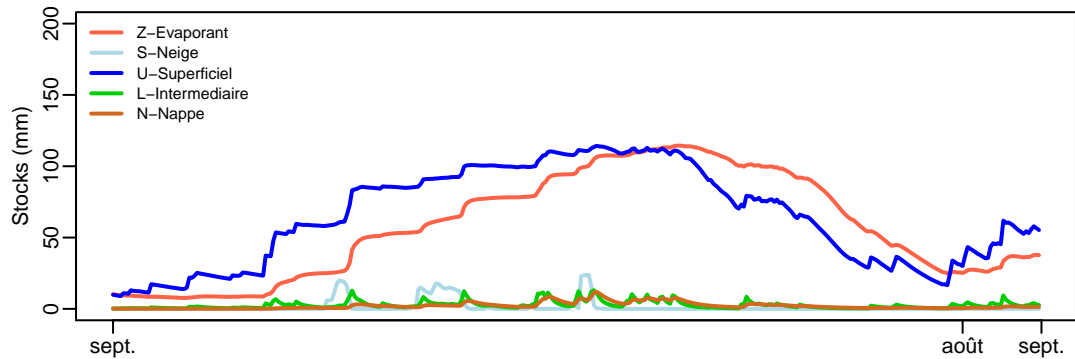

# k1251810 (771.3 km<sup>2</sup>) – année 2006–2007

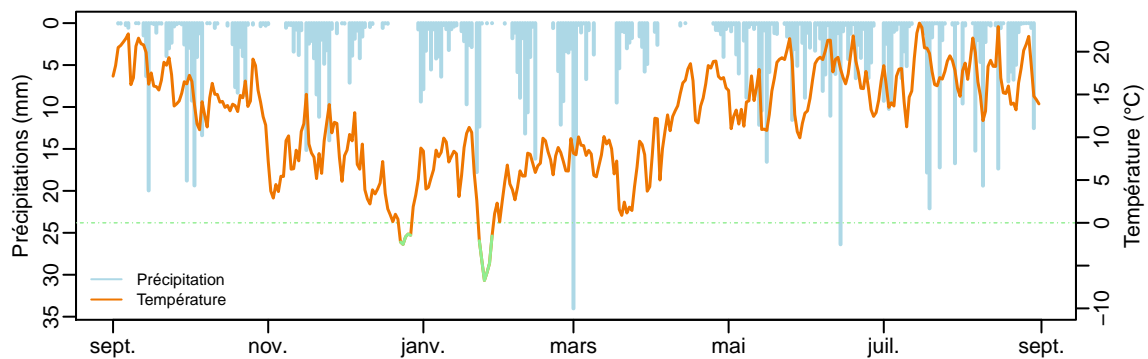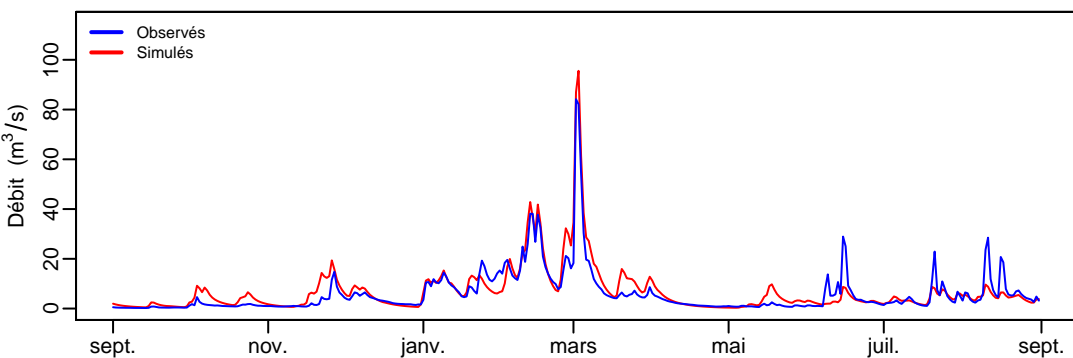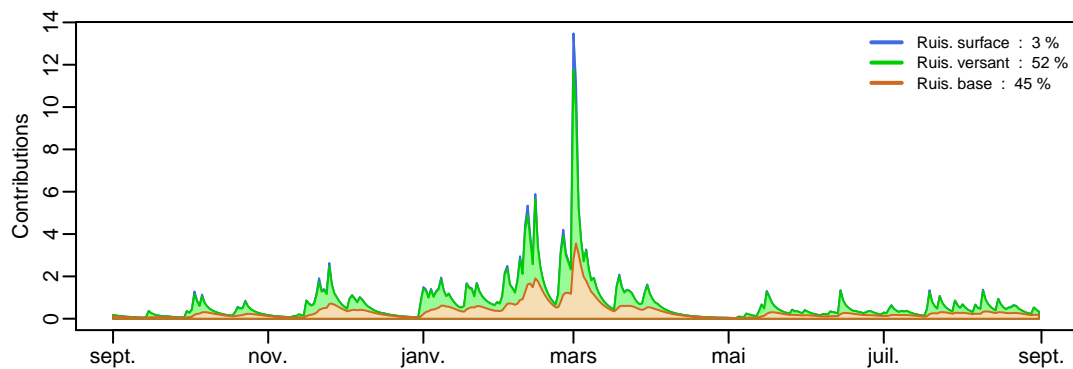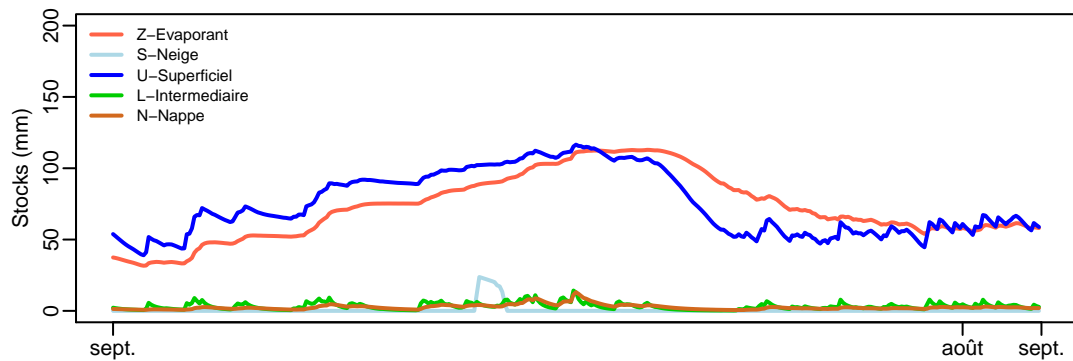

# k1251810 (771.3 km<sup>2</sup>) – année 2007–2008

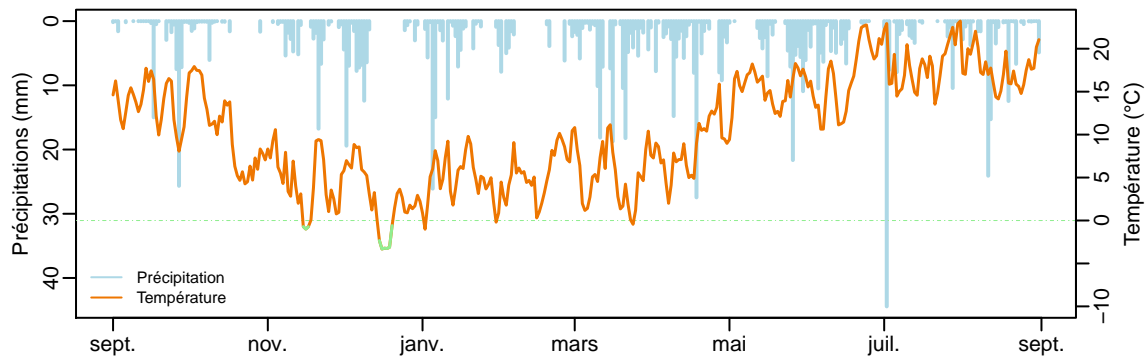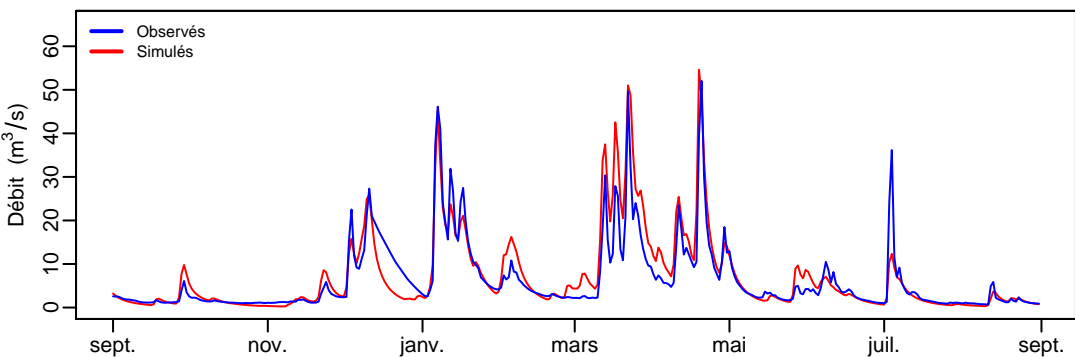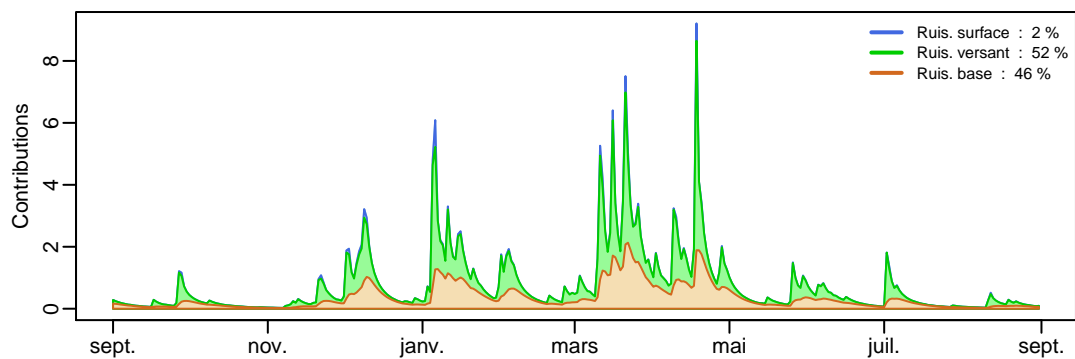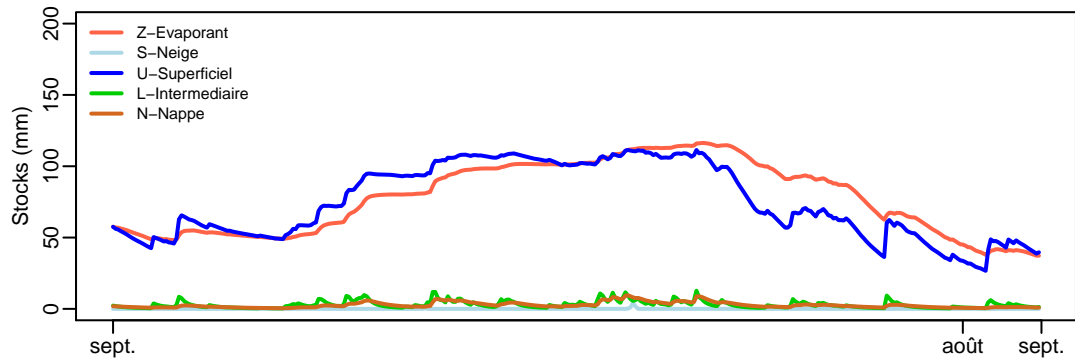

# k1251810 (771.3 km<sup>2</sup>) – année 2008–2009

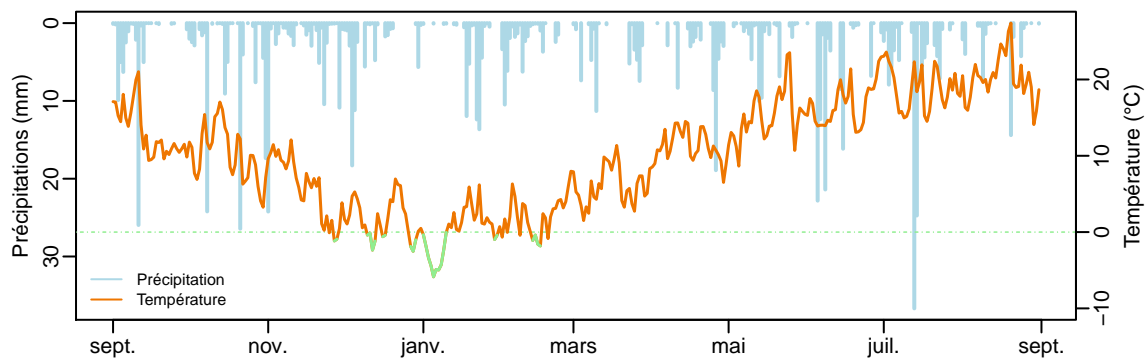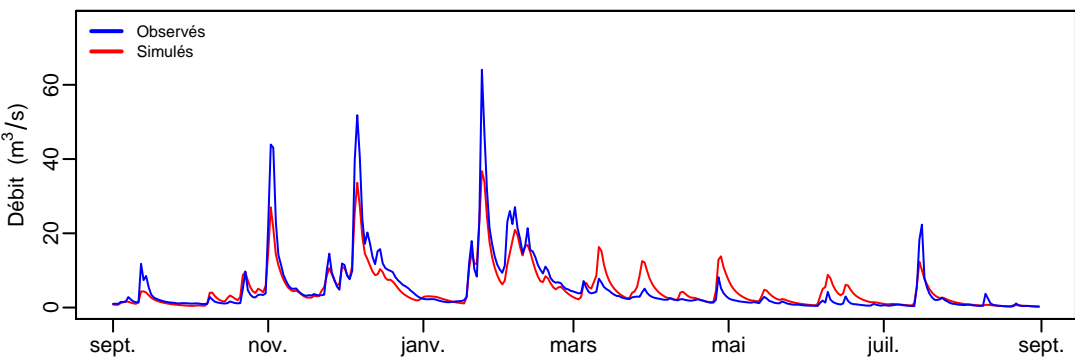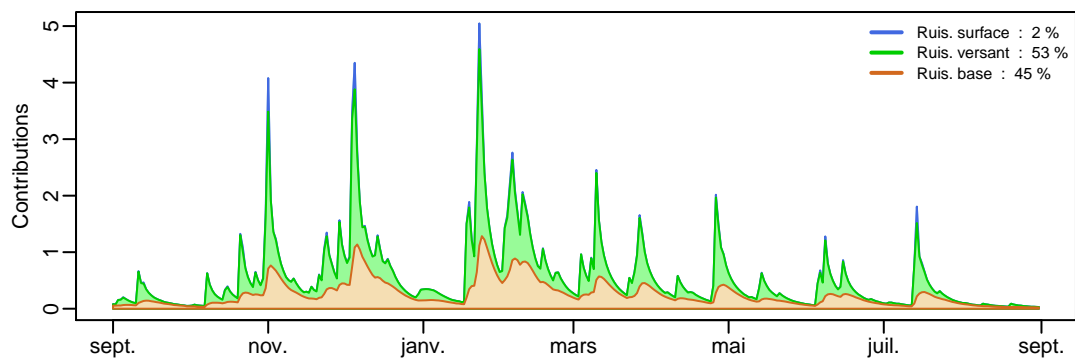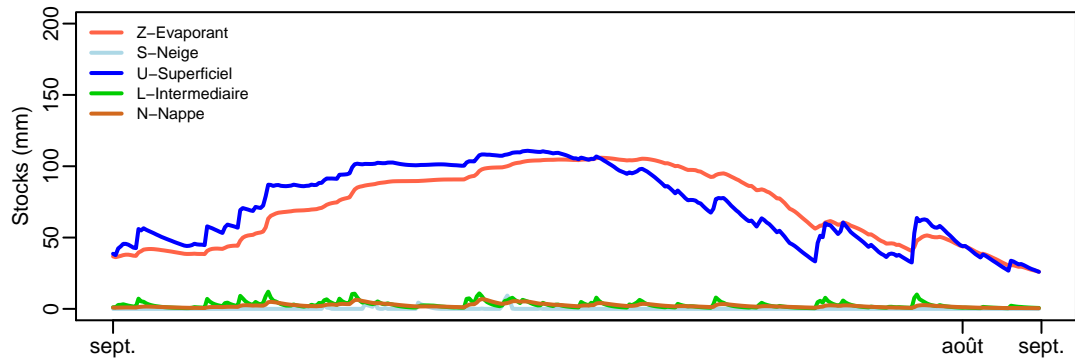

# k1273110 (258.99 km<sup>2</sup>) – année 1981–1982

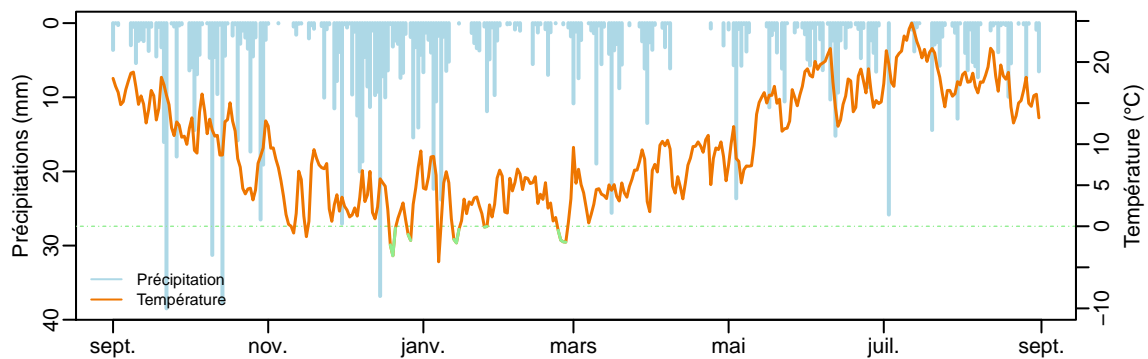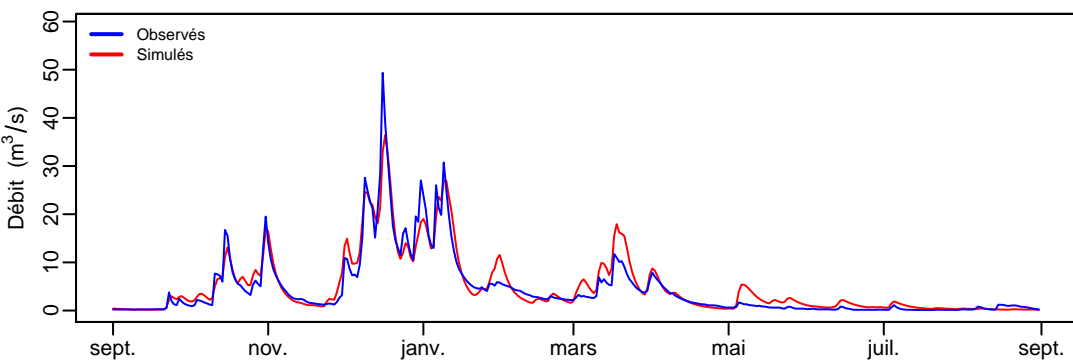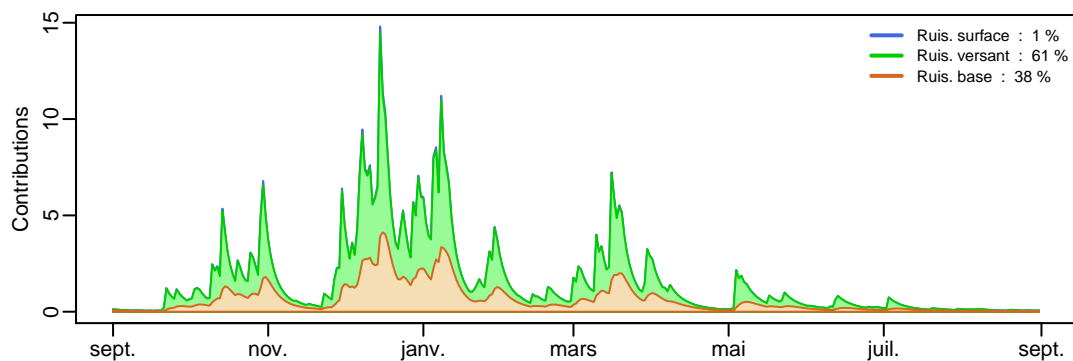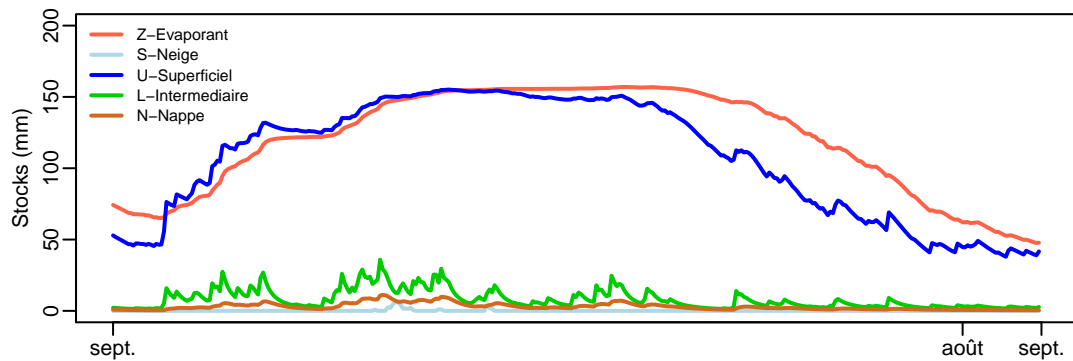

# k1273110 (258.99 km<sup>2</sup>) – année 1982–1983

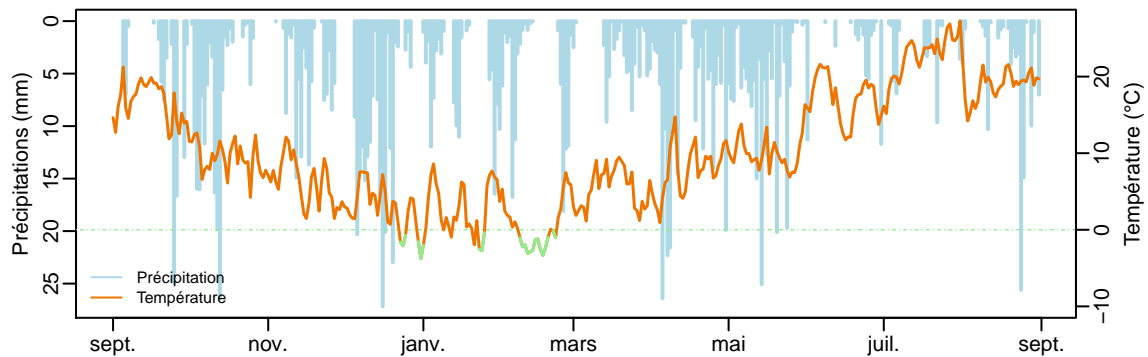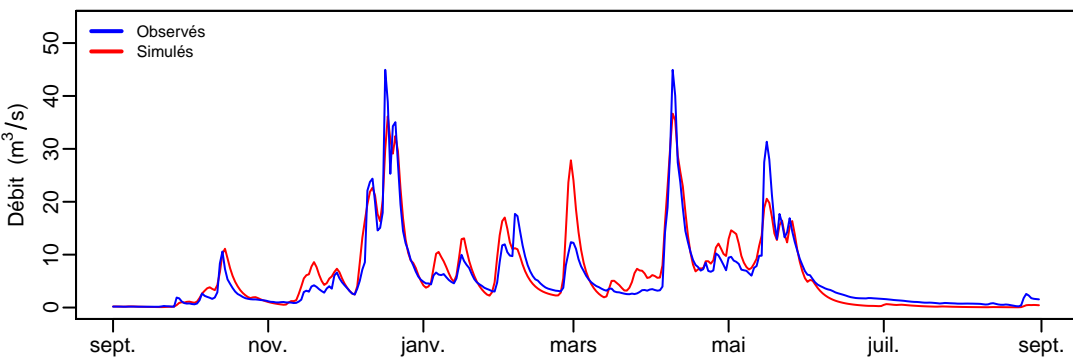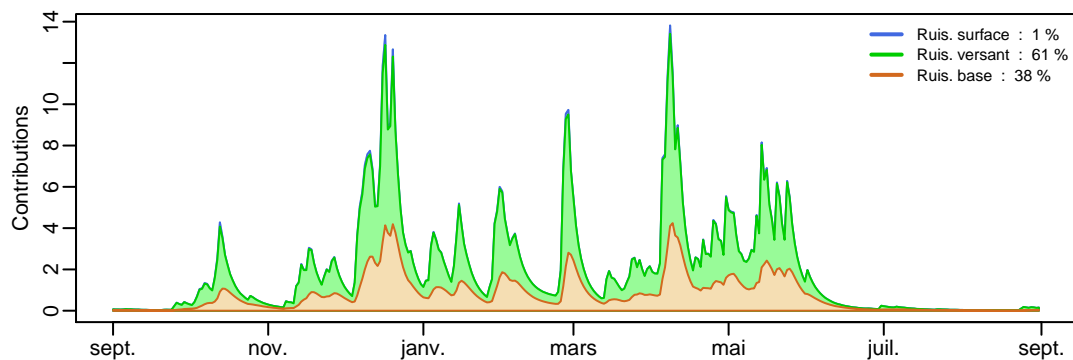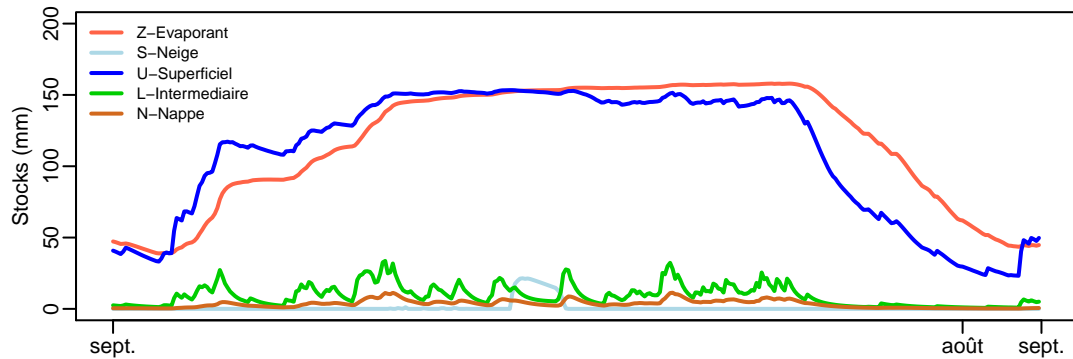

# k1273110 (258.99 km<sup>2</sup>) – année 1983–1984

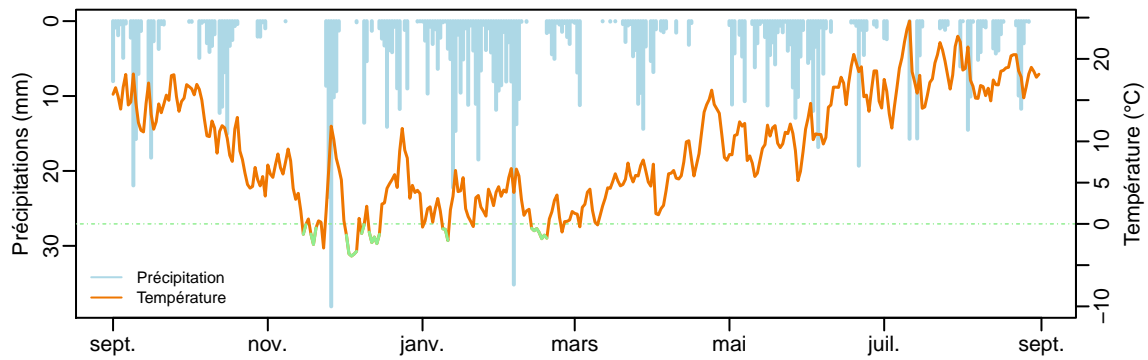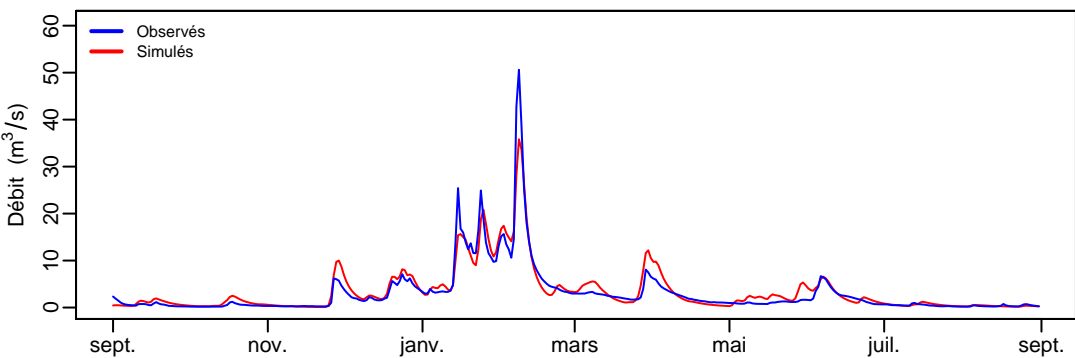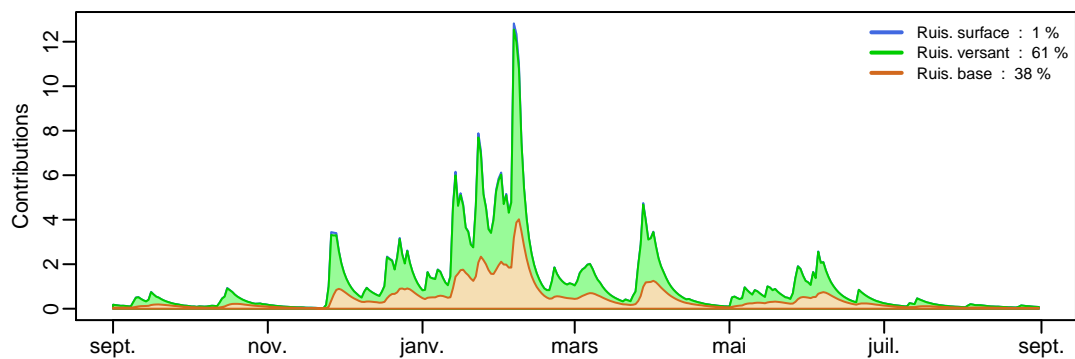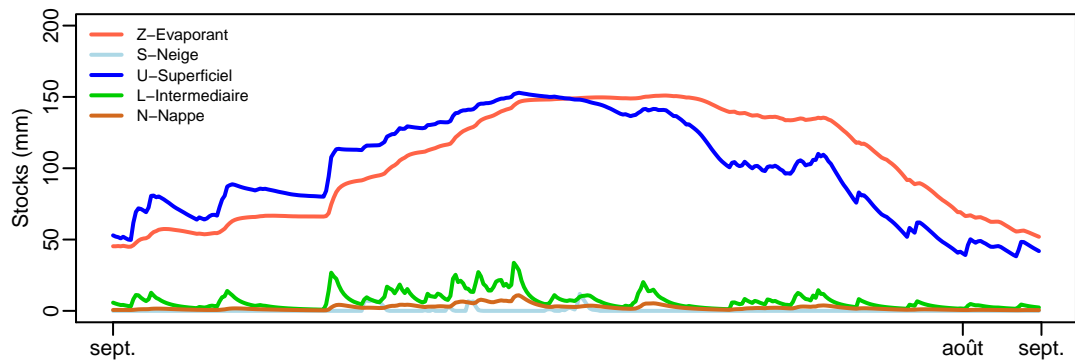

# k1273110 (258.99 km²) – année 1984–1985

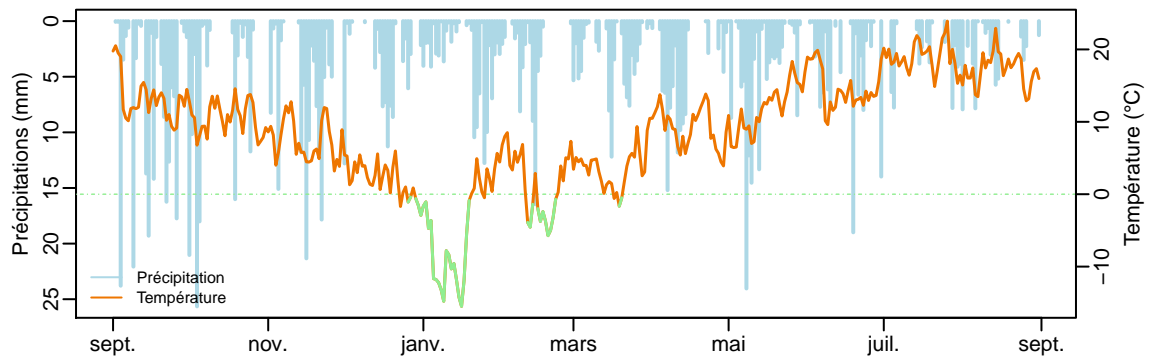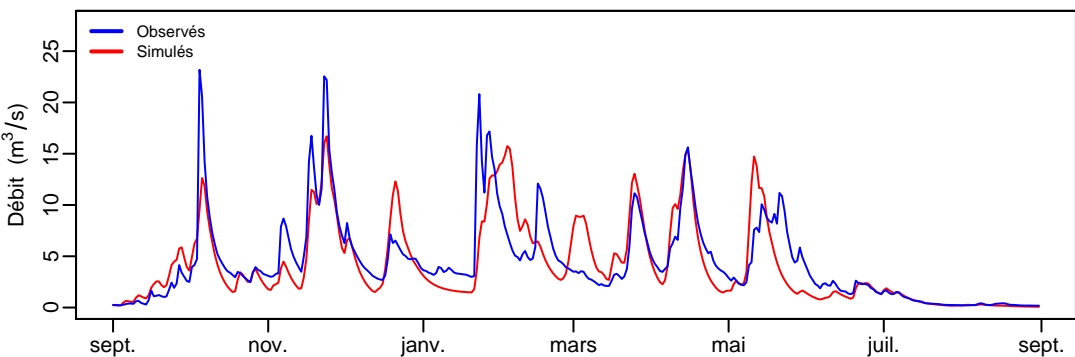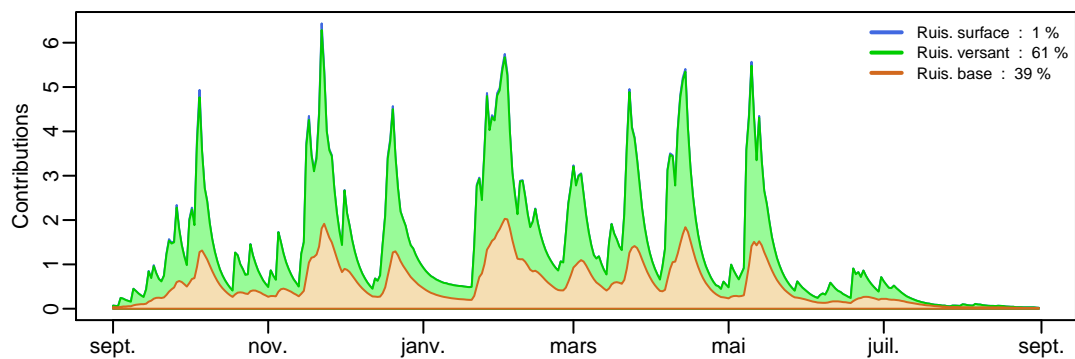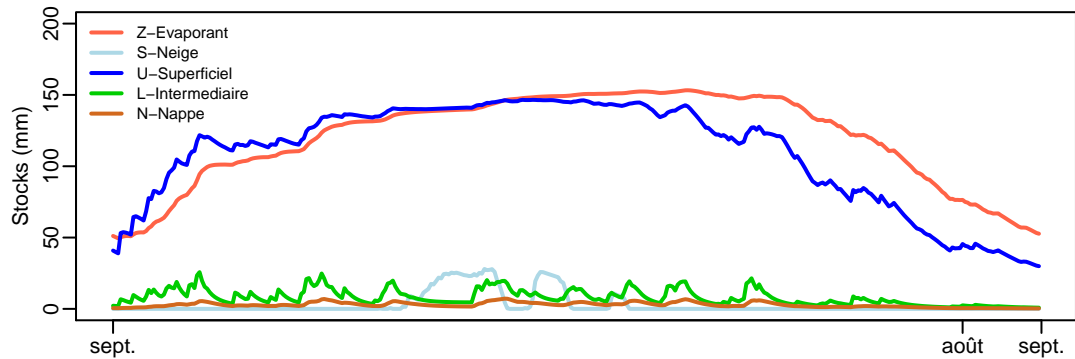



# k1273110 (258.99 km<sup>2</sup>) – année 1985–1986

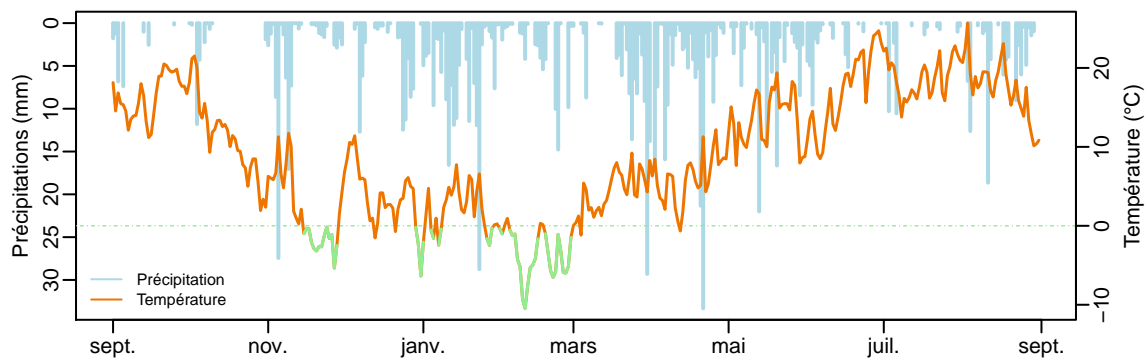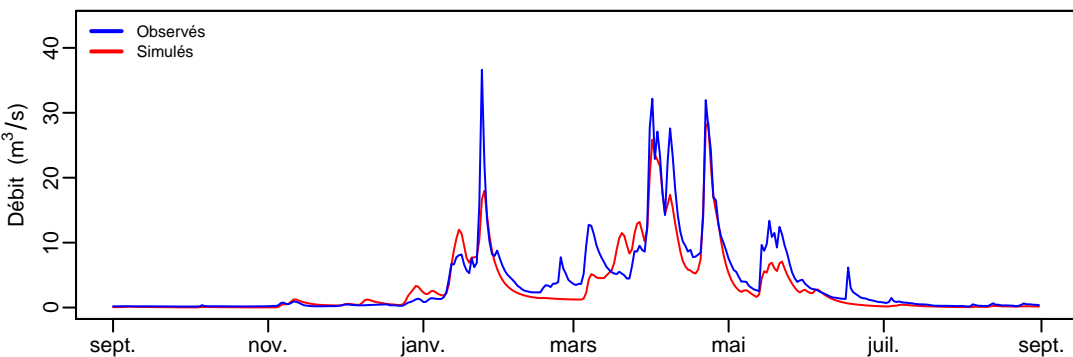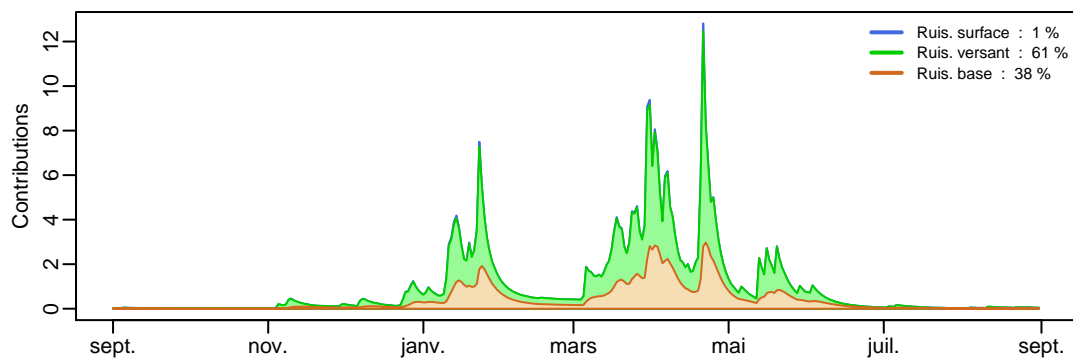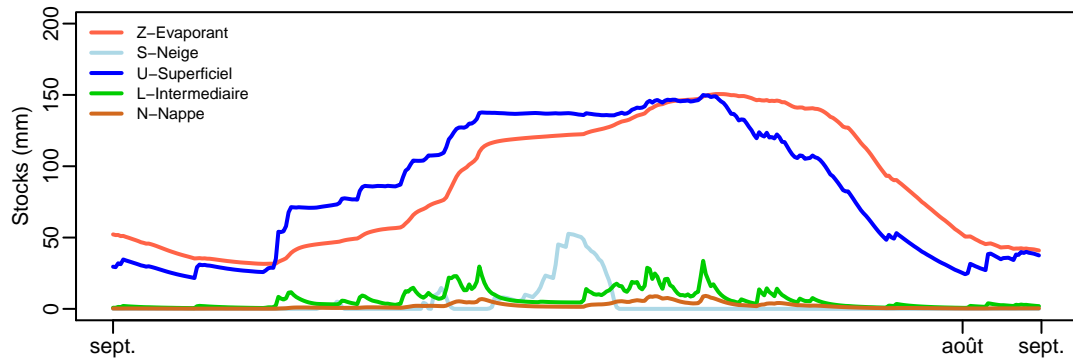

# k1273110 (258.99 km<sup>2</sup>) – année 1986–1987

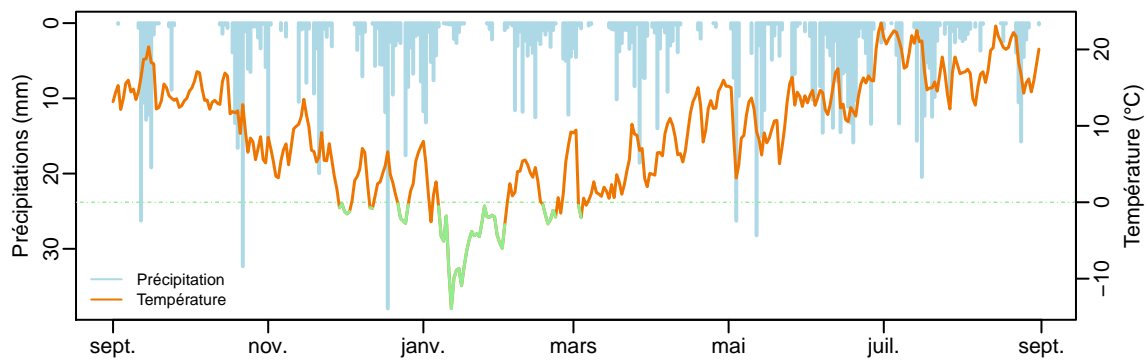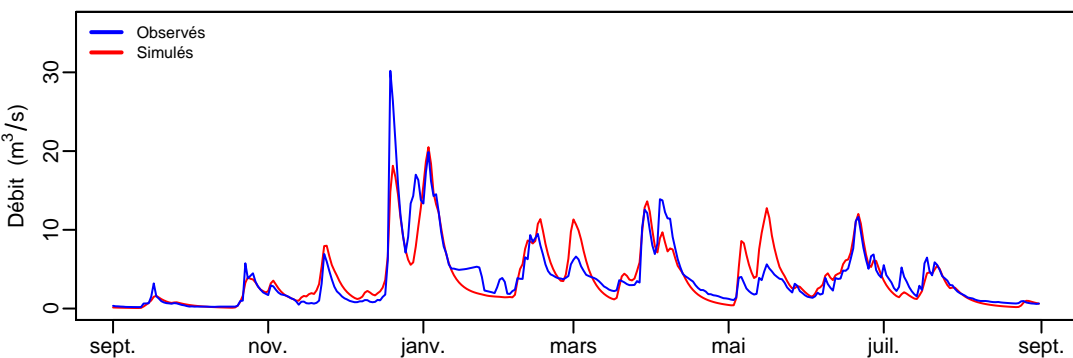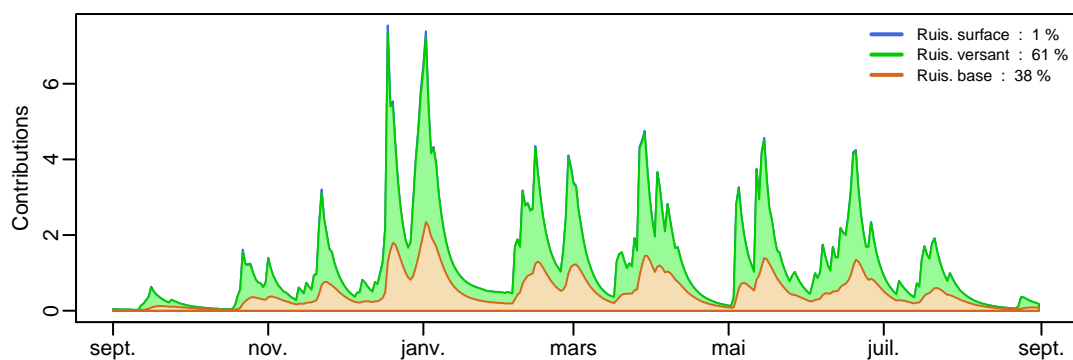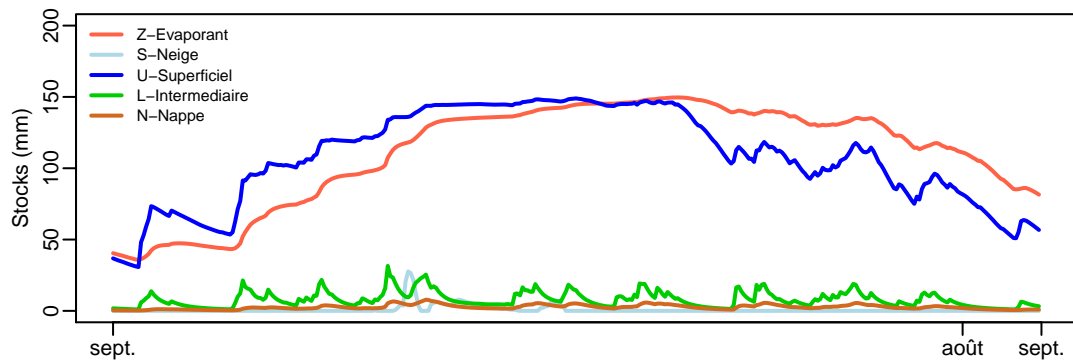

# k1273110 (258.99 km<sup>2</sup>) – année 1987–1988

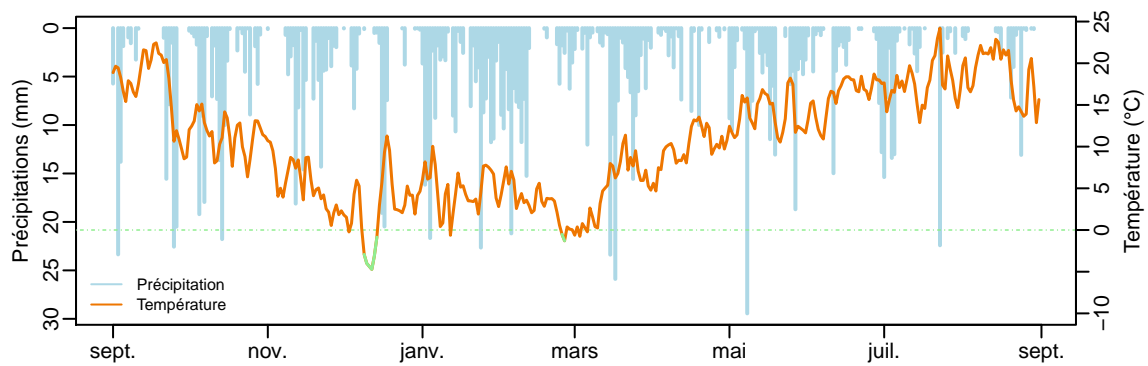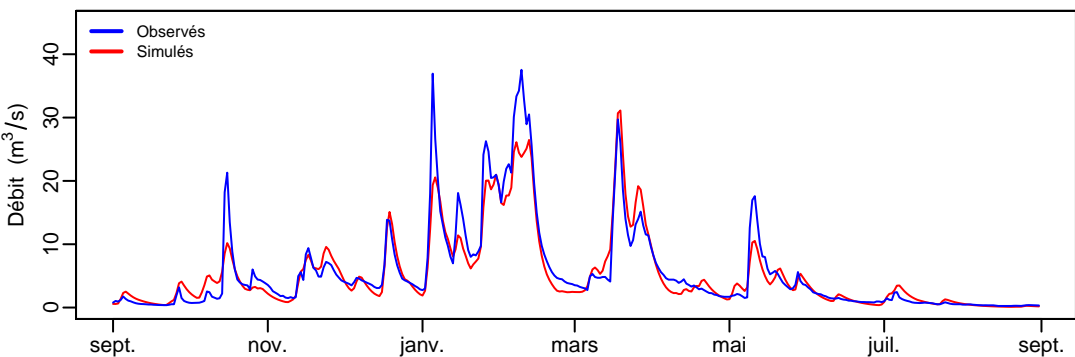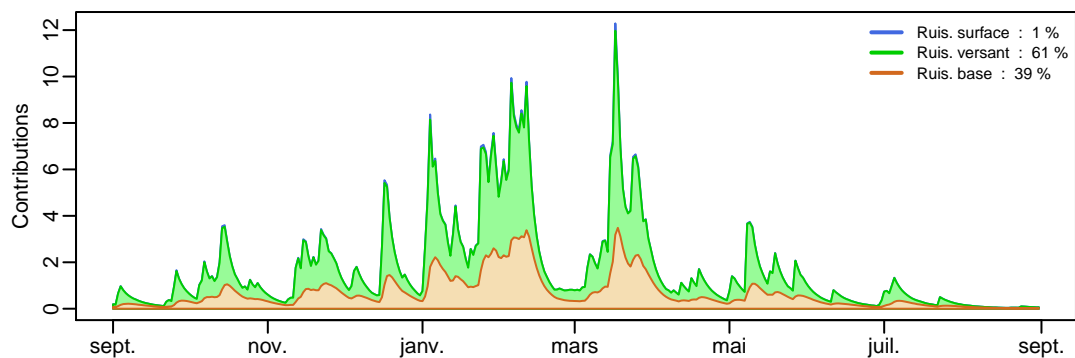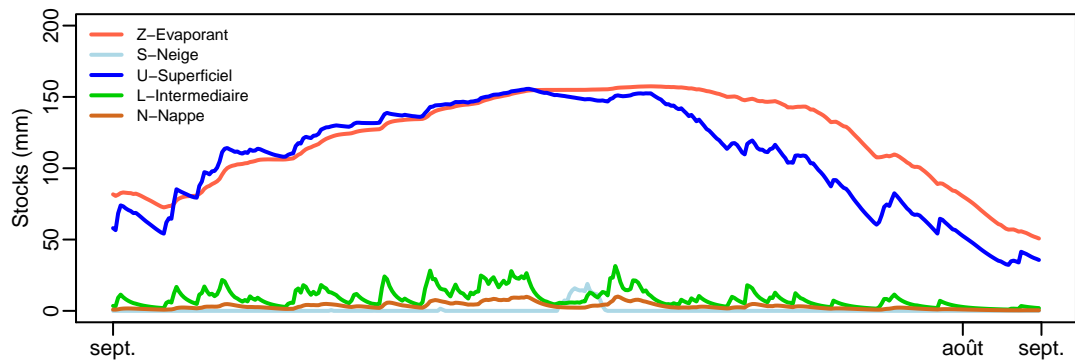

# k1273110 (258.99 km<sup>2</sup>) – année 1988–1989

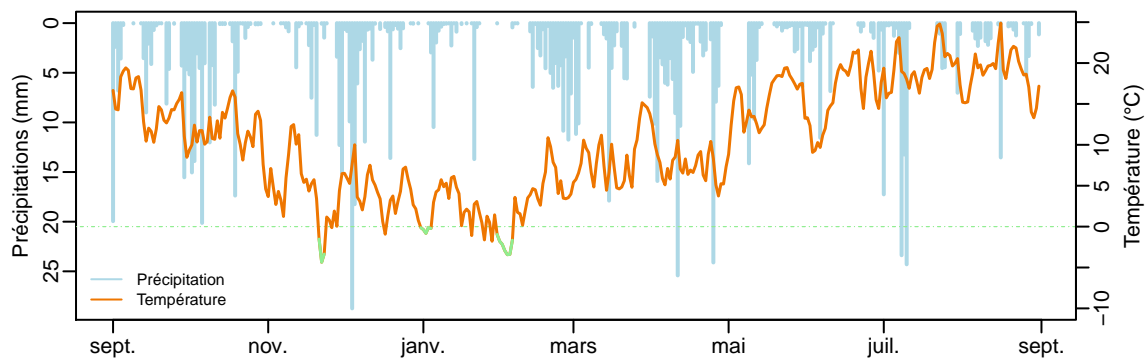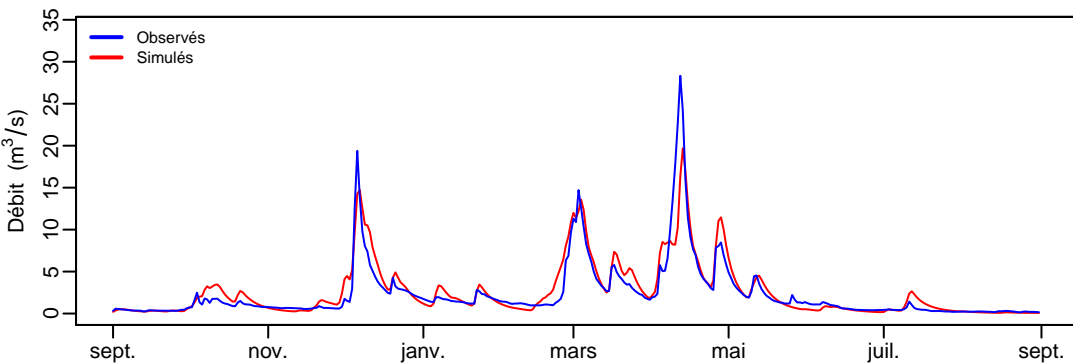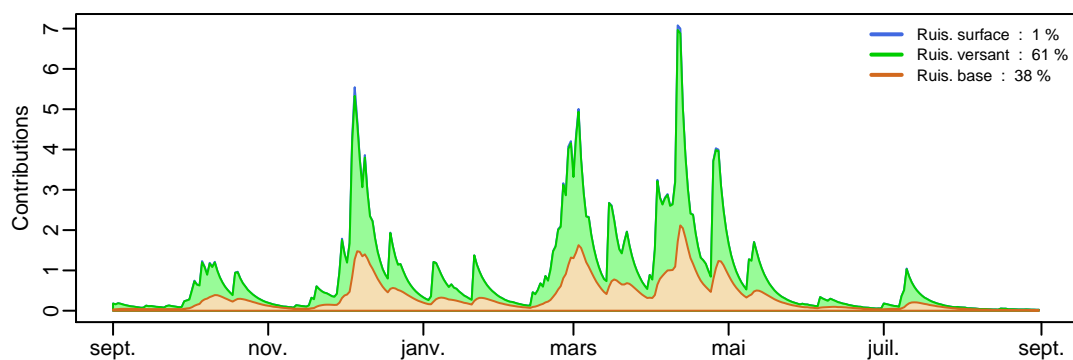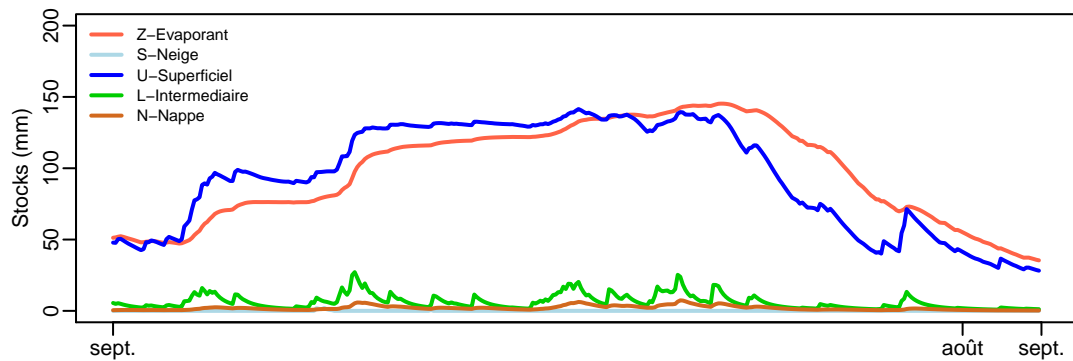

# k1273110 (258.99 km<sup>2</sup>) – année 1989–1990

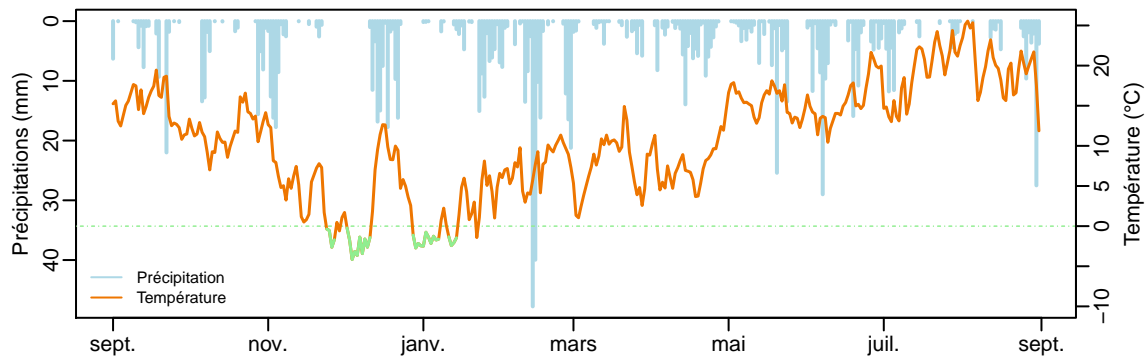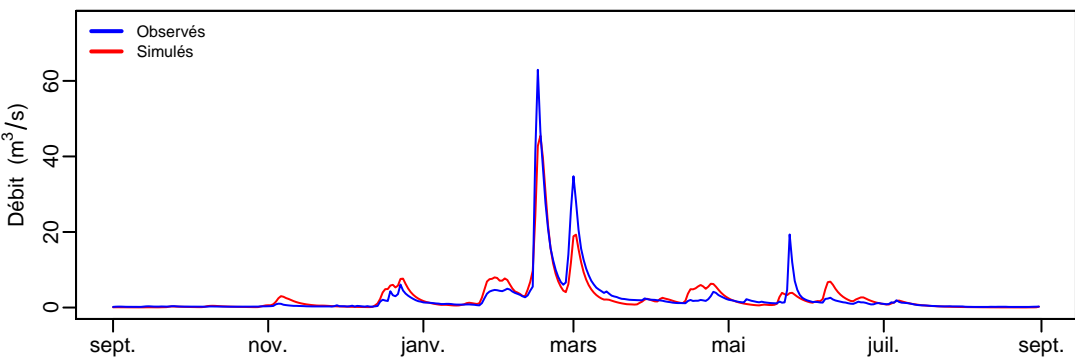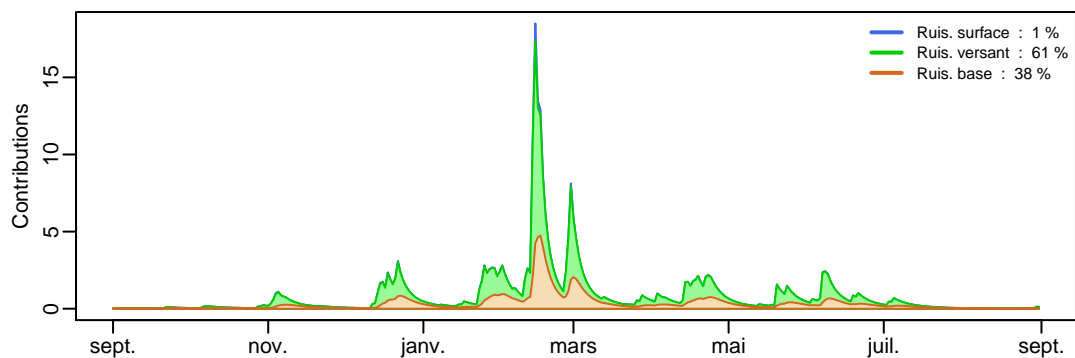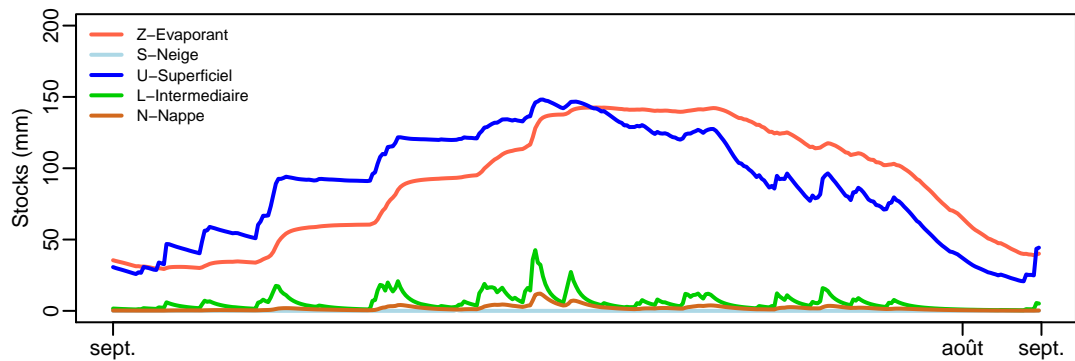

# k1273110 (258.99 km<sup>2</sup>) – année 1990–1991

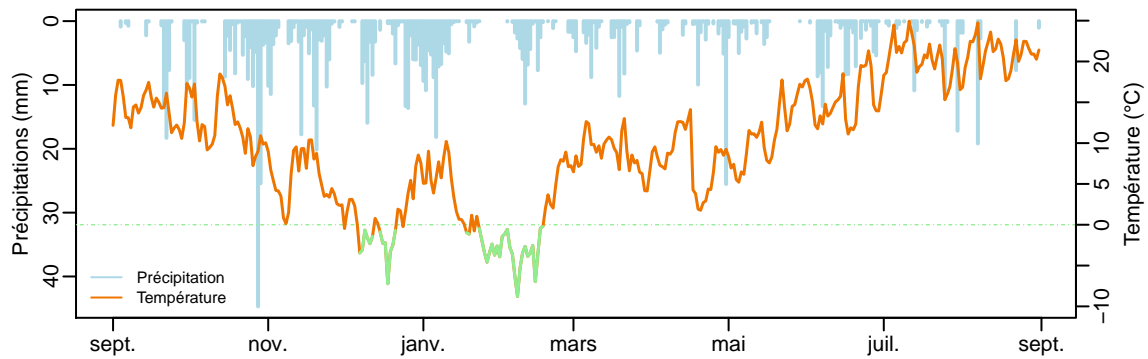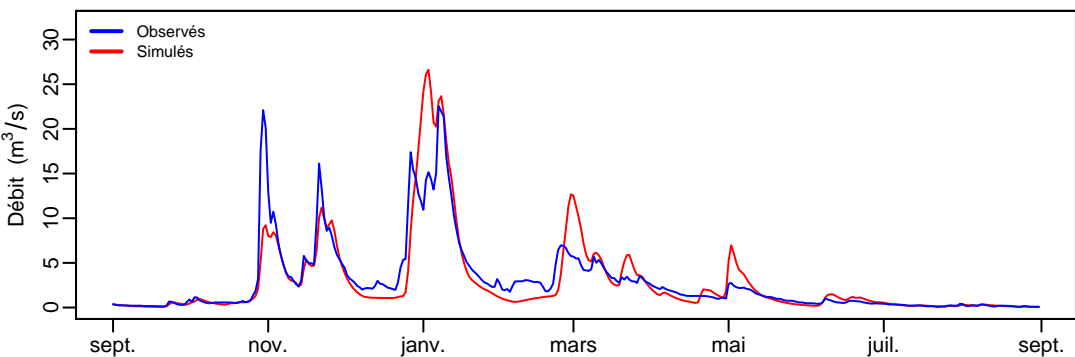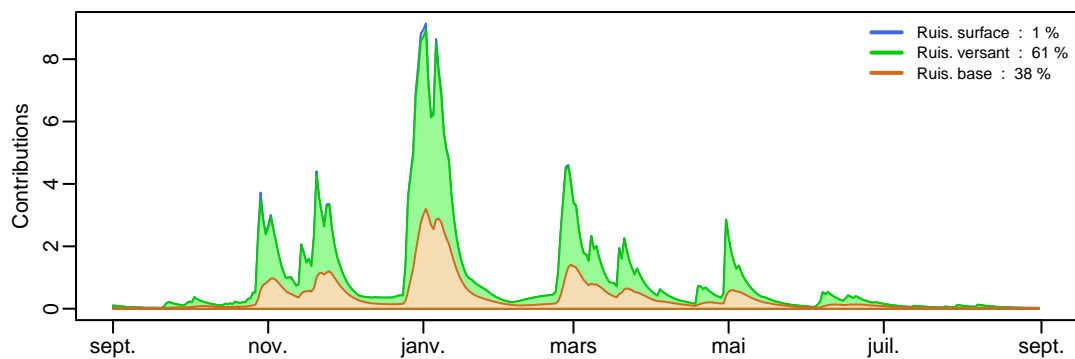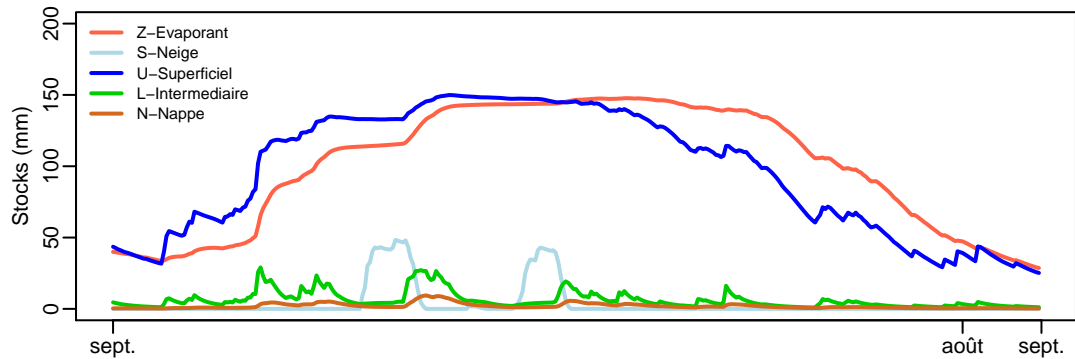

# k1273110 (258.99 km<sup>2</sup>) – année 1991–1992

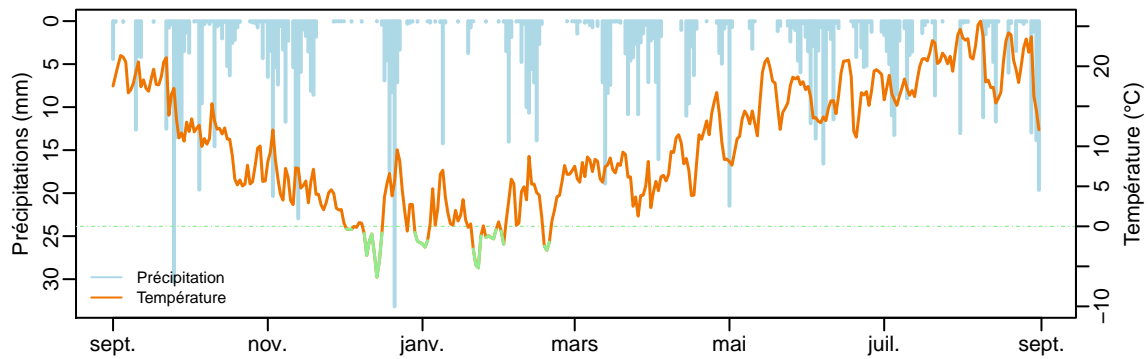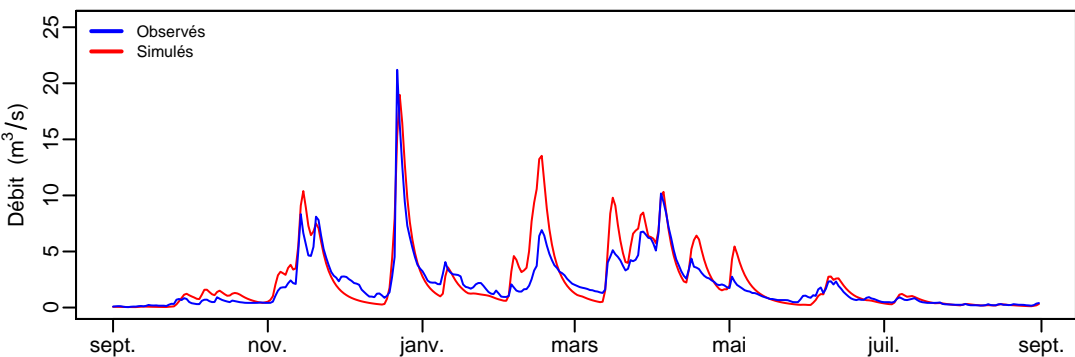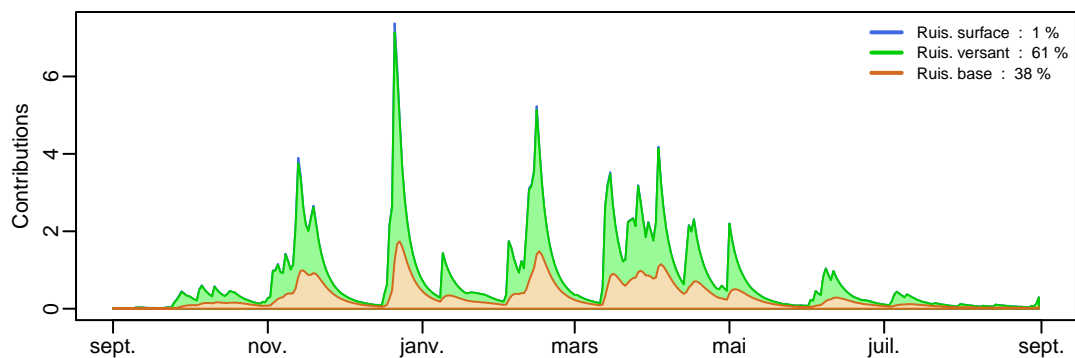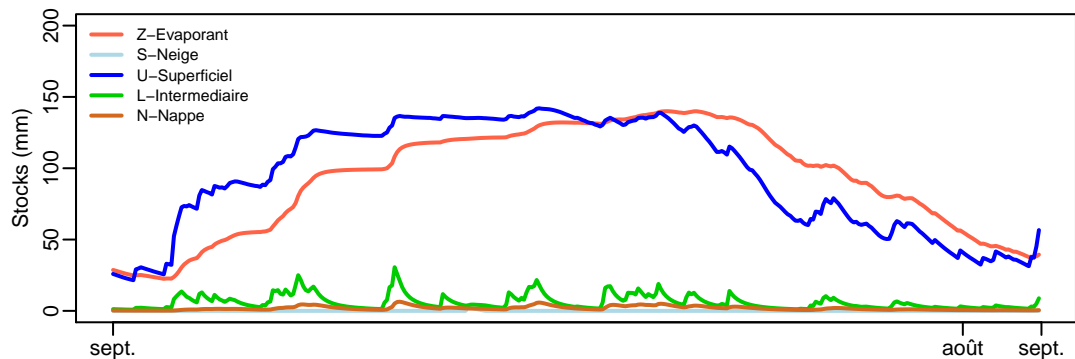

# k1273110 (258.99 km<sup>2</sup>) – année 1992–1993

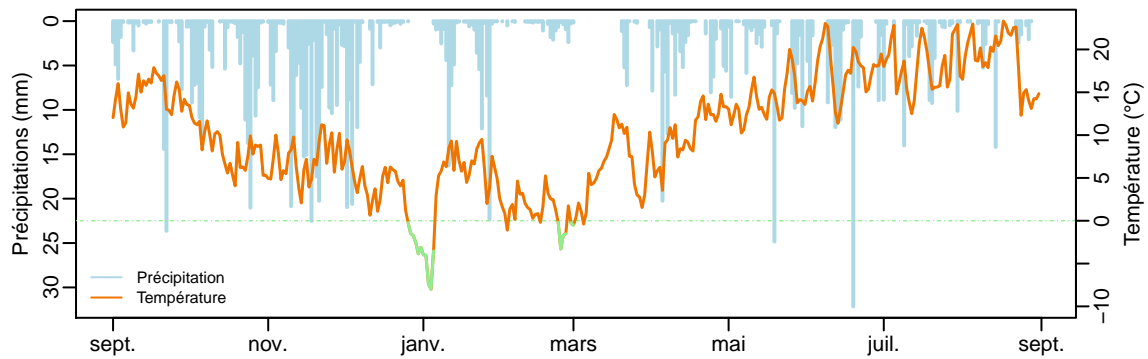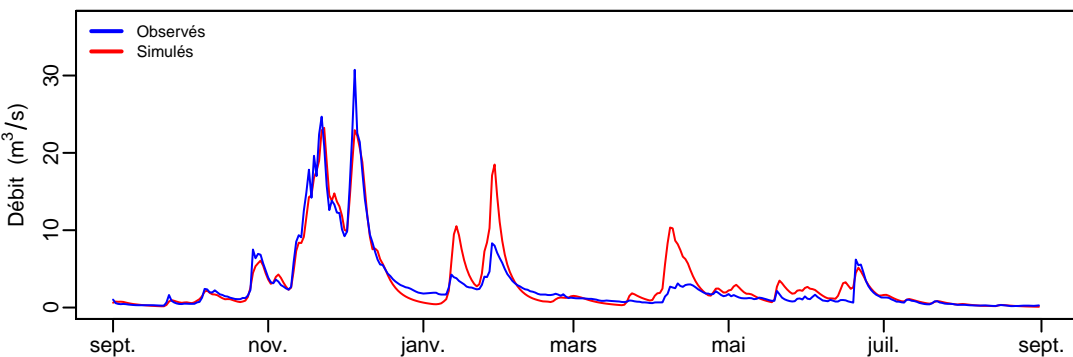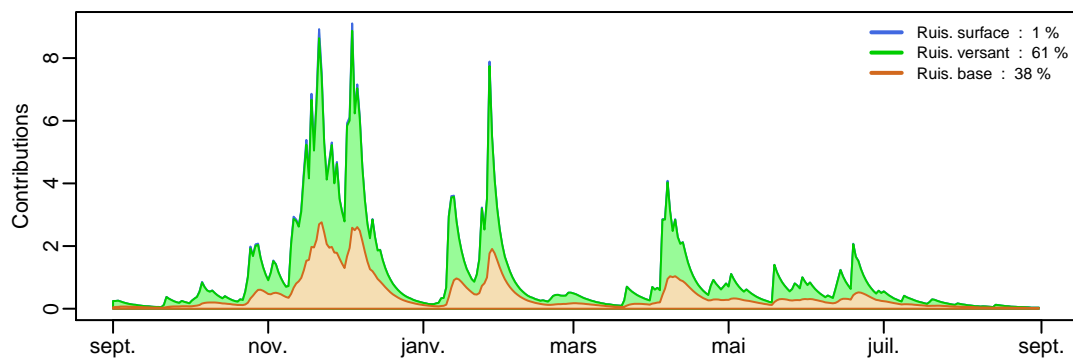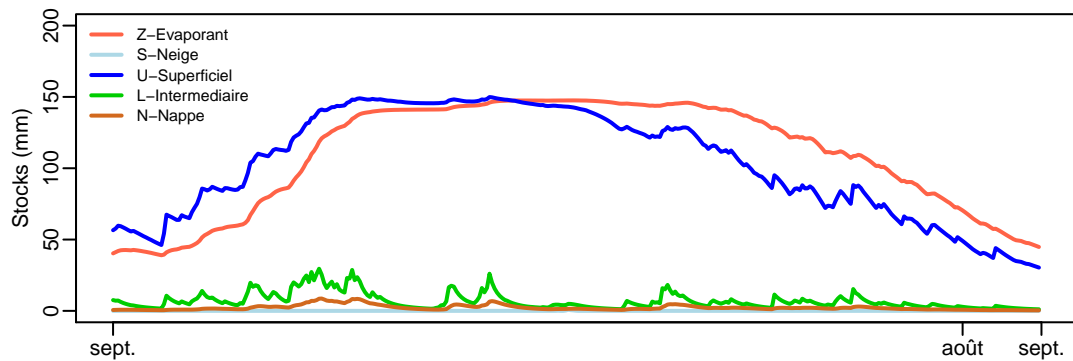



# k1273110 (258.99 km<sup>2</sup>) – année 1993–1994

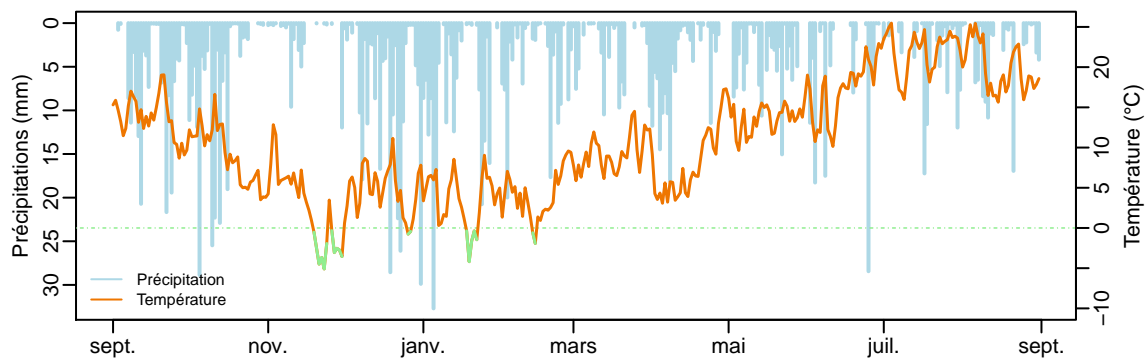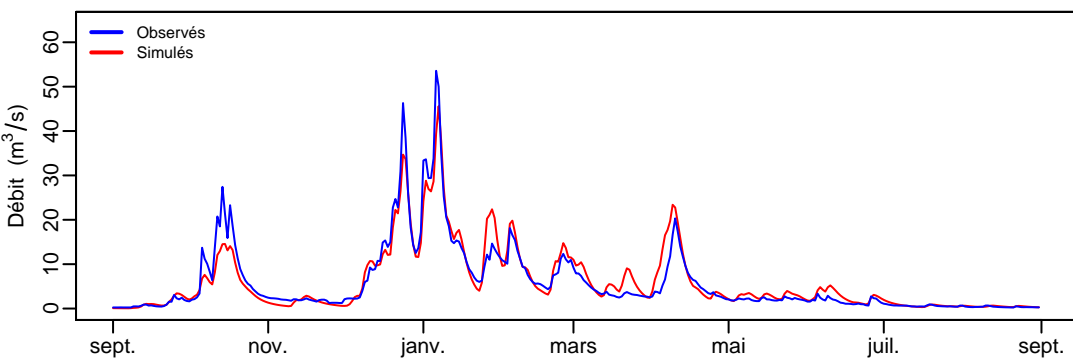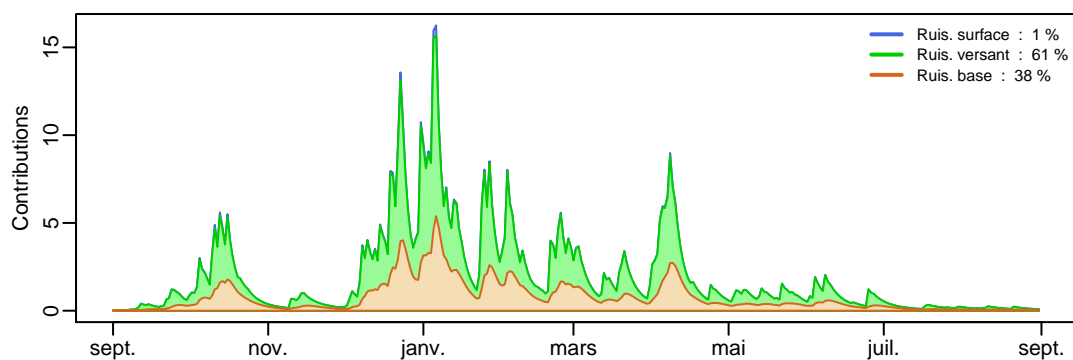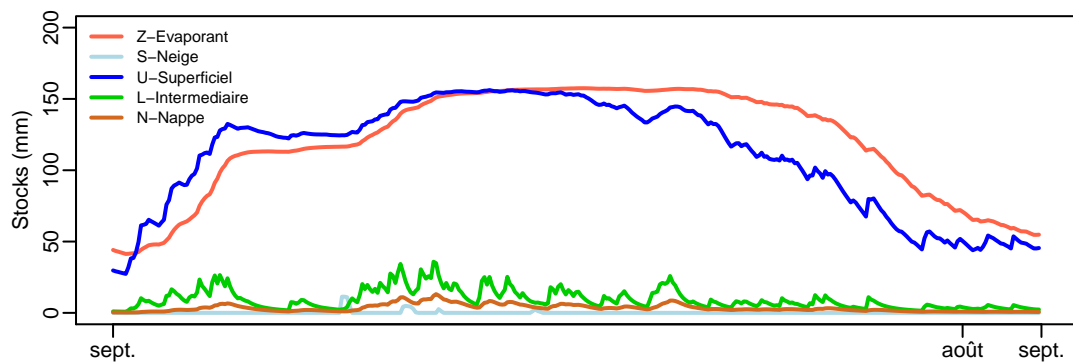

# k1273110 (258.99 km<sup>2</sup>) – année 1994–1995

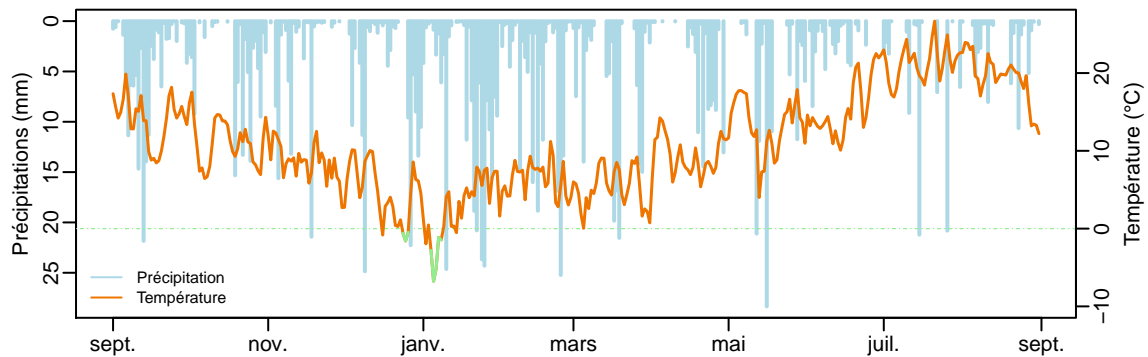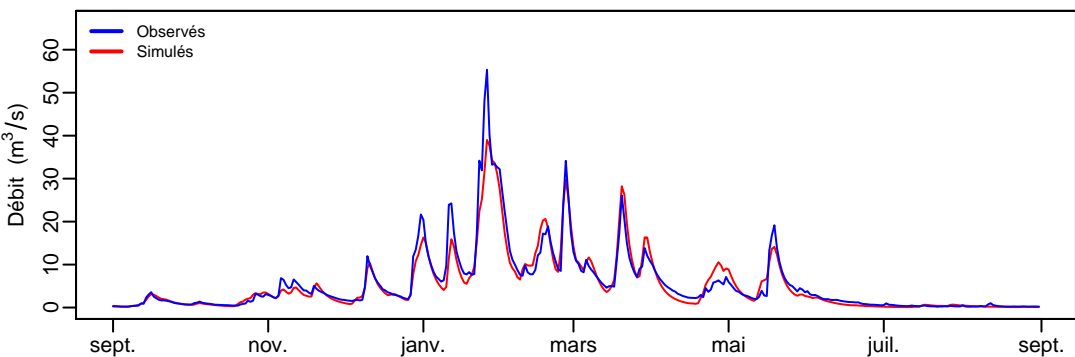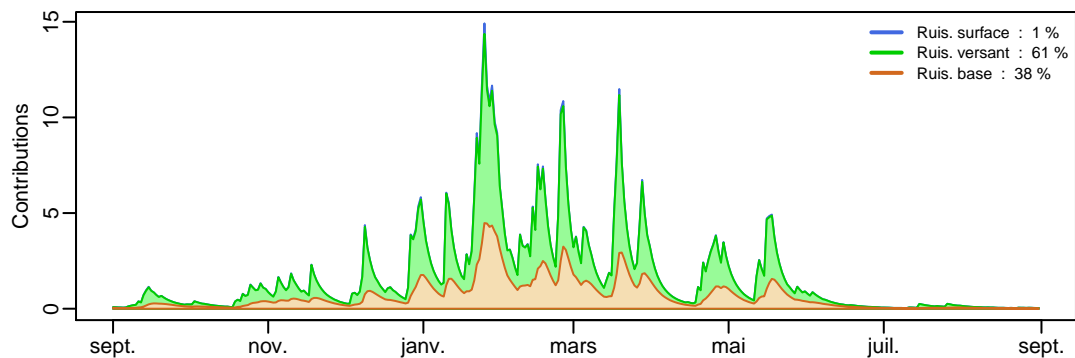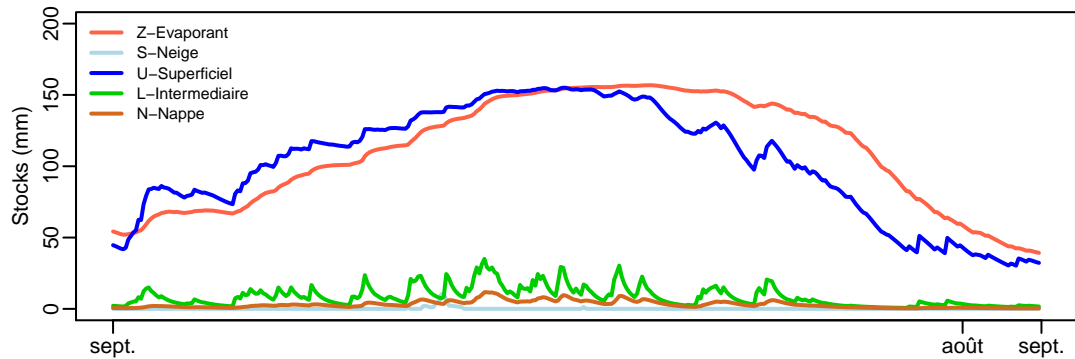

# k1273110 (258.99 km<sup>2</sup>) – année 1995–1996

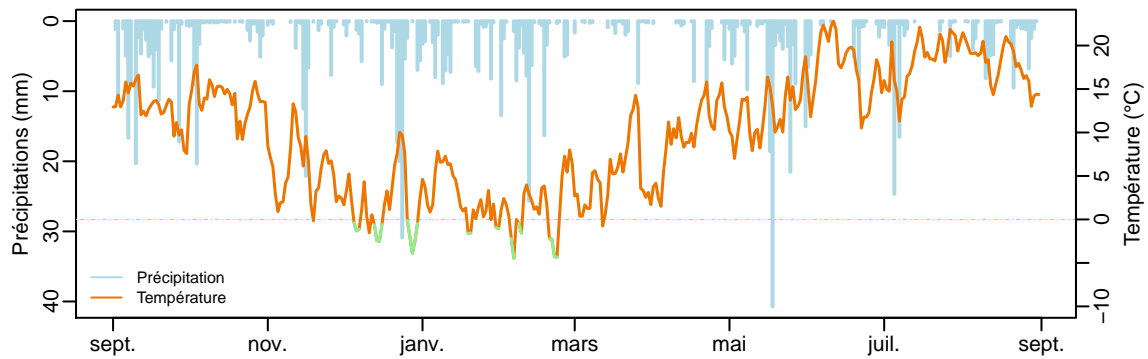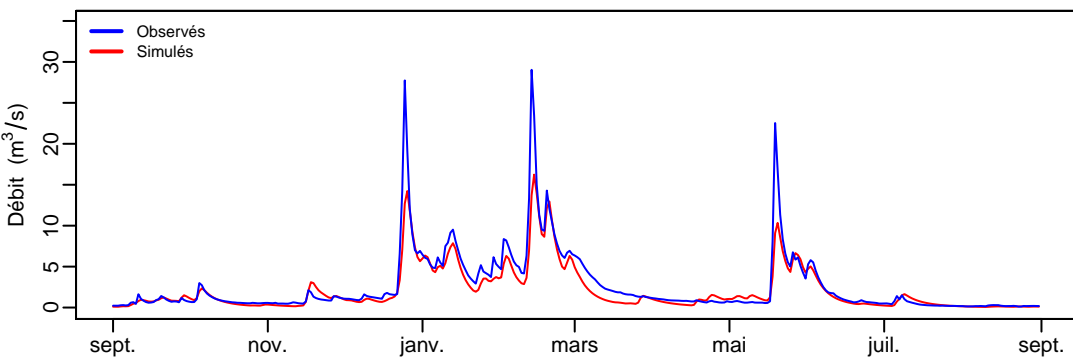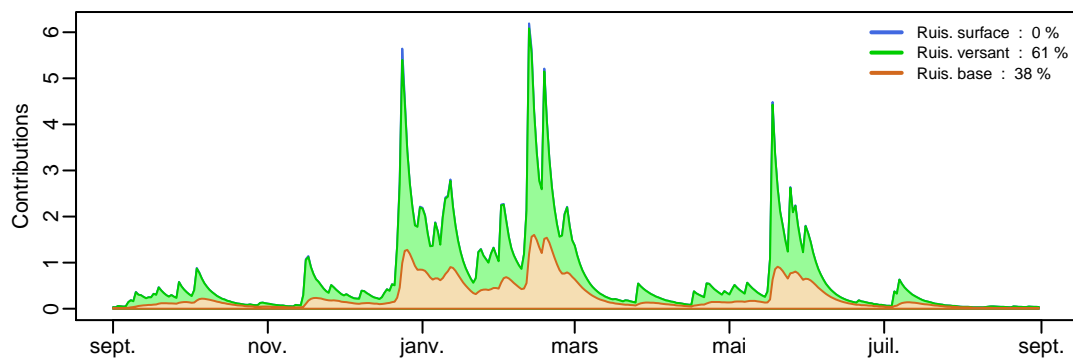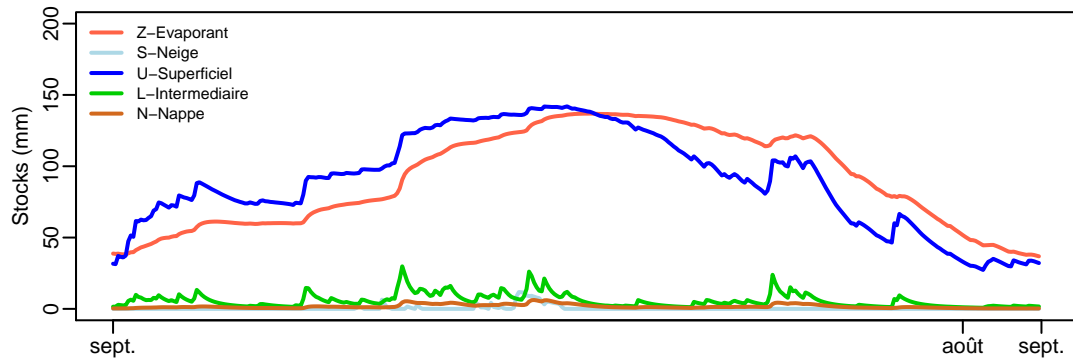

# k1273110 (258.99 km<sup>2</sup>) – année 1996–1997

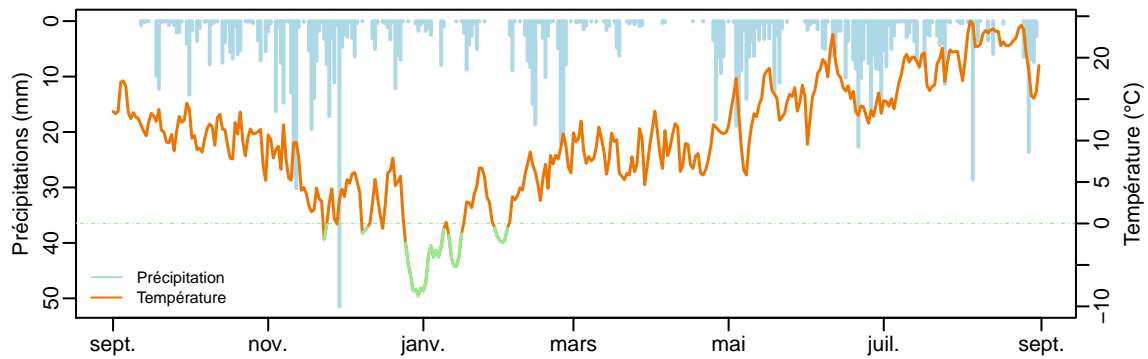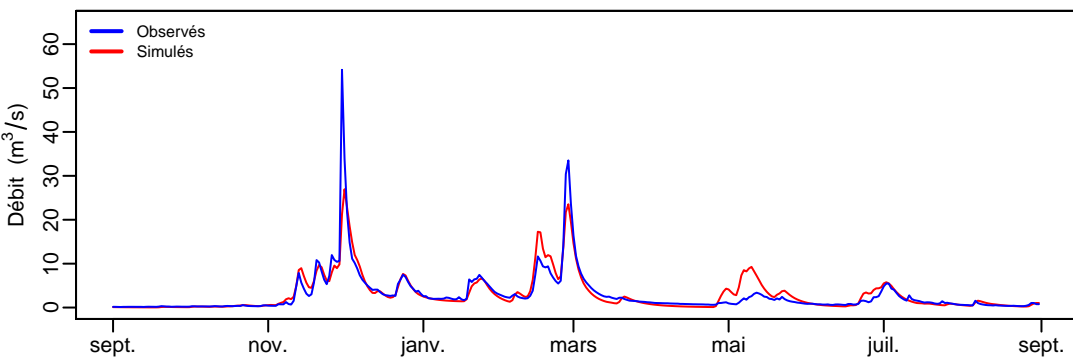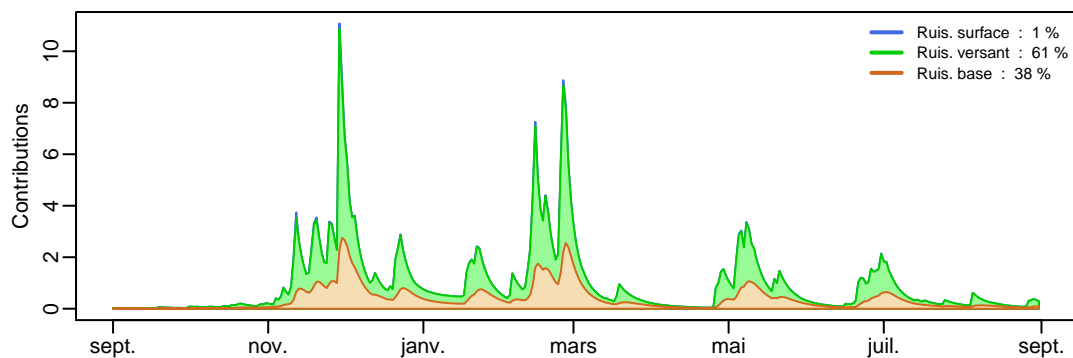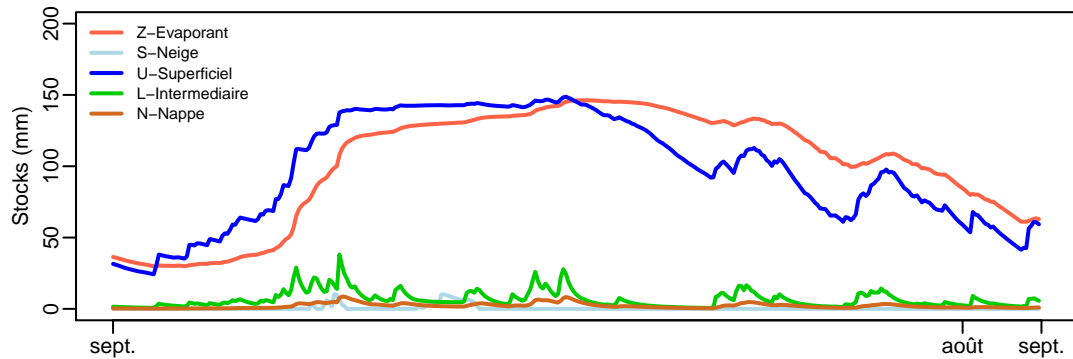

# k1273110 (258.99 km<sup>2</sup>) – année 1997–1998

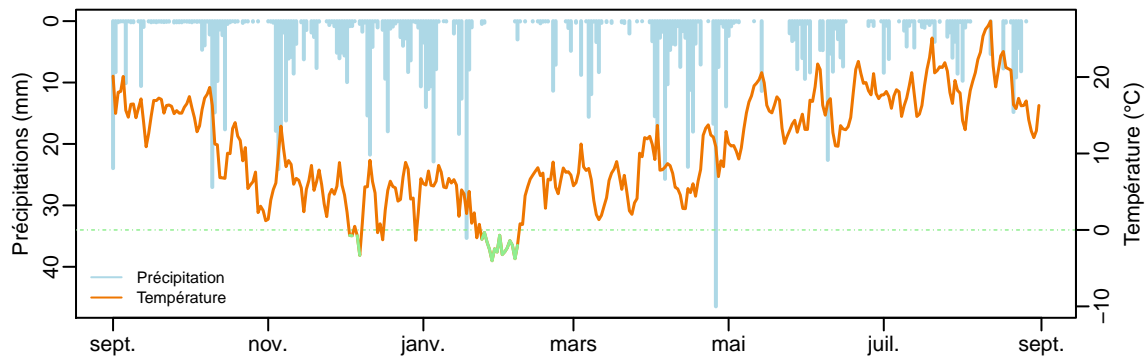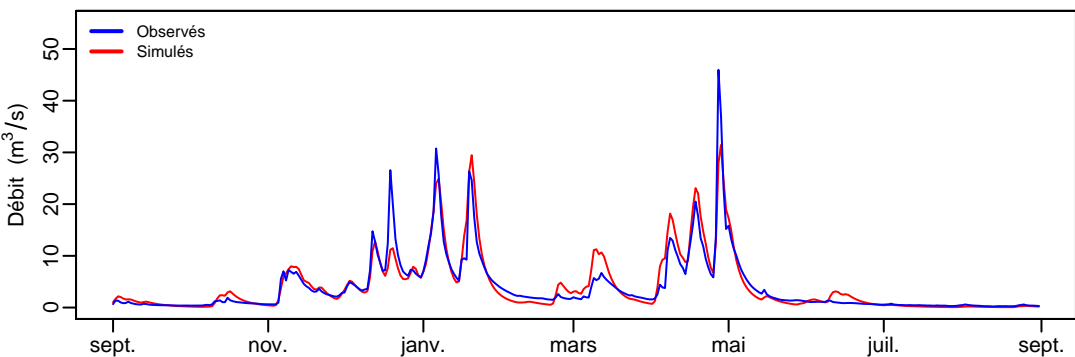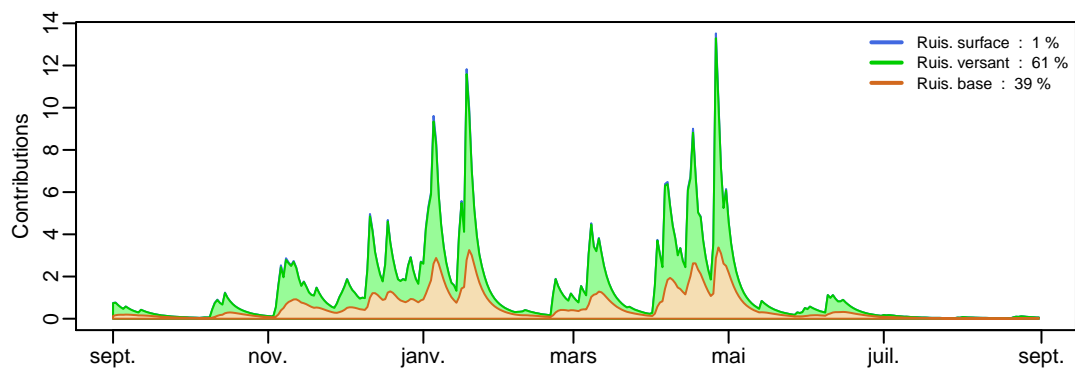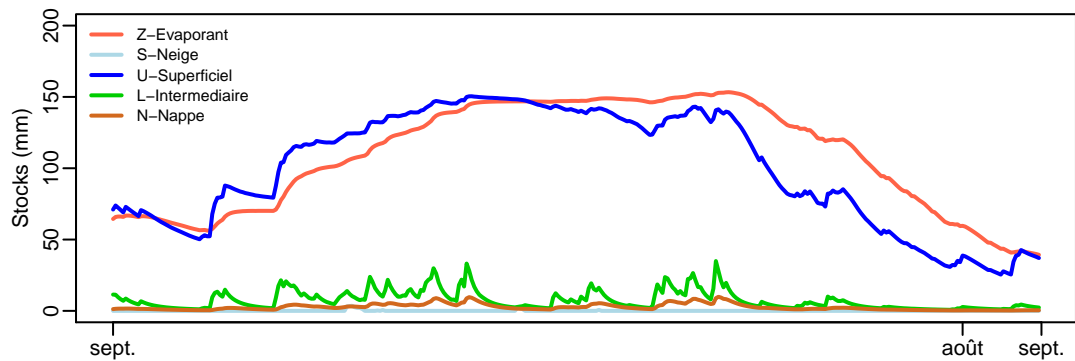

# k1273110 (258.99 km<sup>2</sup>) – année 1998–1999

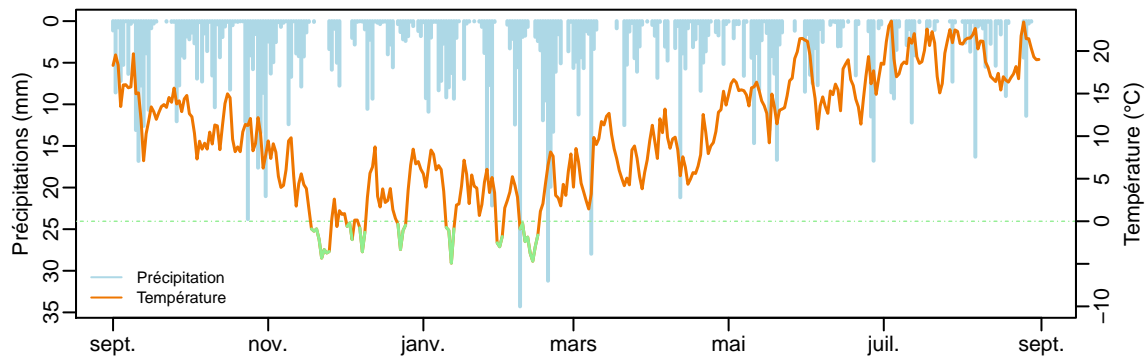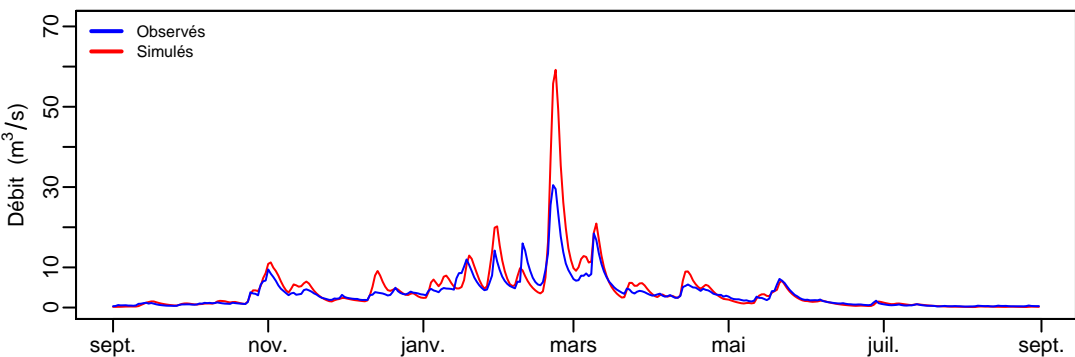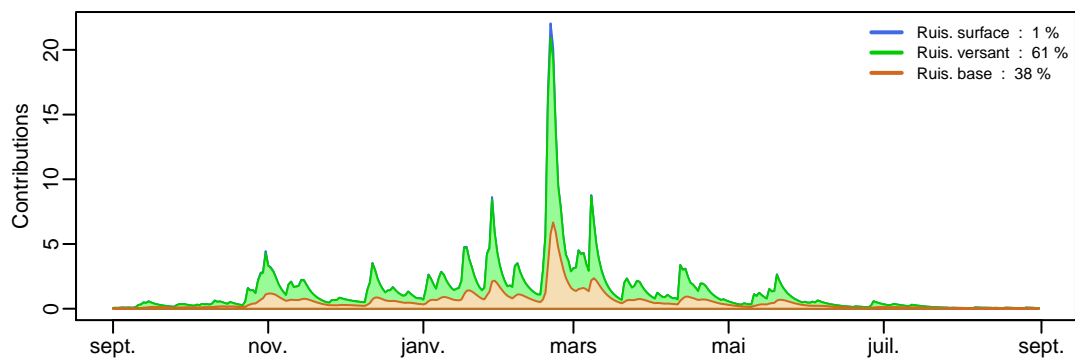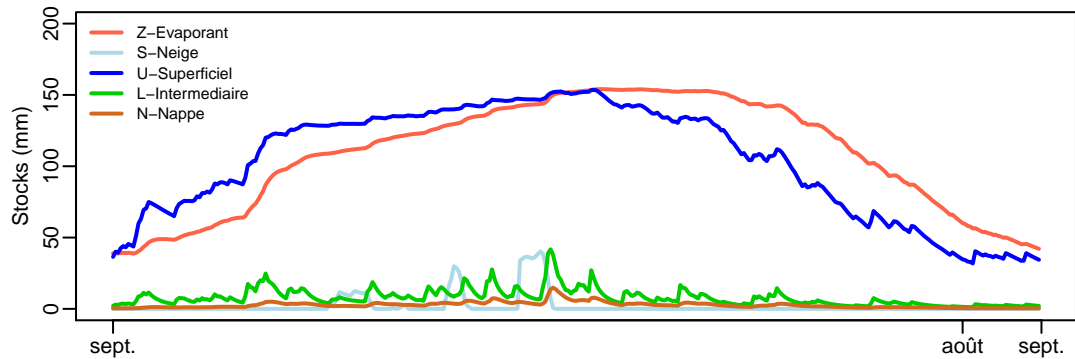

# k1273110 (258.99 km<sup>2</sup>) – année 1999–2000

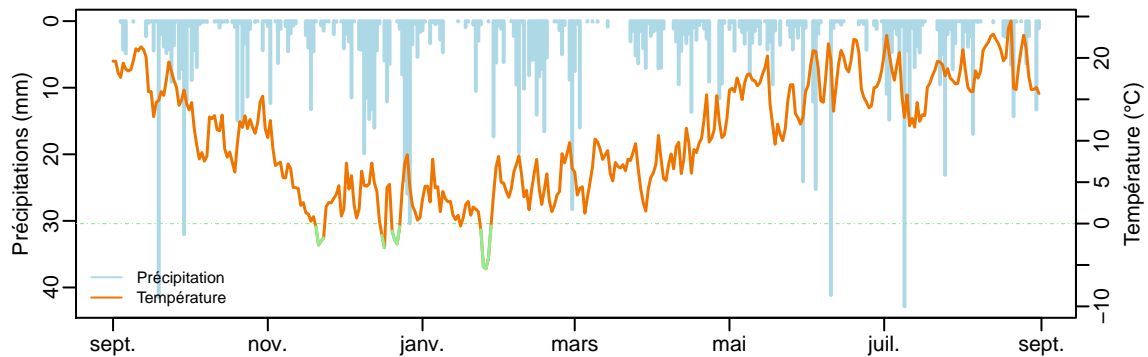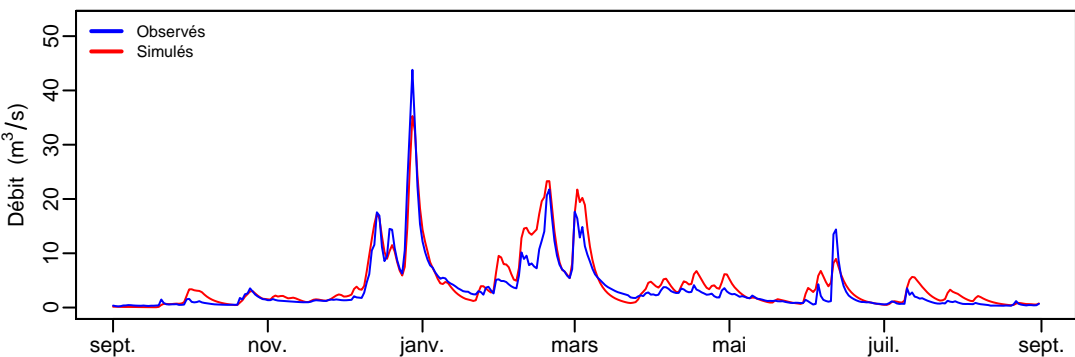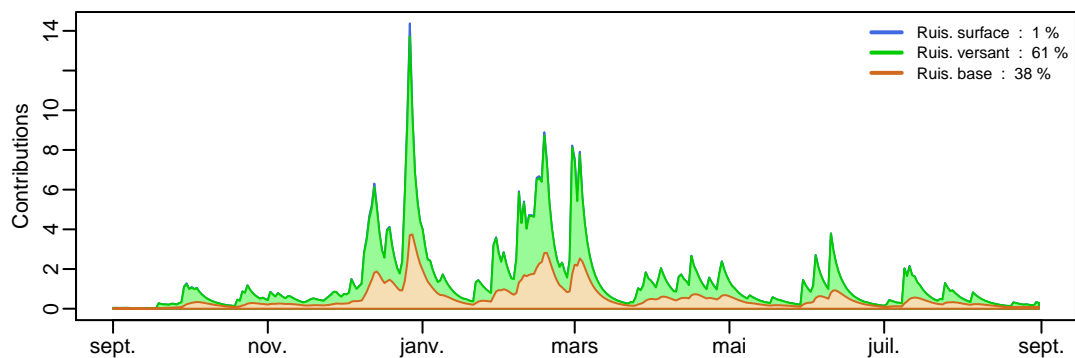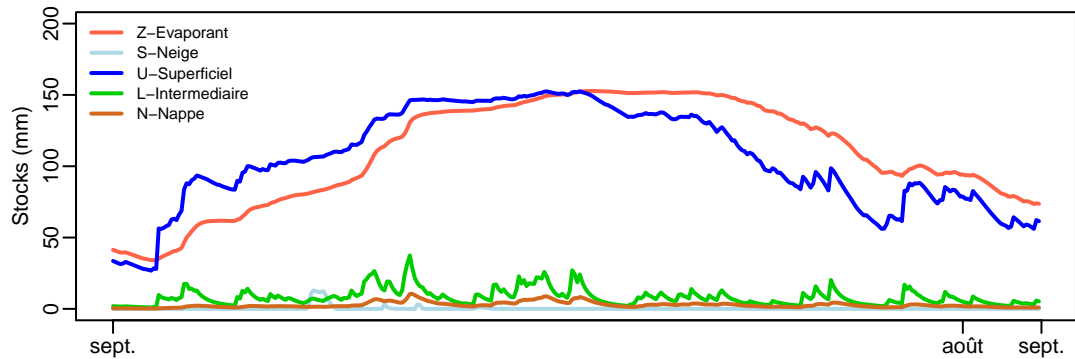

# k1273110 (258.99 km<sup>2</sup>) – année 2000–2001

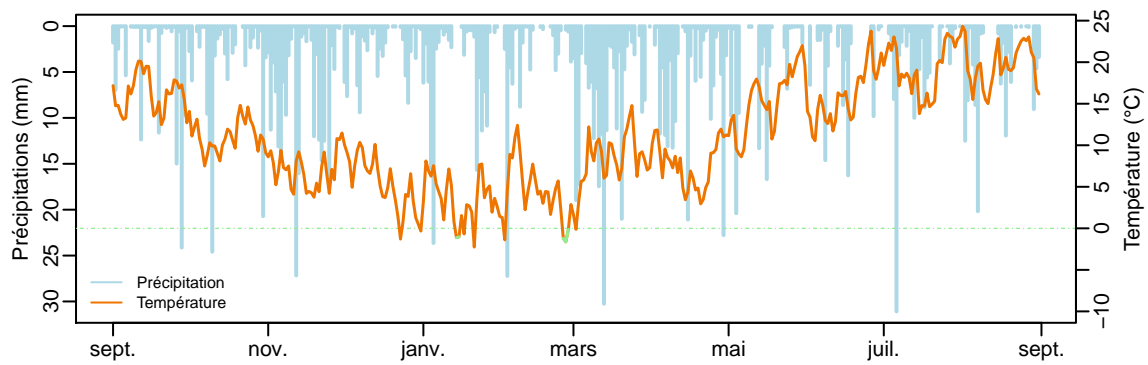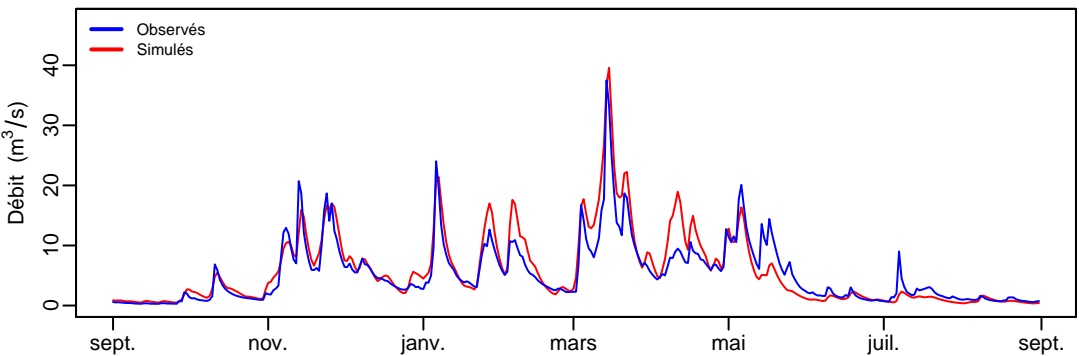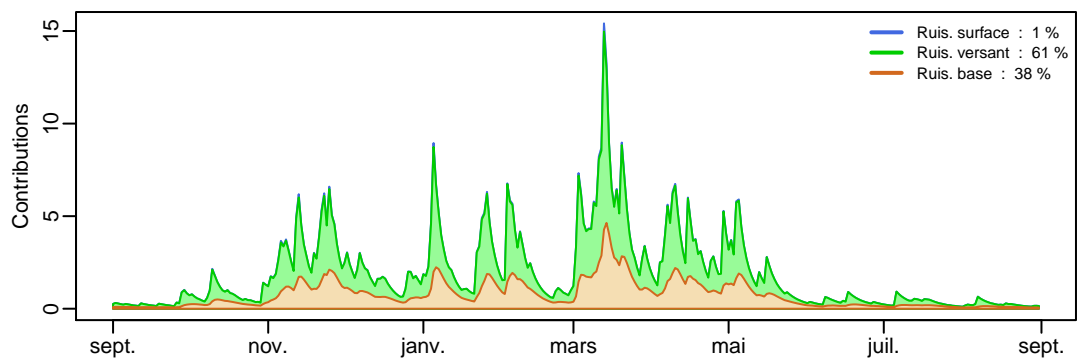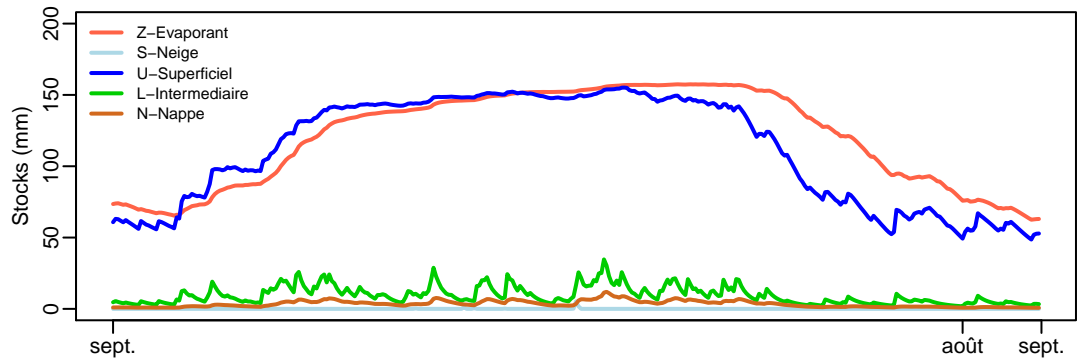



# k1273110 (258.99 km<sup>2</sup>) – année 2001–2002

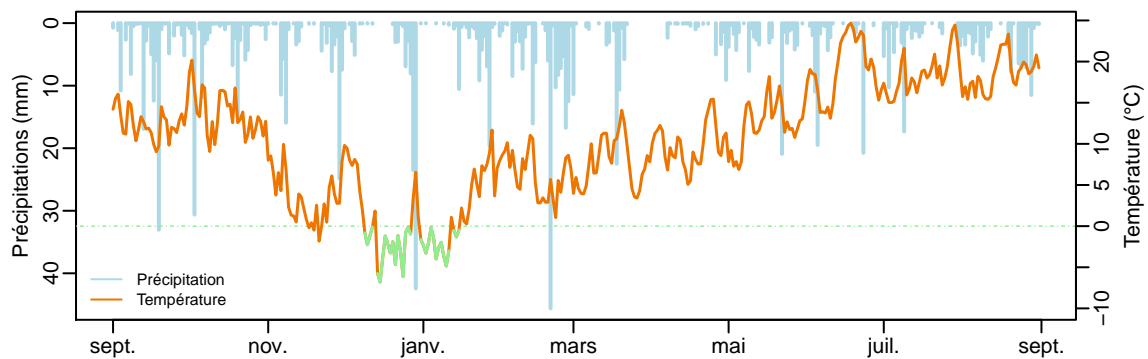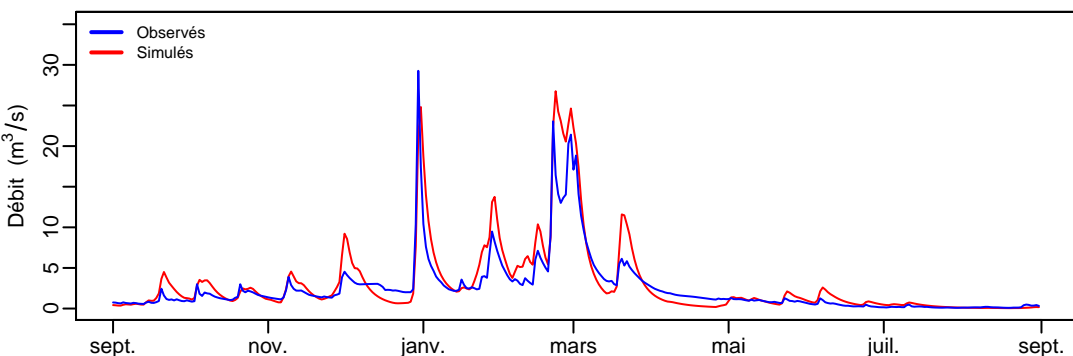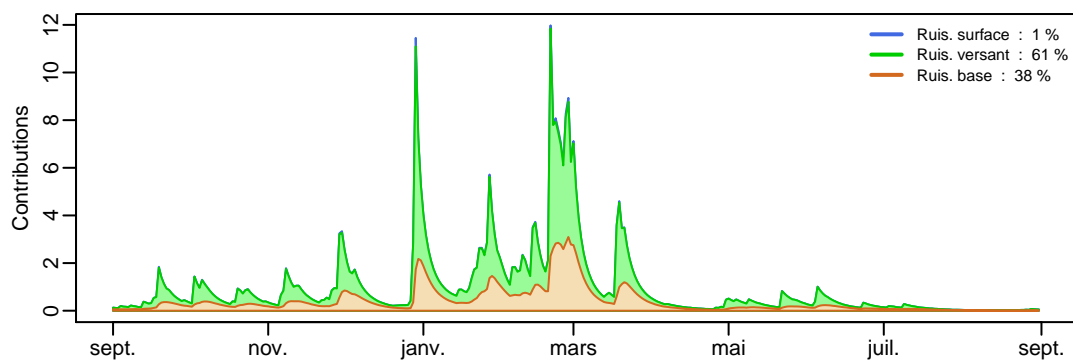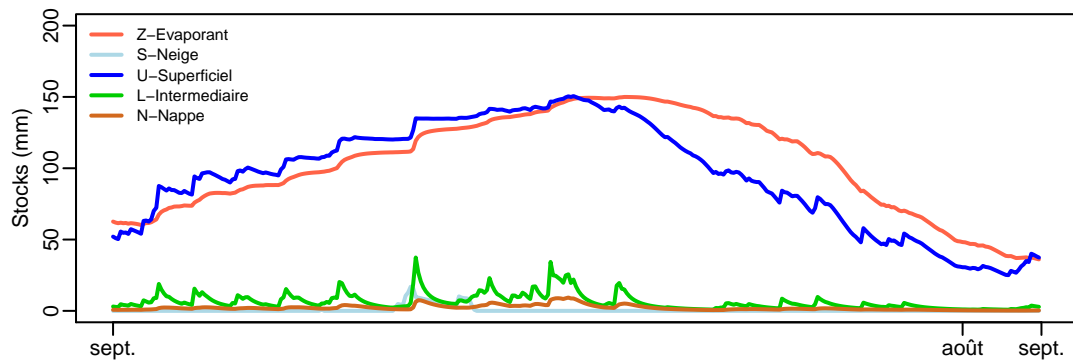

# k1273110 (258.99 km²) – année 2002–2003

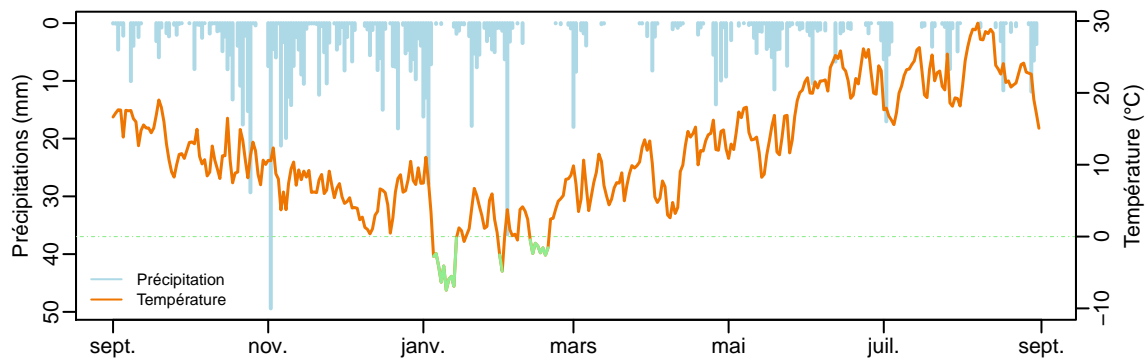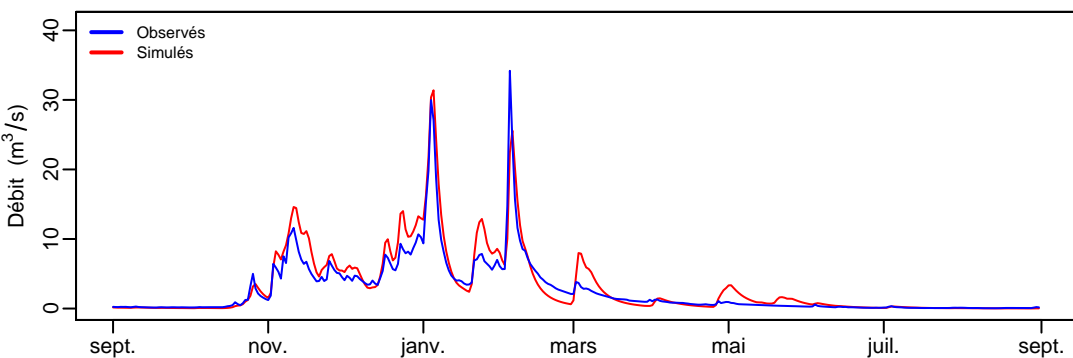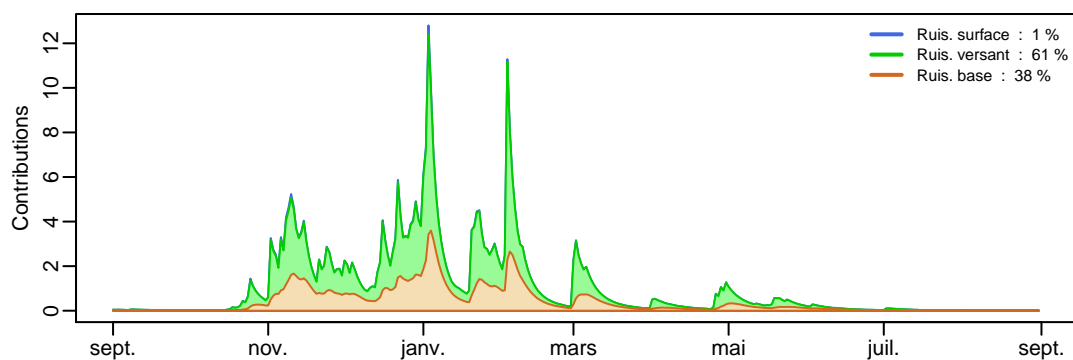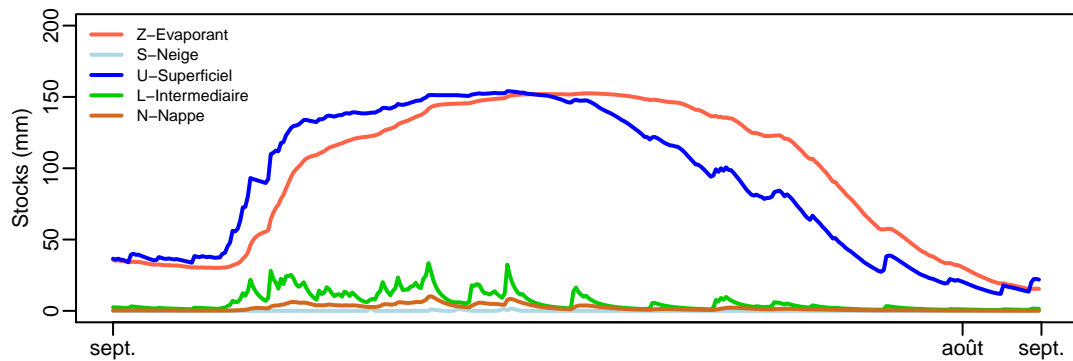

# k1273110 (258.99 km<sup>2</sup>) – année 2003–2004

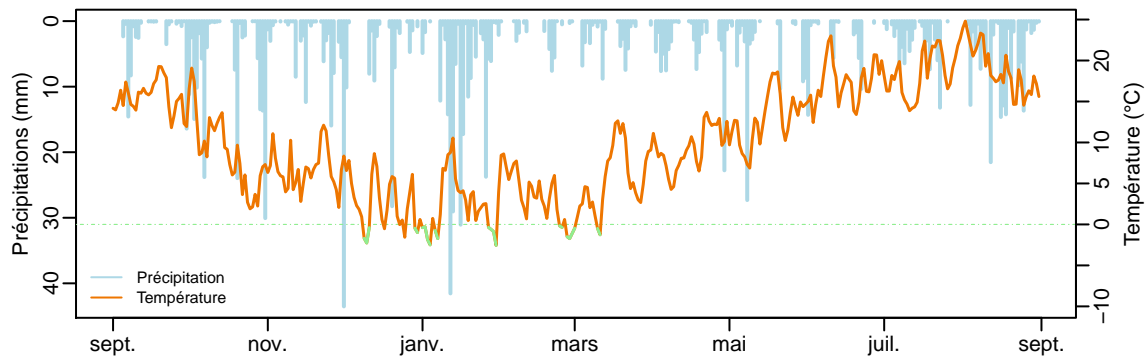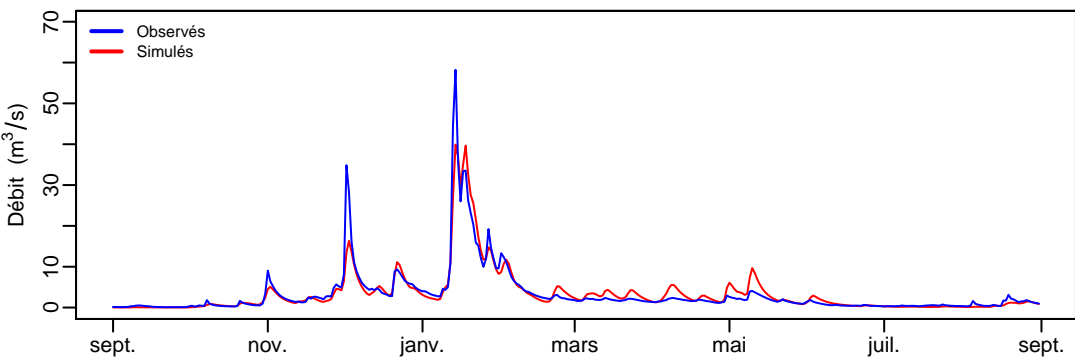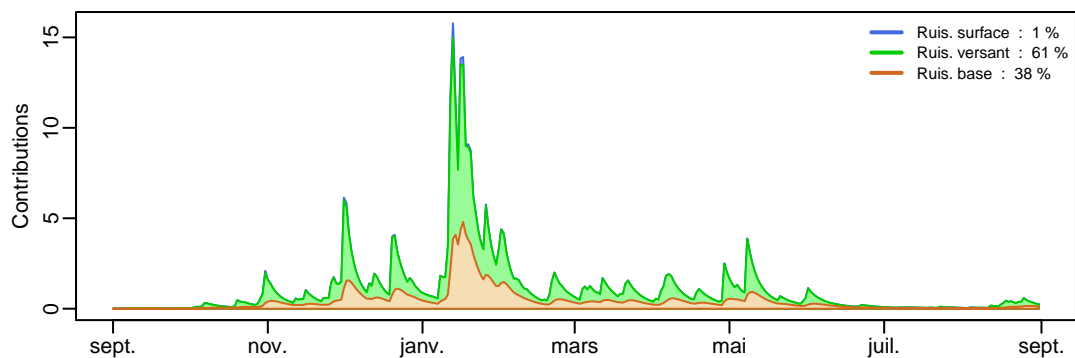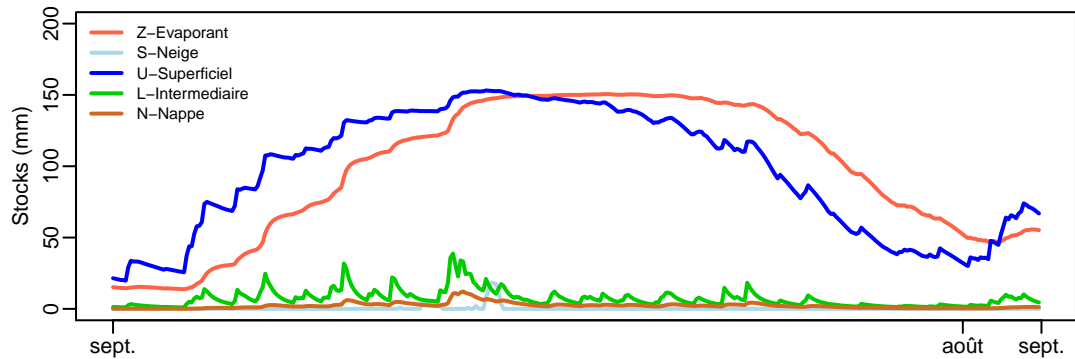

# k1273110 (258.99 km²) – année 2004–2005

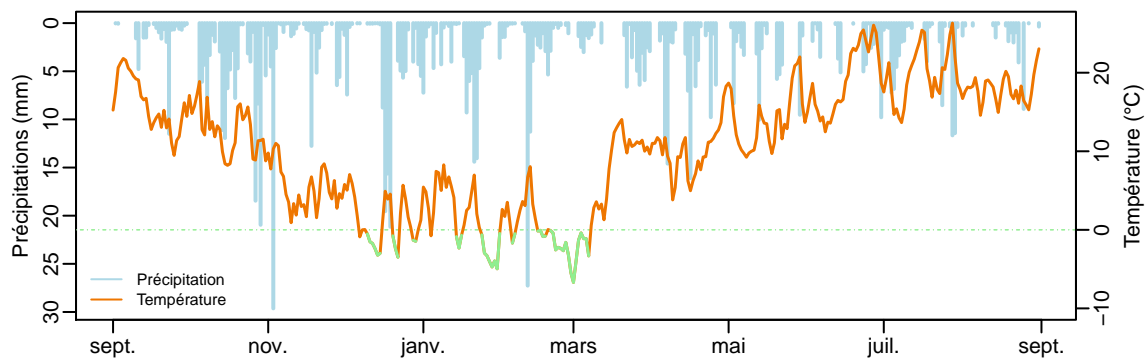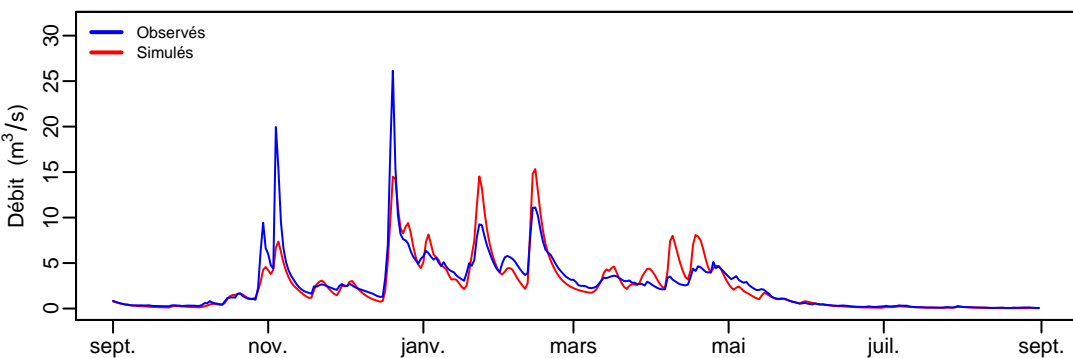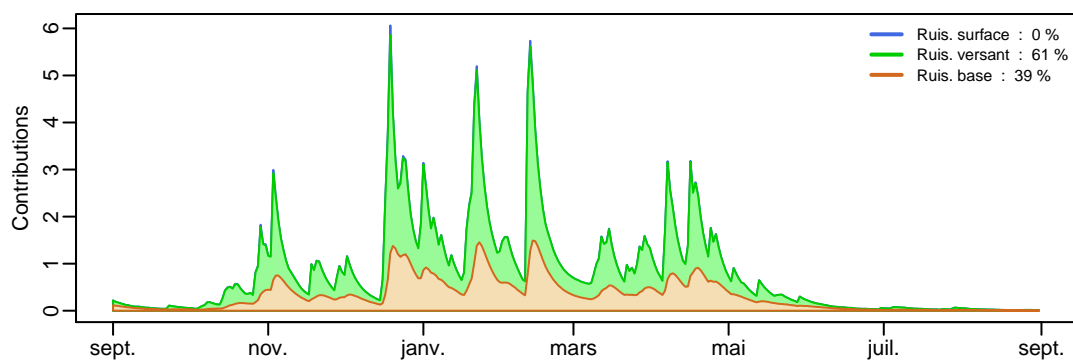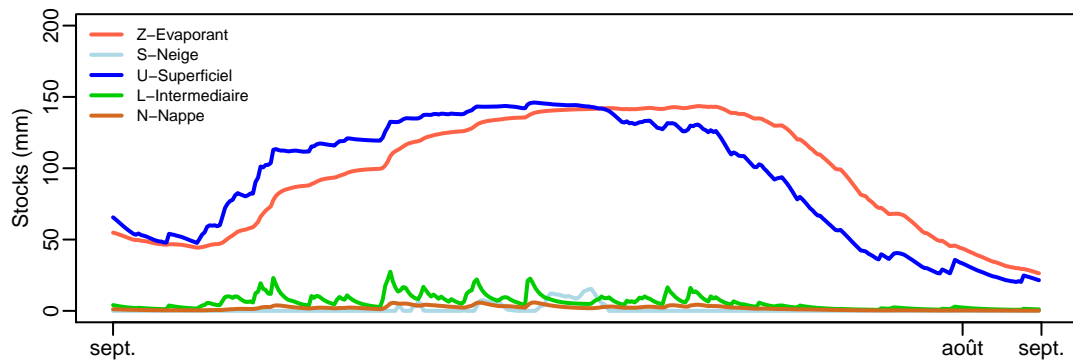

# k1273110 (258.99 km<sup>2</sup>) – année 2005–2006

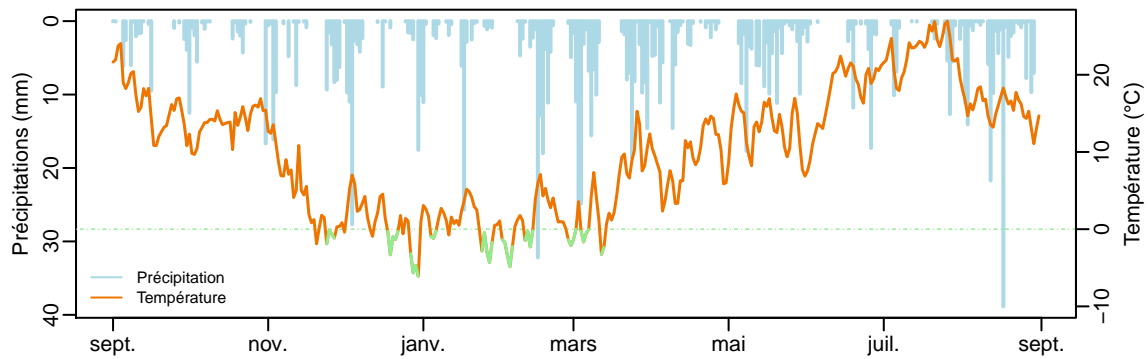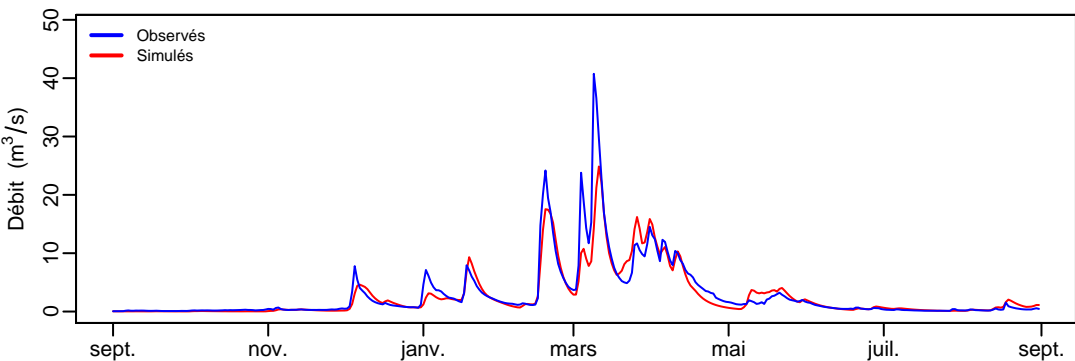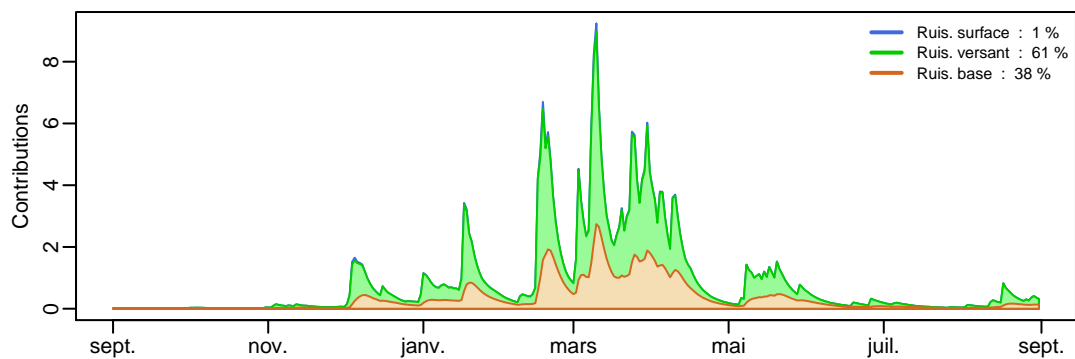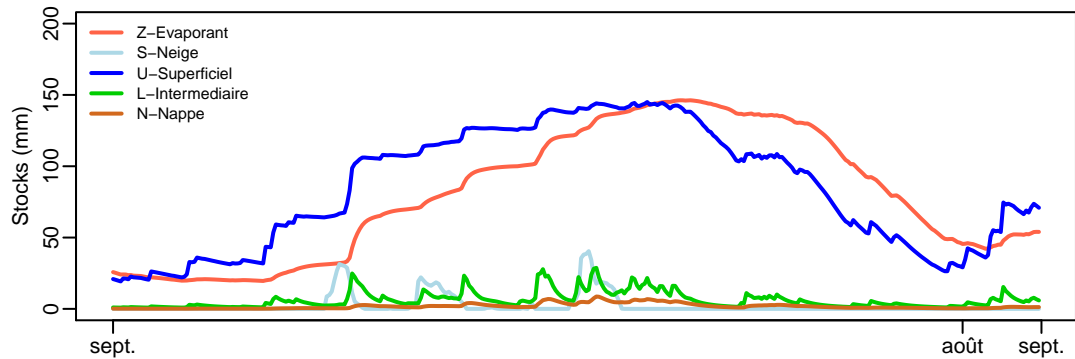

# k1273110 (258.99 km<sup>2</sup>) – année 2006–2007

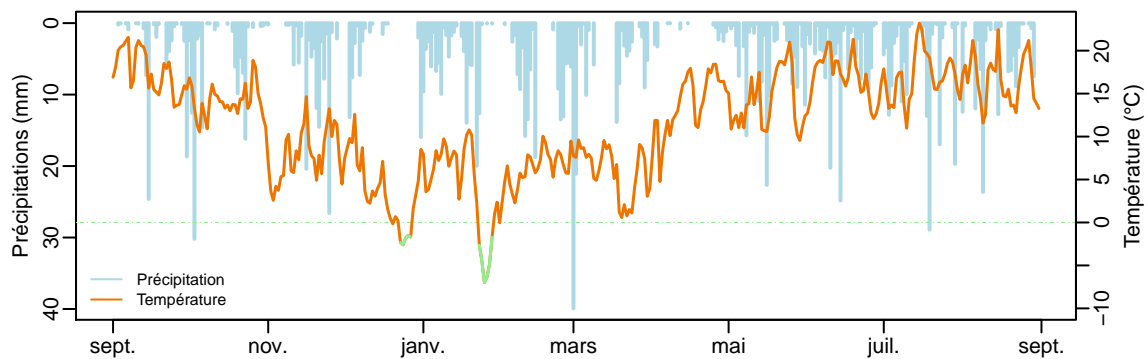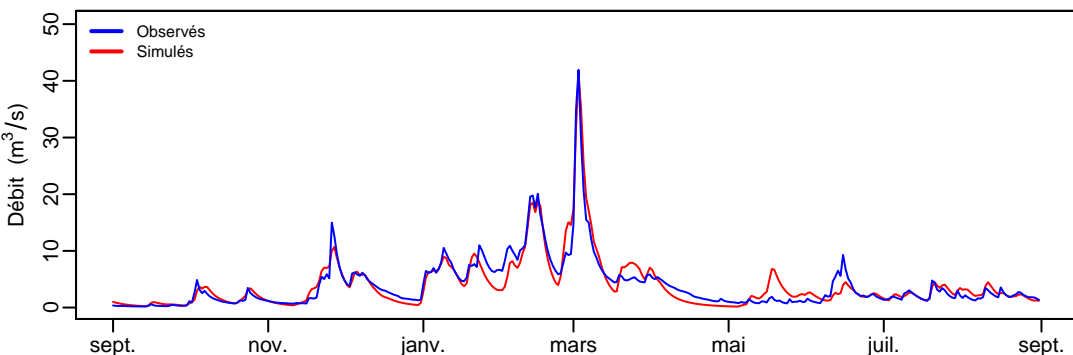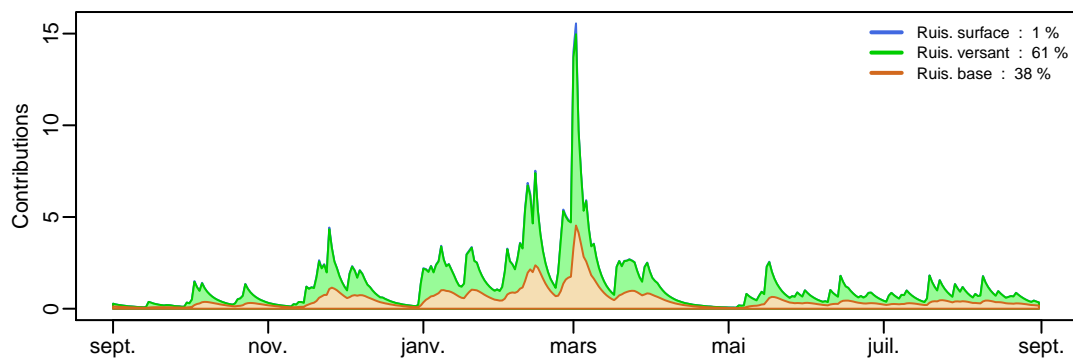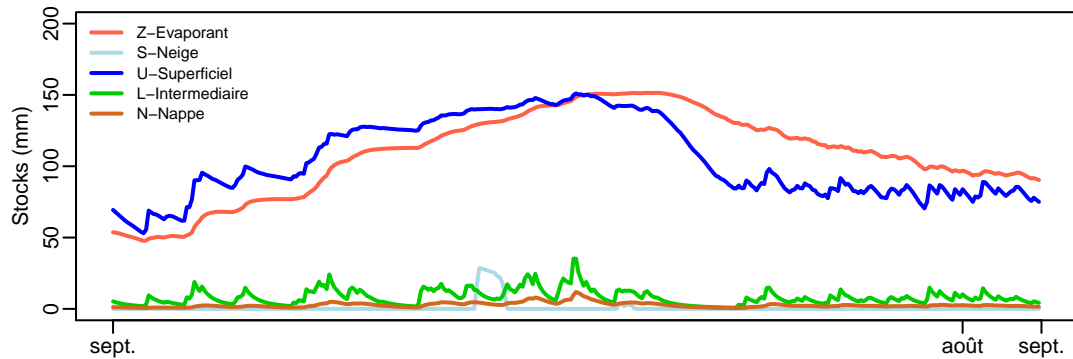

# k1273110 (258.99 km<sup>2</sup>) – année 2007–2008

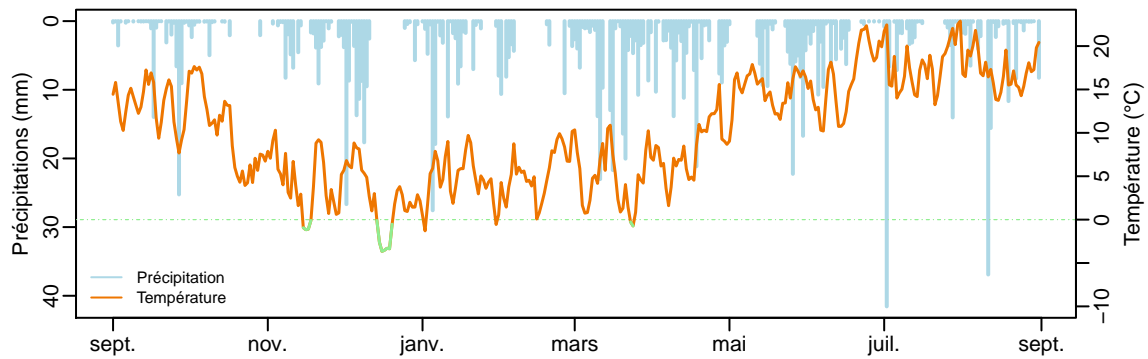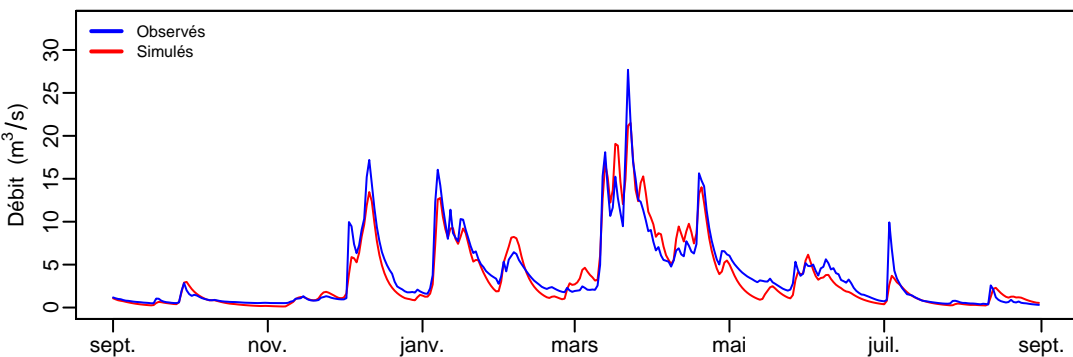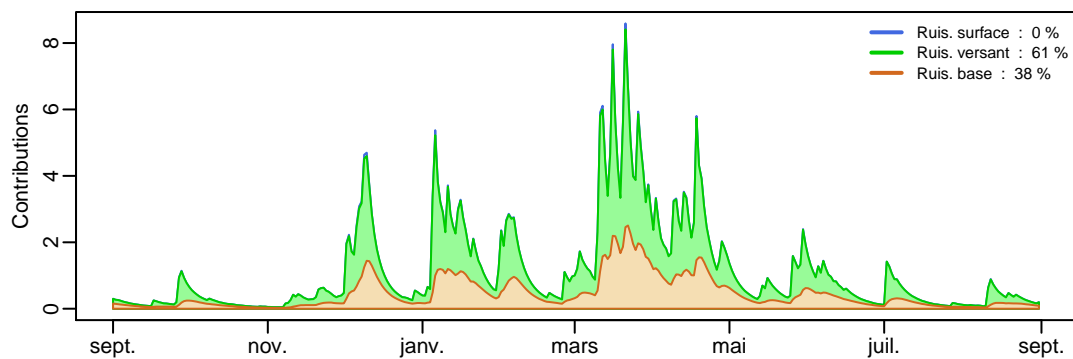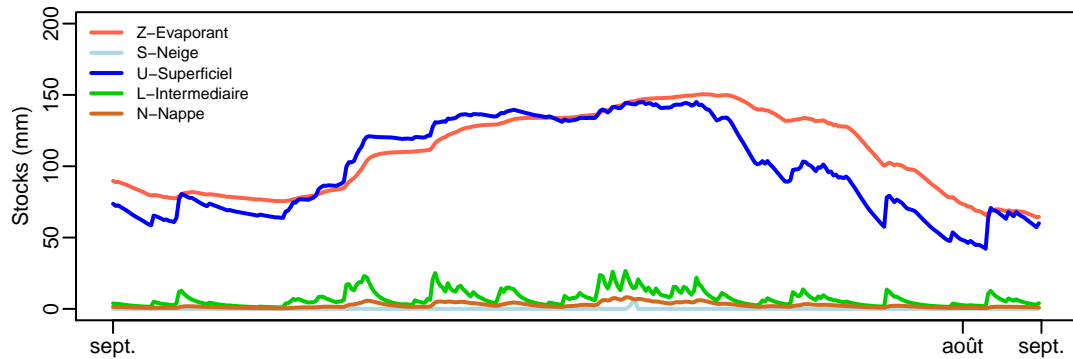

# k1273110 (258.99 km²) – année 2008–2009

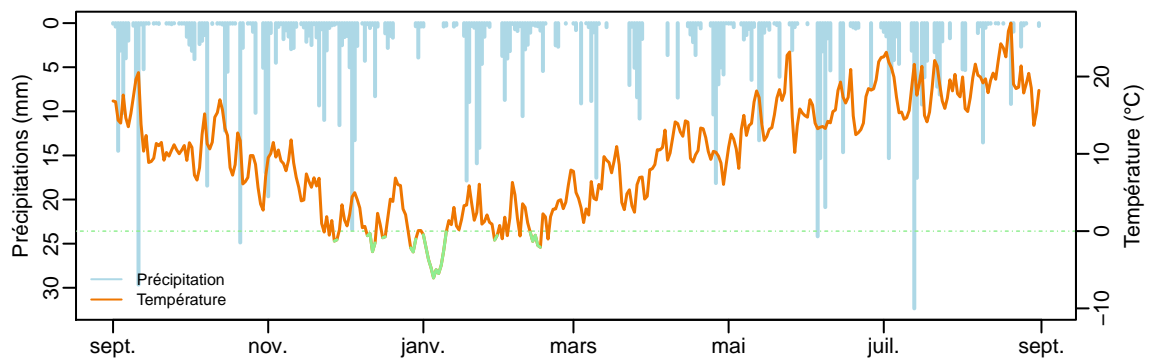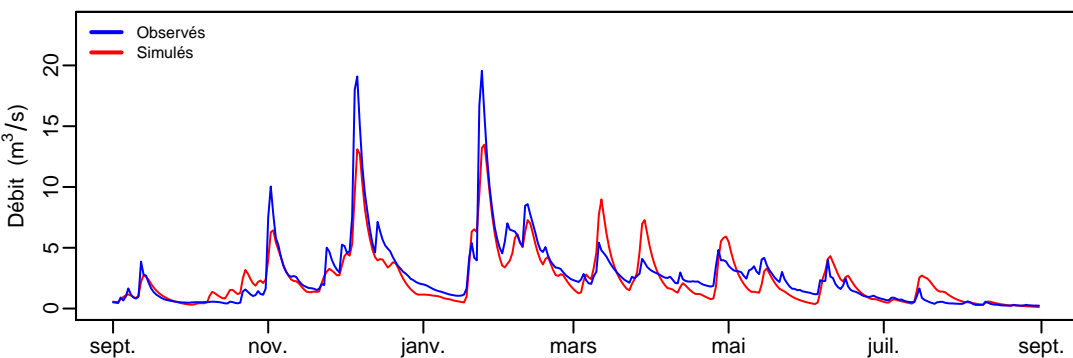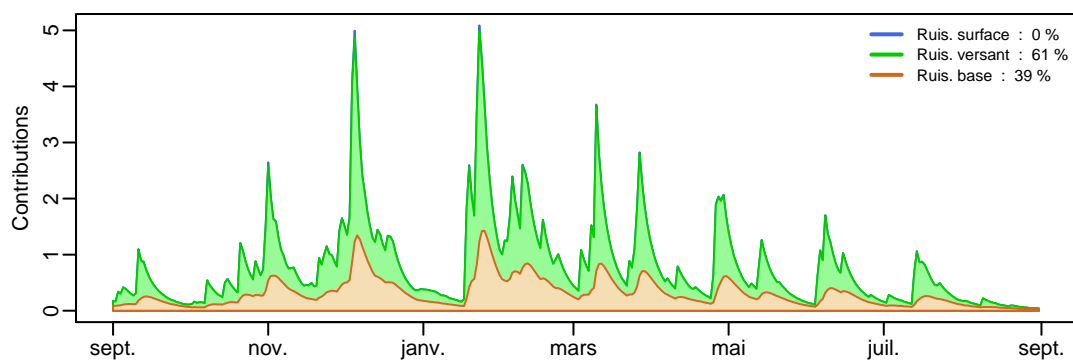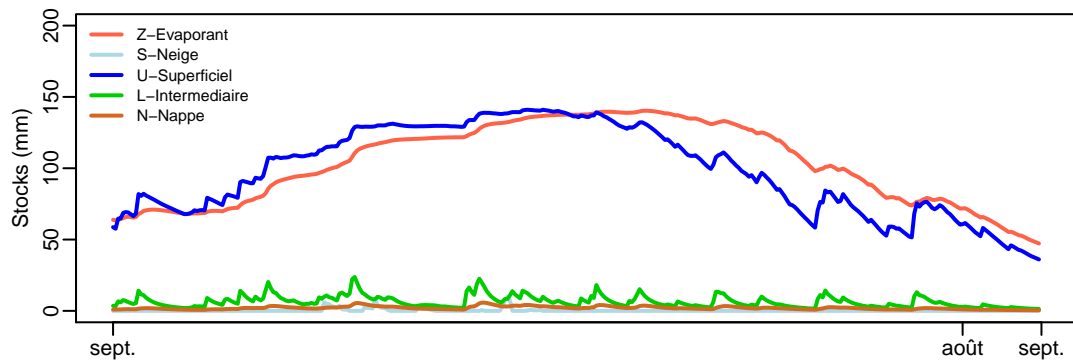



# k1284810 (135.47 km<sup>2</sup>) – année 1981–1982

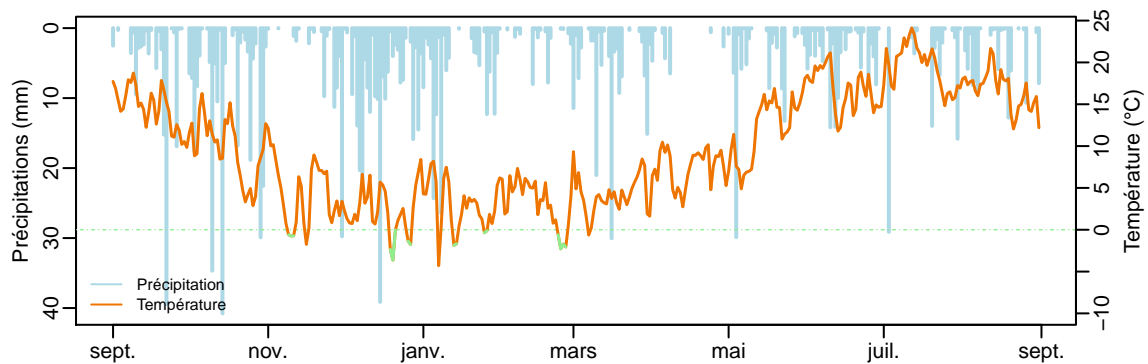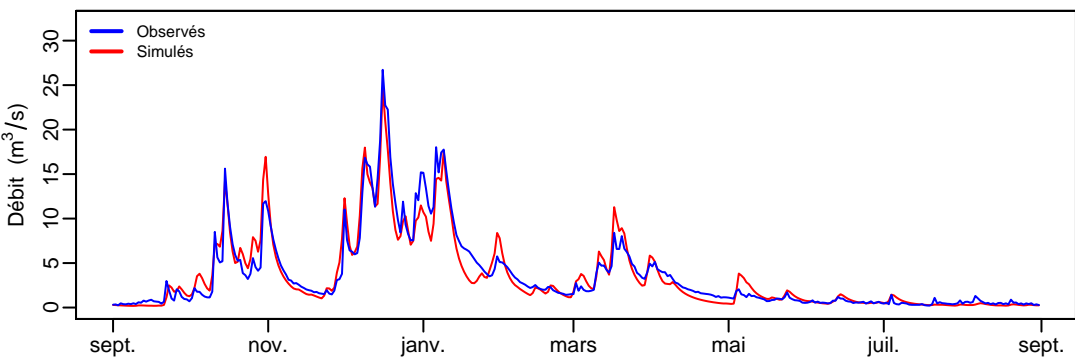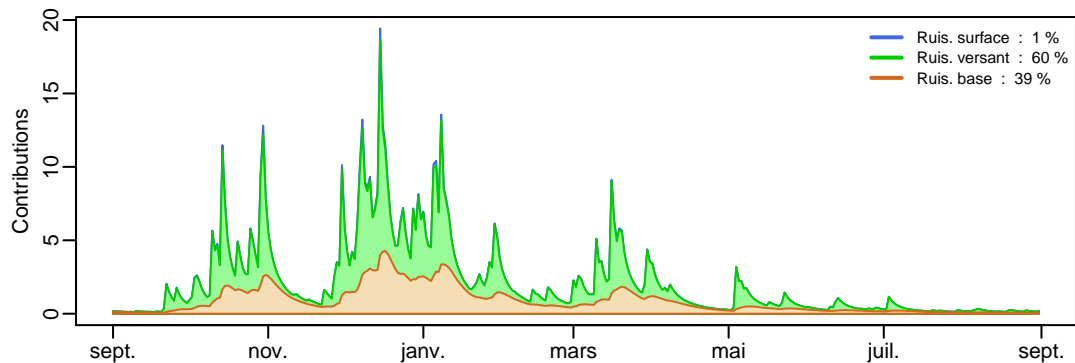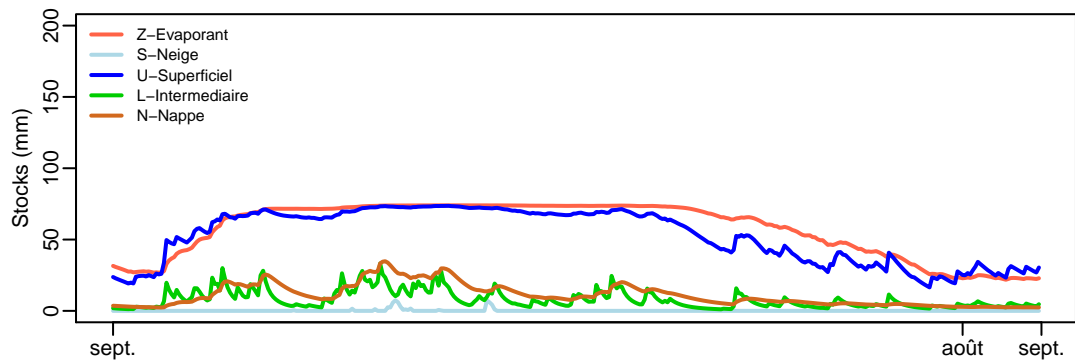

# k1284810 (135.47 km<sup>2</sup>) – année 1982–1983

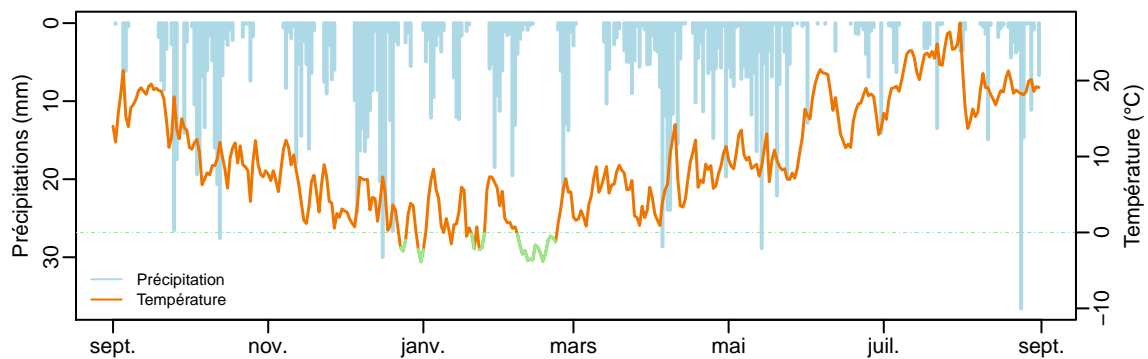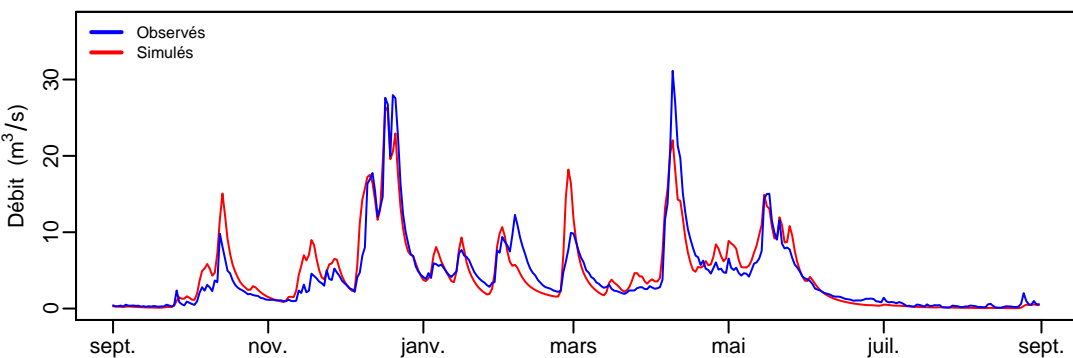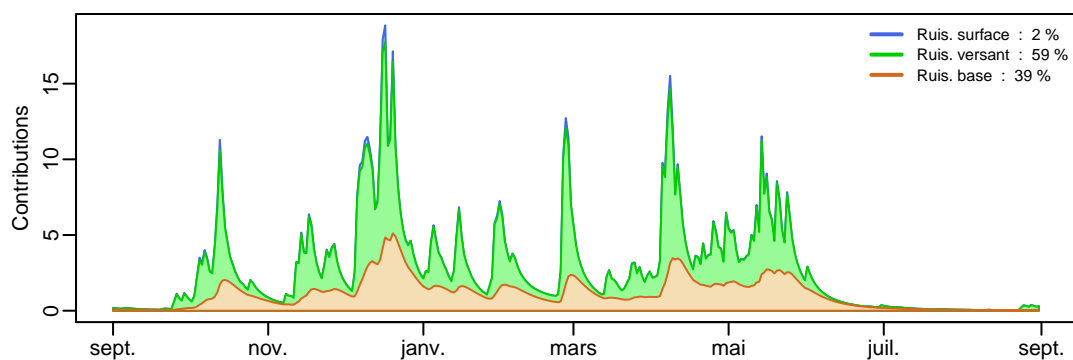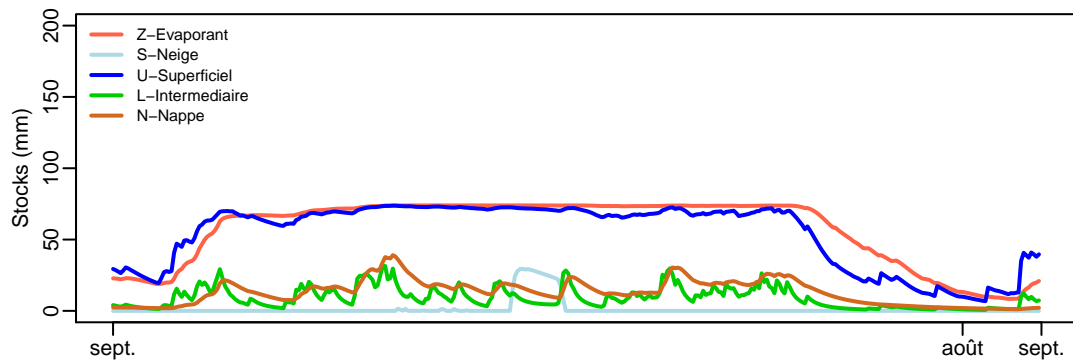

# k1284810 (135.47 km²) – année 1983–1984

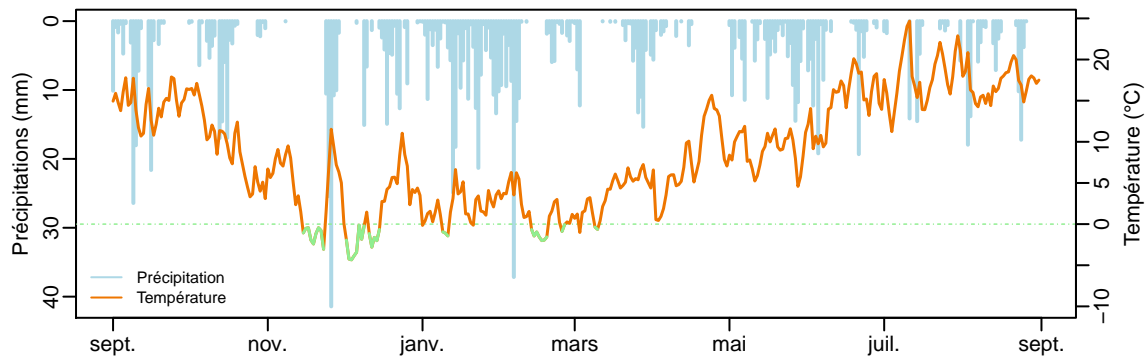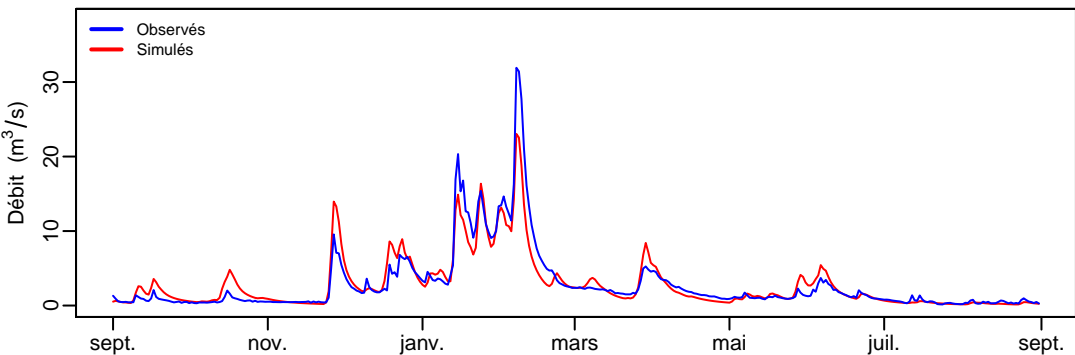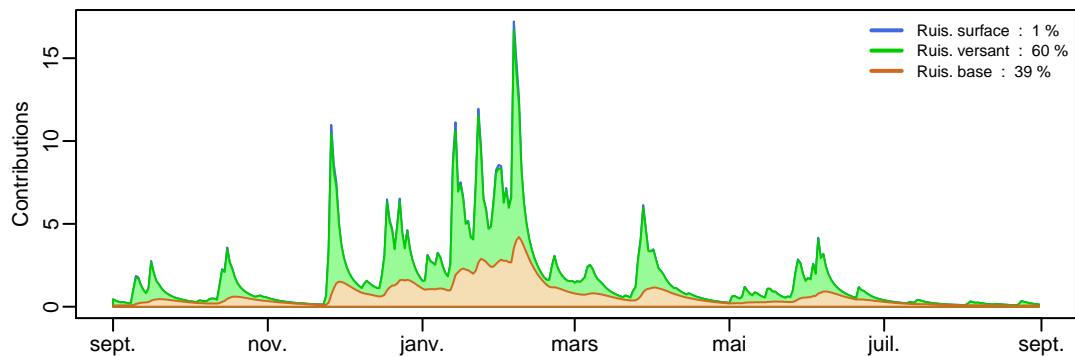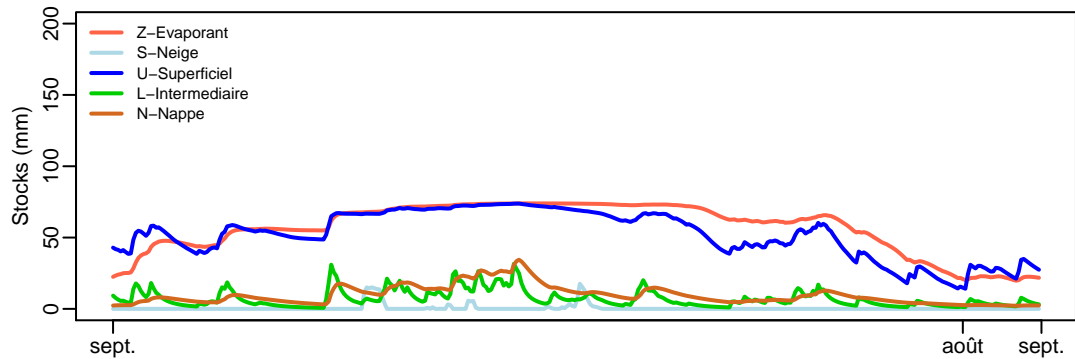

# k1284810 (135.47 km<sup>2</sup>) – année 1984–1985

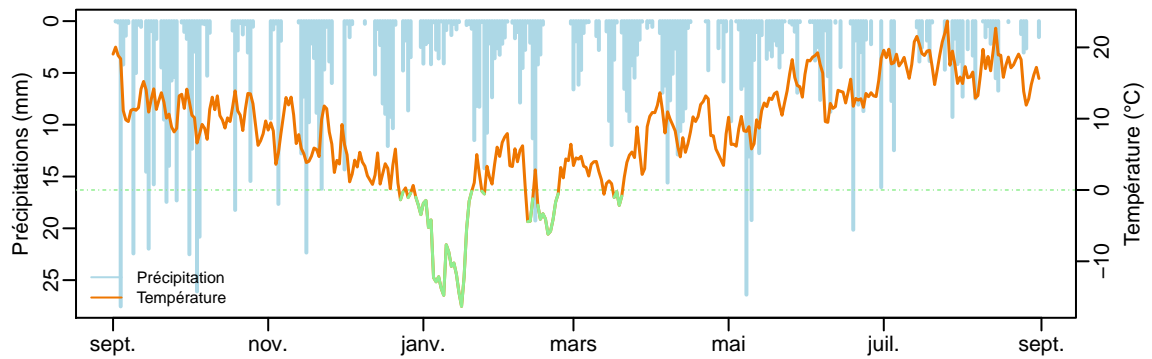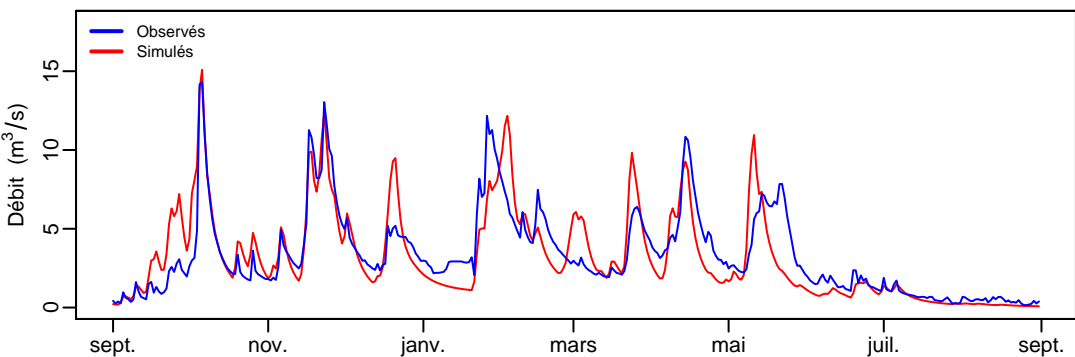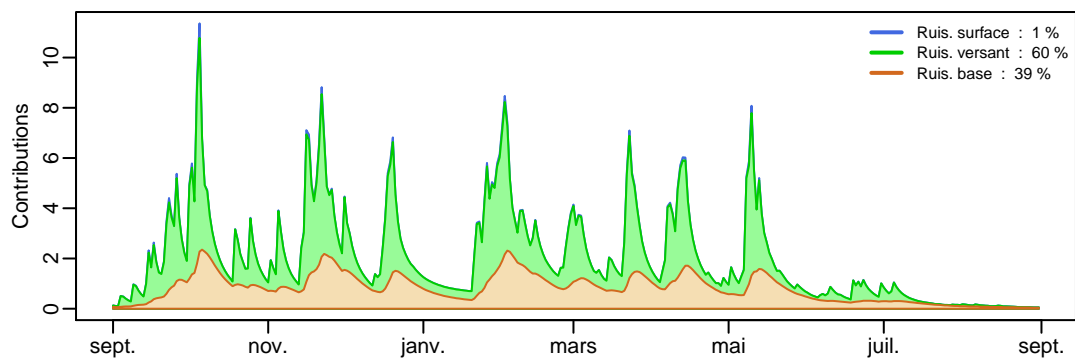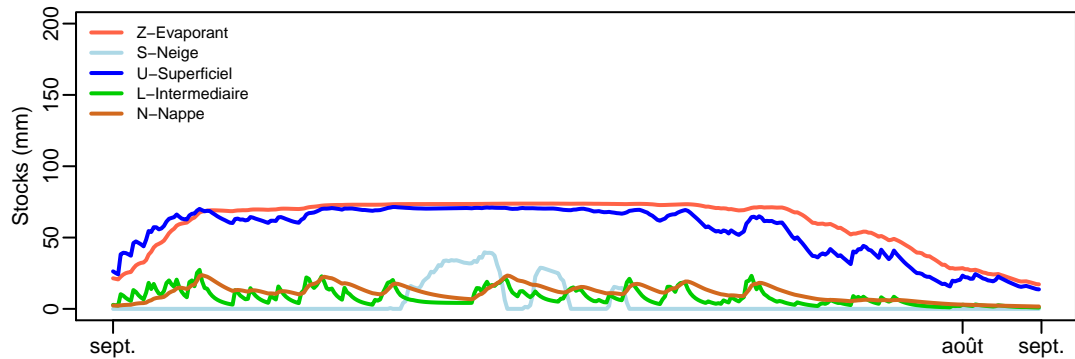

# k1284810 (135.47 km<sup>2</sup>) – année 1985–1986

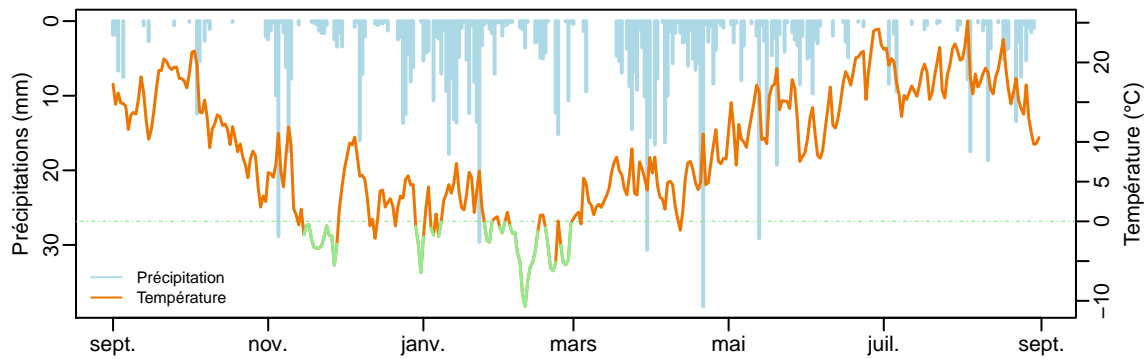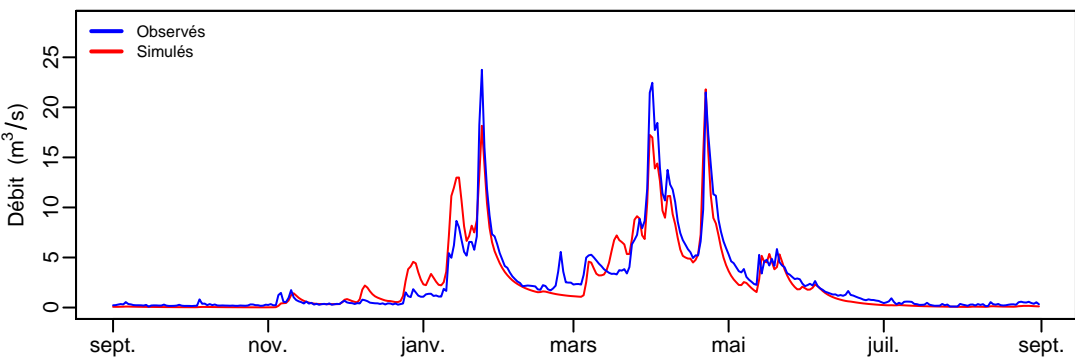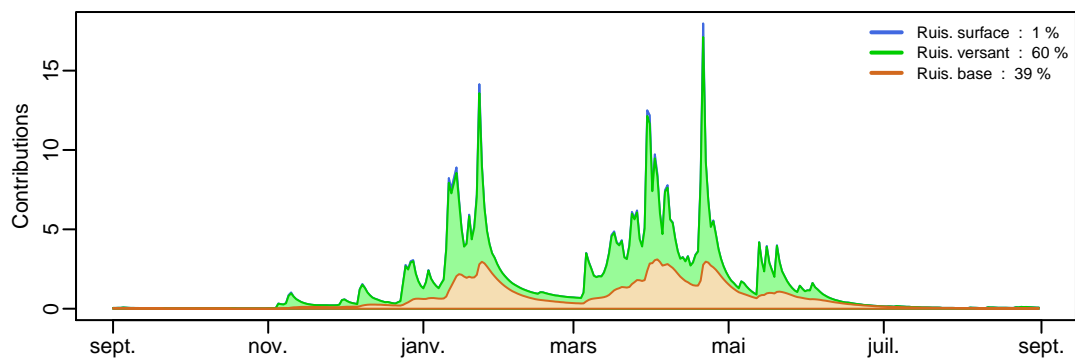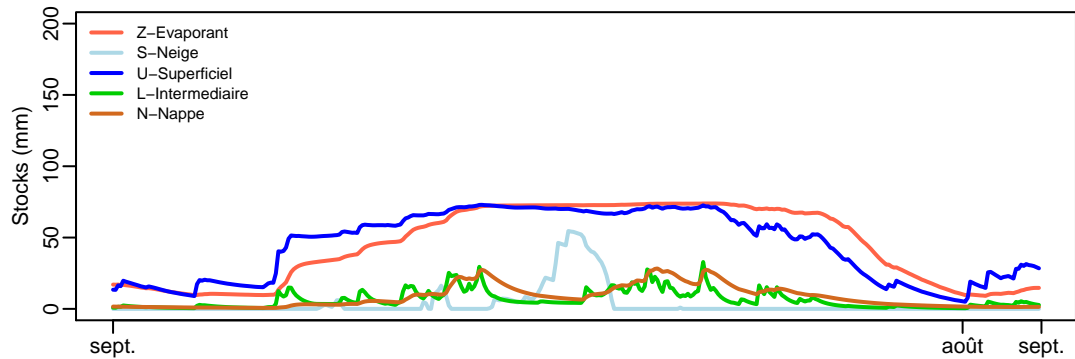

# k1284810 (135.47 km<sup>2</sup>) – année 1986–1987

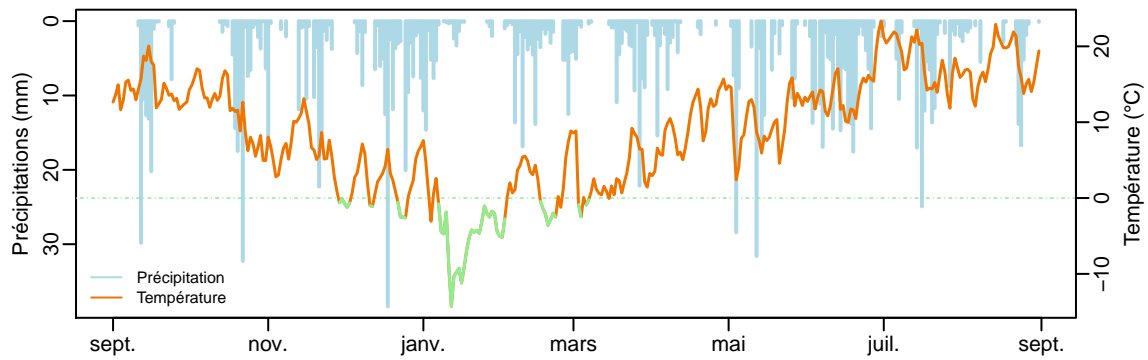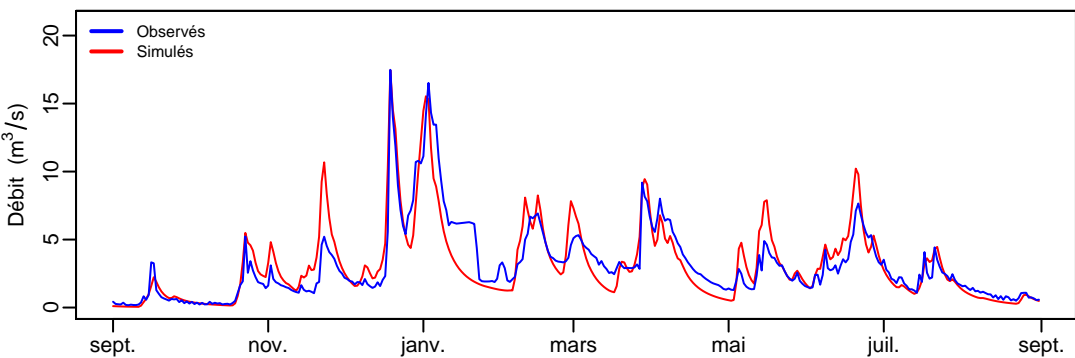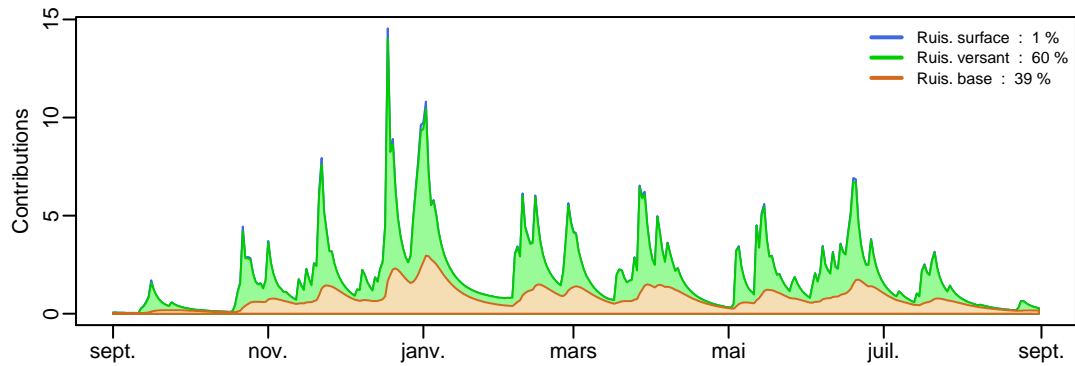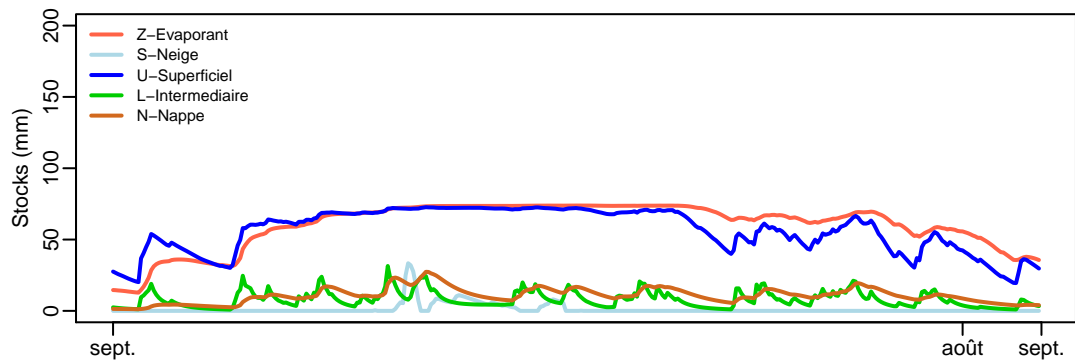

# k1284810 (135.47 km²) – année 1987–1988

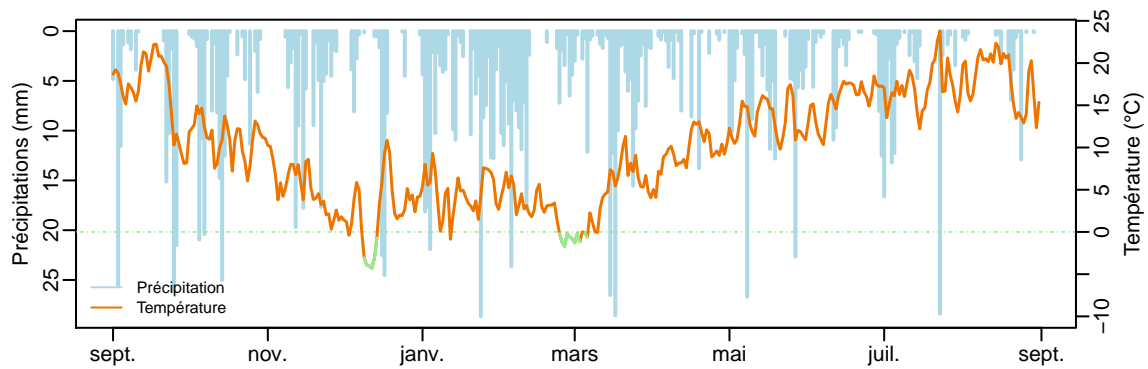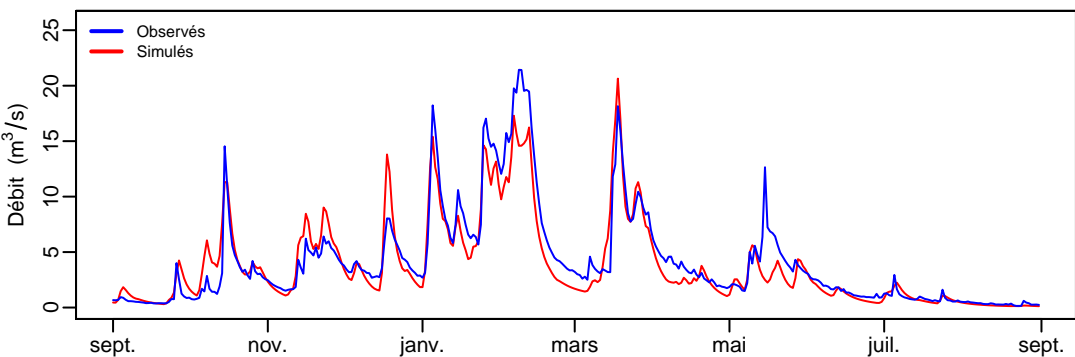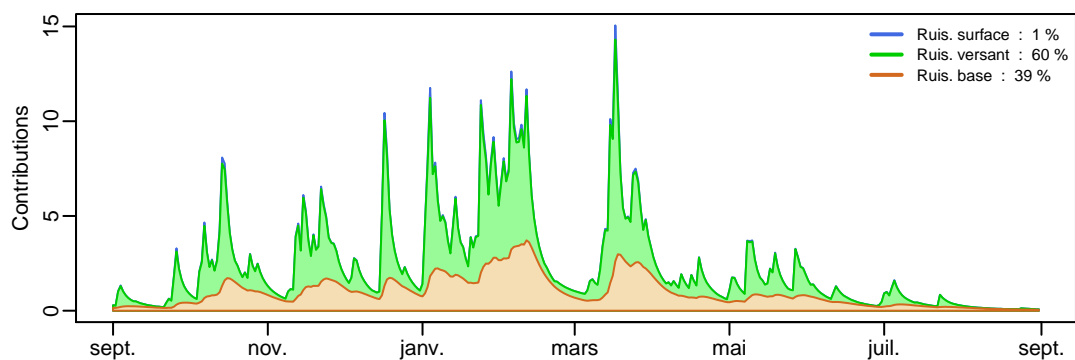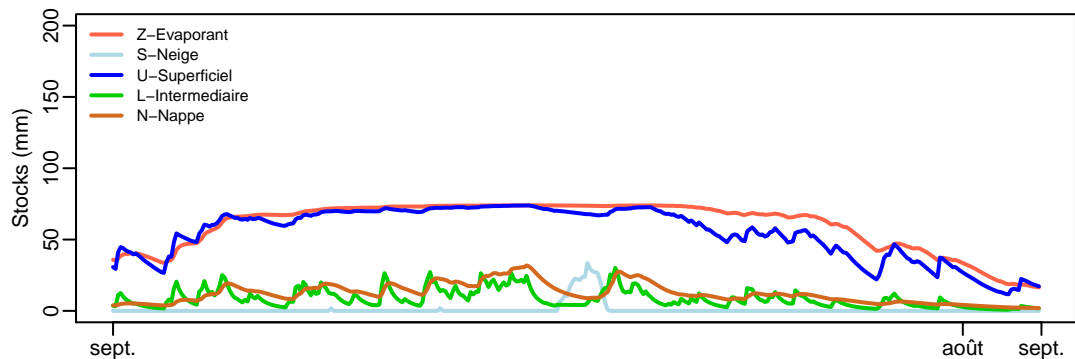

# k1284810 (135.47 km<sup>2</sup>) – année 1988–1989

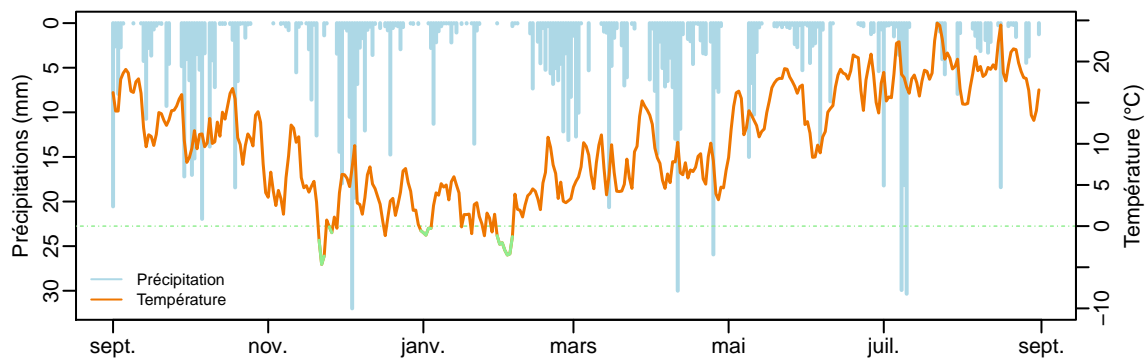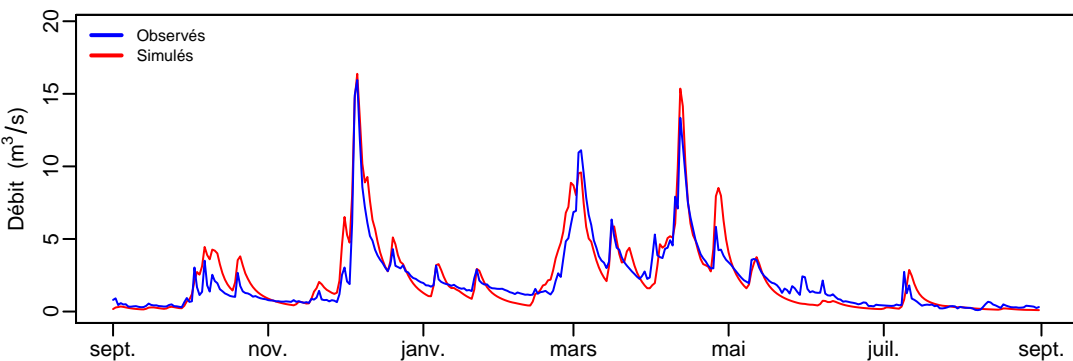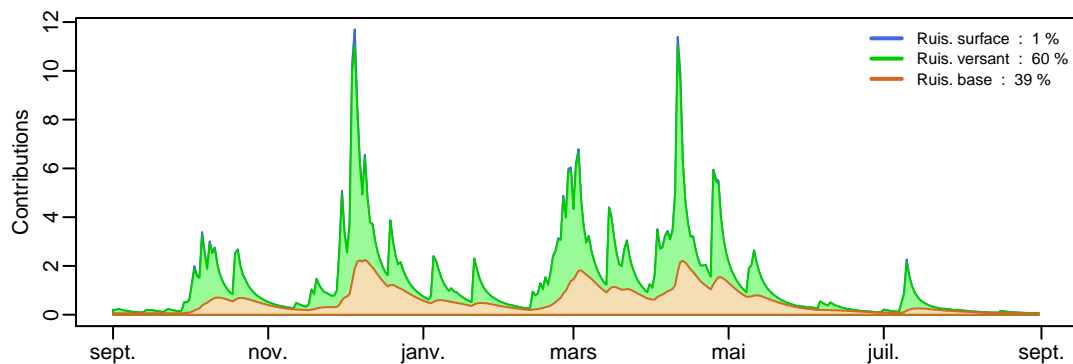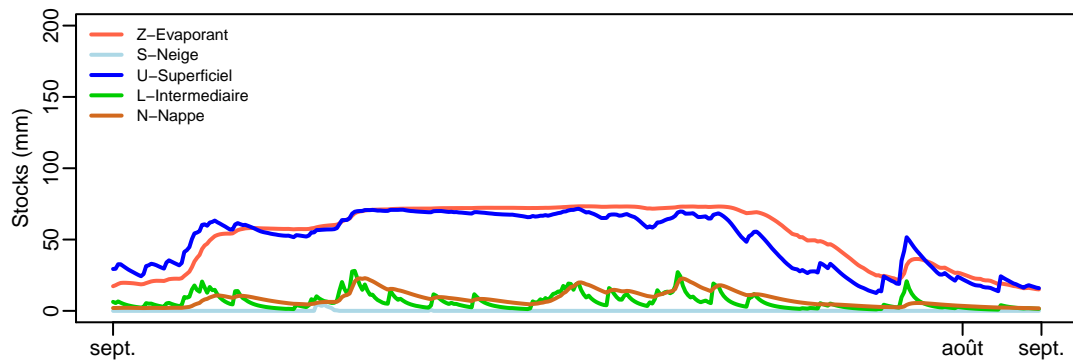



# k1284810 (135.47 km<sup>2</sup>) – année 1989–1990

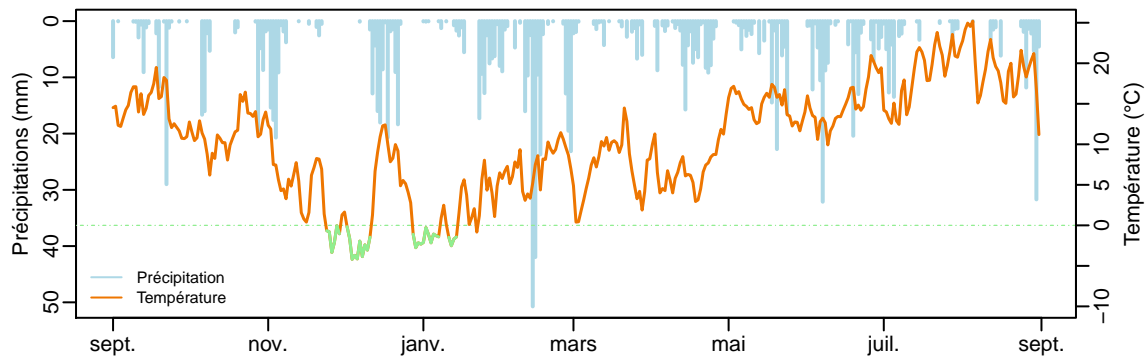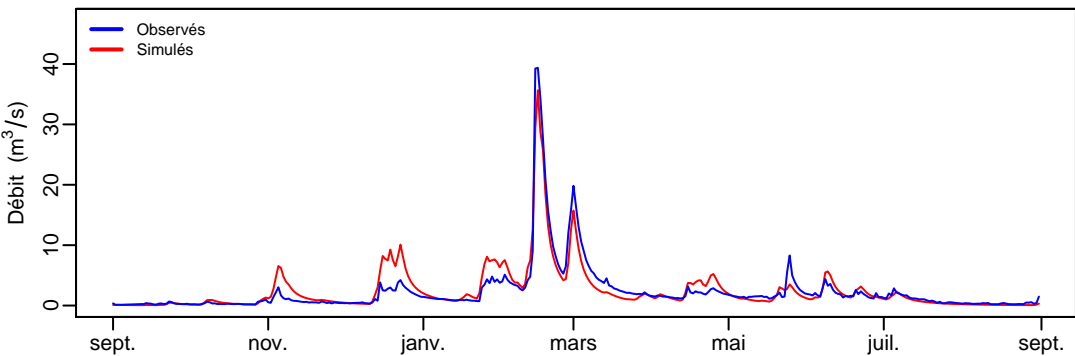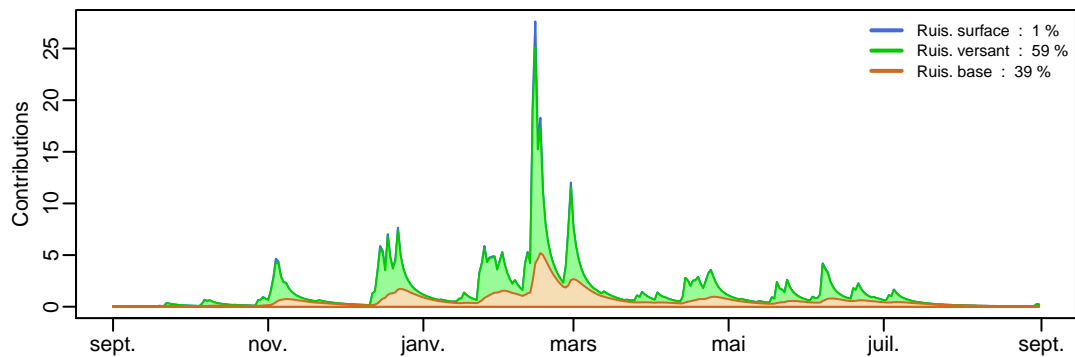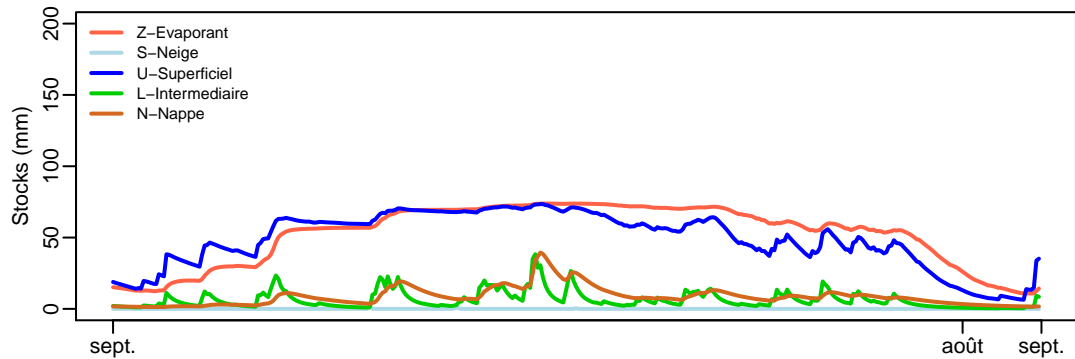

# k1284810 (135.47 km<sup>2</sup>) – année 1990–1991

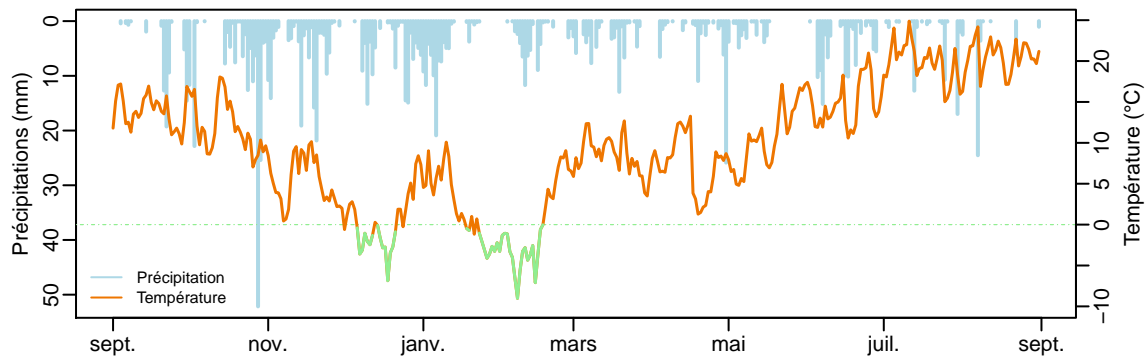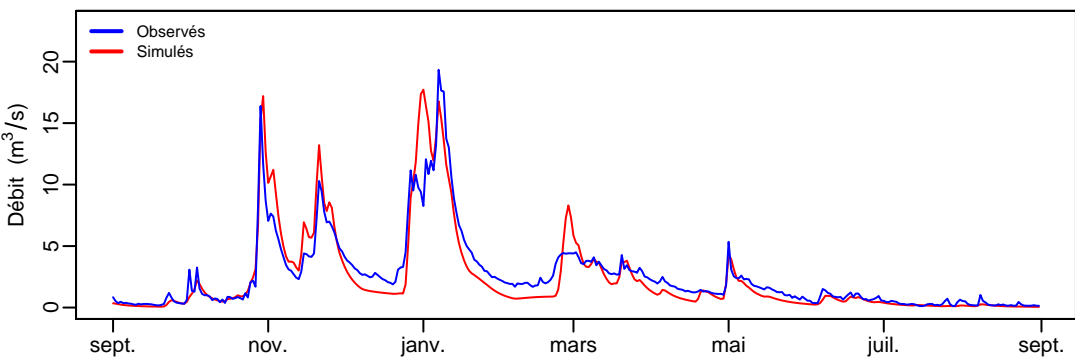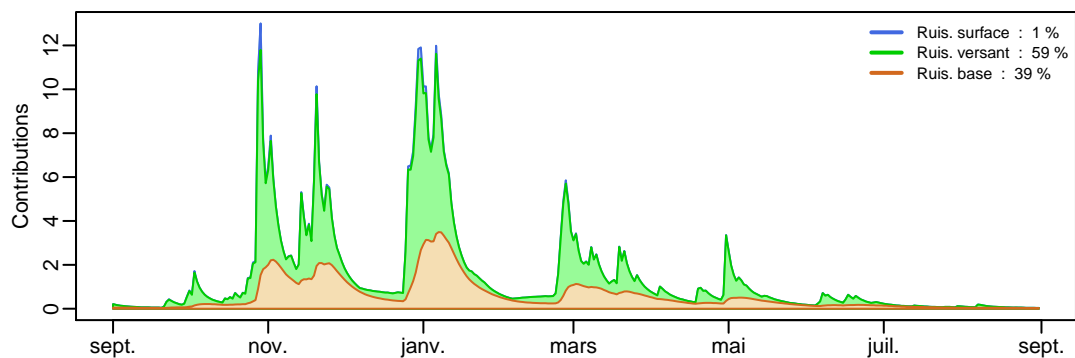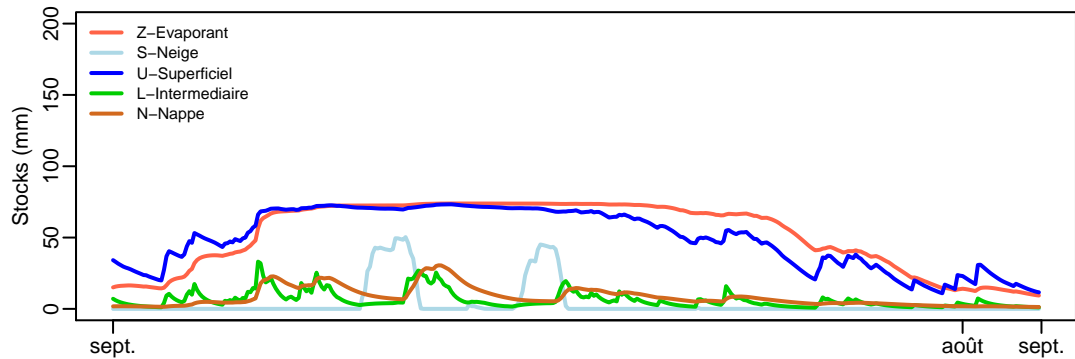

# k1284810 (135.47 km<sup>2</sup>) – année 1991–1992

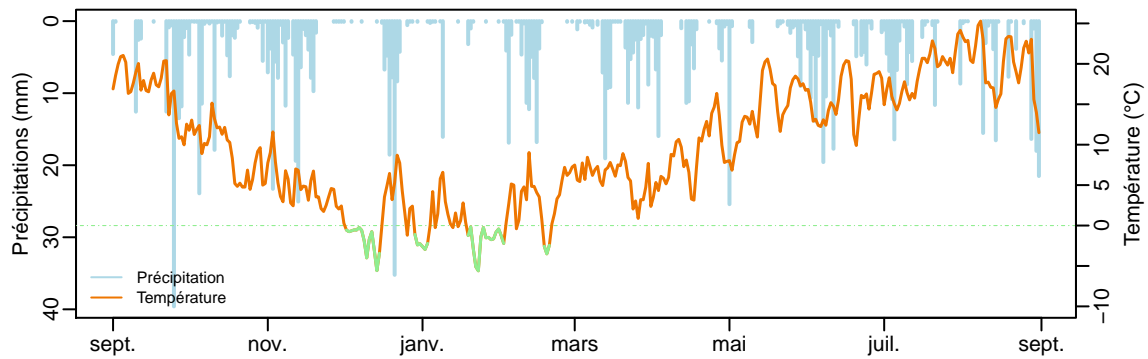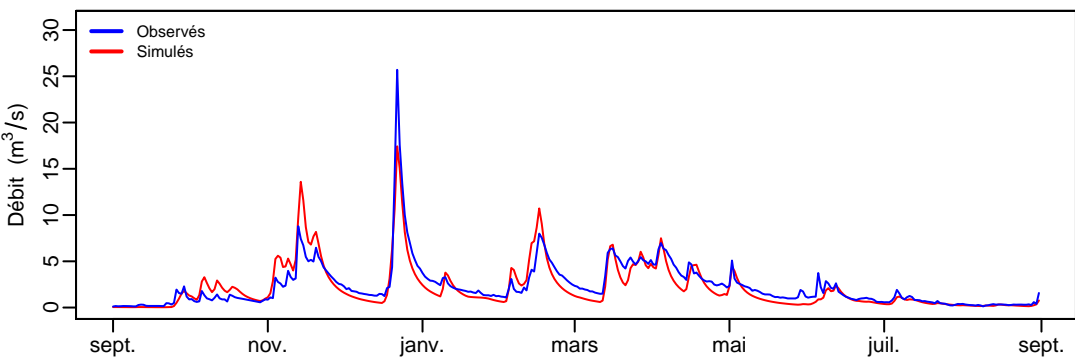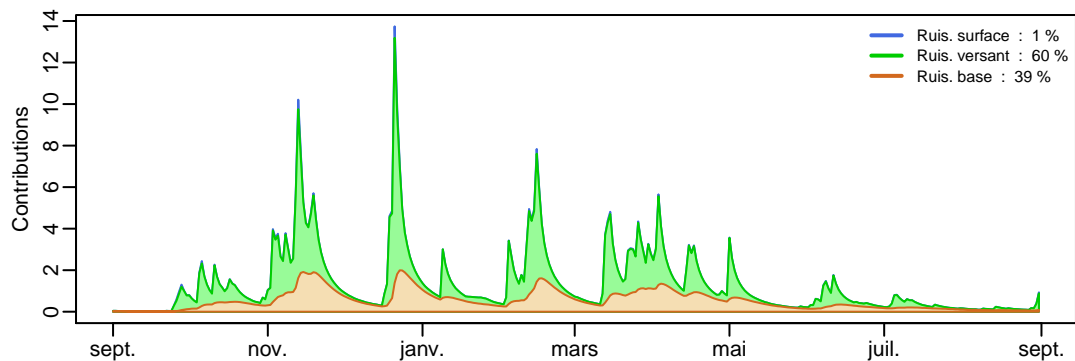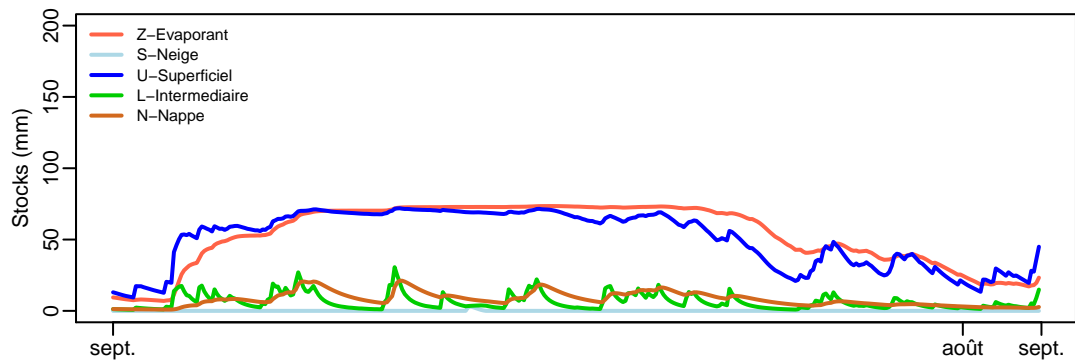

# k1284810 (135.47 km<sup>2</sup>) – année 1992–1993

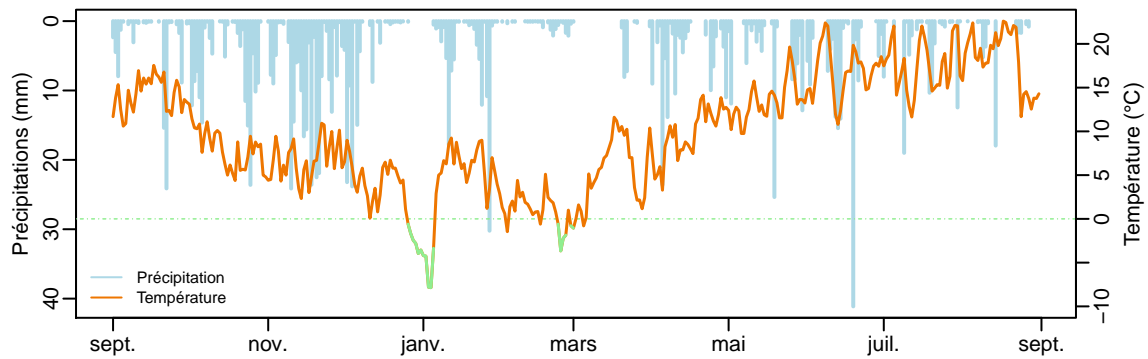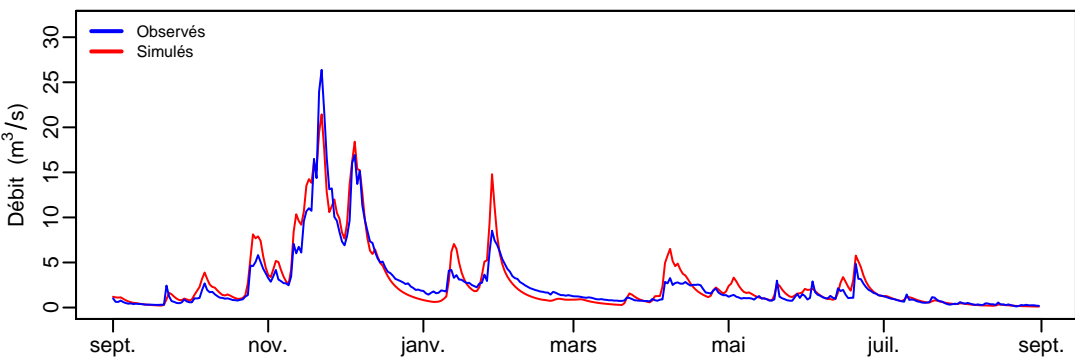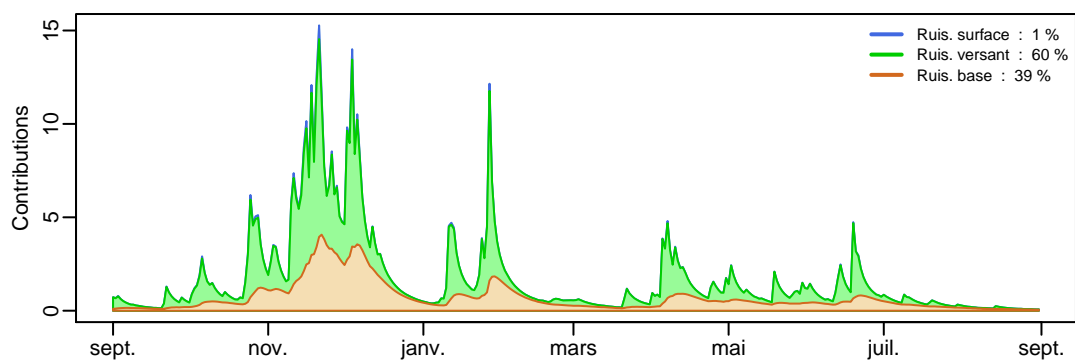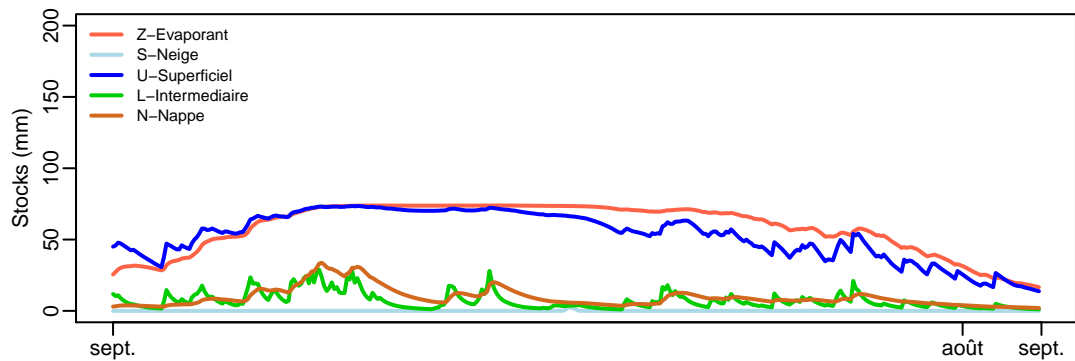

# k1284810 (135.47 km<sup>2</sup>) – année 1993–1994

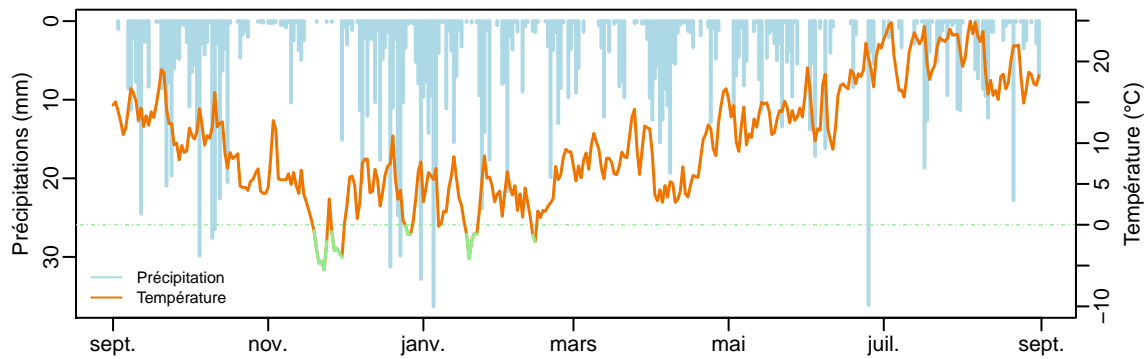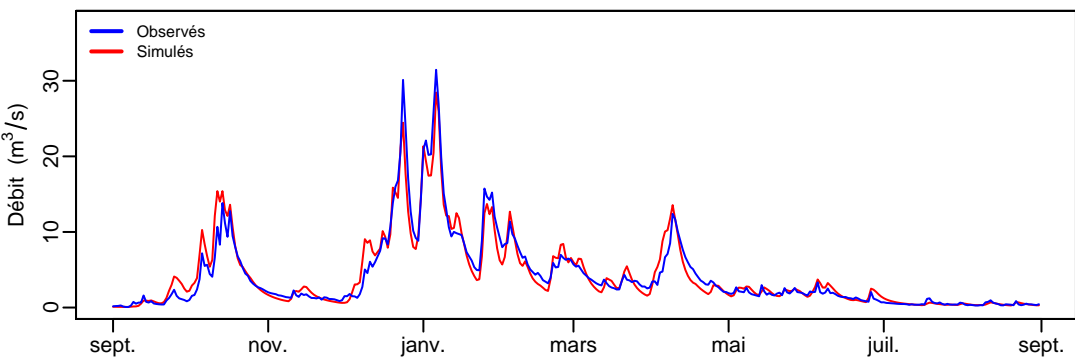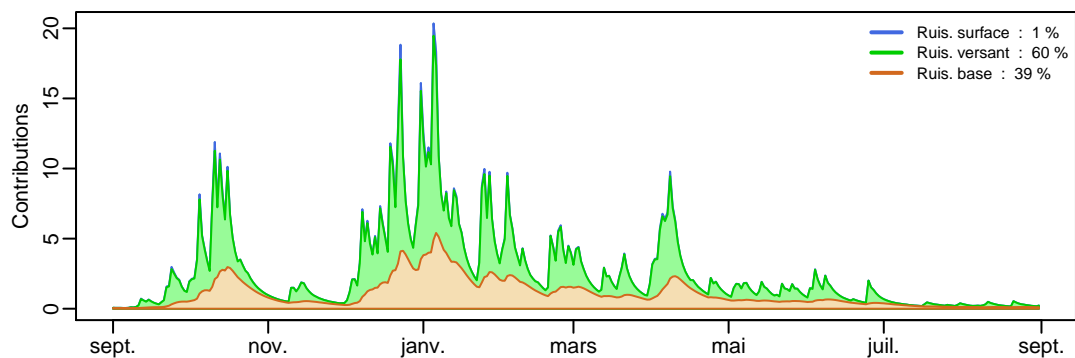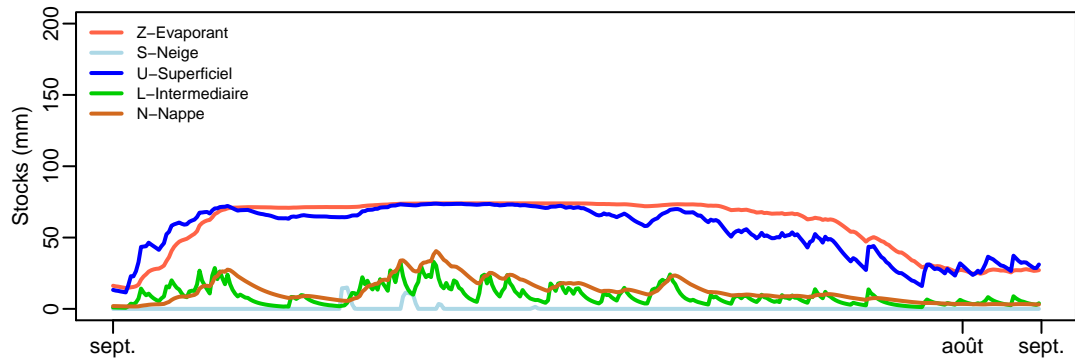

# k1284810 (135.47 km<sup>2</sup>) – année 1994–1995

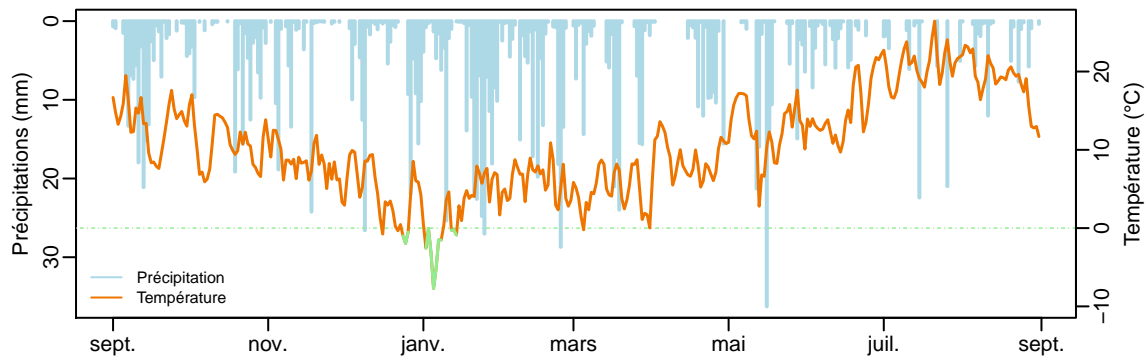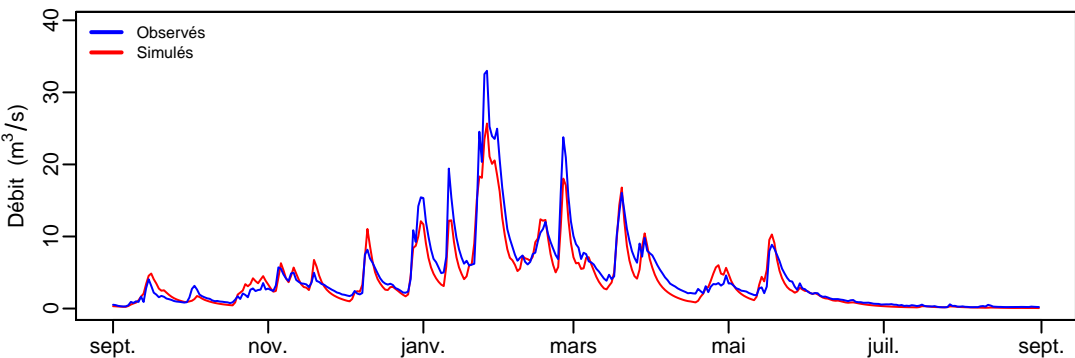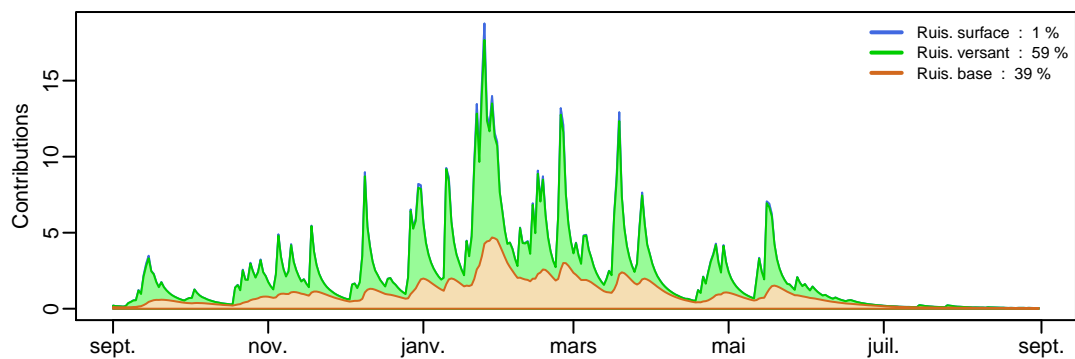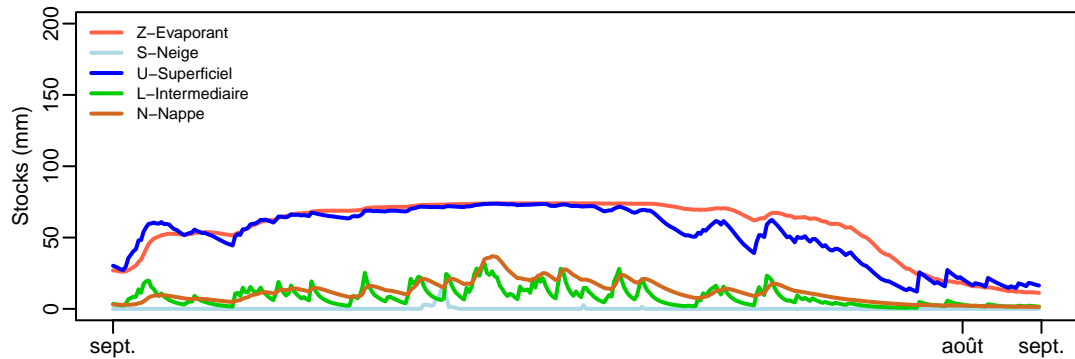

# k1284810 (135.47 km<sup>2</sup>) – année 1995–1996

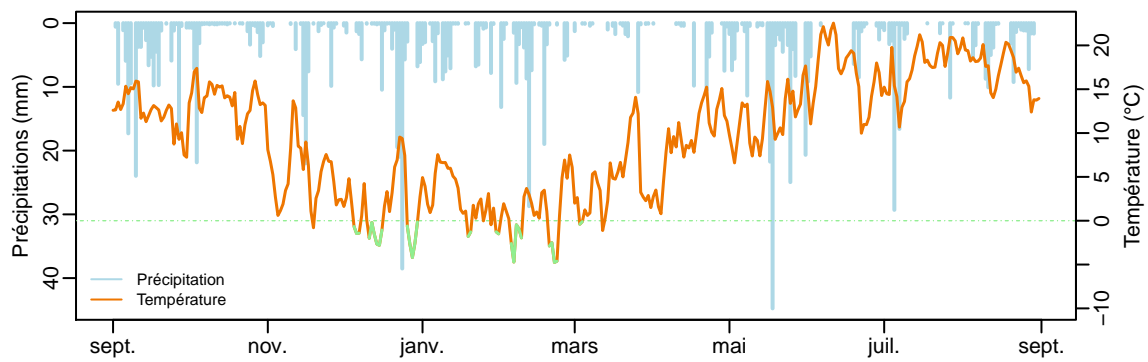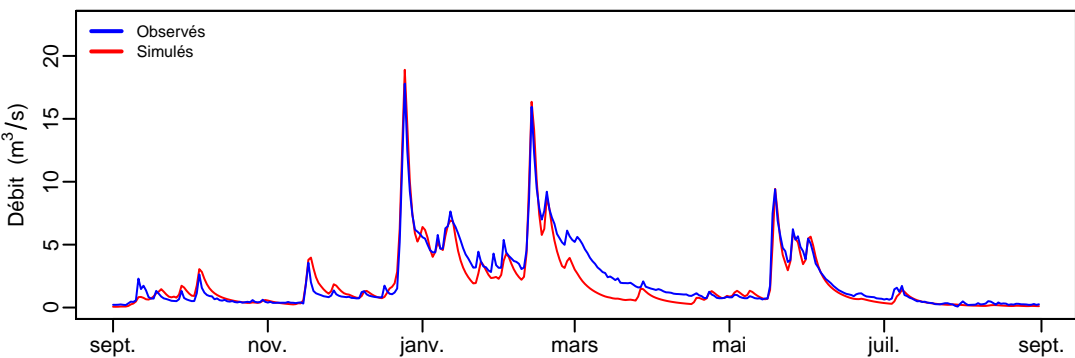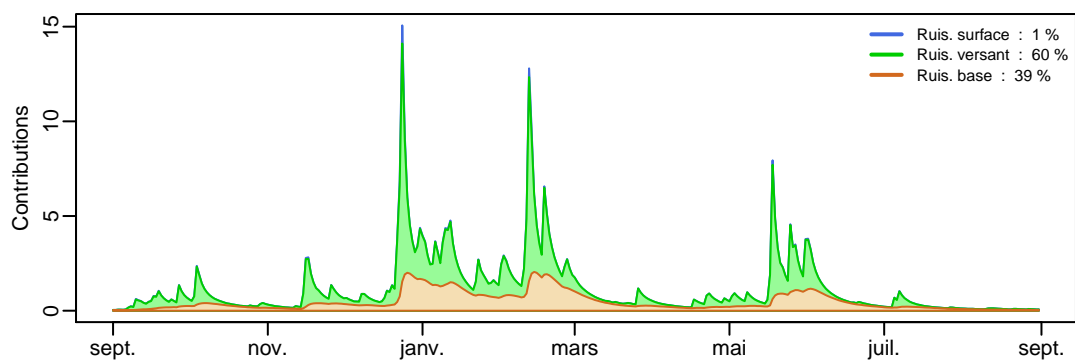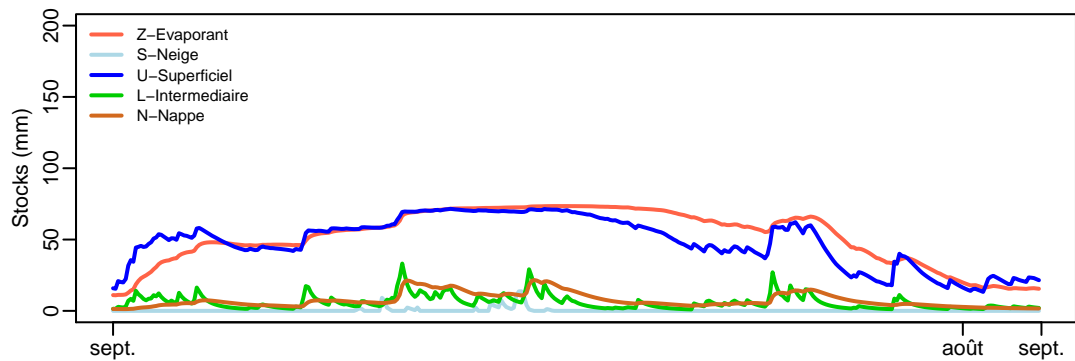

# k1284810 (135.47 km<sup>2</sup>) – année 1996–1997

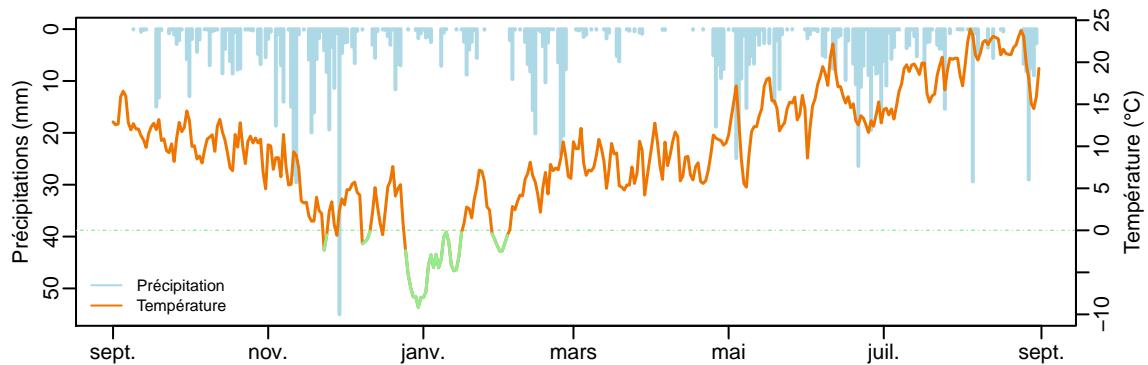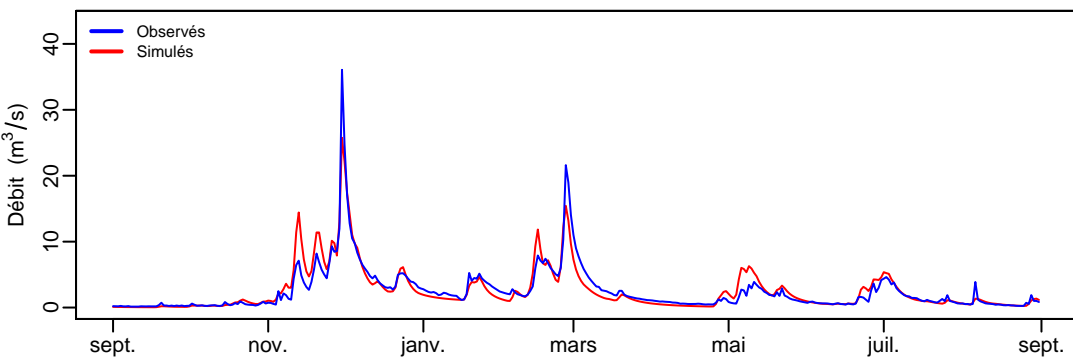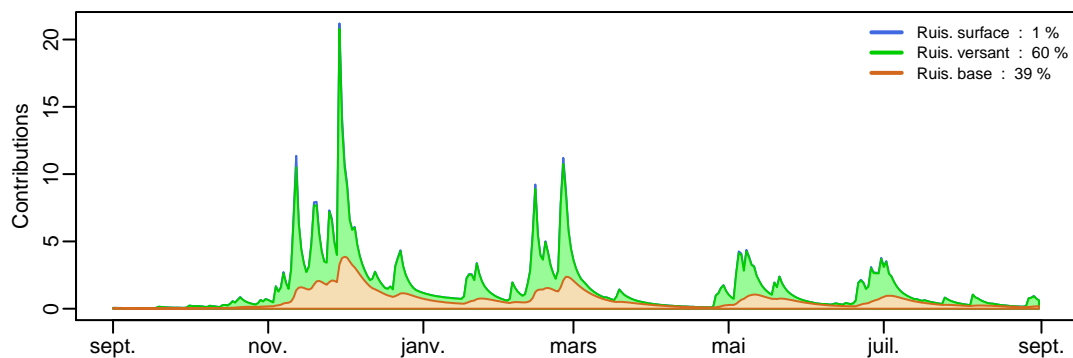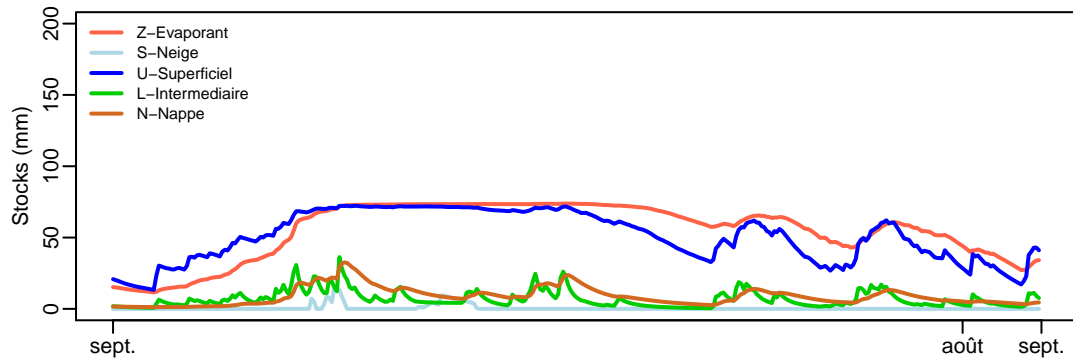



# k1284810 (135.47 km<sup>2</sup>) – année 1997–1998

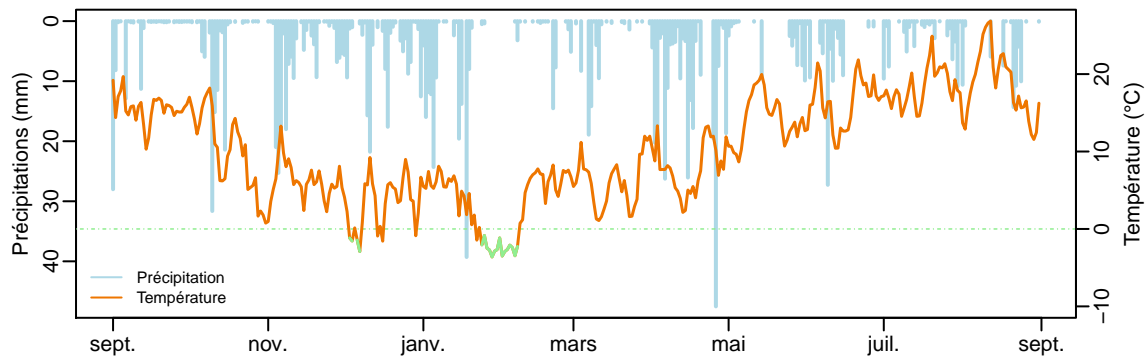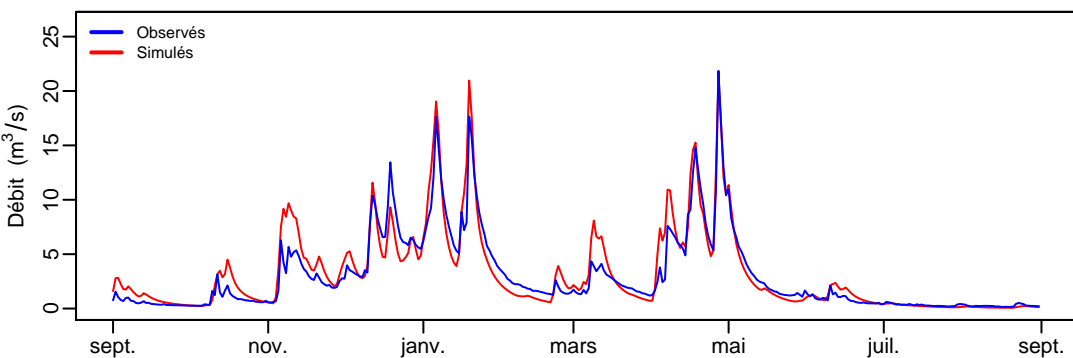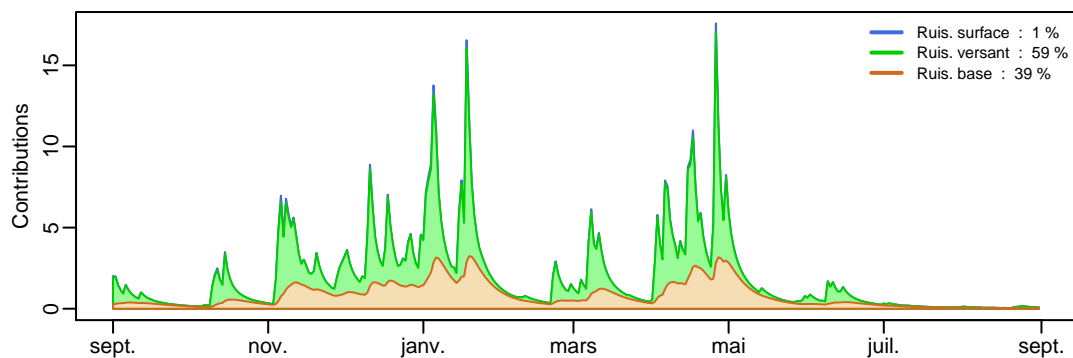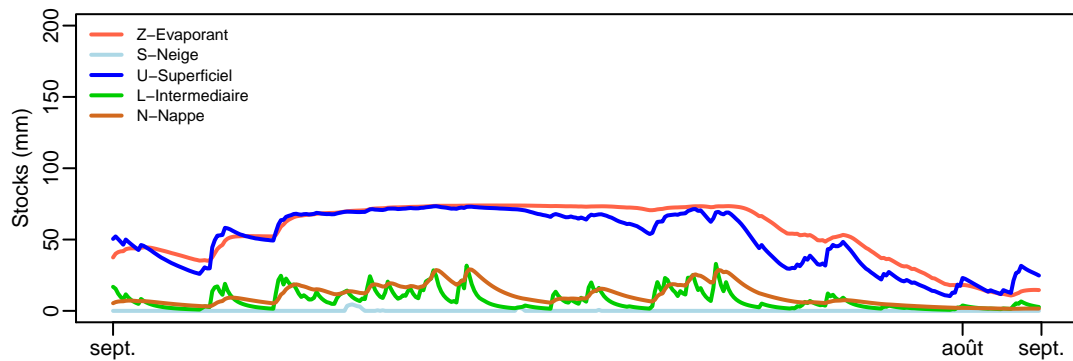

# k1284810 (135.47 km<sup>2</sup>) – année 1998–1999

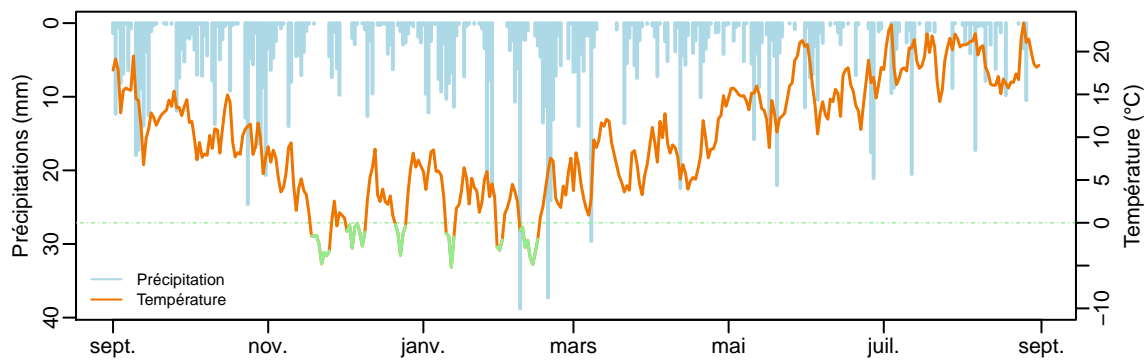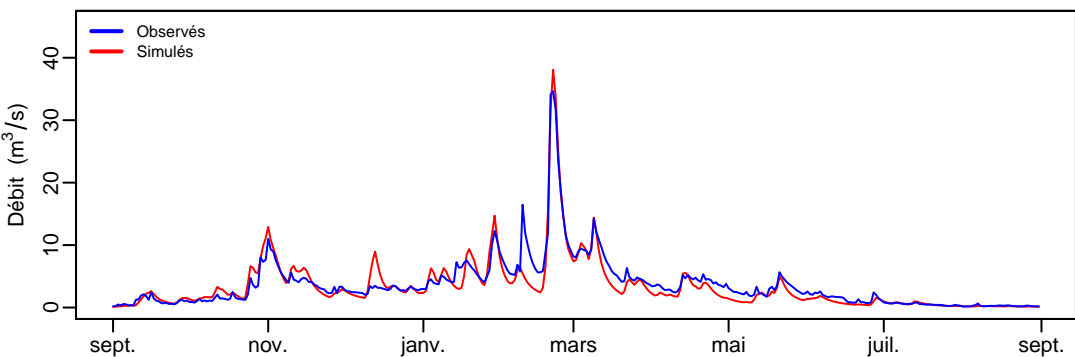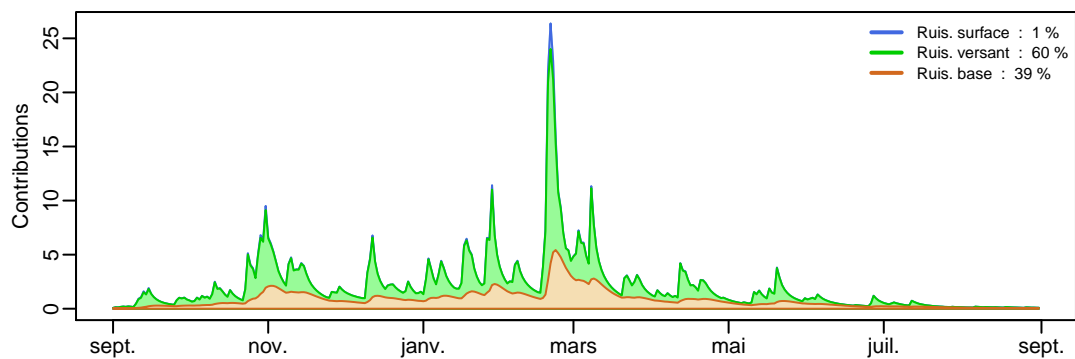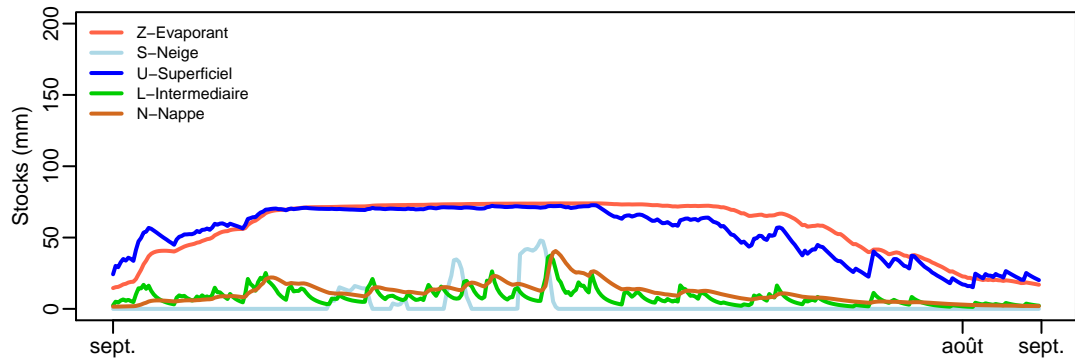

# k1284810 (135.47 km<sup>2</sup>) – année 1999–2000

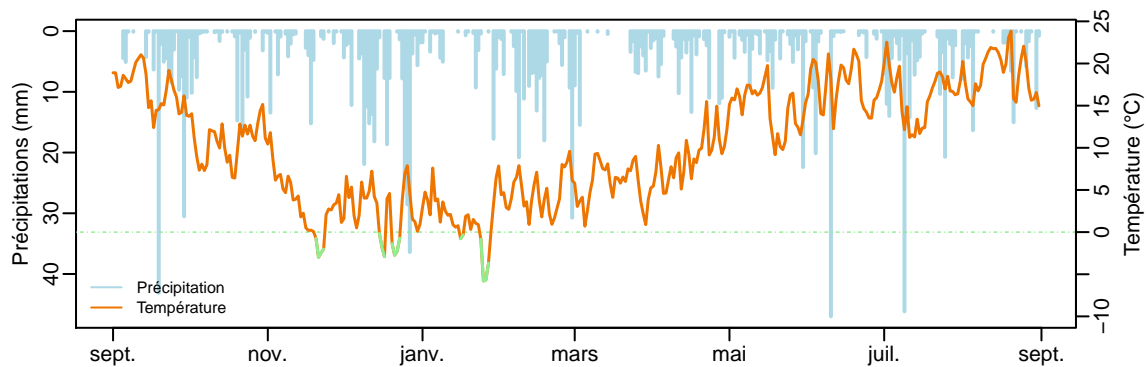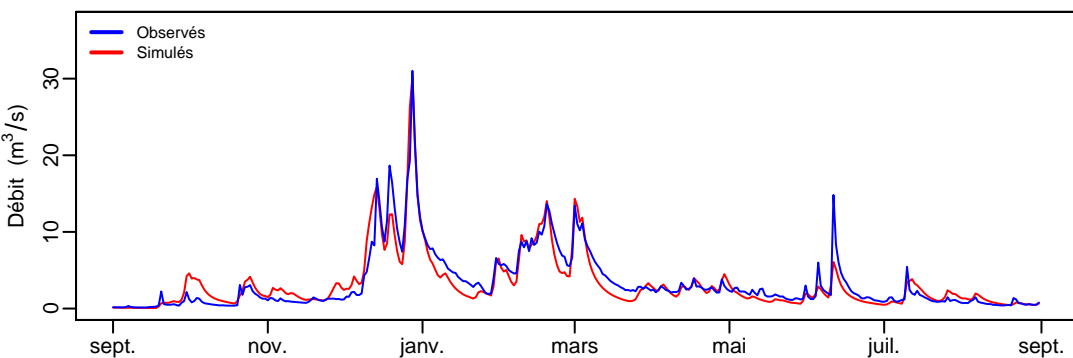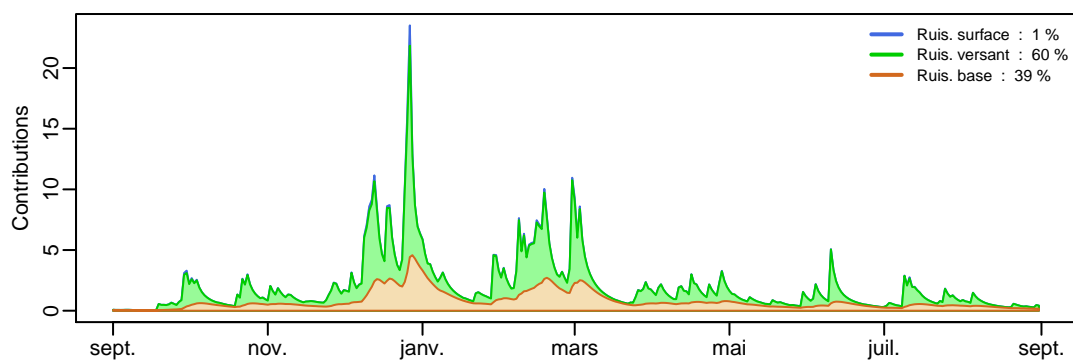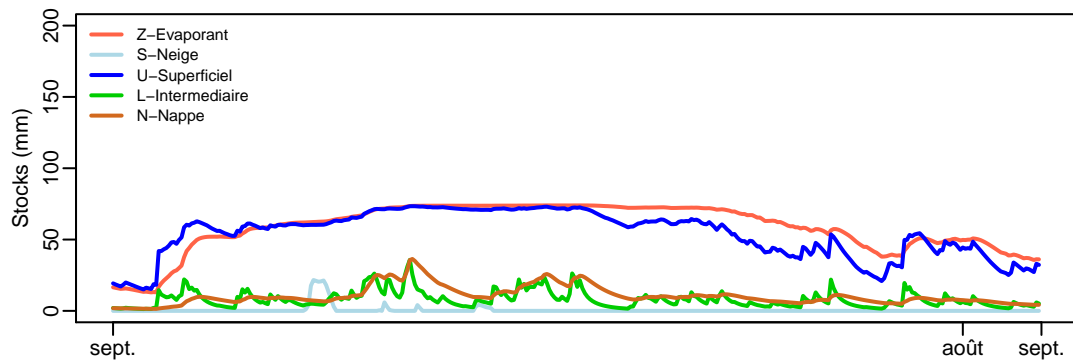

# k1284810 (135.47 km<sup>2</sup>) – année 2000–2001

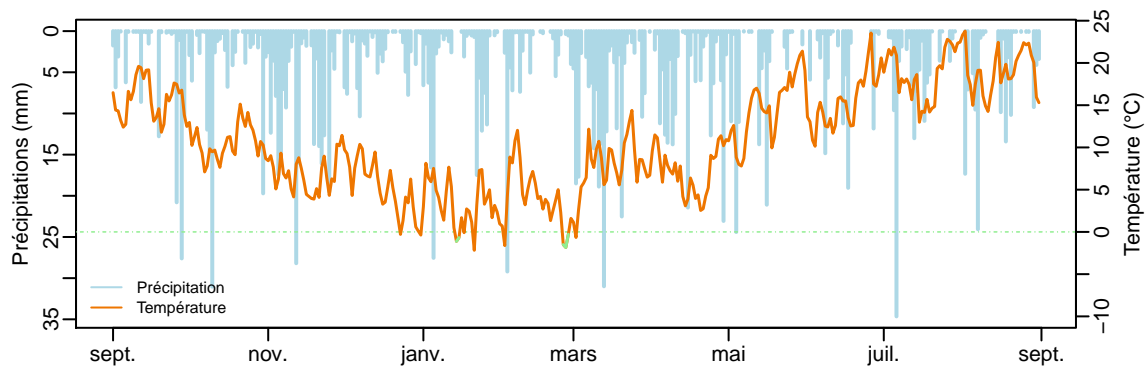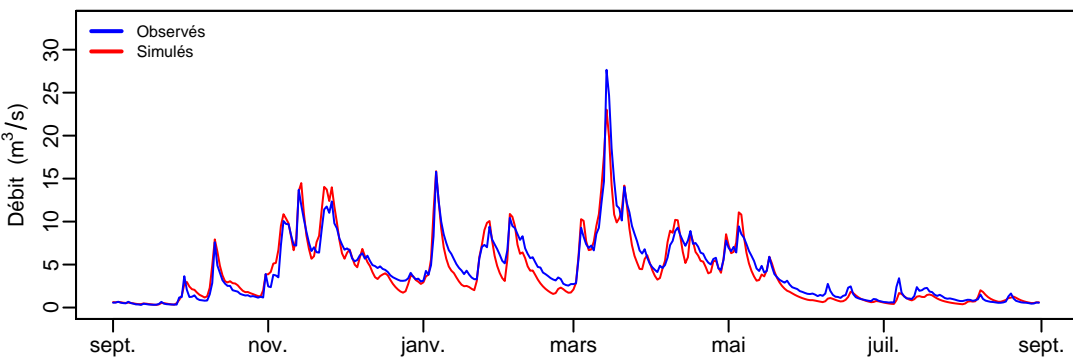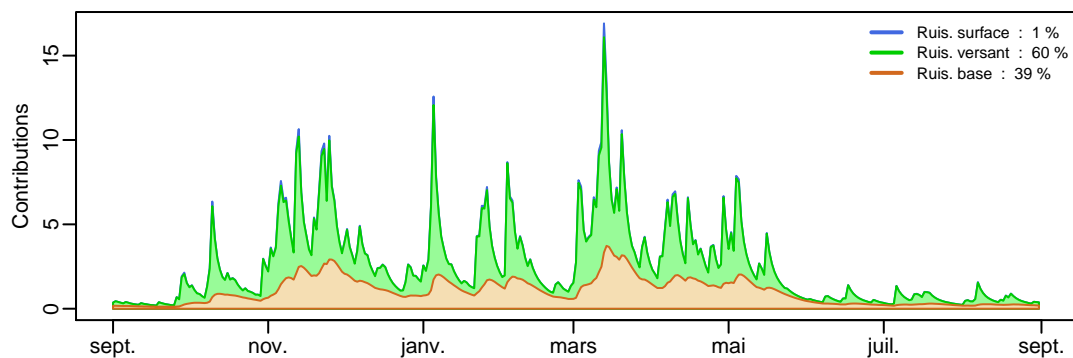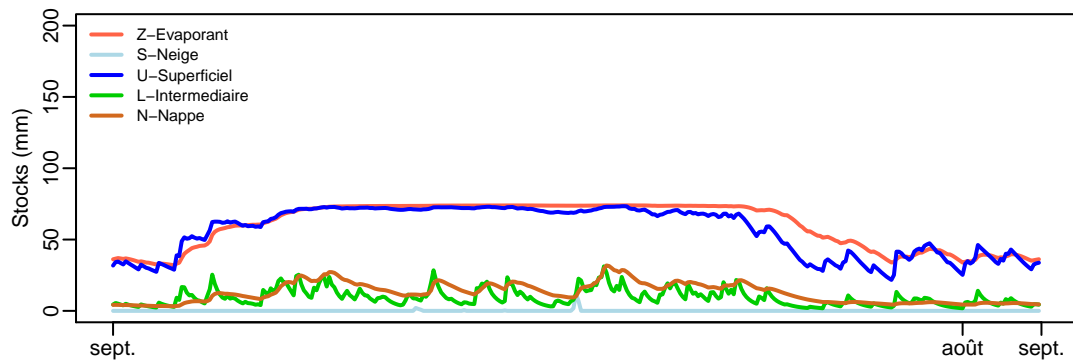

# k1284810 (135.47 km<sup>2</sup>) – année 2001–2002

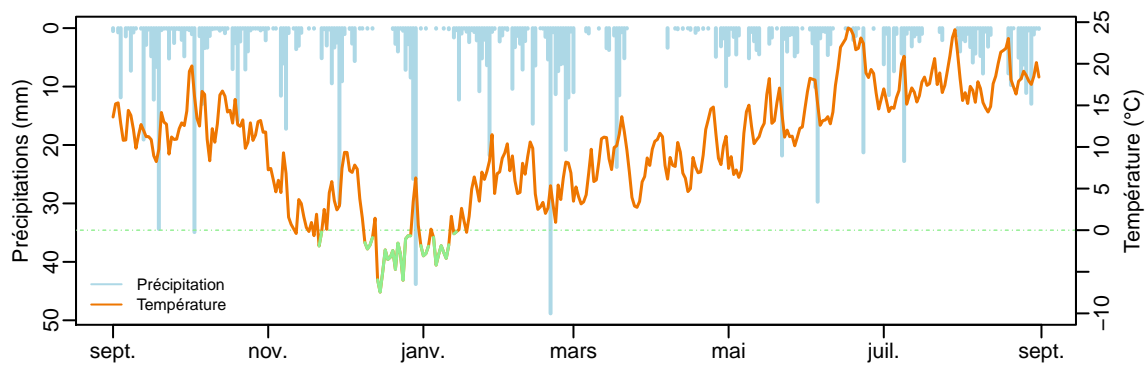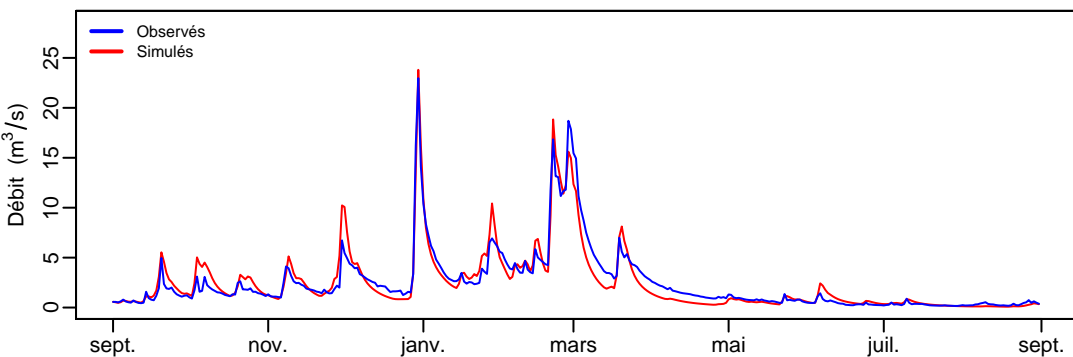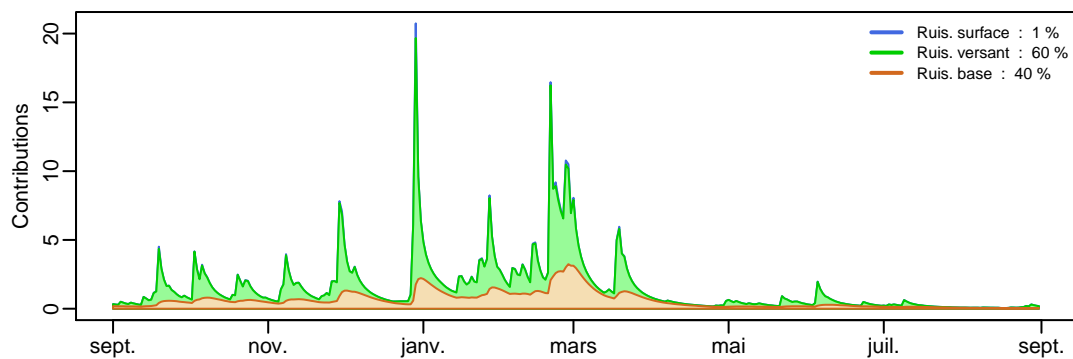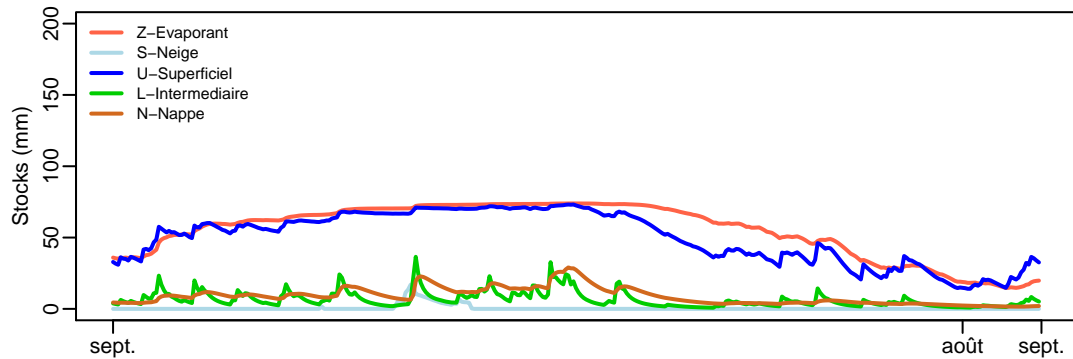

# k1284810 (135.47 km²) – année 2002–2003

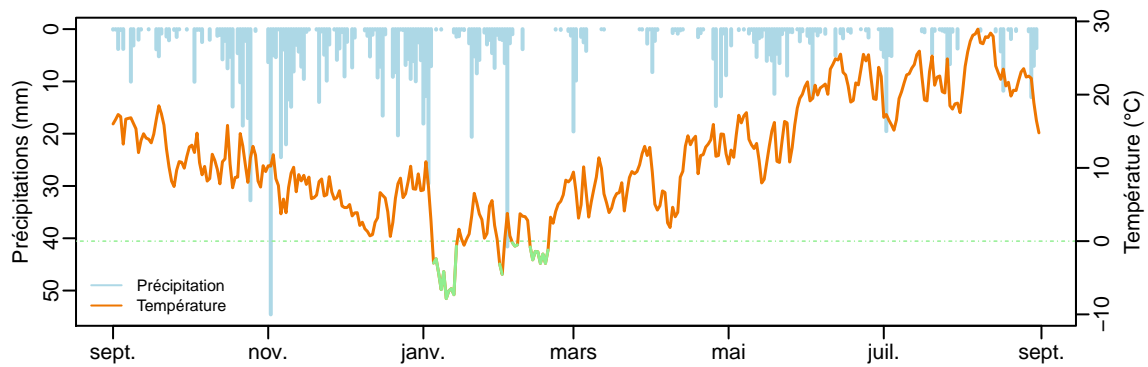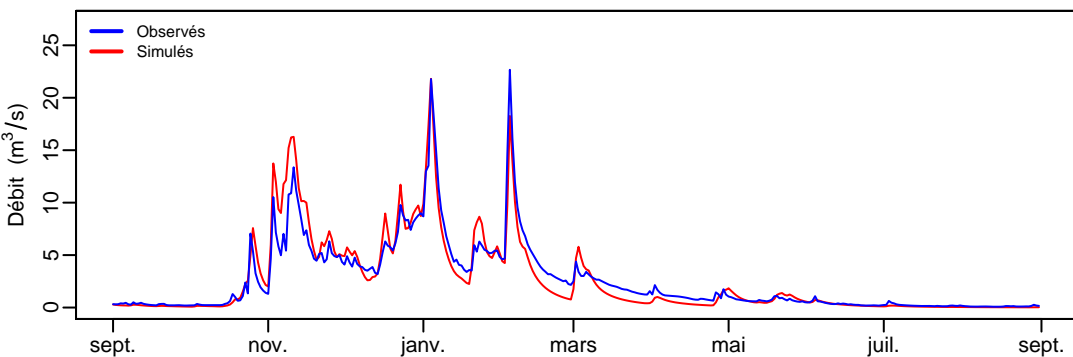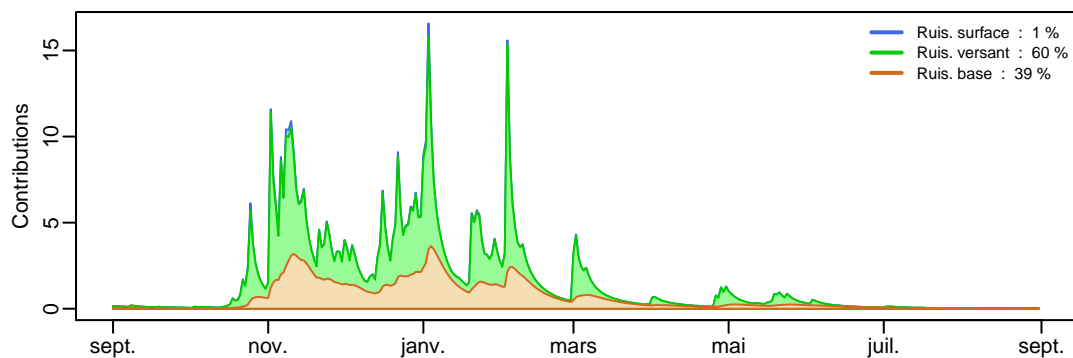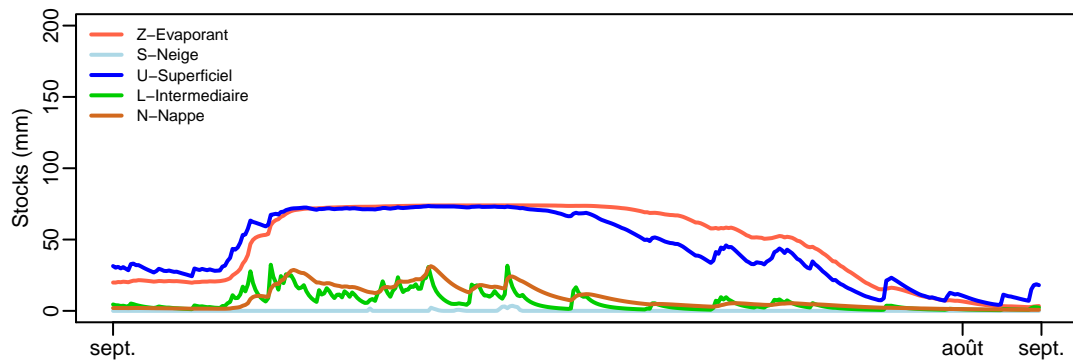

# k1284810 (135.47 km<sup>2</sup>) – année 2003–2004

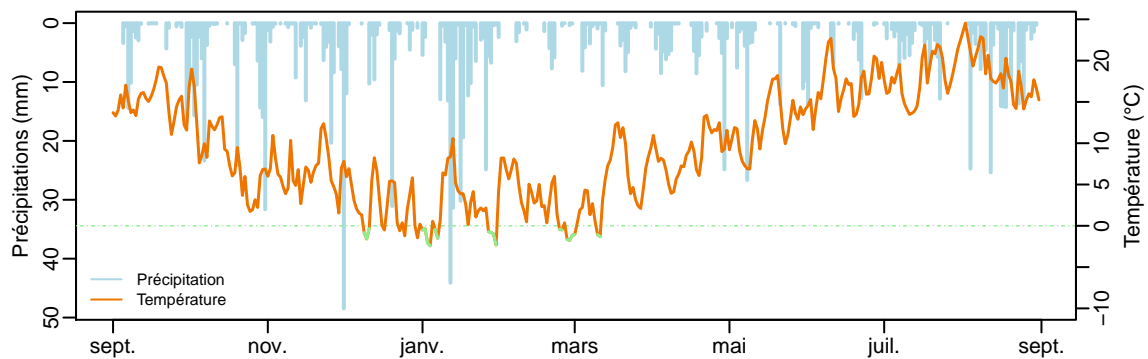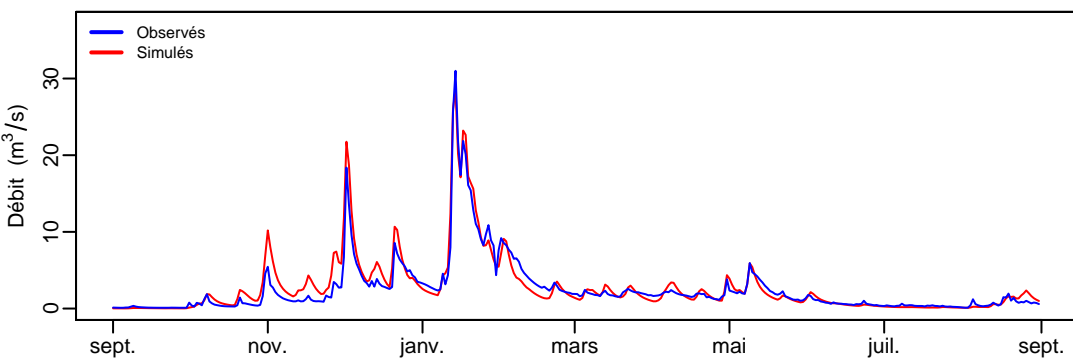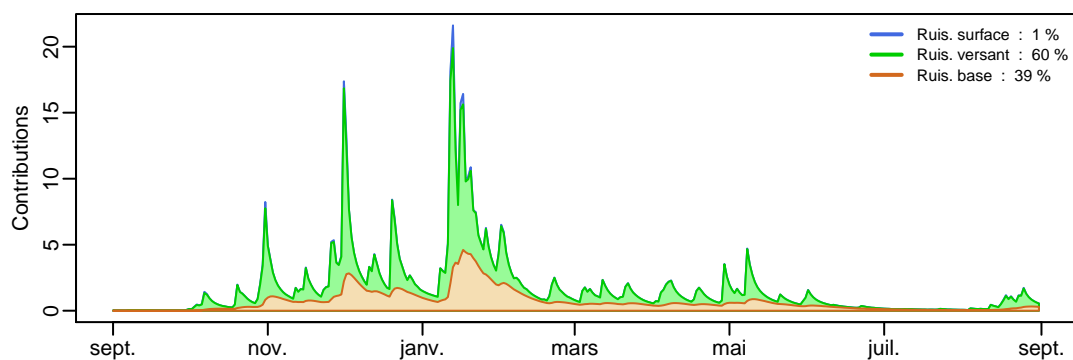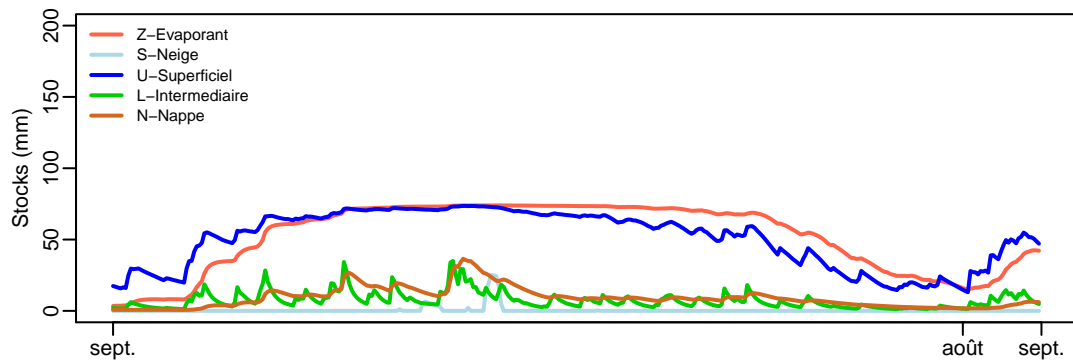

# k1284810 (135.47 km²) – année 2004–2005

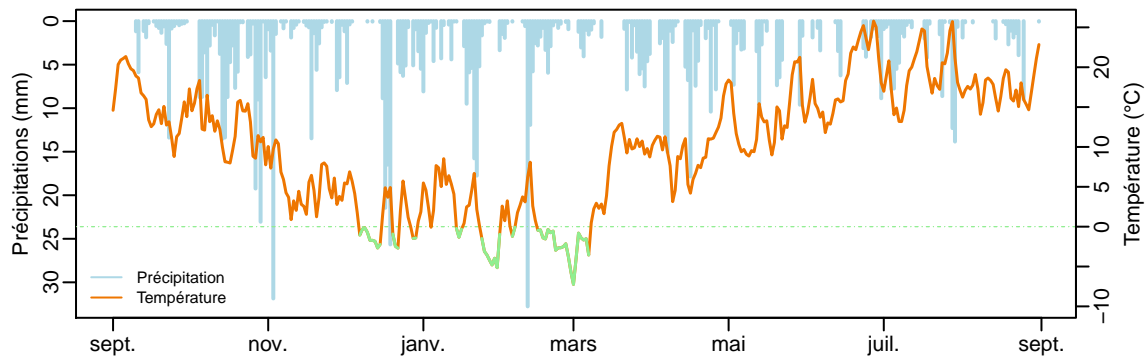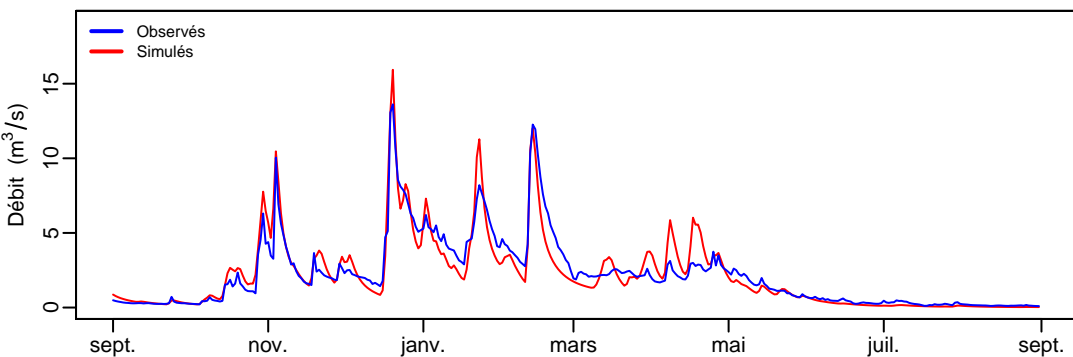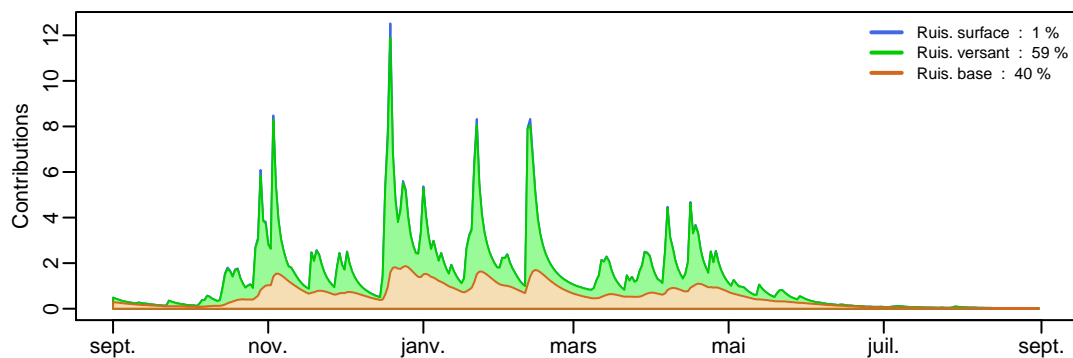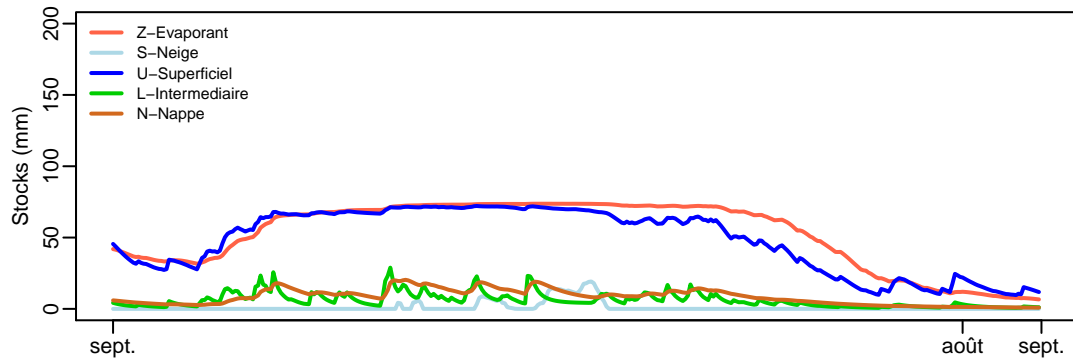



# k1284810 (135.47 km²) – année 2005–2006

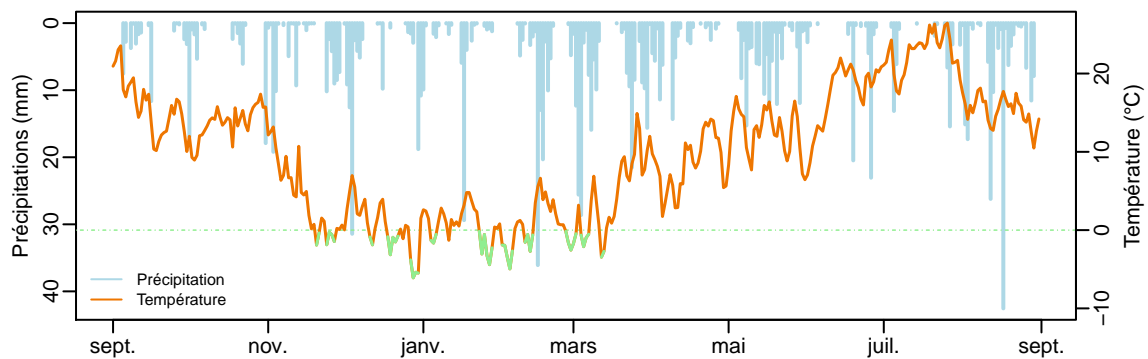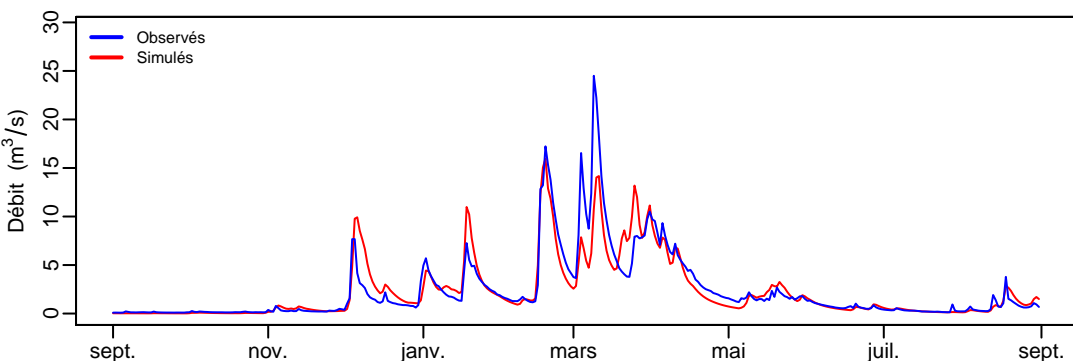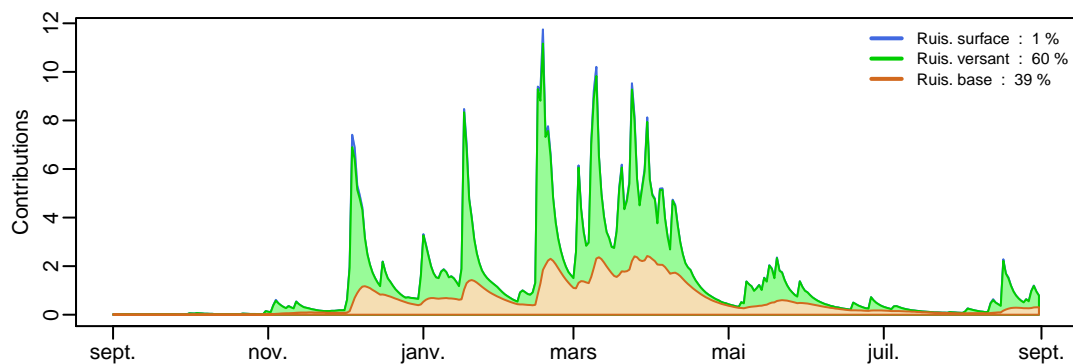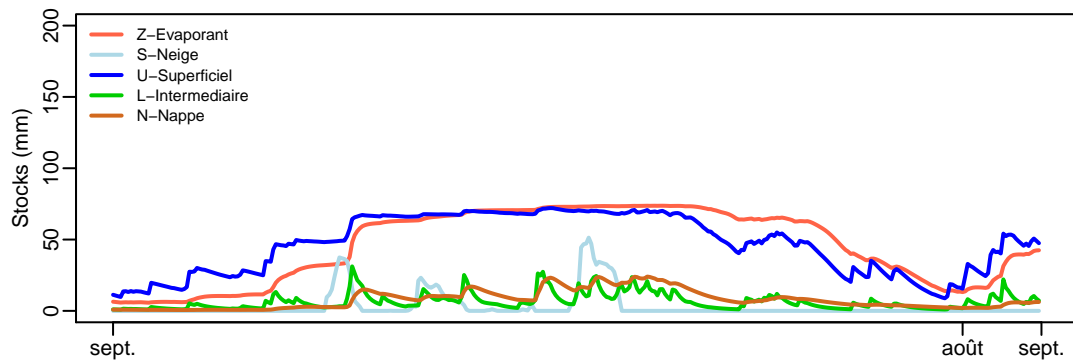

# k1284810 (135.47 km²) – année 2006–2007

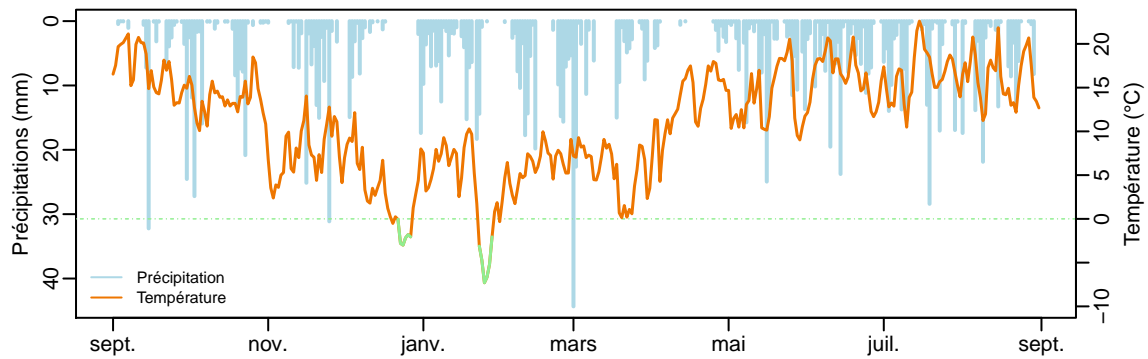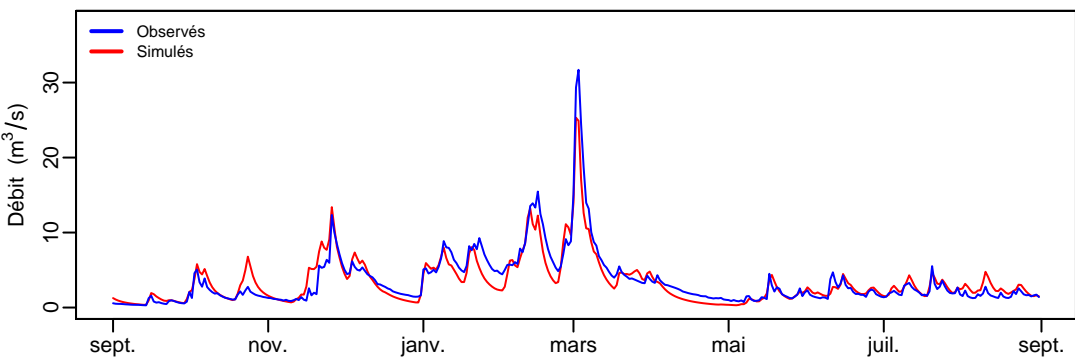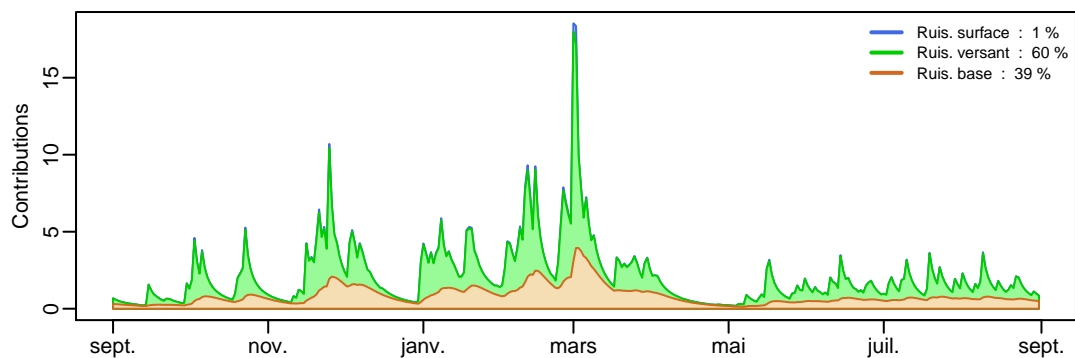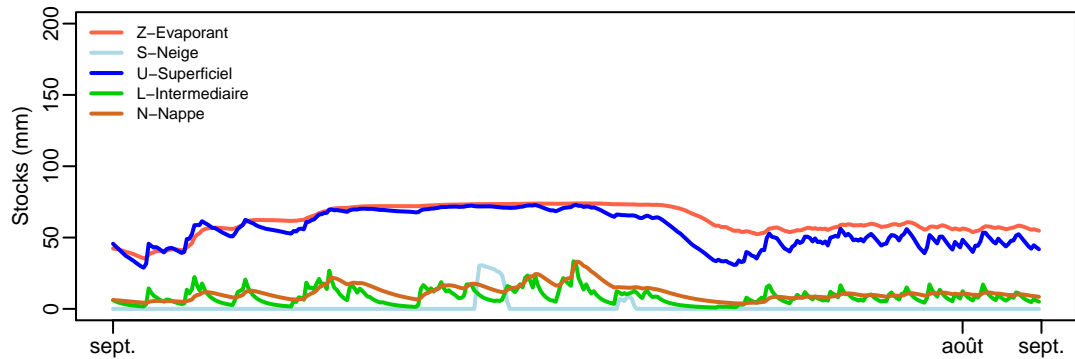

# k1284810 (135.47 km²) – année 2007–2008

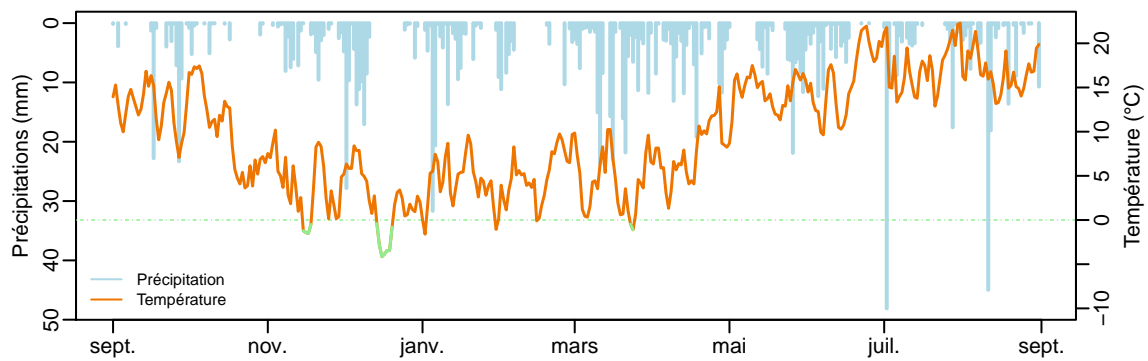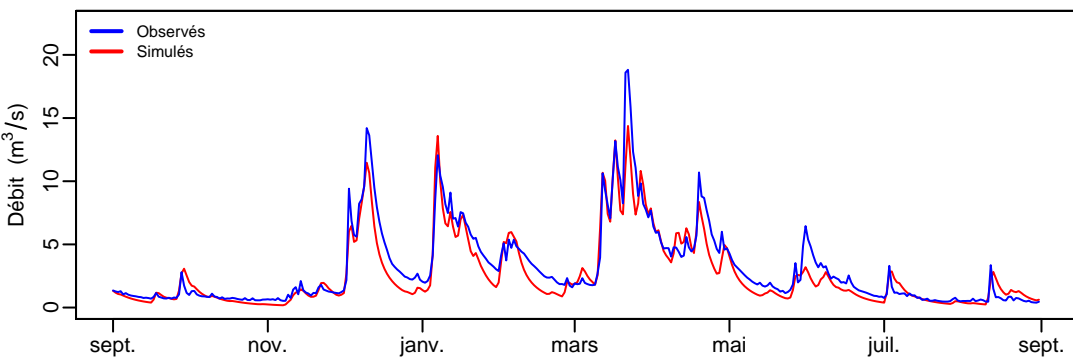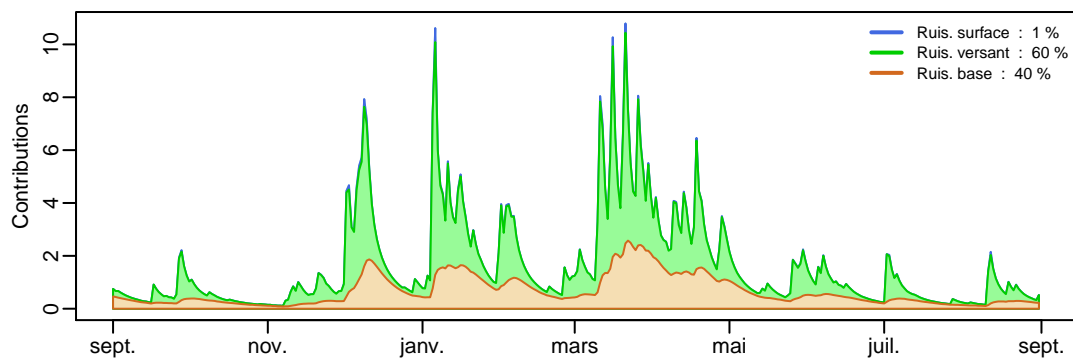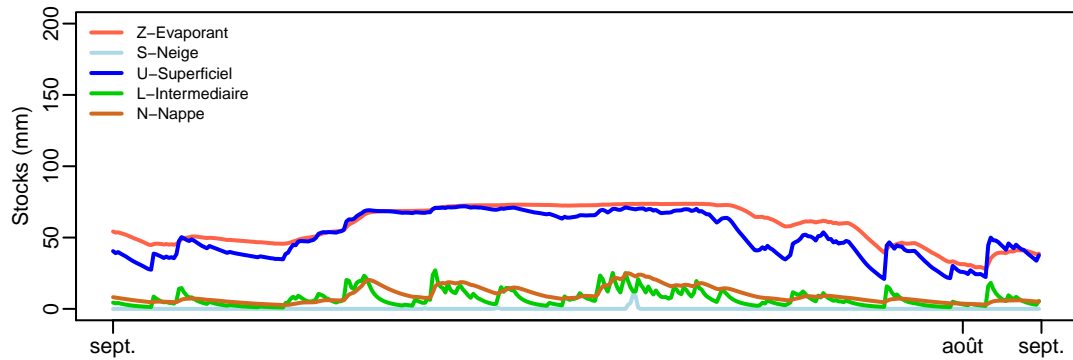

# k1284810 (135.47 km<sup>2</sup>) – année 2008–2009

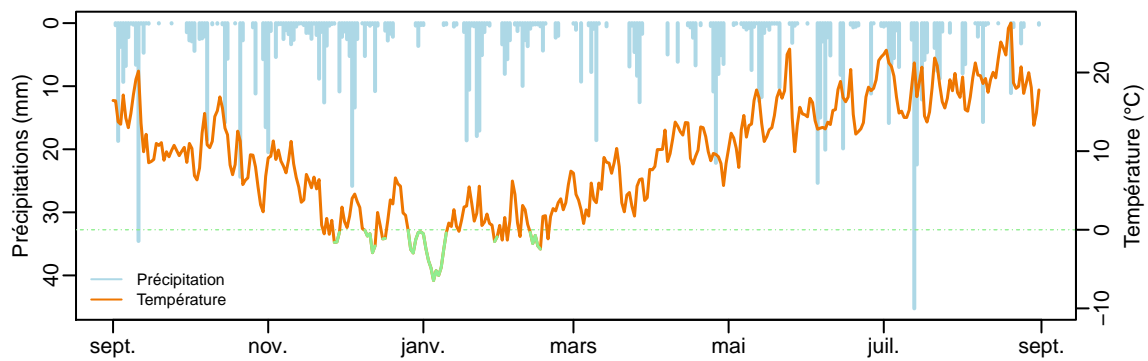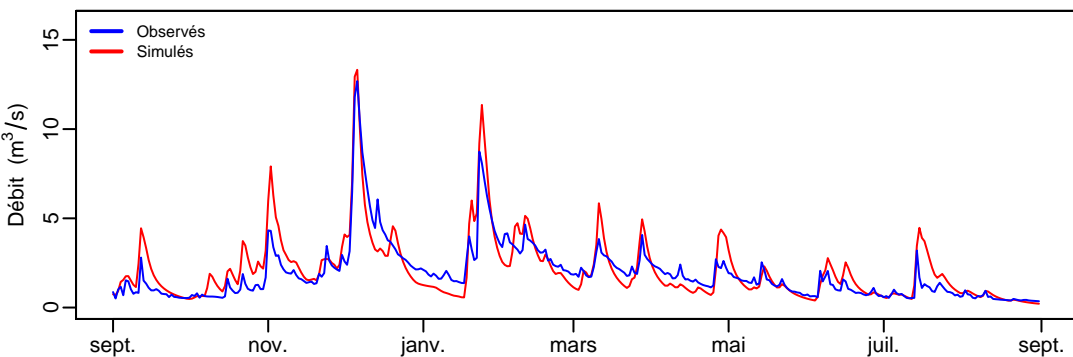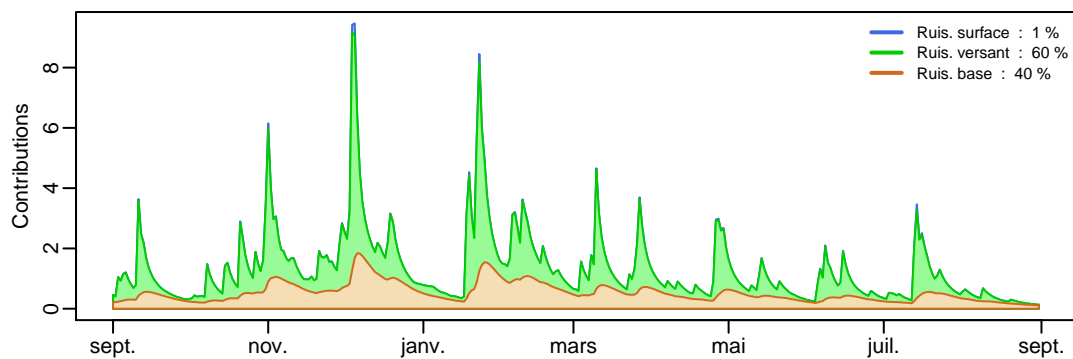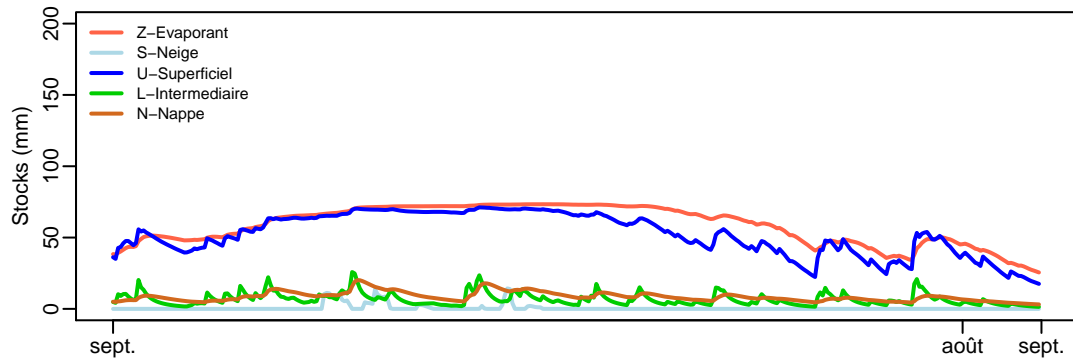

# k1314010 (198.45 km<sup>2</sup>) – année 1996–1997

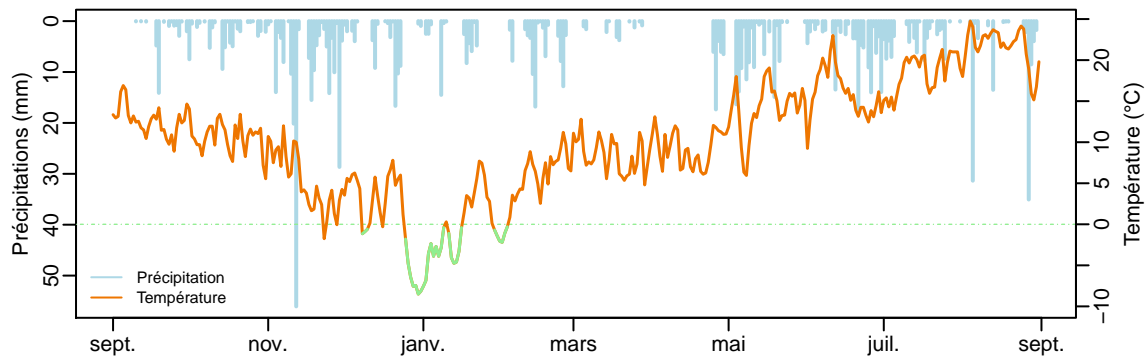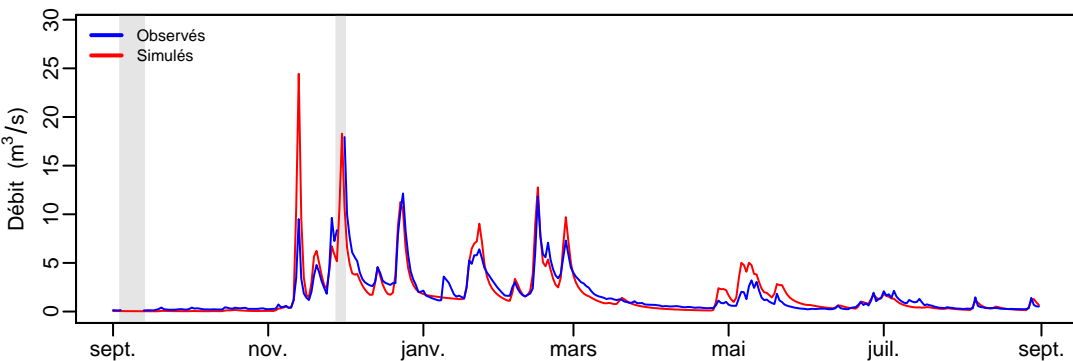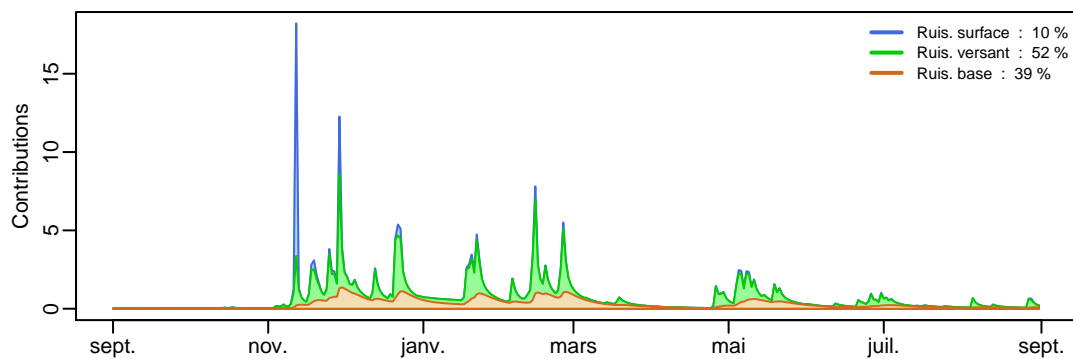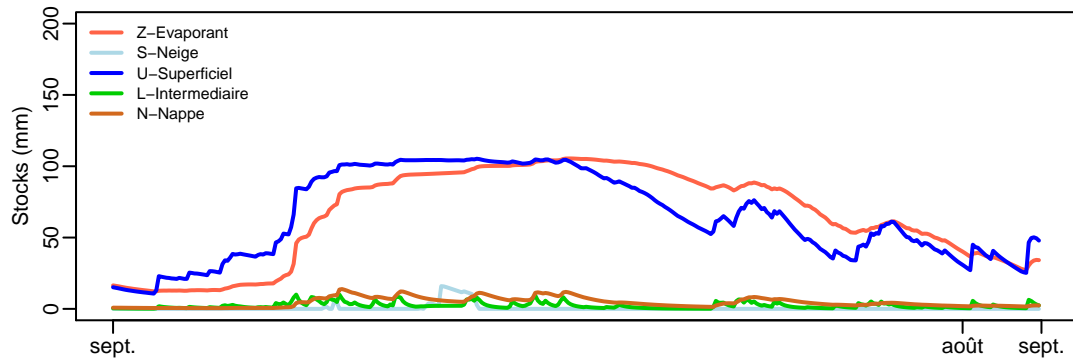

# k1314010 (198.45 km<sup>2</sup>) – année 1997–1998

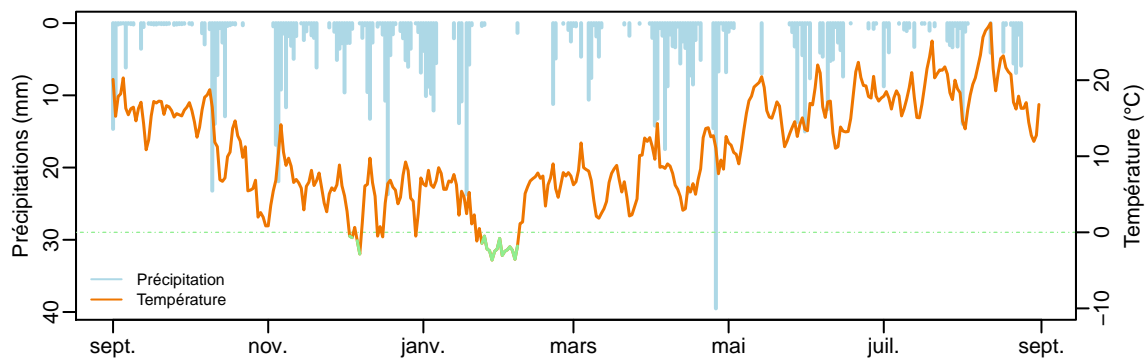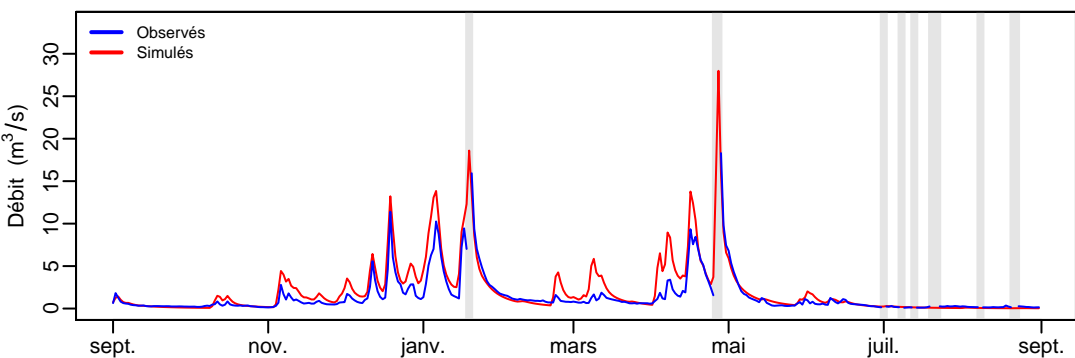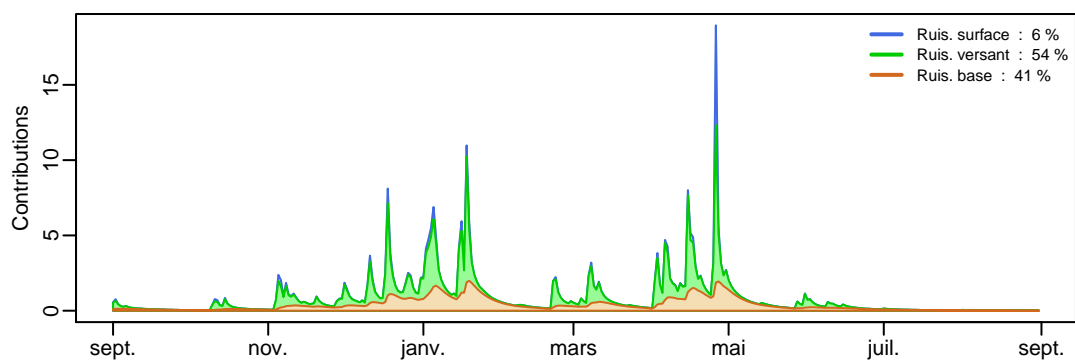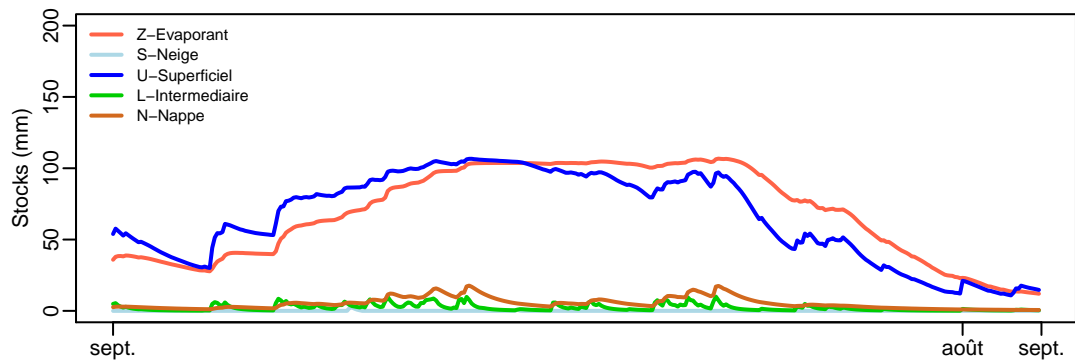

# k1314010 (198.45 km<sup>2</sup>) – année 1998–1999

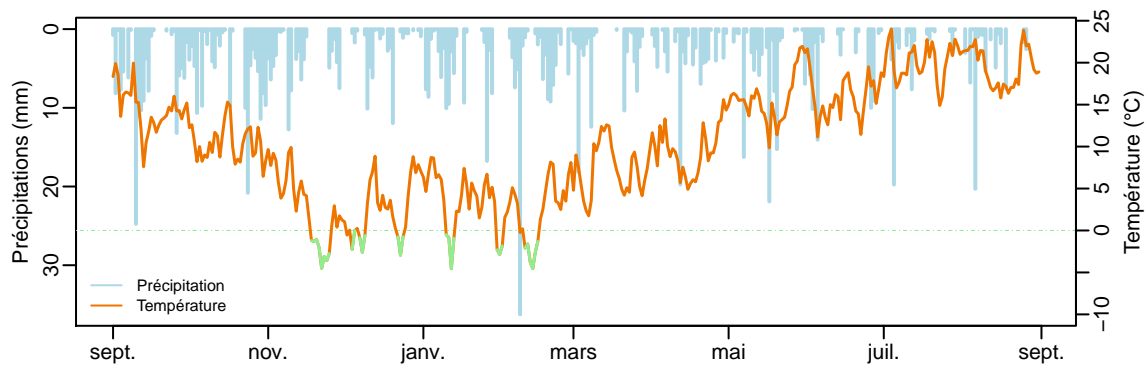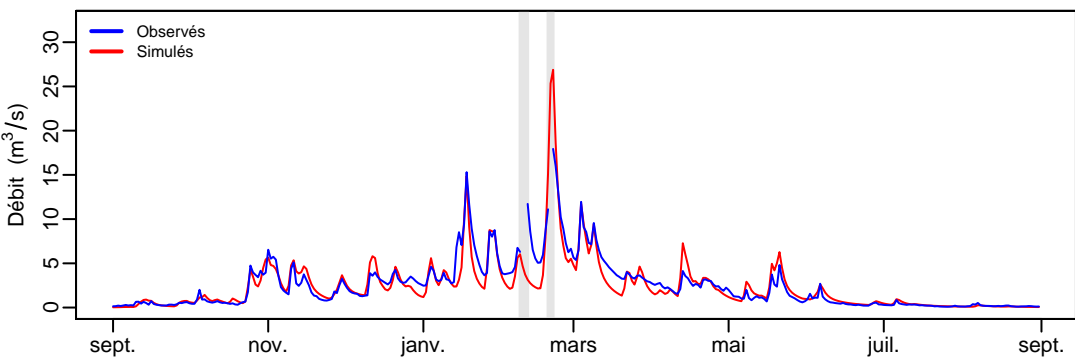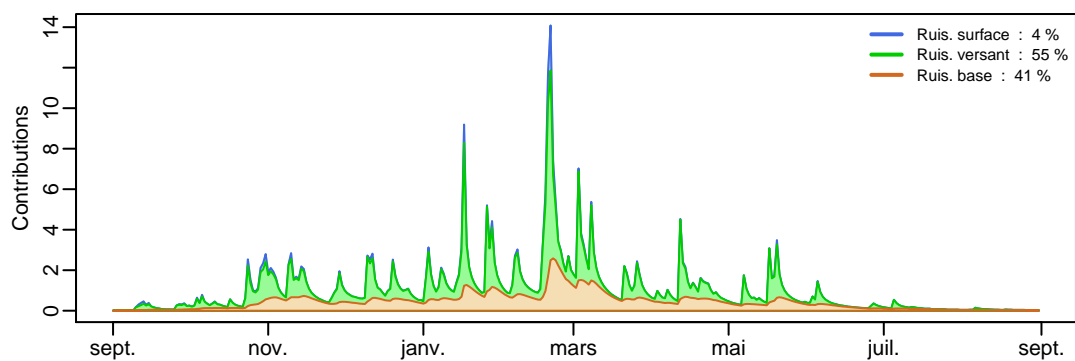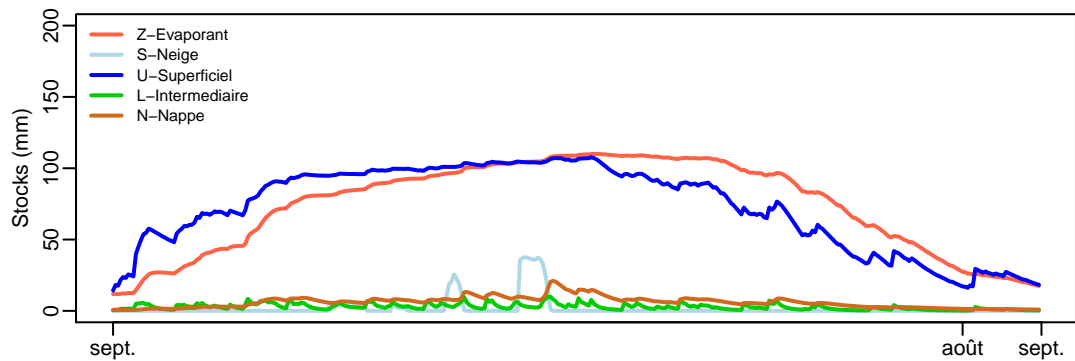

# k1314010 (198.45 km<sup>2</sup>) – année 1999–2000

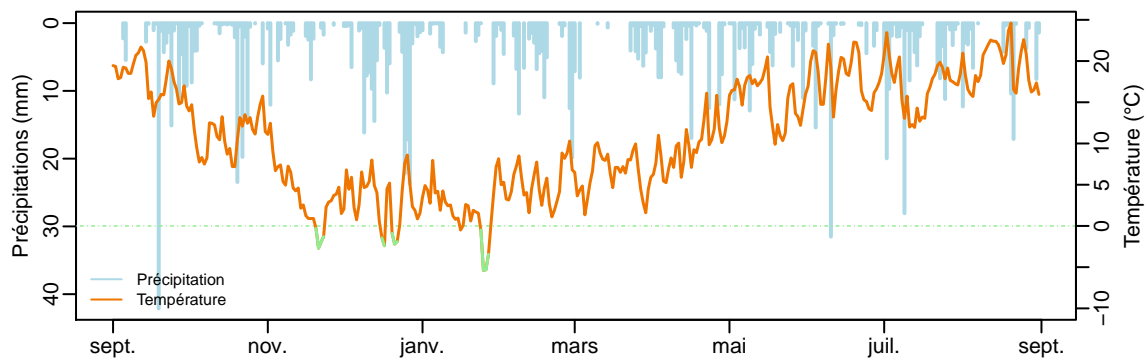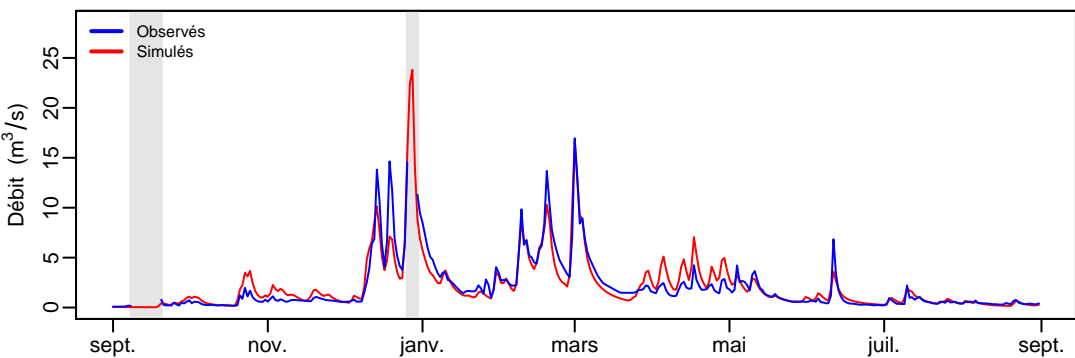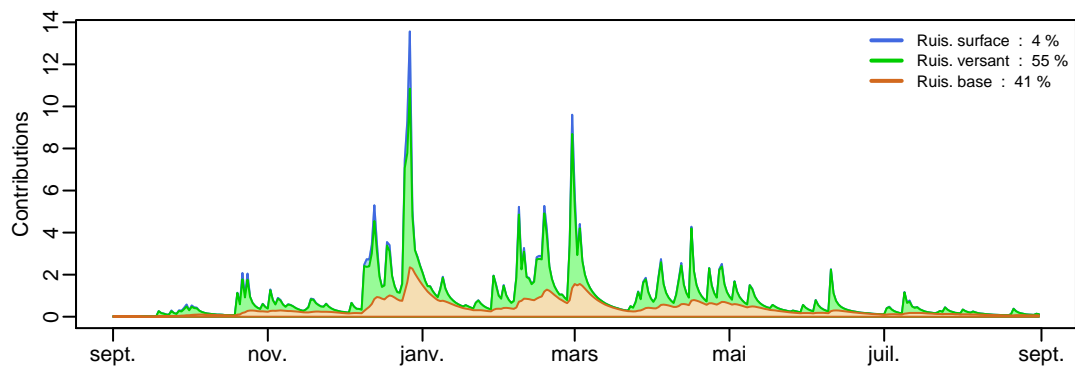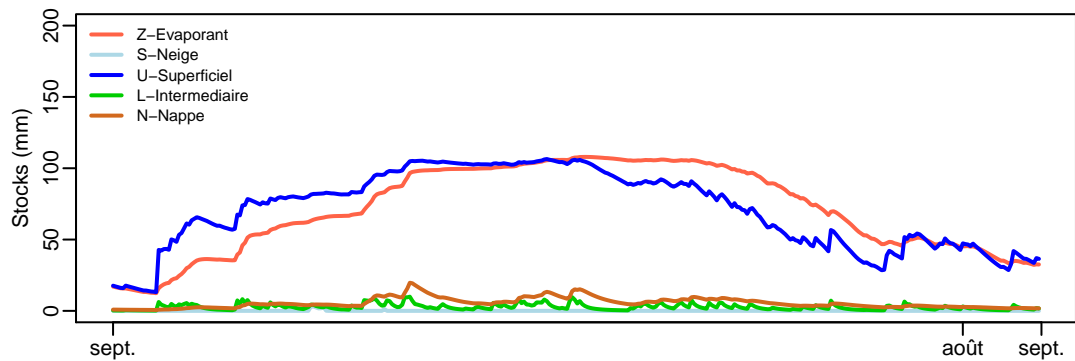



# k1314010 (198.45 km<sup>2</sup>) – année 2000–2001

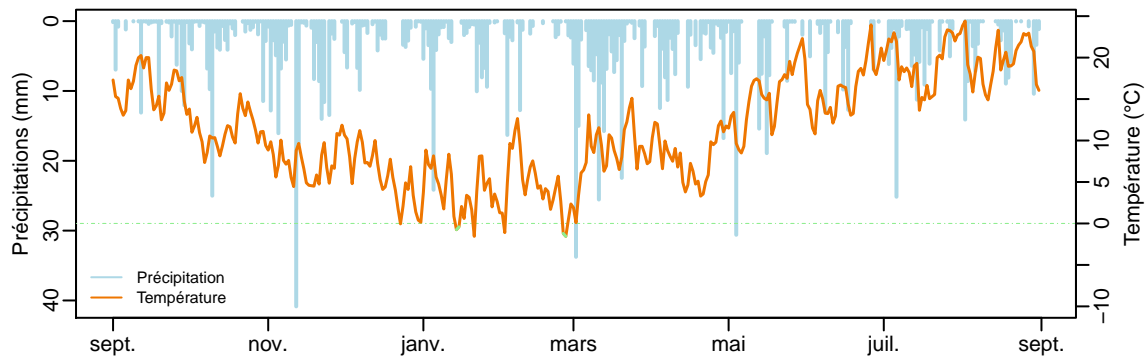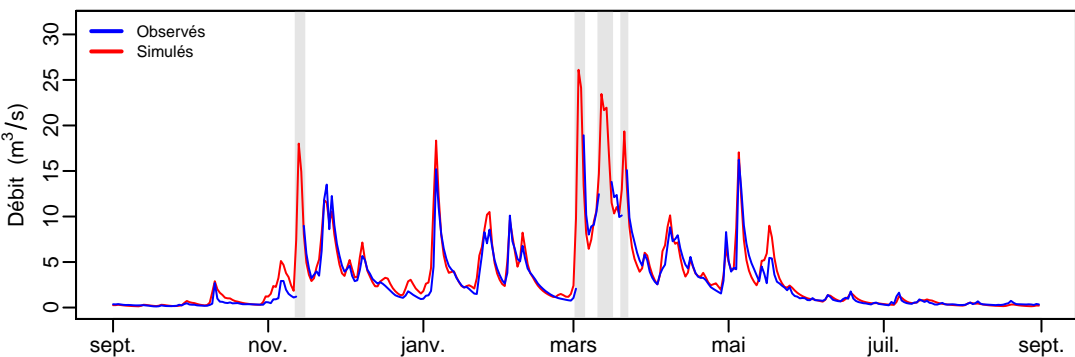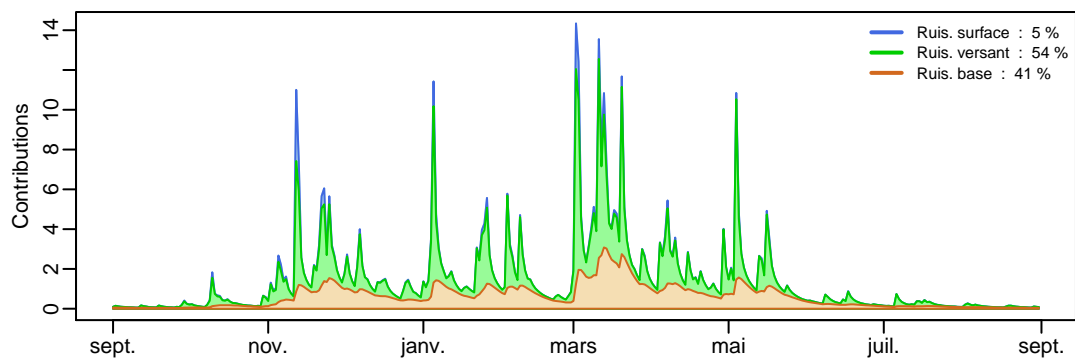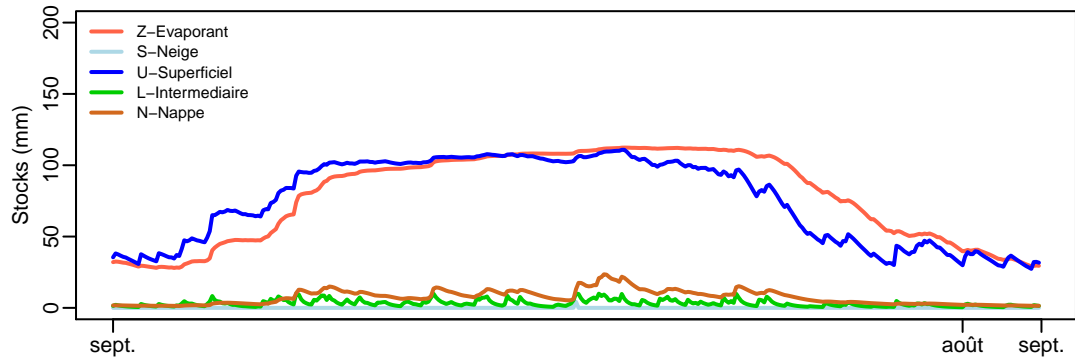

# k1314010 (198.45 km²) – année 2001–2002

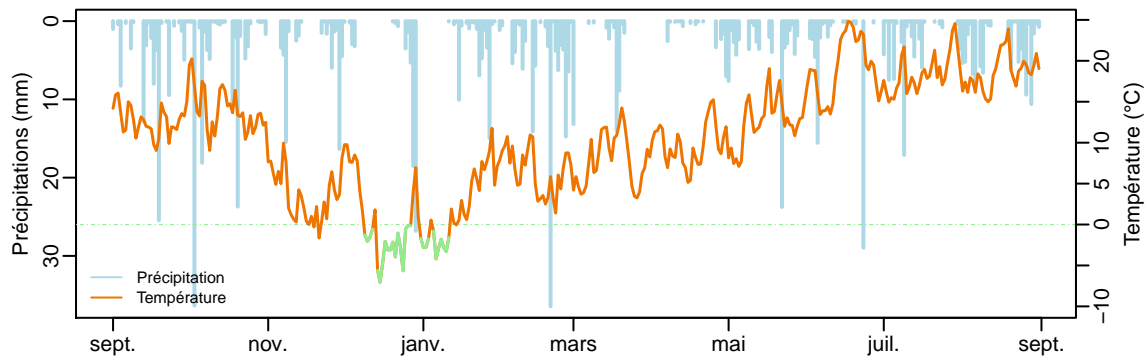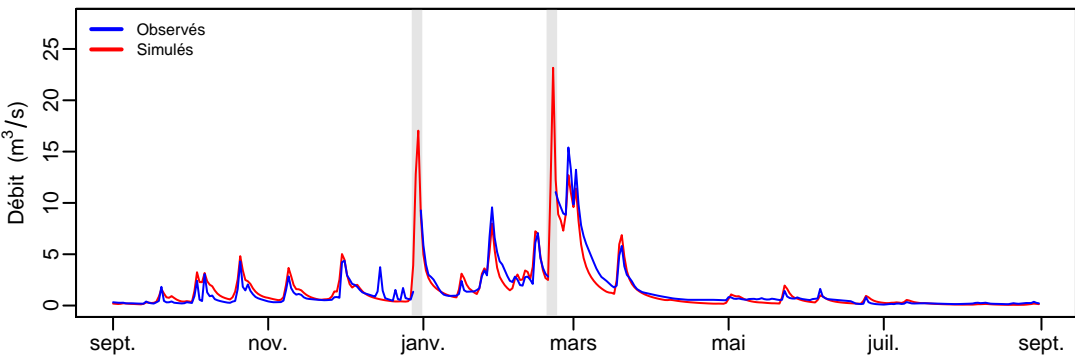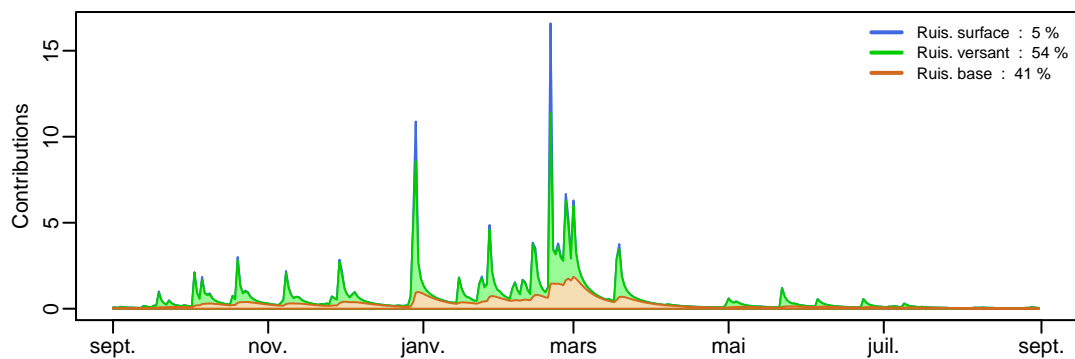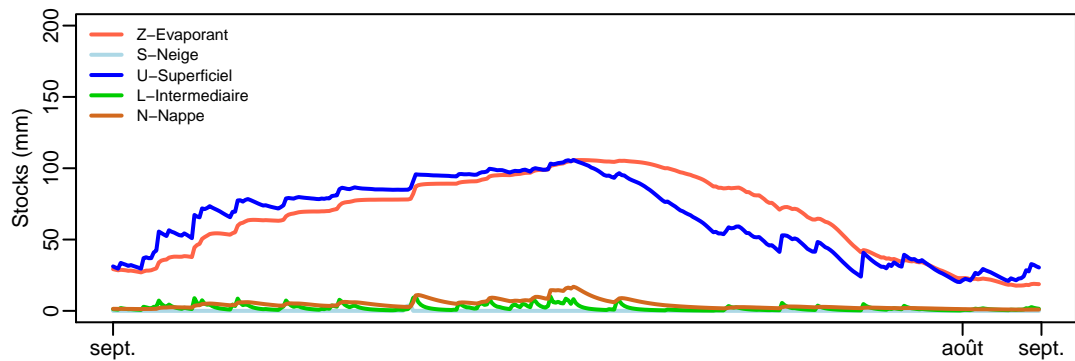

# k1314010 (198.45 km<sup>2</sup>) – année 2002–2003

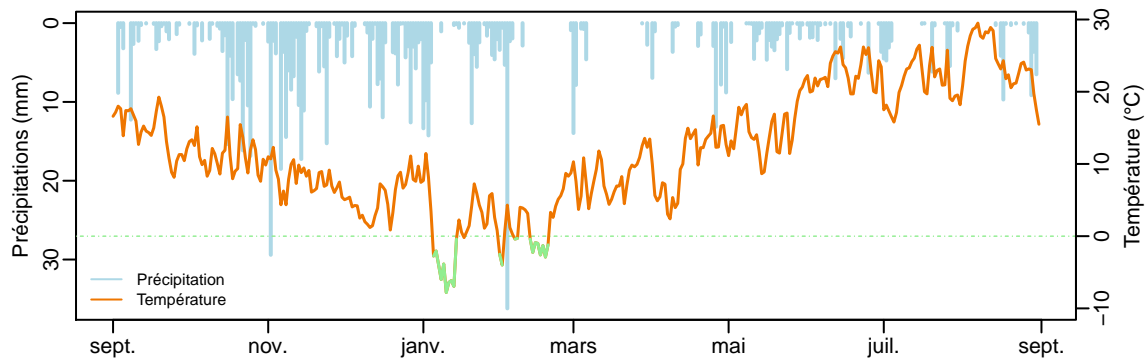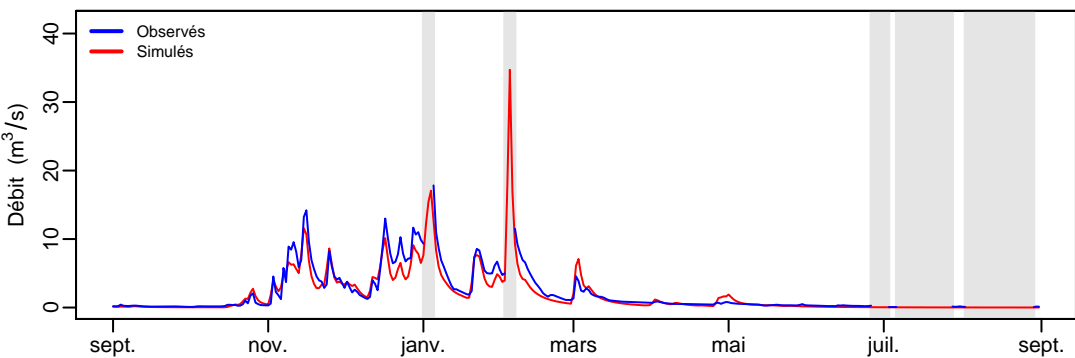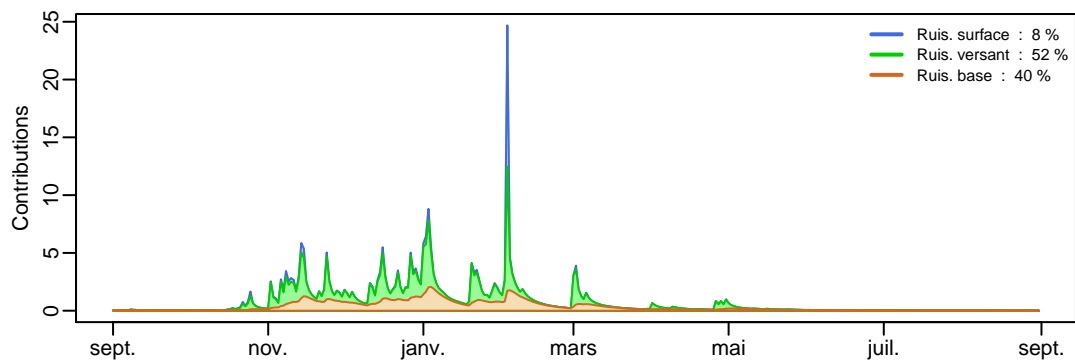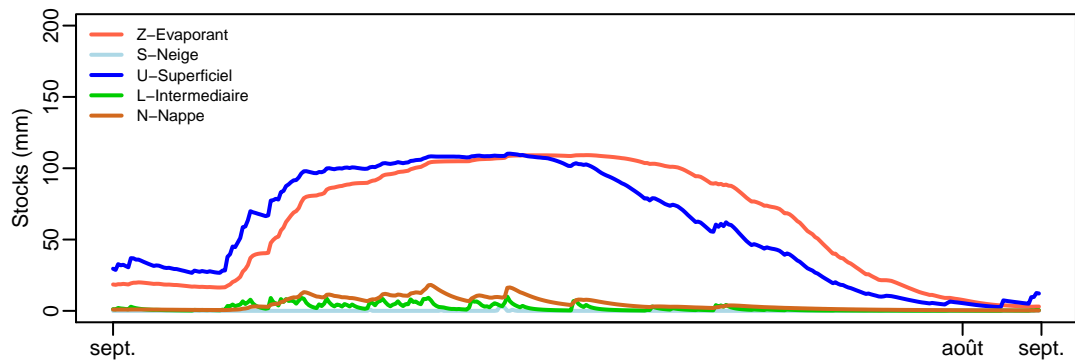

# k1314010 (198.45 km<sup>2</sup>) – année 2003–2004

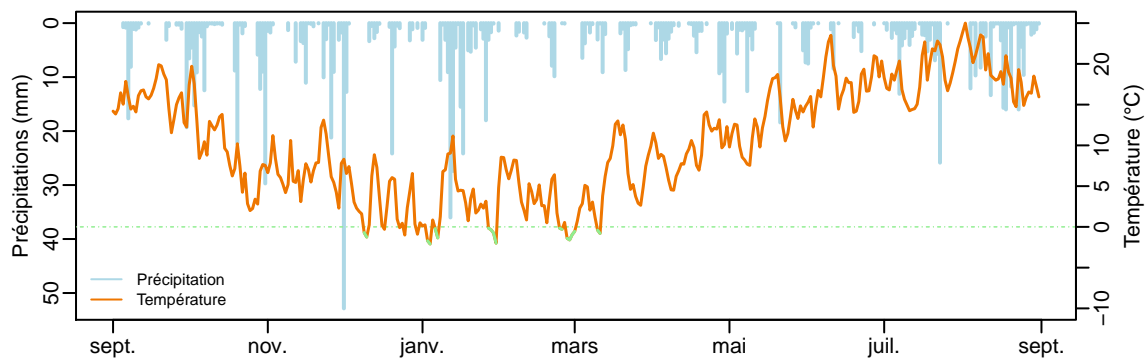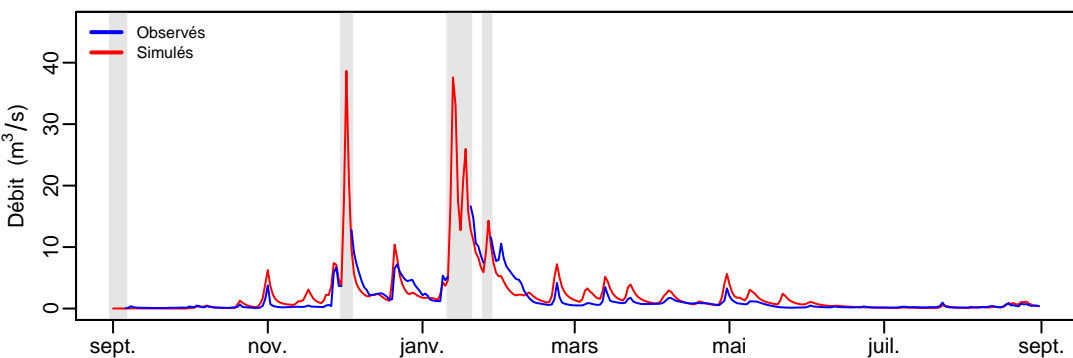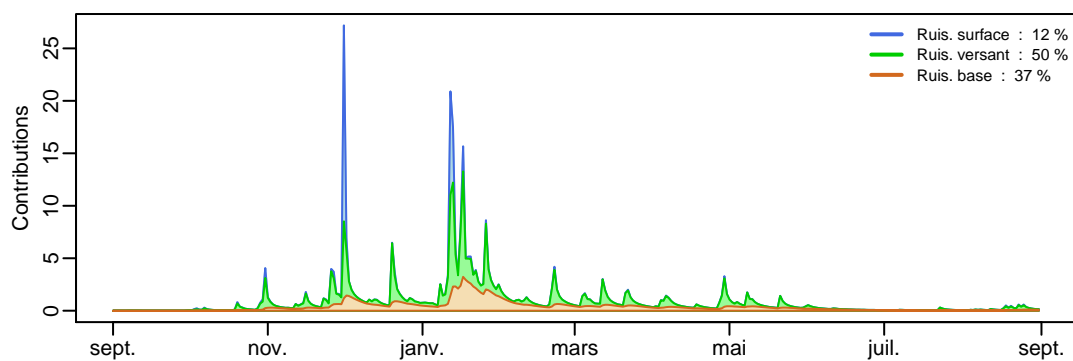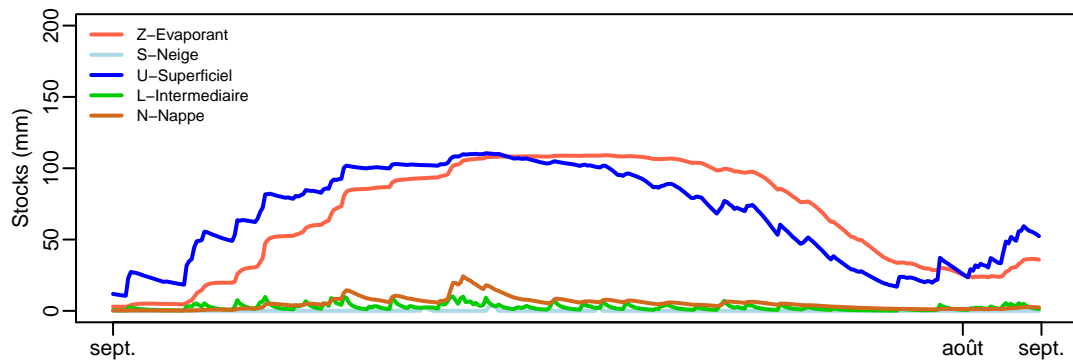

# k1314010 (198.45 km<sup>2</sup>) – année 2004–2005

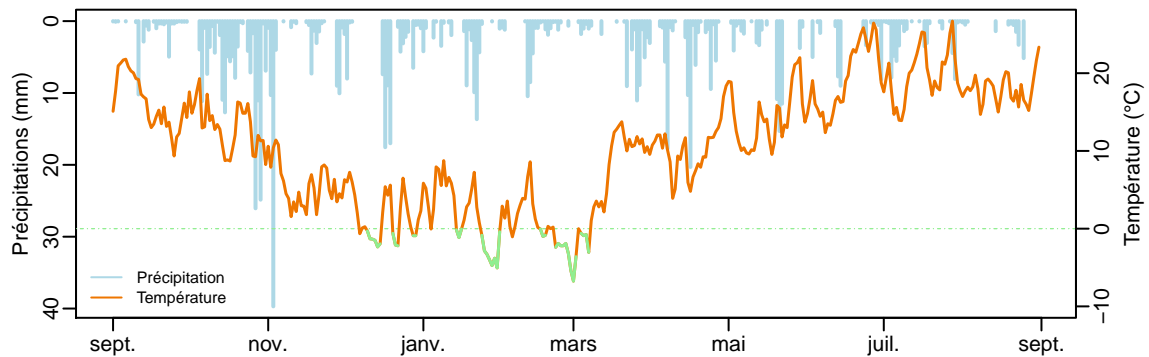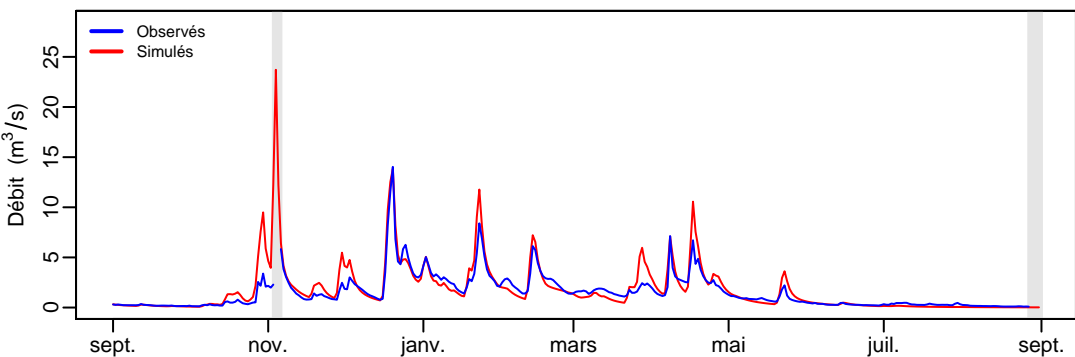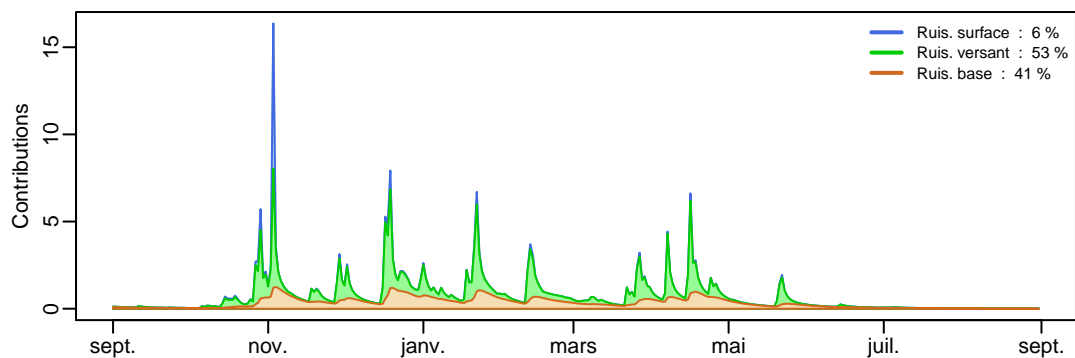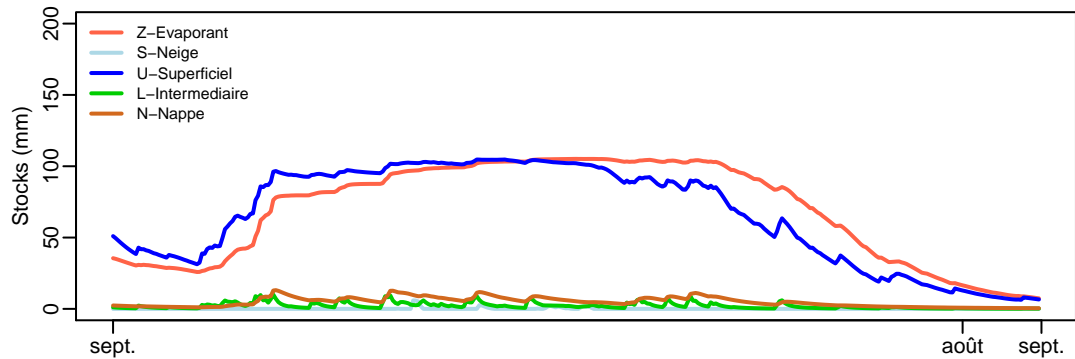

# k1314010 (198.45 km<sup>2</sup>) – année 2005–2006

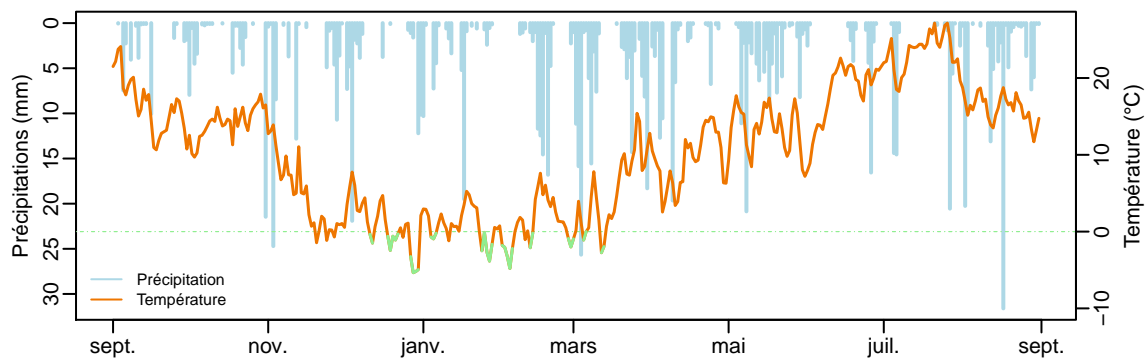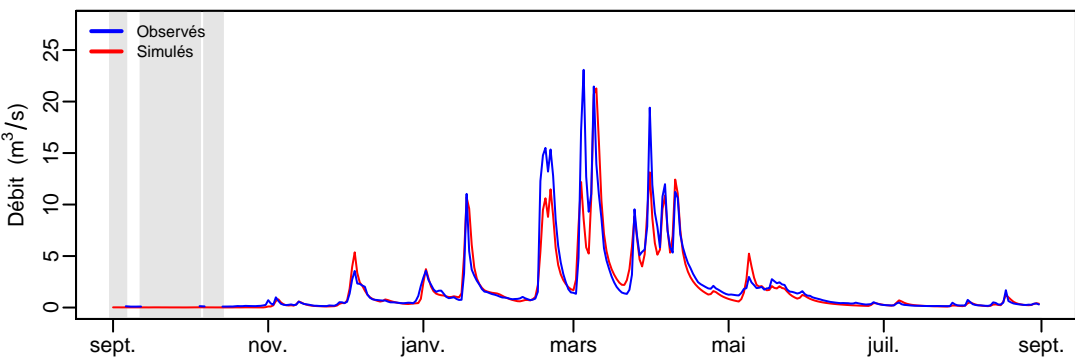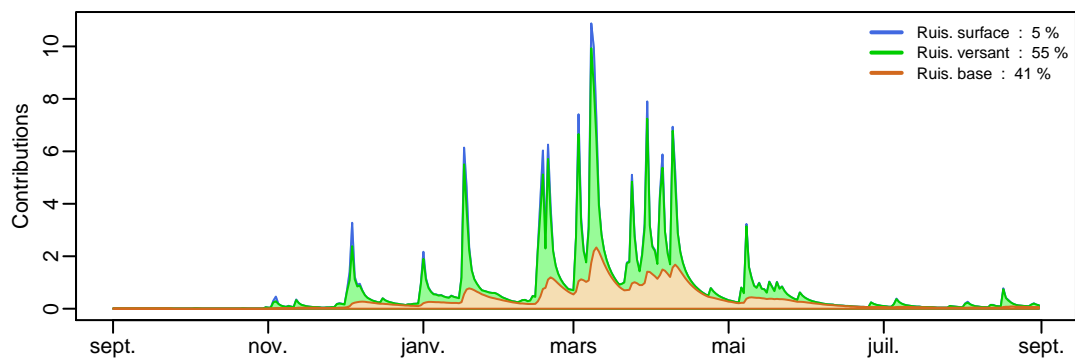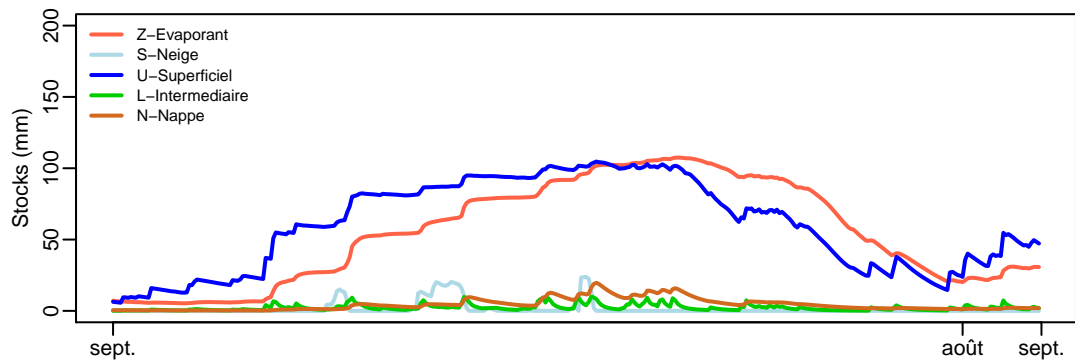

# k1314010 (198.45 km<sup>2</sup>) – année 2006–2007

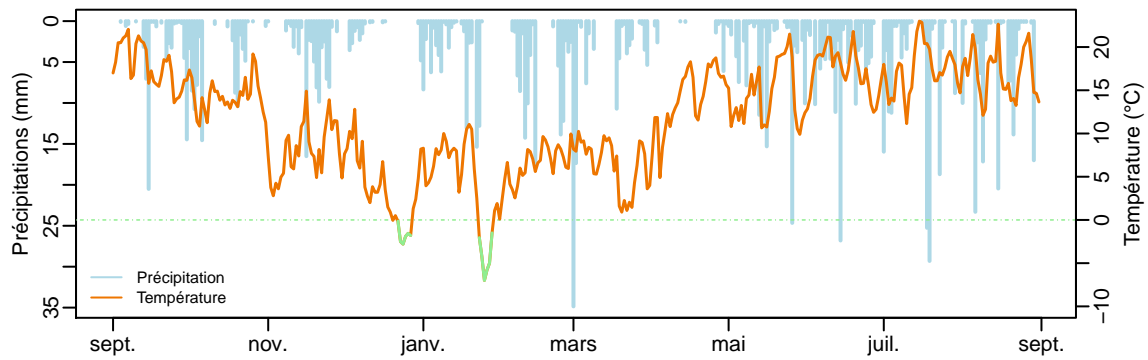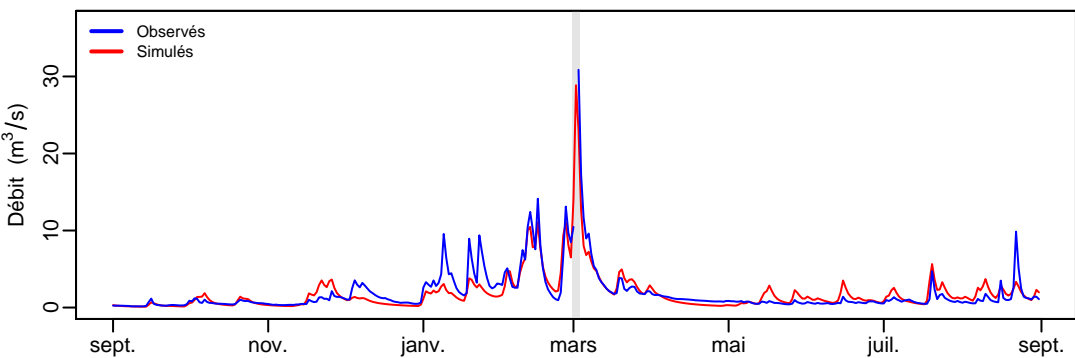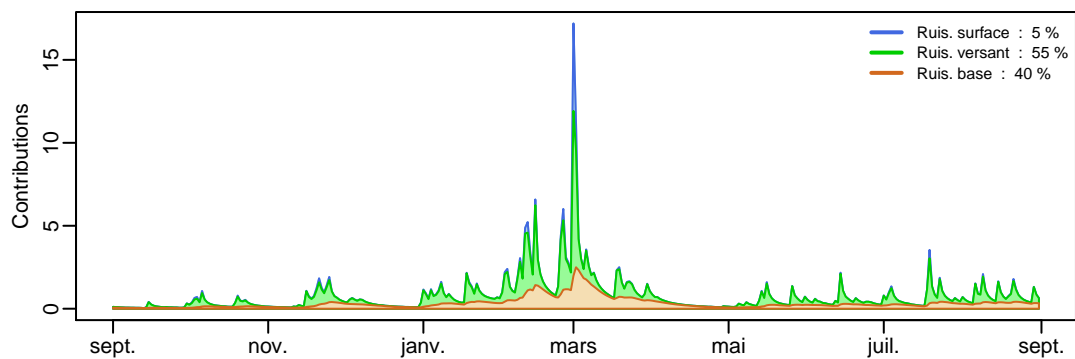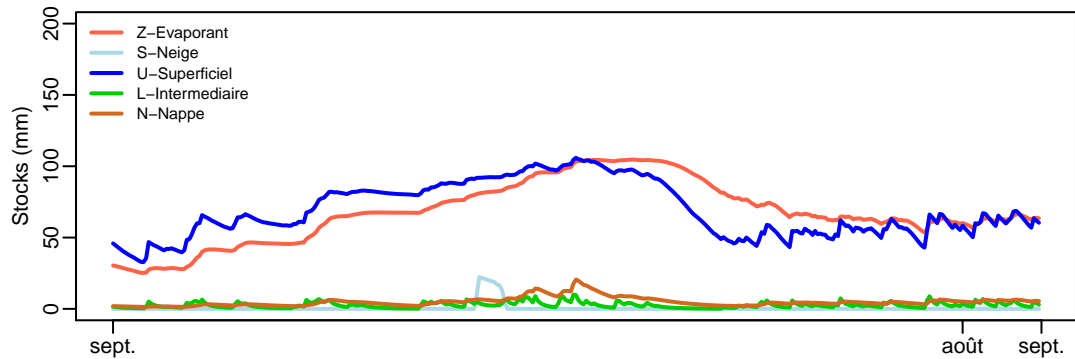

# k1314010 (198.45 km<sup>2</sup>) – année 2007–2008

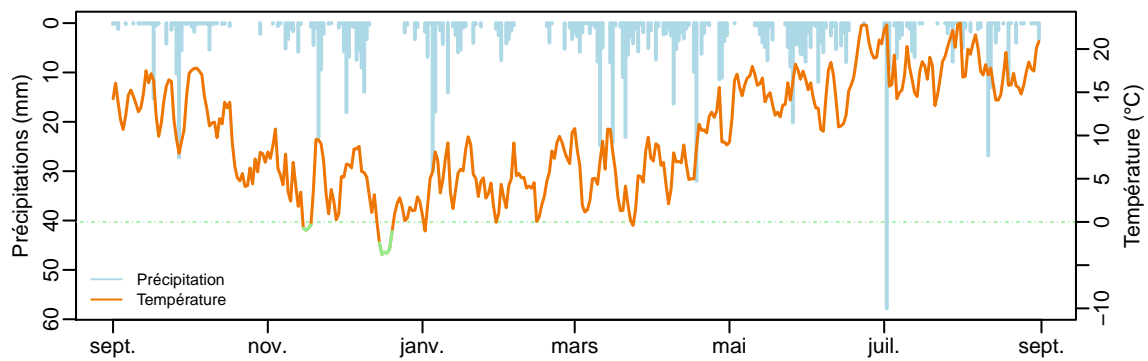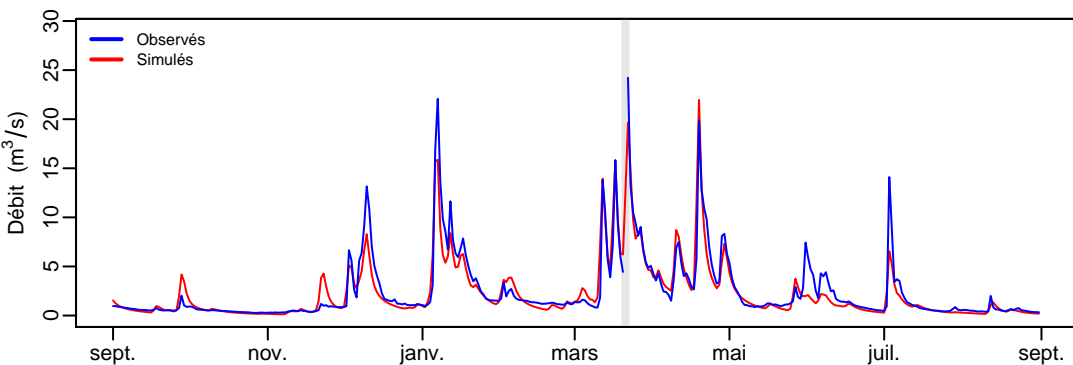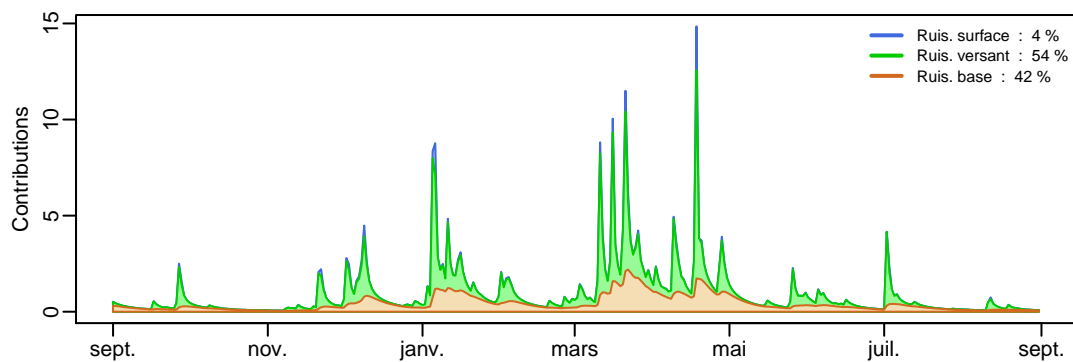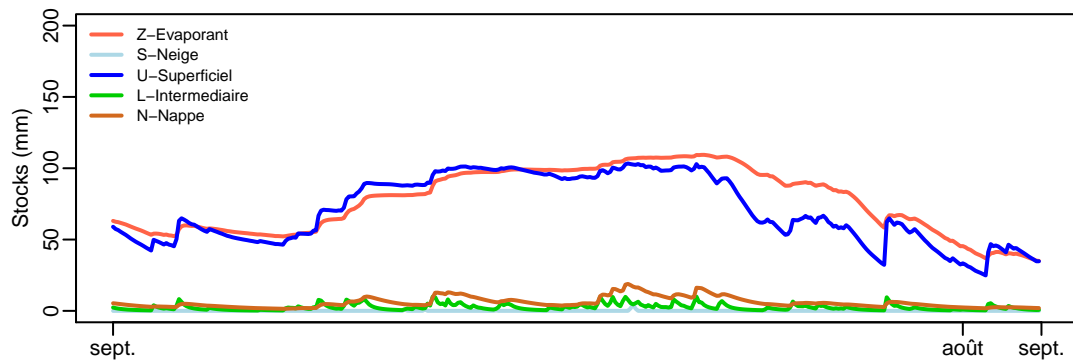



# k1314010 (198.45 km<sup>2</sup>) – année 2008–2009

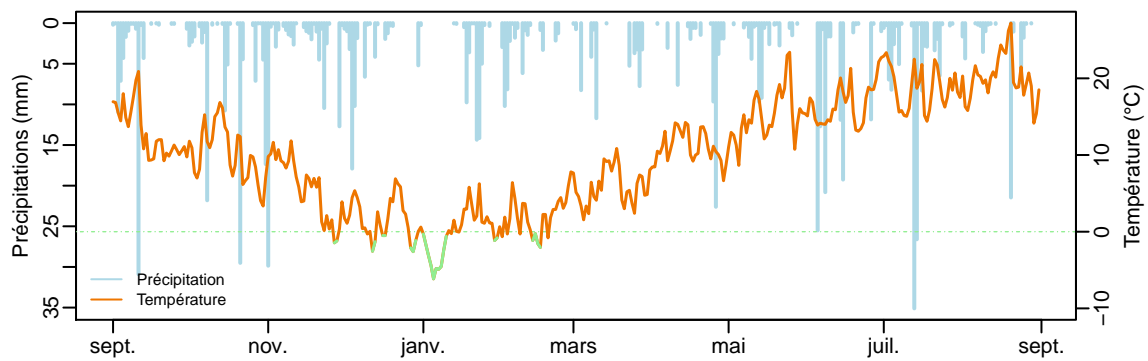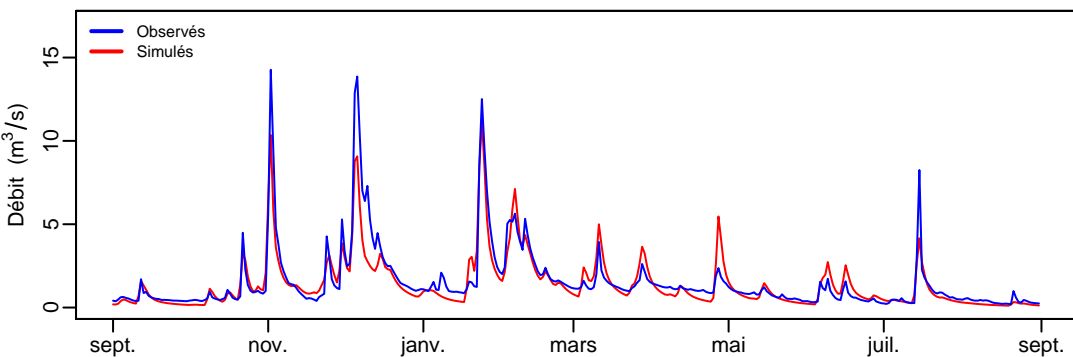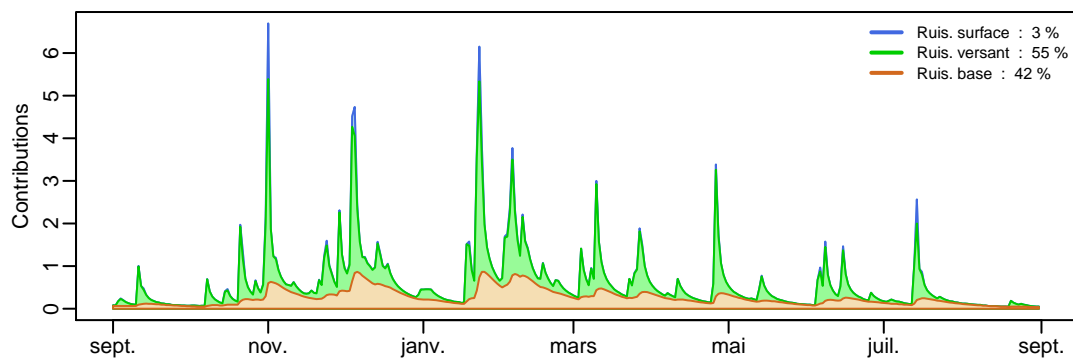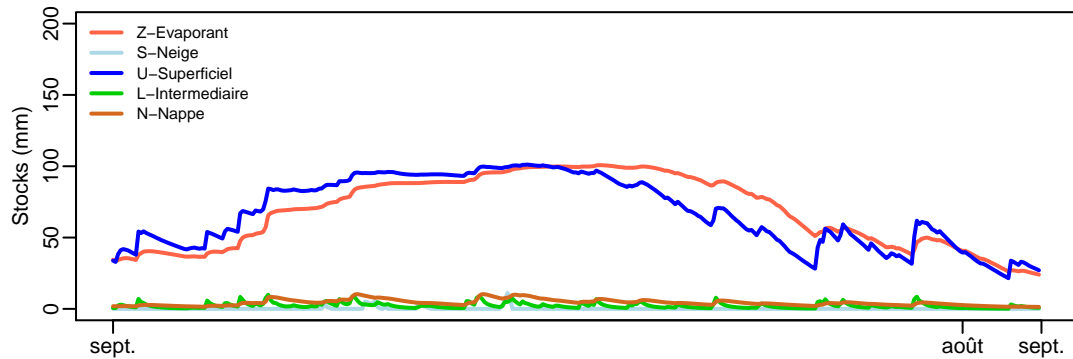

# k1314010 (198.45 km<sup>2</sup>) – année 2009–2010

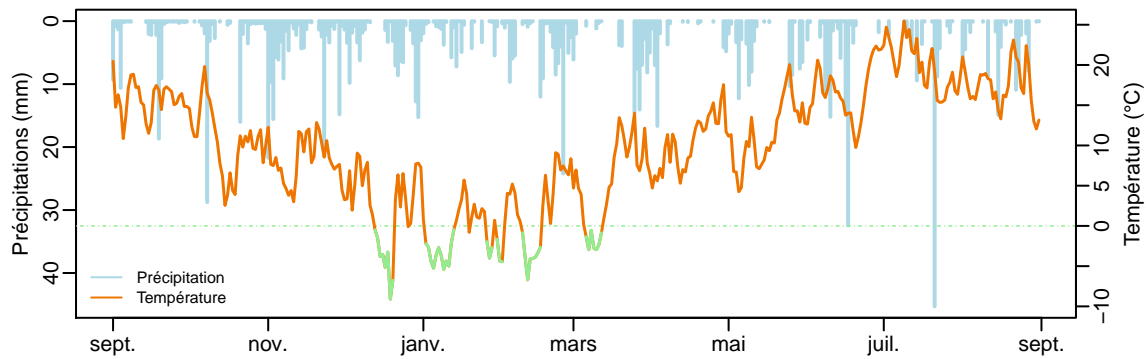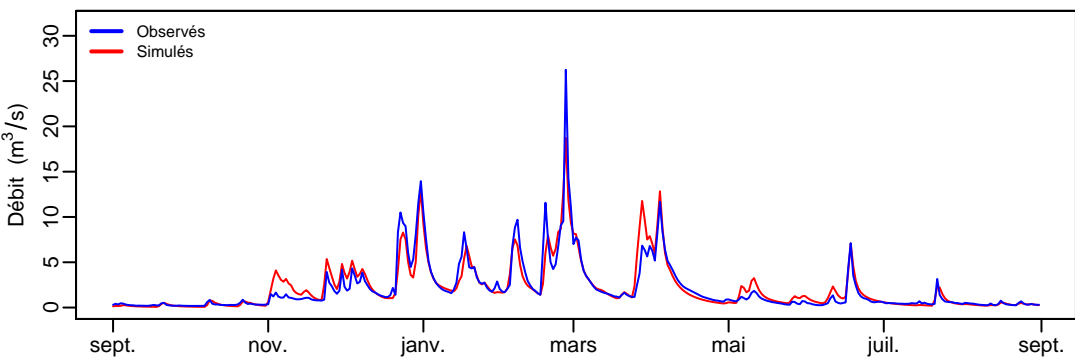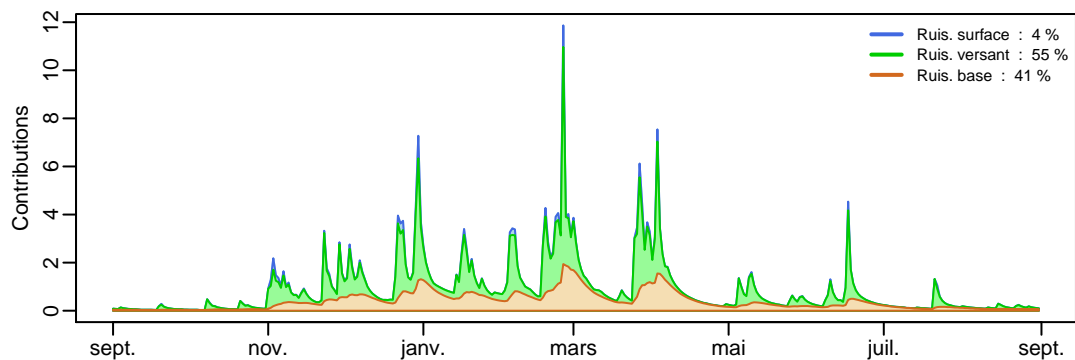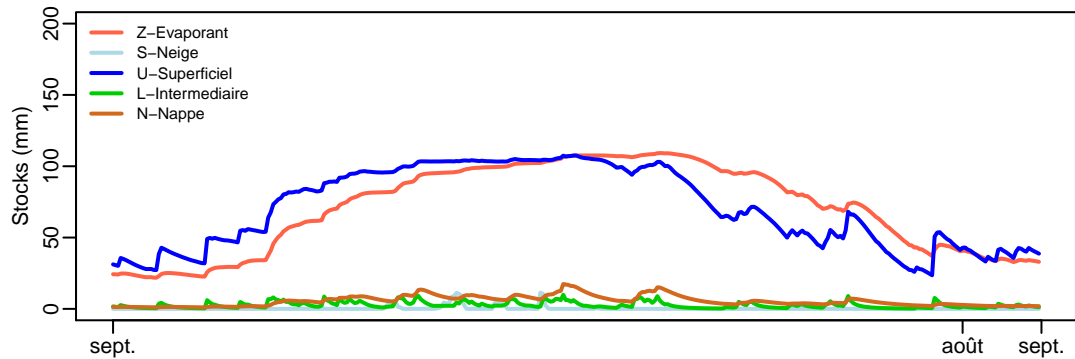

# k1314010 (198.45 km<sup>2</sup>) – année 2010–2011

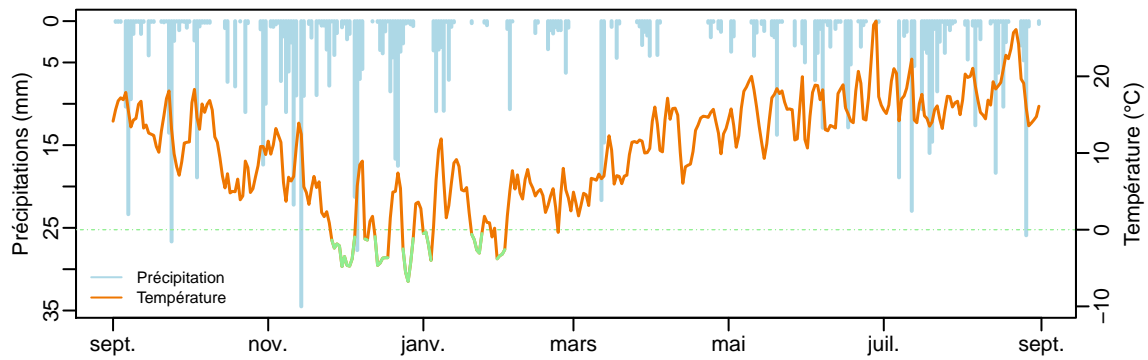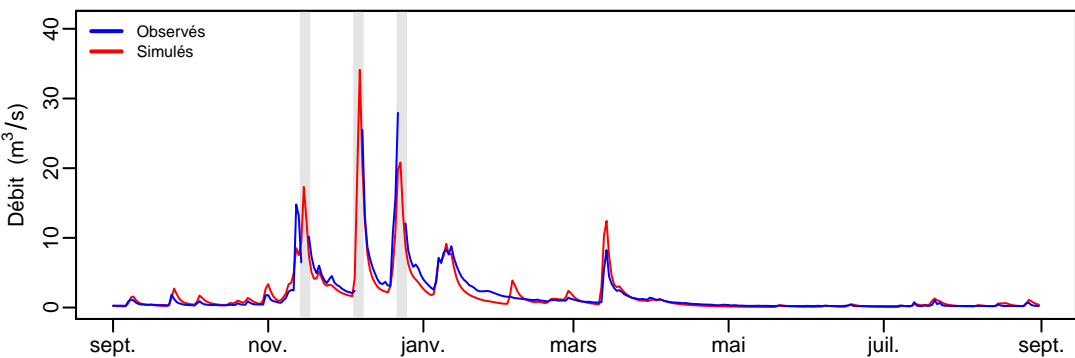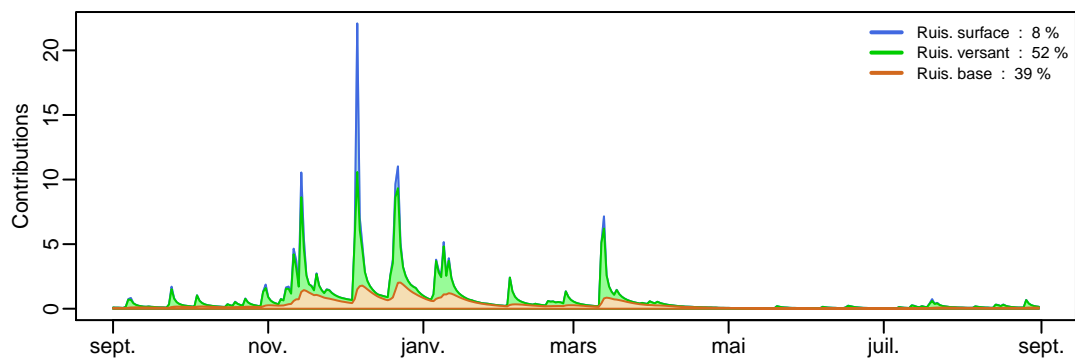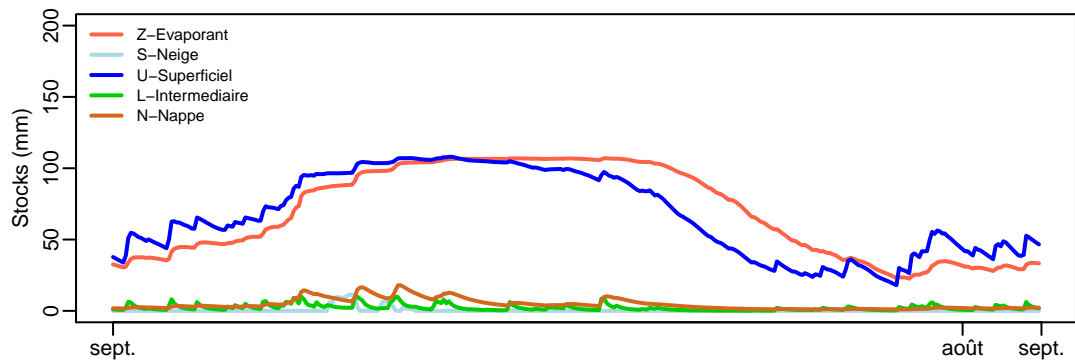

# k1314010 (198.45 km<sup>2</sup>) – année 2011–2012

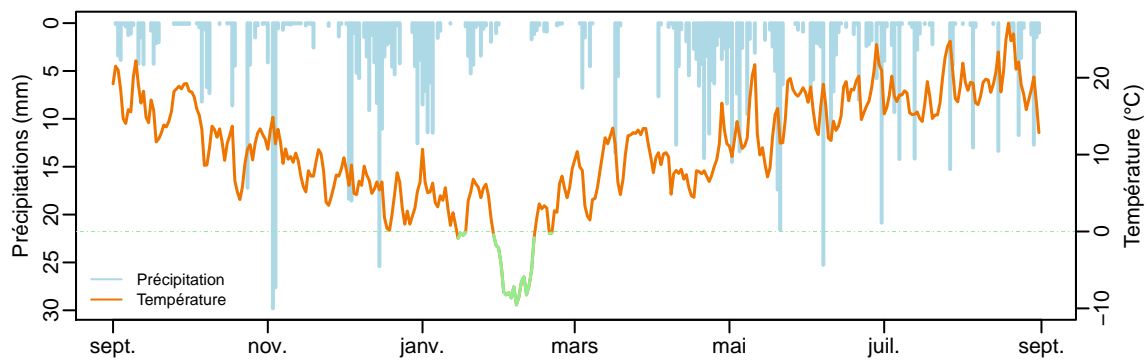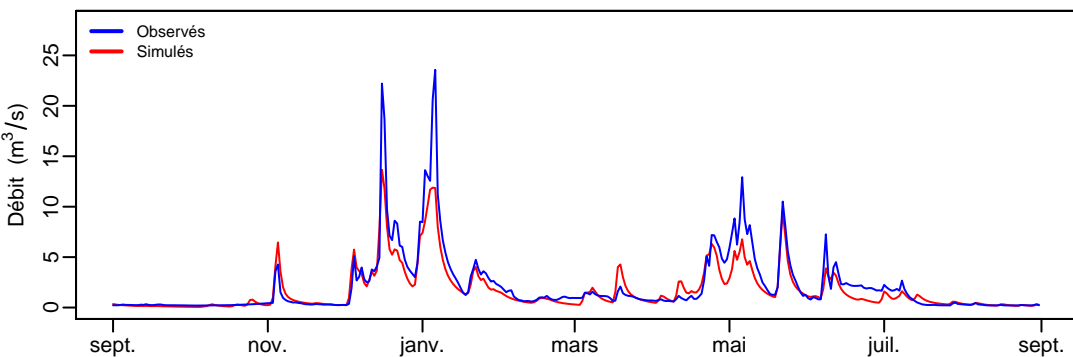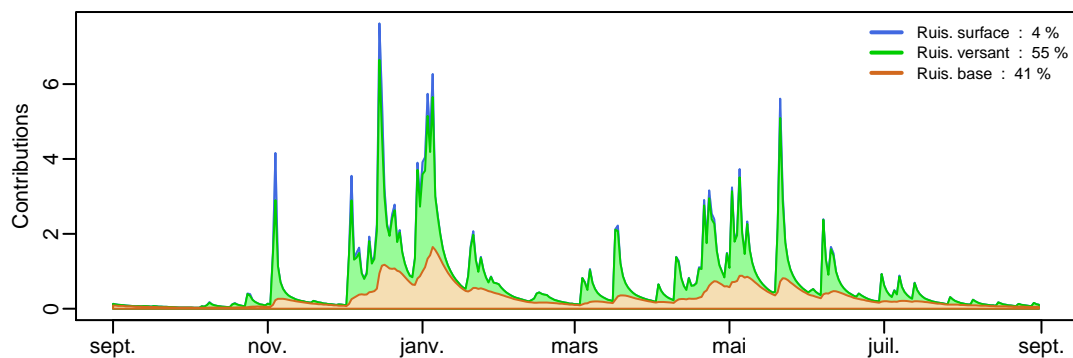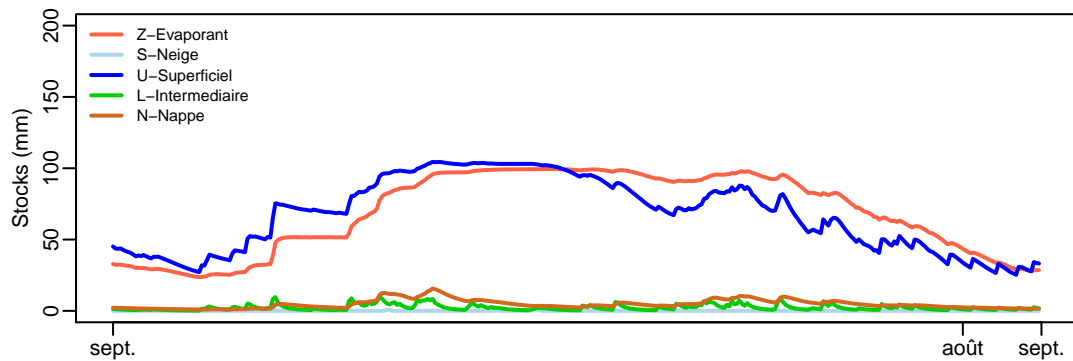

# k1321810 (1788.67 km<sup>2</sup>) – année 1981–1982

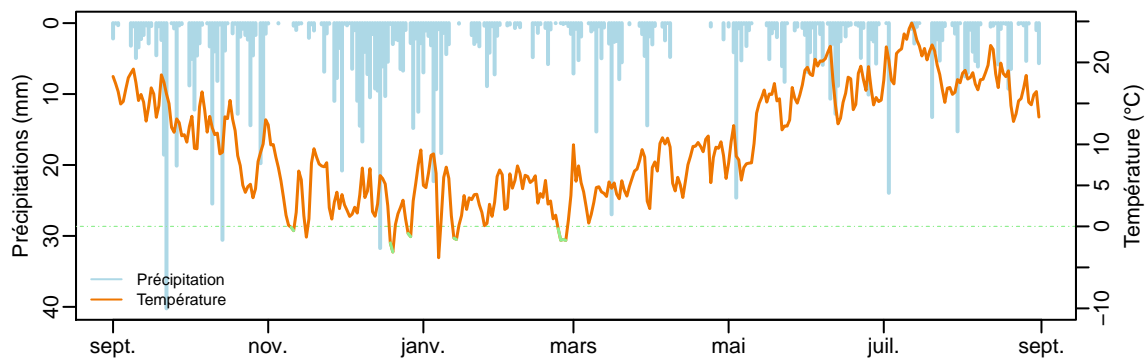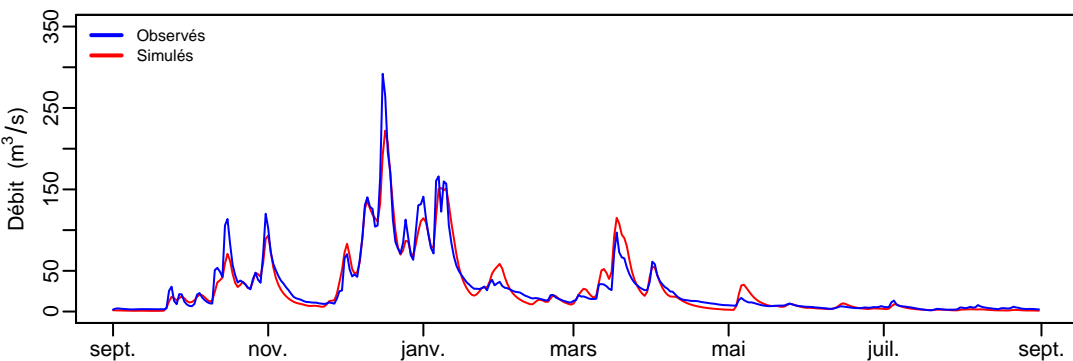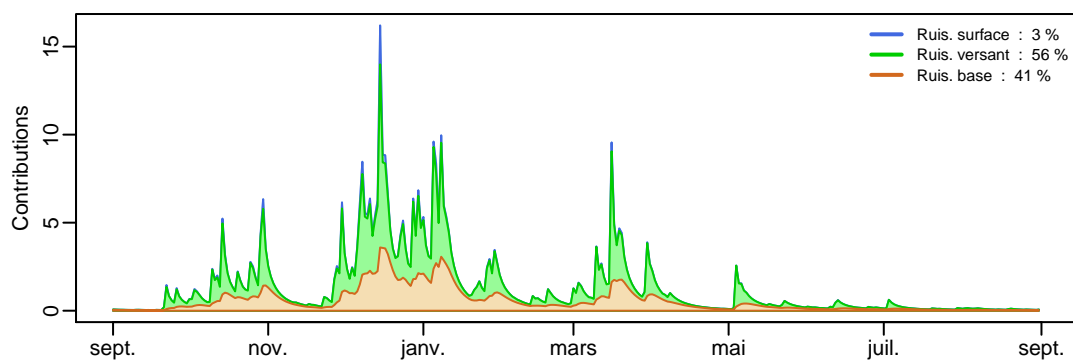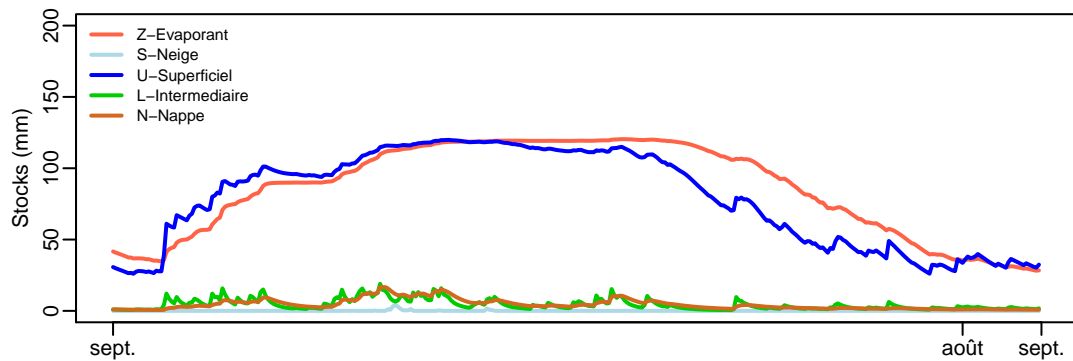

# k1321810 (1788.67 km²) – année 1982–1983

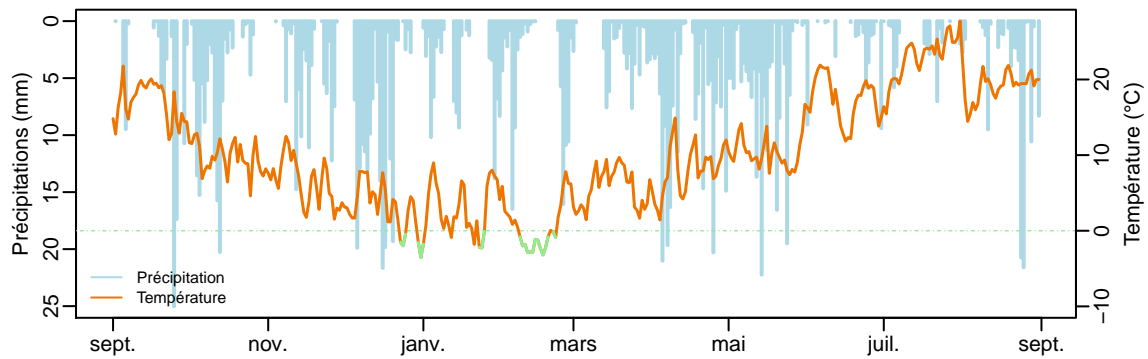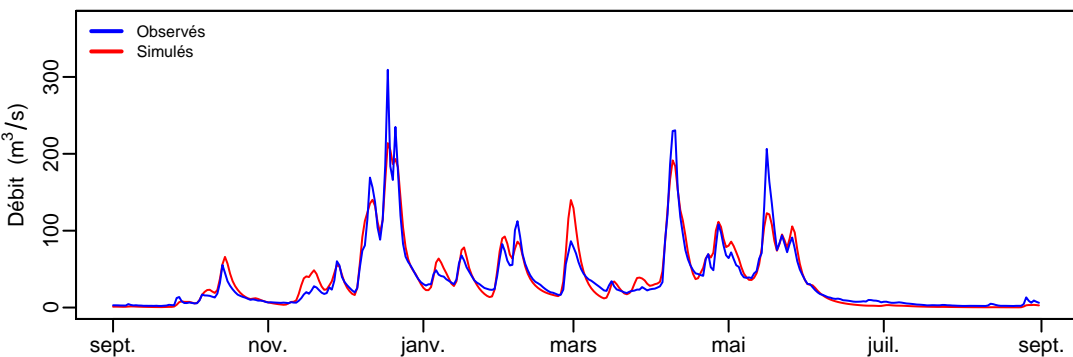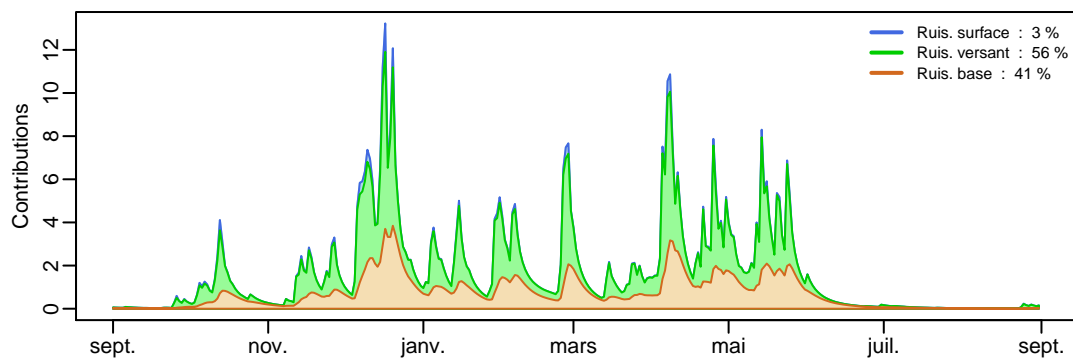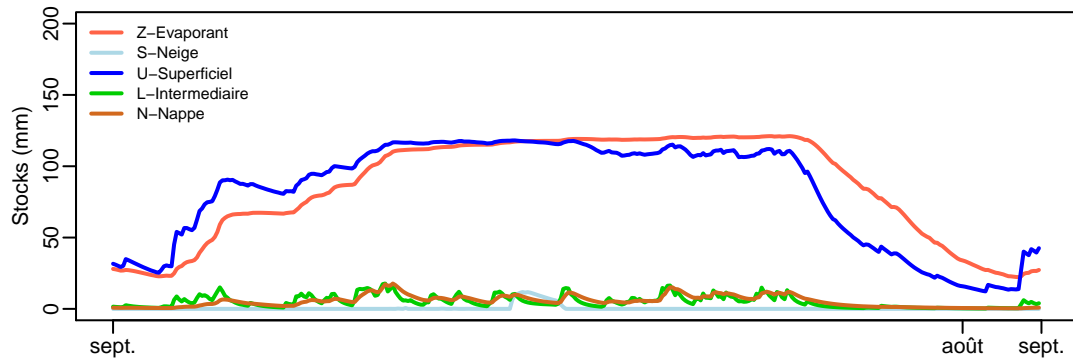

# k1321810 (1788.67 km<sup>2</sup>) – année 1983–1984

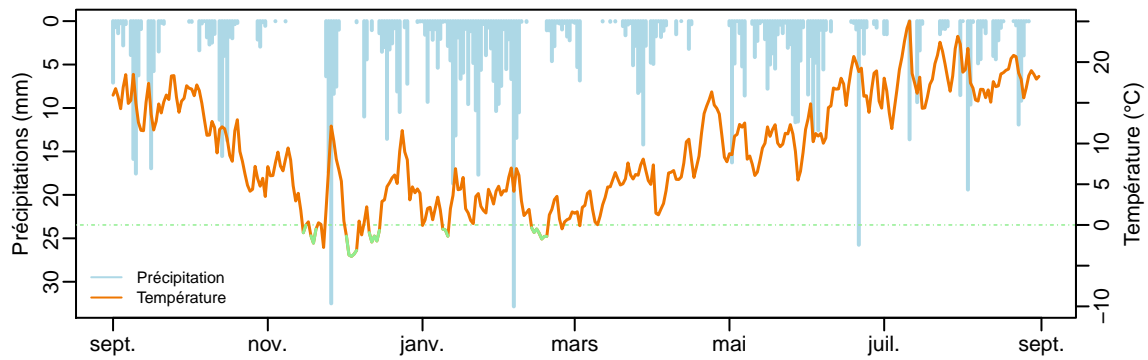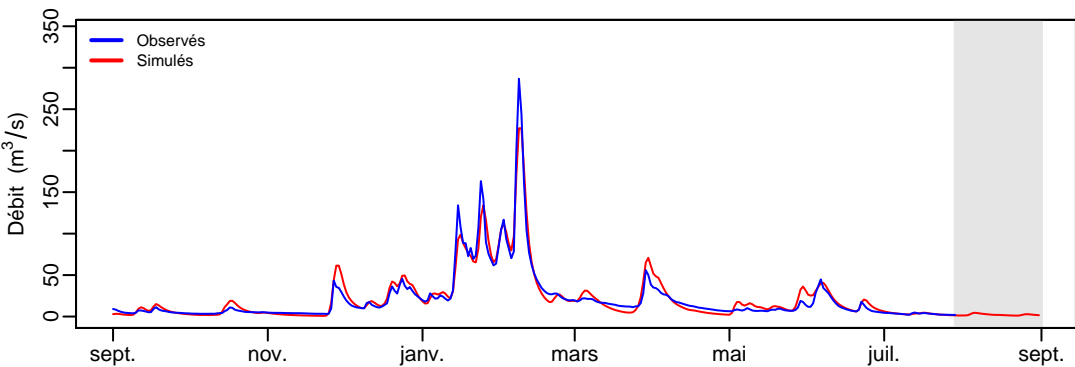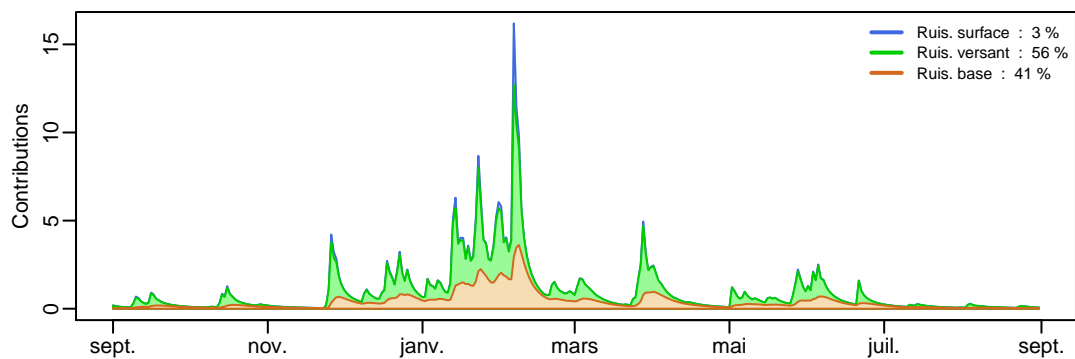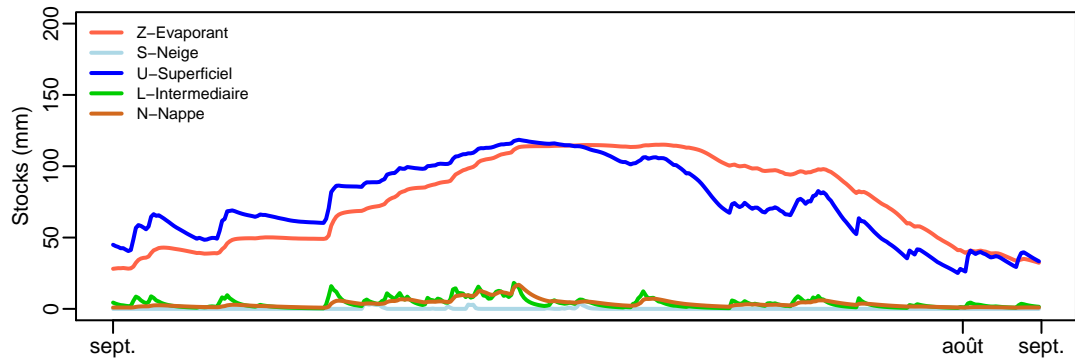

# k1321810 (1788.67 km<sup>2</sup>) – année 1984–1985

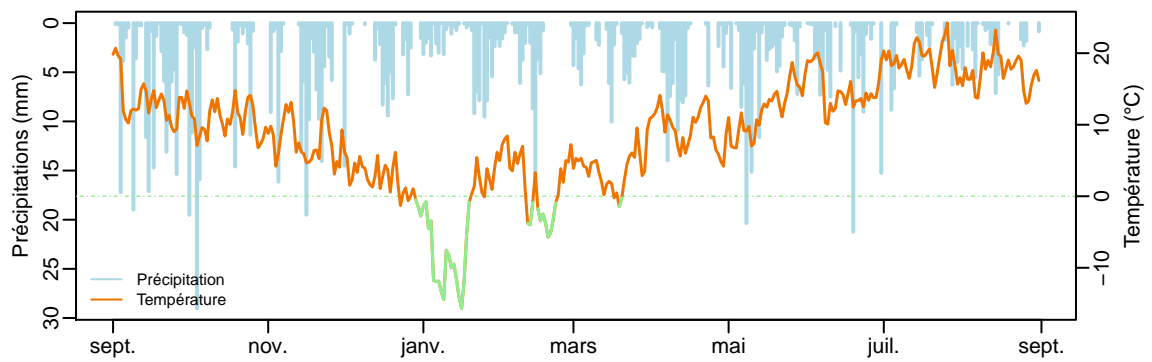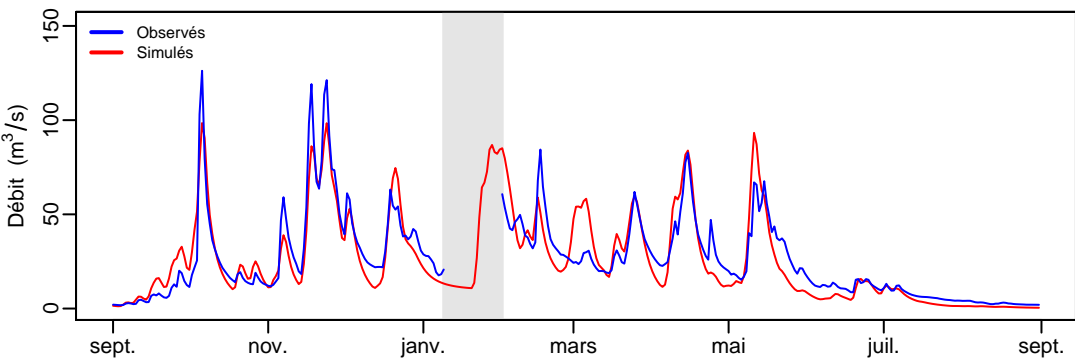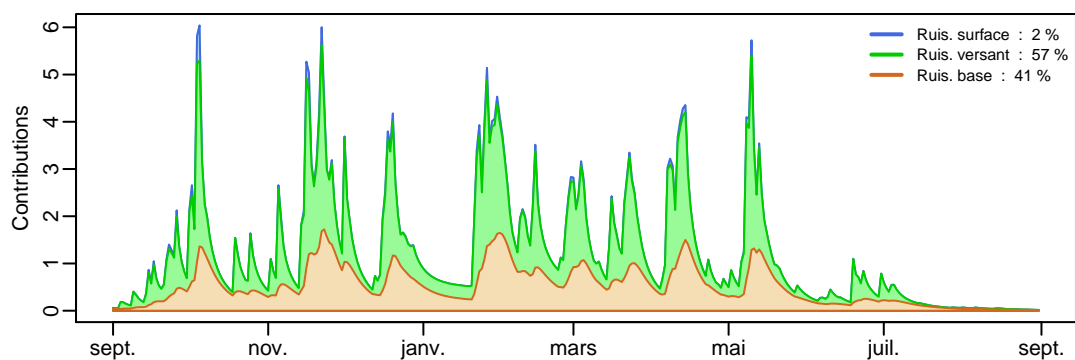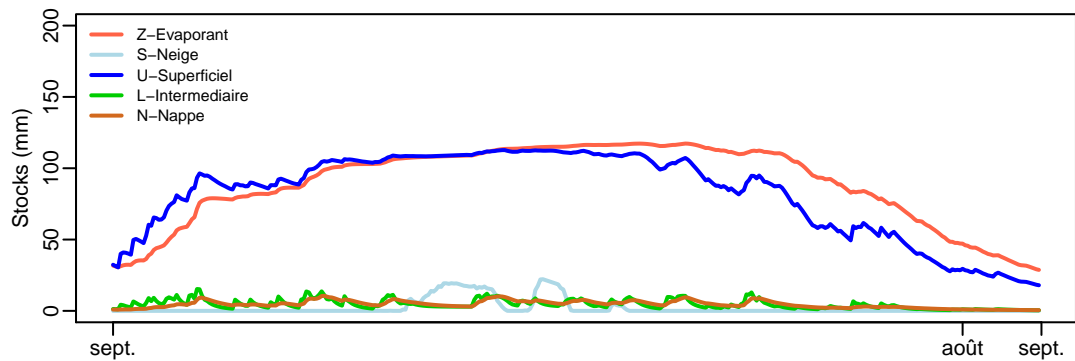



# k1321810 (1788.67 km²) – année 1985–1986

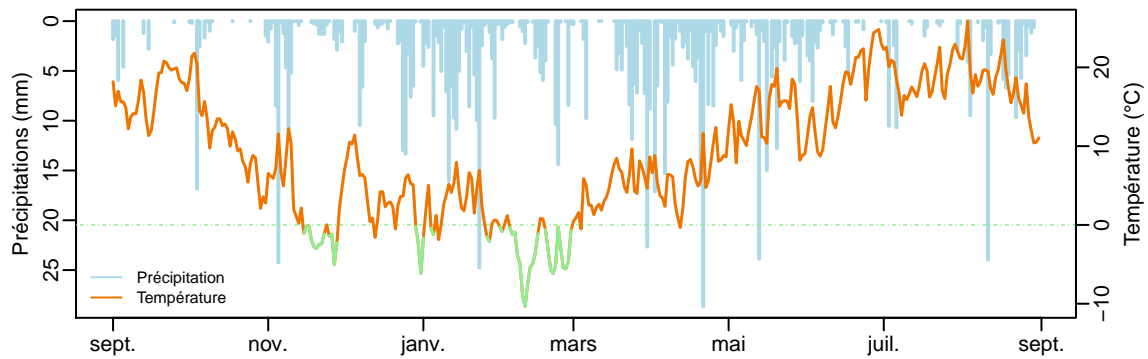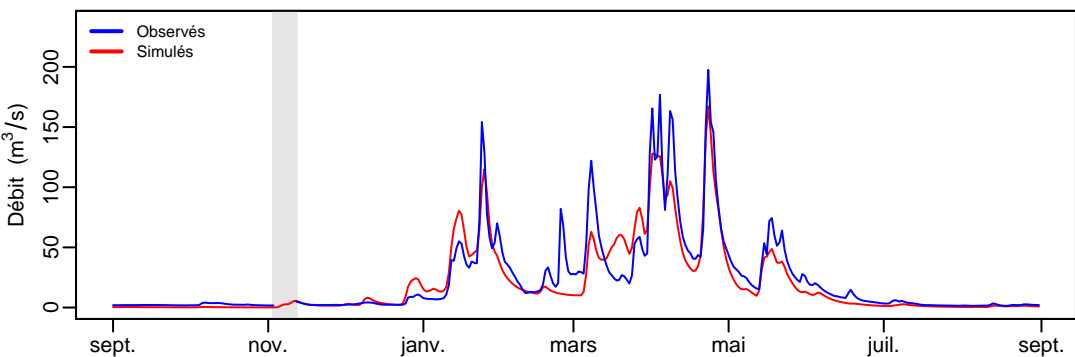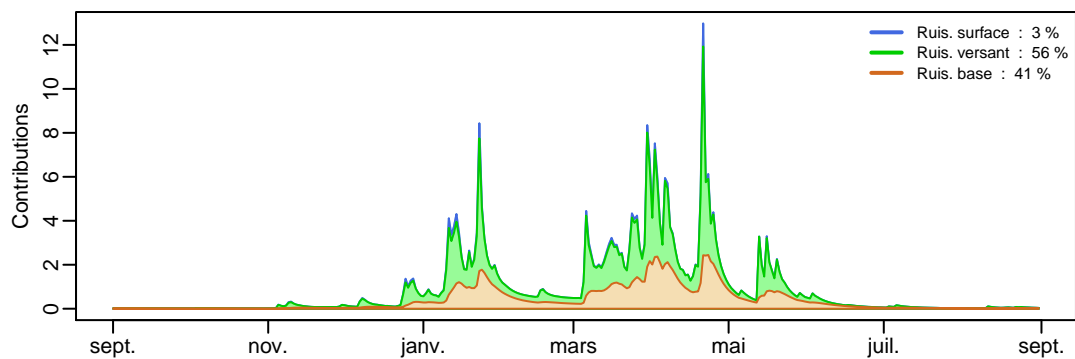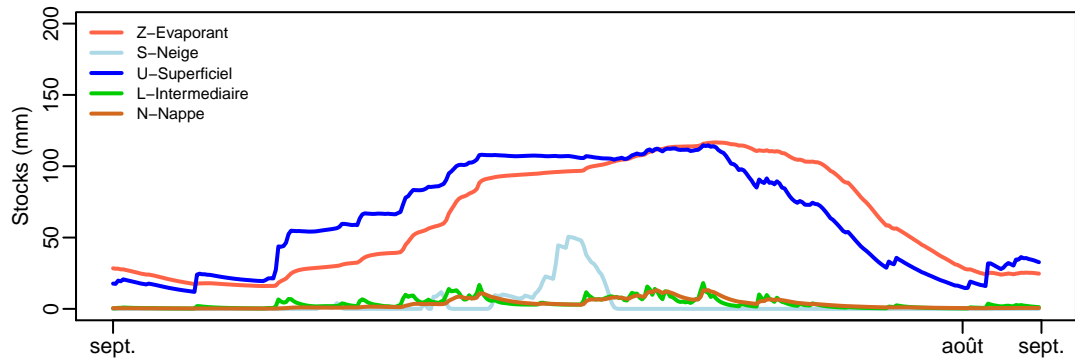

# k1321810 (1788.67 km<sup>2</sup>) – année 1986–1987

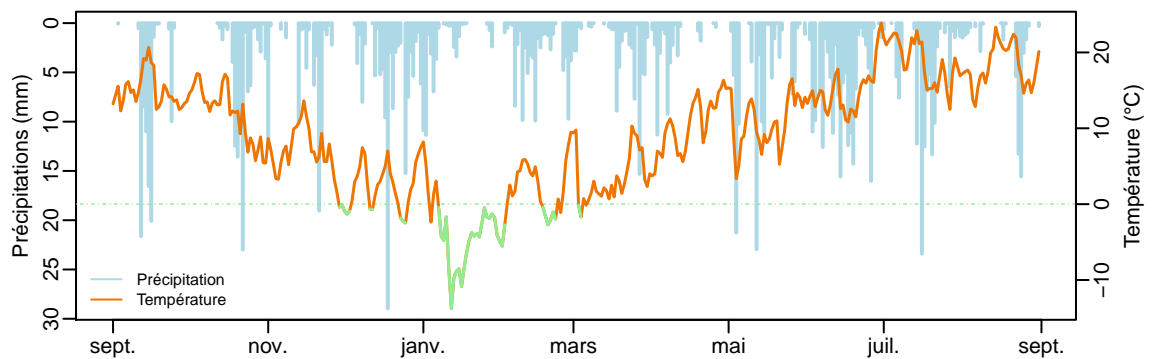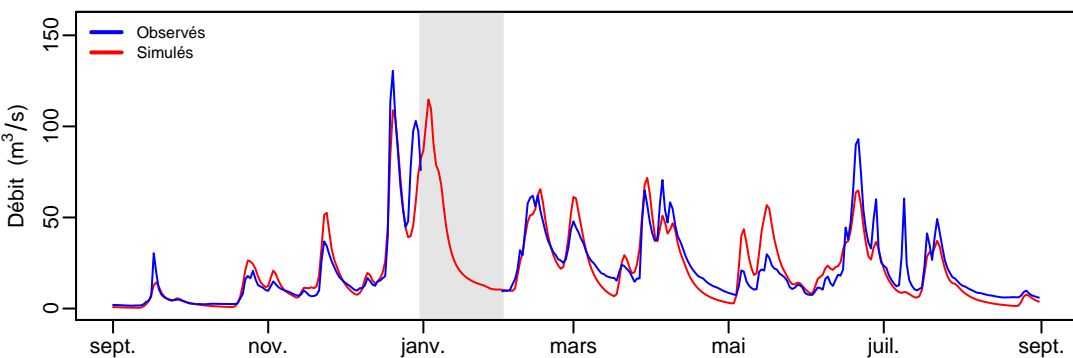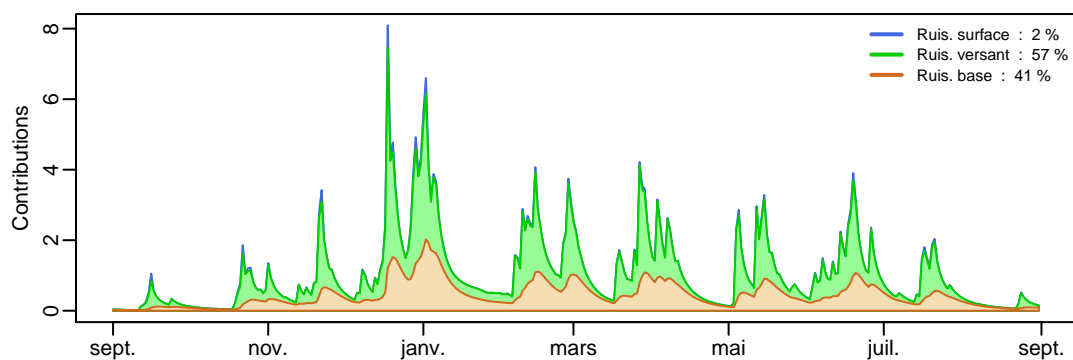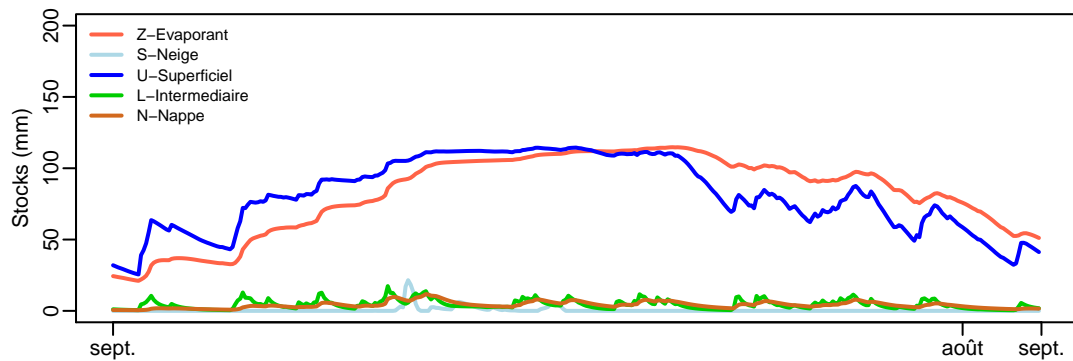

# k1321810 (1788.67 km<sup>2</sup>) – année 1987–1988

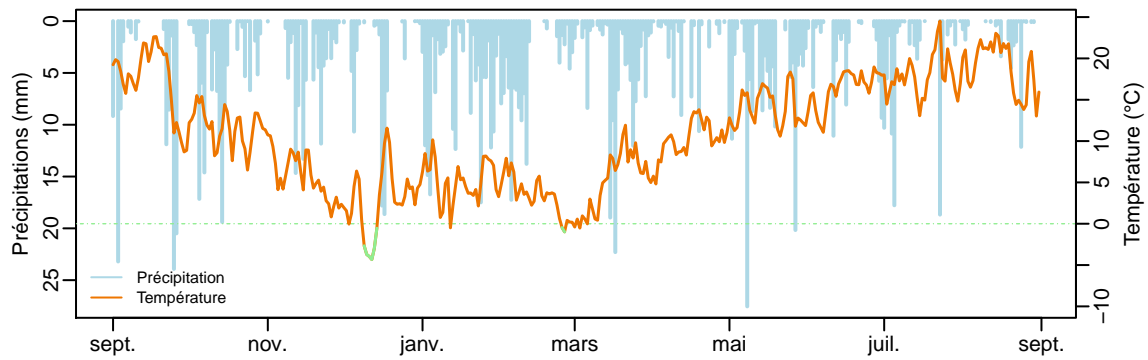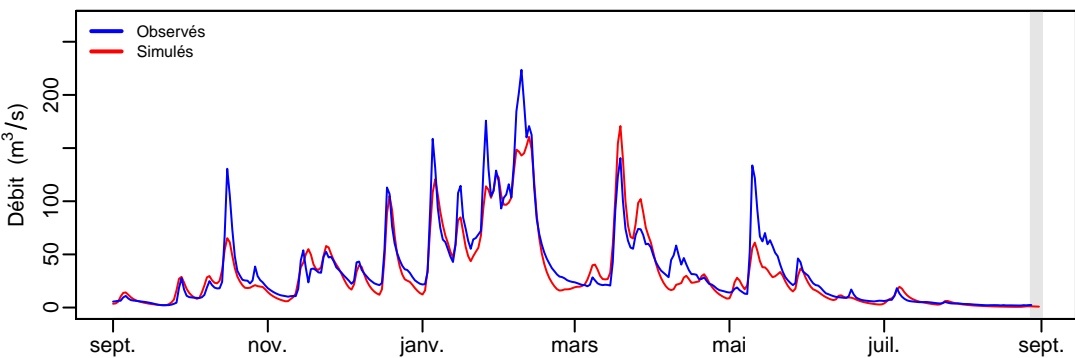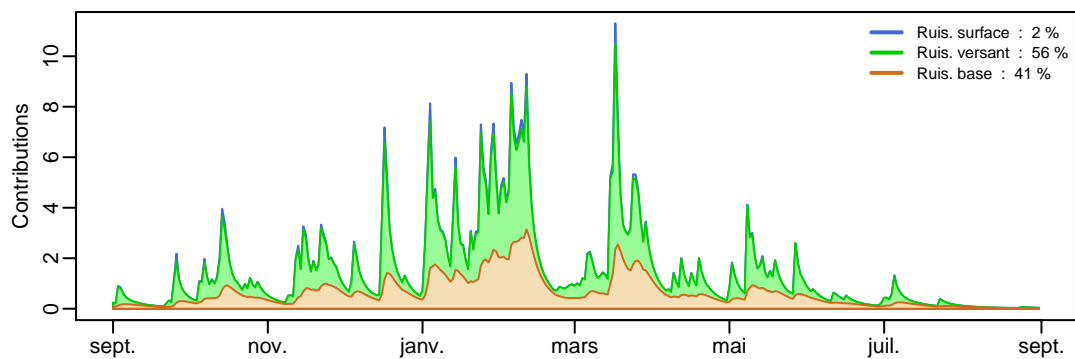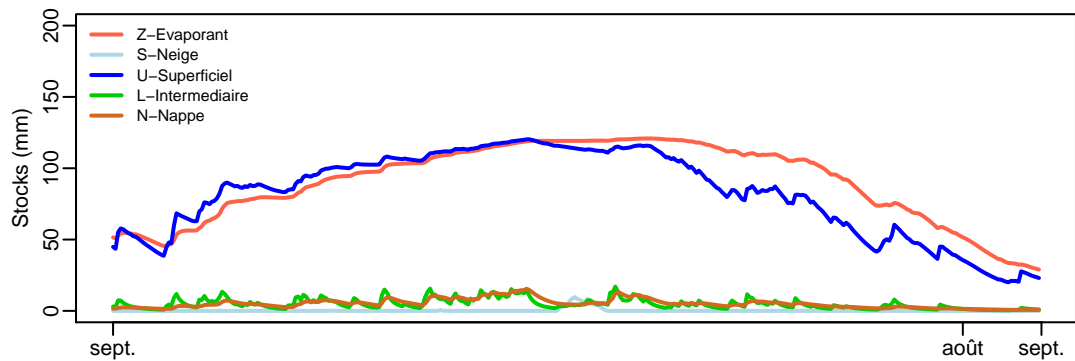

# k1321810 (1788.67 km<sup>2</sup>) – année 1988–1989

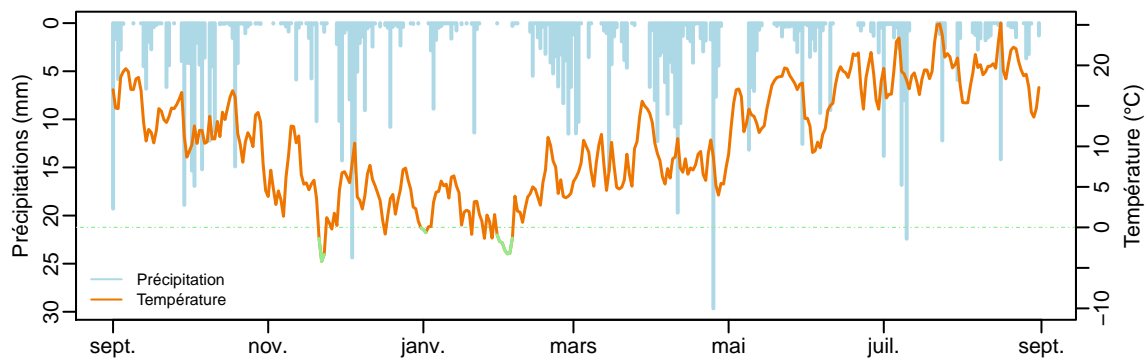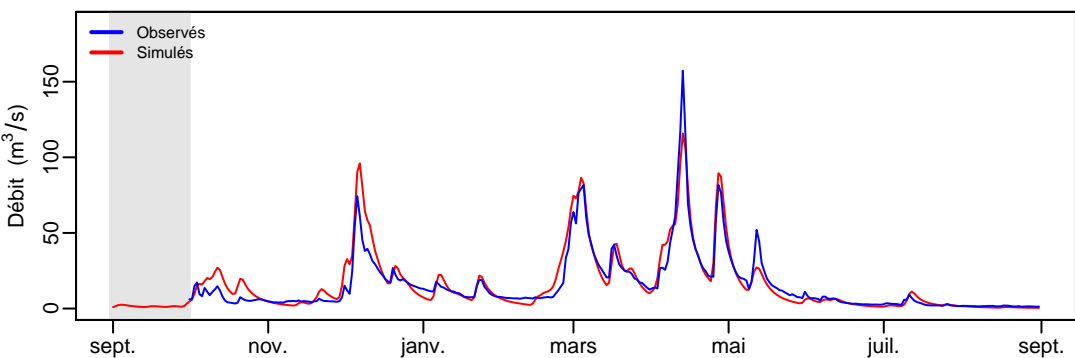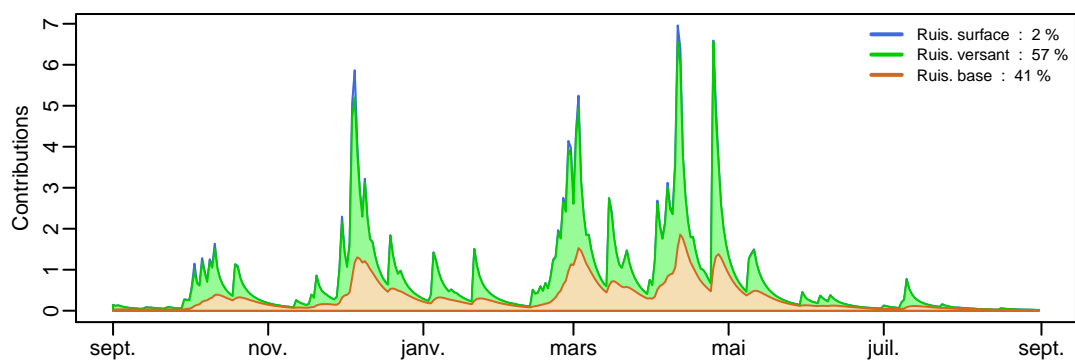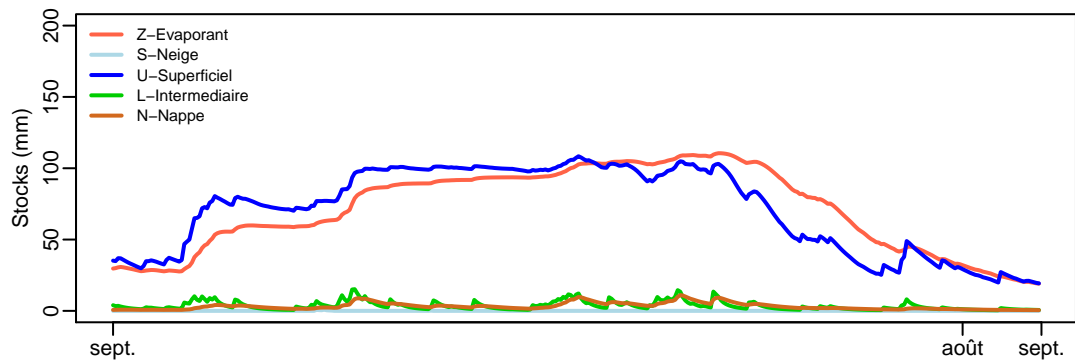

# k1321810 (1788.67 km²) – année 1989–1990

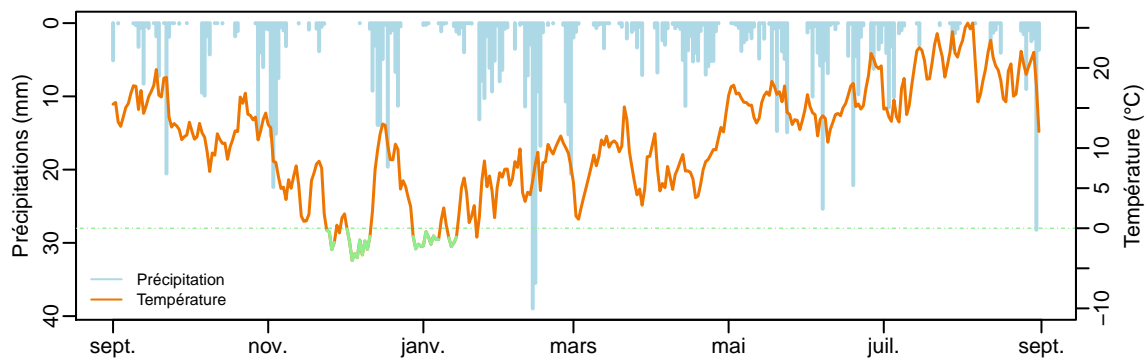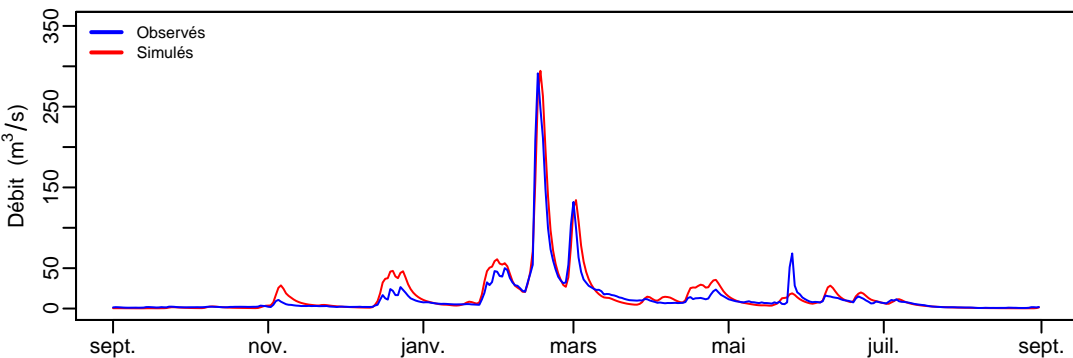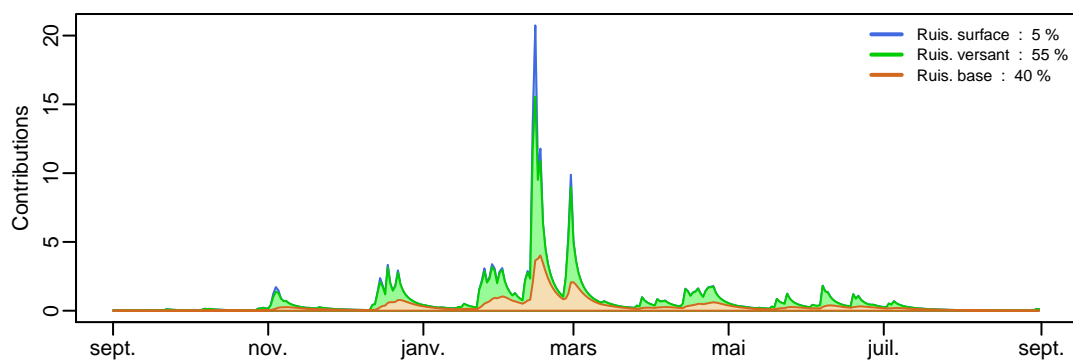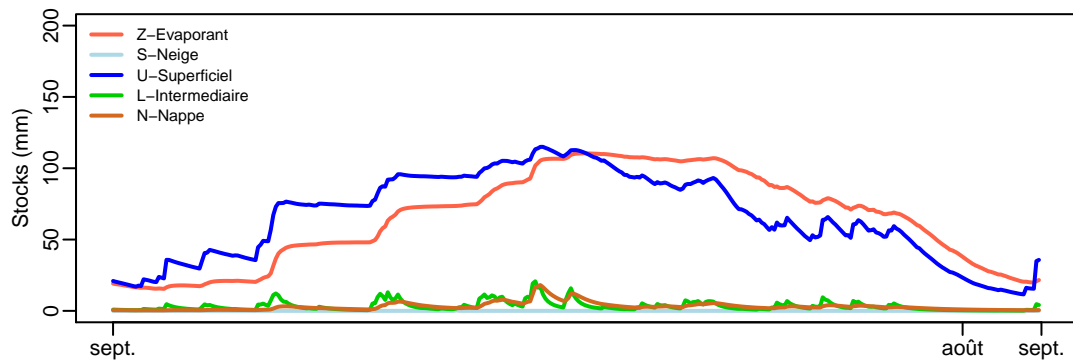

# k1321810 (1788.67 km<sup>2</sup>) – année 1990–1991

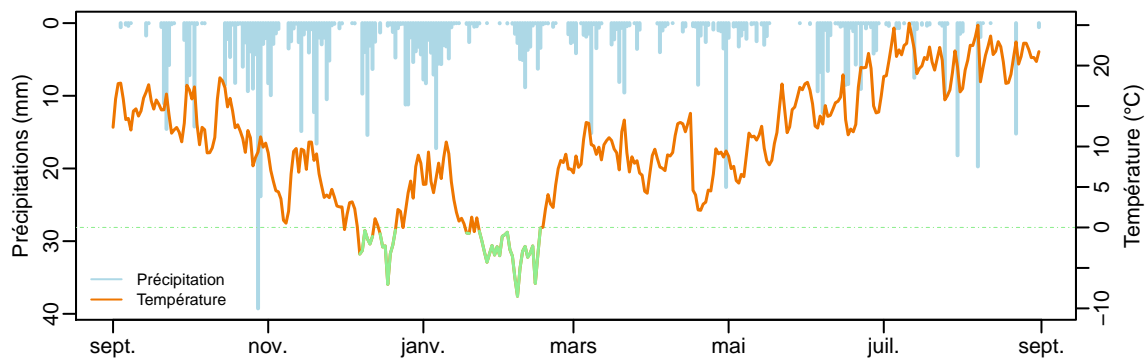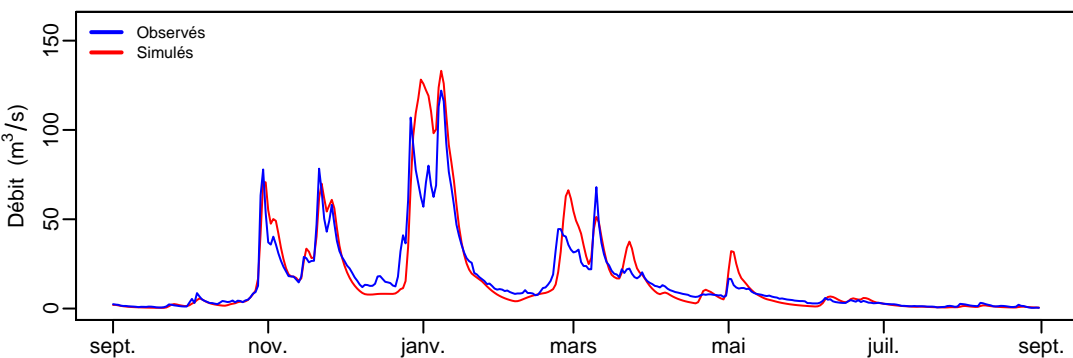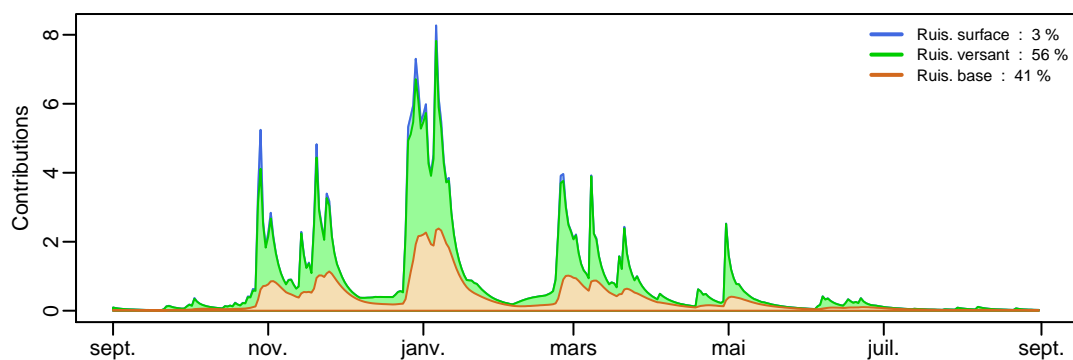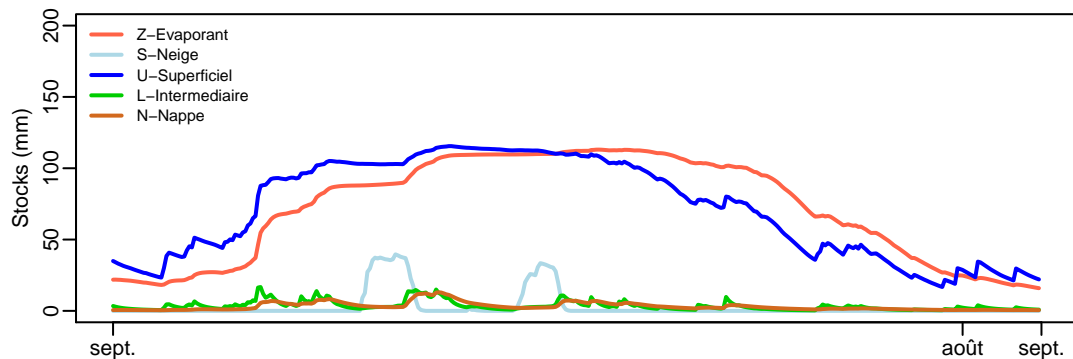

# k1321810 (1788.67 km<sup>2</sup>) – année 1991–1992

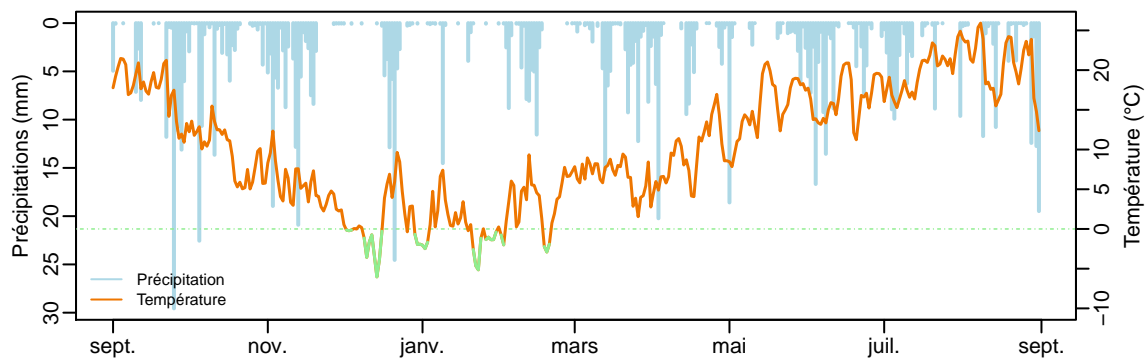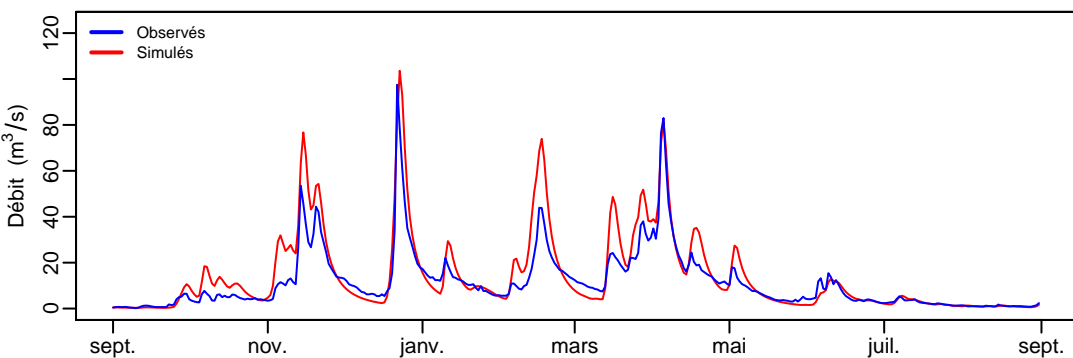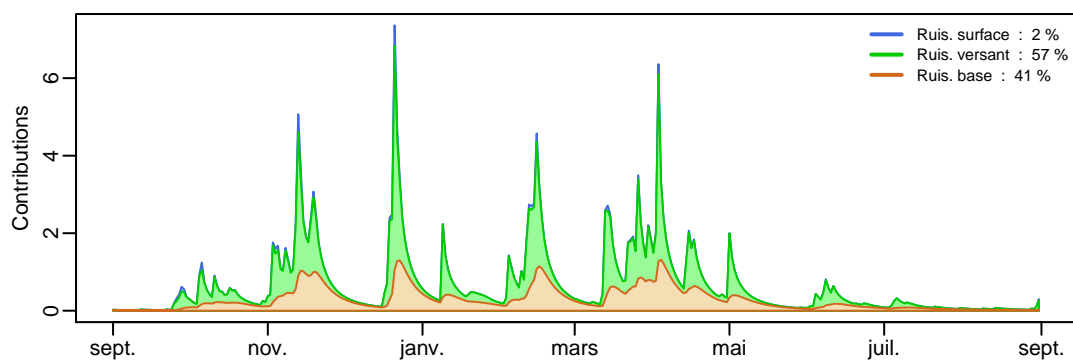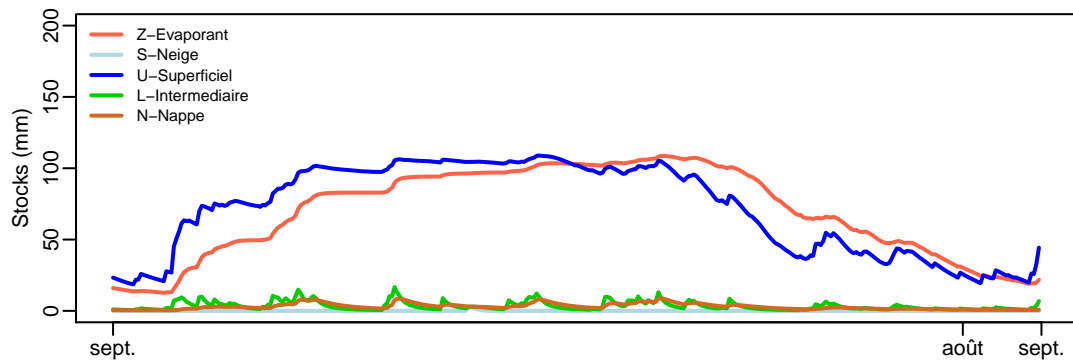

# k1321810 (1788.67 km<sup>2</sup>) – année 1992–1993

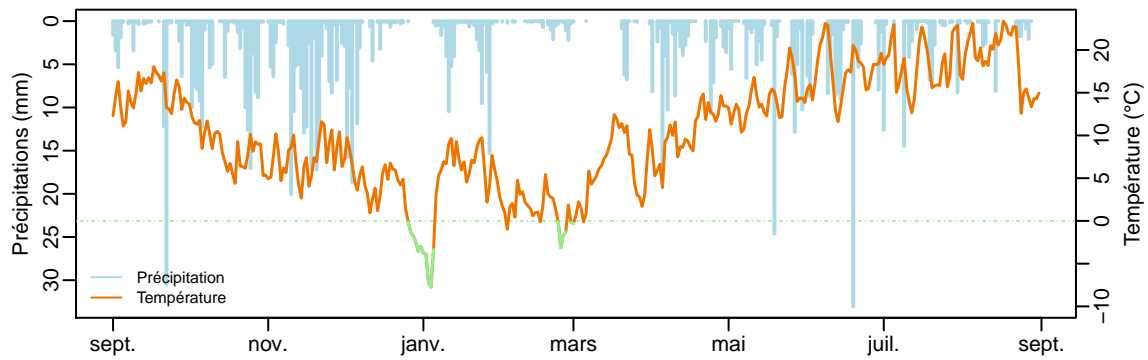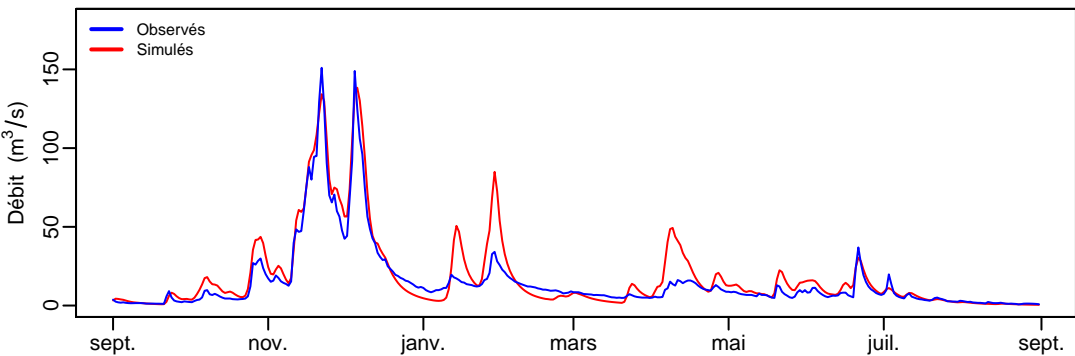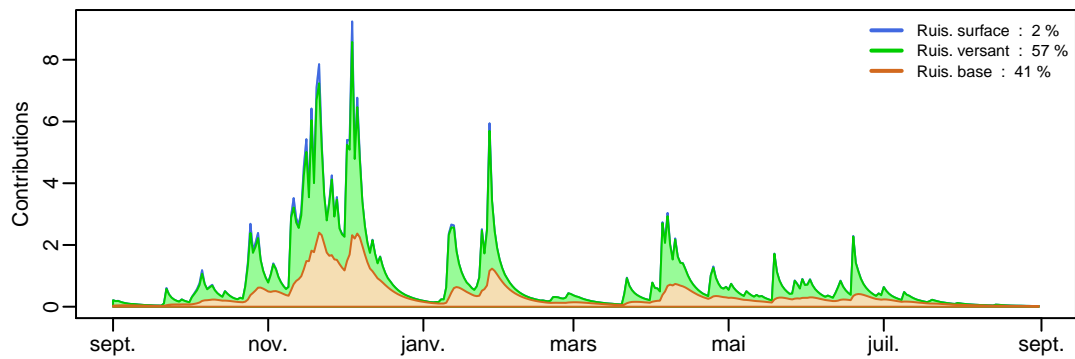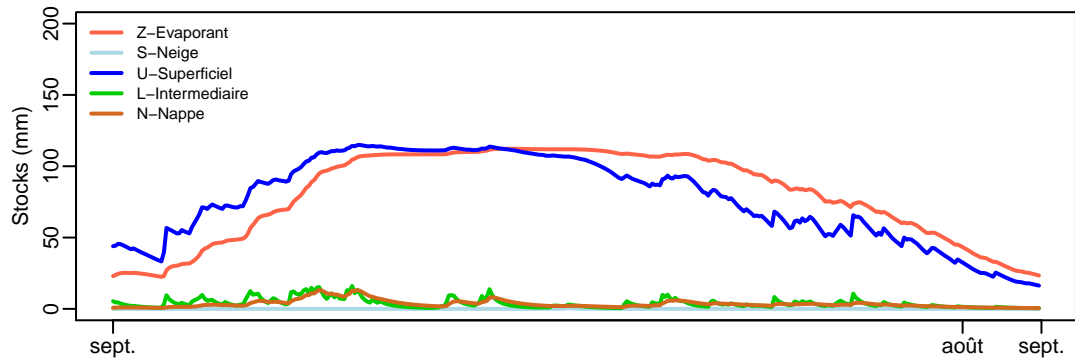



# k1321810 (1788.67 km²) – année 1993–1994

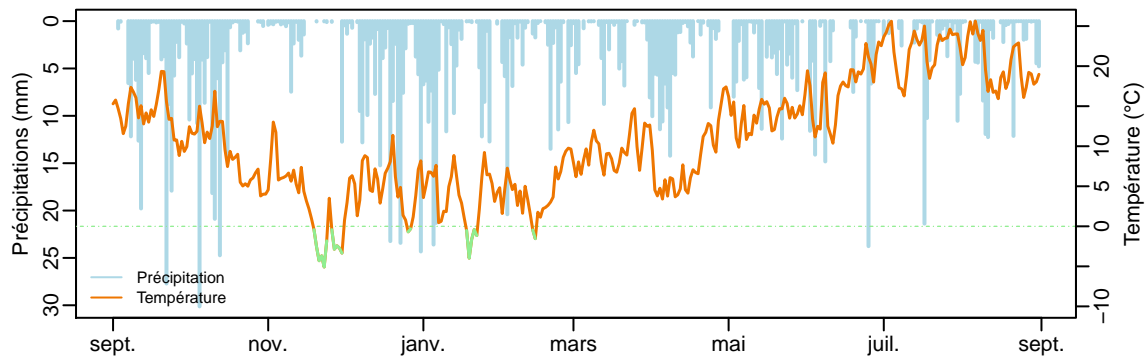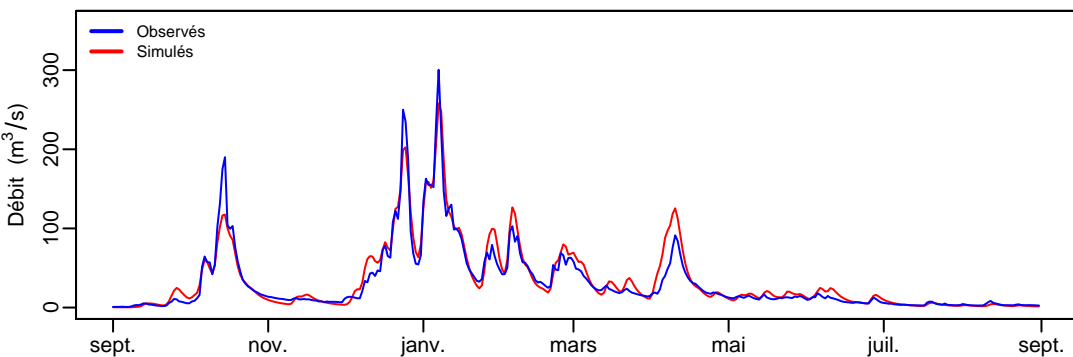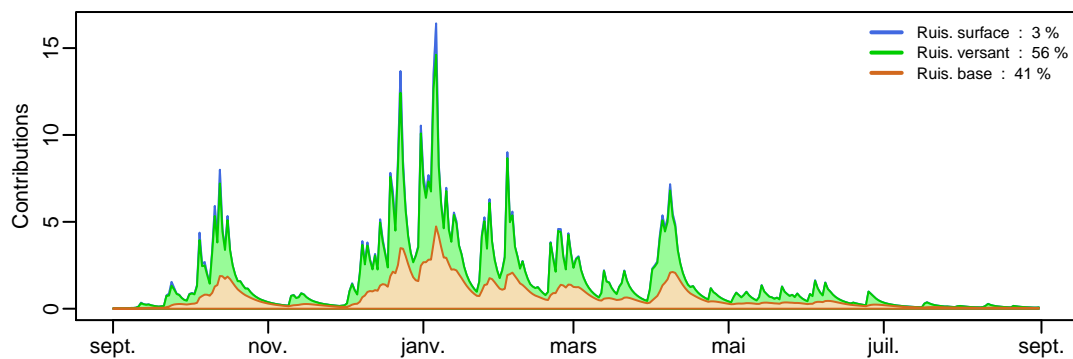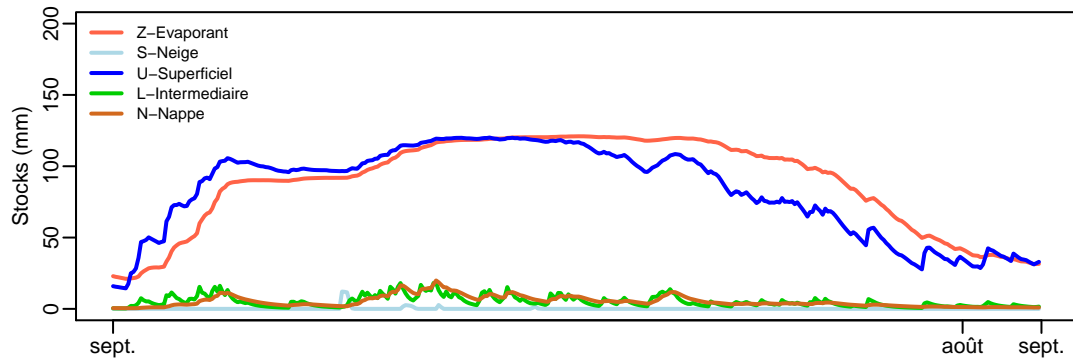

# k1321810 (1788.67 km²) – année 1994–1995

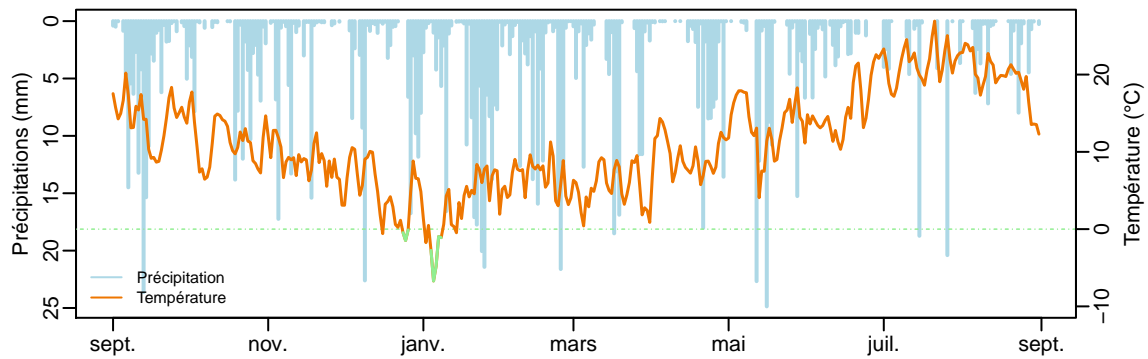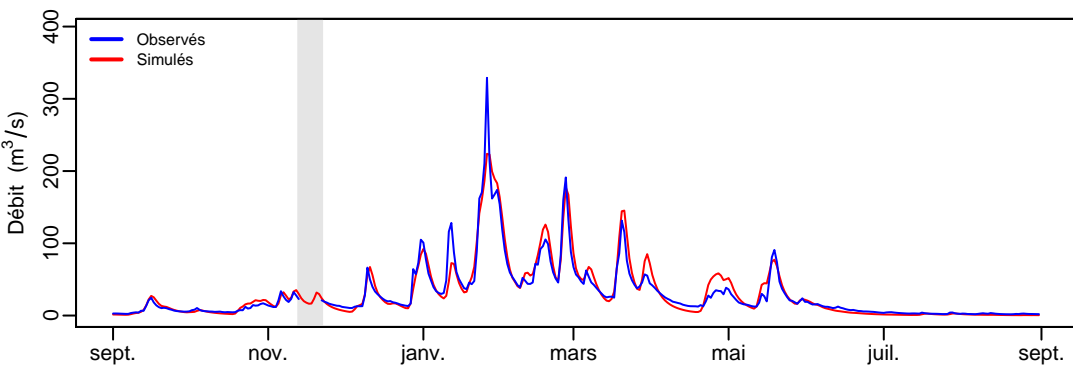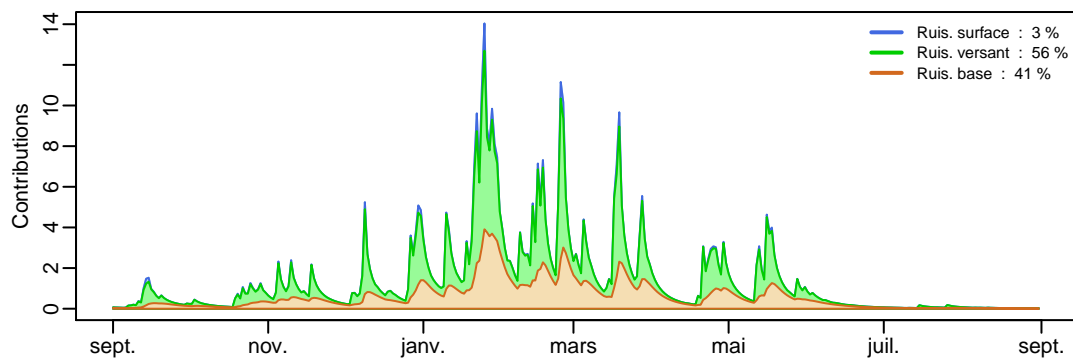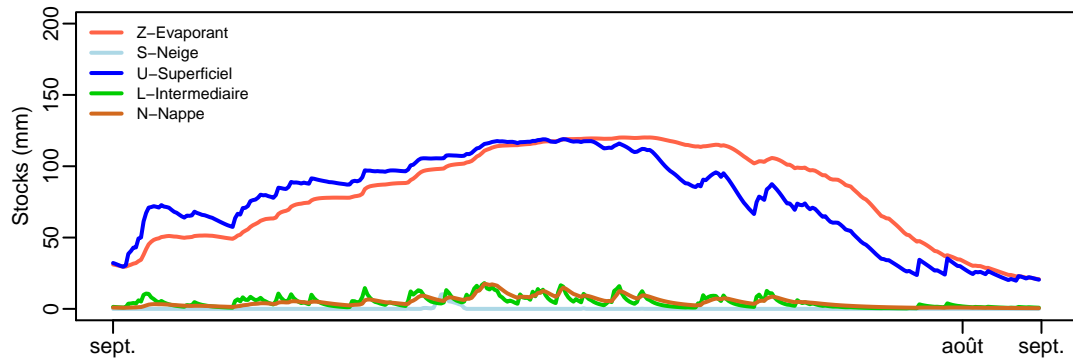

# k1321810 (1788.67 km<sup>2</sup>) – année 1995–1996

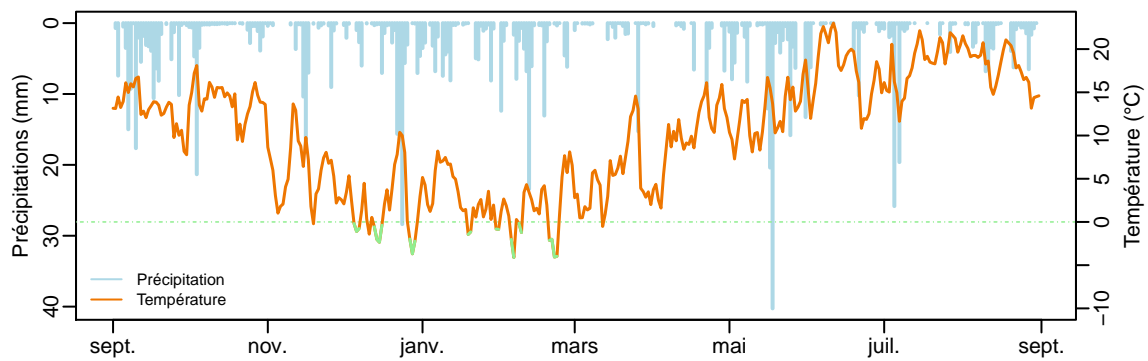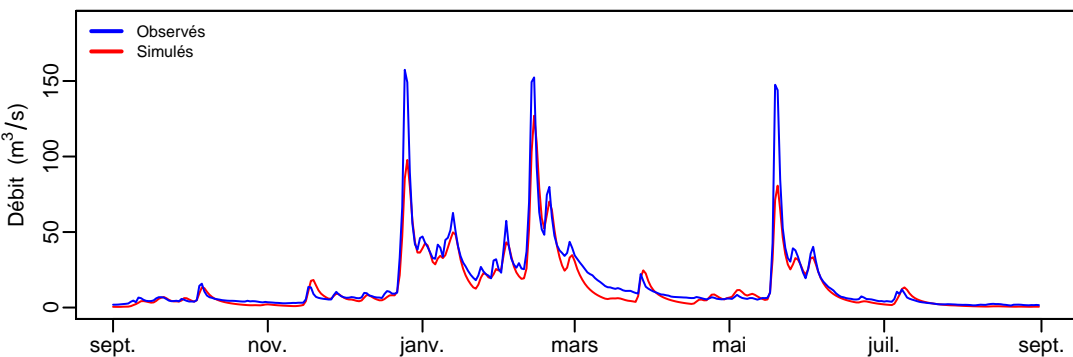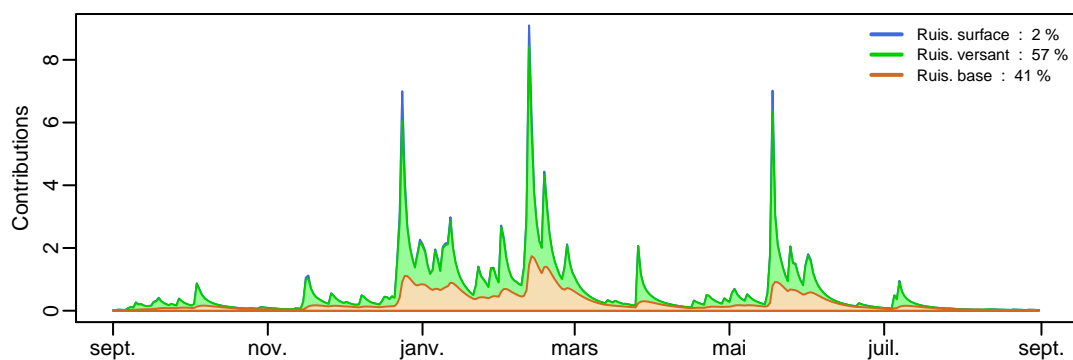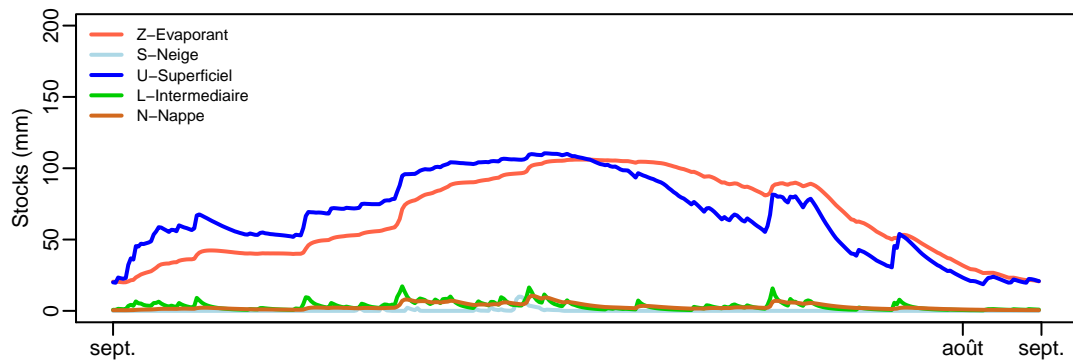

# k1321810 (1788.67 km<sup>2</sup>) – année 1996–1997

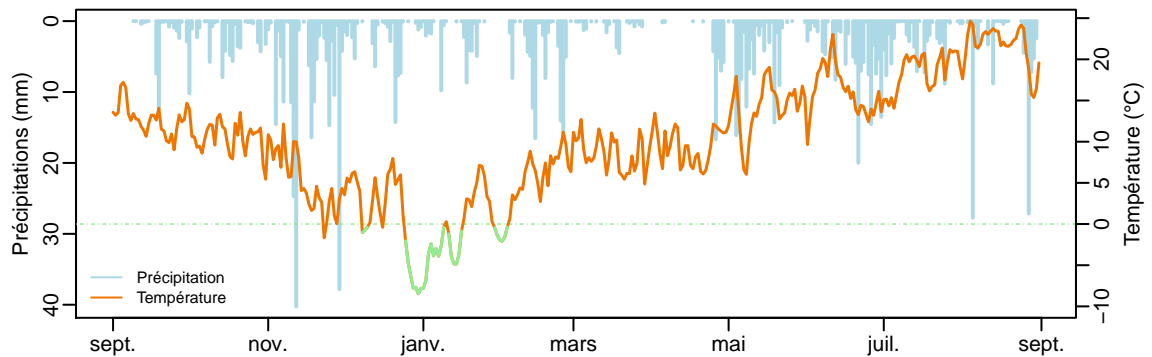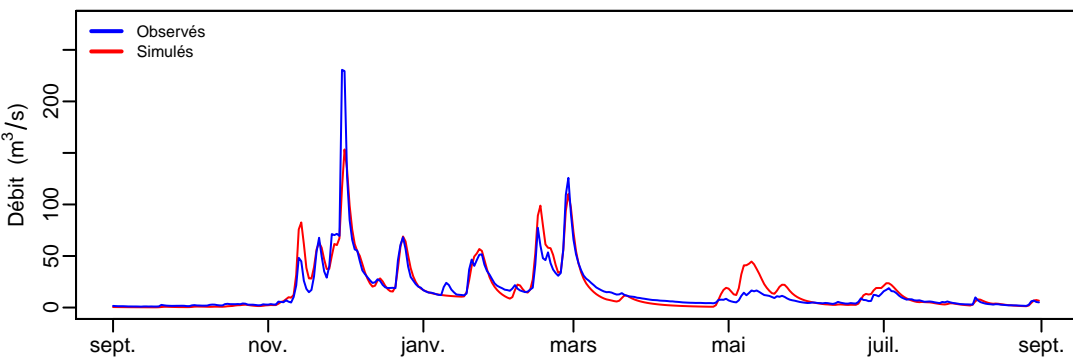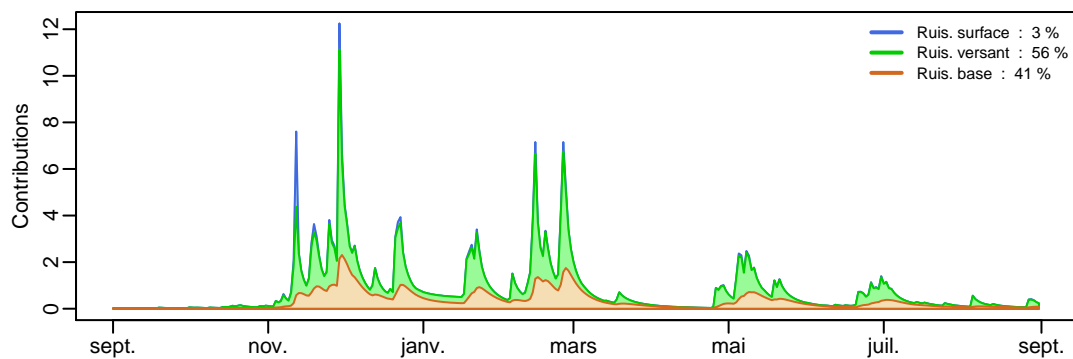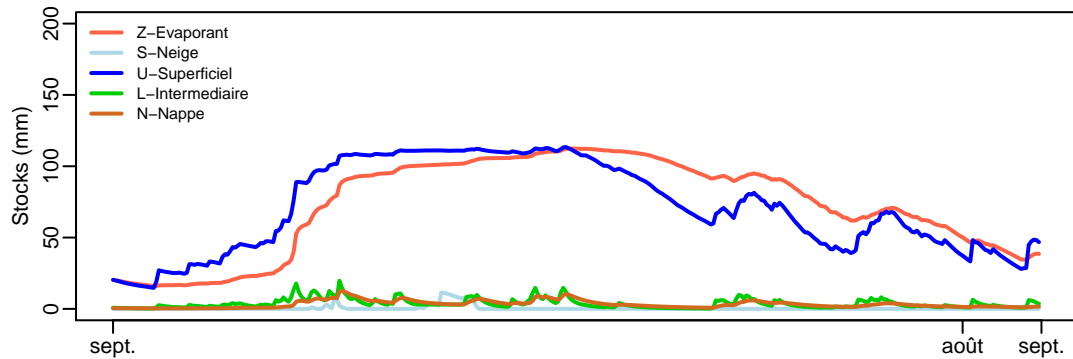

# k1321810 (1788.67 km<sup>2</sup>) – année 1997–1998

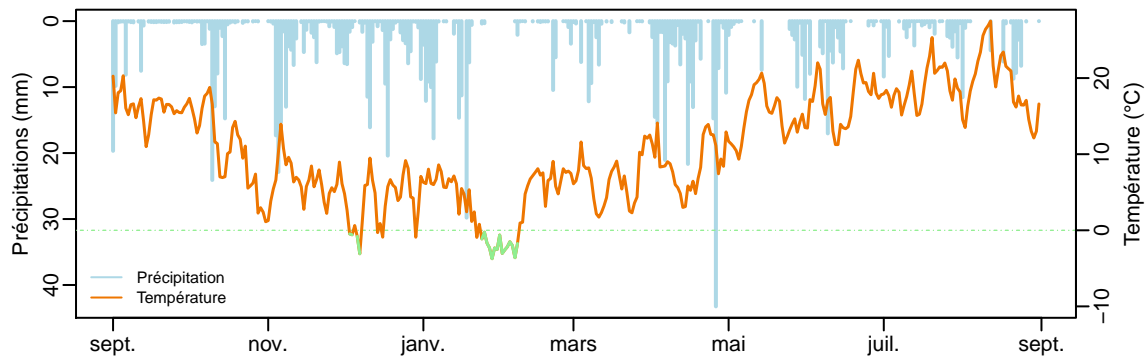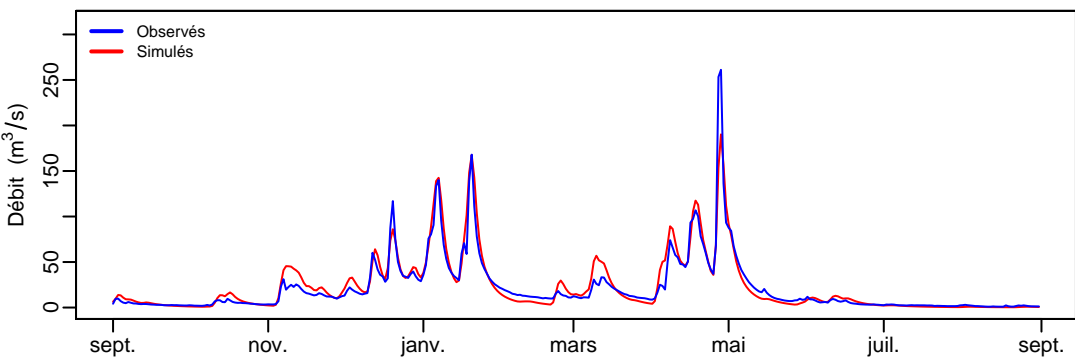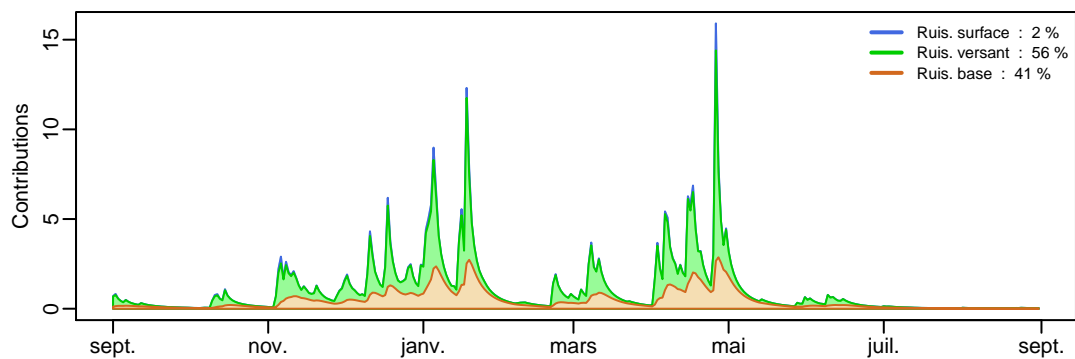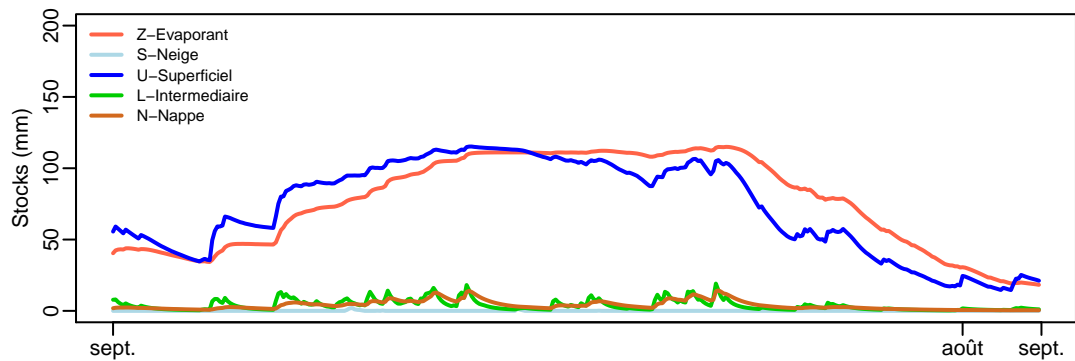

# k1321810 (1788.67 km²) – année 1998–1999

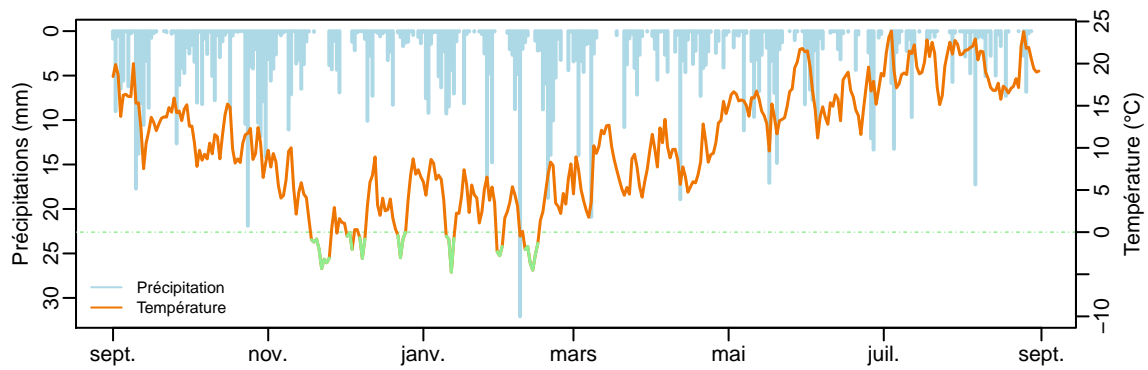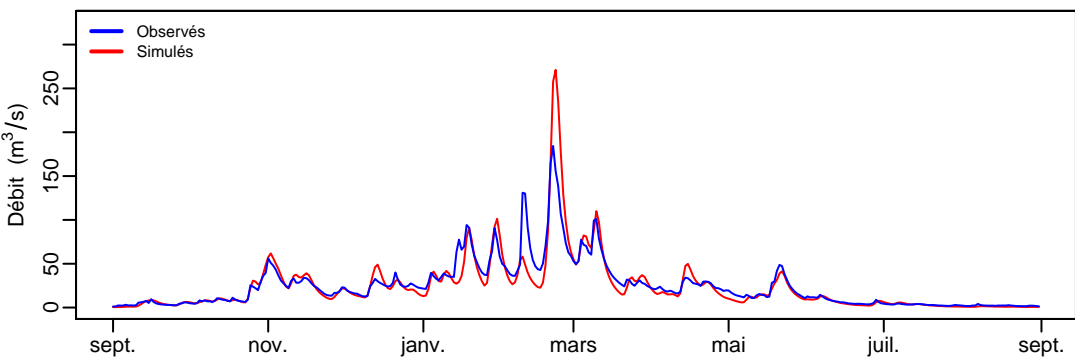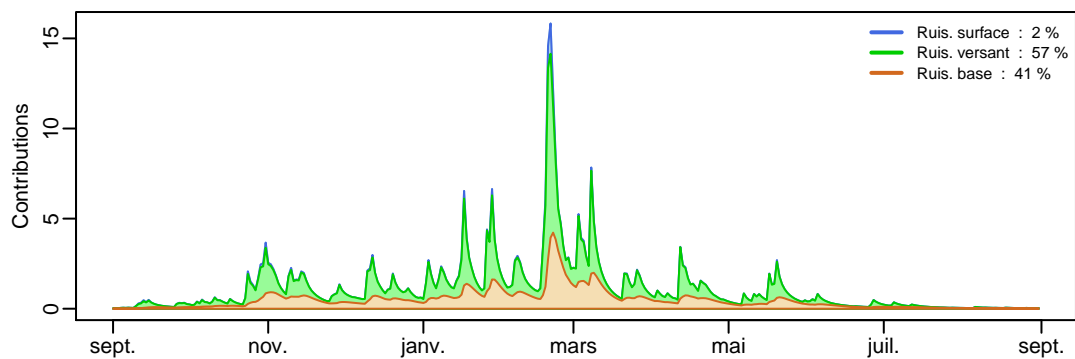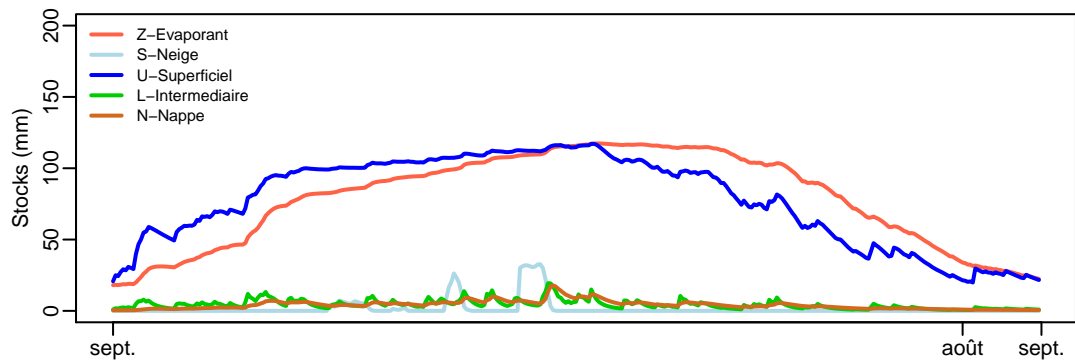

# k1321810 (1788.67 km²) – année 1999–2000

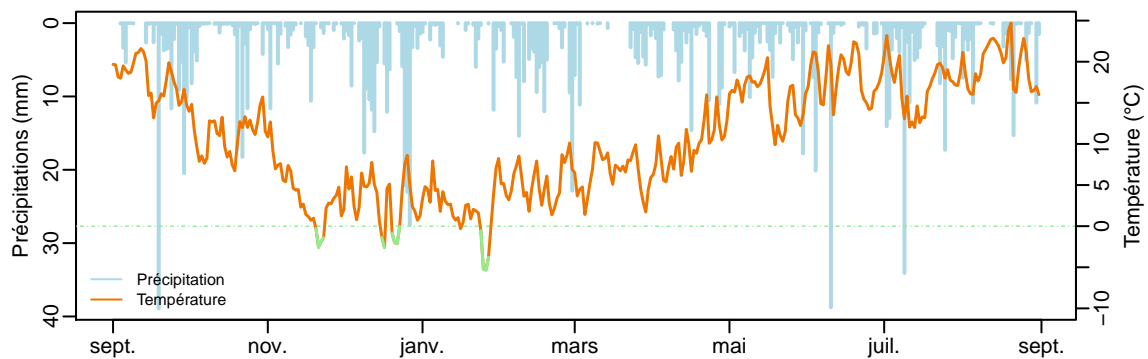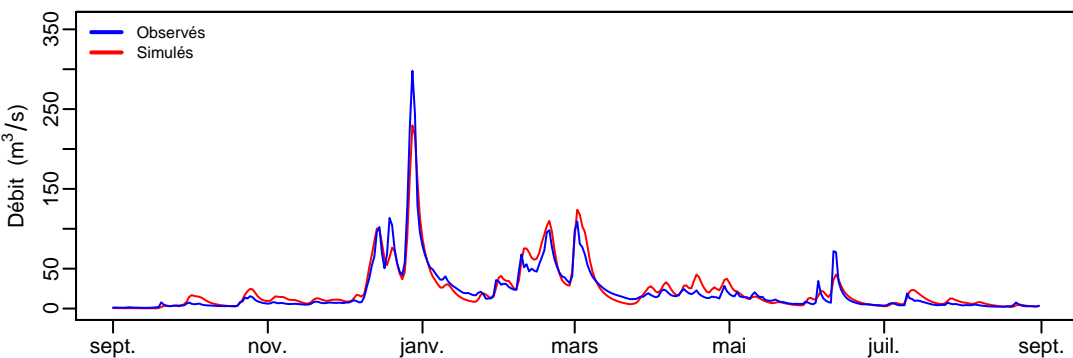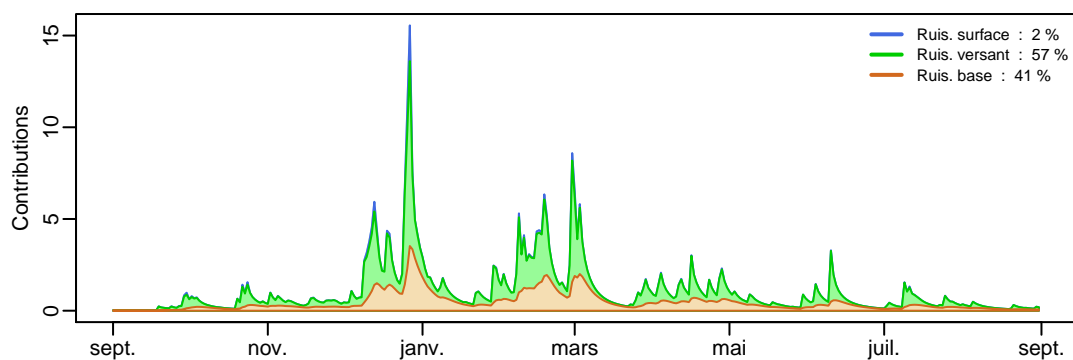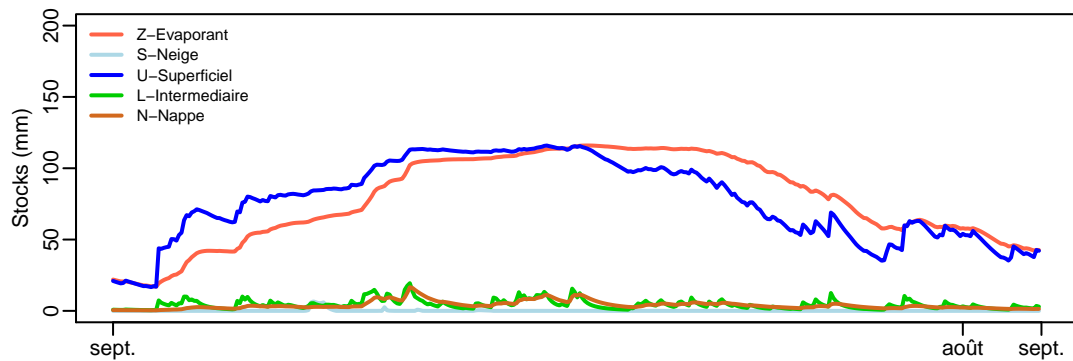

# k1321810 (1788.67 km<sup>2</sup>) – année 2000–2001

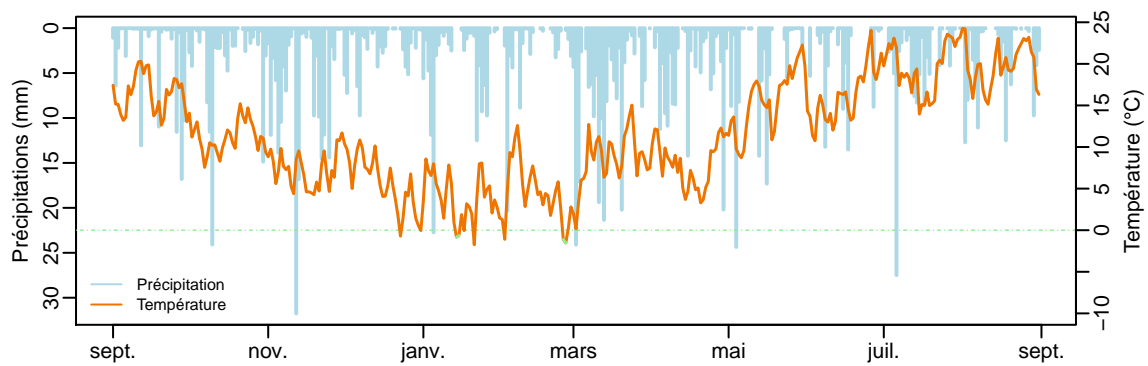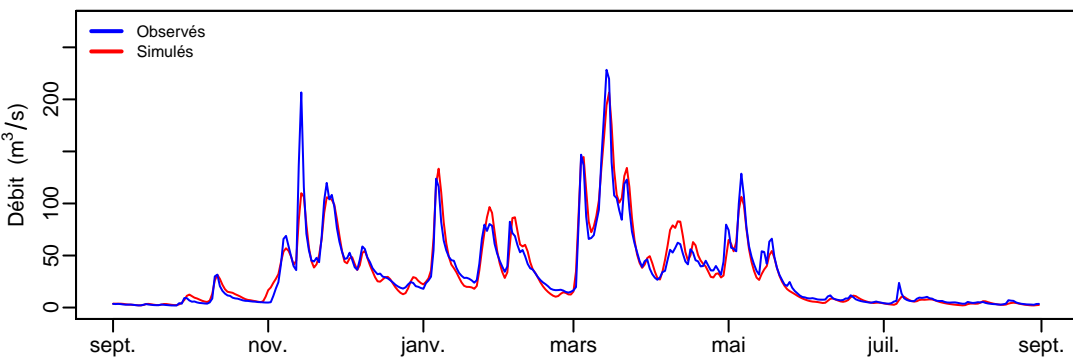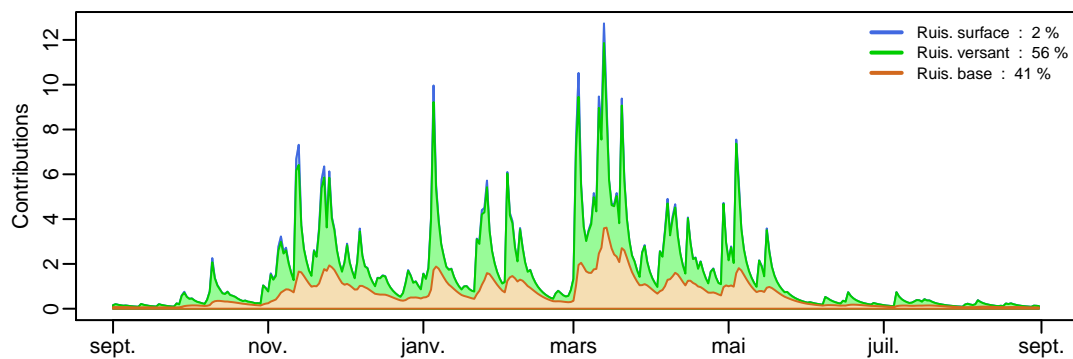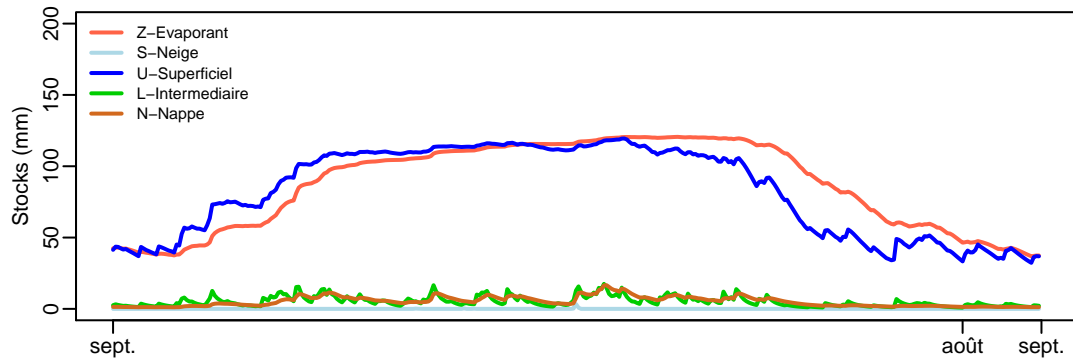



# k1321810 (1788.67 km<sup>2</sup>) – année 2001–2002

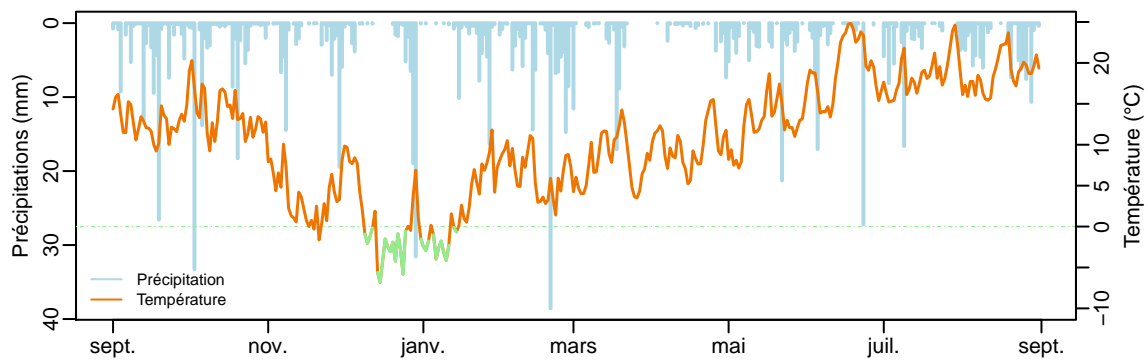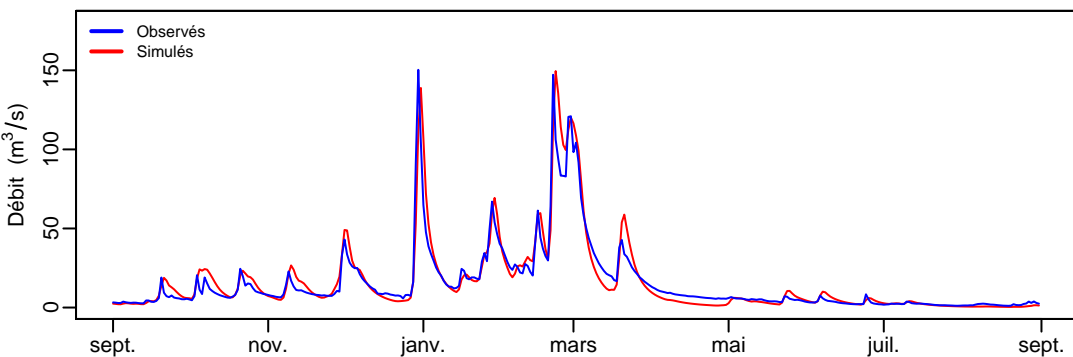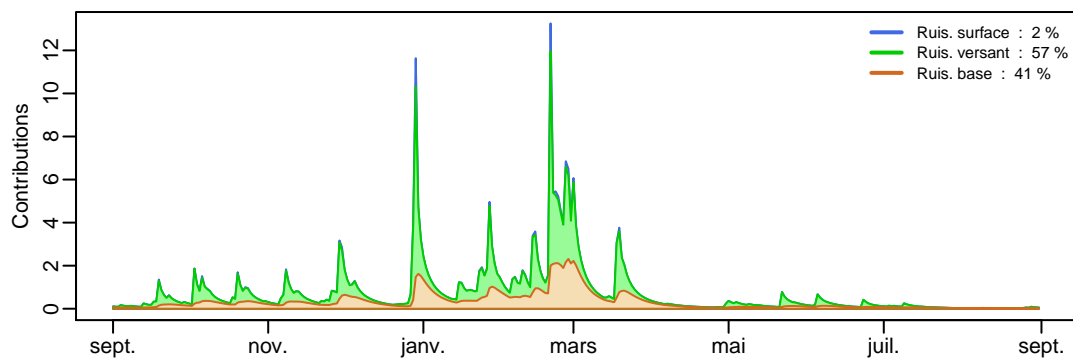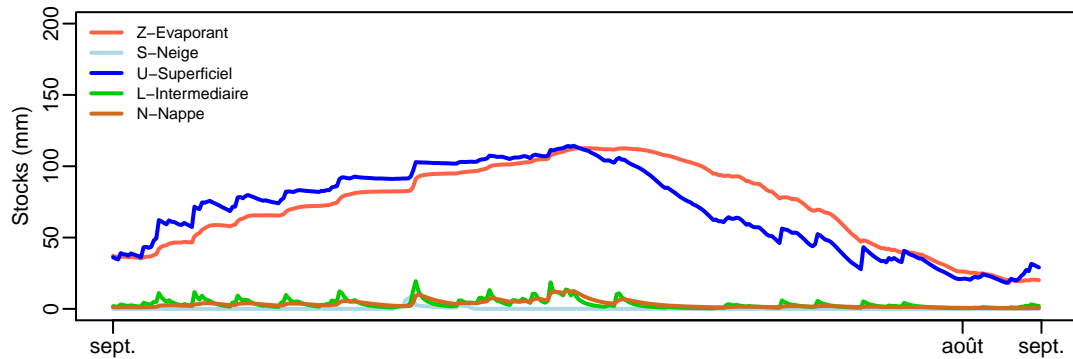

# k1321810 (1788.67 km<sup>2</sup>) – année 2002–2003

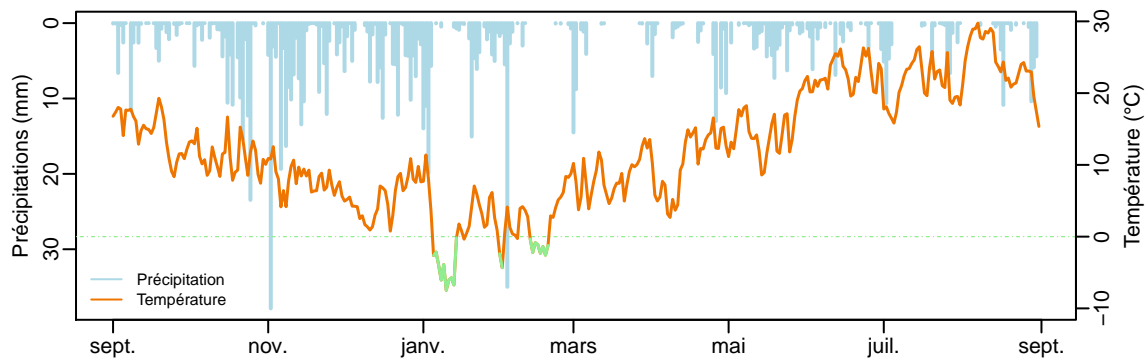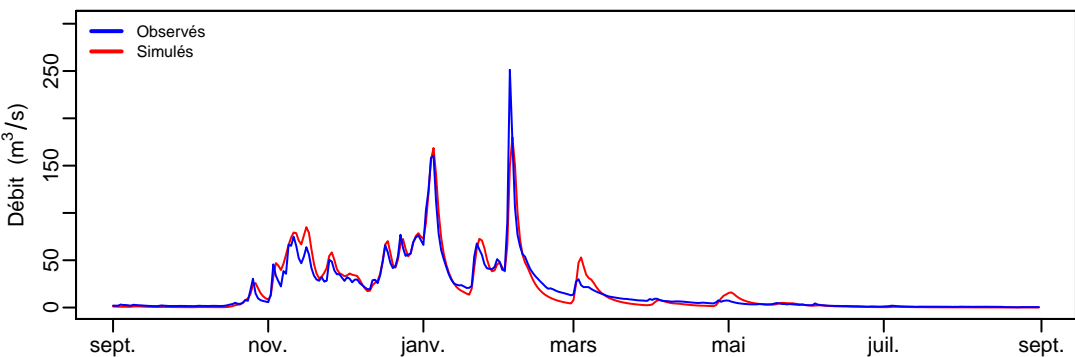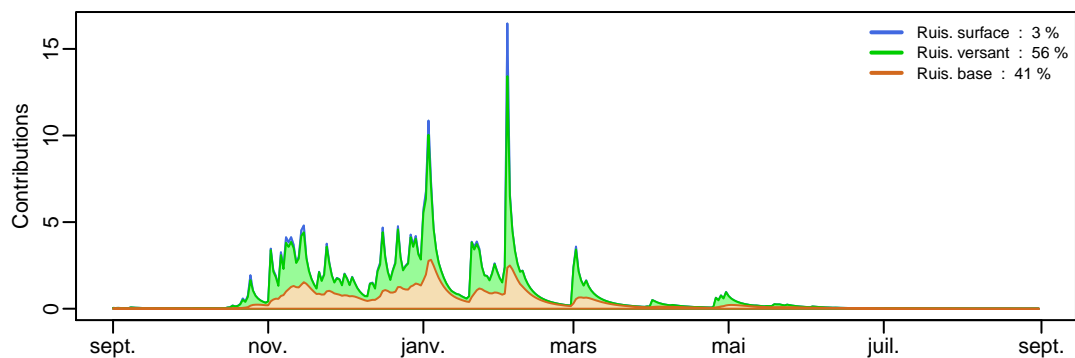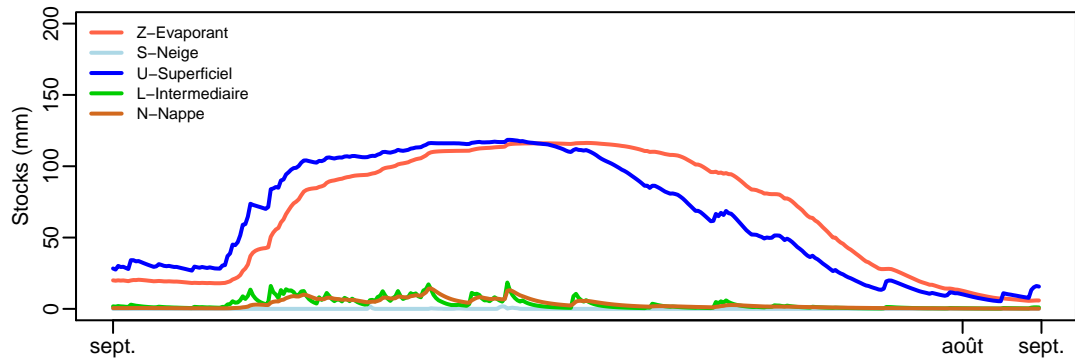

# k1321810 (1788.67 km<sup>2</sup>) – année 2003–2004

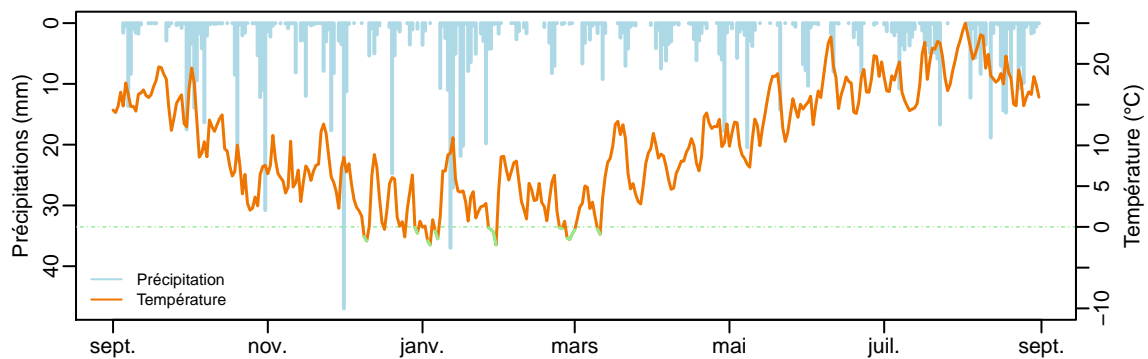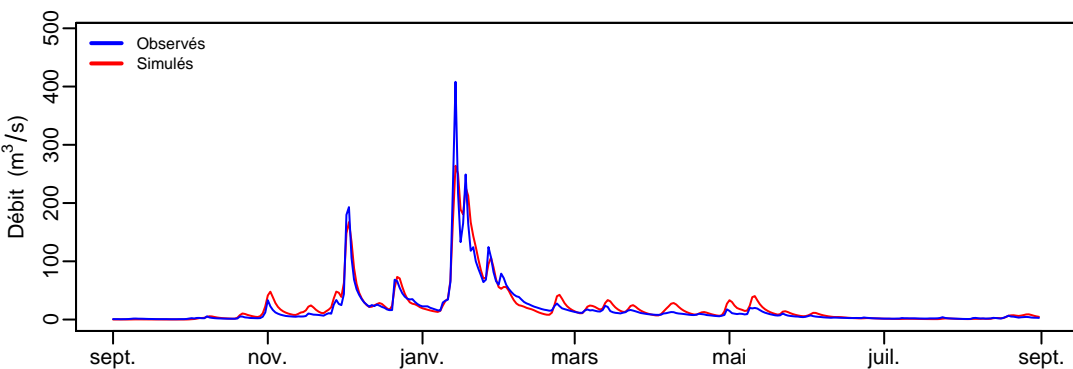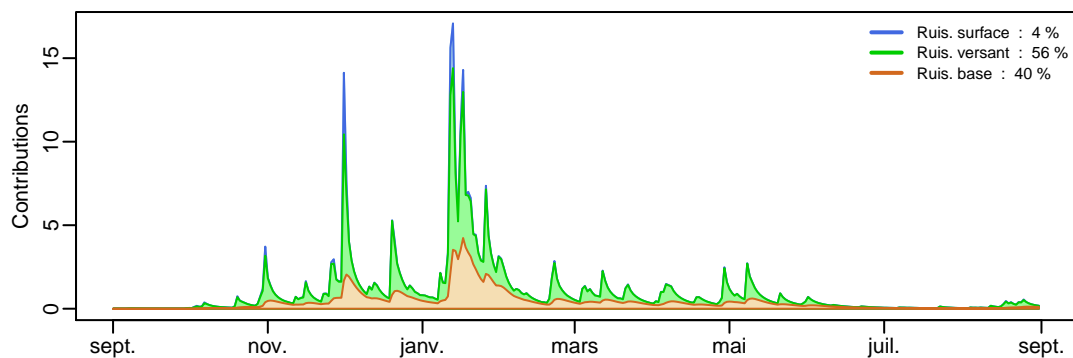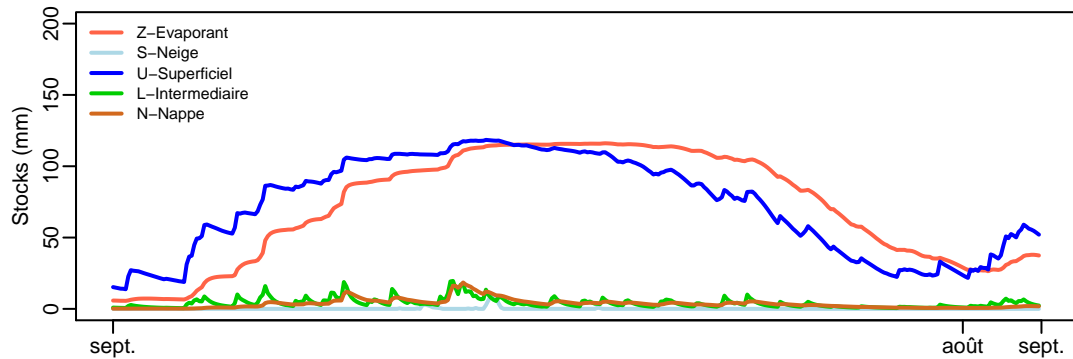

# k1321810 (1788.67 km²) – année 2004–2005

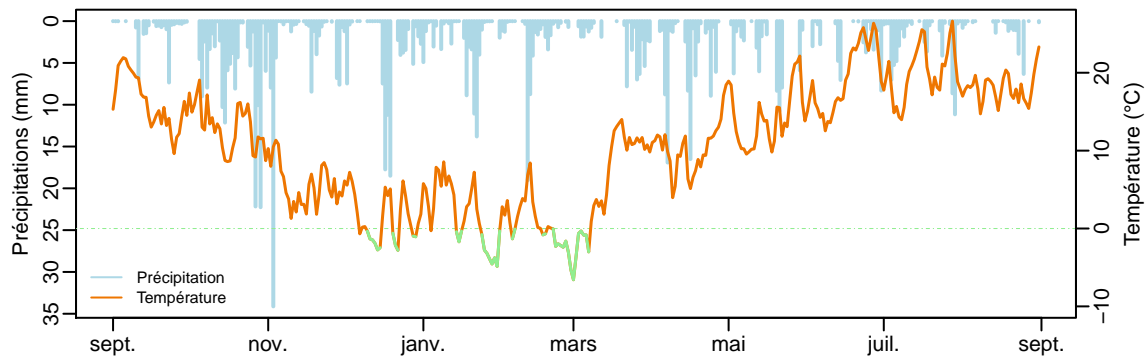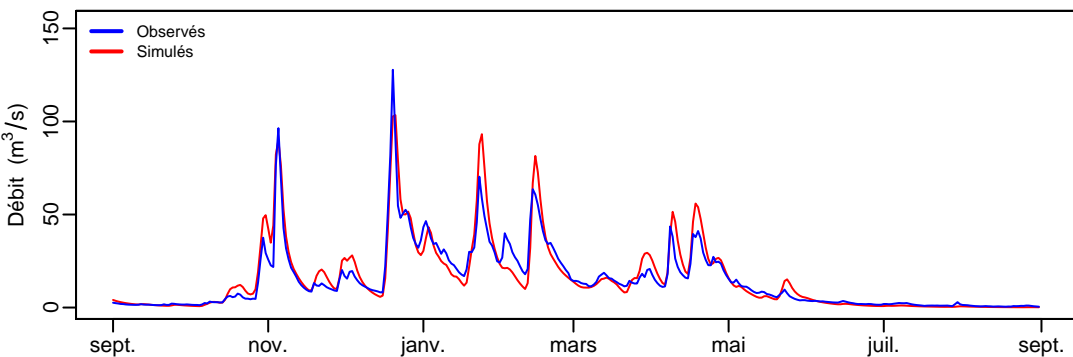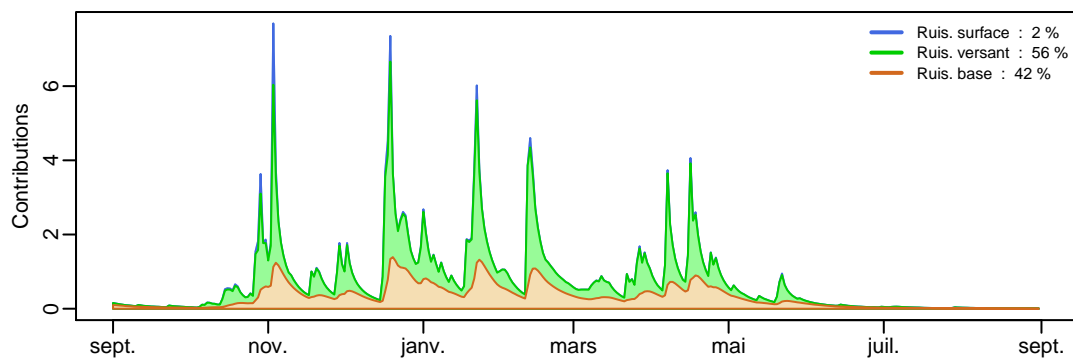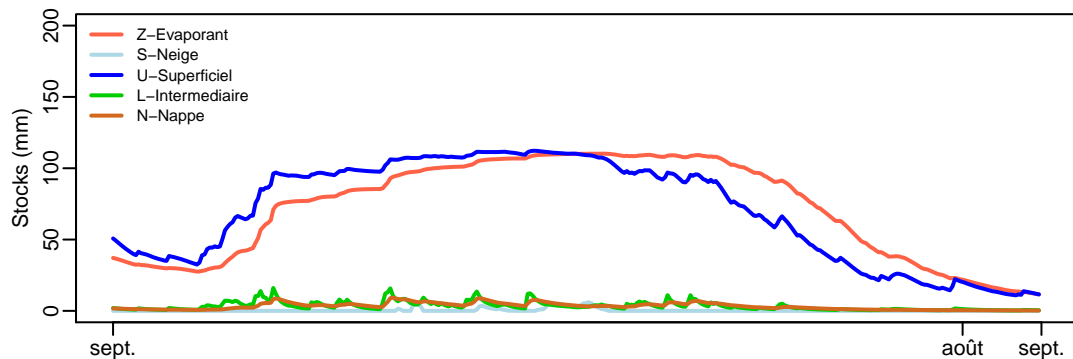

# k1321810 (1788.67 km<sup>2</sup>) – année 2005–2006

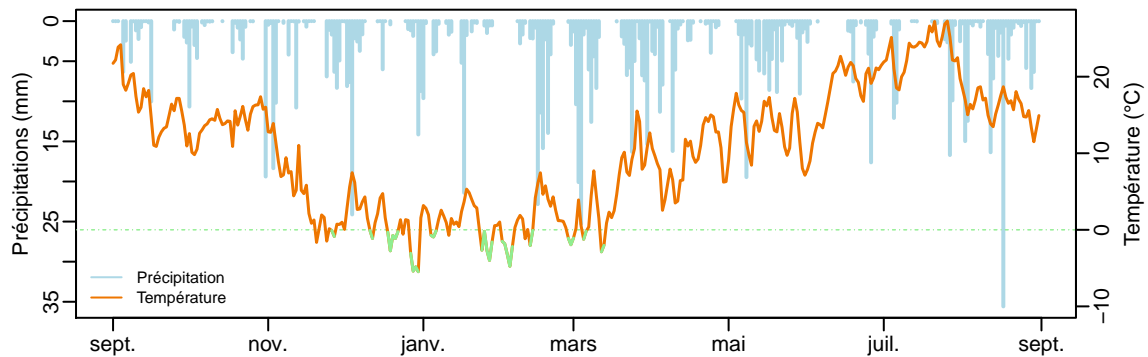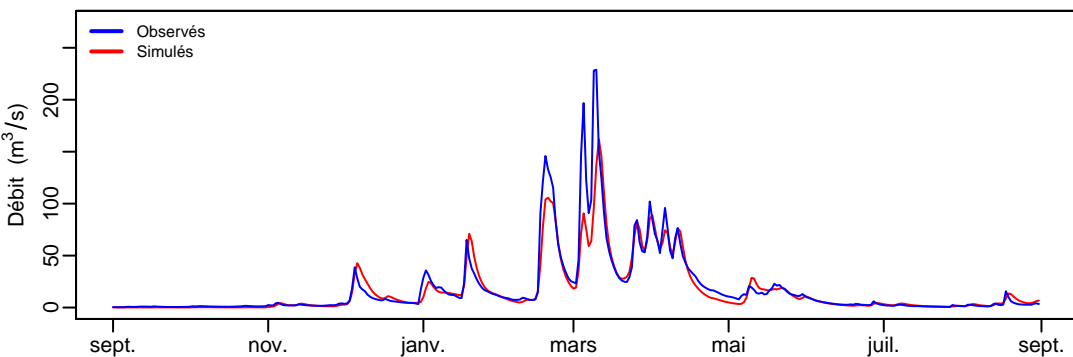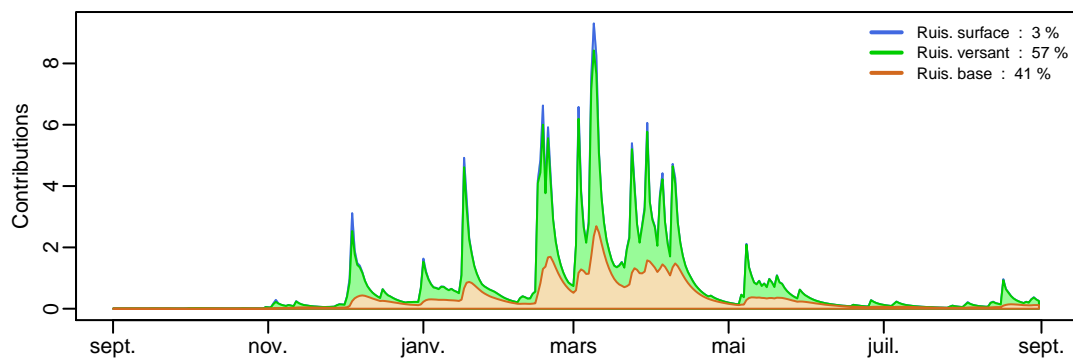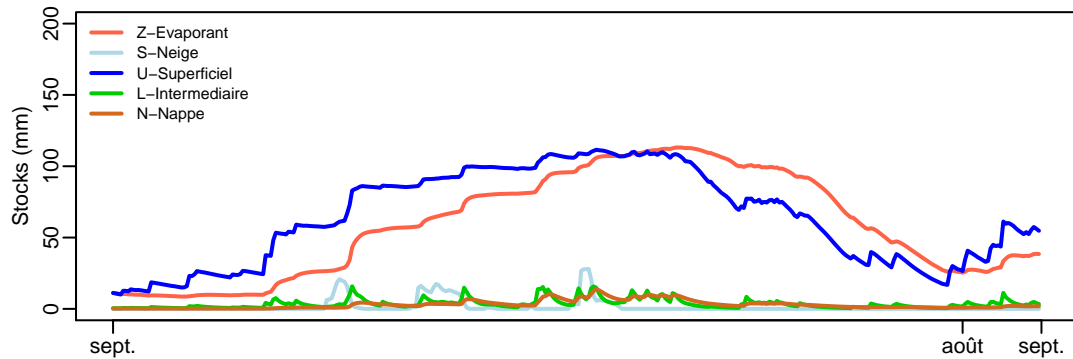

# k1321810 (1788.67 km<sup>2</sup>) – année 2006–2007

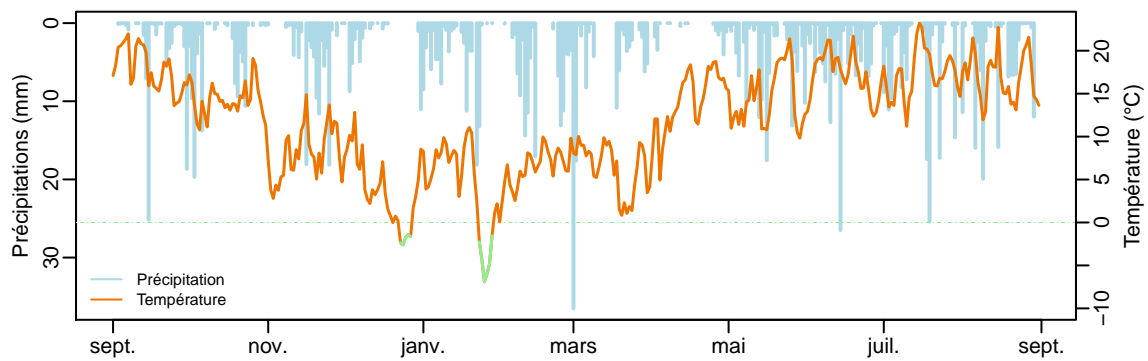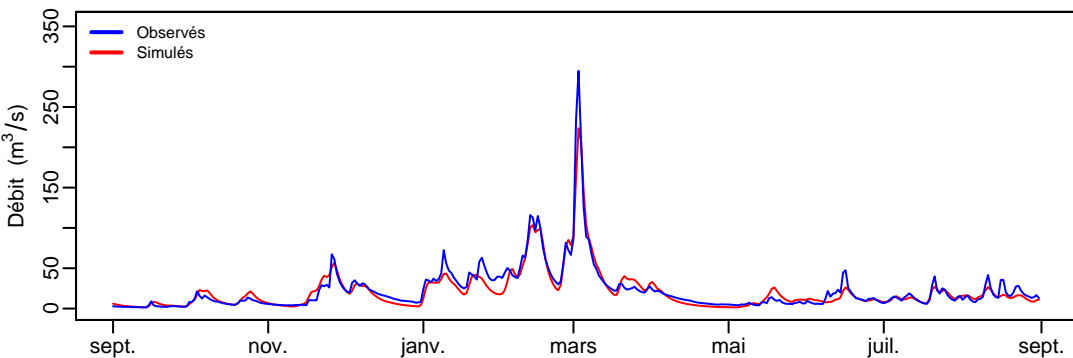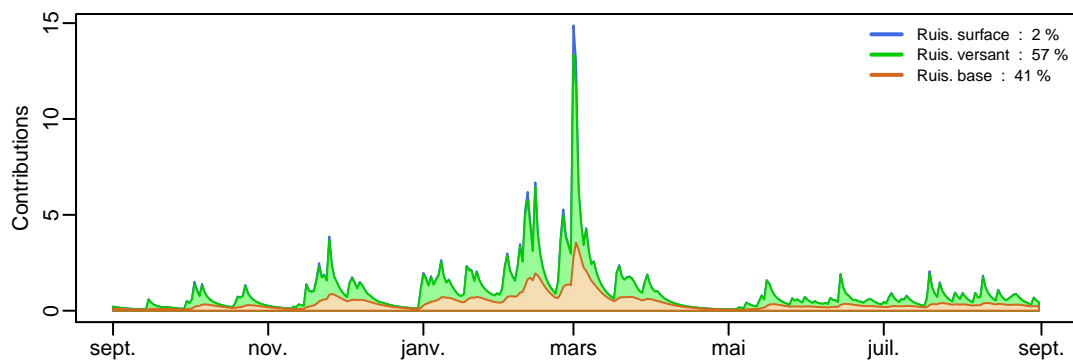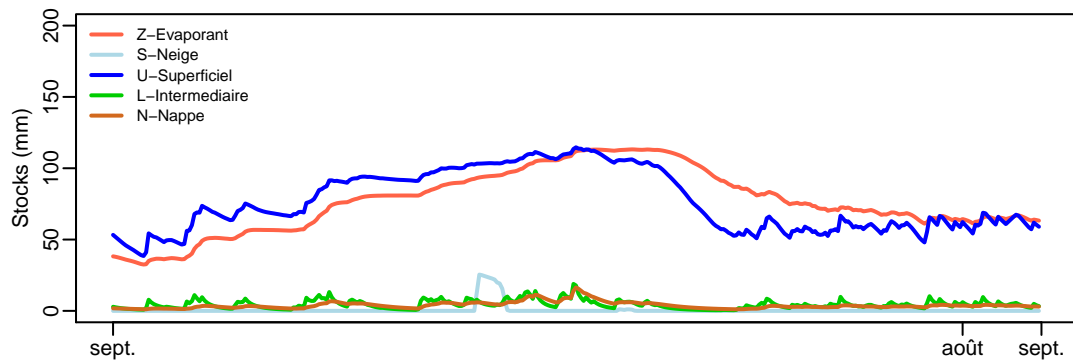

# k1321810 (1788.67 km<sup>2</sup>) – année 2007–2008

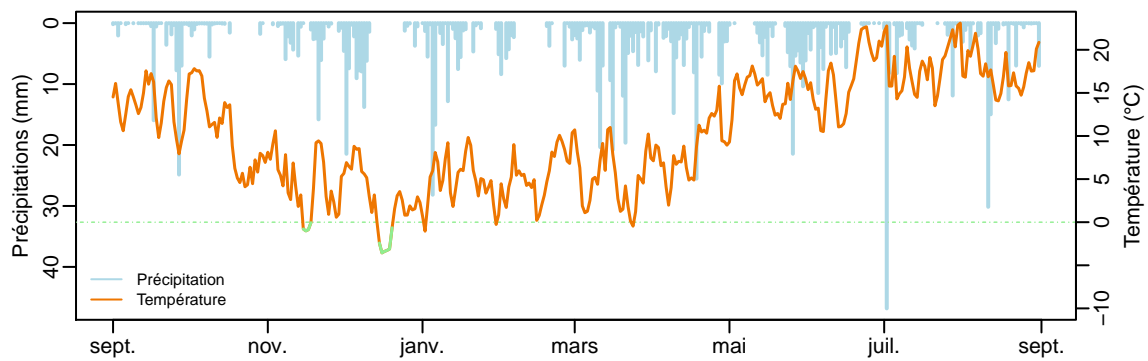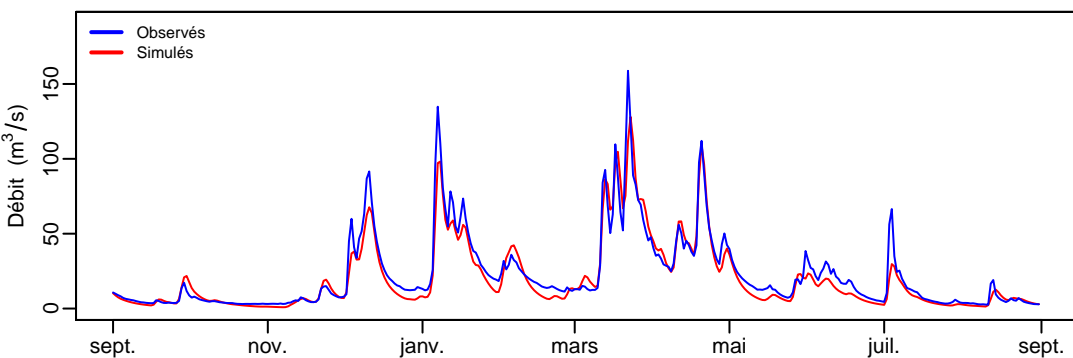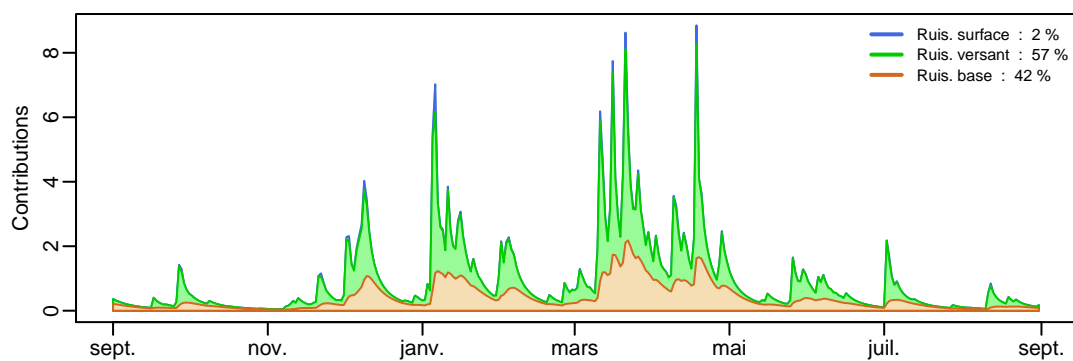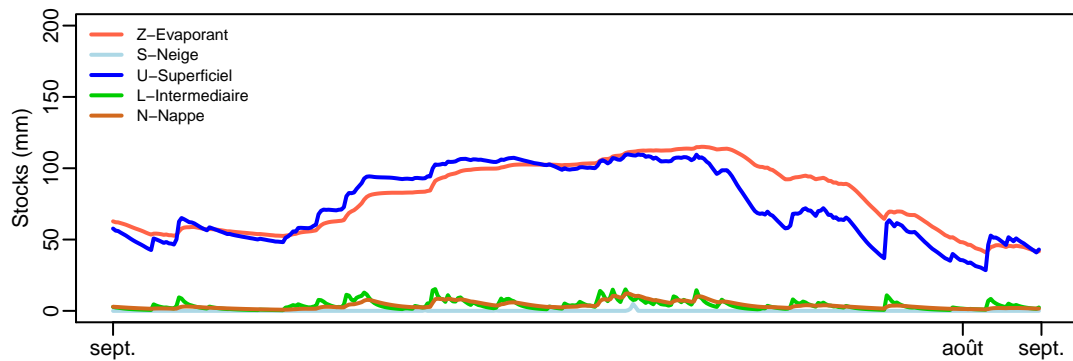

# k1321810 (1788.67 km<sup>2</sup>) – année 2008–2009

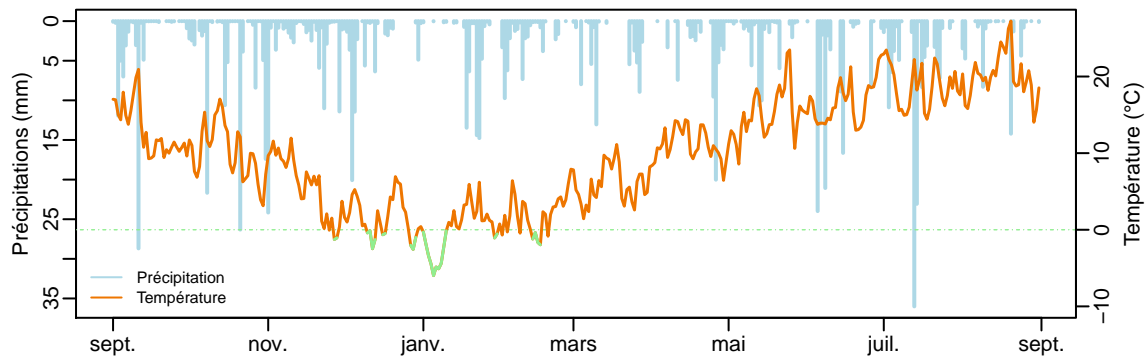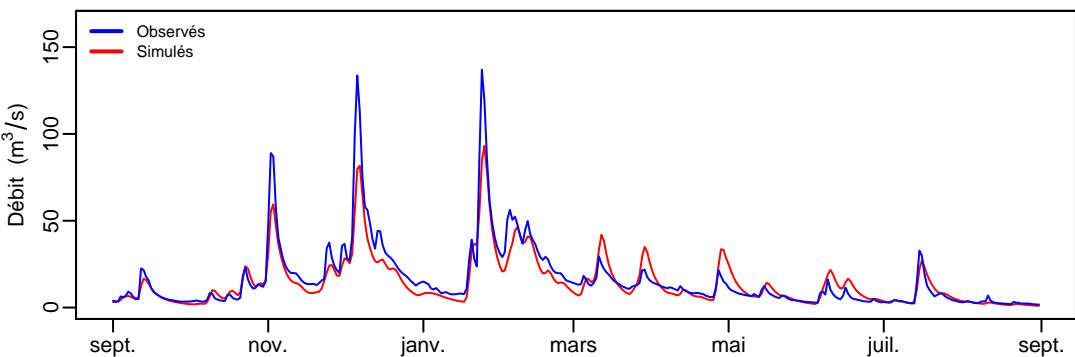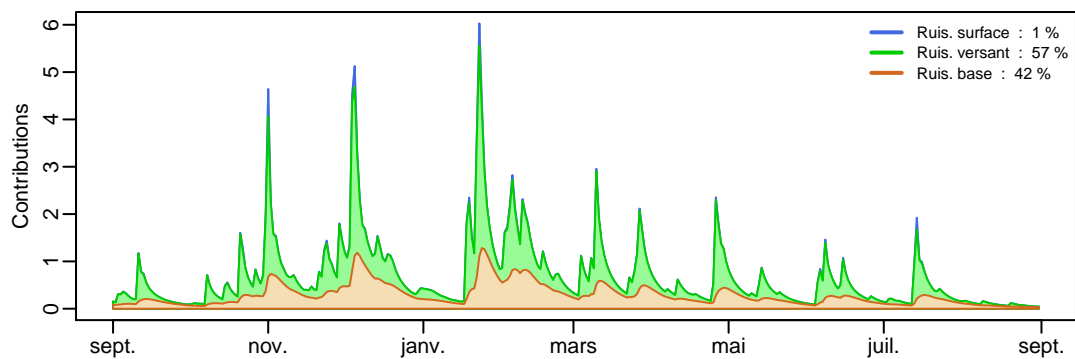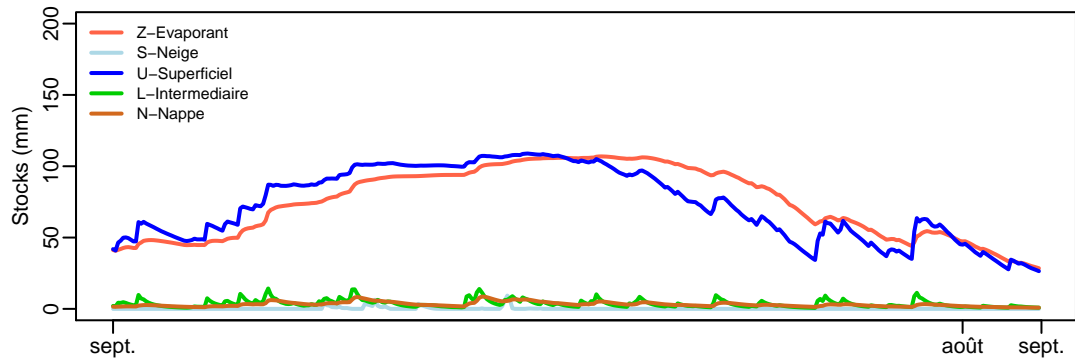



# k1341810 (2270.46 km²) – année 1981–1982

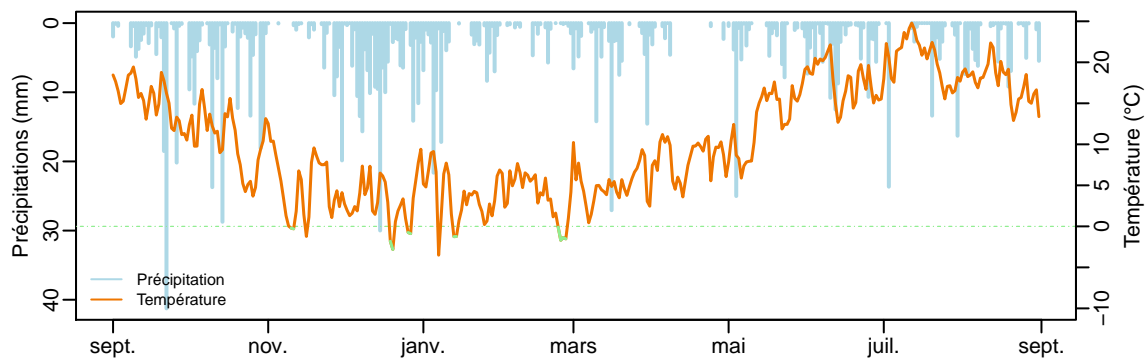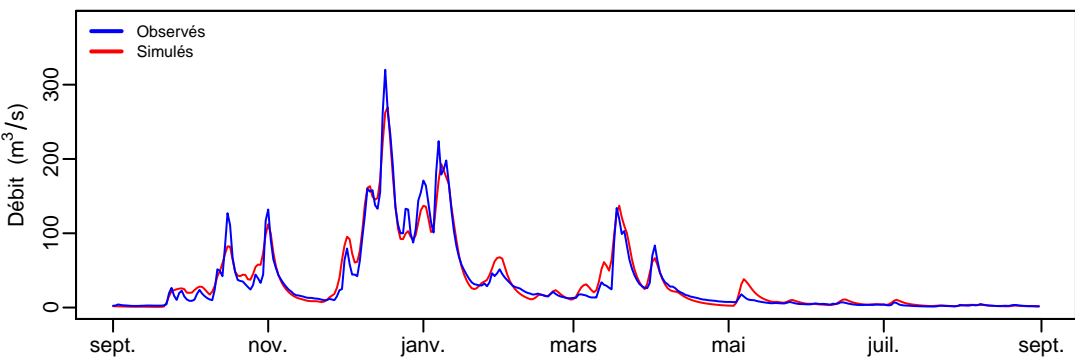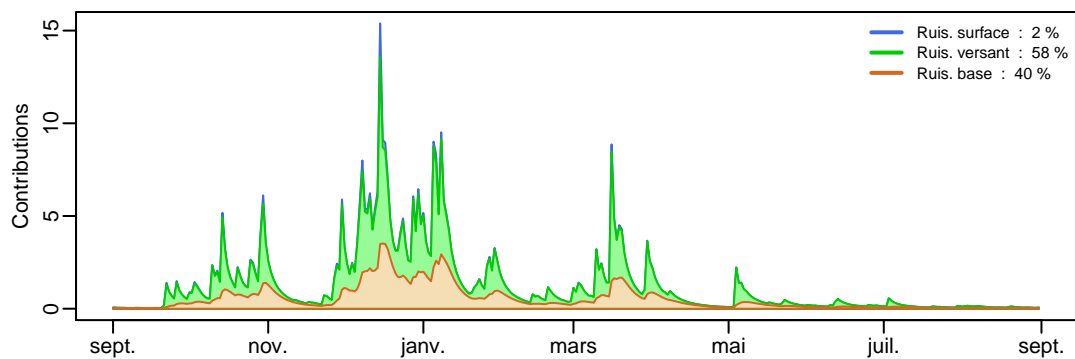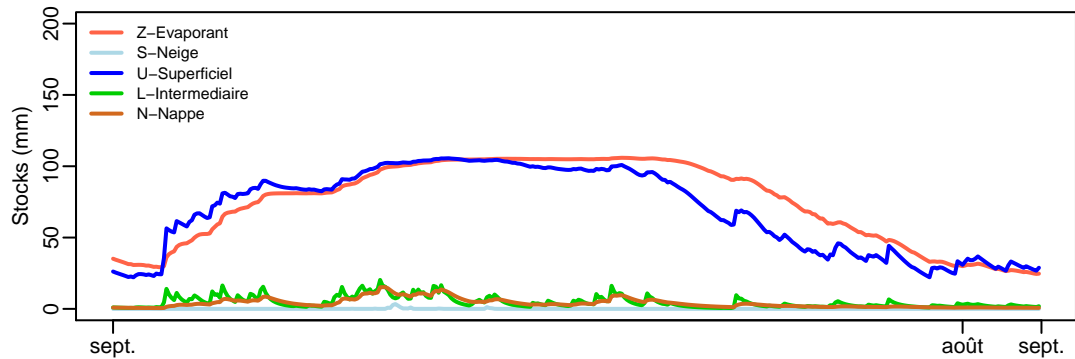

# k1341810 (2270.46 km<sup>2</sup>) – année 1982–1983

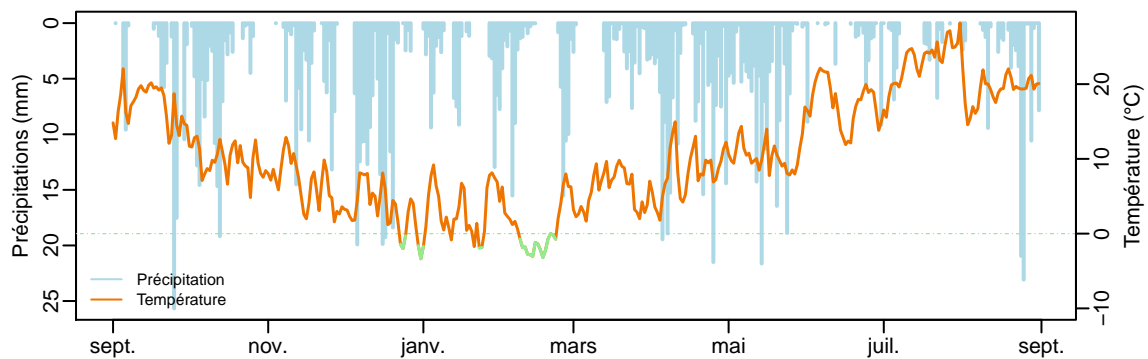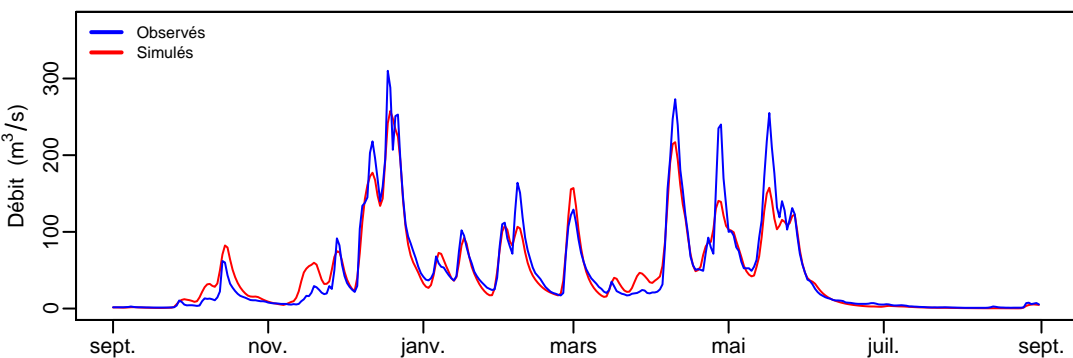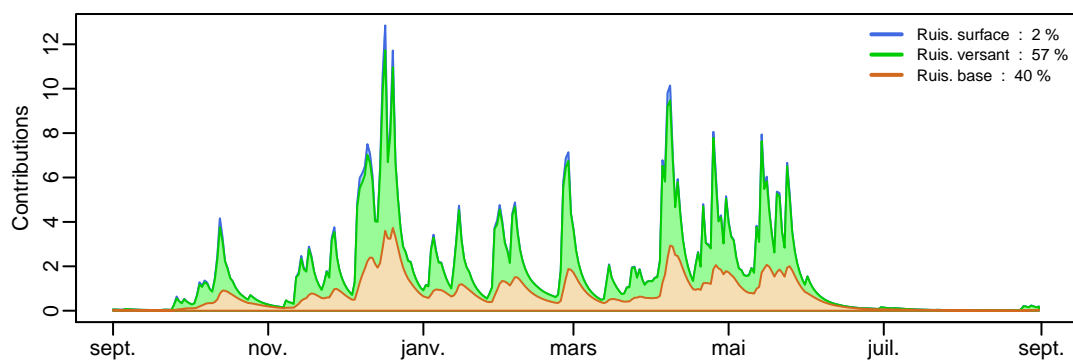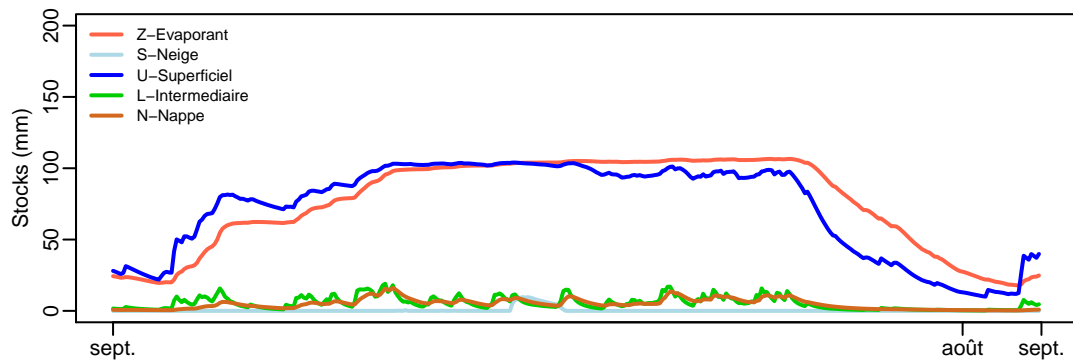

# k1341810 (2270.46 km<sup>2</sup>) – année 1983–1984

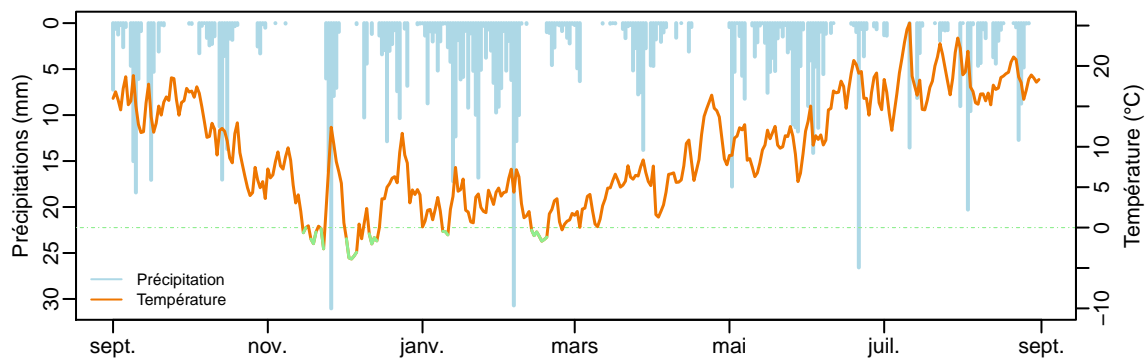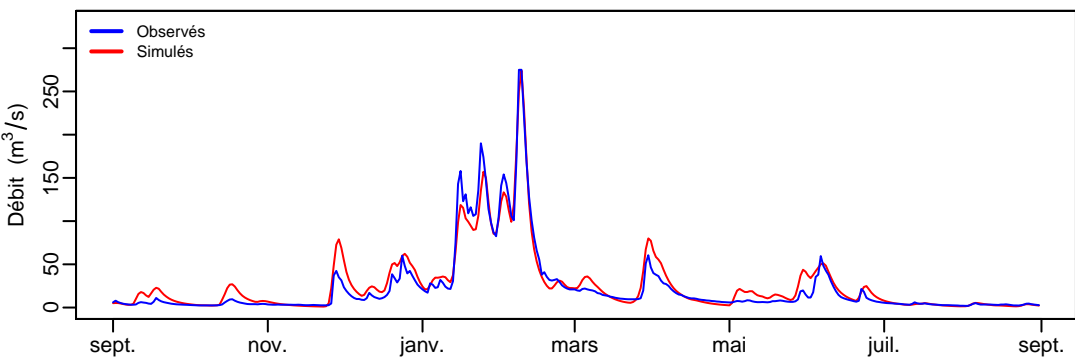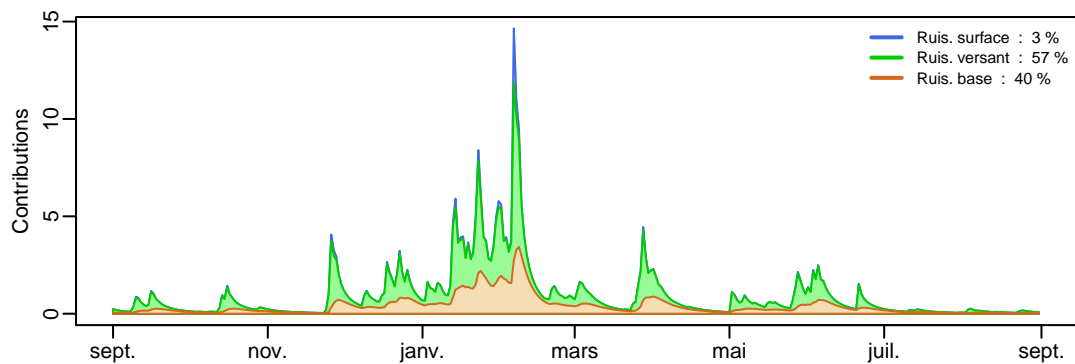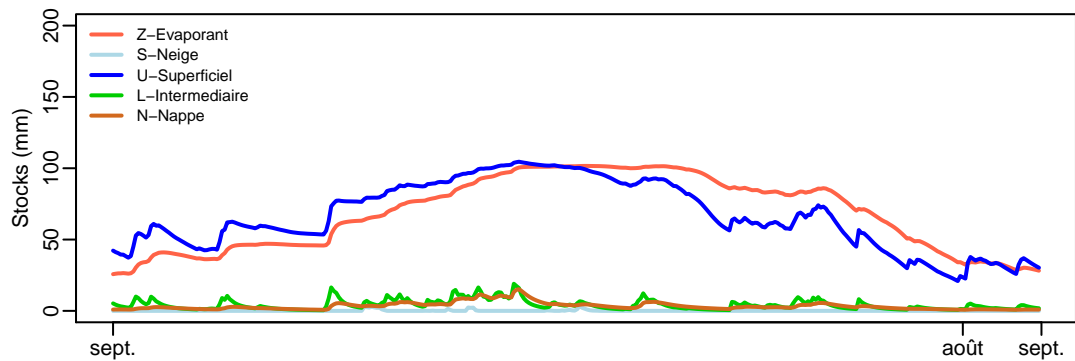

# k1341810 (2270.46 km<sup>2</sup>) – année 1984–1985

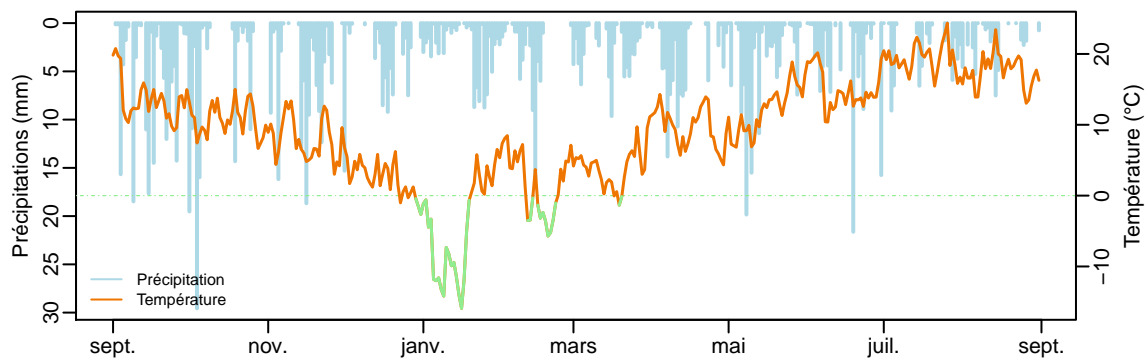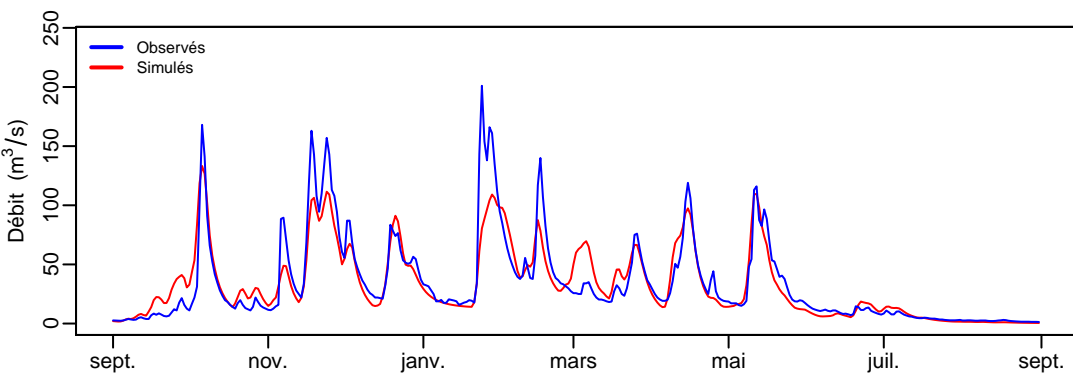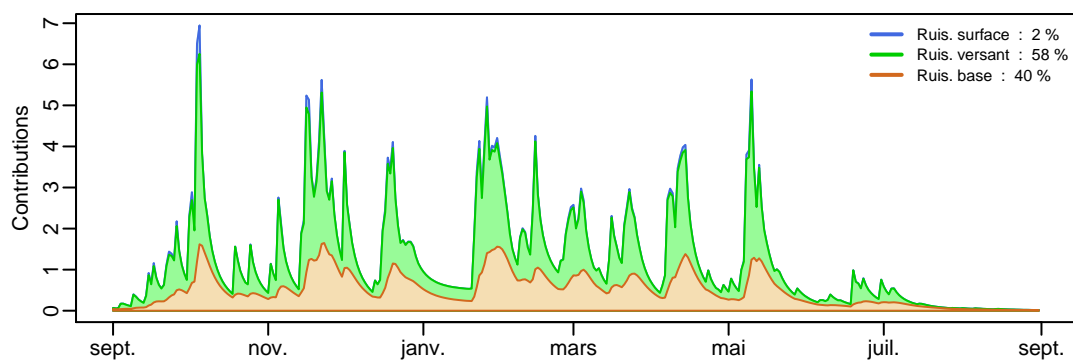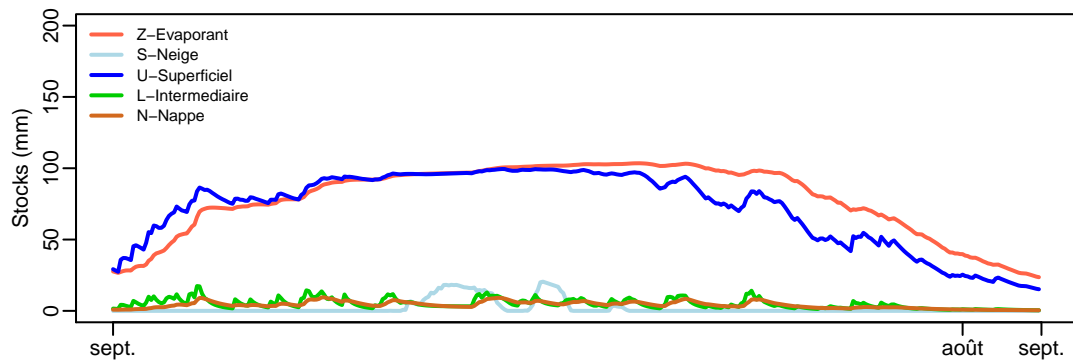

# k1341810 (2270.46 km<sup>2</sup>) – année 1985–1986

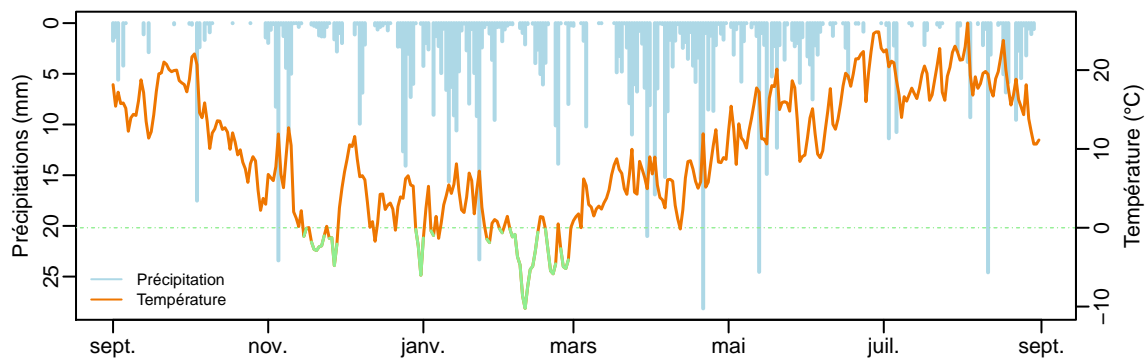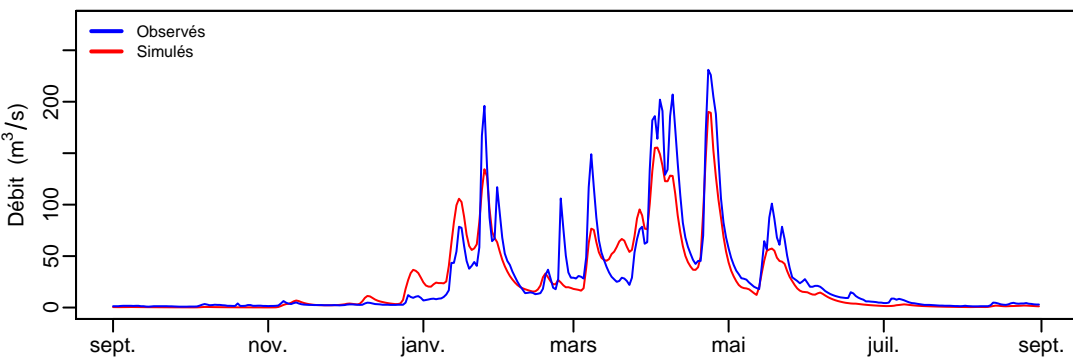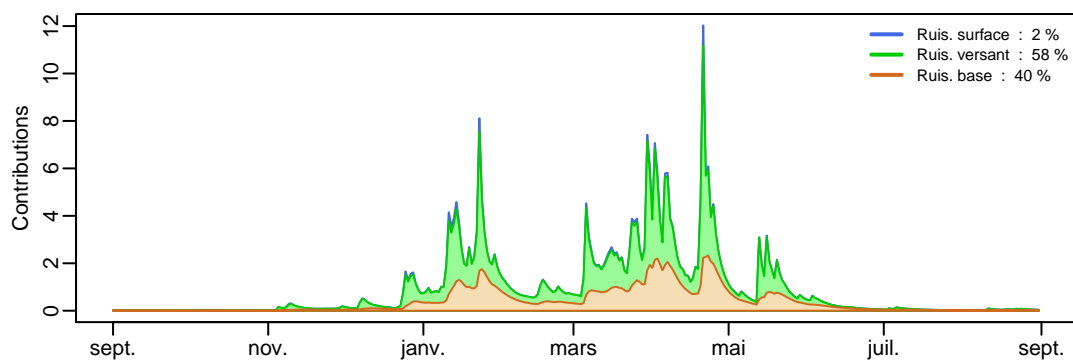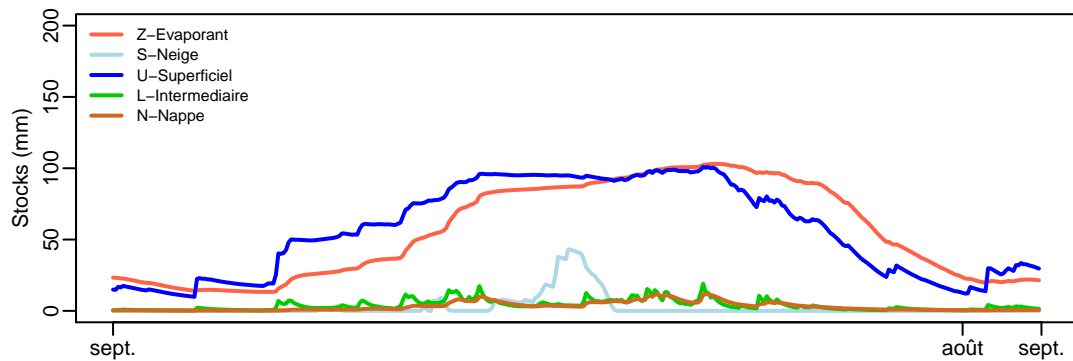

# k1341810 (2270.46 km<sup>2</sup>) – année 1986–1987

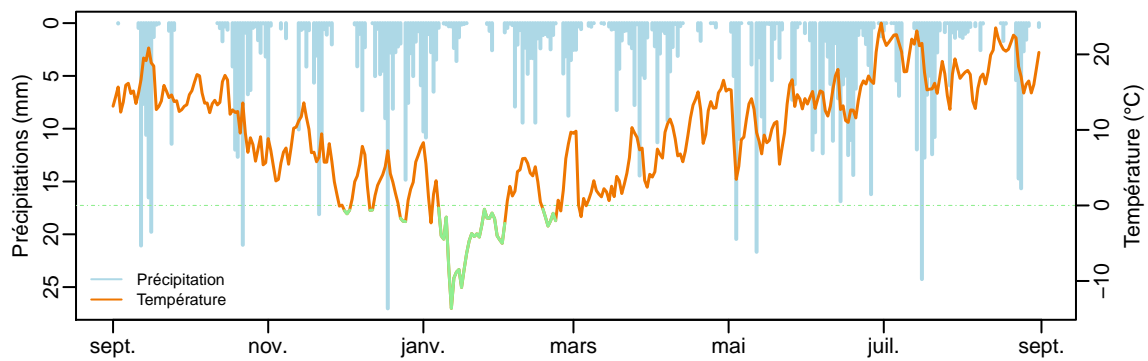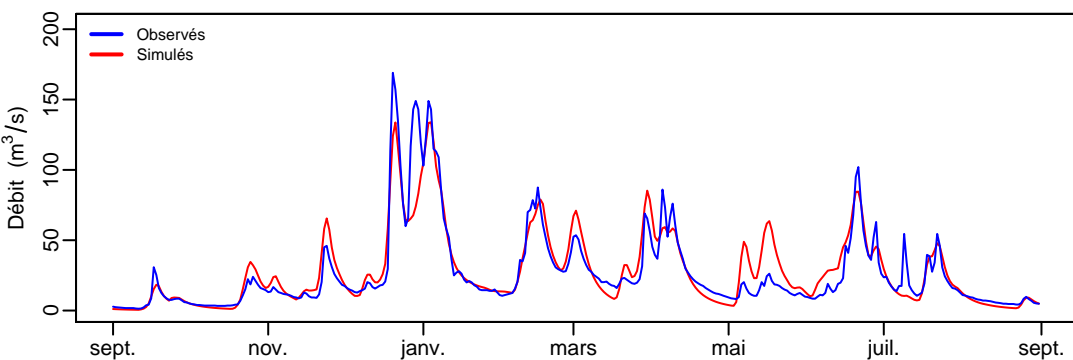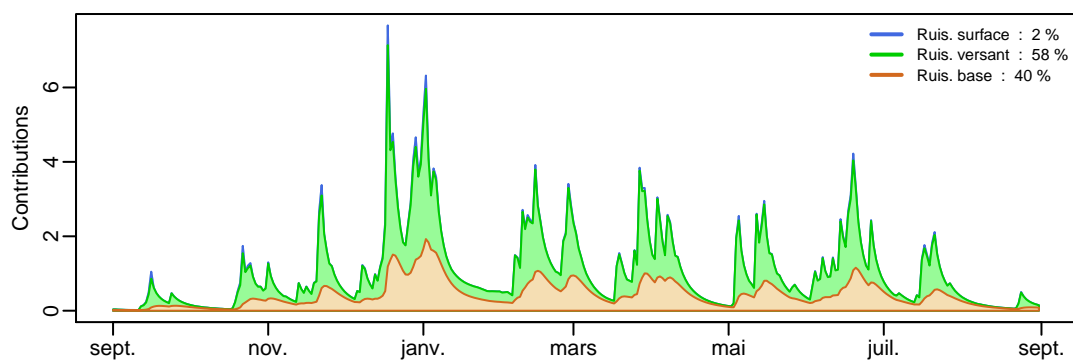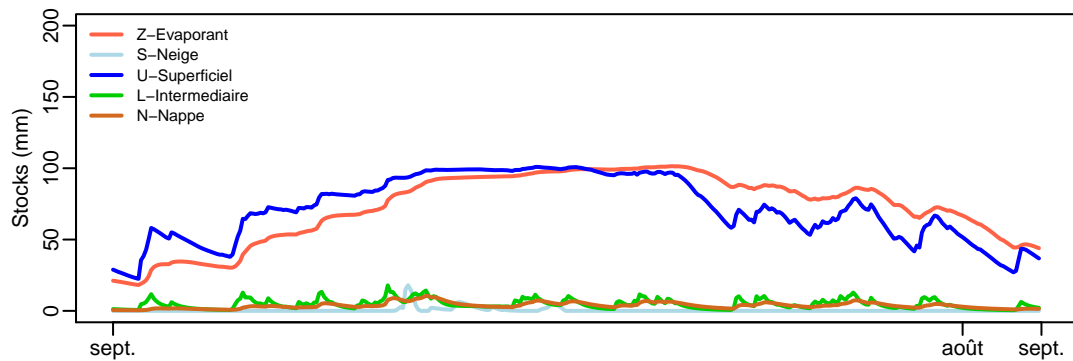

# k1341810 (2270.46 km<sup>2</sup>) – année 1987–1988

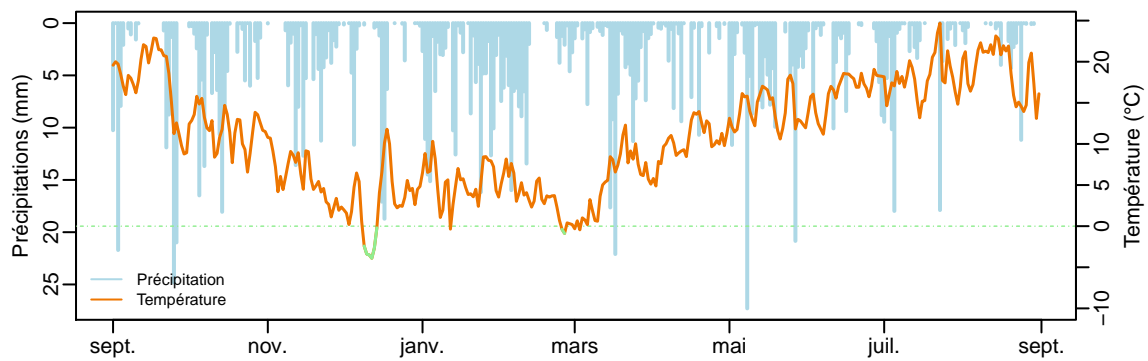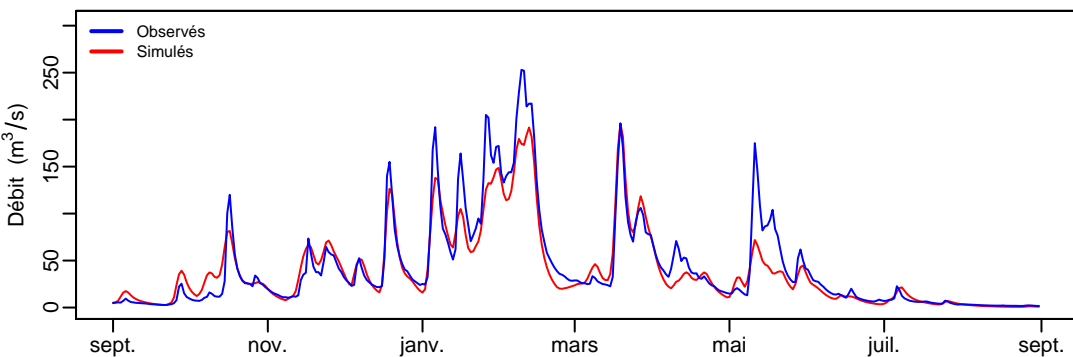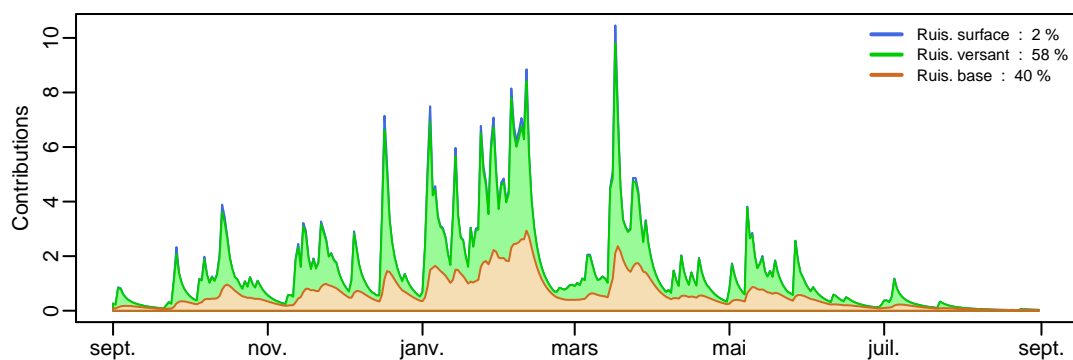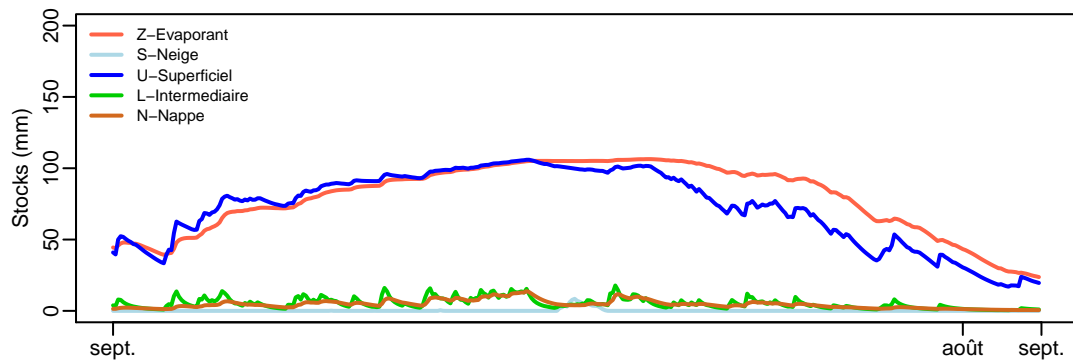

# k1341810 (2270.46 km<sup>2</sup>) – année 1988–1989

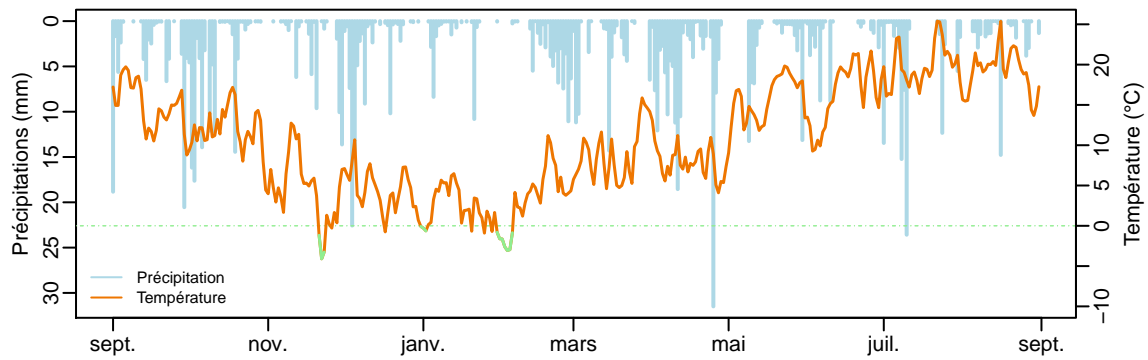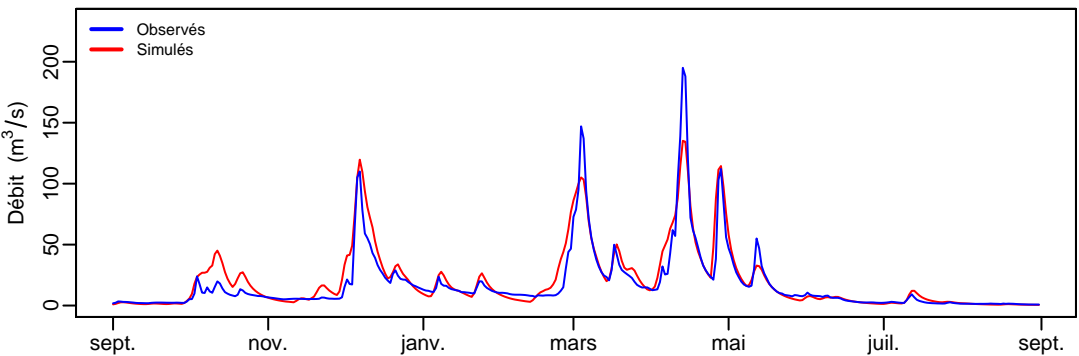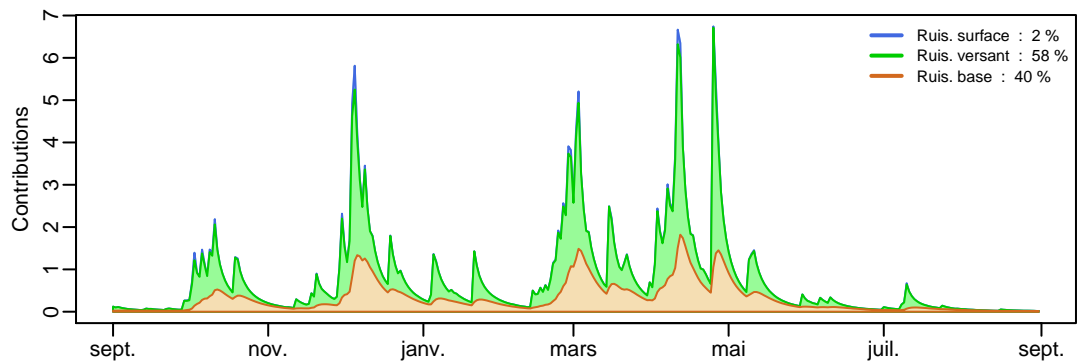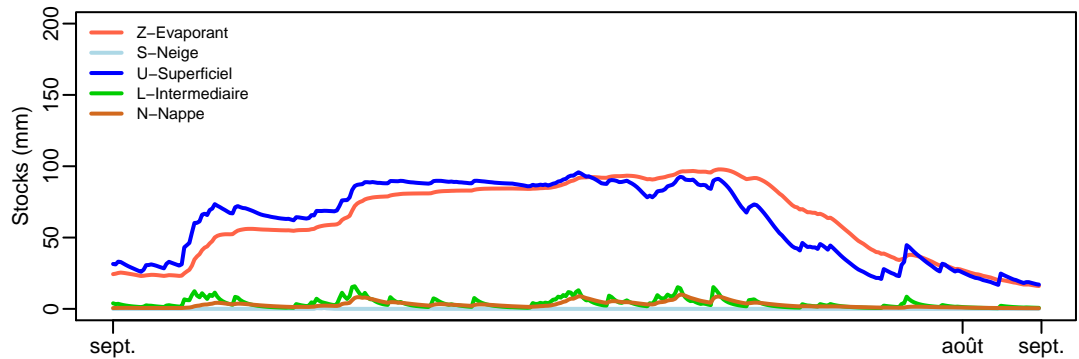



# k1341810 (2270.46 km<sup>2</sup>) – année 1989–1990

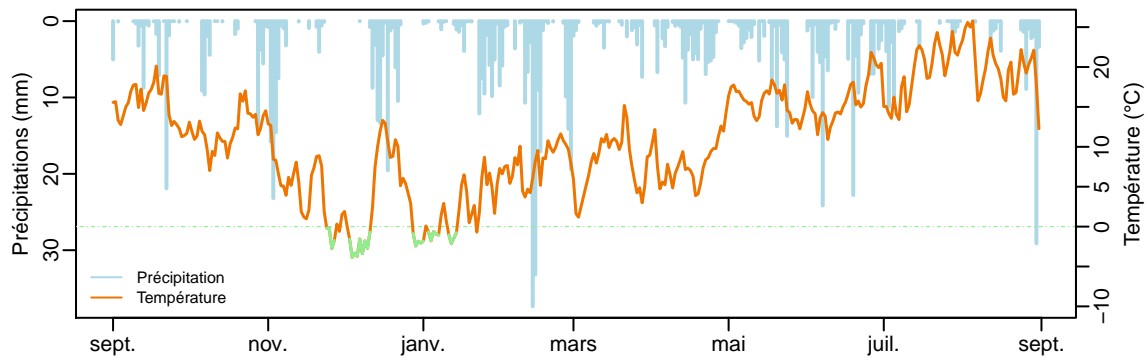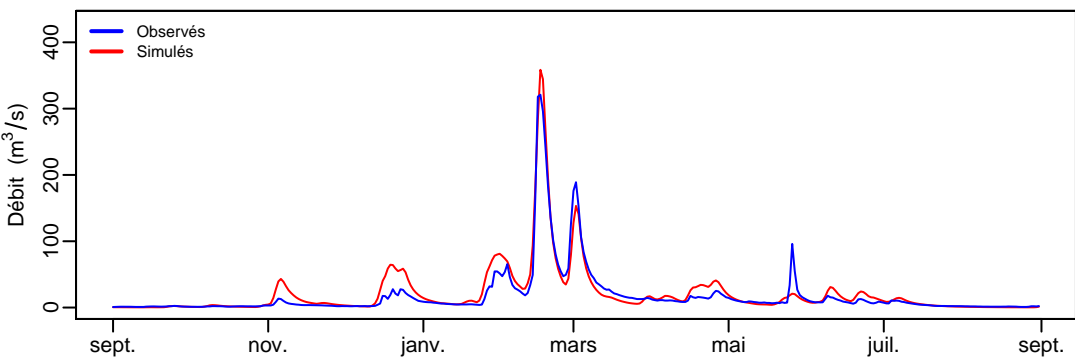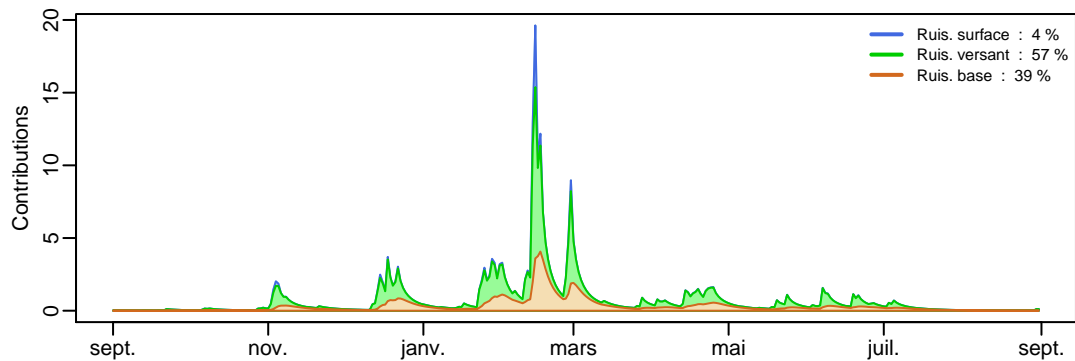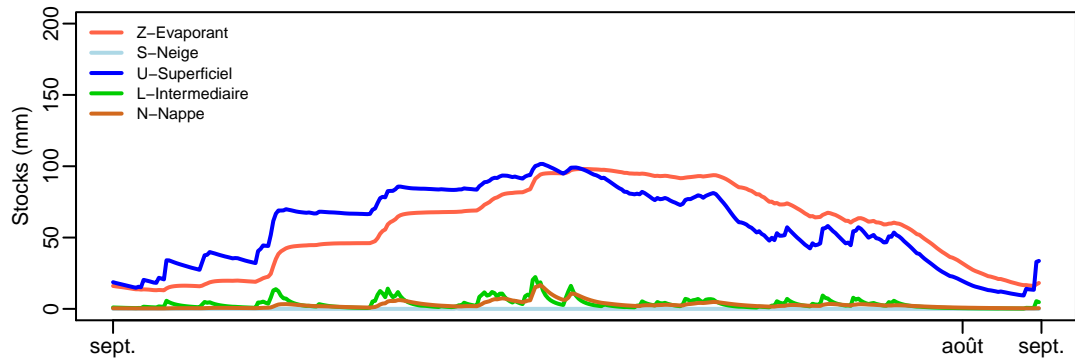

# k1341810 (2270.46 km<sup>2</sup>) – année 1990–1991

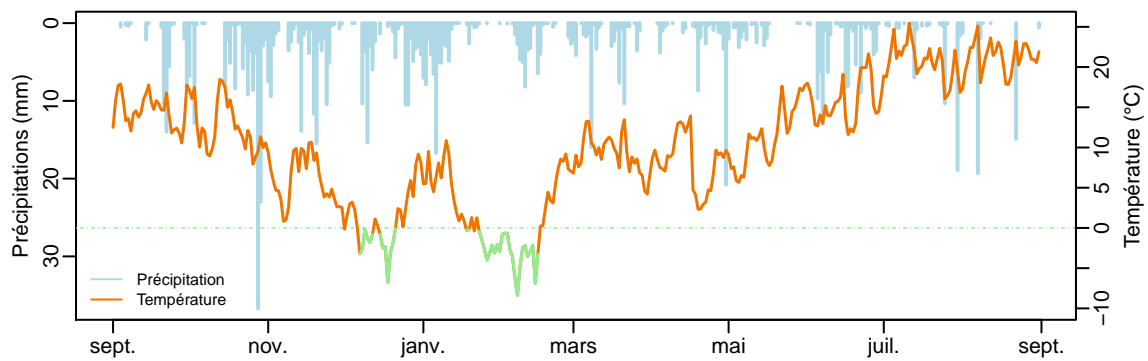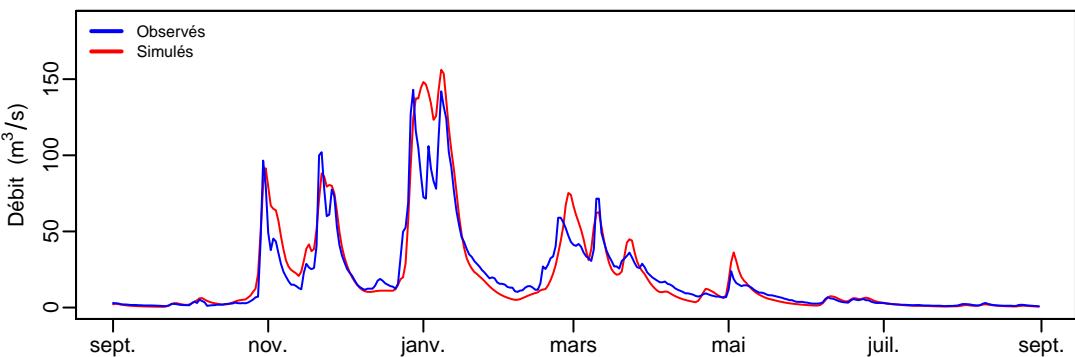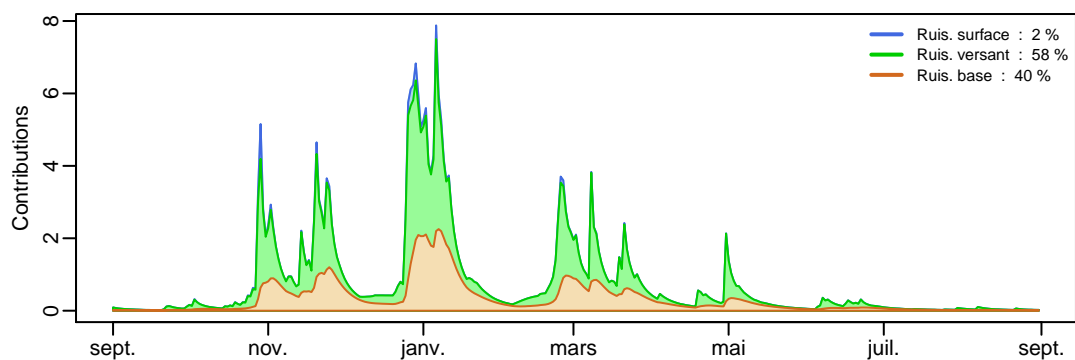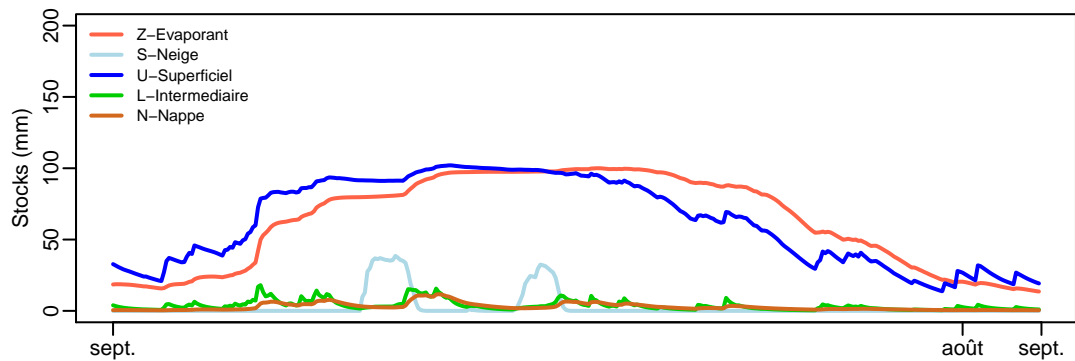

# k1341810 (2270.46 km<sup>2</sup>) – année 1991–1992

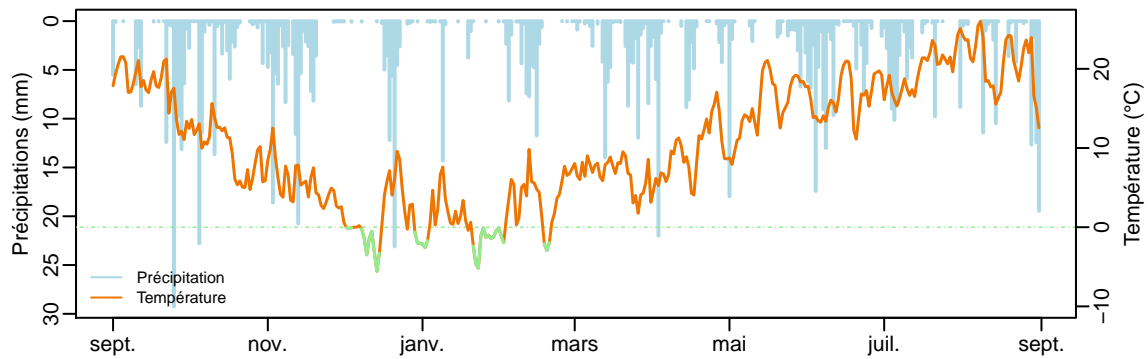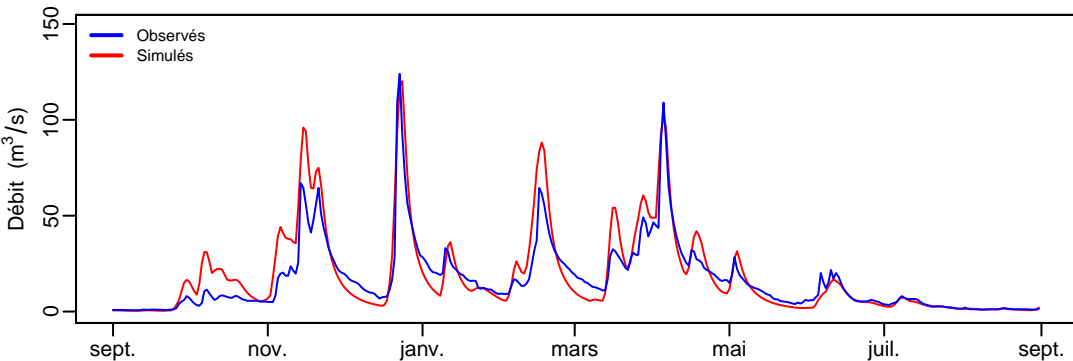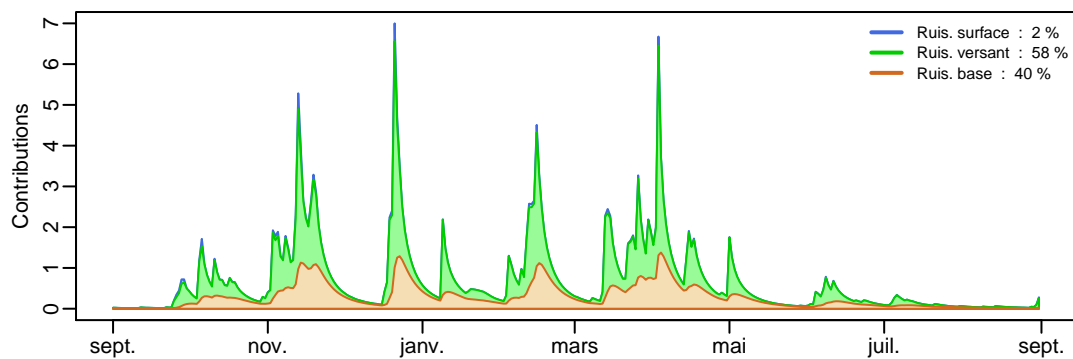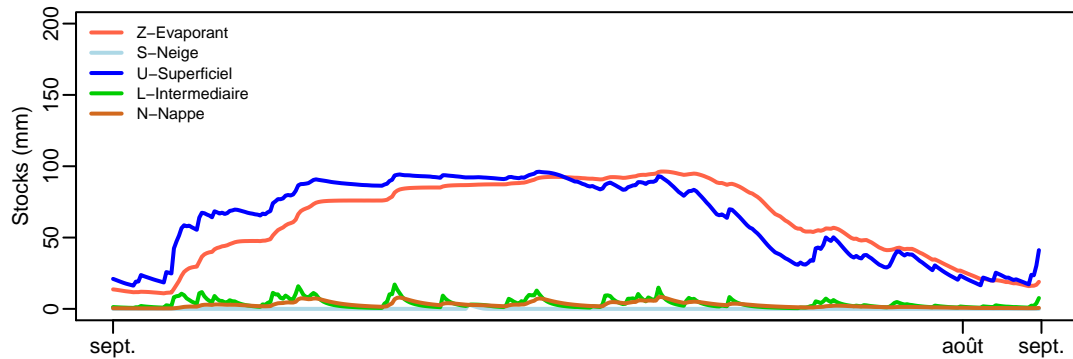

# k1341810 (2270.46 km²) – année 1992–1993

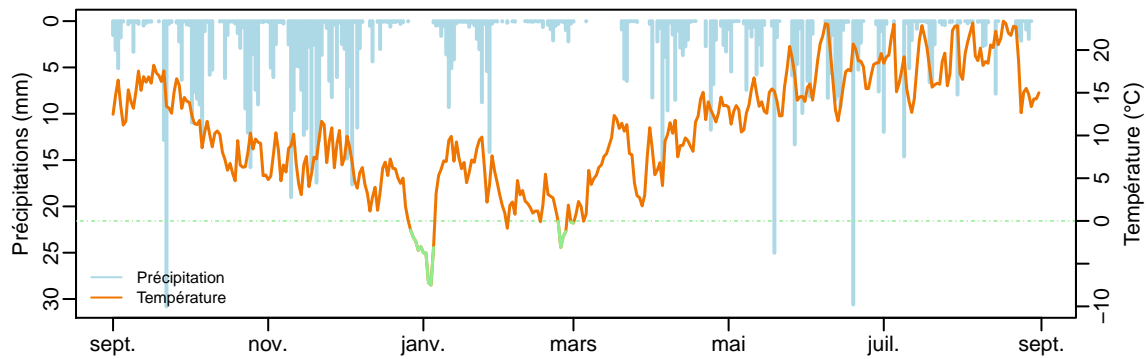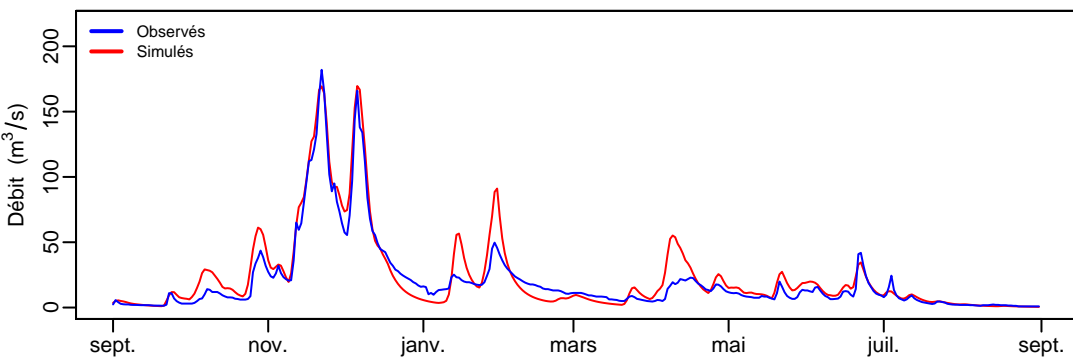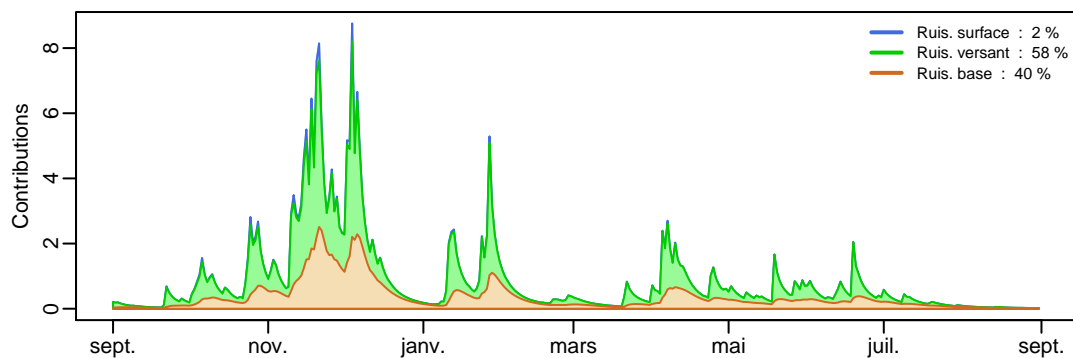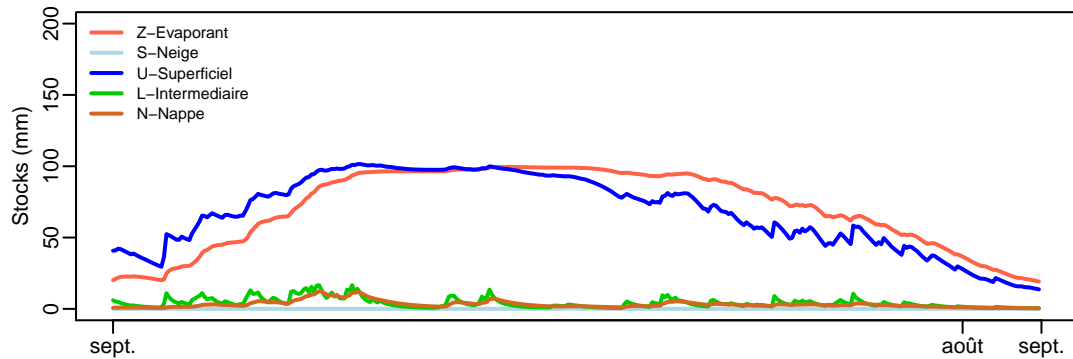

# k1341810 (2270.46 km<sup>2</sup>) – année 1993–1994

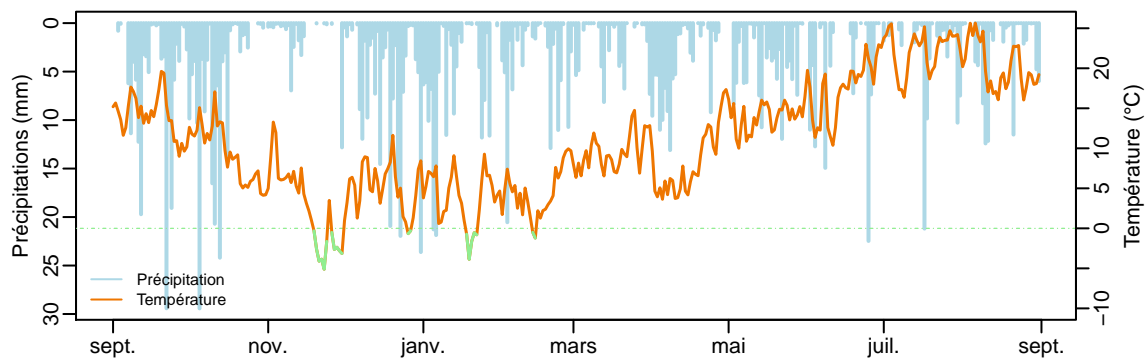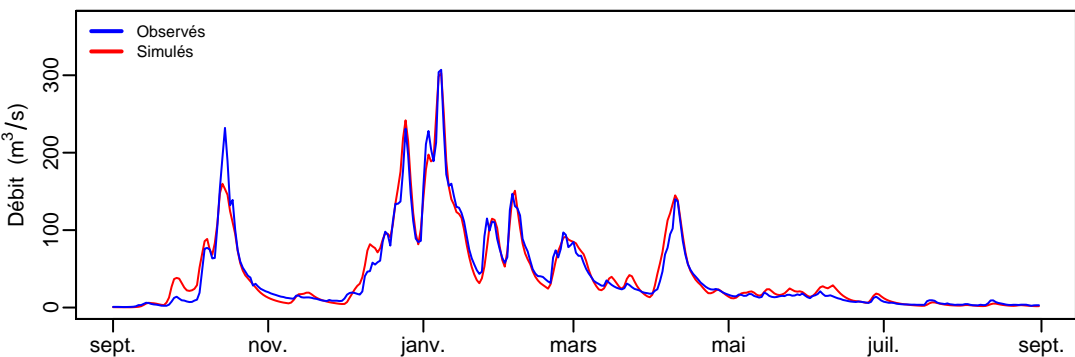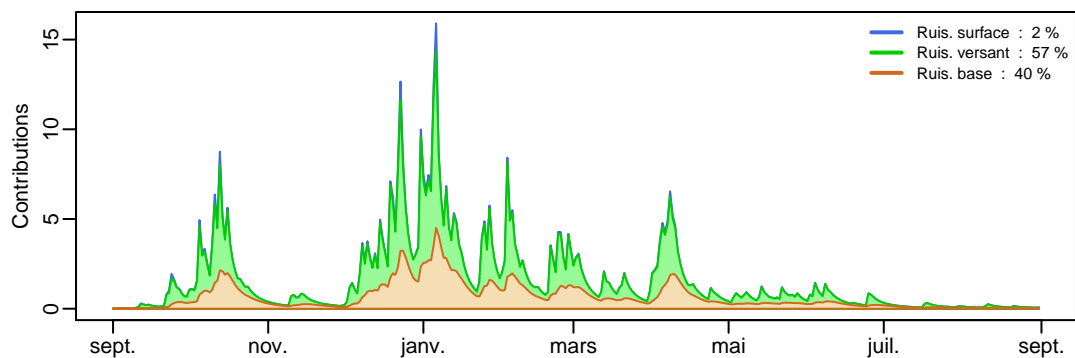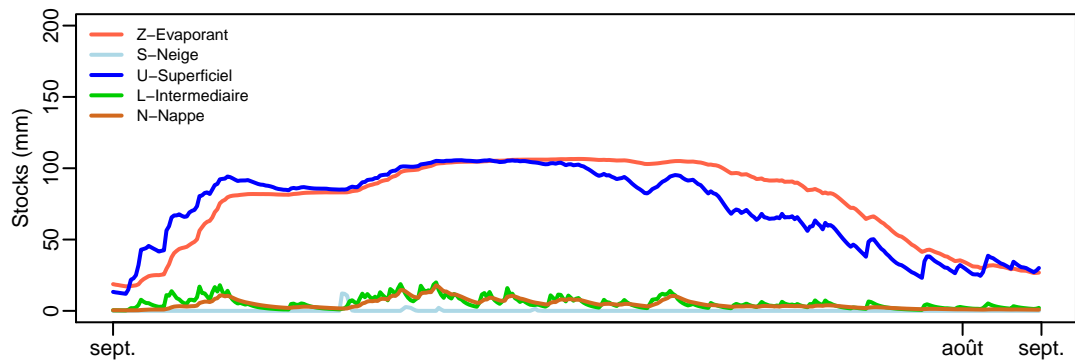

# k1341810 (2270.46 km²) – année 1994–1995

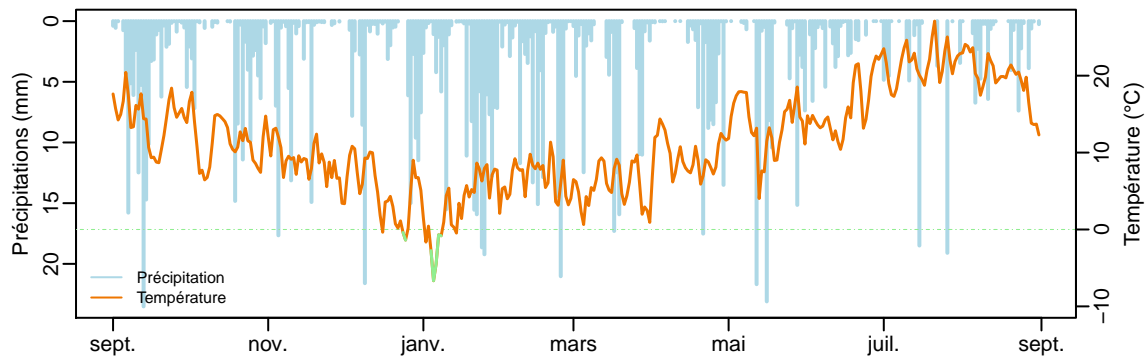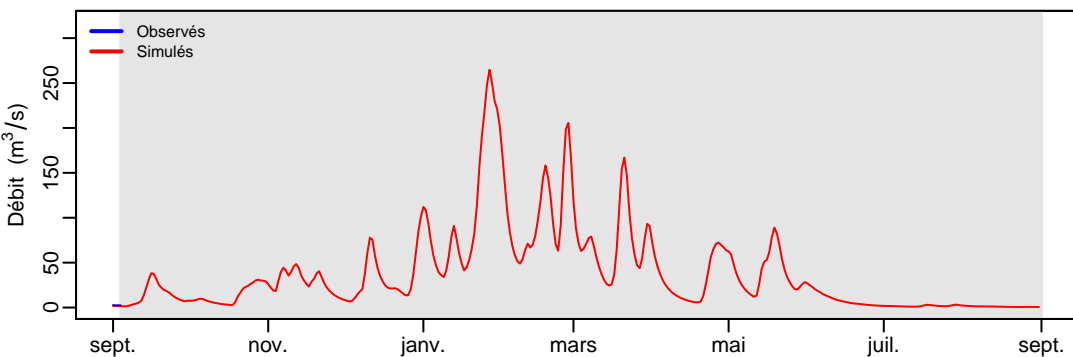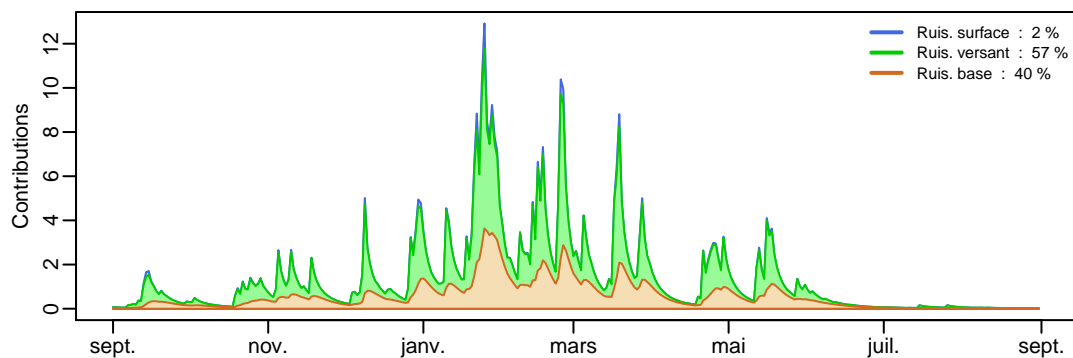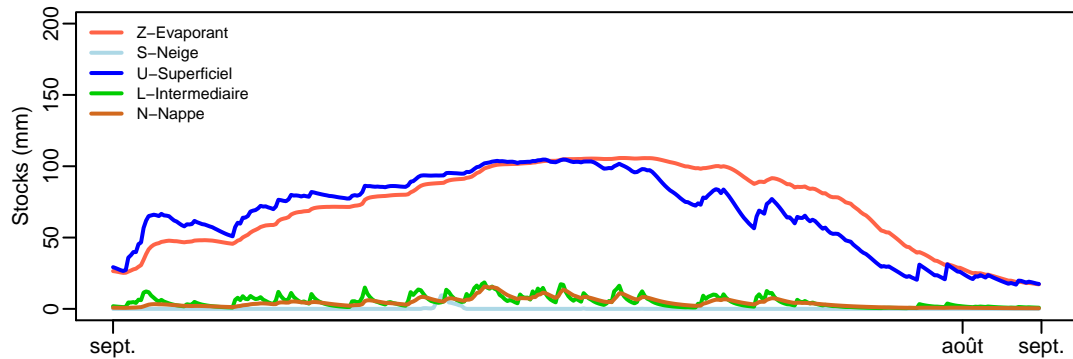

# k1341810 (2270.46 km<sup>2</sup>) – année 1995–1996

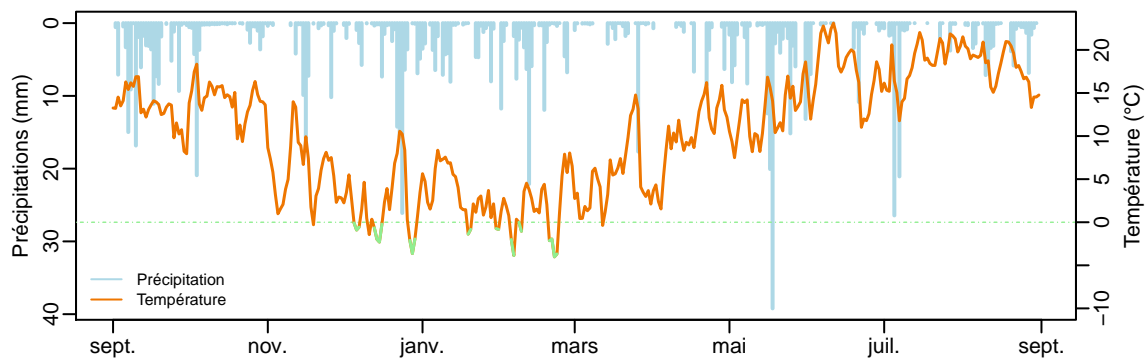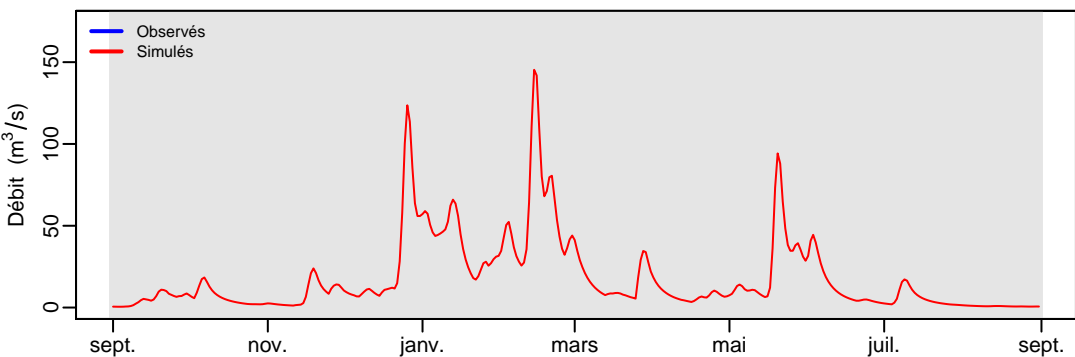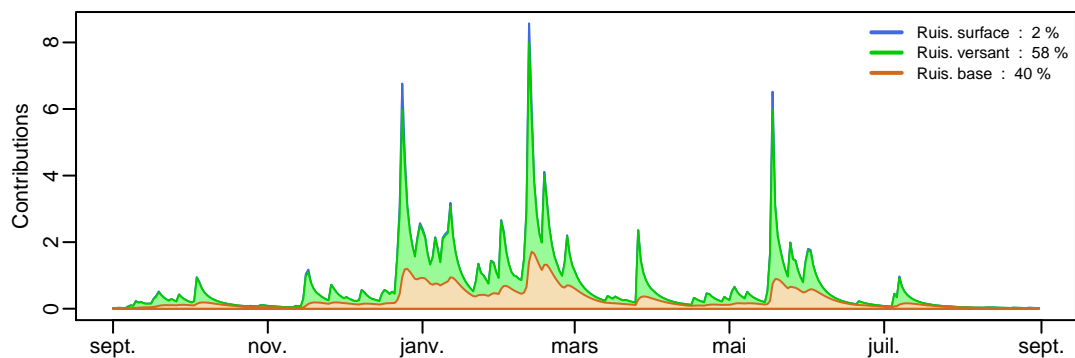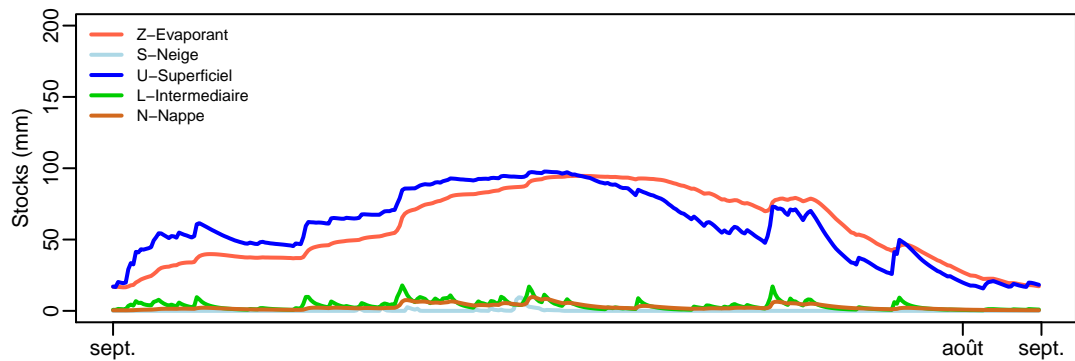

# k1341810 (2270.46 km<sup>2</sup>) – année 1996–1997

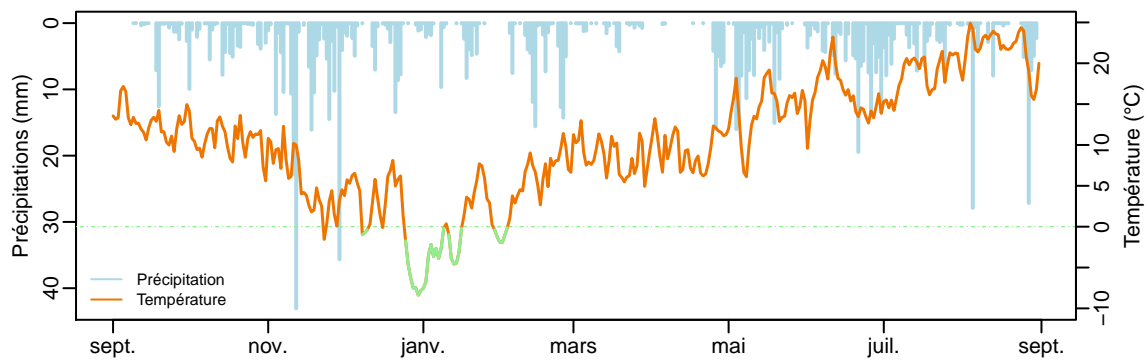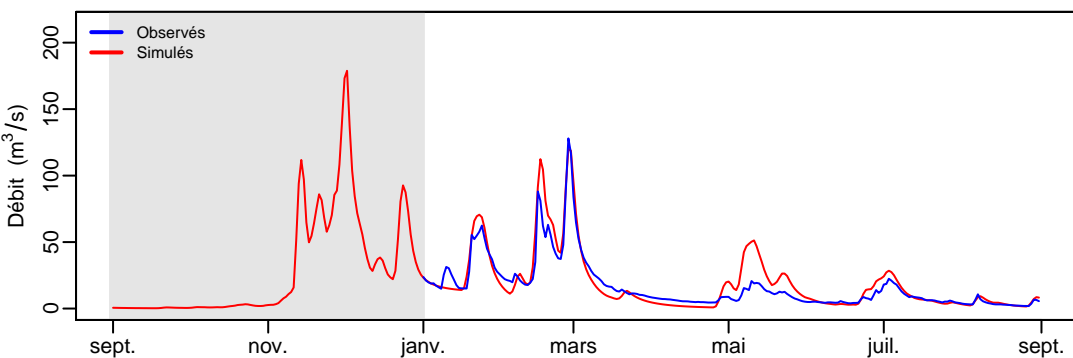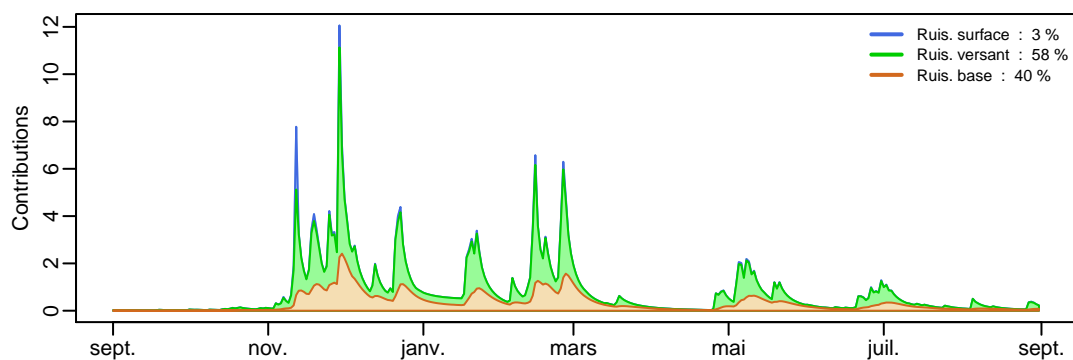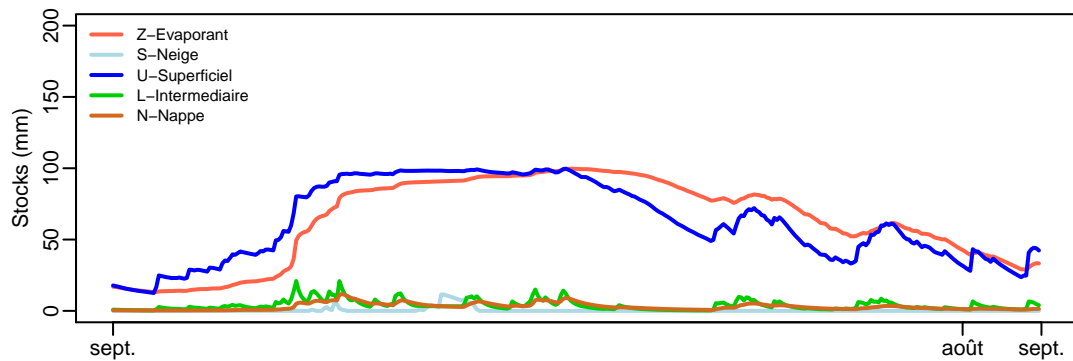



# k1341810 (2270.46 km²) – année 1997–1998

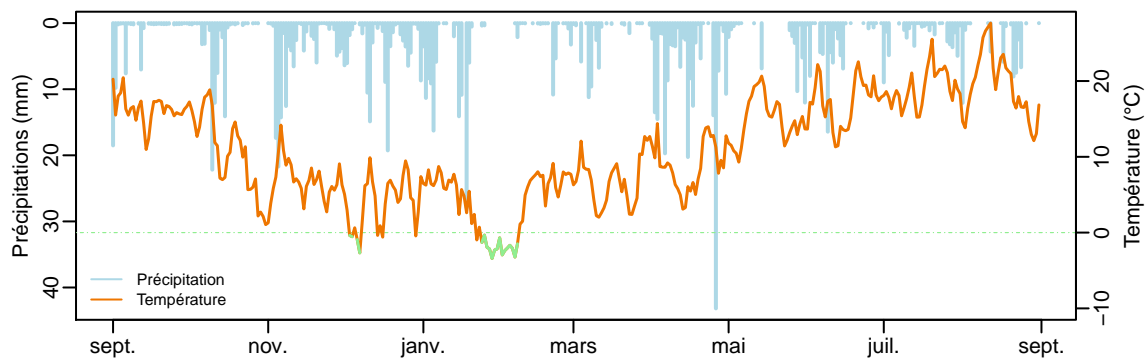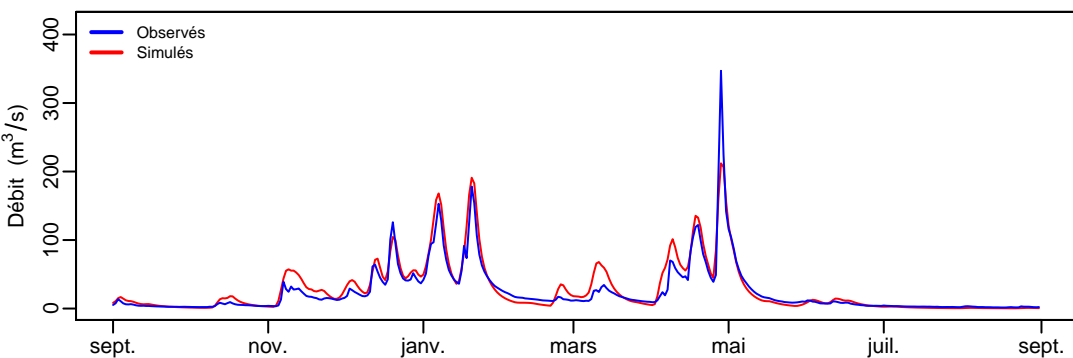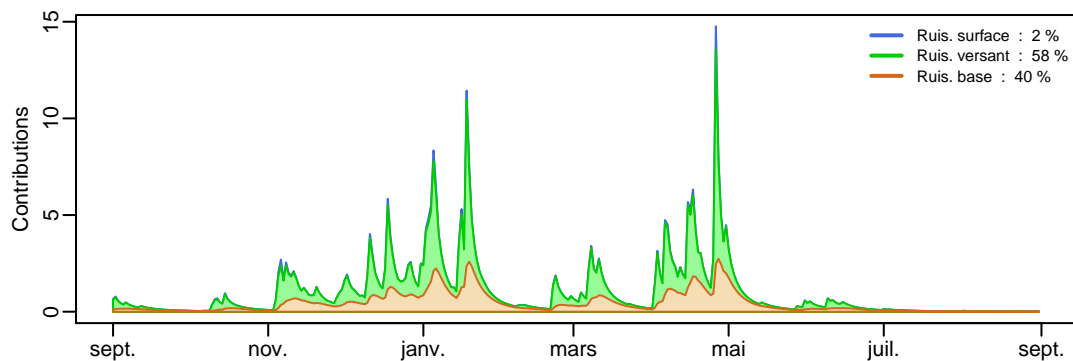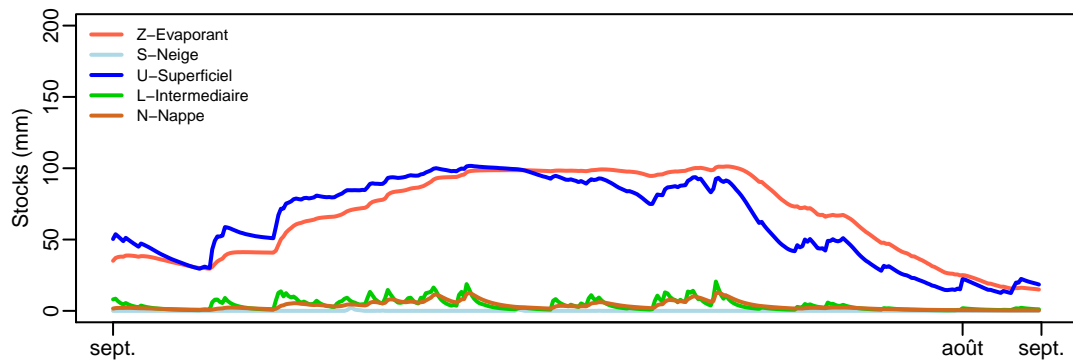

# k1341810 (2270.46 km<sup>2</sup>) – année 1998–1999

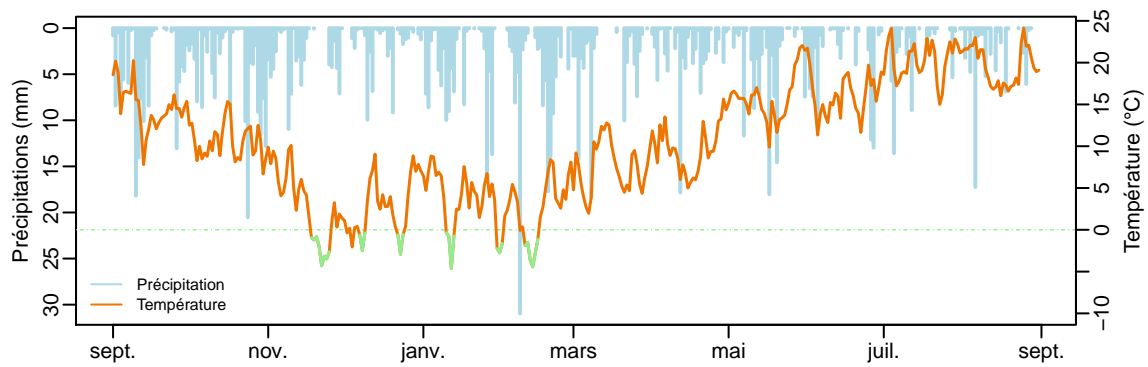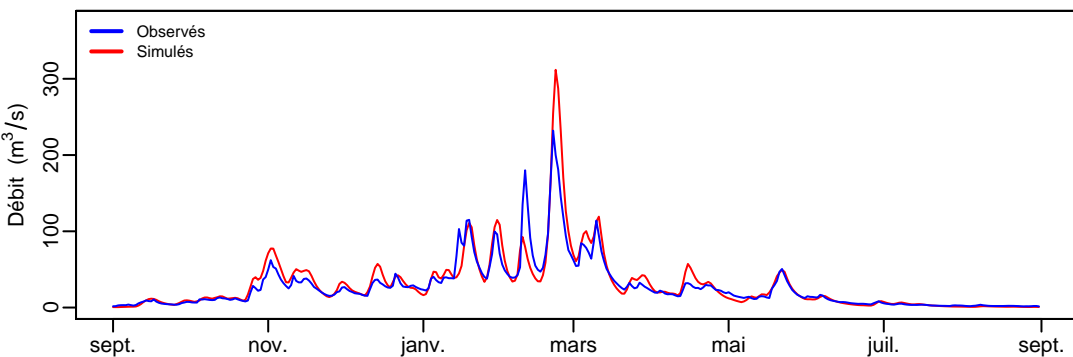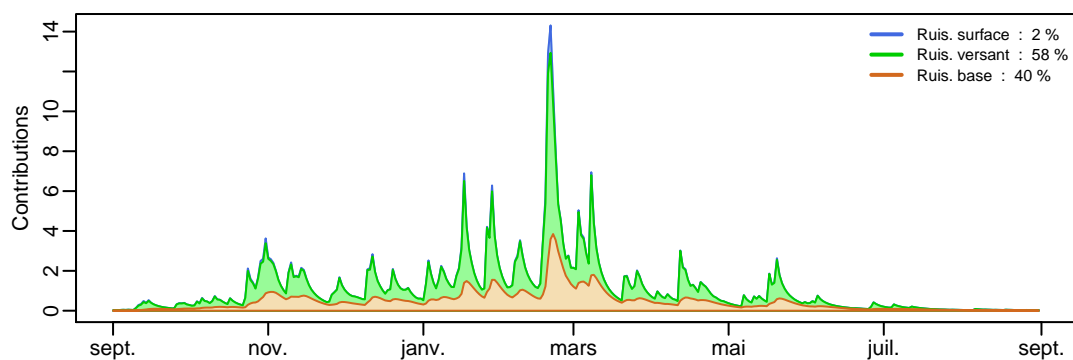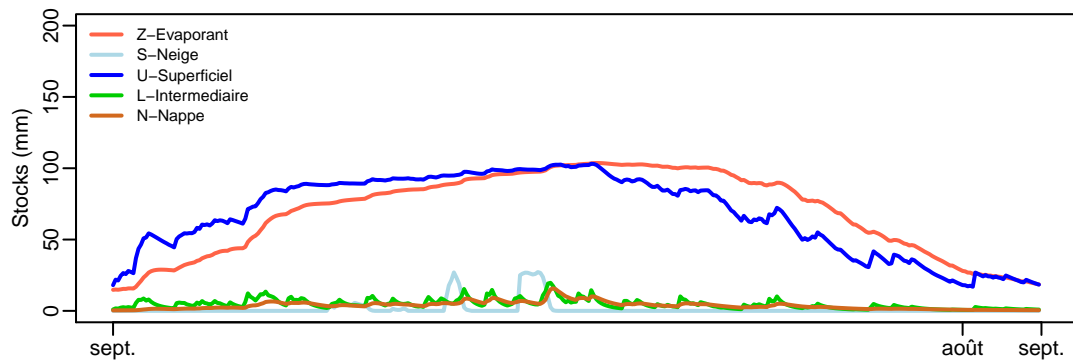

# k1341810 (2270.46 km<sup>2</sup>) – année 1999–2000

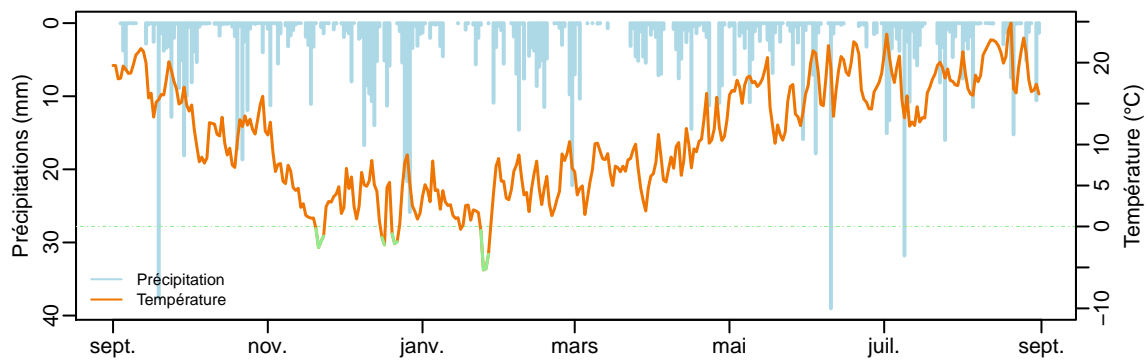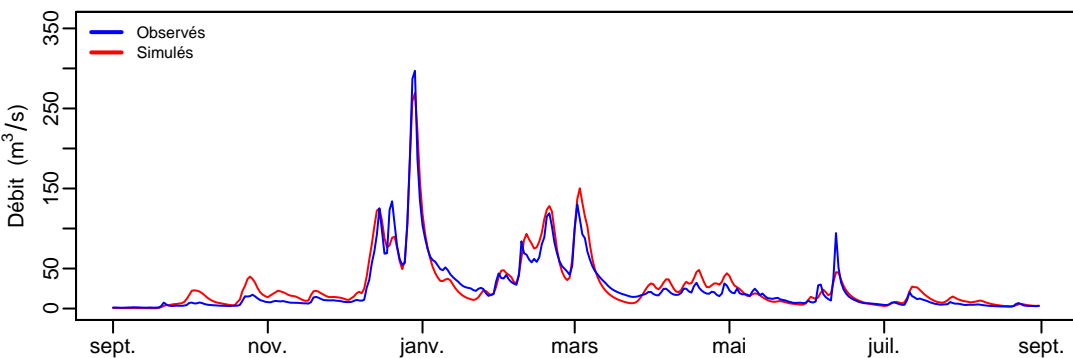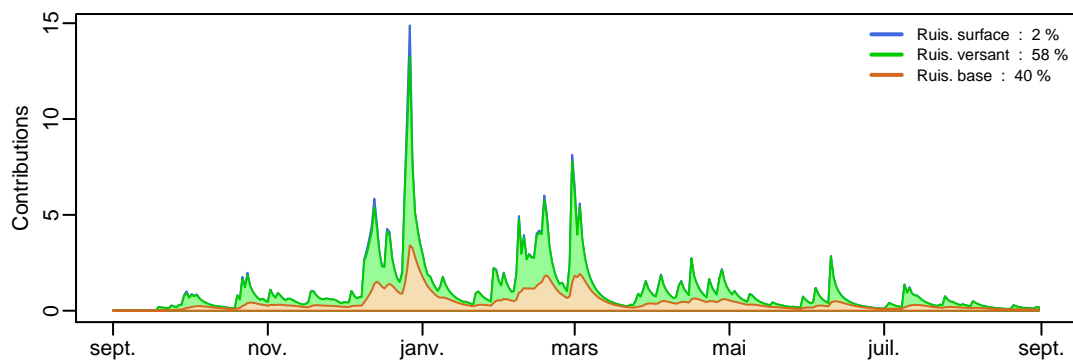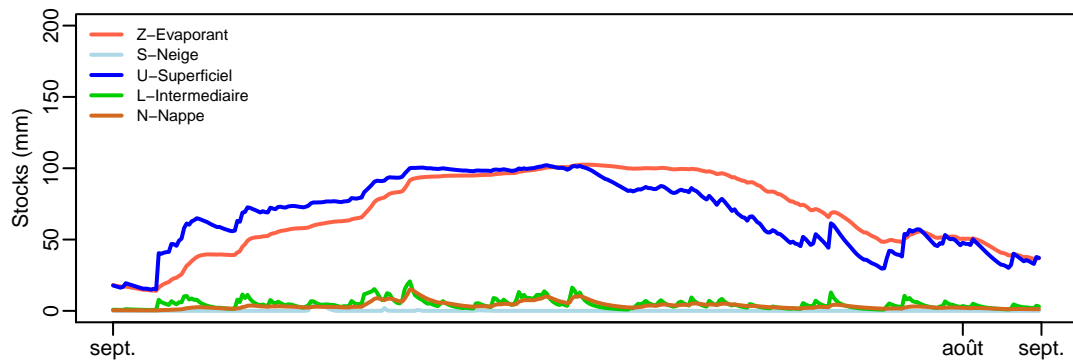

# k1341810 (2270.46 km<sup>2</sup>) – année 2000–2001

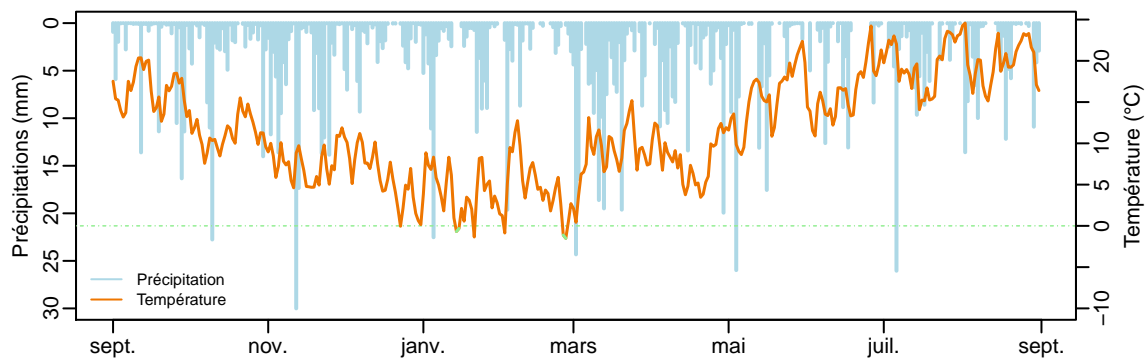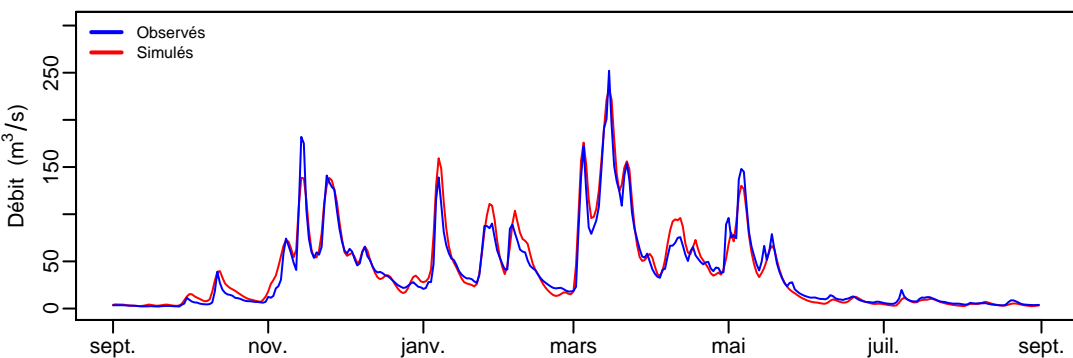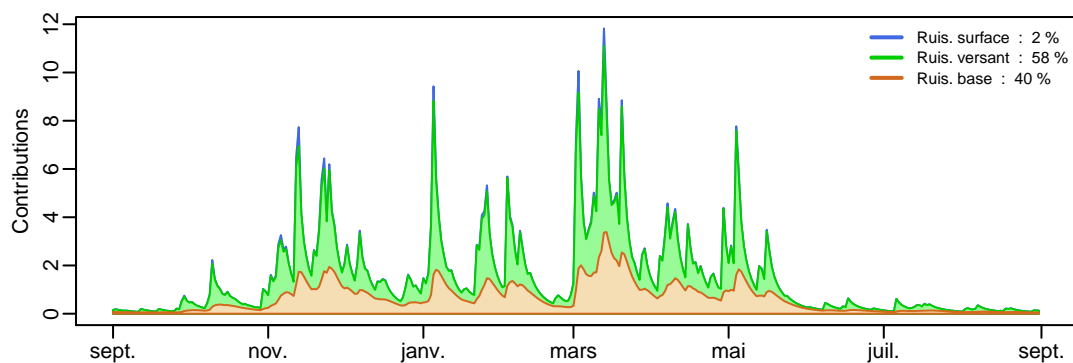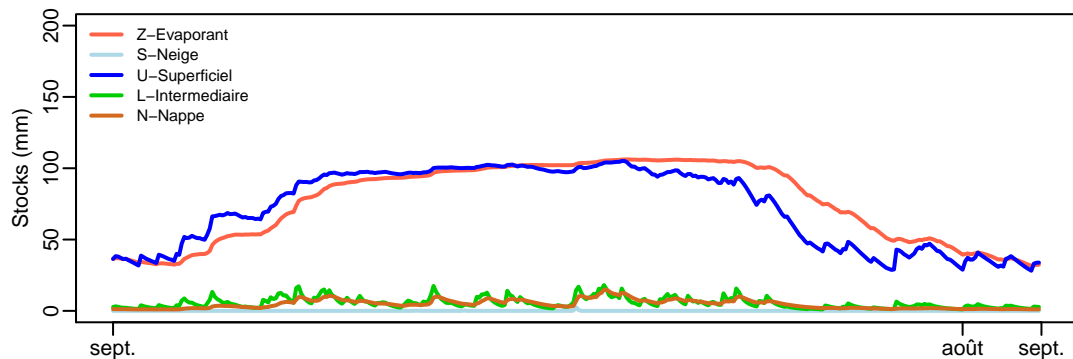

# k1341810 (2270.46 km<sup>2</sup>) – année 2001–2002

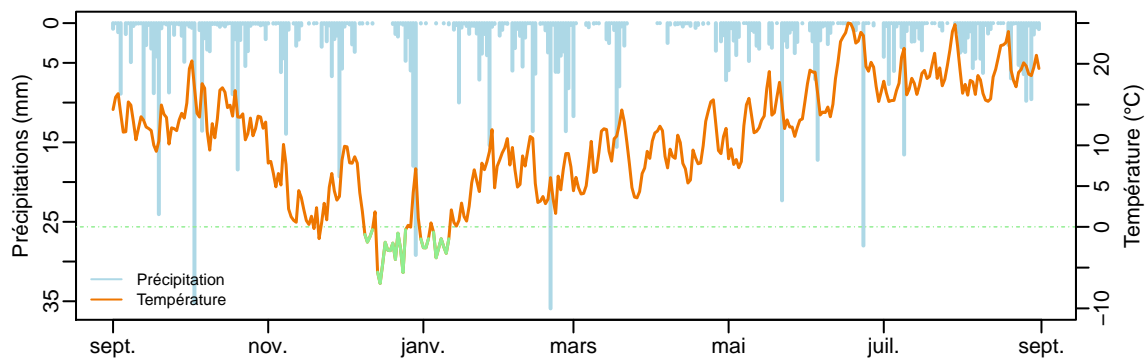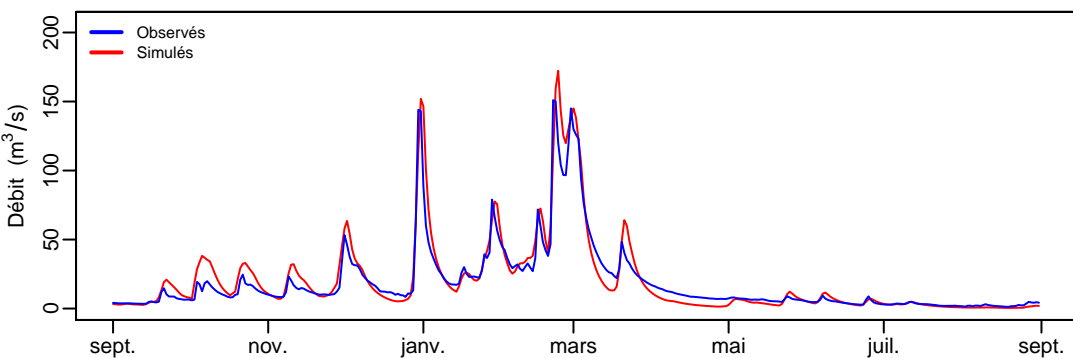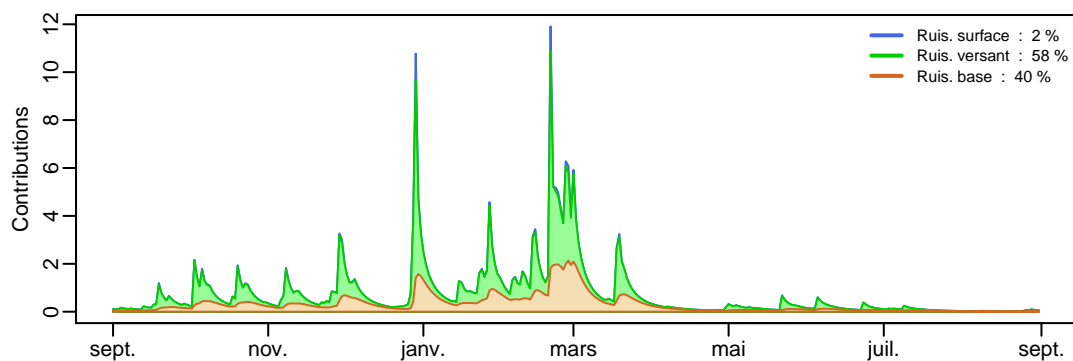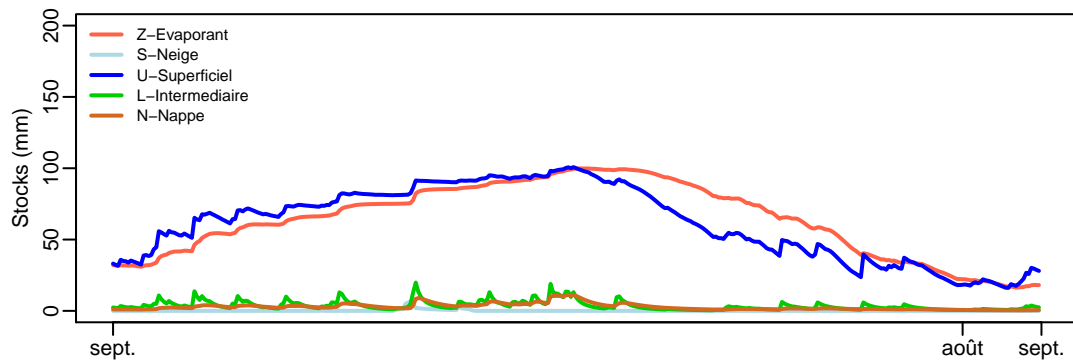

# k1341810 (2270.46 km<sup>2</sup>) – année 2002–2003

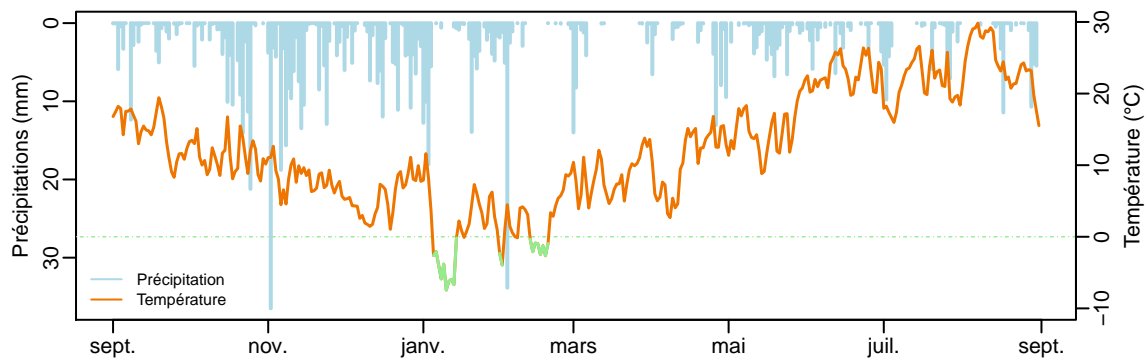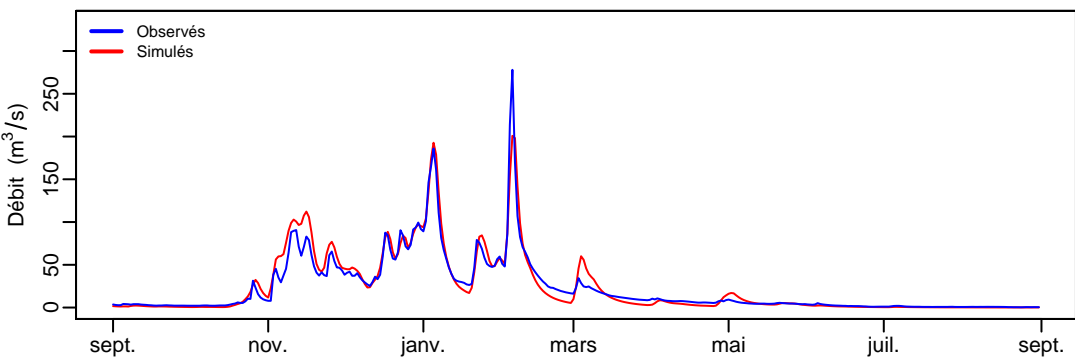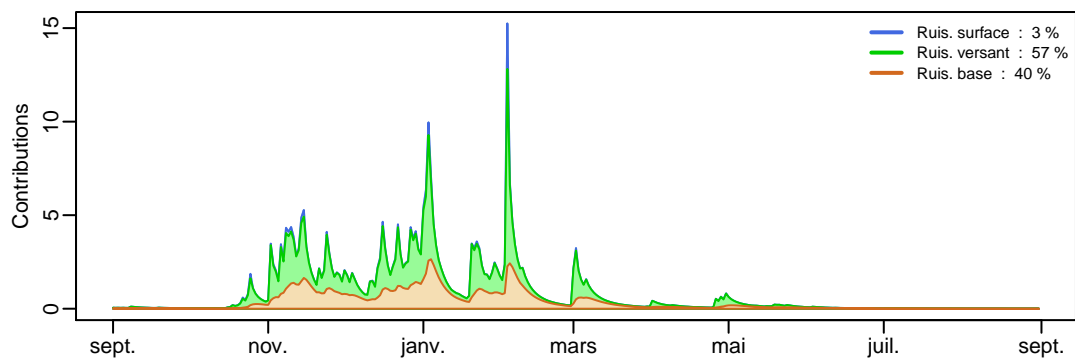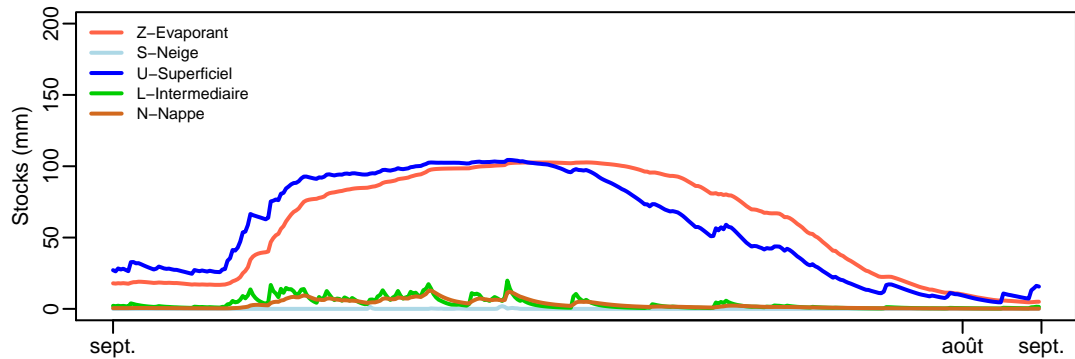

# k1341810 (2270.46 km<sup>2</sup>) – année 2003–2004

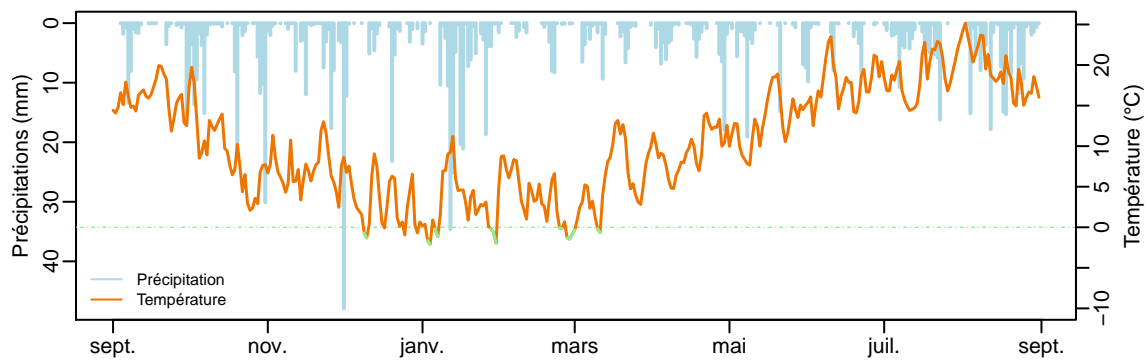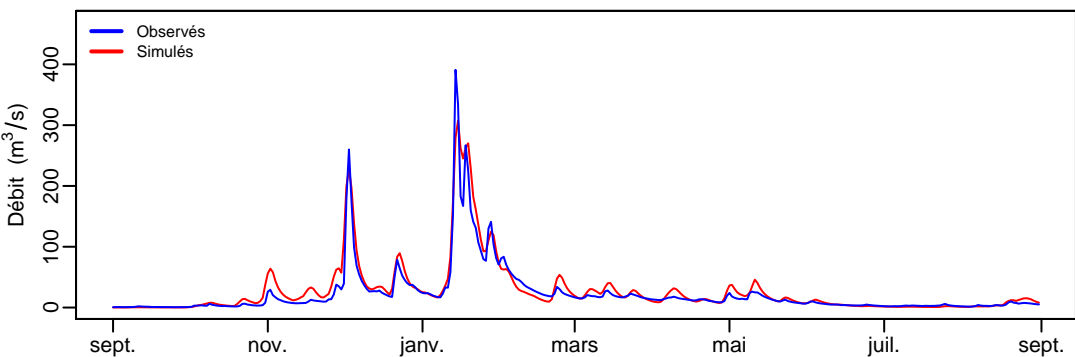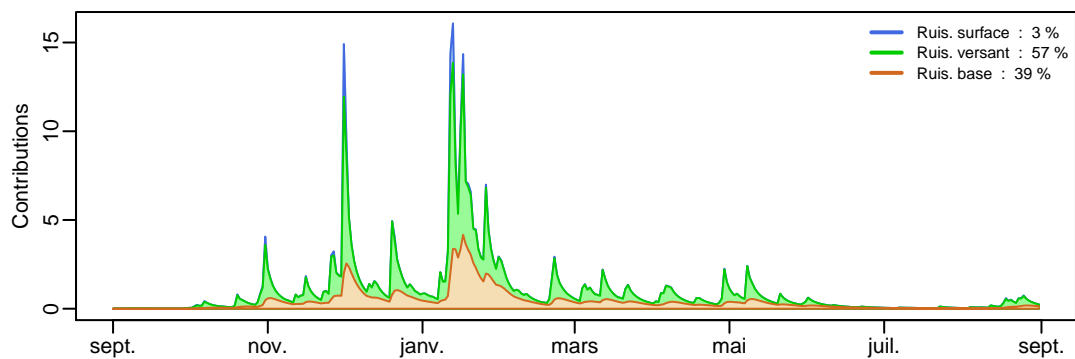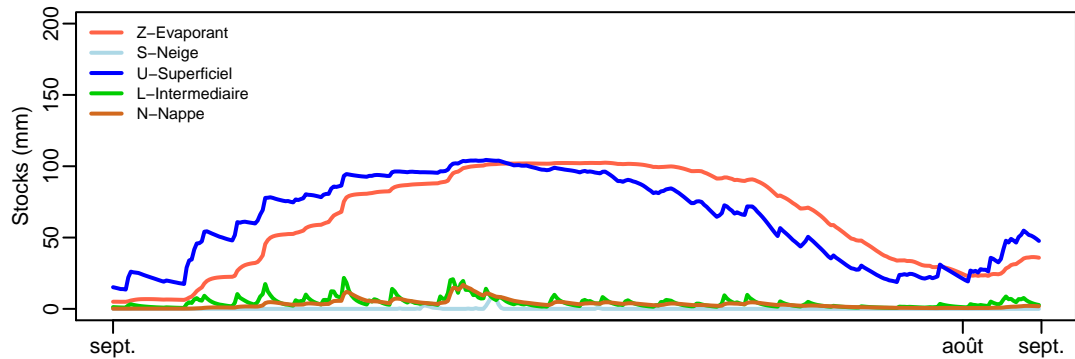

# k1341810 (2270.46 km<sup>2</sup>) – année 2004–2005

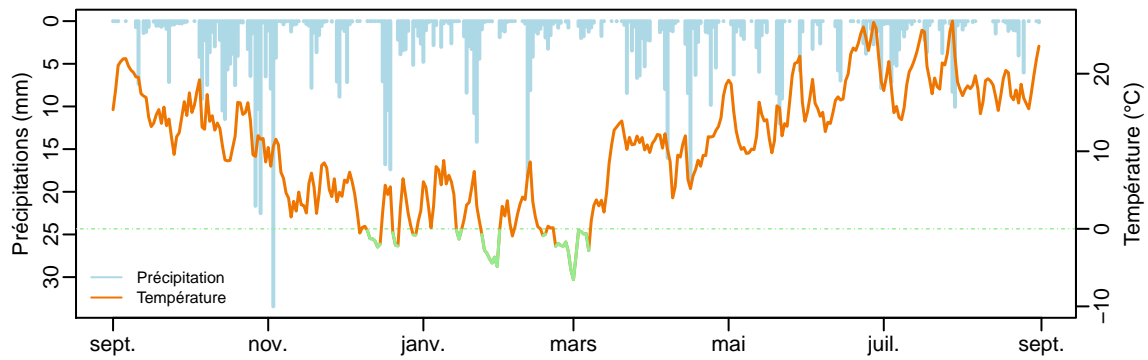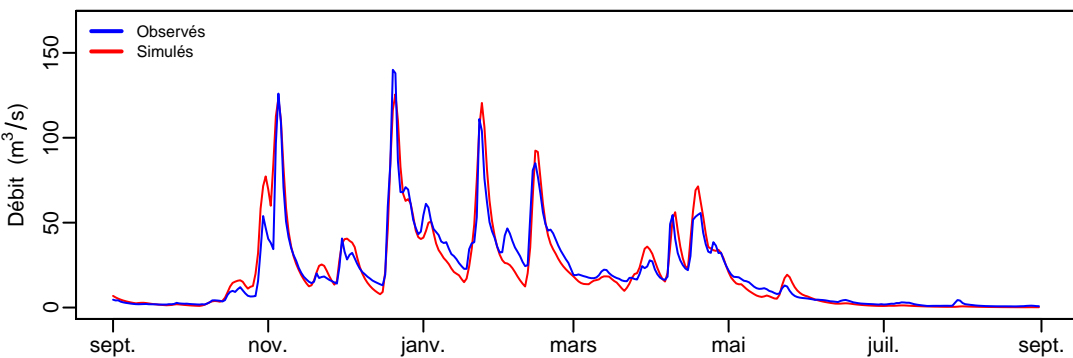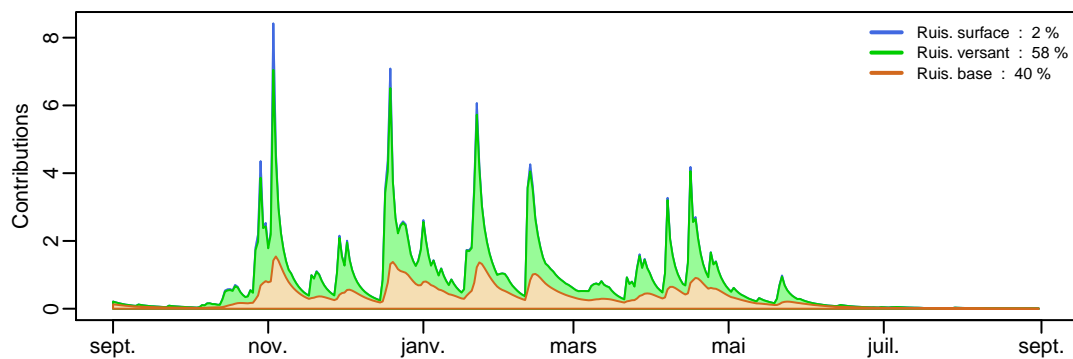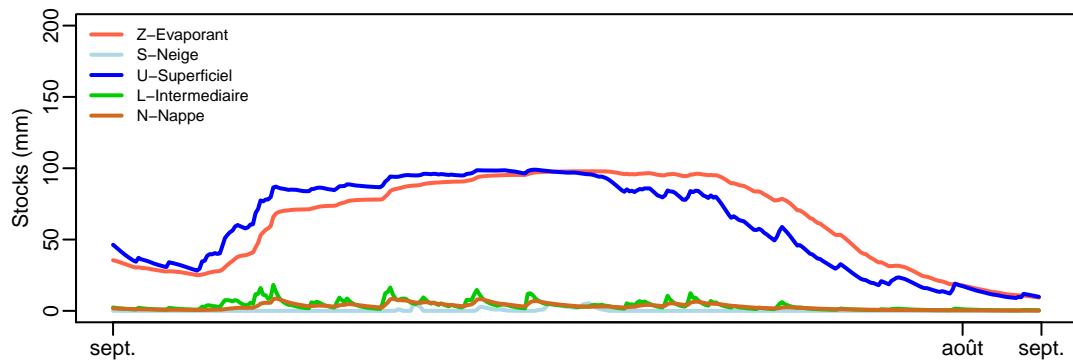



# k1341810 (2270.46 km<sup>2</sup>) – année 2005–2006

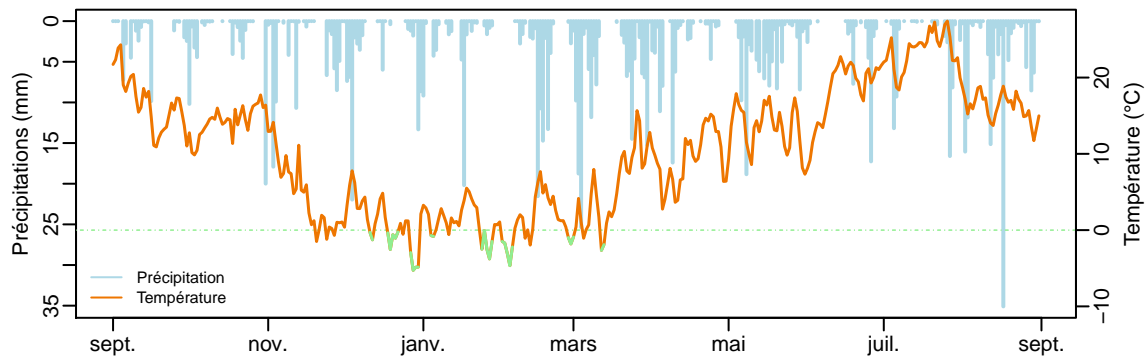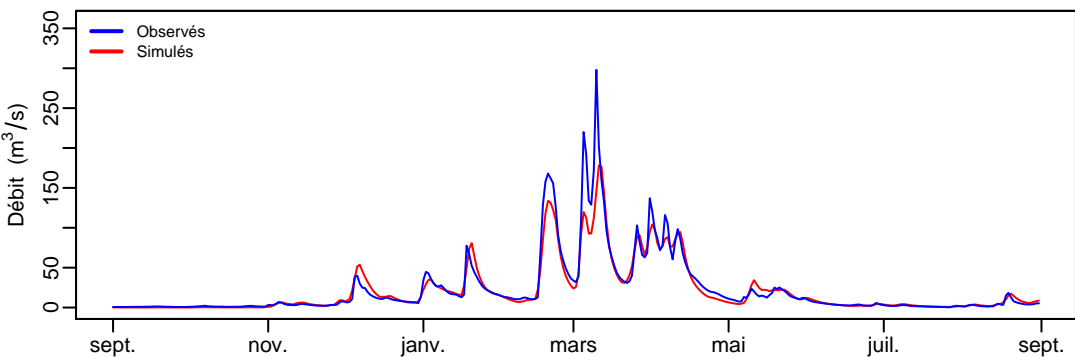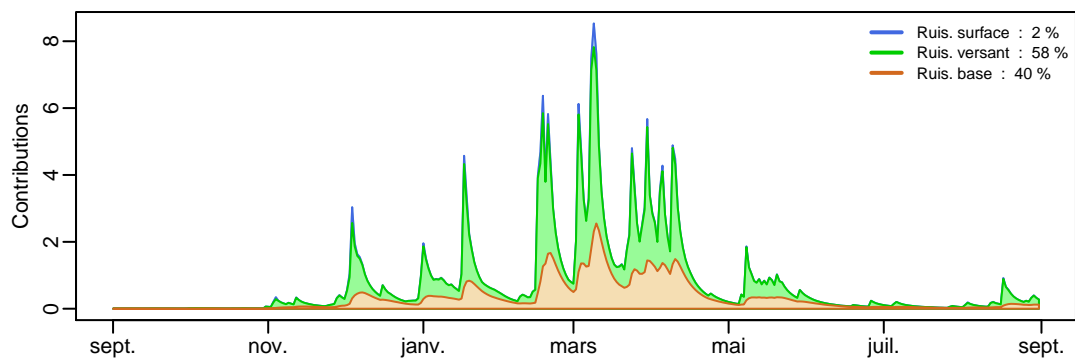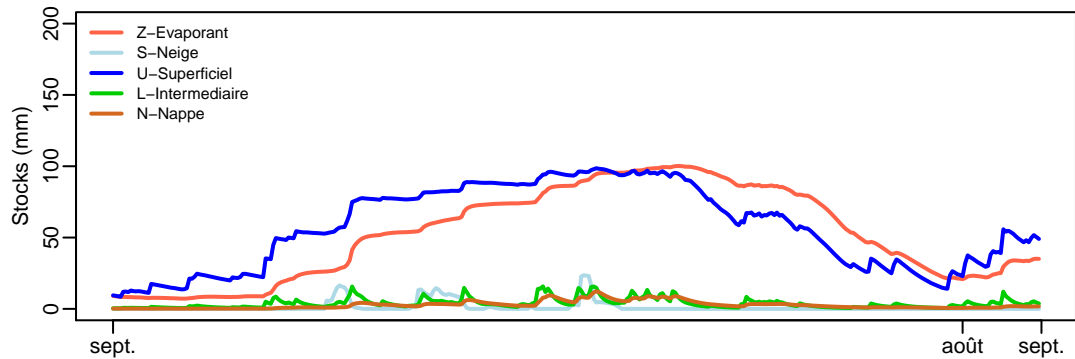

# k1341810 (2270.46 km<sup>2</sup>) – année 2006–2007

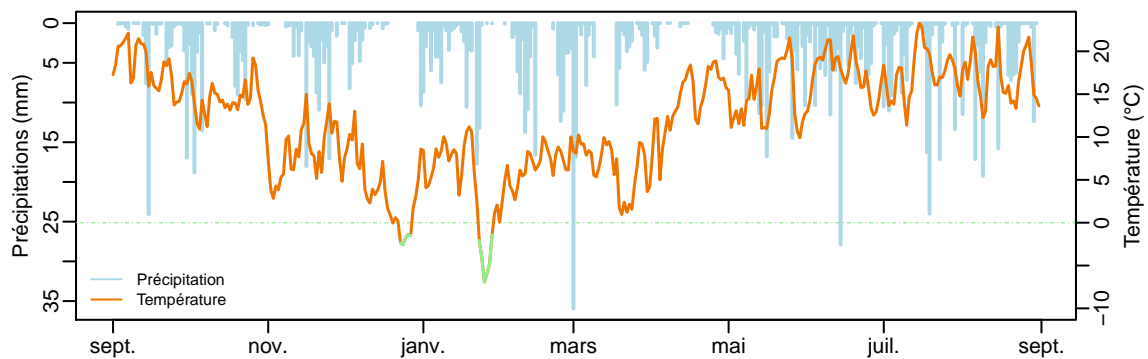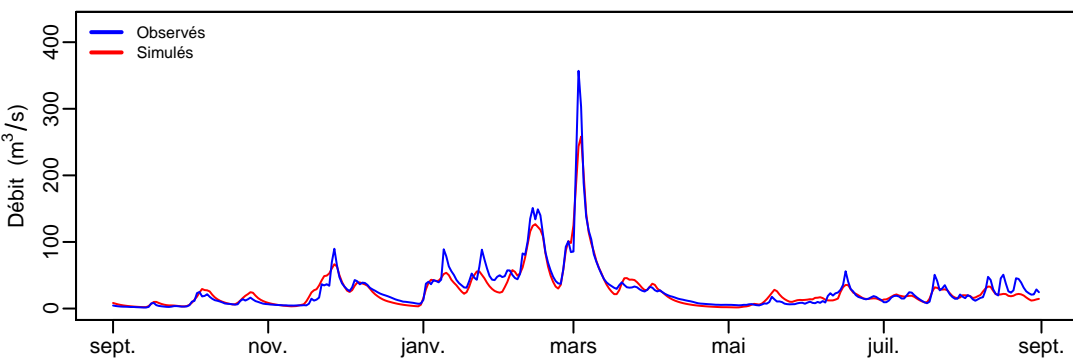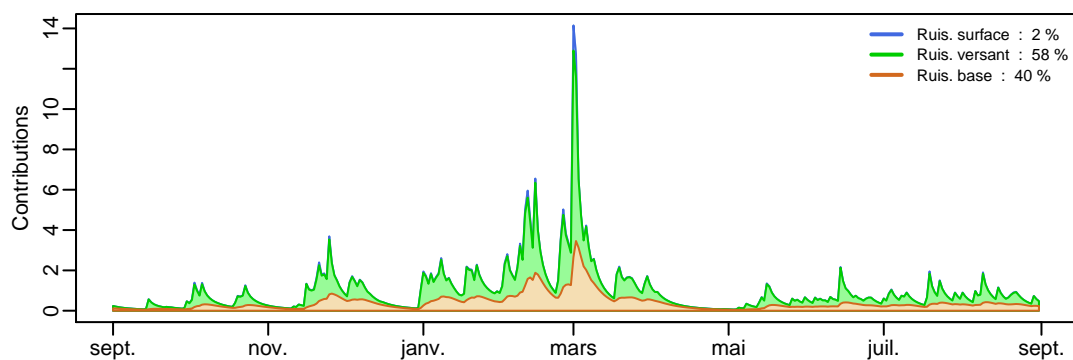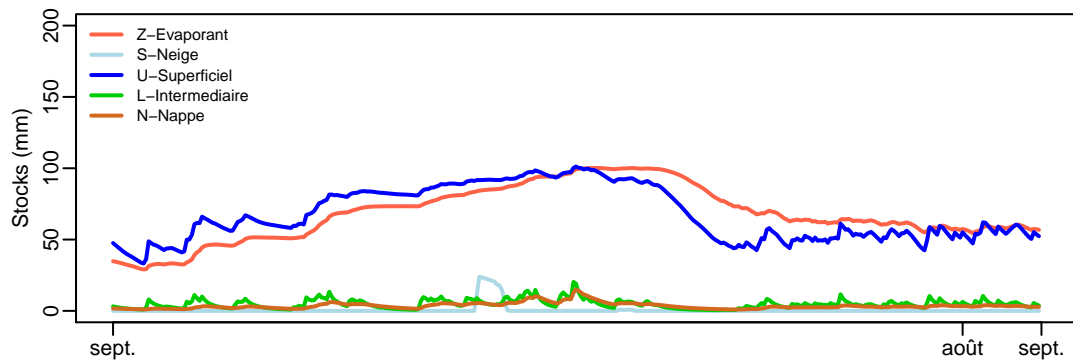

# k1341810 (2270.46 km<sup>2</sup>) – année 2007–2008

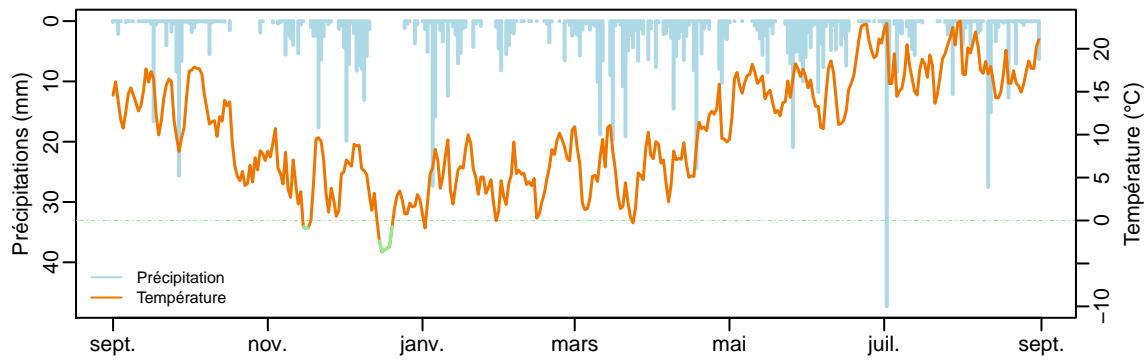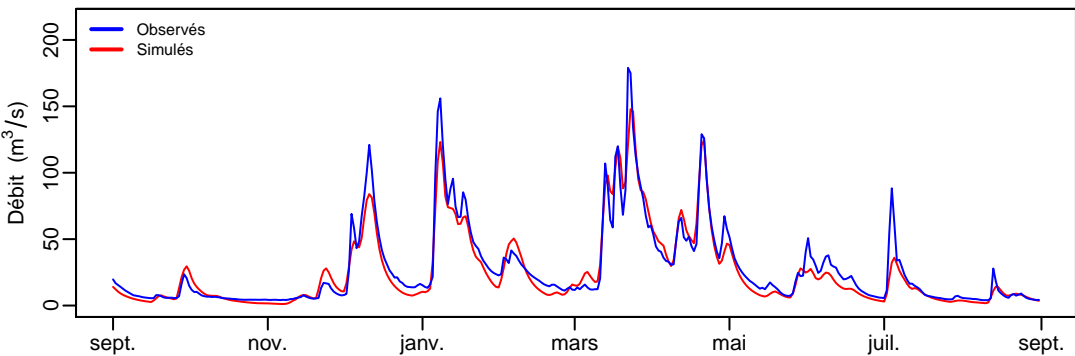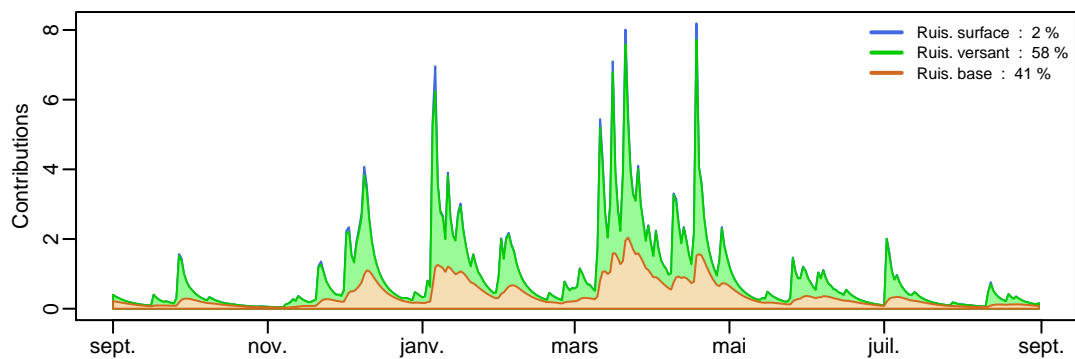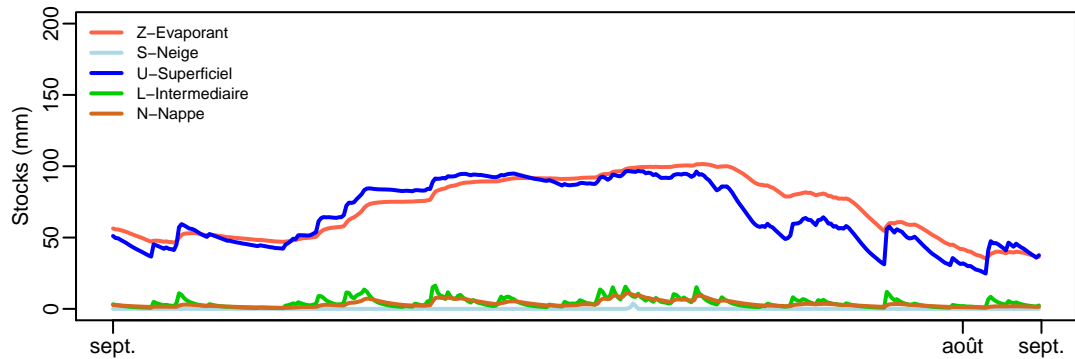

# k1341810 (2270.46 km²) – année 2008–2009

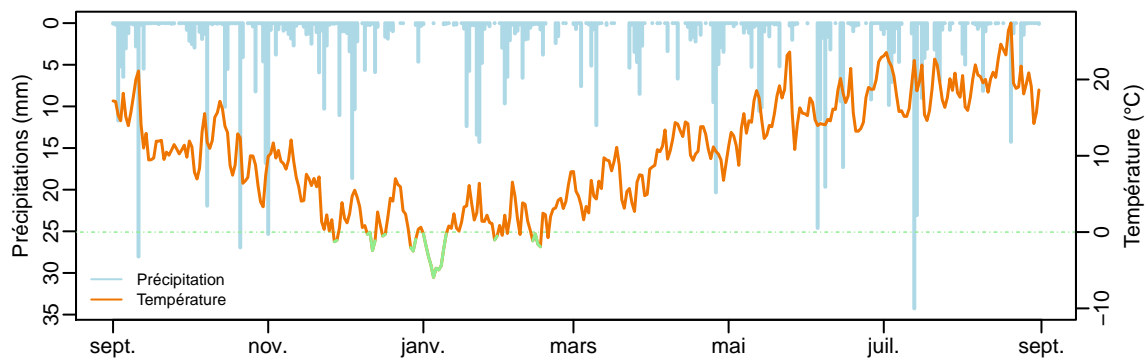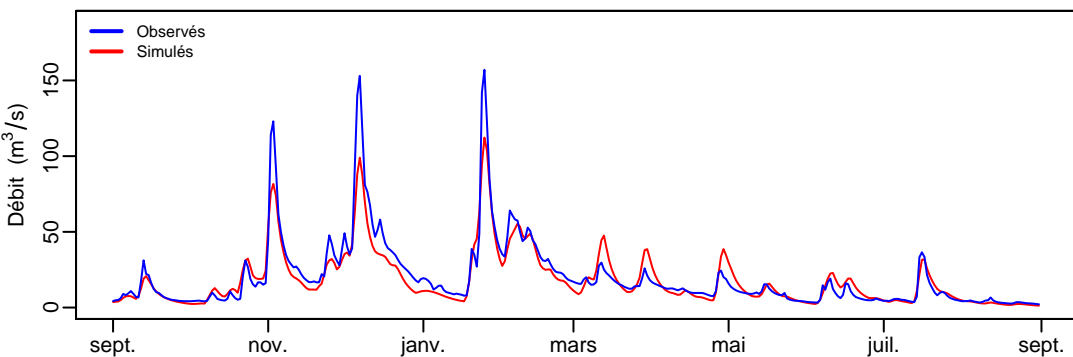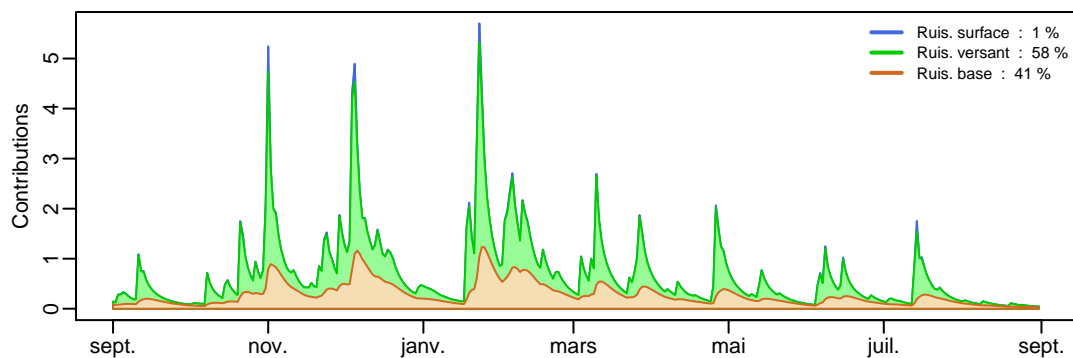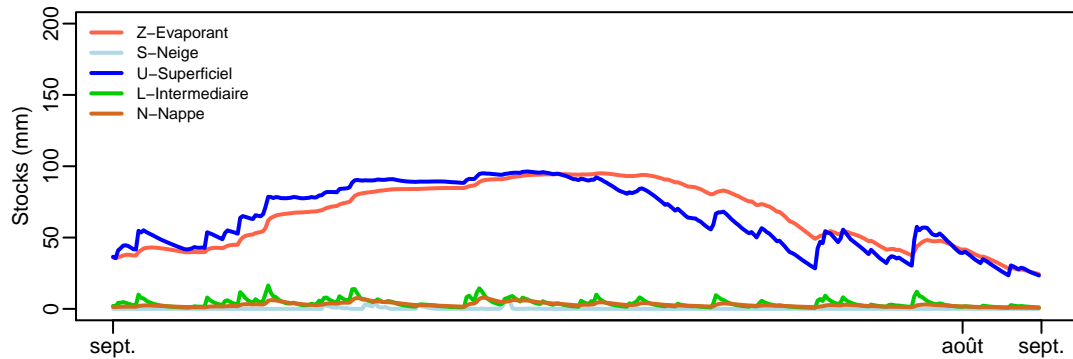

# k1341810 (2270.46 km<sup>2</sup>) – année 2009–2010

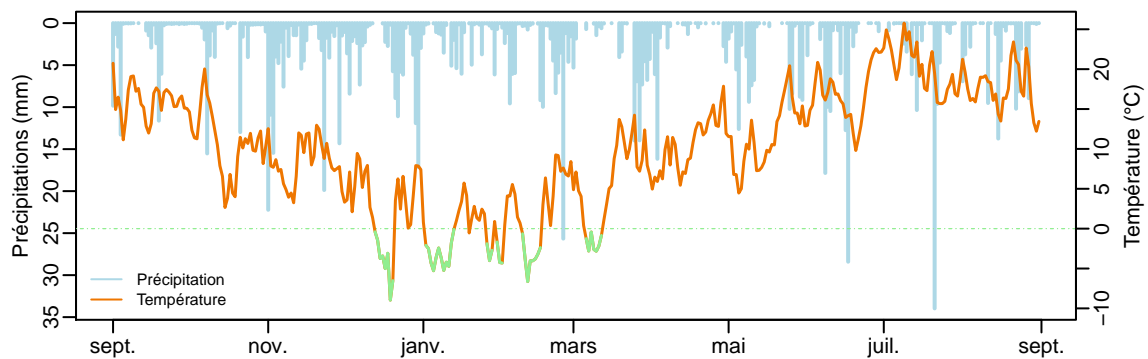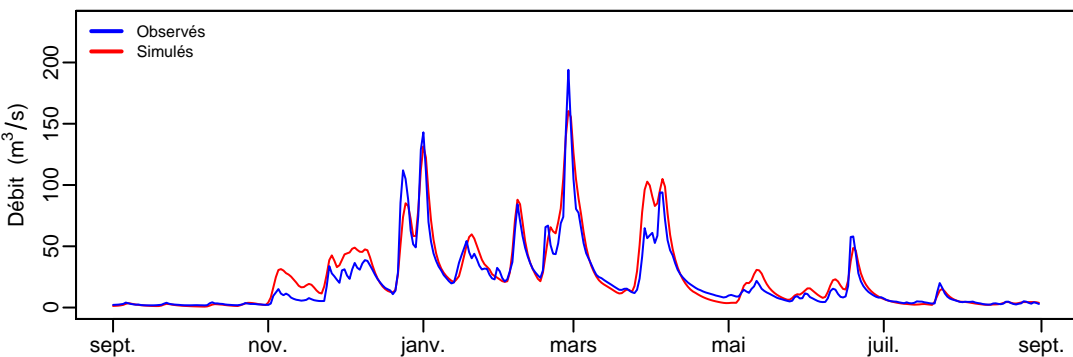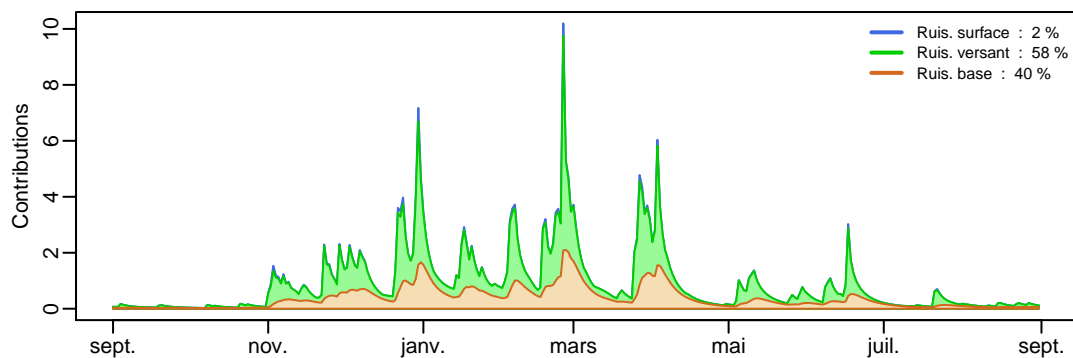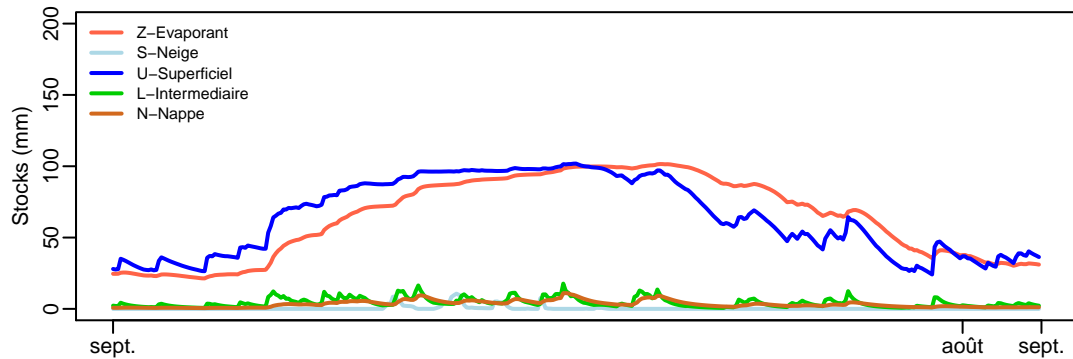

# k1341810 (2270.46 km<sup>2</sup>) – année 2010–2011

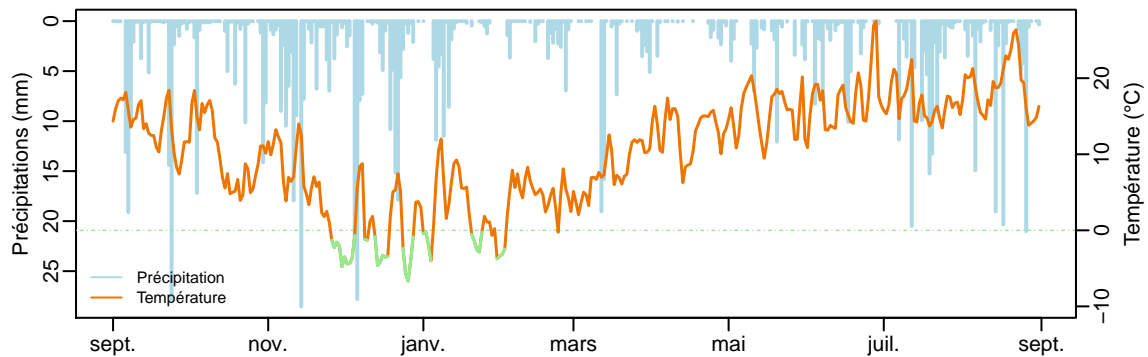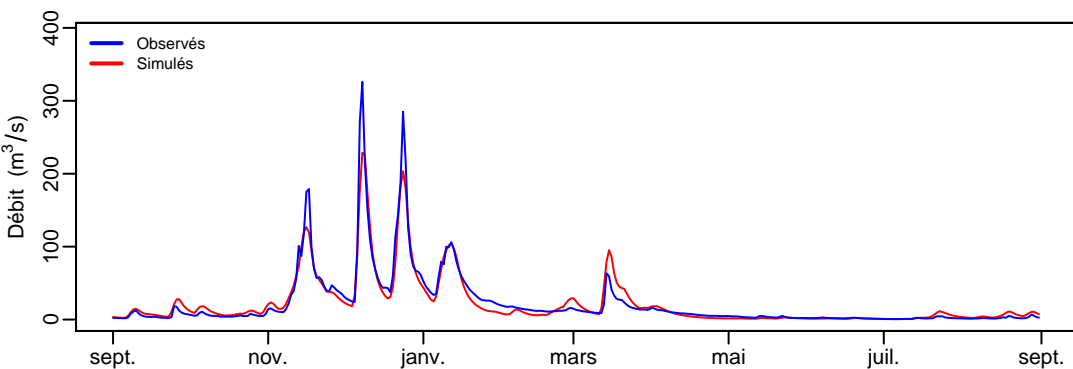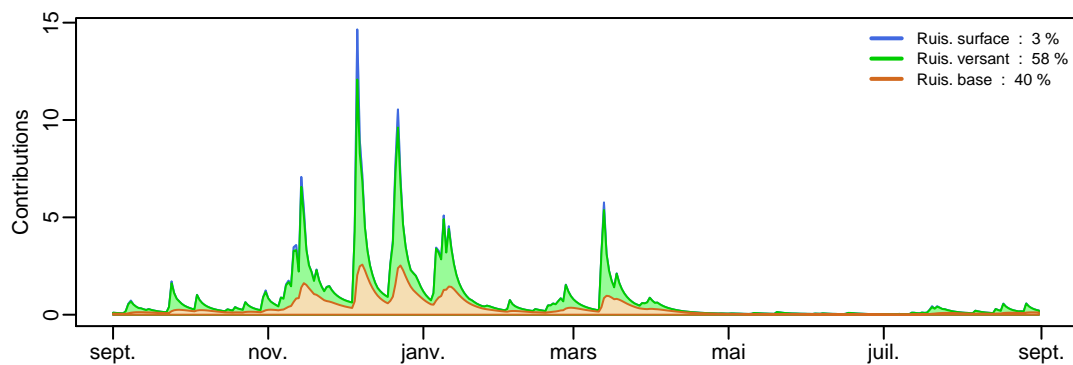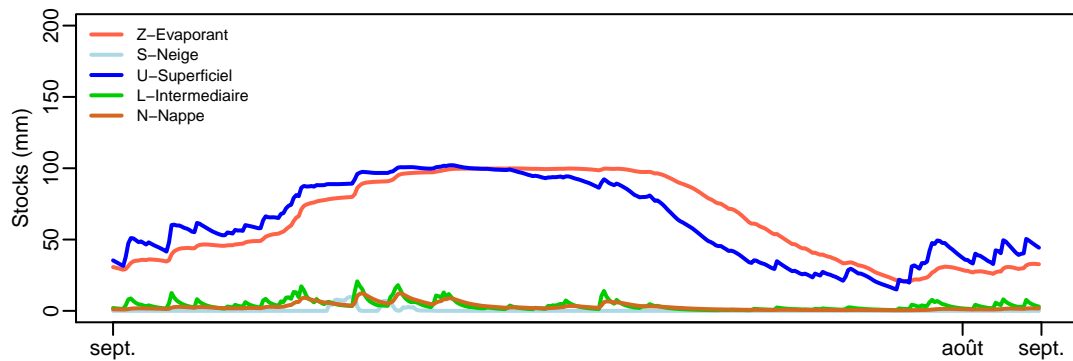

# k1341810 (2270.46 km<sup>2</sup>) – année 2011–2012

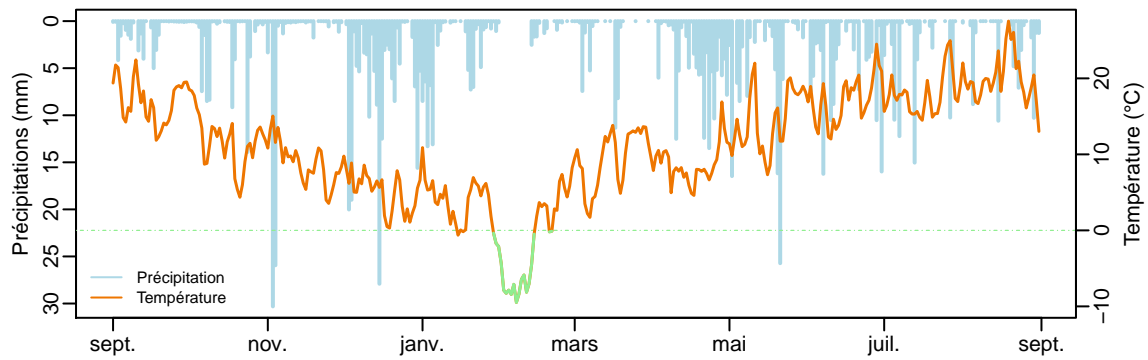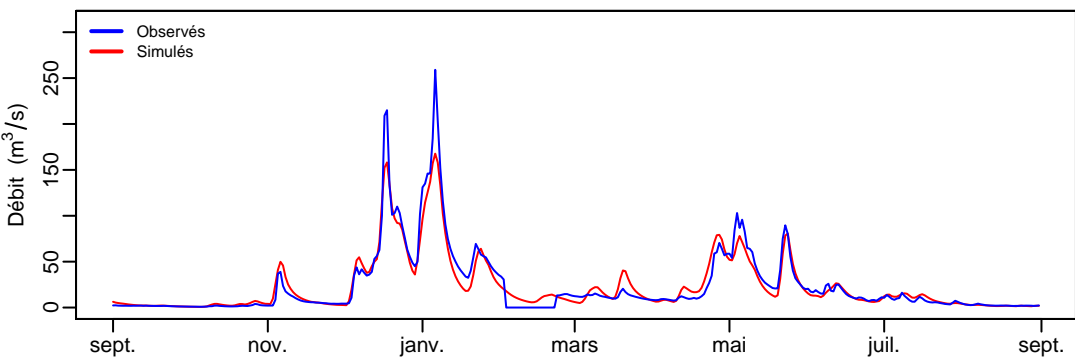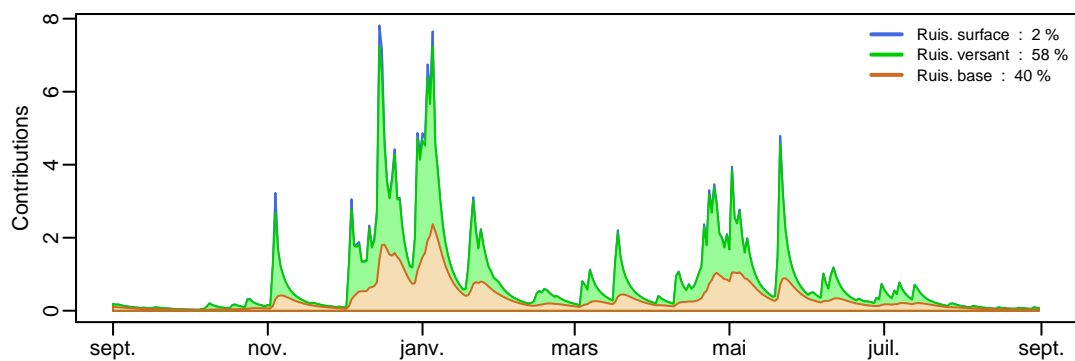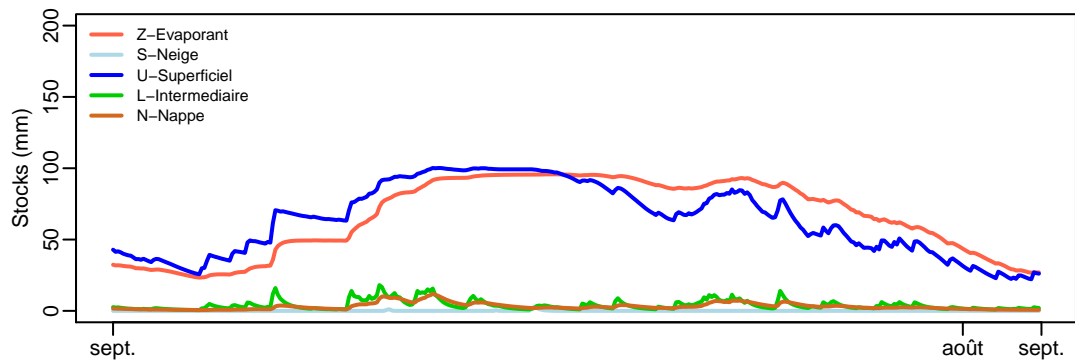

# k1363010 (352.33 km<sup>2</sup>) – année 1981–1982

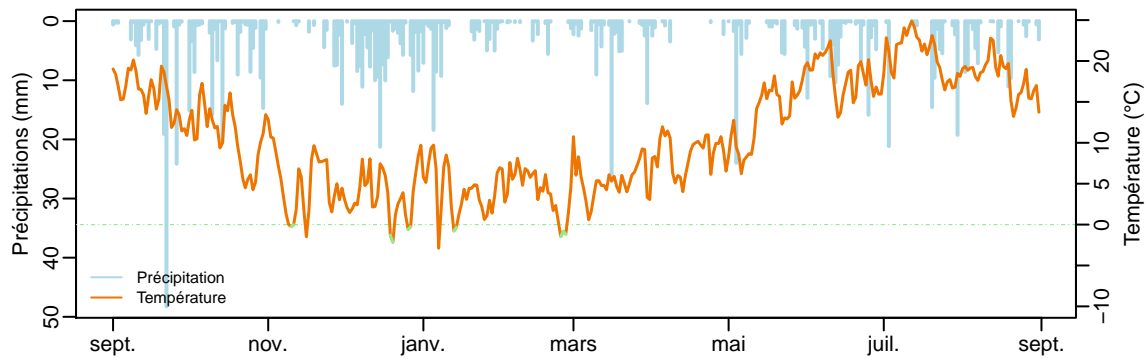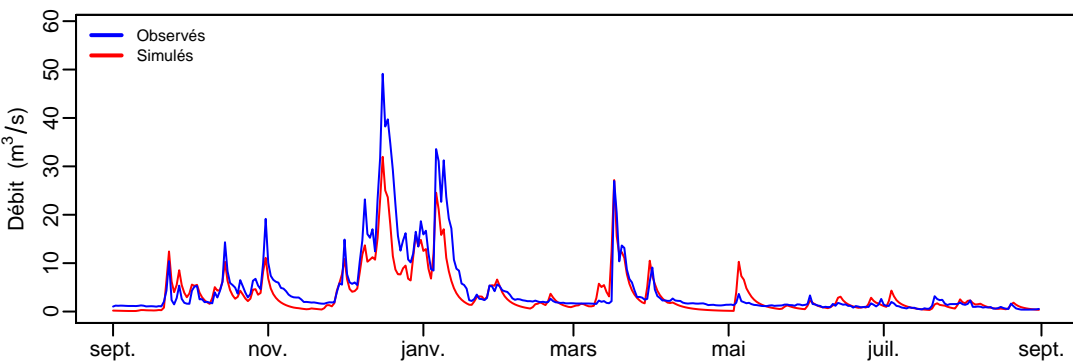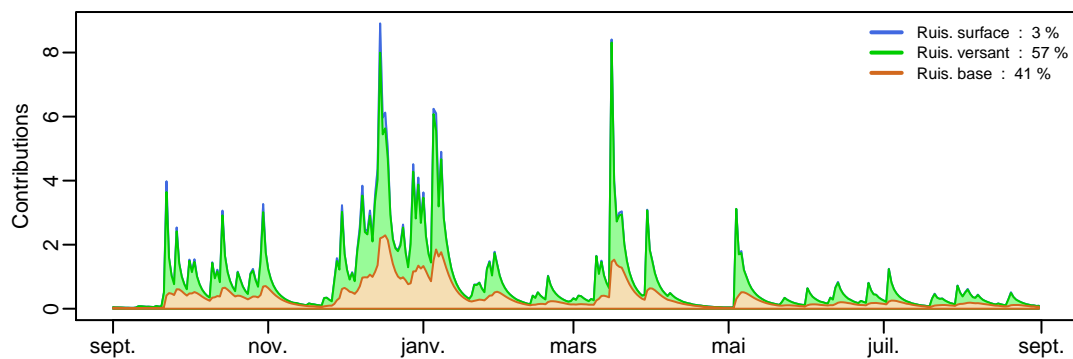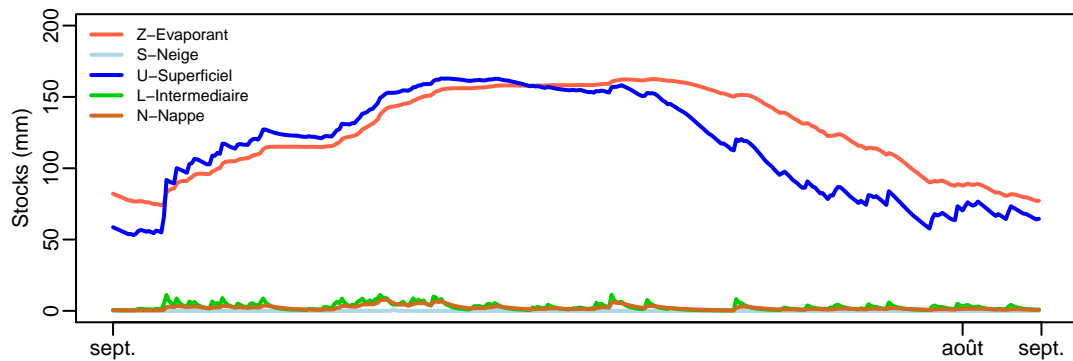



# k1363010 (352.33 km<sup>2</sup>) – année 1982–1983

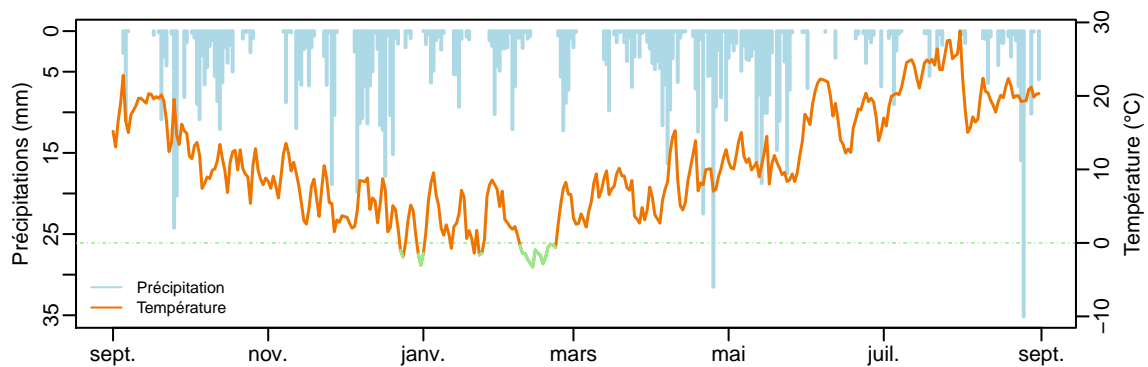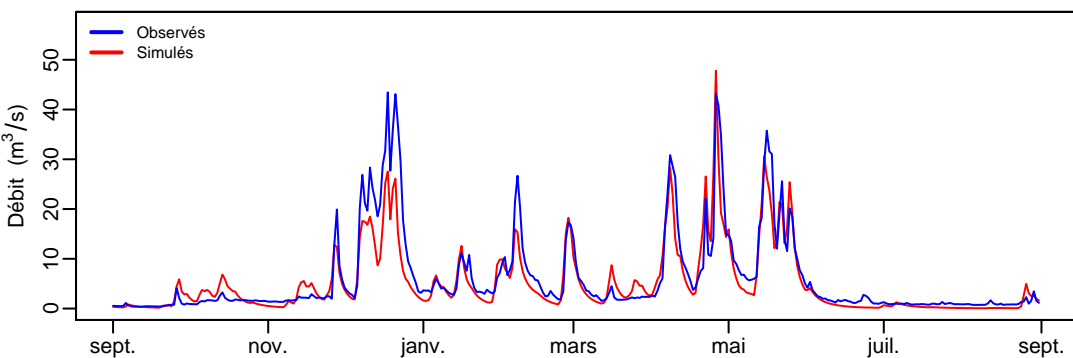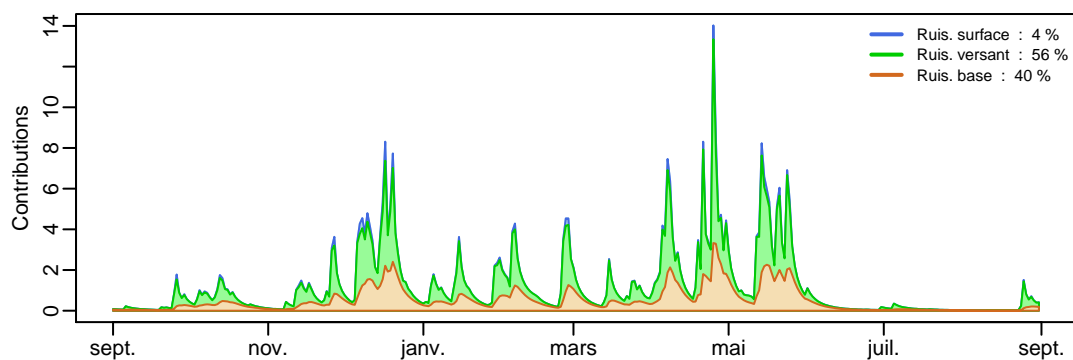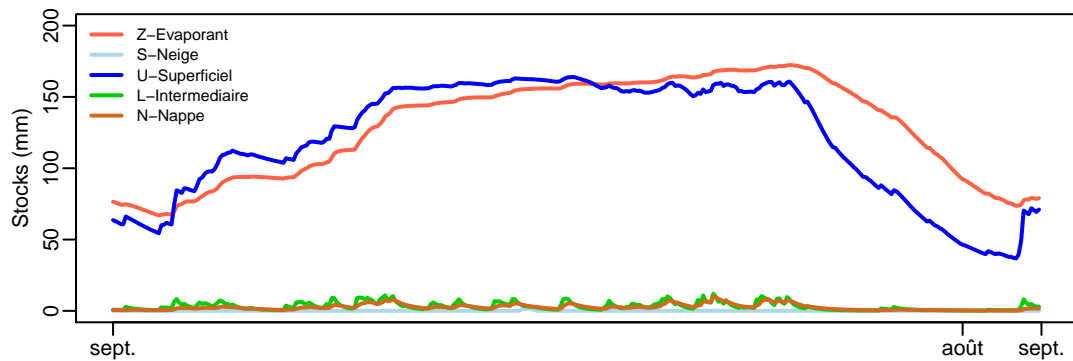

# k1363010 (352.33 km<sup>2</sup>) – année 1983–1984

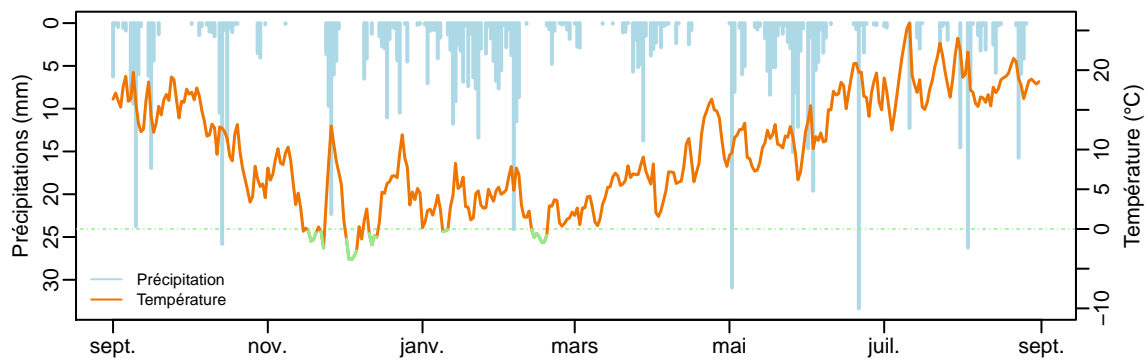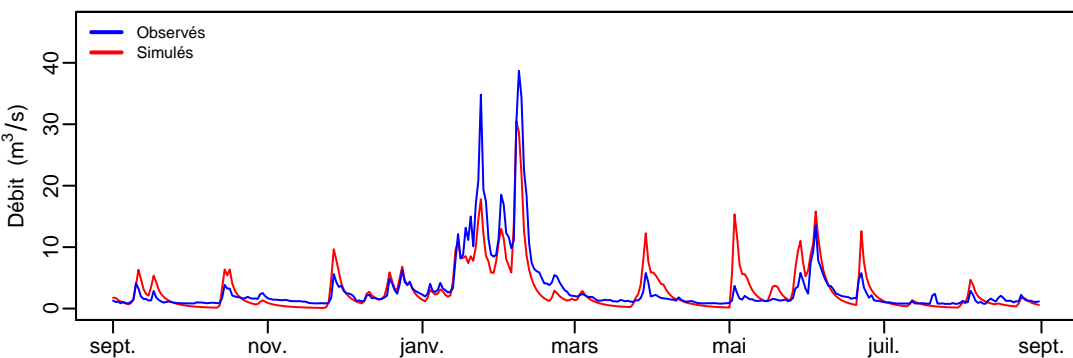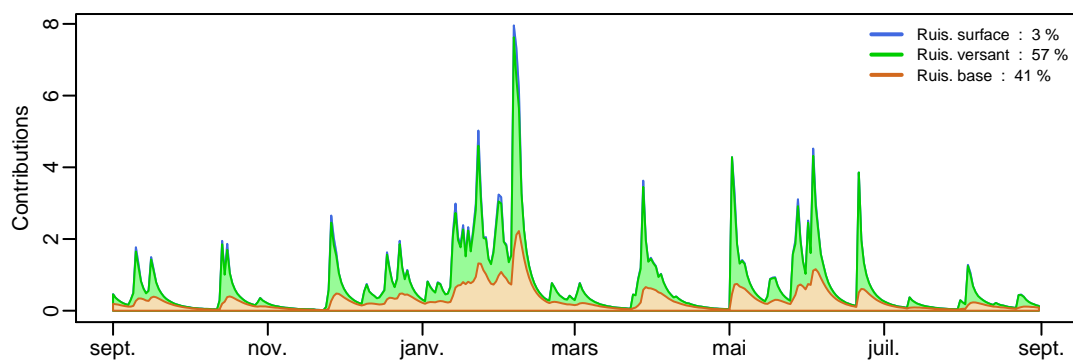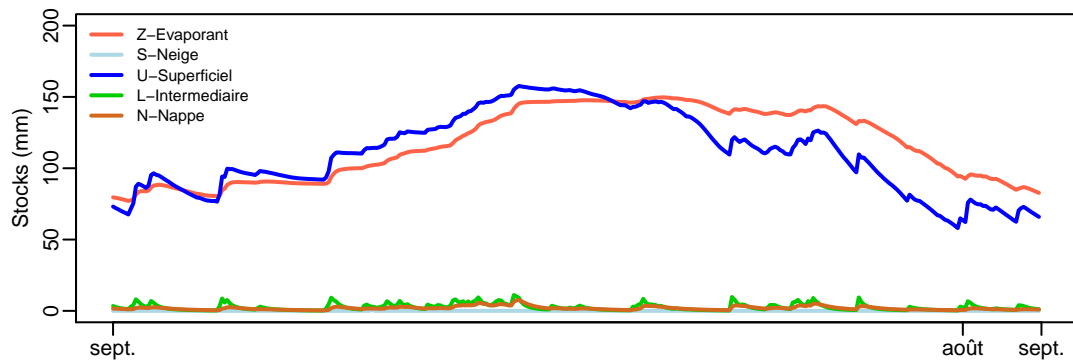

# k1363010 (352.33 km<sup>2</sup>) – année 1984–1985

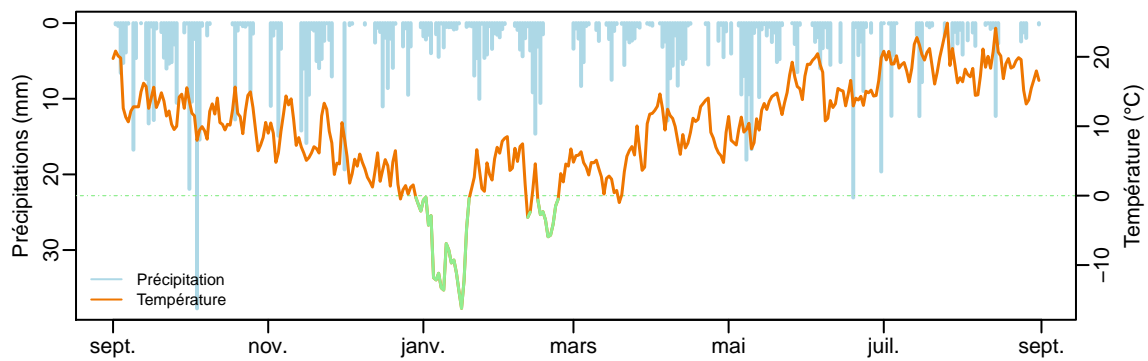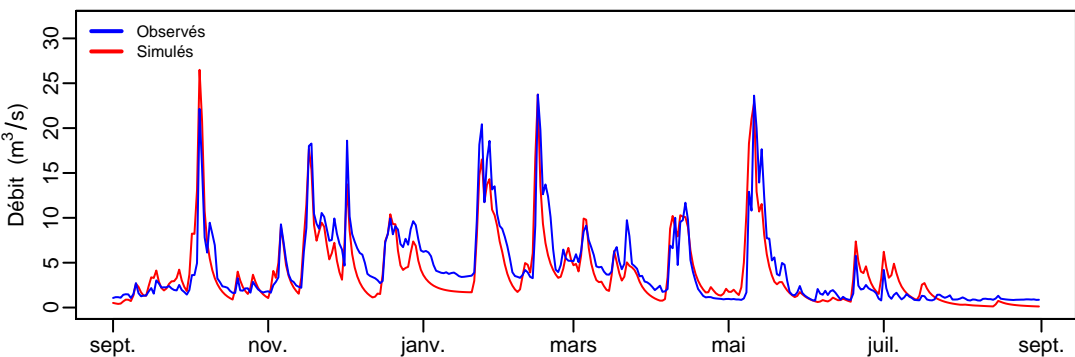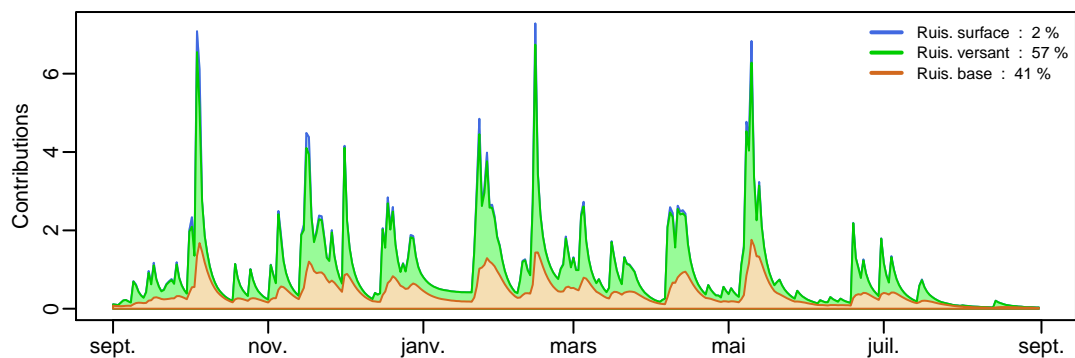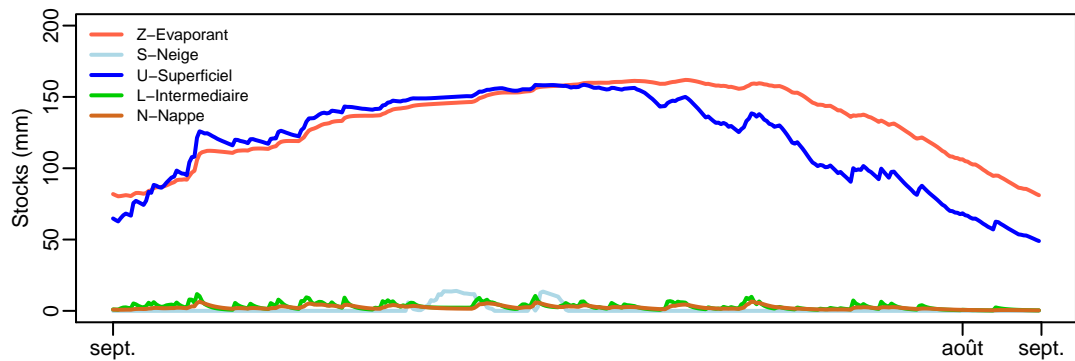

# k1363010 (352.33 km<sup>2</sup>) – année 1985–1986

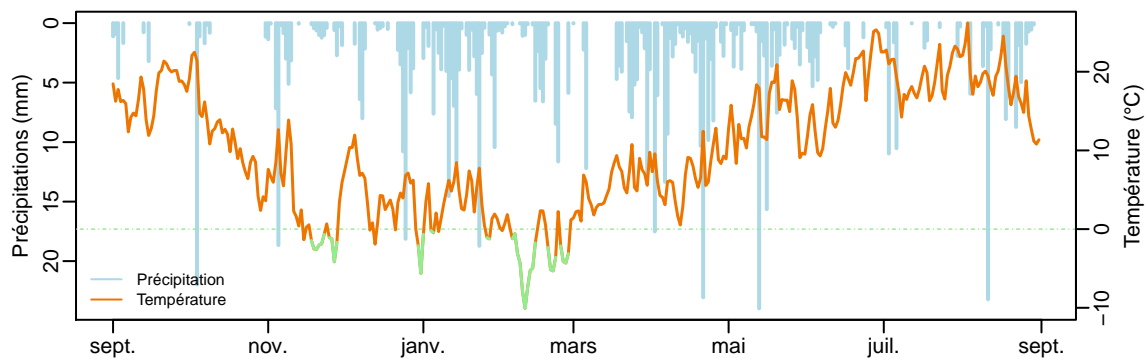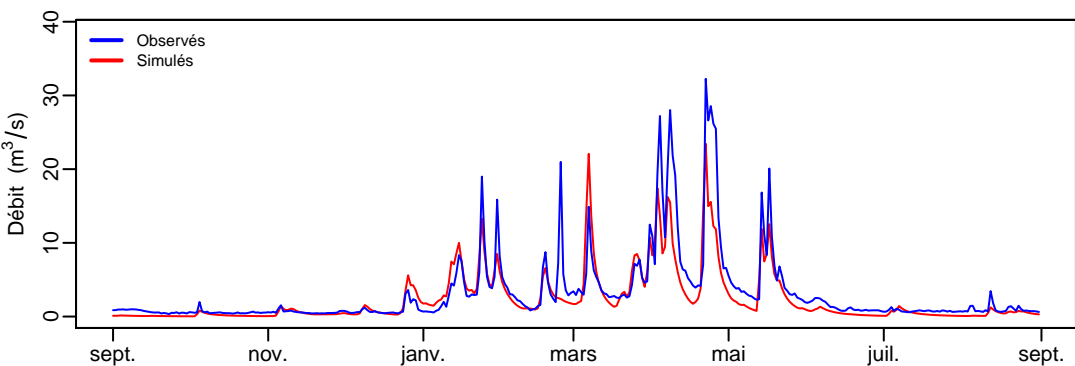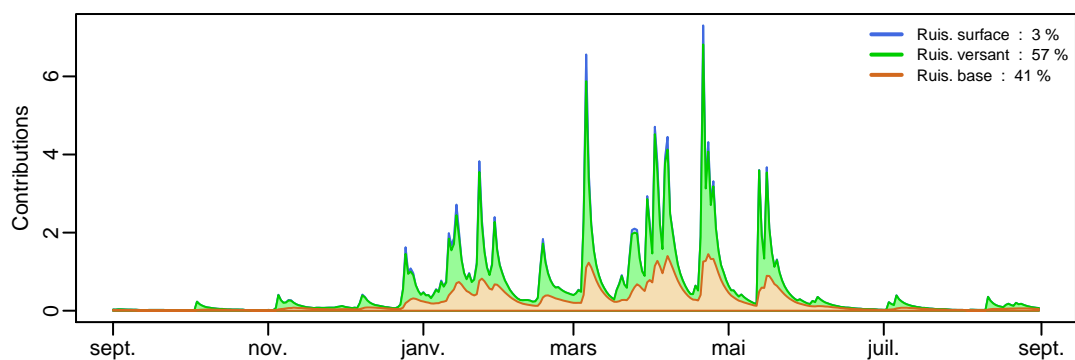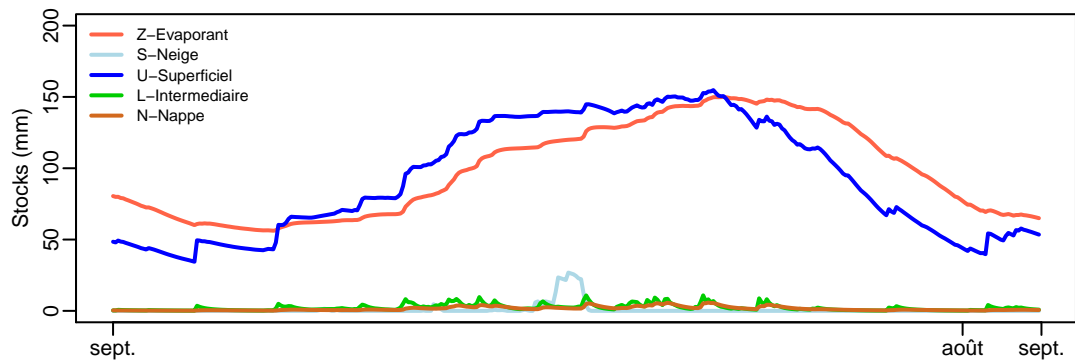

# k1363010 (352.33 km<sup>2</sup>) – année 1986–1987

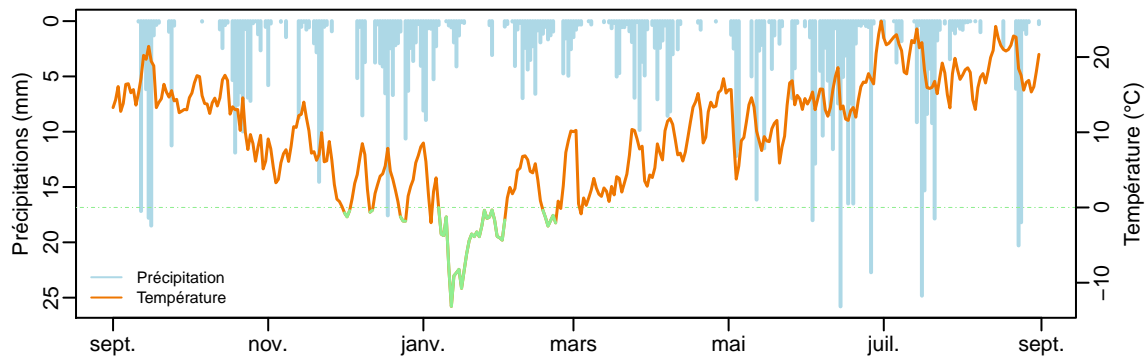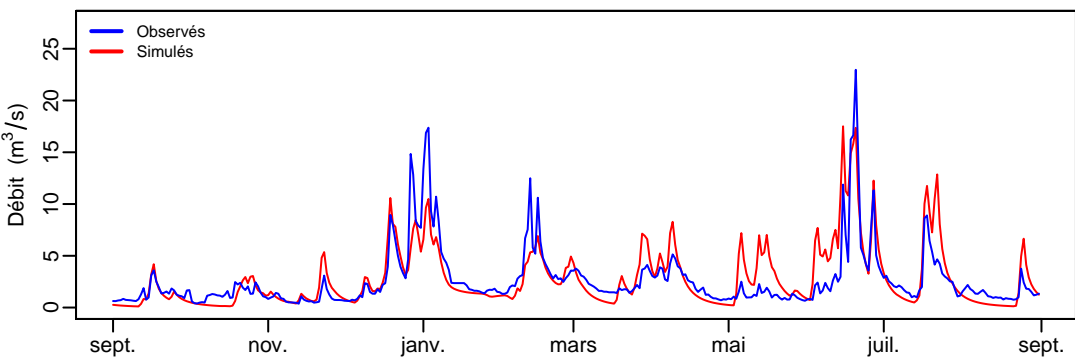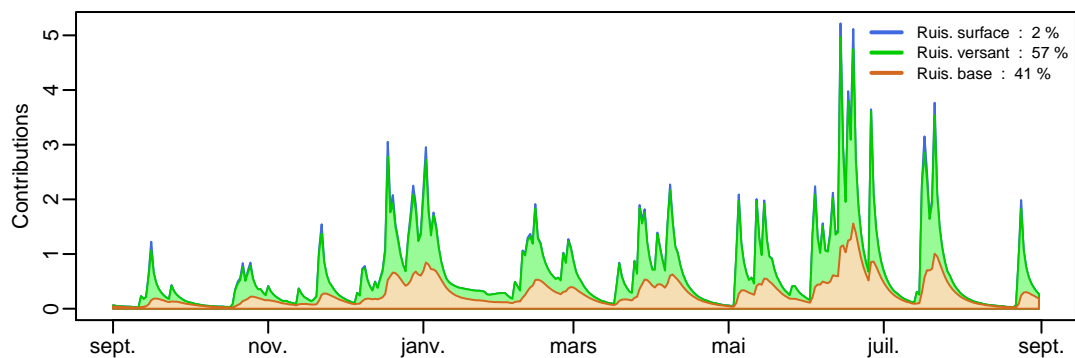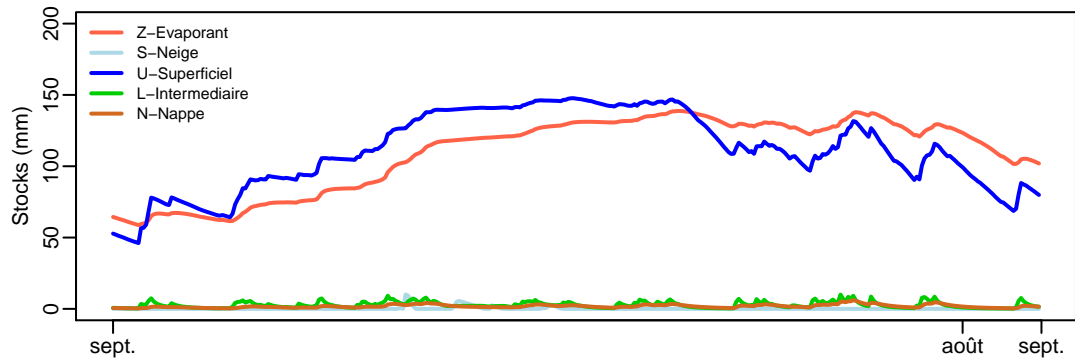

# k1363010 (352.33 km<sup>2</sup>) – année 1987–1988

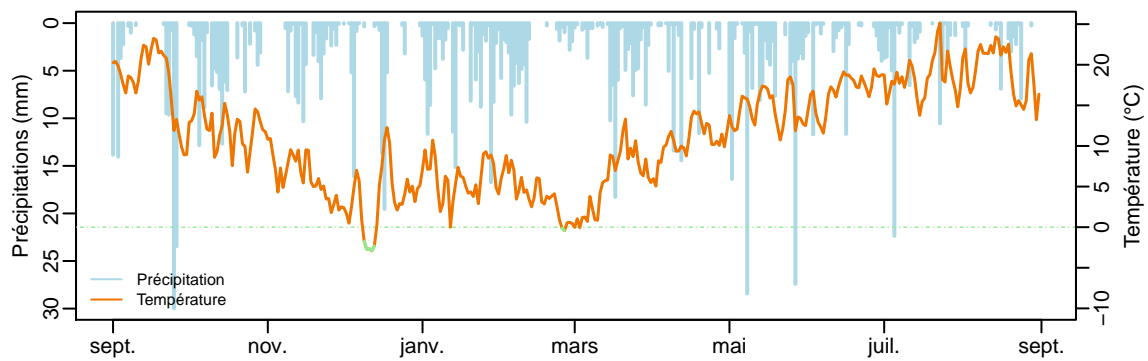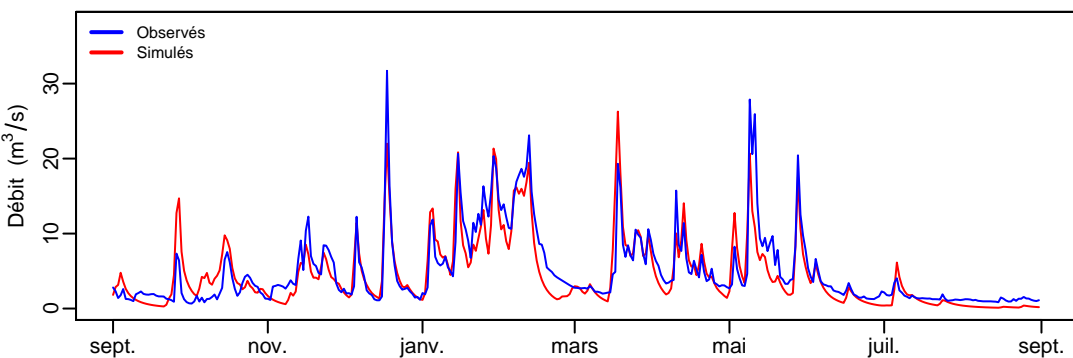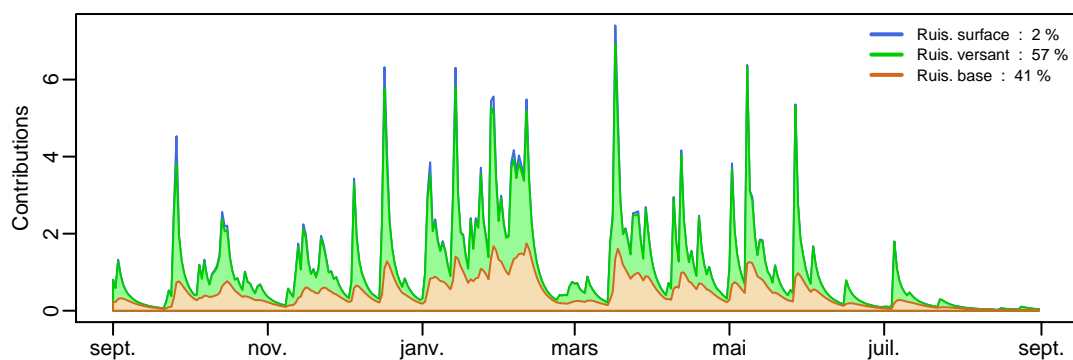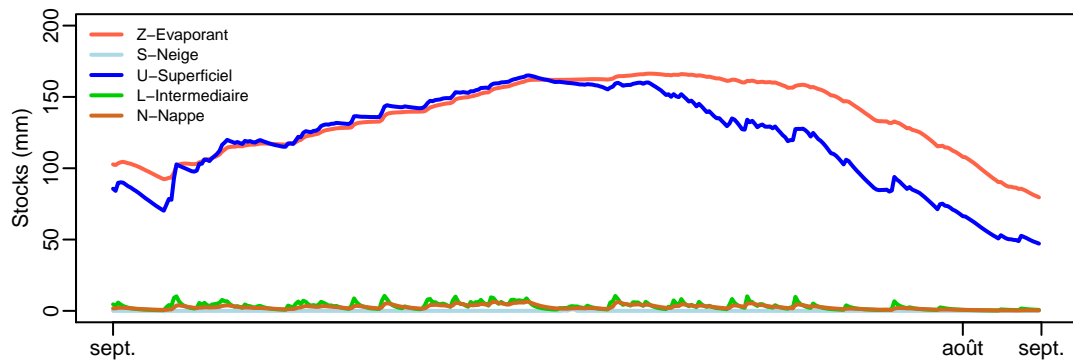

# k1363010 (352.33 km<sup>2</sup>) – année 1988–1989

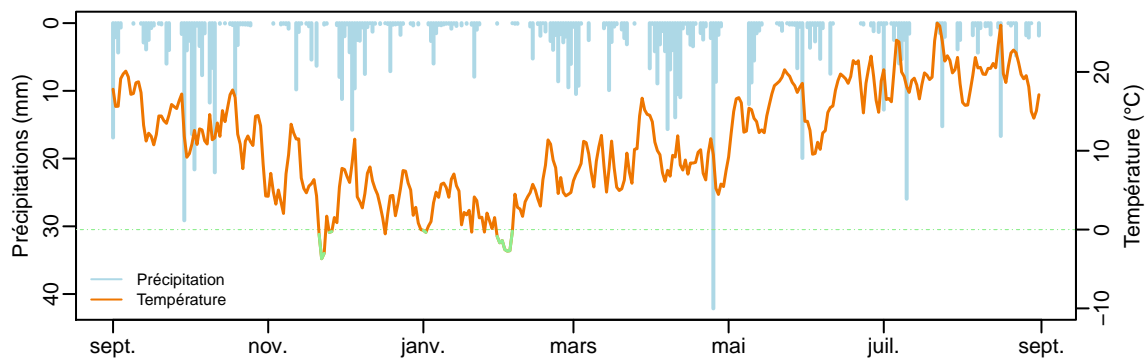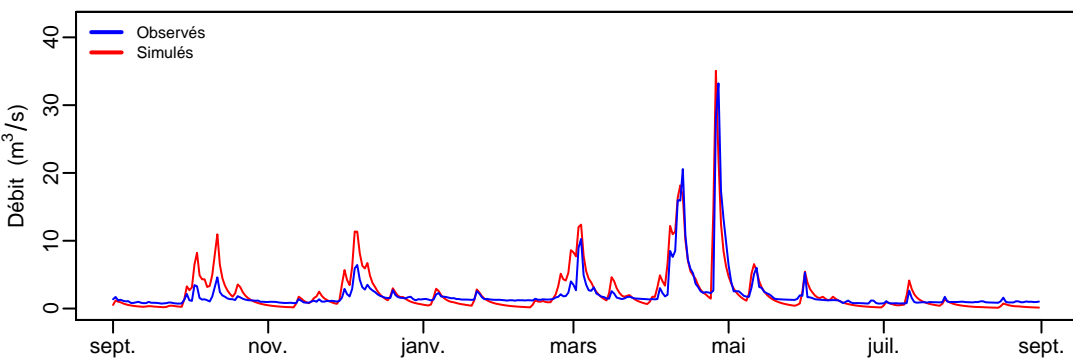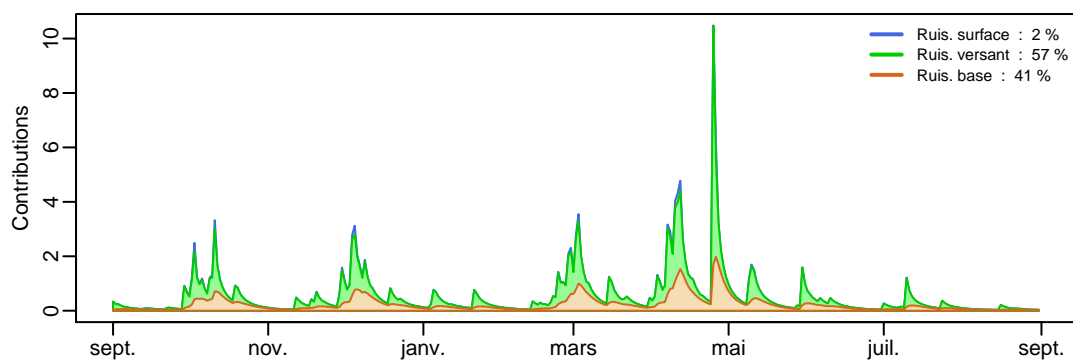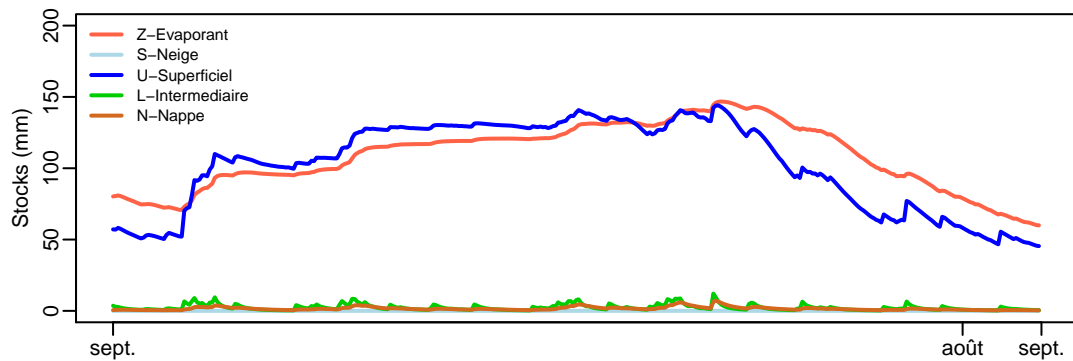

# k1363010 (352.33 km<sup>2</sup>) – année 1989–1990

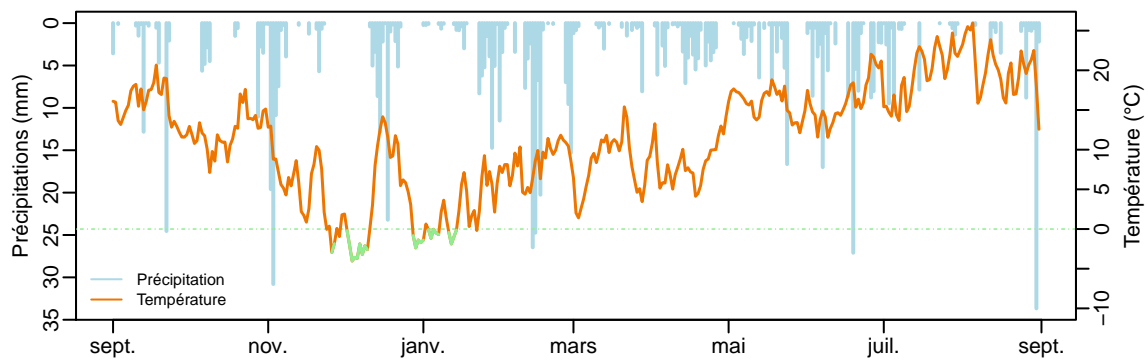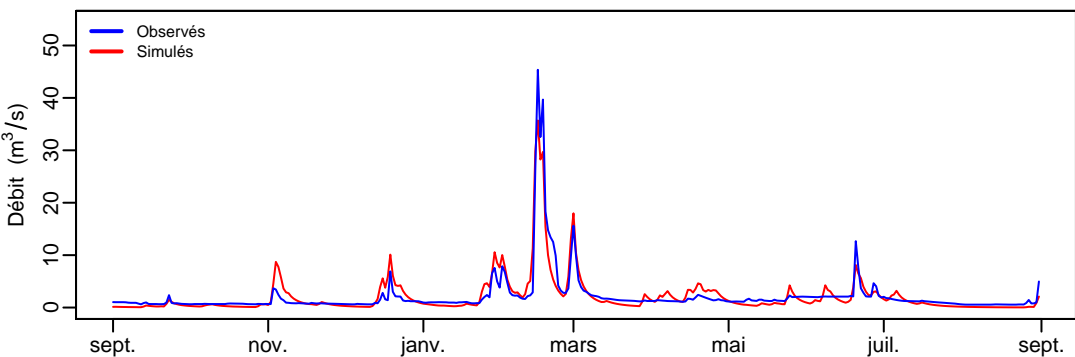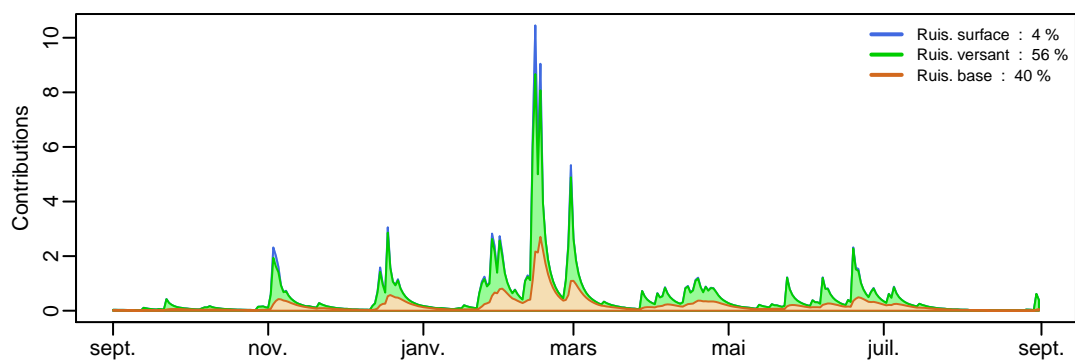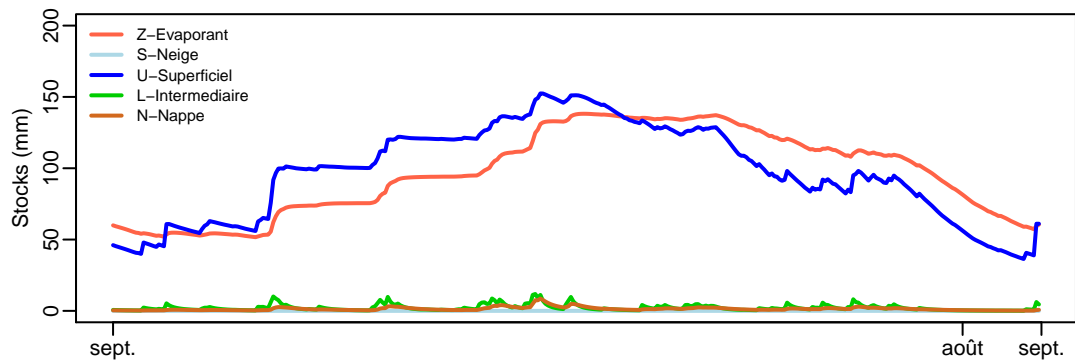



# k1363010 (352.33 km<sup>2</sup>) – année 1990–1991

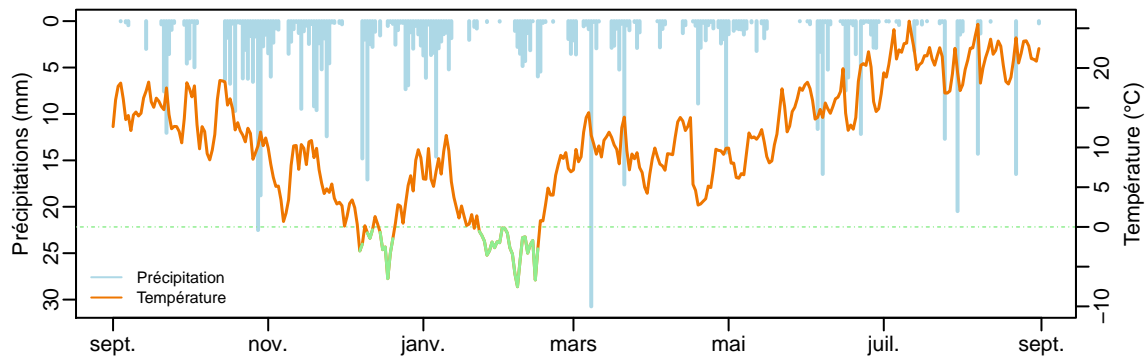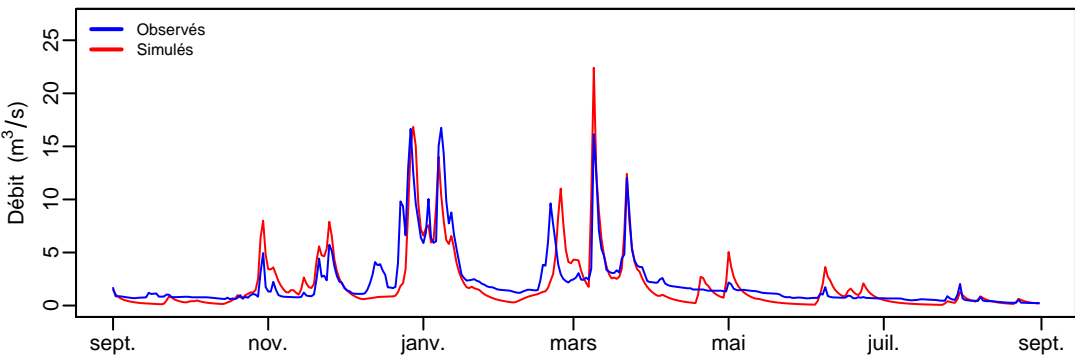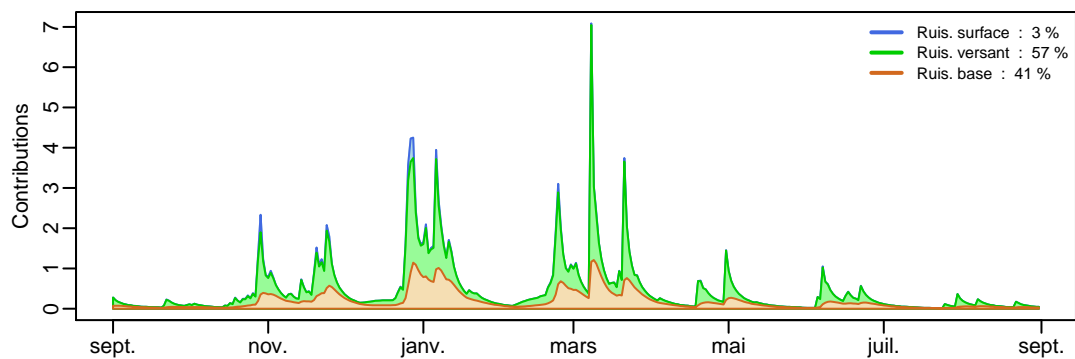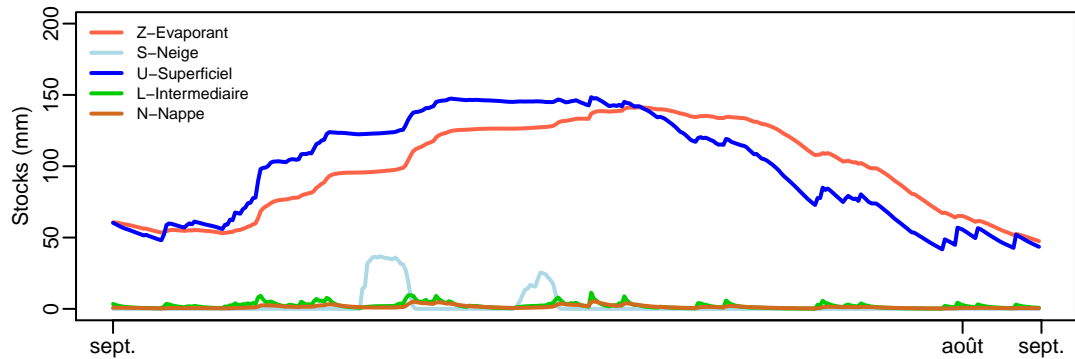

# k1363010 (352.33 km<sup>2</sup>) – année 1991–1992

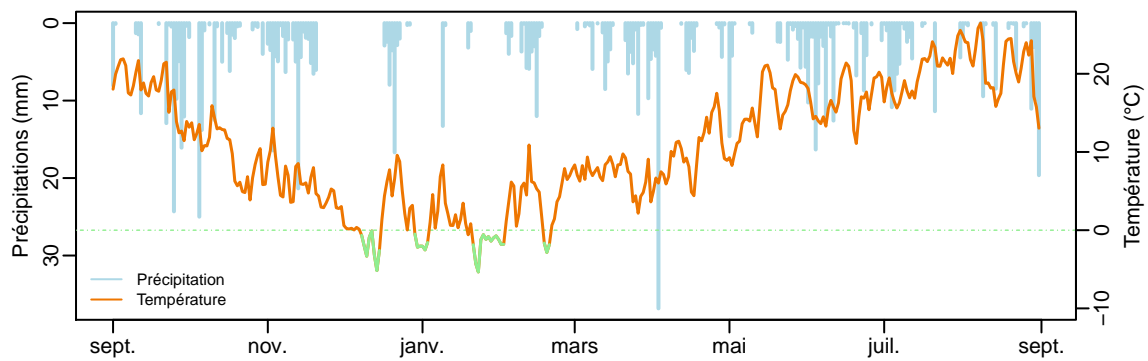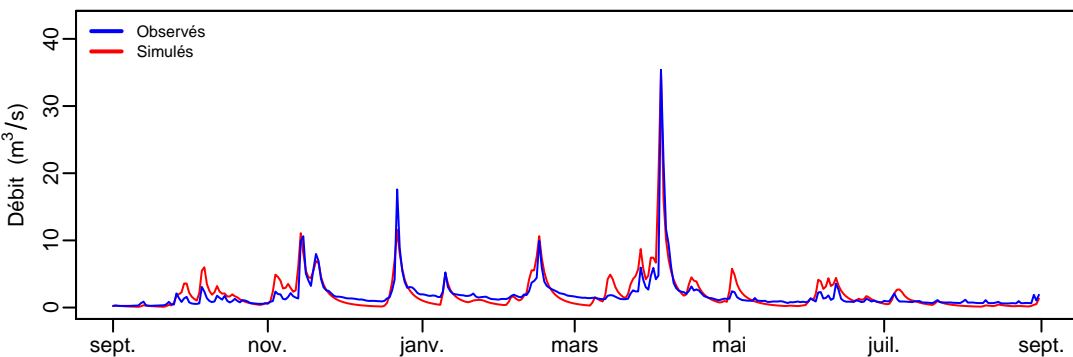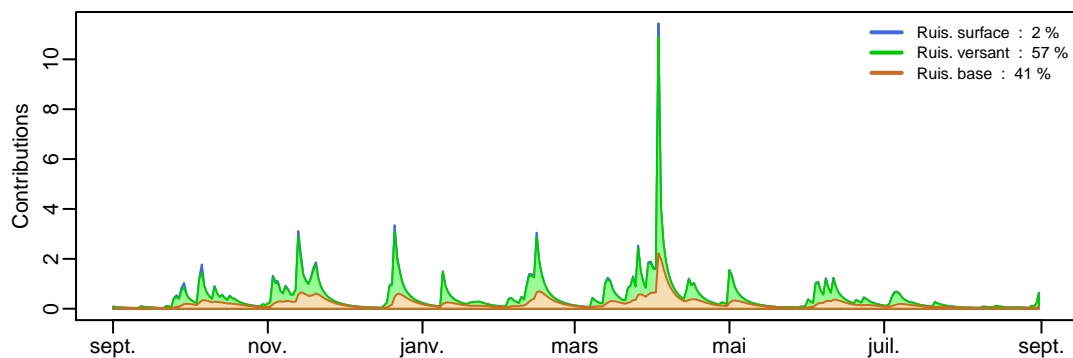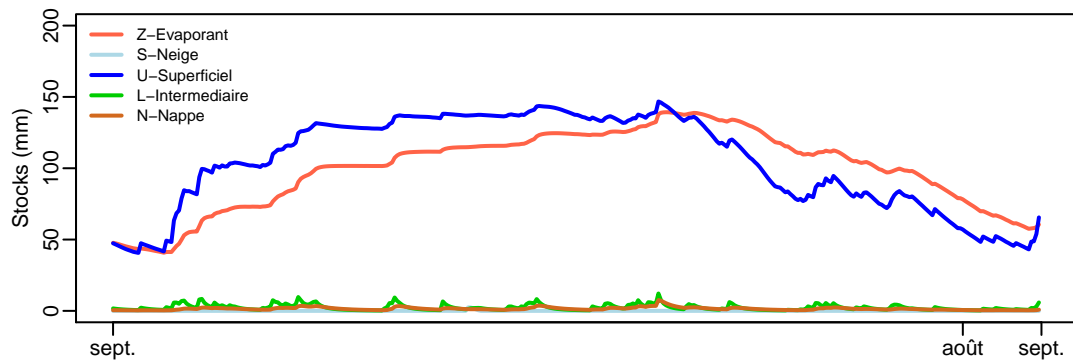

# k1363010 (352.33 km<sup>2</sup>) – année 1992–1993

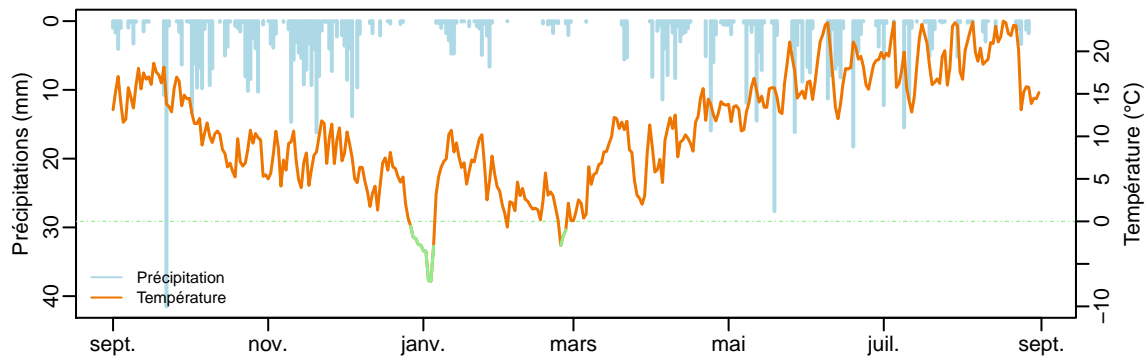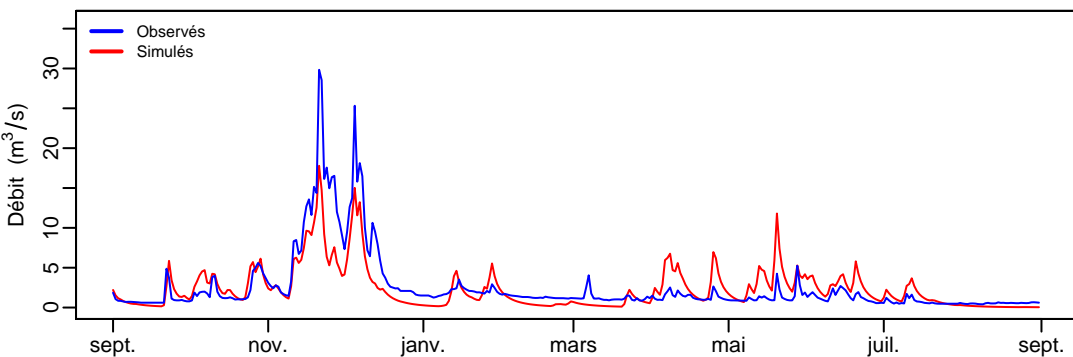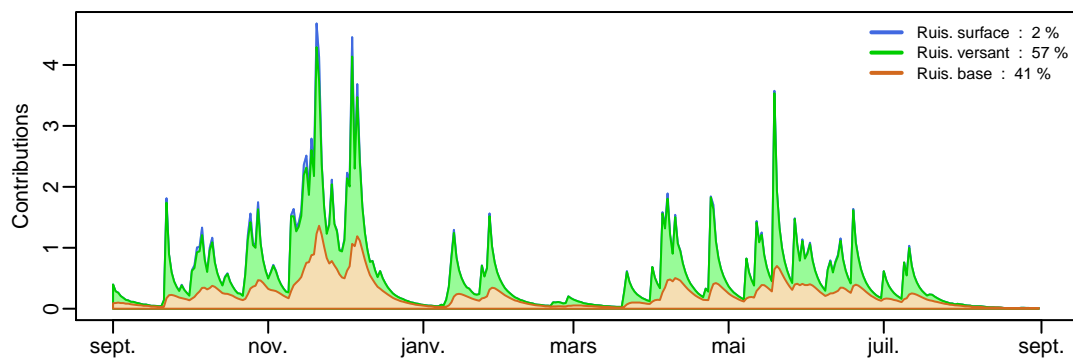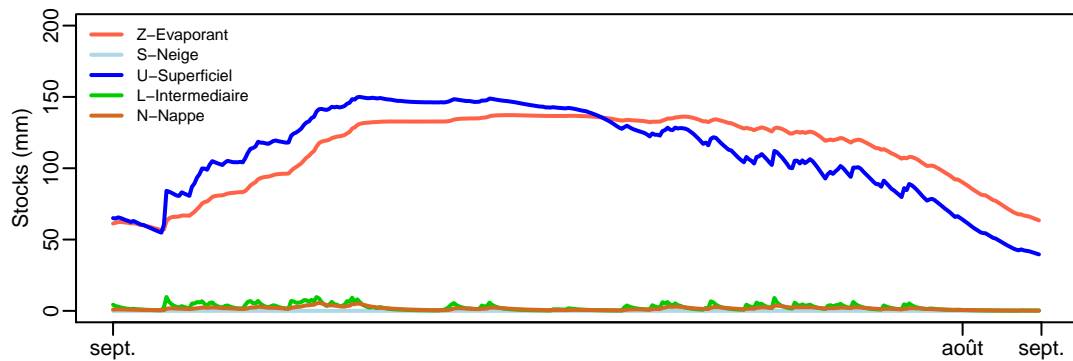

# k1363010 (352.33 km<sup>2</sup>) – année 1993–1994

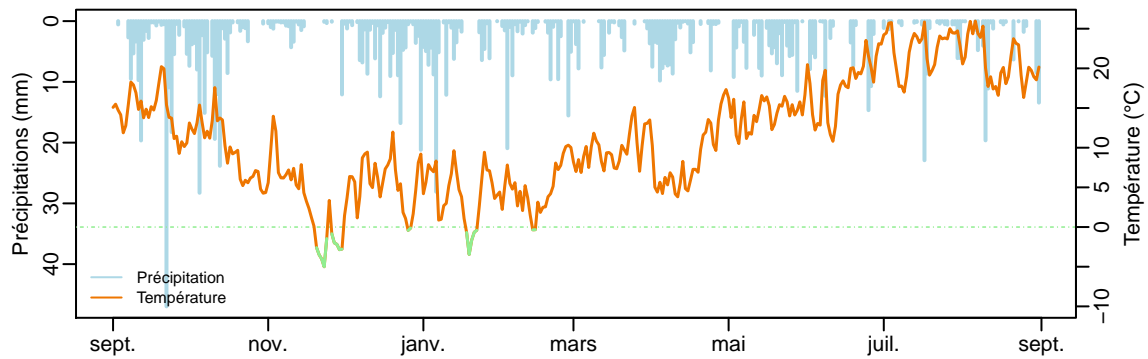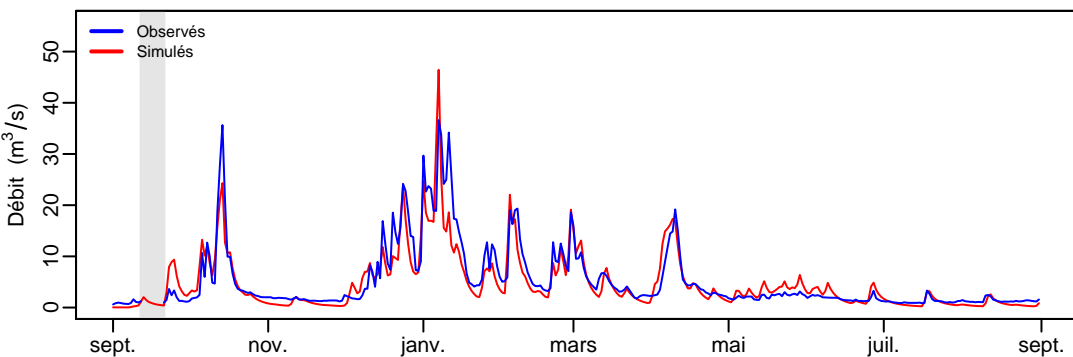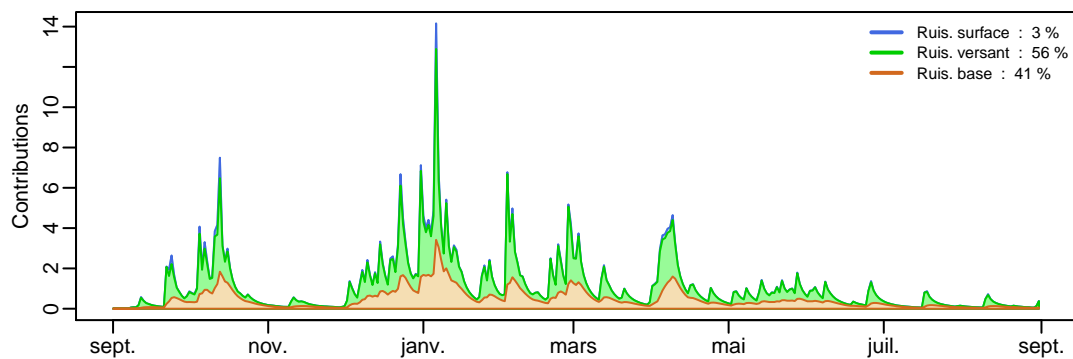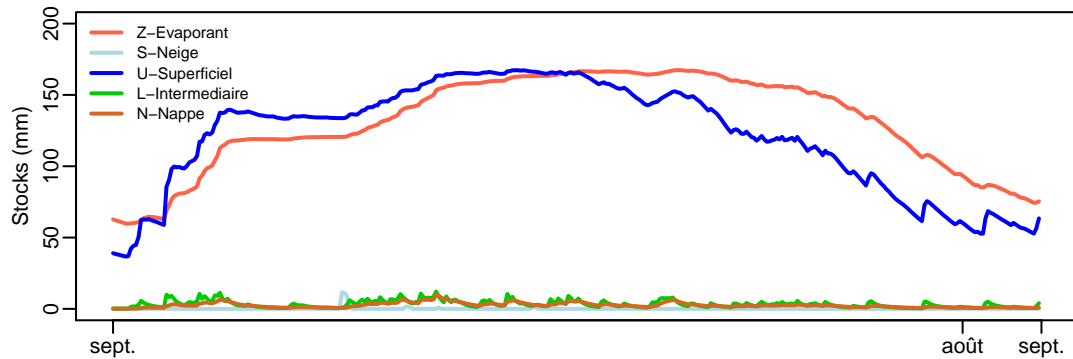

# k1363010 (352.33 km<sup>2</sup>) – année 1994–1995

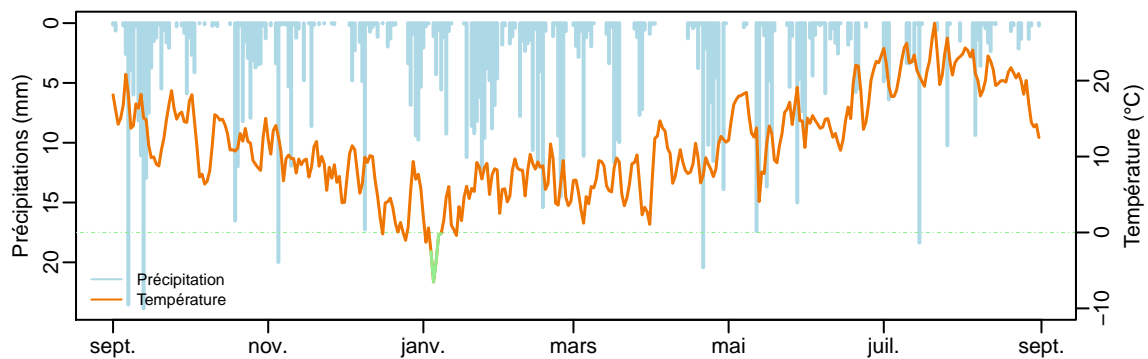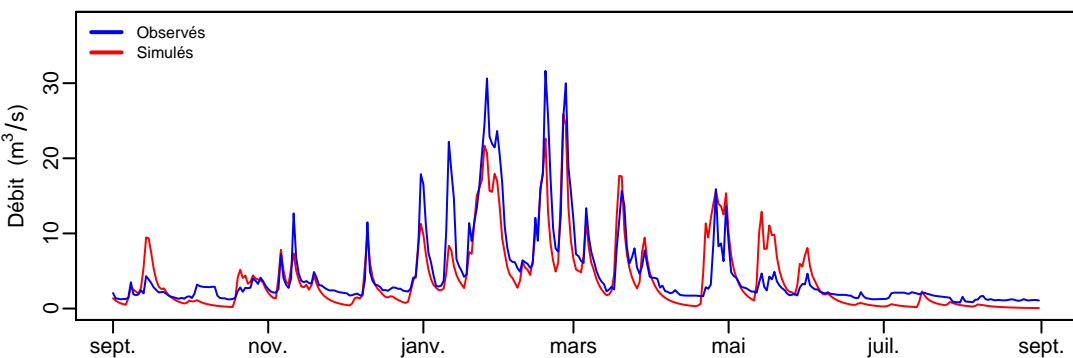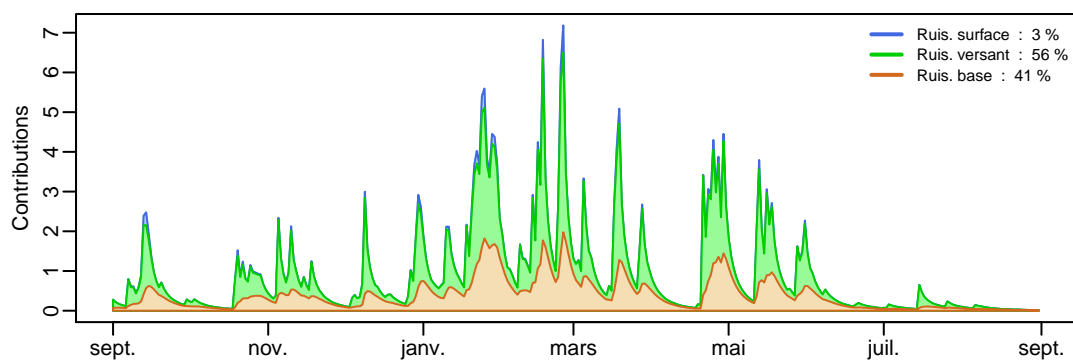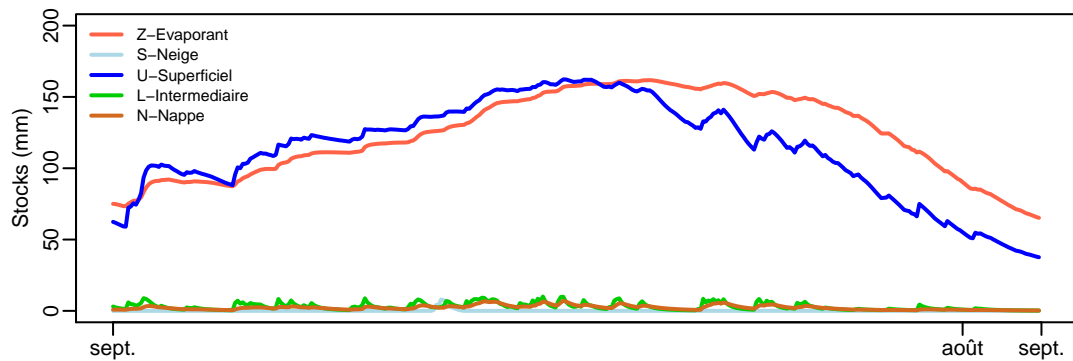

# k1363010 (352.33 km<sup>2</sup>) – année 1995–1996

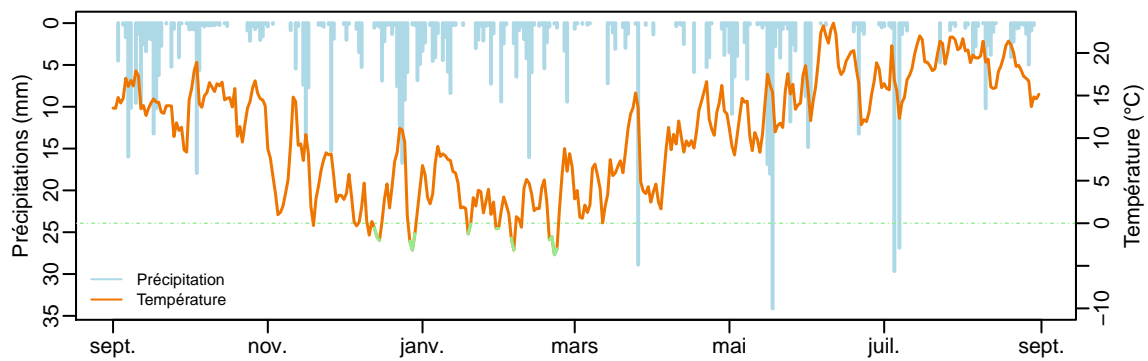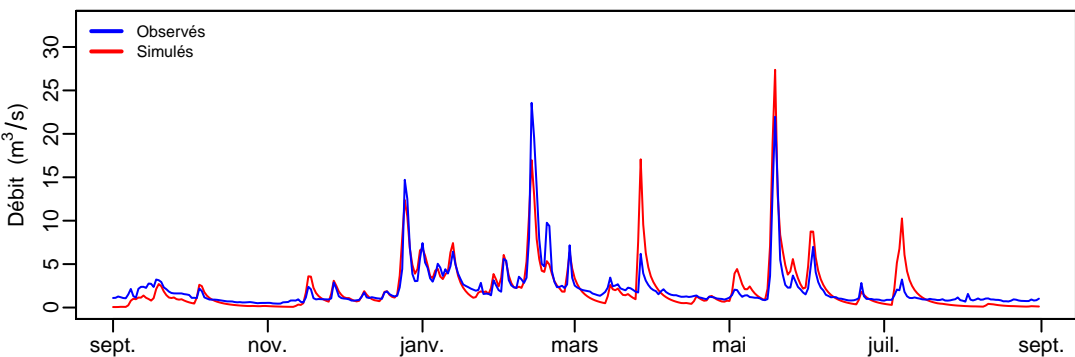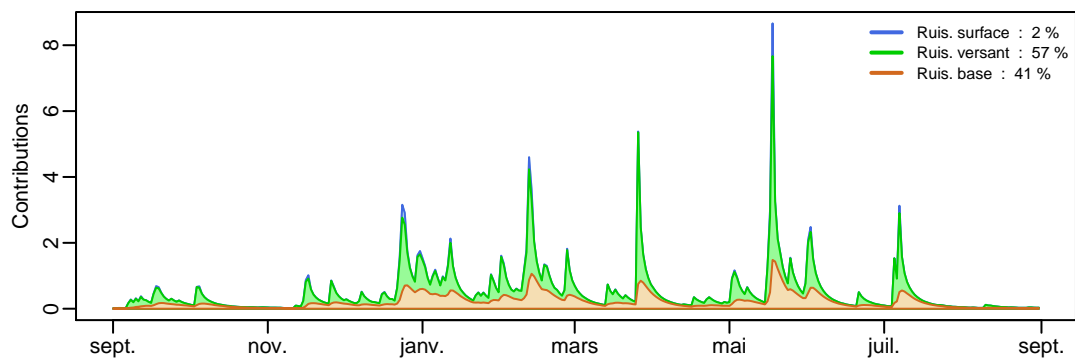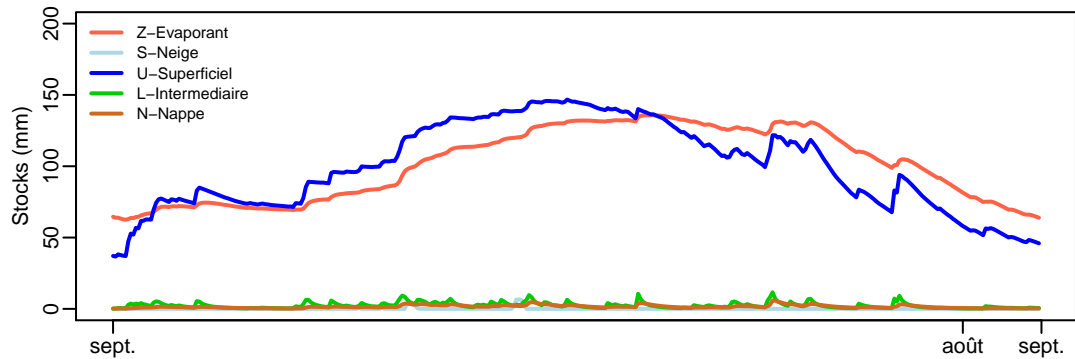

# k1363010 (352.33 km<sup>2</sup>) – année 1996–1997

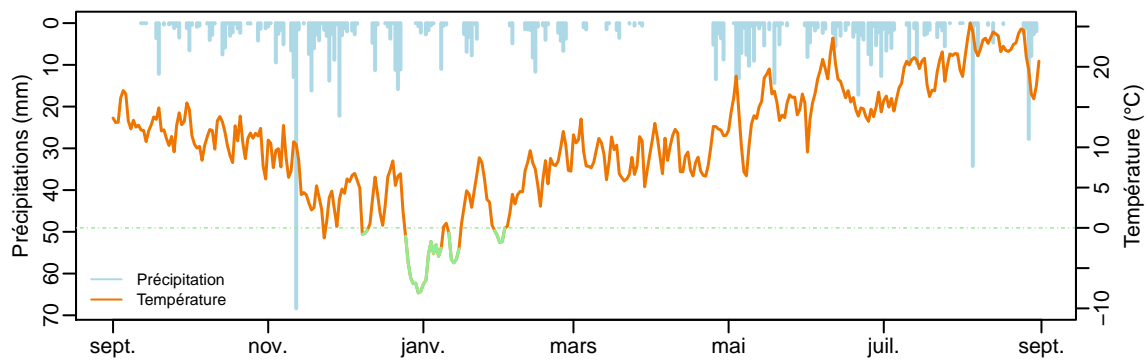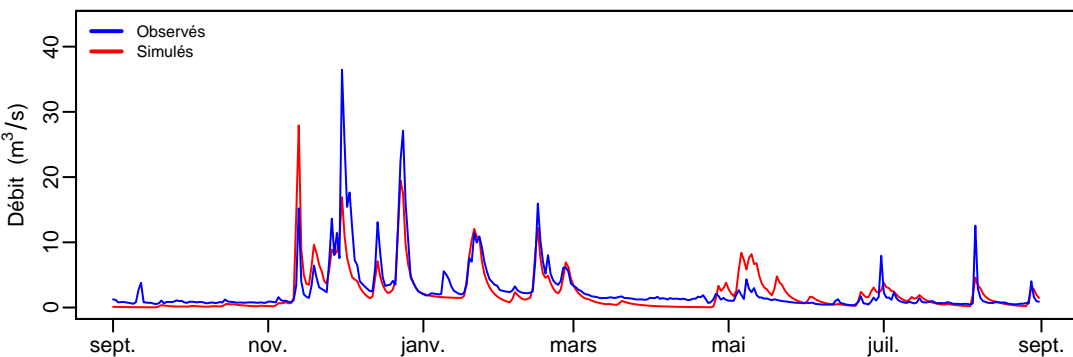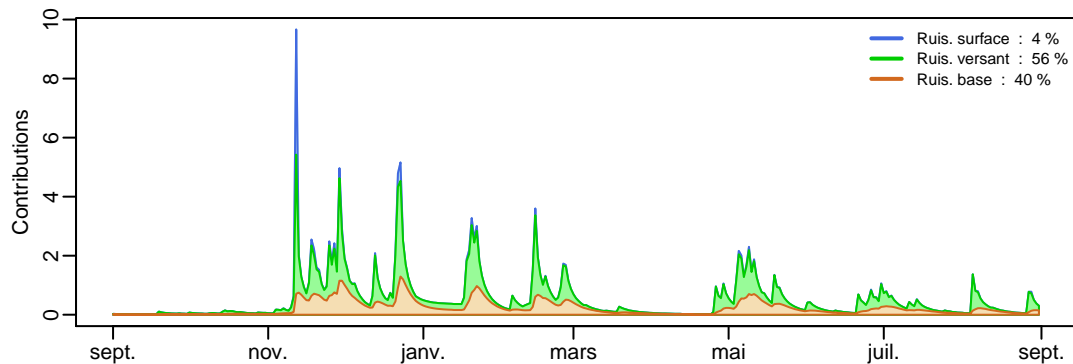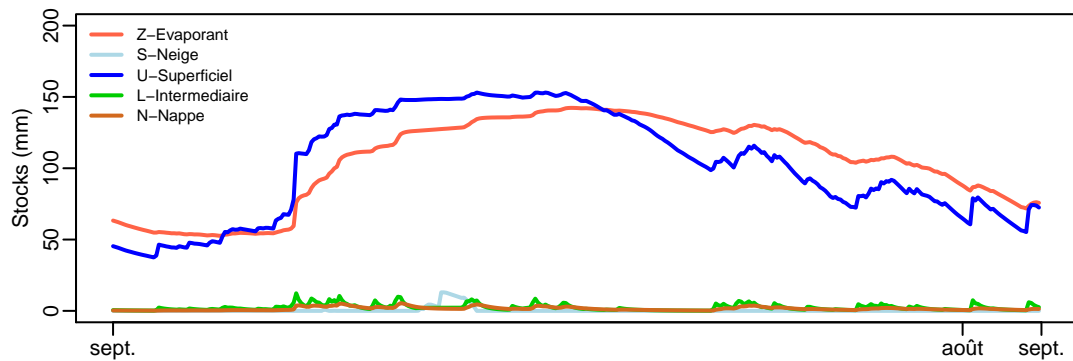

# k1363010 (352.33 km<sup>2</sup>) – année 1997–1998

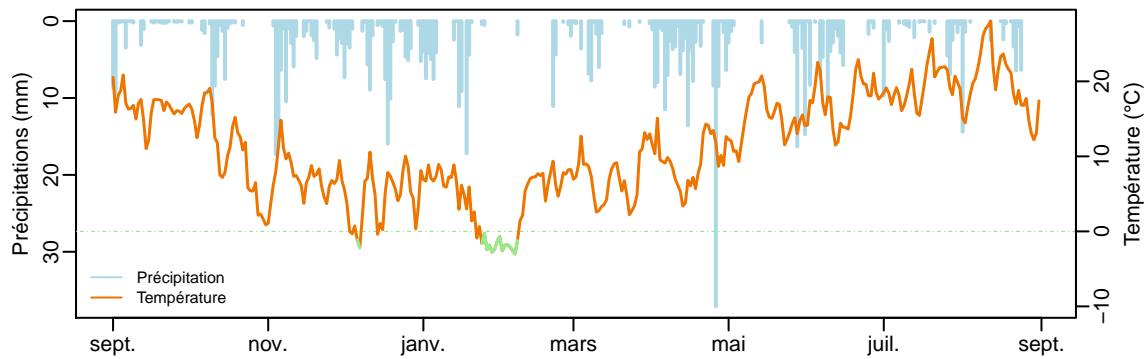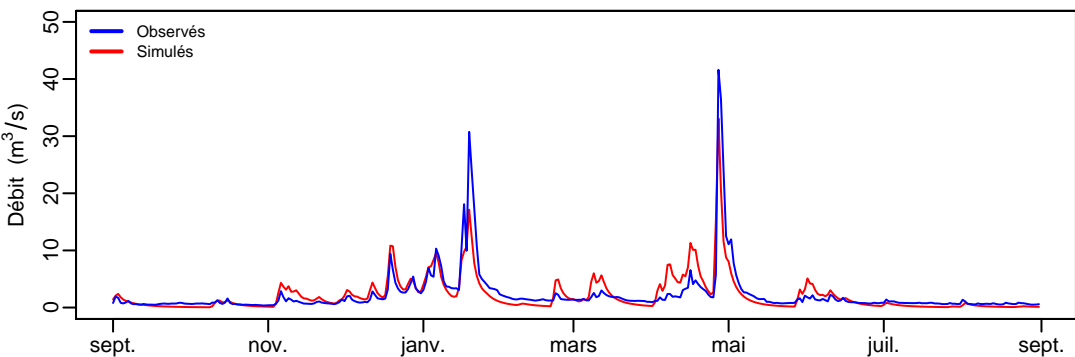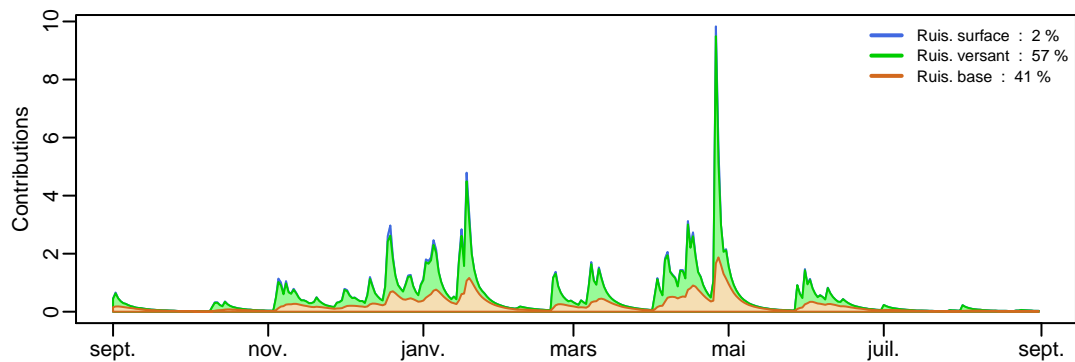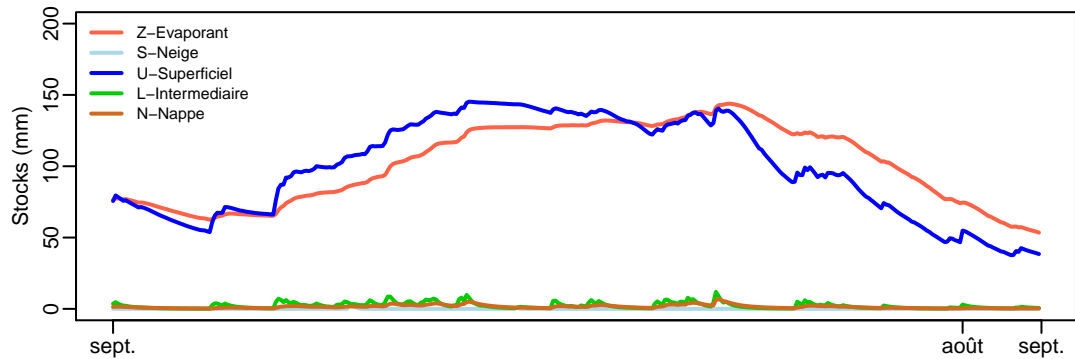



# k1363010 (352.33 km<sup>2</sup>) – année 1998–1999

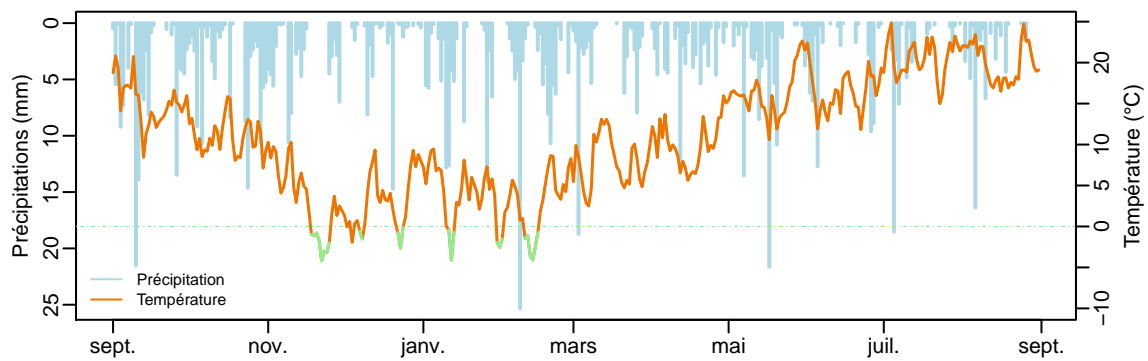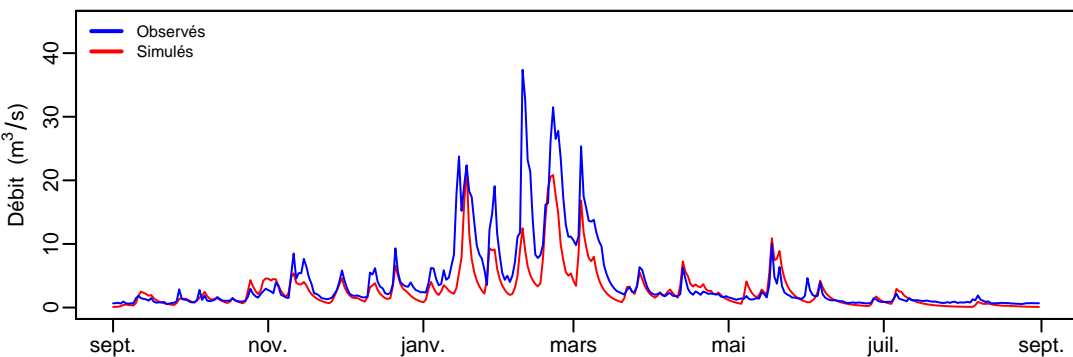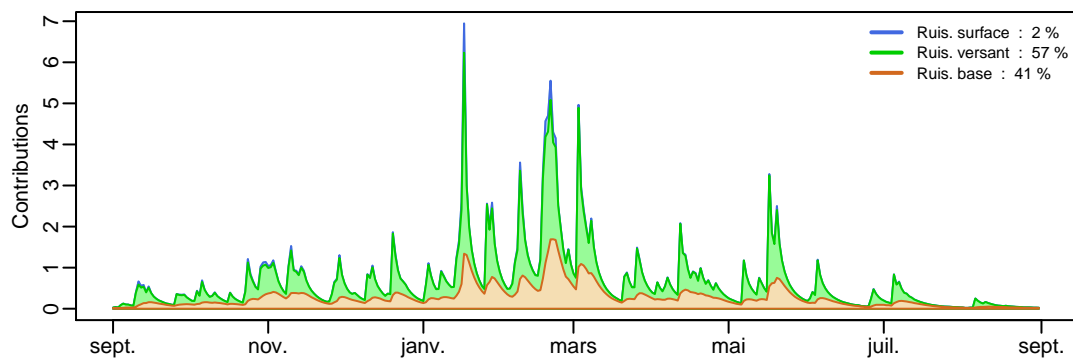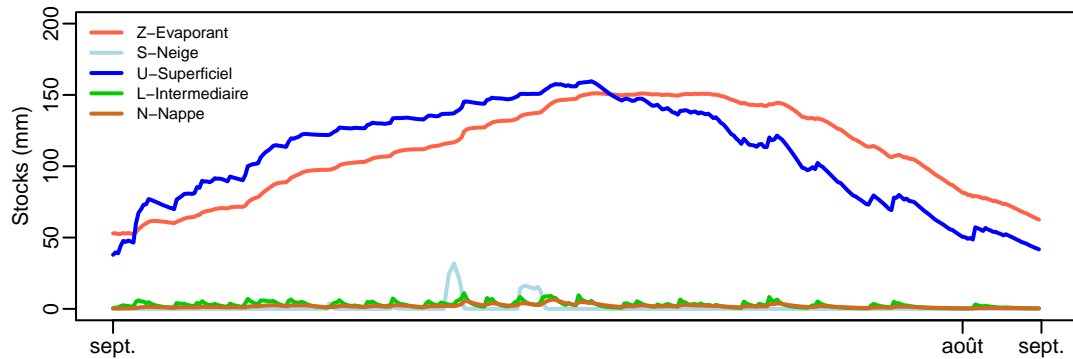

# k1363010 (352.33 km<sup>2</sup>) – année 1999–2000

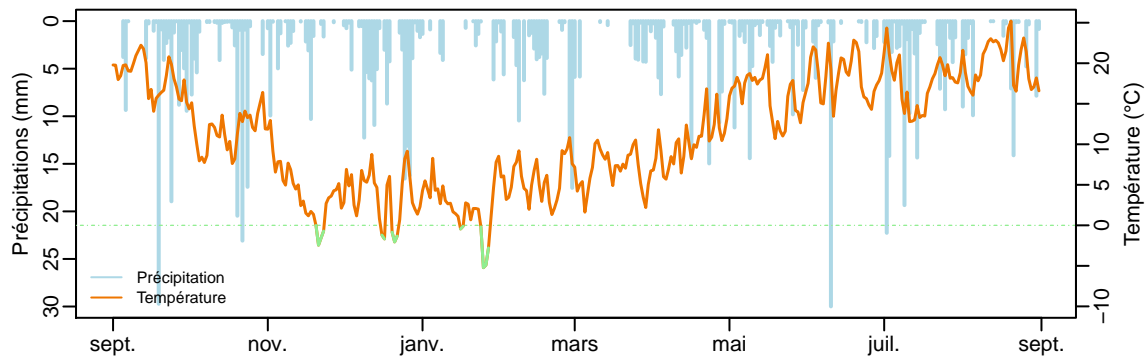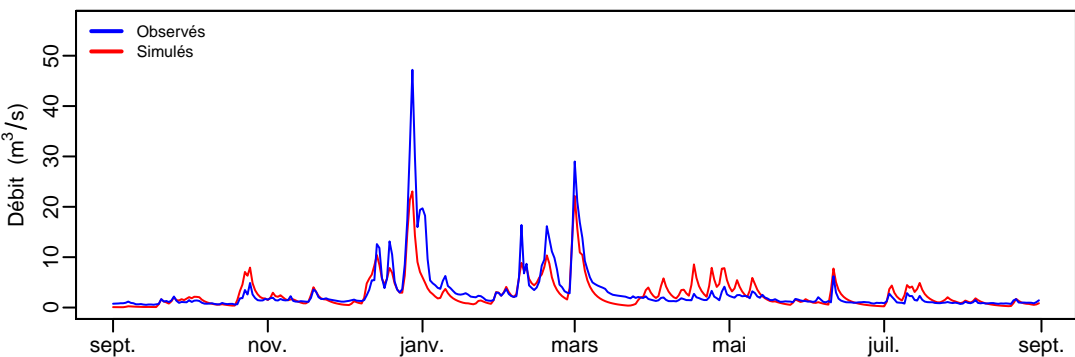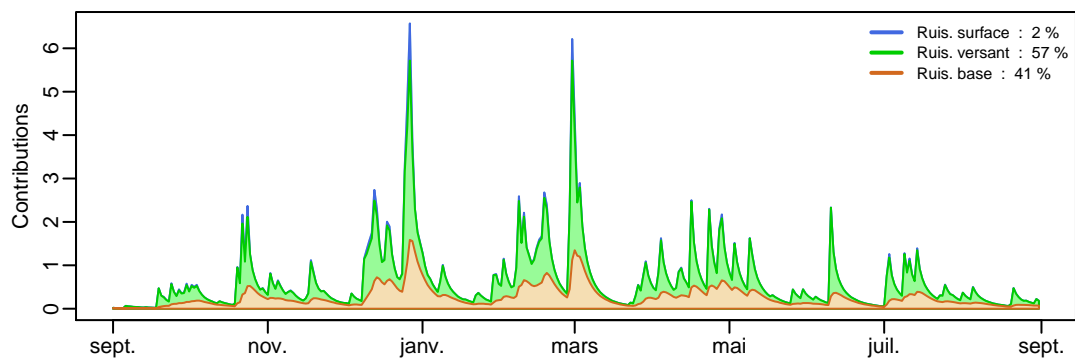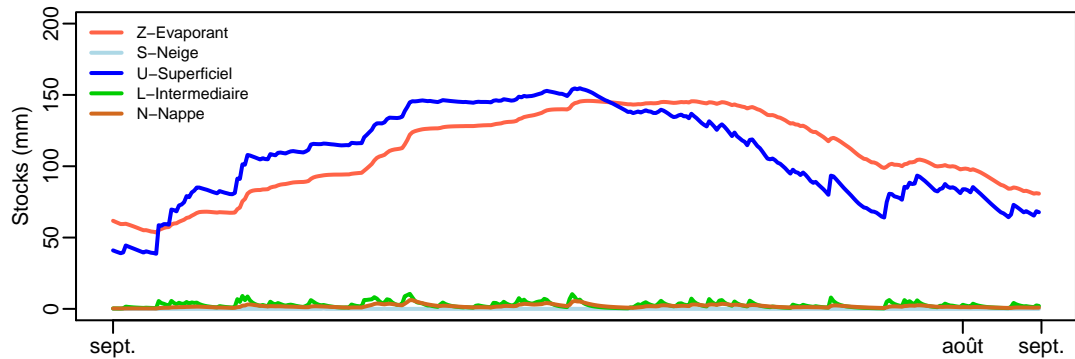

# k1363010 (352.33 km<sup>2</sup>) – année 2000–2001

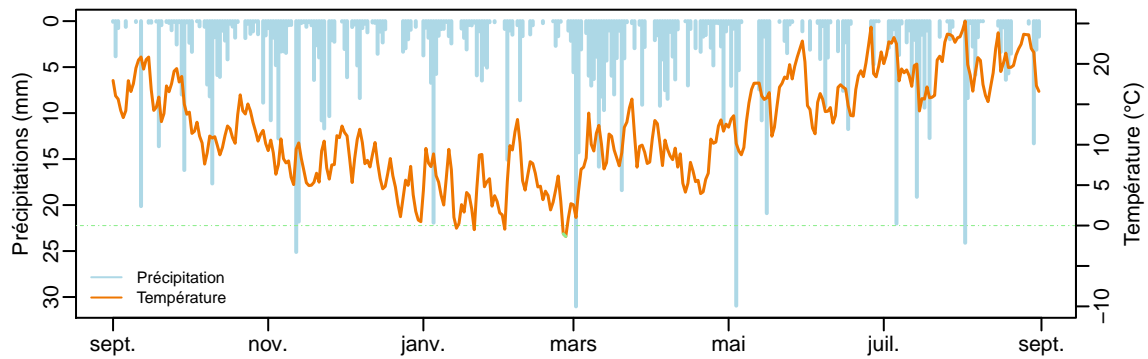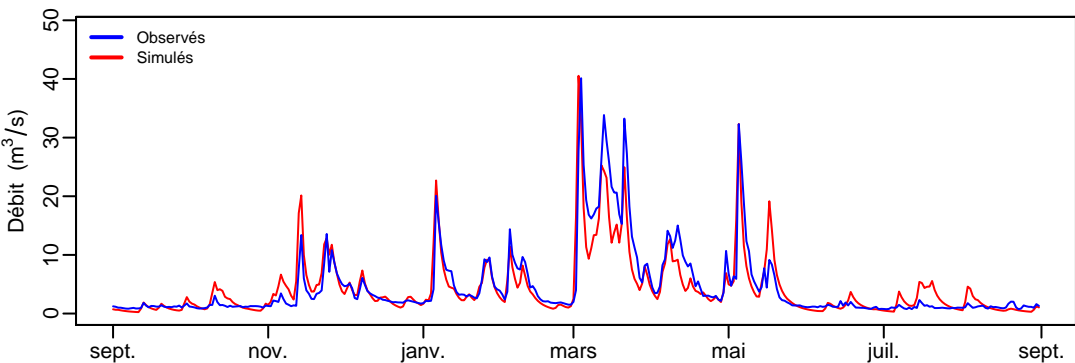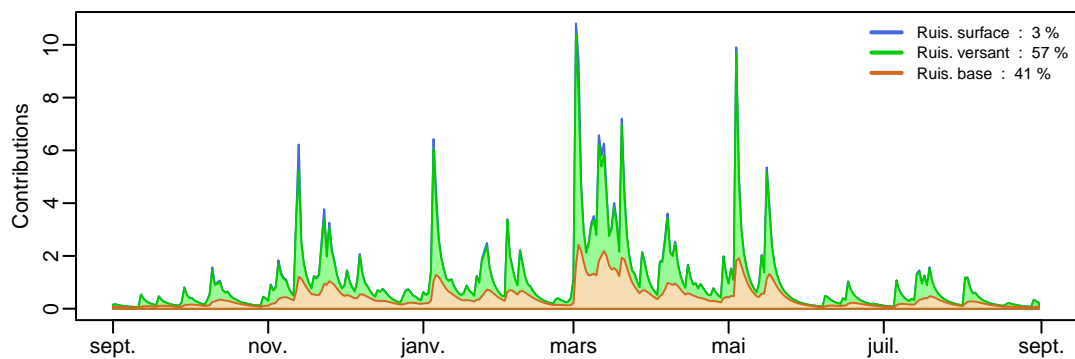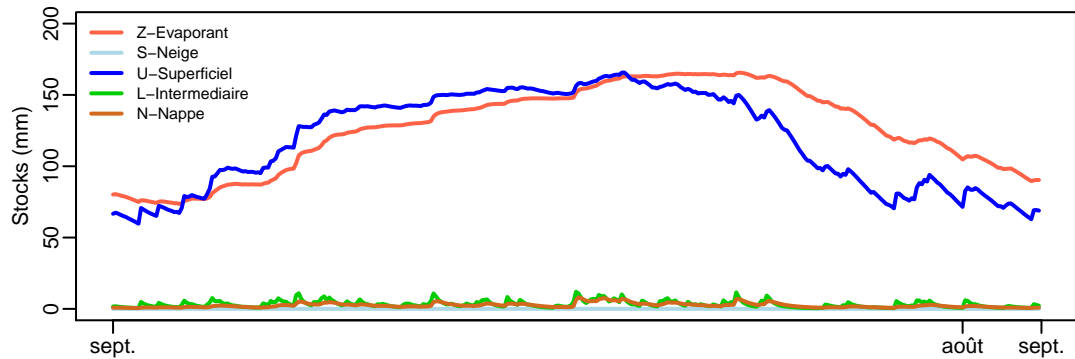

# k1363010 (352.33 km<sup>2</sup>) – année 2001–2002

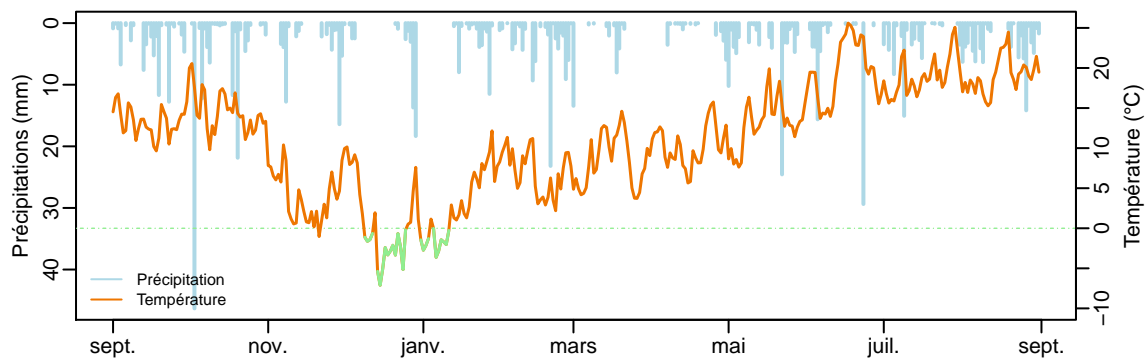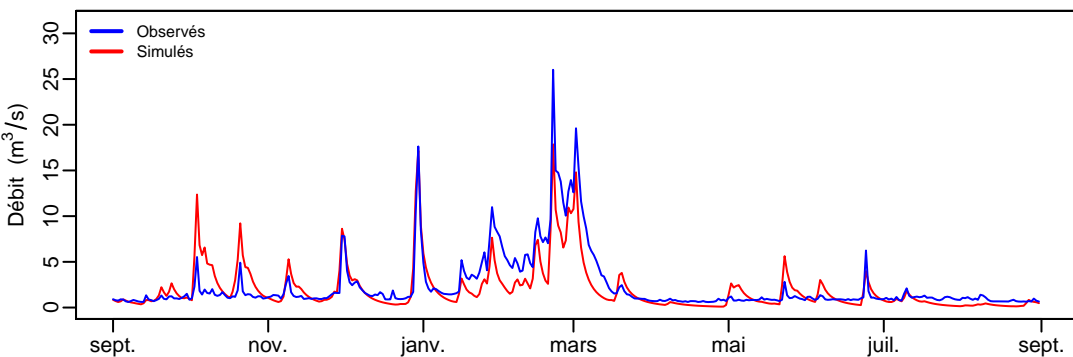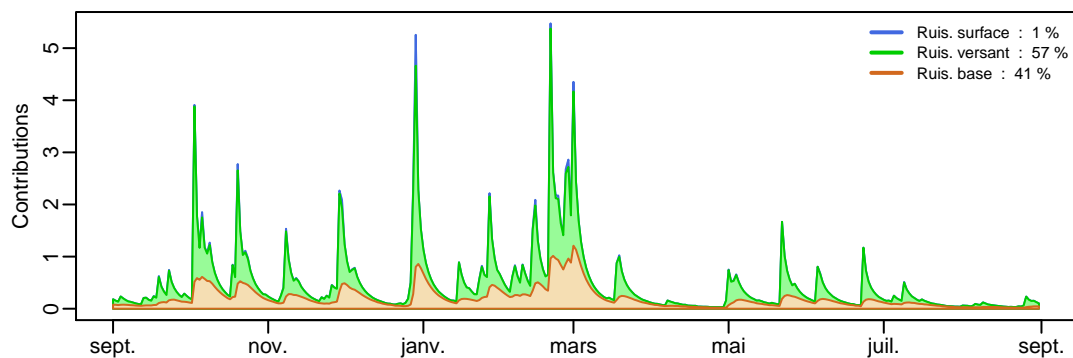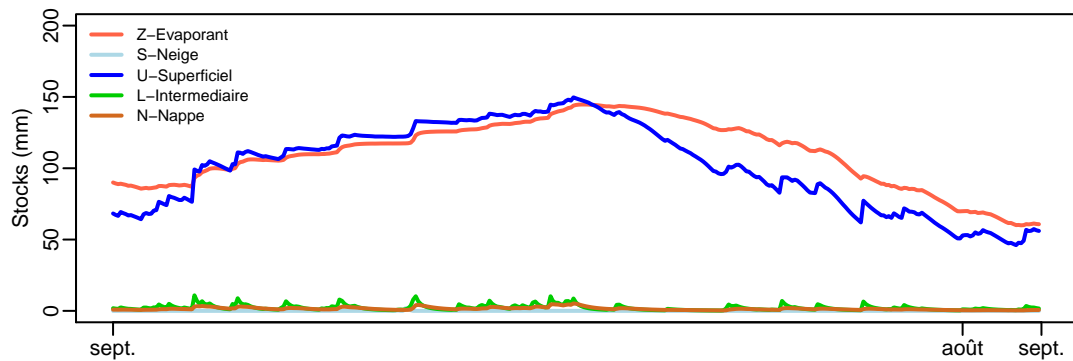

# k1363010 (352.33 km<sup>2</sup>) – année 2002–2003

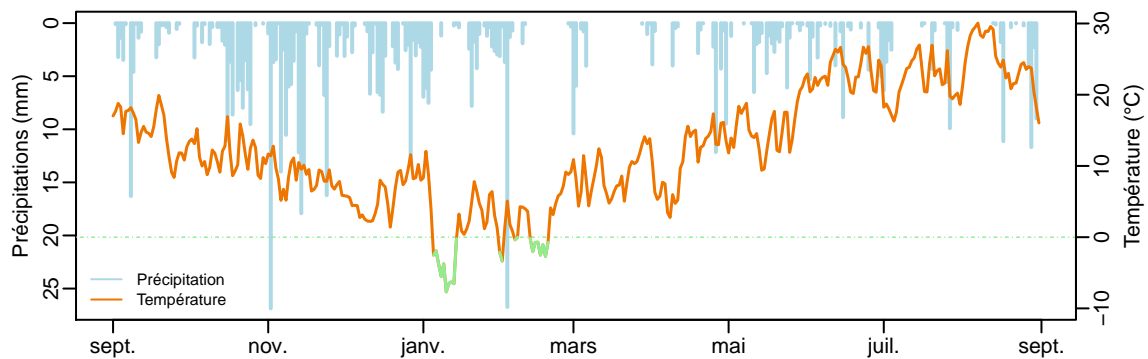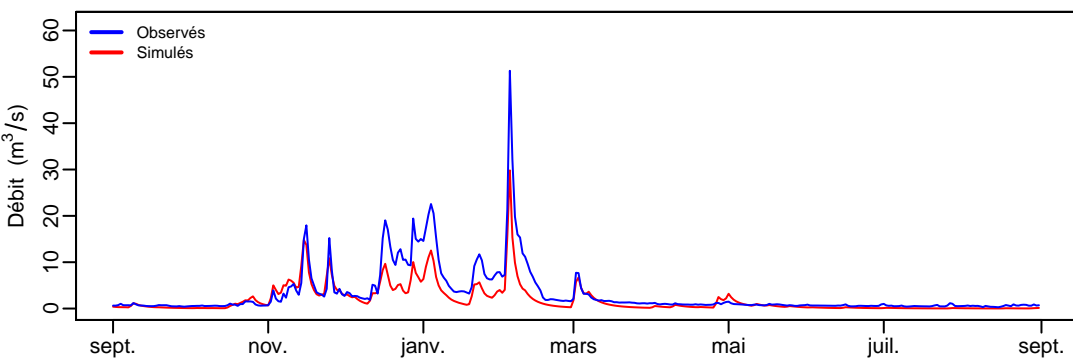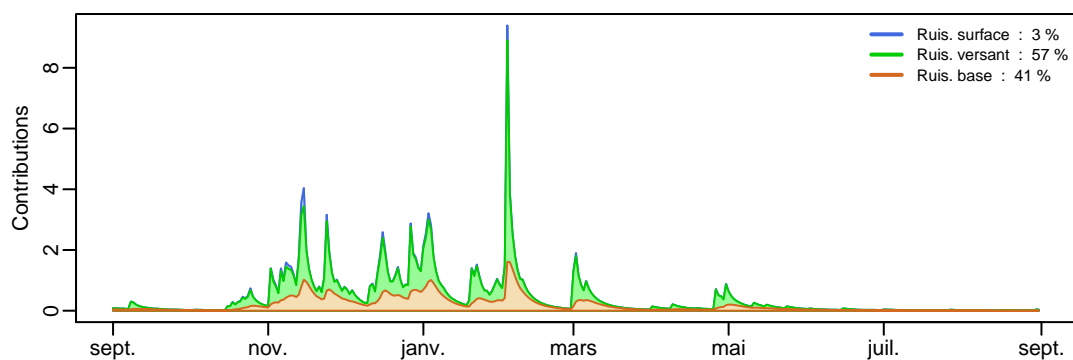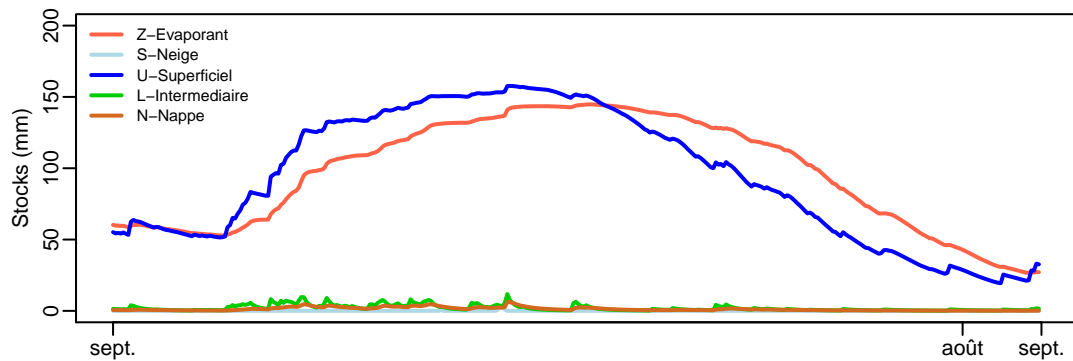

# k1363010 (352.33 km<sup>2</sup>) – année 2003–2004

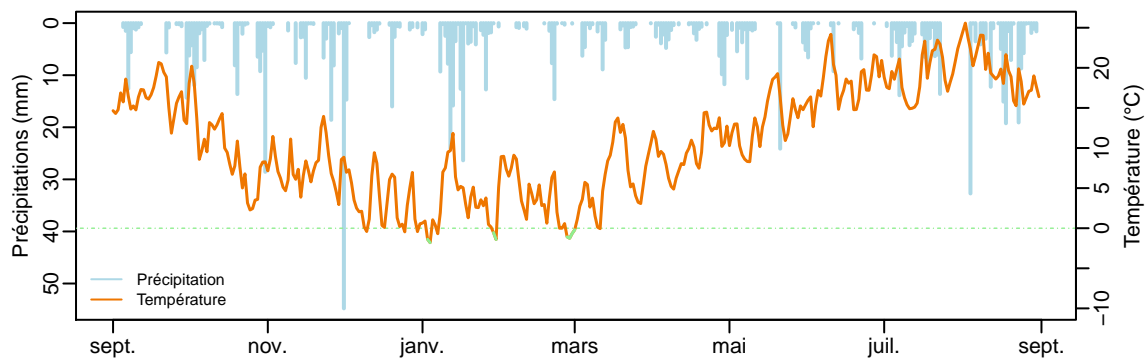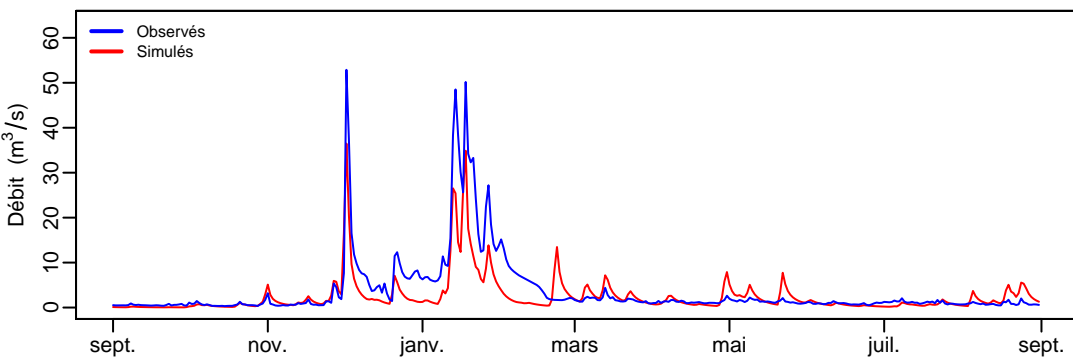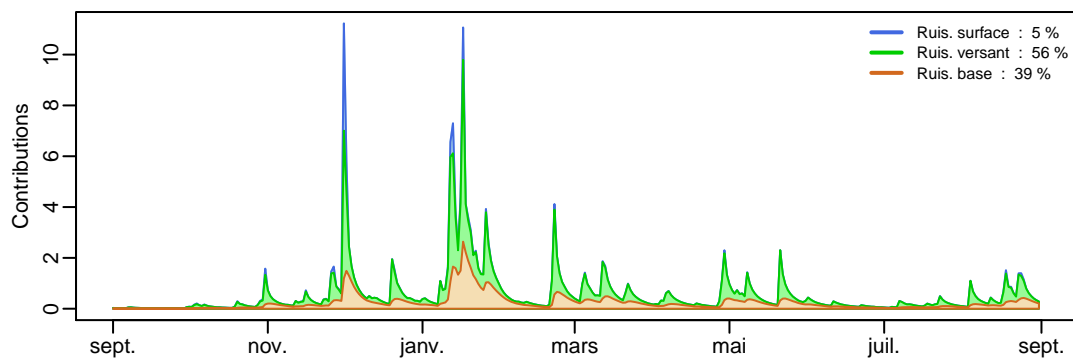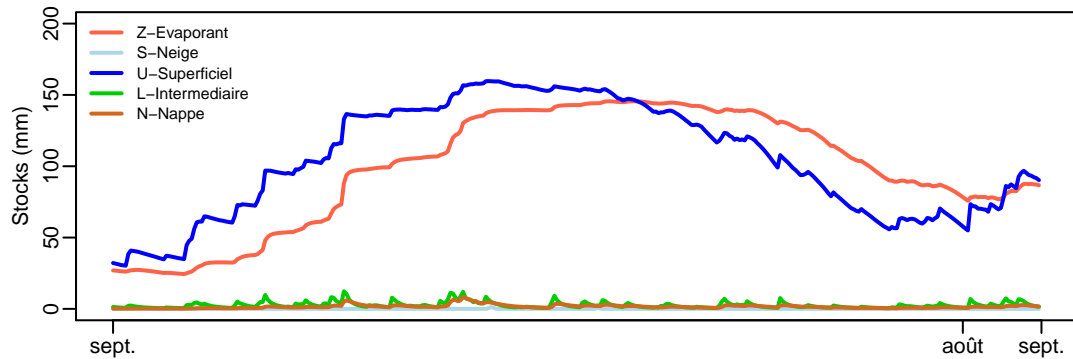

# k1363010 (352.33 km<sup>2</sup>) – année 2004–2005

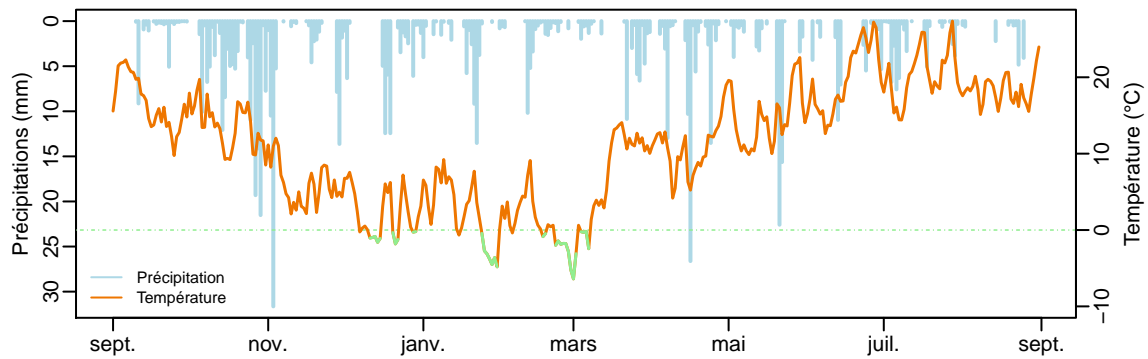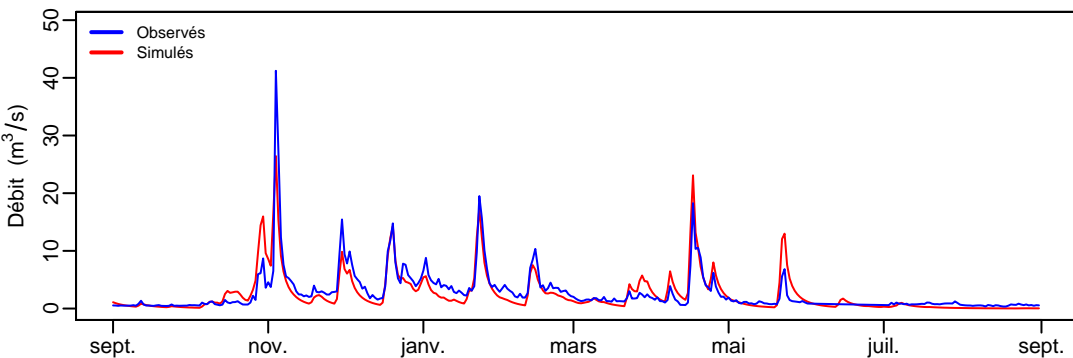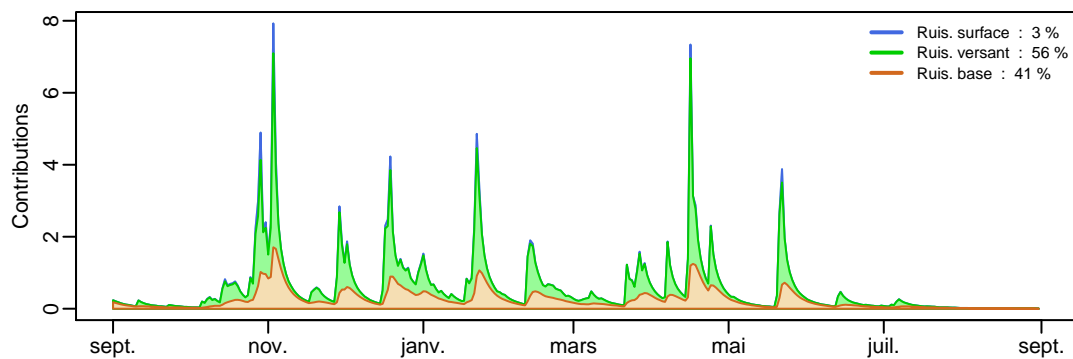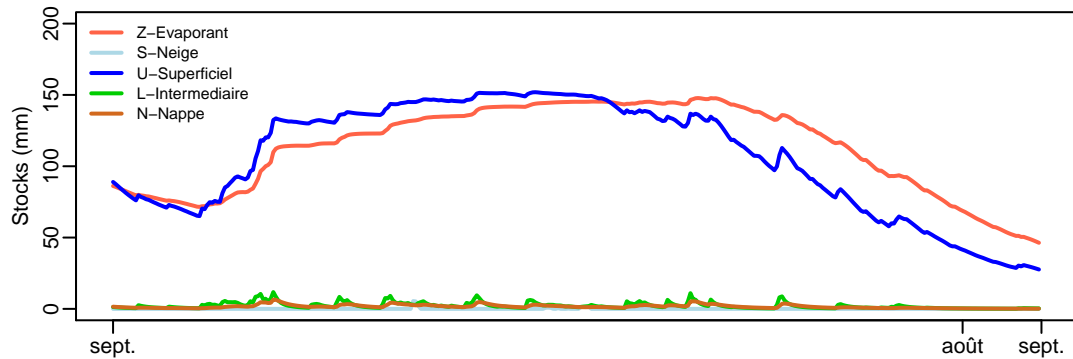

# k1363010 (352.33 km<sup>2</sup>) – année 2005–2006

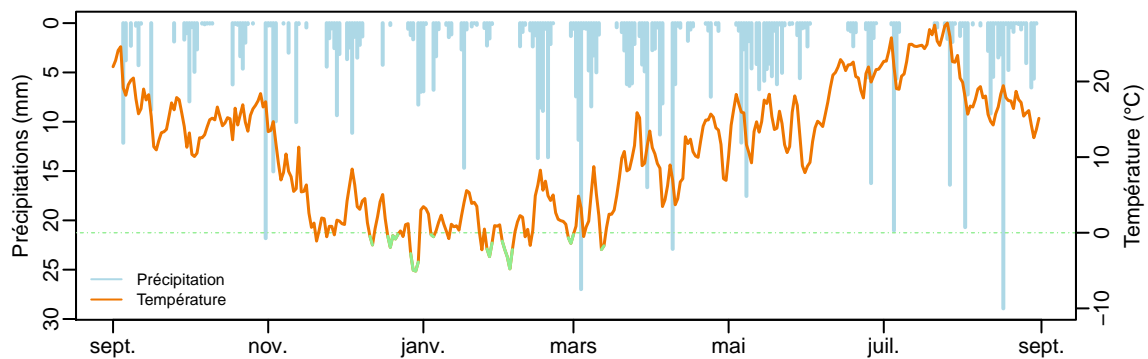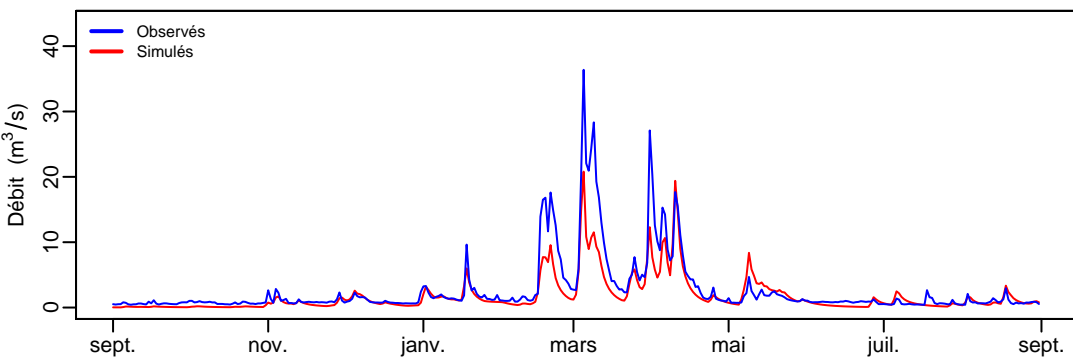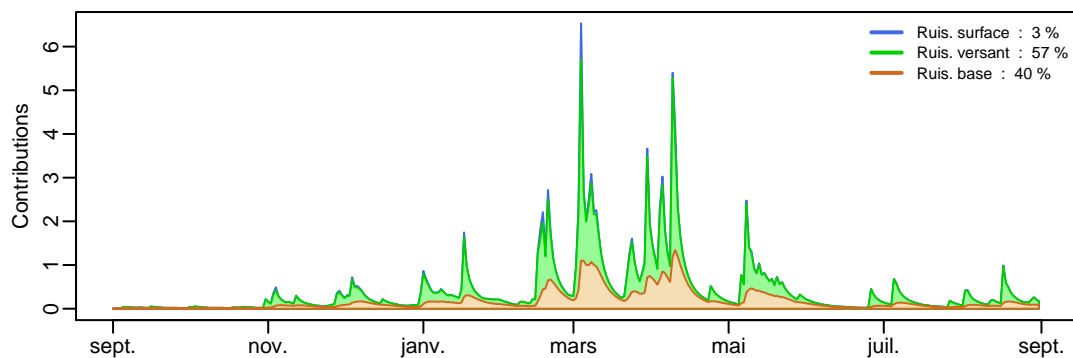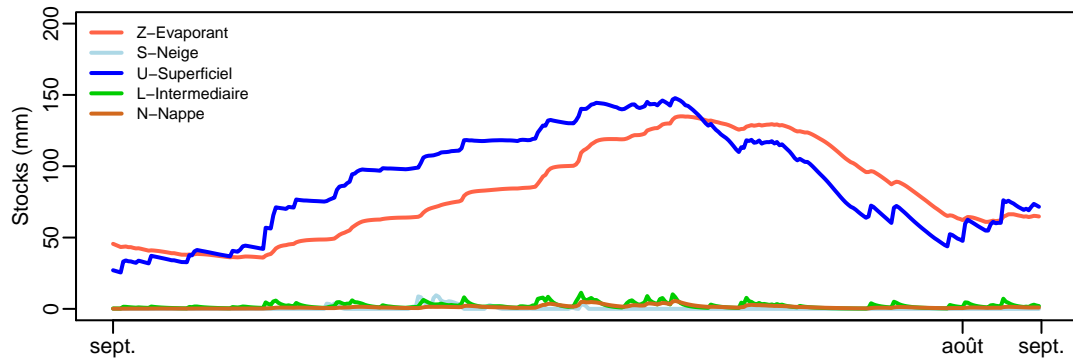



# k1363010 (352.33 km<sup>2</sup>) – année 2006–2007

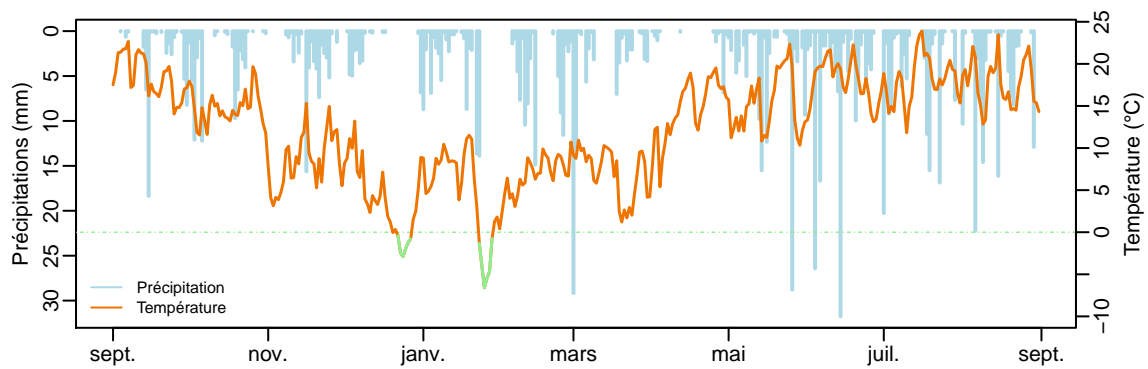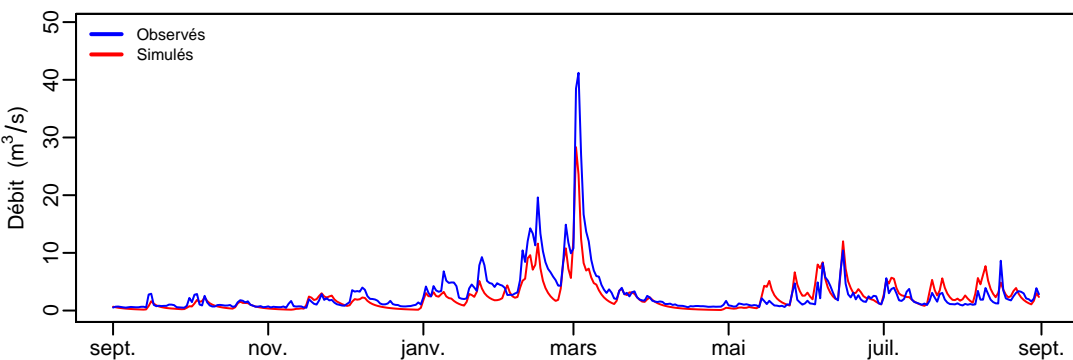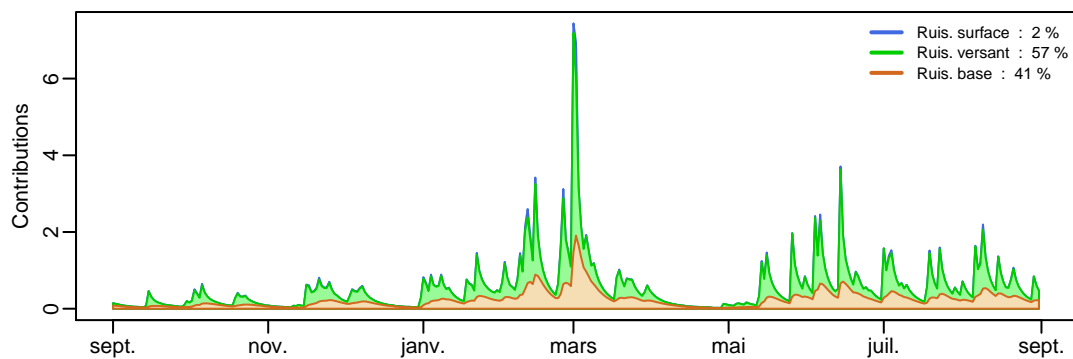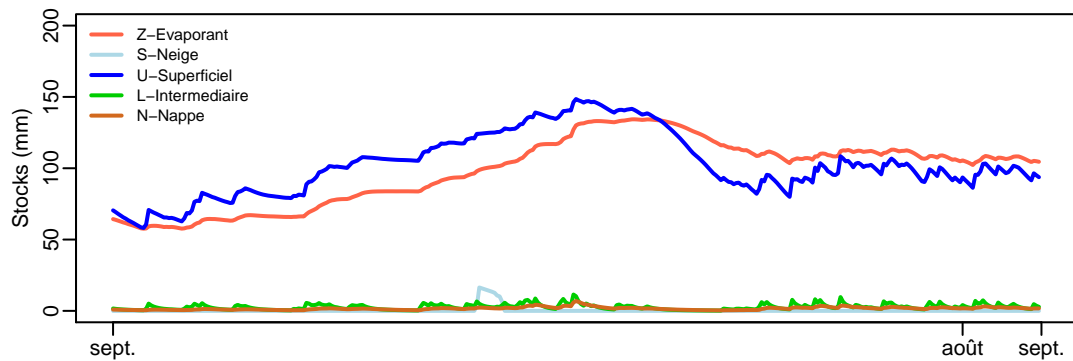

# k1363010 (352.33 km<sup>2</sup>) – année 2007–2008

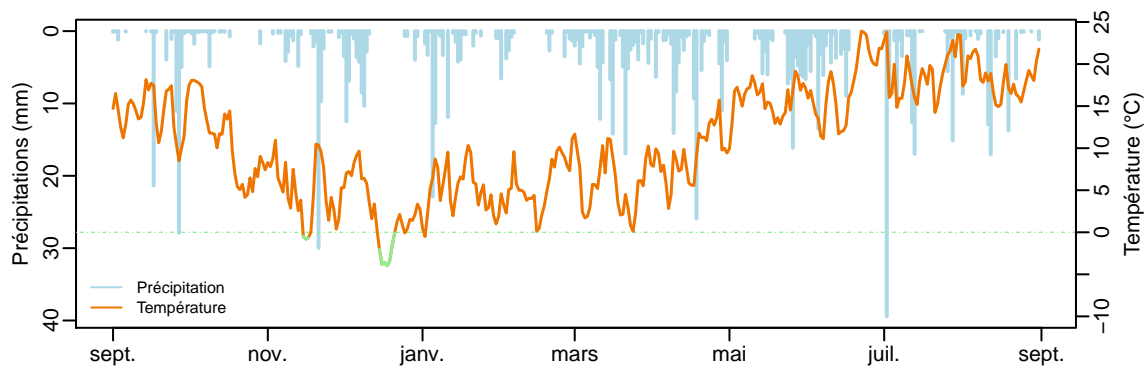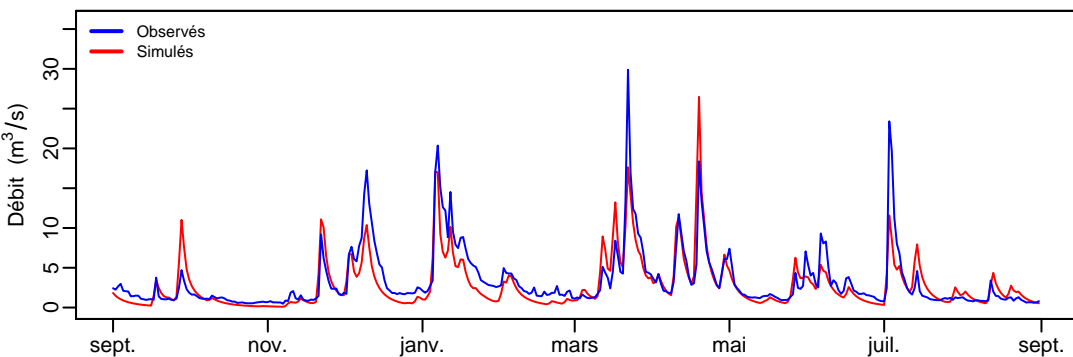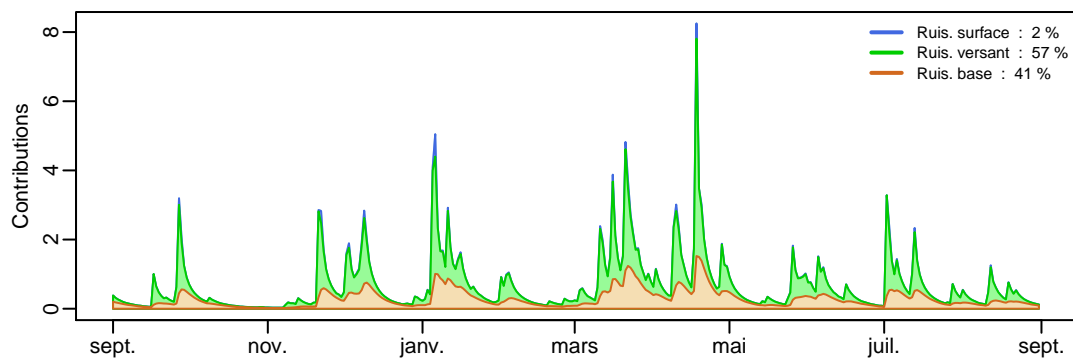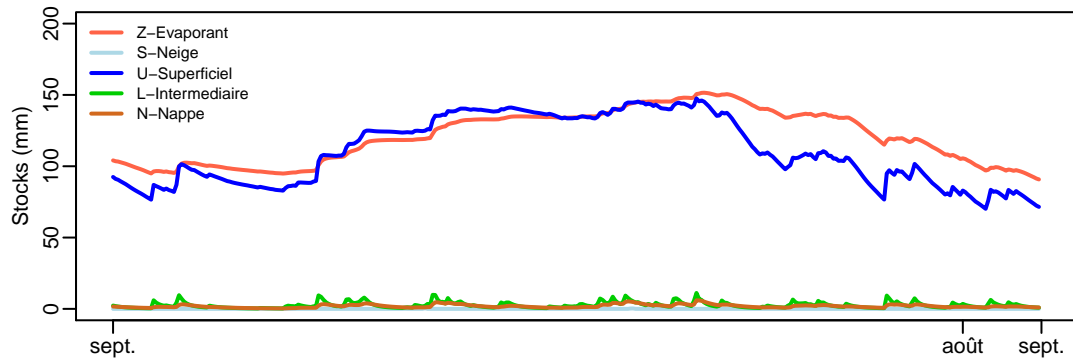

# k1363010 (352.33 km<sup>2</sup>) – année 2008–2009

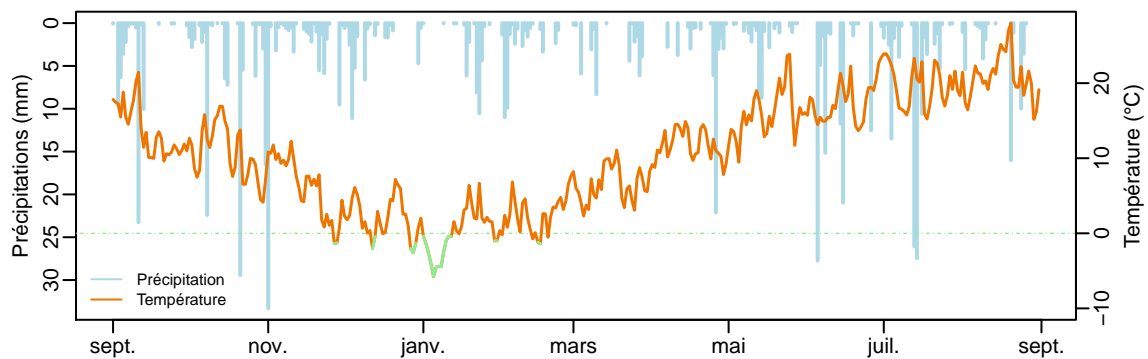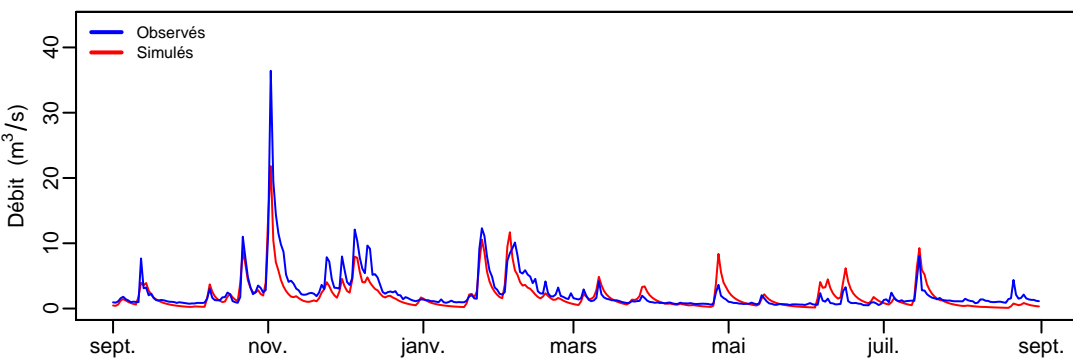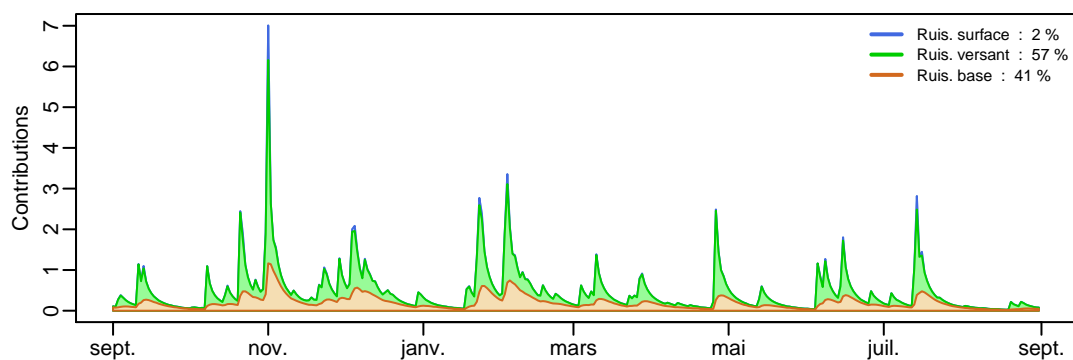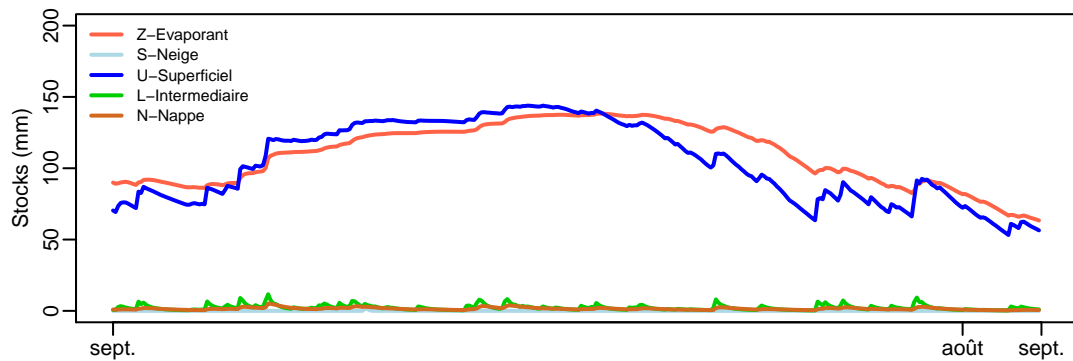

# k1383010 (838.69 km<sup>2</sup>) – année 1981–1982

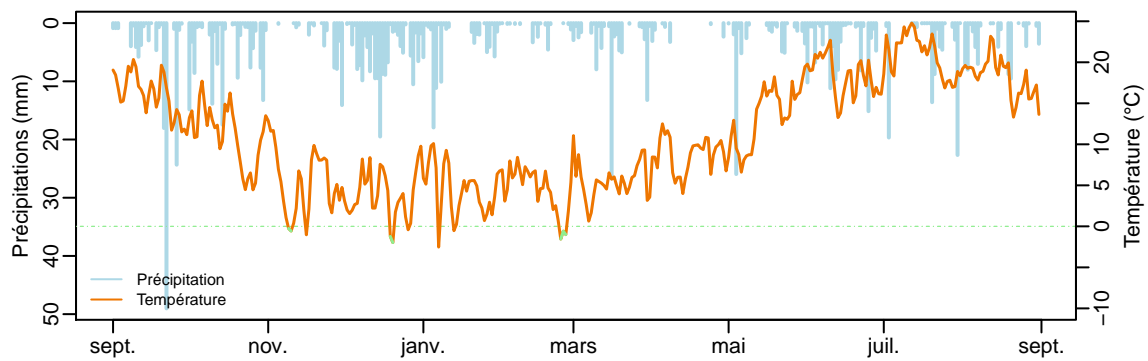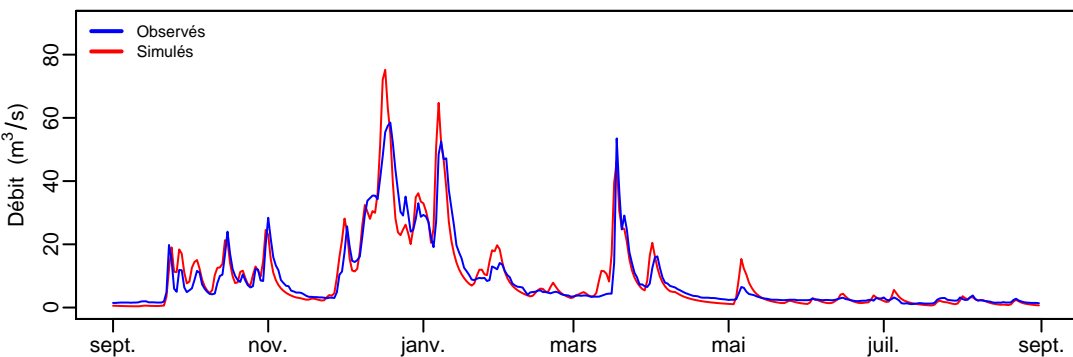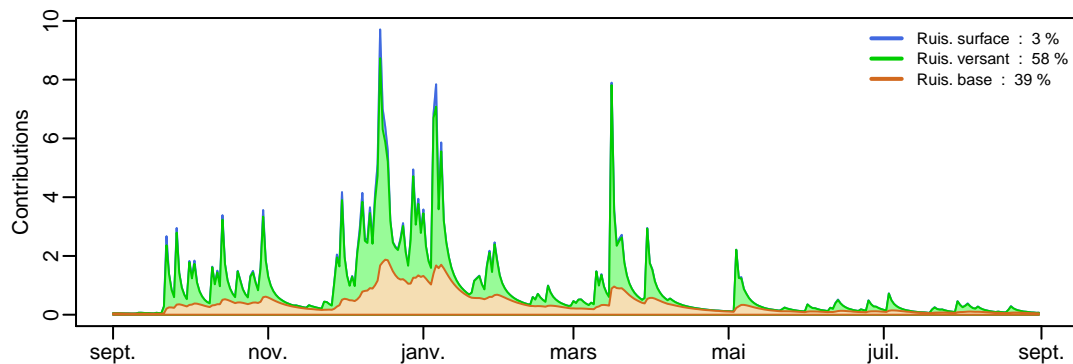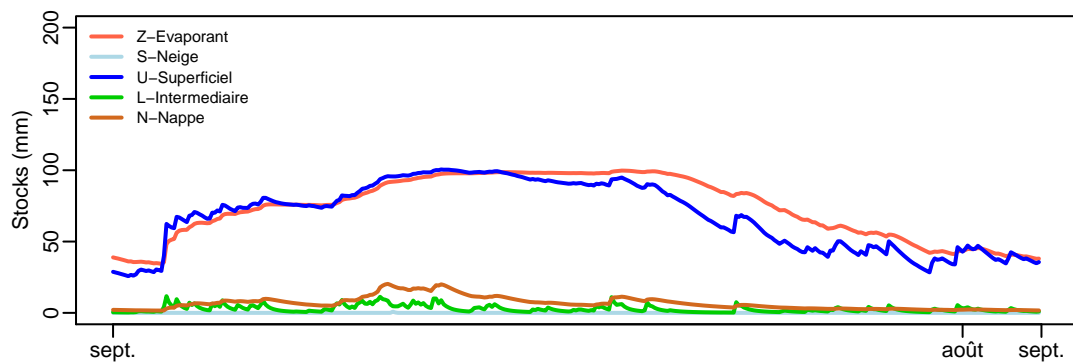

# k1383010 (838.69 km<sup>2</sup>) – année 1982–1983

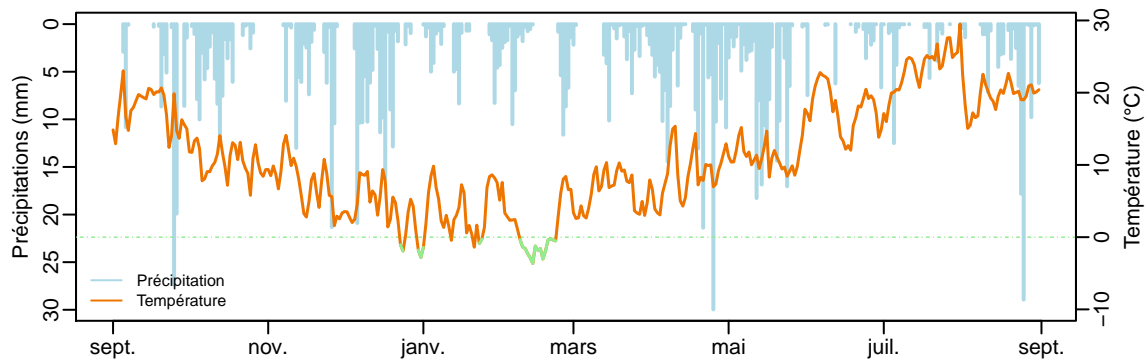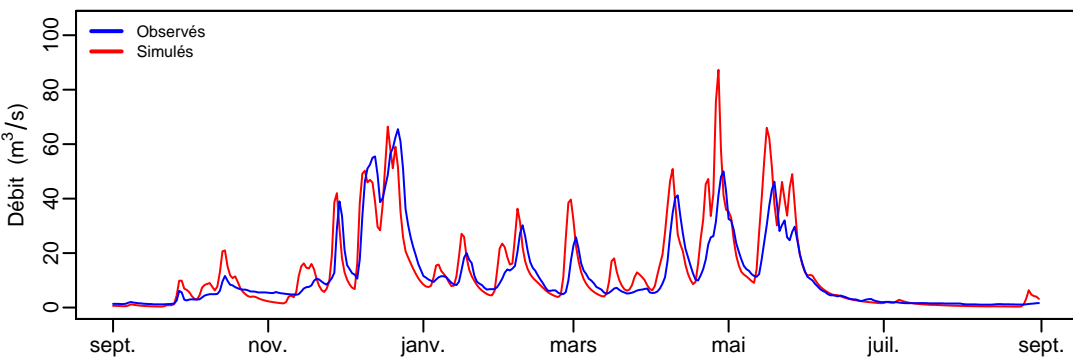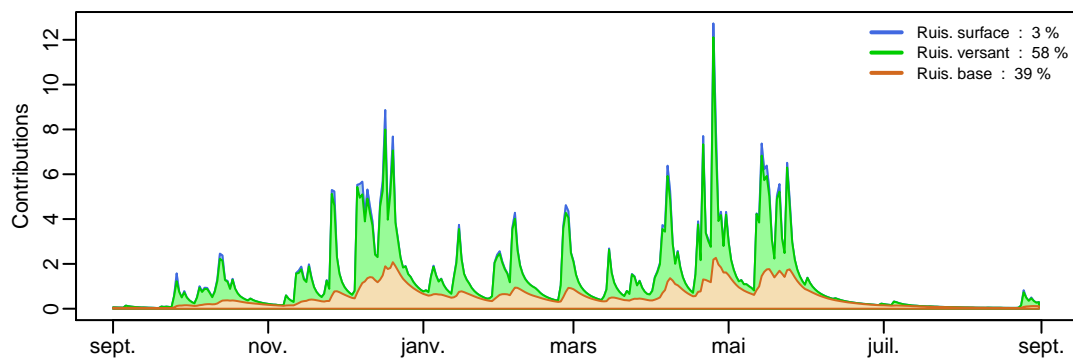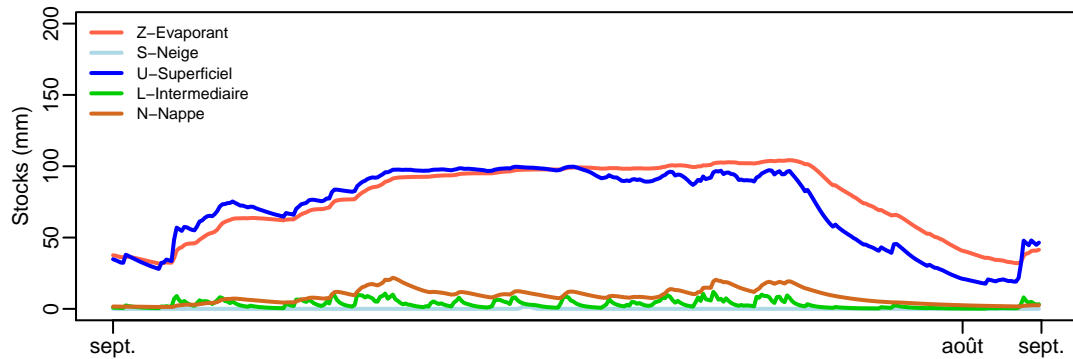

# k1383010 (838.69 km<sup>2</sup>) – année 1983–1984

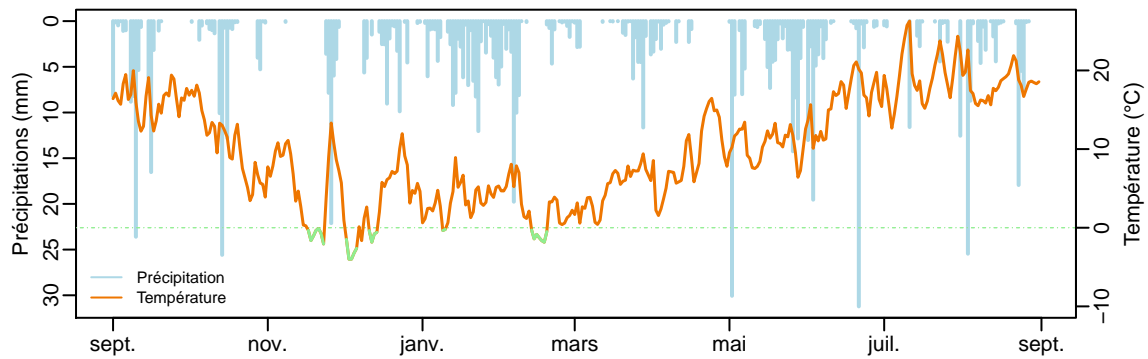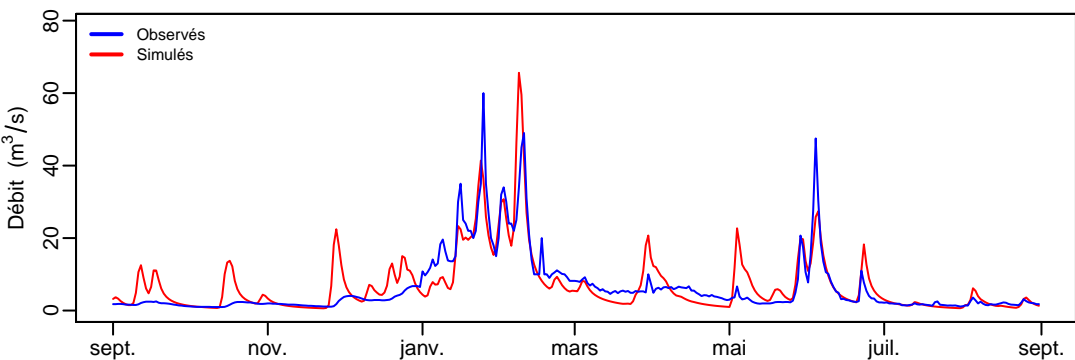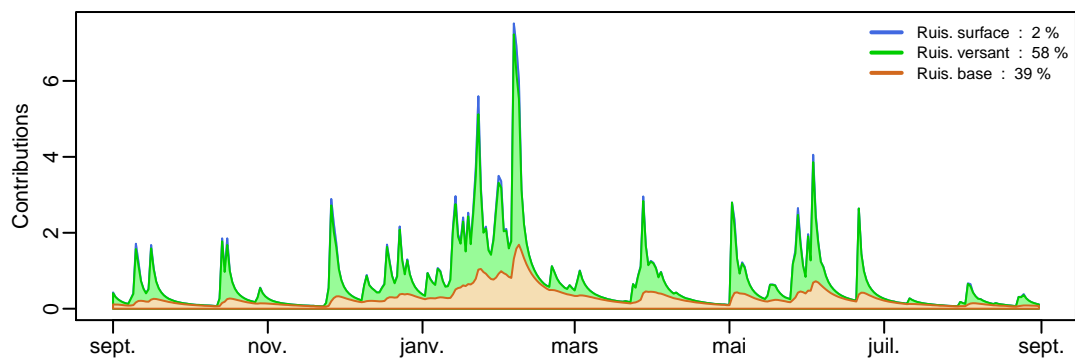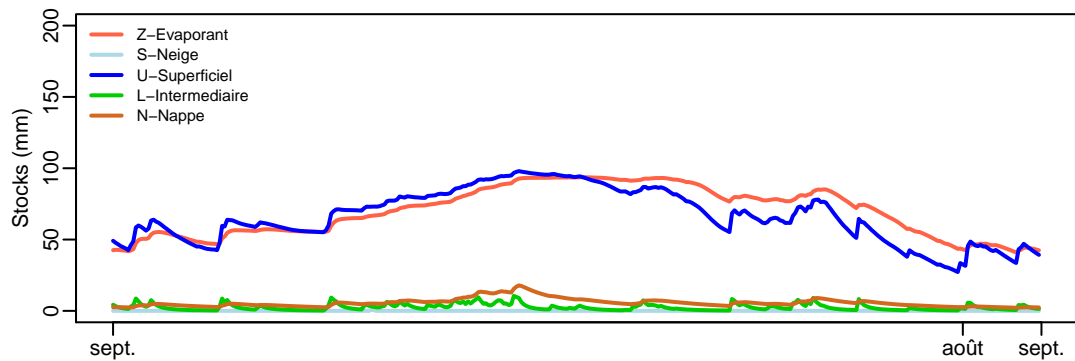

# k1383010 (838.69 km<sup>2</sup>) – année 1984–1985

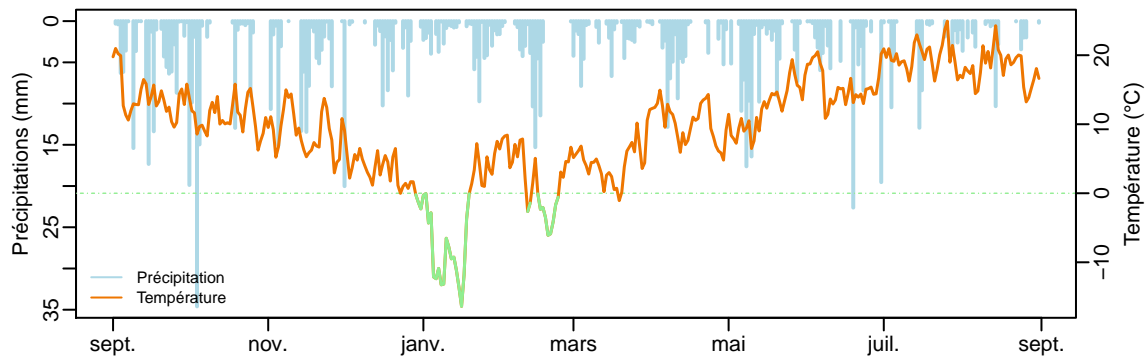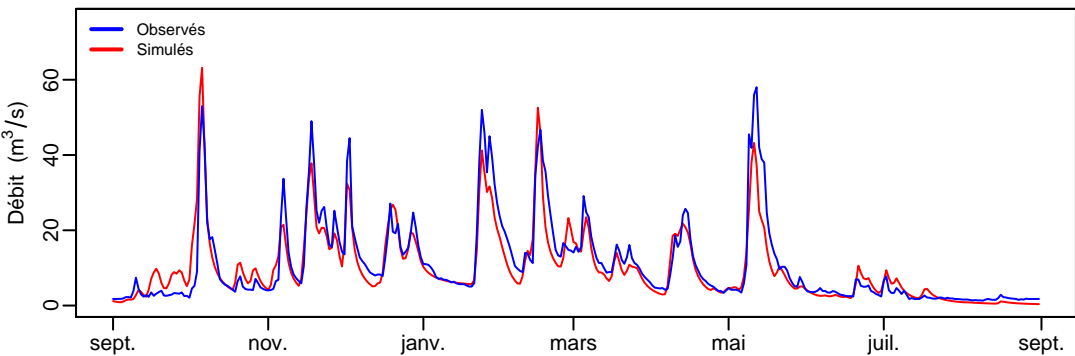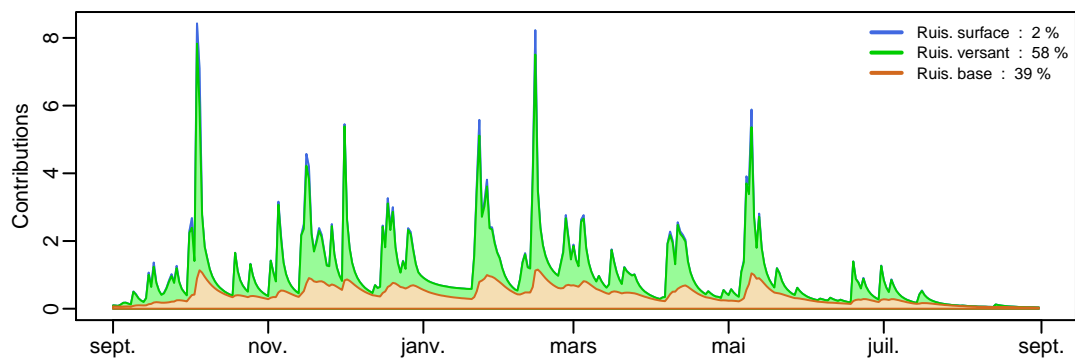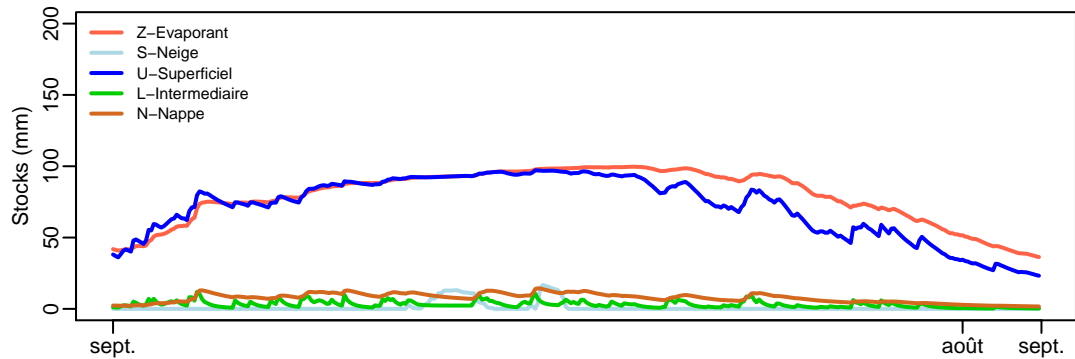

# k1383010 (838.69 km<sup>2</sup>) – année 1985–1986

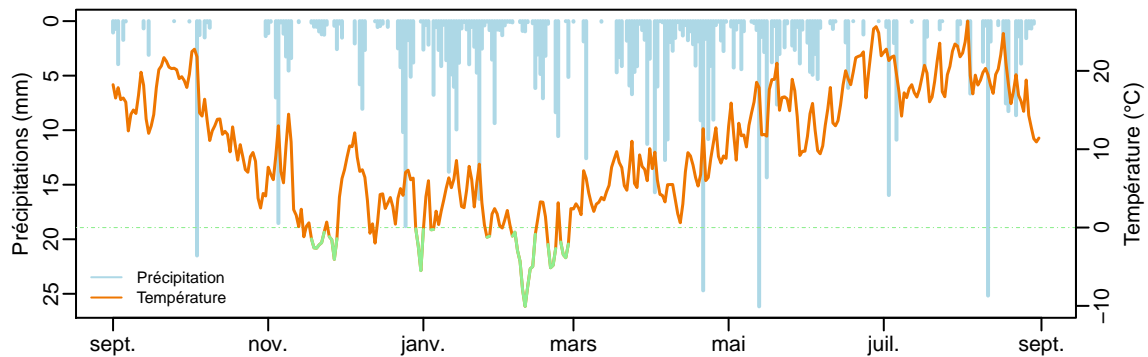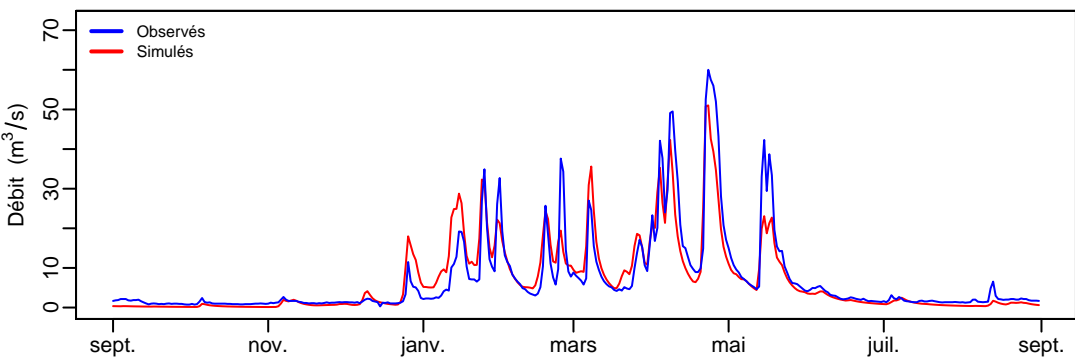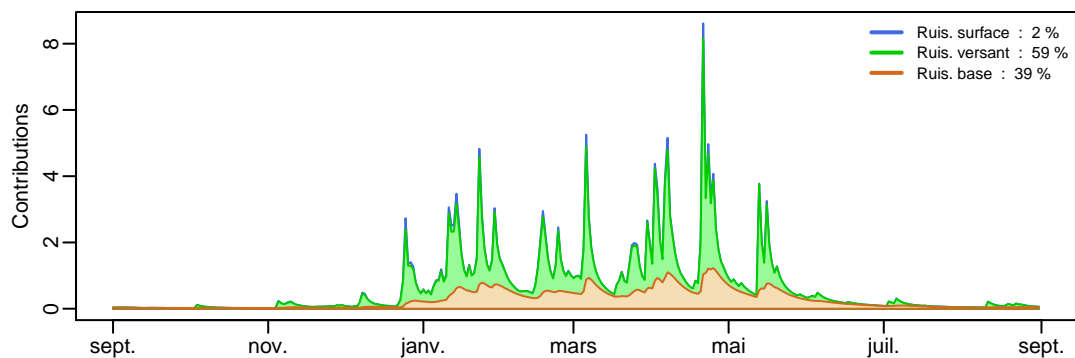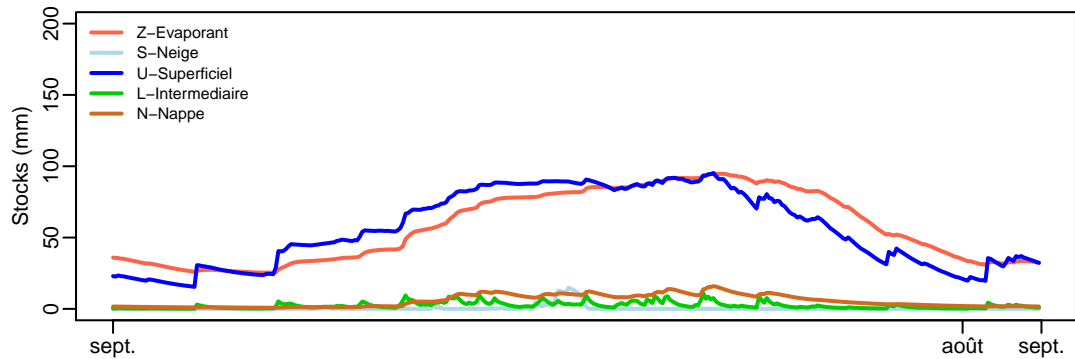



# k1383010 (838.69 km<sup>2</sup>) – année 1986–1987

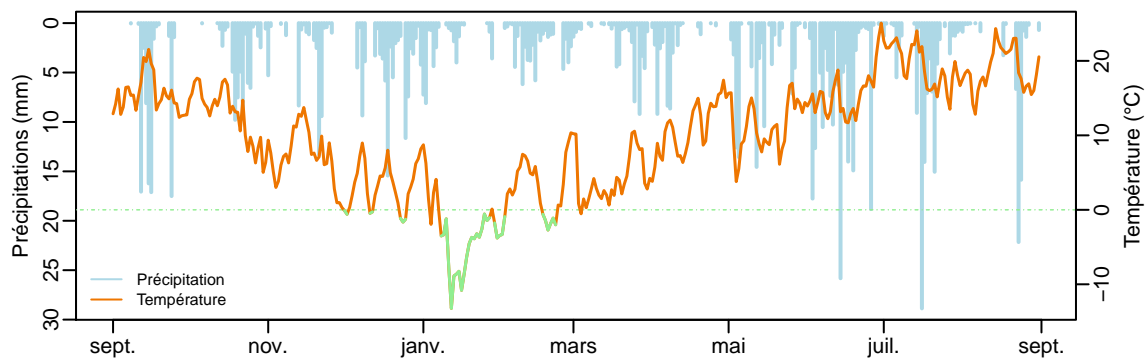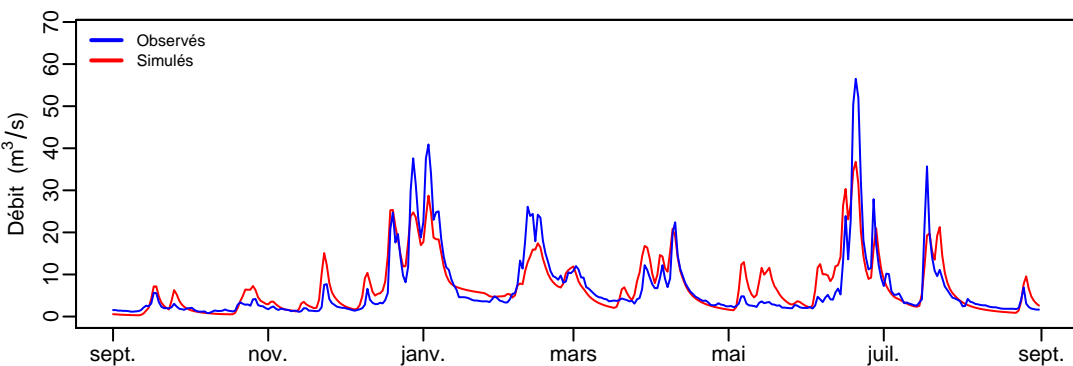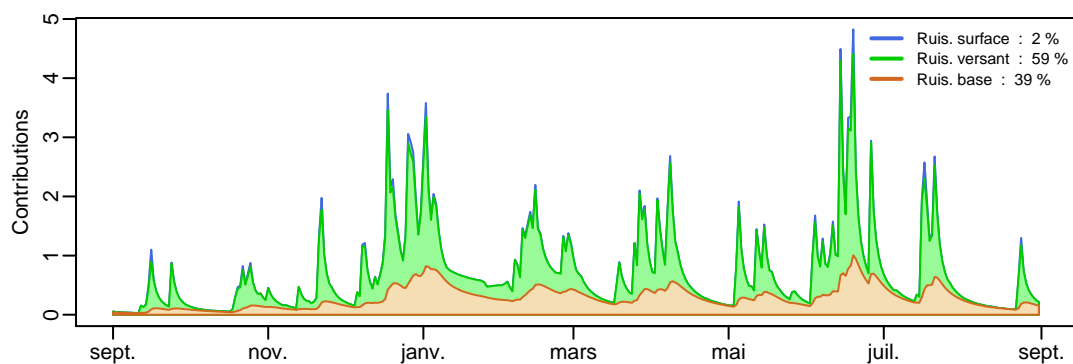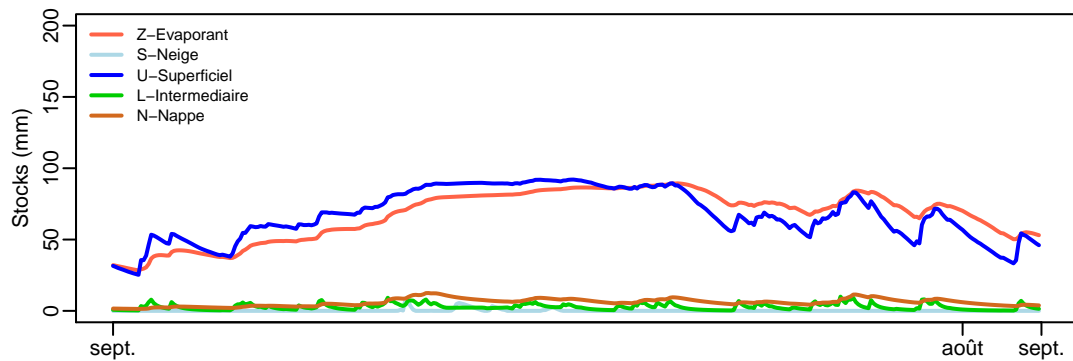

# k1383010 (838.69 km<sup>2</sup>) – année 1987–1988

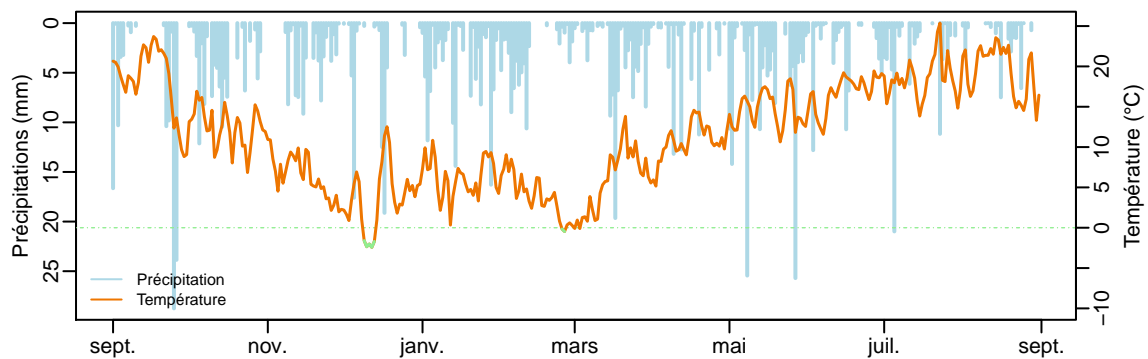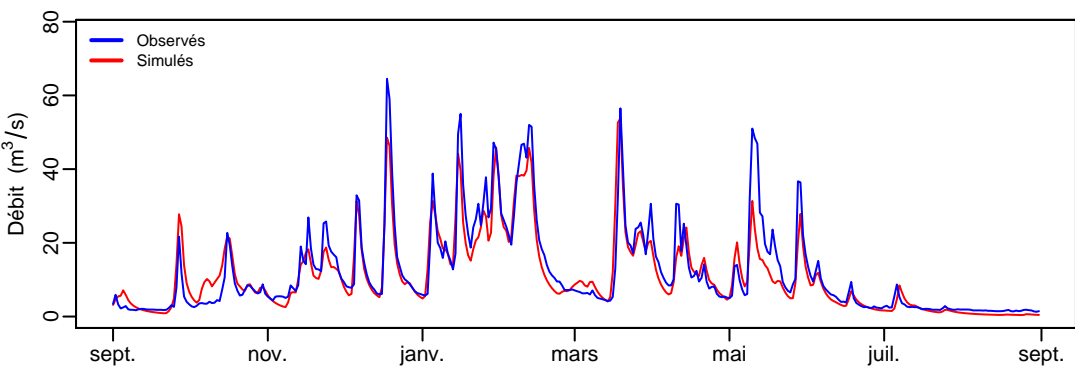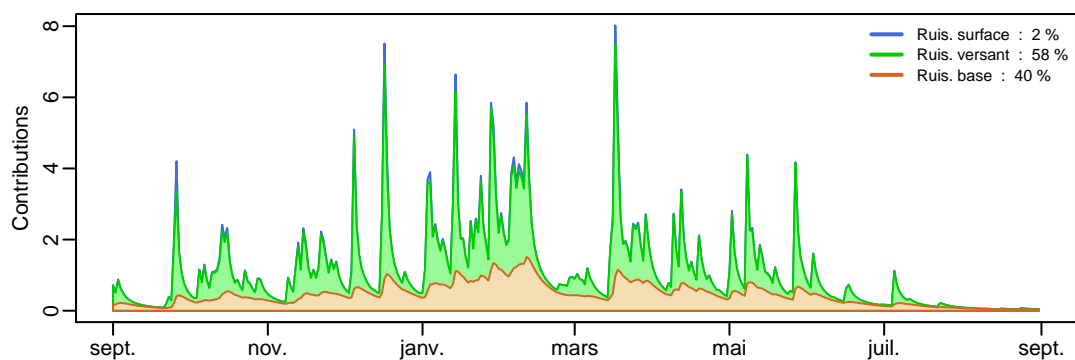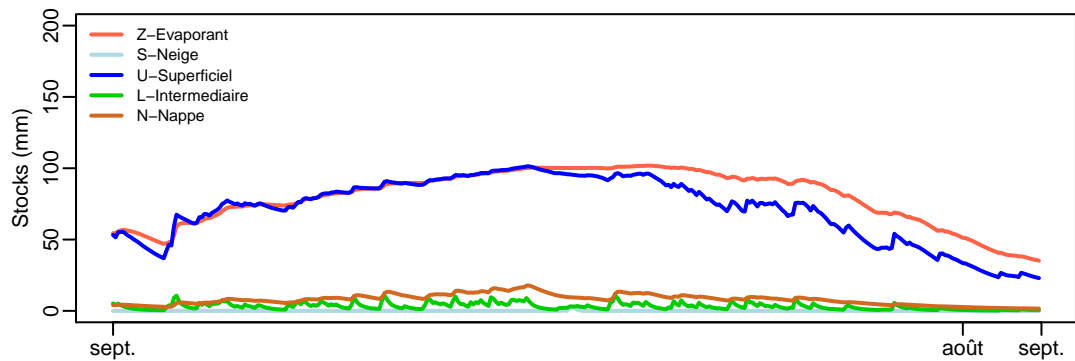

# k1383010 (838.69 km<sup>2</sup>) – année 1988–1989

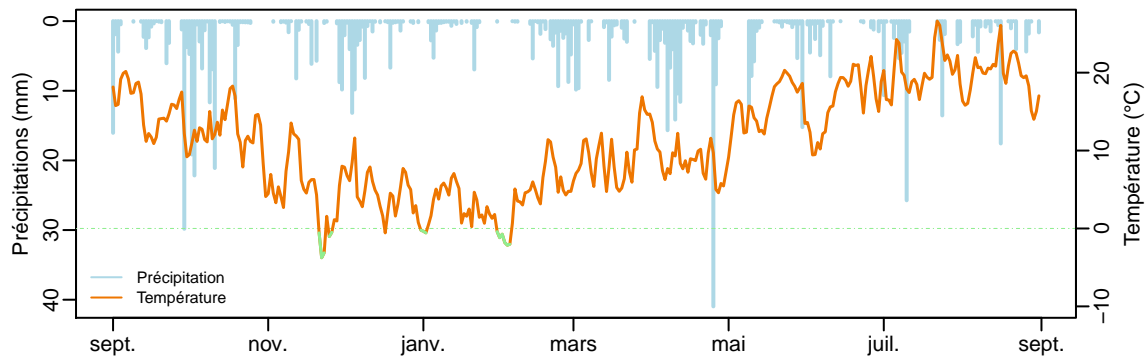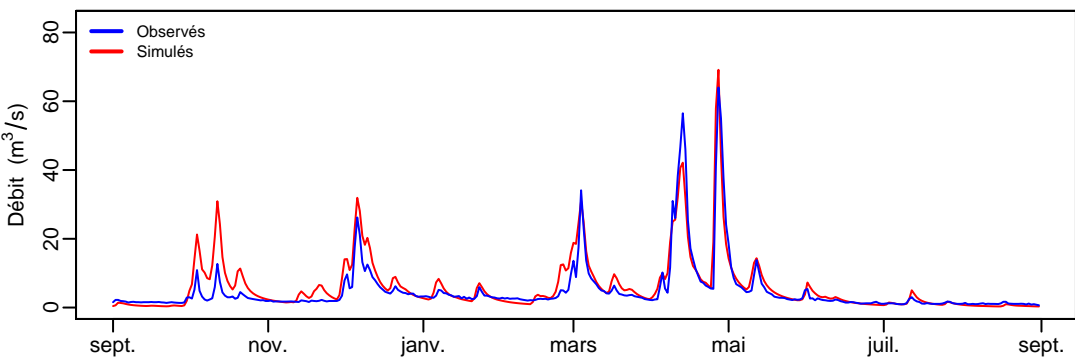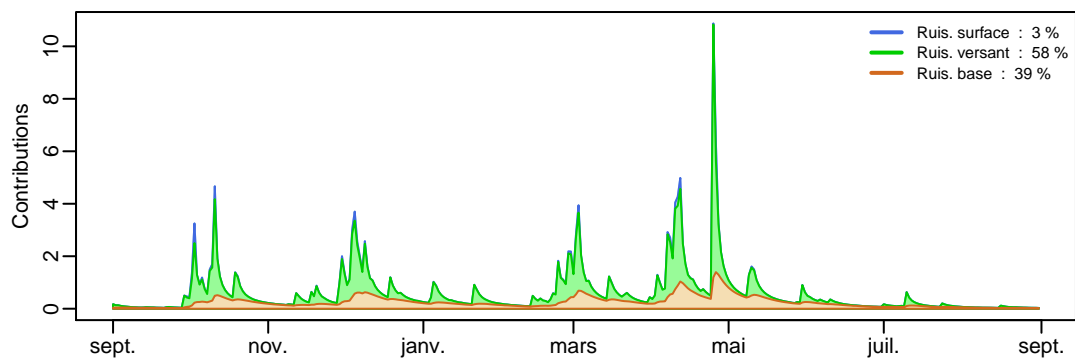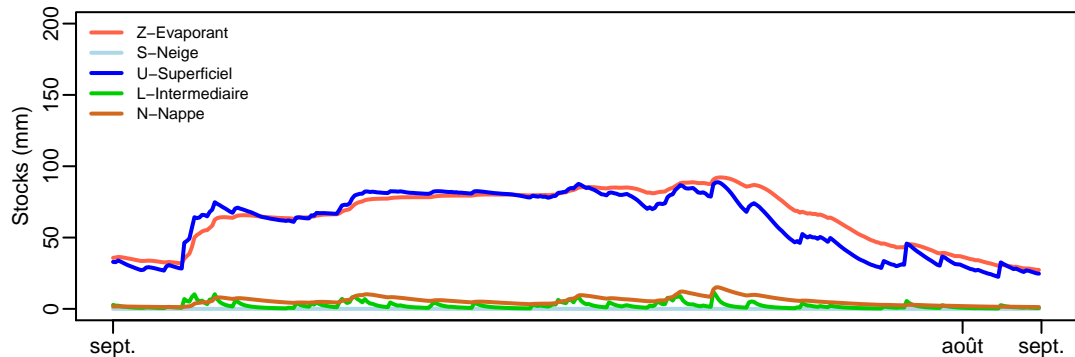

# k1383010 (838.69 km<sup>2</sup>) – année 1989–1990

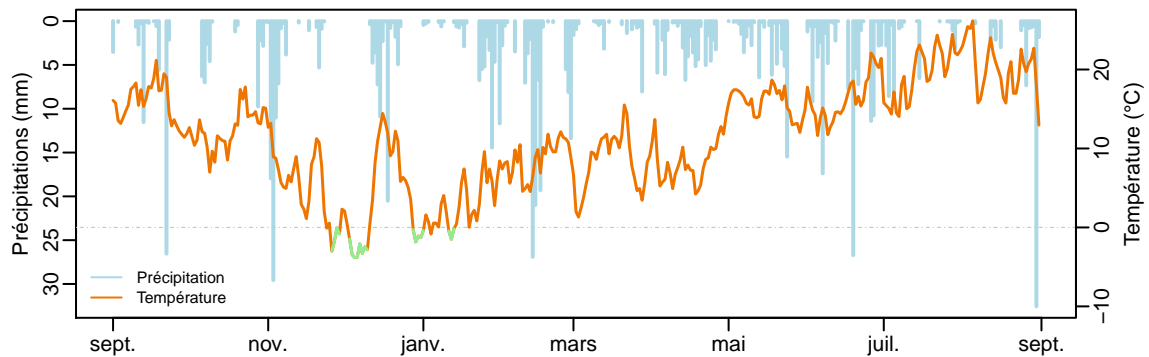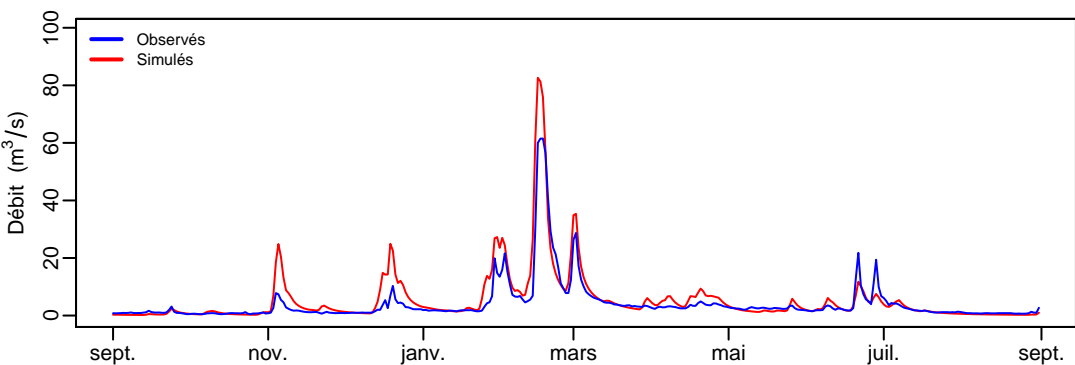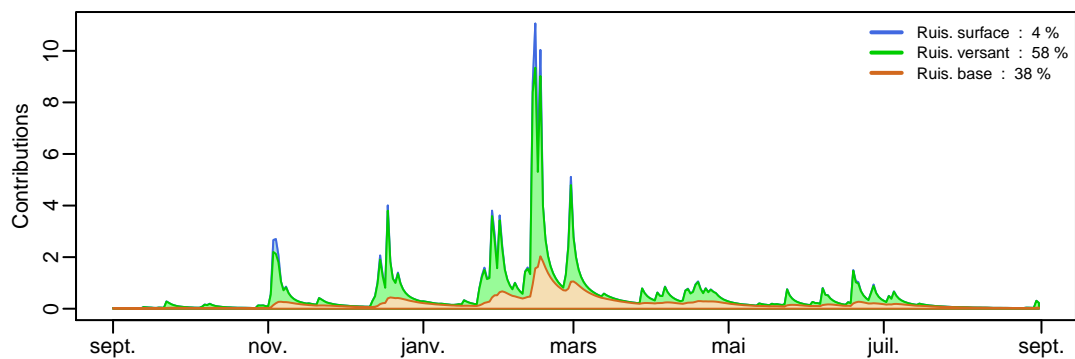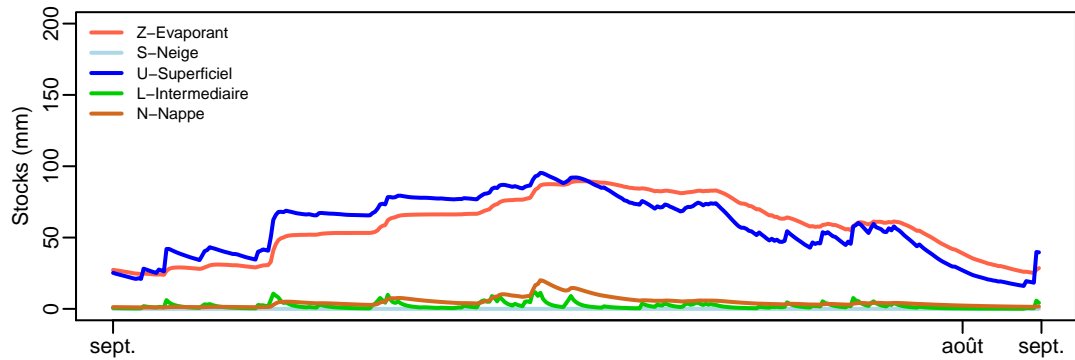

# k1383010 (838.69 km<sup>2</sup>) – année 1990–1991

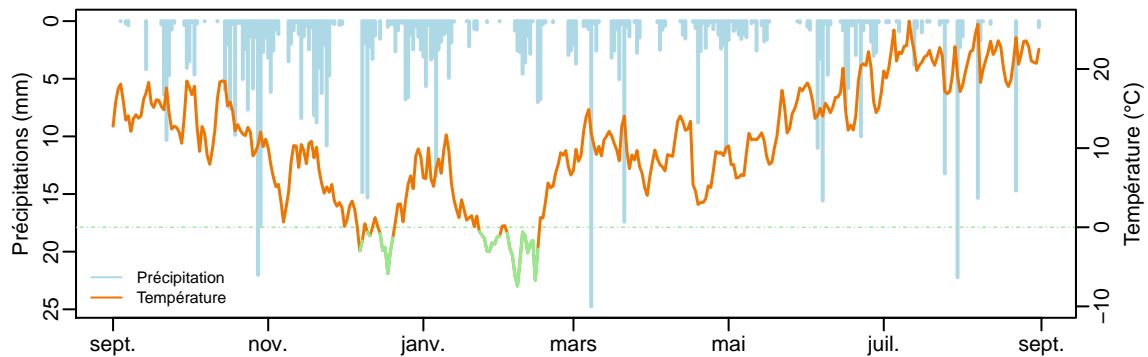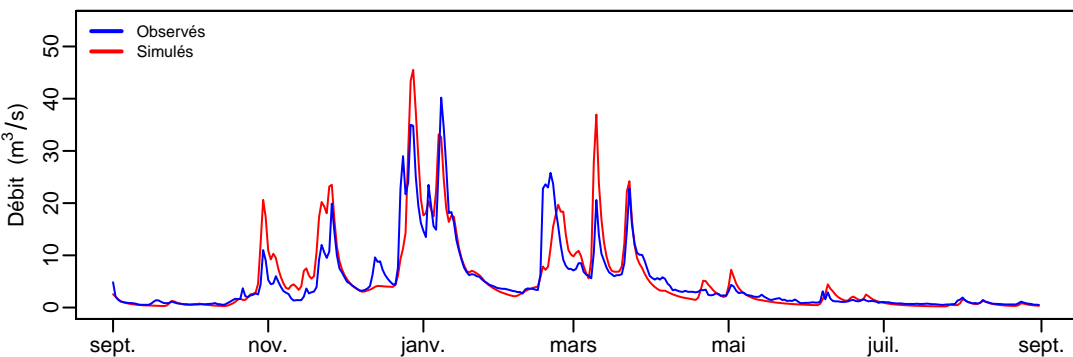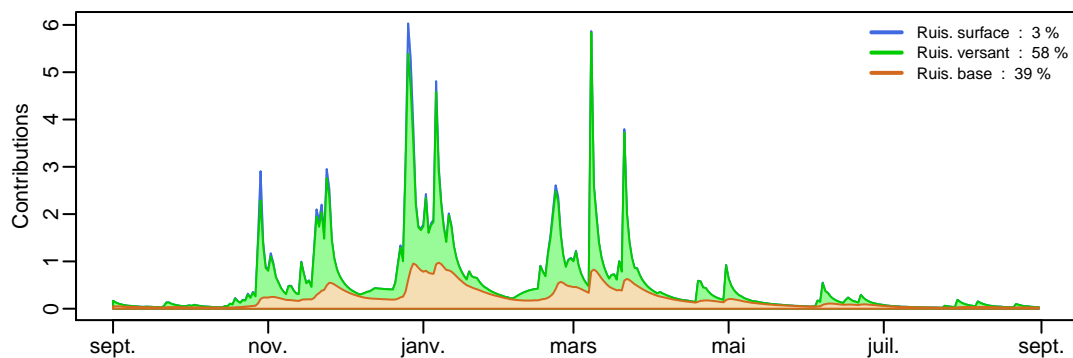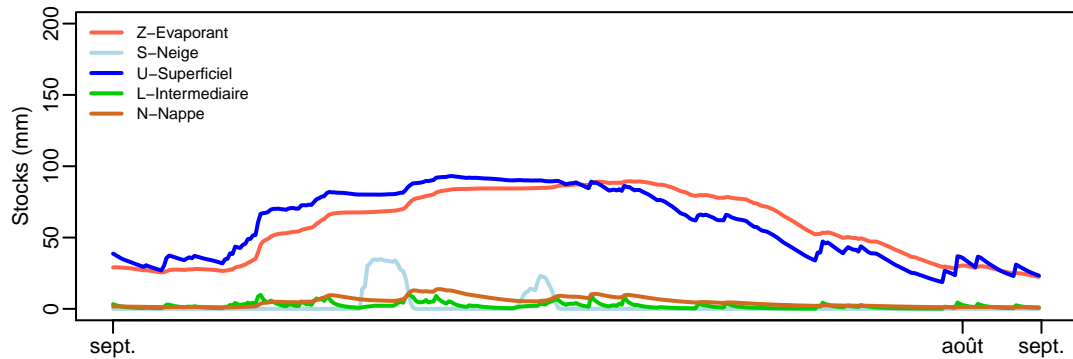

# k1383010 (838.69 km<sup>2</sup>) – année 1991–1992

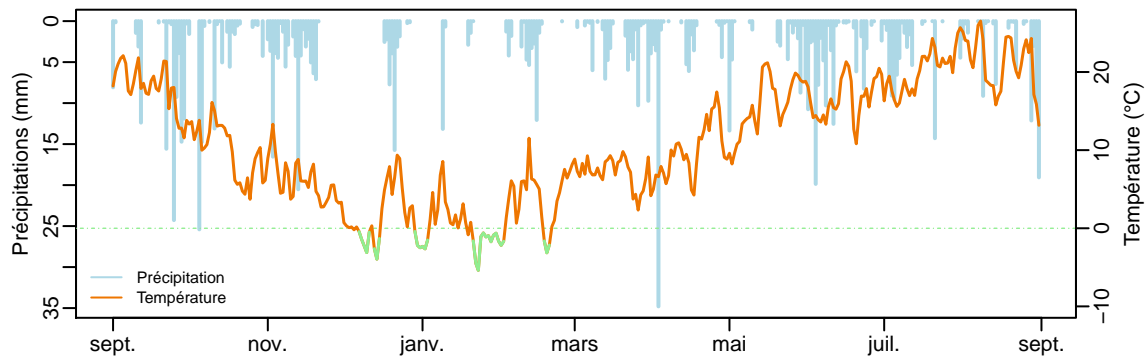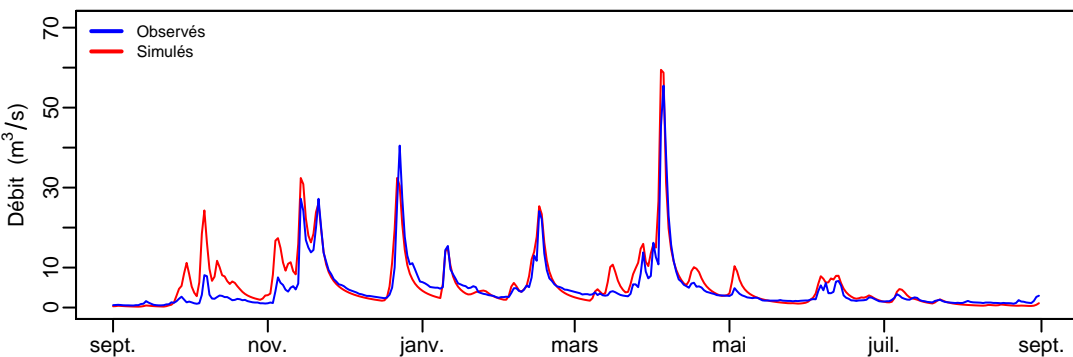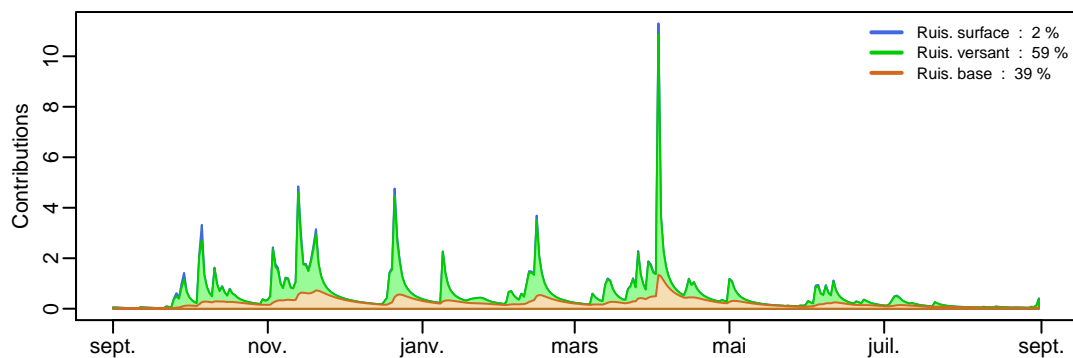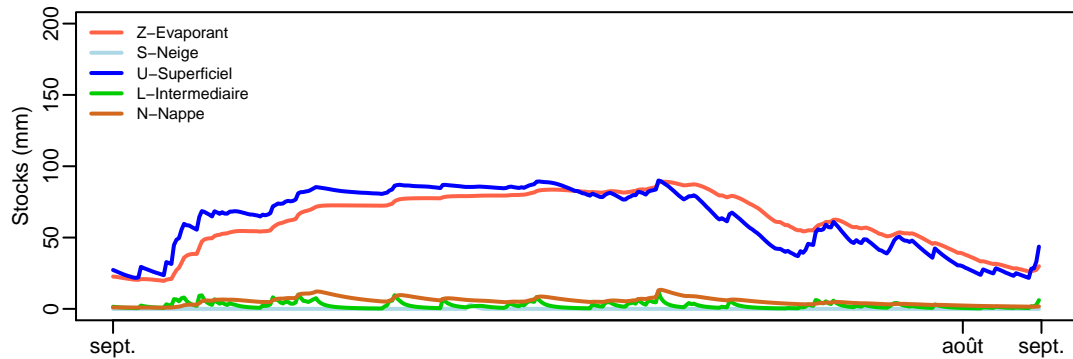

# k1383010 (838.69 km<sup>2</sup>) – année 1992–1993

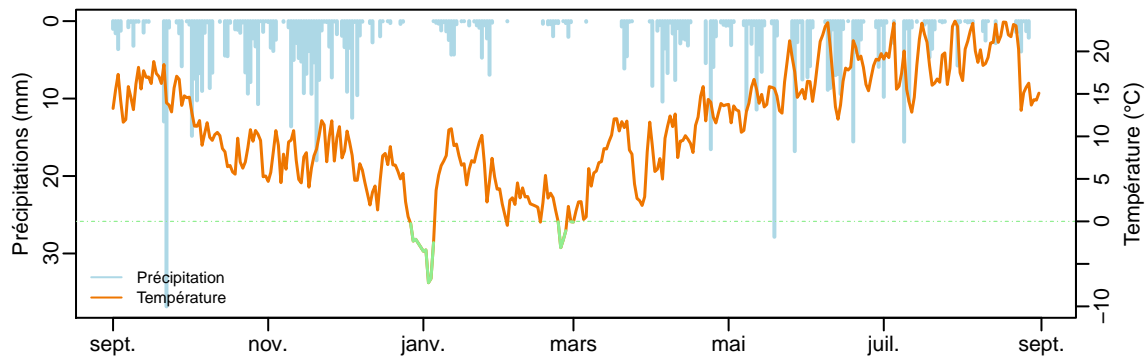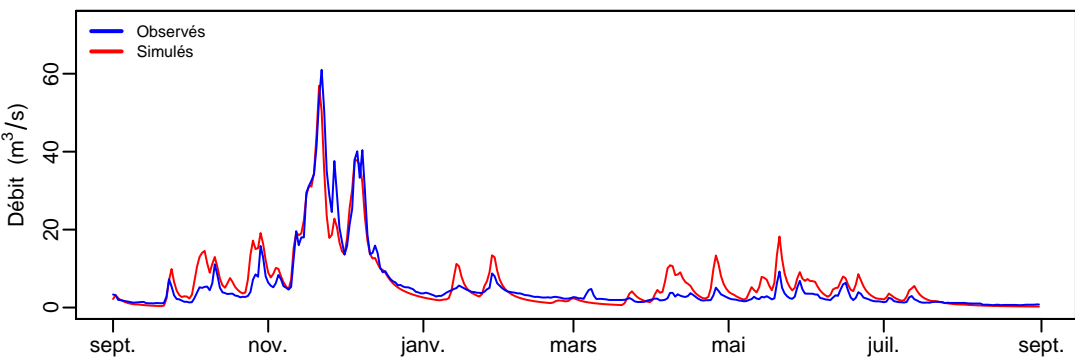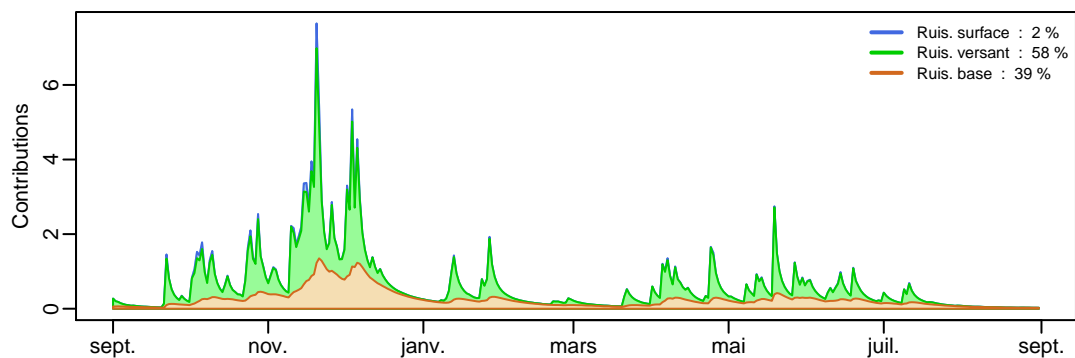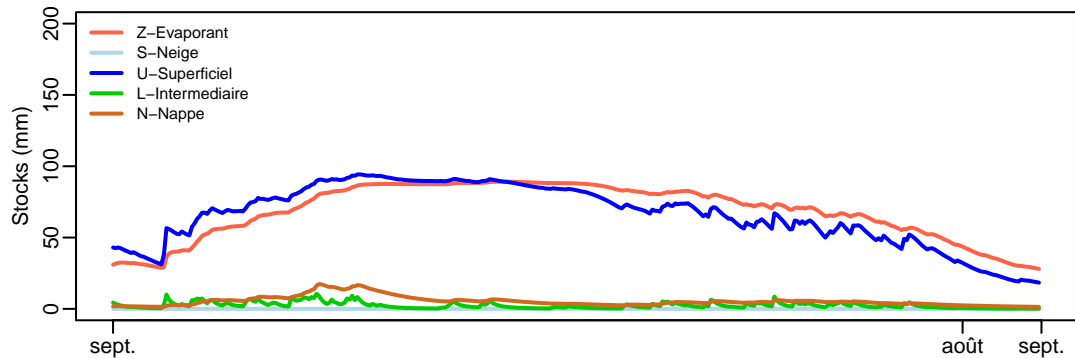

# k1383010 (838.69 km<sup>2</sup>) – année 1993–1994

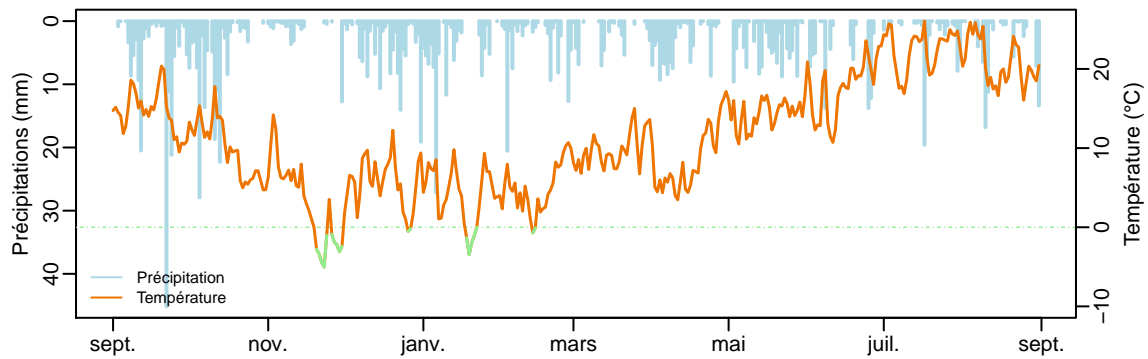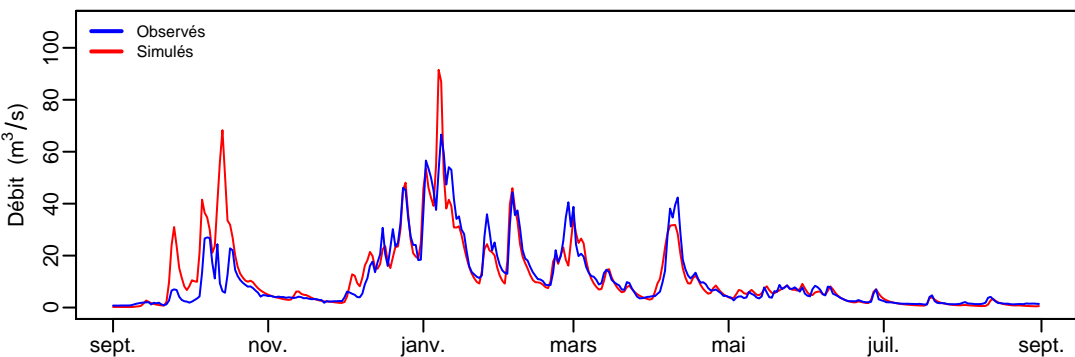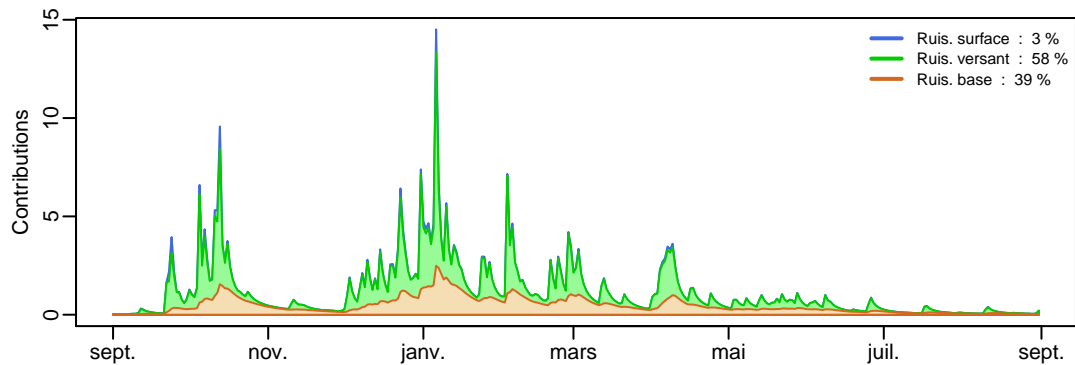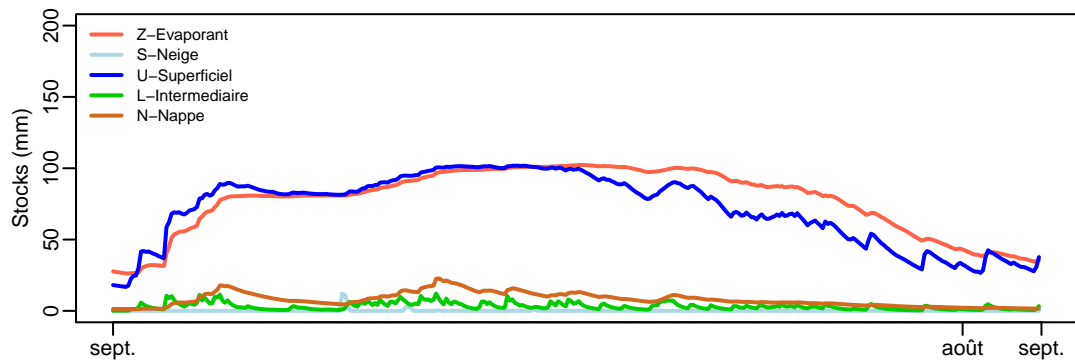



# k1383010 (838.69 km<sup>2</sup>) – année 1994–1995

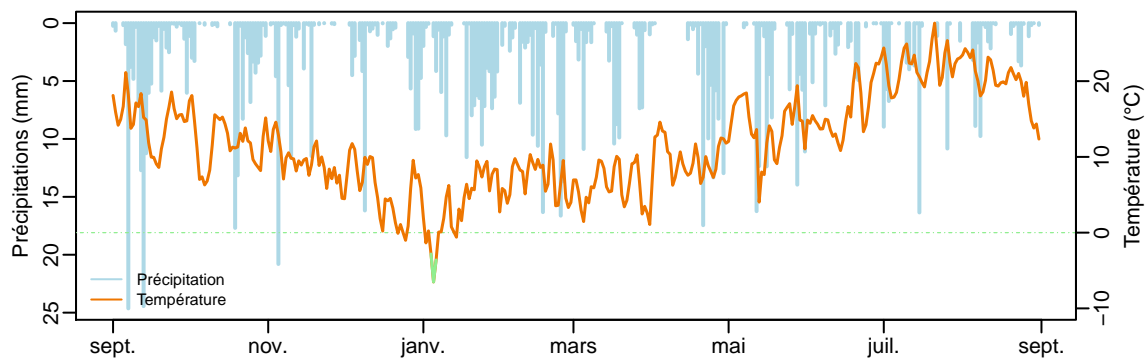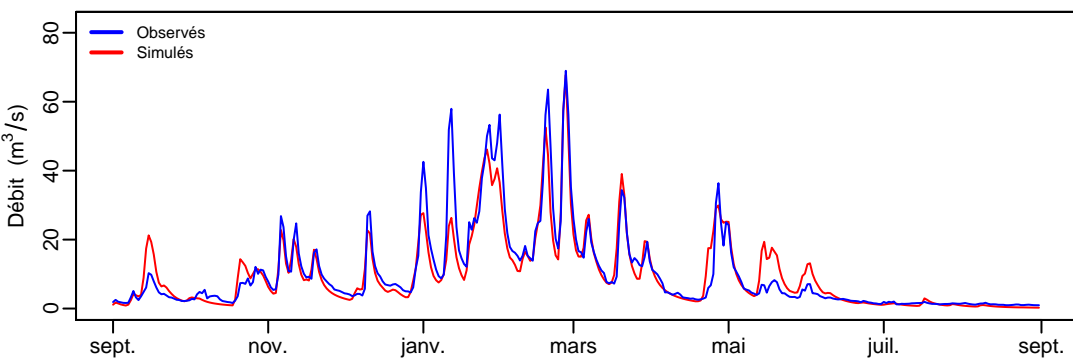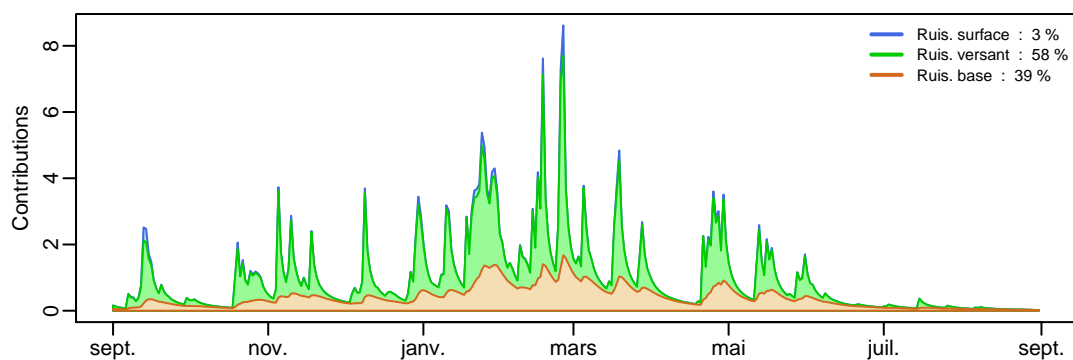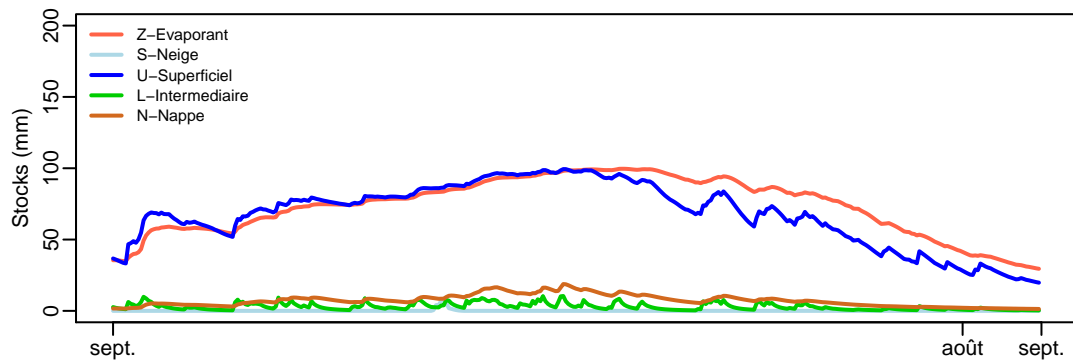

# k1383010 (838.69 km²) – année 1995–1996

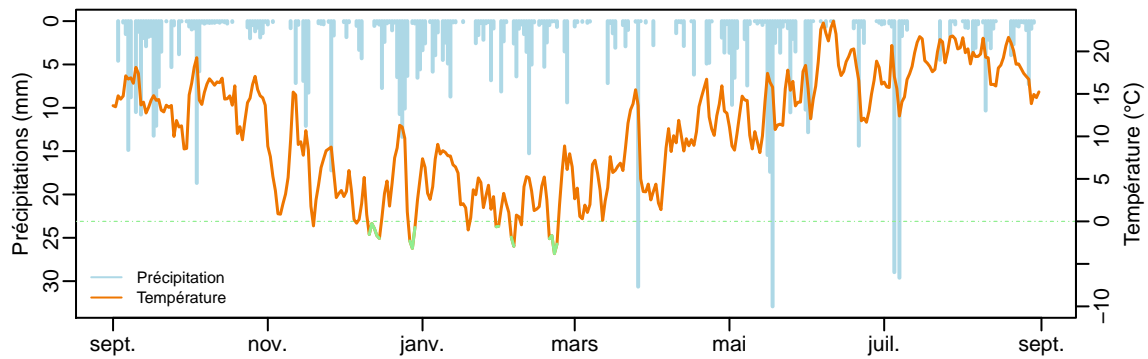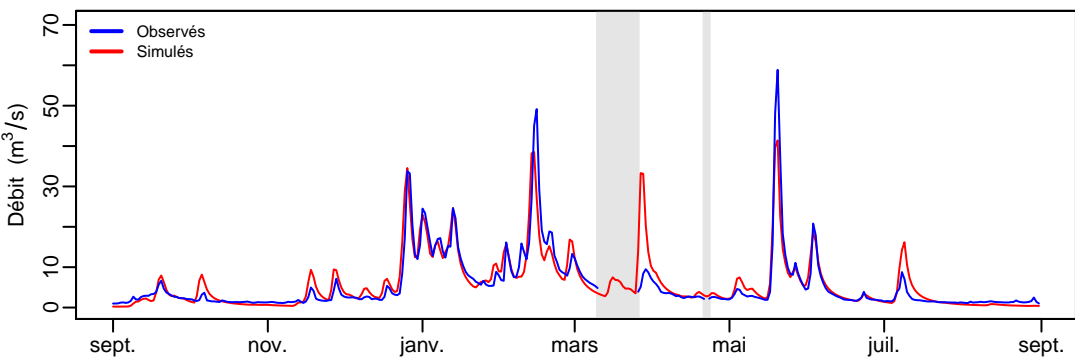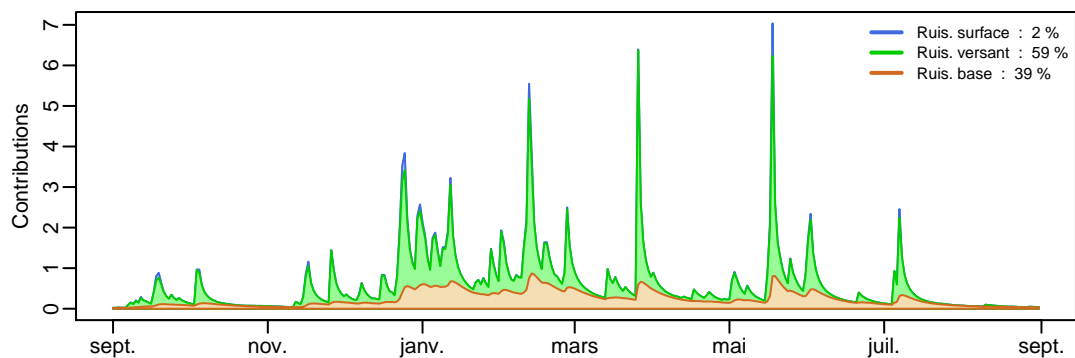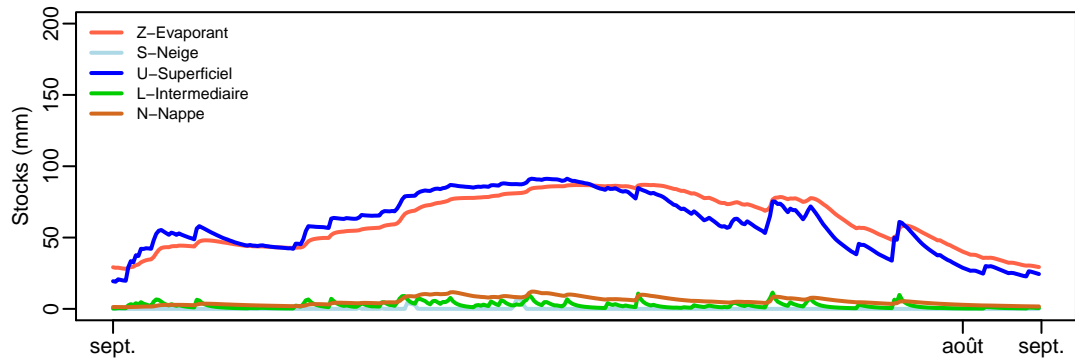

# k1383010 (838.69 km<sup>2</sup>) – année 1996–1997

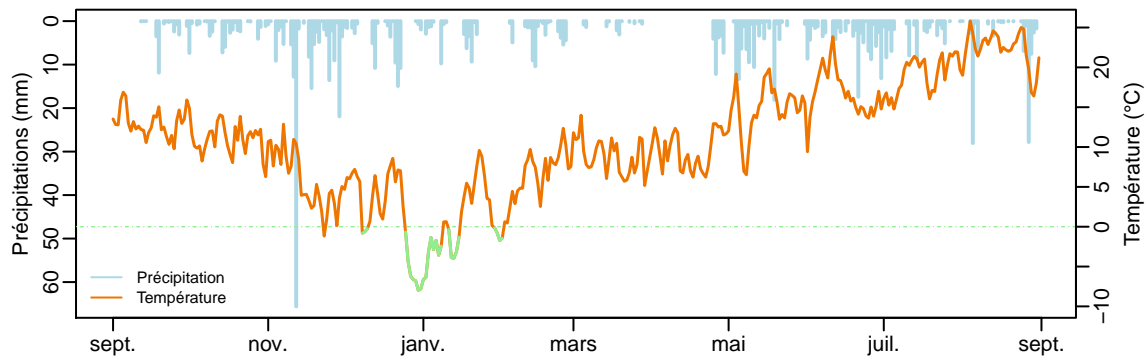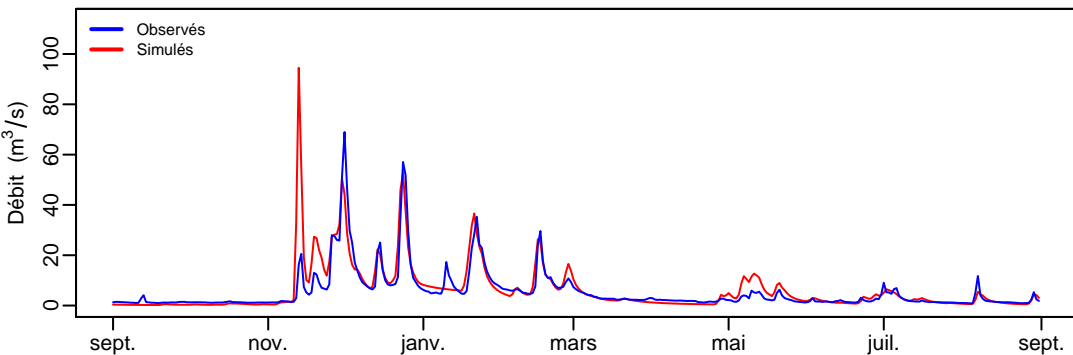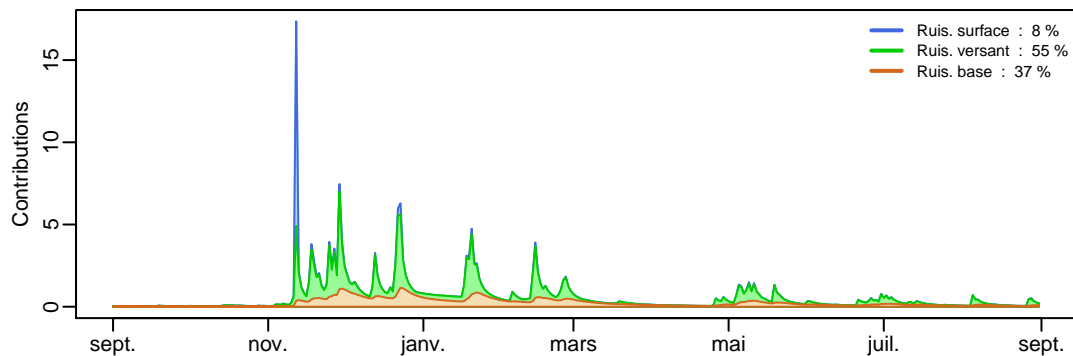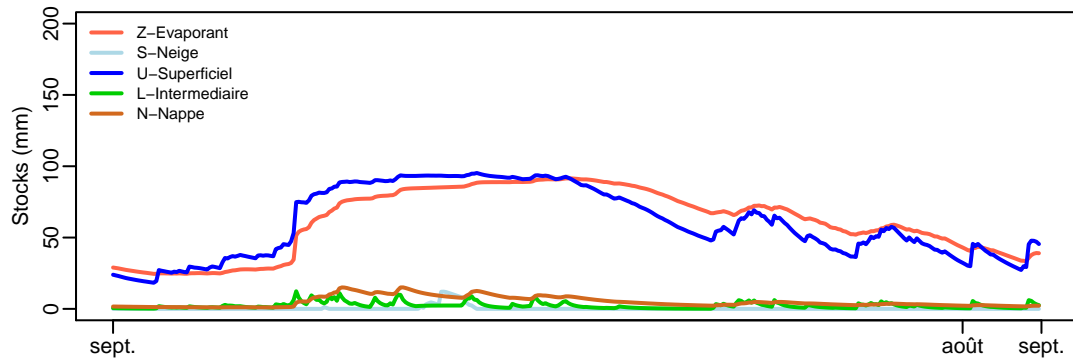

# k1383010 (838.69 km<sup>2</sup>) – année 1997–1998

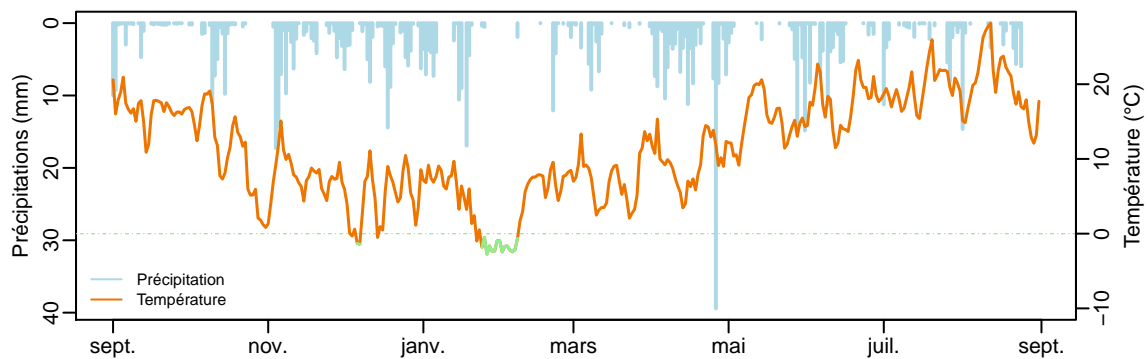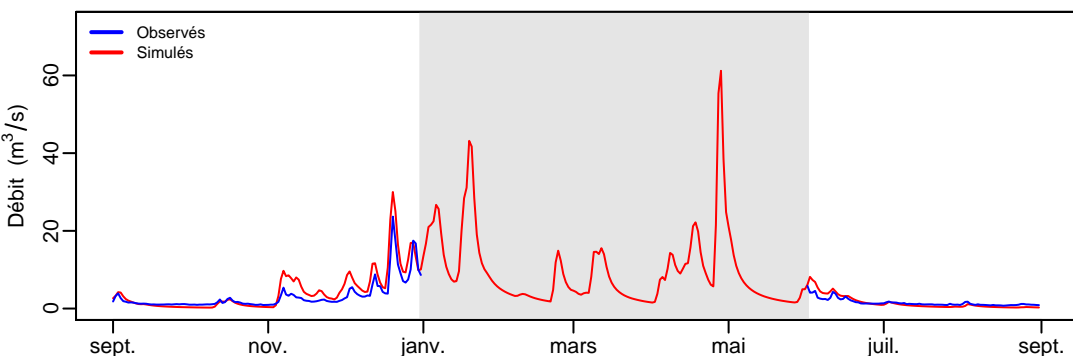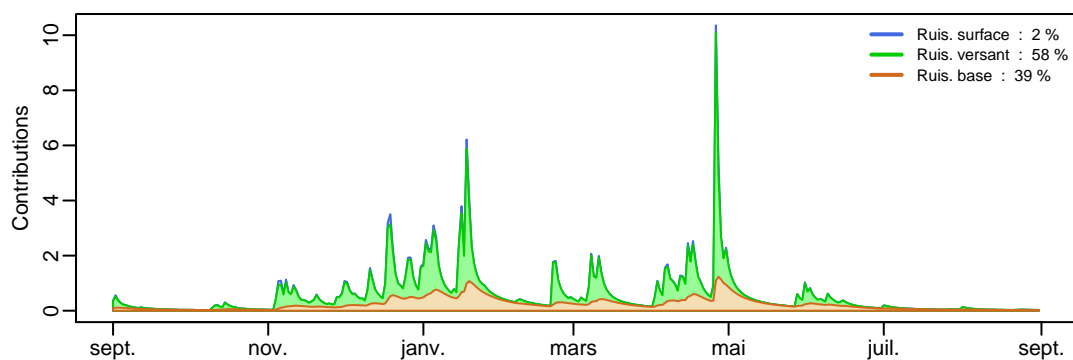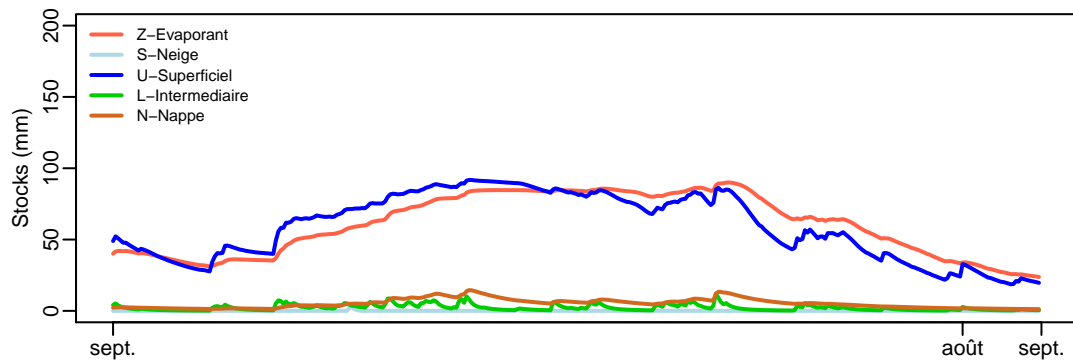

# k1383010 (838.69 km<sup>2</sup>) – année 1998–1999

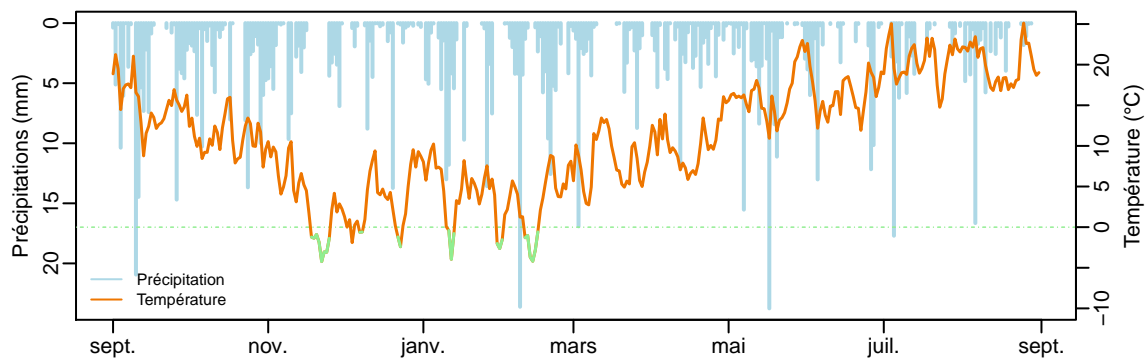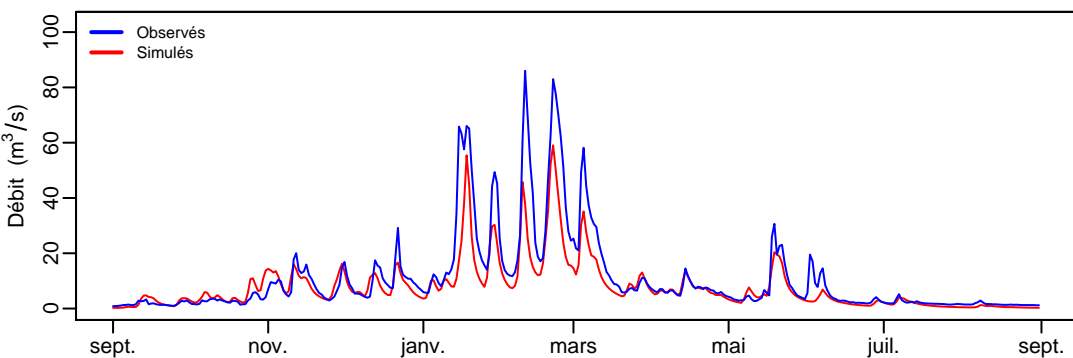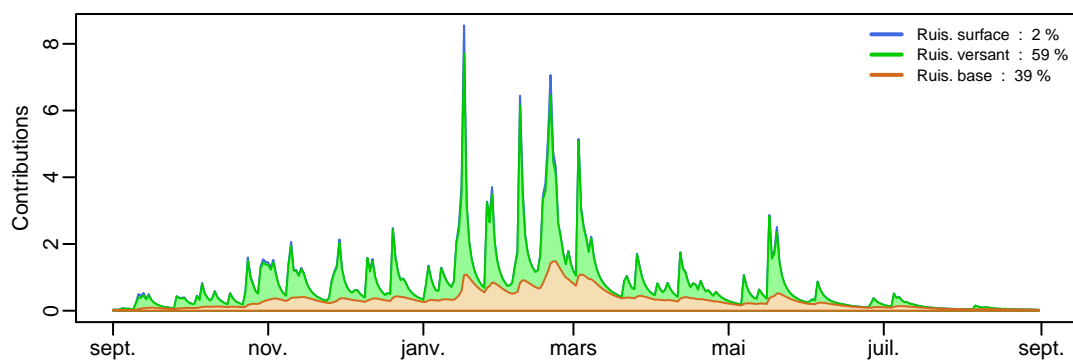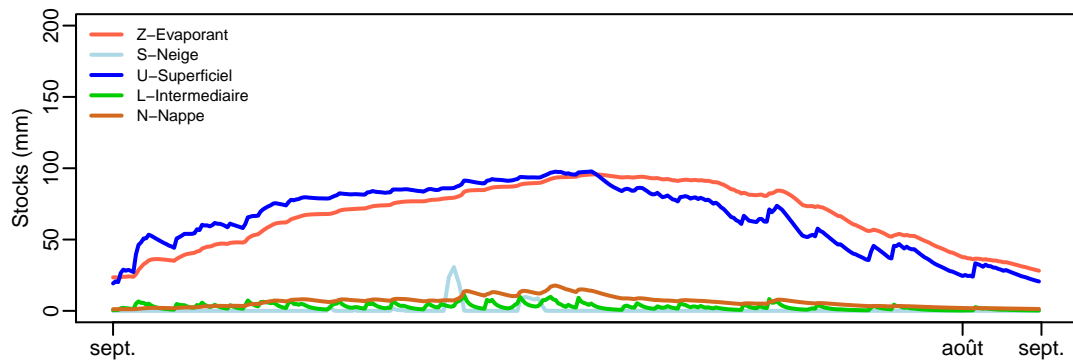

# k1383010 (838.69 km<sup>2</sup>) – année 1999–2000

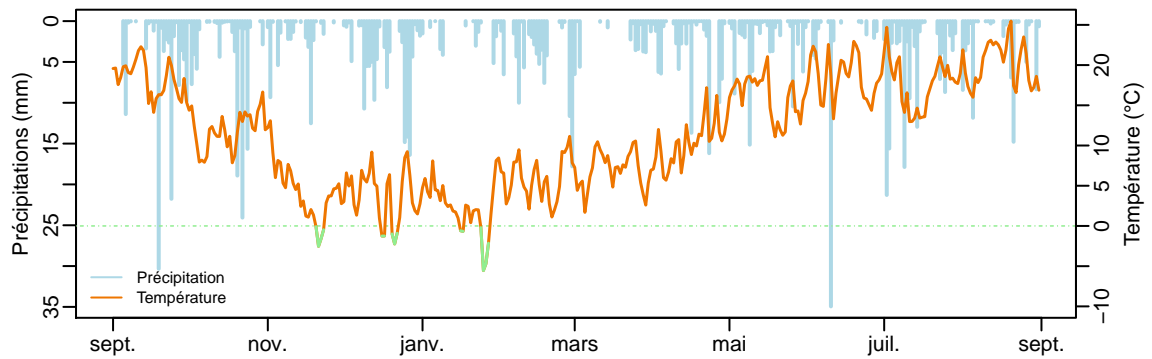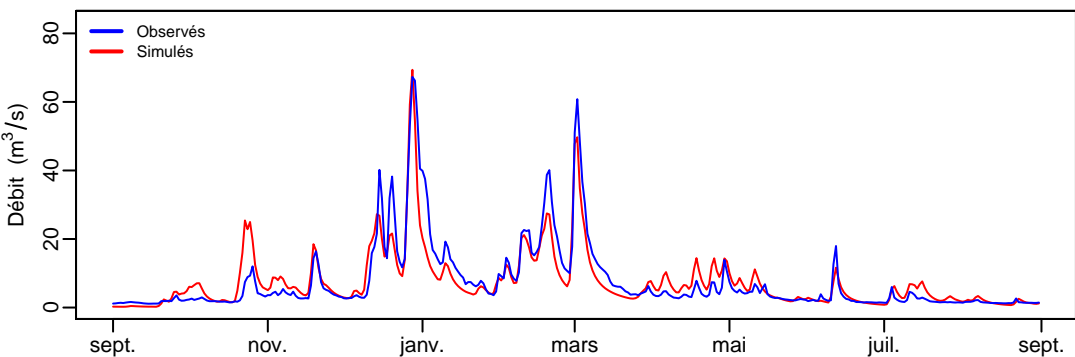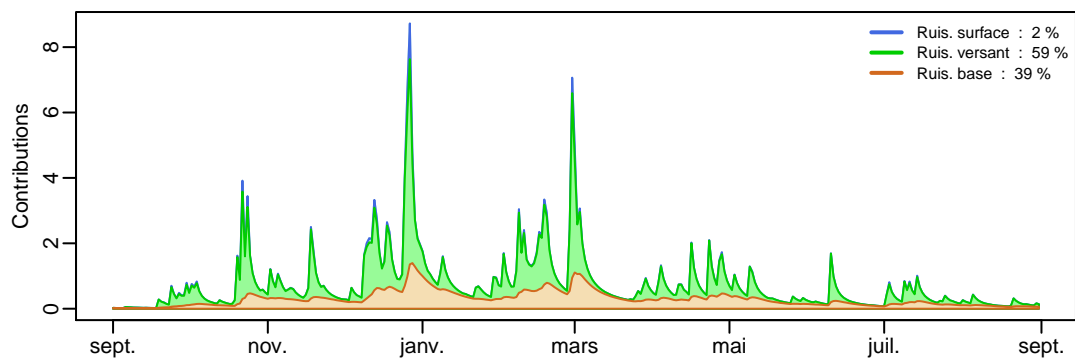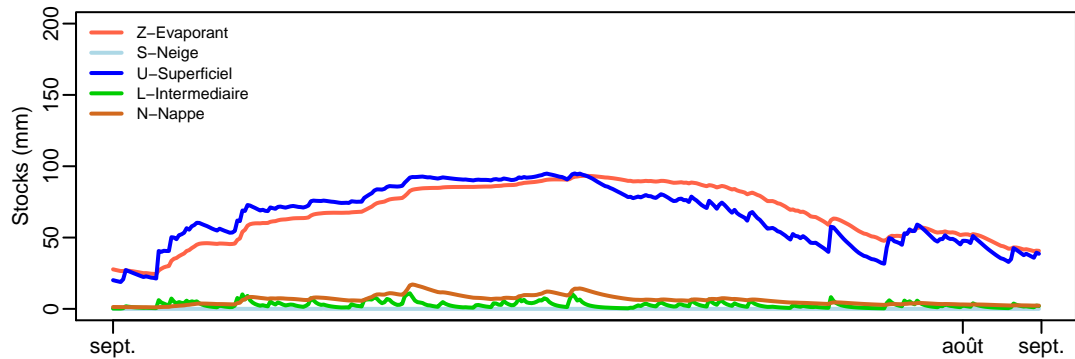

# k1383010 (838.69 km<sup>2</sup>) – année 2000–2001

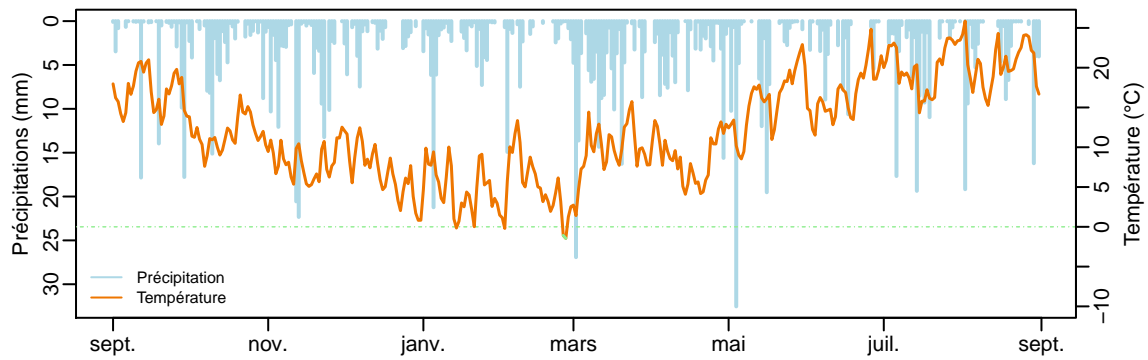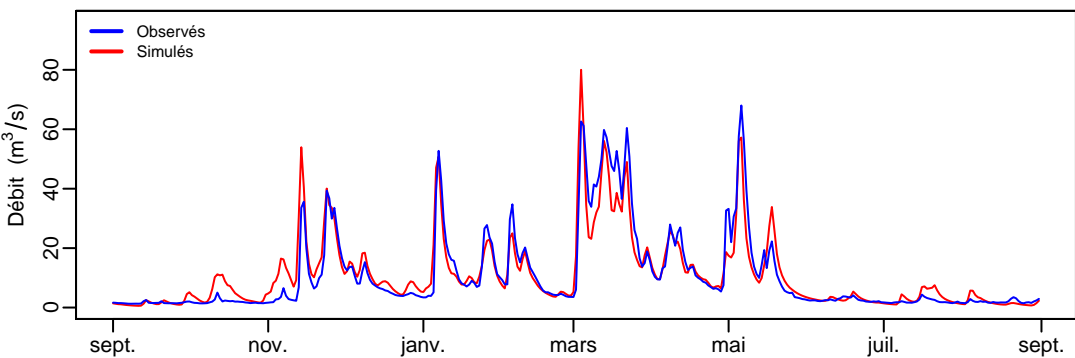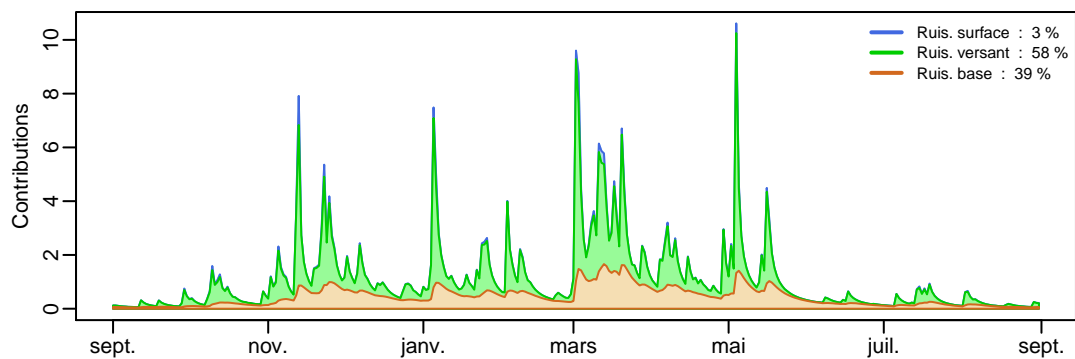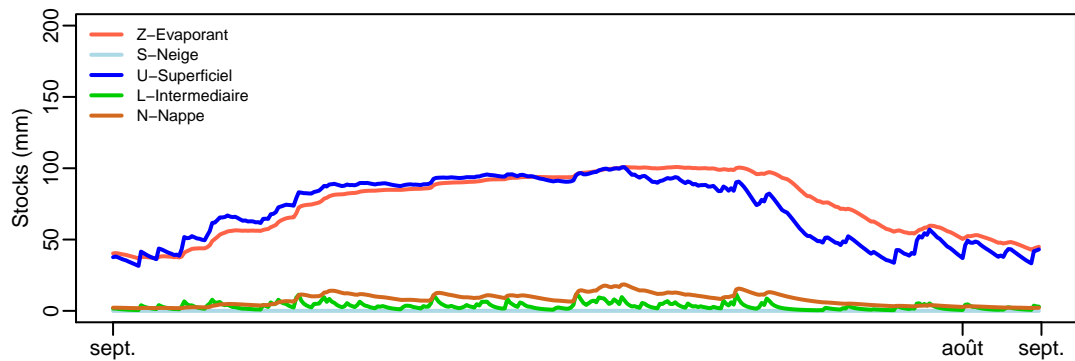

# k1383010 (838.69 km²) – année 2001–2002

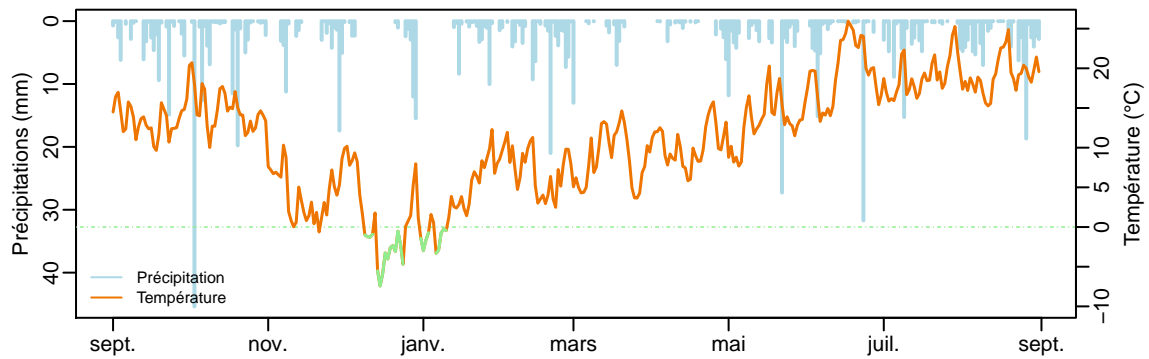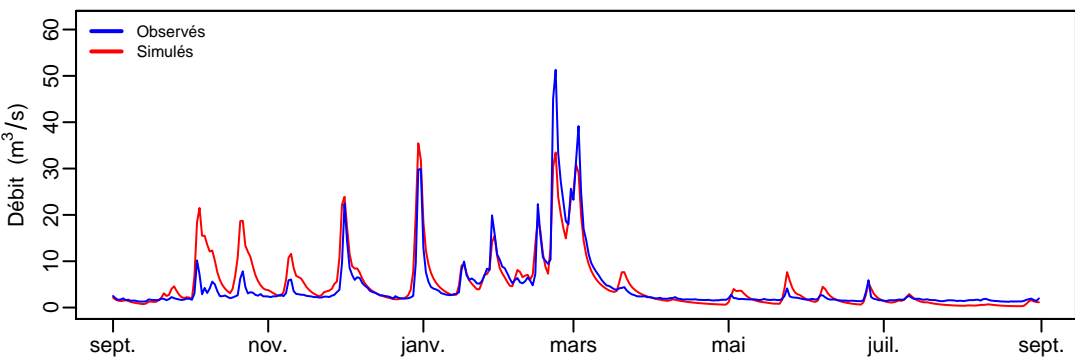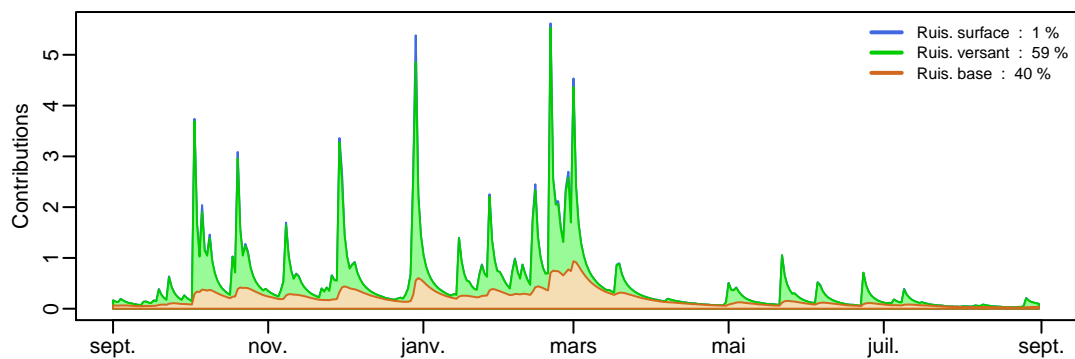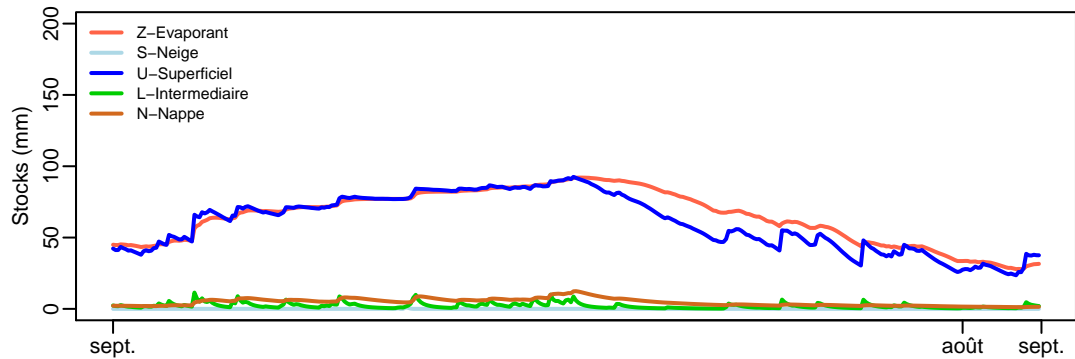



# k1383010 (838.69 km<sup>2</sup>) – année 2002–2003

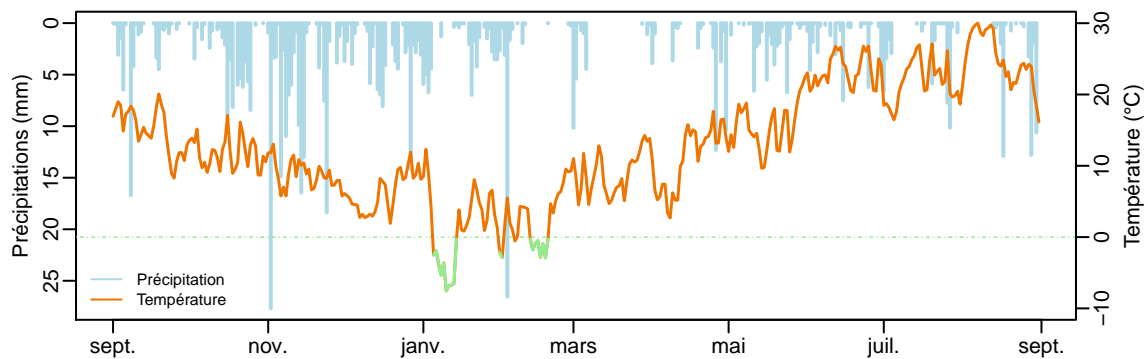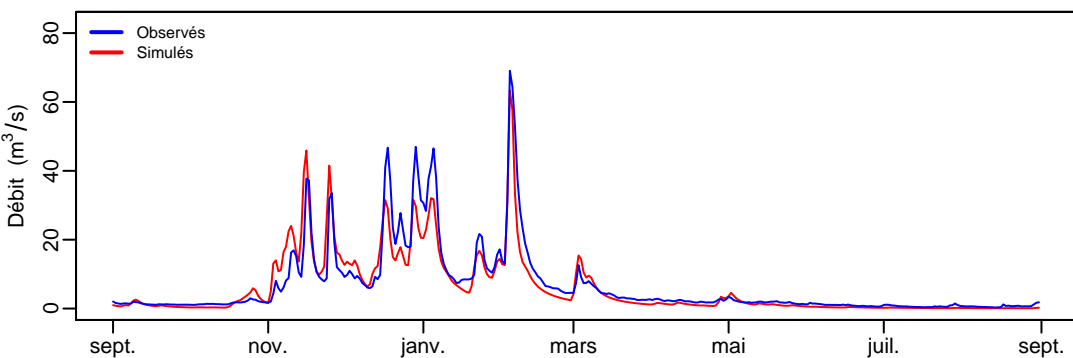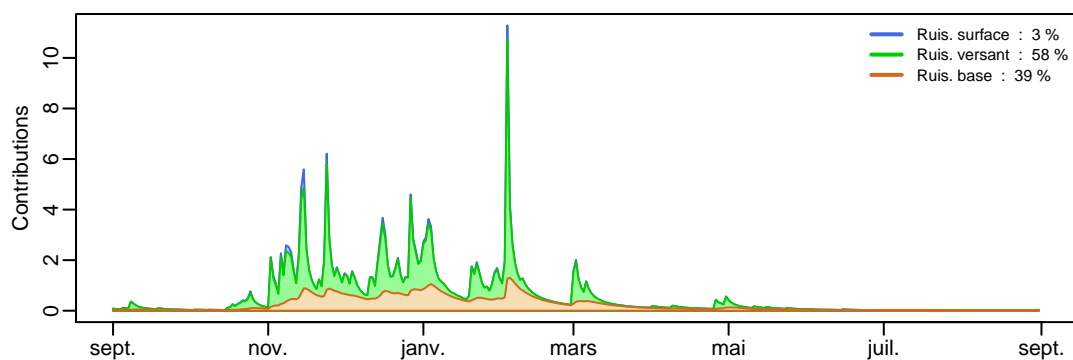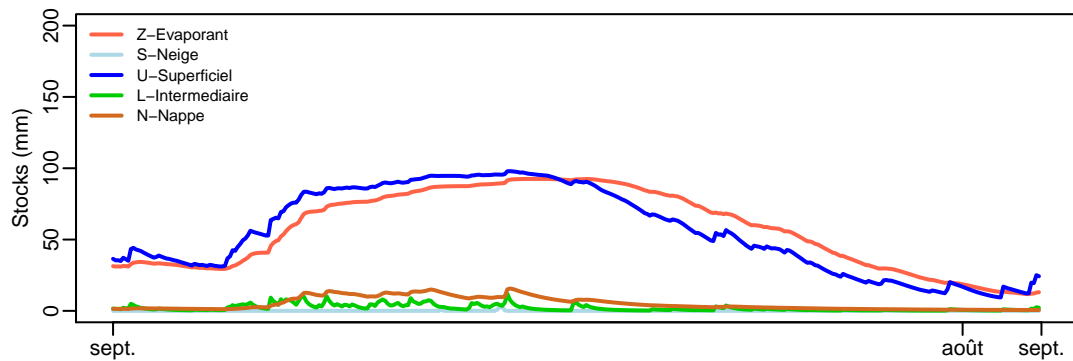

# k1383010 (838.69 km<sup>2</sup>) – année 2003–2004

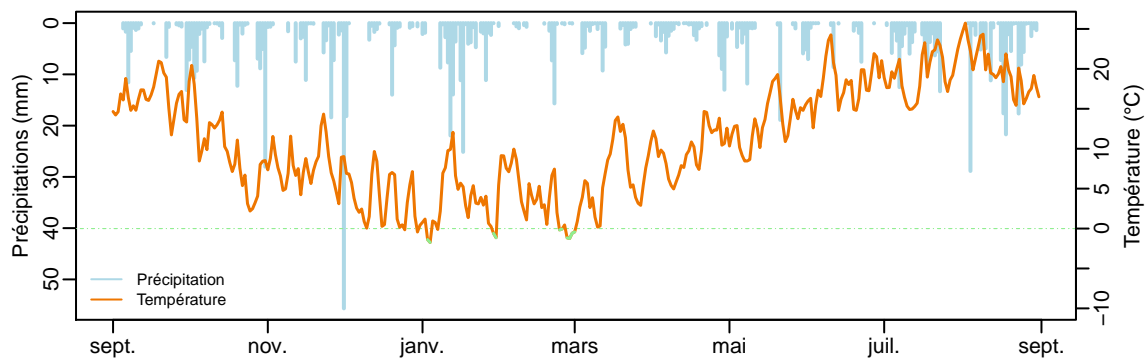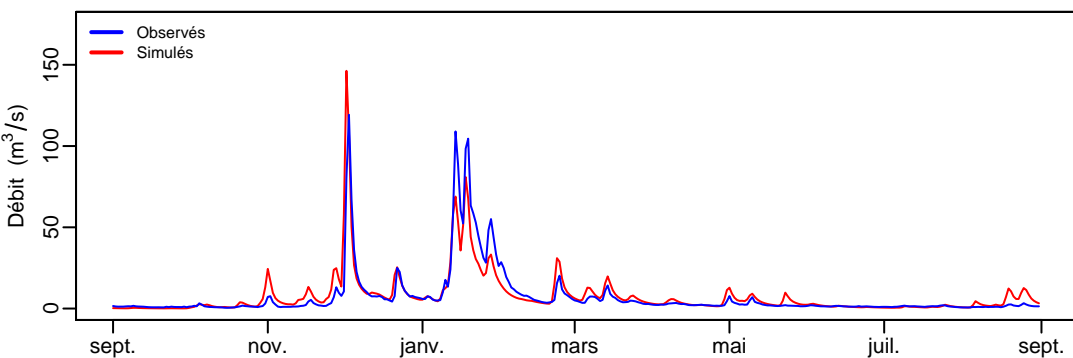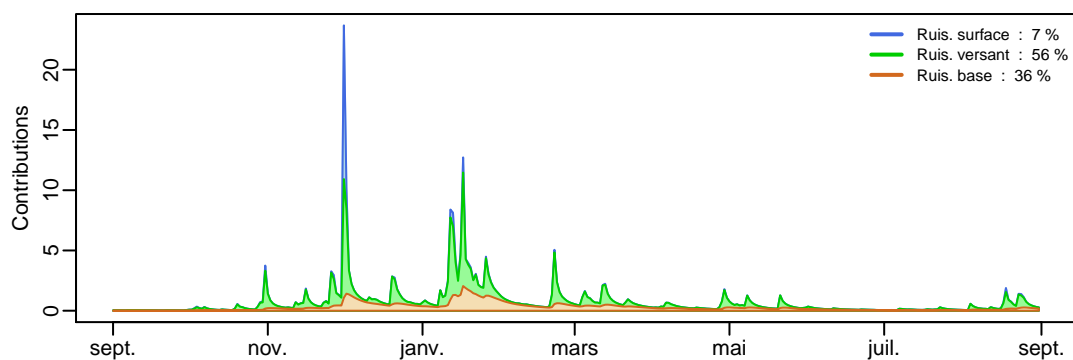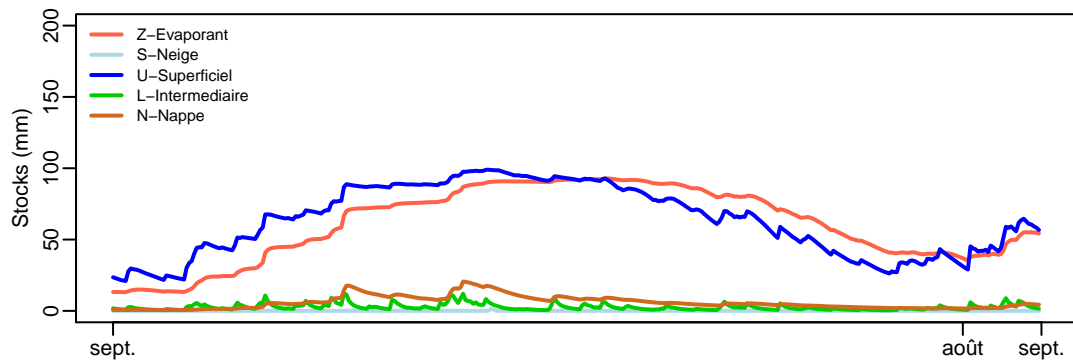

# k1383010 (838.69 km<sup>2</sup>) – année 2004–2005

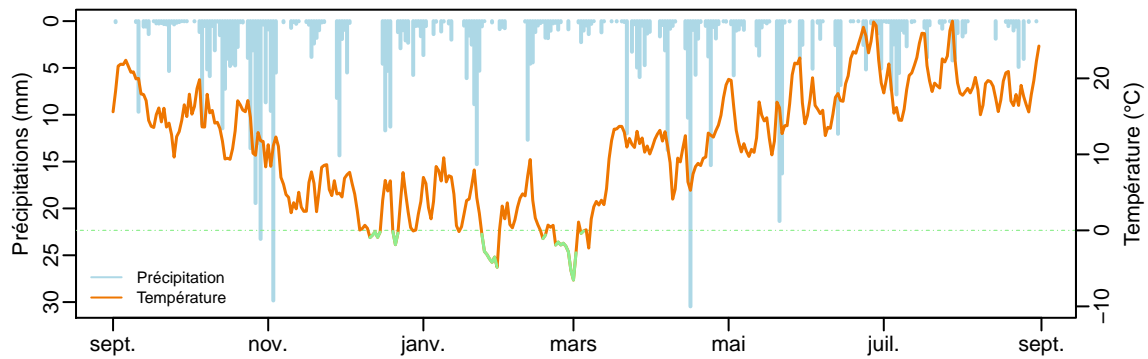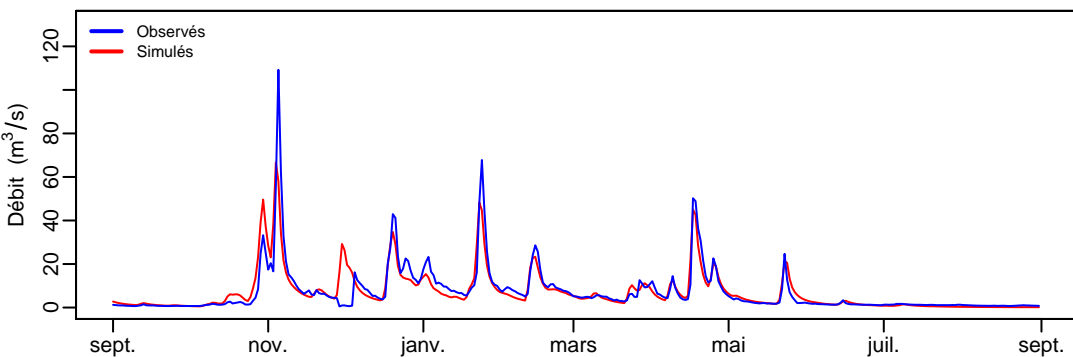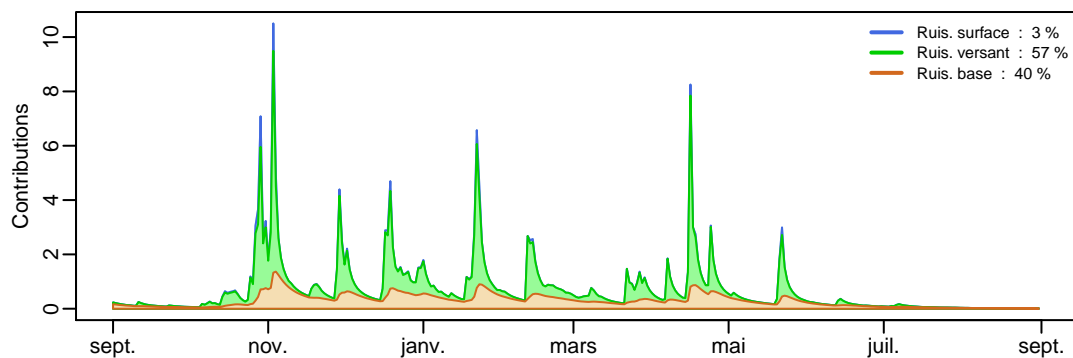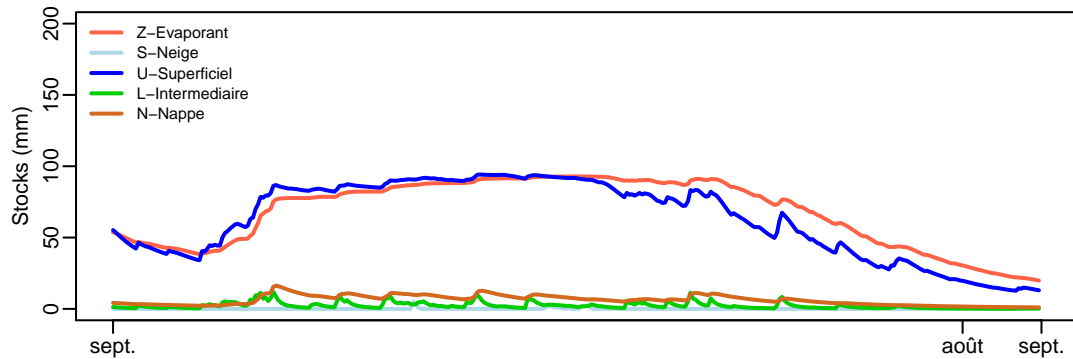

# k1383010 (838.69 km<sup>2</sup>) – année 2005–2006

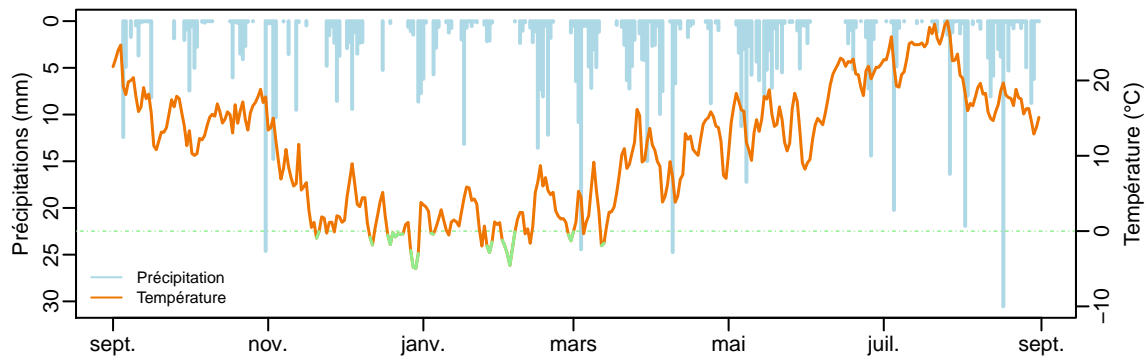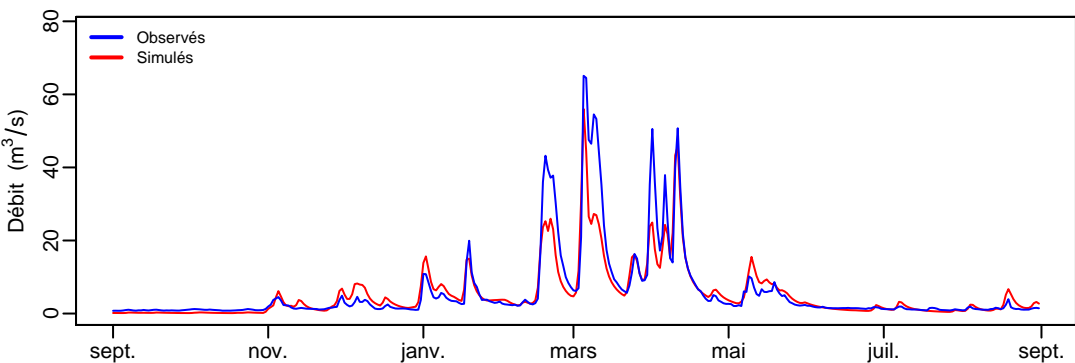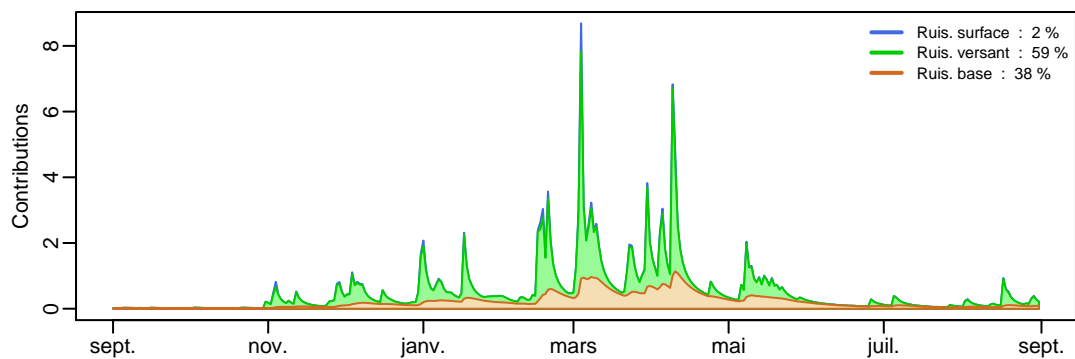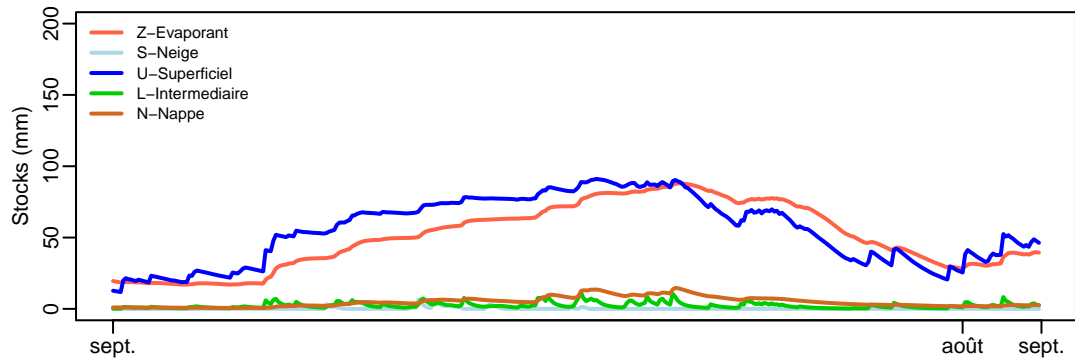

# k1383010 (838.69 km²) – année 2006–2007

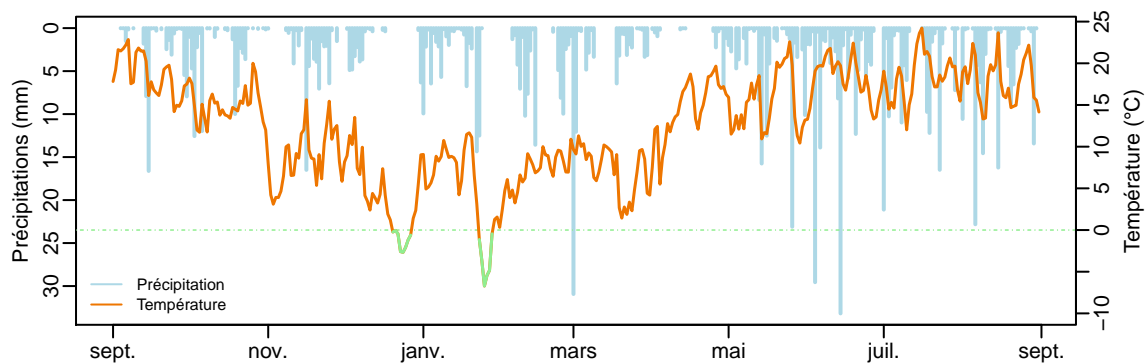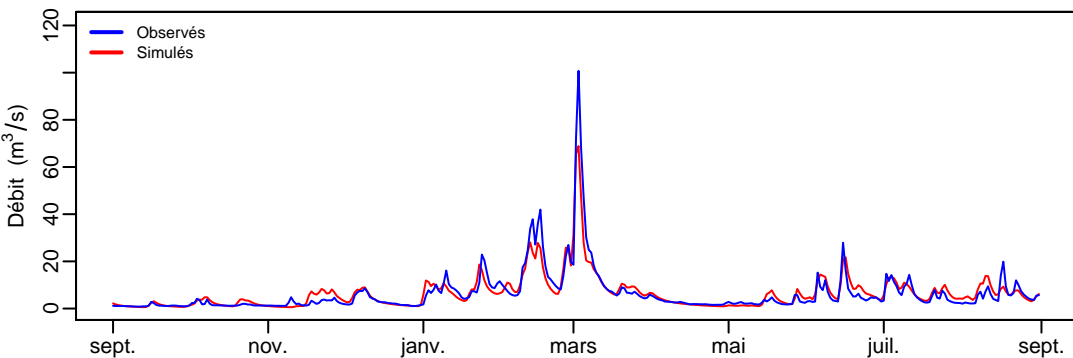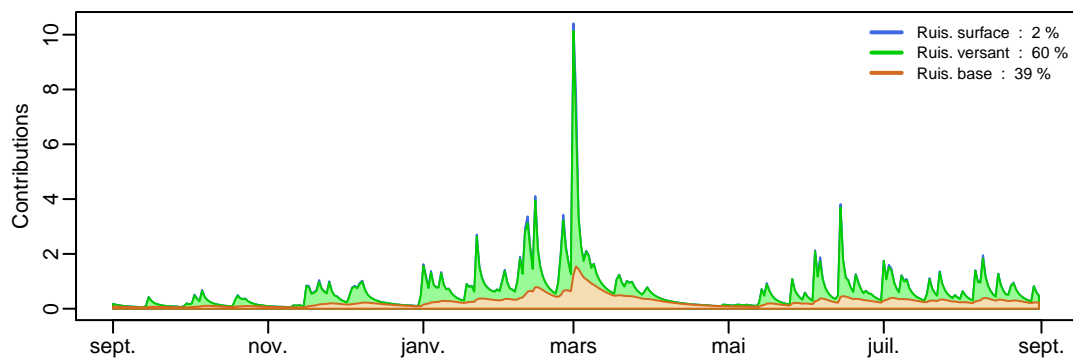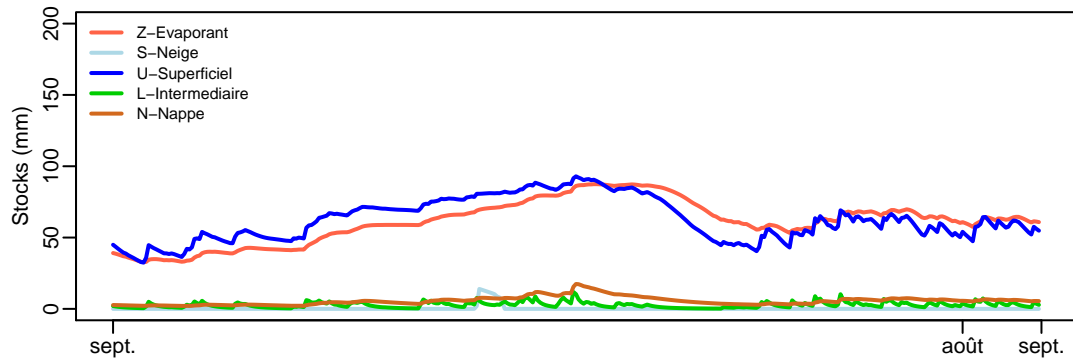

# k1383010 (838.69 km<sup>2</sup>) – année 2007–2008

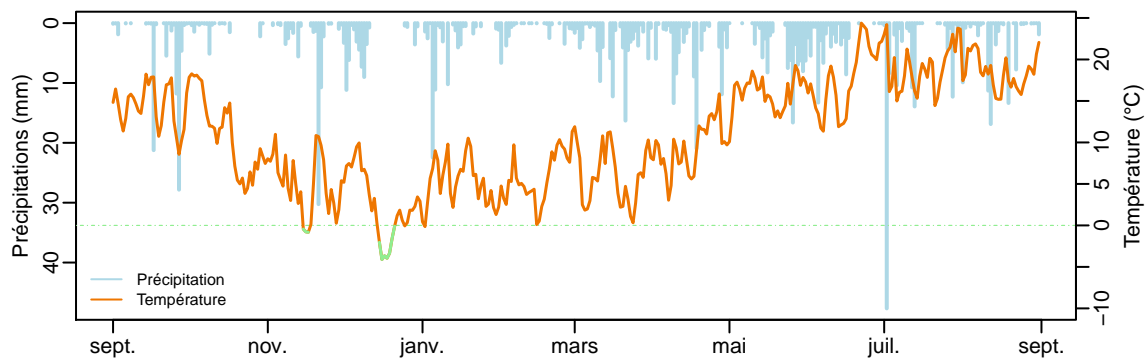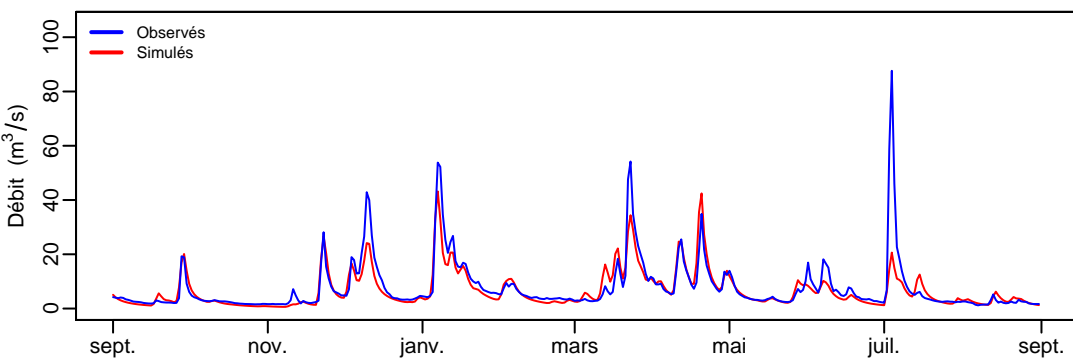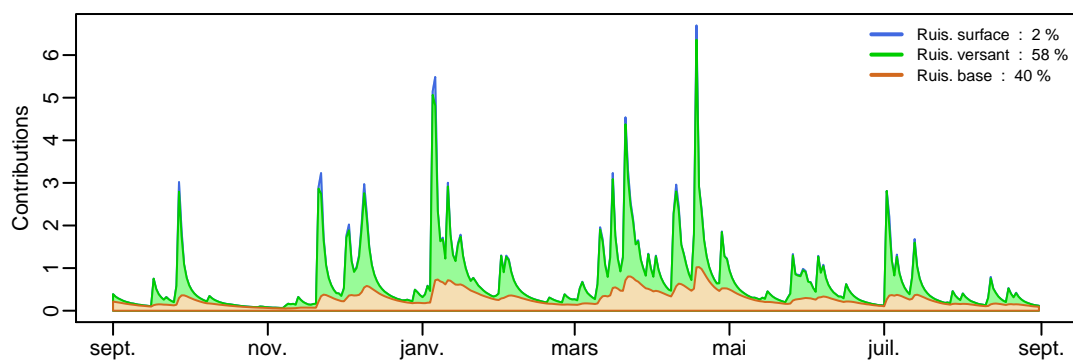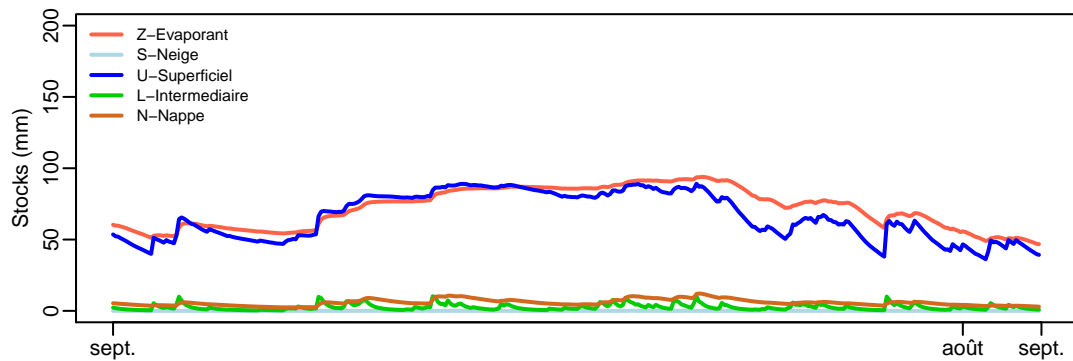

# k1383010 (838.69 km<sup>2</sup>) – année 2008–2009

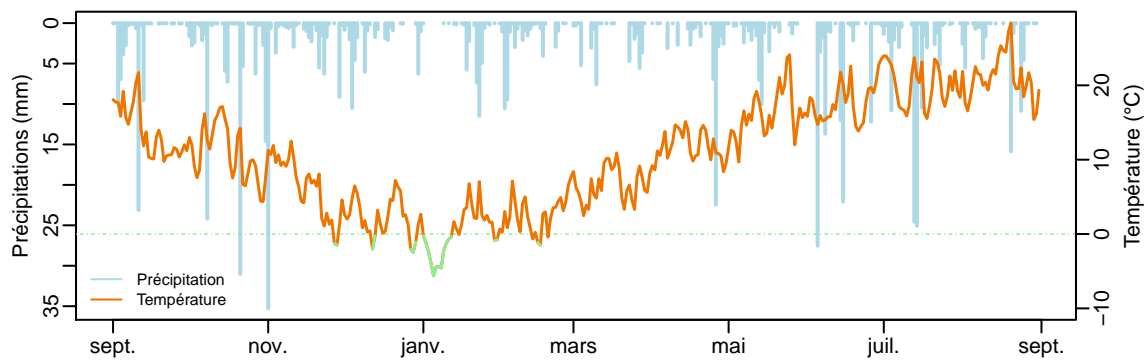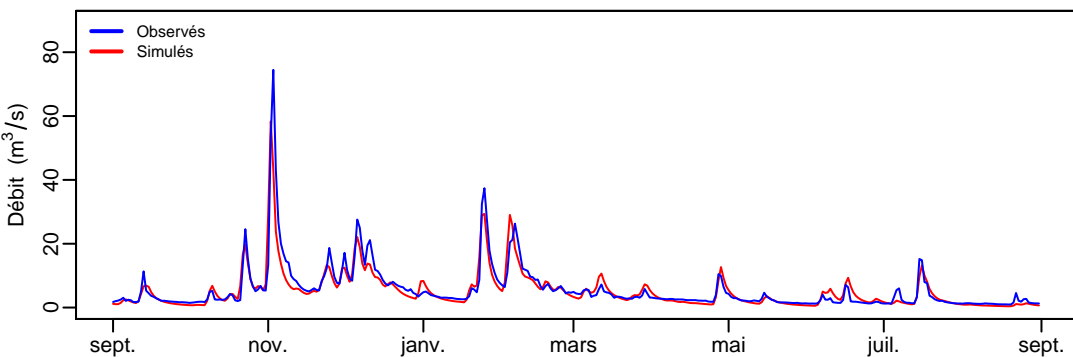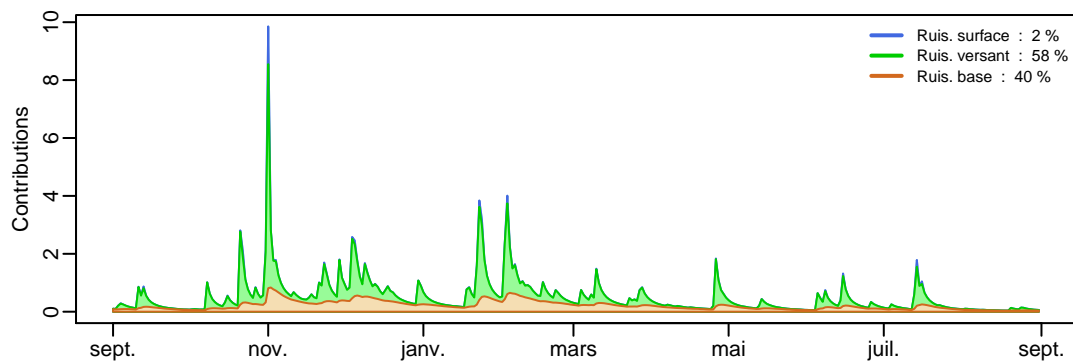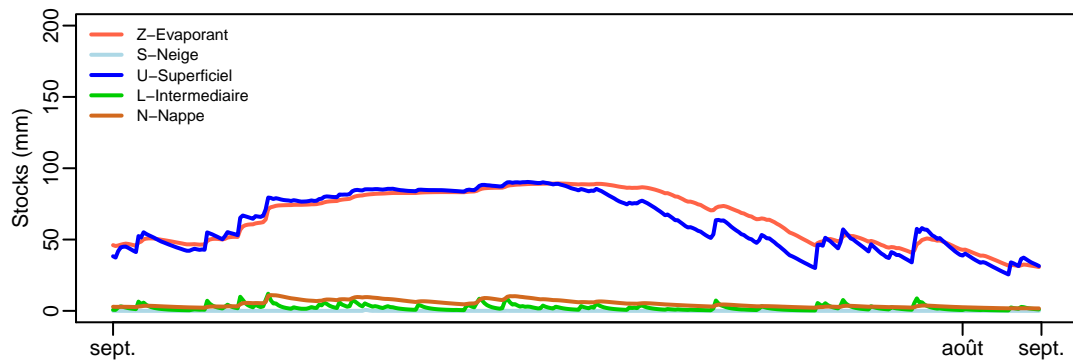

# k1440010 (13025.14 km<sup>2</sup>) – année 1981–1982

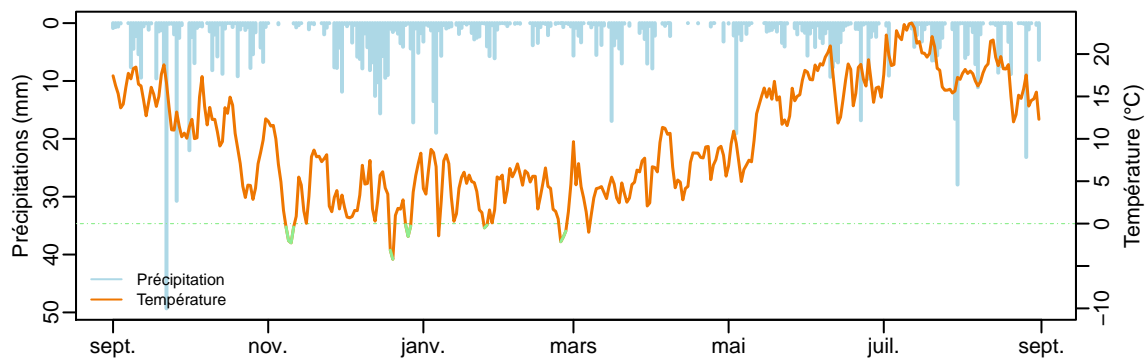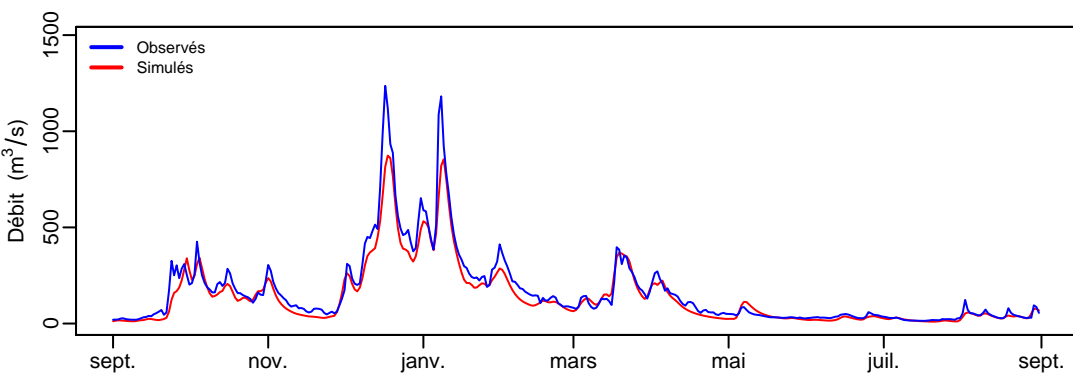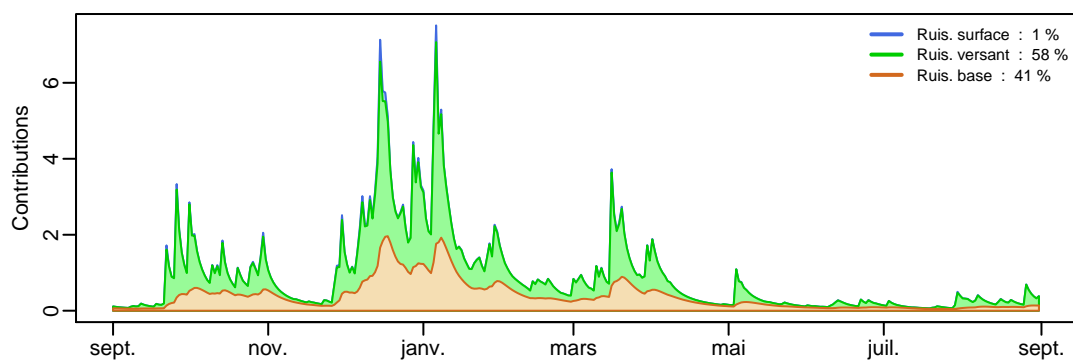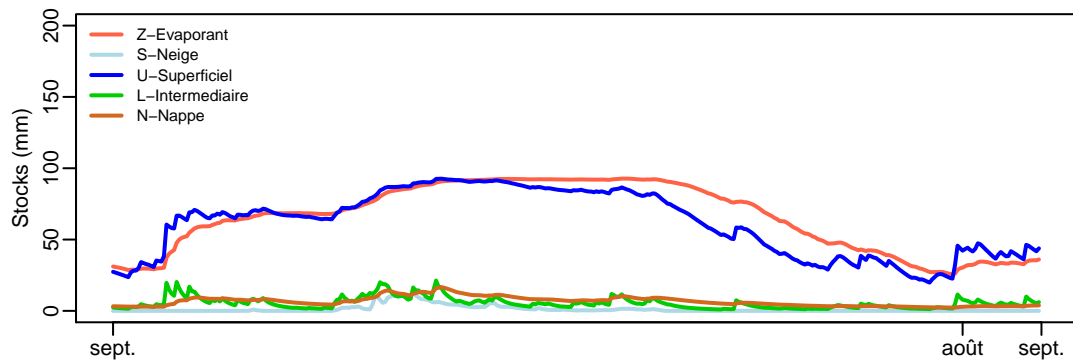



# k1440010 (13025.14 km<sup>2</sup>) – année 1982–1983

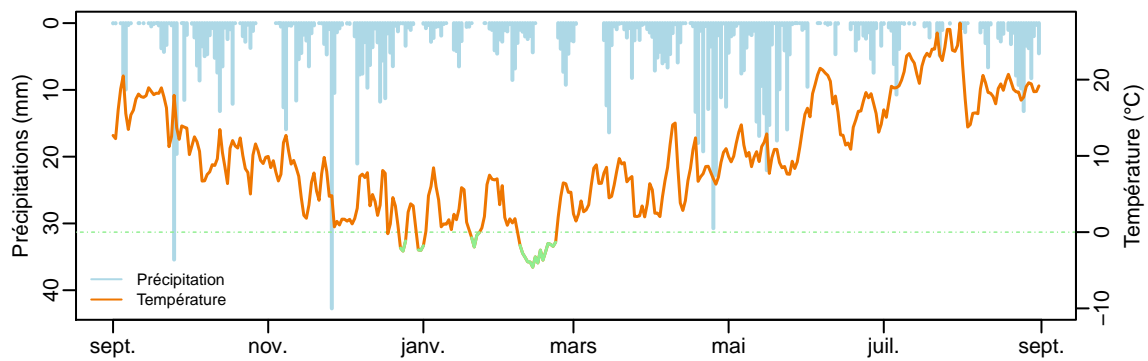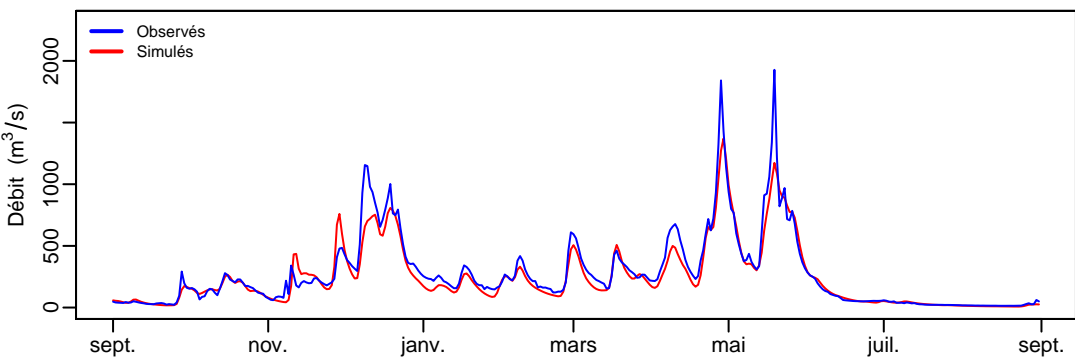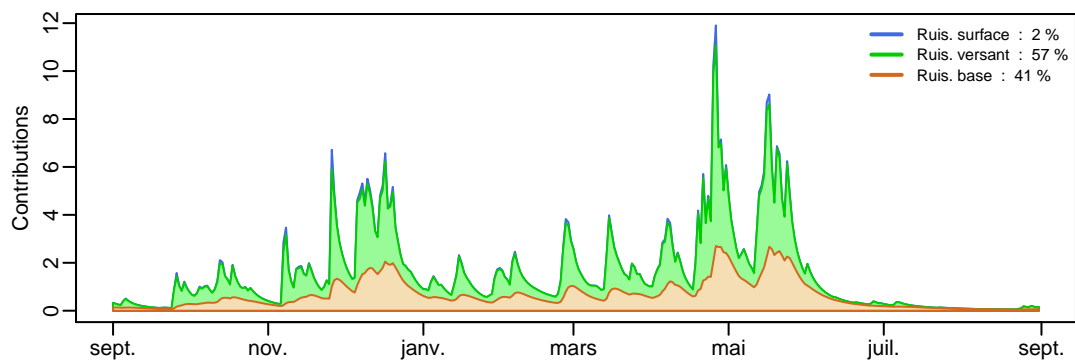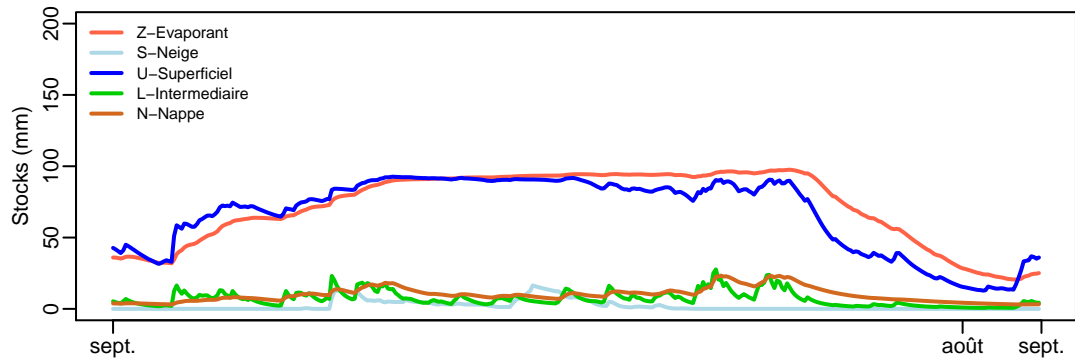

# k1440010 (13025.14 km<sup>2</sup>) – année 1983–1984

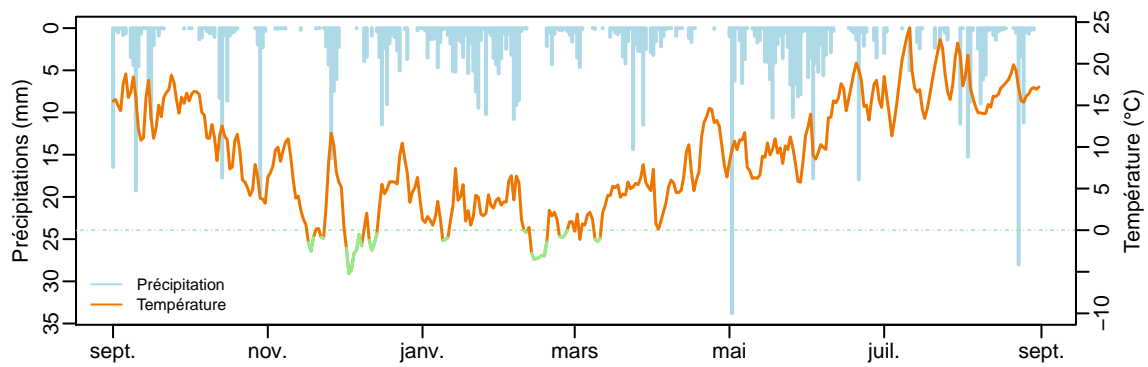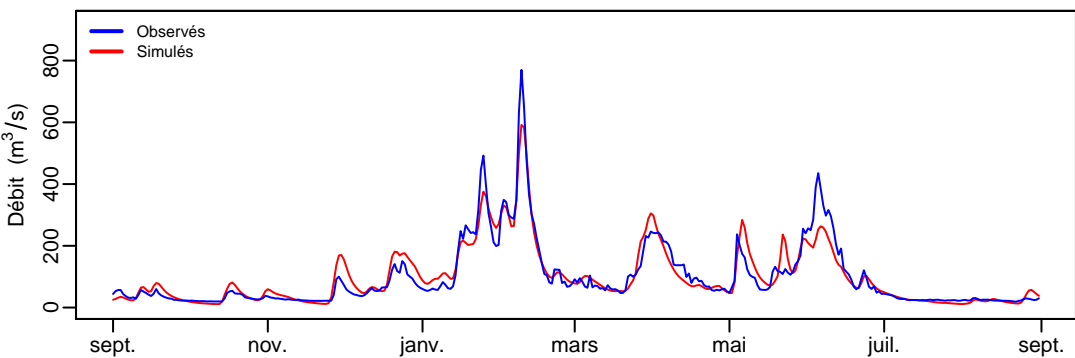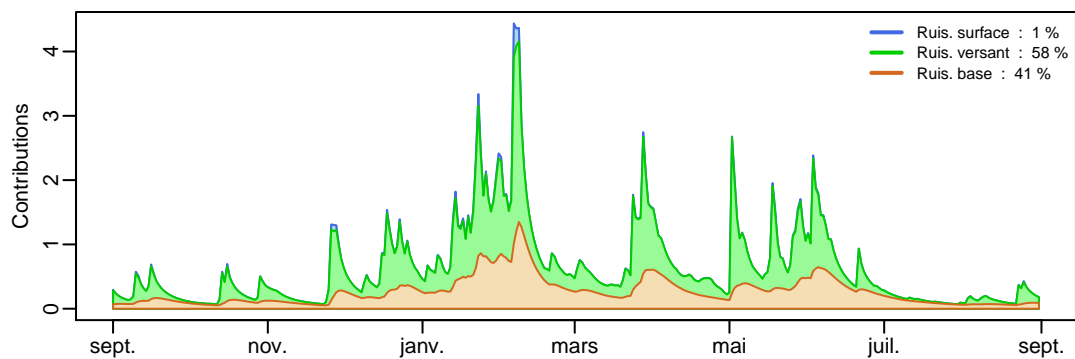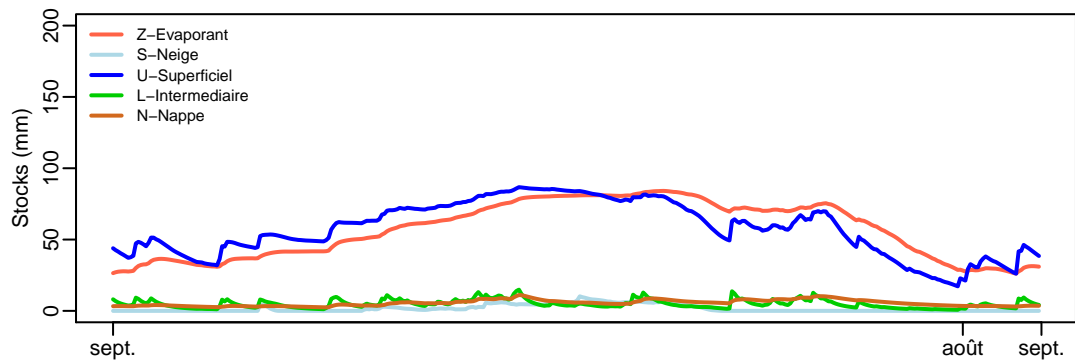

# k1440010 (13025.14 km<sup>2</sup>) – année 1984–1985

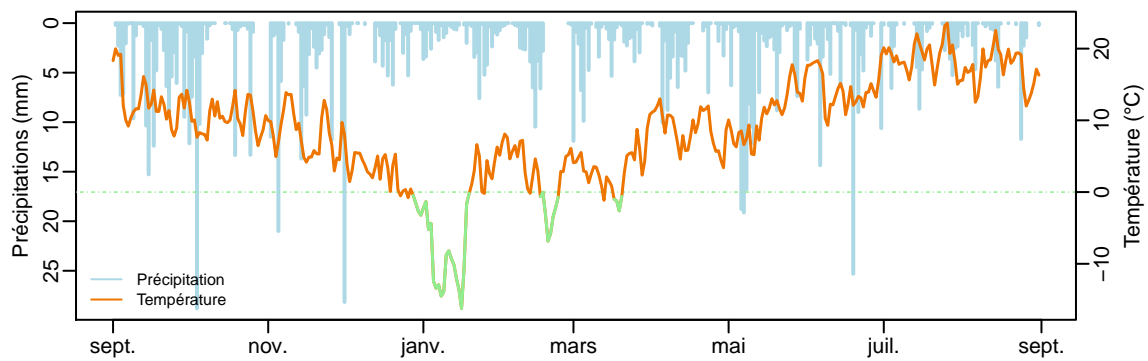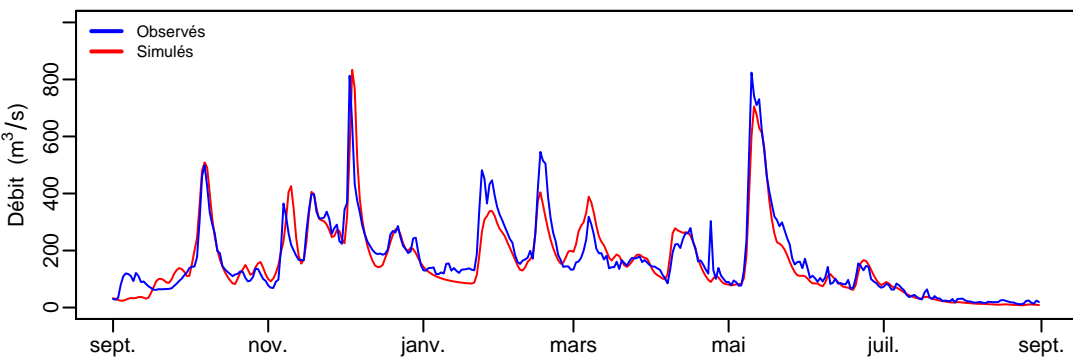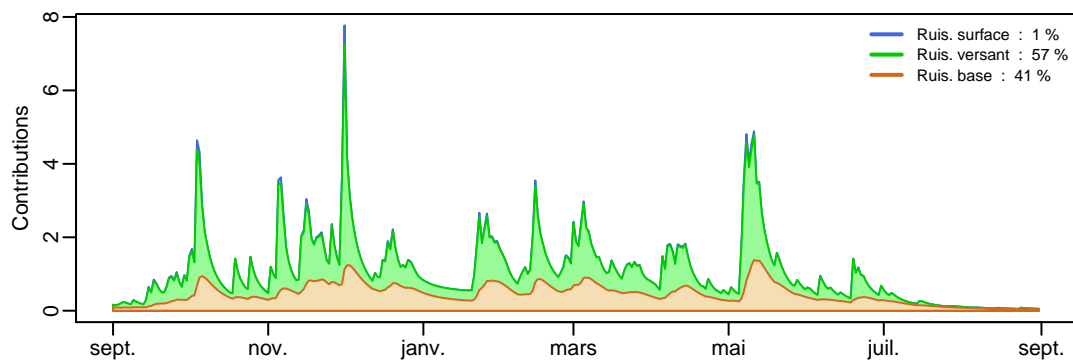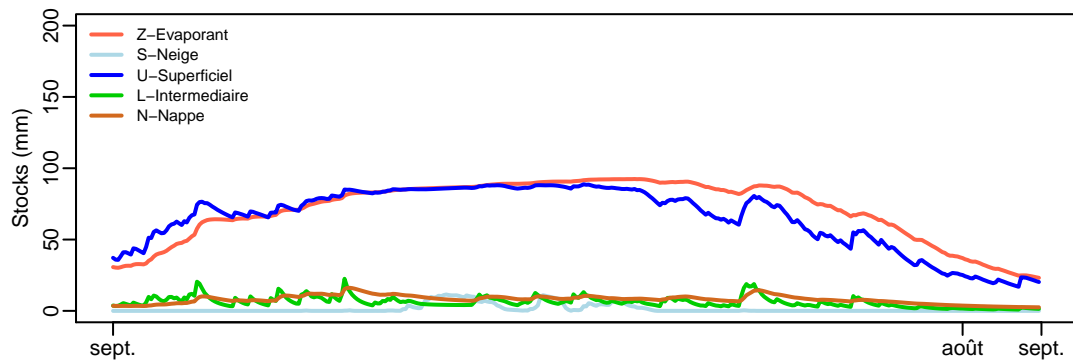

# k1440010 (13025.14 km<sup>2</sup>) – année 1985–1986

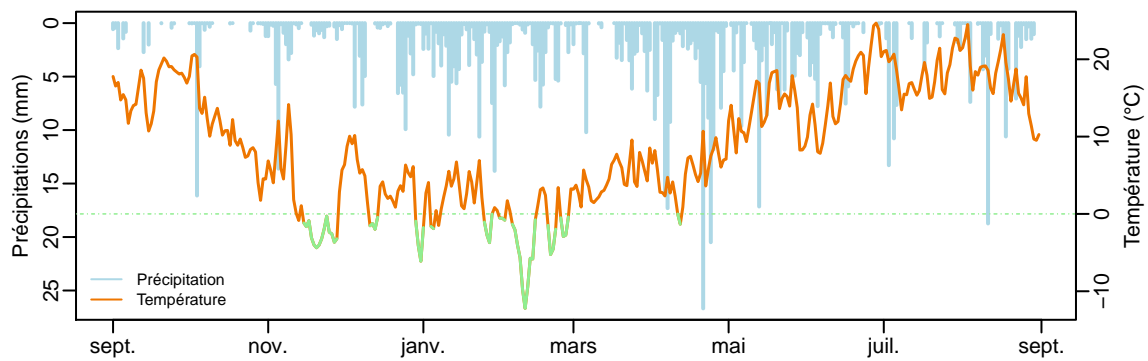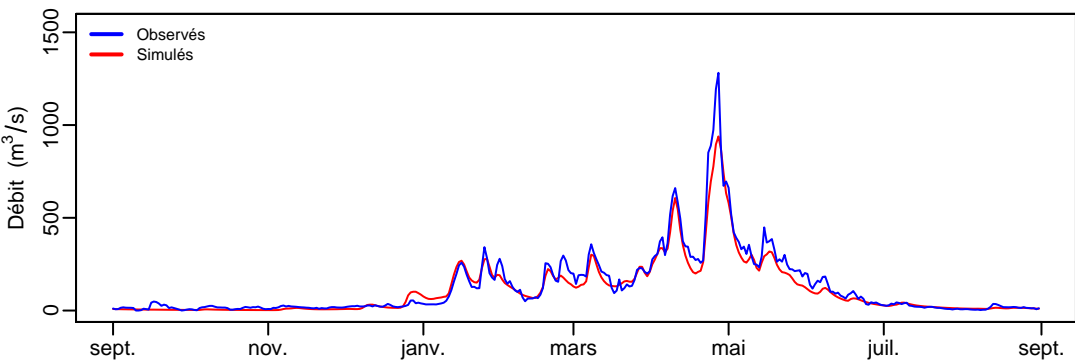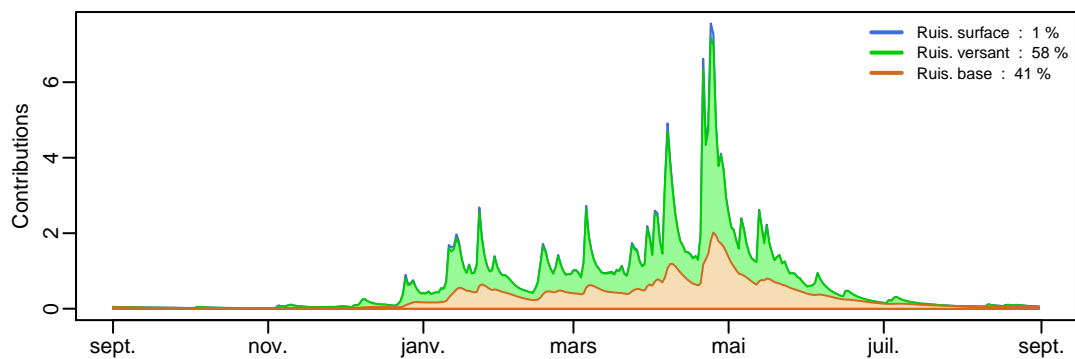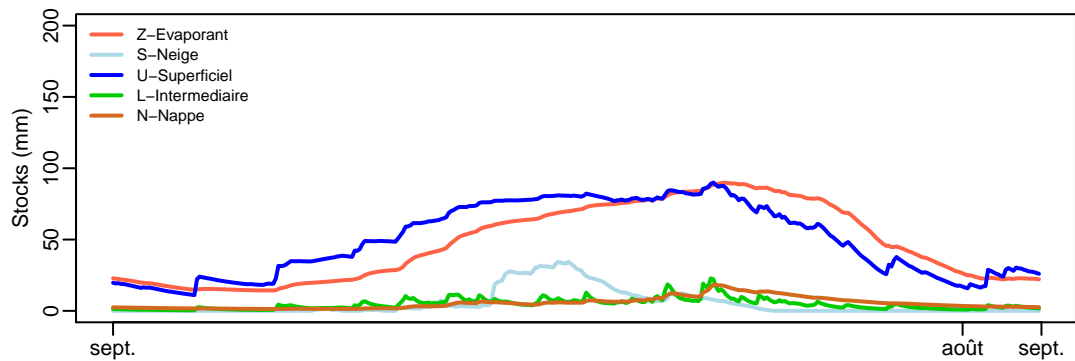

# k1440010 (13025.14 km<sup>2</sup>) – année 1986–1987

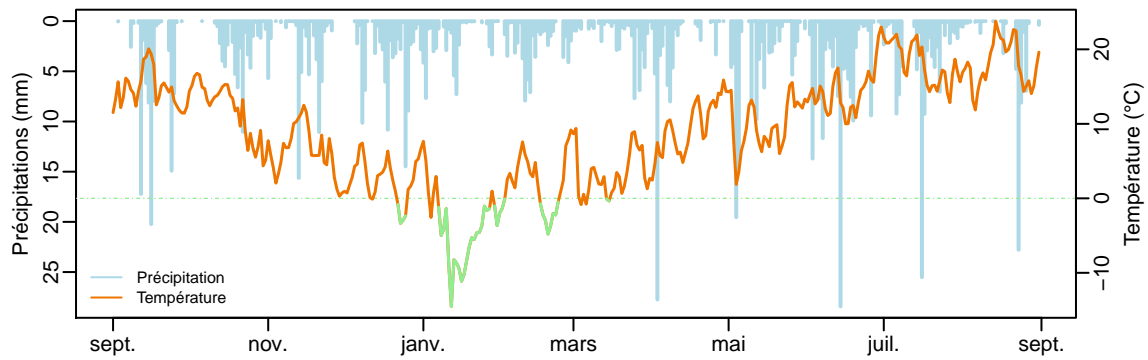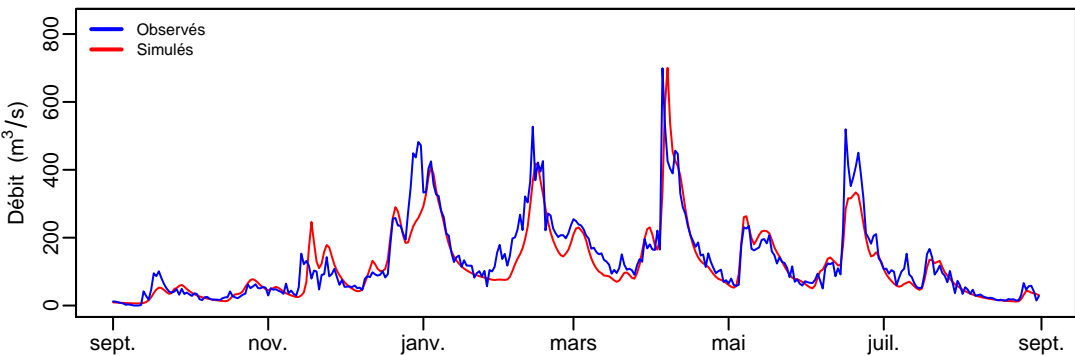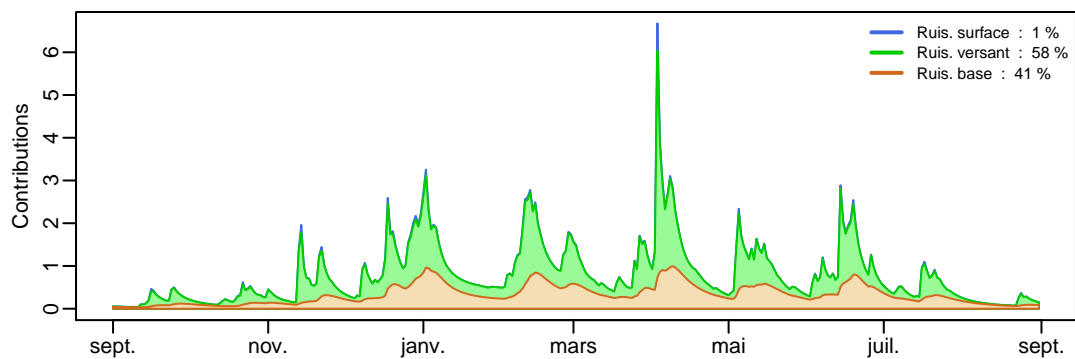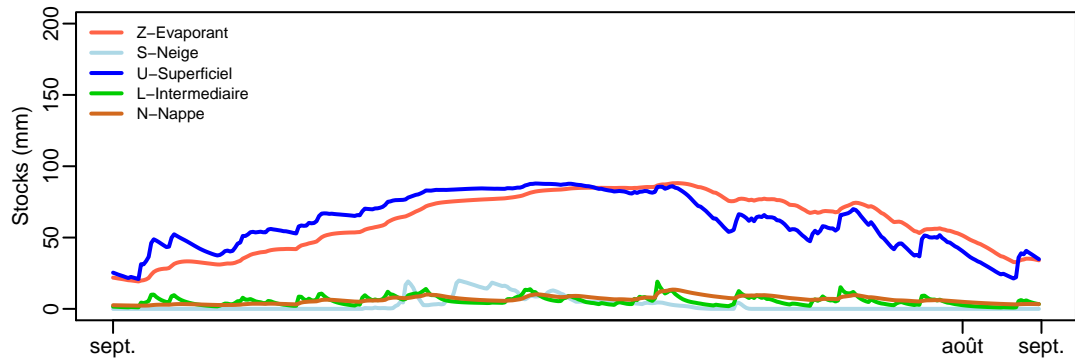

# k1440010 (13025.14 km<sup>2</sup>) – année 1987–1988

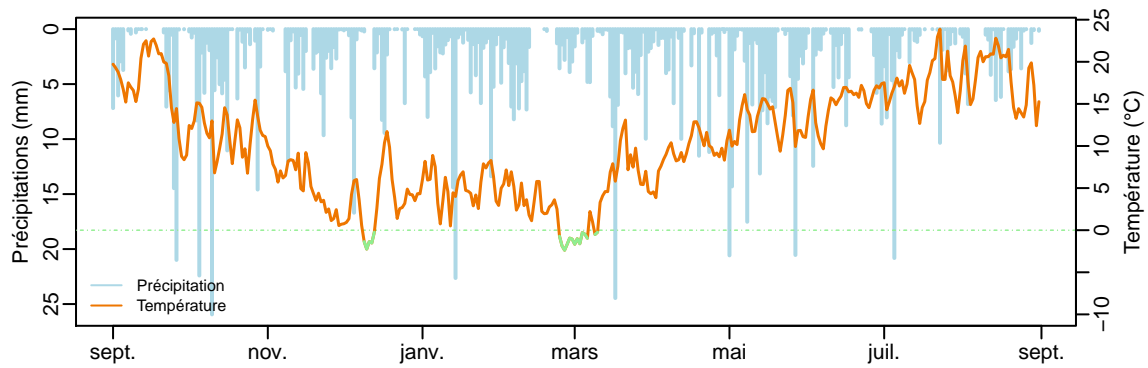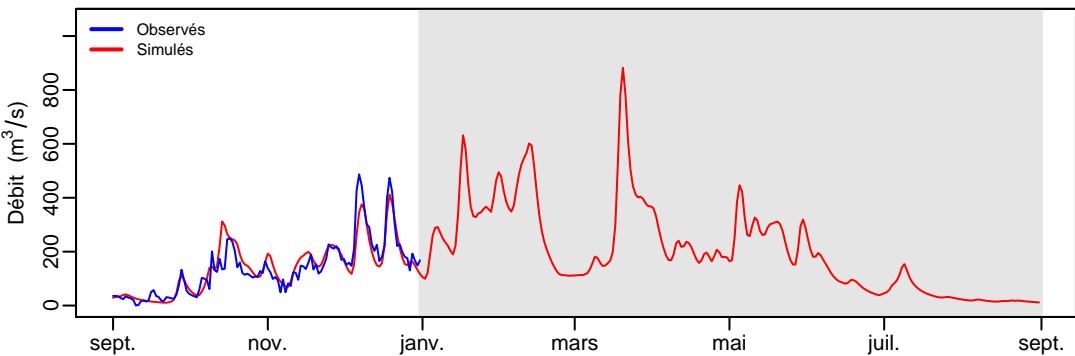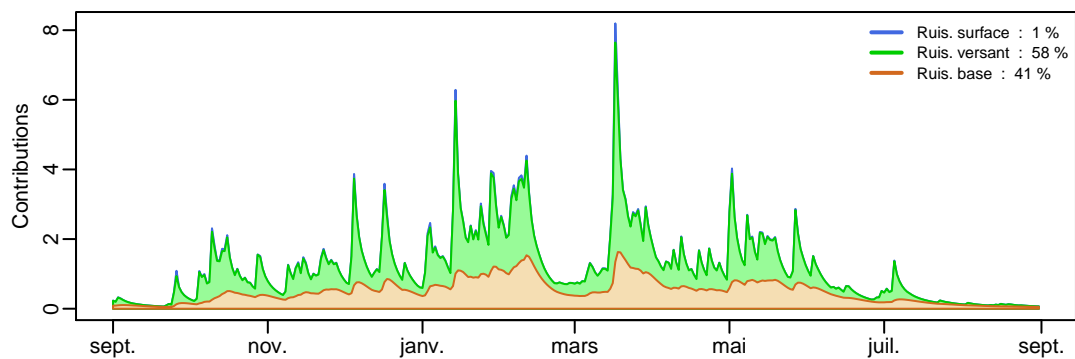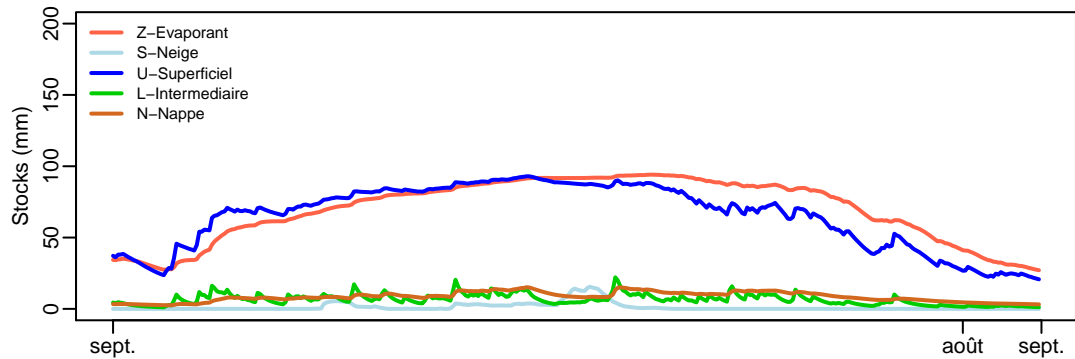

# k1440010 (13025.14 km<sup>2</sup>) – année 1988–1989

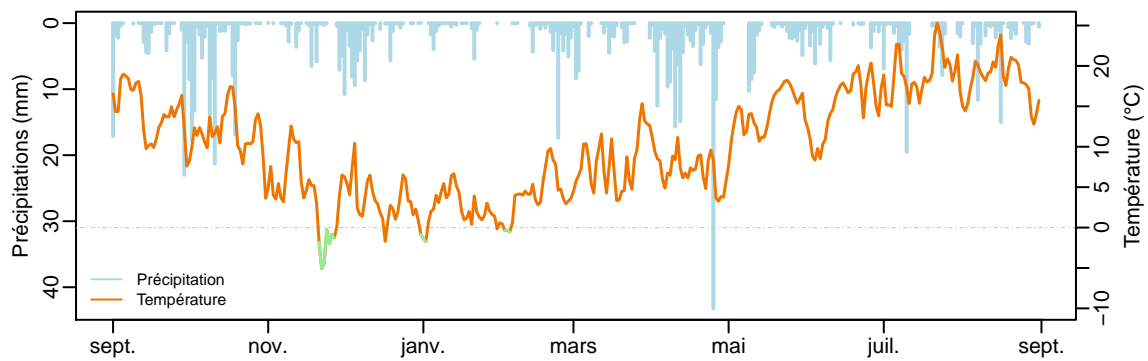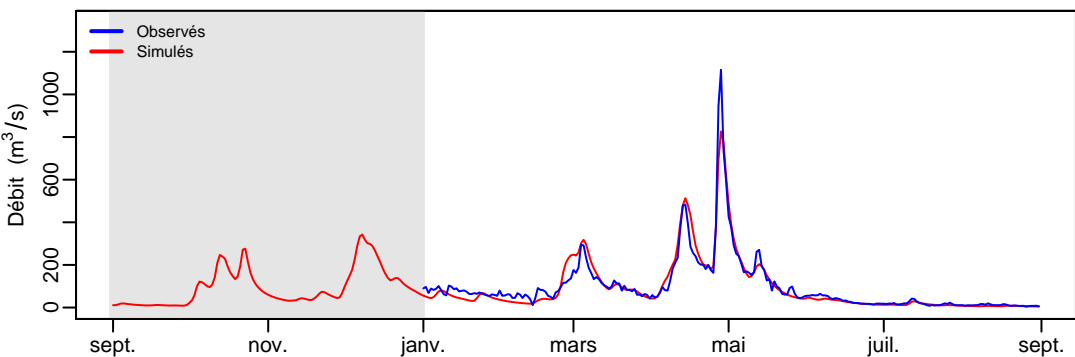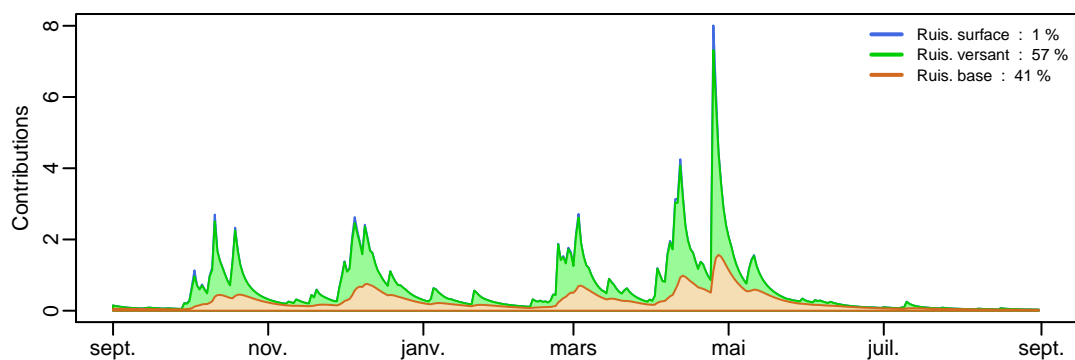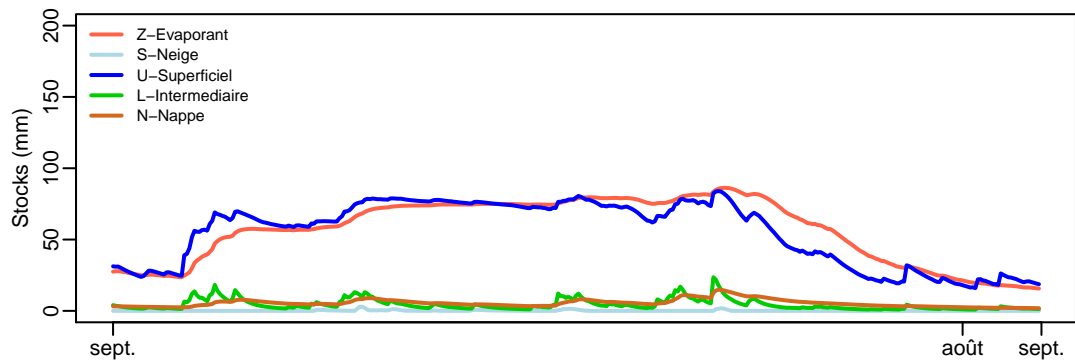

# k1440010 (13025.14 km<sup>2</sup>) – année 1989–1990

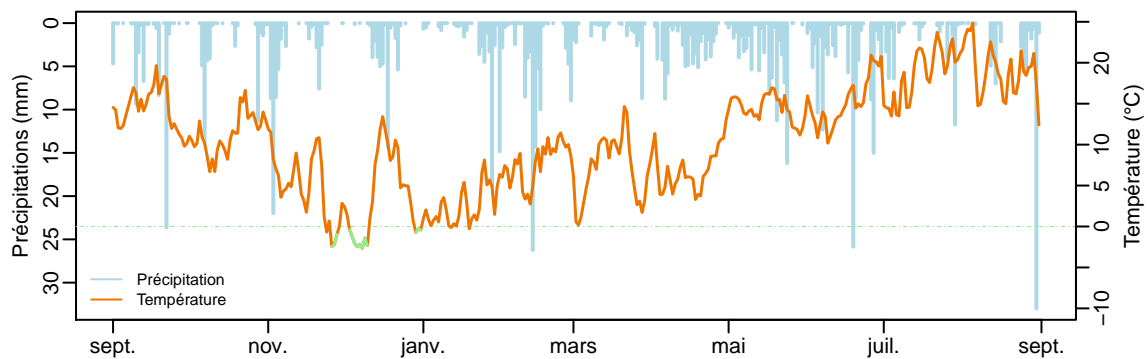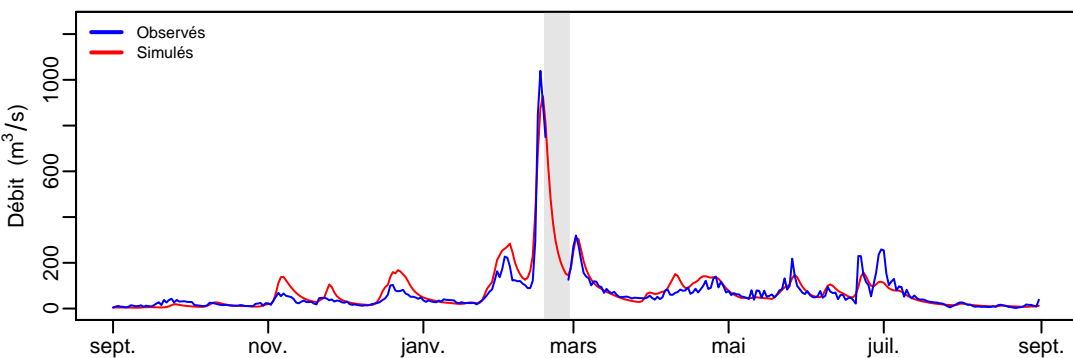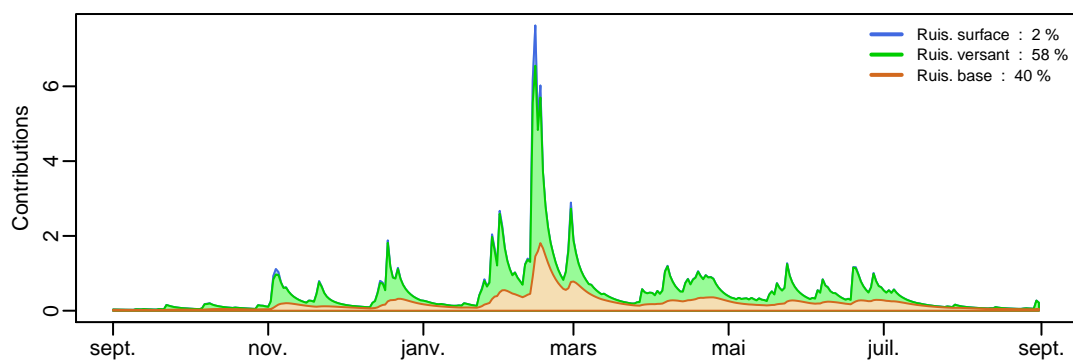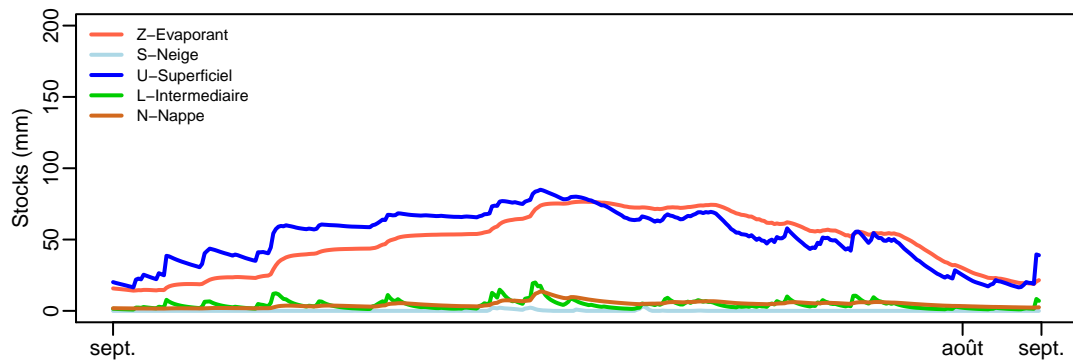



# k1440010 (13025.14 km<sup>2</sup>) – année 1990–1991

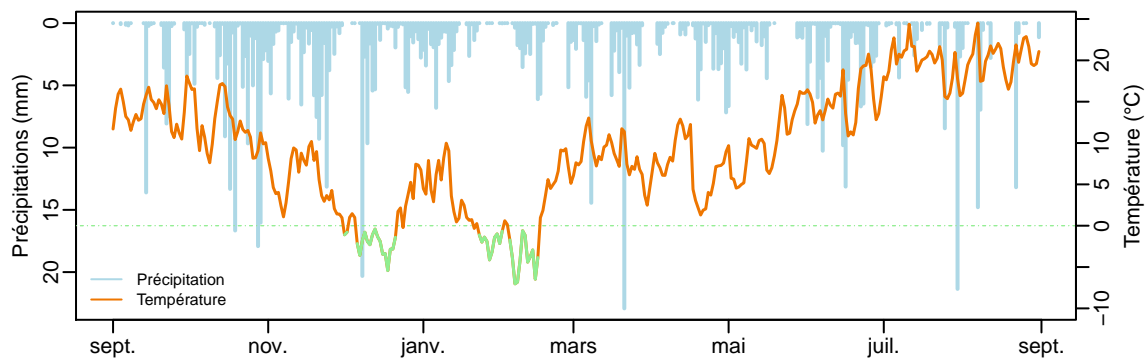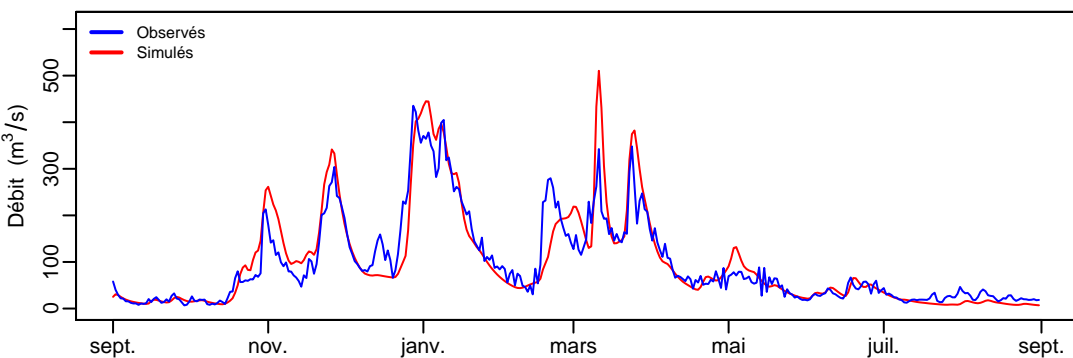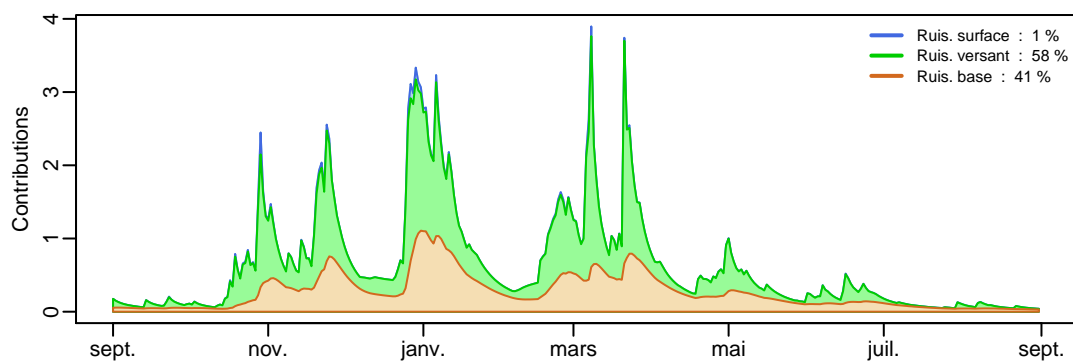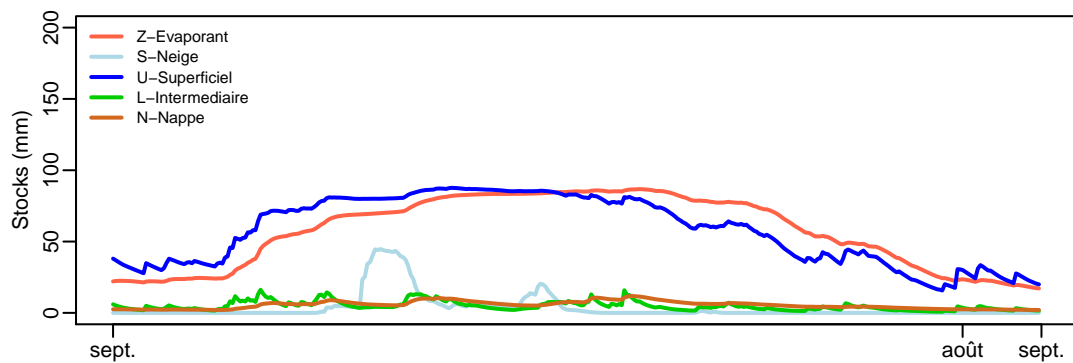

# k1440010 (13025.14 km<sup>2</sup>) – année 1991–1992

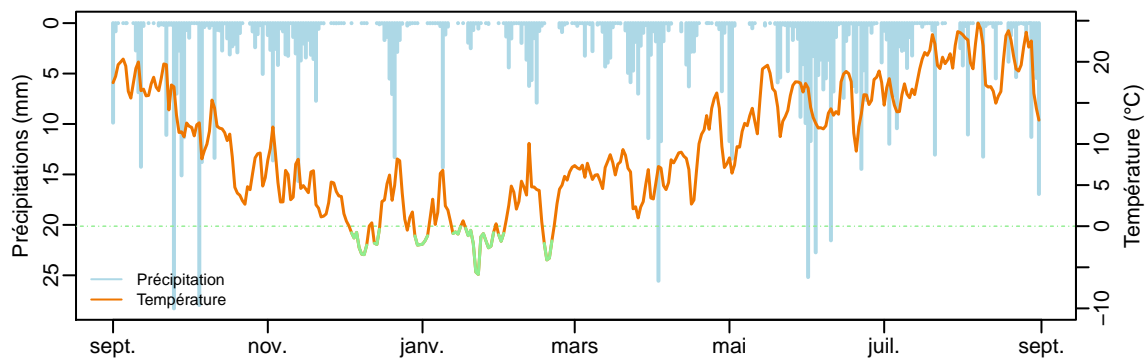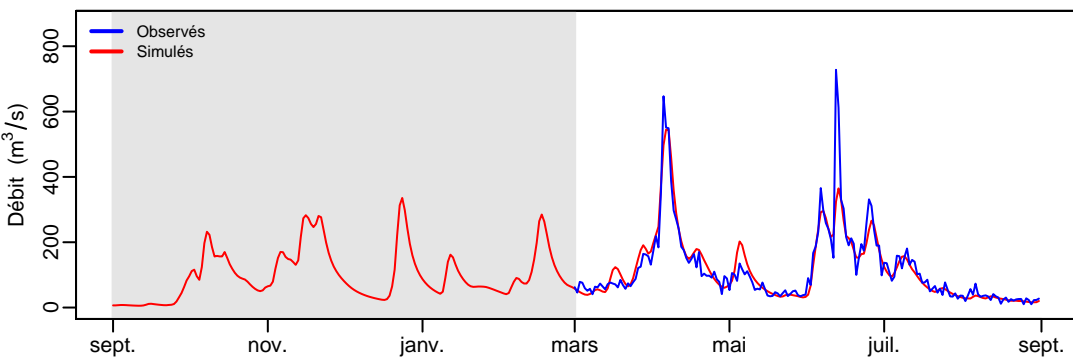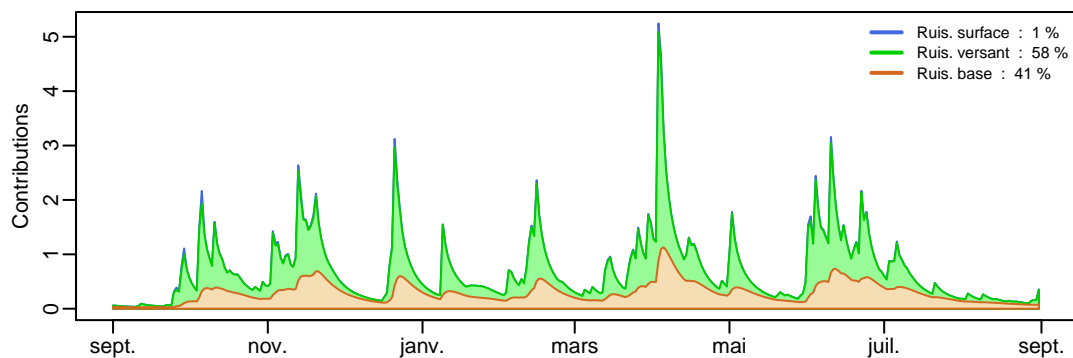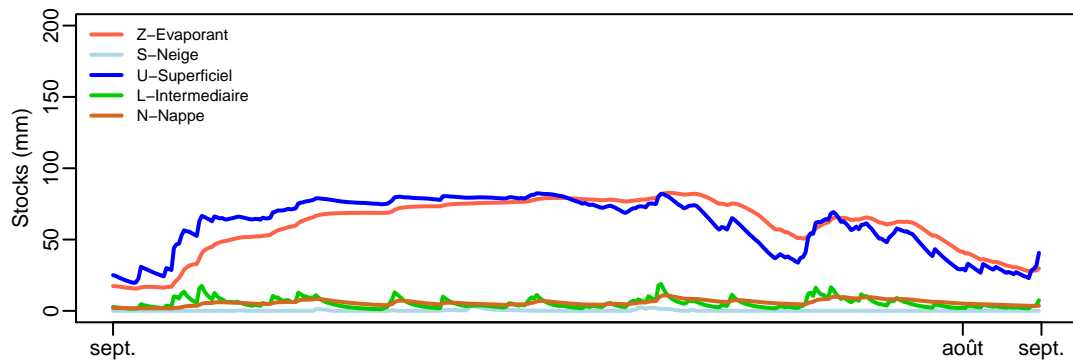

# k1440010 (13025.14 km<sup>2</sup>) – année 1992–1993

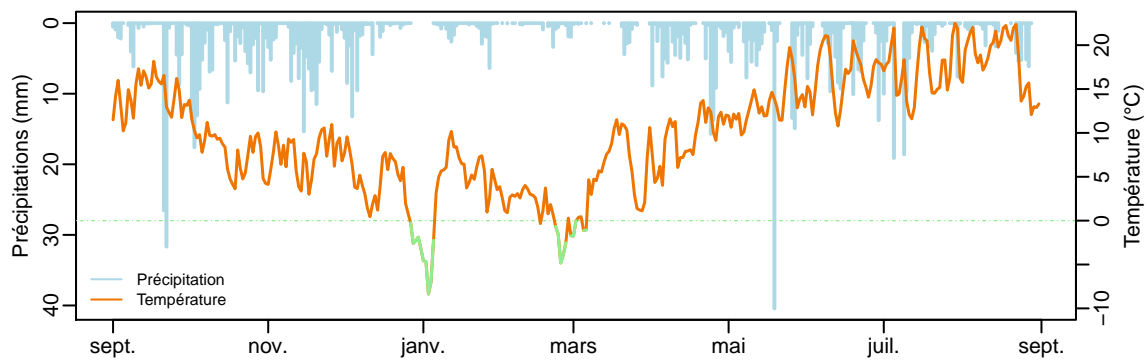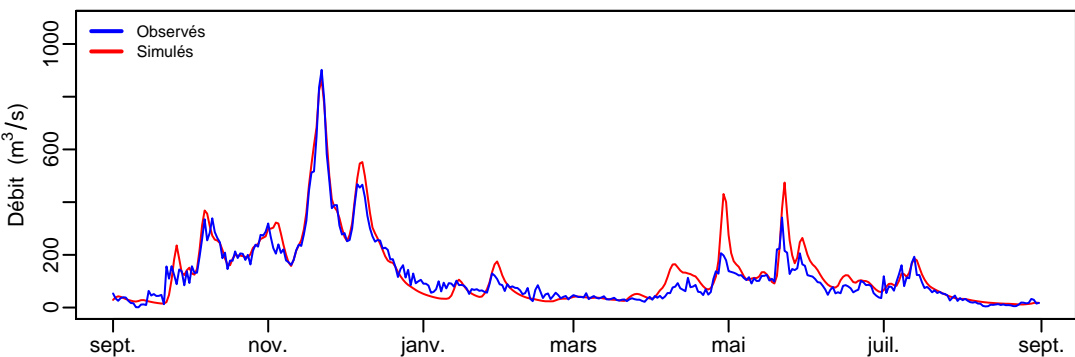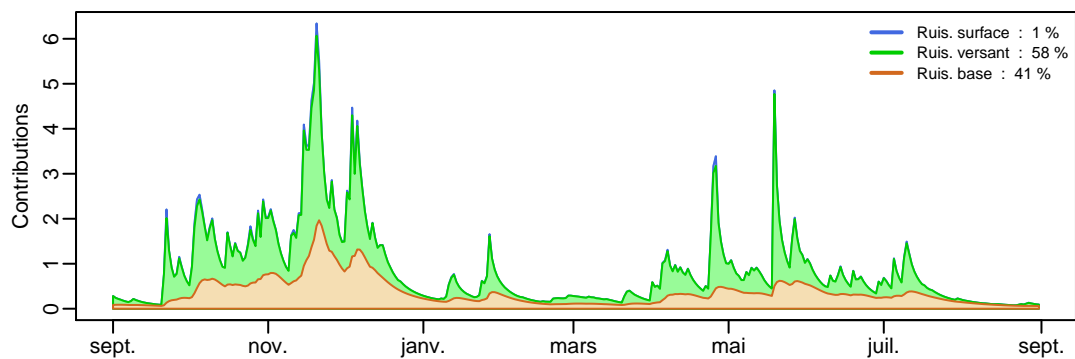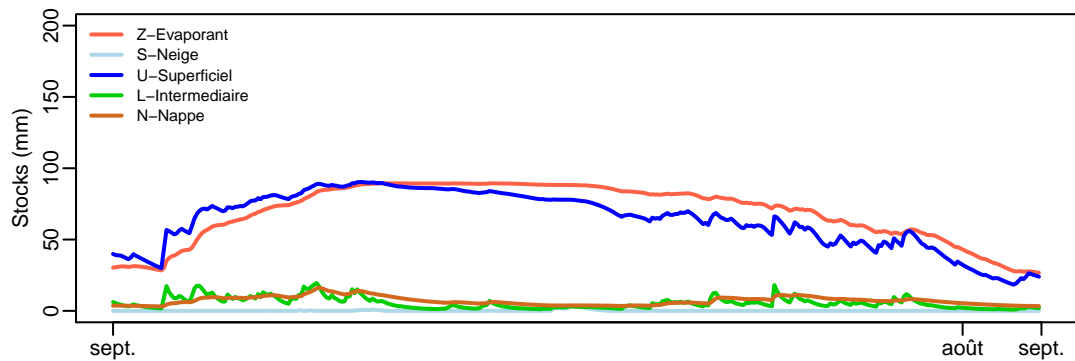

# k1440010 (13025.14 km<sup>2</sup>) – année 1993–1994

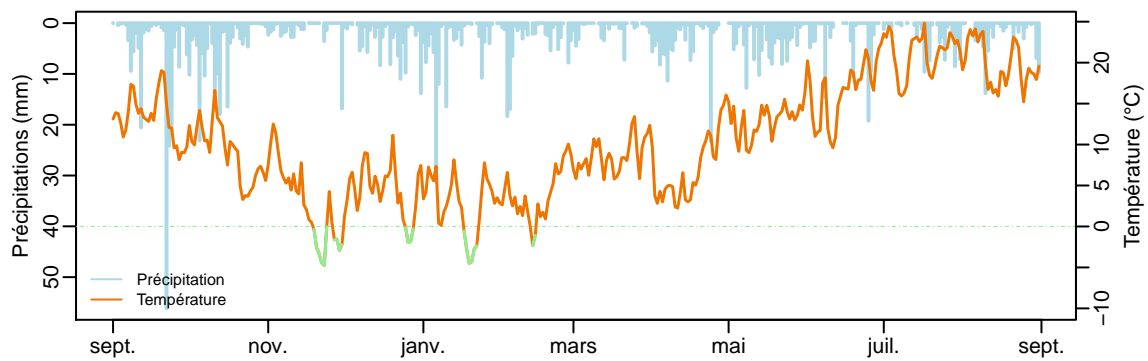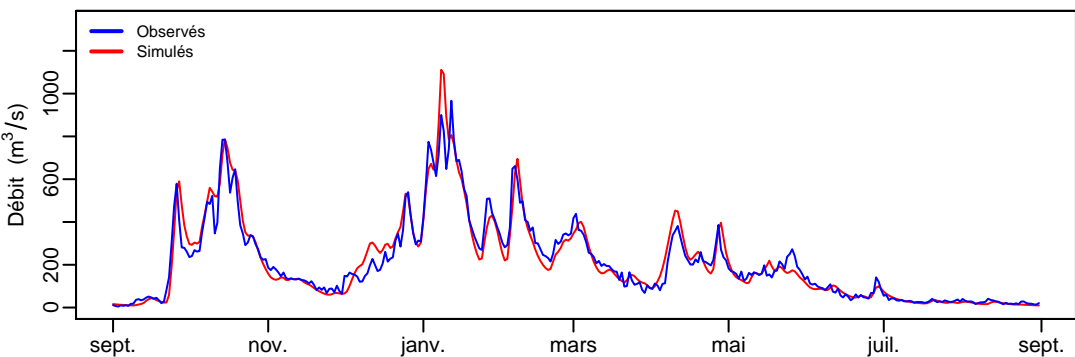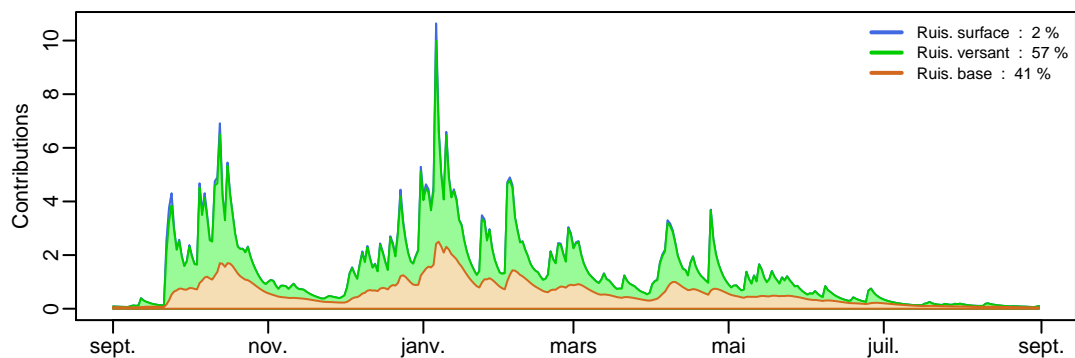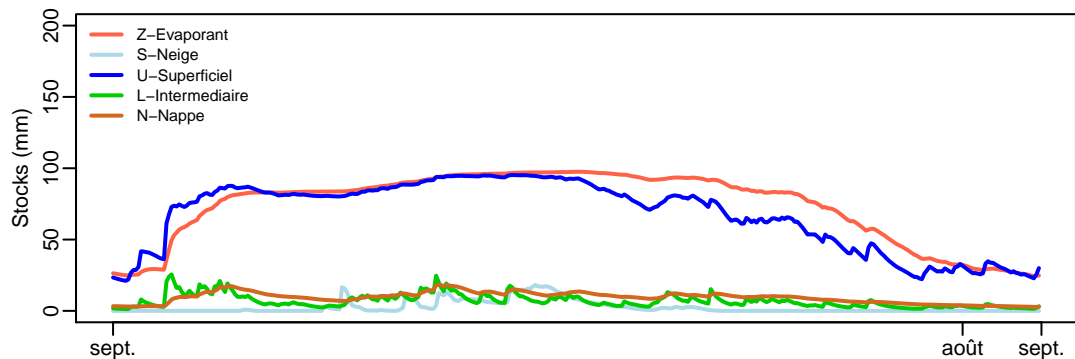

# k1440010 (13025.14 km<sup>2</sup>) – année 1994–1995

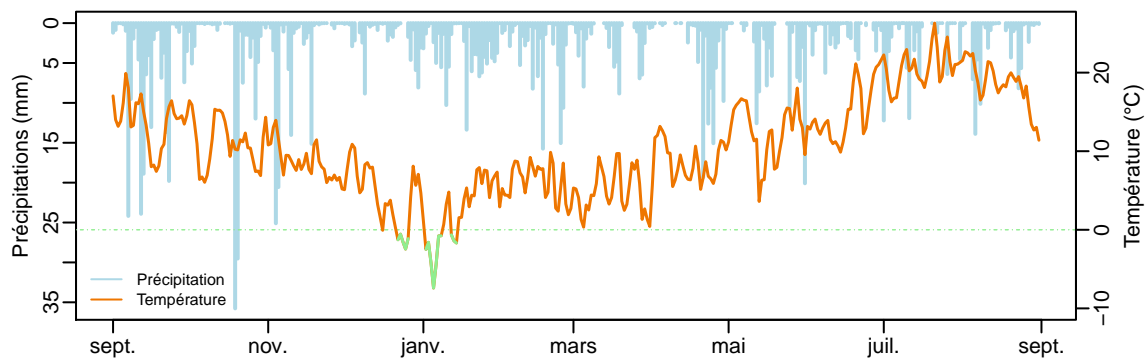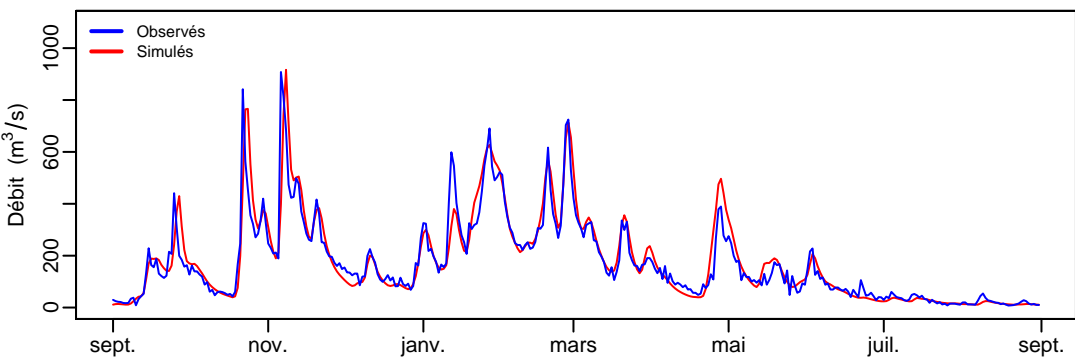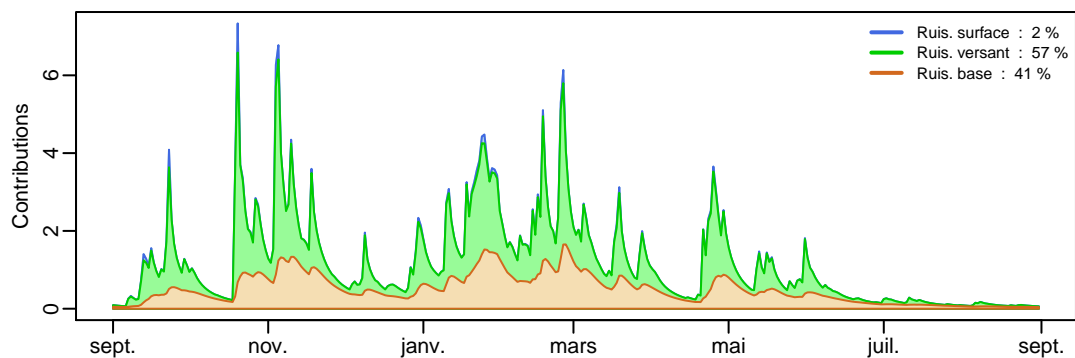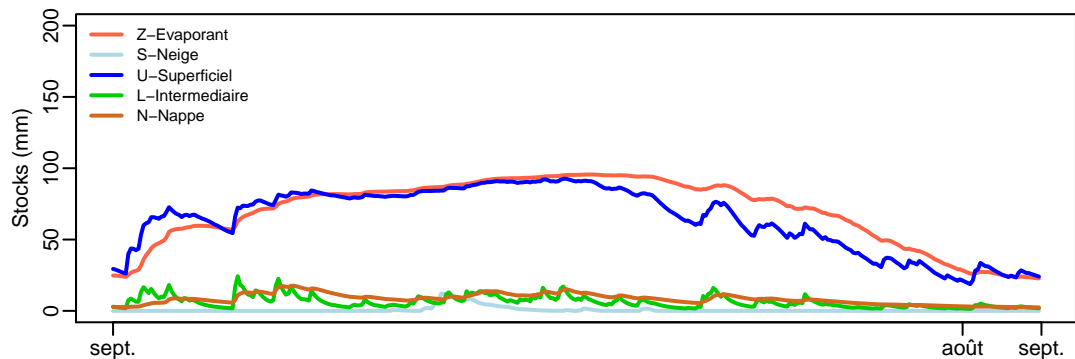

# k1440010 (13025.14 km<sup>2</sup>) – année 1995–1996

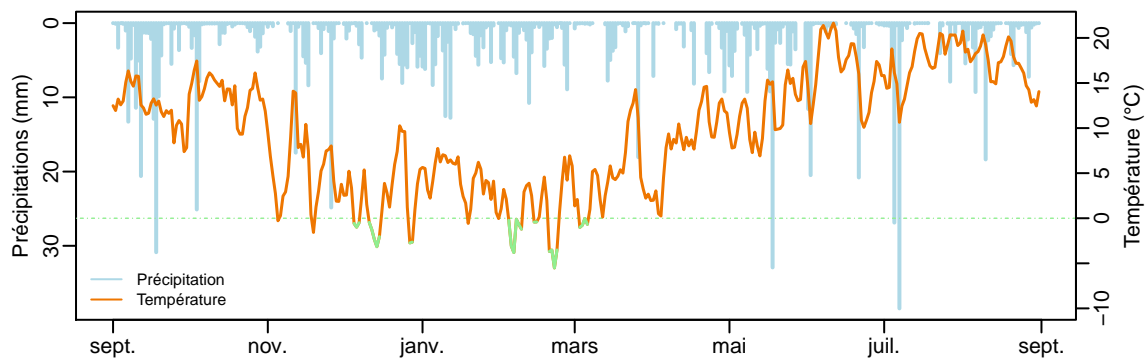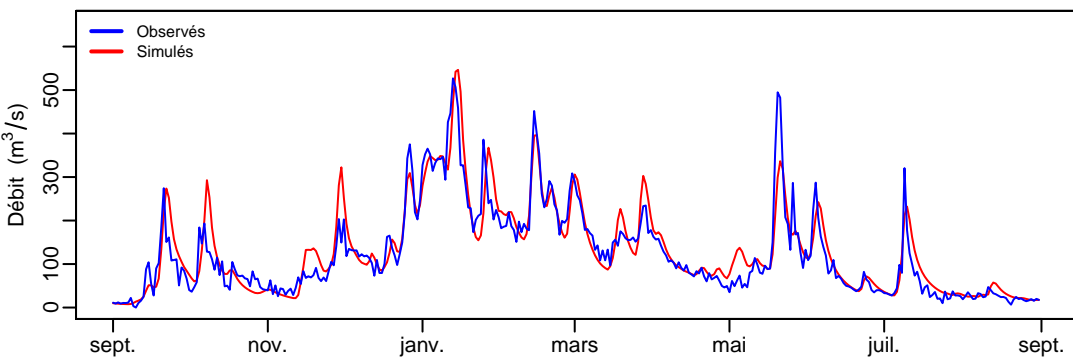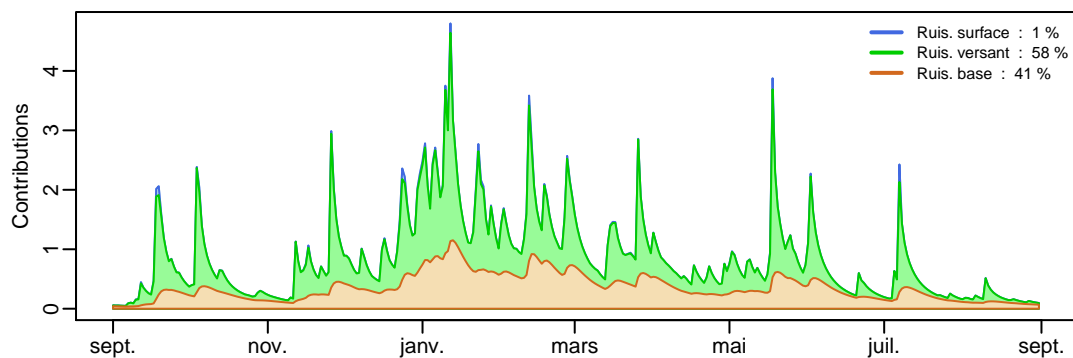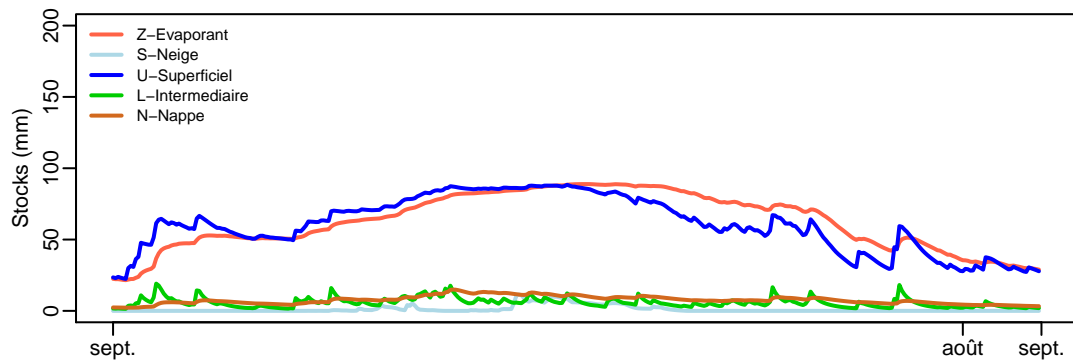

# k1440010 (13025.14 km<sup>2</sup>) – année 1996–1997

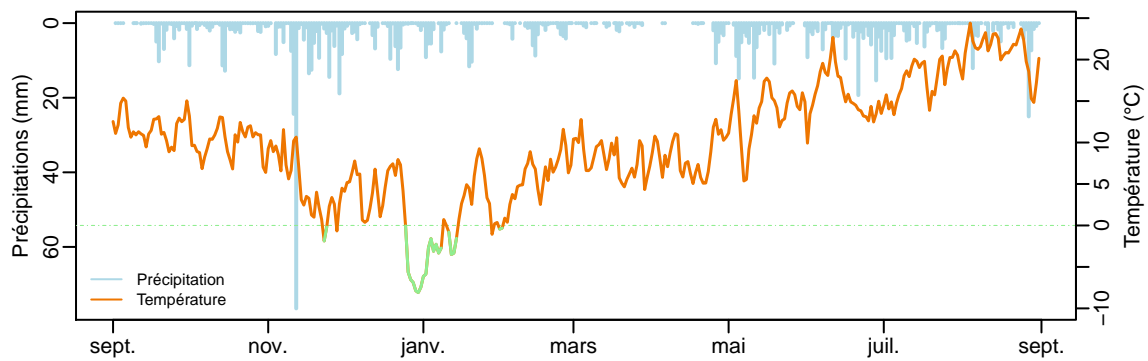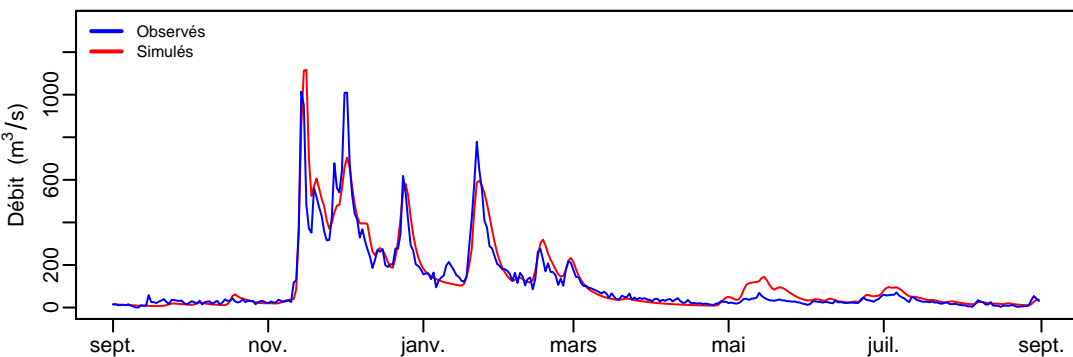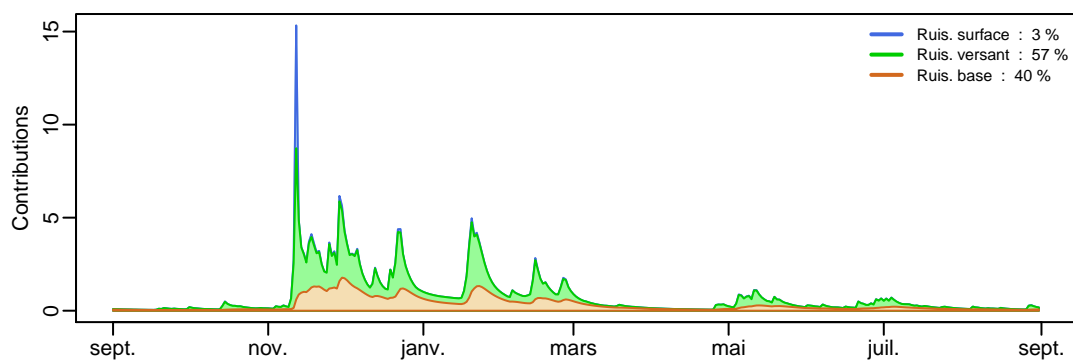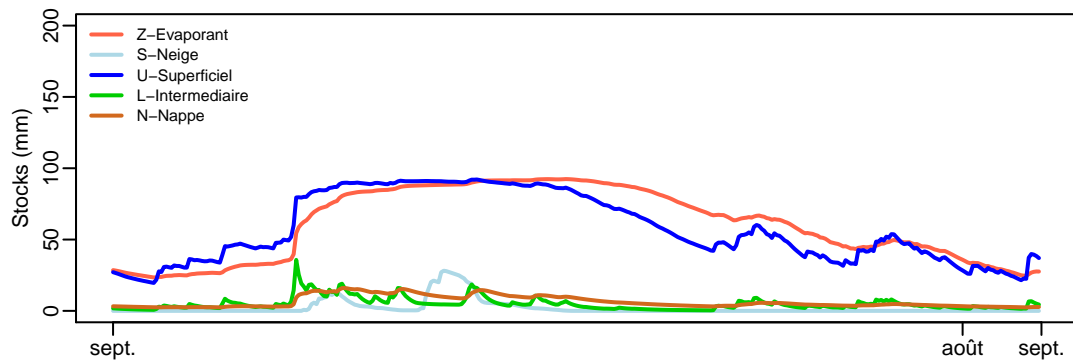

# k1440010 (13025.14 km<sup>2</sup>) – année 1997–1998

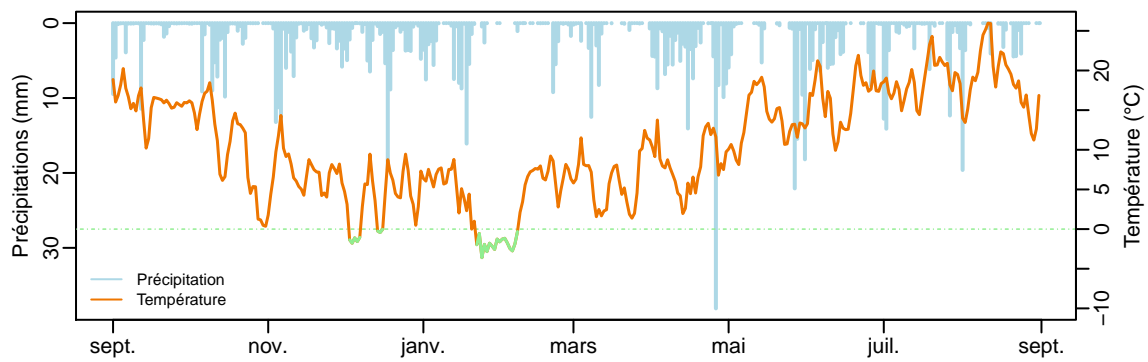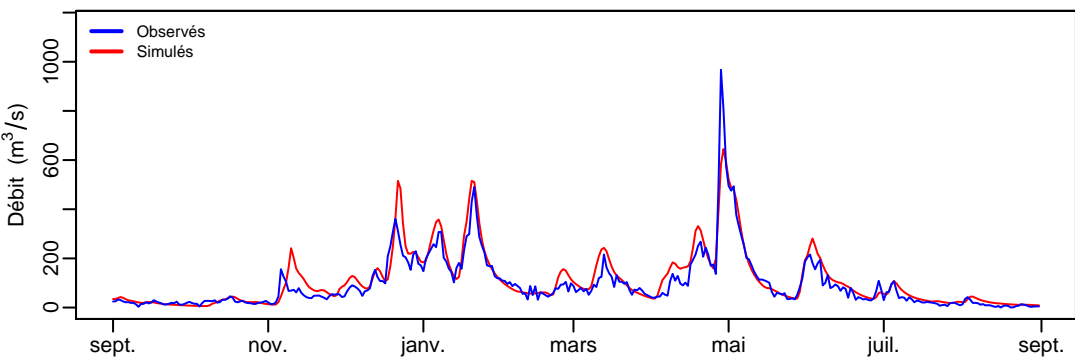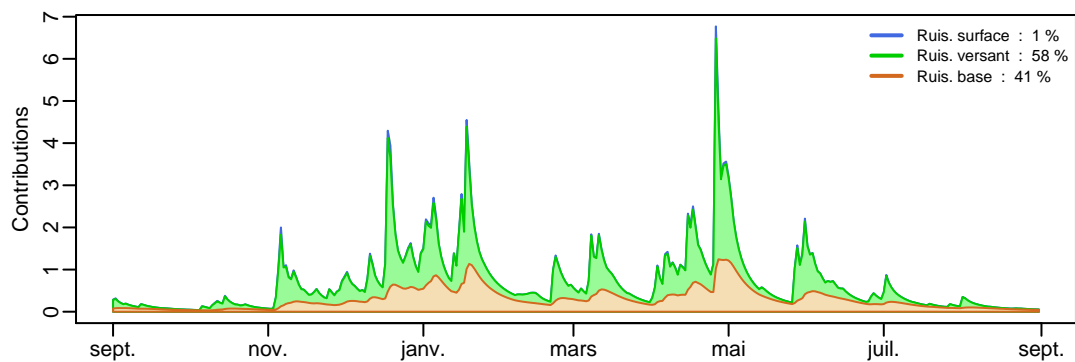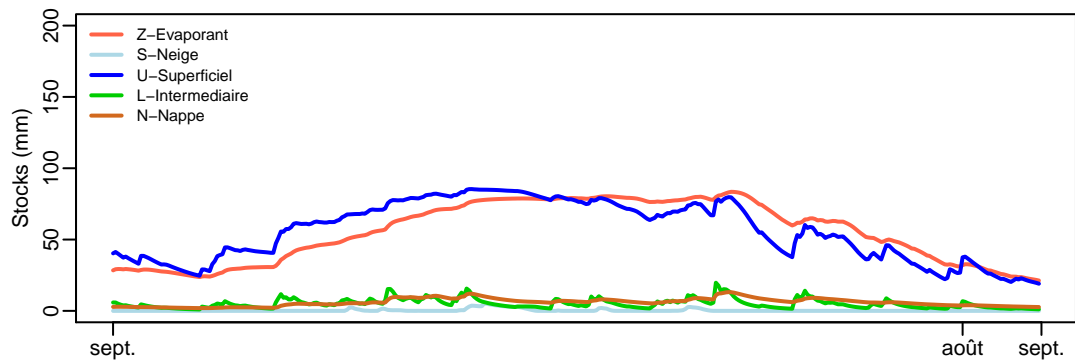



# k1440010 (13025.14 km<sup>2</sup>) – année 1998–1999

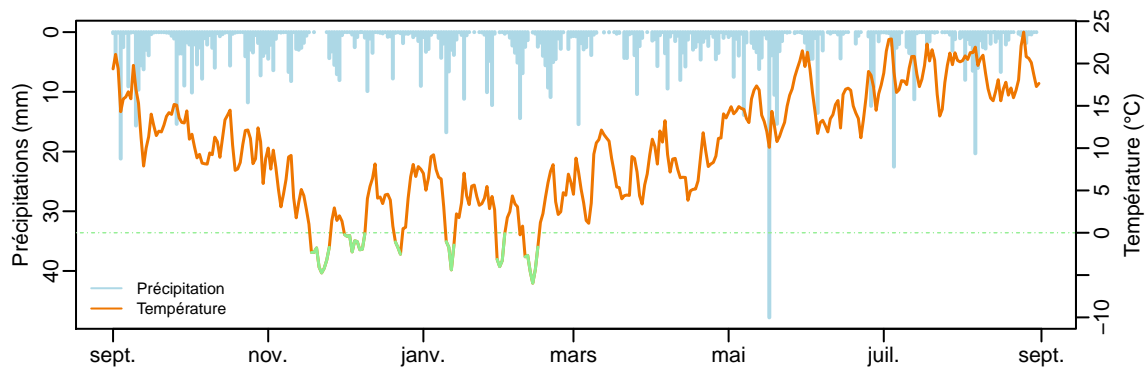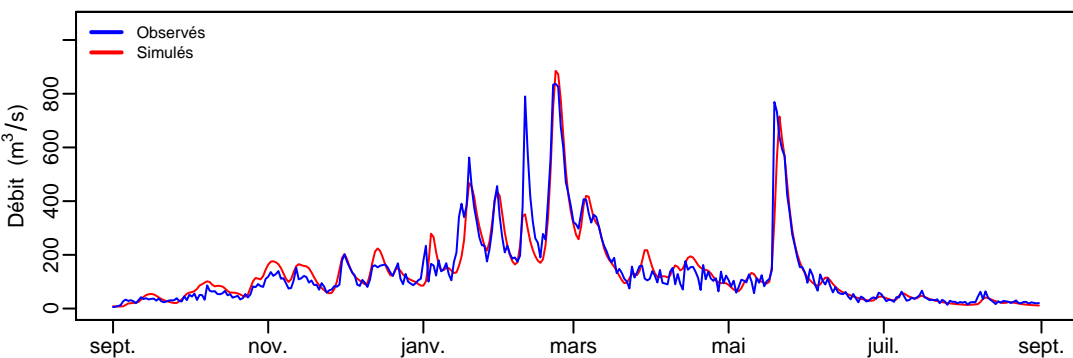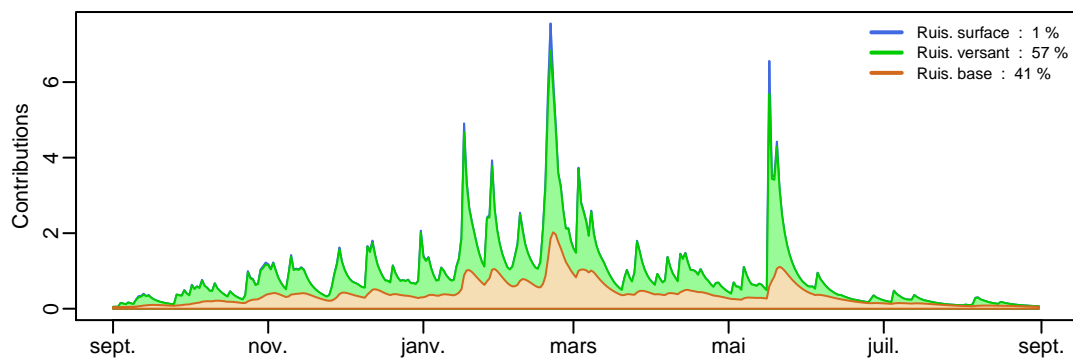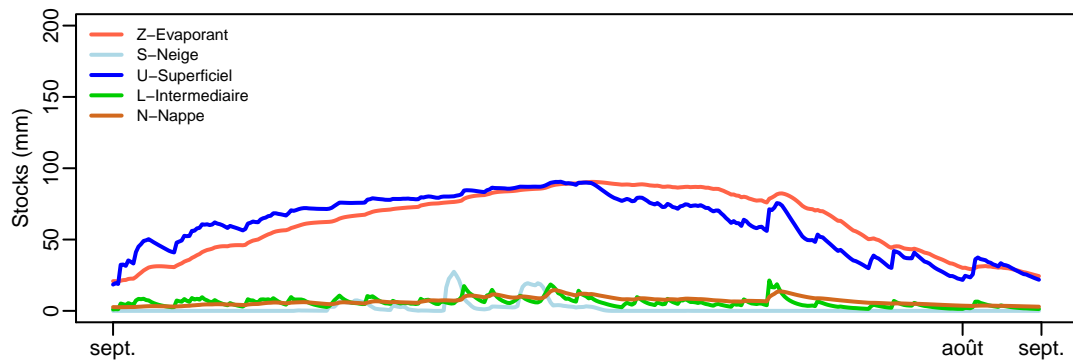

# k1440010 (13025.14 km<sup>2</sup>) – année 1999–2000

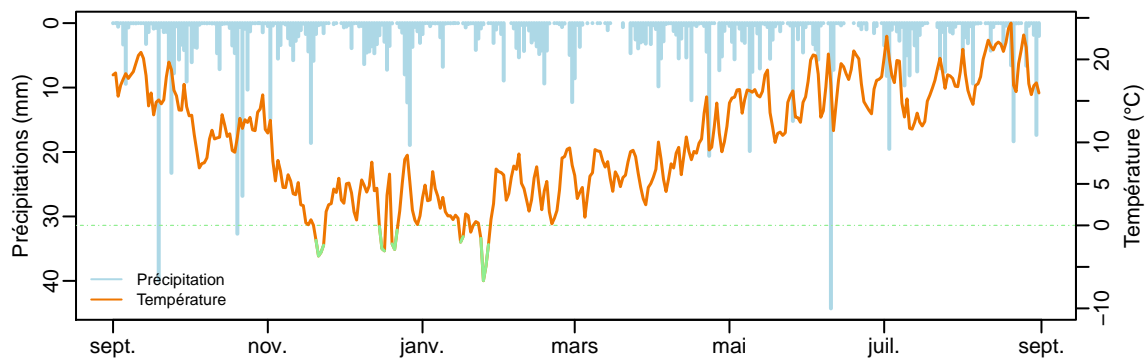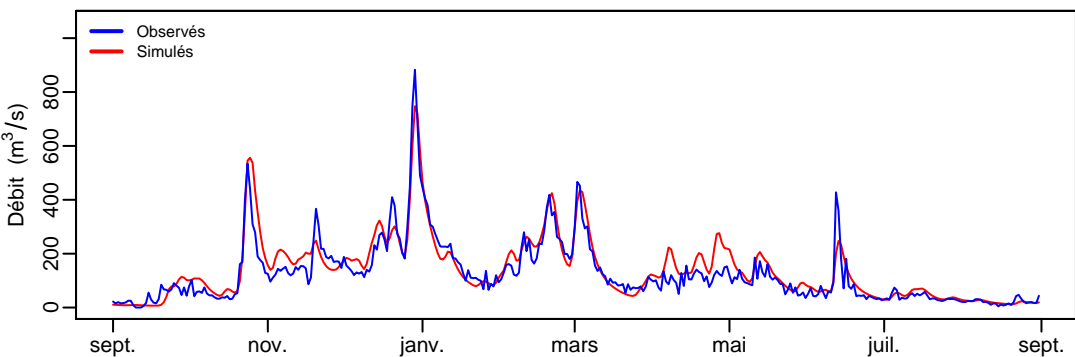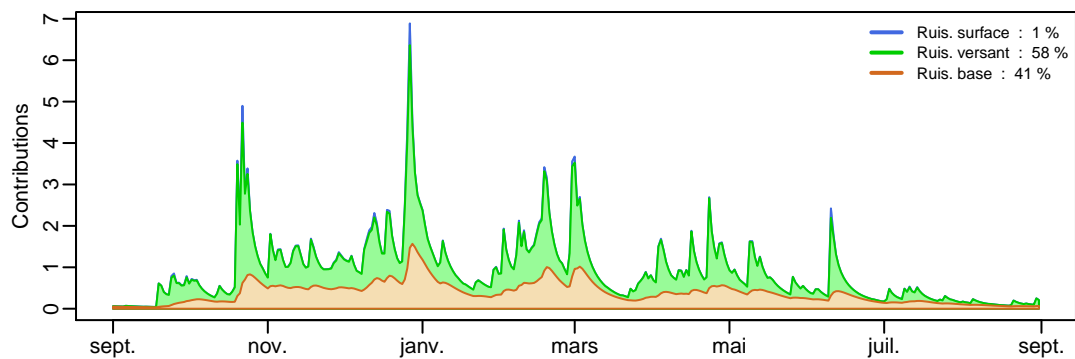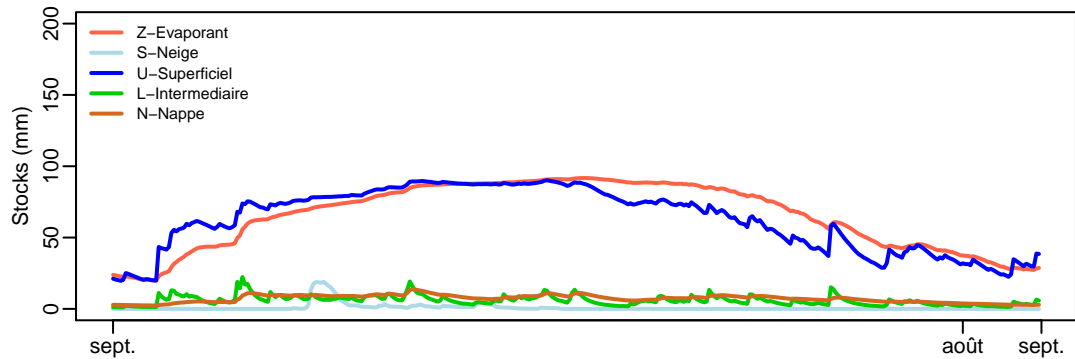

# k1440010 (13025.14 km<sup>2</sup>) – année 2000–2001

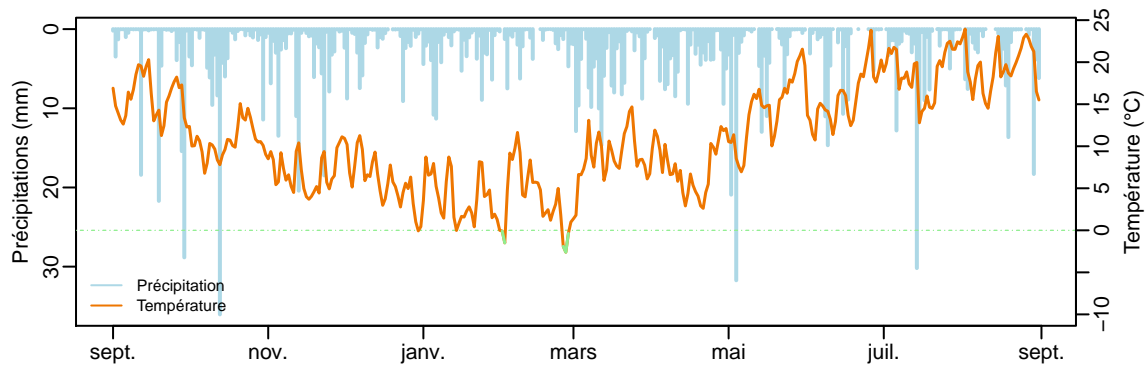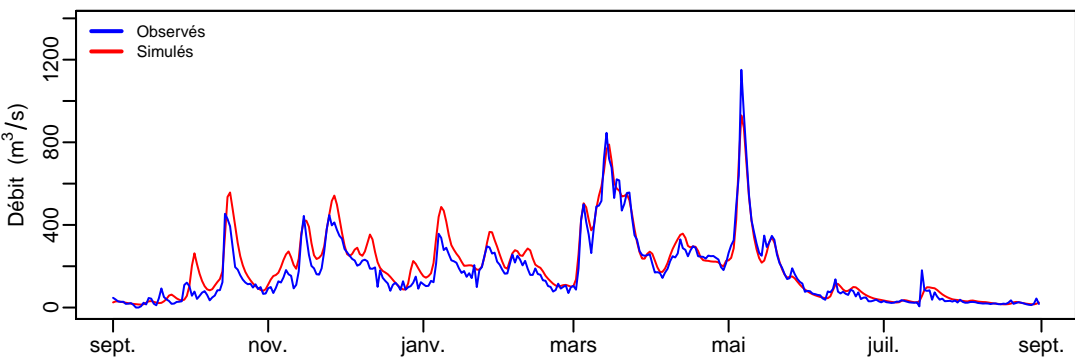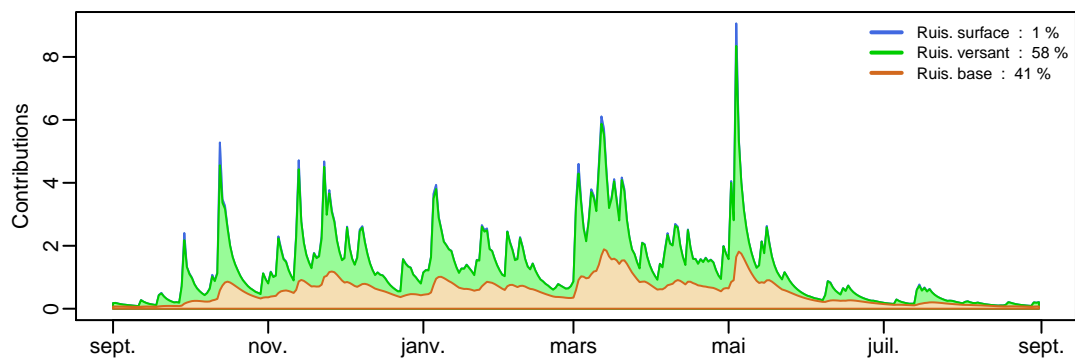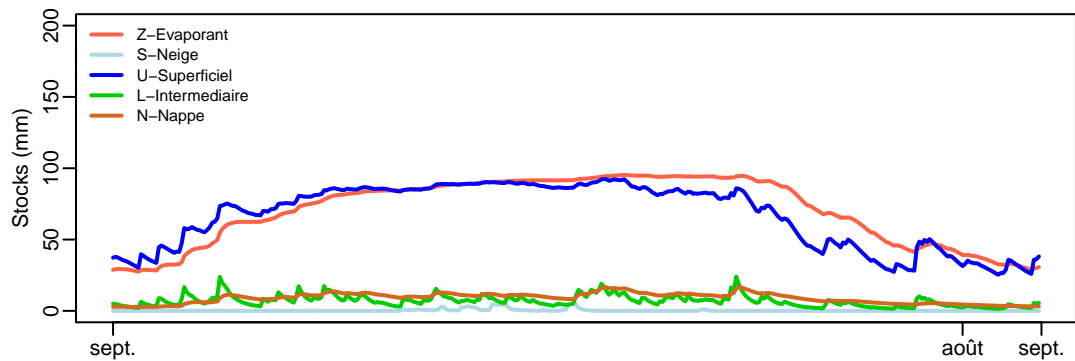

# k1440010 (13025.14 km<sup>2</sup>) – année 2001–2002

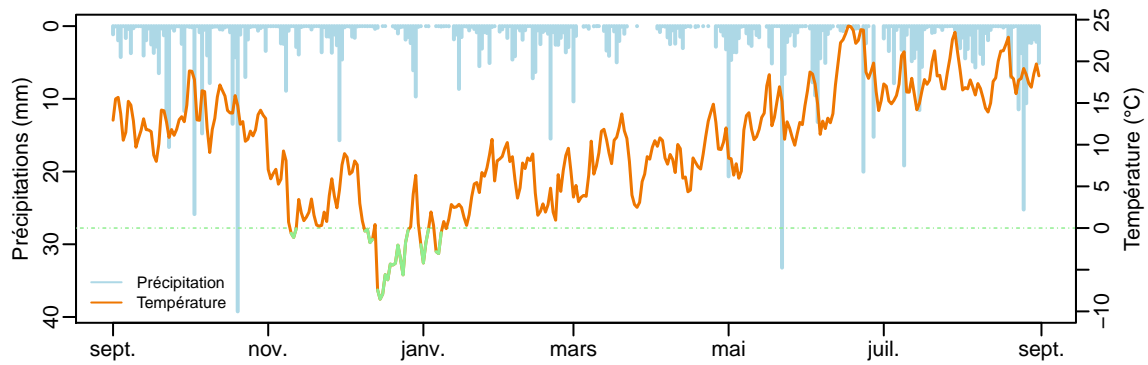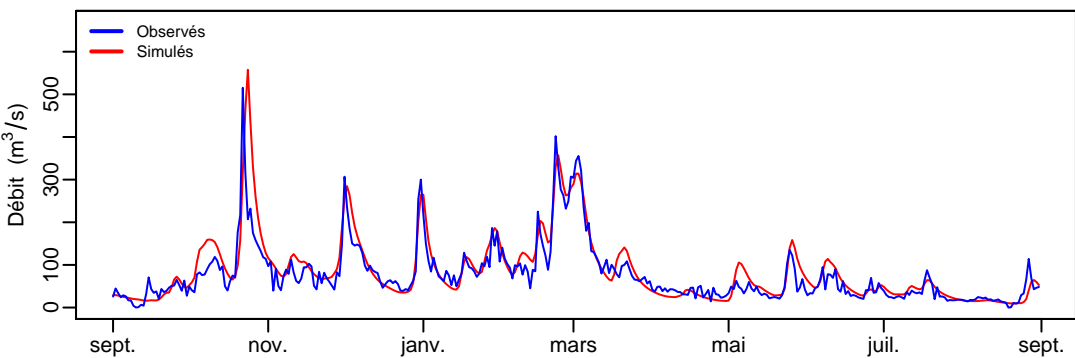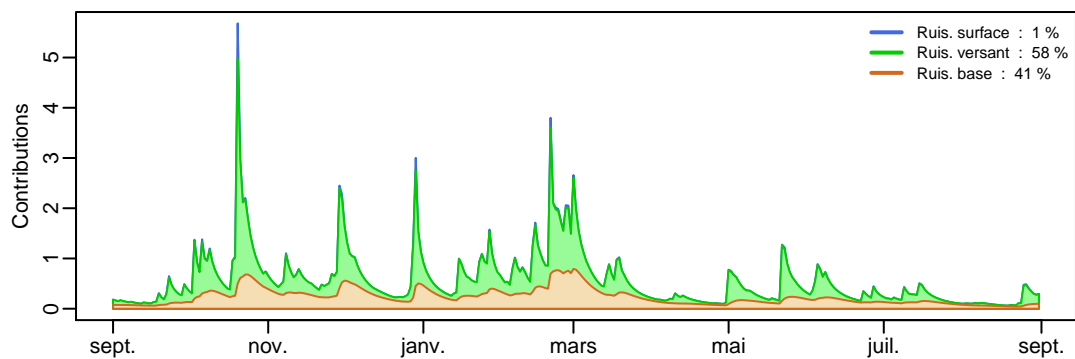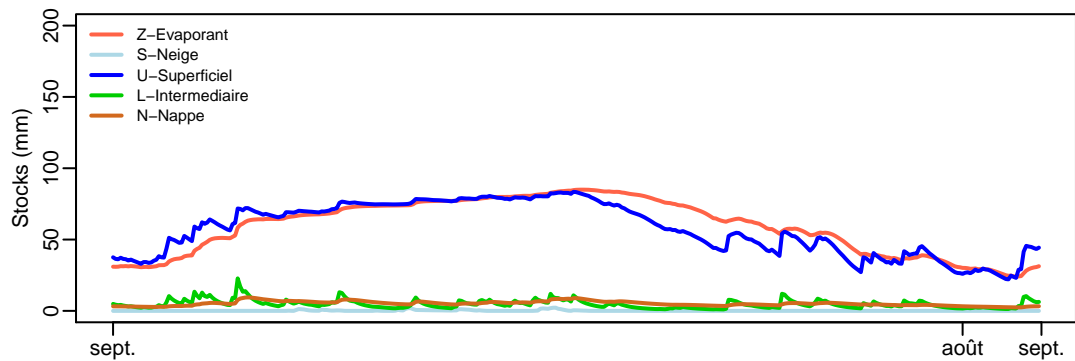

# k1440010 (13025.14 km<sup>2</sup>) – année 2002–2003

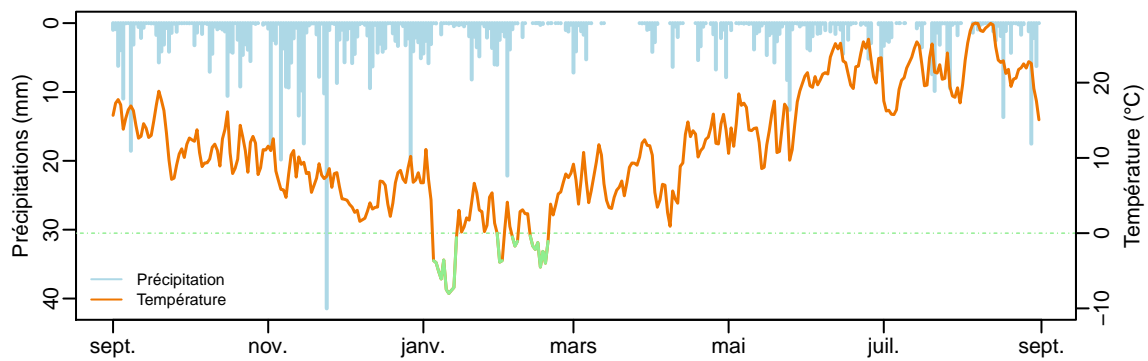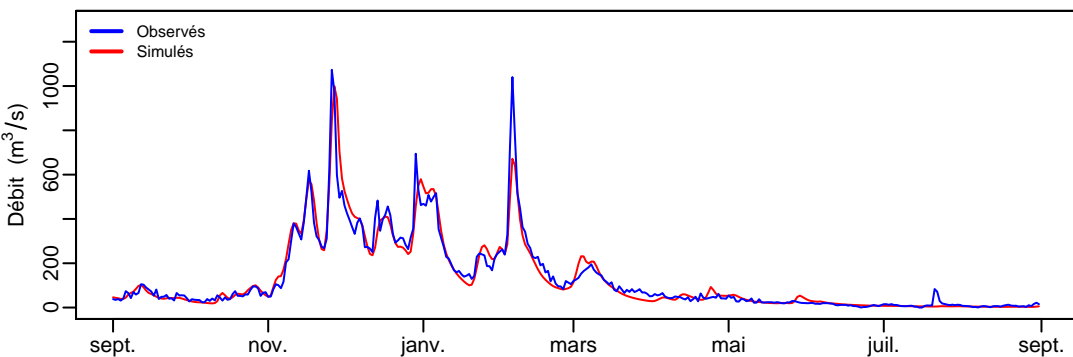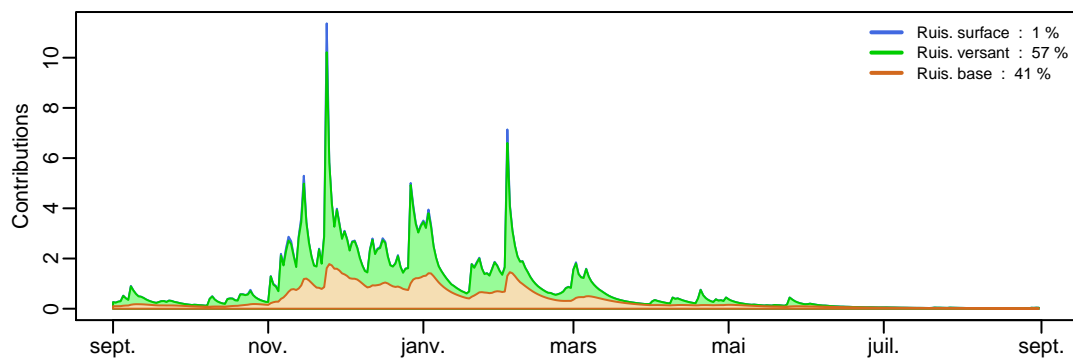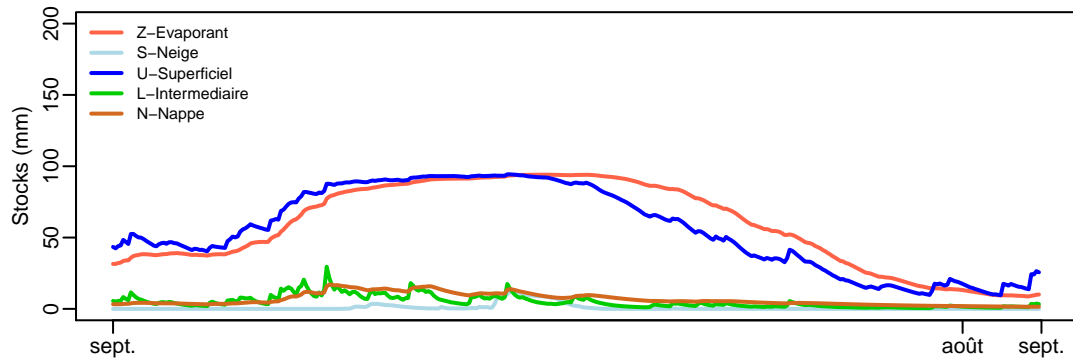

# k1440010 (13025.14 km<sup>2</sup>) – année 2003–2004

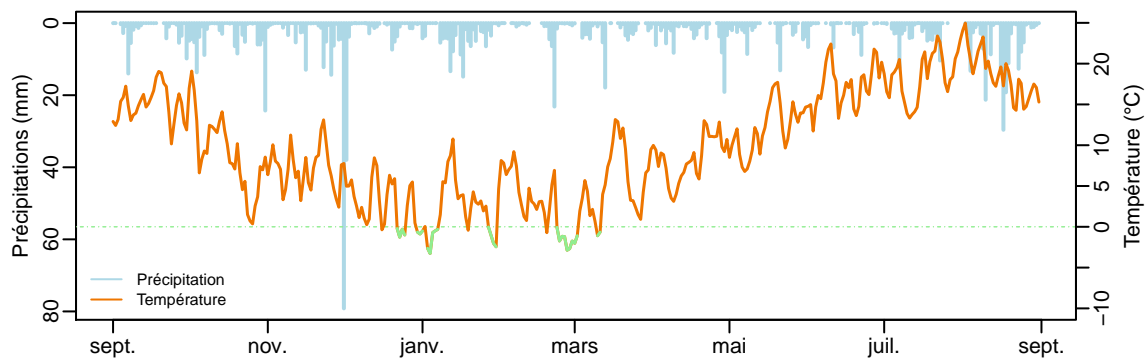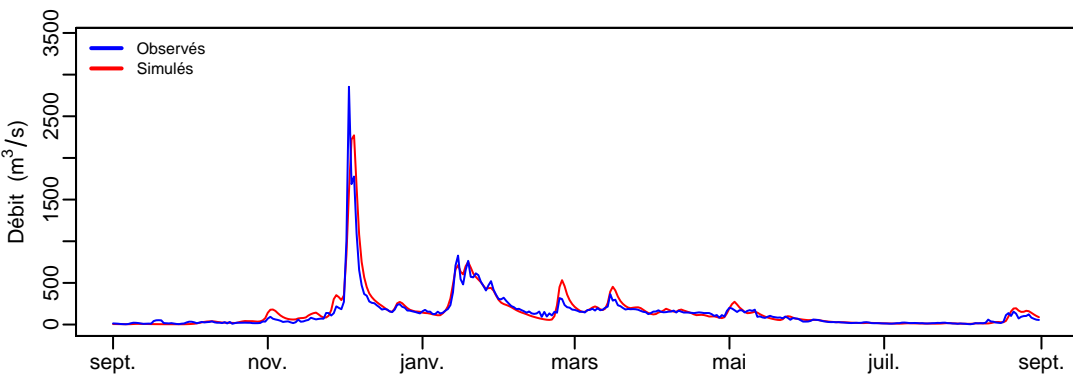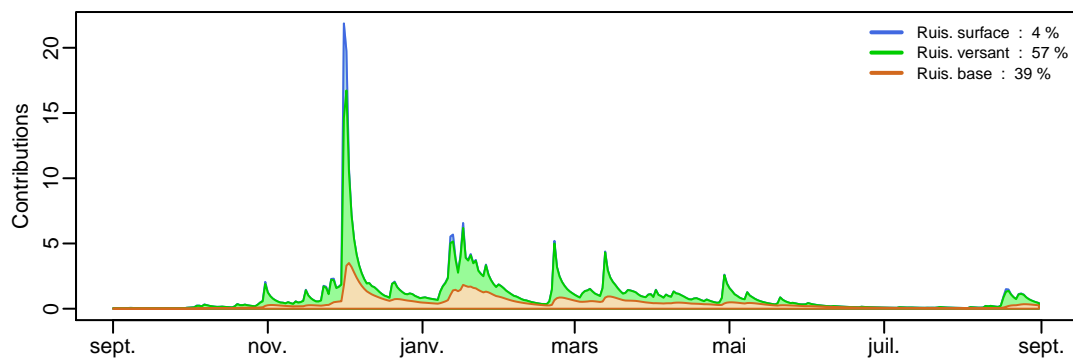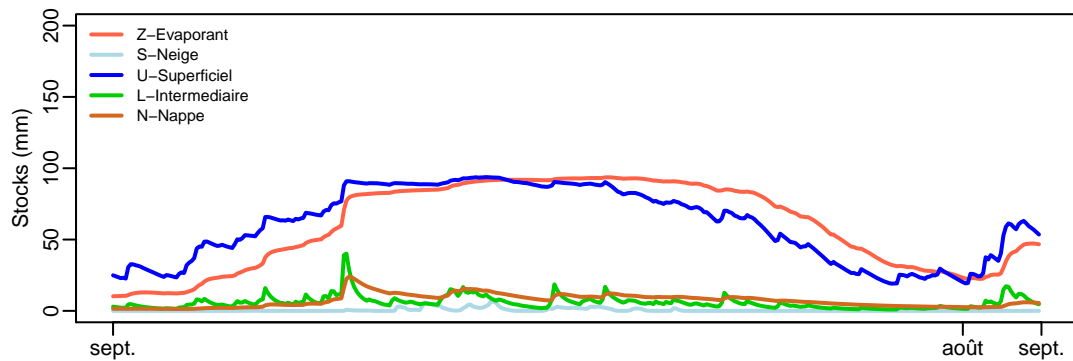

# k1440010 (13025.14 km<sup>2</sup>) – année 2004–2005

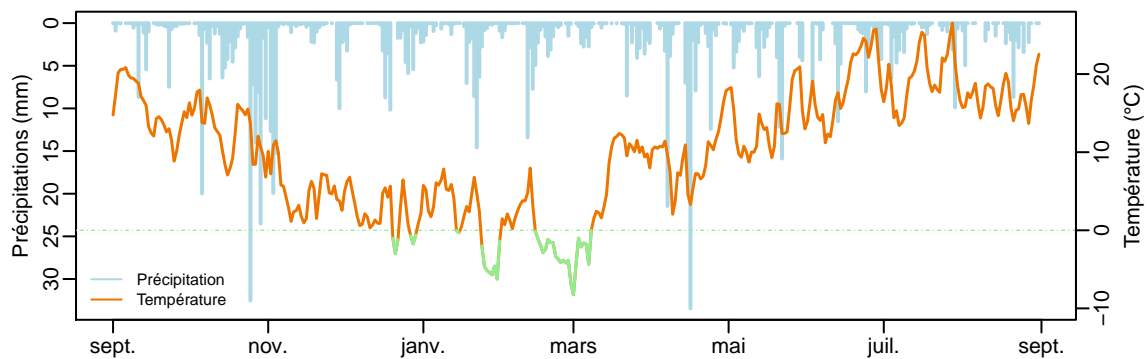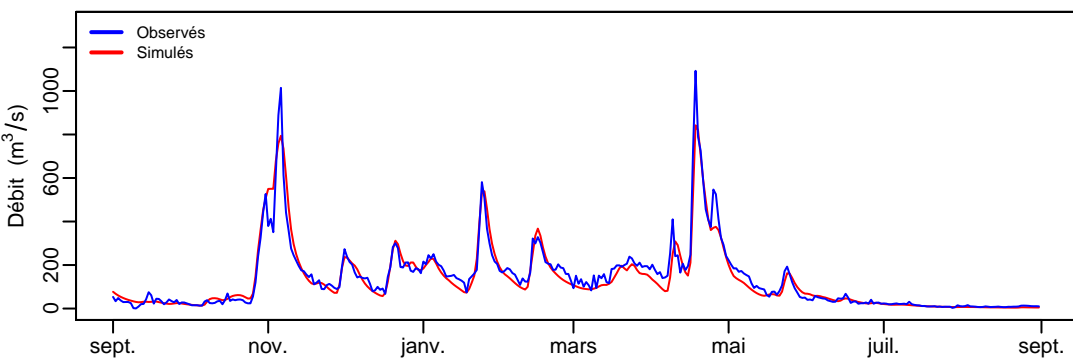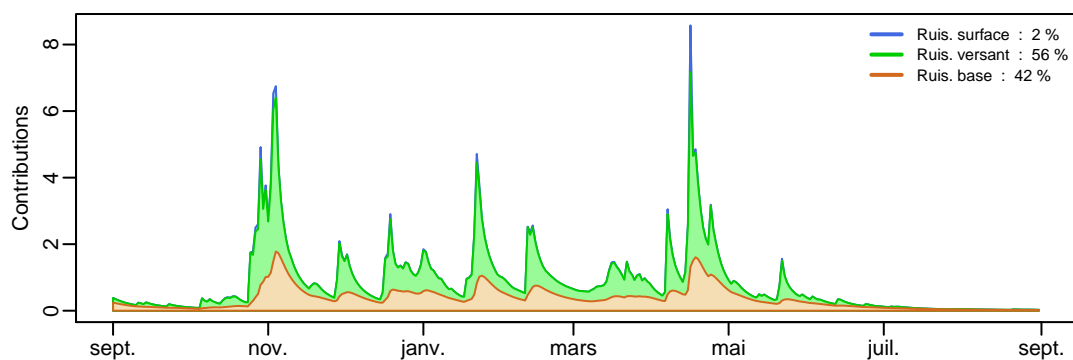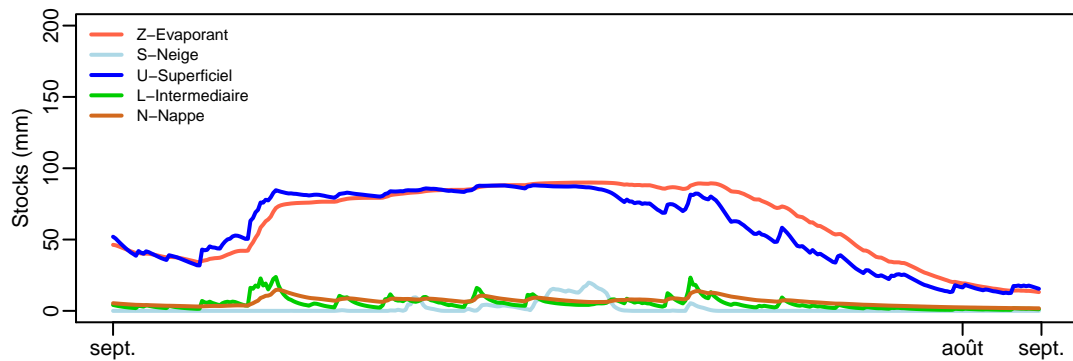

# k1440010 (13025.14 km<sup>2</sup>) – année 2005–2006

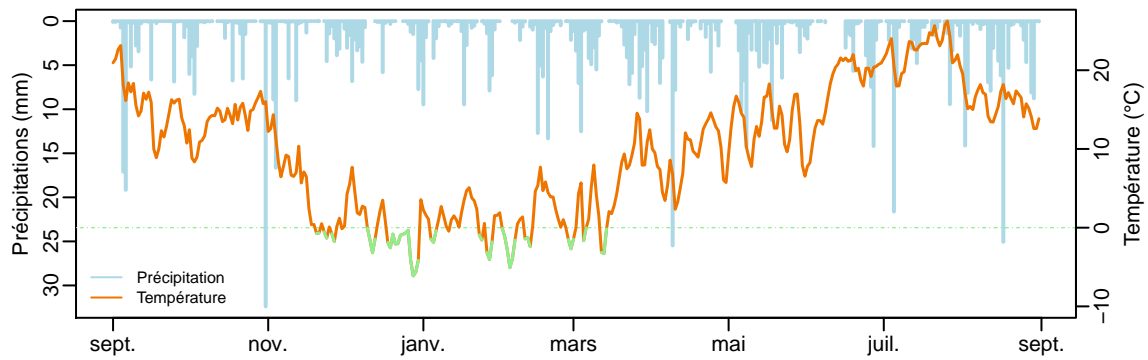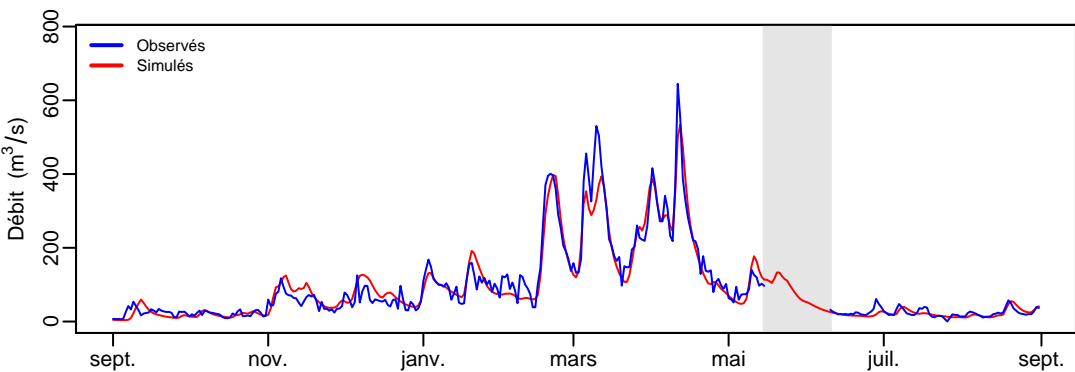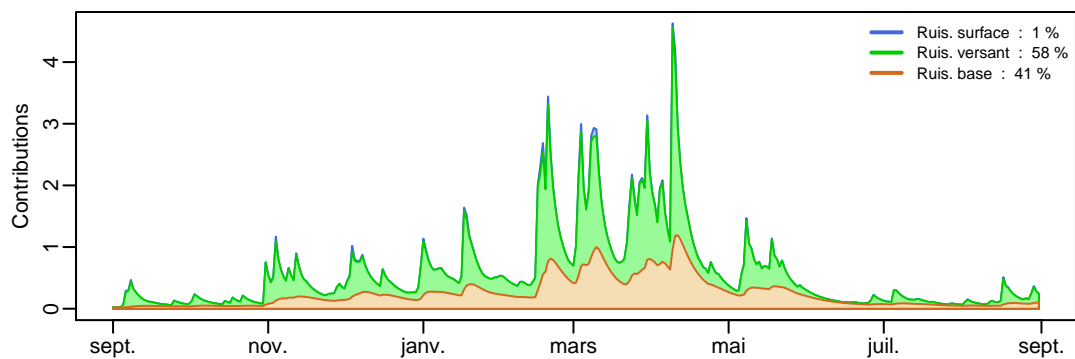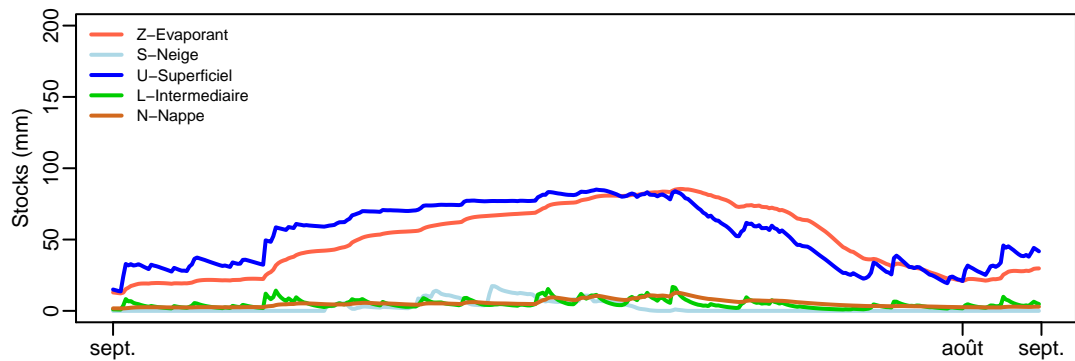



# k1440010 (13025.14 km<sup>2</sup>) – année 2006–2007

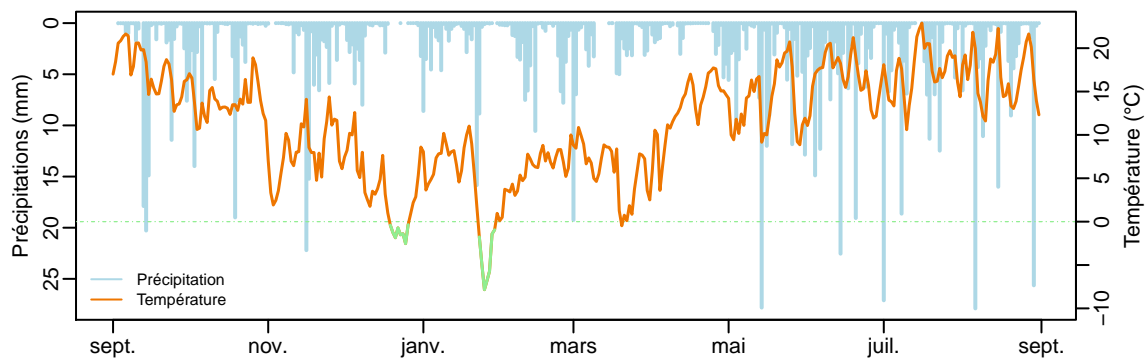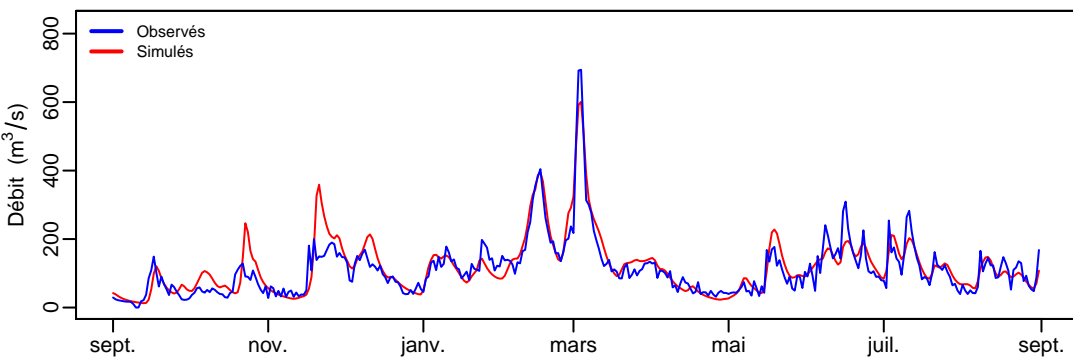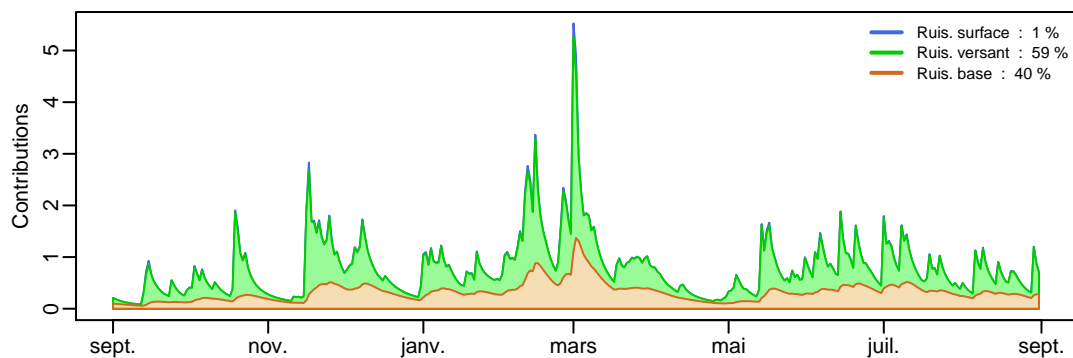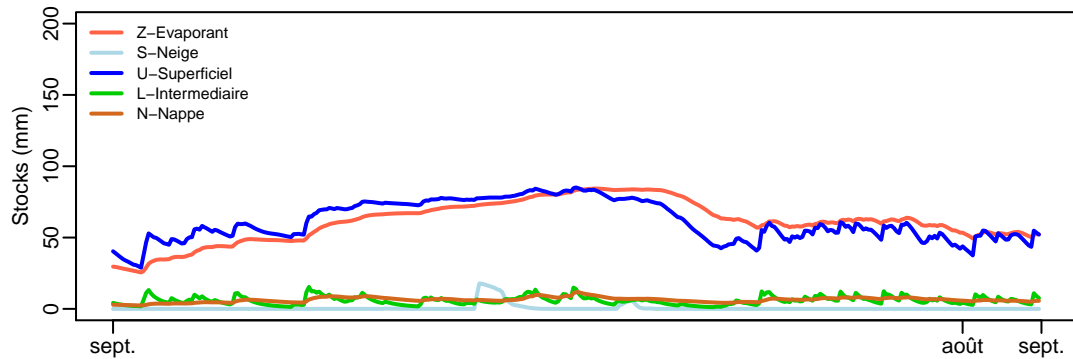

# k1440010 (13025.14 km<sup>2</sup>) – année 2007–2008

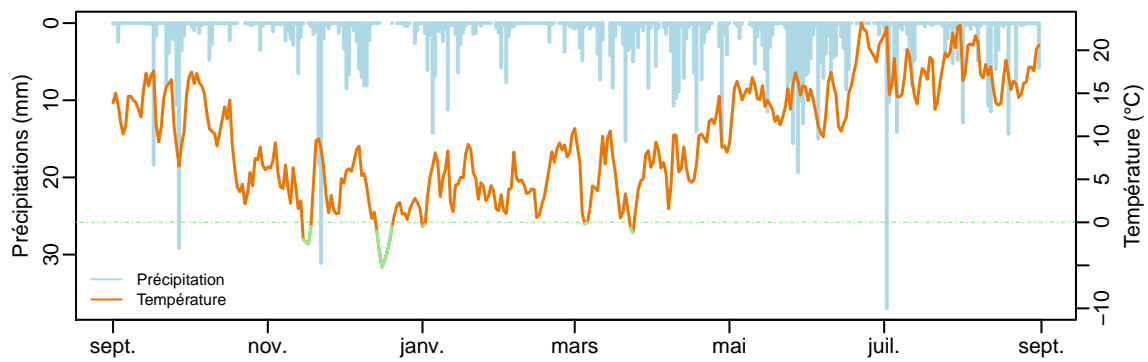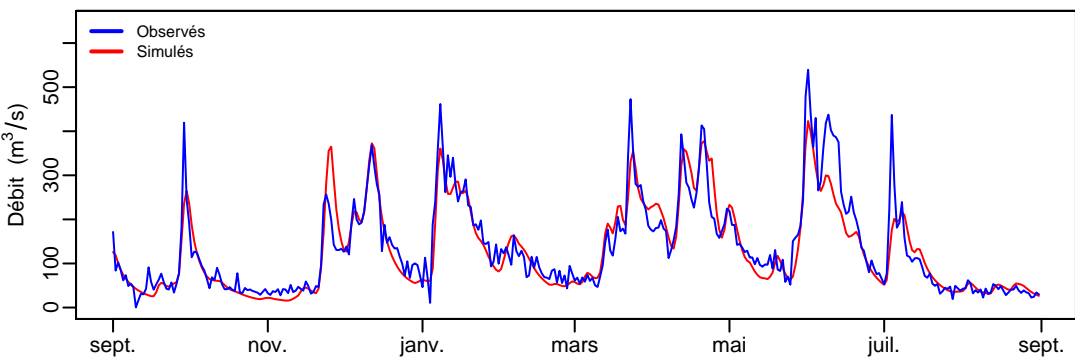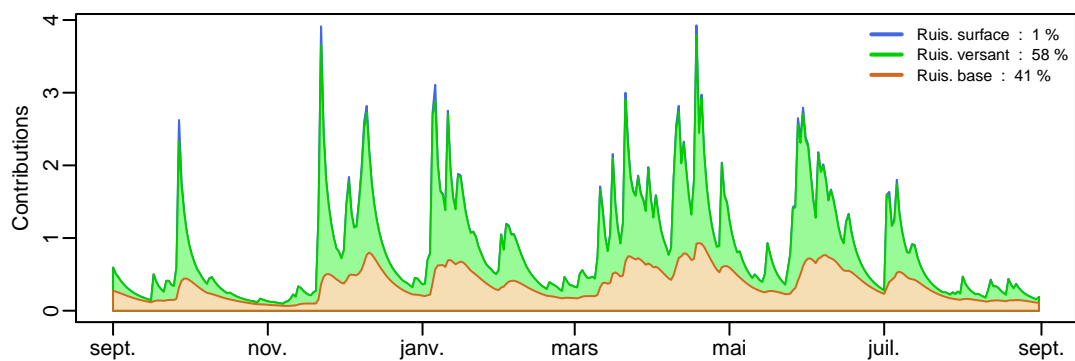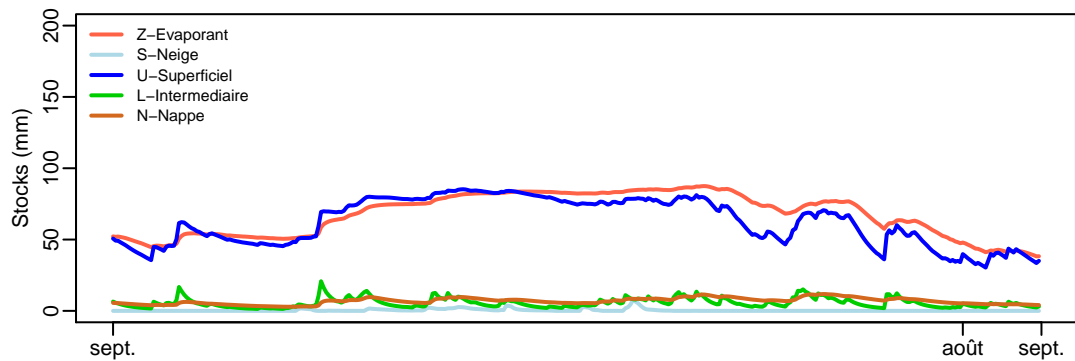

# k1440010 (13025.14 km<sup>2</sup>) – année 2008–2009

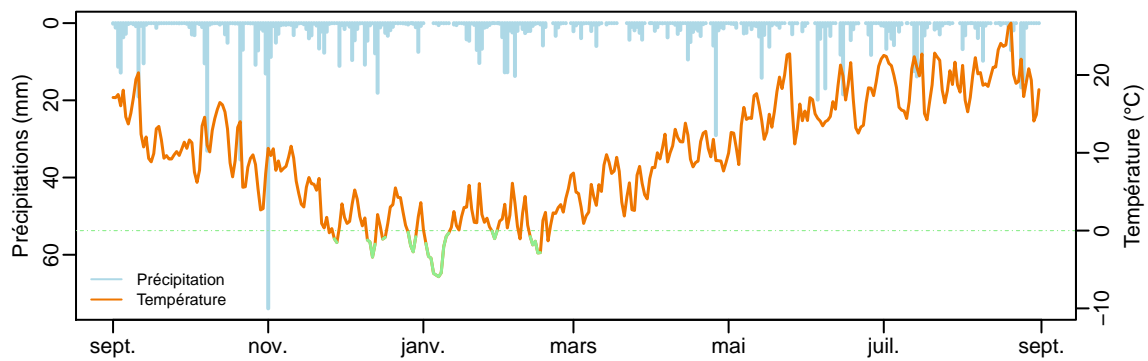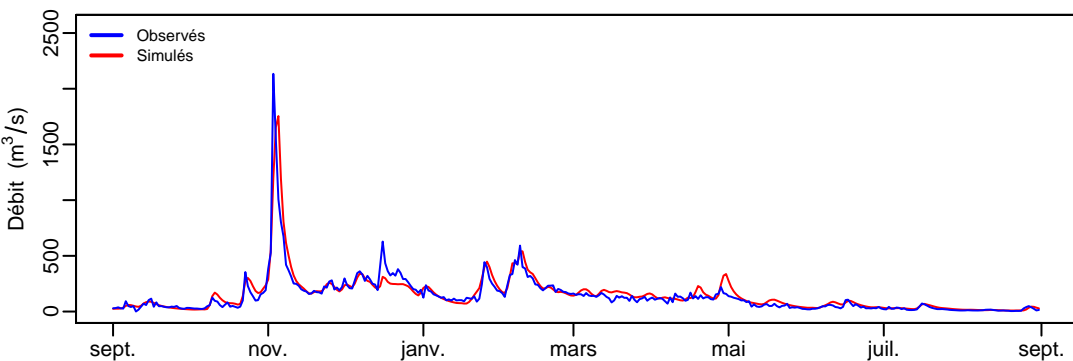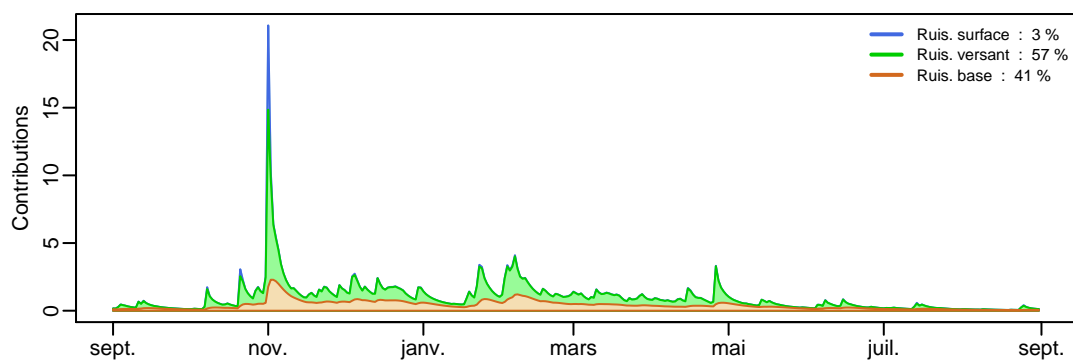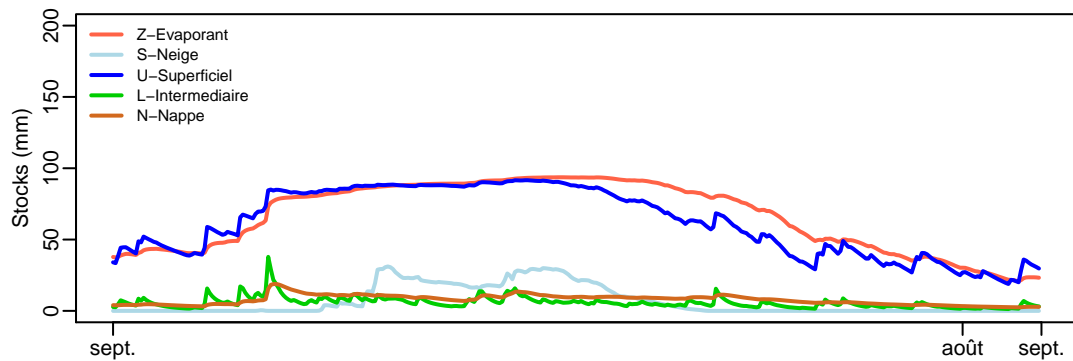

# k1440010 (13025.14 km<sup>2</sup>) – année 2009–2010

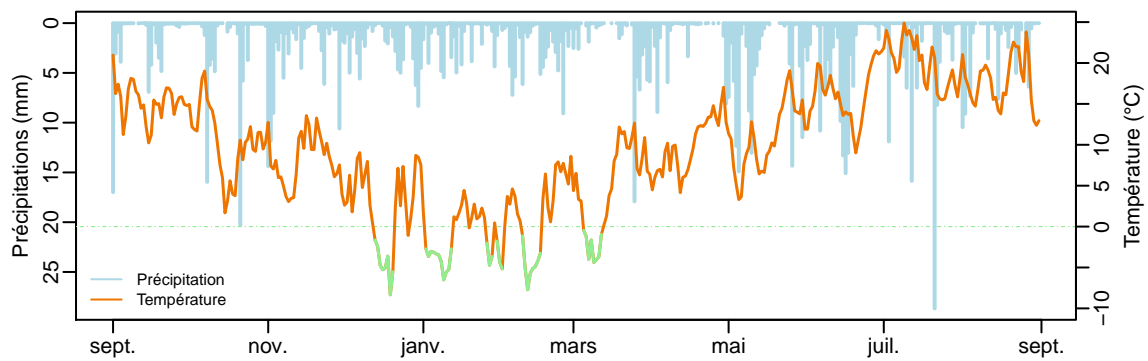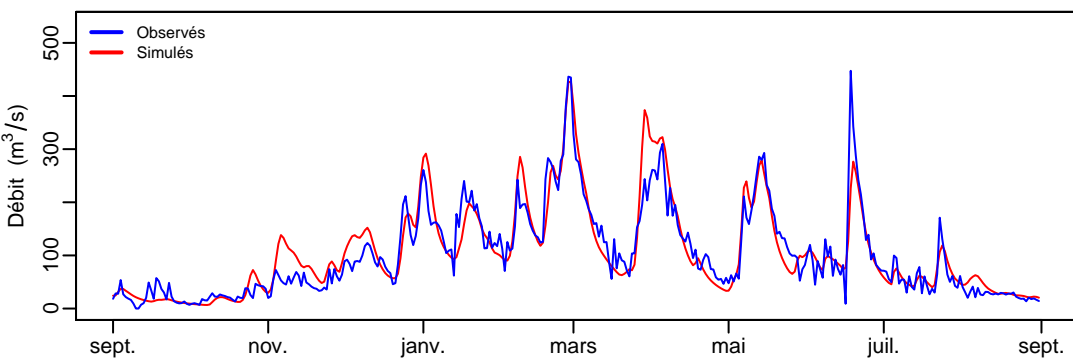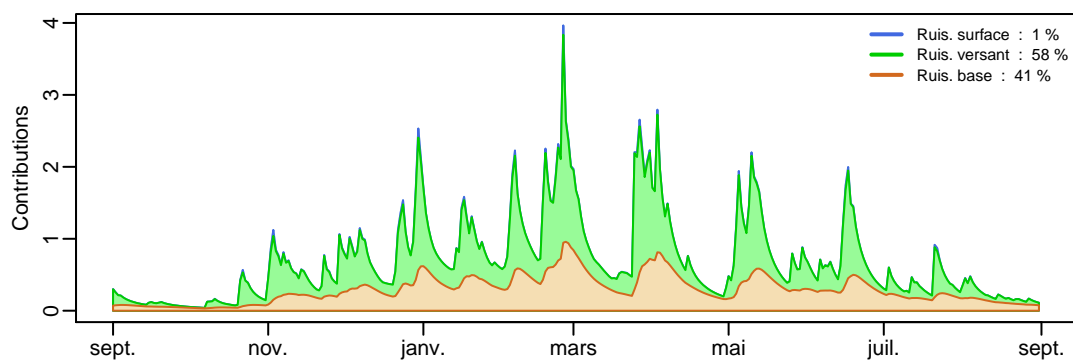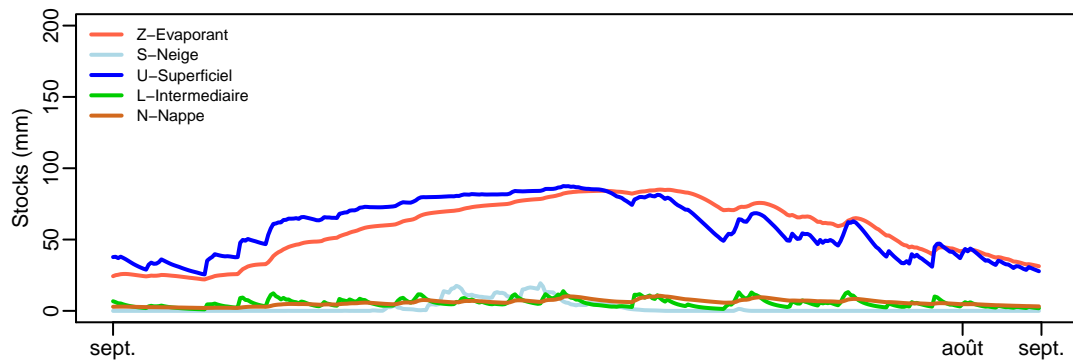

# k1440010 (13025.14 km<sup>2</sup>) – année 2010–2011

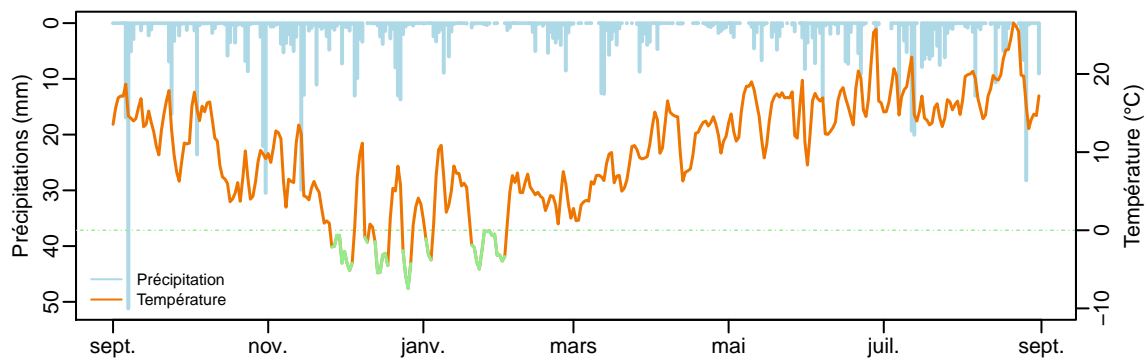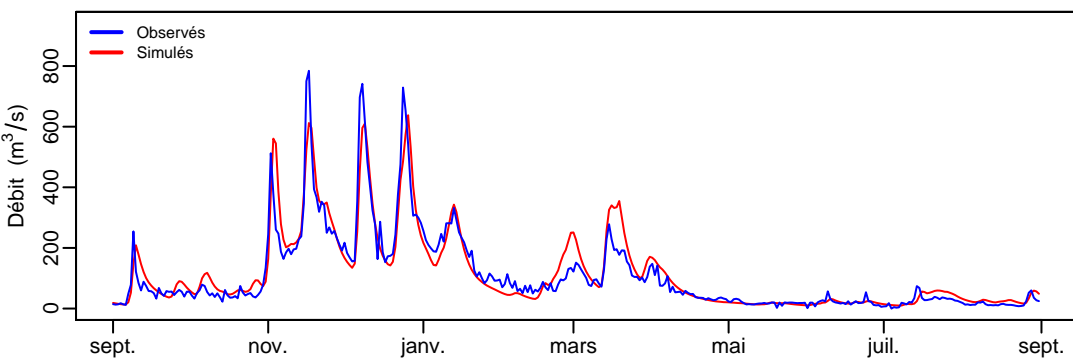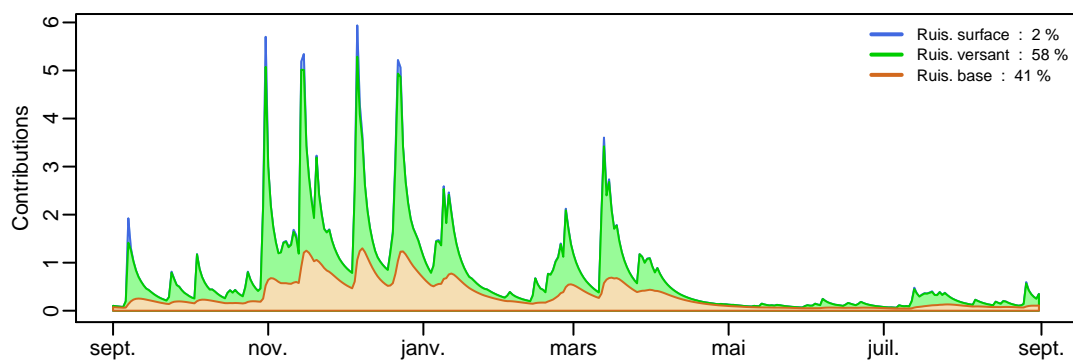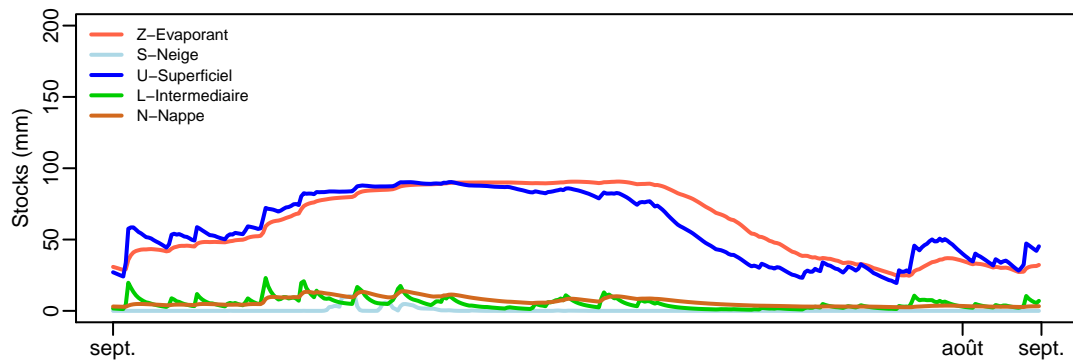

# k1440010 (13025.14 km²) – année 2011–2012

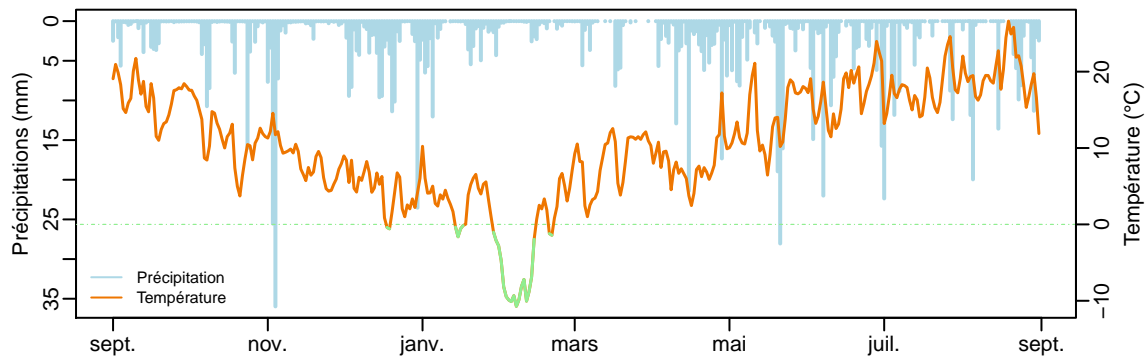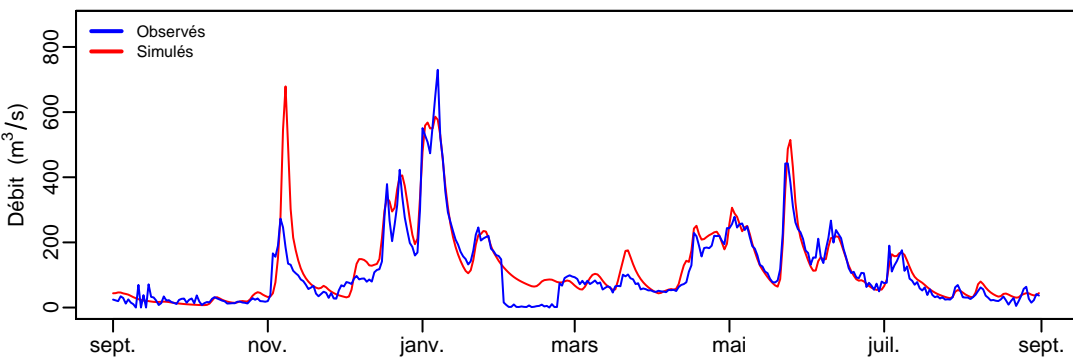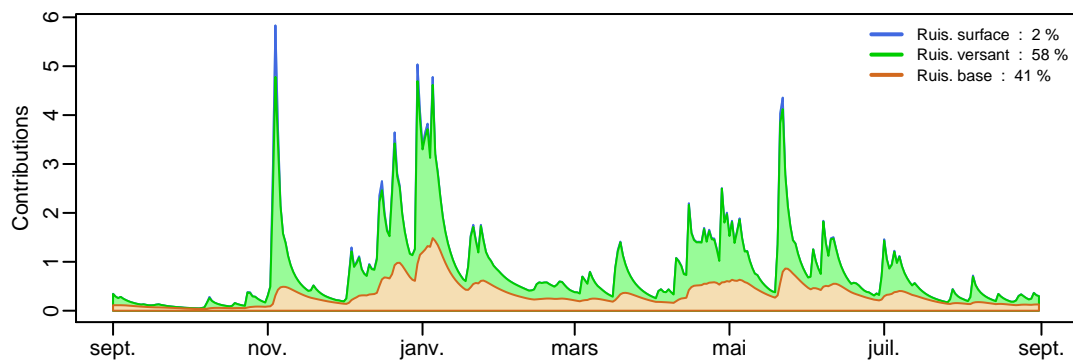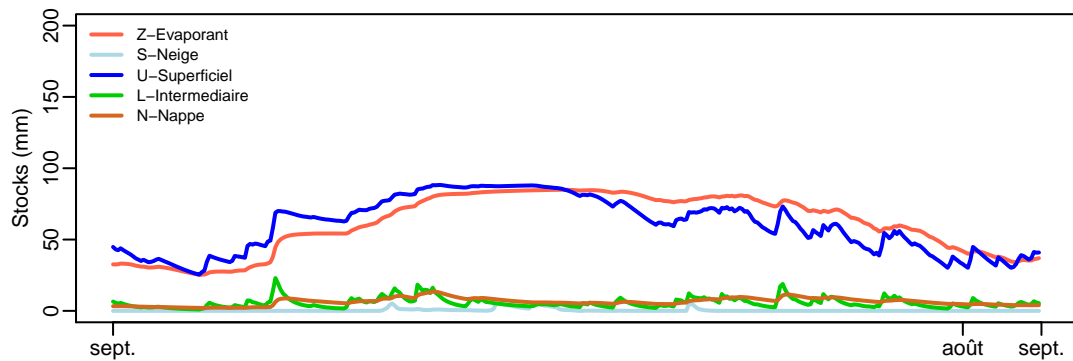

# k1524010 (122.17 km<sup>2</sup>) – année 1981–1982

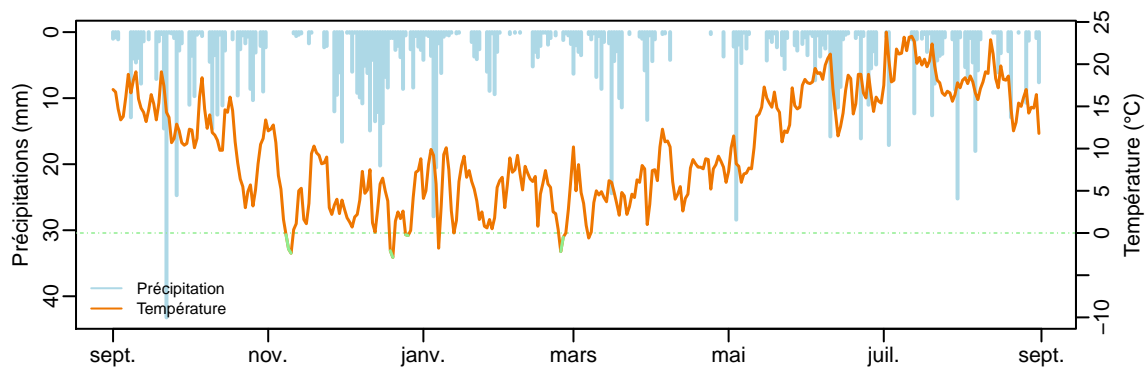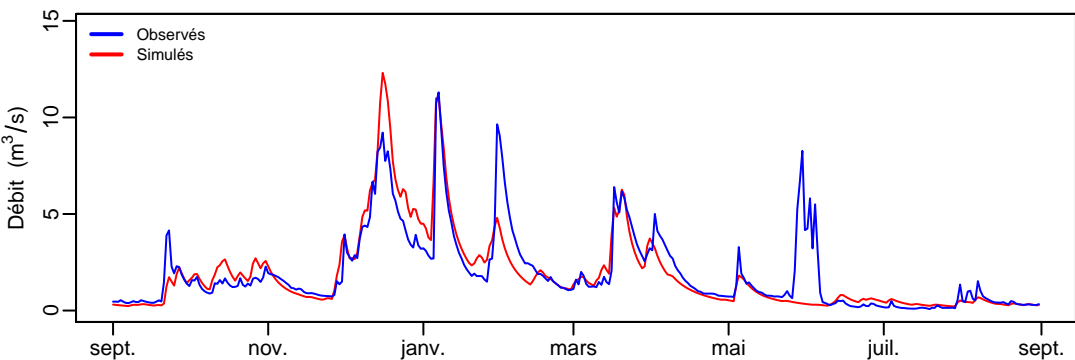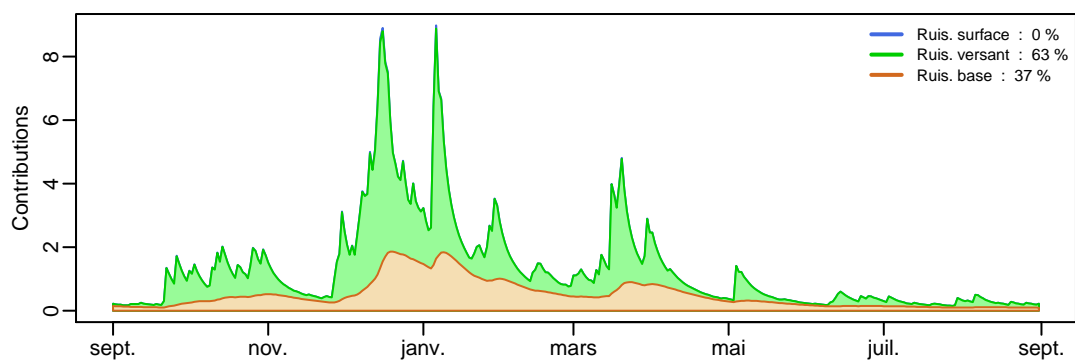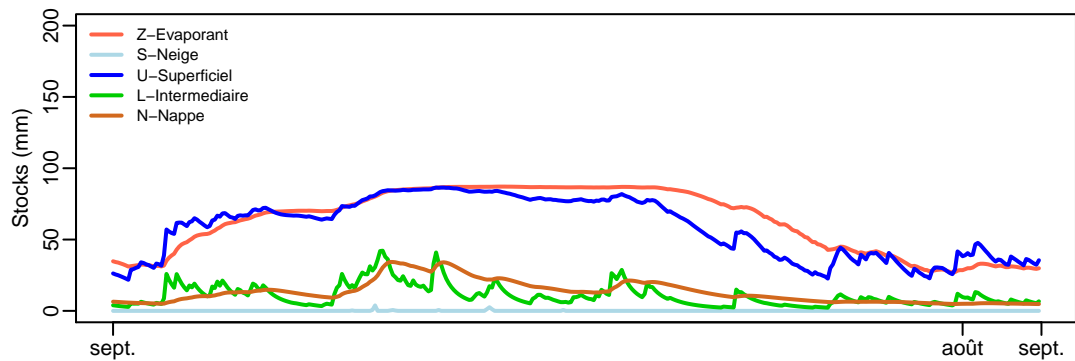

# k1524010 (122.17 km<sup>2</sup>) – année 1982–1983

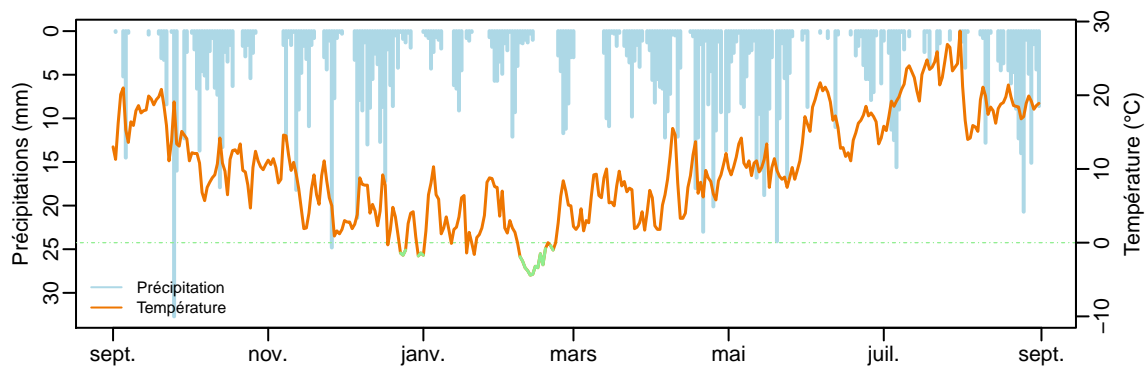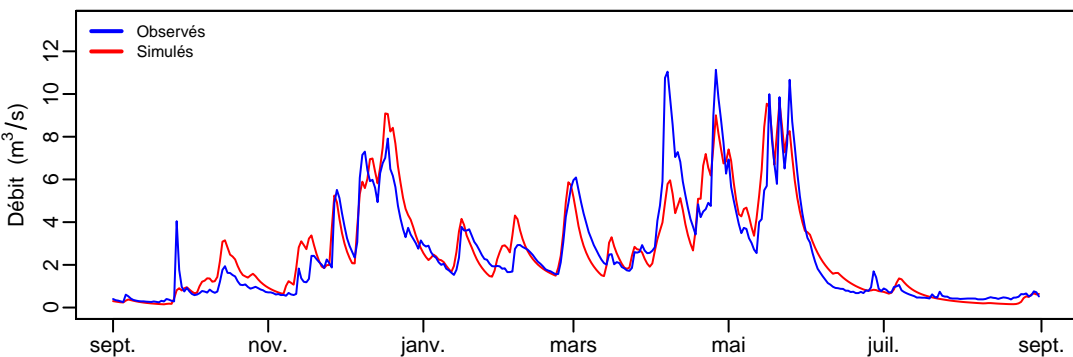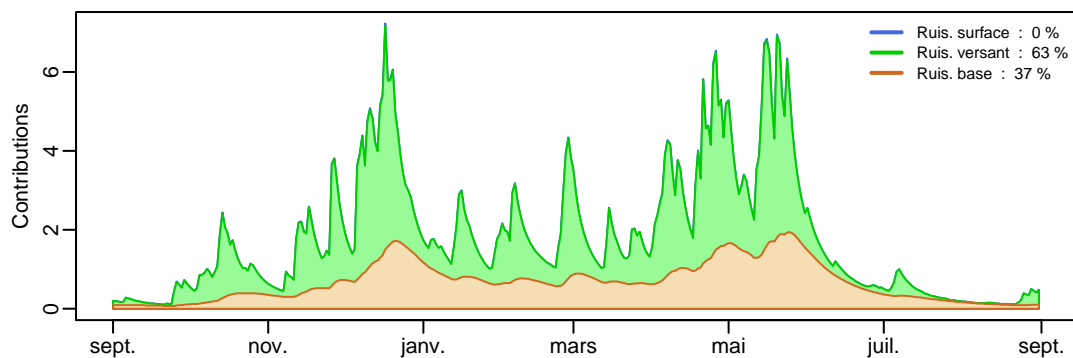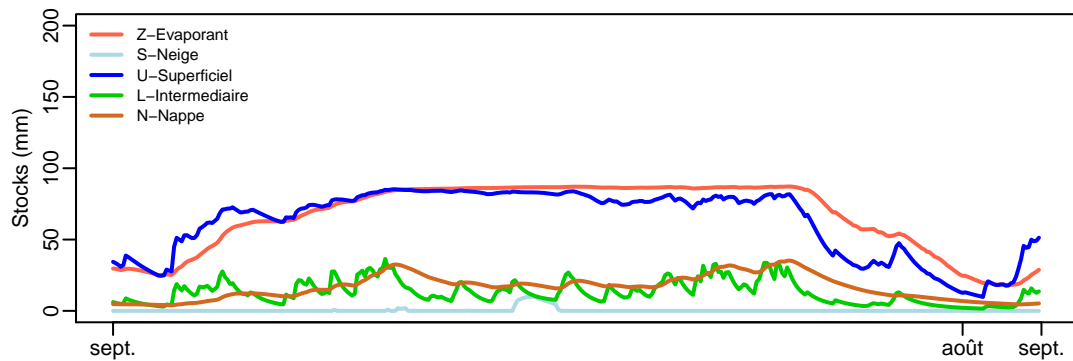



# k1524010 (122.17 km<sup>2</sup>) – année 1983–1984

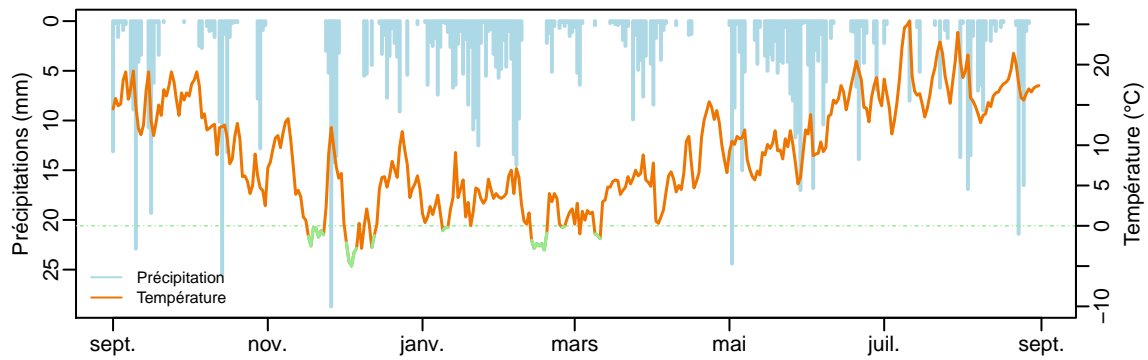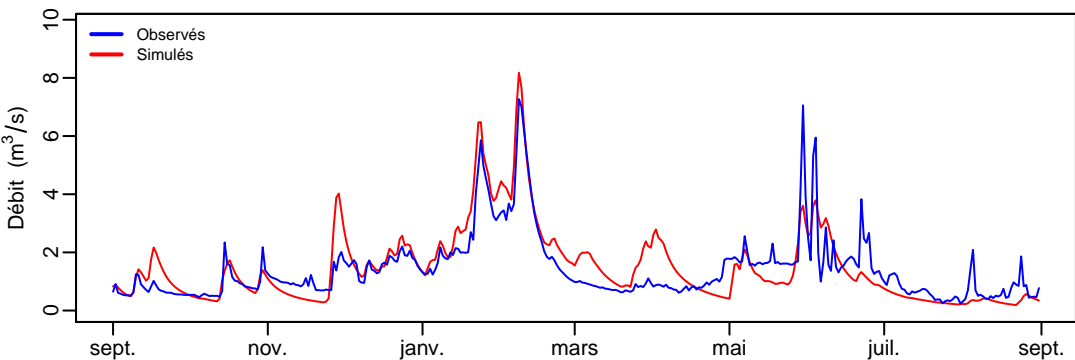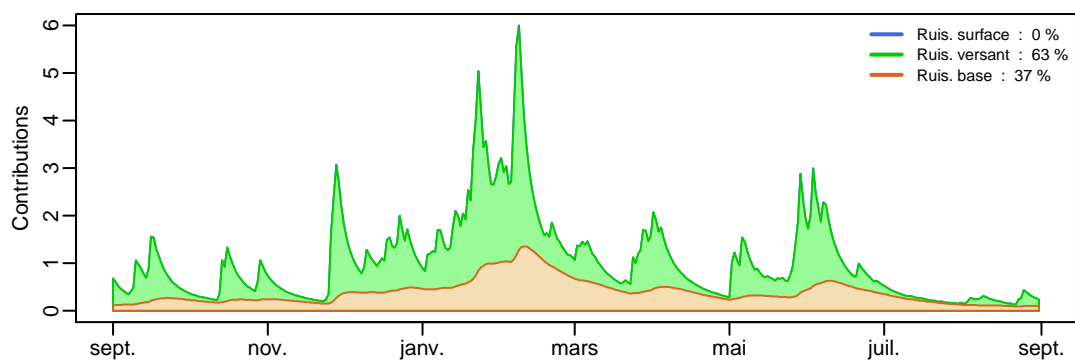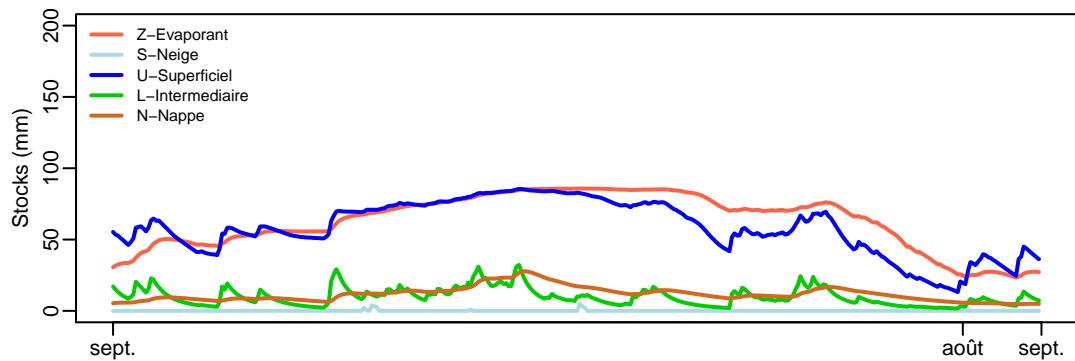

# k1524010 (122.17 km<sup>2</sup>) – année 1984–1985

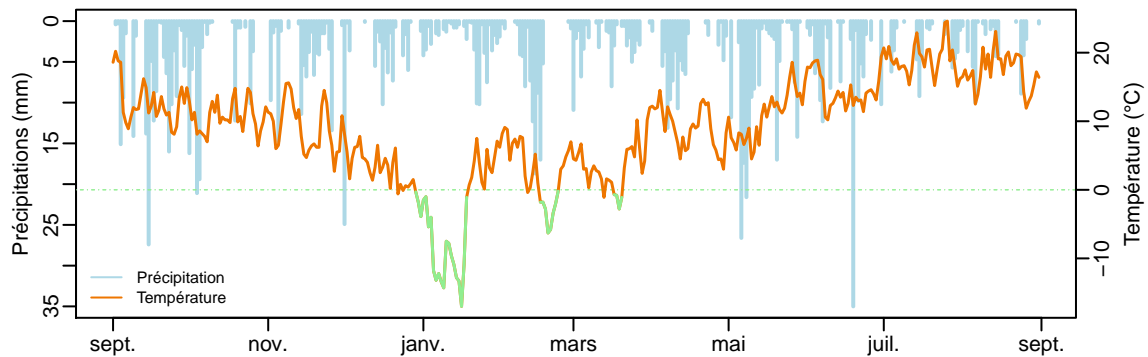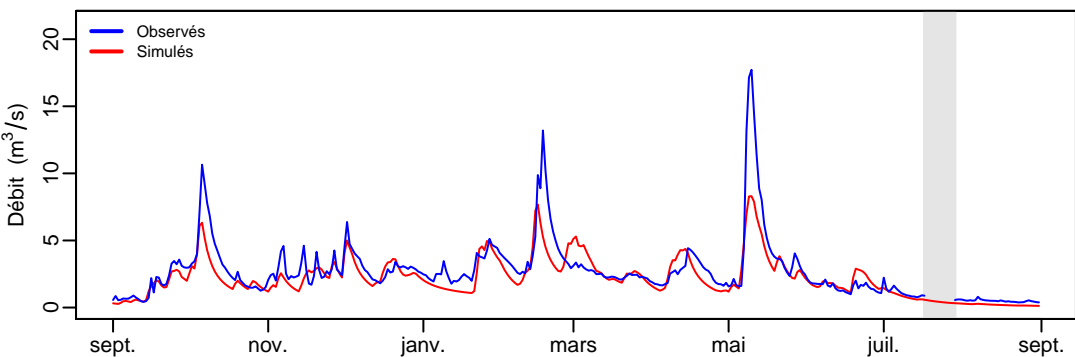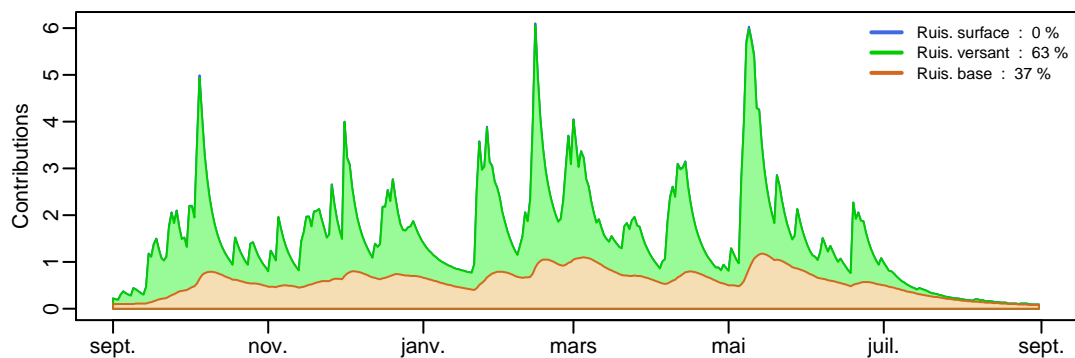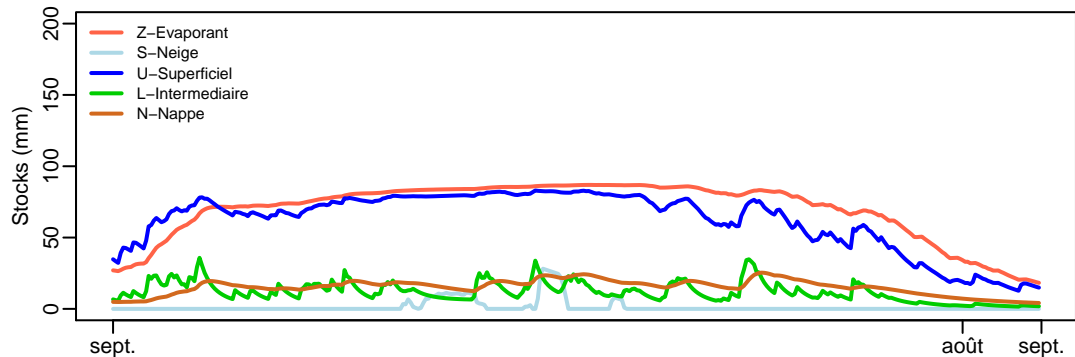

# k1524010 (122.17 km<sup>2</sup>) – année 1985–1986

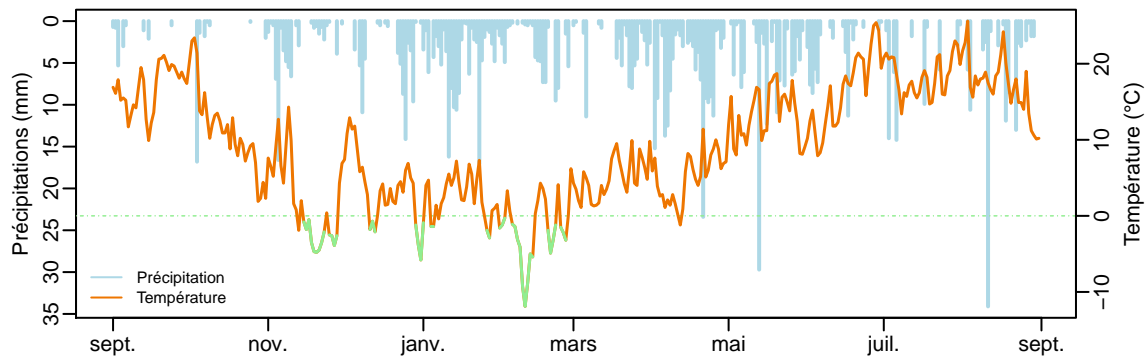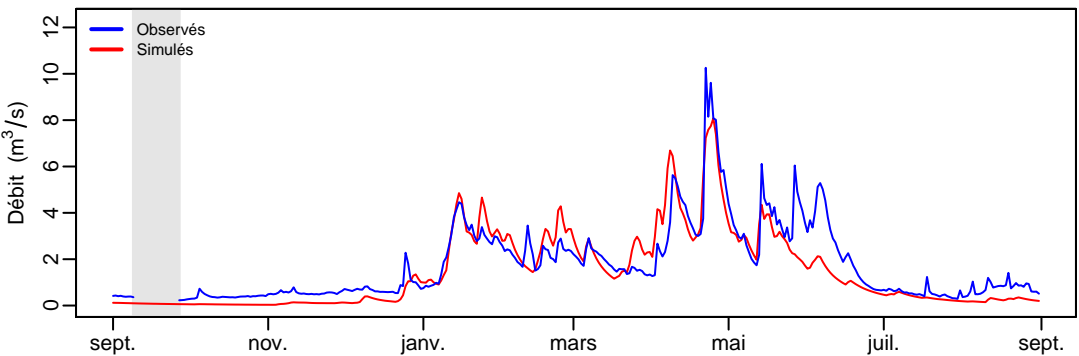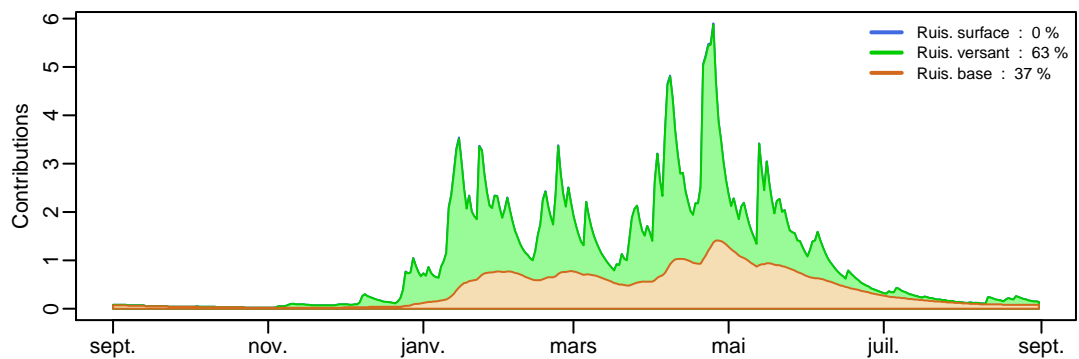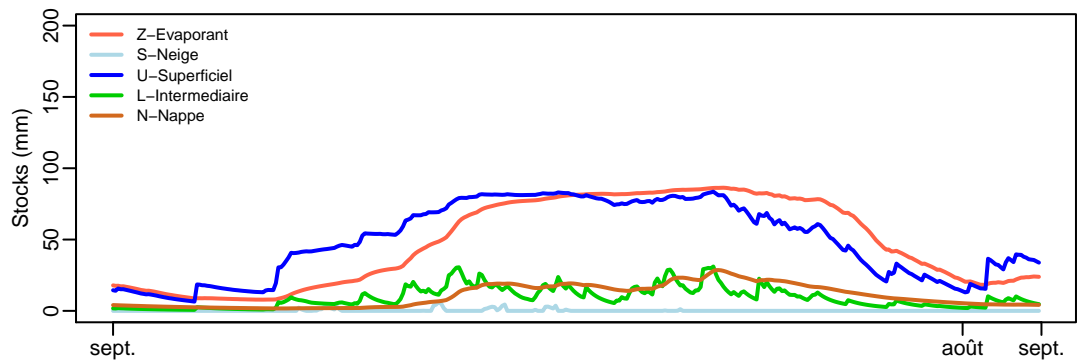

# k1524010 (122.17 km<sup>2</sup>) – année 1986–1987

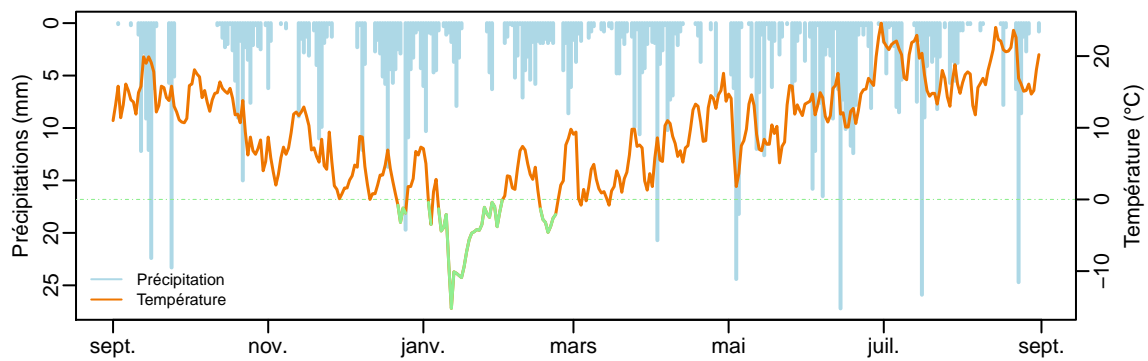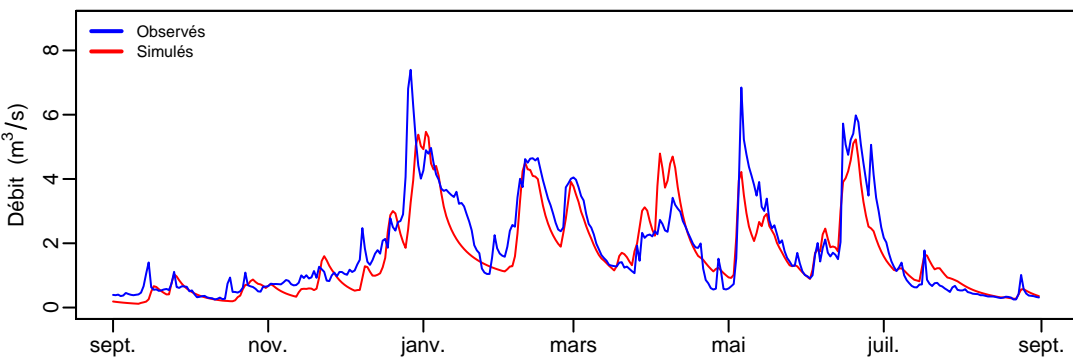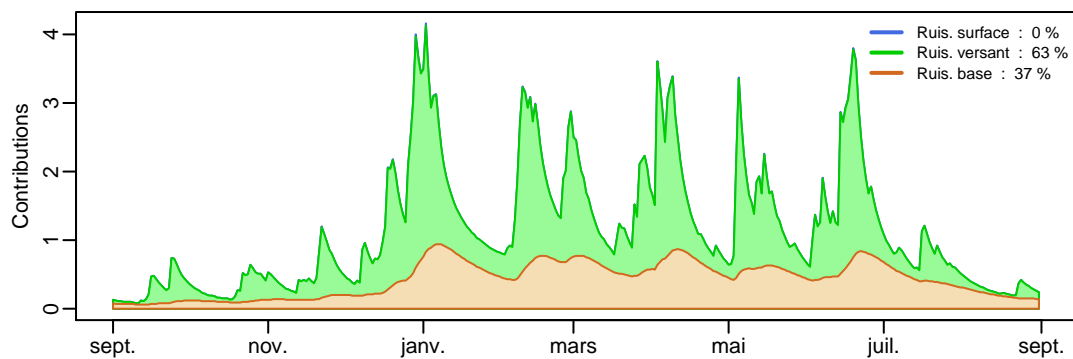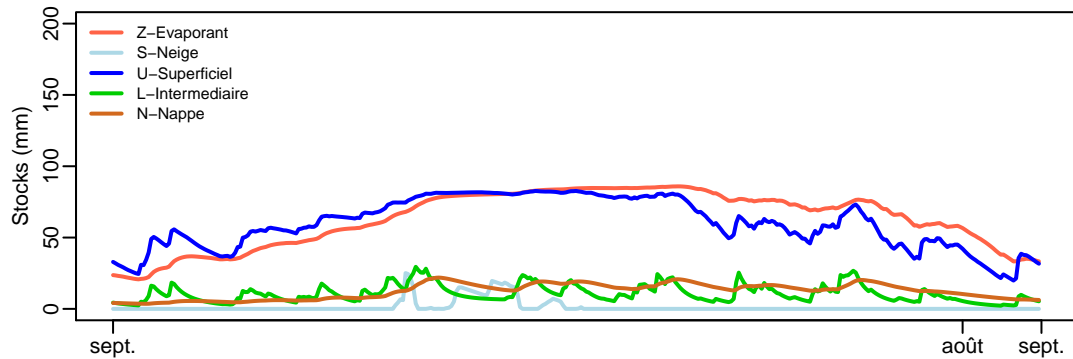

# k1524010 (122.17 km<sup>2</sup>) – année 1987–1988

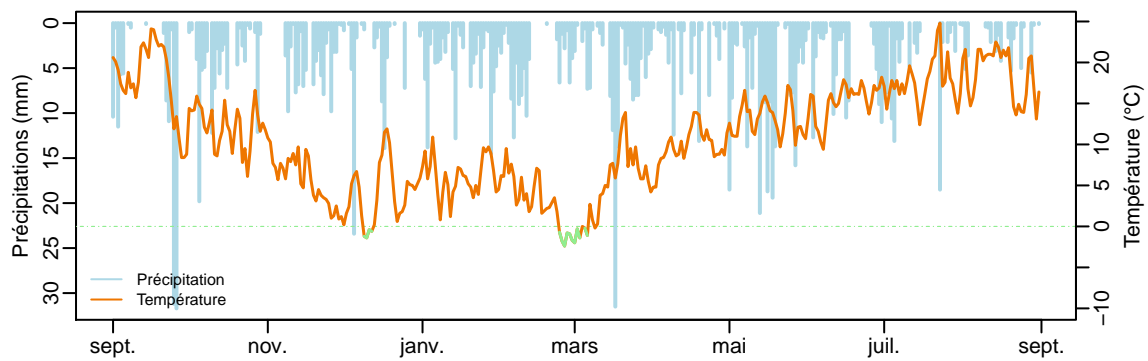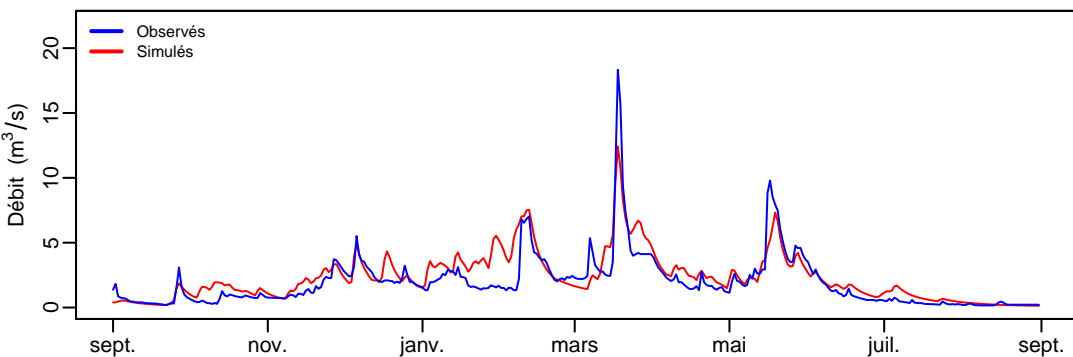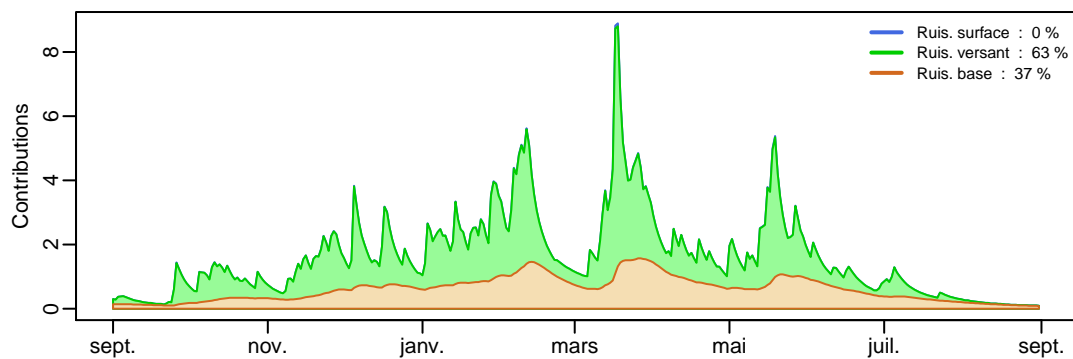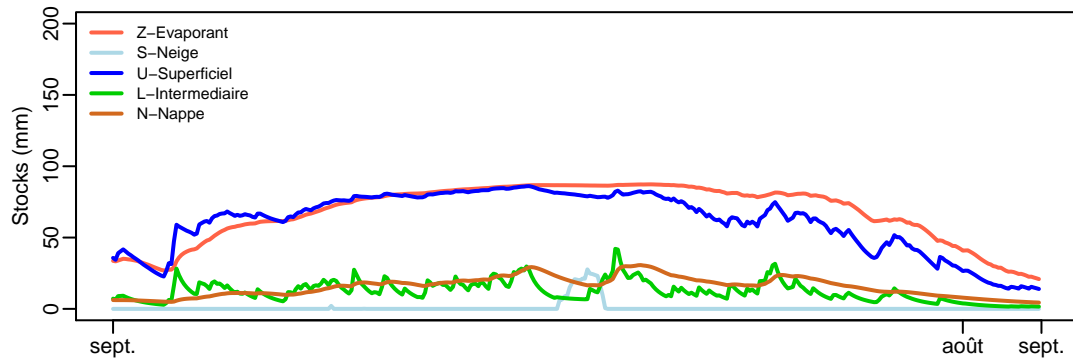

# k1524010 (122.17 km<sup>2</sup>) – année 1988–1989

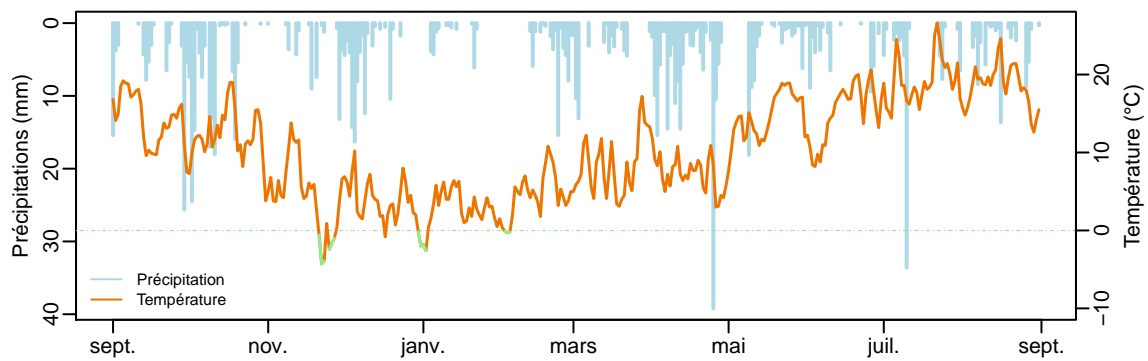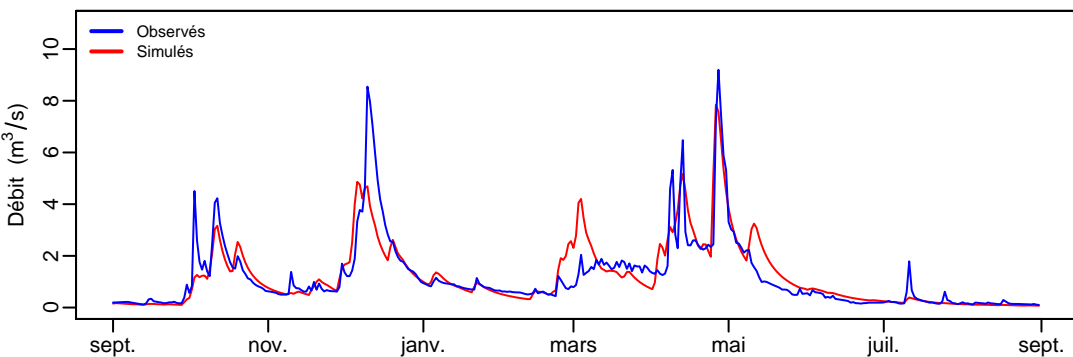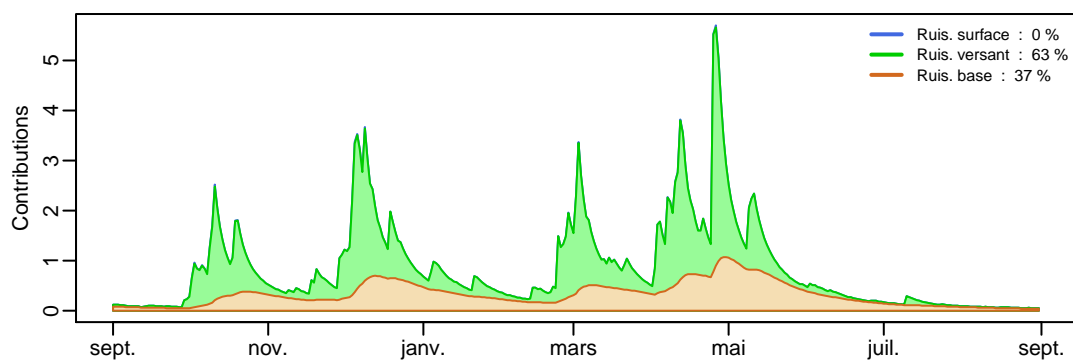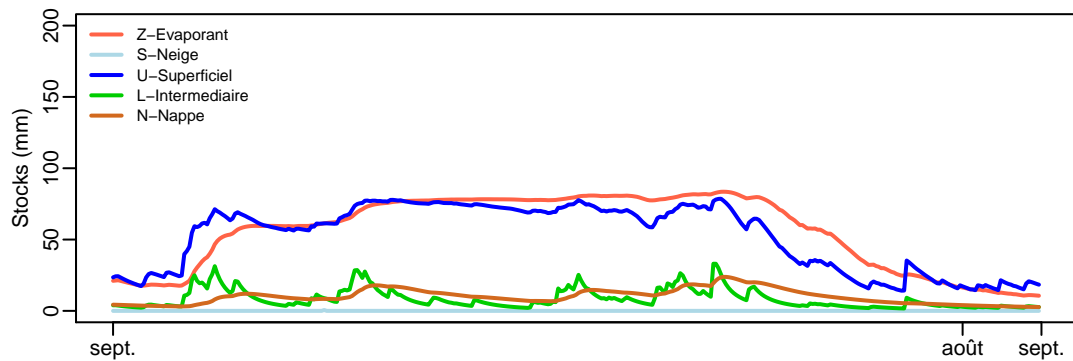

# k1524010 (122.17 km²) – année 1989–1990

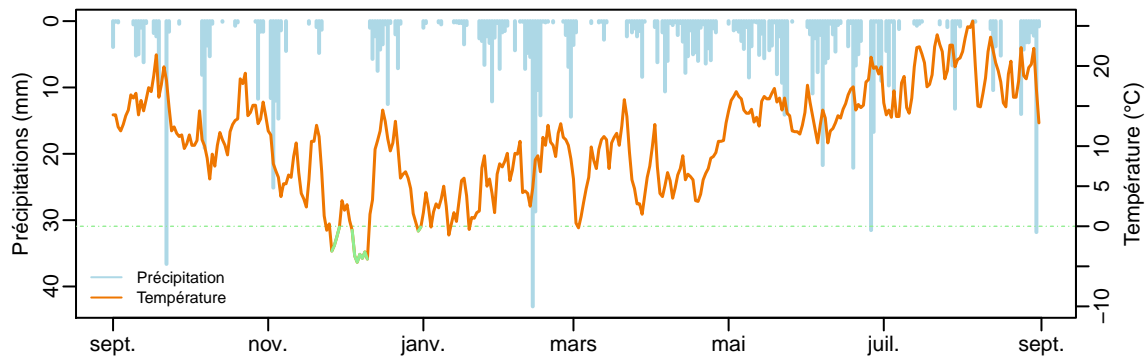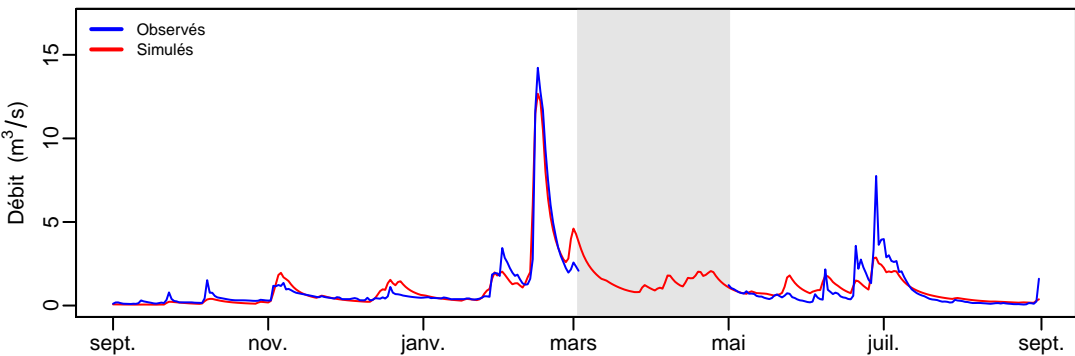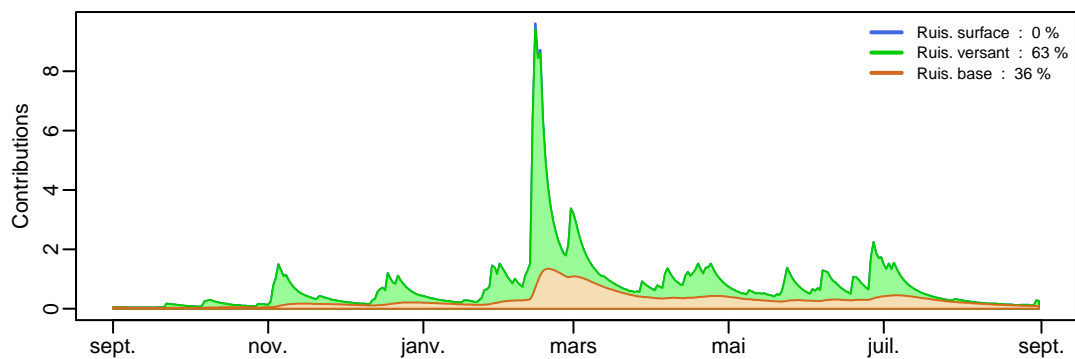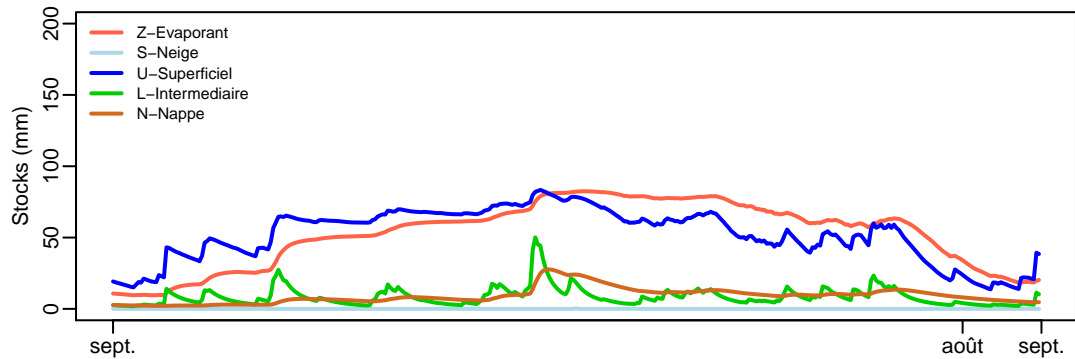

# k1524010 (122.17 km<sup>2</sup>) – année 1990–1991

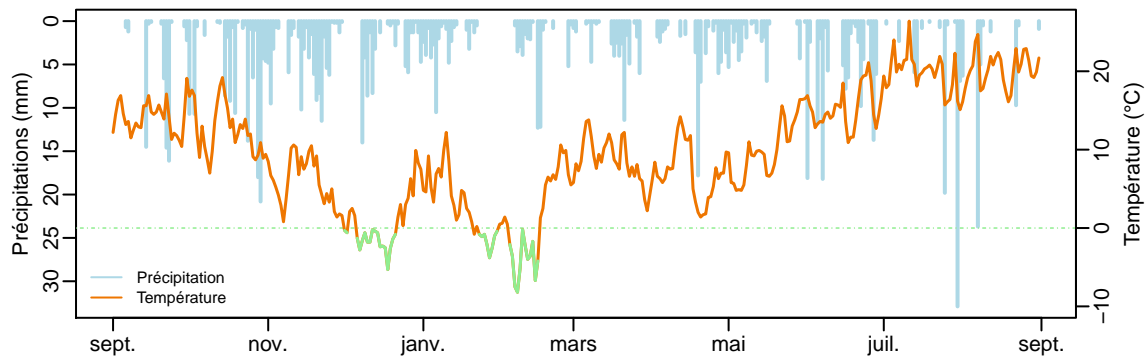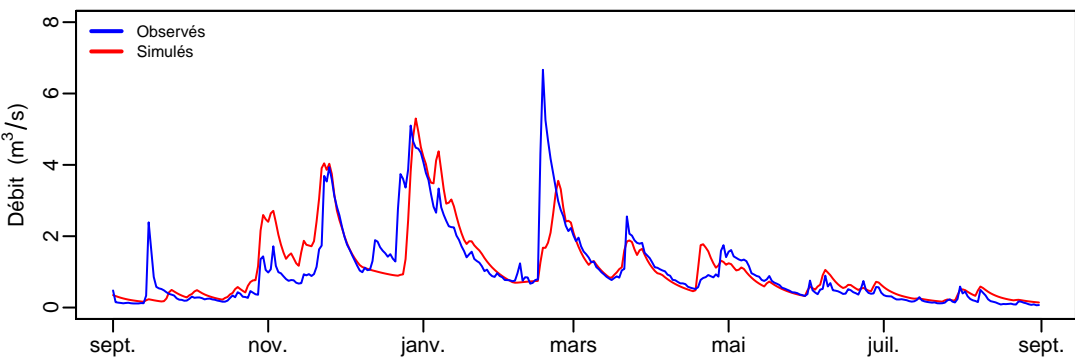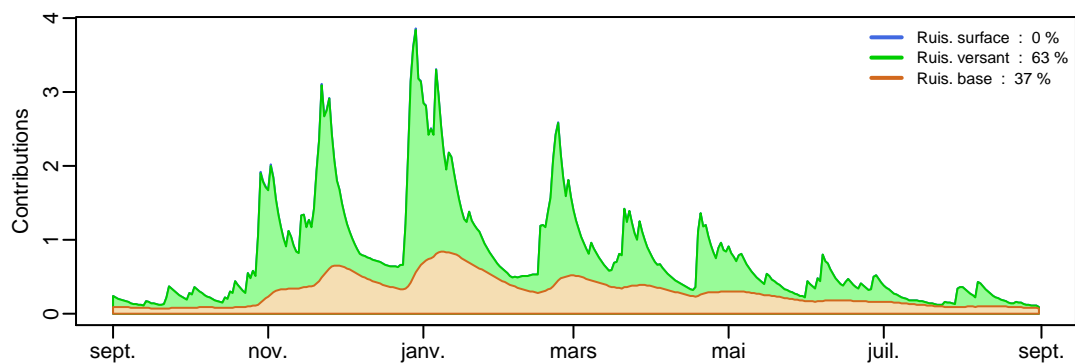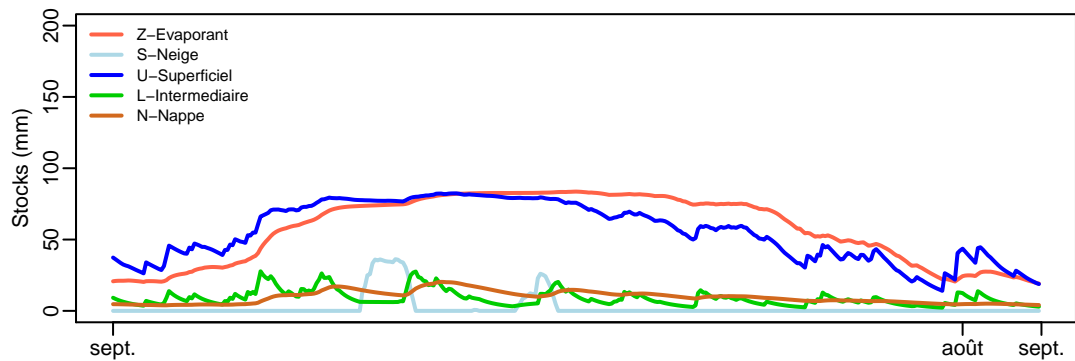



# k1524010 (122.17 km<sup>2</sup>) – année 1991–1992

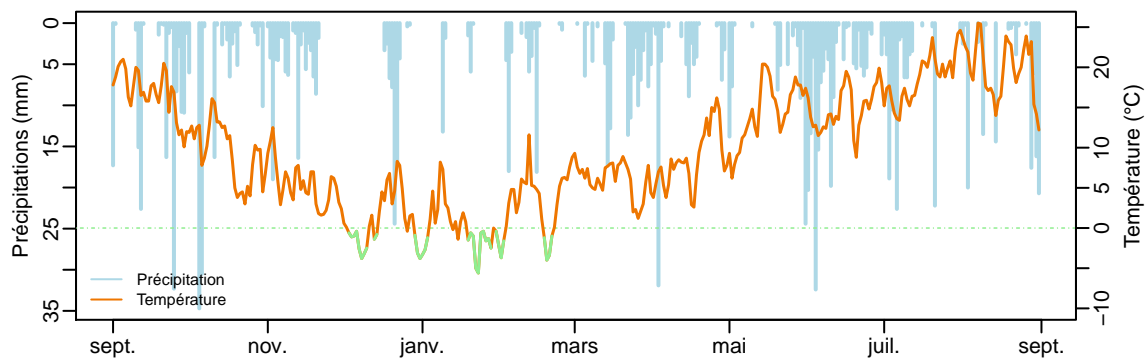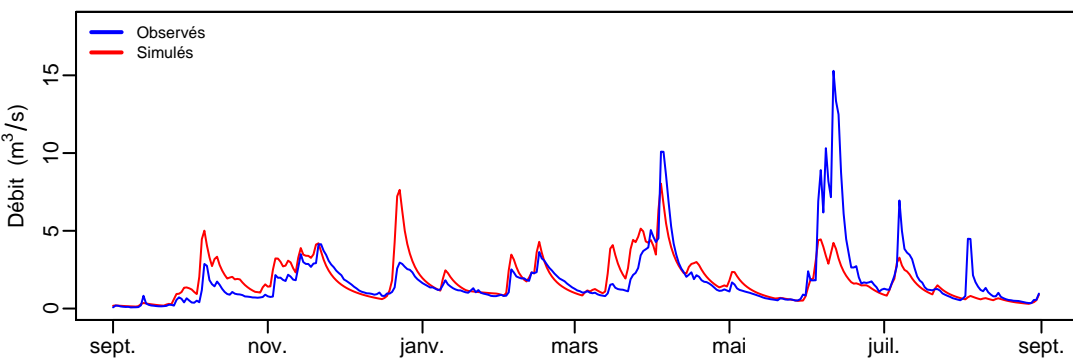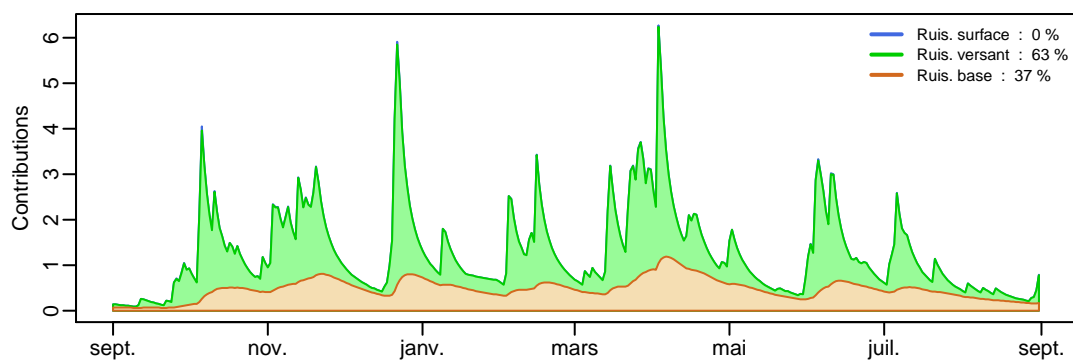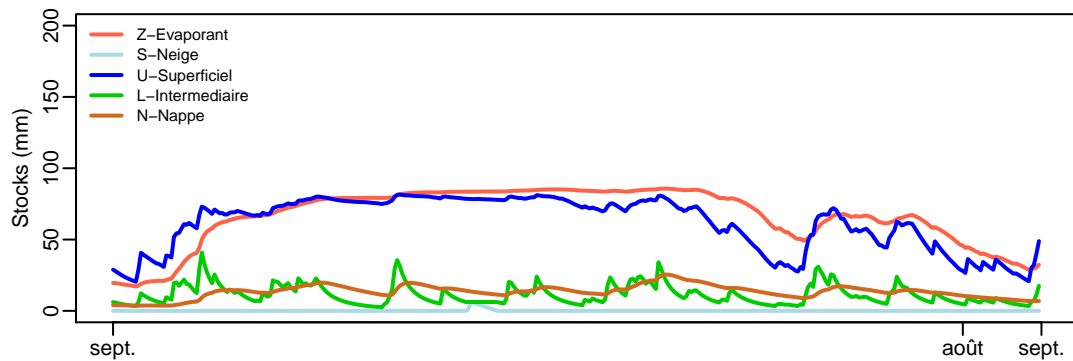

# k1524010 (122.17 km<sup>2</sup>) – année 1992–1993

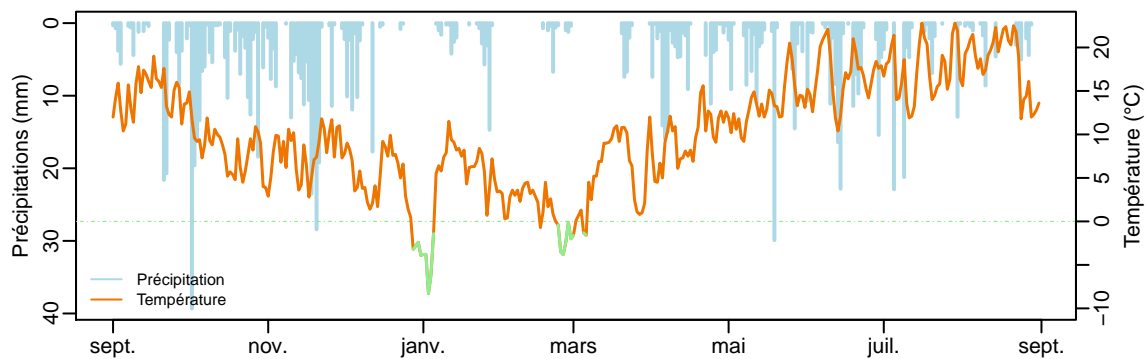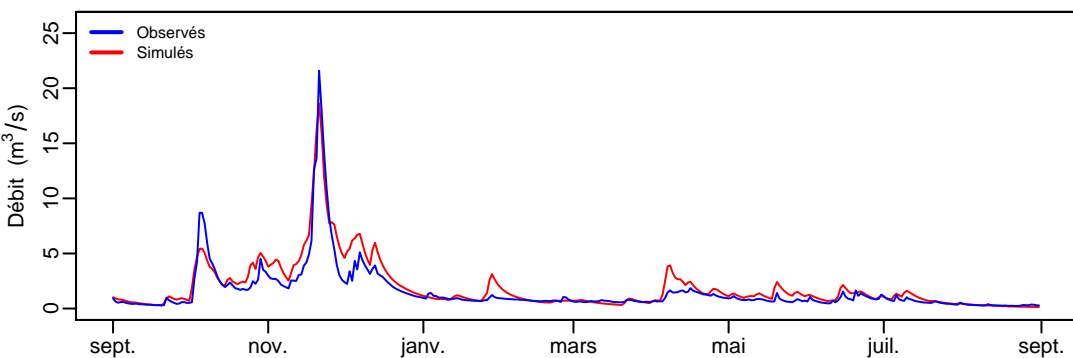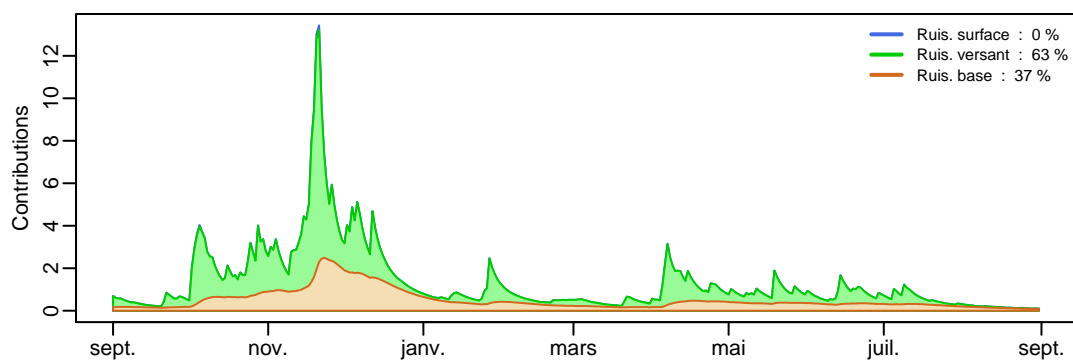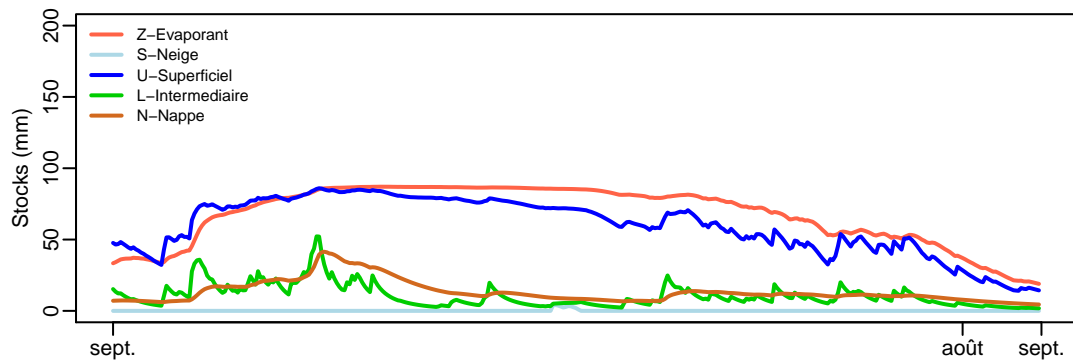

# k1524010 (122.17 km<sup>2</sup>) – année 1993–1994

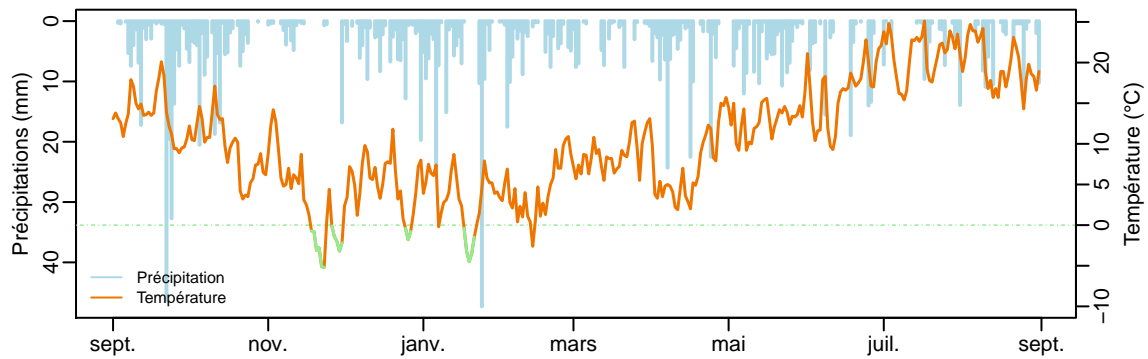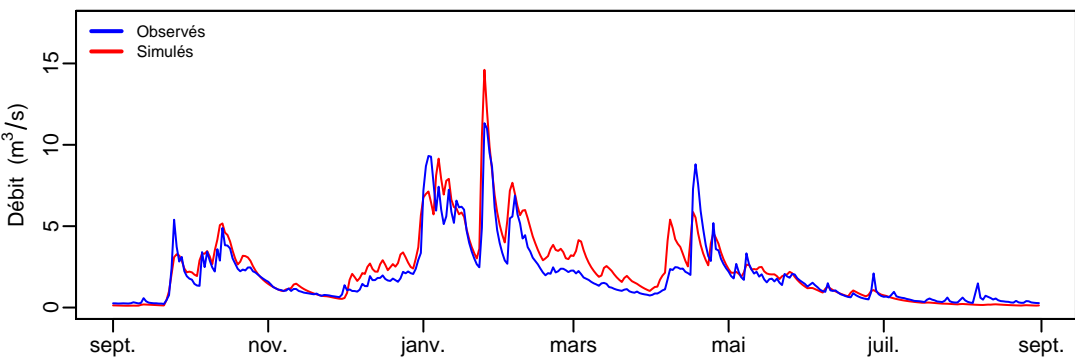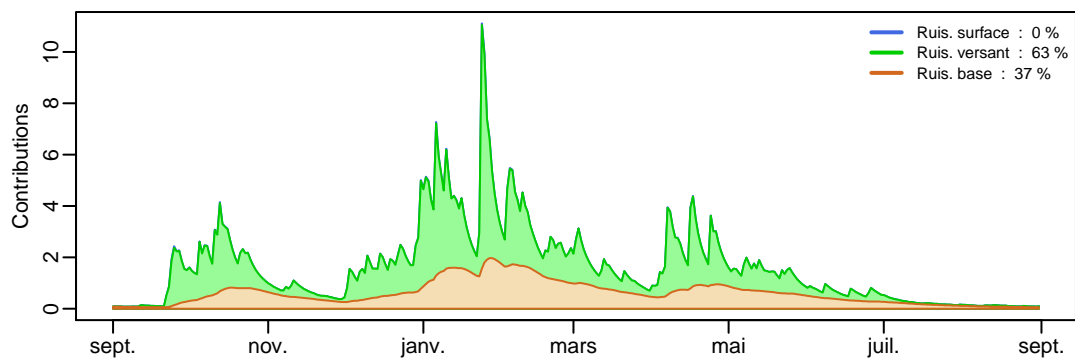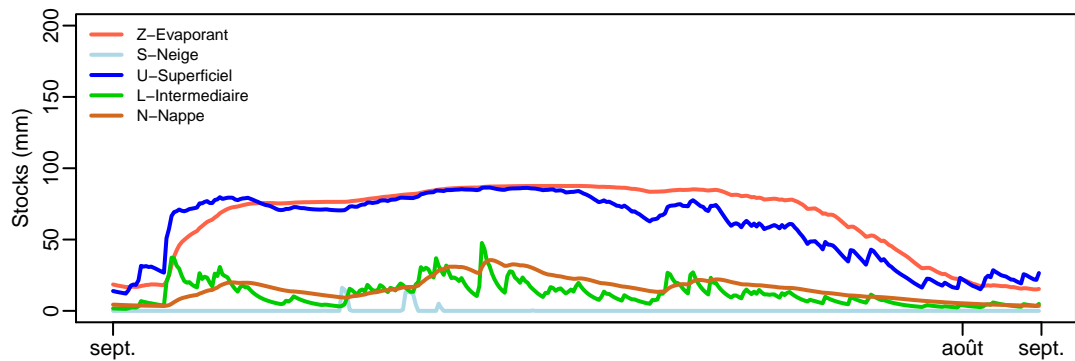

# k1524010 (122.17 km<sup>2</sup>) – année 1994–1995

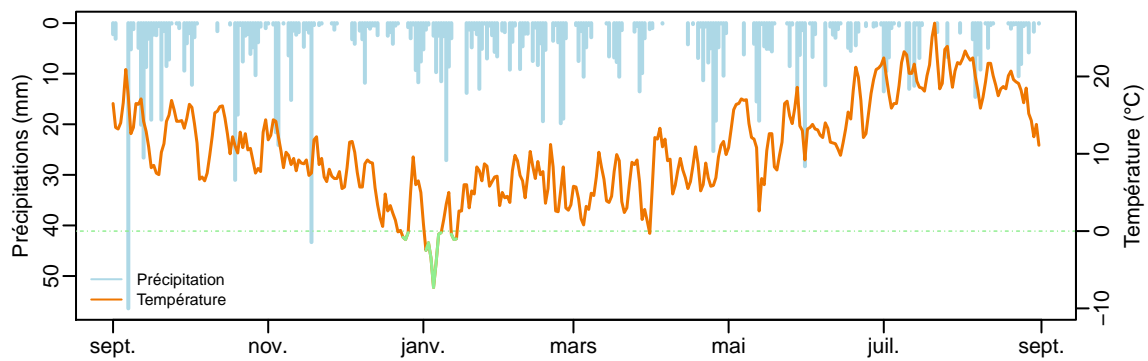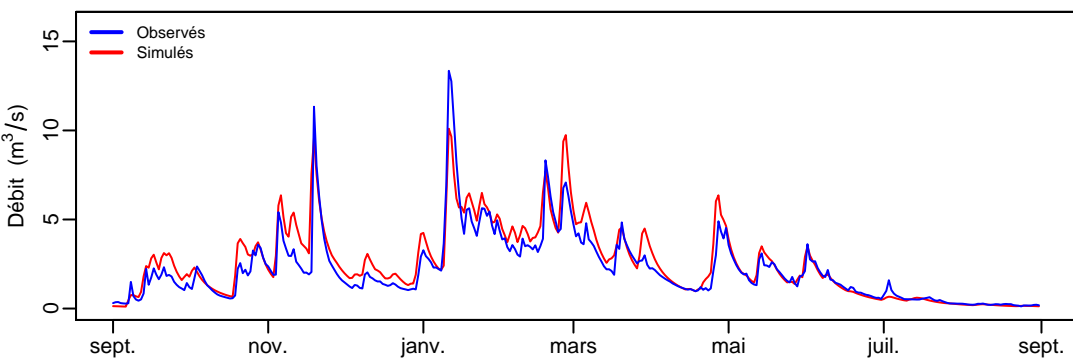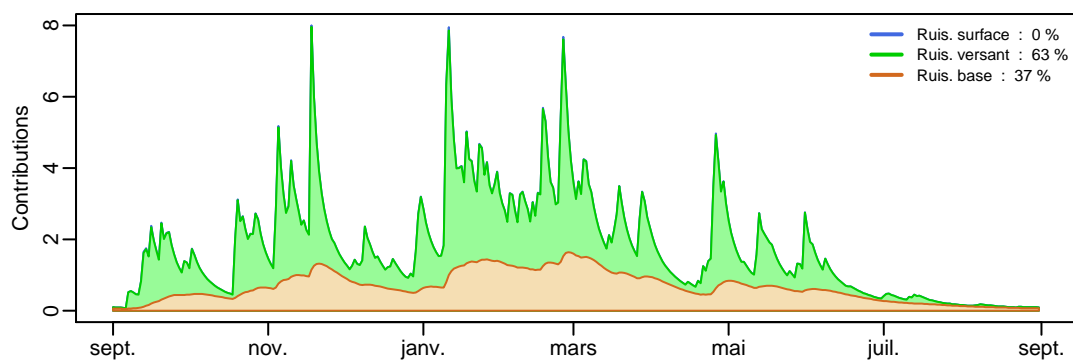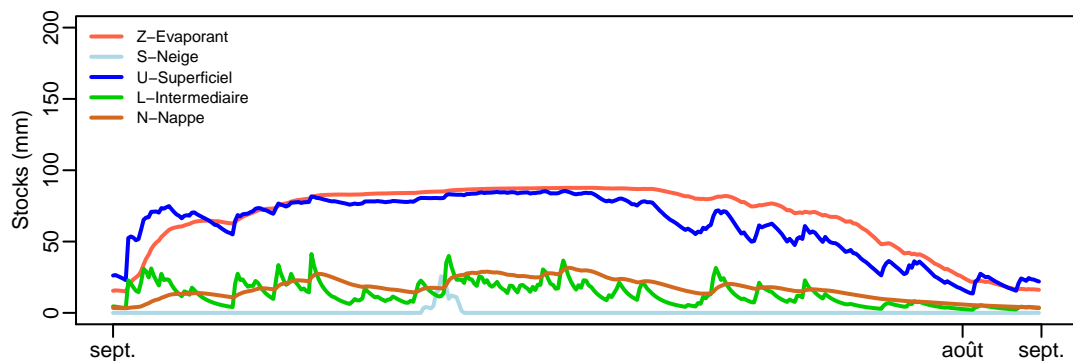

# k1524010 (122.17 km<sup>2</sup>) – année 1995–1996

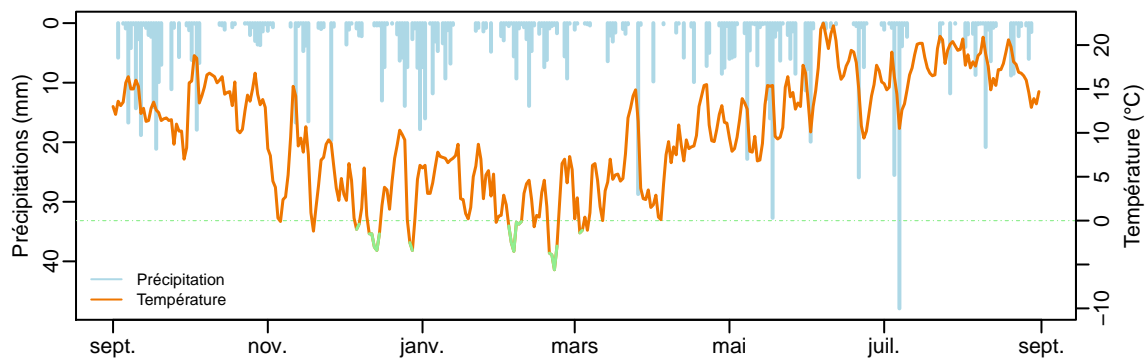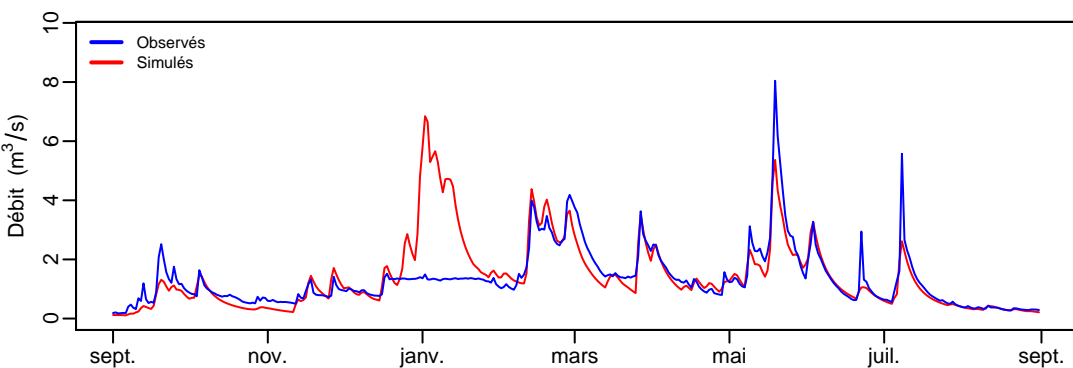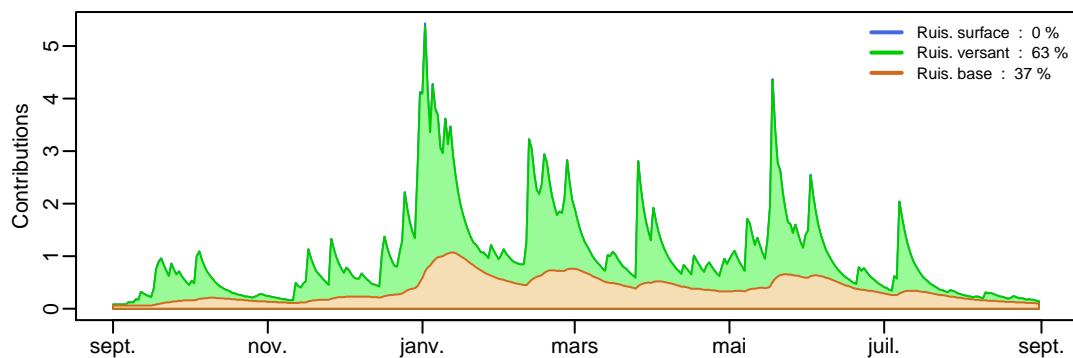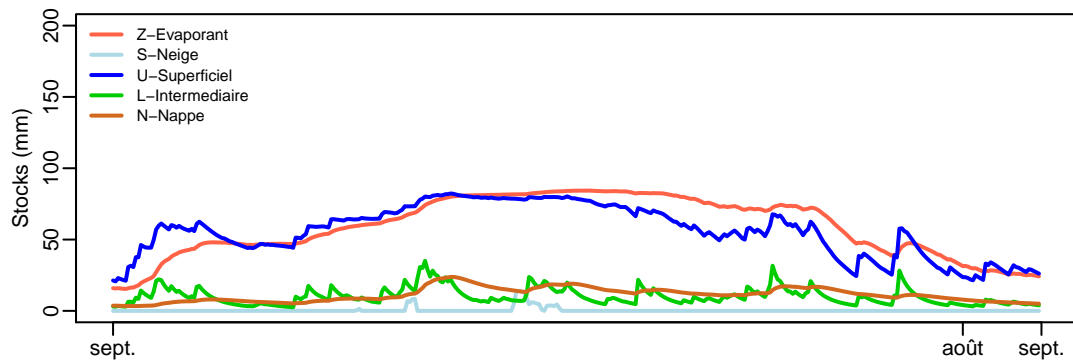

# k1524010 (122.17 km<sup>2</sup>) – année 1996–1997

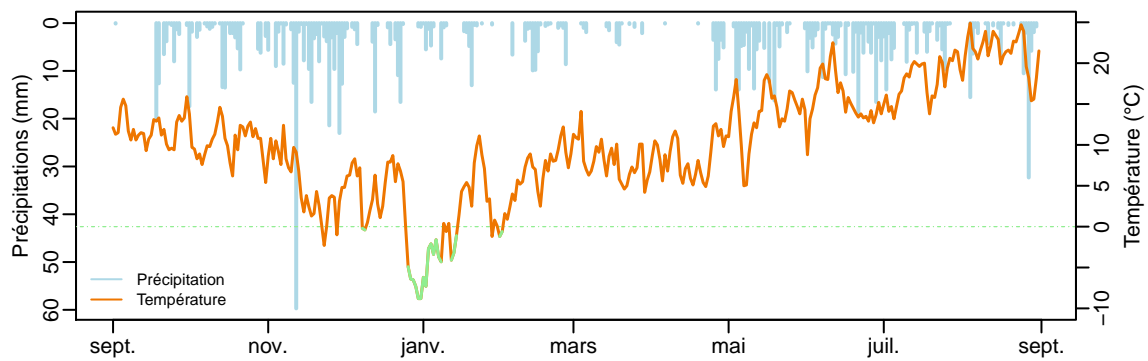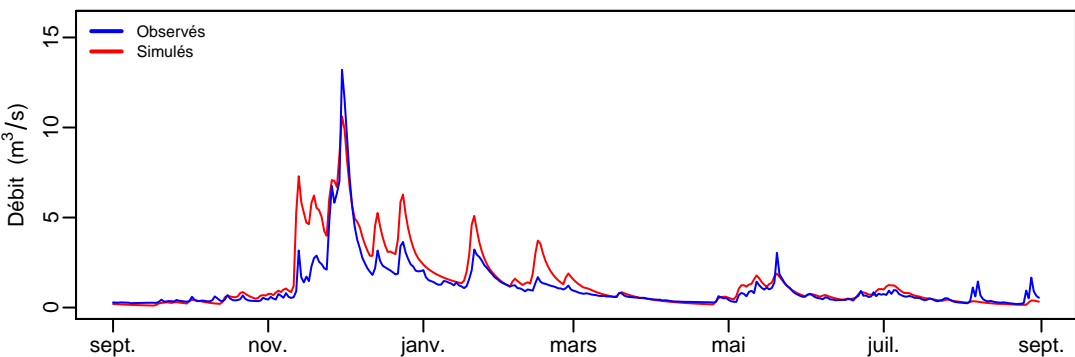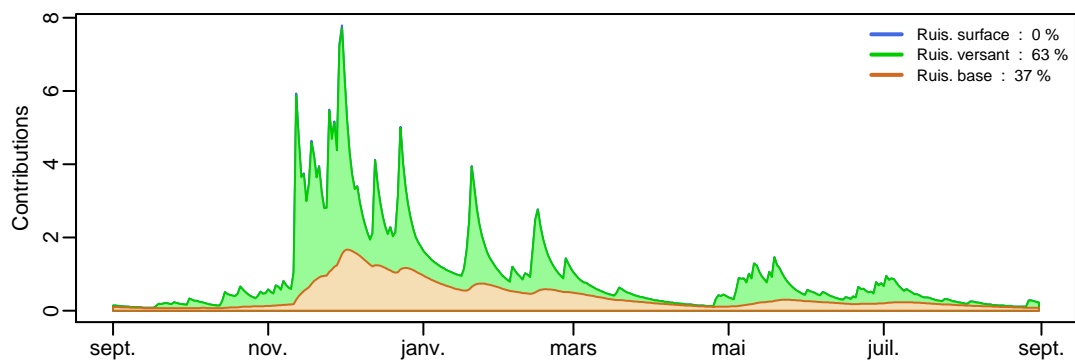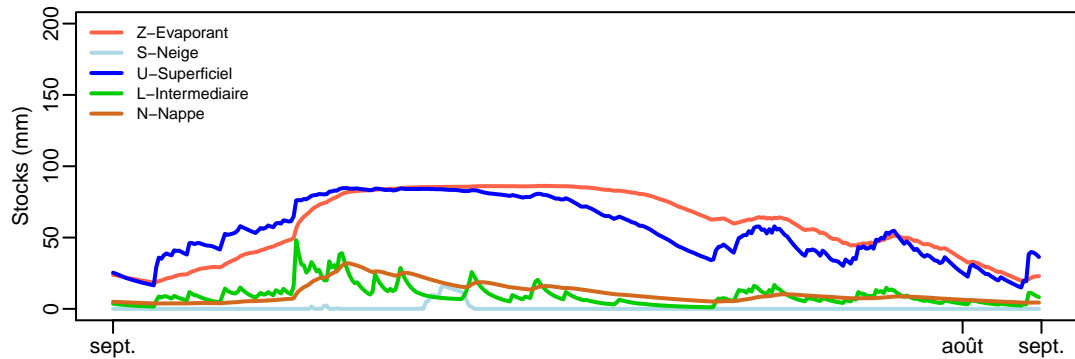

# k1524010 (122.17 km<sup>2</sup>) – année 1997–1998

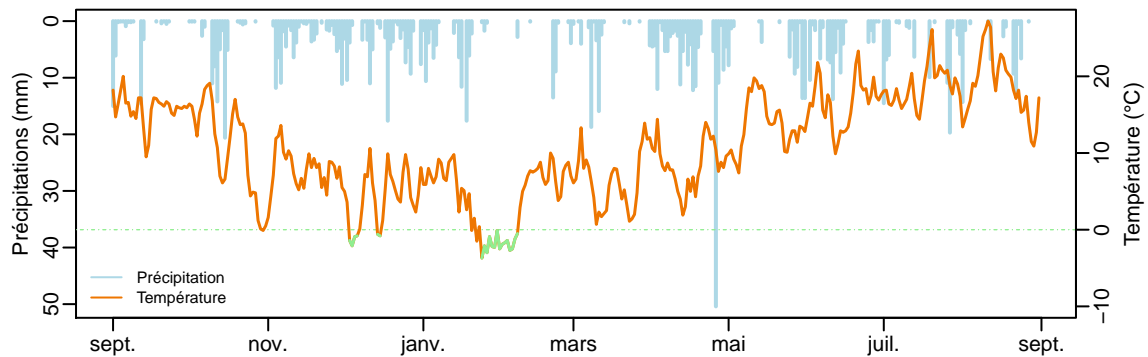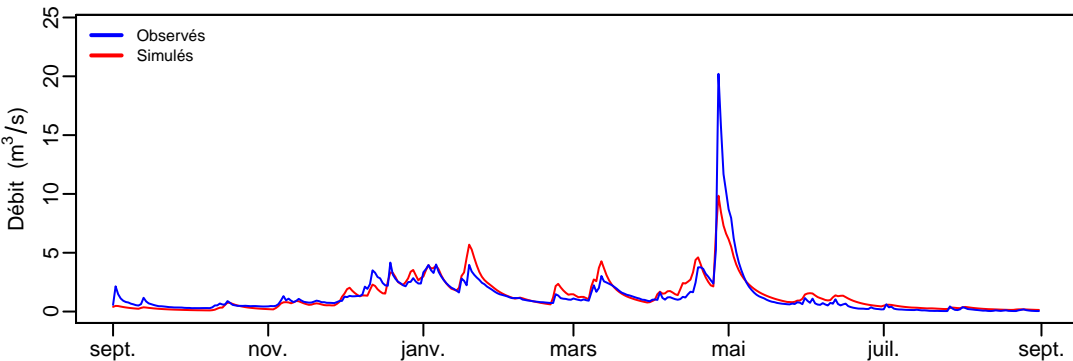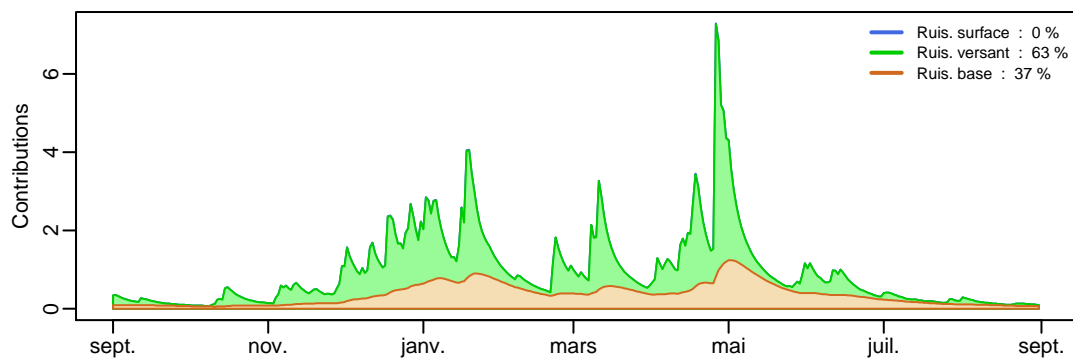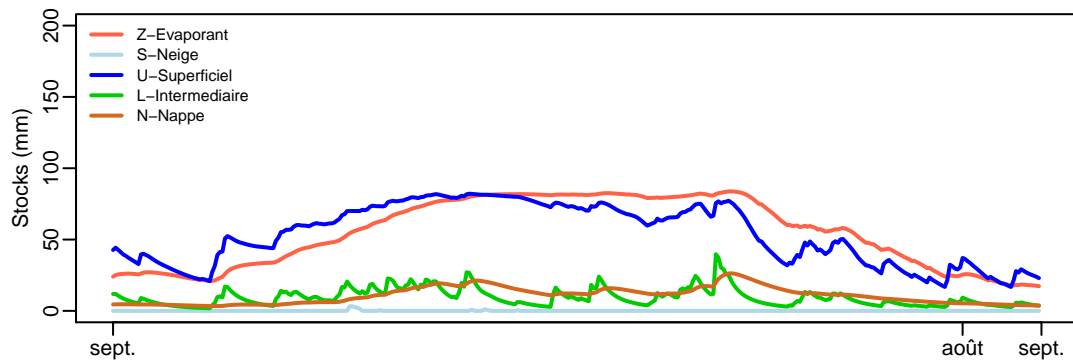

# k1524010 (122.17 km<sup>2</sup>) – année 1998–1999

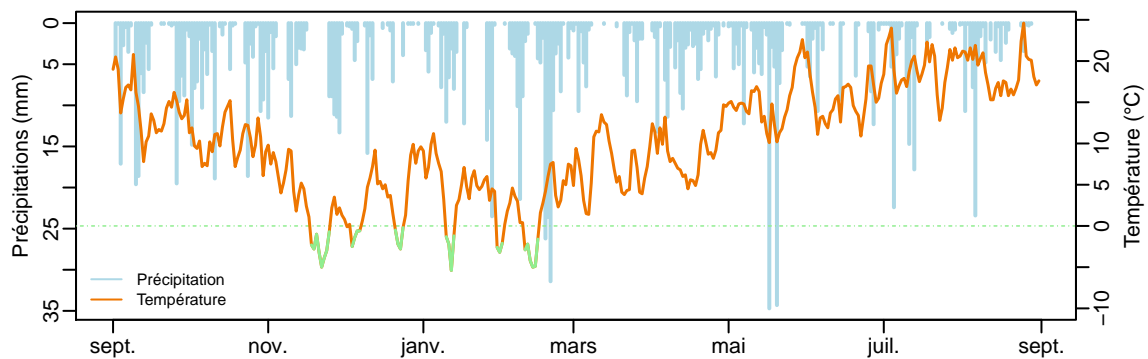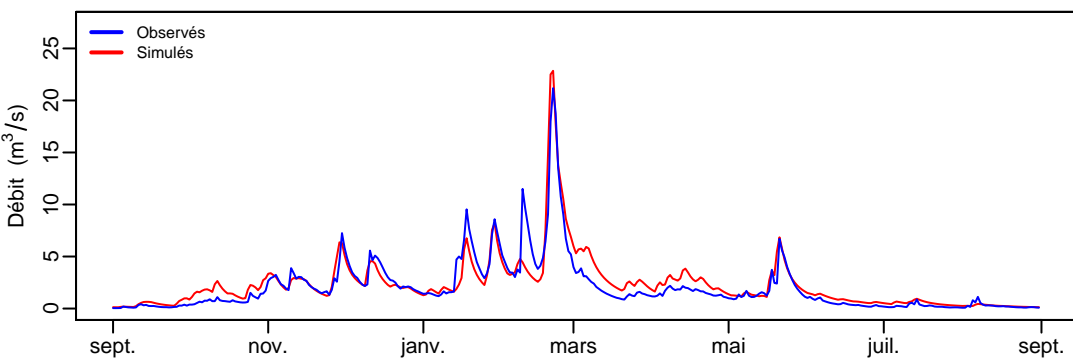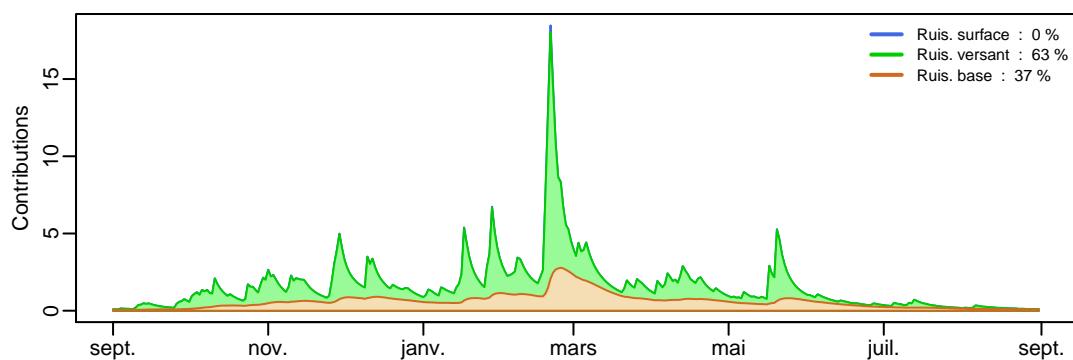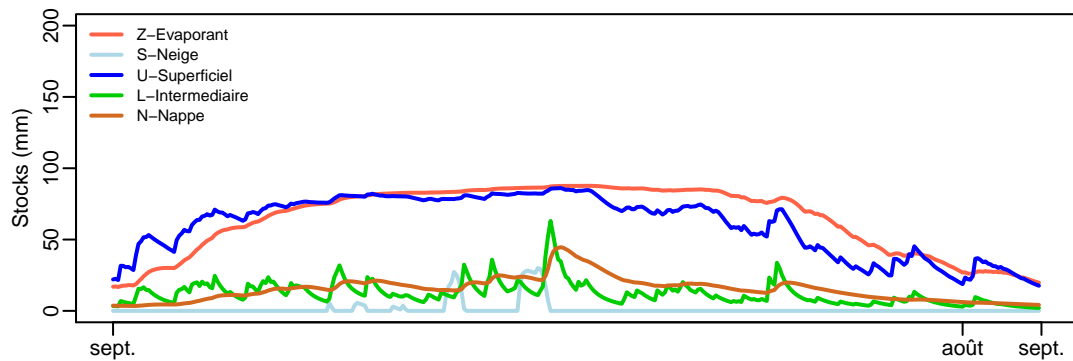



# k1524010 (122.17 km<sup>2</sup>) – année 1999–2000

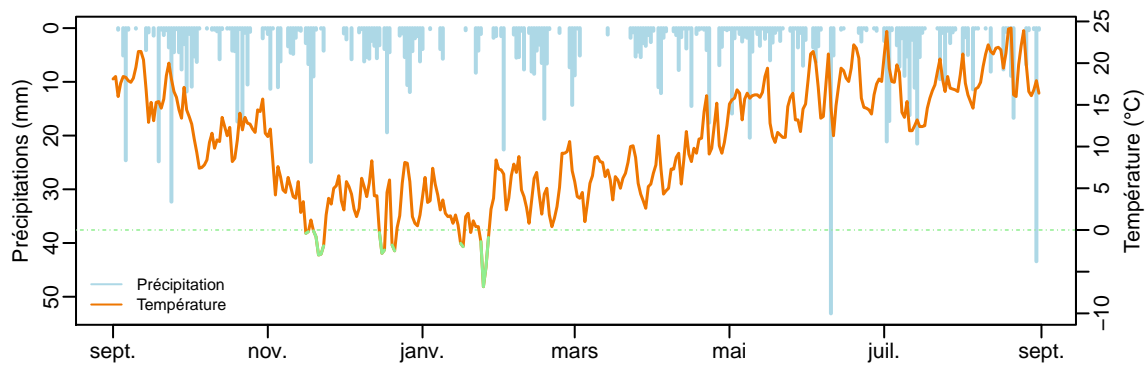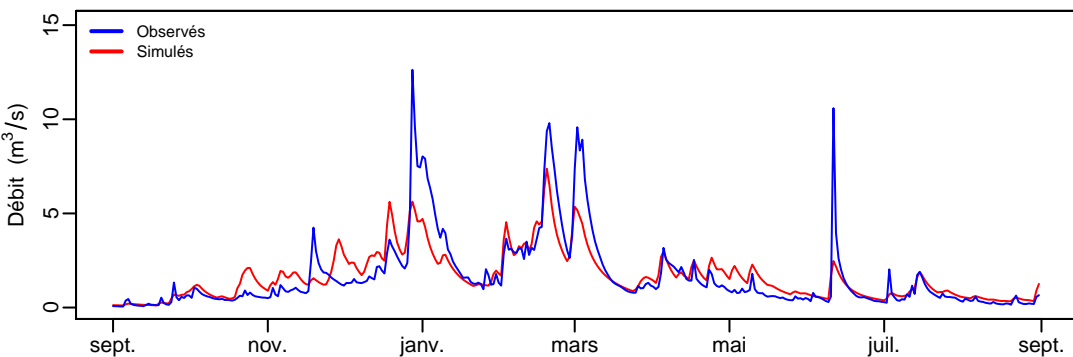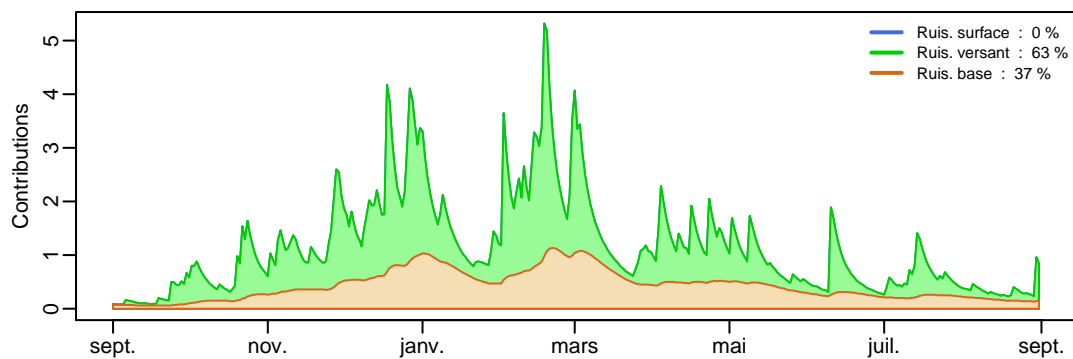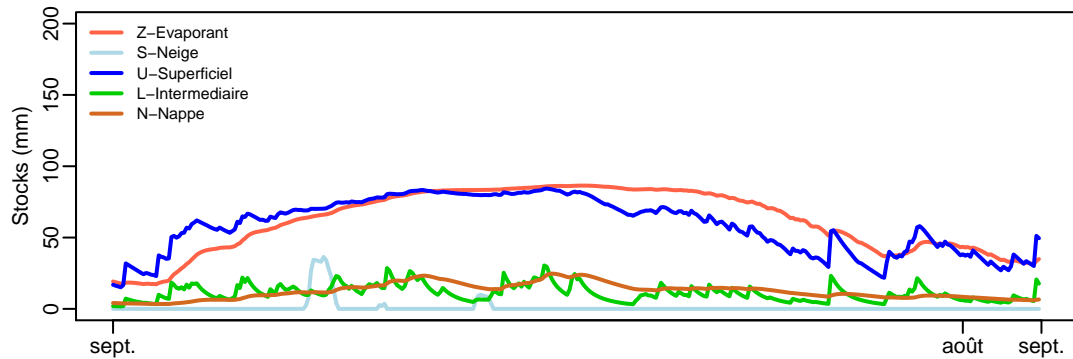

# k1524010 (122.17 km<sup>2</sup>) – année 2000–2001

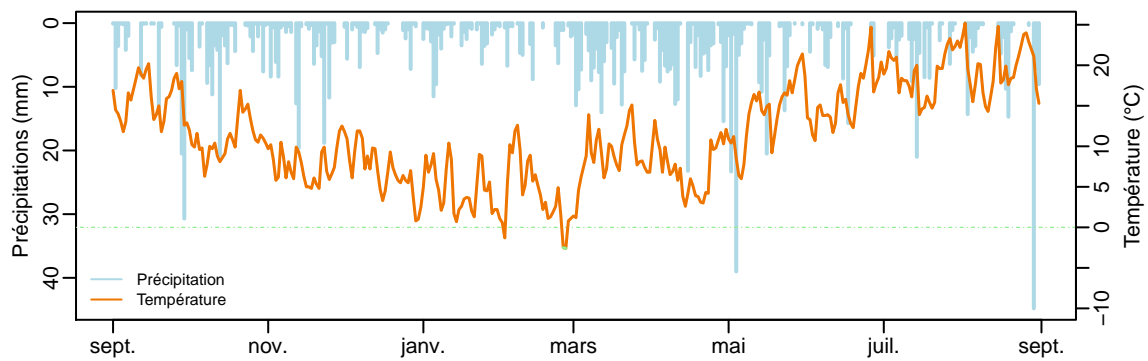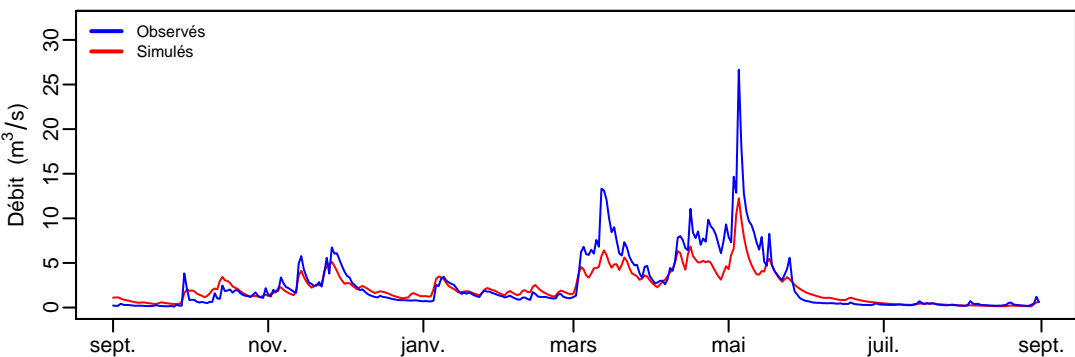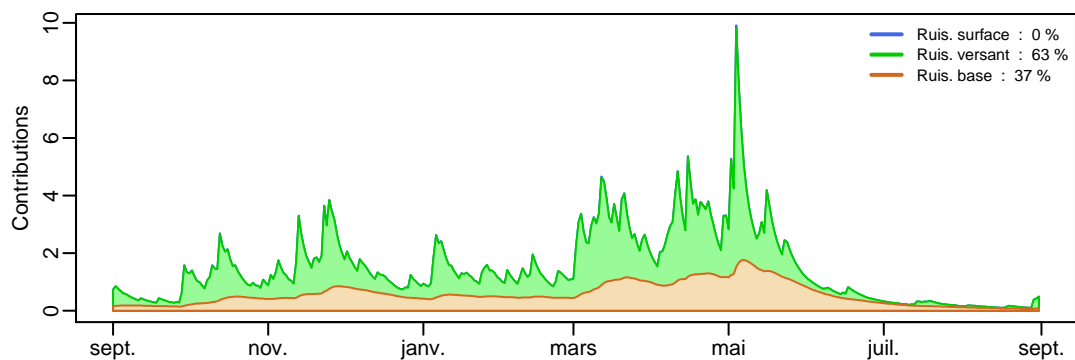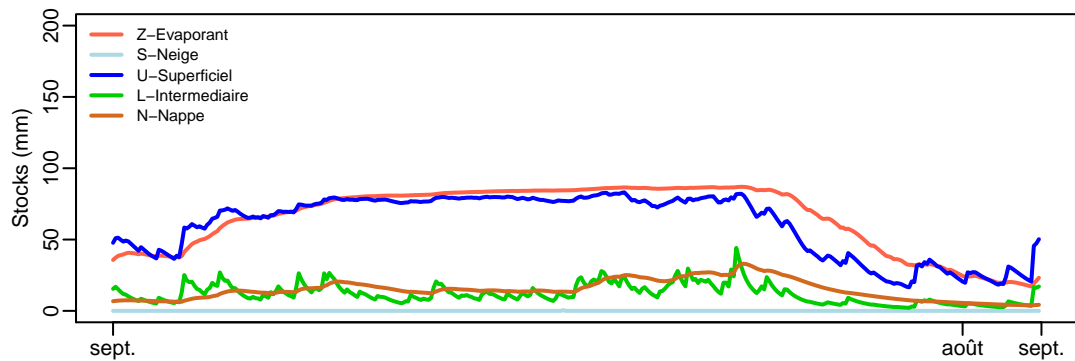

# k1524010 (122.17 km<sup>2</sup>) – année 2001–2002

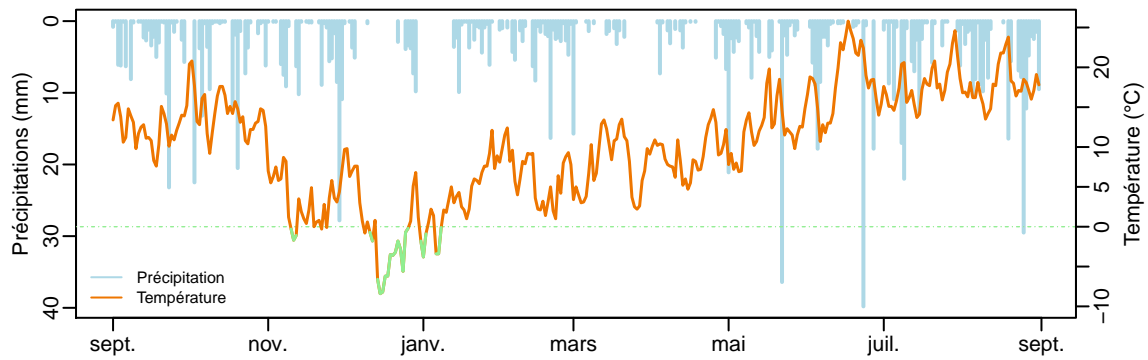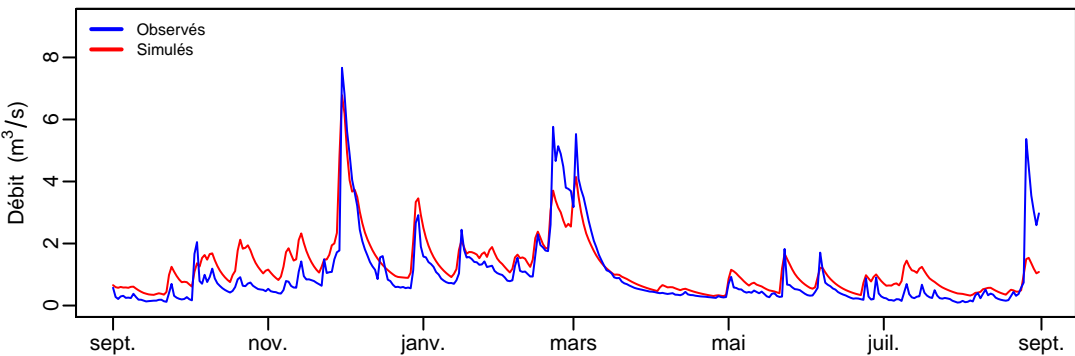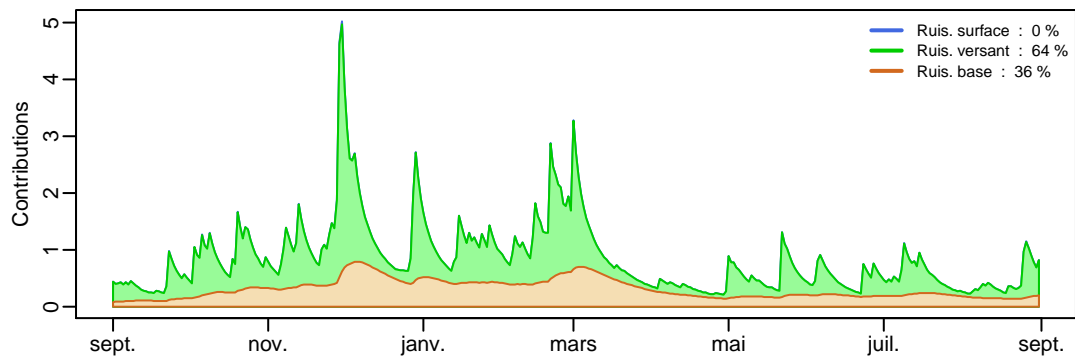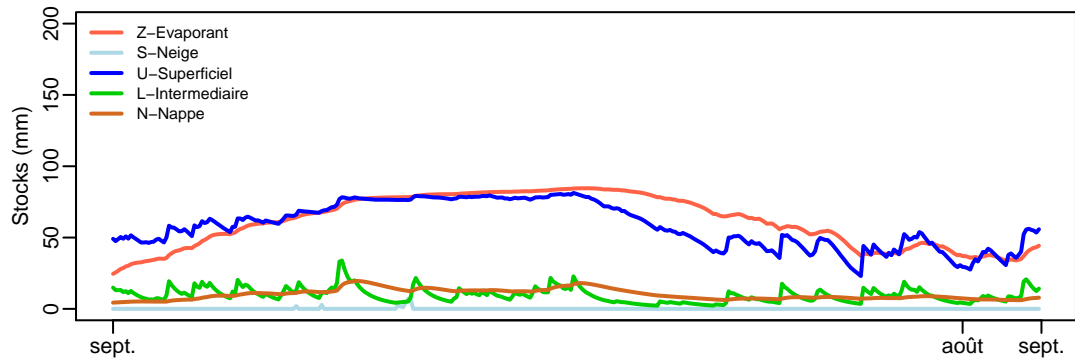

# k1524010 (122.17 km<sup>2</sup>) – année 2002–2003

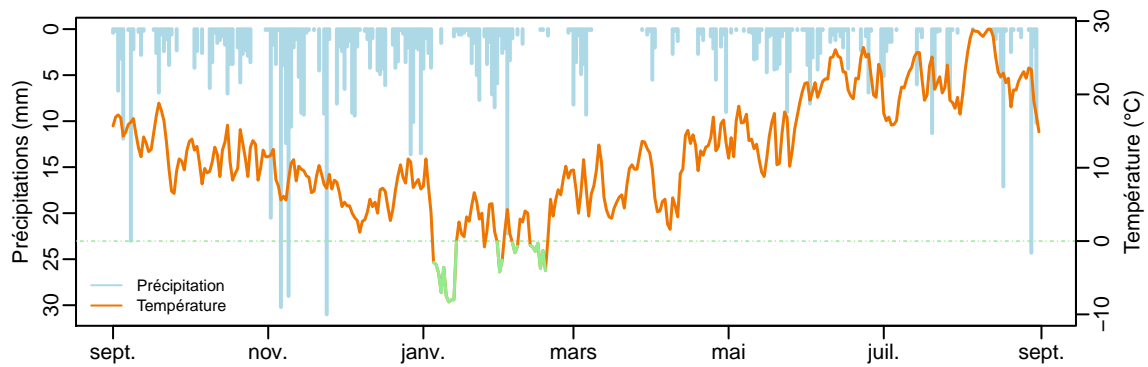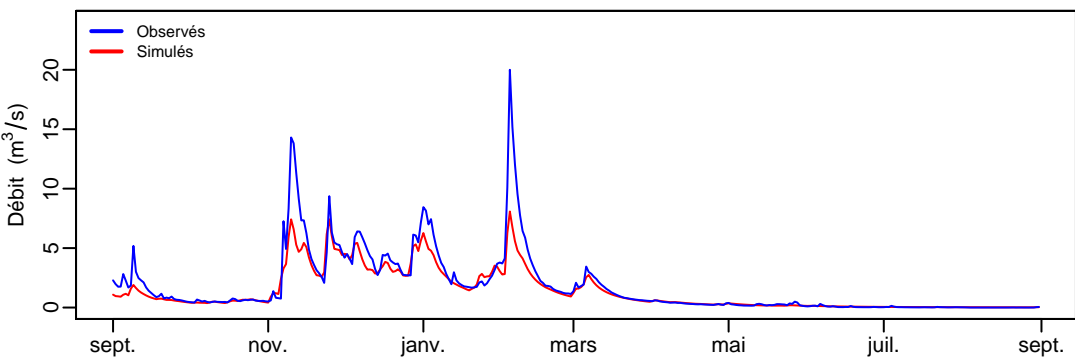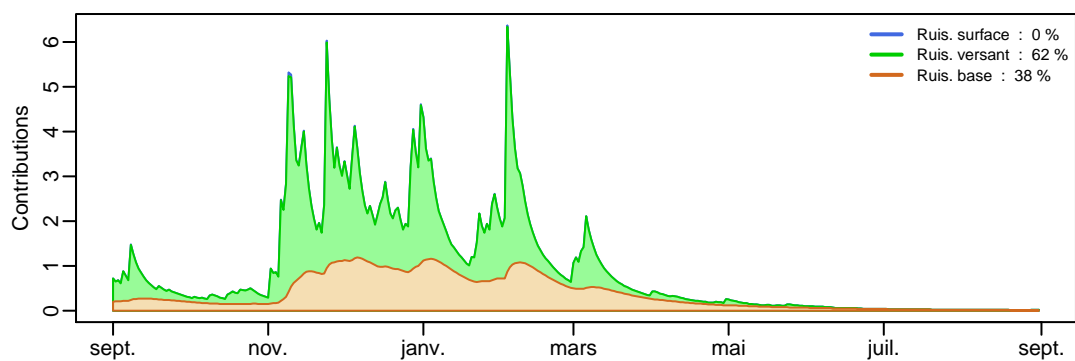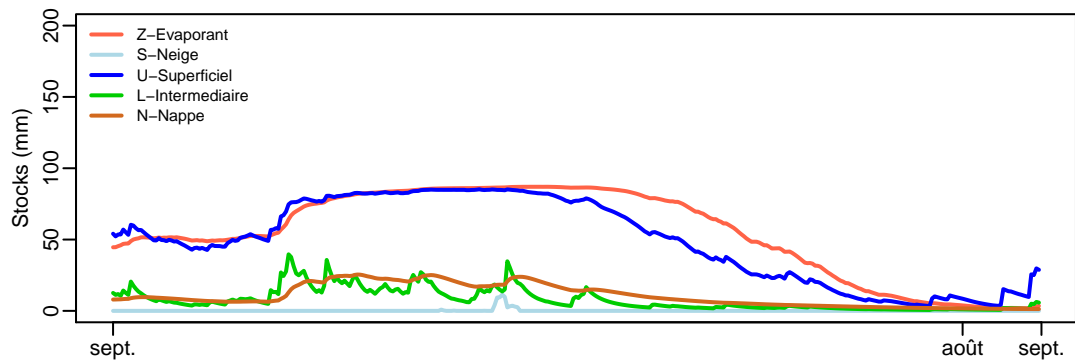

# k1524010 (122.17 km<sup>2</sup>) – année 2003–2004

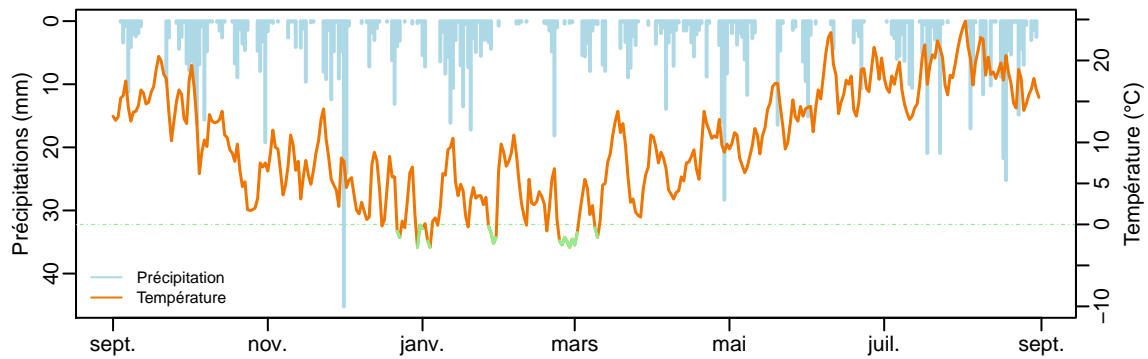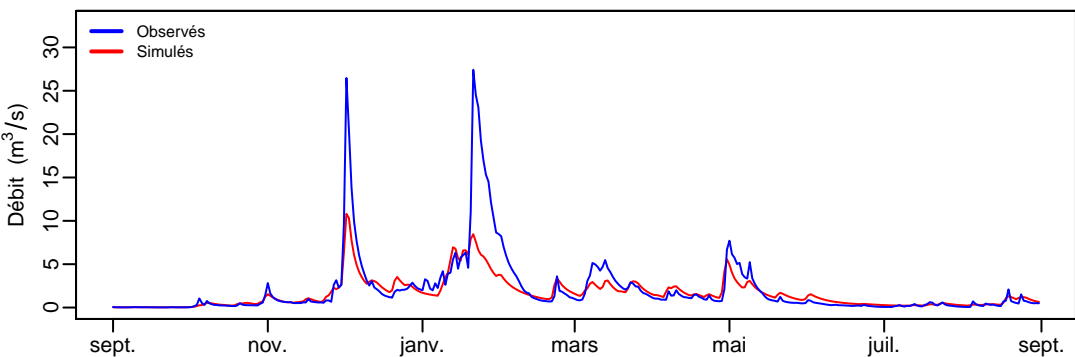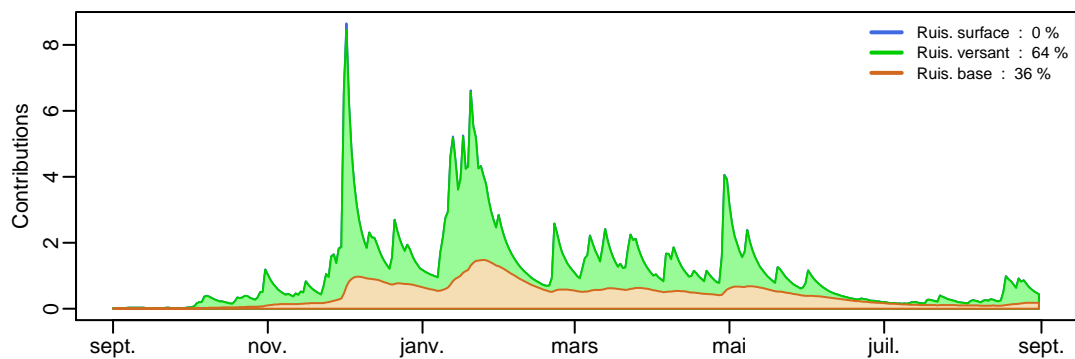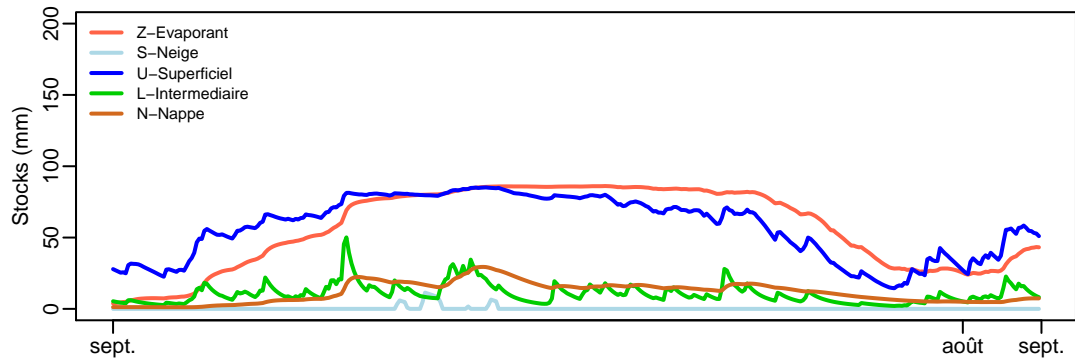

# k1524010 (122.17 km<sup>2</sup>) – année 2004–2005

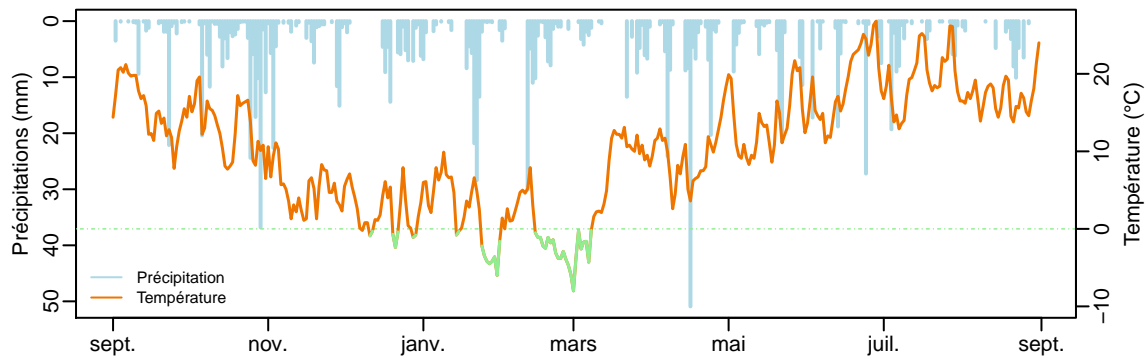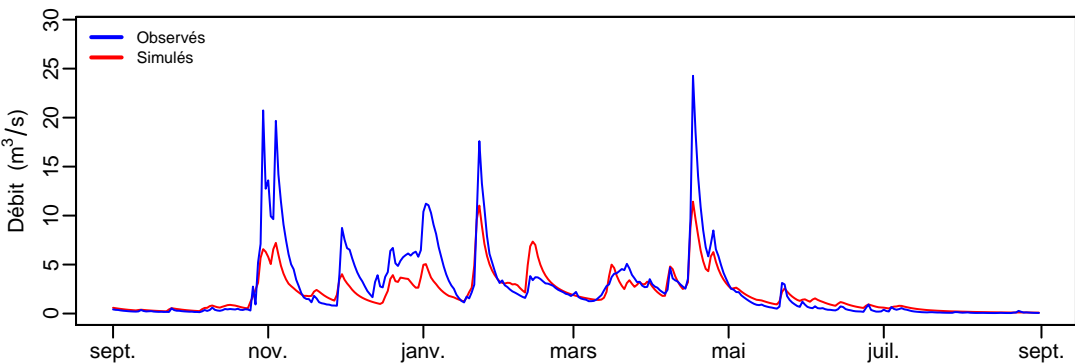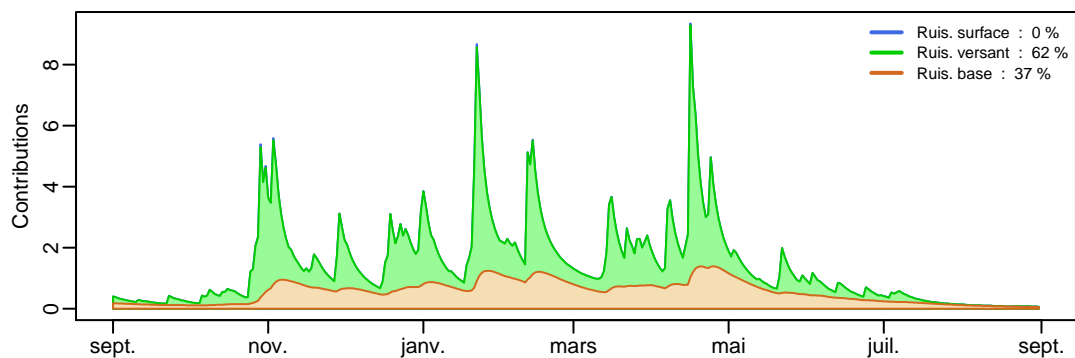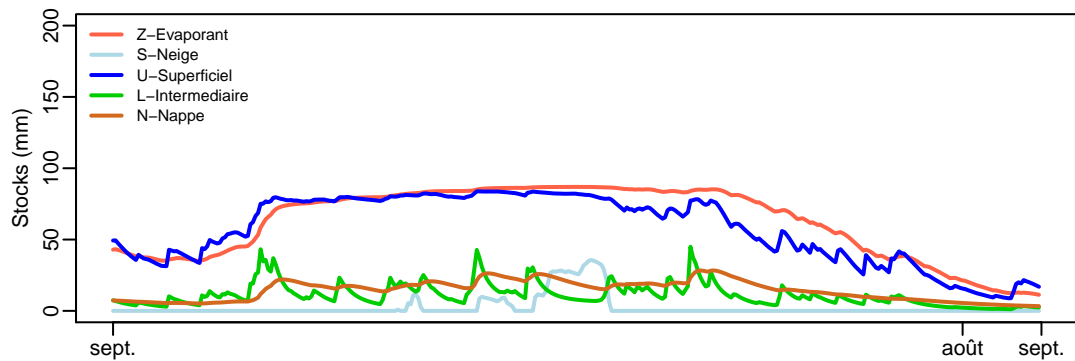

# k1524010 (122.17 km<sup>2</sup>) – année 2005–2006

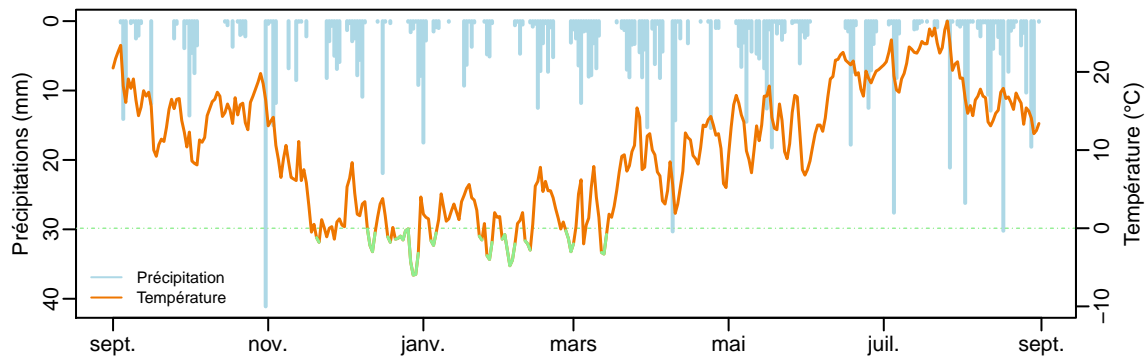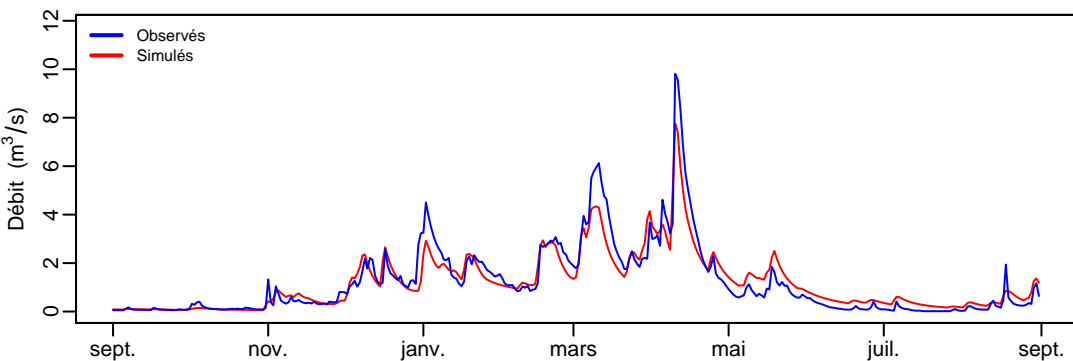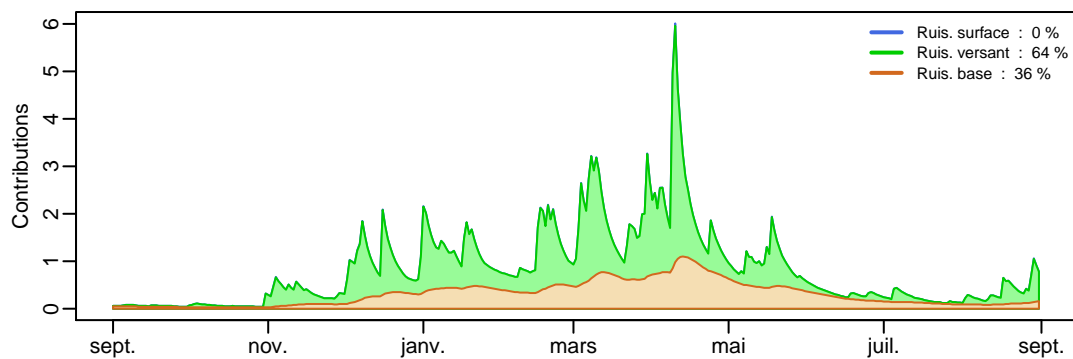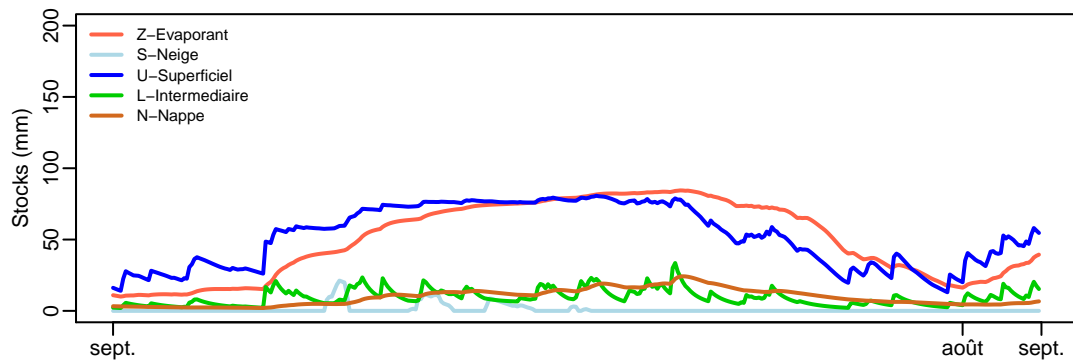

# k1524010 (122.17 km<sup>2</sup>) – année 2006–2007

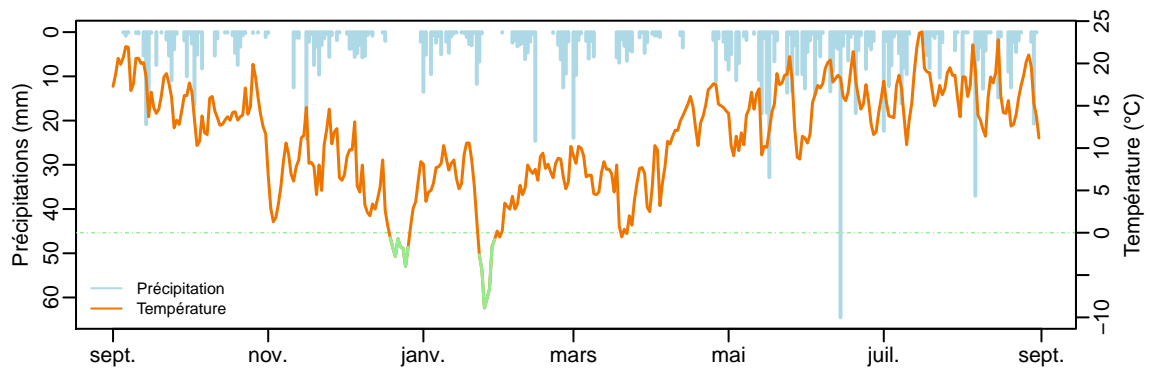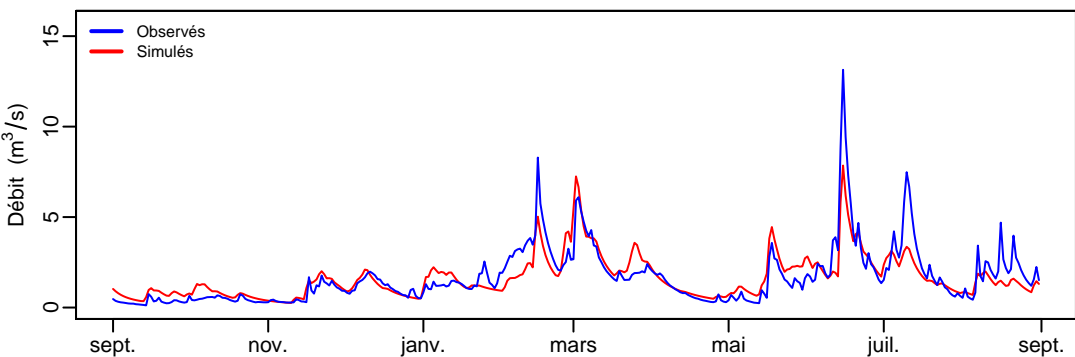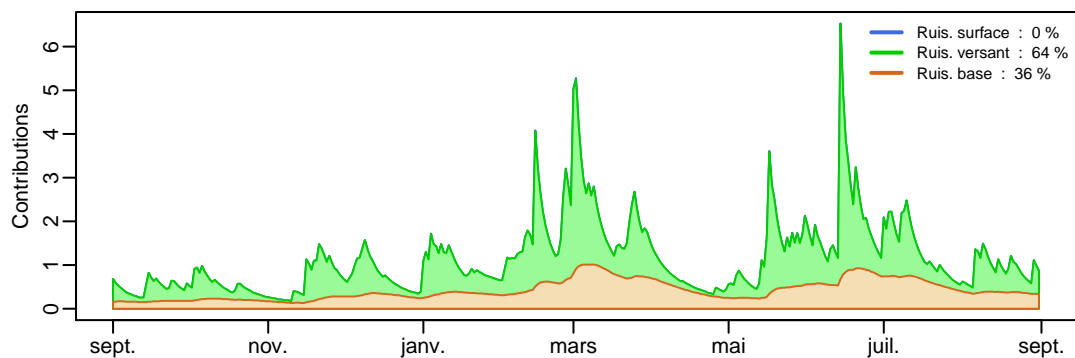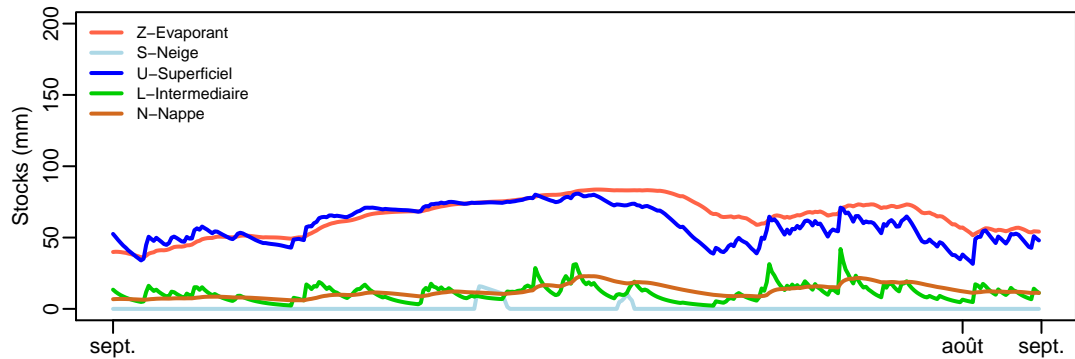



# k1533020 (454.43 km<sup>2</sup>) – année 1994–1995

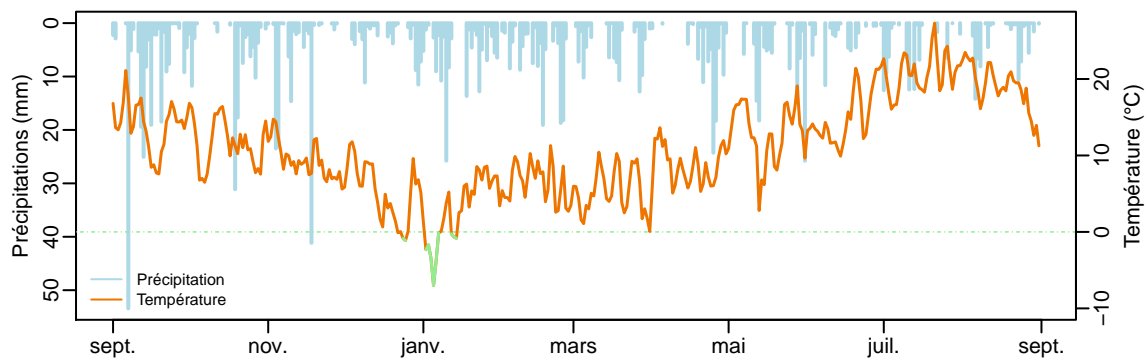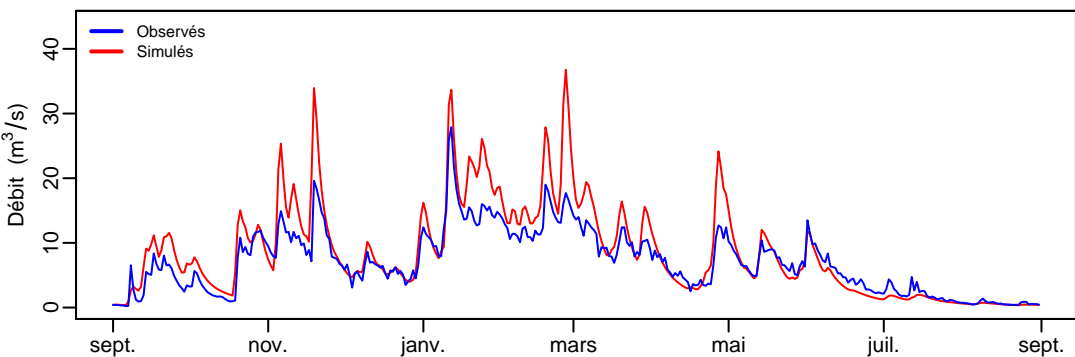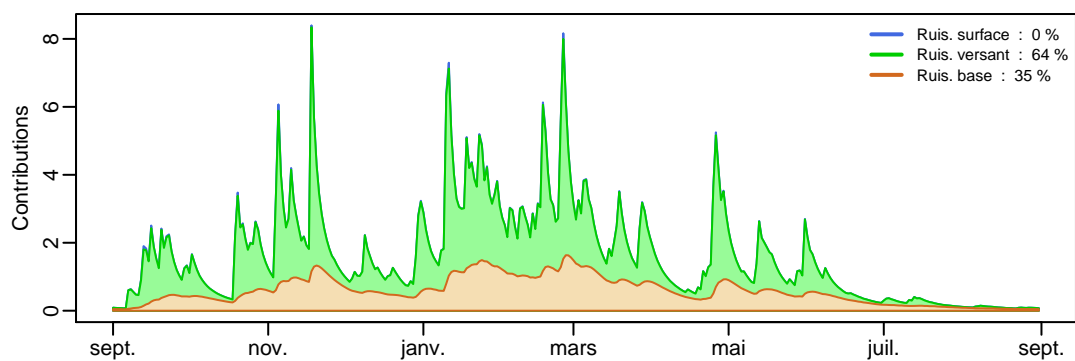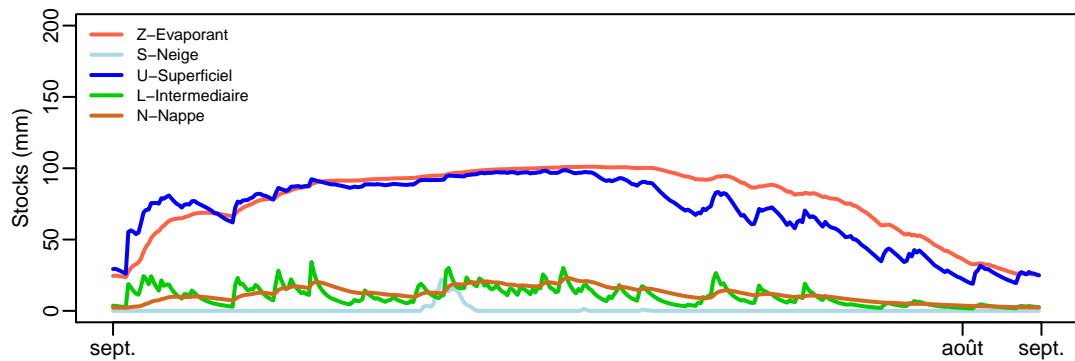

# k1533020 (454.43 km<sup>2</sup>) – année 1995–1996

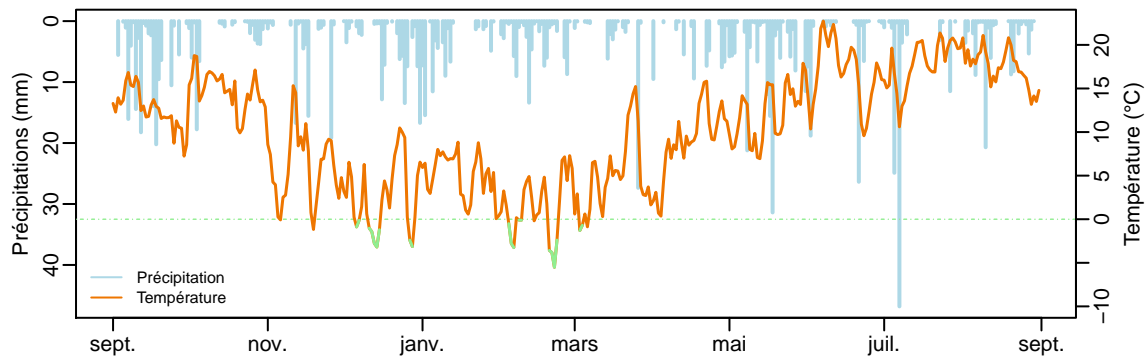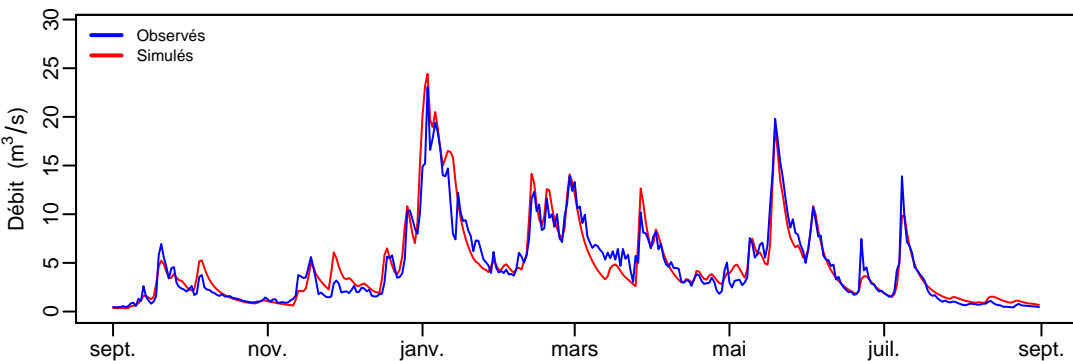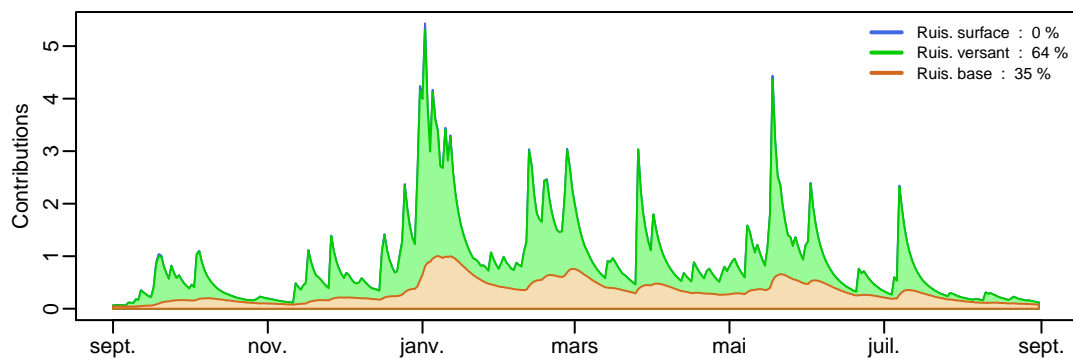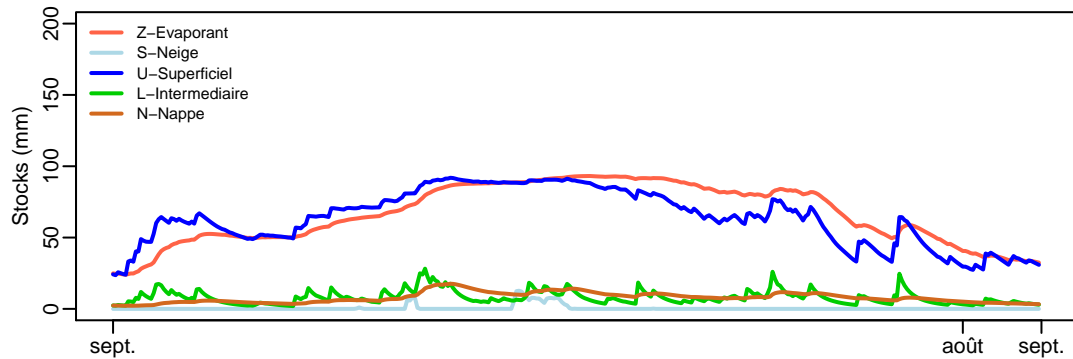

# k1533020 (454.43 km<sup>2</sup>) – année 1996–1997

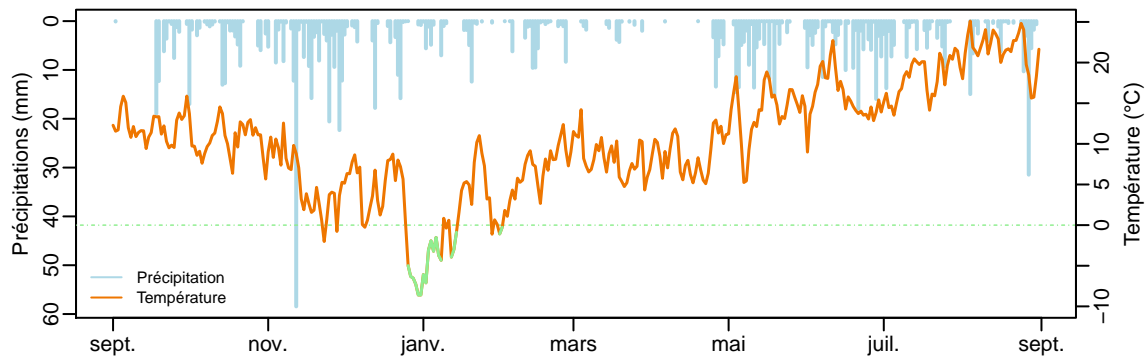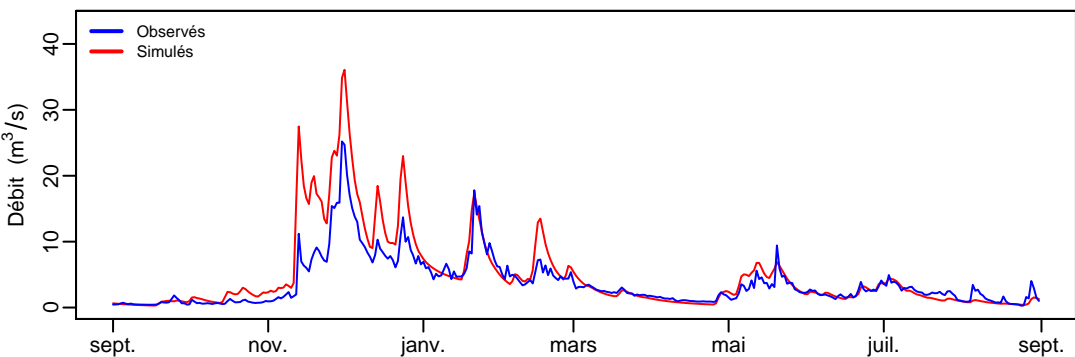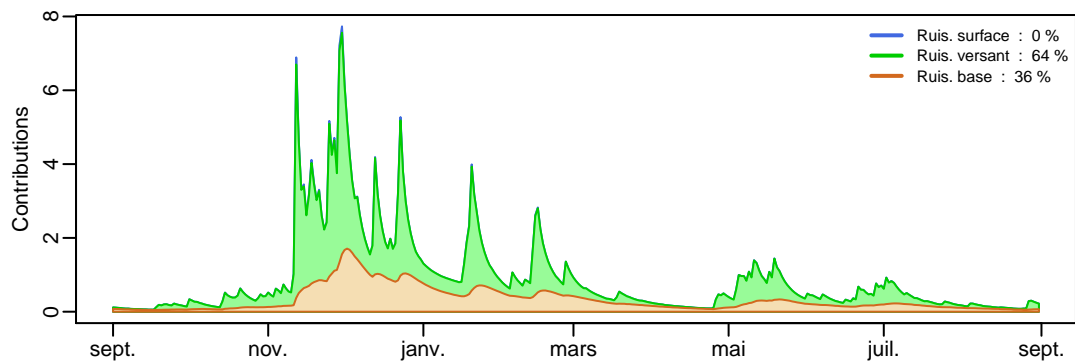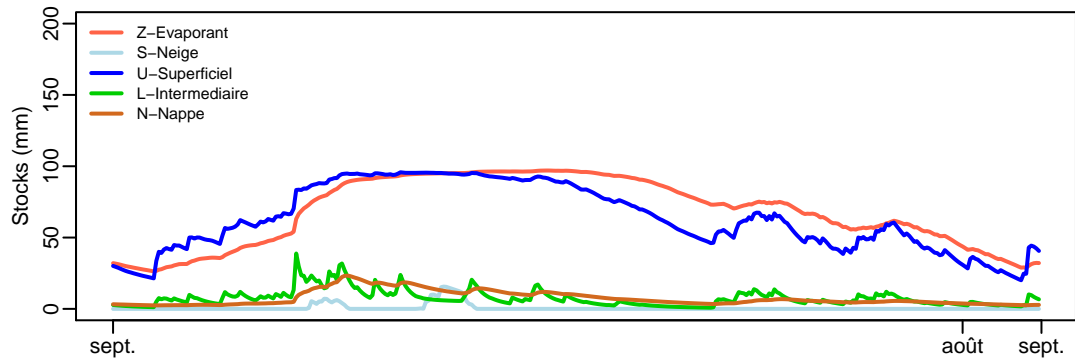

# k1533020 (454.43 km<sup>2</sup>) – année 1997–1998

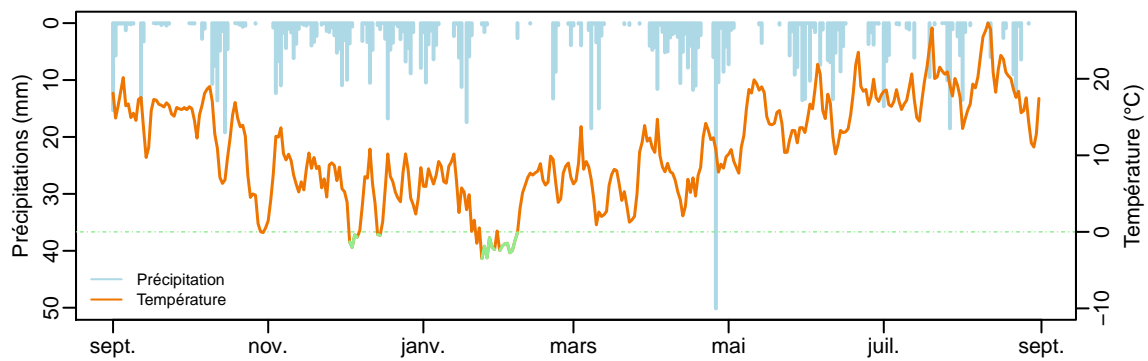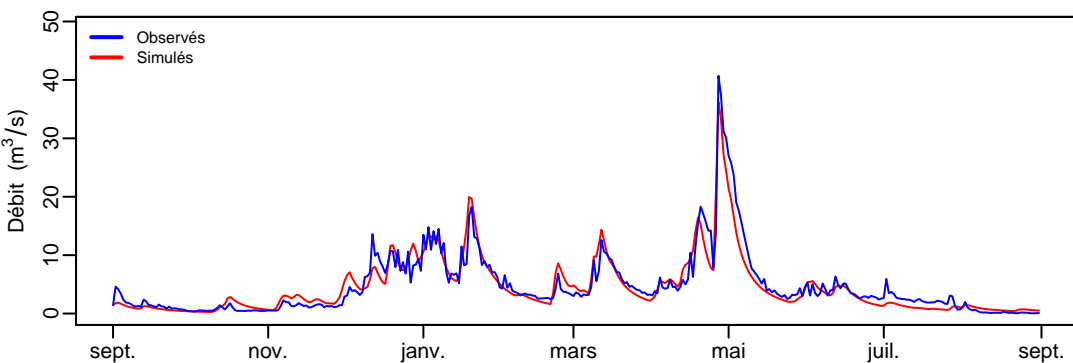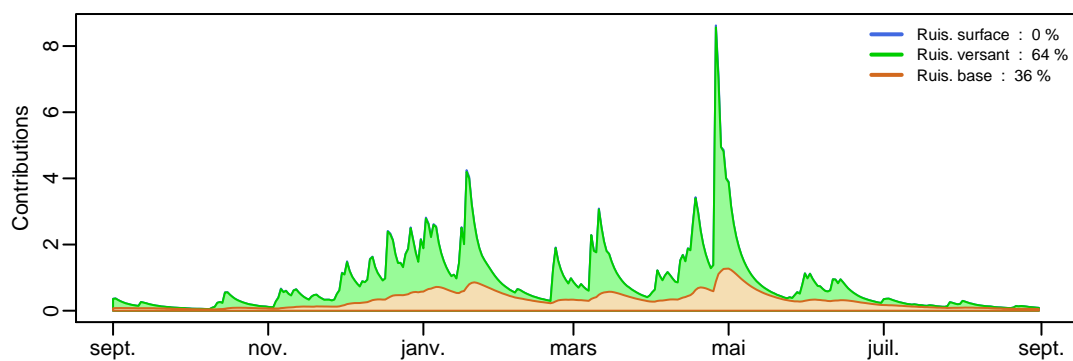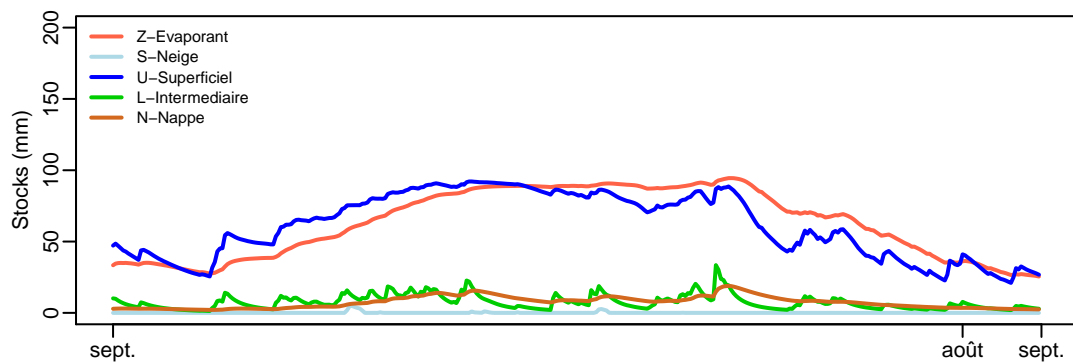

# k1533020 (454.43 km<sup>2</sup>) – année 1998–1999

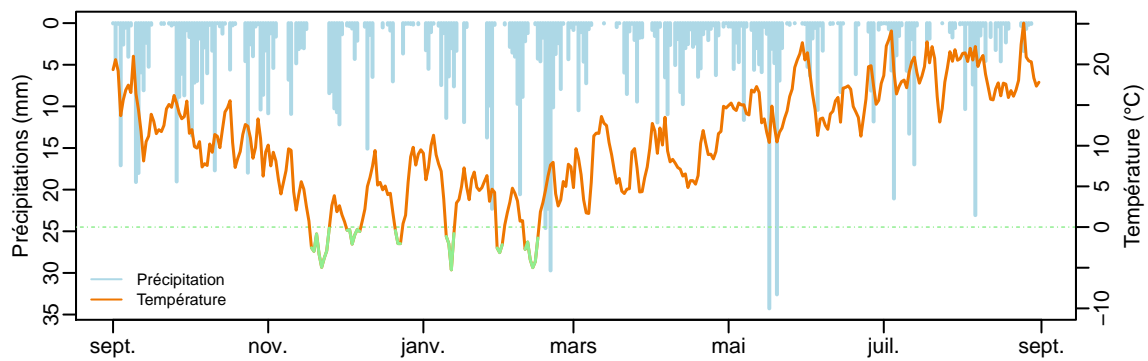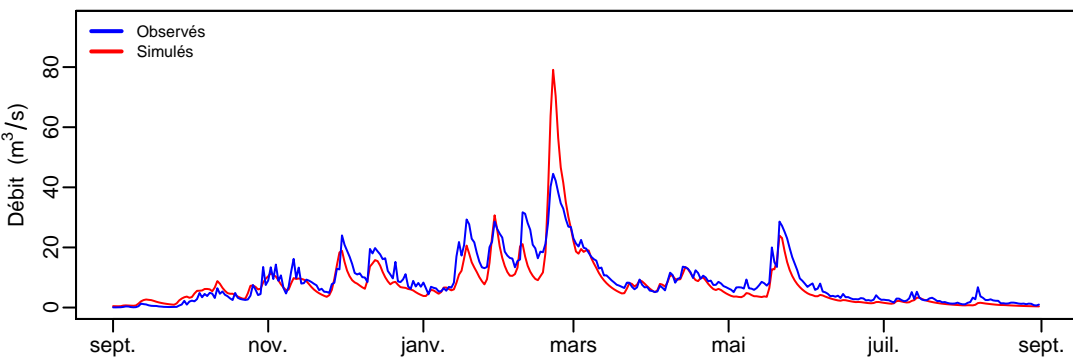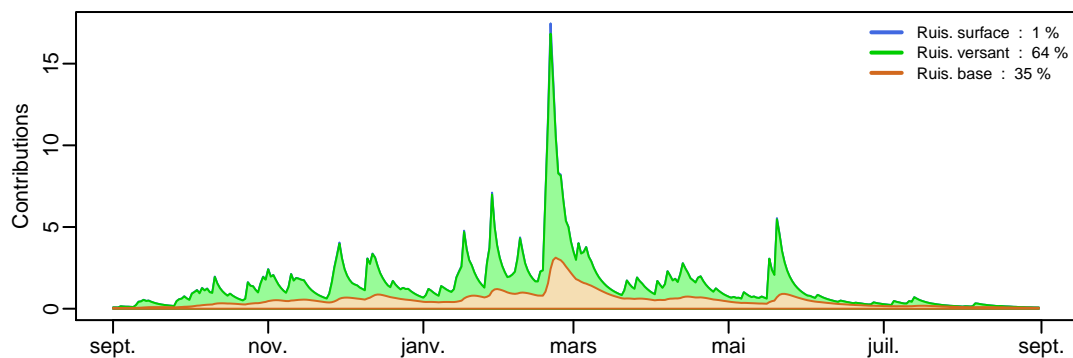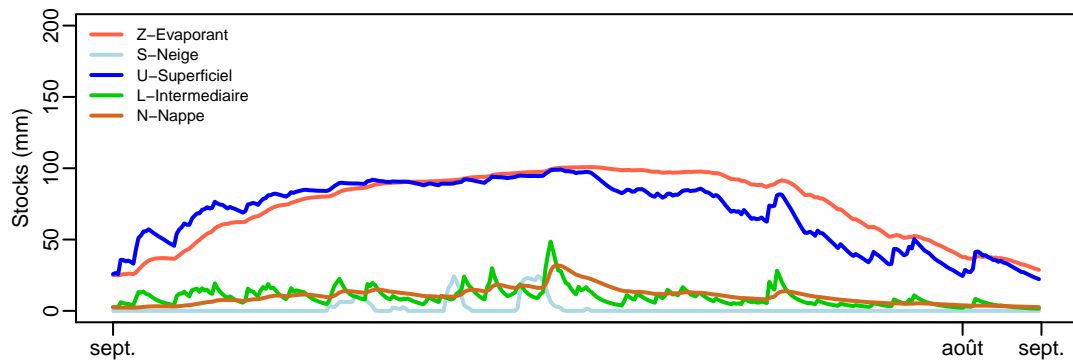

# k1533020 (454.43 km<sup>2</sup>) – année 1999–2000

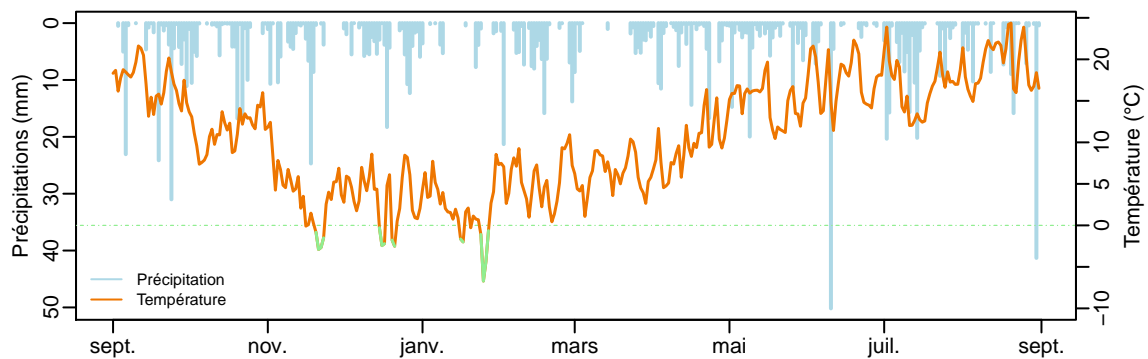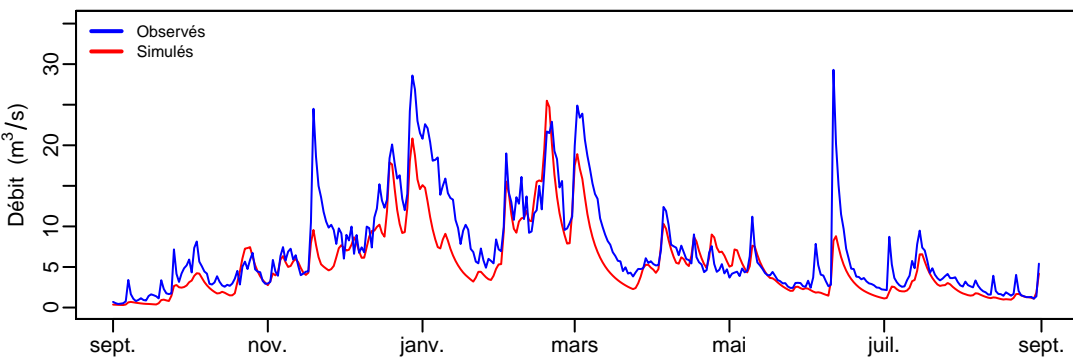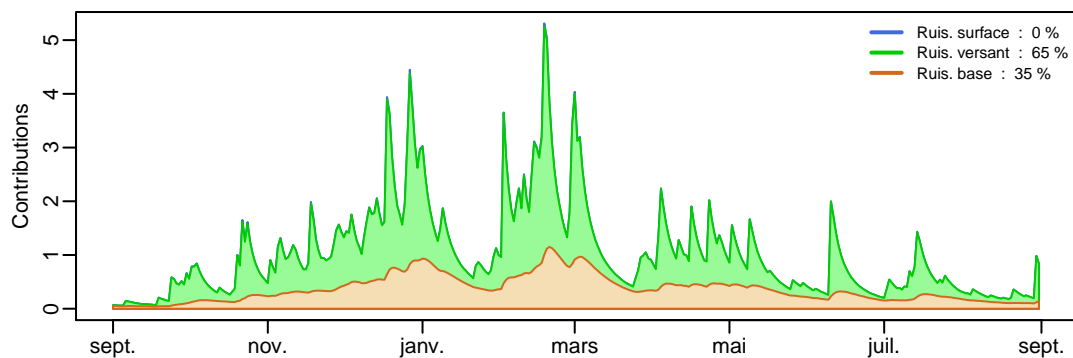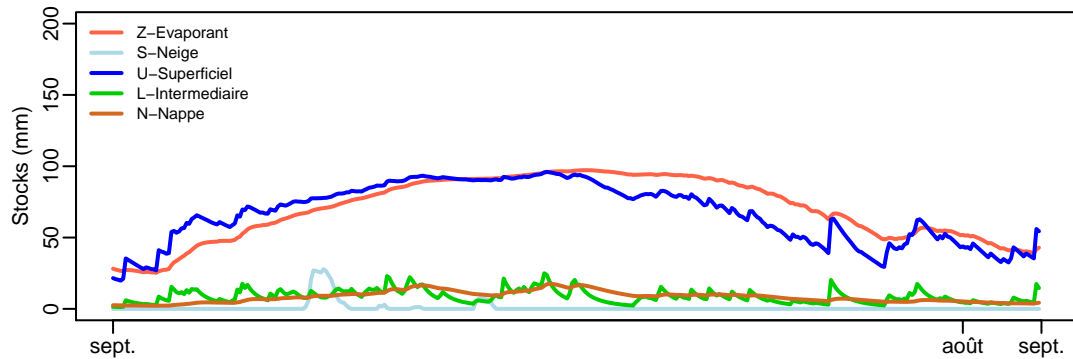

# k1533020 (454.43 km<sup>2</sup>) – année 2000–2001

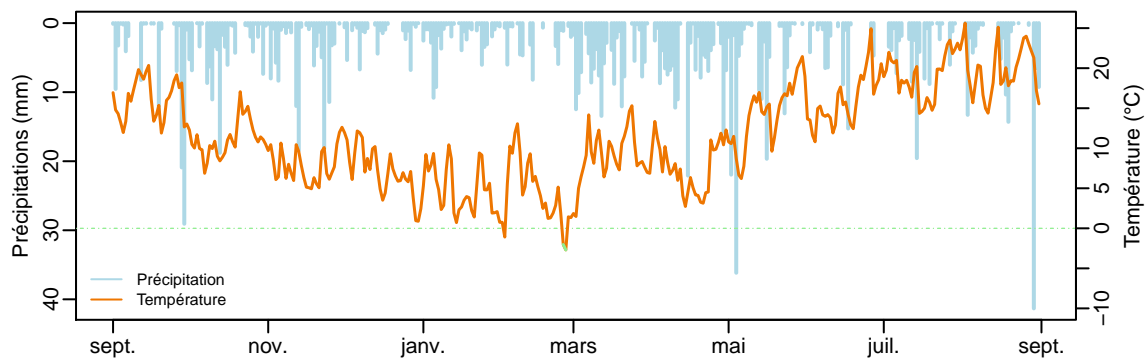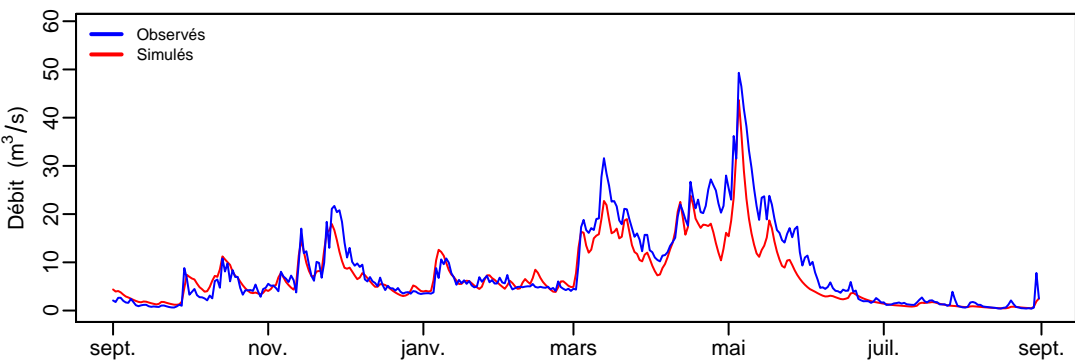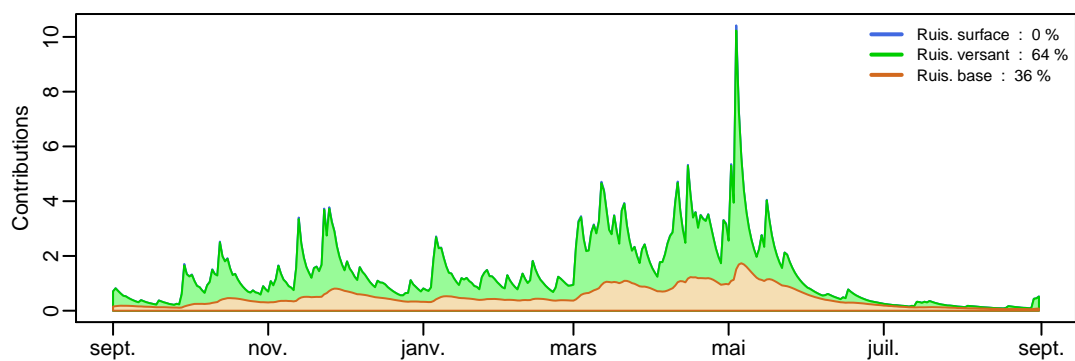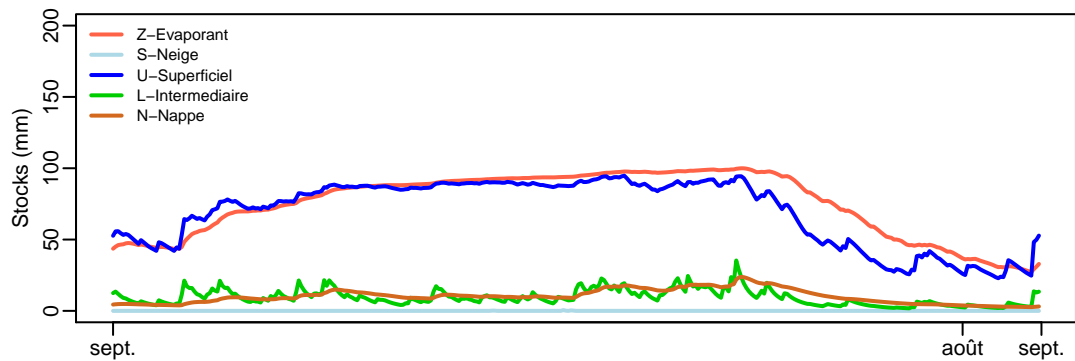

# k1533020 (454.43 km<sup>2</sup>) – année 2001–2002

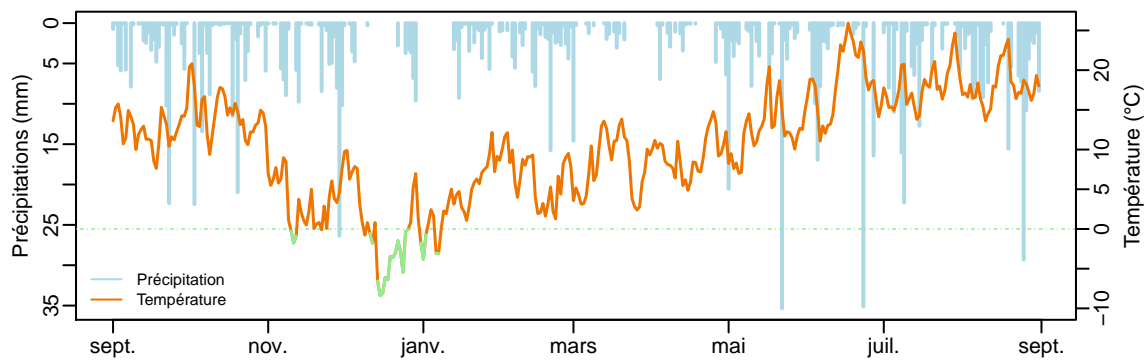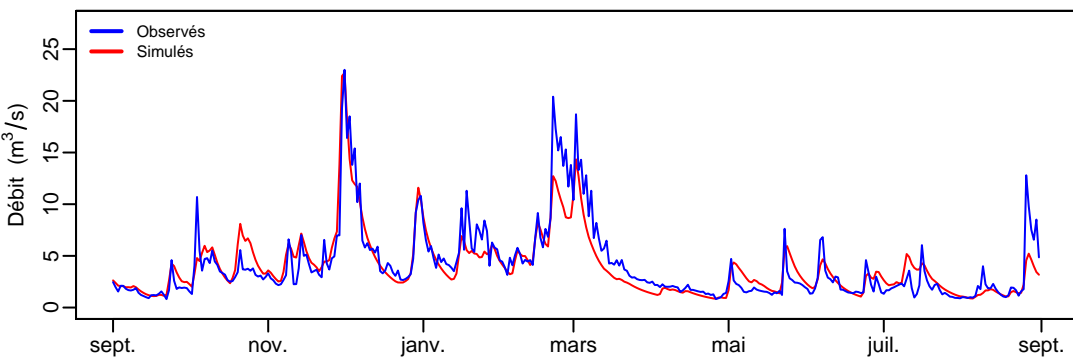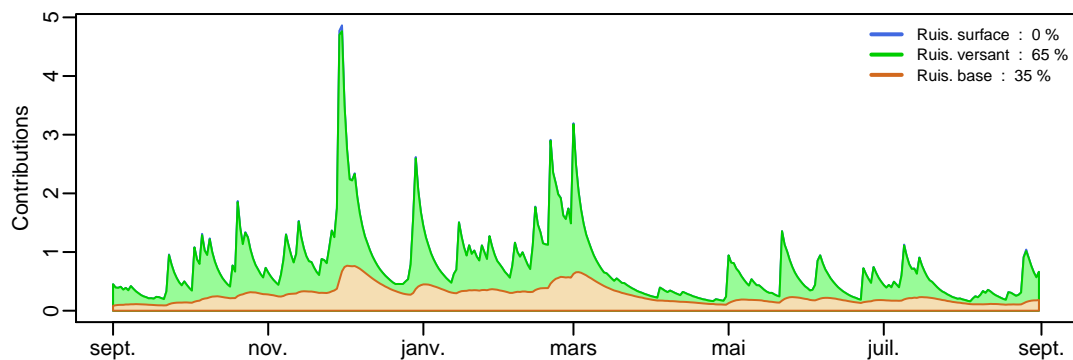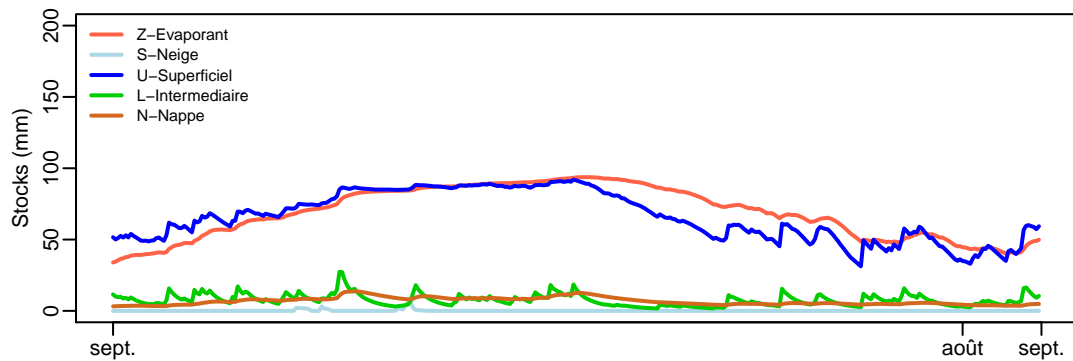



# k1533020 (454.43 km<sup>2</sup>) – année 2002–2003

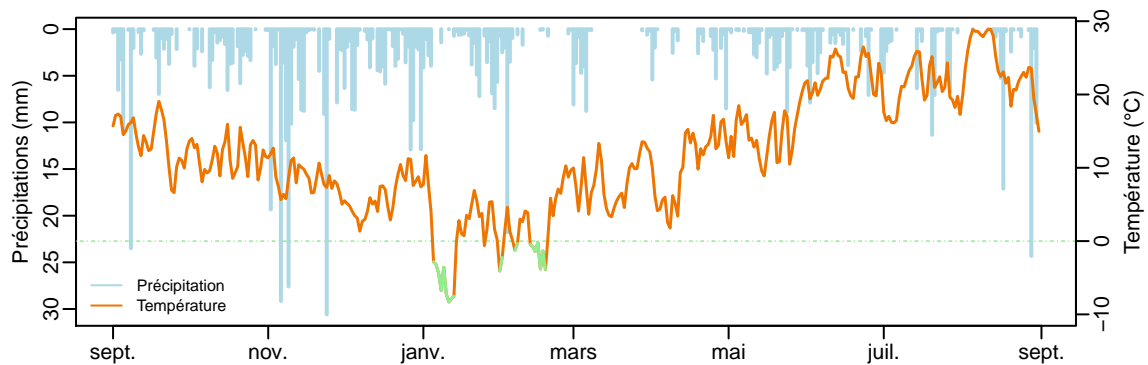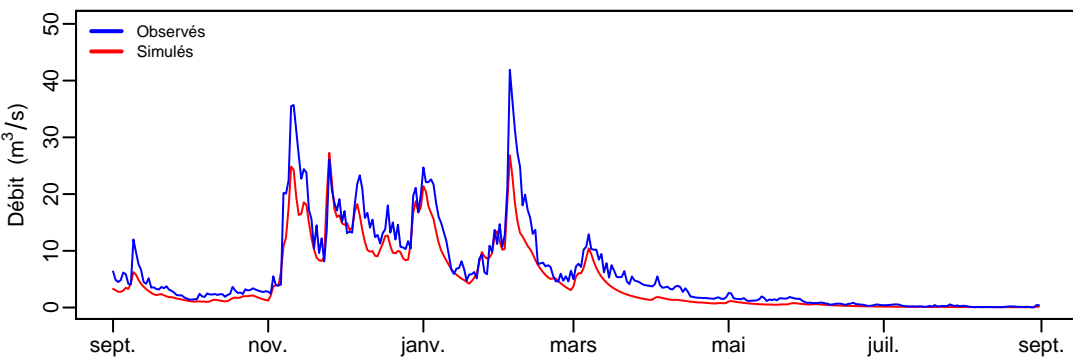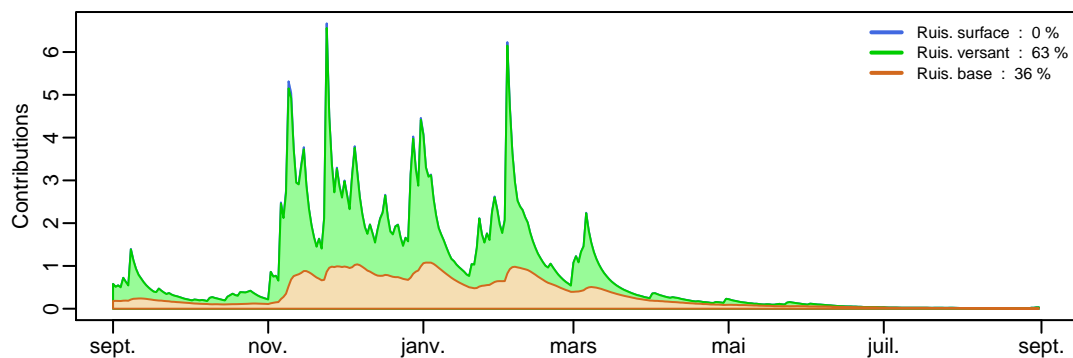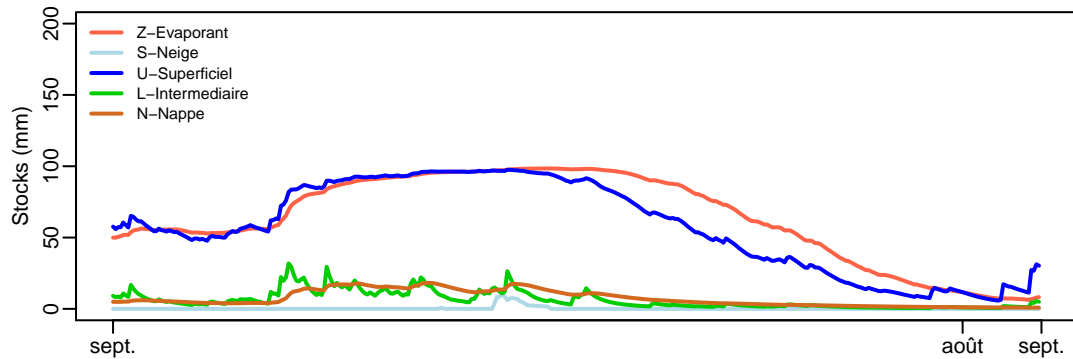

# k1533020 (454.43 km<sup>2</sup>) – année 2003–2004

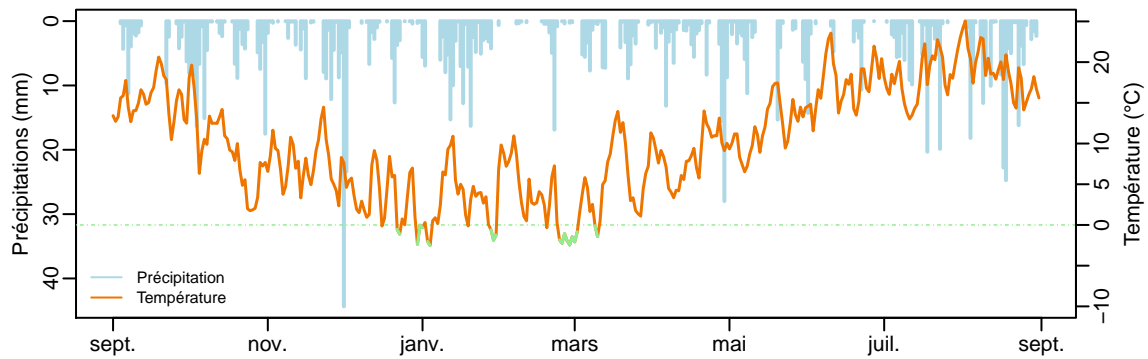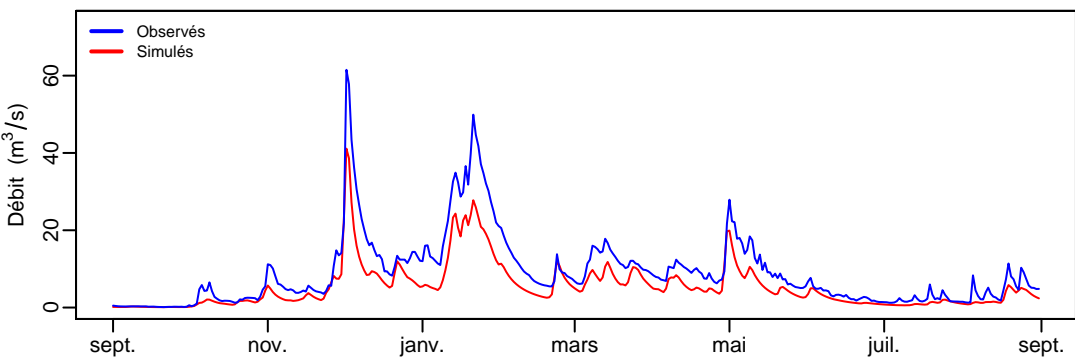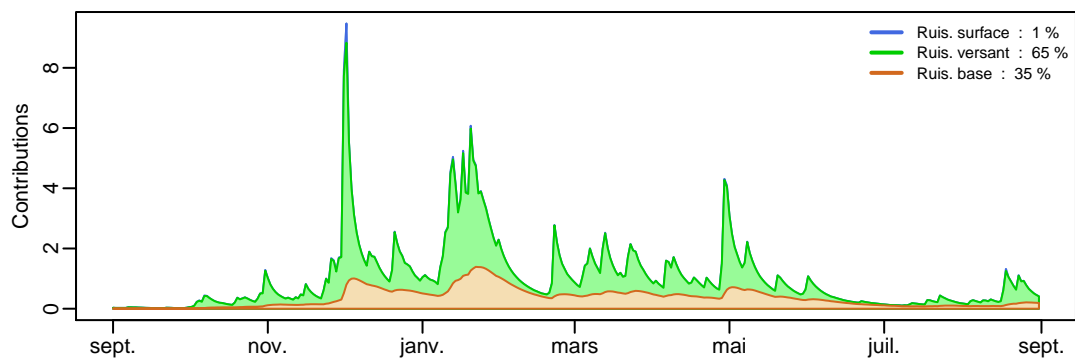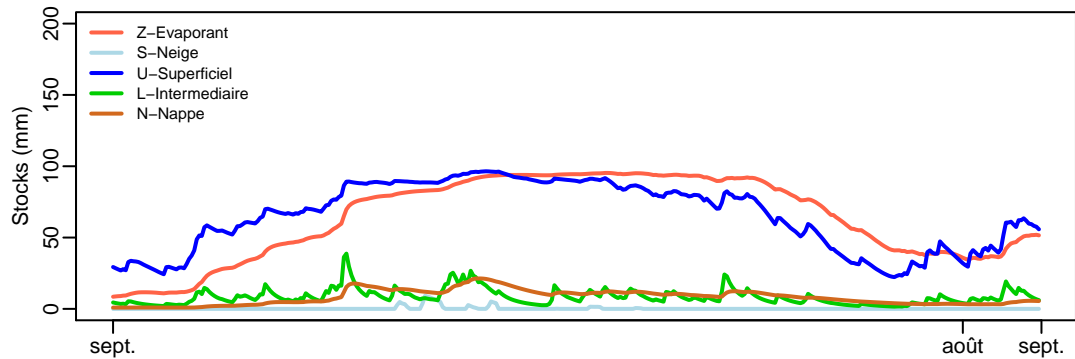

# k1533020 (454.43 km<sup>2</sup>) – année 2004–2005

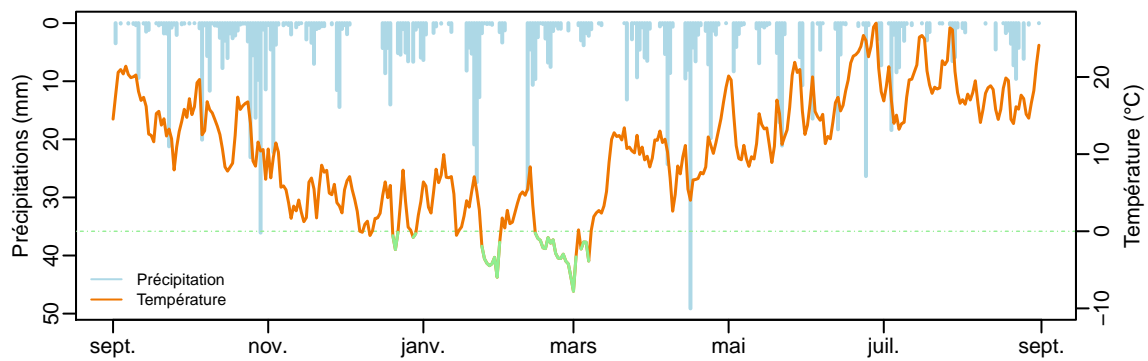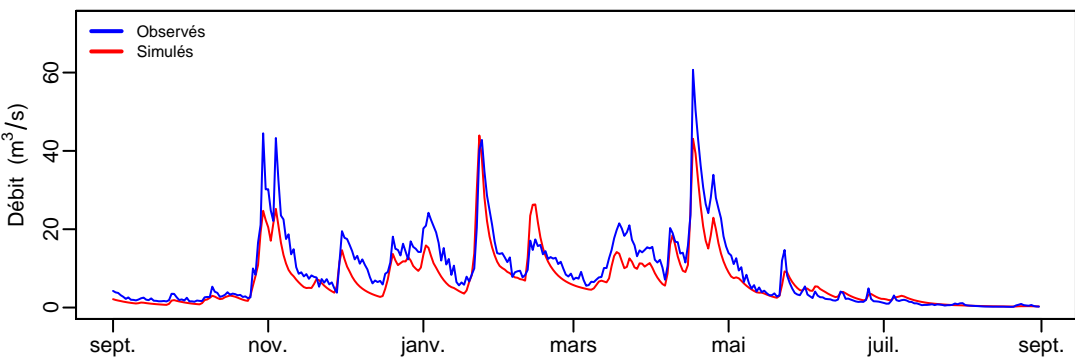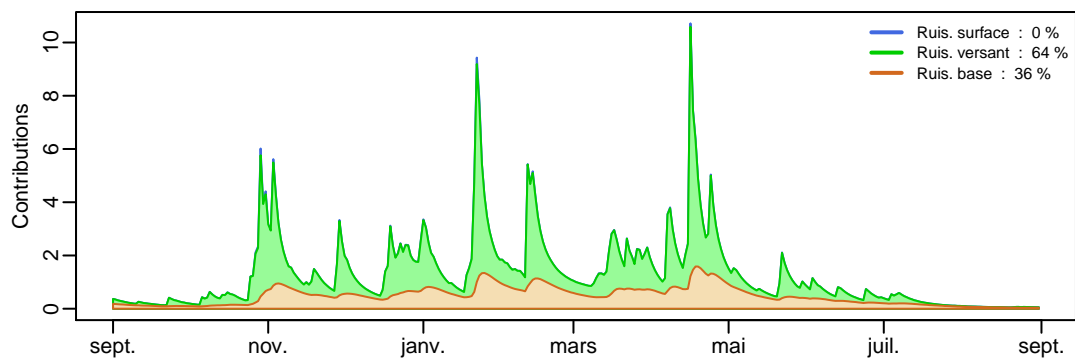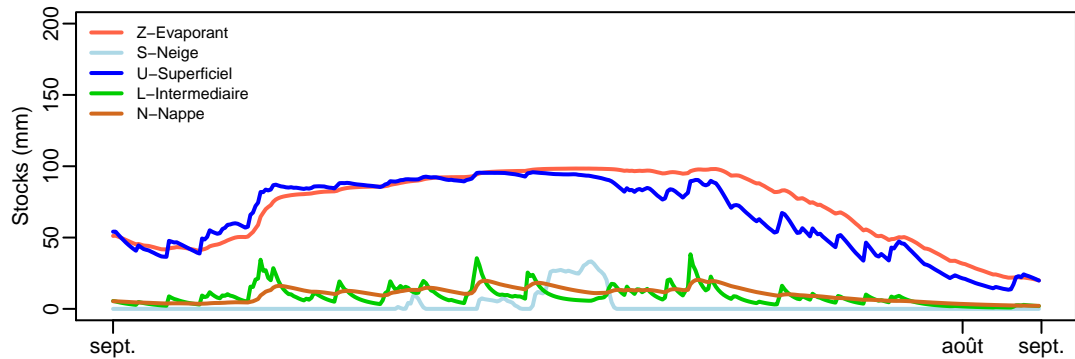

# k1533020 (454.43 km<sup>2</sup>) – année 2005–2006

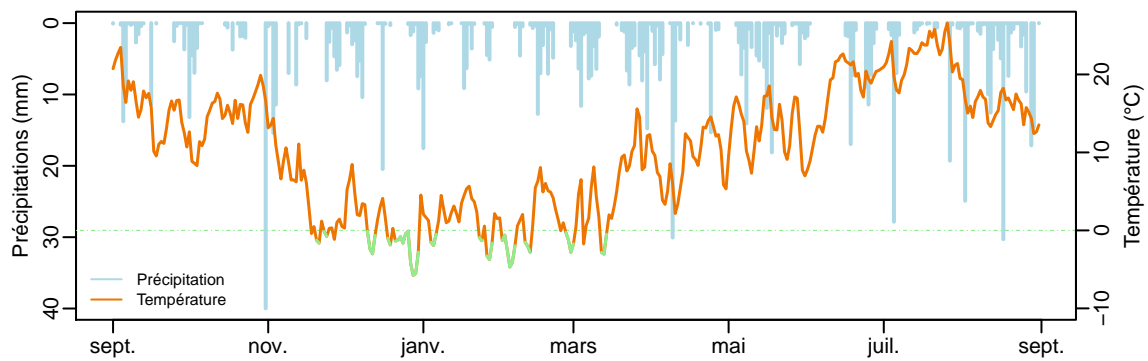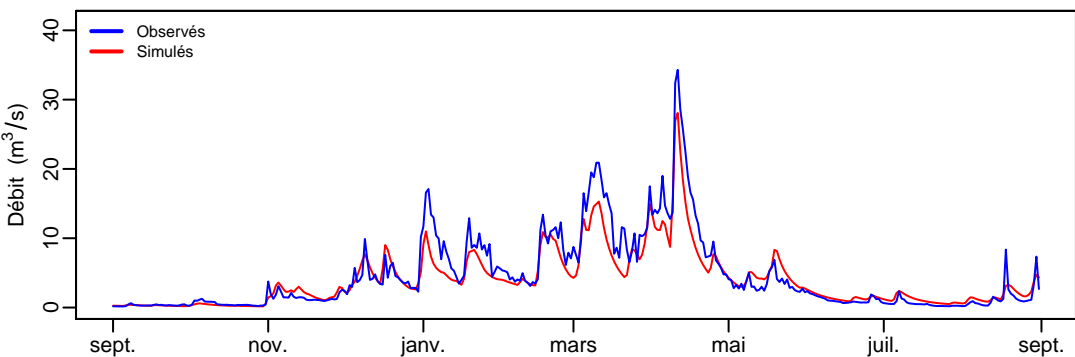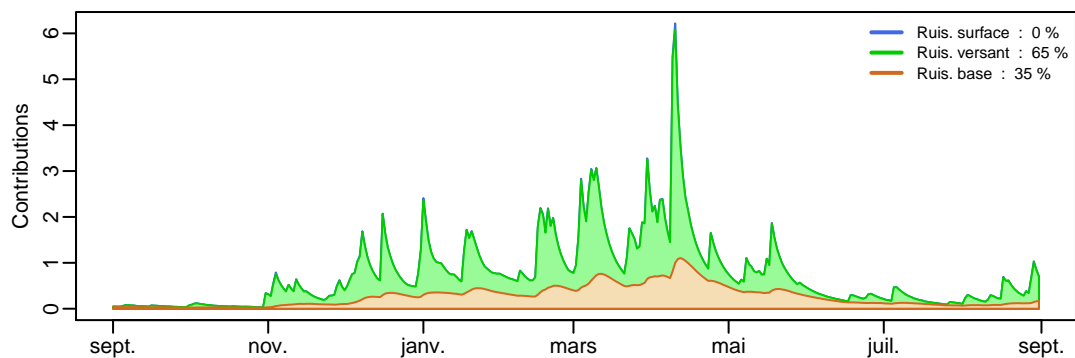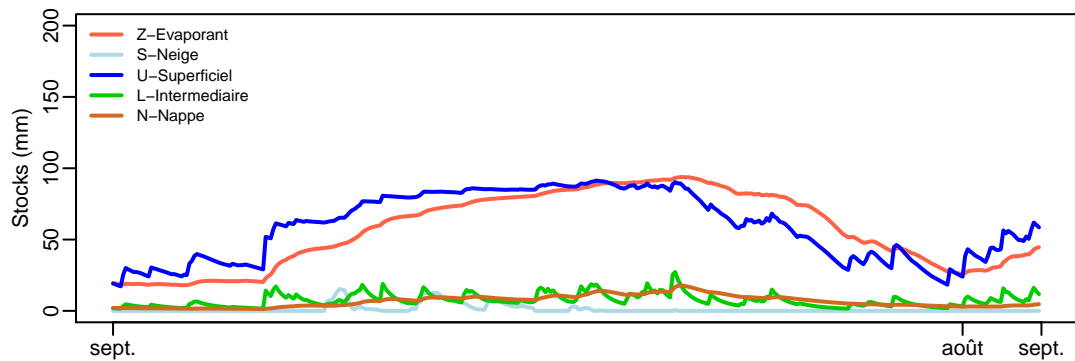

# k1533020 (454.43 km<sup>2</sup>) – année 2006–2007

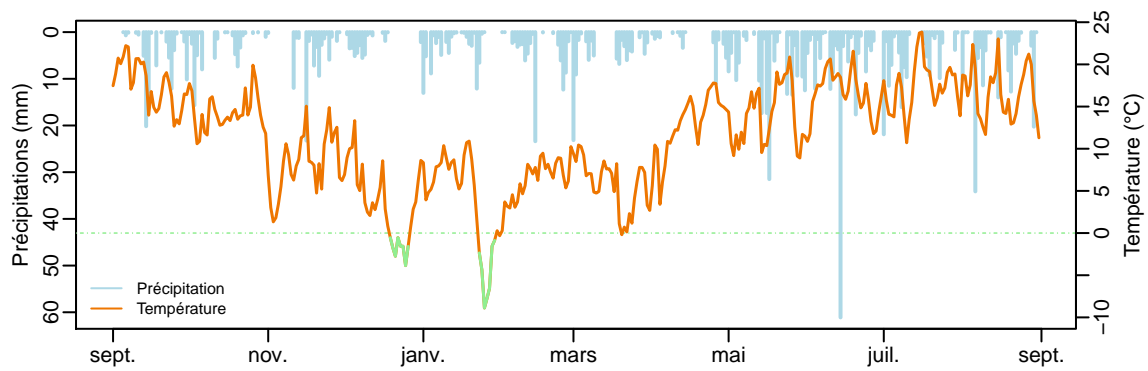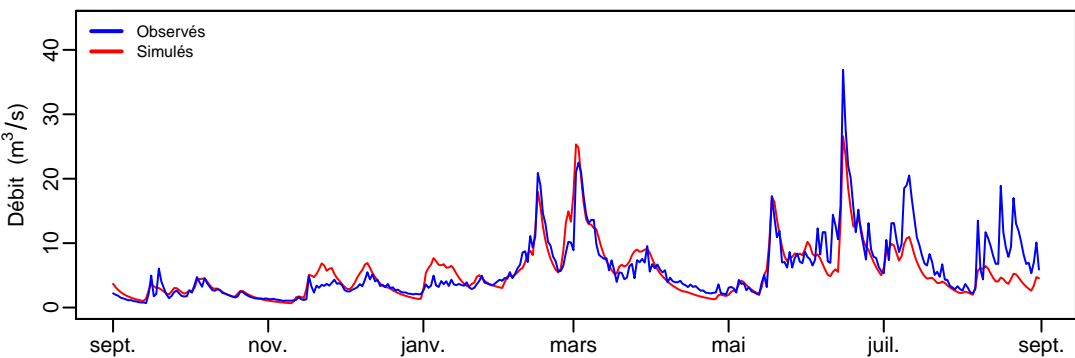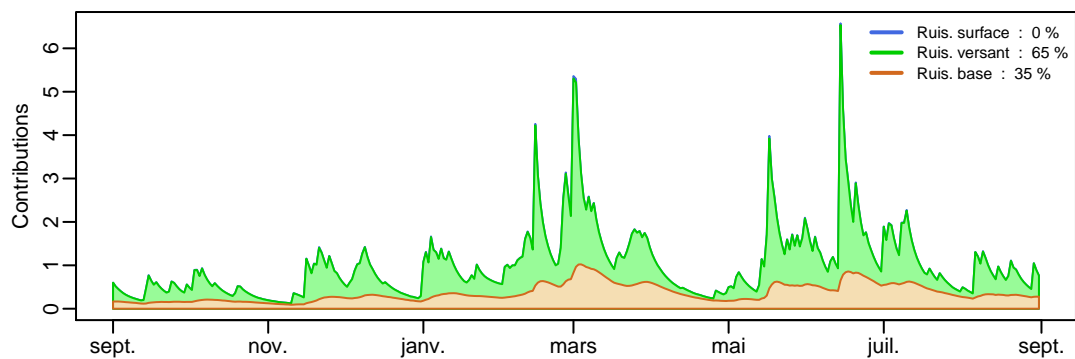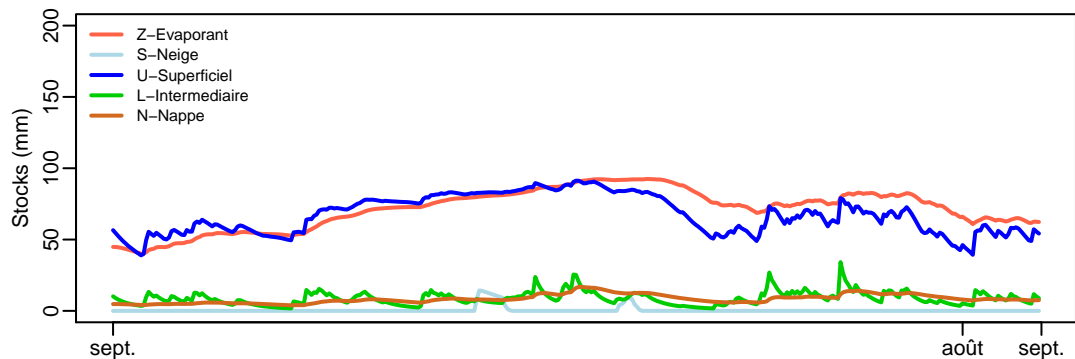

# k1563010 (727.42 km<sup>2</sup>) – année 1982–1983

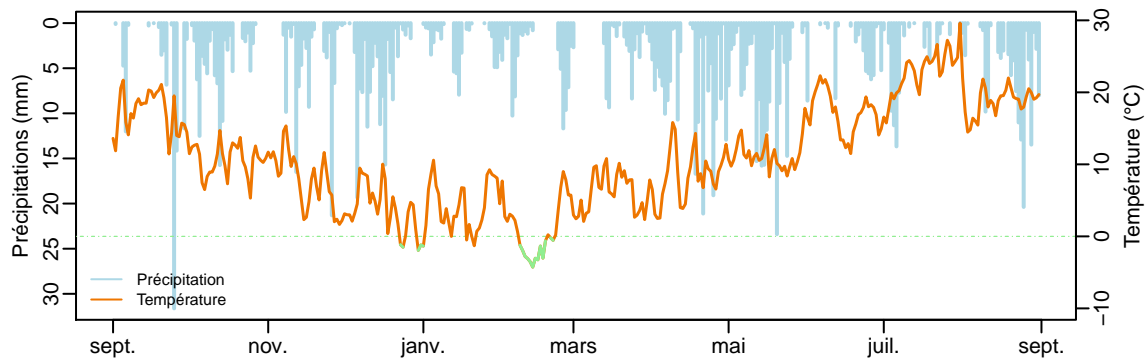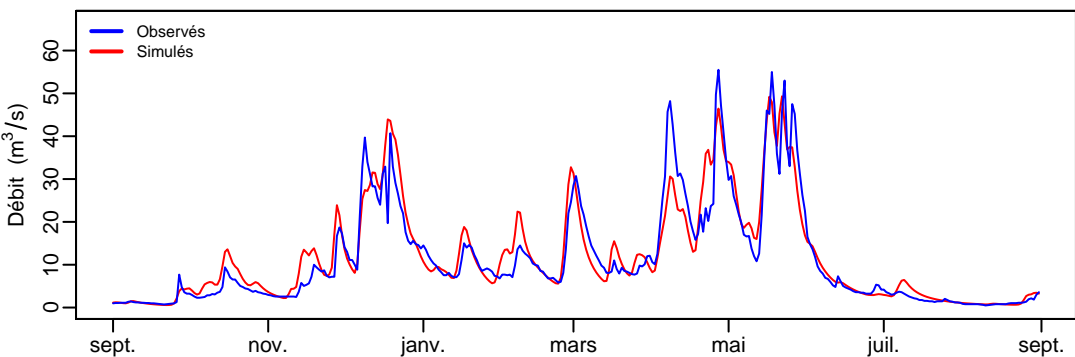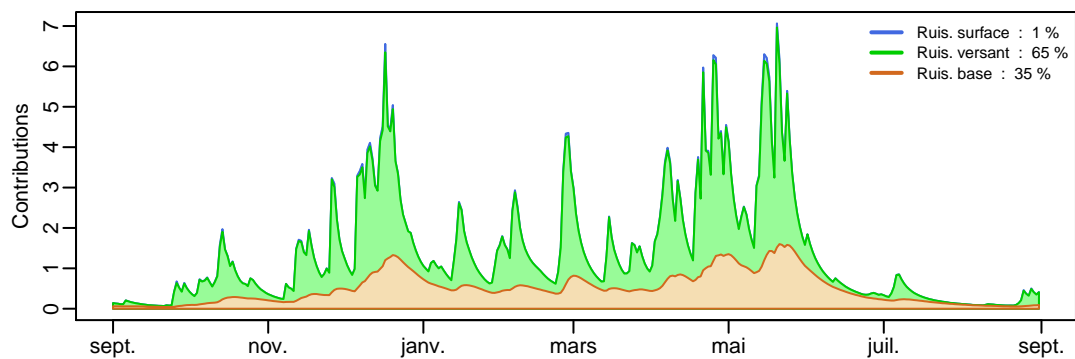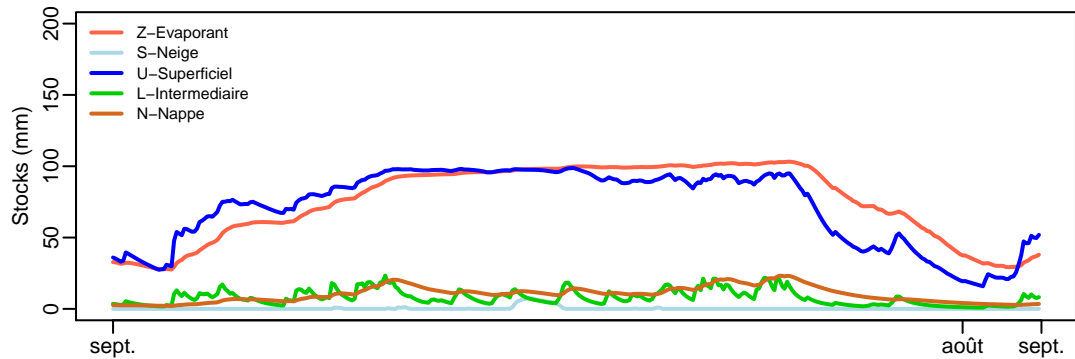

# k1563010 (727.42 km<sup>2</sup>) – année 1983–1984

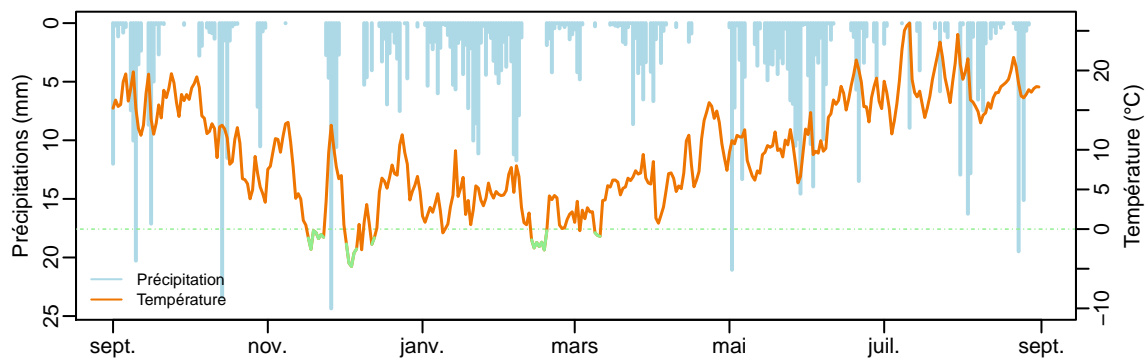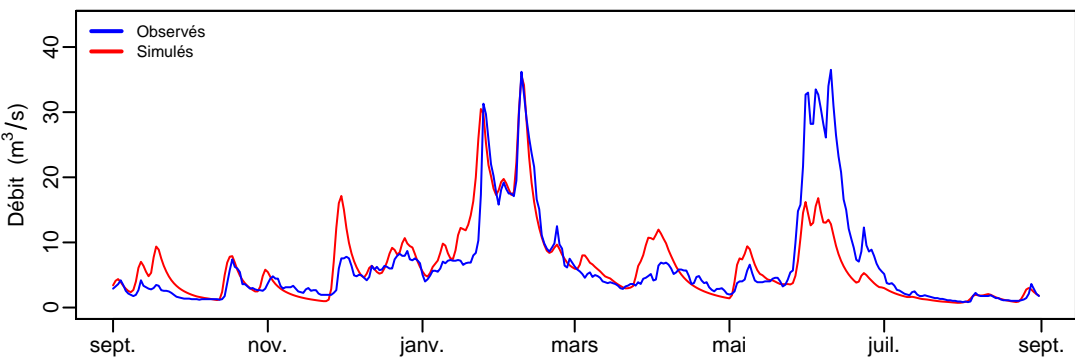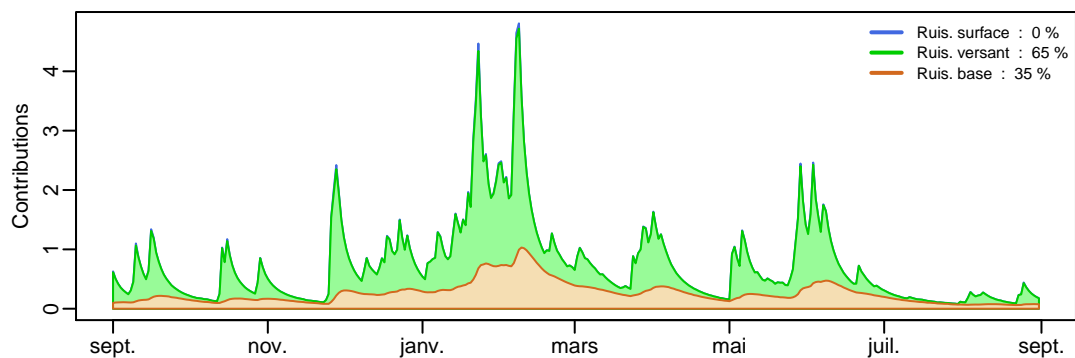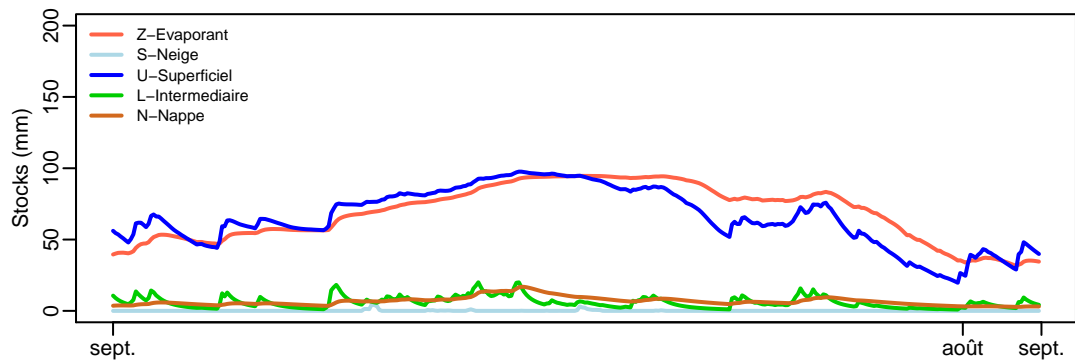

# k1563010 (727.42 km<sup>2</sup>) – année 1984–1985

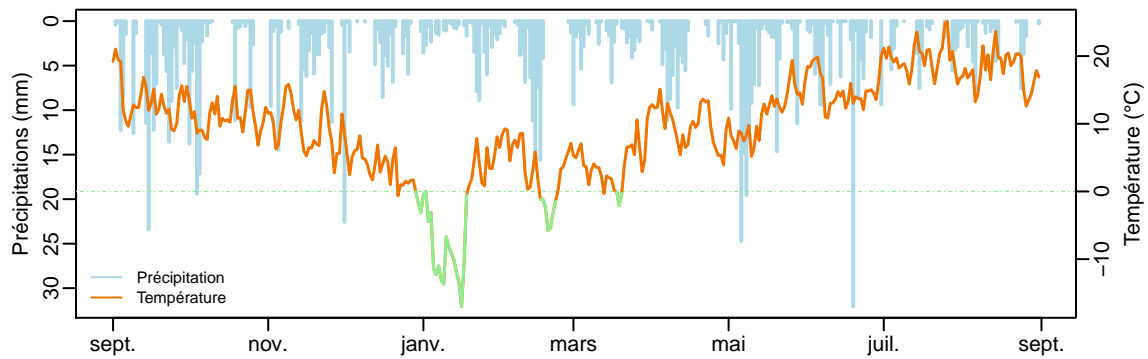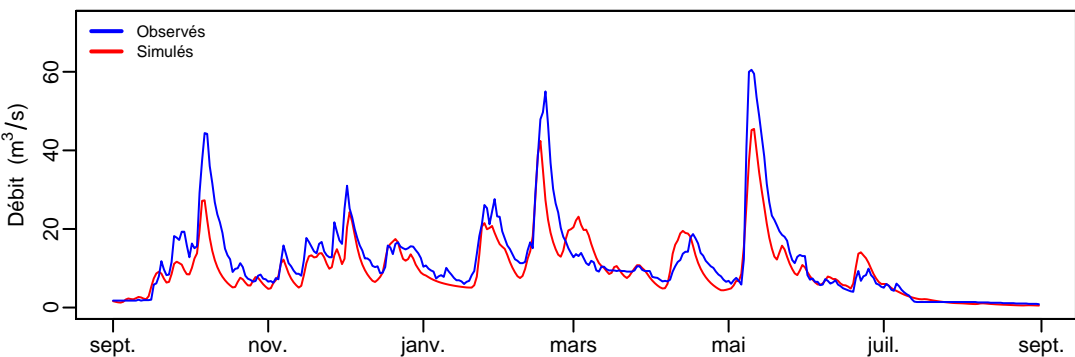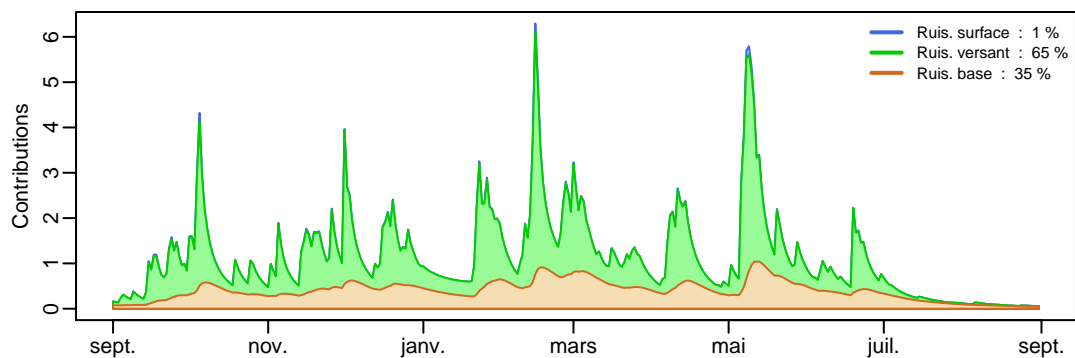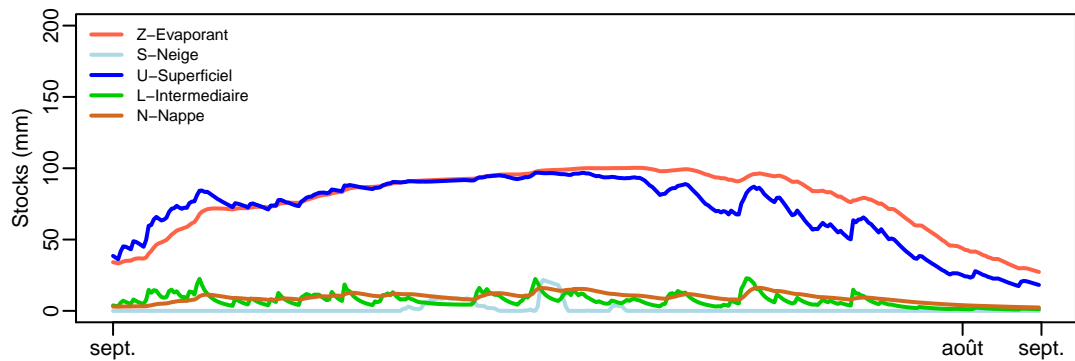



# k1563010 (727.42 km<sup>2</sup>) – année 1985–1986

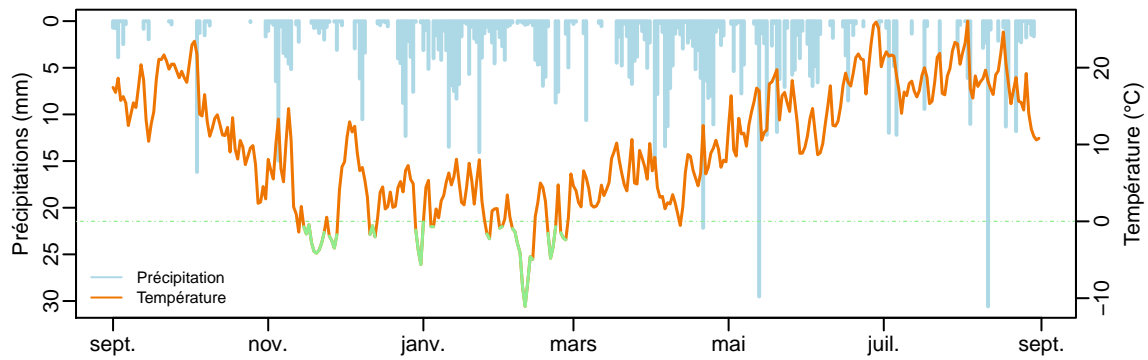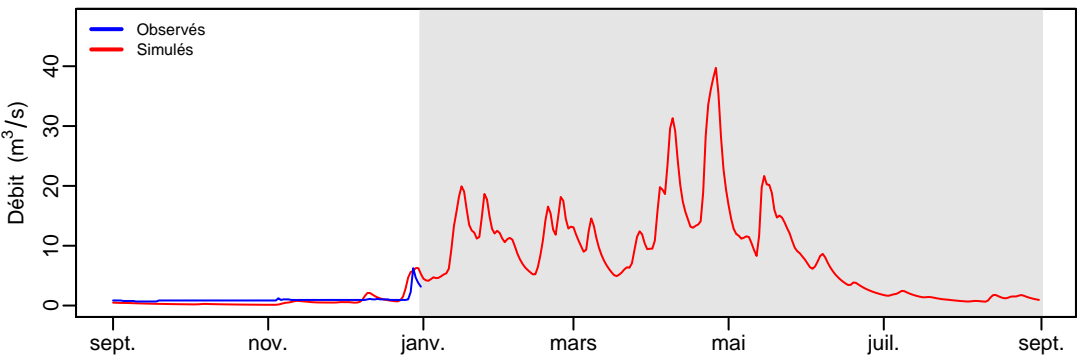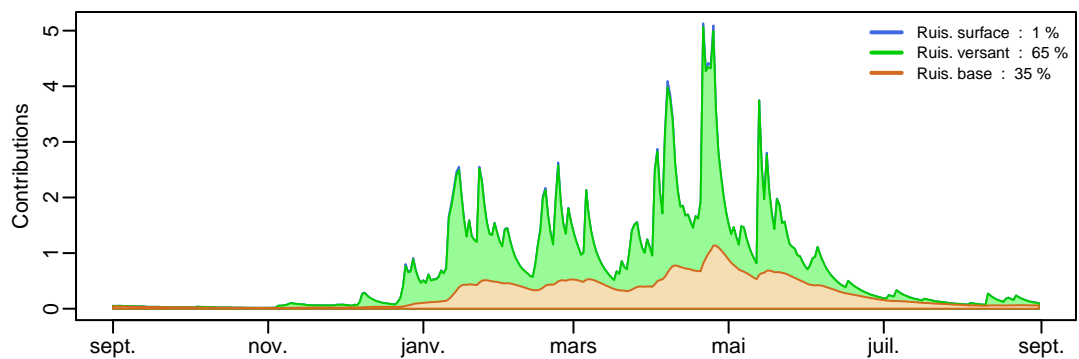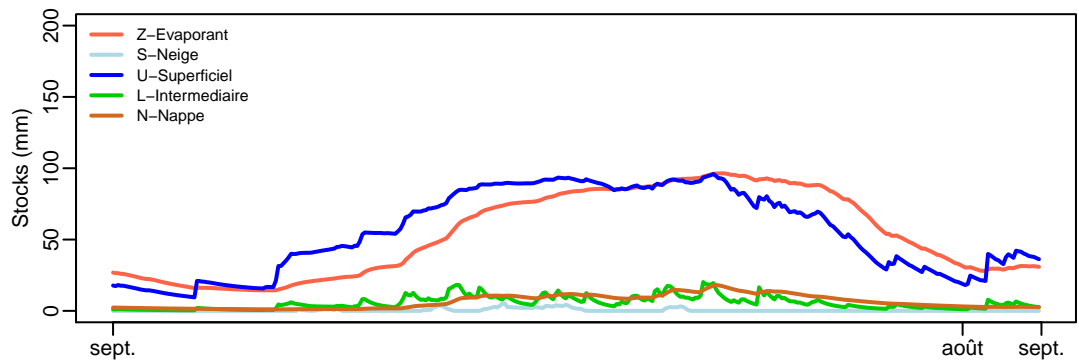

# k1563010 (727.42 km<sup>2</sup>) – année 1986–1987

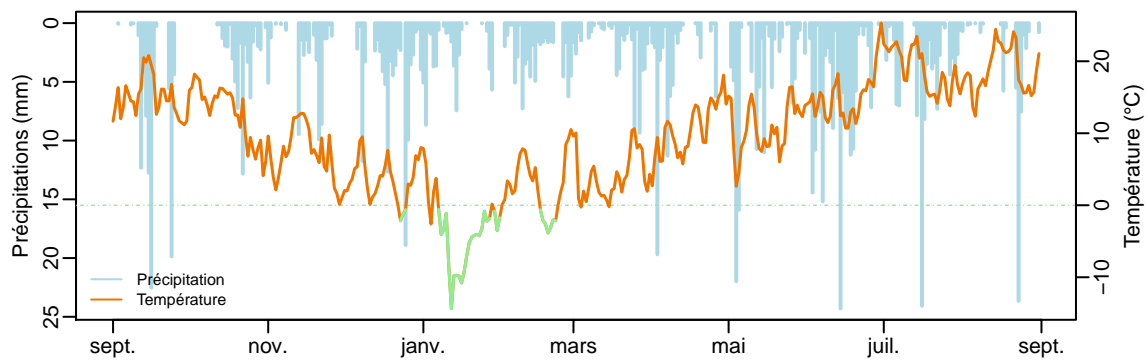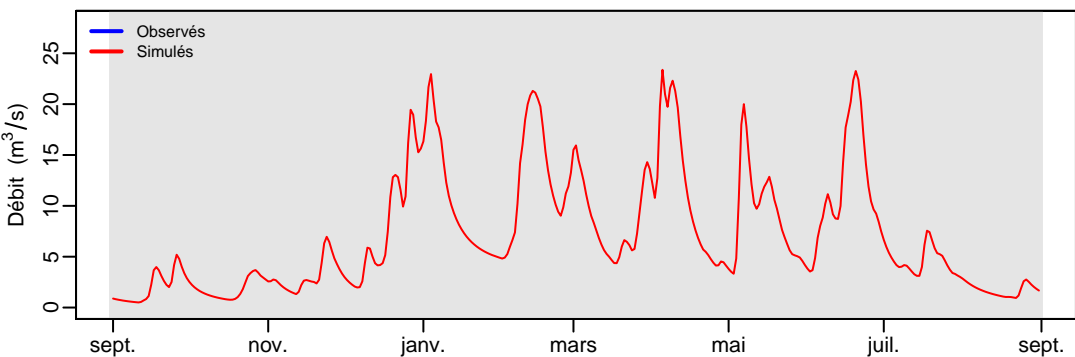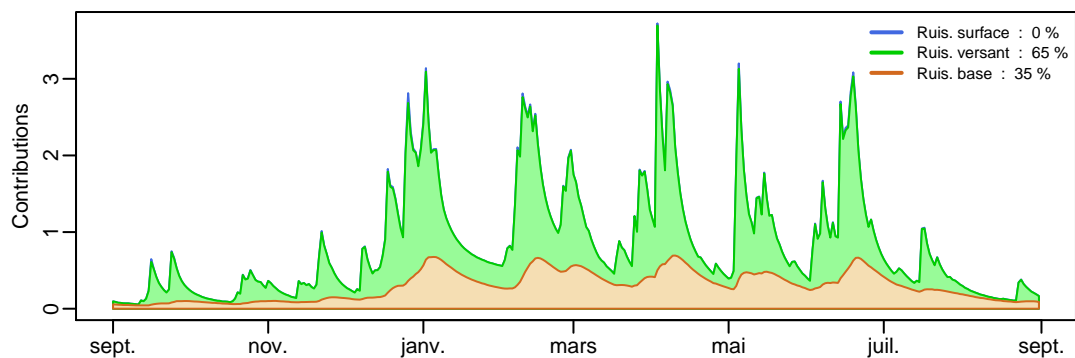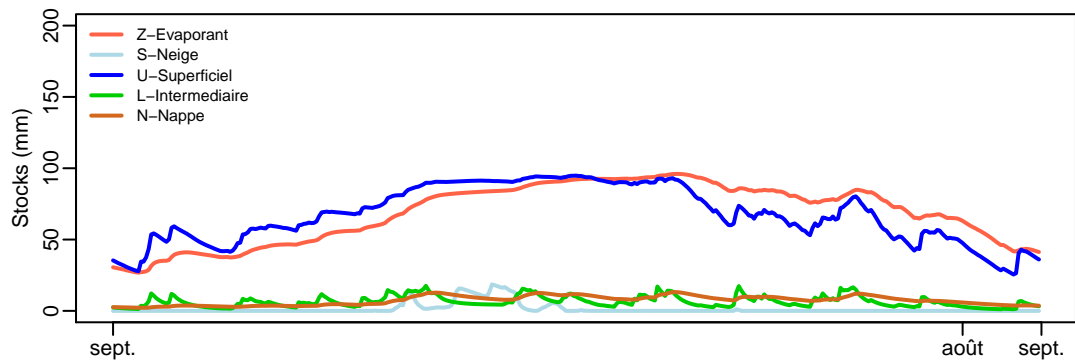

# k1563010 (727.42 km<sup>2</sup>) – année 1987–1988

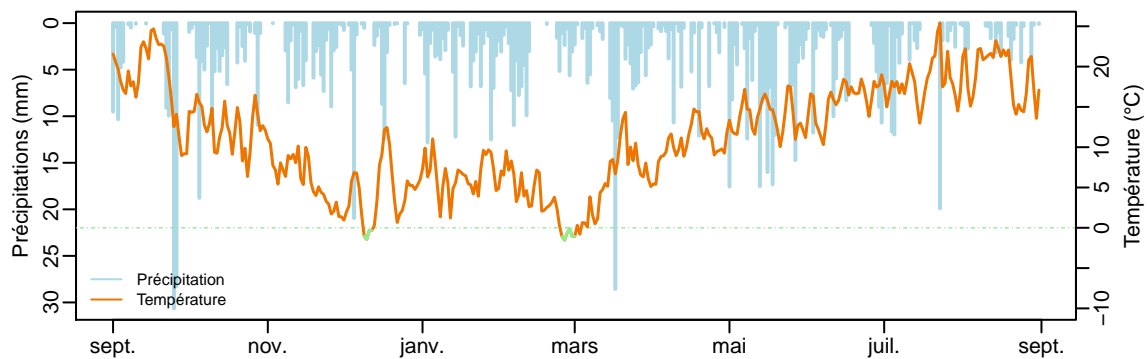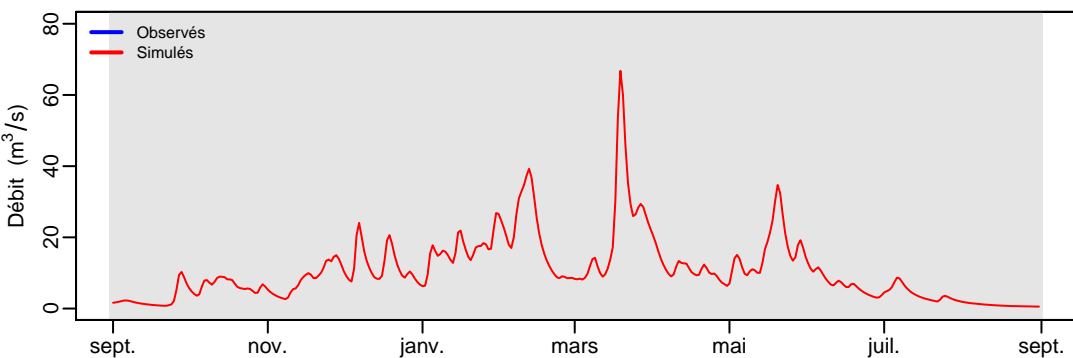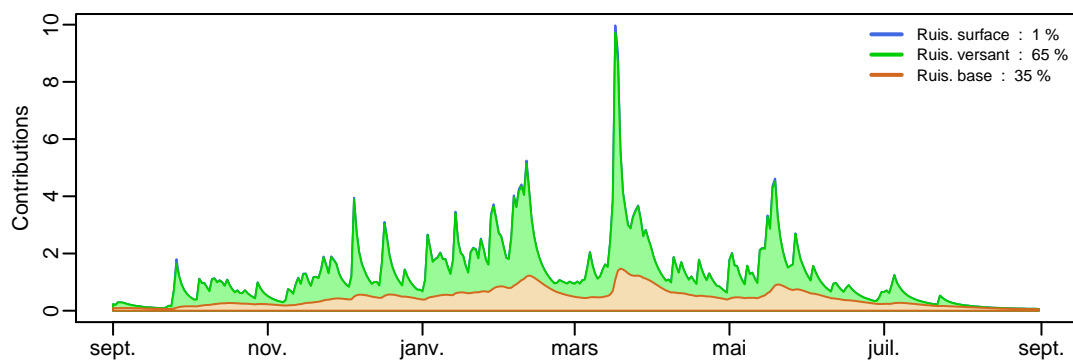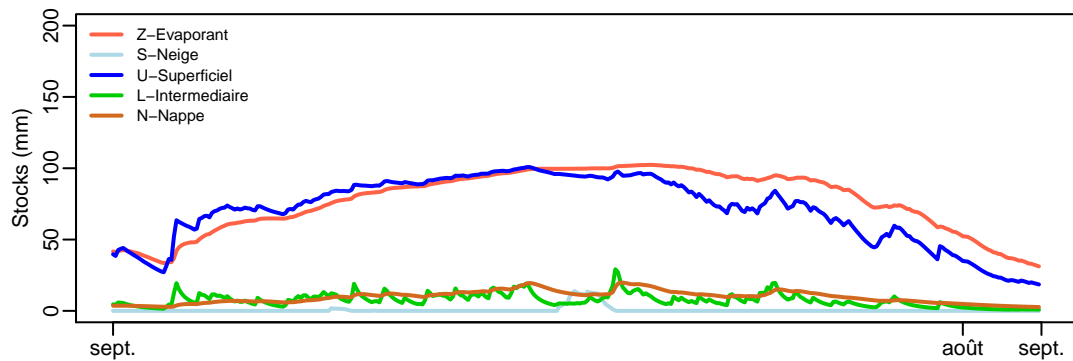

# k1563010 (727.42 km<sup>2</sup>) – année 1988–1989

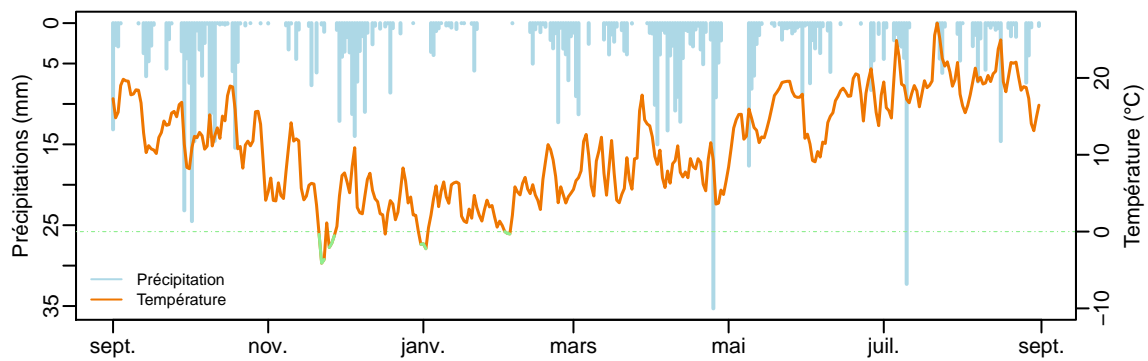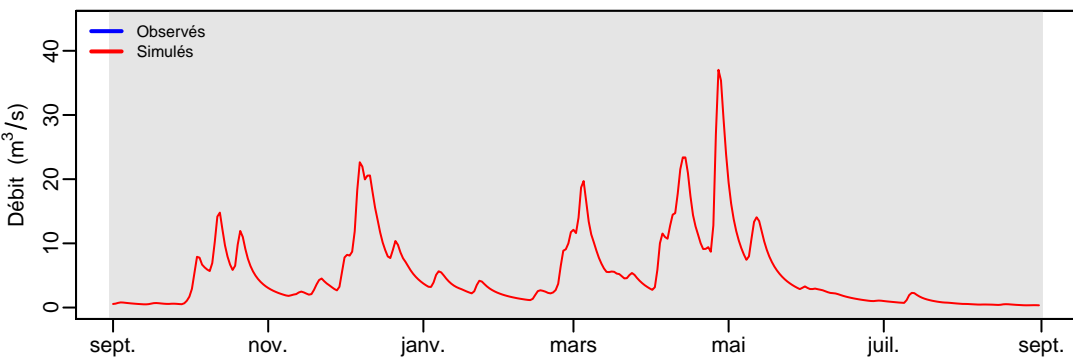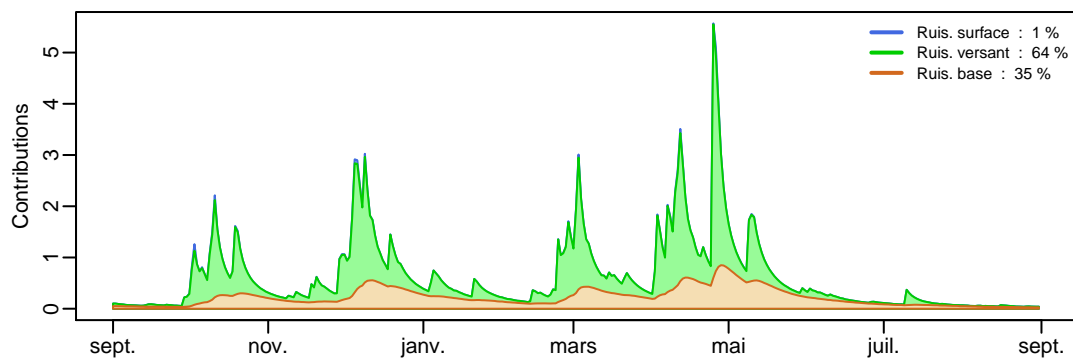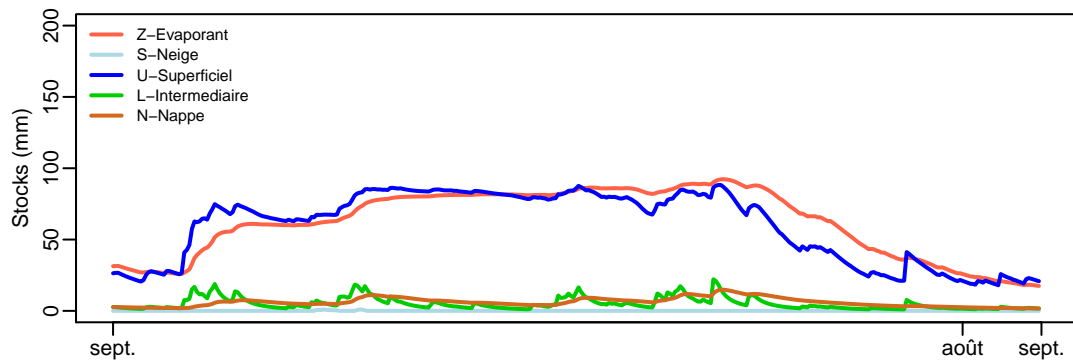

# k1563010 (727.42 km<sup>2</sup>) – année 1989–1990

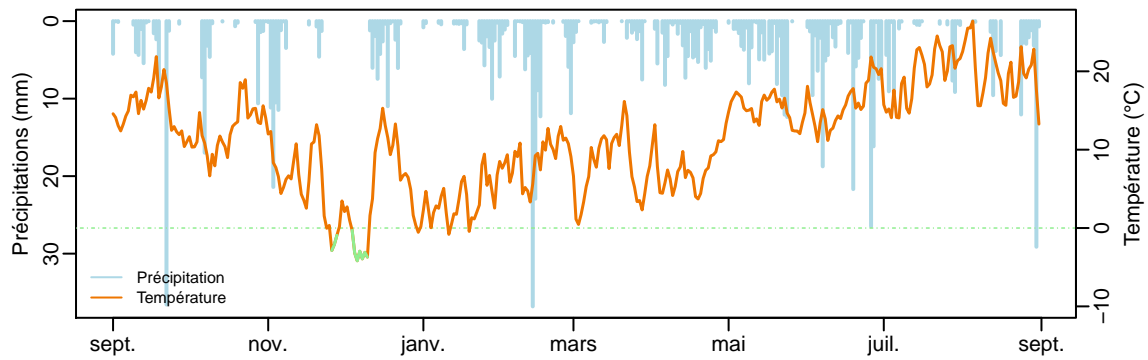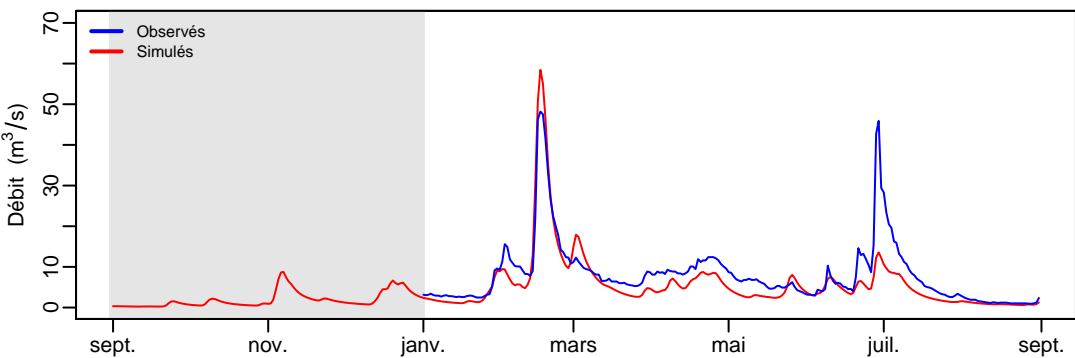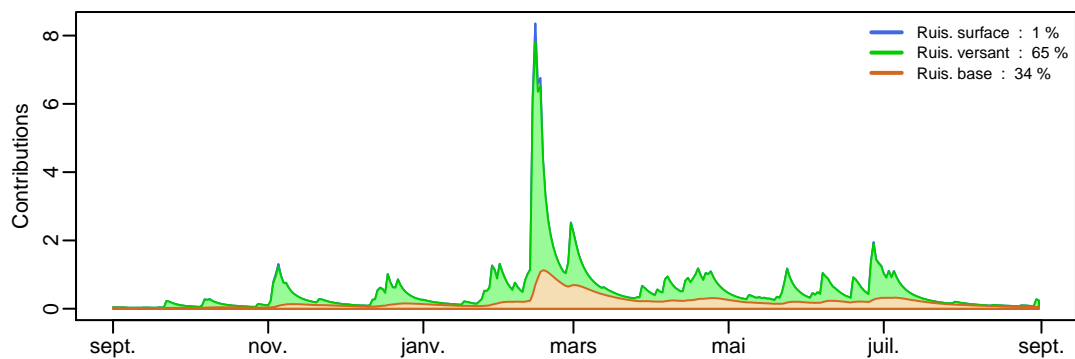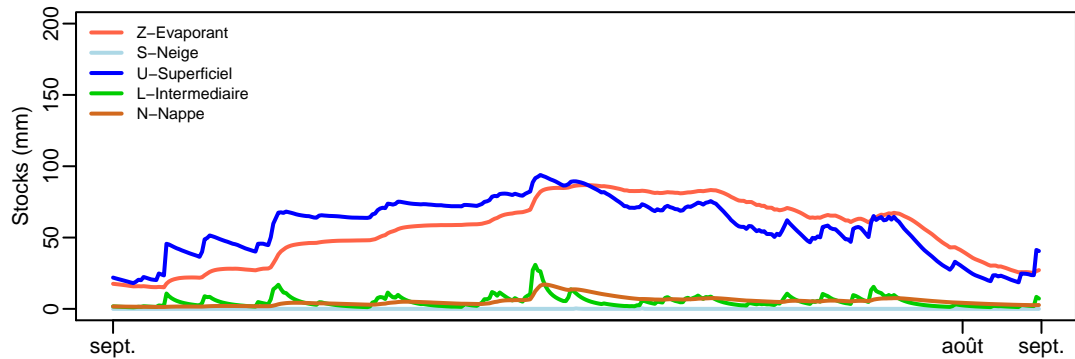

# k1563010 (727.42 km<sup>2</sup>) – année 1990–1991

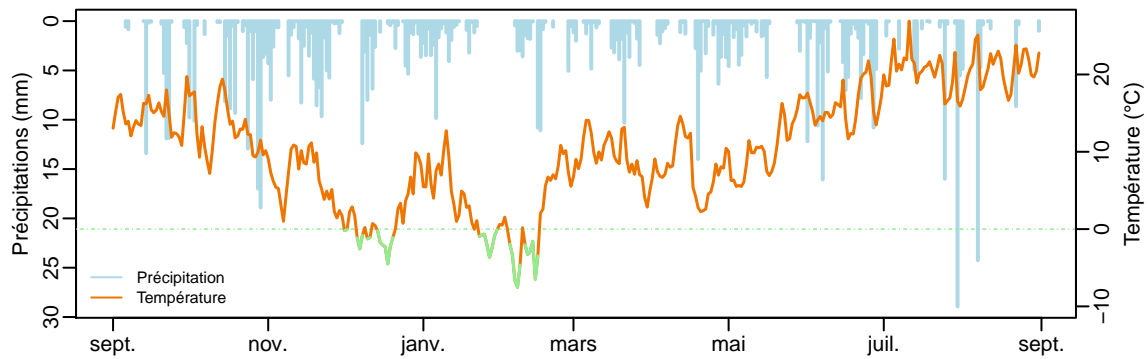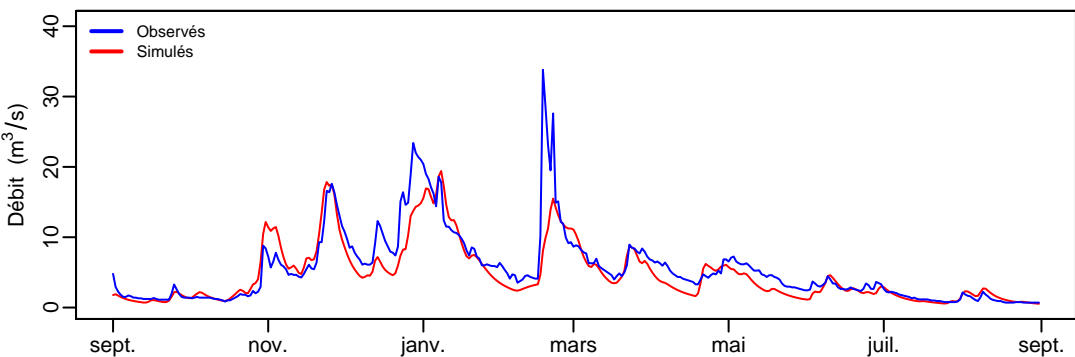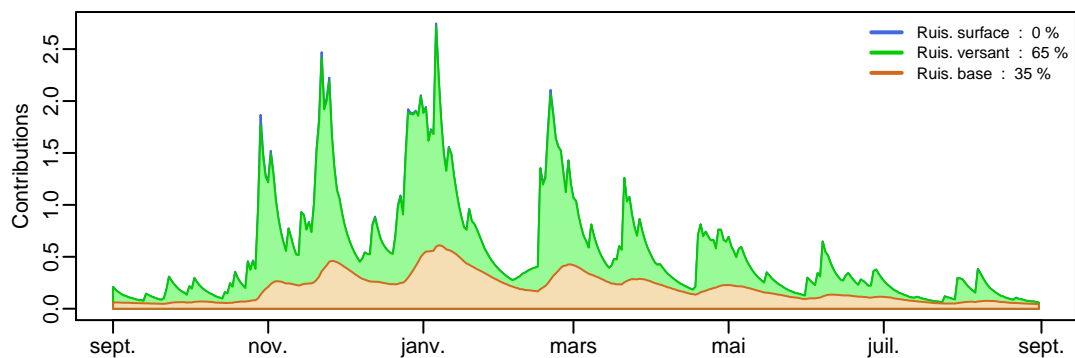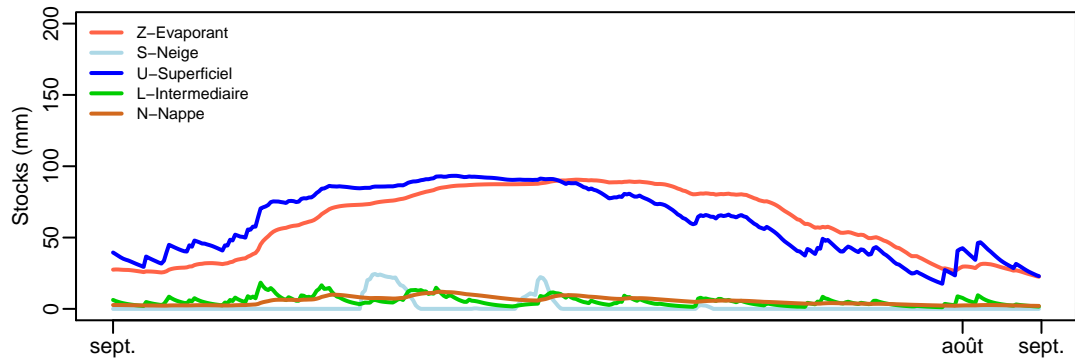

# k1563010 (727.42 km<sup>2</sup>) – année 1991–1992

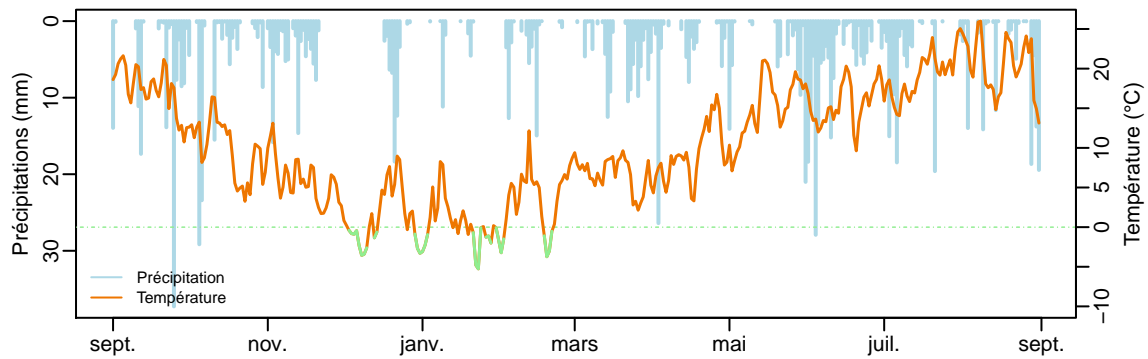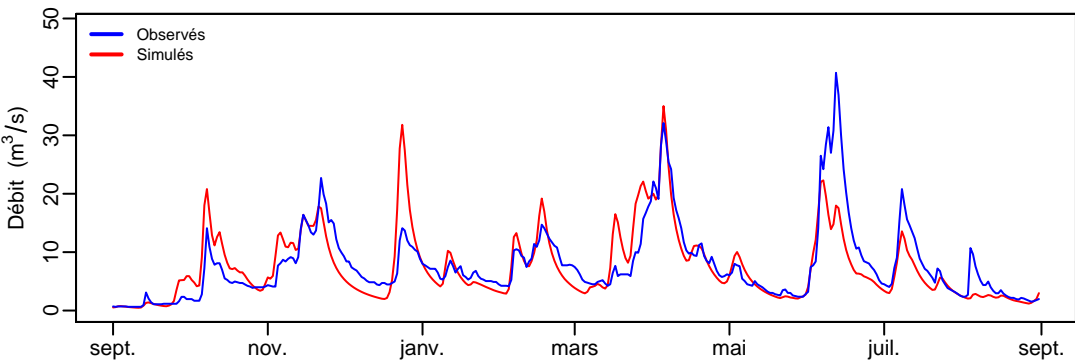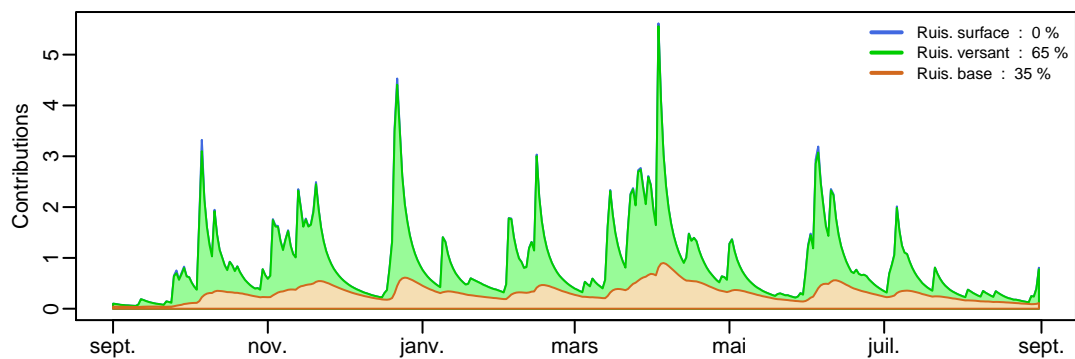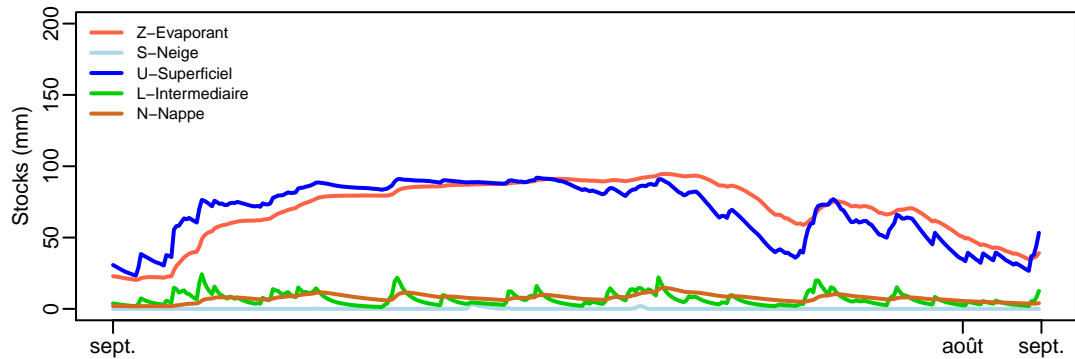

# k1563010 (727.42 km<sup>2</sup>) – année 1992–1993

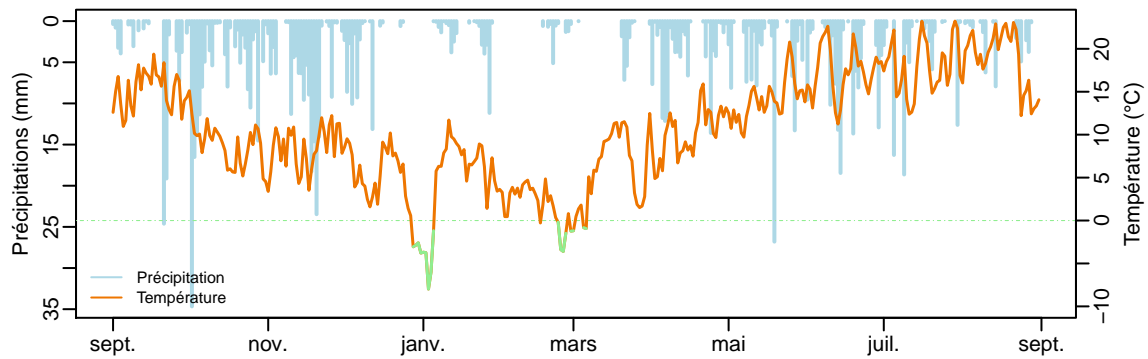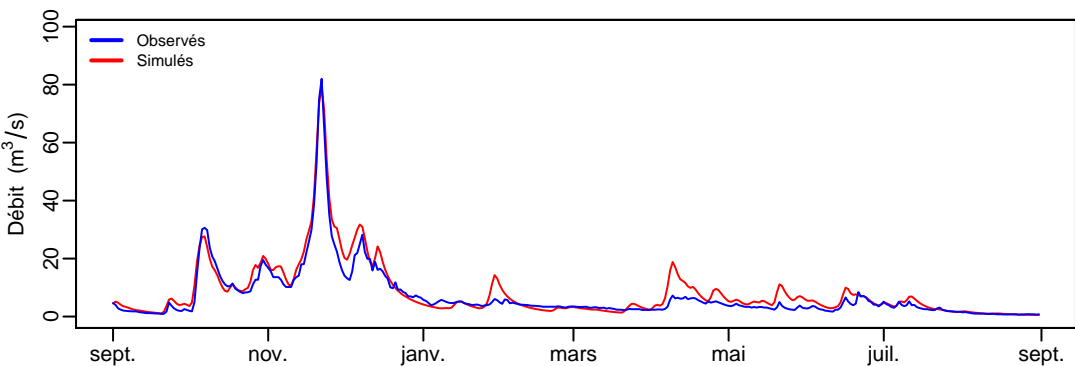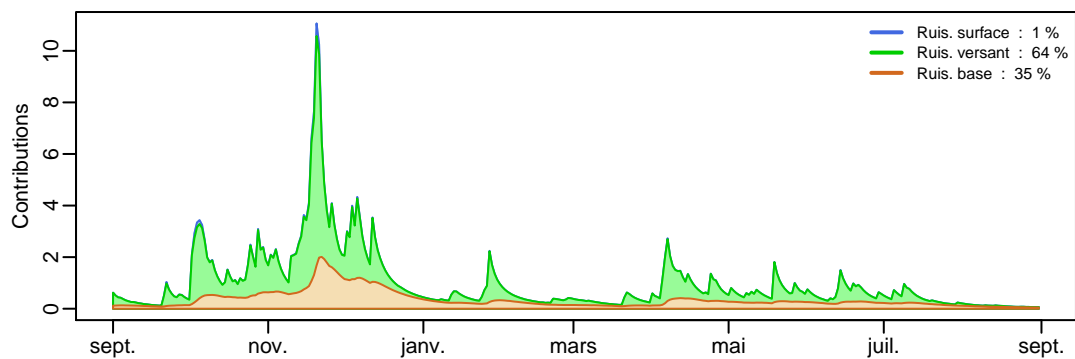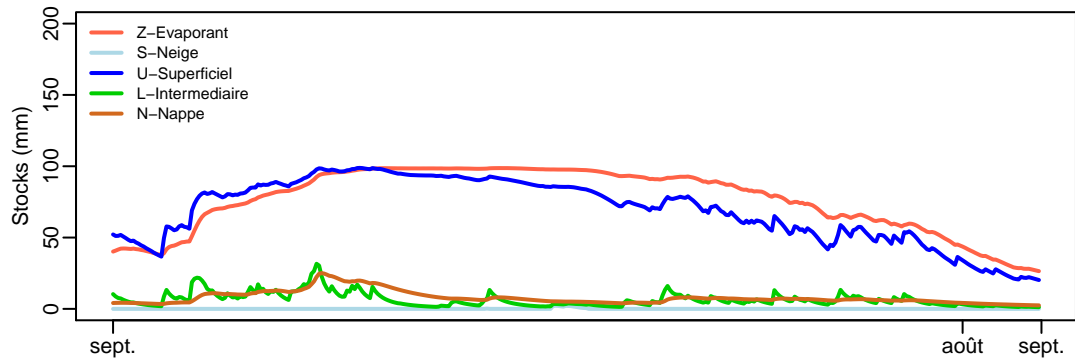



# k1563010 (727.42 km<sup>2</sup>) – année 1993–1994

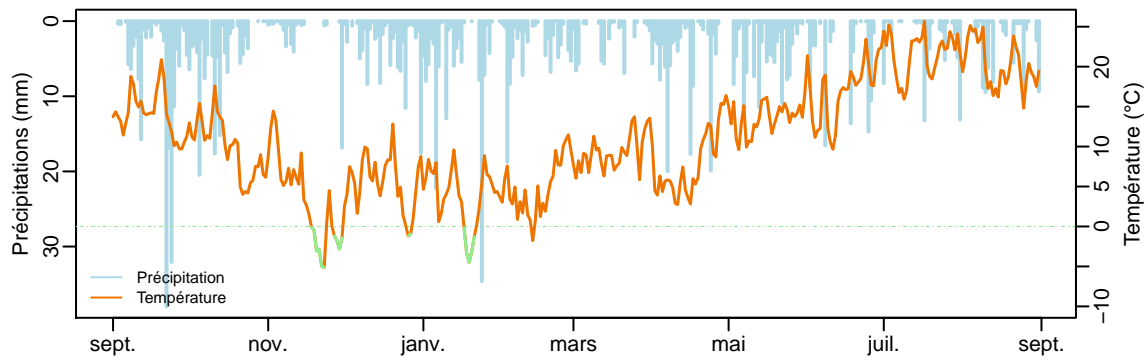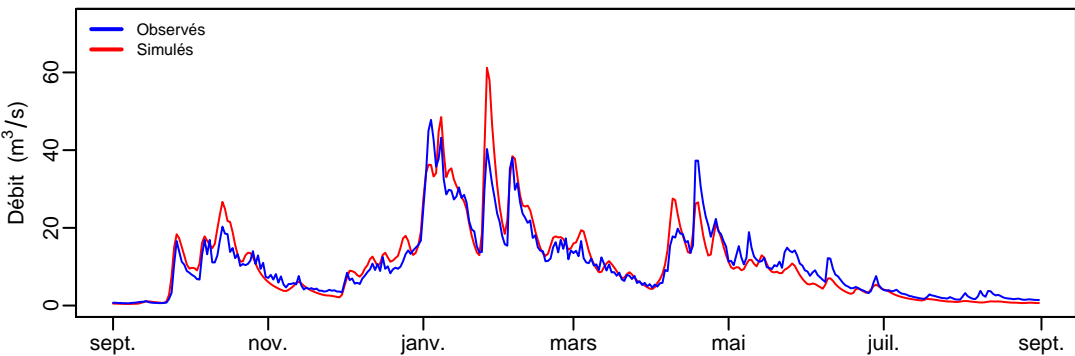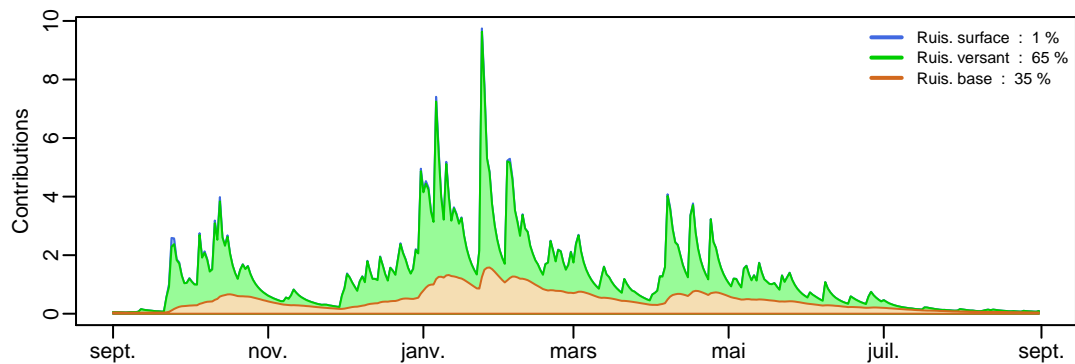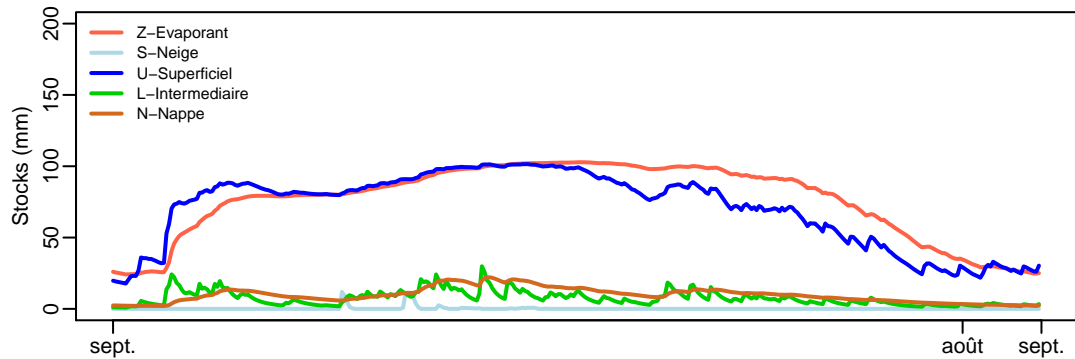

# k1563010 (727.42 km<sup>2</sup>) – année 1994–1995

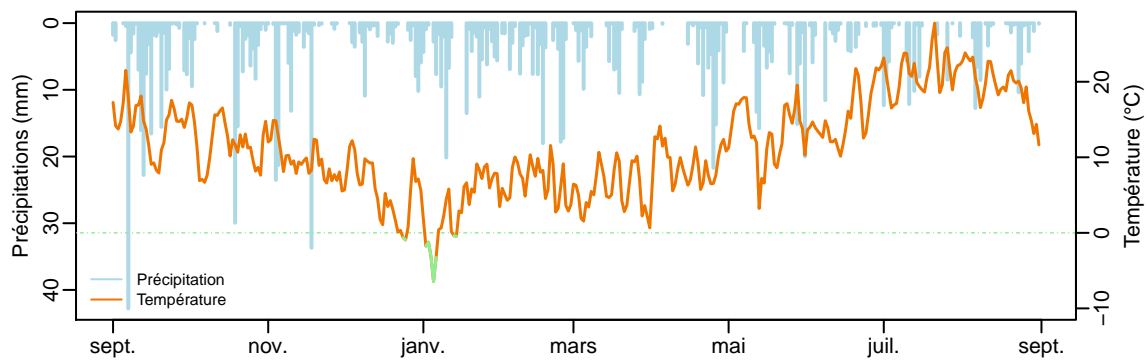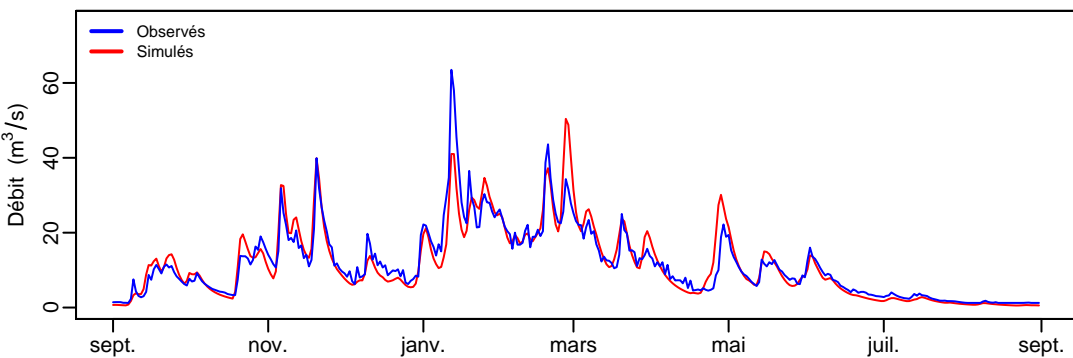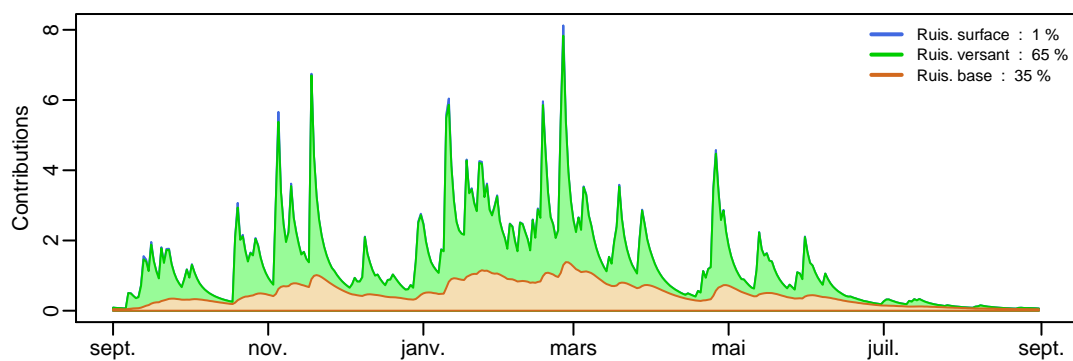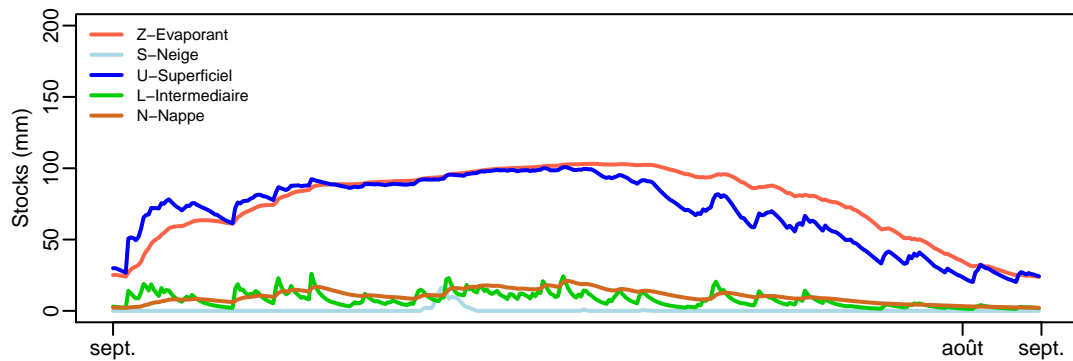

# k1563010 (727.42 km<sup>2</sup>) – année 1995–1996

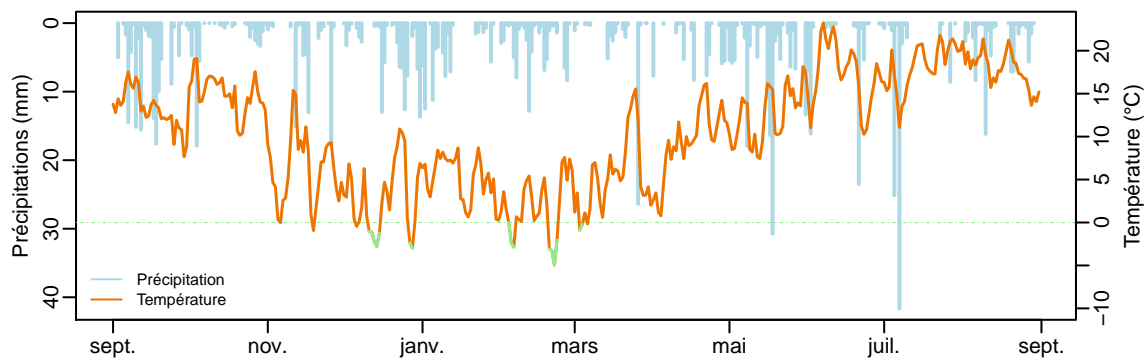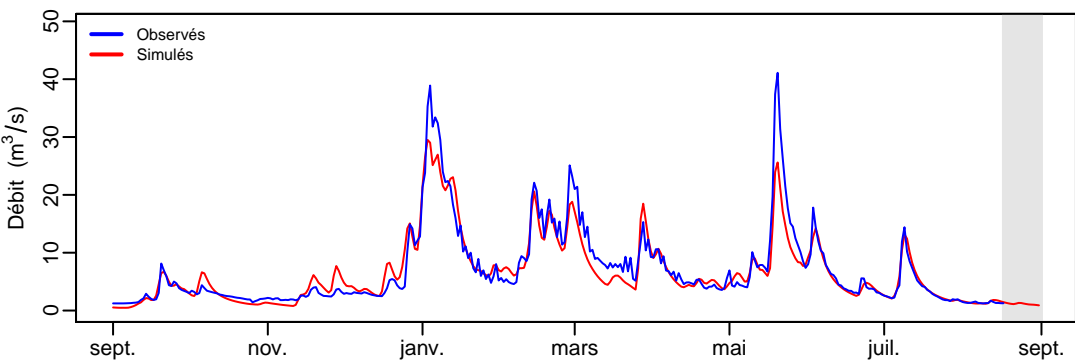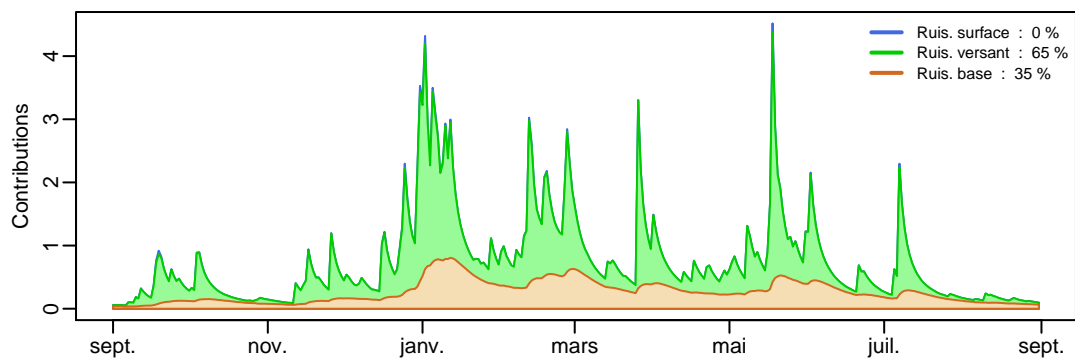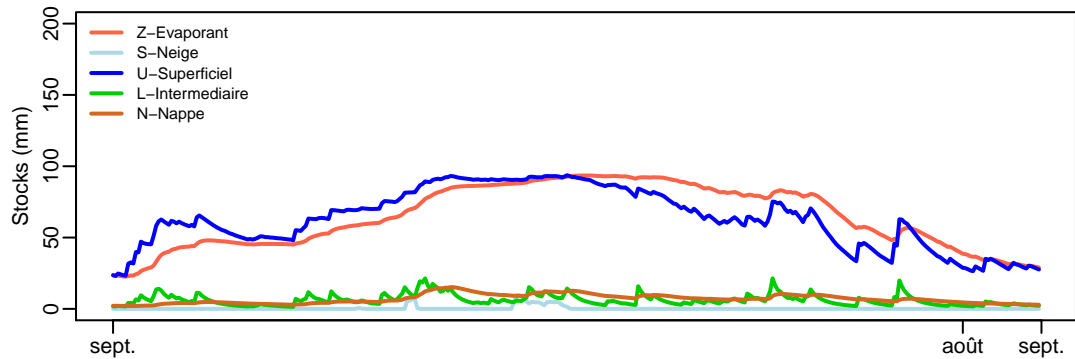

# k1563010 (727.42 km<sup>2</sup>) – année 1996–1997

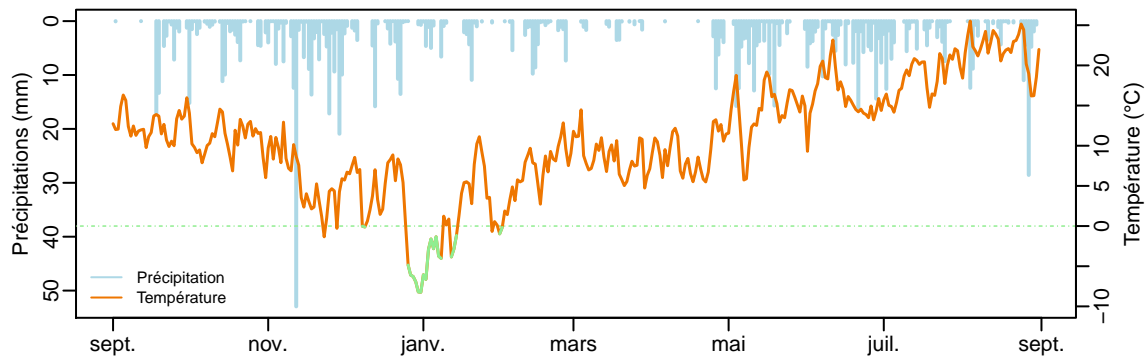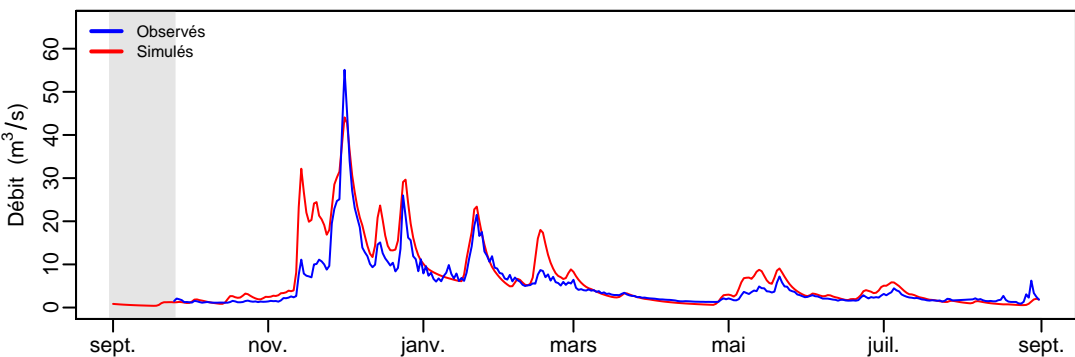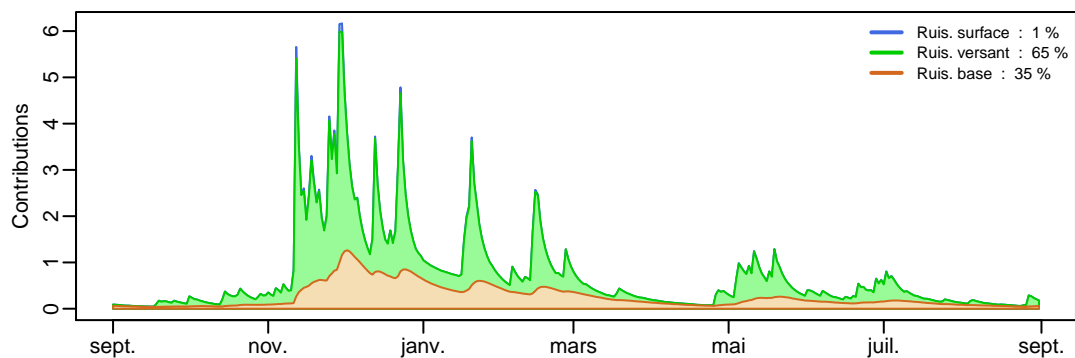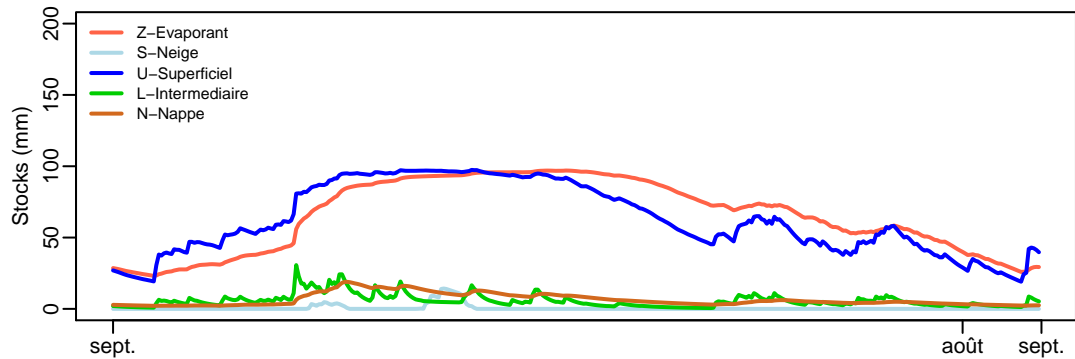

# k1563010 (727.42 km<sup>2</sup>) – année 1997–1998

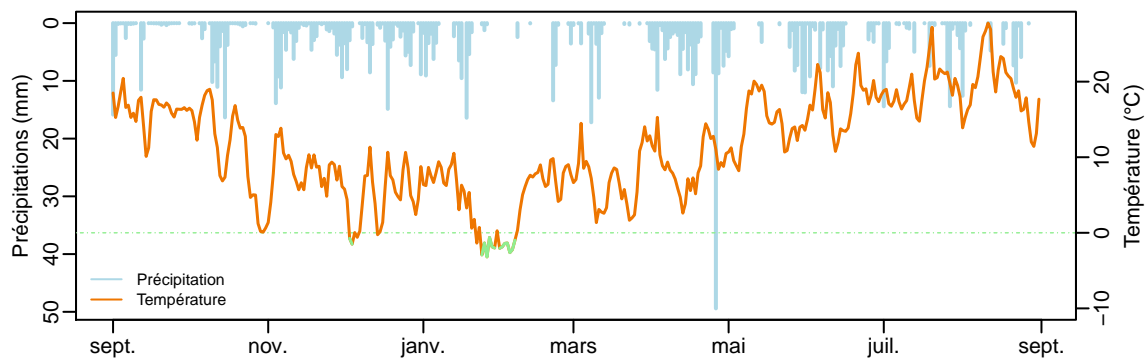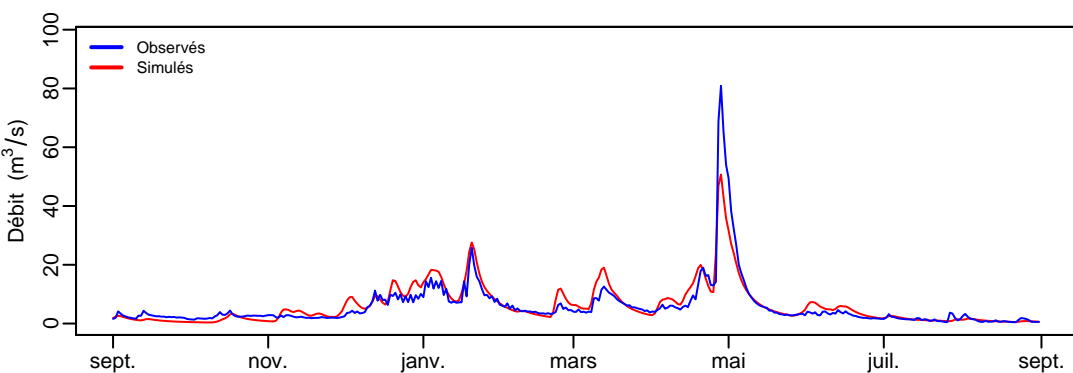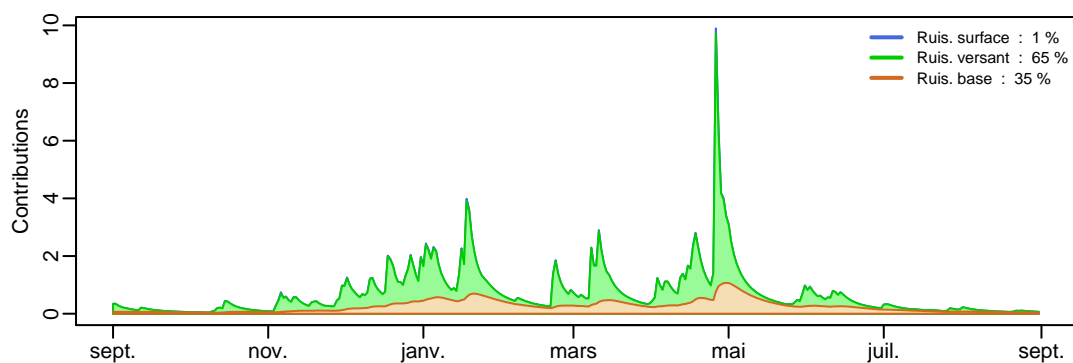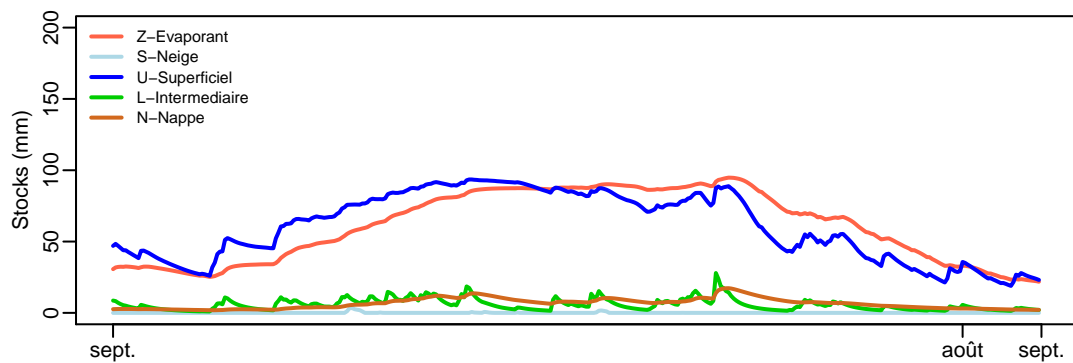

# k1563020 (717.89 km<sup>2</sup>) – année 2000–2001

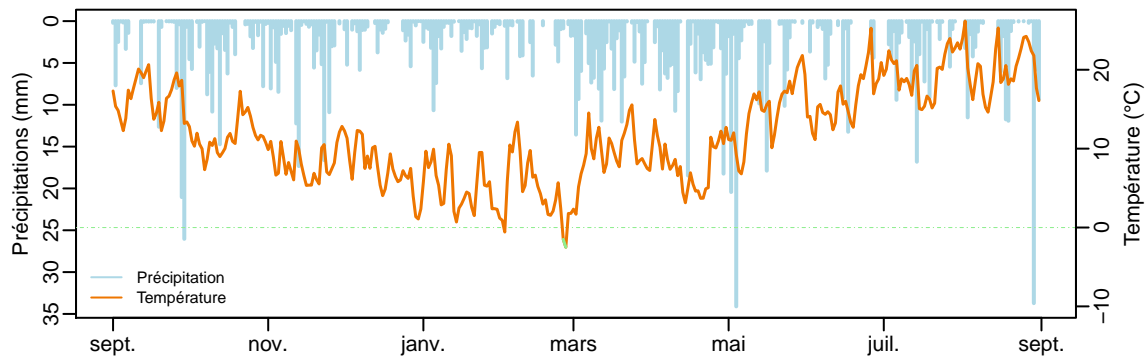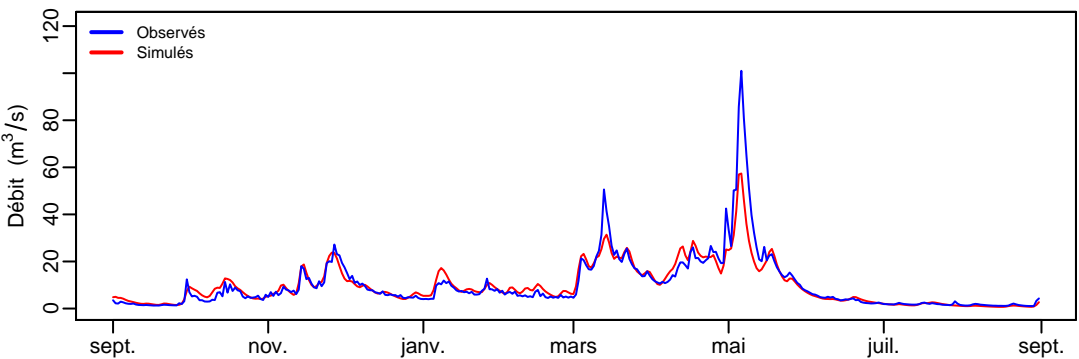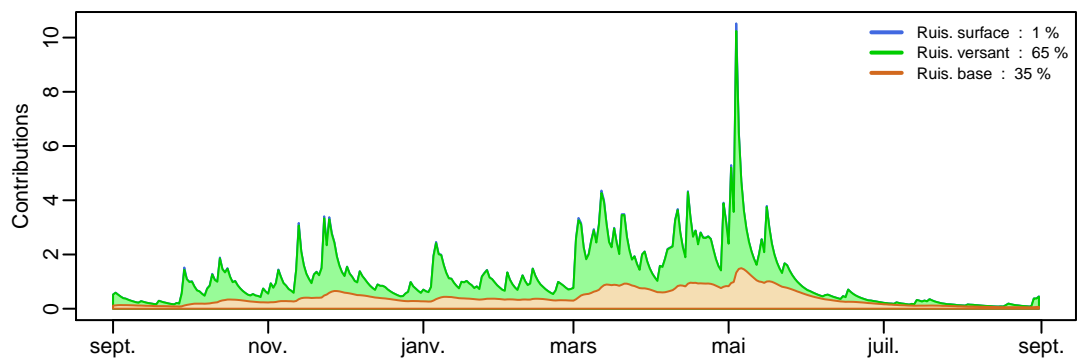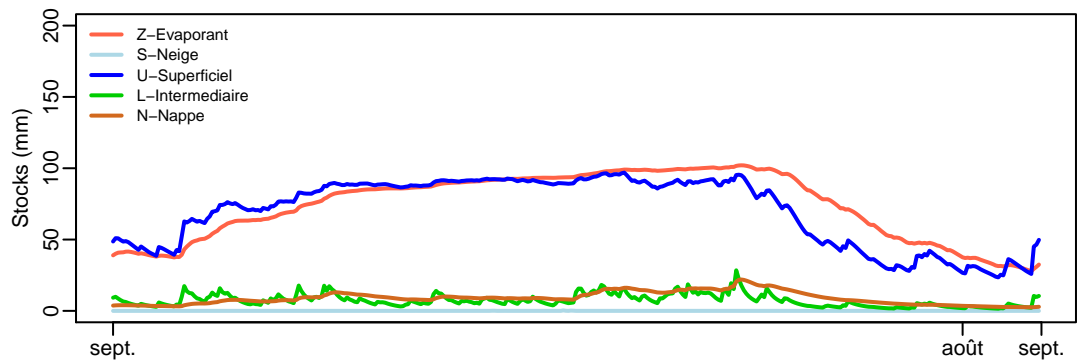

# k1563020 (717.89 km<sup>2</sup>) – année 2001–2002

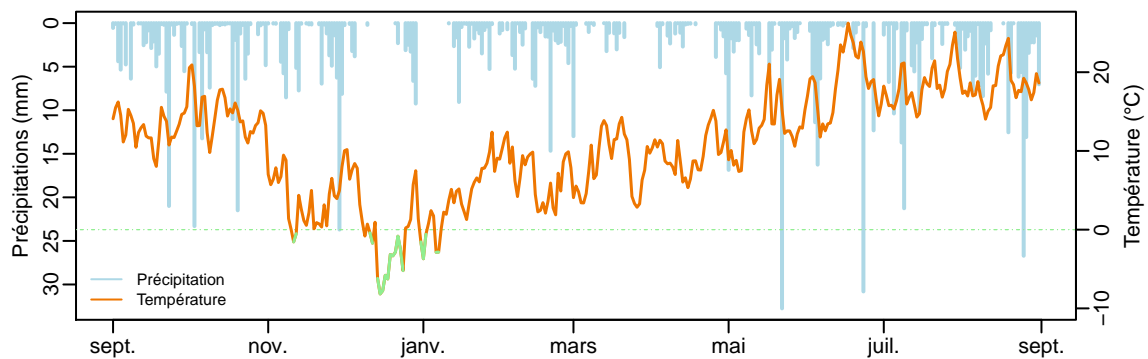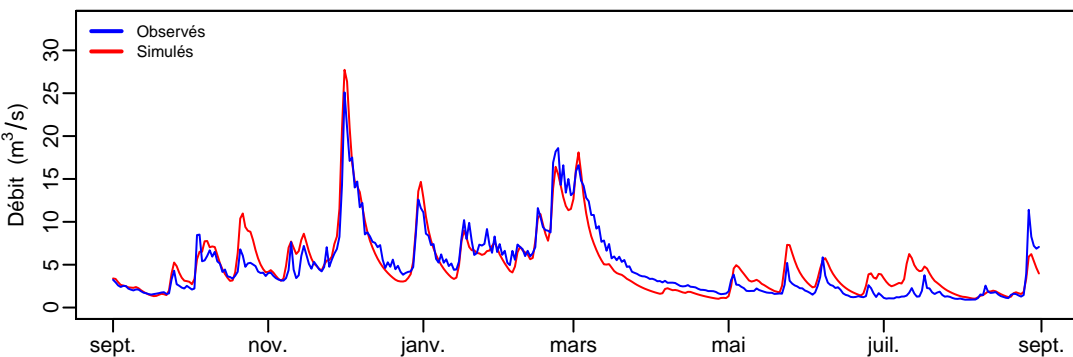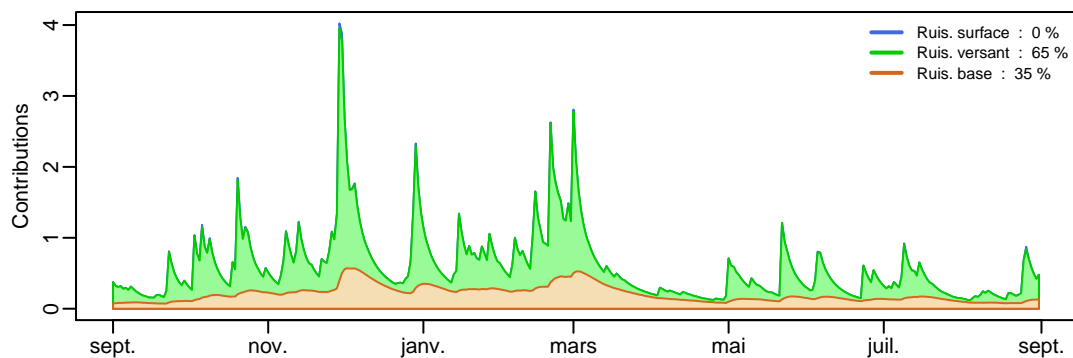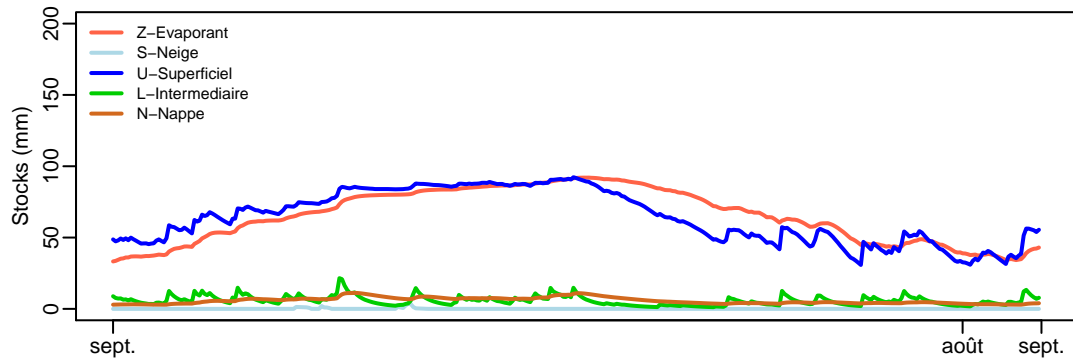

# k1563020 (717.89 km<sup>2</sup>) – année 2002–2003

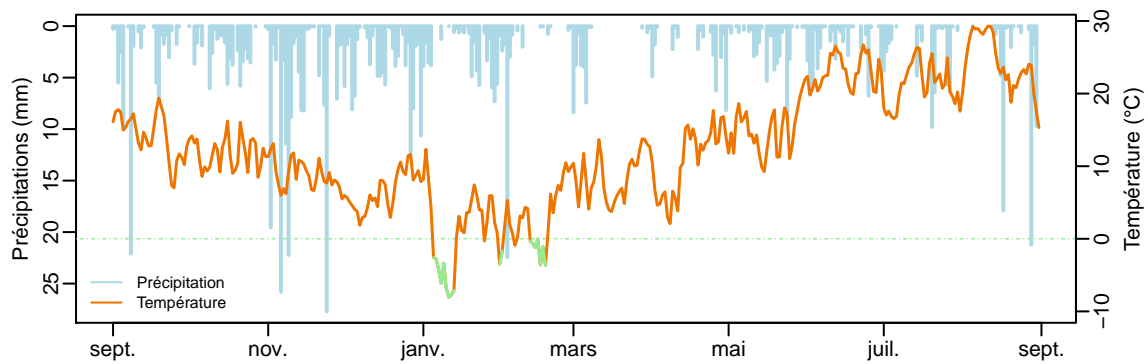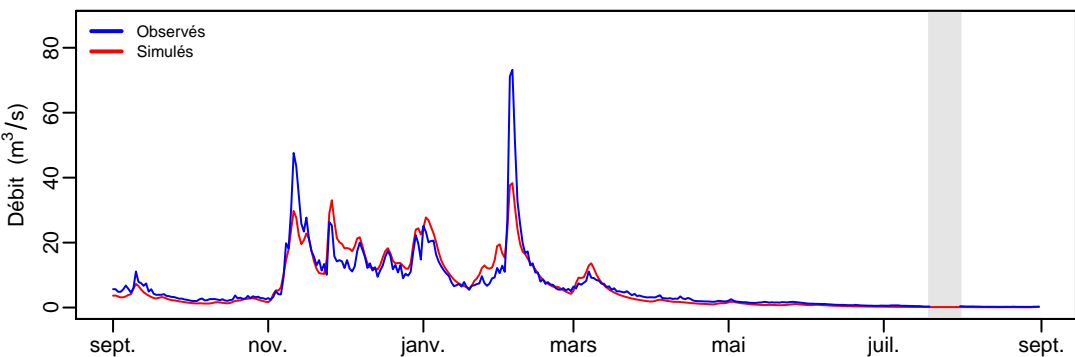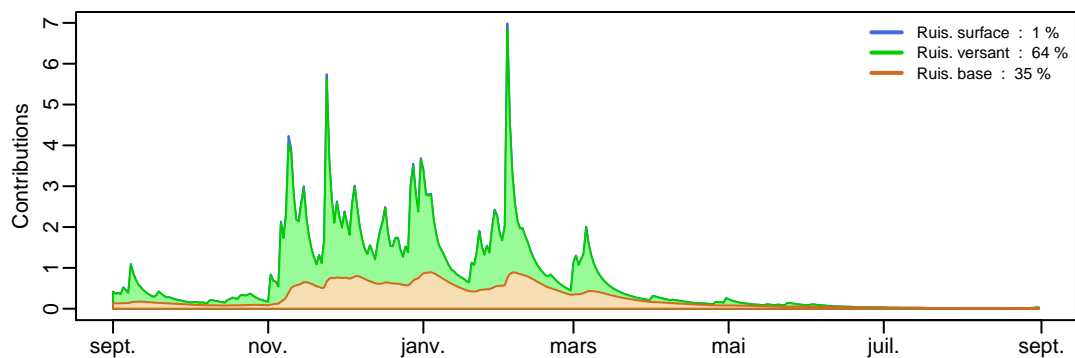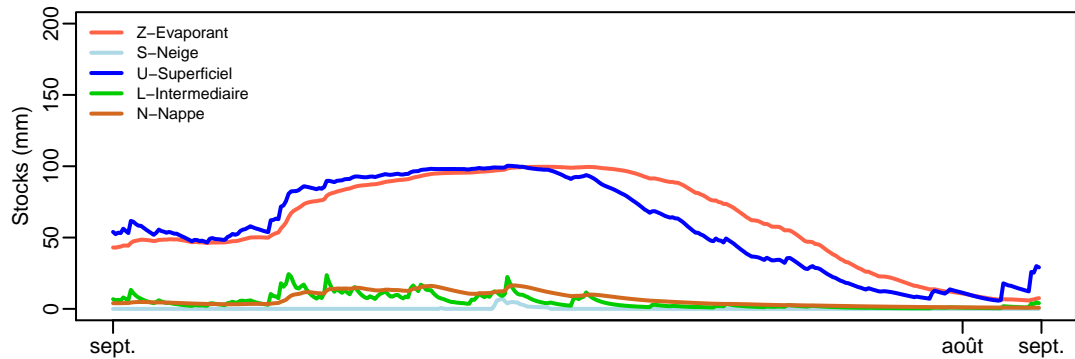



# k1563020 (717.89 km<sup>2</sup>) – année 2003–2004

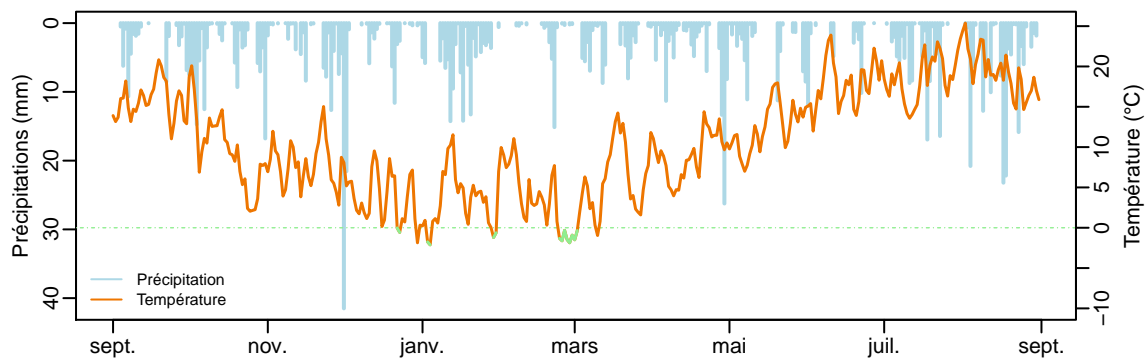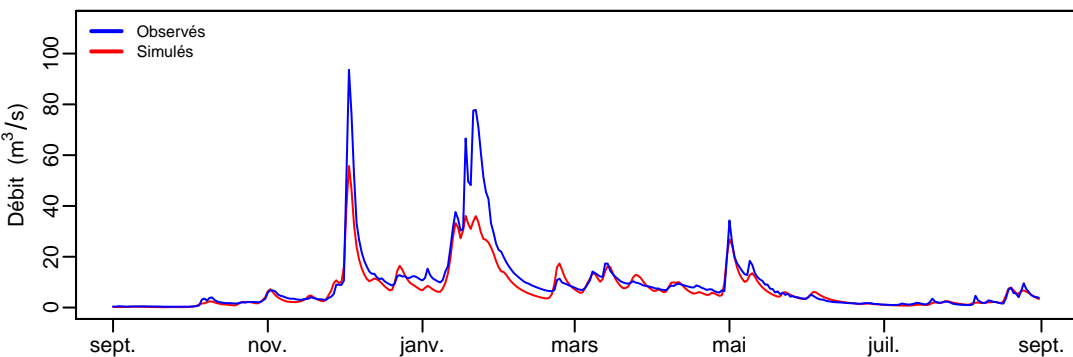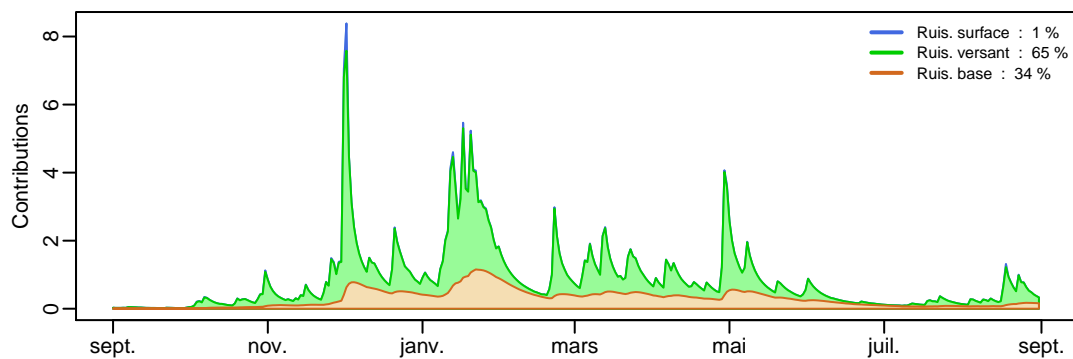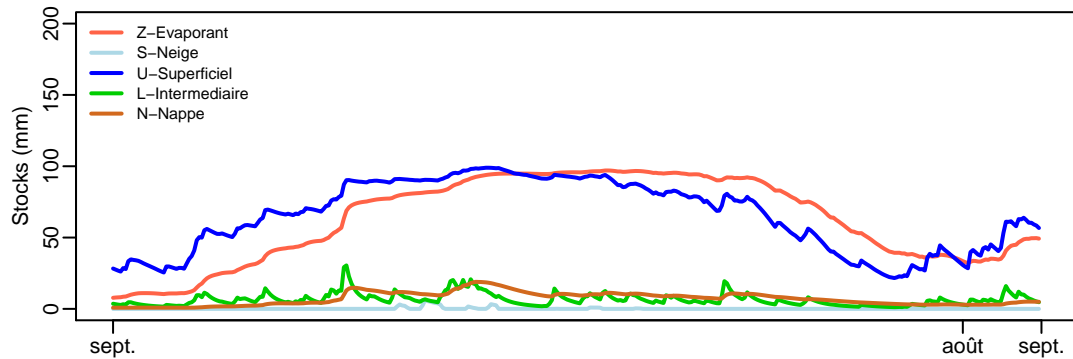

# k1563020 (717.89 km<sup>2</sup>) – année 2004–2005

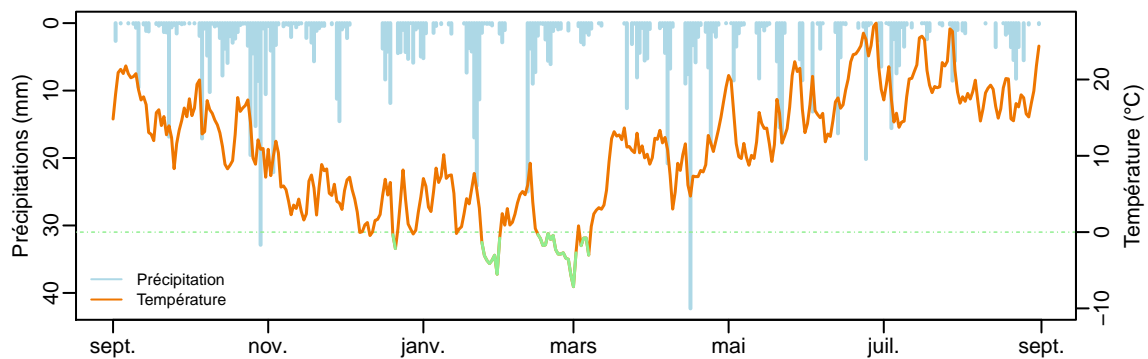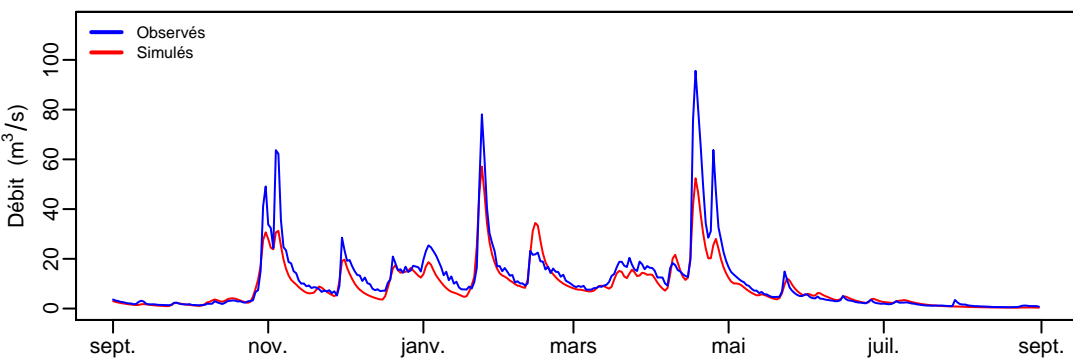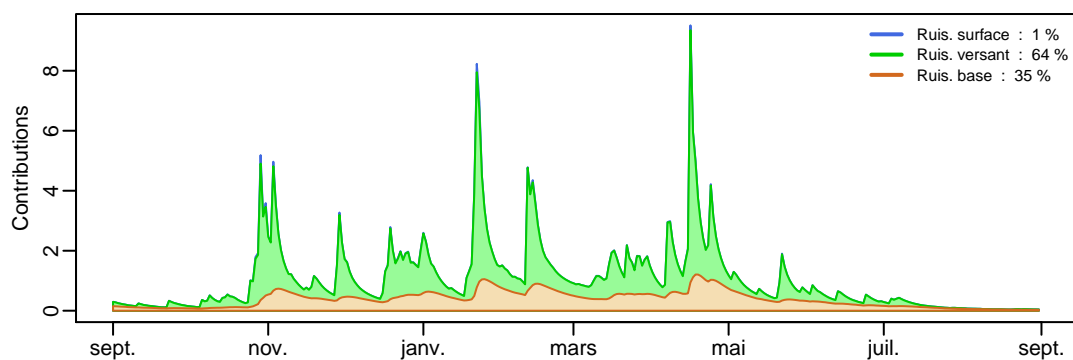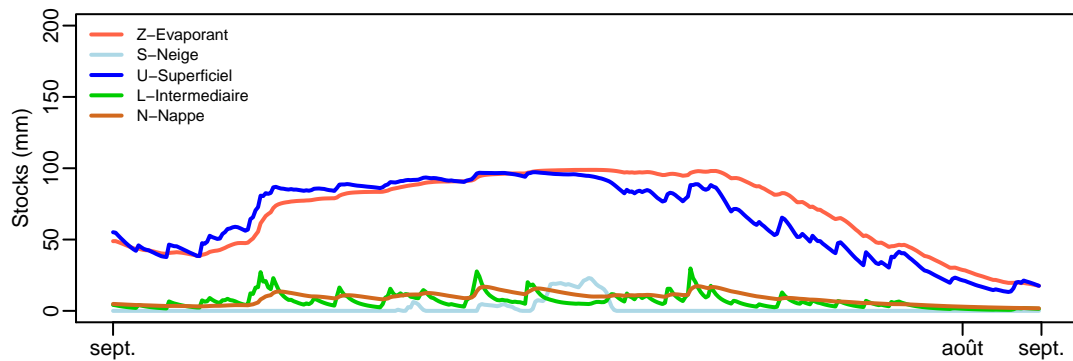

# k1563020 (717.89 km<sup>2</sup>) – année 2005–2006

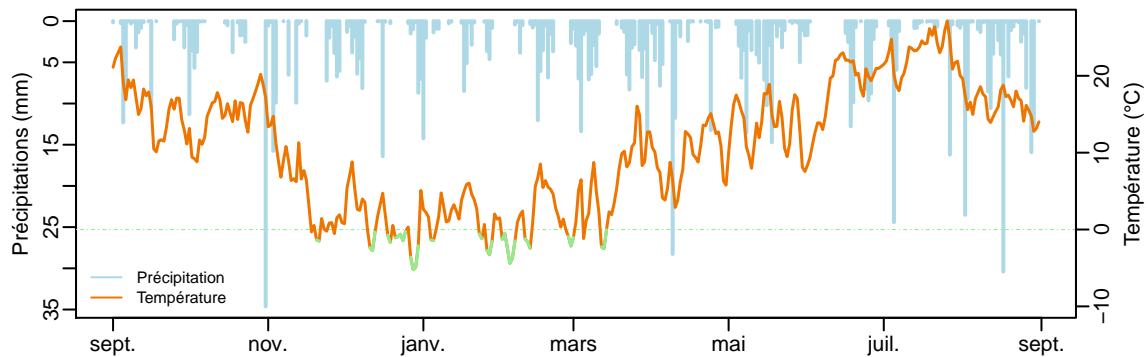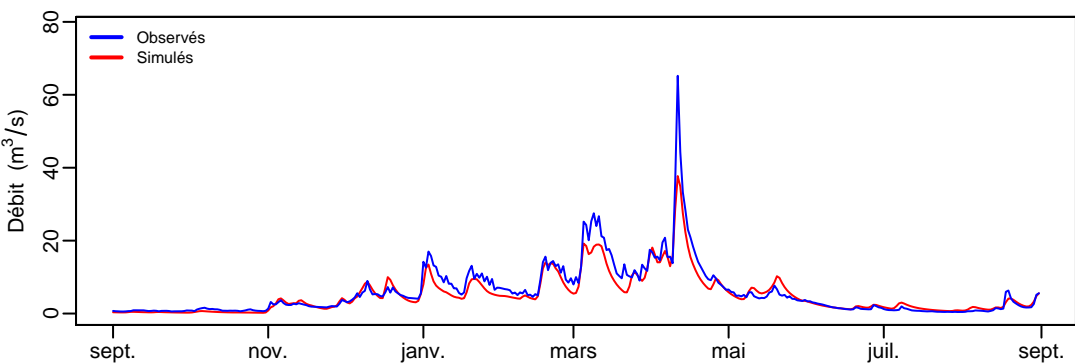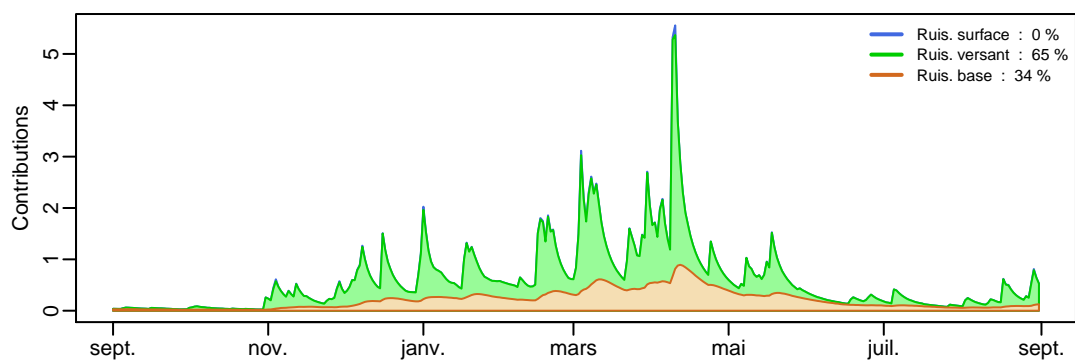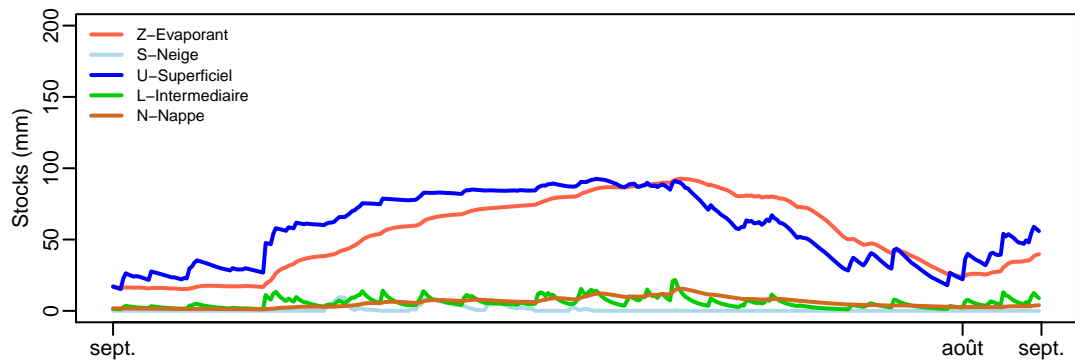

# k1563020 (717.89 km<sup>2</sup>) – année 2006–2007

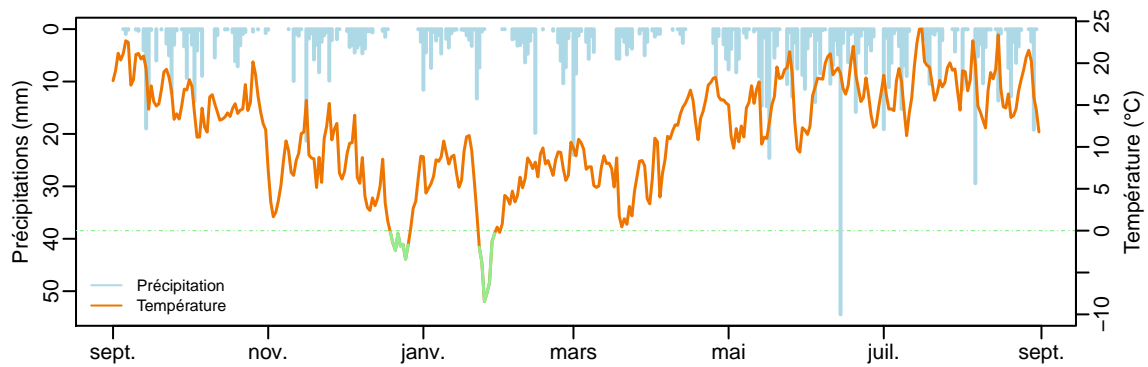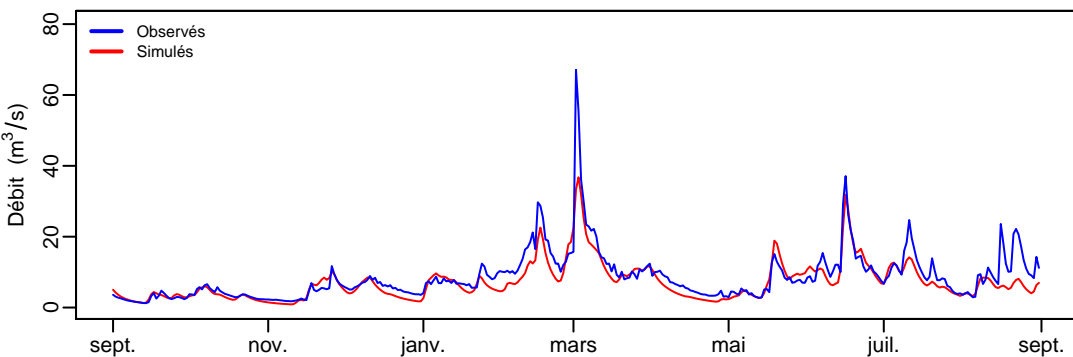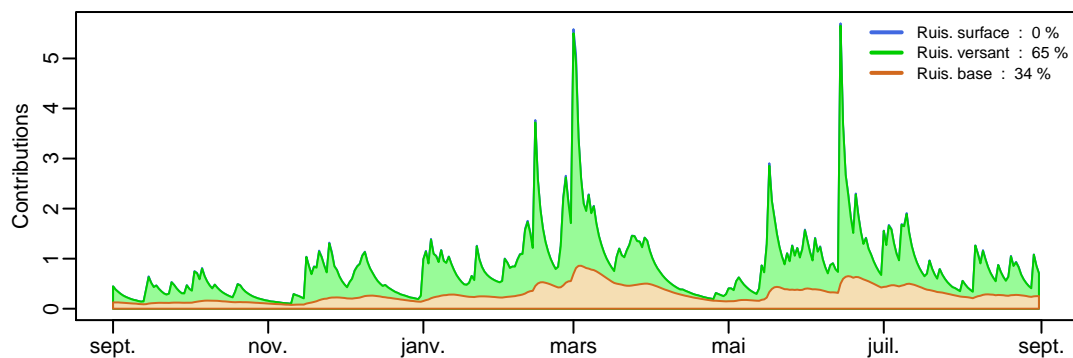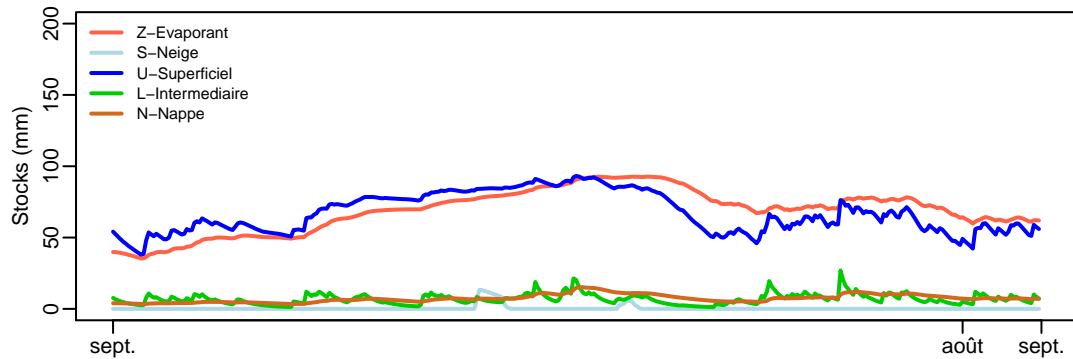

# k1563020 (717.89 km<sup>2</sup>) – année 2007–2008

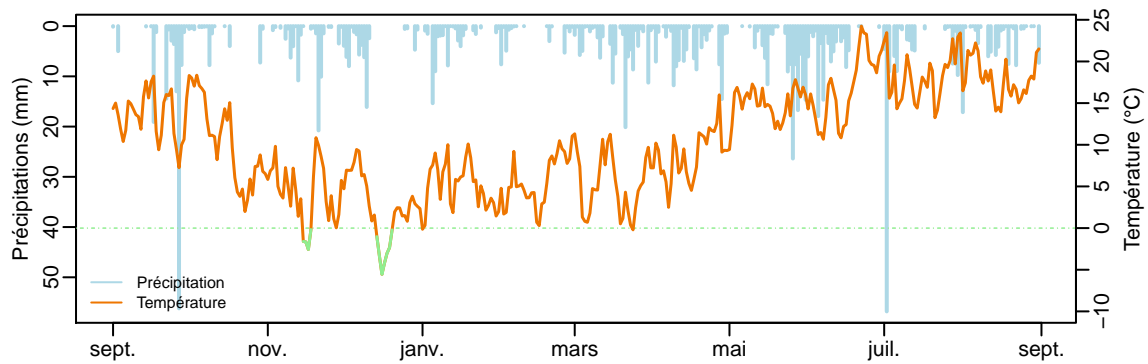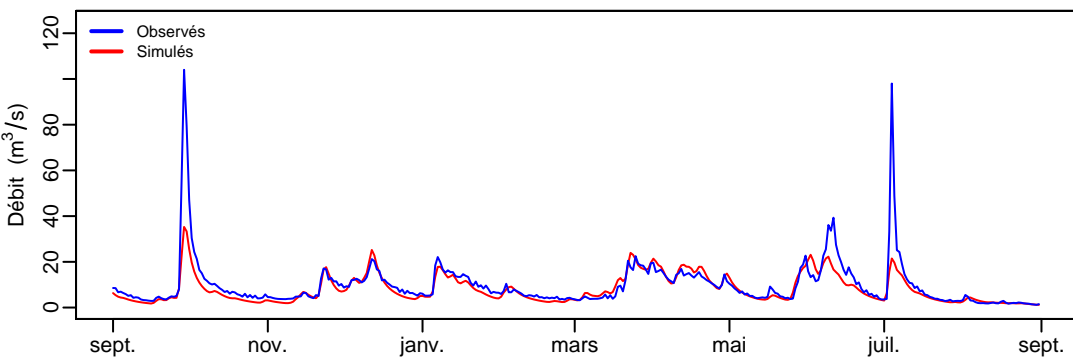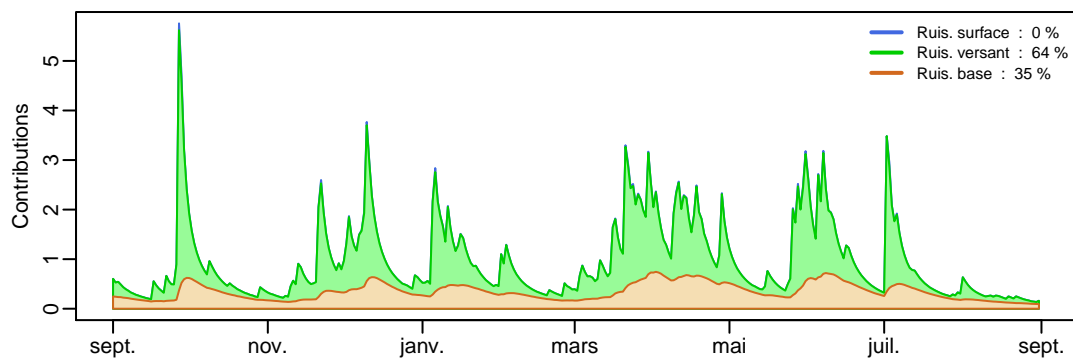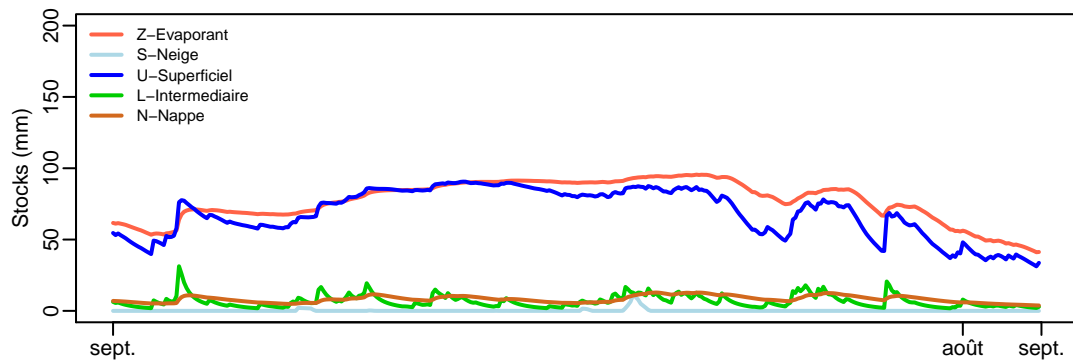

# k1563020 (717.89 km<sup>2</sup>) – année 2008–2009

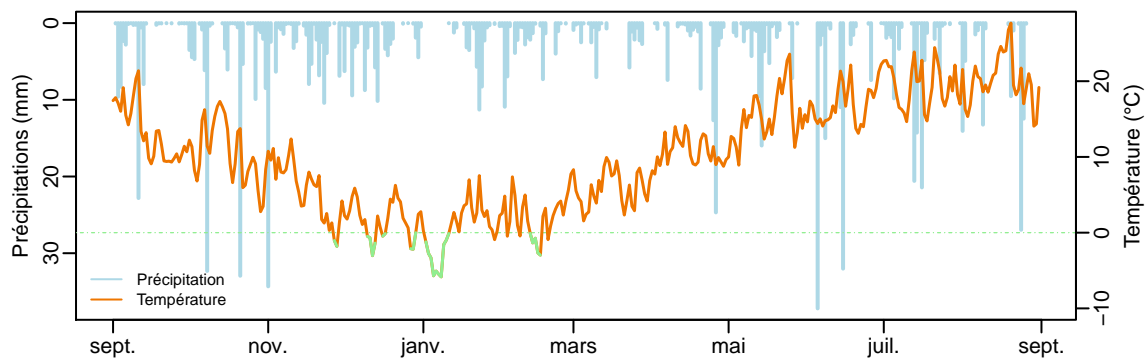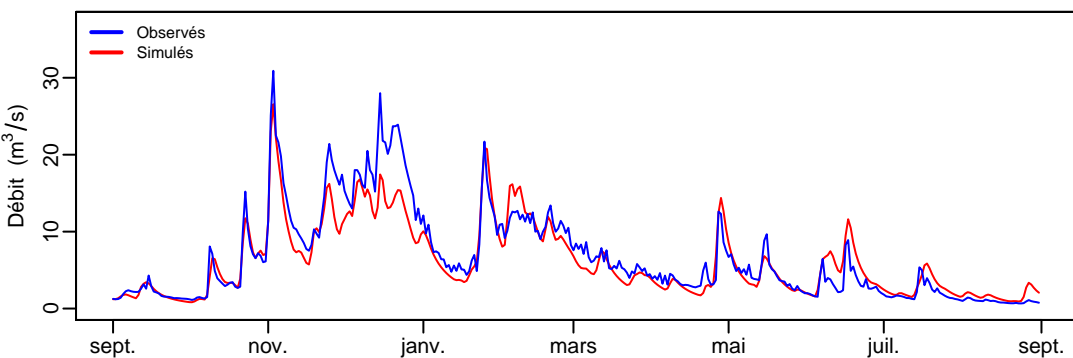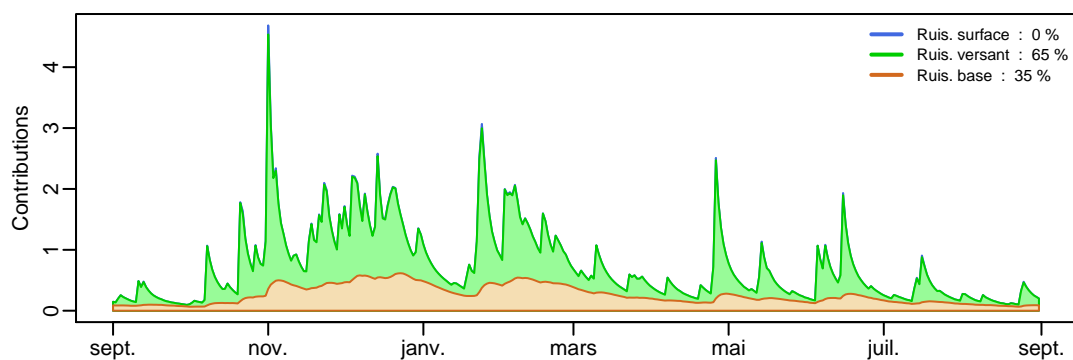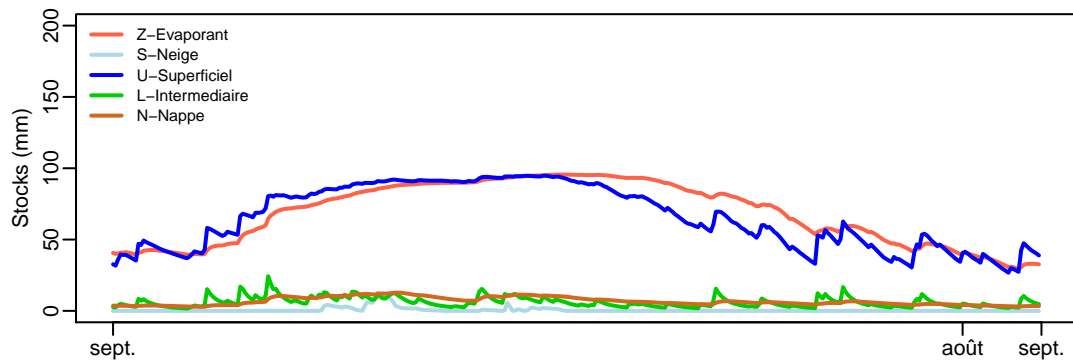

# k1563020 (717.89 km<sup>2</sup>) – année 2009–2010

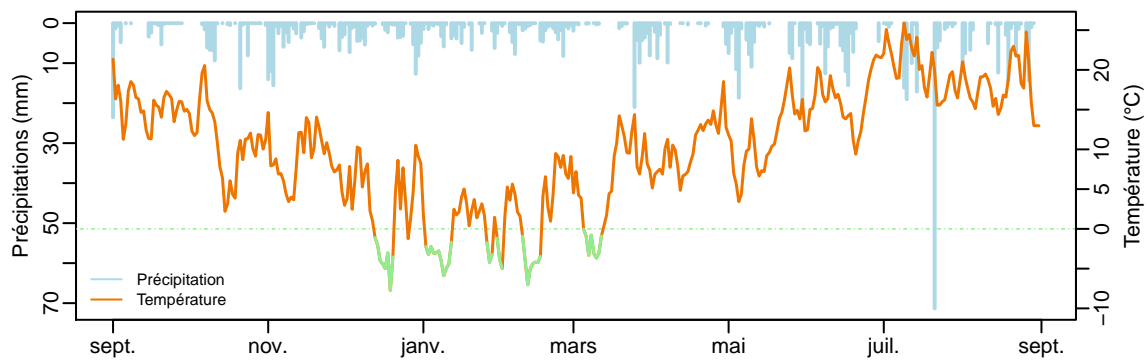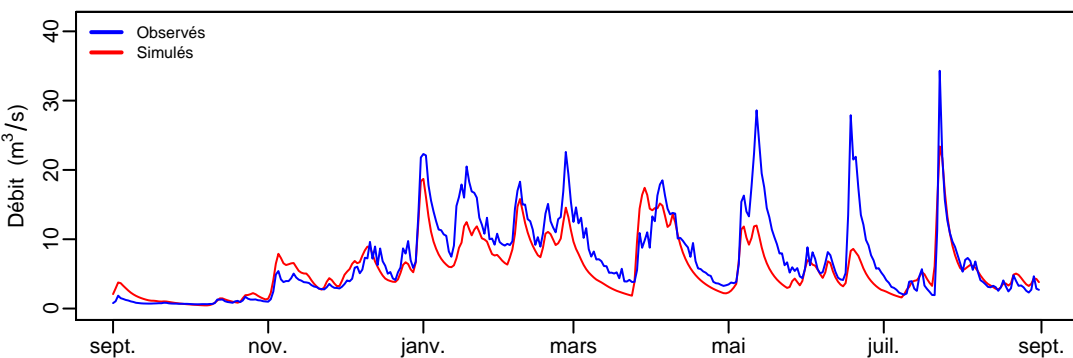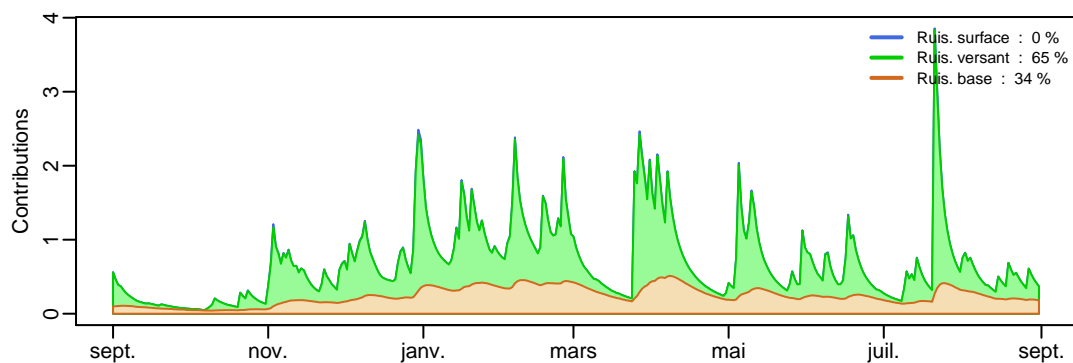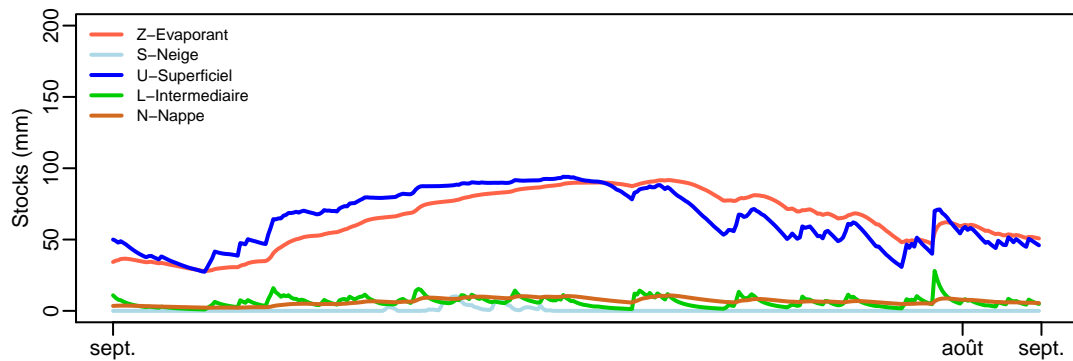

# k1563020 (717.89 km<sup>2</sup>) – année 2010–2011

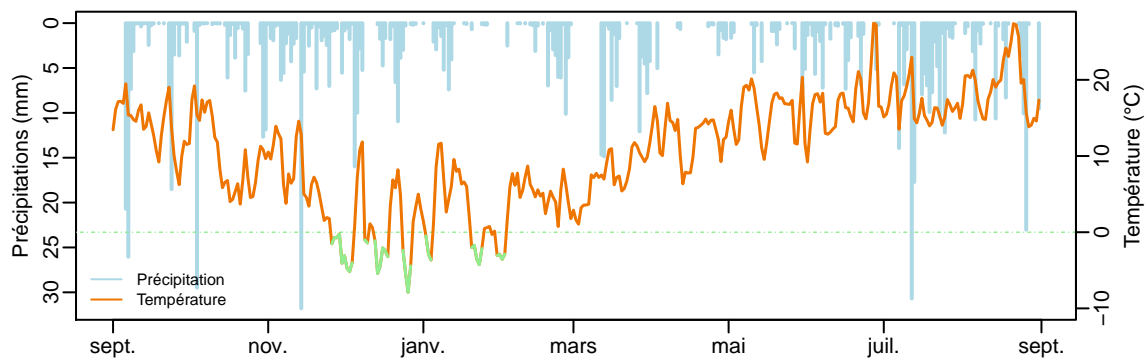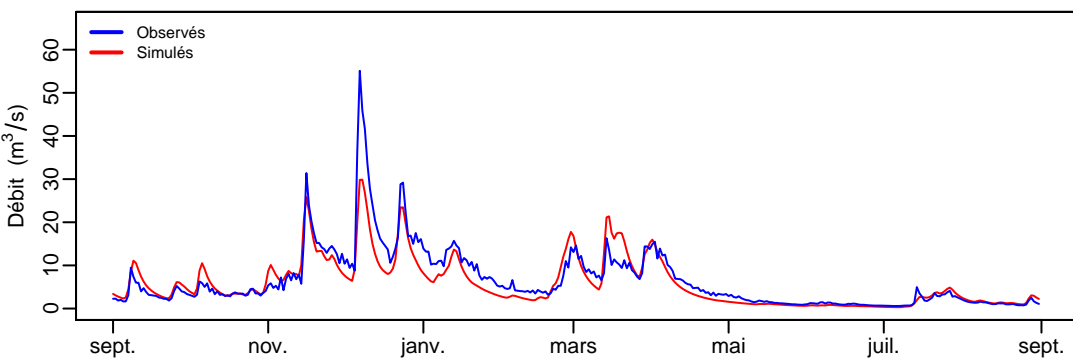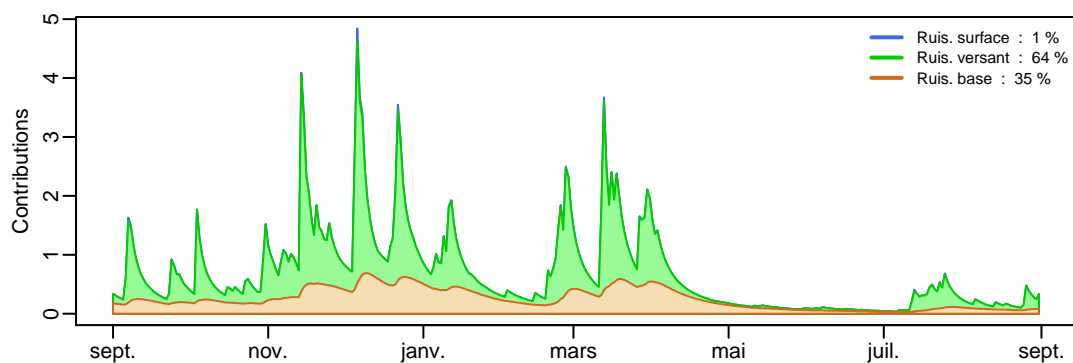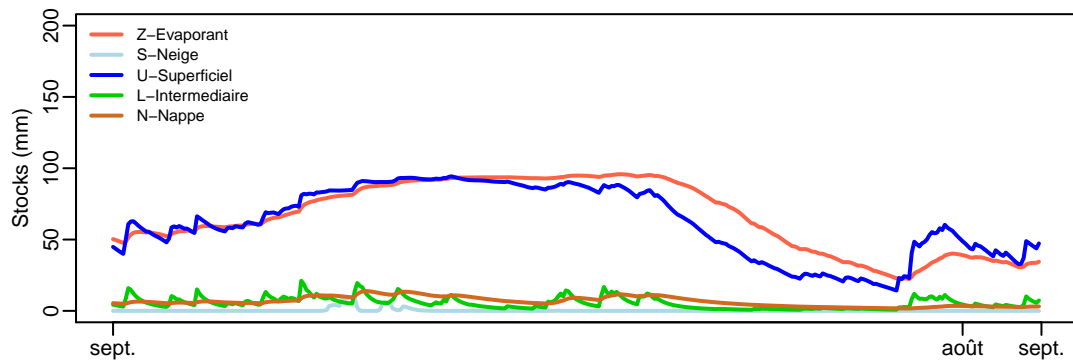



# k1563020 (717.89 km<sup>2</sup>) – année 2011–2012

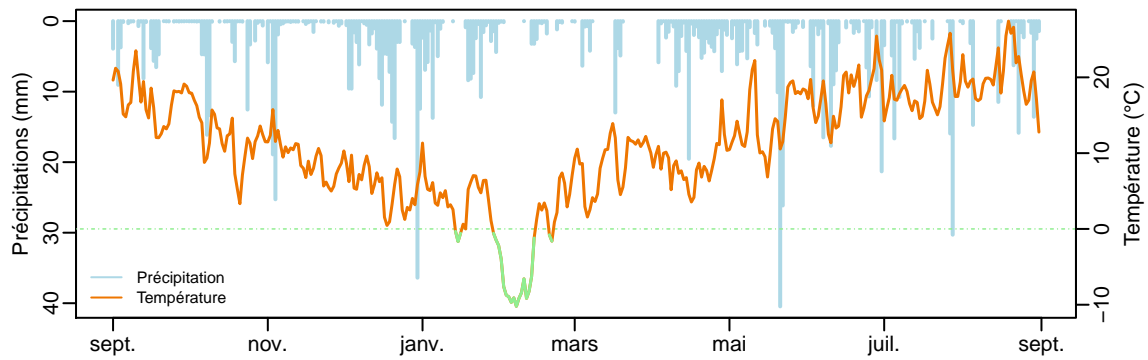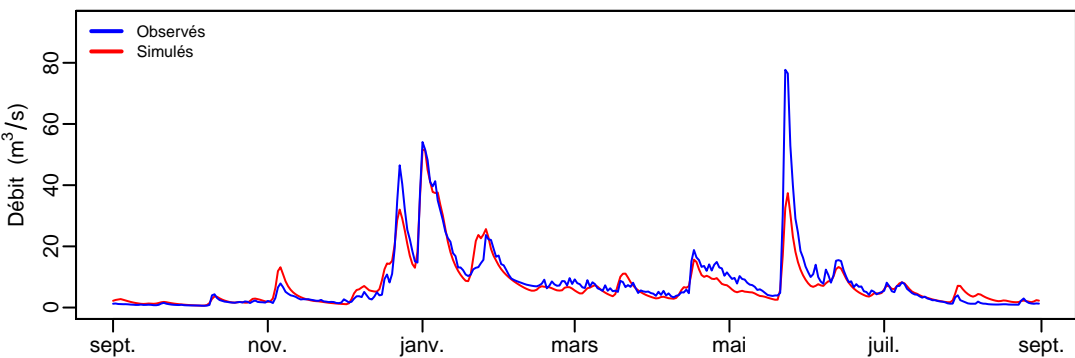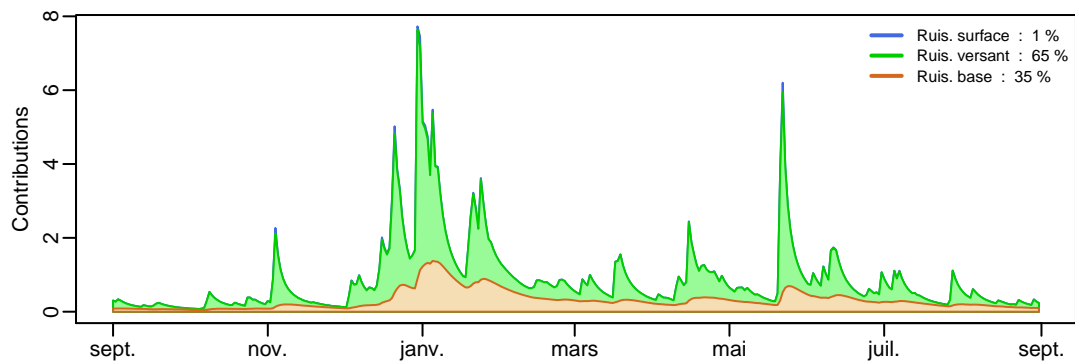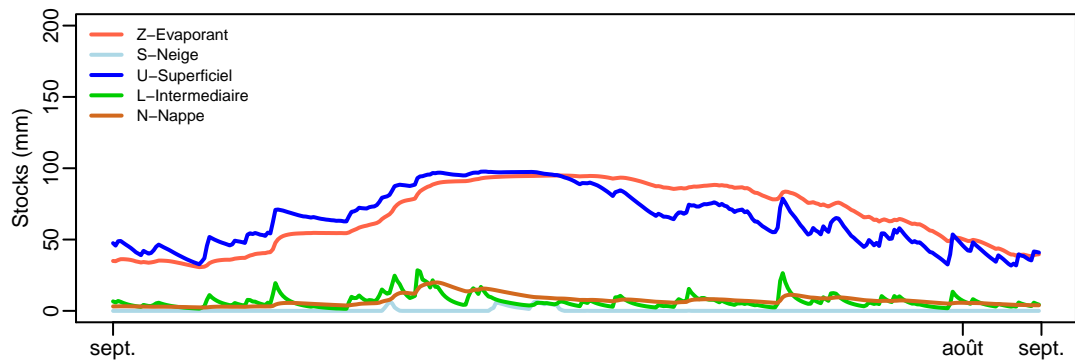

# k1713010 (184.46 km<sup>2</sup>) – année 1996–1997

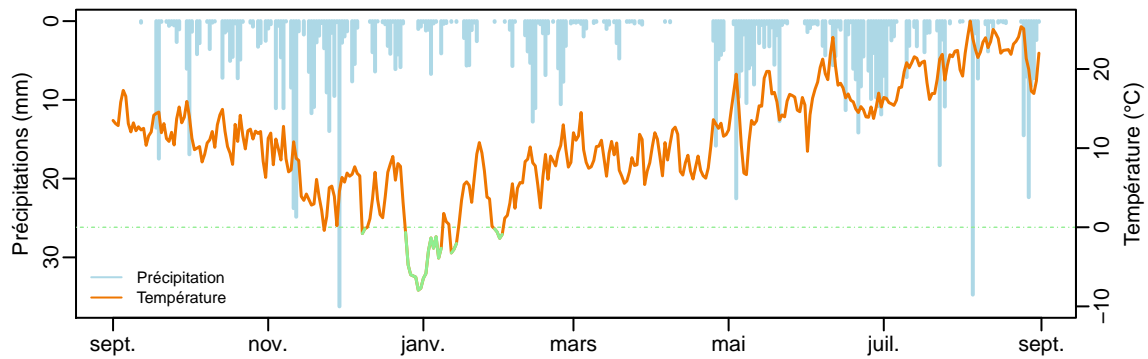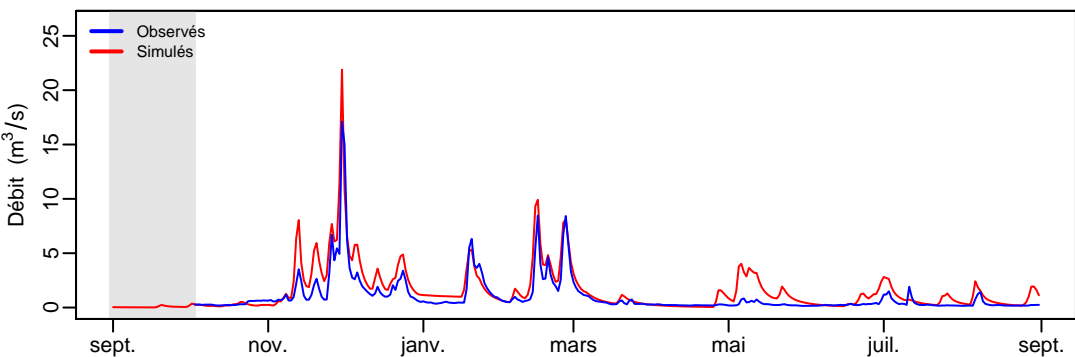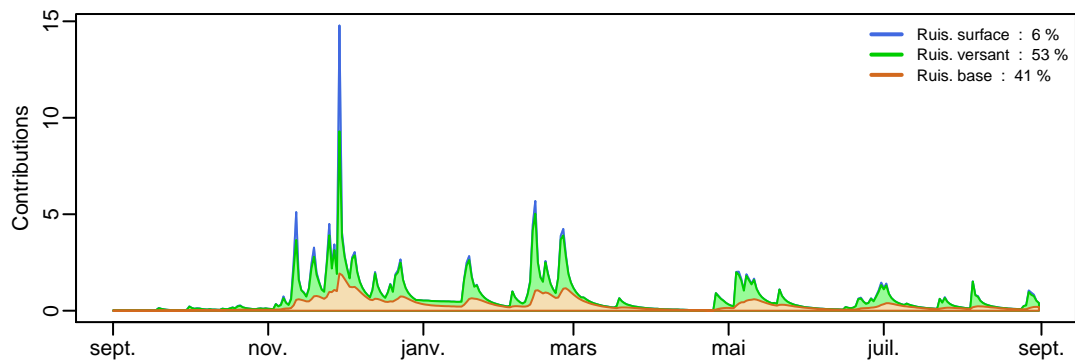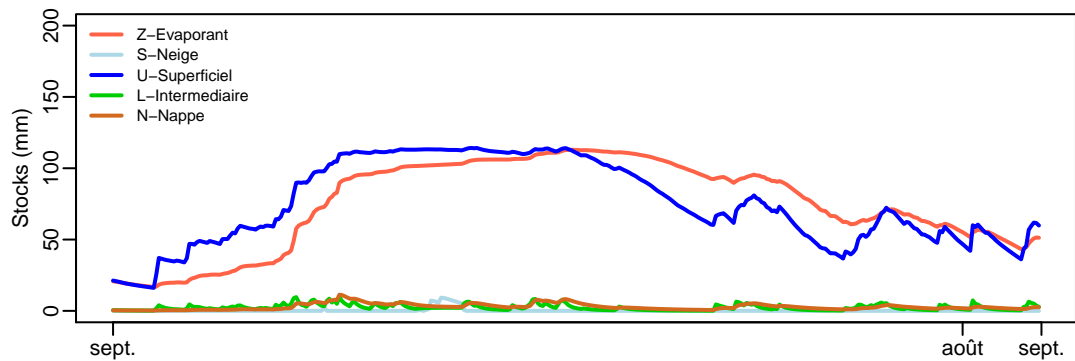

# k1713010 (184.46 km<sup>2</sup>) – année 1997–1998

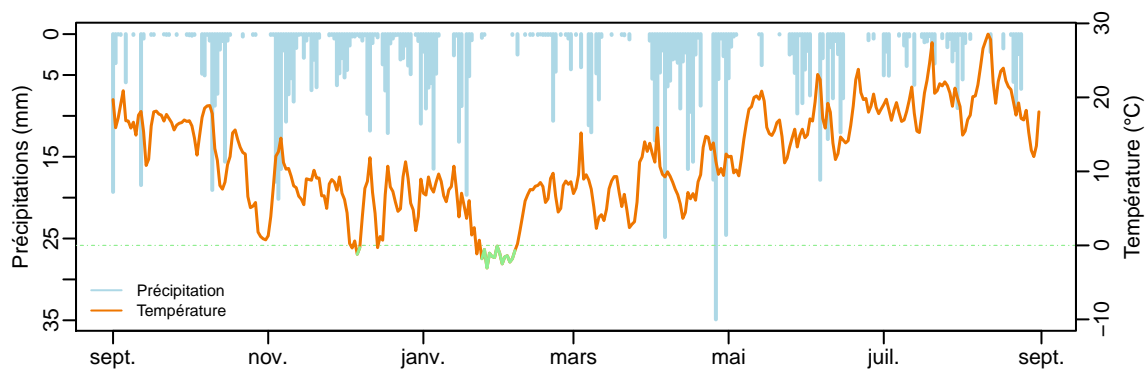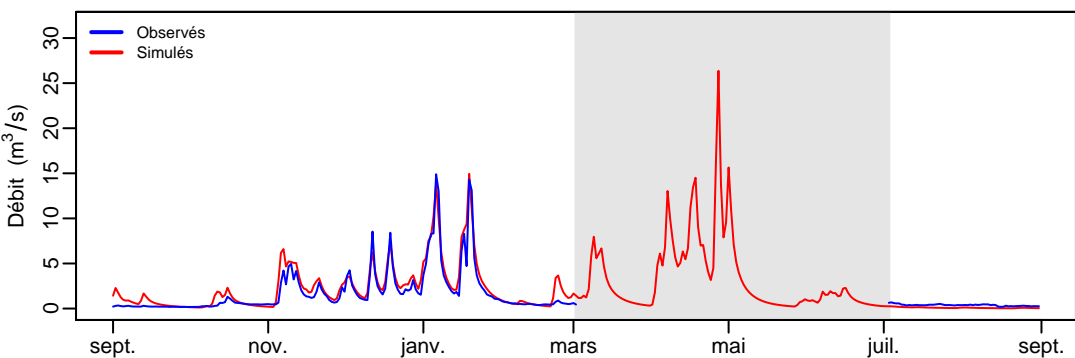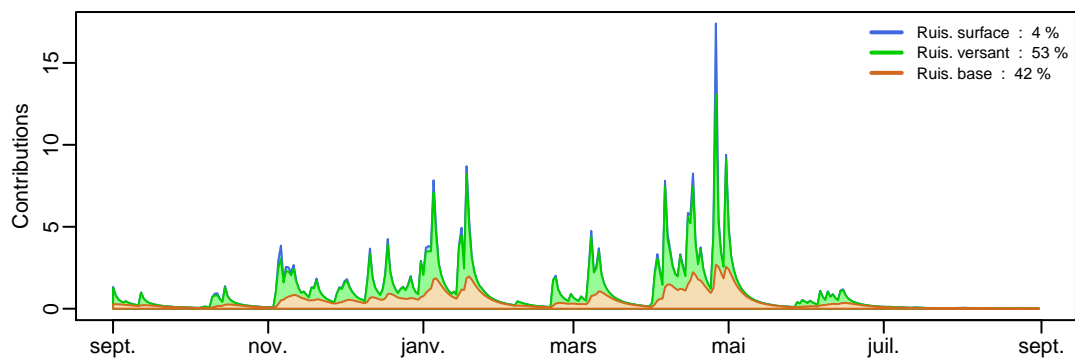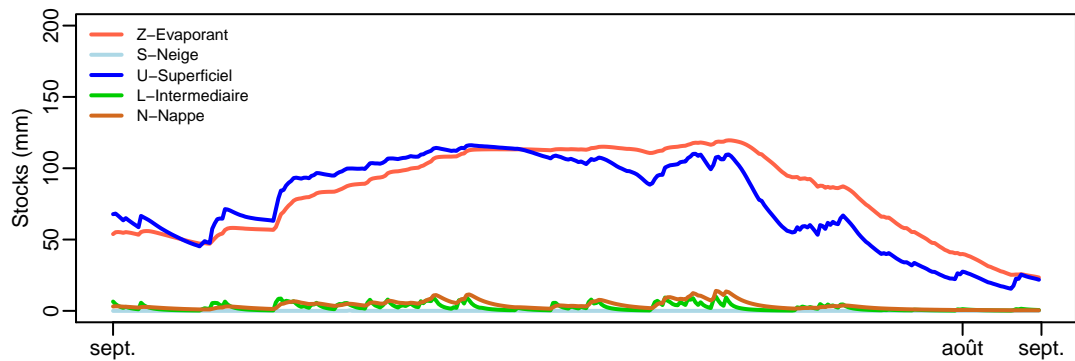

# k1713010 (184.46 km<sup>2</sup>) – année 1998–1999

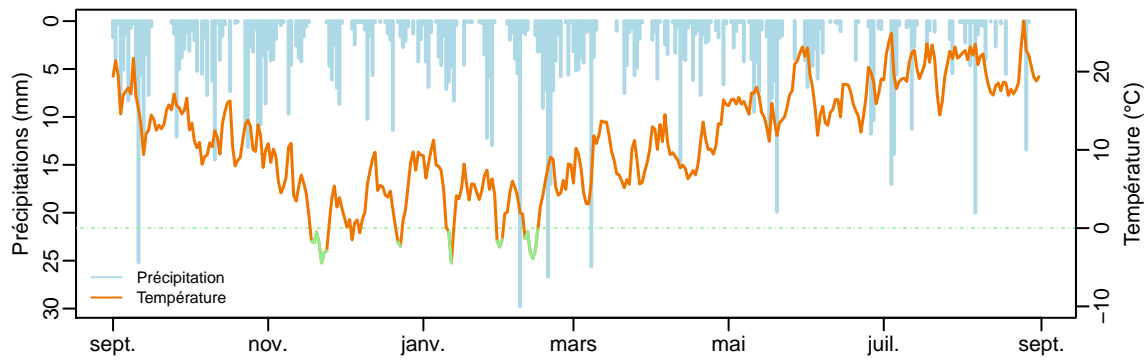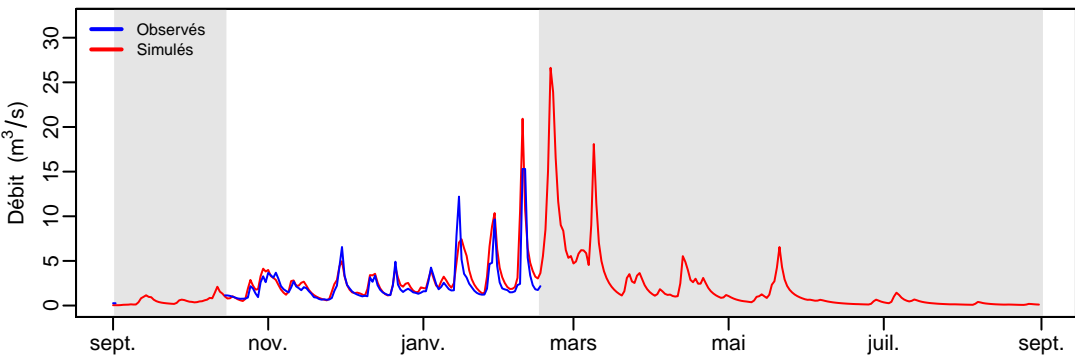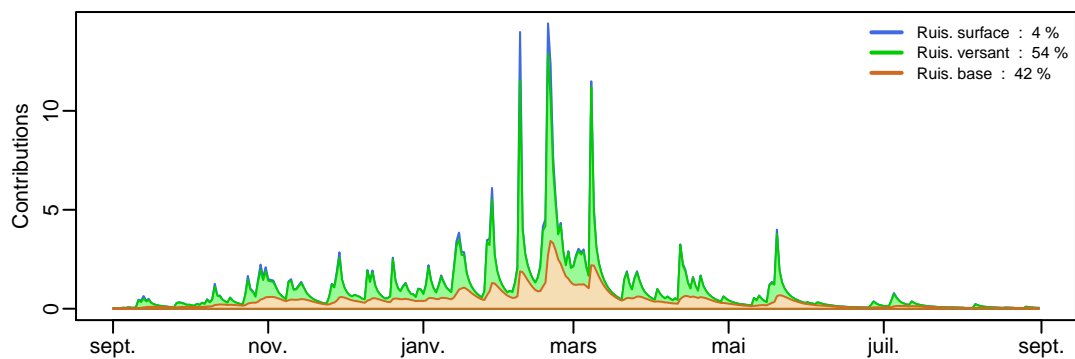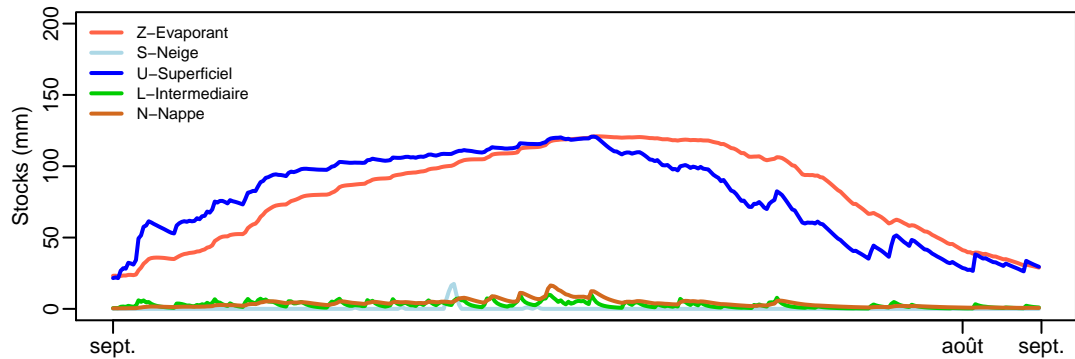

# k1713010 (184.46 km<sup>2</sup>) – année 1999–2000

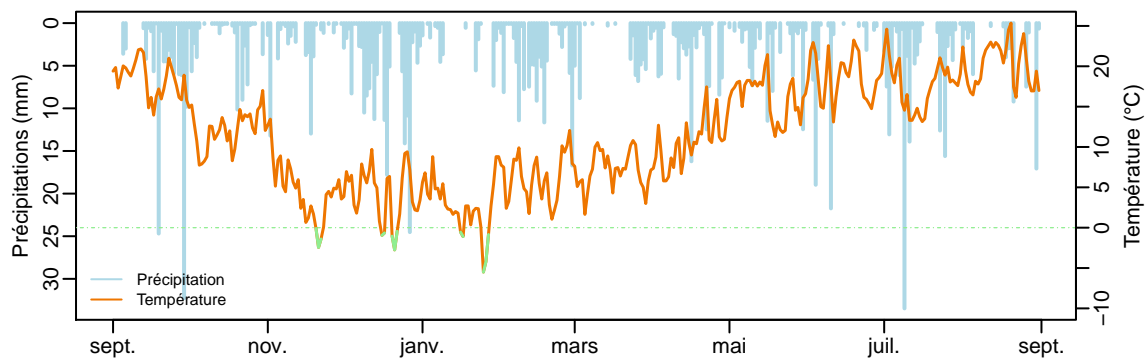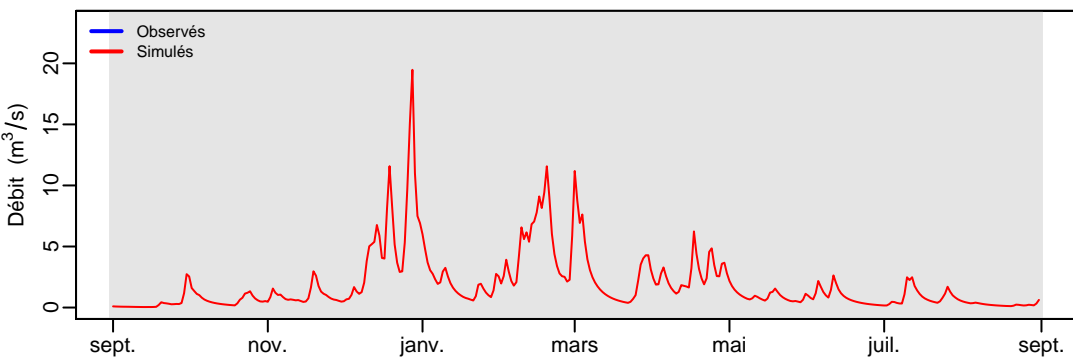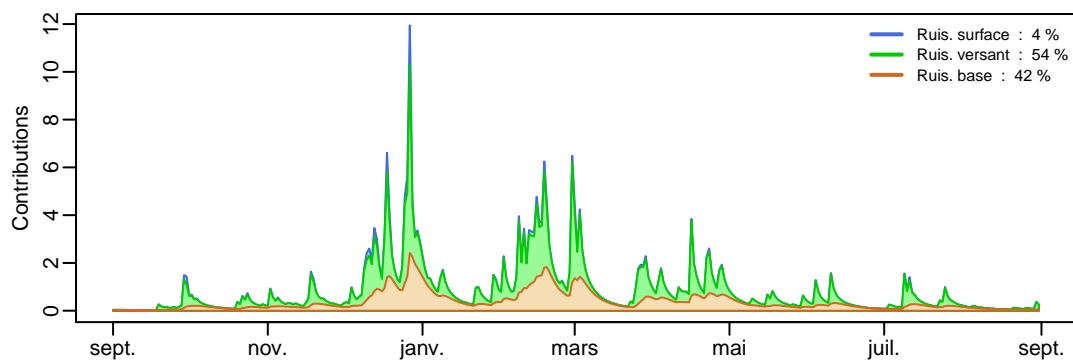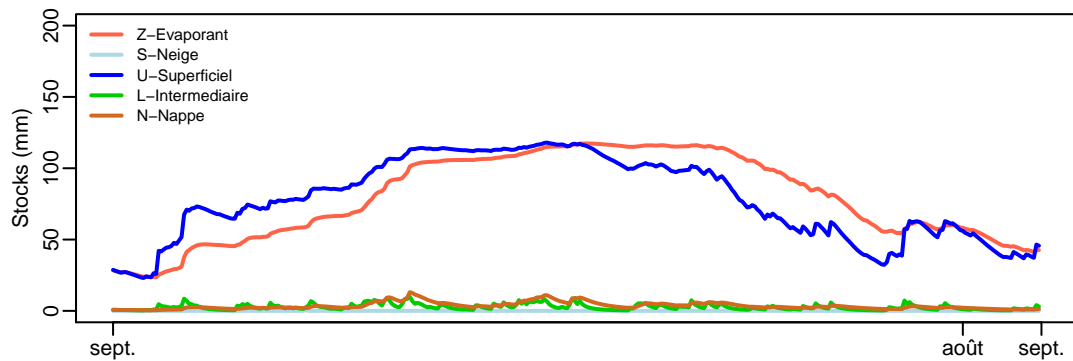

# k1713010 (184.46 km<sup>2</sup>) – année 2000–2001

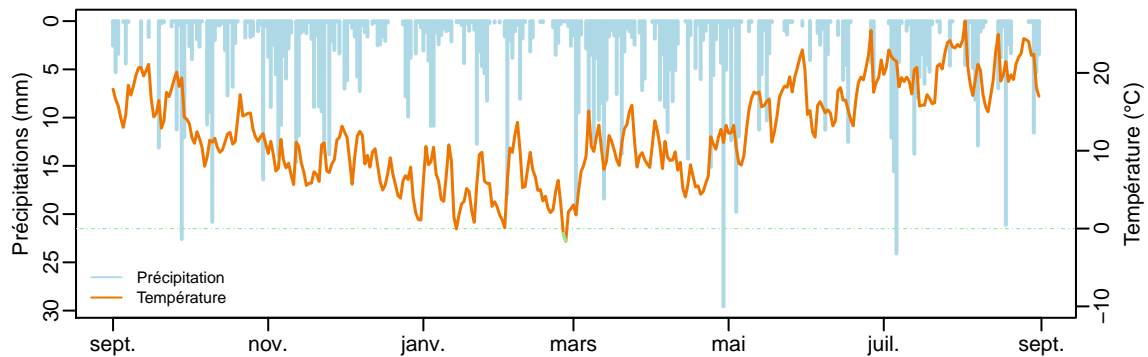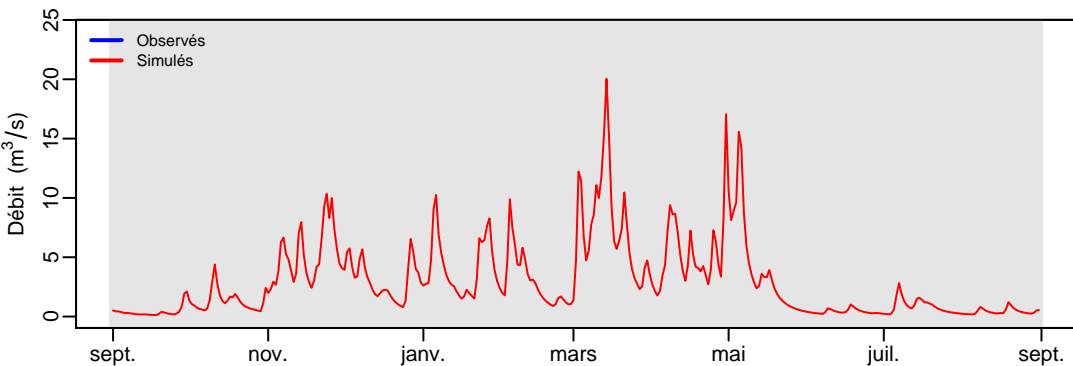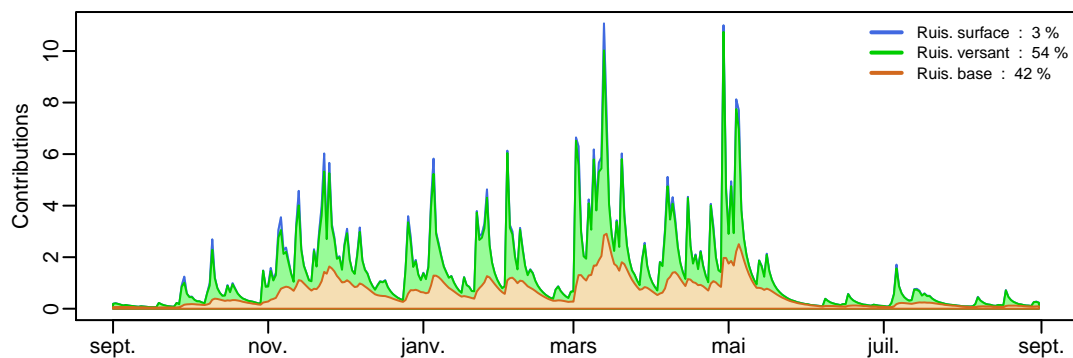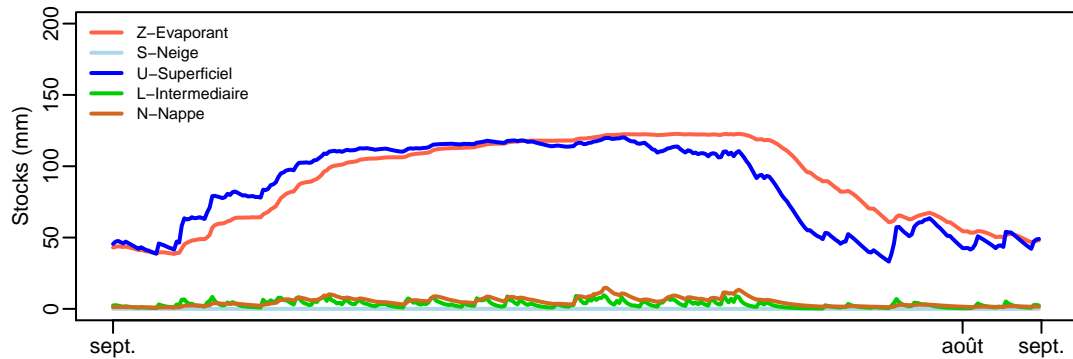

# k1713010 (184.46 km<sup>2</sup>) – année 2001–2002

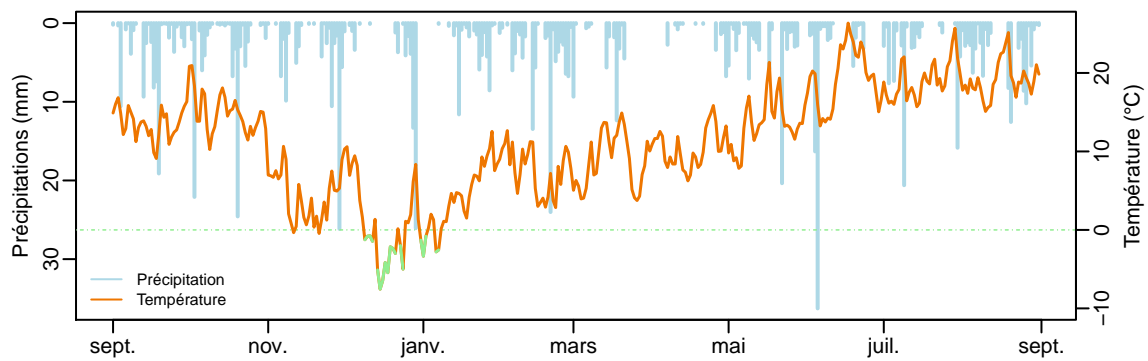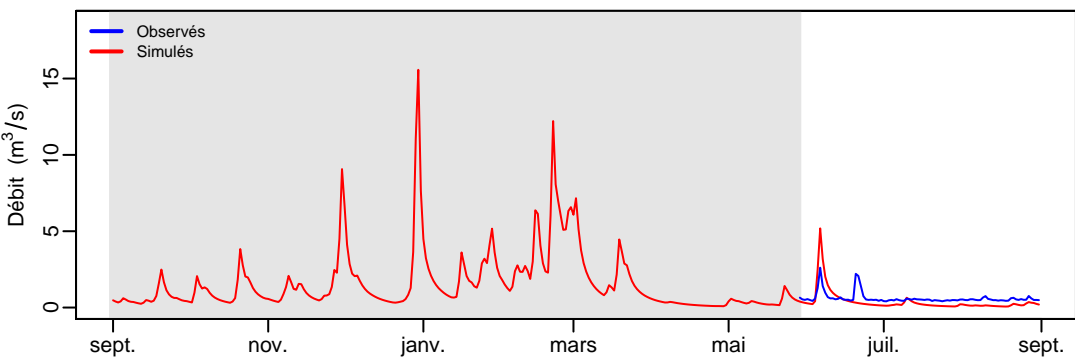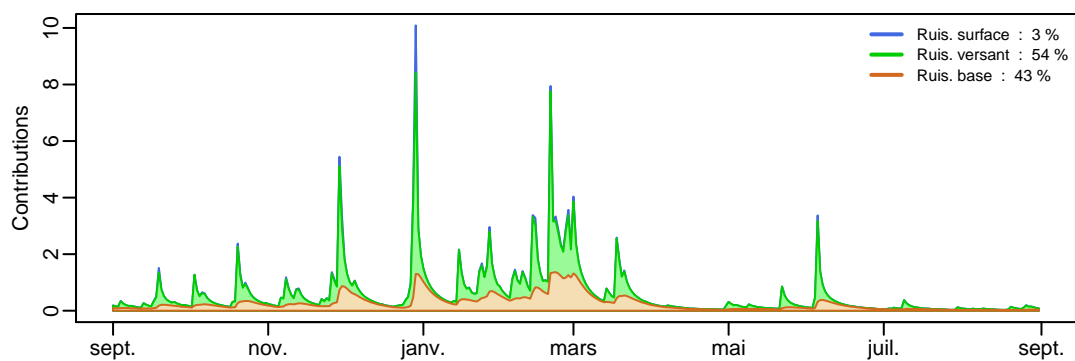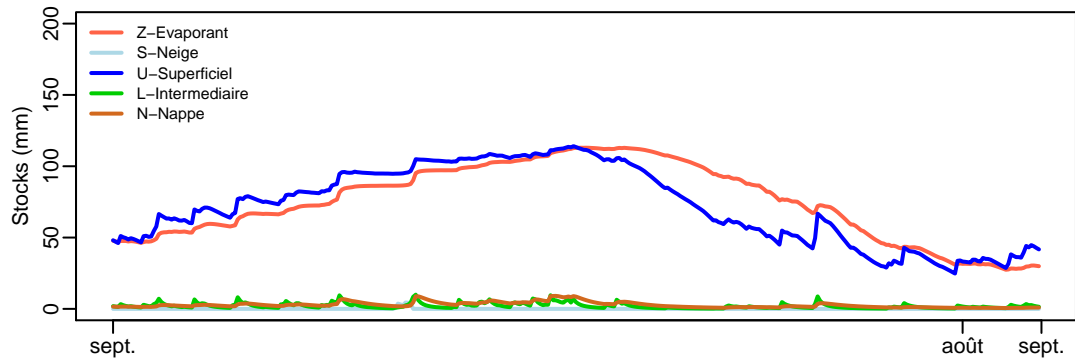

# k1713010 (184.46 km<sup>2</sup>) – année 2002–2003

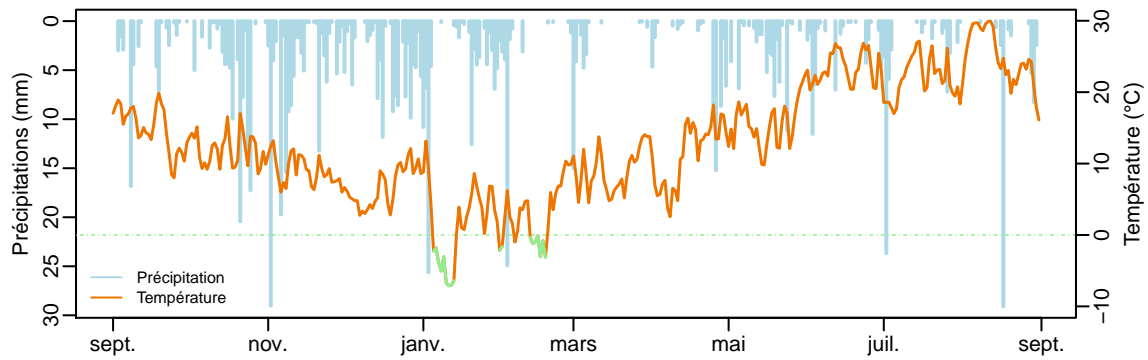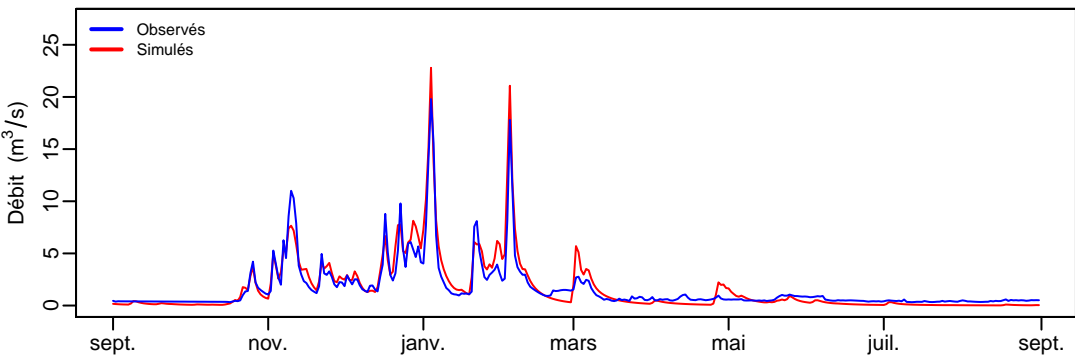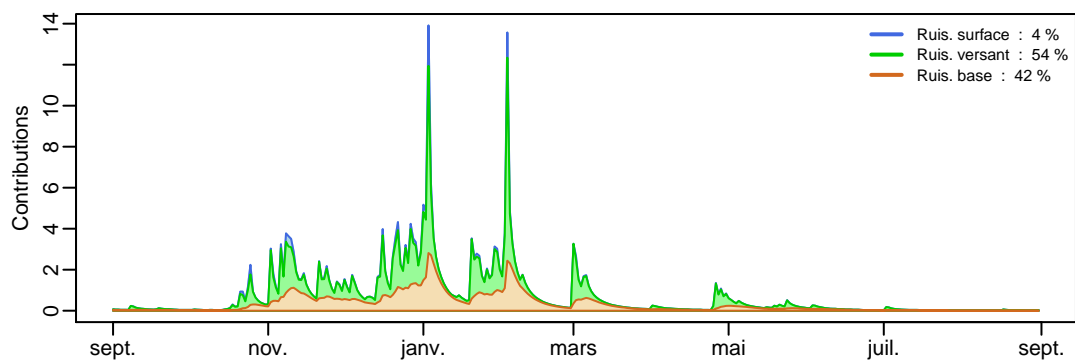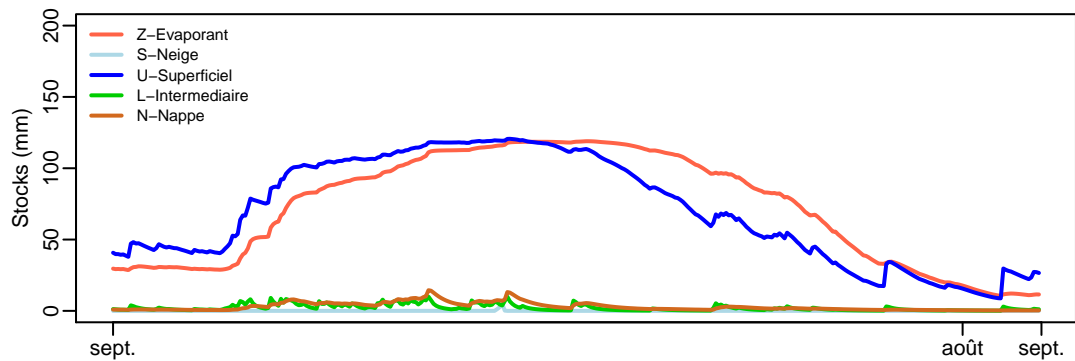



# k1713010 (184.46 km<sup>2</sup>) – année 2003–2004

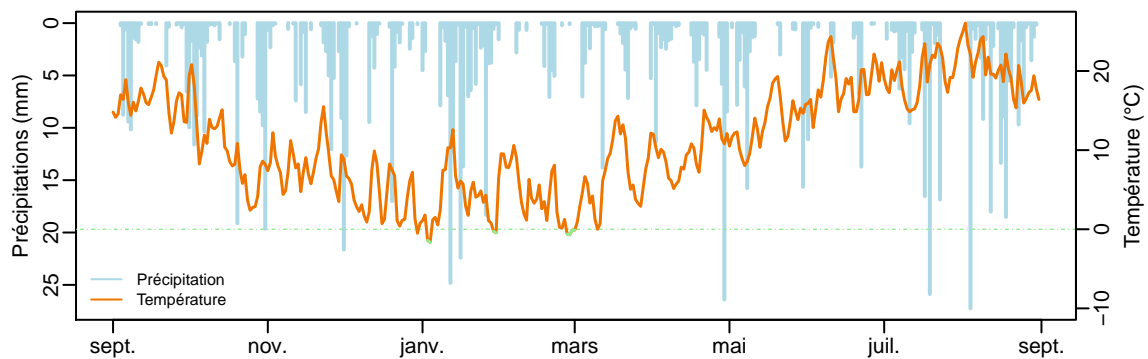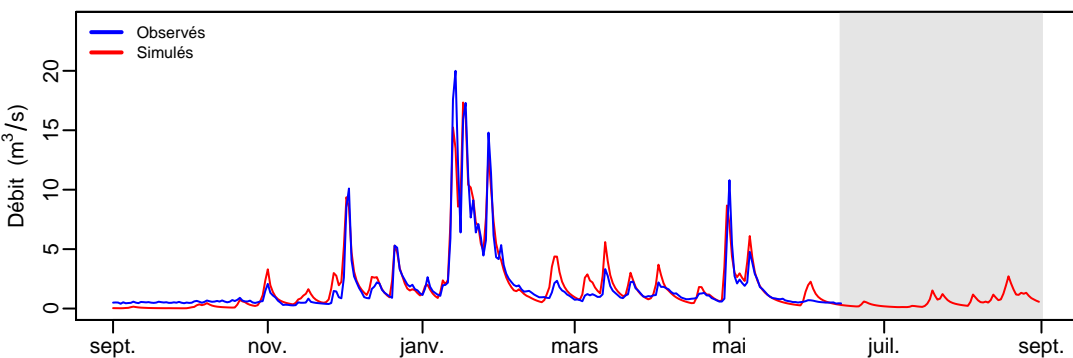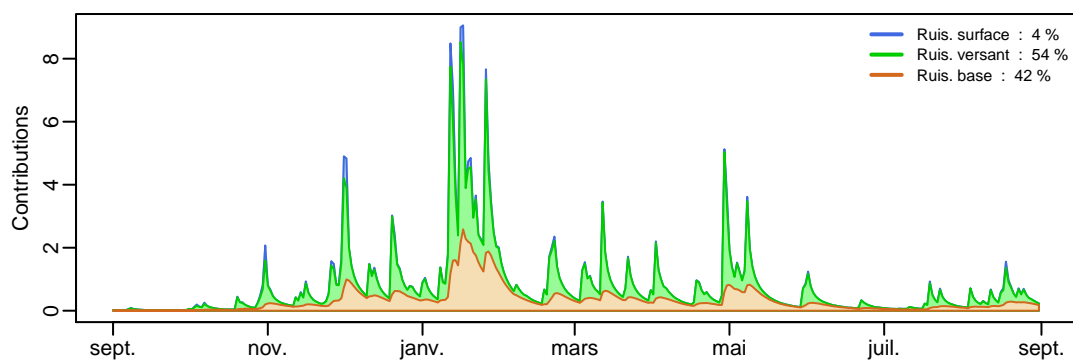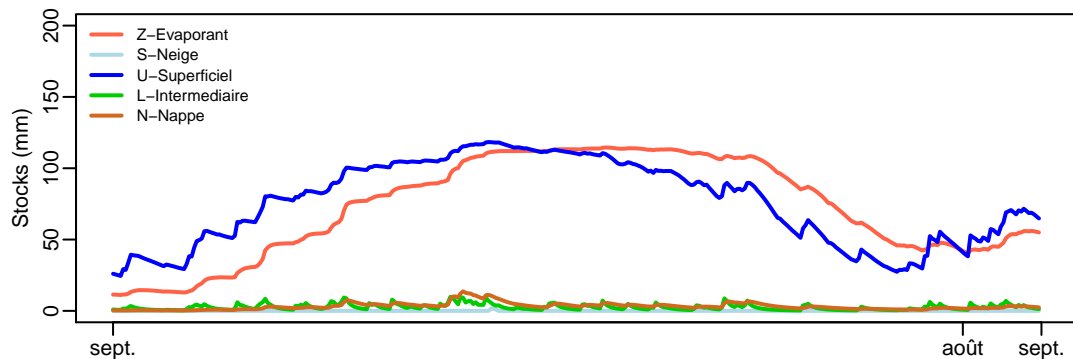

# k1713010 (184.46 km<sup>2</sup>) – année 2004–2005

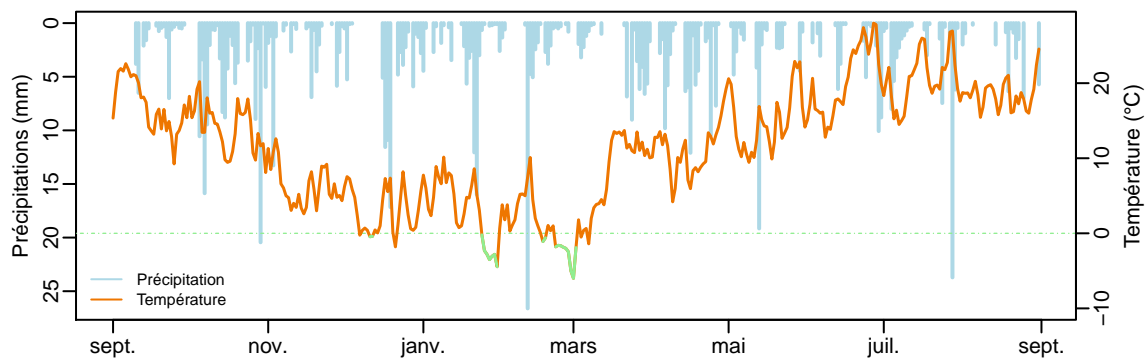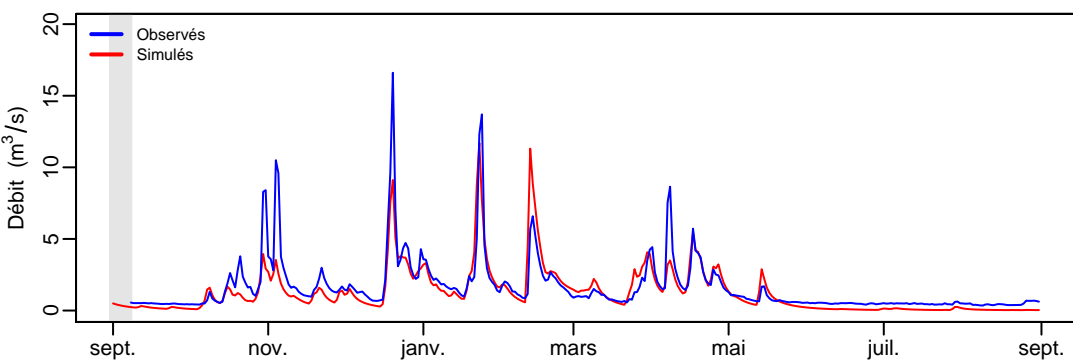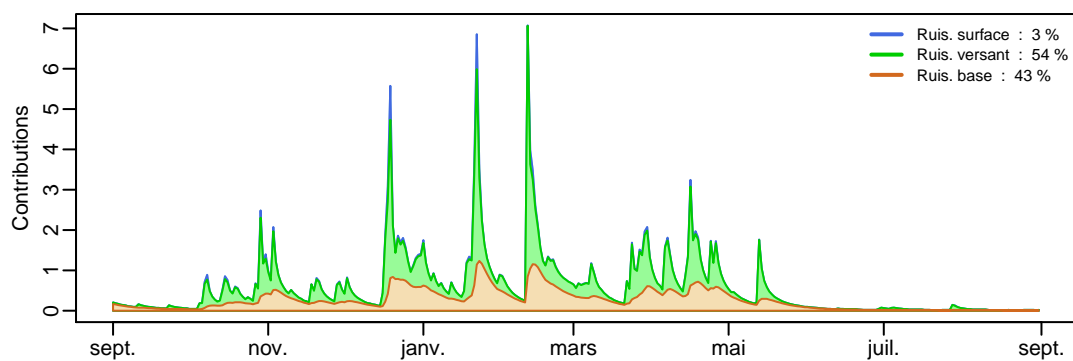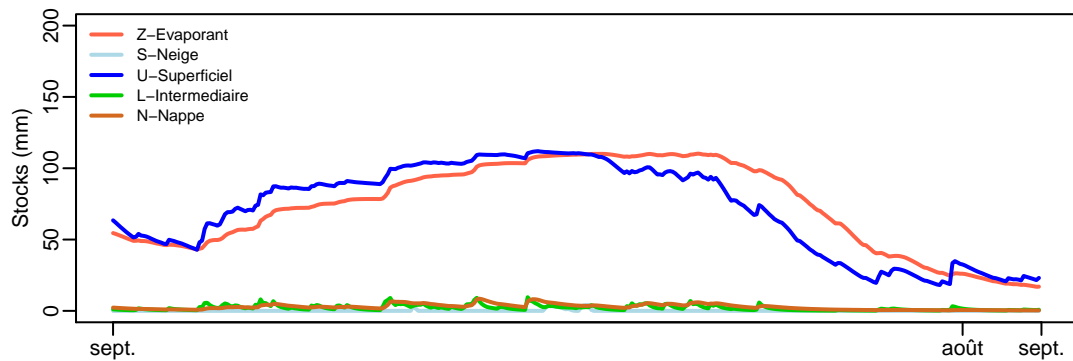

# k1713010 (184.46 km<sup>2</sup>) – année 2005–2006

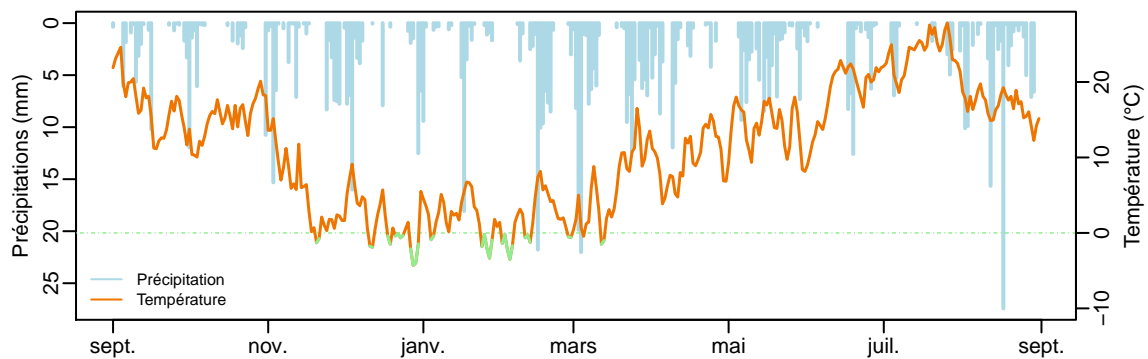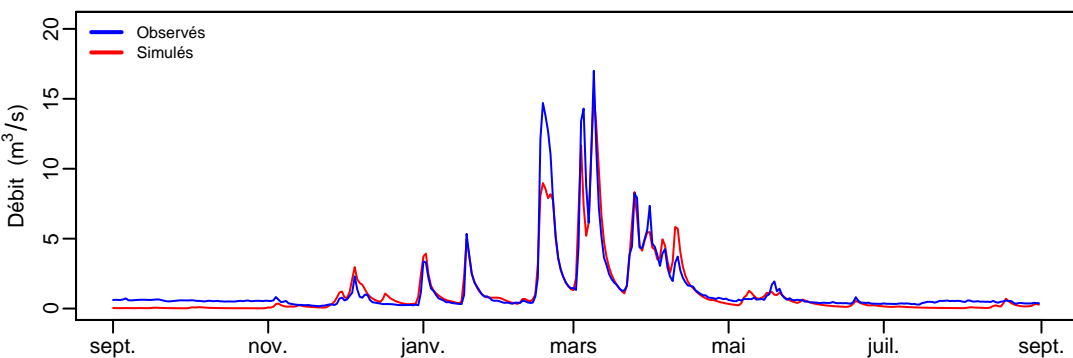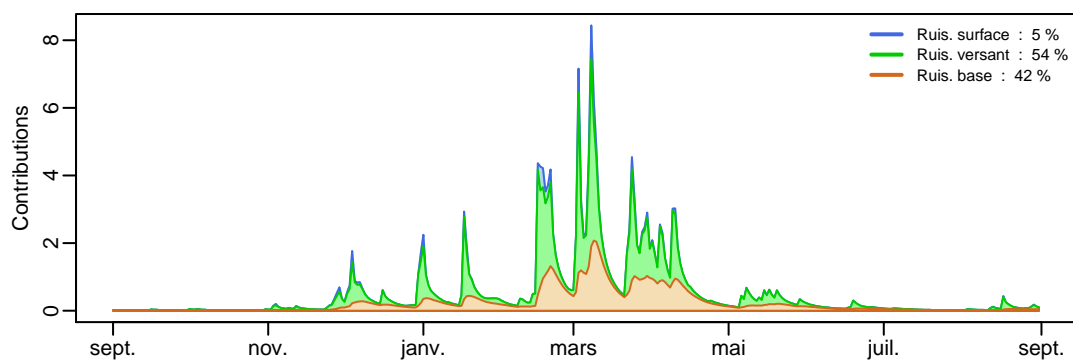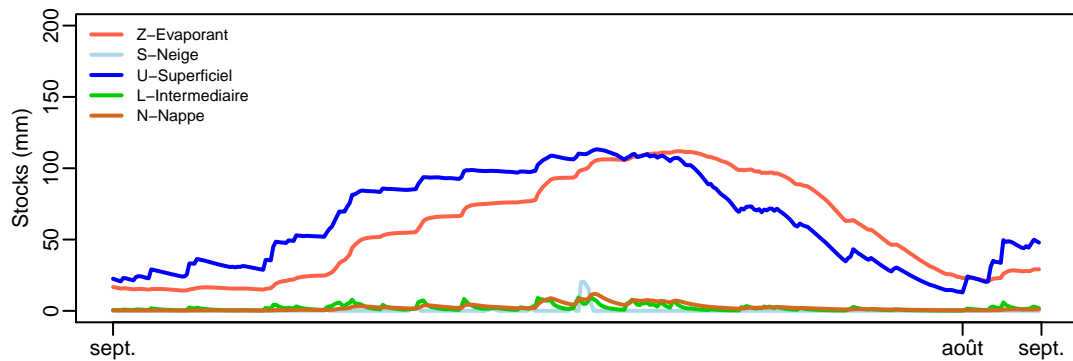

# k1713010 (184.46 km<sup>2</sup>) – année 2006–2007

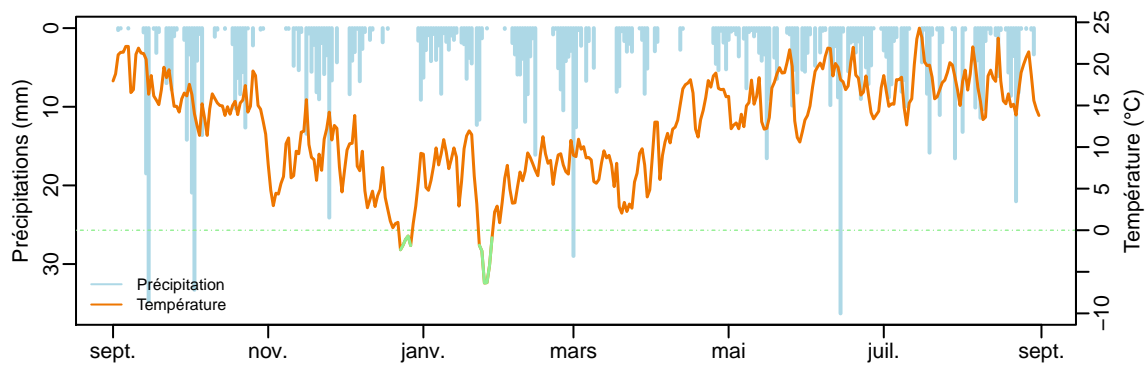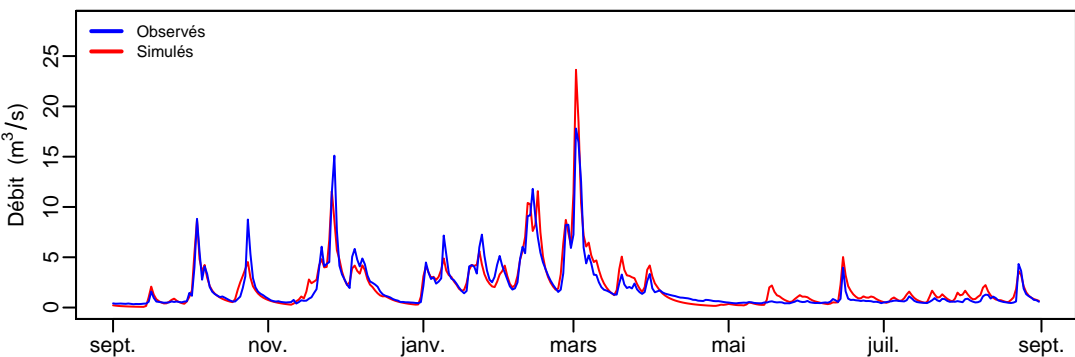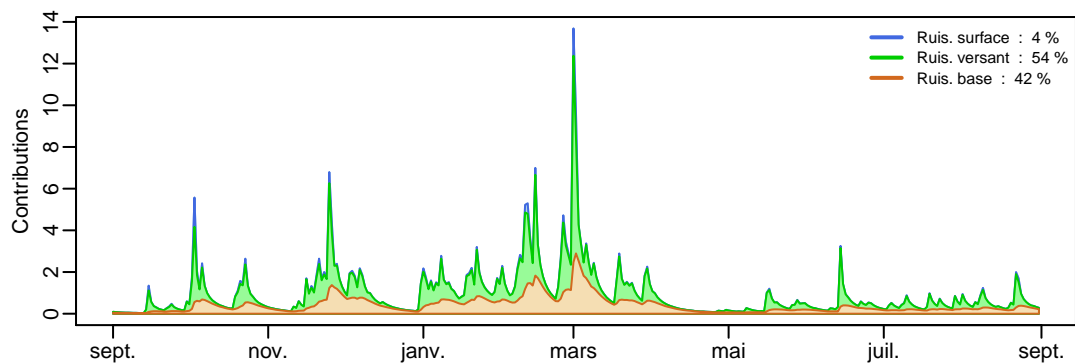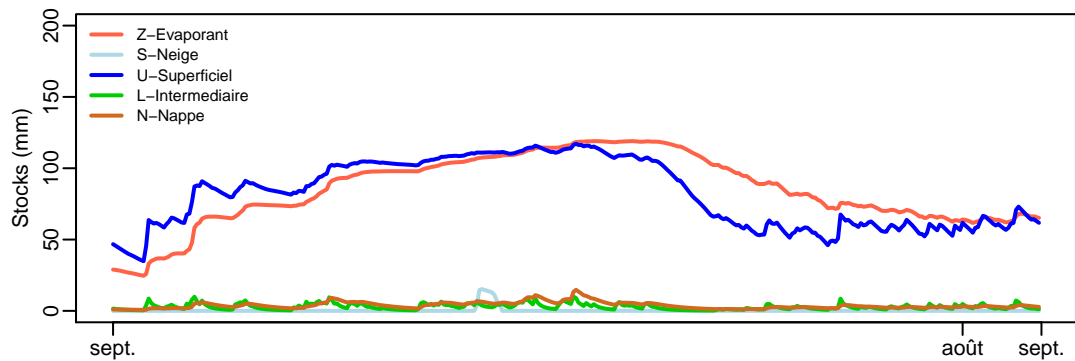

# k1713010 (184.46 km²) – année 2007–2008

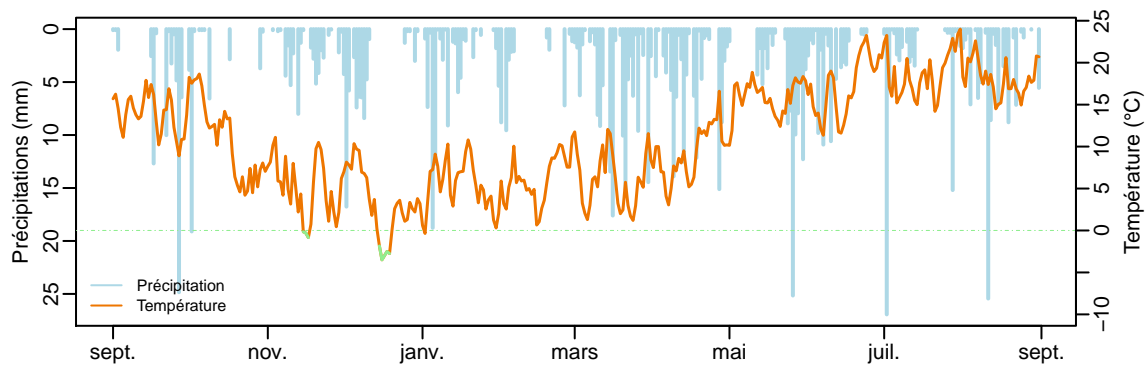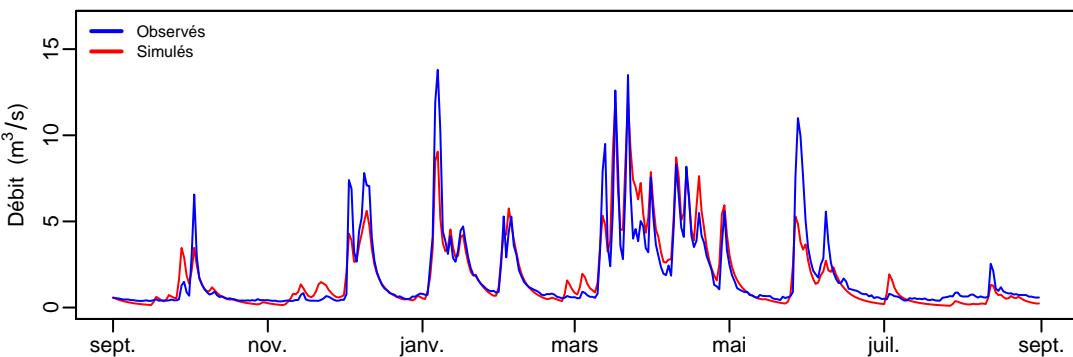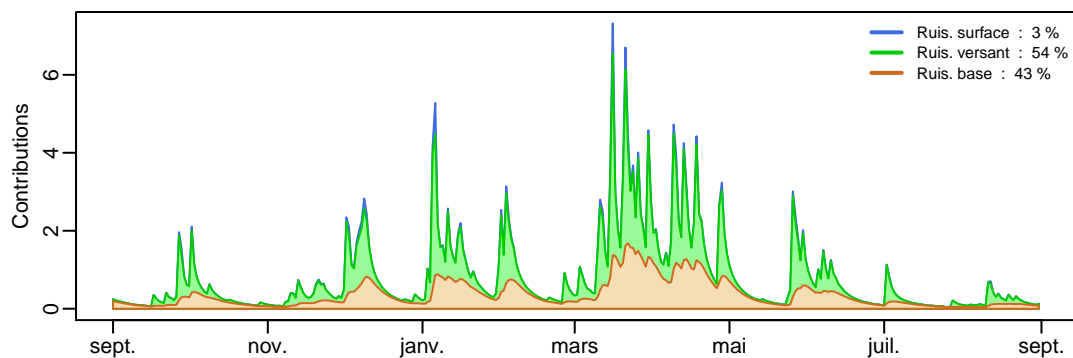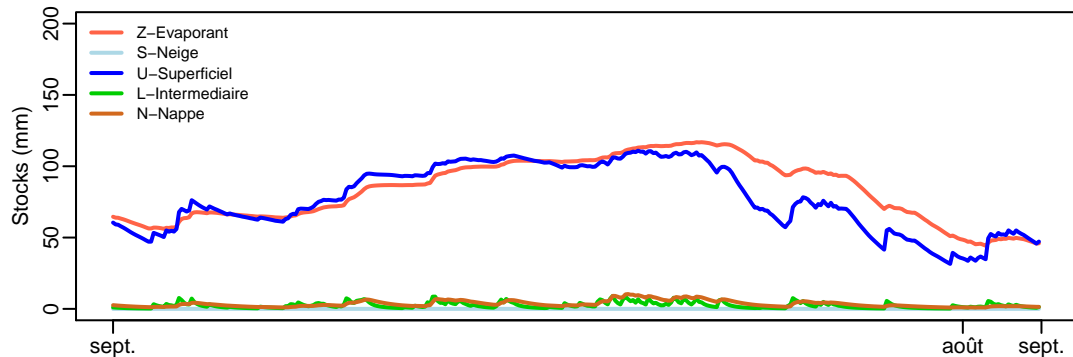

# k1713010 (184.46 km<sup>2</sup>) – année 2008–2009

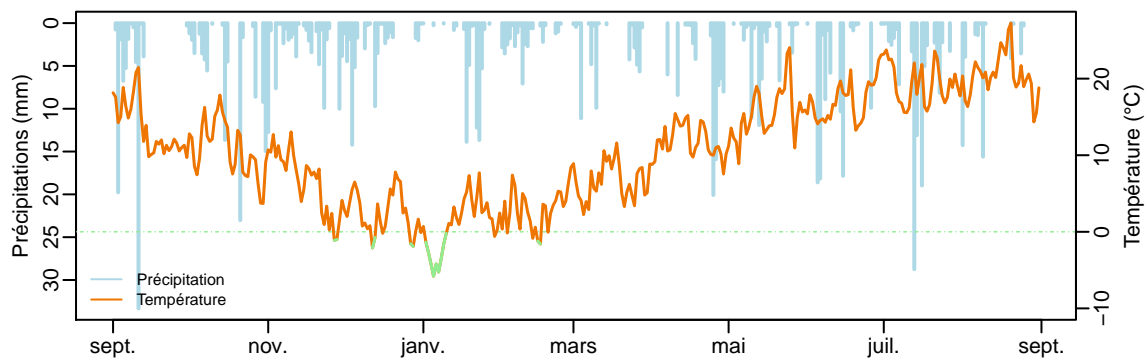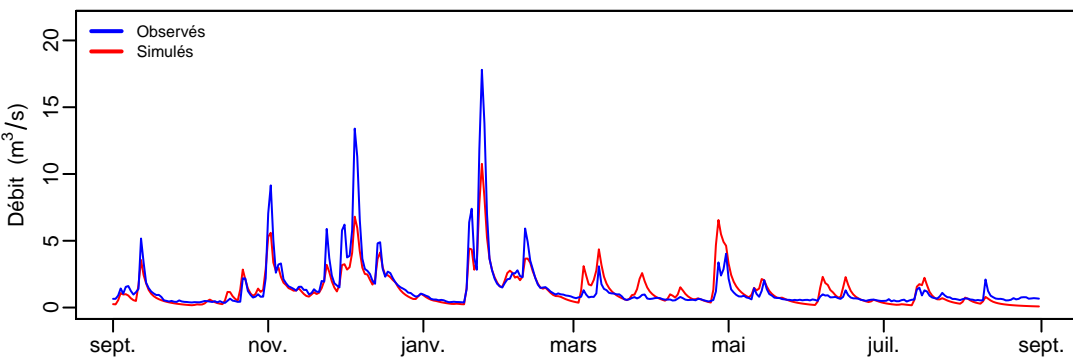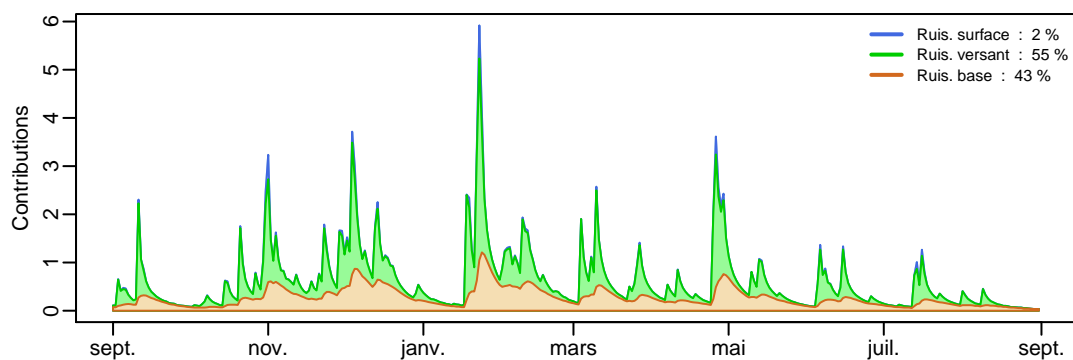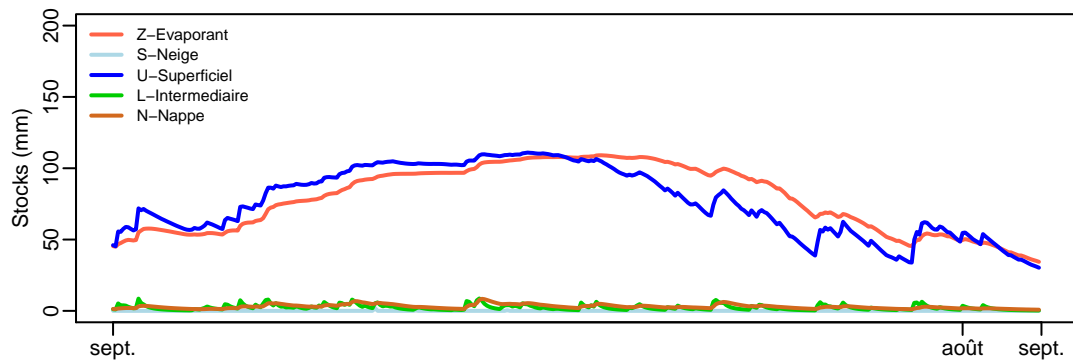

# k1713010 (184.46 km<sup>2</sup>) – année 2009–2010

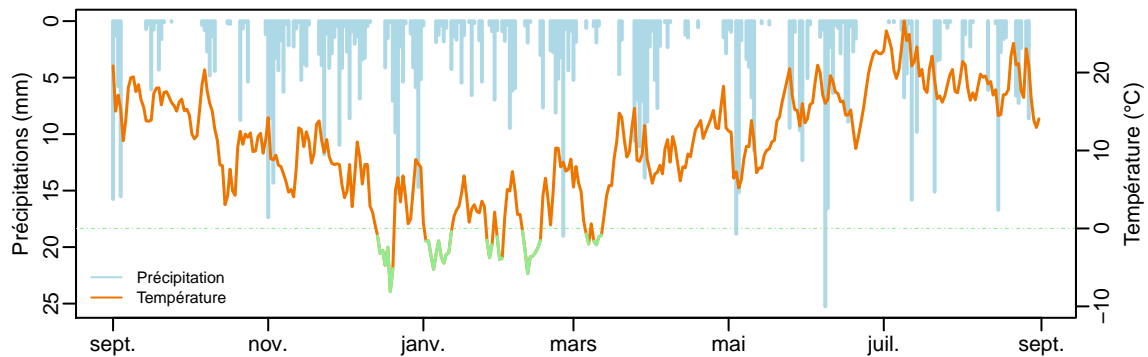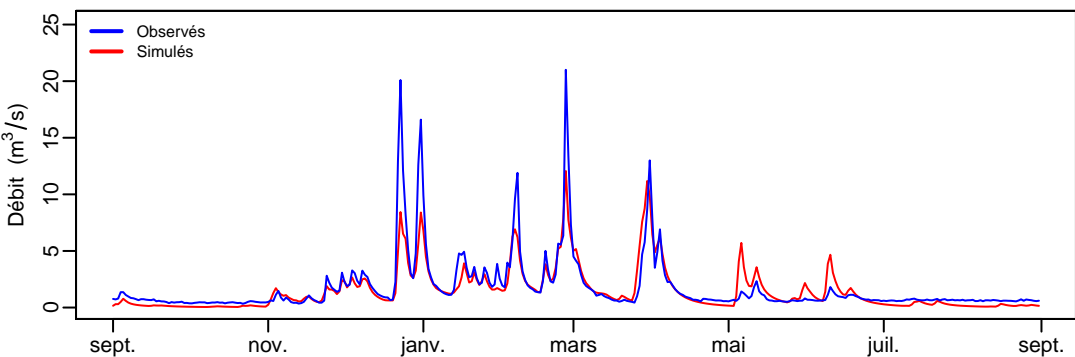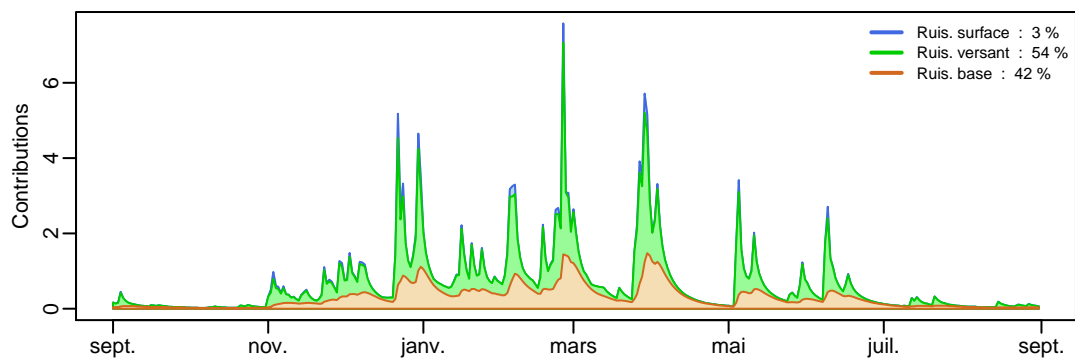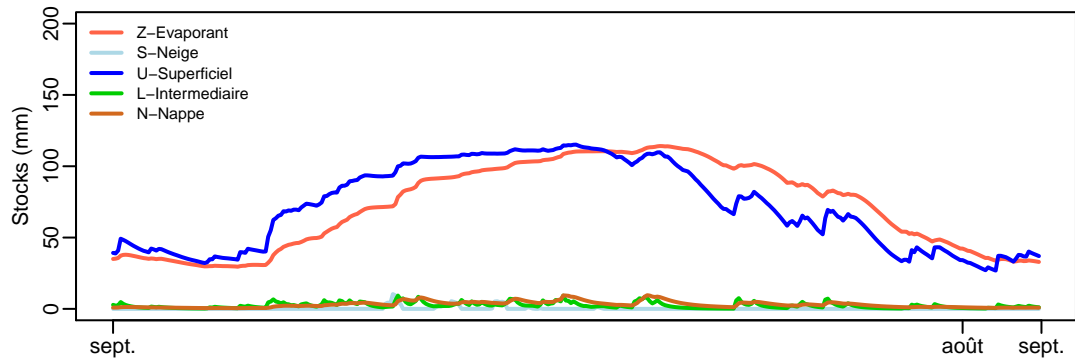

# k1713010 (184.46 km<sup>2</sup>) – année 2010–2011

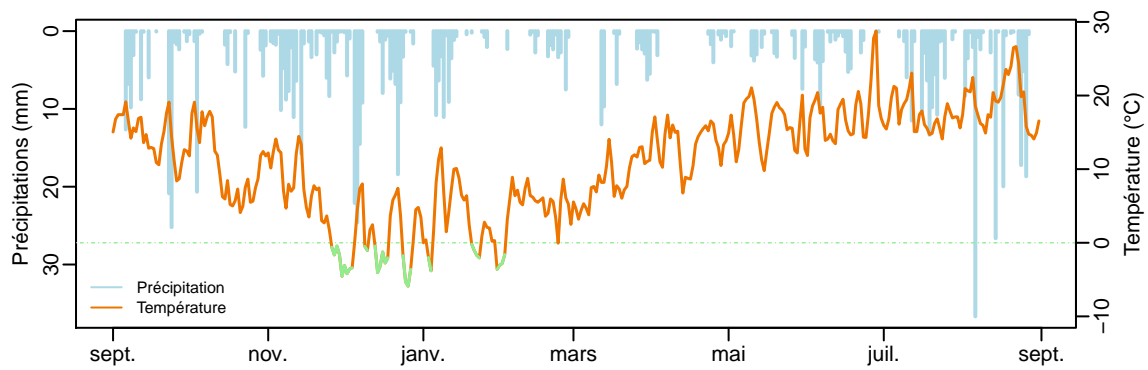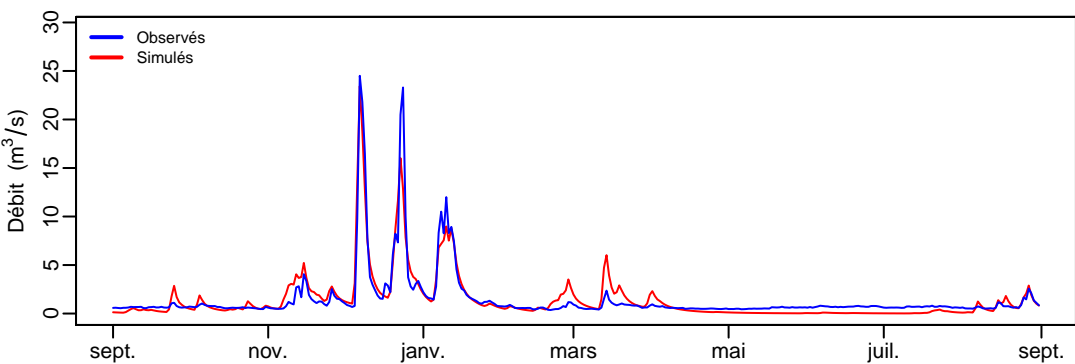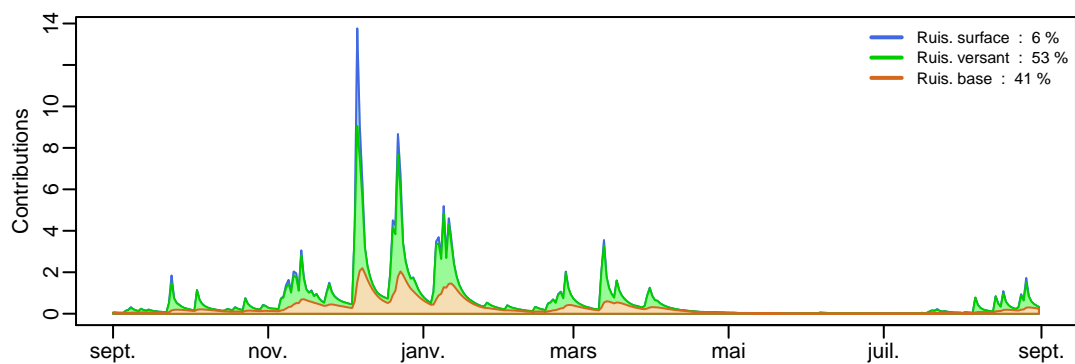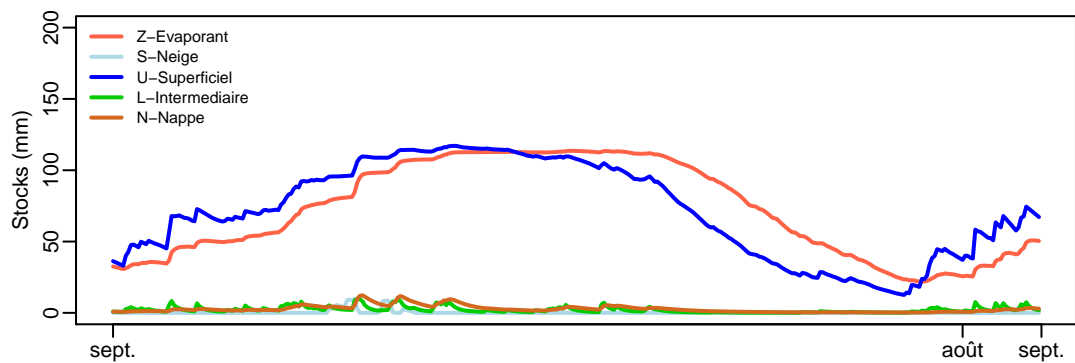



# k1713010 (184.46 km<sup>2</sup>) – année 2011–2012

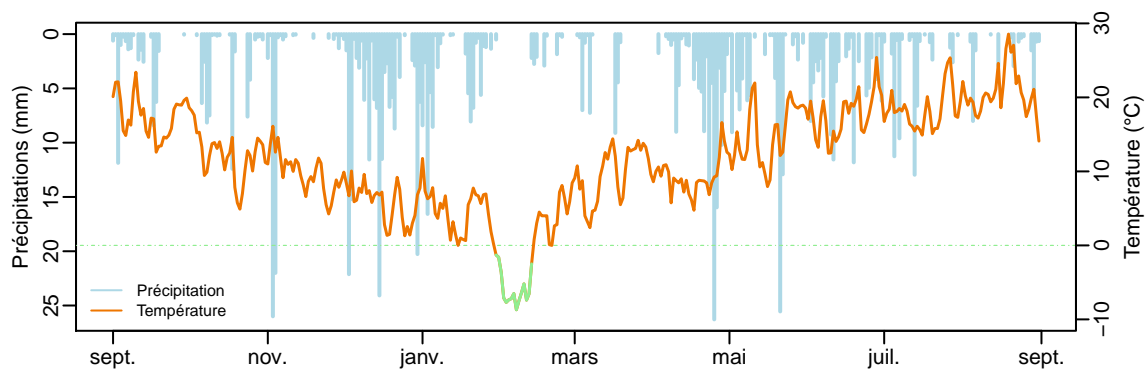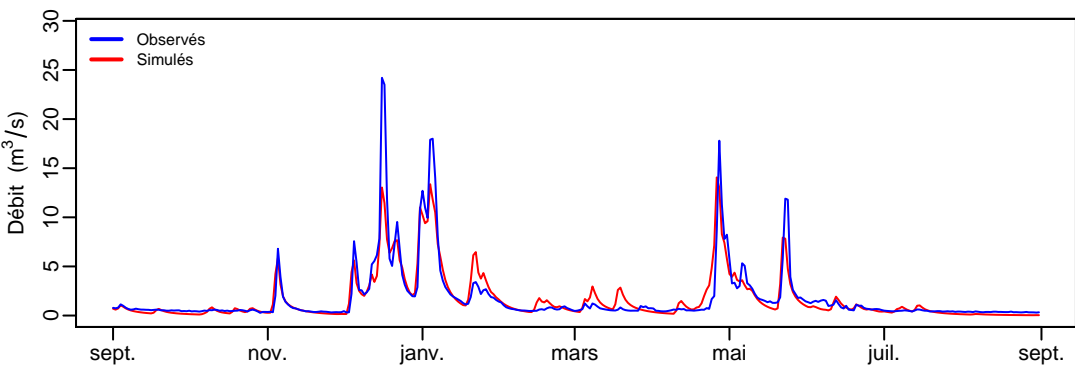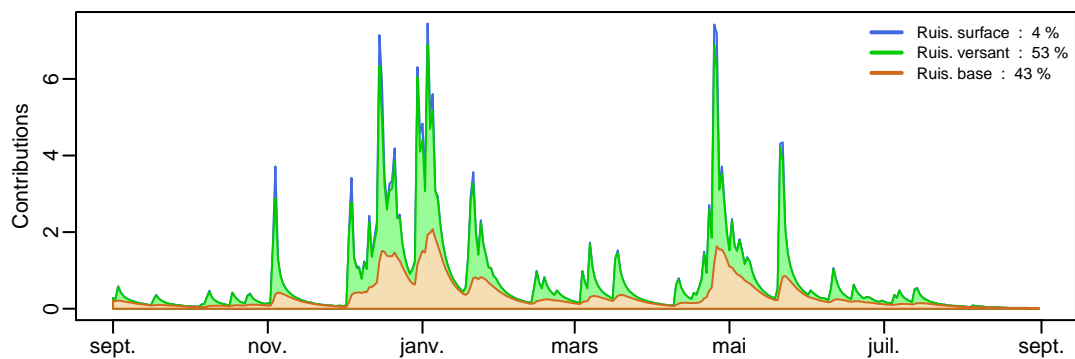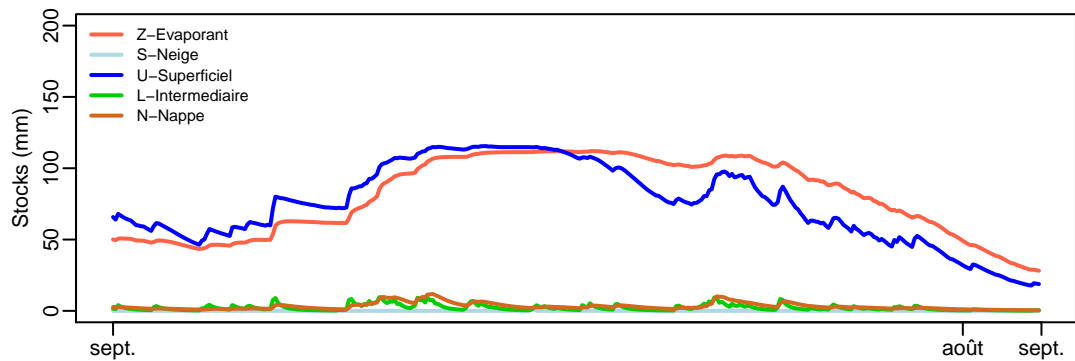

# k1724210 (112.82 km<sup>2</sup>) – année 1981–1982

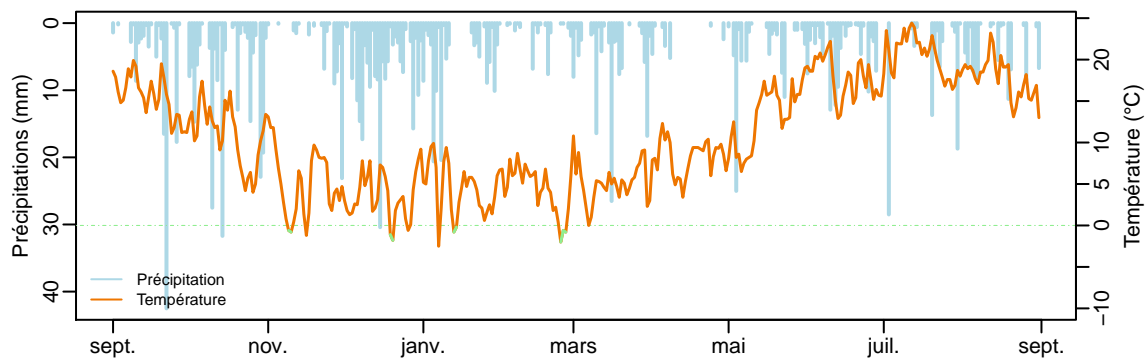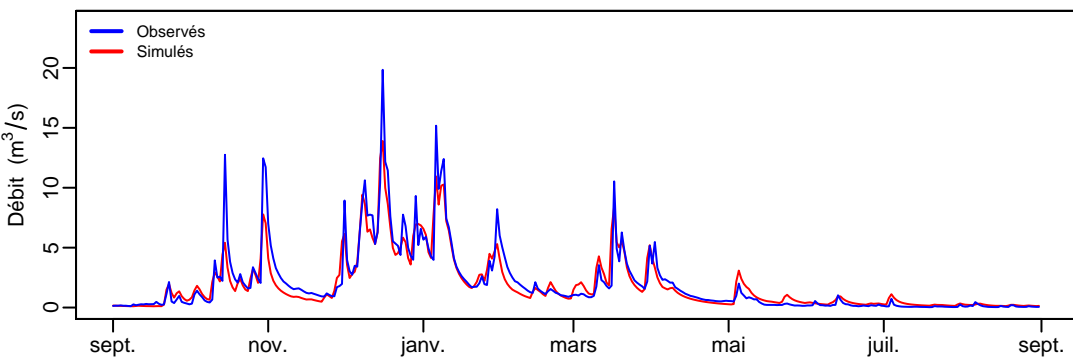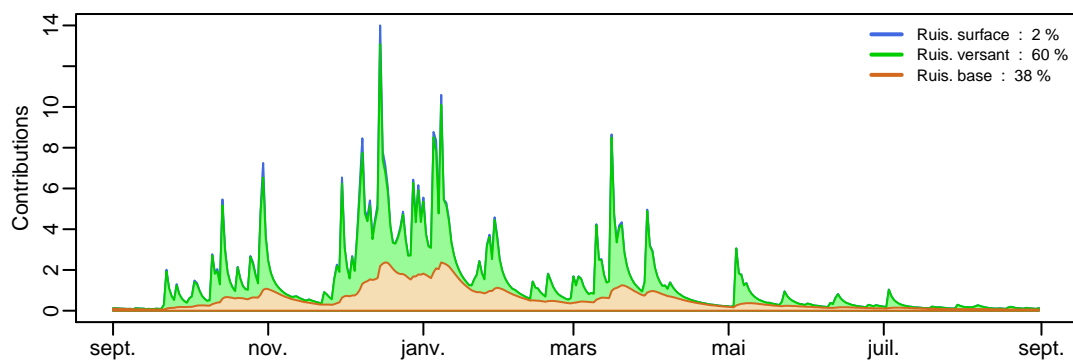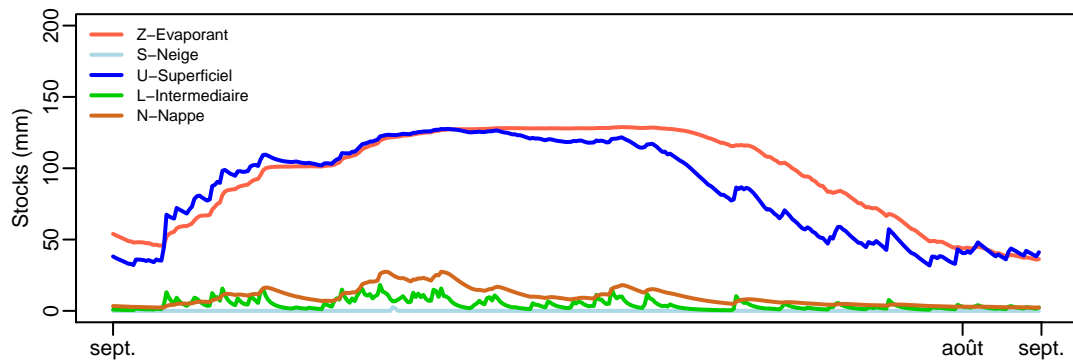

# k1724210 (112.82 km<sup>2</sup>) – année 1982–1983

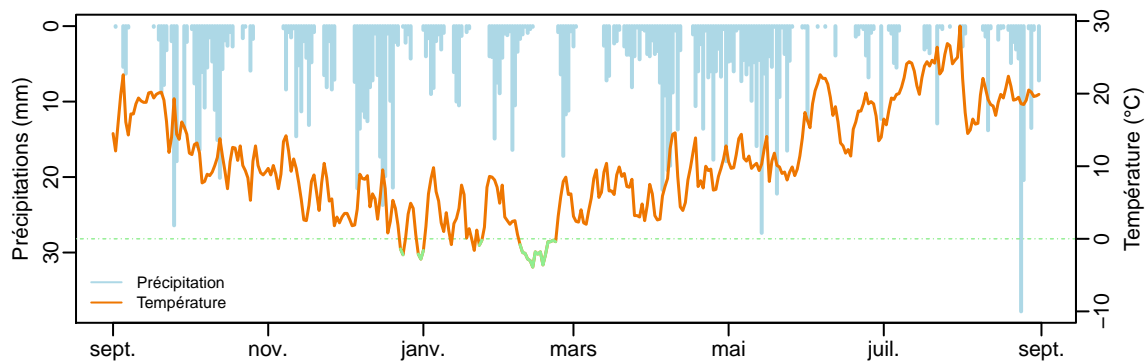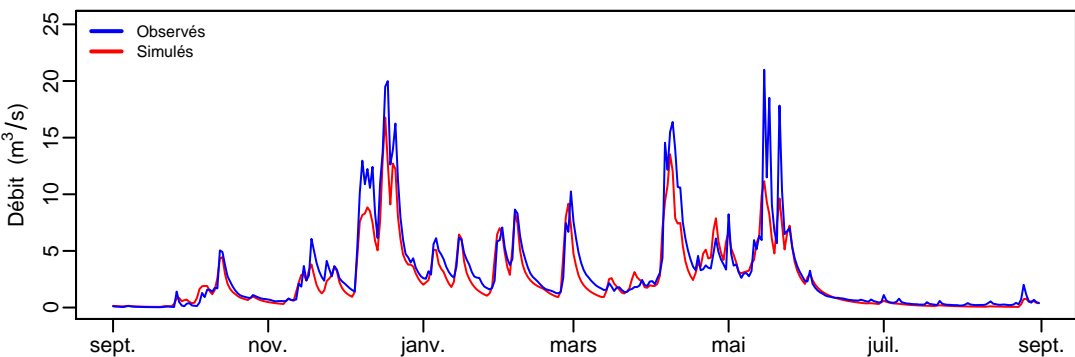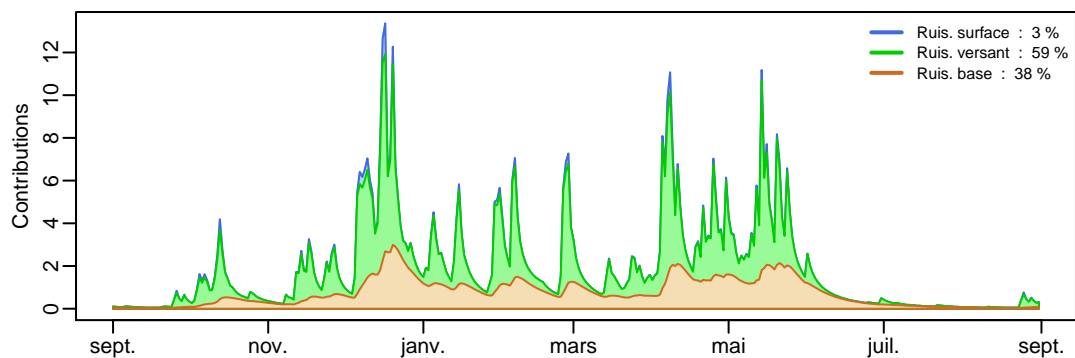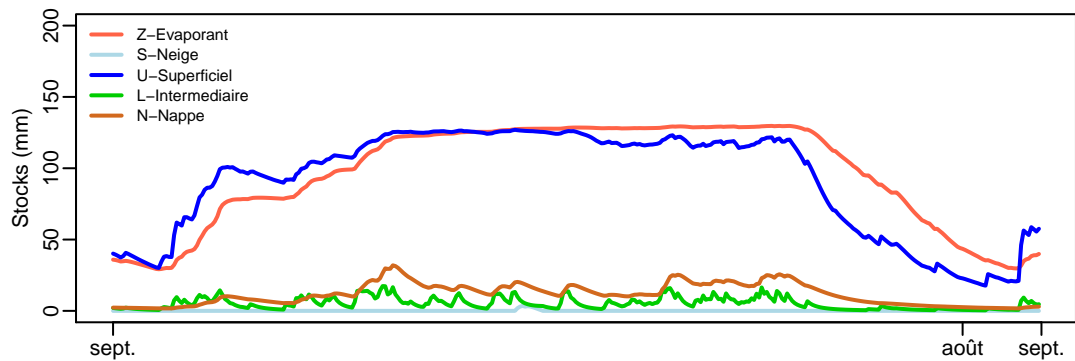

# k1724210 (112.82 km<sup>2</sup>) – année 1983–1984

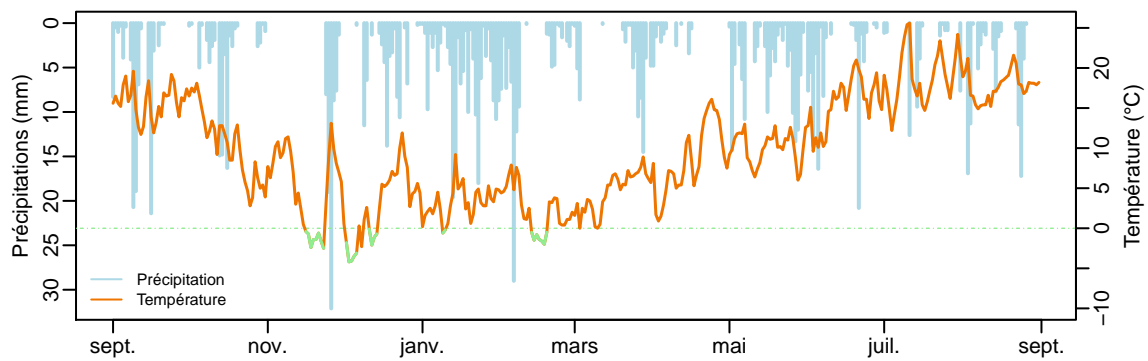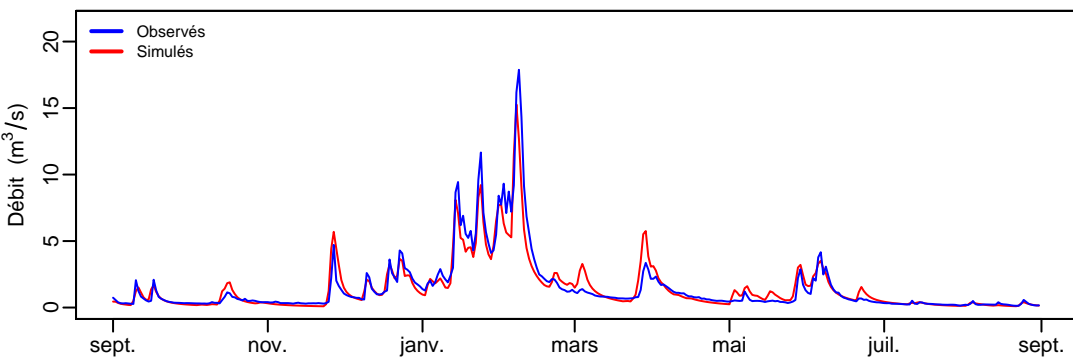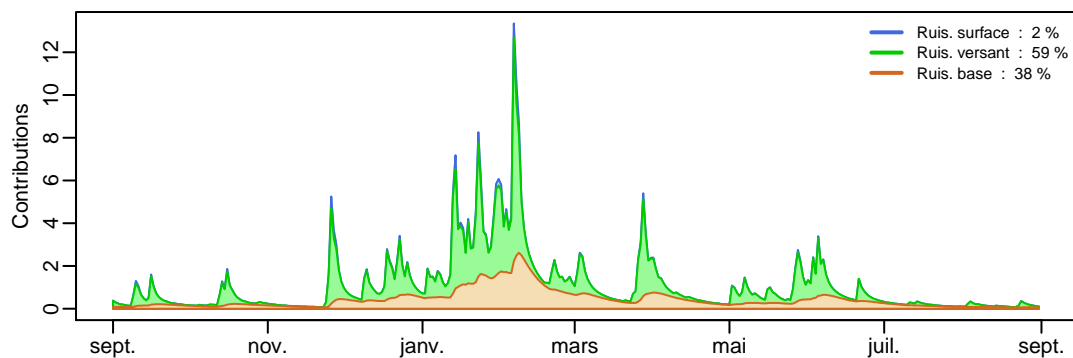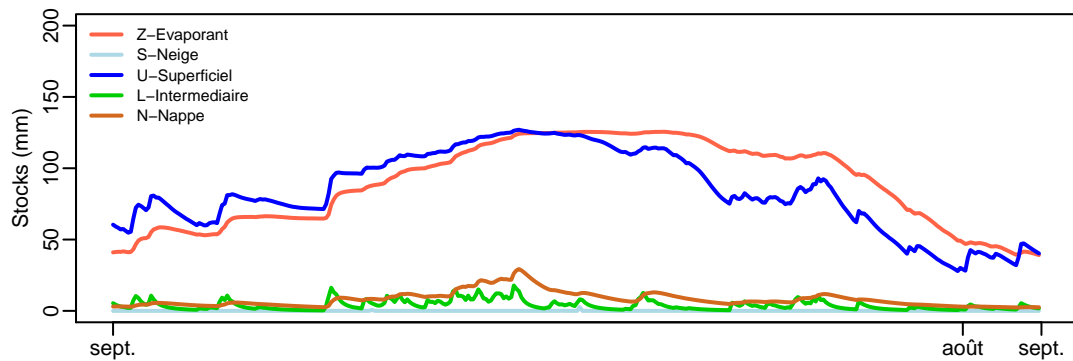

# k1724210 (112.82 km<sup>2</sup>) – année 1984–1985

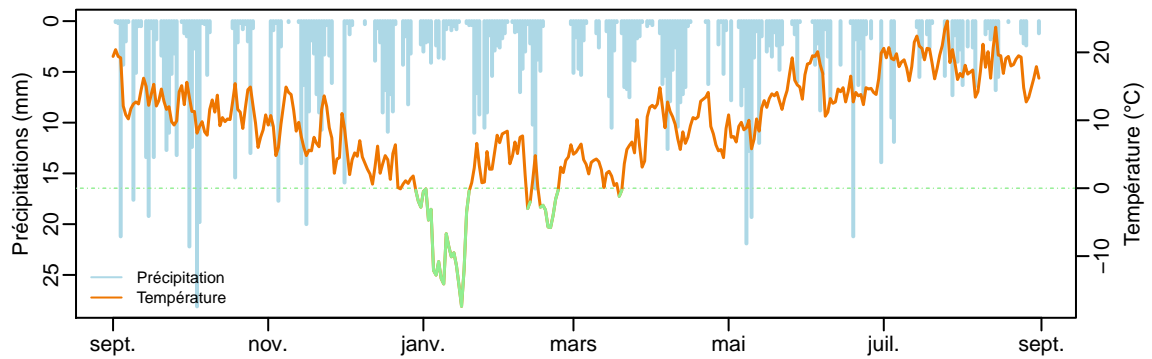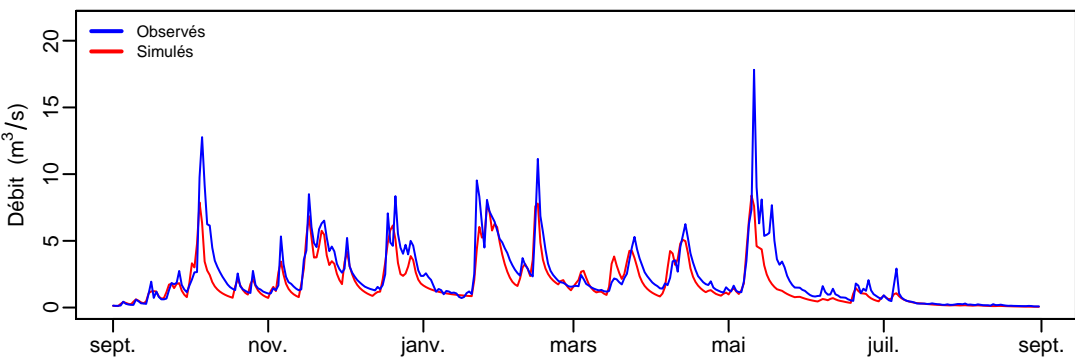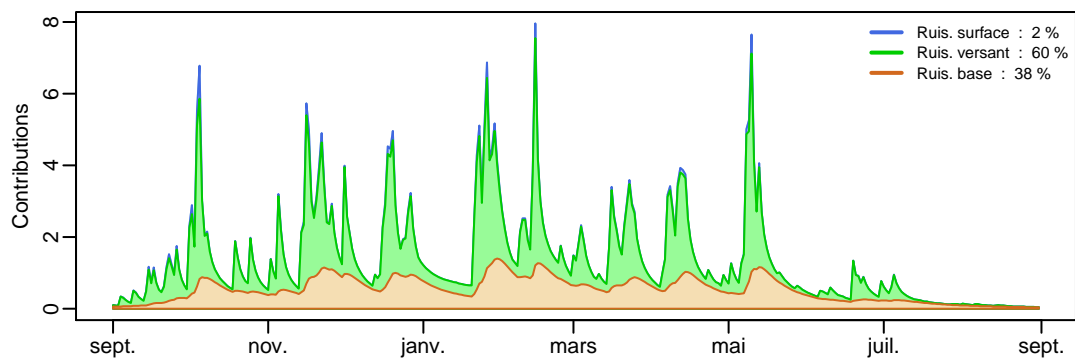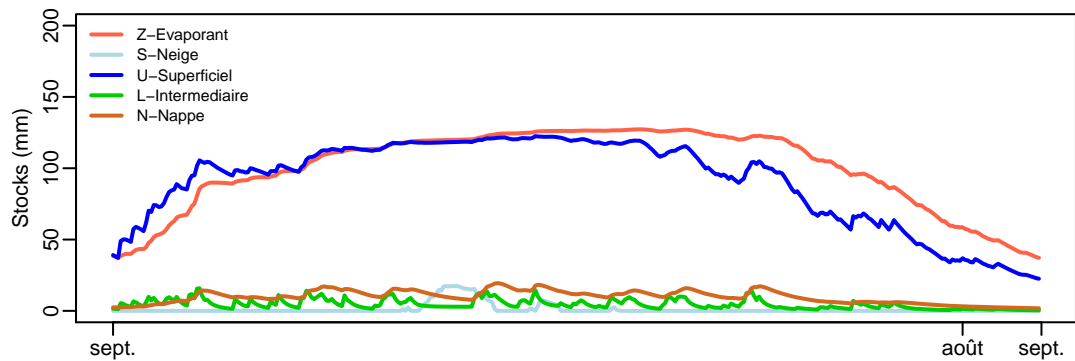

# k1724210 (112.82 km<sup>2</sup>) – année 1985–1986

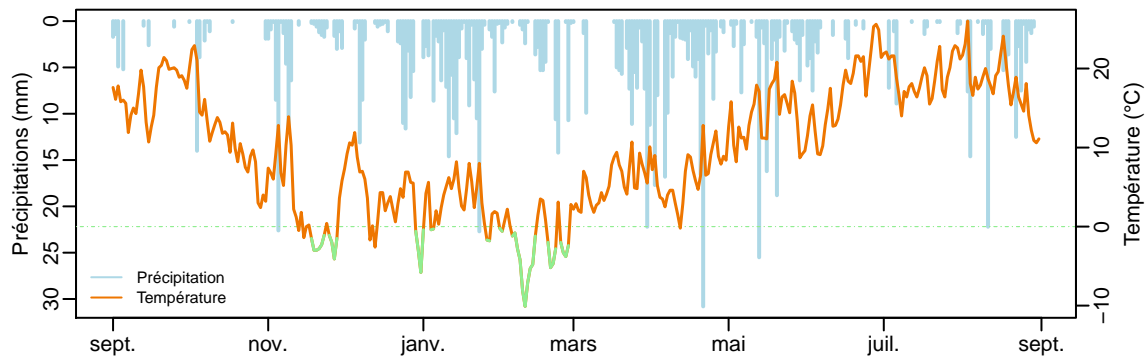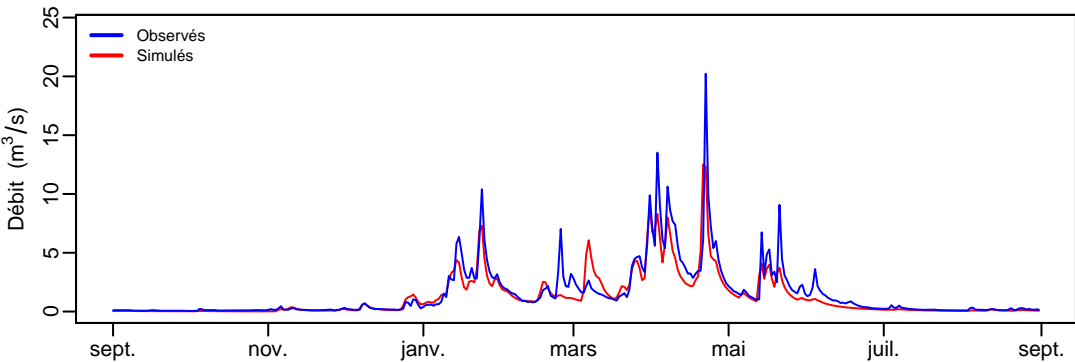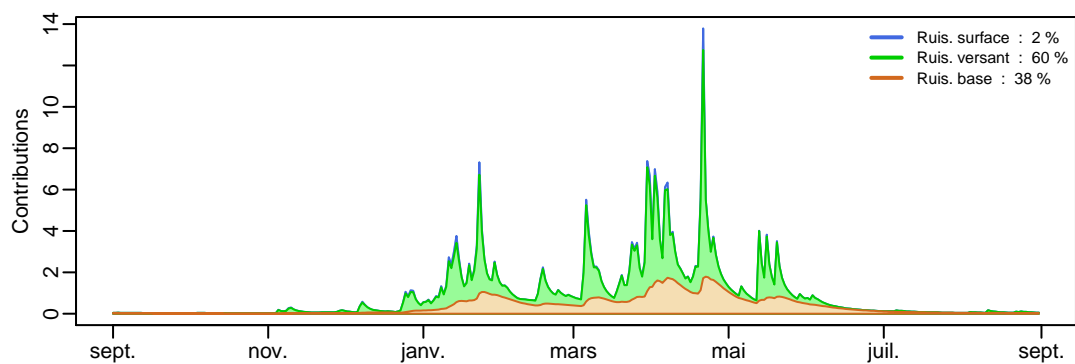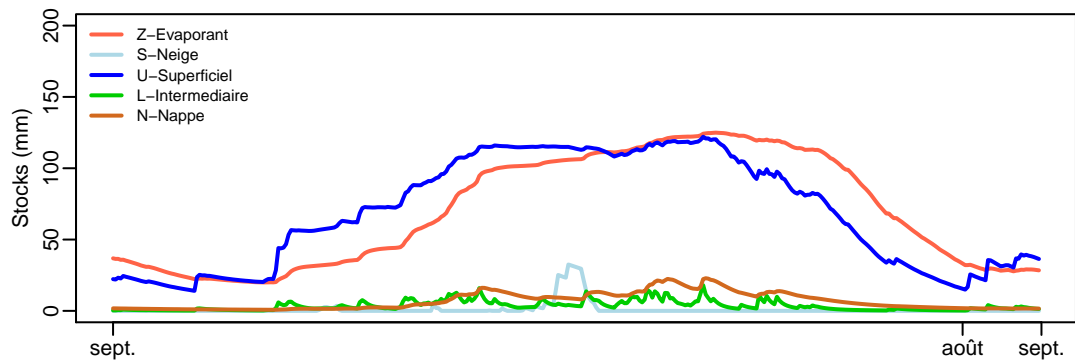

# k1724210 (112.82 km<sup>2</sup>) – année 1986–1987

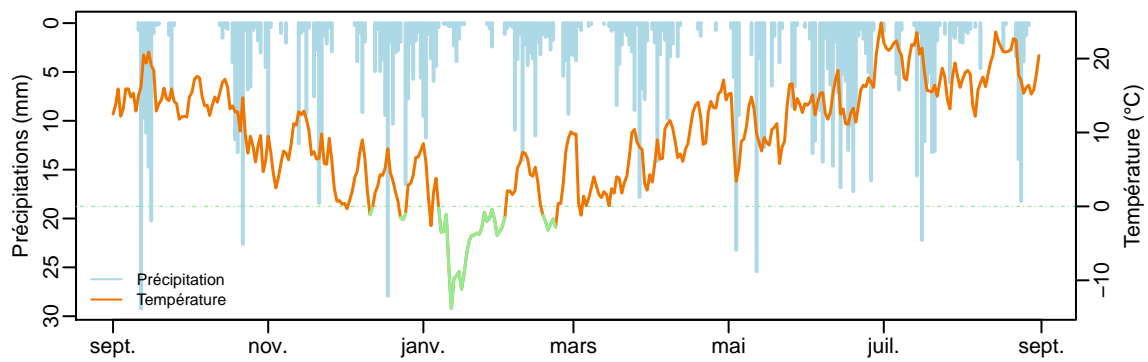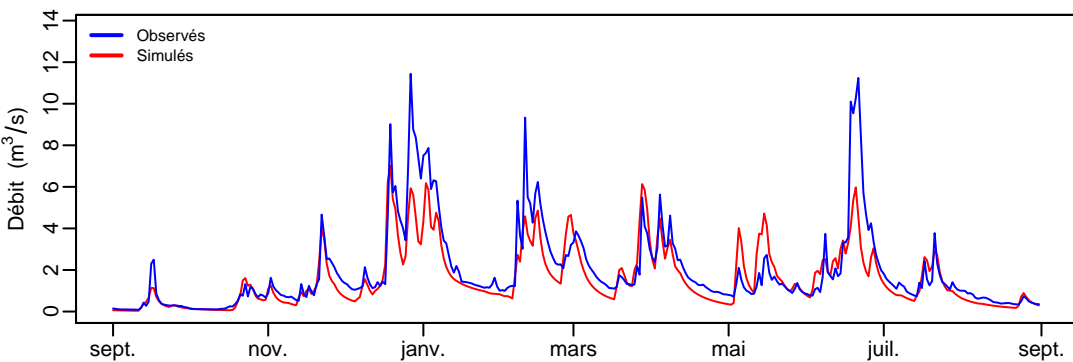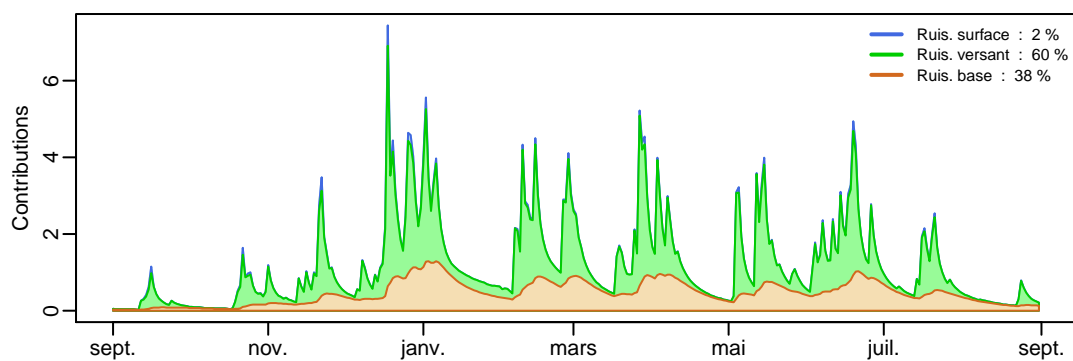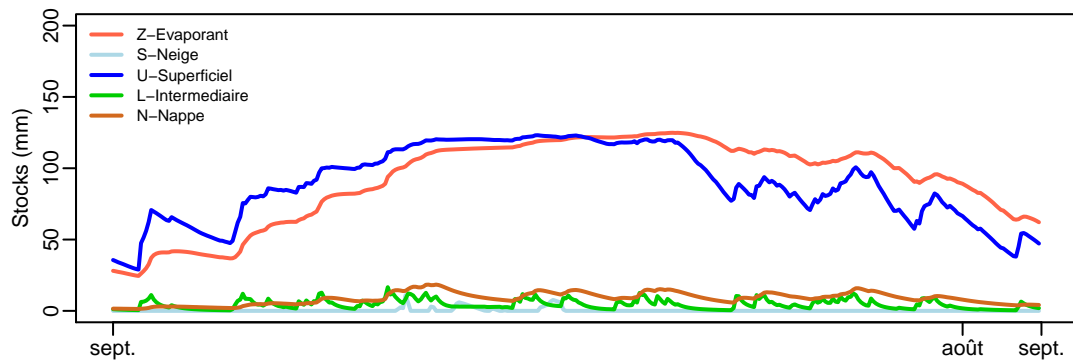

# k1724210 (112.82 km²) – année 1987–1988

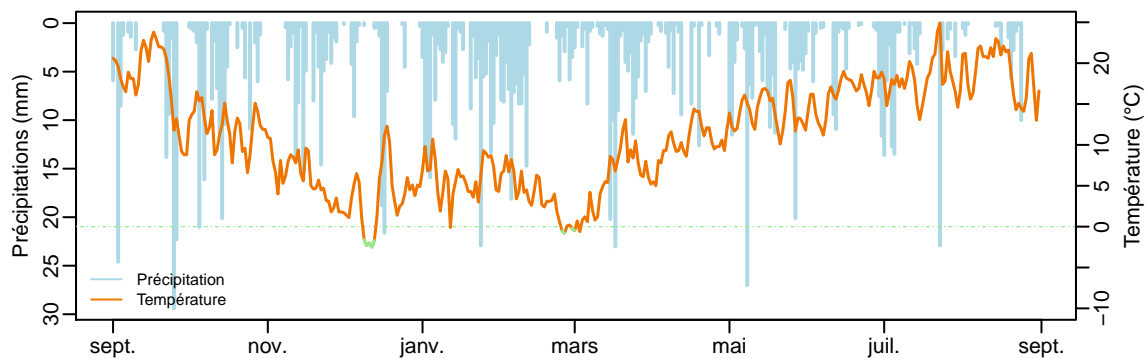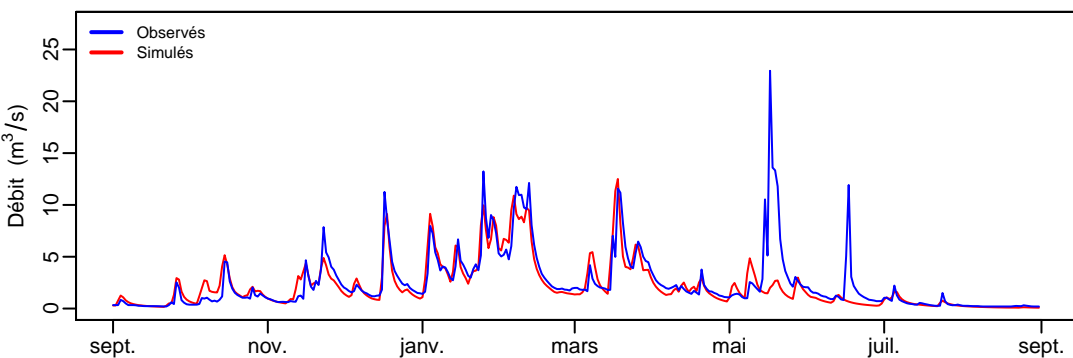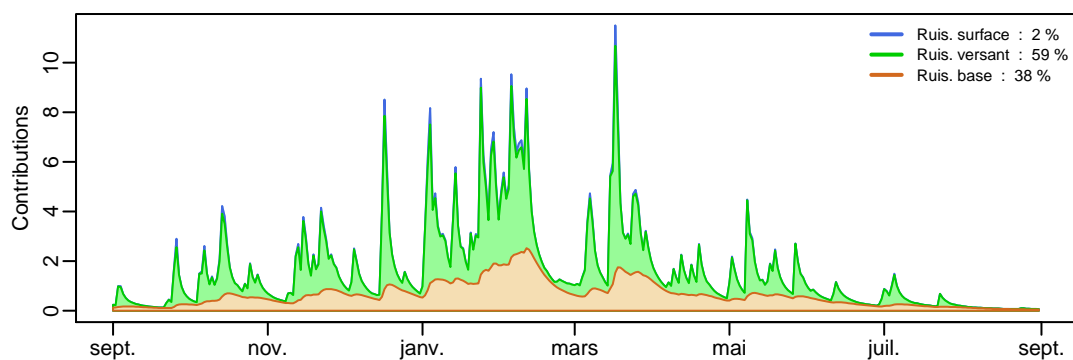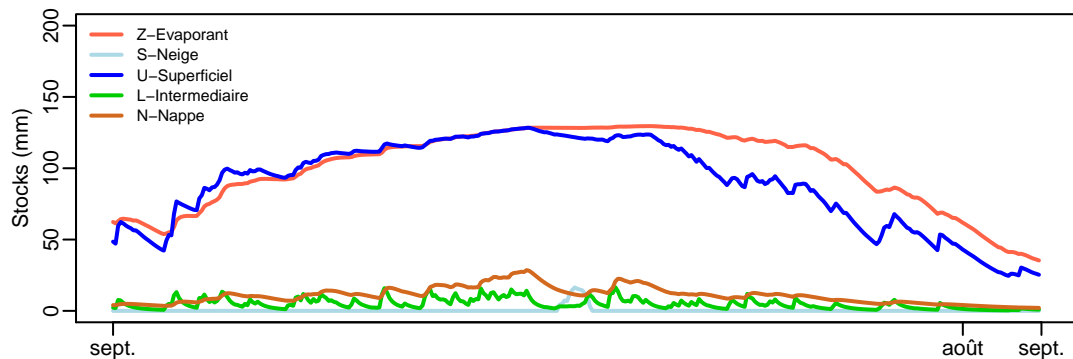



# k1724210 (112.82 km<sup>2</sup>) – année 1988–1989

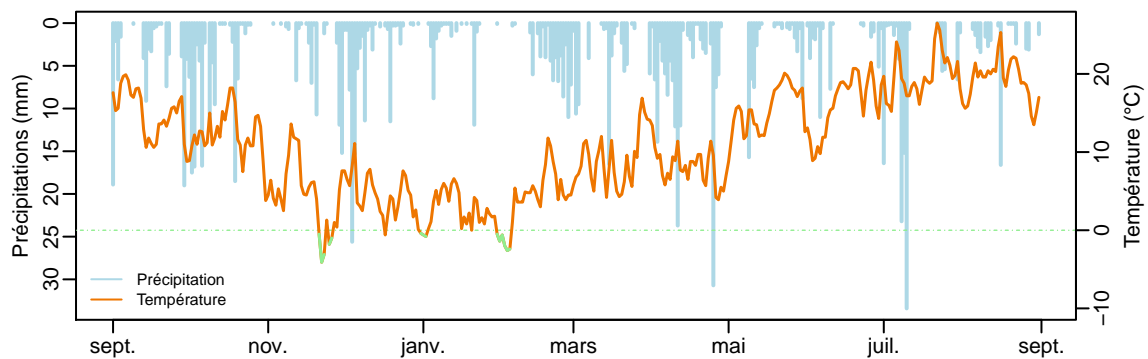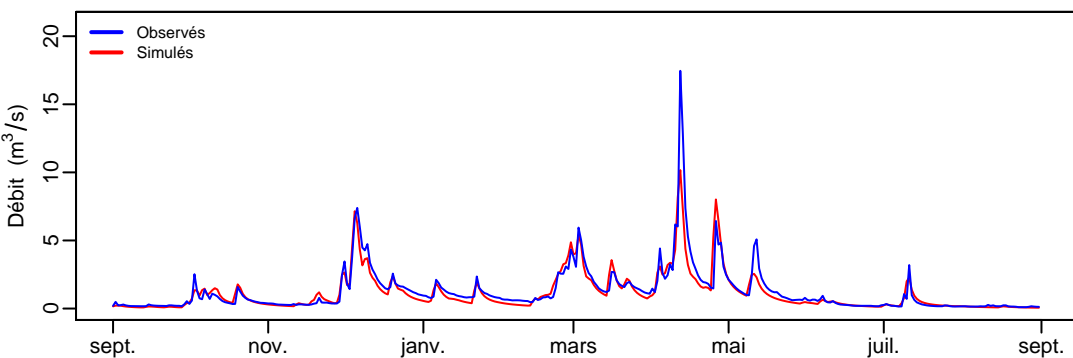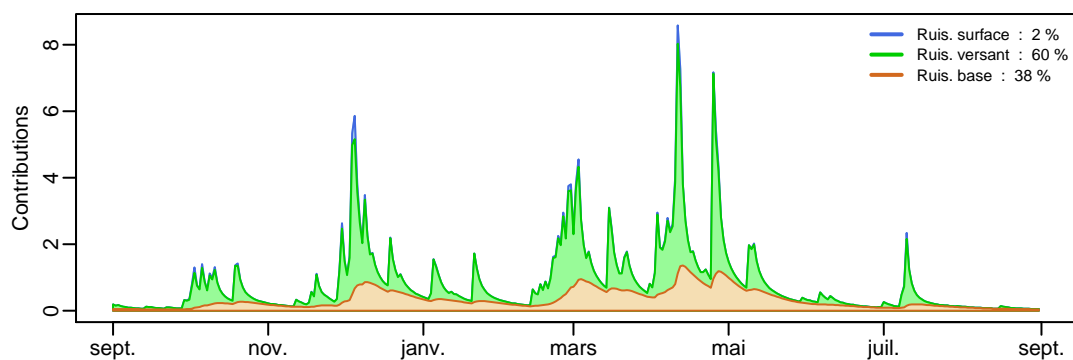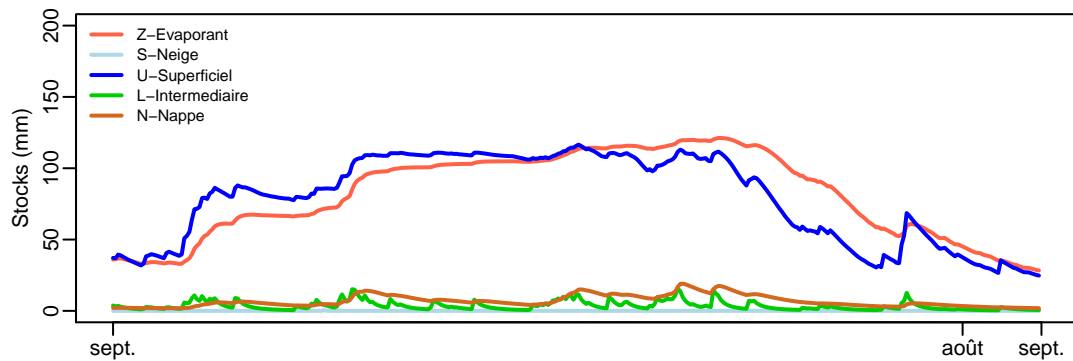

# k1724210 (112.82 km<sup>2</sup>) – année 1989–1990

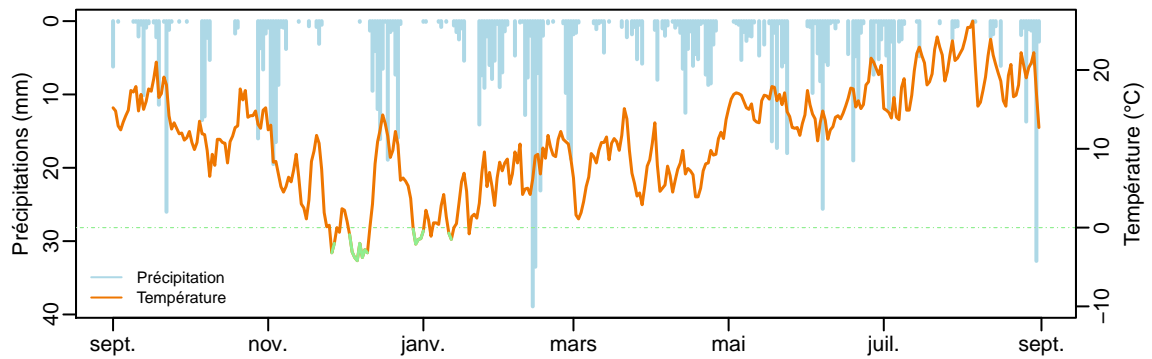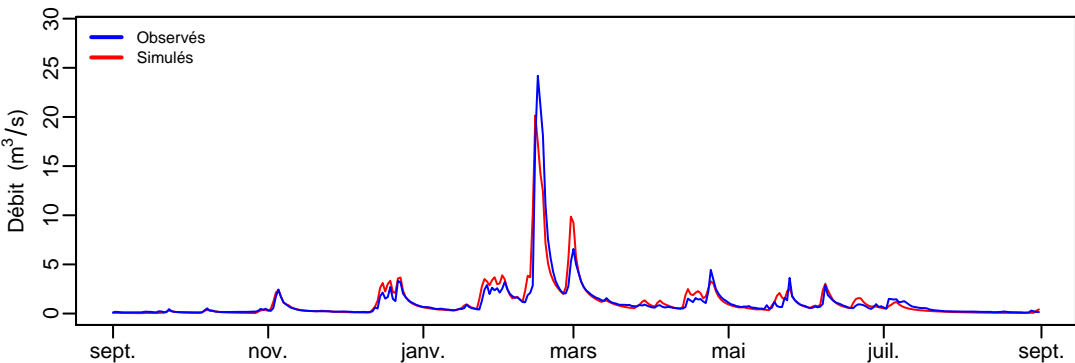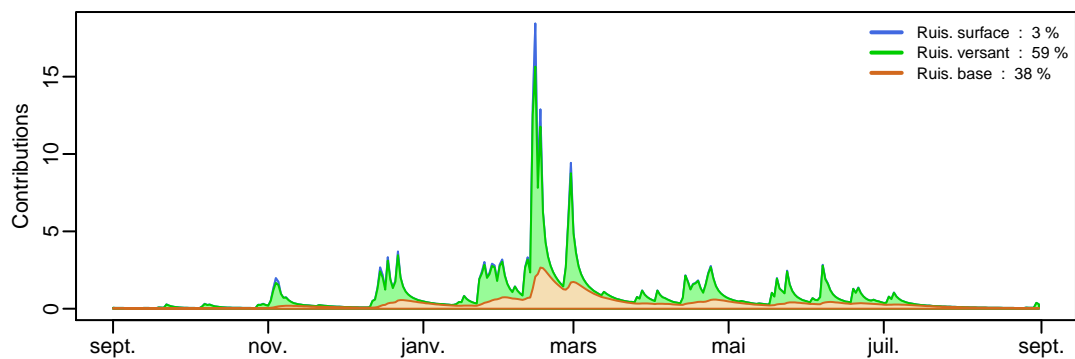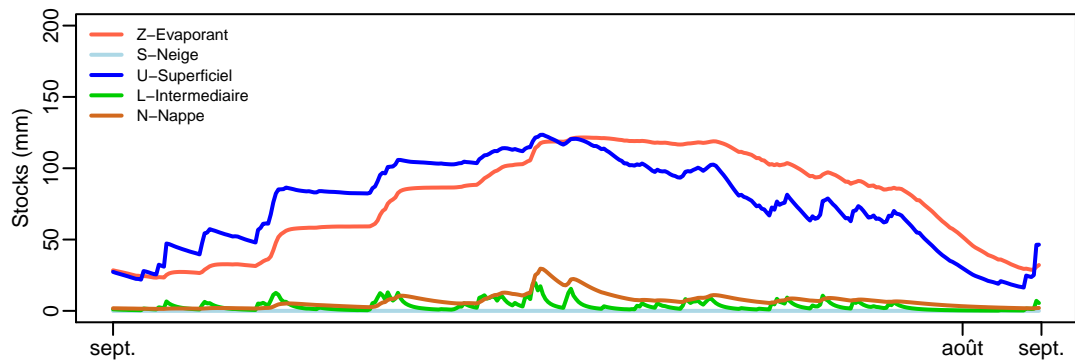

# k1724210 (112.82 km<sup>2</sup>) – année 1990–1991

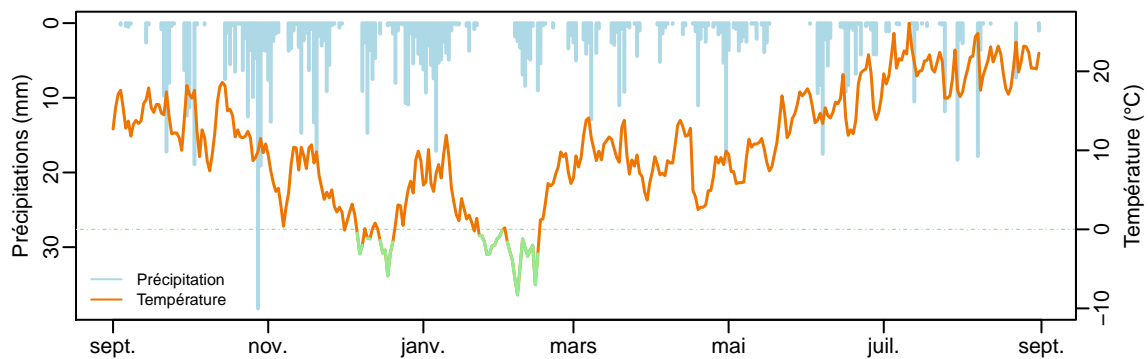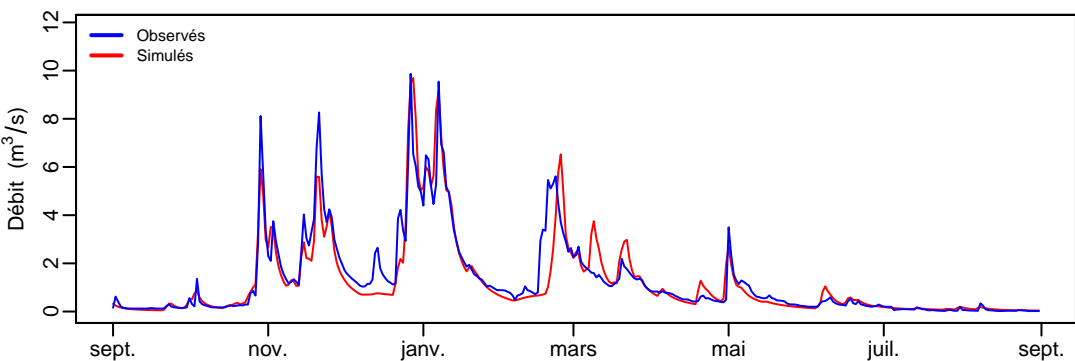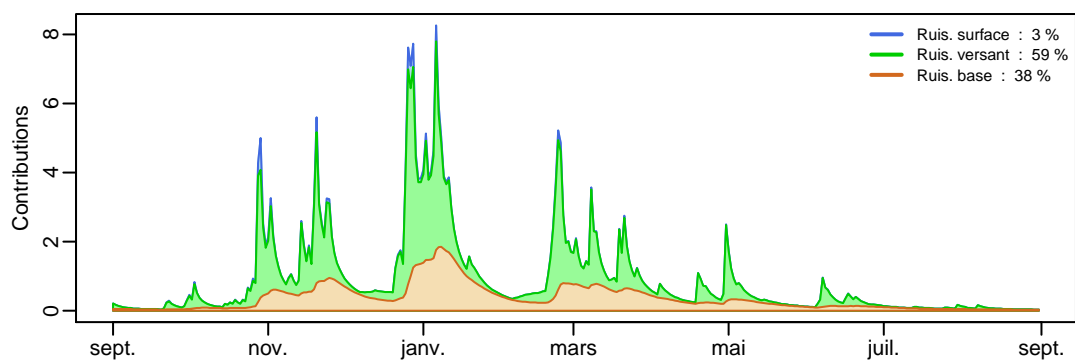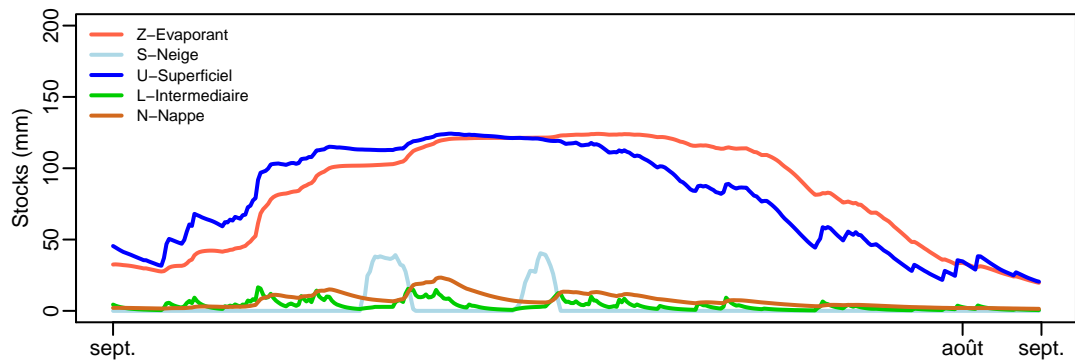

# k1724210 (112.82 km<sup>2</sup>) – année 1991–1992

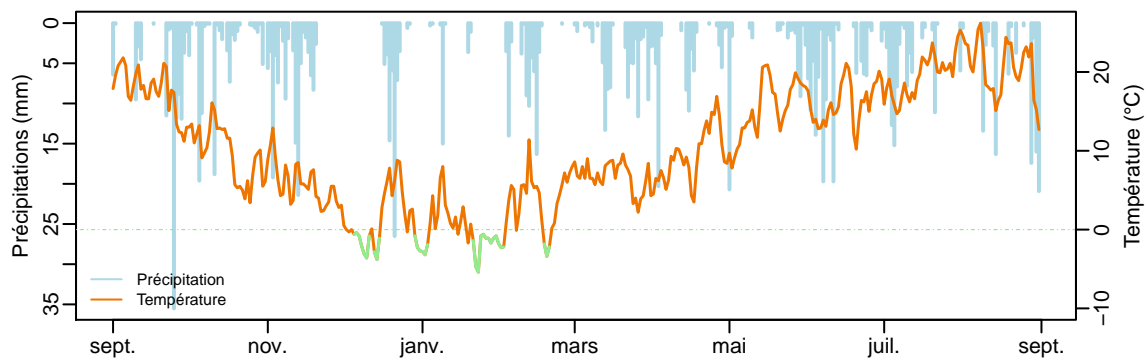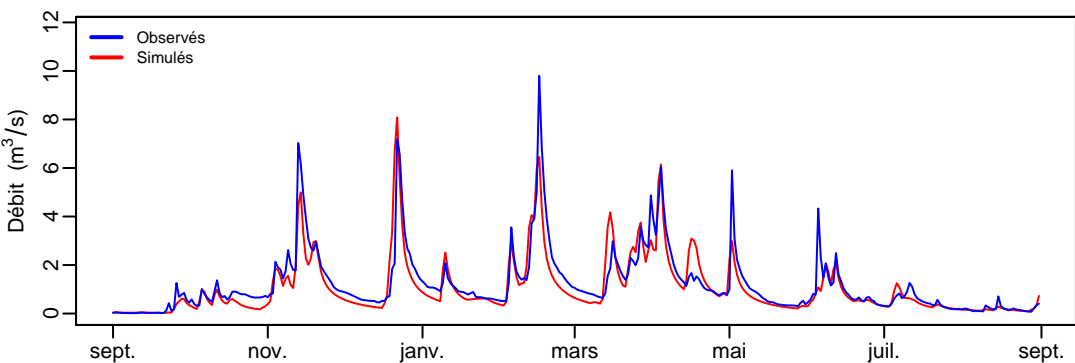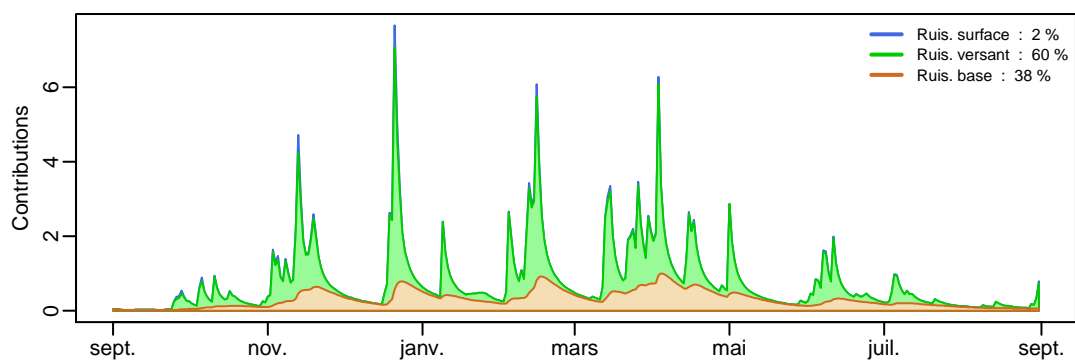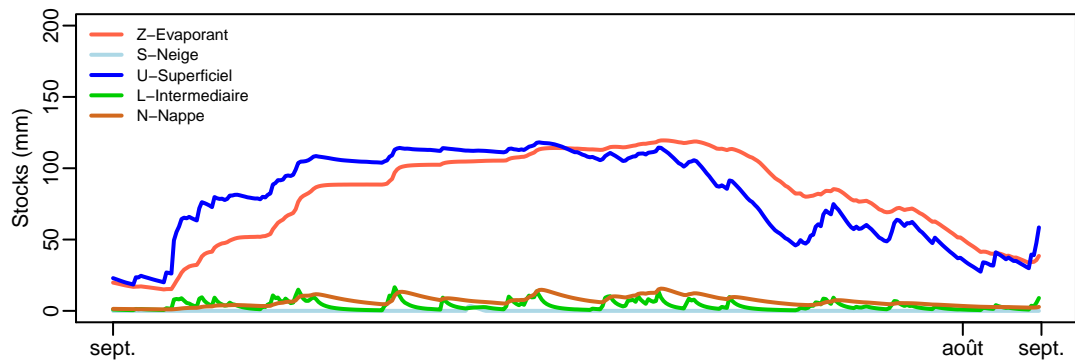

# k1724210 (112.82 km<sup>2</sup>) – année 1992–1993

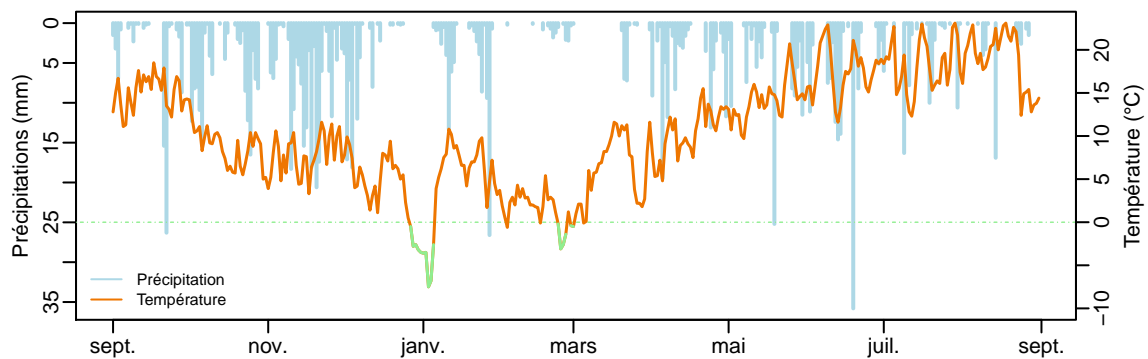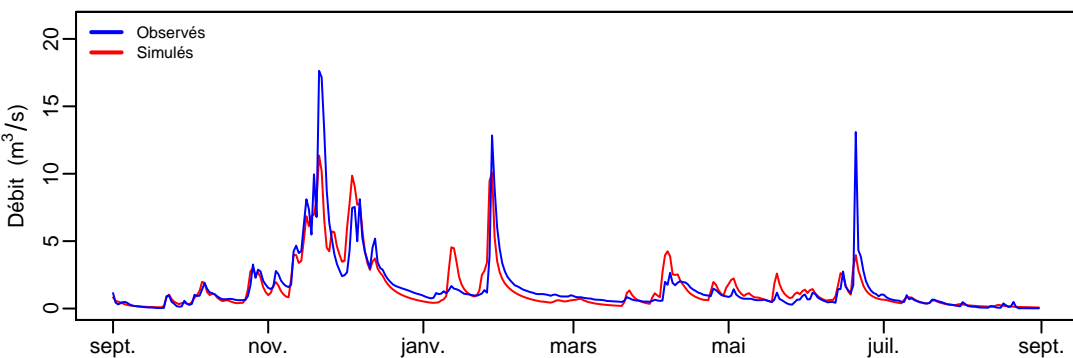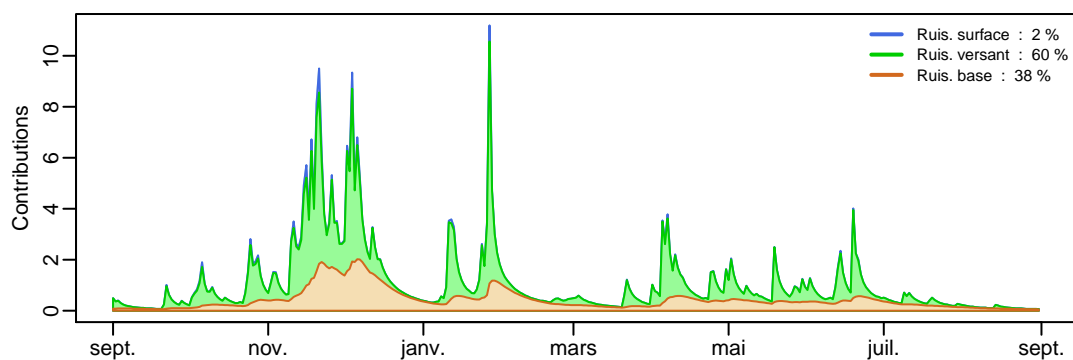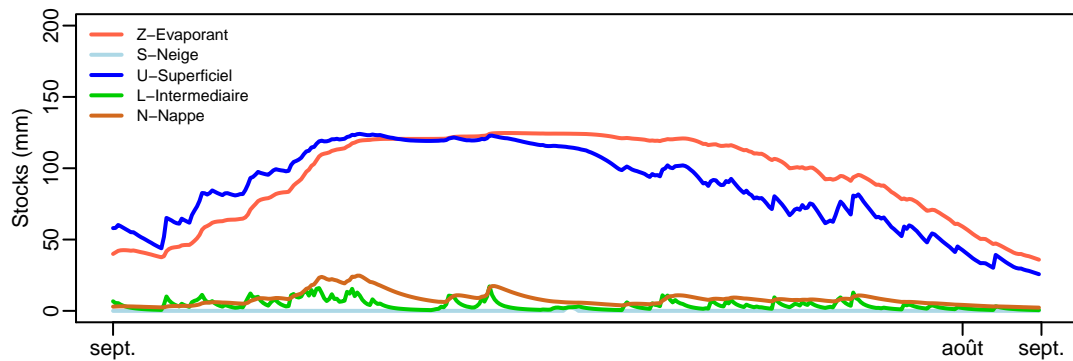

# k1724210 (112.82 km<sup>2</sup>) – année 1993–1994

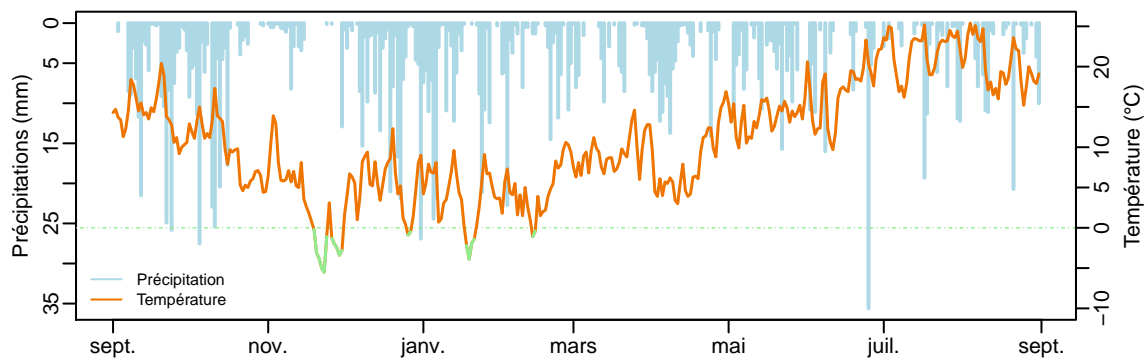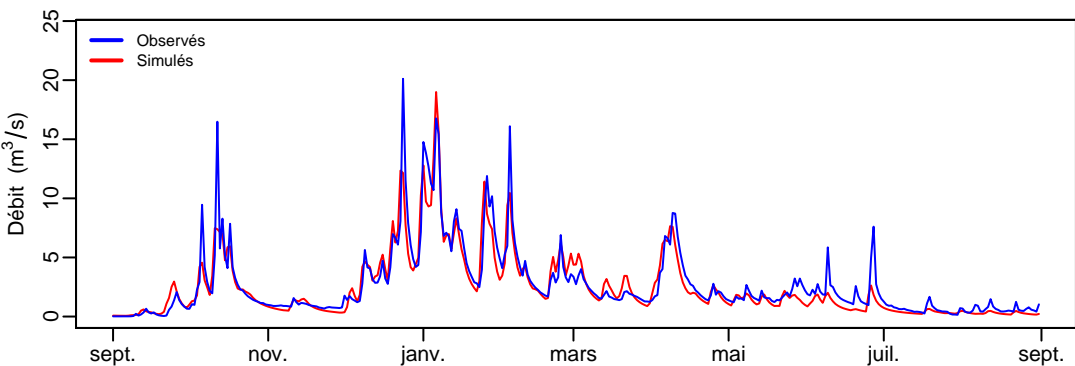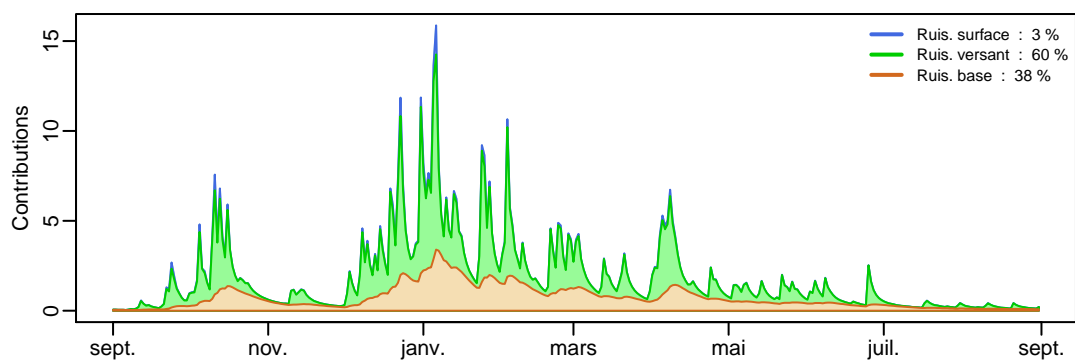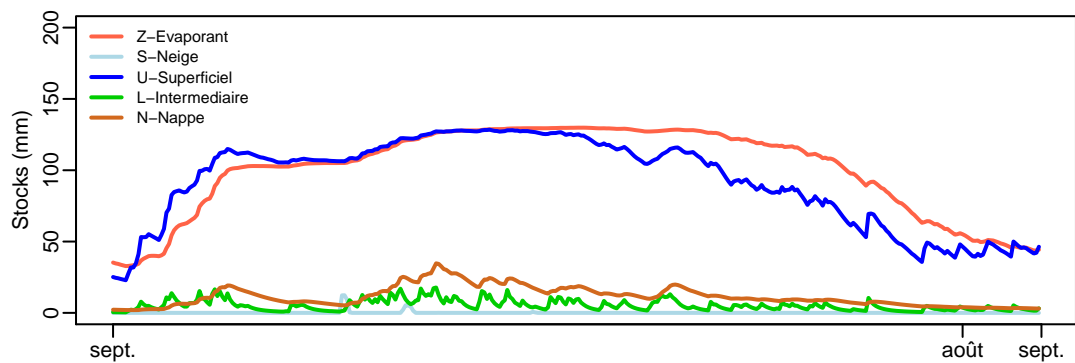

# k1724210 (112.82 km<sup>2</sup>) – année 1994–1995

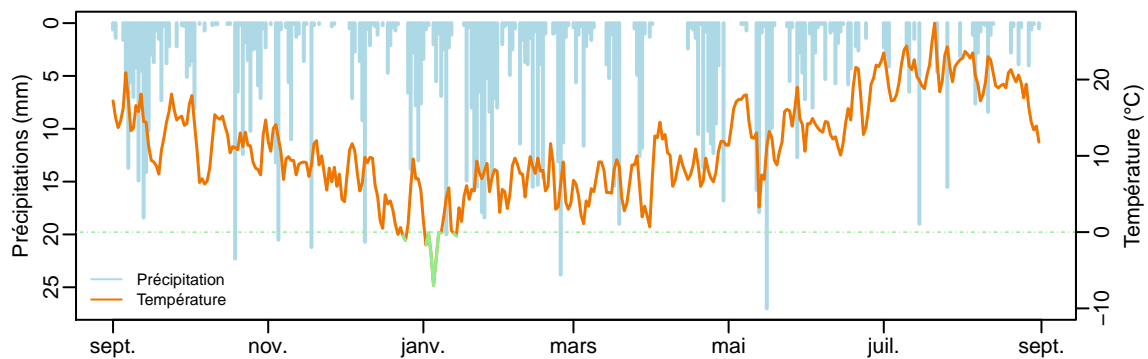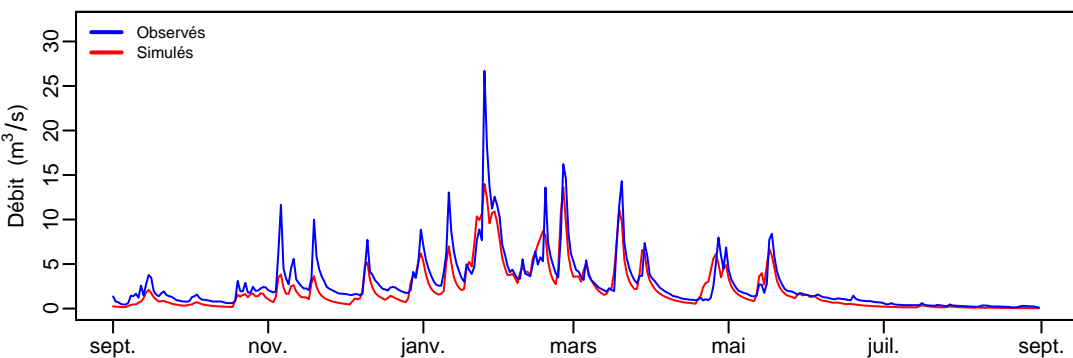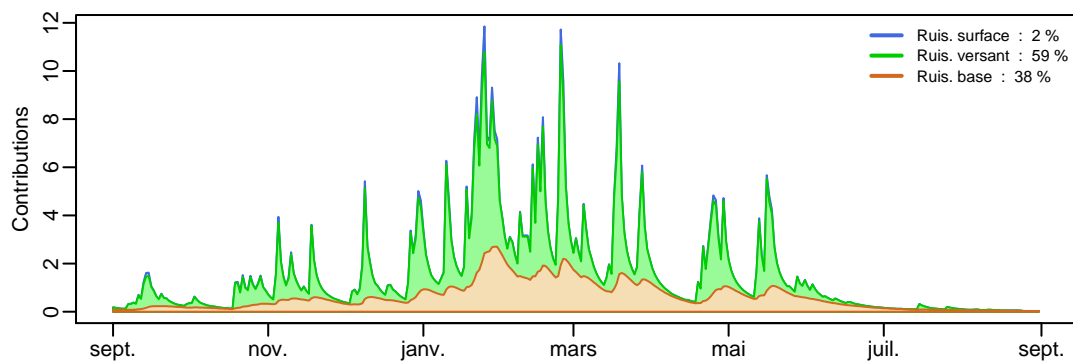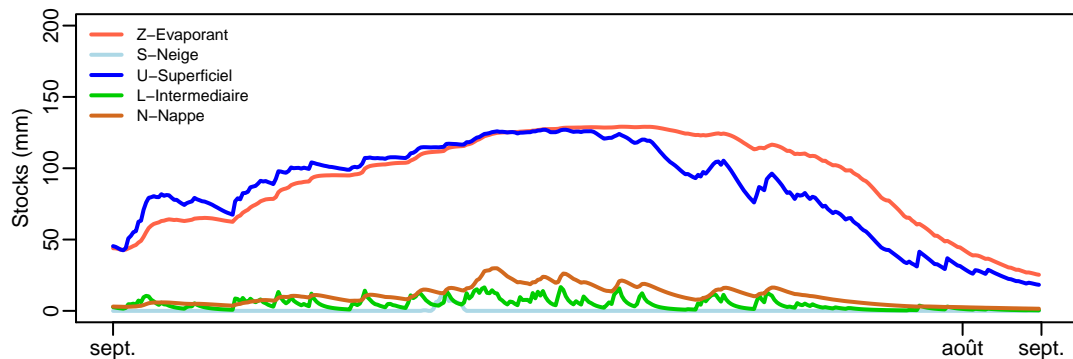

# k1724210 (112.82 km<sup>2</sup>) – année 1995–1996

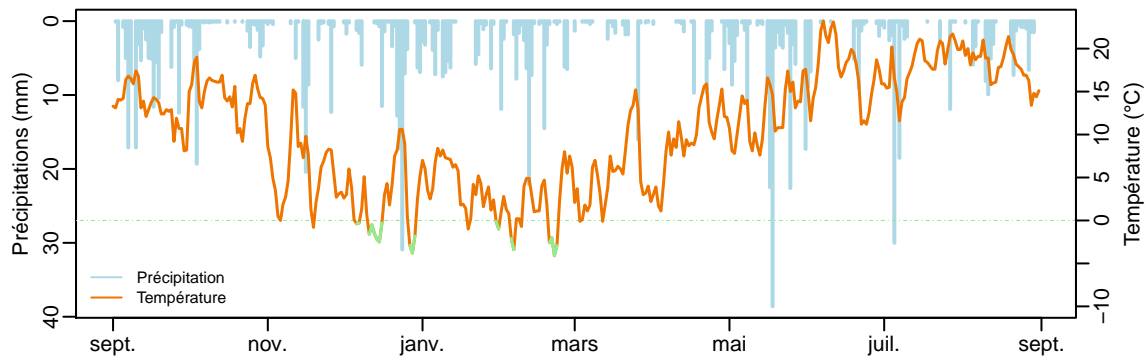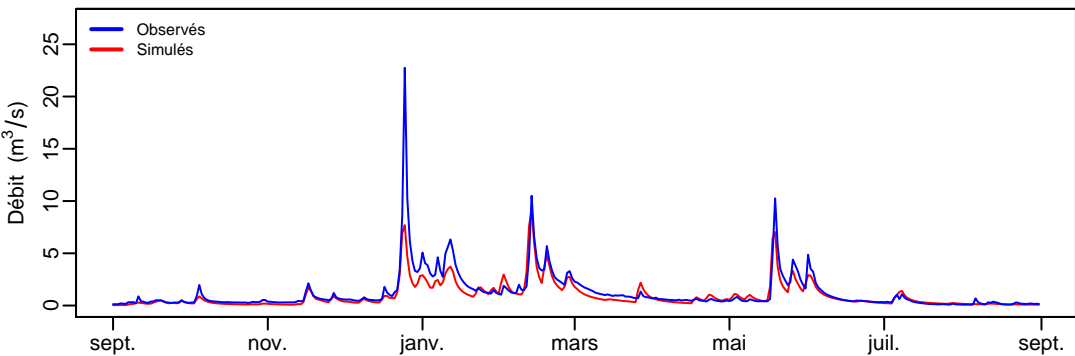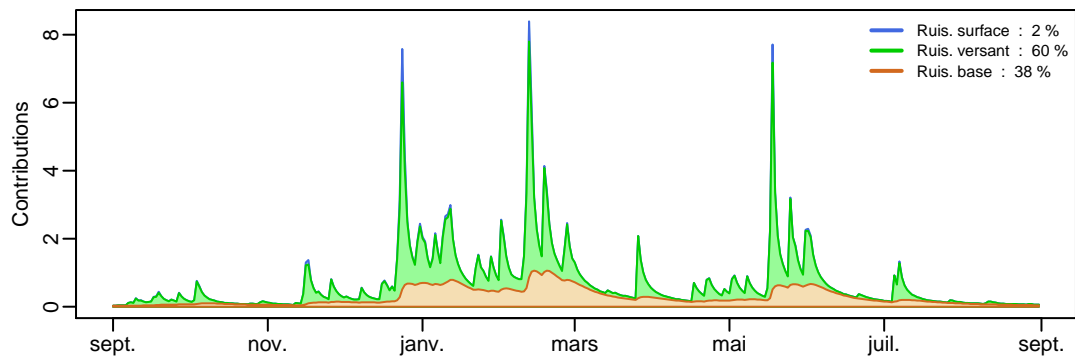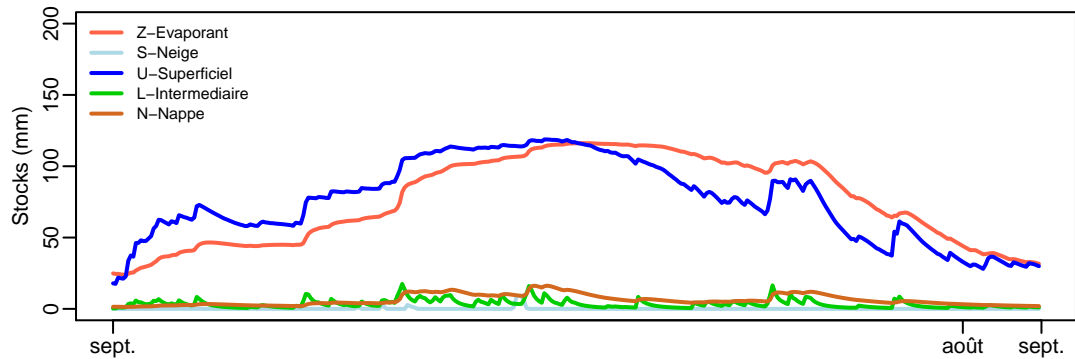



# k1724210 (112.82 km<sup>2</sup>) – année 1996–1997

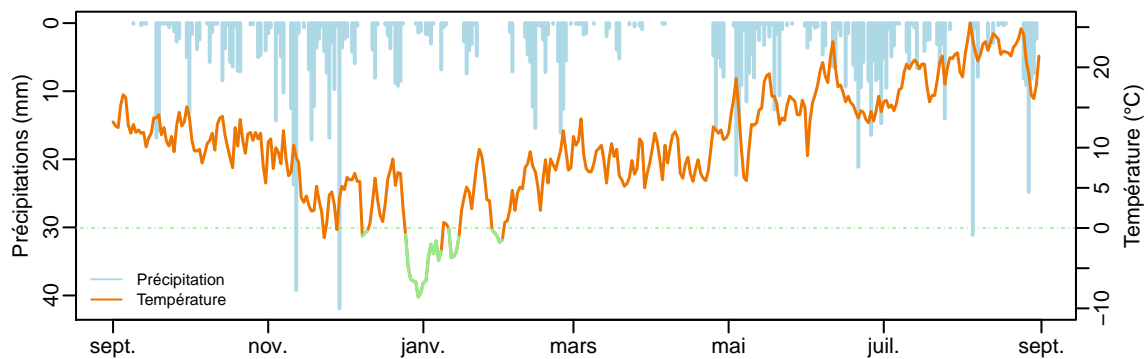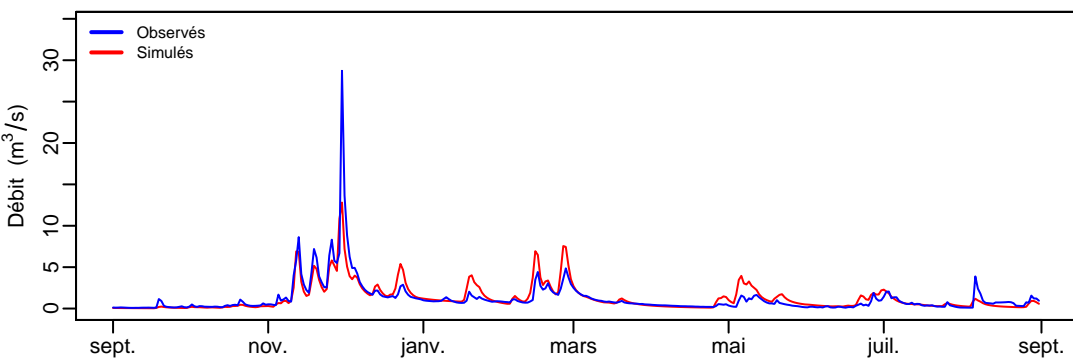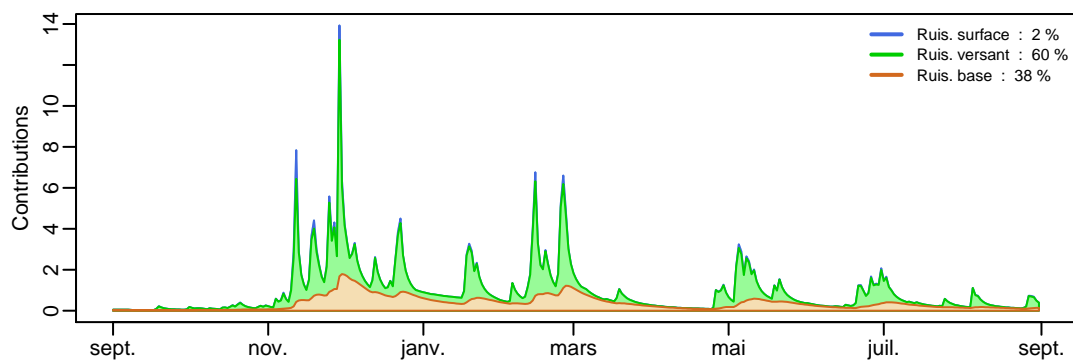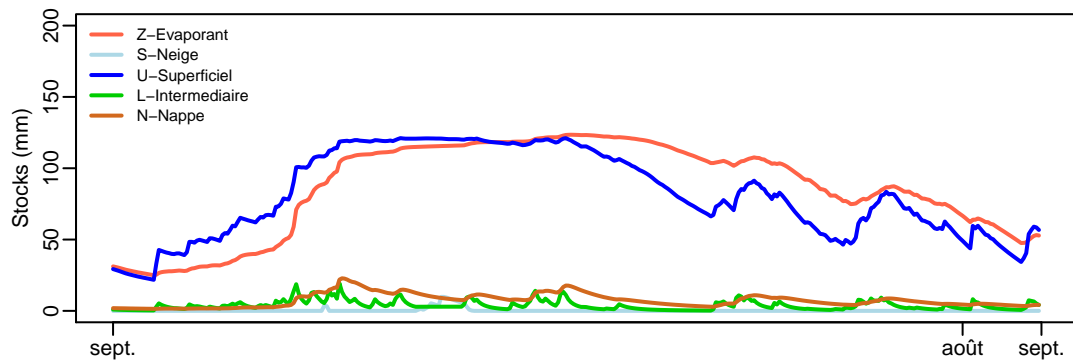

# k1724210 (112.82 km<sup>2</sup>) – année 1997–1998

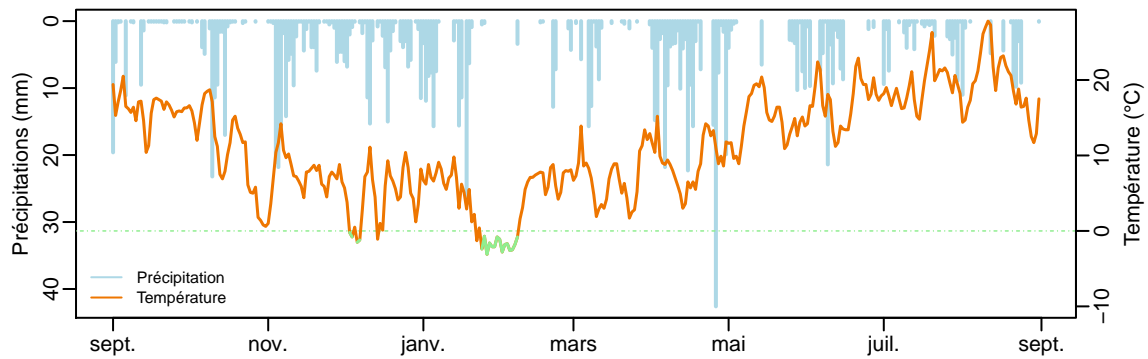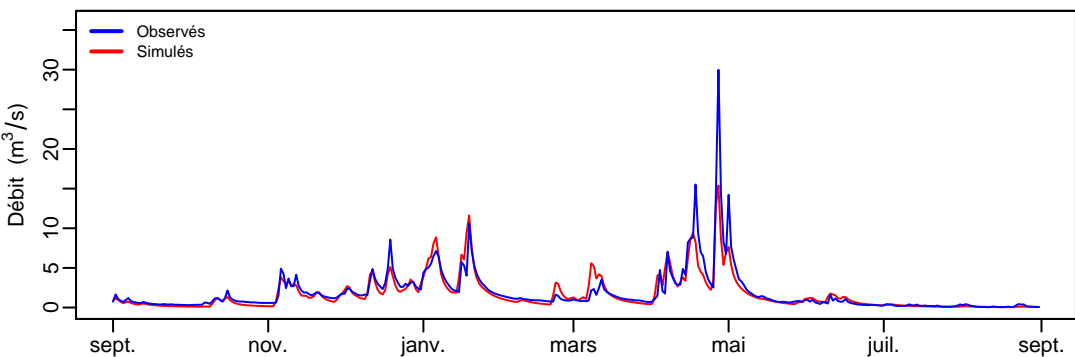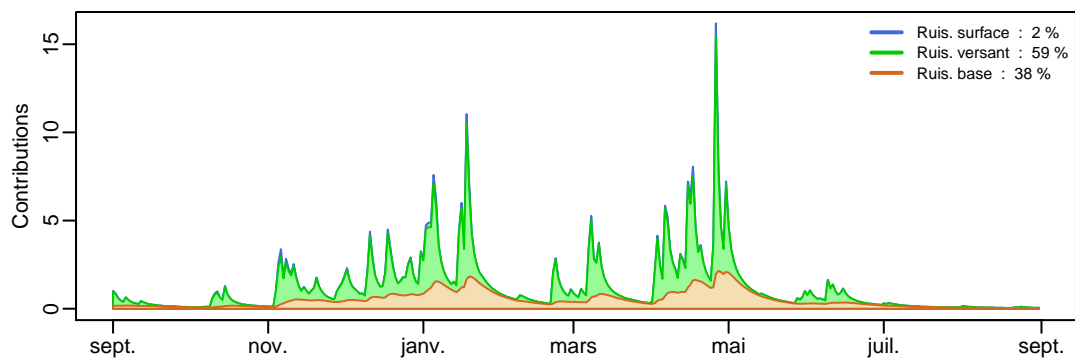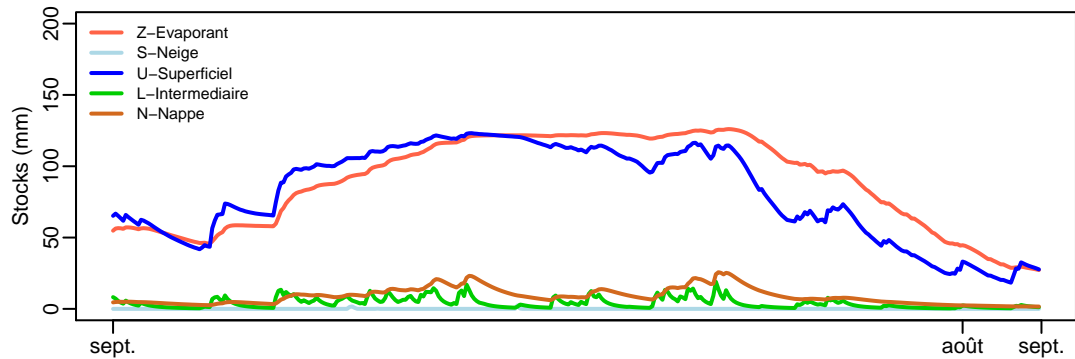

# k1724210 (112.82 km<sup>2</sup>) – année 1998–1999

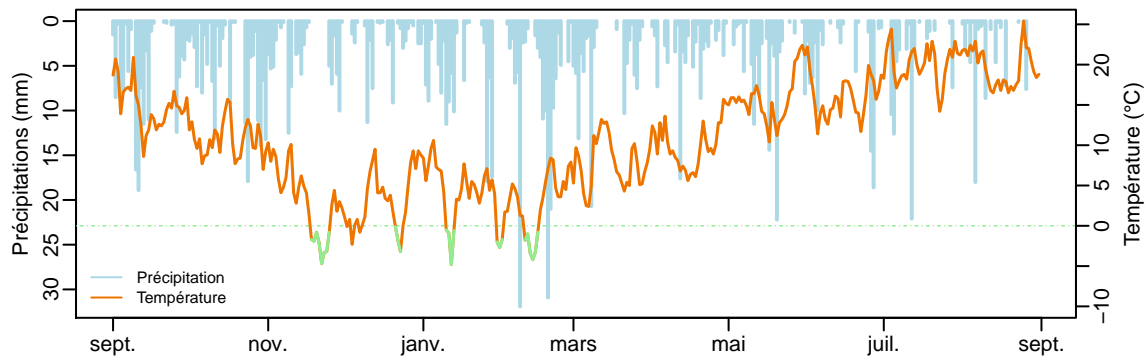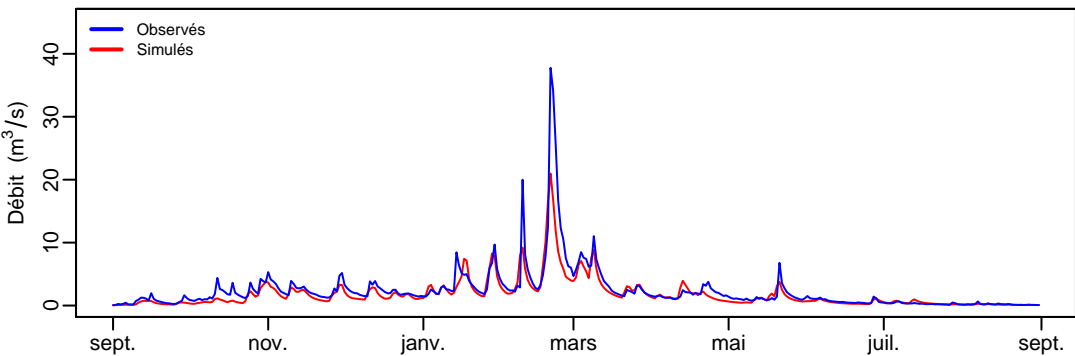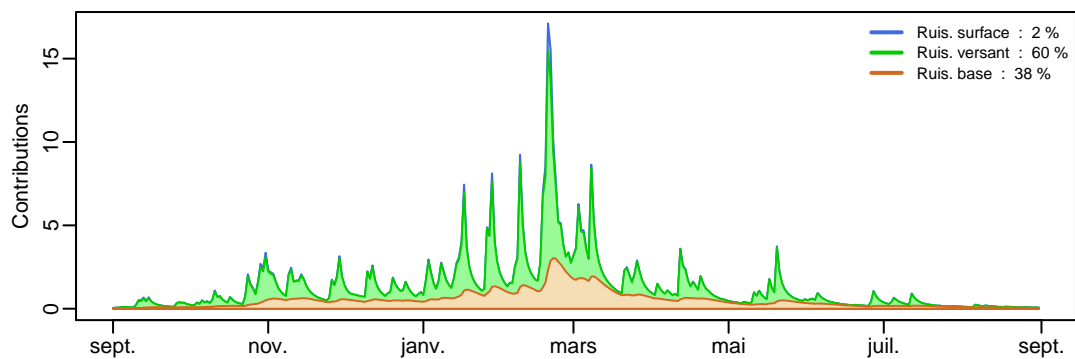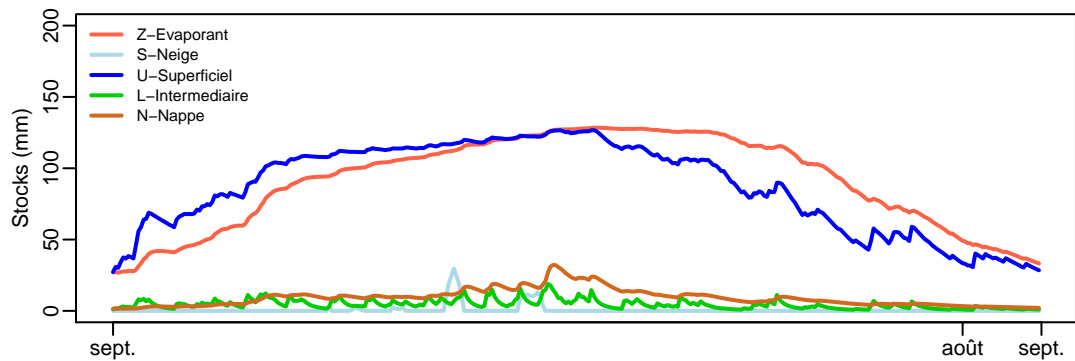

# k1724210 (112.82 km<sup>2</sup>) – année 1999–2000

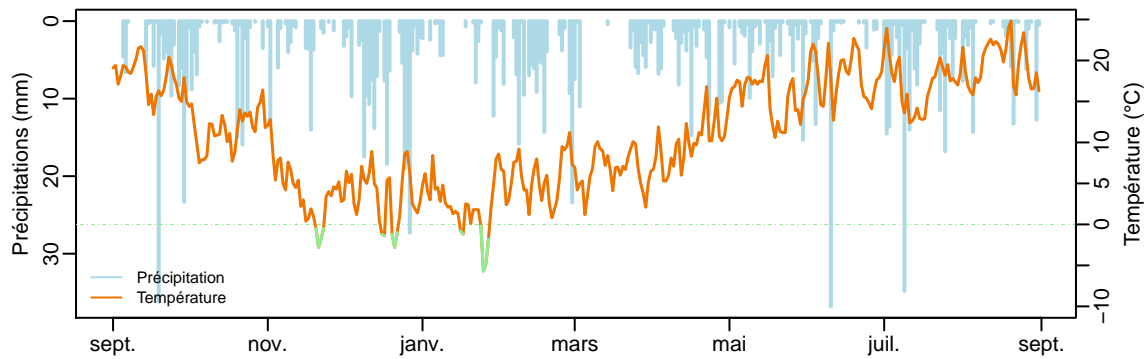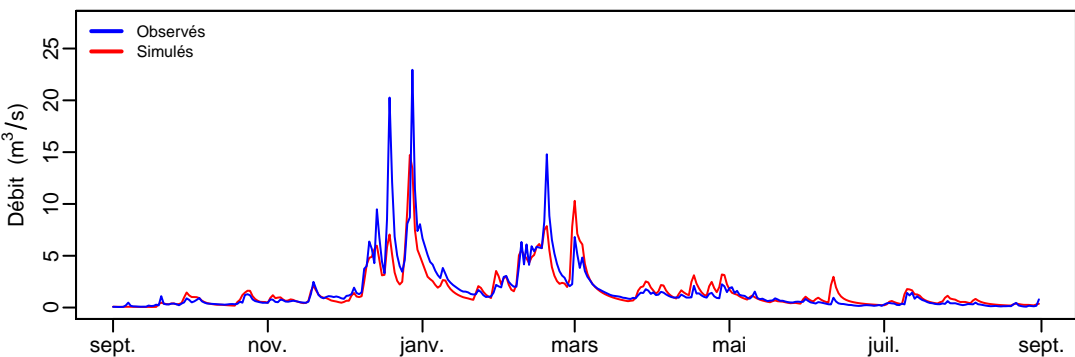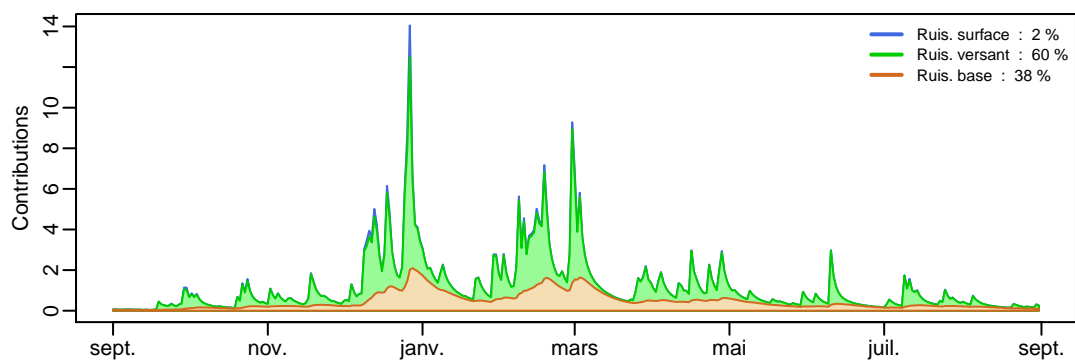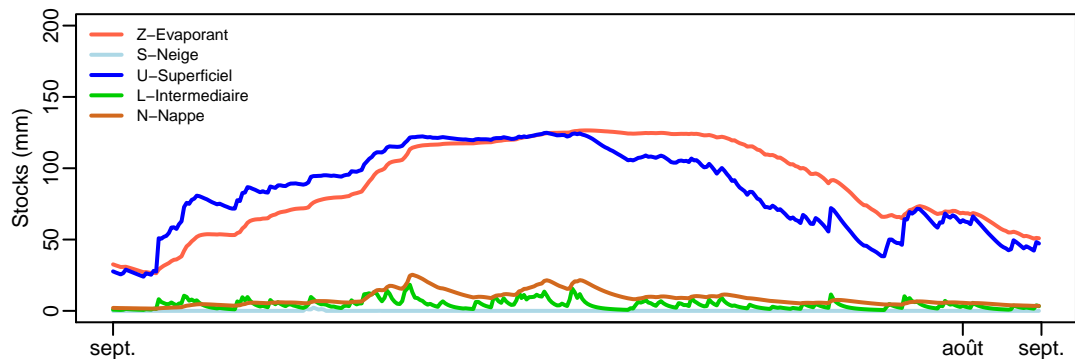

# k1724210 (112.82 km<sup>2</sup>) – année 2000–2001

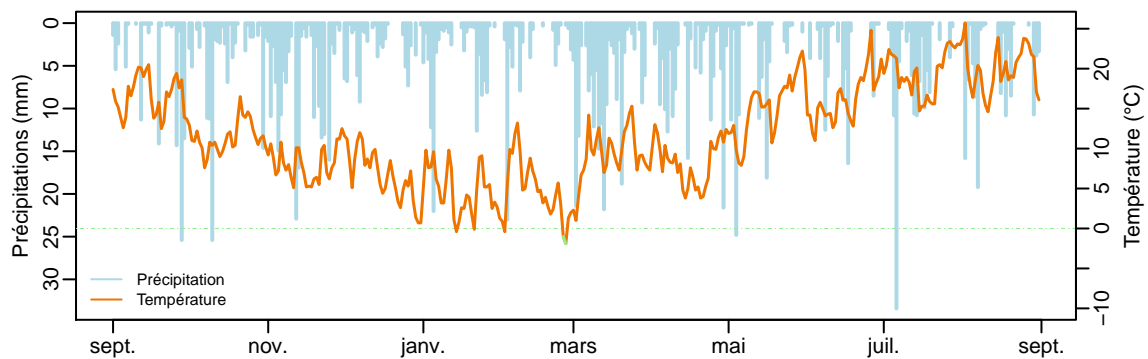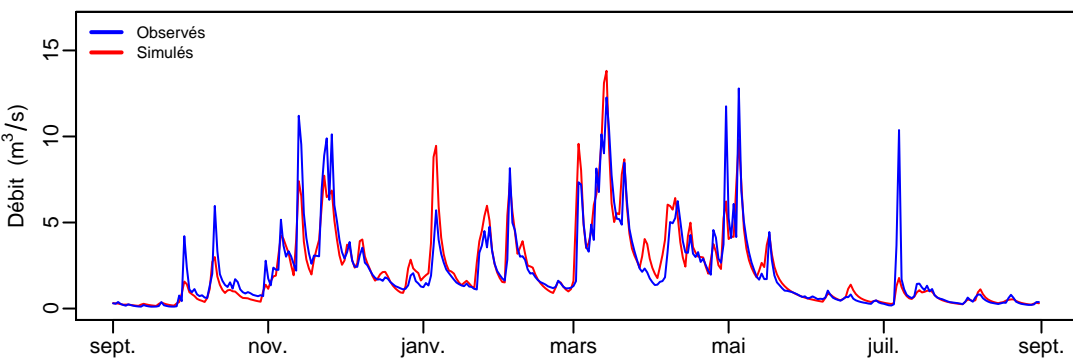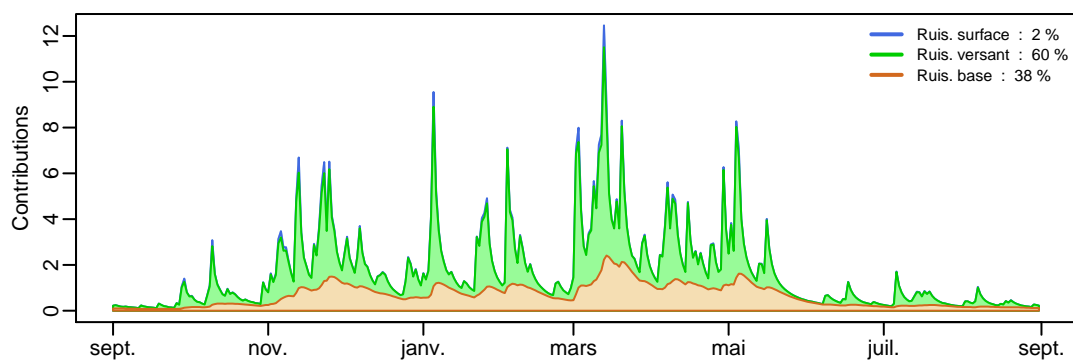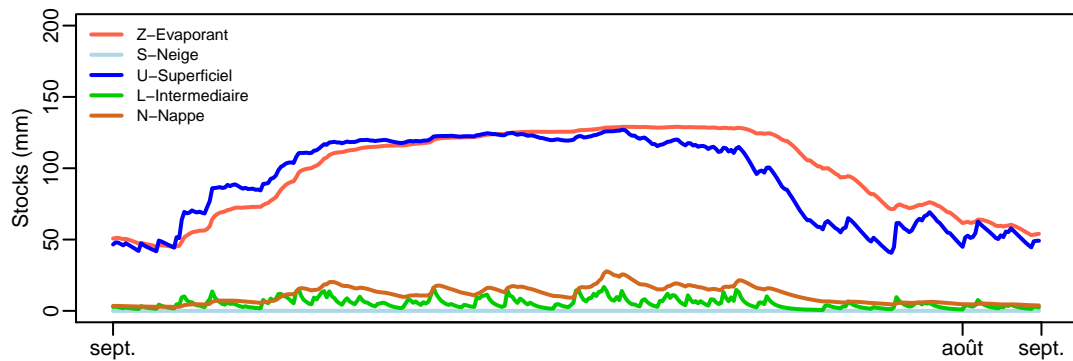

# k1724210 (112.82 km<sup>2</sup>) – année 2001–2002

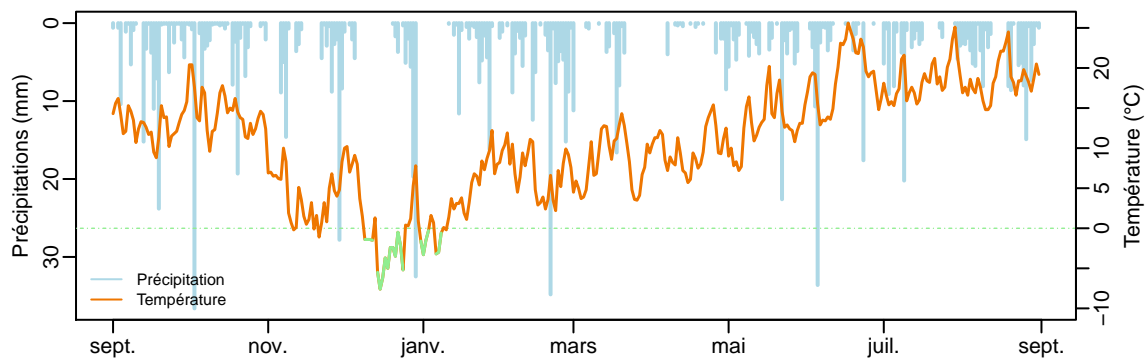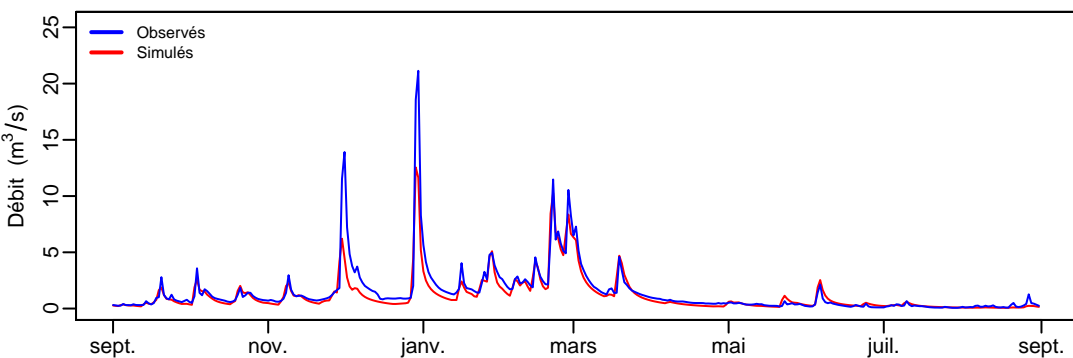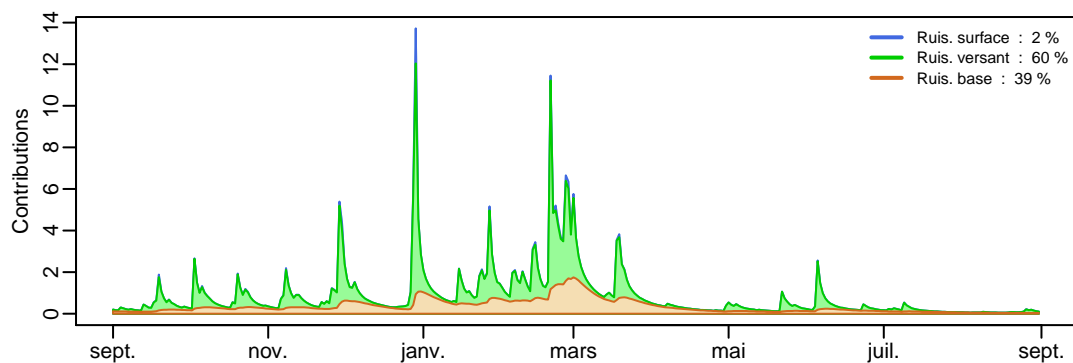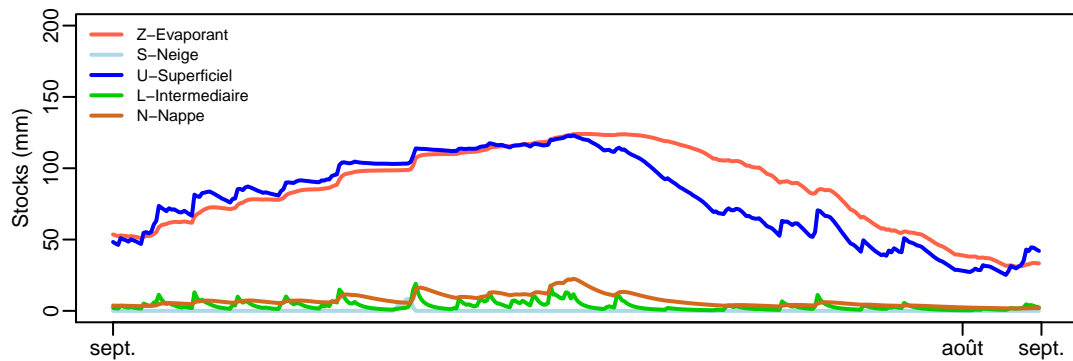

# k1724210 (112.82 km<sup>2</sup>) – année 2002–2003

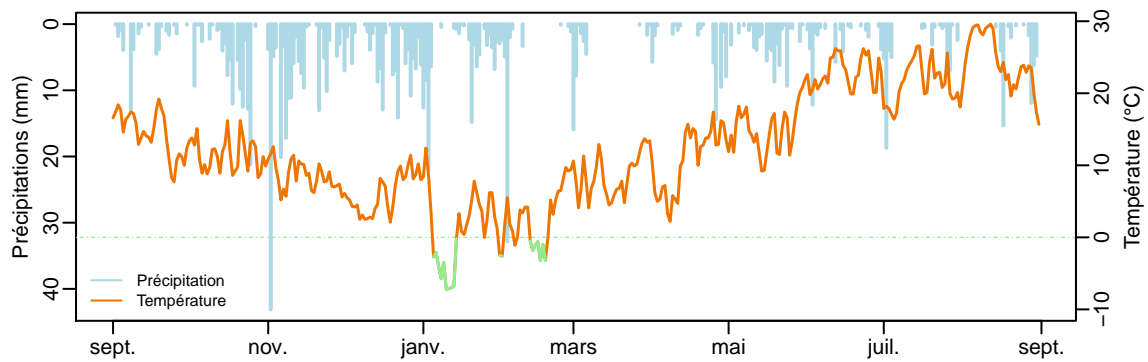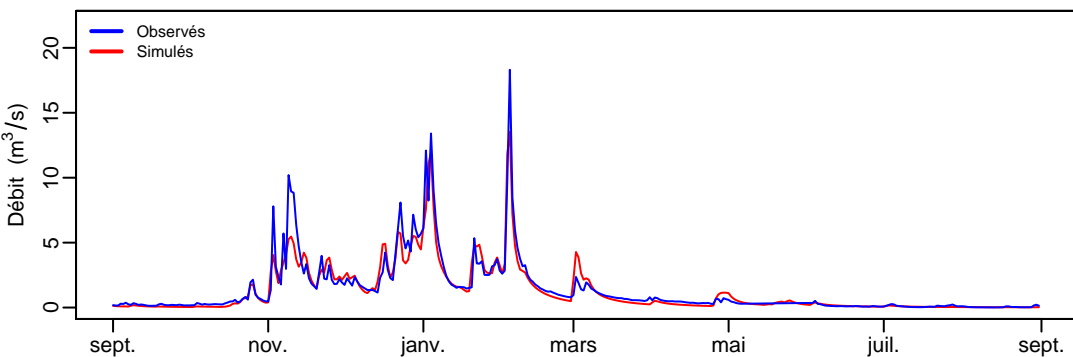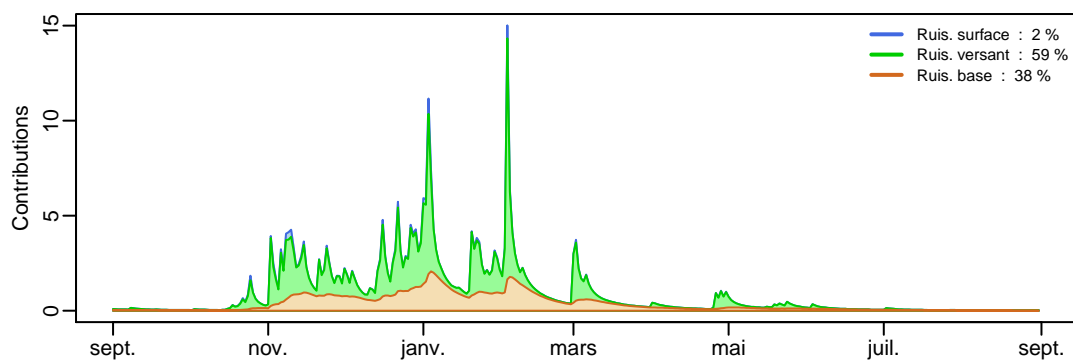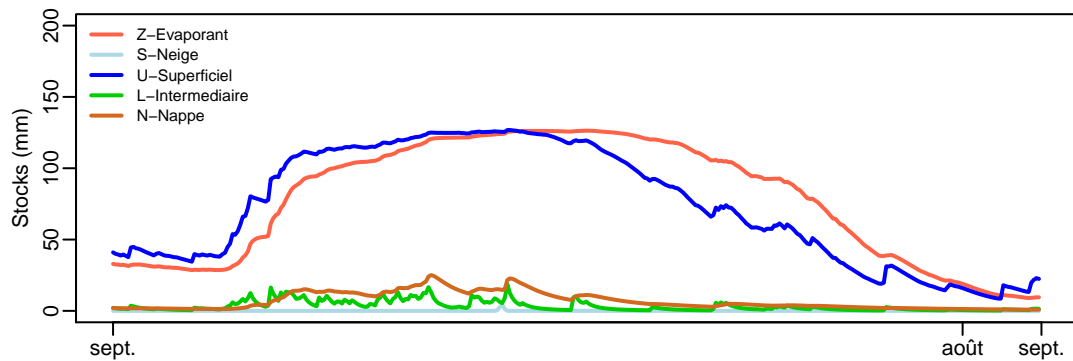

# k1724210 (112.82 km<sup>2</sup>) – année 2003–2004

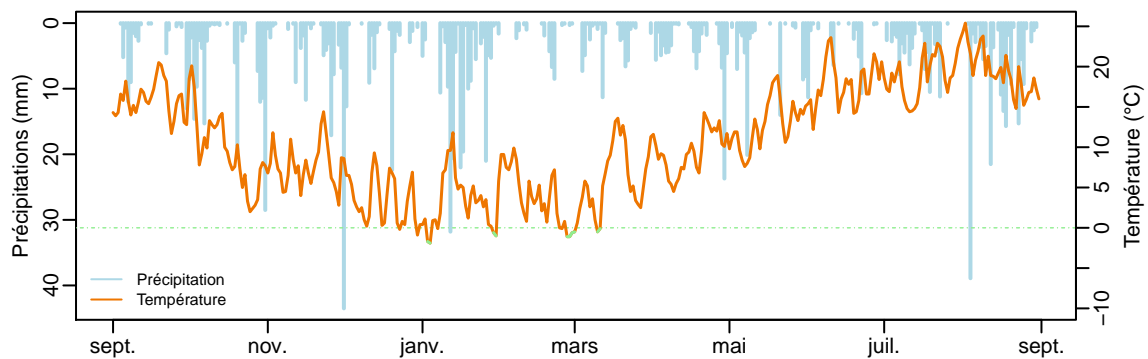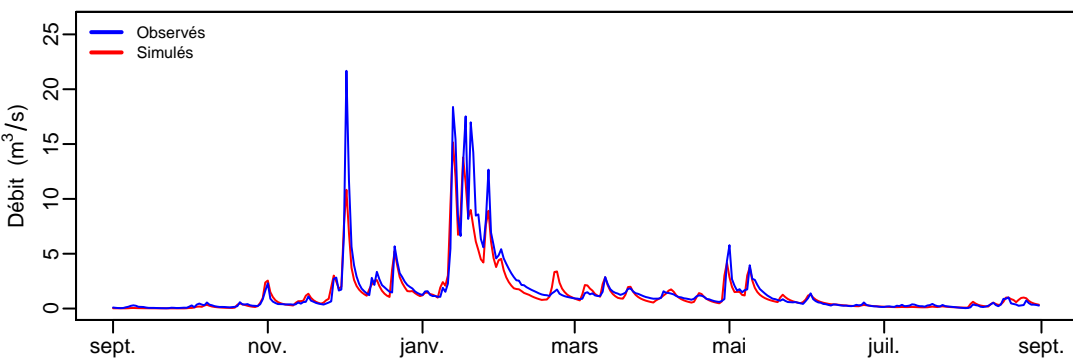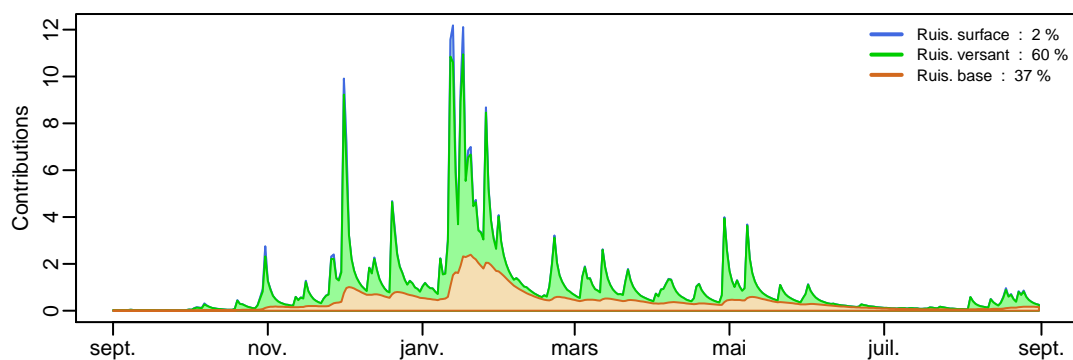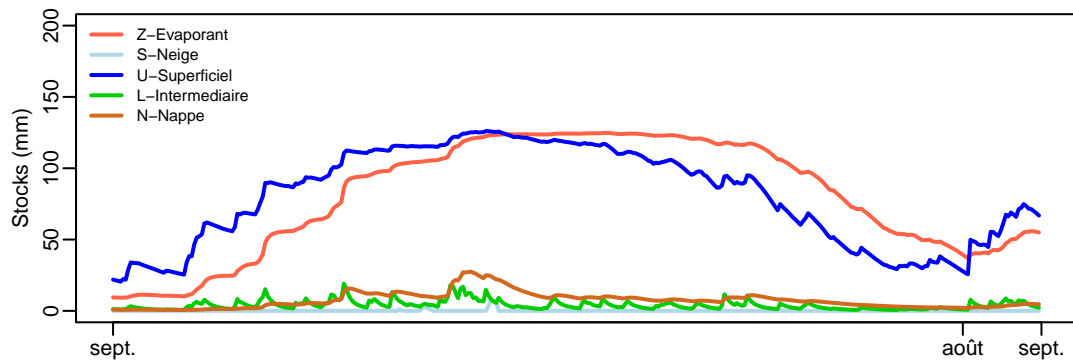



# k1724210 (112.82 km²) – année 2004–2005

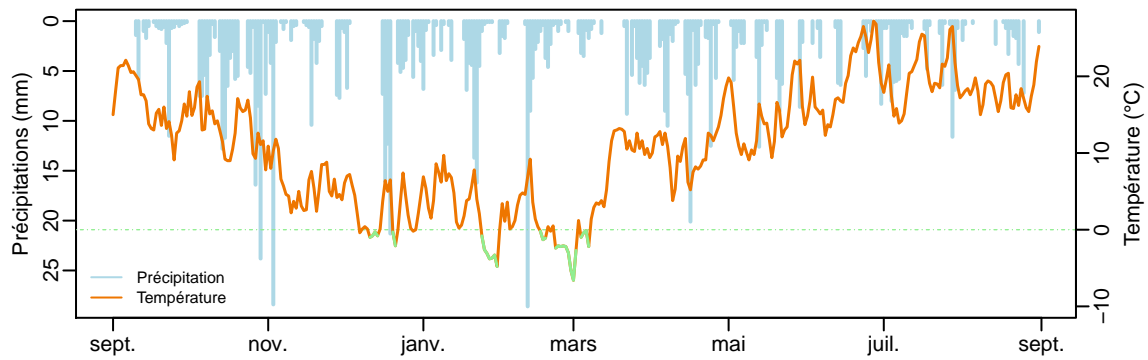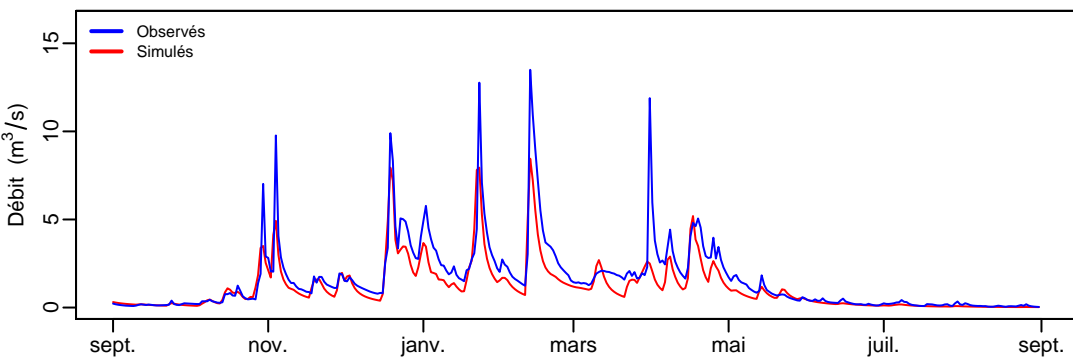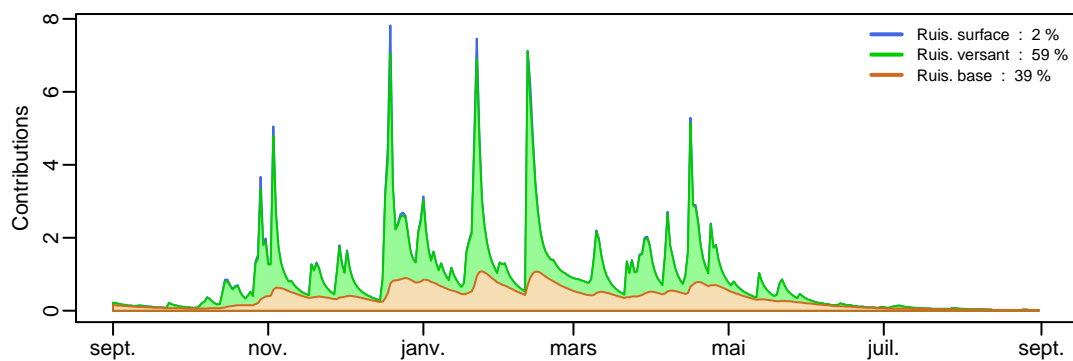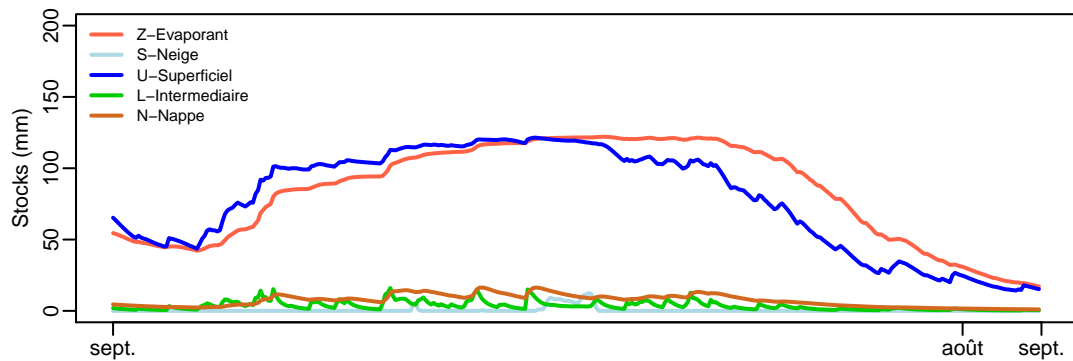

# k1724210 (112.82 km<sup>2</sup>) – année 2005–2006

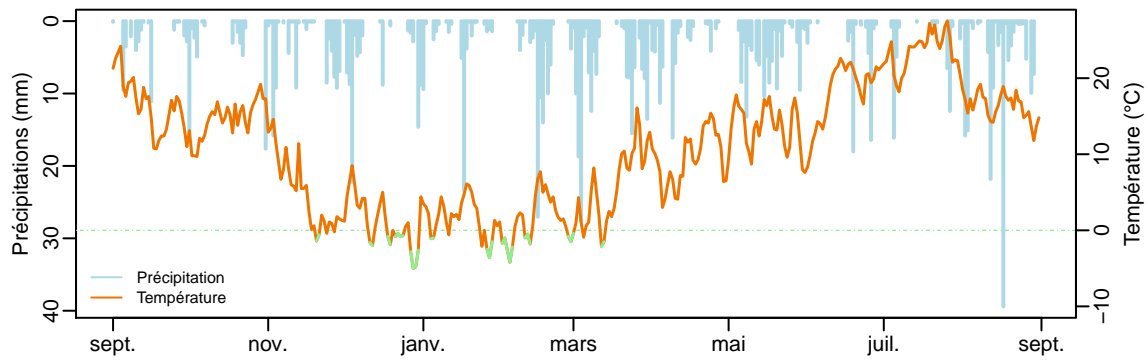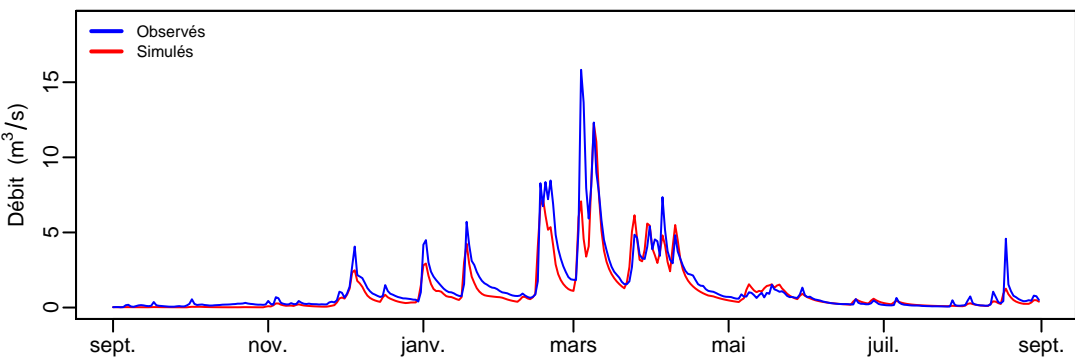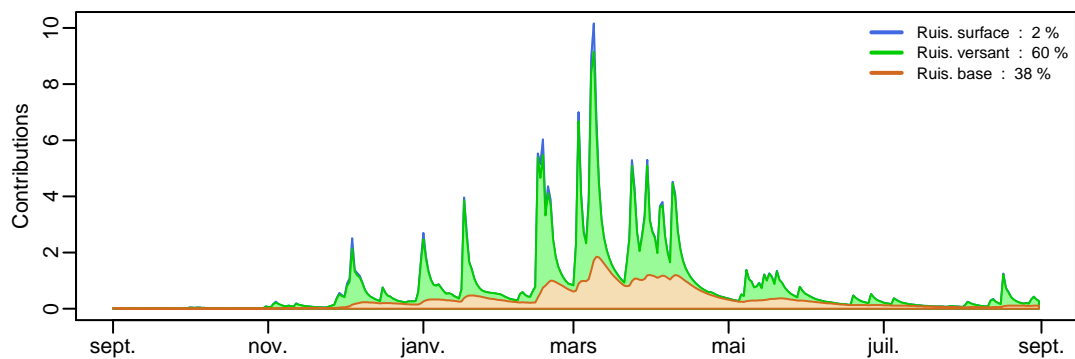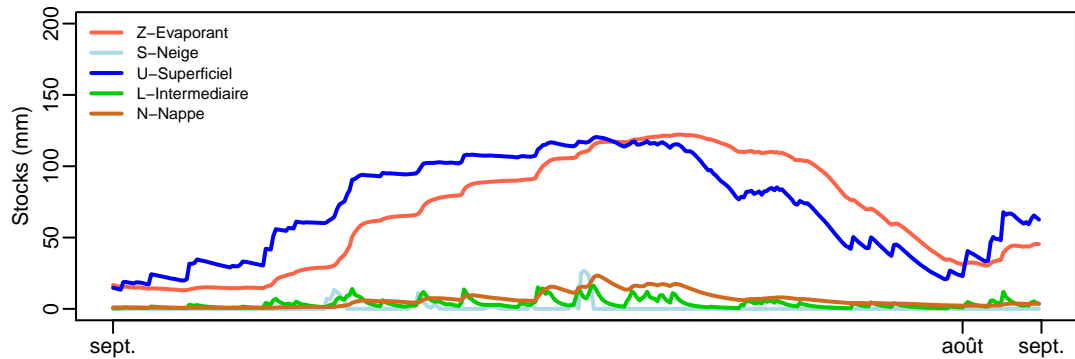

# k1724210 (112.82 km<sup>2</sup>) – année 2006–2007

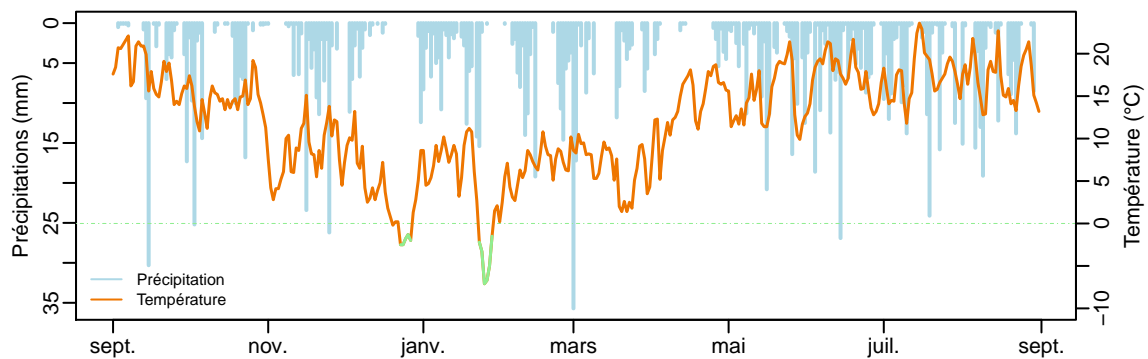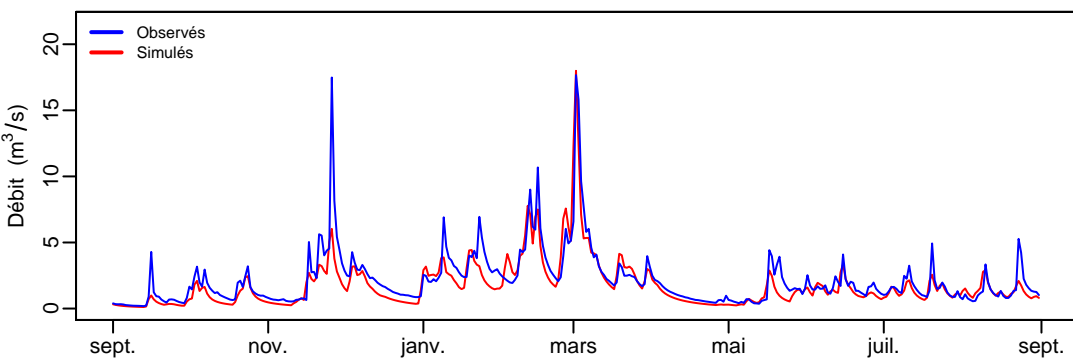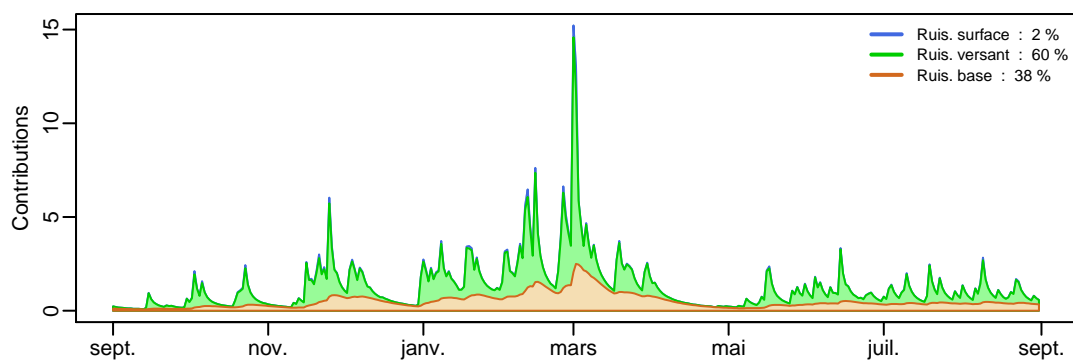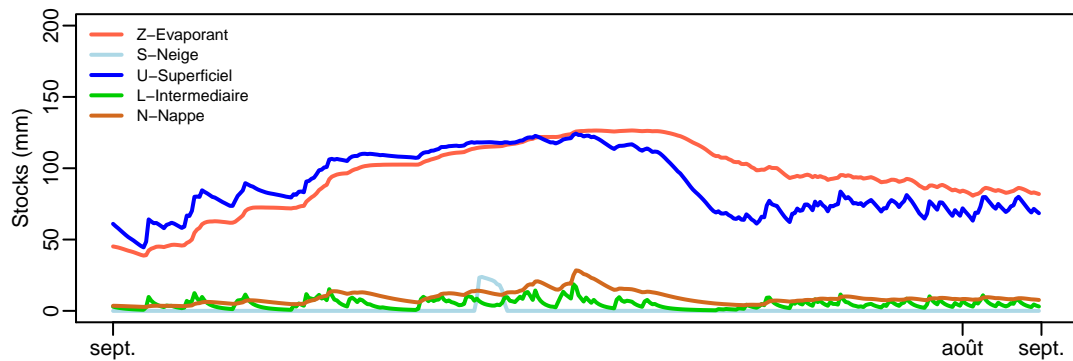

# k1724210 (112.82 km²) – année 2007–2008

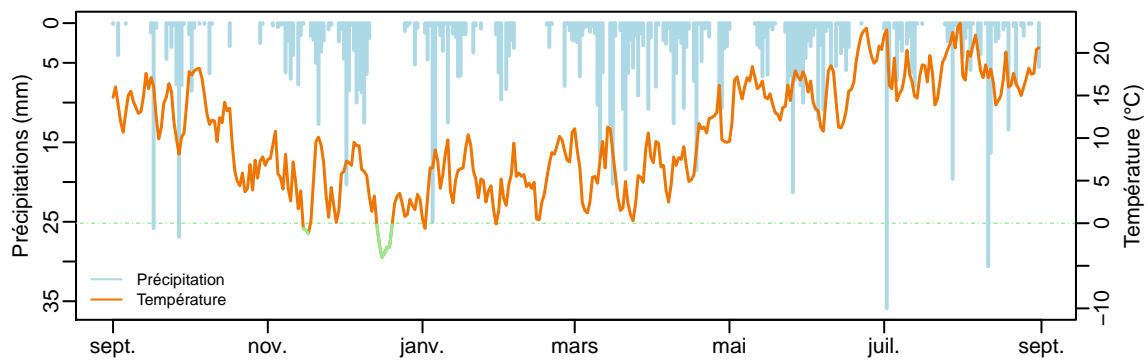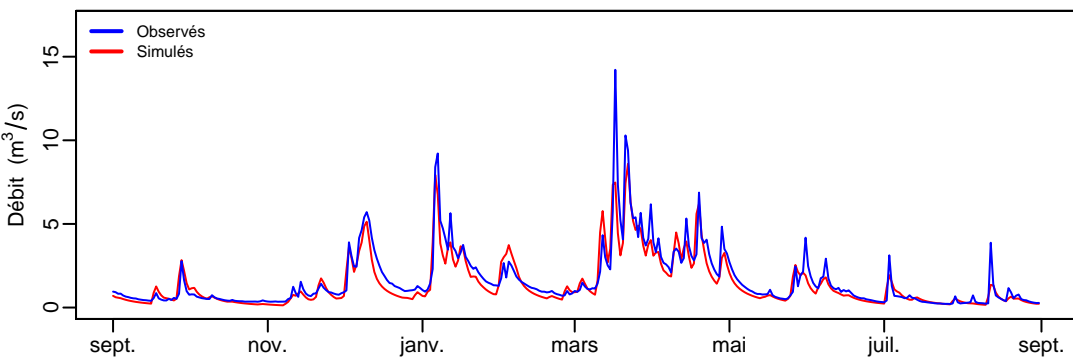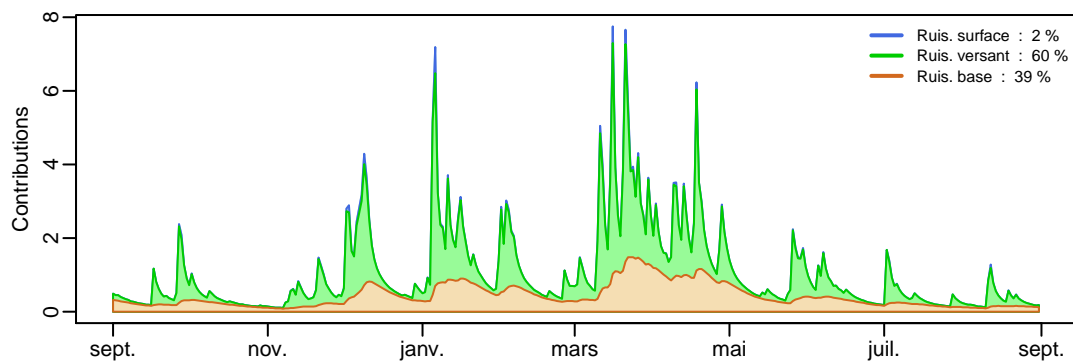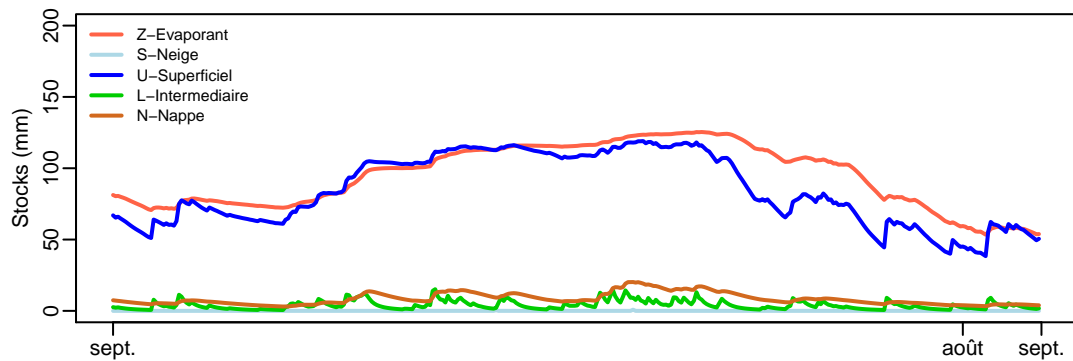

# k1724210 (112.82 km<sup>2</sup>) – année 2008–2009

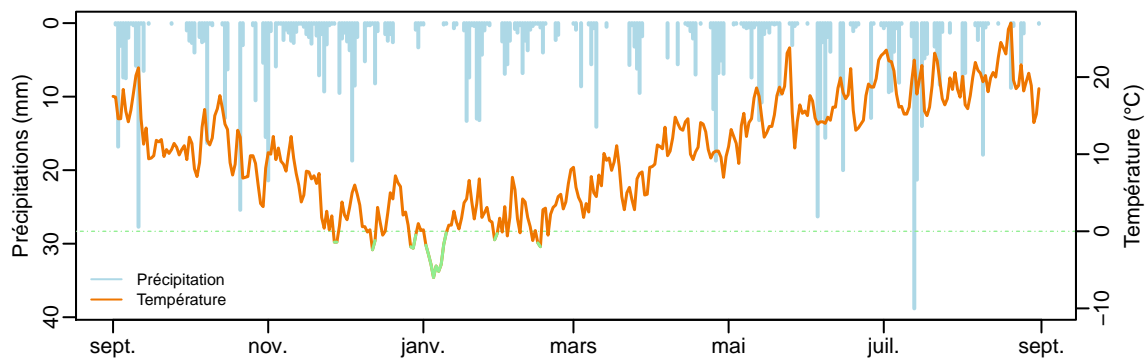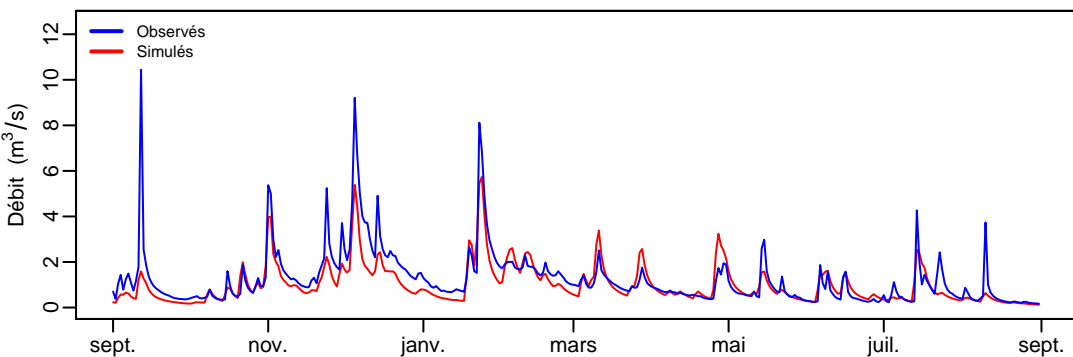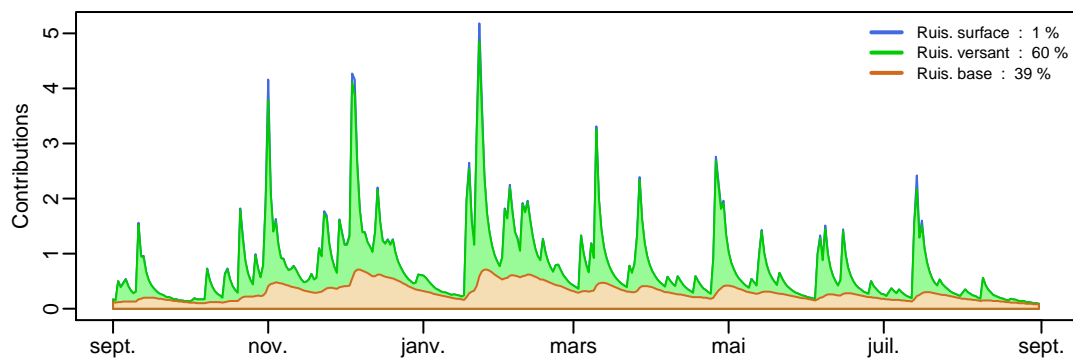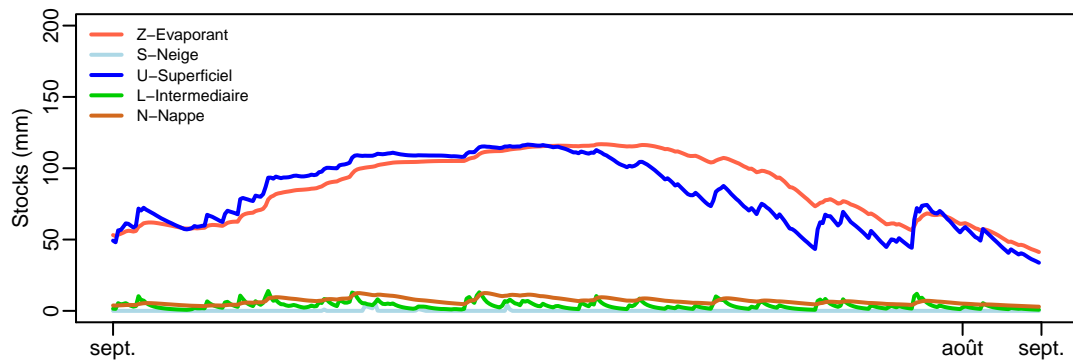

# k1753110 (333.57 km<sup>2</sup>) – année 1981–1982

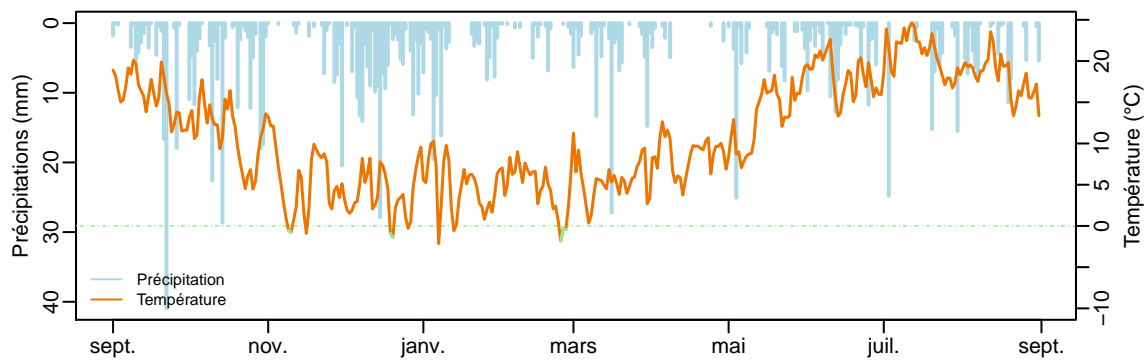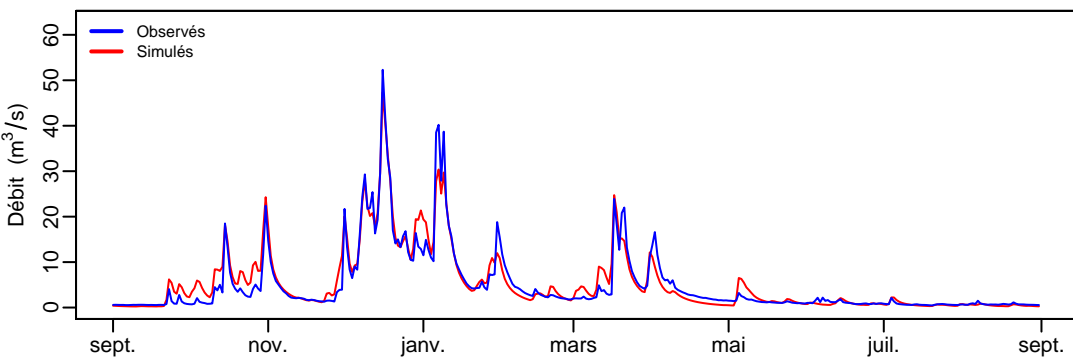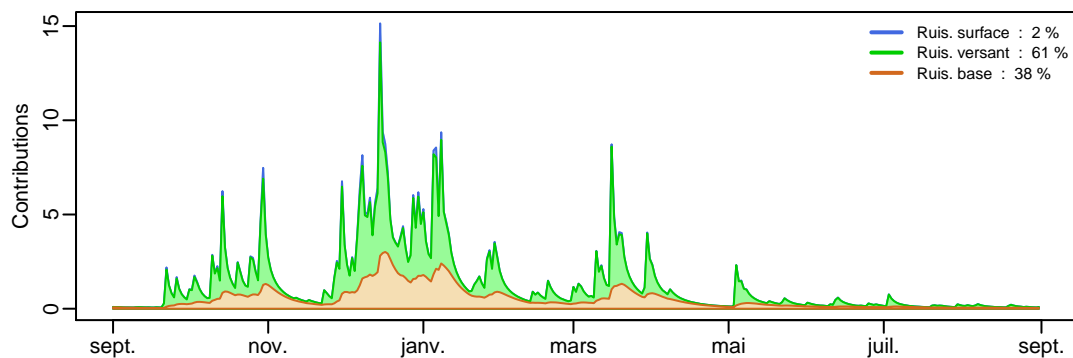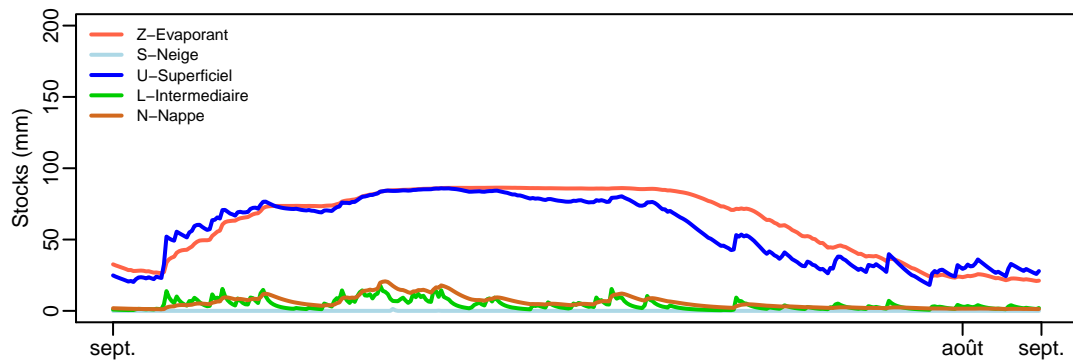

# k1753110 (333.57 km<sup>2</sup>) – année 1982–1983

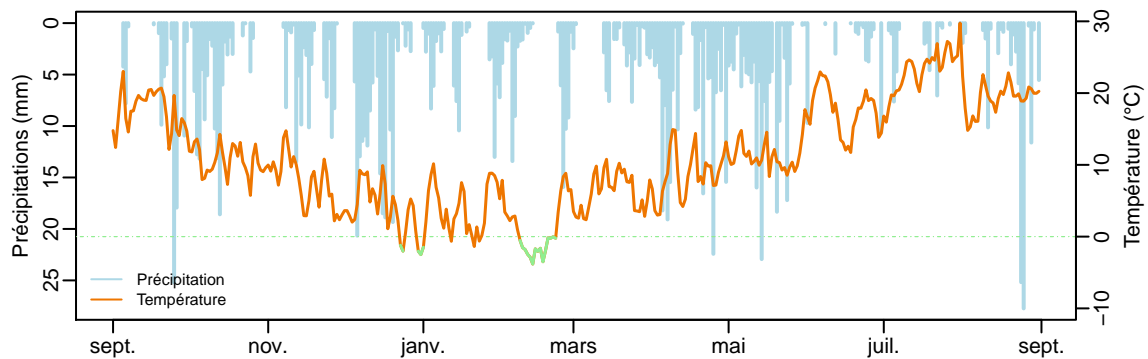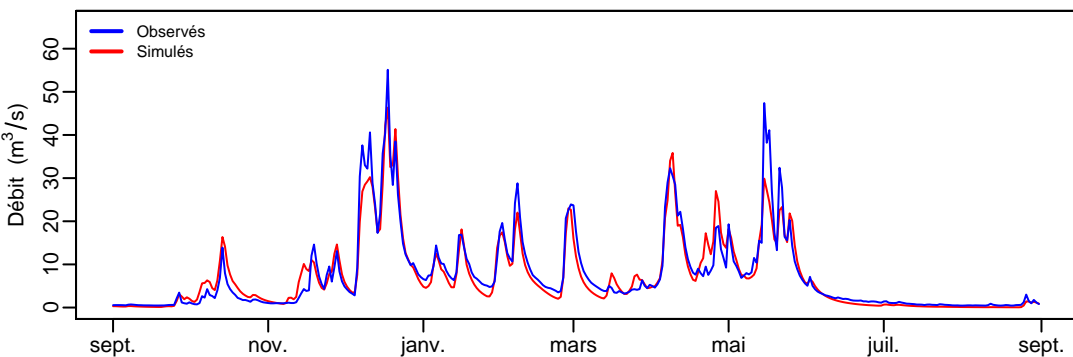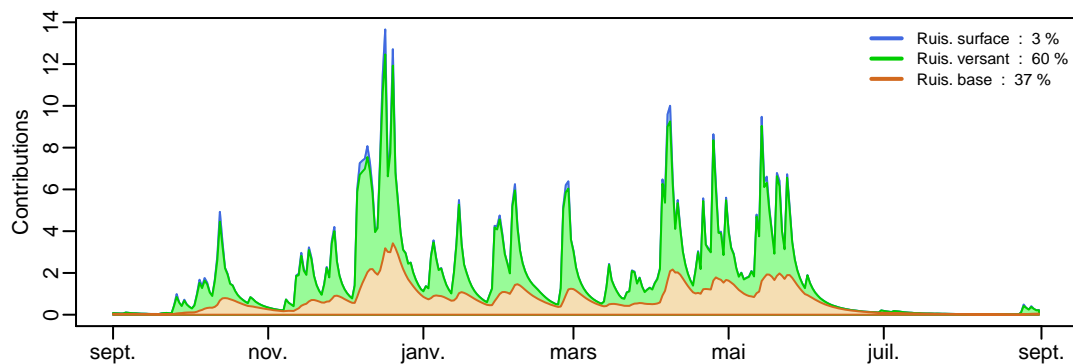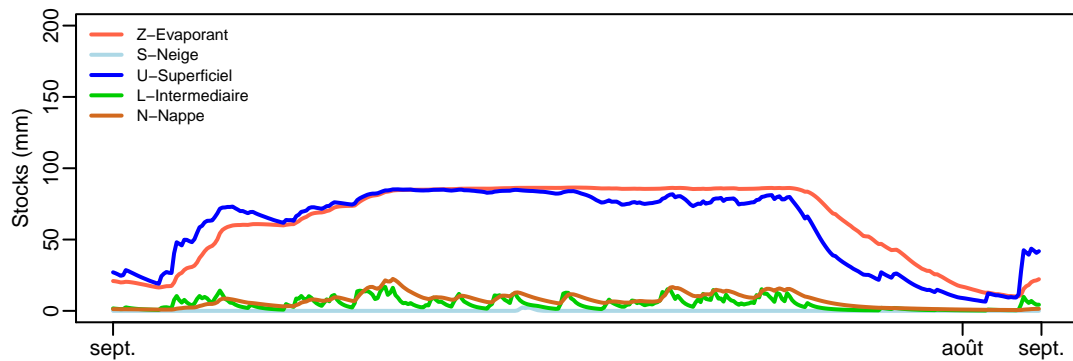

# k1753110 (333.57 km<sup>2</sup>) – année 1983–1984

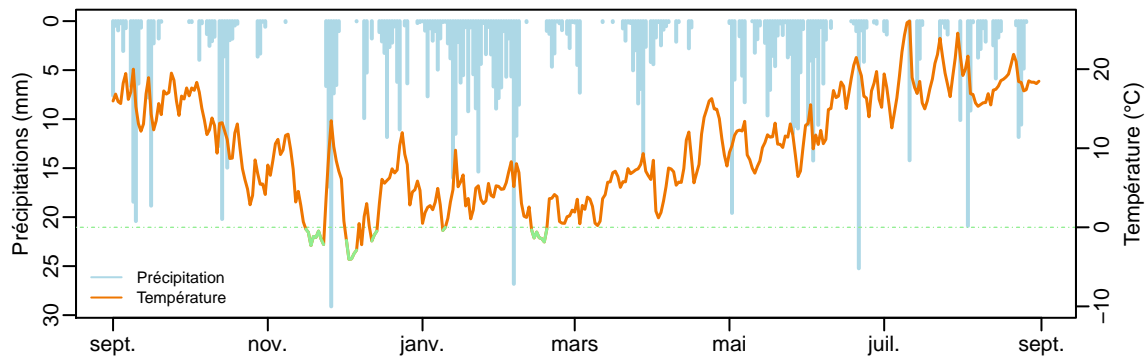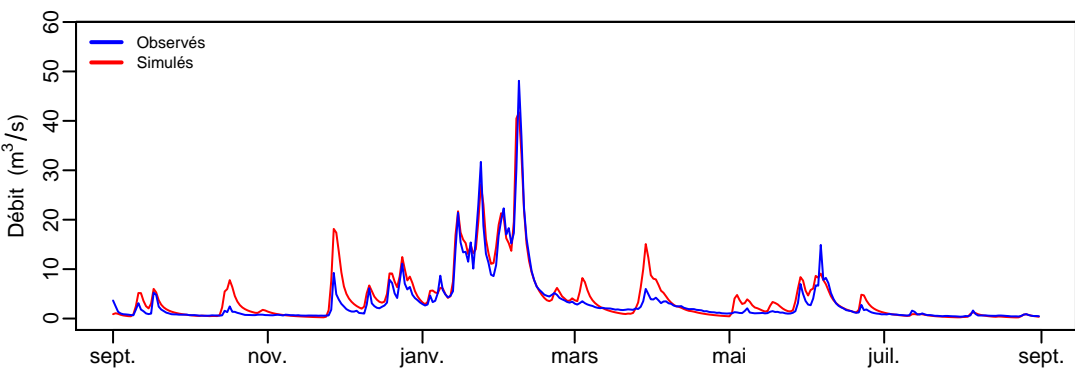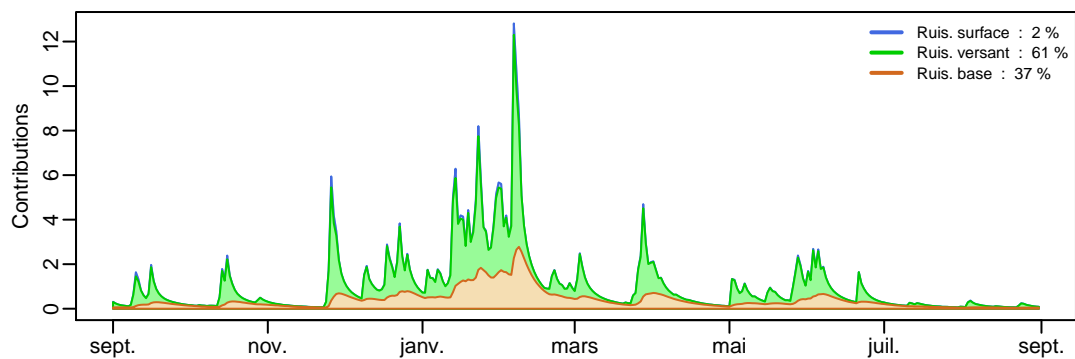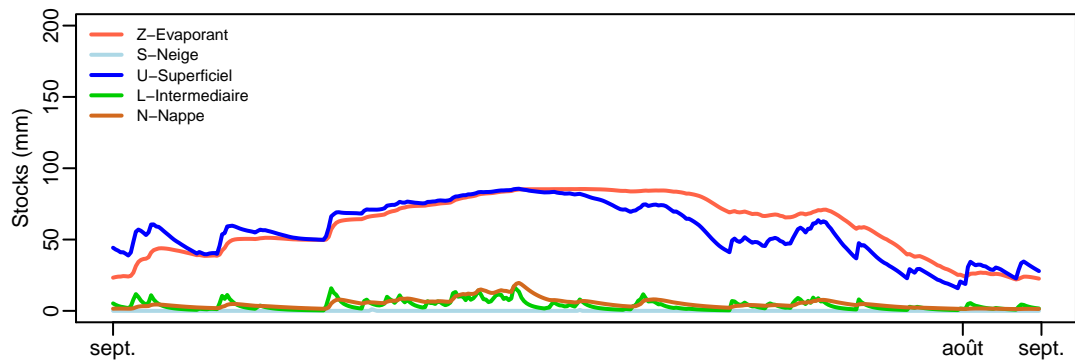



# k1753110 (333.57 km<sup>2</sup>) – année 1984–1985

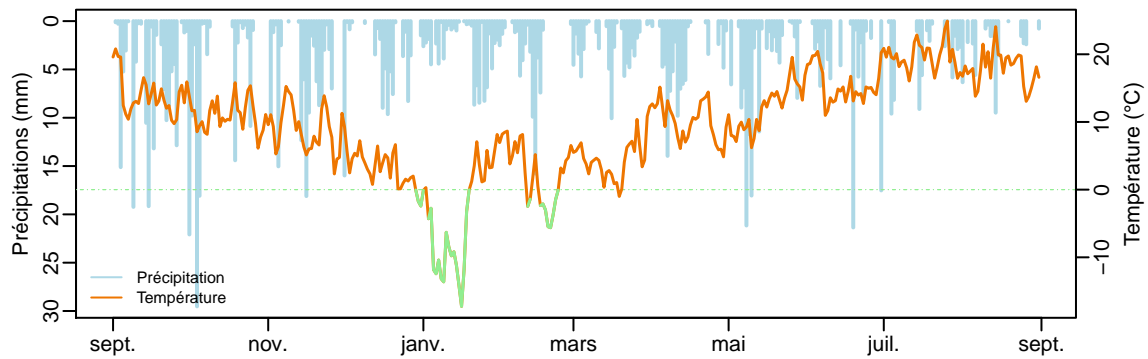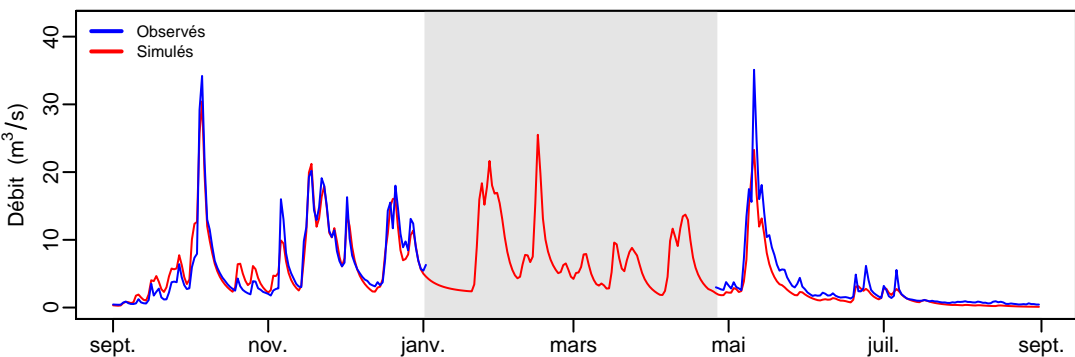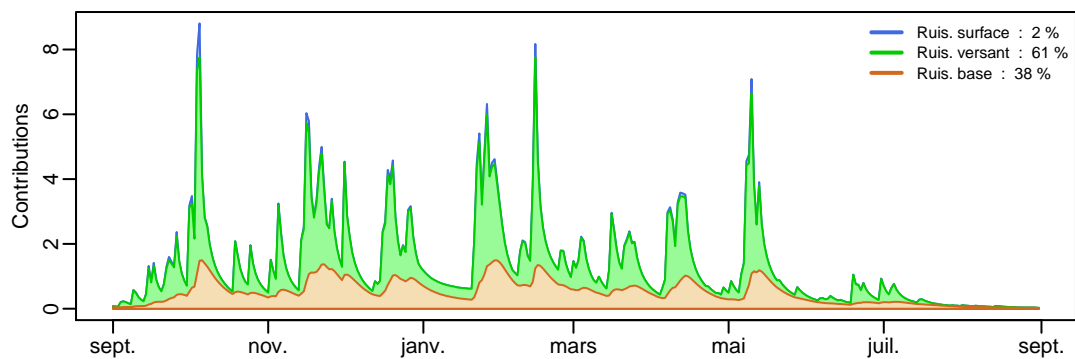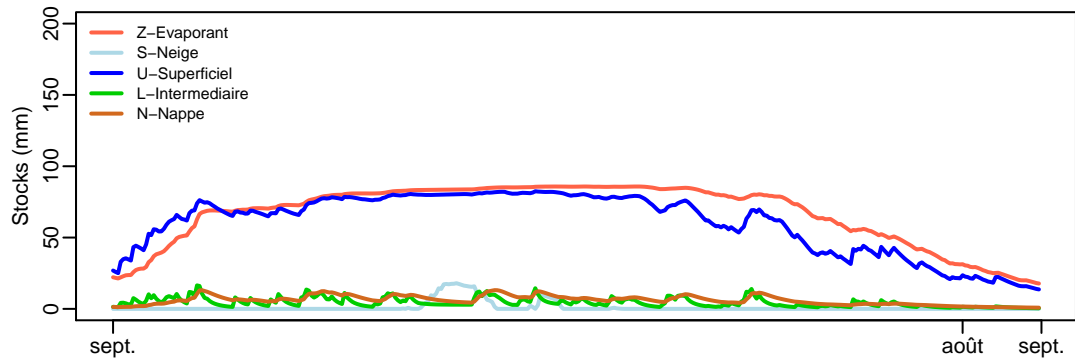

# k1753110 (333.57 km<sup>2</sup>) – année 1985–1986

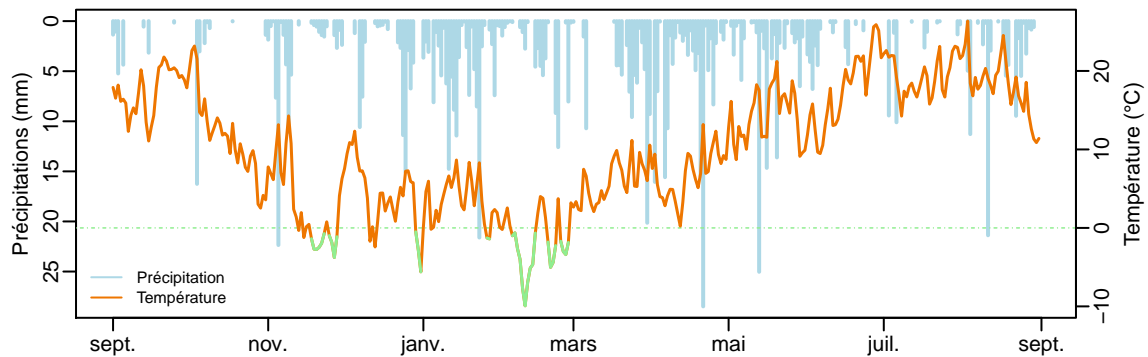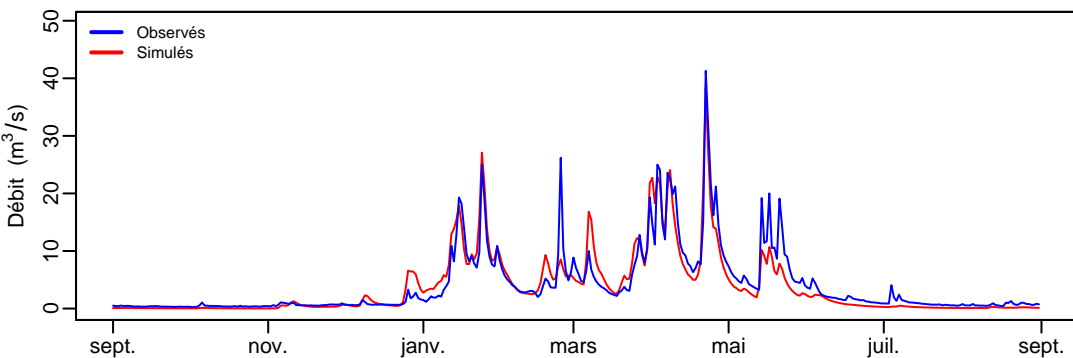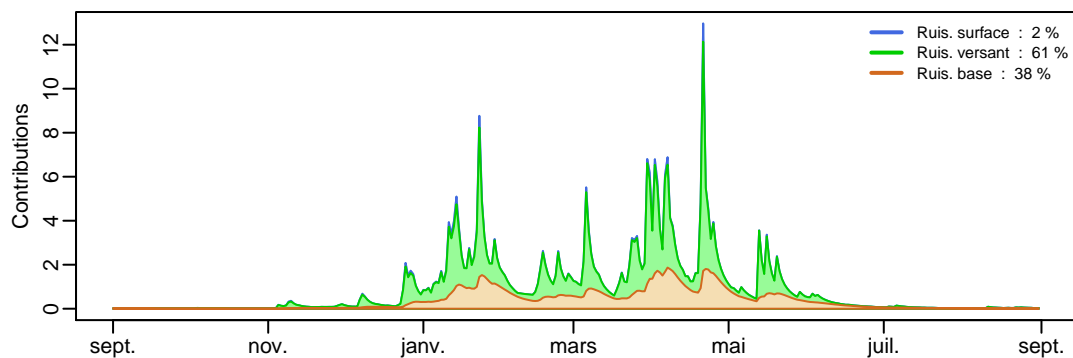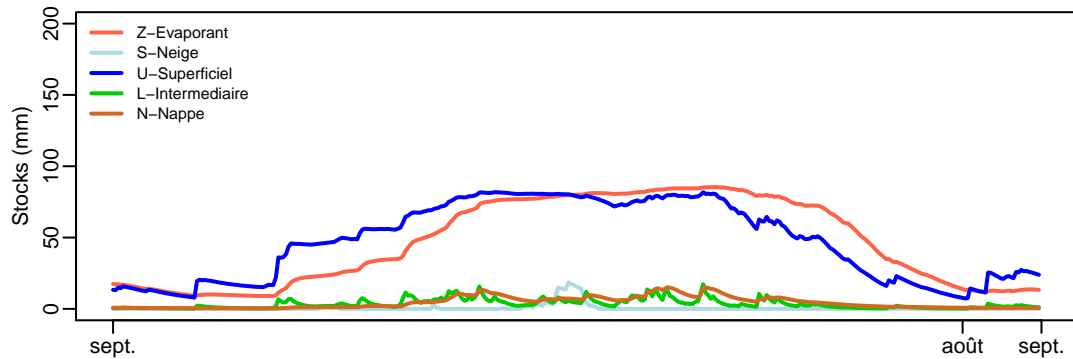

# k1753110 (333.57 km<sup>2</sup>) – année 1986–1987

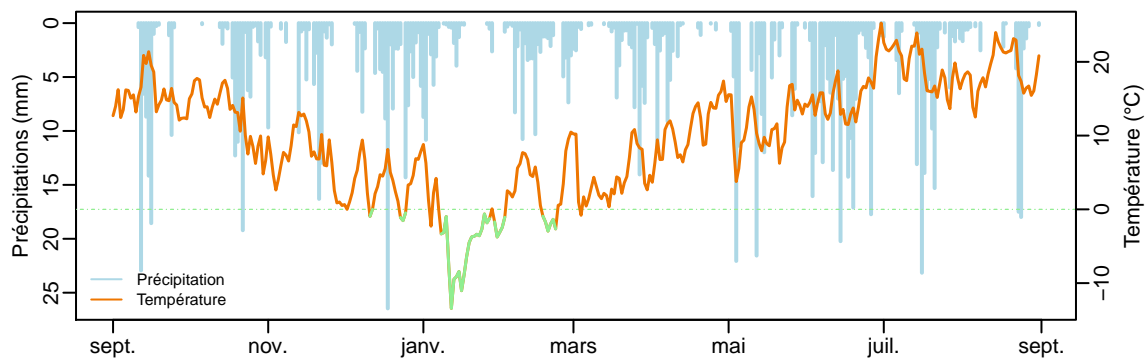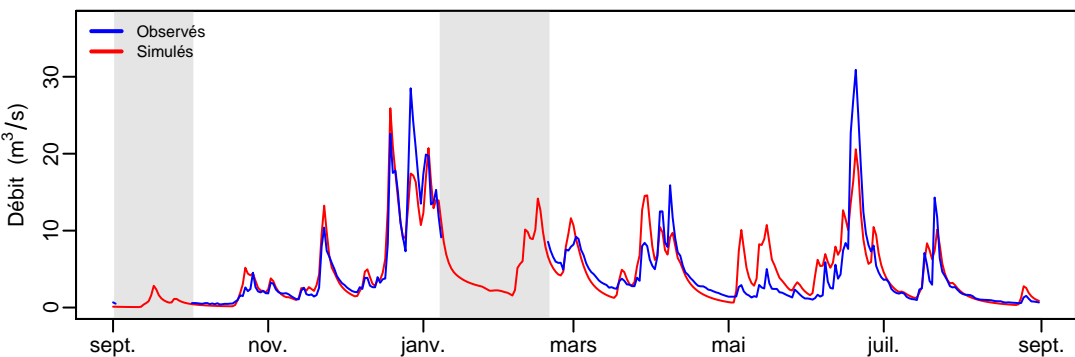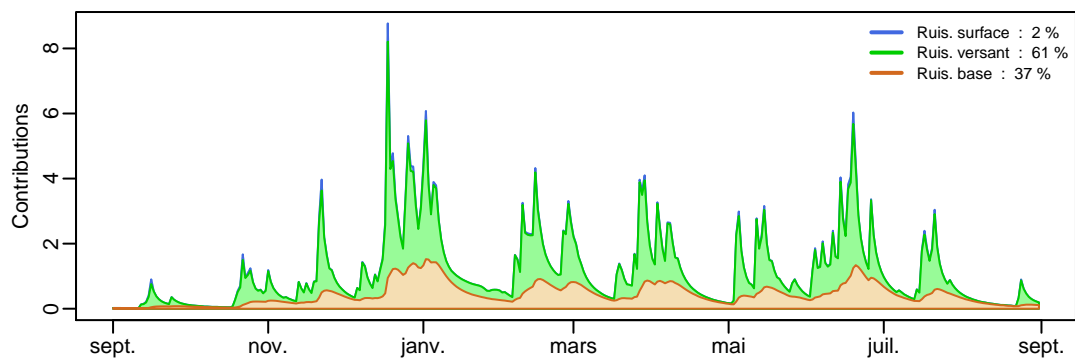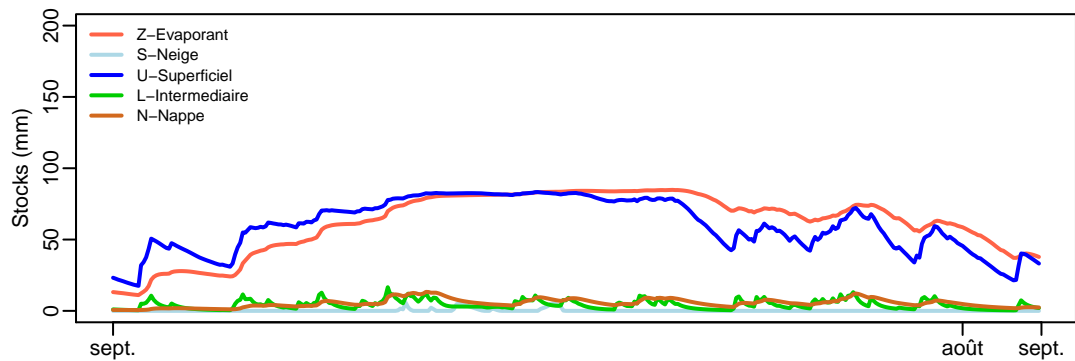

# k1753110 (333.57 km<sup>2</sup>) – année 1987–1988

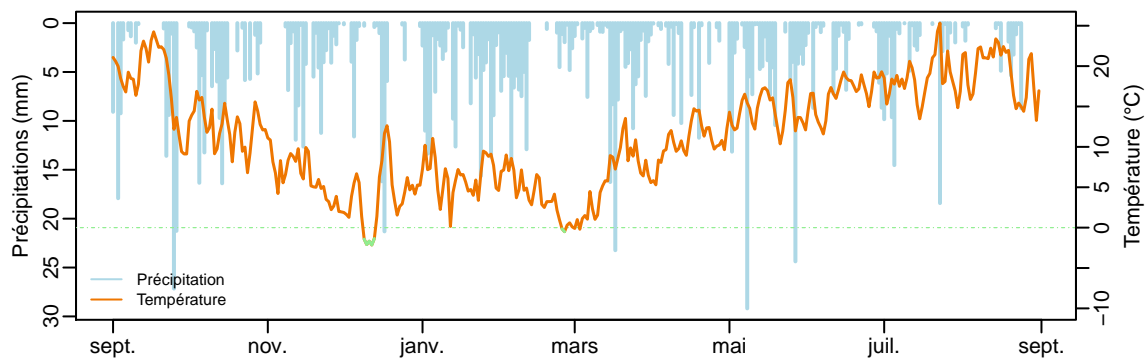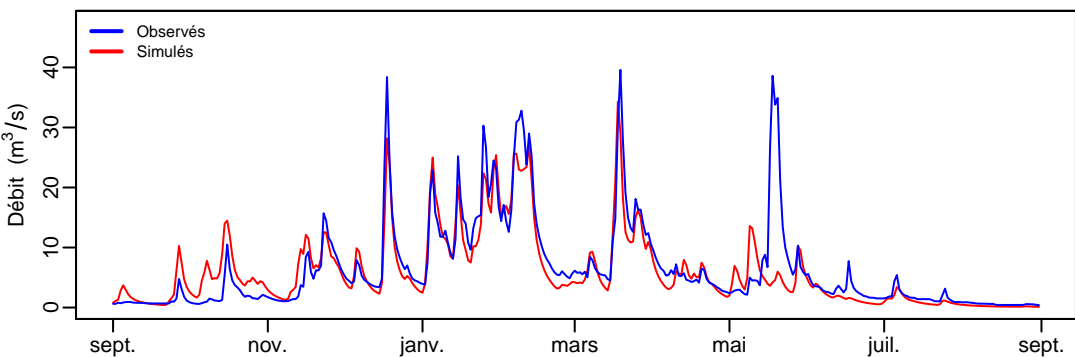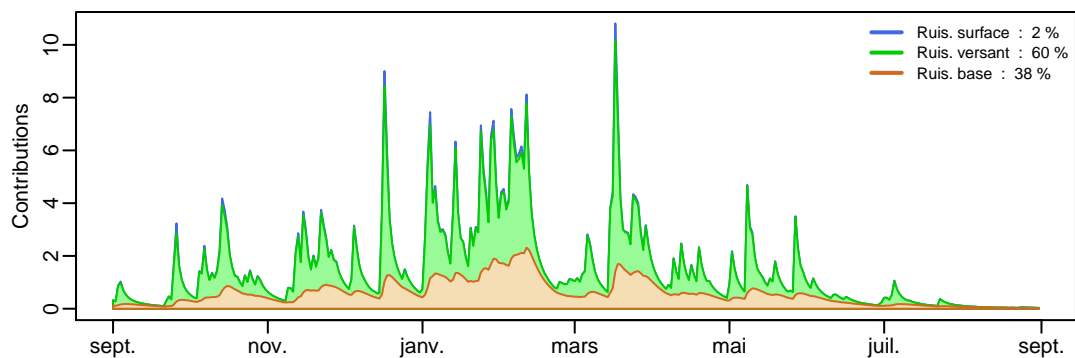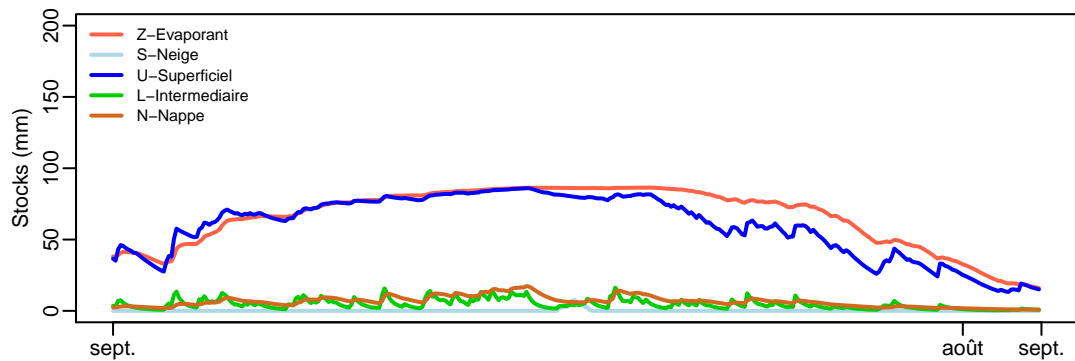

# k1753110 (333.57 km<sup>2</sup>) – année 1988–1989

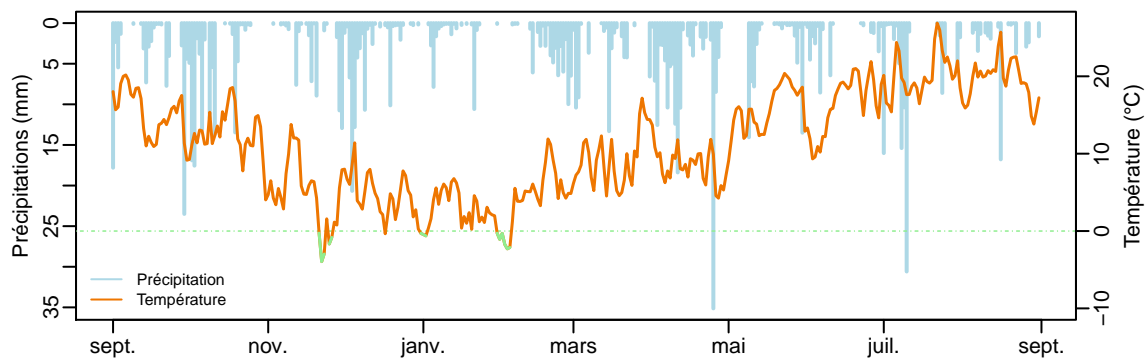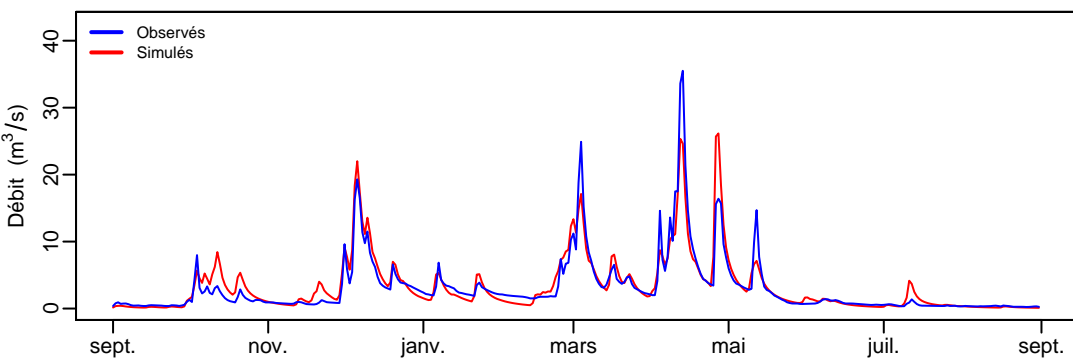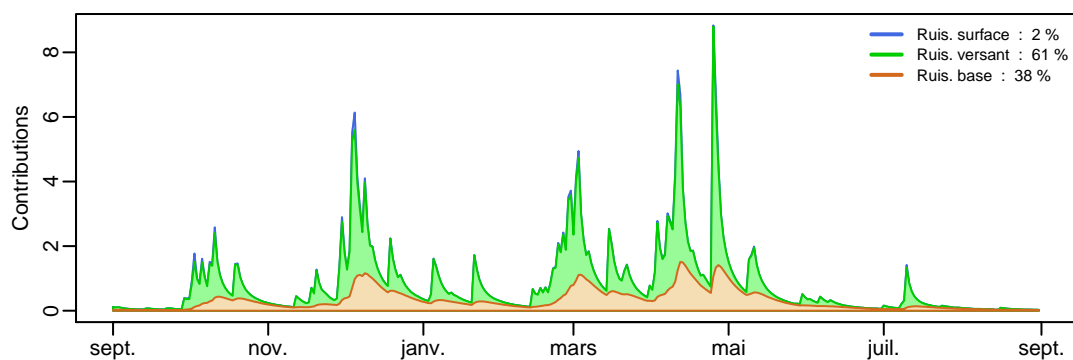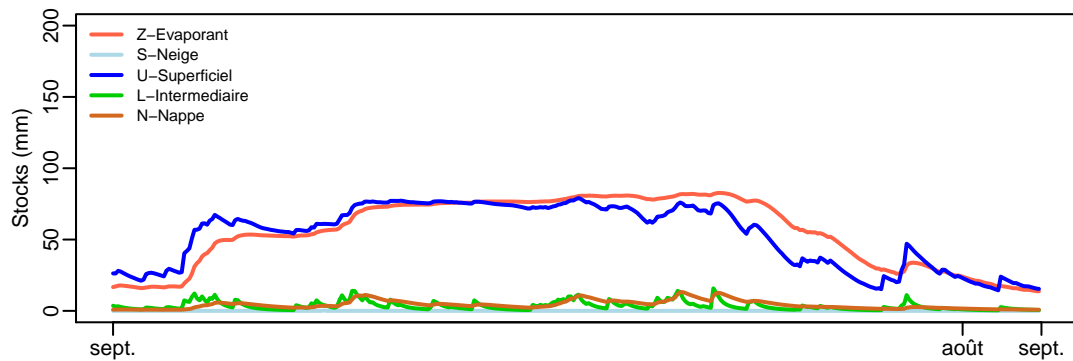

# k1753110 (333.57 km<sup>2</sup>) – année 1989–1990

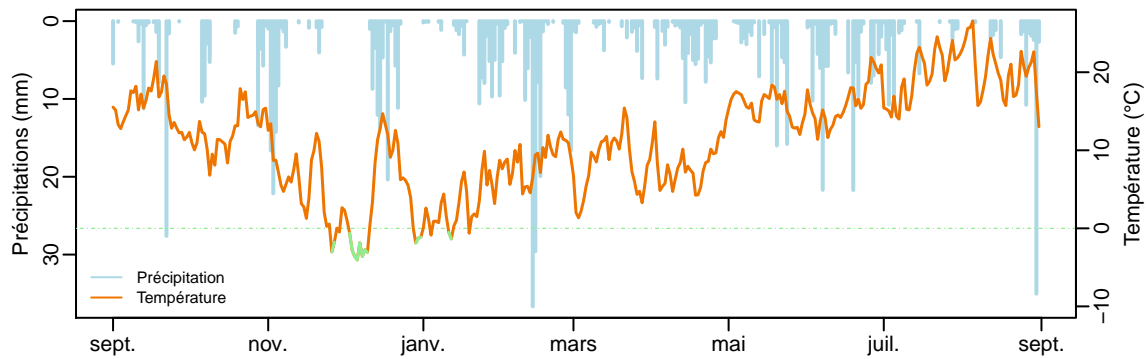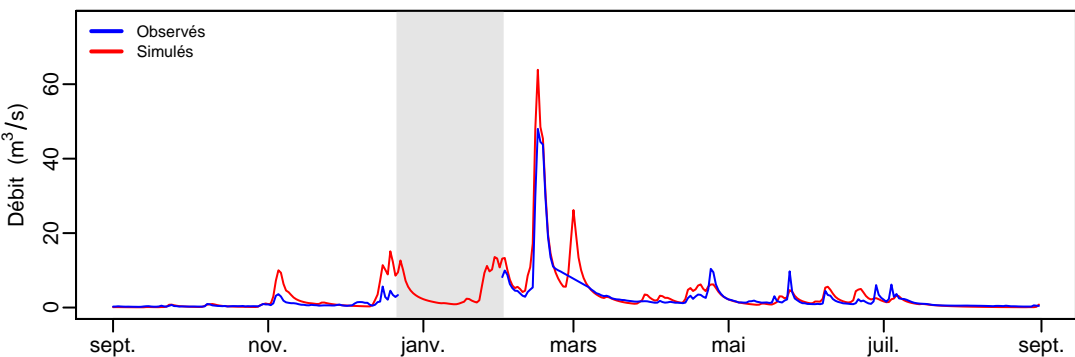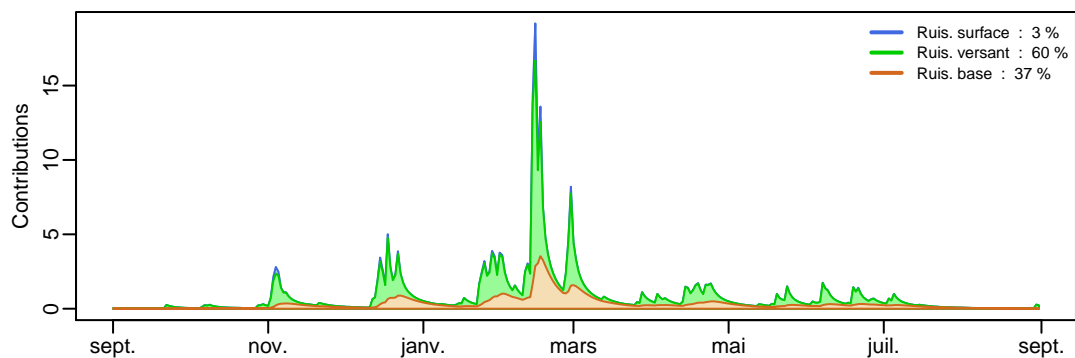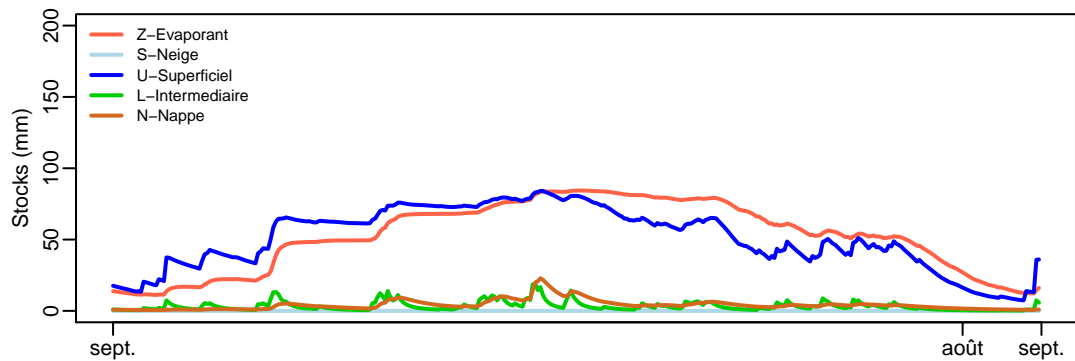

# k1753110 (333.57 km<sup>2</sup>) – année 1990–1991

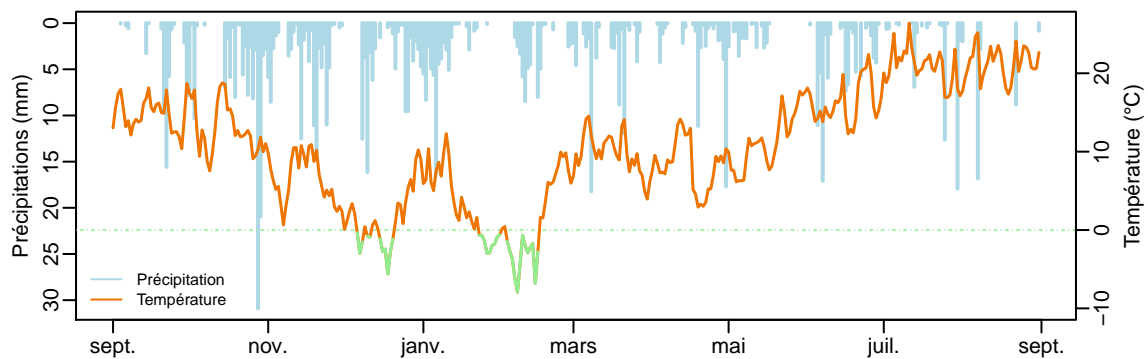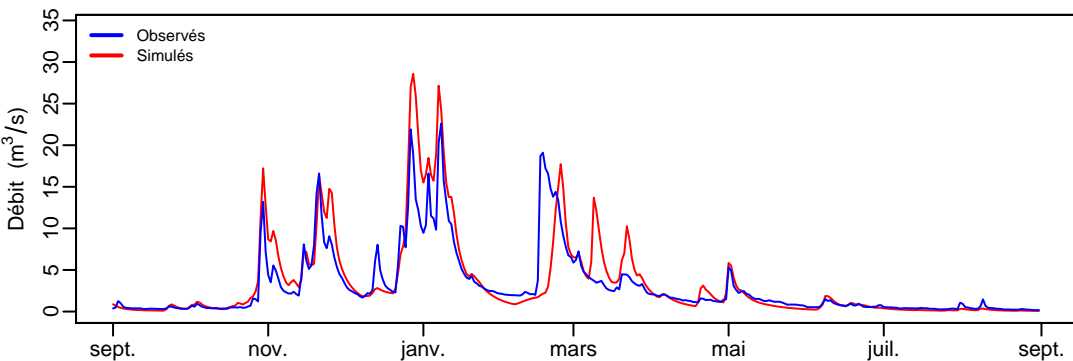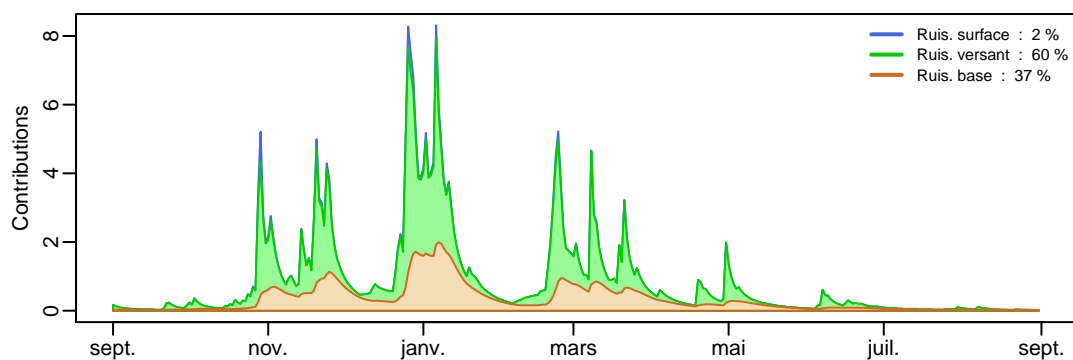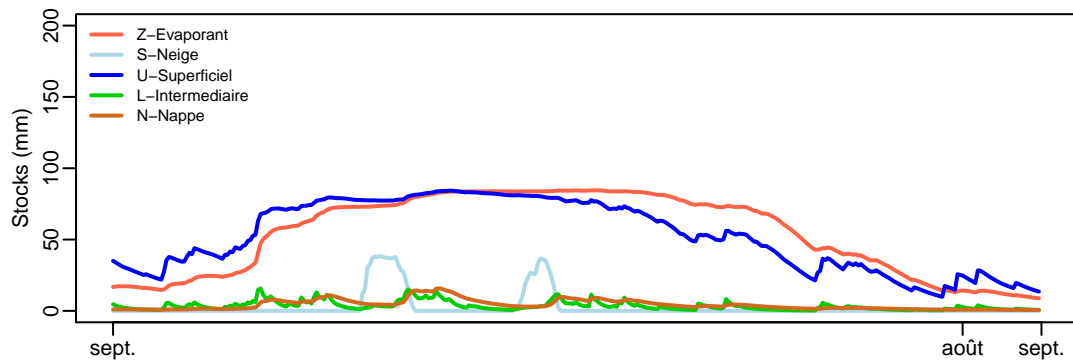

# k1753110 (333.57 km<sup>2</sup>) – année 1991–1992

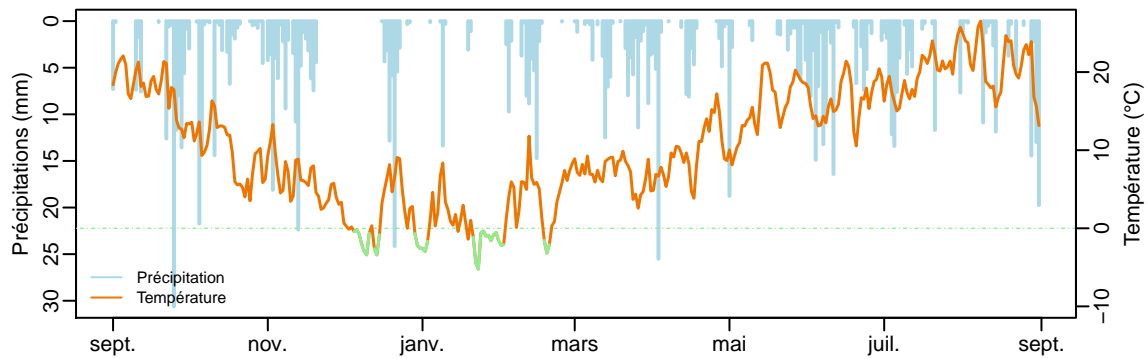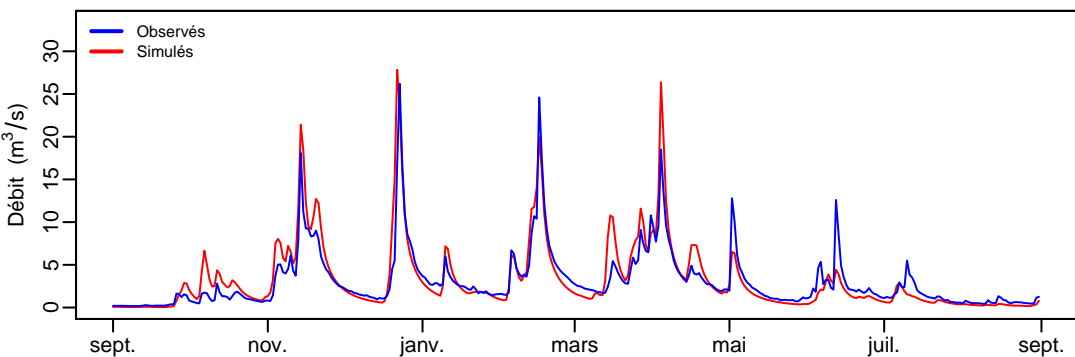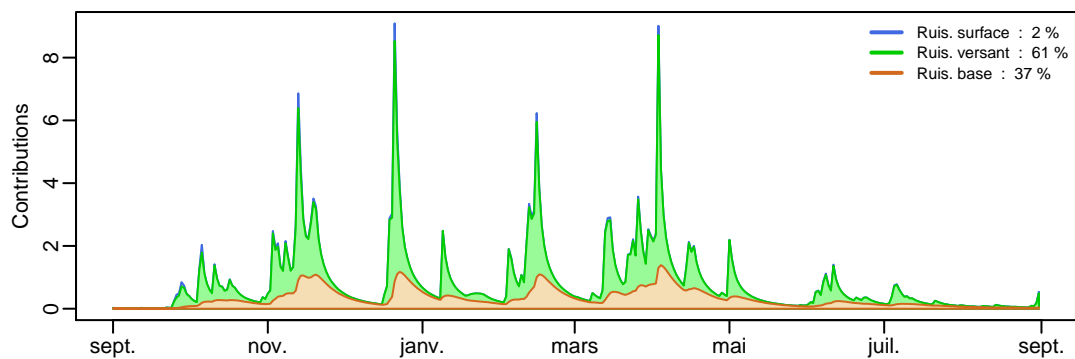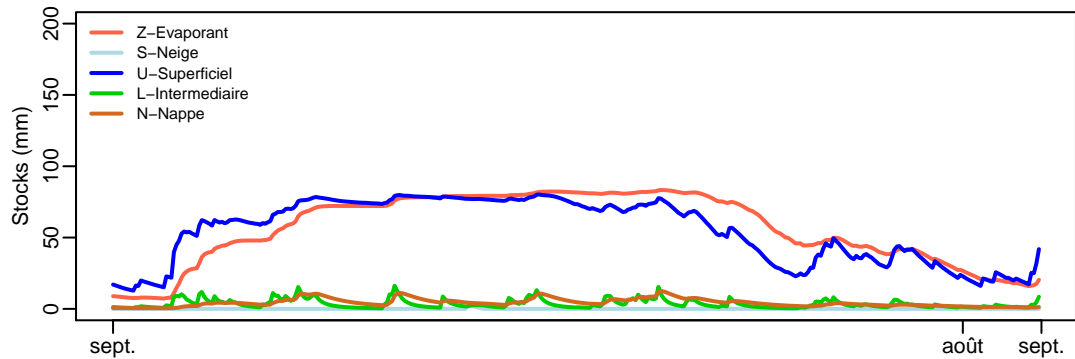



# k1753110 (333.57 km<sup>2</sup>) – année 1992–1993

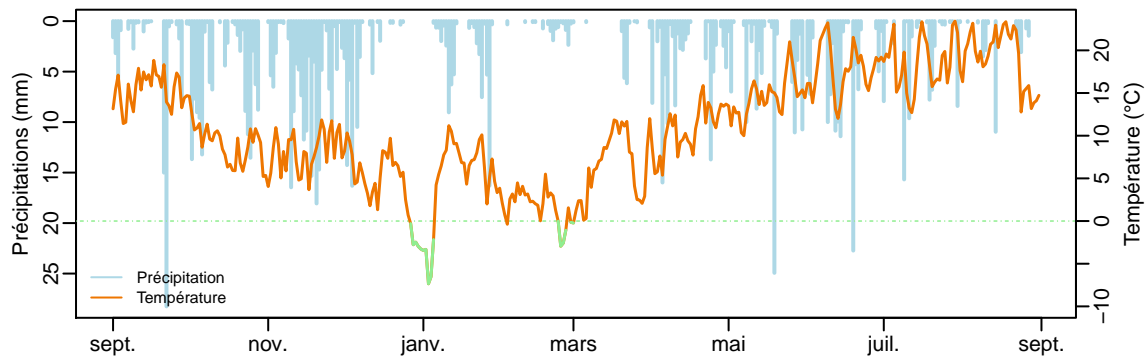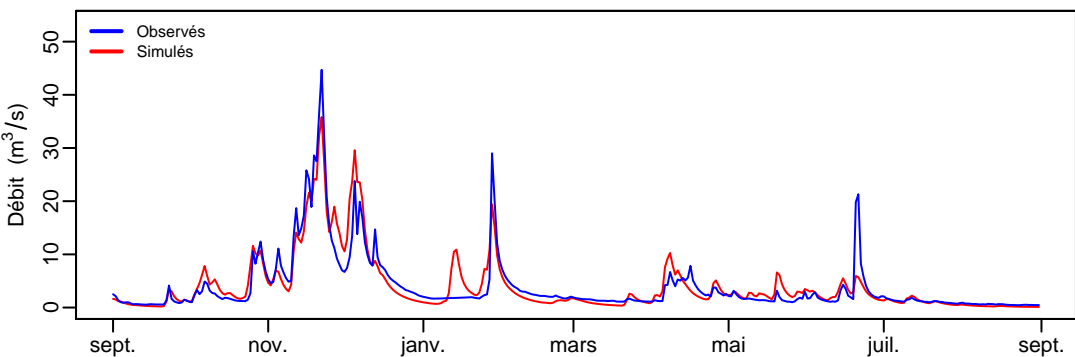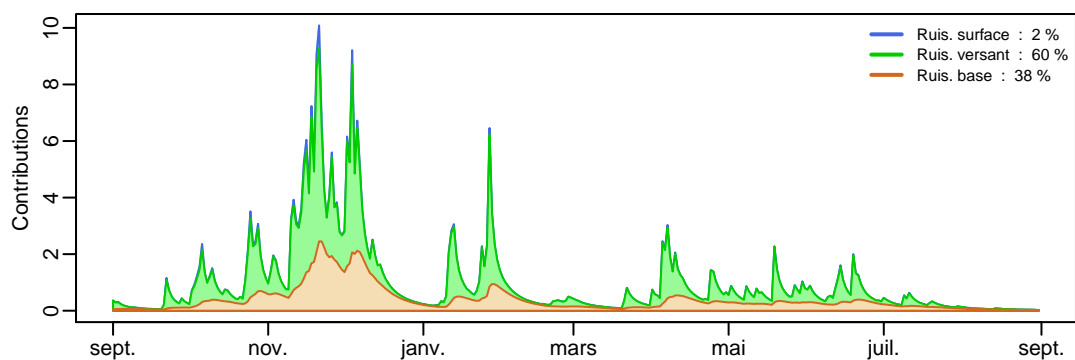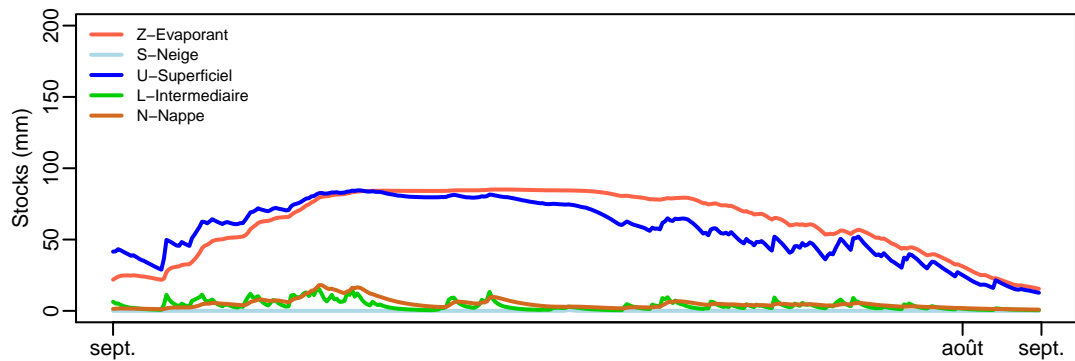

# k1753110 (333.57 km<sup>2</sup>) – année 1993–1994

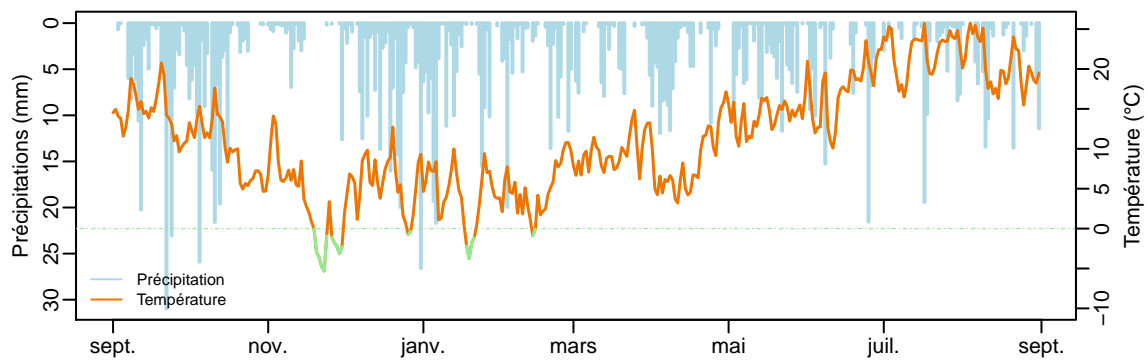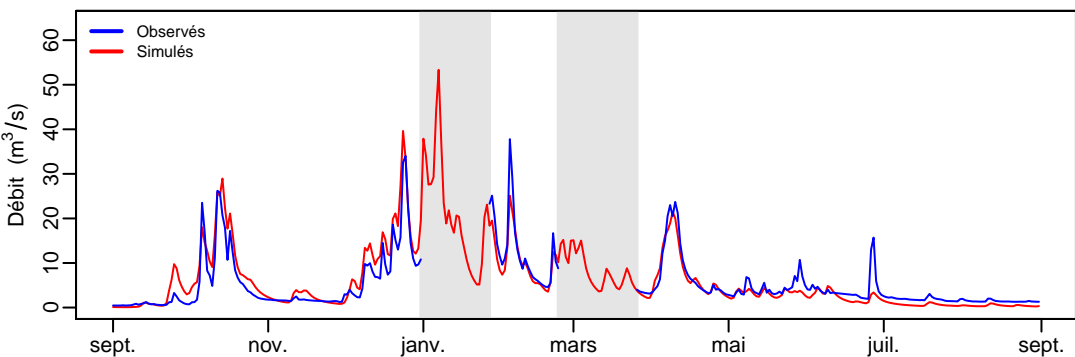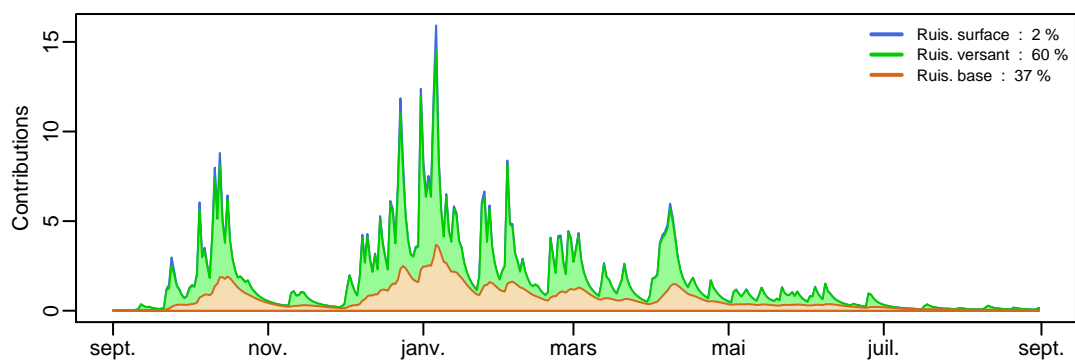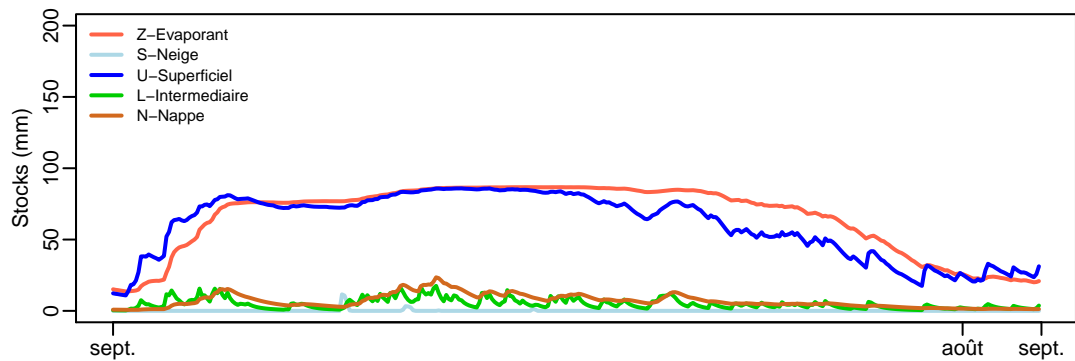

# k1753110 (333.57 km<sup>2</sup>) – année 1994–1995

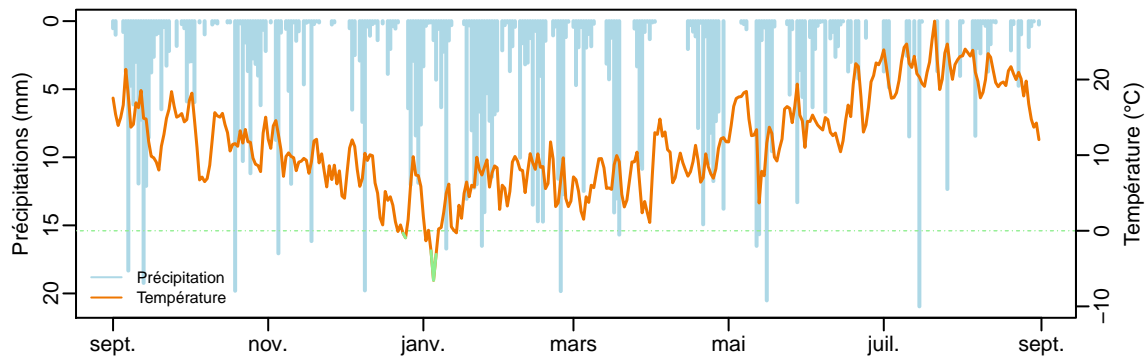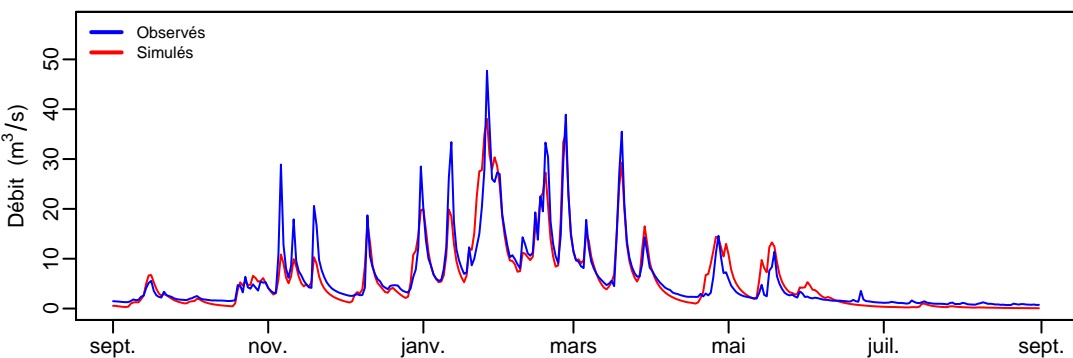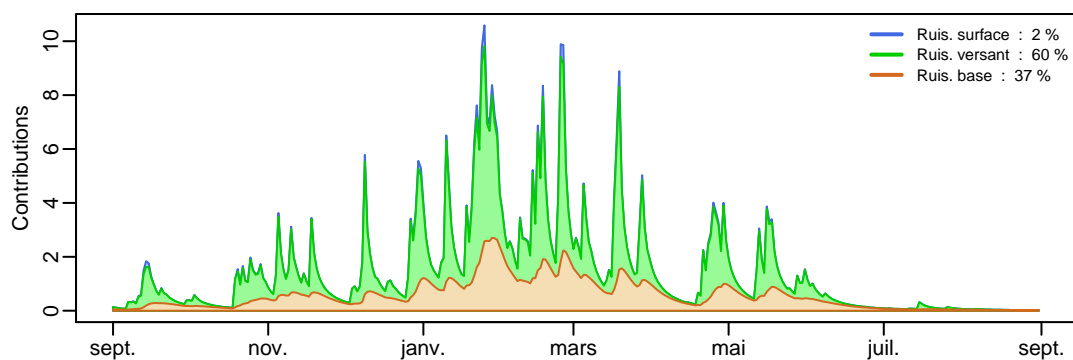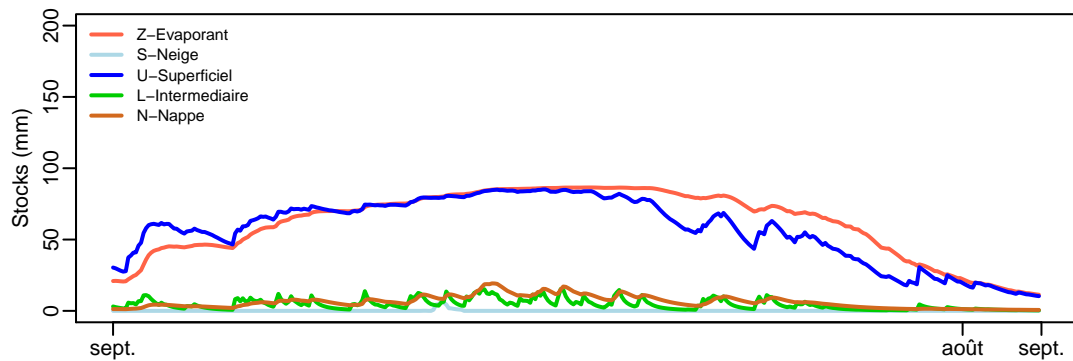

# k1753110 (333.57 km<sup>2</sup>) – année 1995–1996

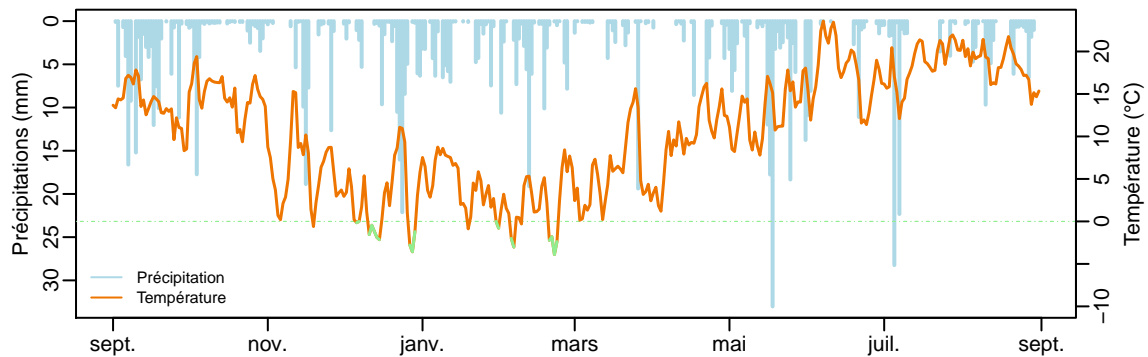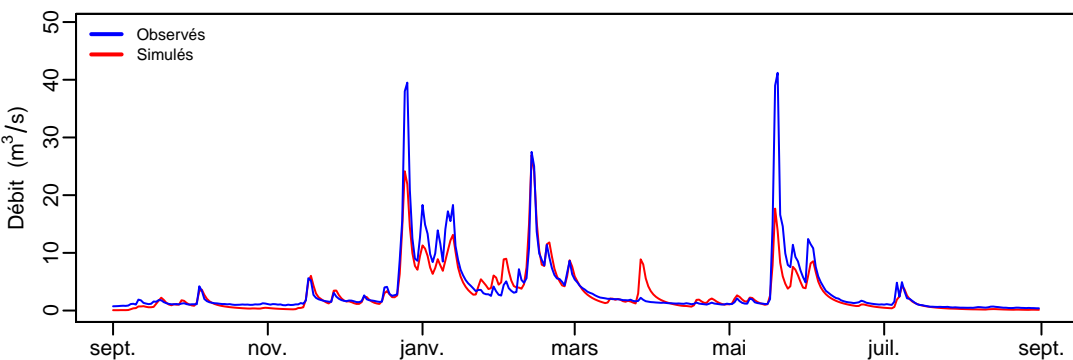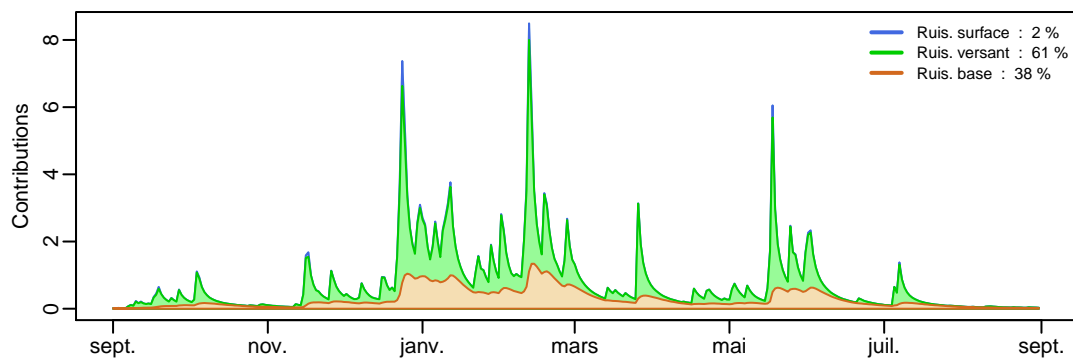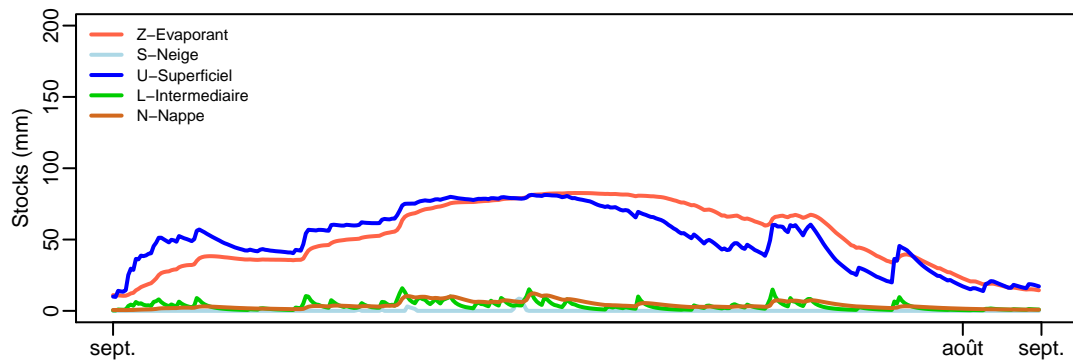

# k1753110 (333.57 km<sup>2</sup>) – année 1996–1997

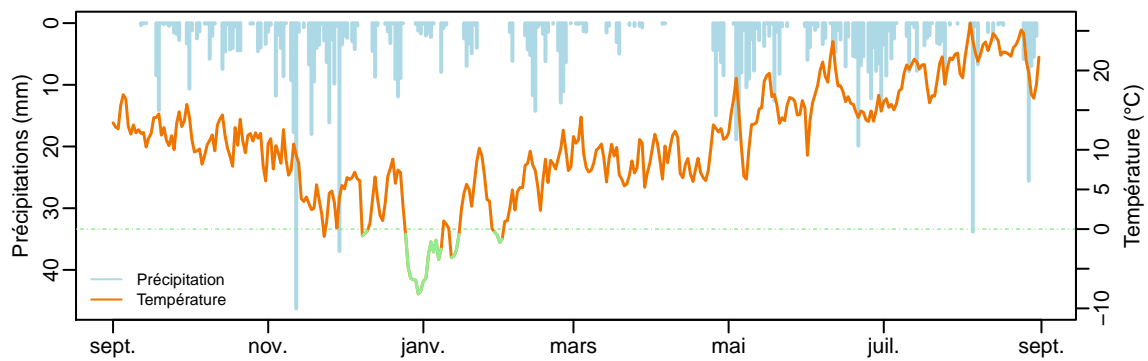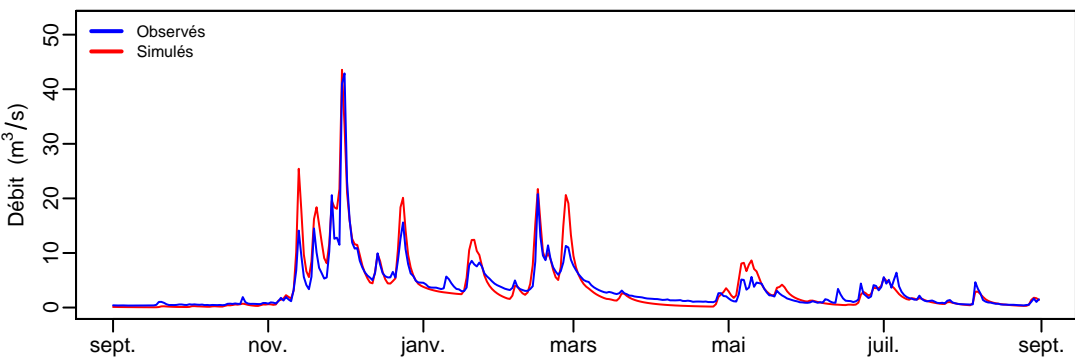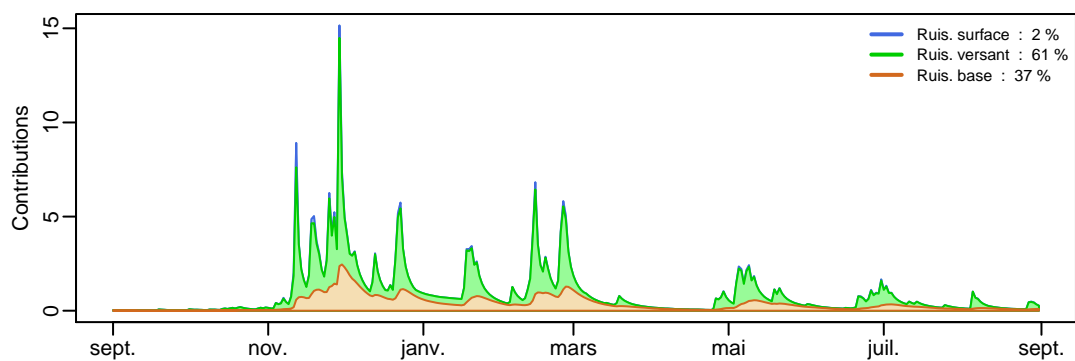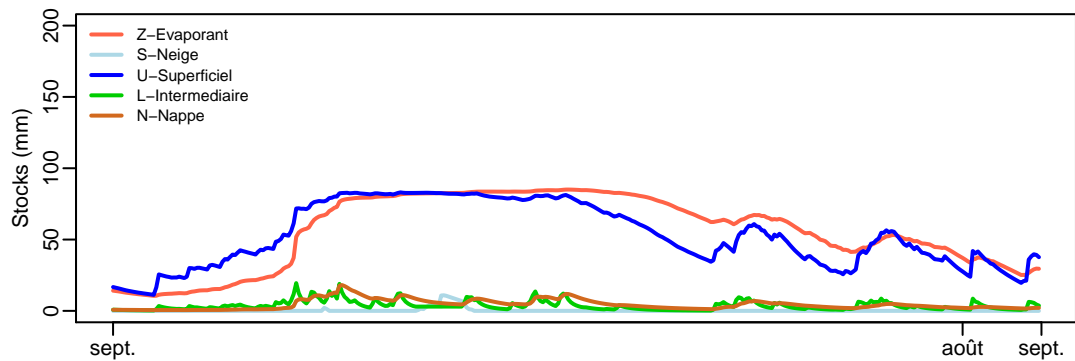

# k1753110 (333.57 km<sup>2</sup>) – année 1997–1998

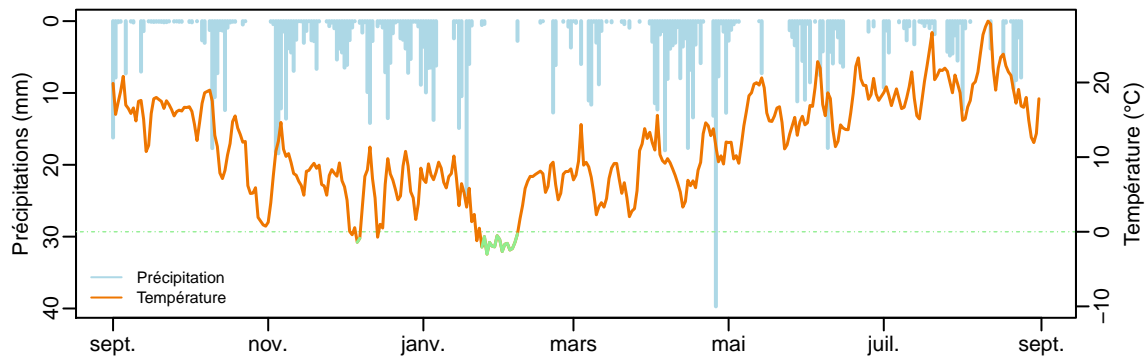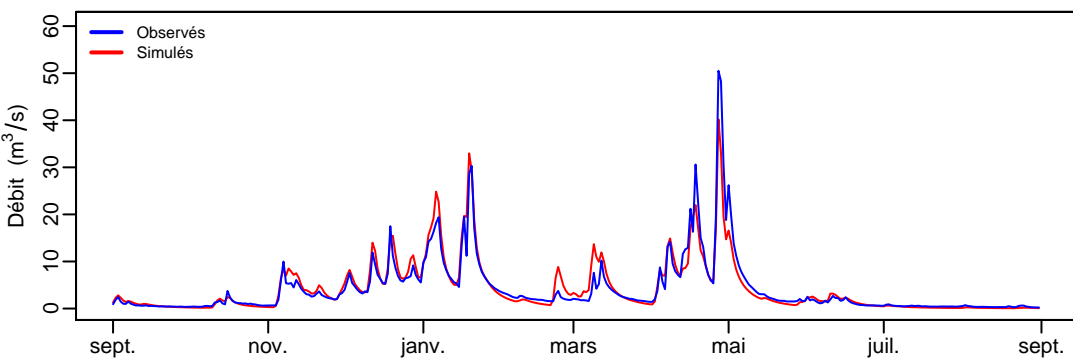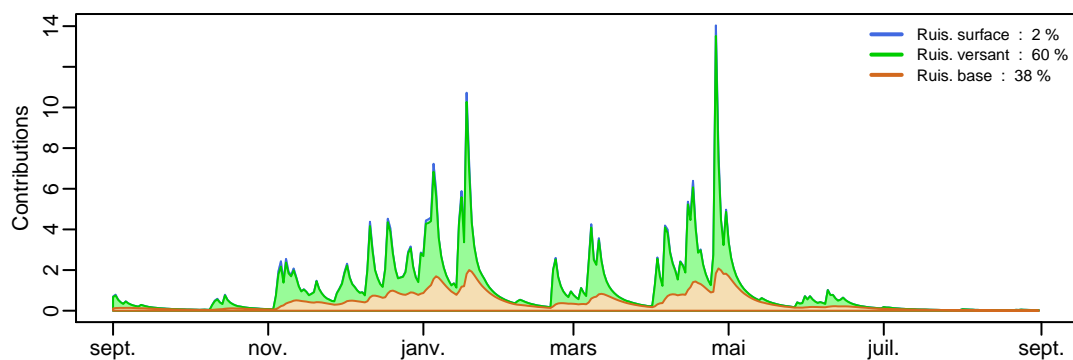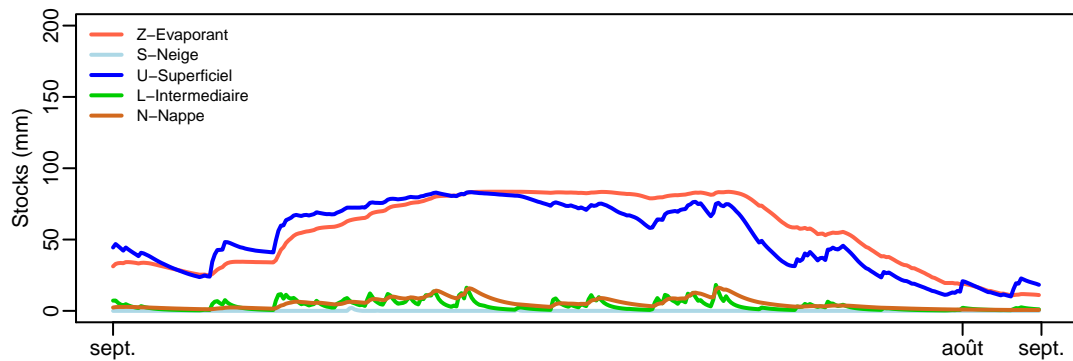

# k1753110 (333.57 km<sup>2</sup>) – année 1998–1999

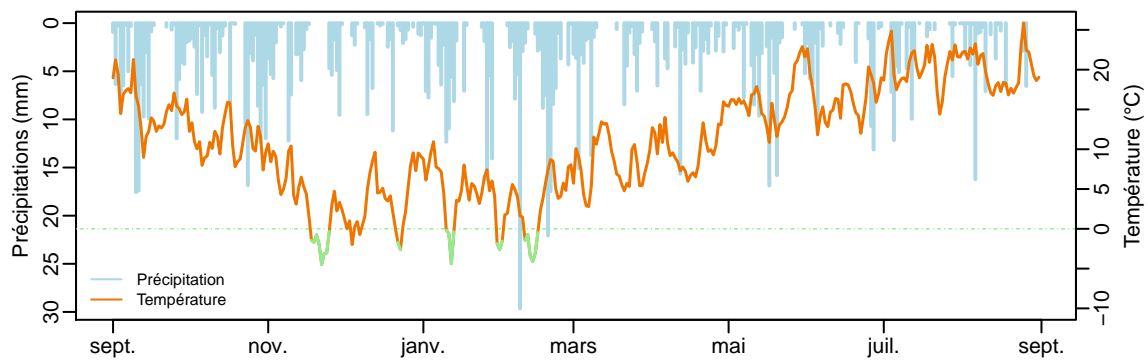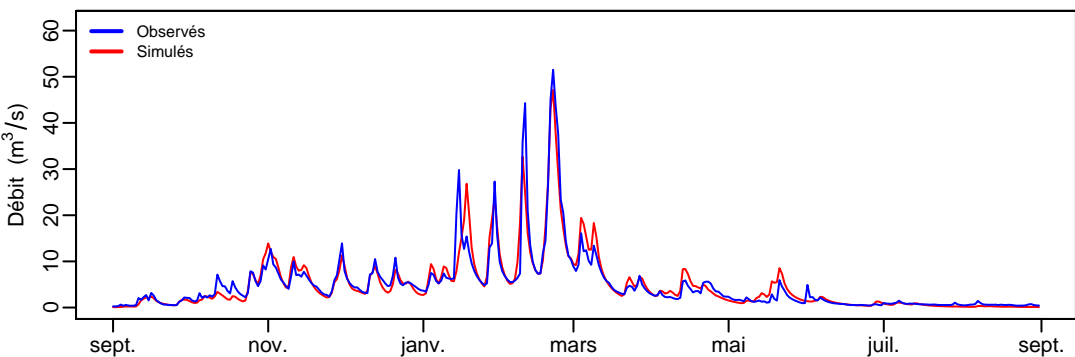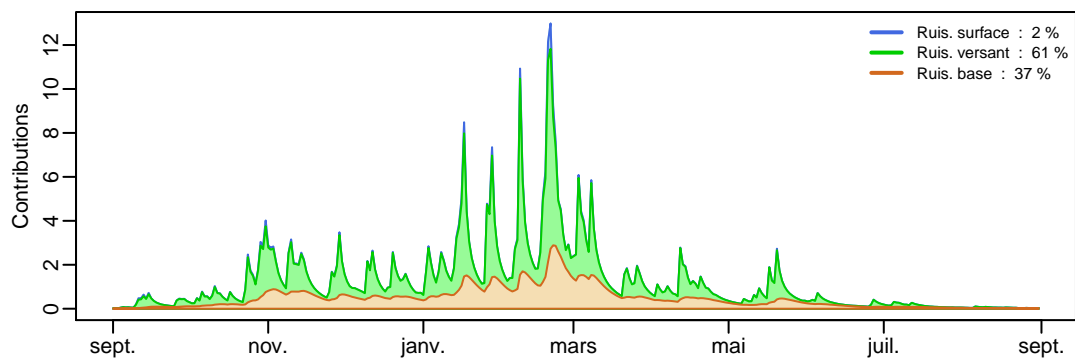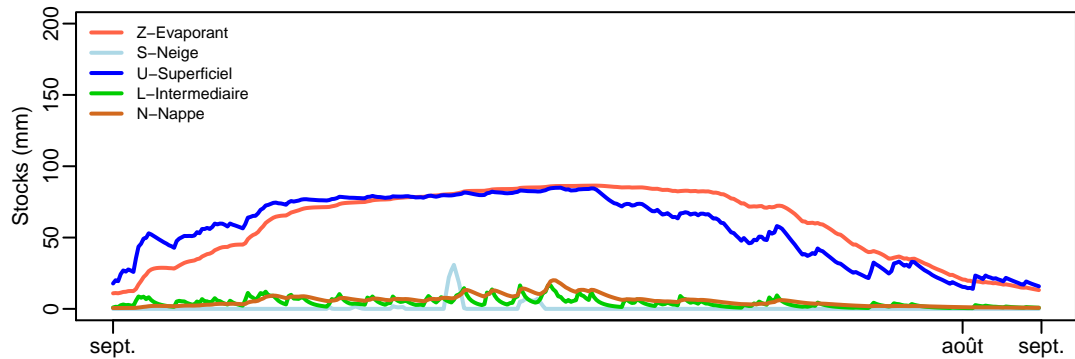

# k1753110 (333.57 km<sup>2</sup>) – année 1999–2000

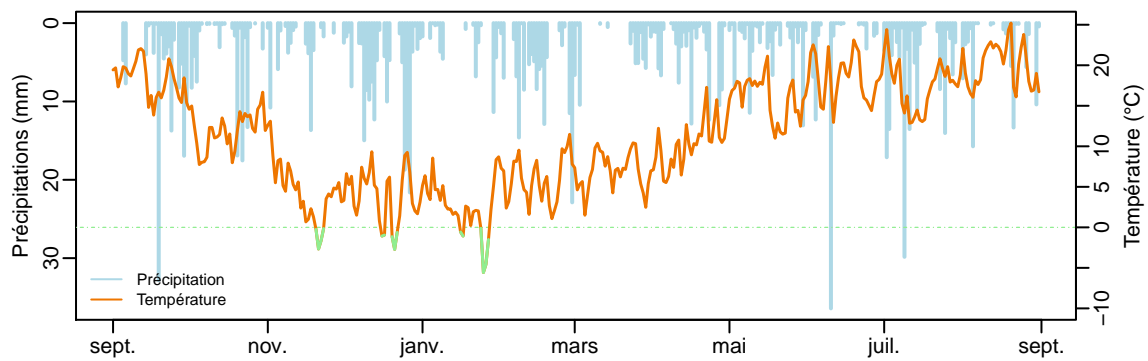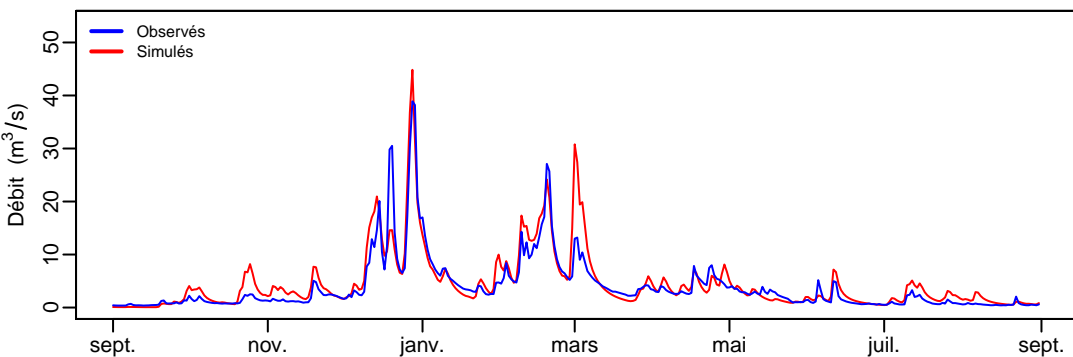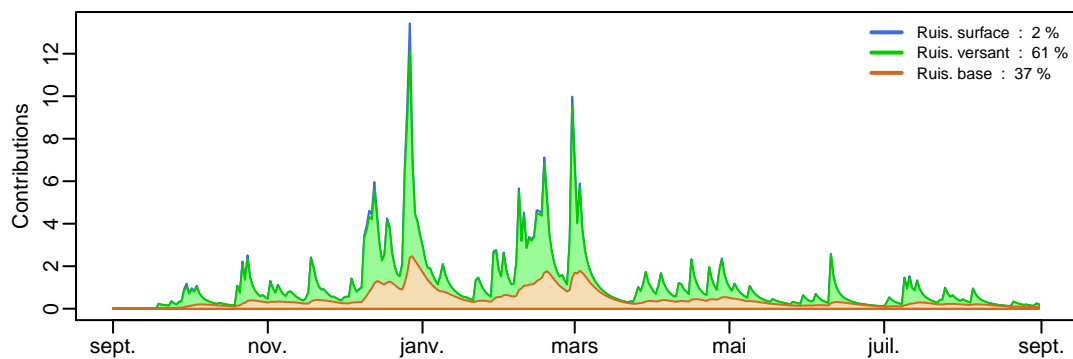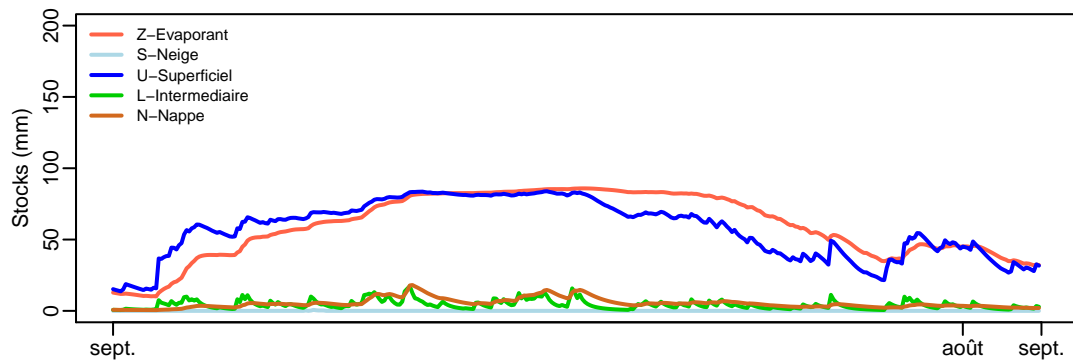



# k1753110 (333.57 km²) – année 2000–2001

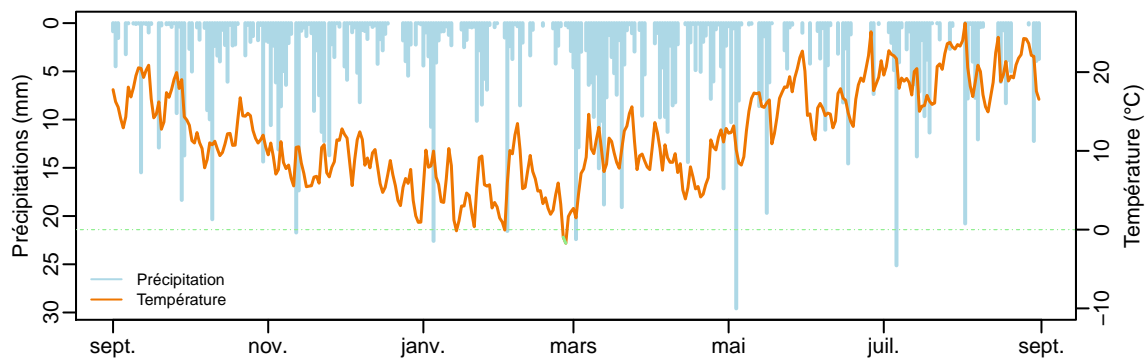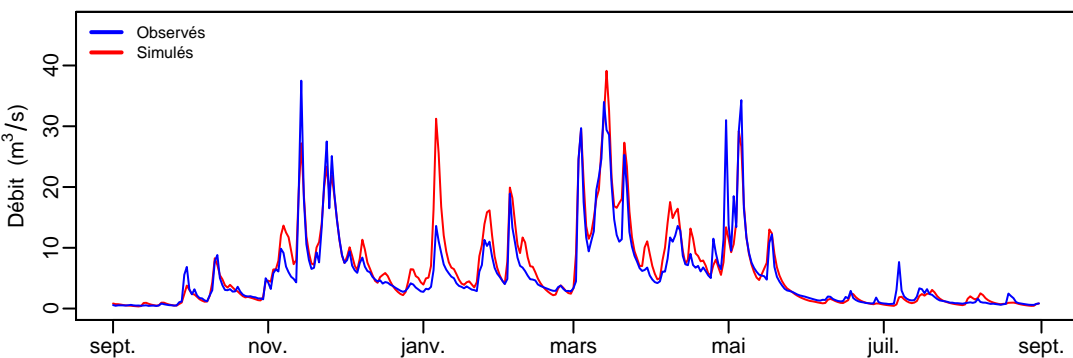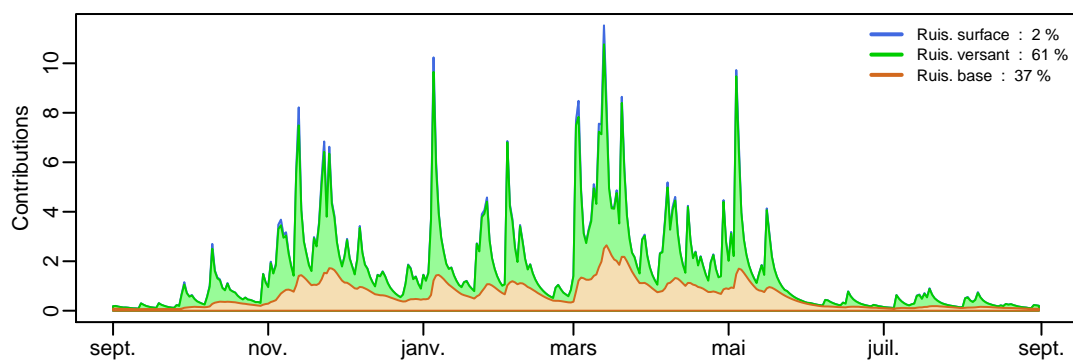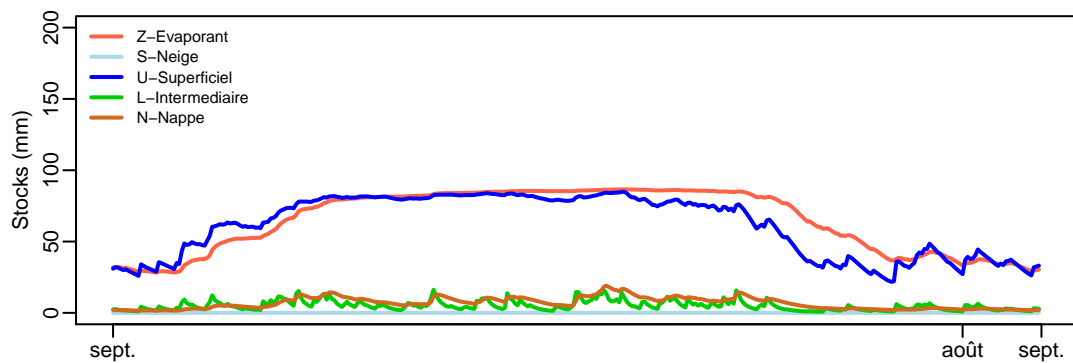

# k1753110 (333.57 km<sup>2</sup>) – année 2001–2002

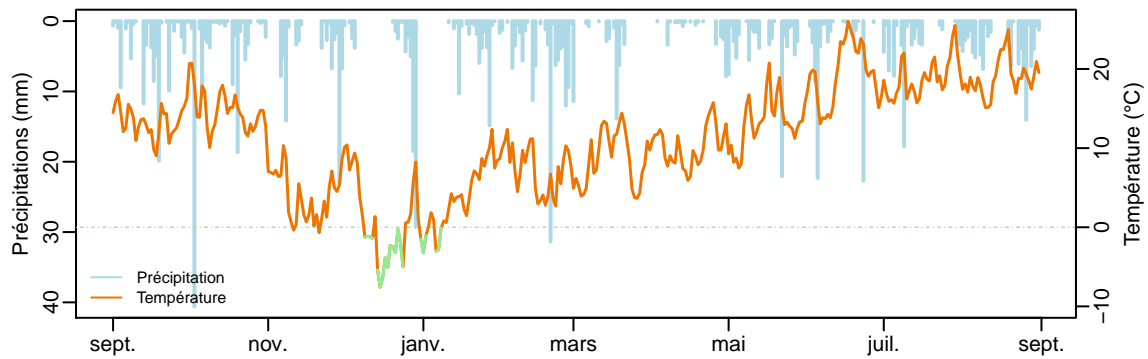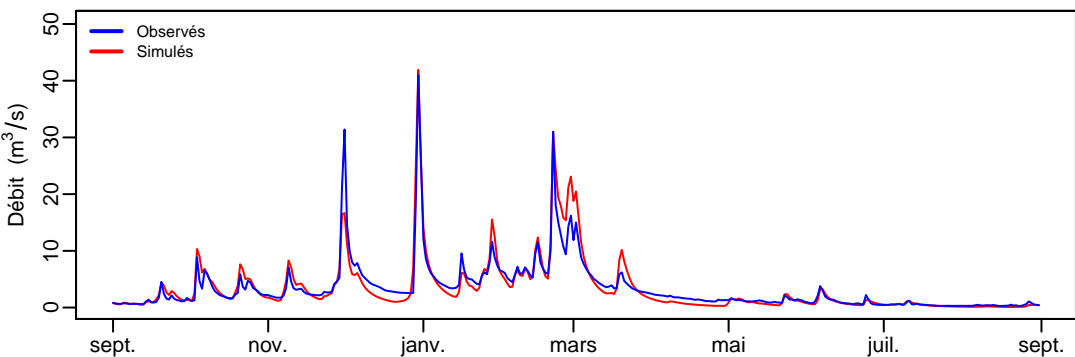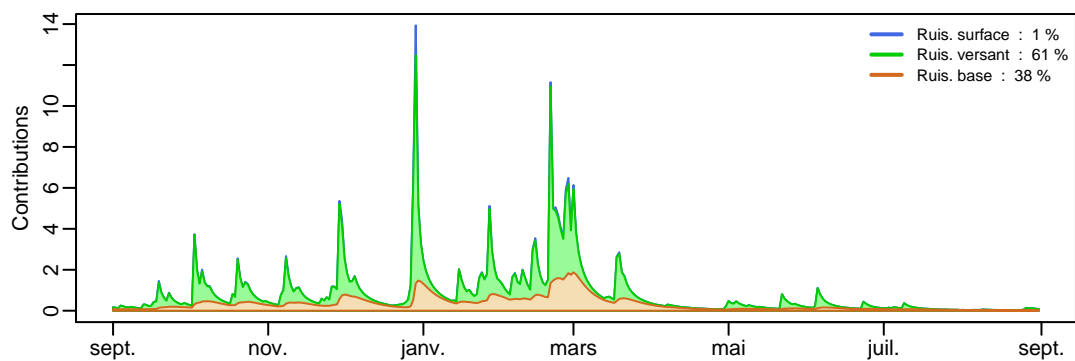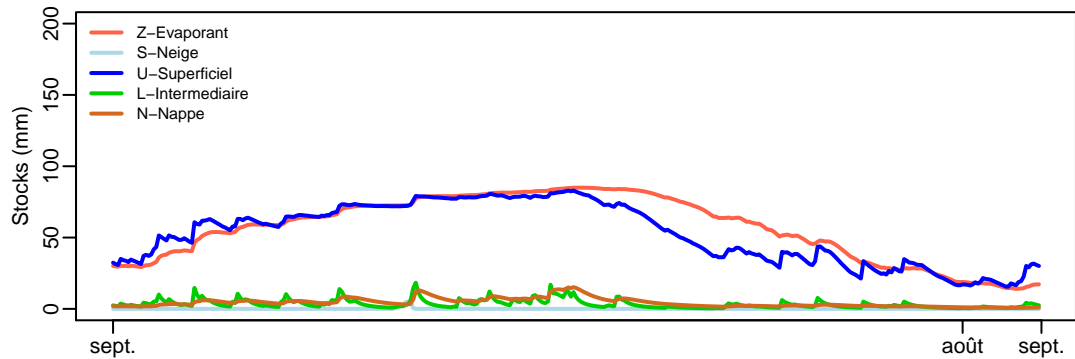

# k1753110 (333.57 km<sup>2</sup>) – année 2002–2003

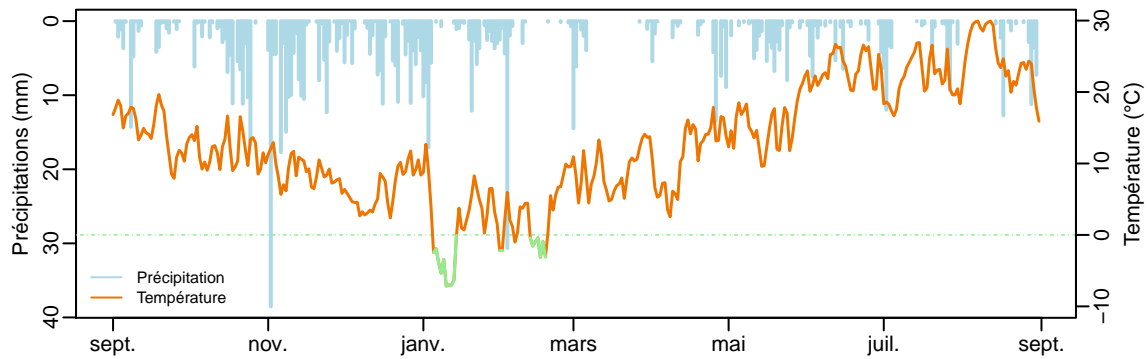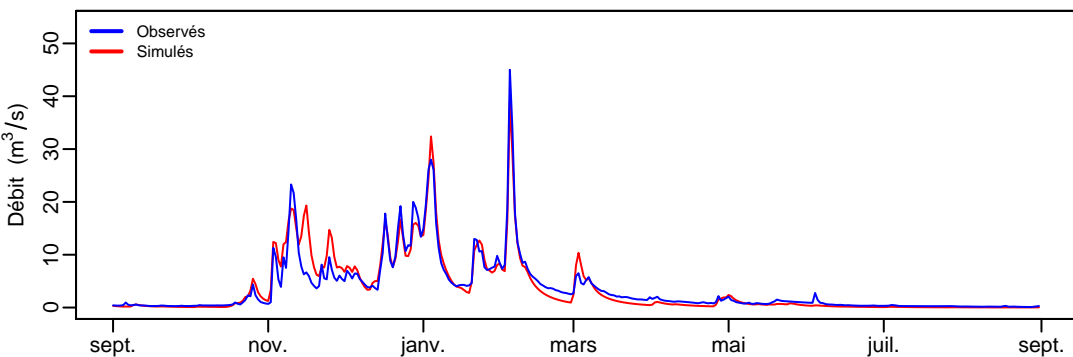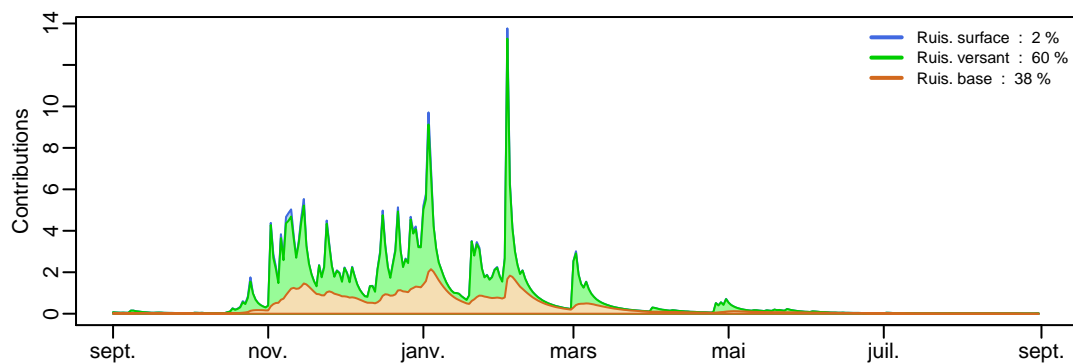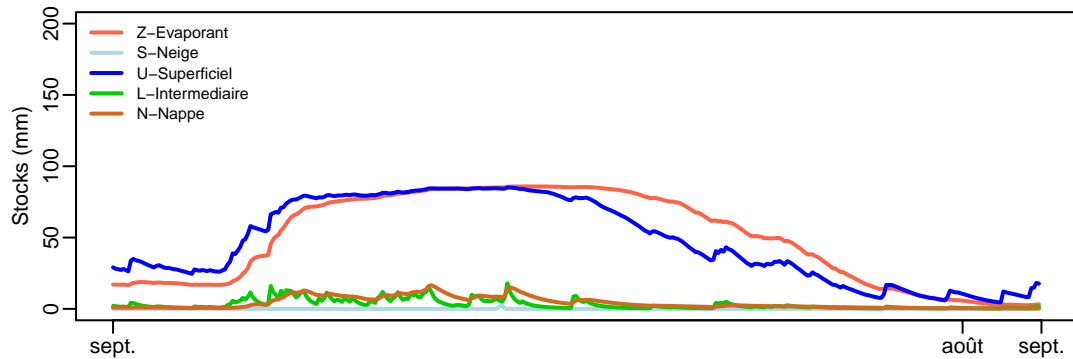

# k1753110 (333.57 km<sup>2</sup>) – année 2003–2004

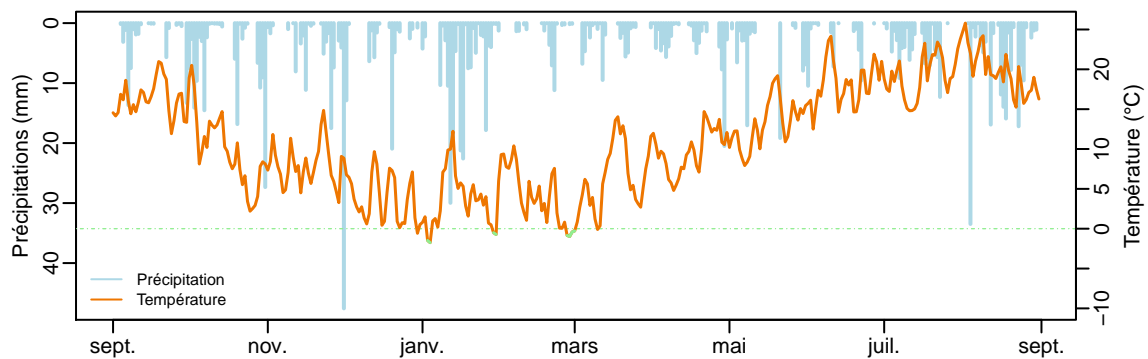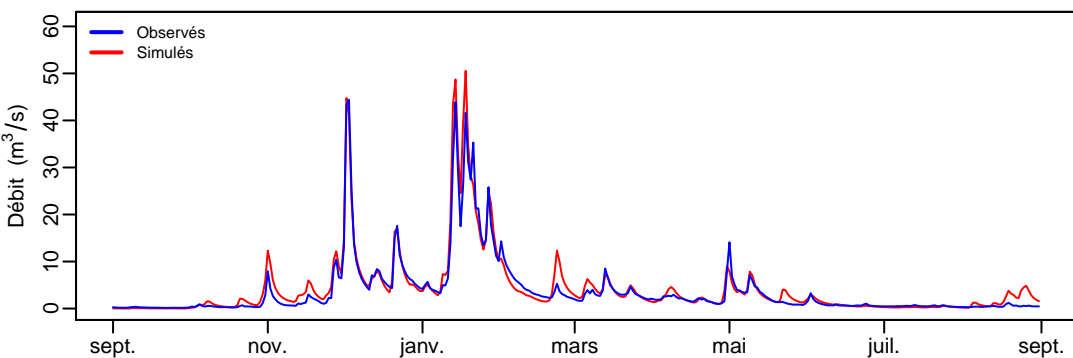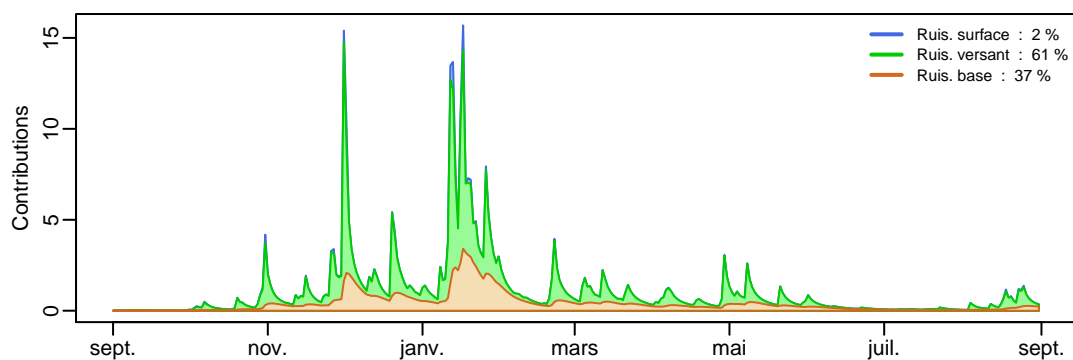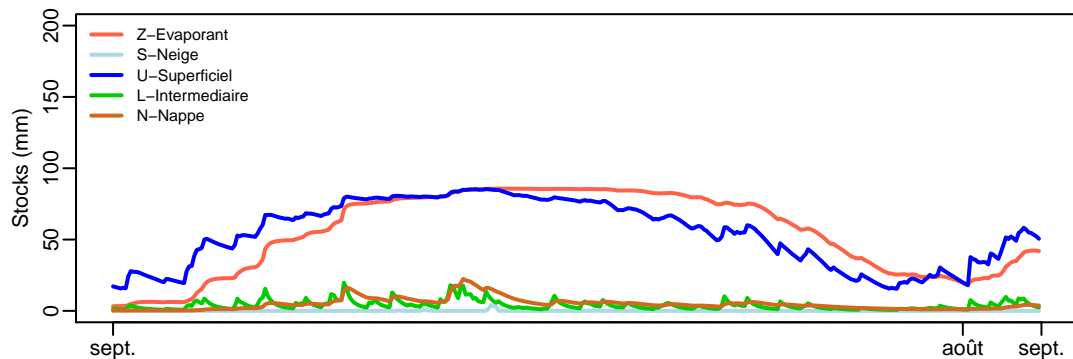

# k1753110 (333.57 km<sup>2</sup>) – année 2004–2005

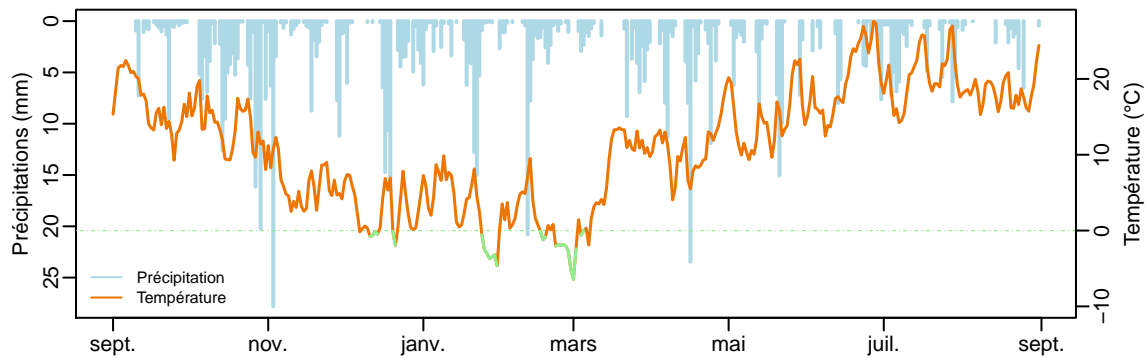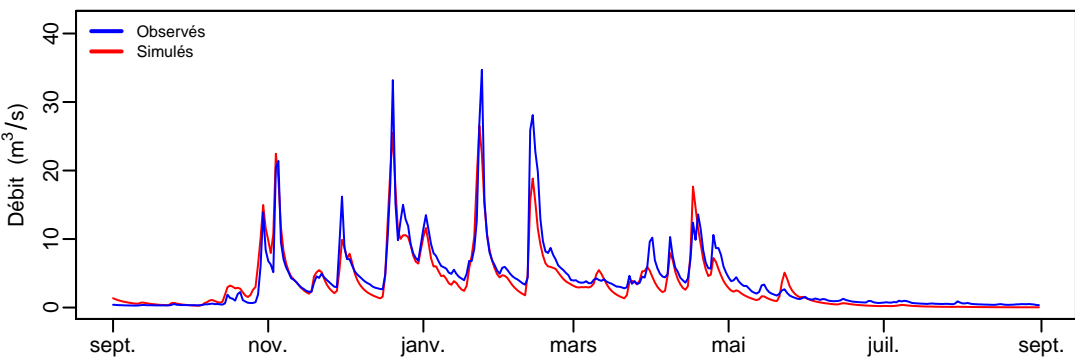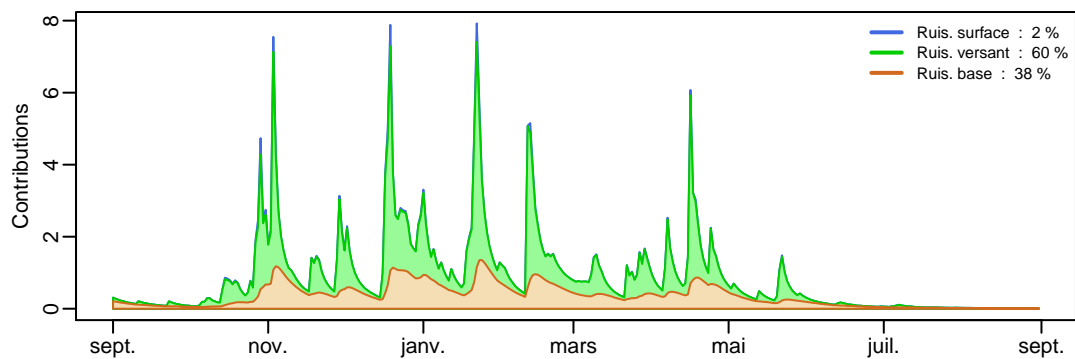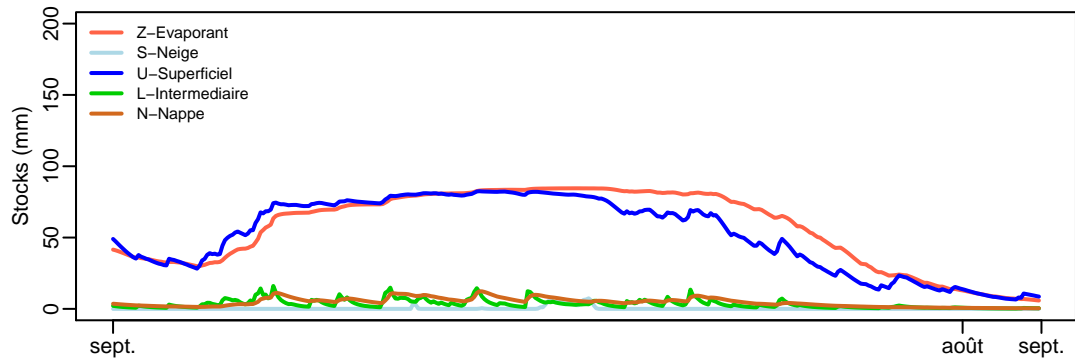

# k1753110 (333.57 km<sup>2</sup>) – année 2005–2006

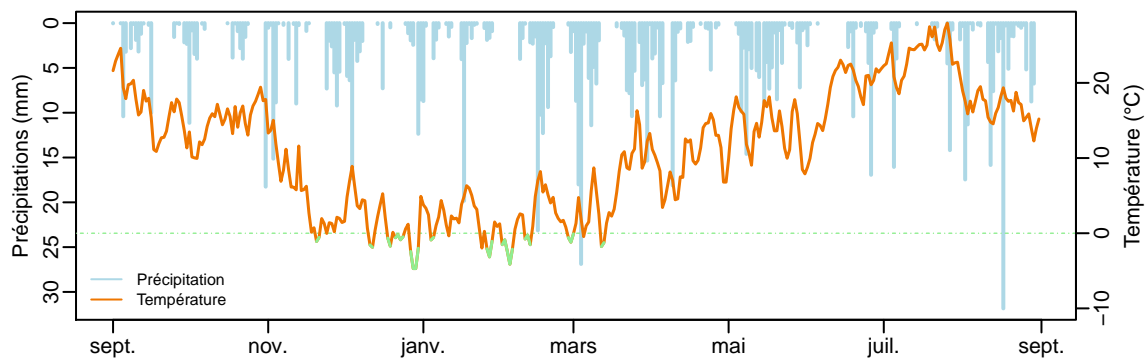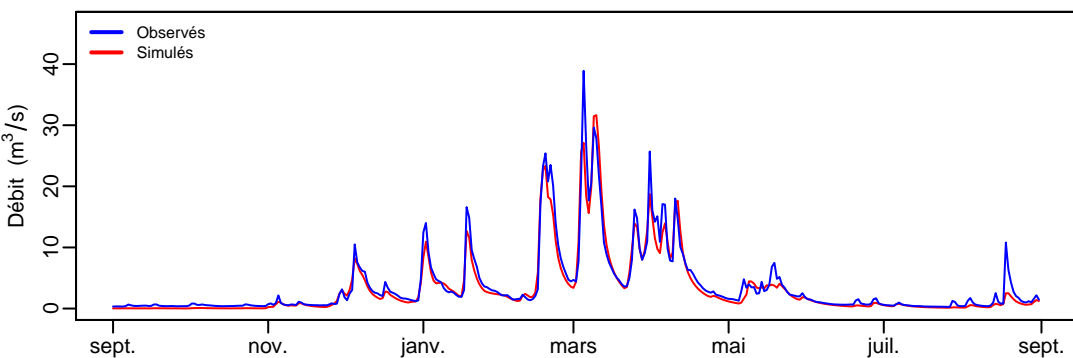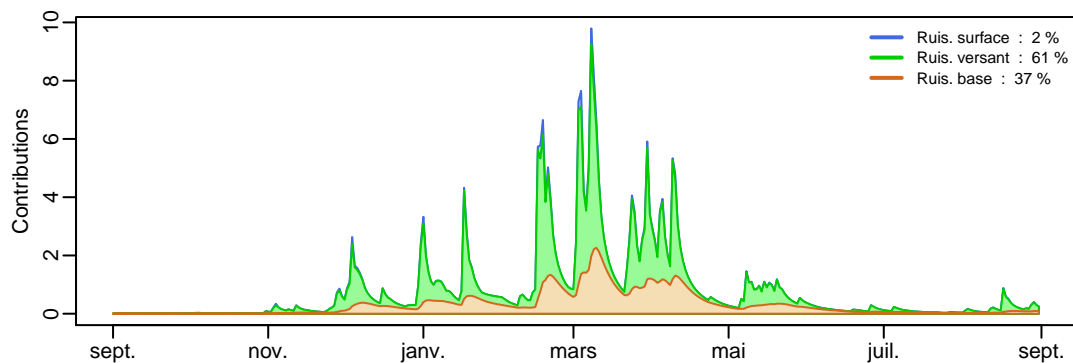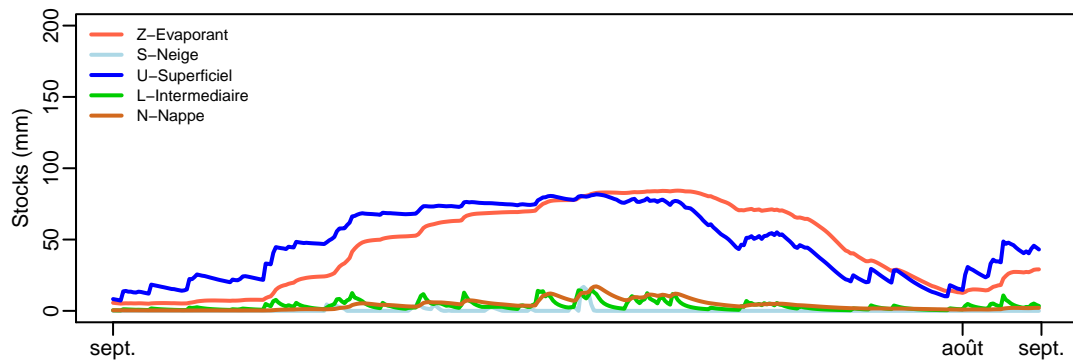

# k1753110 (333.57 km<sup>2</sup>) – année 2006–2007

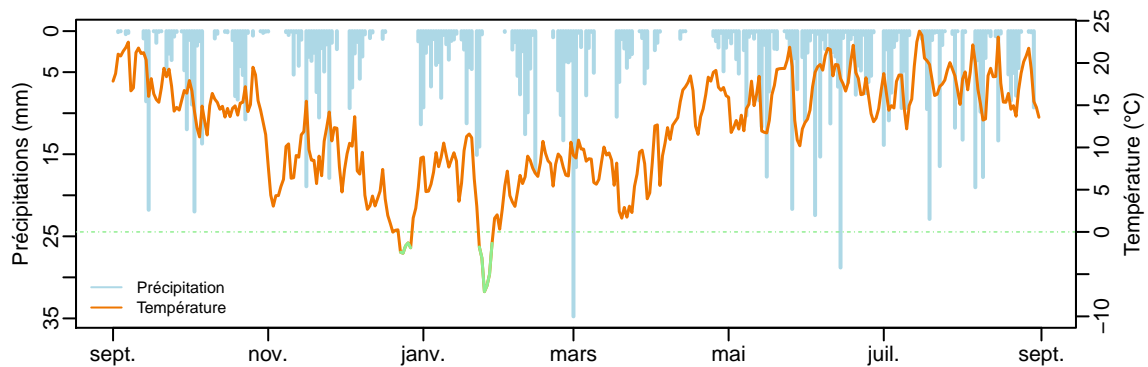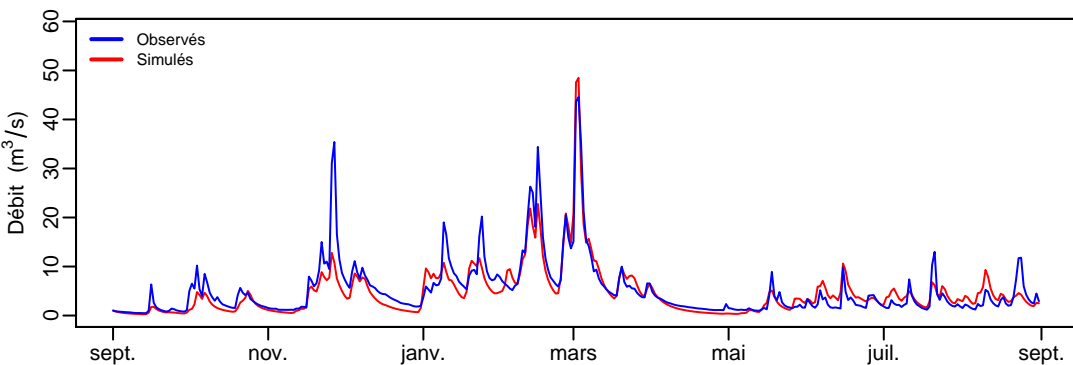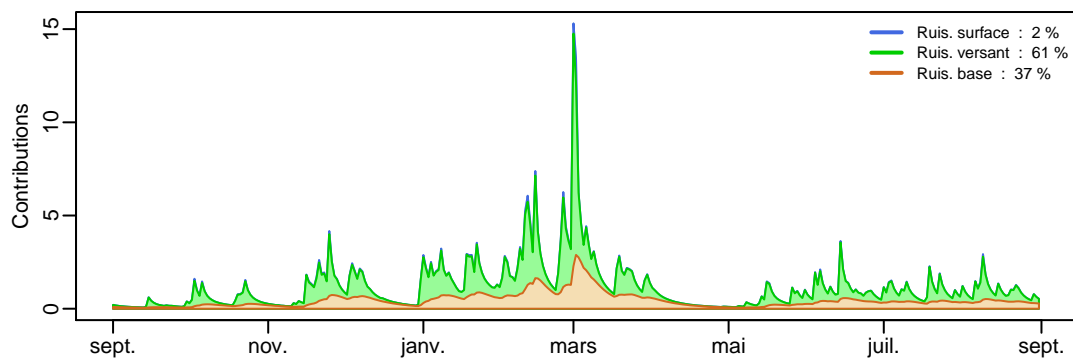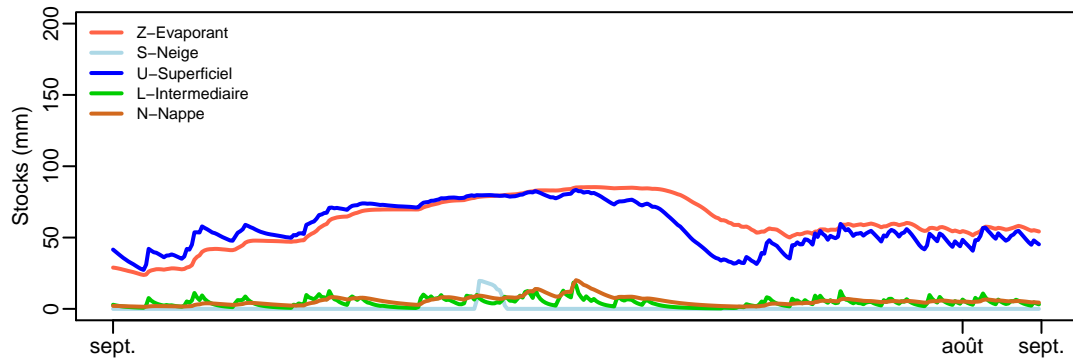

# k1753110 (333.57 km<sup>2</sup>) – année 2007–2008

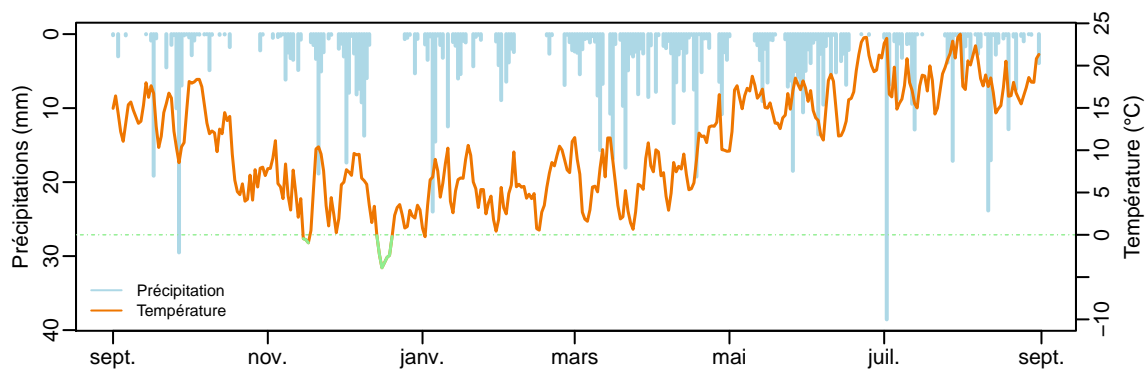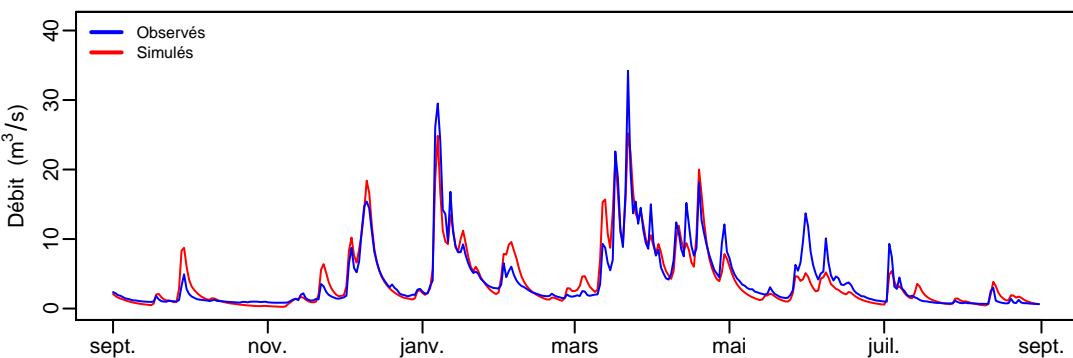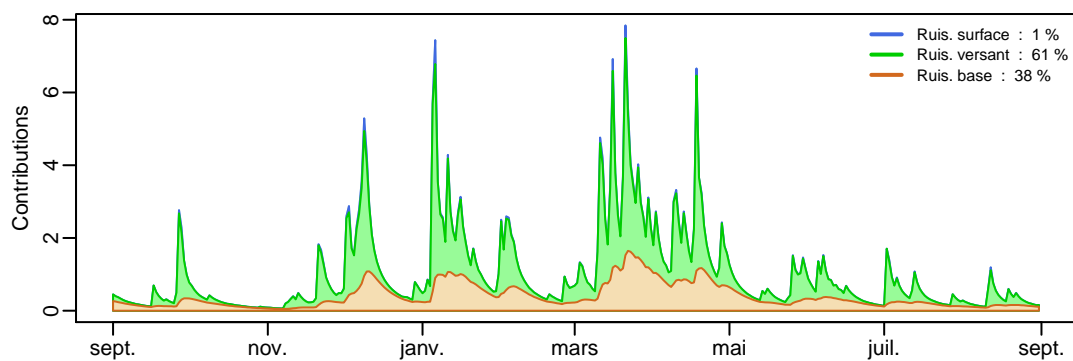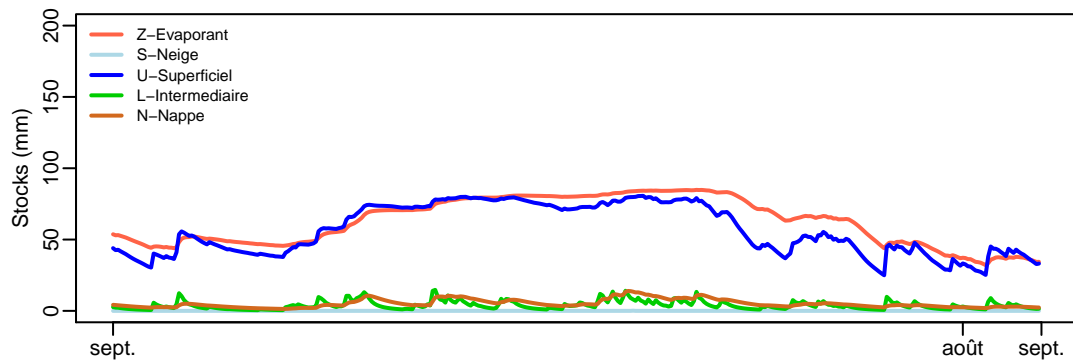



# k1753110 (333.57 km<sup>2</sup>) – année 2008–2009

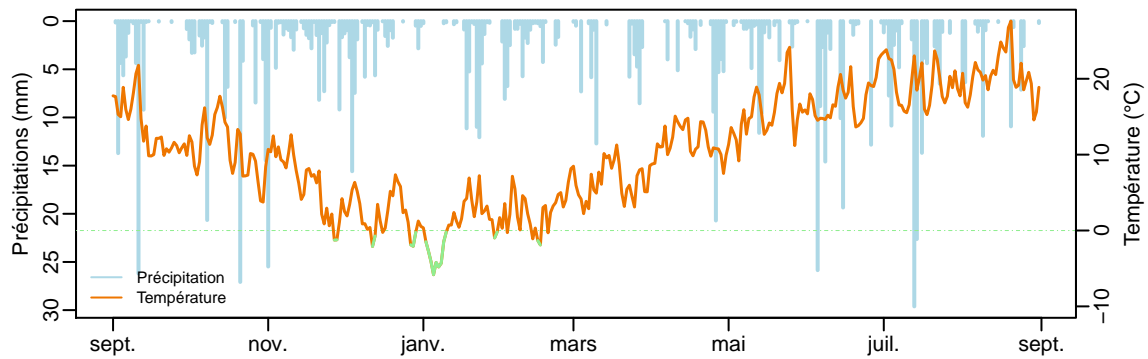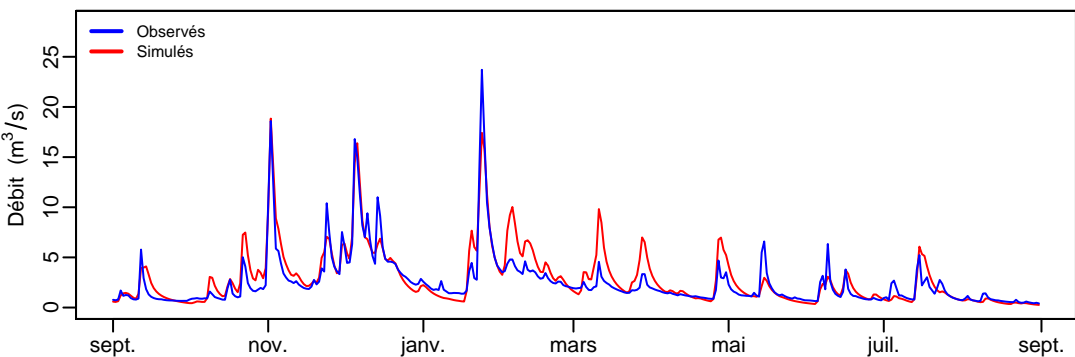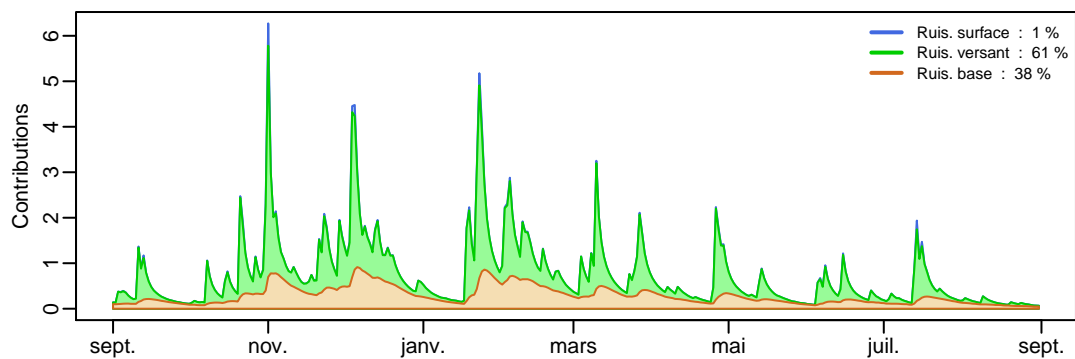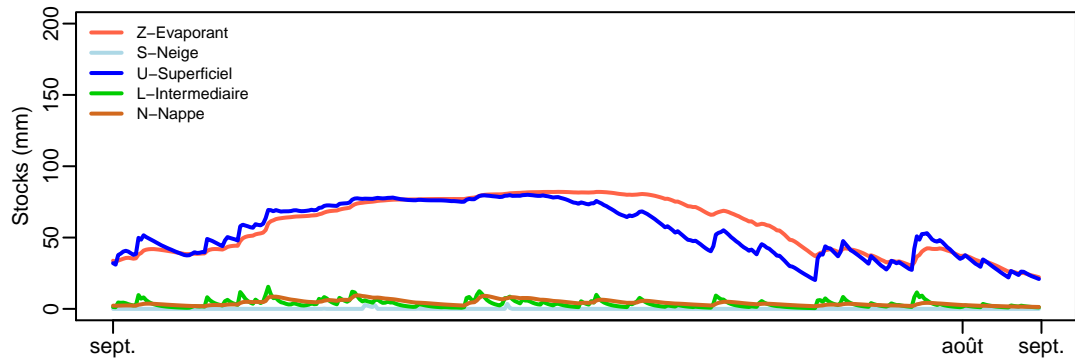

# k1753110 (333.57 km<sup>2</sup>) – année 2009–2010

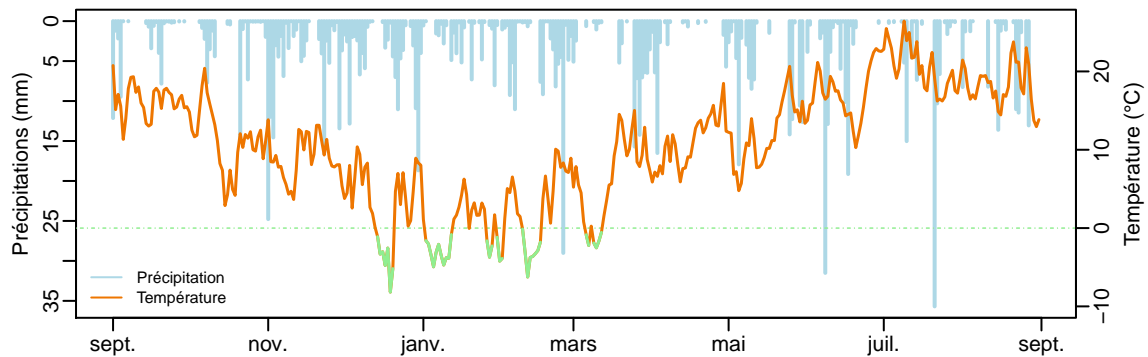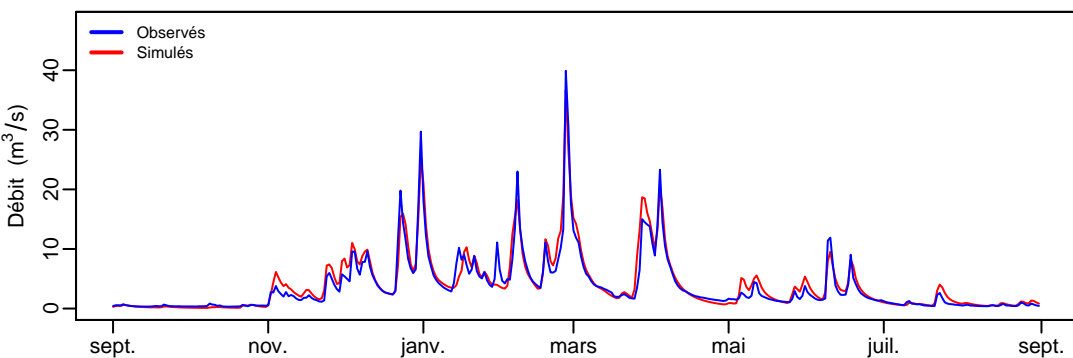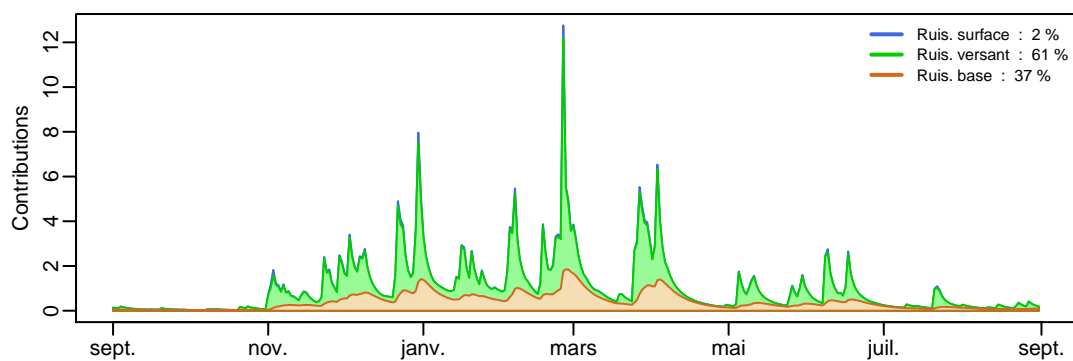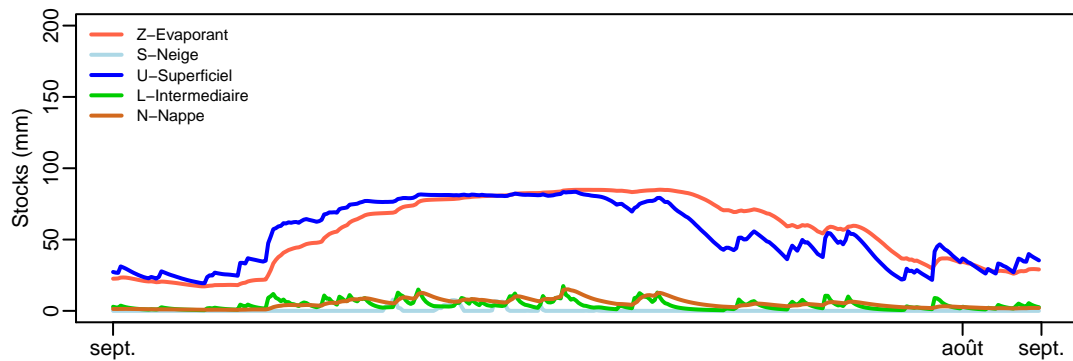

# k1753110 (333.57 km<sup>2</sup>) – année 2010–2011

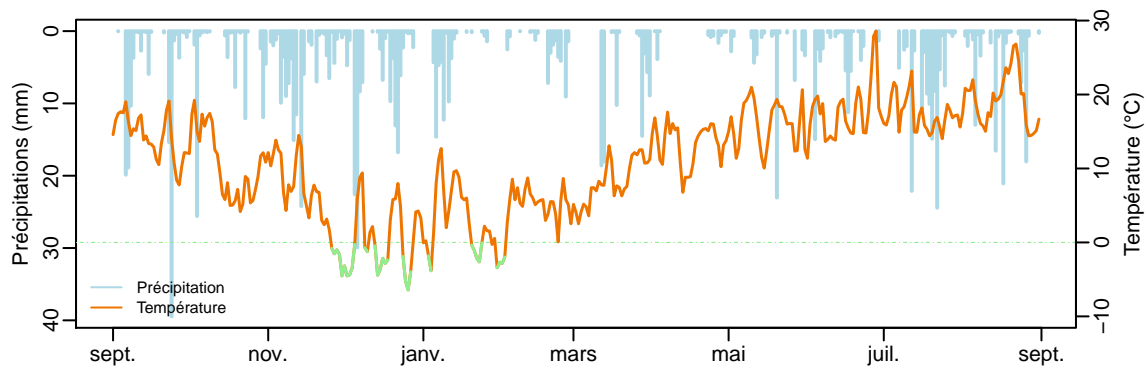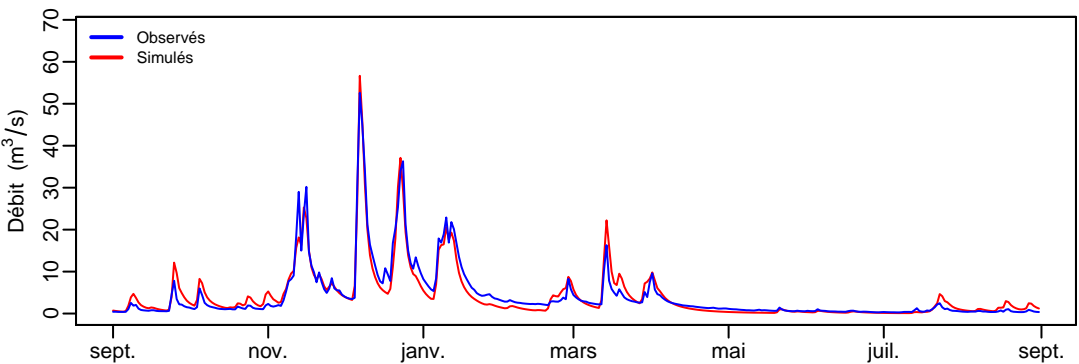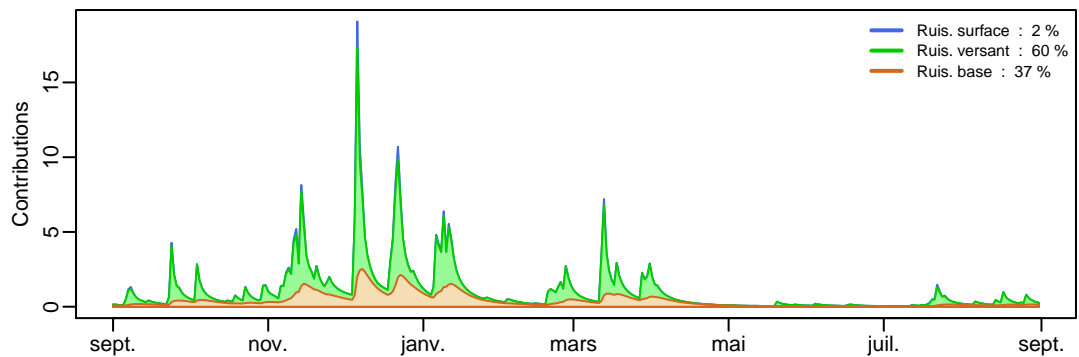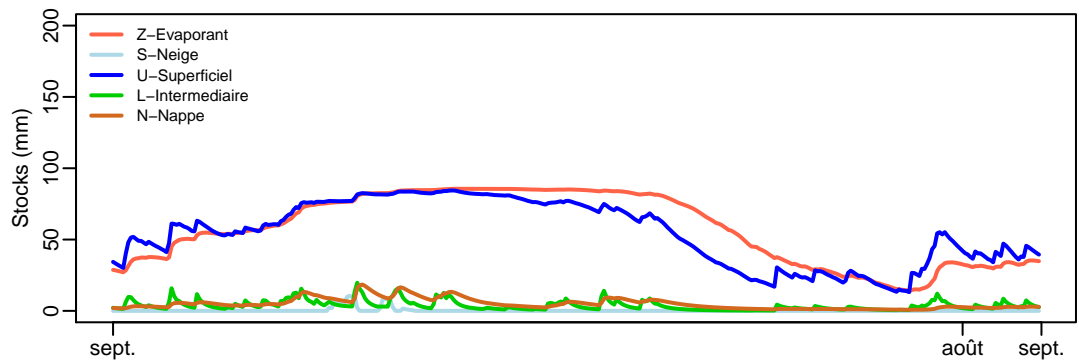

# k1753110 (333.57 km<sup>2</sup>) – année 2011–2012

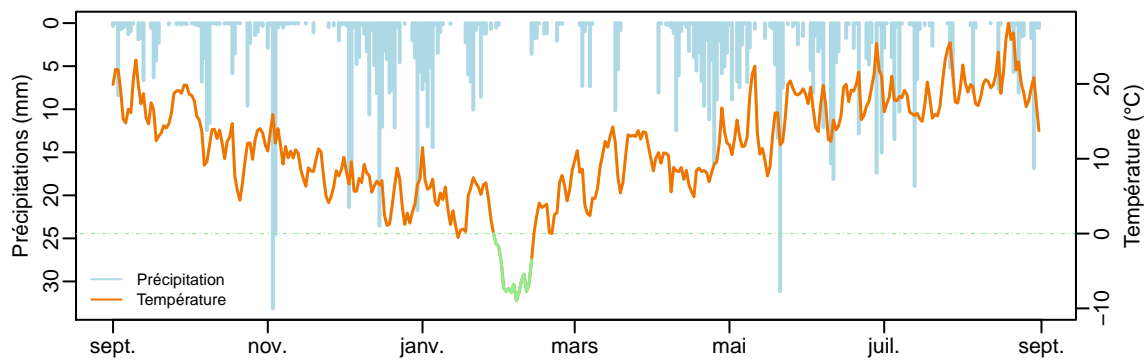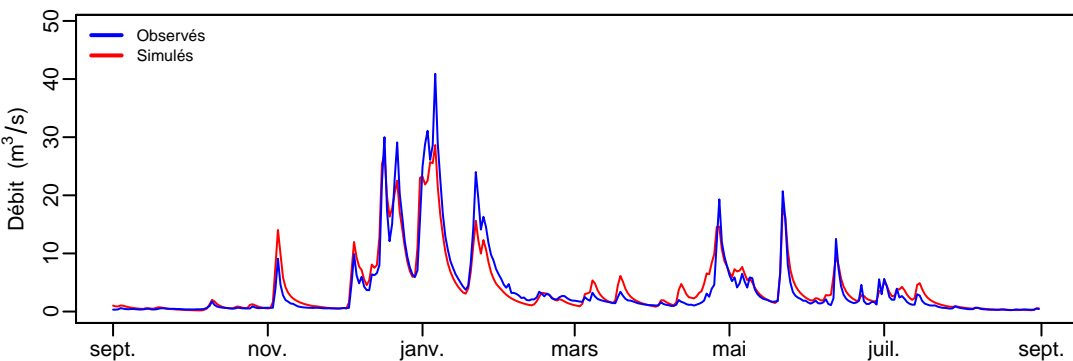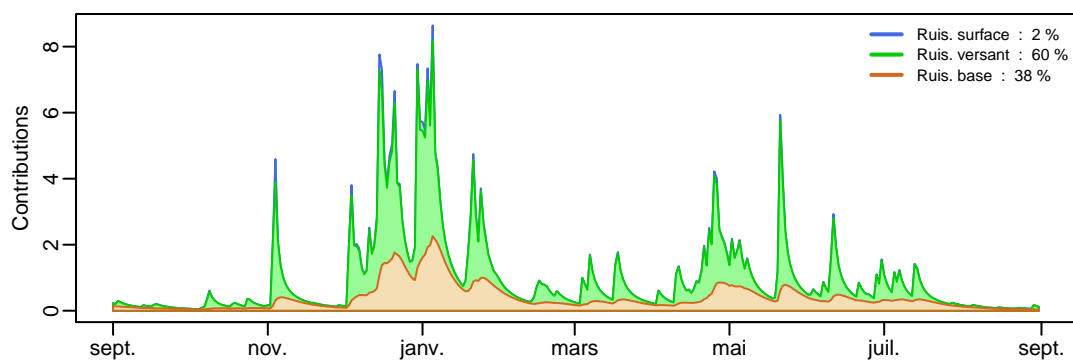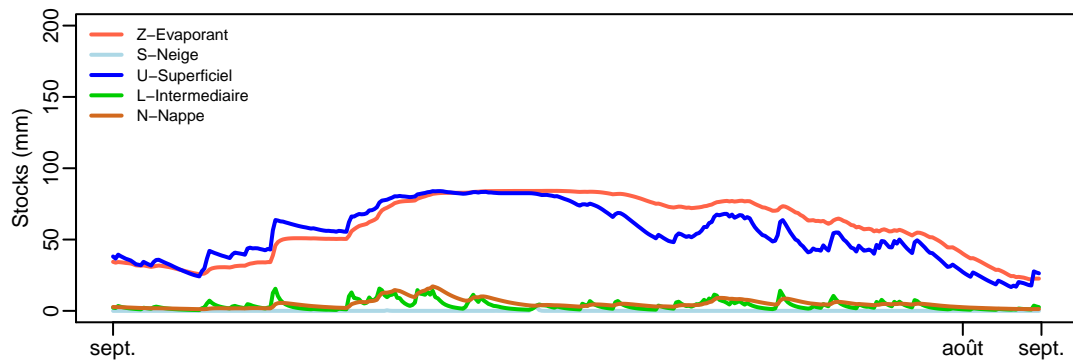

# k1764020 (179.8 km<sup>2</sup>) – année 1996–1997

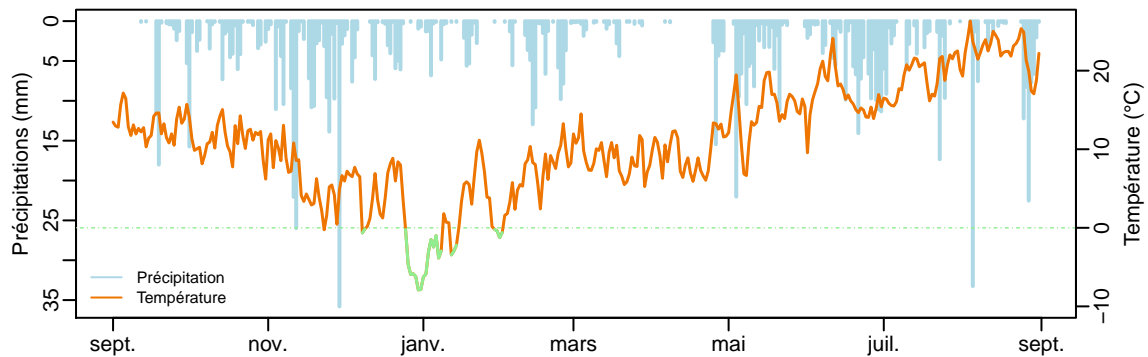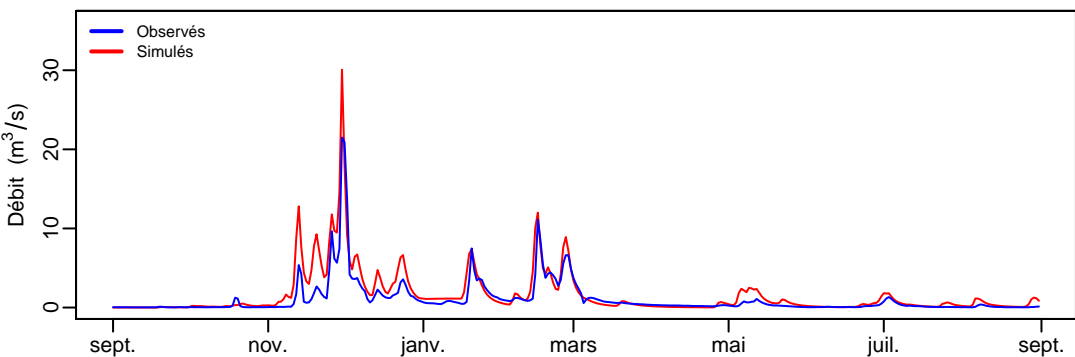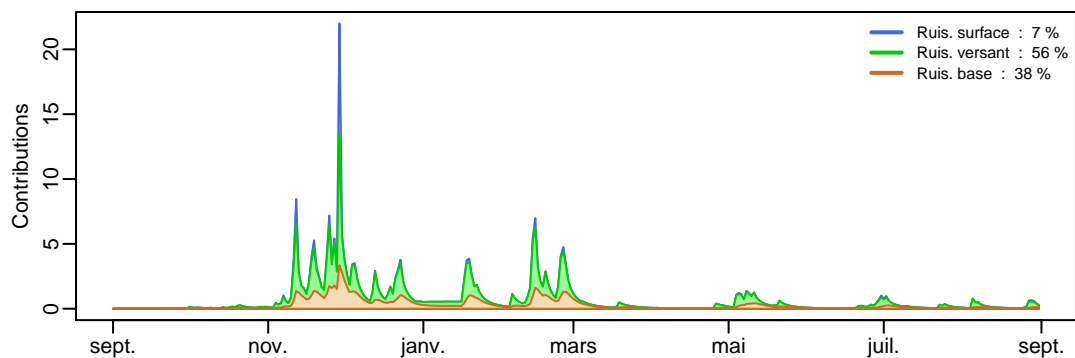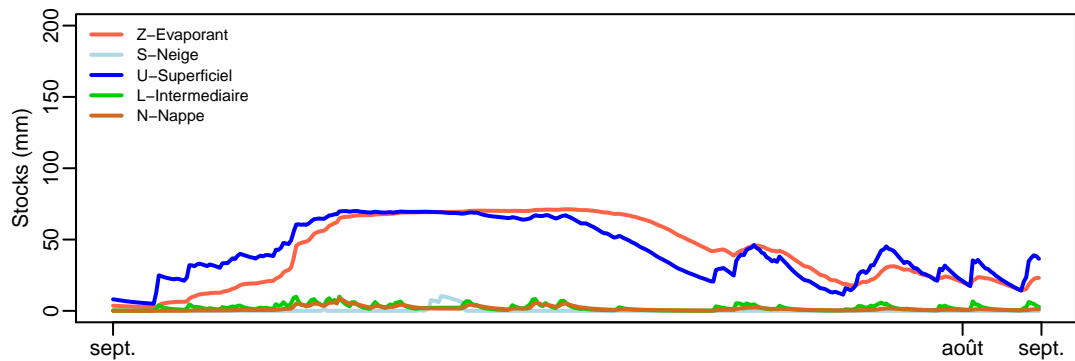

# k1764020 (179.8 km<sup>2</sup>) – année 1997–1998

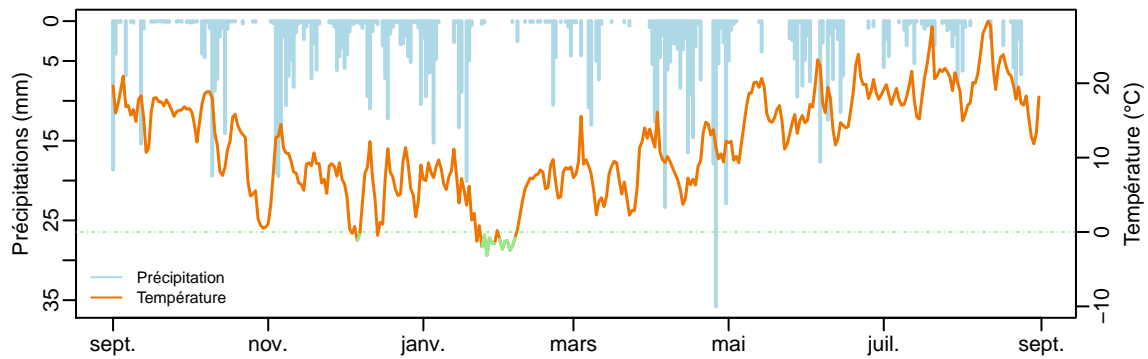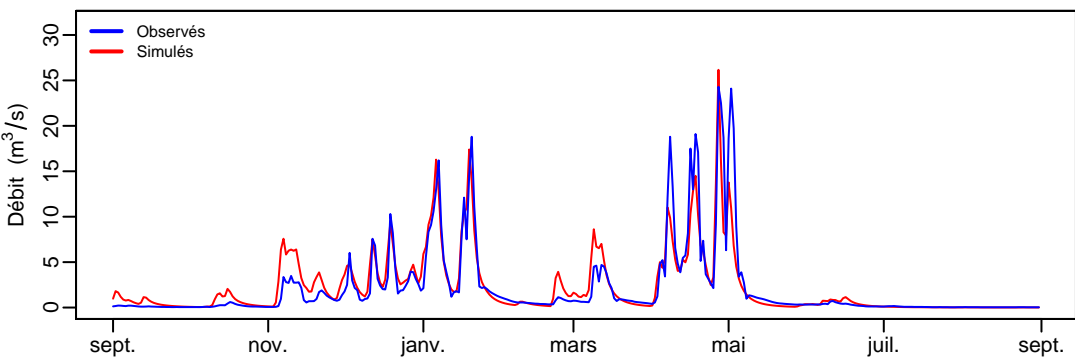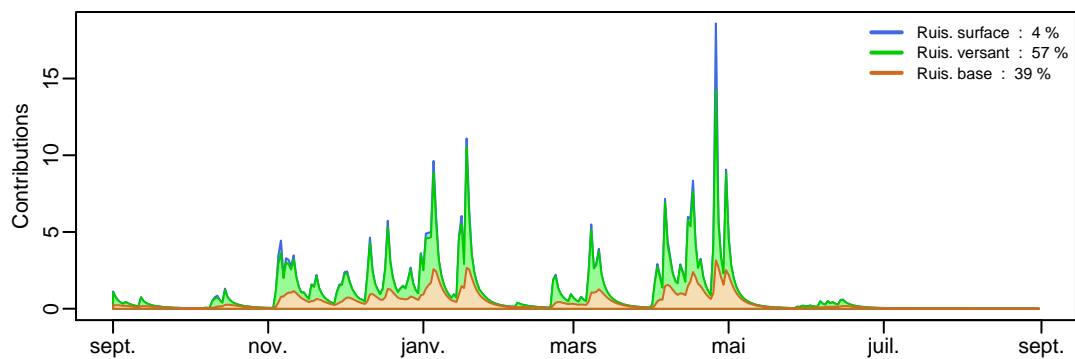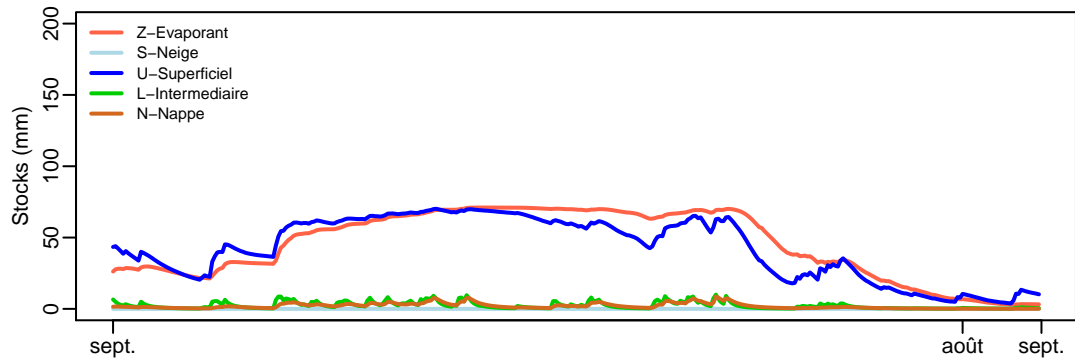

# k1764020 (179.8 km<sup>2</sup>) – année 1998–1999

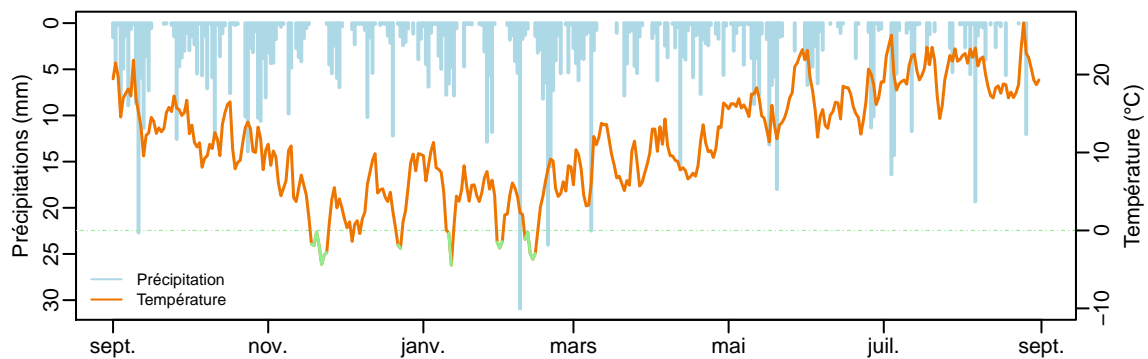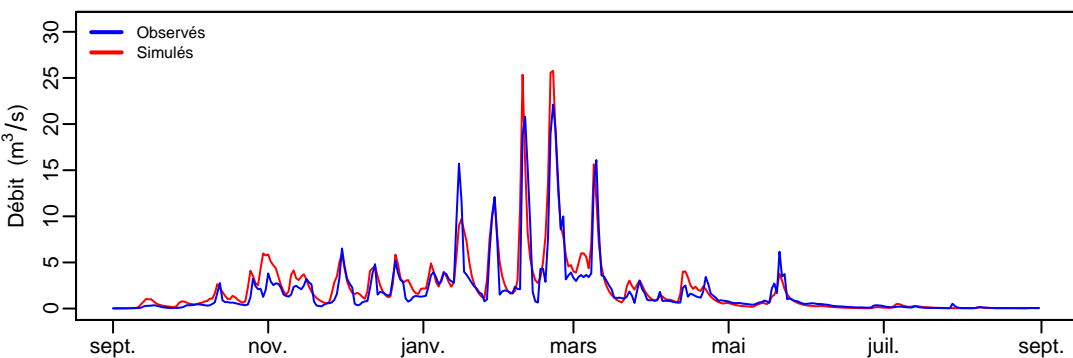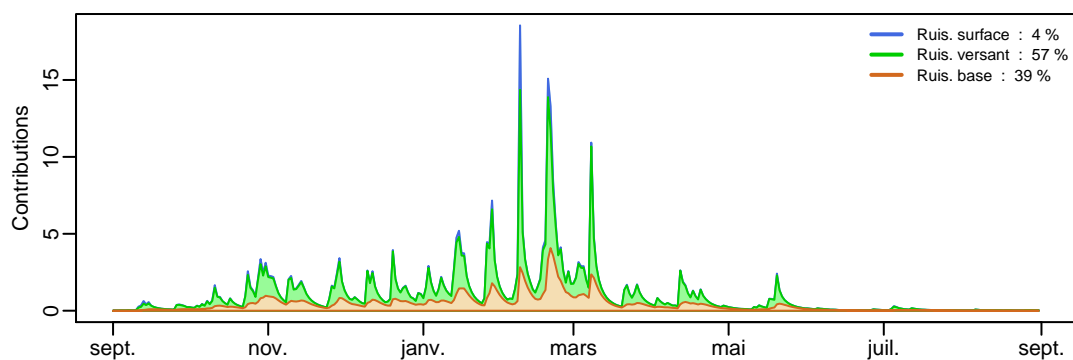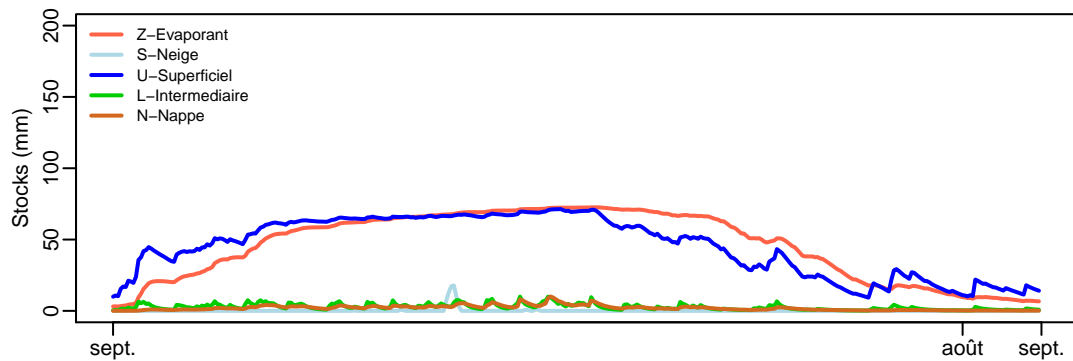

# k1764020 (179.8 km<sup>2</sup>) – année 1999–2000

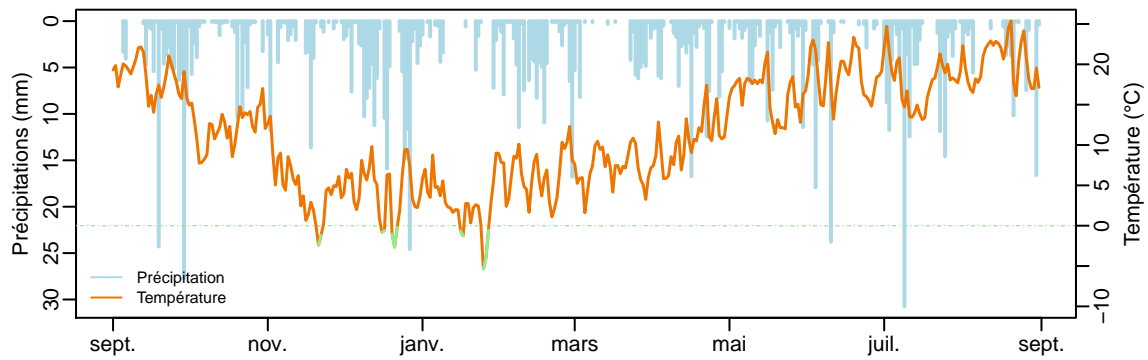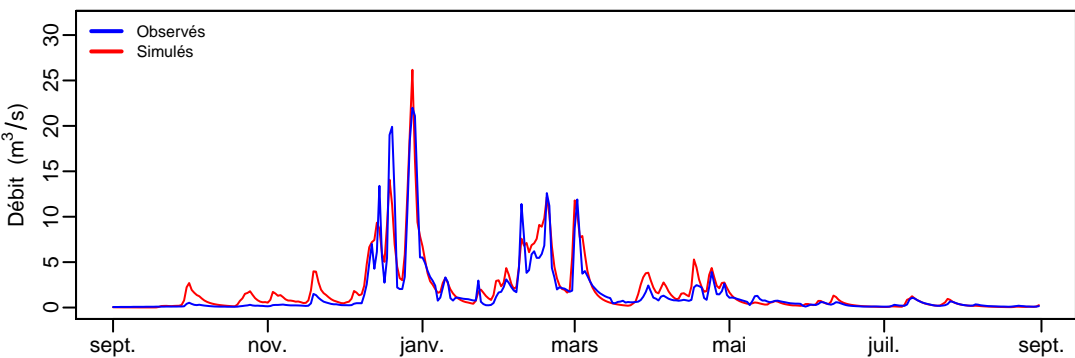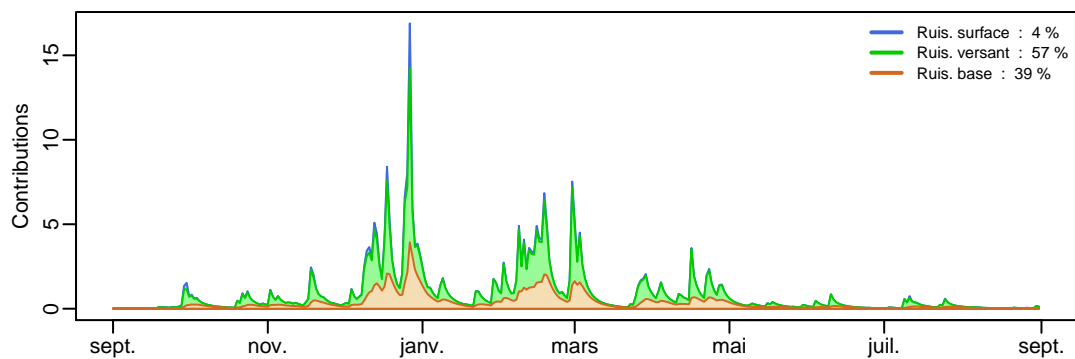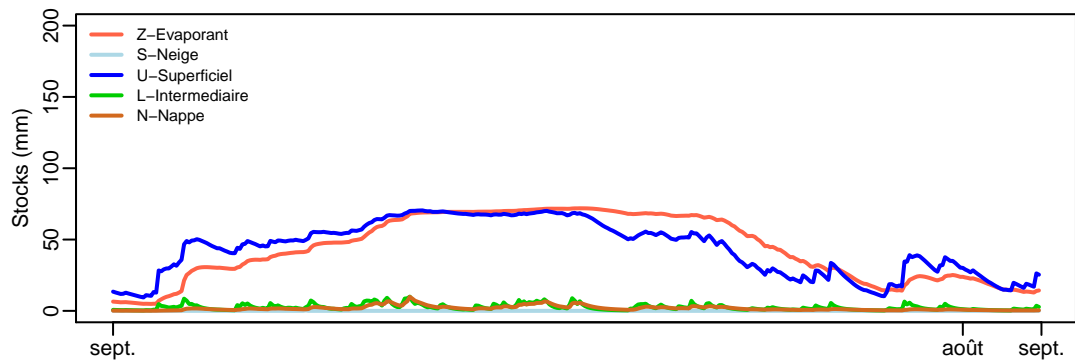



# k1764020 (179.8 km<sup>2</sup>) – année 2000–2001

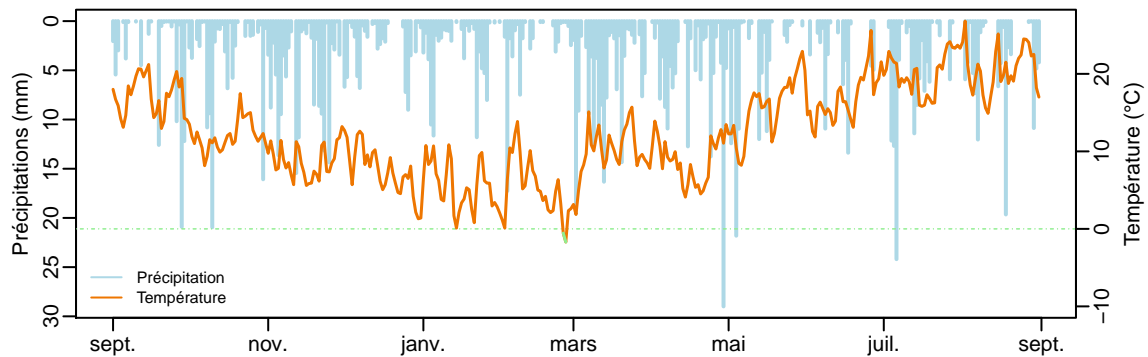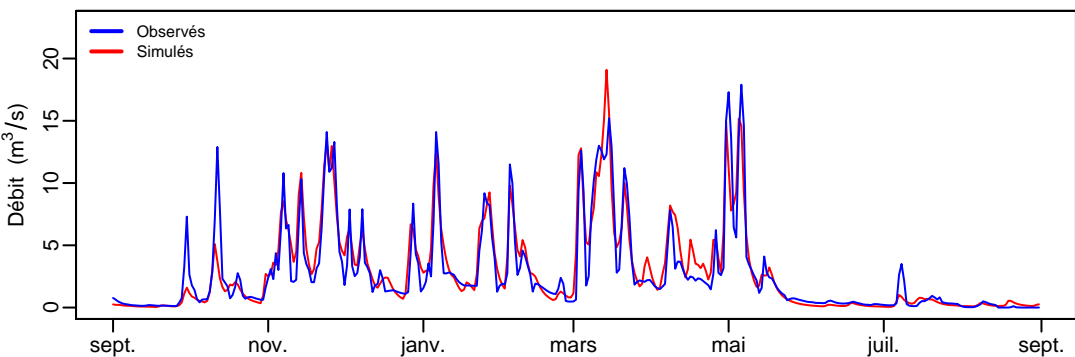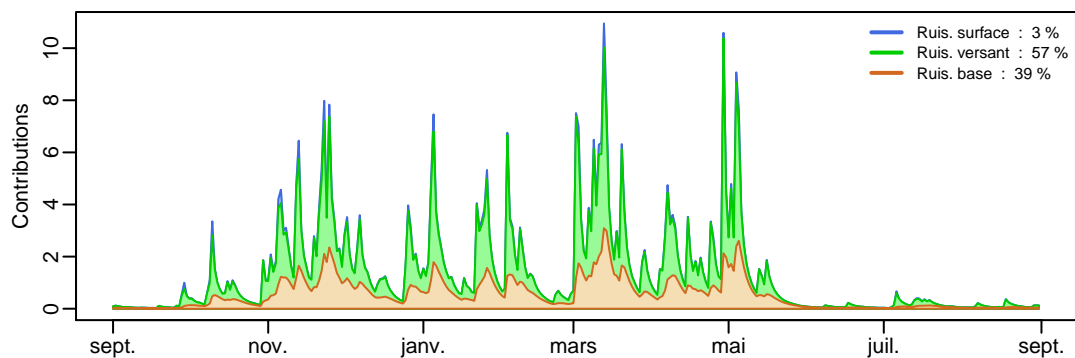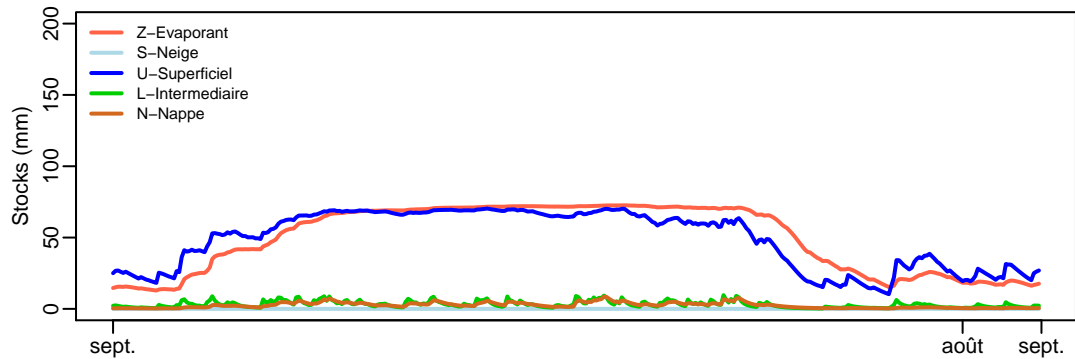

# k1764020 (179.8 km<sup>2</sup>) – année 2001–2002

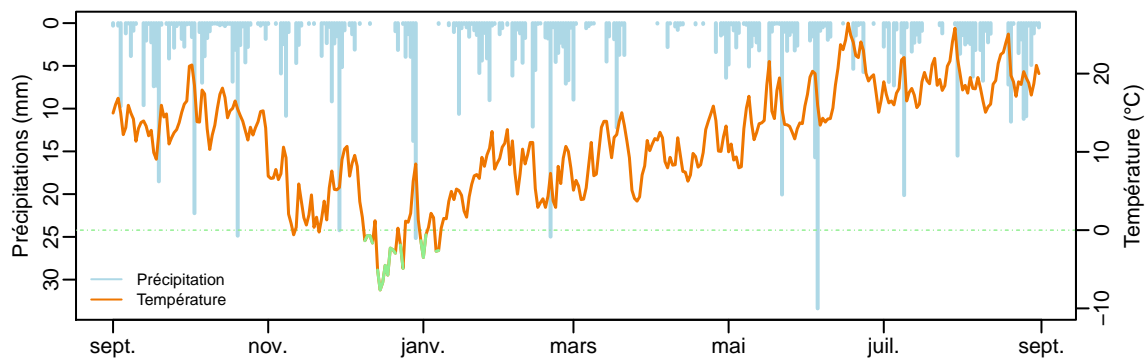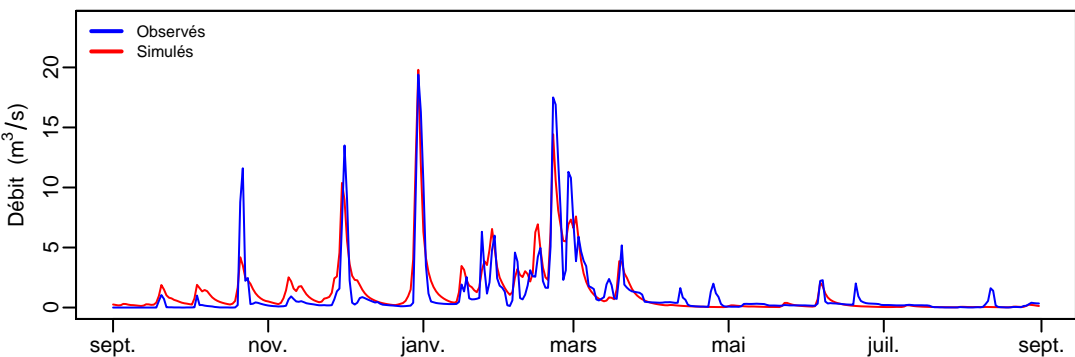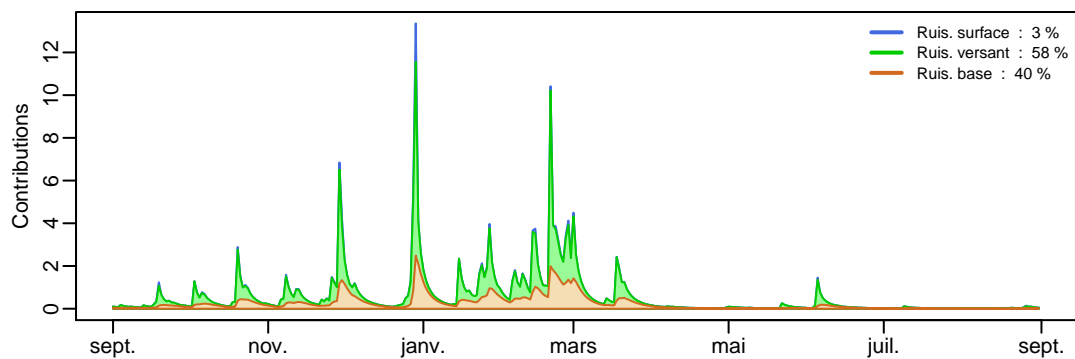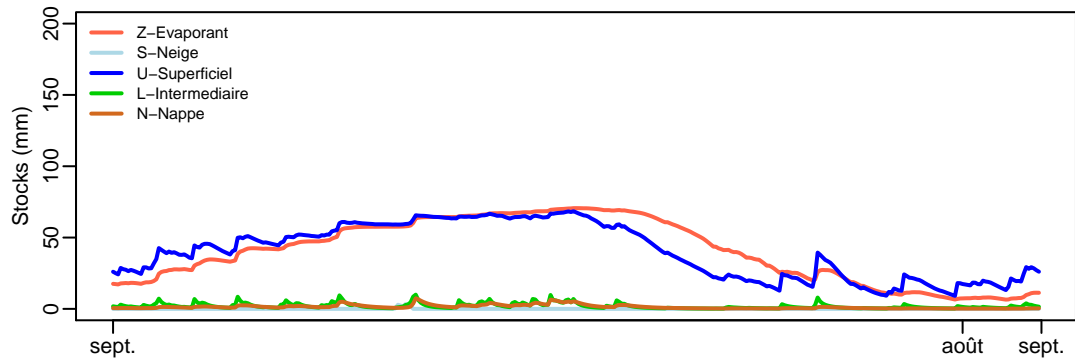

# k1764020 (179.8 km<sup>2</sup>) – année 2002–2003

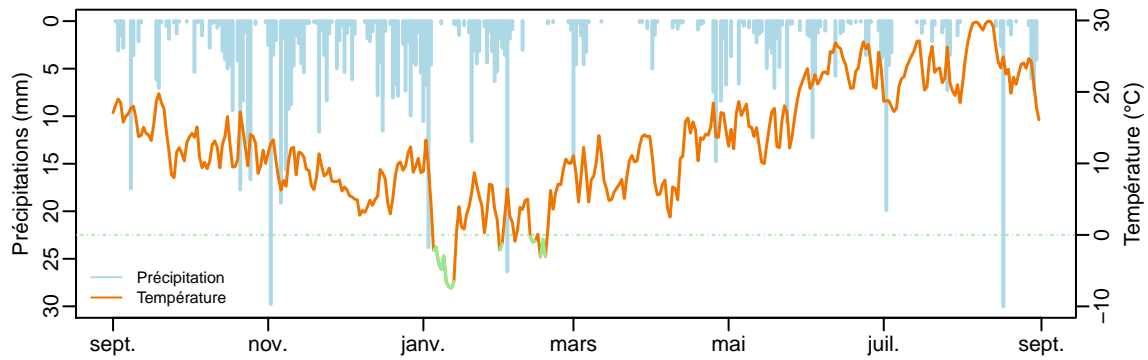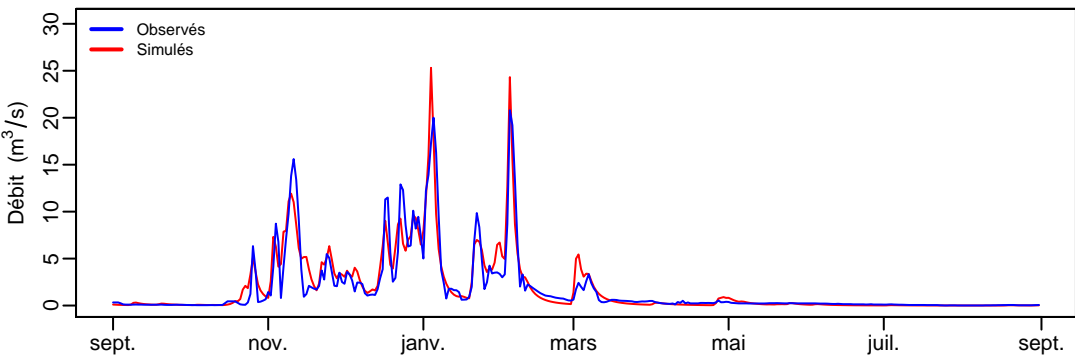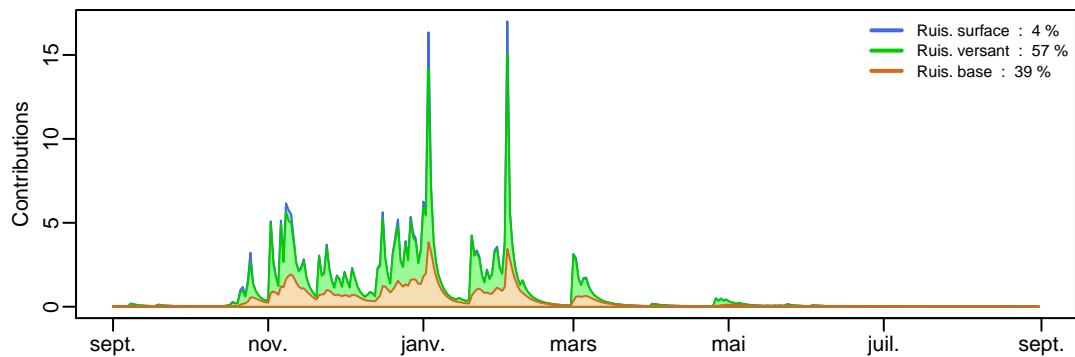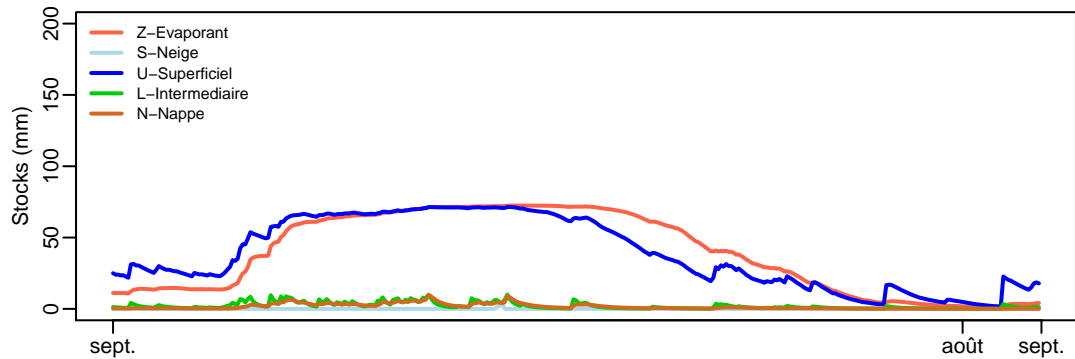

# k1764020 (179.8 km<sup>2</sup>) – année 2003–2004

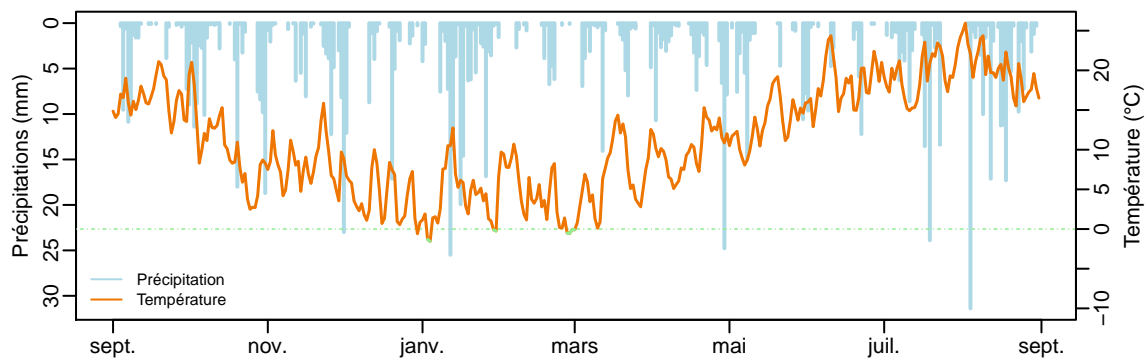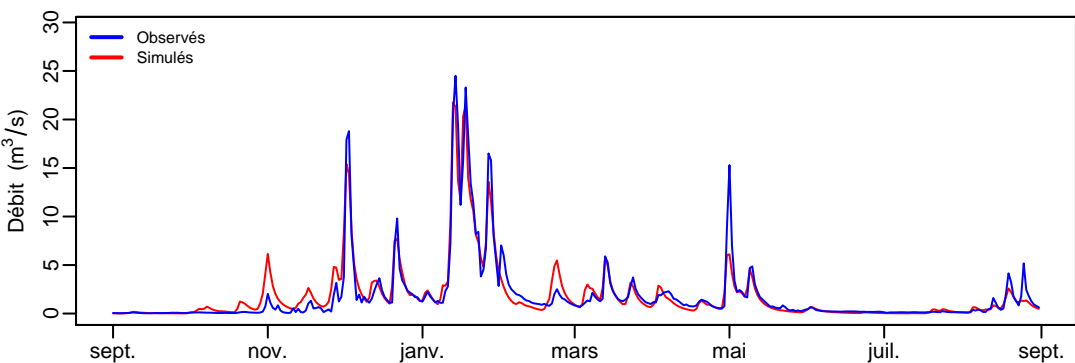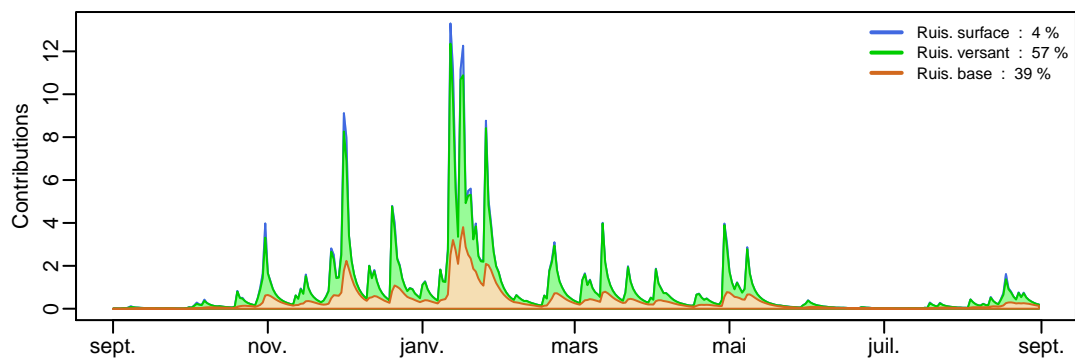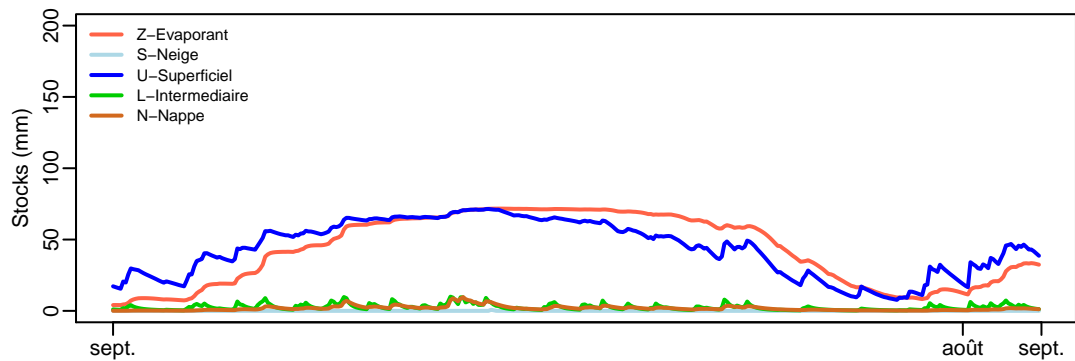

# k1764020 (179.8 km<sup>2</sup>) – année 2004–2005

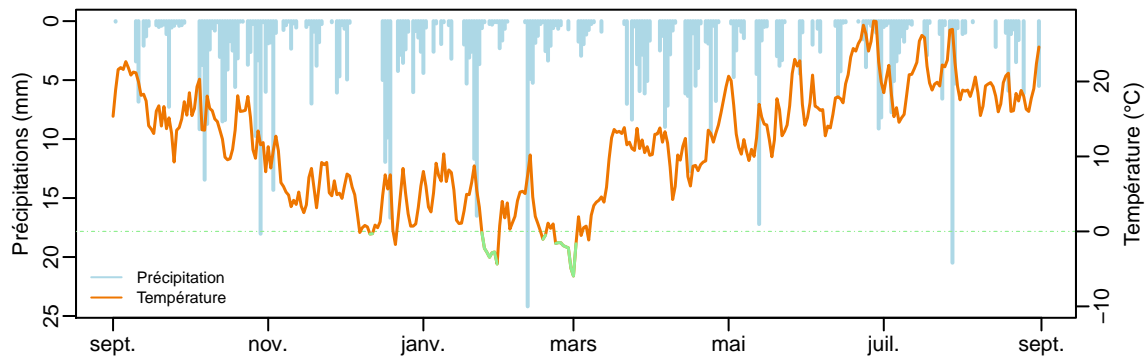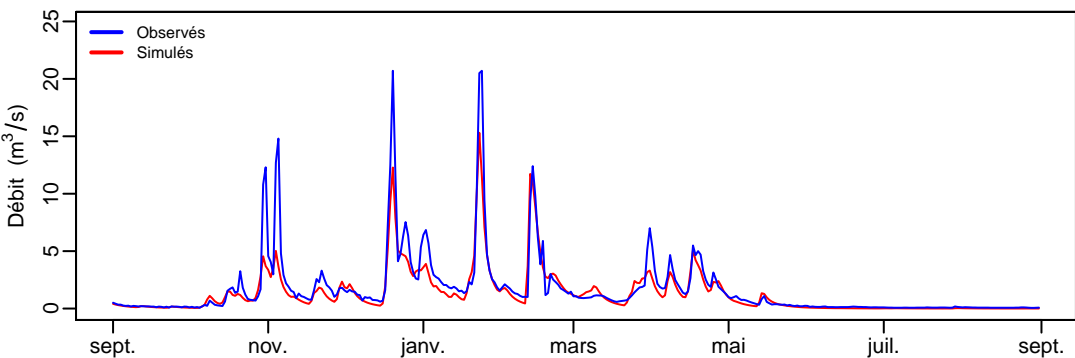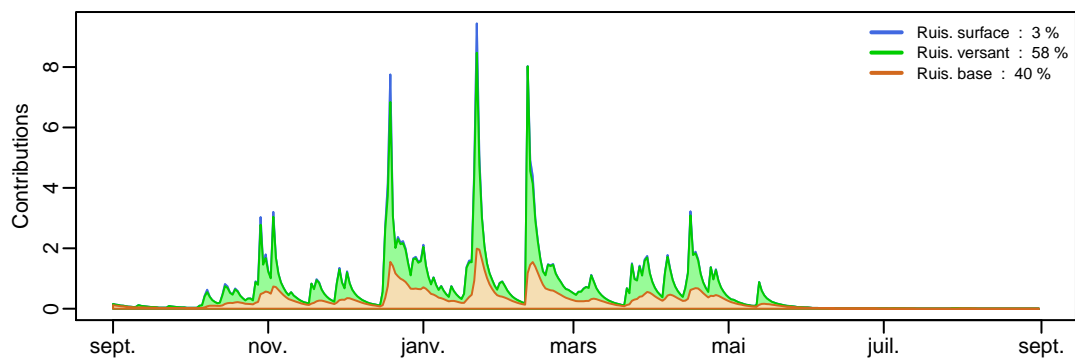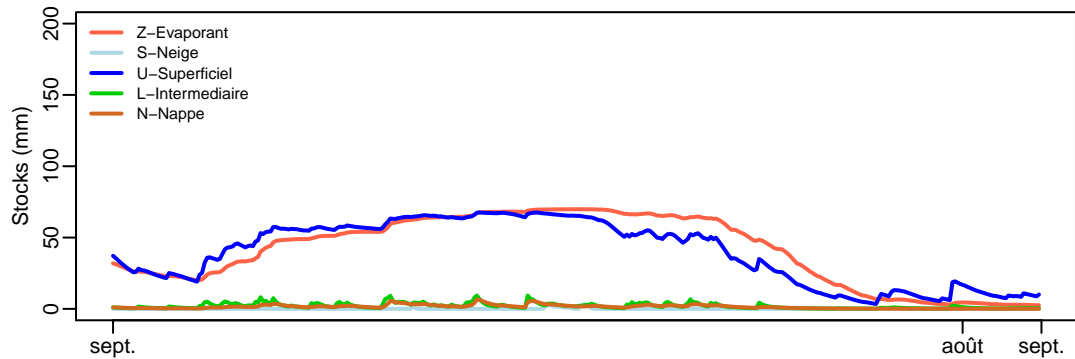

# k1764020 (179.8 km<sup>2</sup>) – année 2005–2006

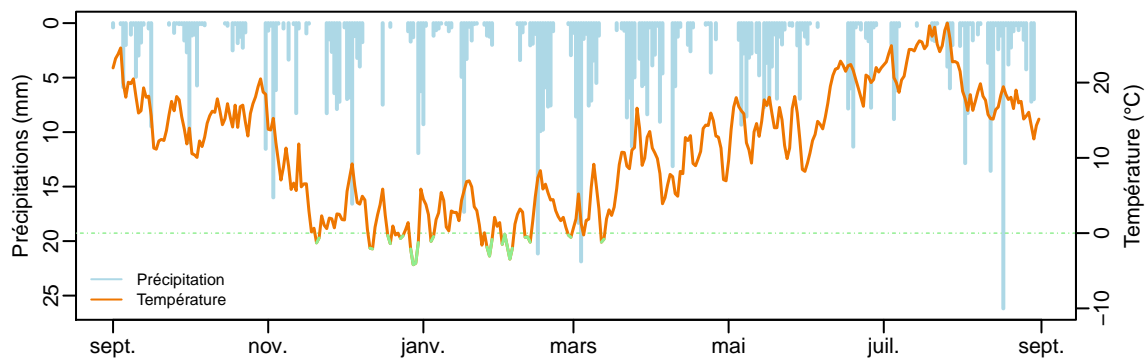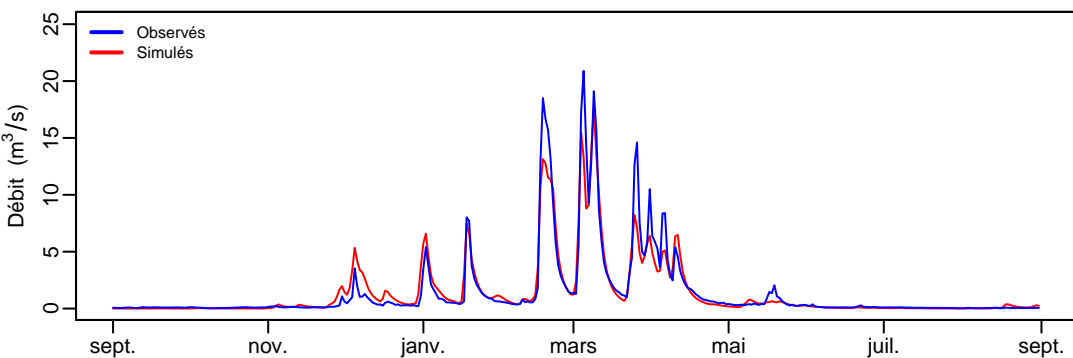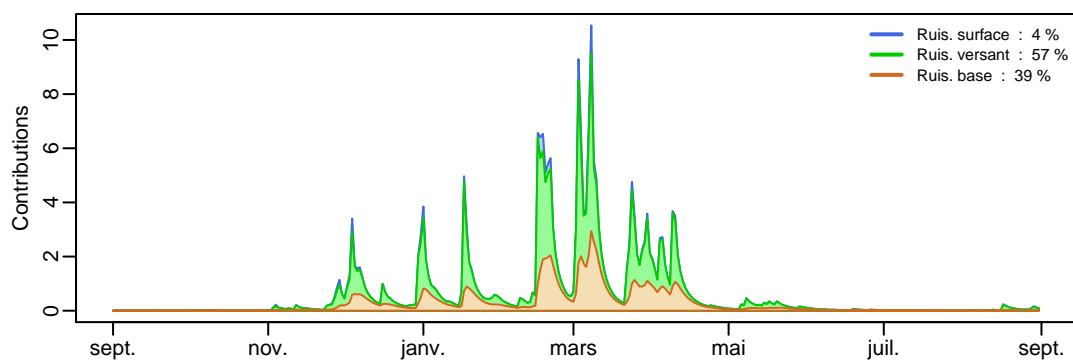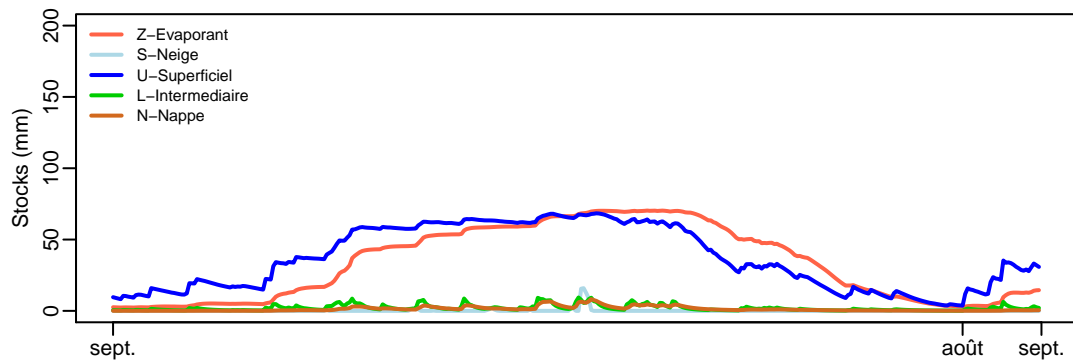

# k1764020 (179.8 km<sup>2</sup>) – année 2006–2007

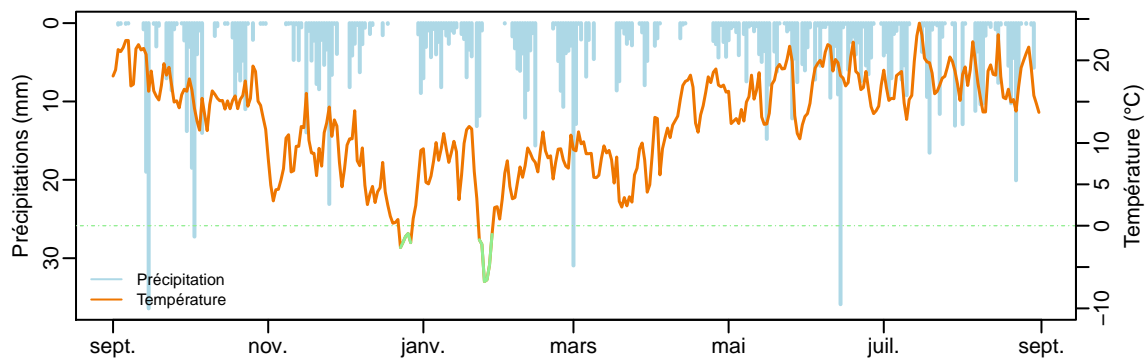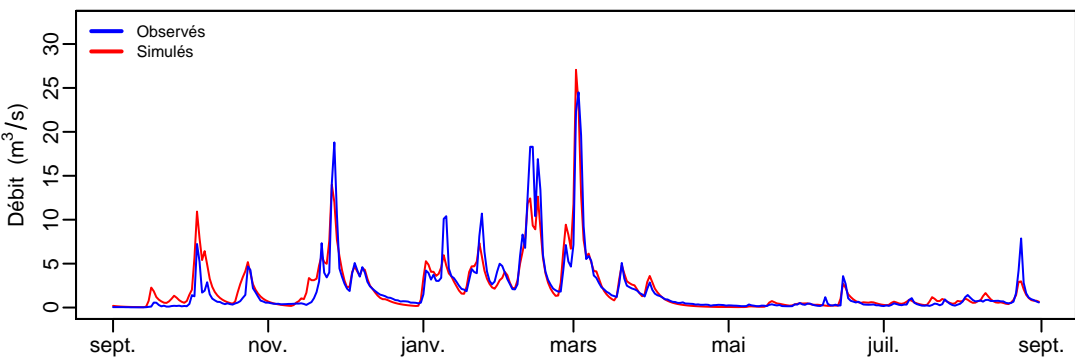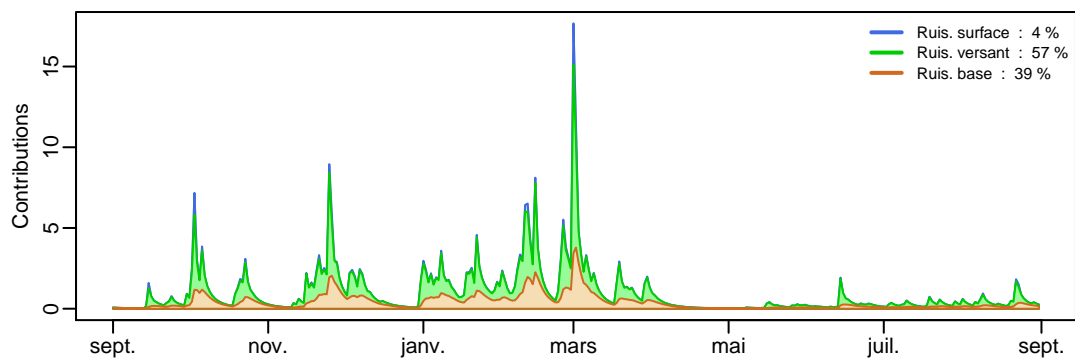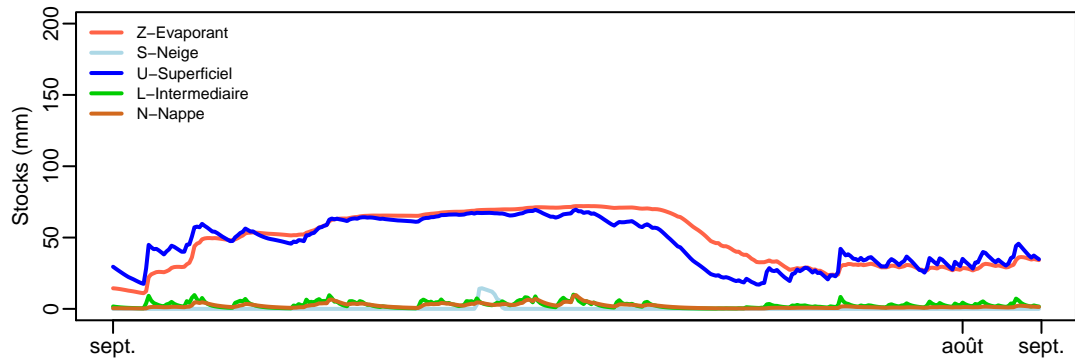

# k1764020 (179.8 km<sup>2</sup>) – année 2007–2008

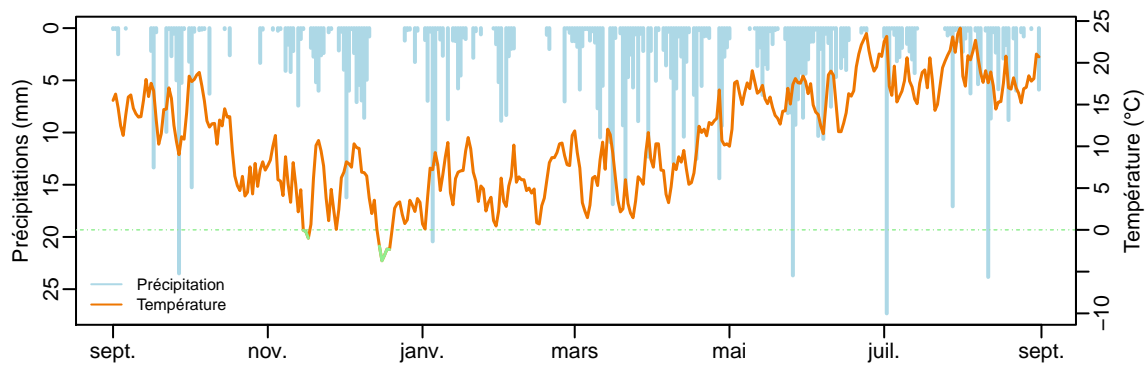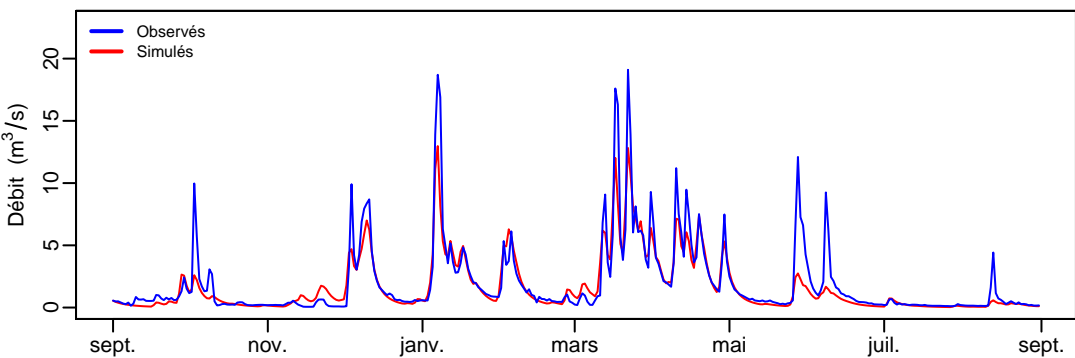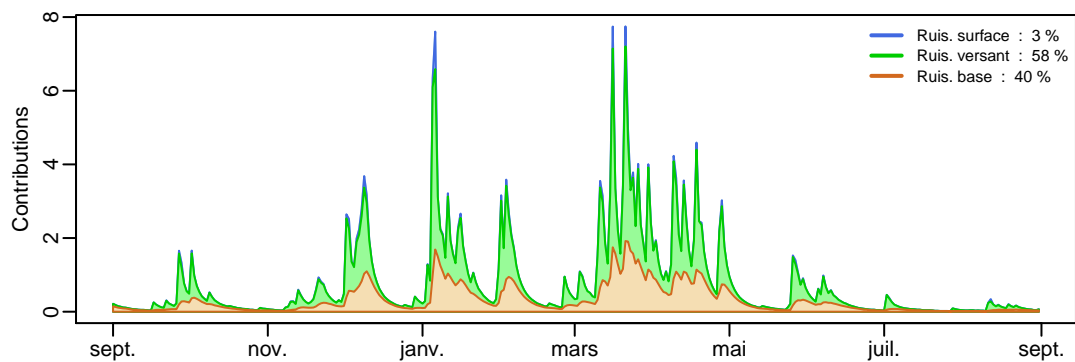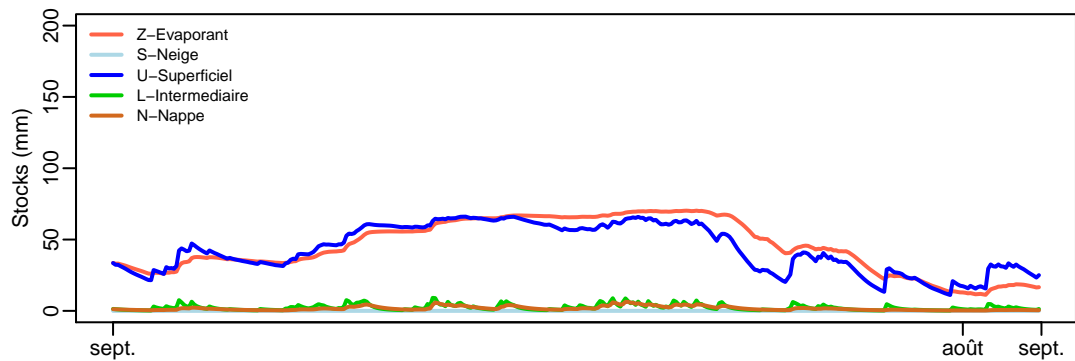



# k1764020 (179.8 km<sup>2</sup>) – année 2008–2009

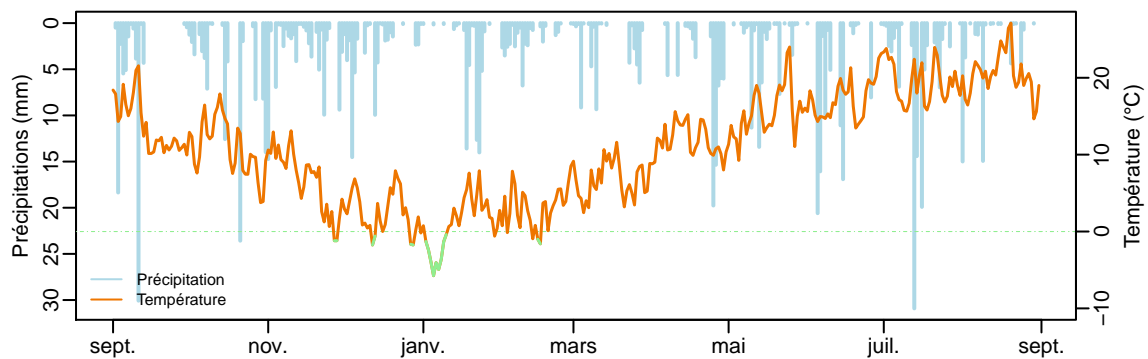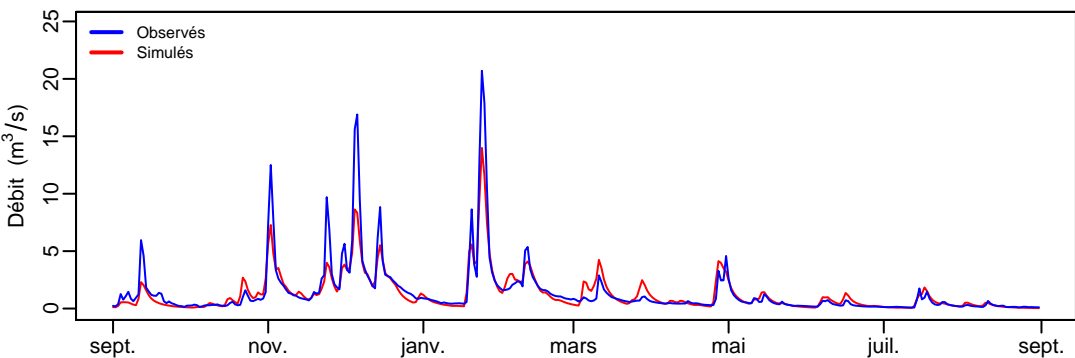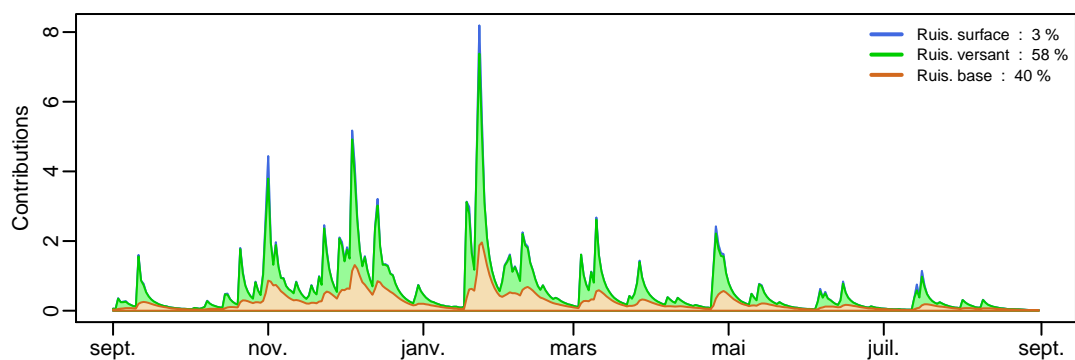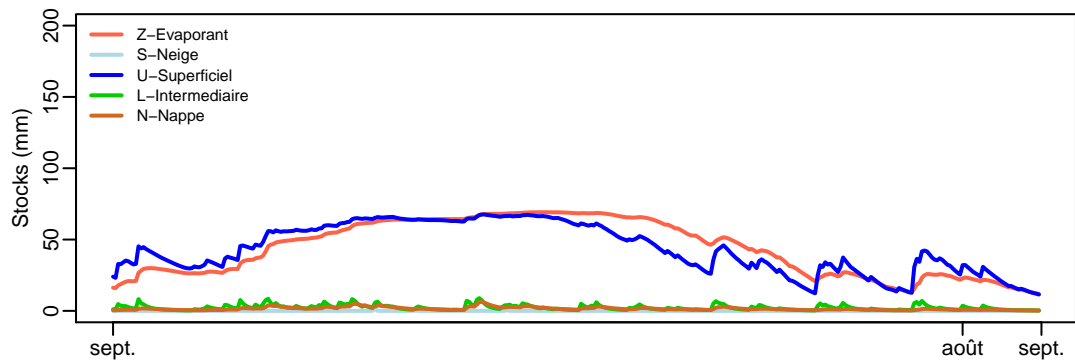

# k1764020 (179.8 km<sup>2</sup>) – année 2009–2010

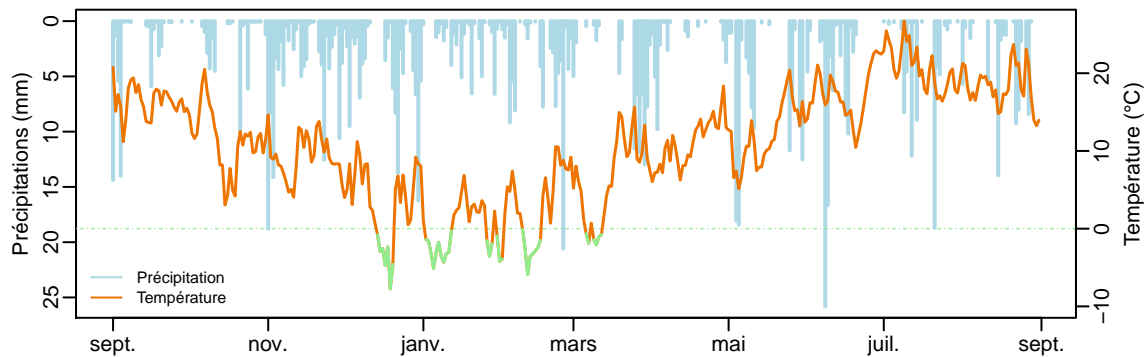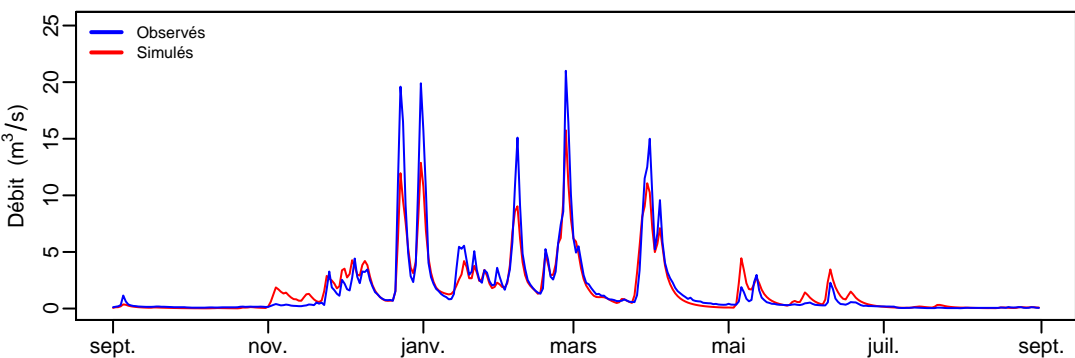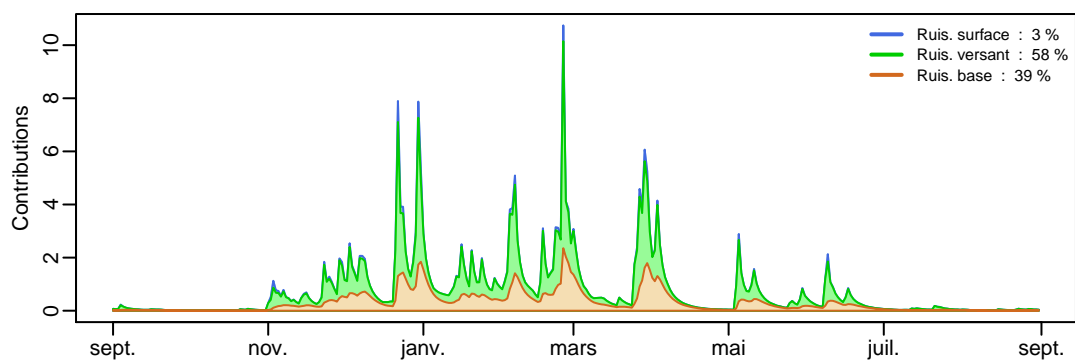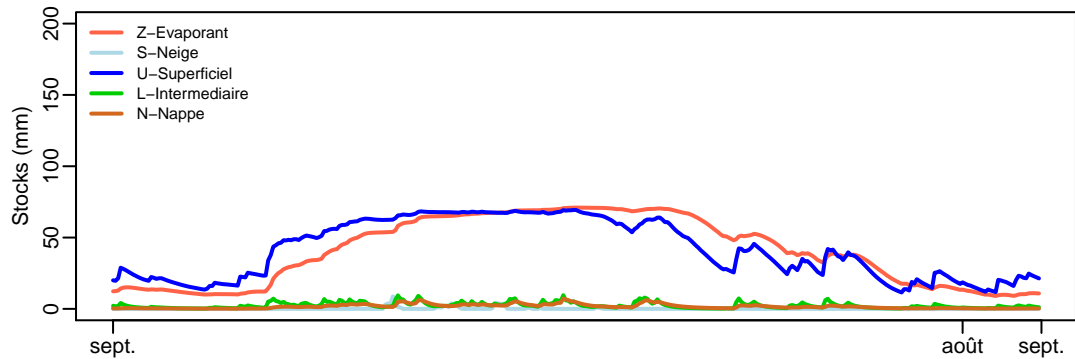

# k1764020 (179.8 km<sup>2</sup>) – année 2010–2011

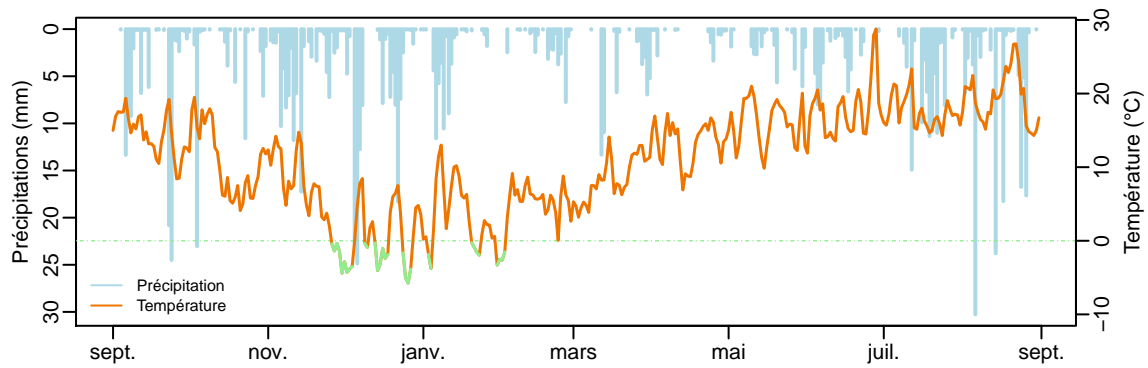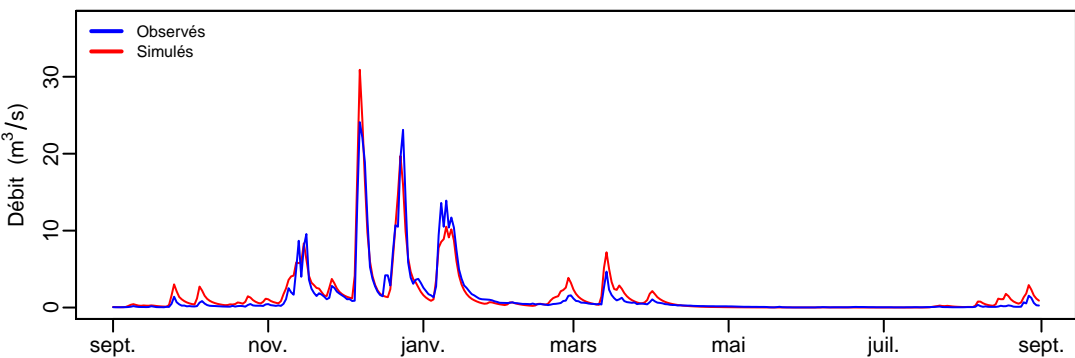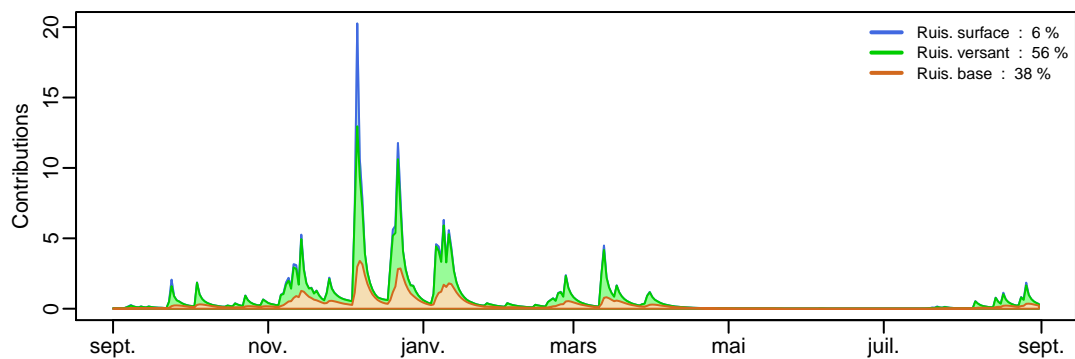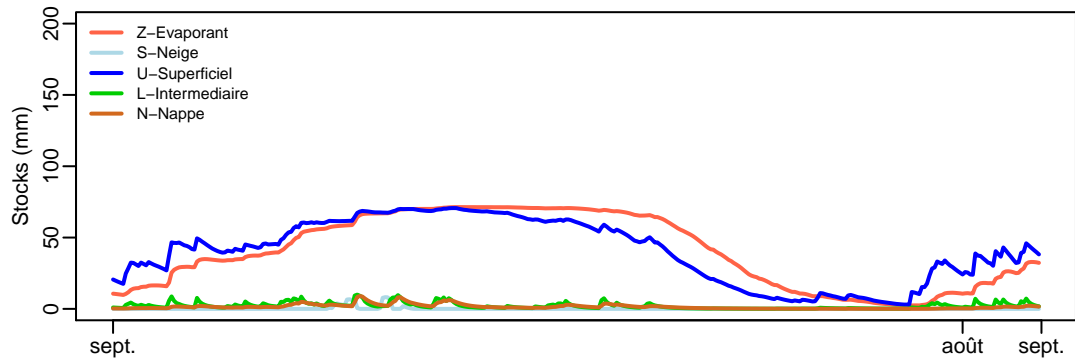

# k1764020 (179.8 km<sup>2</sup>) – année 2011–2012

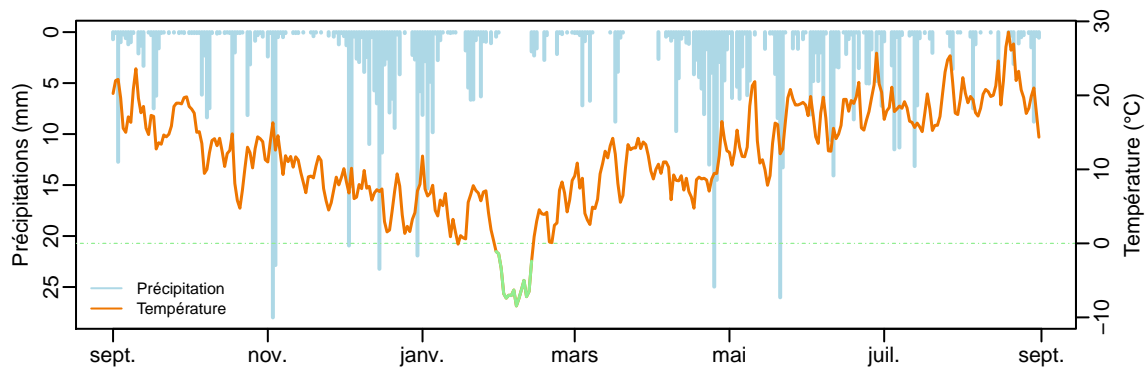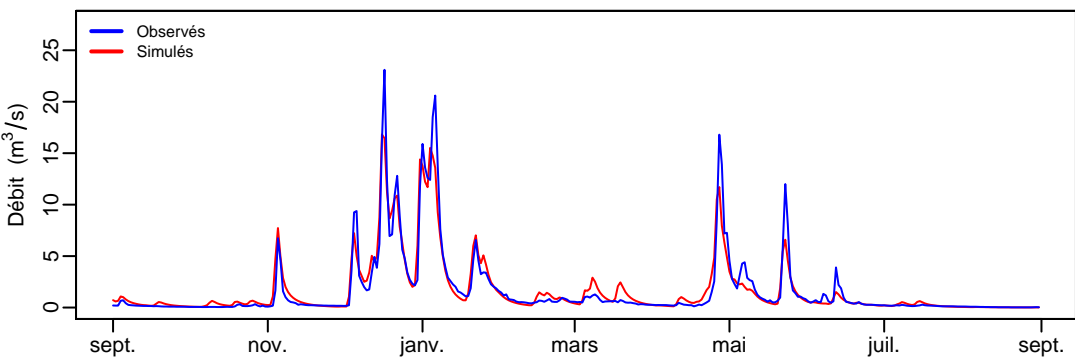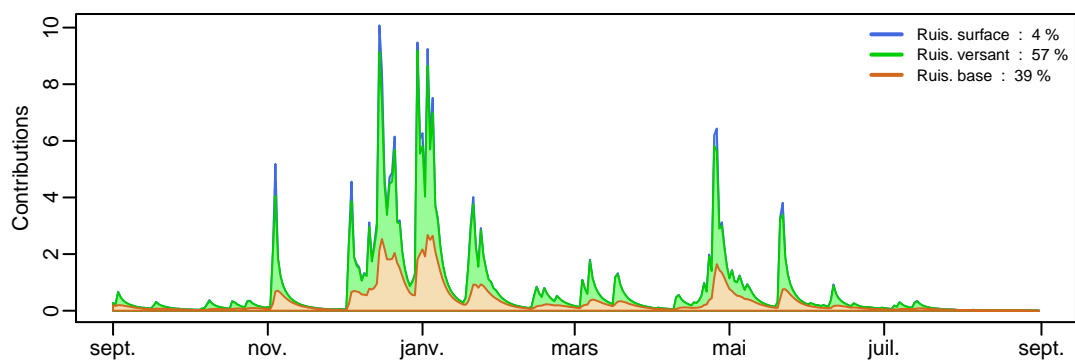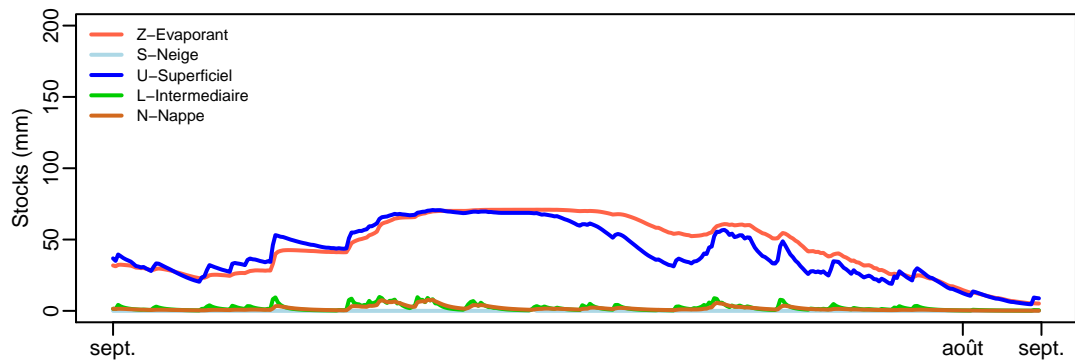

# k1773010 (1467.58 km²) – année 1985–1986

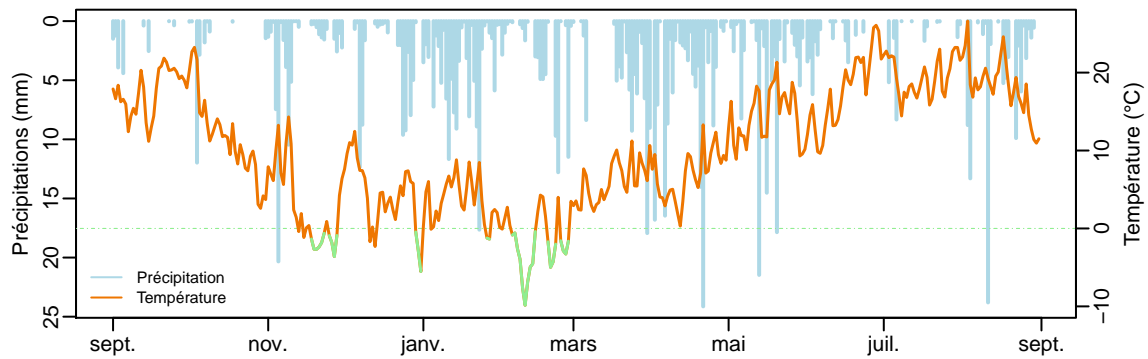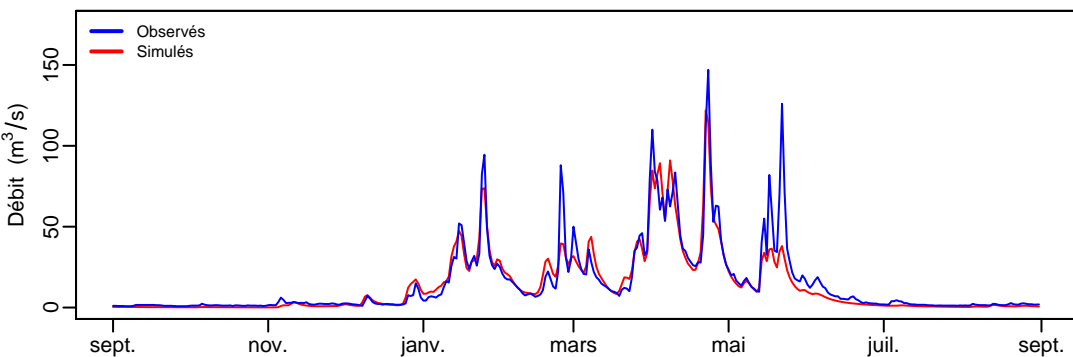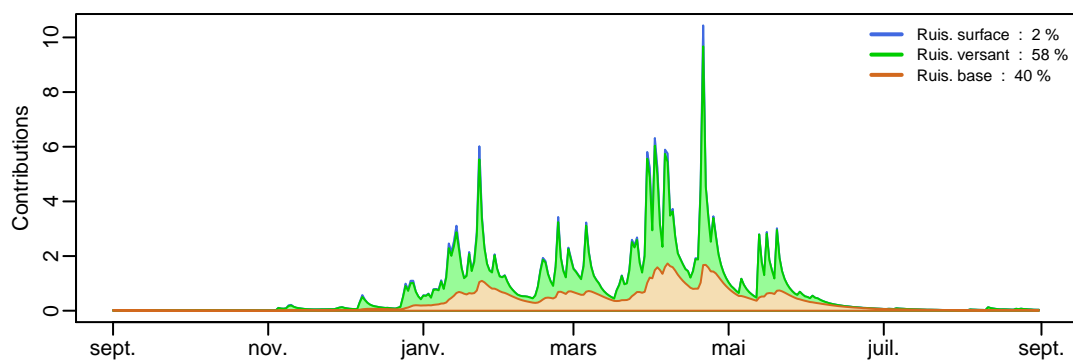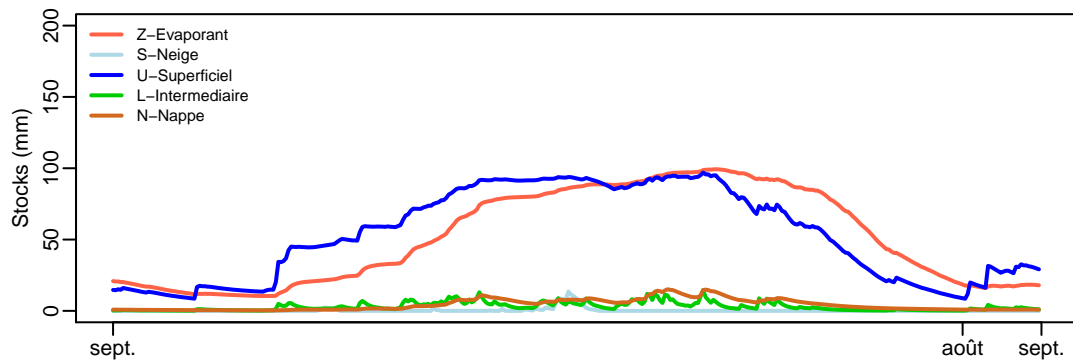

# k1773010 (1467.58 km<sup>2</sup>) – année 1986–1987

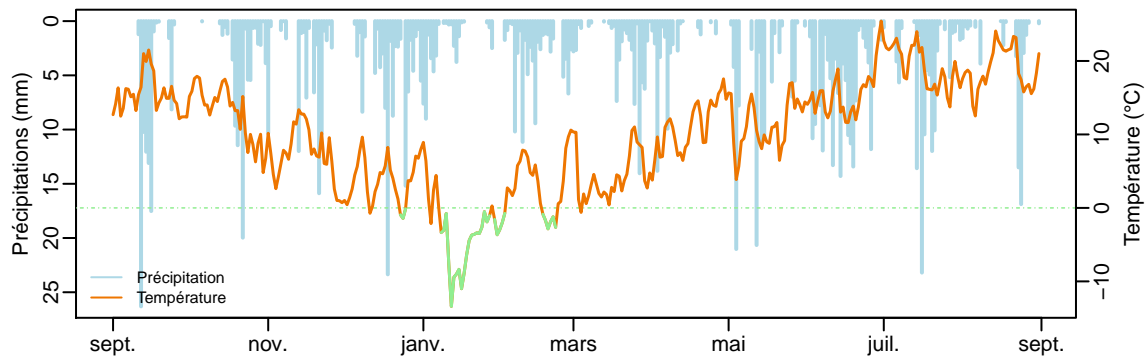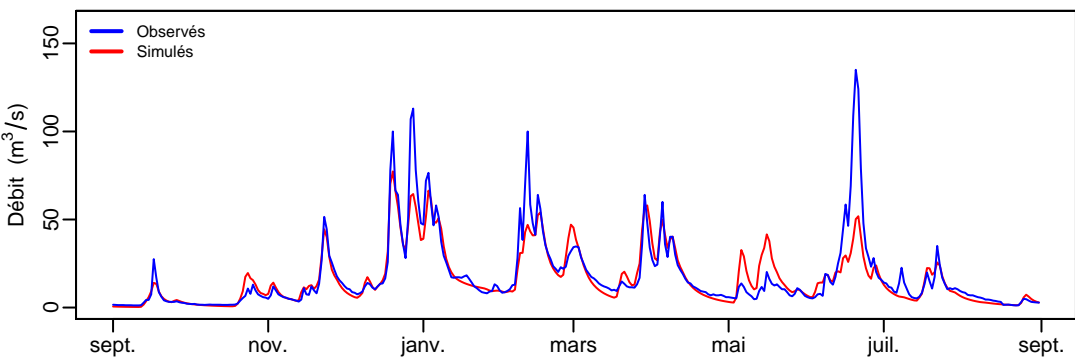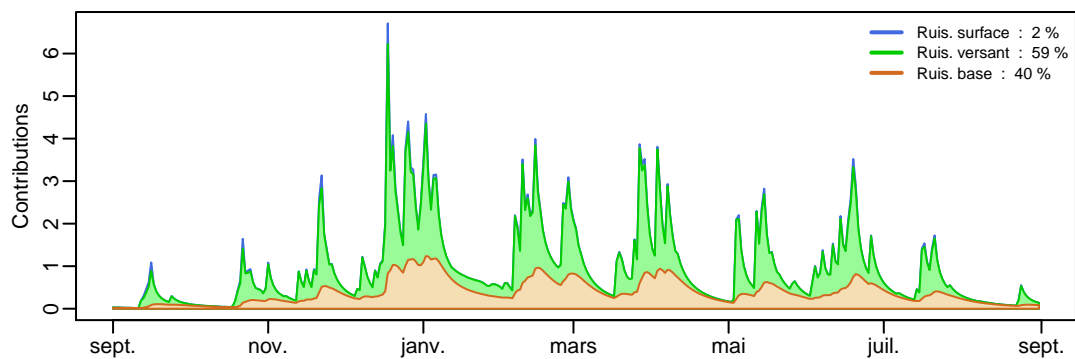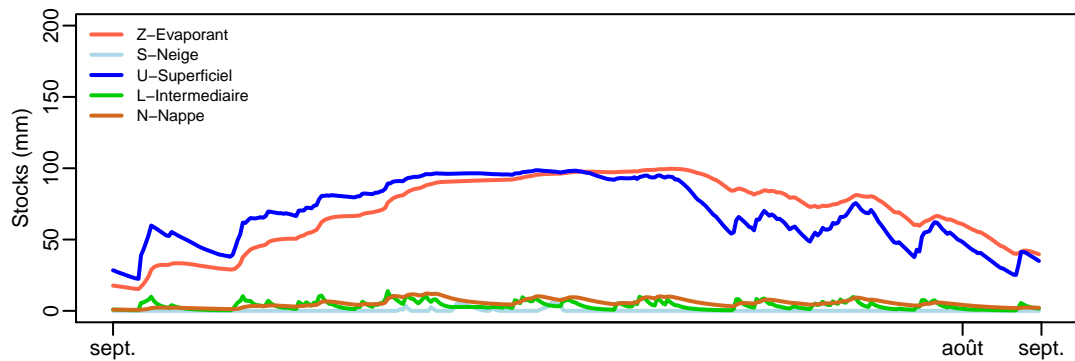

# k1773010 (1467.58 km<sup>2</sup>) – année 1987–1988

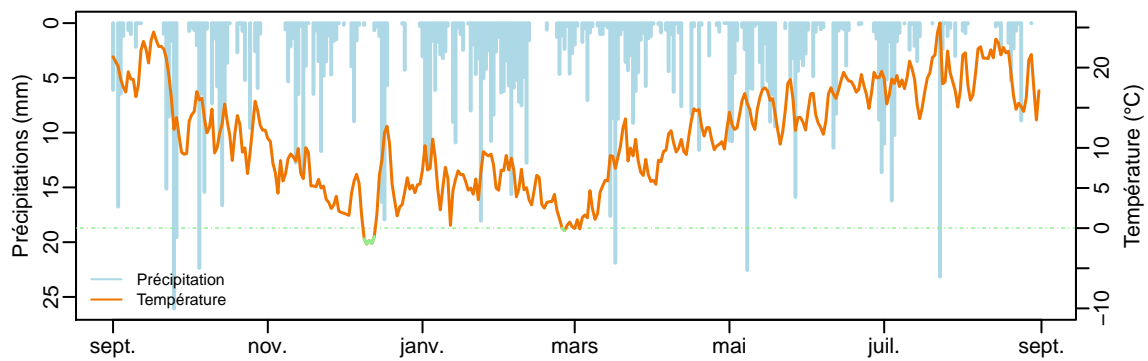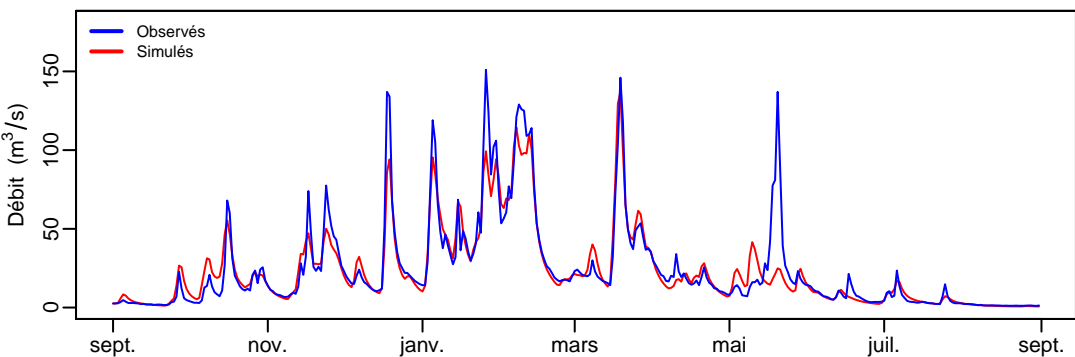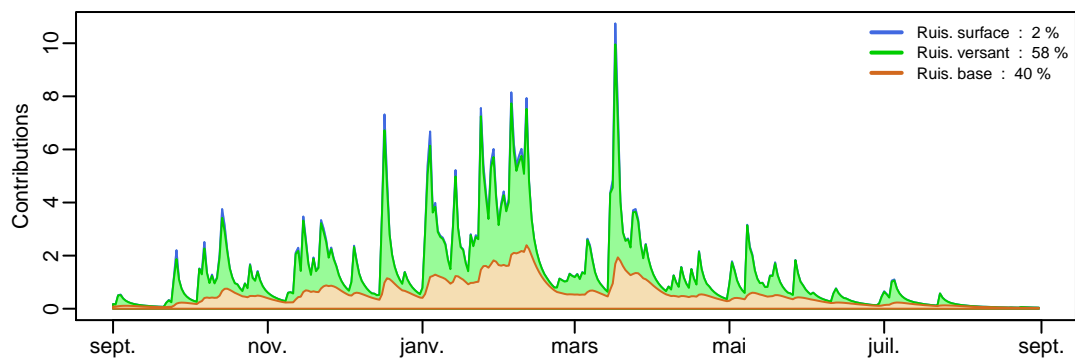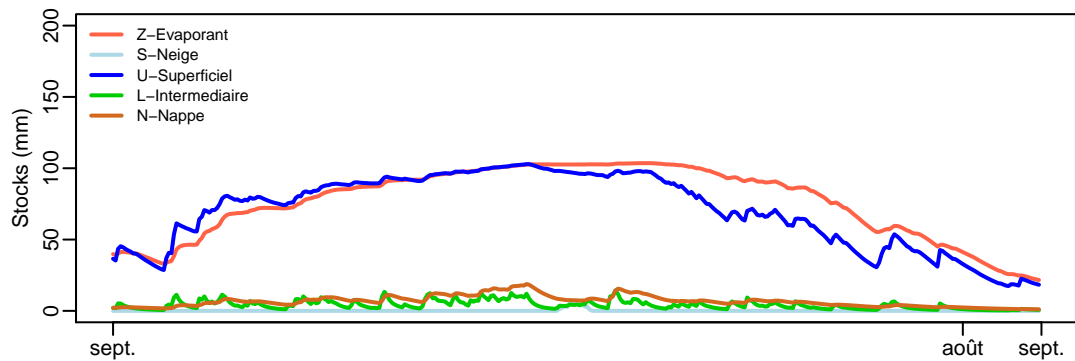

# k1773010 (1467.58 km²) – année 1988–1989

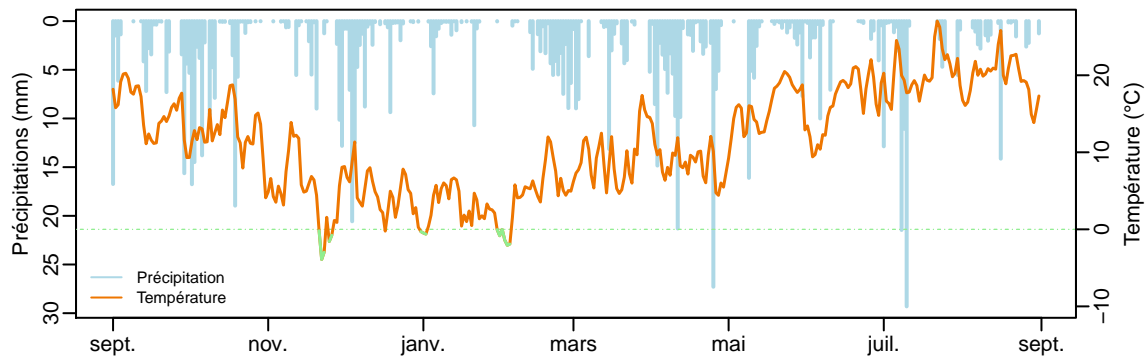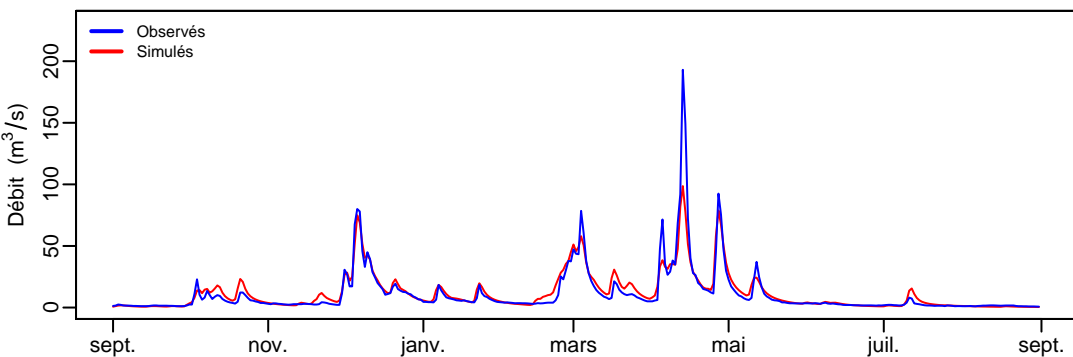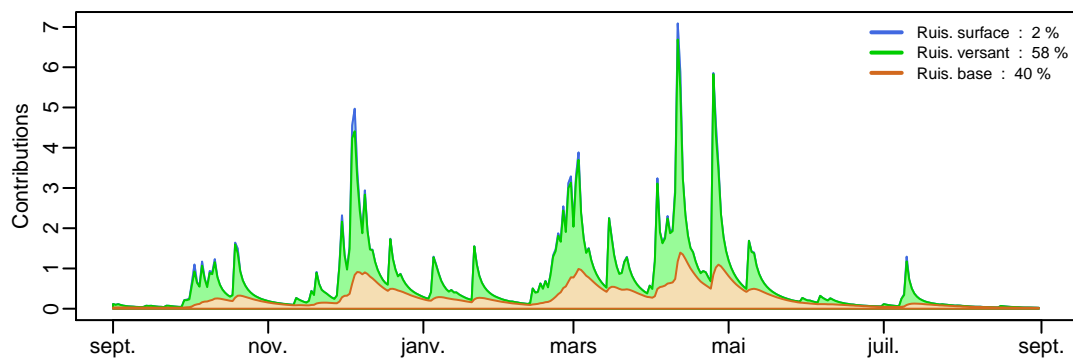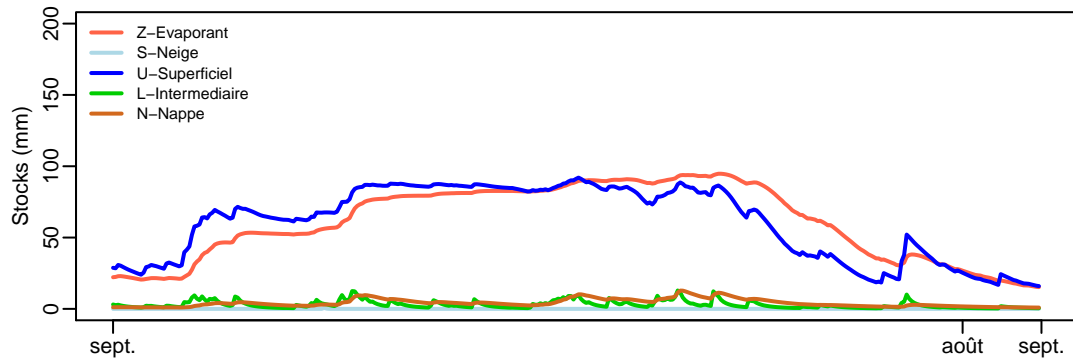



# k1773010 (1467.58 km<sup>2</sup>) – année 1989–1990

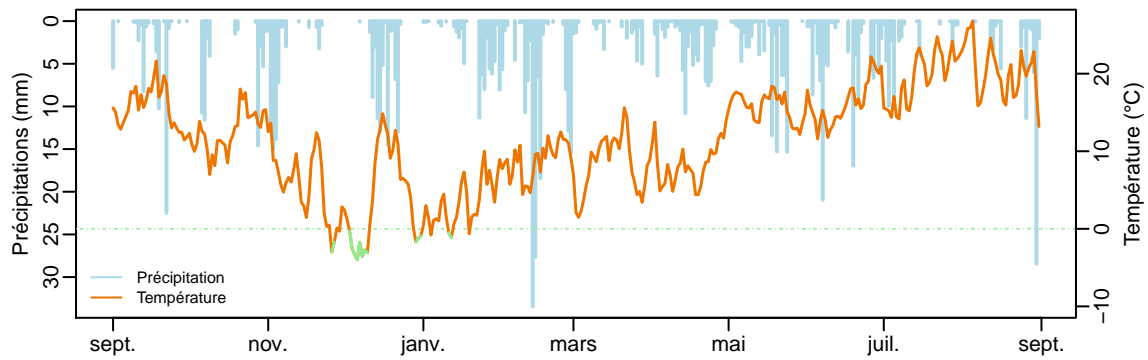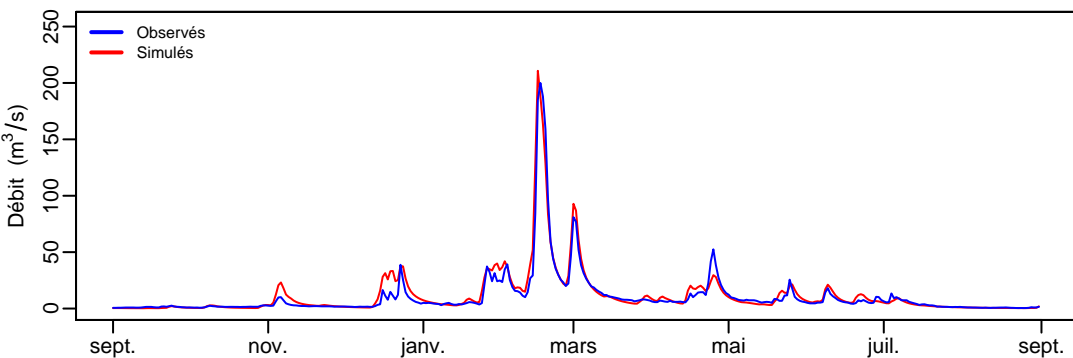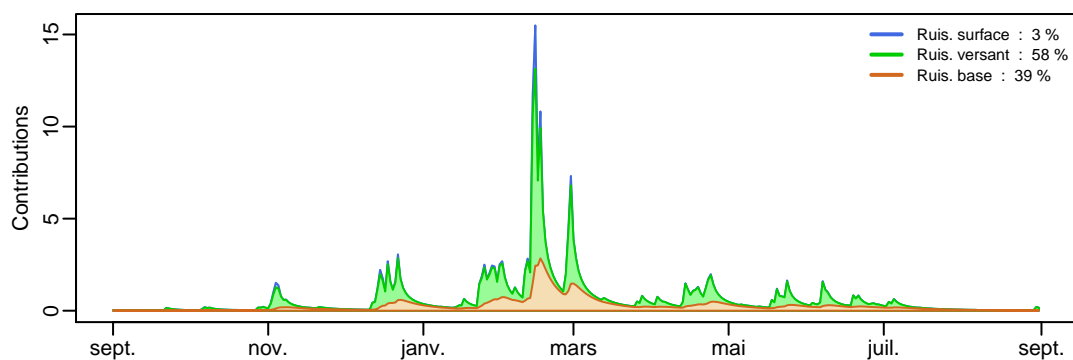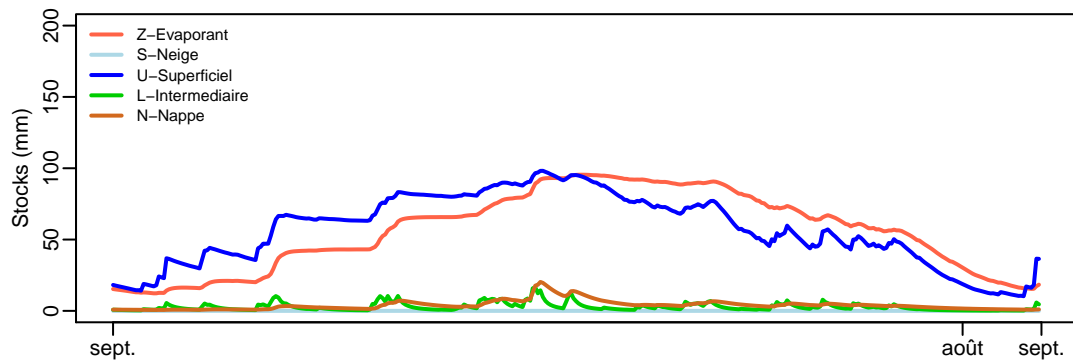

# k1773010 (1467.58 km<sup>2</sup>) – année 1990–1991

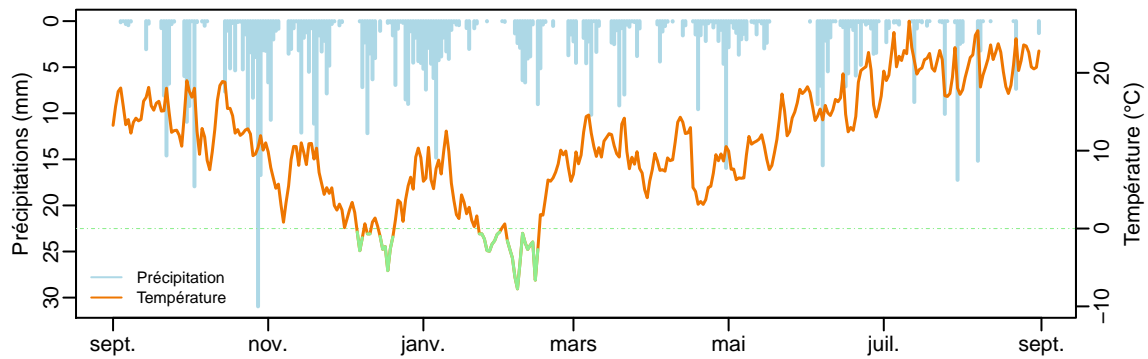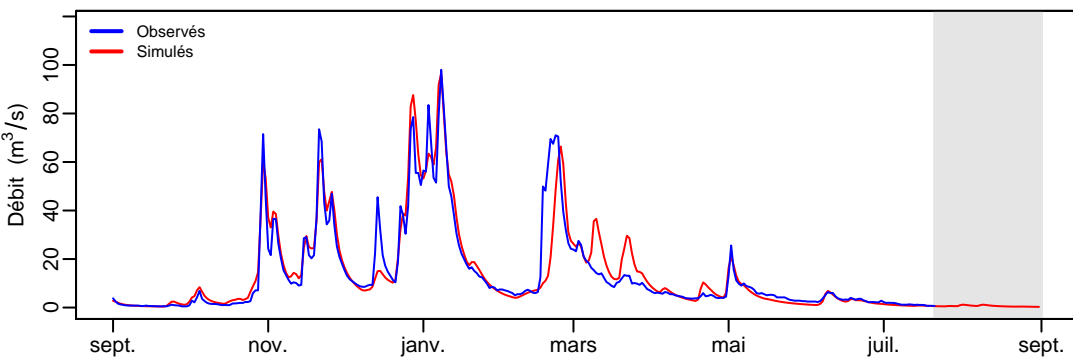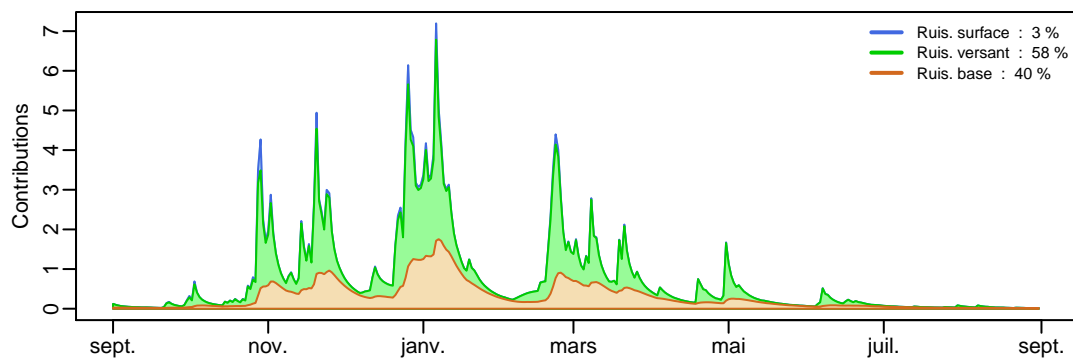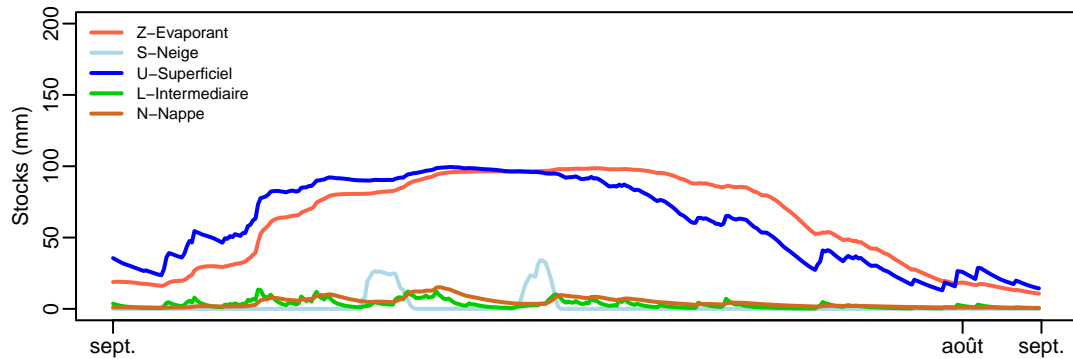

# k1773010 (1467.58 km<sup>2</sup>) – année 1991–1992

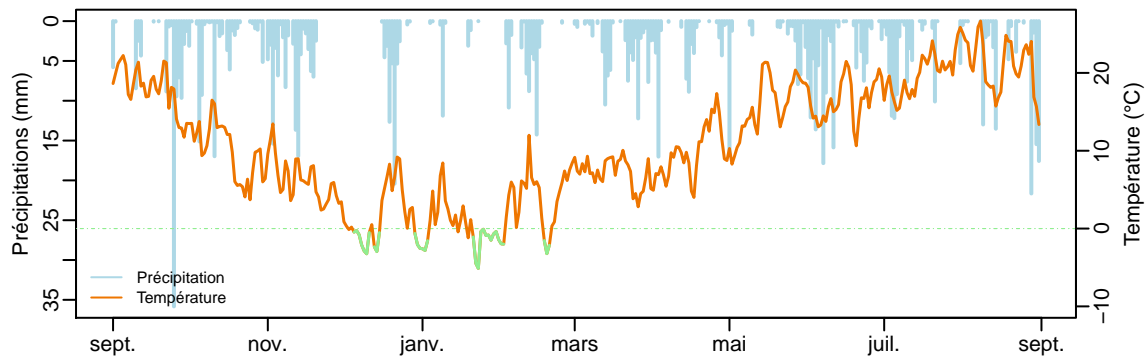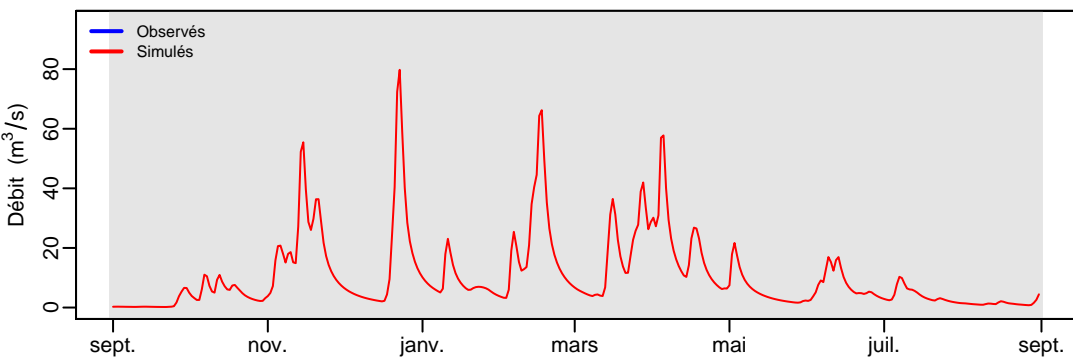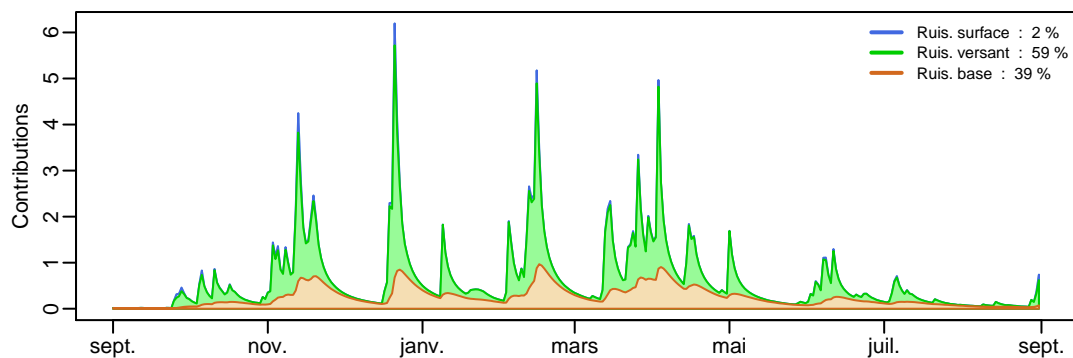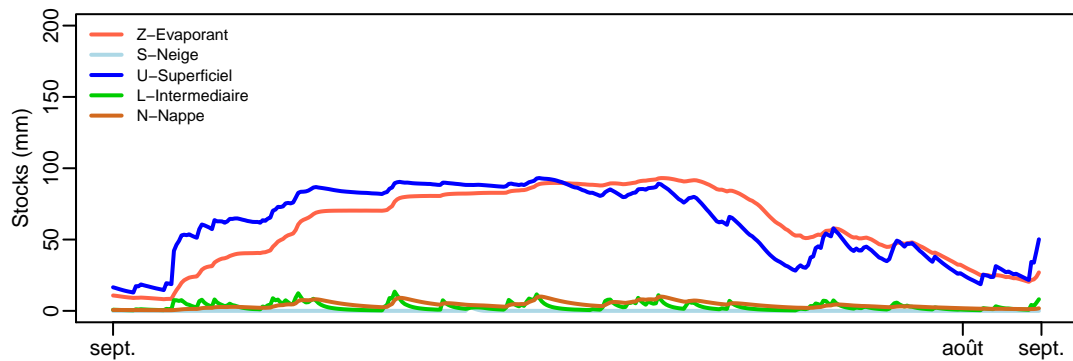

# k1773010 (1467.58 km<sup>2</sup>) – année 1992–1993

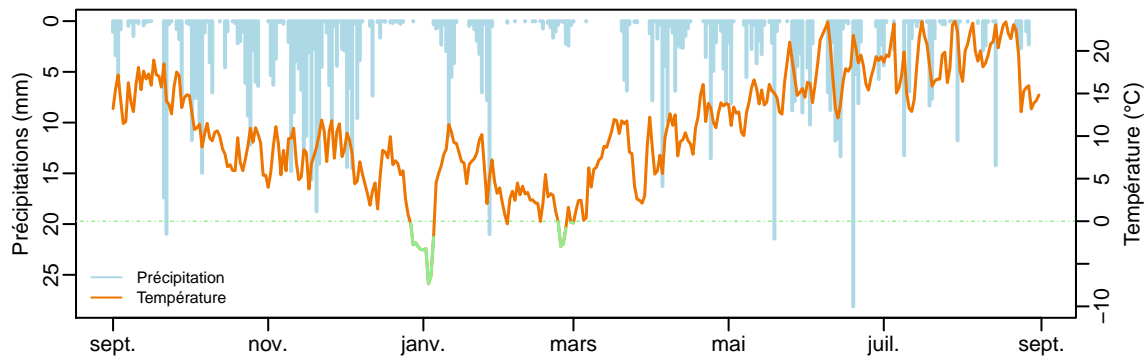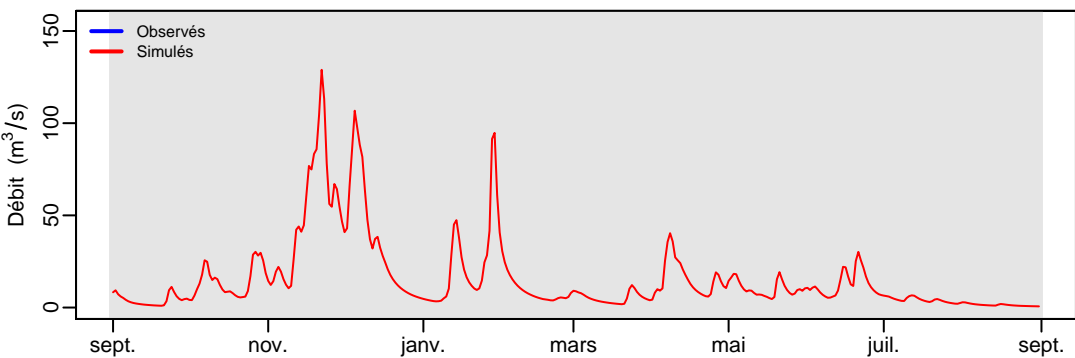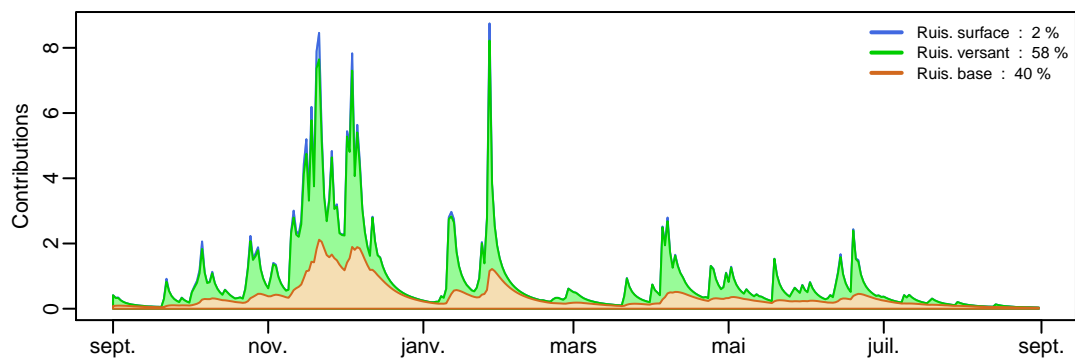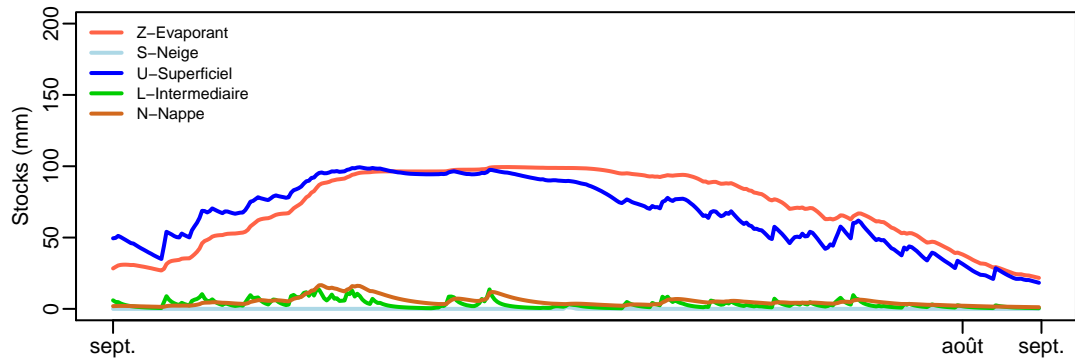

# k1773010 (1467.58 km²) – année 1993–1994

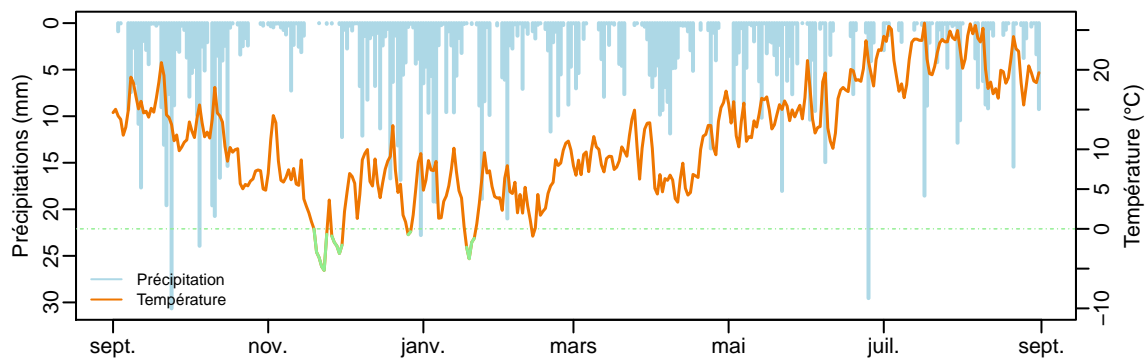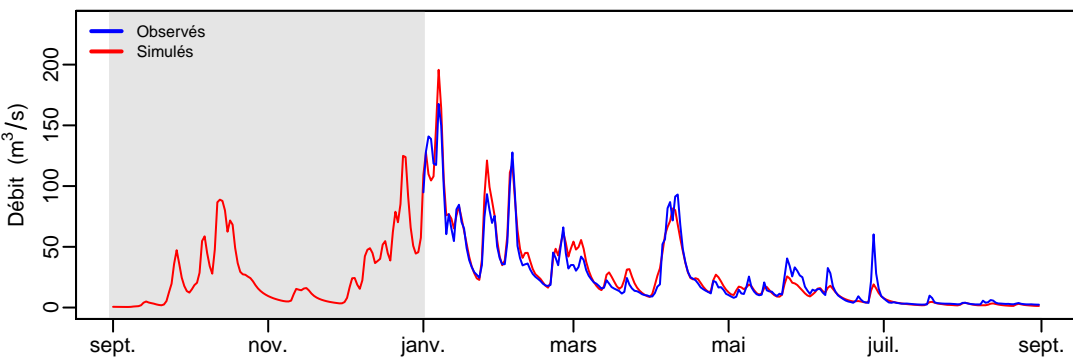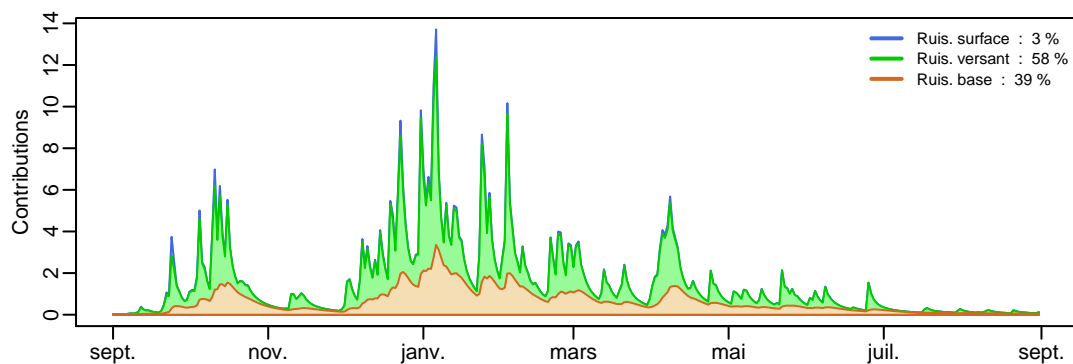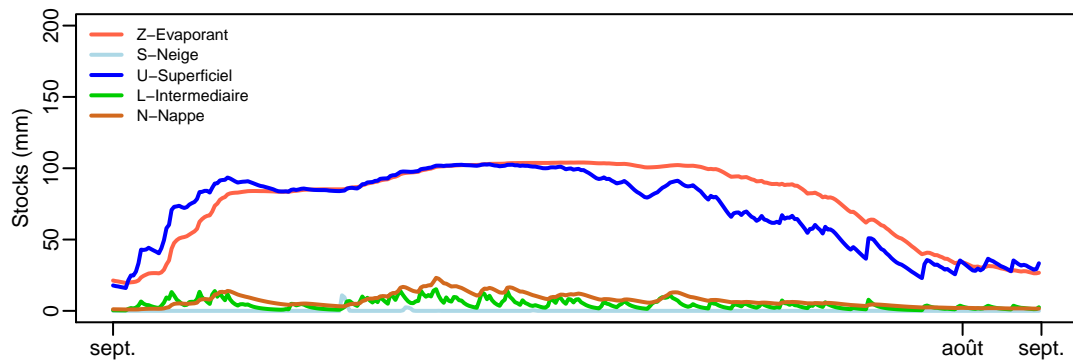

# k1773010 (1467.58 km²) – année 1994–1995

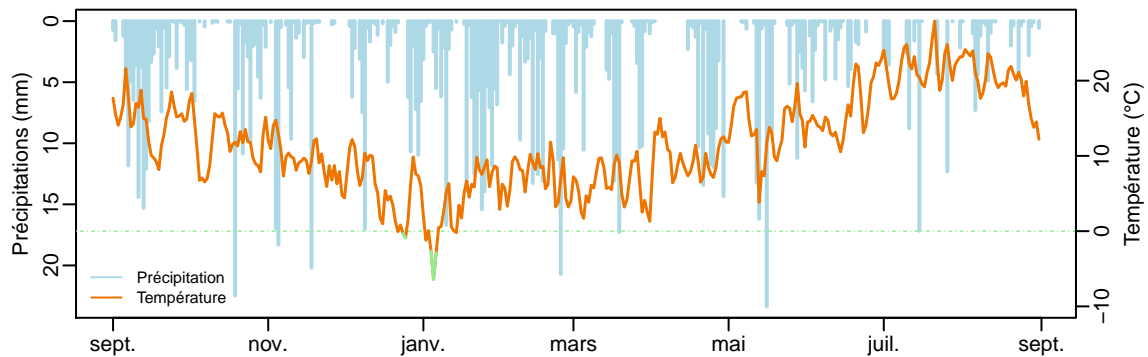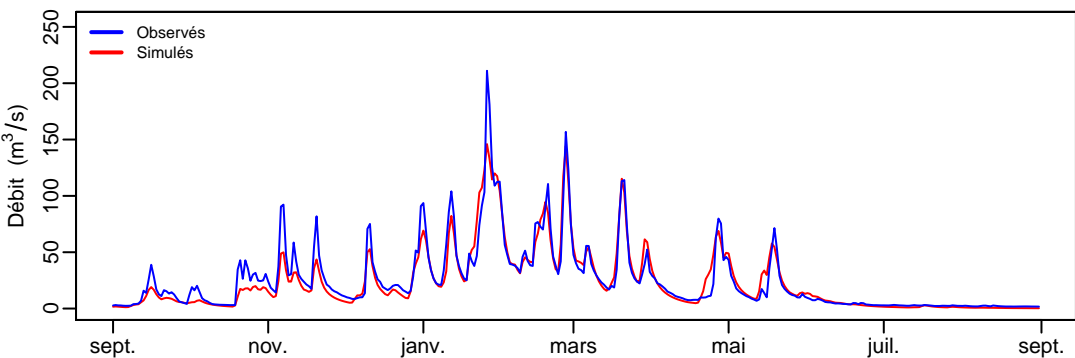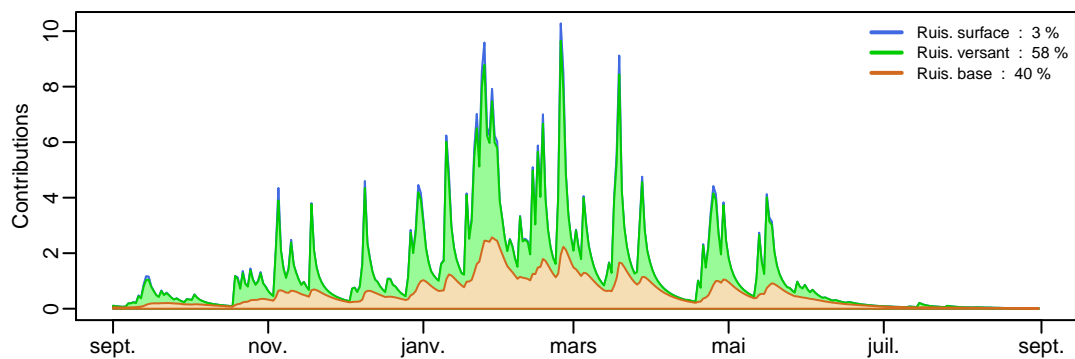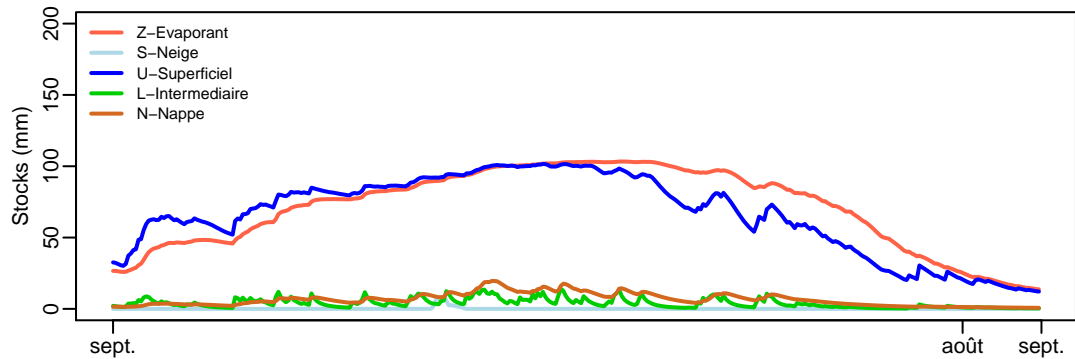

# k1773010 (1467.58 km²) – année 1995–1996

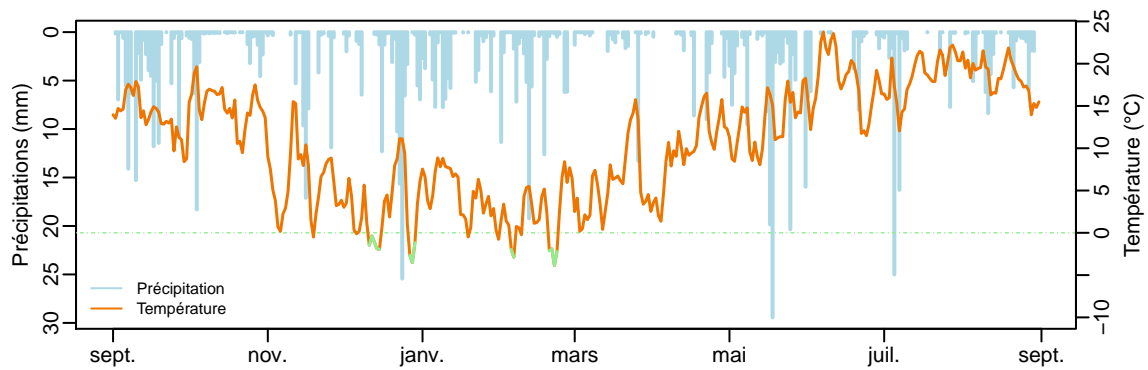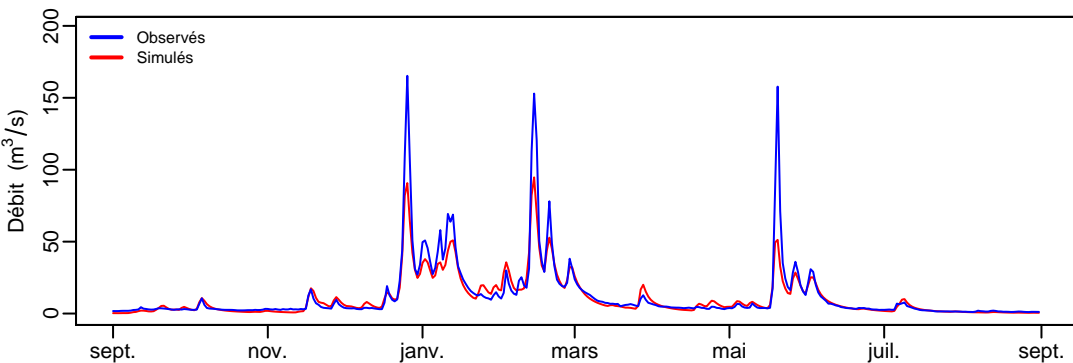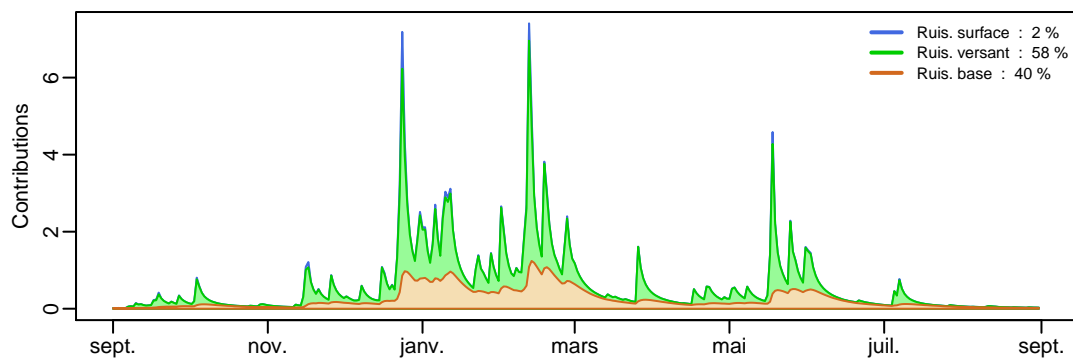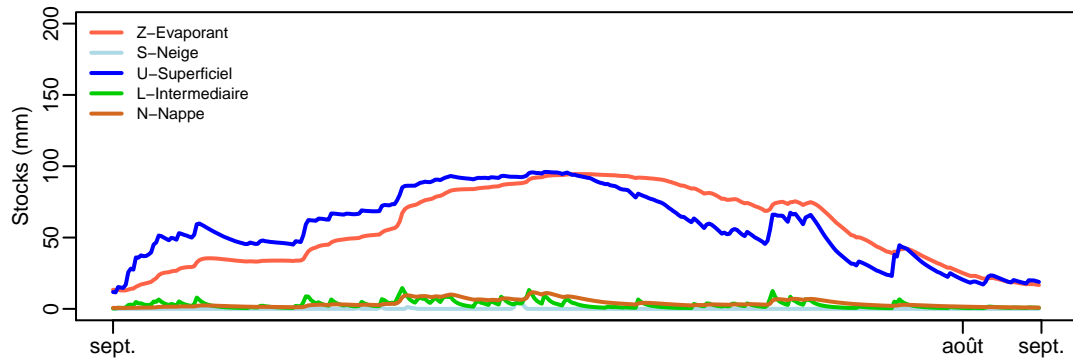

# k1773010 (1467.58 km²) – année 1996–1997

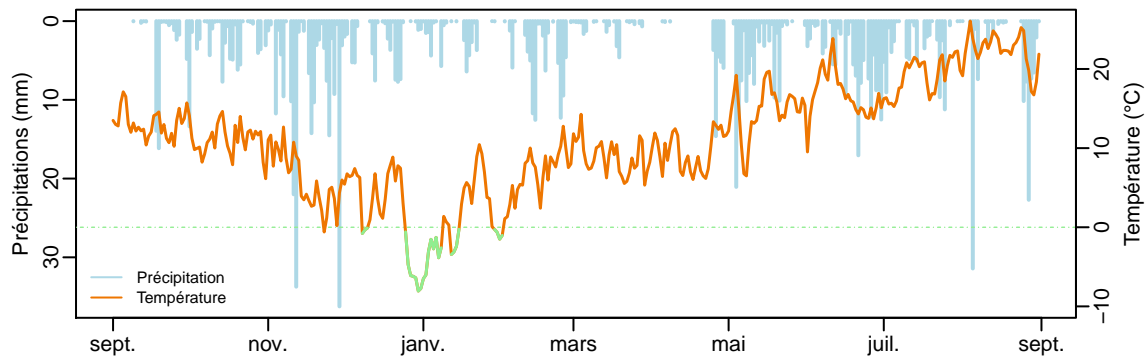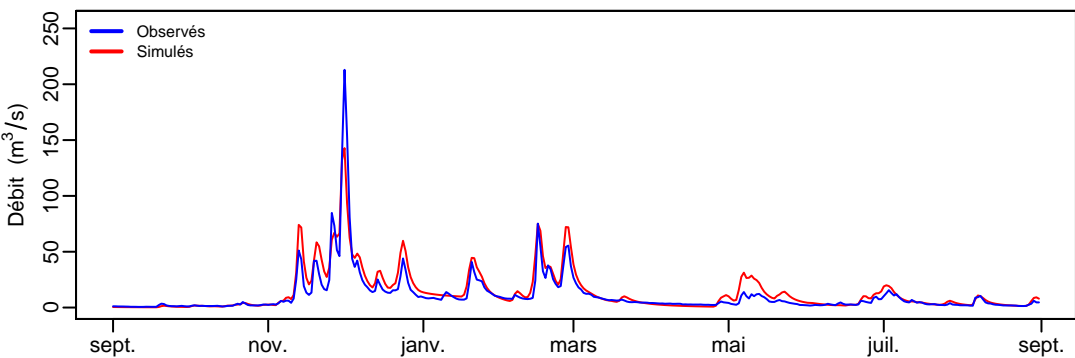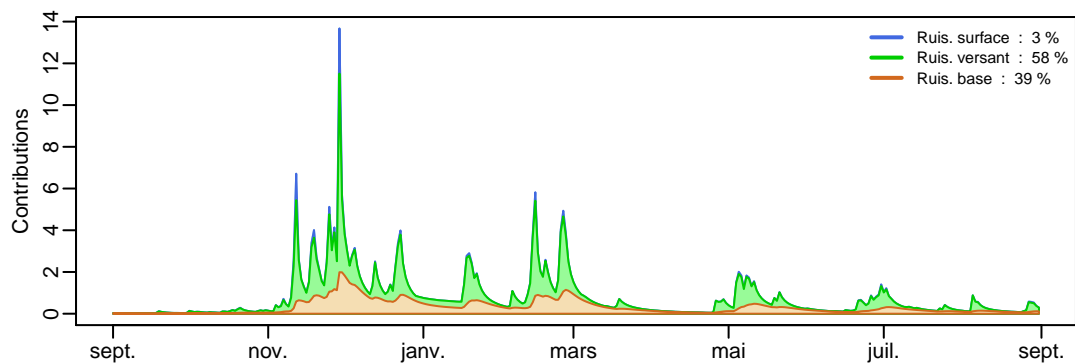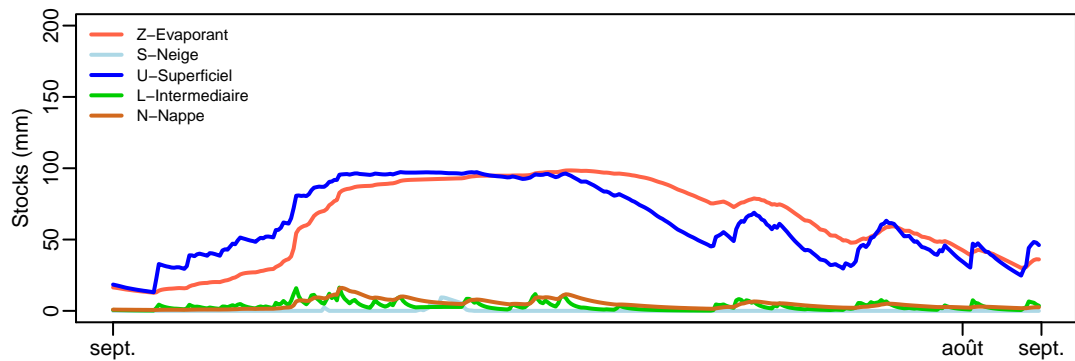



# k1773010 (1467.58 km²) – année 1997–1998

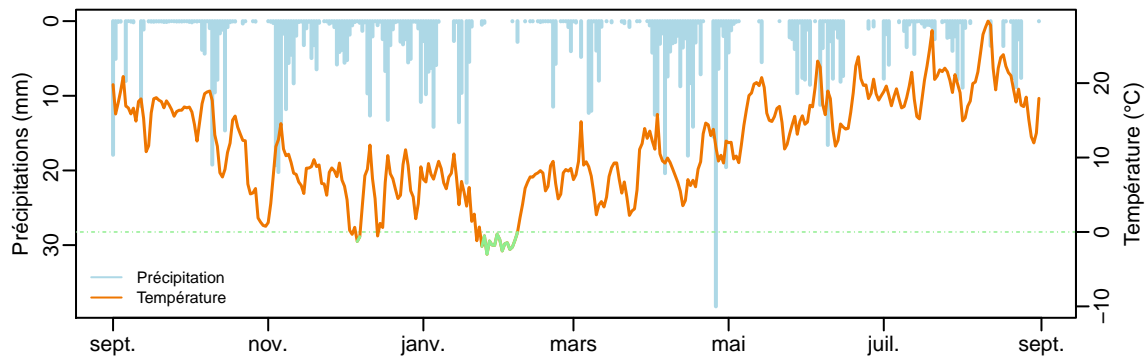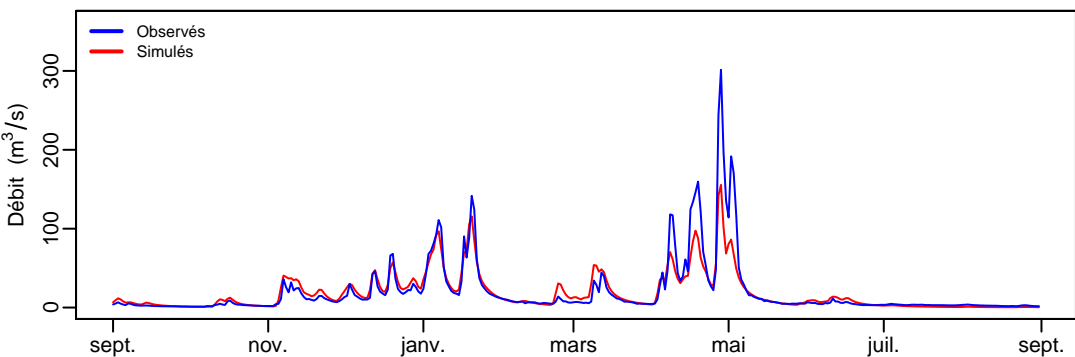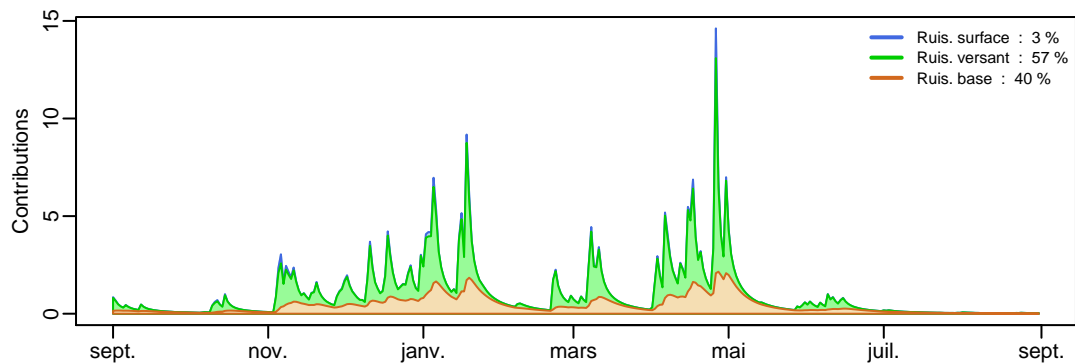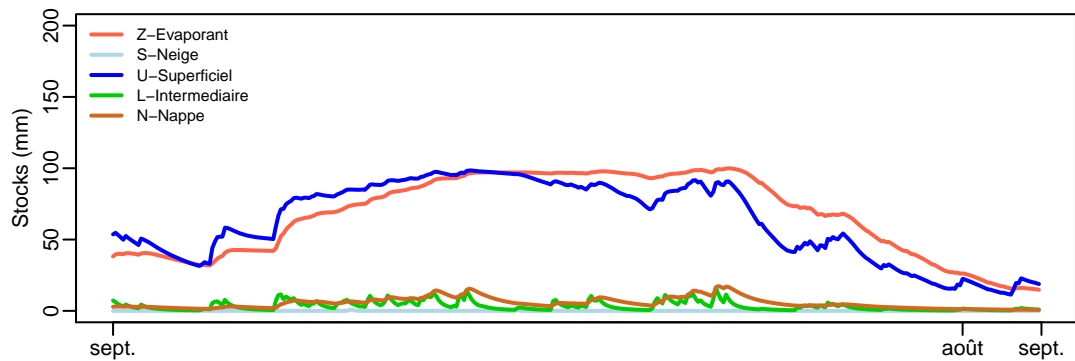

# k1773010 (1467.58 km<sup>2</sup>) – année 1998–1999

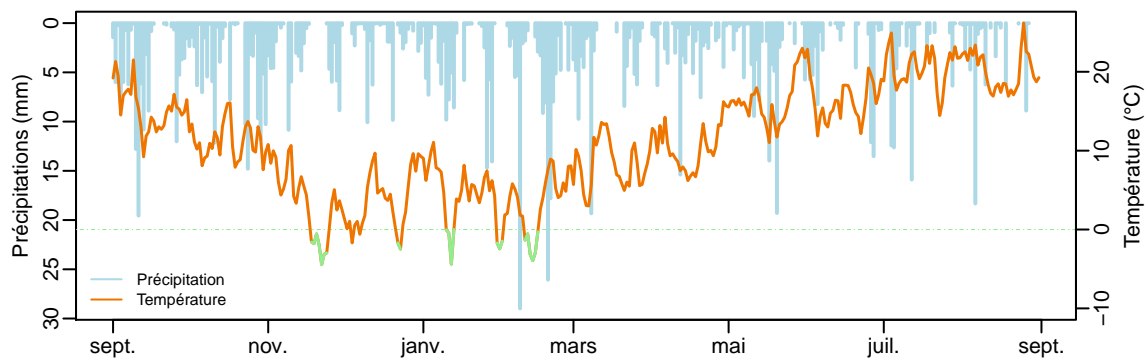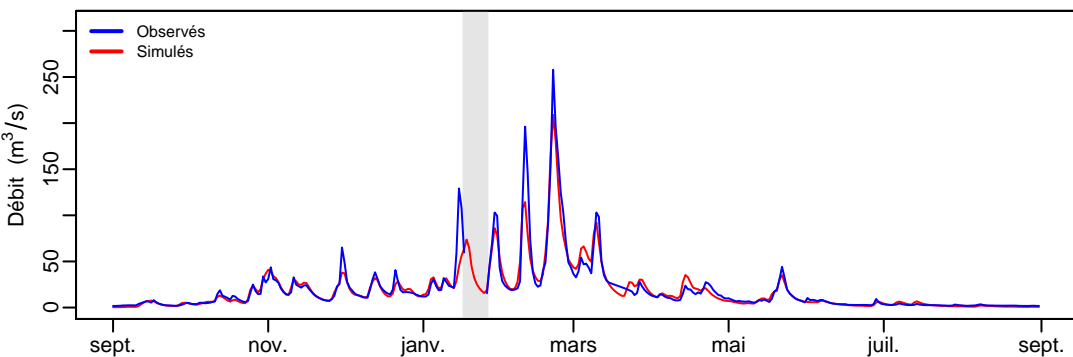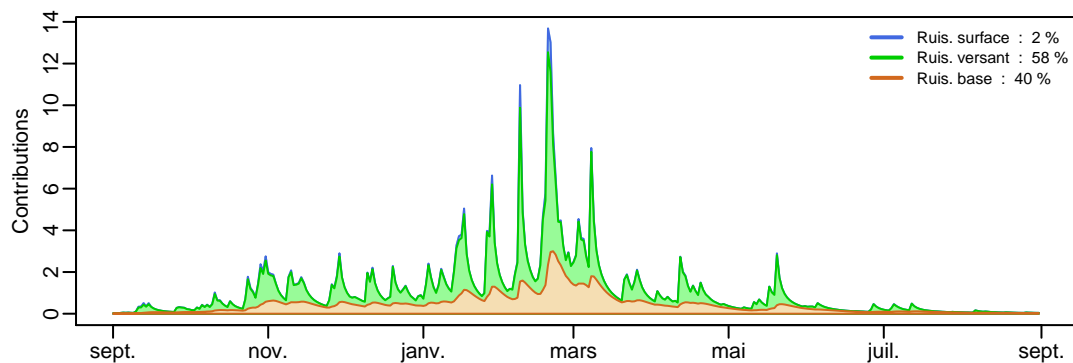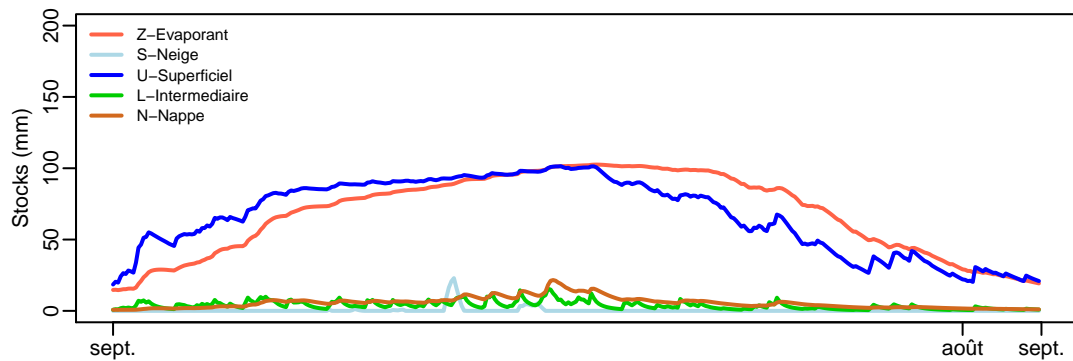

# k1773010 (1467.58 km<sup>2</sup>) – année 1999–2000

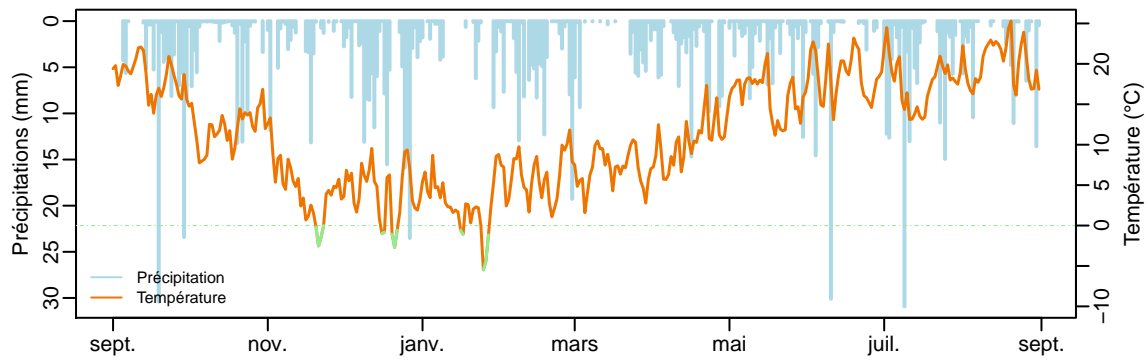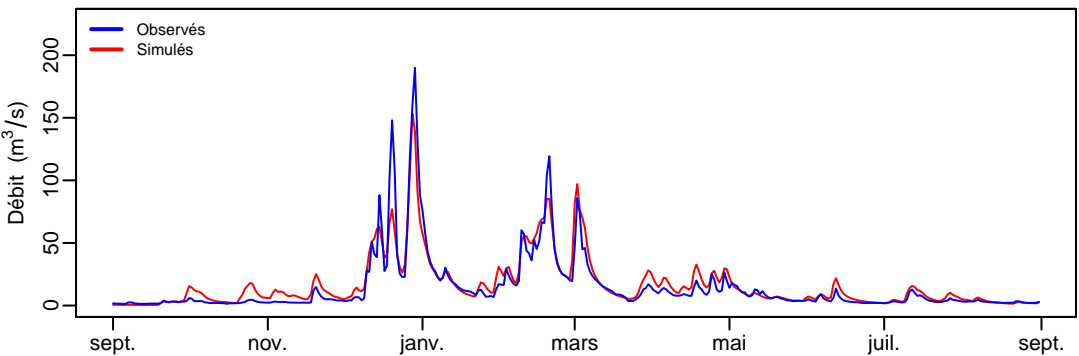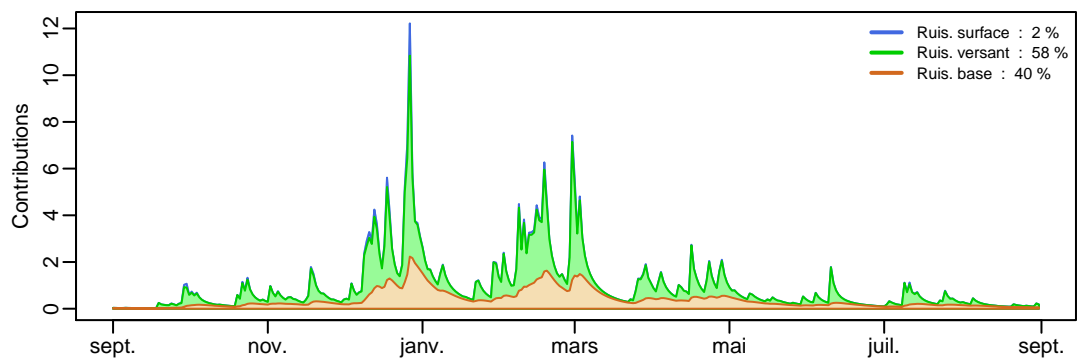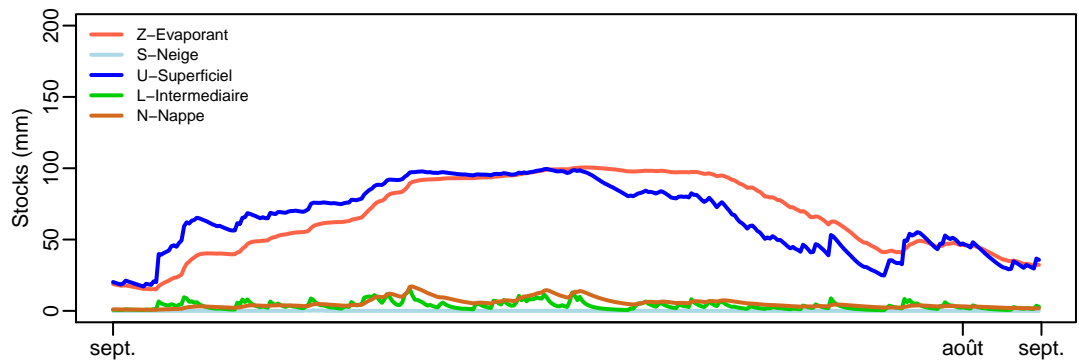

# k1773010 (1467.58 km<sup>2</sup>) – année 2000–2001

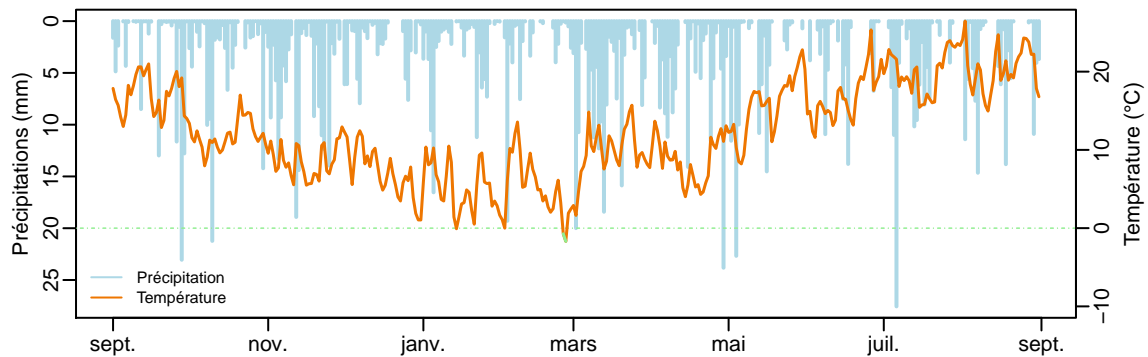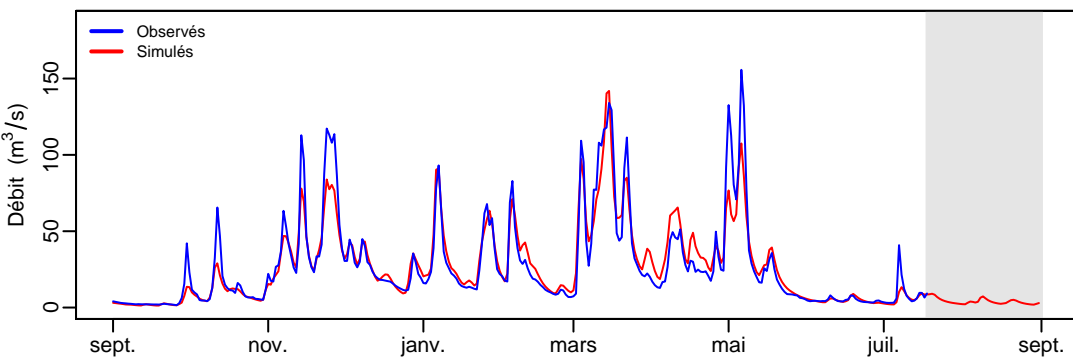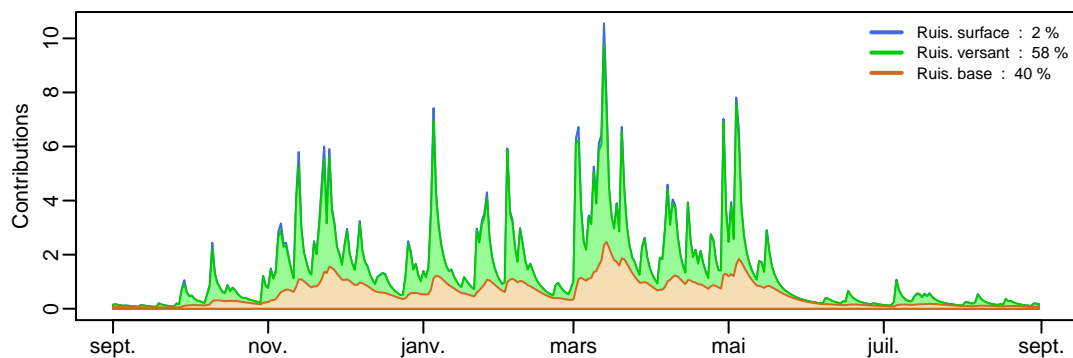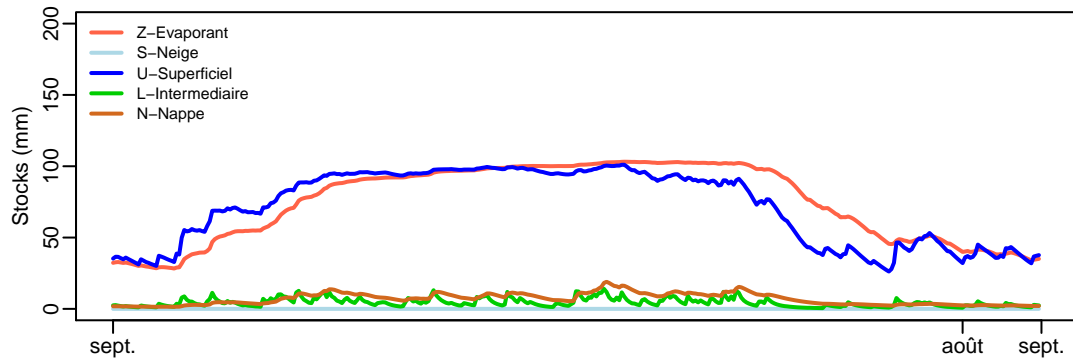

# k1773010 (1467.58 km<sup>2</sup>) – année 2001–2002

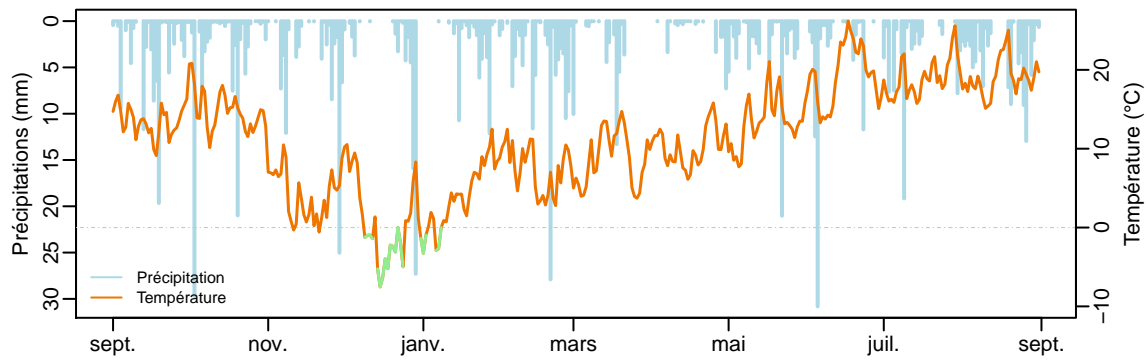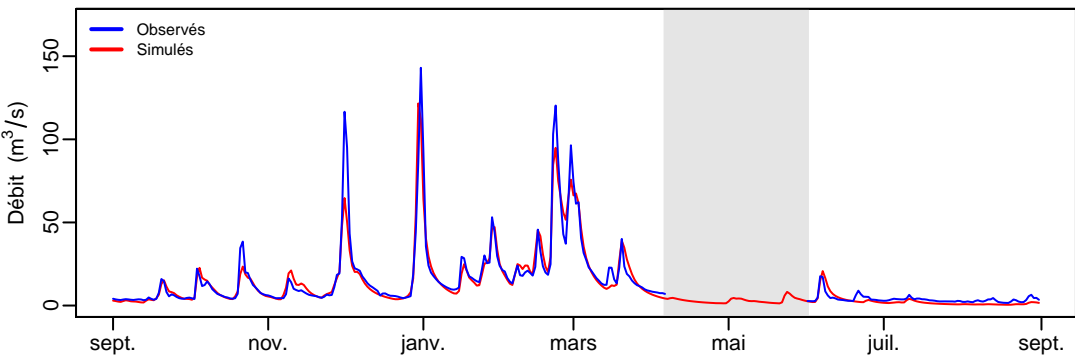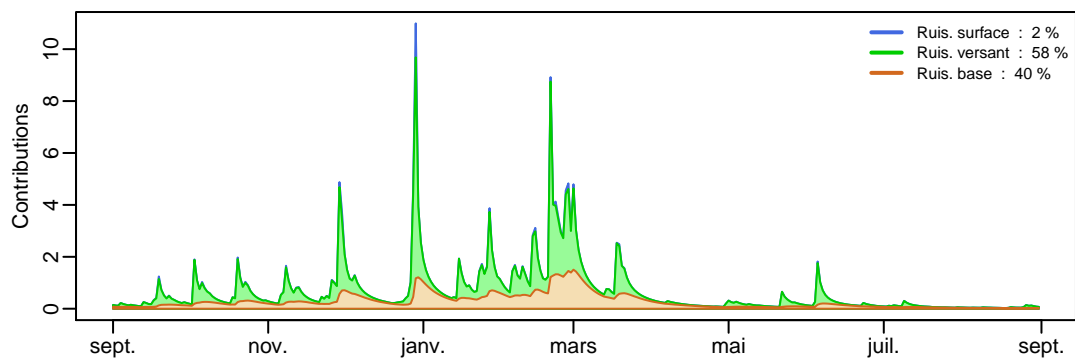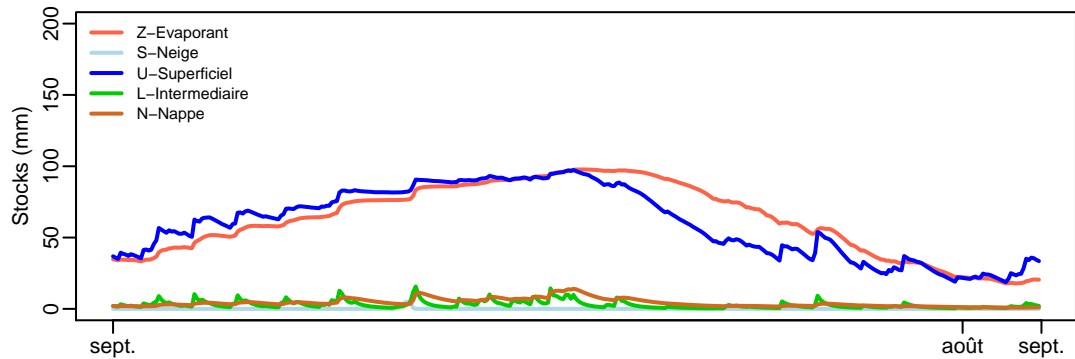

# k1773010 (1467.58 km²) – année 2002–2003

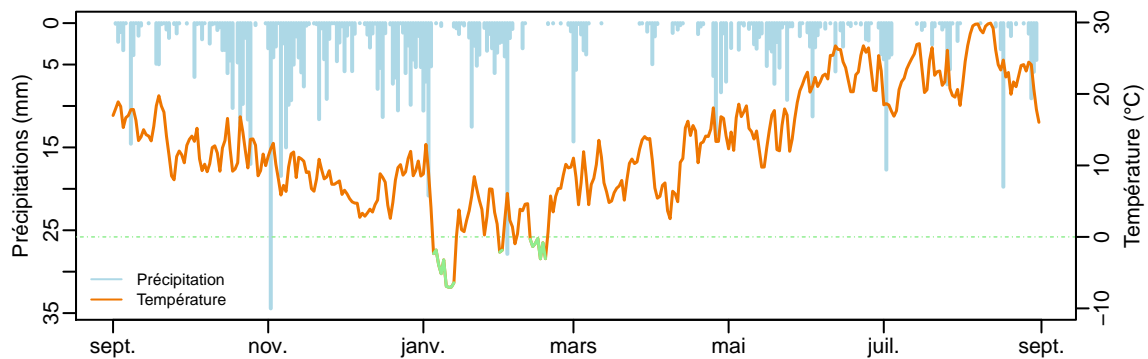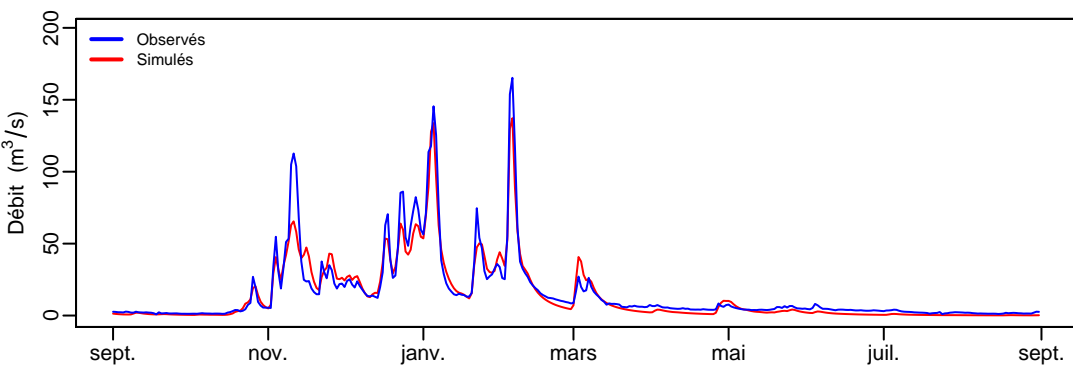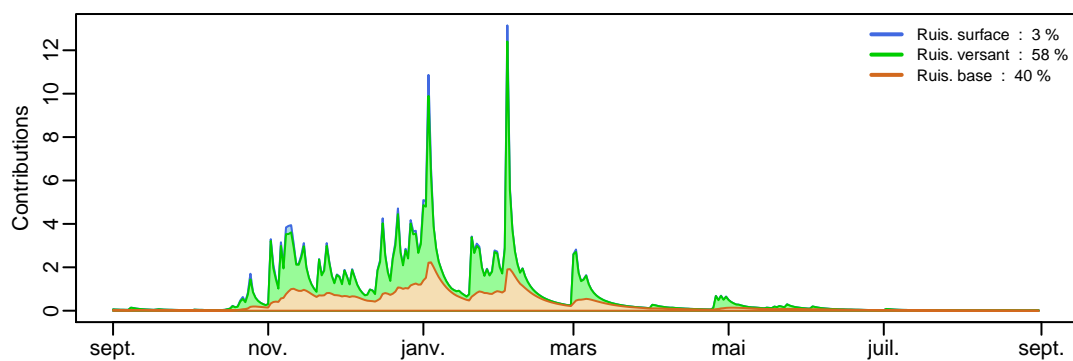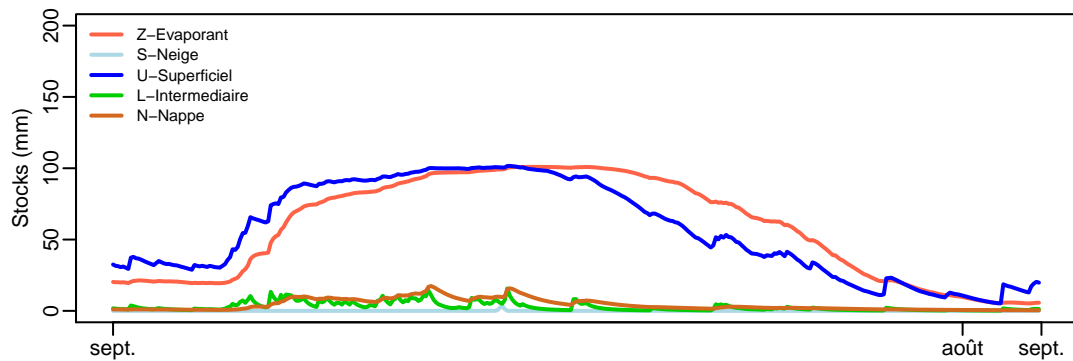

# k1773010 (1467.58 km²) – année 2003–2004

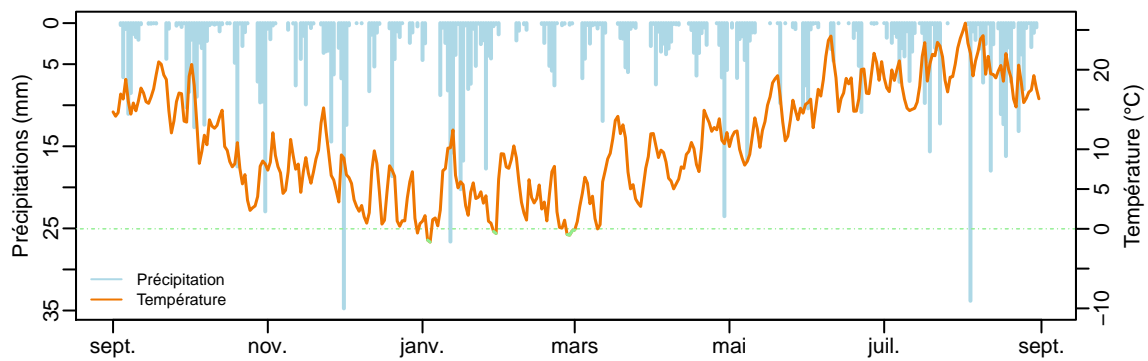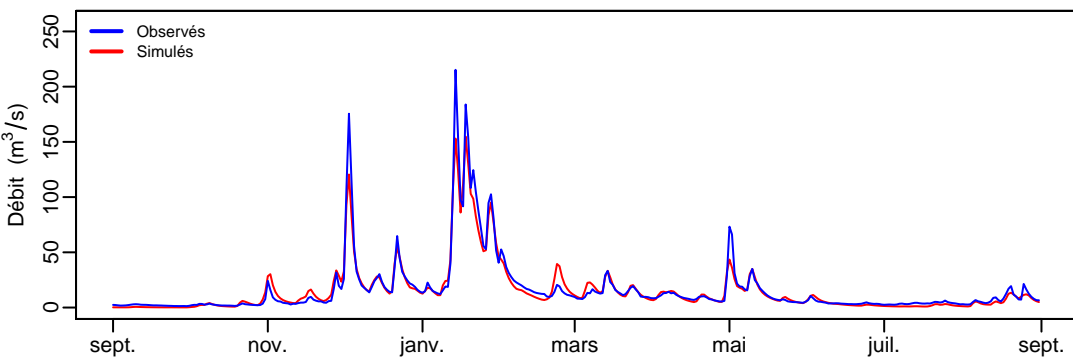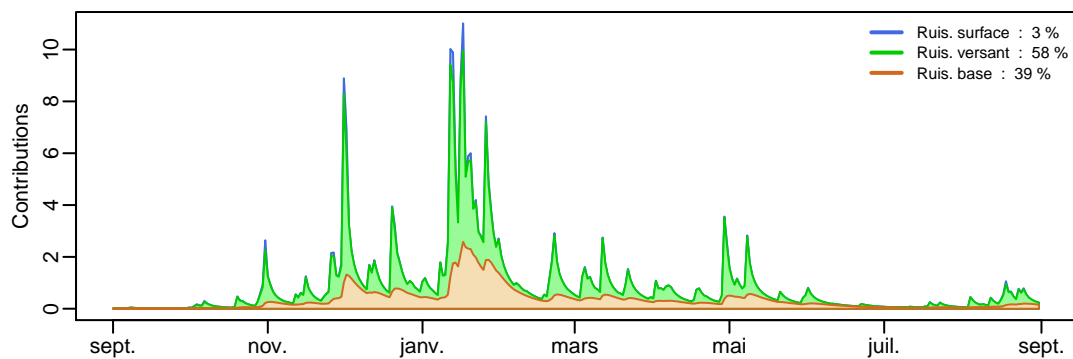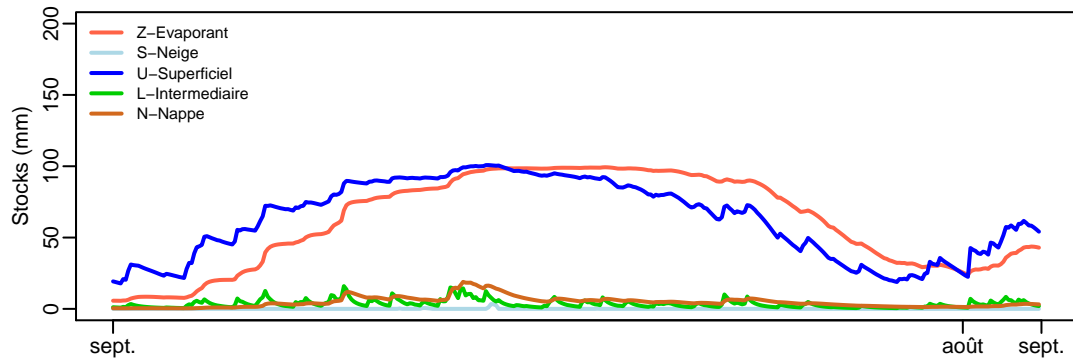

# k1773010 (1467.58 km²) – année 2004–2005

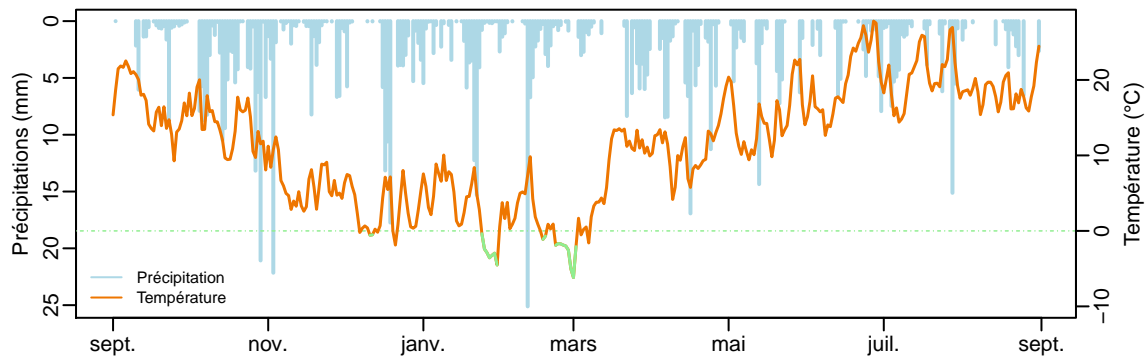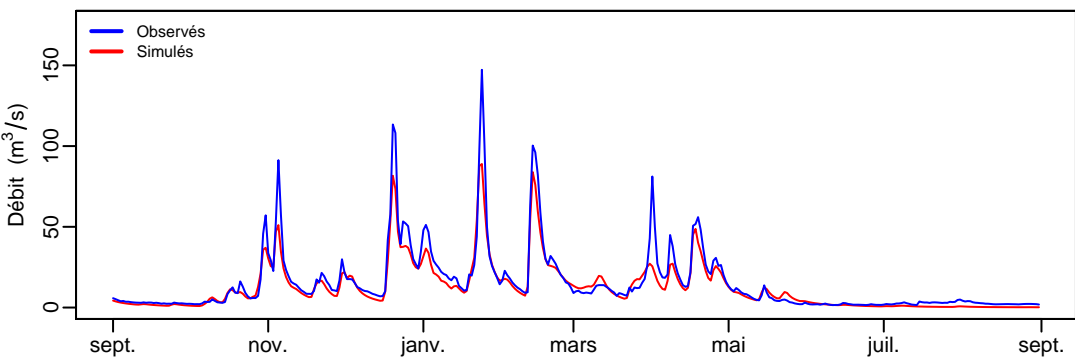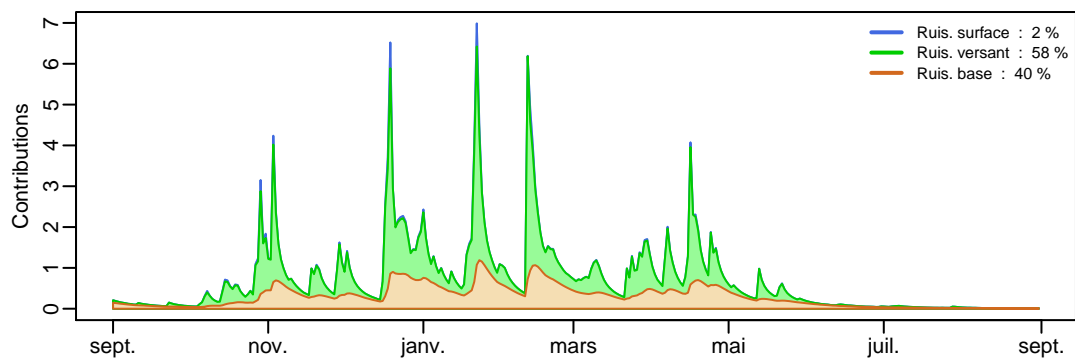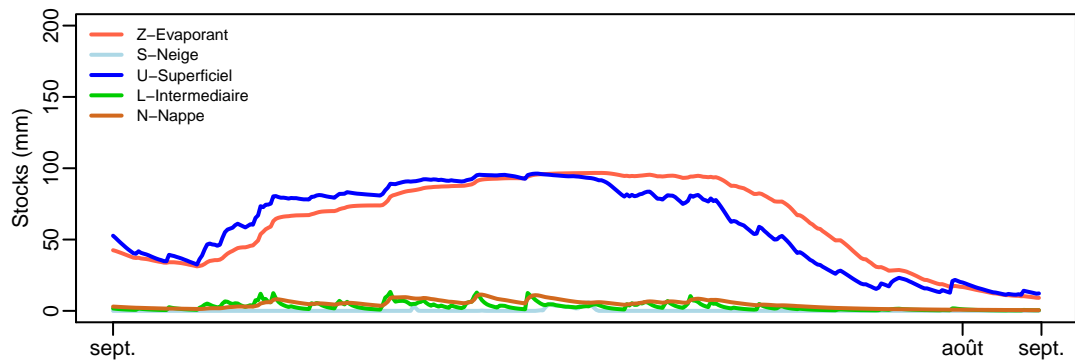



# k1773010 (1467.58 km<sup>2</sup>) – année 2005–2006

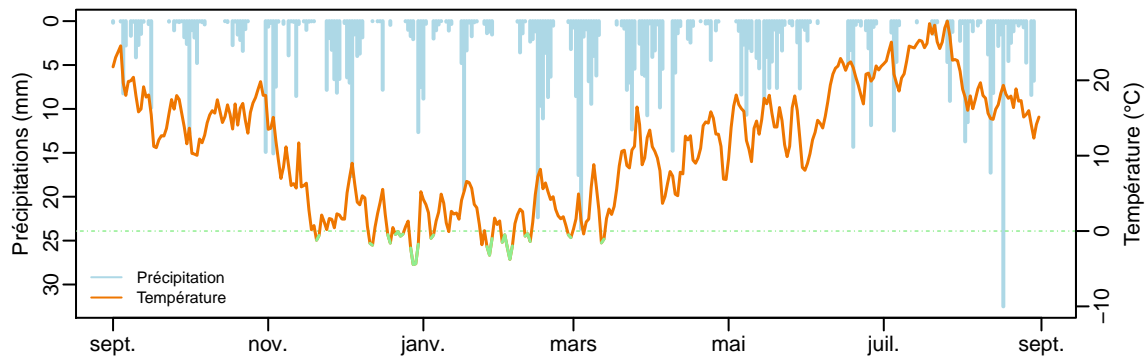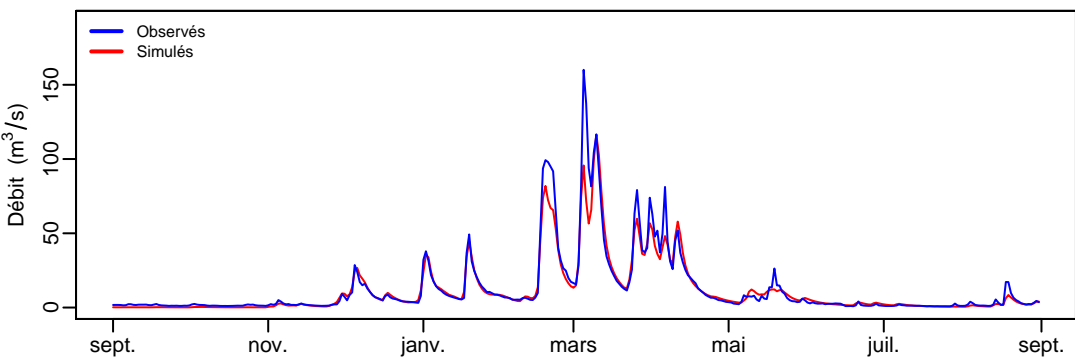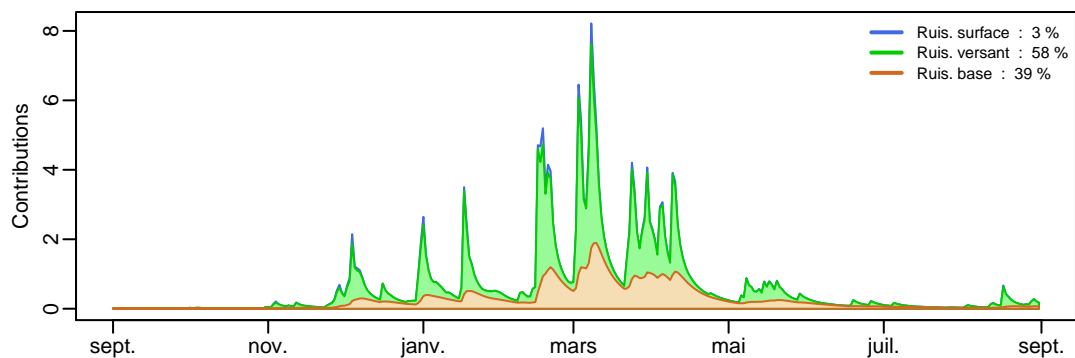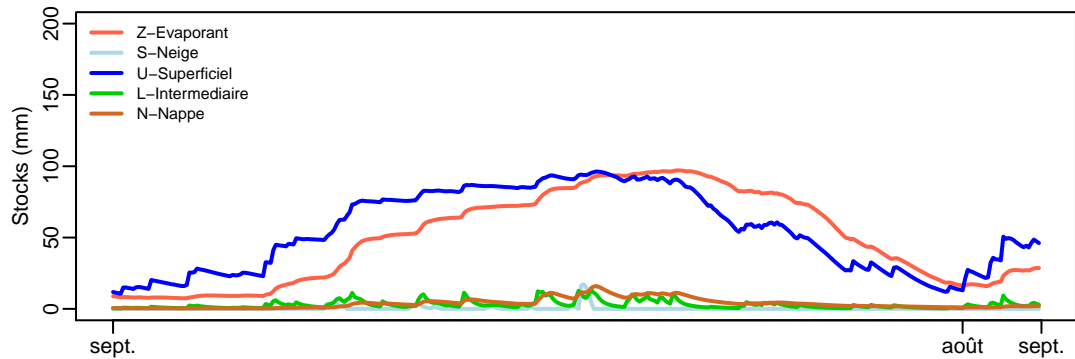

# k1773010 (1467.58 km<sup>2</sup>) – année 2006–2007

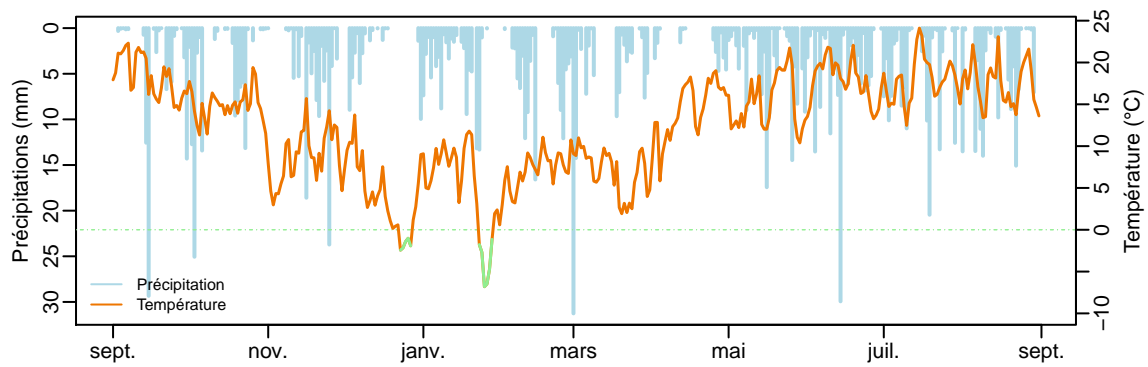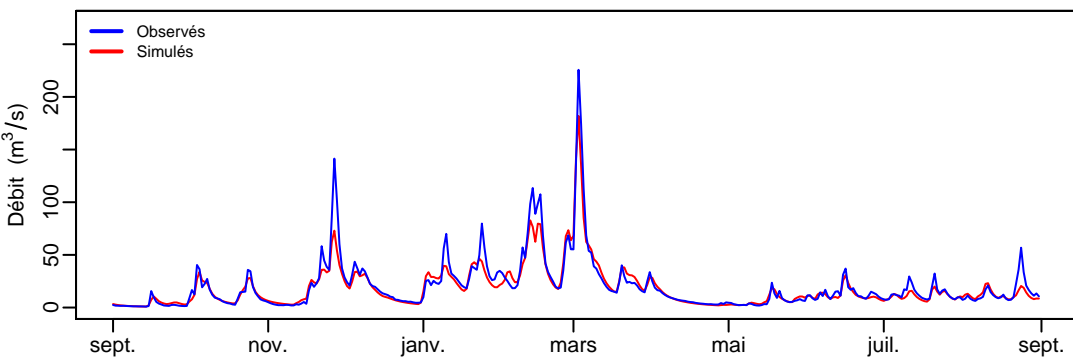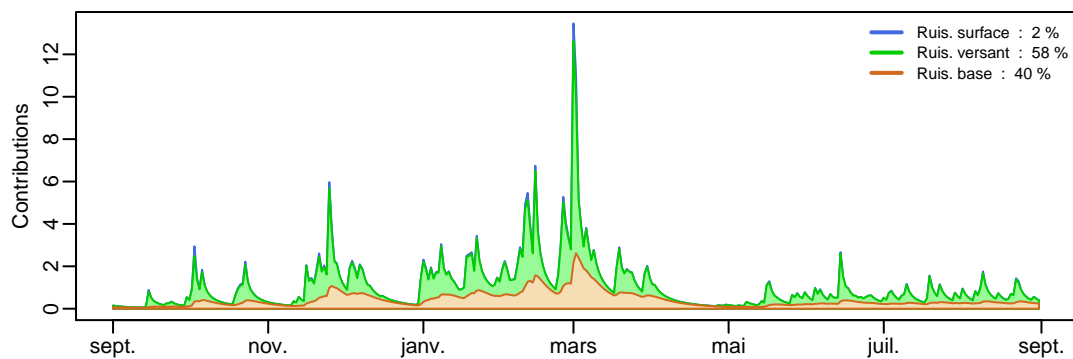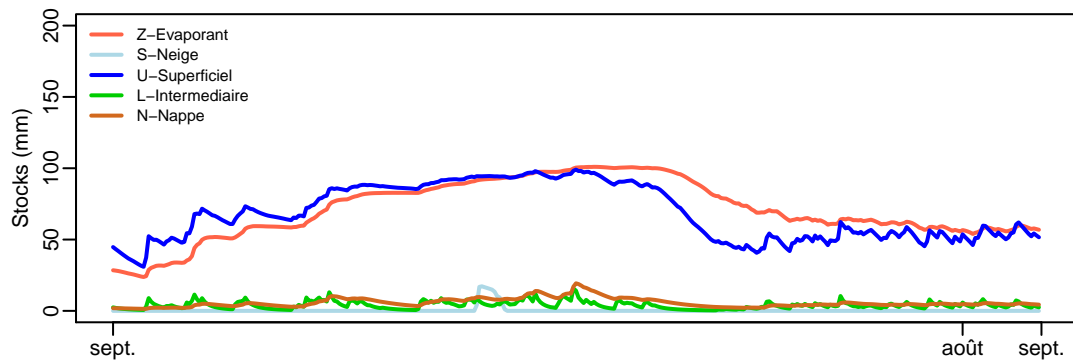

# k1773010 (1467.58 km<sup>2</sup>) – année 2007–2008

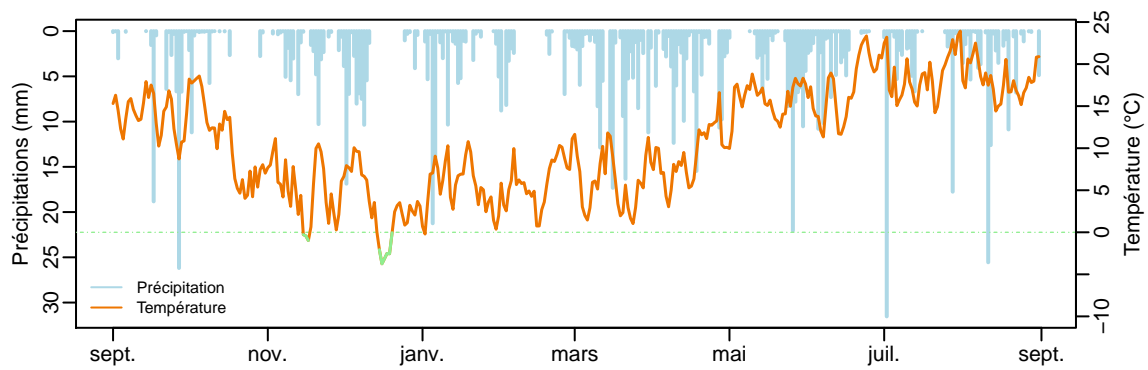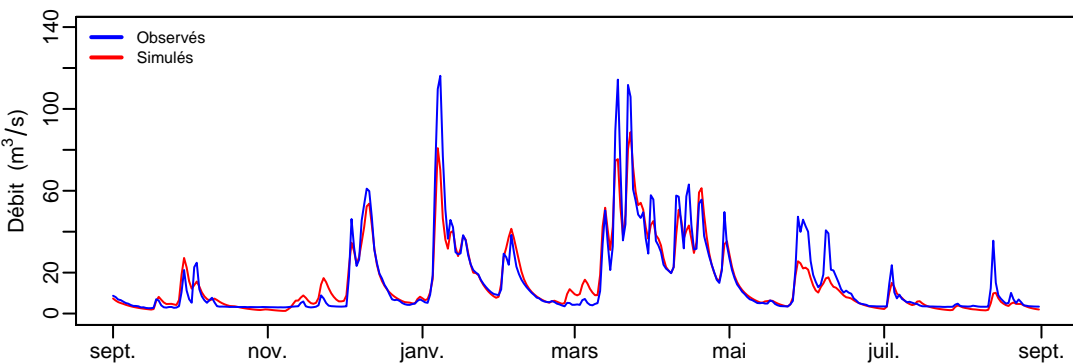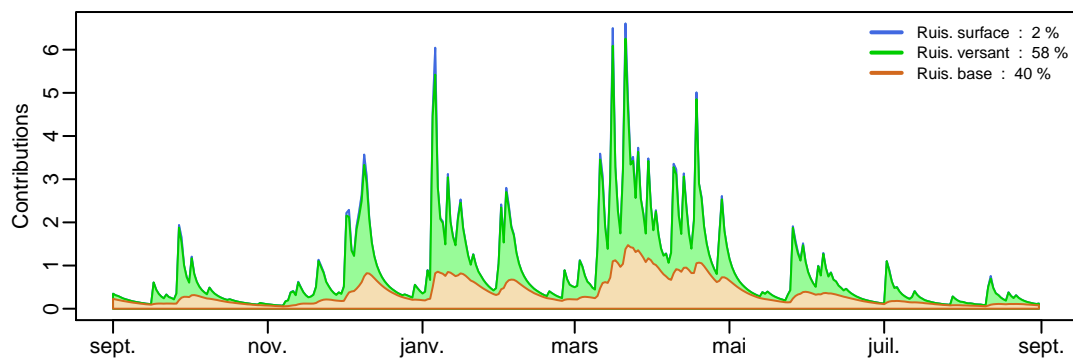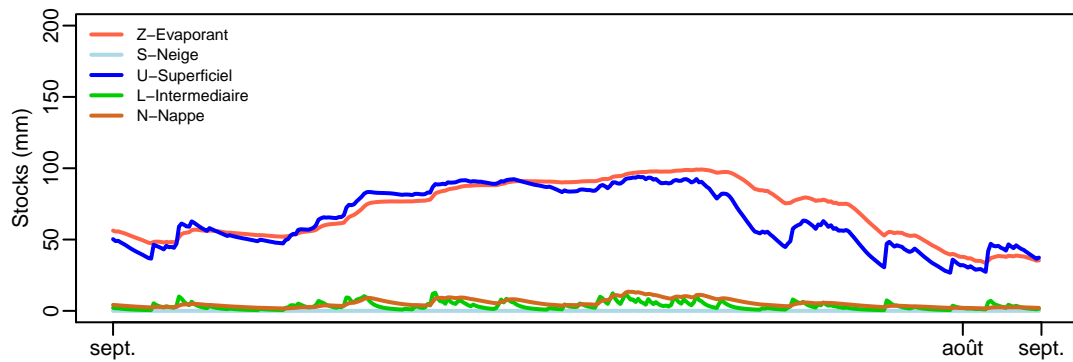

# k1773010 (1467.58 km²) – année 2008–2009

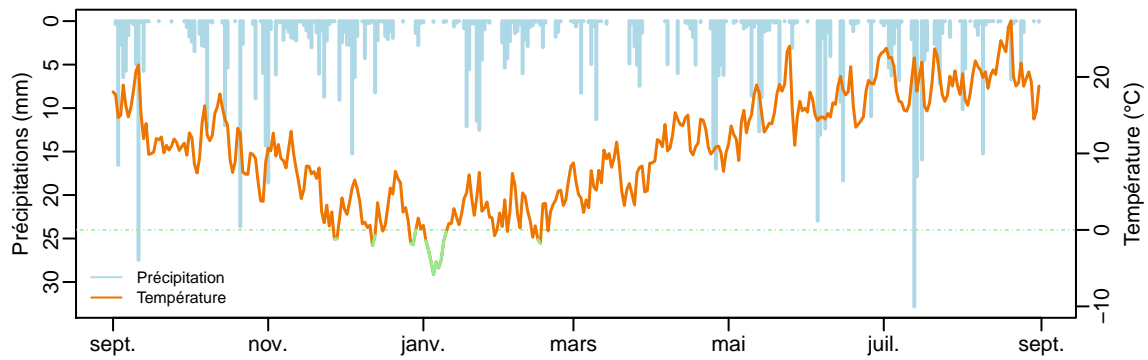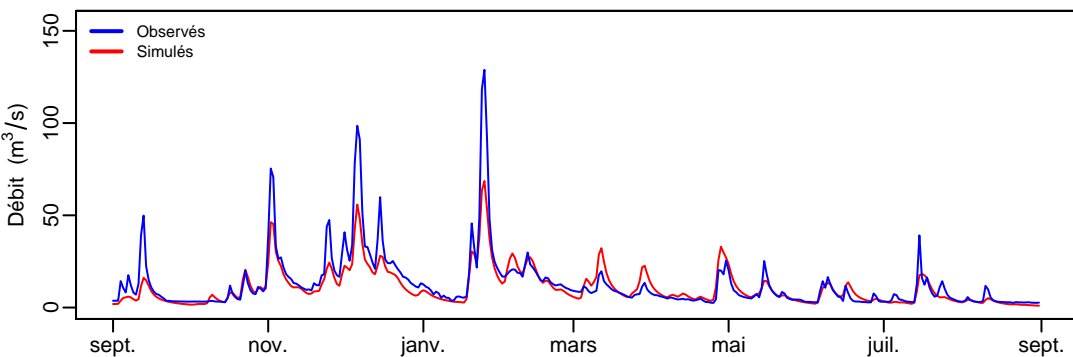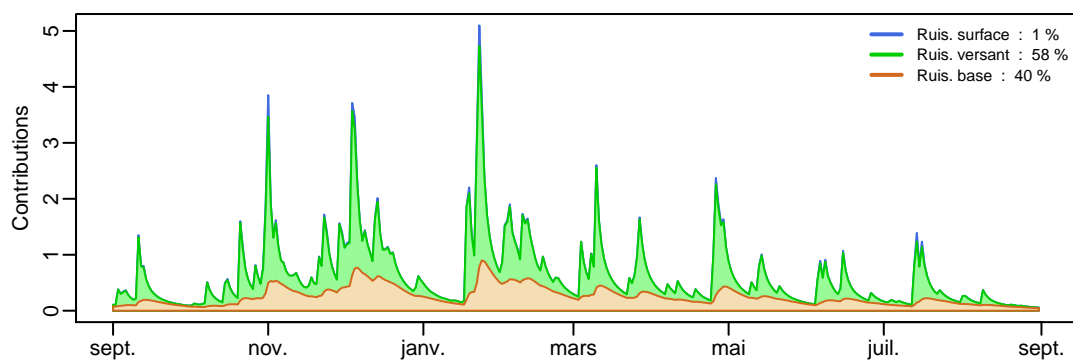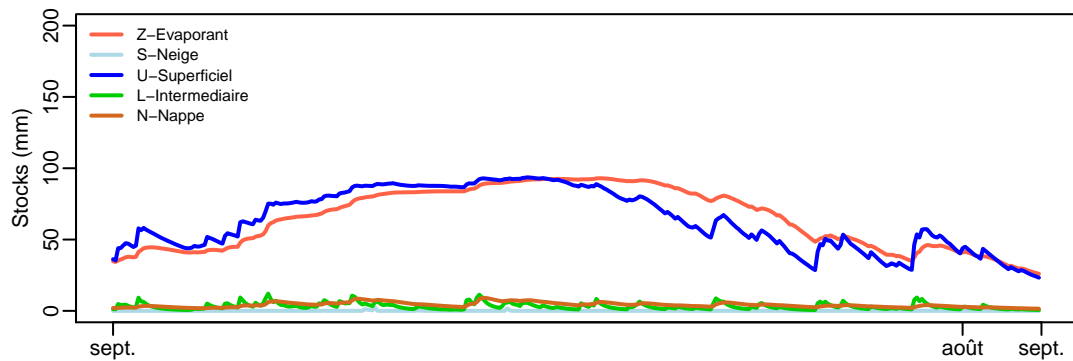

# k1810310 (243.61 km<sup>2</sup>) – année 1998–1999

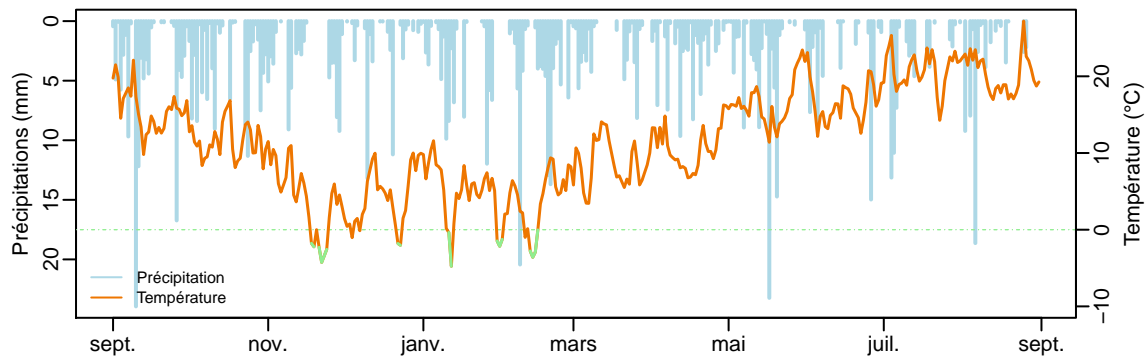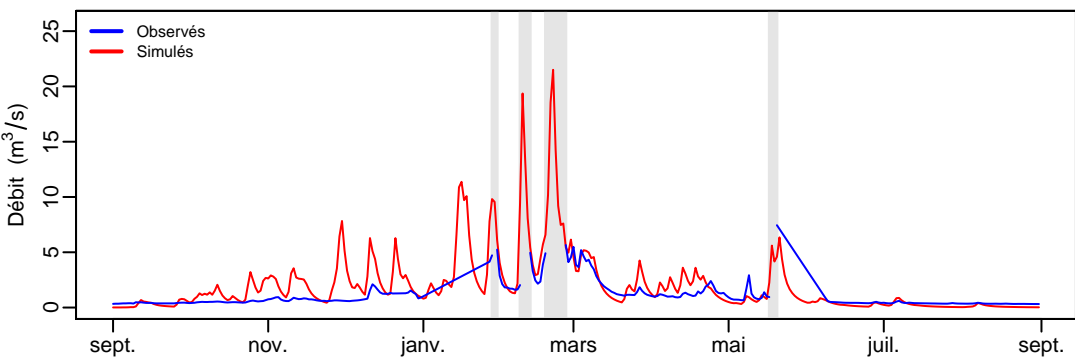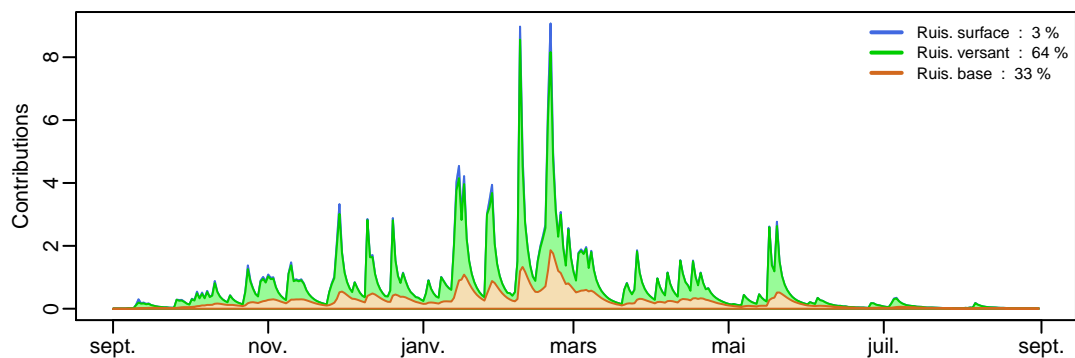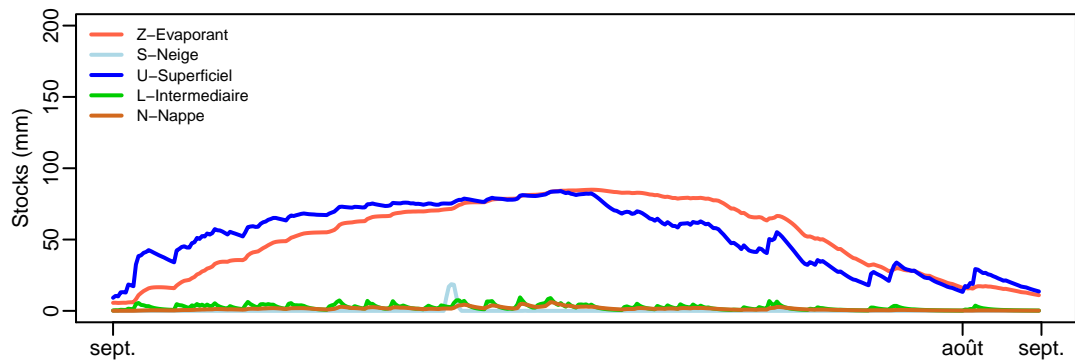

# k1810310 (243.61 km<sup>2</sup>) – année 1999–2000

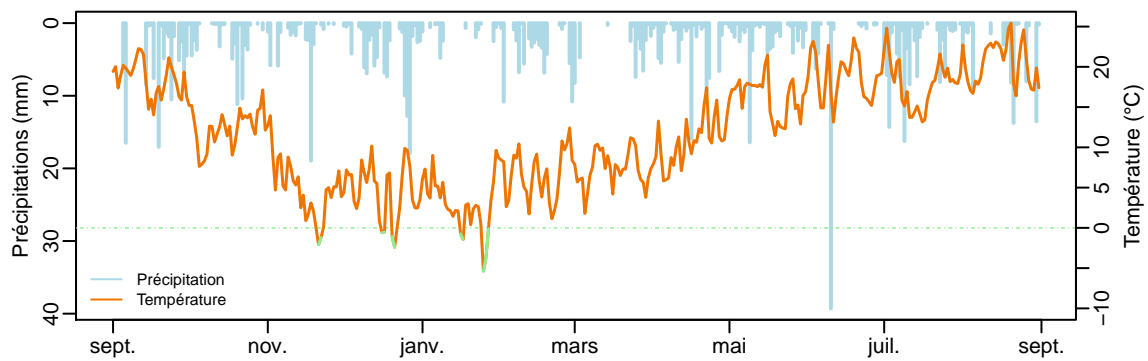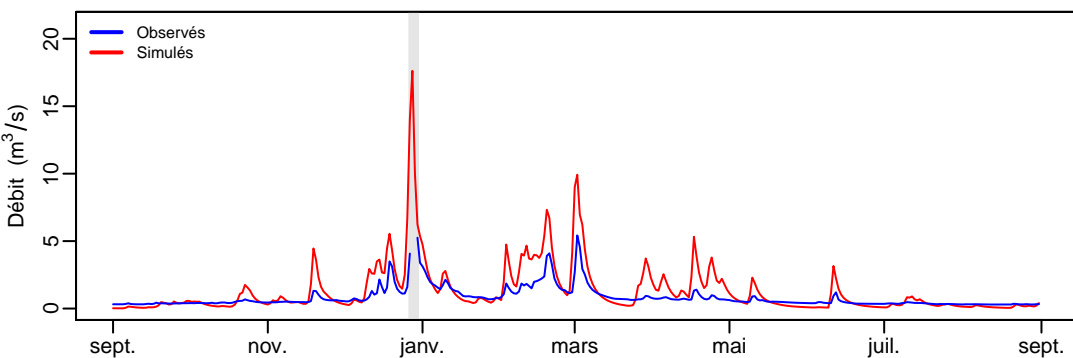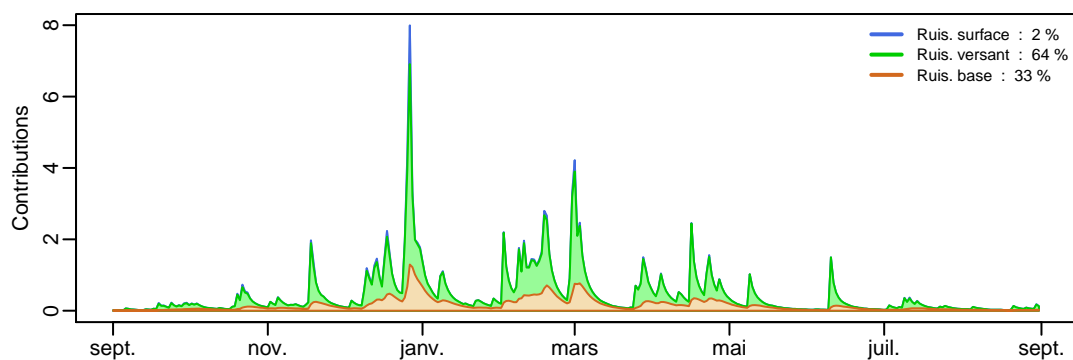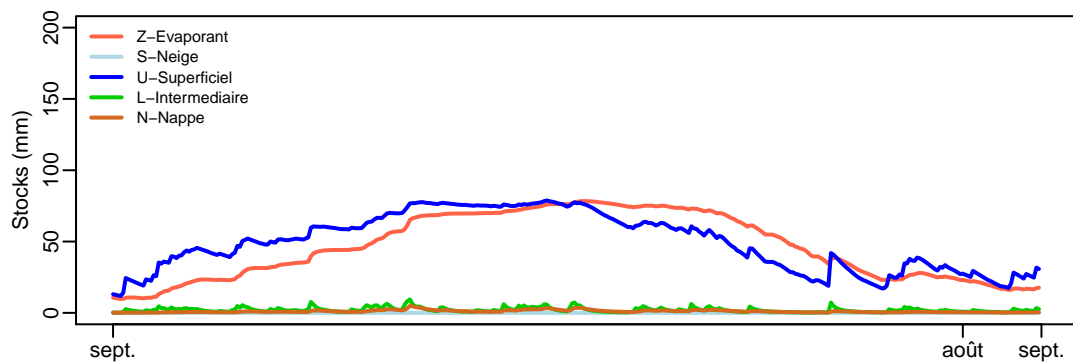

# k1810310 (243.61 km²) – année 2000–2001

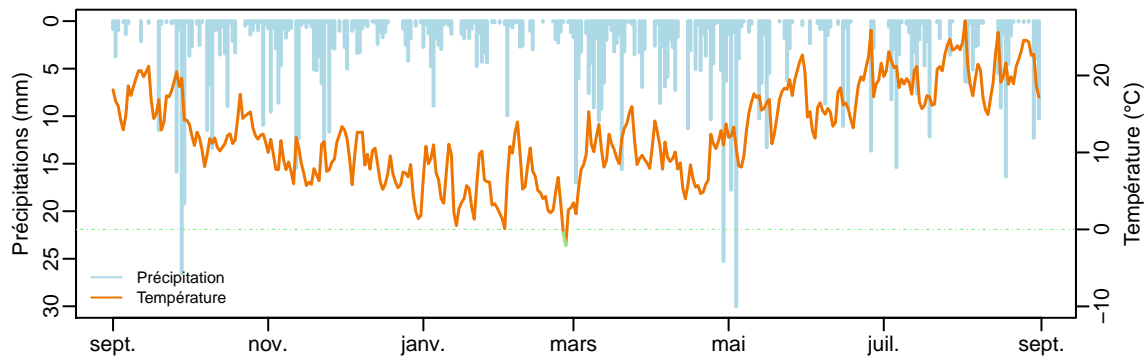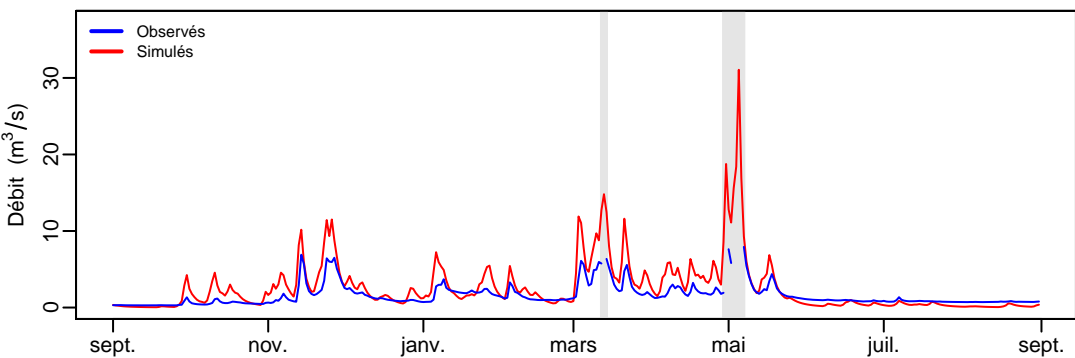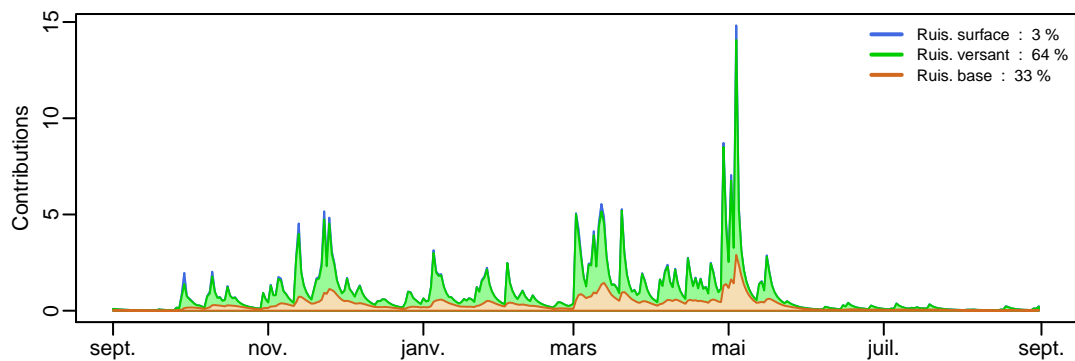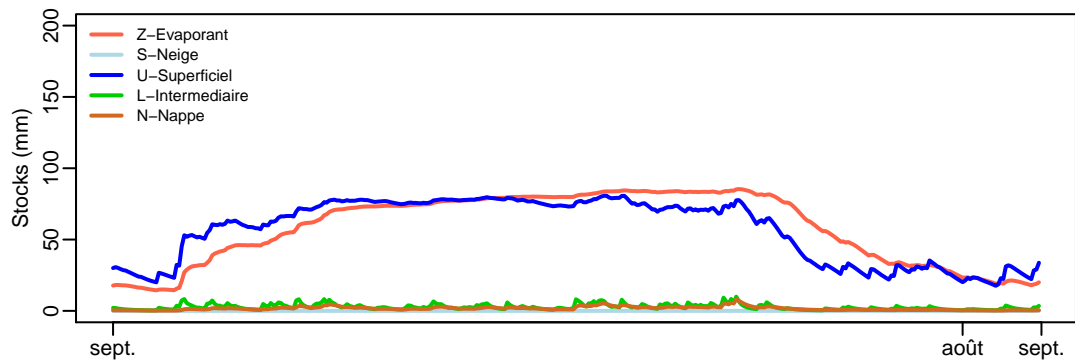

# k1810310 (243.61 km<sup>2</sup>) – année 2001–2002

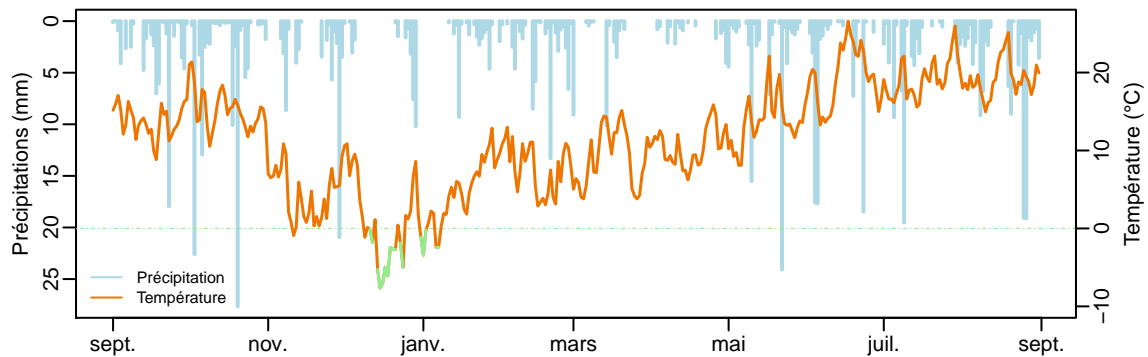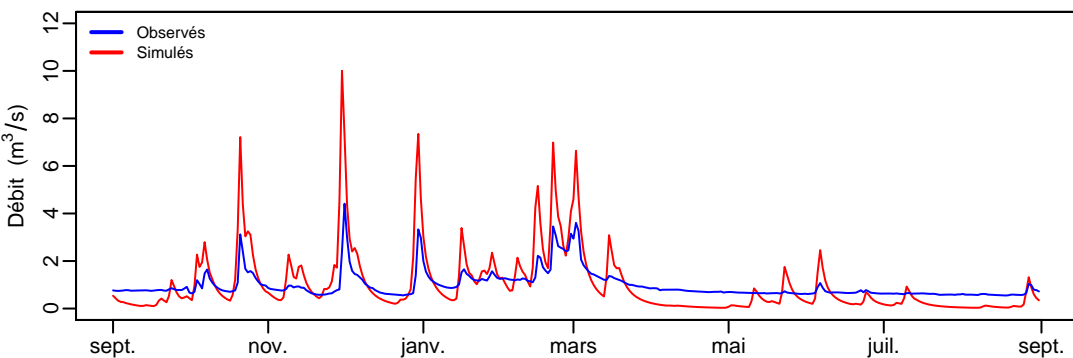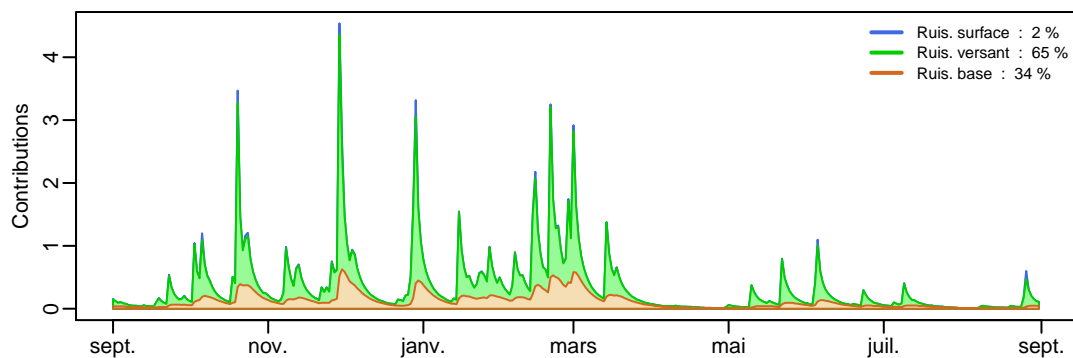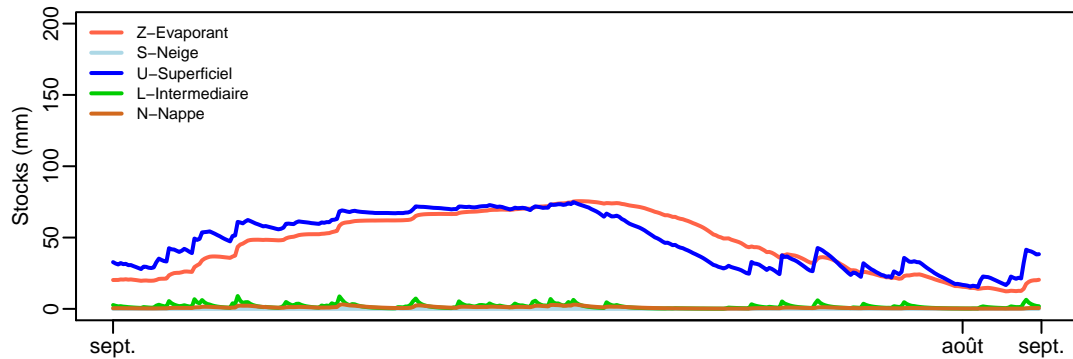



# k1810310 (243.61 km<sup>2</sup>) – année 2002–2003

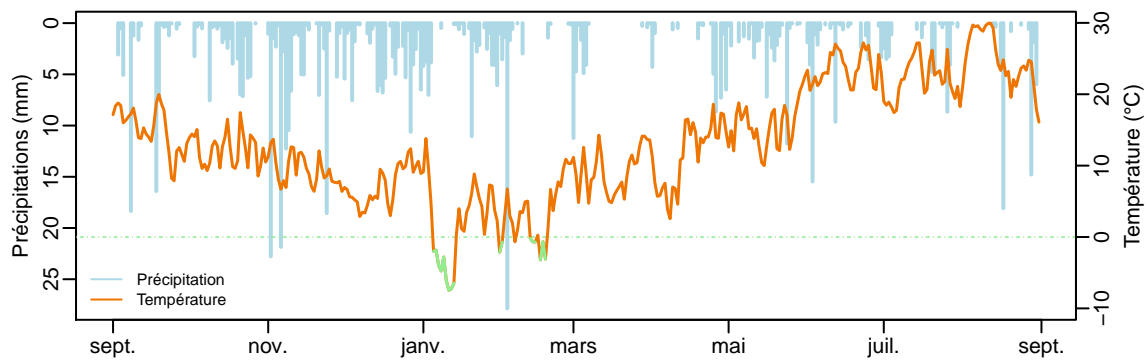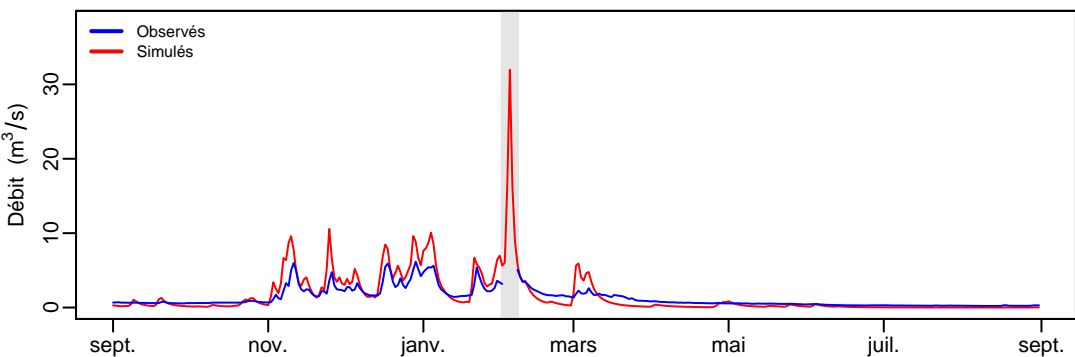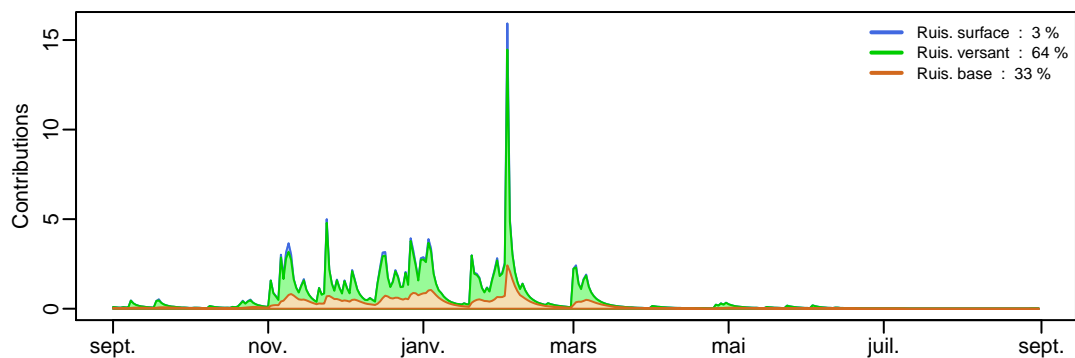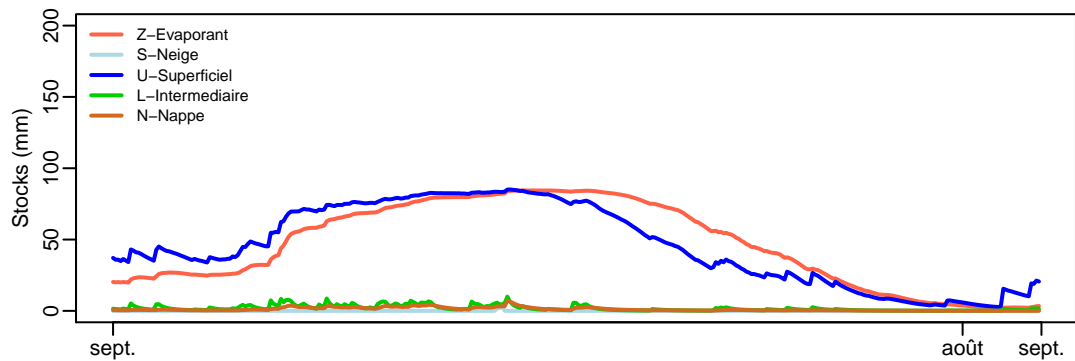

# k1810310 (243.61 km<sup>2</sup>) – année 2003–2004

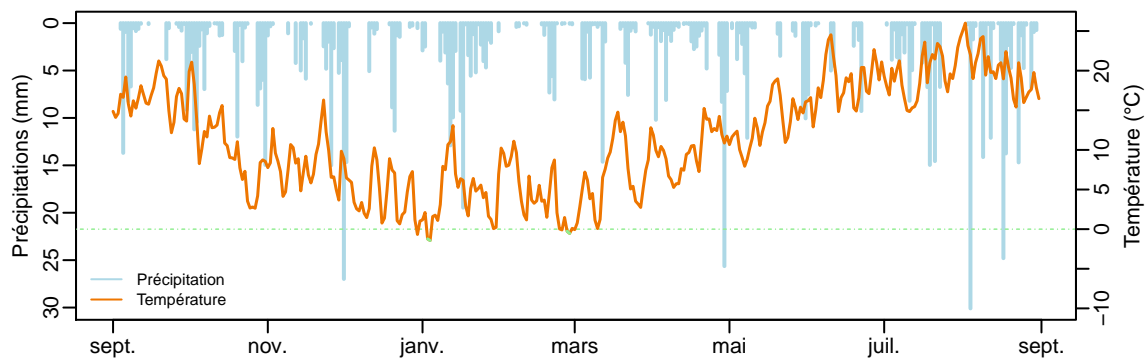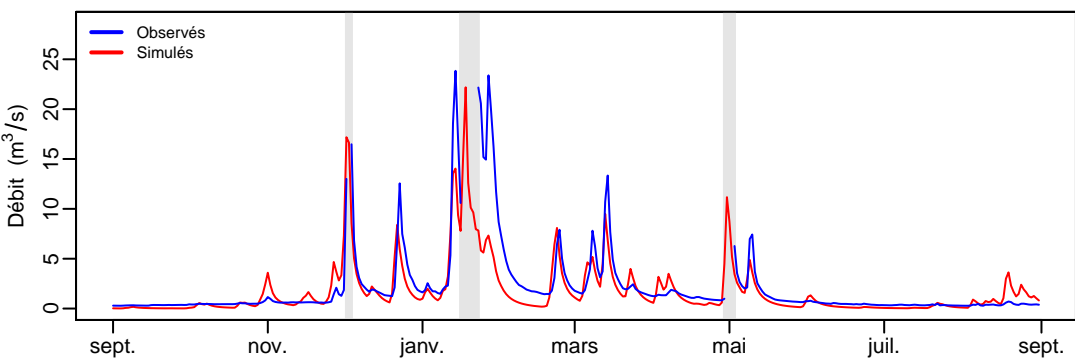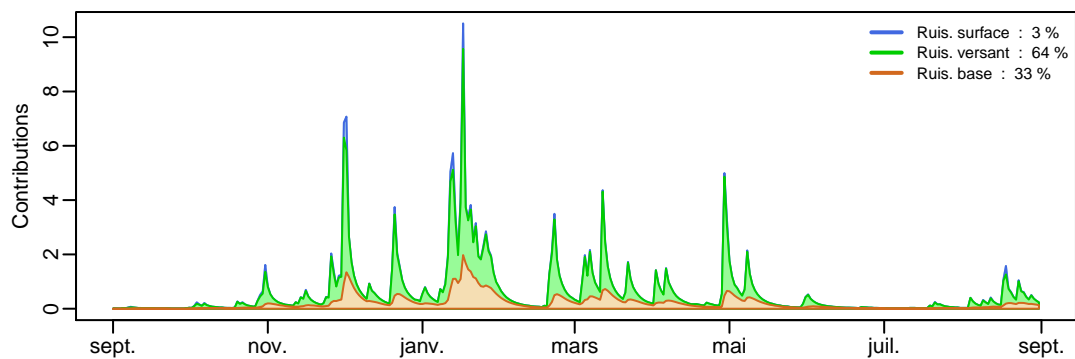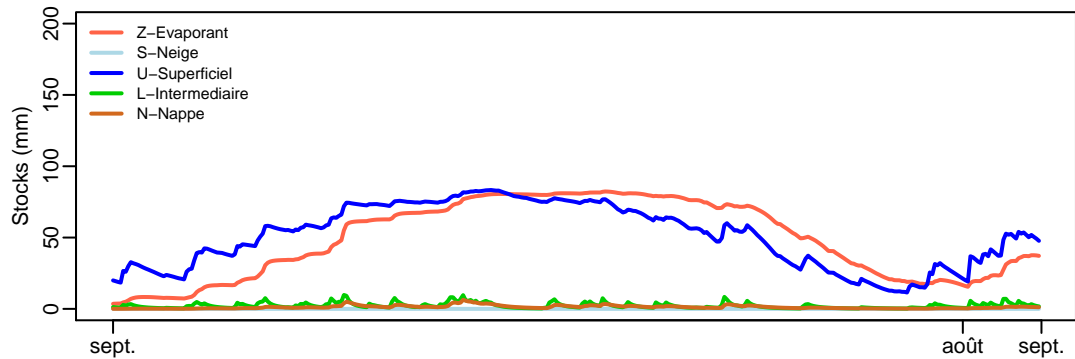

# k1810310 (243.61 km<sup>2</sup>) – année 2004–2005

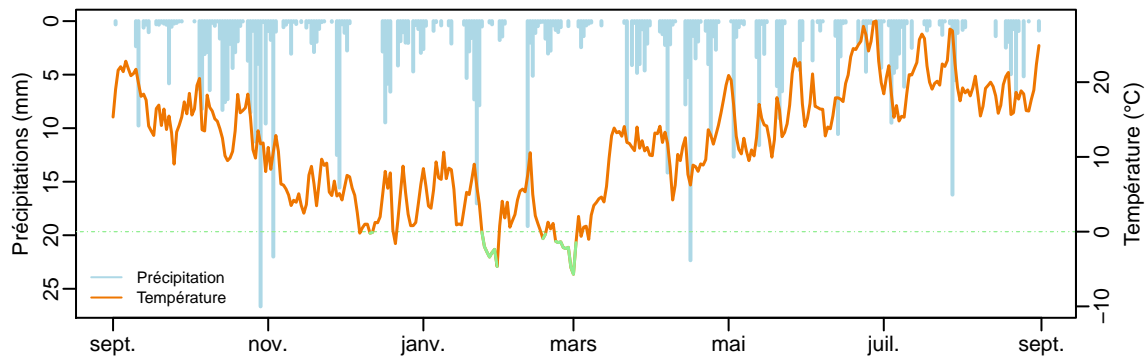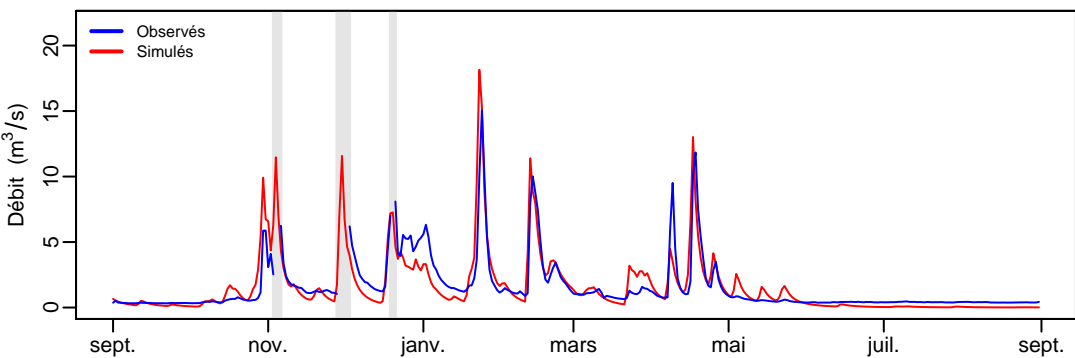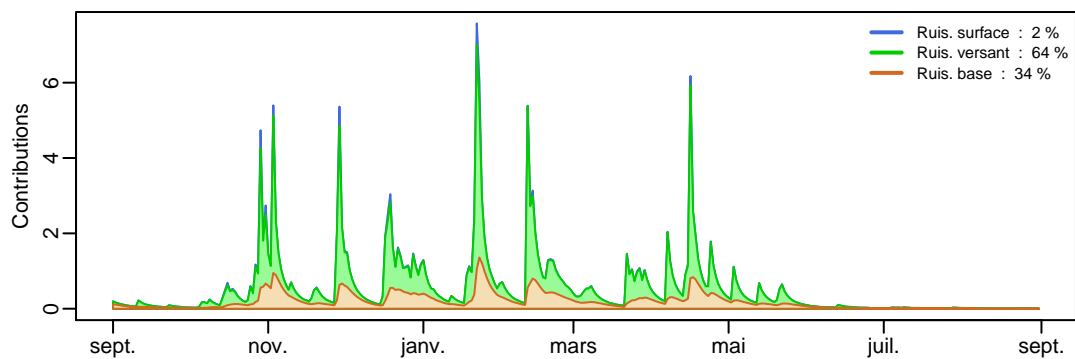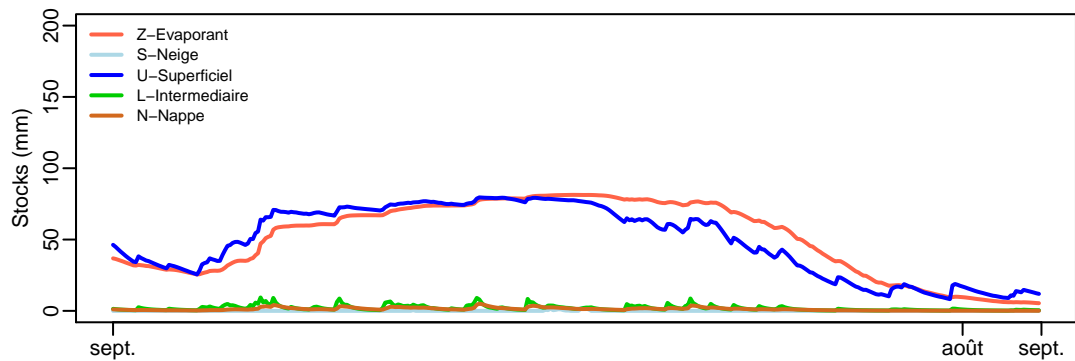

# k1810310 (243.61 km<sup>2</sup>) – année 2005–2006

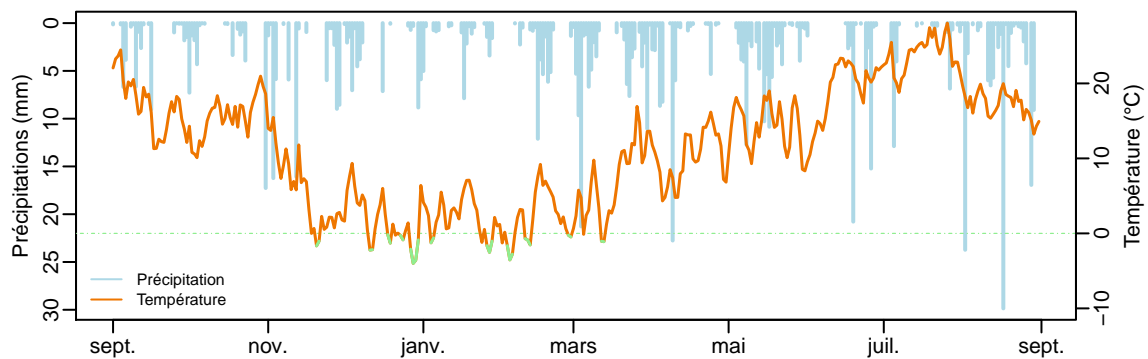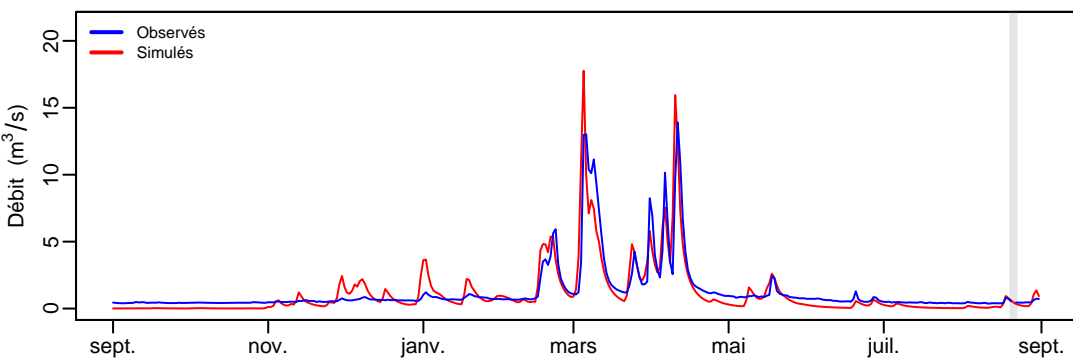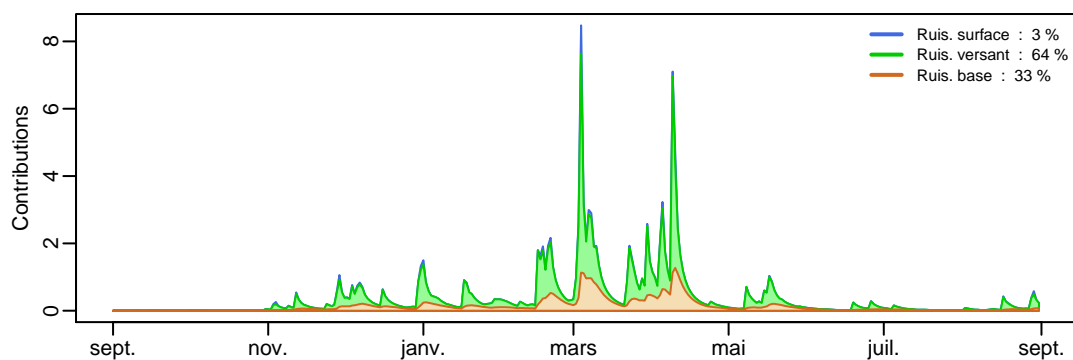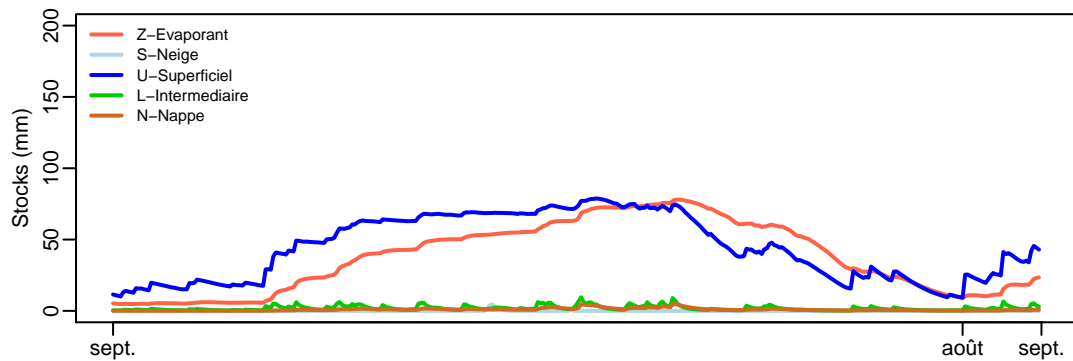

# k1810310 (243.61 km<sup>2</sup>) – année 2006–2007

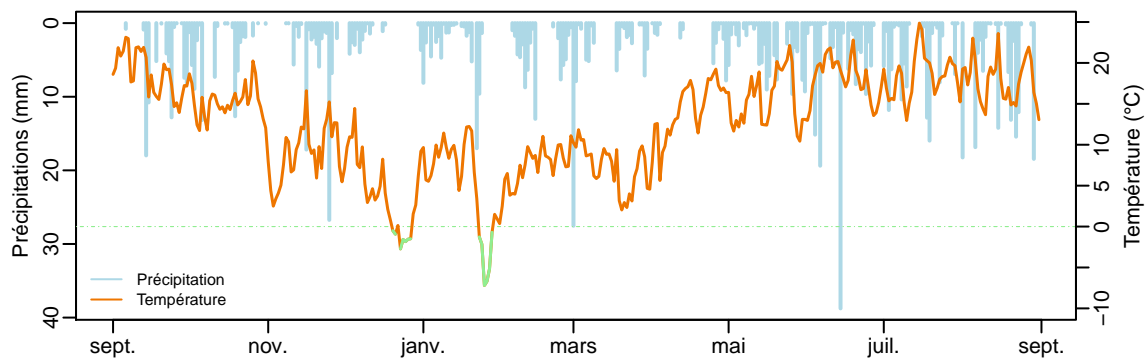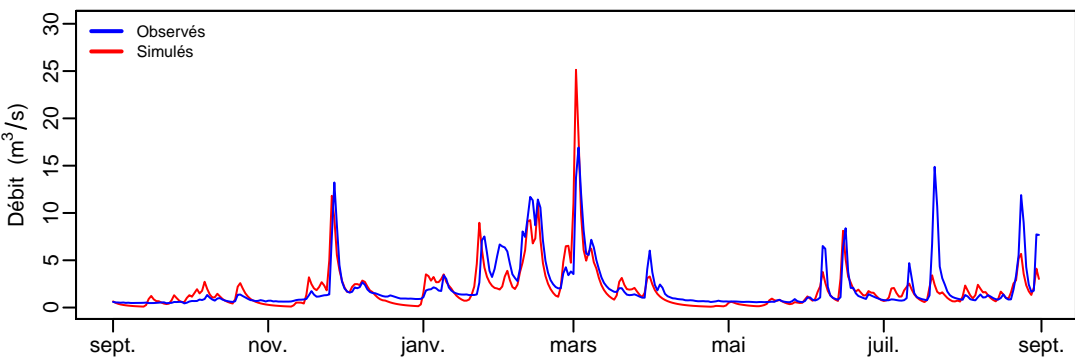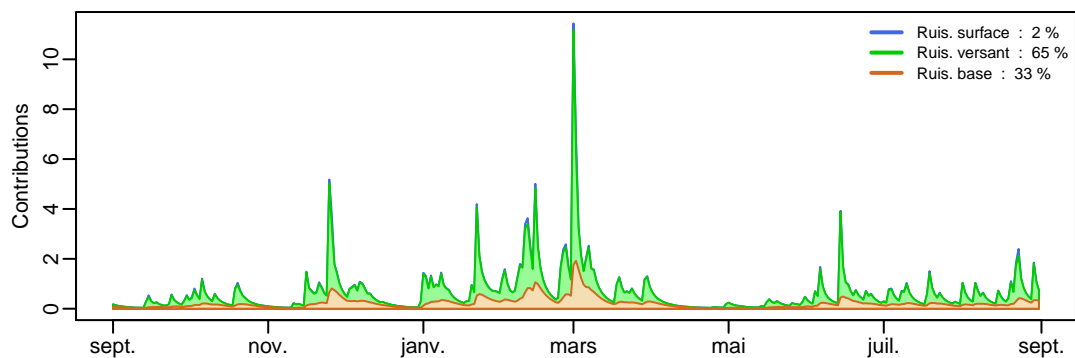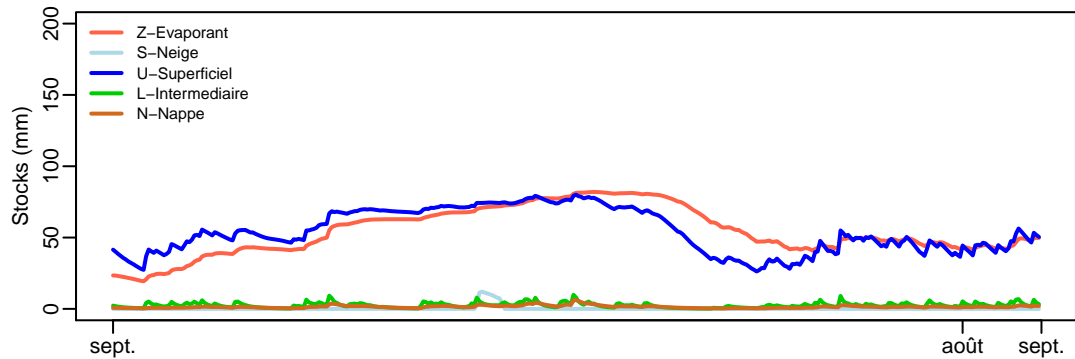

# k1810310 (243.61 km<sup>2</sup>) – année 2007–2008

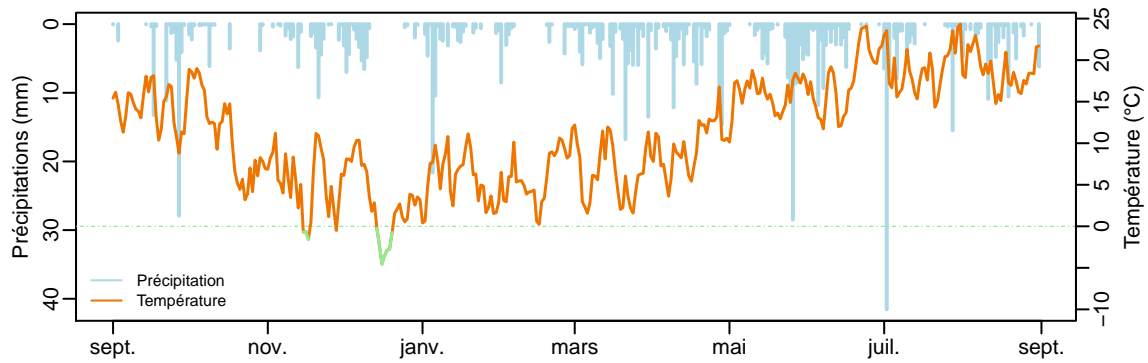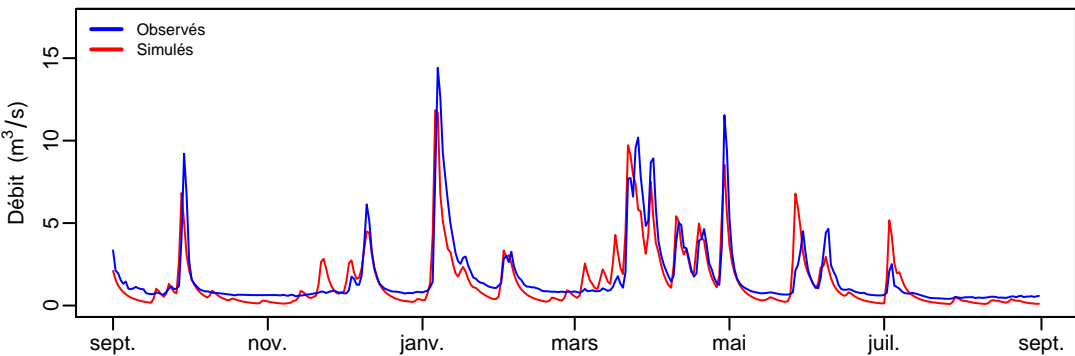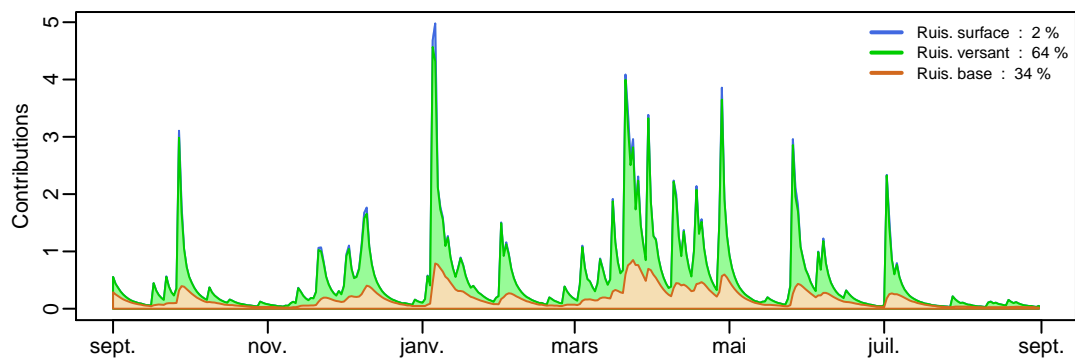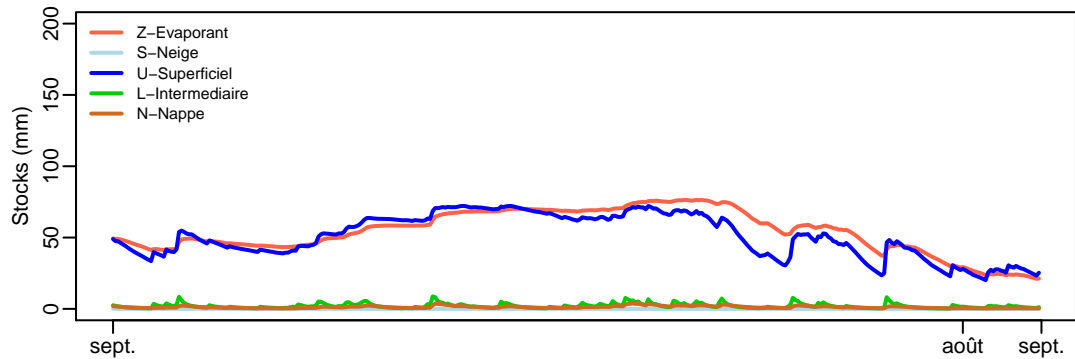

# k1810310 (243.61 km<sup>2</sup>) – année 2008–2009

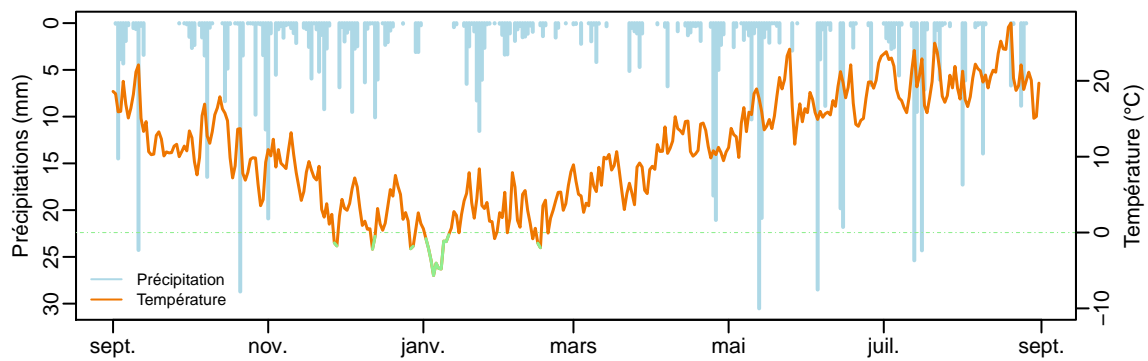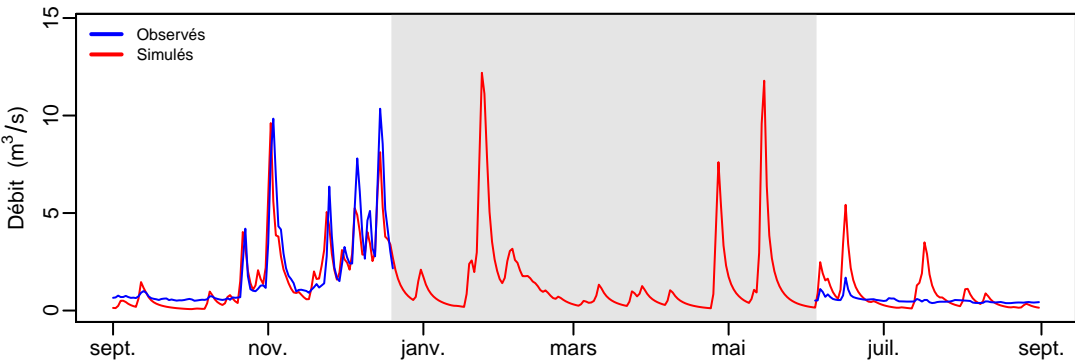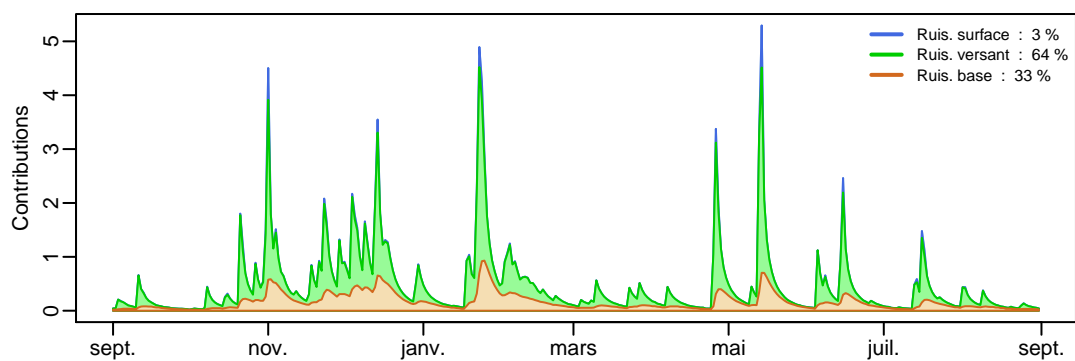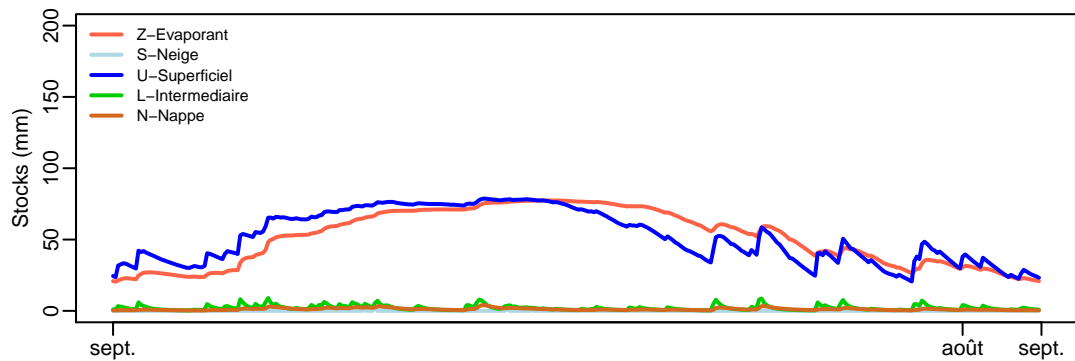

# k1810310 (243.61 km<sup>2</sup>) – année 2009–2010

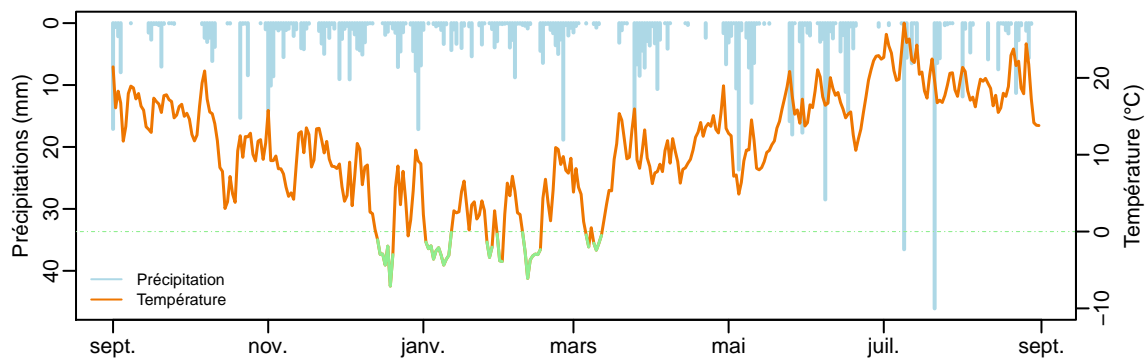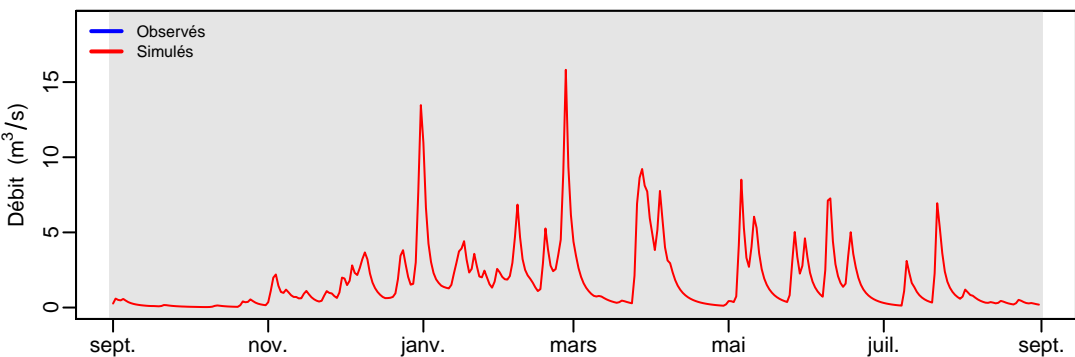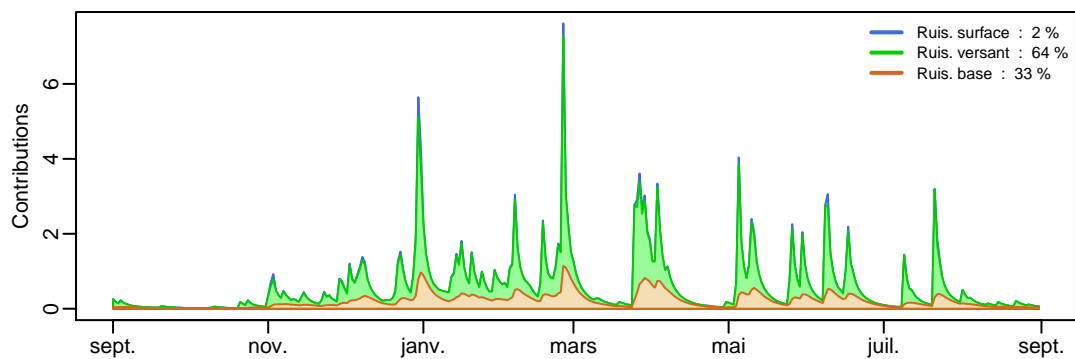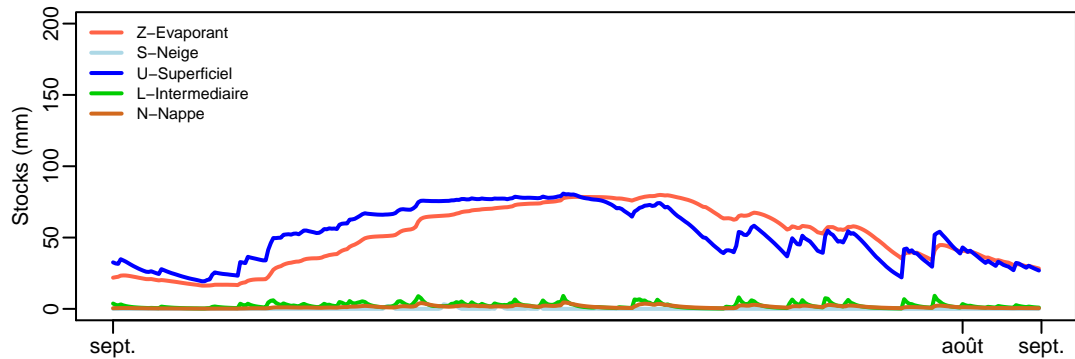



# k1810310 (243.61 km<sup>2</sup>) – année 2010–2011

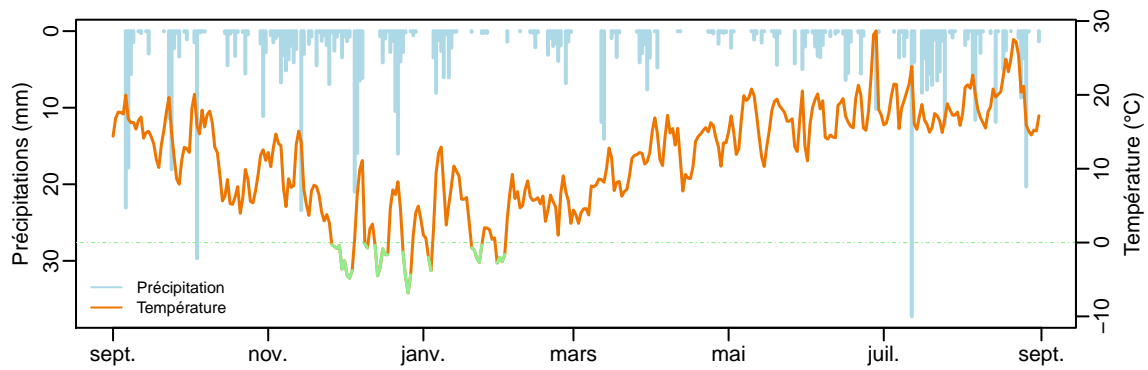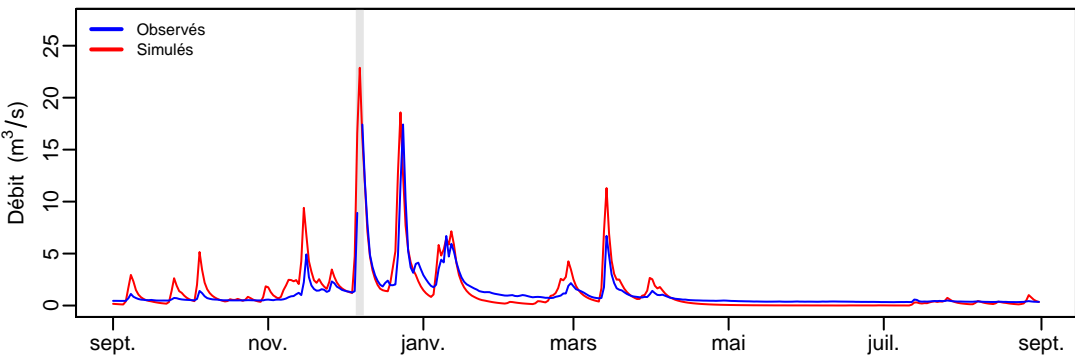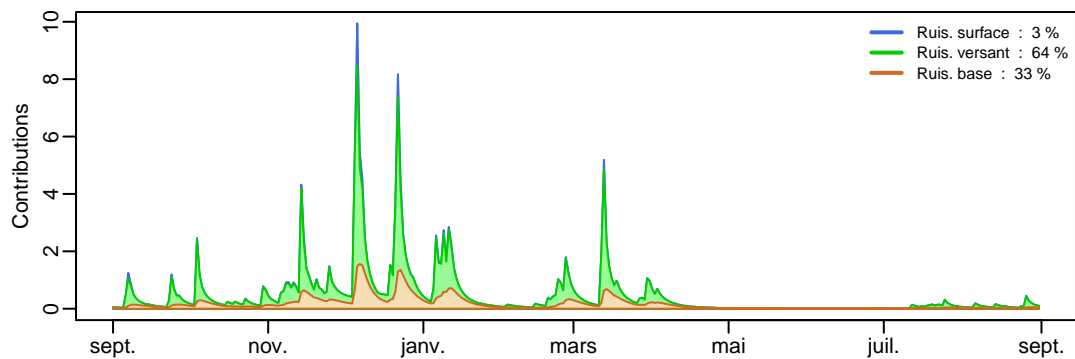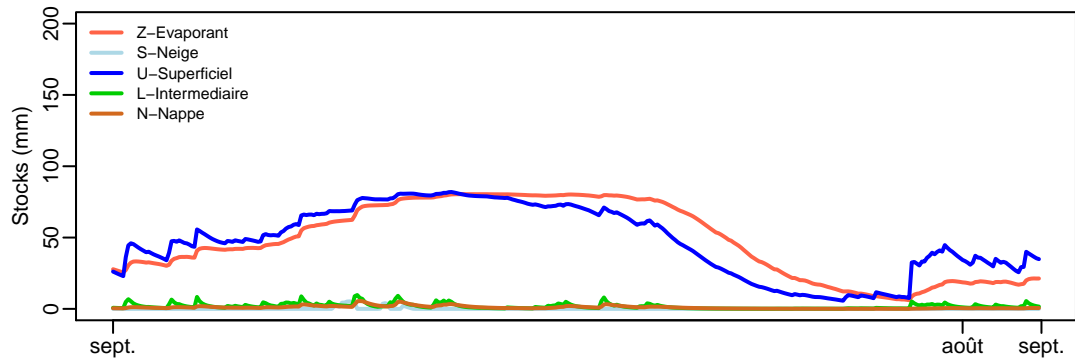

# k1810310 (243.61 km<sup>2</sup>) – année 2011–2012

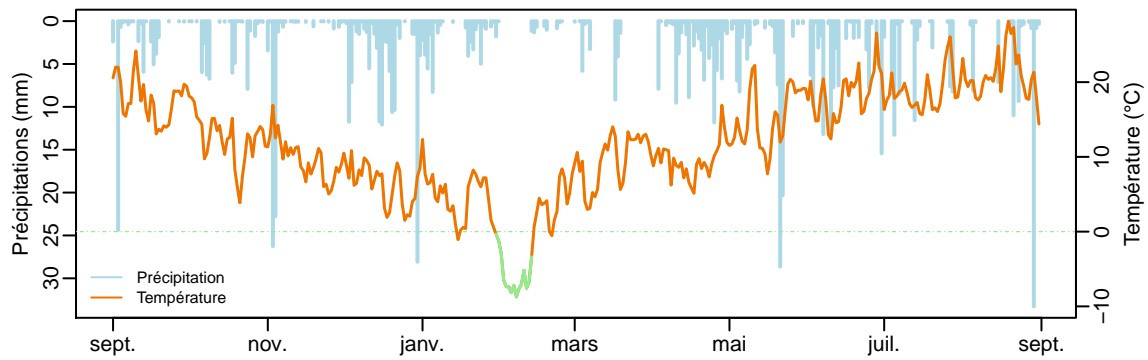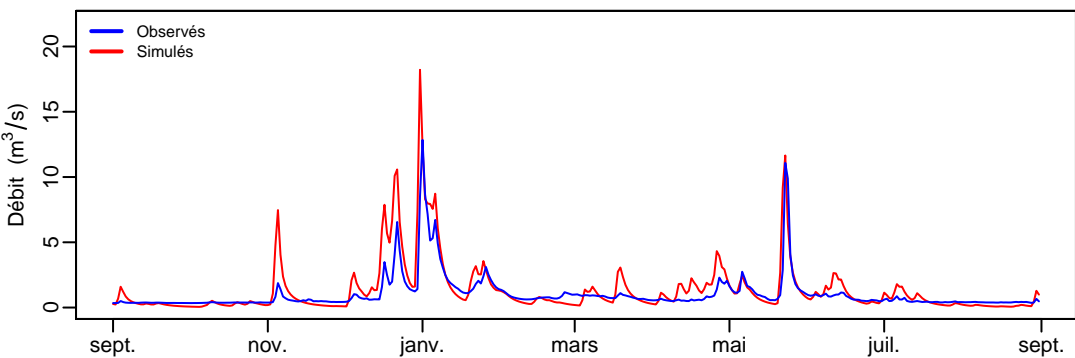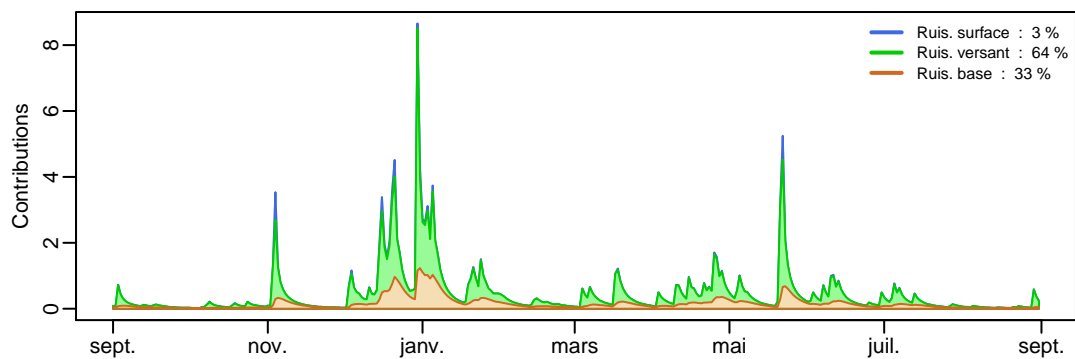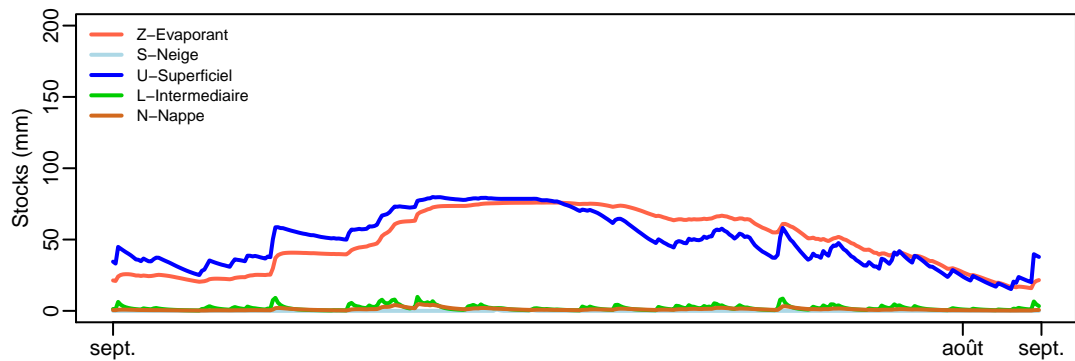

# k1900010 (17573.31 km<sup>2</sup>) – année 2001–2002

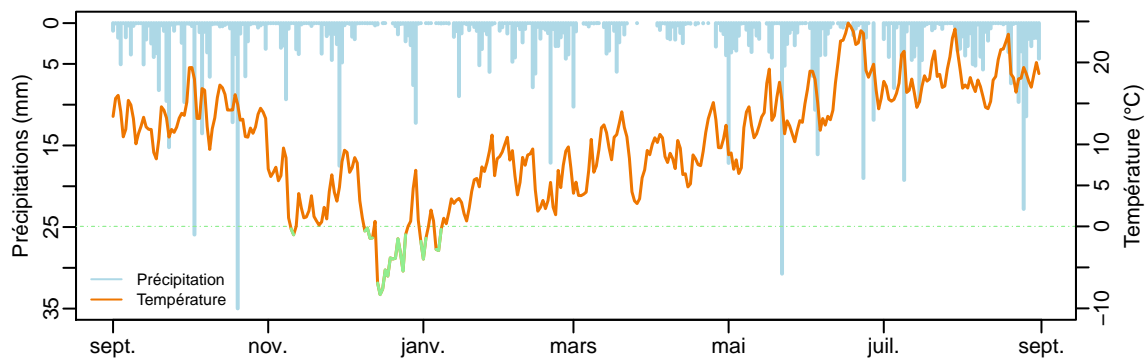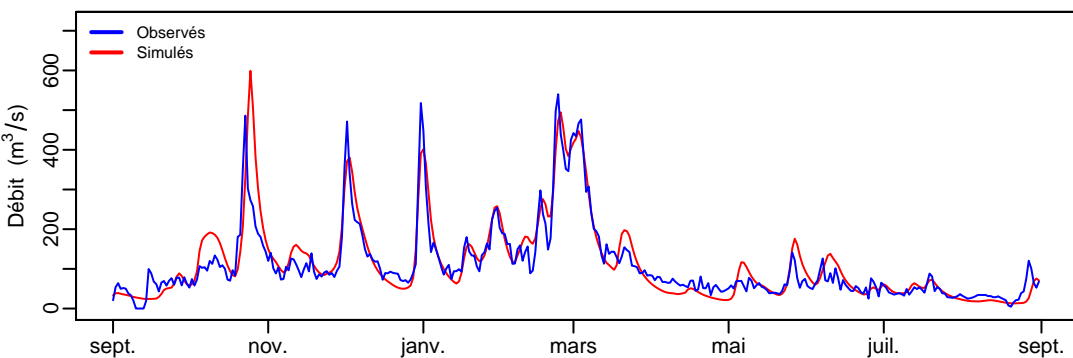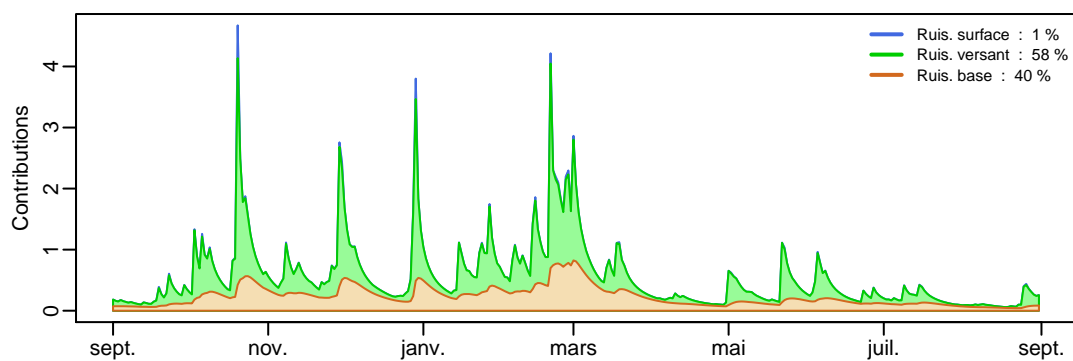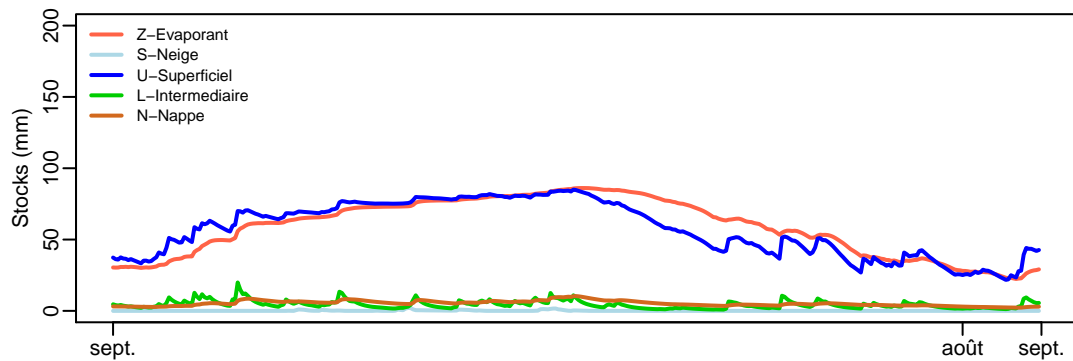

# k1900010 (17573.31 km<sup>2</sup>) – année 2002–2003

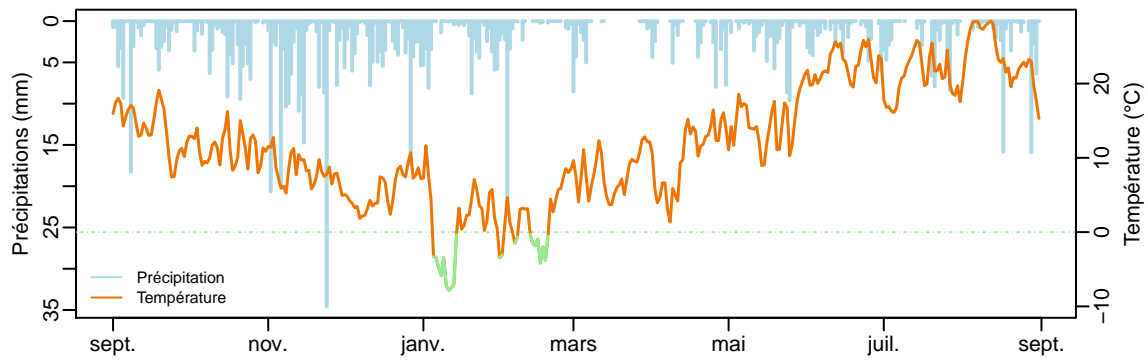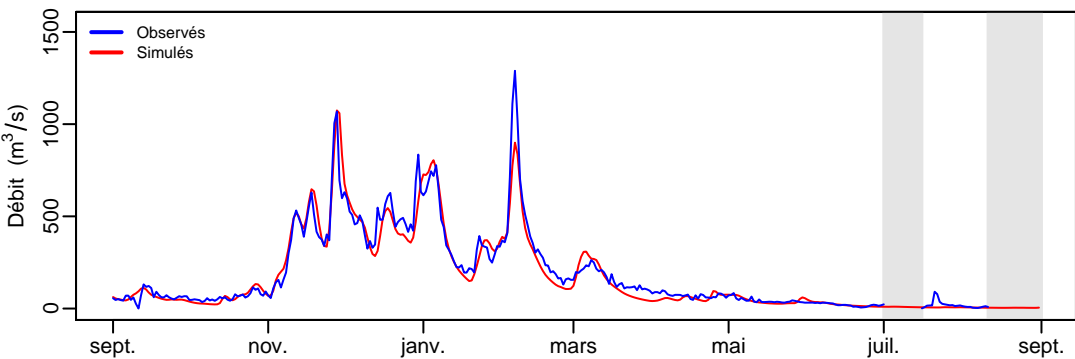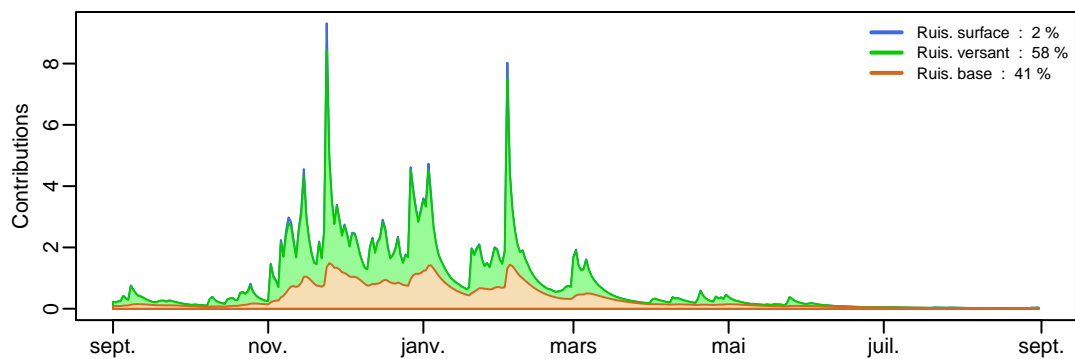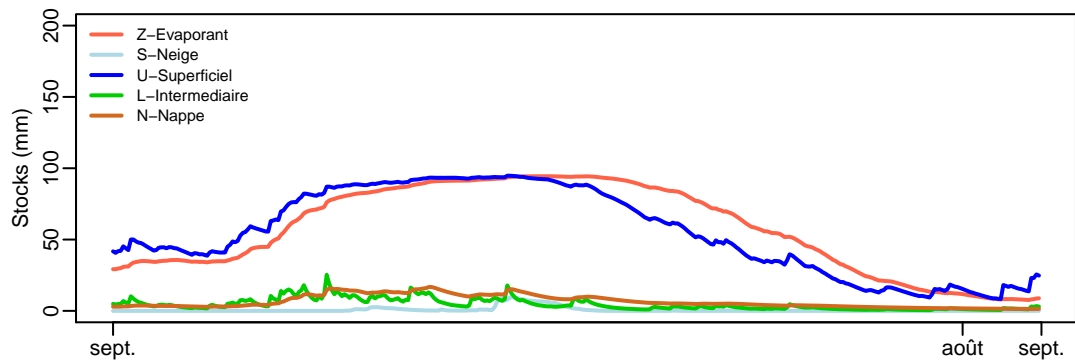

# k1900010 (17573.31 km<sup>2</sup>) – année 2003–2004

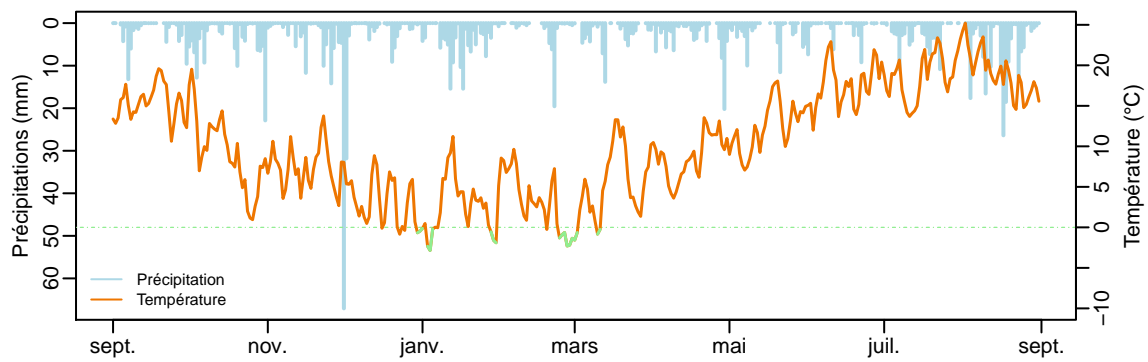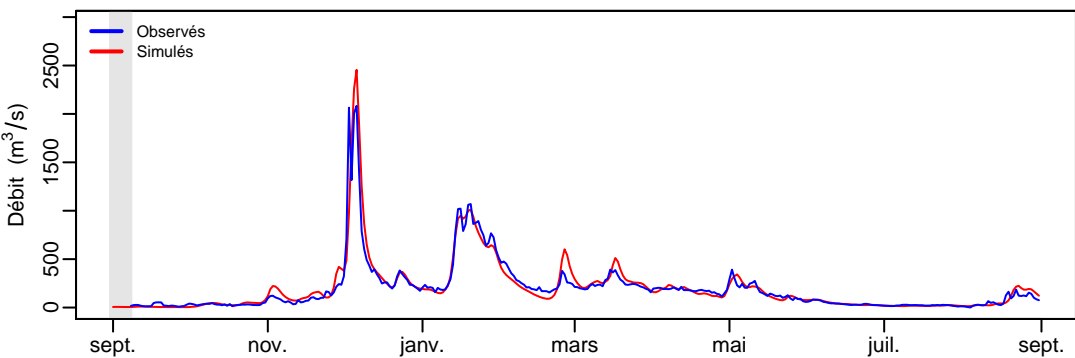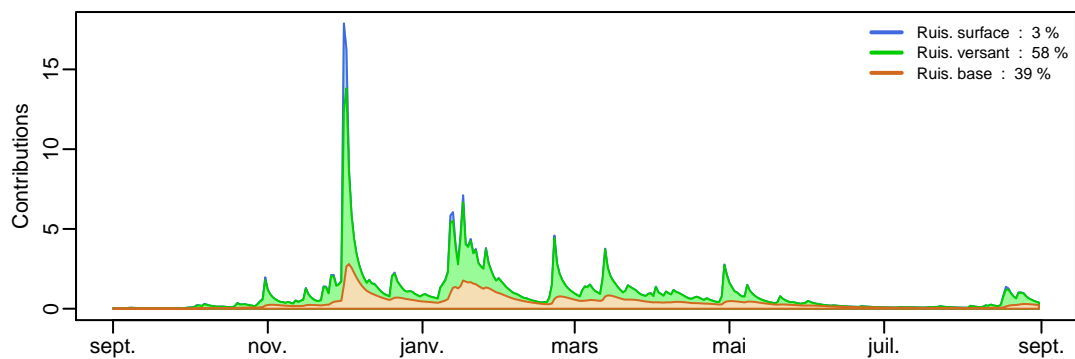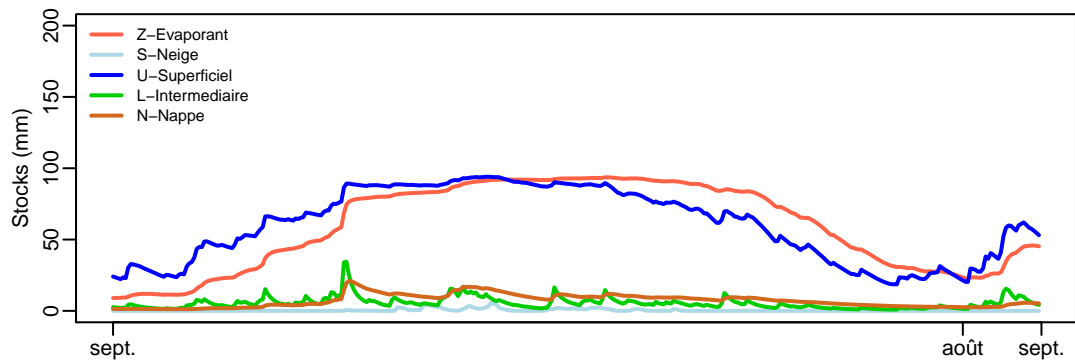

# k1900010 (17573.31 km<sup>2</sup>) – année 2004–2005

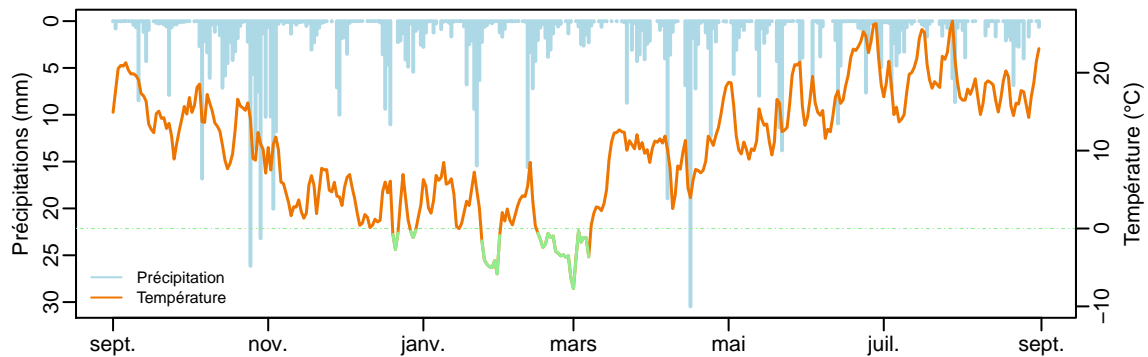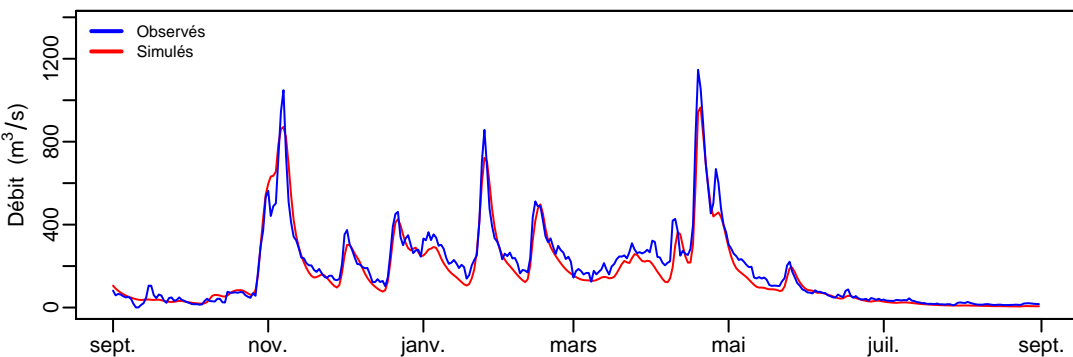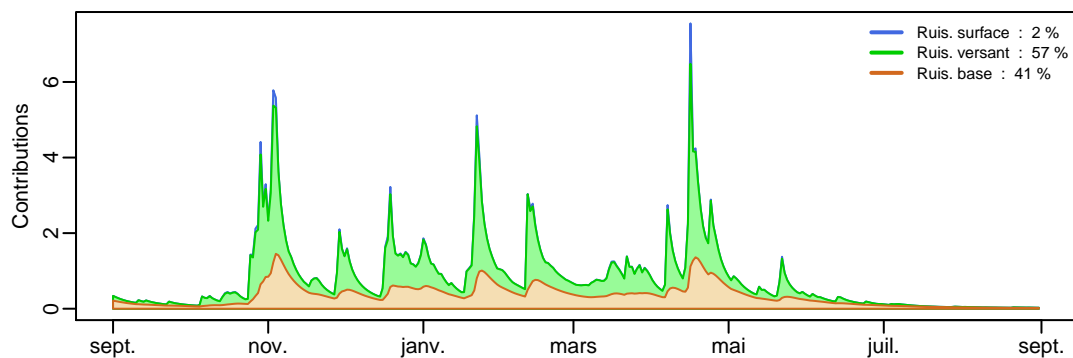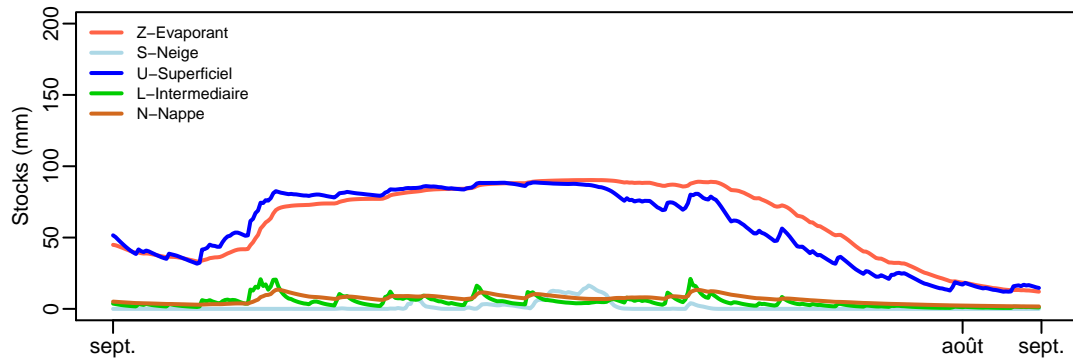

# k1900010 (17573.31 km<sup>2</sup>) – année 2005–2006

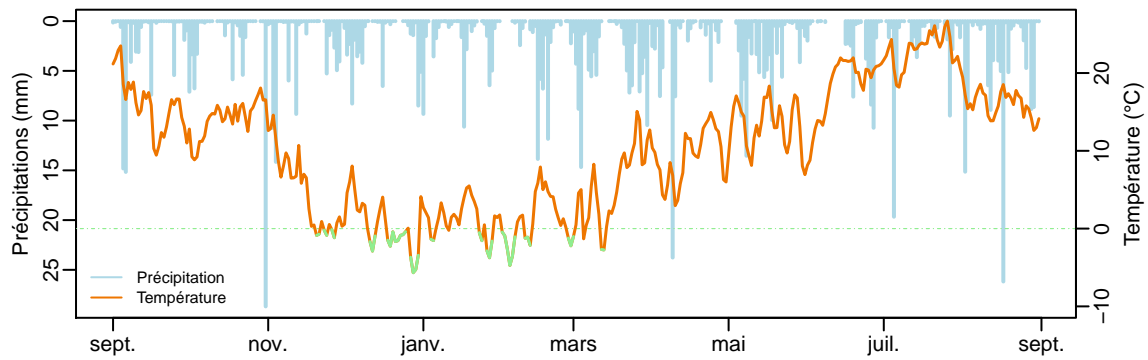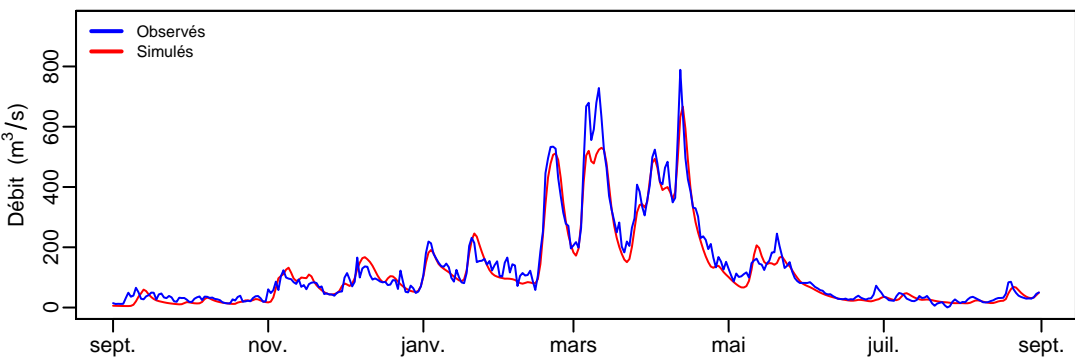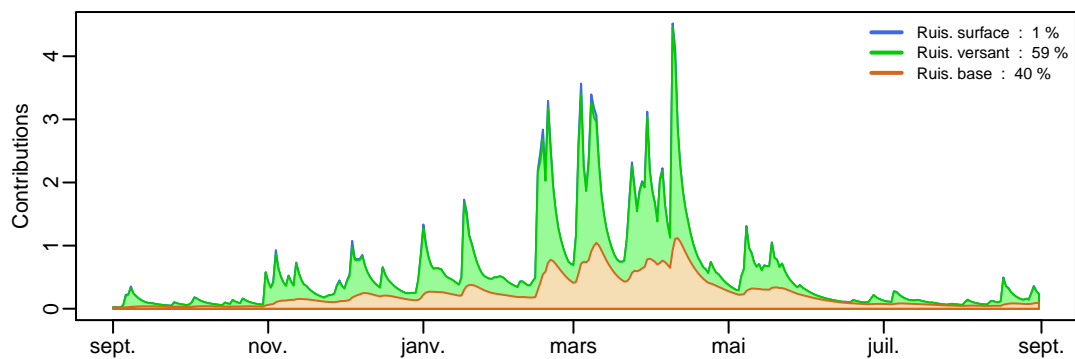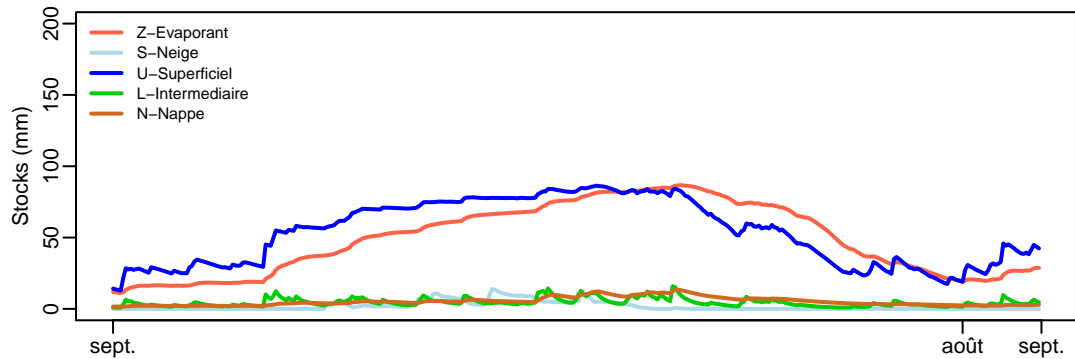

# k1900010 (17573.31 km<sup>2</sup>) – année 2006–2007

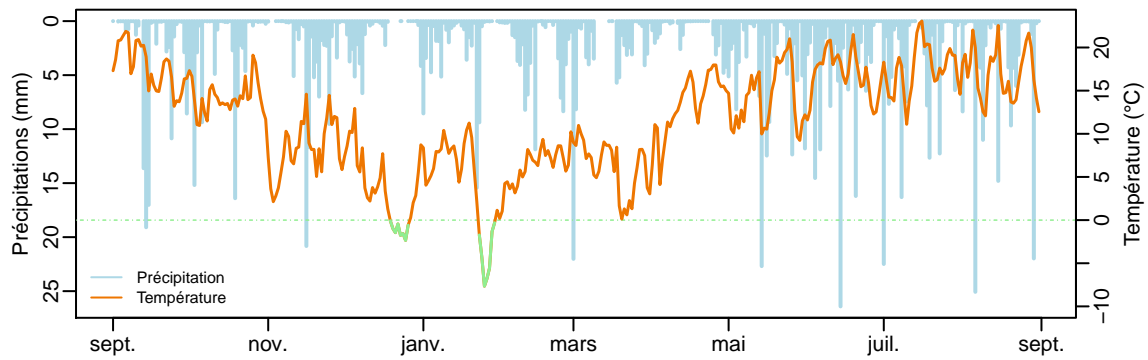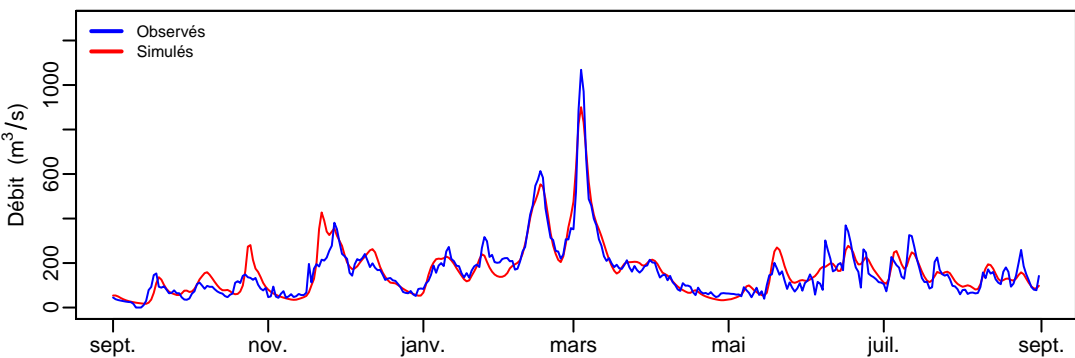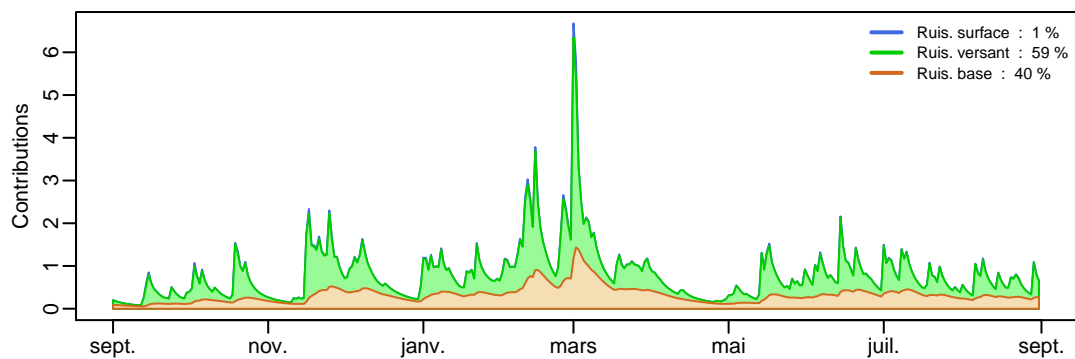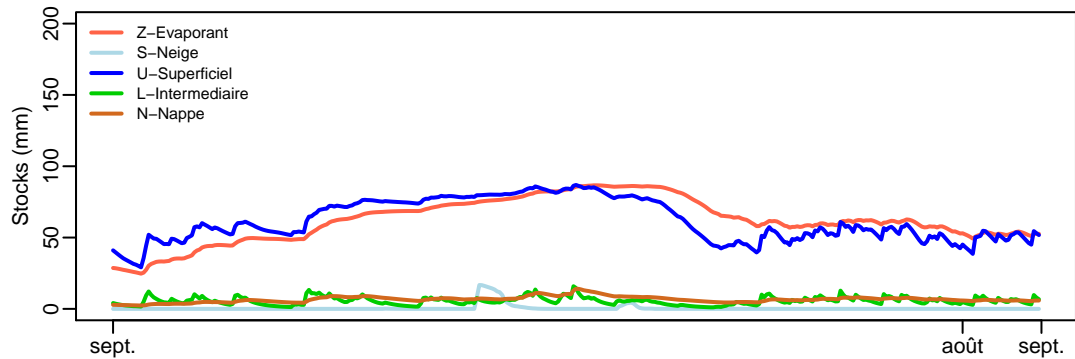



# k1900010 (17573.31 km²) – année 2007–2008

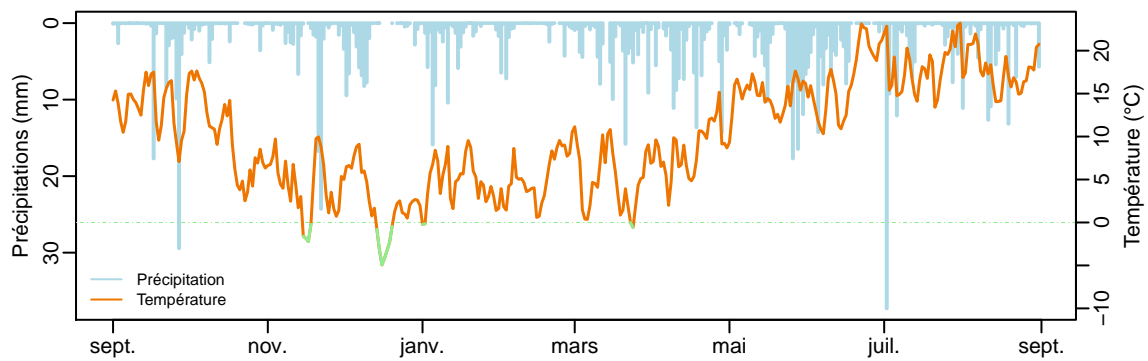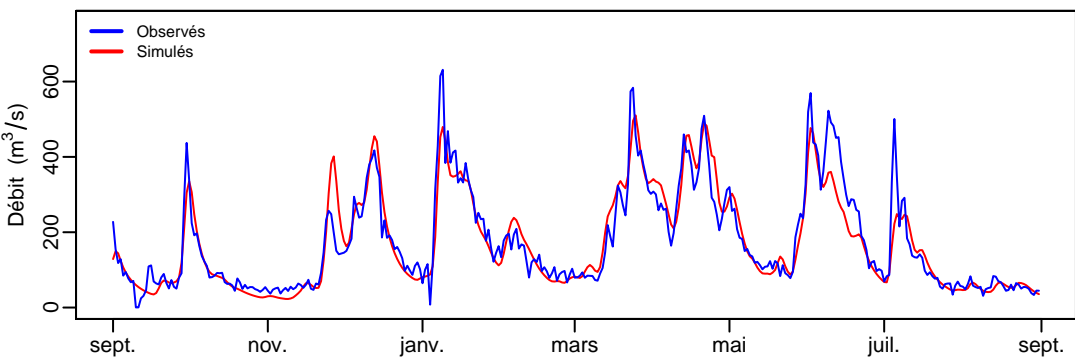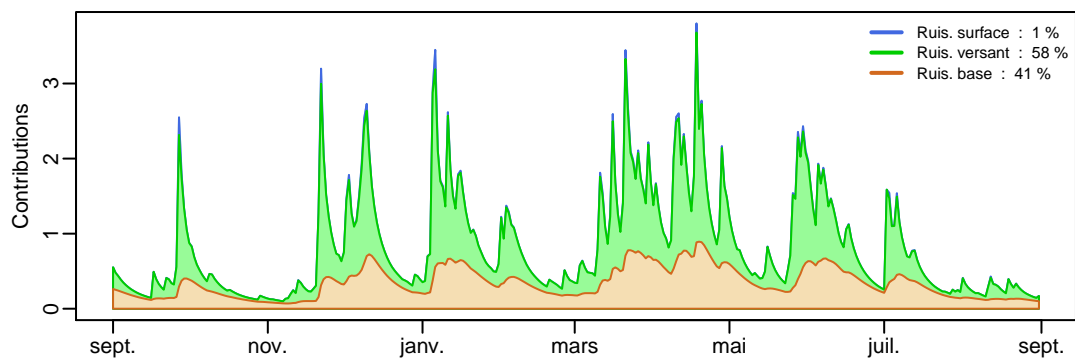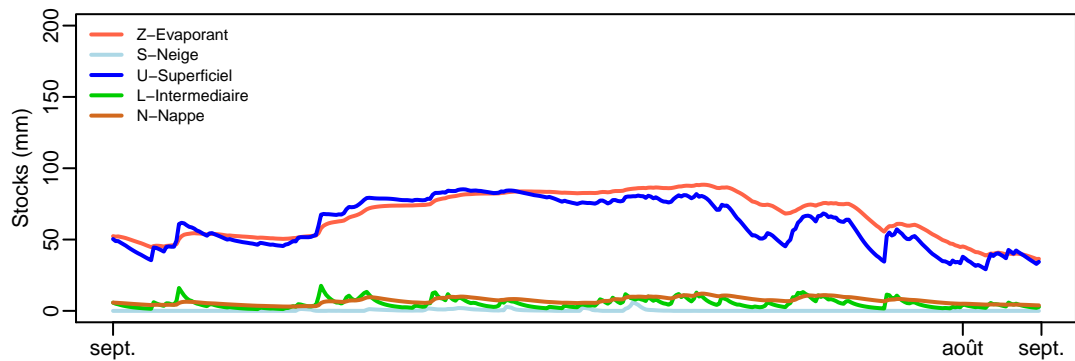

# k1900010 (17573.31 km<sup>2</sup>) – année 2008–2009

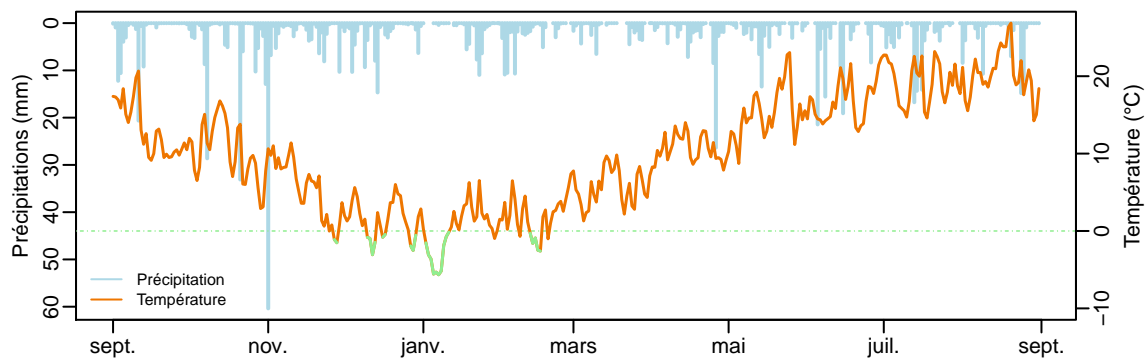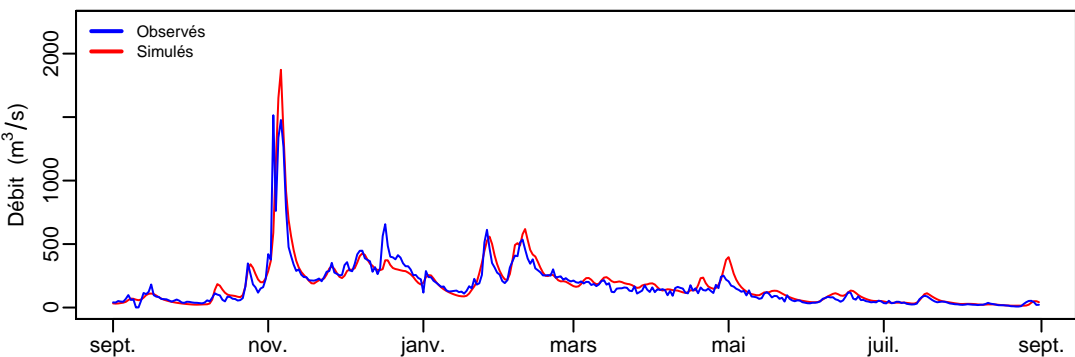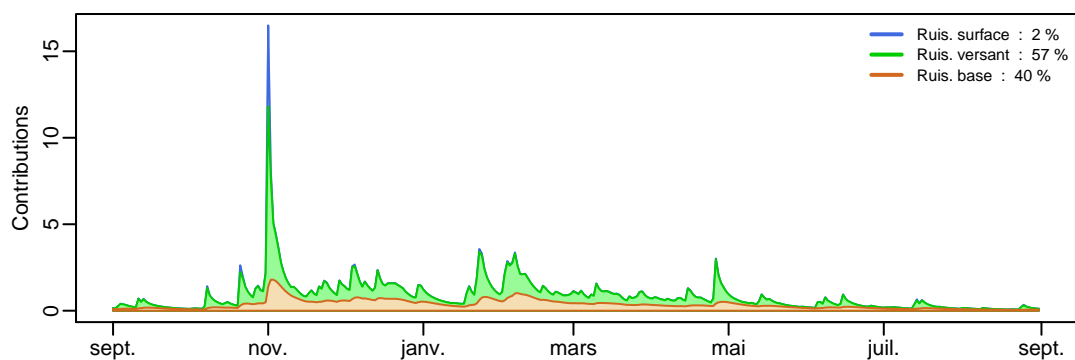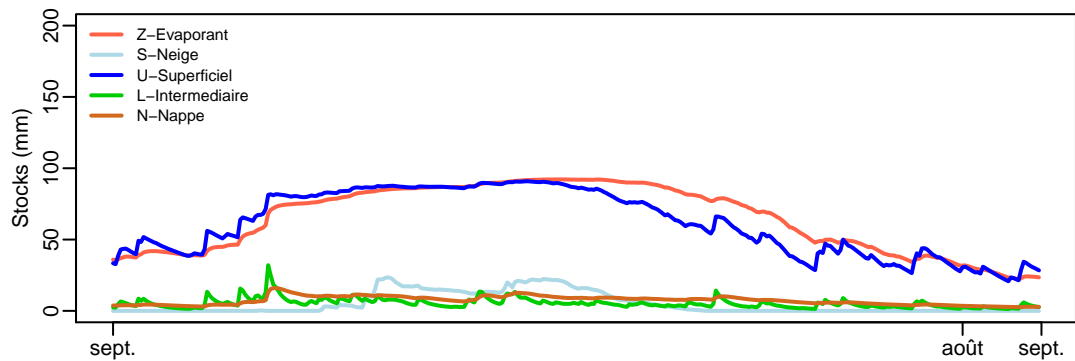

# k1900010 (17573.31 km²) – année 2009–2010

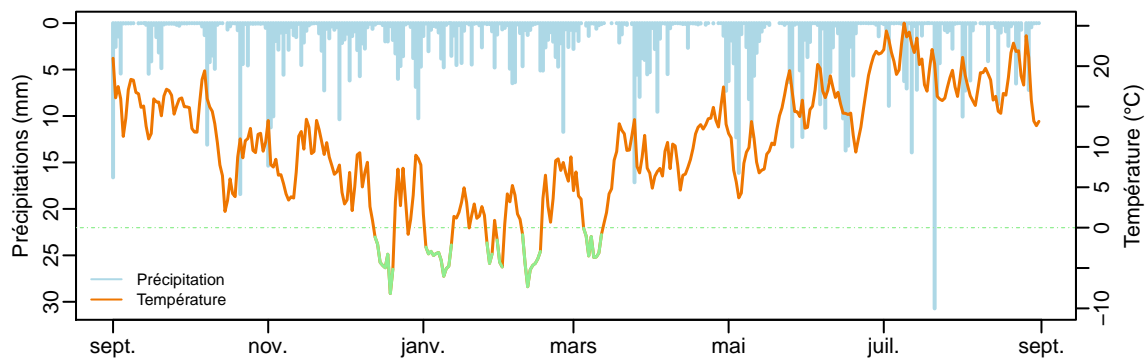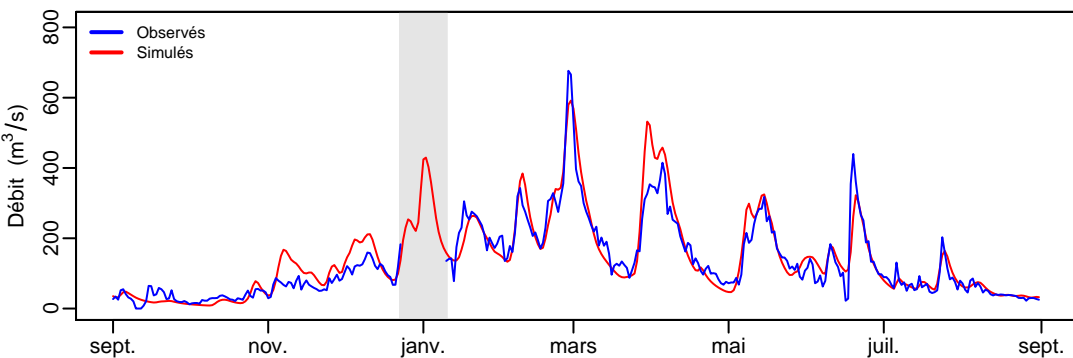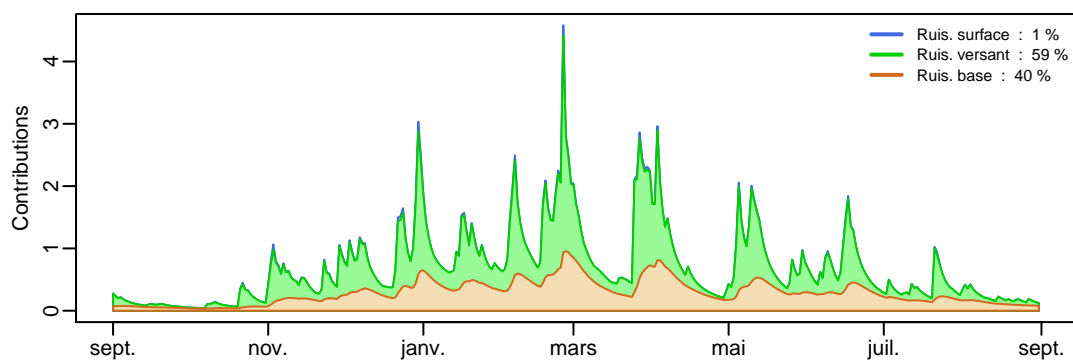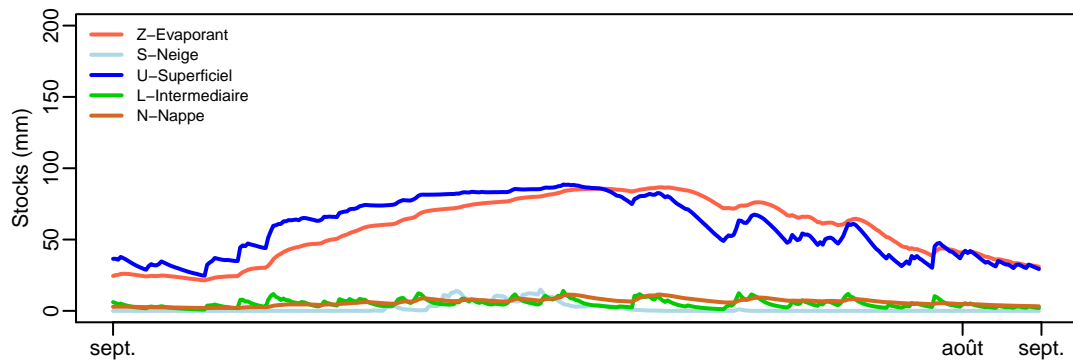

# k1900010 (17573.31 km<sup>2</sup>) – année 2010–2011

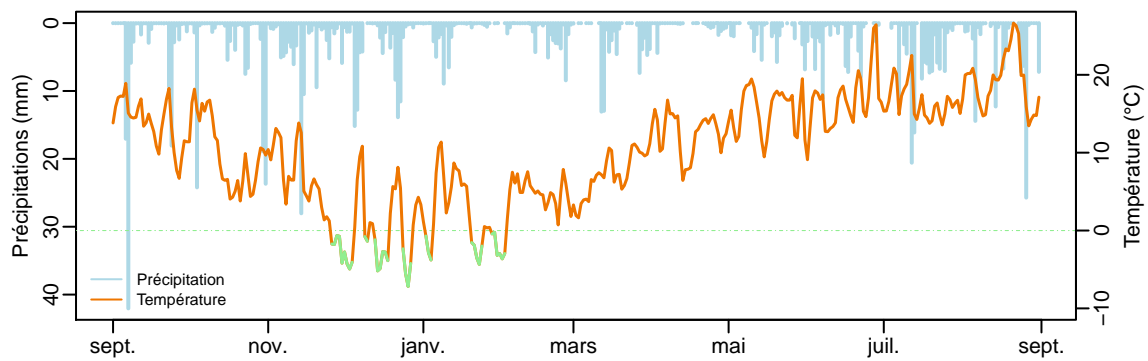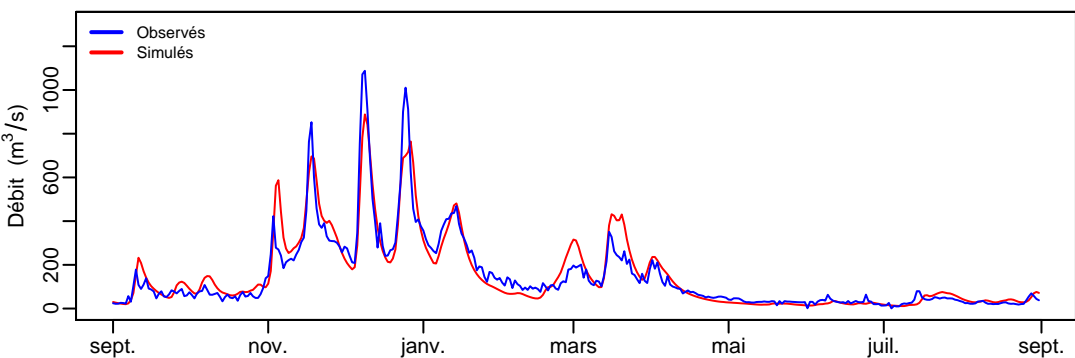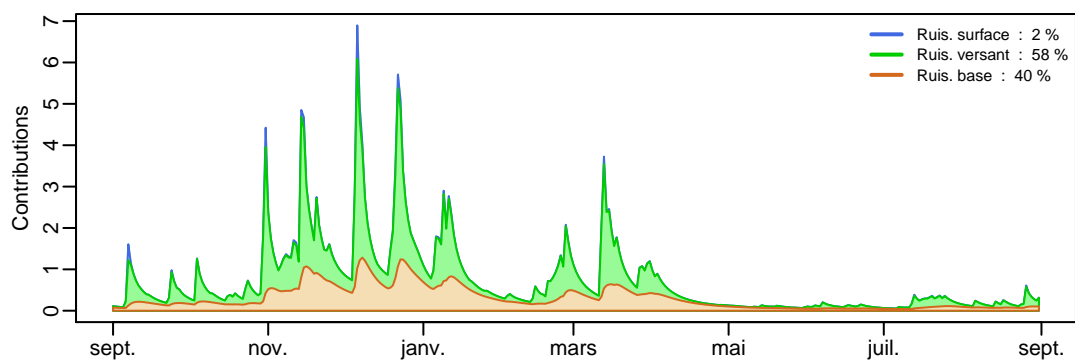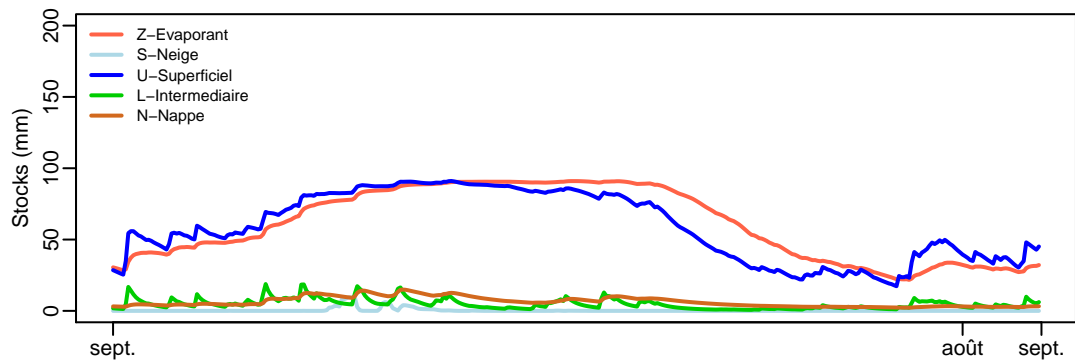

# k1900010 (17573.31 km²) – année 2011–2012

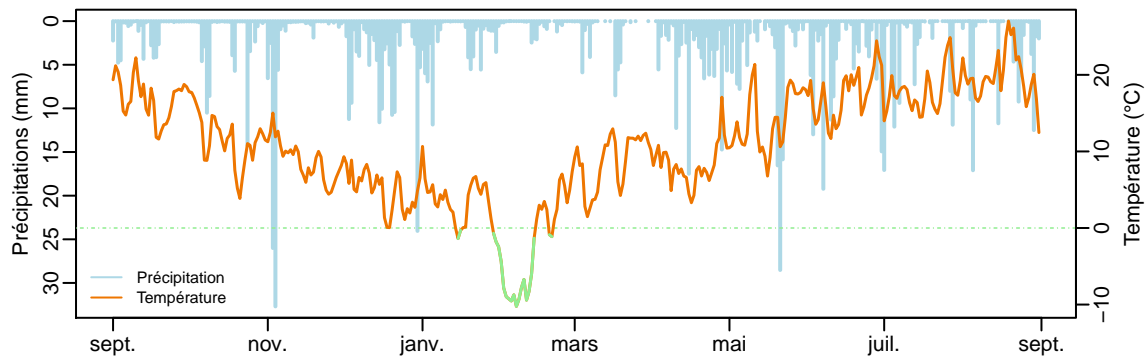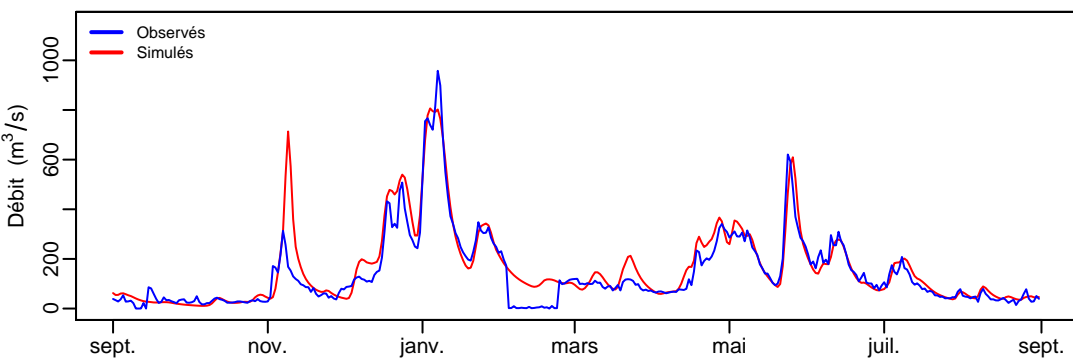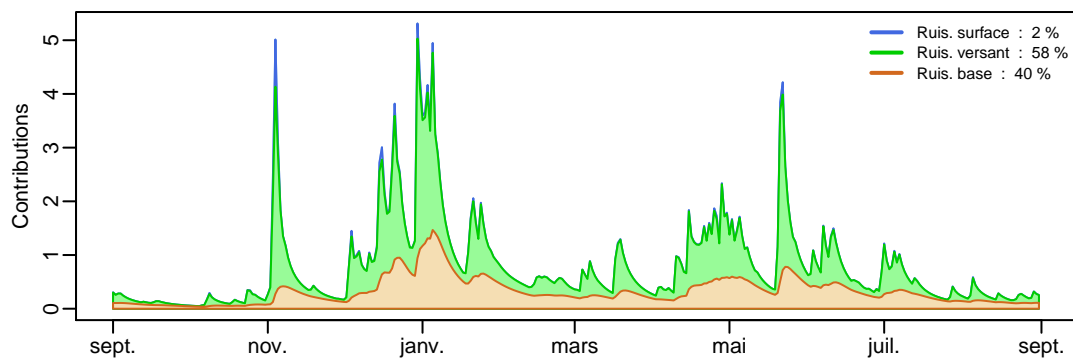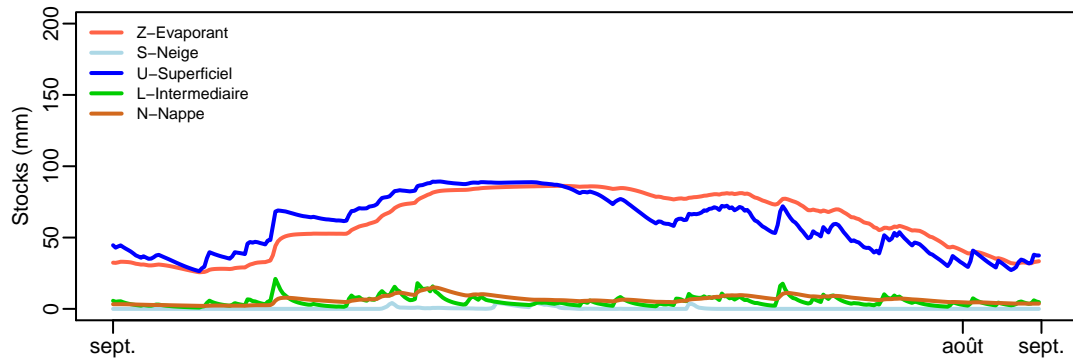

# k1914510 (115.07 km<sup>2</sup>) – année 1981–1982

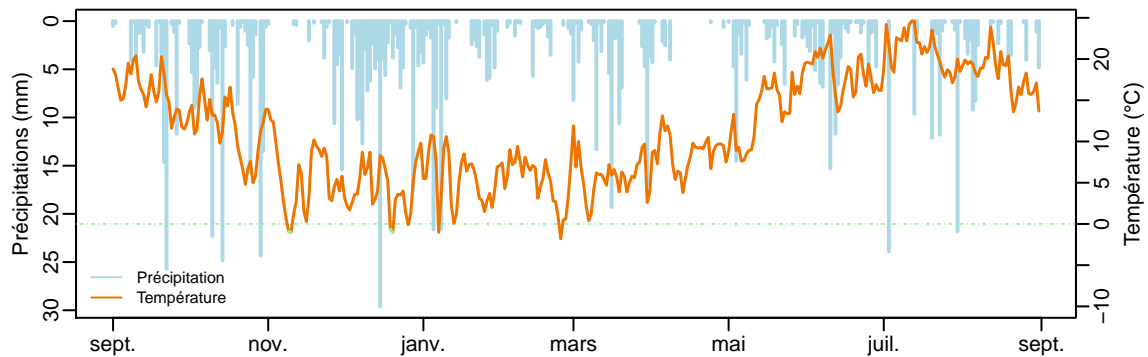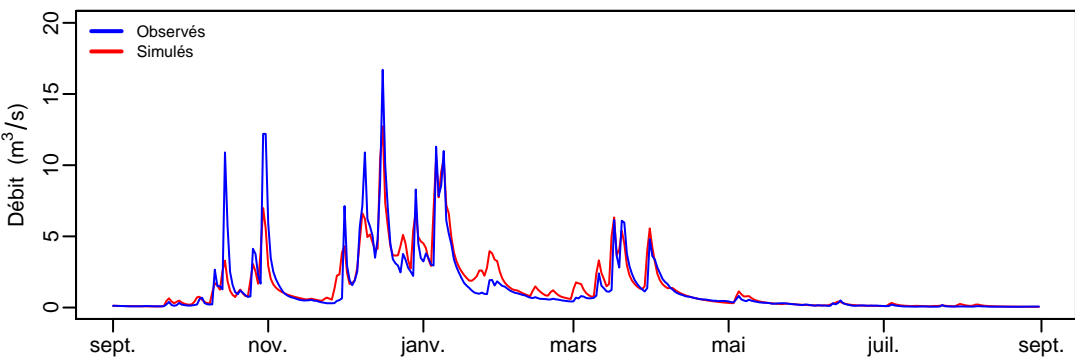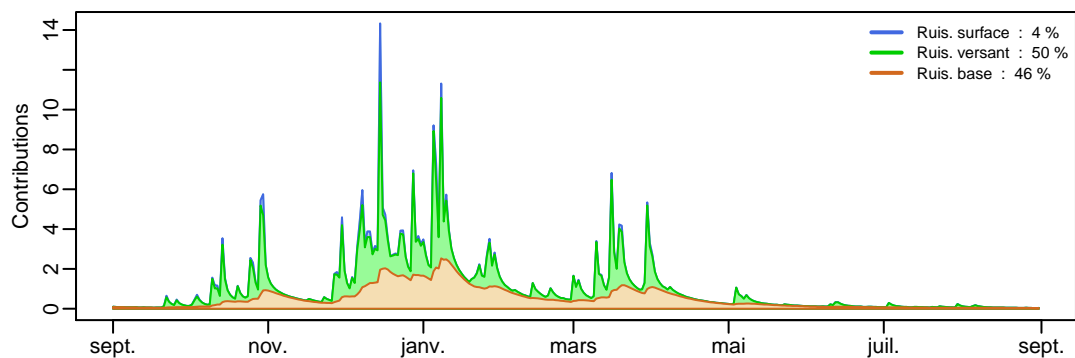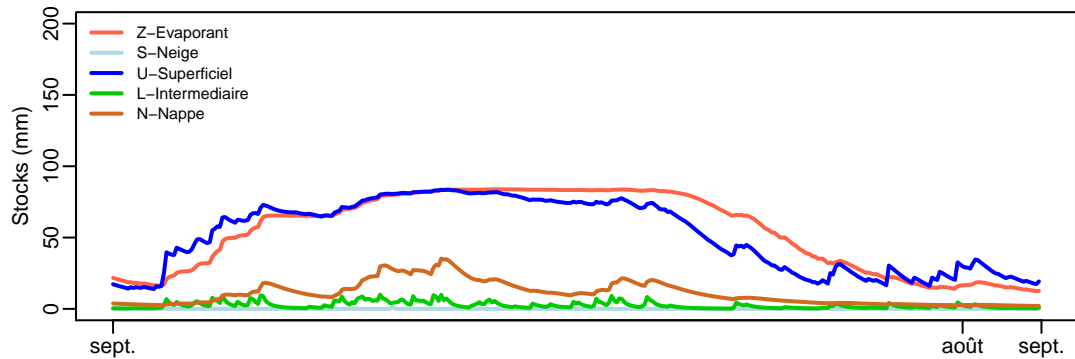

# k1914510 (115.07 km<sup>2</sup>) – année 1982–1983

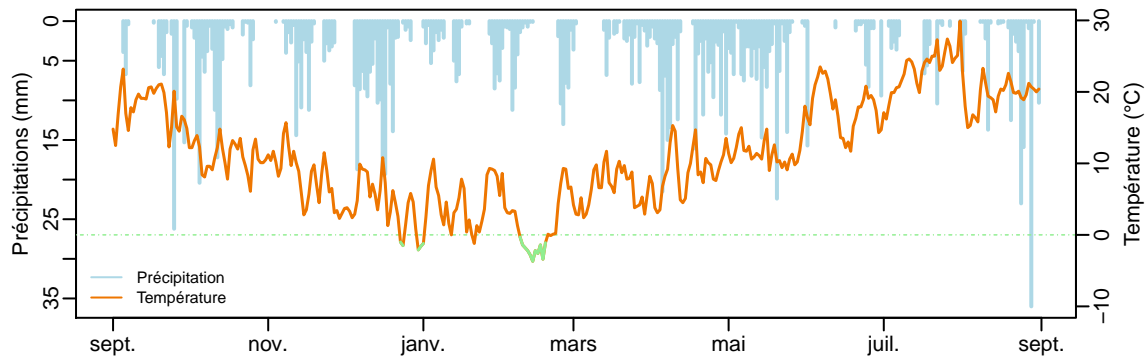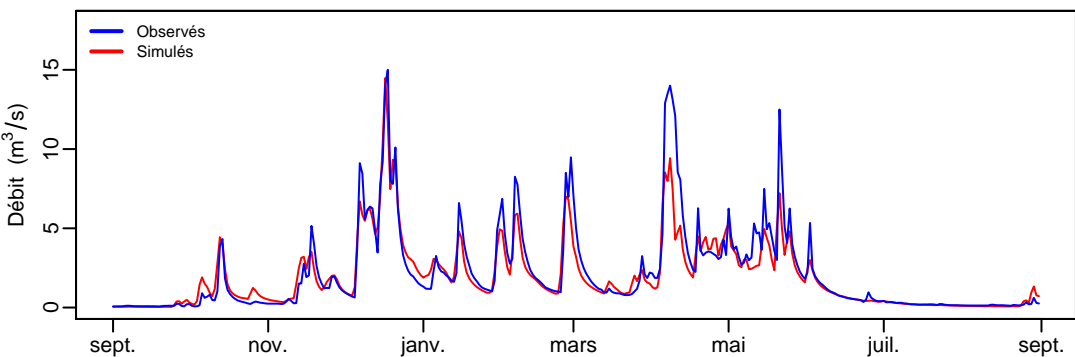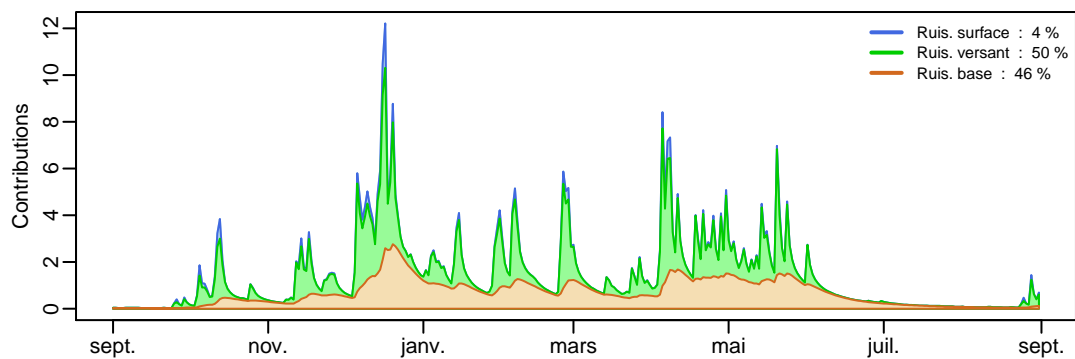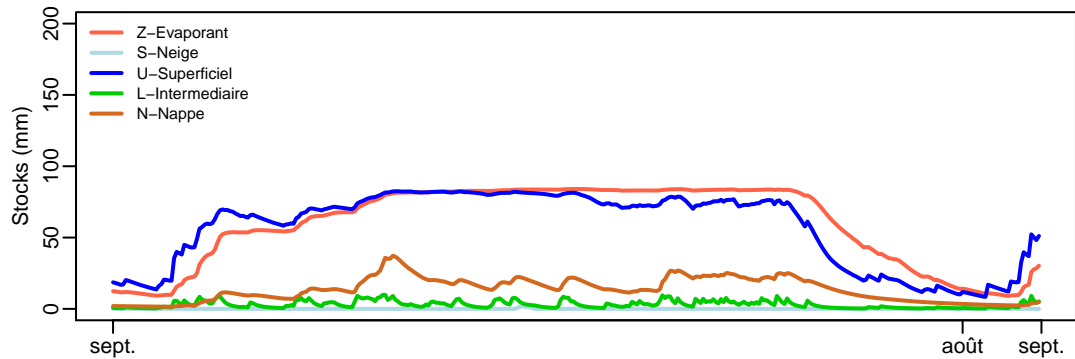

# k1914510 (115.07 km<sup>2</sup>) – année 1983–1984

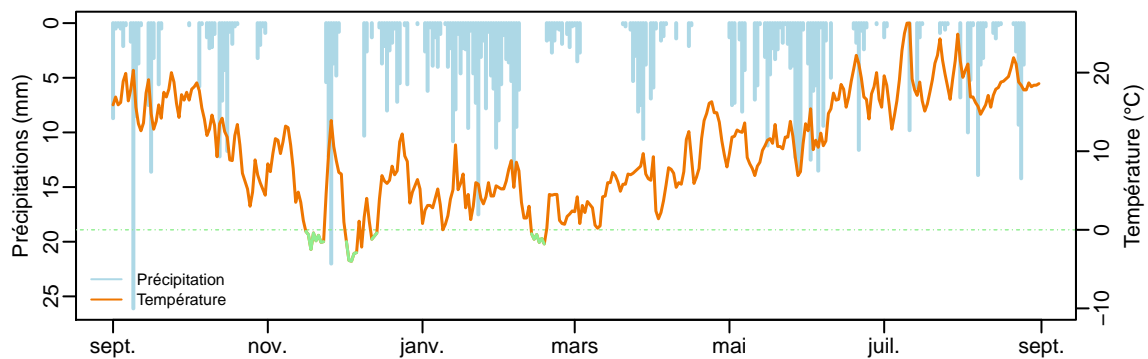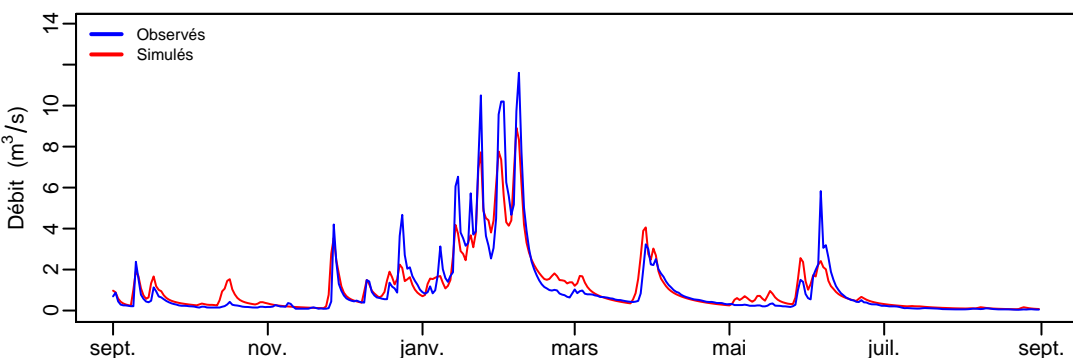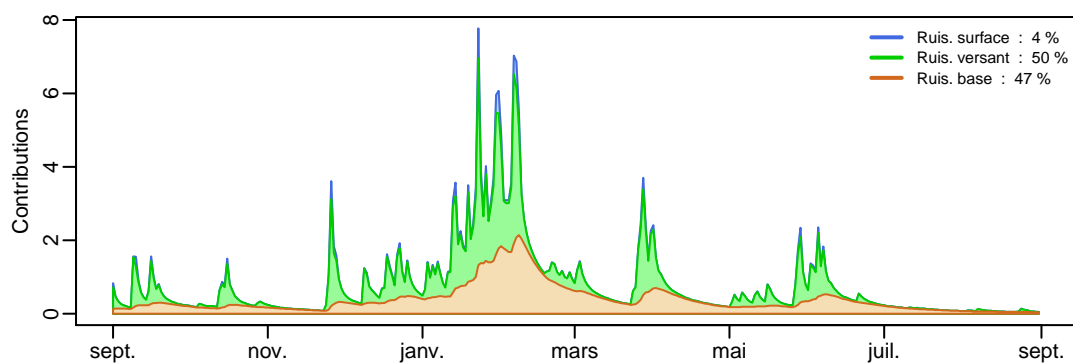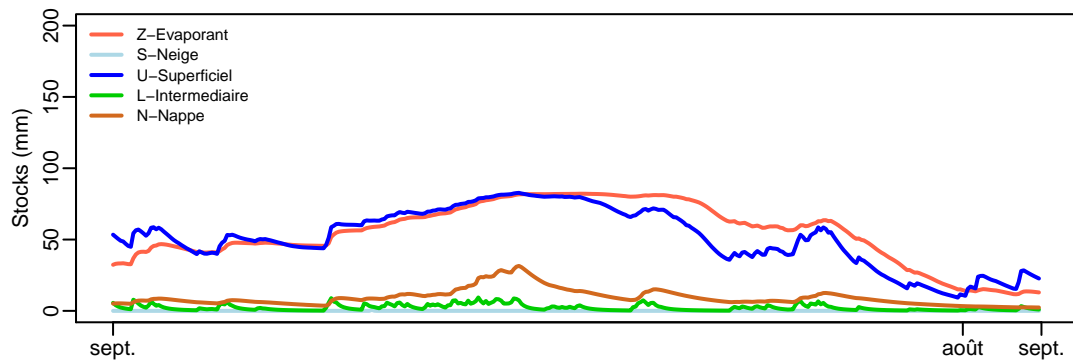



# k1914510 (115.07 km<sup>2</sup>) – année 1984–1985

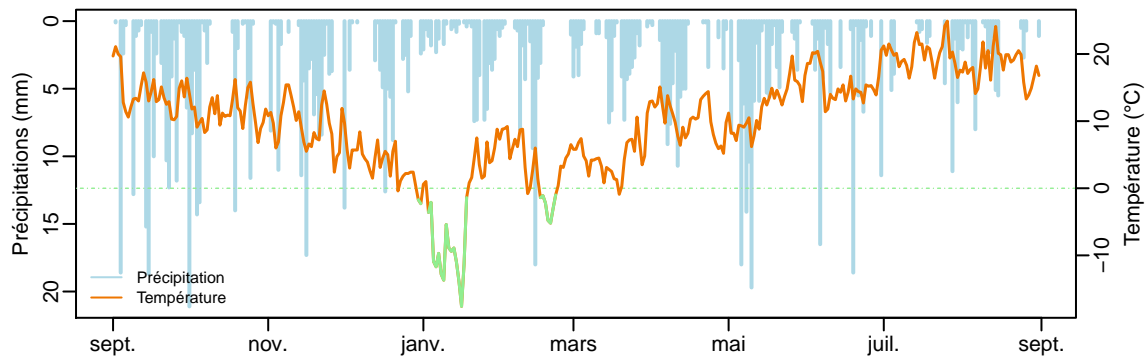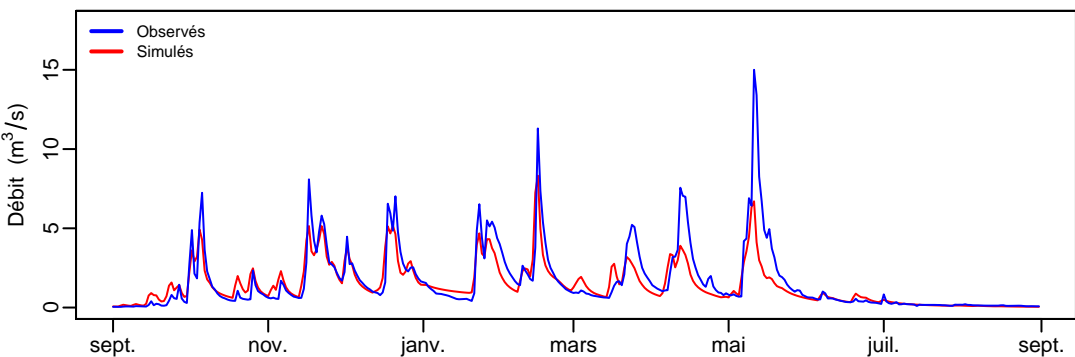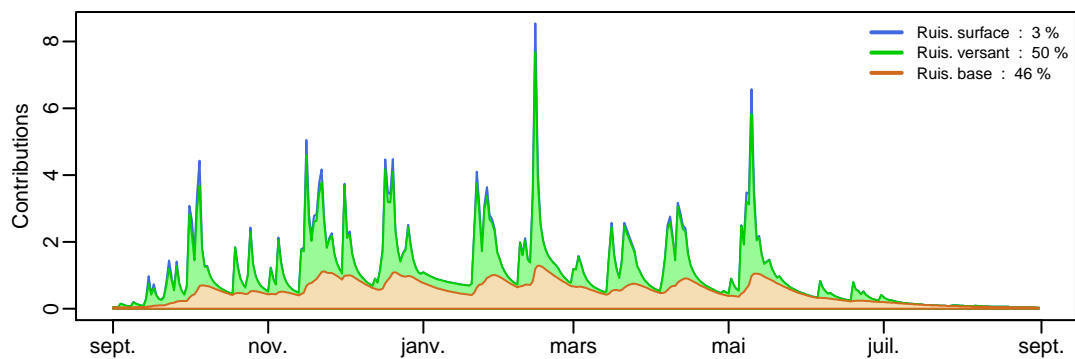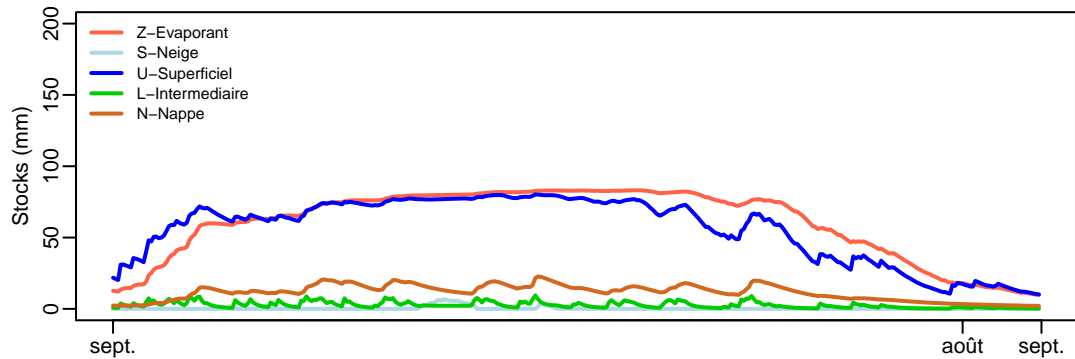

# k1914510 (115.07 km<sup>2</sup>) – année 1985–1986

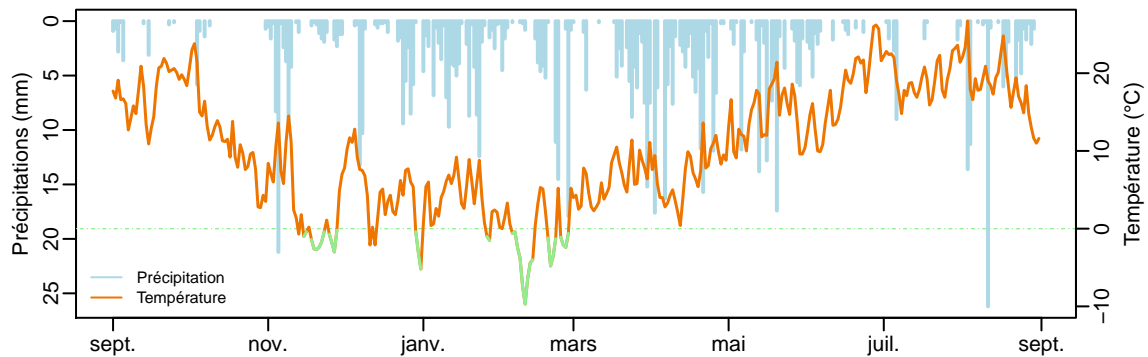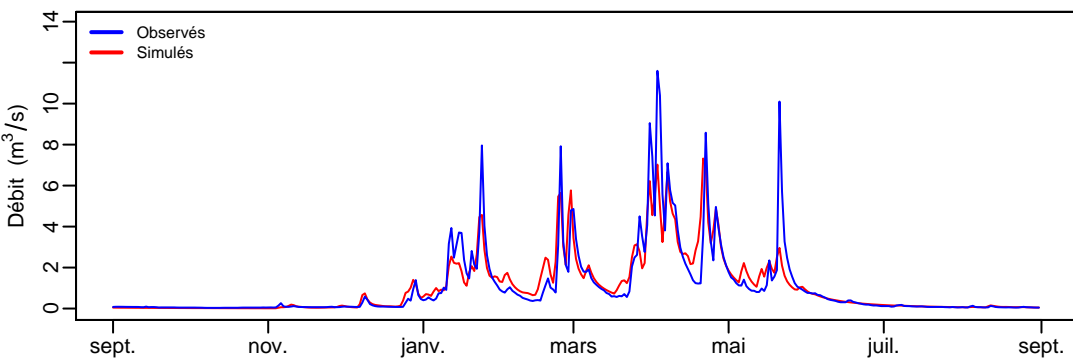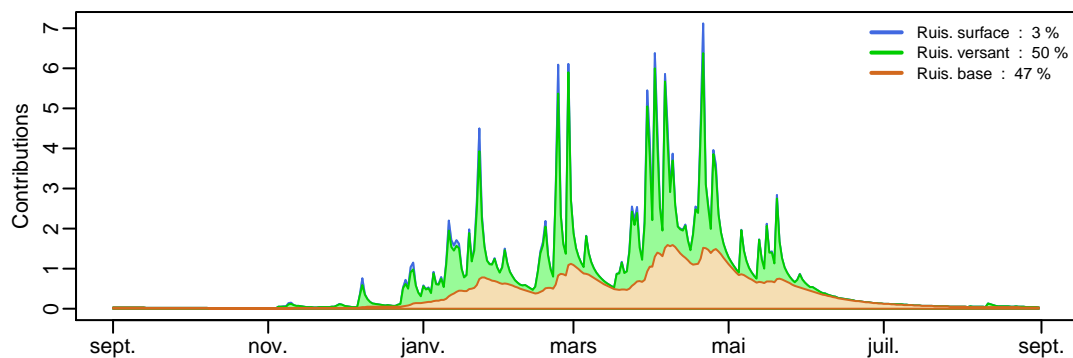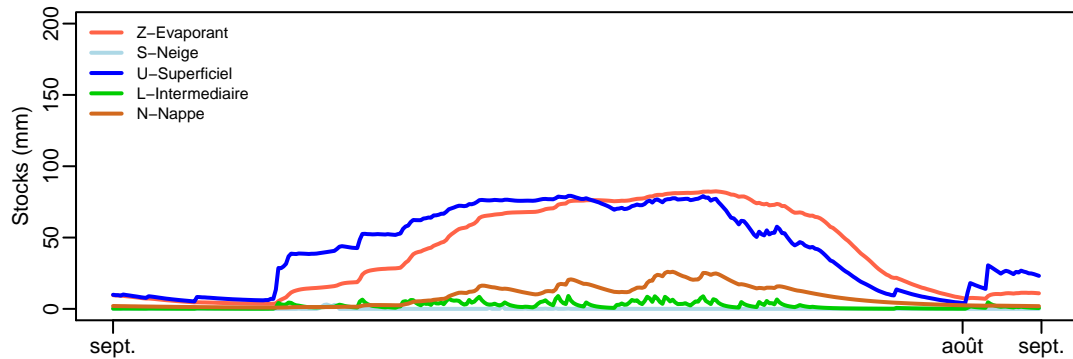

# k1914510 (115.07 km<sup>2</sup>) – année 1986–1987

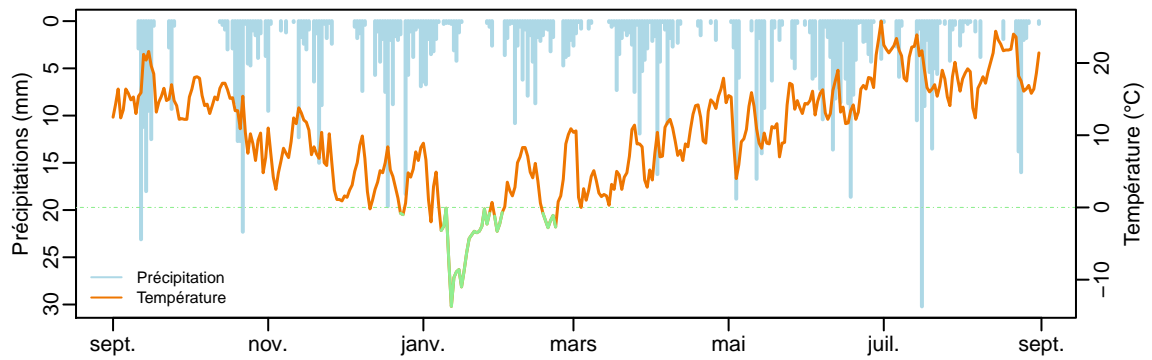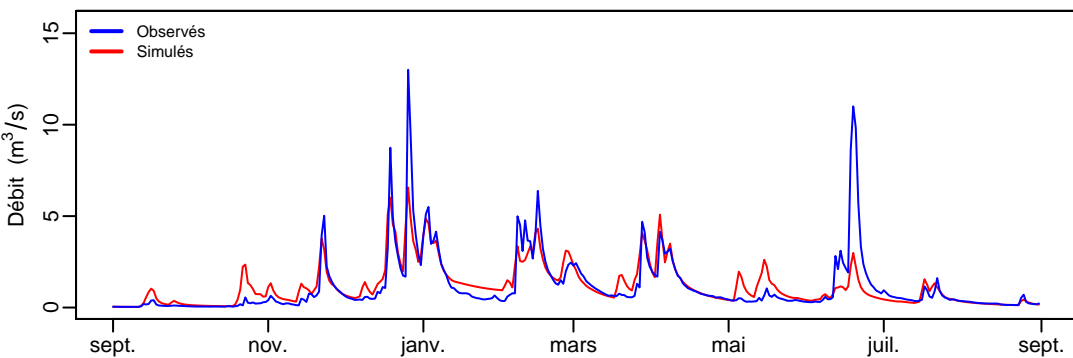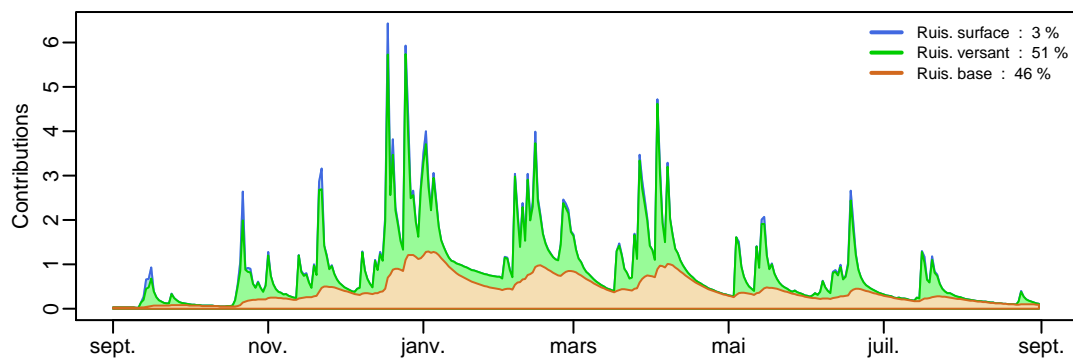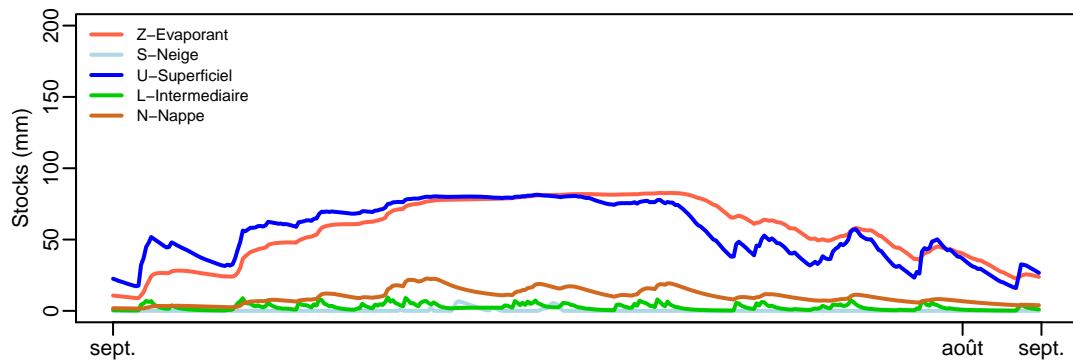

# k1914510 (115.07 km<sup>2</sup>) – année 1987–1988

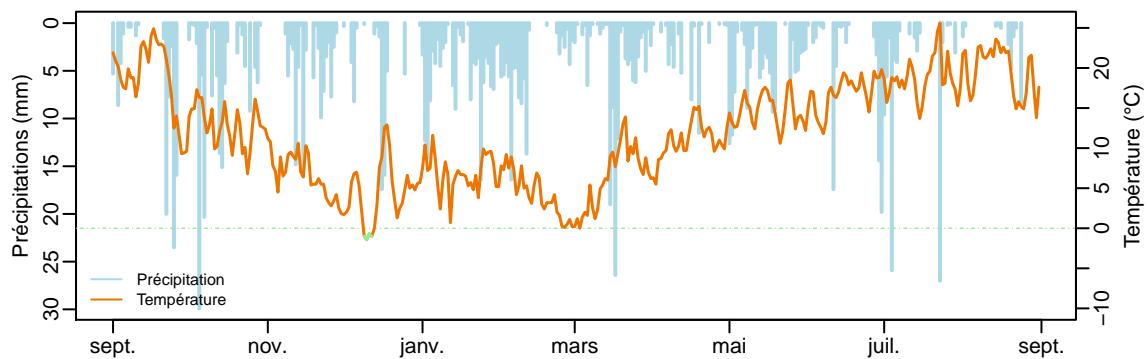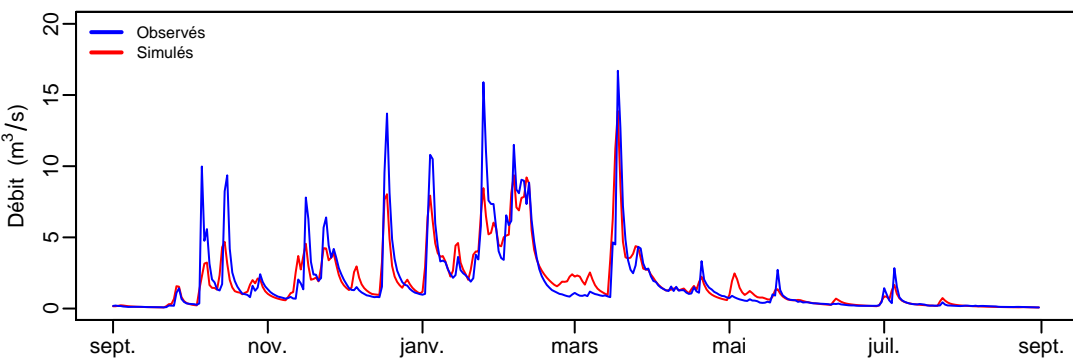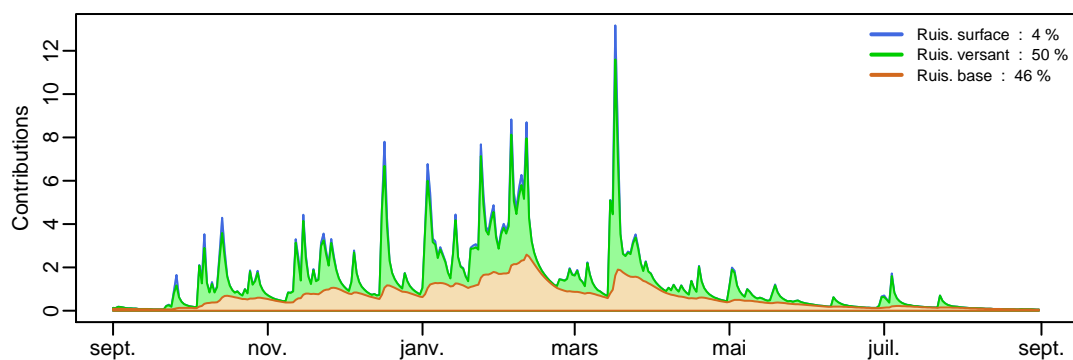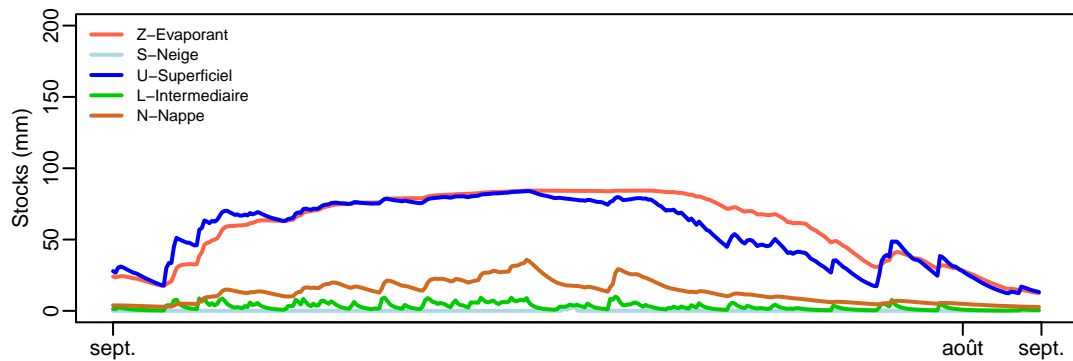

# k1914510 (115.07 km<sup>2</sup>) – année 1988–1989

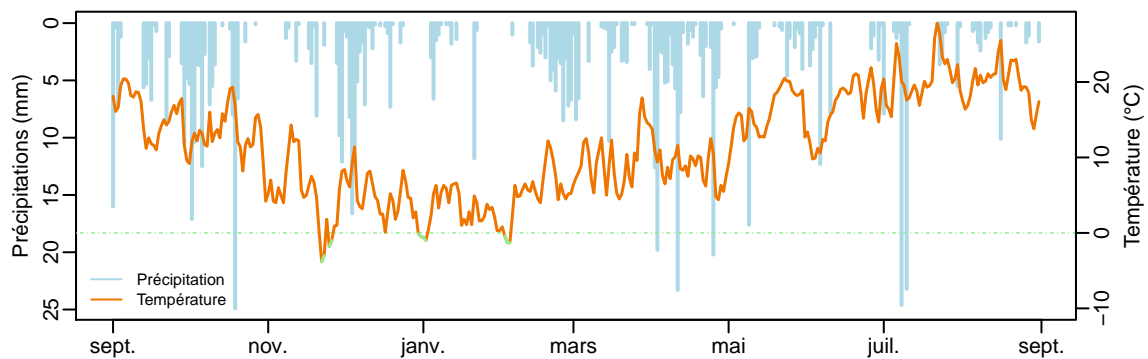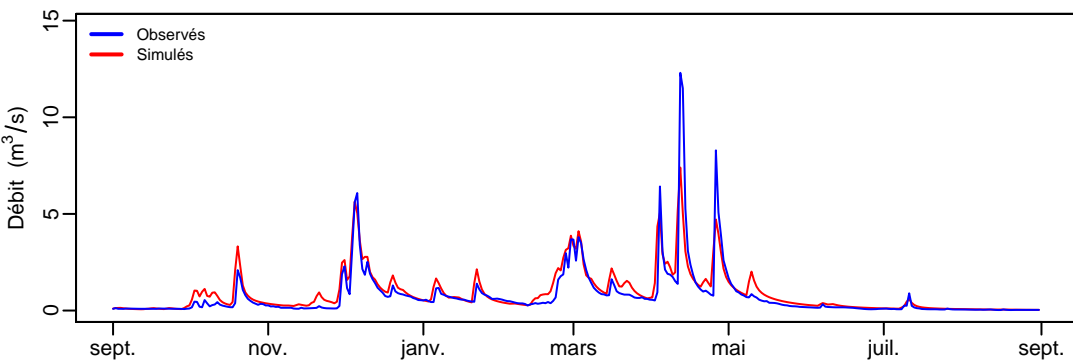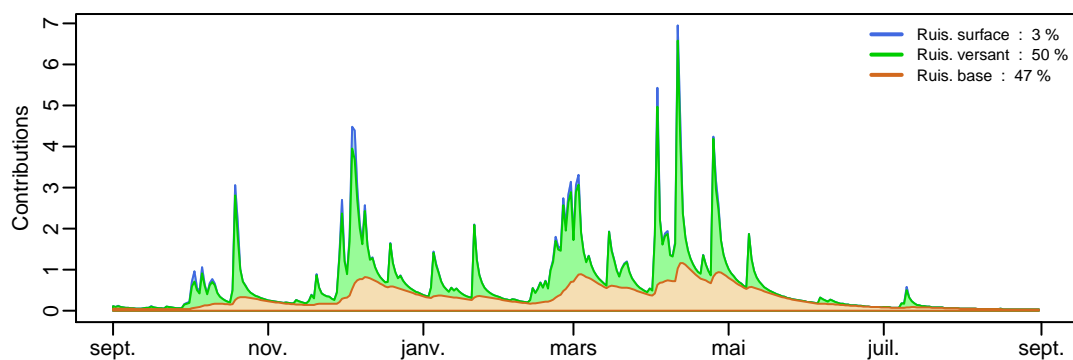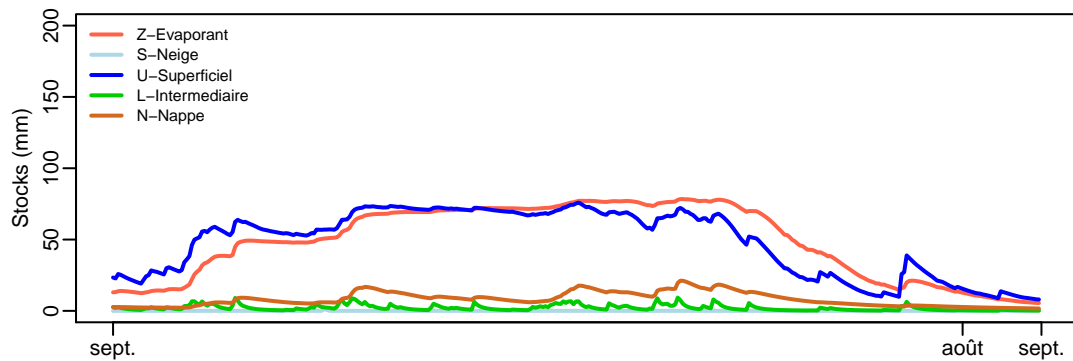

# k1914510 (115.07 km<sup>2</sup>) – année 1989–1990

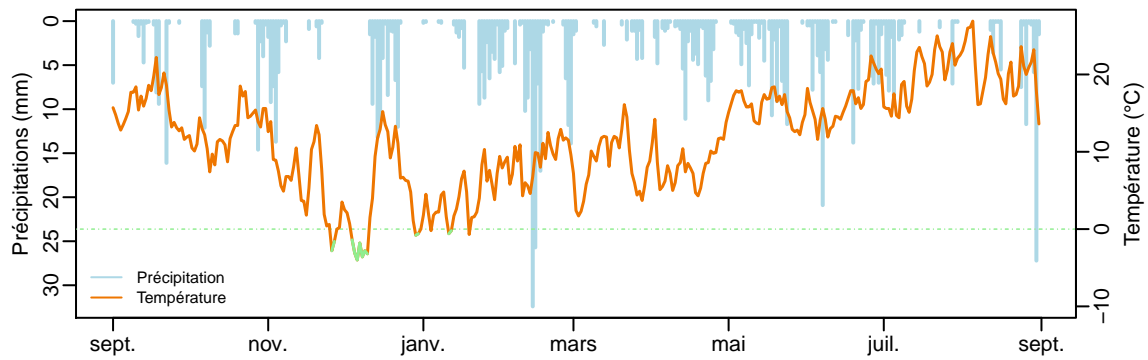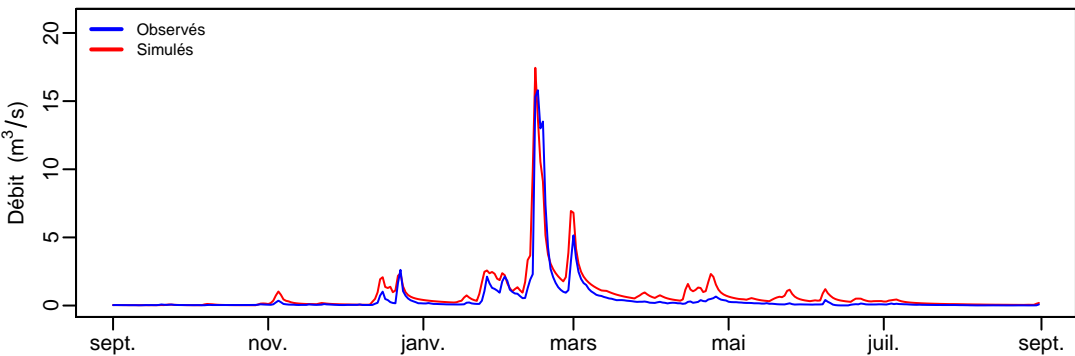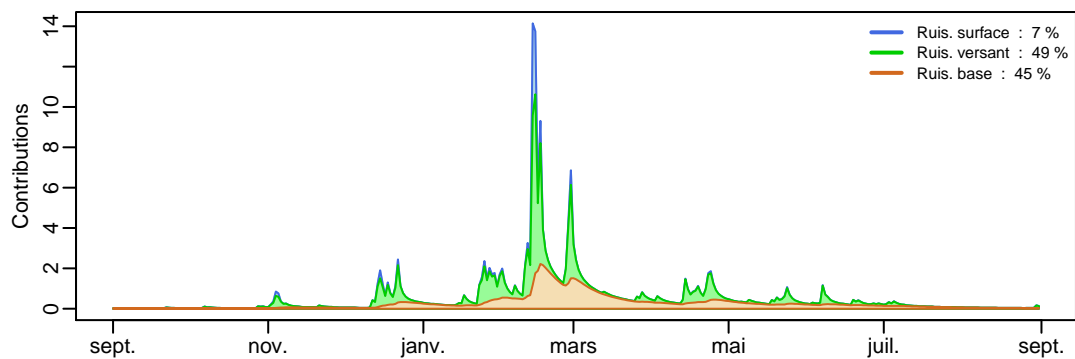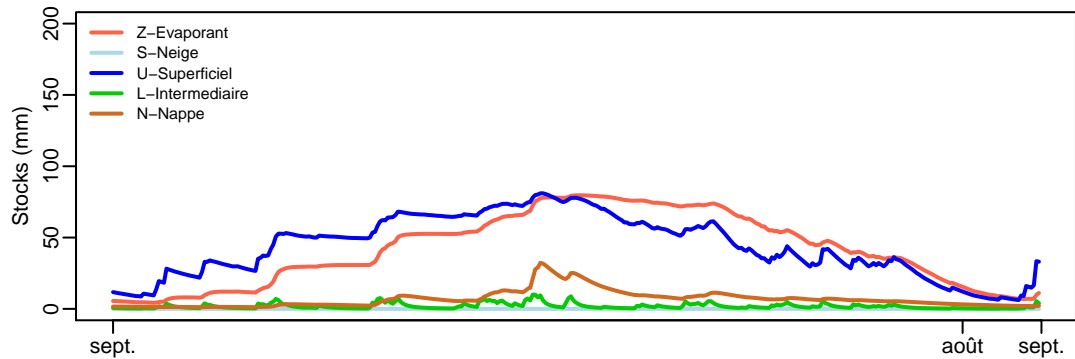

# k1914510 (115.07 km<sup>2</sup>) – année 1990–1991

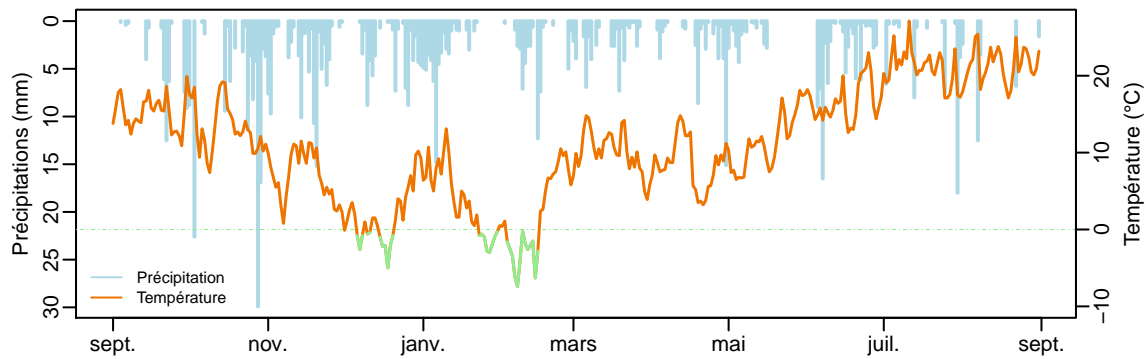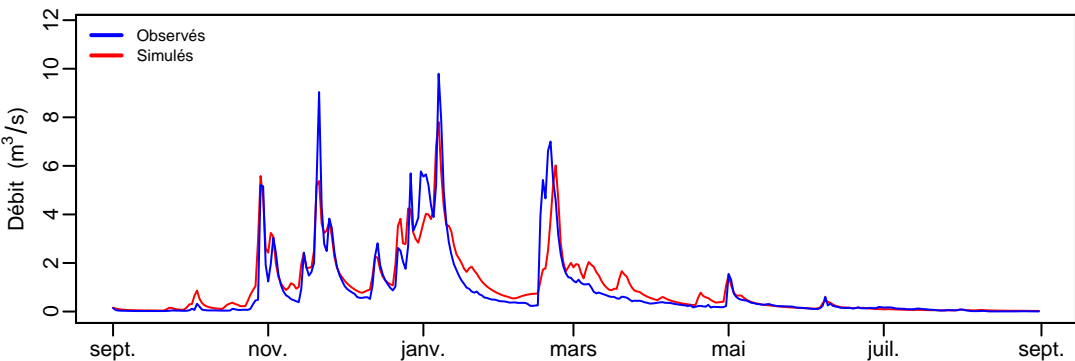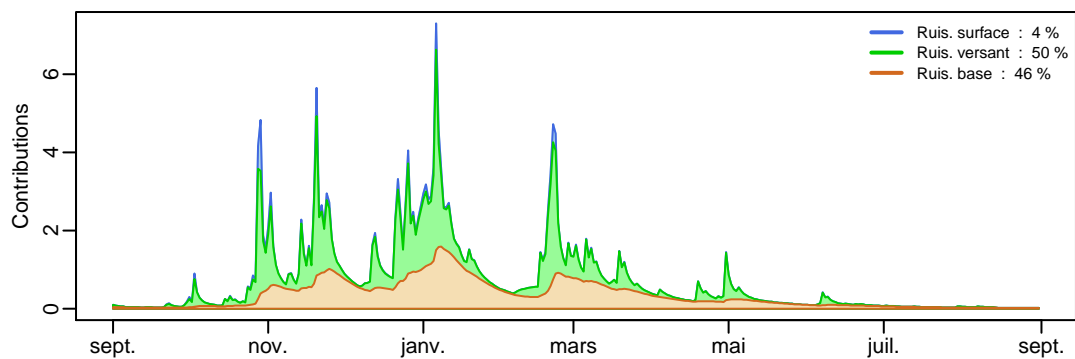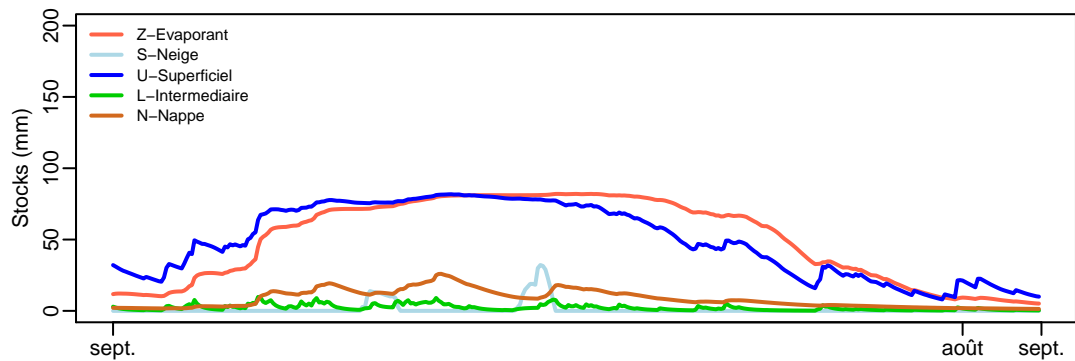

# k1914510 (115.07 km<sup>2</sup>) – année 1991–1992

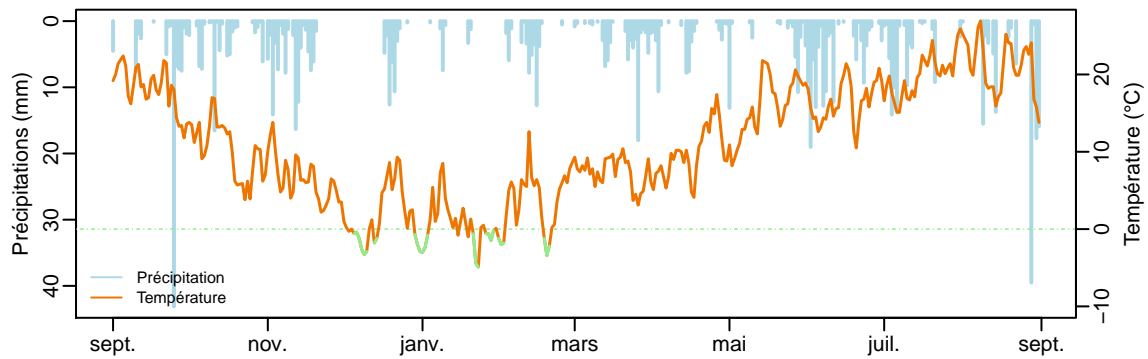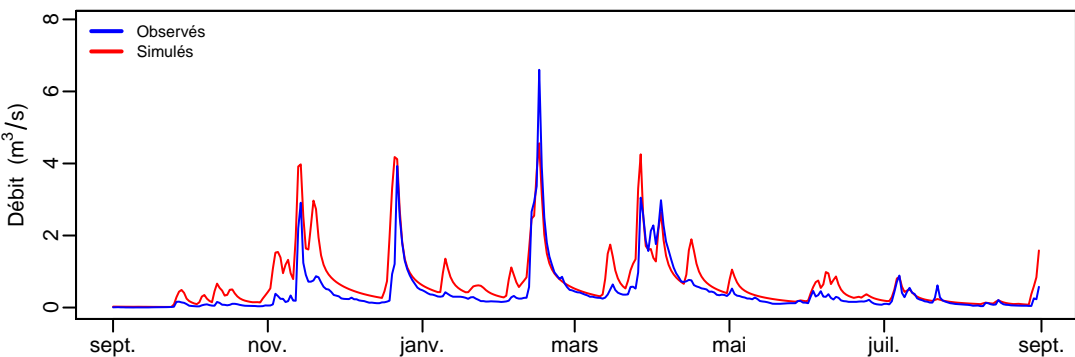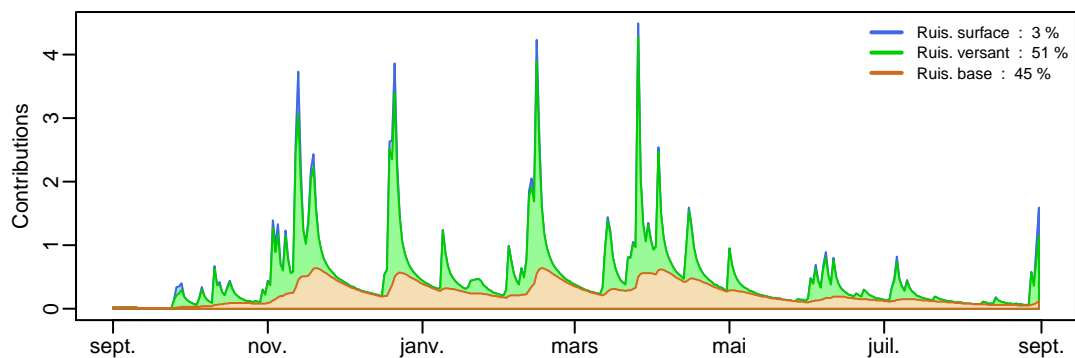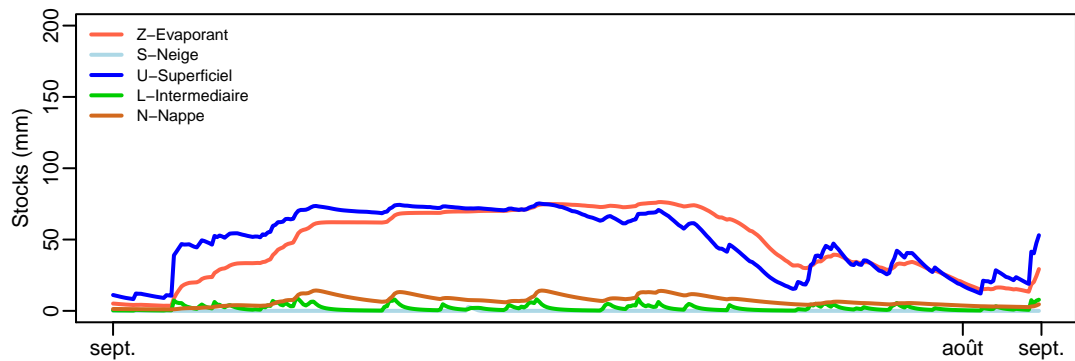



# k1914510 (115.07 km<sup>2</sup>) – année 1992–1993

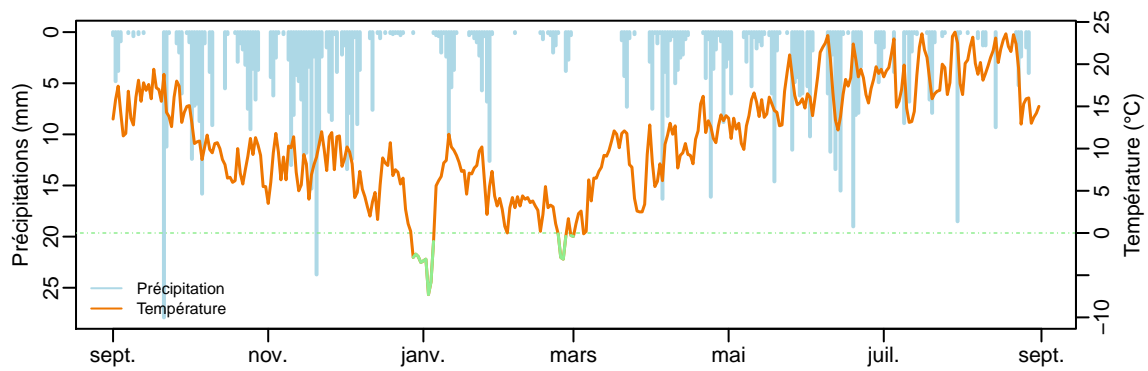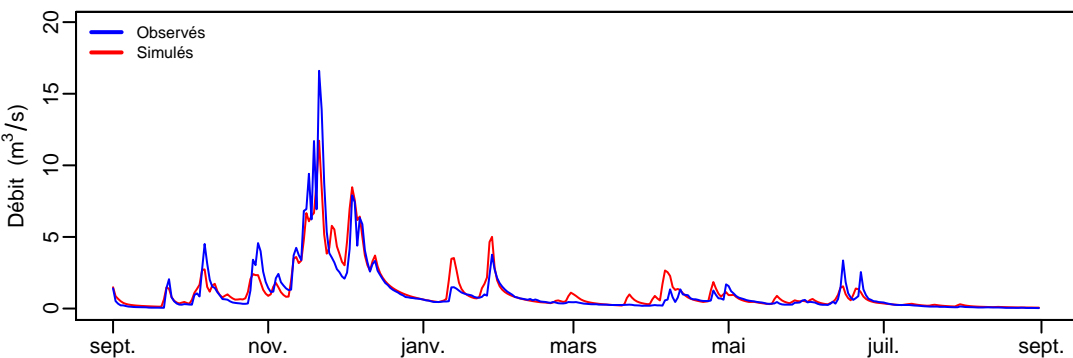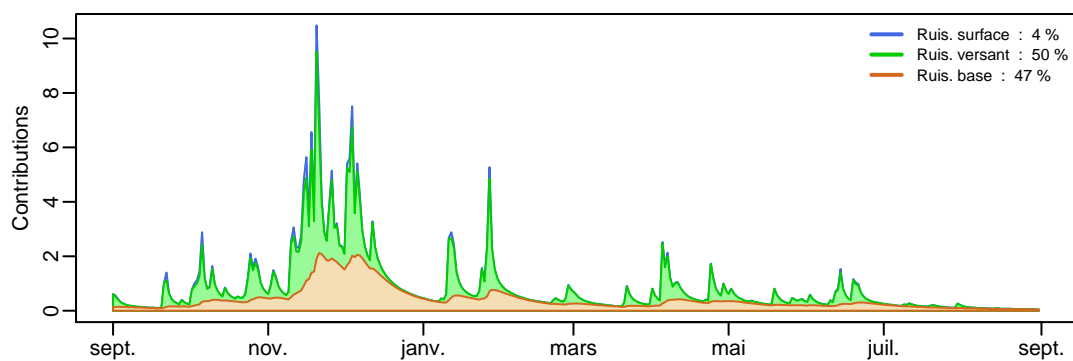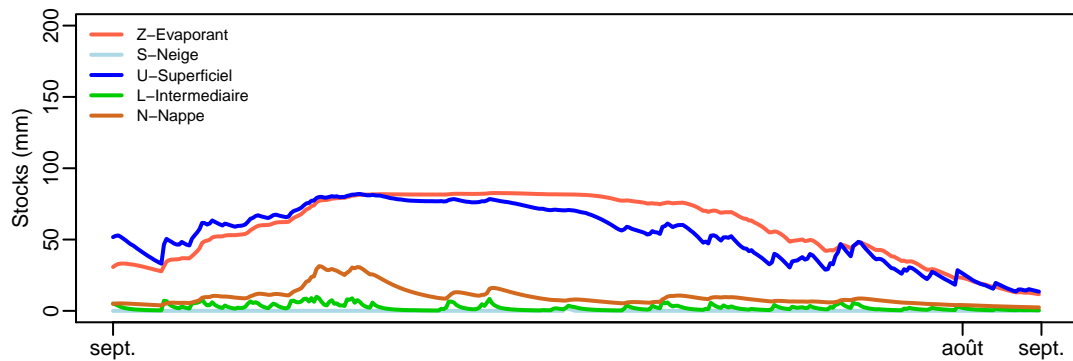

# k1914510 (115.07 km²) – année 1993–1994

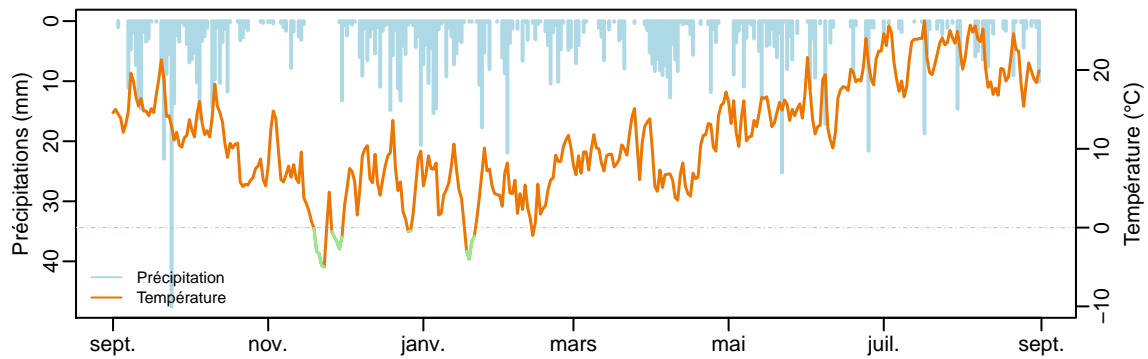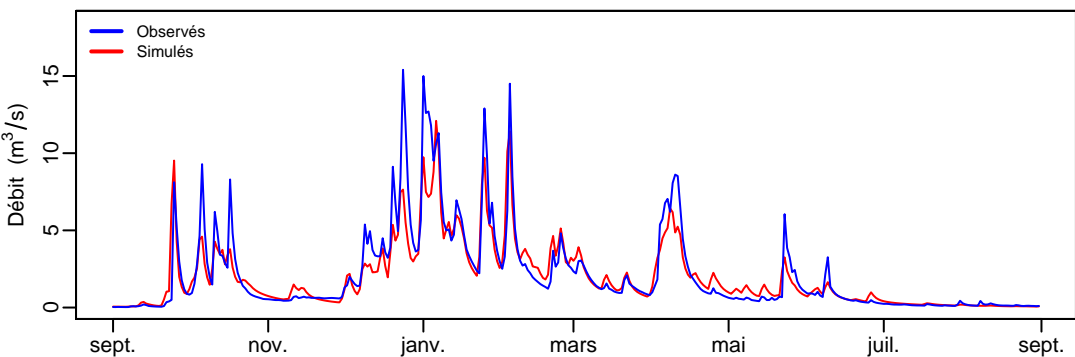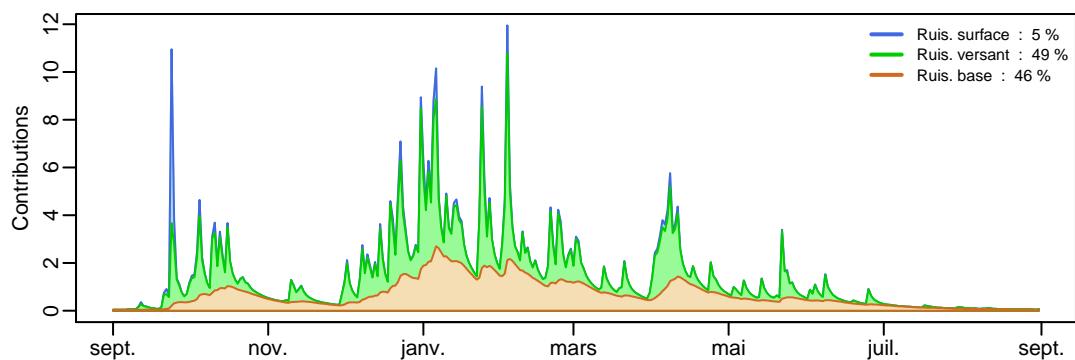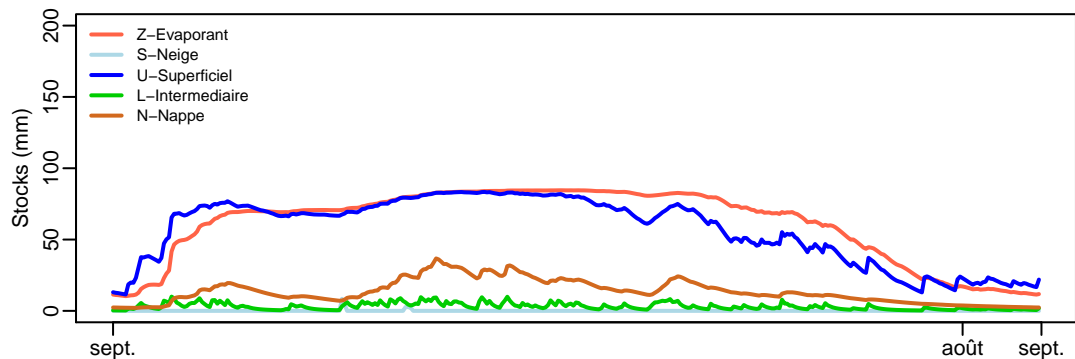

# k1914510 (115.07 km²) – année 1994–1995

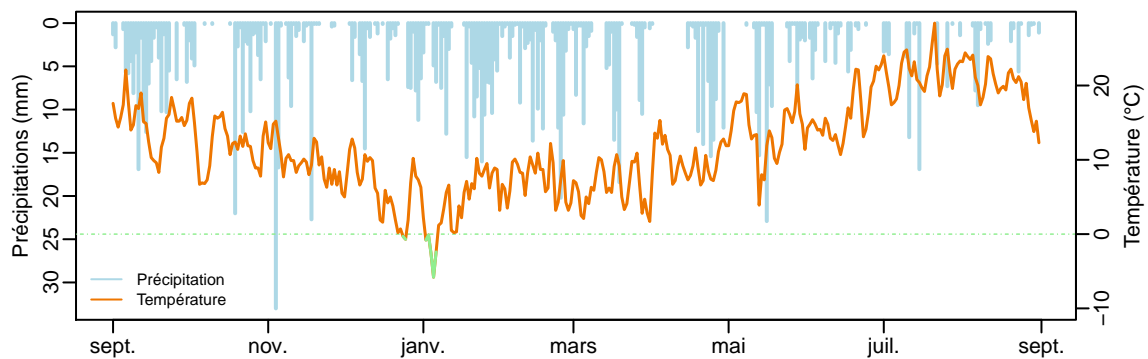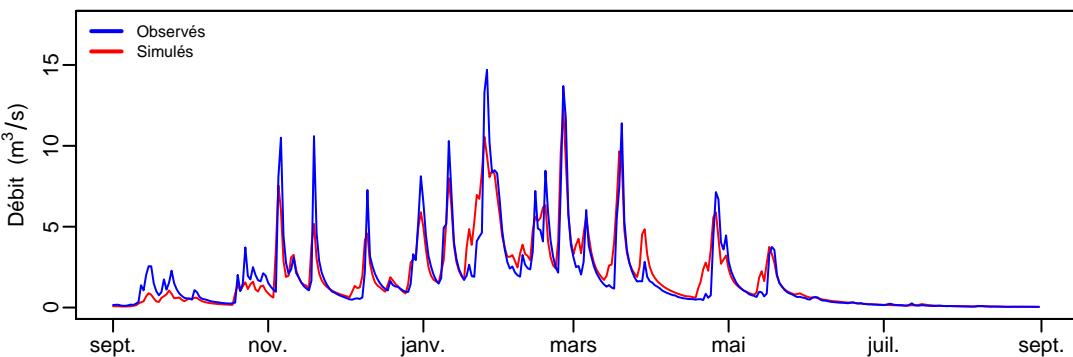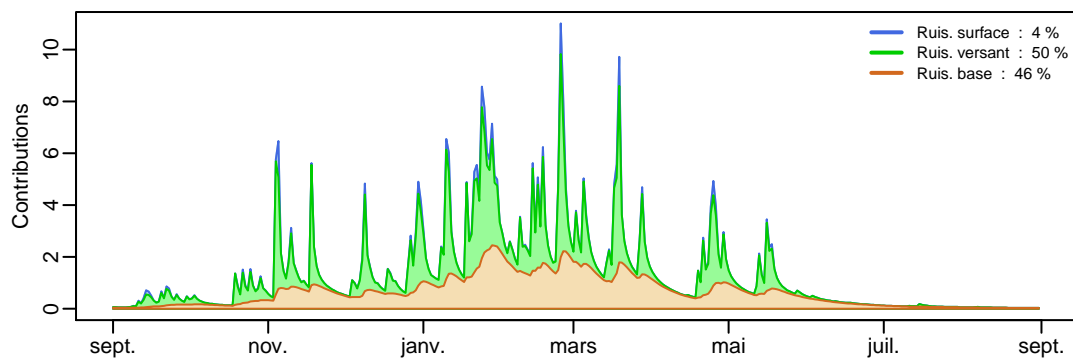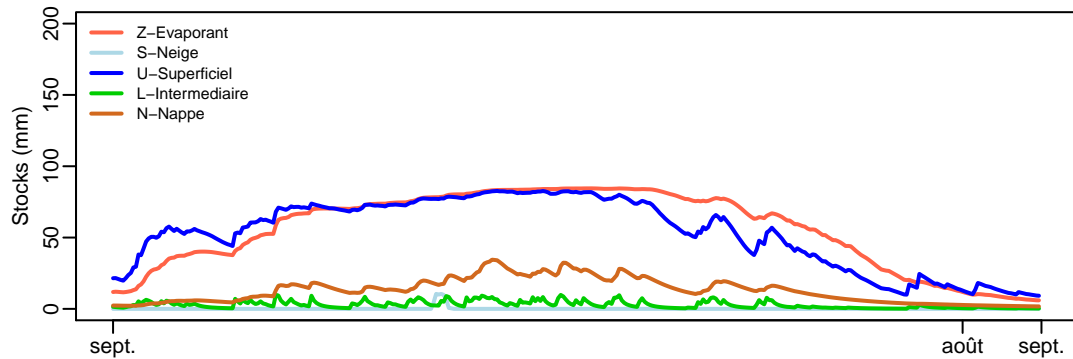

# k1914510 (115.07 km<sup>2</sup>) – année 1995–1996

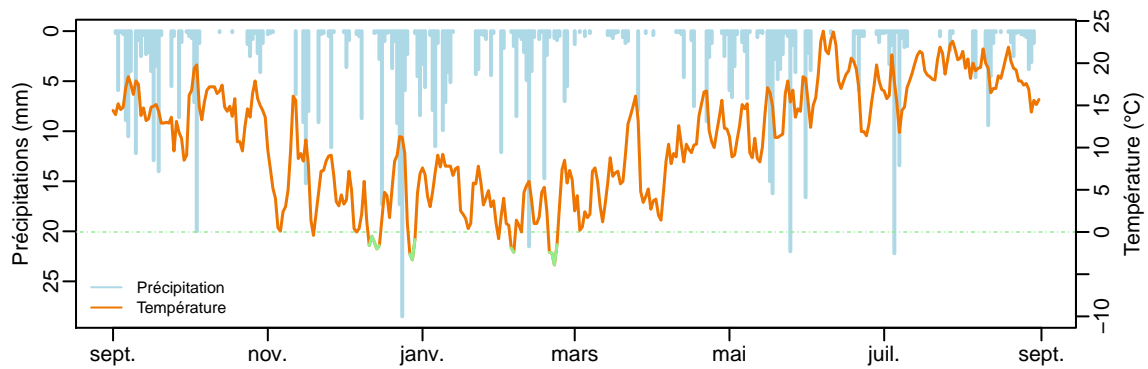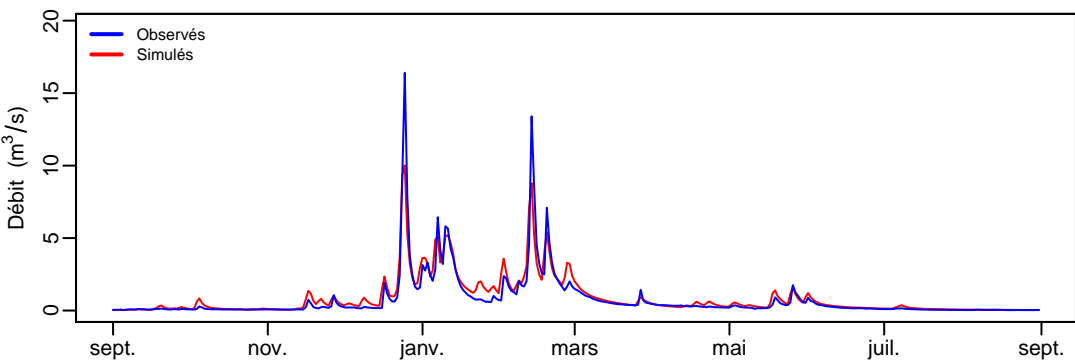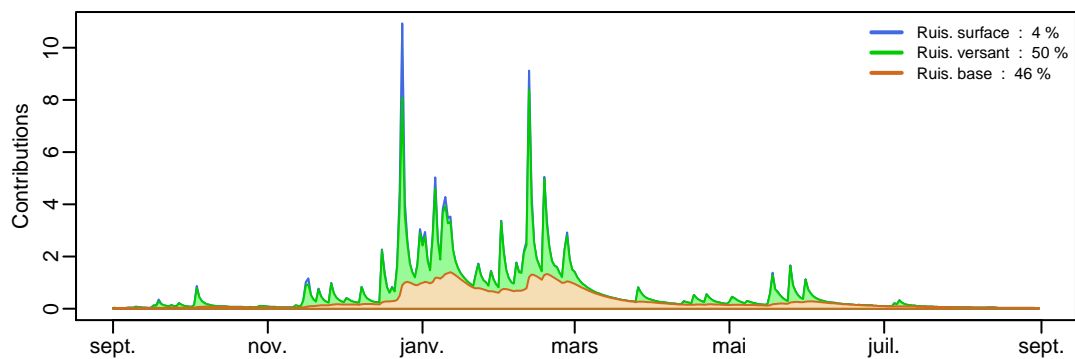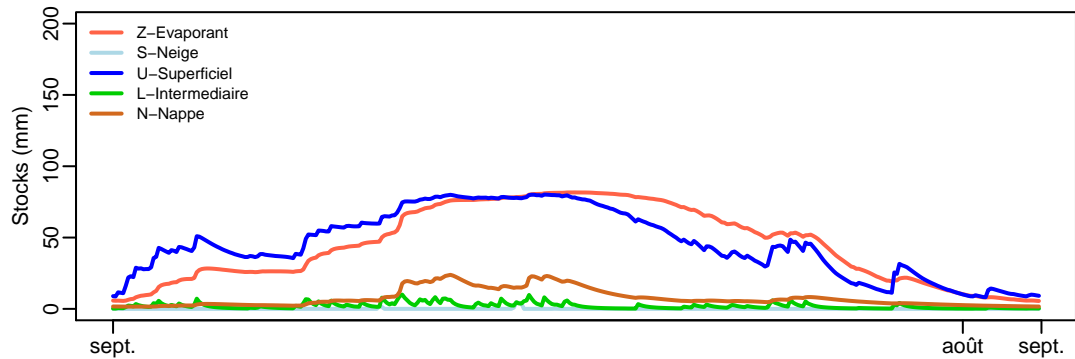

# k1914510 (115.07 km<sup>2</sup>) – année 1996–1997

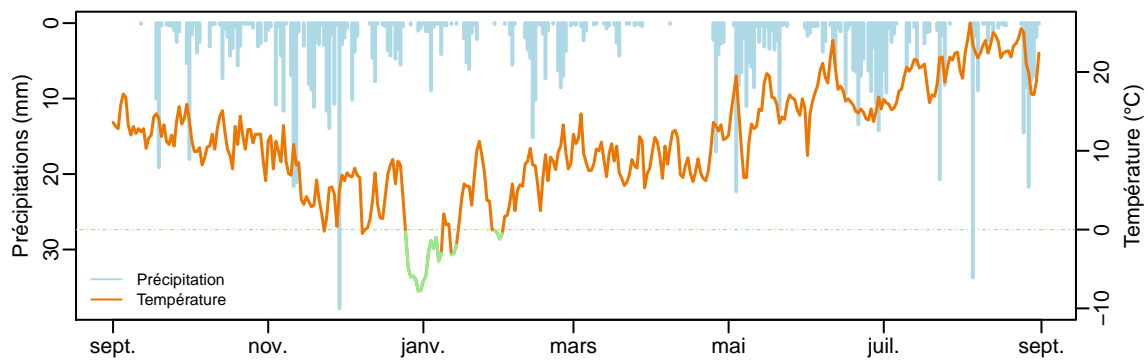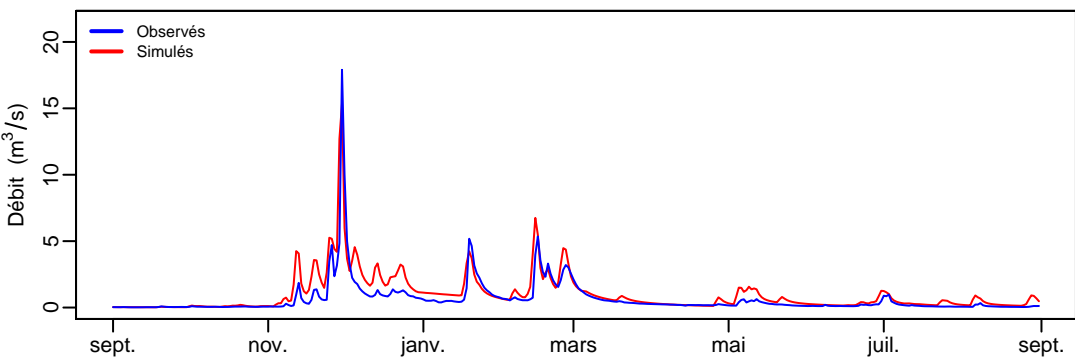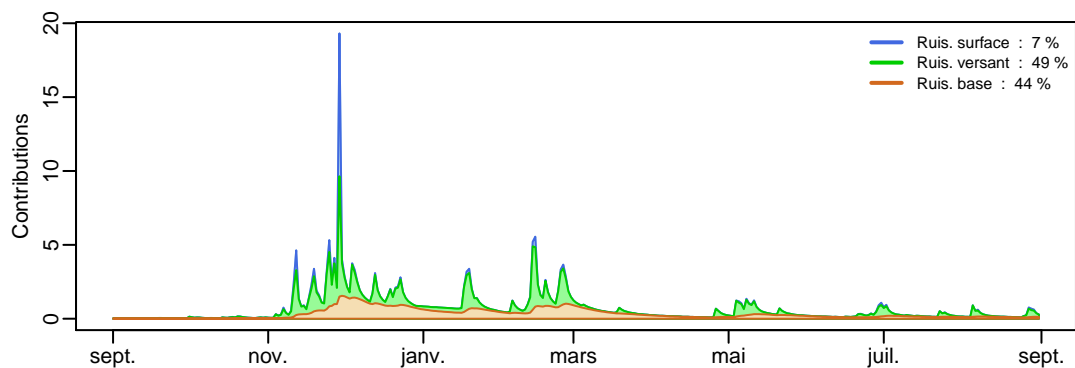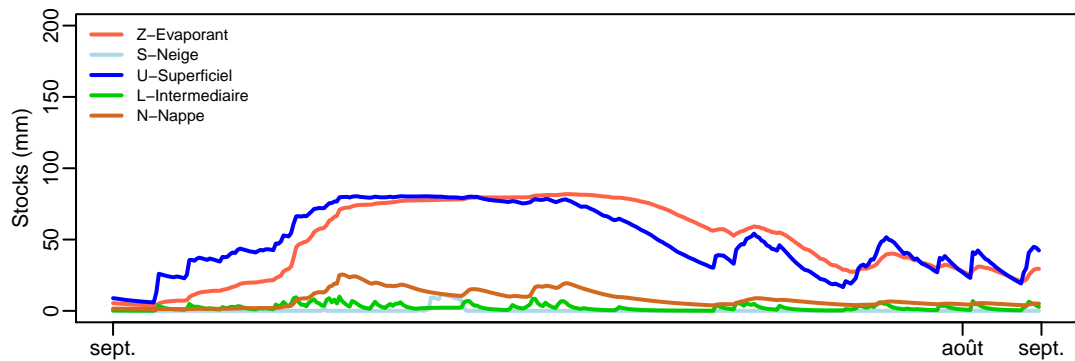

# k1914510 (115.07 km<sup>2</sup>) – année 1997–1998

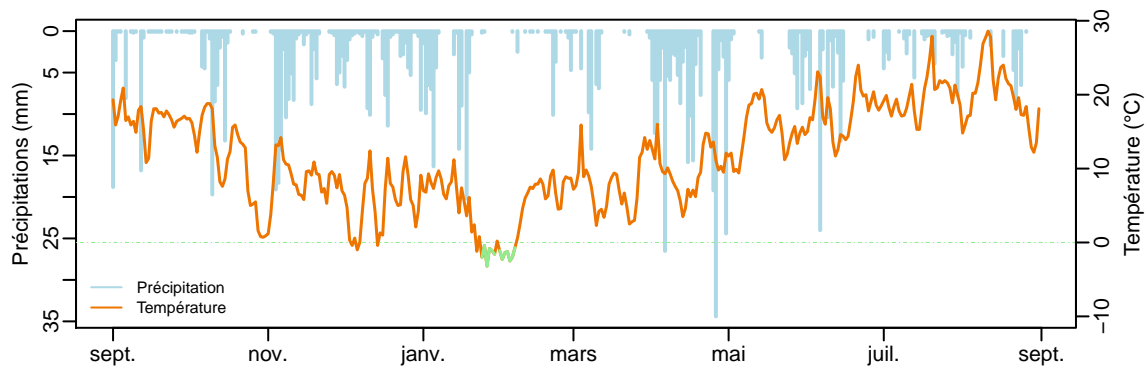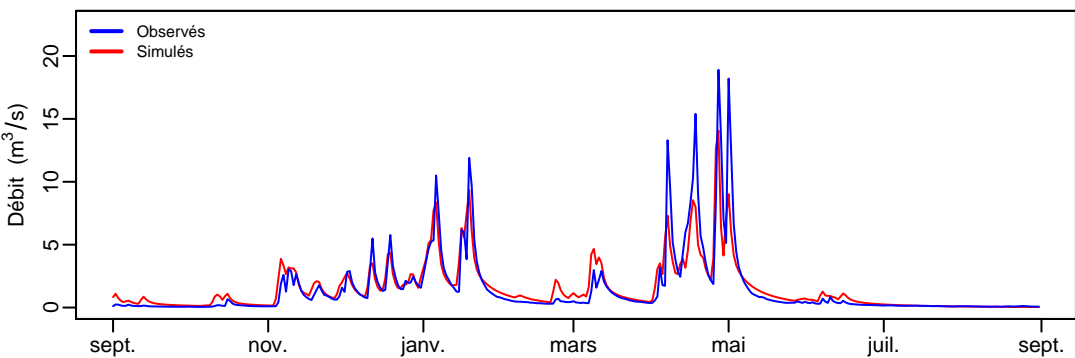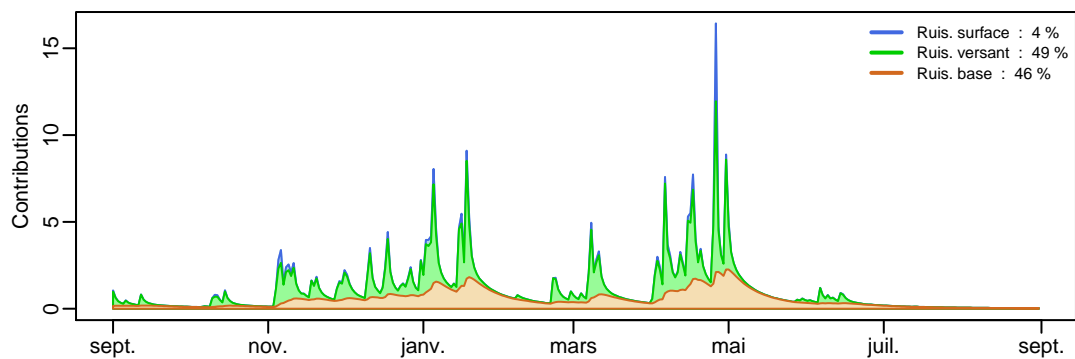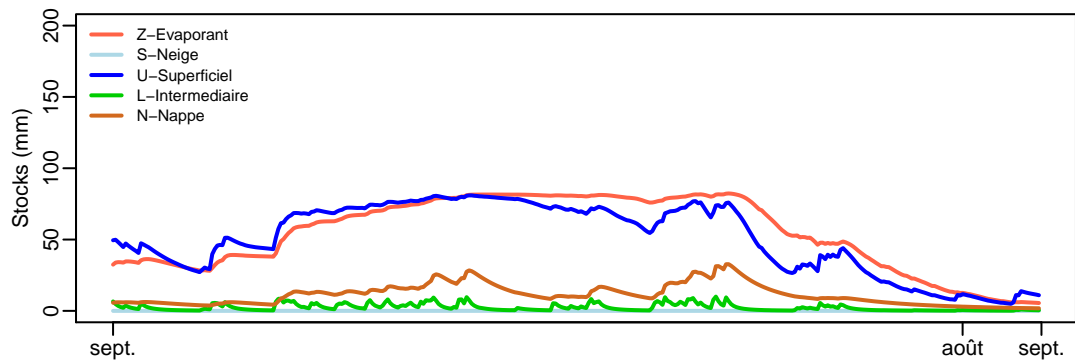

# k1914510 (115.07 km<sup>2</sup>) – année 1998–1999

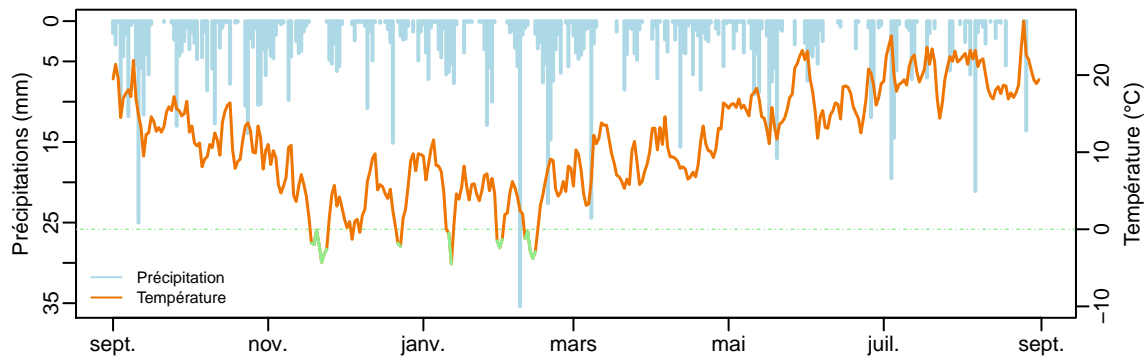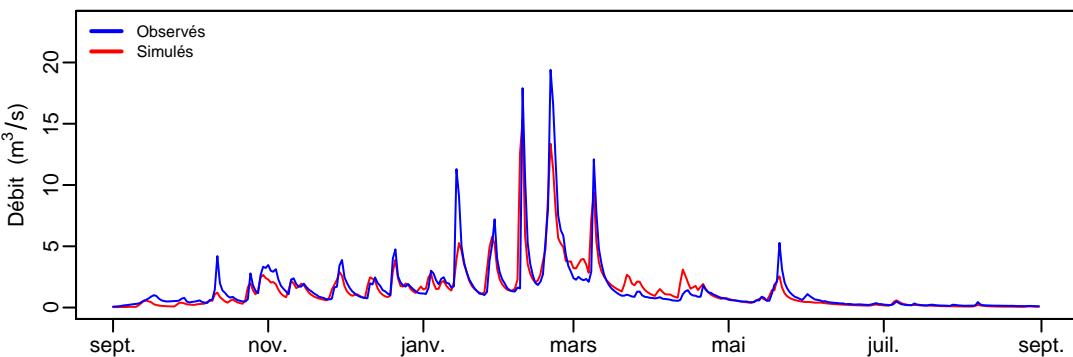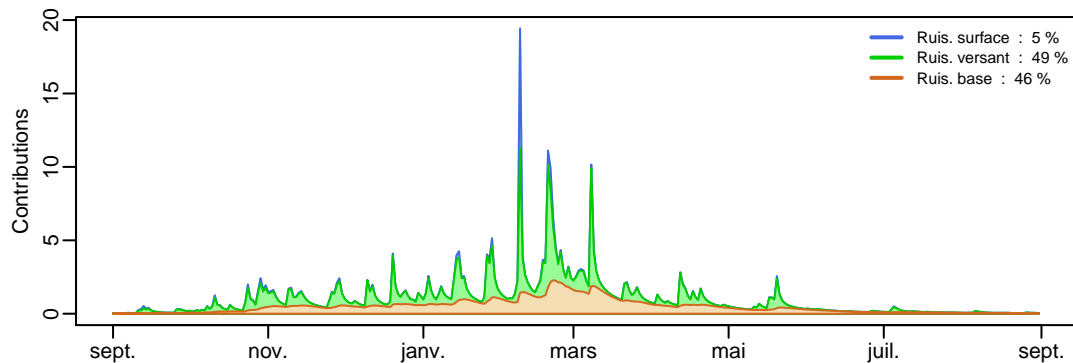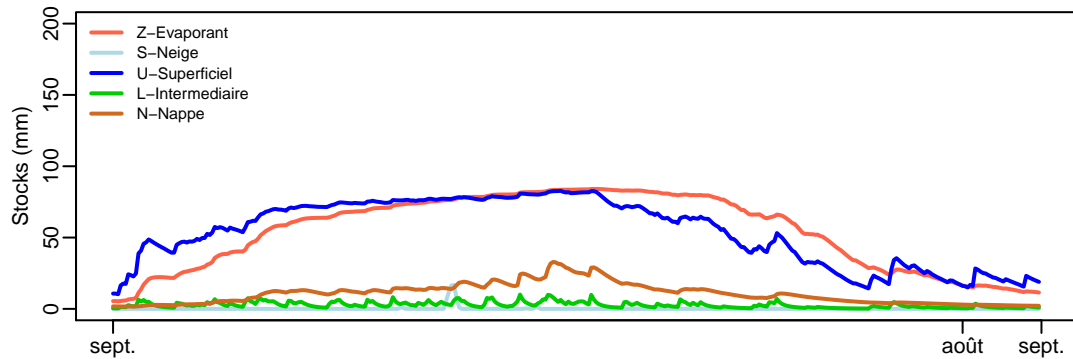

# k1914510 (115.07 km<sup>2</sup>) – année 1999–2000

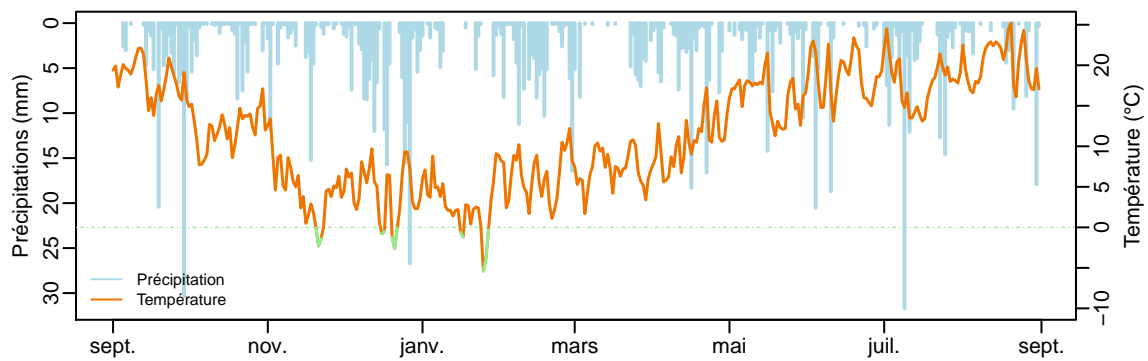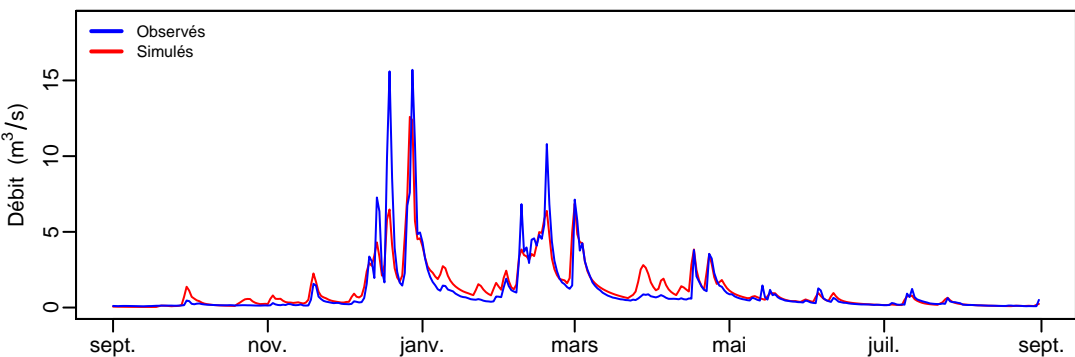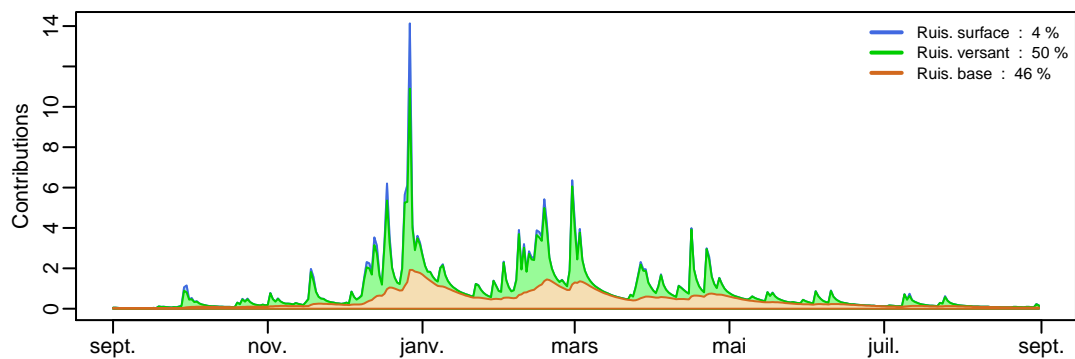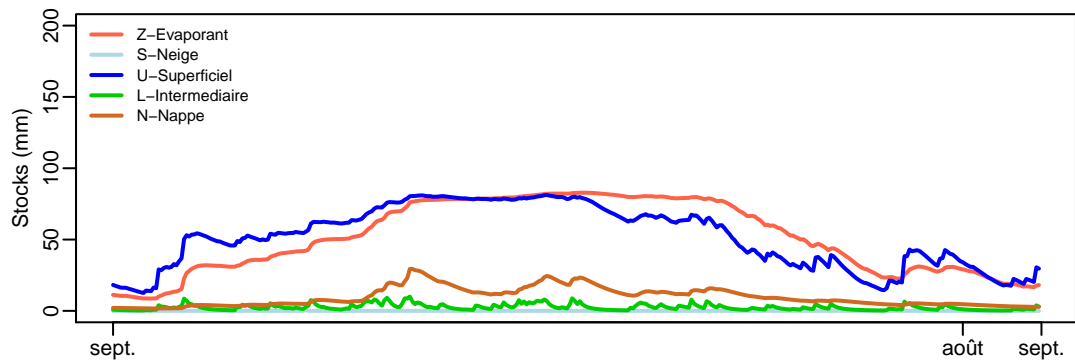



# k1914510 (115.07 km<sup>2</sup>) – année 2000–2001

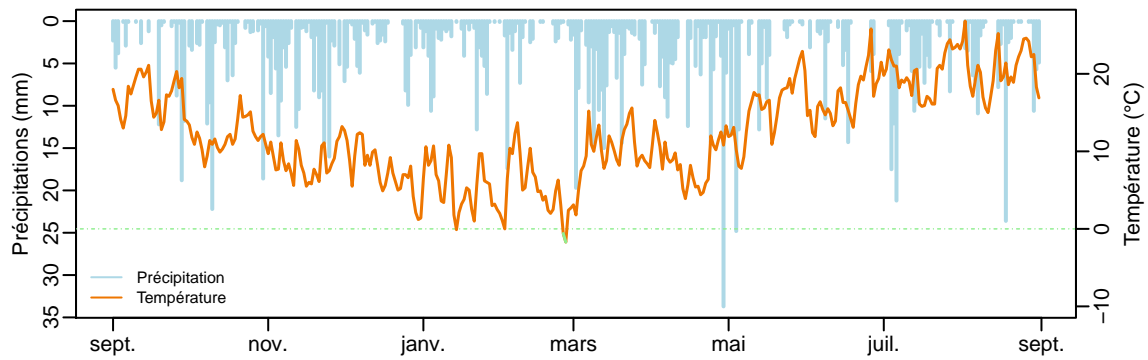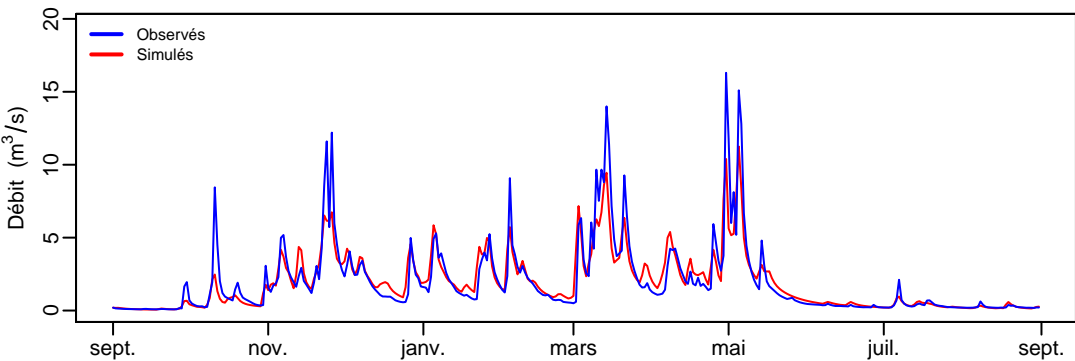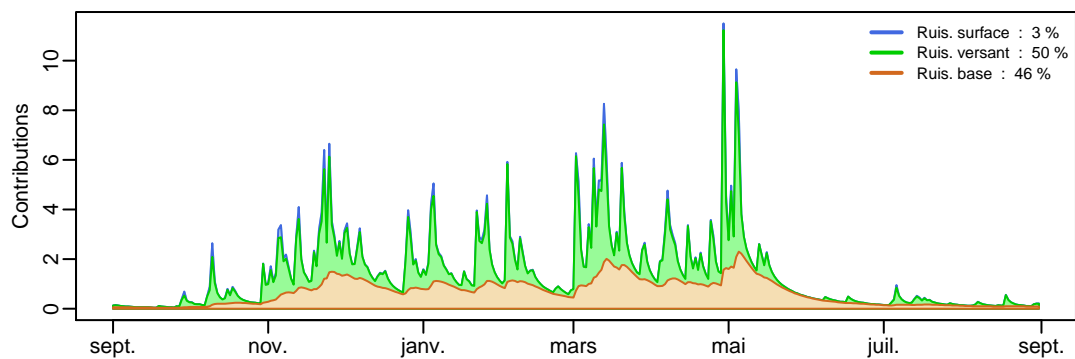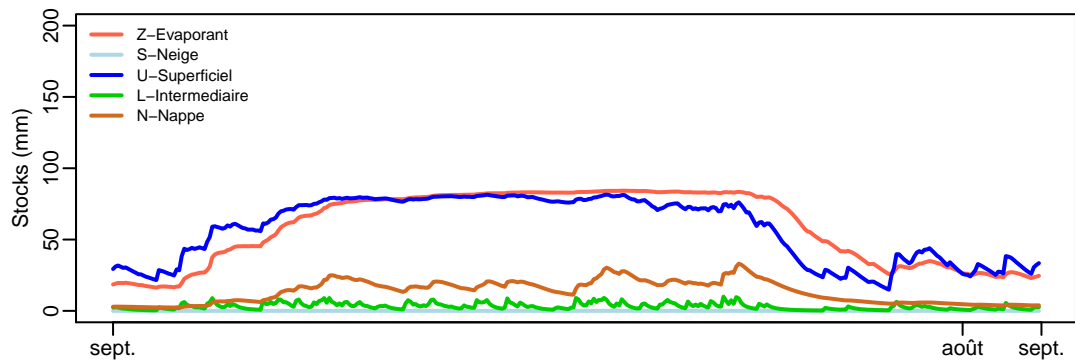

# k1914510 (115.07 km<sup>2</sup>) – année 2001–2002

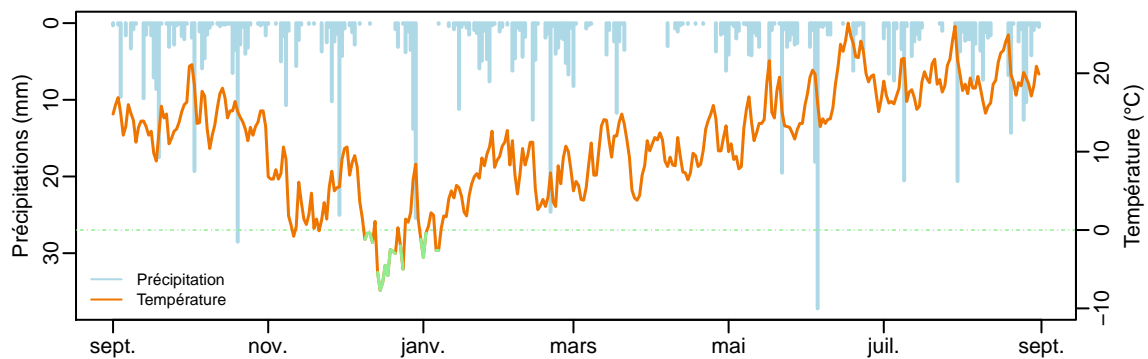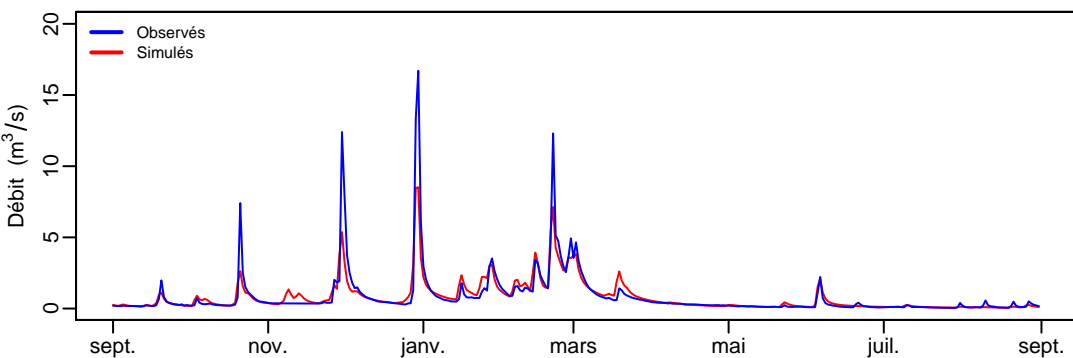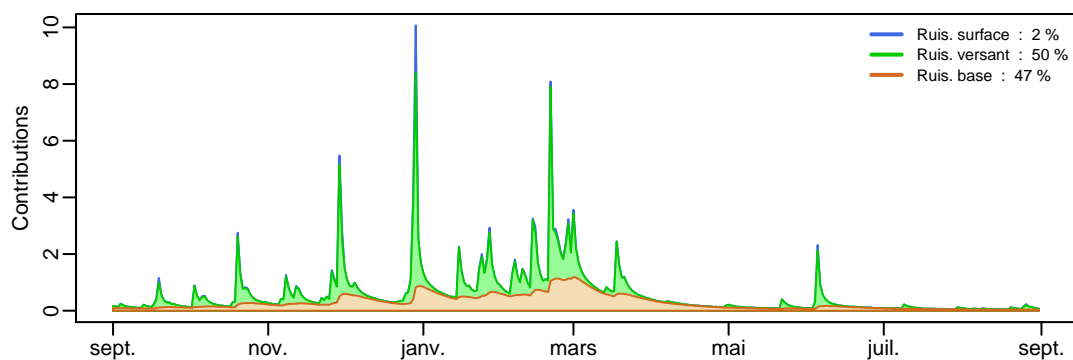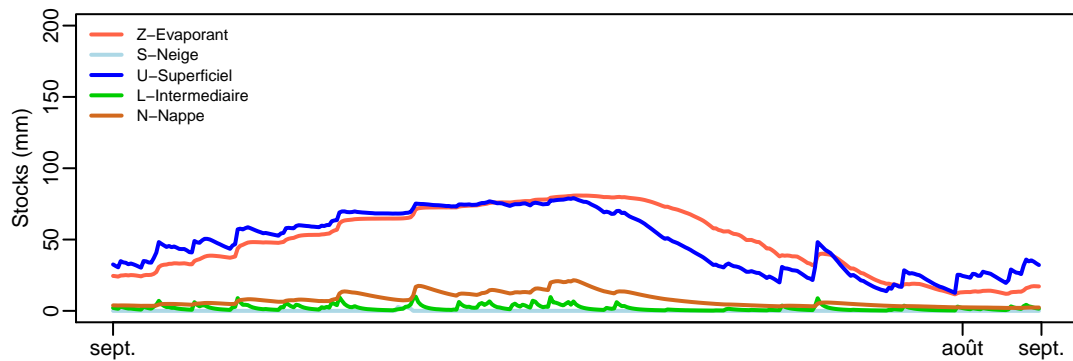

# k1914510 (115.07 km<sup>2</sup>) – année 2002–2003

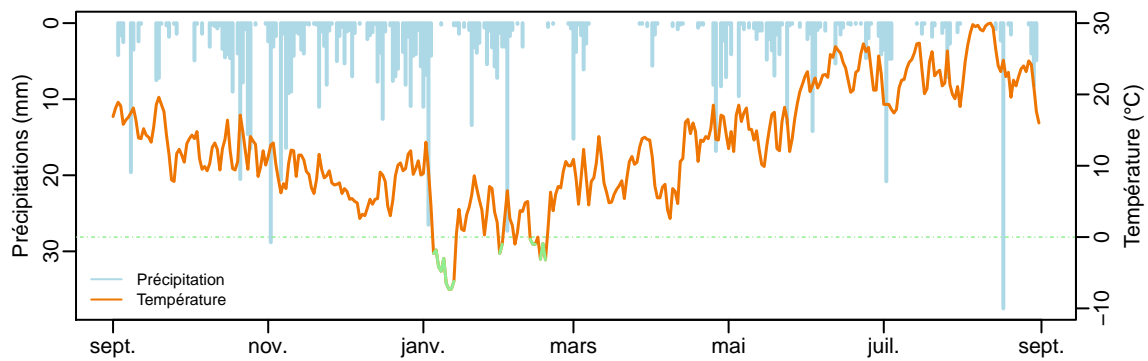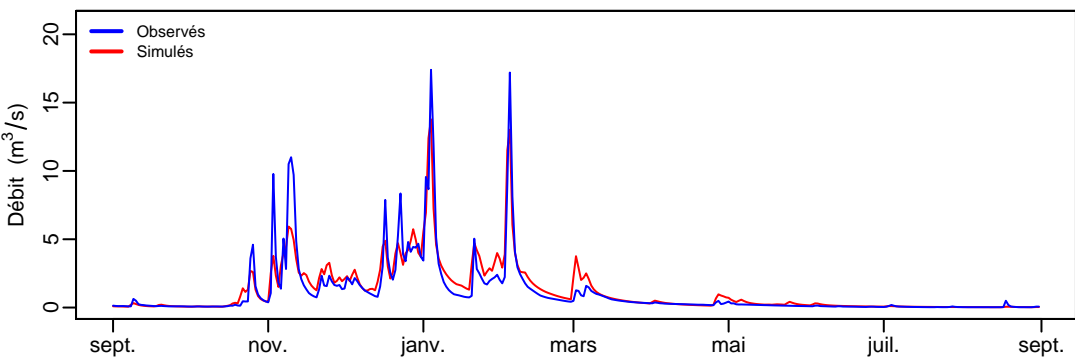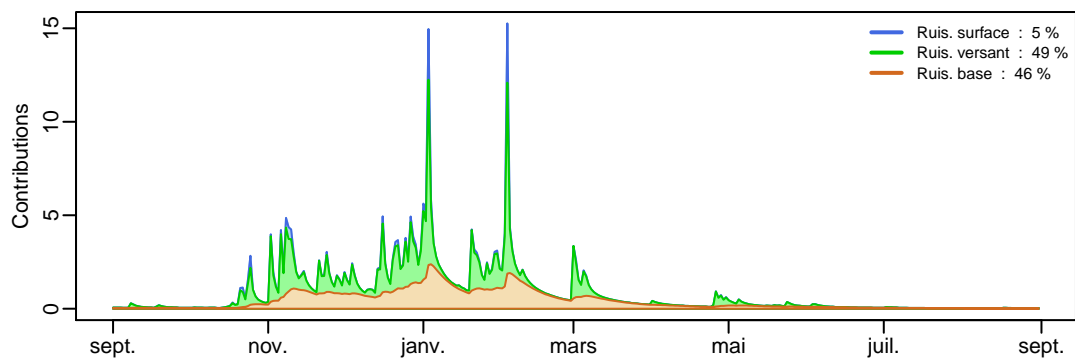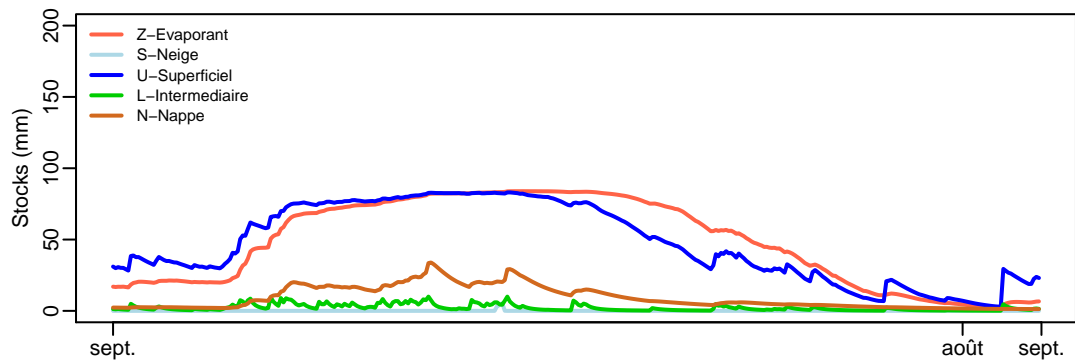

# k1914510 (115.07 km<sup>2</sup>) – année 2003–2004

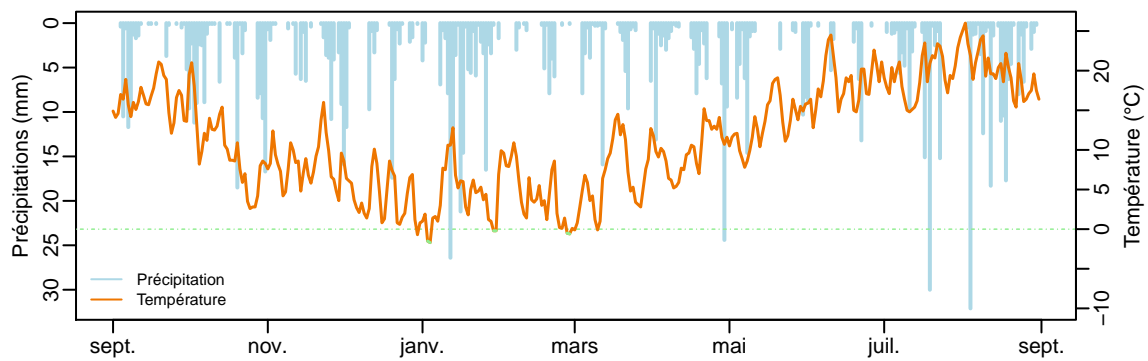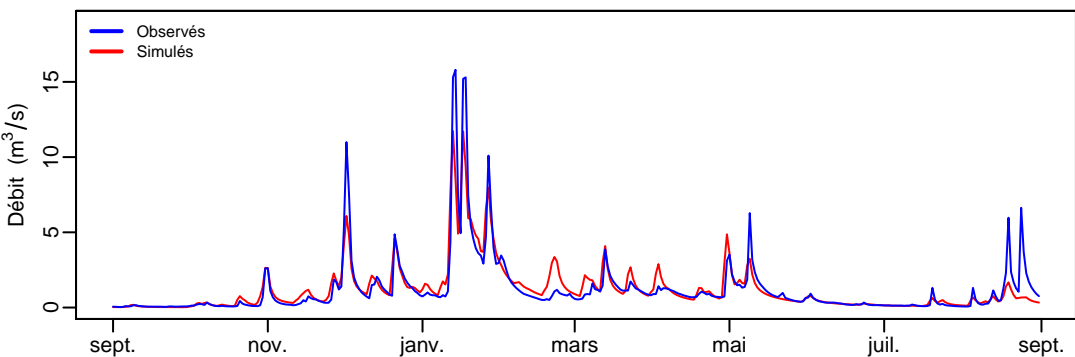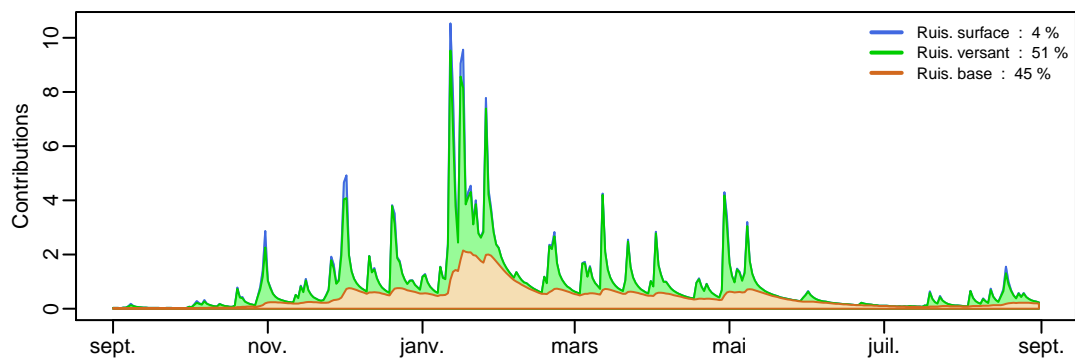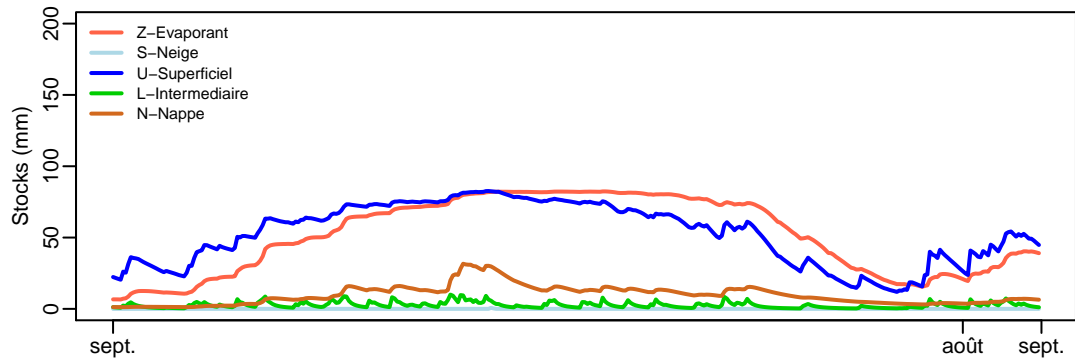

# k1914510 (115.07 km<sup>2</sup>) – année 2004–2005

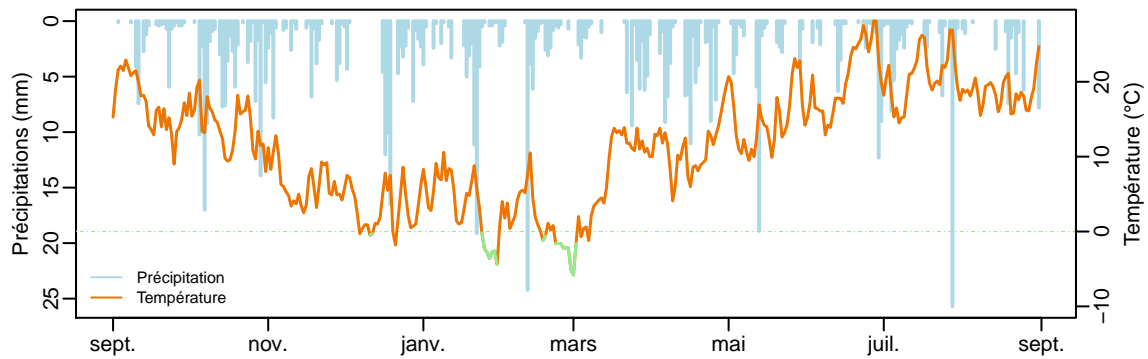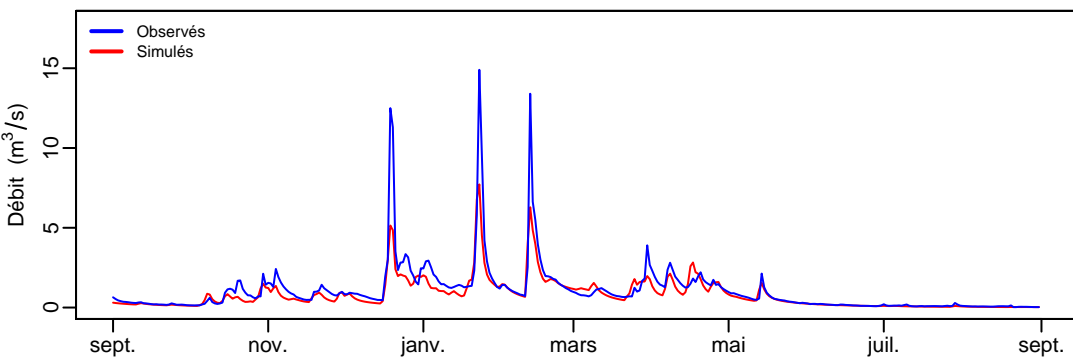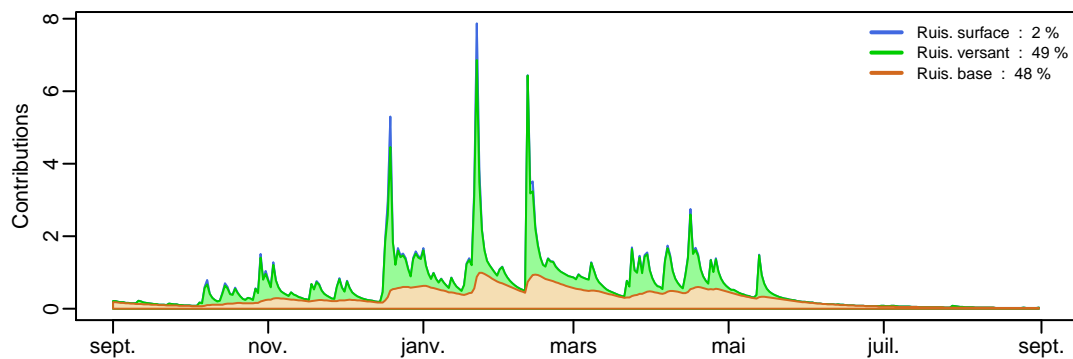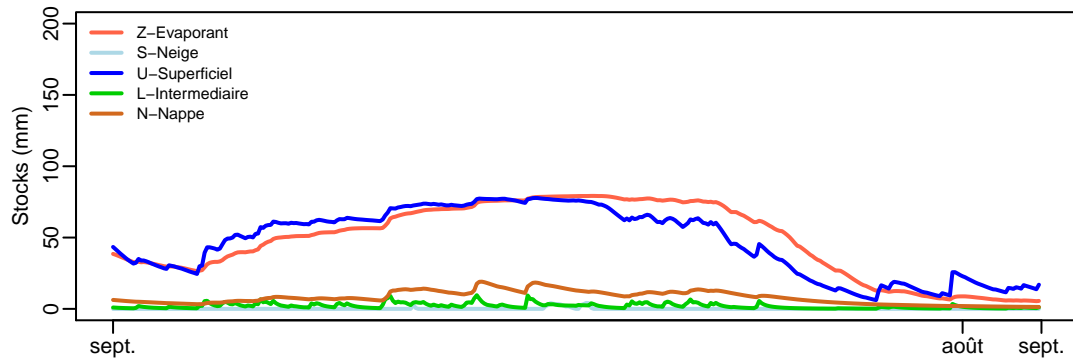

# k1914510 (115.07 km<sup>2</sup>) – année 2005–2006

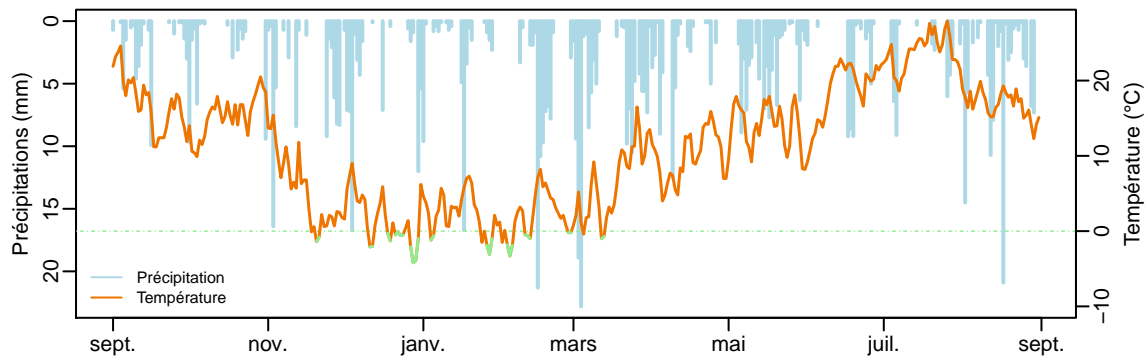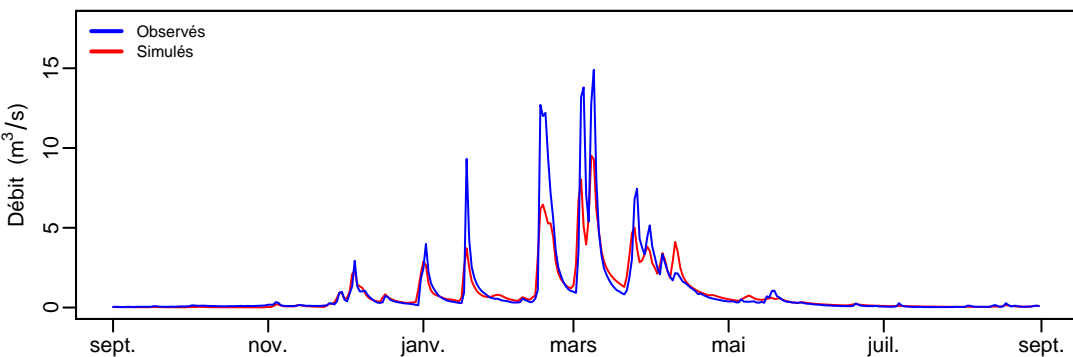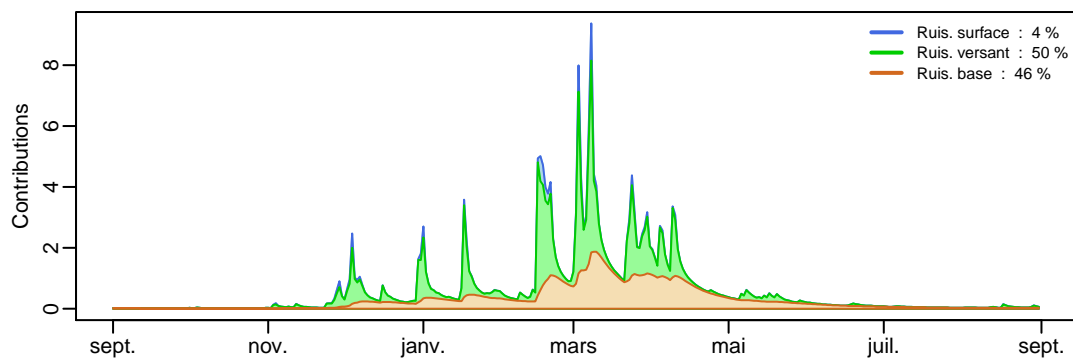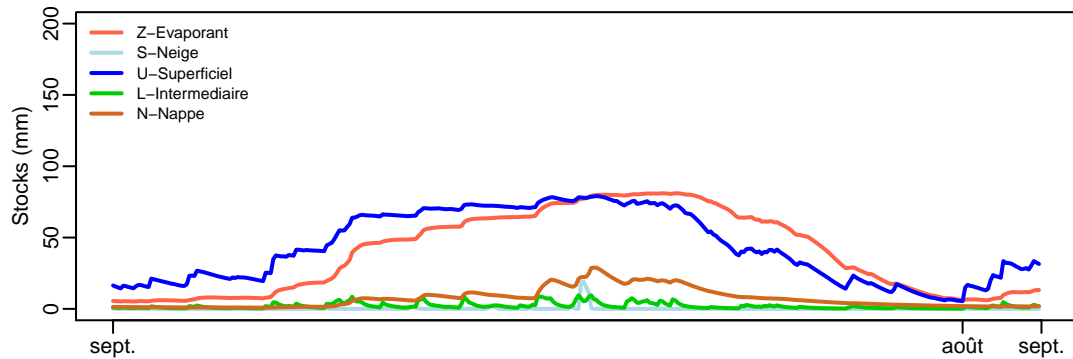

# k1914510 (115.07 km<sup>2</sup>) – année 2006–2007

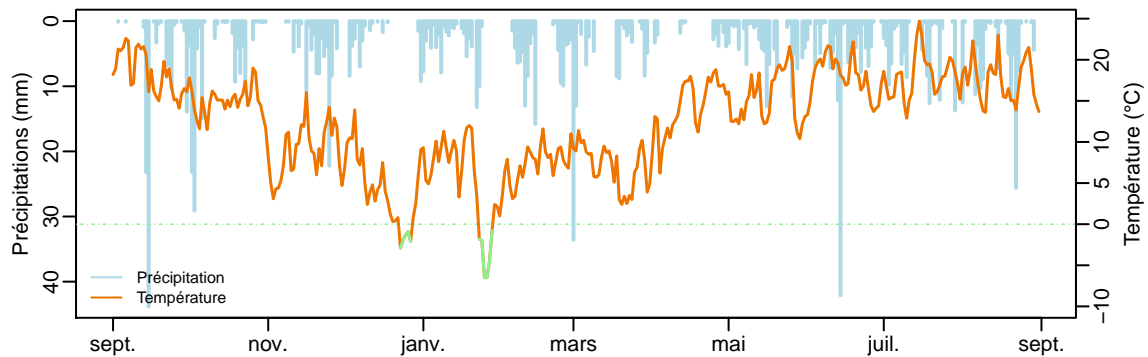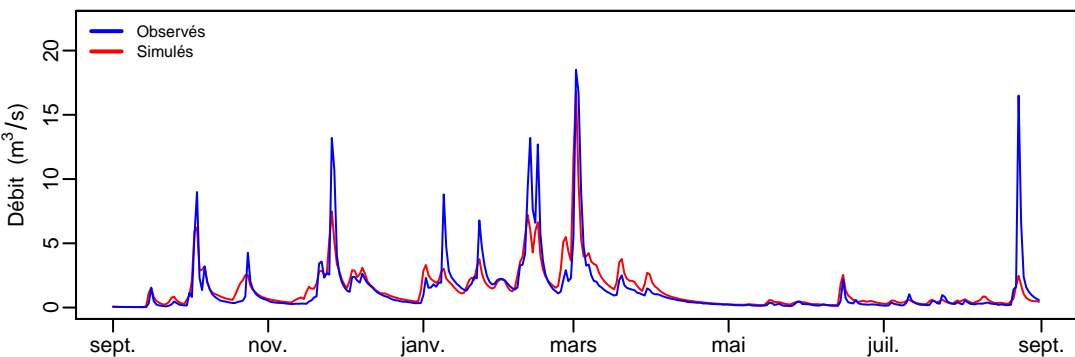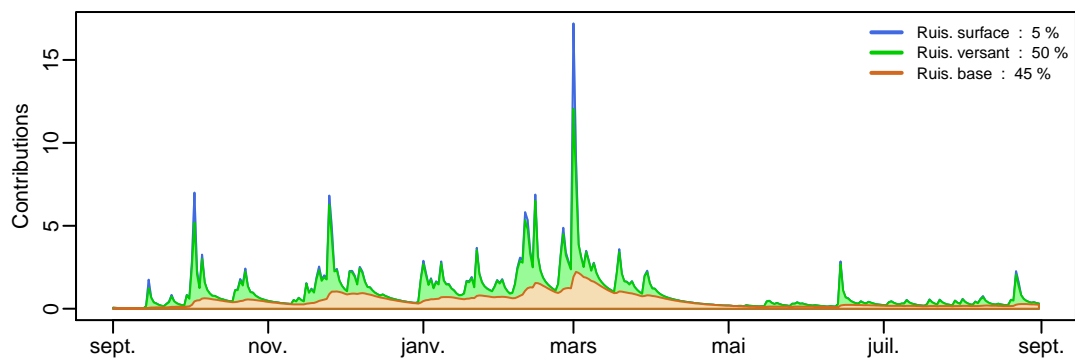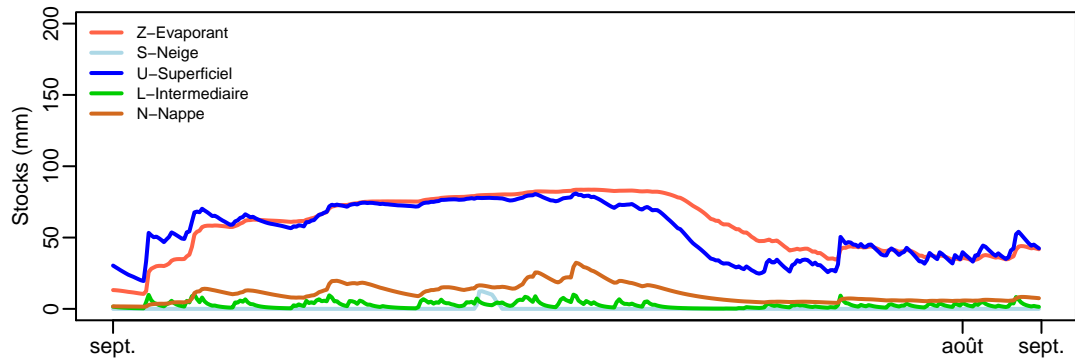

# k1914510 (115.07 km<sup>2</sup>) – année 2007–2008

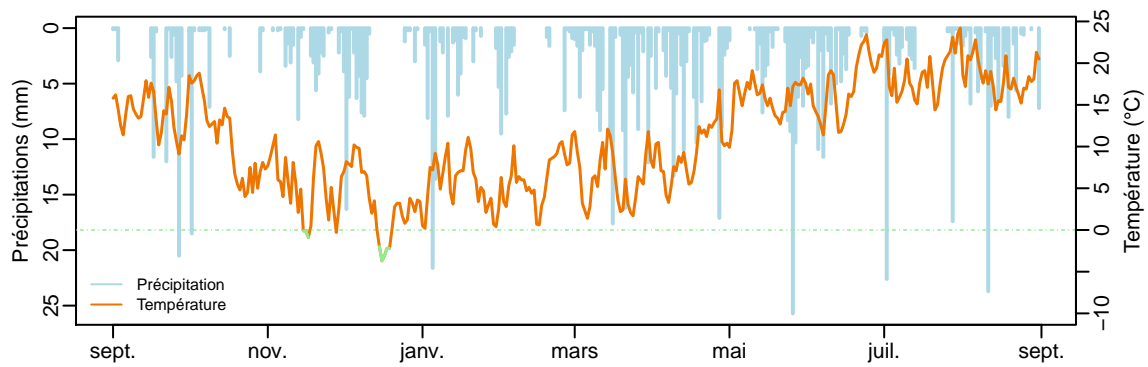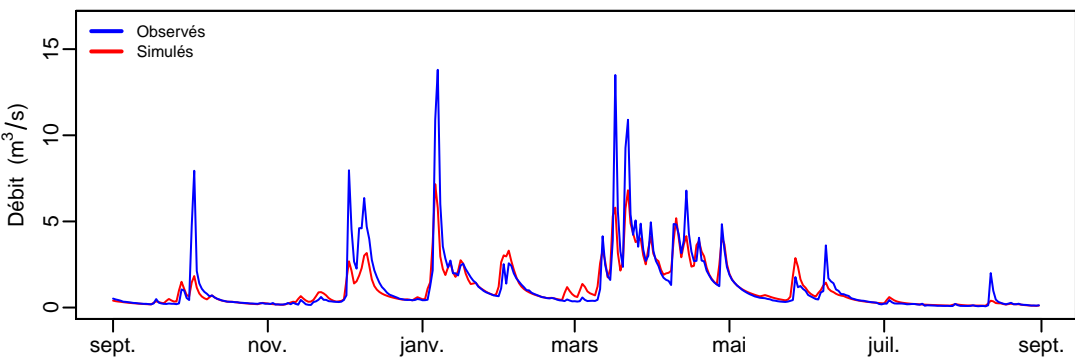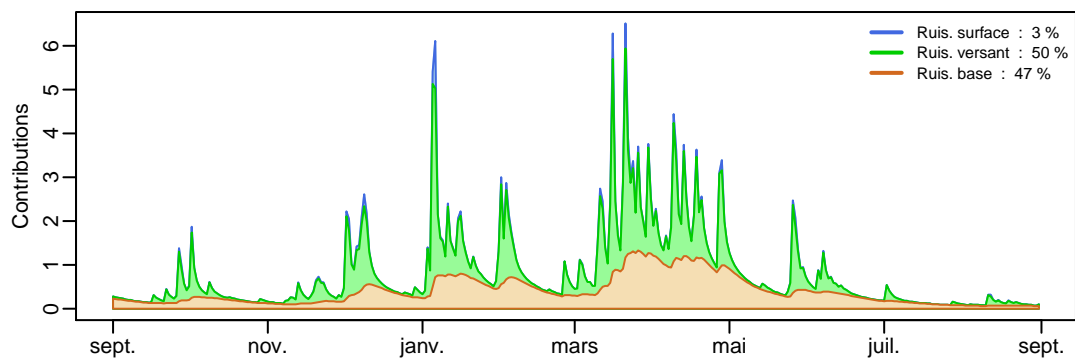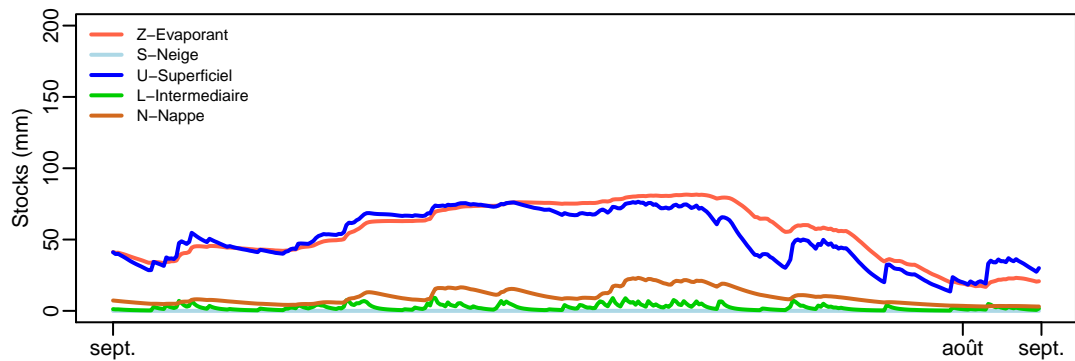



# k1914510 (115.07 km<sup>2</sup>) – année 2008–2009

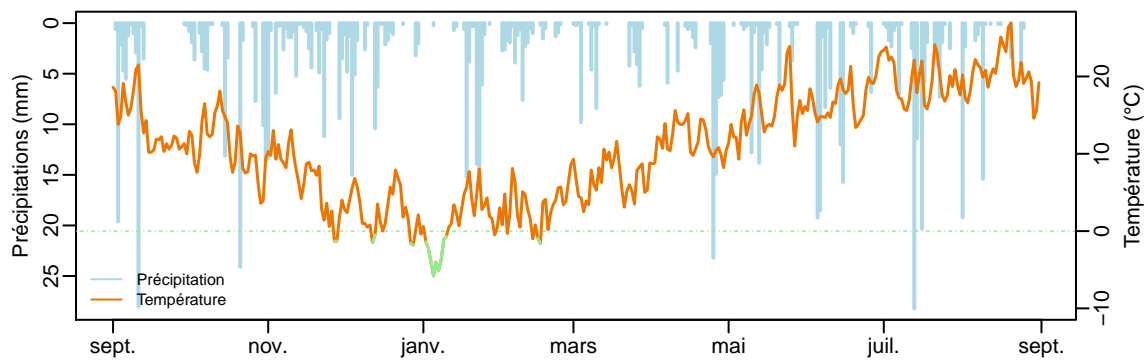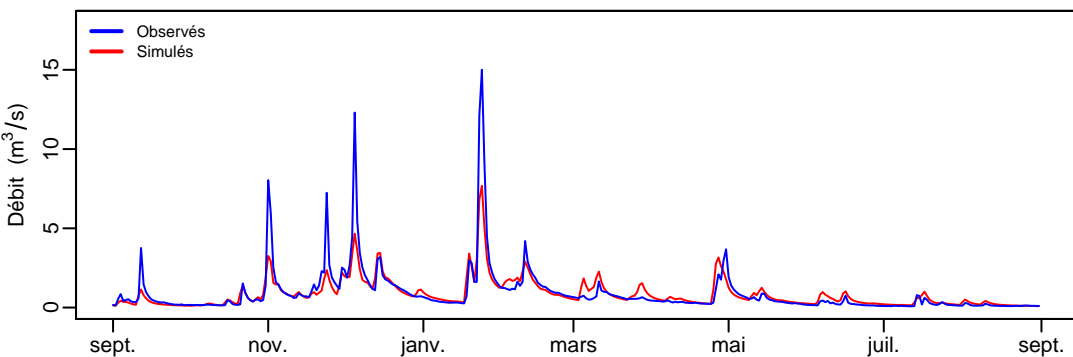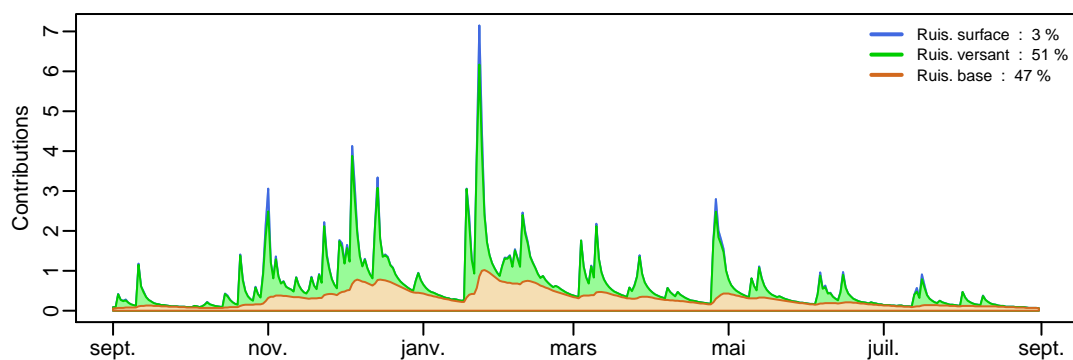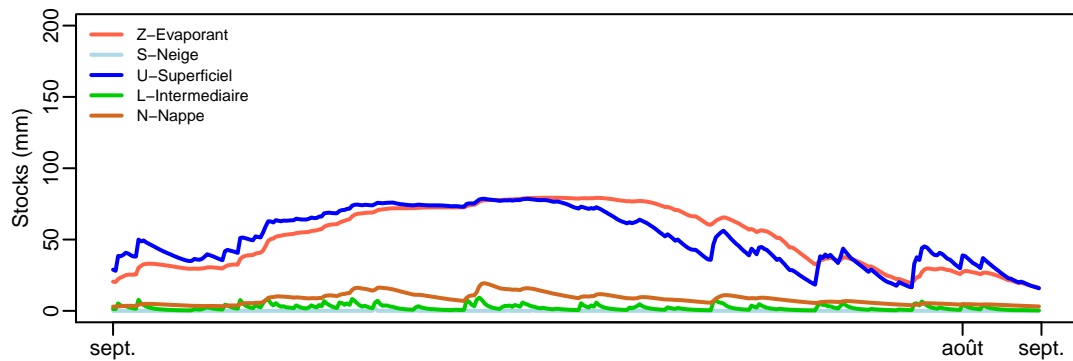

# k1914510 (115.07 km<sup>2</sup>) – année 2009–2010

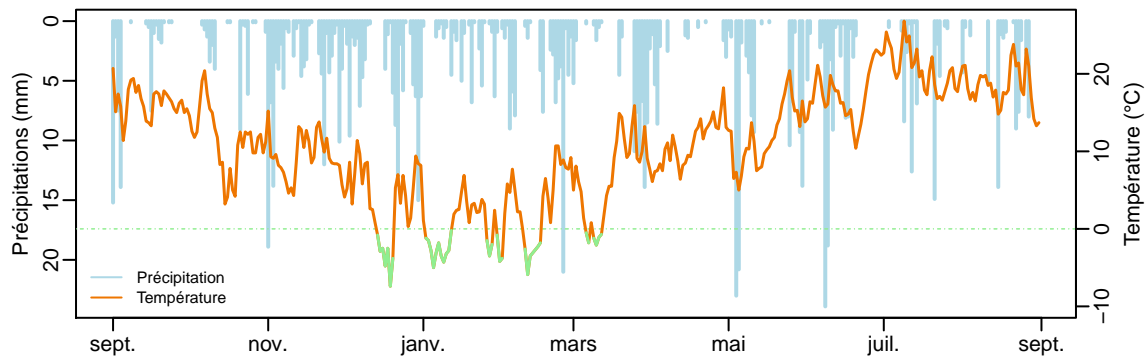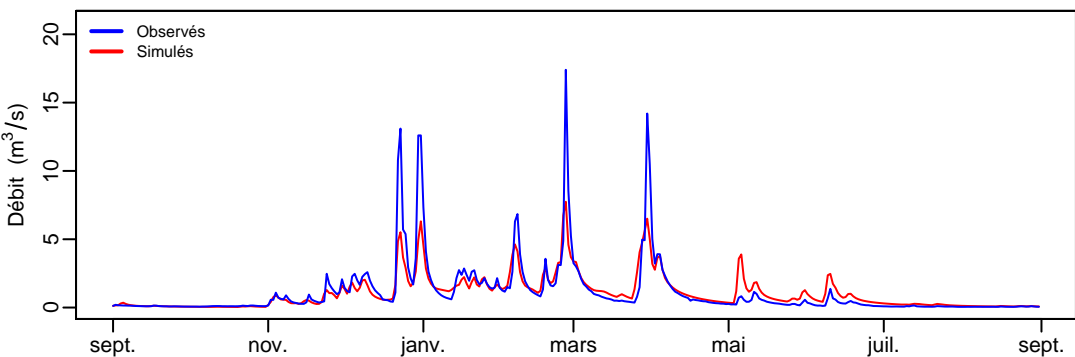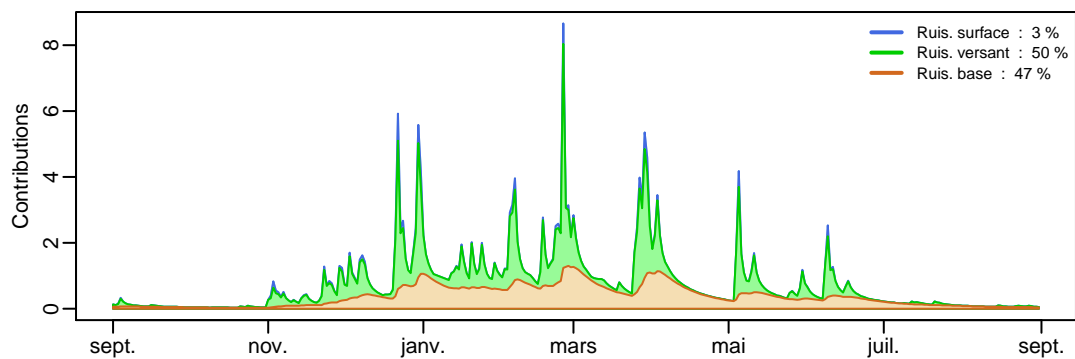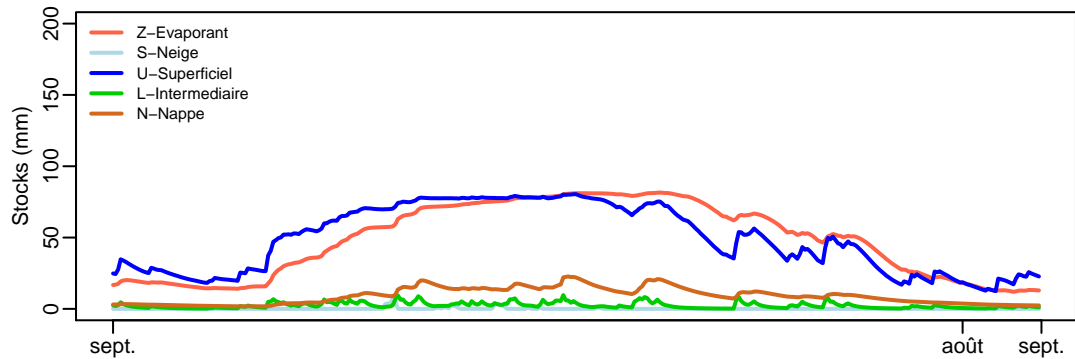

# k1914510 (115.07 km<sup>2</sup>) – année 2010–2011

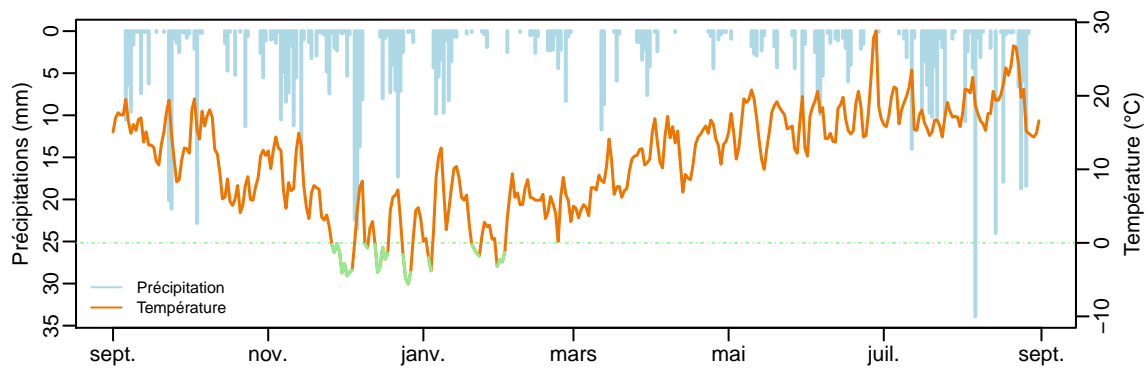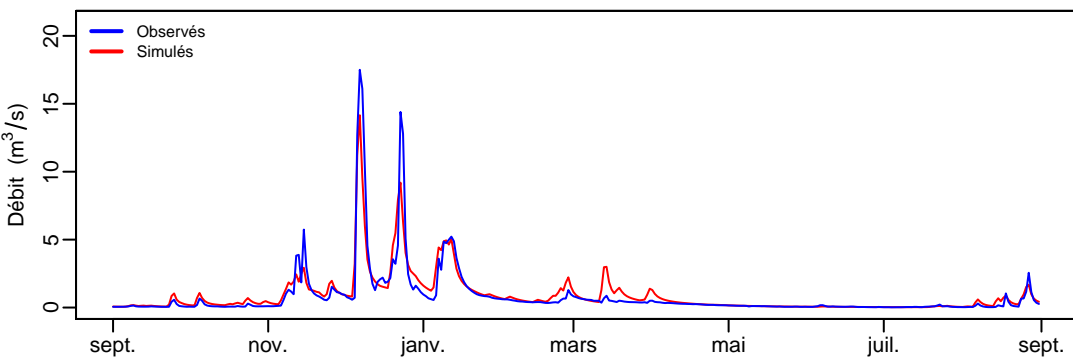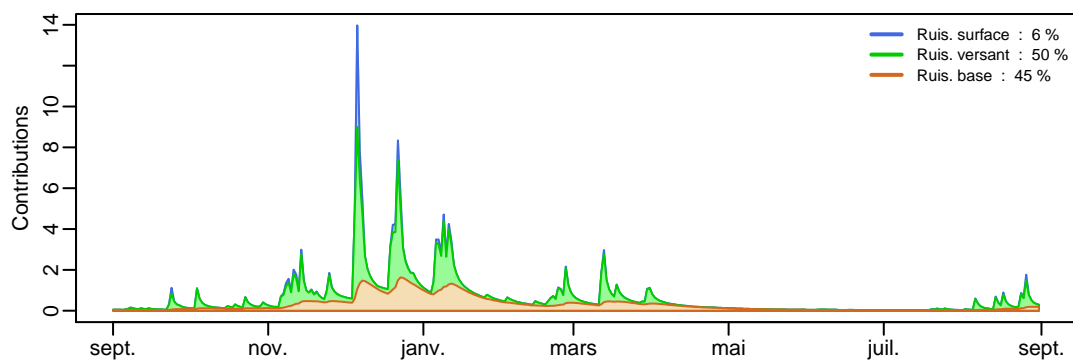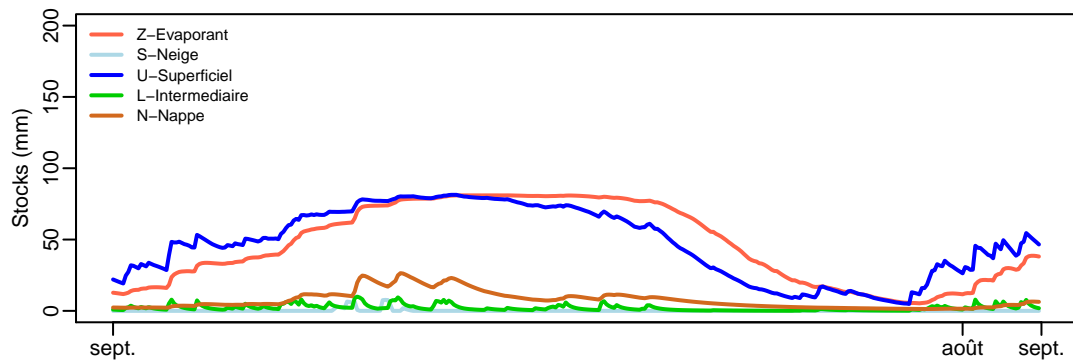

# k1914510 (115.07 km<sup>2</sup>) – année 2011–2012

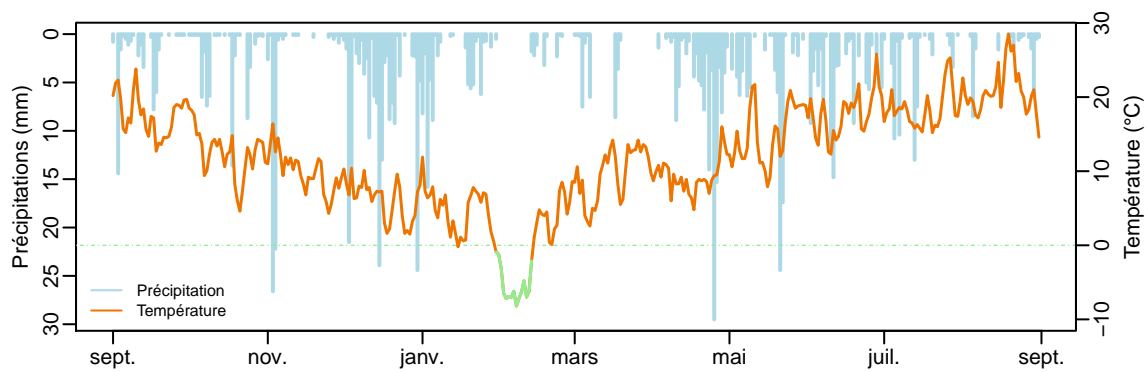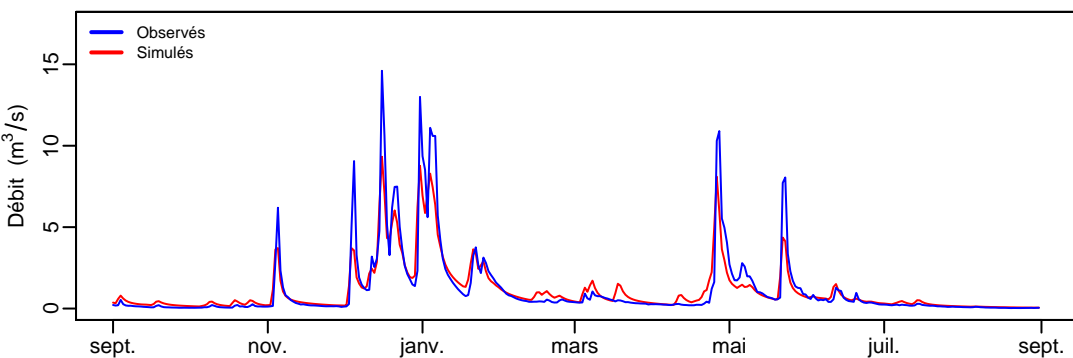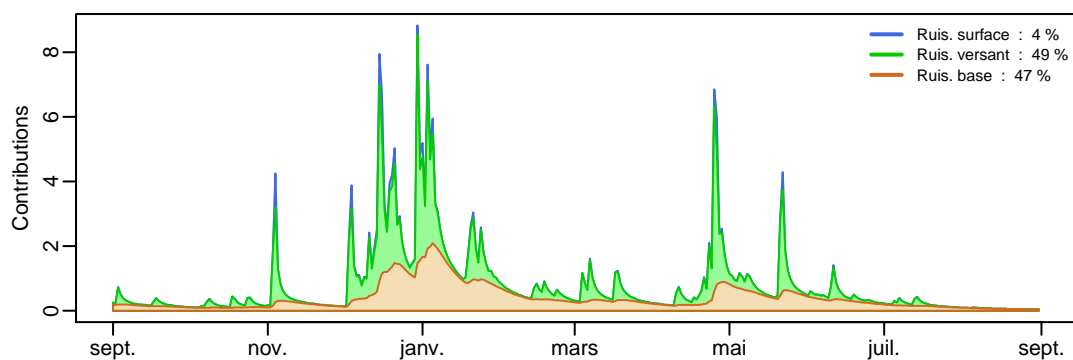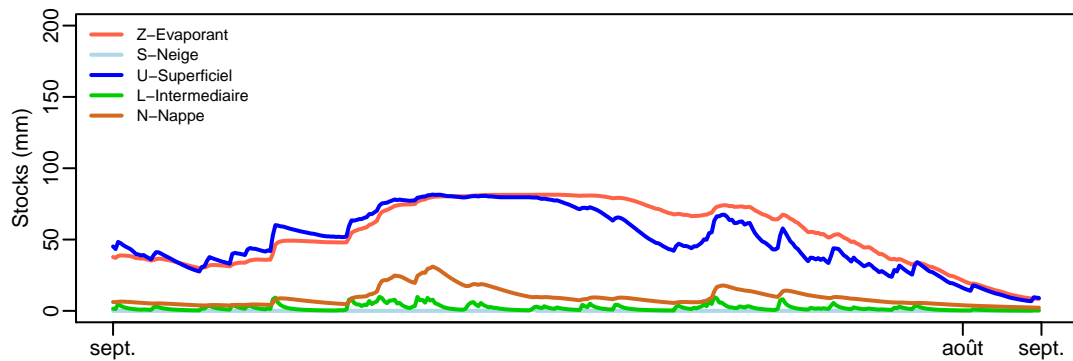

# k1930010 (17637.82 km<sup>2</sup>) – année 1981–1982

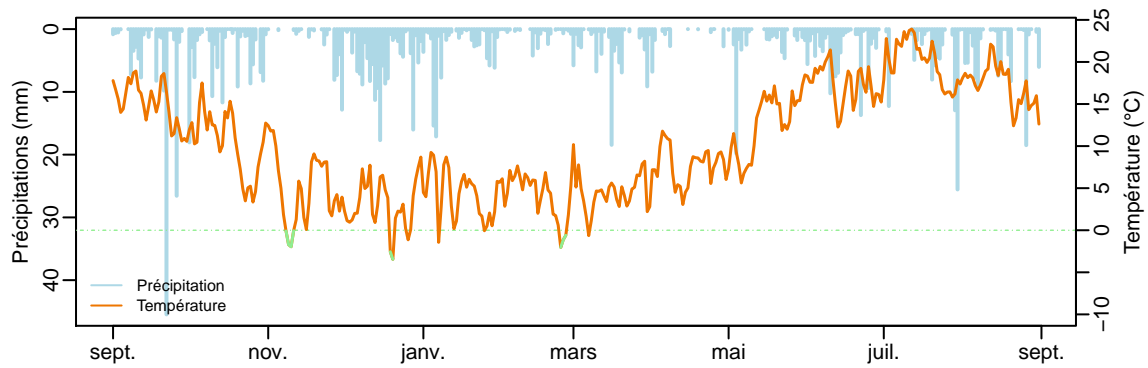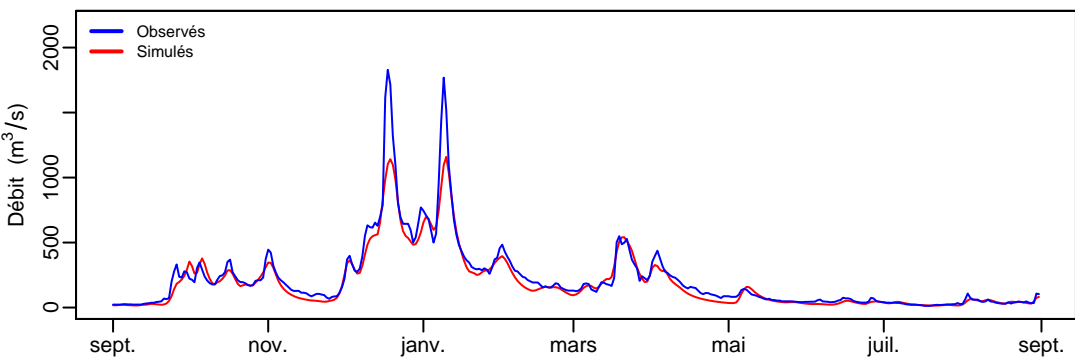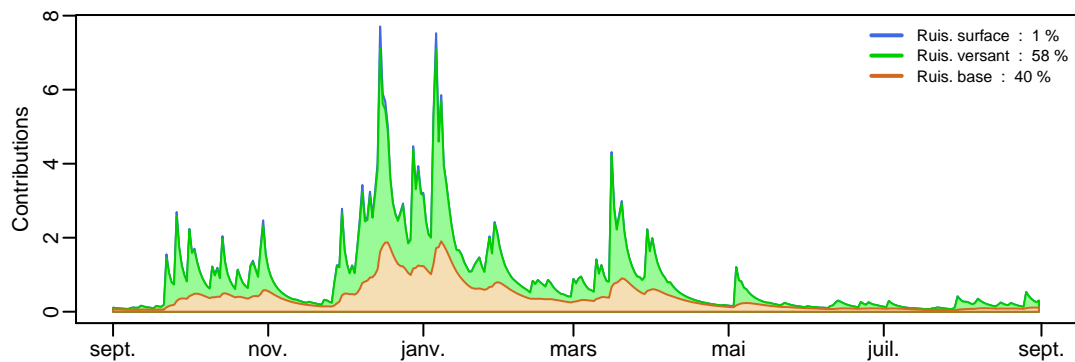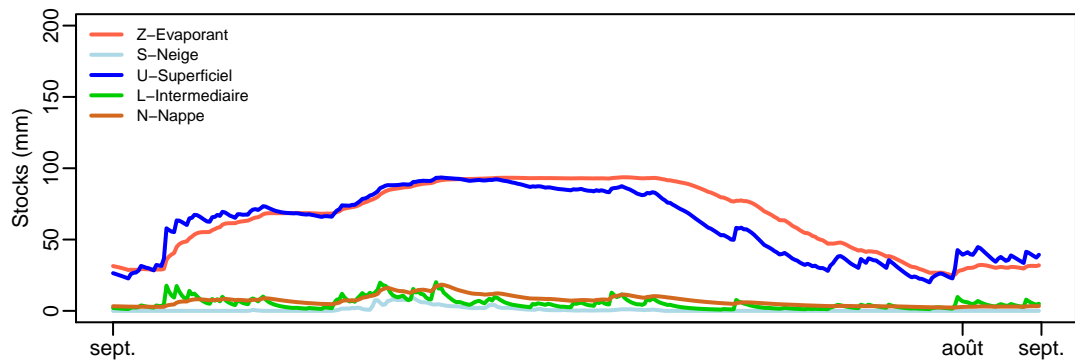

# k1930010 (17637.82 km<sup>2</sup>) – année 1982–1983

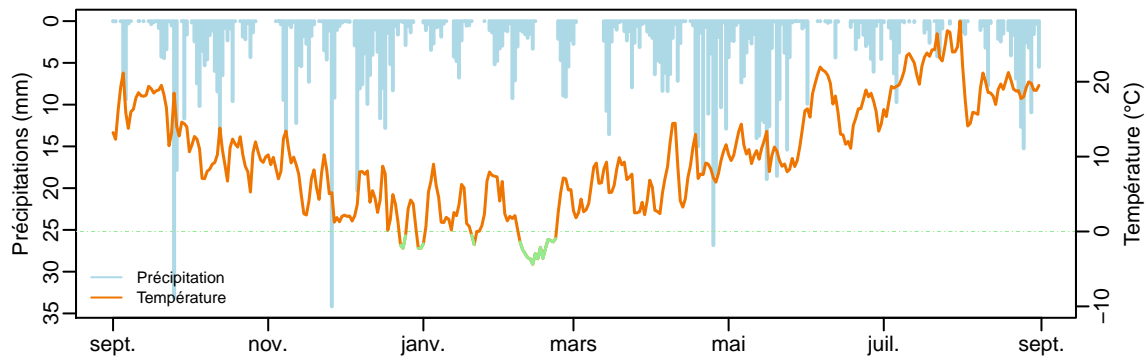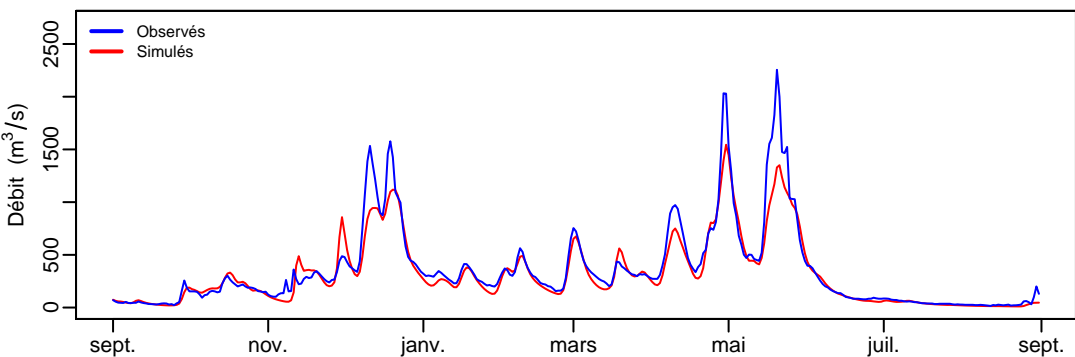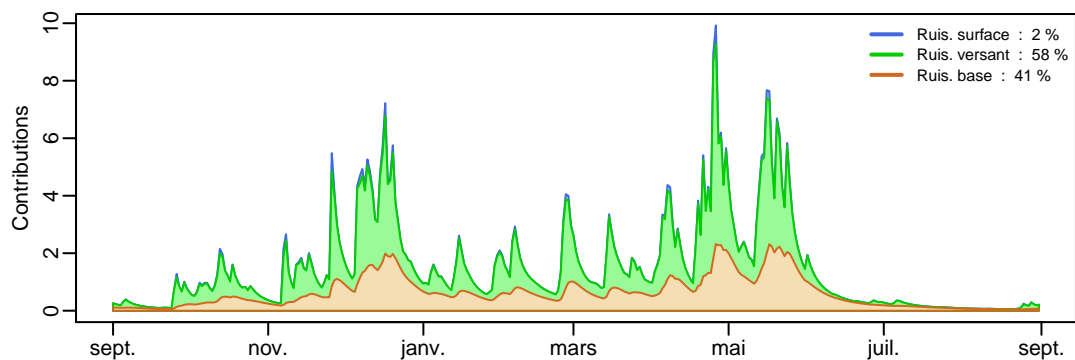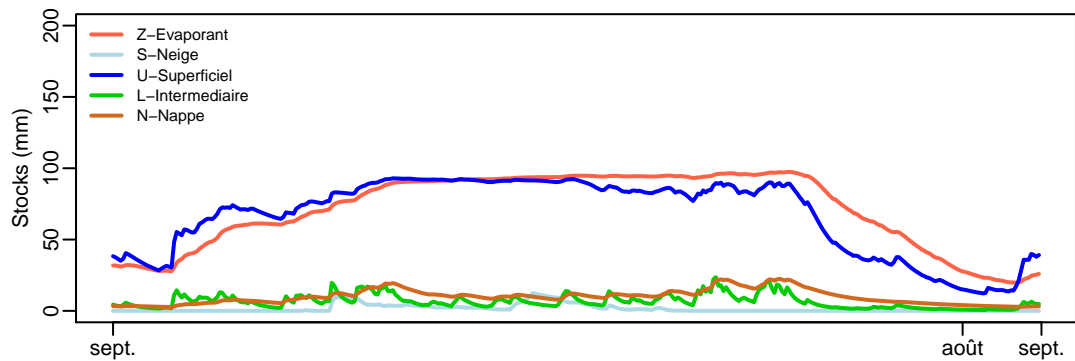

# k1930010 (17637.82 km<sup>2</sup>) – année 1983–1984

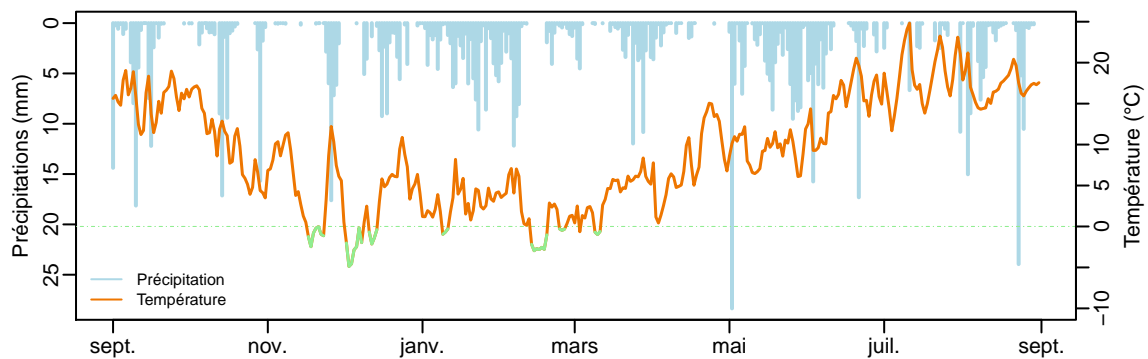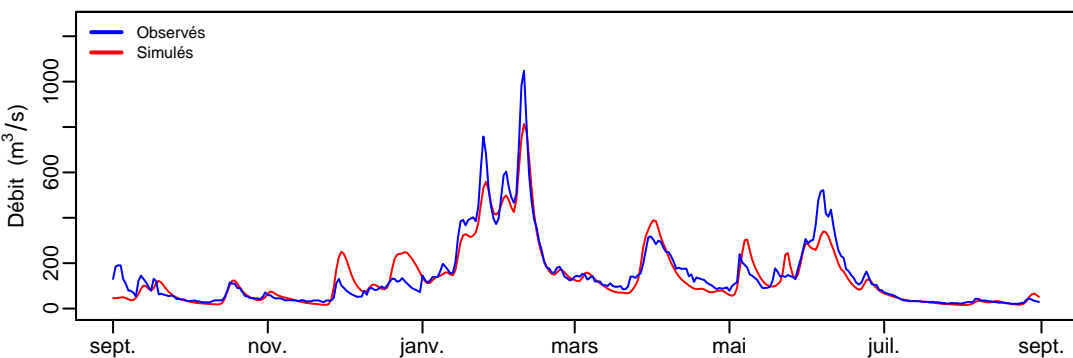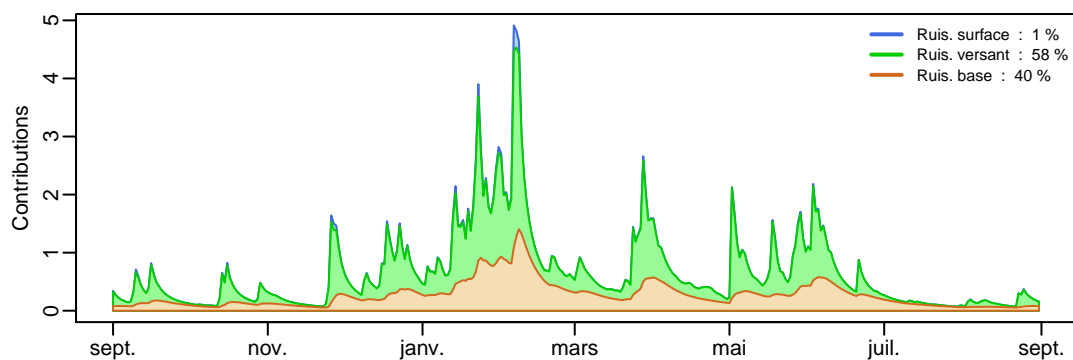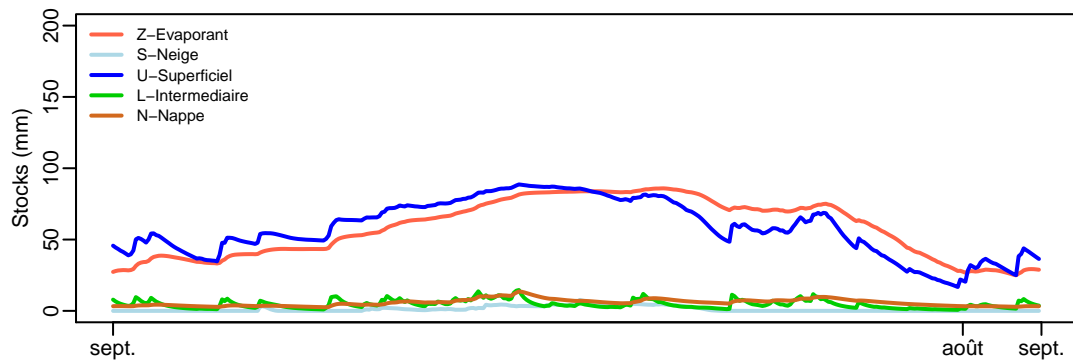

# k1930010 (17637.82 km<sup>2</sup>) – année 1984–1985

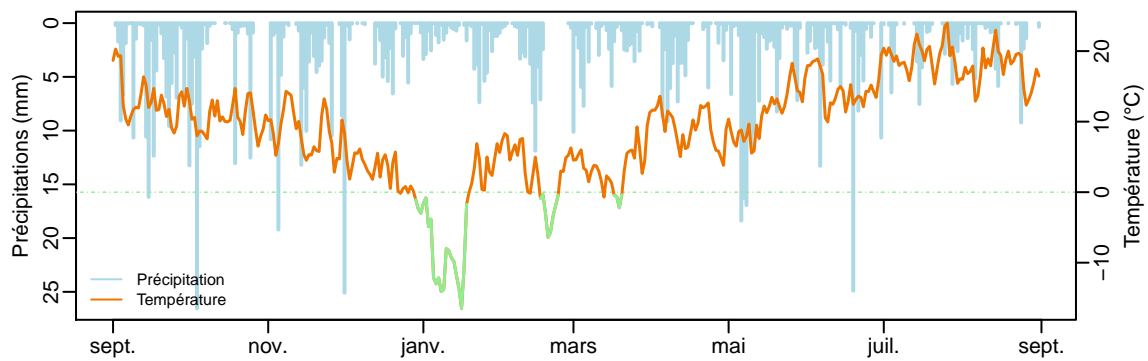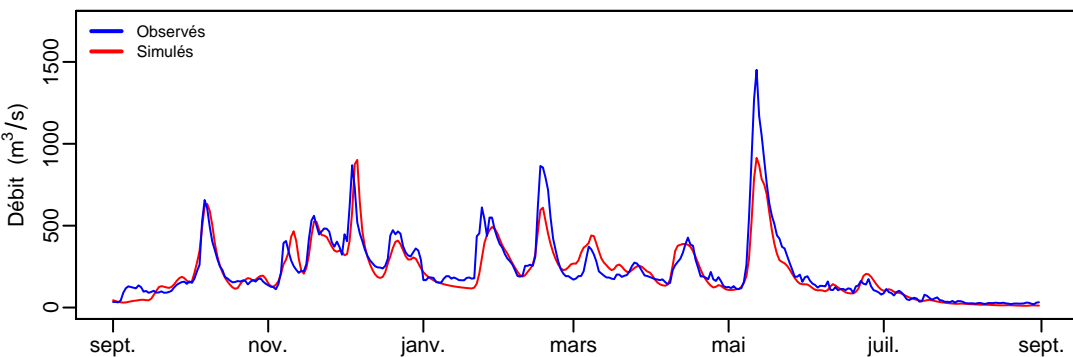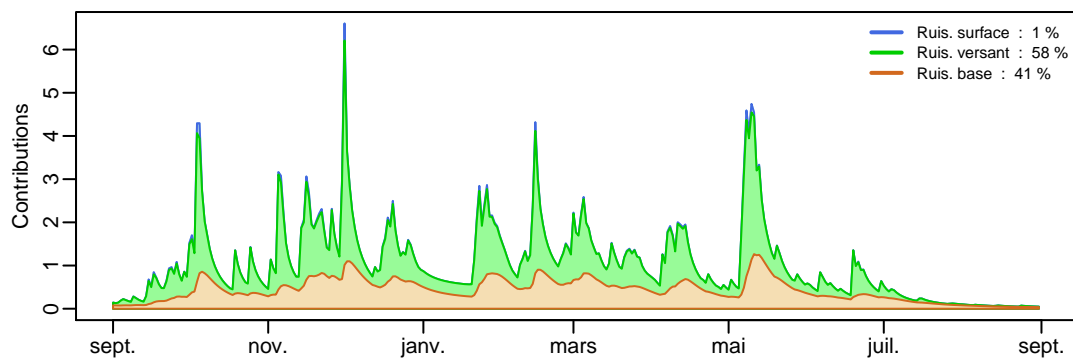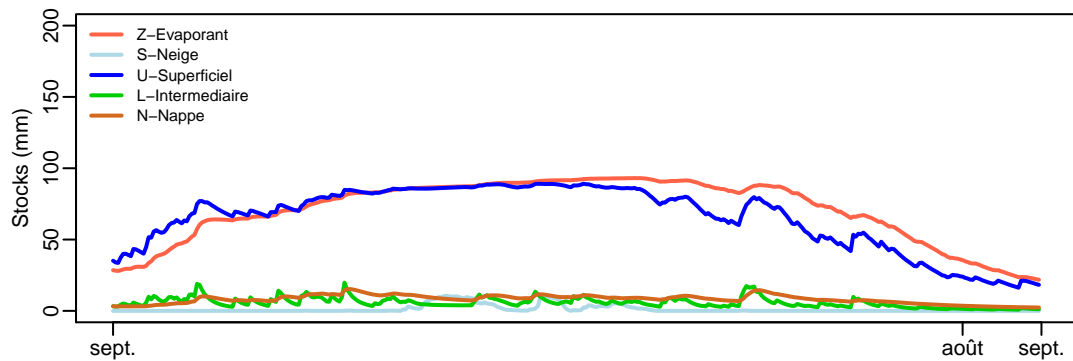



# k1930010 (17637.82 km<sup>2</sup>) – année 1985–1986

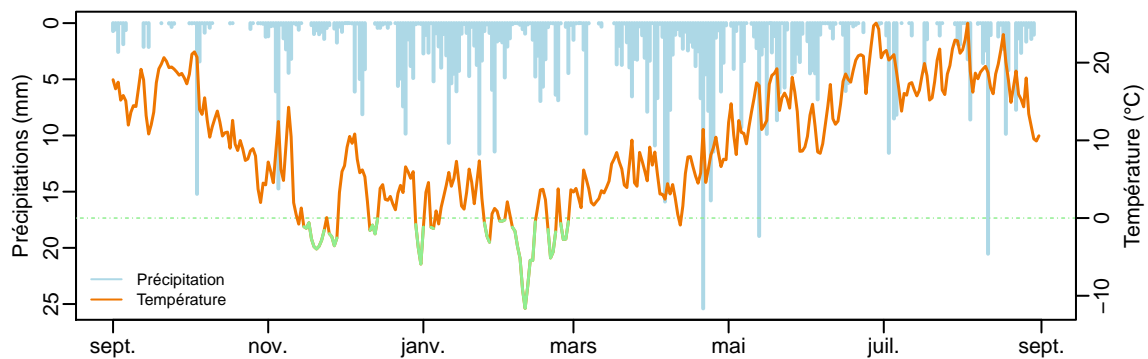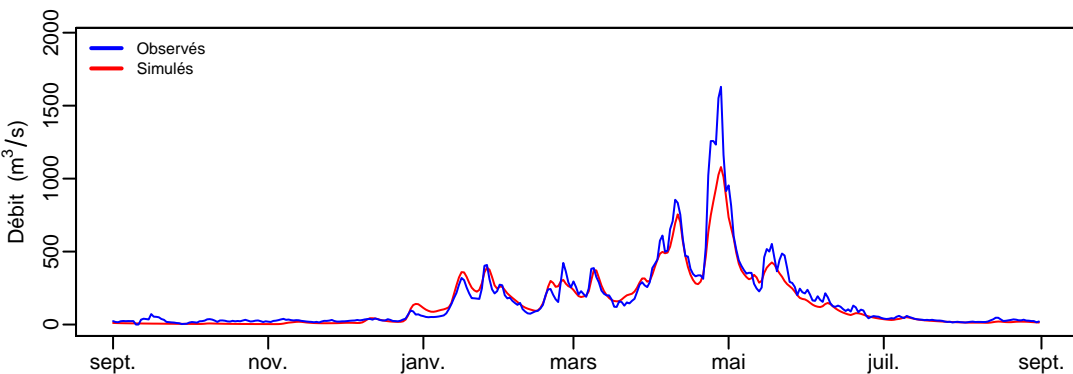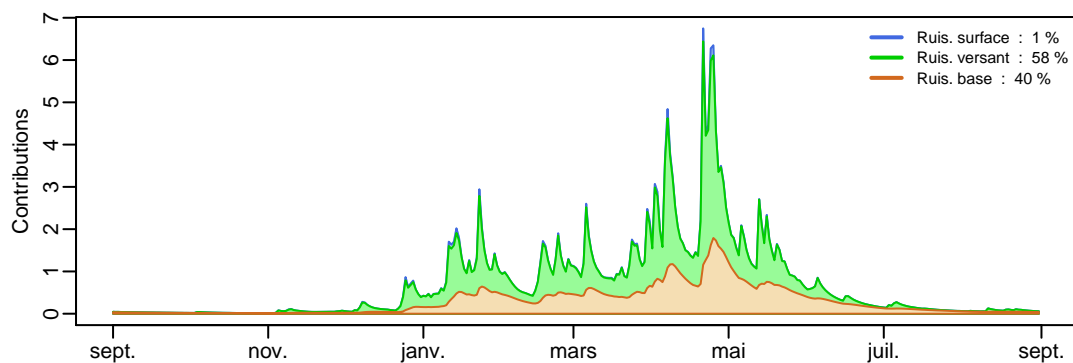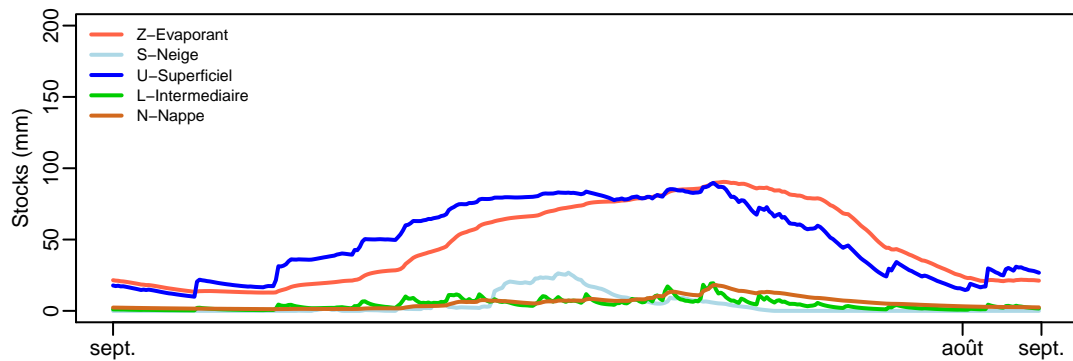

# k1930010 (17637.82 km<sup>2</sup>) – année 1986–1987

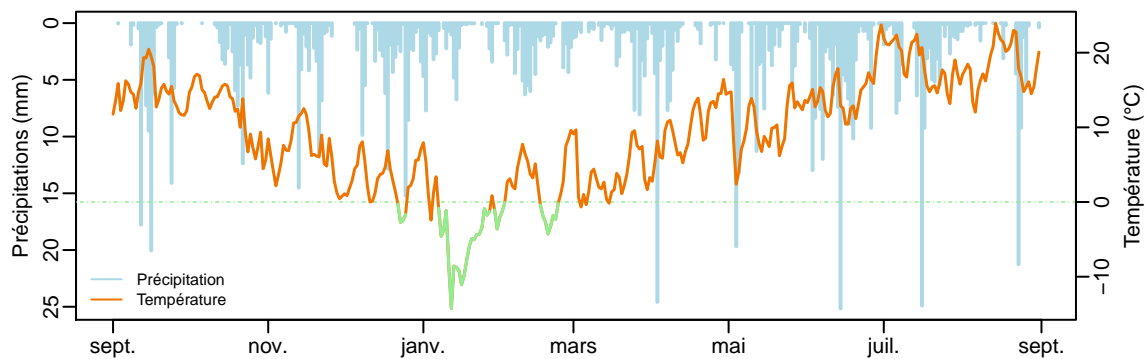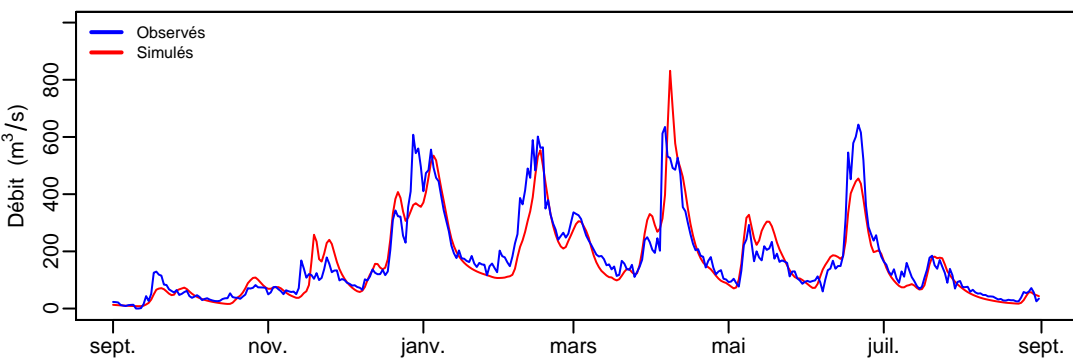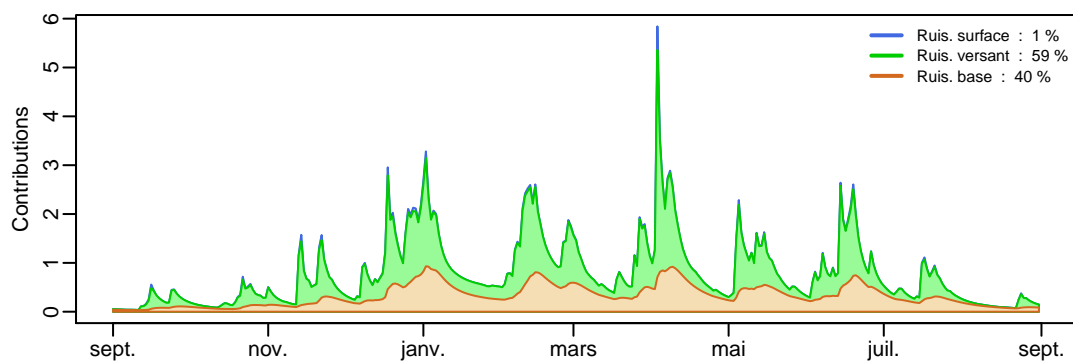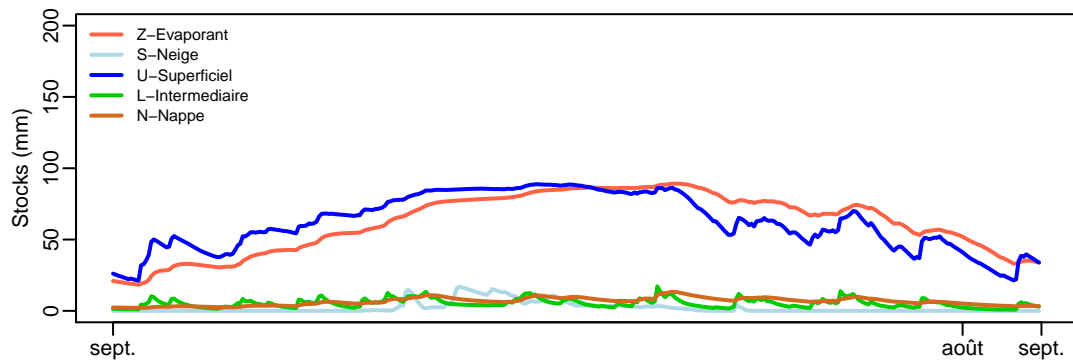

# k1930010 (17637.82 km<sup>2</sup>) – année 1987–1988

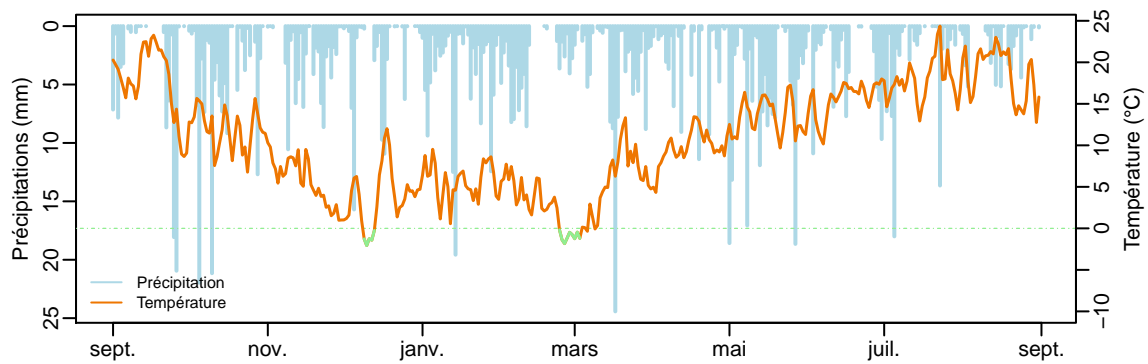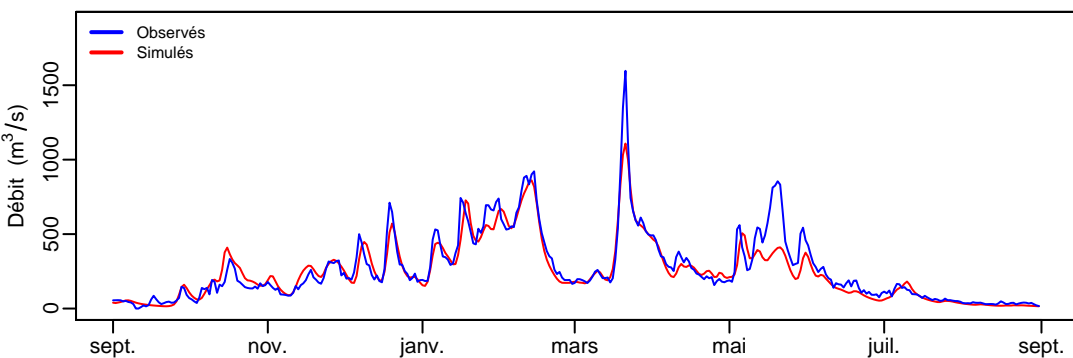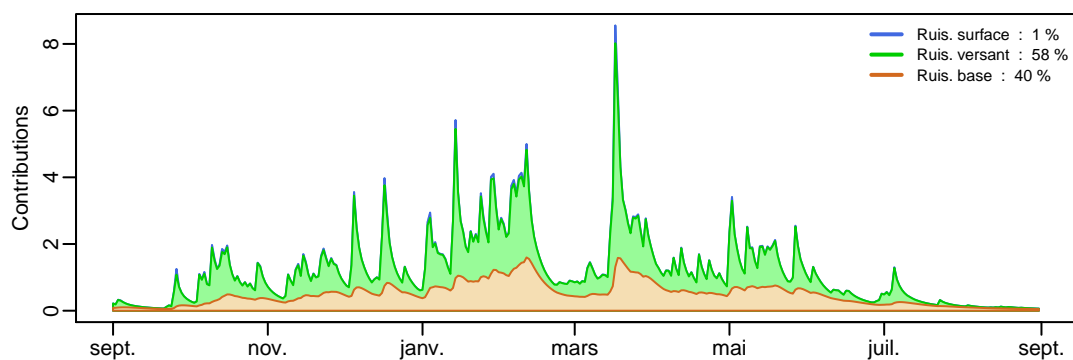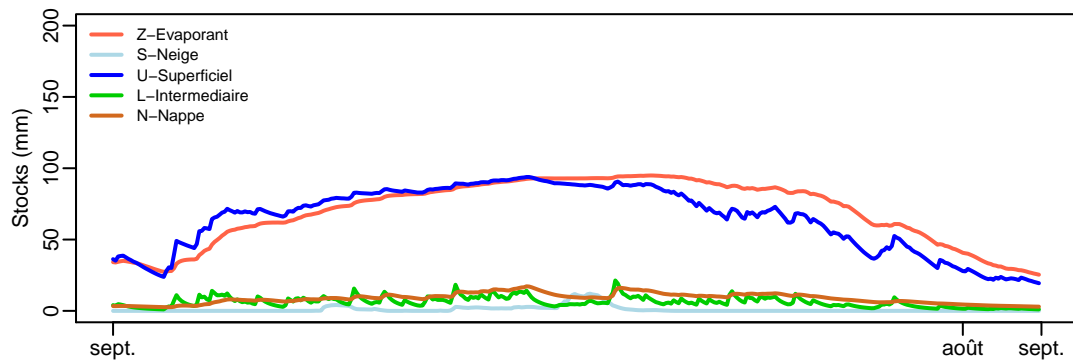

# k1930010 (17637.82 km<sup>2</sup>) – année 1988–1989

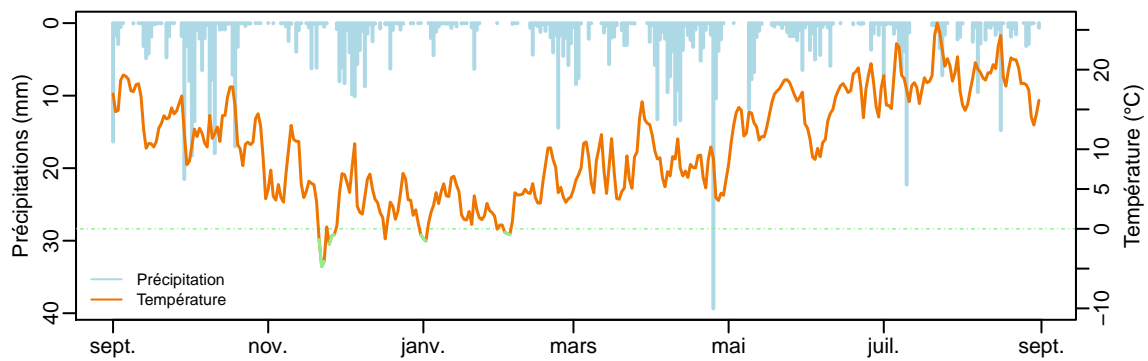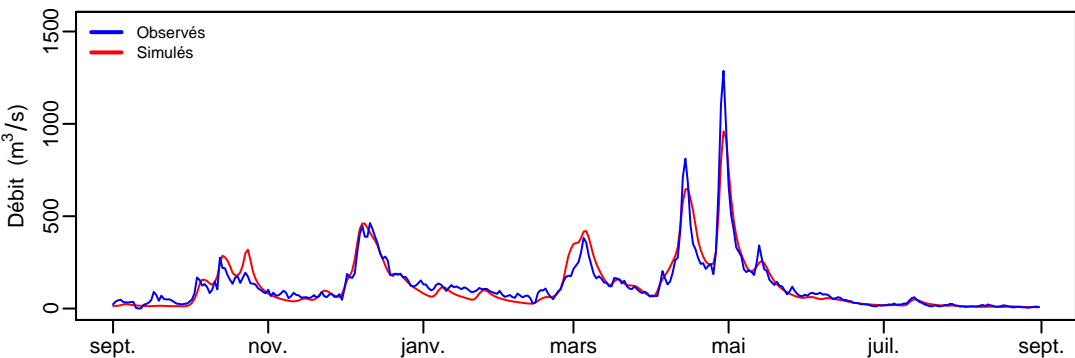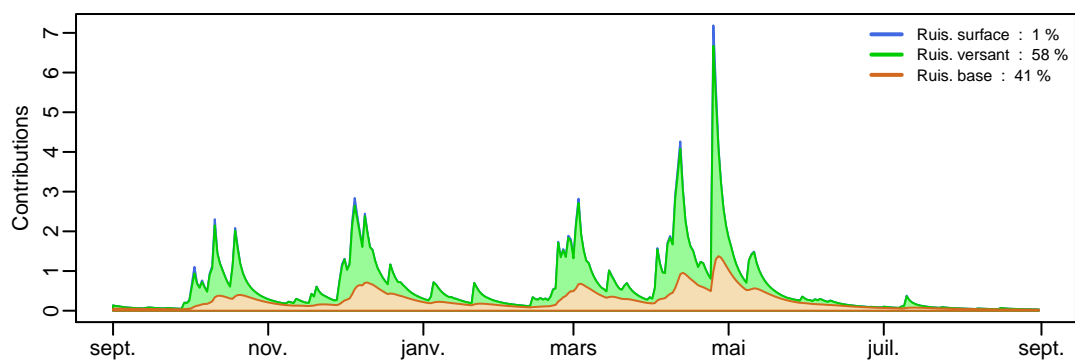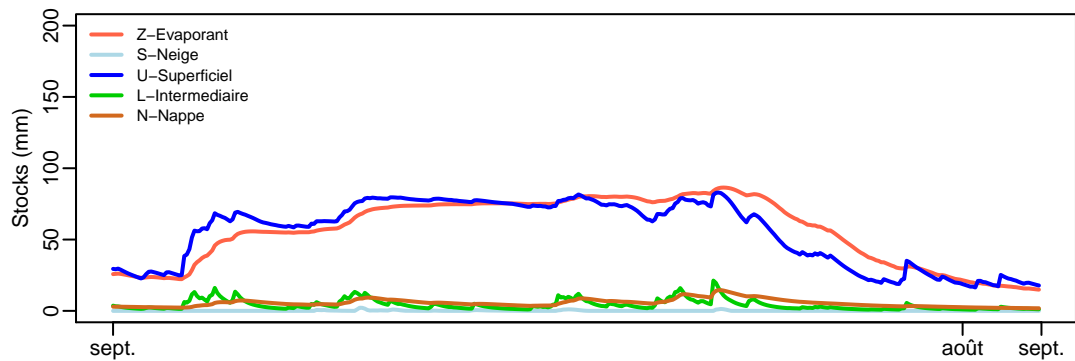

# k1930010 (17637.82 km<sup>2</sup>) – année 1989–1990

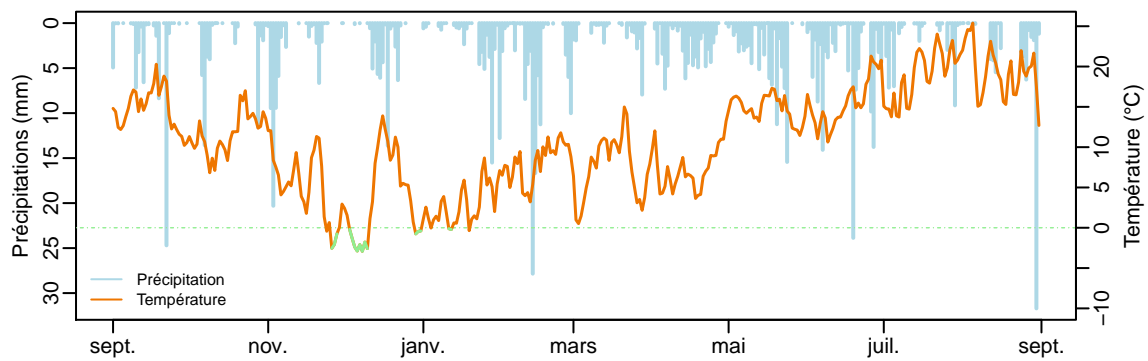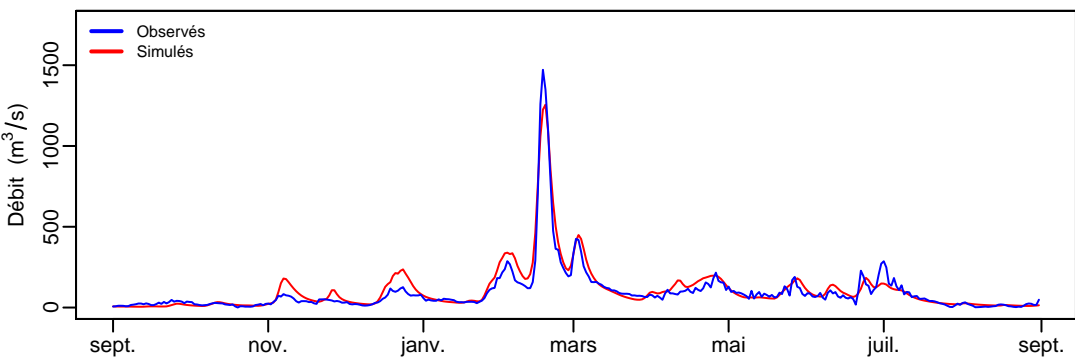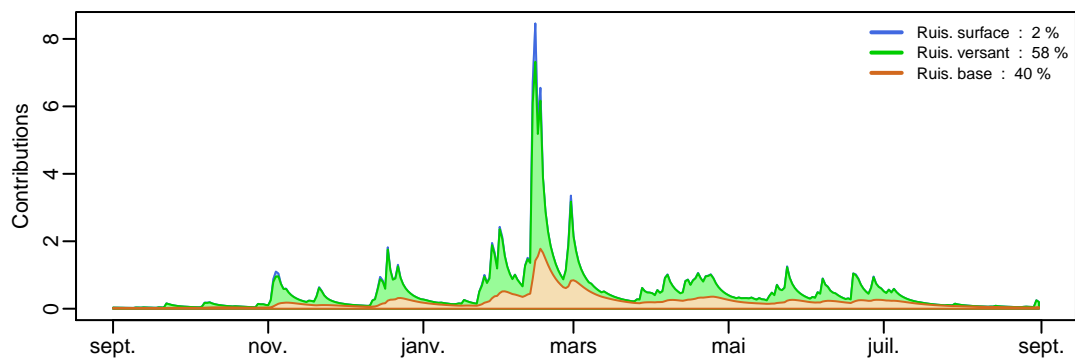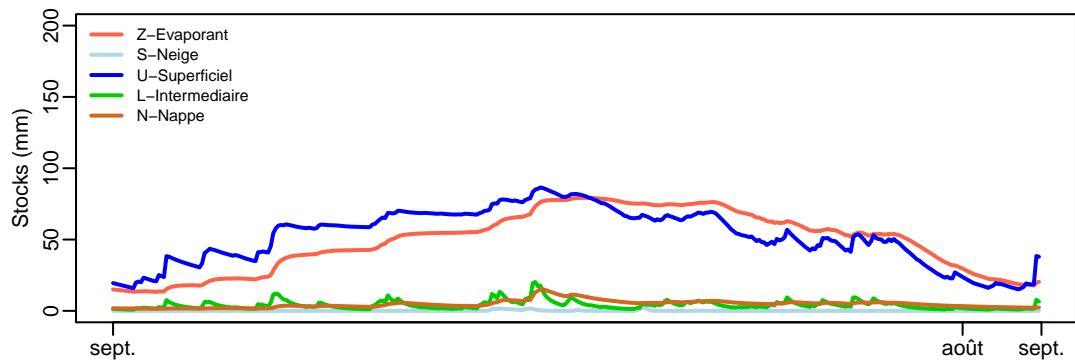

# k1930010 (17637.82 km<sup>2</sup>) – année 1990–1991

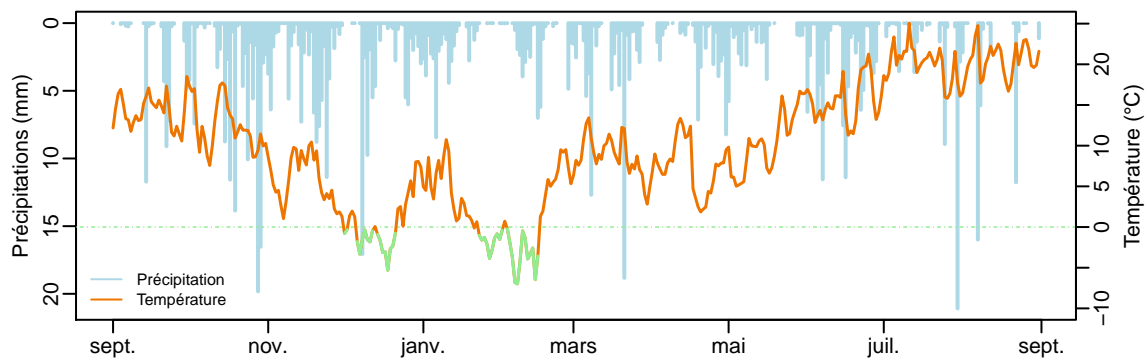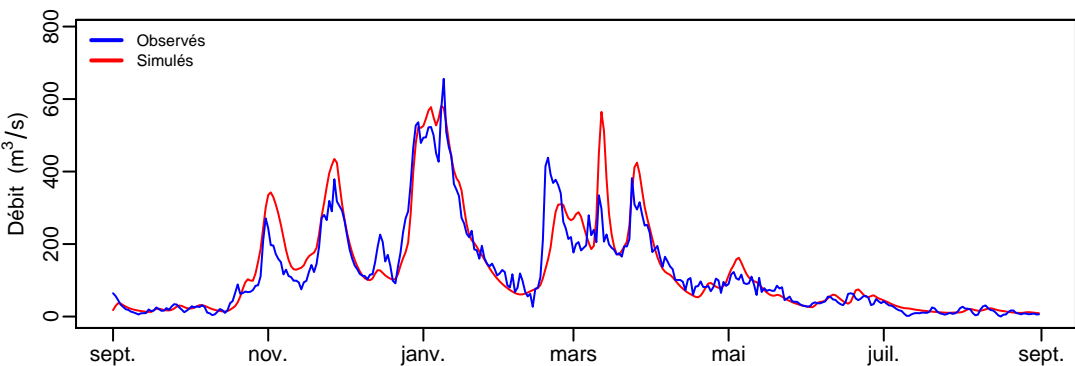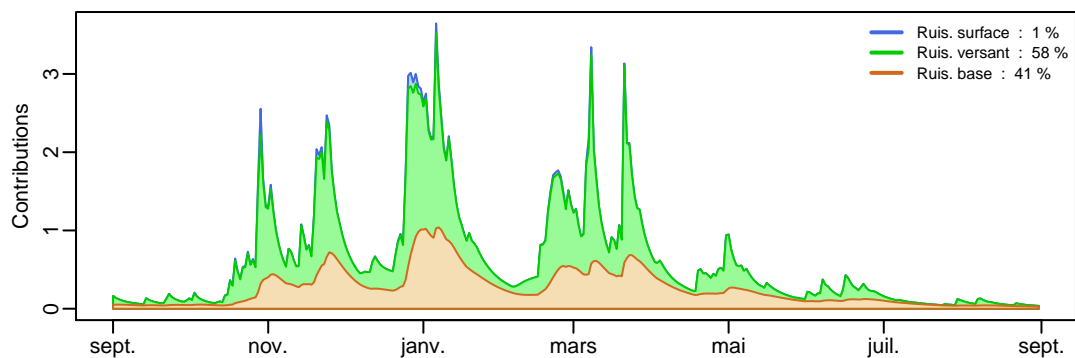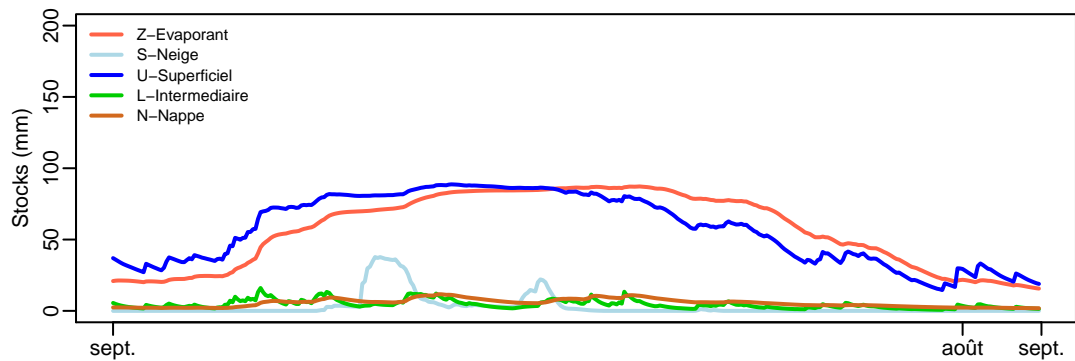

# k1930010 (17637.82 km<sup>2</sup>) – année 1991–1992

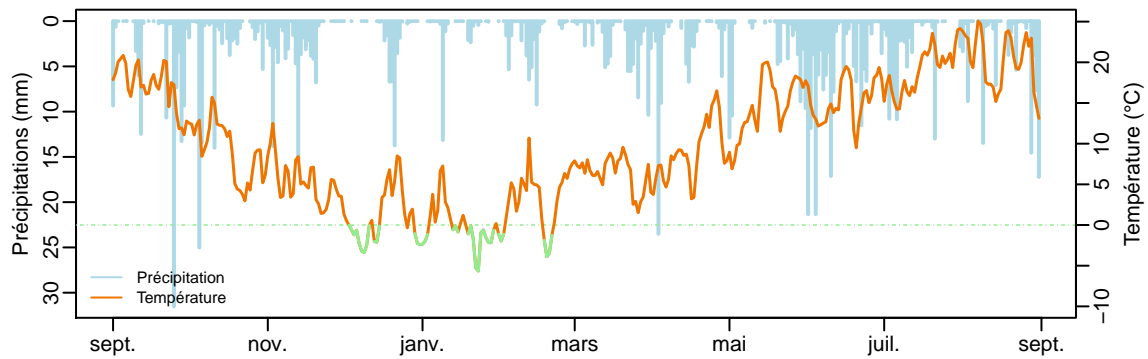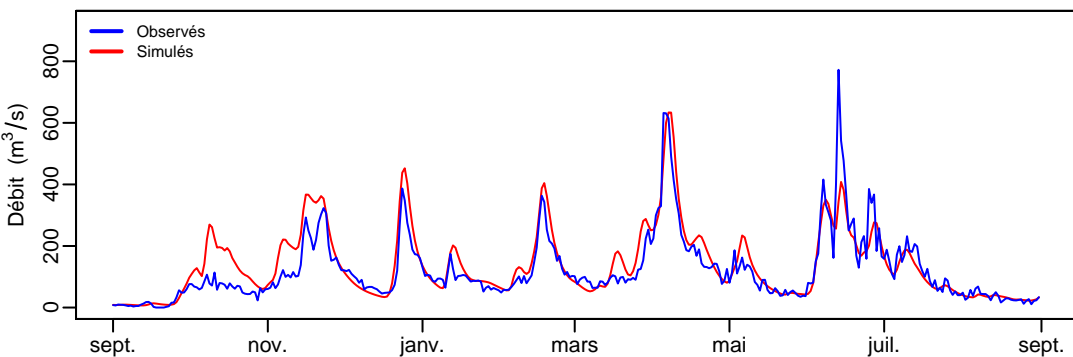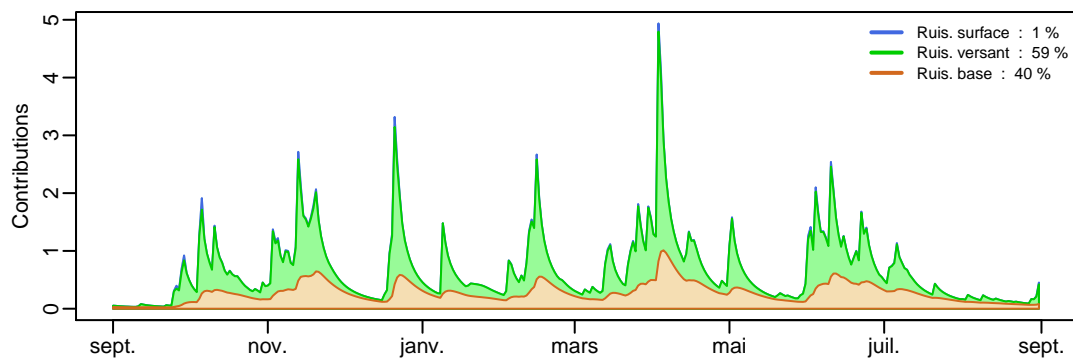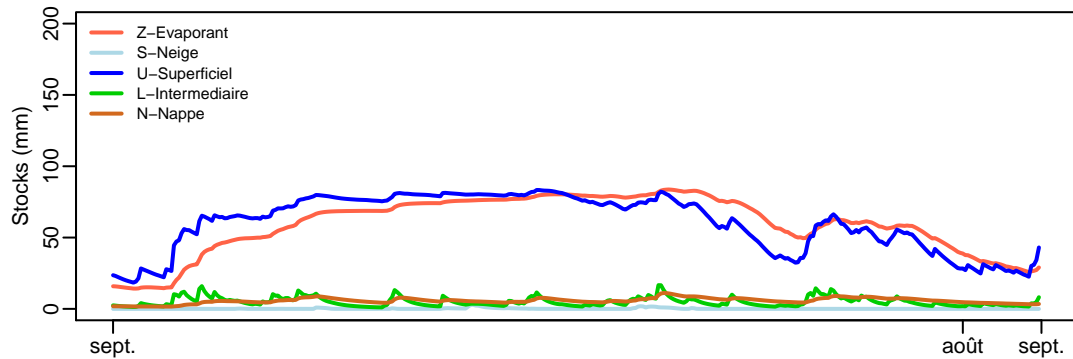

# k1930010 (17637.82 km<sup>2</sup>) – année 1992–1993

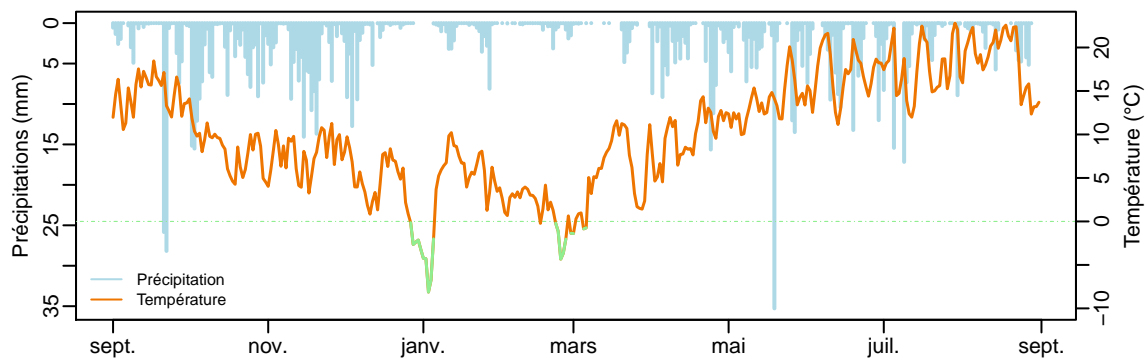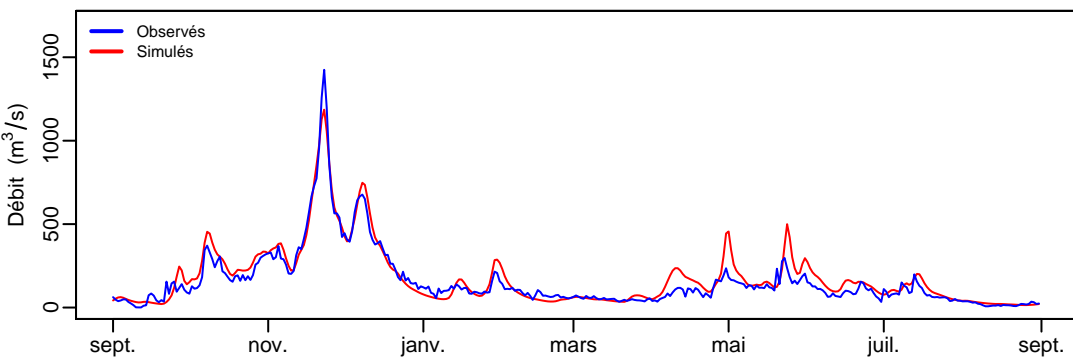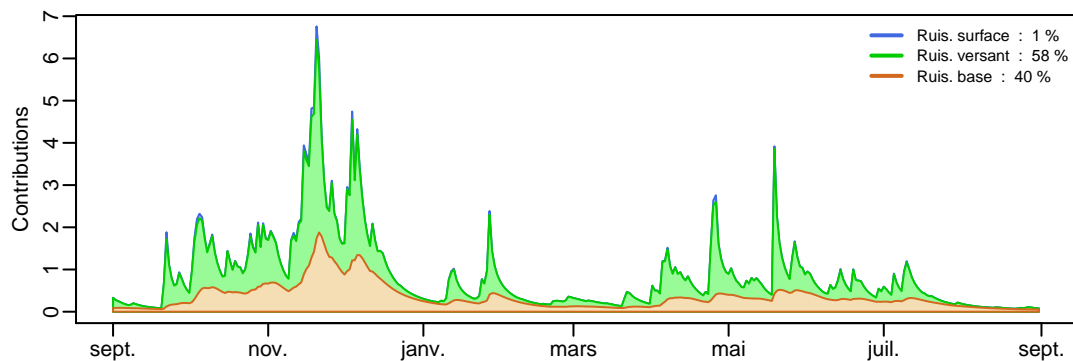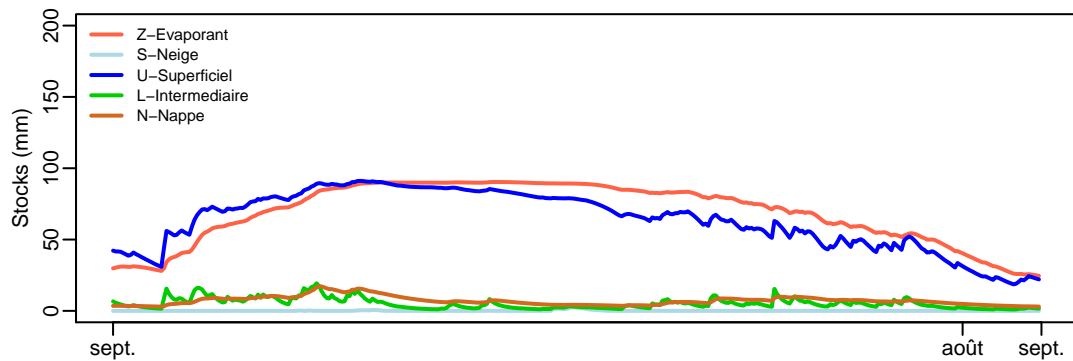



# k1930010 (17637.82 km<sup>2</sup>) – année 1993–1994

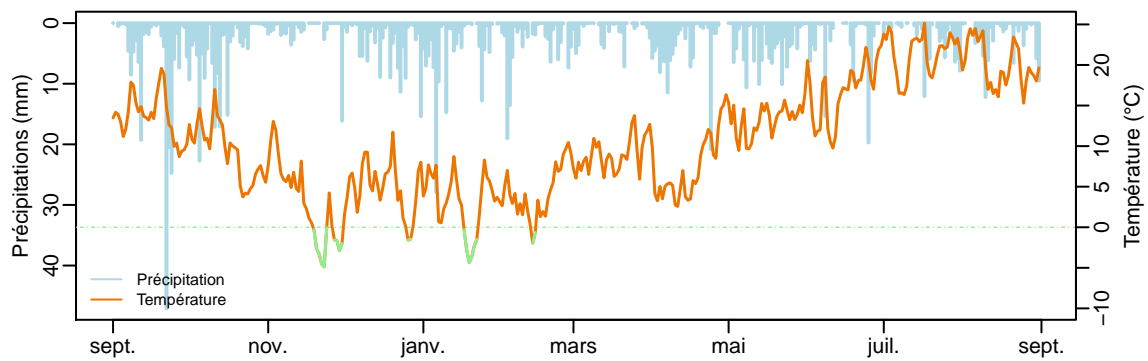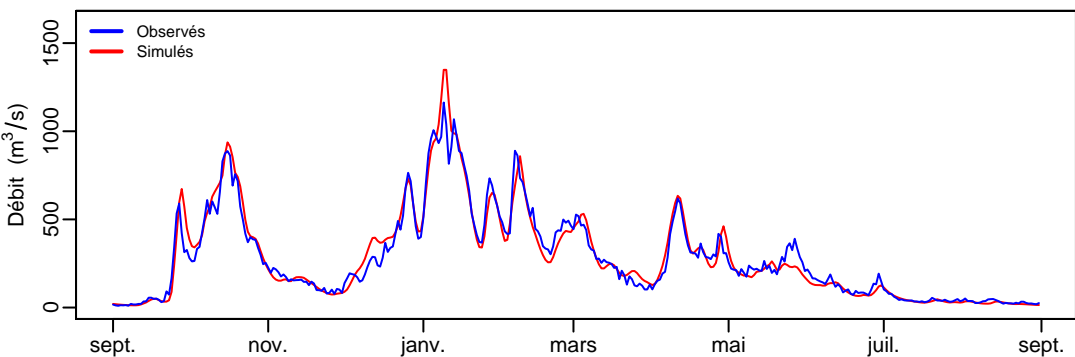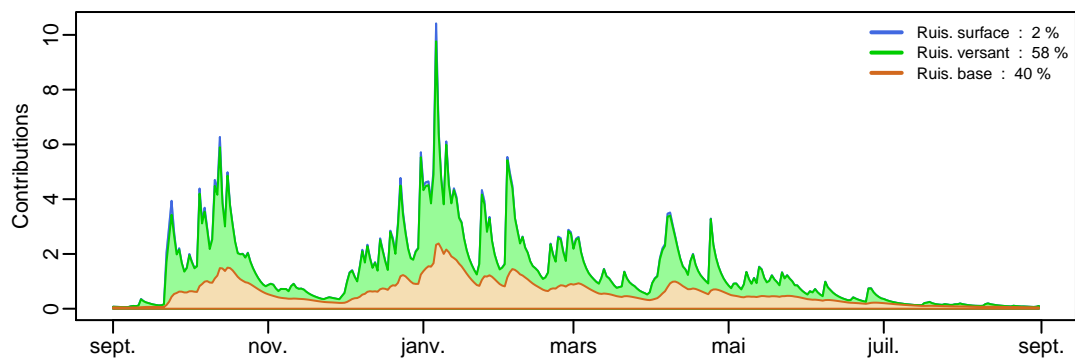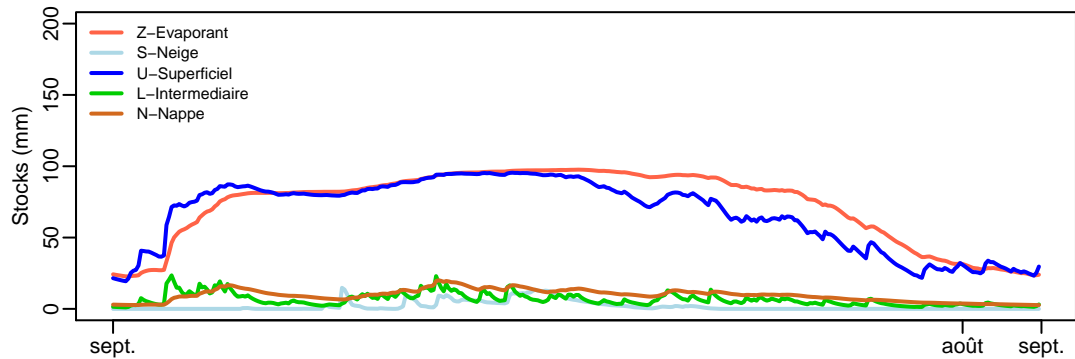

# k1930010 (17637.82 km<sup>2</sup>) – année 1994–1995

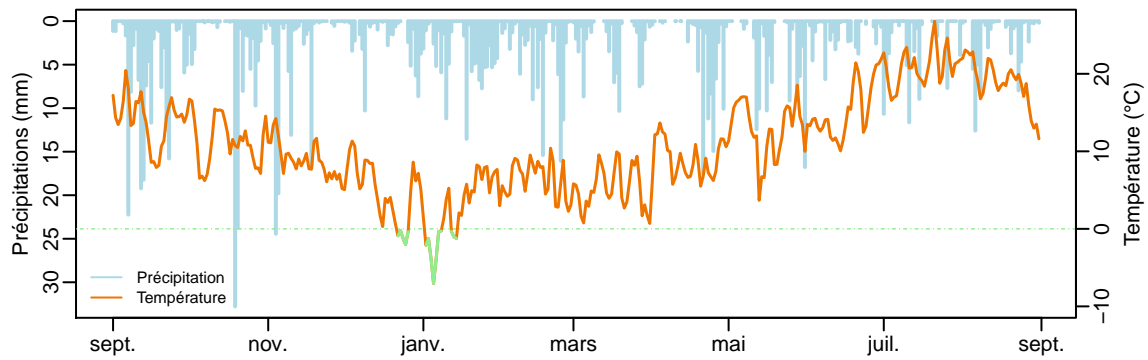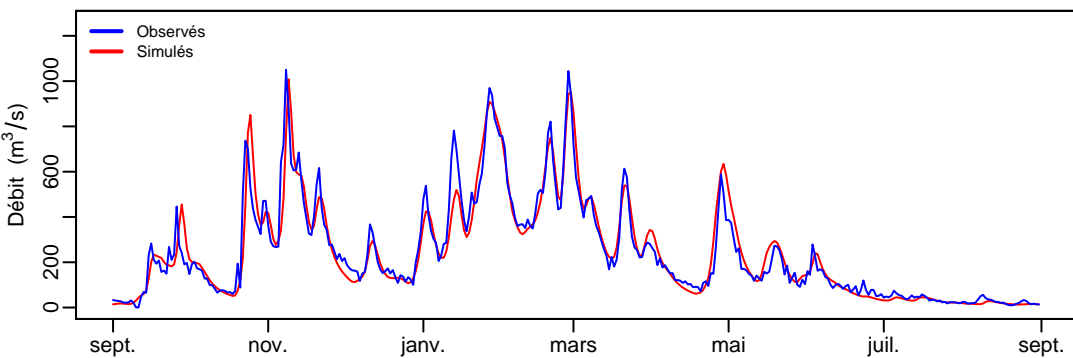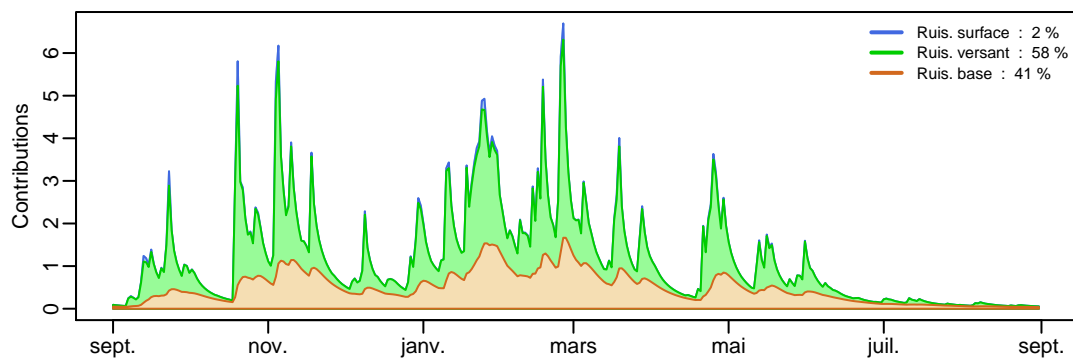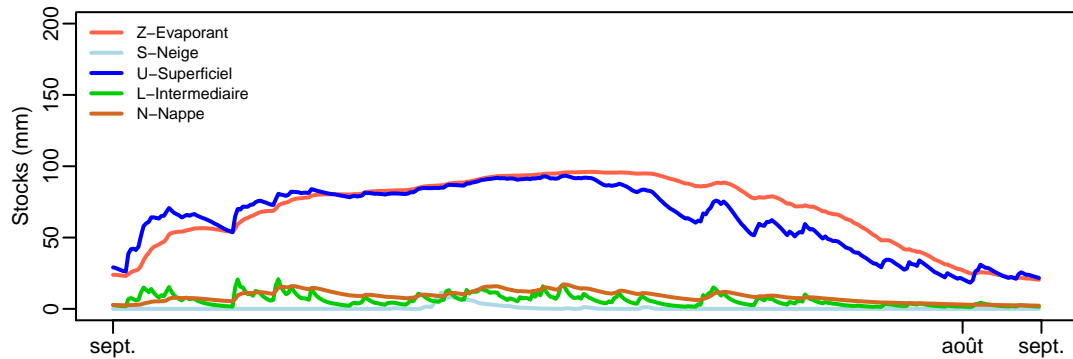

# k1930010 (17637.82 km<sup>2</sup>) – année 1995–1996

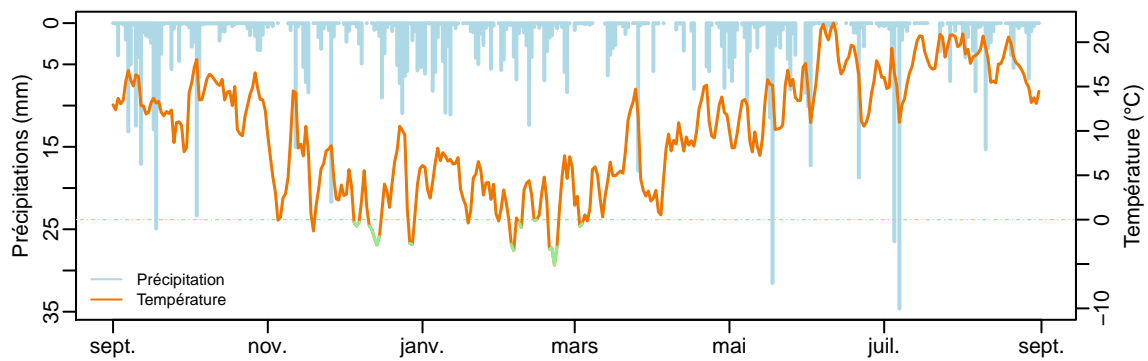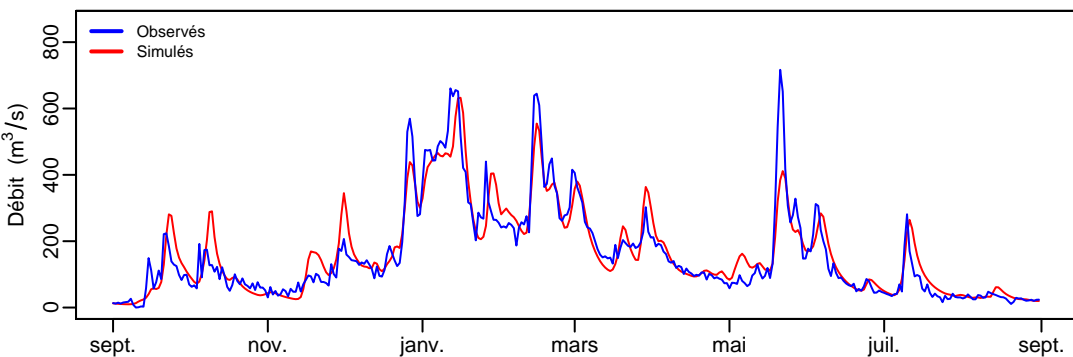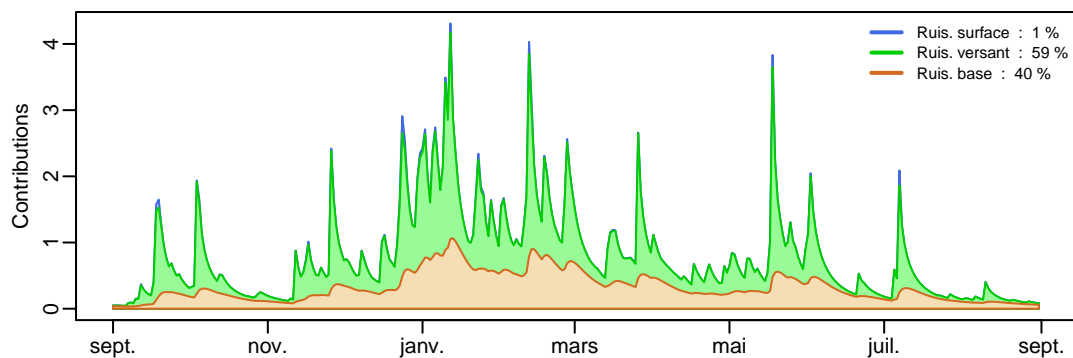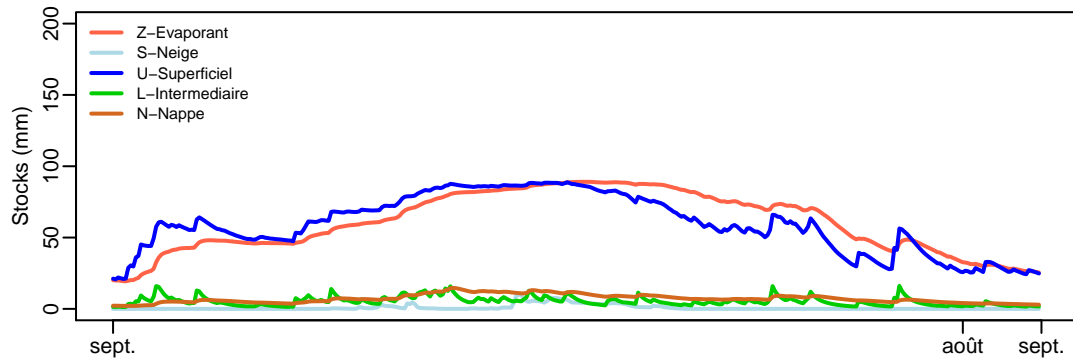

# k1930010 (17637.82 km<sup>2</sup>) – année 1996–1997

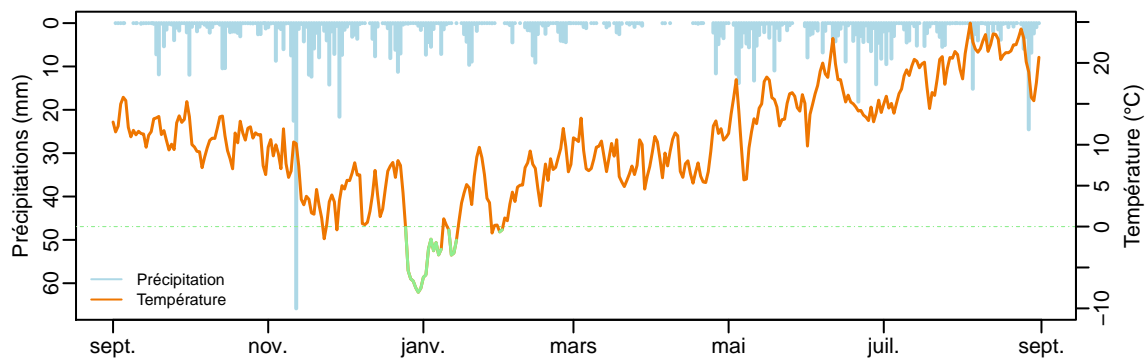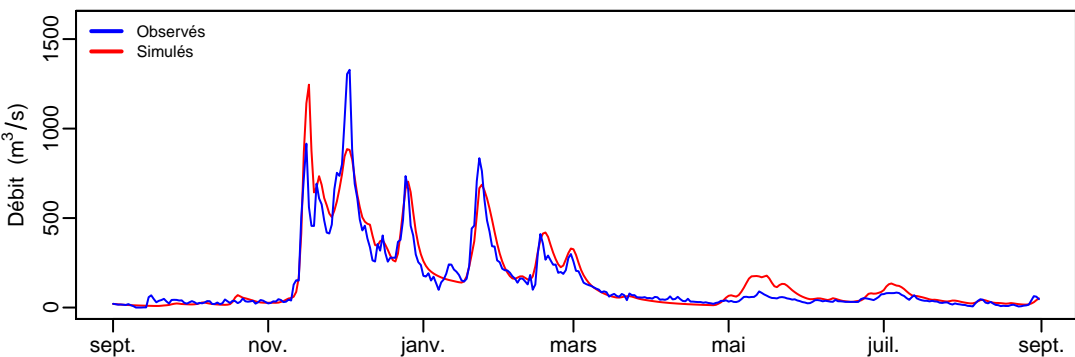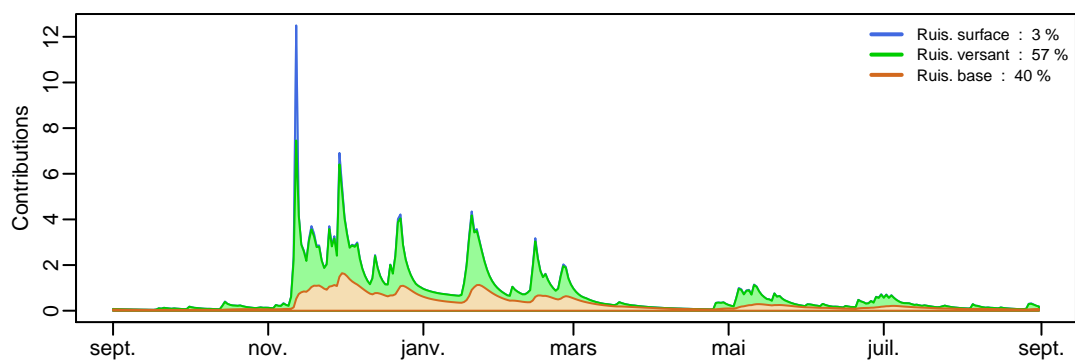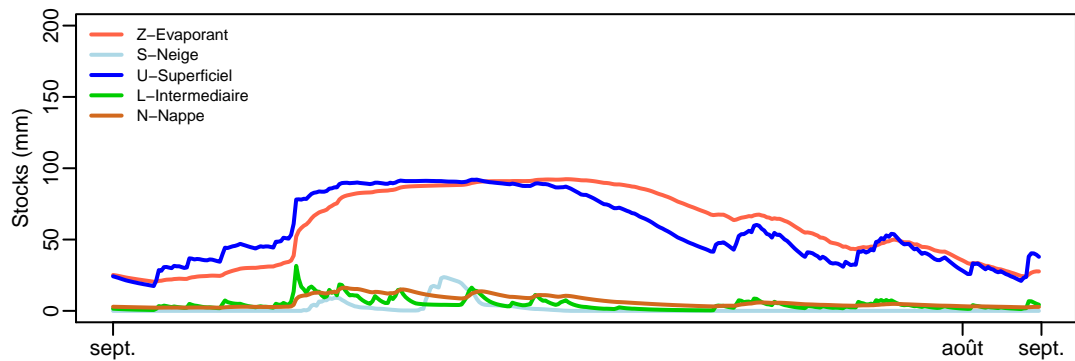

# k1930010 (17637.82 km<sup>2</sup>) – année 1997–1998

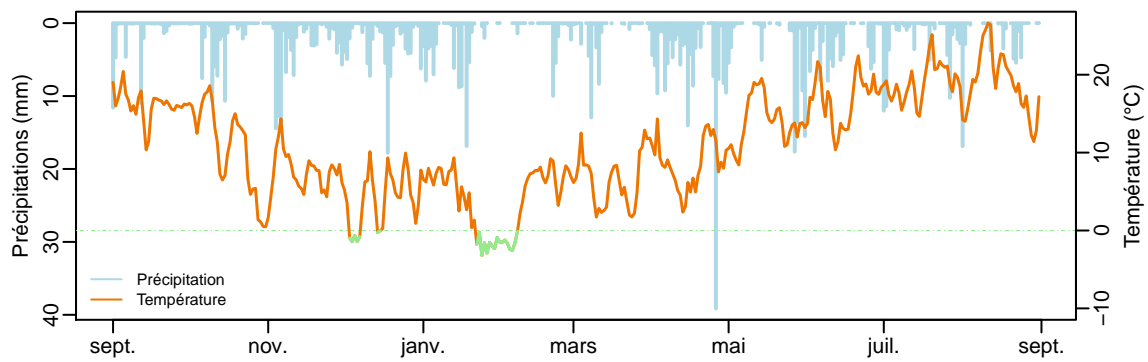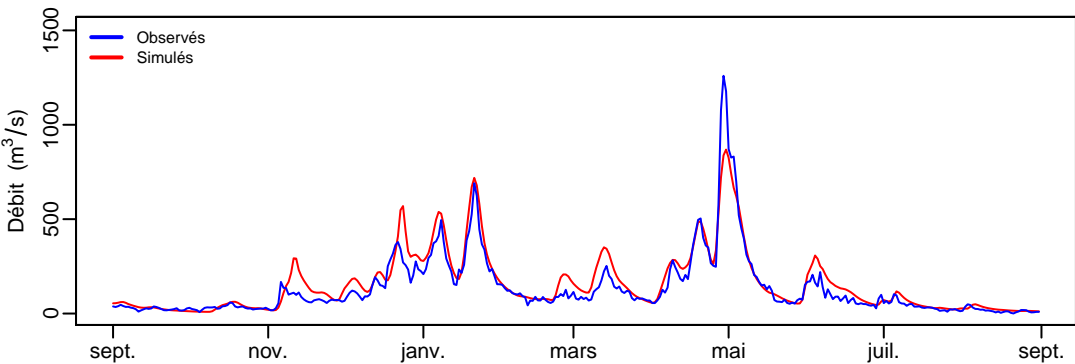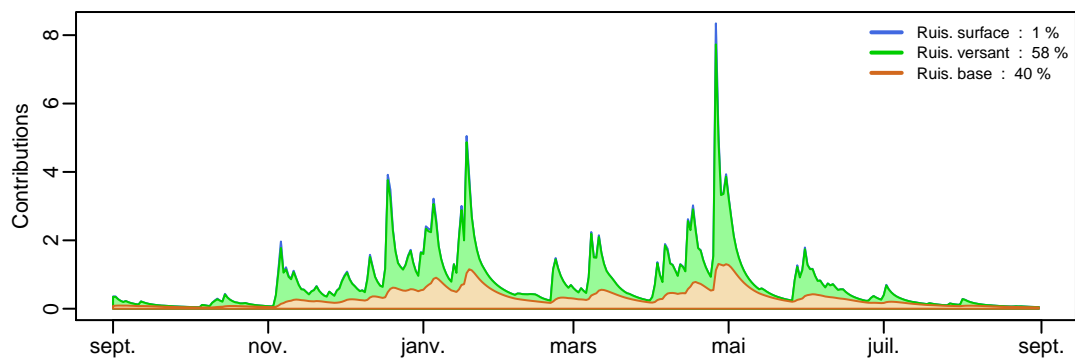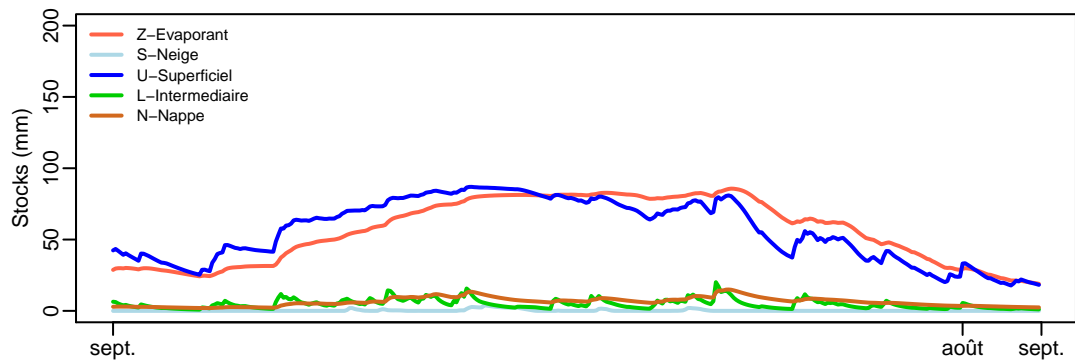

# k1930010 (17637.82 km<sup>2</sup>) – année 1998–1999

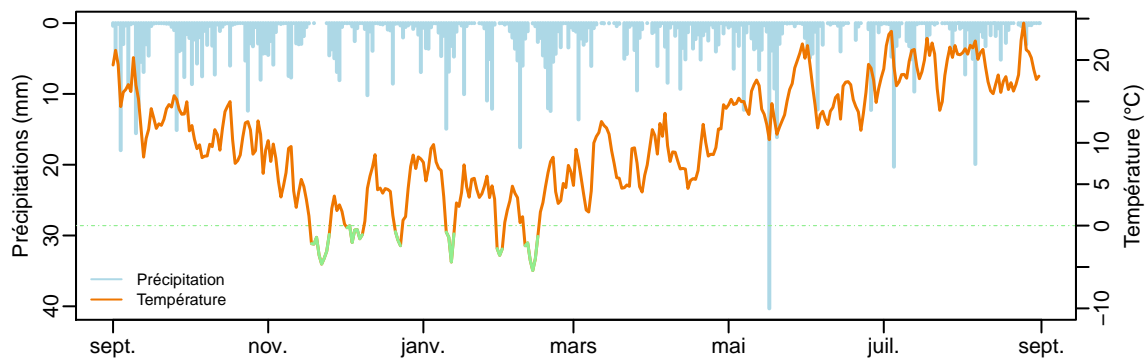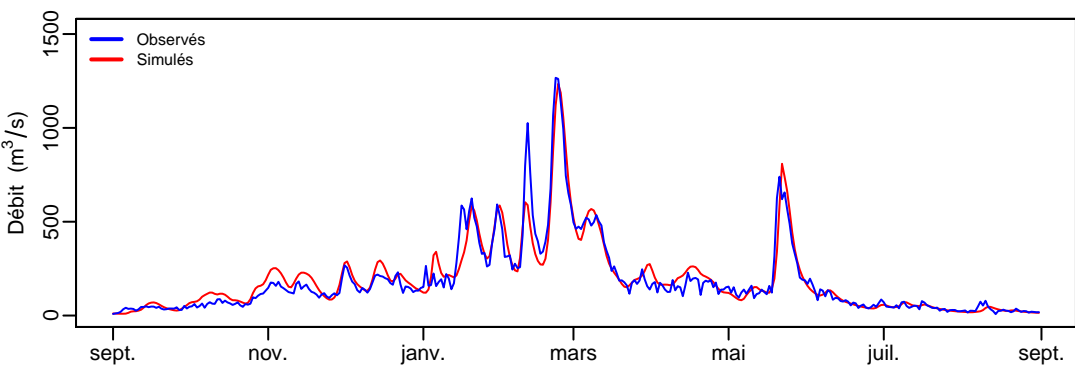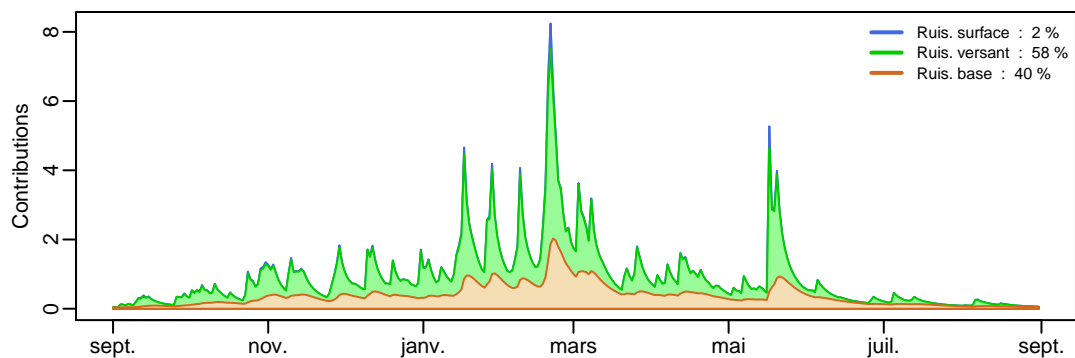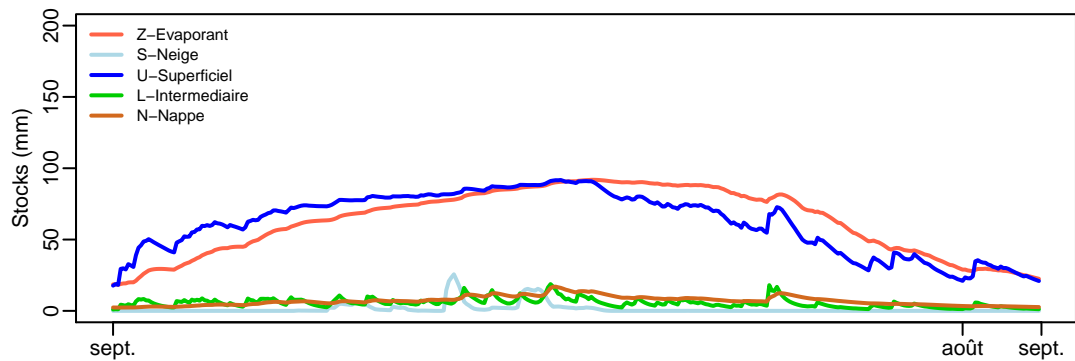

# k1930010 (17637.82 km<sup>2</sup>) – année 1999–2000

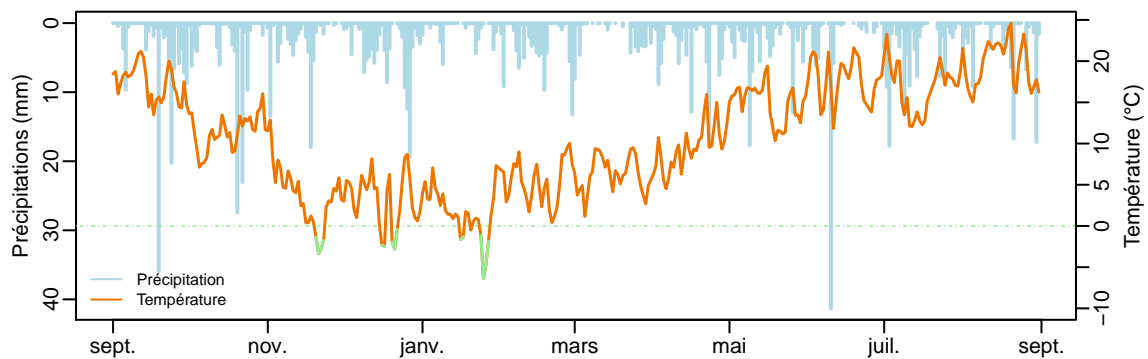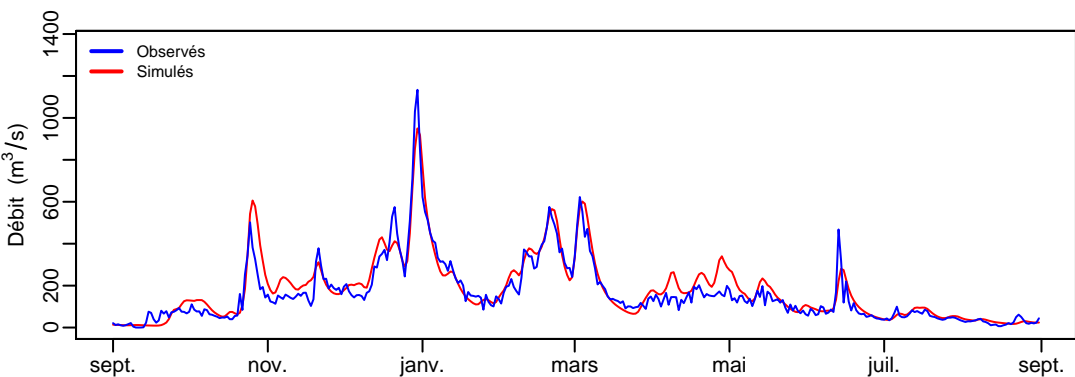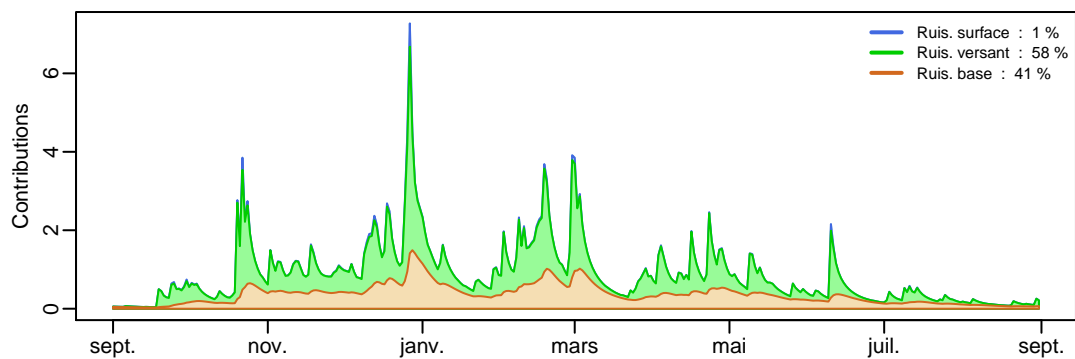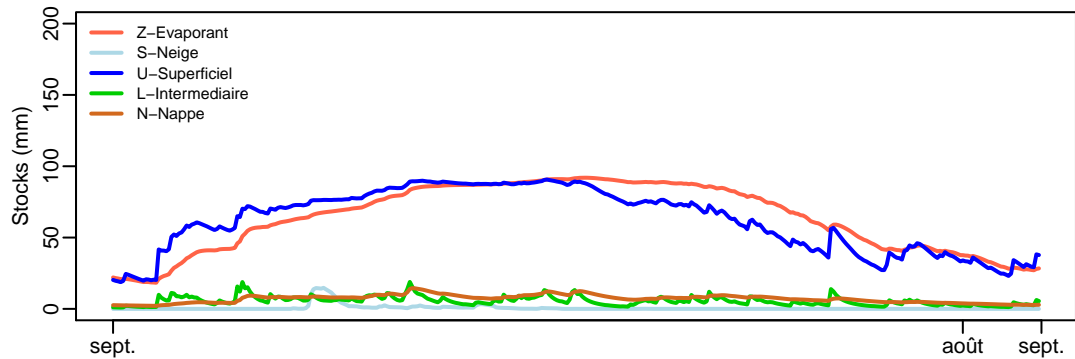

# k1930010 (17637.82 km<sup>2</sup>) – année 2000–2001

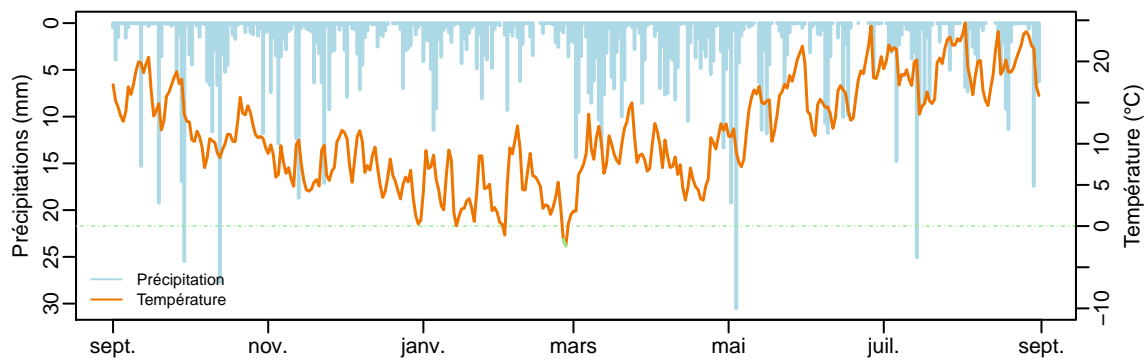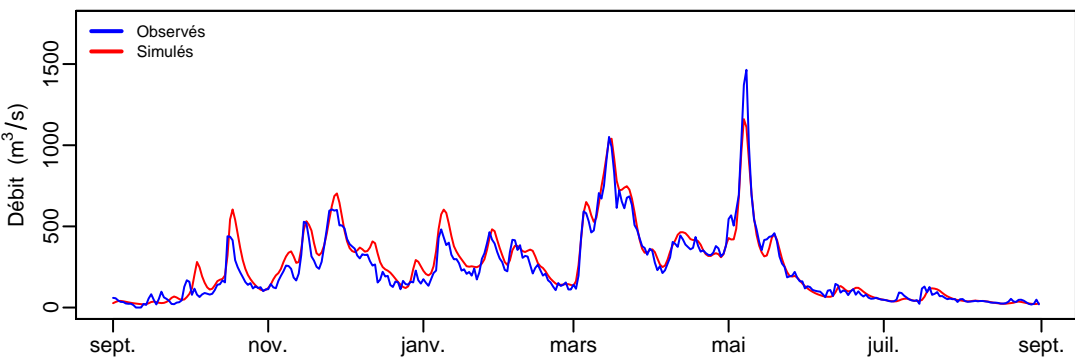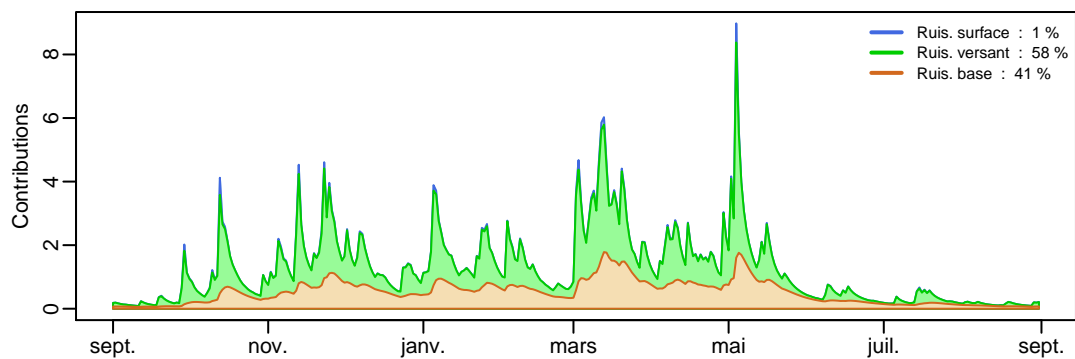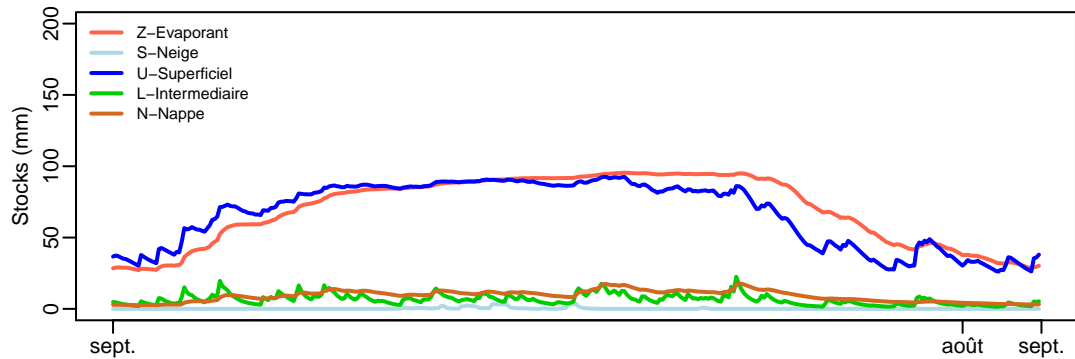



# k1930010 (17637.82 km<sup>2</sup>) – année 2001–2002

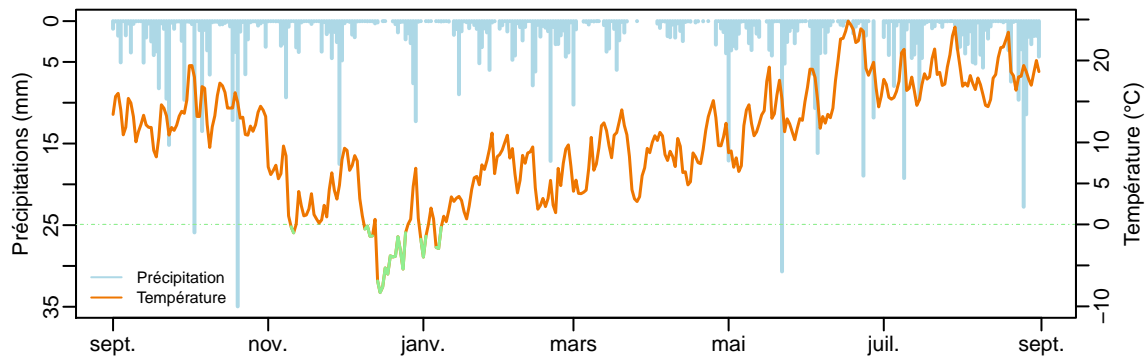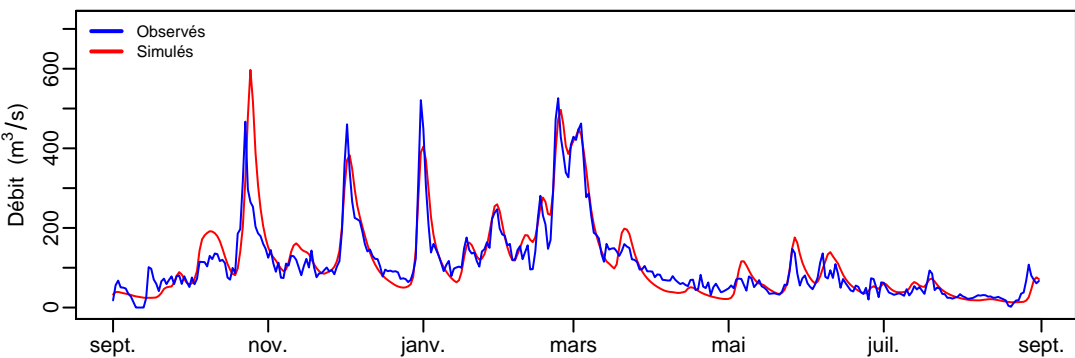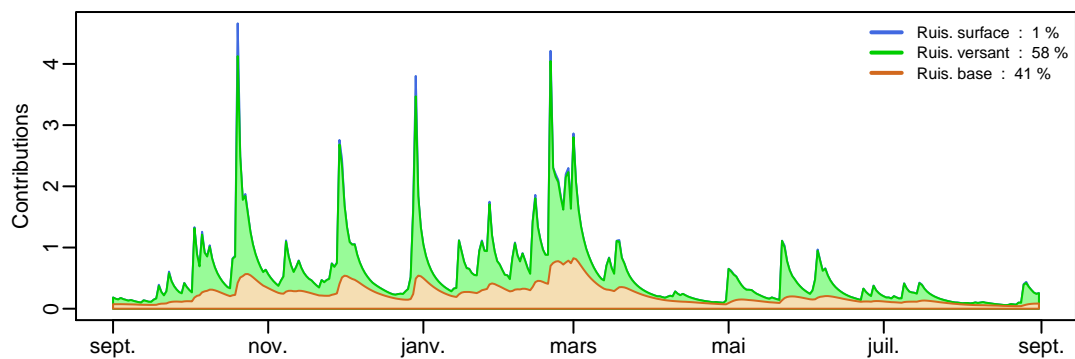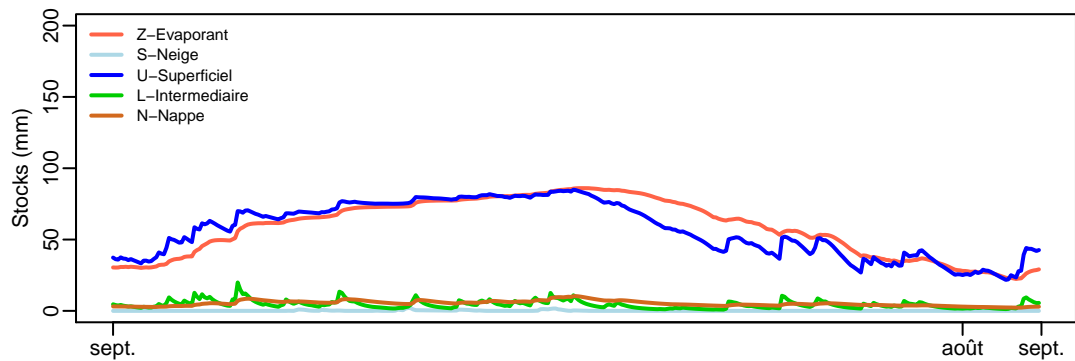

# k1930010 (17637.82 km<sup>2</sup>) – année 2002–2003

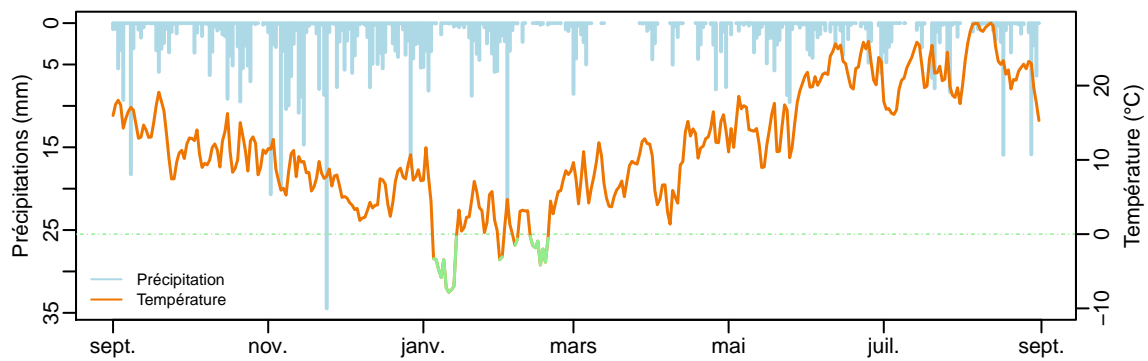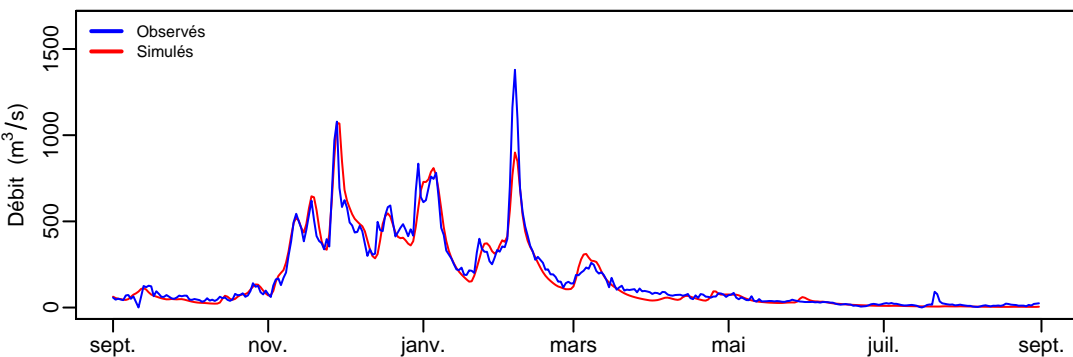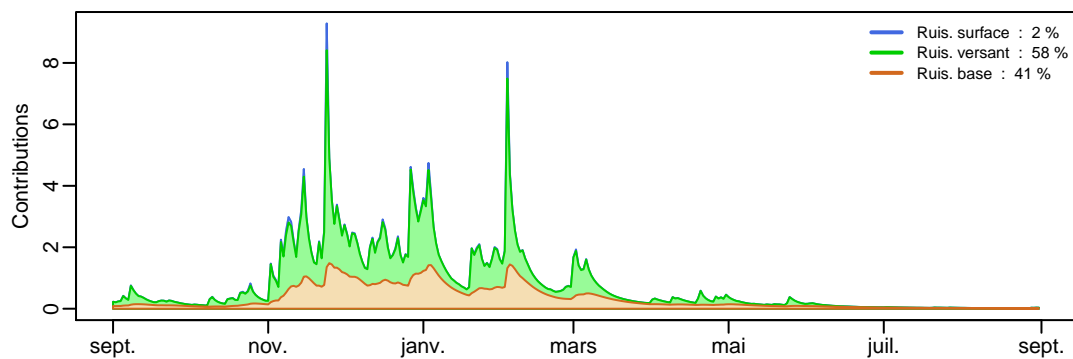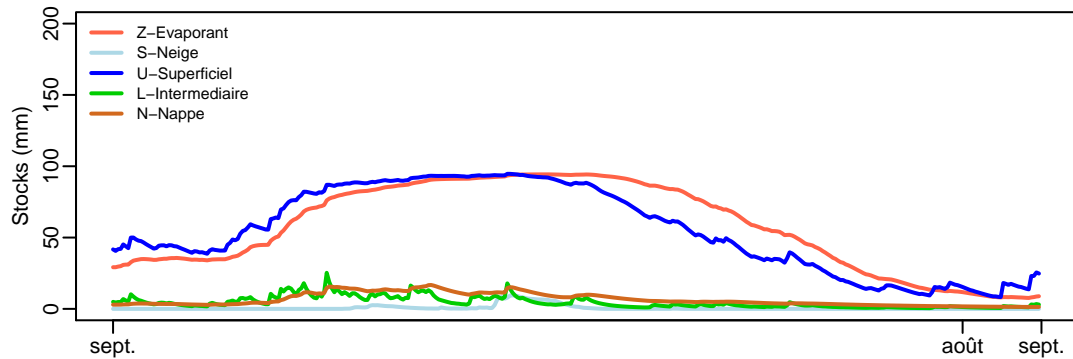

# k1930010 (17637.82 km<sup>2</sup>) – année 2003–2004

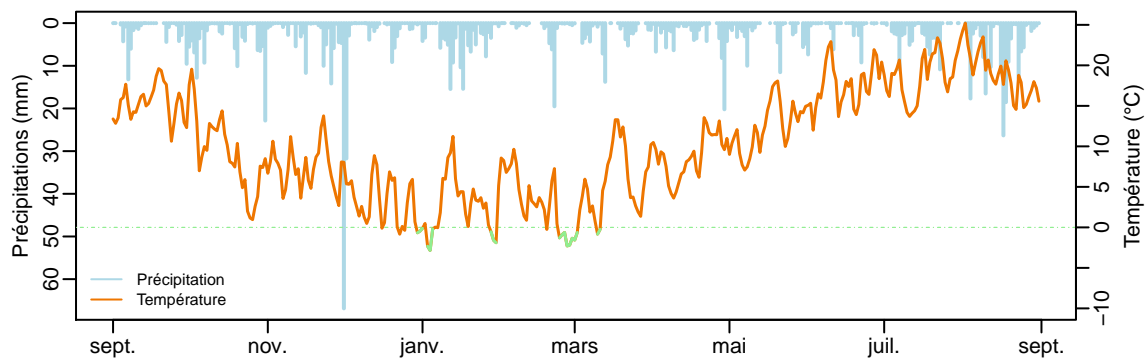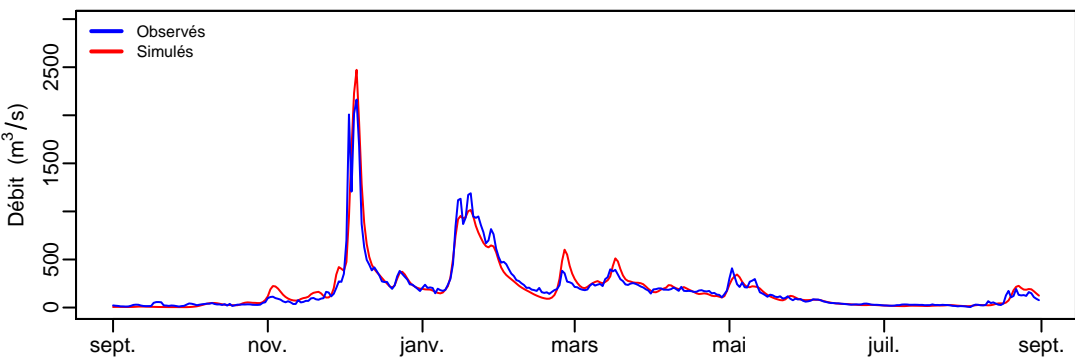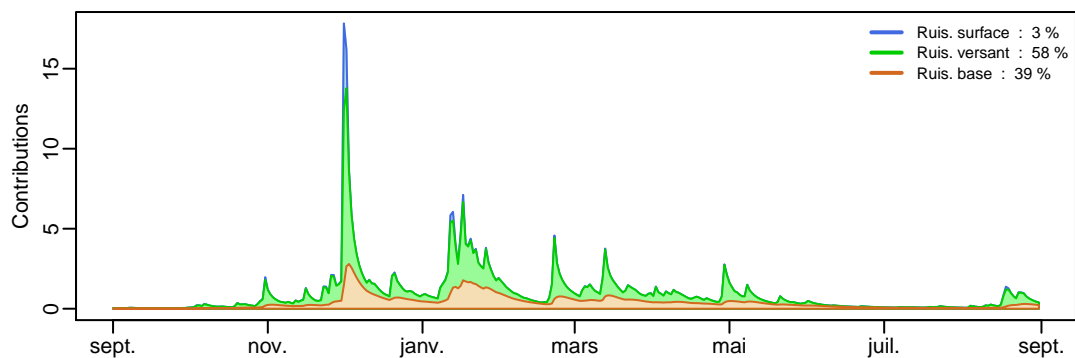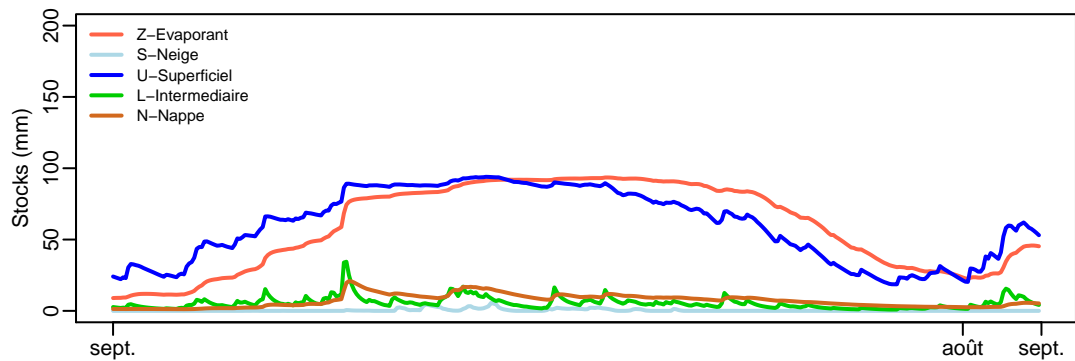

# k1930010 (17637.82 km<sup>2</sup>) – année 2004–2005

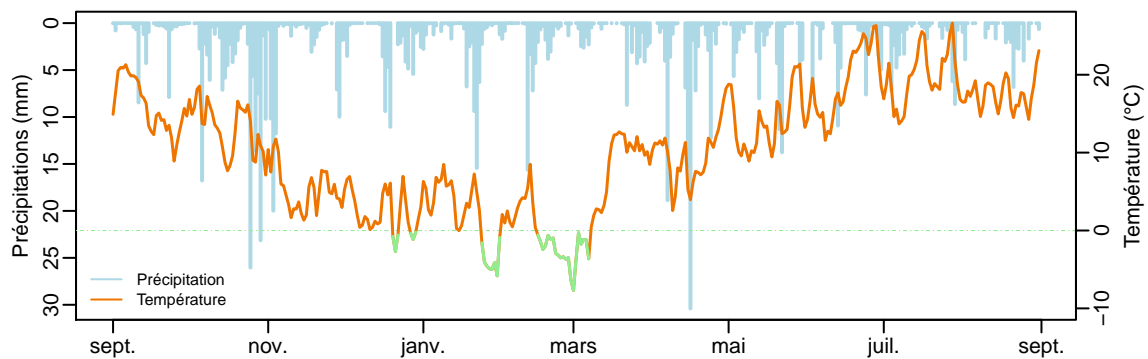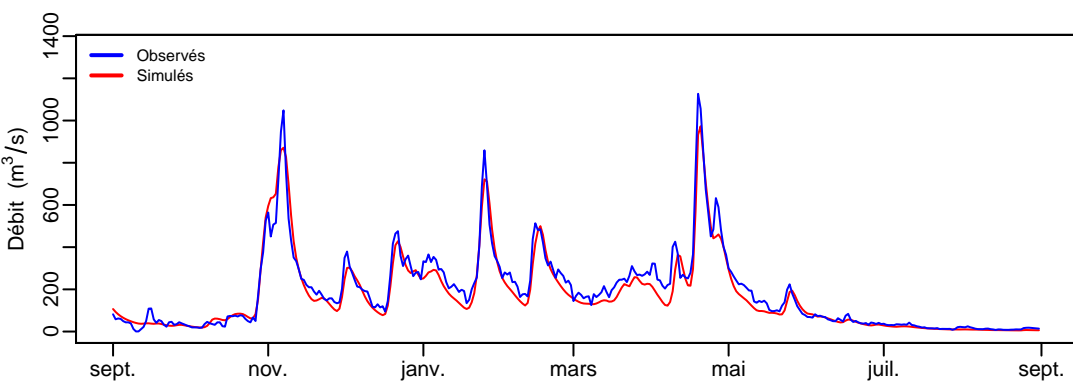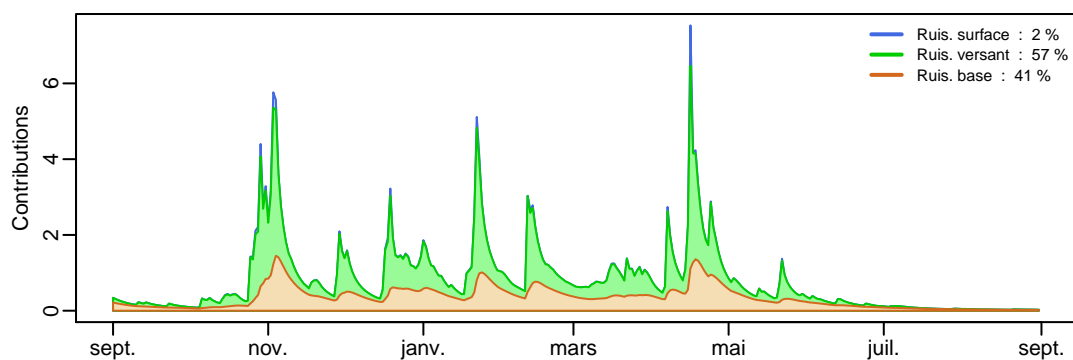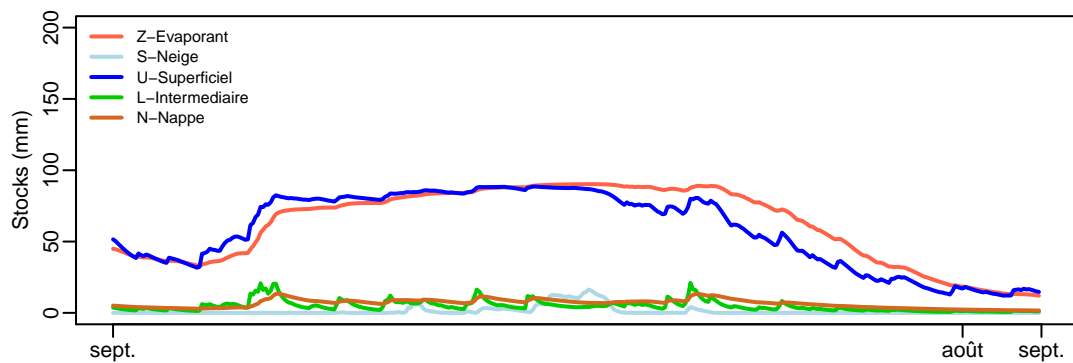

# k1930010 (17637.82 km<sup>2</sup>) – année 2005–2006

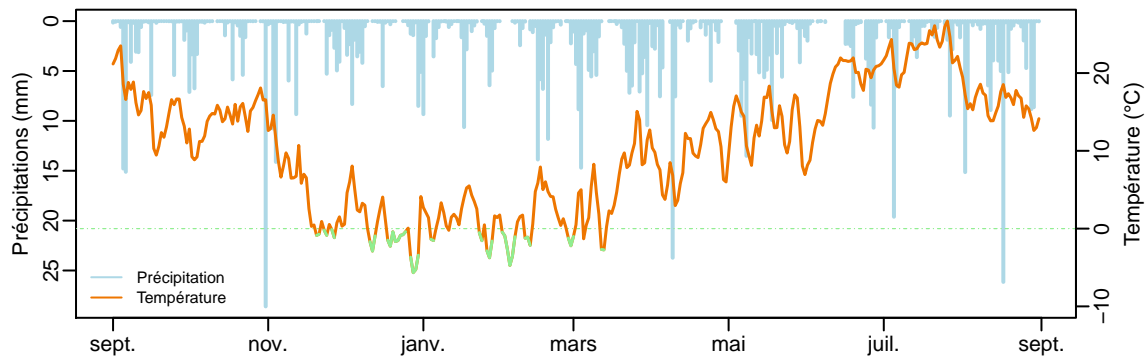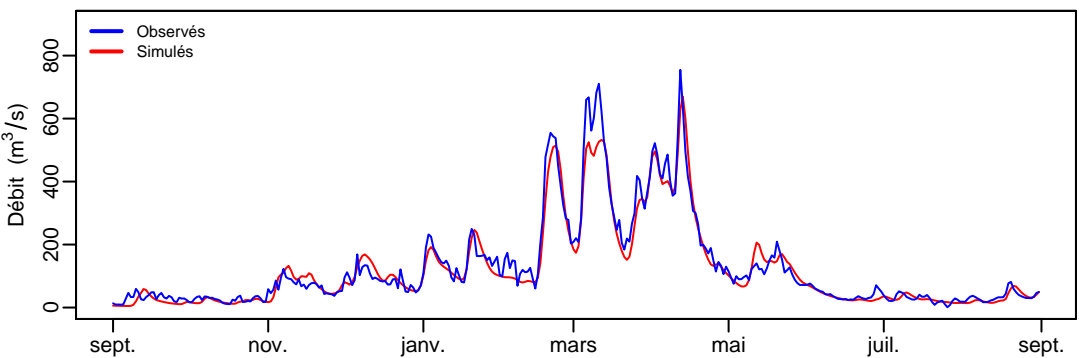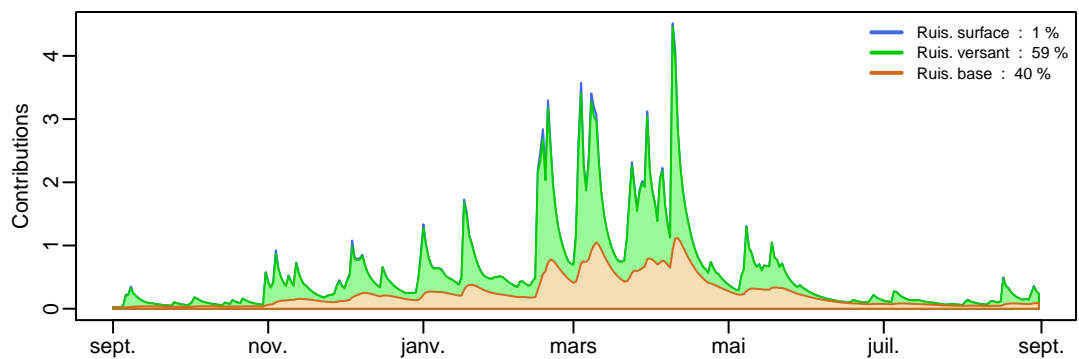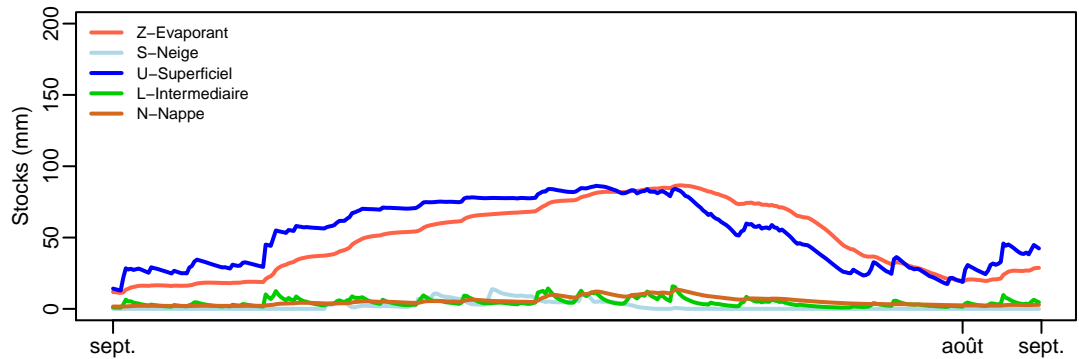

# k1930010 (17637.82 km<sup>2</sup>) – année 2006–2007

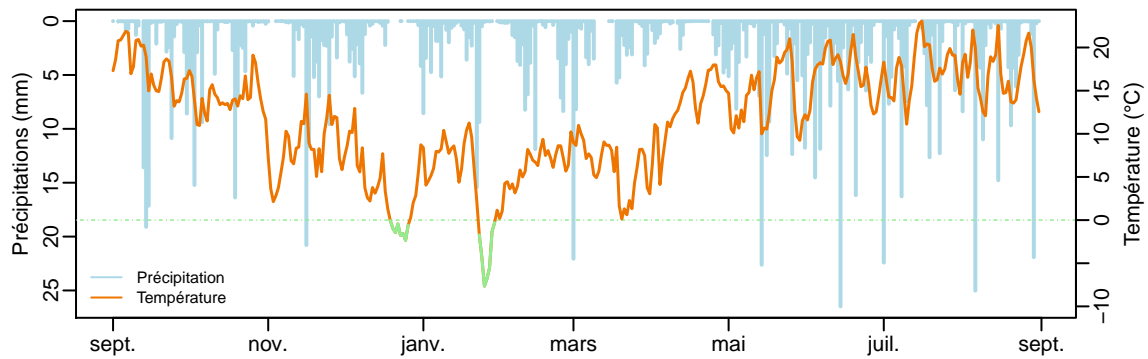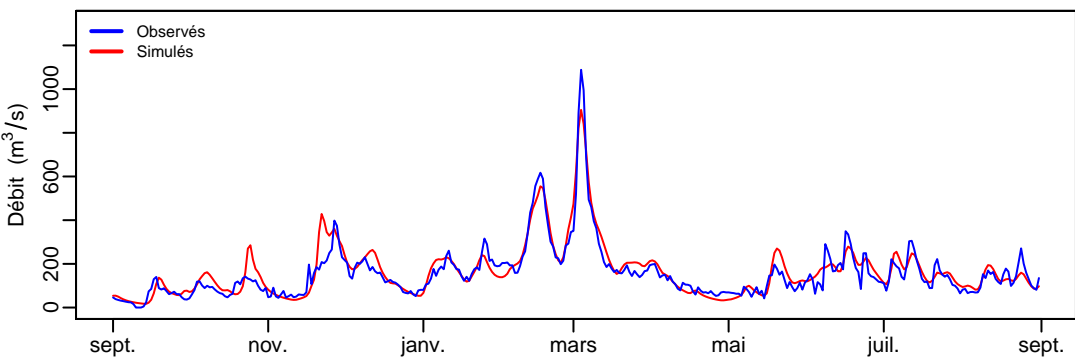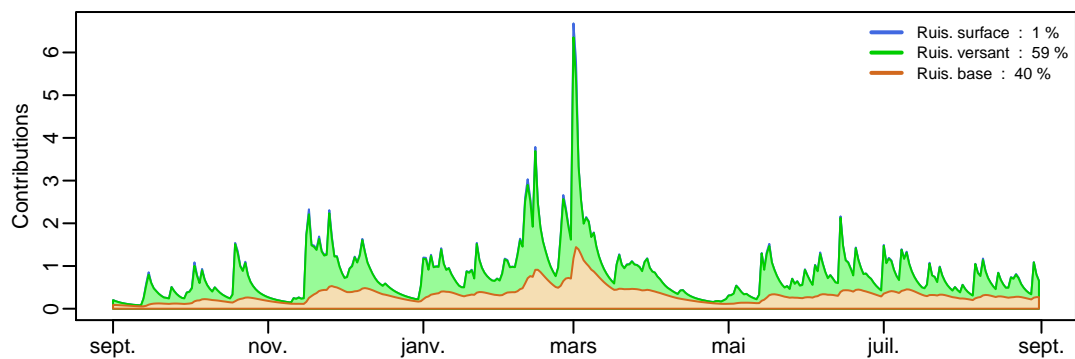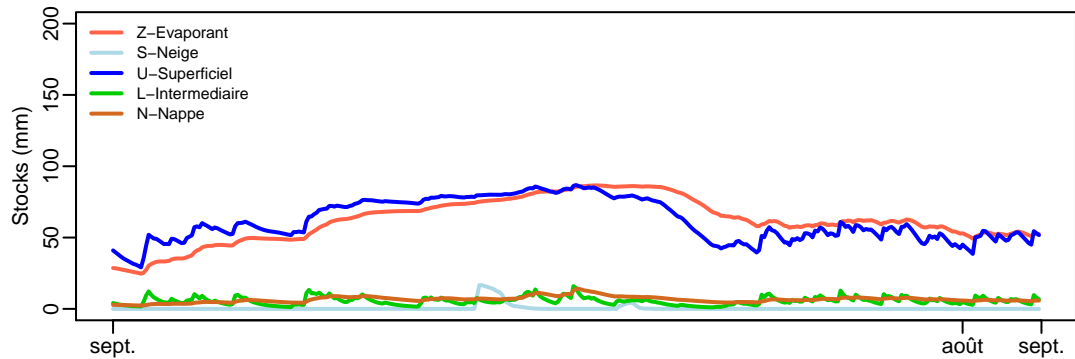

# k1930010 (17637.82 km<sup>2</sup>) – année 2007–2008

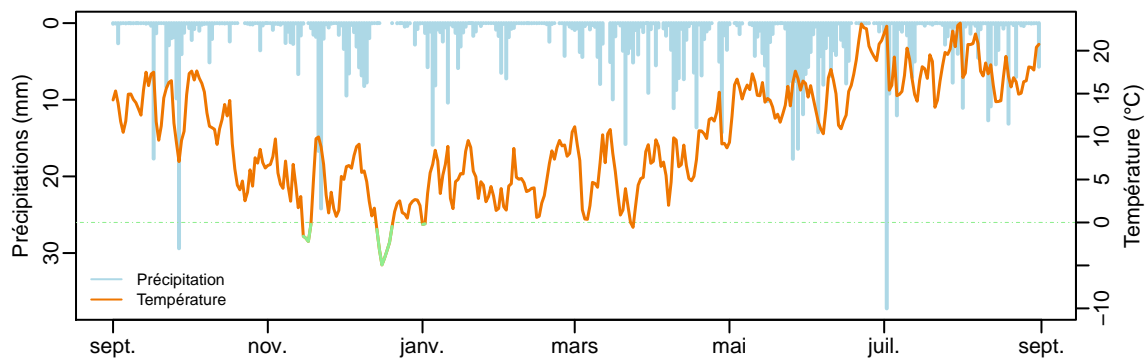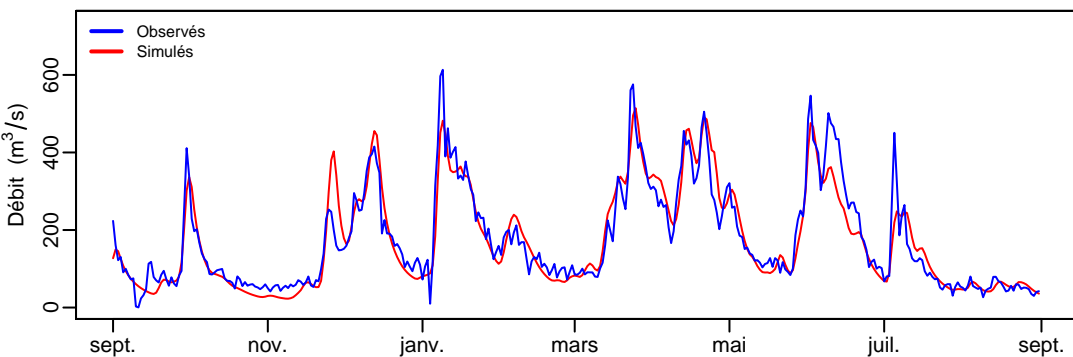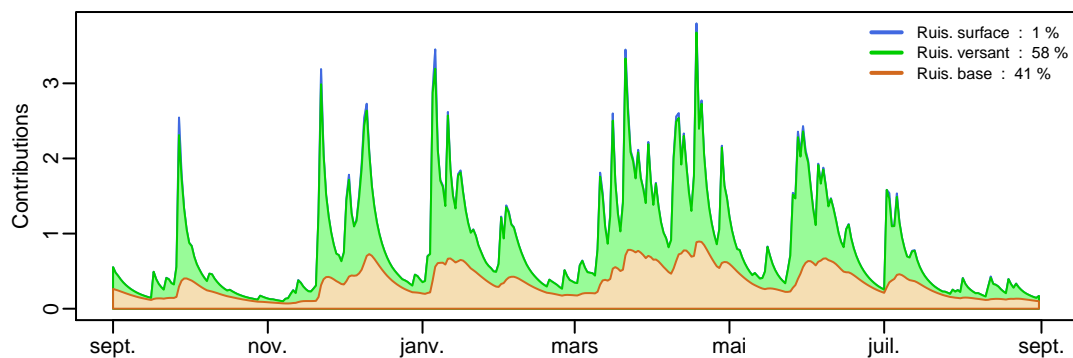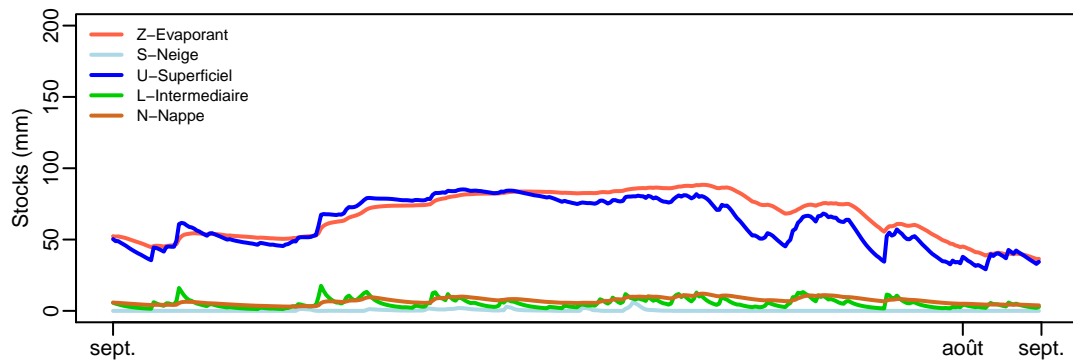

# k1930010 (17637.82 km<sup>2</sup>) – année 2008–2009

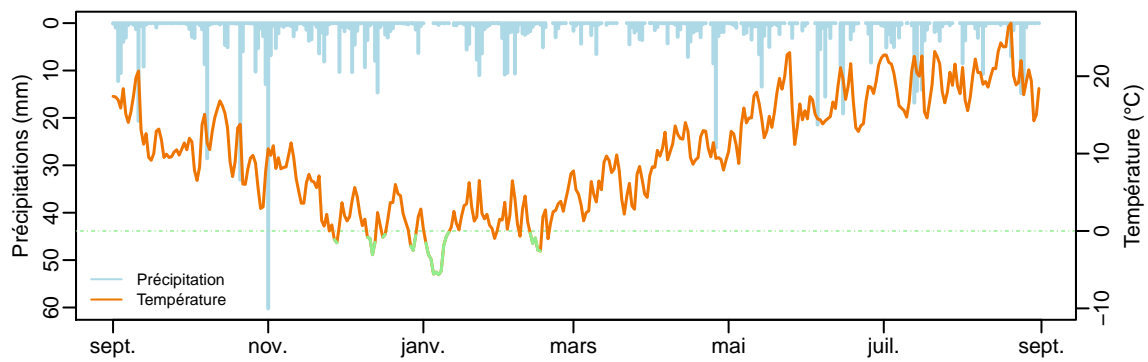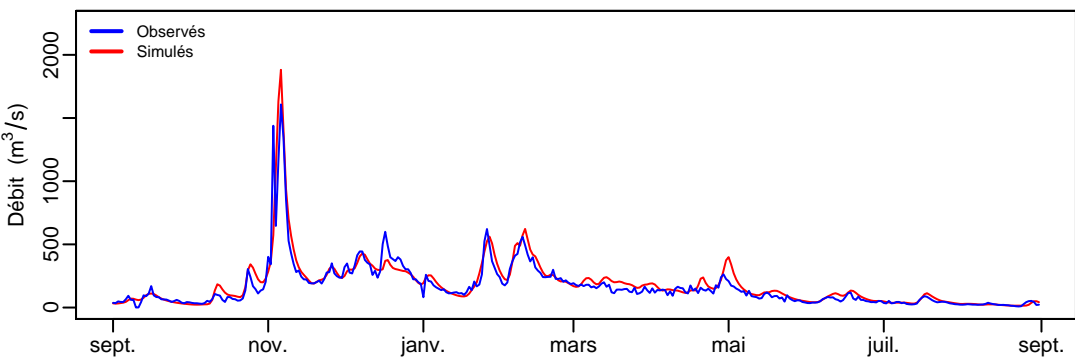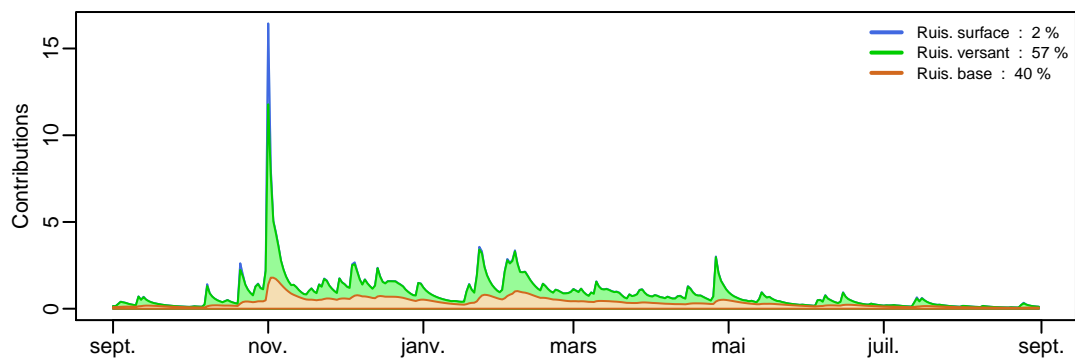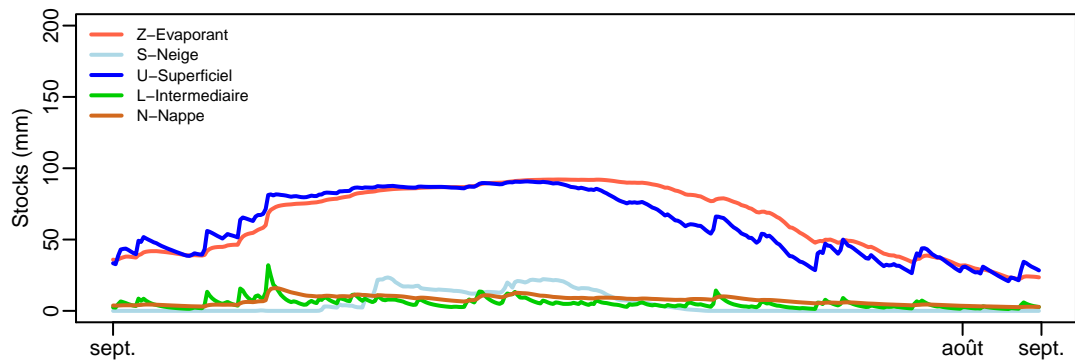



# k1930010 (17637.82 km²) – année 2009–2010

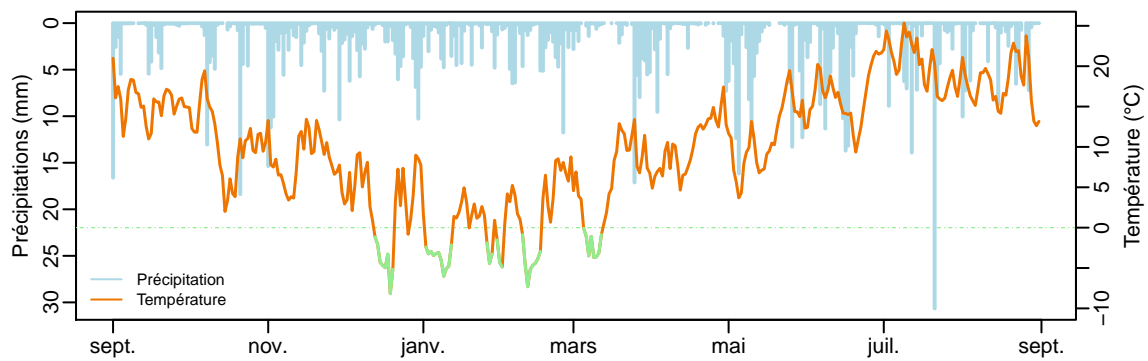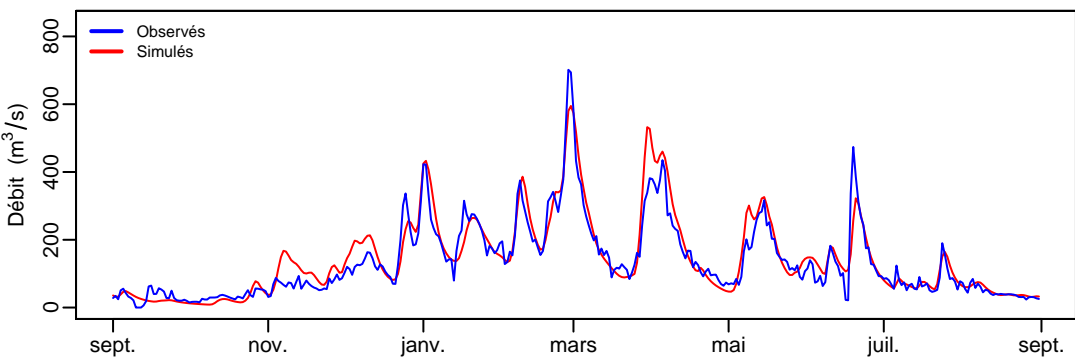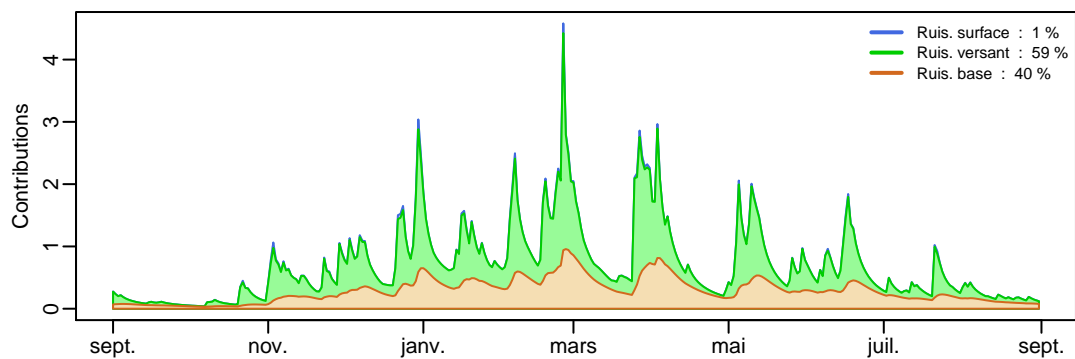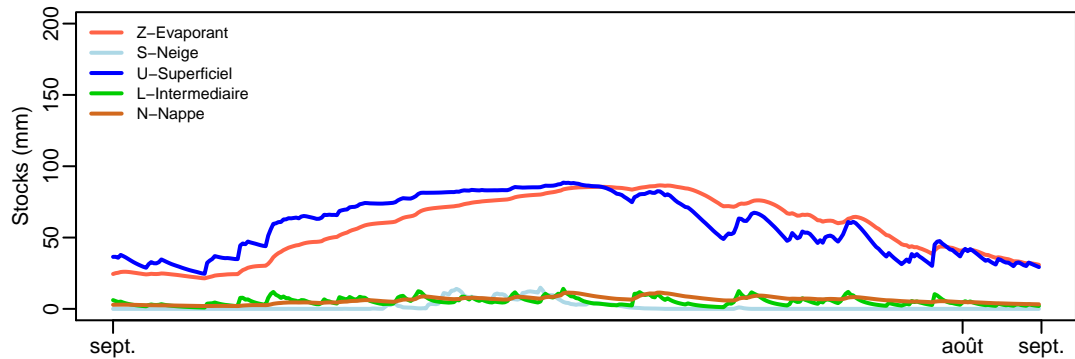

# k1930010 (17637.82 km<sup>2</sup>) – année 2010–2011

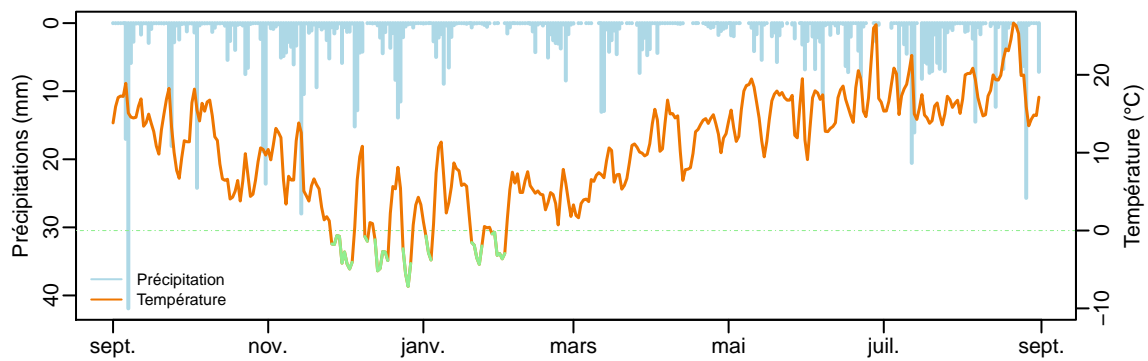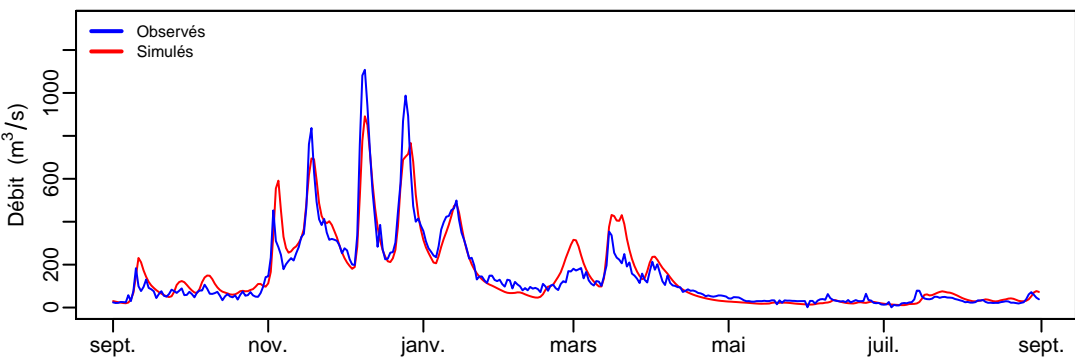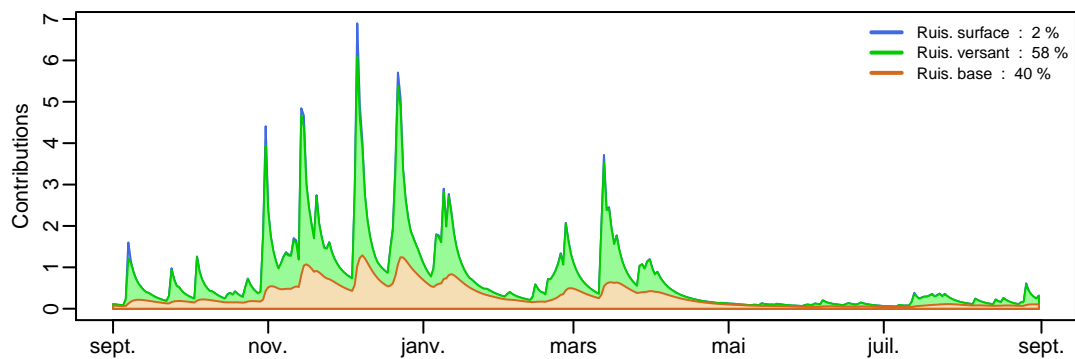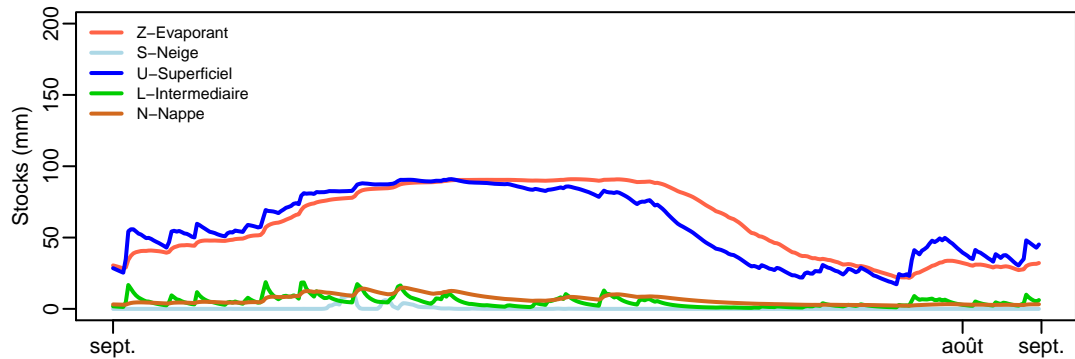

# k1930010 (17637.82 km<sup>2</sup>) – année 2011–2012

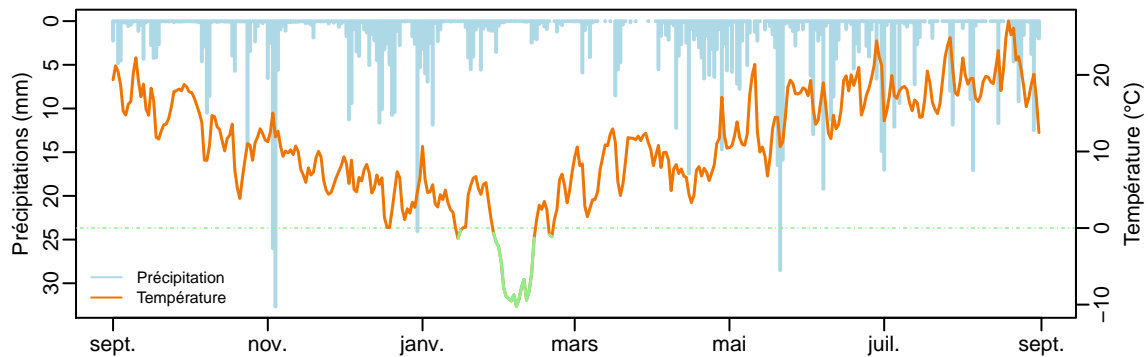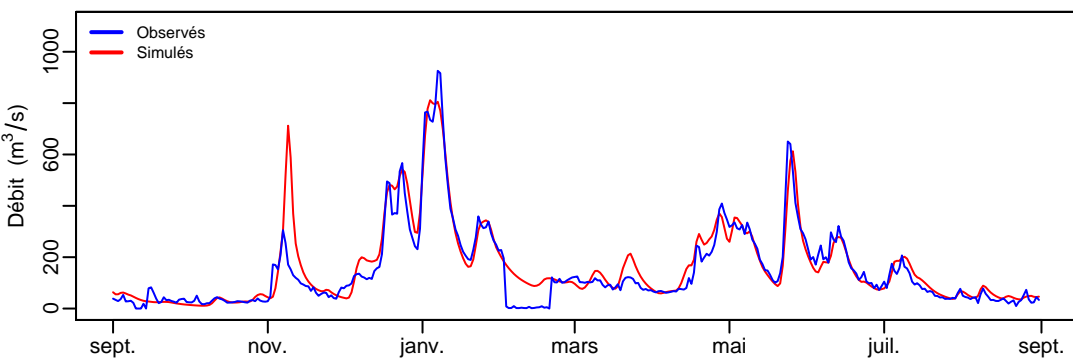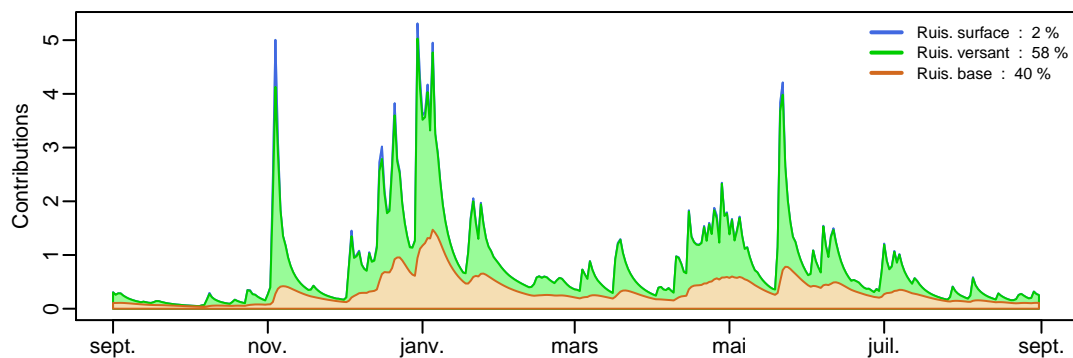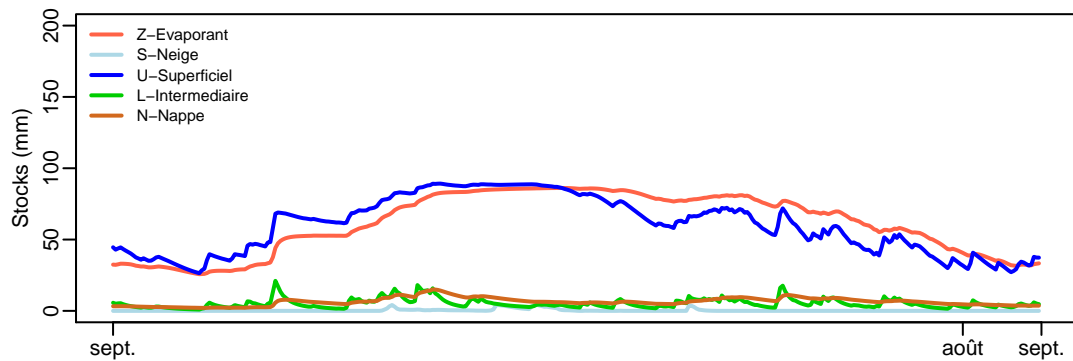

# k1943010 (201.55 km<sup>2</sup>) – année 1981–1982

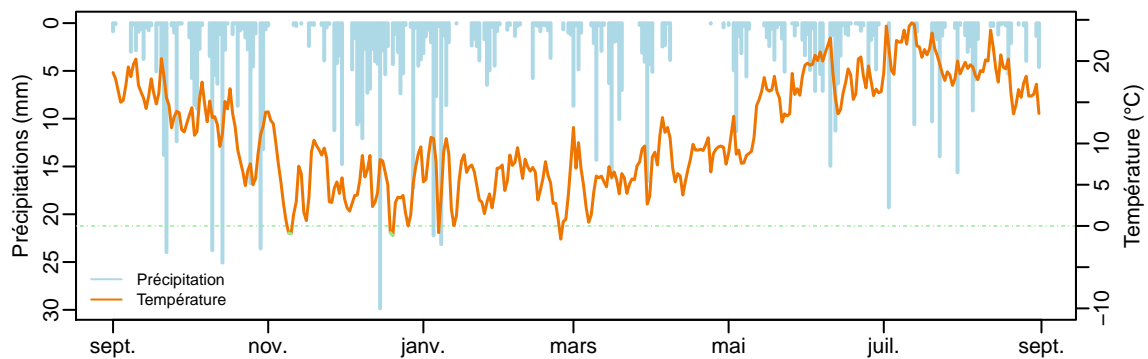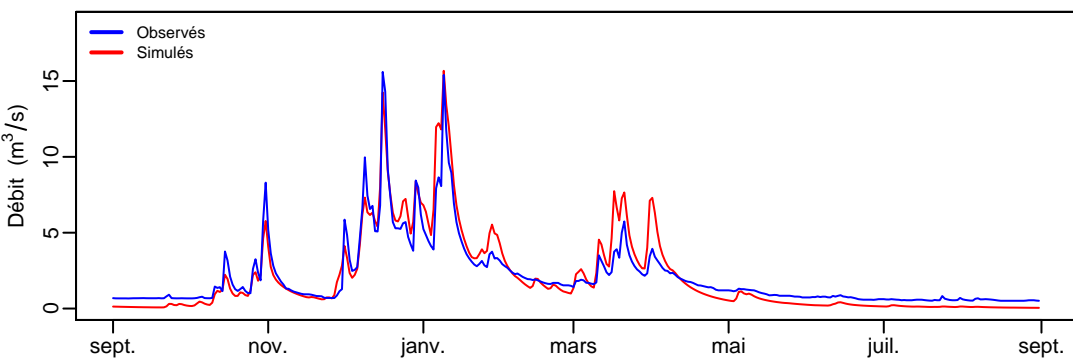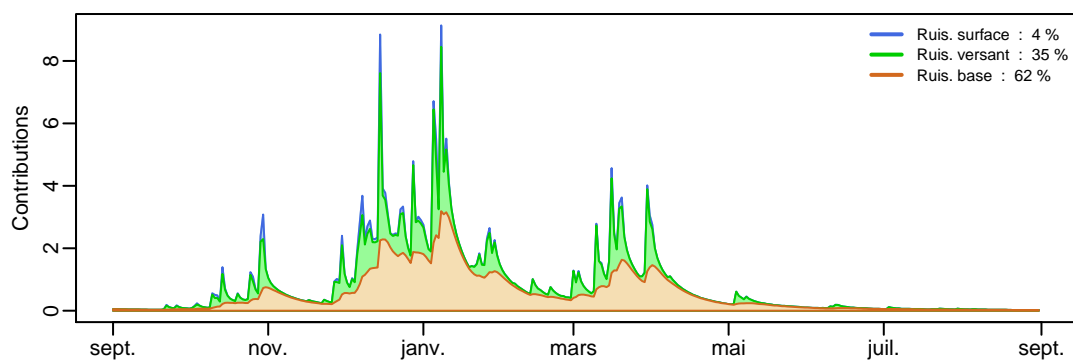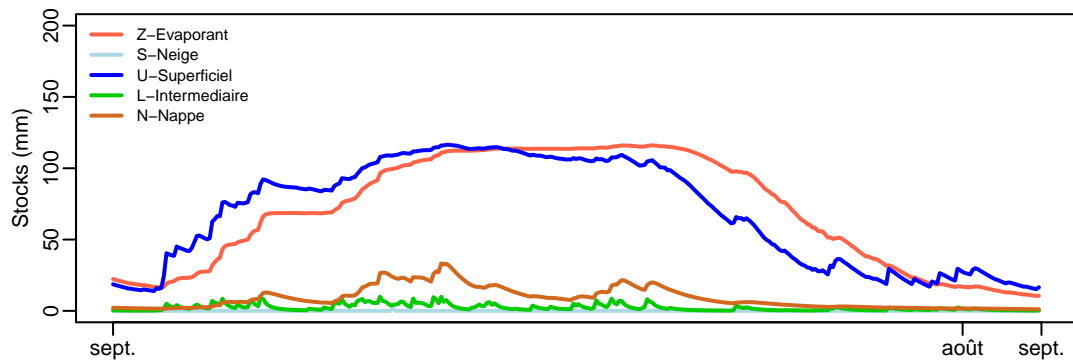

# k1943010 (201.55 km<sup>2</sup>) – année 1982–1983

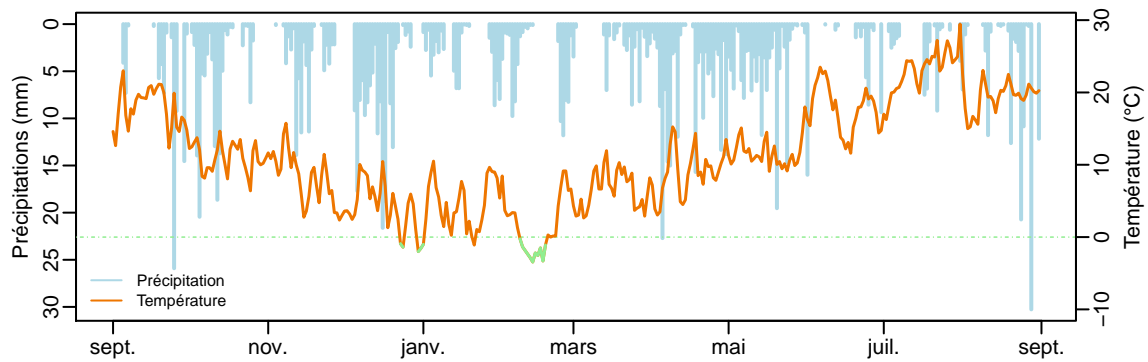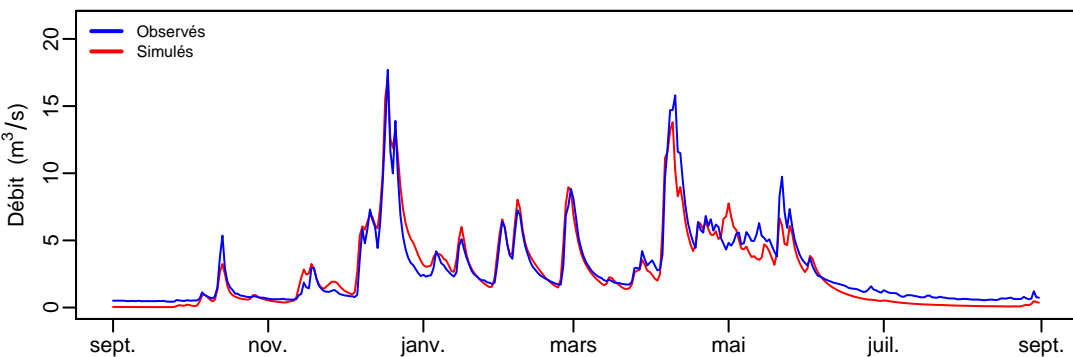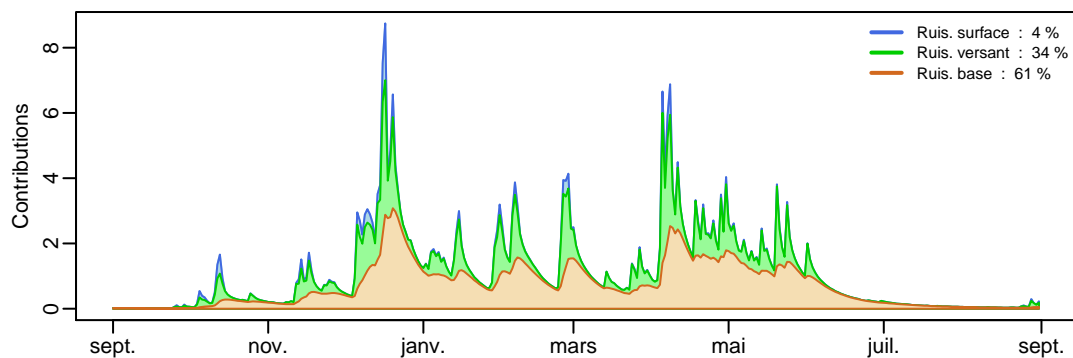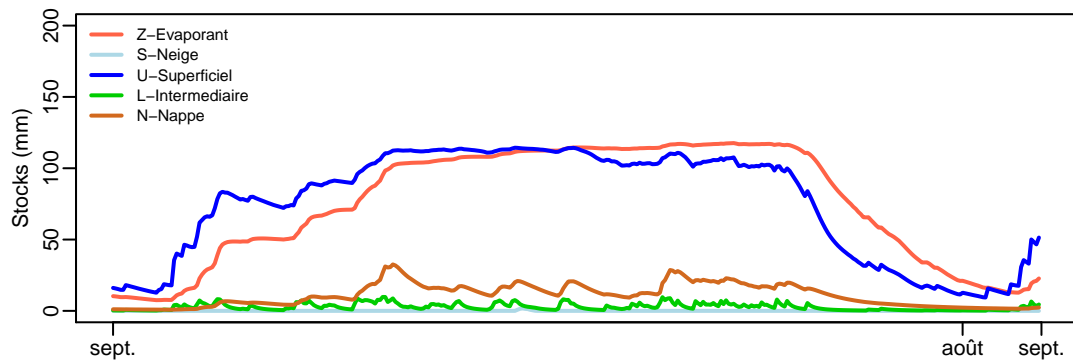

# k1943010 (201.55 km<sup>2</sup>) – année 1983–1984

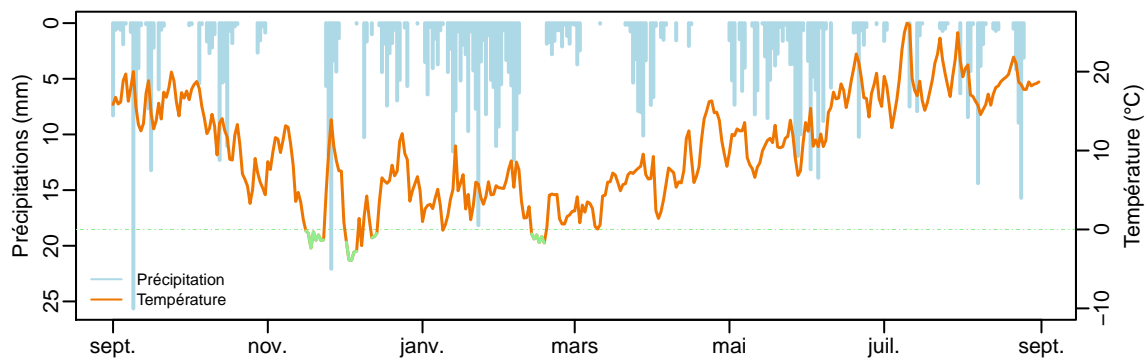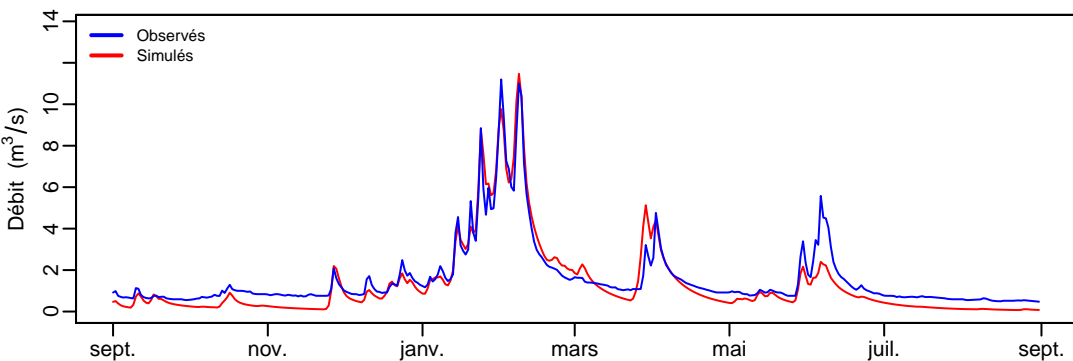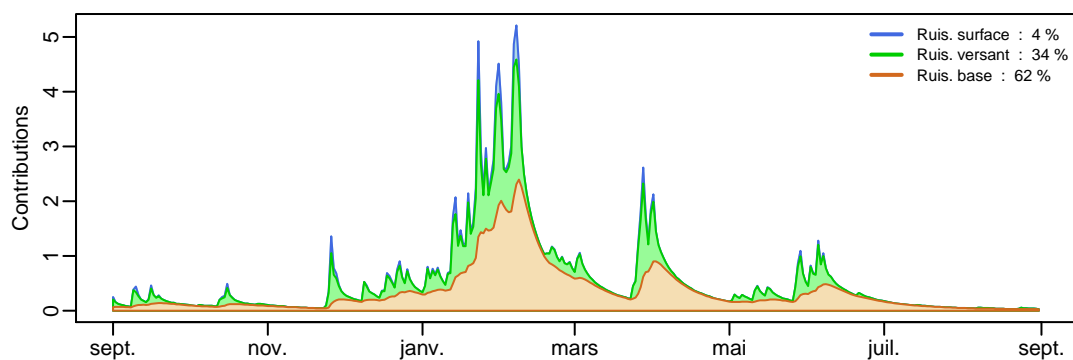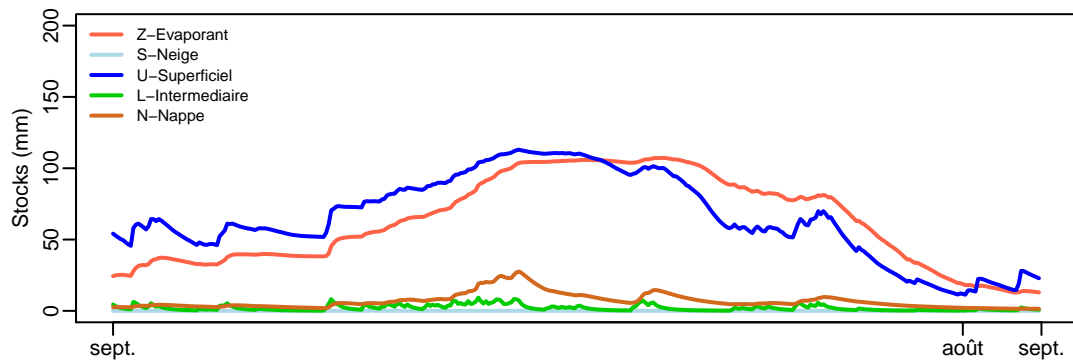

# k1943010 (201.55 km<sup>2</sup>) – année 1984–1985

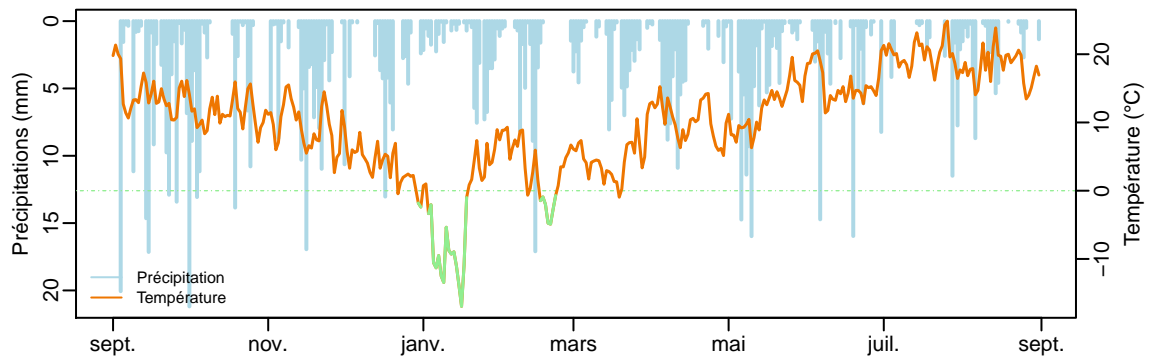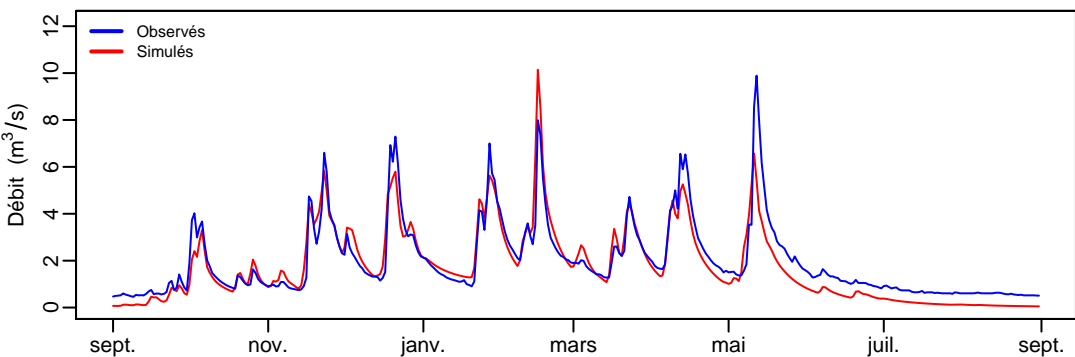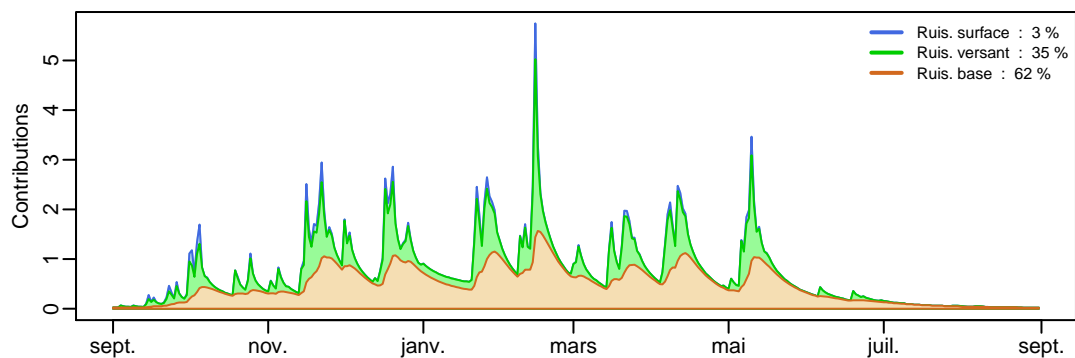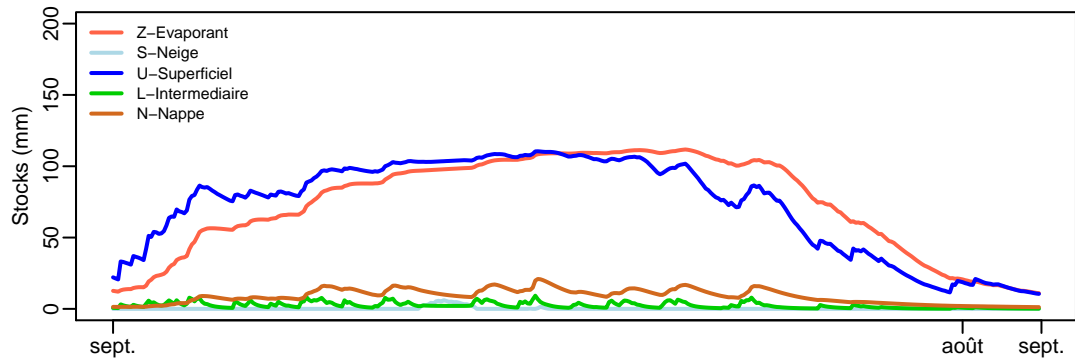

# k1943010 (201.55 km<sup>2</sup>) – année 1985–1986

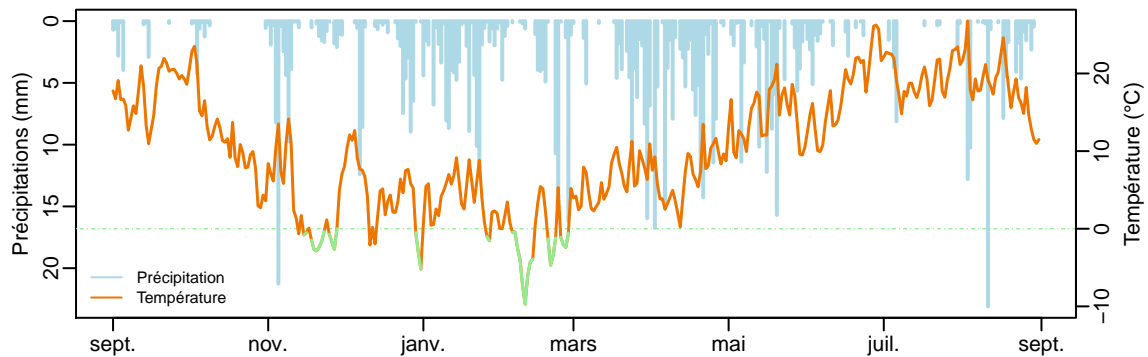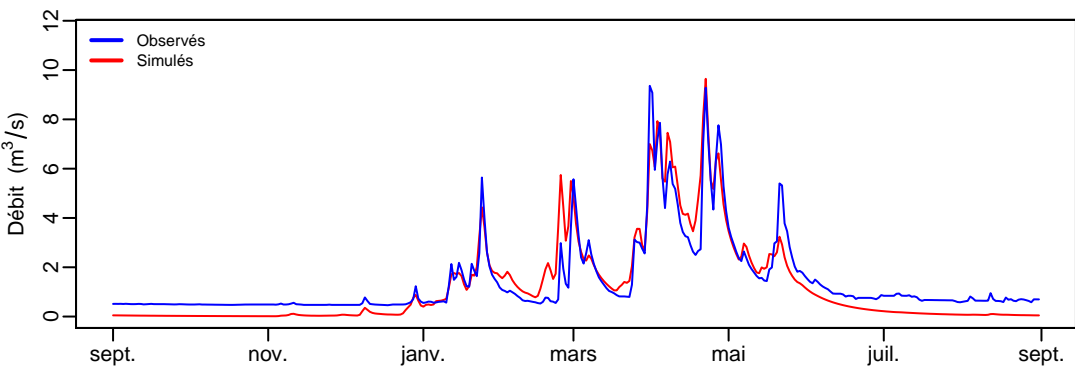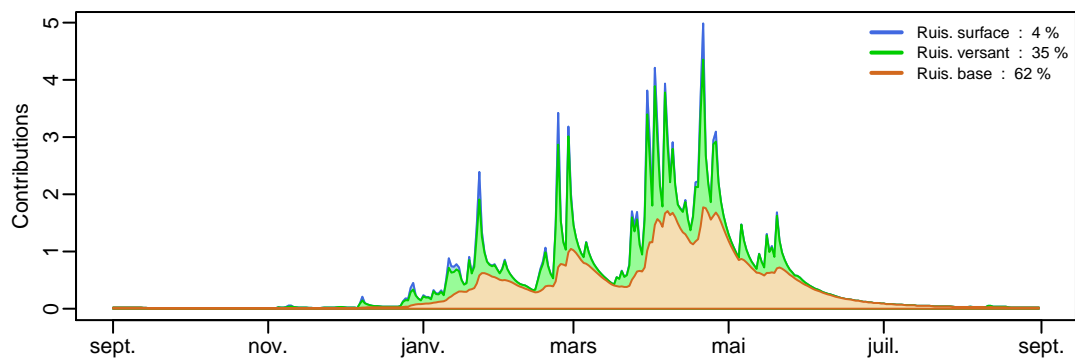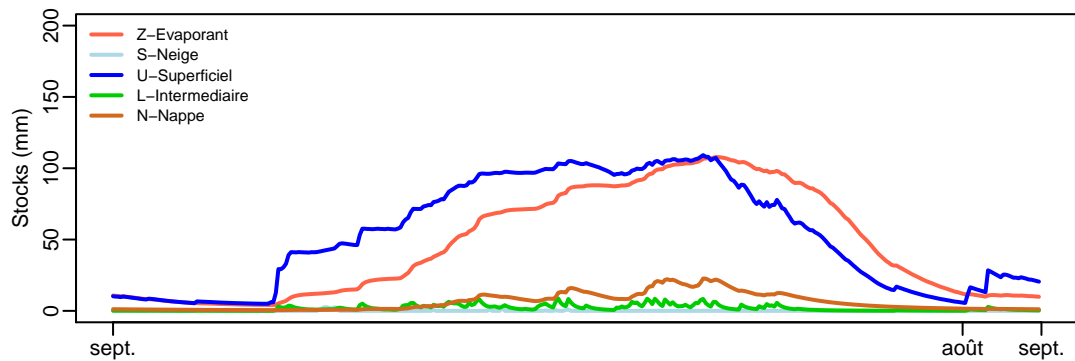



# k1943010 (201.55 km<sup>2</sup>) – année 1986–1987

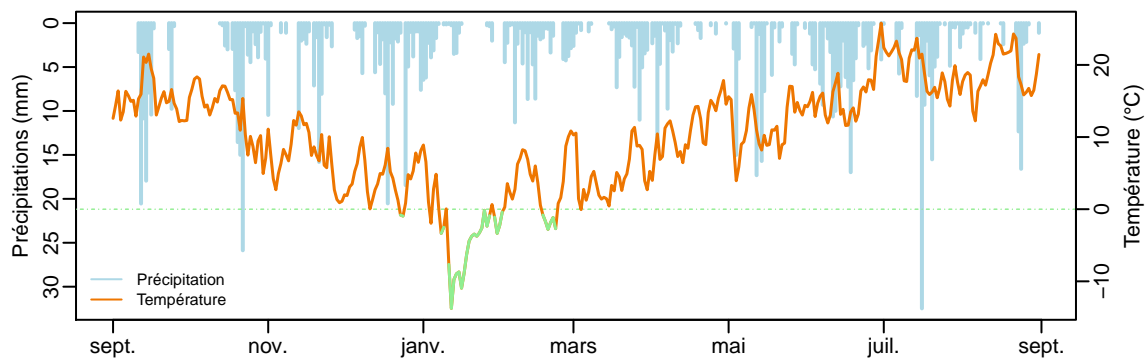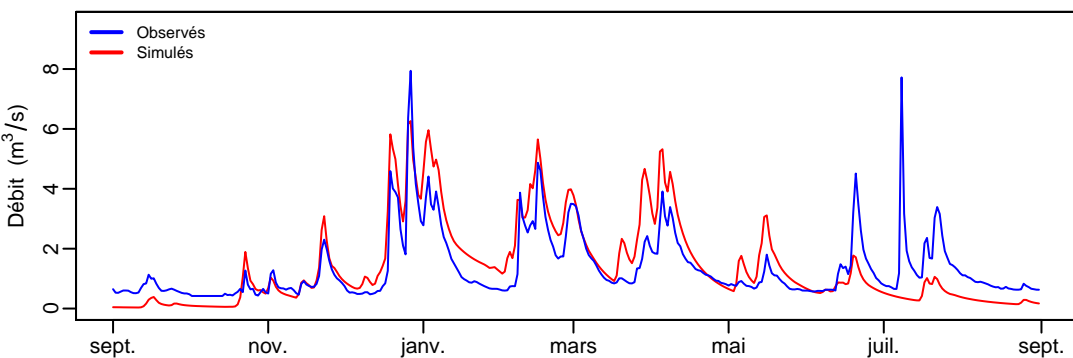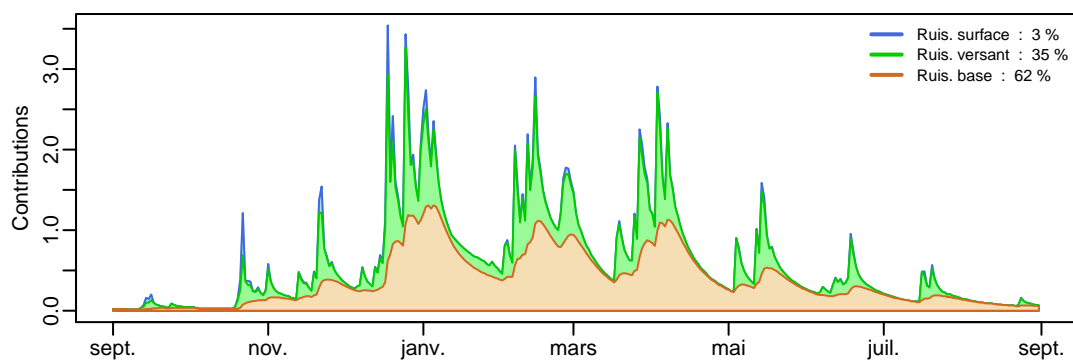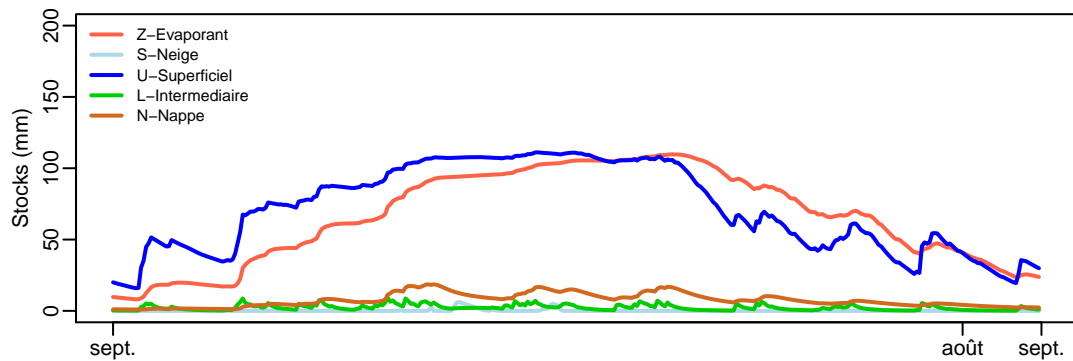

# k1943010 (201.55 km<sup>2</sup>) – année 1987–1988

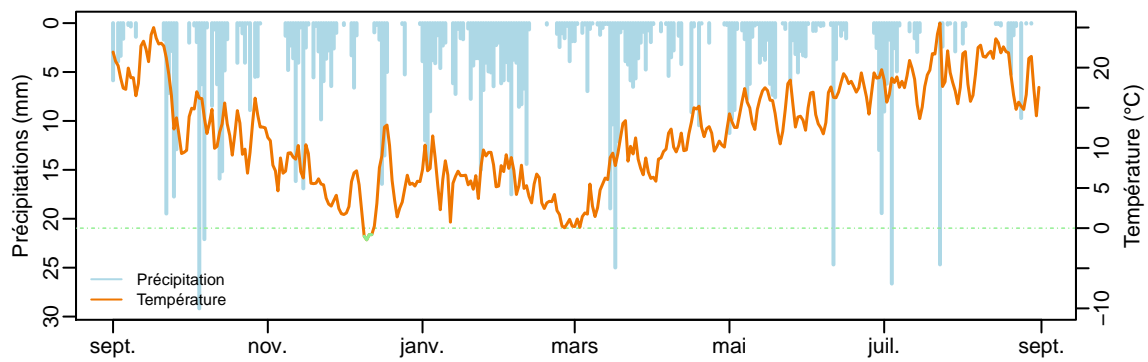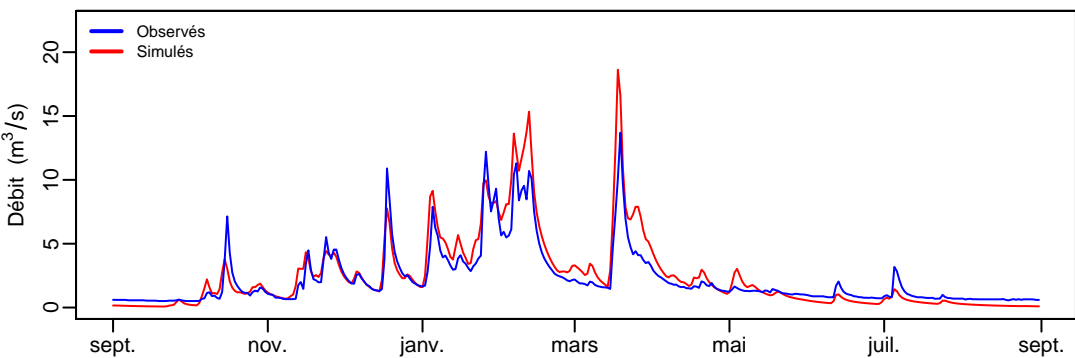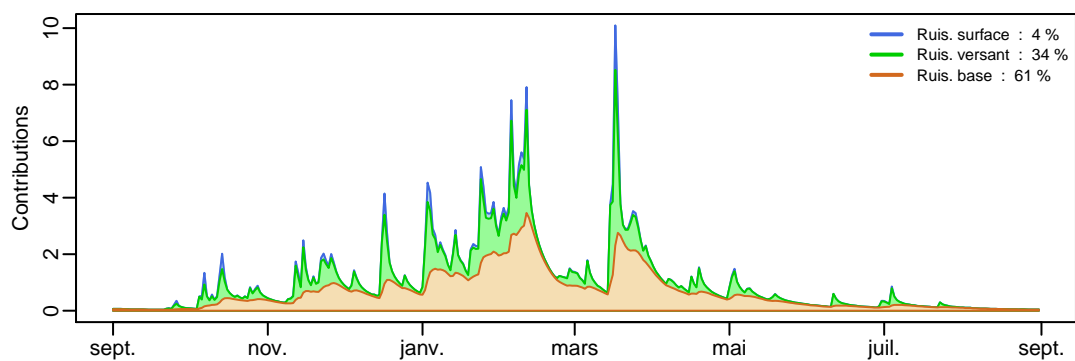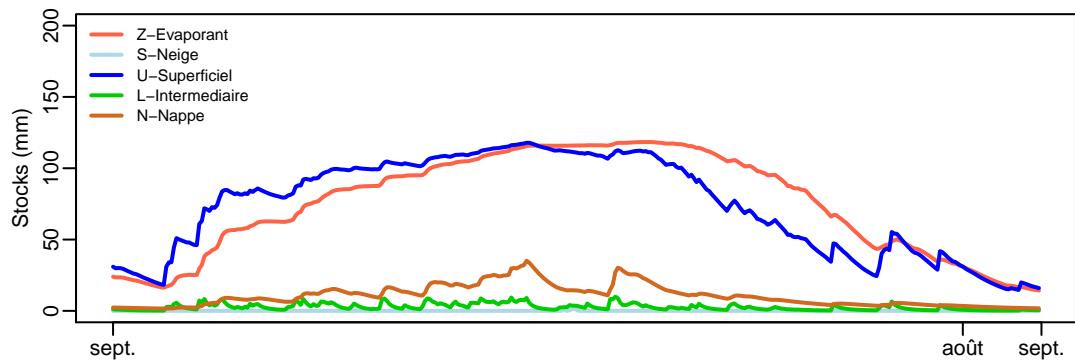

# k1943010 (201.55 km<sup>2</sup>) – année 1988–1989

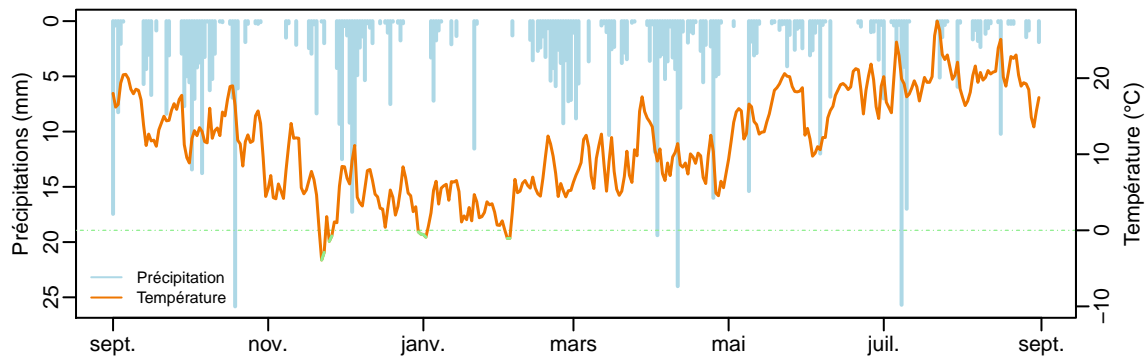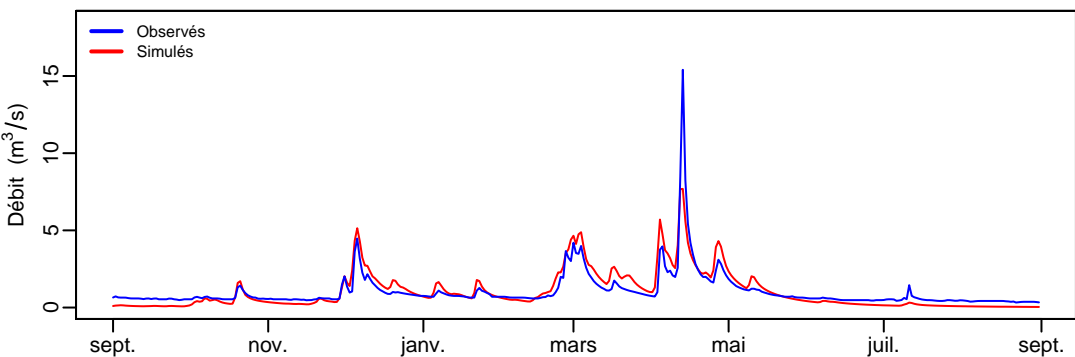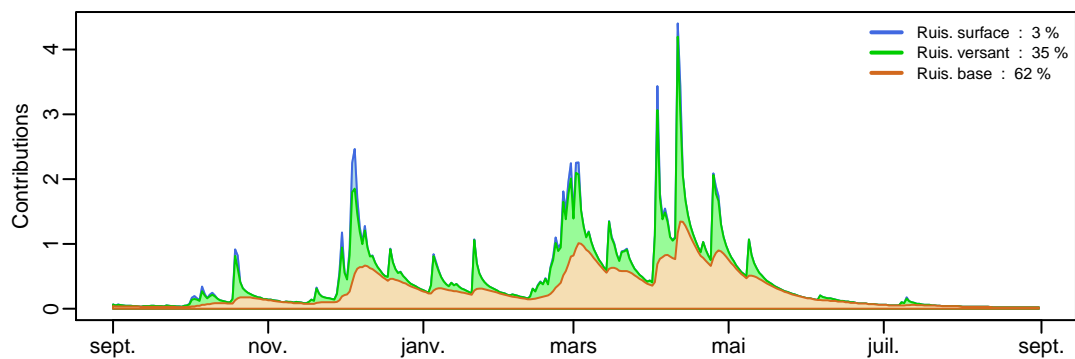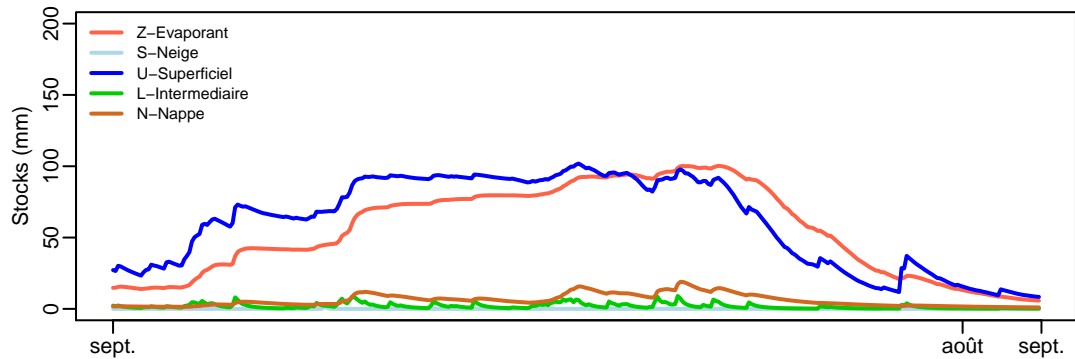

# k1943010 (201.55 km<sup>2</sup>) – année 1989–1990

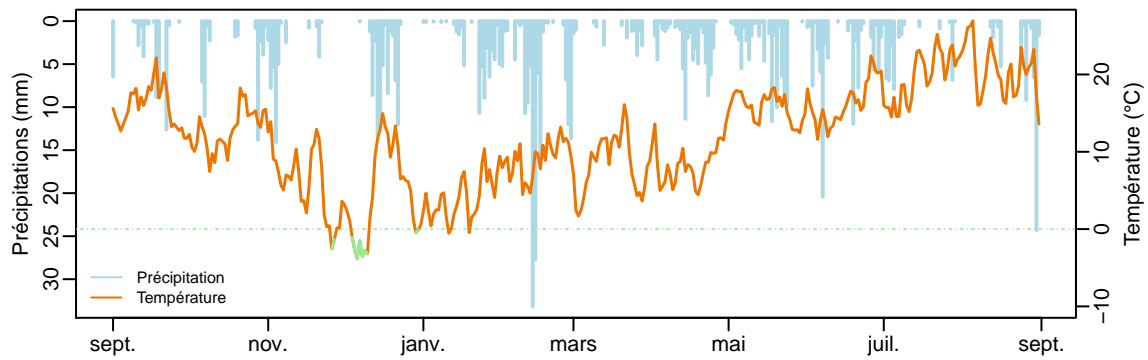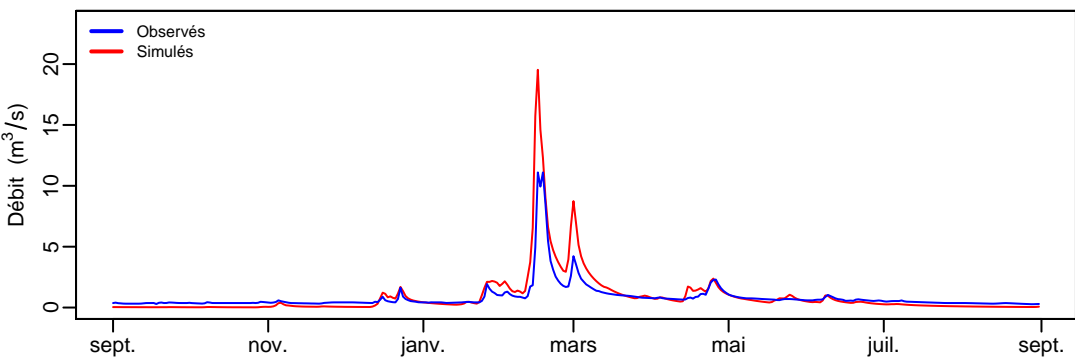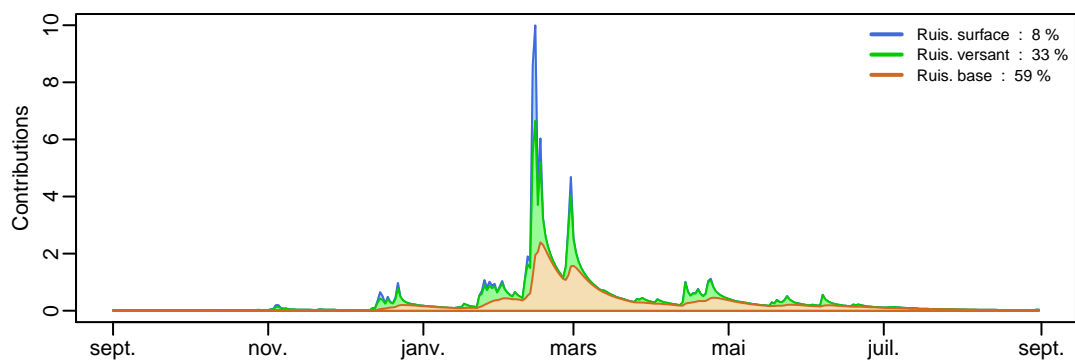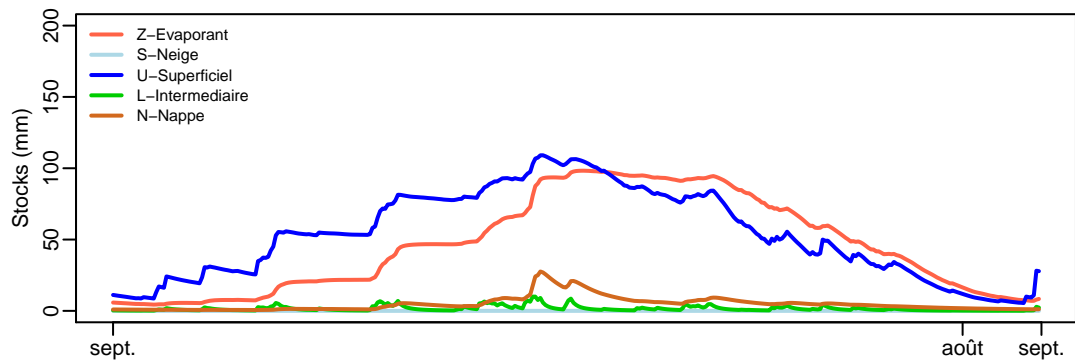

# k1943010 (201.55 km<sup>2</sup>) – année 1990–1991

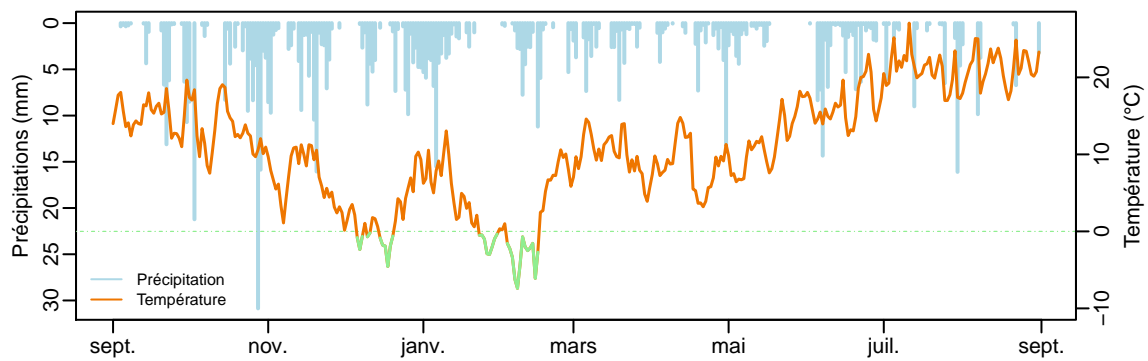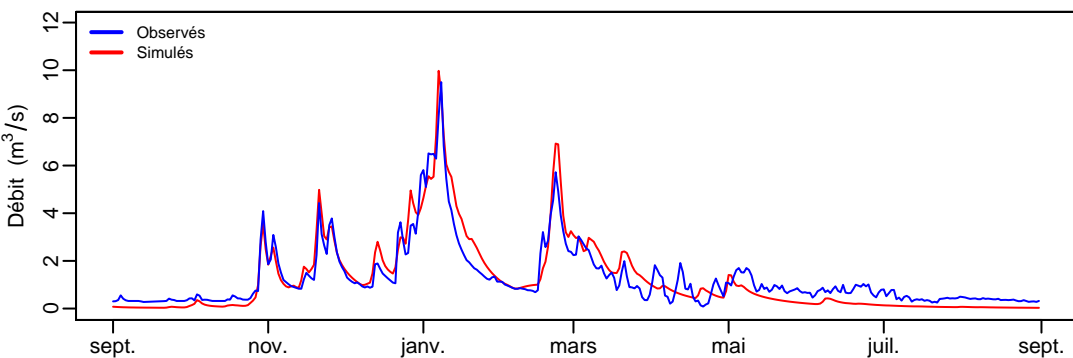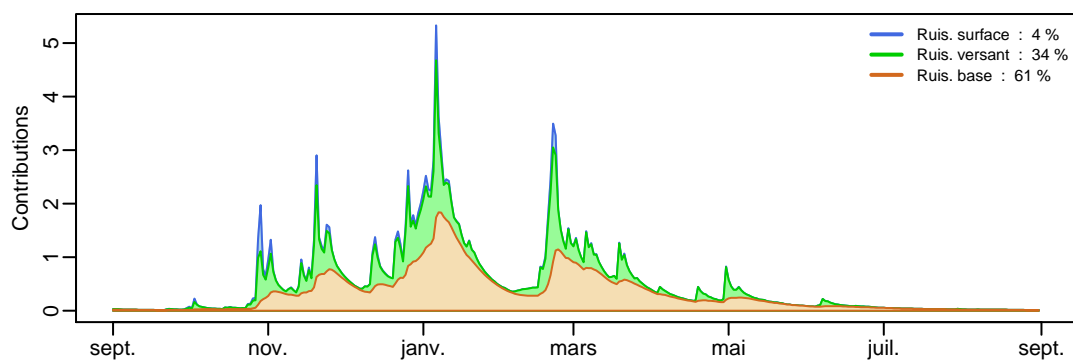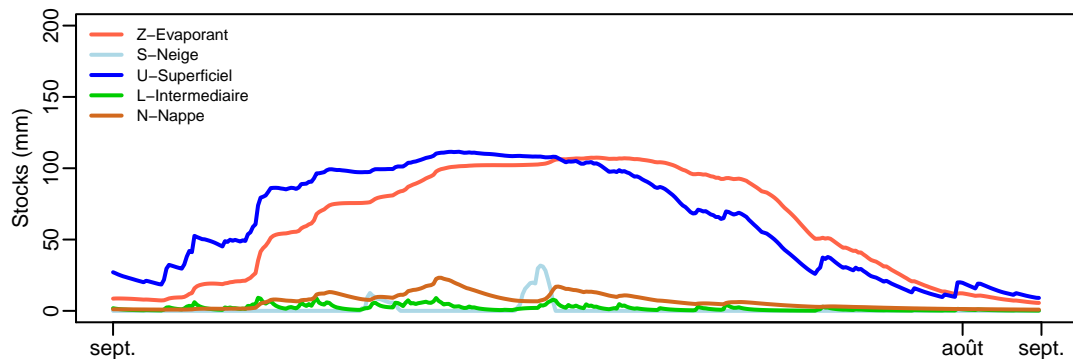

# k1943010 (201.55 km<sup>2</sup>) – année 1991–1992

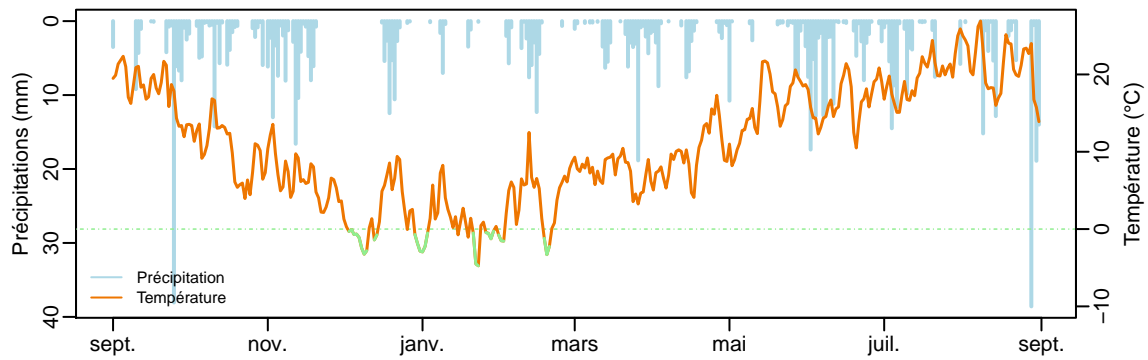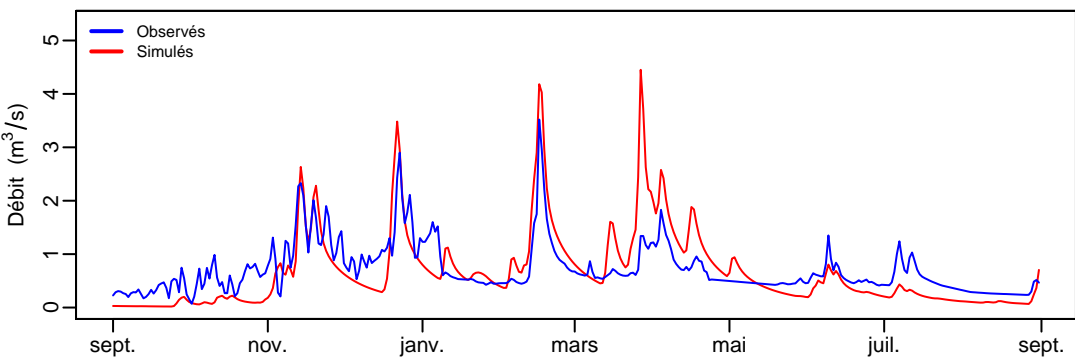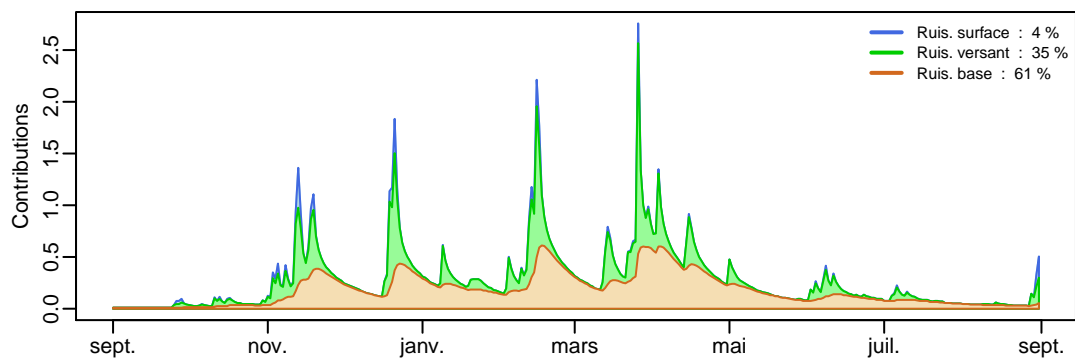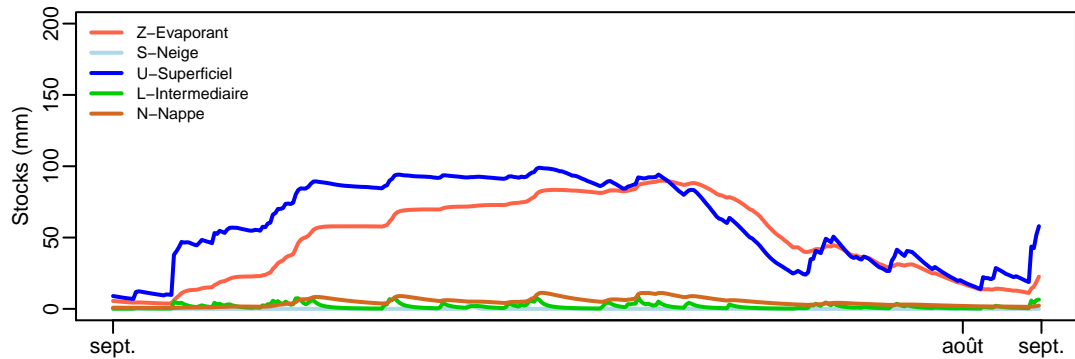

# k1943010 (201.55 km<sup>2</sup>) – année 1992–1993

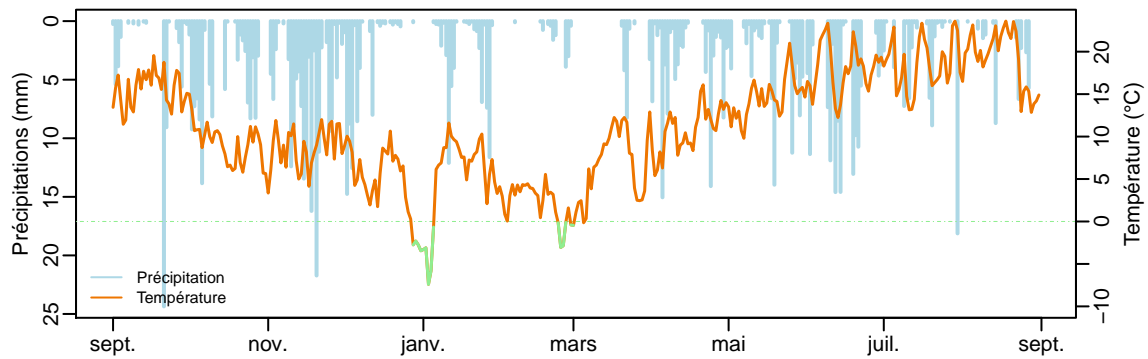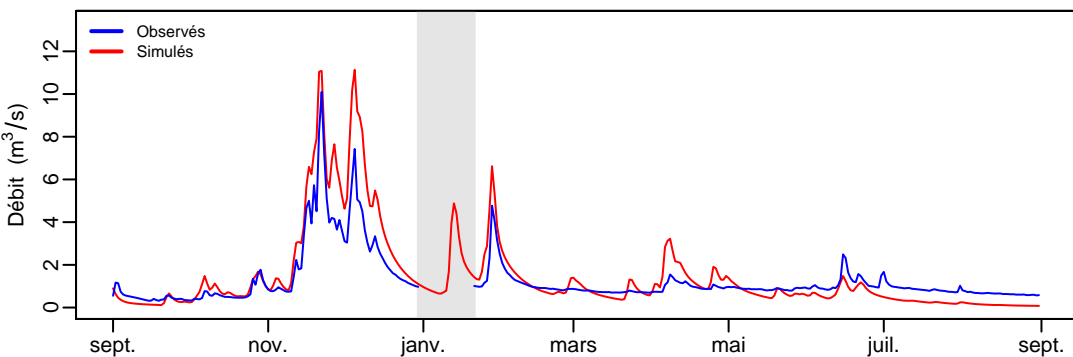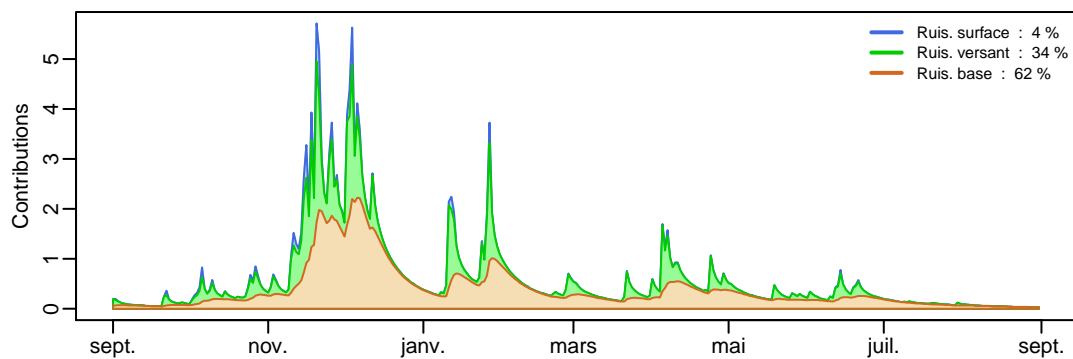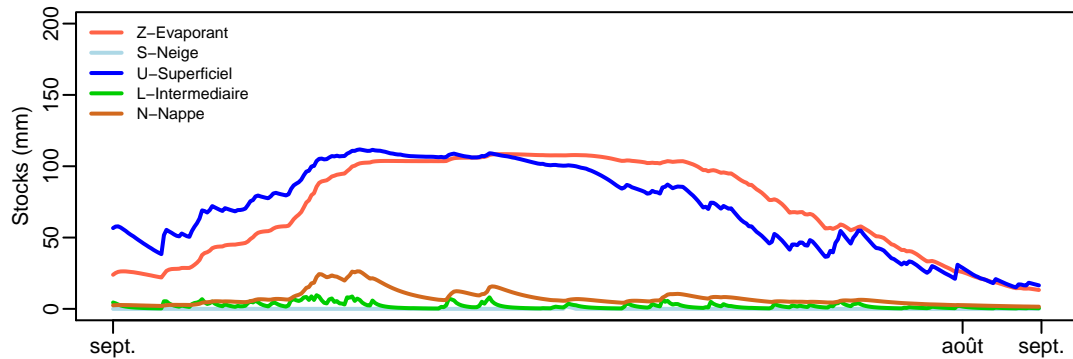

# k1943010 (201.55 km<sup>2</sup>) – année 1993–1994

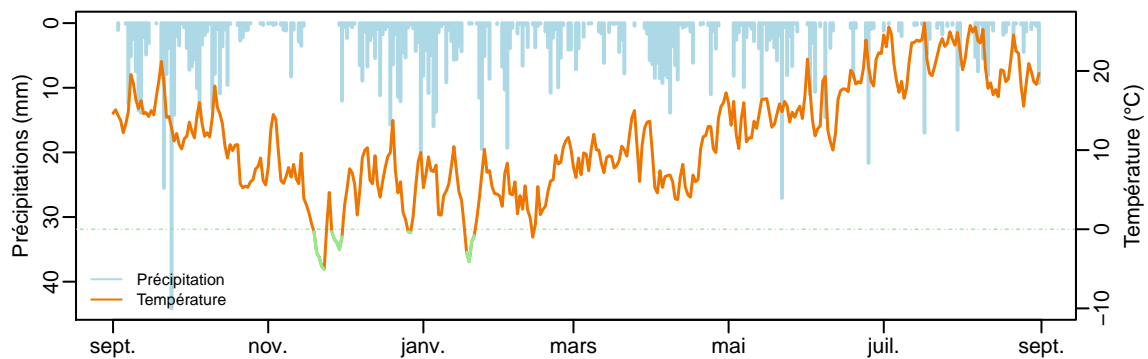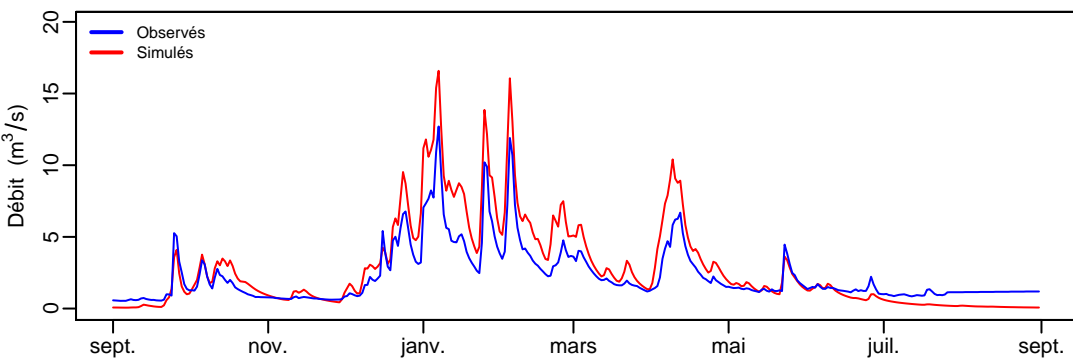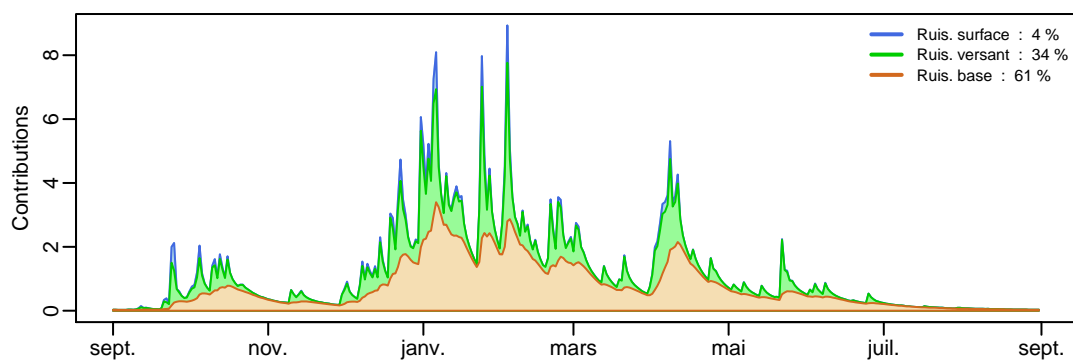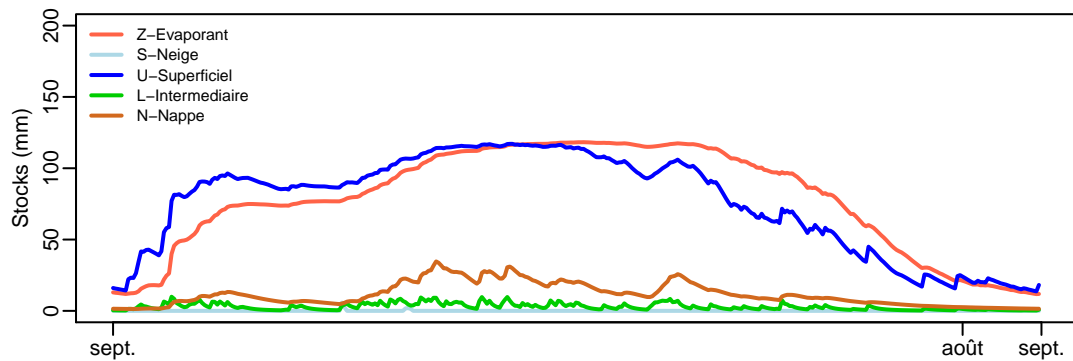



# k1943010 (201.55 km<sup>2</sup>) – année 1994–1995

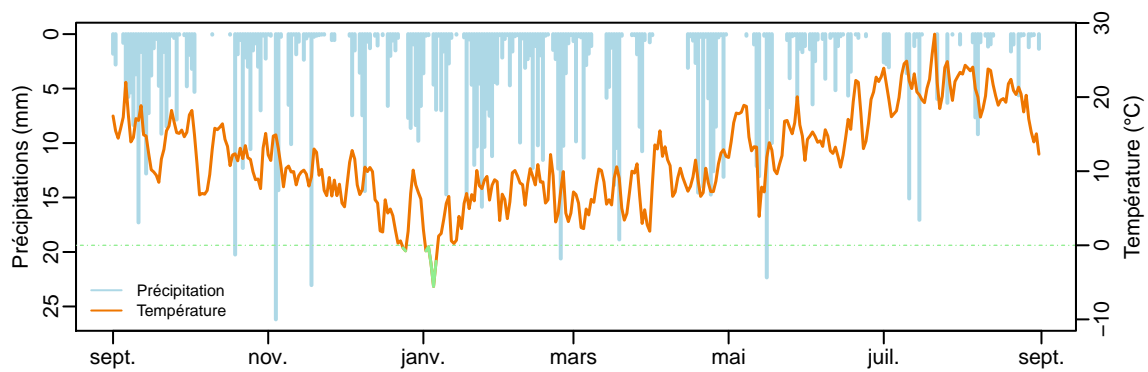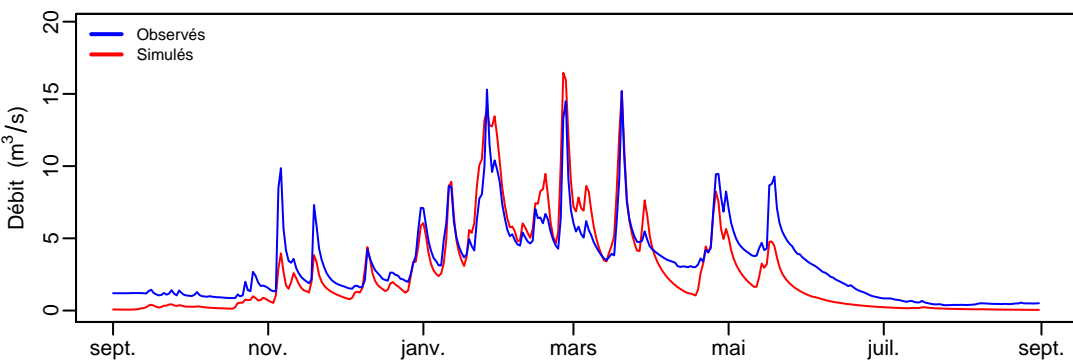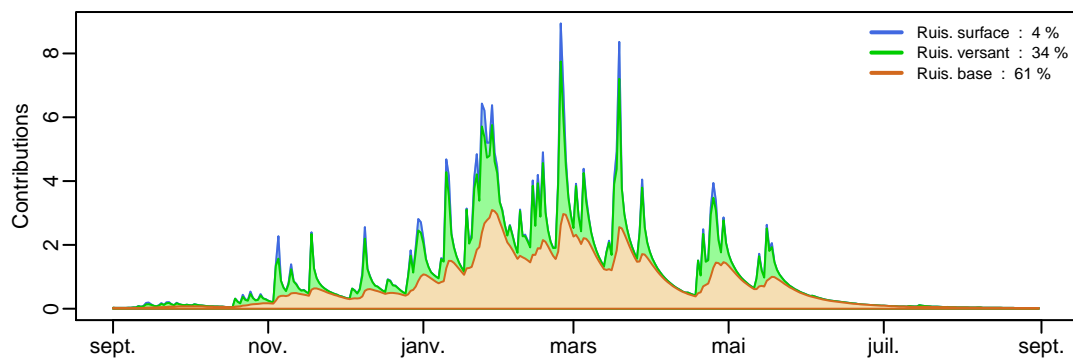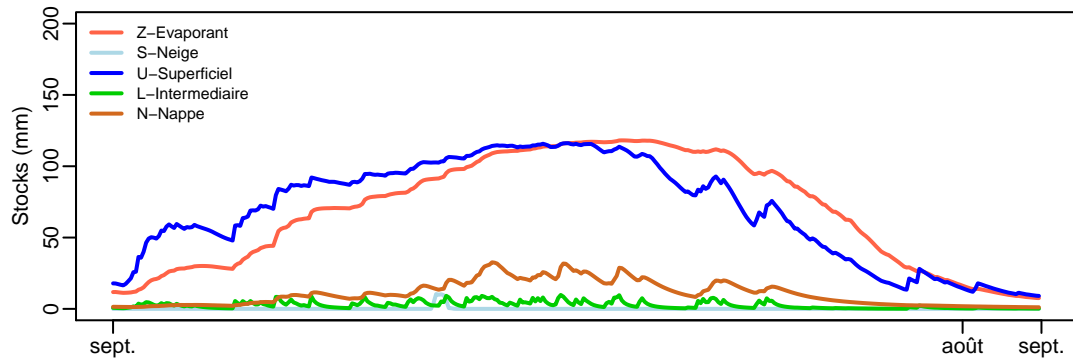

# k1943010 (201.55 km<sup>2</sup>) – année 1995–1996

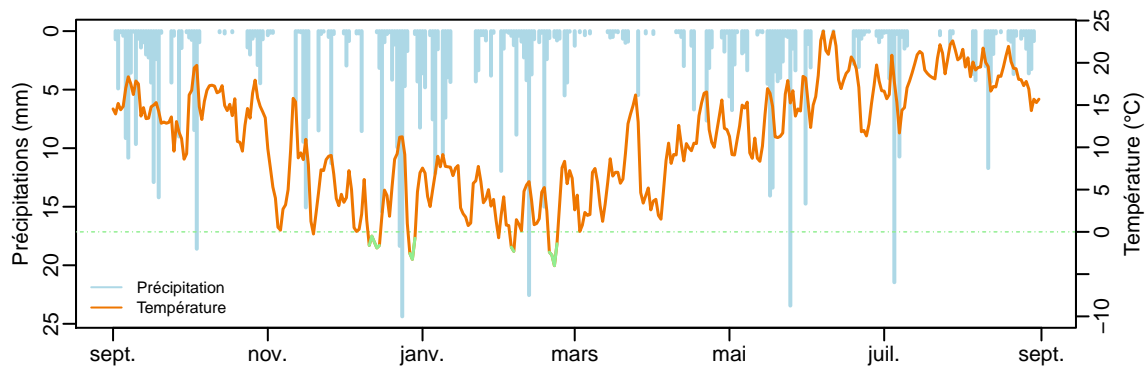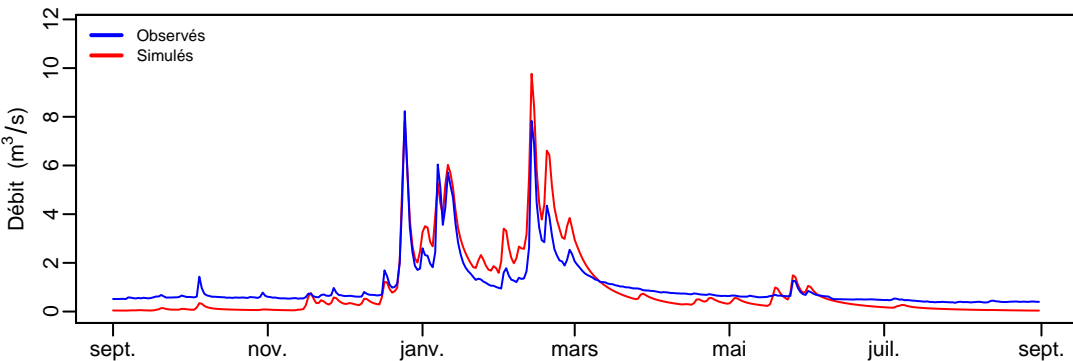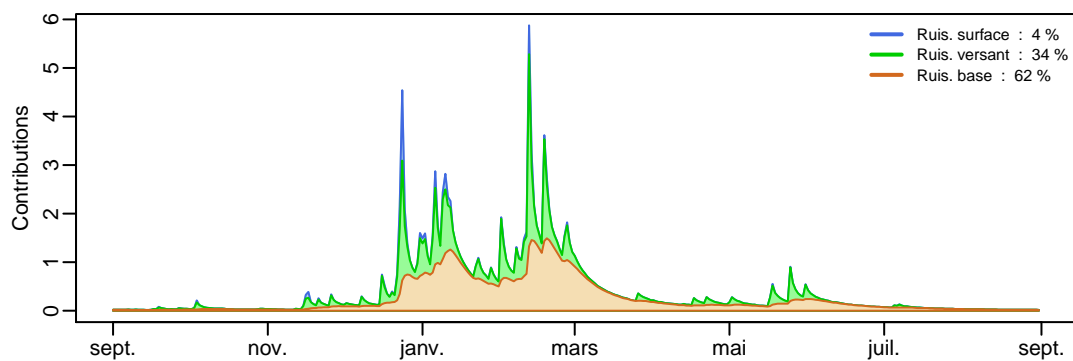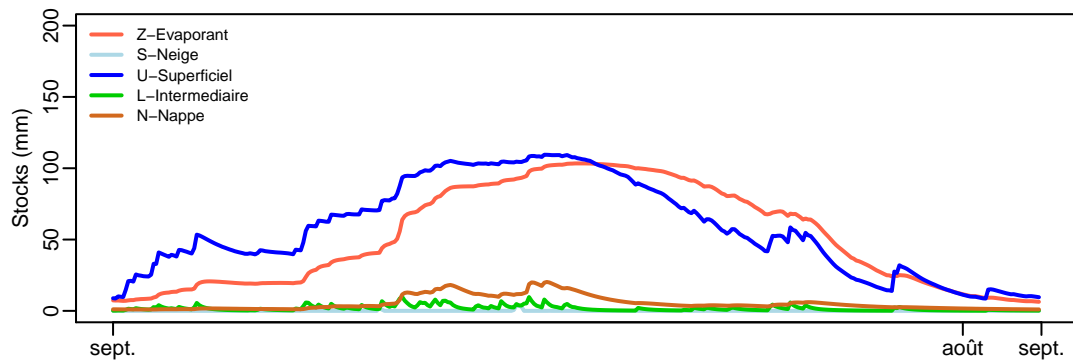

# k1943010 (201.55 km<sup>2</sup>) – année 1996–1997

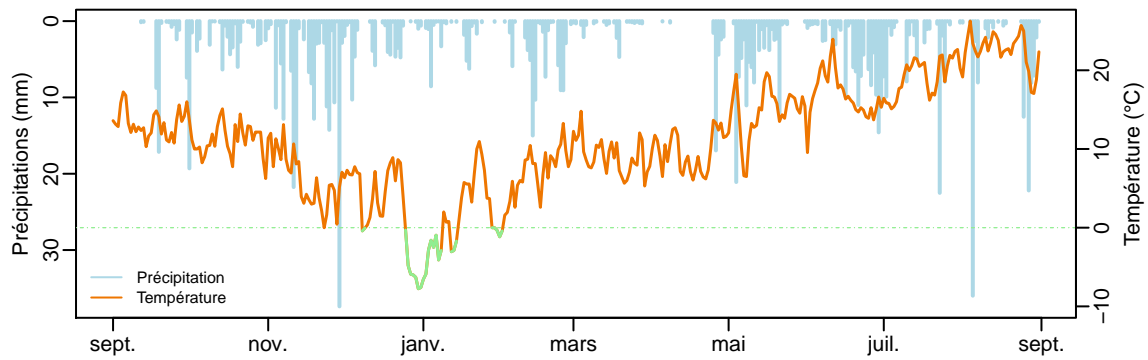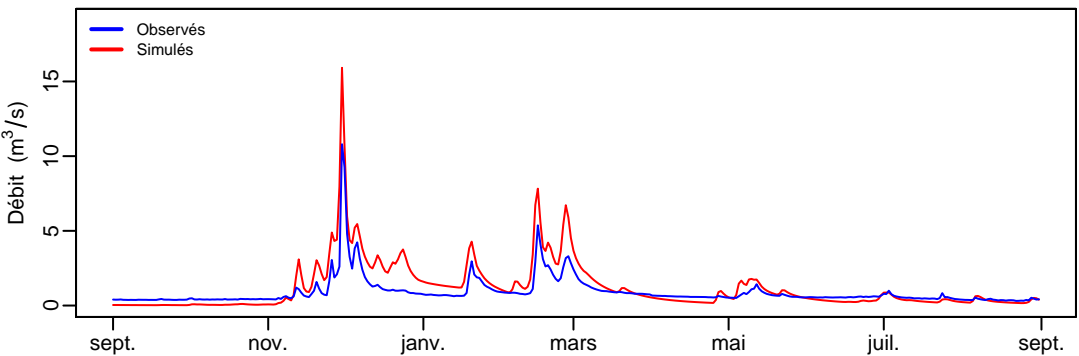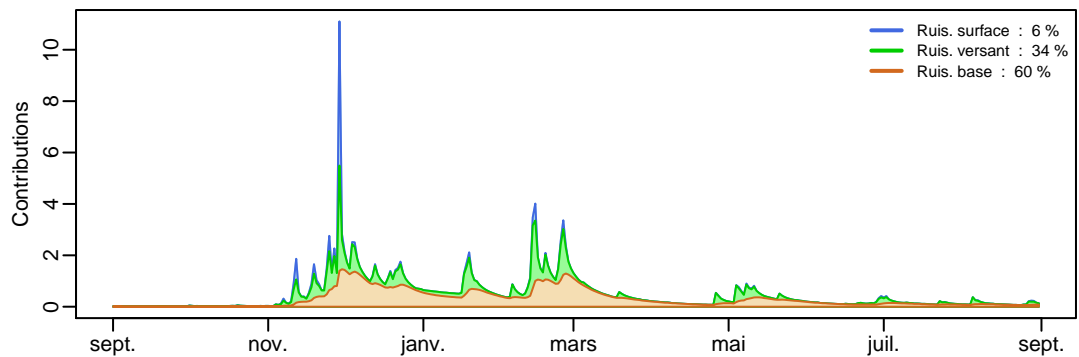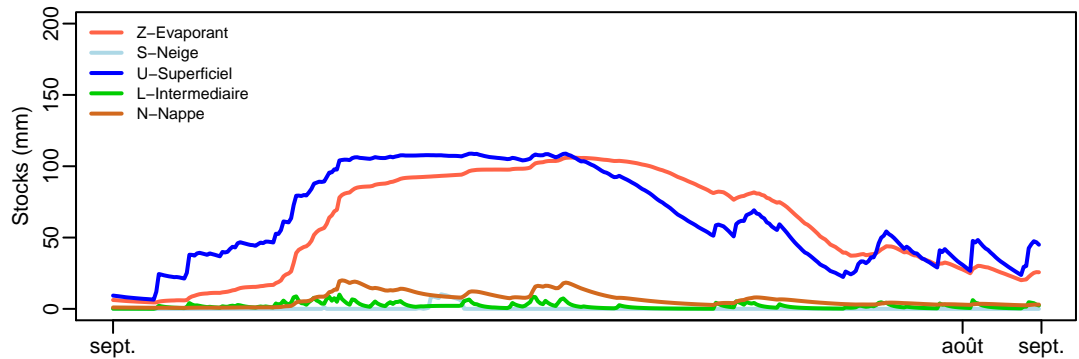

# k1943010 (201.55 km<sup>2</sup>) – année 1997–1998

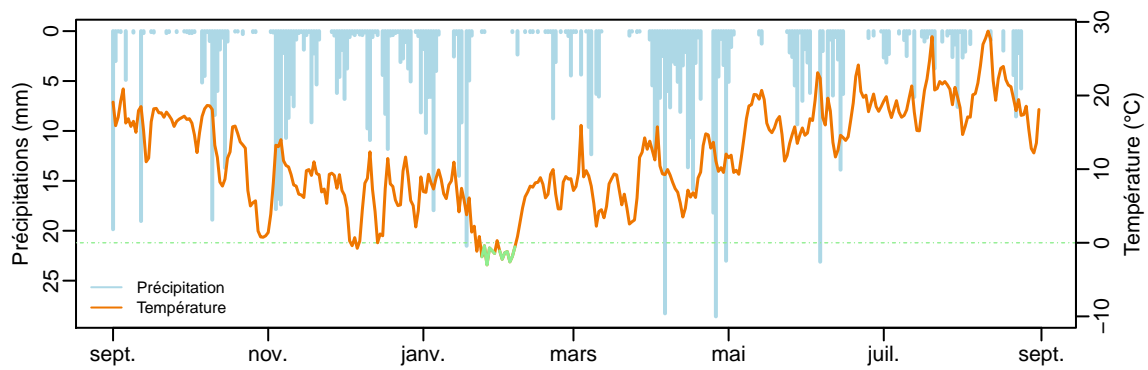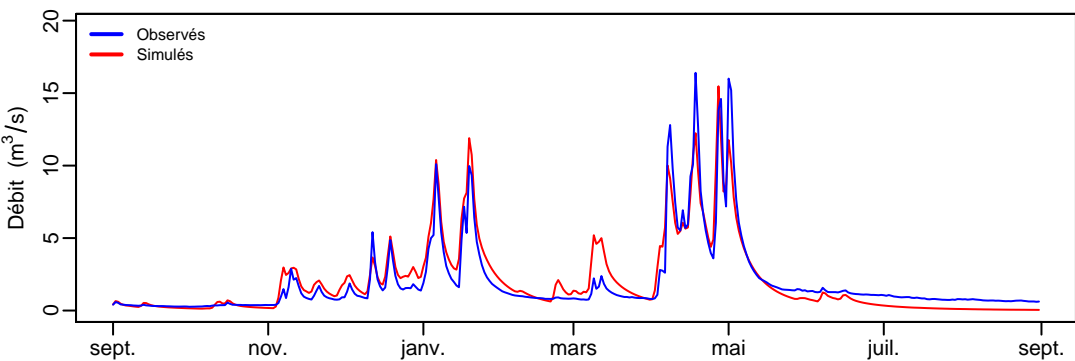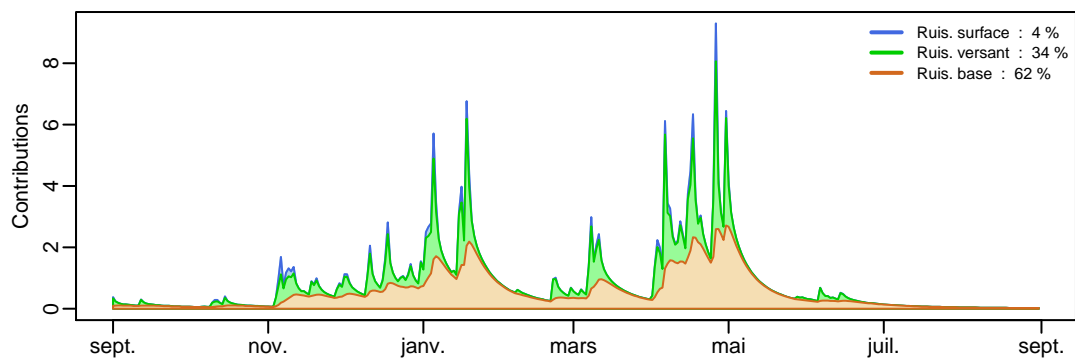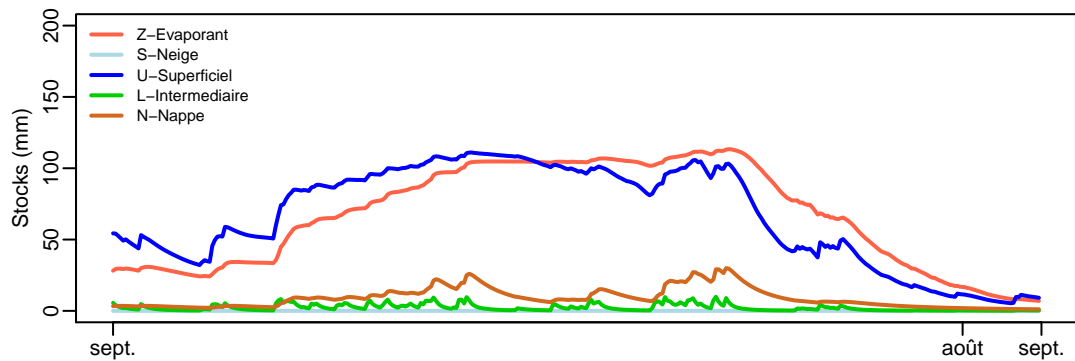

# k1943010 (201.55 km<sup>2</sup>) – année 1998–1999

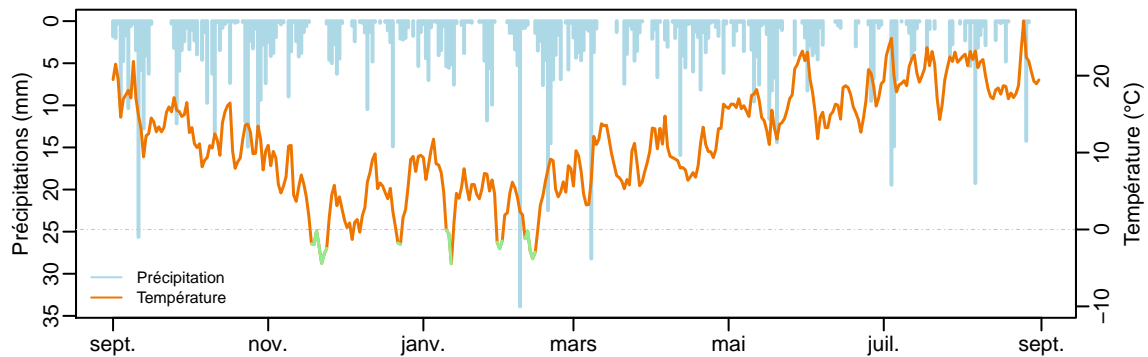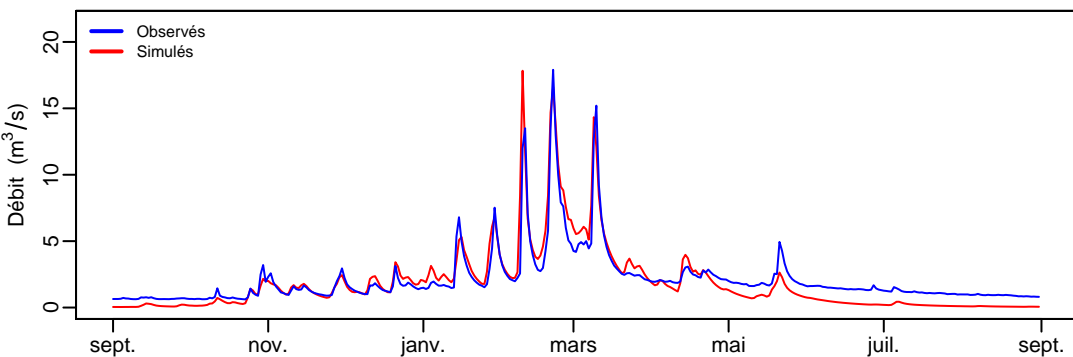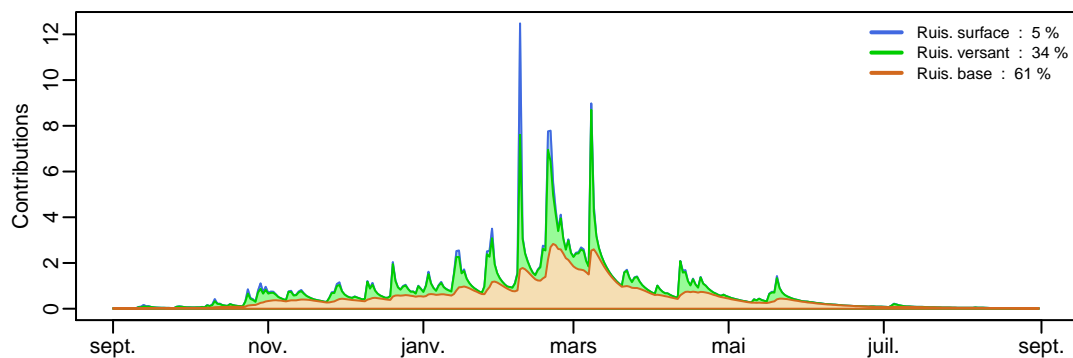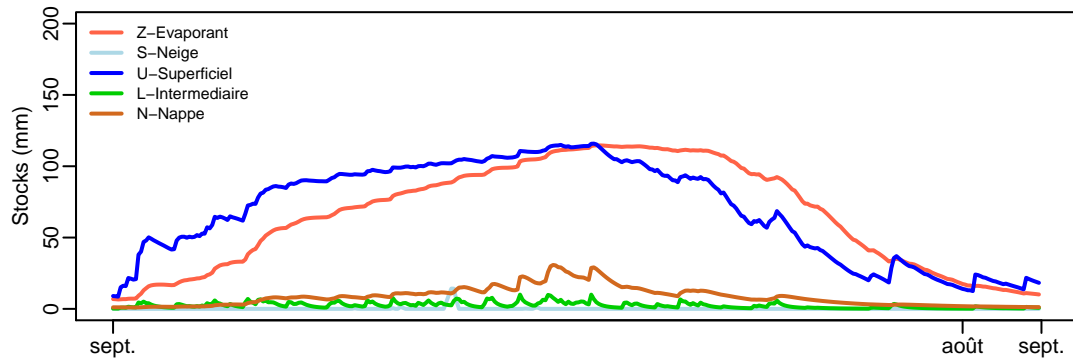

# k1954010 (225.72 km<sup>2</sup>) – année 1995–1996

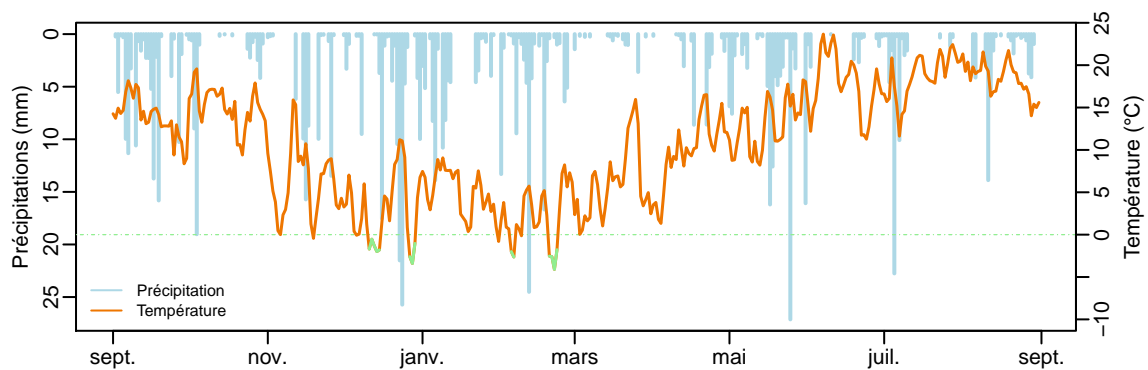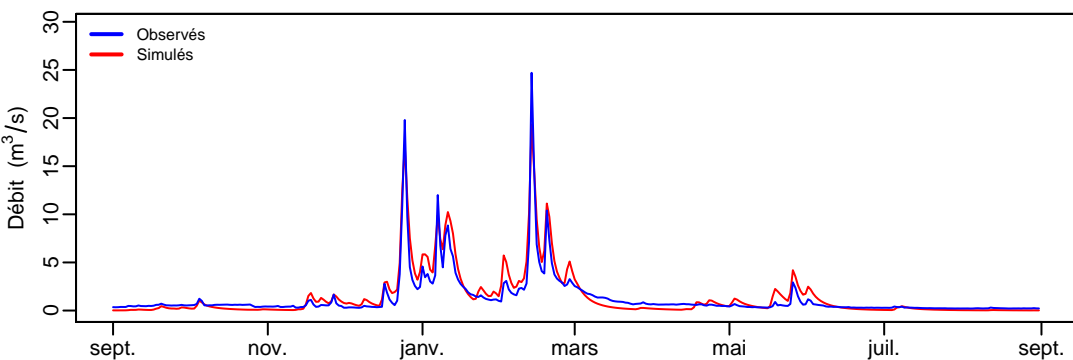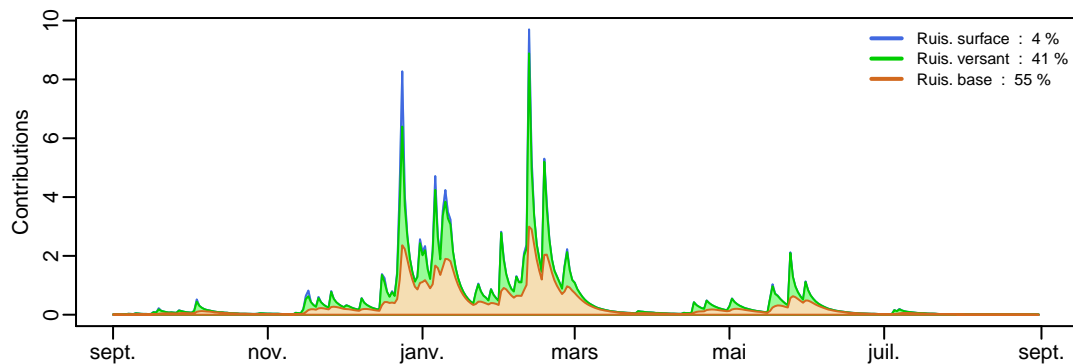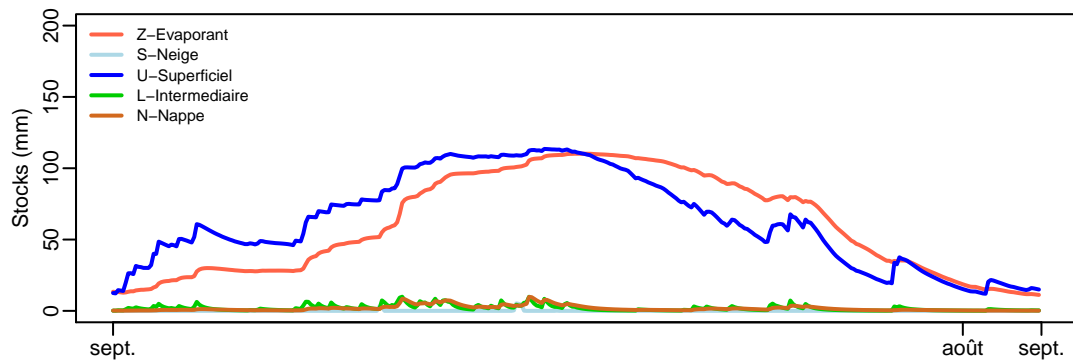

# k1954010 (225.72 km<sup>2</sup>) – année 1996–1997

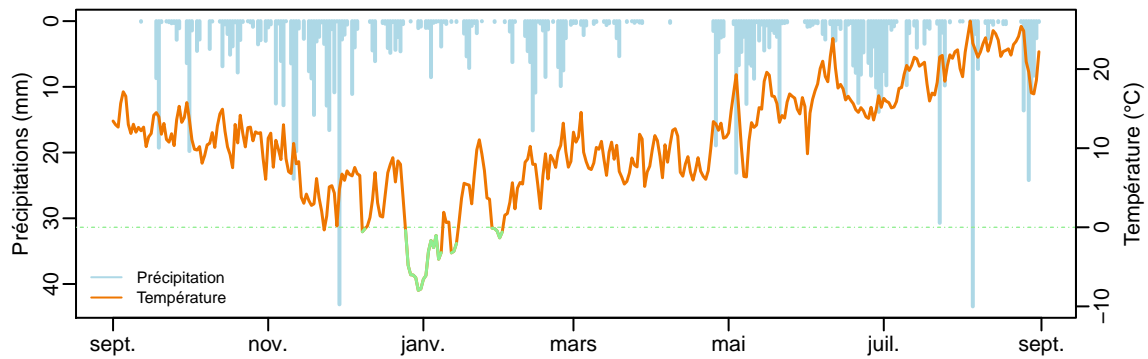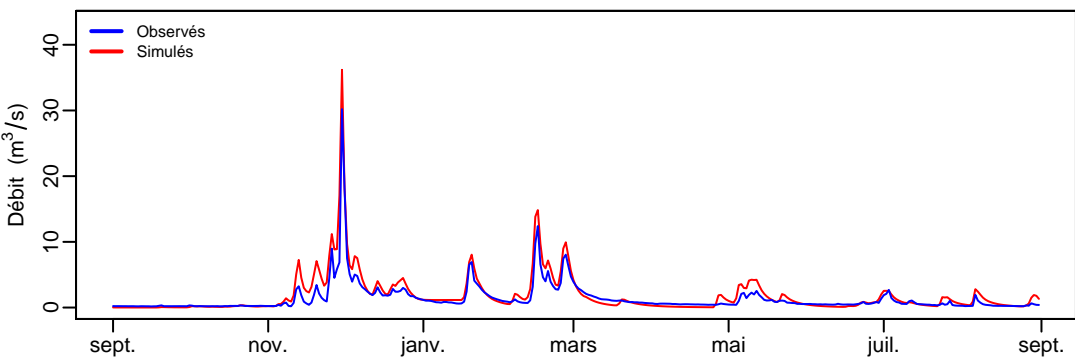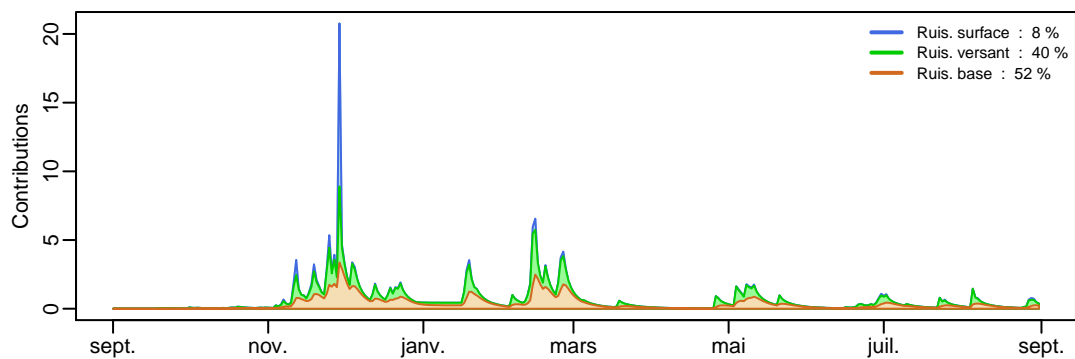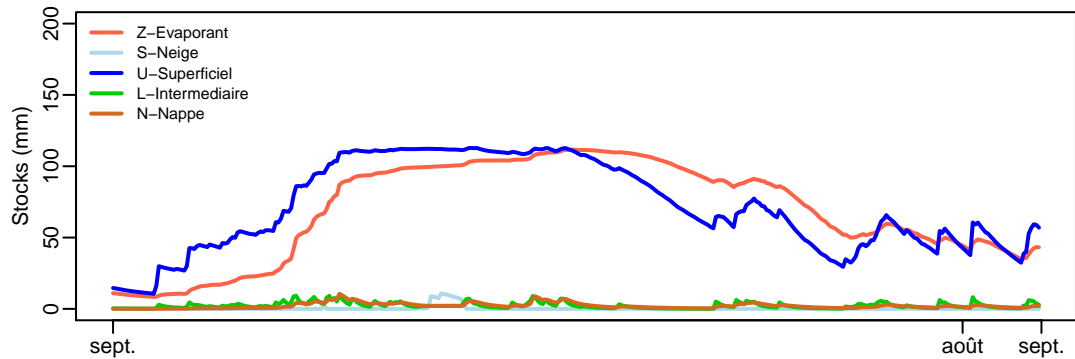

# k1954010 (225.72 km<sup>2</sup>) – année 1997–1998

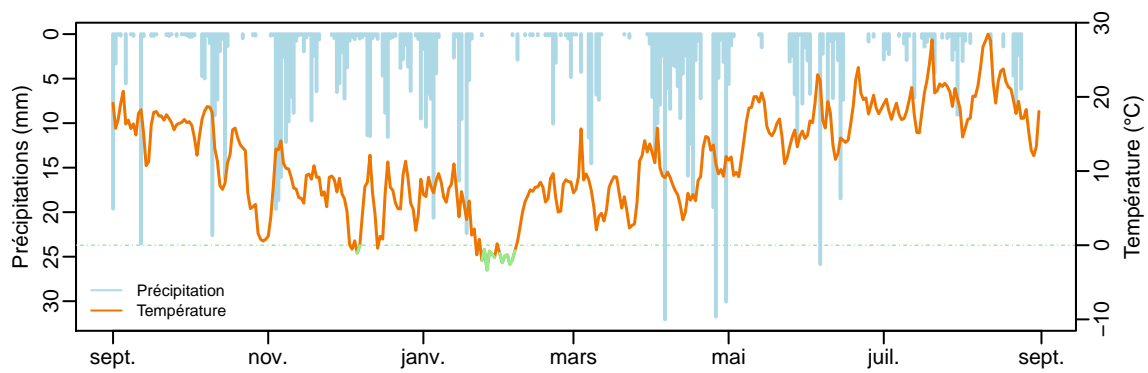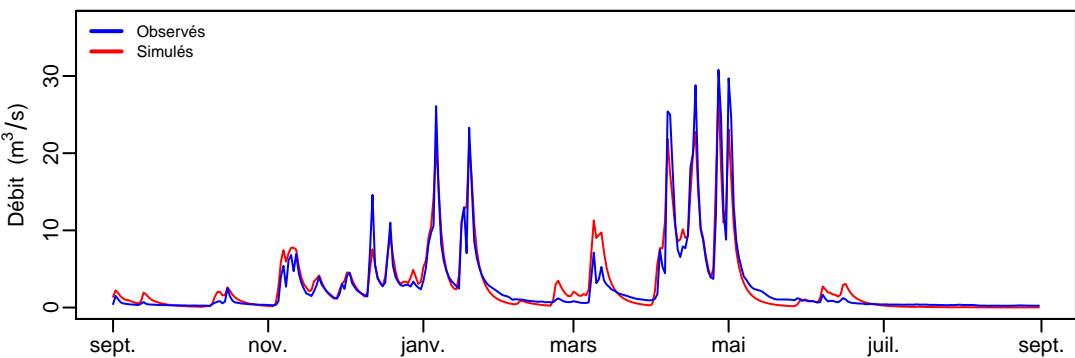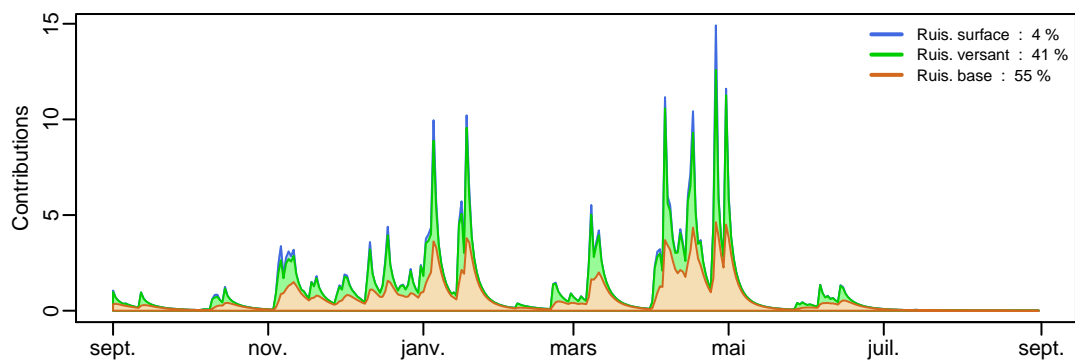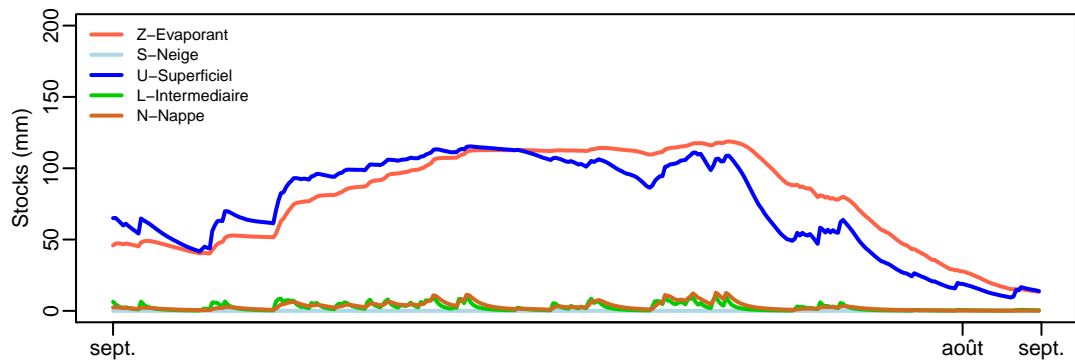



# k1954010 (225.72 km<sup>2</sup>) – année 1998–1999

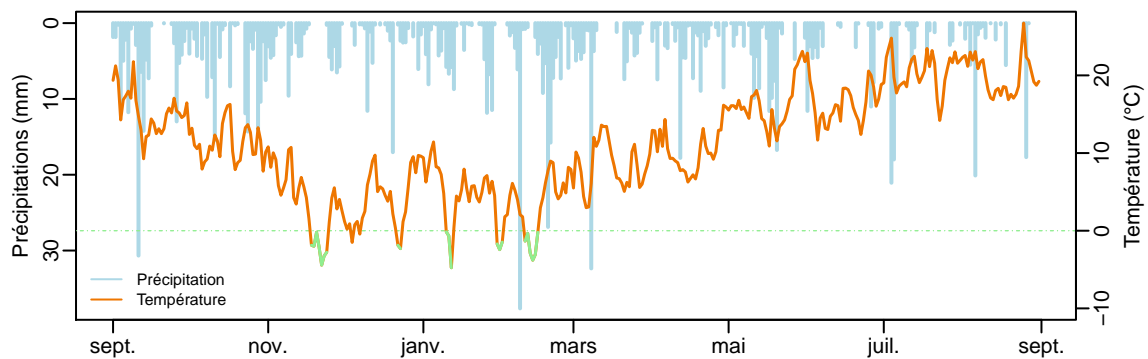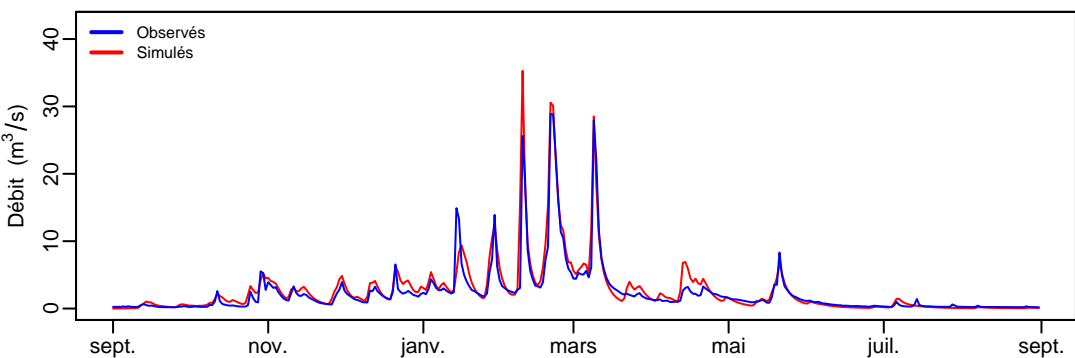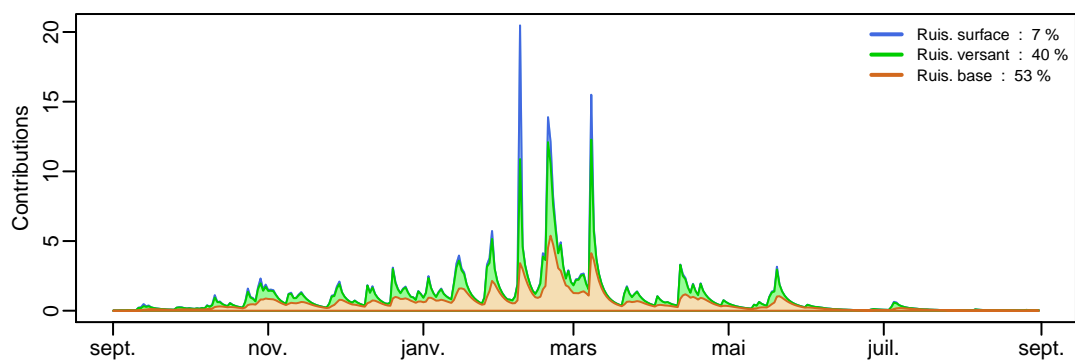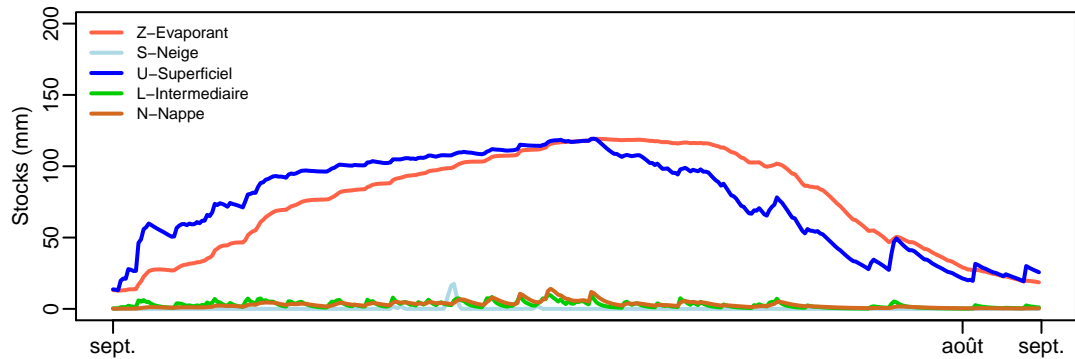

# k1954010 (225.72 km<sup>2</sup>) – année 1999–2000

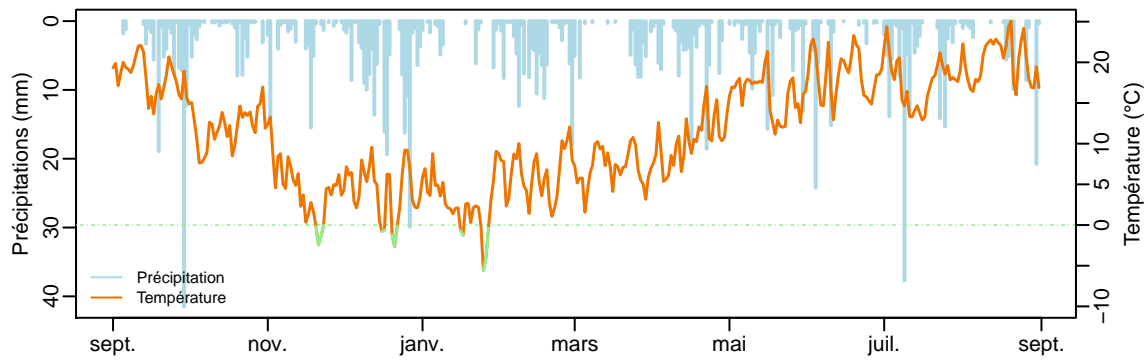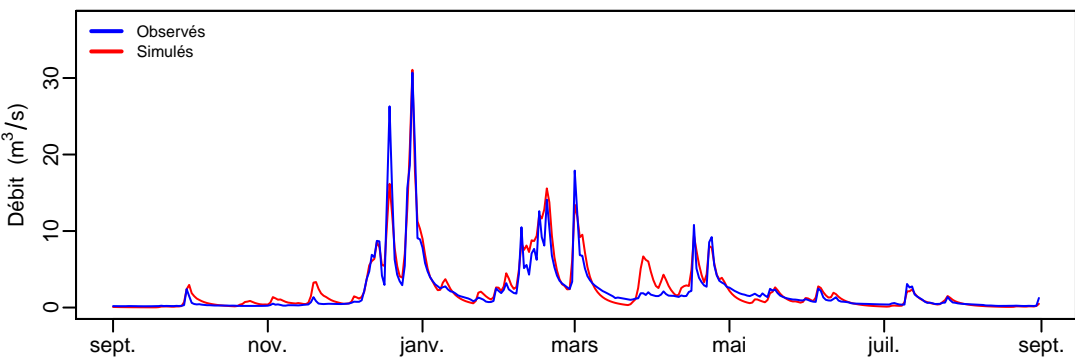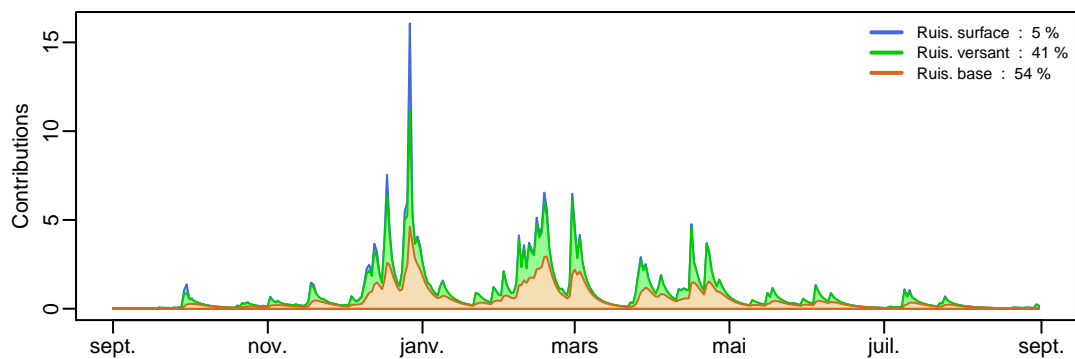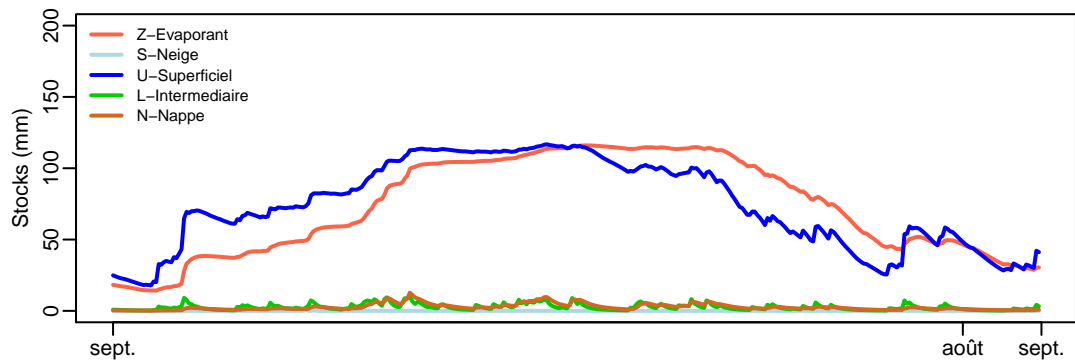

# k1954010 (225.72 km<sup>2</sup>) – année 2000–2001

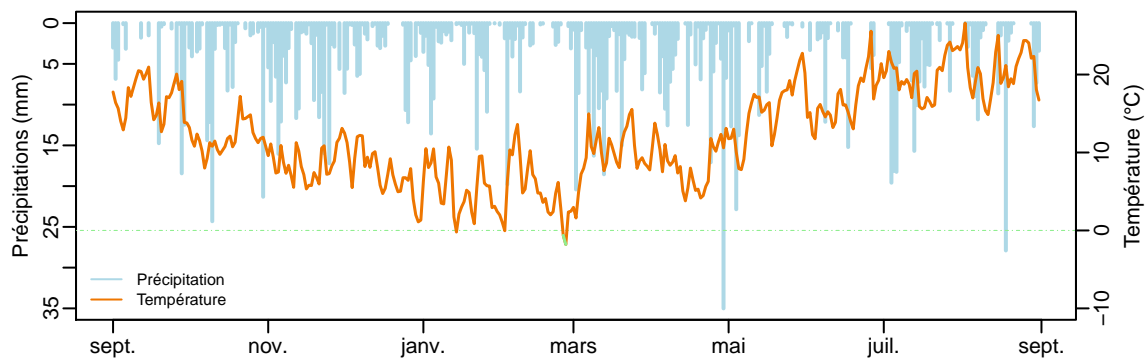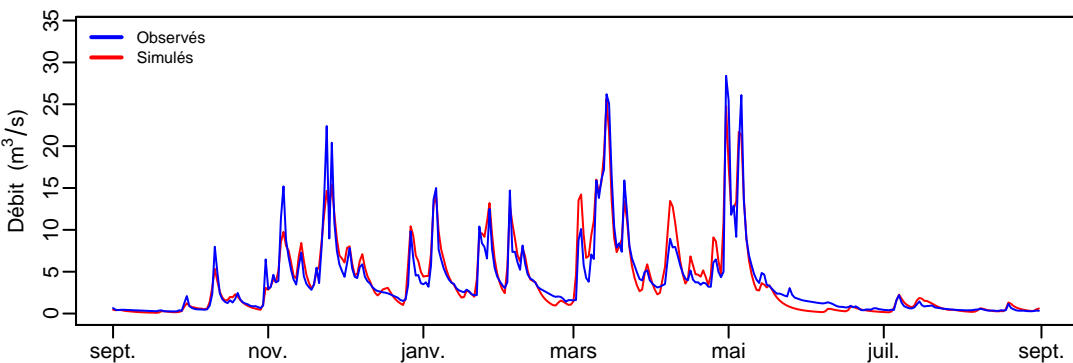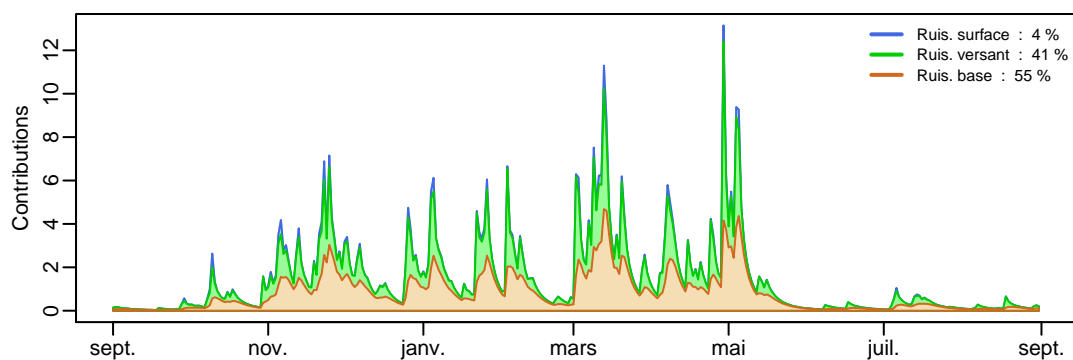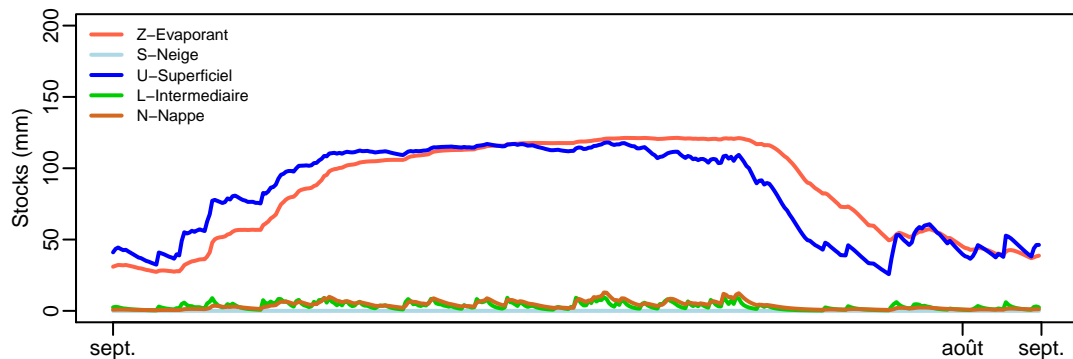

# k1954010 (225.72 km<sup>2</sup>) – année 2001–2002

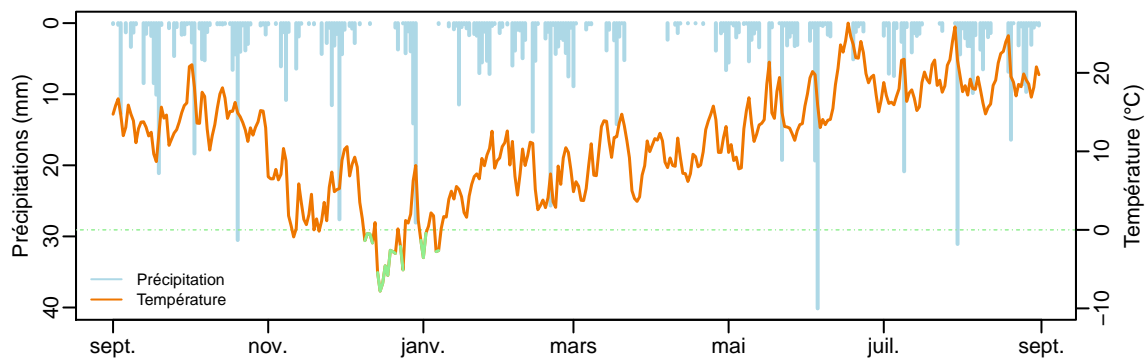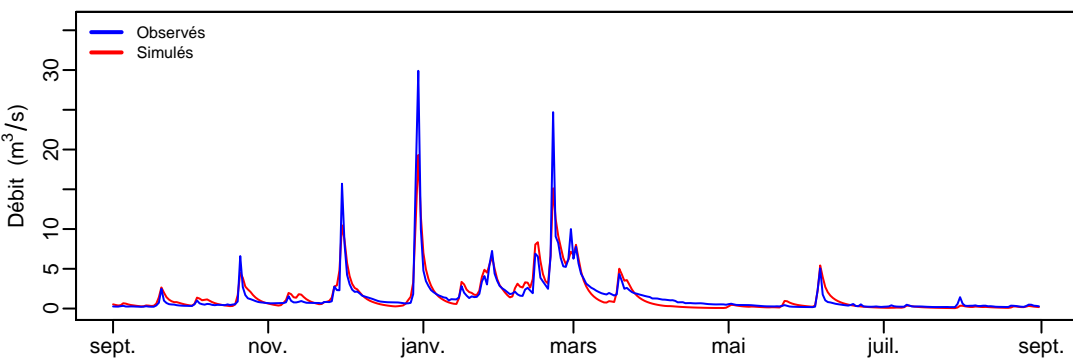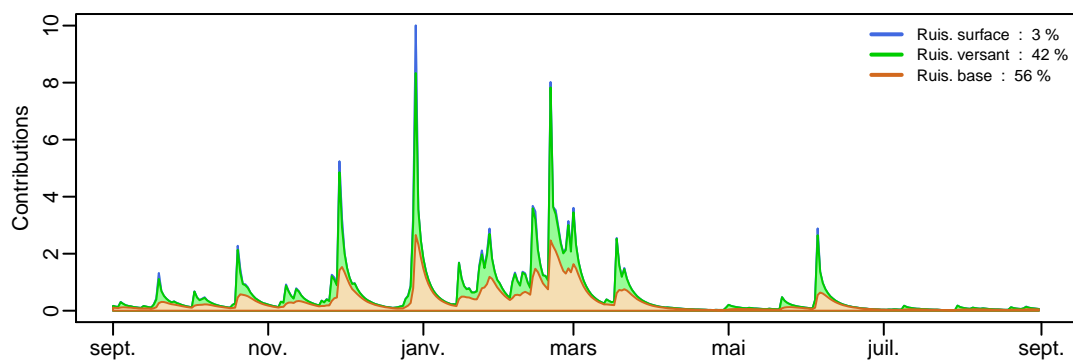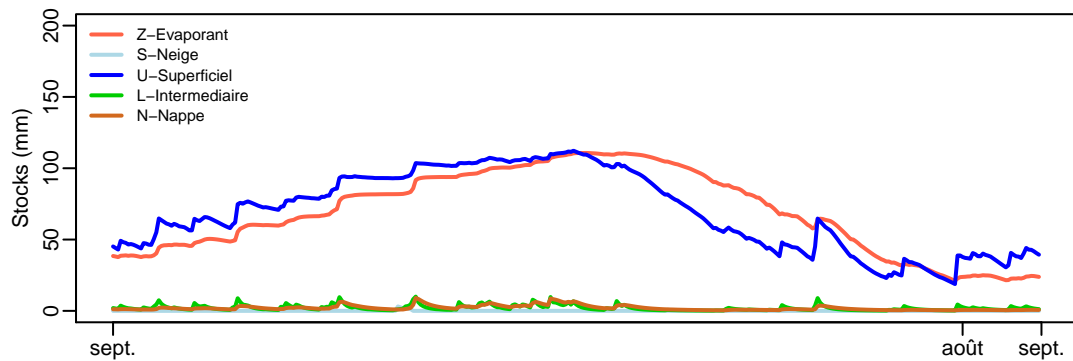

# k1954010 (225.72 km<sup>2</sup>) – année 2002–2003

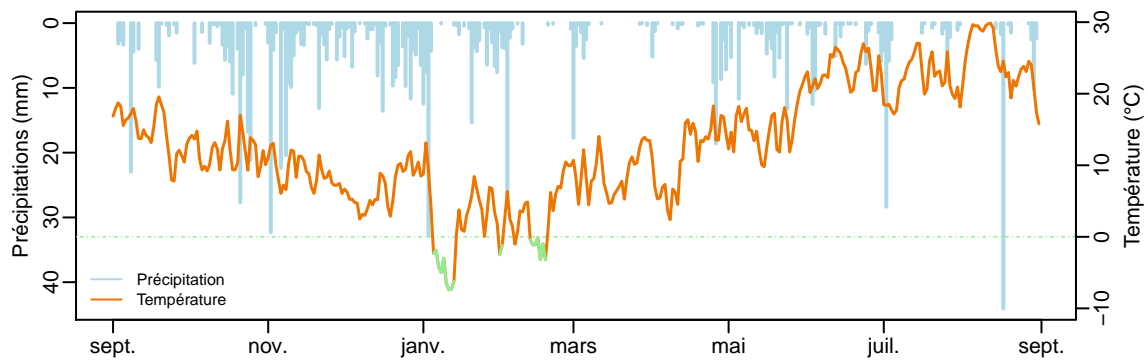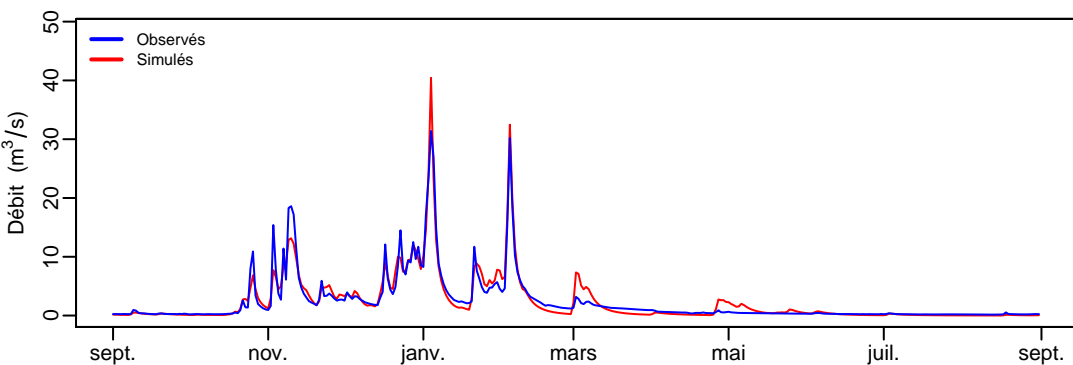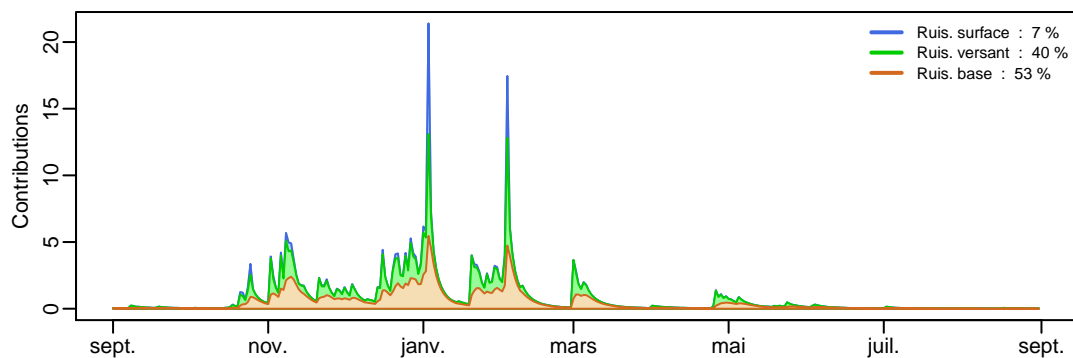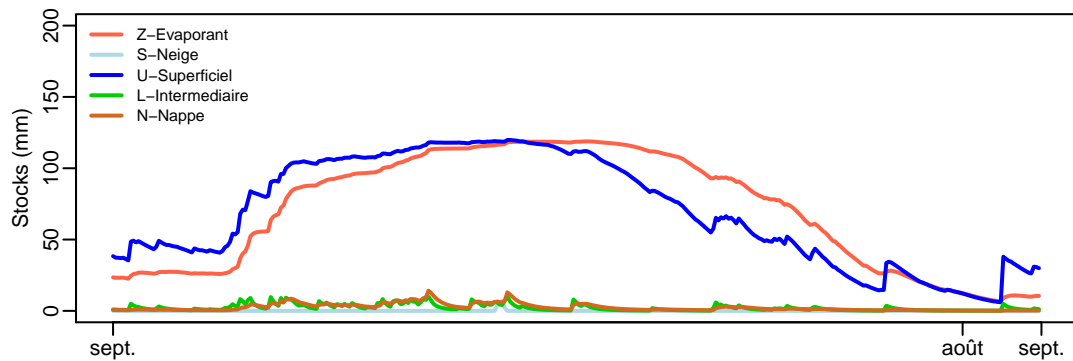

# k1954010 (225.72 km<sup>2</sup>) – année 2003–2004

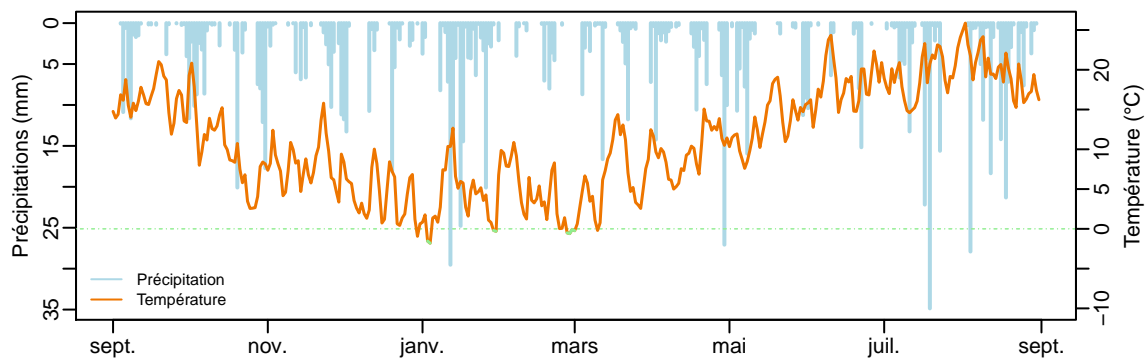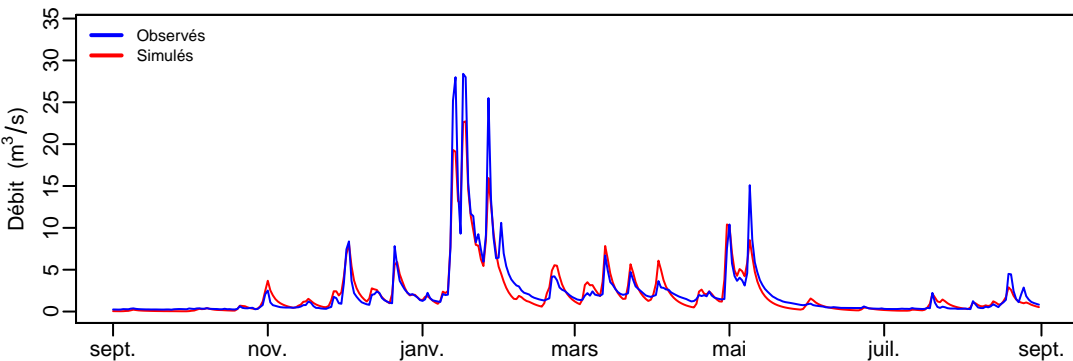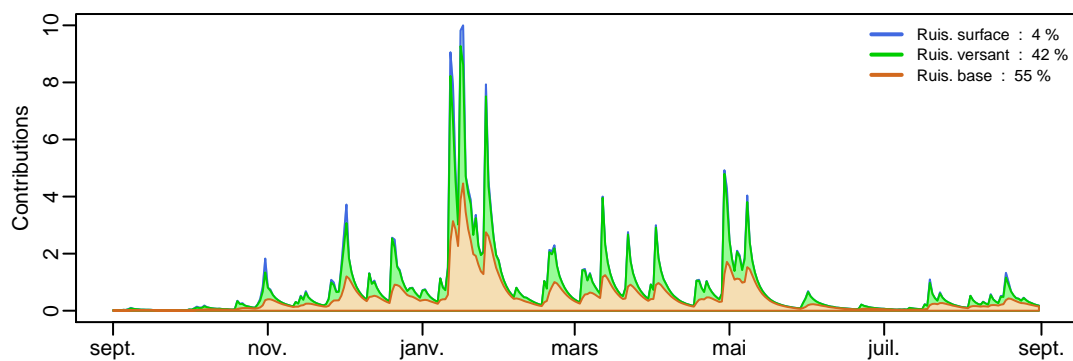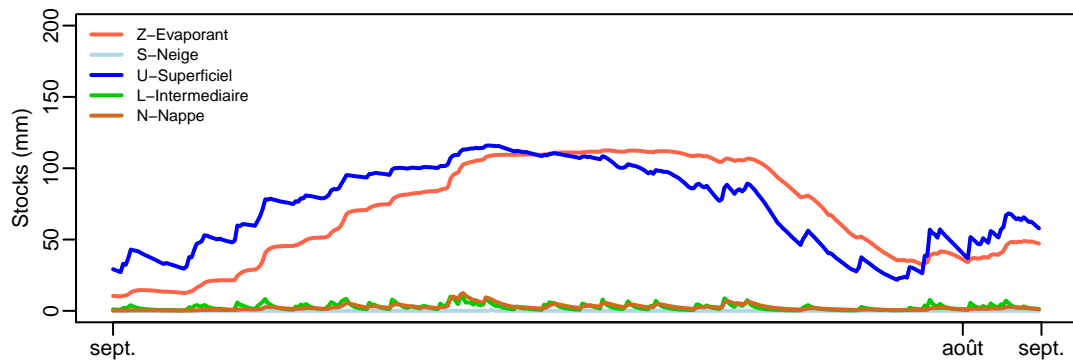

# k1954010 (225.72 km<sup>2</sup>) – année 2004–2005

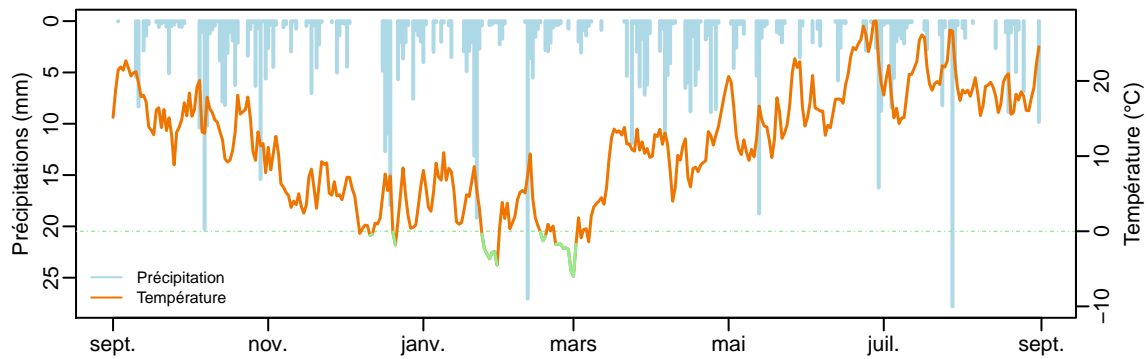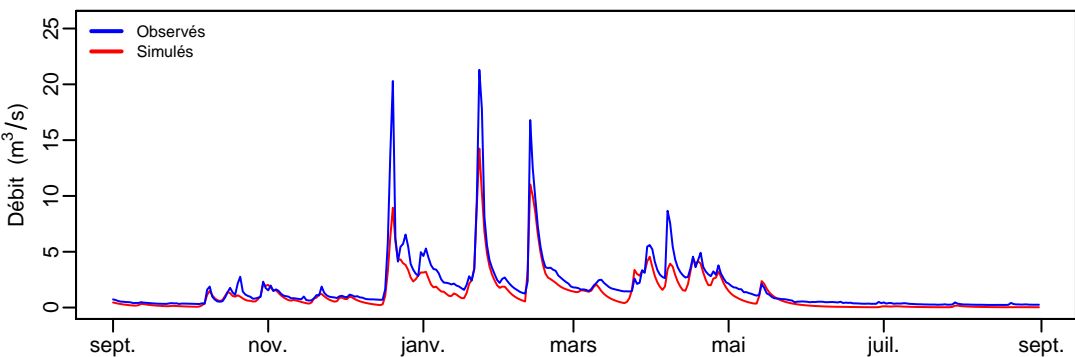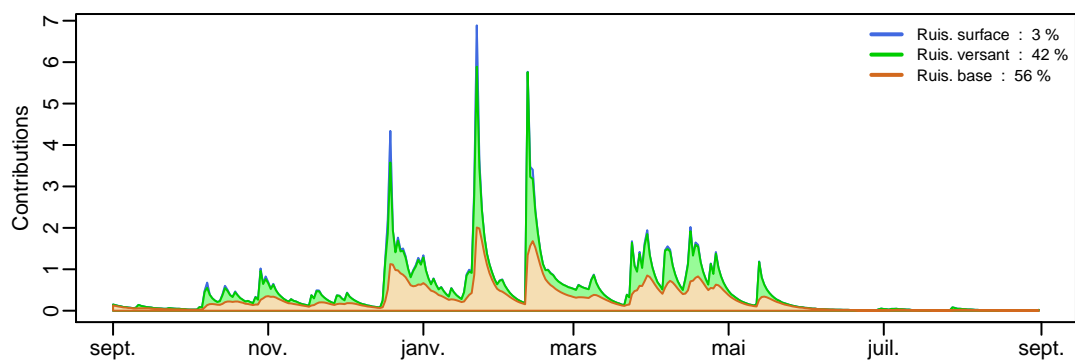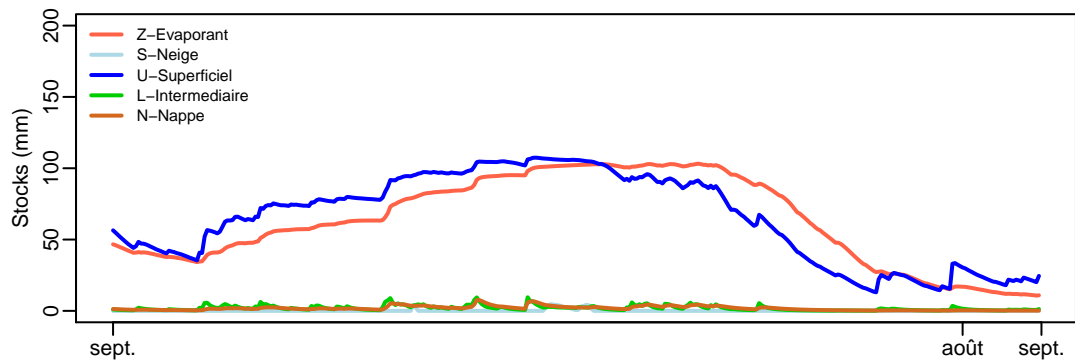

# k1954010 (225.72 km<sup>2</sup>) – année 2005–2006

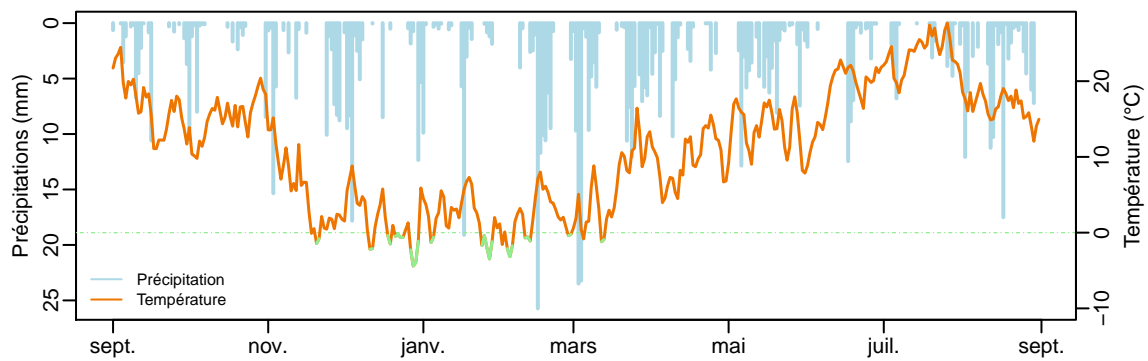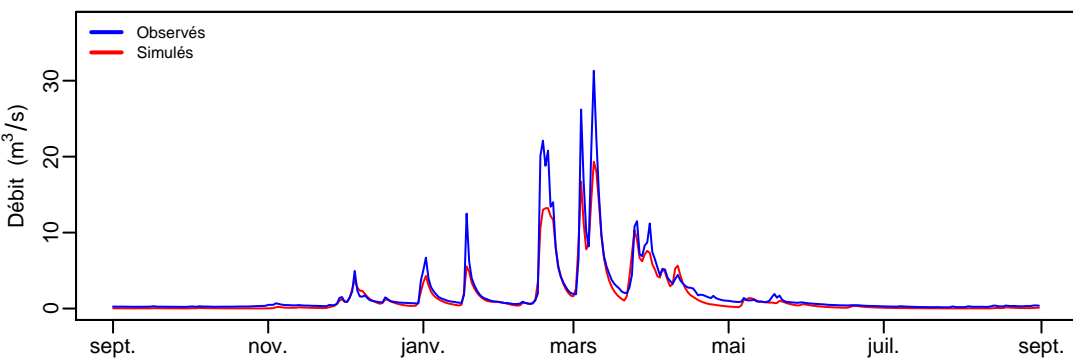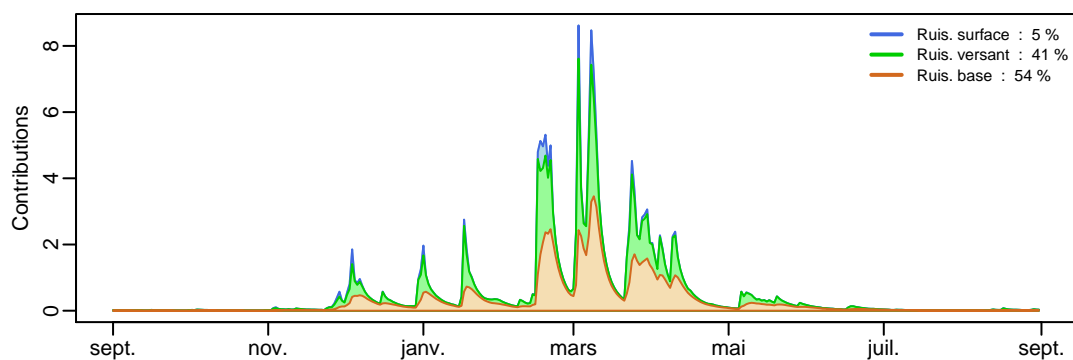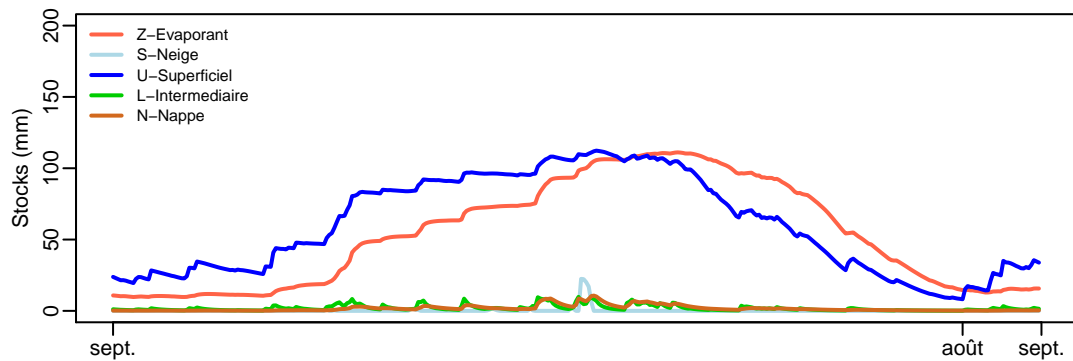



# k2070810 (324.08 km<sup>2</sup>) – année 1987–1988

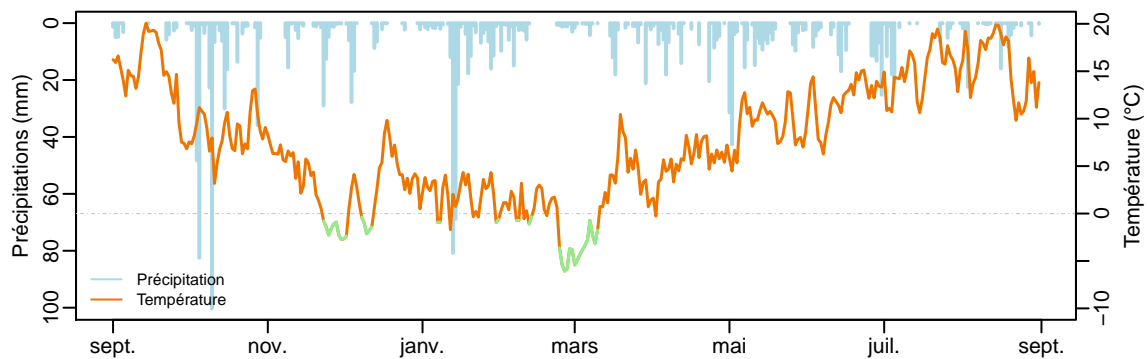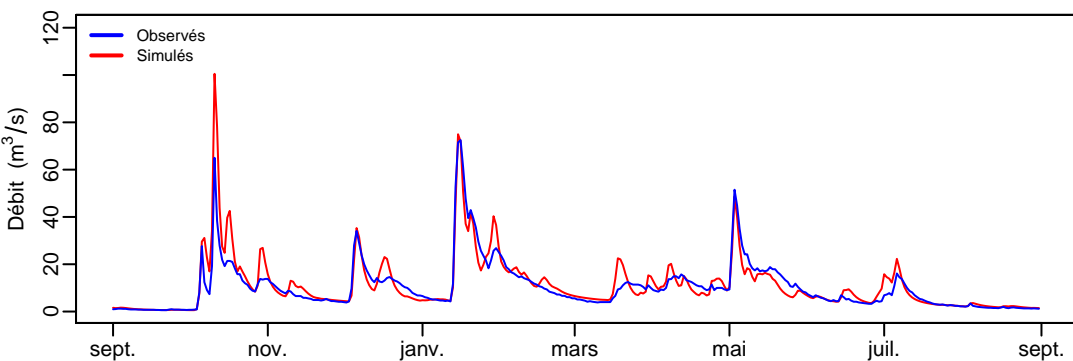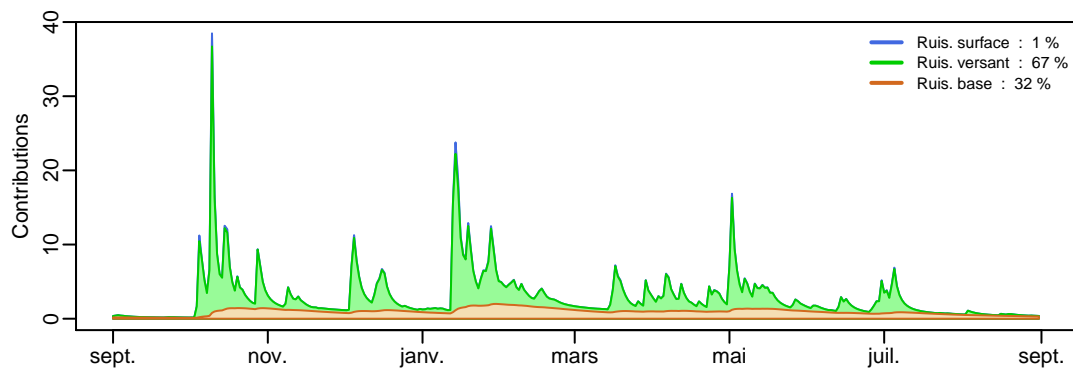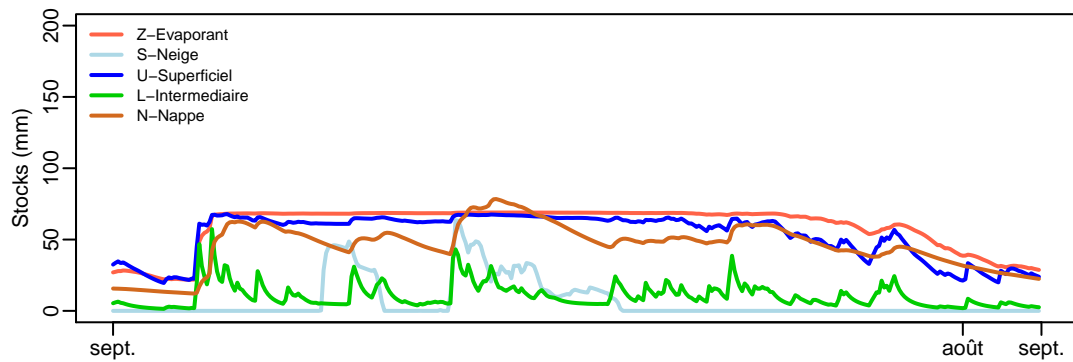

# k2070810 (324.08 km<sup>2</sup>) – année 1988–1989

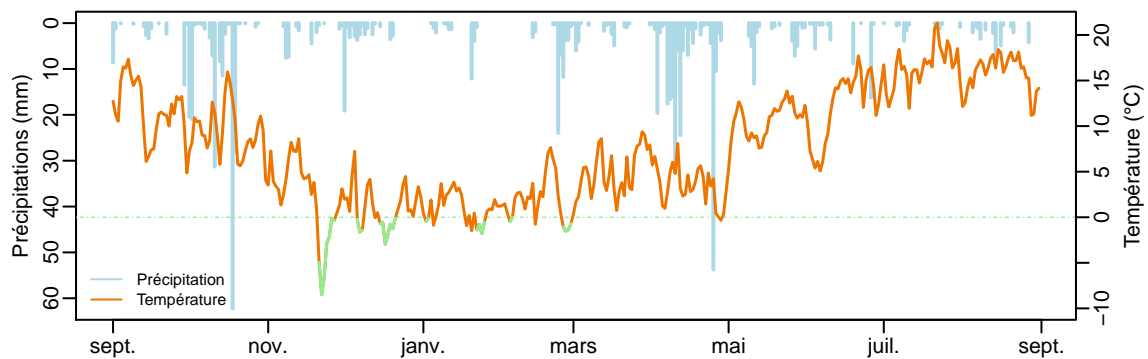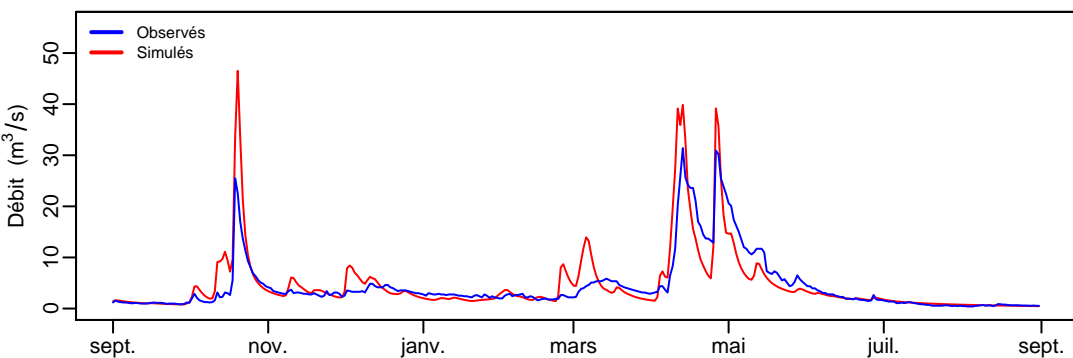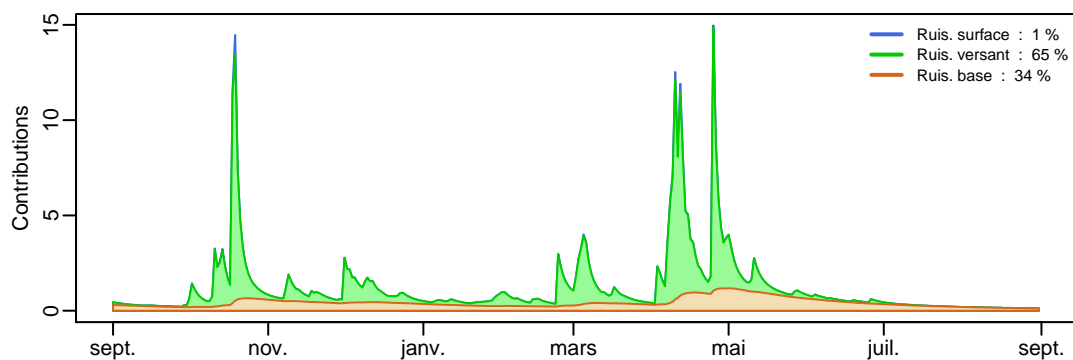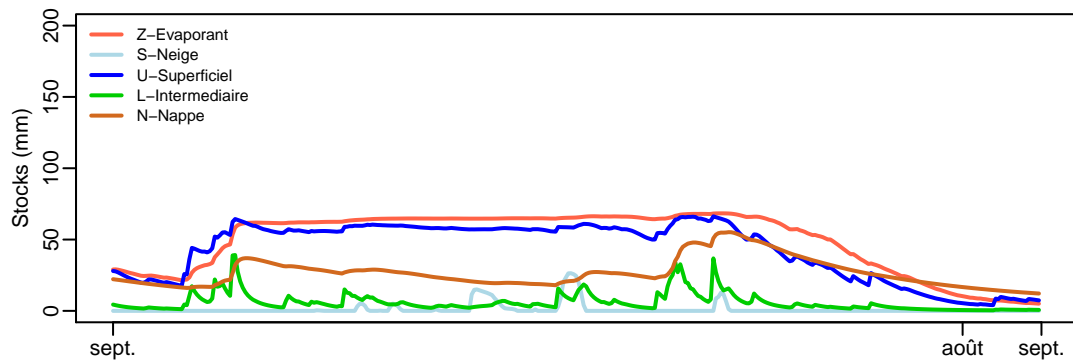

# k2070810 (324.08 km<sup>2</sup>) – année 1989–1990

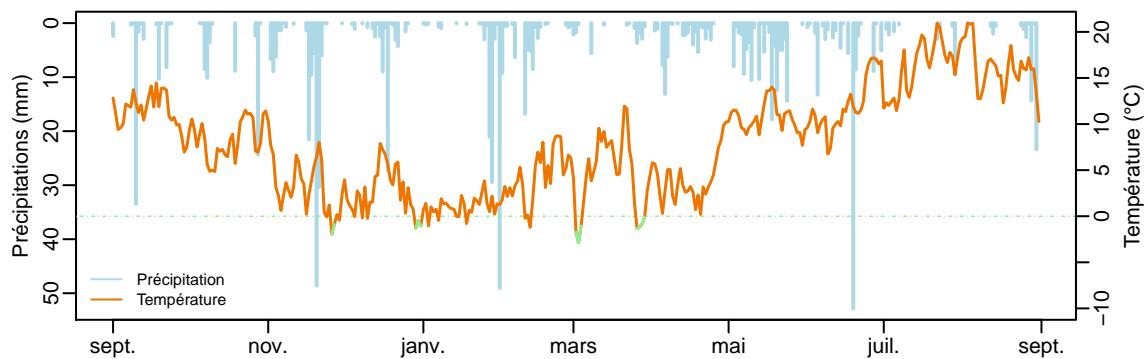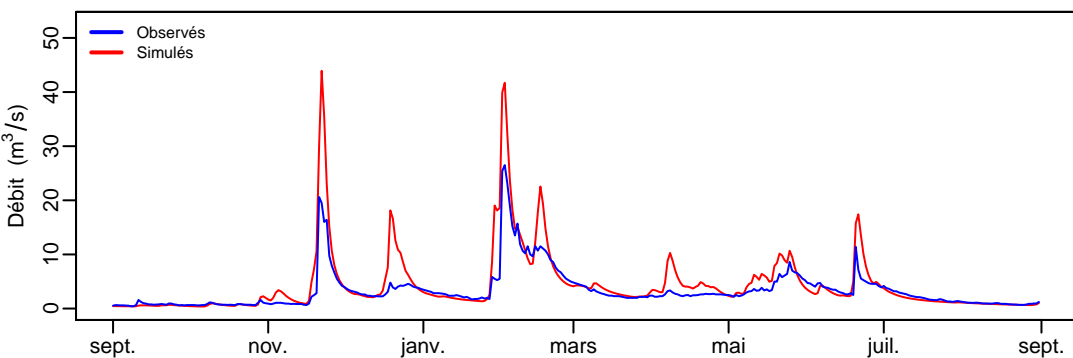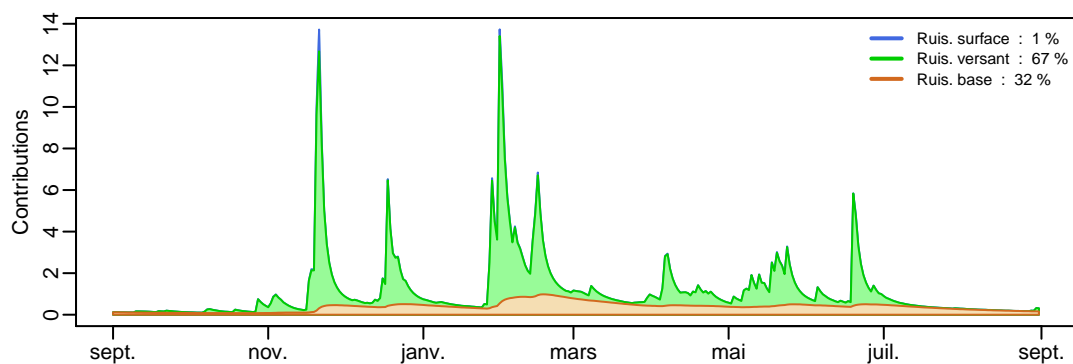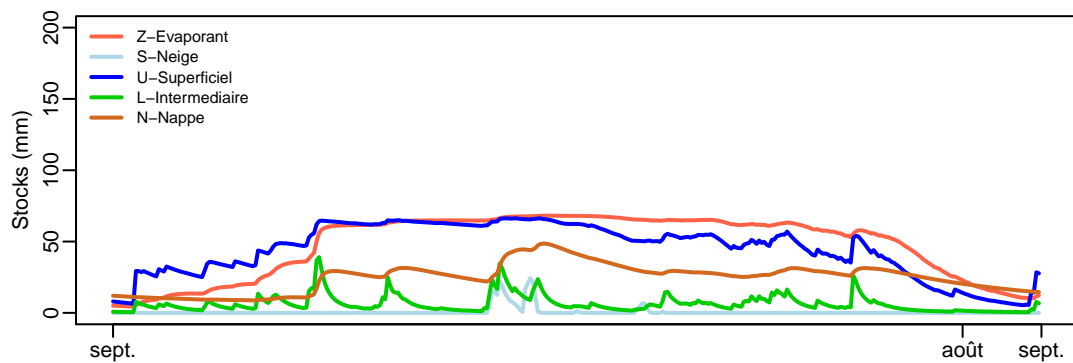

# k2070810 (324.08 km²) – année 1990–1991

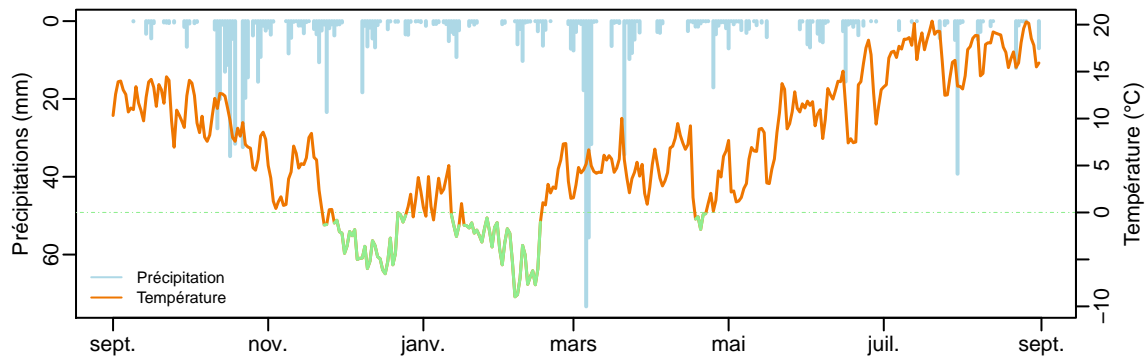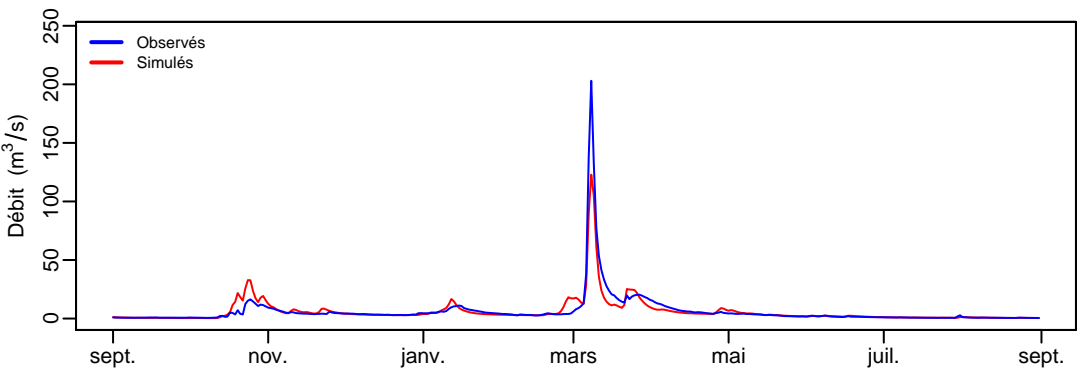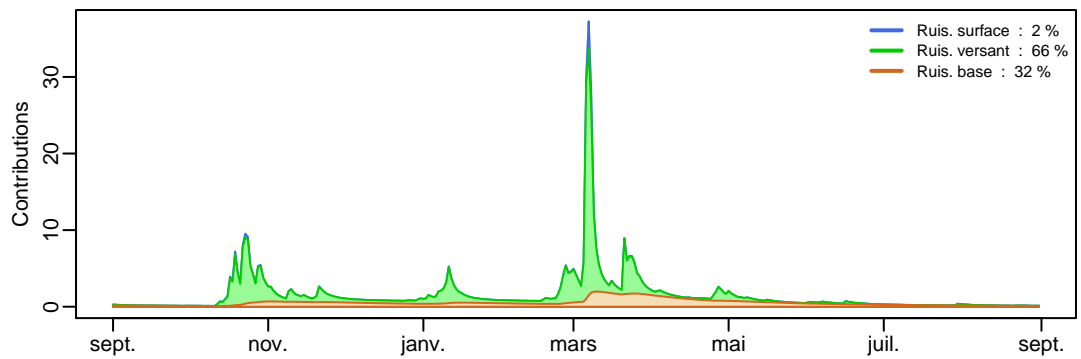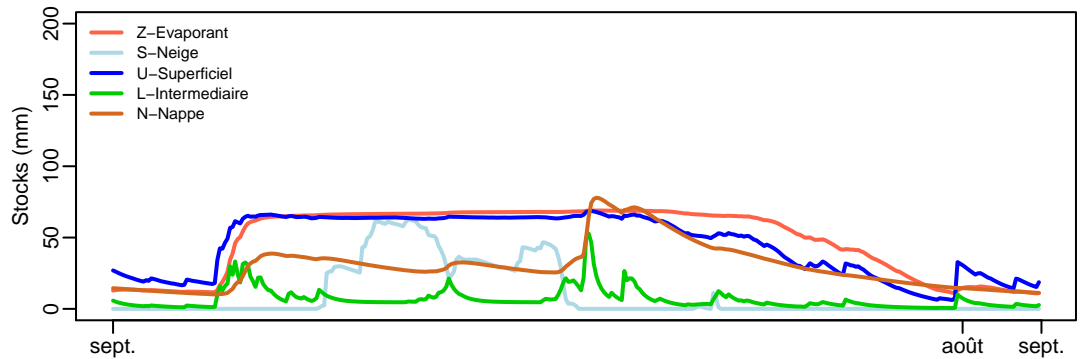

# k2070810 (324.08 km<sup>2</sup>) – année 1991–1992

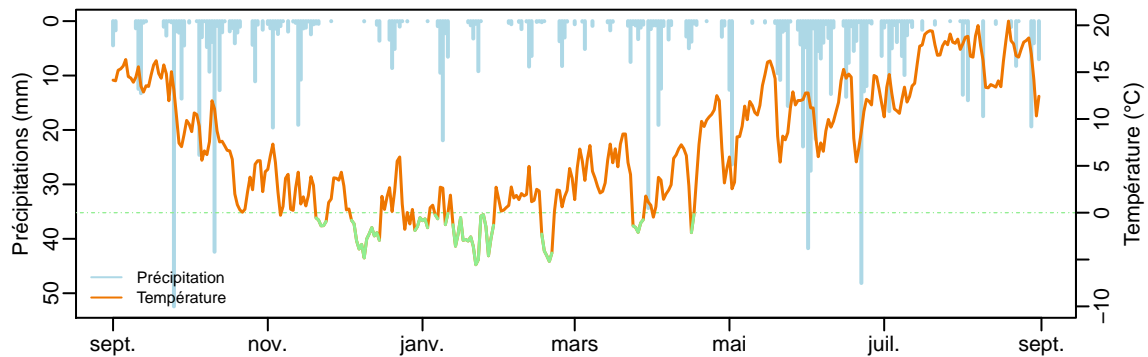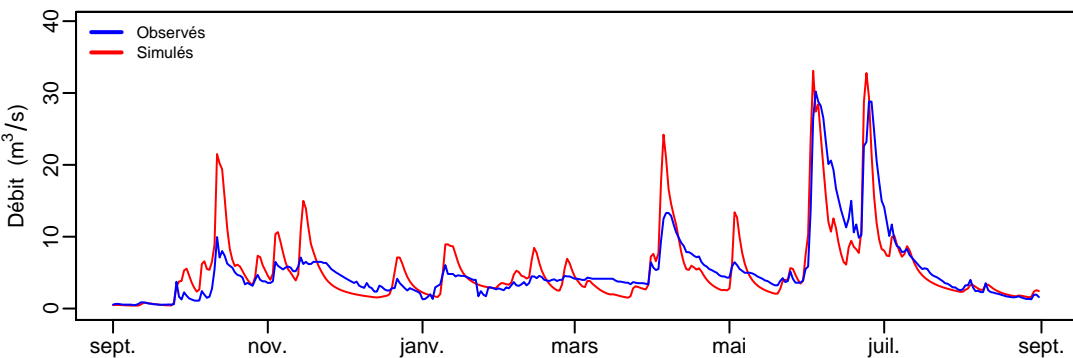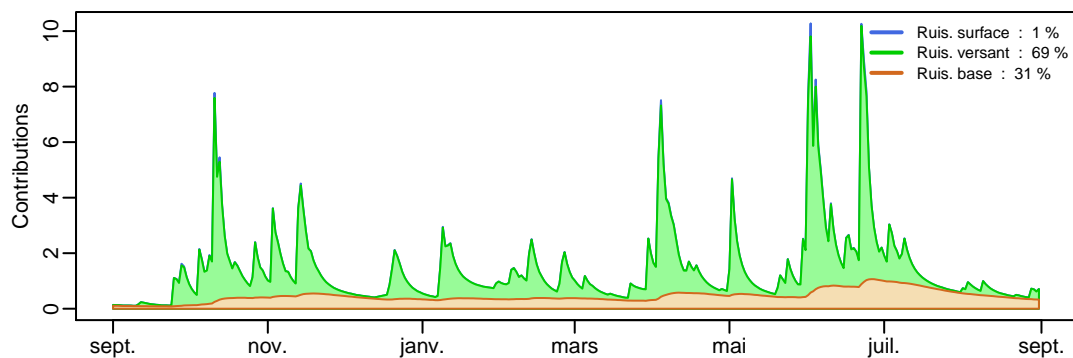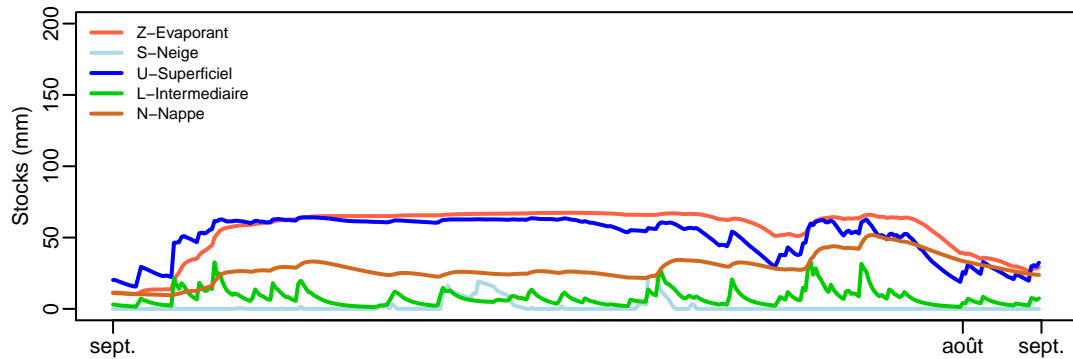

# k2070810 (324.08 km<sup>2</sup>) – année 1992–1993

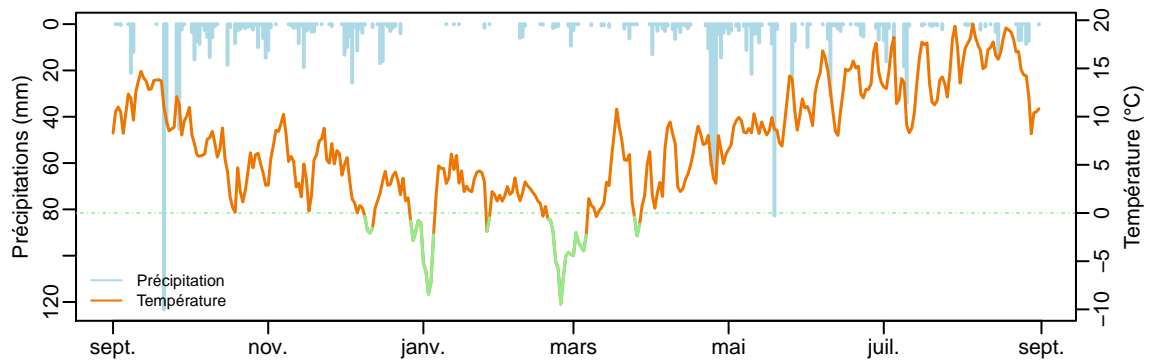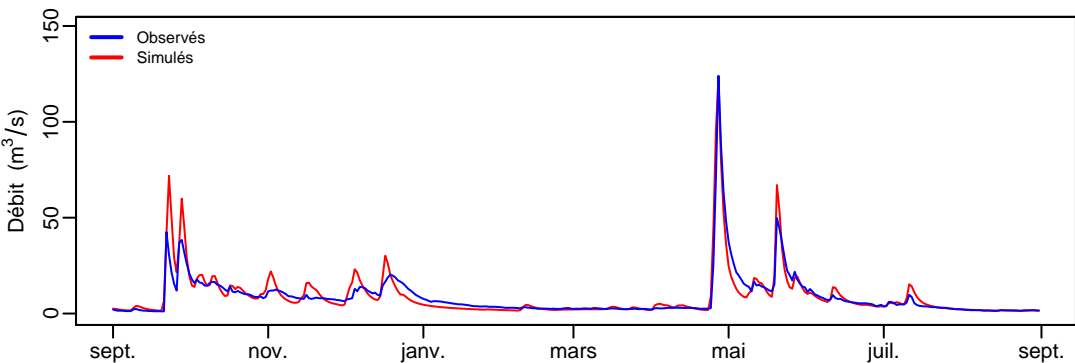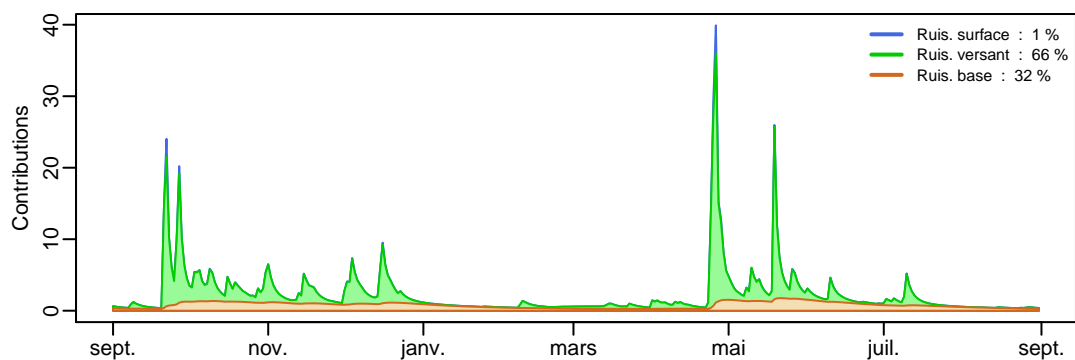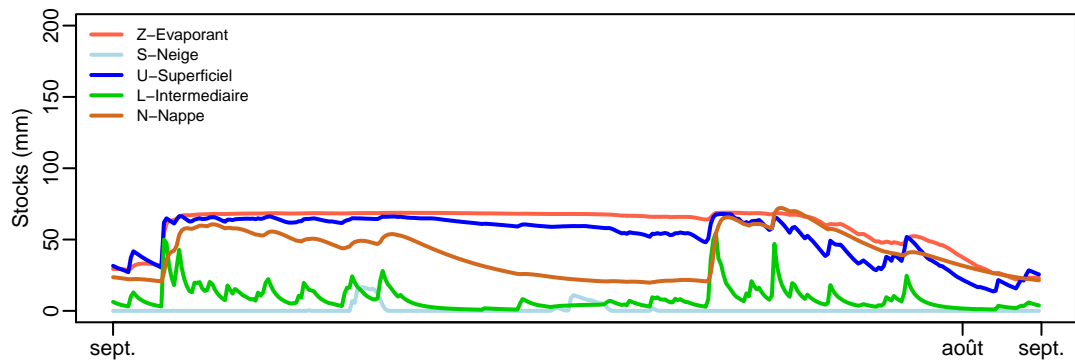

# k2070810 (324.08 km²) – année 1993–1994

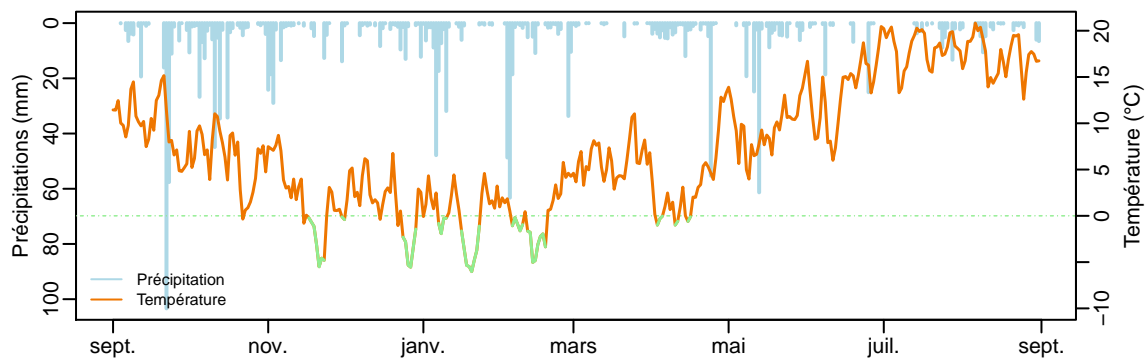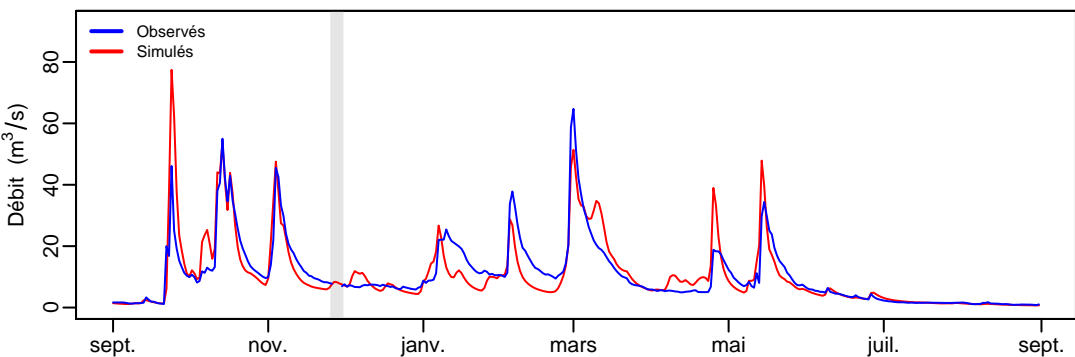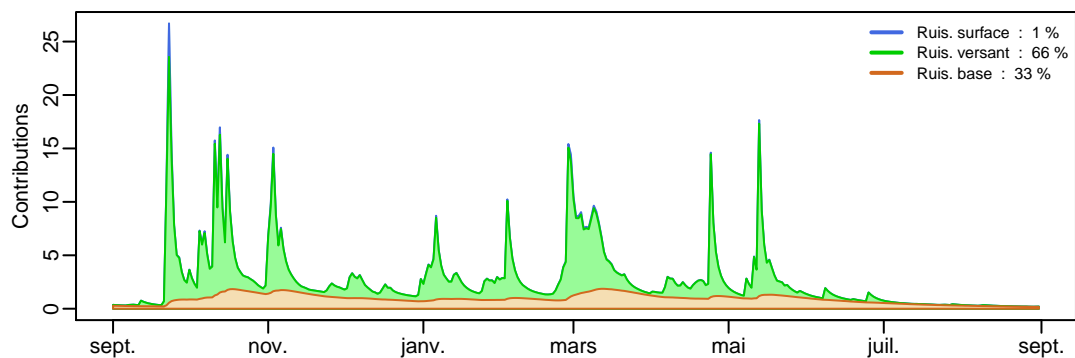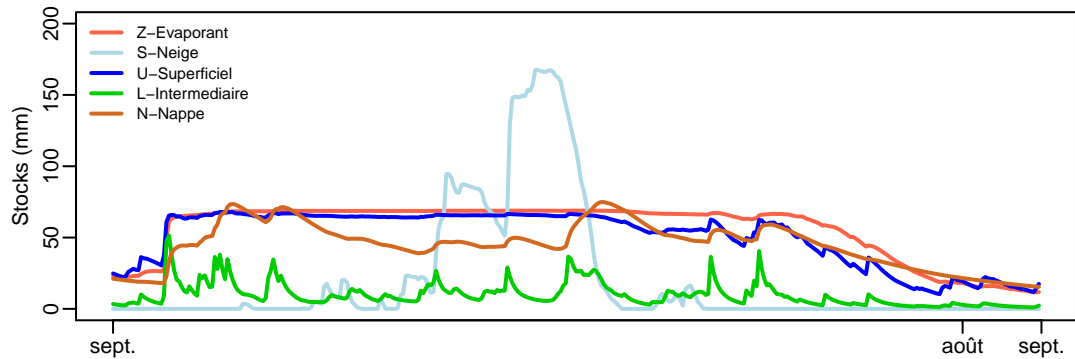

# k2070810 (324.08 km<sup>2</sup>) – année 1994–1995

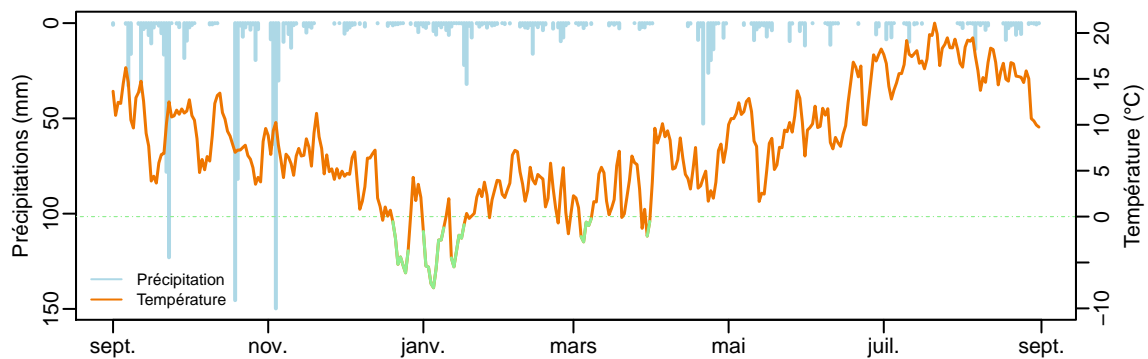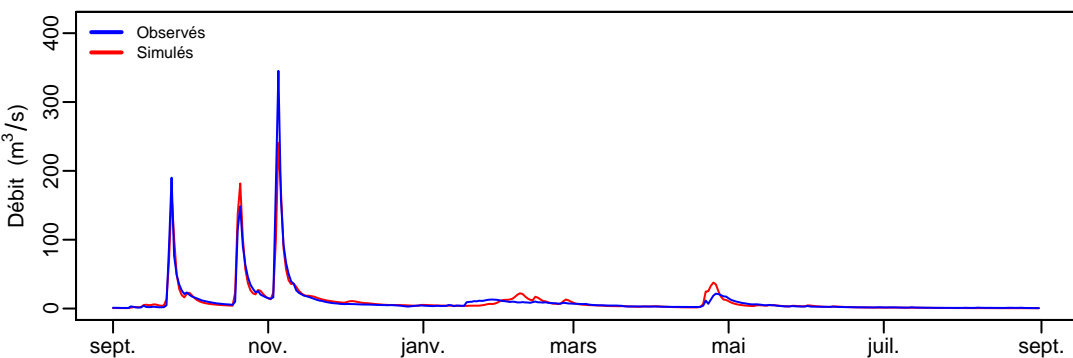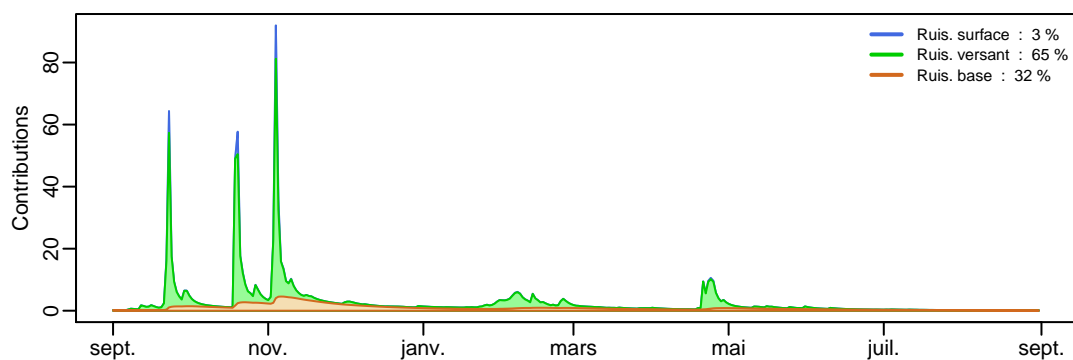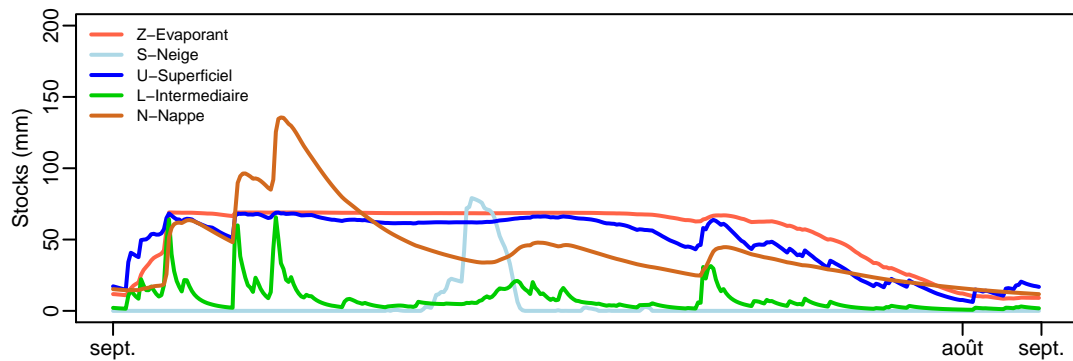



# k2070810 (324.08 km<sup>2</sup>) – année 1995–1996

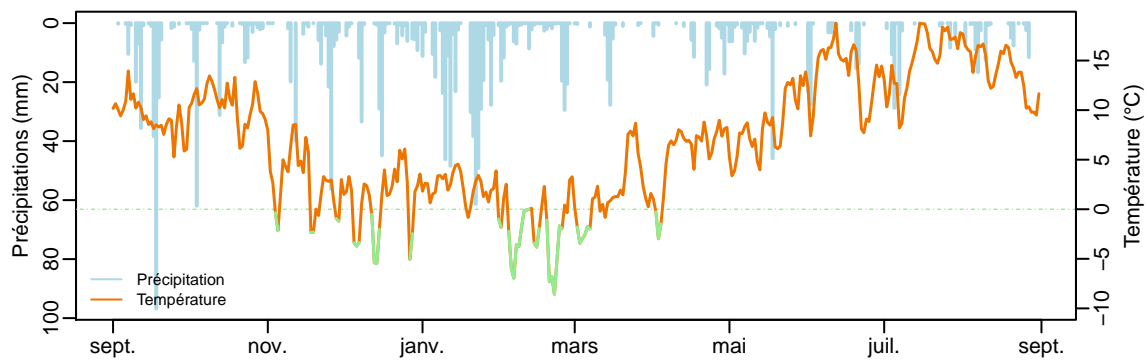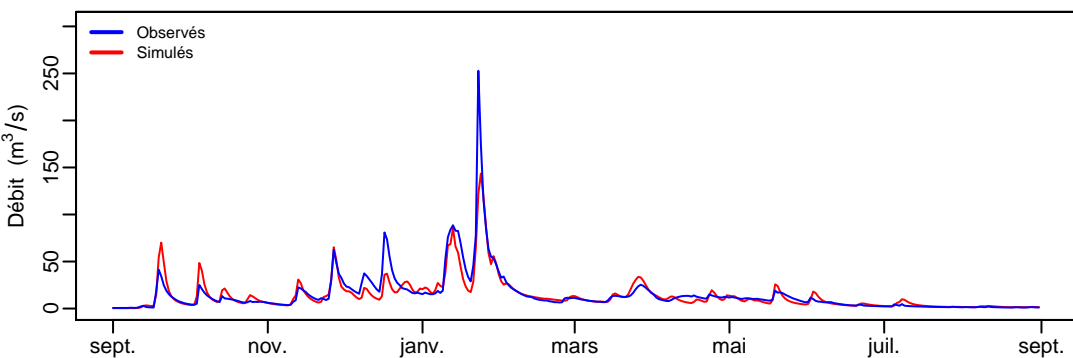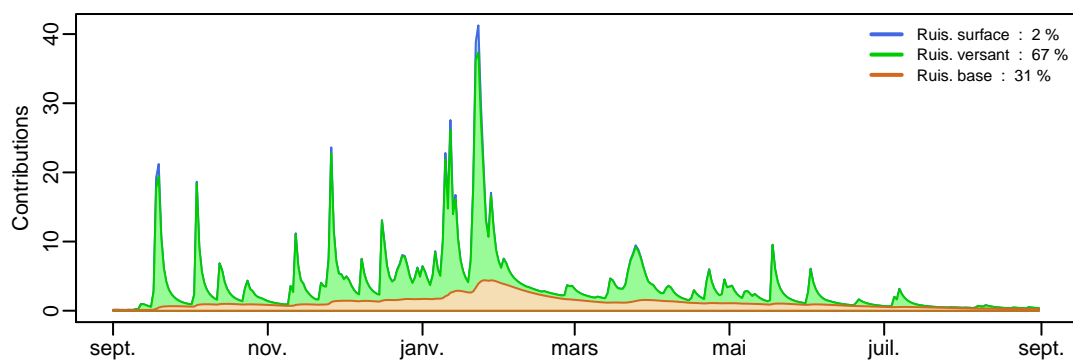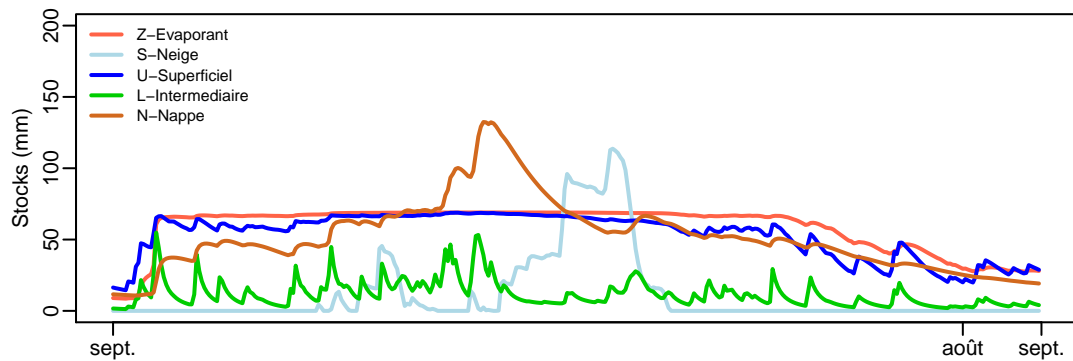

# k2070810 (324.08 km<sup>2</sup>) – année 1996–1997

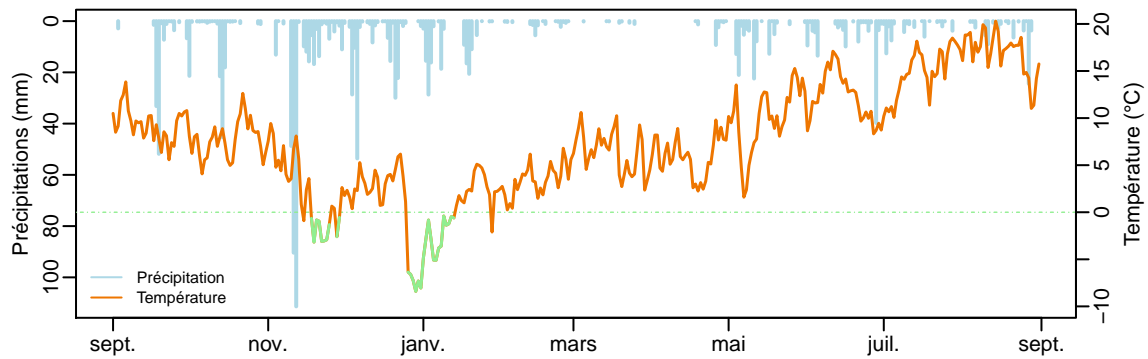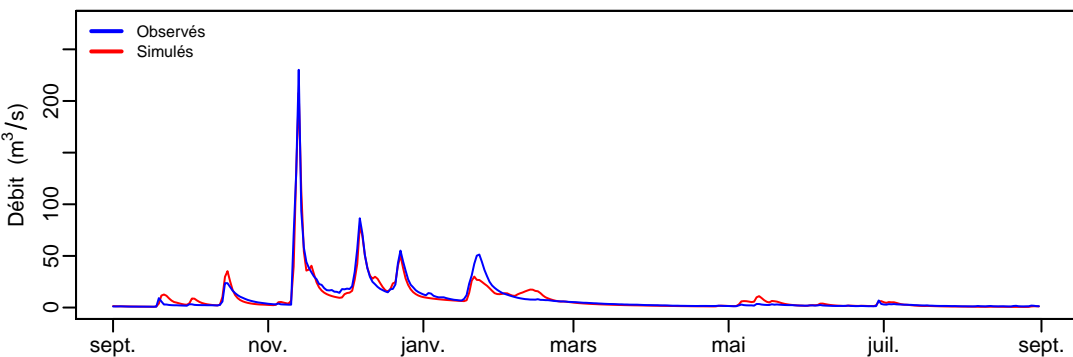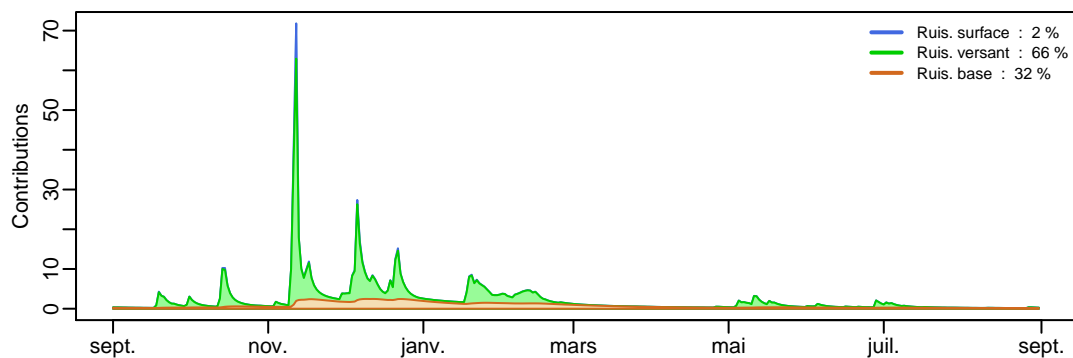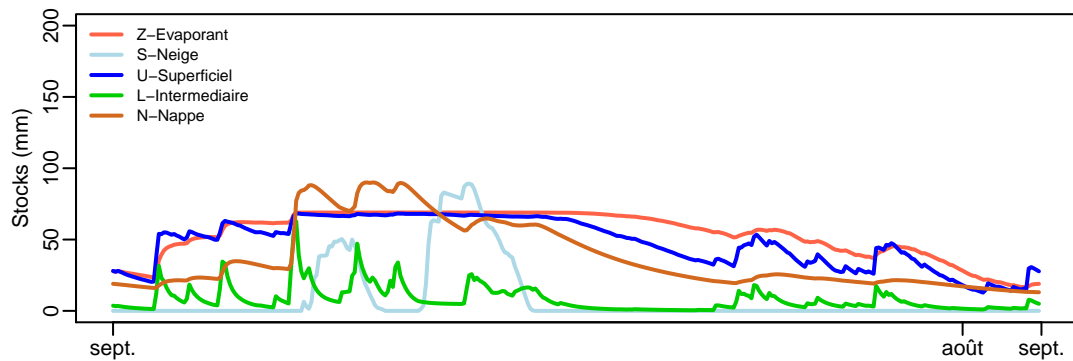

# k2070810 (324.08 km<sup>2</sup>) – année 1997–1998

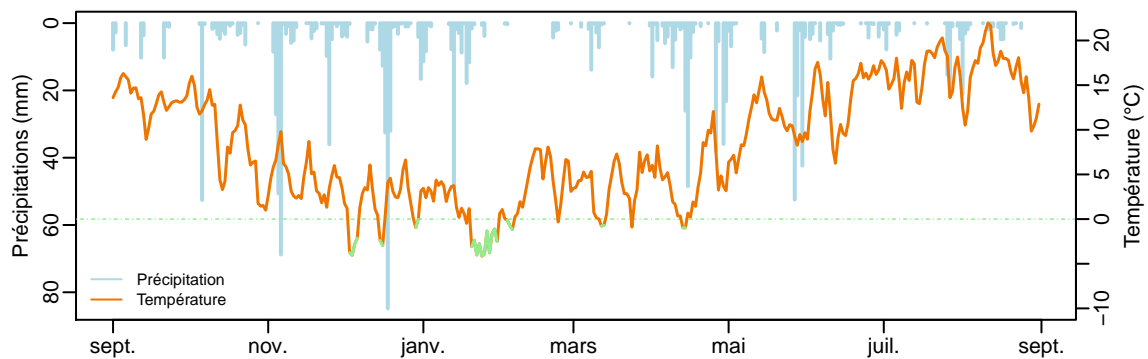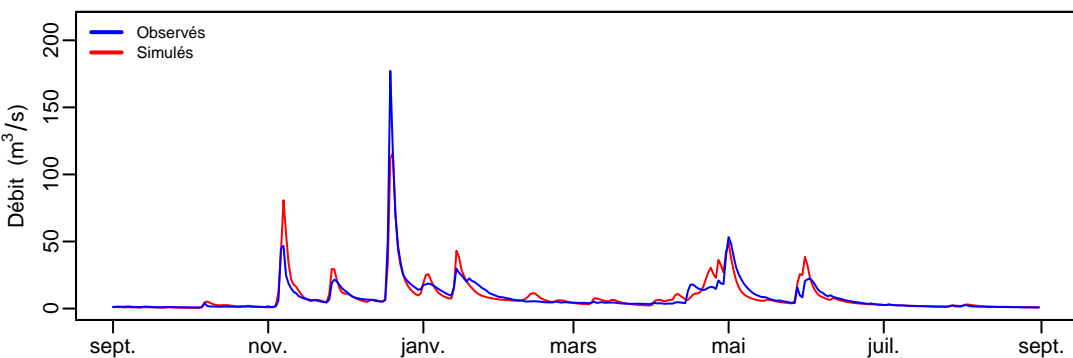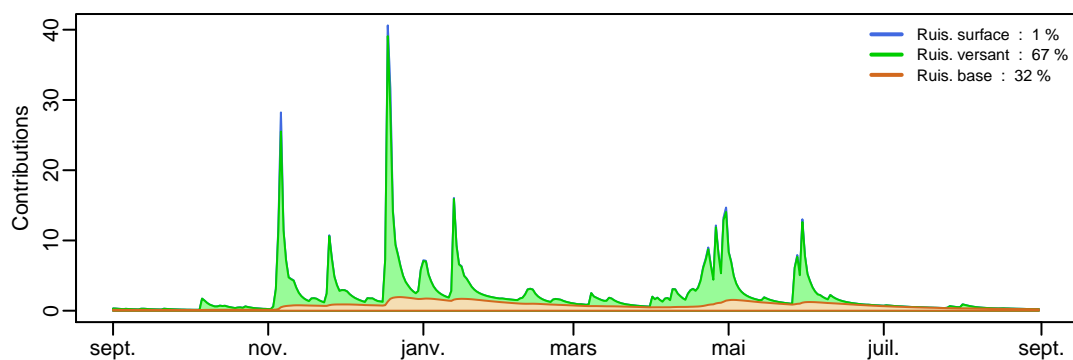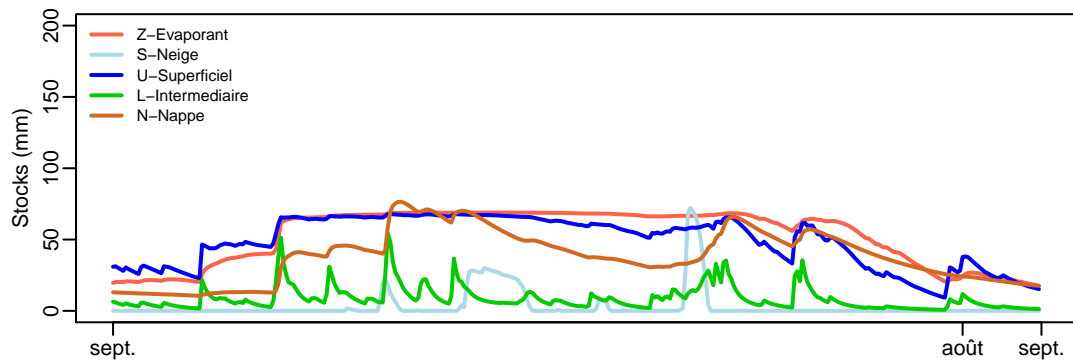

# k2070810 (324.08 km<sup>2</sup>) – année 1998–1999

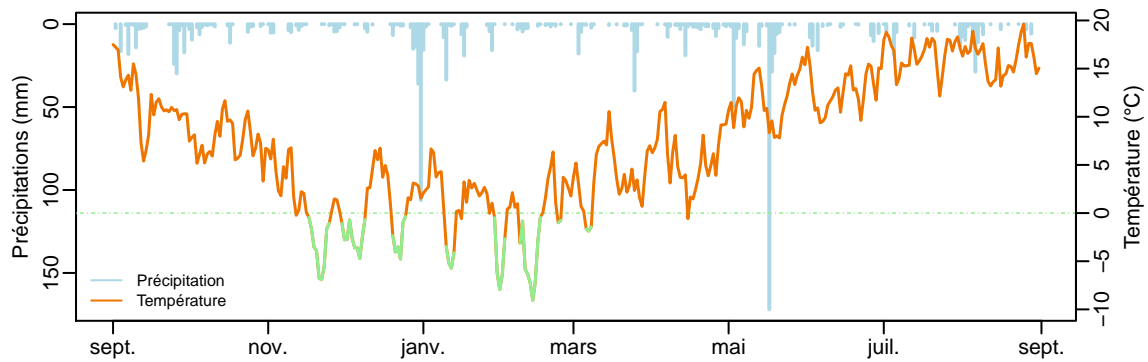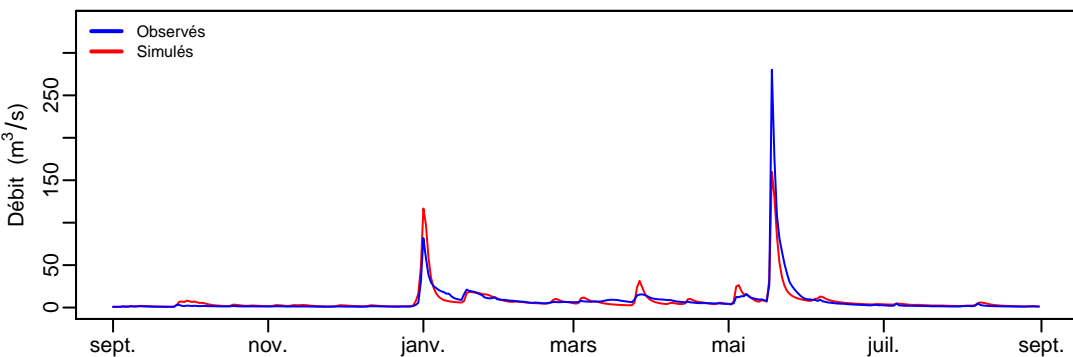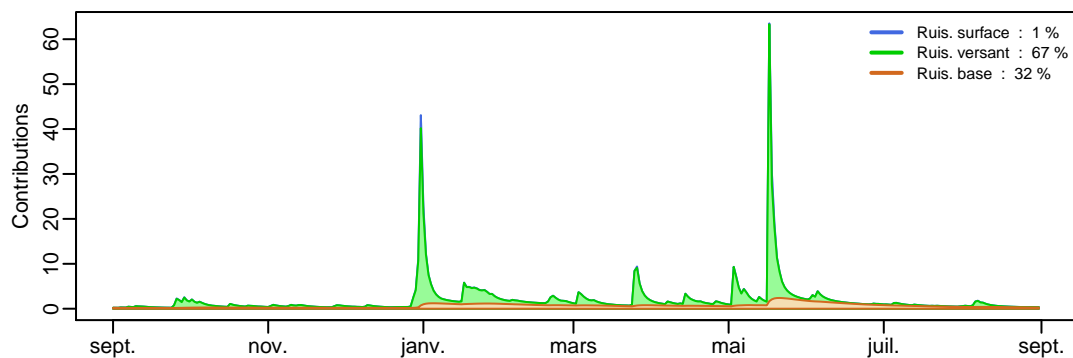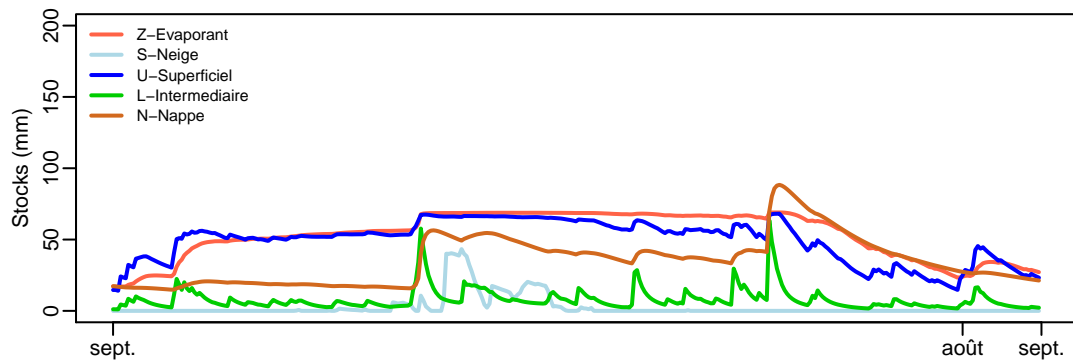

# k2070810 (324.08 km<sup>2</sup>) – année 1999–2000

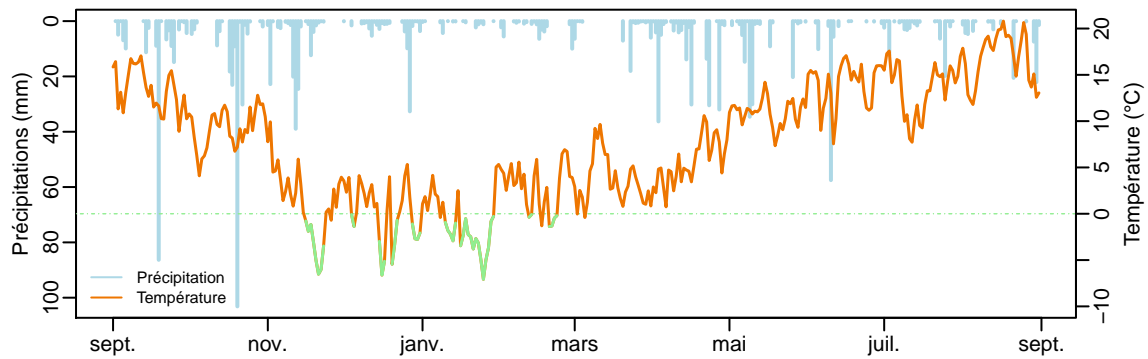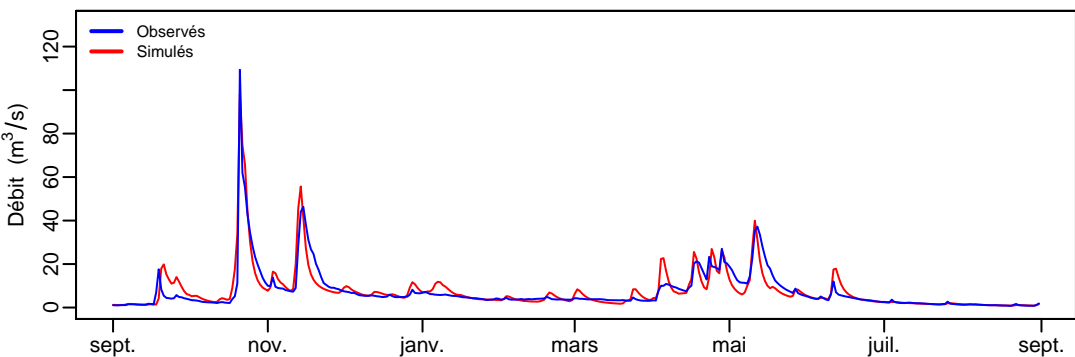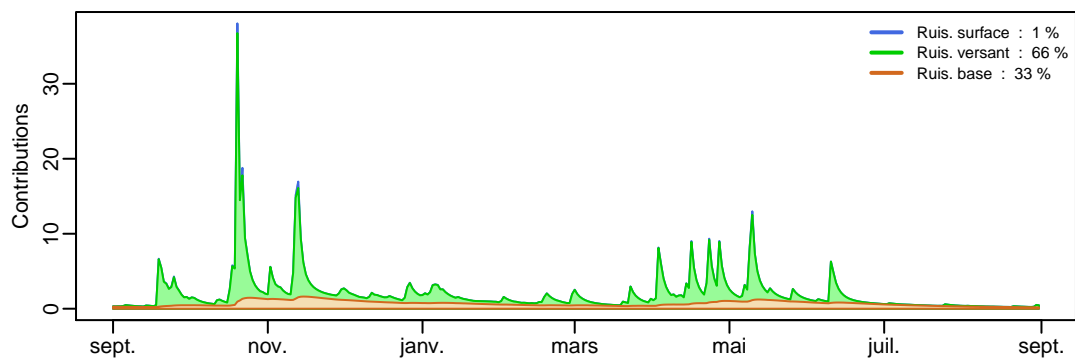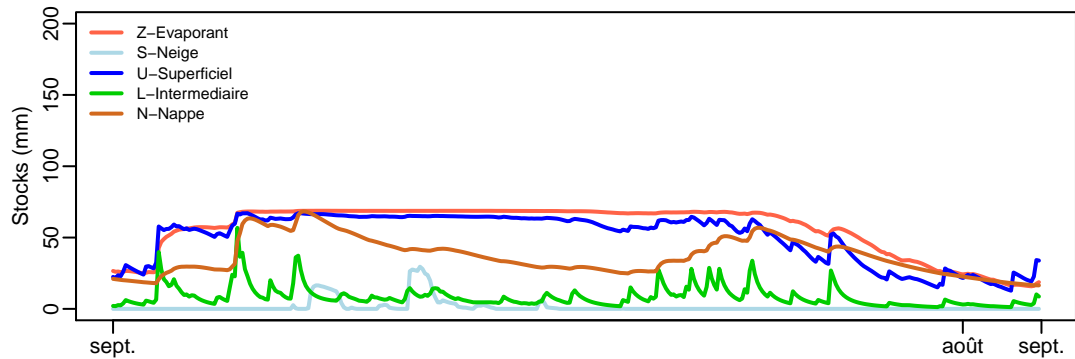

# k2070810 (324.08 km<sup>2</sup>) – année 2000–2001

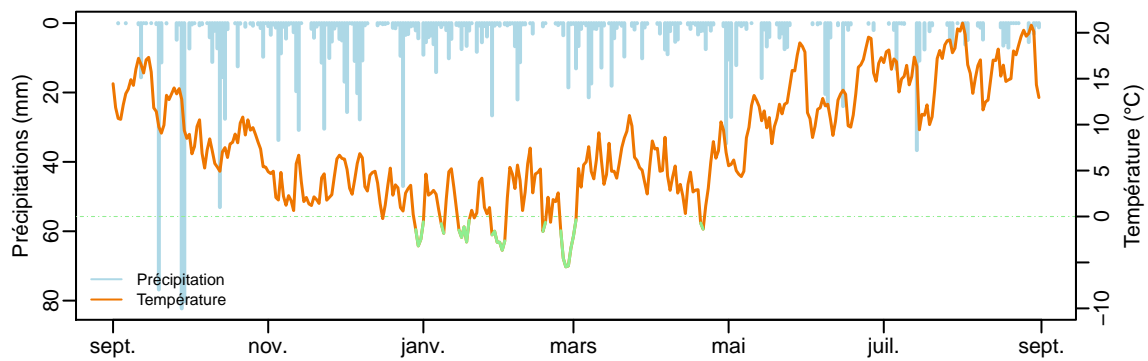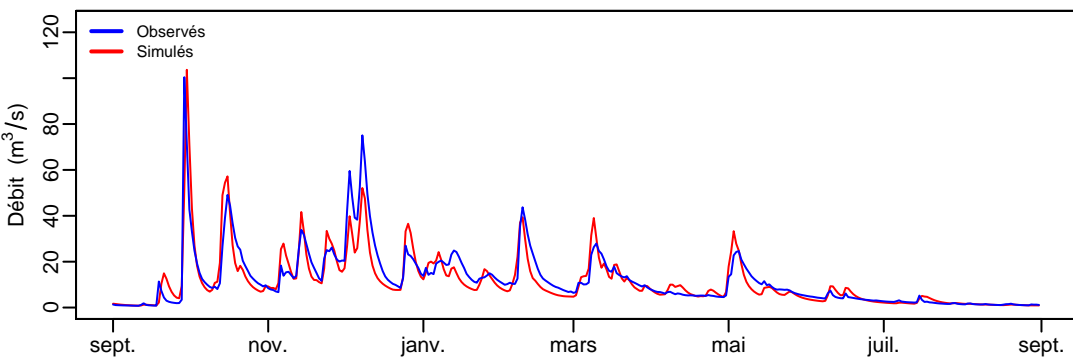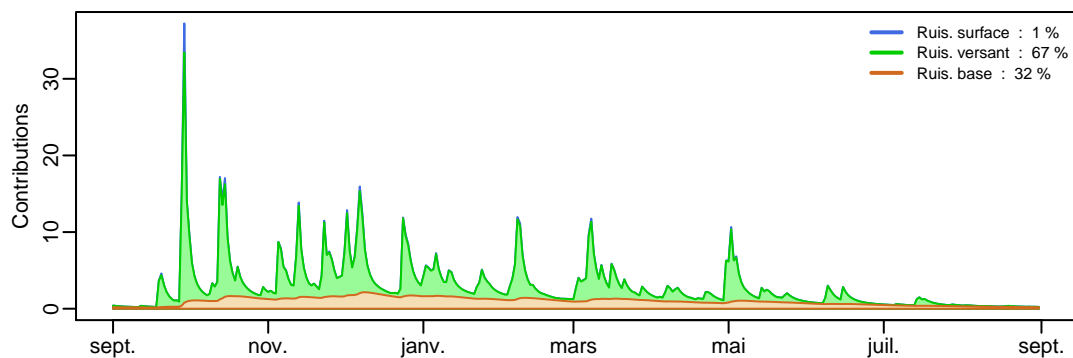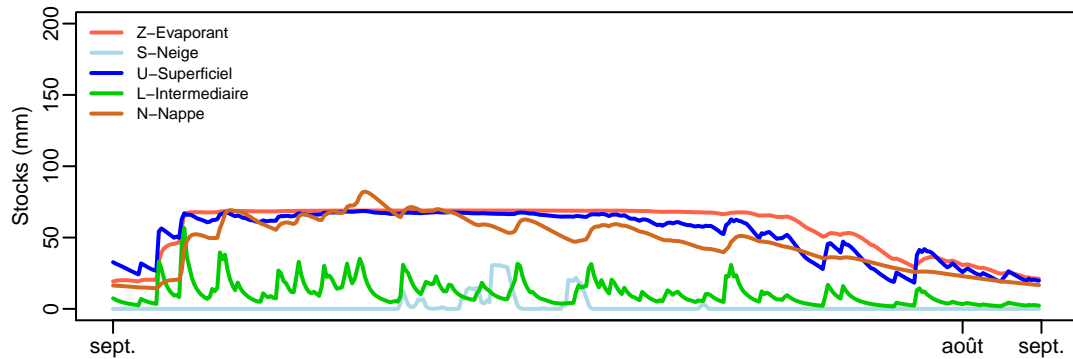

# k2070810 (324.08 km<sup>2</sup>) – année 2001–2002

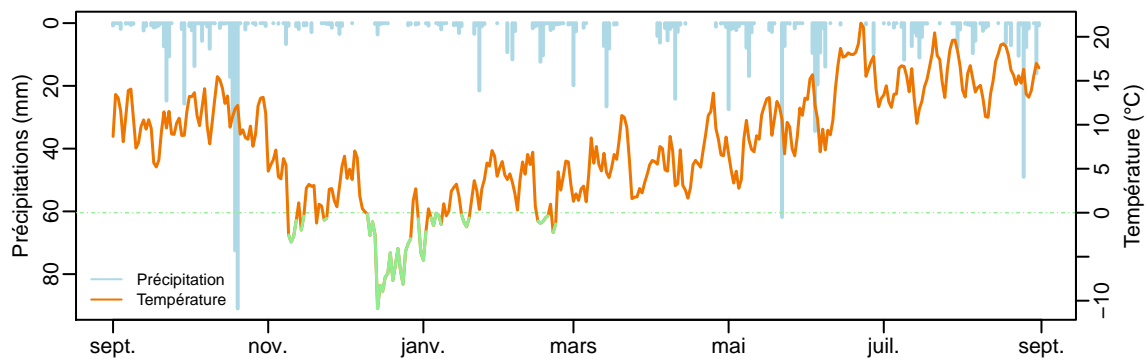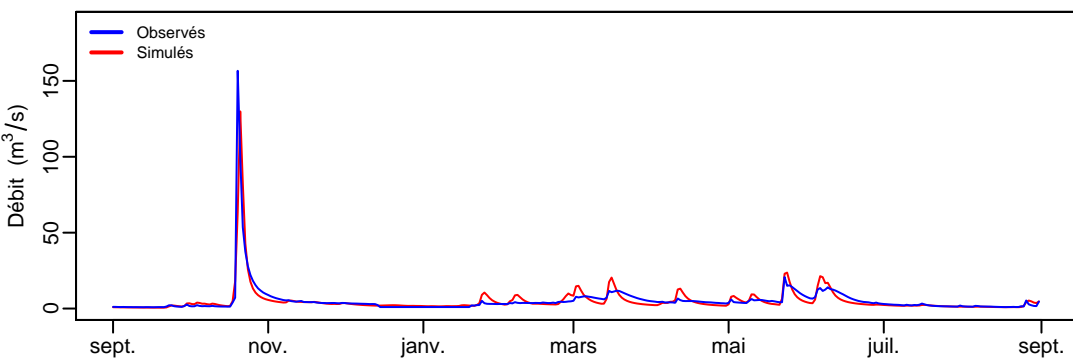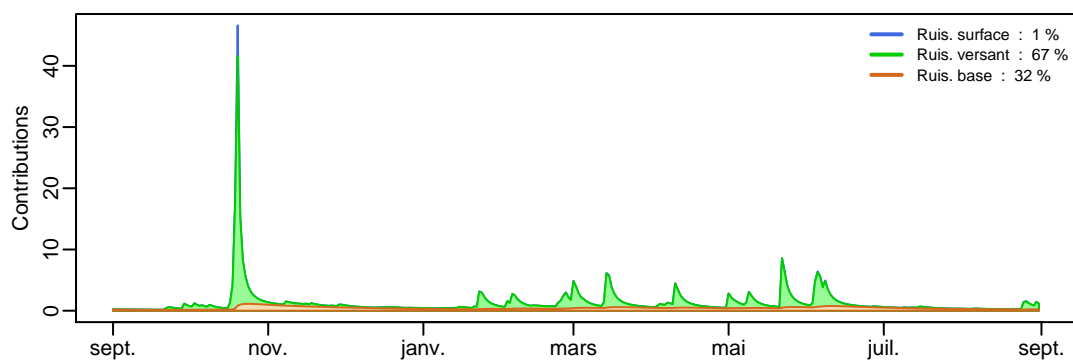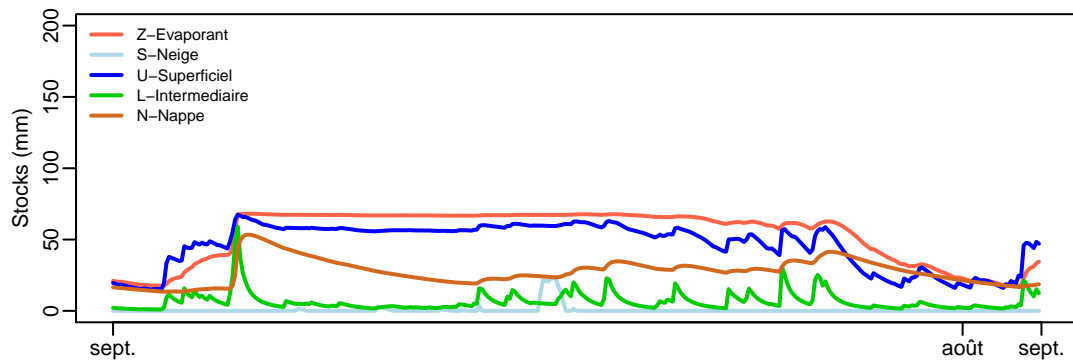

# k2070810 (324.08 km<sup>2</sup>) – année 2002–2003

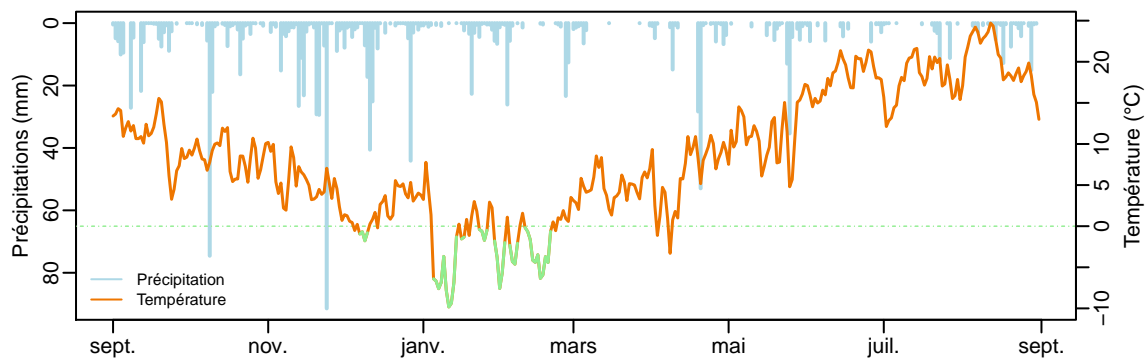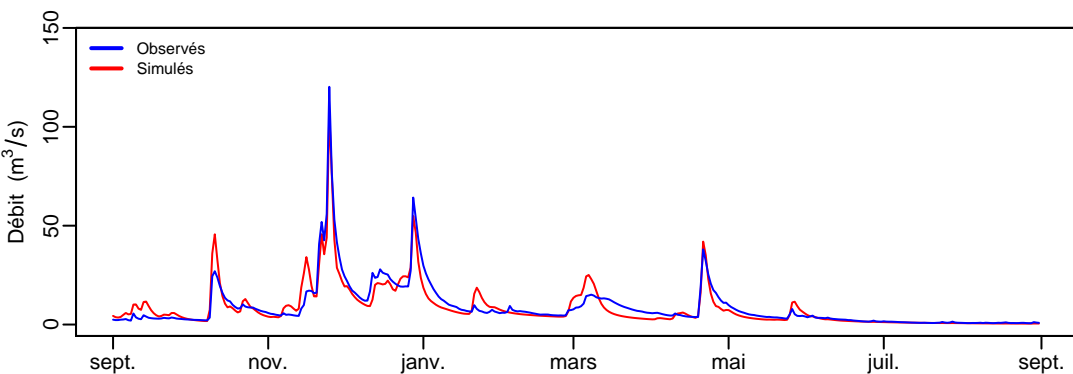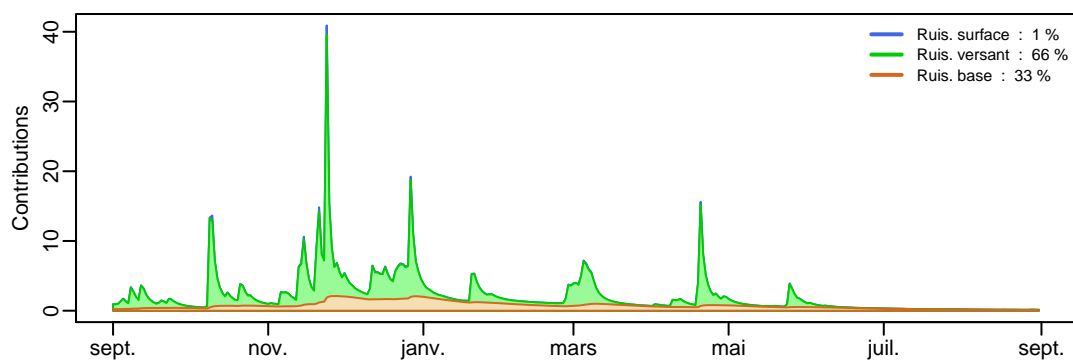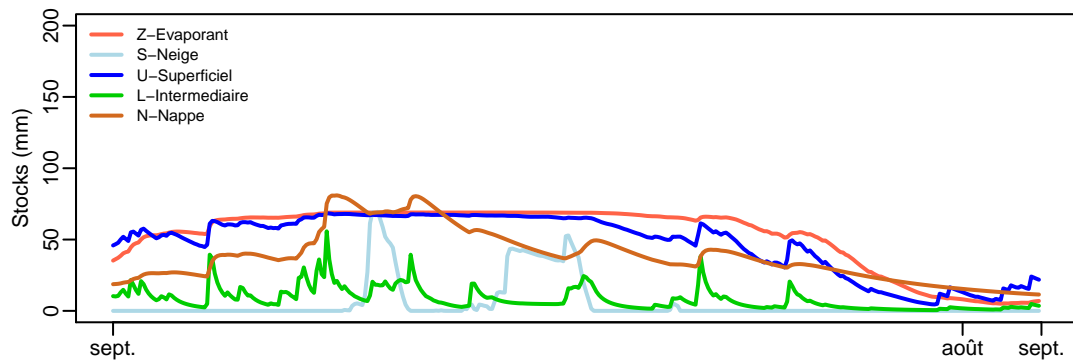



# k2070810 (324.08 km<sup>2</sup>) – année 2003–2004

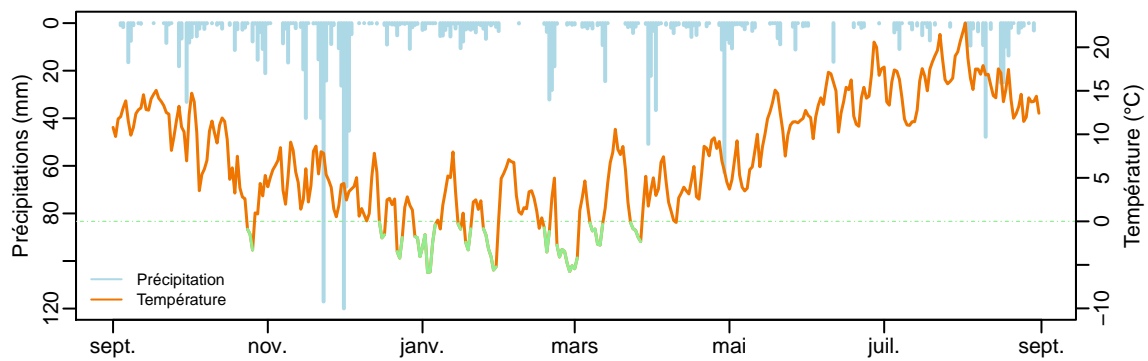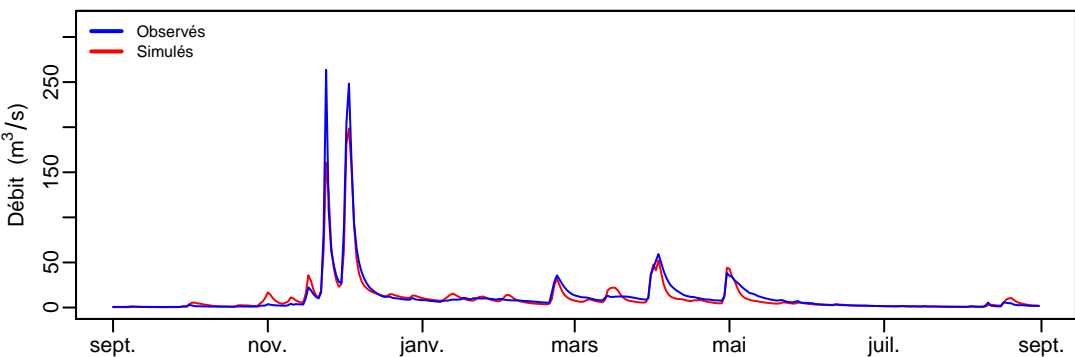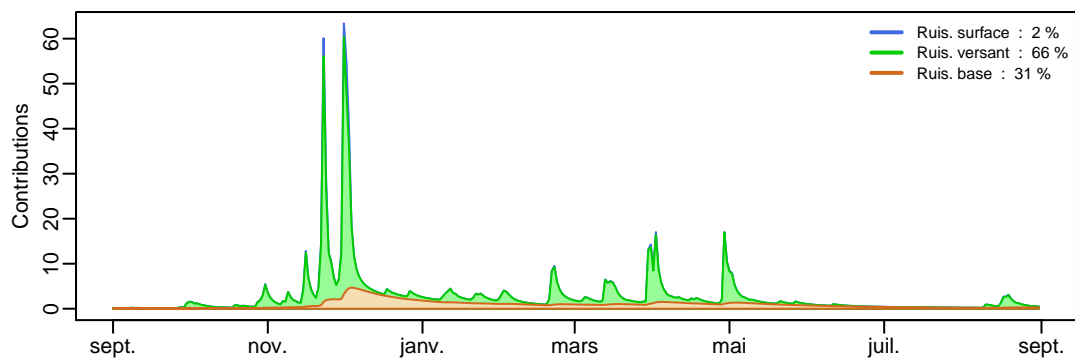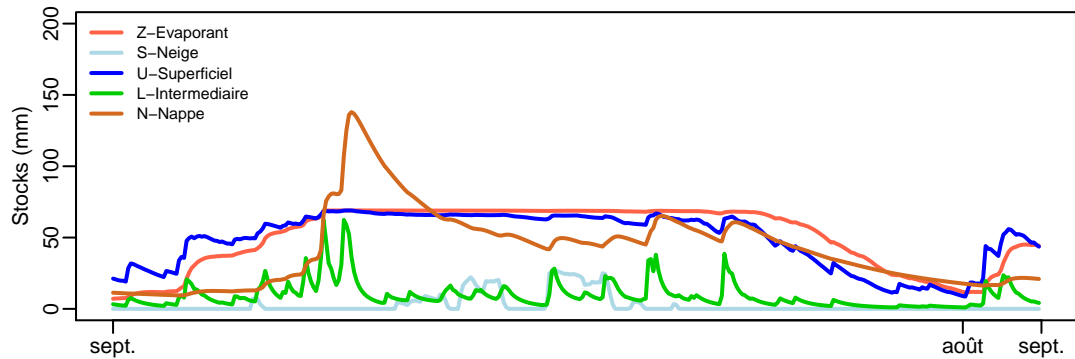

# k2070810 (324.08 km<sup>2</sup>) – année 2004–2005

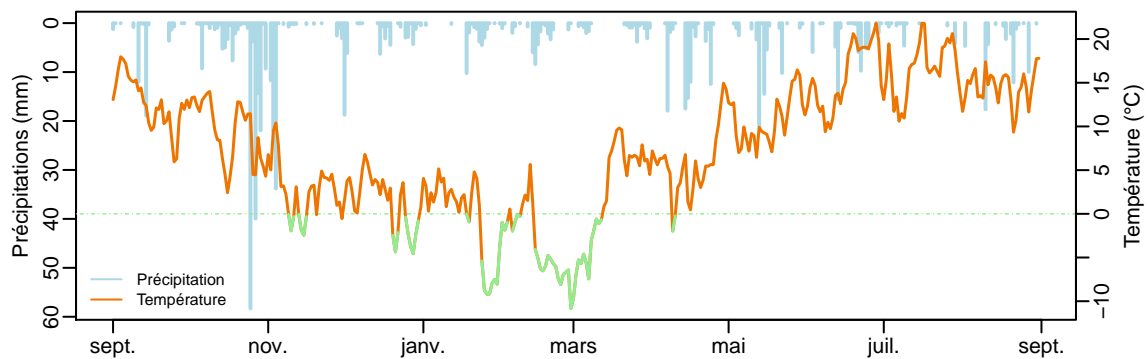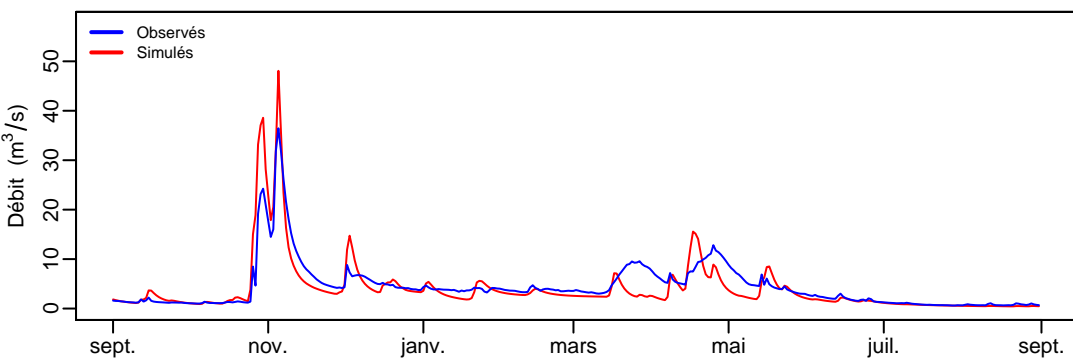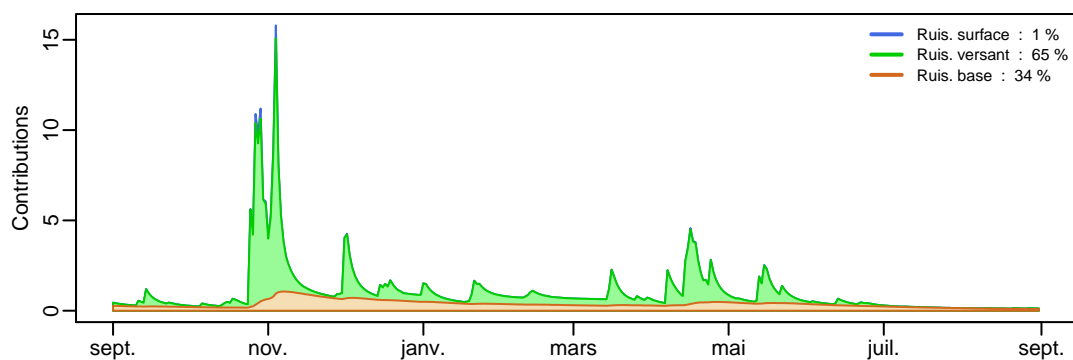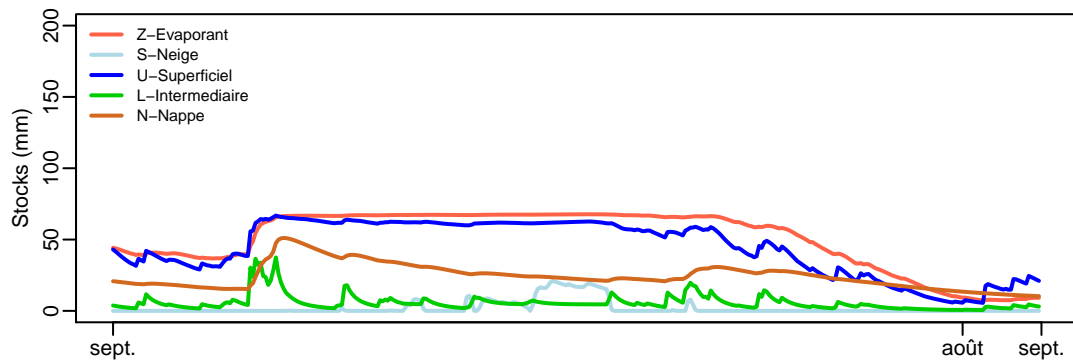

# k2070810 (324.08 km<sup>2</sup>) – année 2005–2006

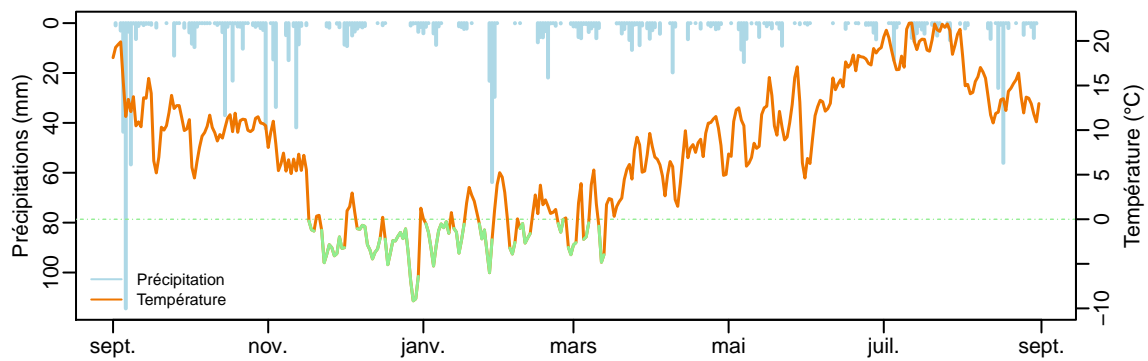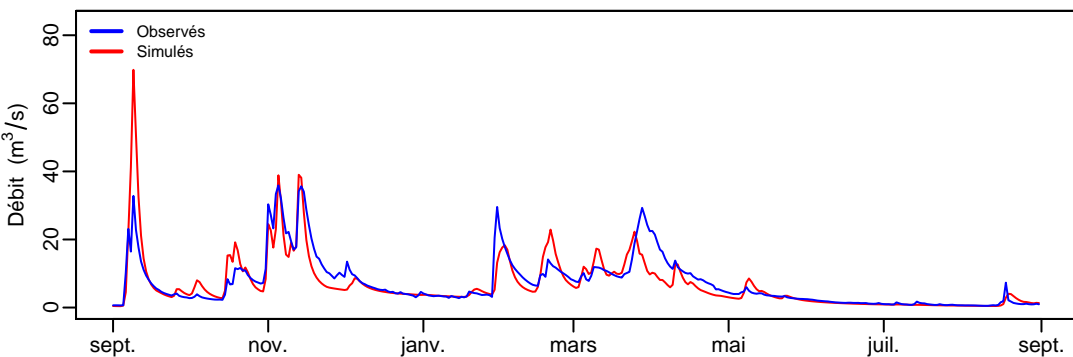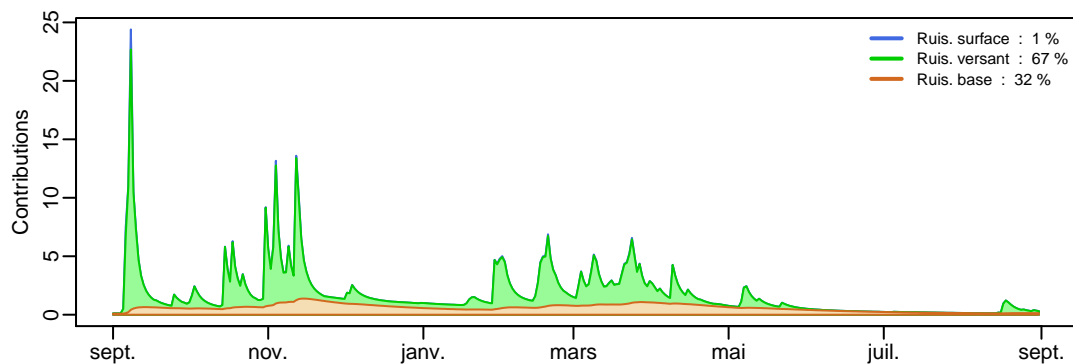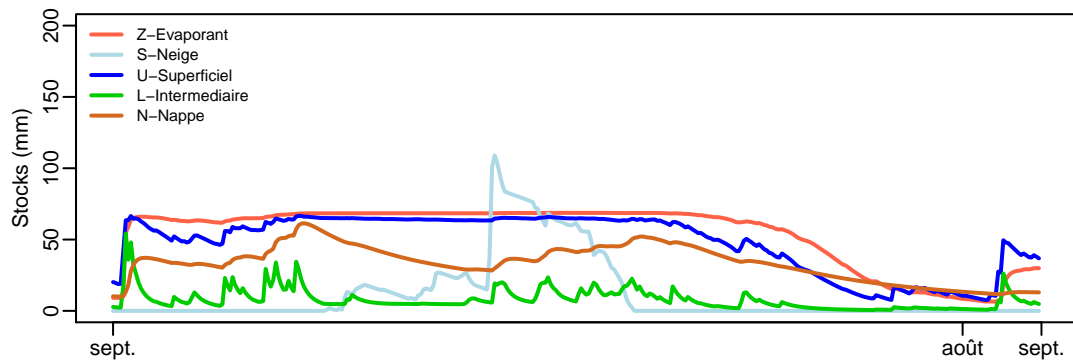

# k2070810 (324.08 km<sup>2</sup>) – année 2006–2007

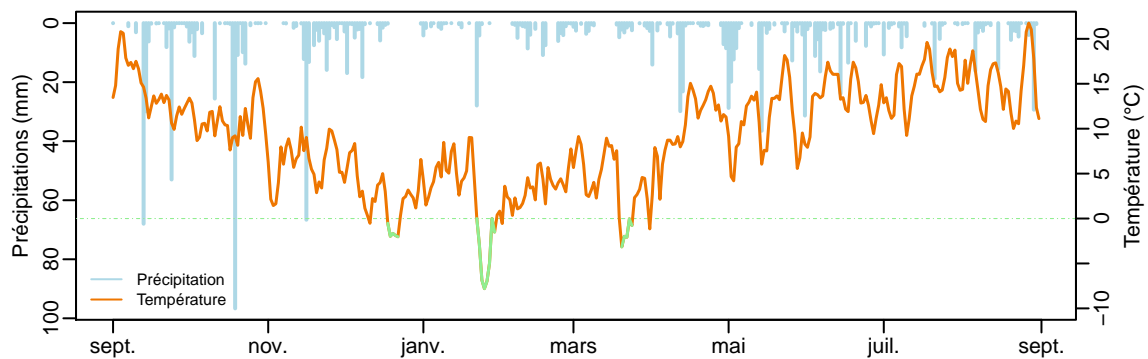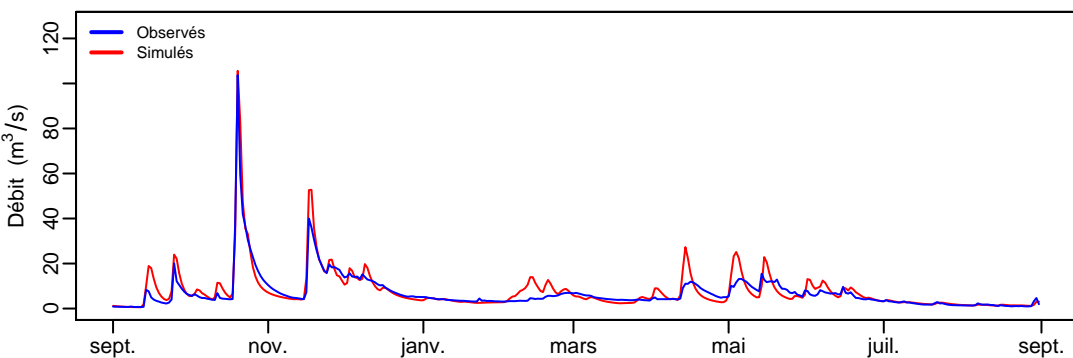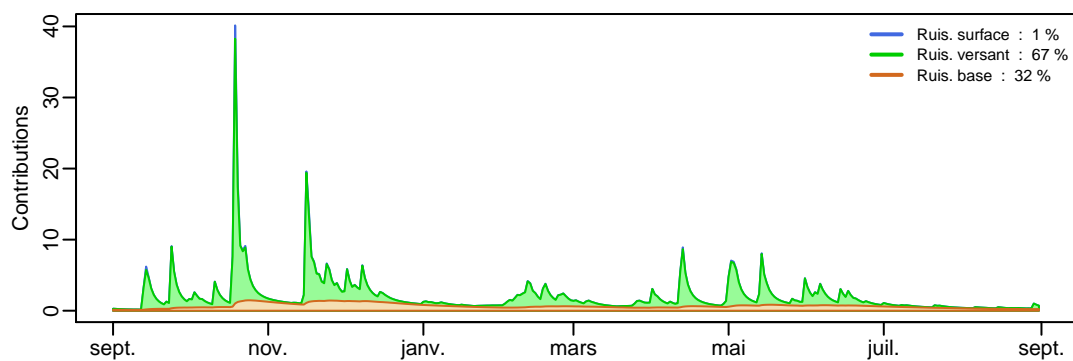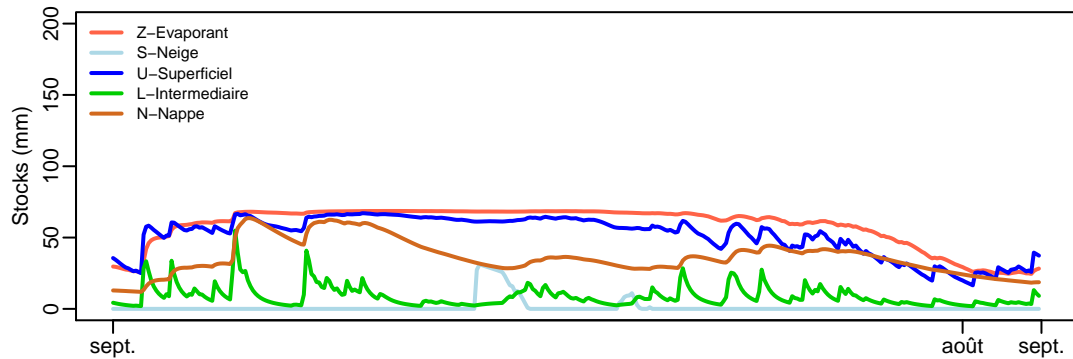

# k2070810 (324.08 km<sup>2</sup>) – année 2007–2008

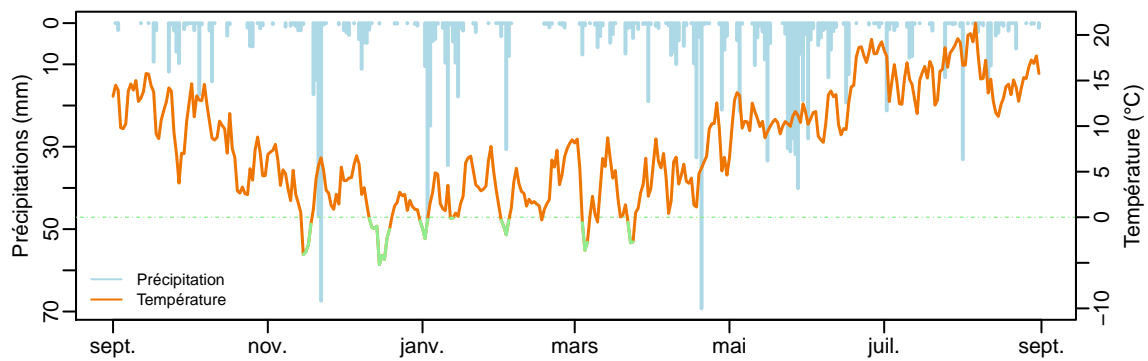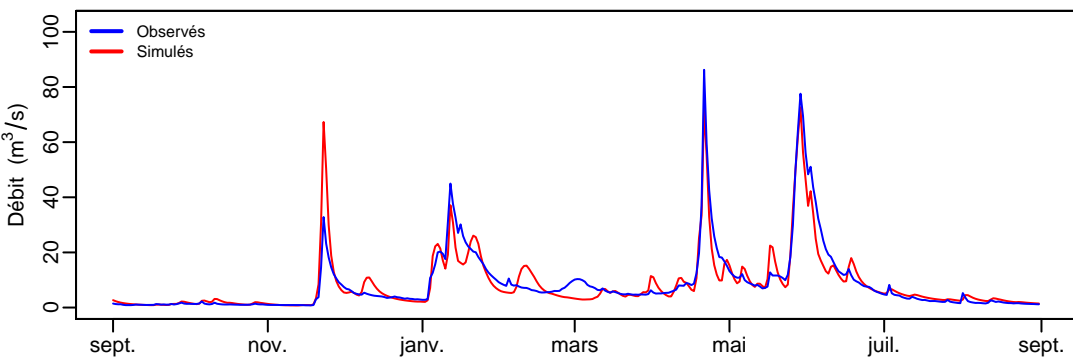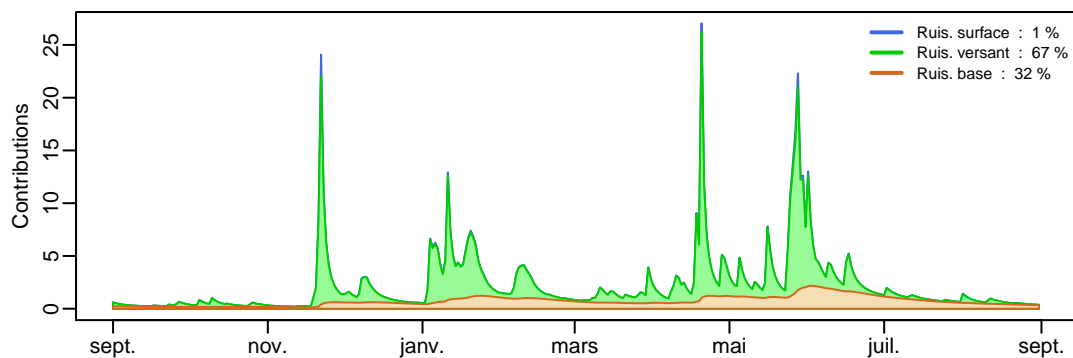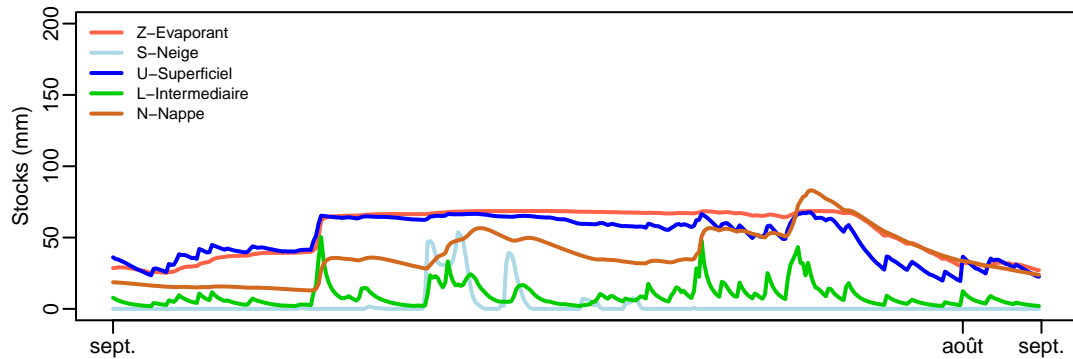

# k2070810 (324.08 km<sup>2</sup>) – année 2008–2009

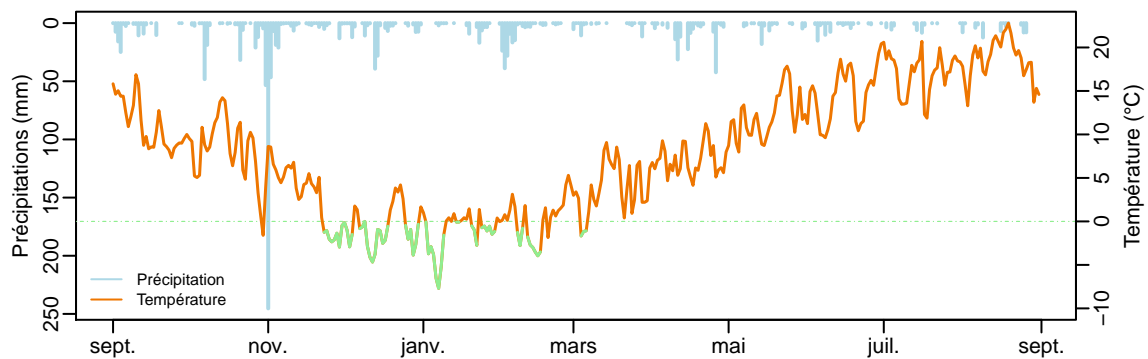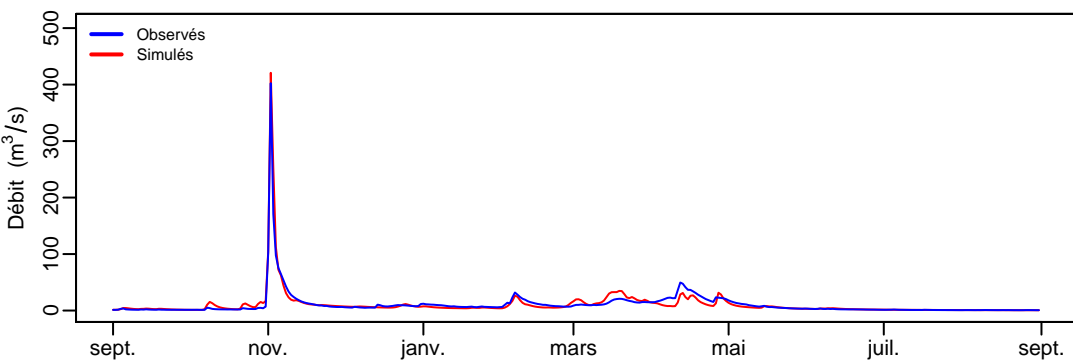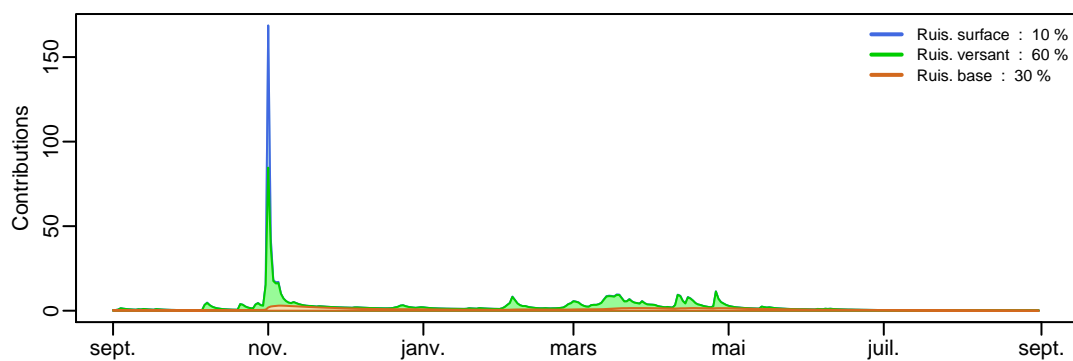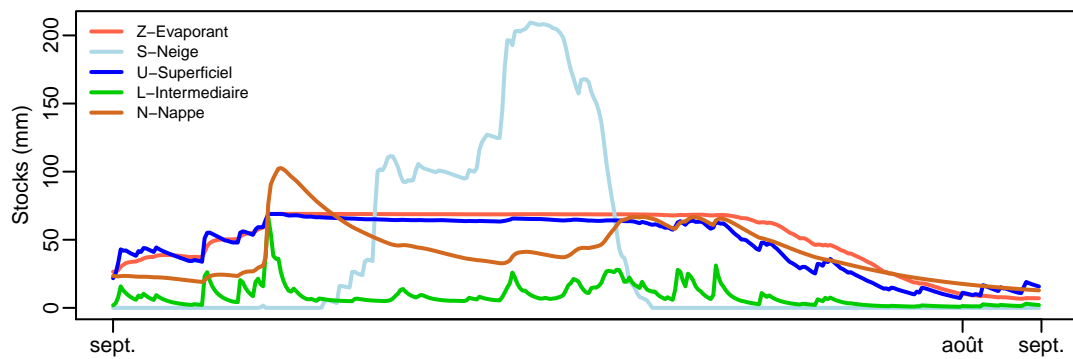

# k2123010 (113.01 km<sup>2</sup>) – année 1981–1982

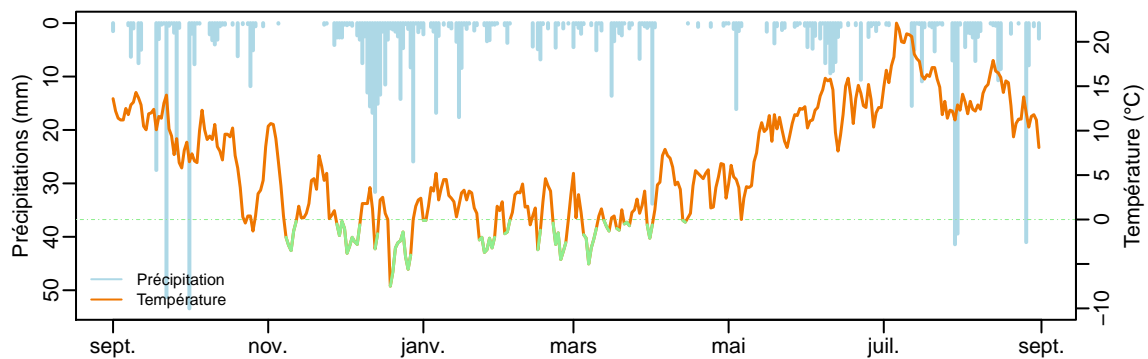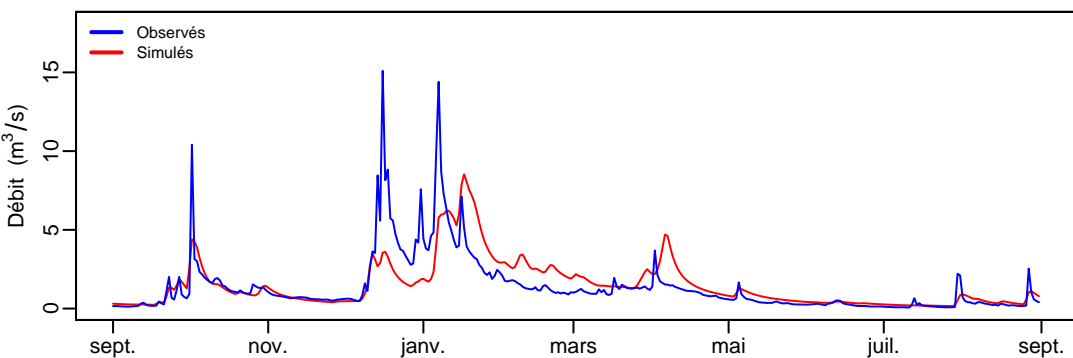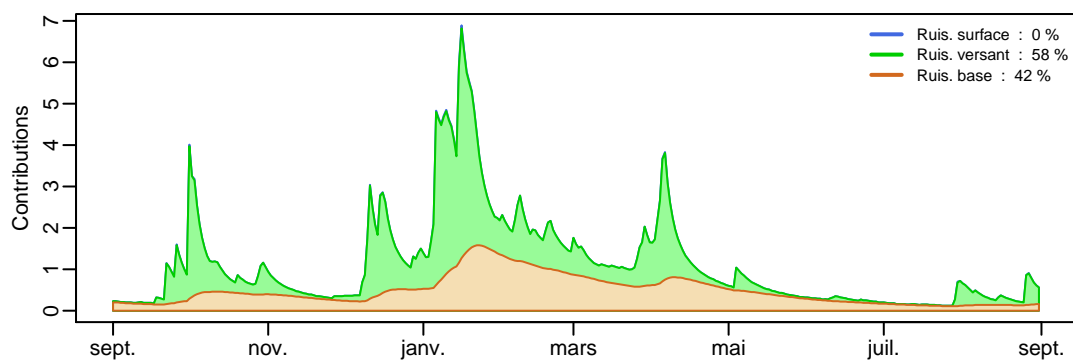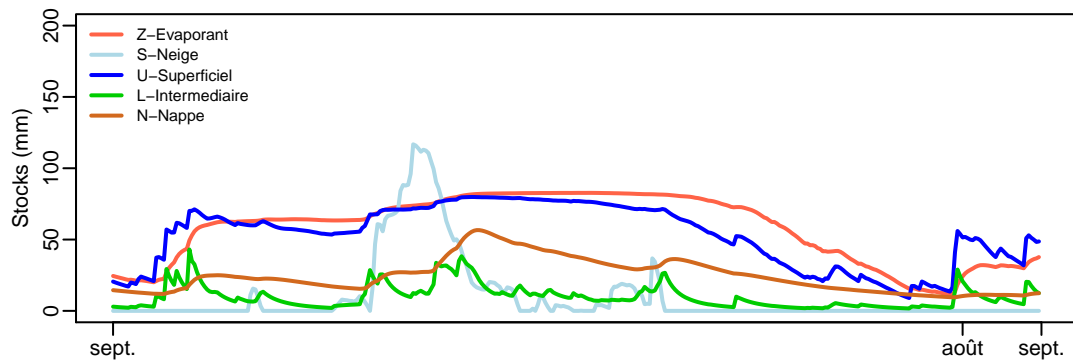

# k2123010 (113.01 km<sup>2</sup>) – année 1982–1983

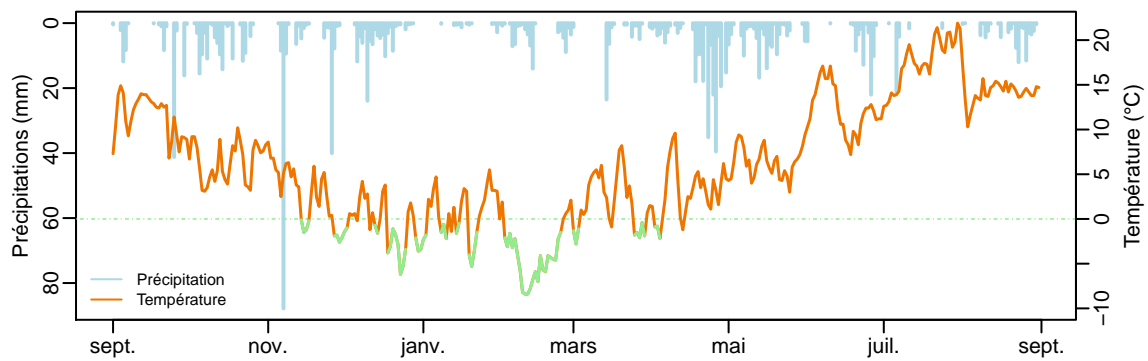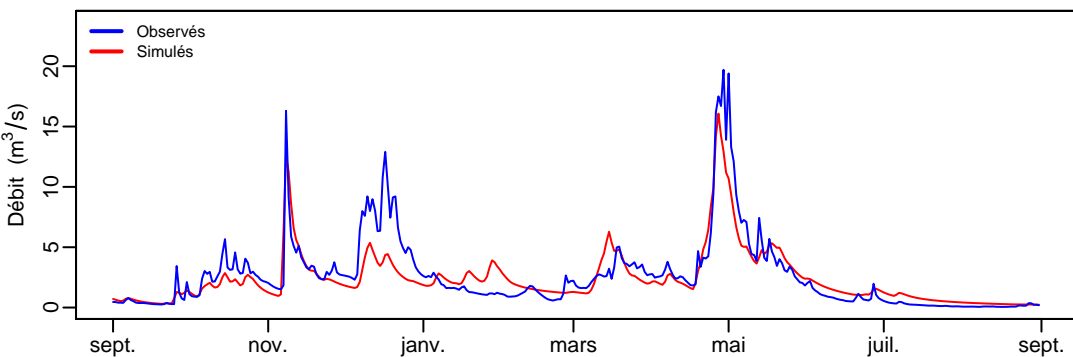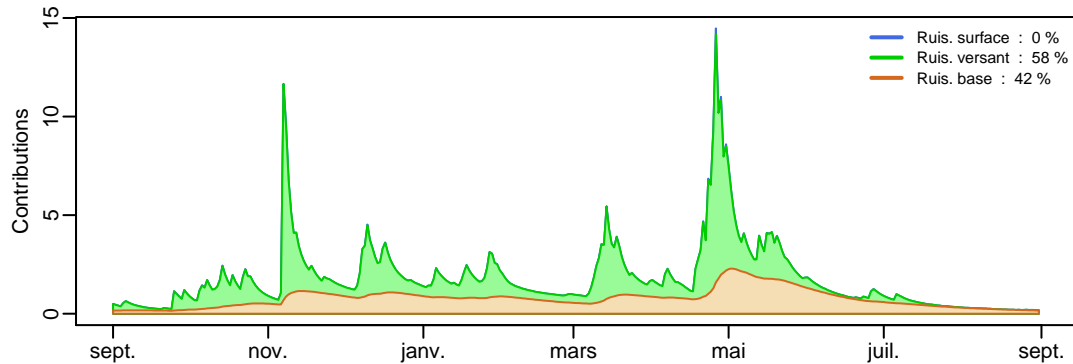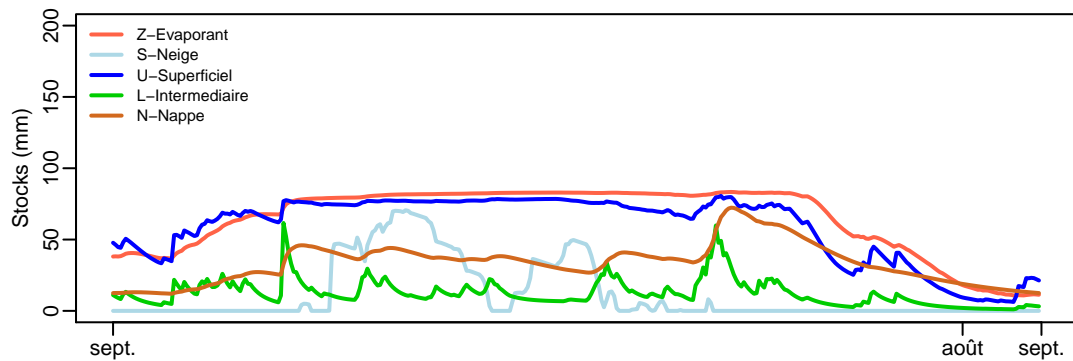



# k2123010 (113.01 km<sup>2</sup>) – année 1983–1984

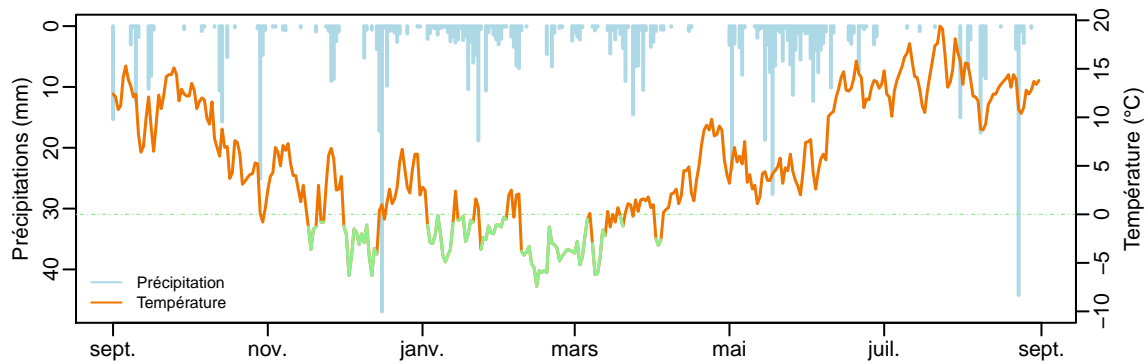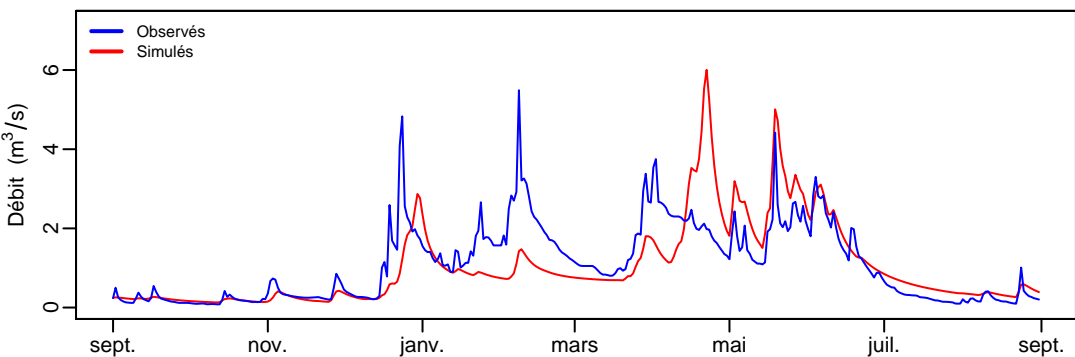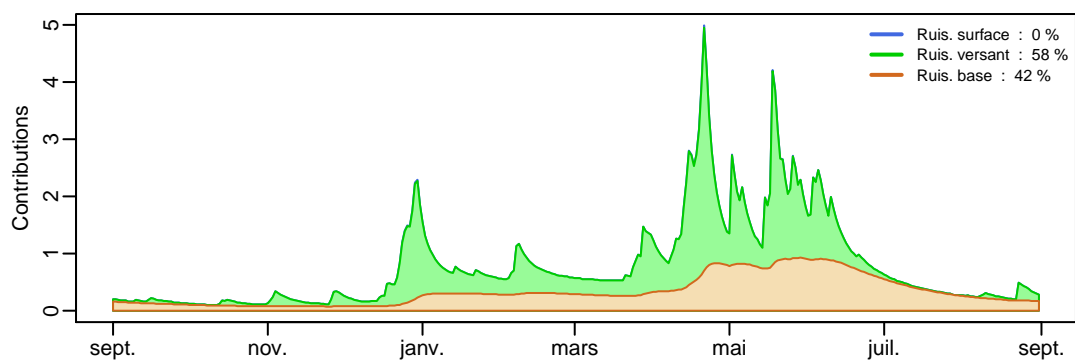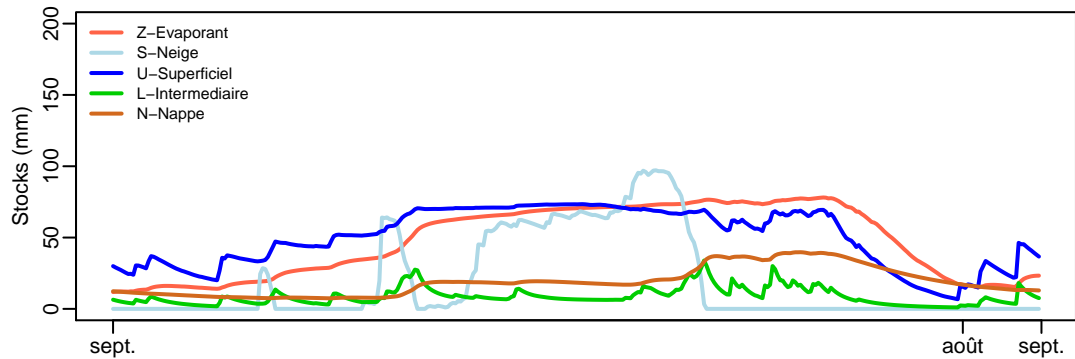

# k2123010 (113.01 km<sup>2</sup>) – année 1984–1985

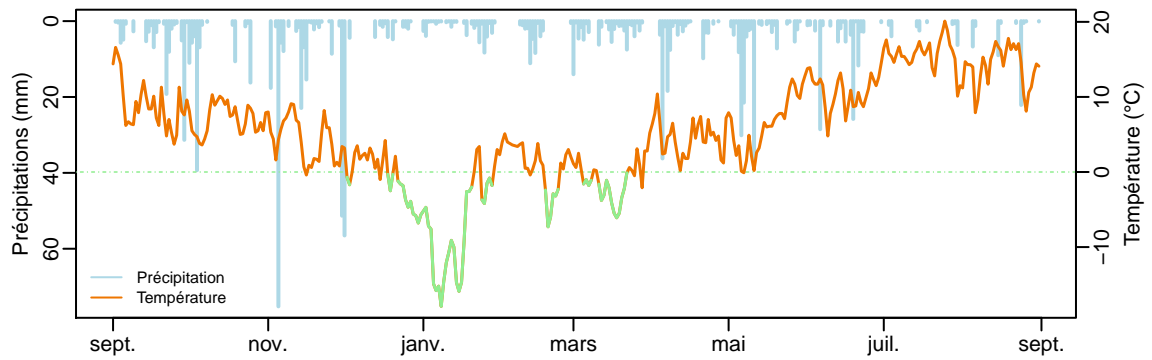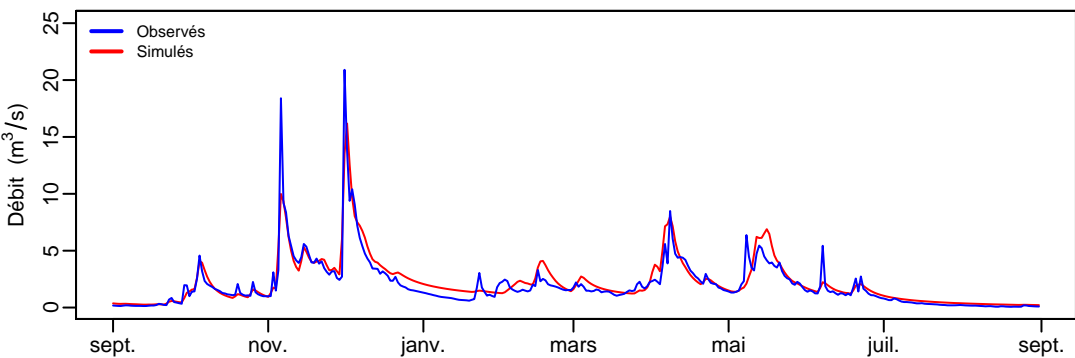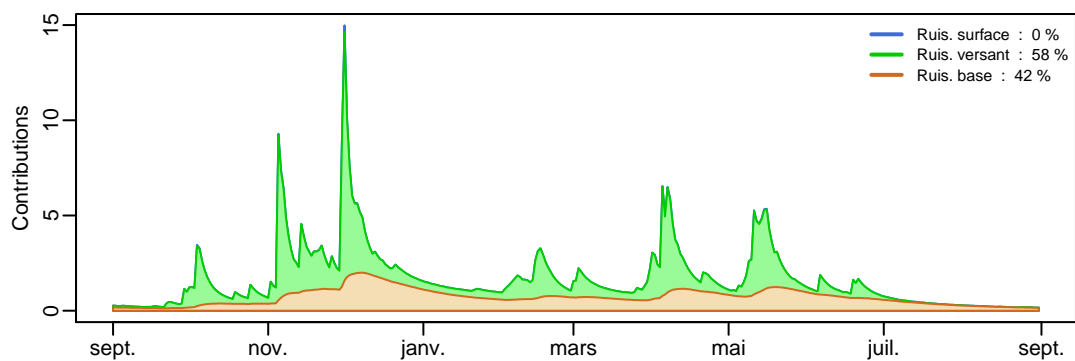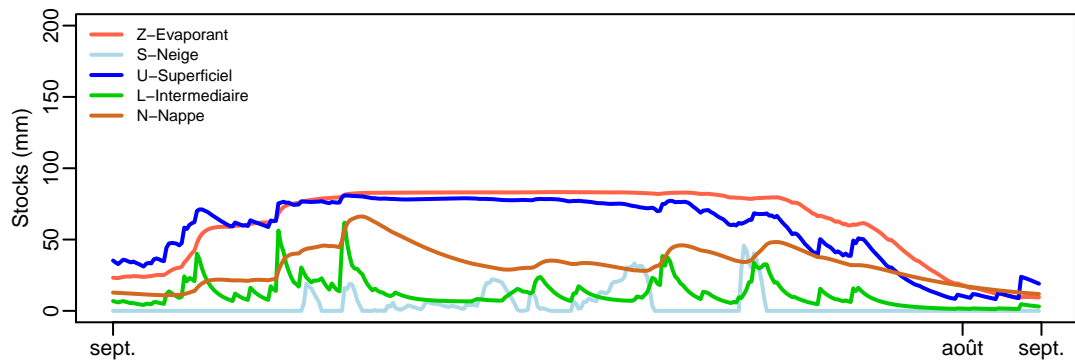

# k2123010 (113.01 km<sup>2</sup>) – année 1985–1986

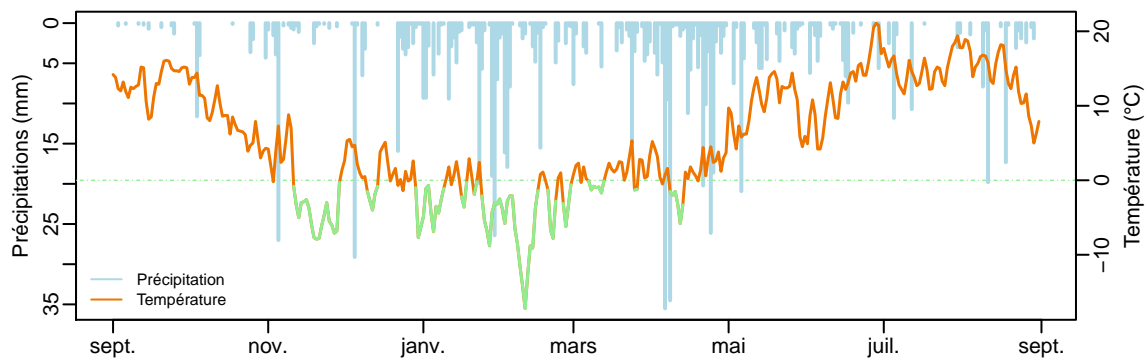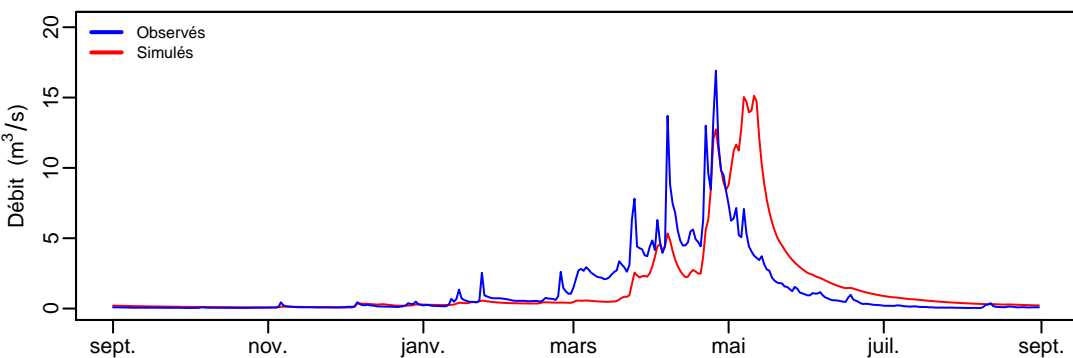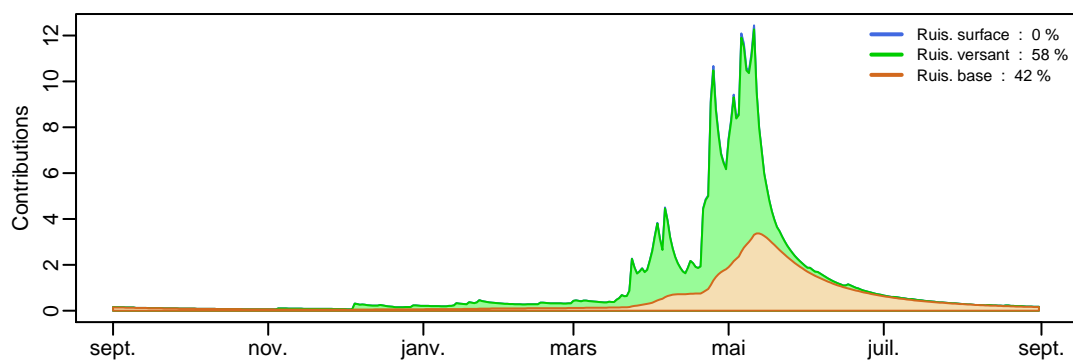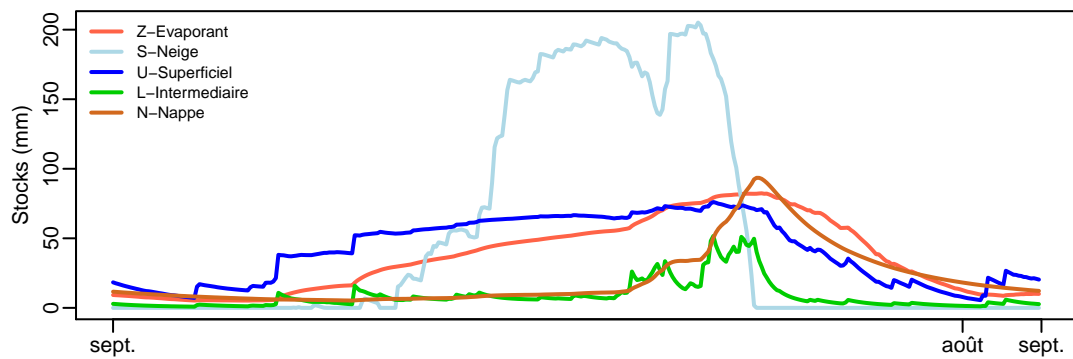

# k2123010 (113.01 km<sup>2</sup>) – année 1986–1987

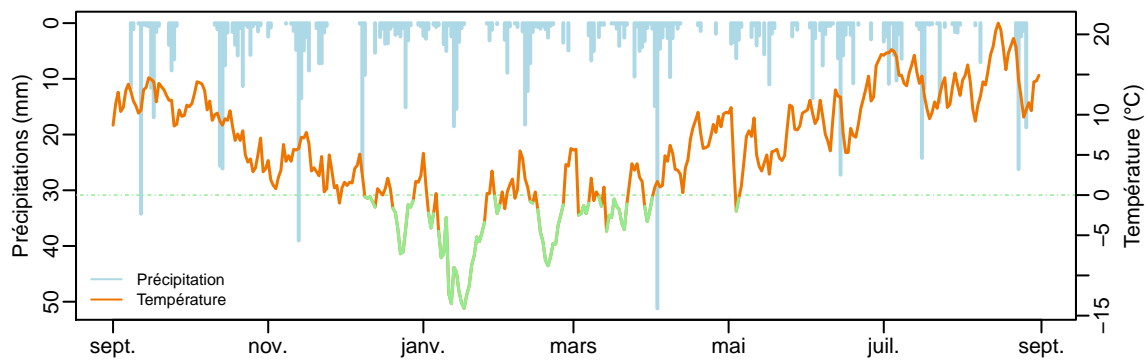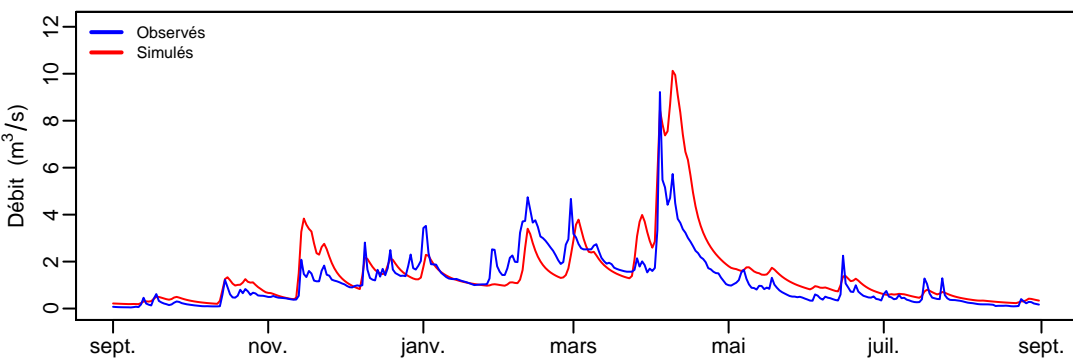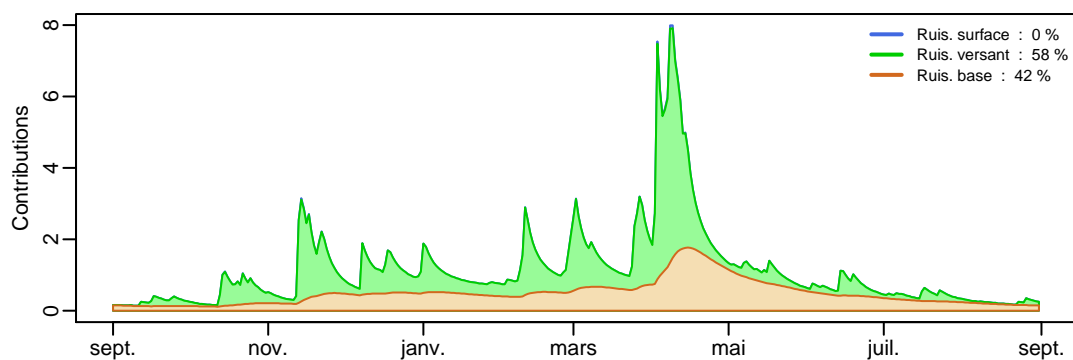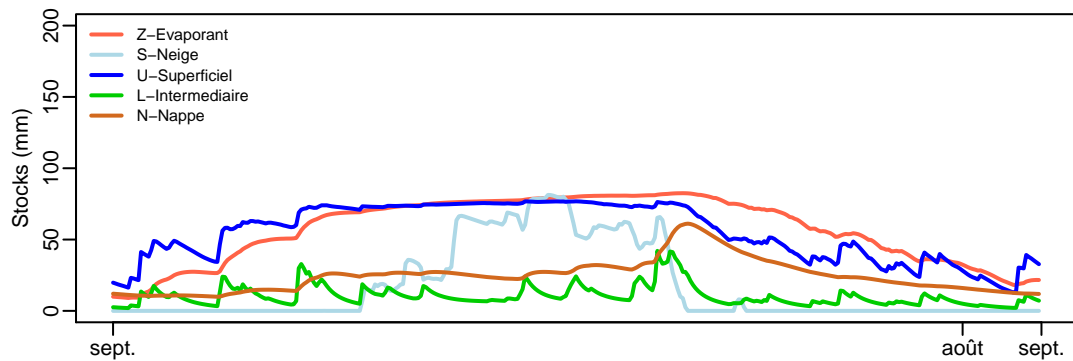

# k2123010 (113.01 km<sup>2</sup>) – année 1987–1988

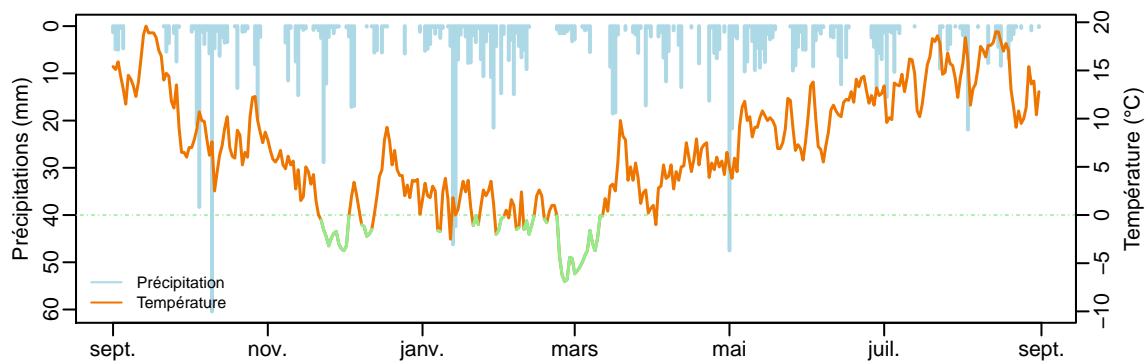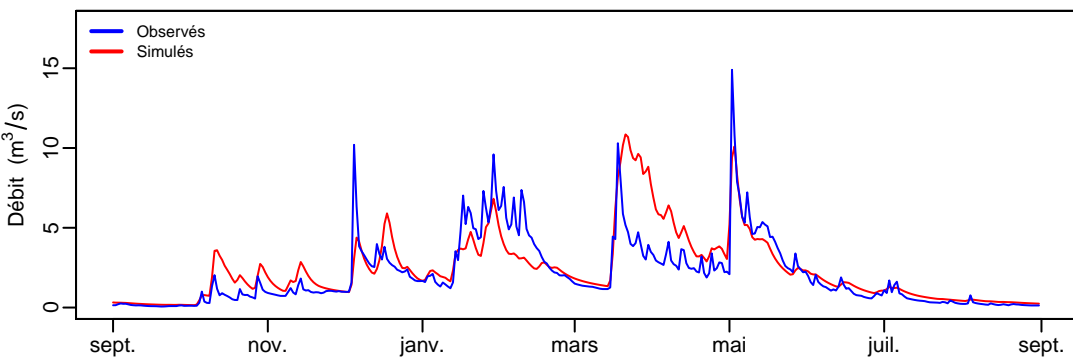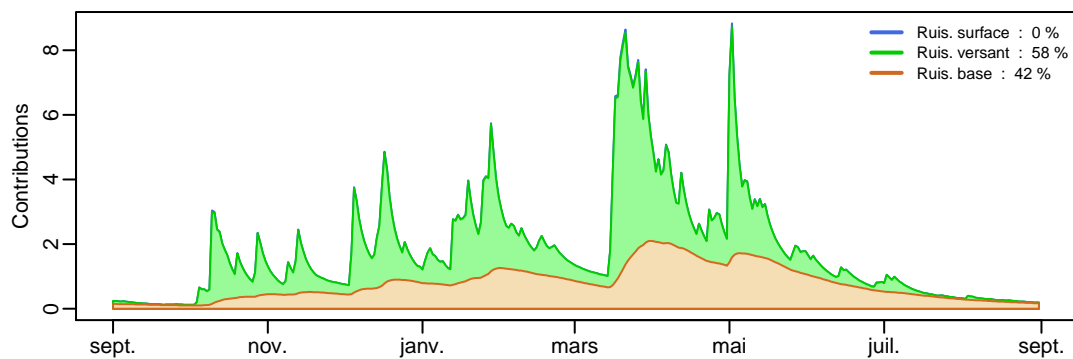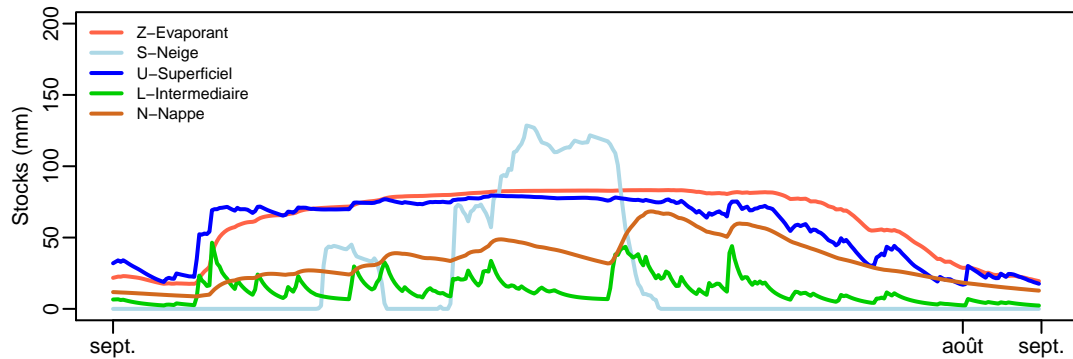

# k2123010 (113.01 km<sup>2</sup>) – année 1988–1989

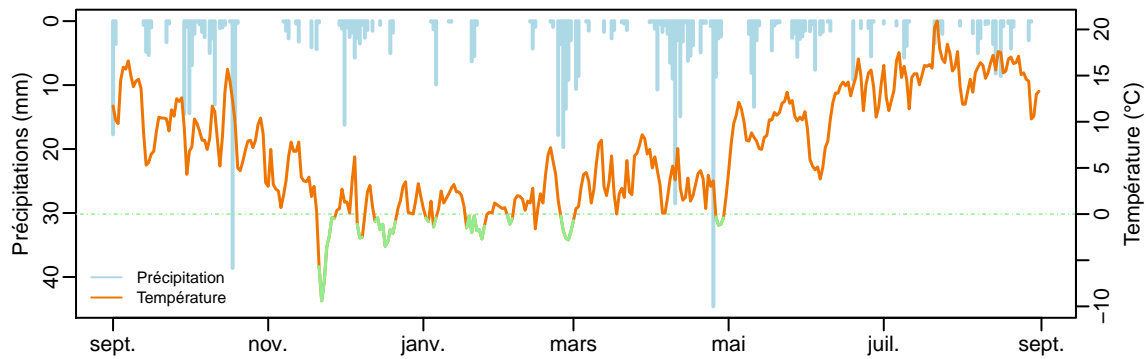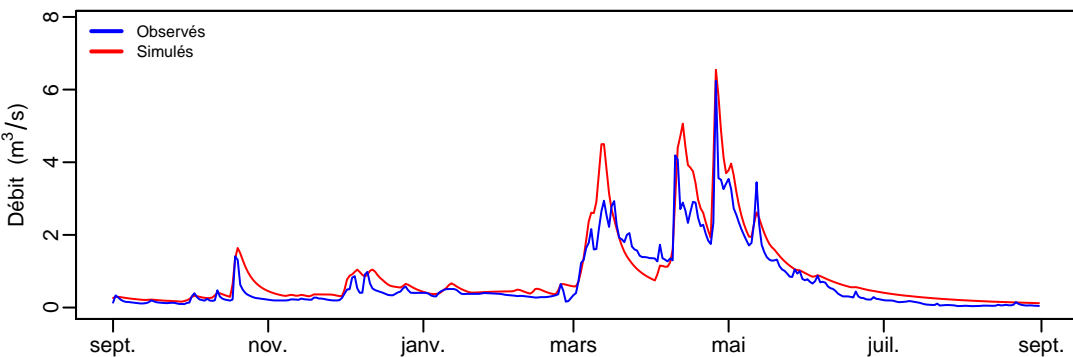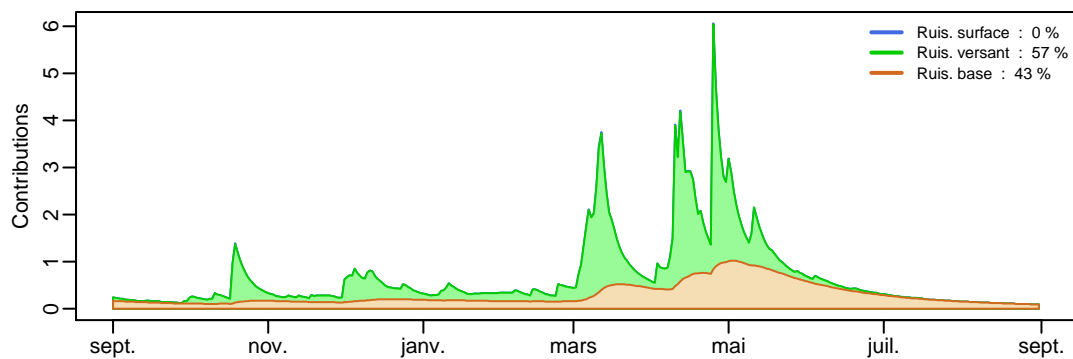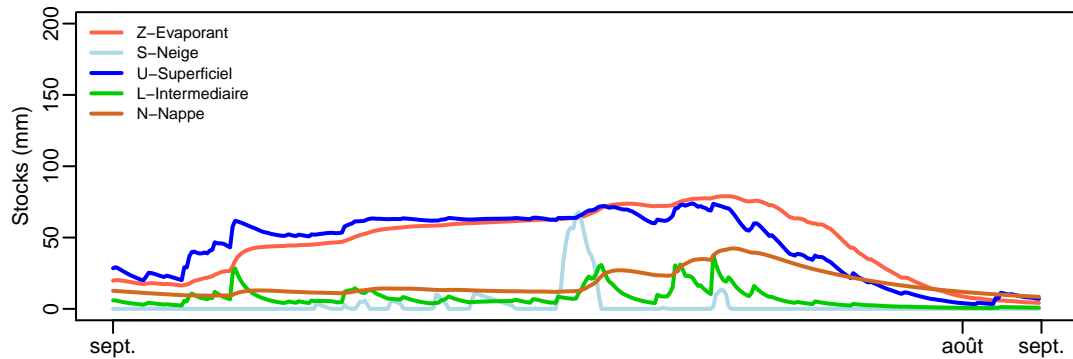

# k2123010 (113.01 km<sup>2</sup>) – année 1989–1990

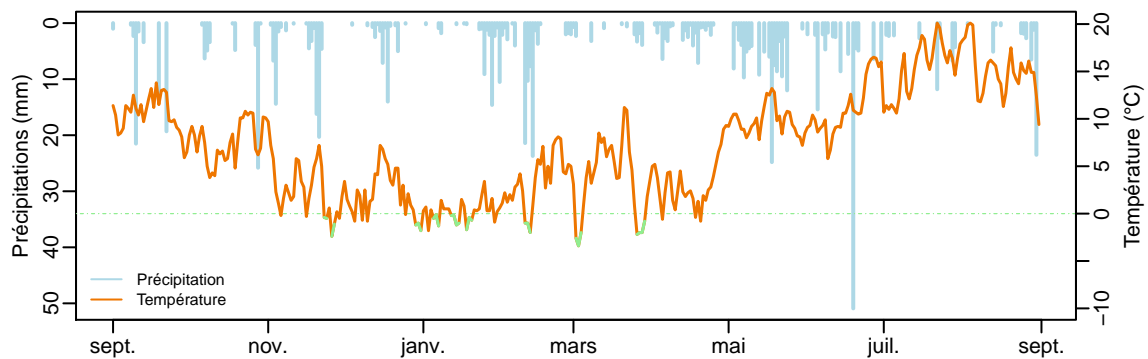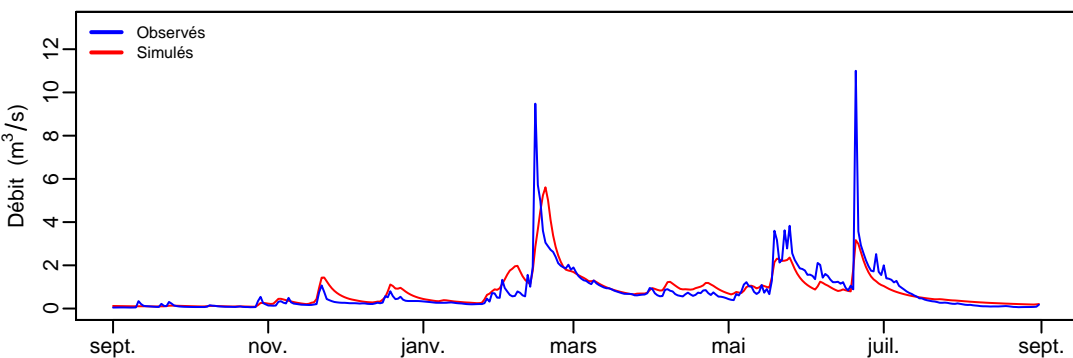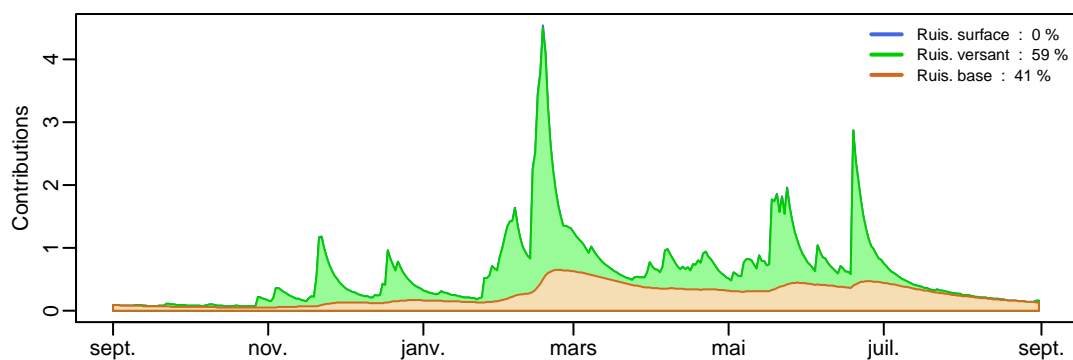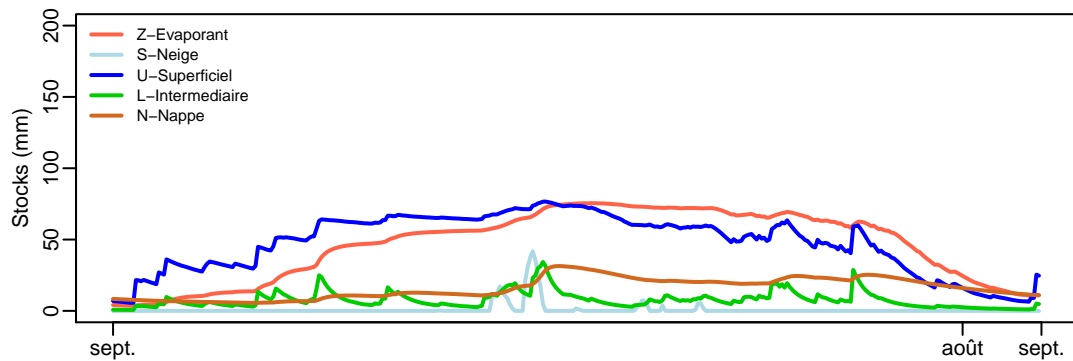

# k2123010 (113.01 km<sup>2</sup>) – année 1990–1991

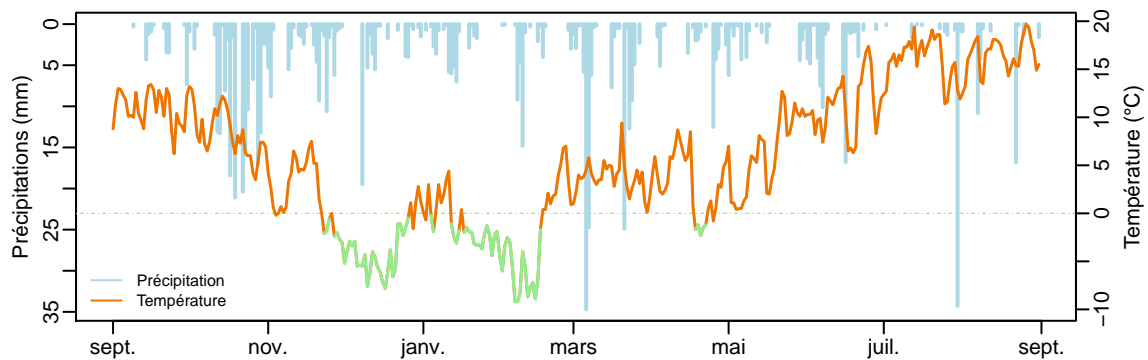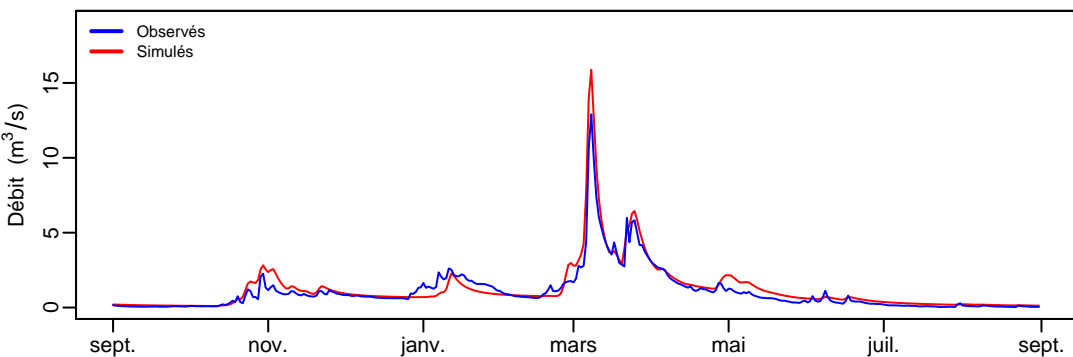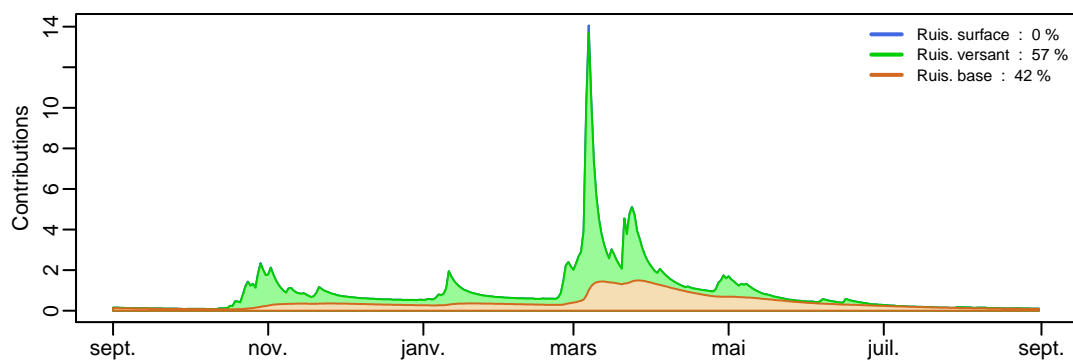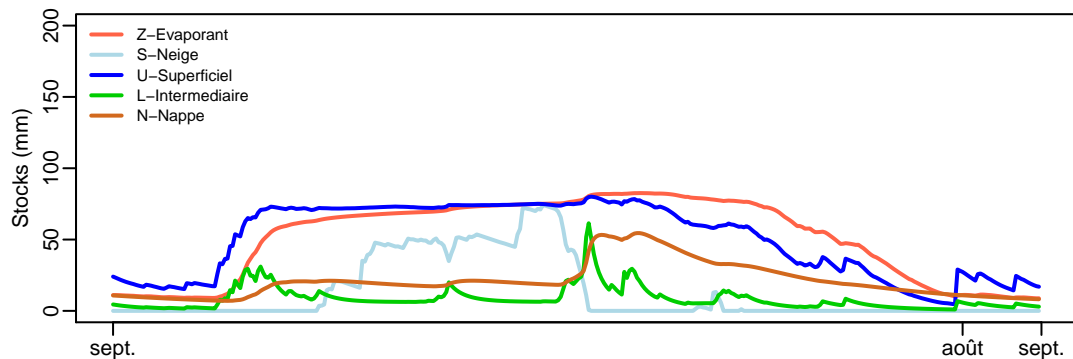



# k2123010 (113.01 km<sup>2</sup>) – année 1991–1992

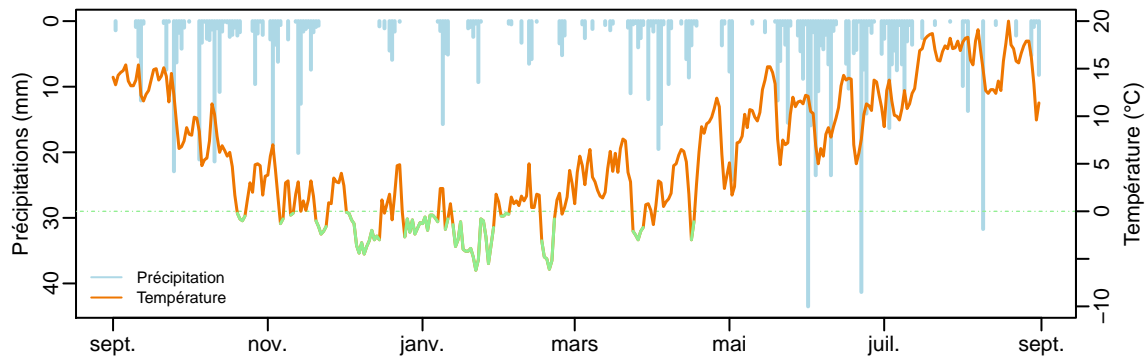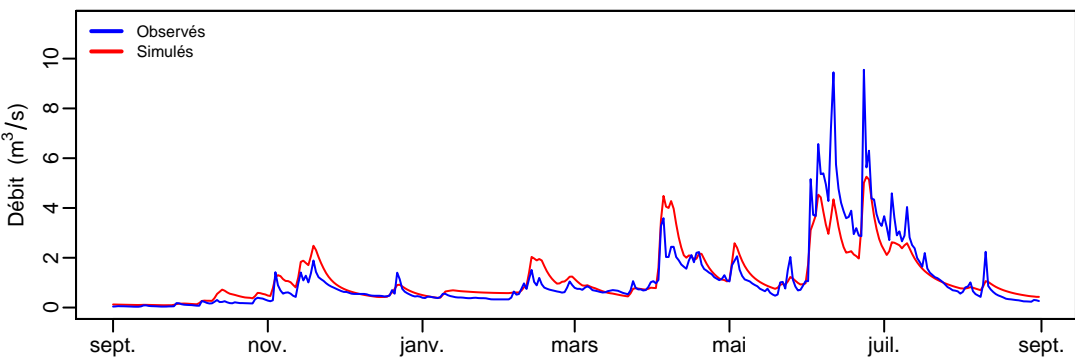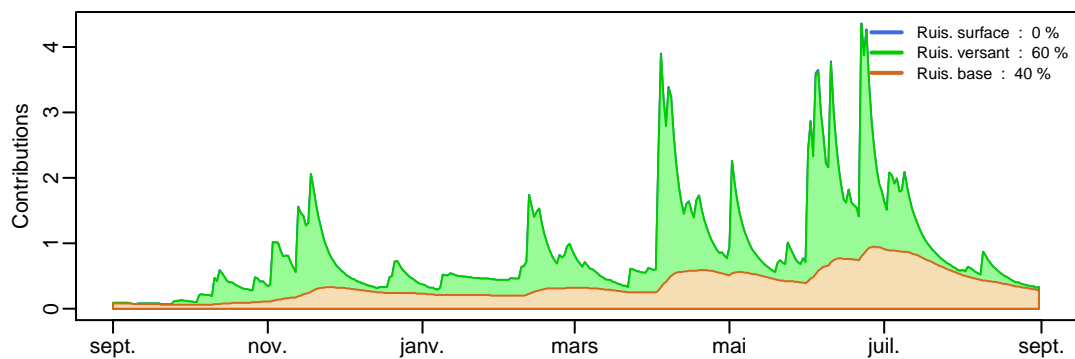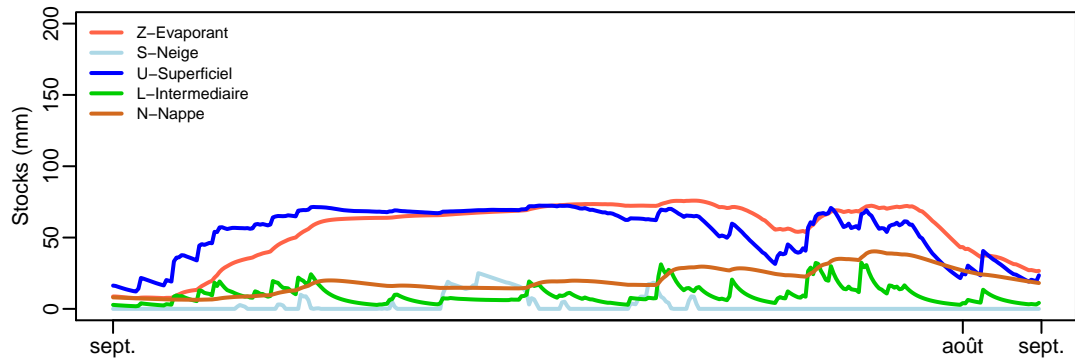

# k2123010 (113.01 km<sup>2</sup>) – année 1992–1993

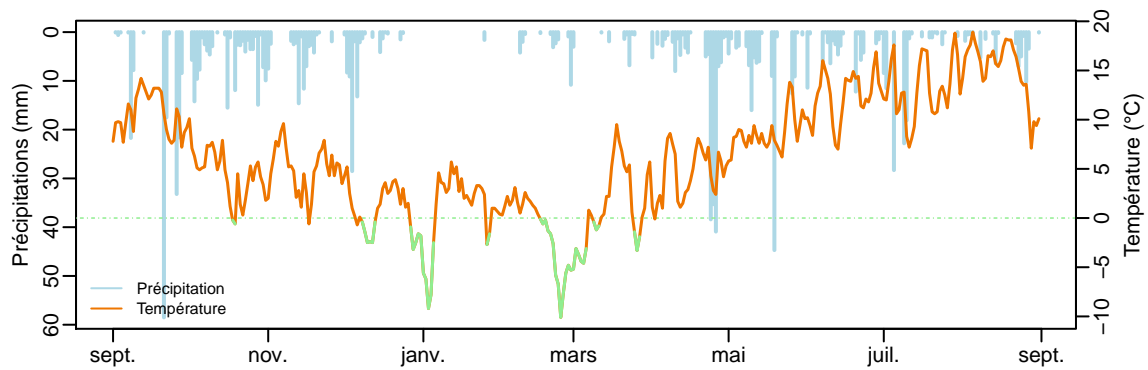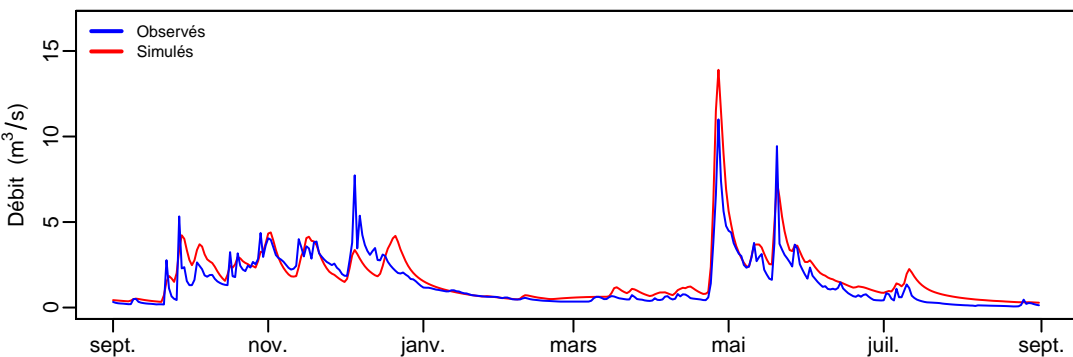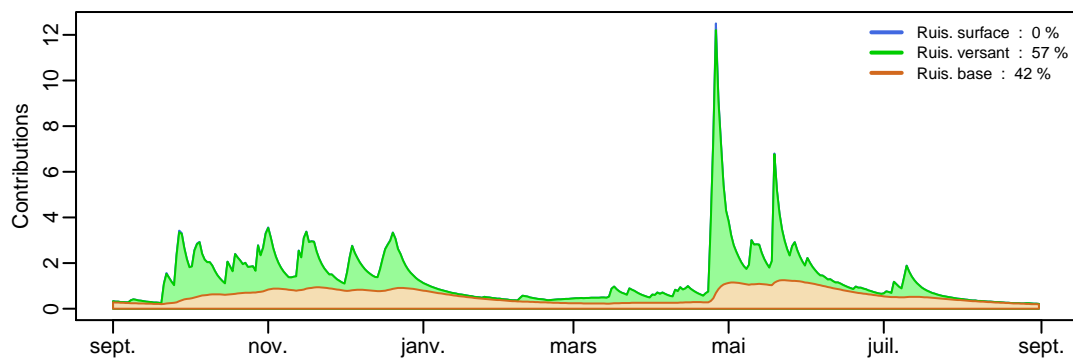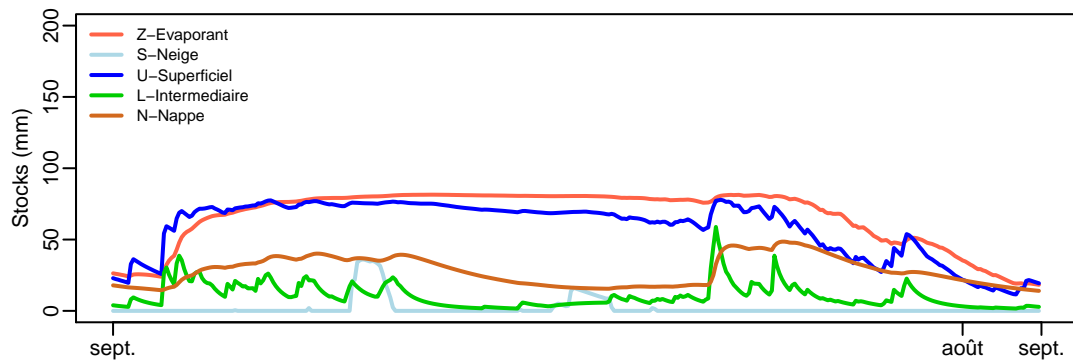

# k2123010 (113.01 km<sup>2</sup>) – année 1993–1994

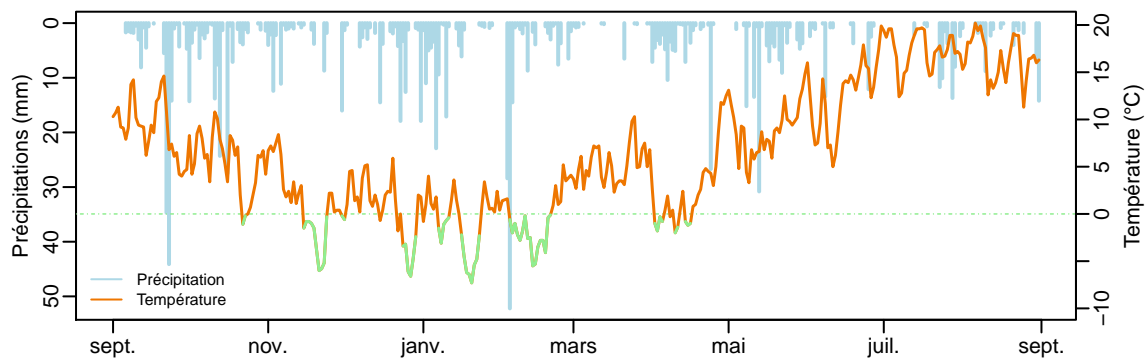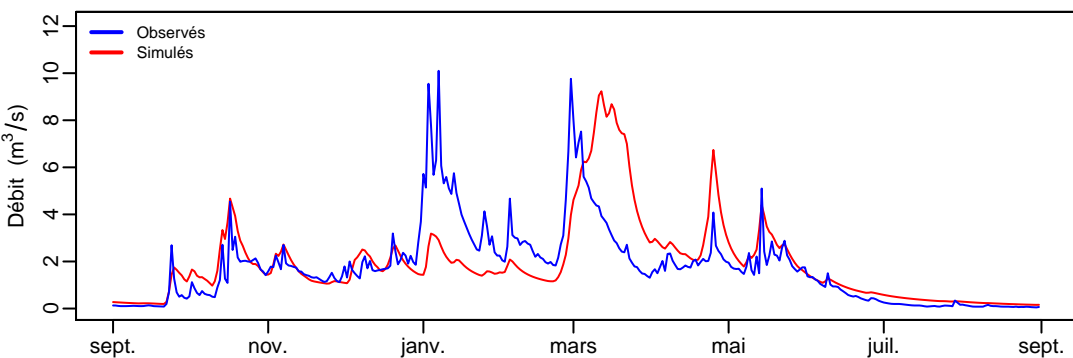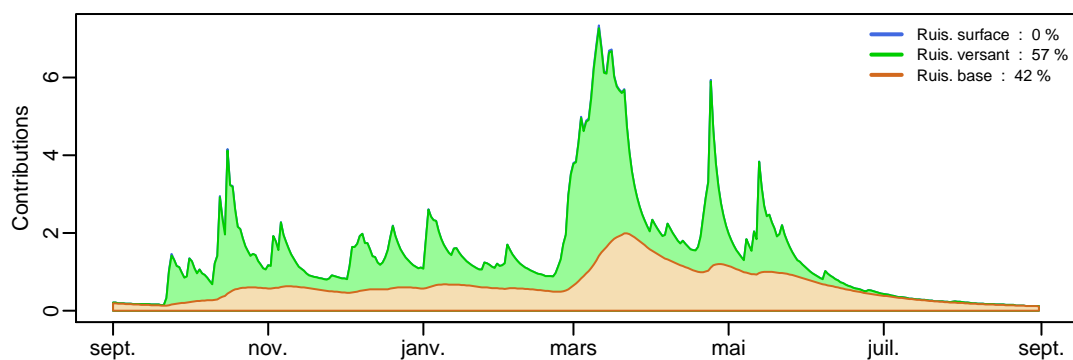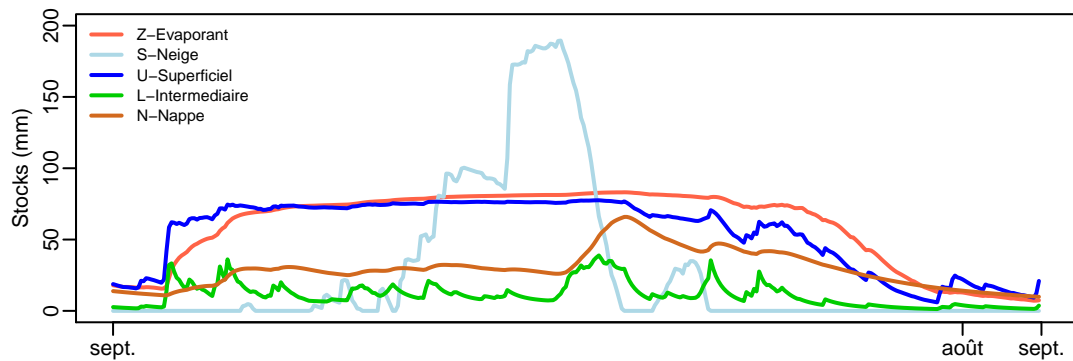

# k2123010 (113.01 km<sup>2</sup>) – année 1994–1995

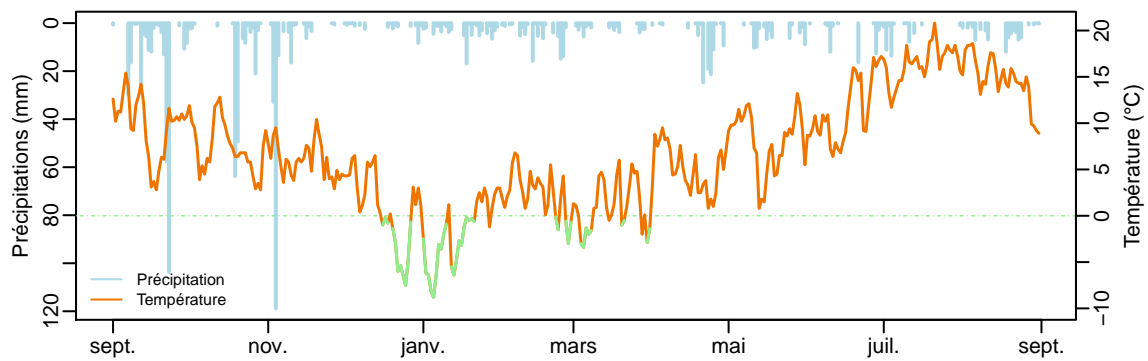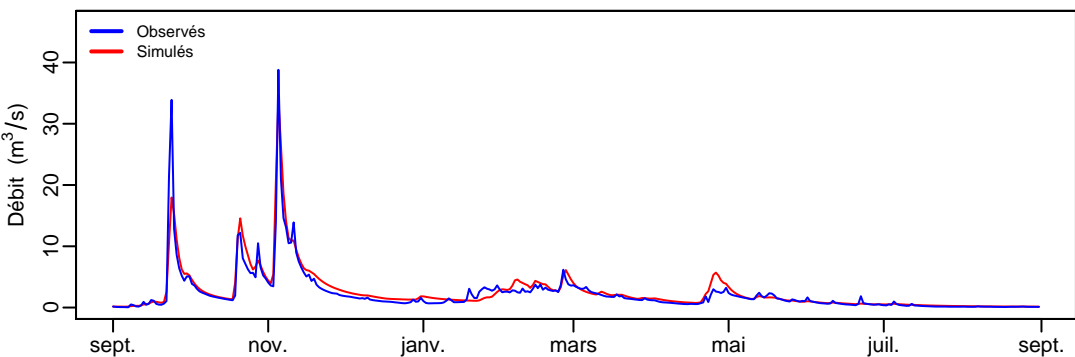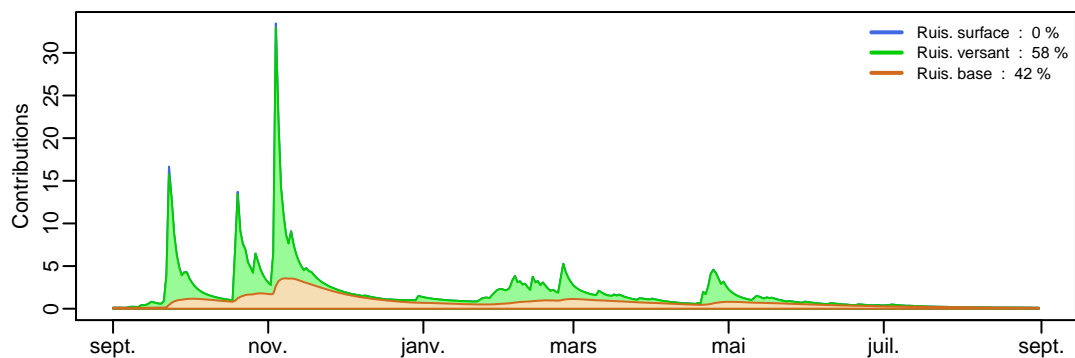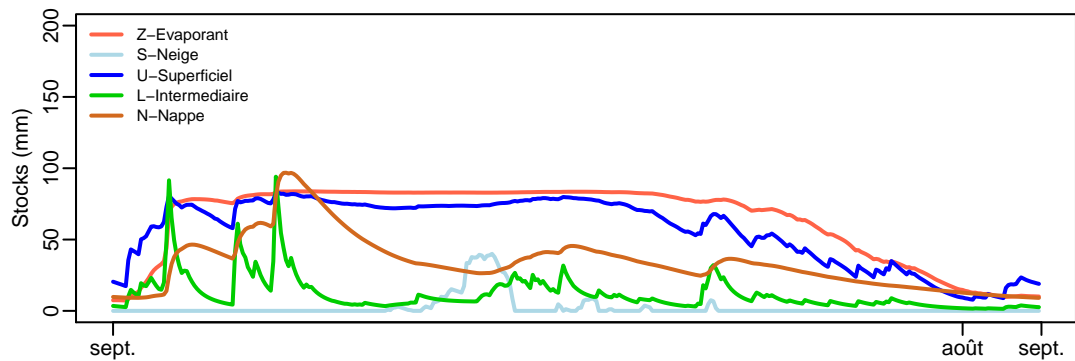

# k2123010 (113.01 km<sup>2</sup>) – année 1995–1996

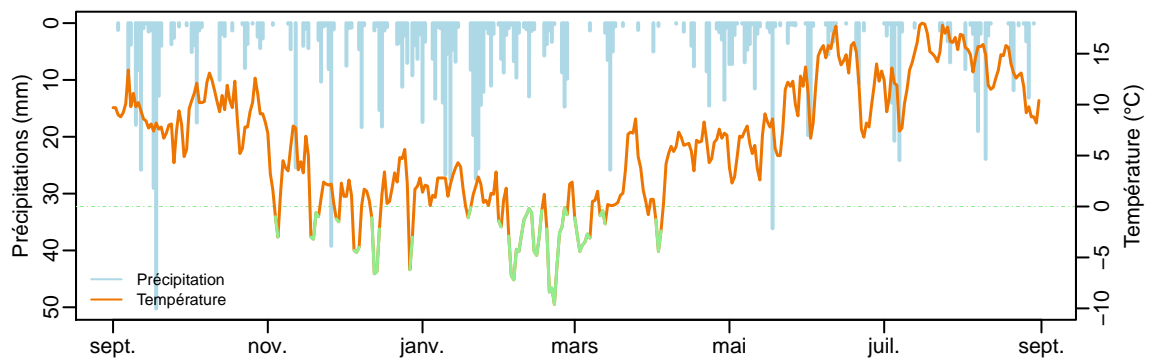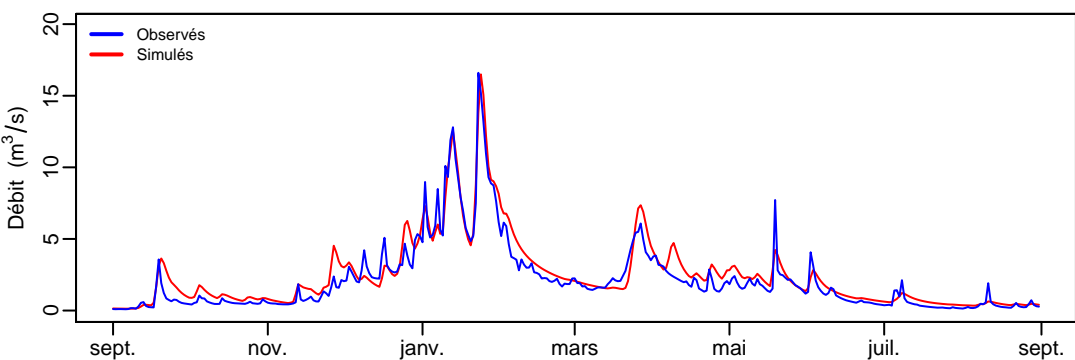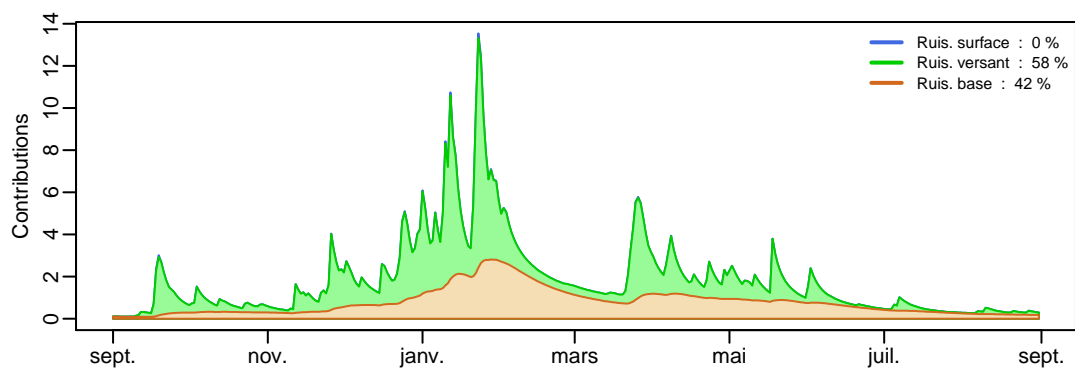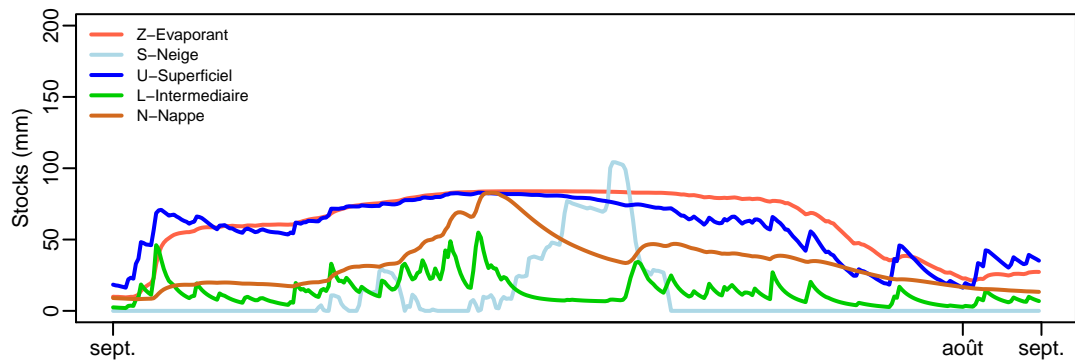

# k2123010 (113.01 km<sup>2</sup>) – année 1996–1997

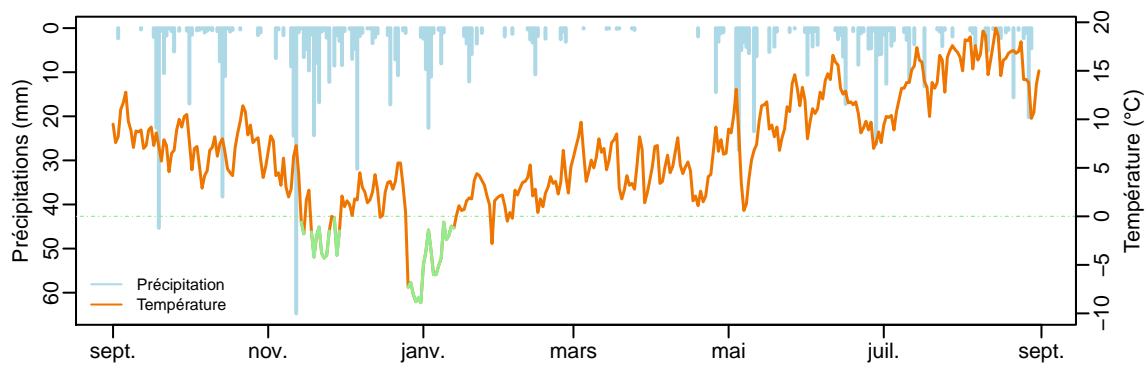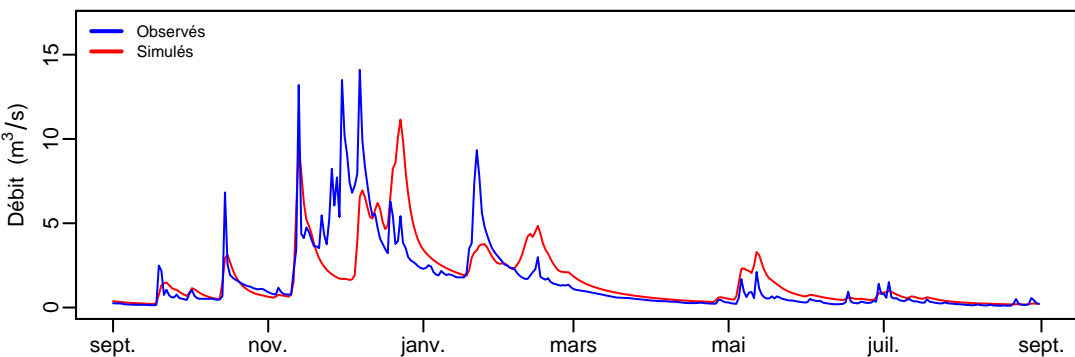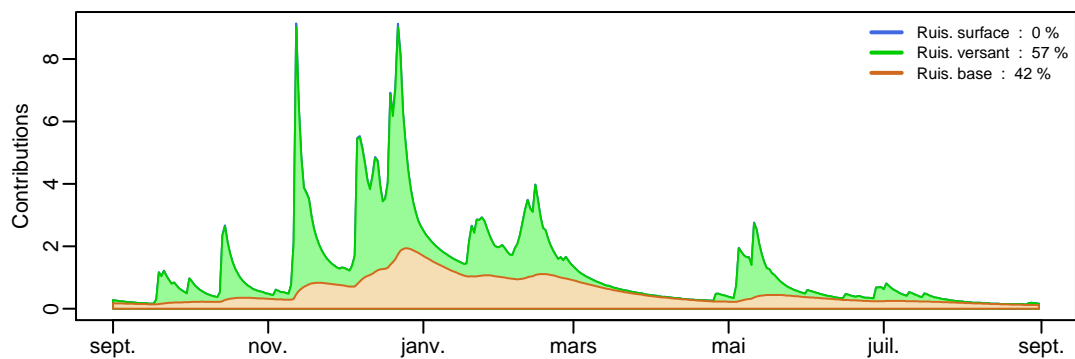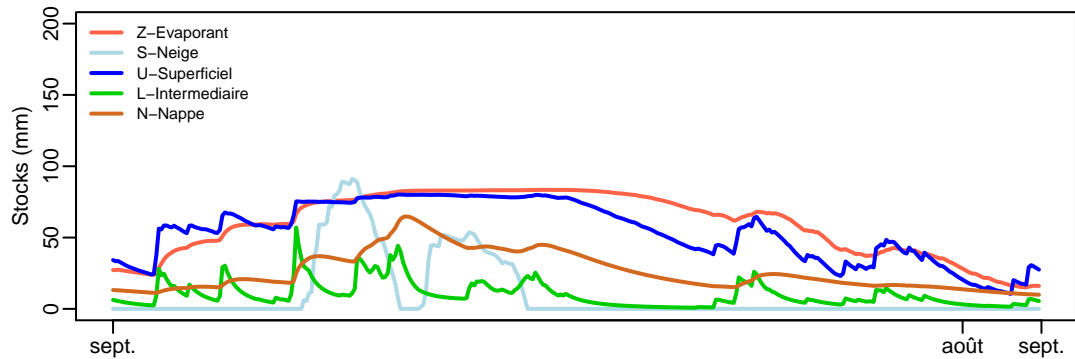

# k2123010 (113.01 km<sup>2</sup>) – année 1997–1998

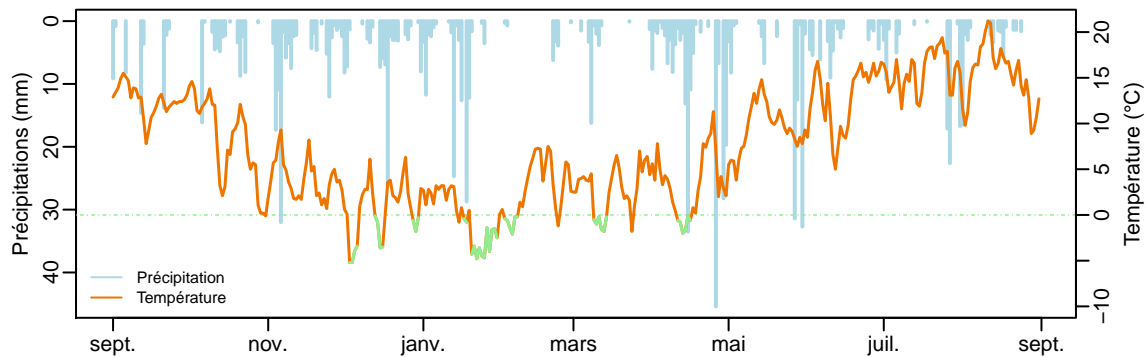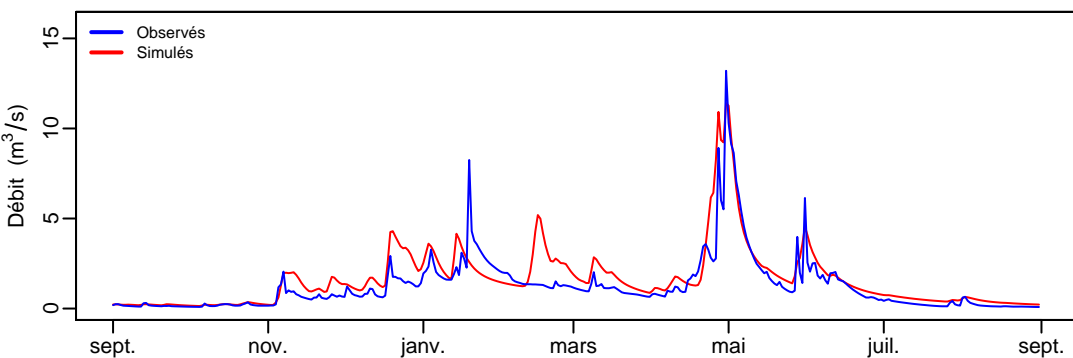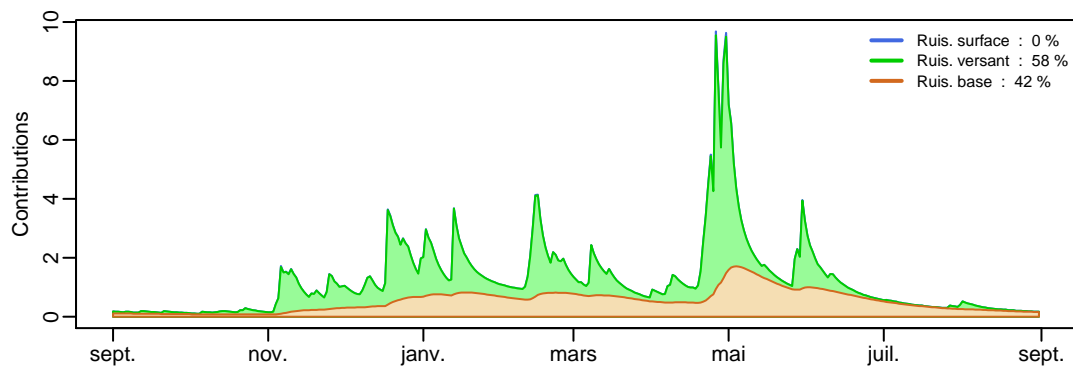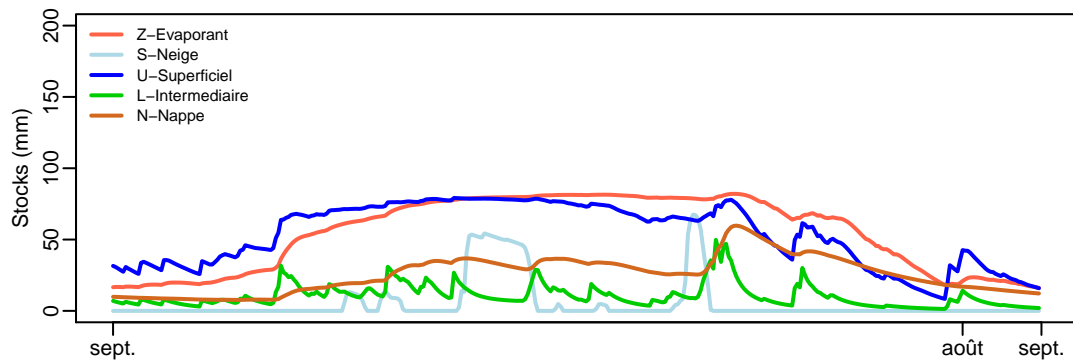

# k2123010 (113.01 km<sup>2</sup>) – année 1998–1999

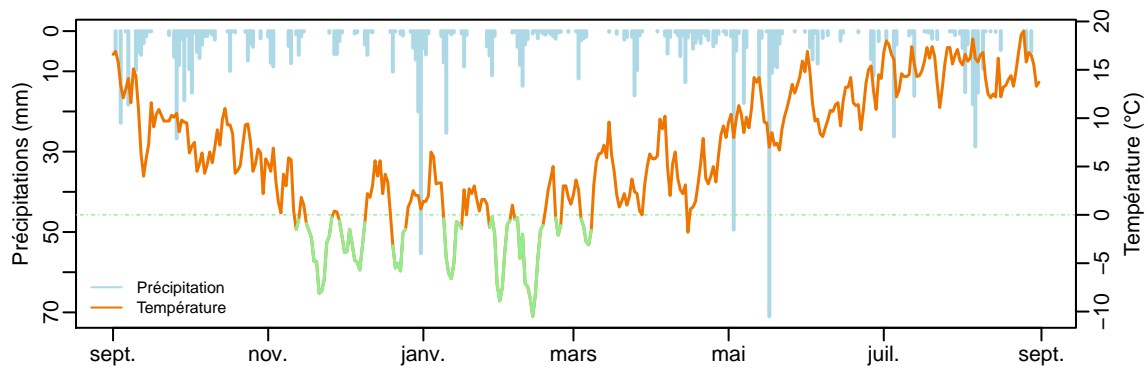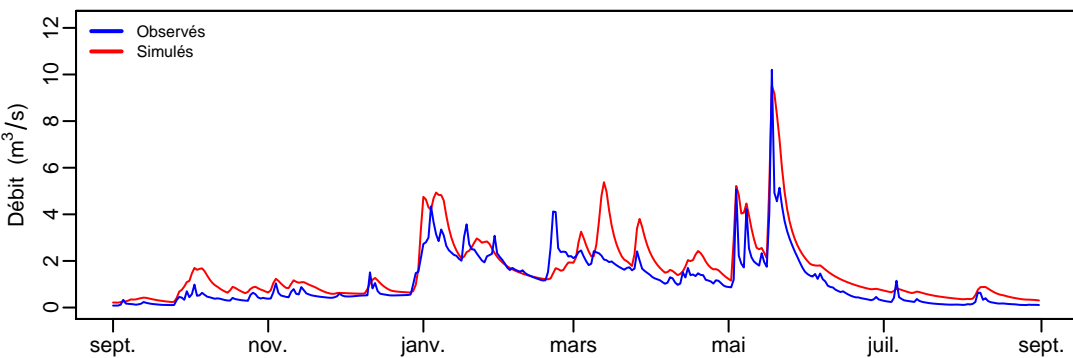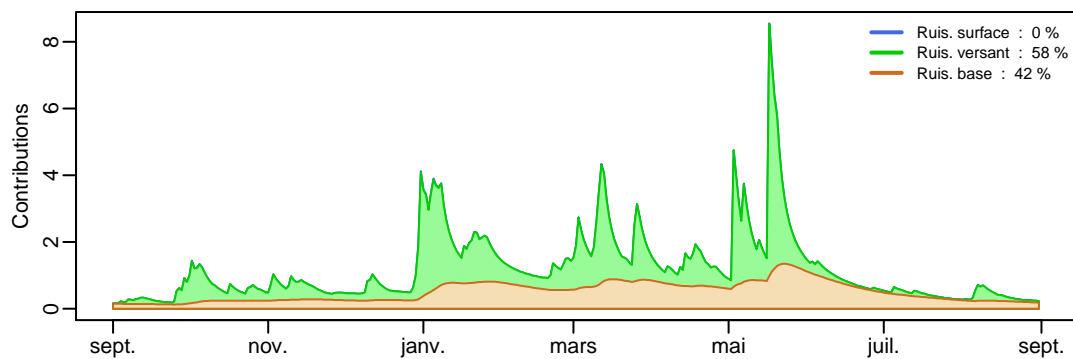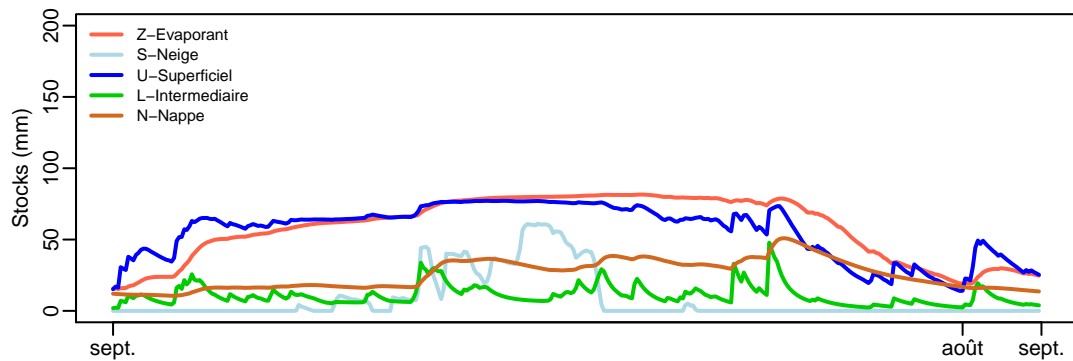



# k2123010 (113.01 km<sup>2</sup>) – année 1999–2000

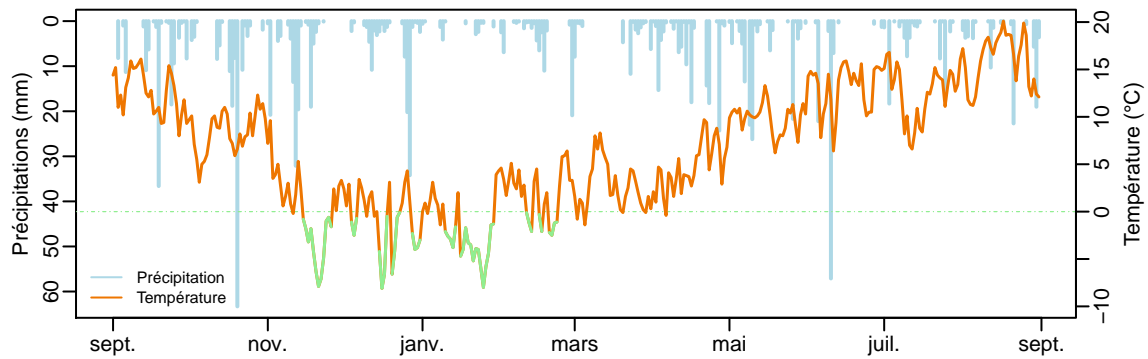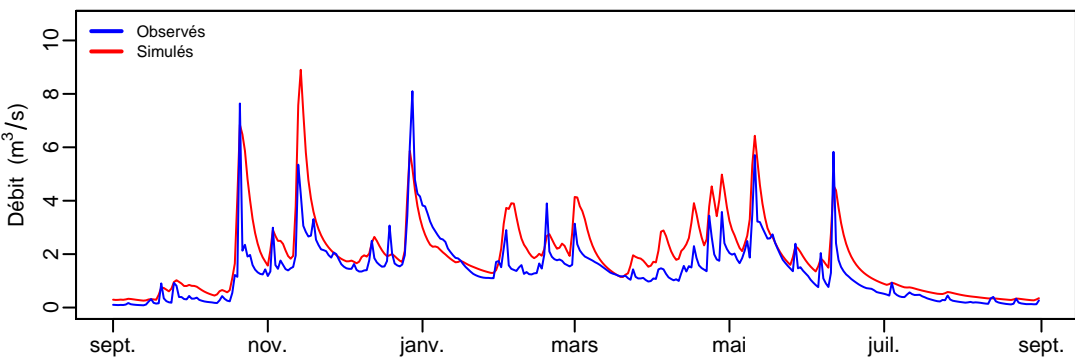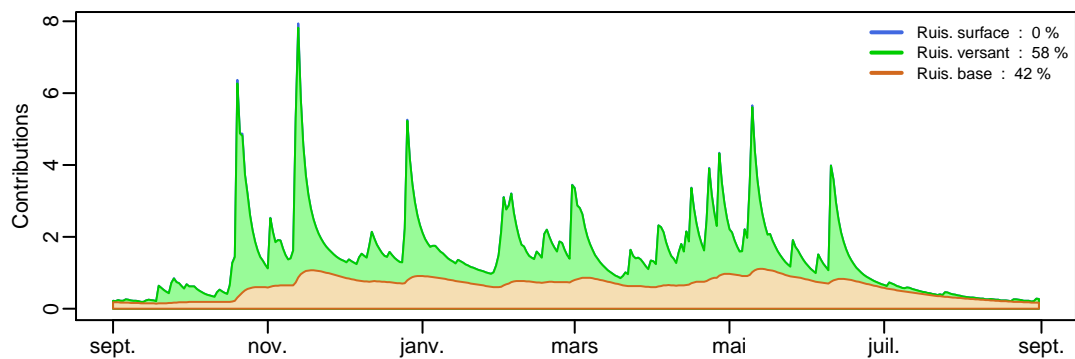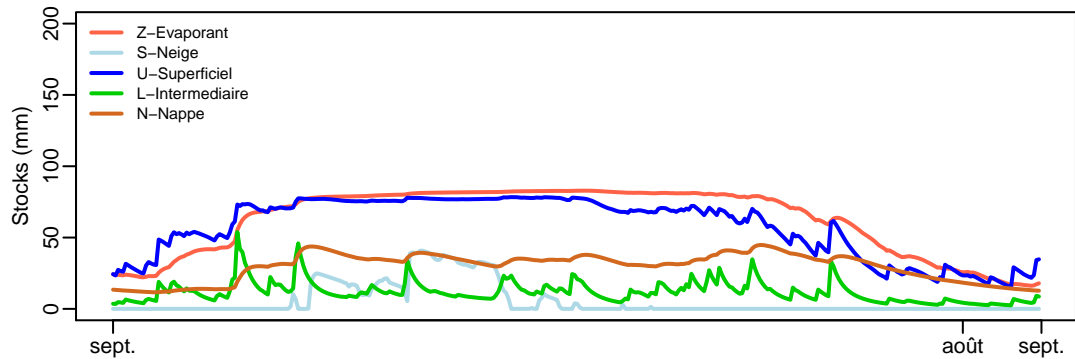

# k2123010 (113.01 km<sup>2</sup>) – année 2000–2001

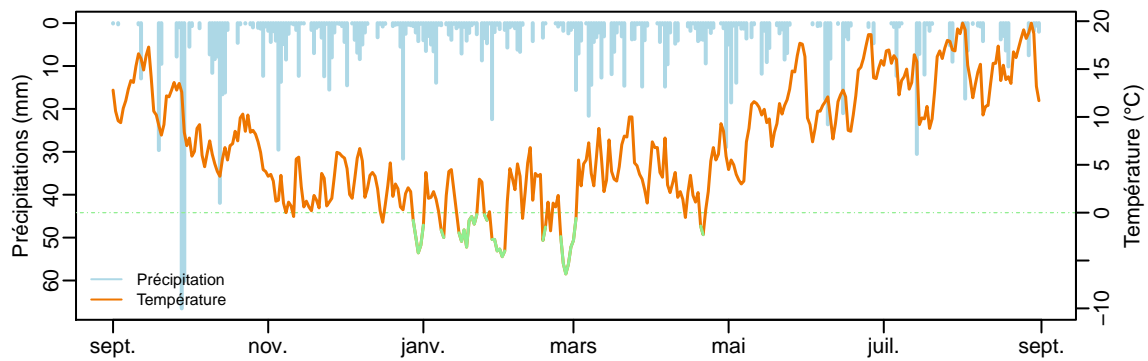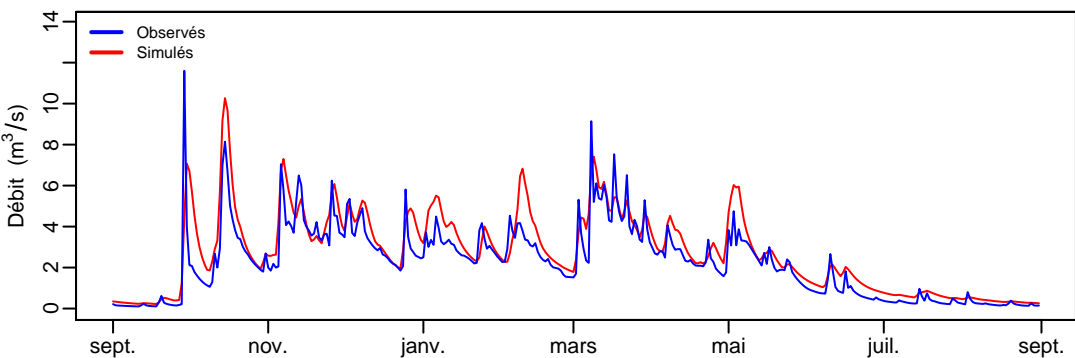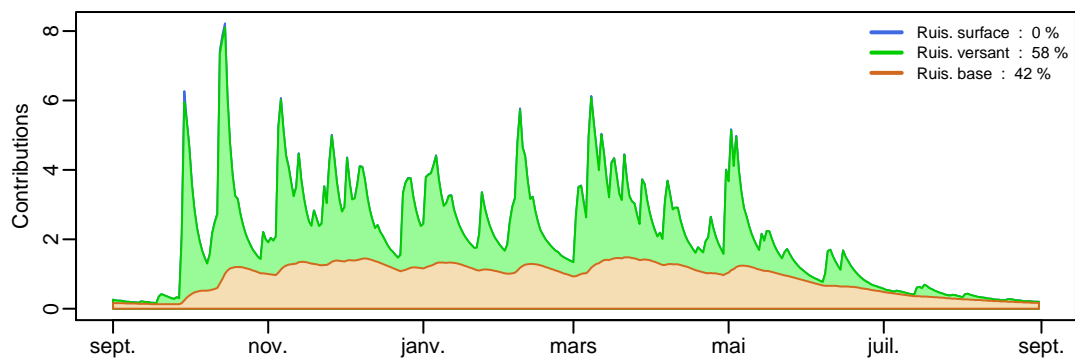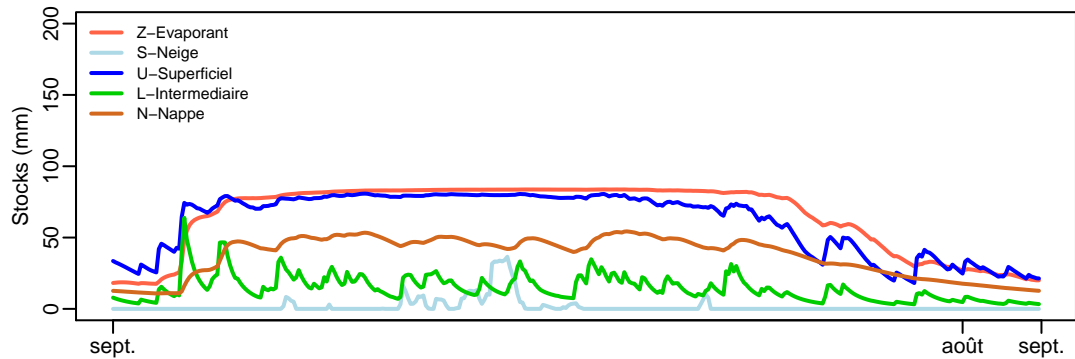

# k2123010 (113.01 km<sup>2</sup>) – année 2001–2002

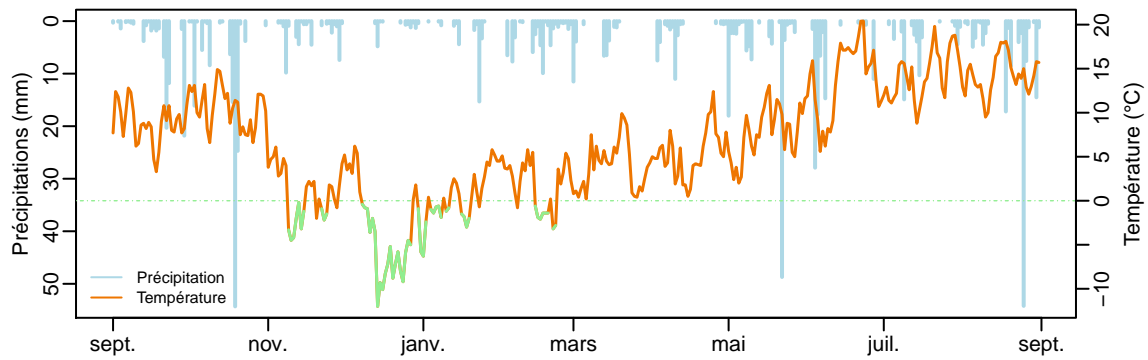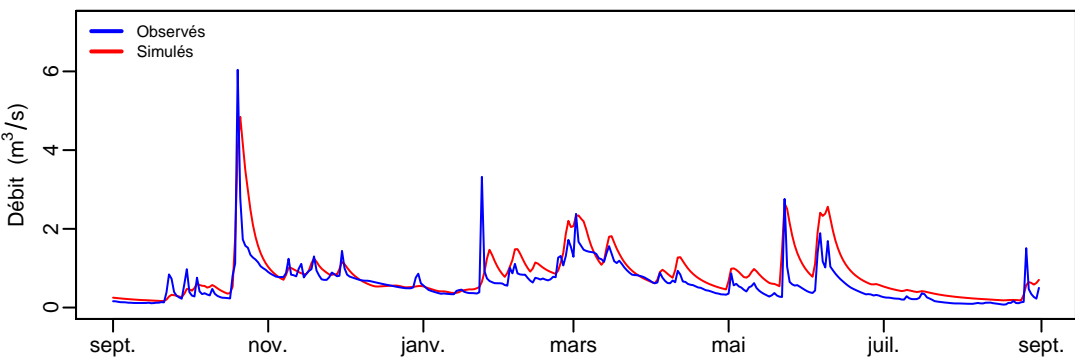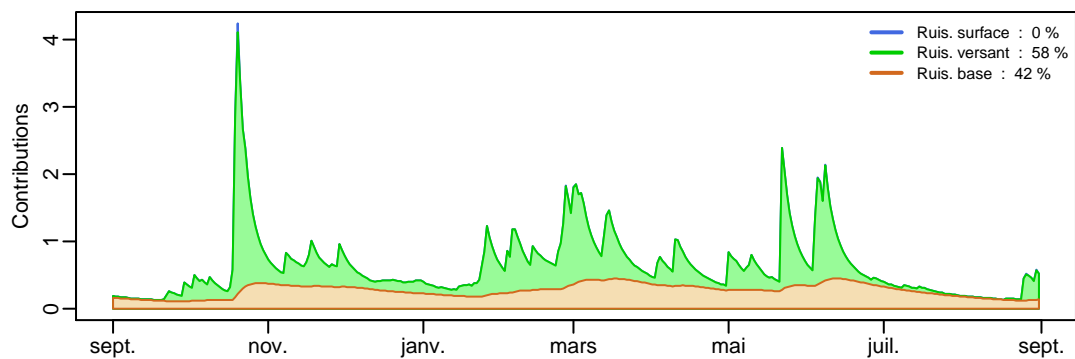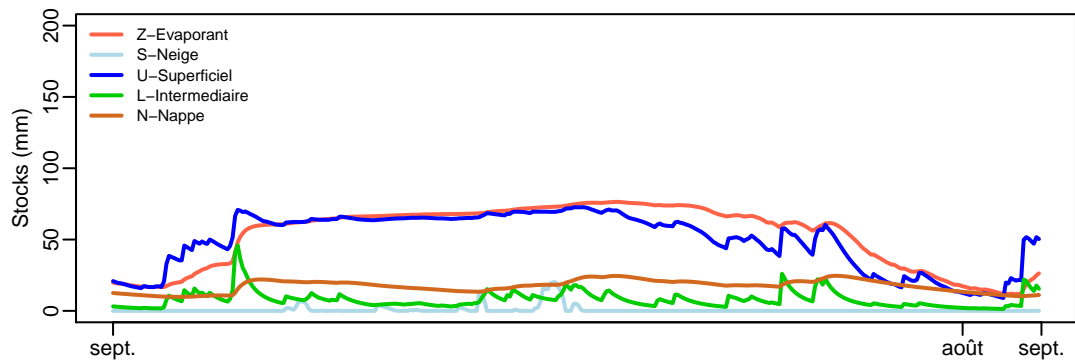

# k2123010 (113.01 km<sup>2</sup>) – année 2002–2003

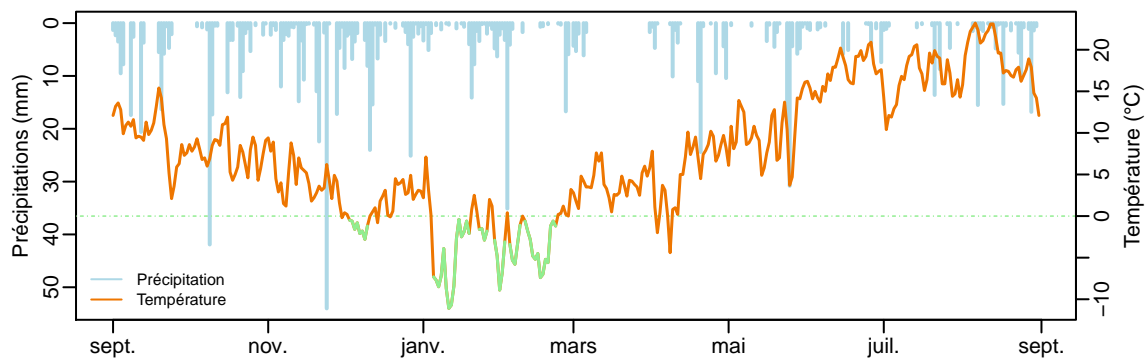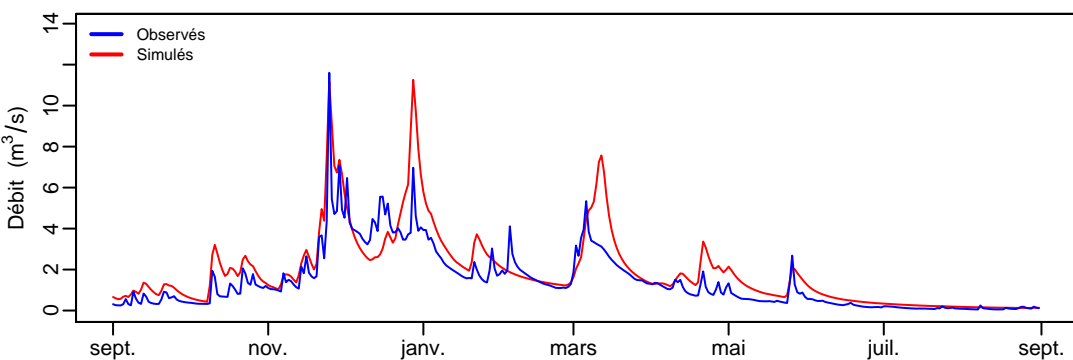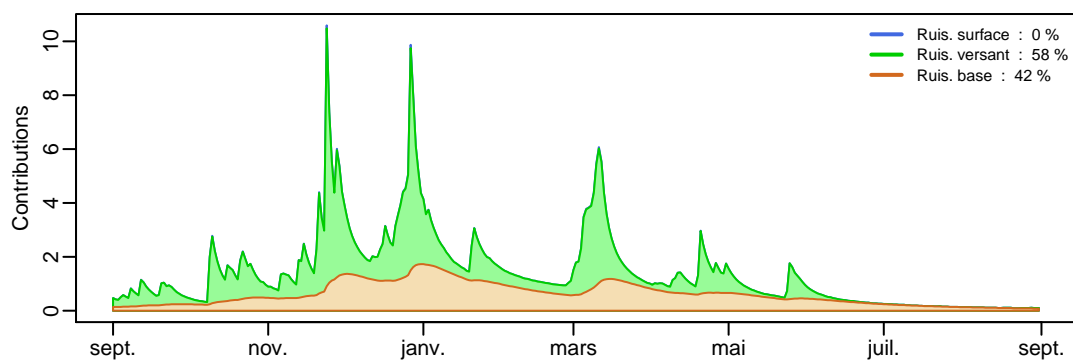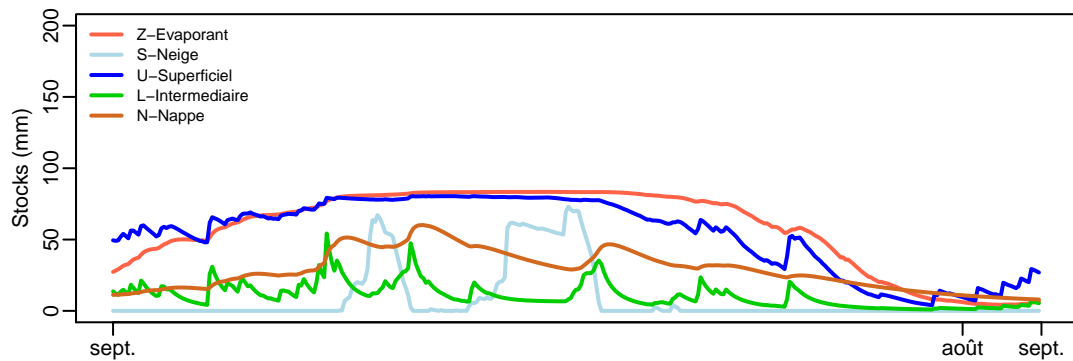

# k2123010 (113.01 km<sup>2</sup>) – année 2003–2004

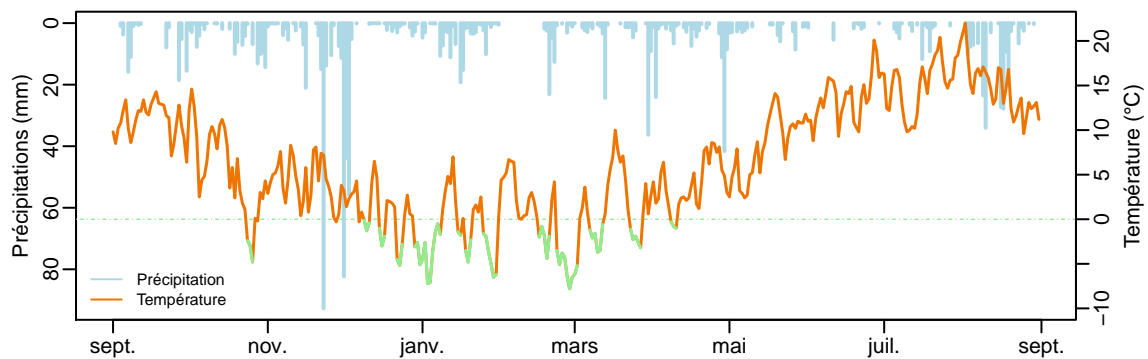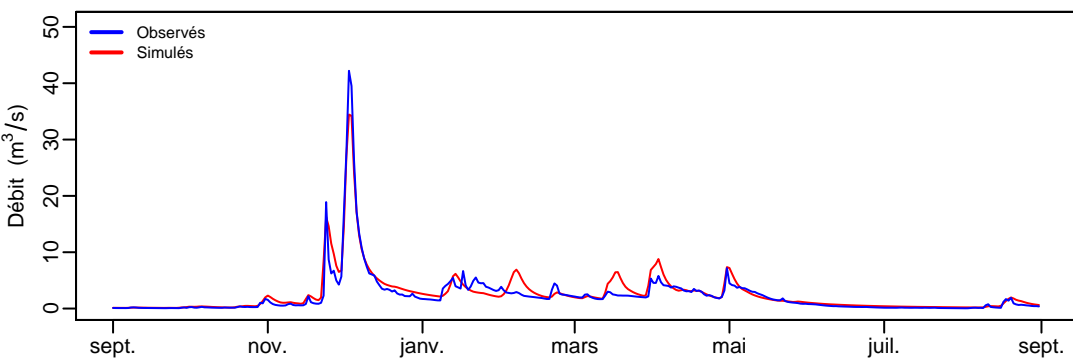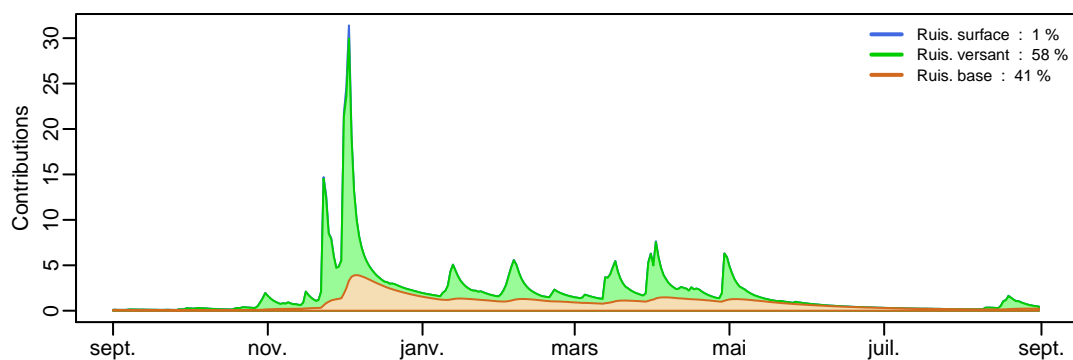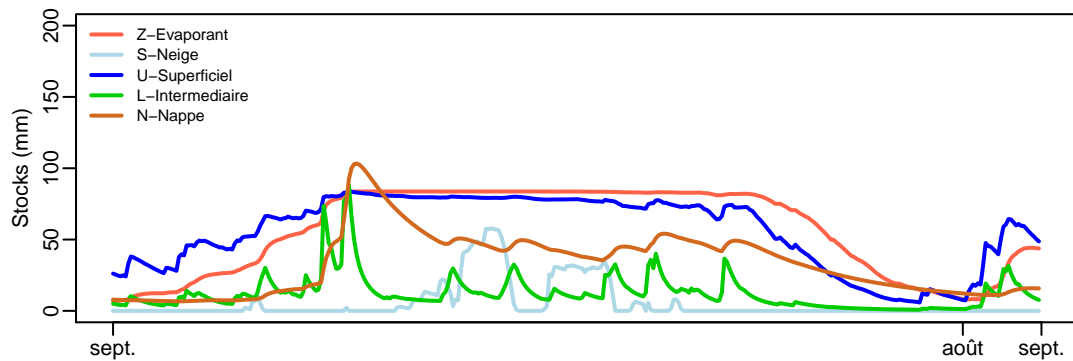

# k2123010 (113.01 km<sup>2</sup>) – année 2004–2005

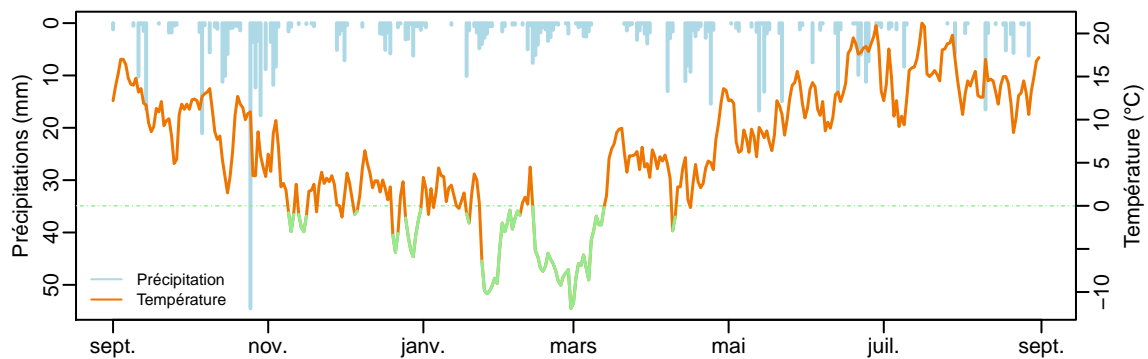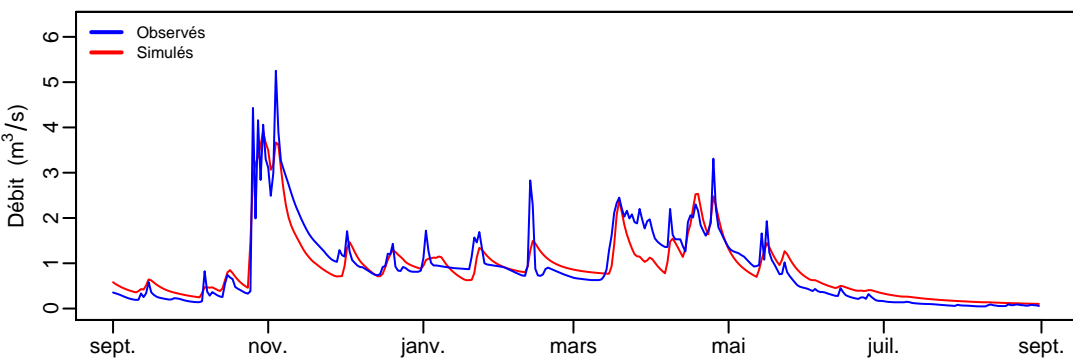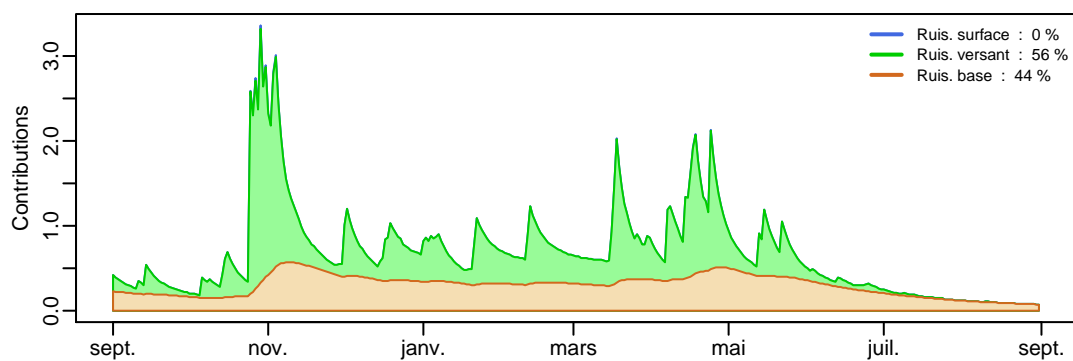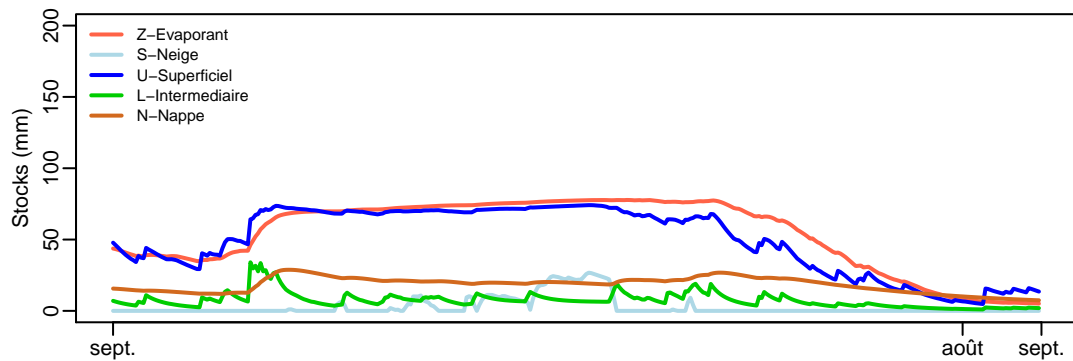

# k2123010 (113.01 km²) – année 2005–2006

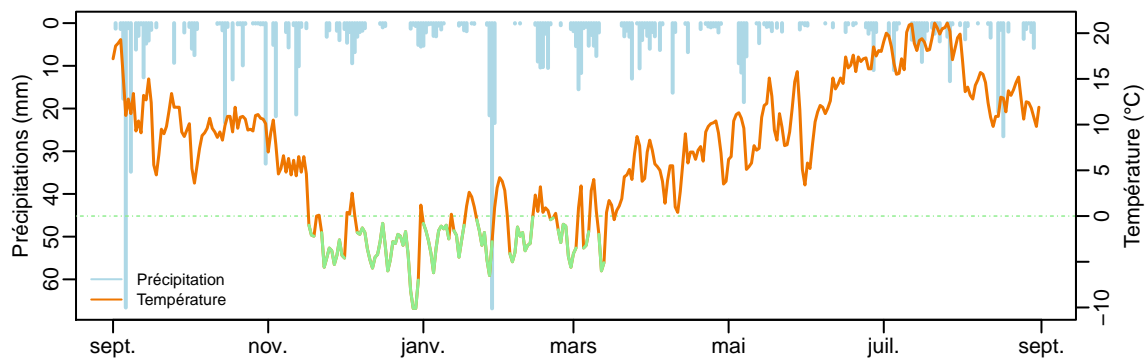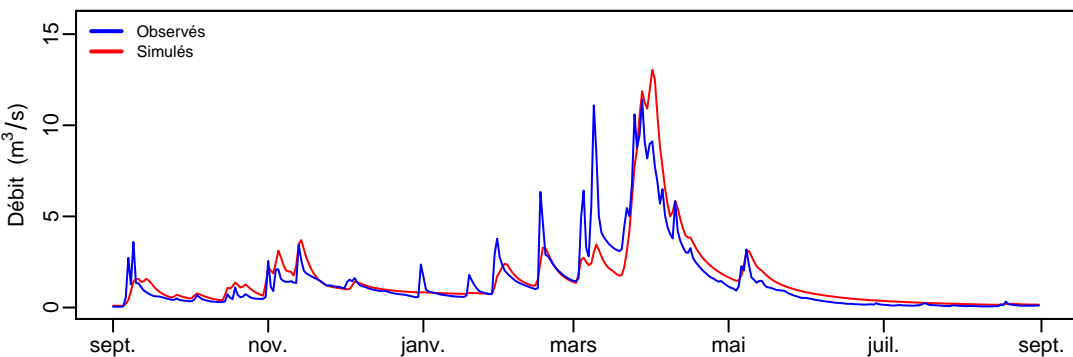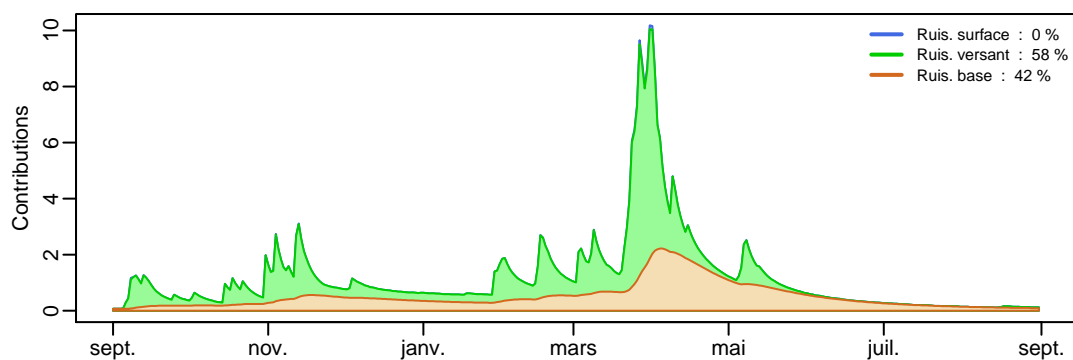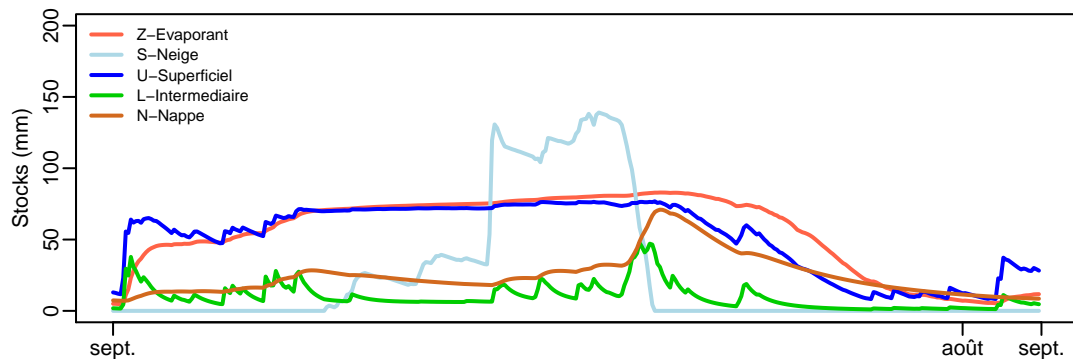

# k2123010 (113.01 km²) – année 2006–2007

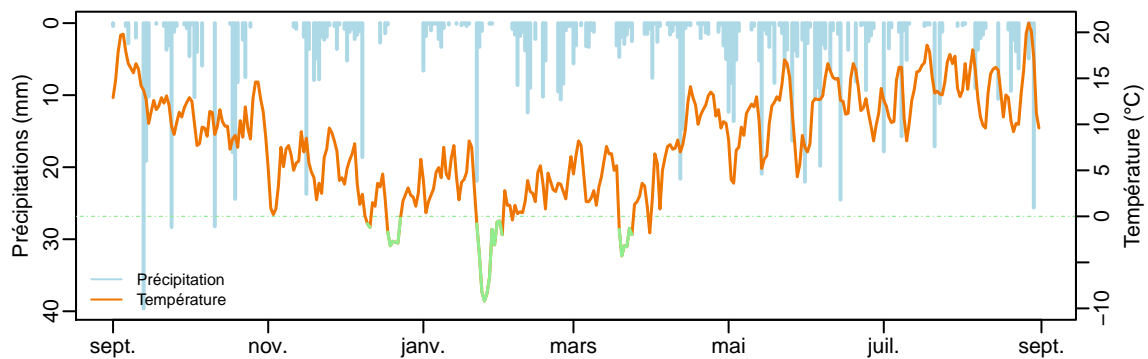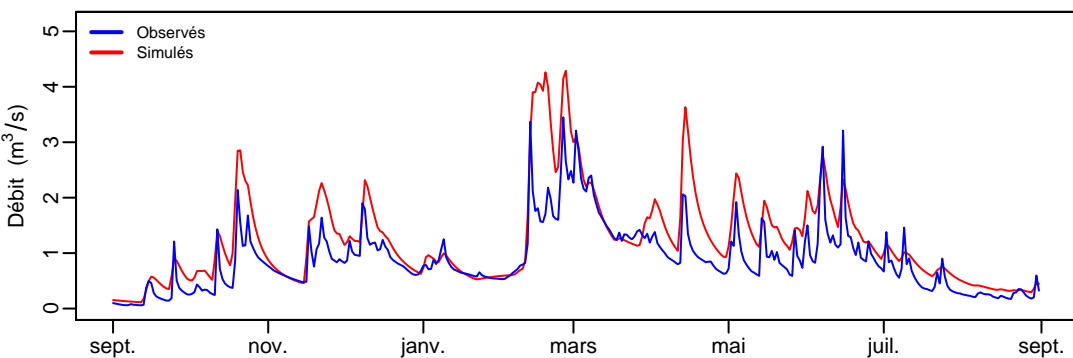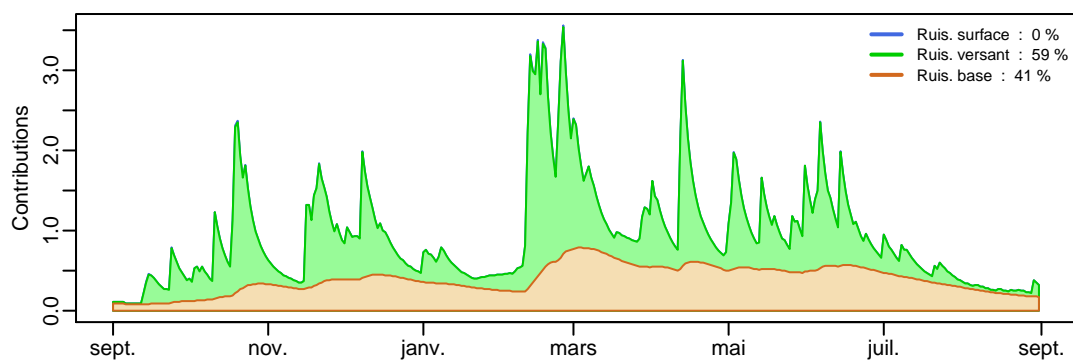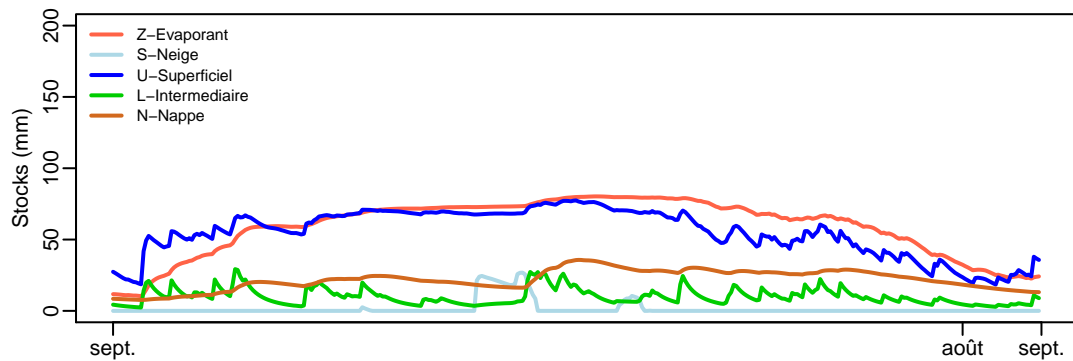



# k2123010 (113.01 km<sup>2</sup>) – année 2007–2008

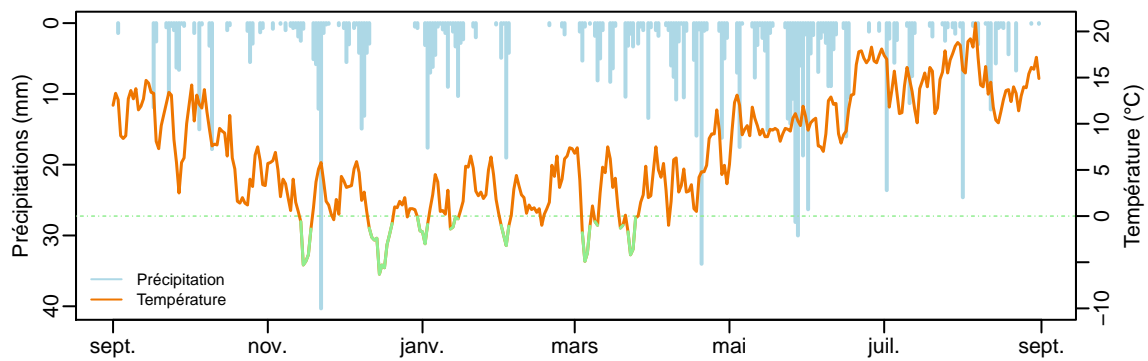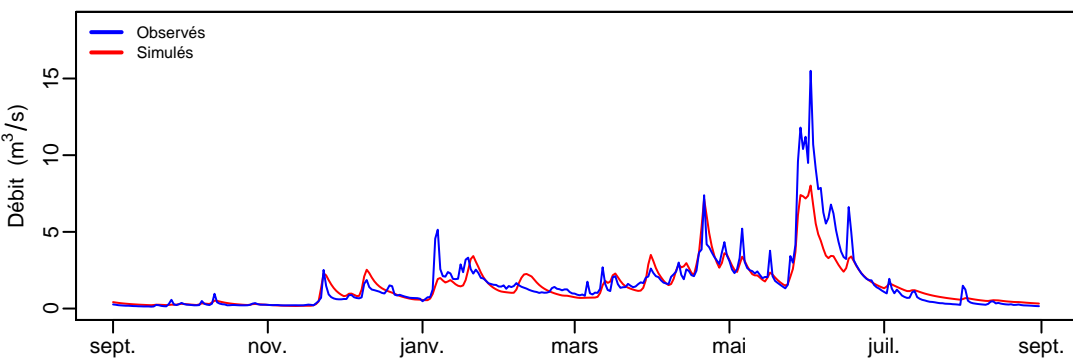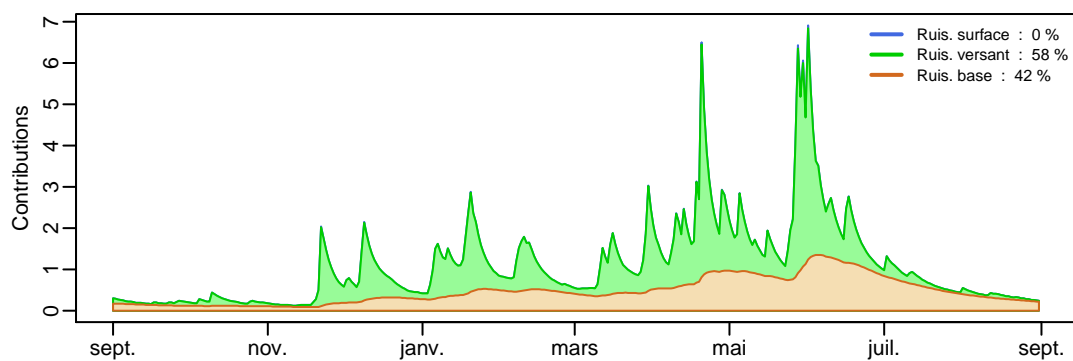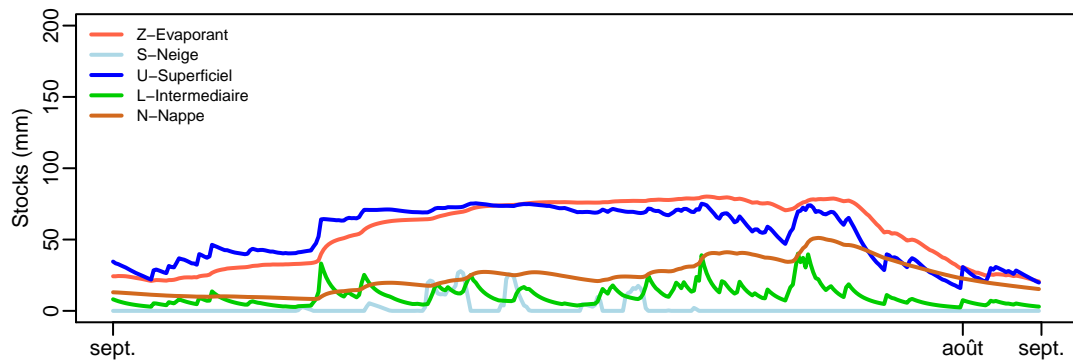

# k2123010 (113.01 km<sup>2</sup>) – année 2008–2009

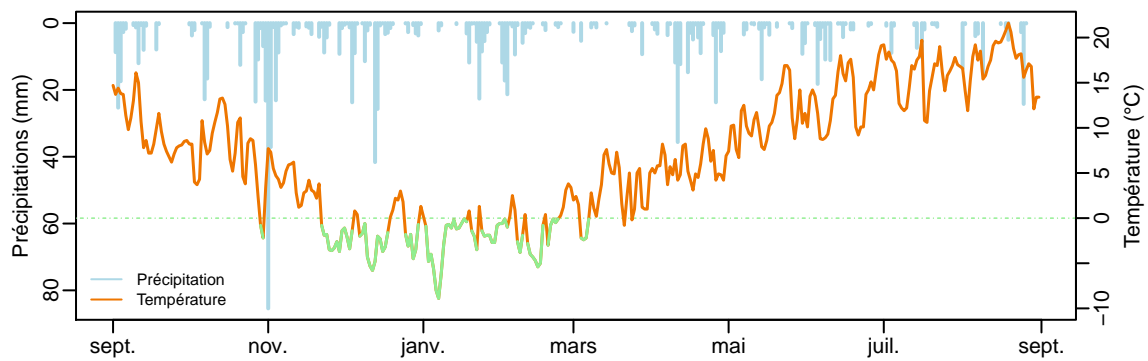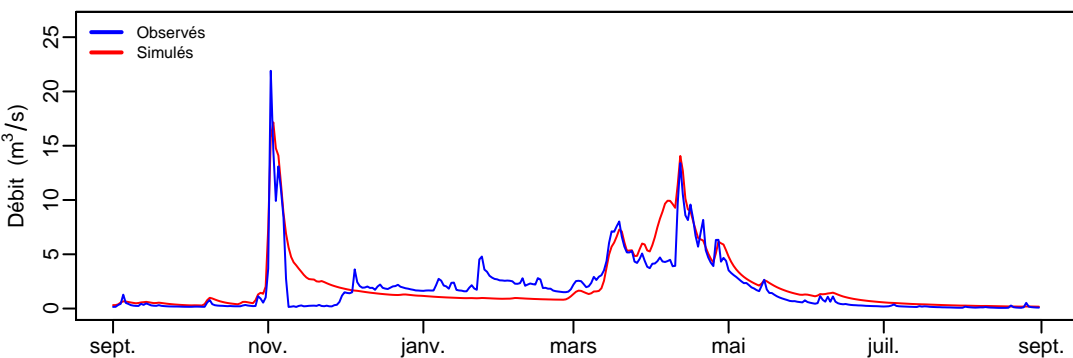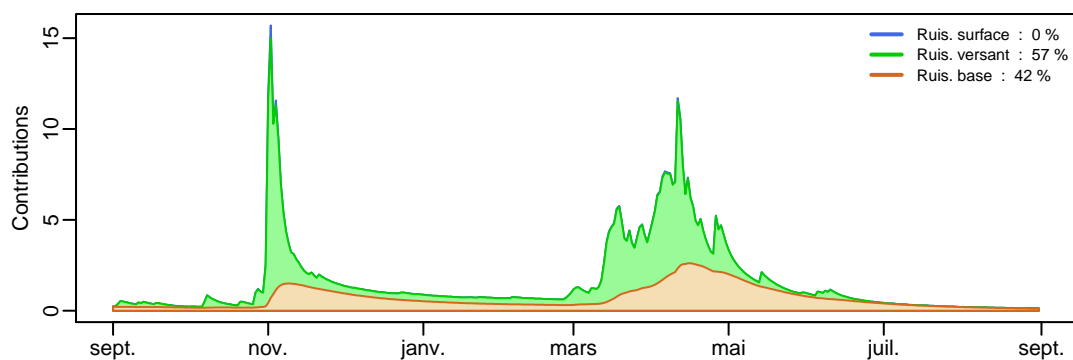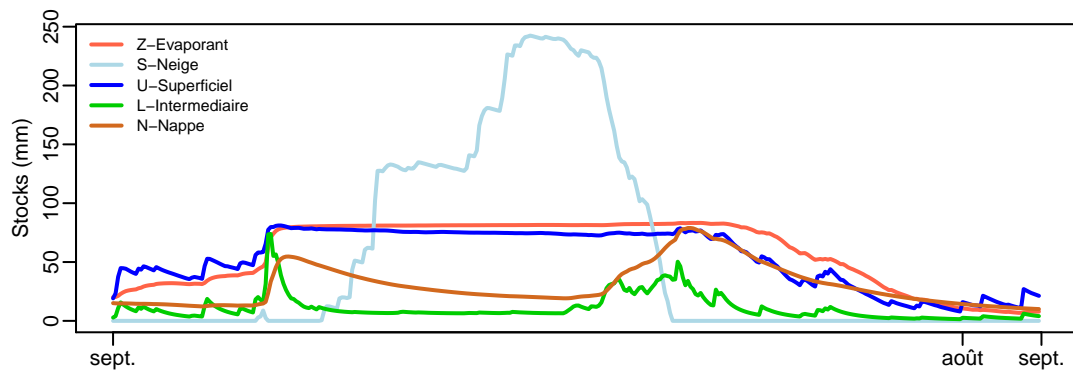

# k2123010 (113.01 km<sup>2</sup>) – année 2009–2010

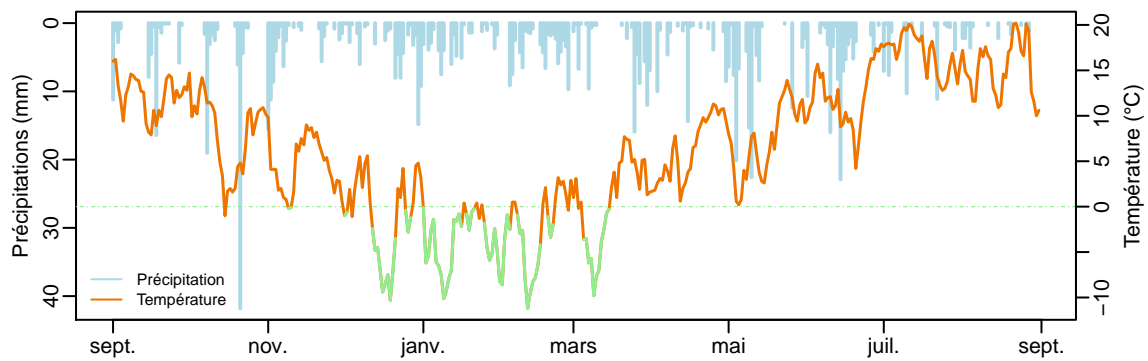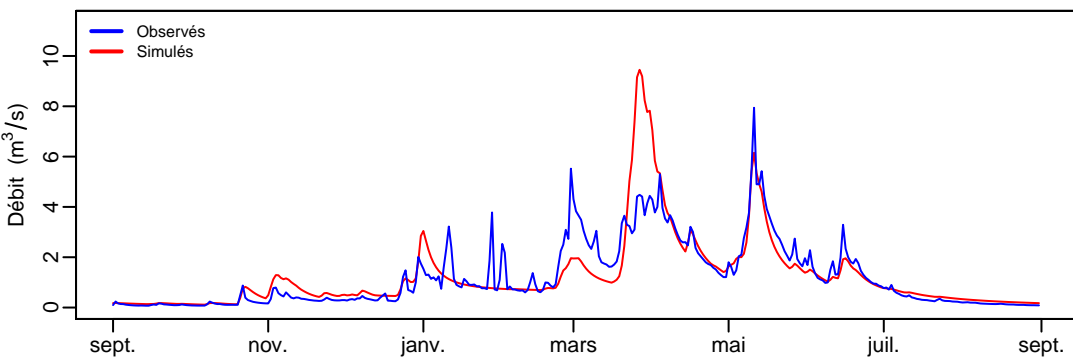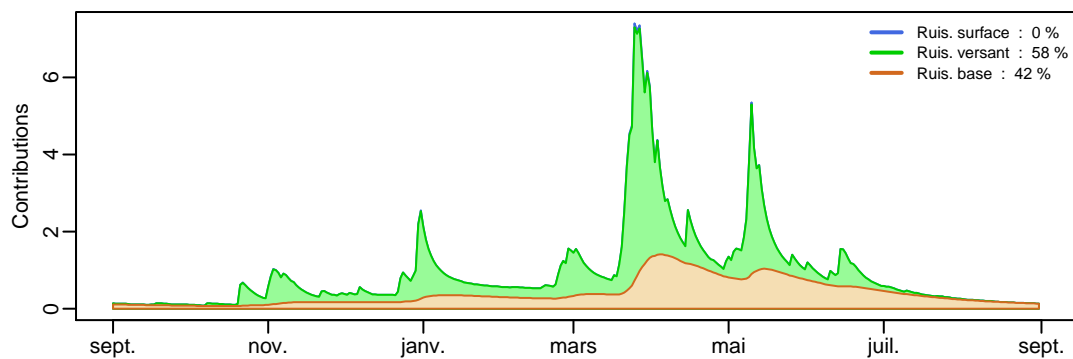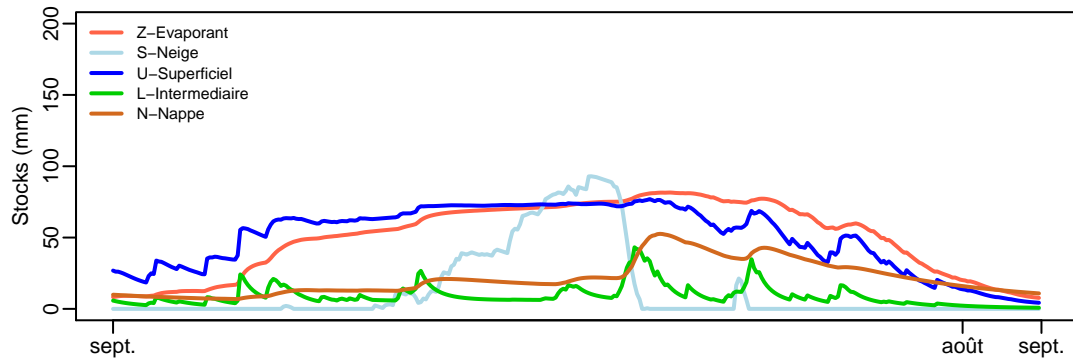

# k2123010 (113.01 km<sup>2</sup>) – année 2010–2011

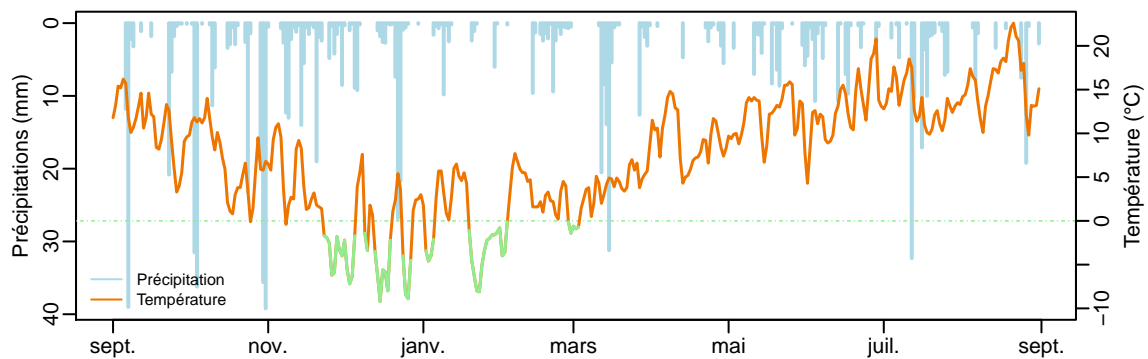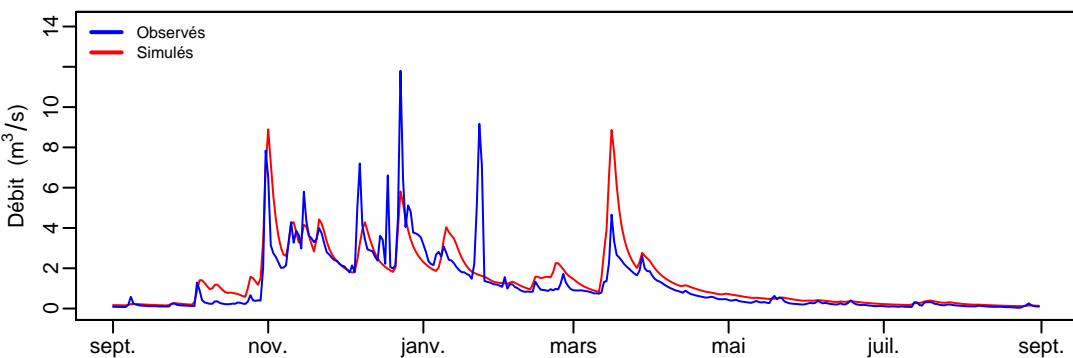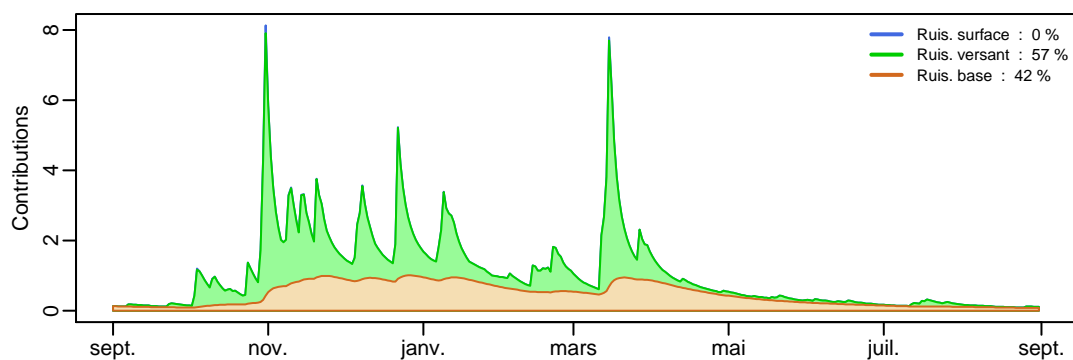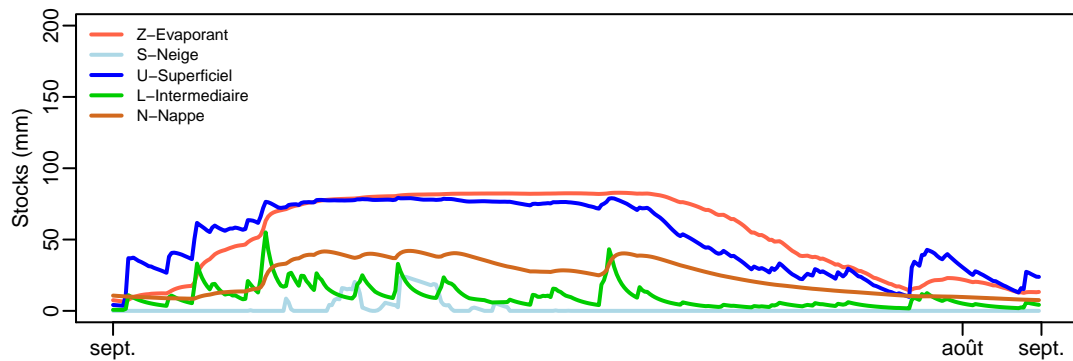

# k2123010 (113.01 km<sup>2</sup>) – année 2011–2012

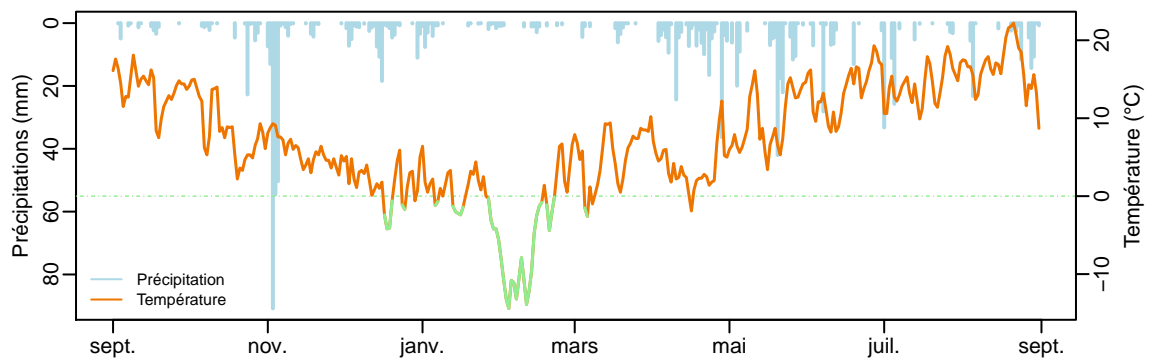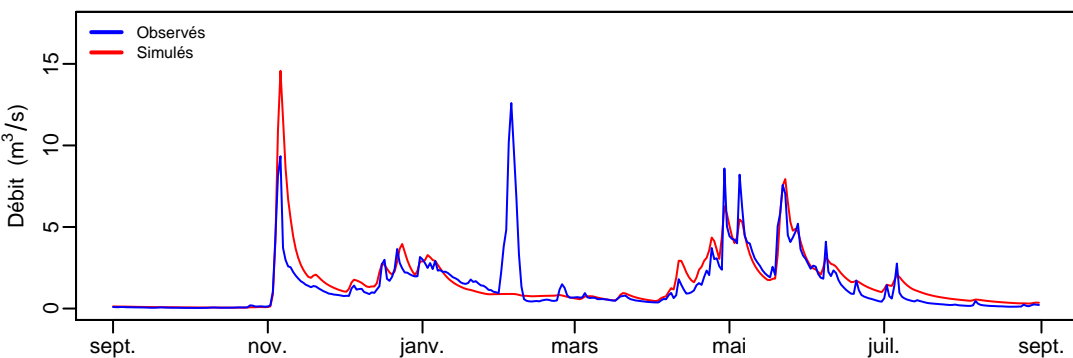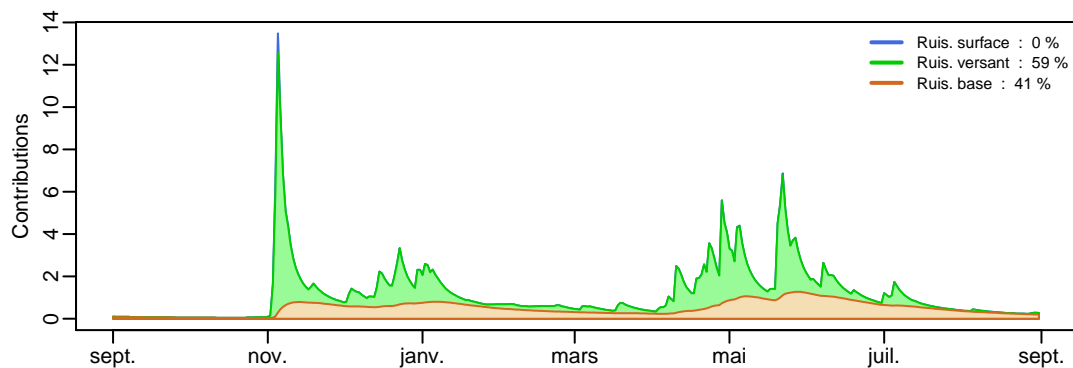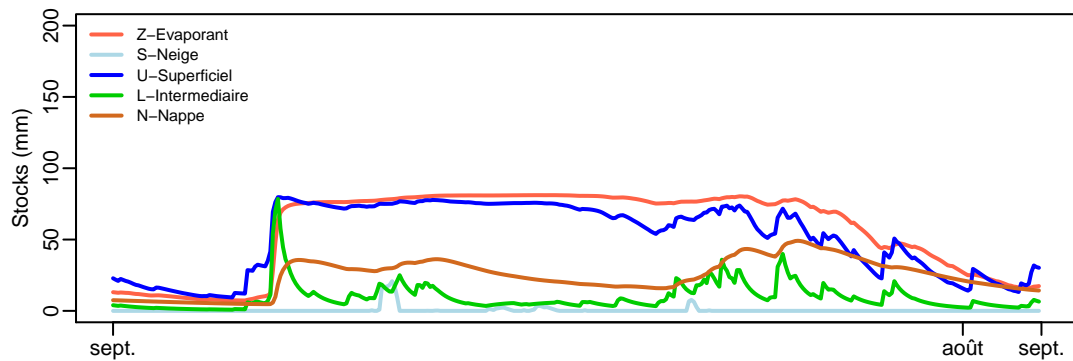

# k2223030 (157.66 km<sup>2</sup>) – année 1983–1984

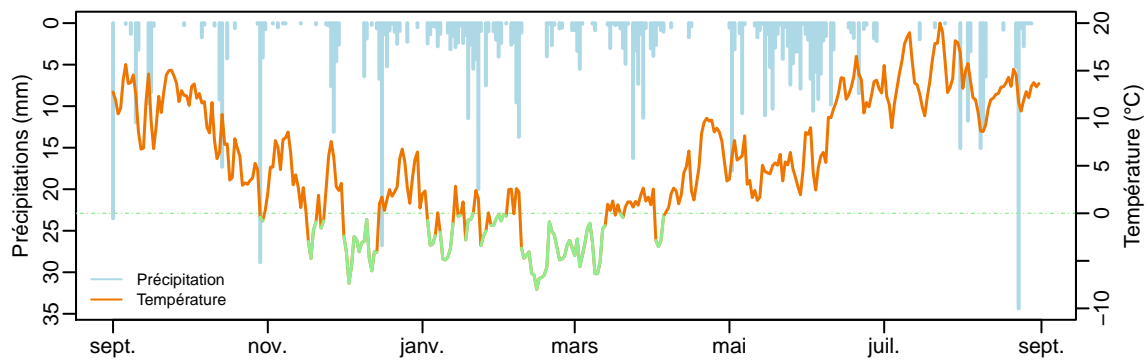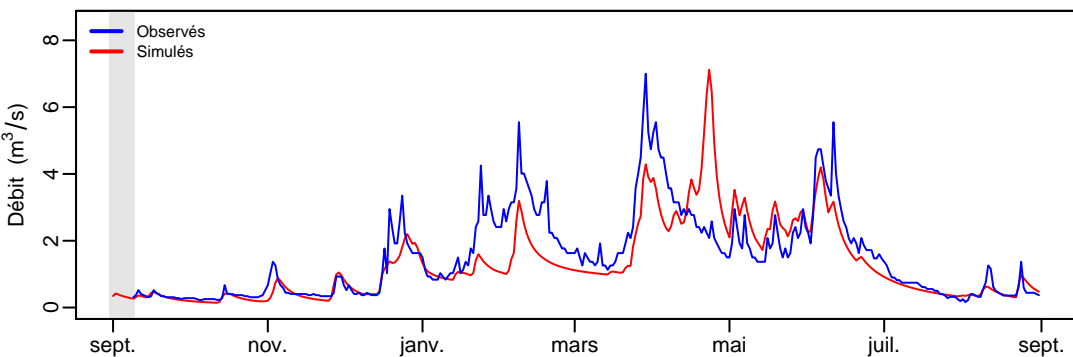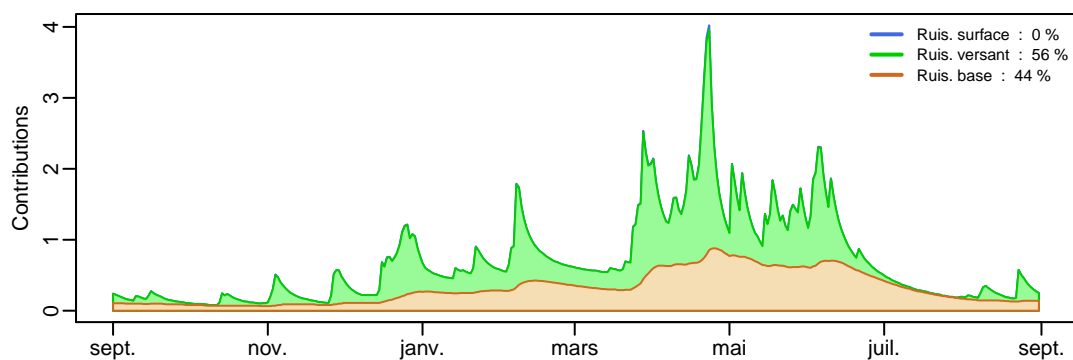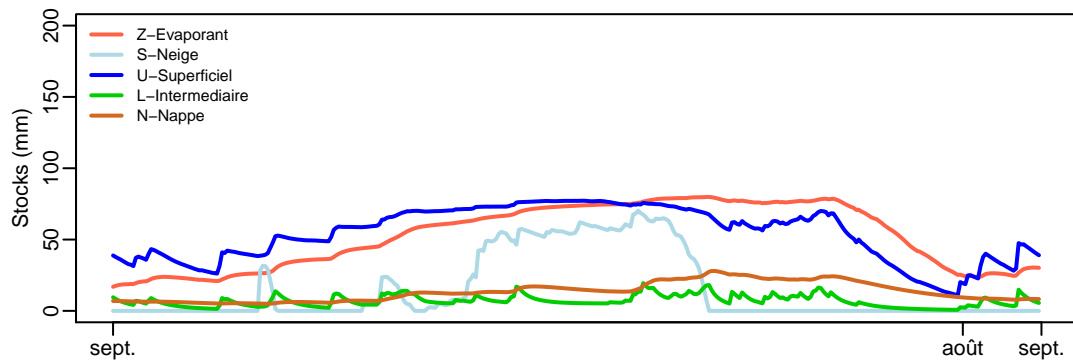

# k2223030 (157.66 km<sup>2</sup>) – année 1984–1985

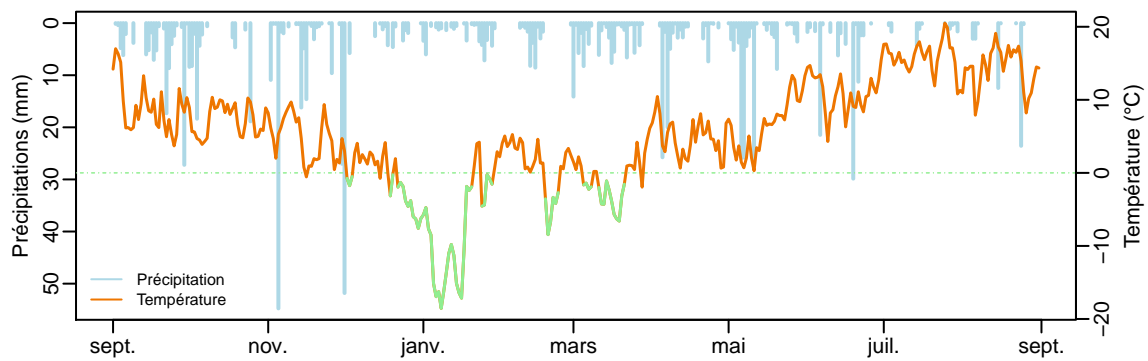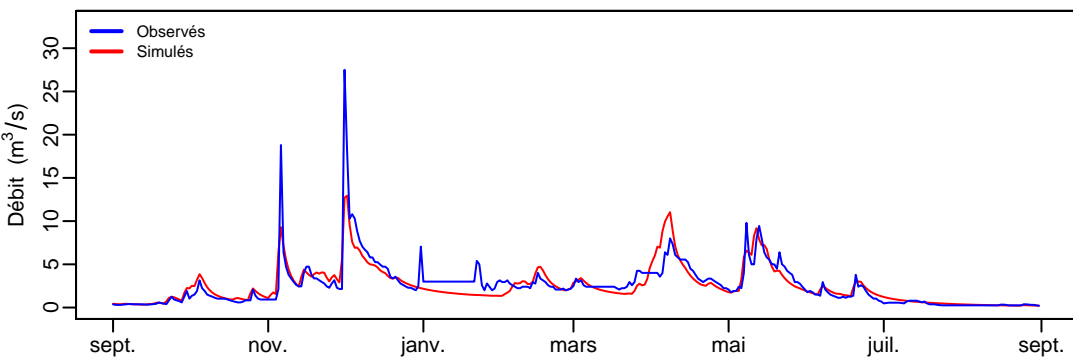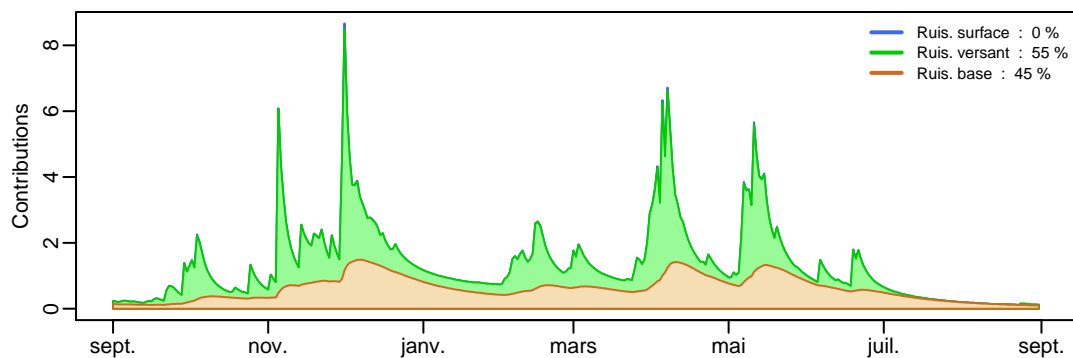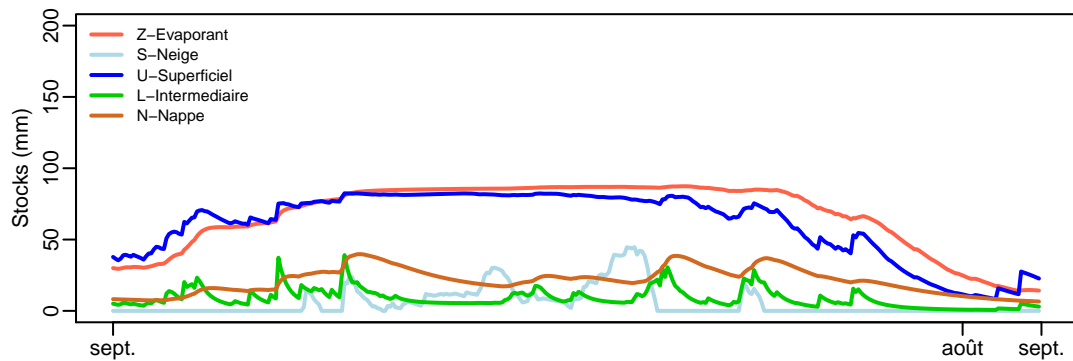

# k2223030 (157.66 km<sup>2</sup>) – année 1985–1986

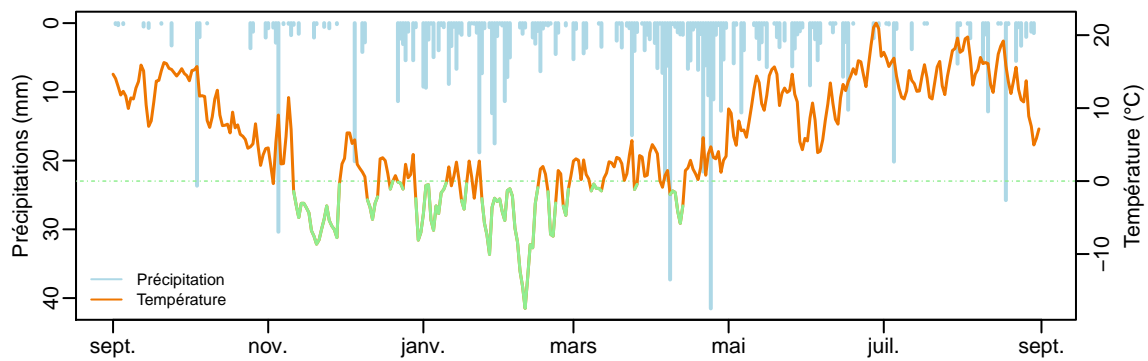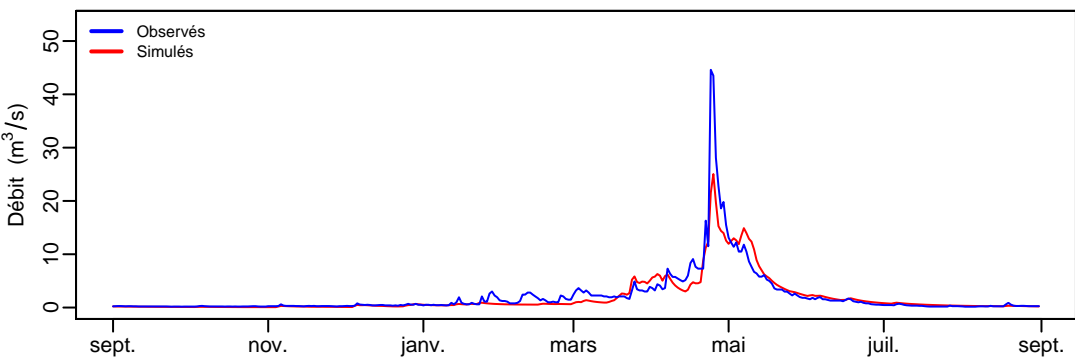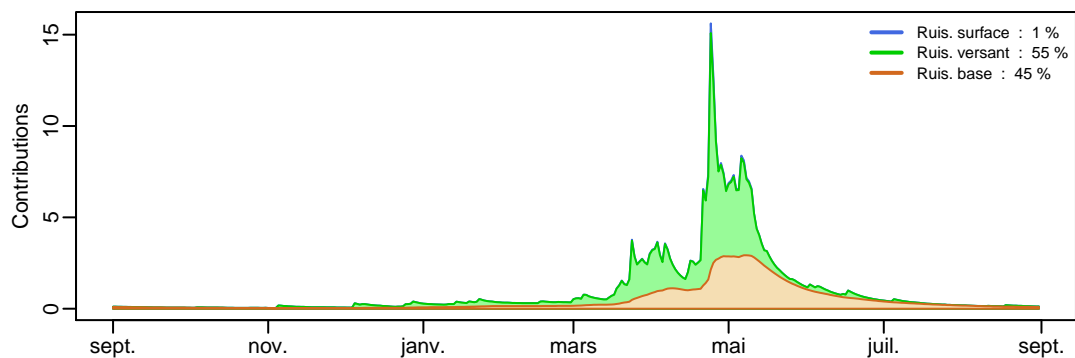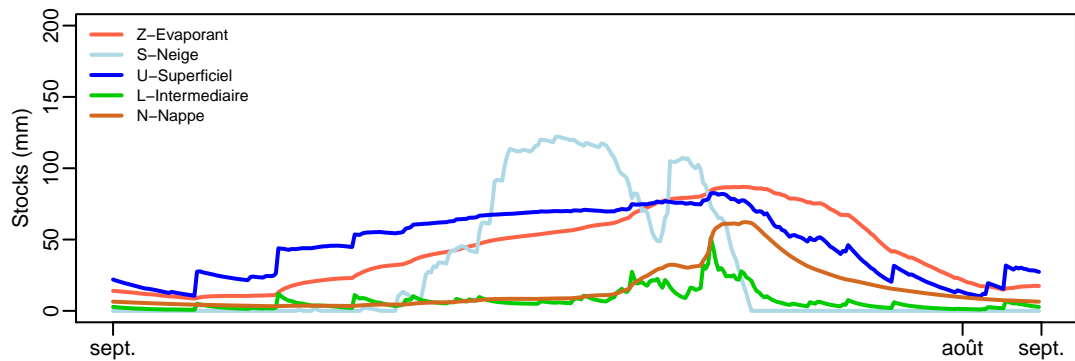



# k2223030 (157.66 km<sup>2</sup>) – année 1986–1987

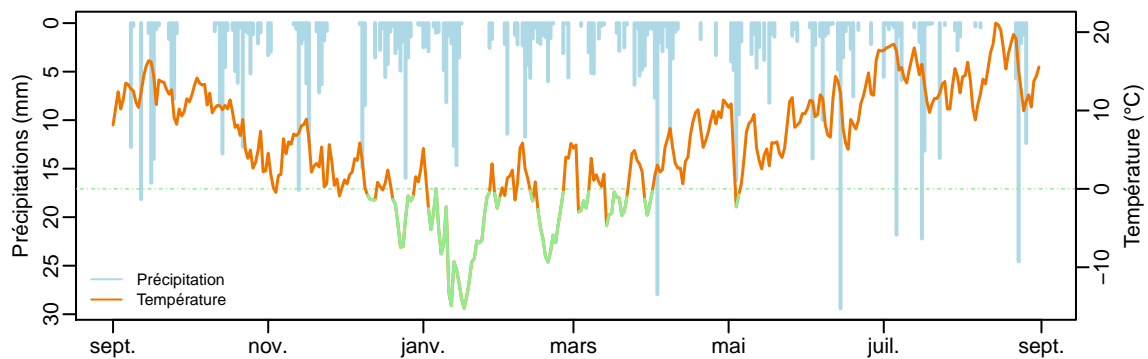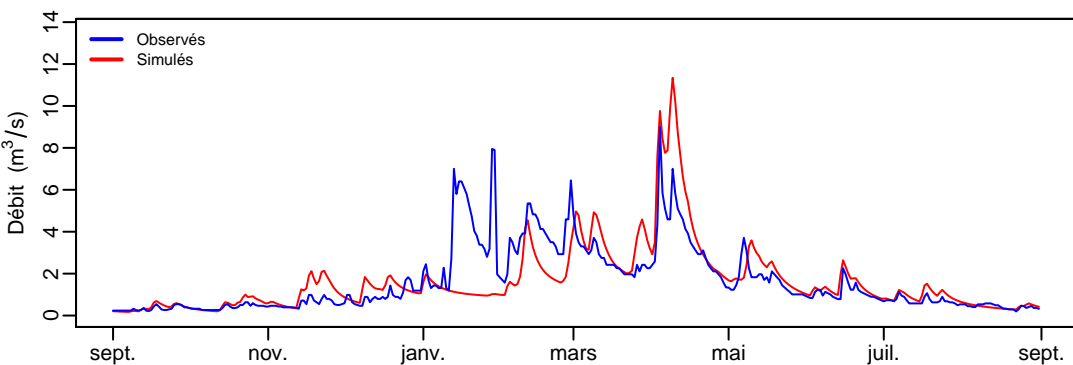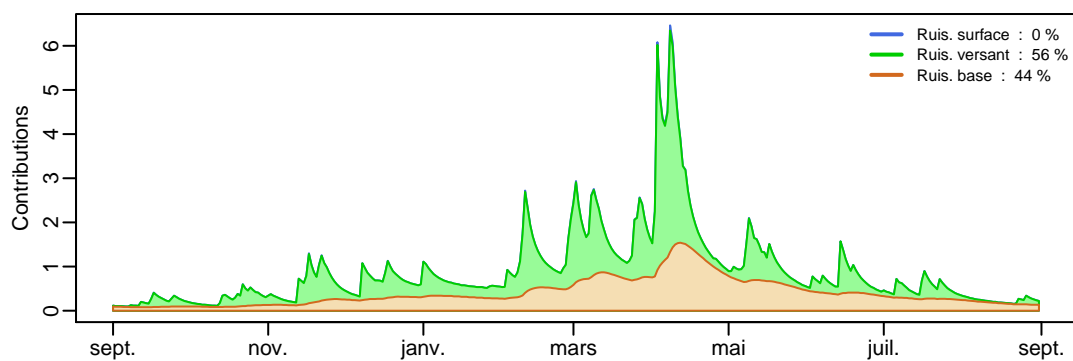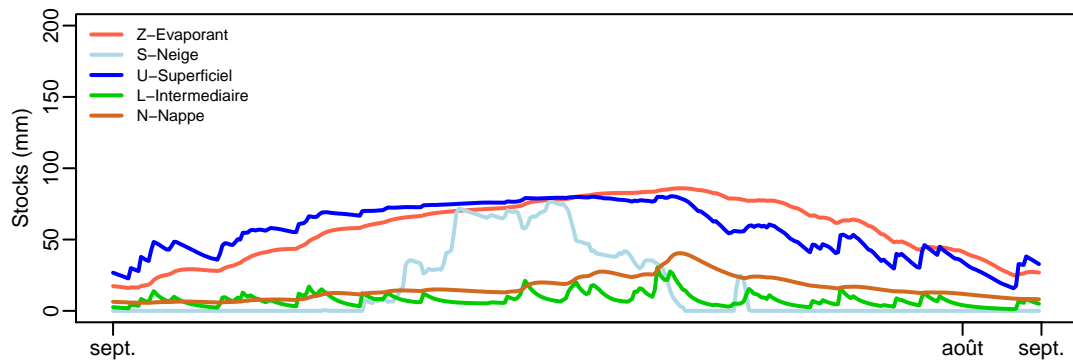

# k2223030 (157.66 km²) – année 1987–1988

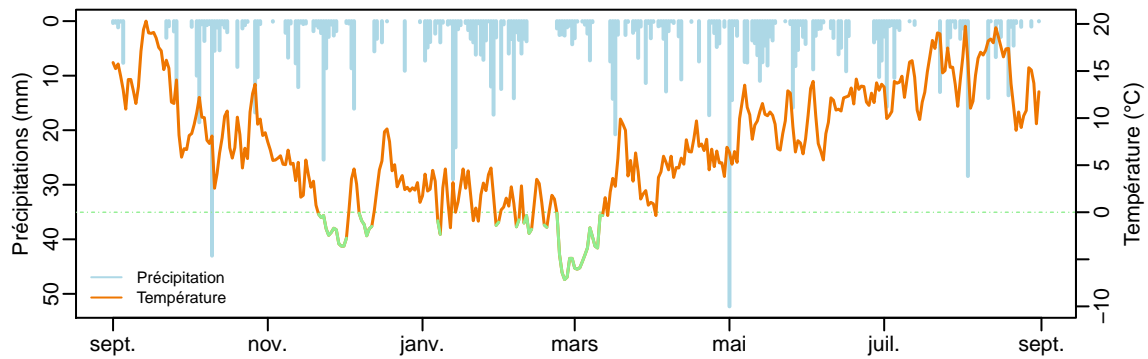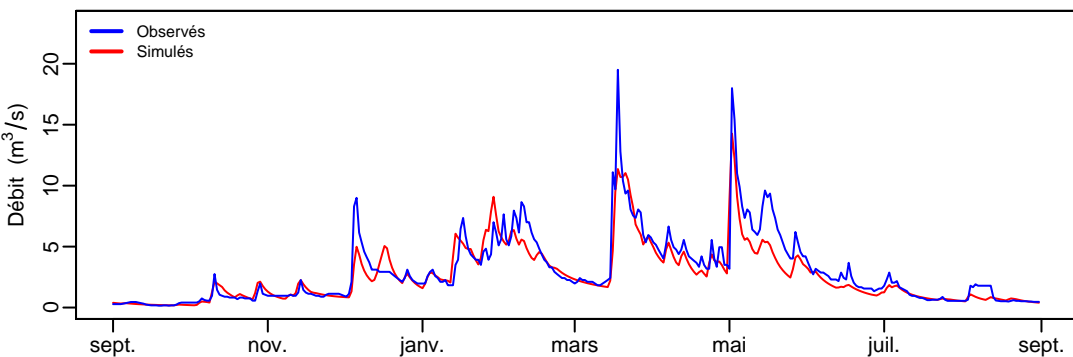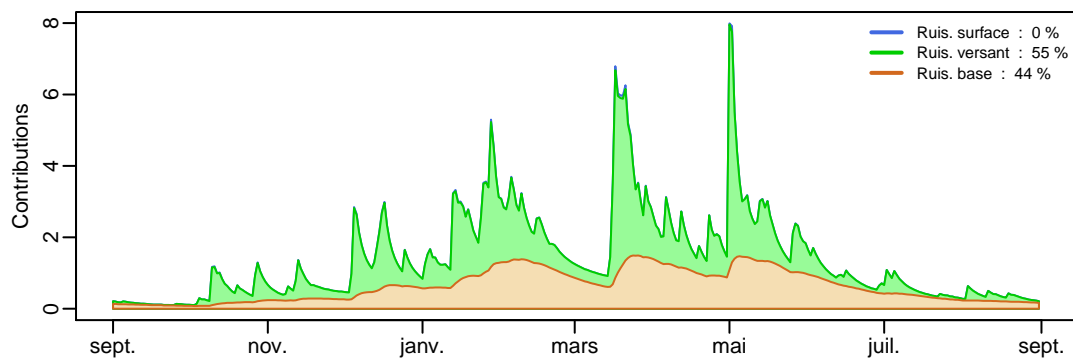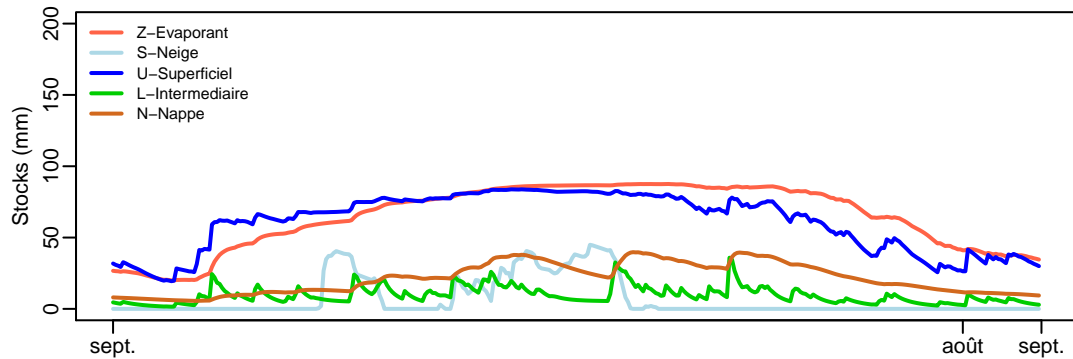

# k2223030 (157.66 km<sup>2</sup>) – année 1988–1989

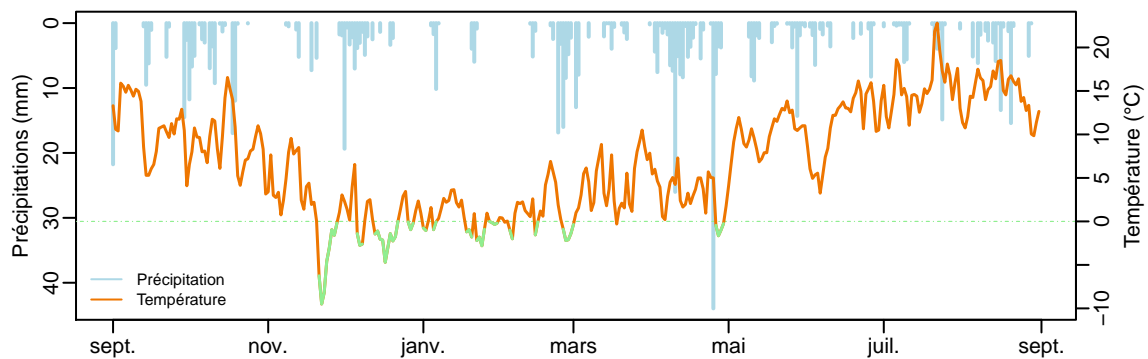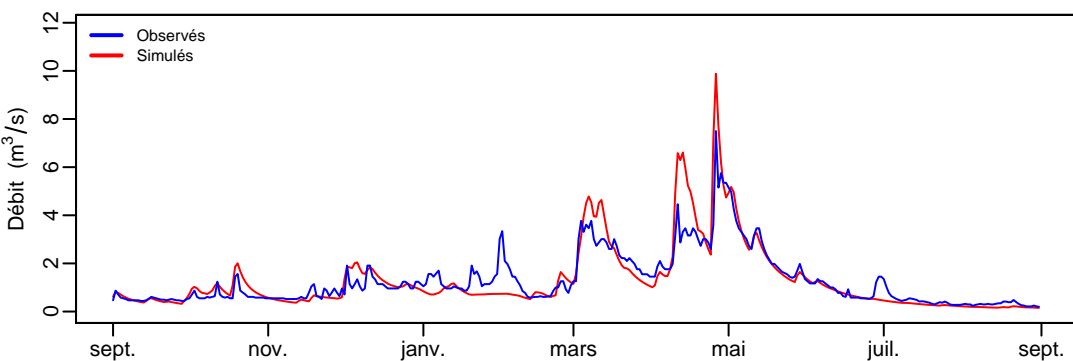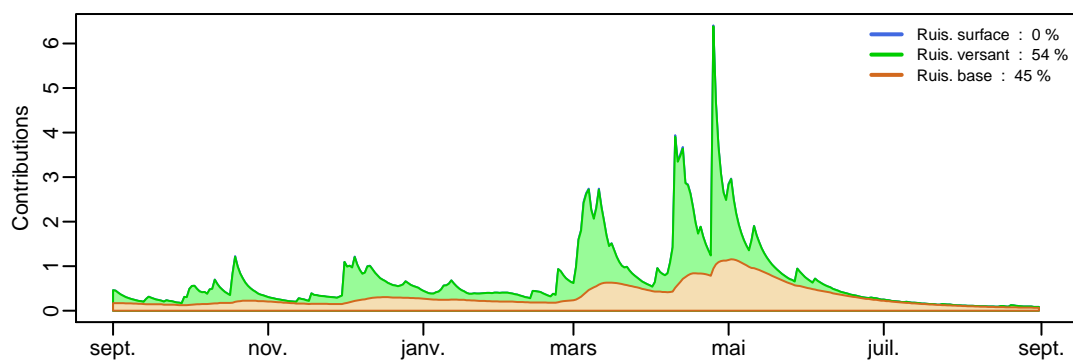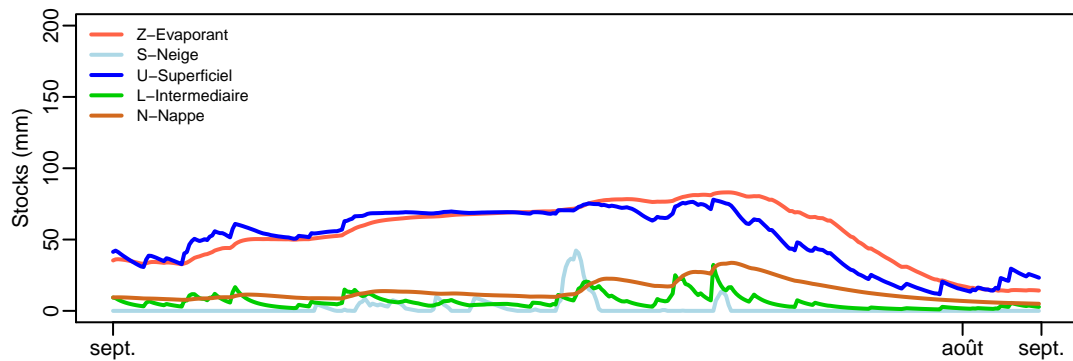

# k2223030 (157.66 km<sup>2</sup>) – année 1989–1990

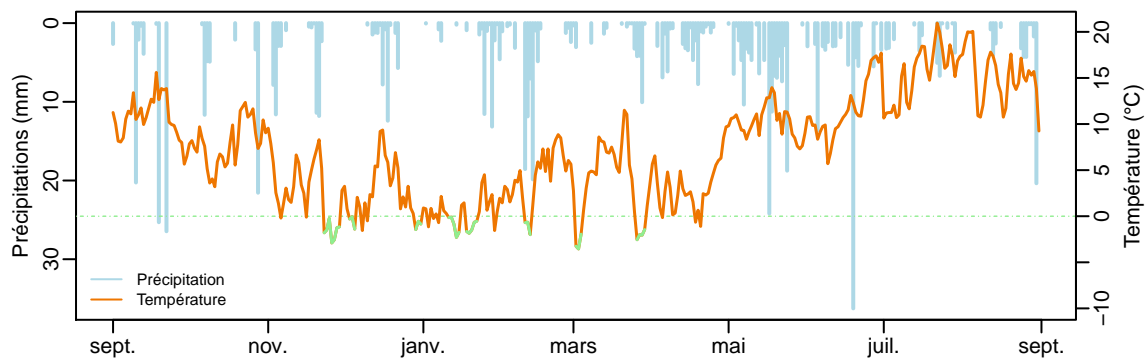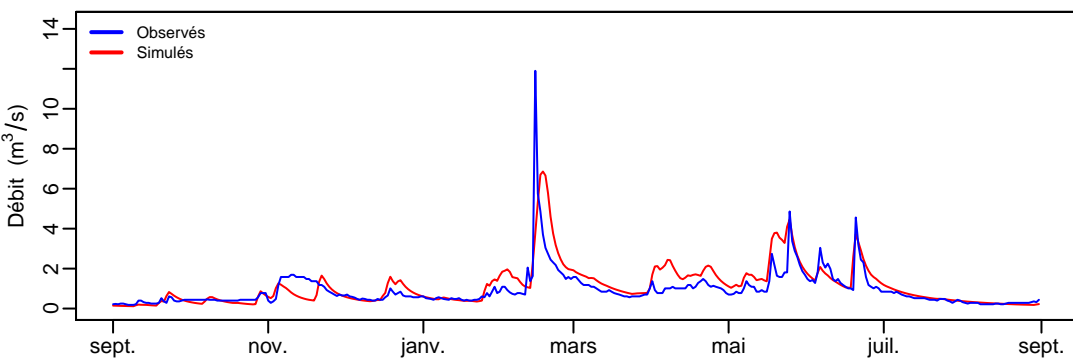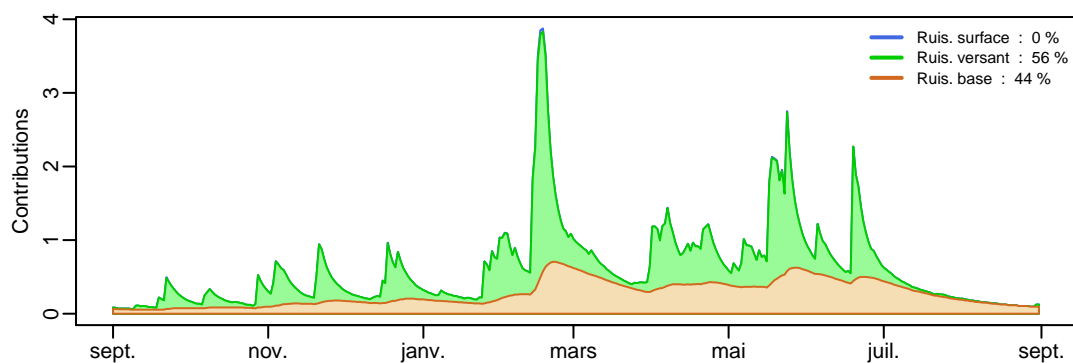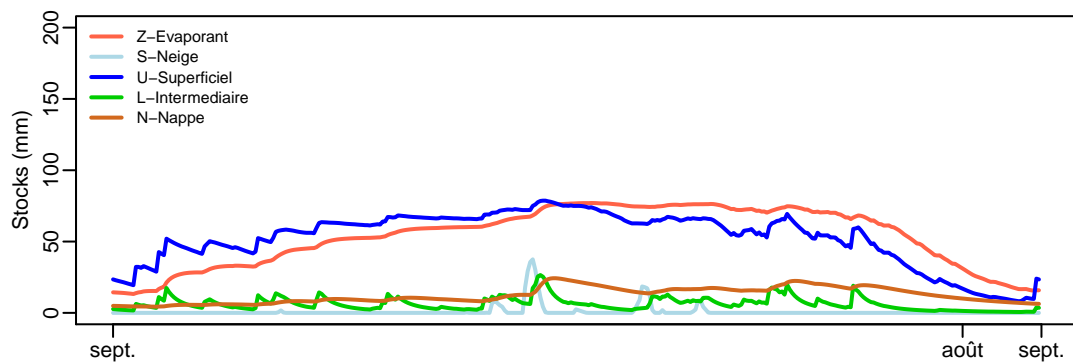

# k2223030 (157.66 km²) – année 1990–1991

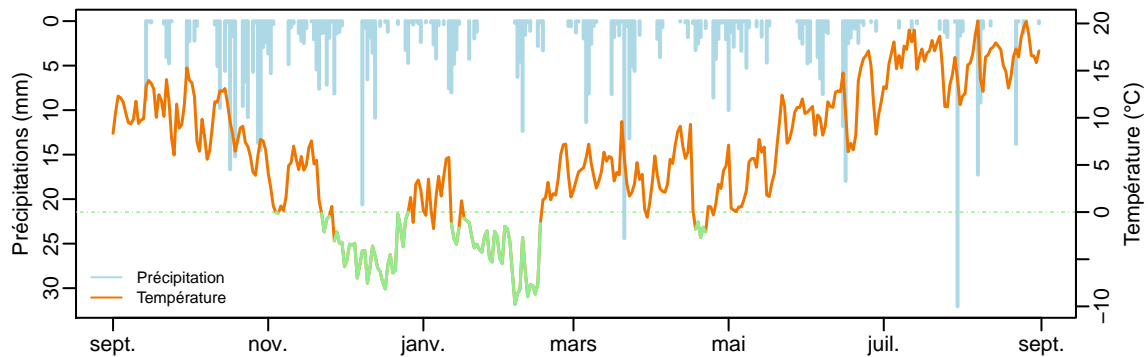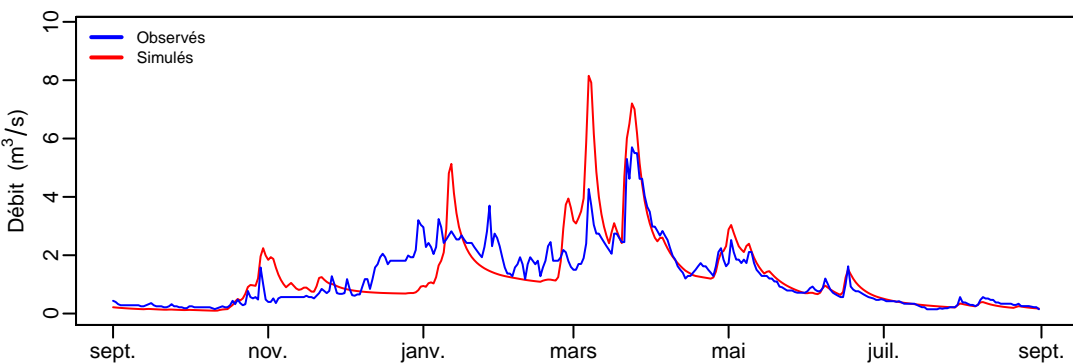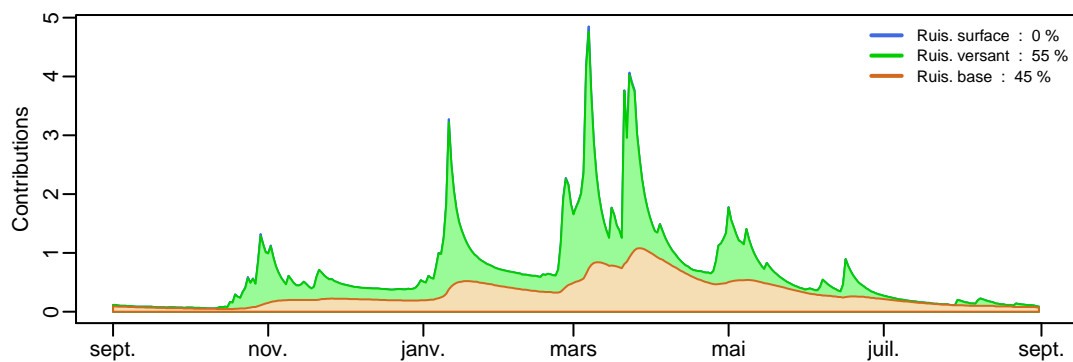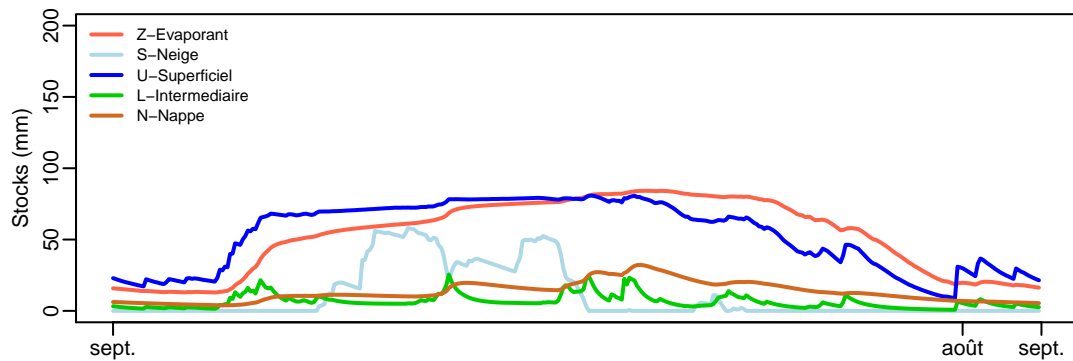

# k2223030 (157.66 km²) – année 1991–1992

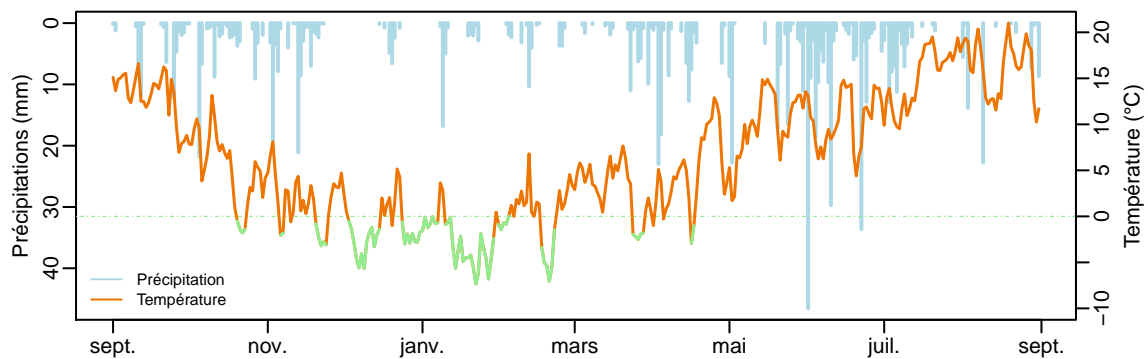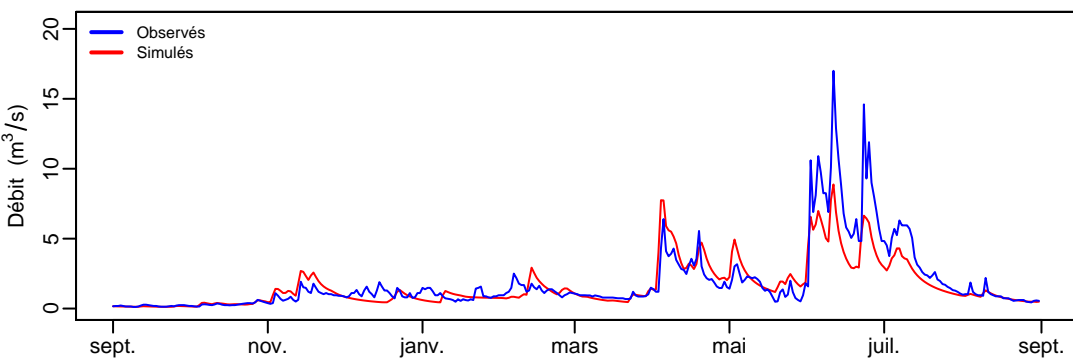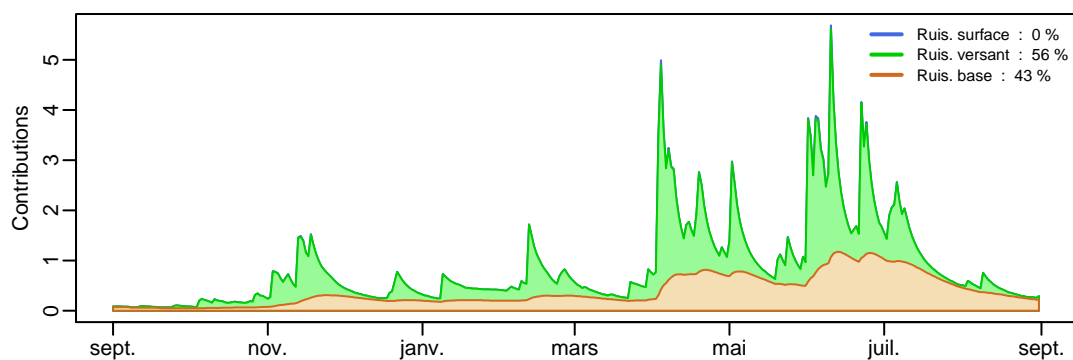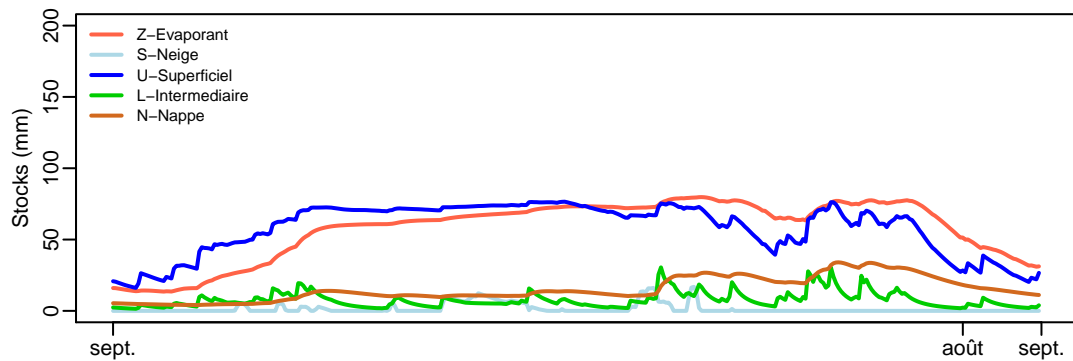

# k2223030 (157.66 km<sup>2</sup>) – année 1992–1993

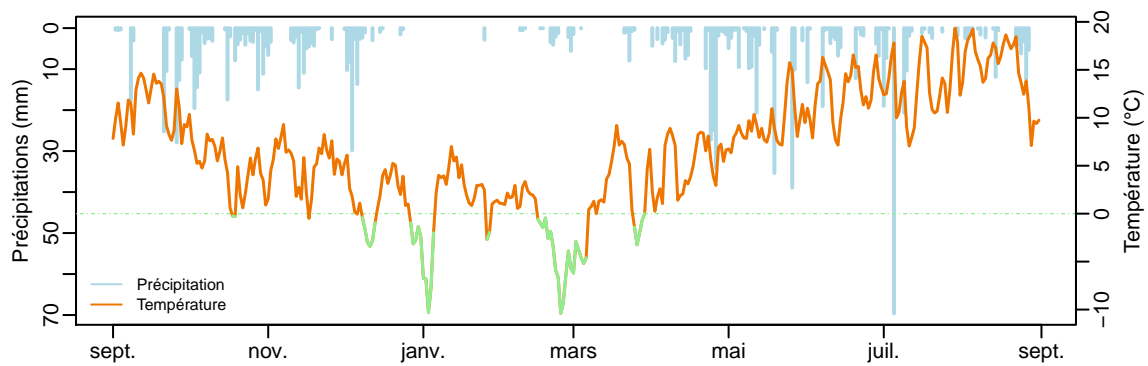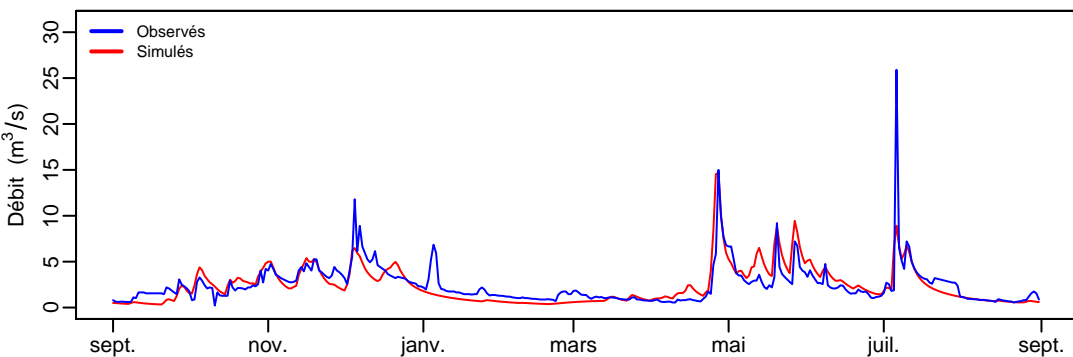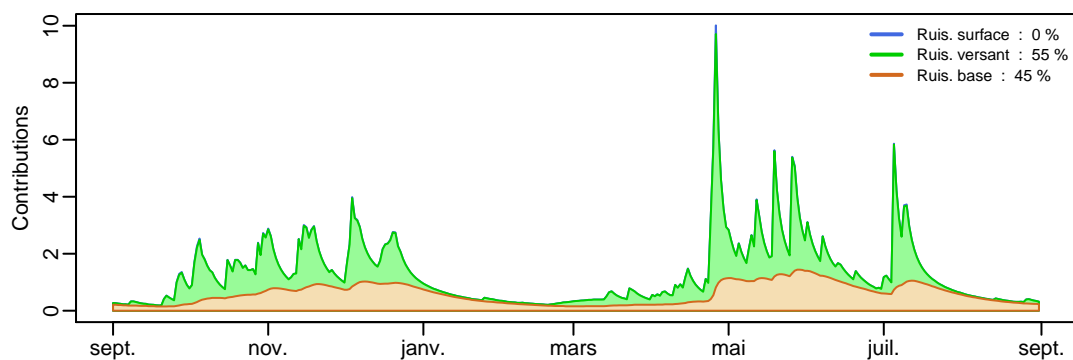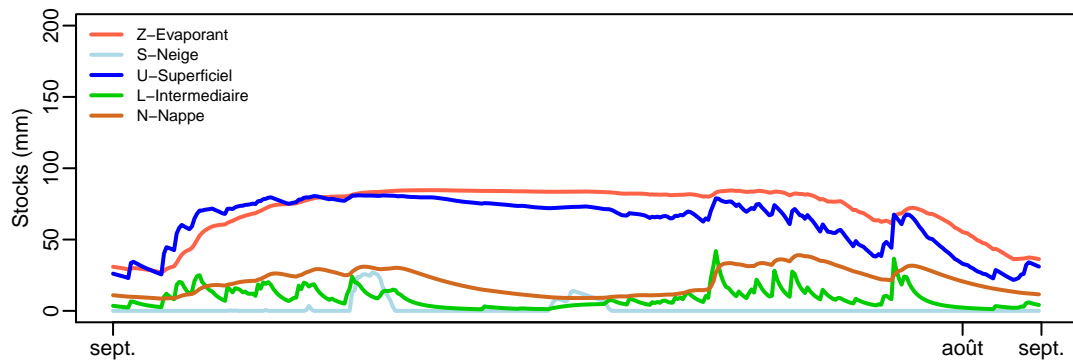

# k2223030 (157.66 km<sup>2</sup>) – année 1993–1994

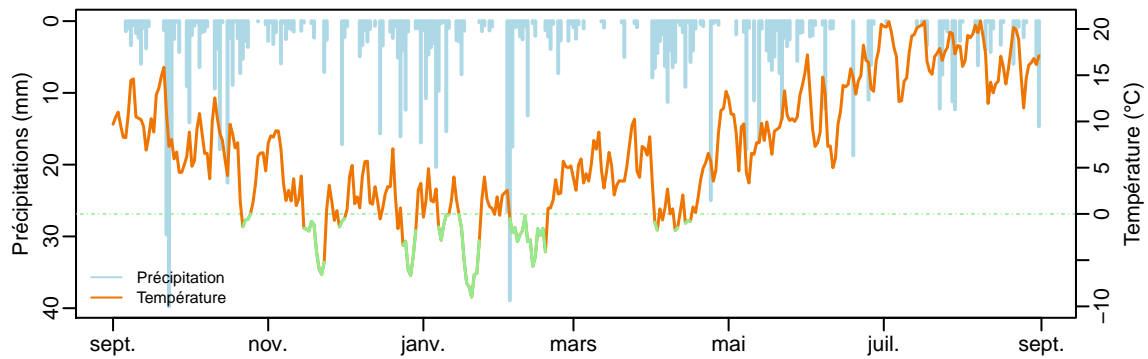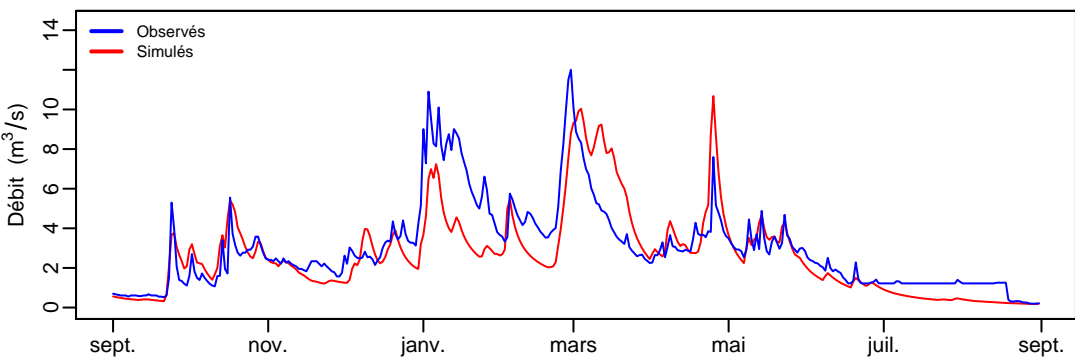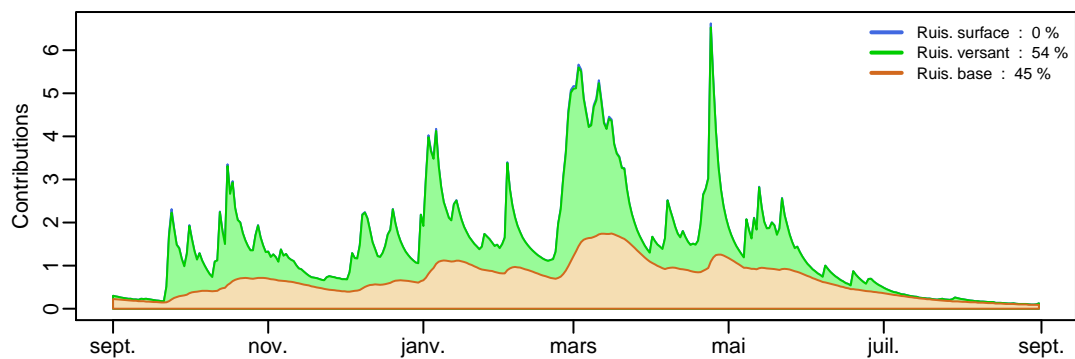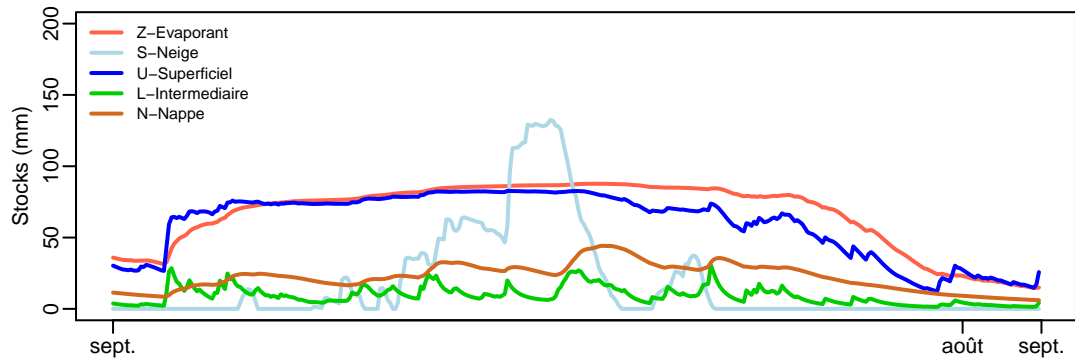



# k2223030 (157.66 km<sup>2</sup>) – année 1994–1995

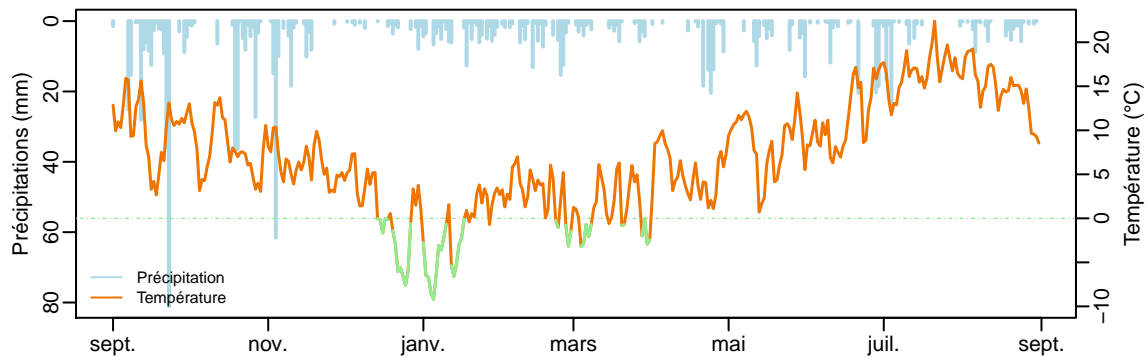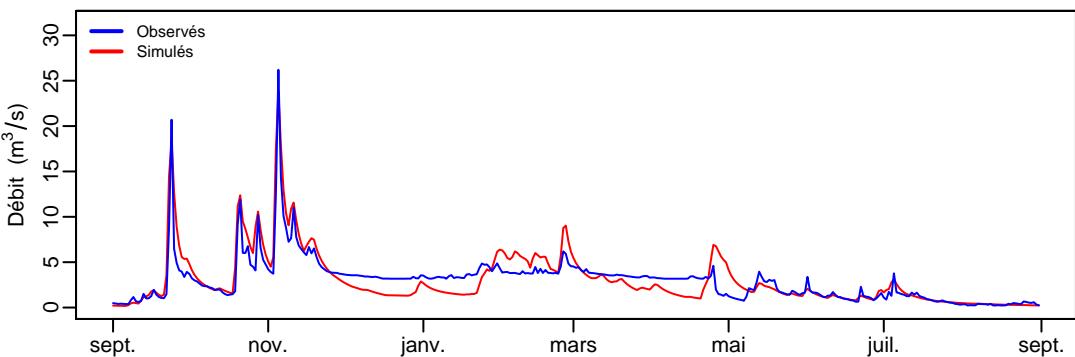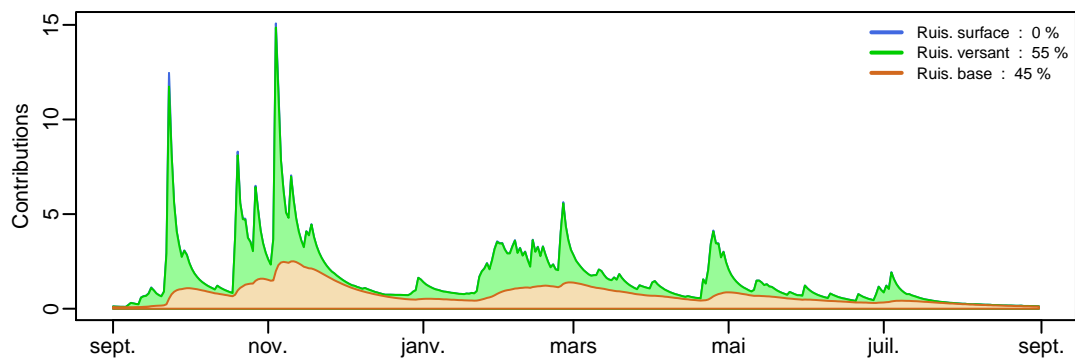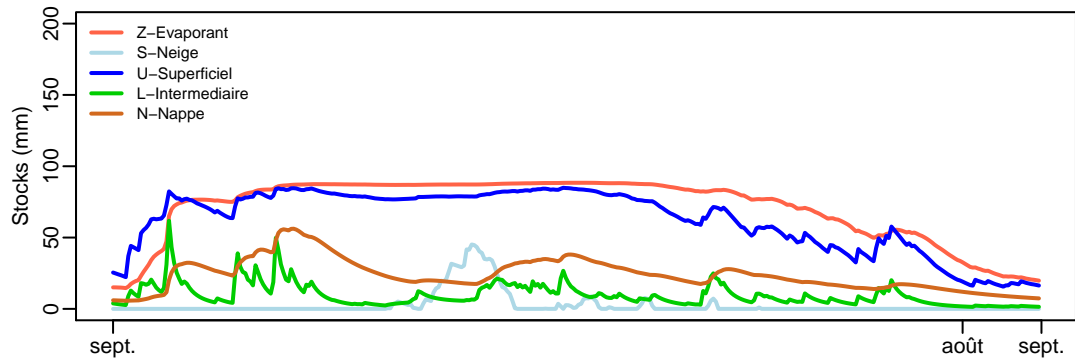

# k2223030 (157.66 km<sup>2</sup>) – année 1995–1996

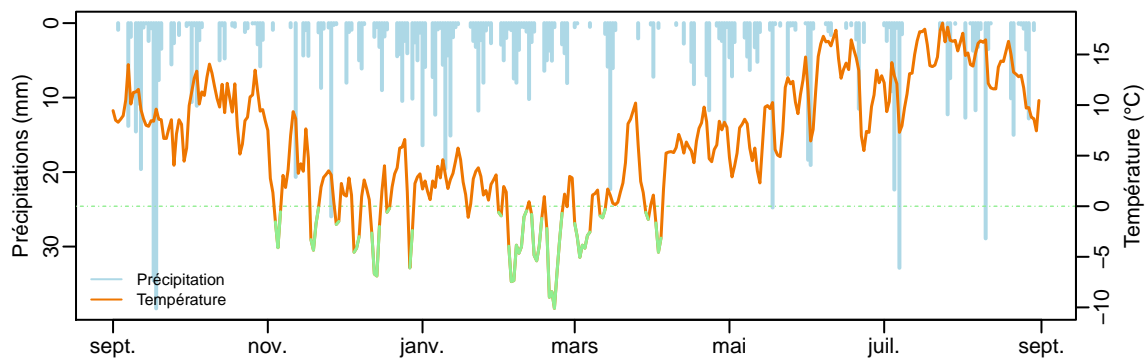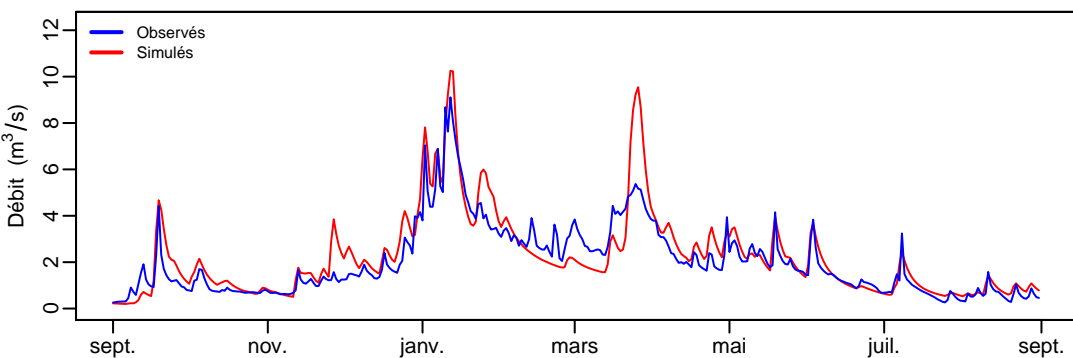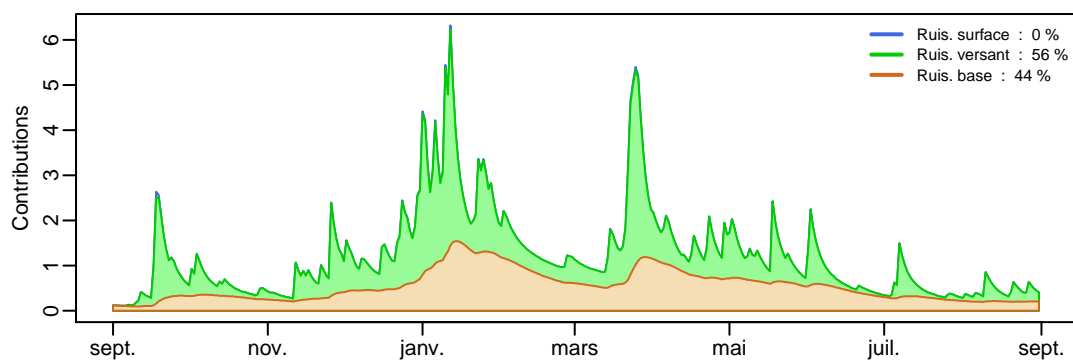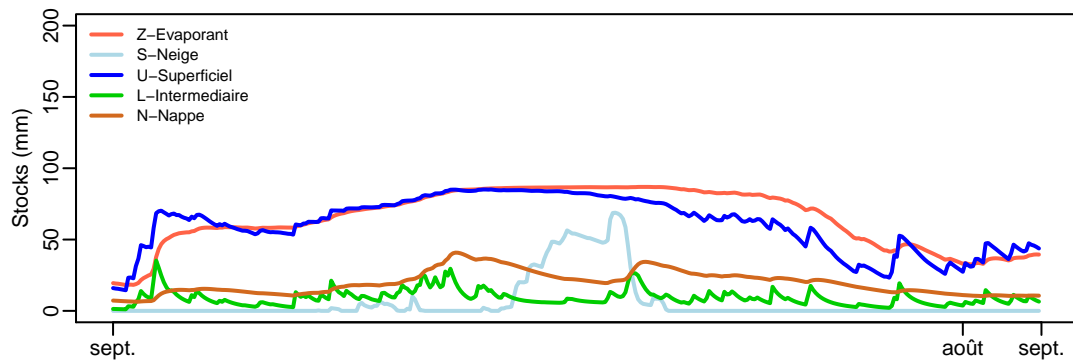

# k2223030 (157.66 km<sup>2</sup>) – année 1996–1997

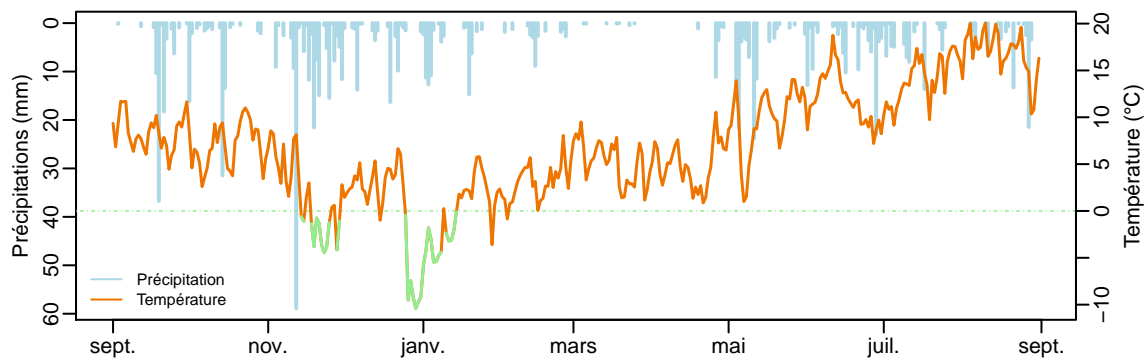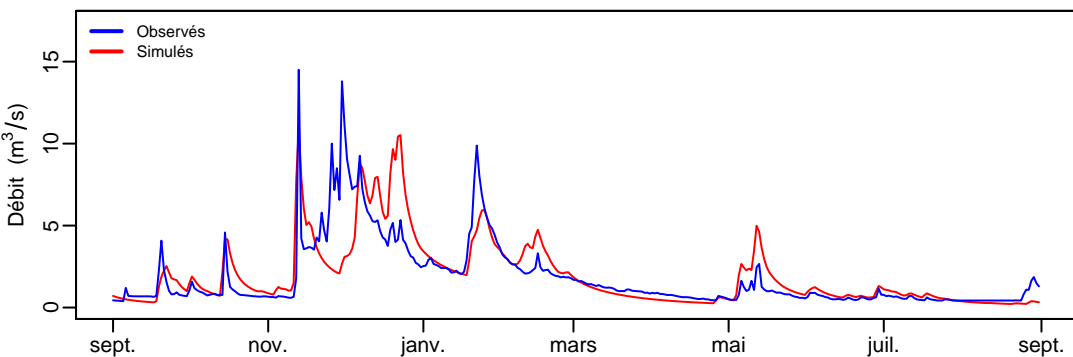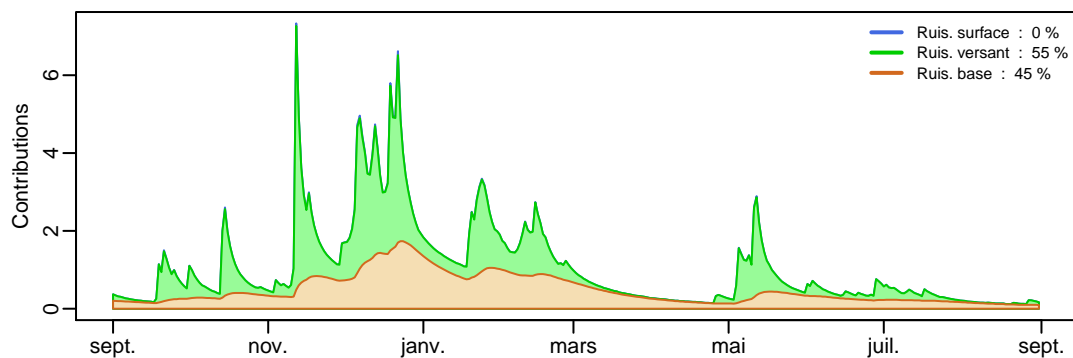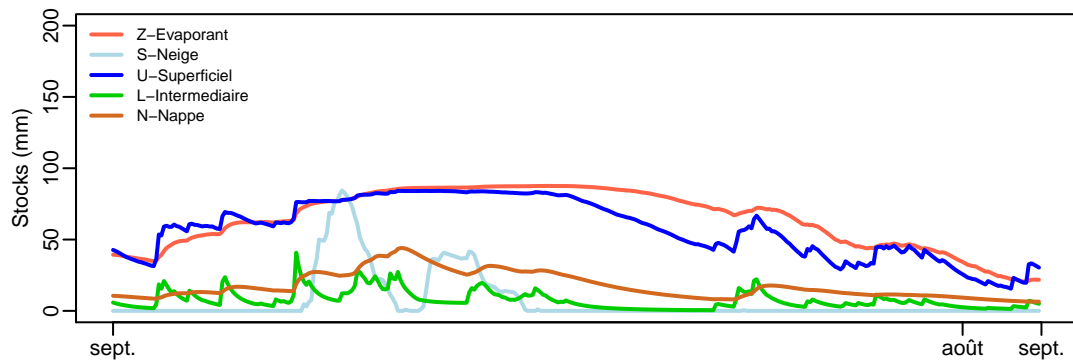

# k2223030 (157.66 km<sup>2</sup>) – année 1997–1998

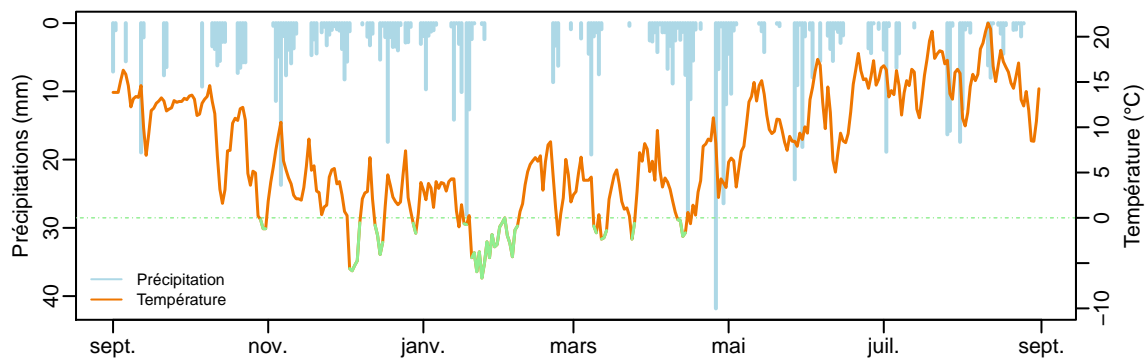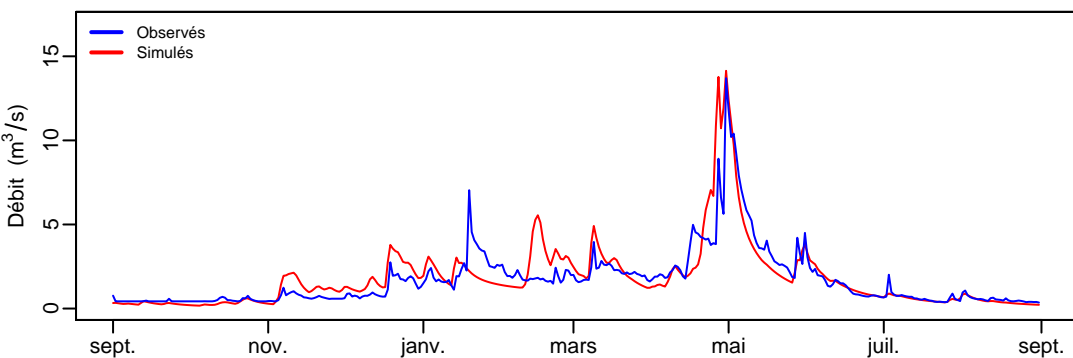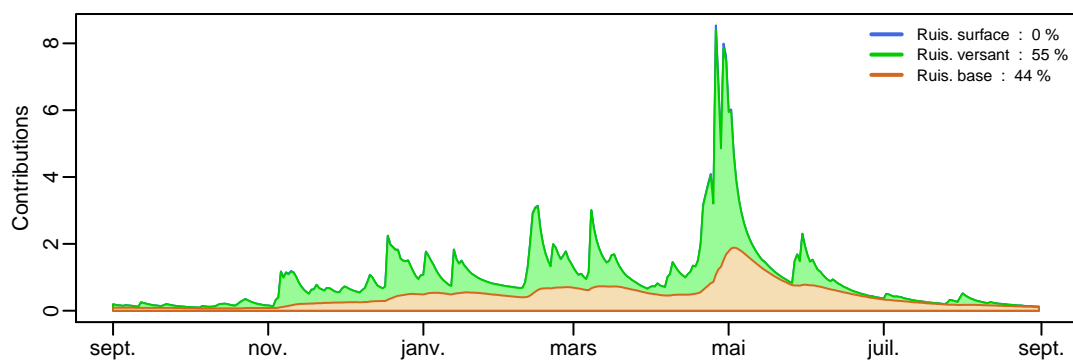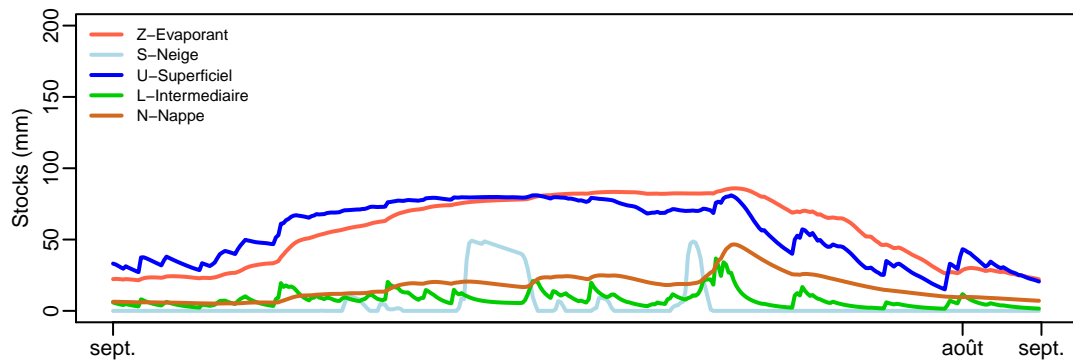

# k2223030 (157.66 km<sup>2</sup>) – année 1998–1999

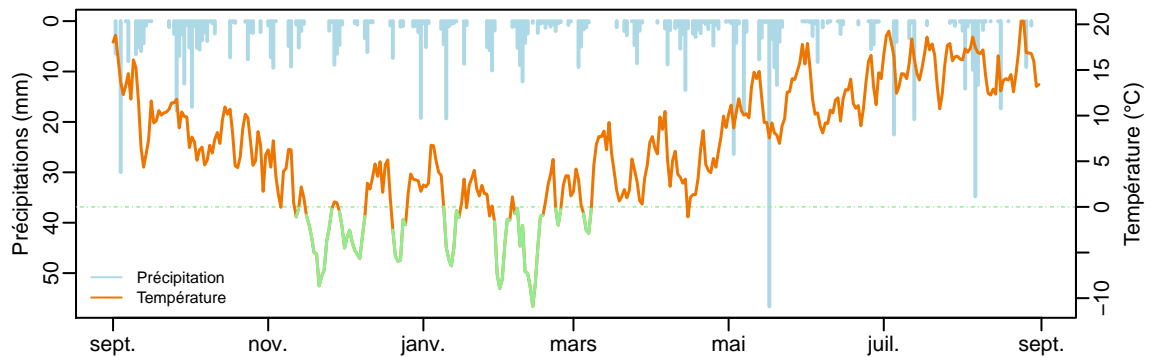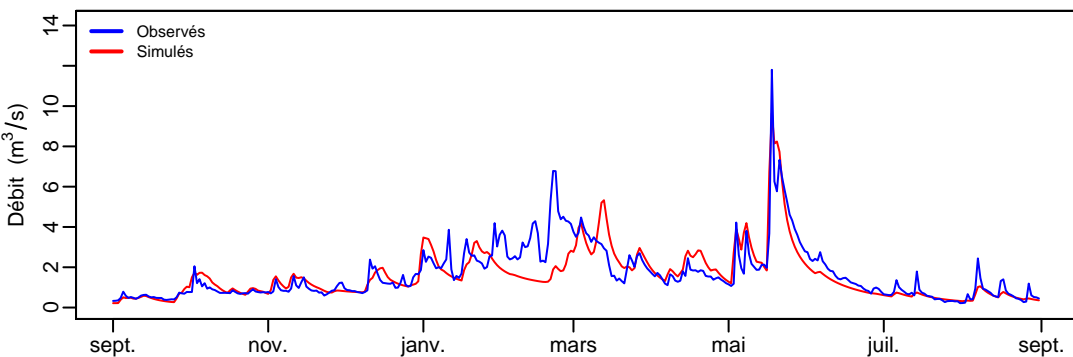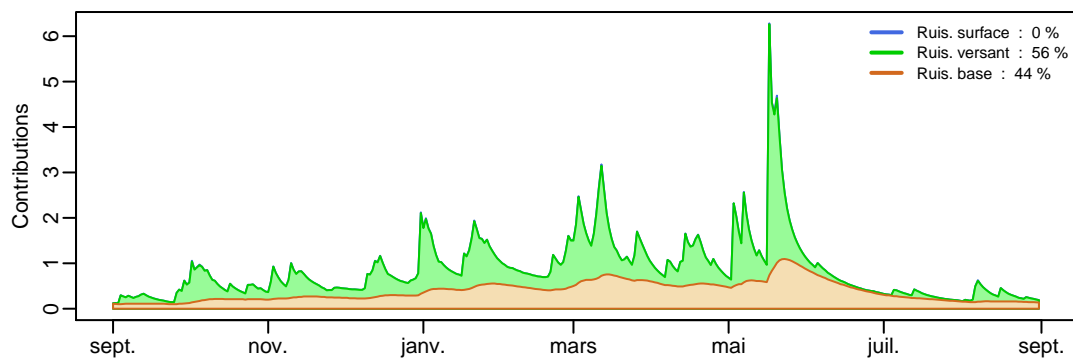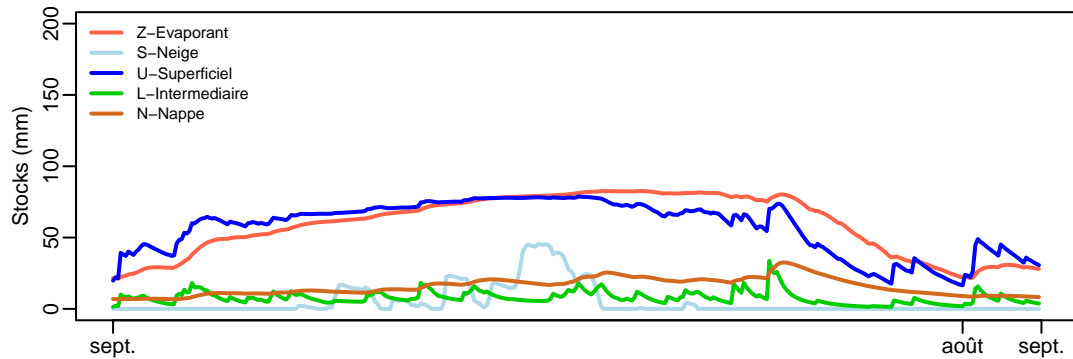

# k2223030 (157.66 km<sup>2</sup>) – année 1999–2000

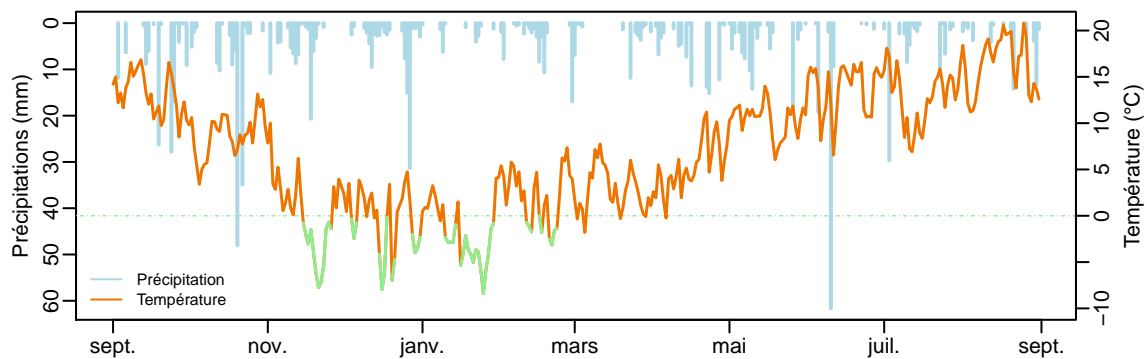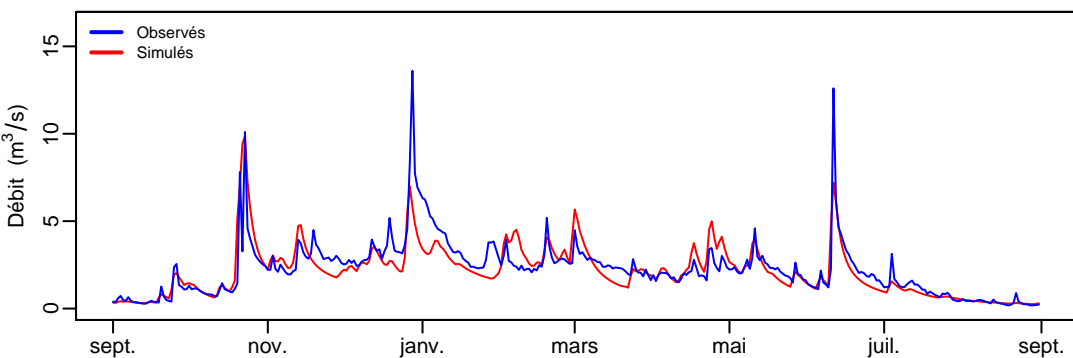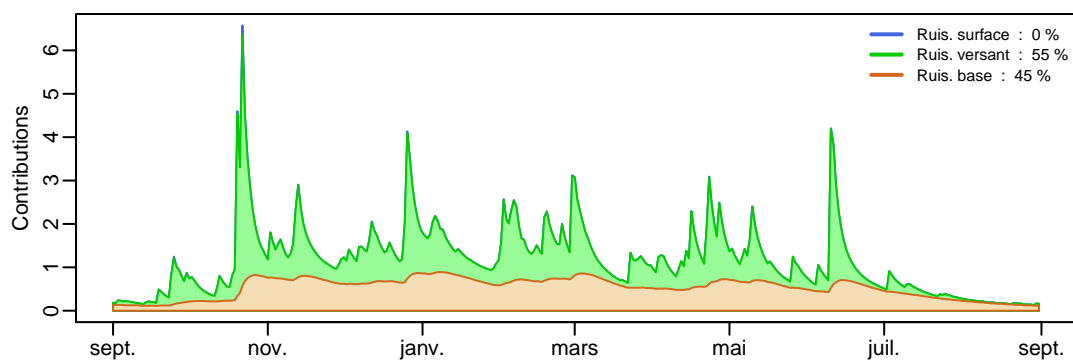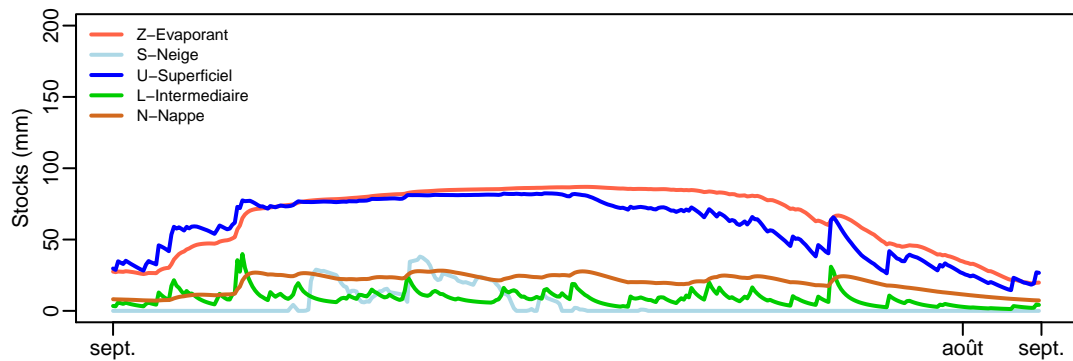

# k2223030 (157.66 km<sup>2</sup>) – année 2000–2001

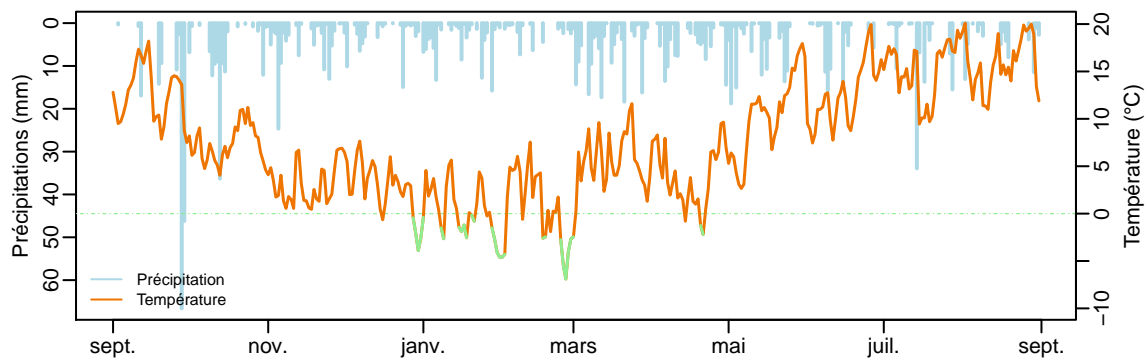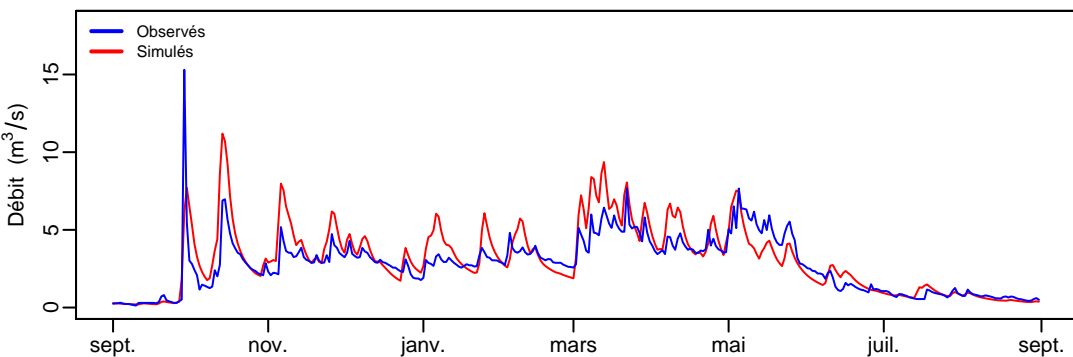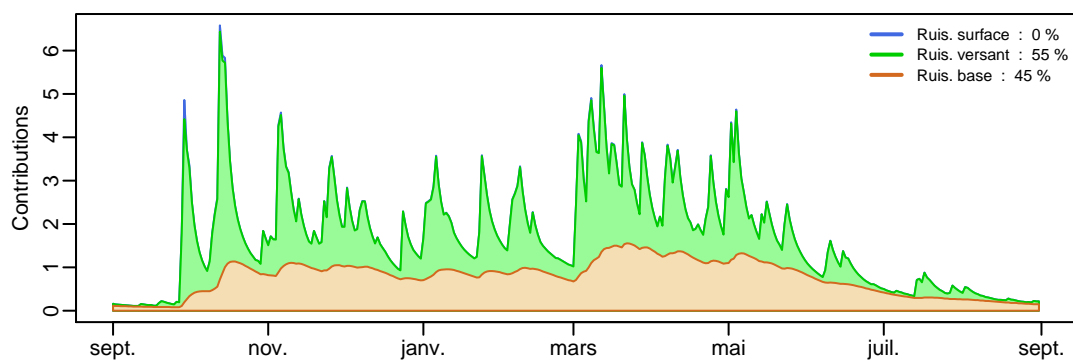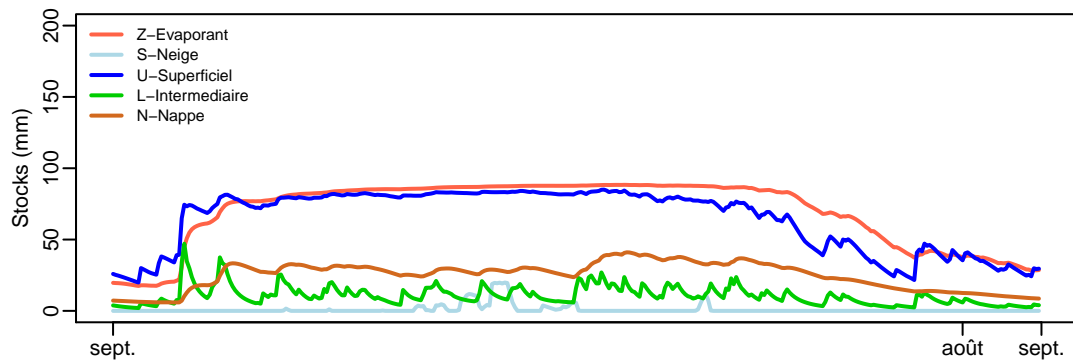

# k2223030 (157.66 km<sup>2</sup>) – année 2001–2002

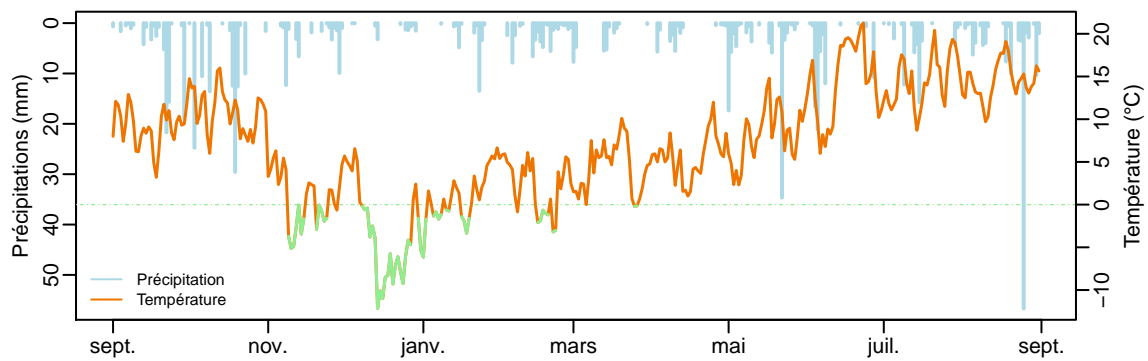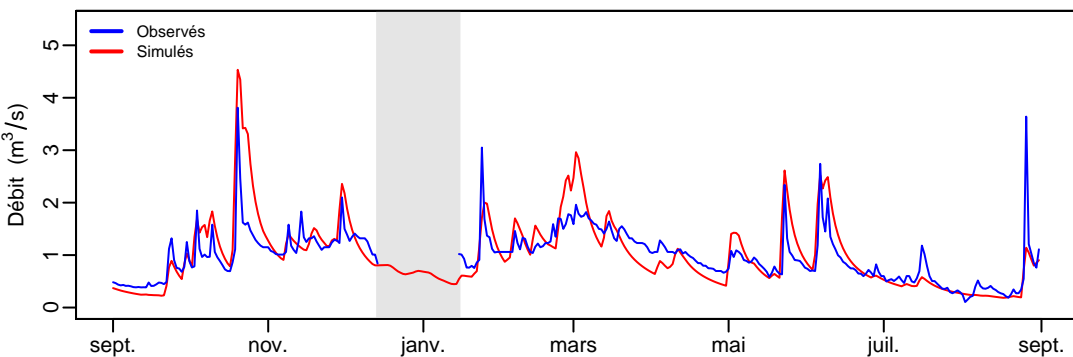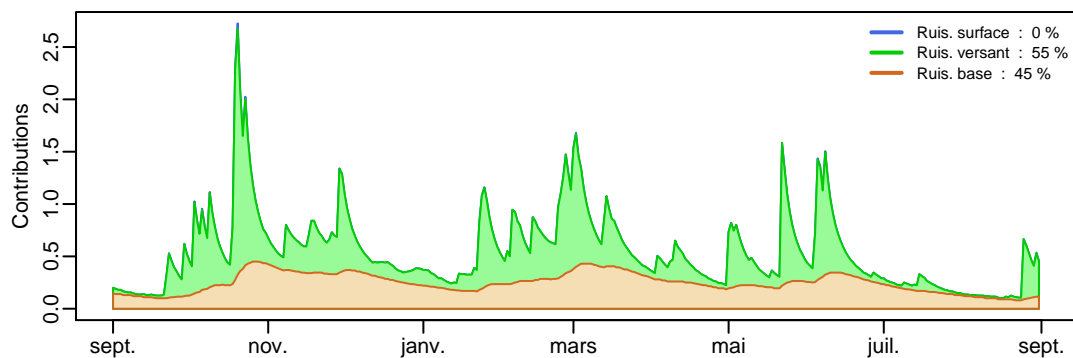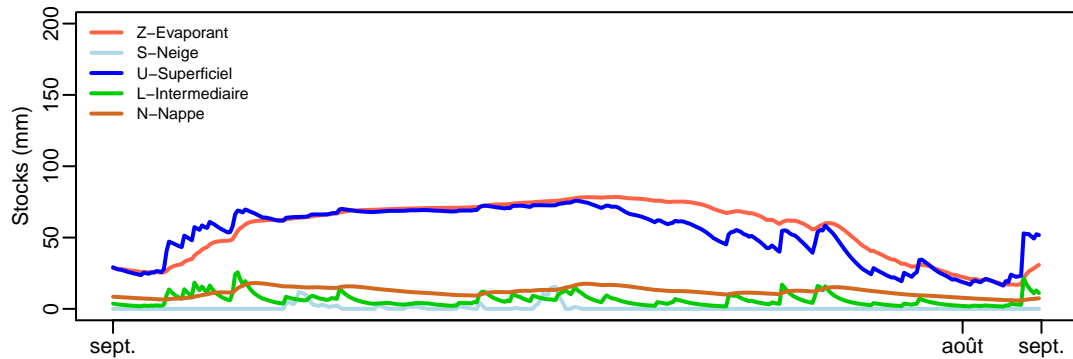



# k2223030 (157.66 km<sup>2</sup>) – année 2002–2003

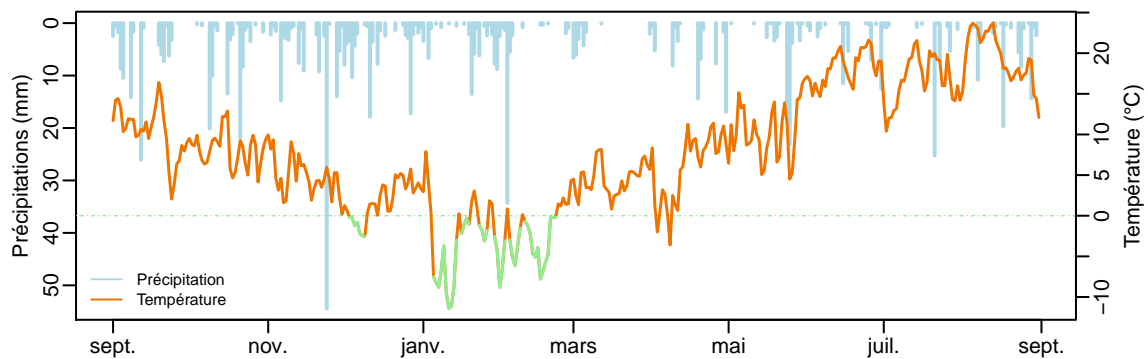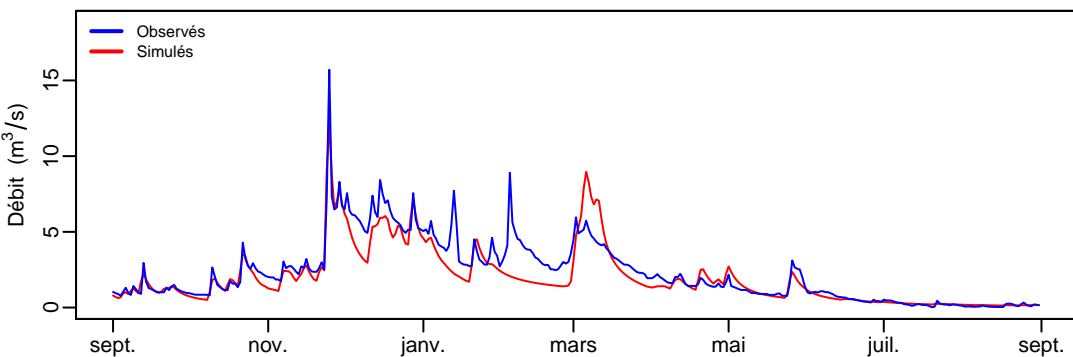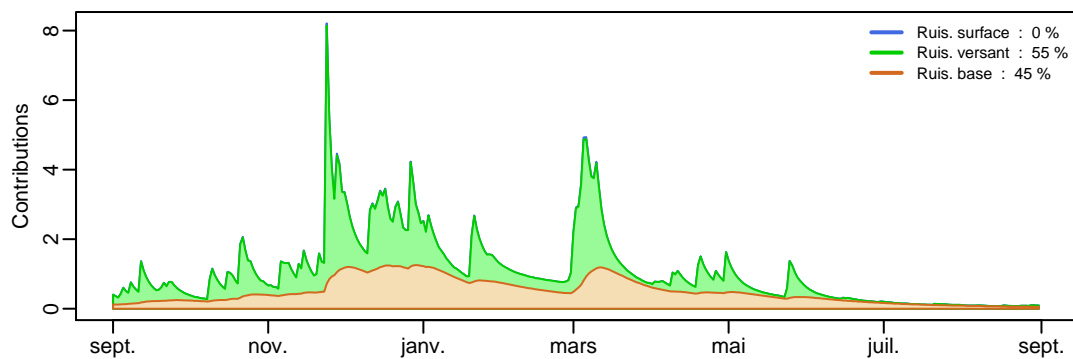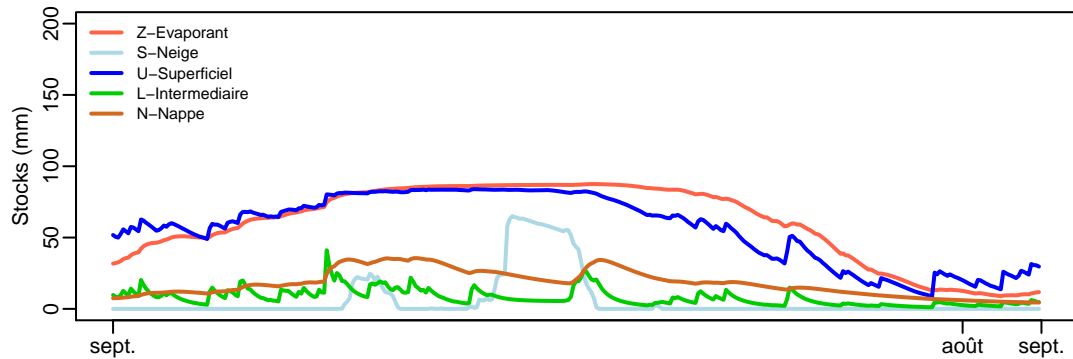

# k2223030 (157.66 km<sup>2</sup>) – année 2003–2004

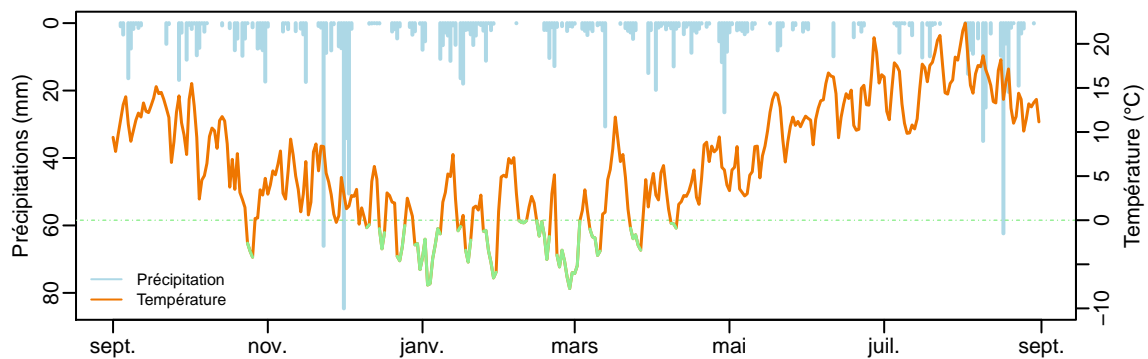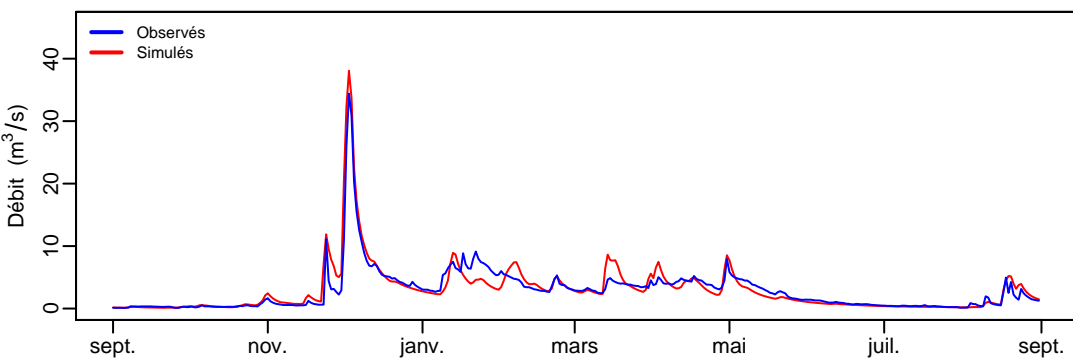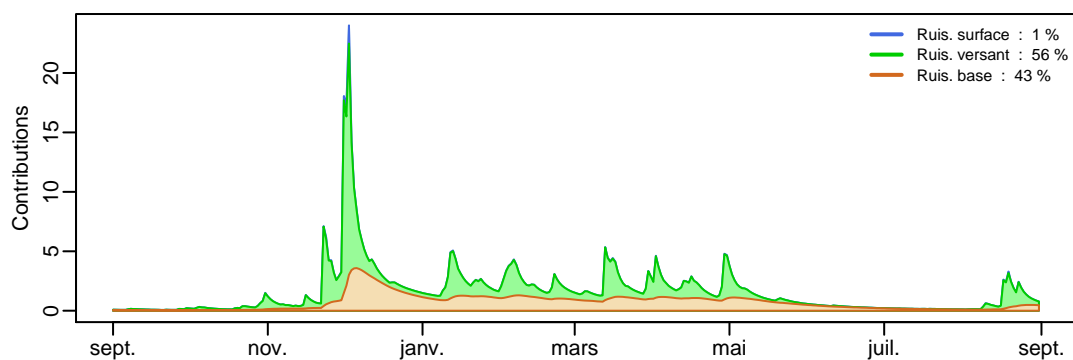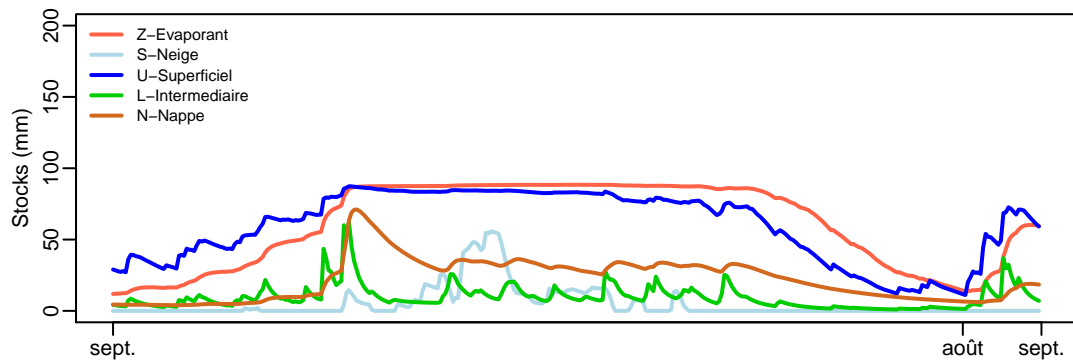

# k2223030 (157.66 km<sup>2</sup>) – année 2004–2005

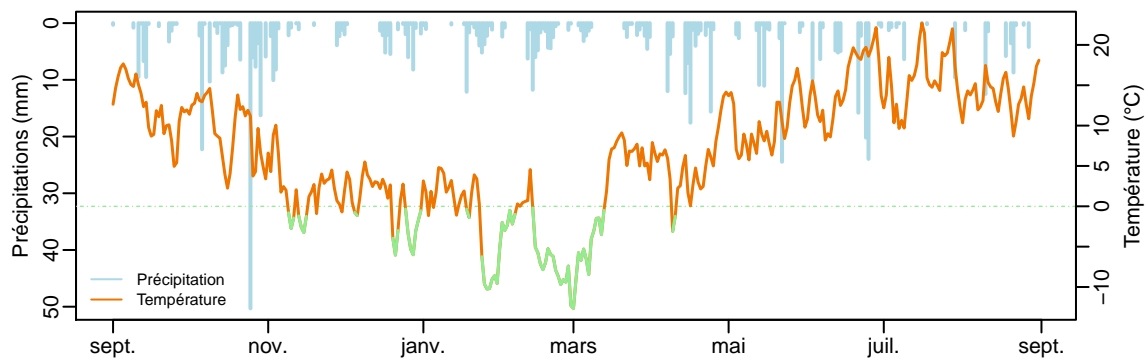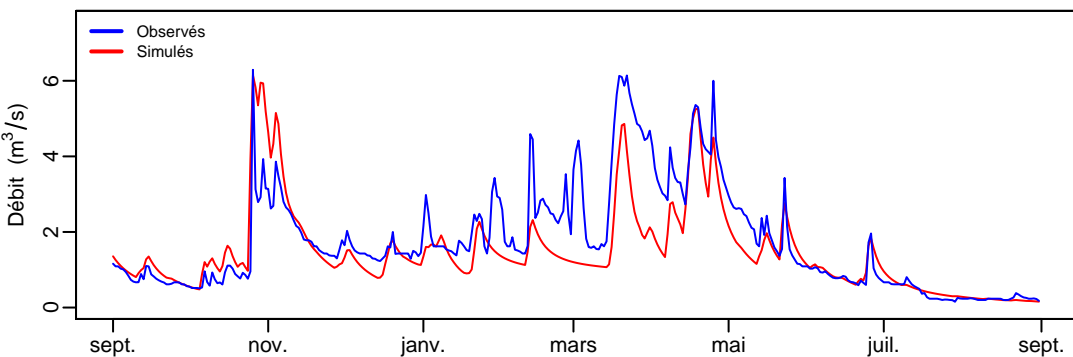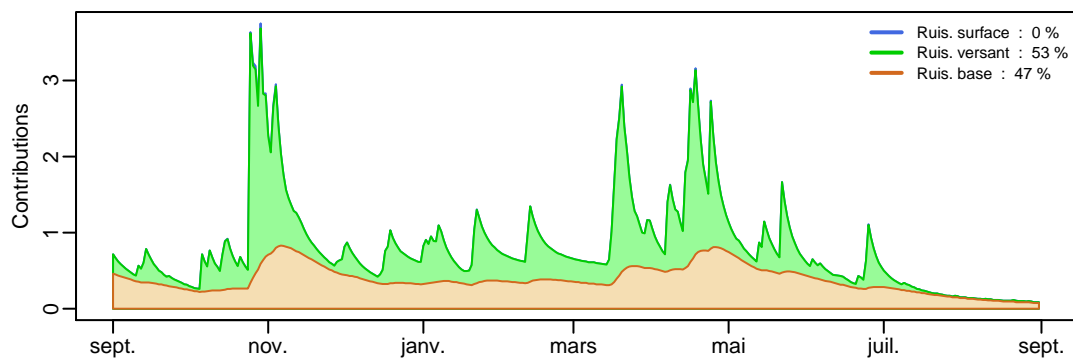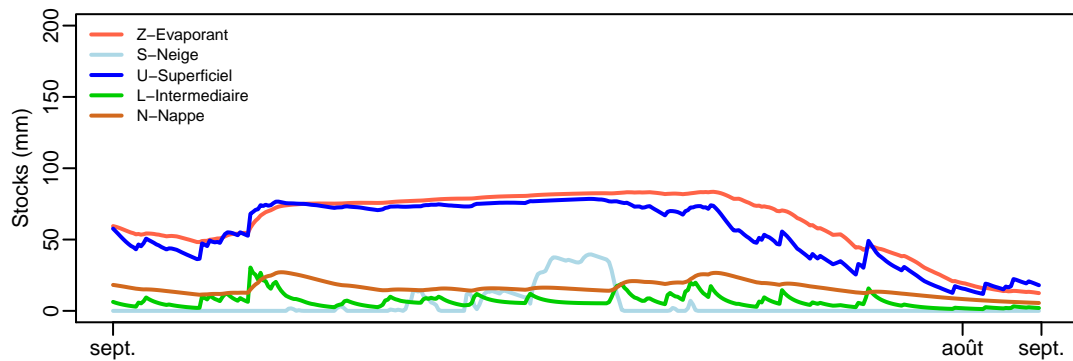

# k2223030 (157.66 km<sup>2</sup>) – année 2005–2006

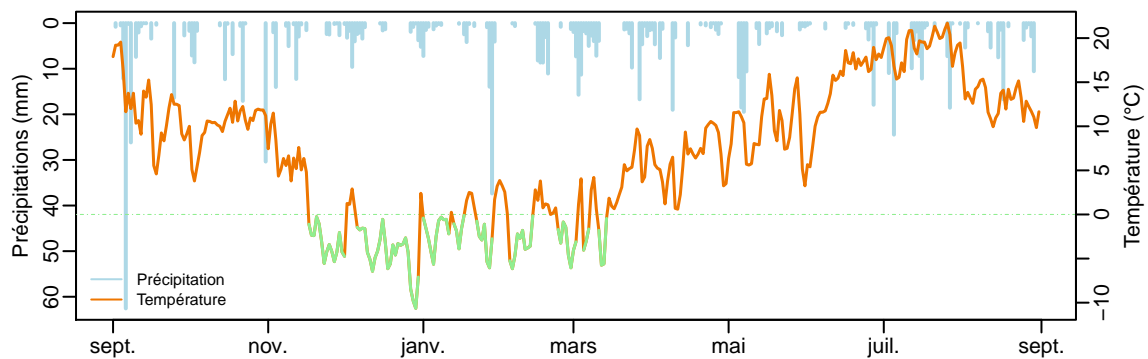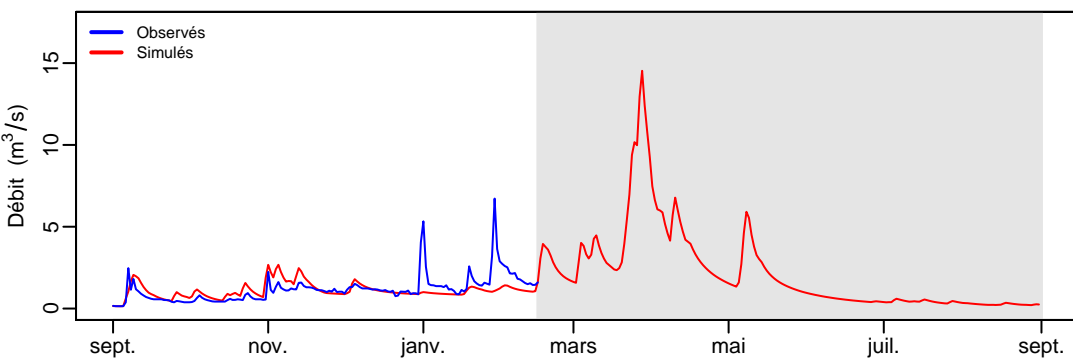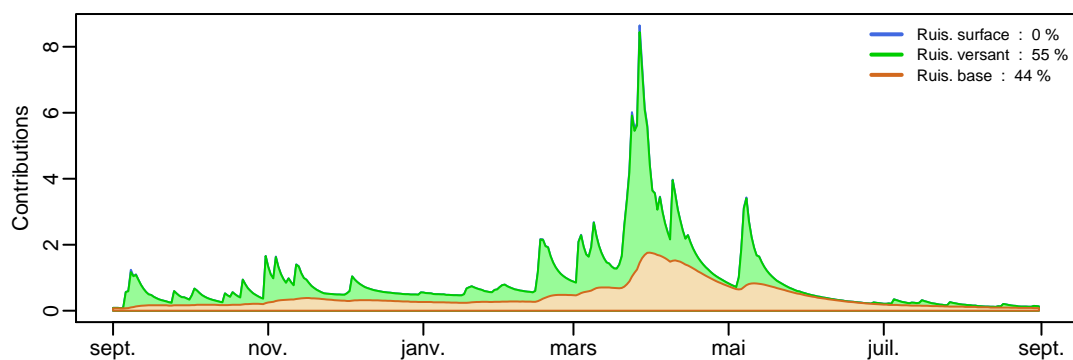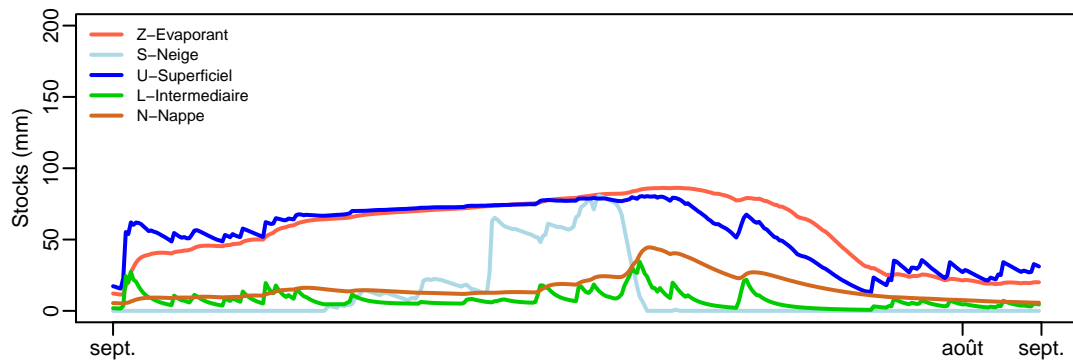

# k2223030 (157.66 km²) – année 2006–2007

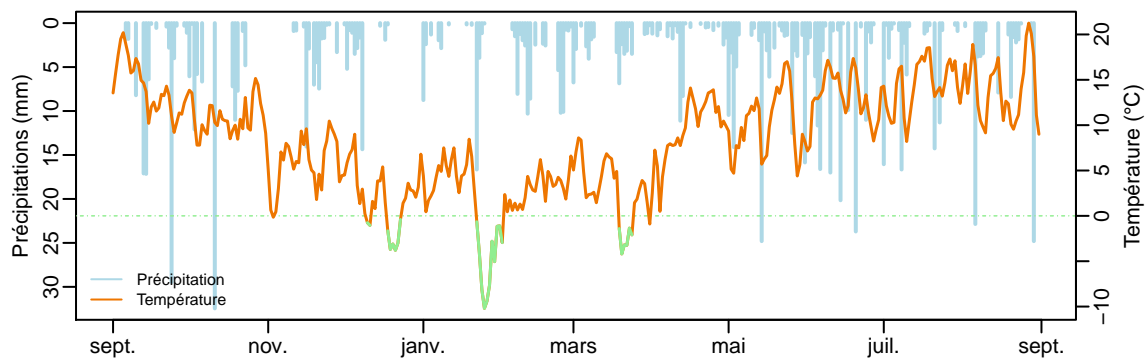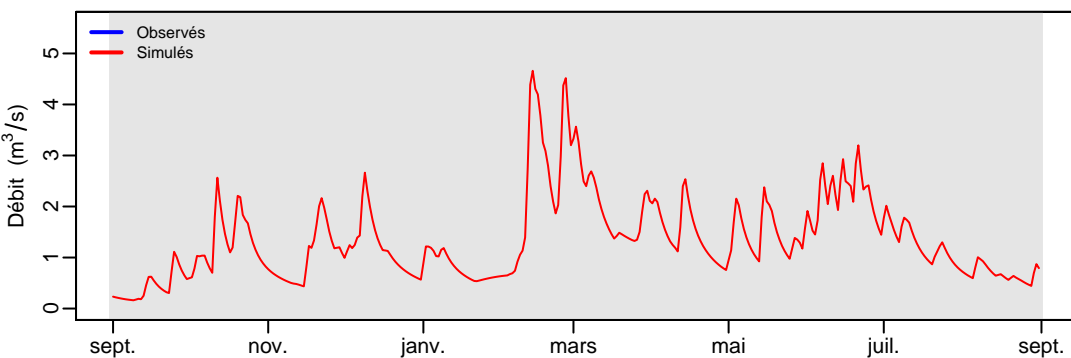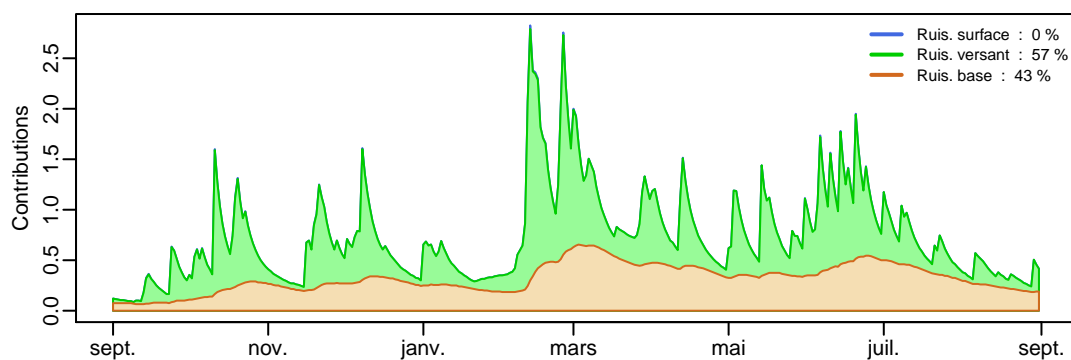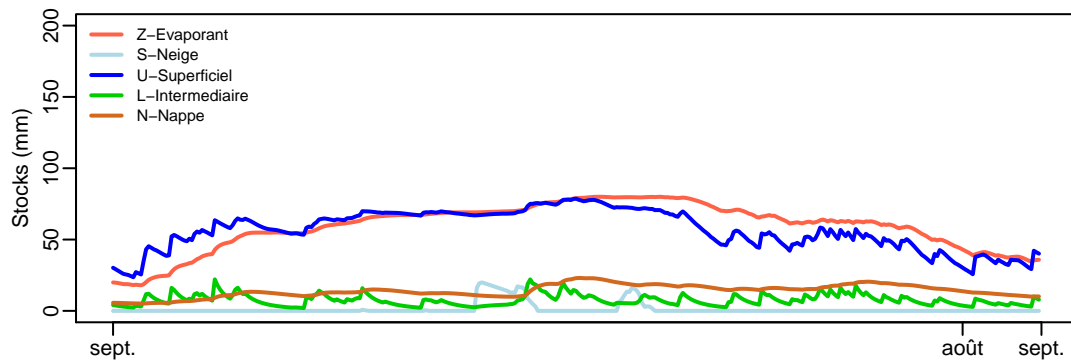

# k2223030 (157.66 km<sup>2</sup>) – année 2007–2008

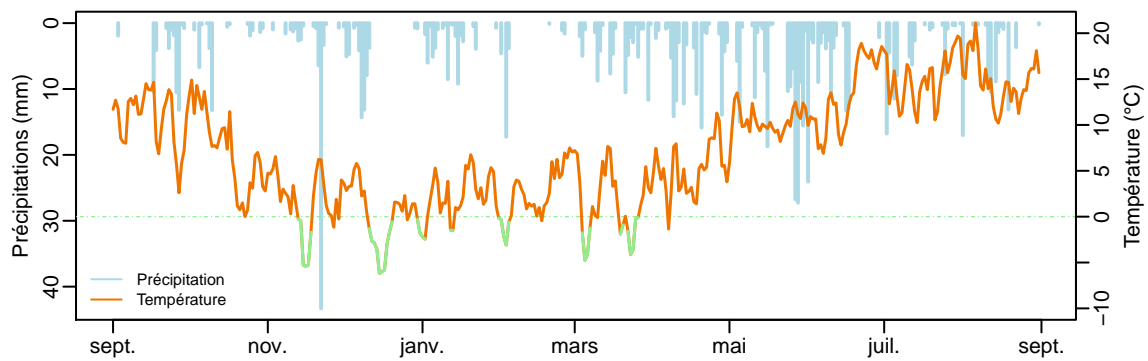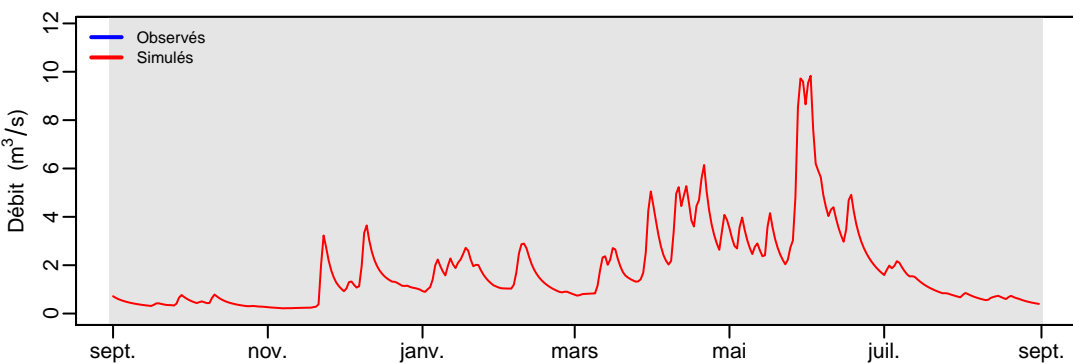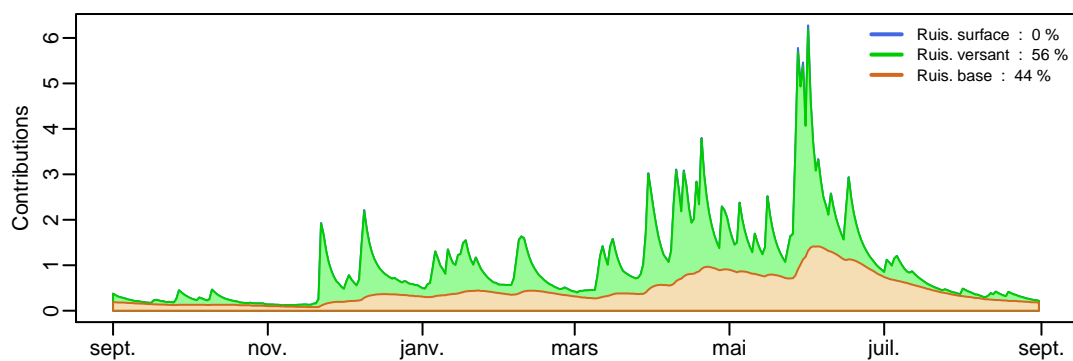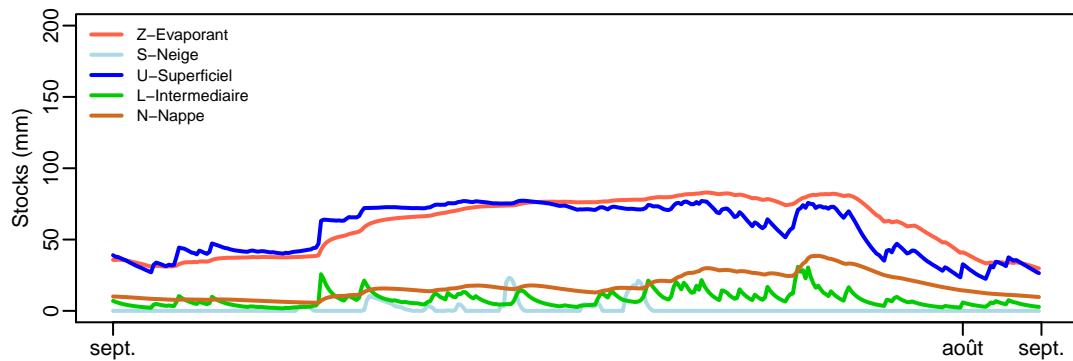

# k2223030 (157.66 km<sup>2</sup>) – année 2008–2009

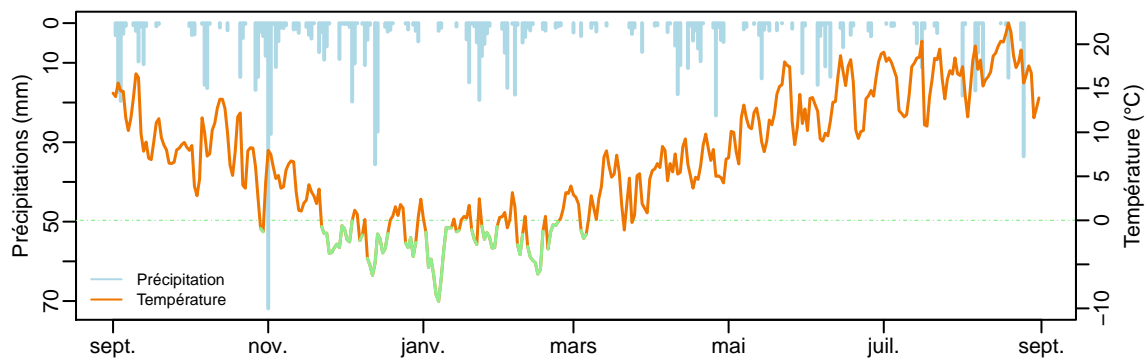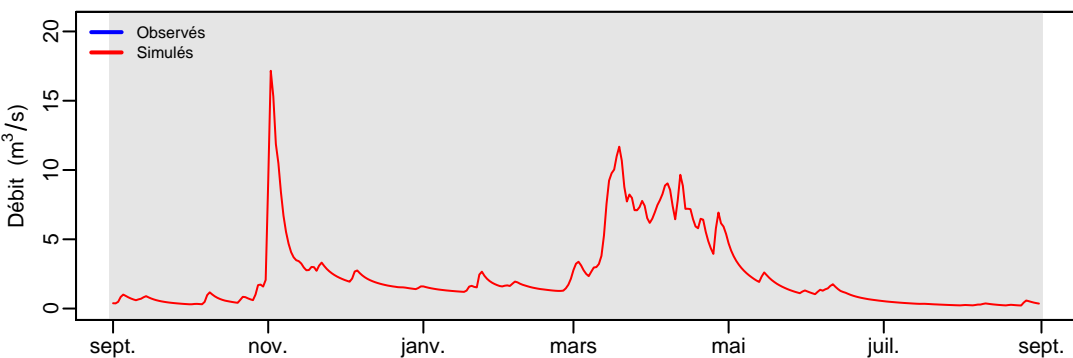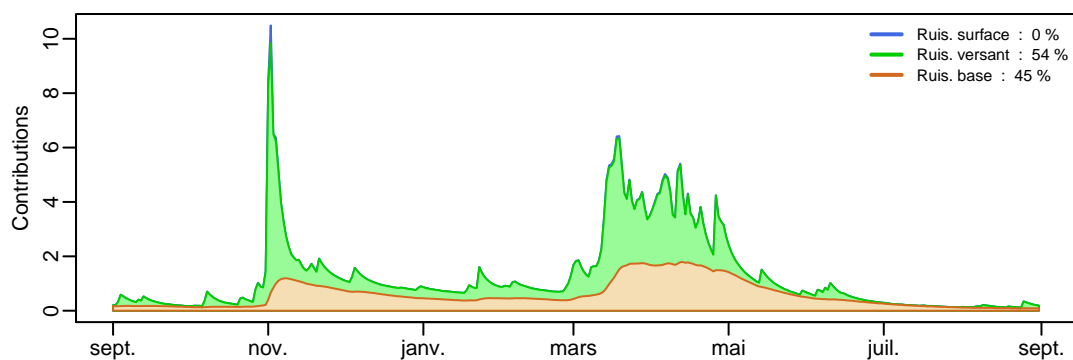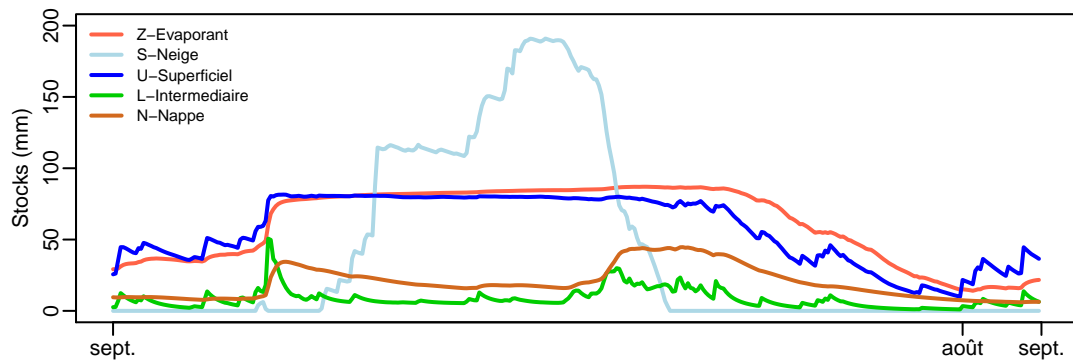

# k2223030 (157.66 km<sup>2</sup>) – année 2009–2010

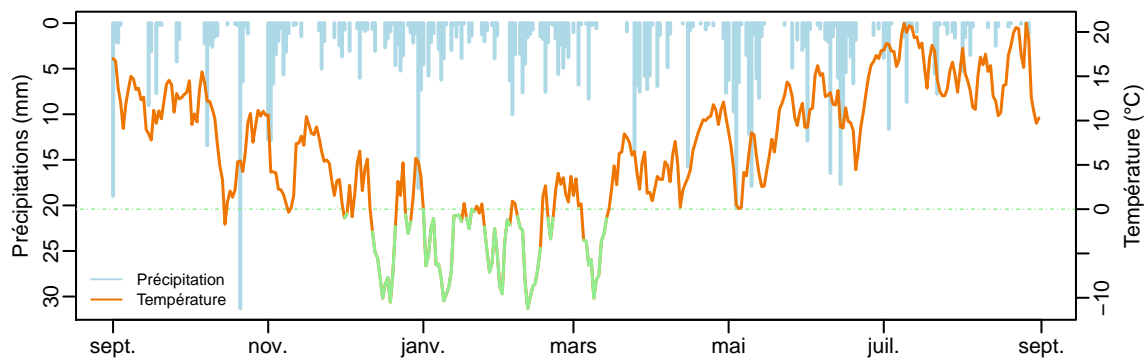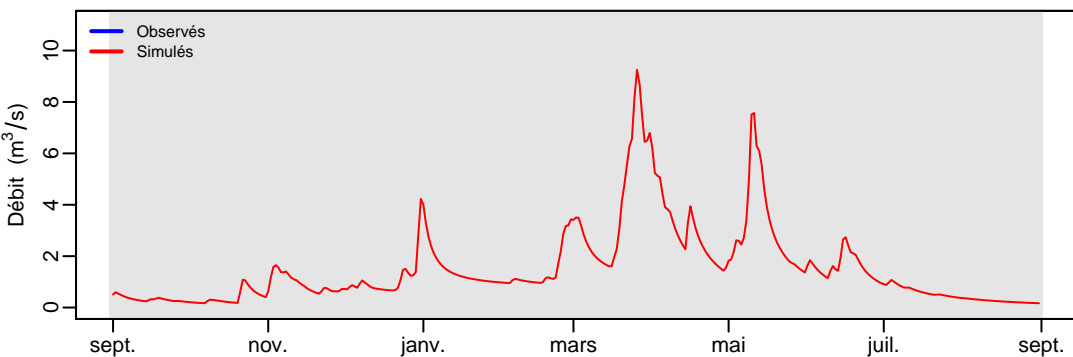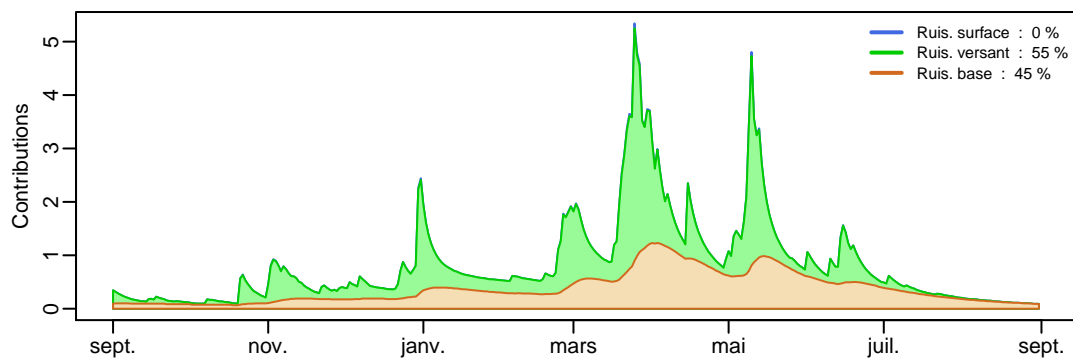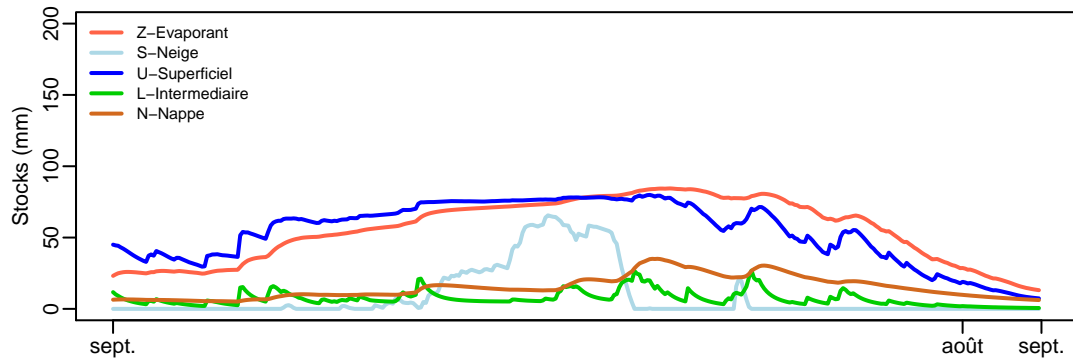



# k2223030 (157.66 km<sup>2</sup>) – année 2010–2011

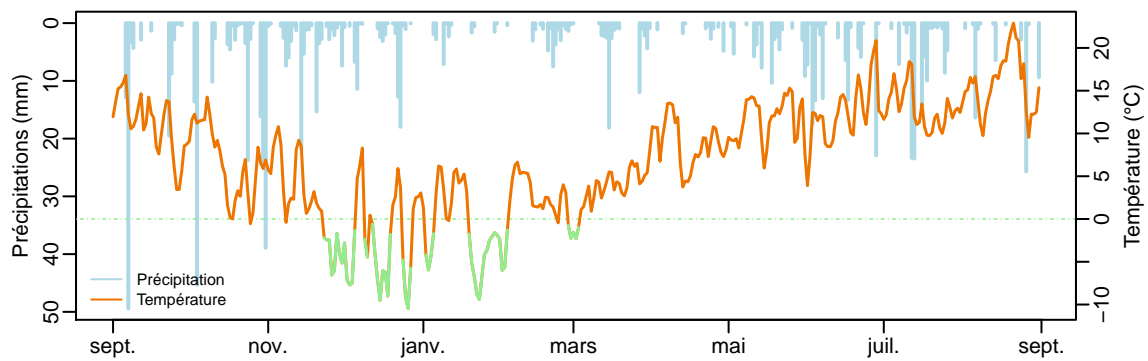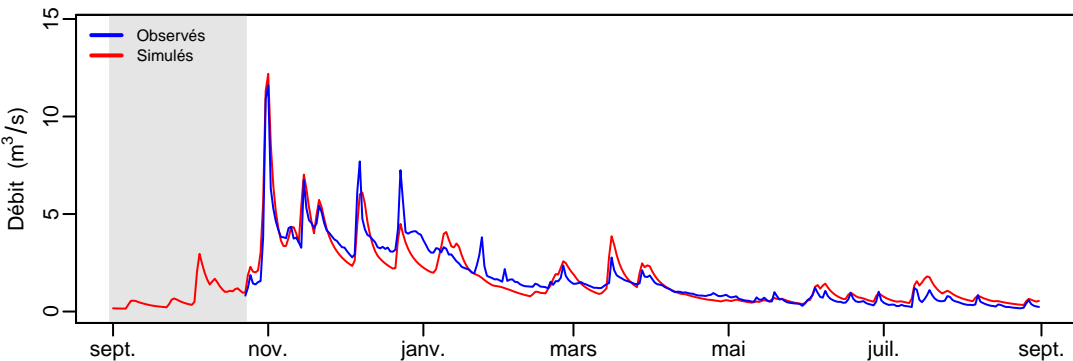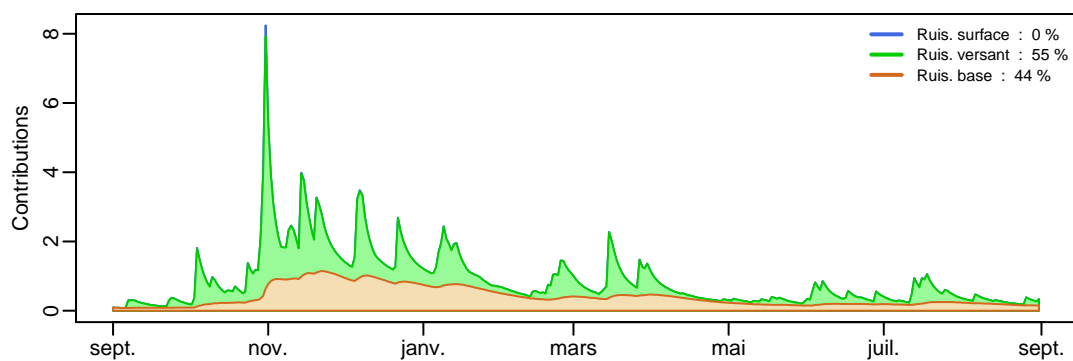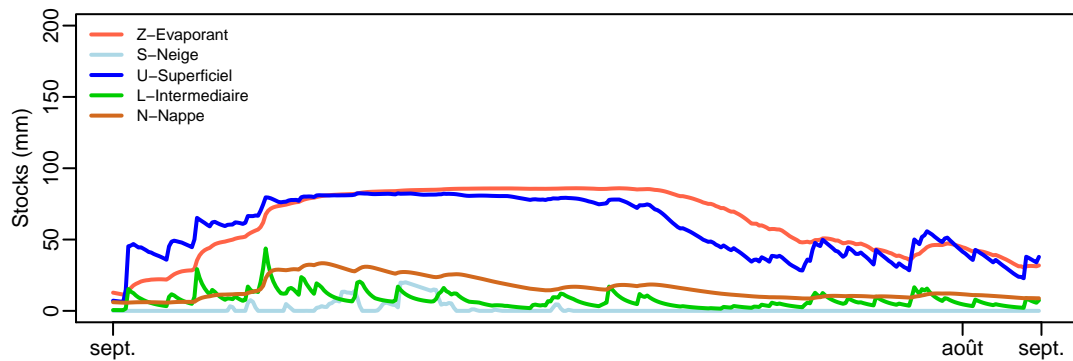

# k2223030 (157.66 km<sup>2</sup>) – année 2011–2012

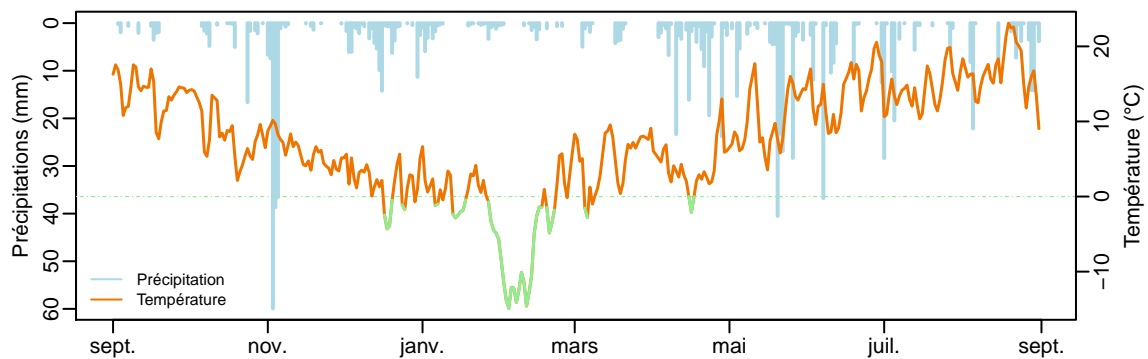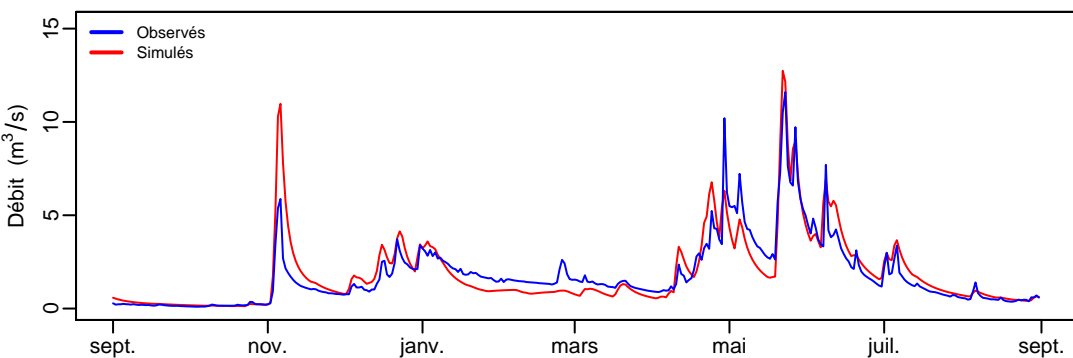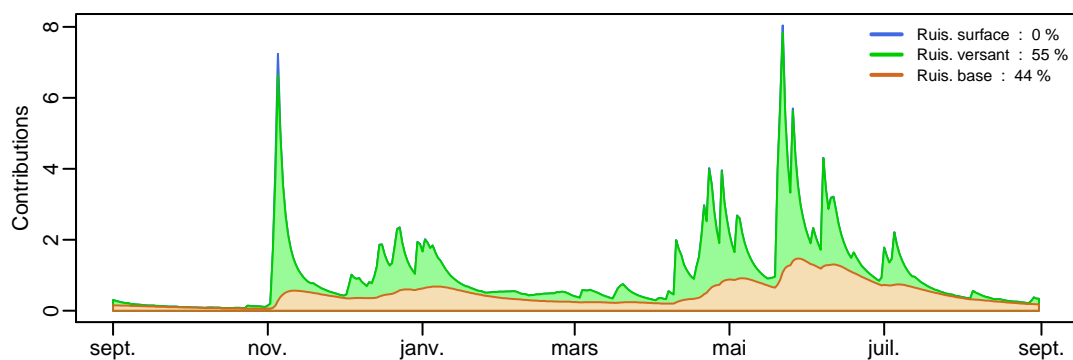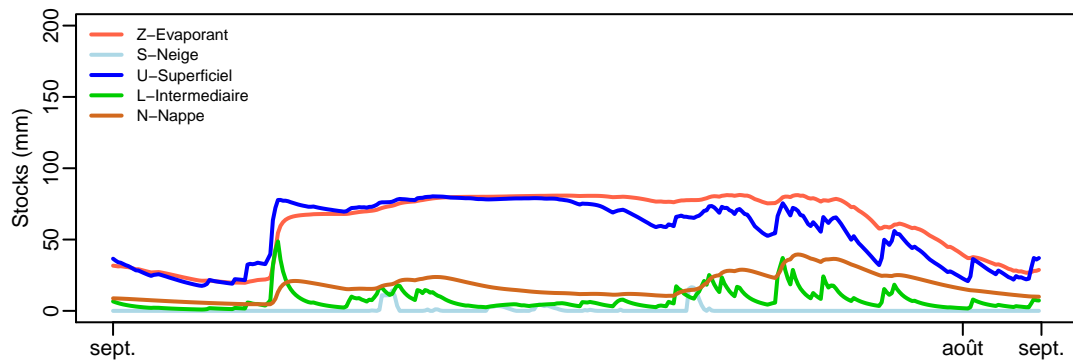

# k2240810 (1346.08 km<sup>2</sup>) – année 1981–1982

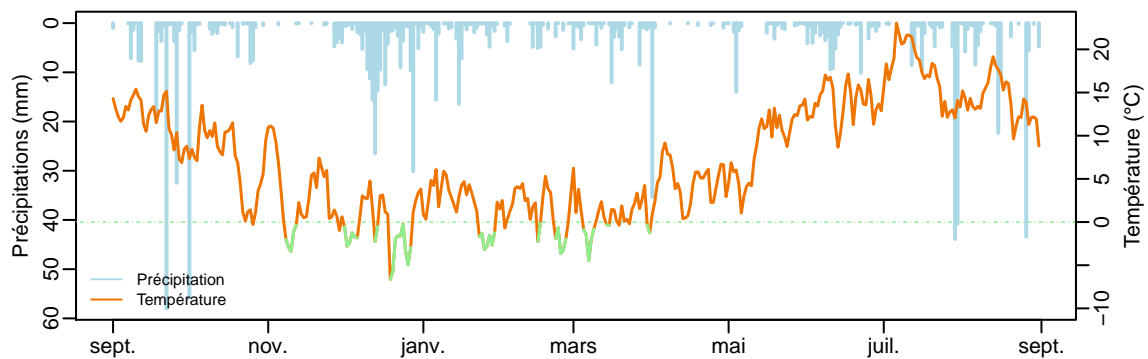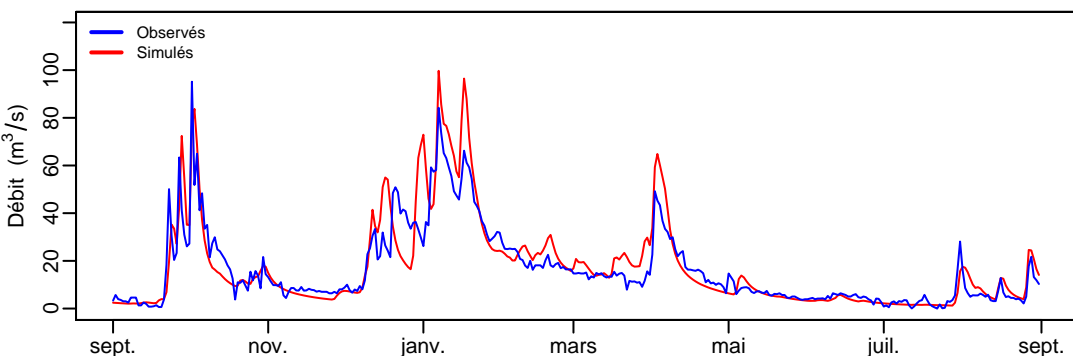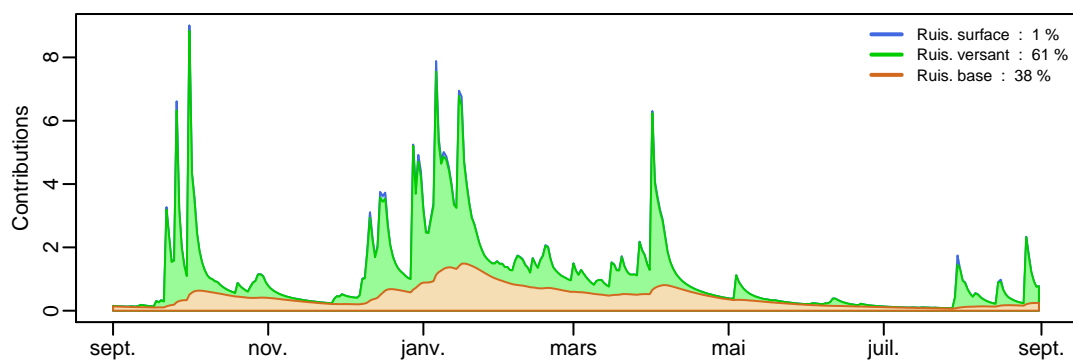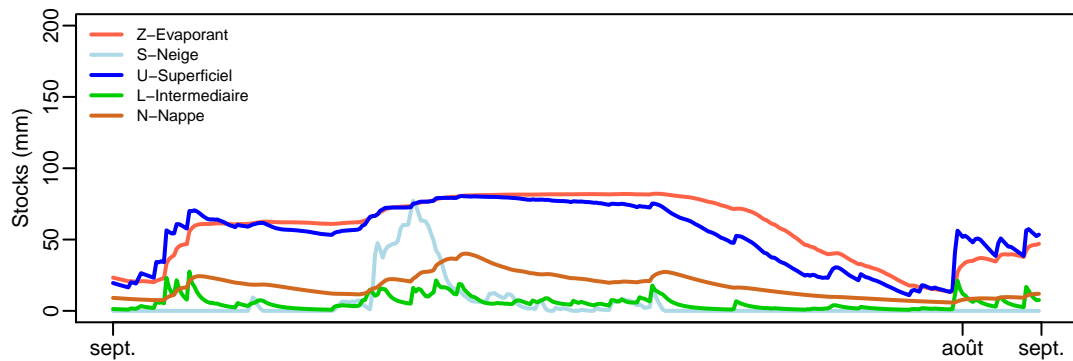

# k2240810 (1346.08 km<sup>2</sup>) – année 1982–1983

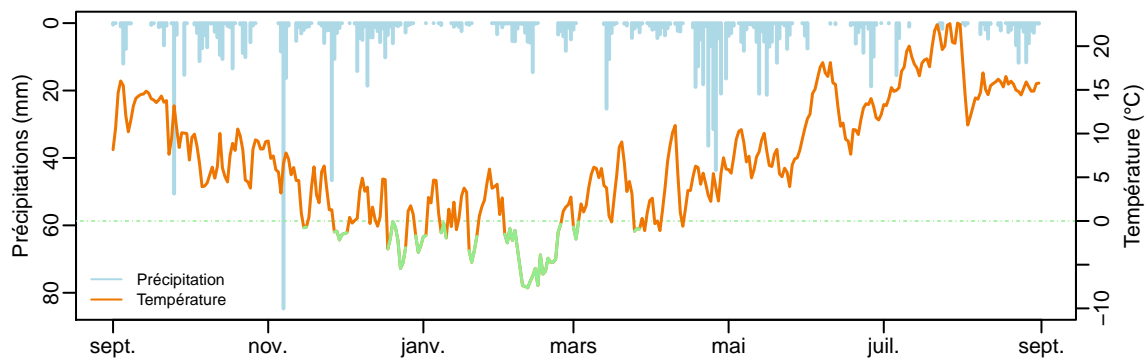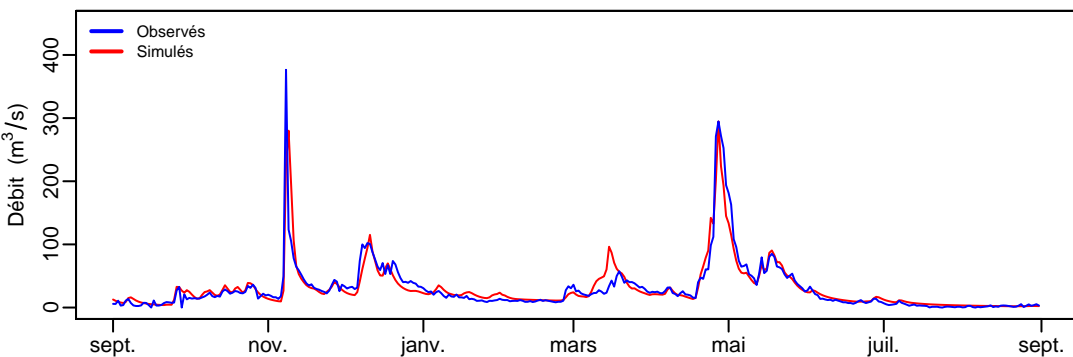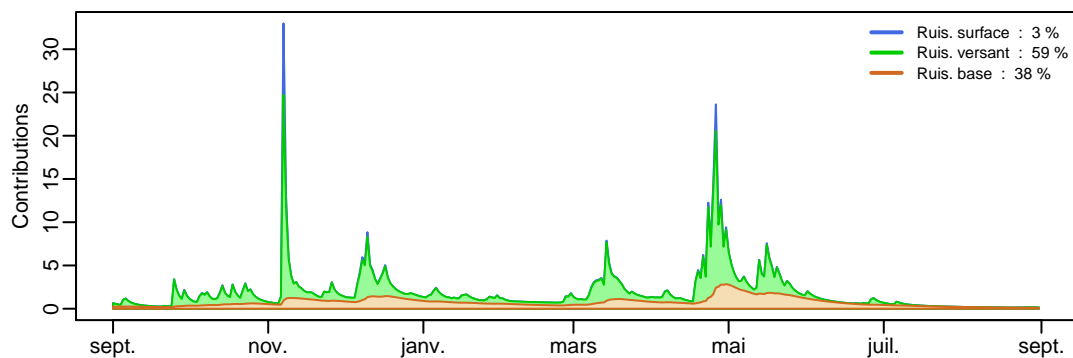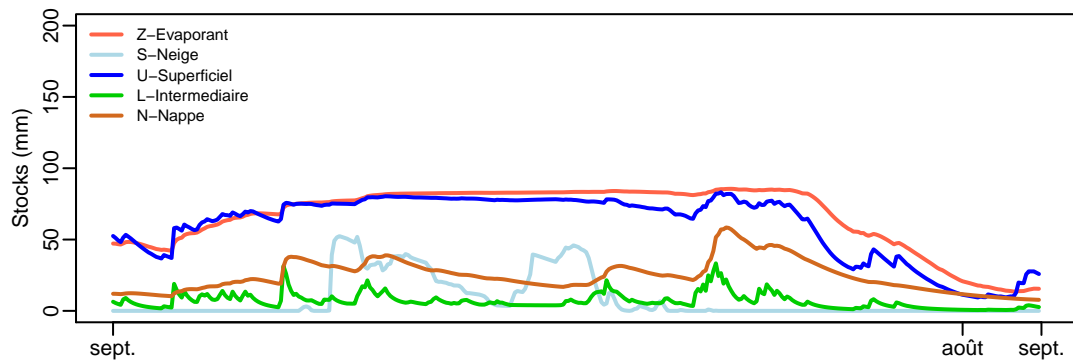

# k2240810 (1346.08 km<sup>2</sup>) – année 1983–1984

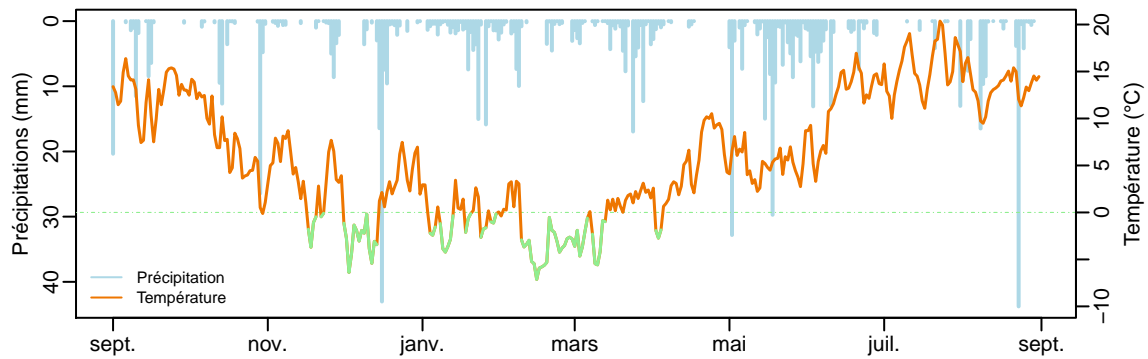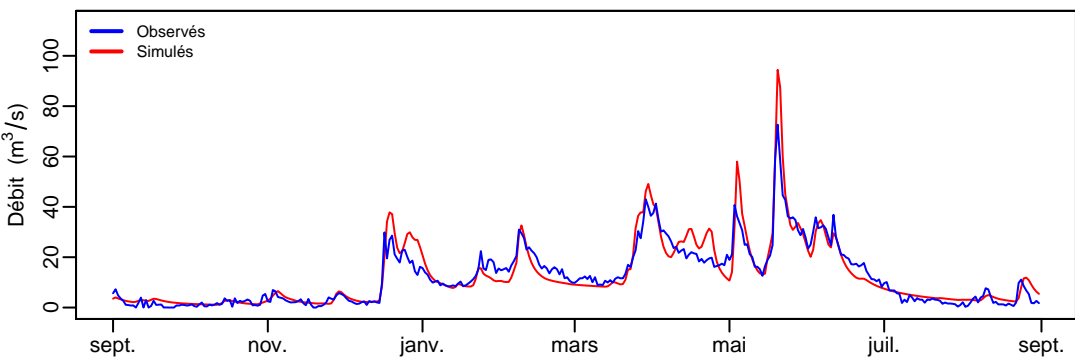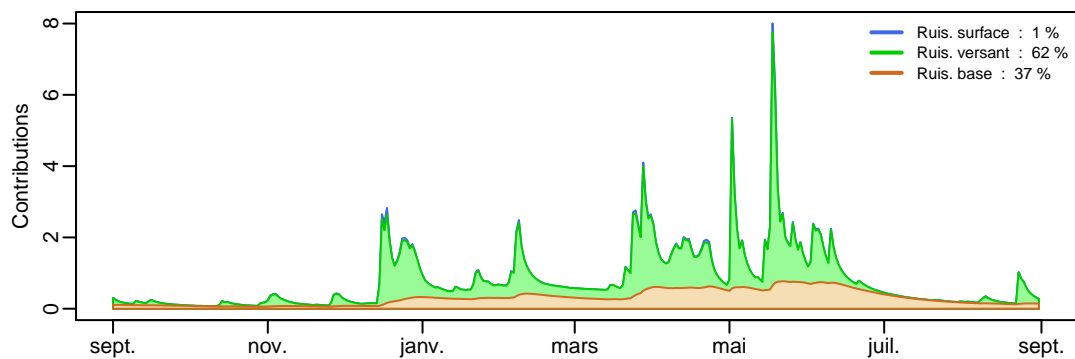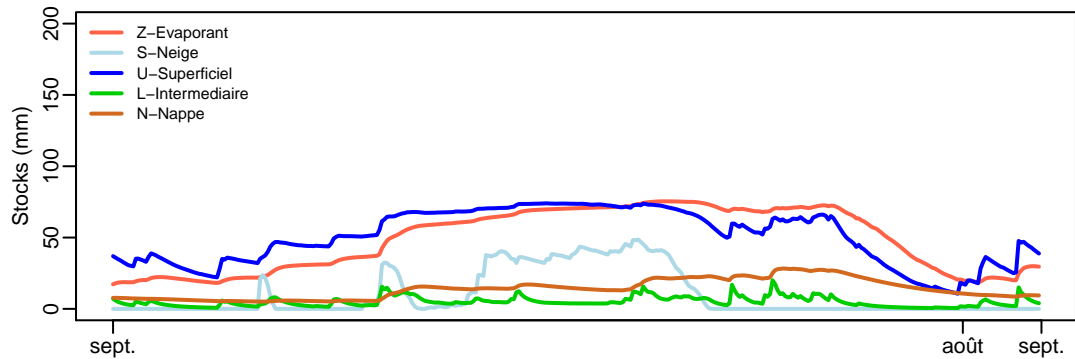

# k2240810 (1346.08 km²) – année 1984–1985

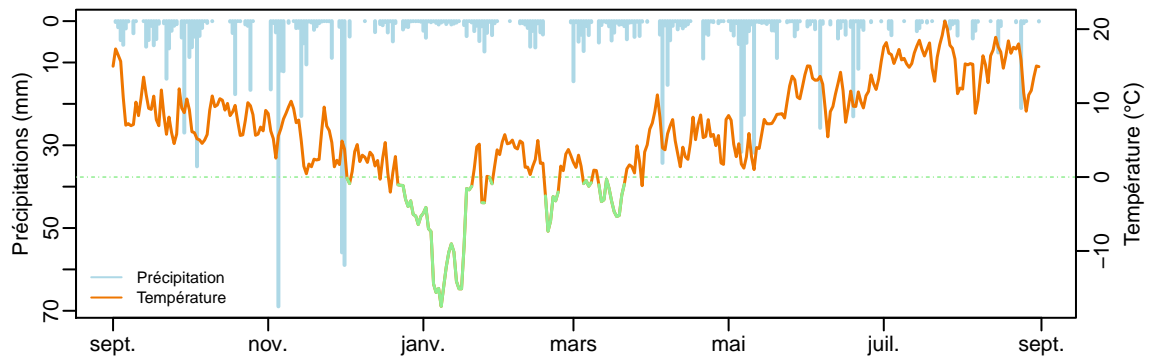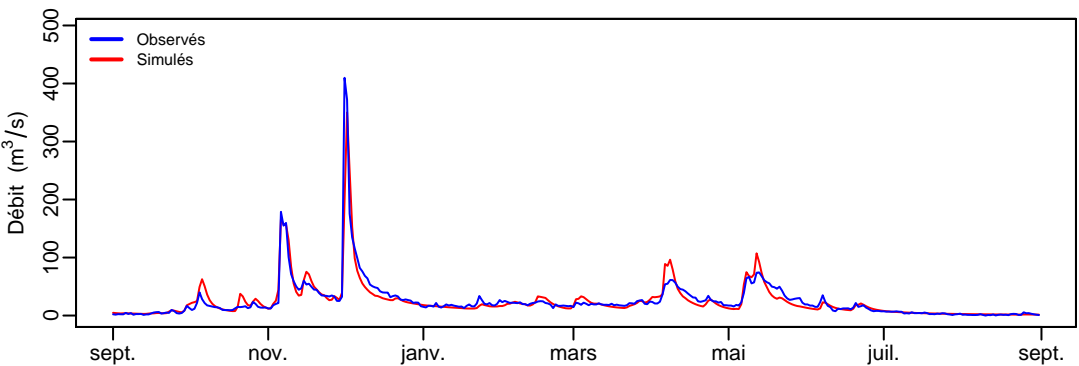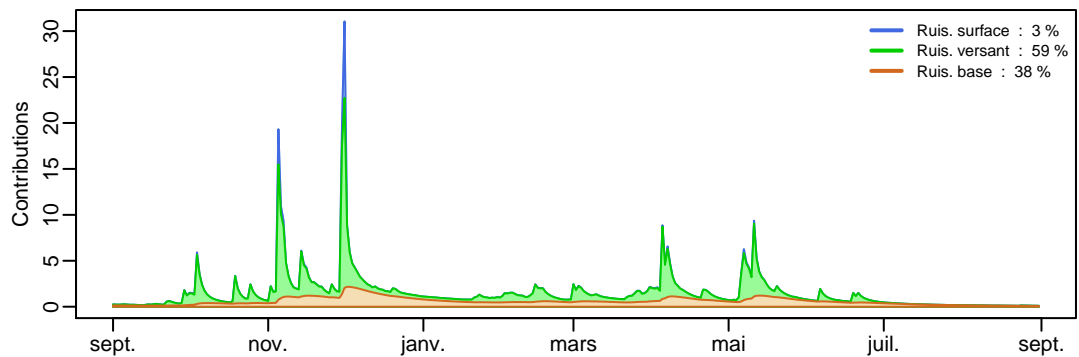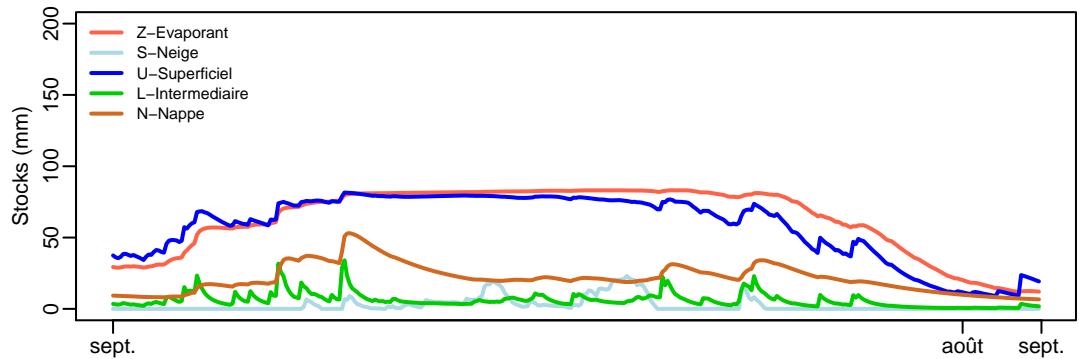

# k2240810 (1346.08 km<sup>2</sup>) – année 1985–1986

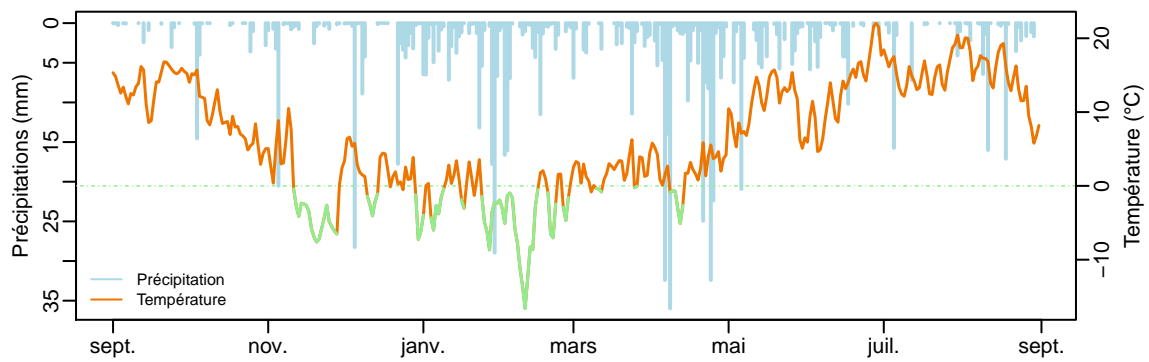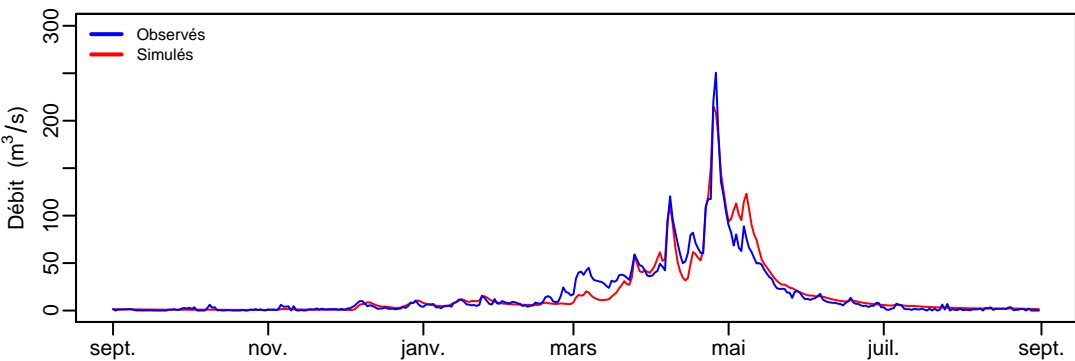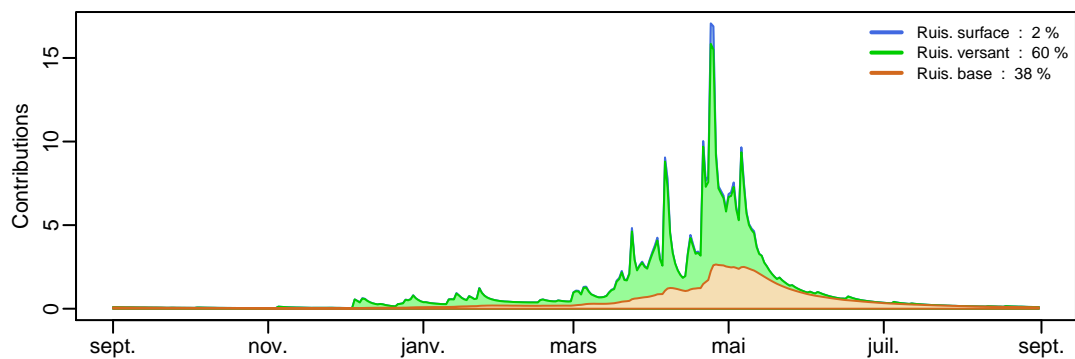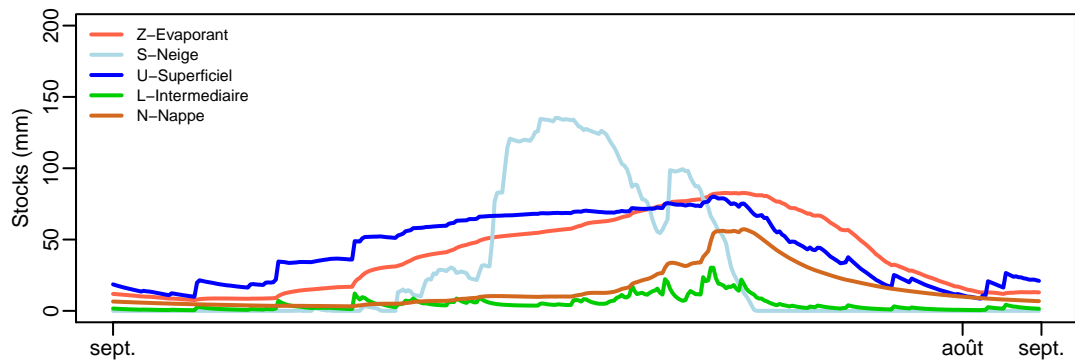

# k2240810 (1346.08 km<sup>2</sup>) – année 1986–1987

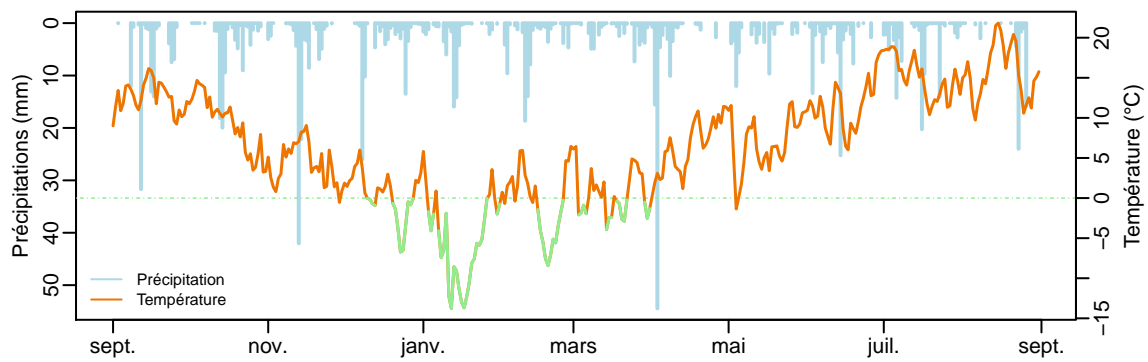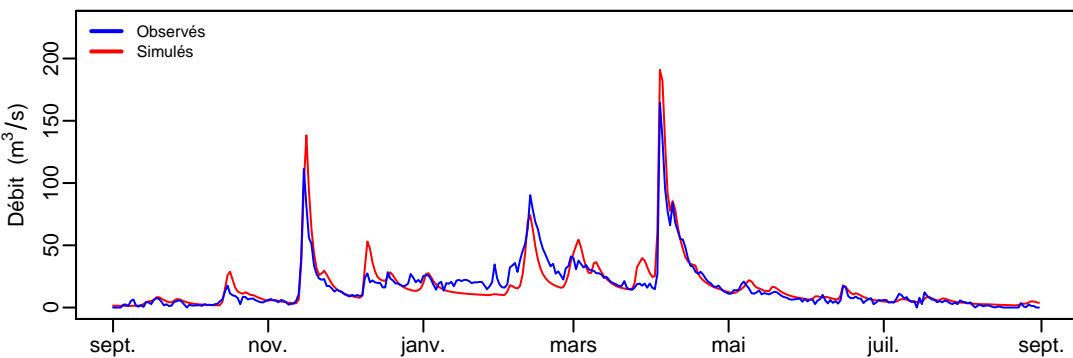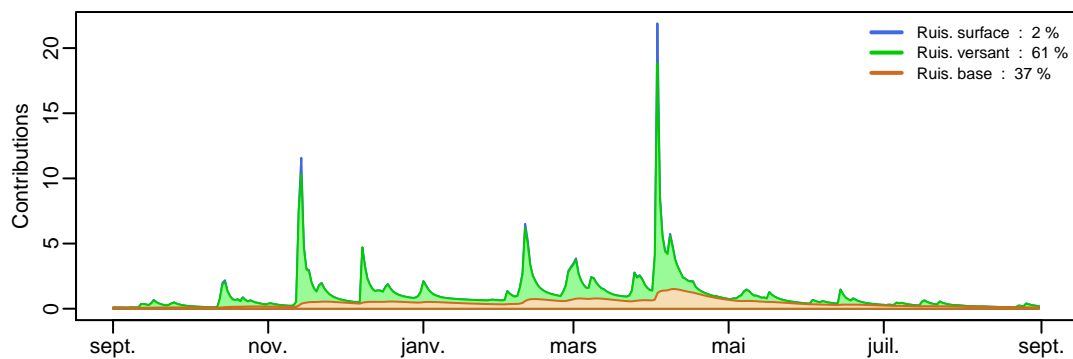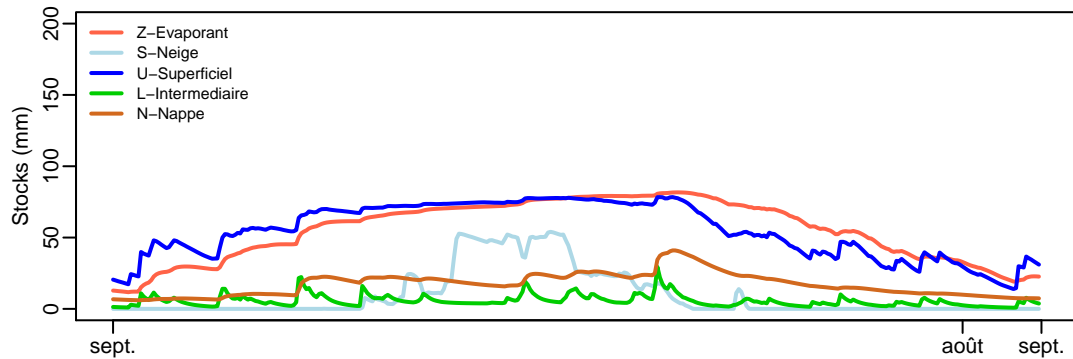



# k2240810 (1346.08 km<sup>2</sup>) – année 1987–1988

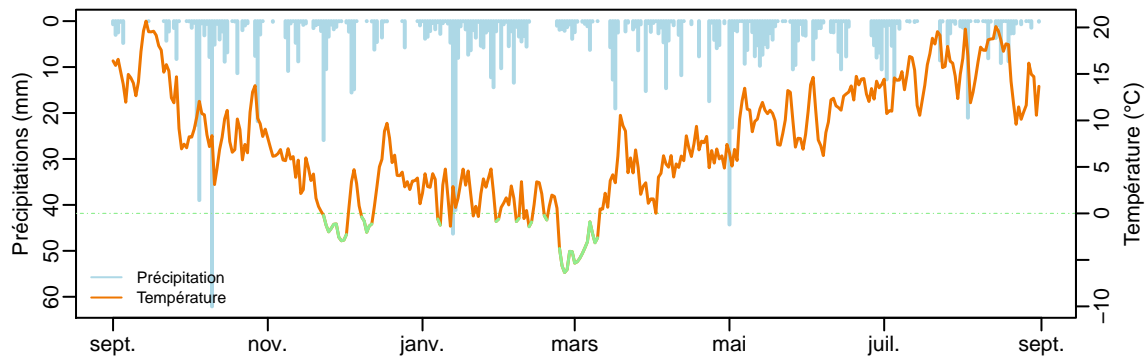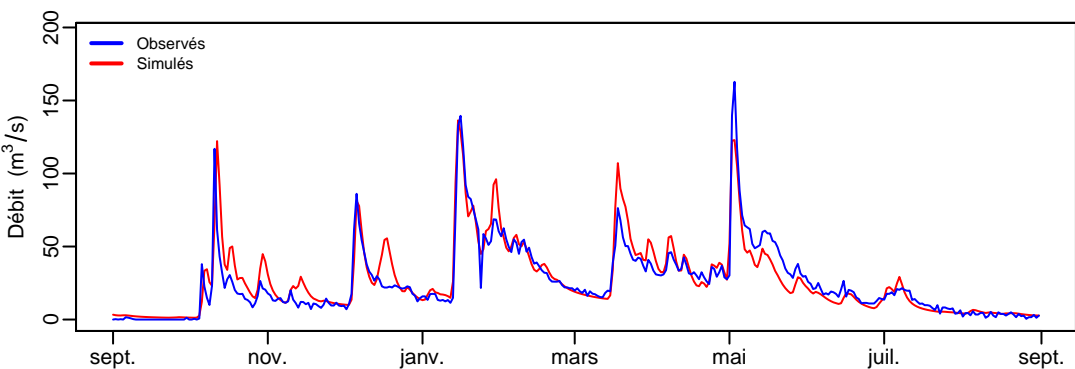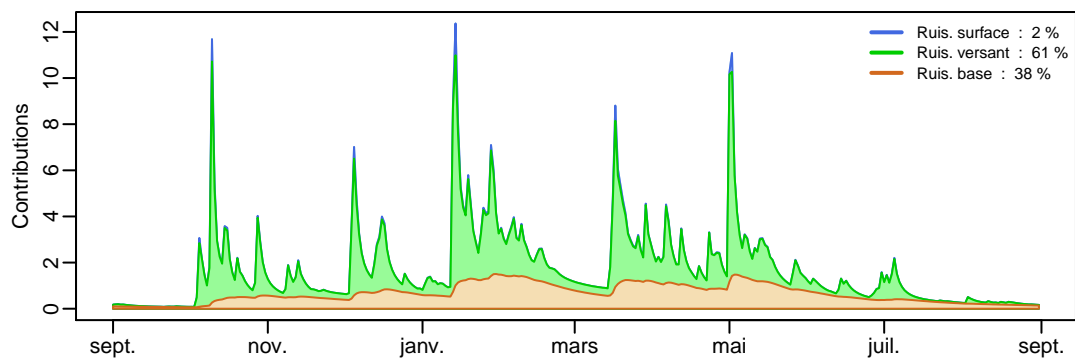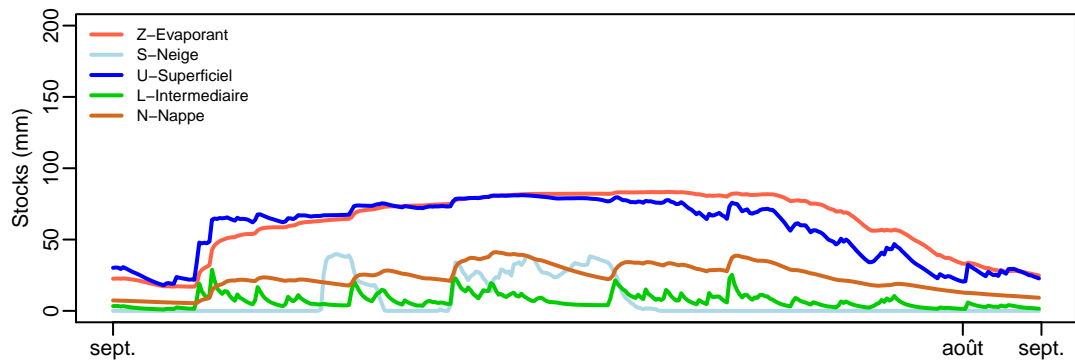

# k2240810 (1346.08 km<sup>2</sup>) – année 1988–1989

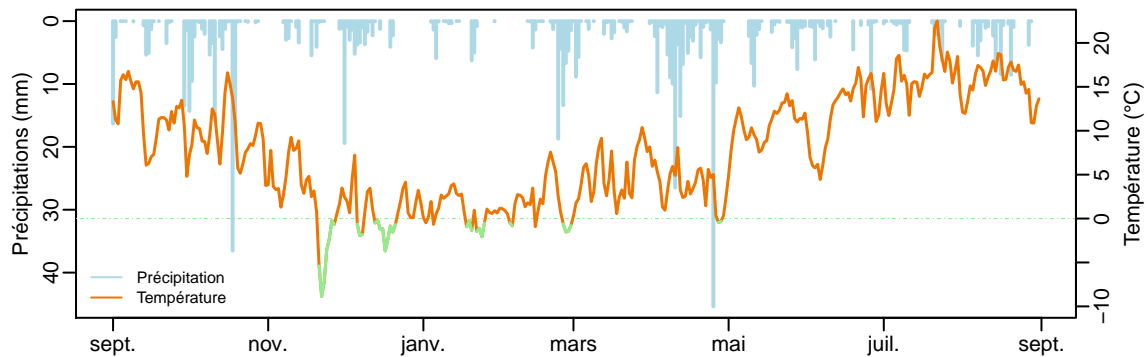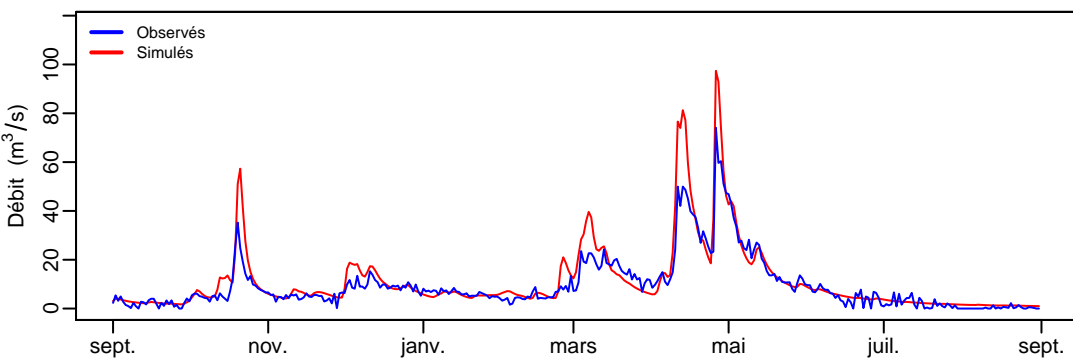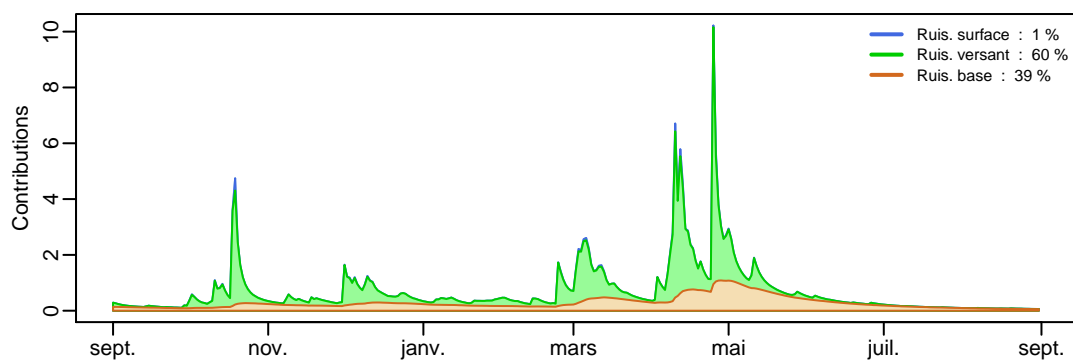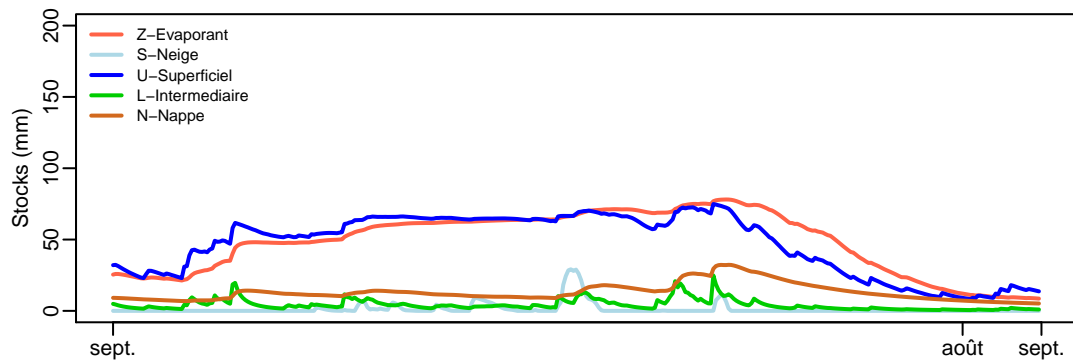

# k2240810 (1346.08 km<sup>2</sup>) – année 1989–1990

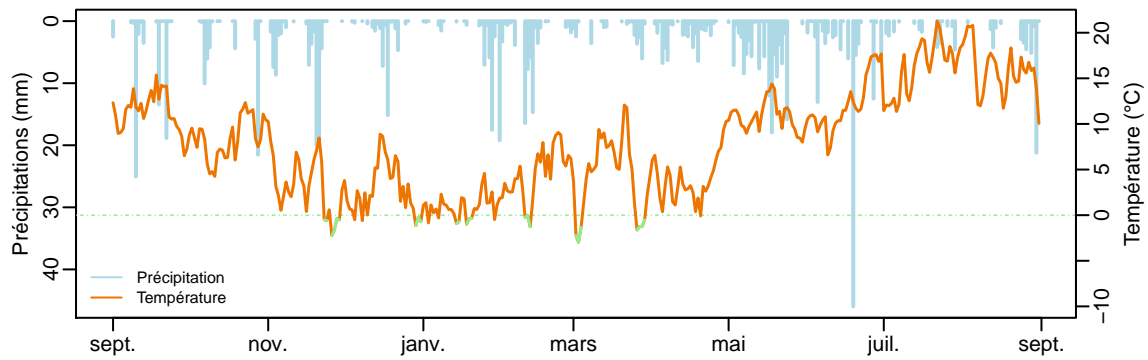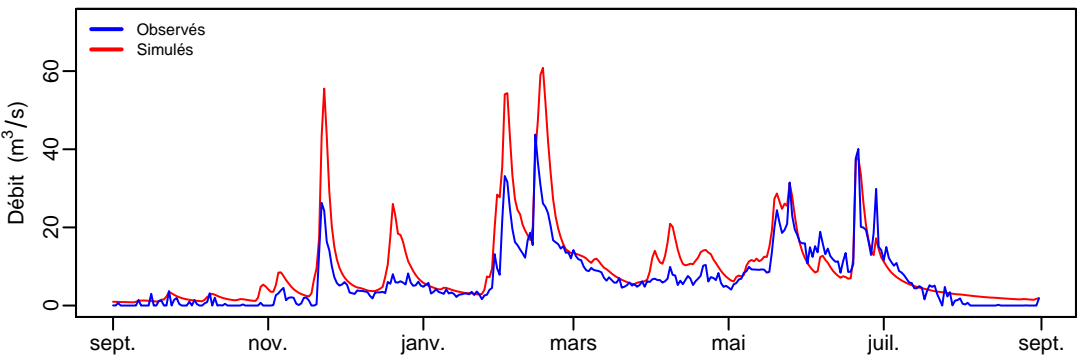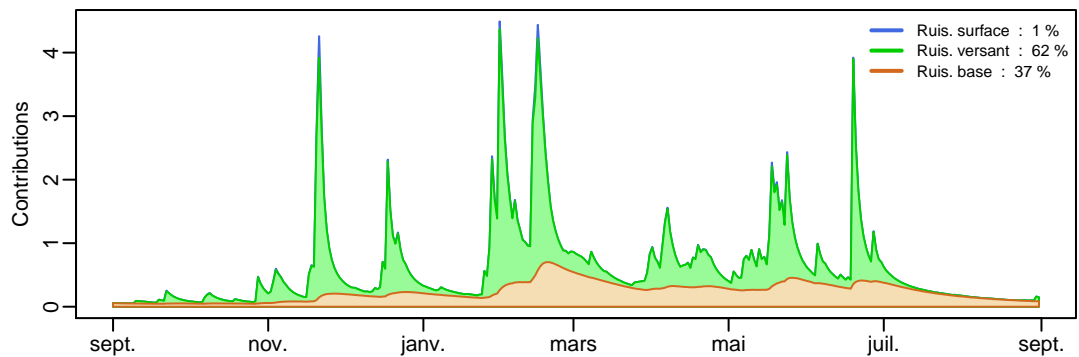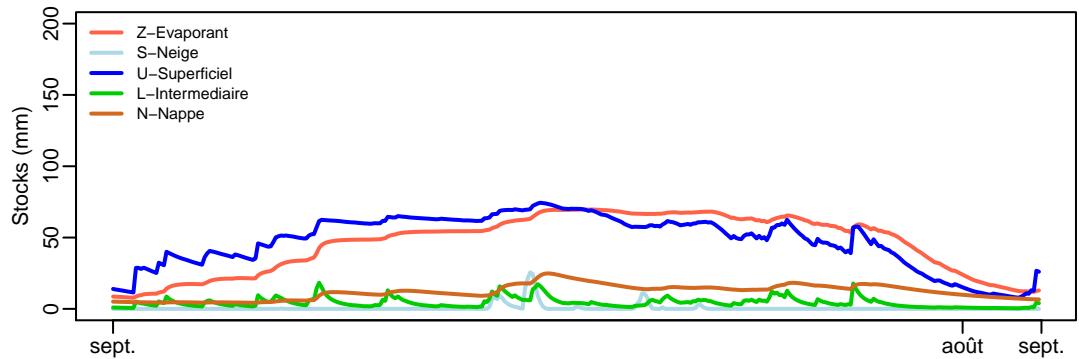

# k2240810 (1346.08 km<sup>2</sup>) – année 1990–1991

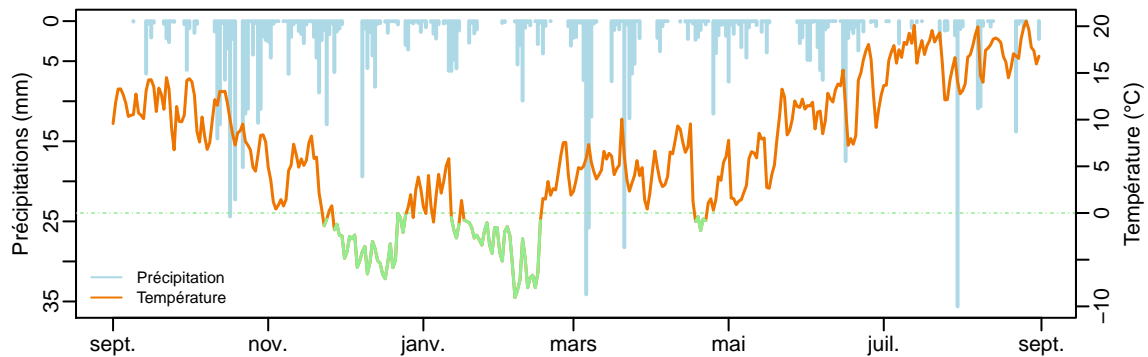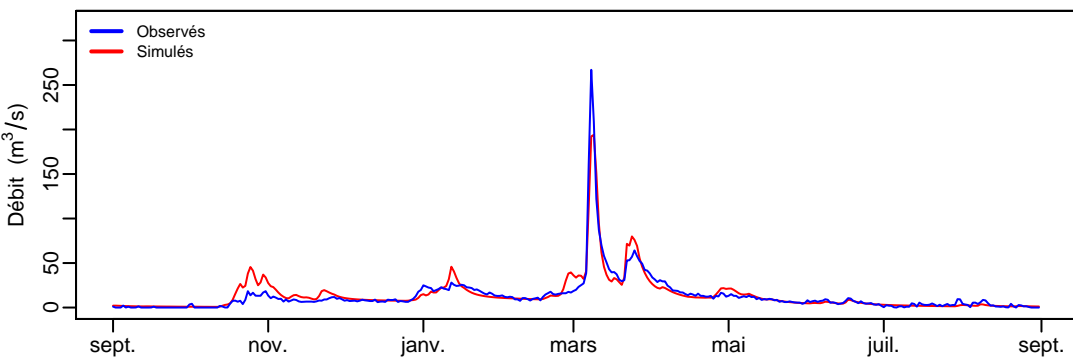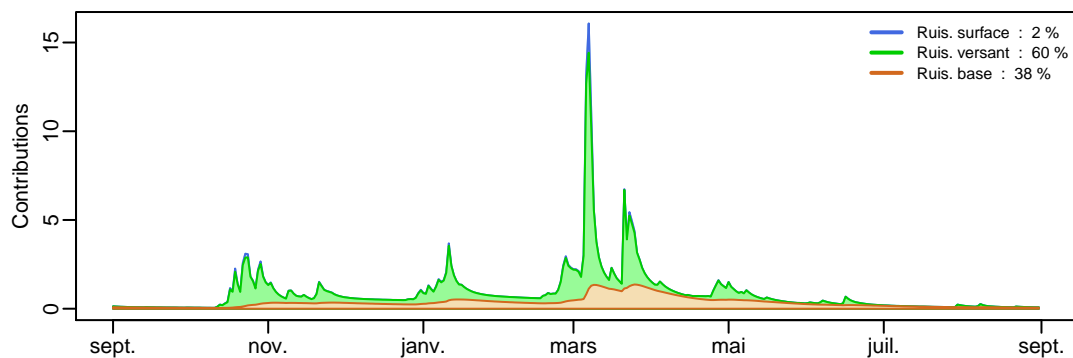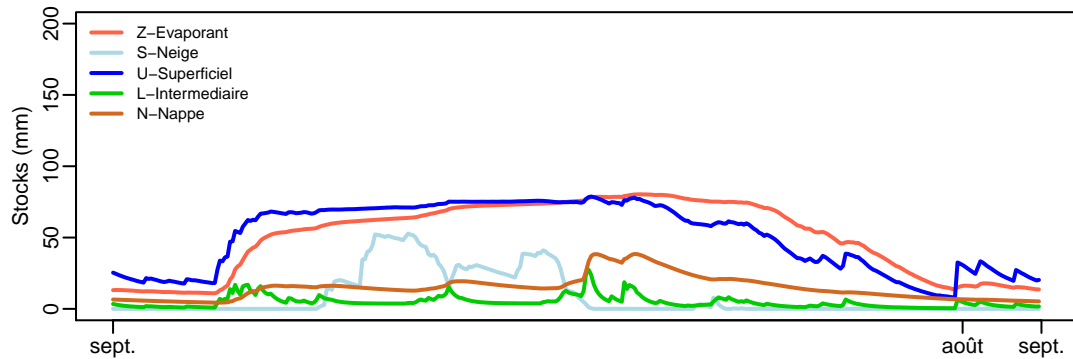

# k2240810 (1346.08 km²) – année 1991–1992

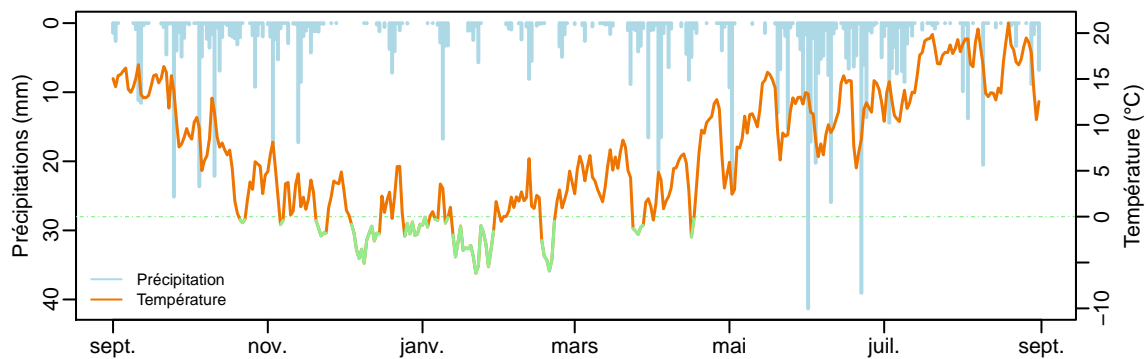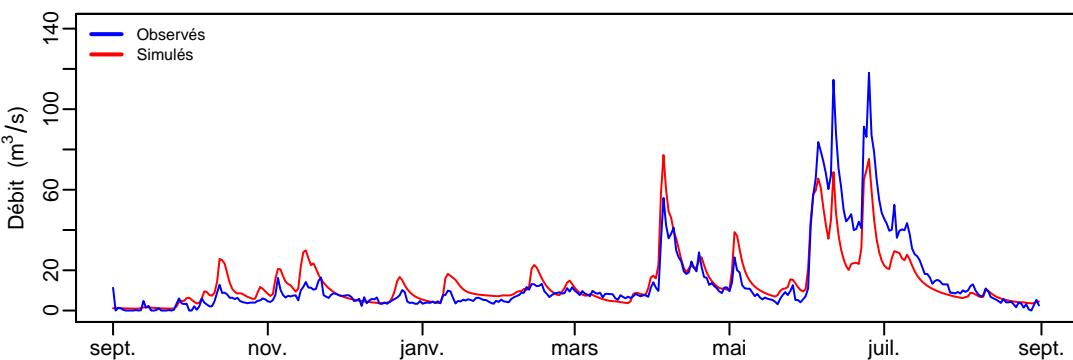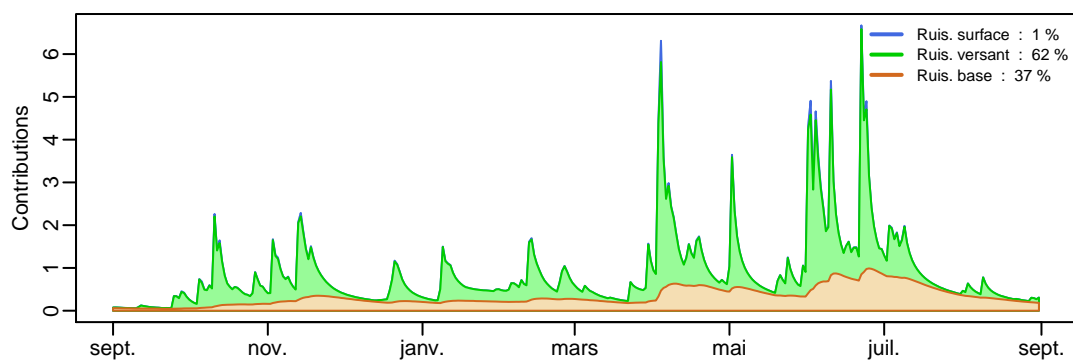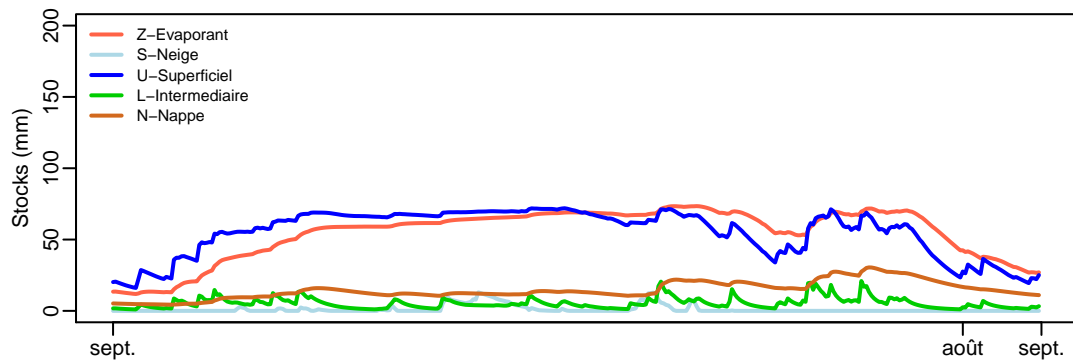

# k2240810 (1346.08 km<sup>2</sup>) – année 1992–1993

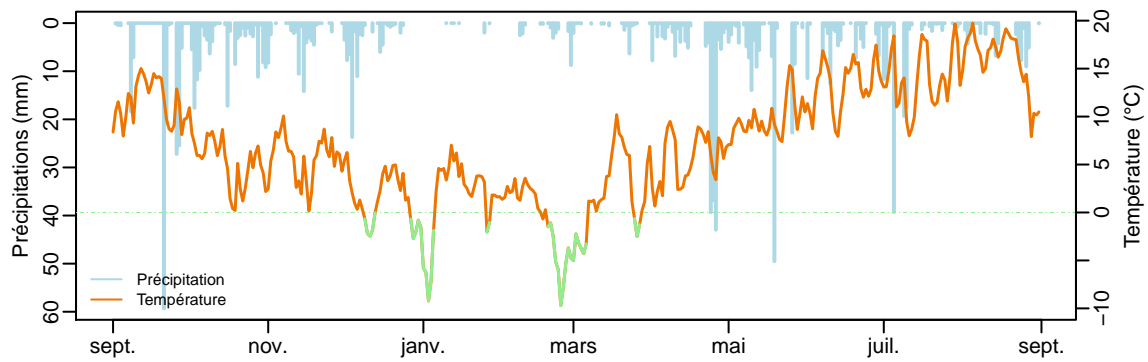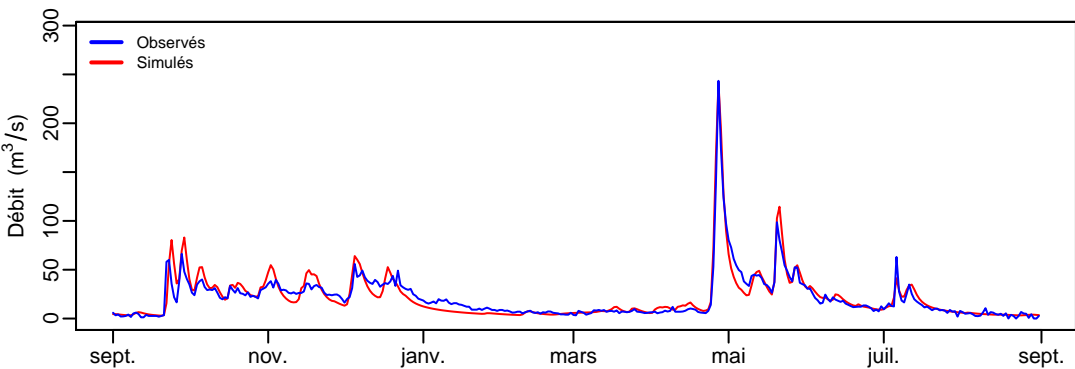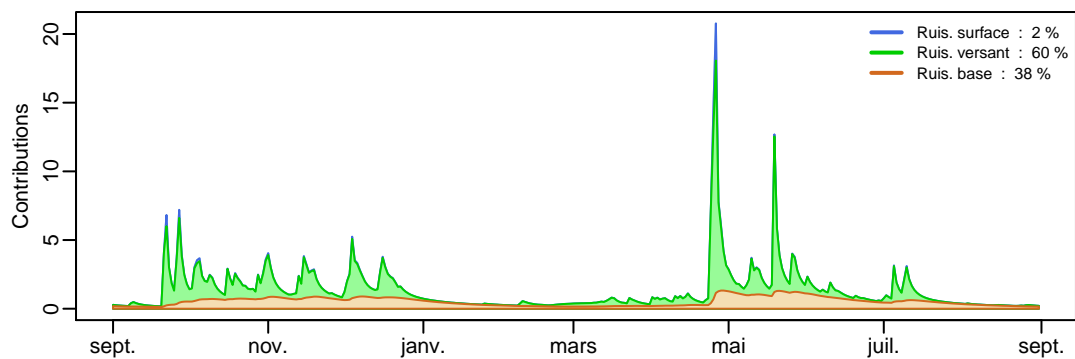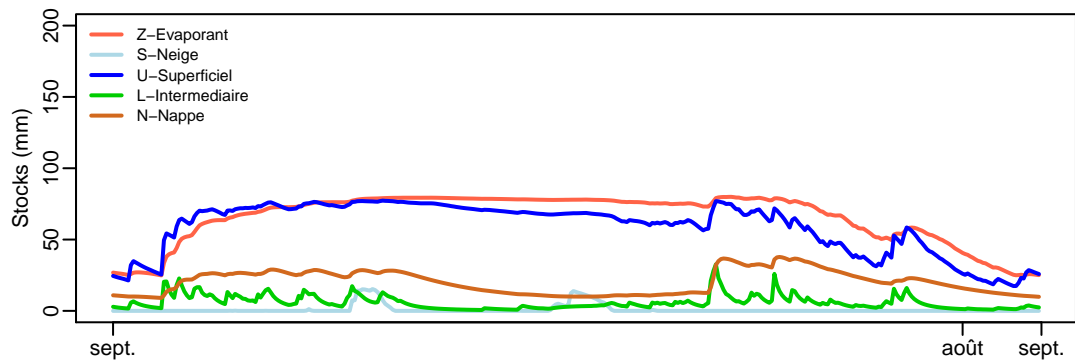

# k2240810 (1346.08 km<sup>2</sup>) – année 1993–1994

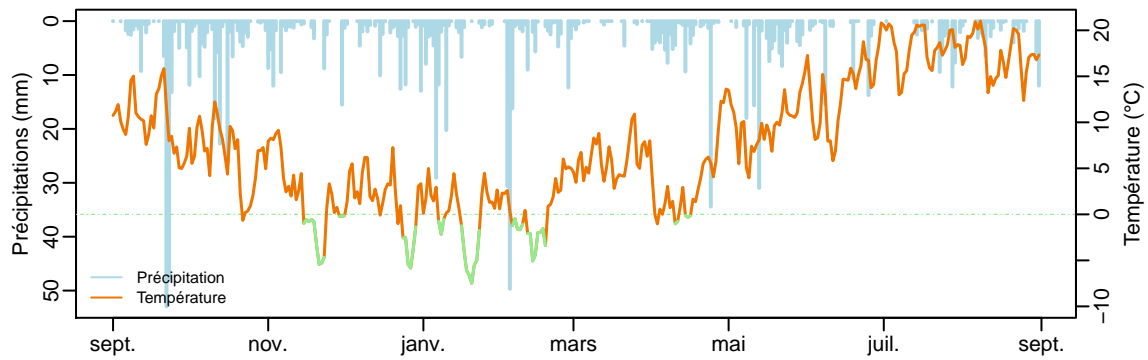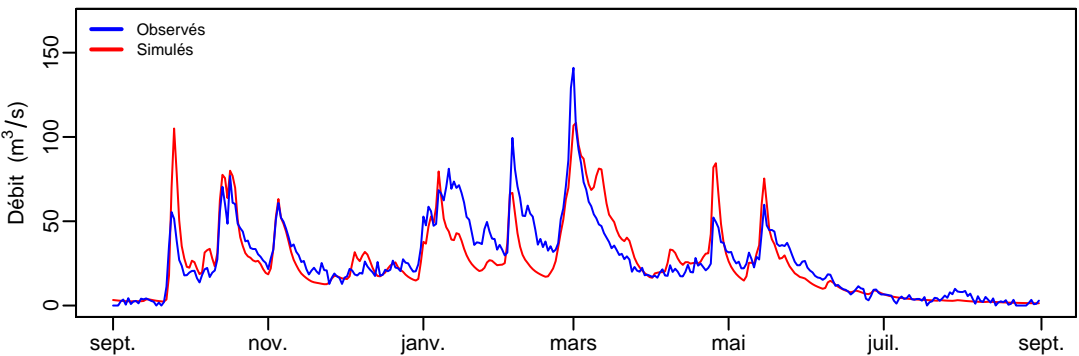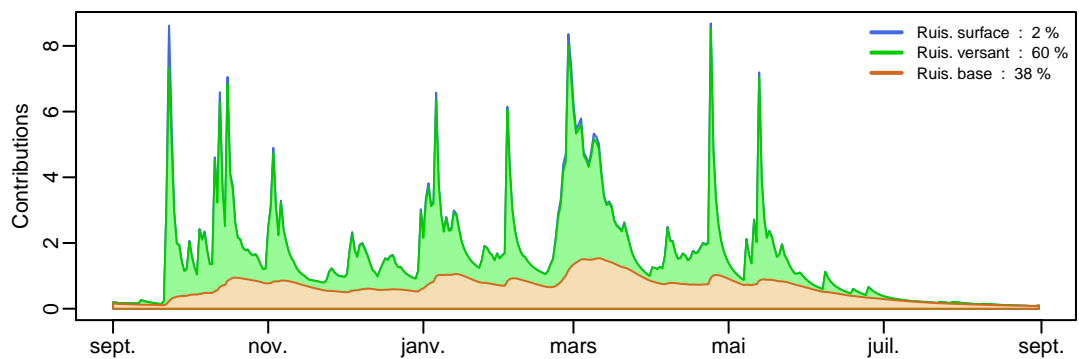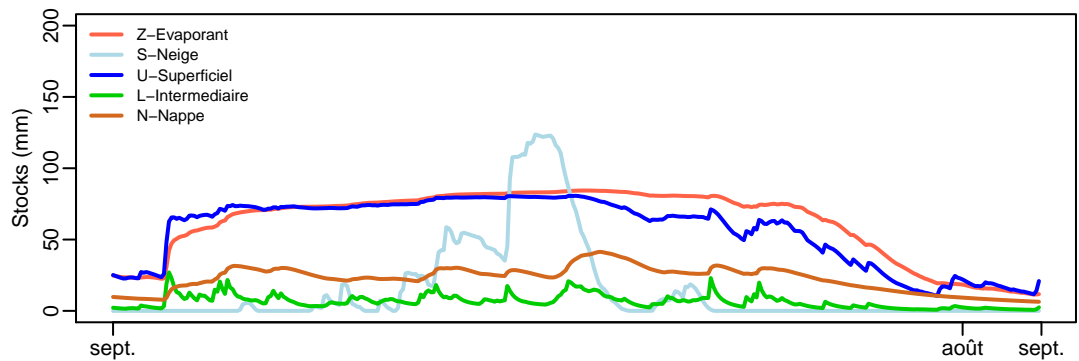

# k2240810 (1346.08 km²) – année 1994–1995

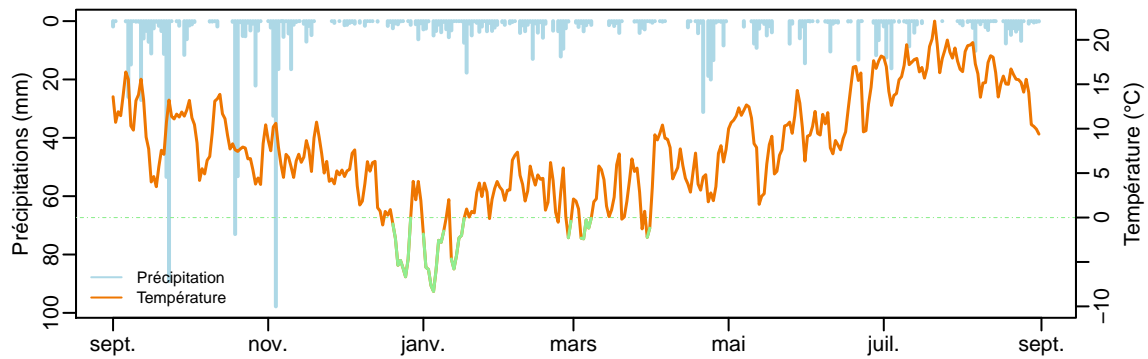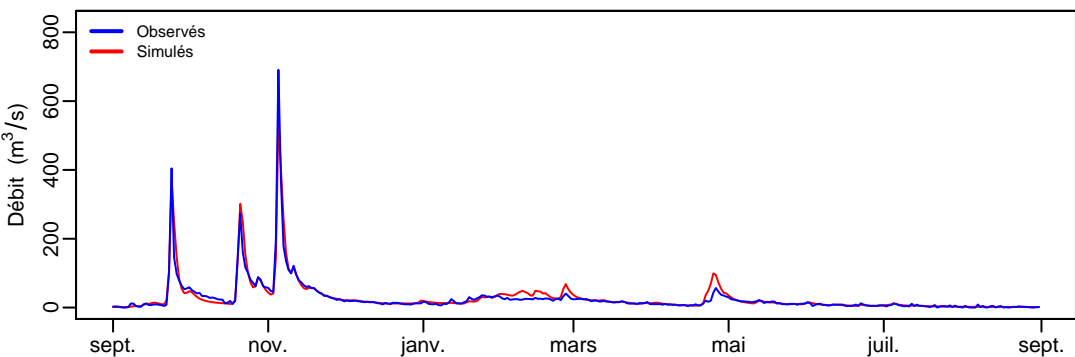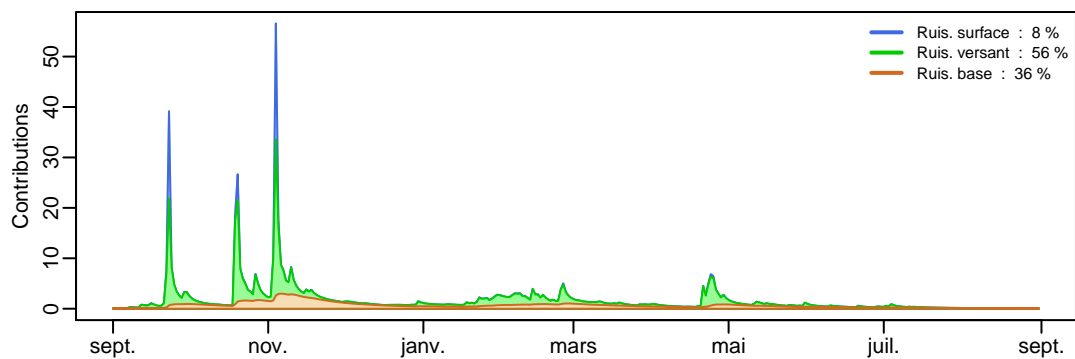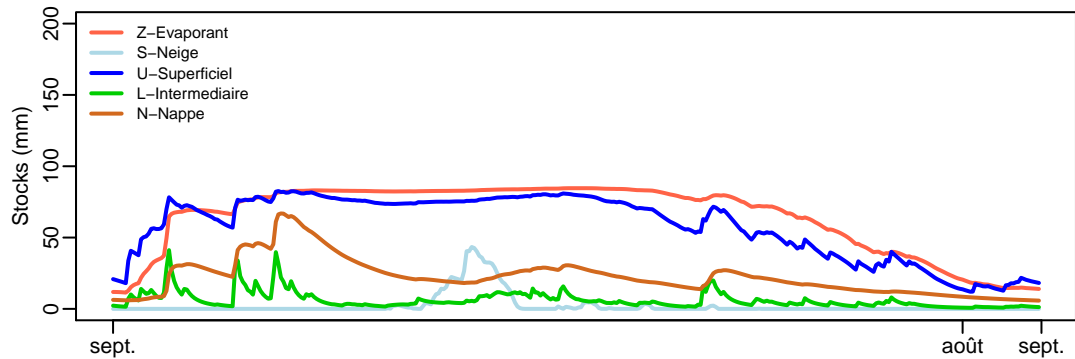



# k2240810 (1346.08 km<sup>2</sup>) – année 1995–1996

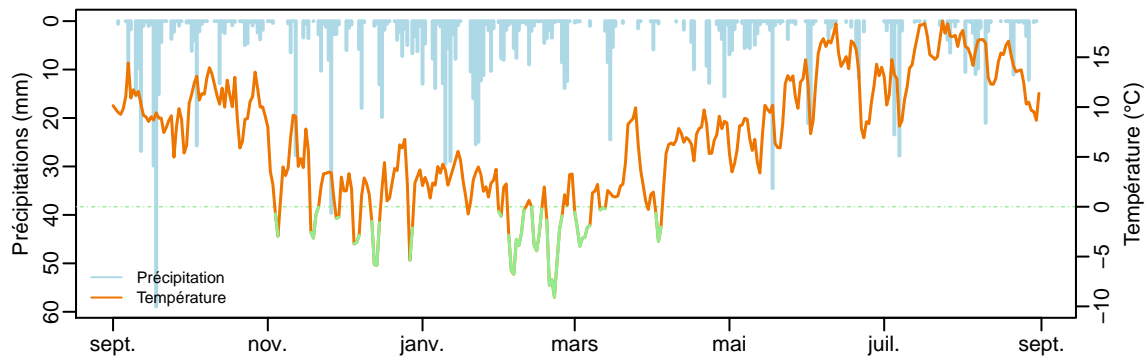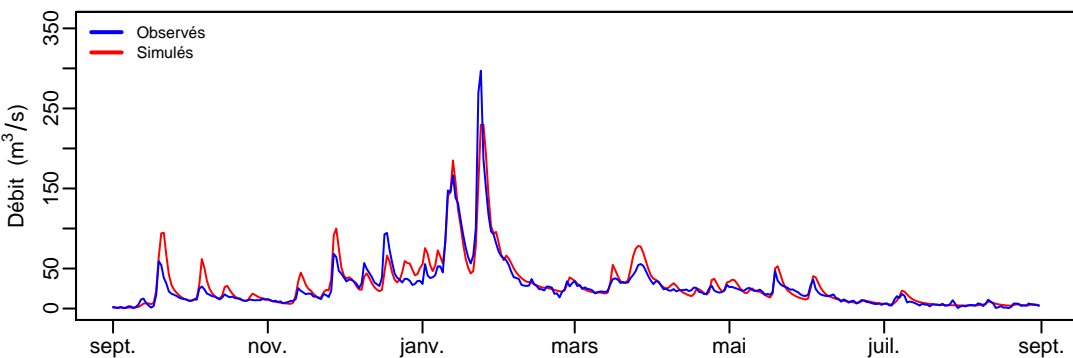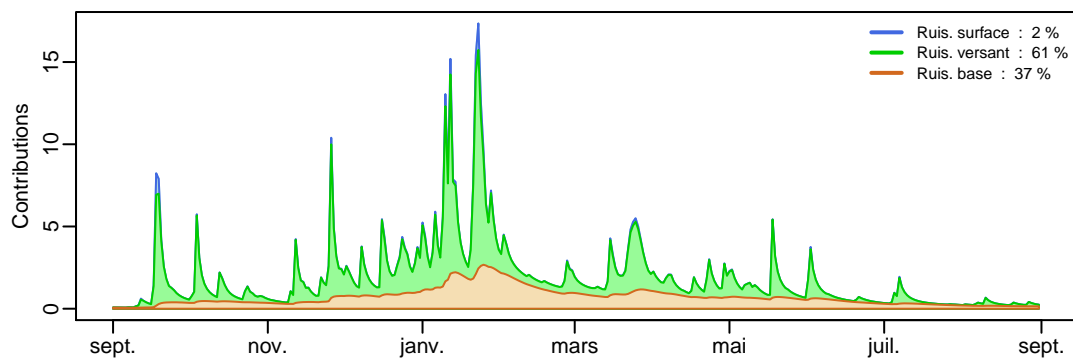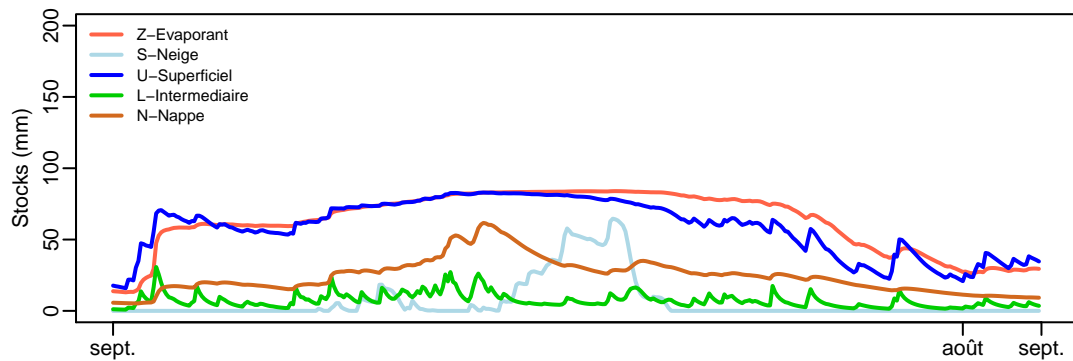

# k2240810 (1346.08 km²) – année 1996–1997

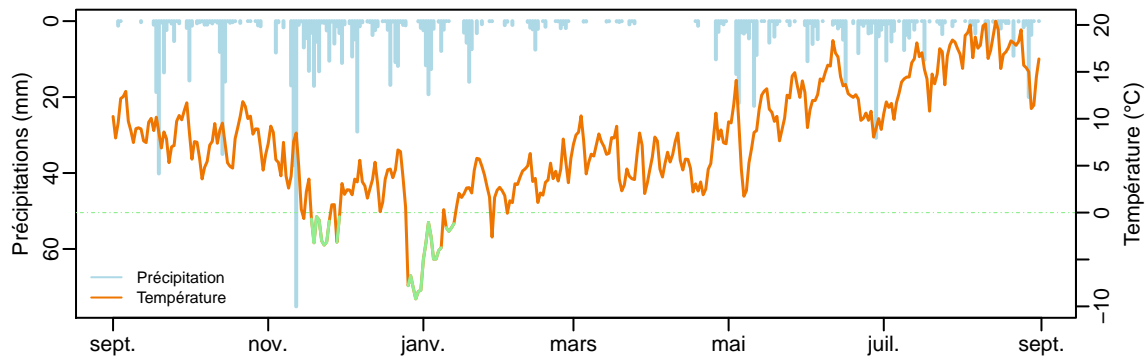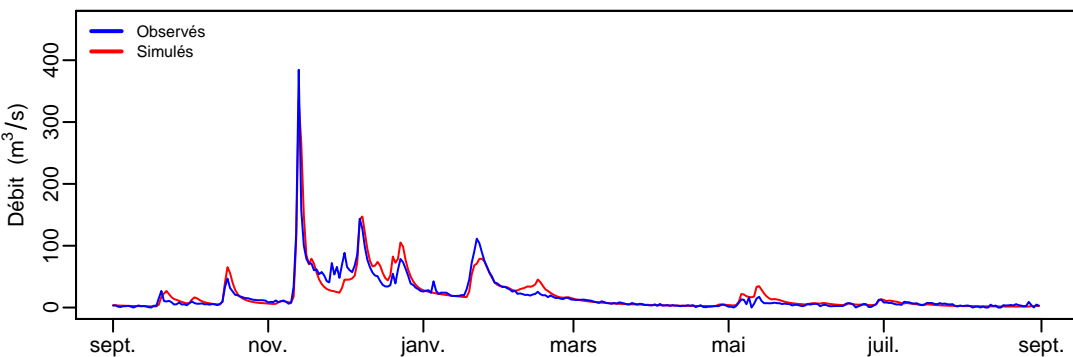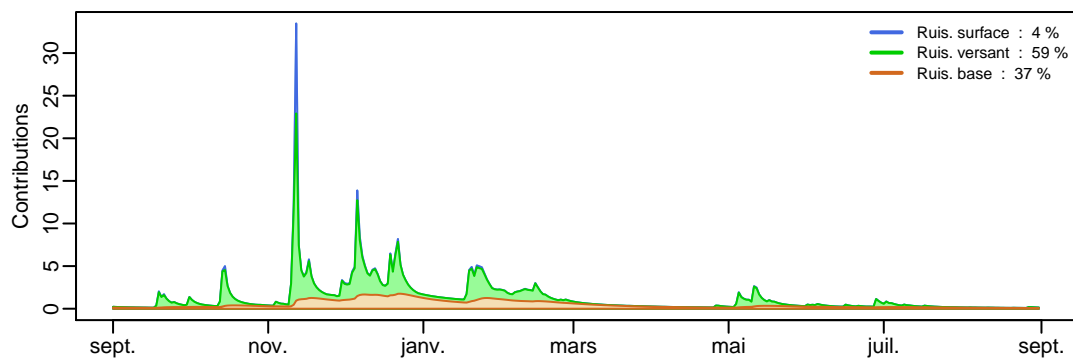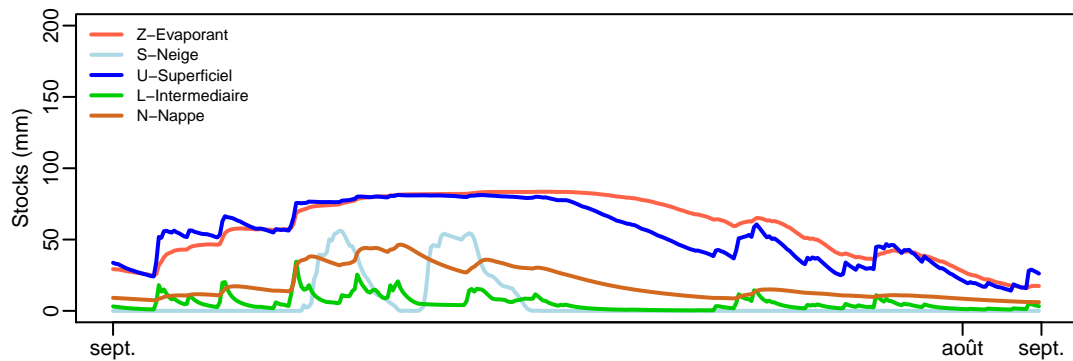

# k2240810 (1346.08 km²) – année 1997–1998

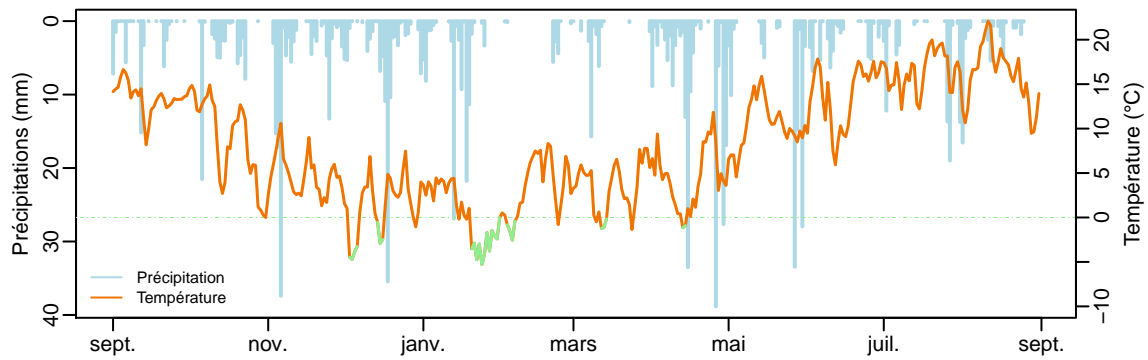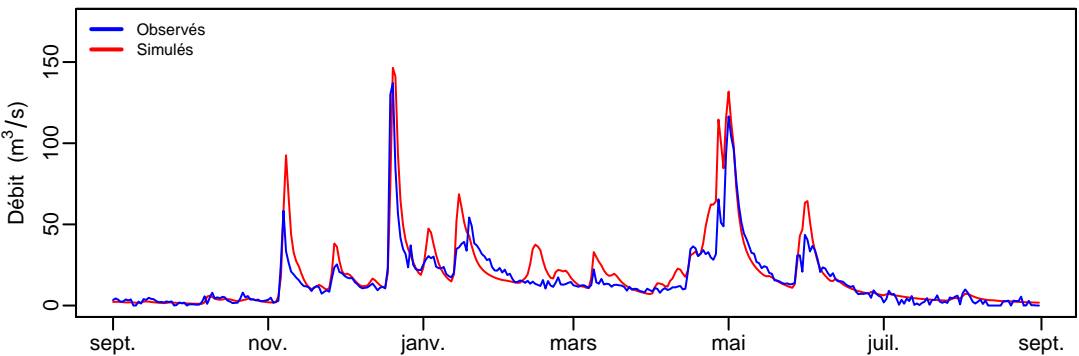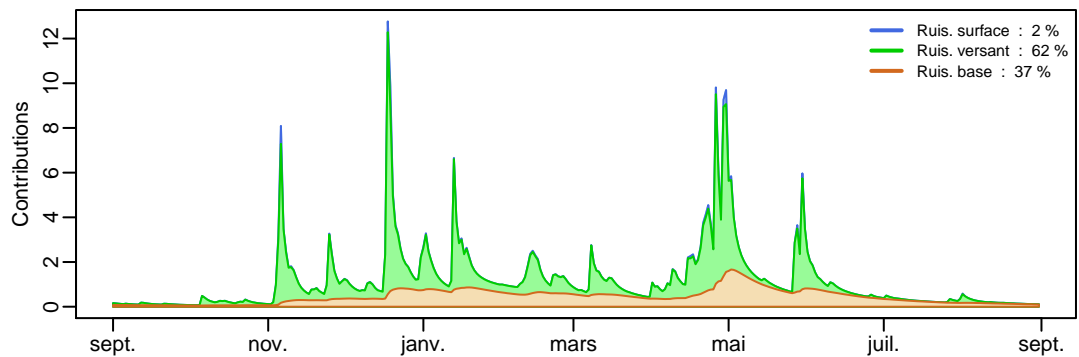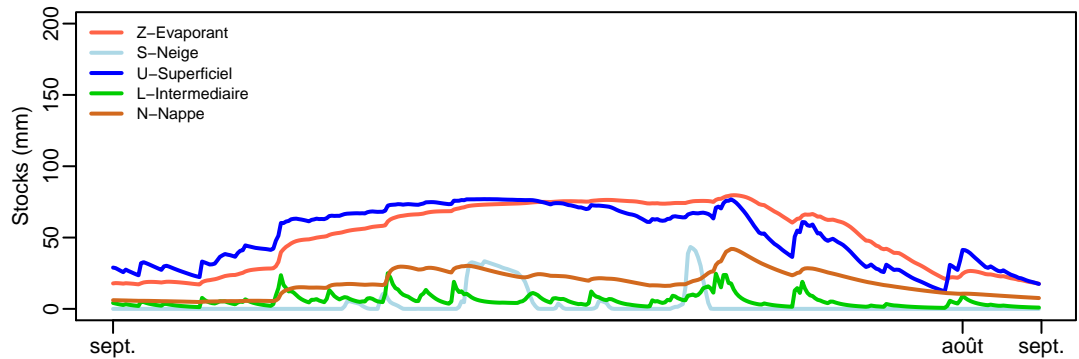

# k2240810 (1346.08 km<sup>2</sup>) – année 1998–1999

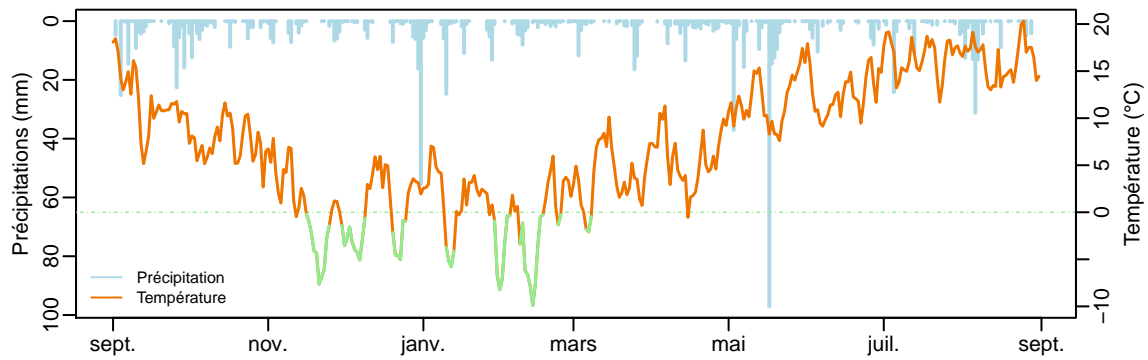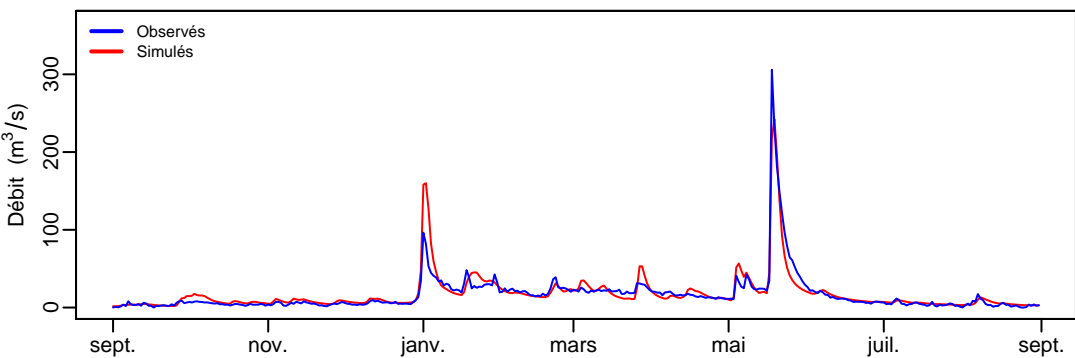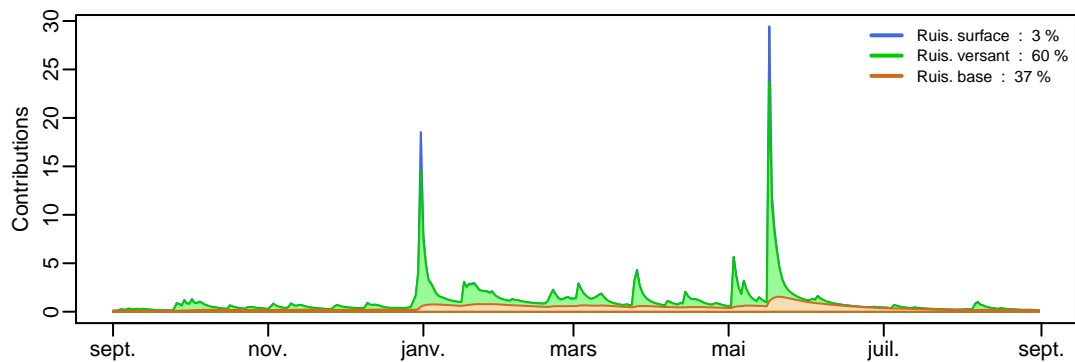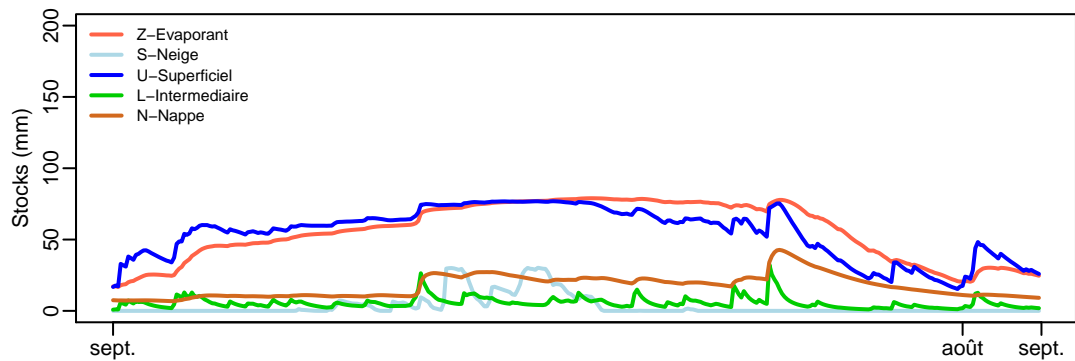

# k2240810 (1346.08 km<sup>2</sup>) – année 1999–2000

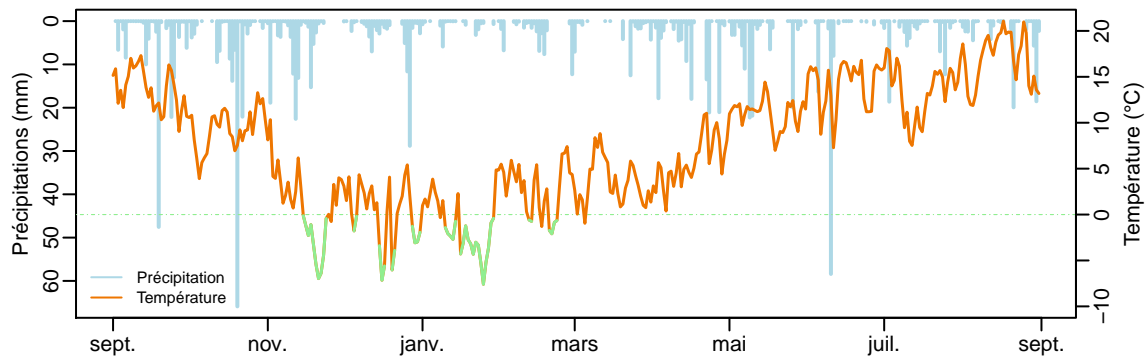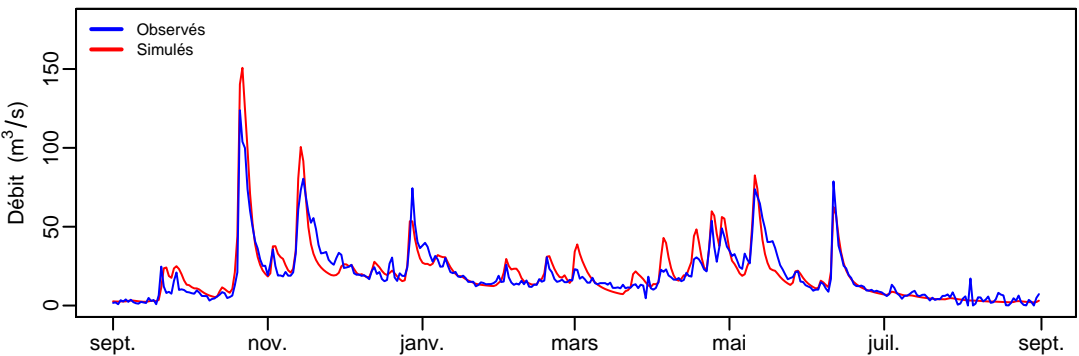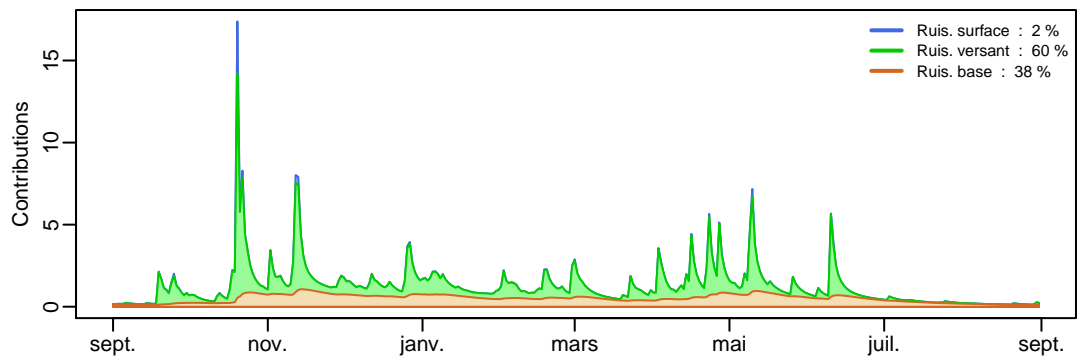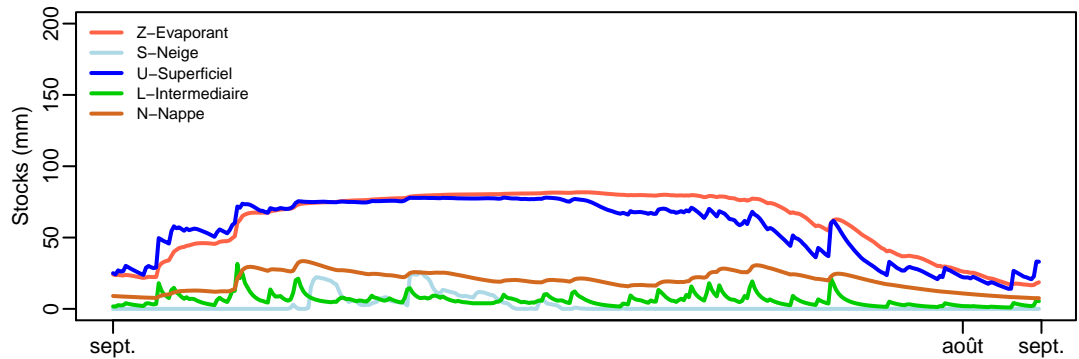

# k2240810 (1346.08 km<sup>2</sup>) – année 2000–2001

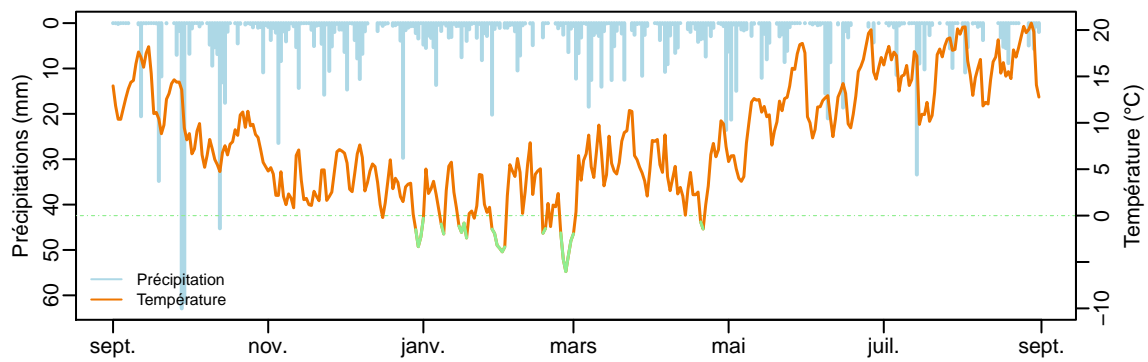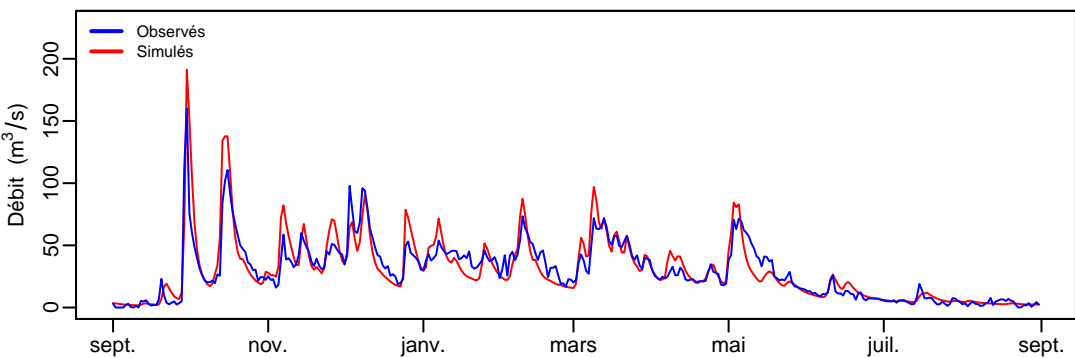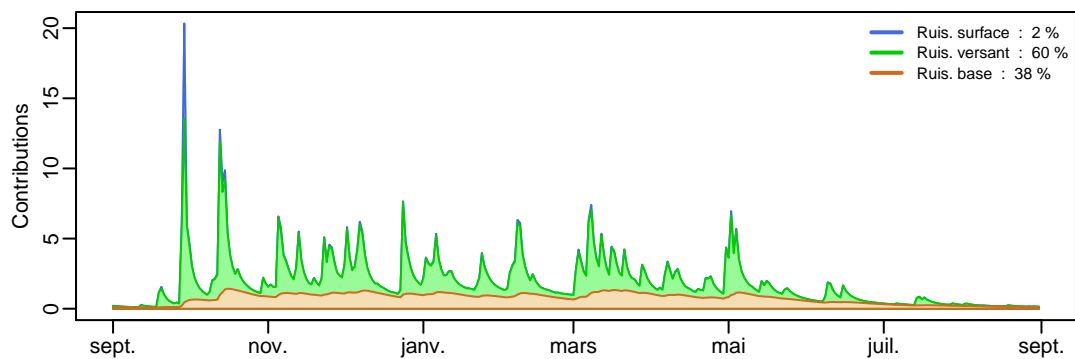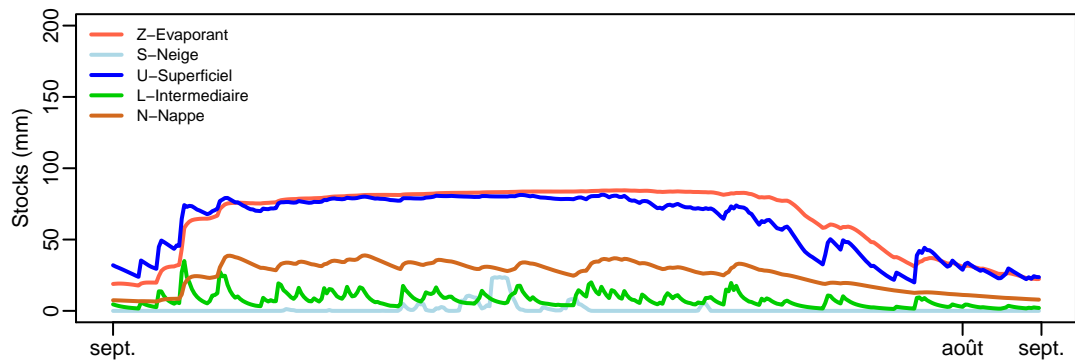

# k2240810 (1346.08 km<sup>2</sup>) – année 2001–2002

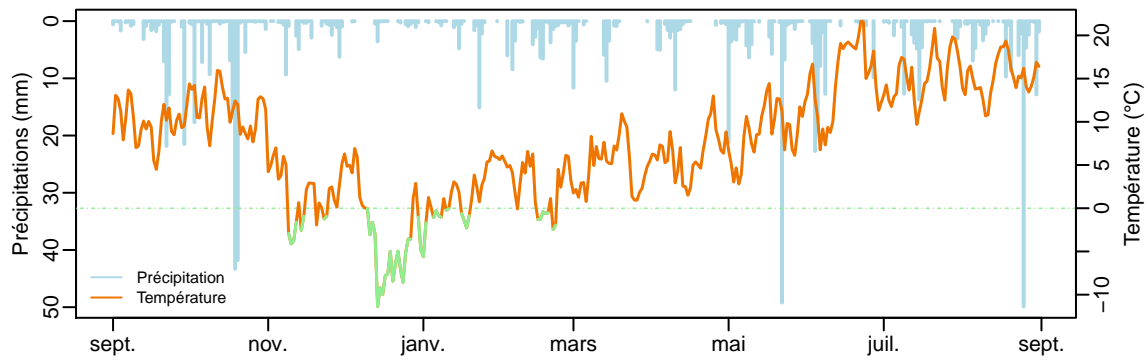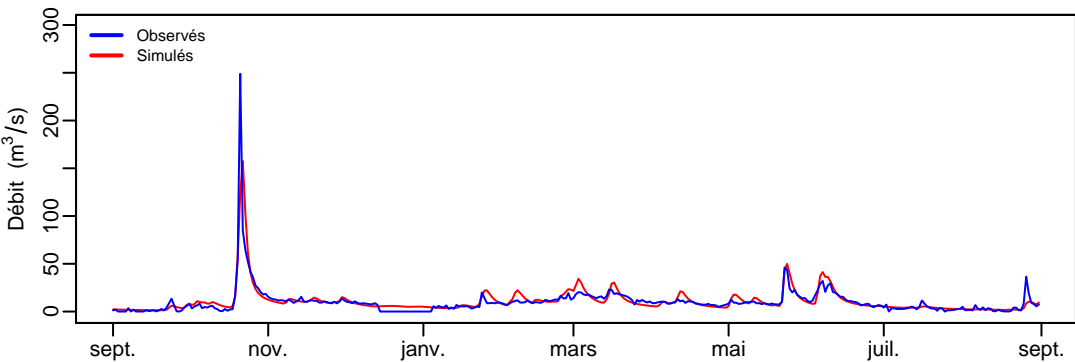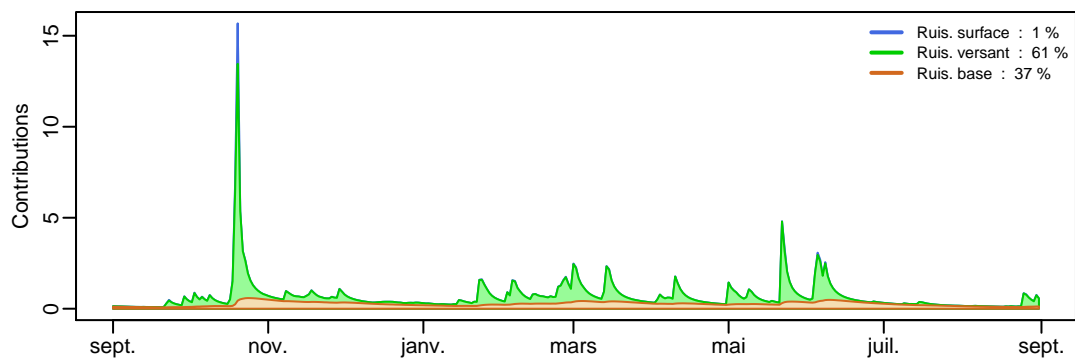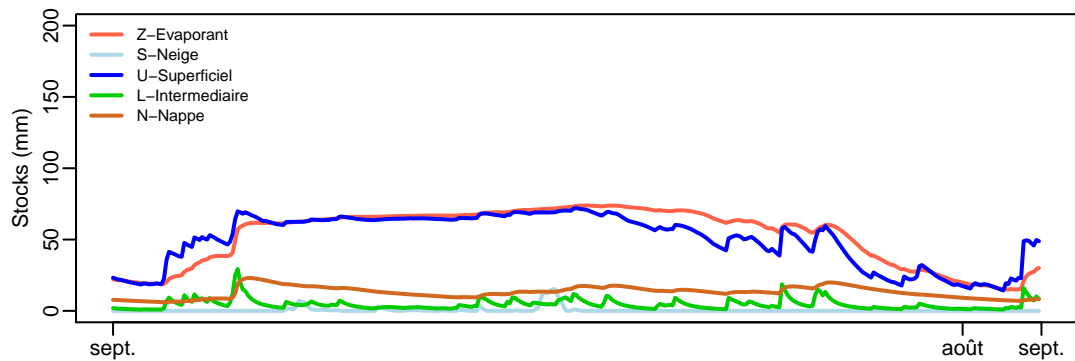

# k2240810 (1346.08 km<sup>2</sup>) – année 2002–2003

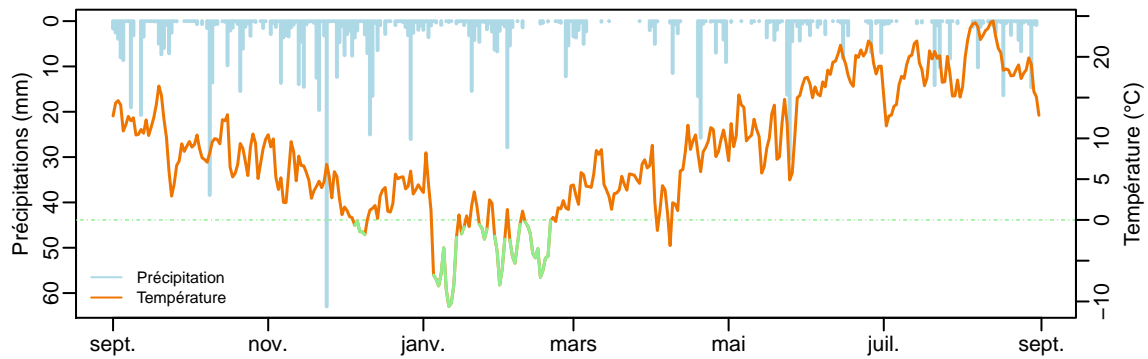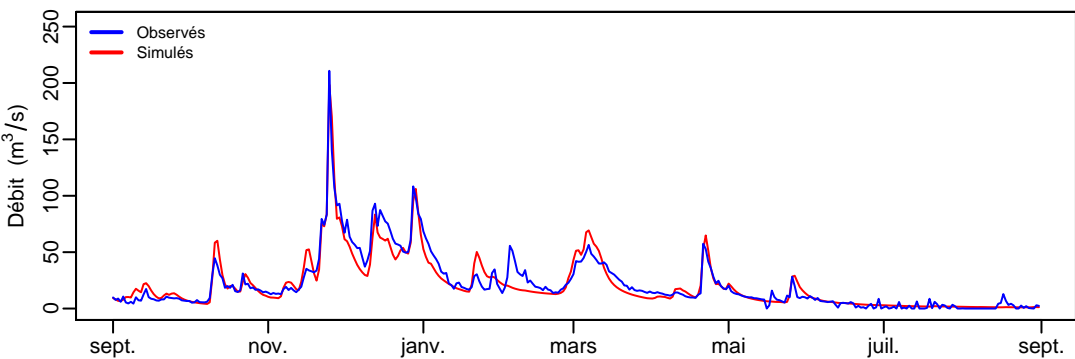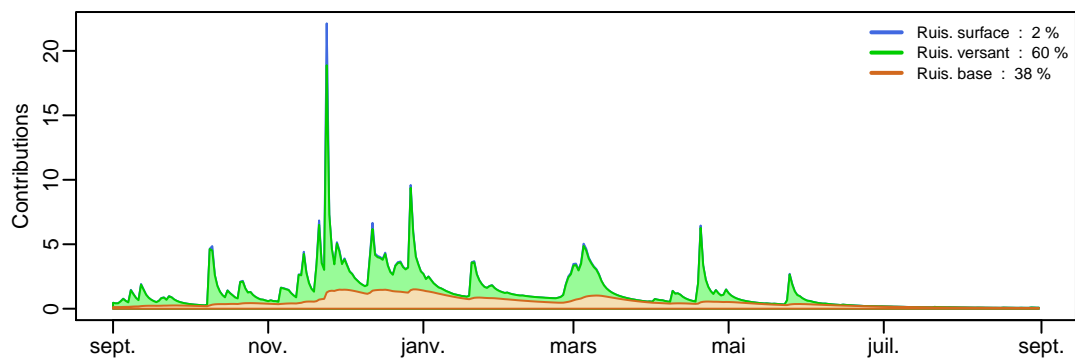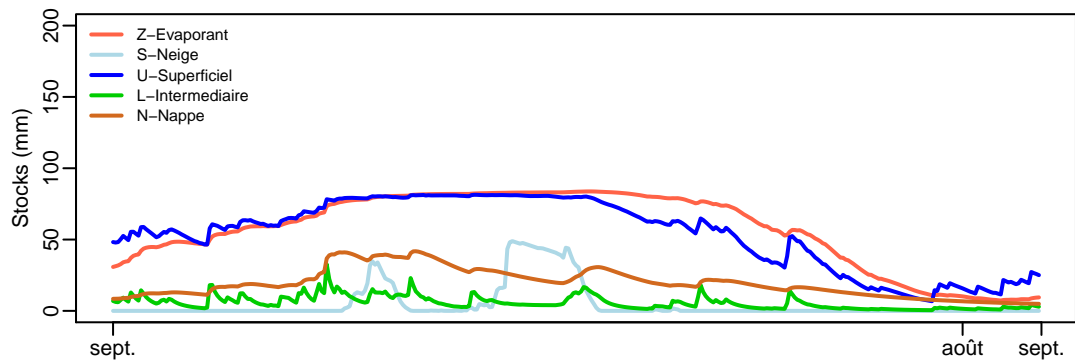



# k2240810 (1346.08 km<sup>2</sup>) – année 2003–2004

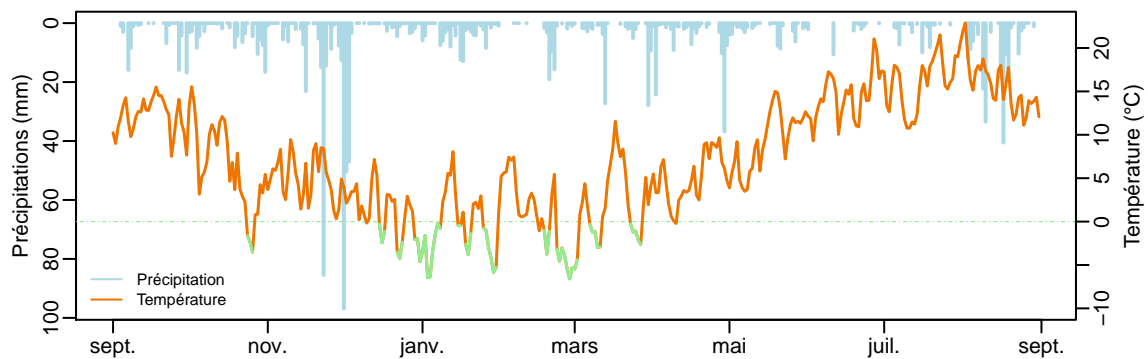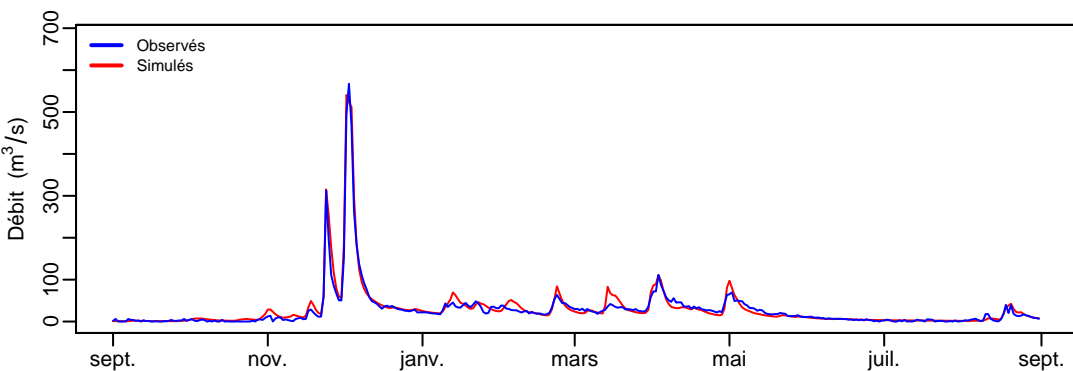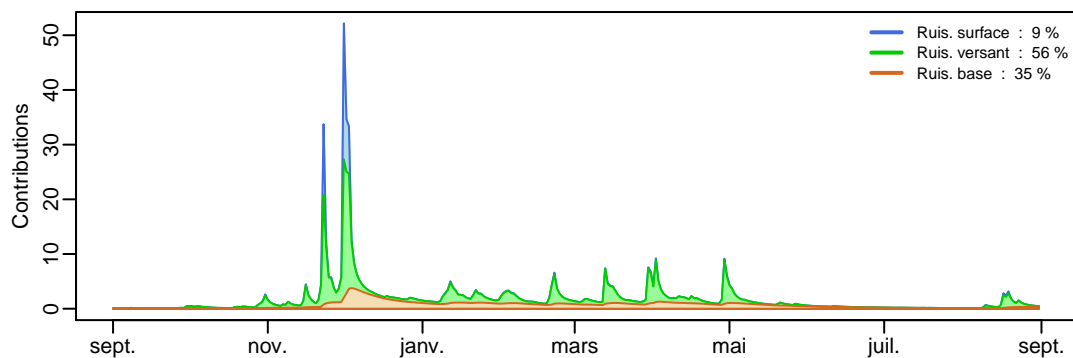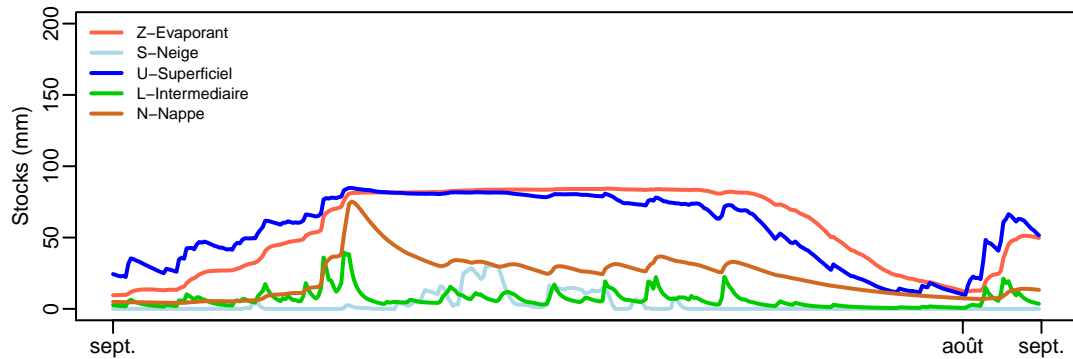

# k2240810 (1346.08 km<sup>2</sup>) – année 2004–2005

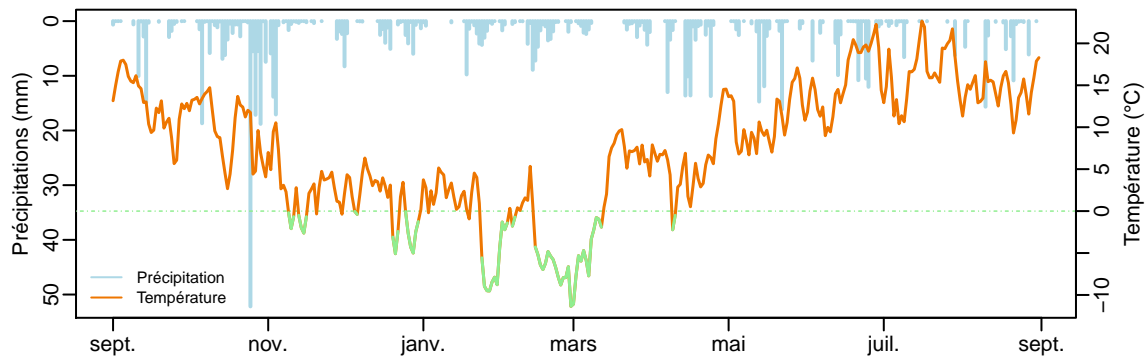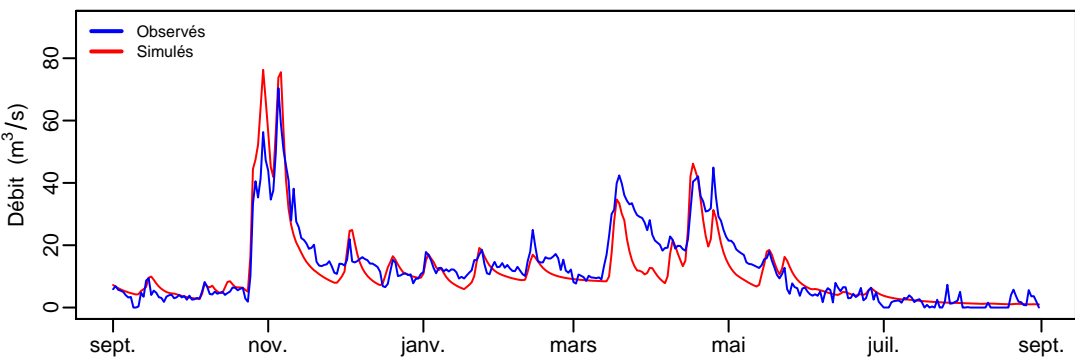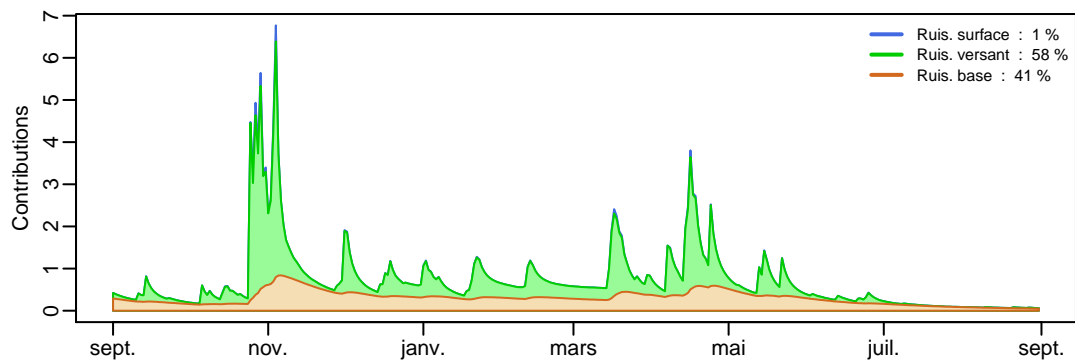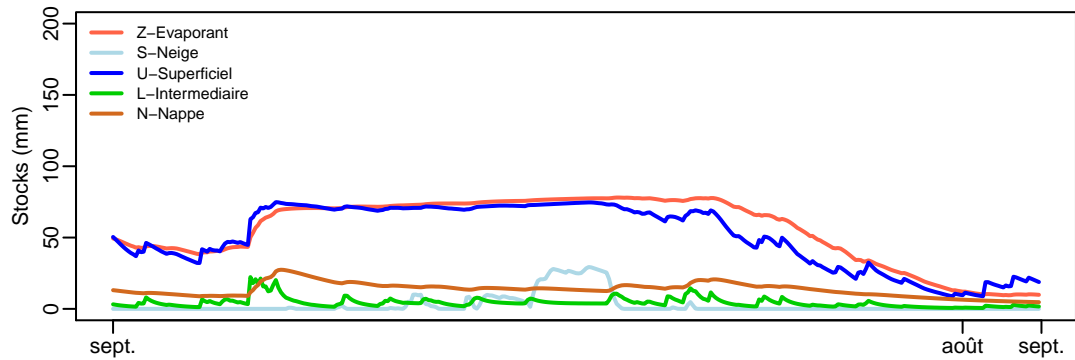

# k2240810 (1346.08 km<sup>2</sup>) – année 2005–2006

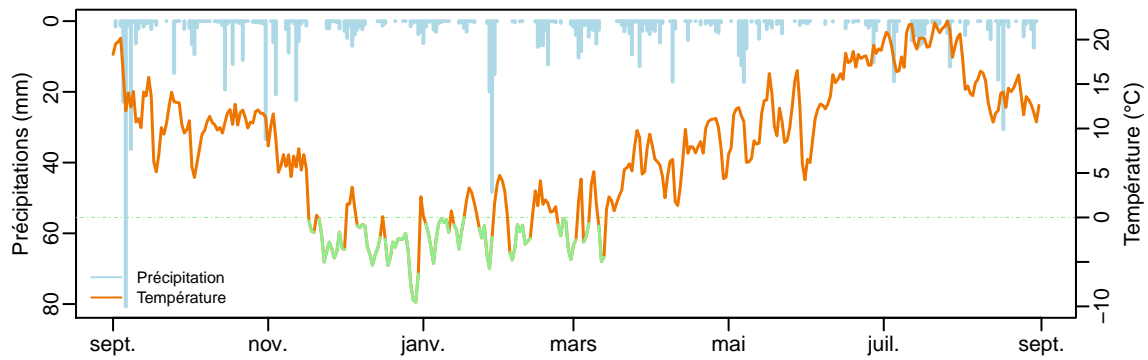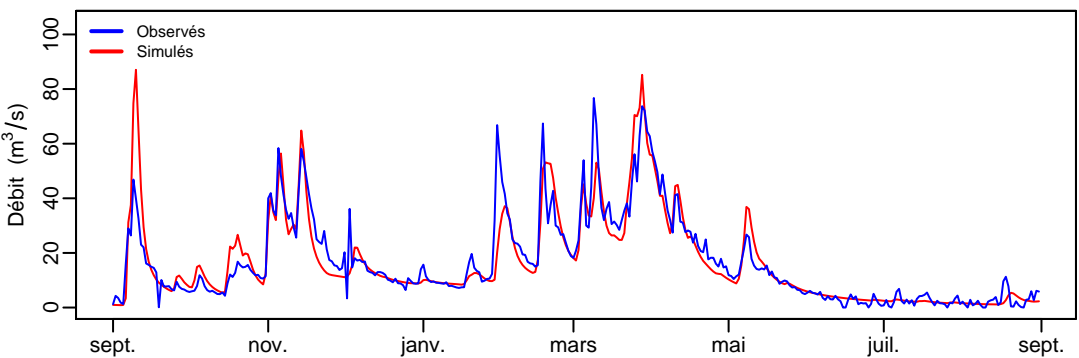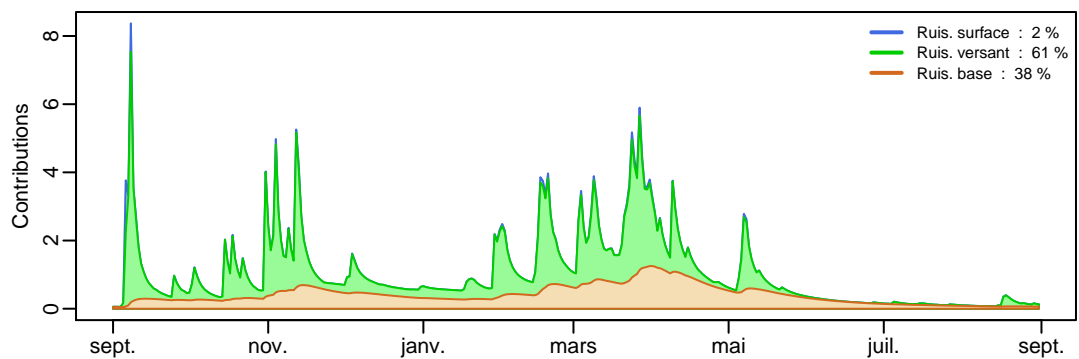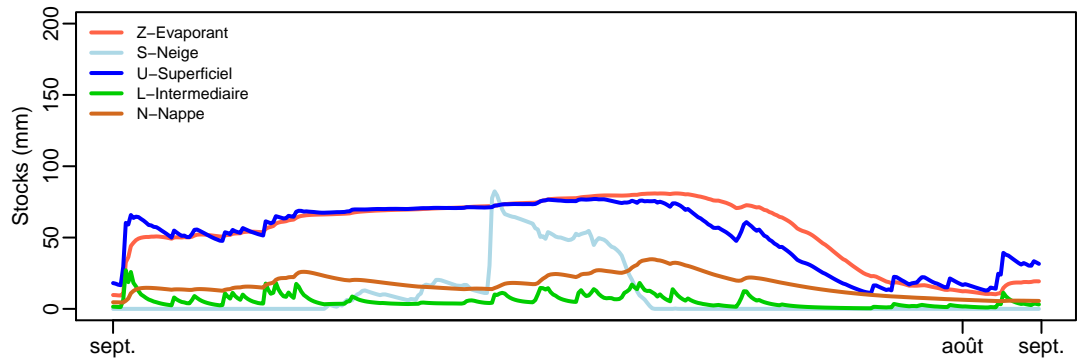

# k2240810 (1346.08 km<sup>2</sup>) – année 2006–2007

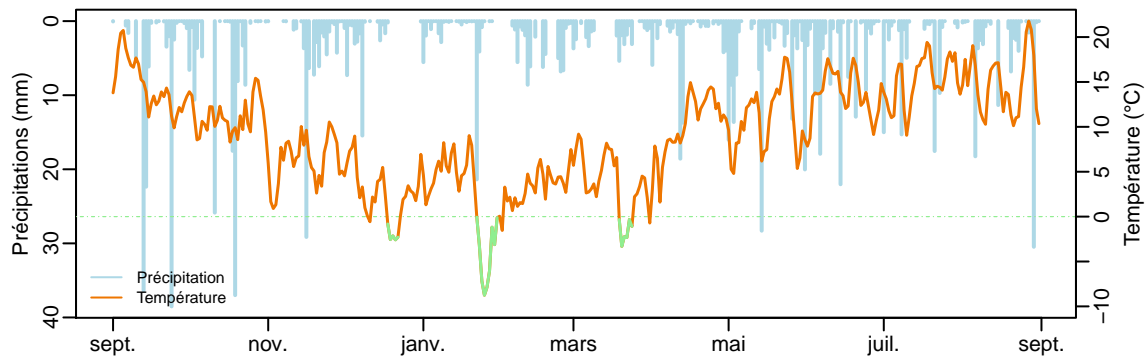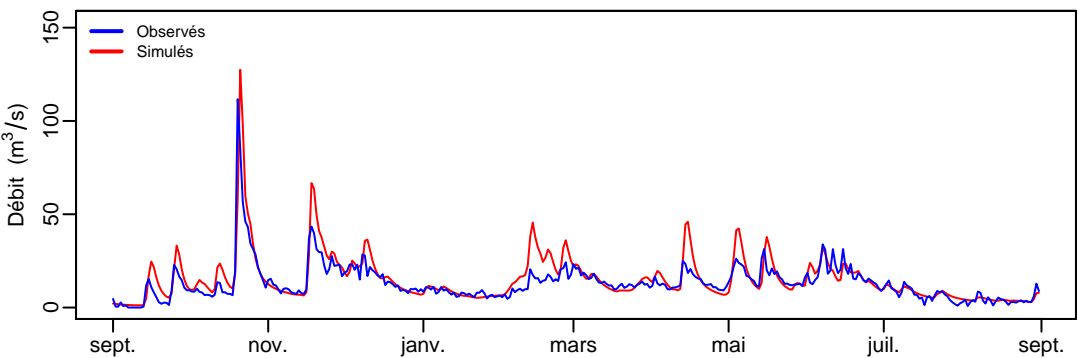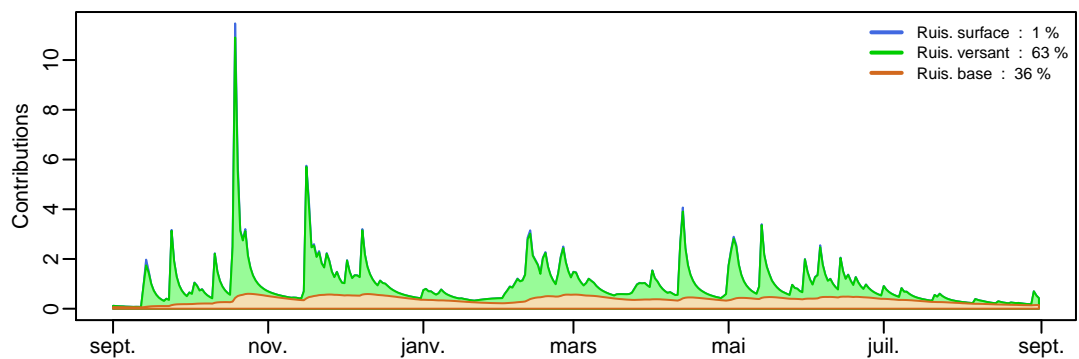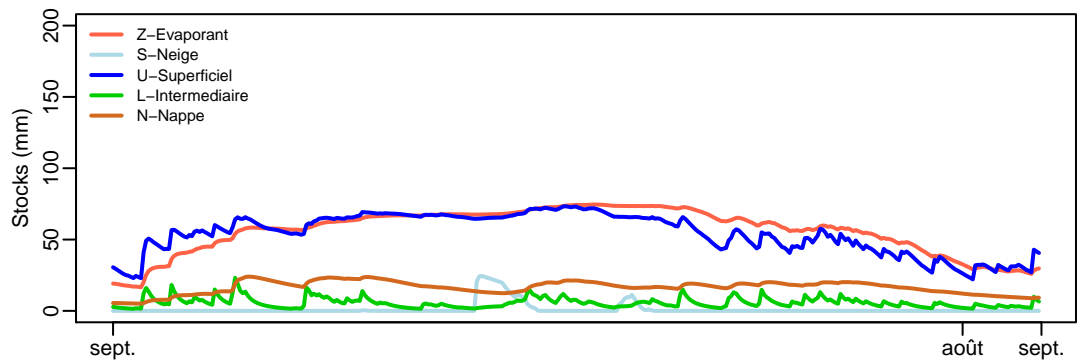

# k2254010 (118.27 km<sup>2</sup>) – année 1981–1982

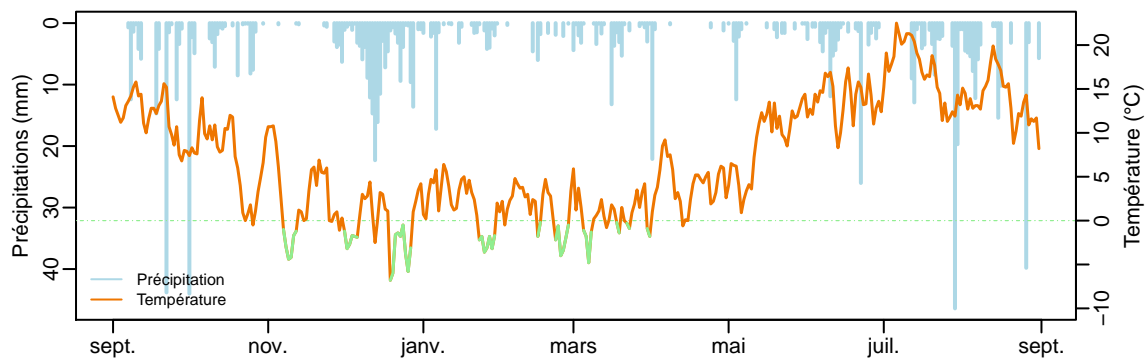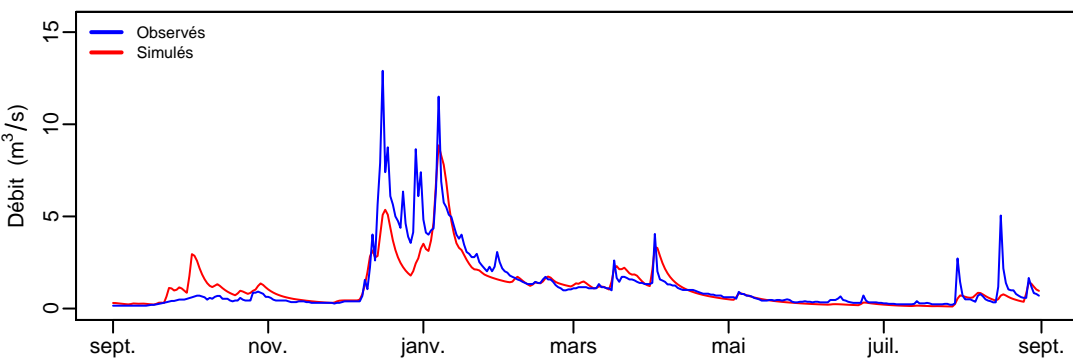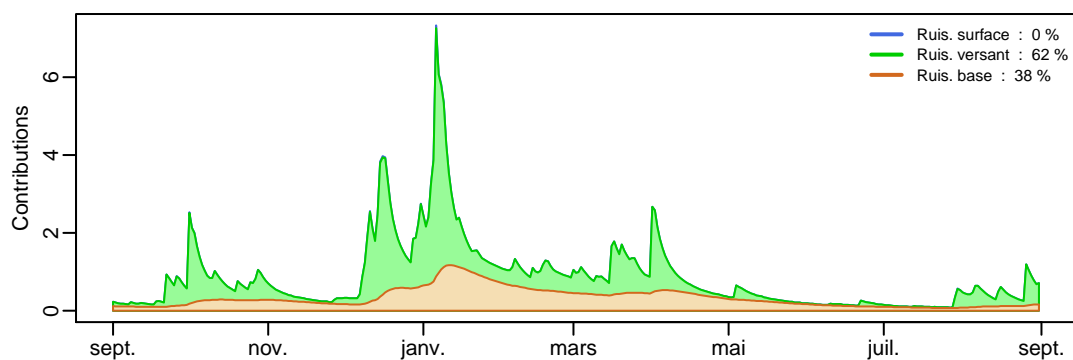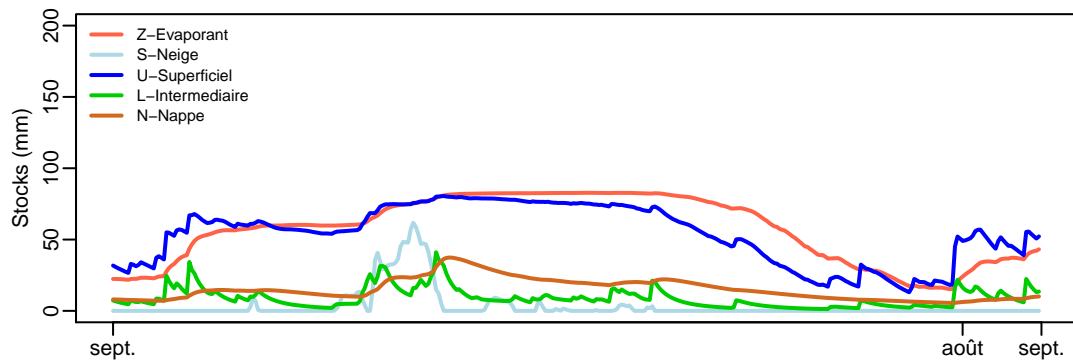

# k2254010 (118.27 km<sup>2</sup>) – année 1982–1983

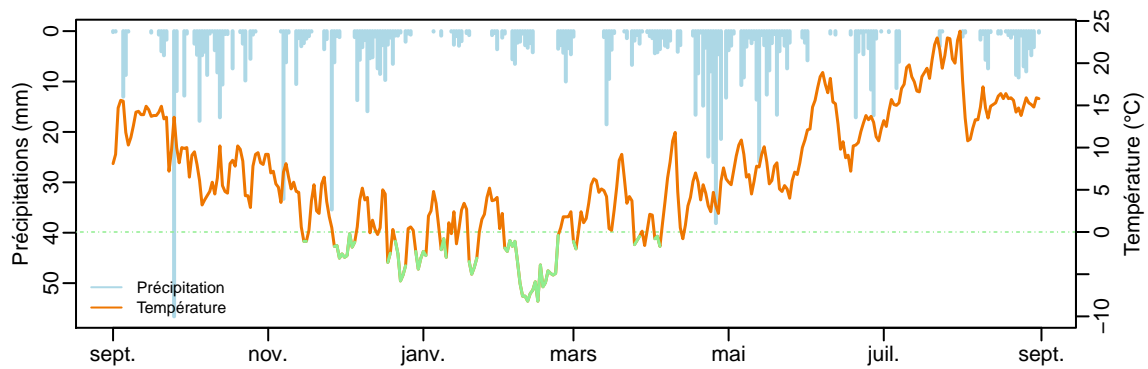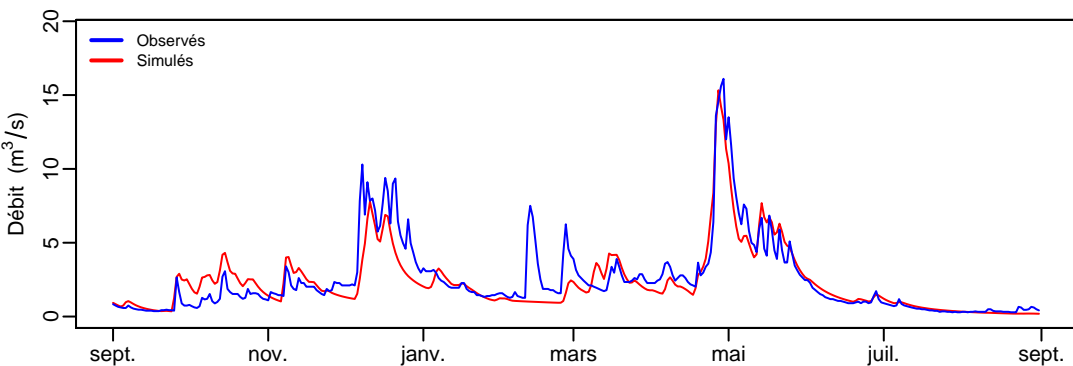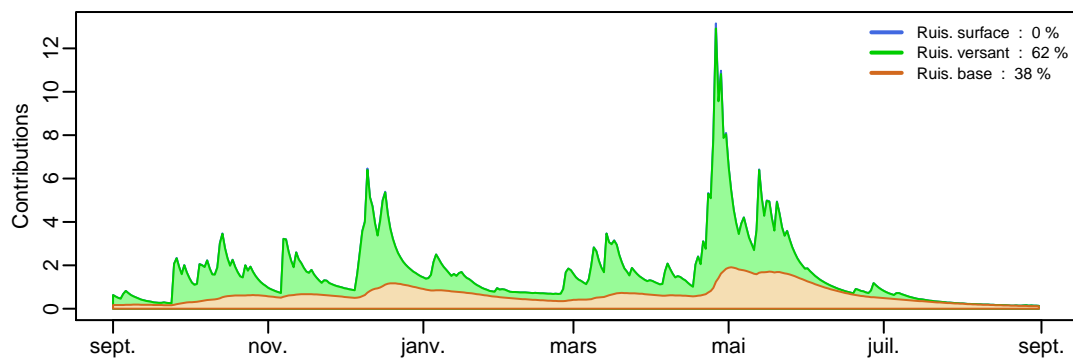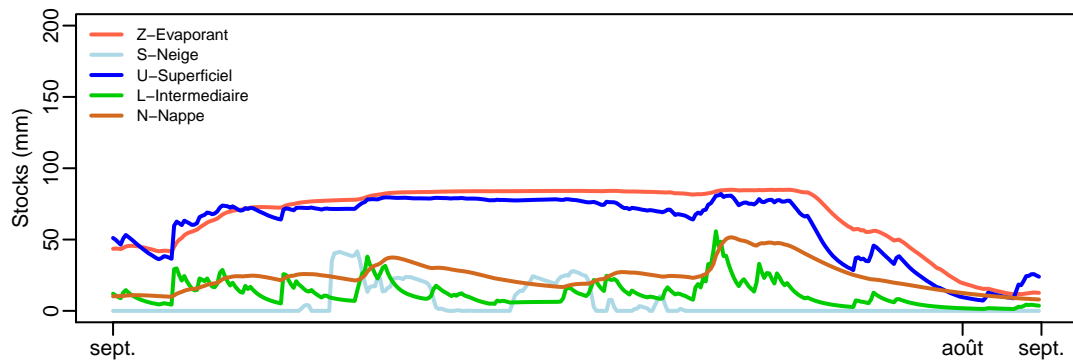

# k2254010 (118.27 km<sup>2</sup>) – année 1983–1984

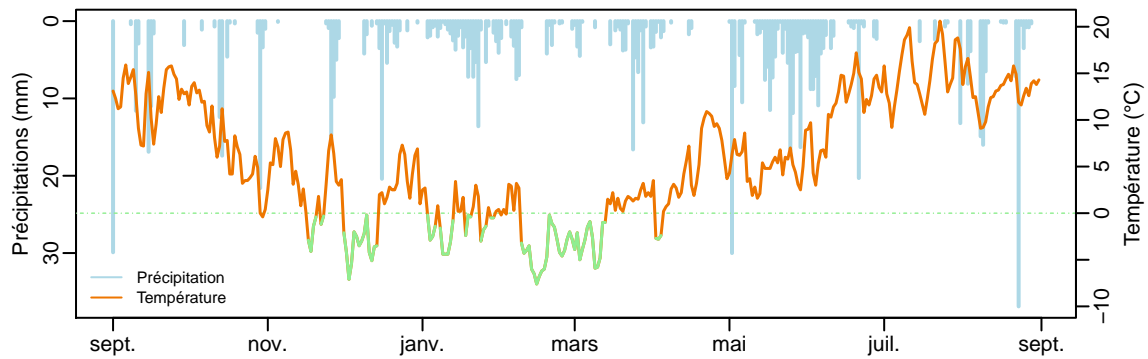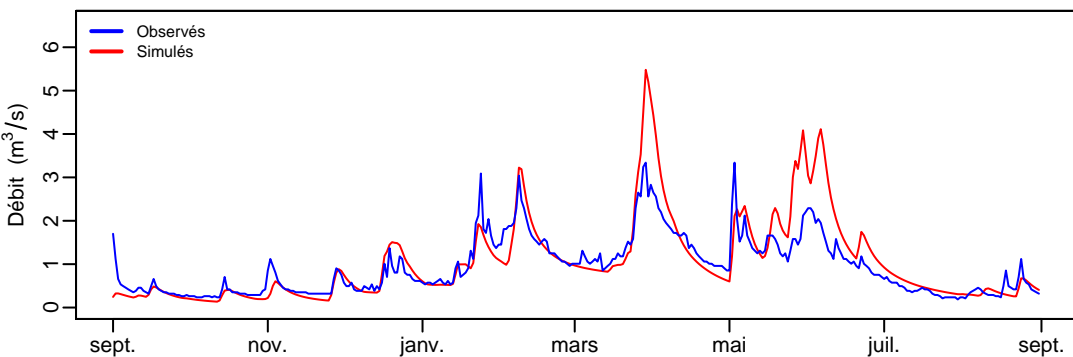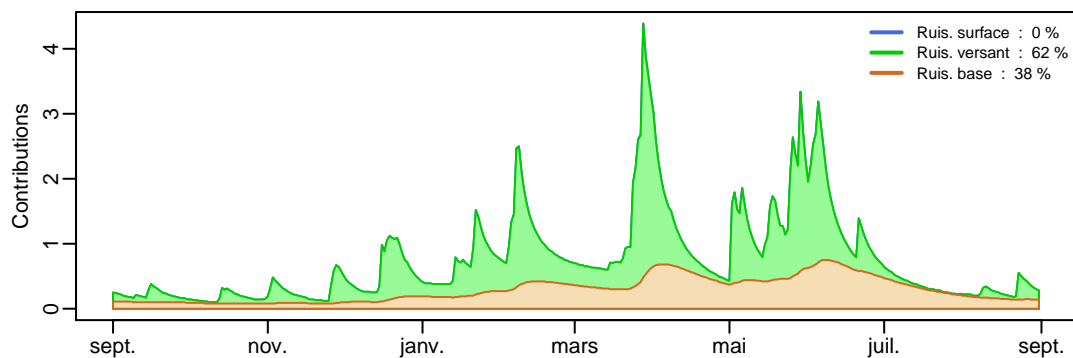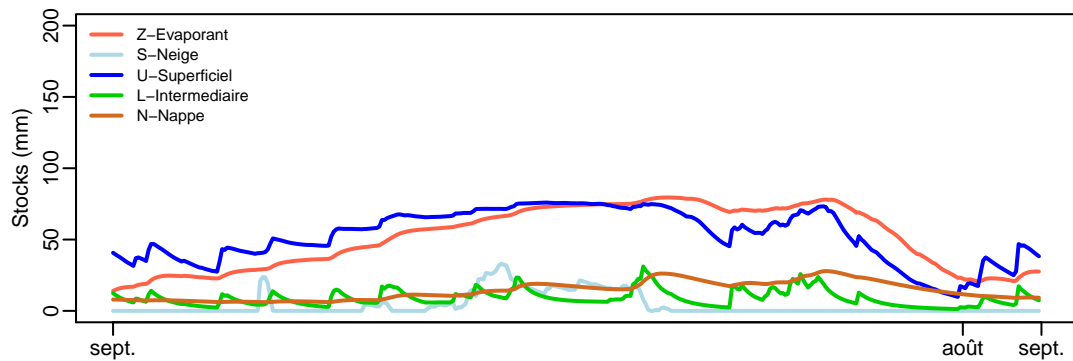

# k2254010 (118.27 km<sup>2</sup>) – année 1984–1985

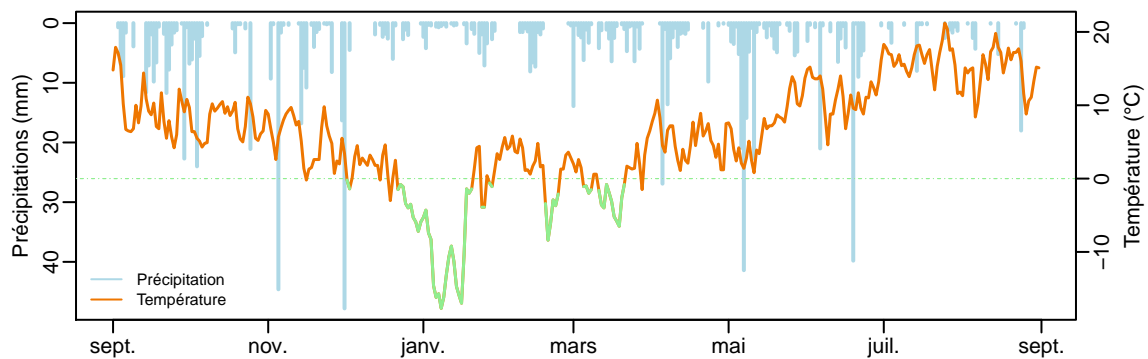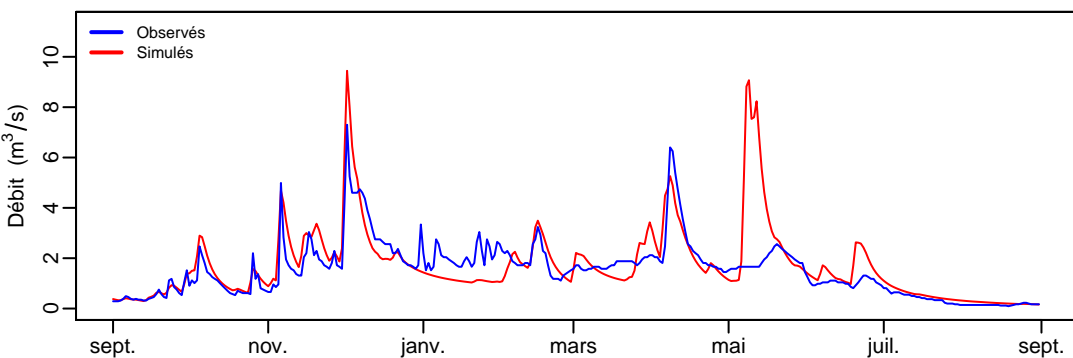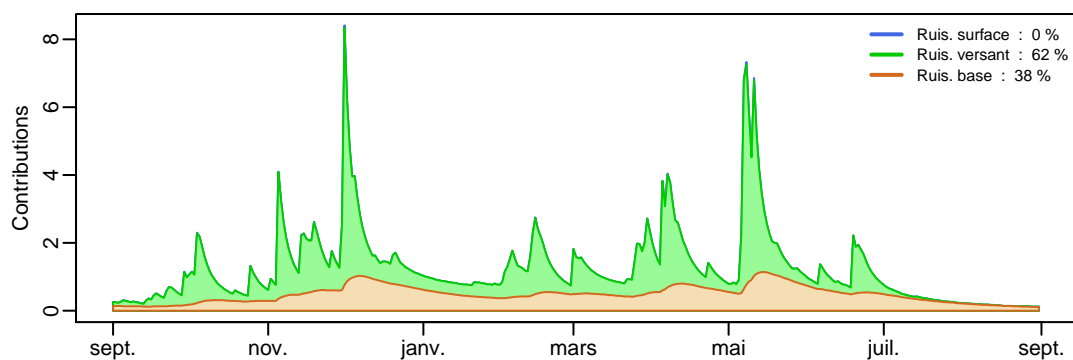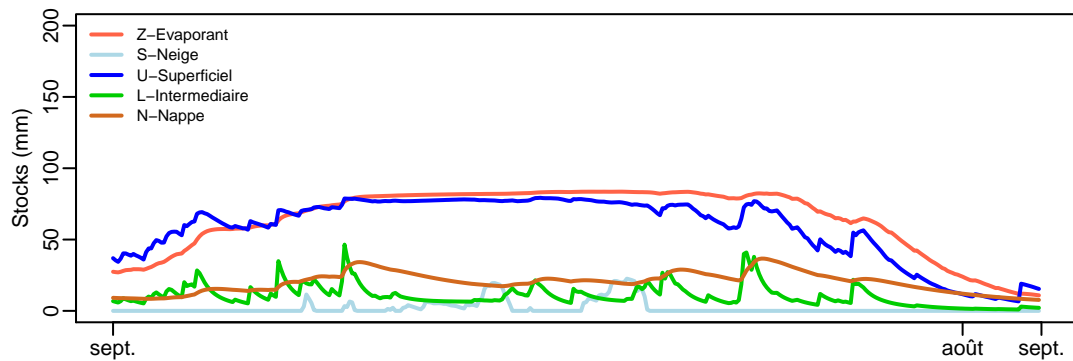



# k2254010 (118.27 km<sup>2</sup>) – année 1985–1986

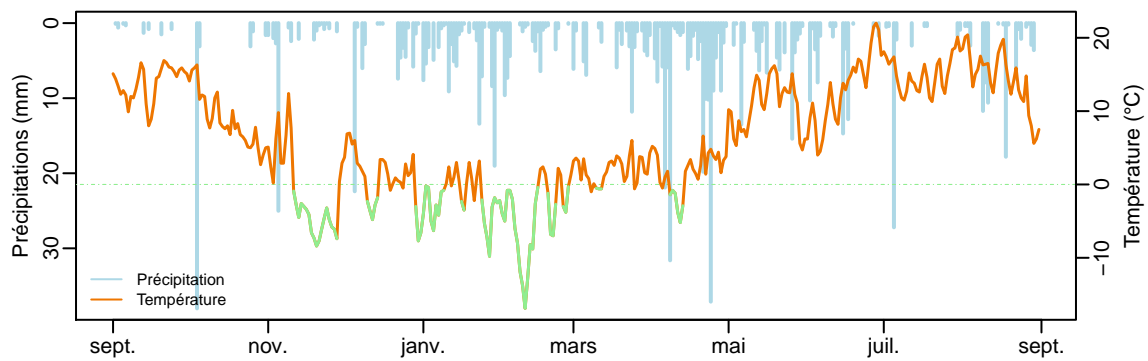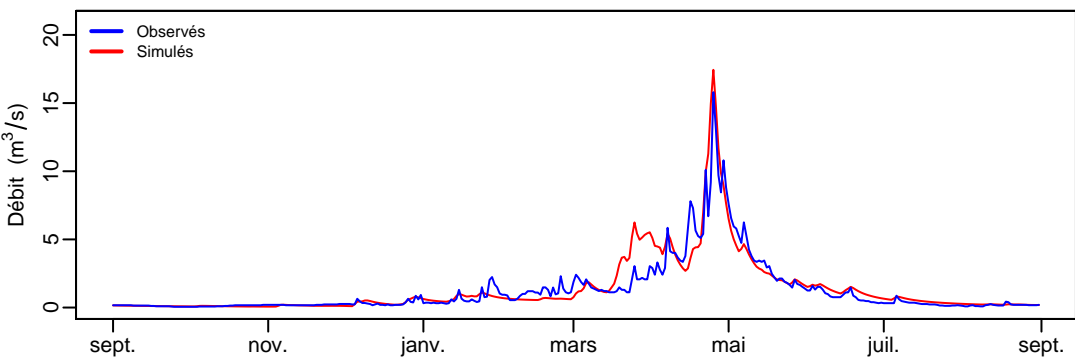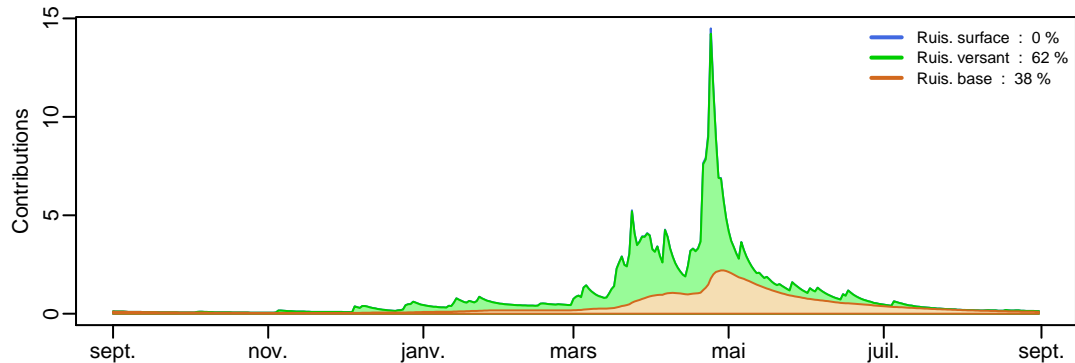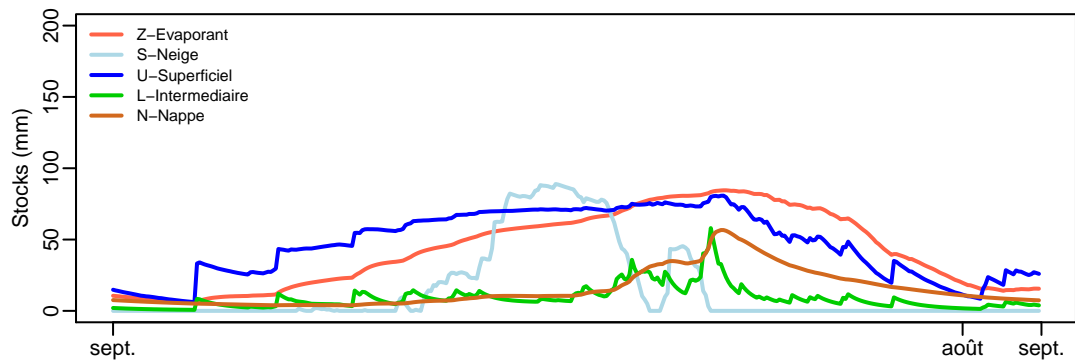

# k2254010 (118.27 km²) – année 1986–1987

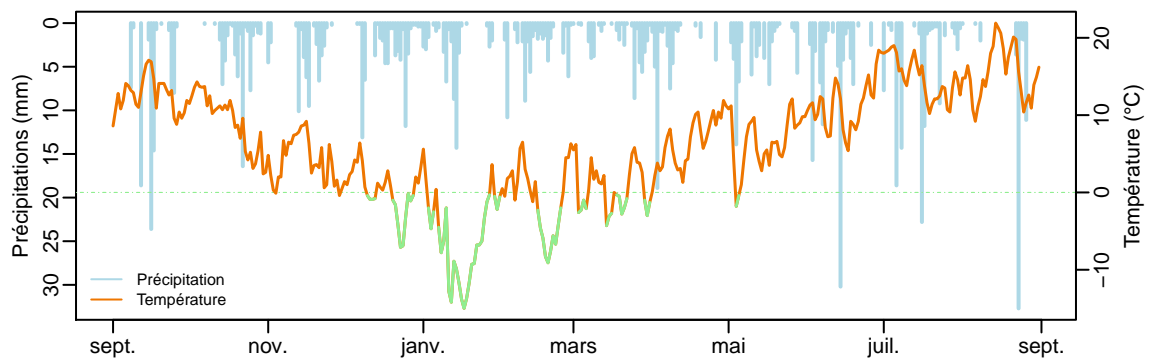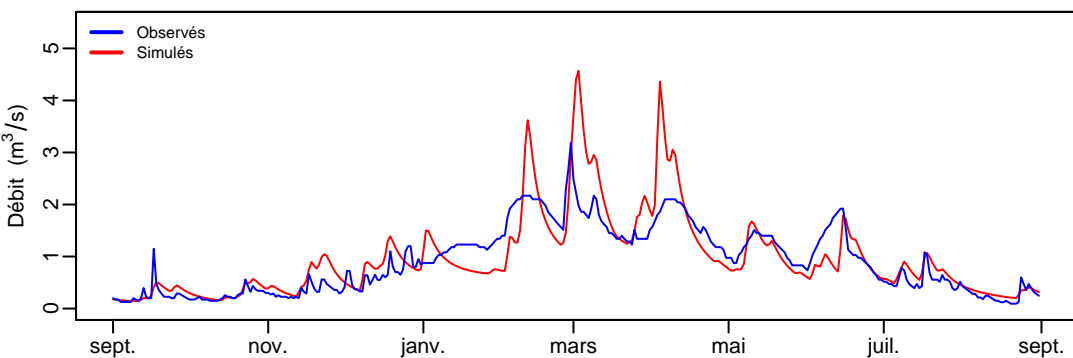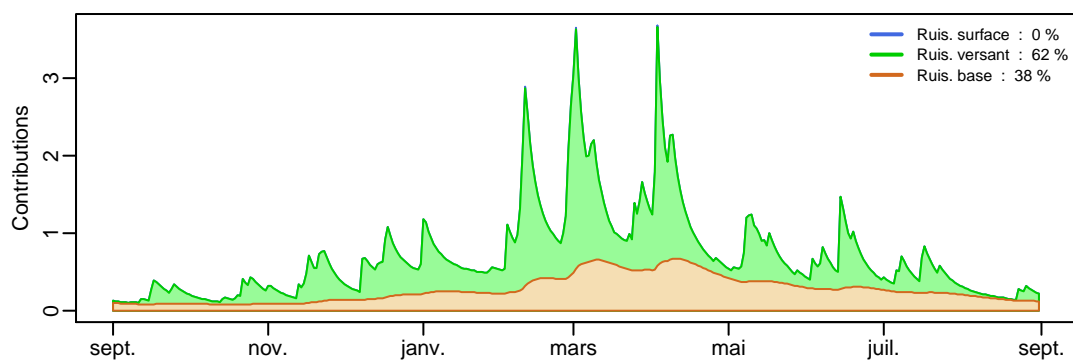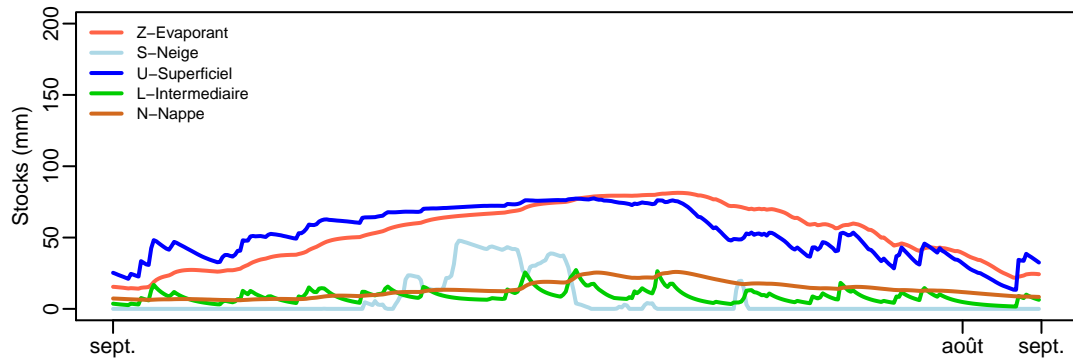

# k2254010 (118.27 km²) – année 1987–1988

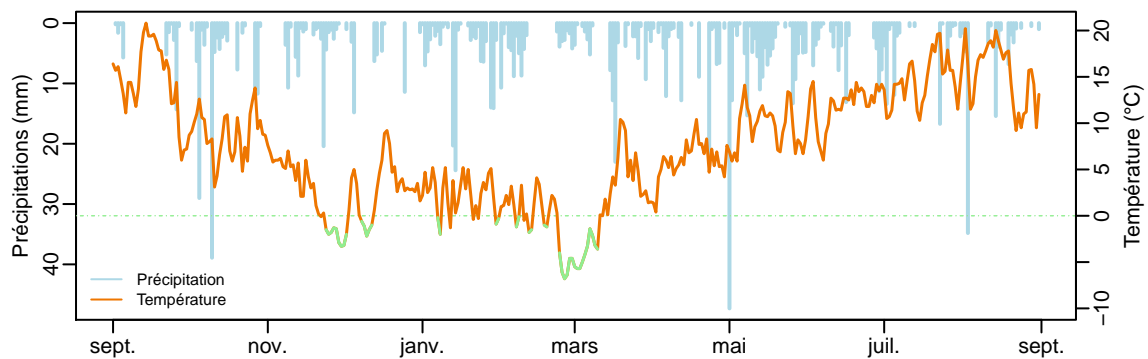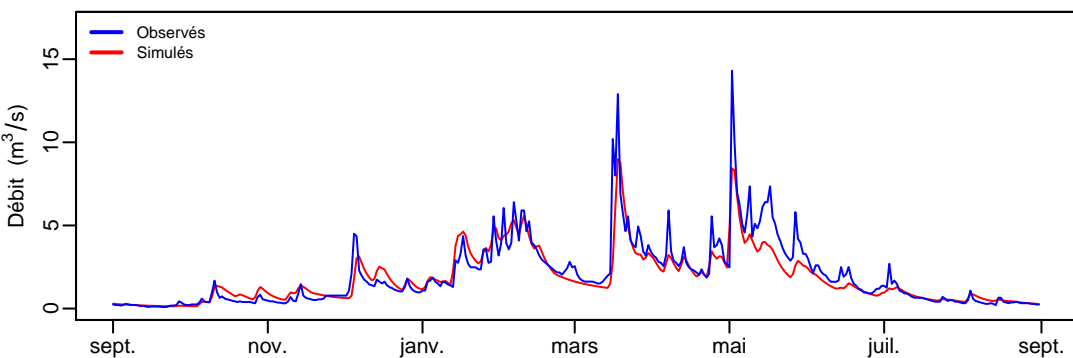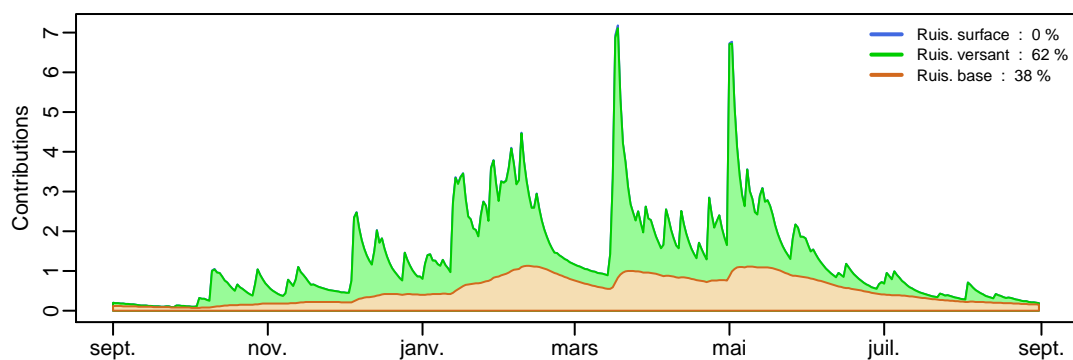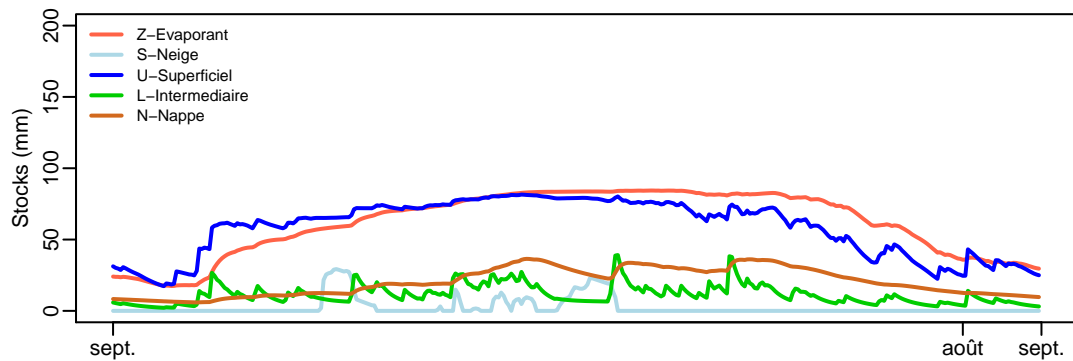

# k2254010 (118.27 km<sup>2</sup>) – année 1988–1989

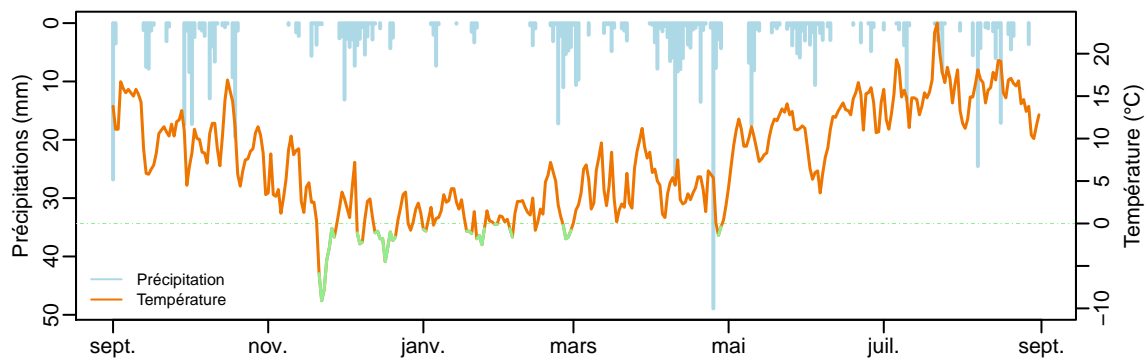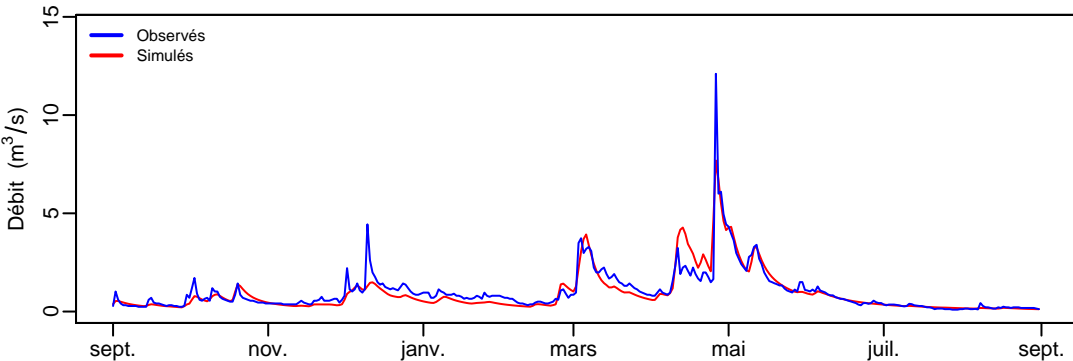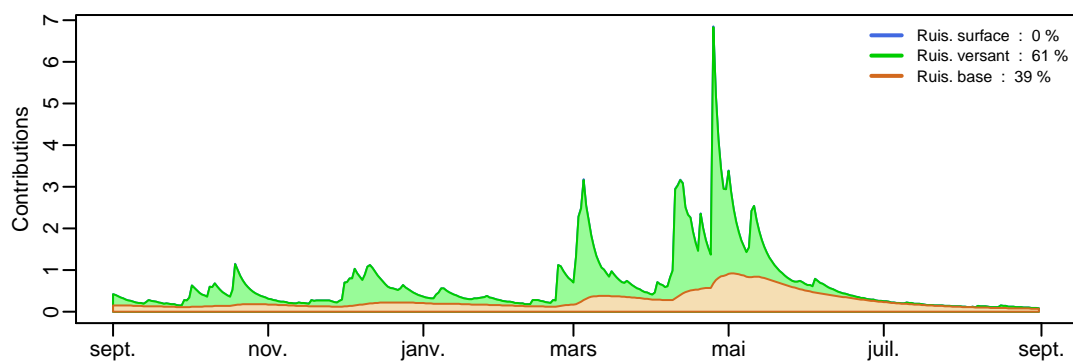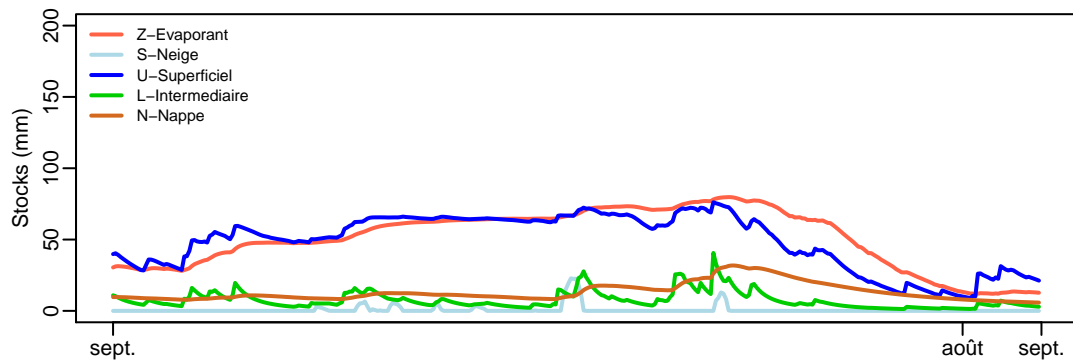

# k2254010 (118.27 km<sup>2</sup>) – année 1989–1990

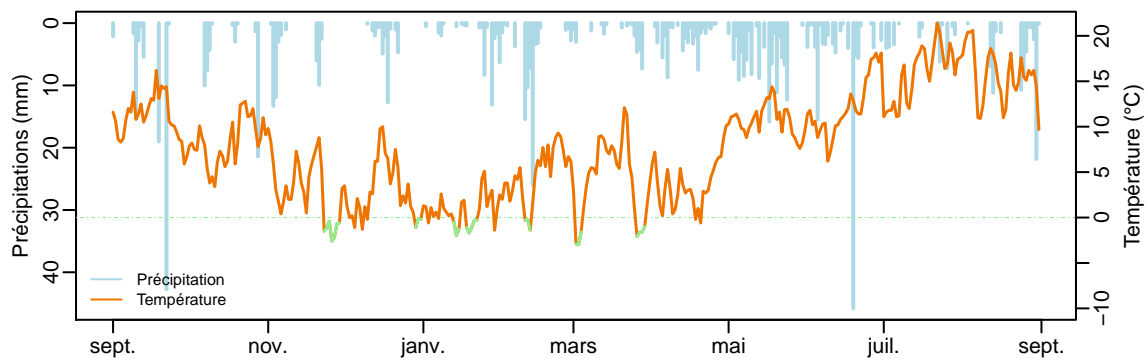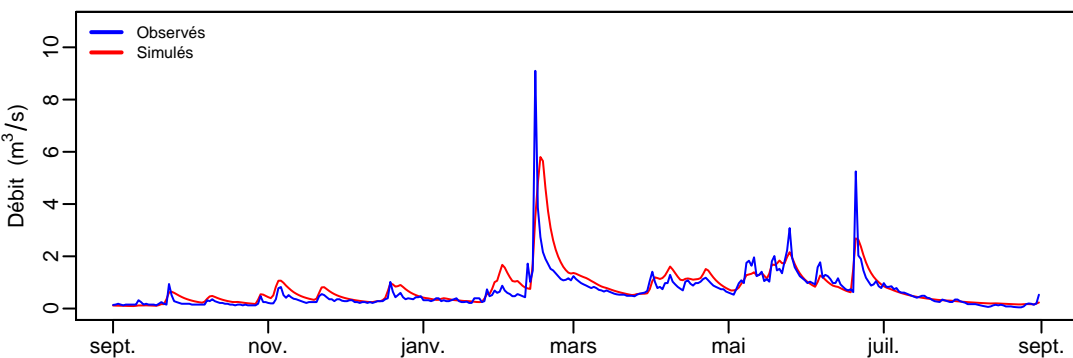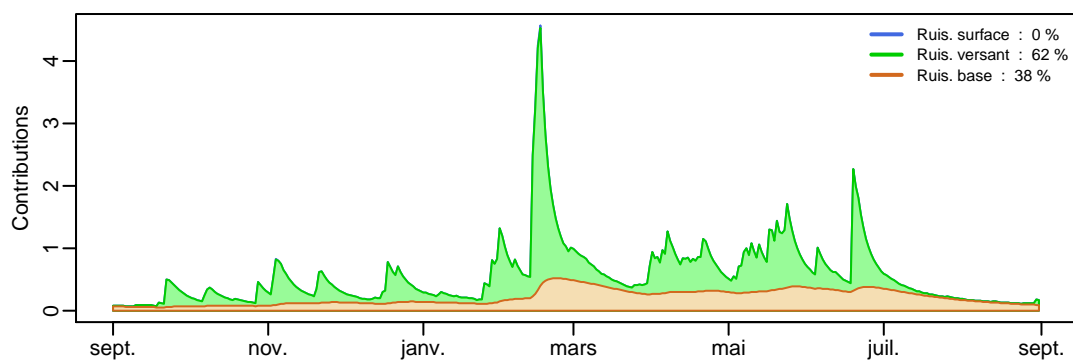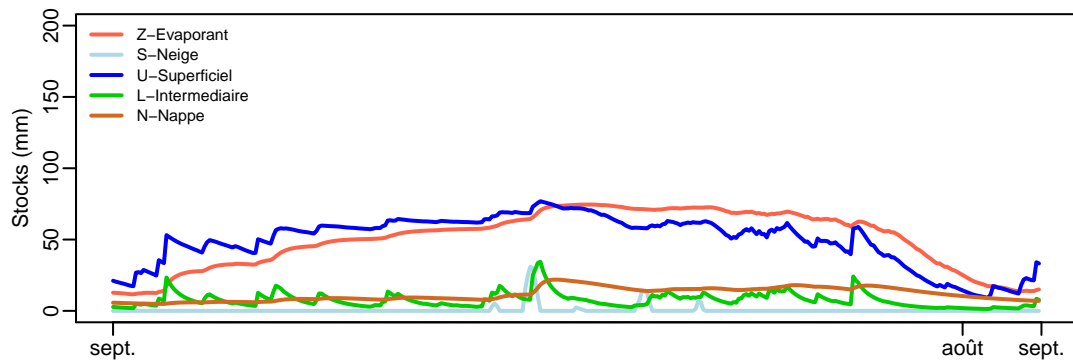

# k2254010 (118.27 km<sup>2</sup>) – année 1990–1991

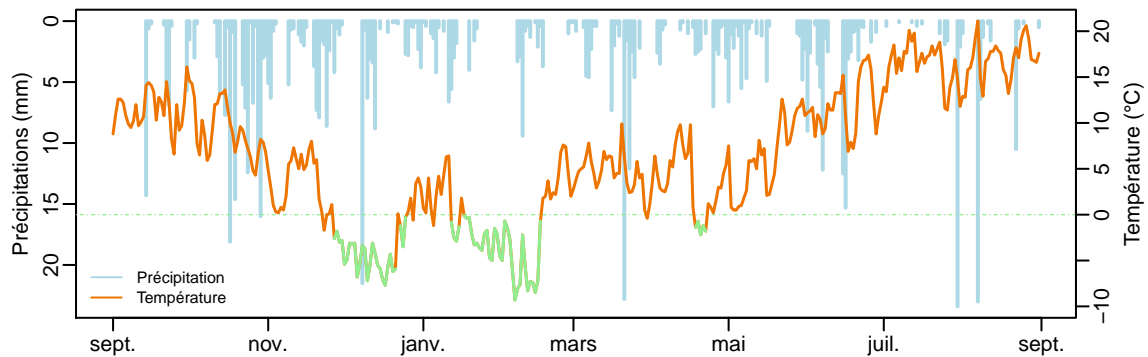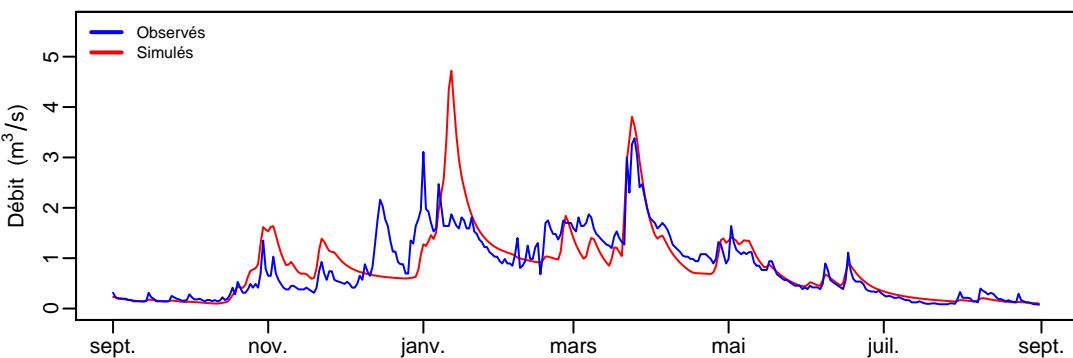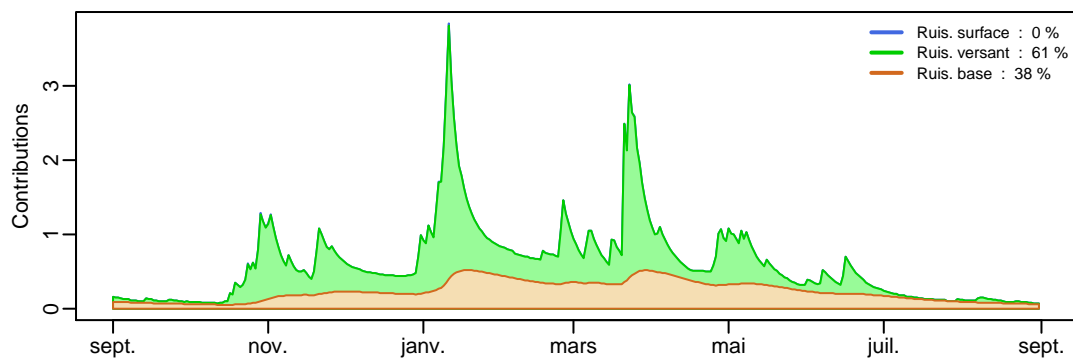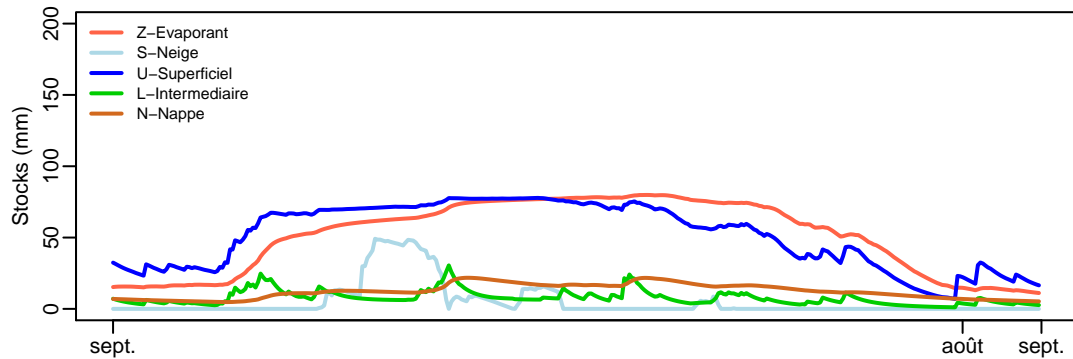

# k2254010 (118.27 km<sup>2</sup>) – année 1991–1992

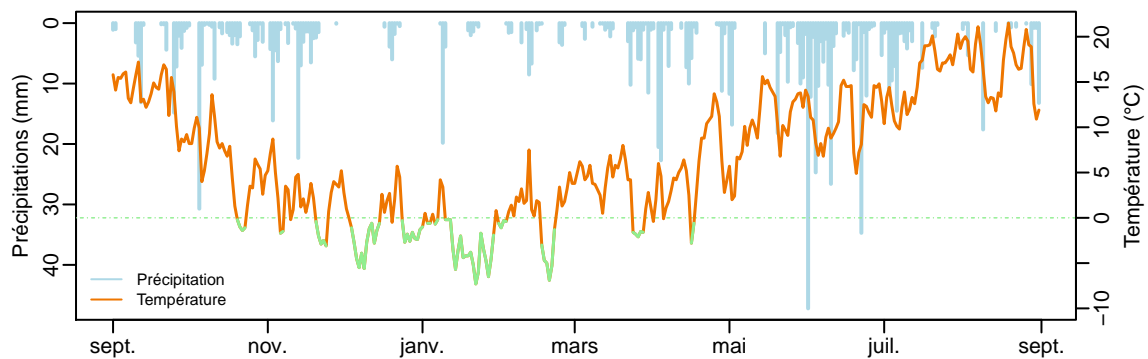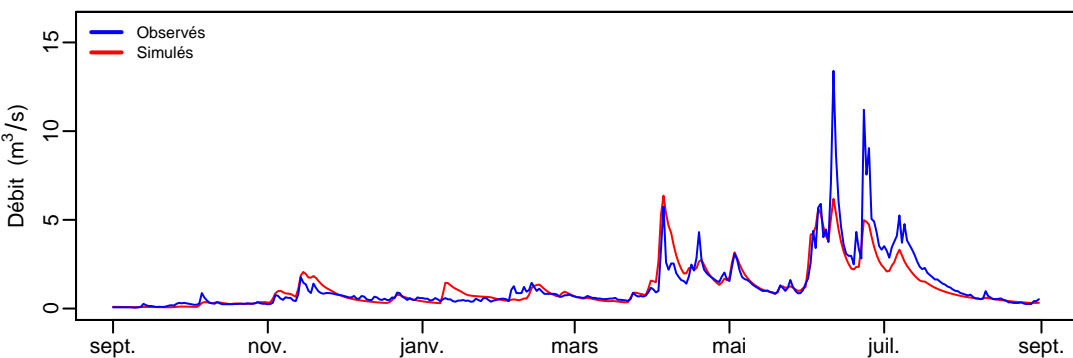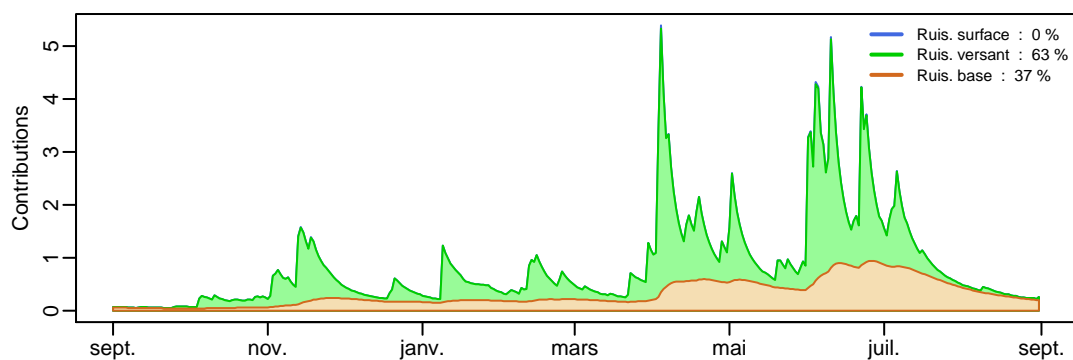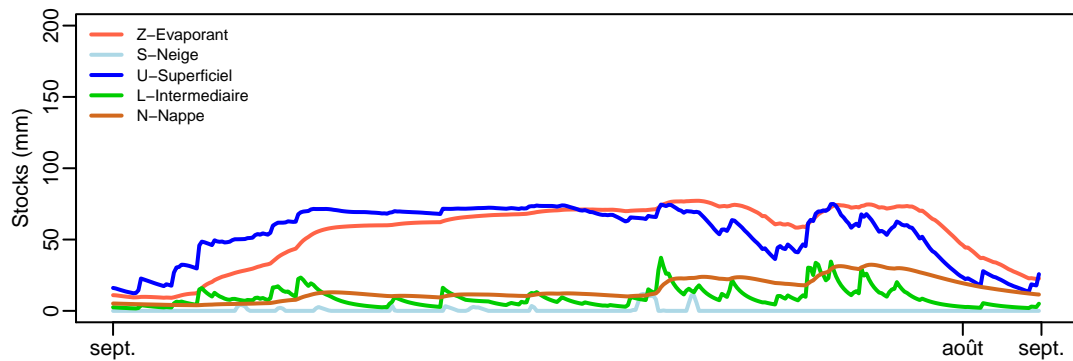

# k2254010 (118.27 km²) – année 1992–1993

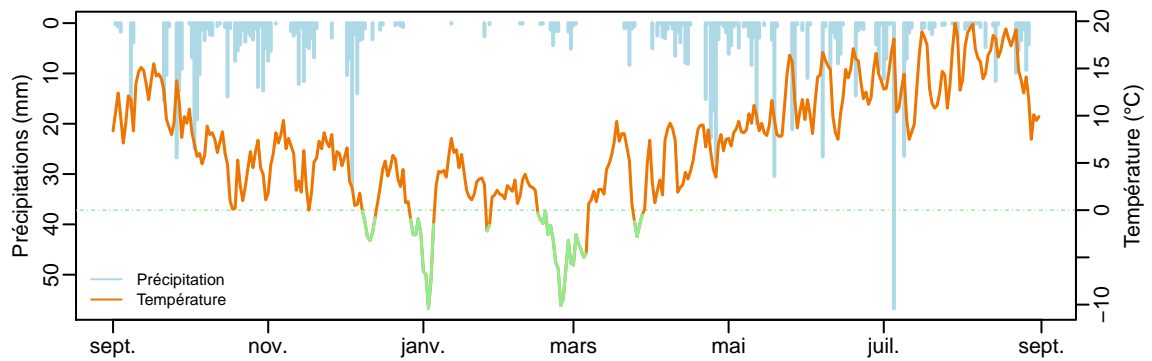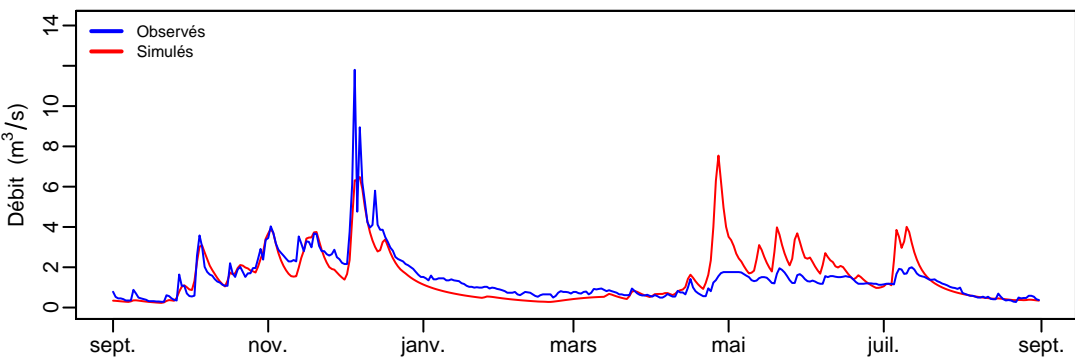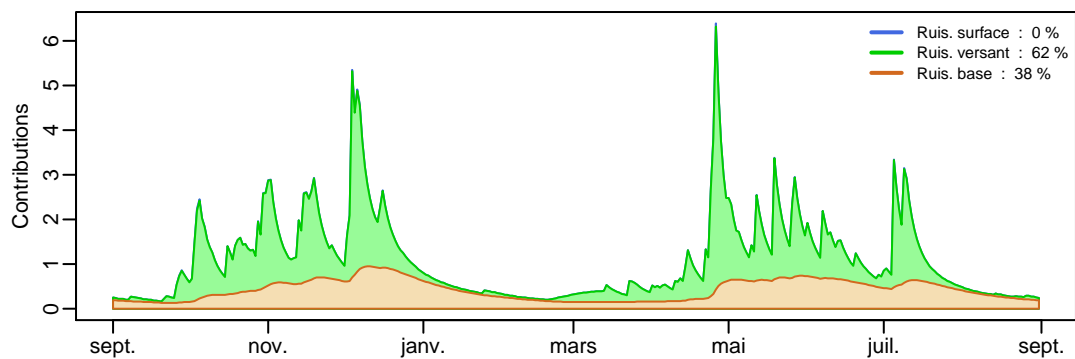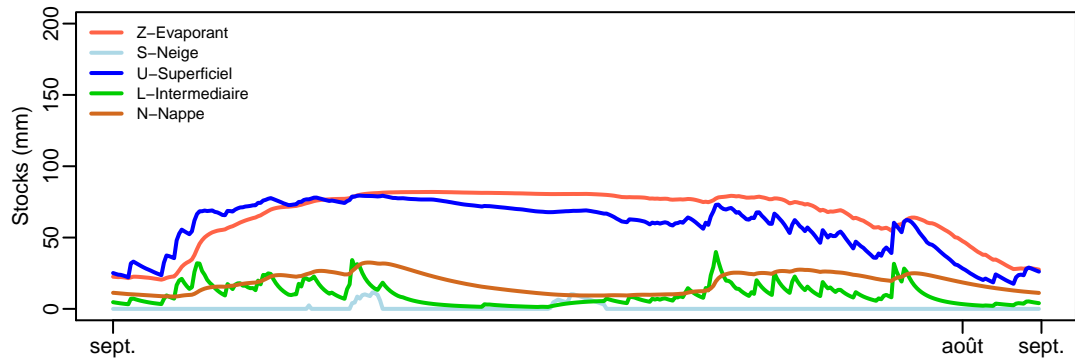



# k2254010 (118.27 km²) – année 1993–1994

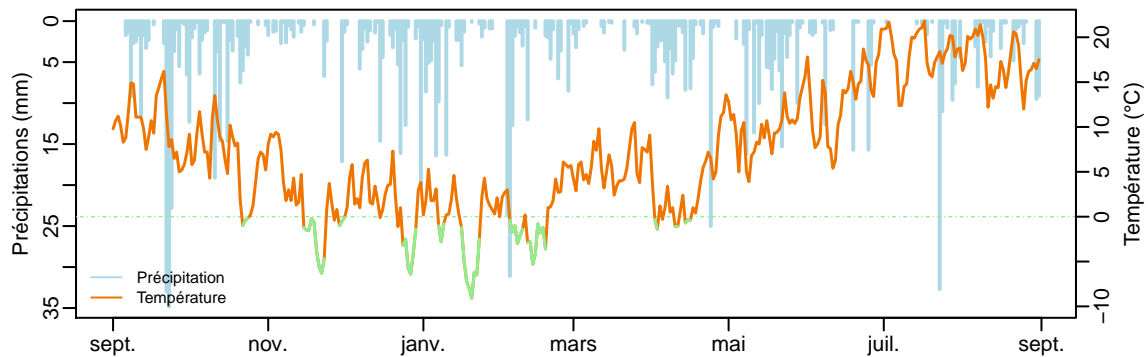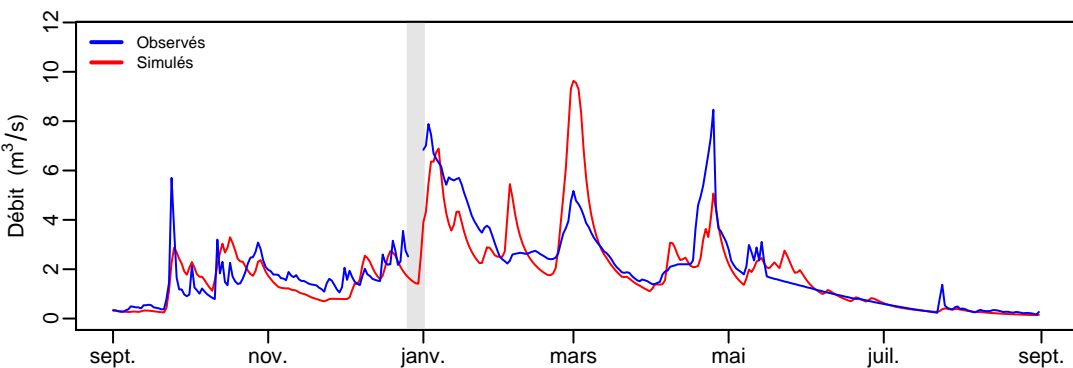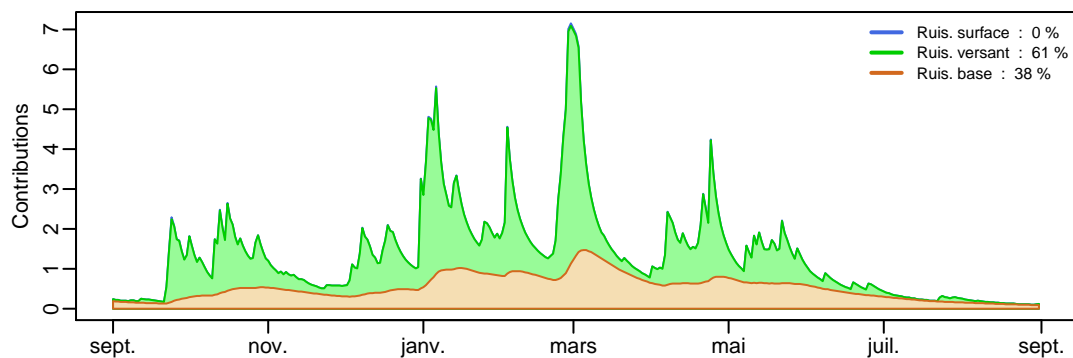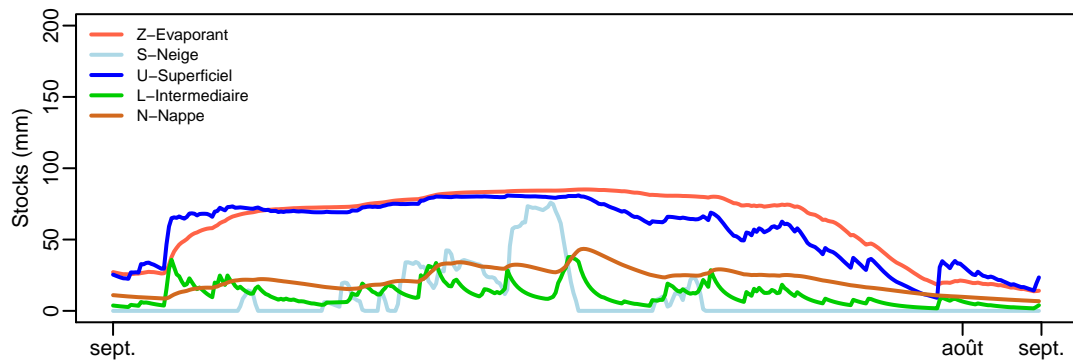

# k2254010 (118.27 km<sup>2</sup>) – année 1994–1995

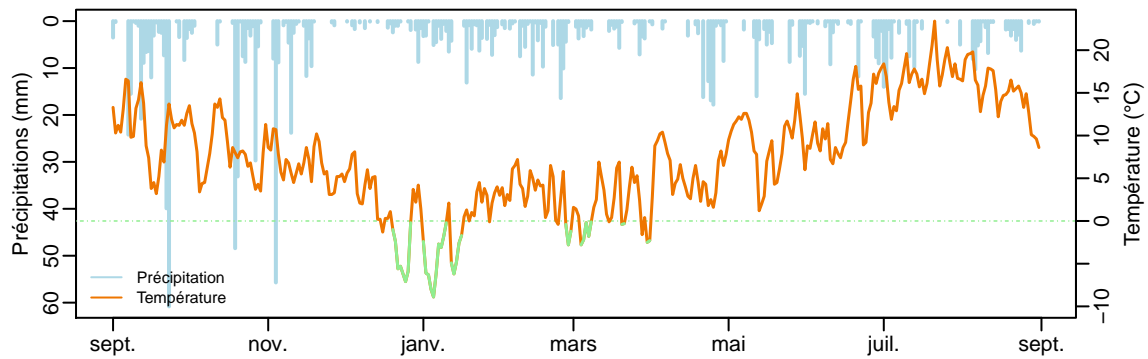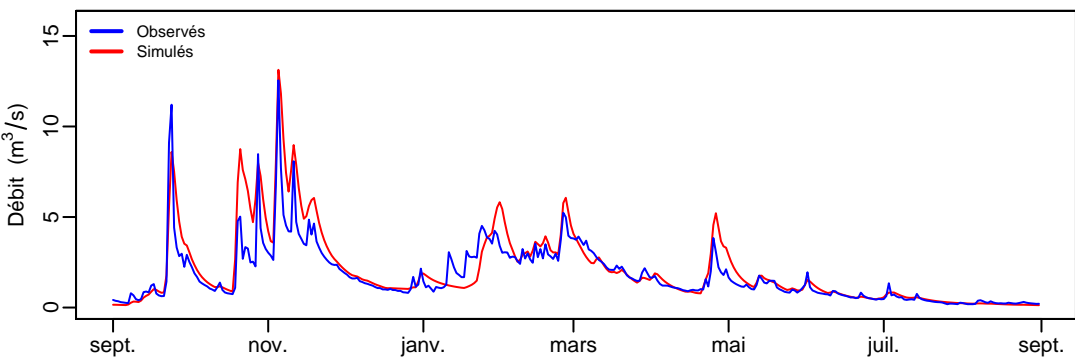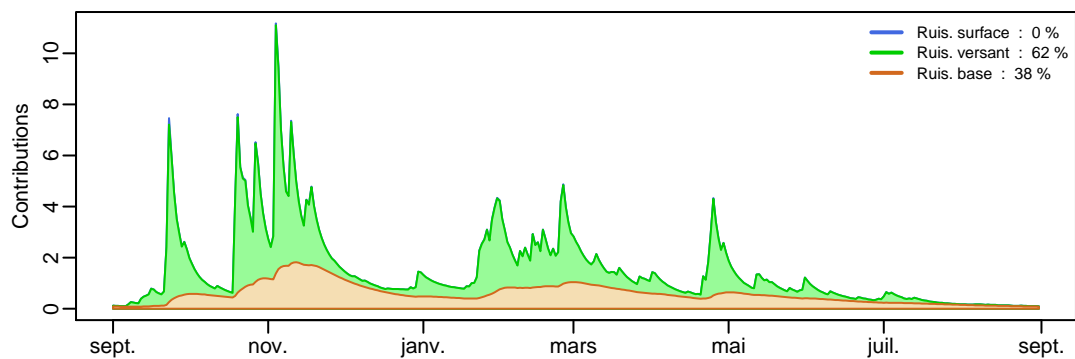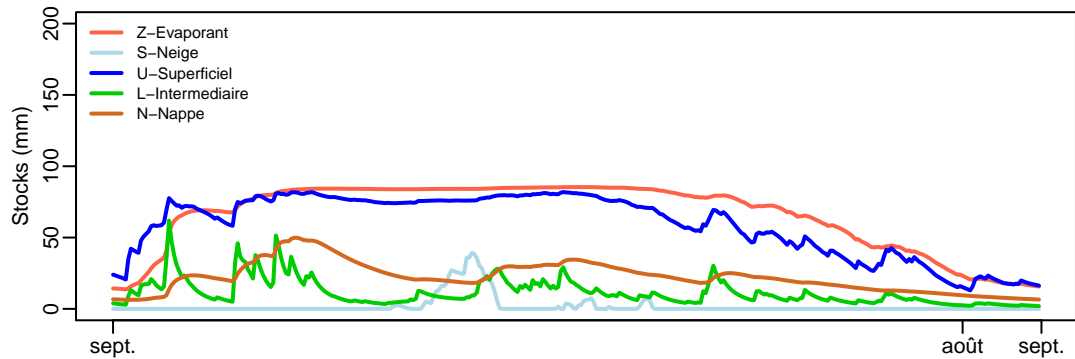

# k2254010 (118.27 km<sup>2</sup>) – année 1995–1996

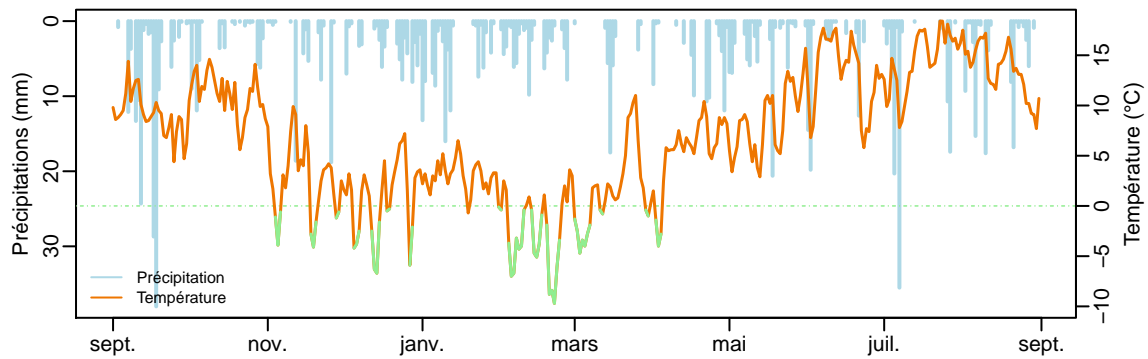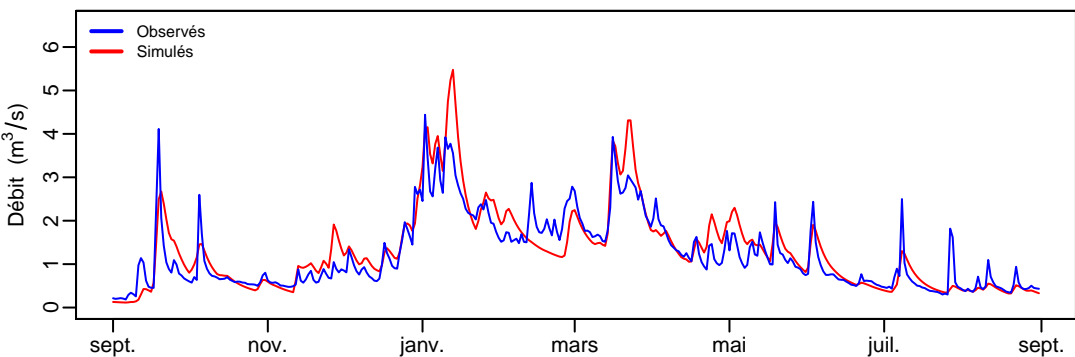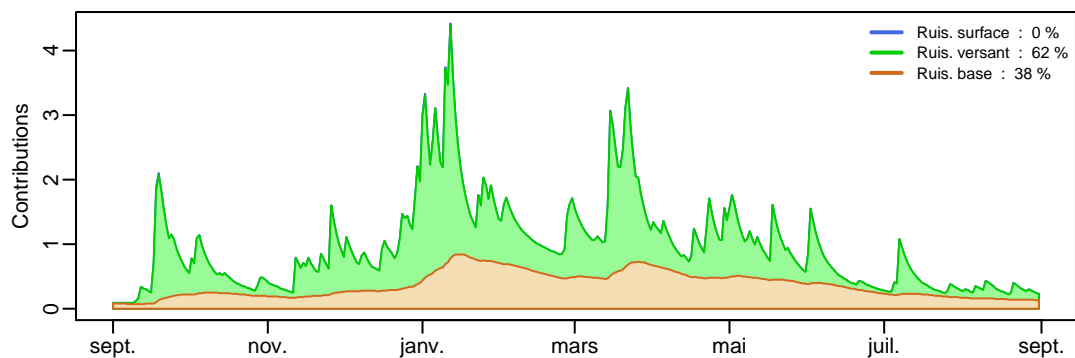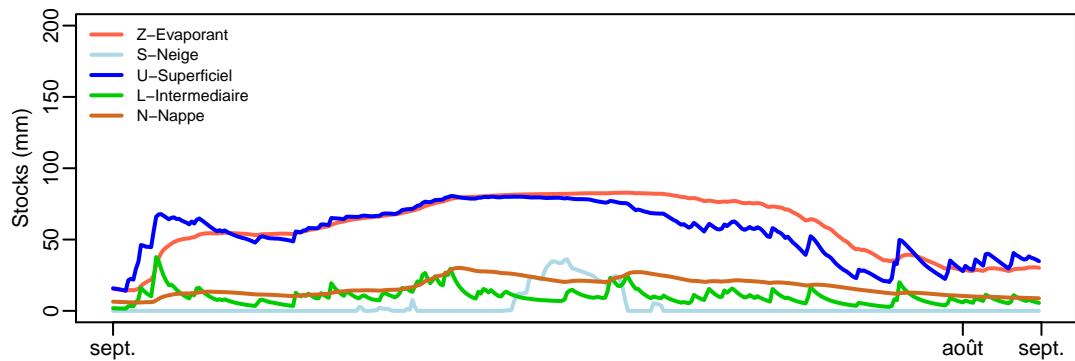

# k2254010 (118.27 km<sup>2</sup>) – année 1996–1997

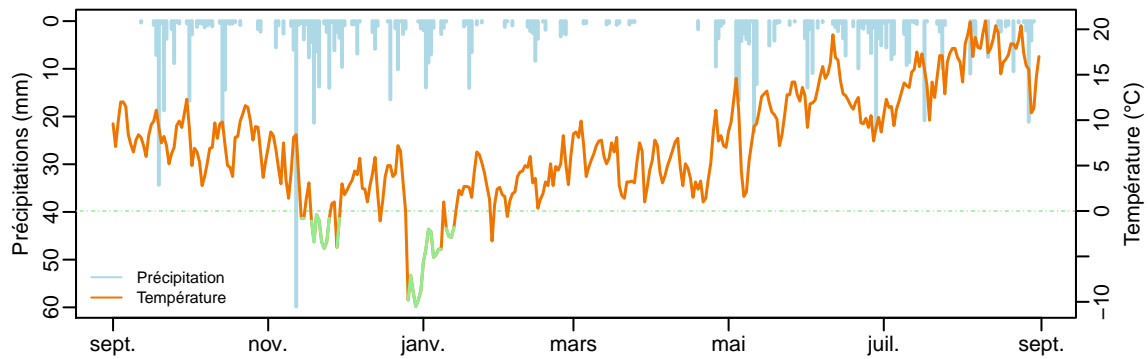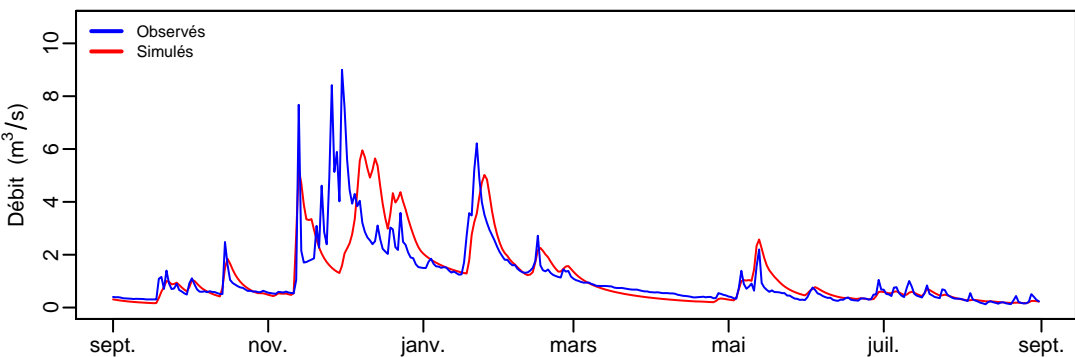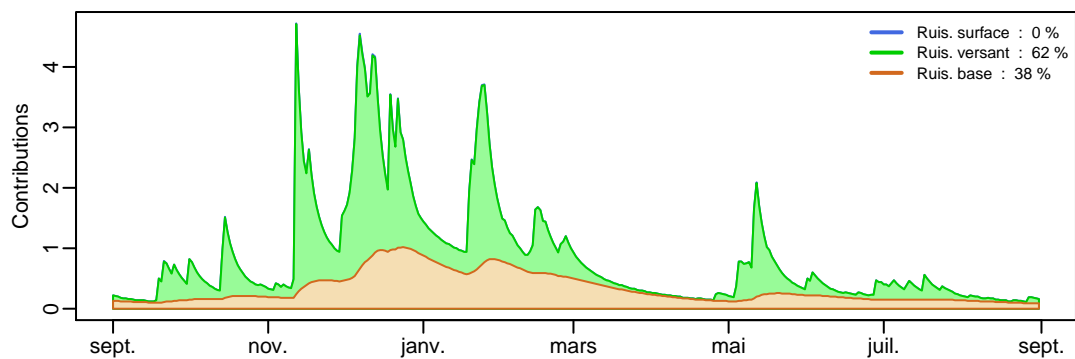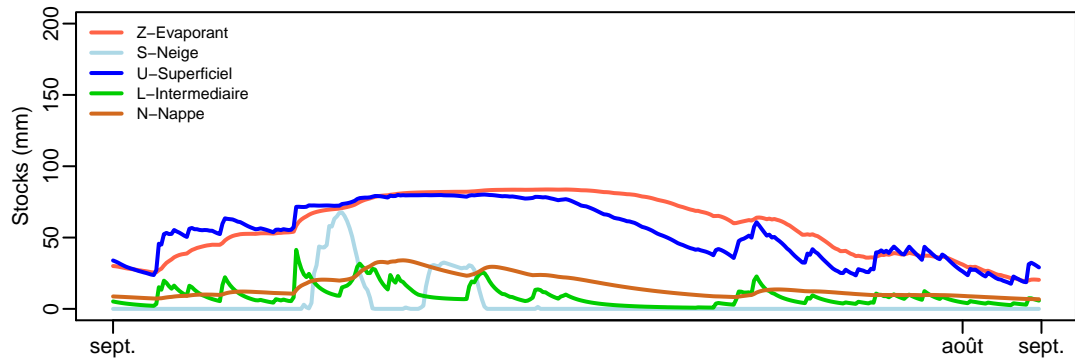

# k2254010 (118.27 km<sup>2</sup>) – année 1997–1998

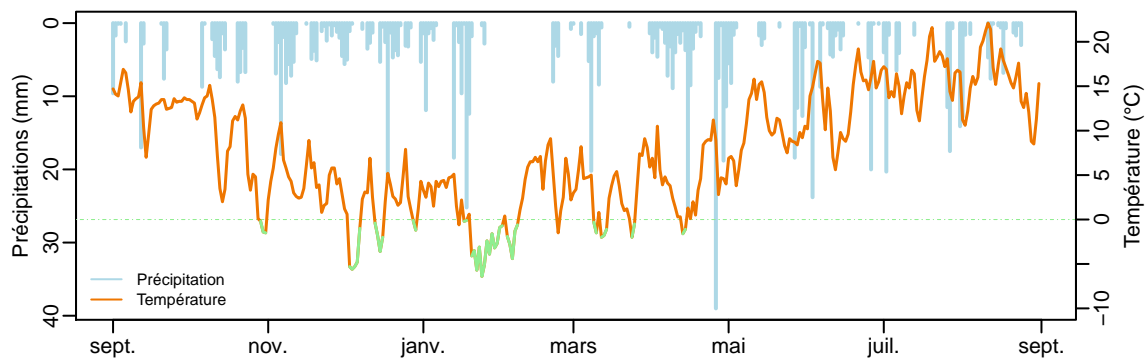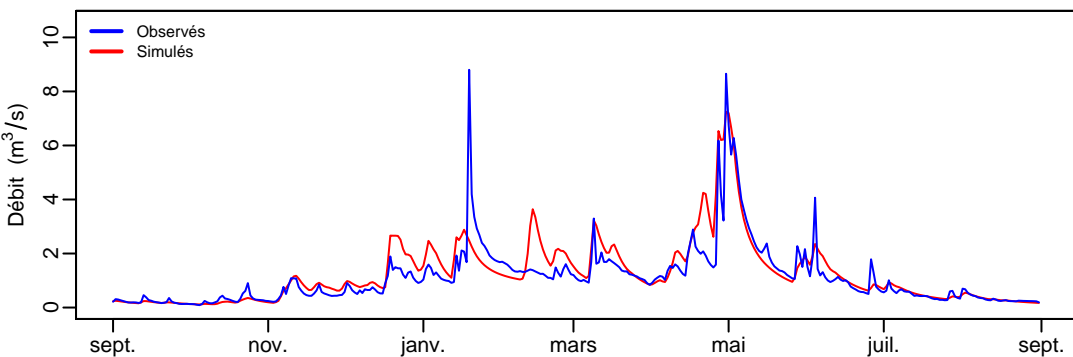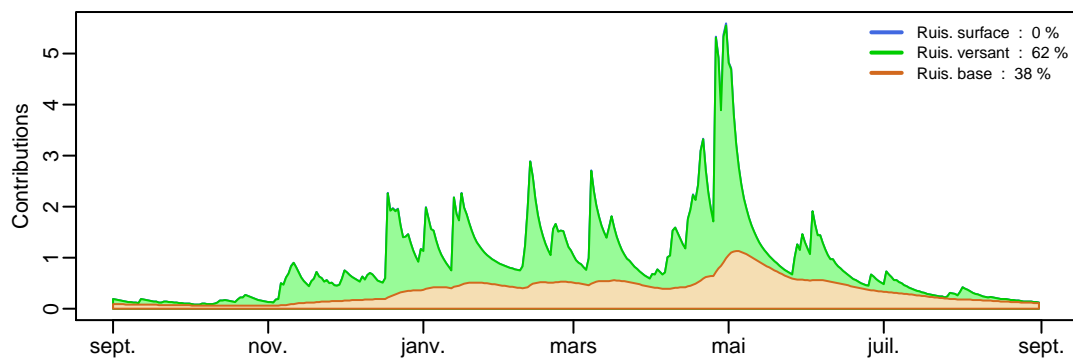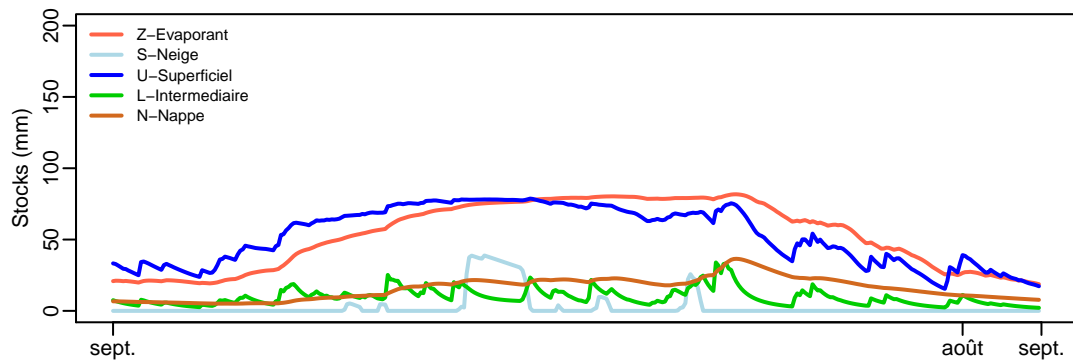

# k2254010 (118.27 km²) – année 1998–1999

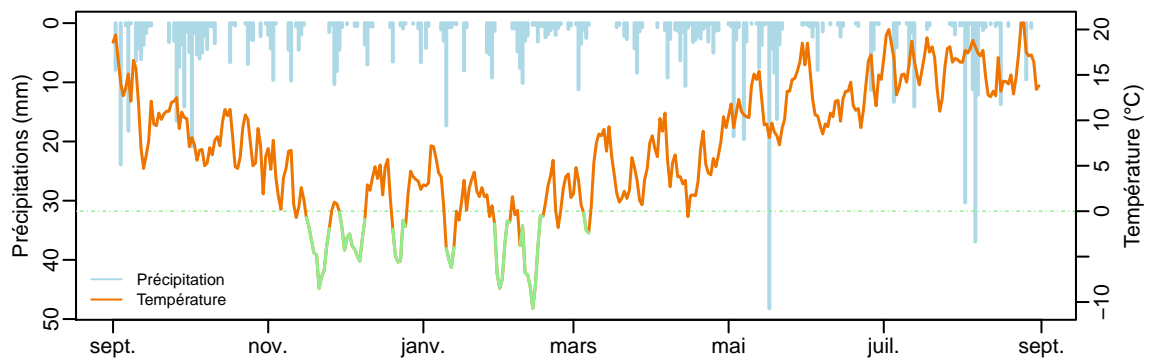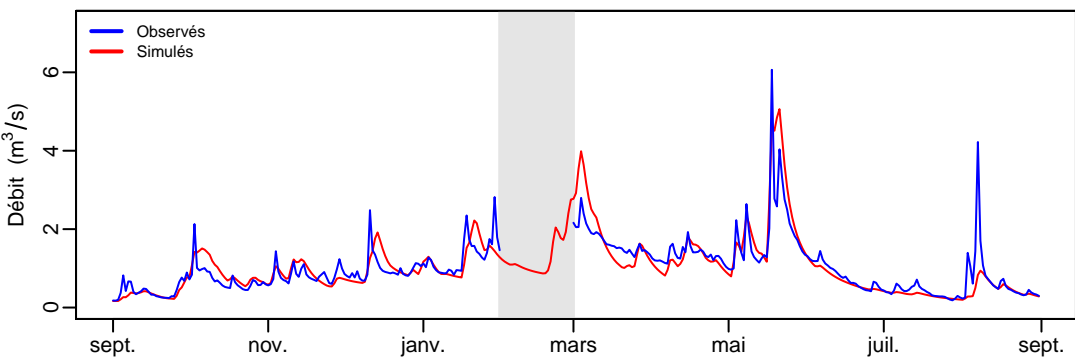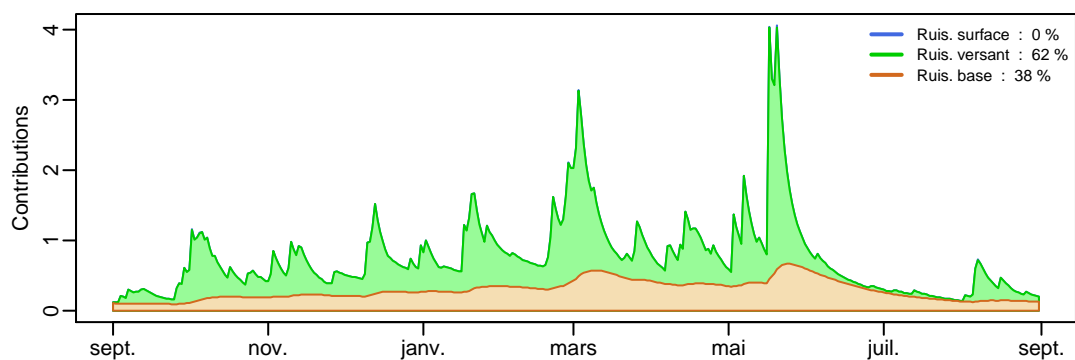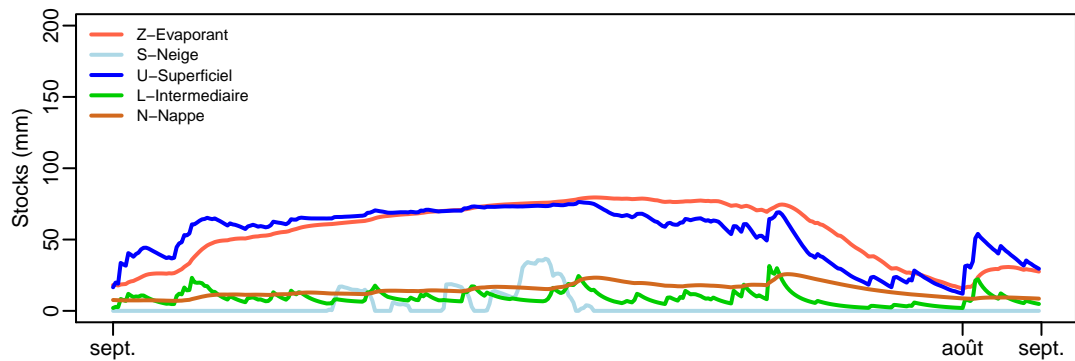

# k2254010 (118.27 km<sup>2</sup>) – année 1999–2000

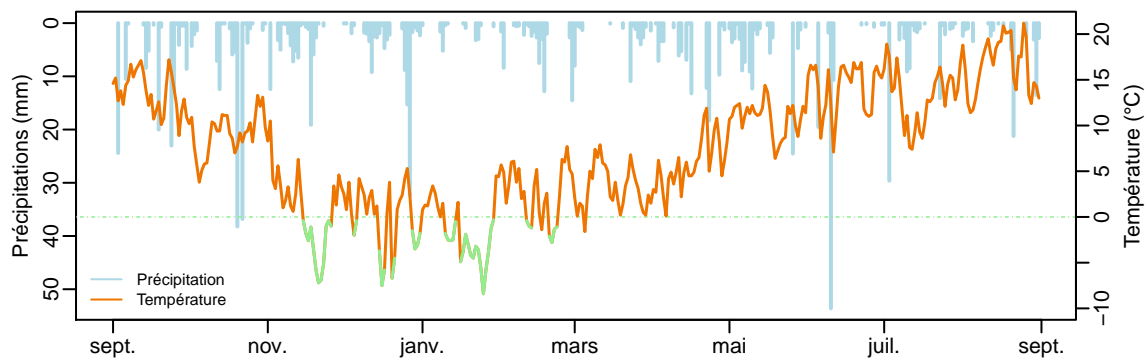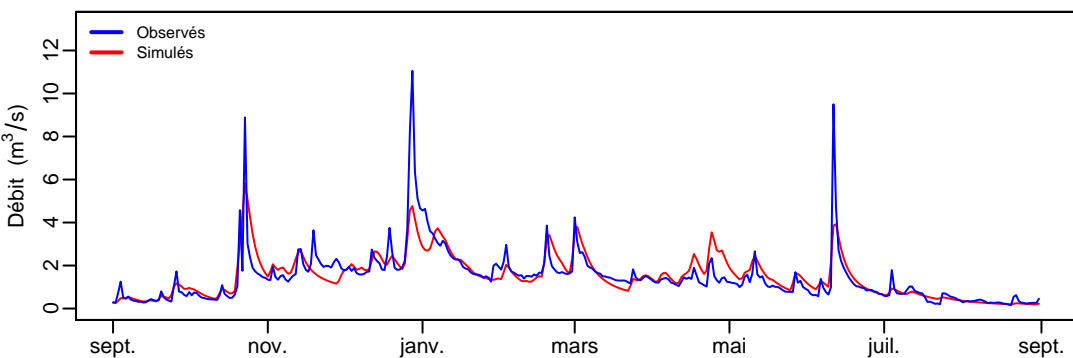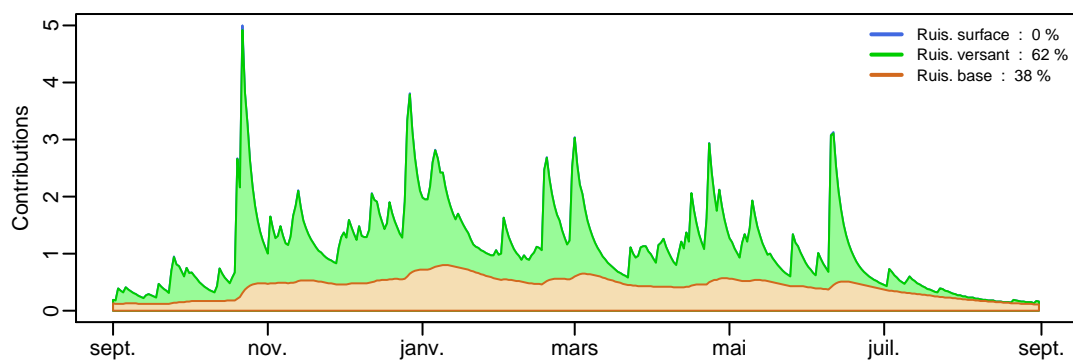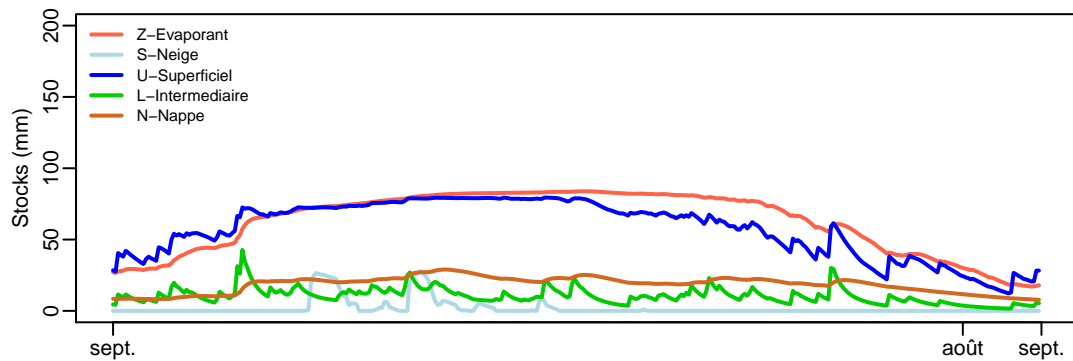

# k2254010 (118.27 km<sup>2</sup>) – année 2000–2001

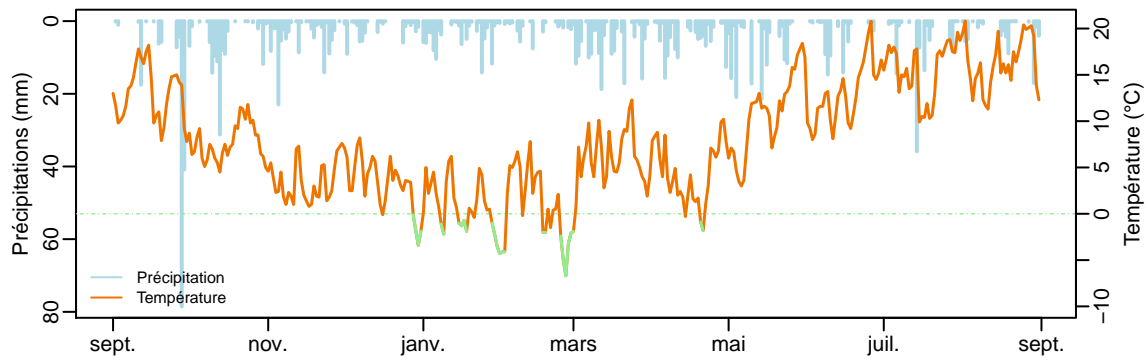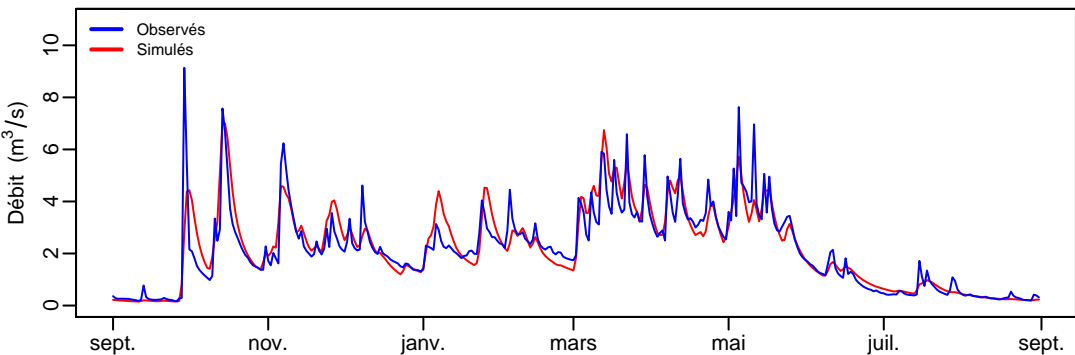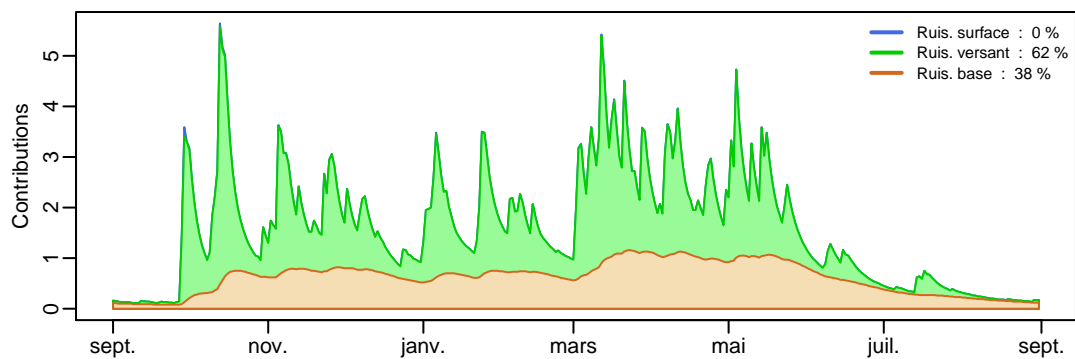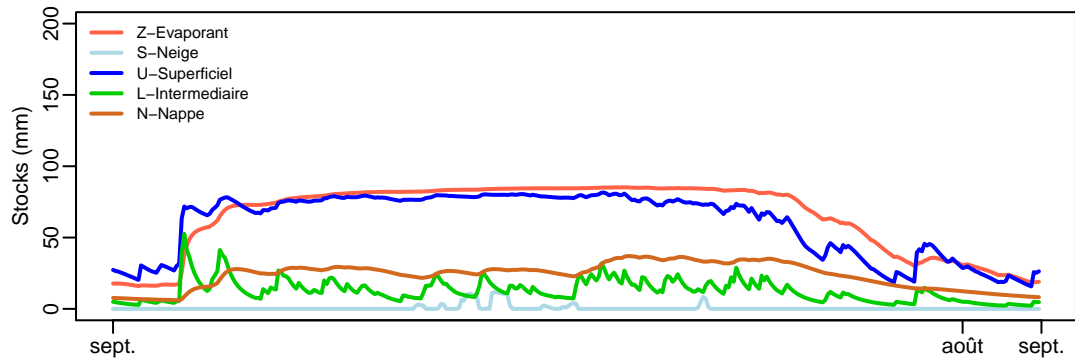



# k2254010 (118.27 km<sup>2</sup>) – année 2001–2002

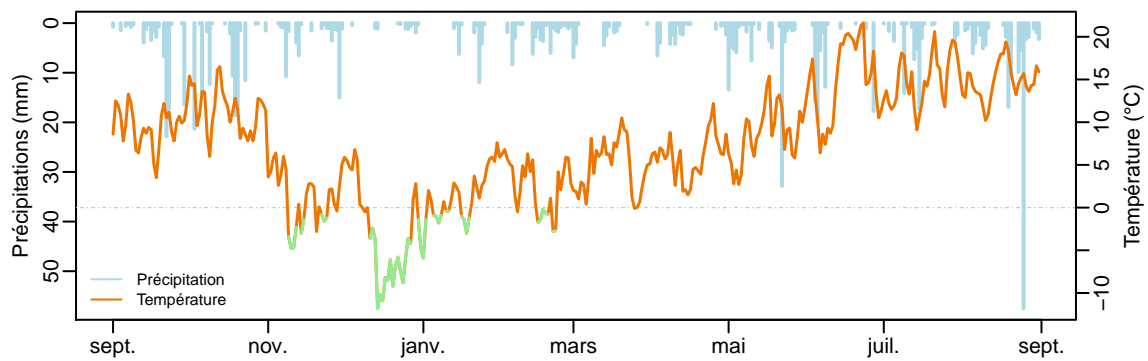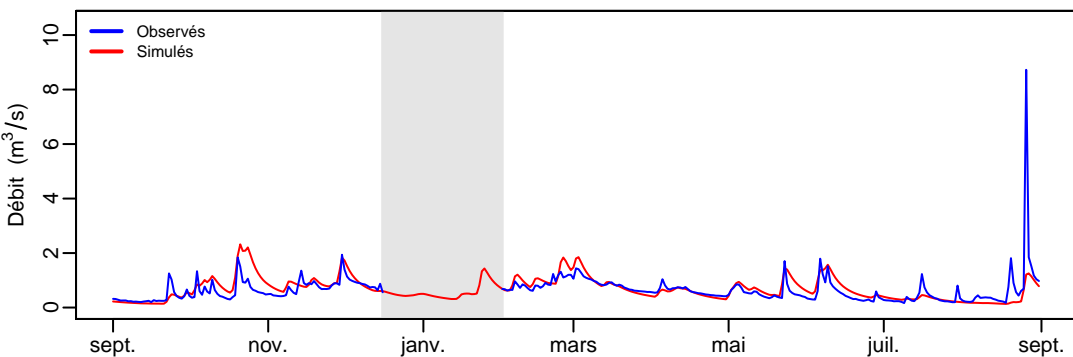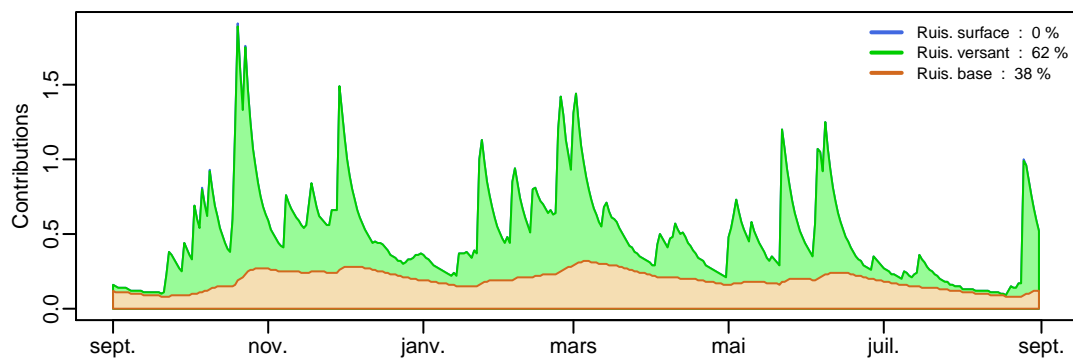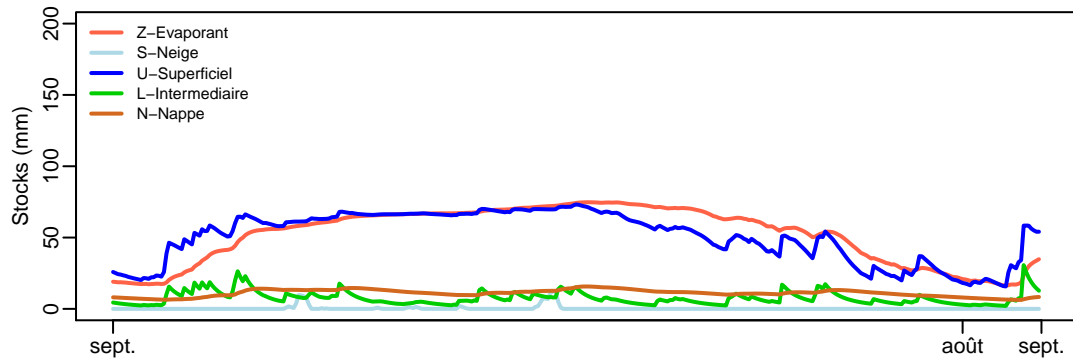

# k2254010 (118.27 km<sup>2</sup>) – année 2002–2003

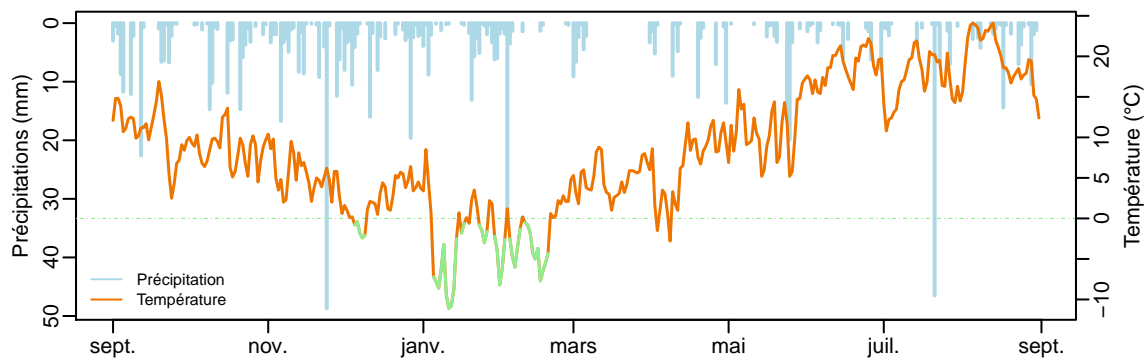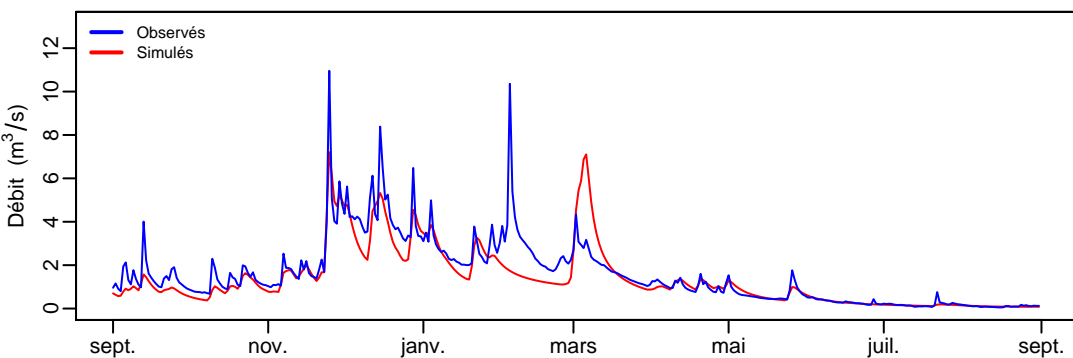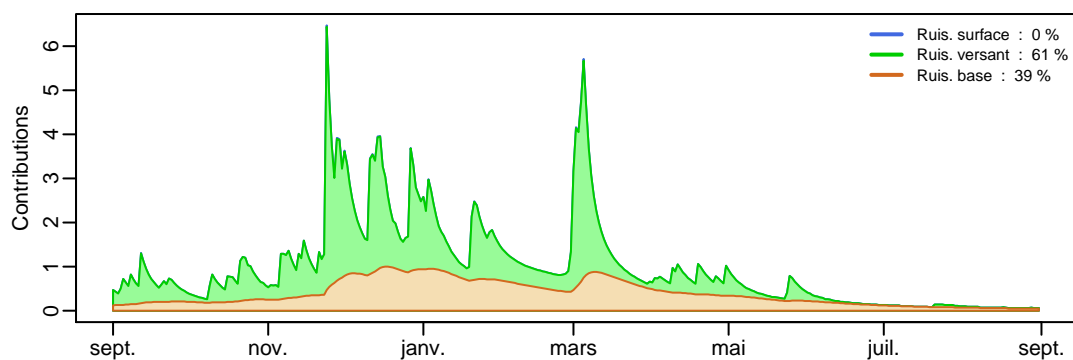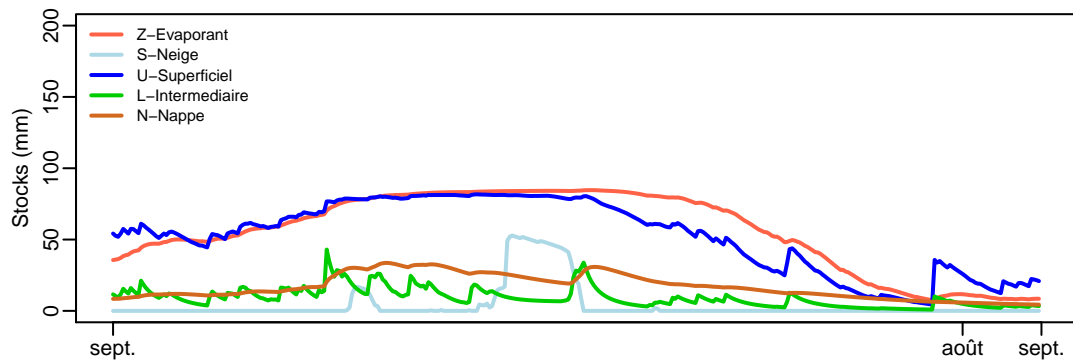

# k2254010 (118.27 km<sup>2</sup>) – année 2003–2004

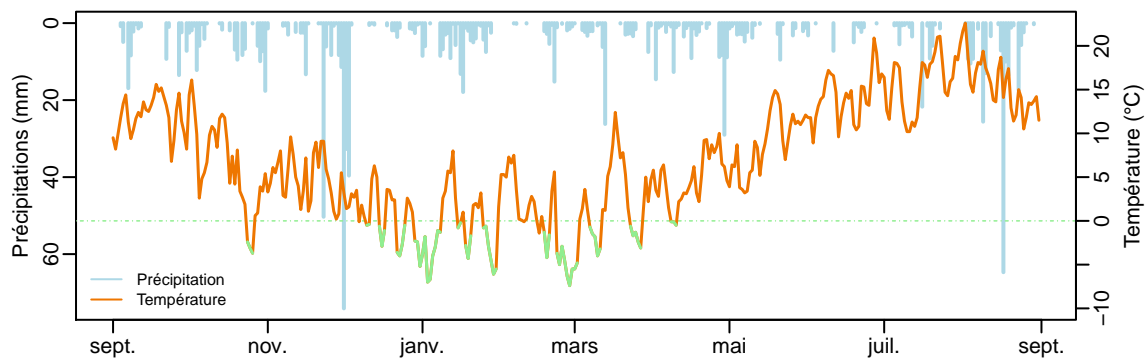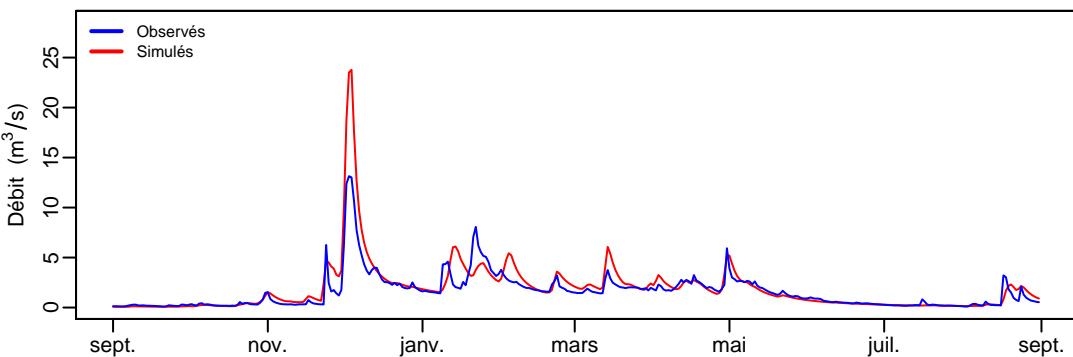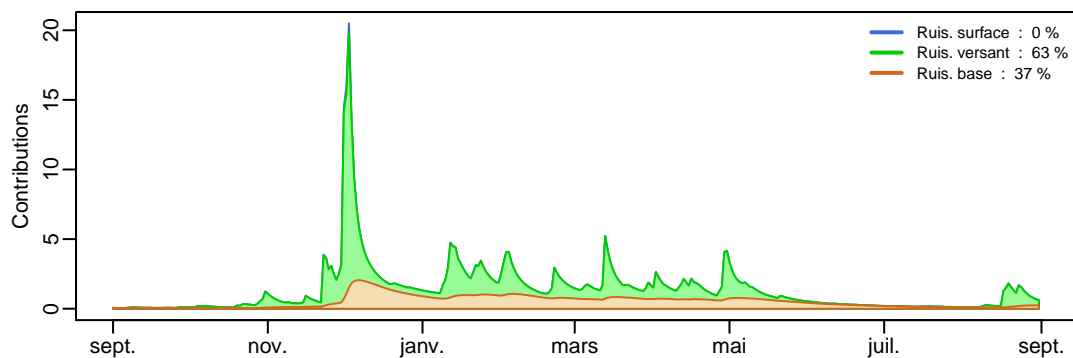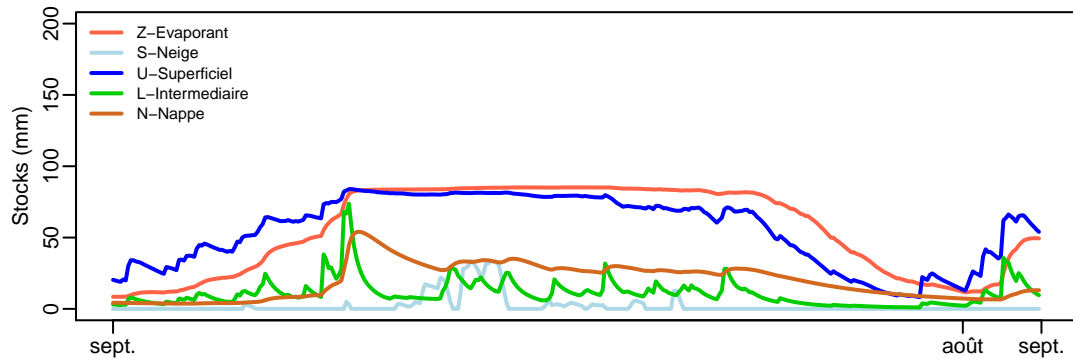

# k2254010 (118.27 km<sup>2</sup>) – année 2004–2005

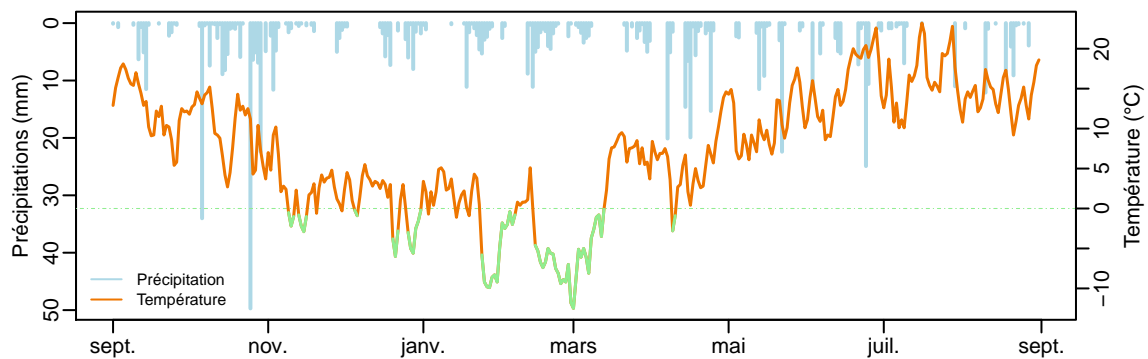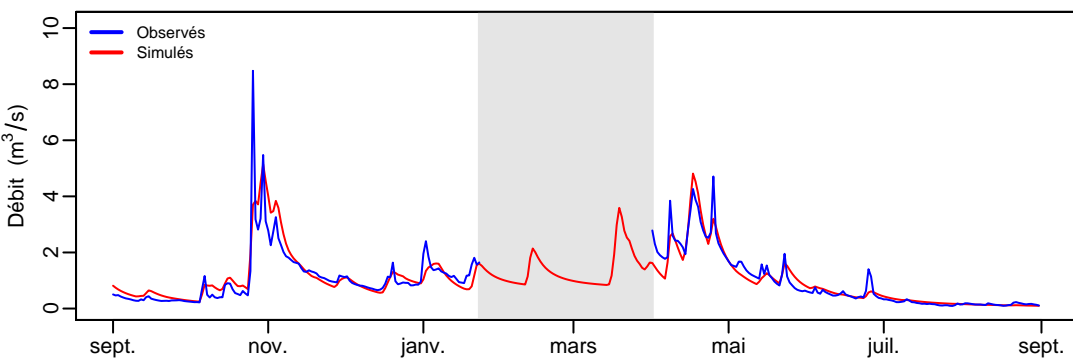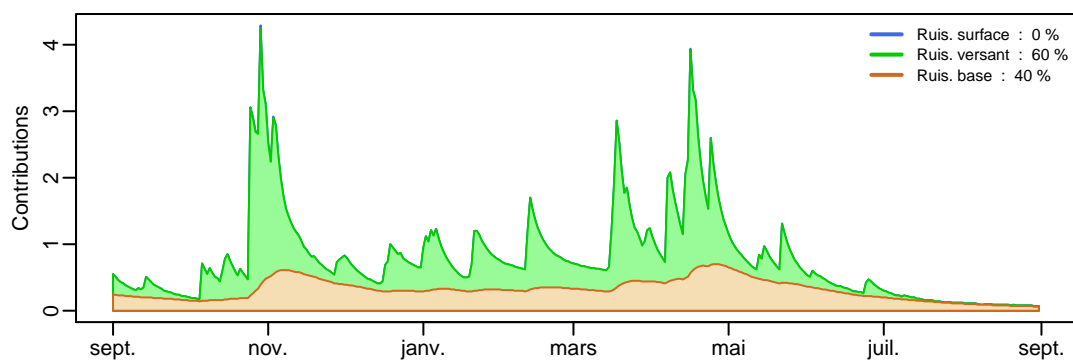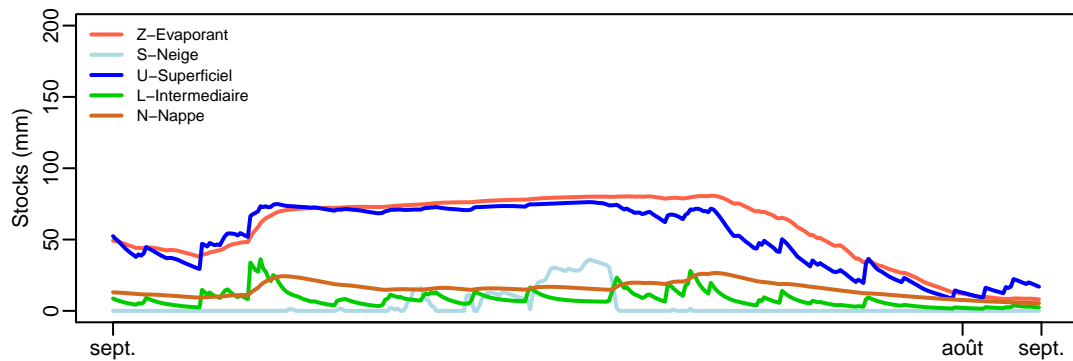

# k2254010 (118.27 km<sup>2</sup>) – année 2005–2006

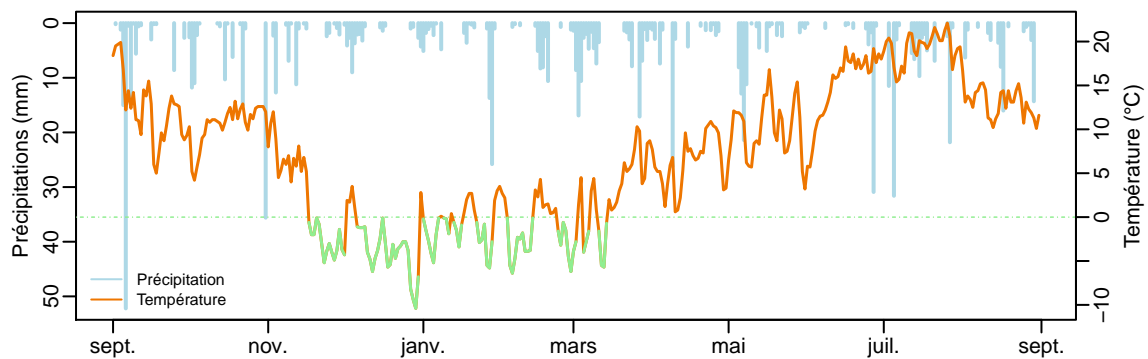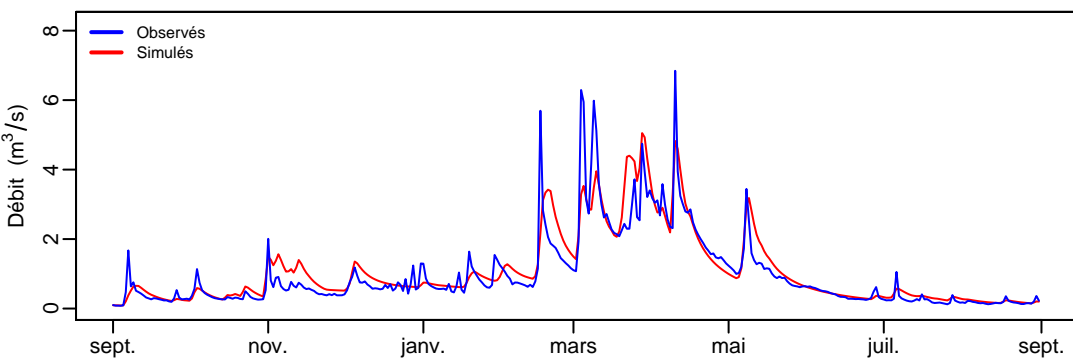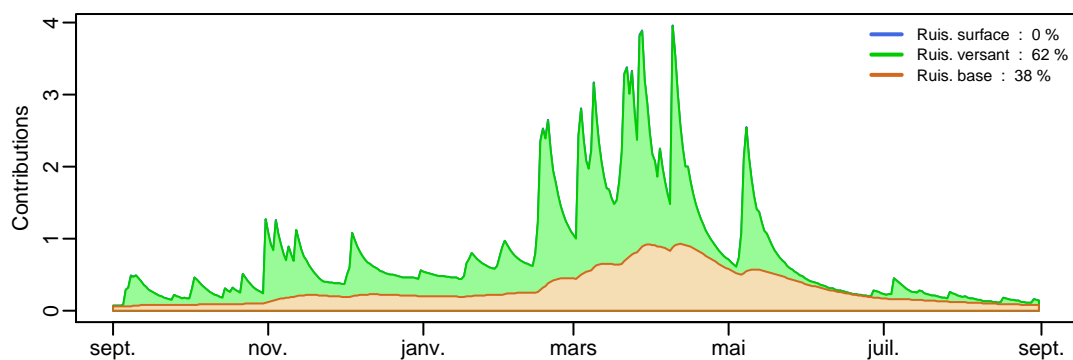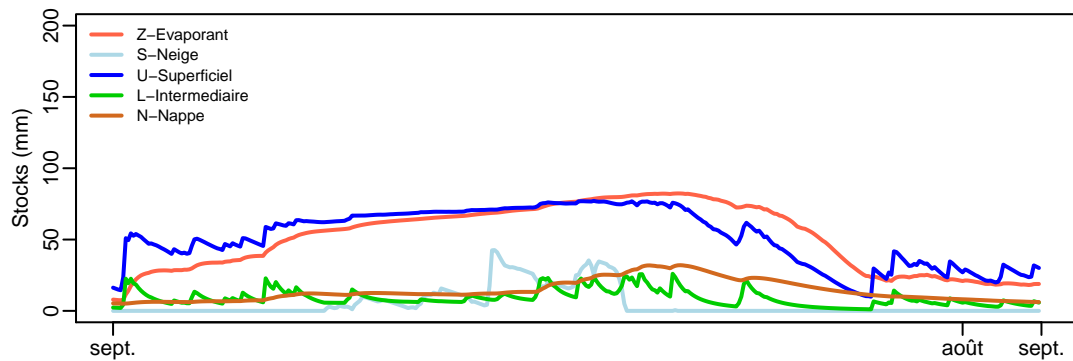

# k2254010 (118.27 km<sup>2</sup>) – année 2006–2007

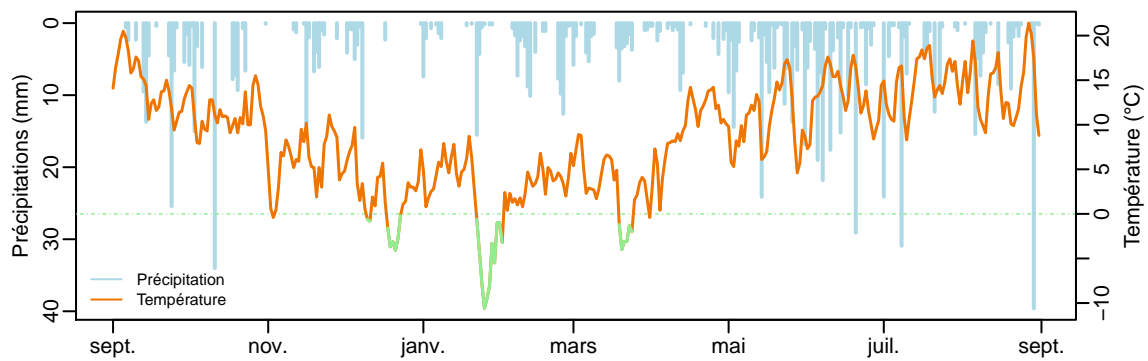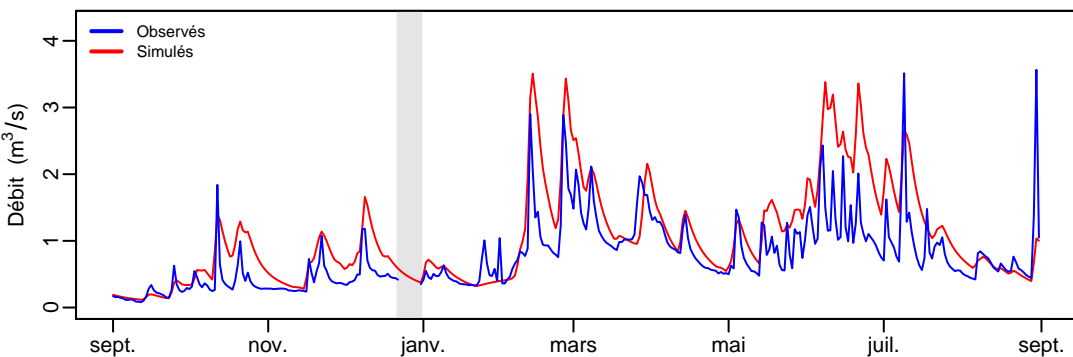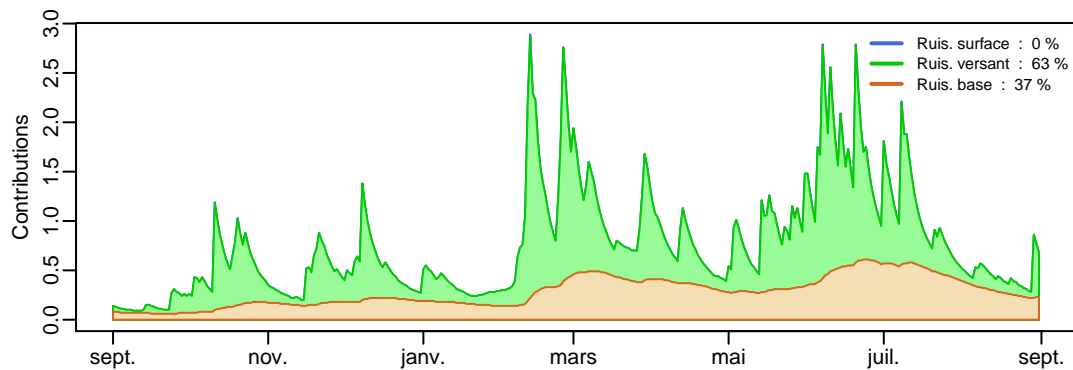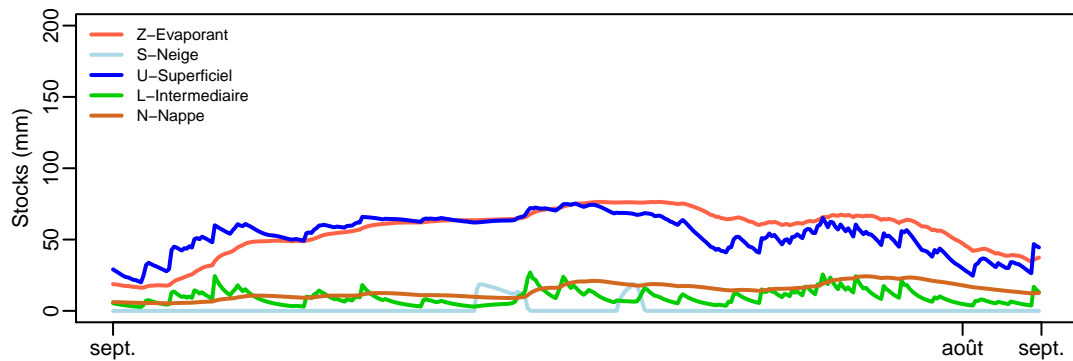

# k2254010 (118.27 km<sup>2</sup>) – année 2007–2008

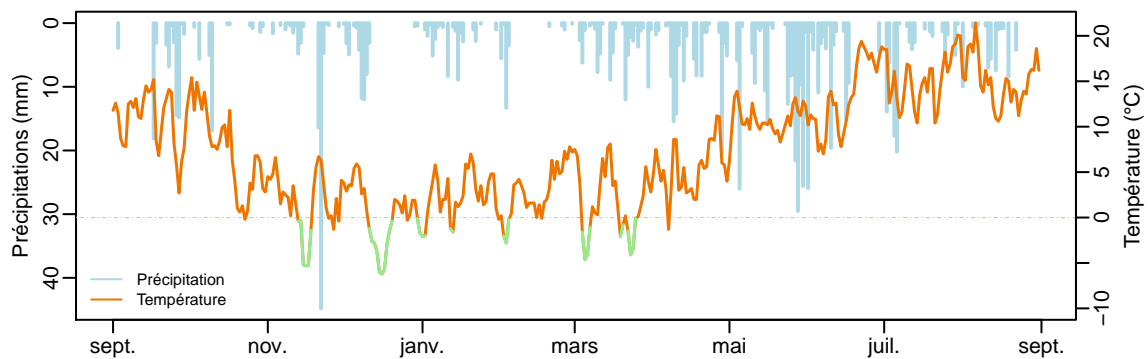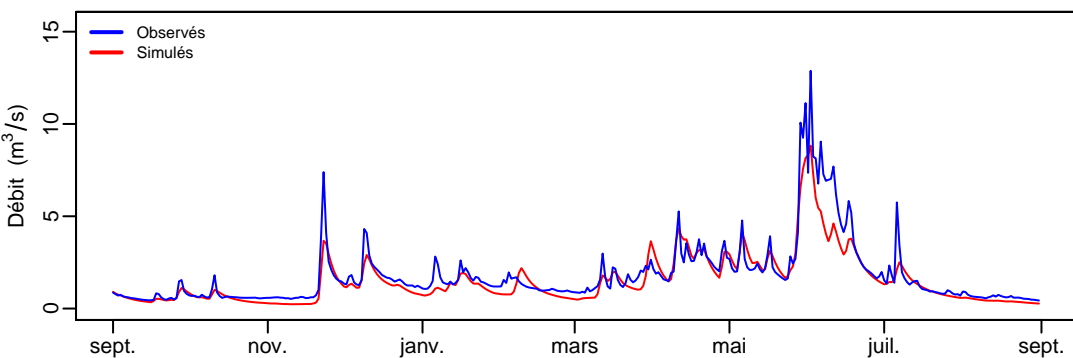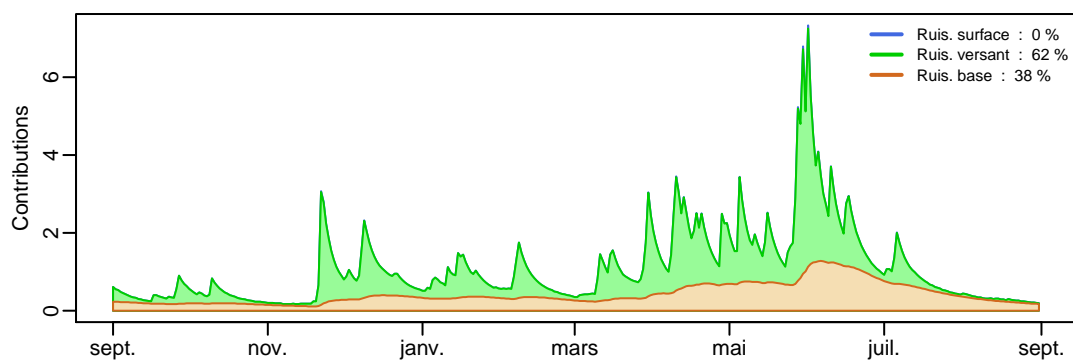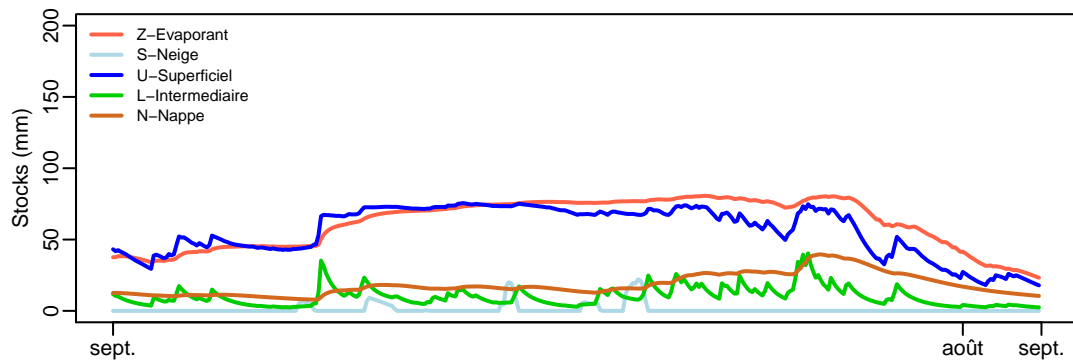

# k2254010 (118.27 km<sup>2</sup>) – année 2008–2009

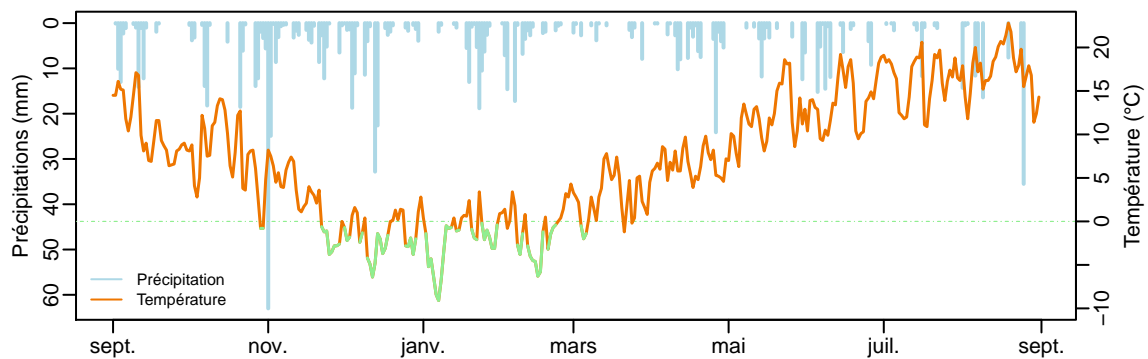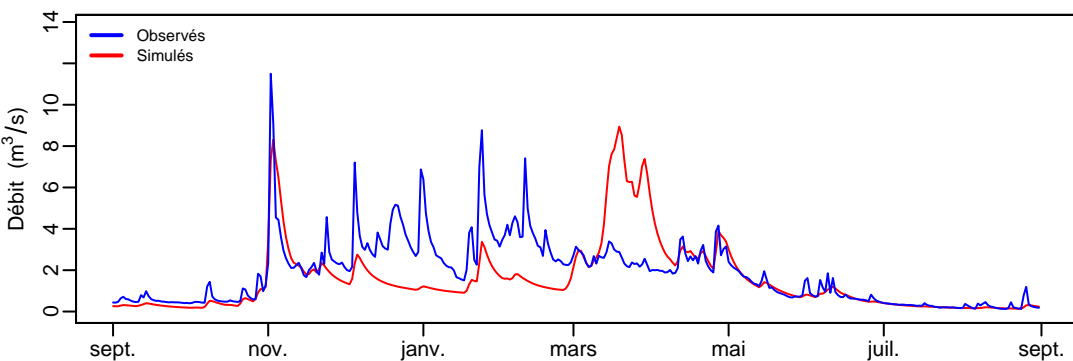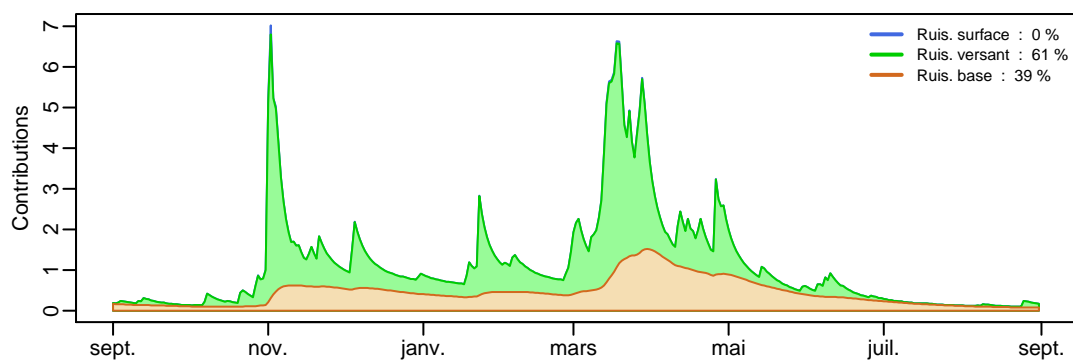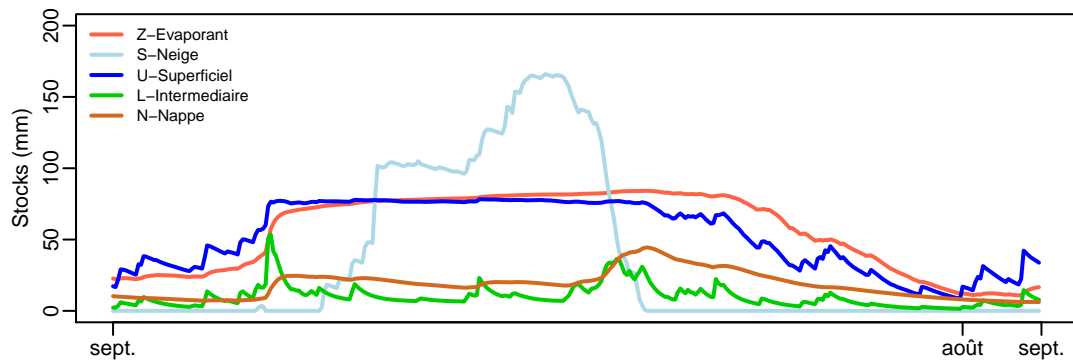



# k2283110 (139.88 km<sup>2</sup>) – année 1995–1996

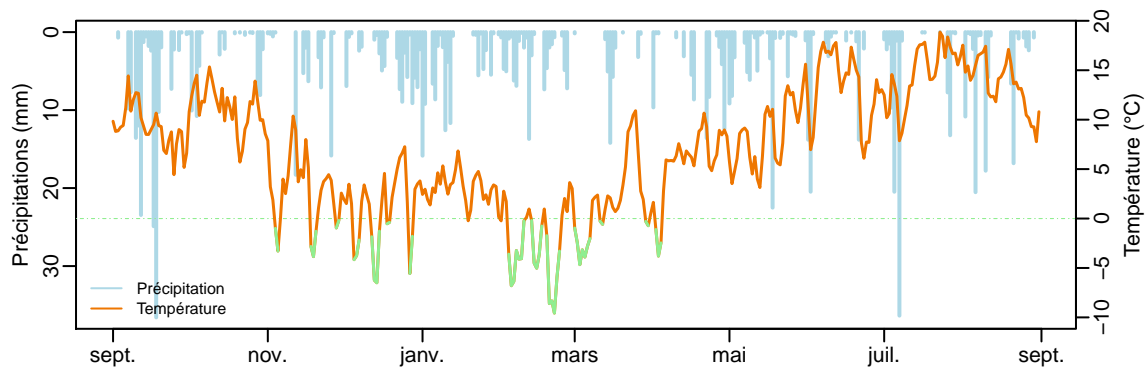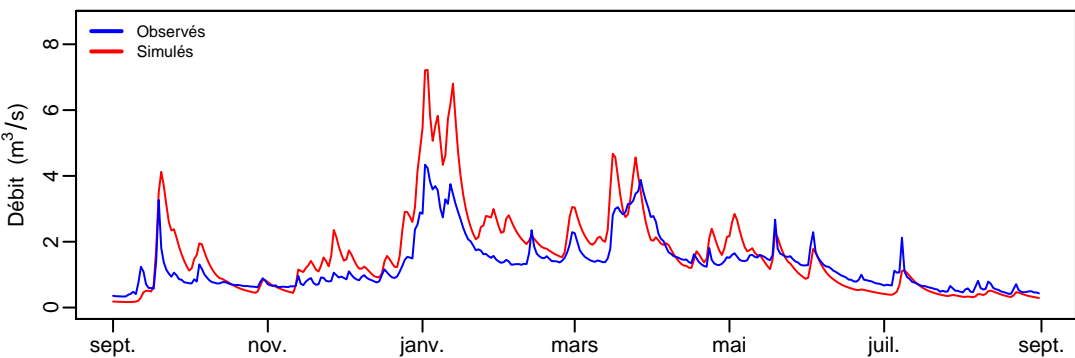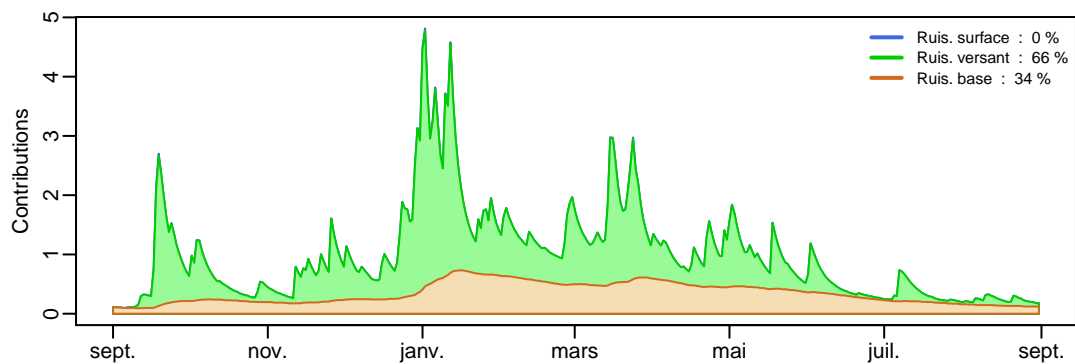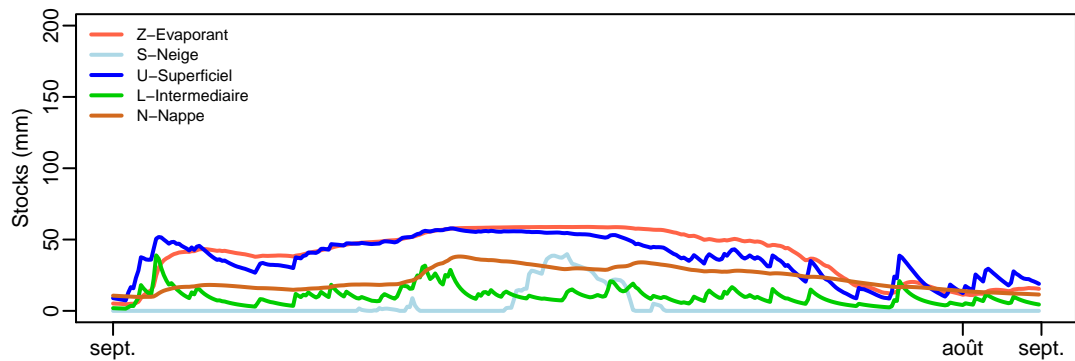

# k2283110 (139.88 km<sup>2</sup>) – année 1996–1997

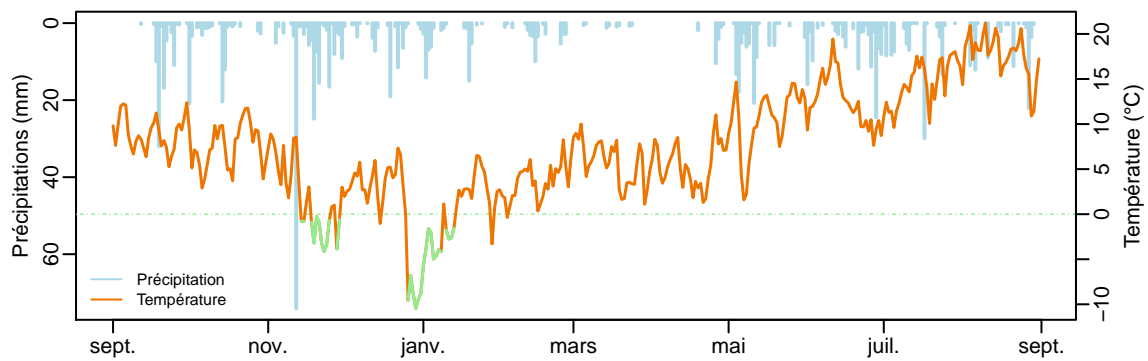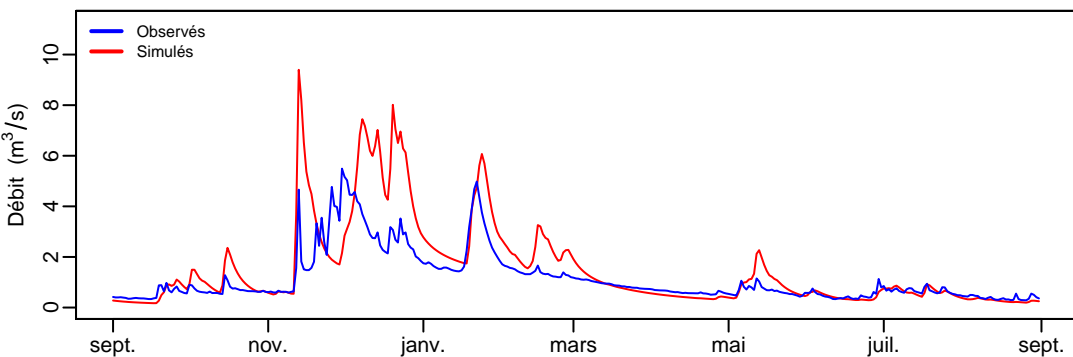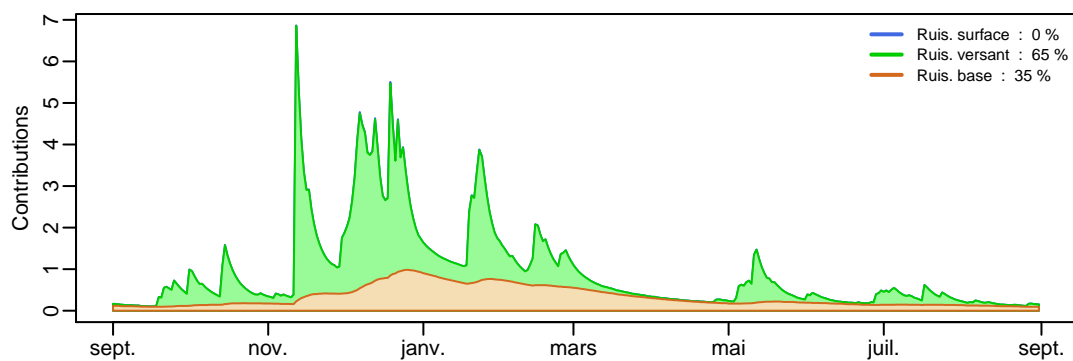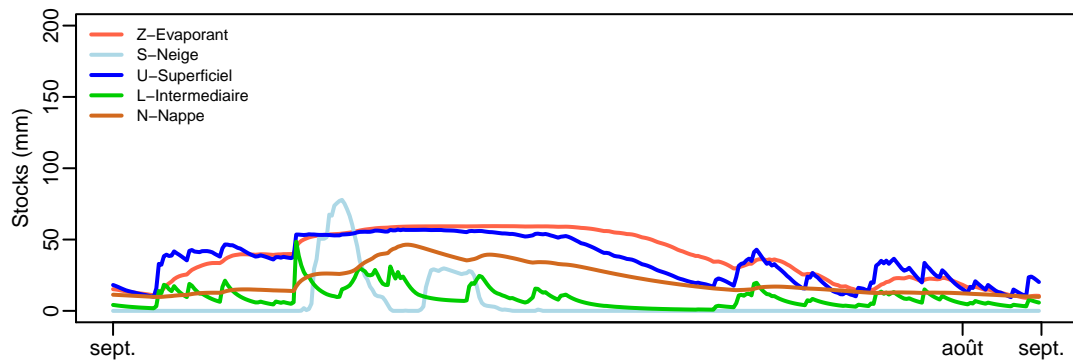

# k2283110 (139.88 km<sup>2</sup>) – année 1997–1998

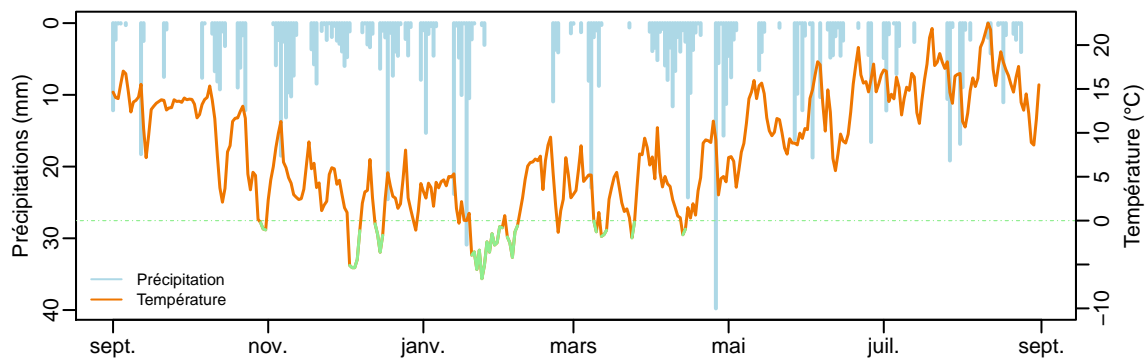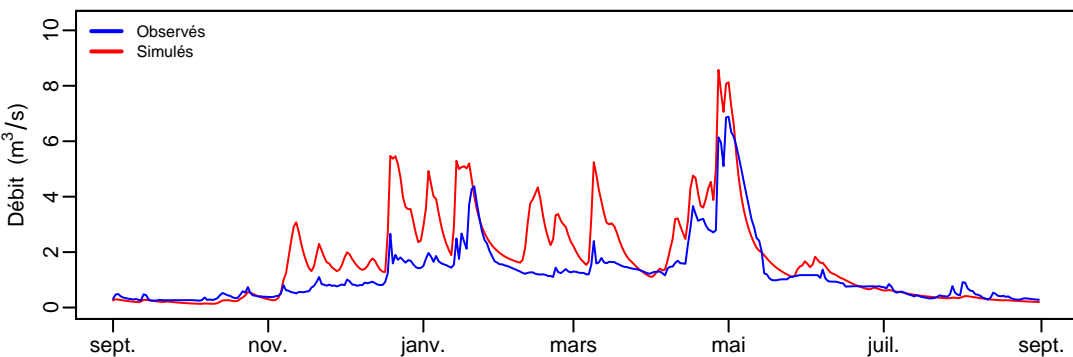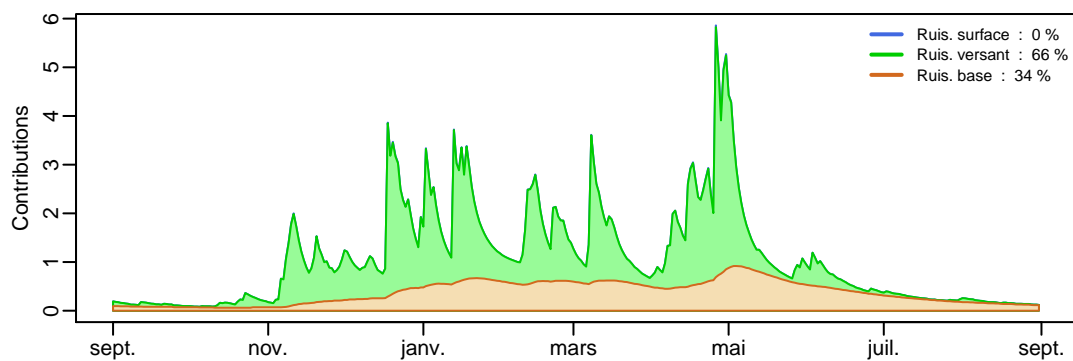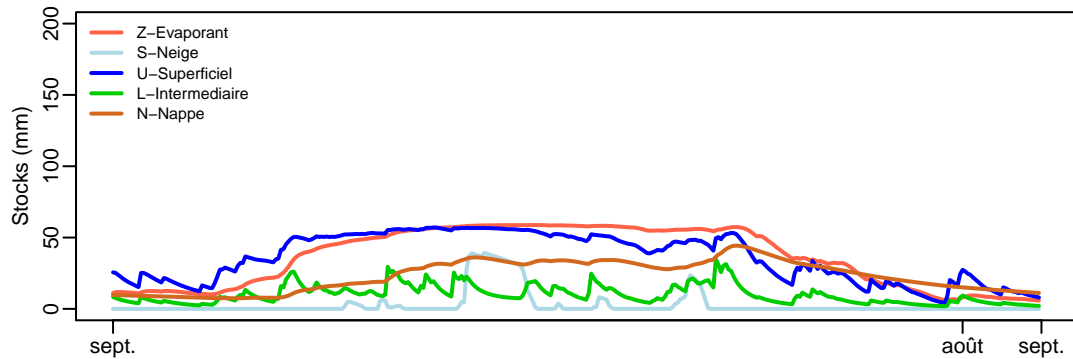

# k2283110 (139.88 km²) – année 1998–1999

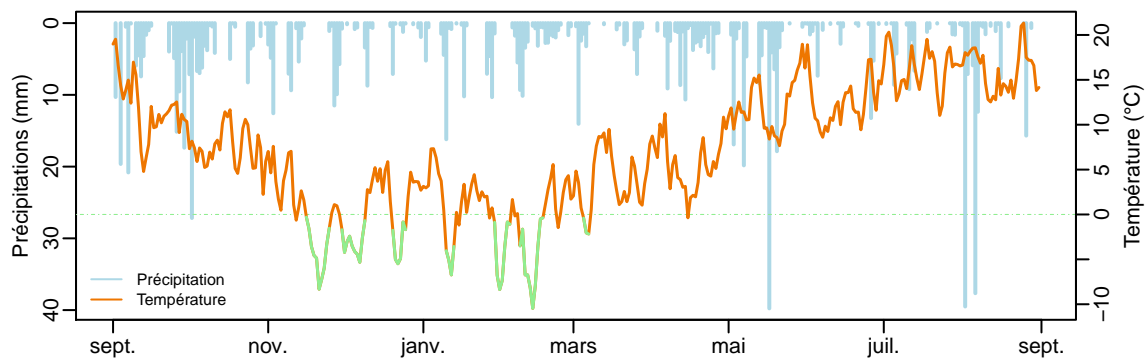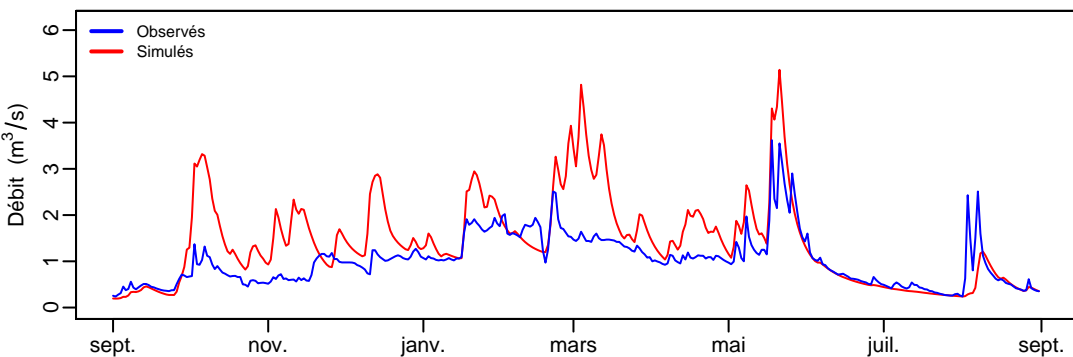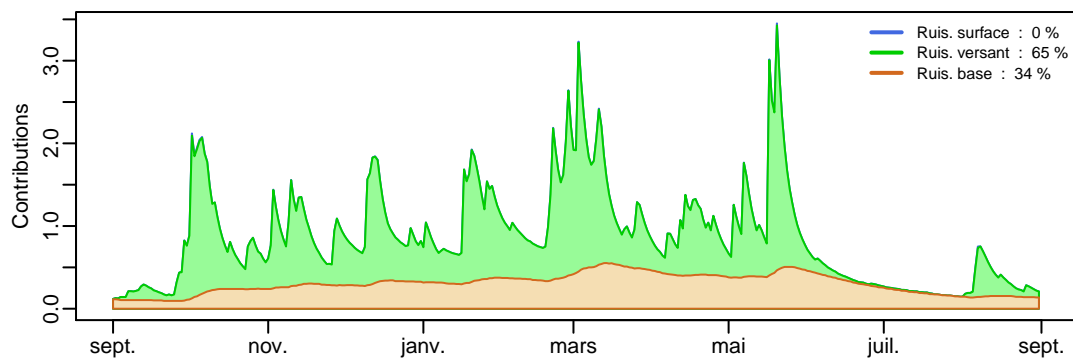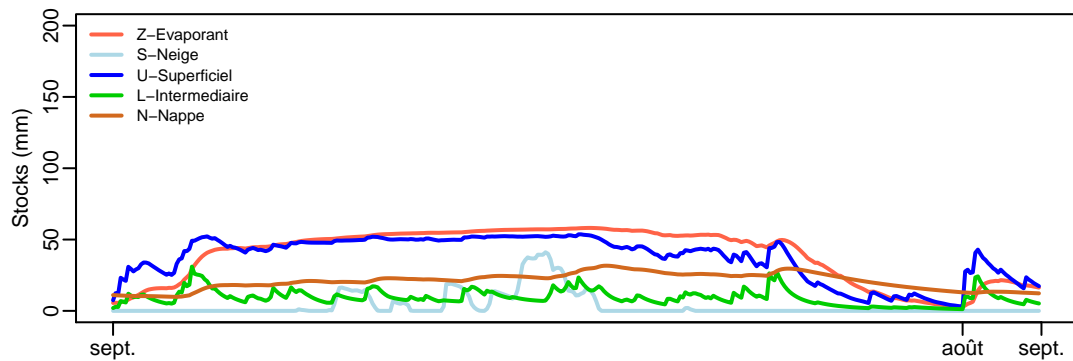

# k2283110 (139.88 km<sup>2</sup>) – année 1999–2000

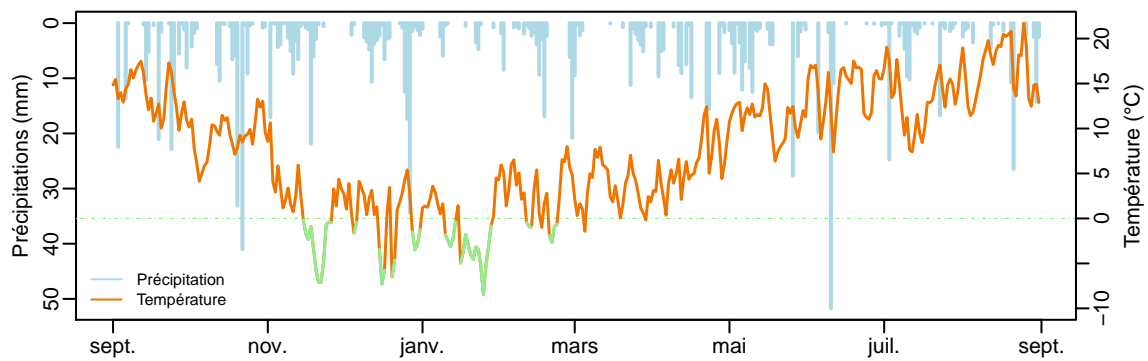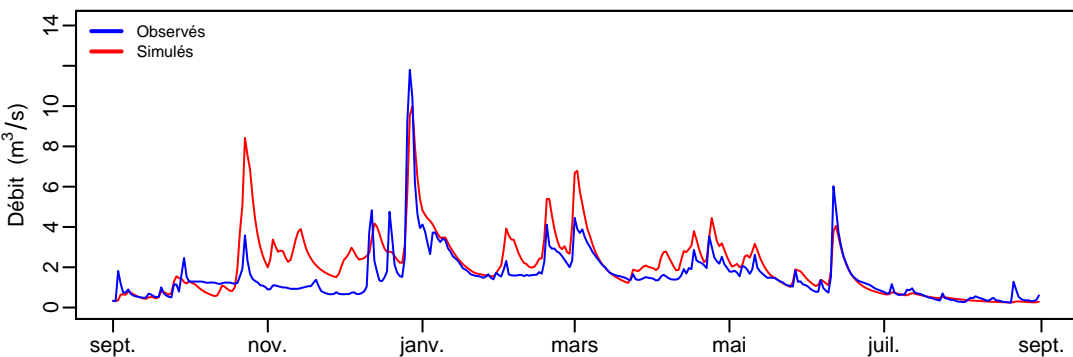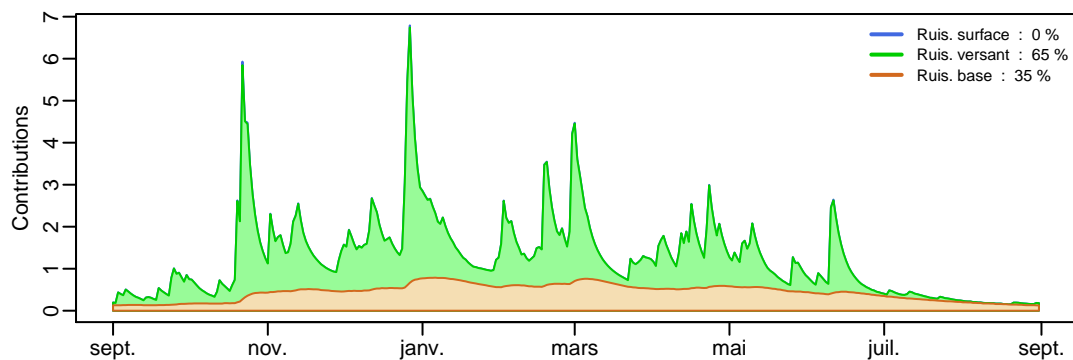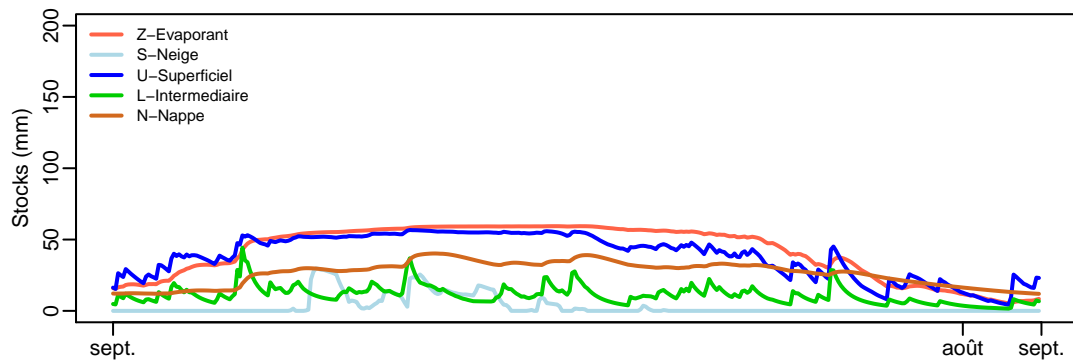

# k2283110 (139.88 km<sup>2</sup>) – année 2000–2001

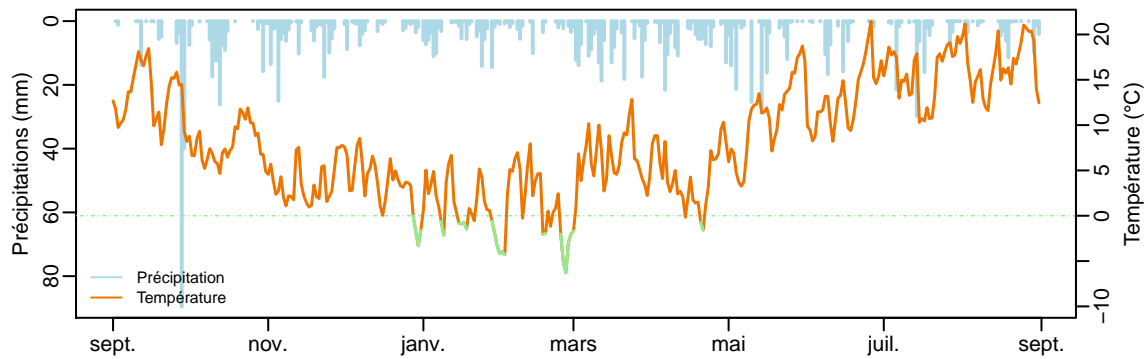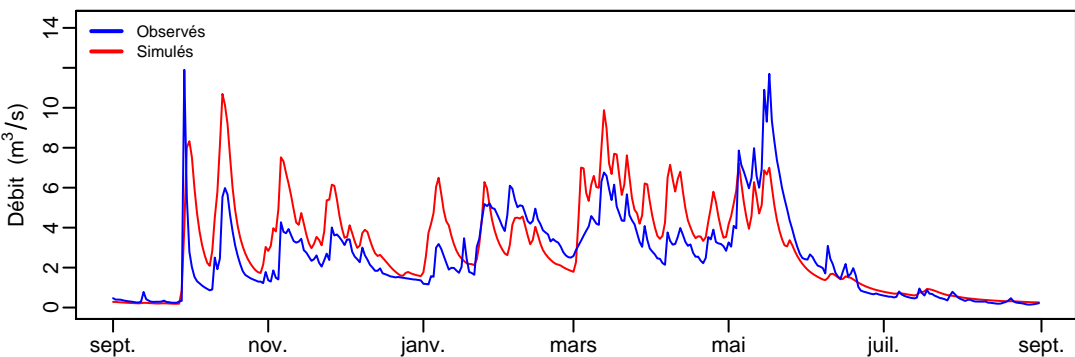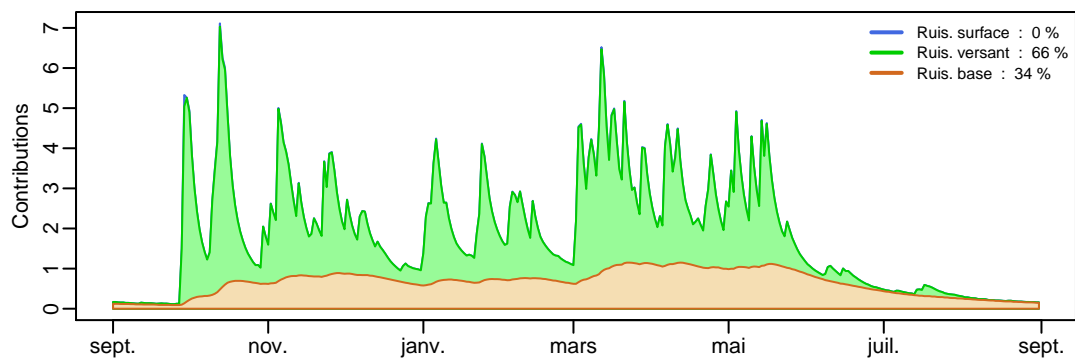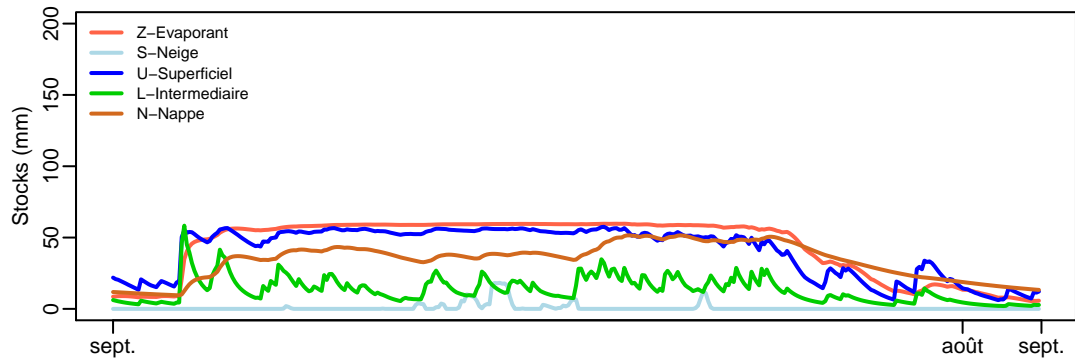

# k2283110 (139.88 km<sup>2</sup>) – année 2001–2002

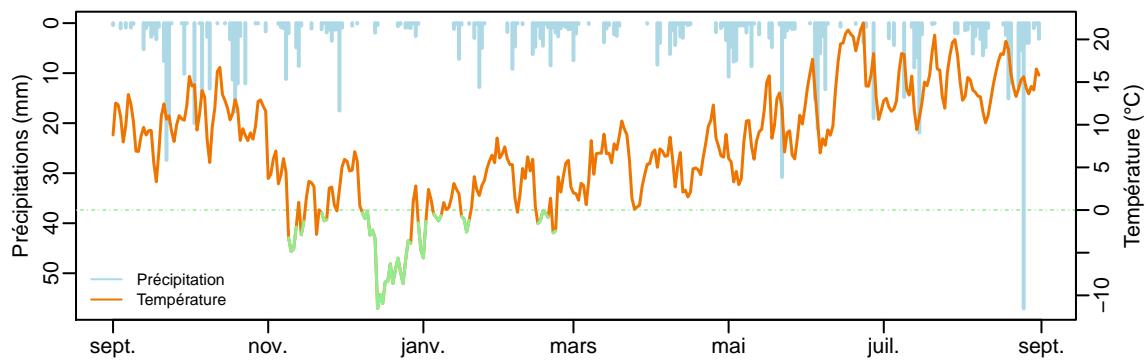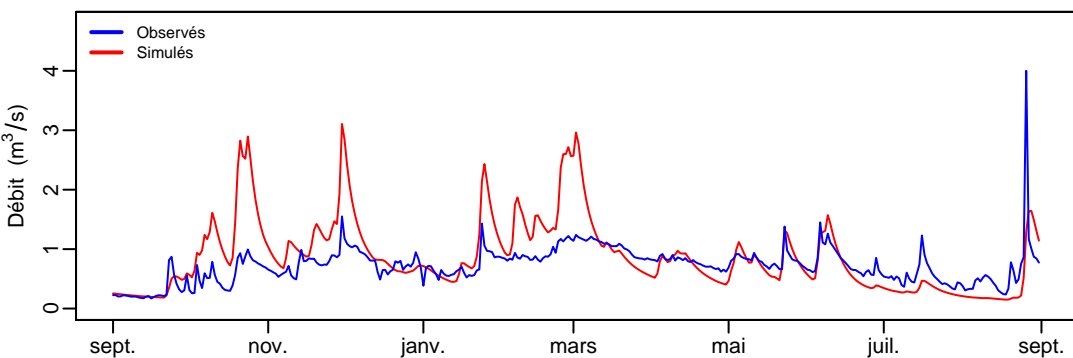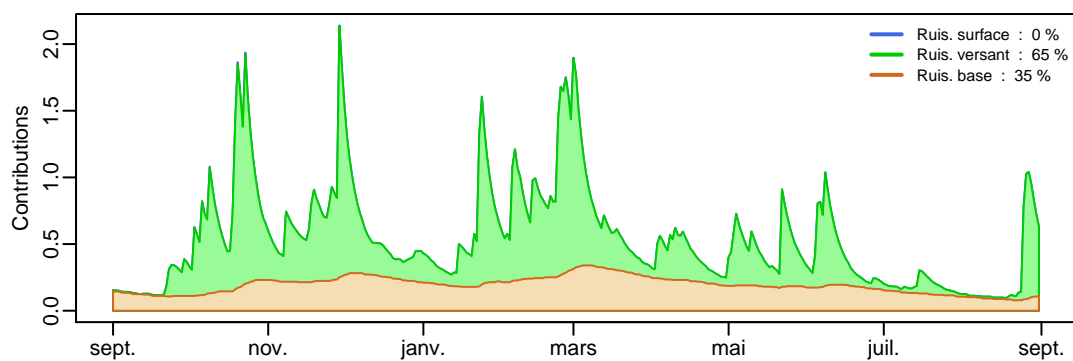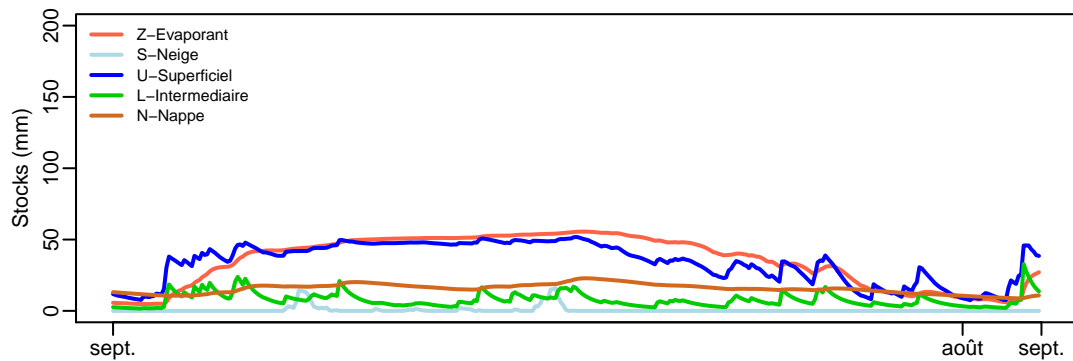

# k2283110 (139.88 km<sup>2</sup>) – année 2002–2003

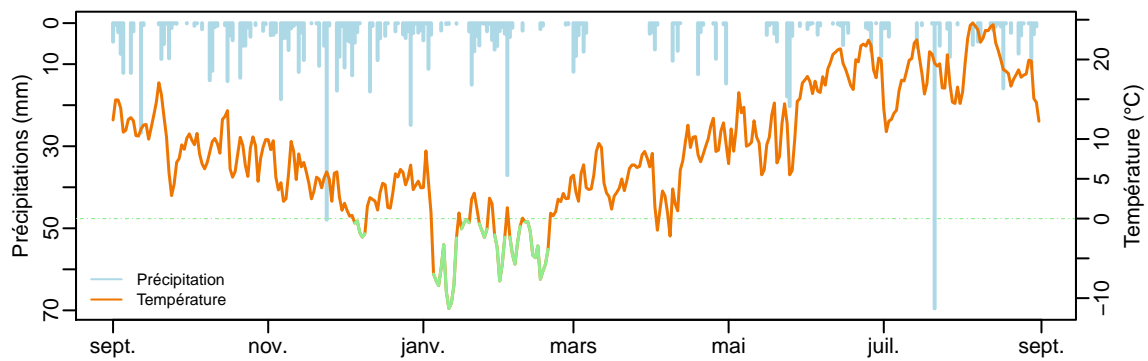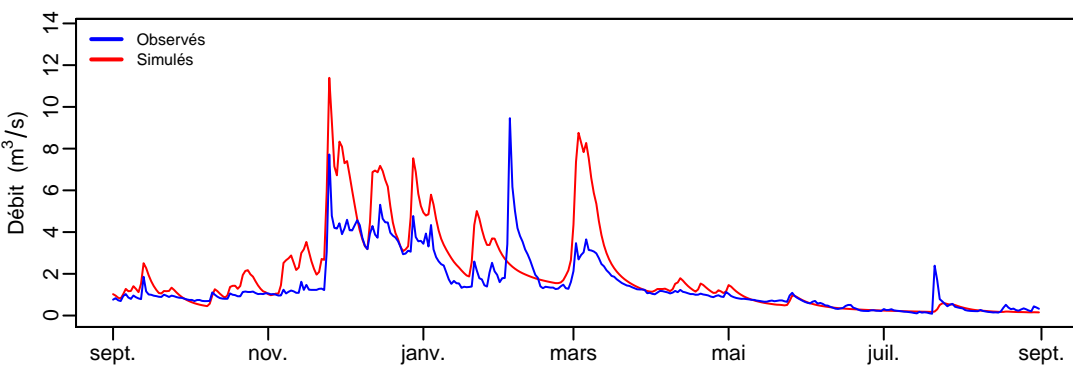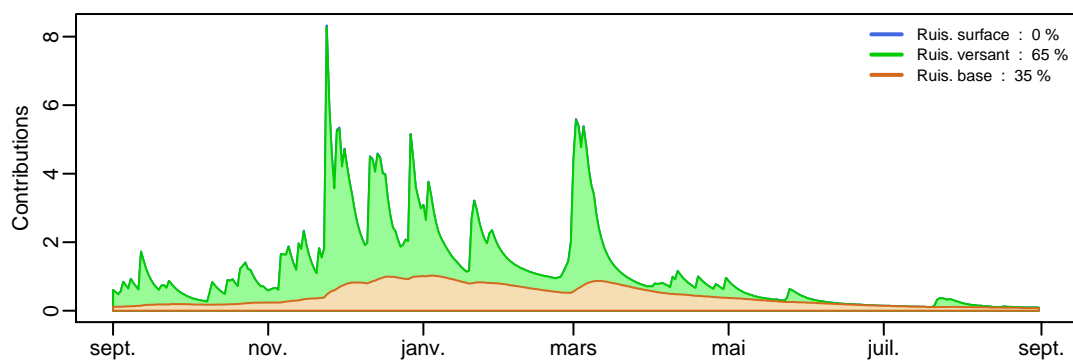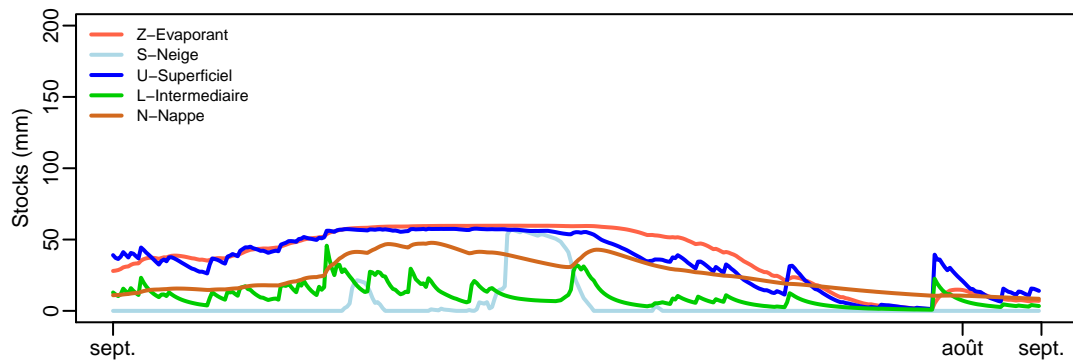



# k2283110 (139.88 km<sup>2</sup>) – année 2003–2004

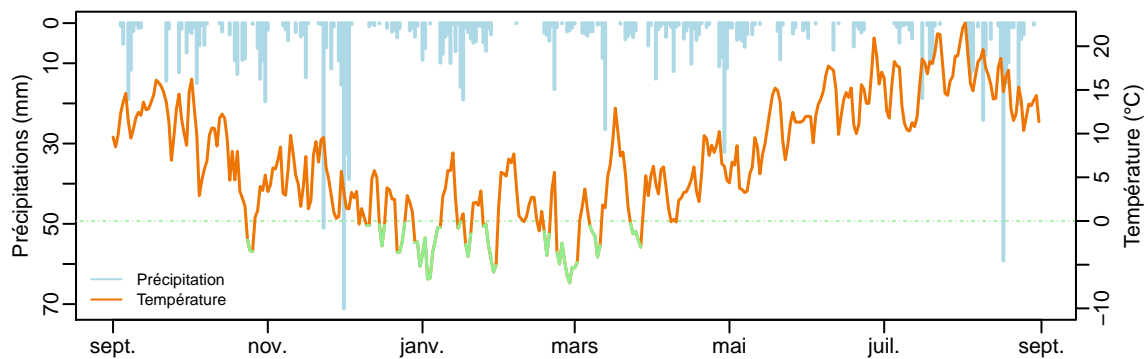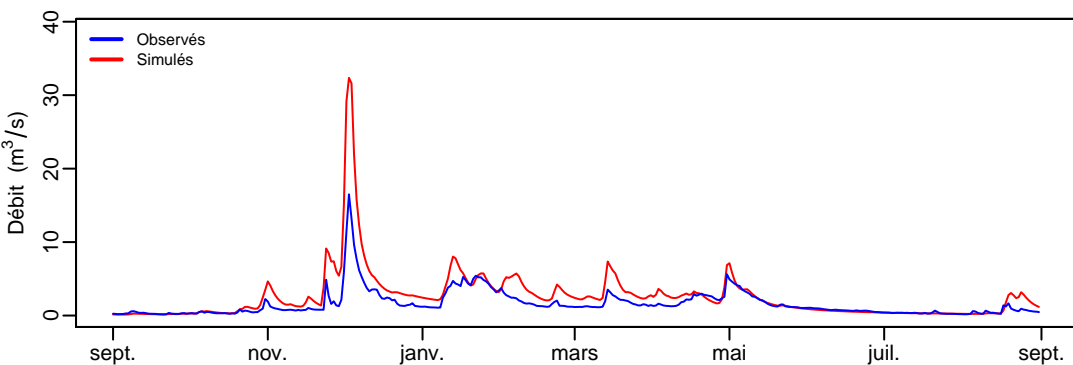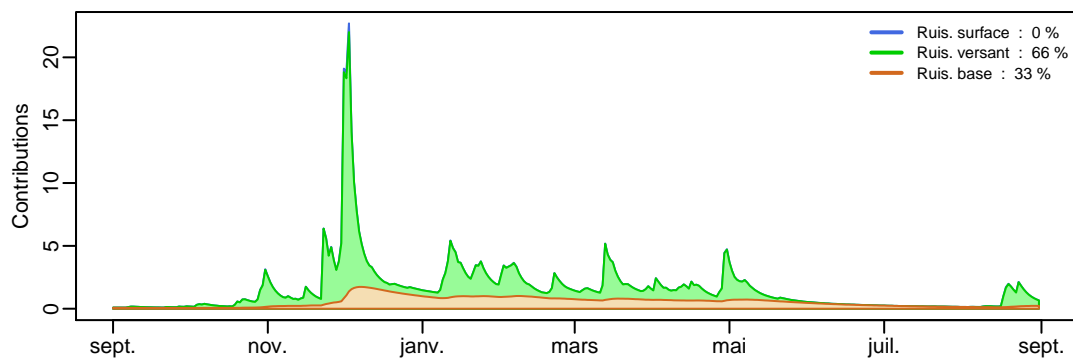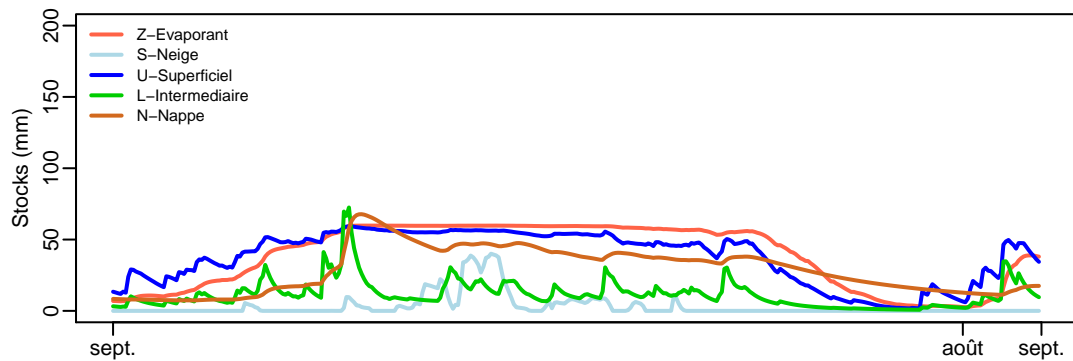

# k2283110 (139.88 km<sup>2</sup>) – année 2004–2005

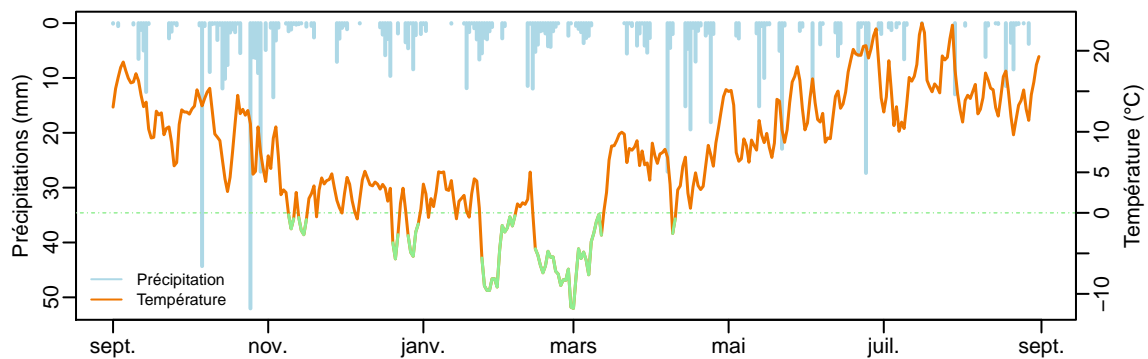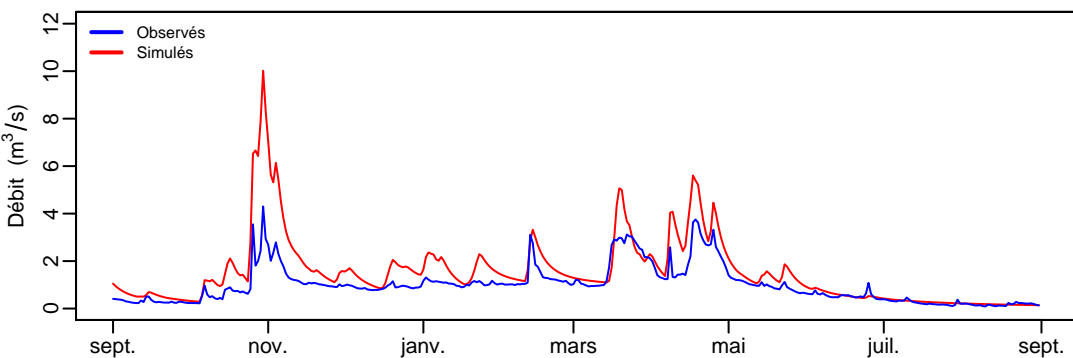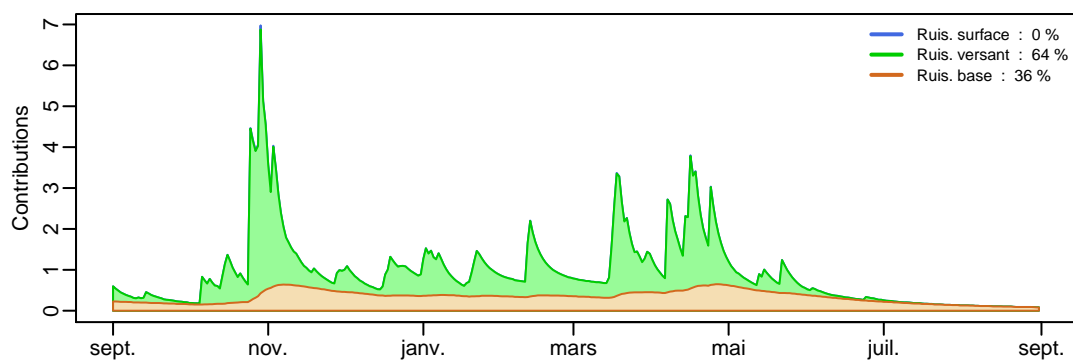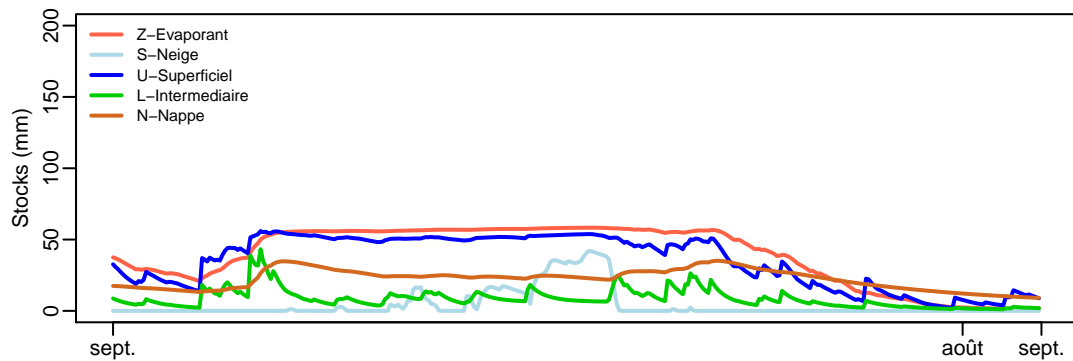

# k2283110 (139.88 km<sup>2</sup>) – année 2005–2006

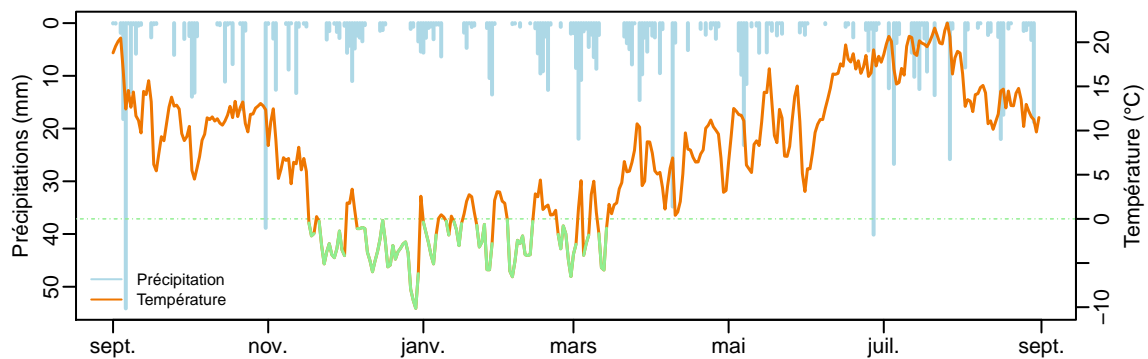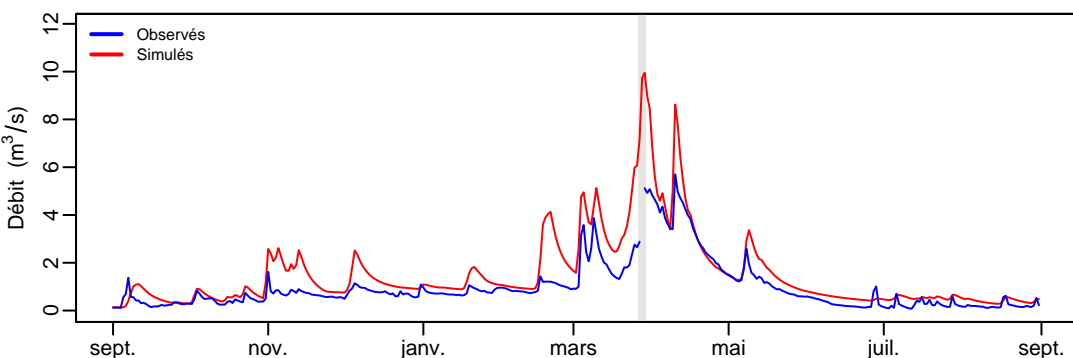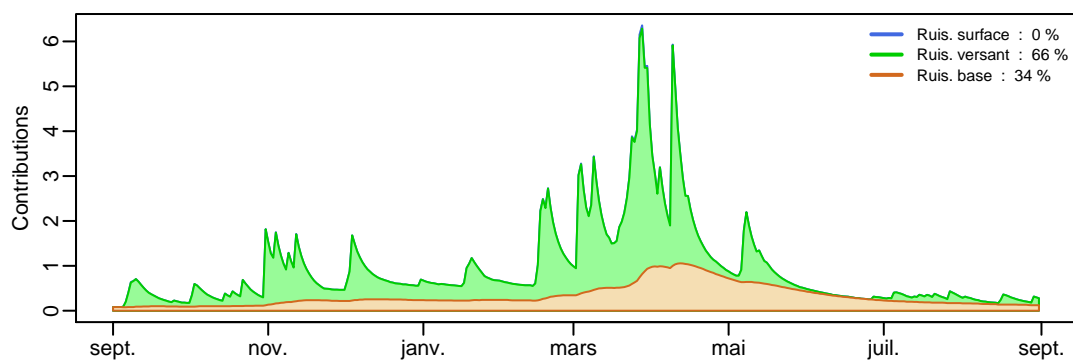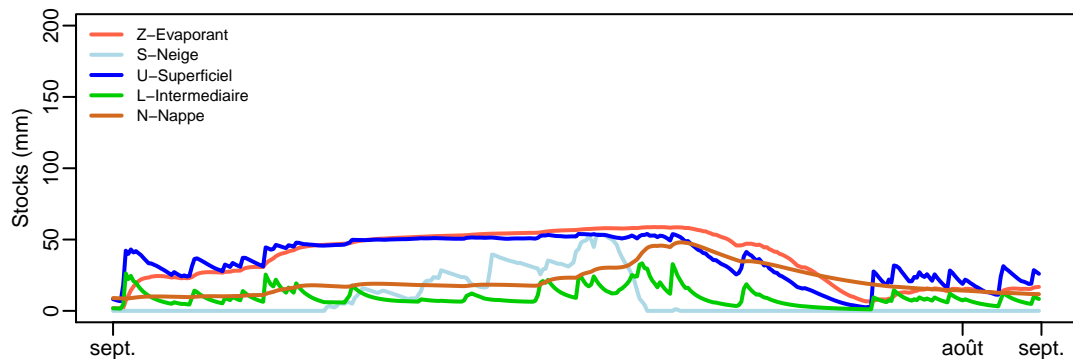

# k2283110 (139.88 km<sup>2</sup>) – année 2006–2007

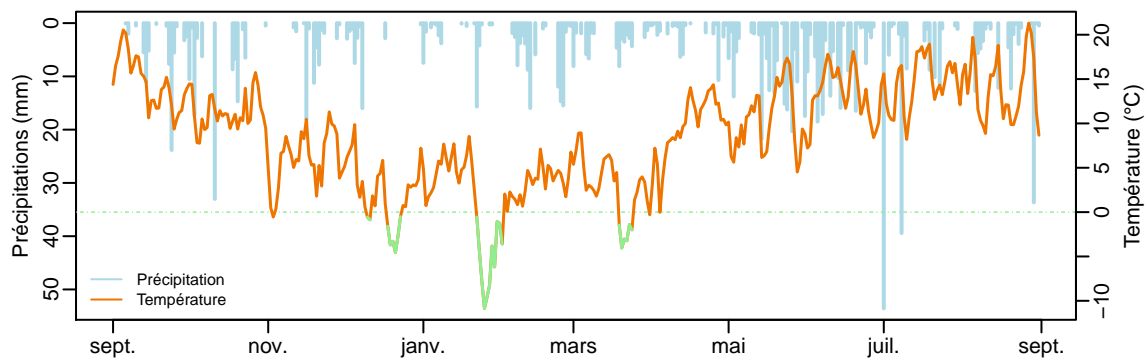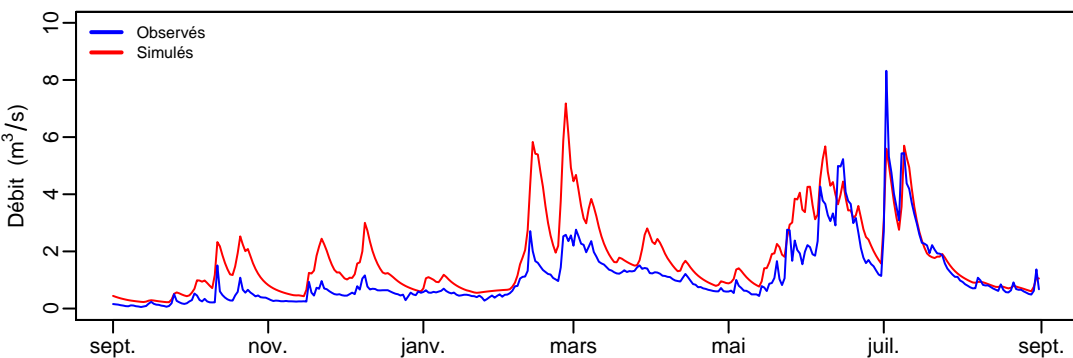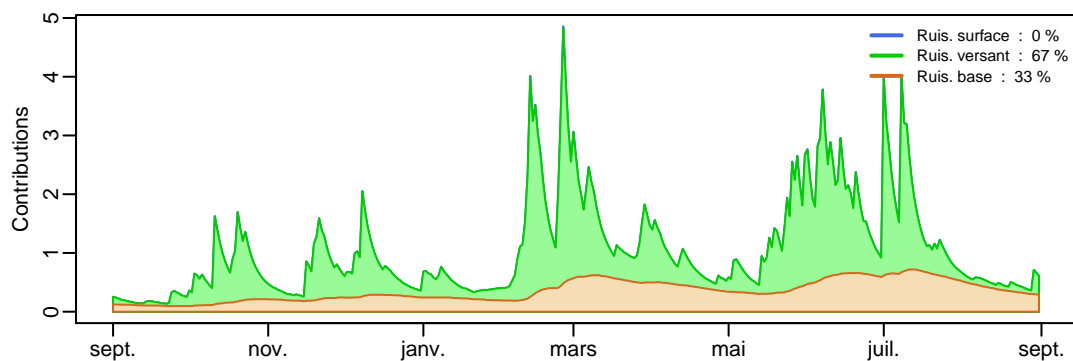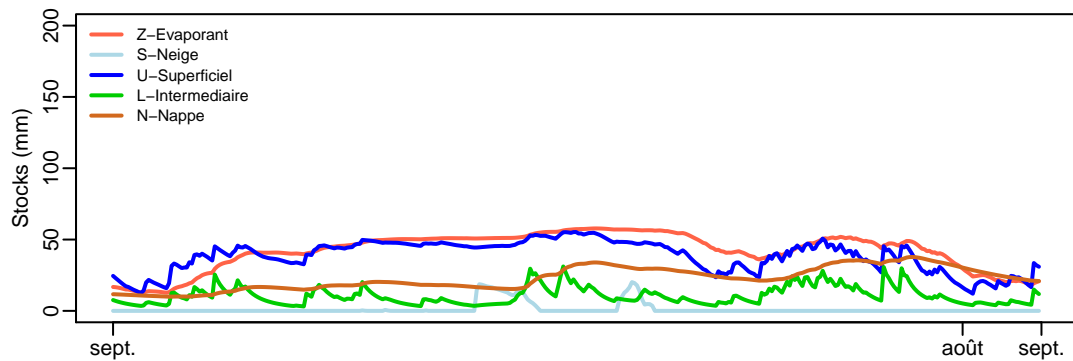

# k2283110 (139.88 km<sup>2</sup>) – année 2007–2008

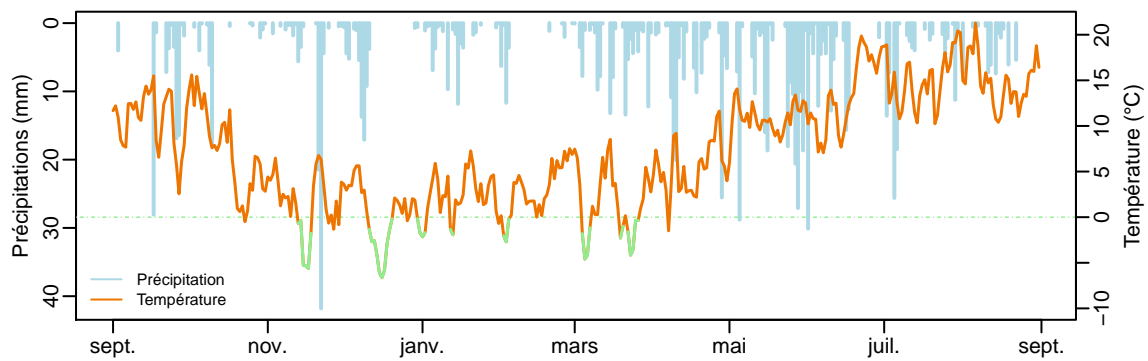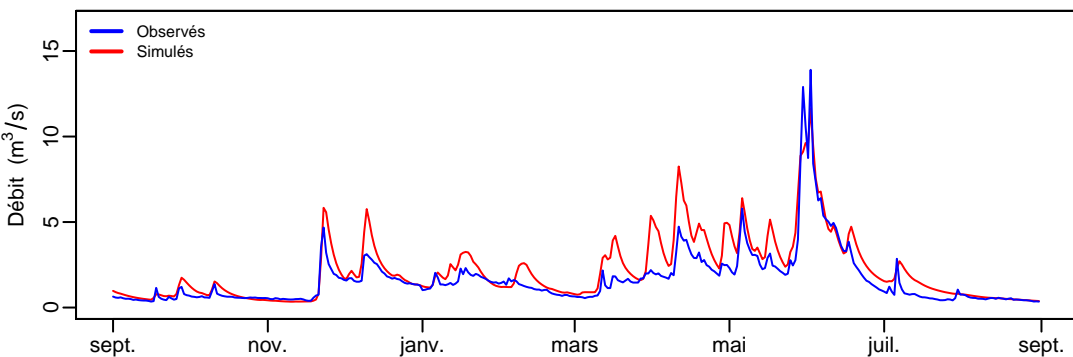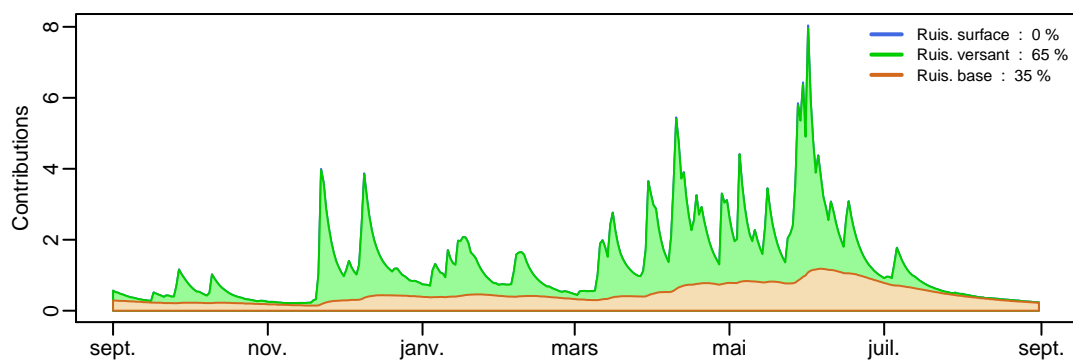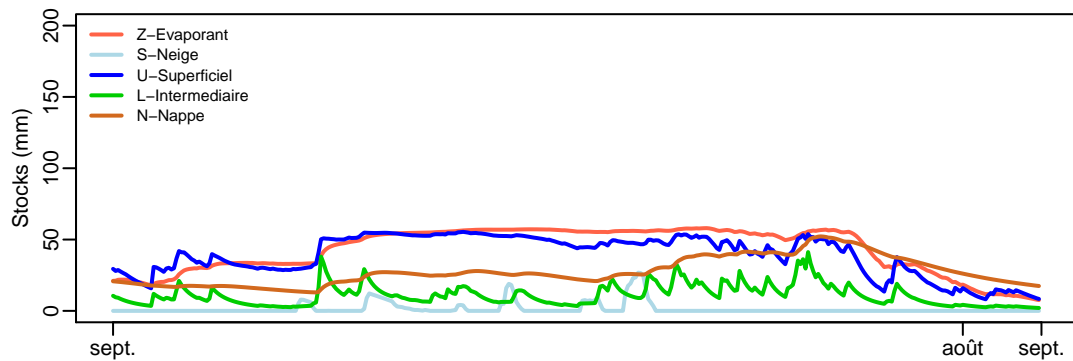

# k2283110 (139.88 km<sup>2</sup>) – année 2008–2009

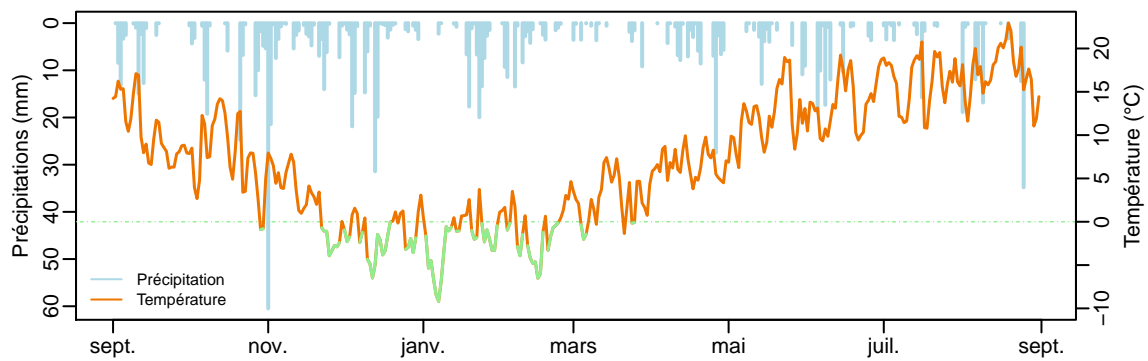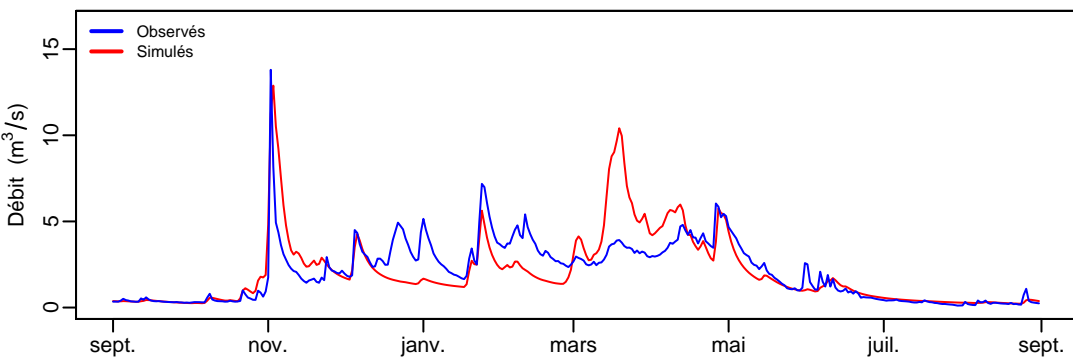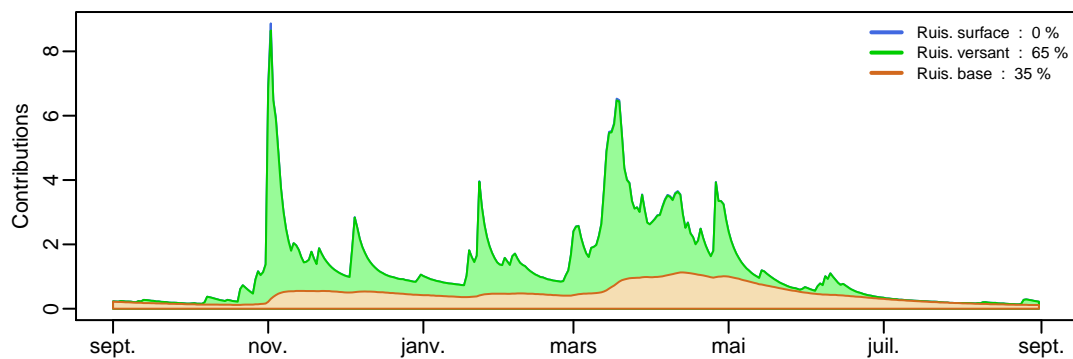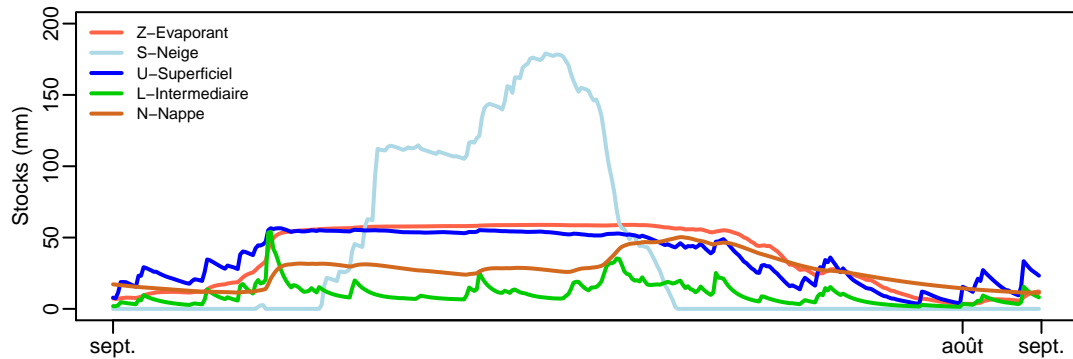

# k2283110 (139.88 km²) – année 2009–2010

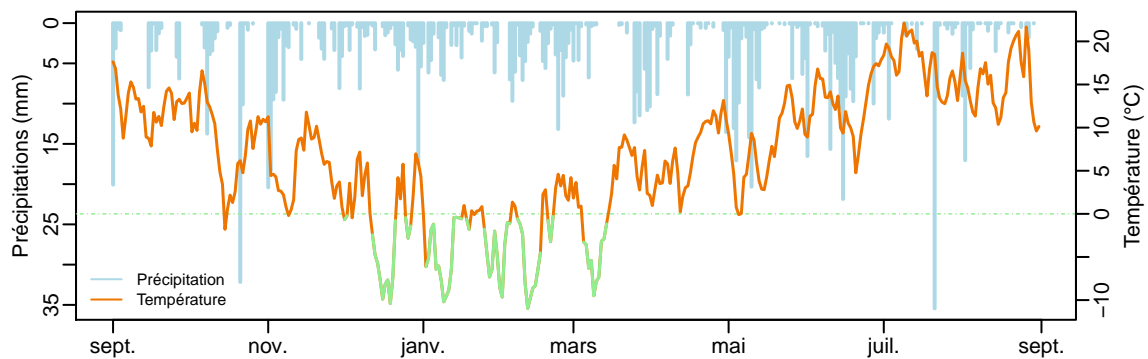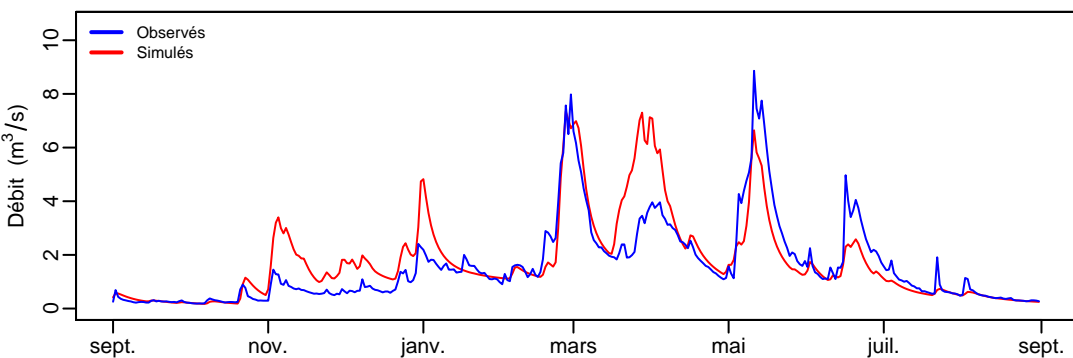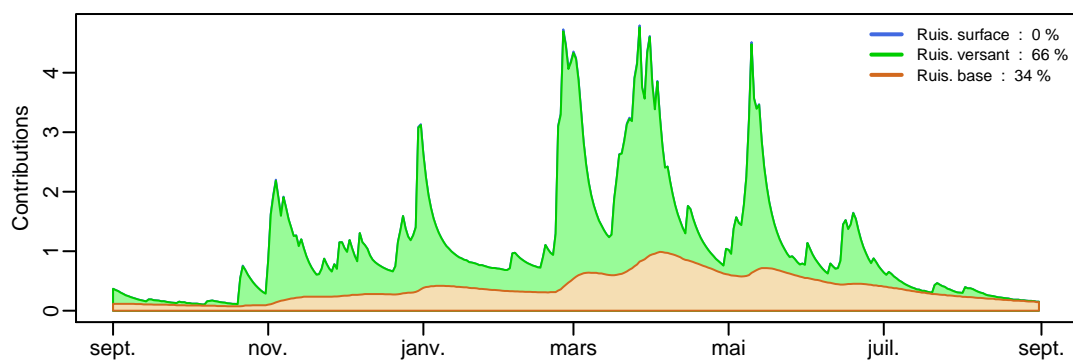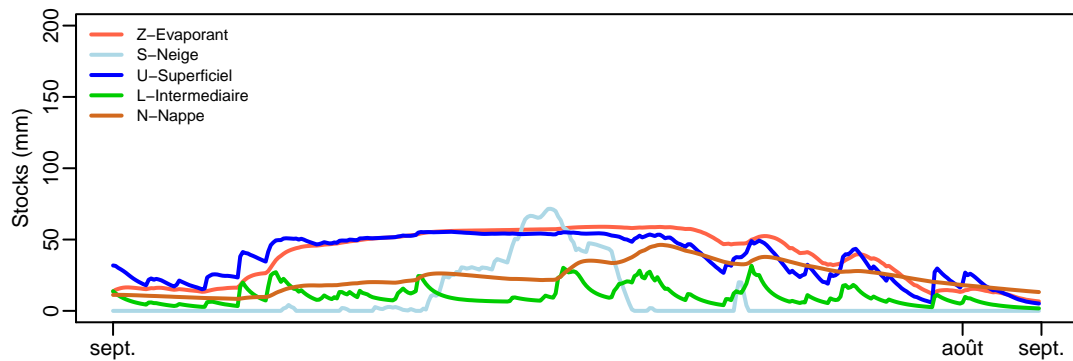

# k2283110 (139.88 km<sup>2</sup>) – année 2010–2011

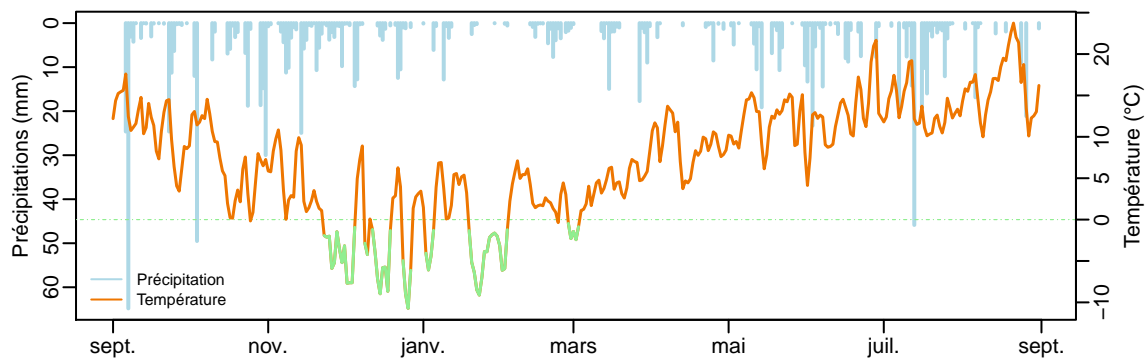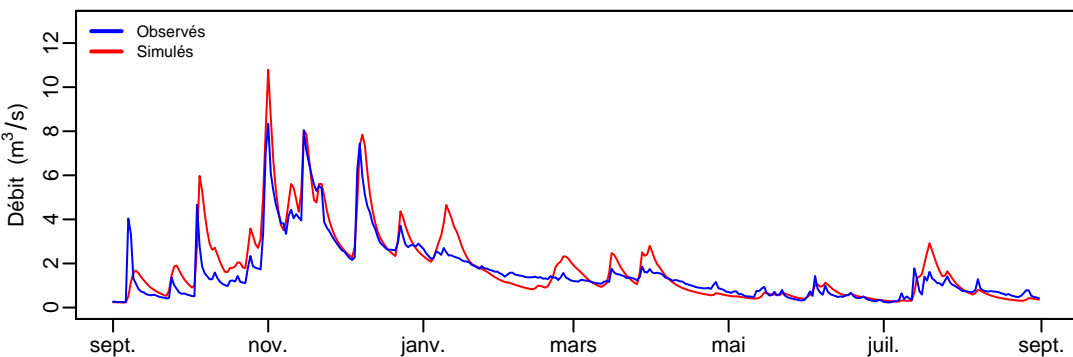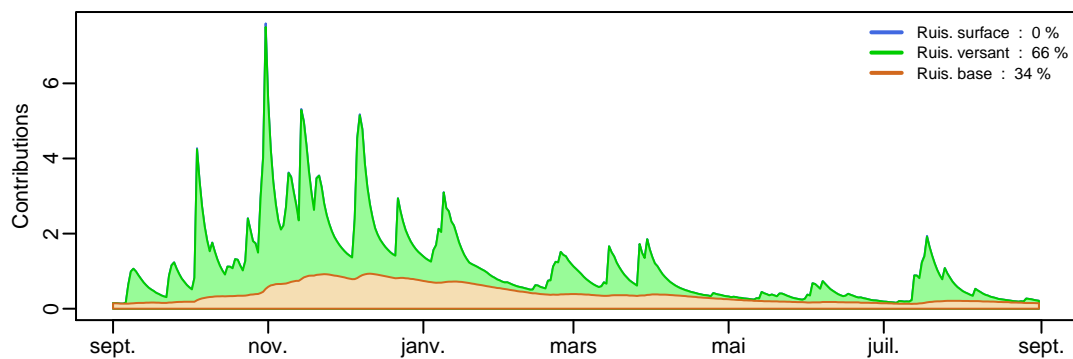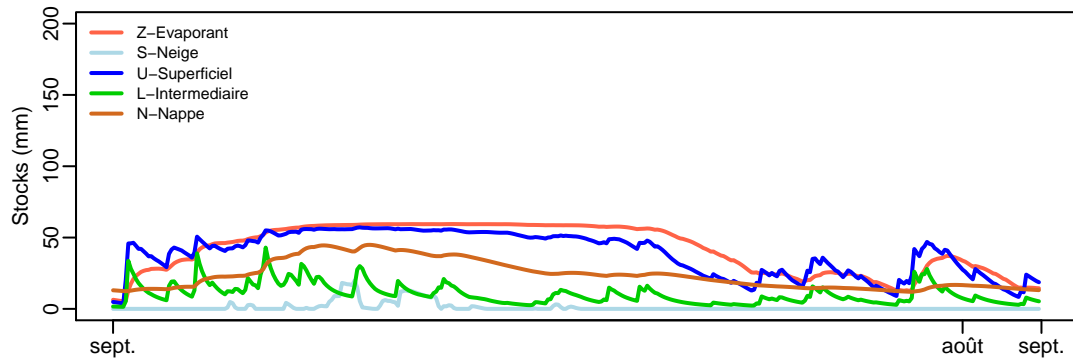



# k2283110 (139.88 km<sup>2</sup>) – année 2011–2012

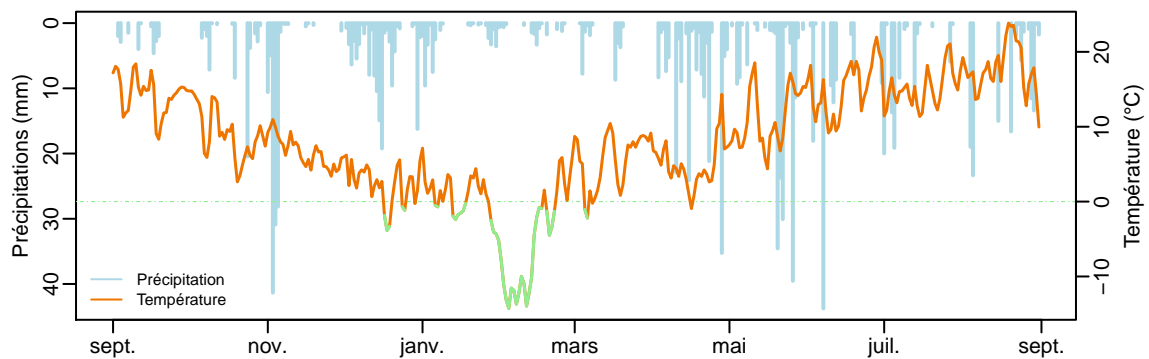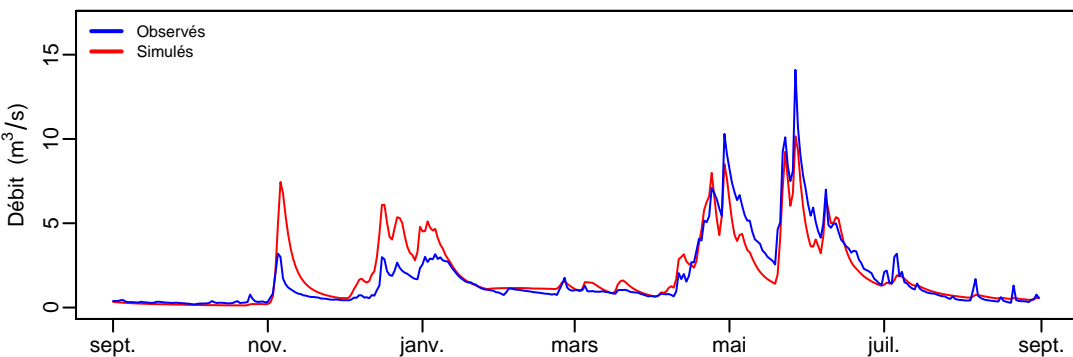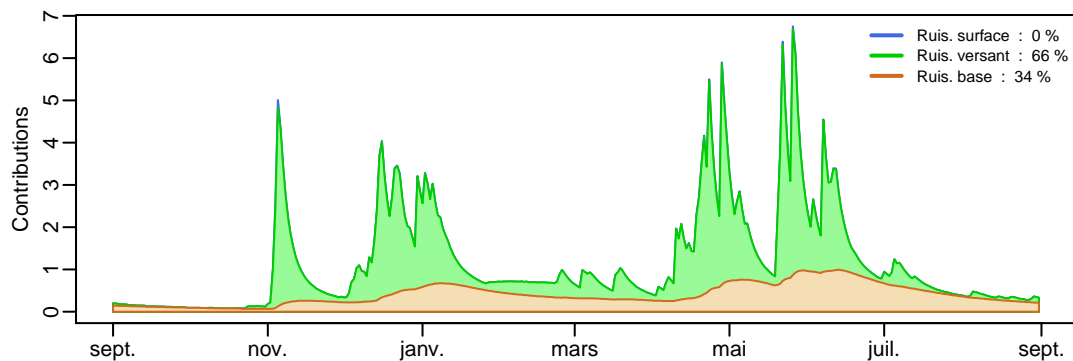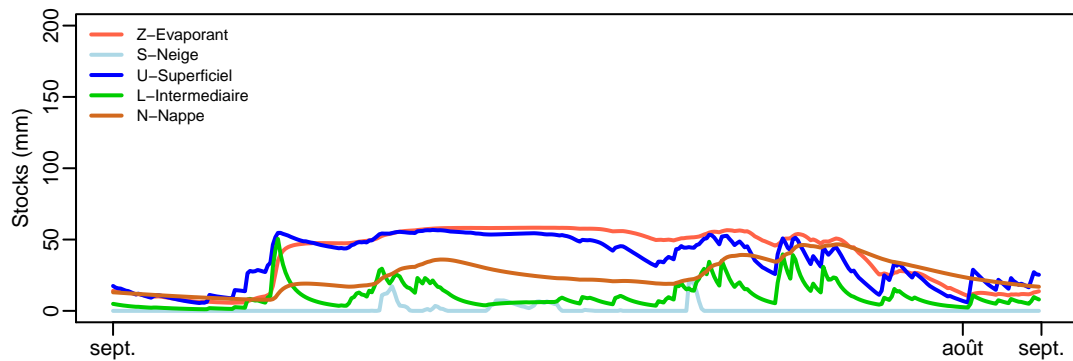

# k2300810 (1808.63 km<sup>2</sup>) – année 1987–1988

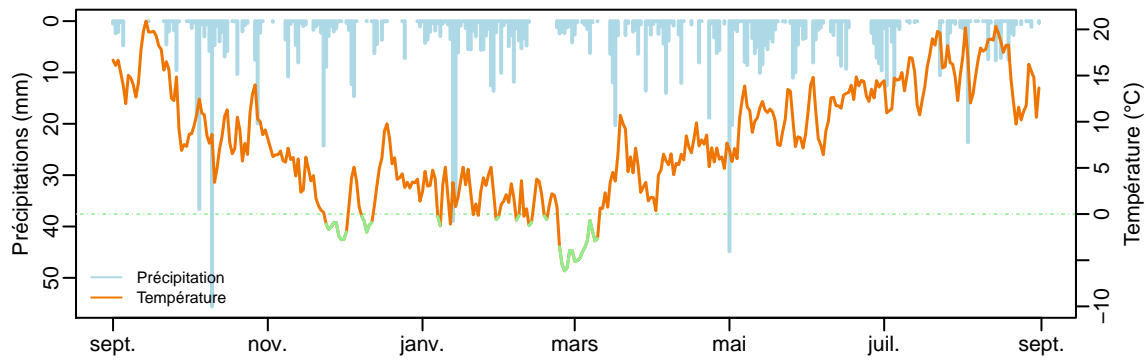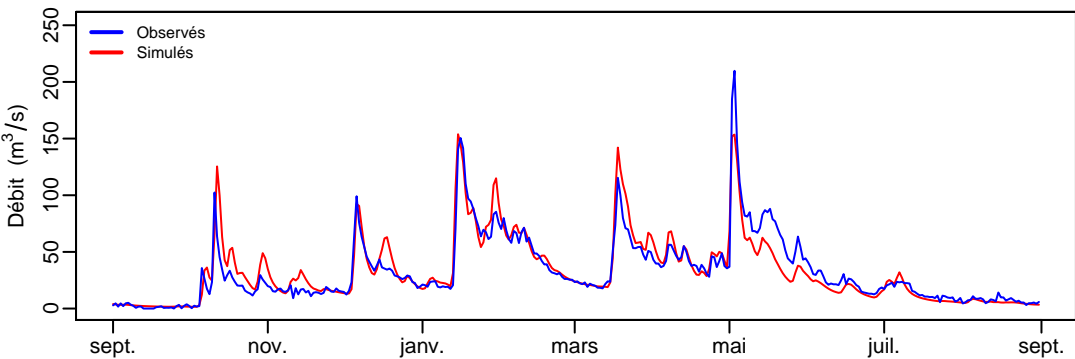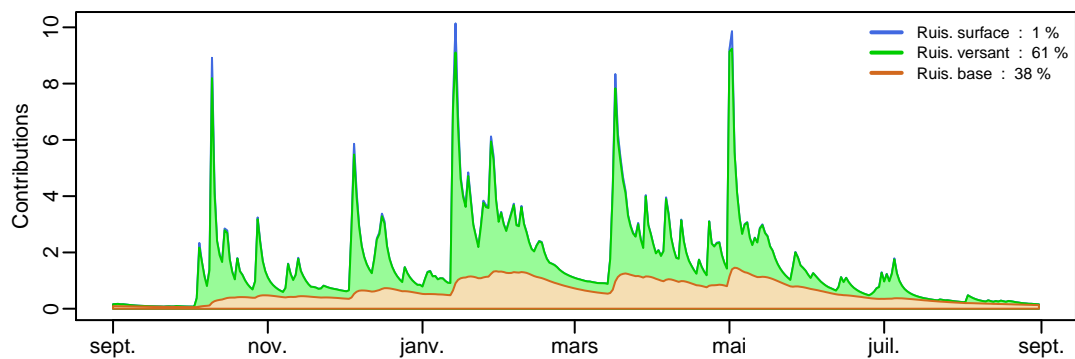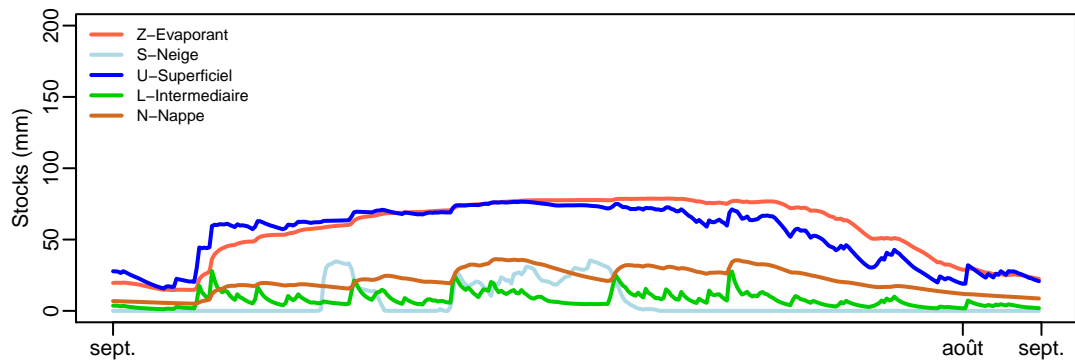

# k2300810 (1808.63 km²) – année 1988–1989

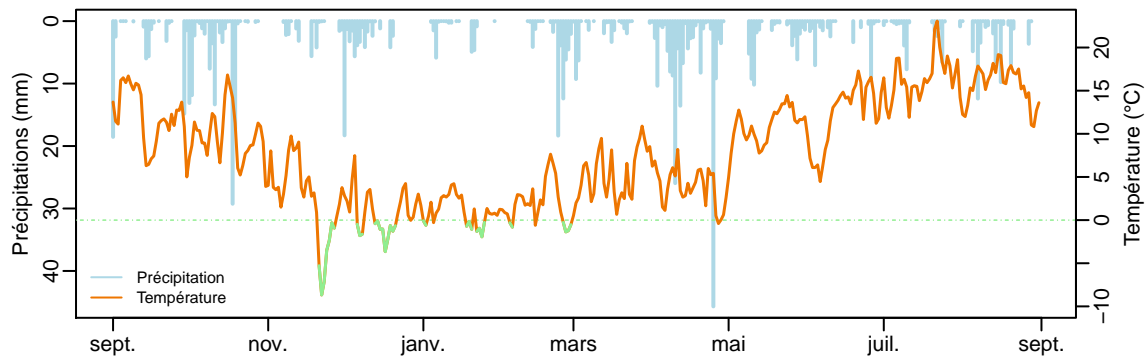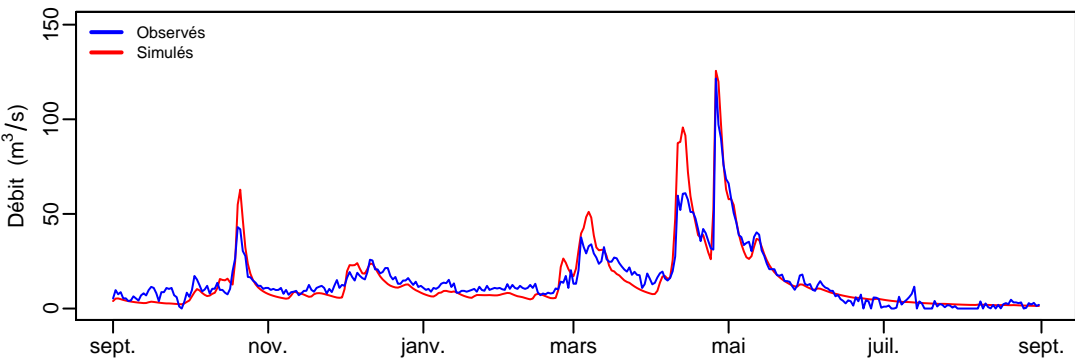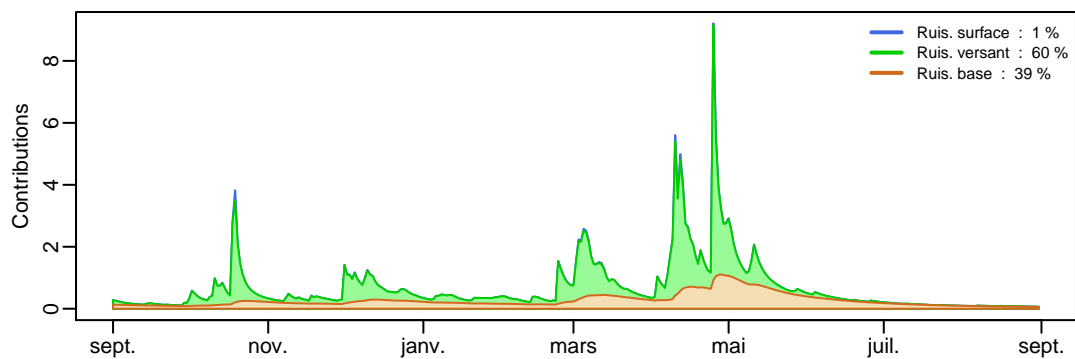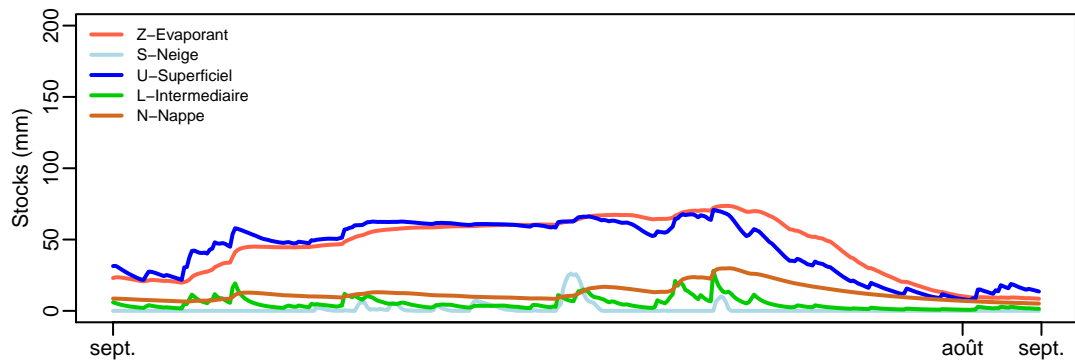

# k2300810 (1808.63 km<sup>2</sup>) – année 1989–1990

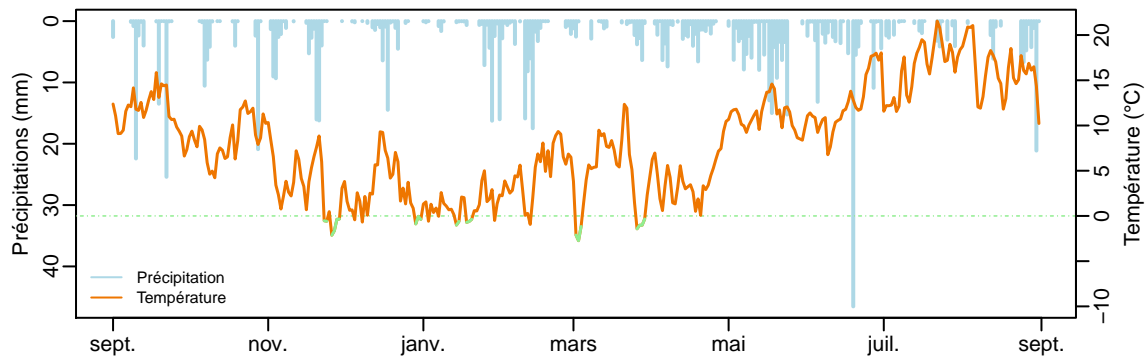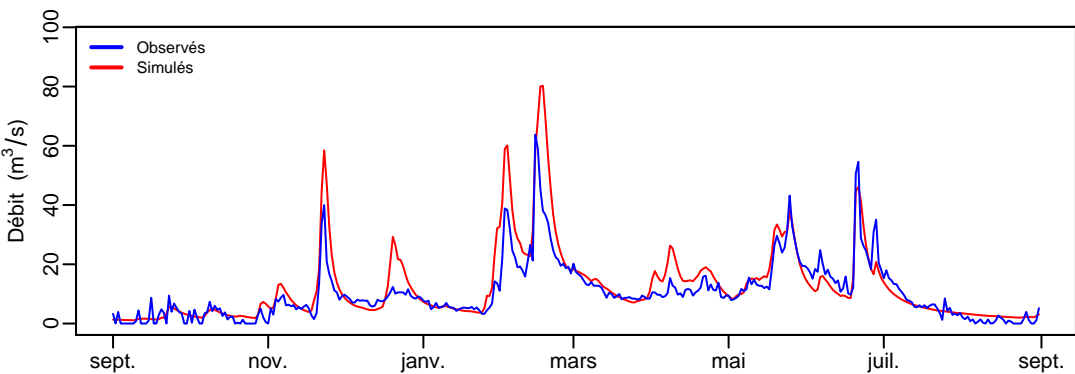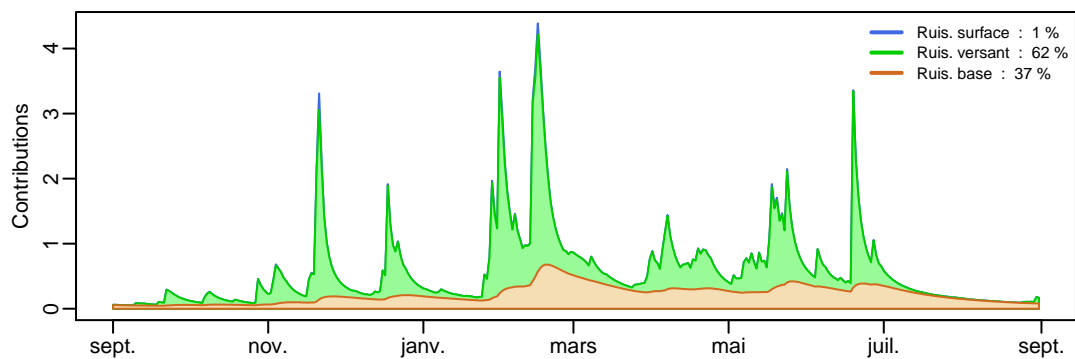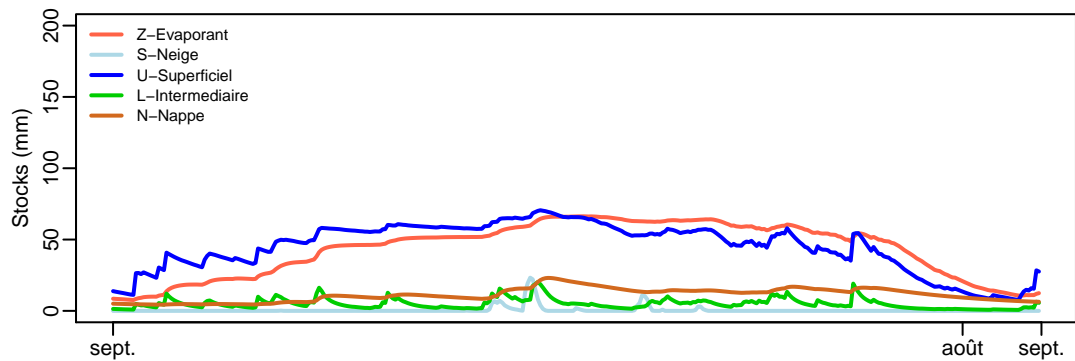

# k2300810 (1808.63 km<sup>2</sup>) – année 1990–1991

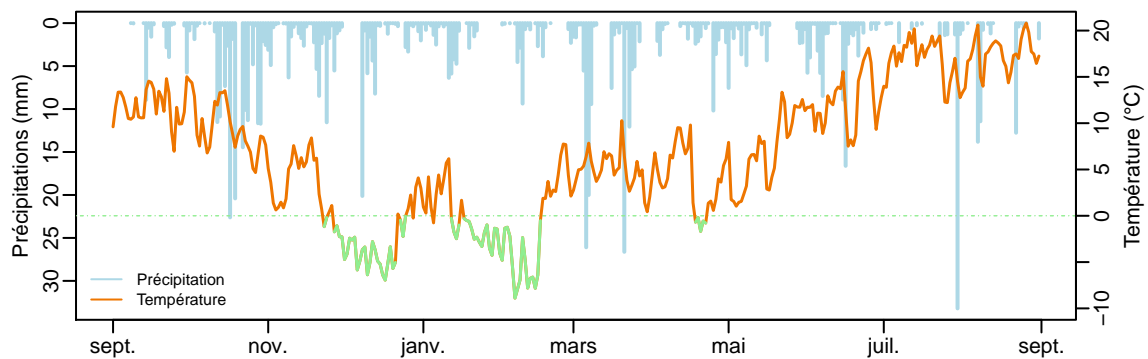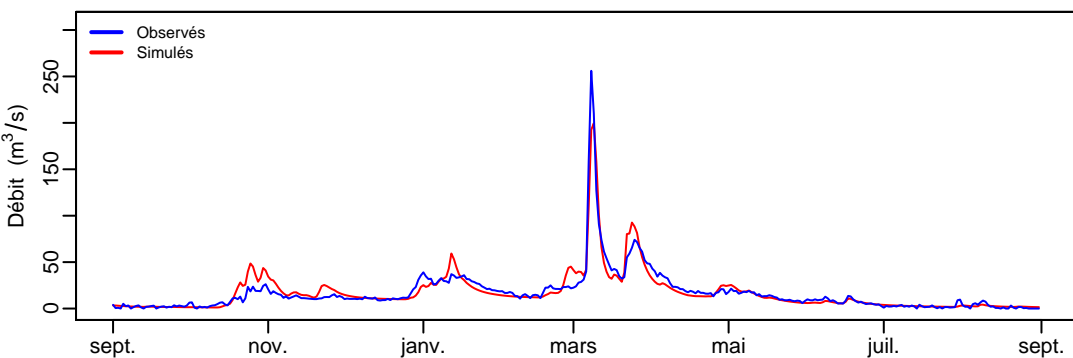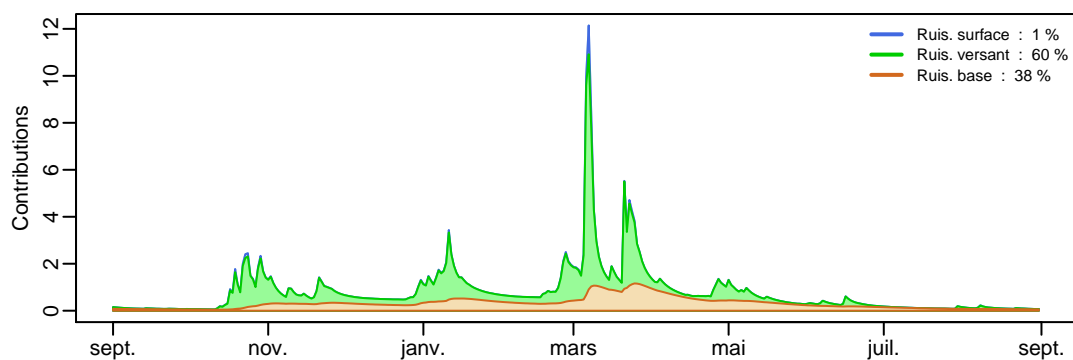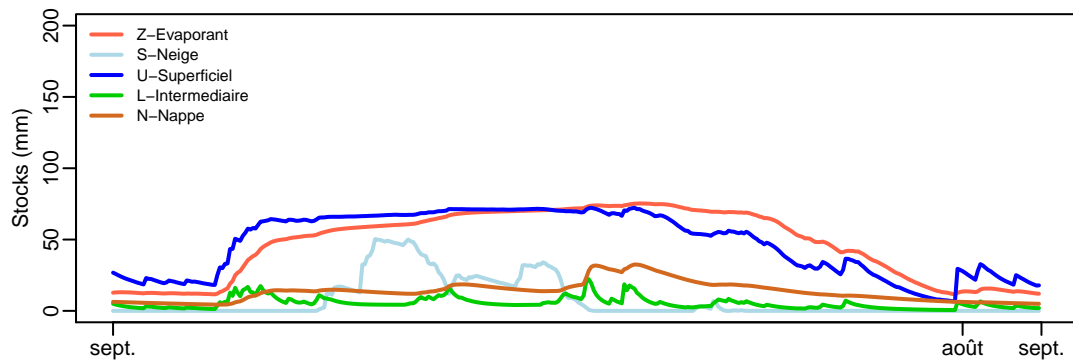

# k2300810 (1808.63 km²) – année 1991–1992

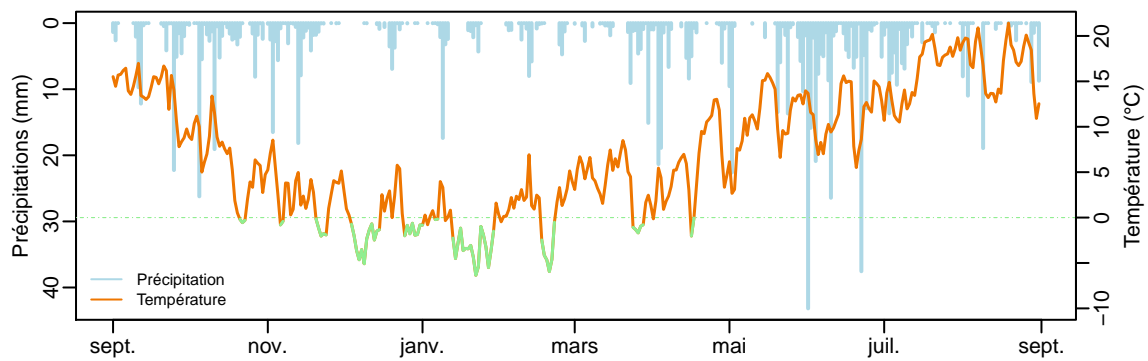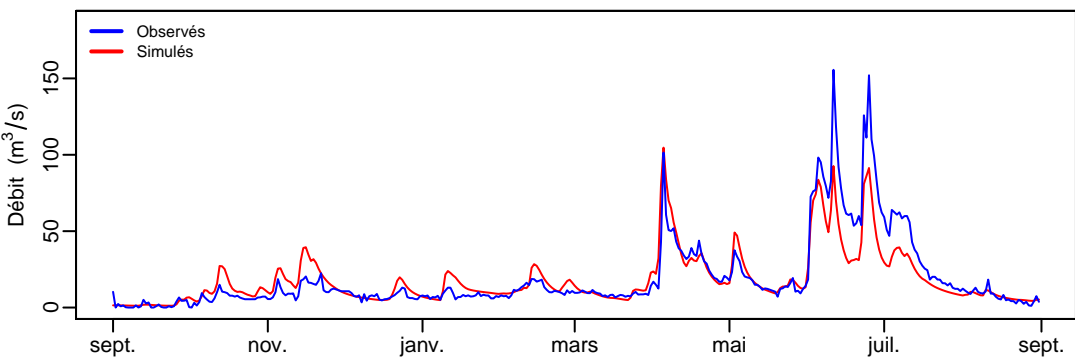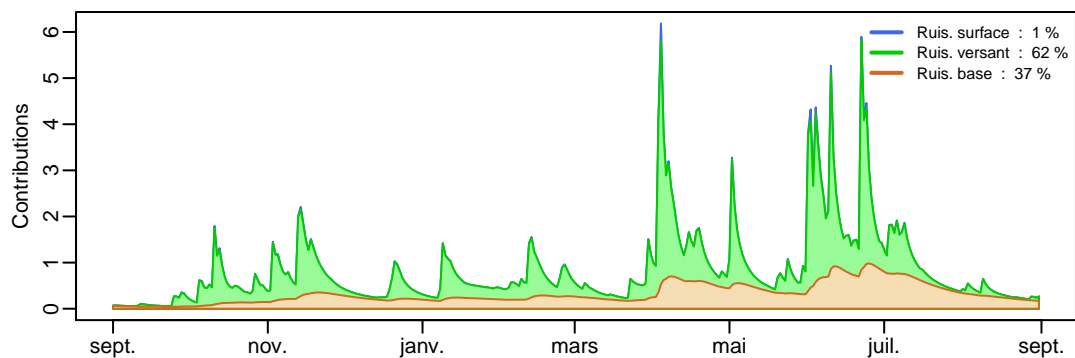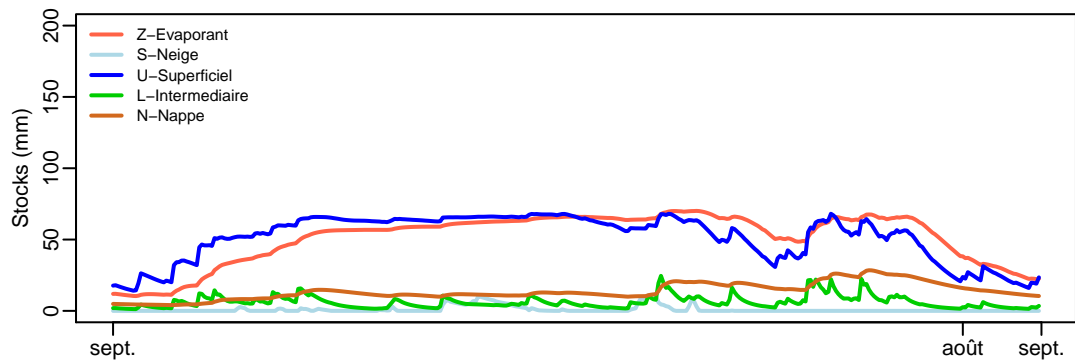

# k2300810 (1808.63 km<sup>2</sup>) – année 1992–1993

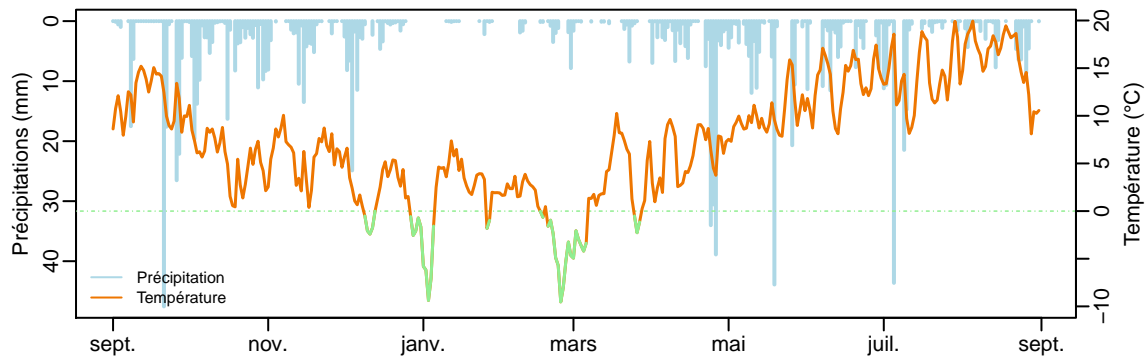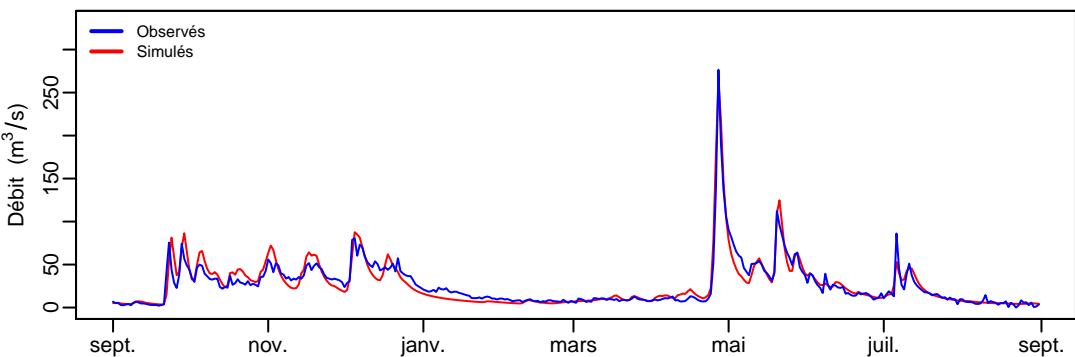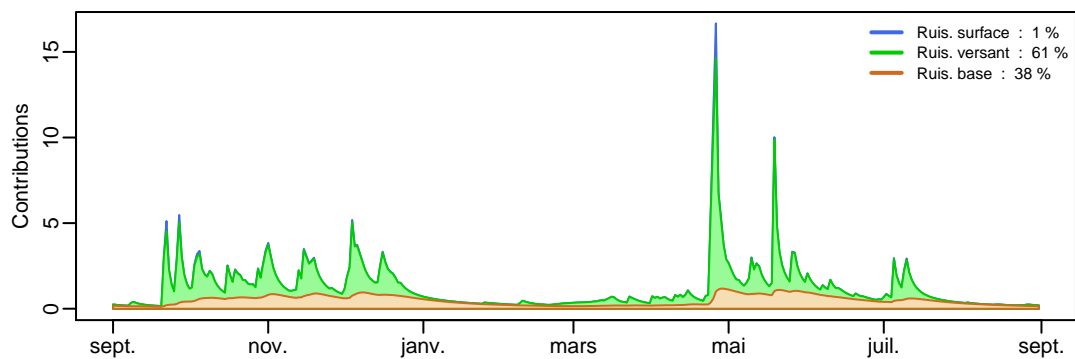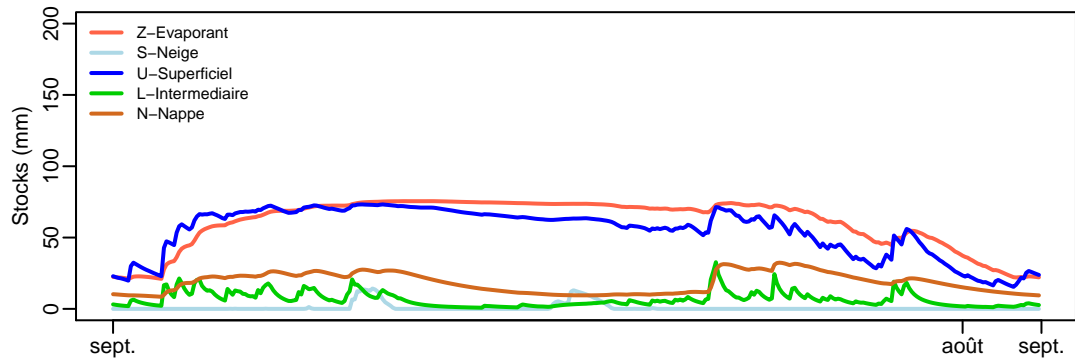

# k2300810 (1808.63 km<sup>2</sup>) – année 1993–1994

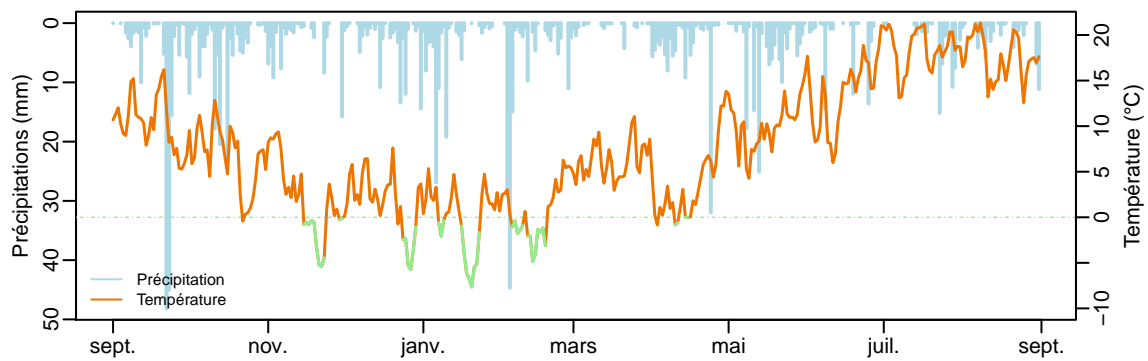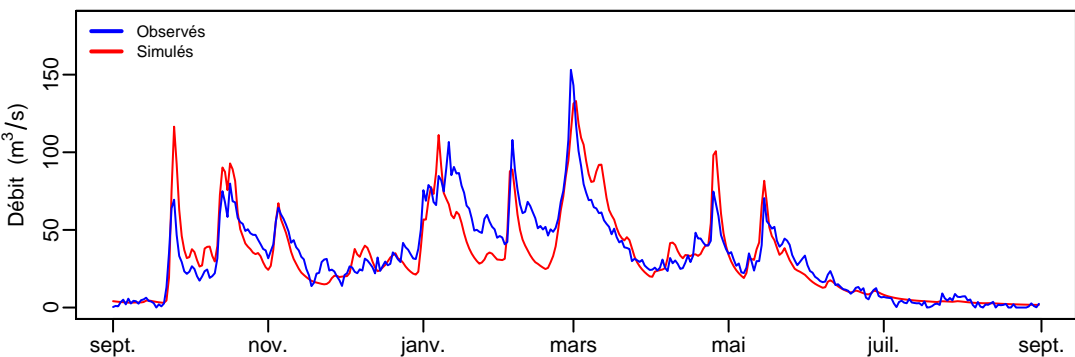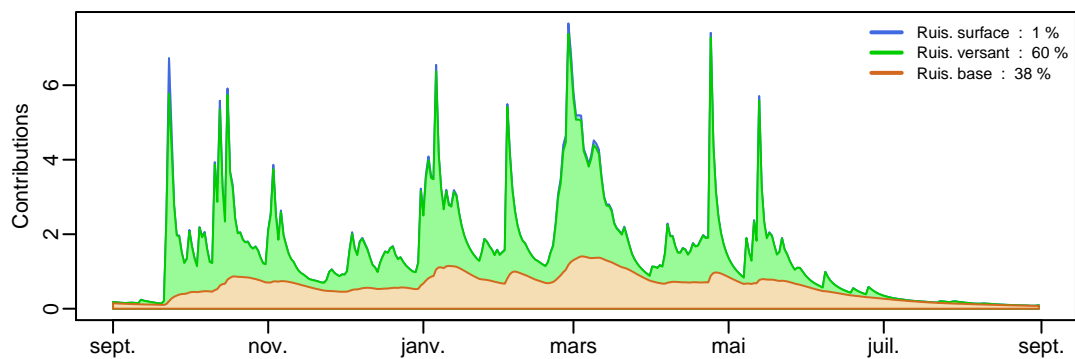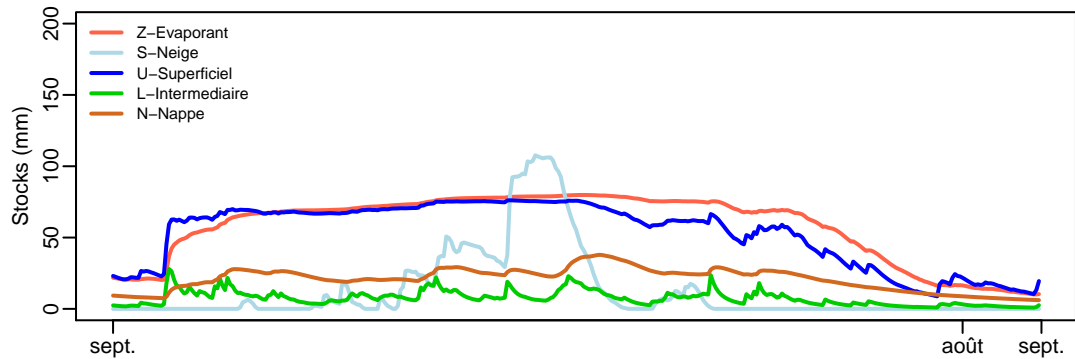



# k2300810 (1808.63 km<sup>2</sup>) – année 1994–1995

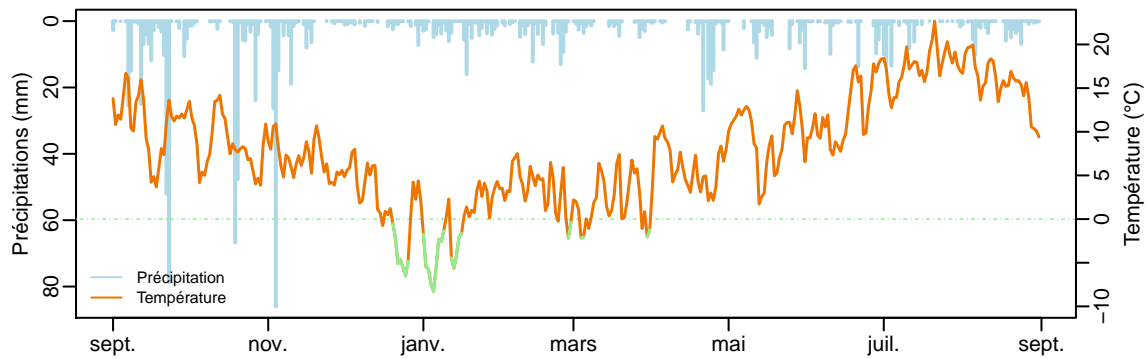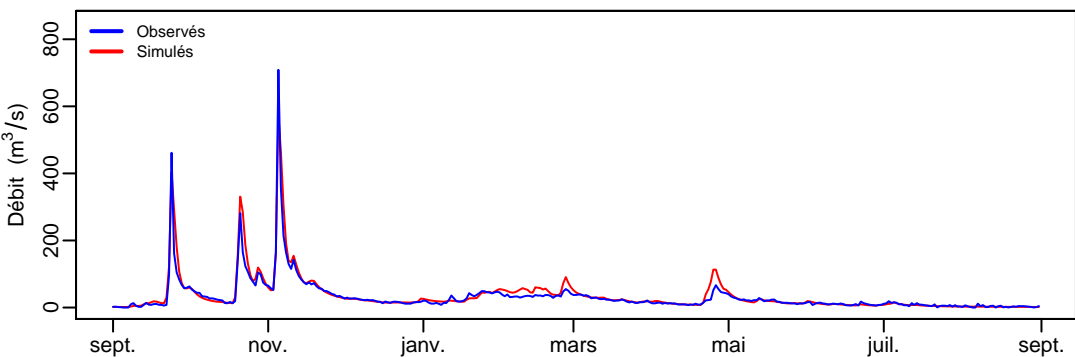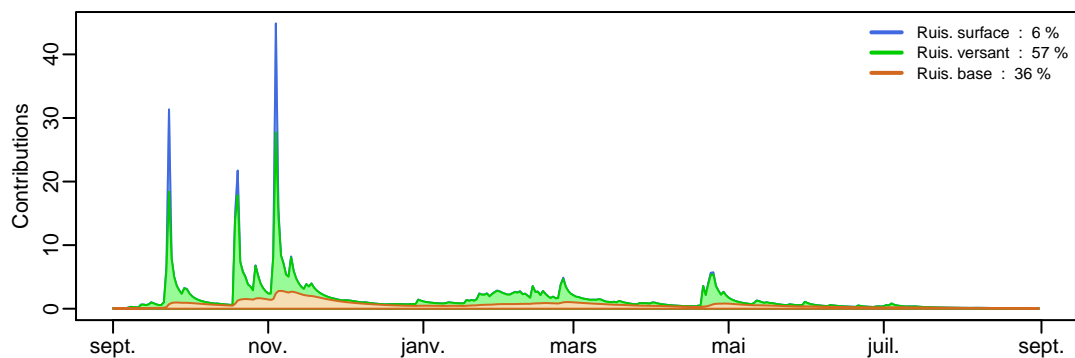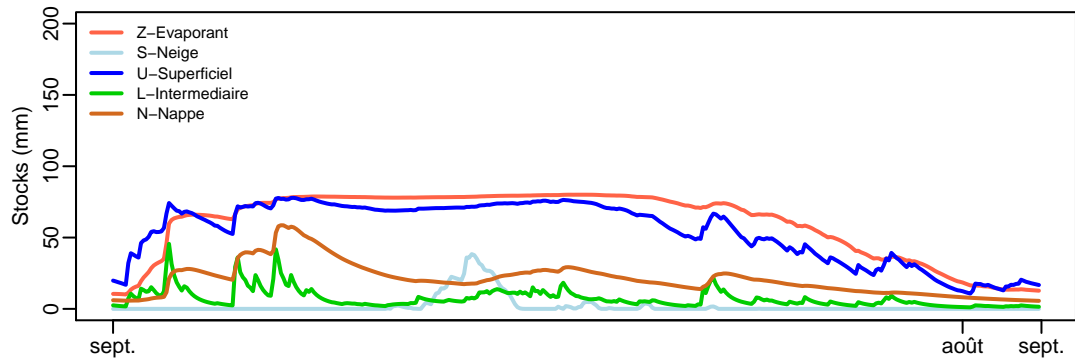

# k2300810 (1808.63 km<sup>2</sup>) – année 1995–1996

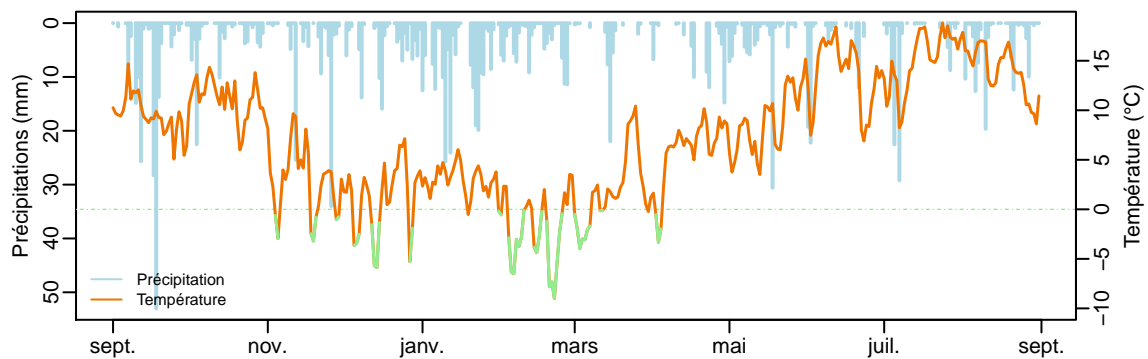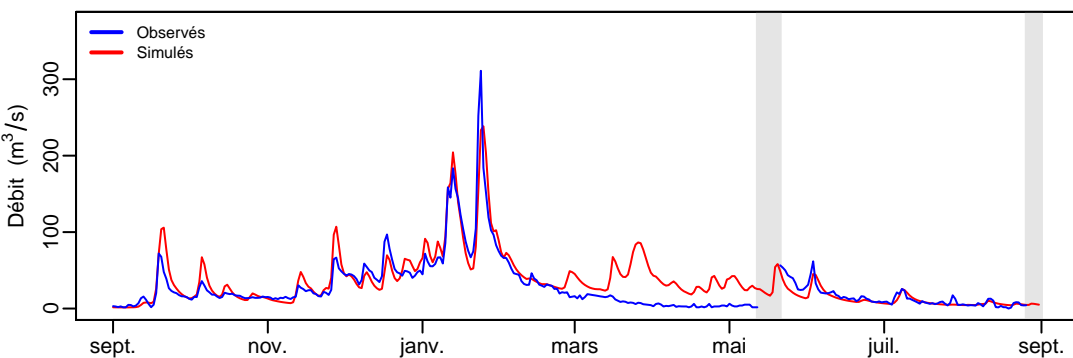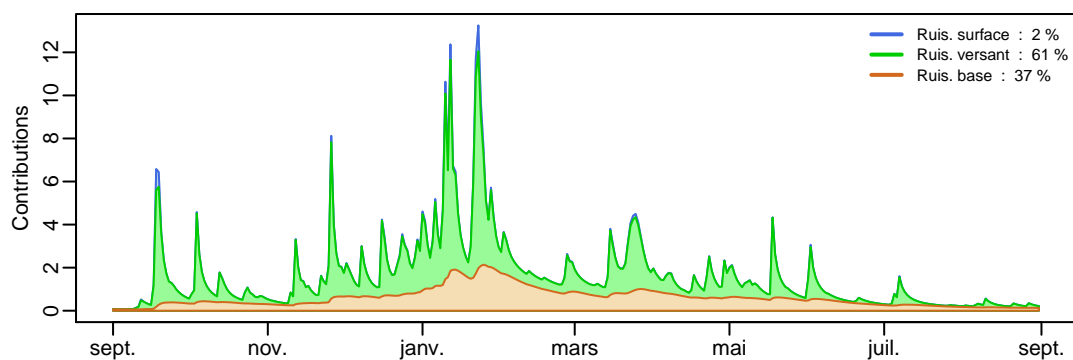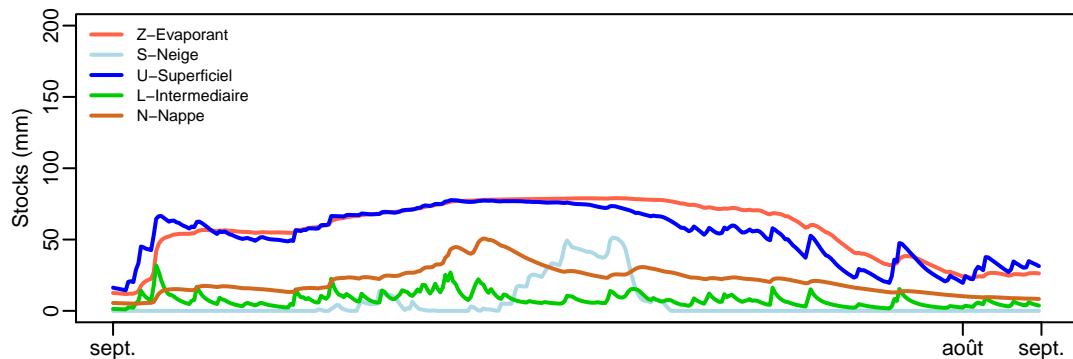

# k2300810 (1808.63 km<sup>2</sup>) – année 1996–1997

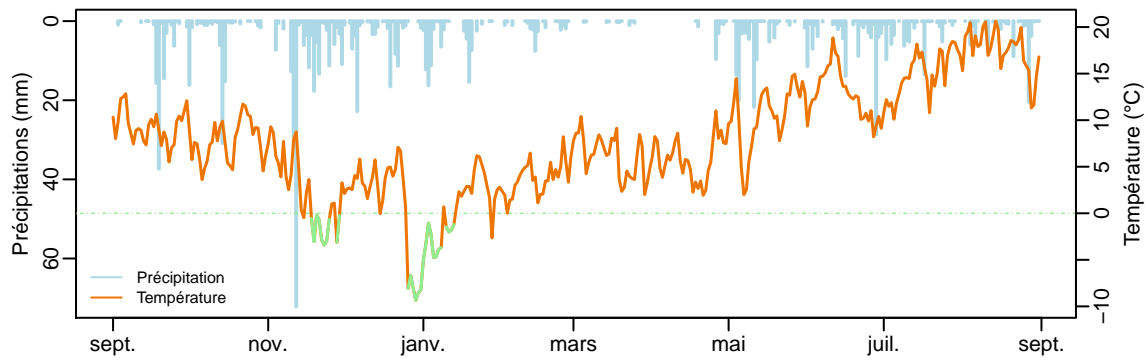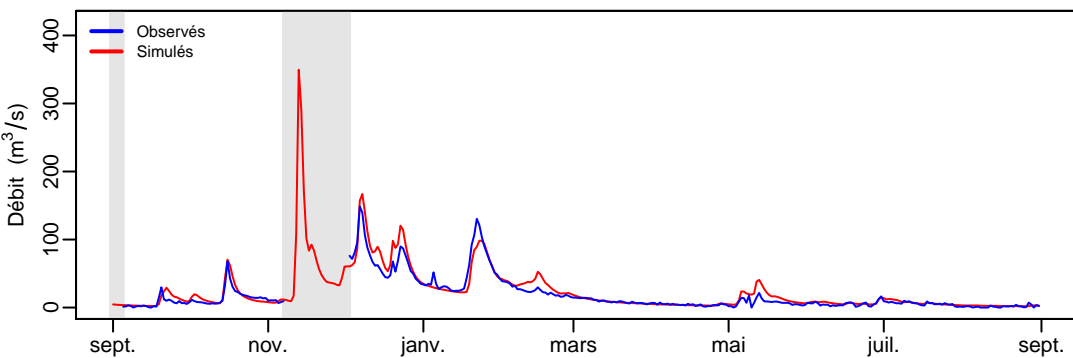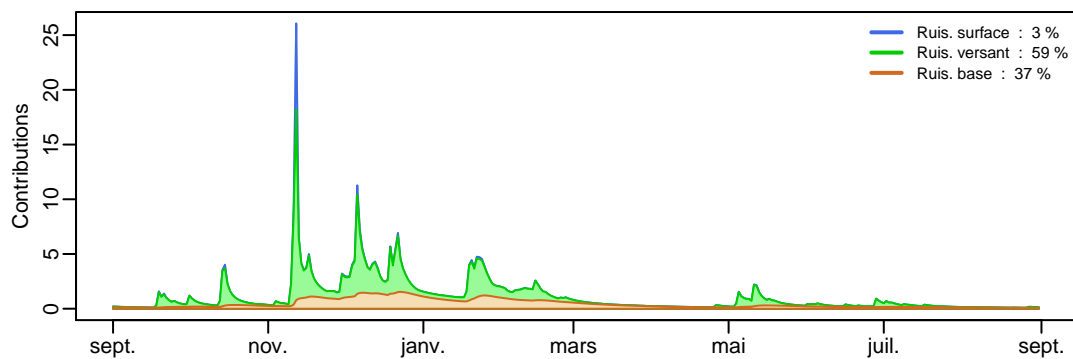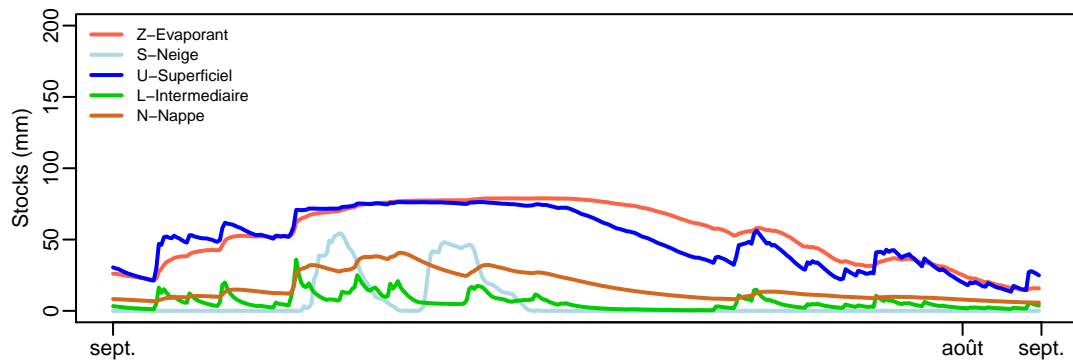

# k2300810 (1808.63 km<sup>2</sup>) – année 1997–1998

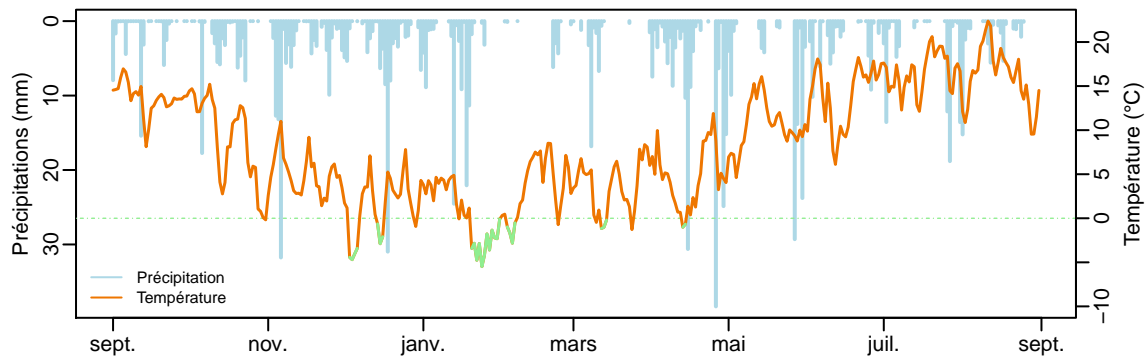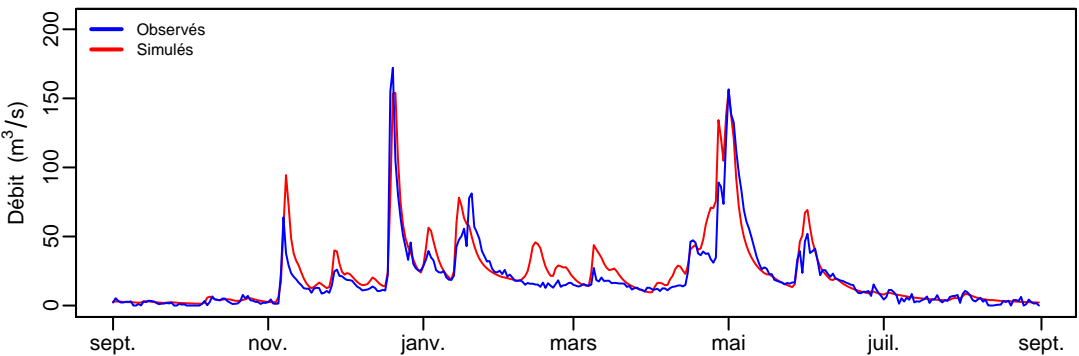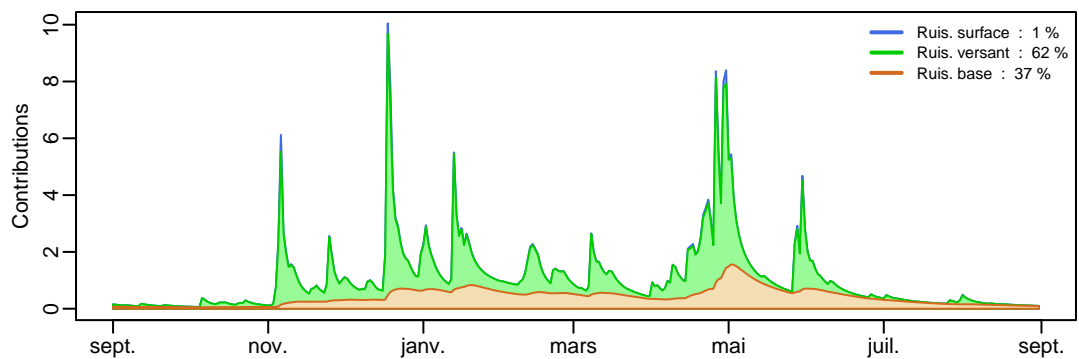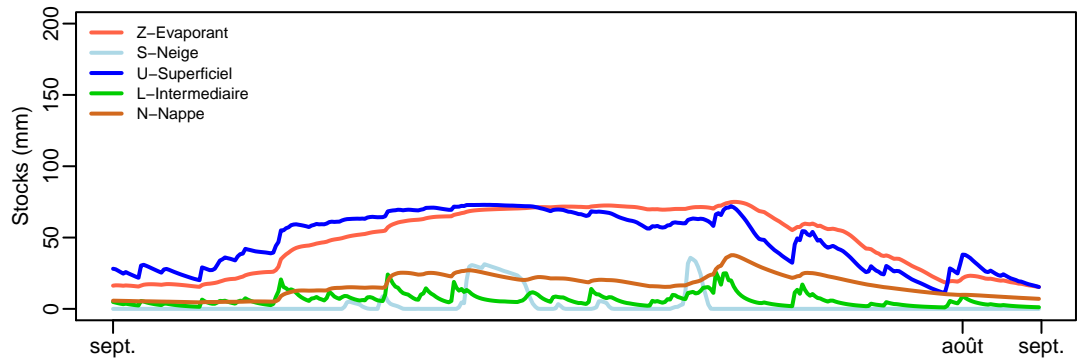

# k2300810 (1808.63 km<sup>2</sup>) – année 1998–1999

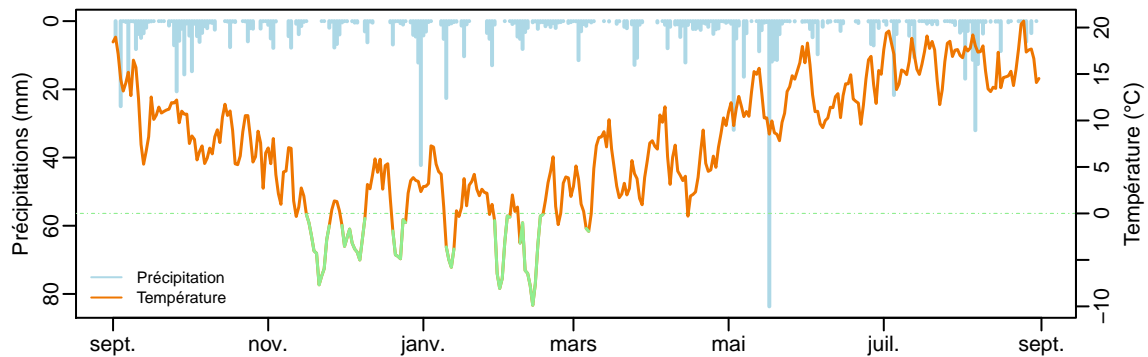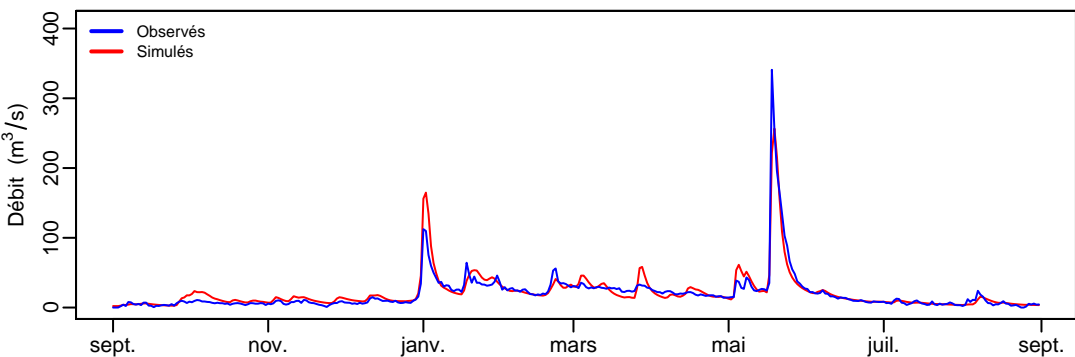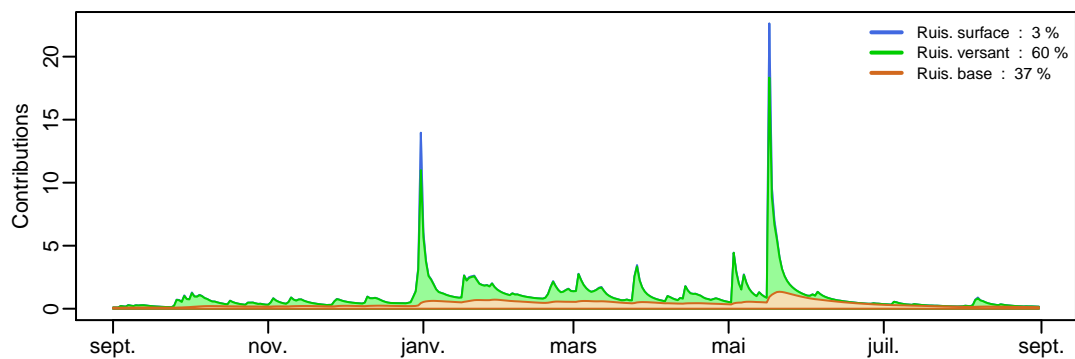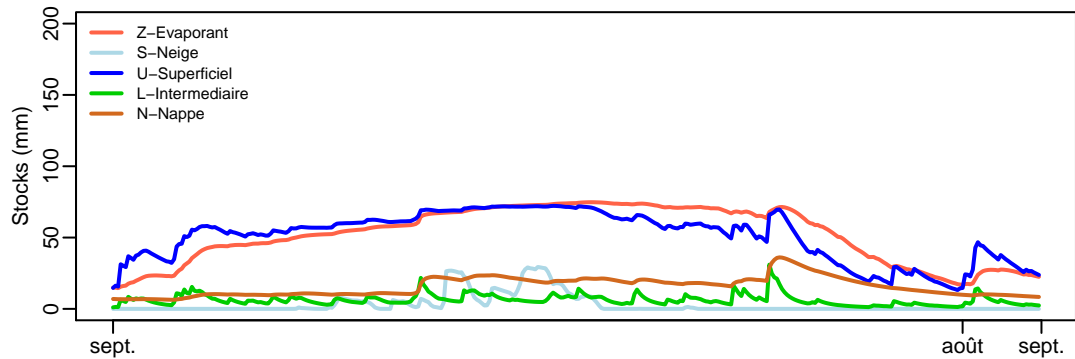

# k2300810 (1808.63 km<sup>2</sup>) – année 1999–2000

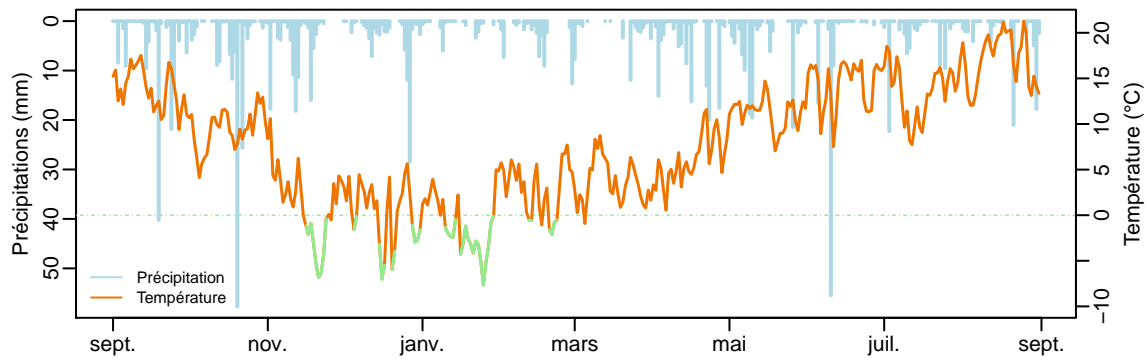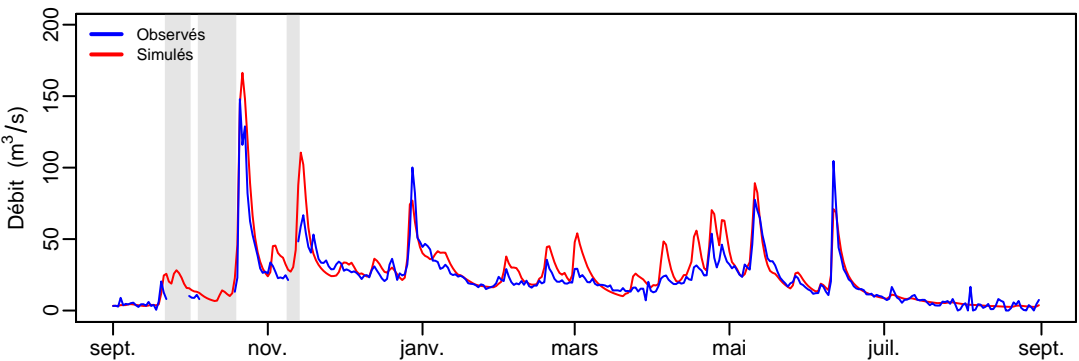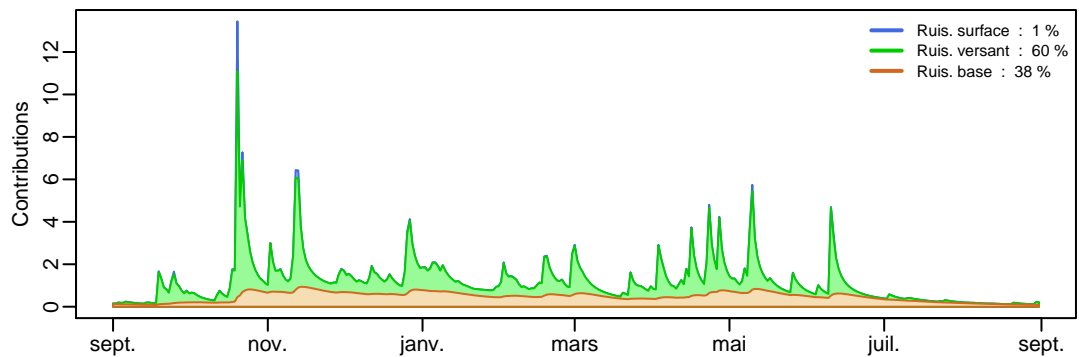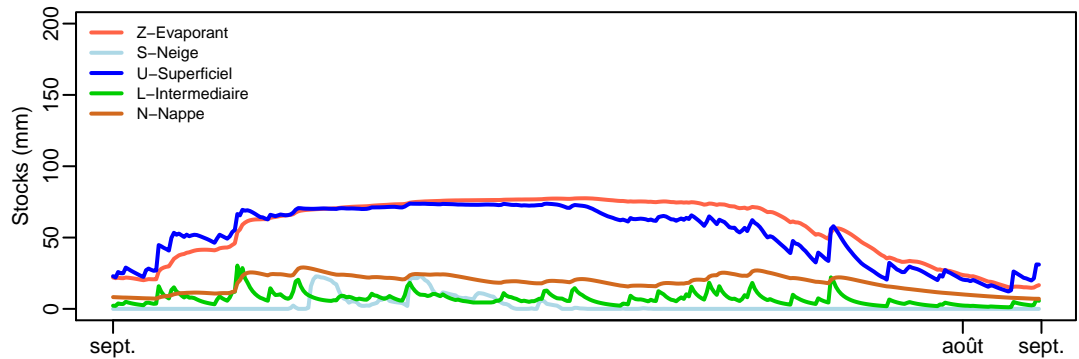

# k2300810 (1808.63 km<sup>2</sup>) – année 2000–2001

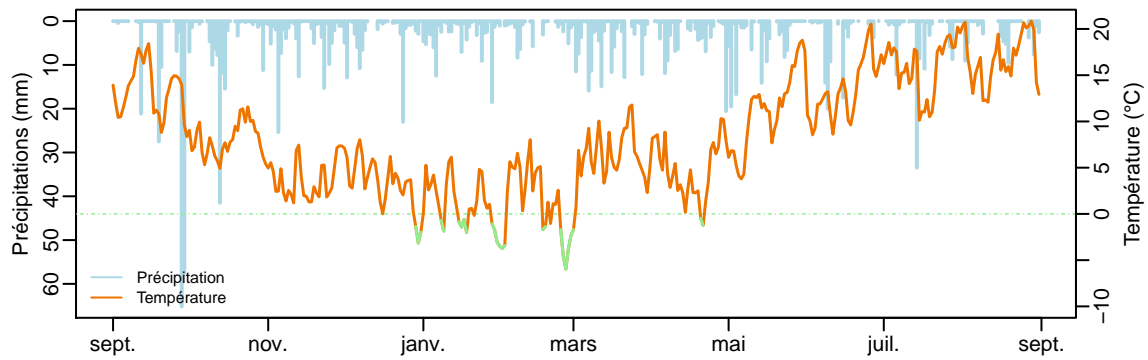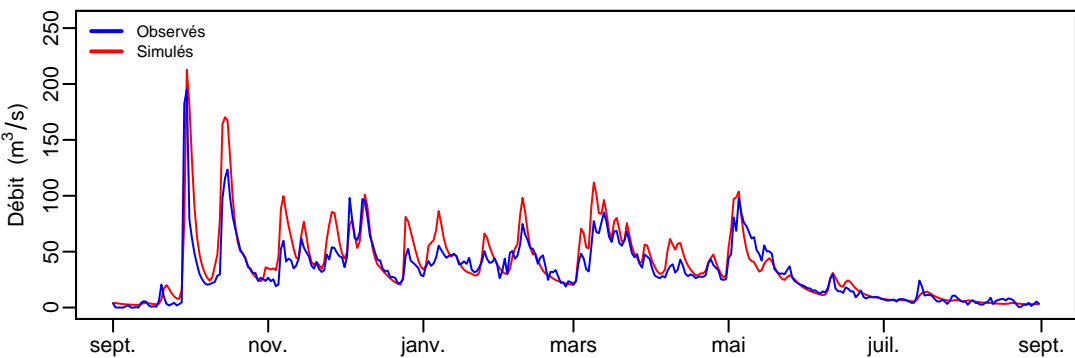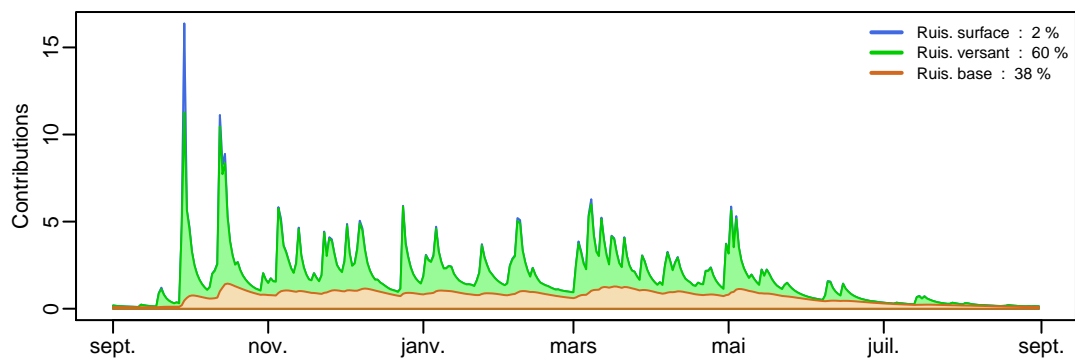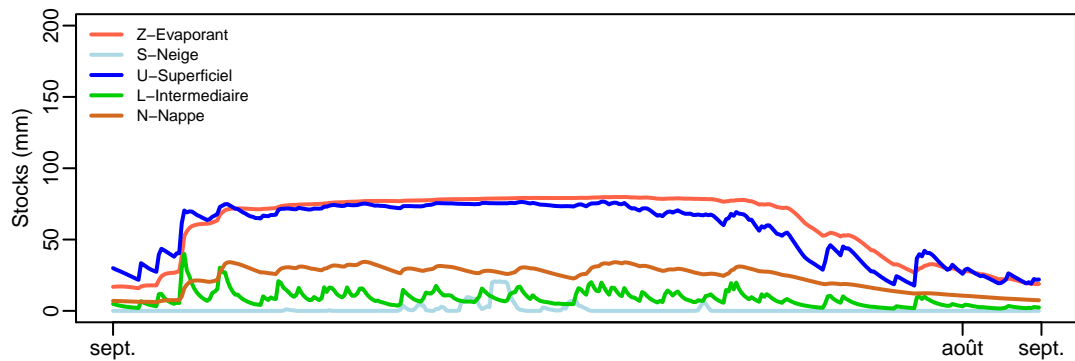

# k2300810 (1808.63 km<sup>2</sup>) – année 2001–2002

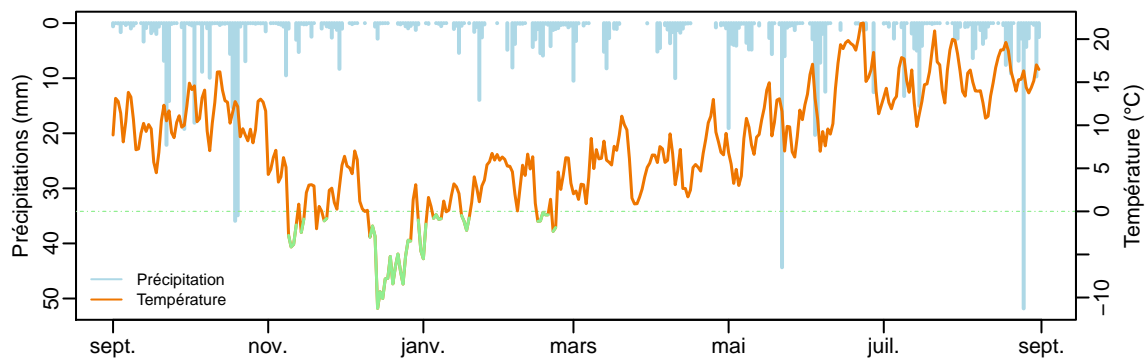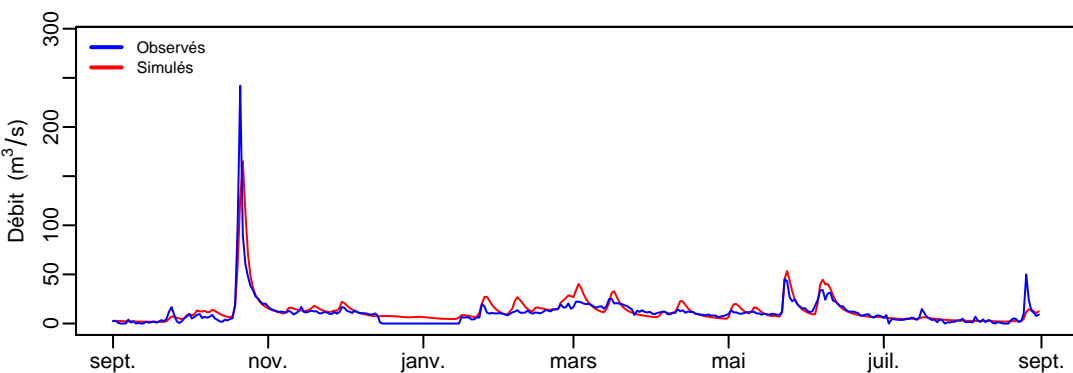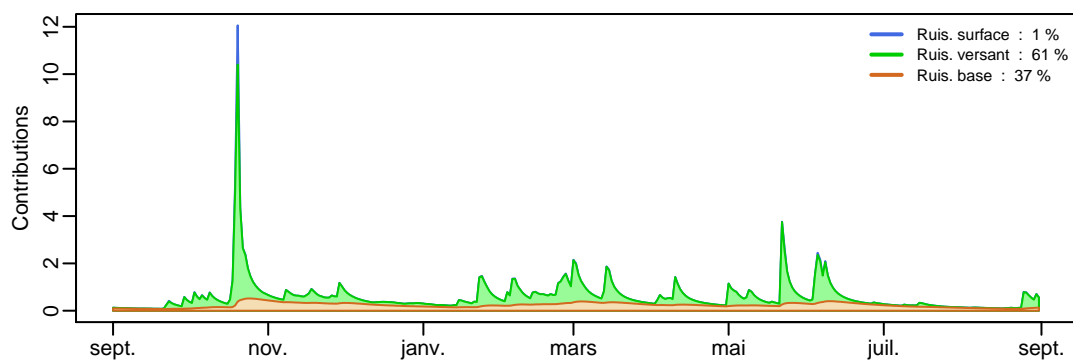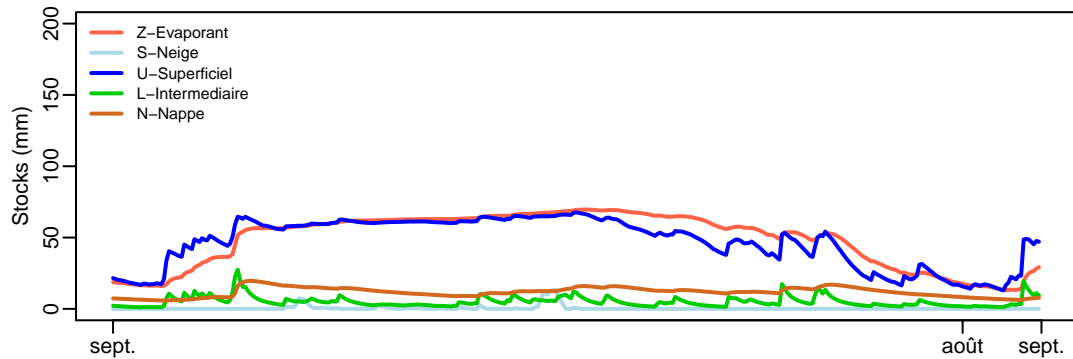



# k2300810 (1808.63 km<sup>2</sup>) – année 2002–2003

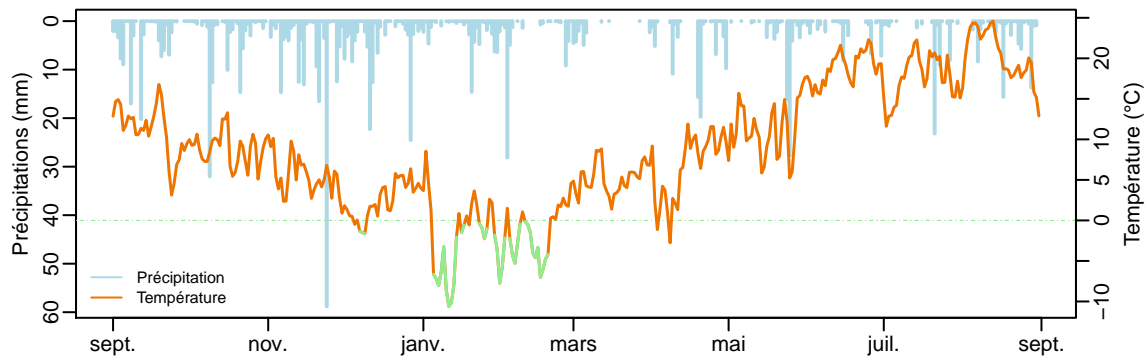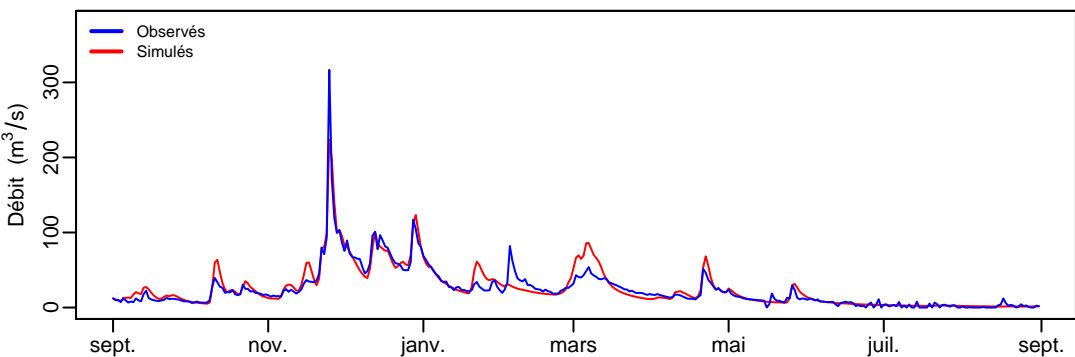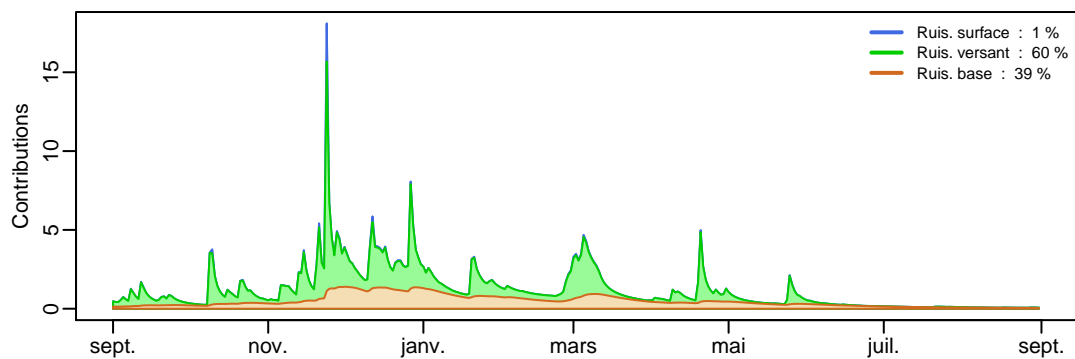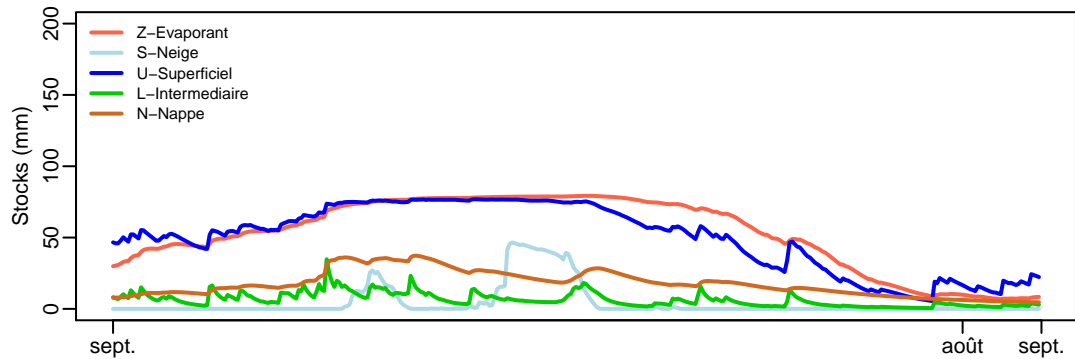

# k2300810 (1808.63 km<sup>2</sup>) – année 2003–2004

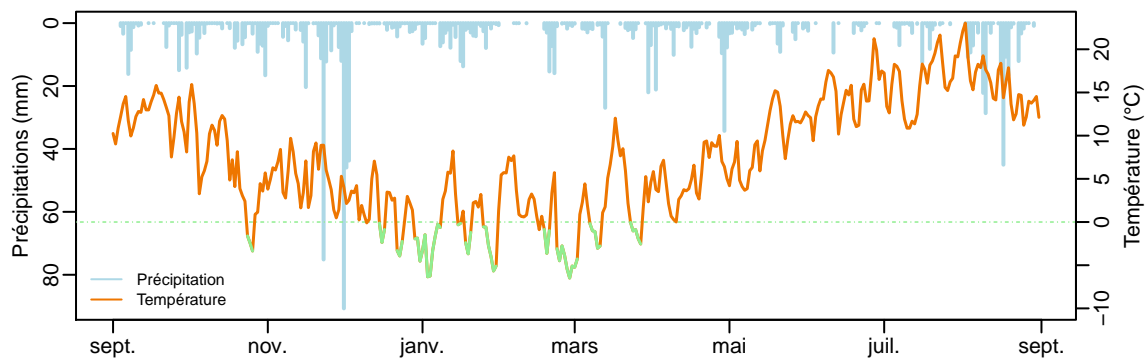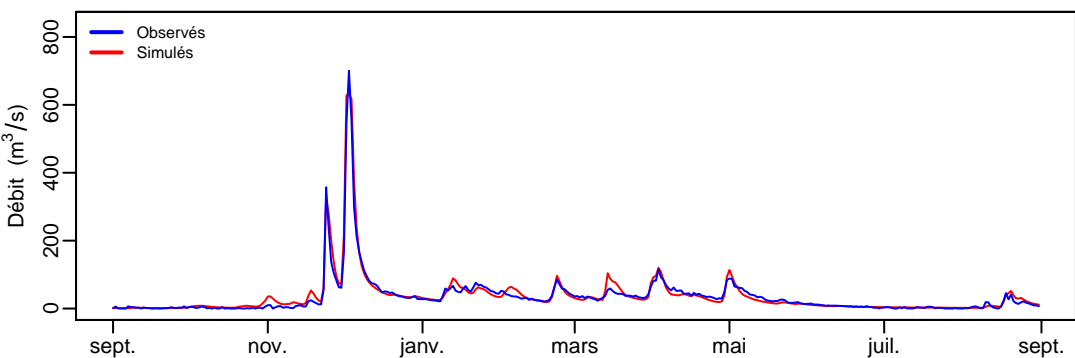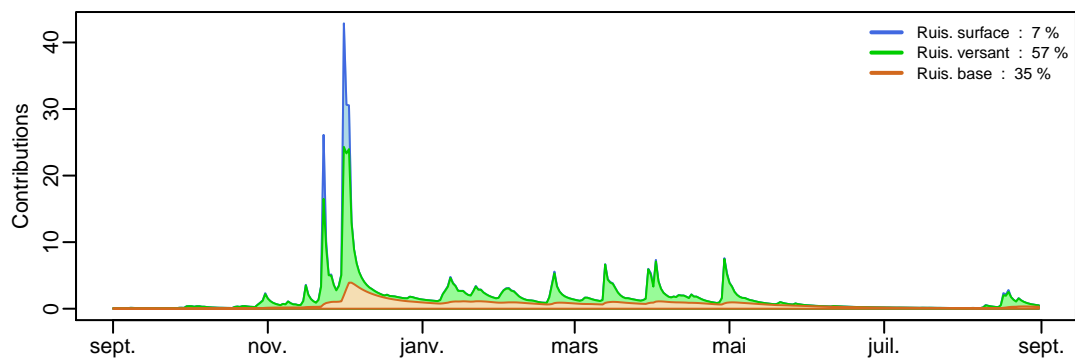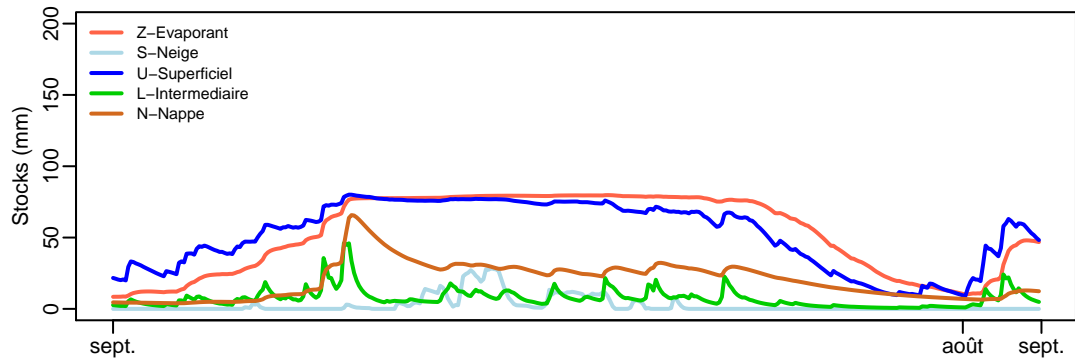

# k2300810 (1808.63 km<sup>2</sup>) – année 2004–2005

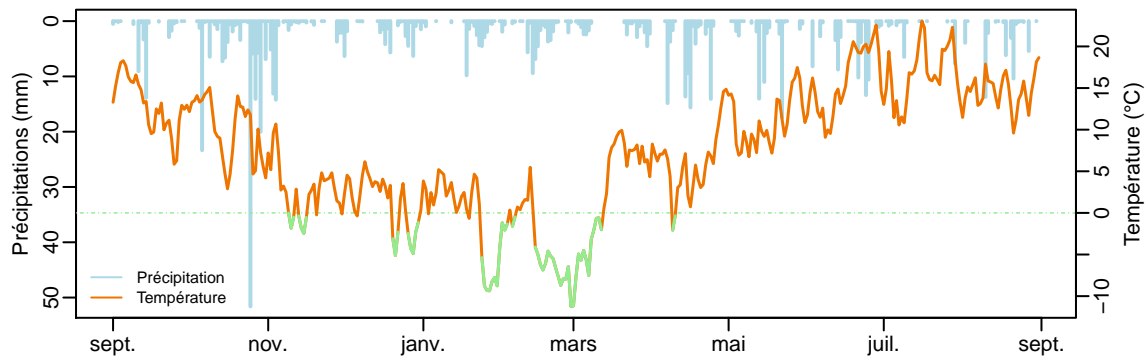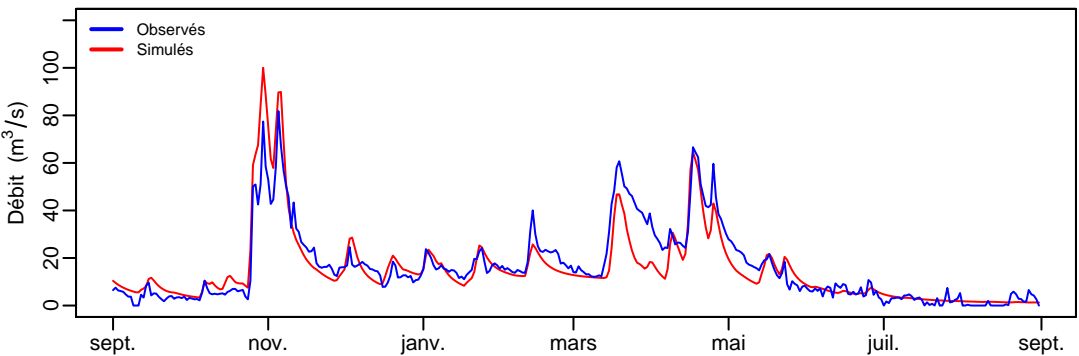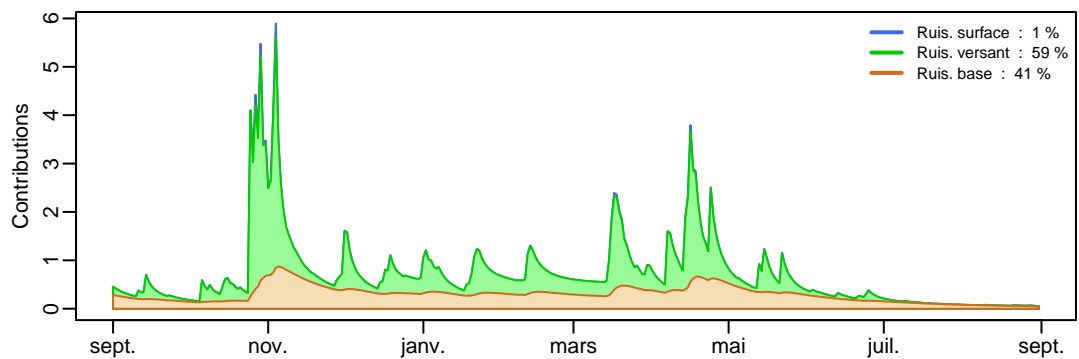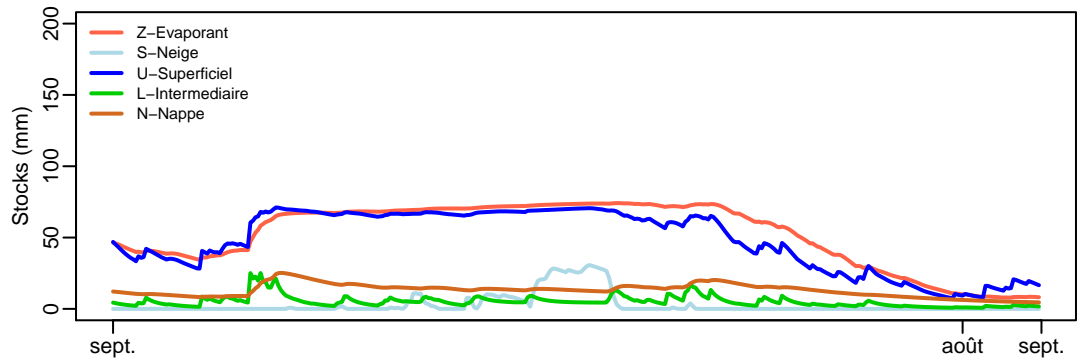

# k2300810 (1808.63 km<sup>2</sup>) – année 2005–2006

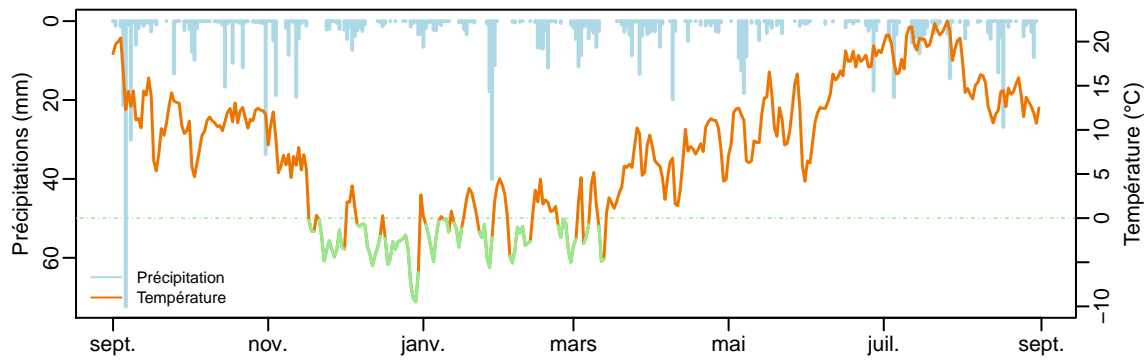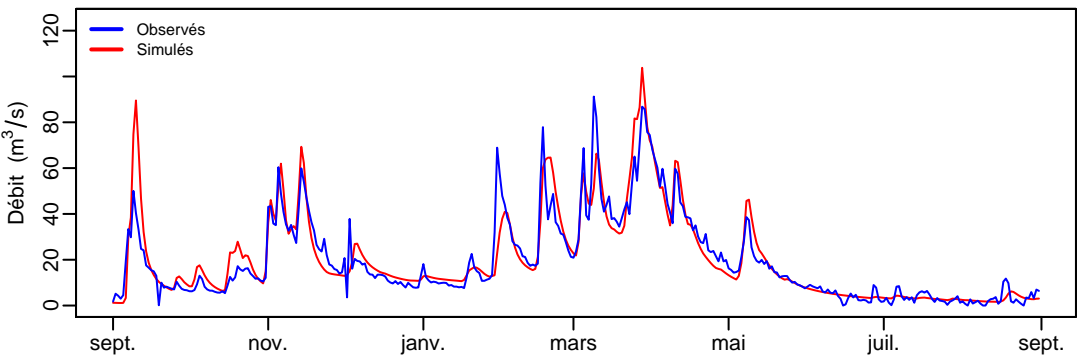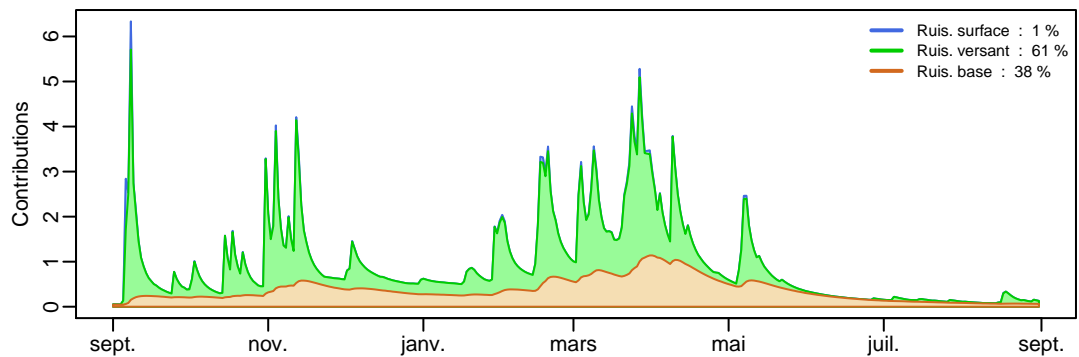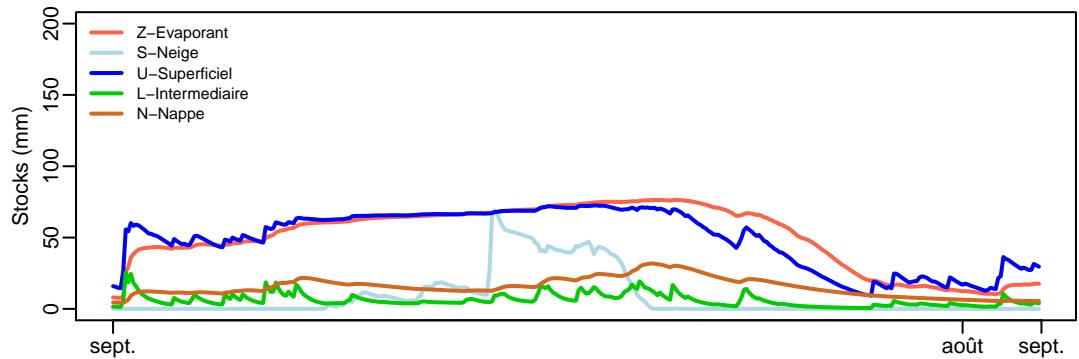

# k2300810 (1808.63 km<sup>2</sup>) – année 2006–2007

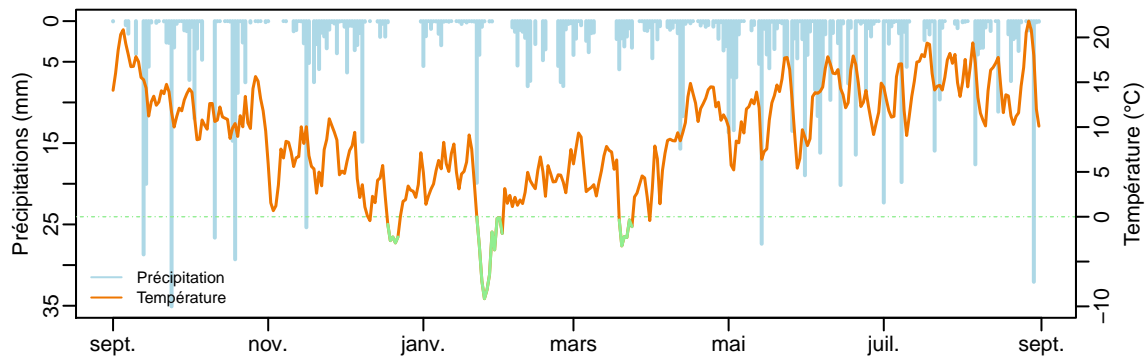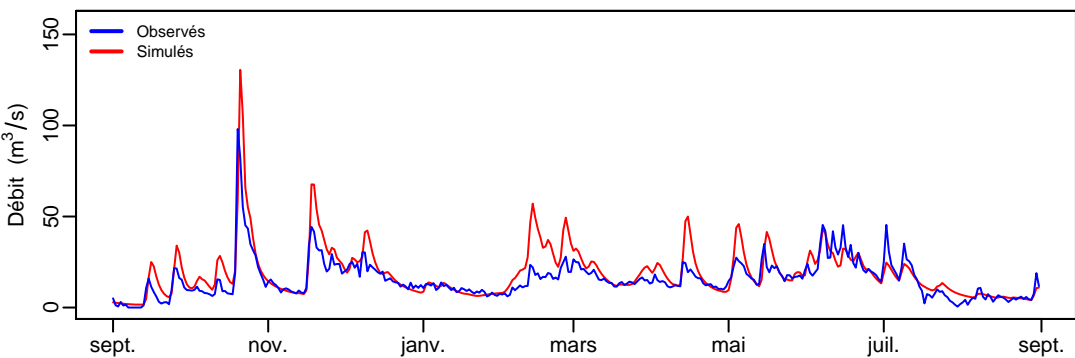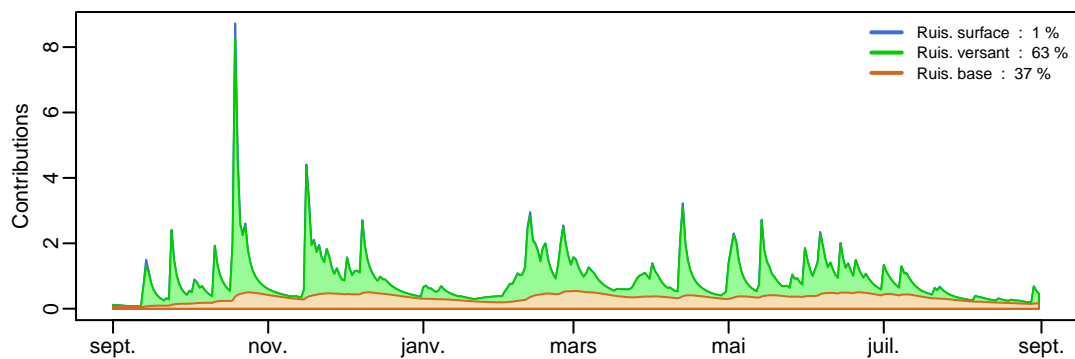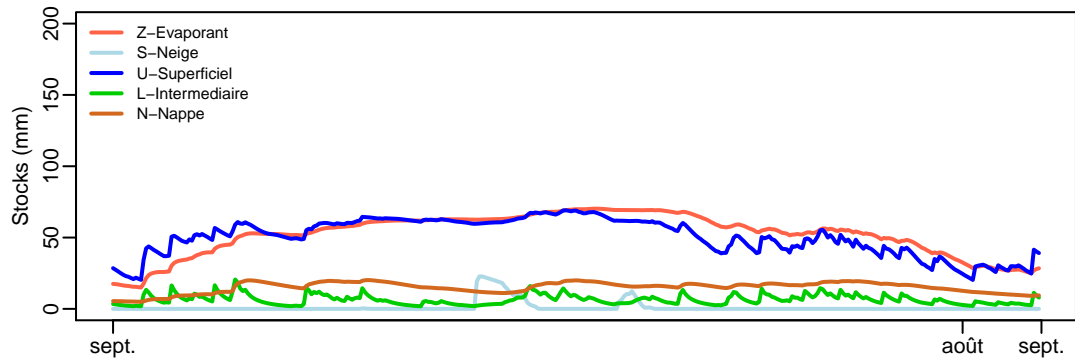

# k2300810 (1808.63 km<sup>2</sup>) – année 2007–2008

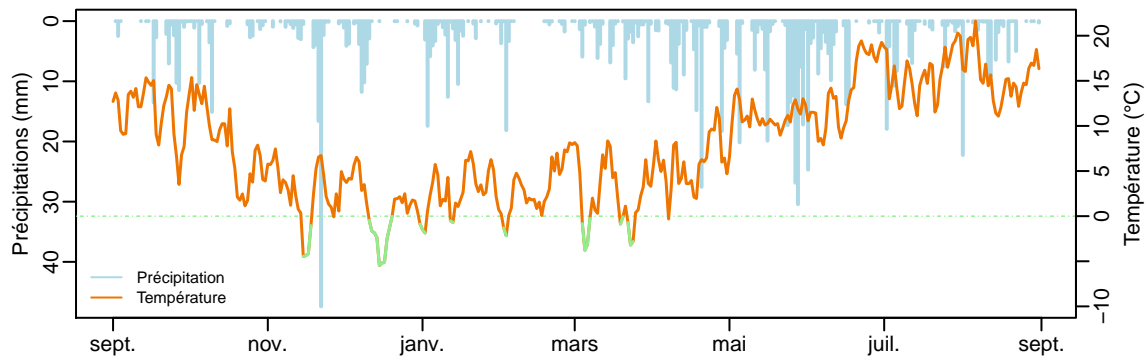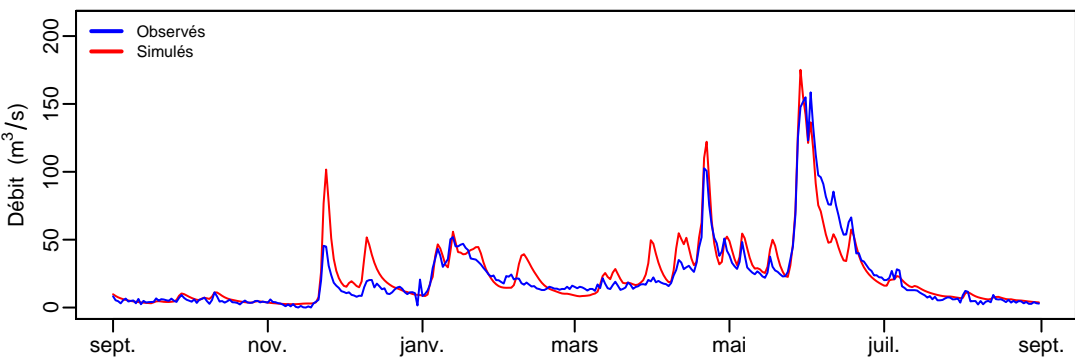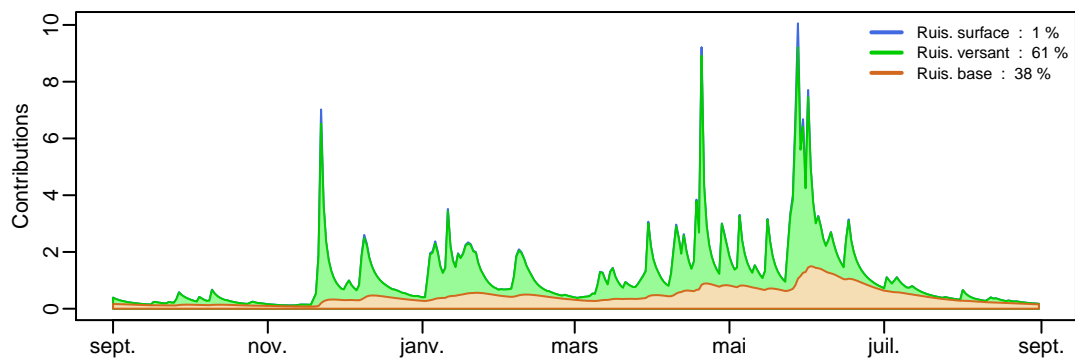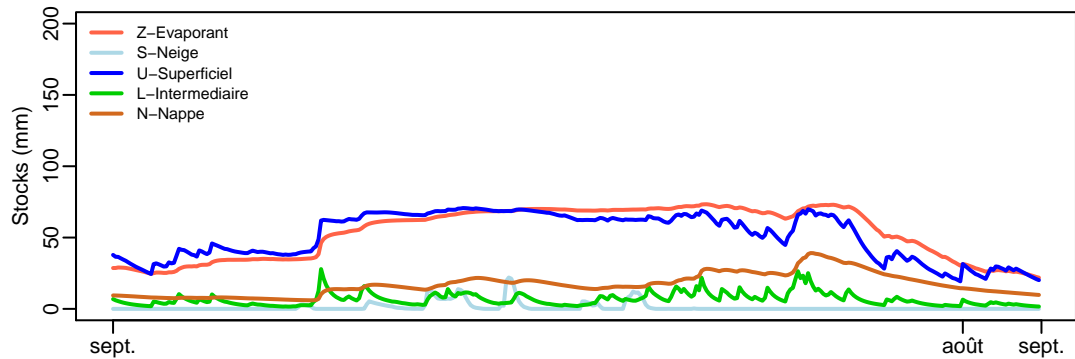

# k2300810 (1808.63 km<sup>2</sup>) – année 2008–2009

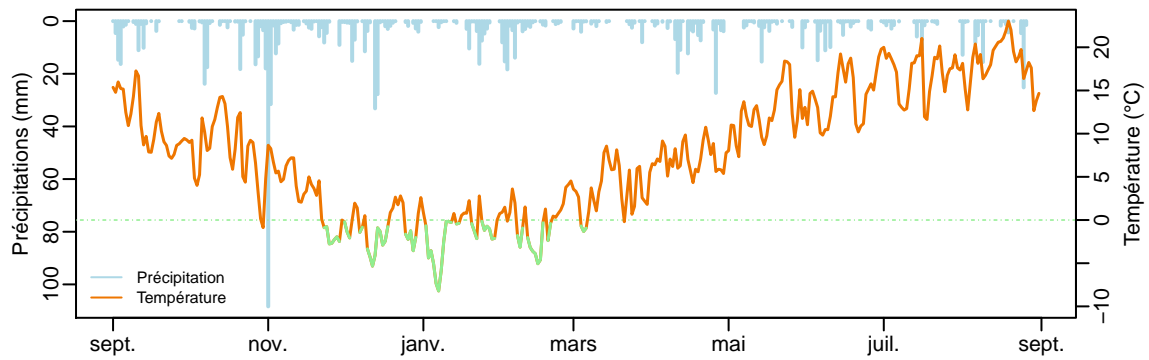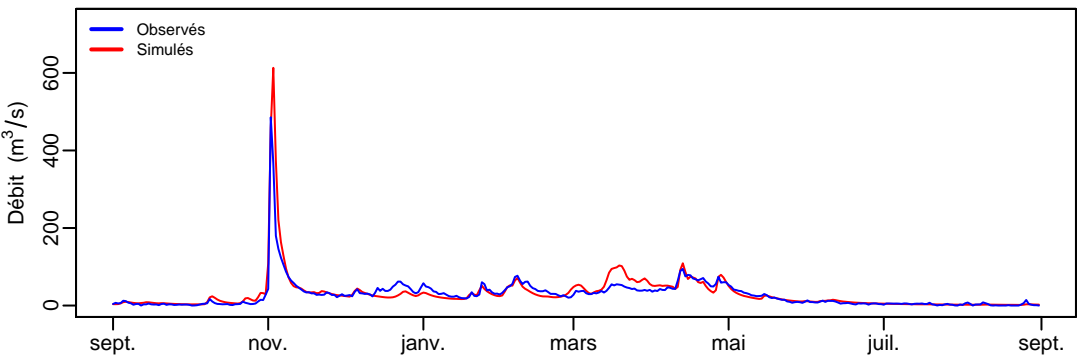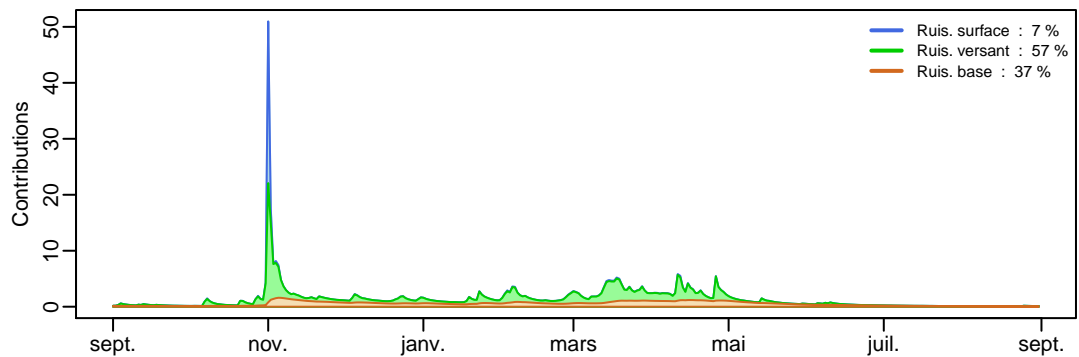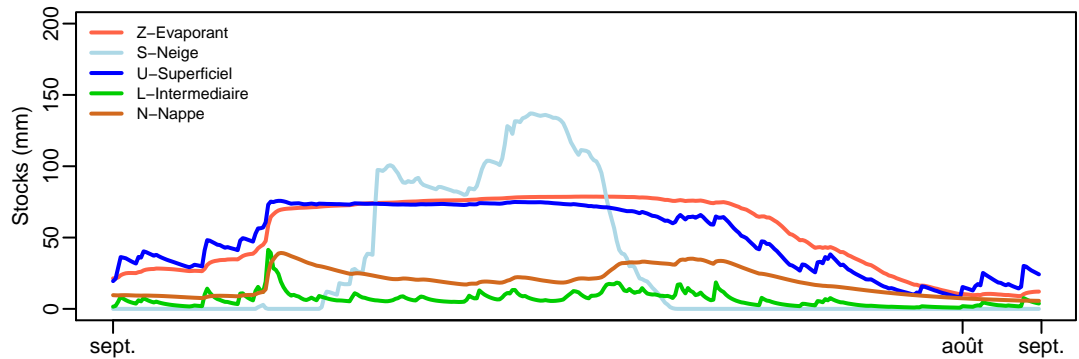

# k2300810 (1808.63 km<sup>2</sup>) – année 2009–2010

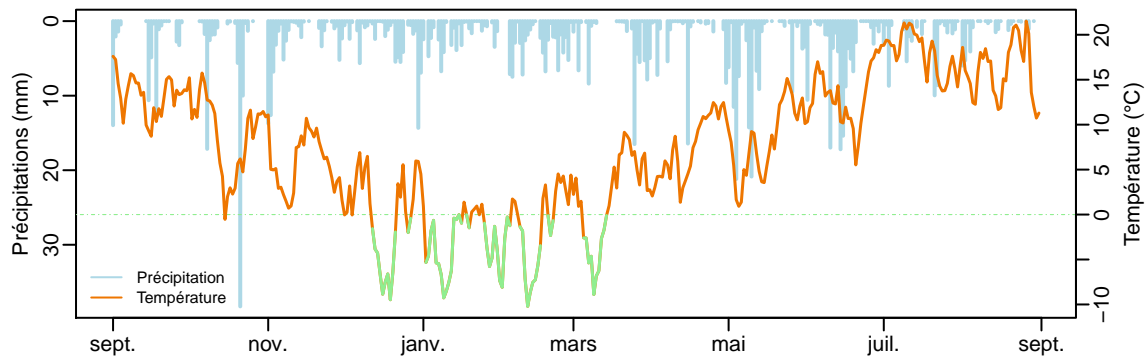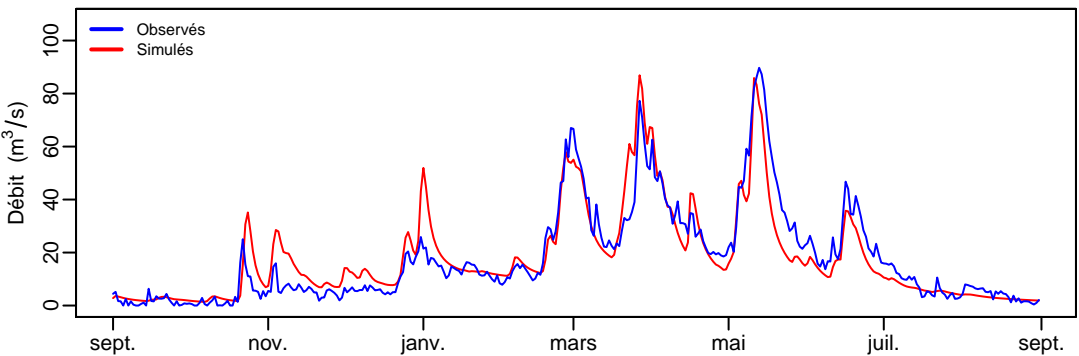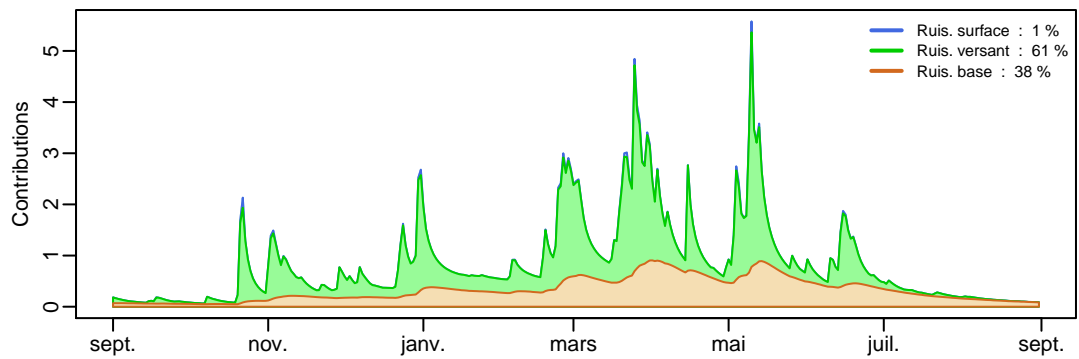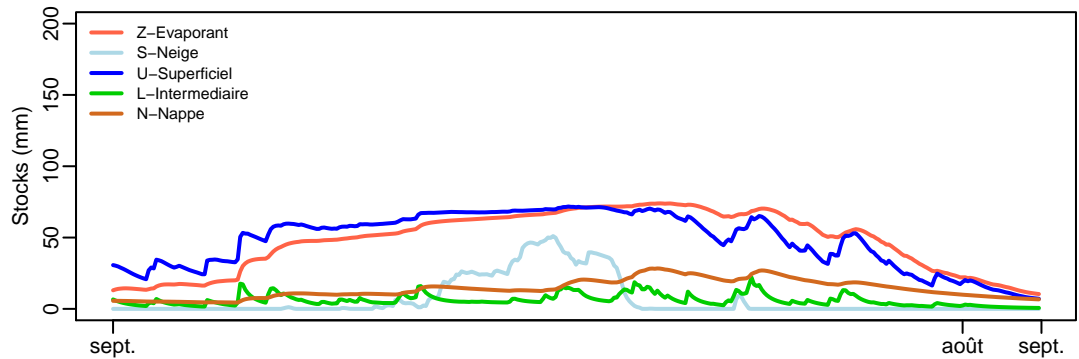



# k2300810 (1808.63 km<sup>2</sup>) – année 2010–2011

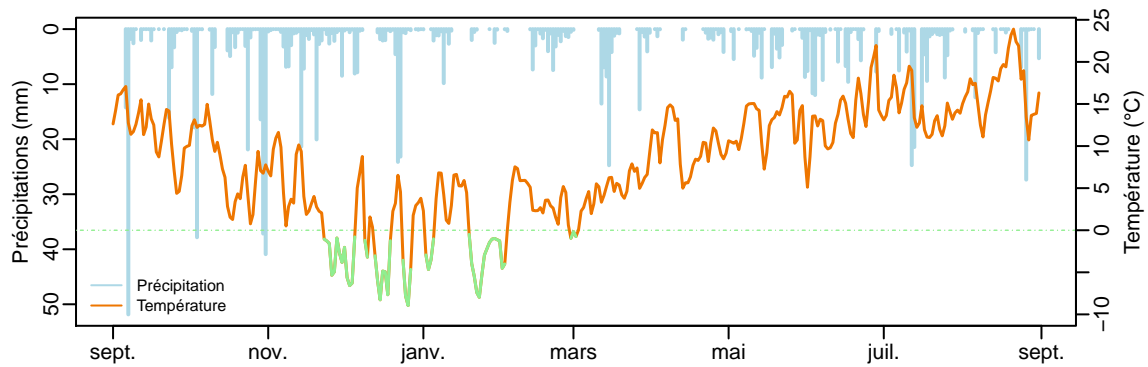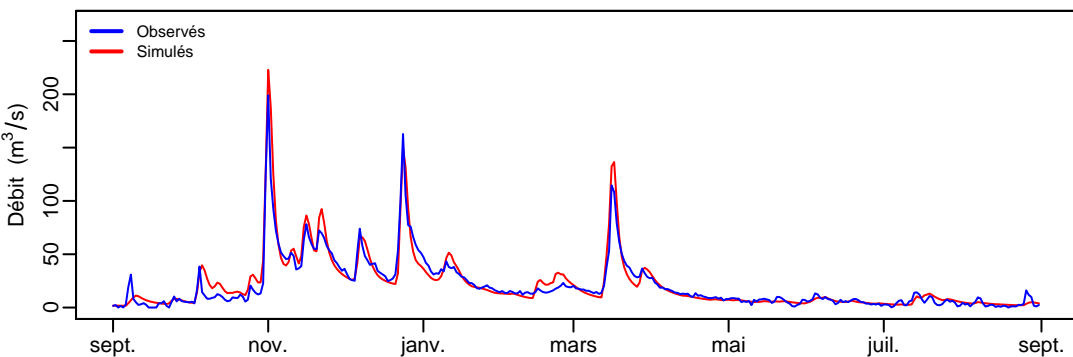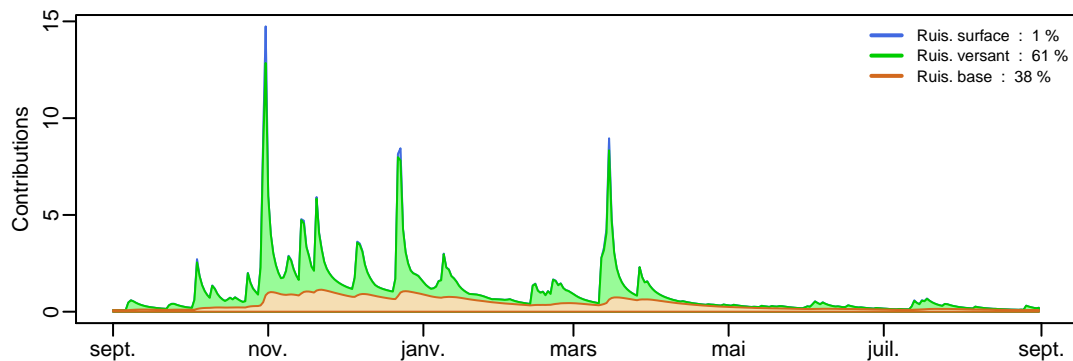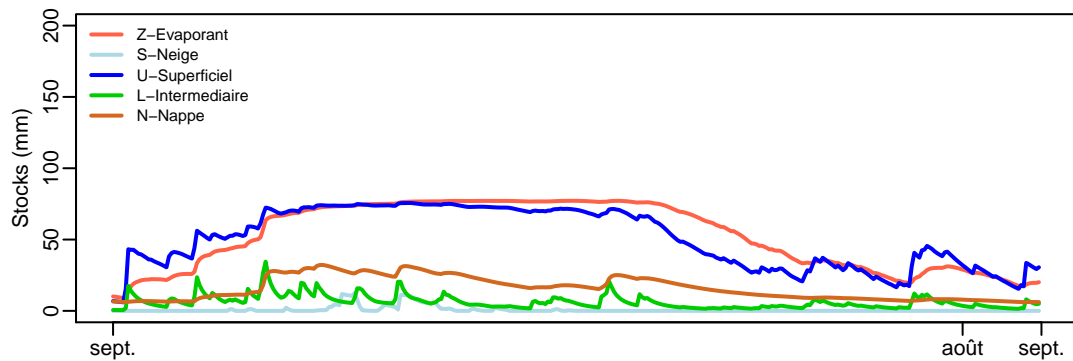

# k2300810 (1808.63 km²) – année 2011–2012

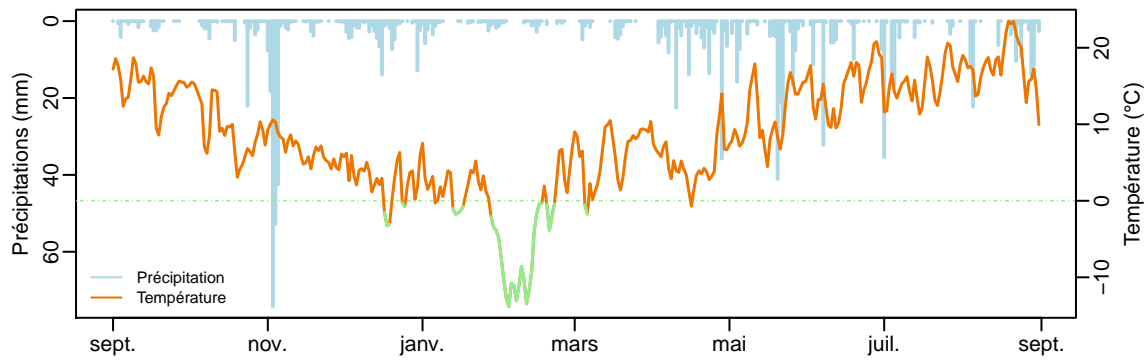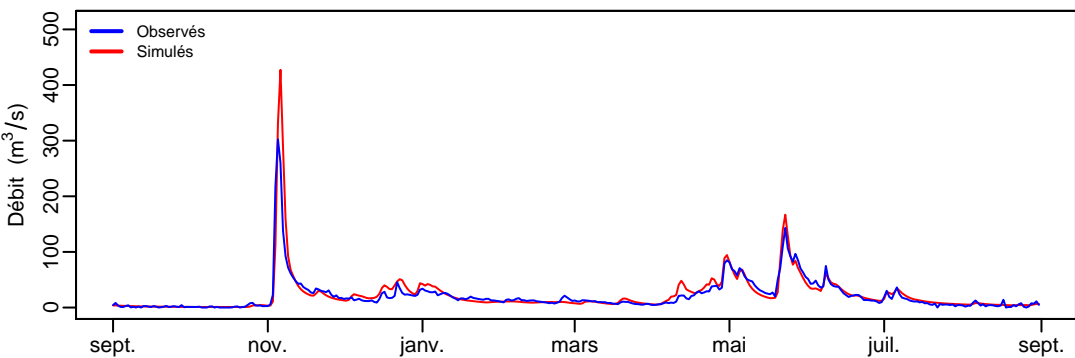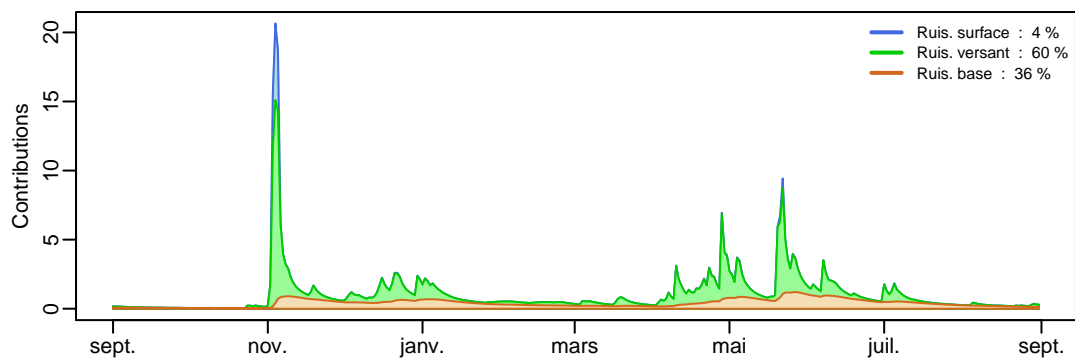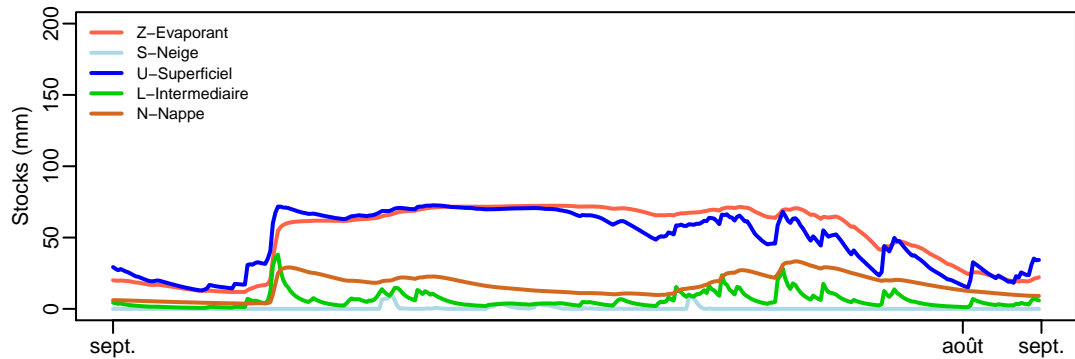

# k2316210 (126.07 km<sup>2</sup>) – année 1991–1992

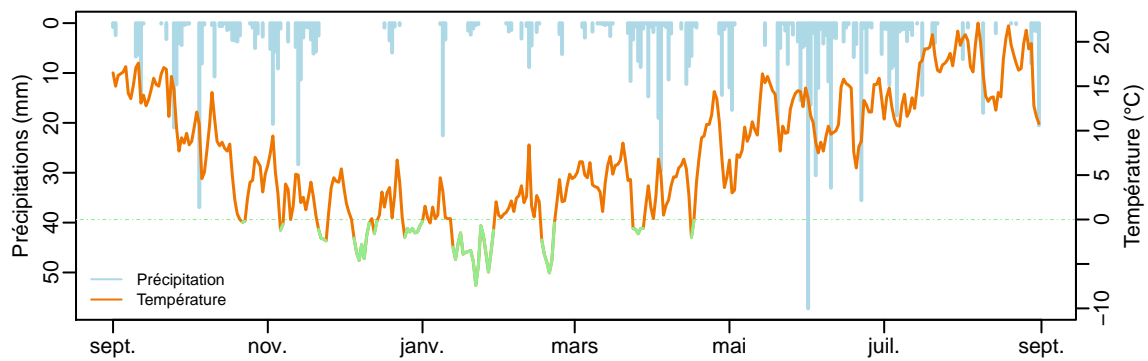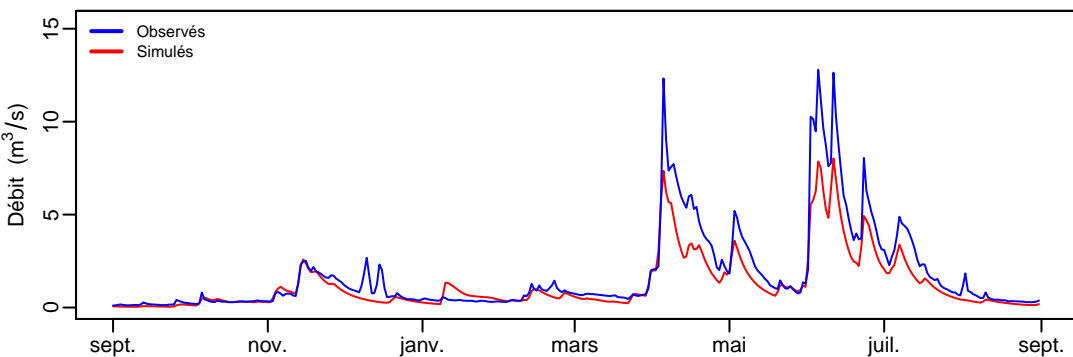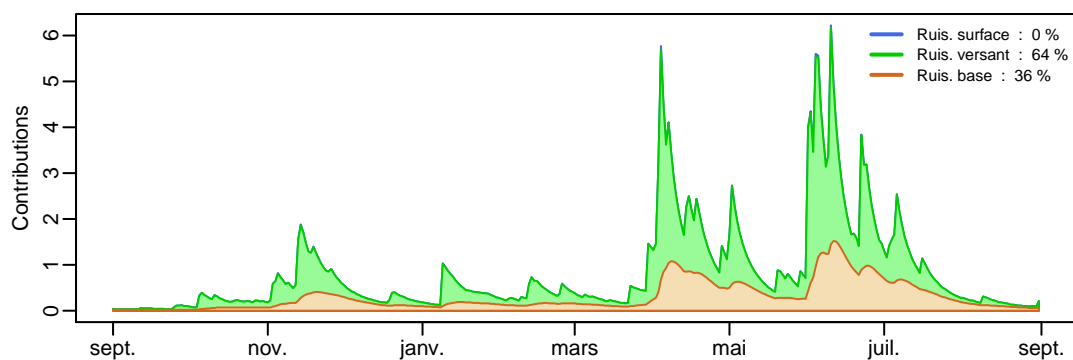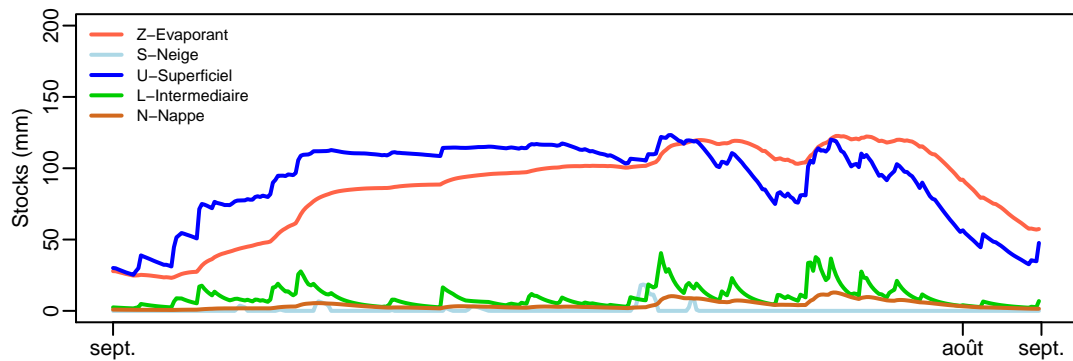

# k2316210 (126.07 km<sup>2</sup>) – année 1992–1993

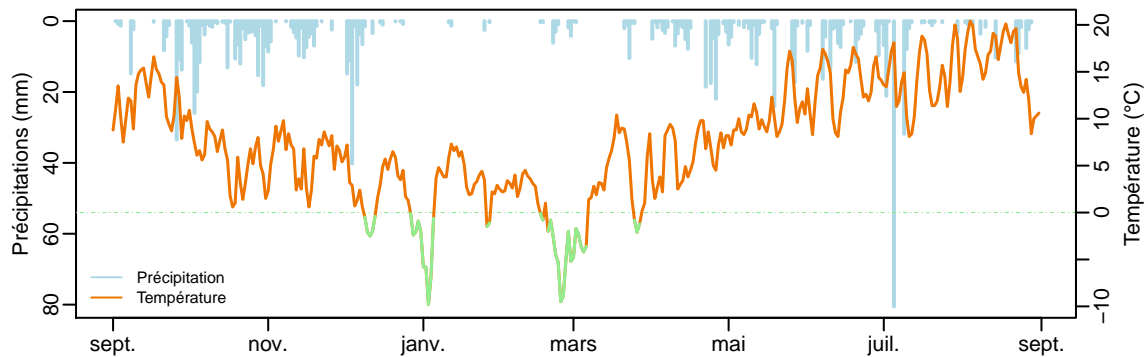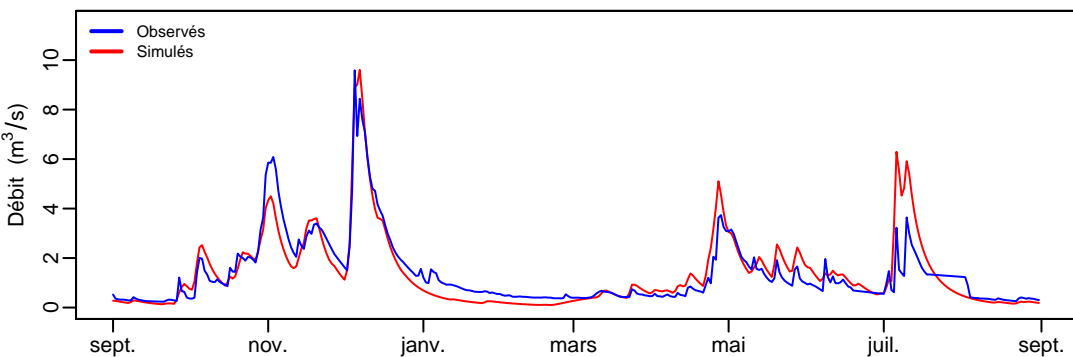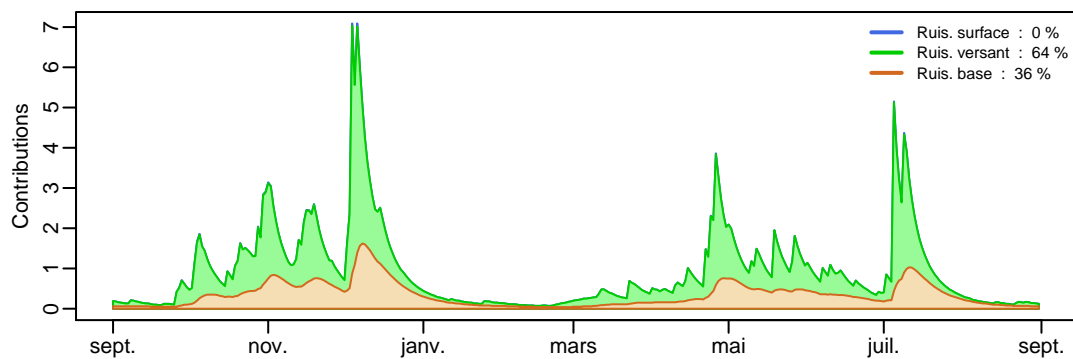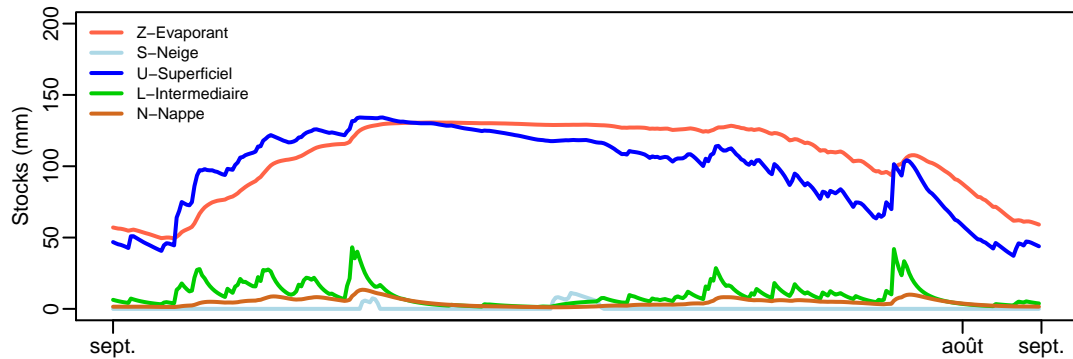

# k2316210 (126.07 km<sup>2</sup>) – année 1993–1994

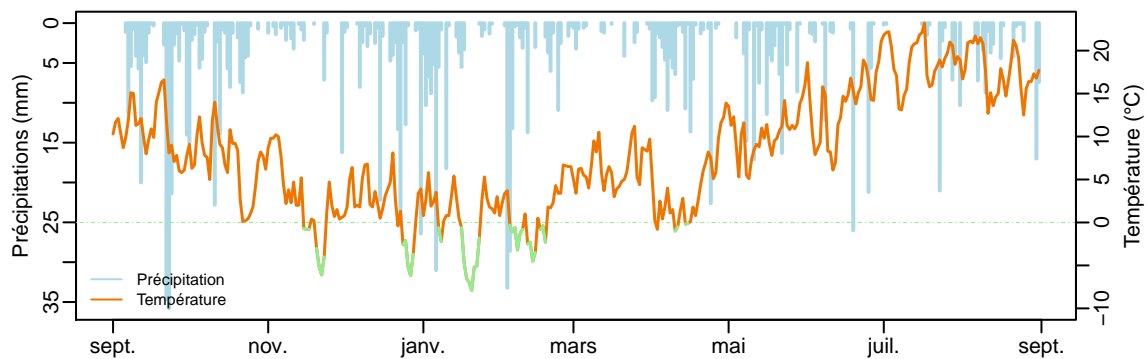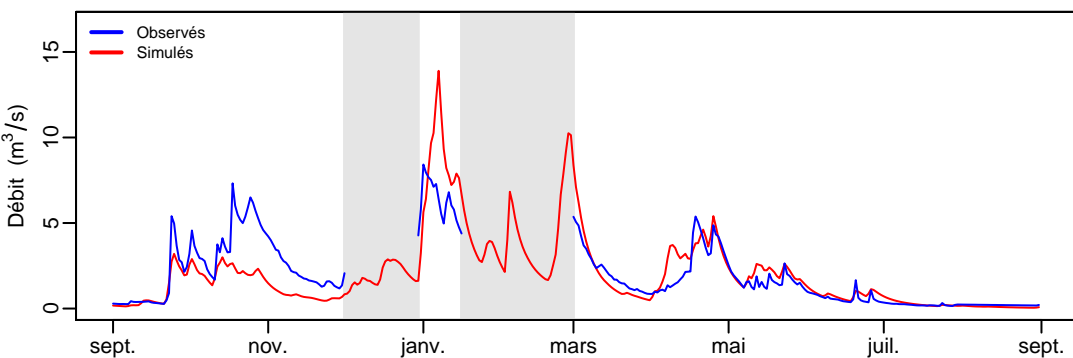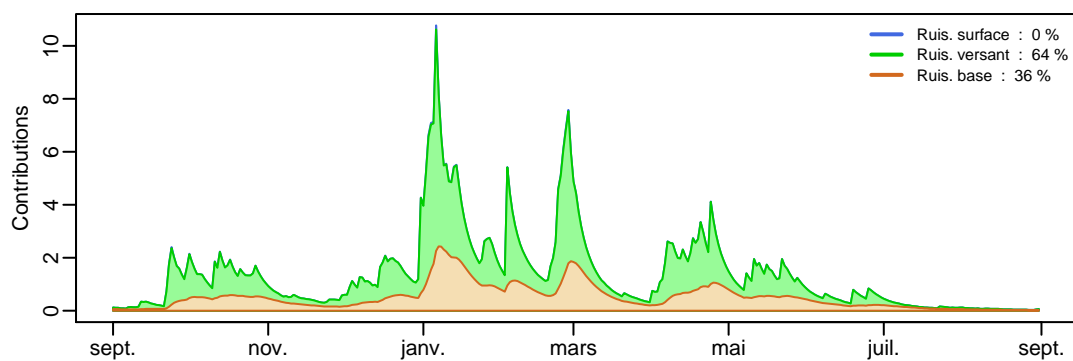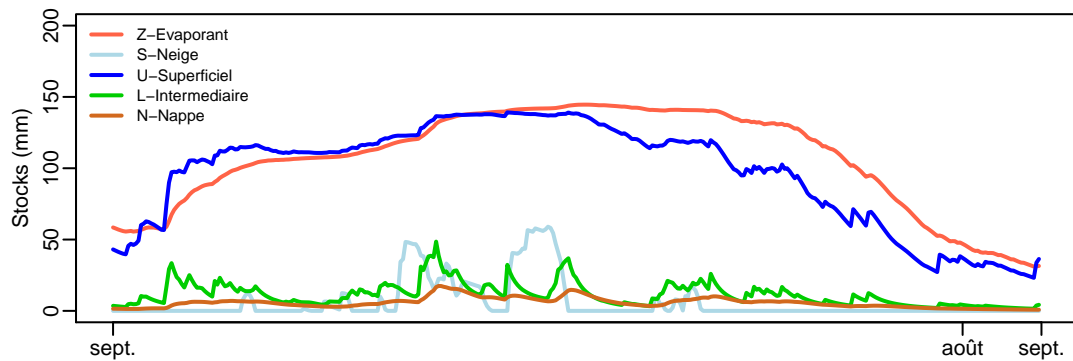

# k2316210 (126.07 km<sup>2</sup>) – année 1994–1995

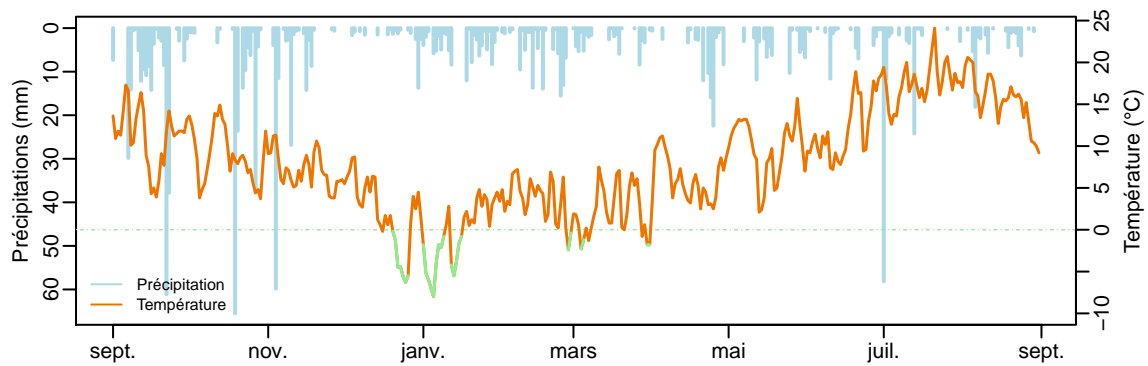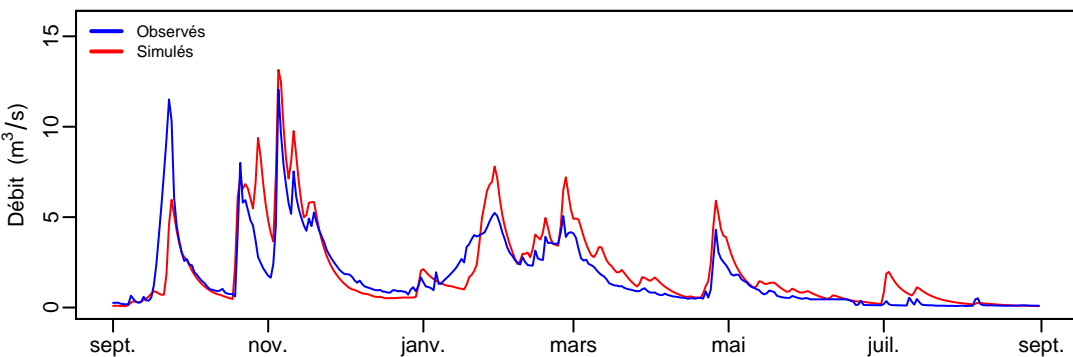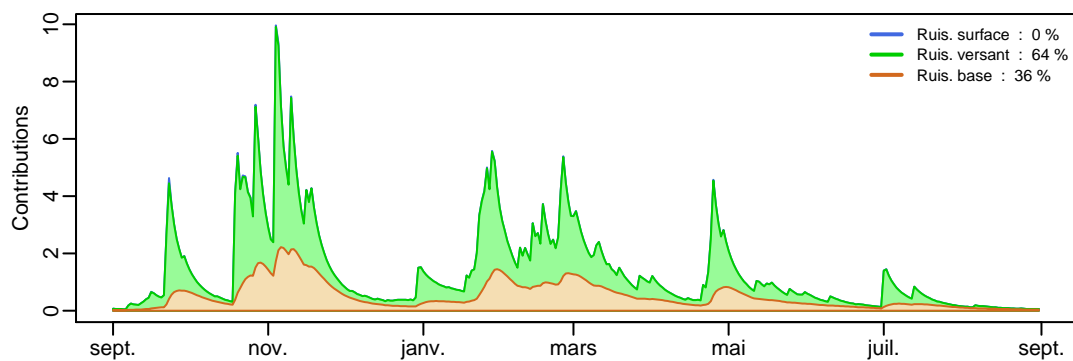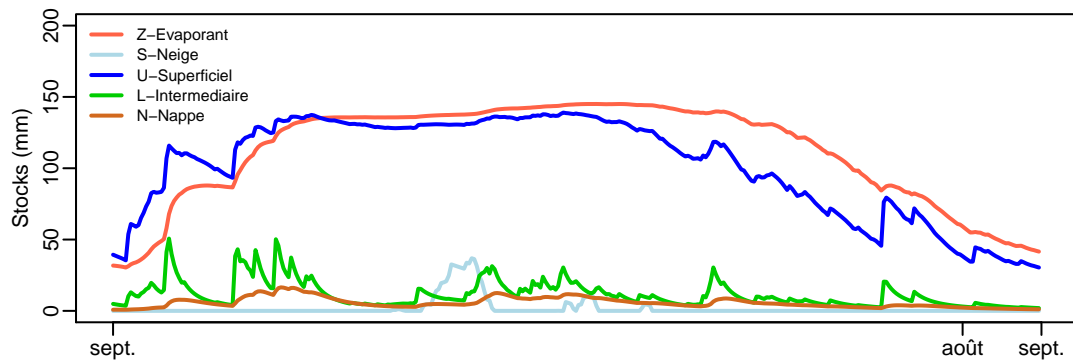

# k2316210 (126.07 km<sup>2</sup>) – année 1995–1996

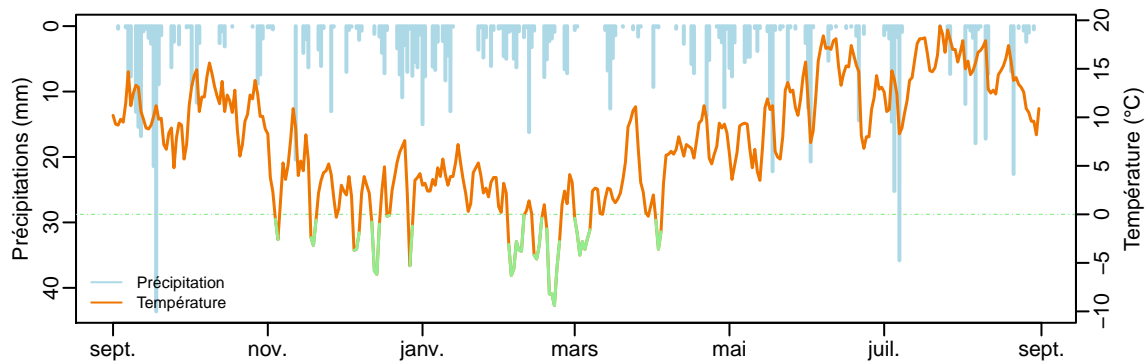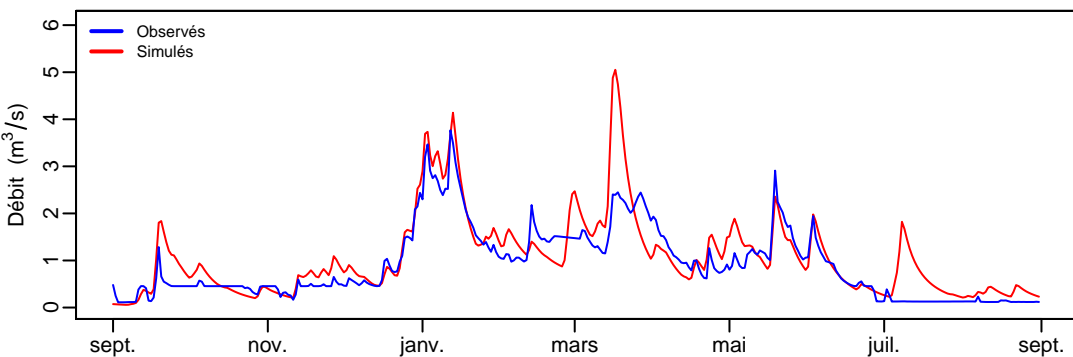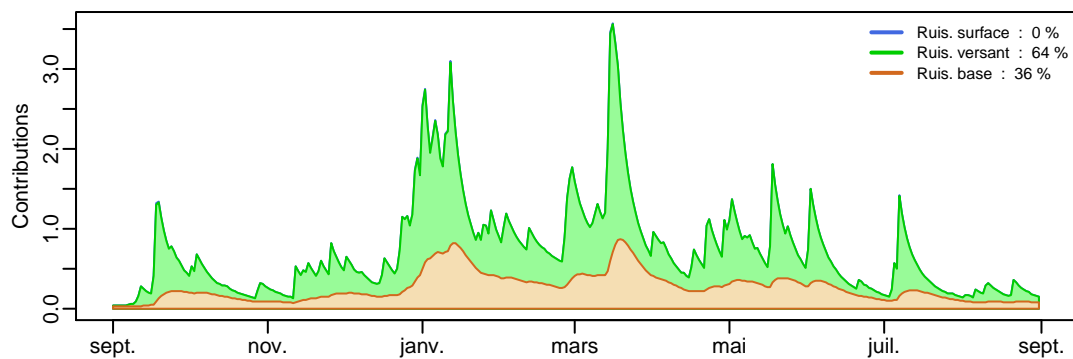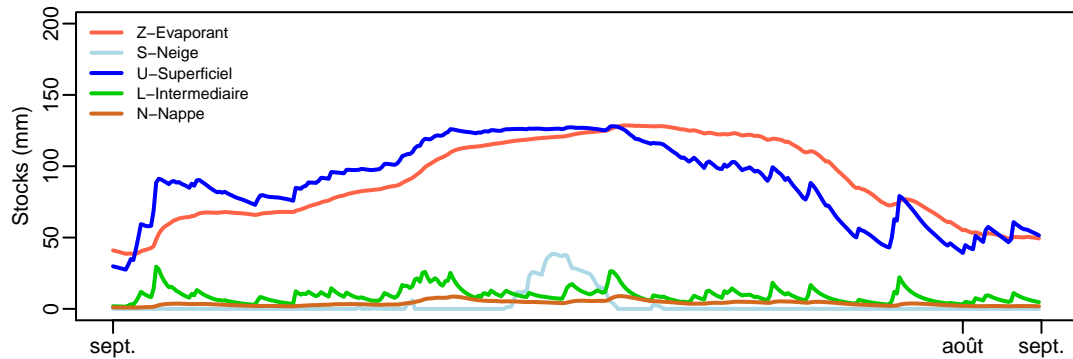

# k2316210 (126.07 km<sup>2</sup>) – année 1996–1997

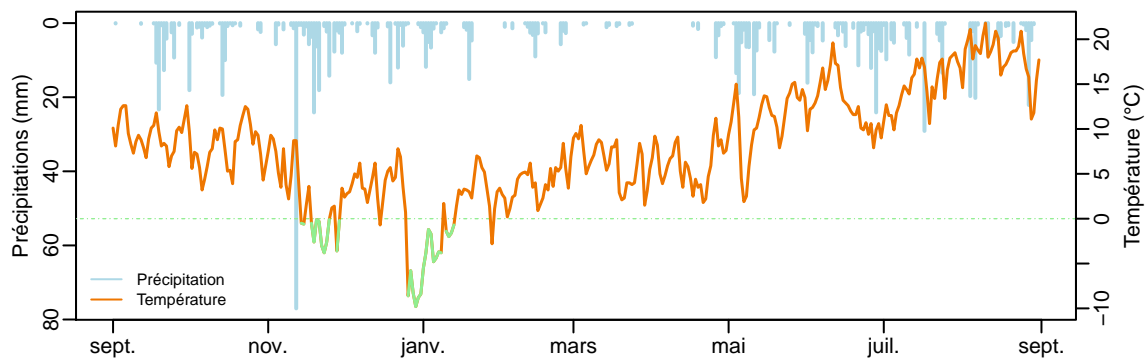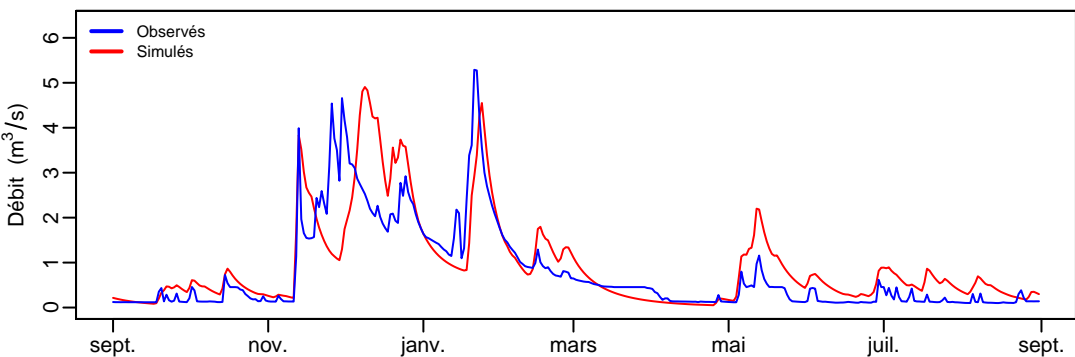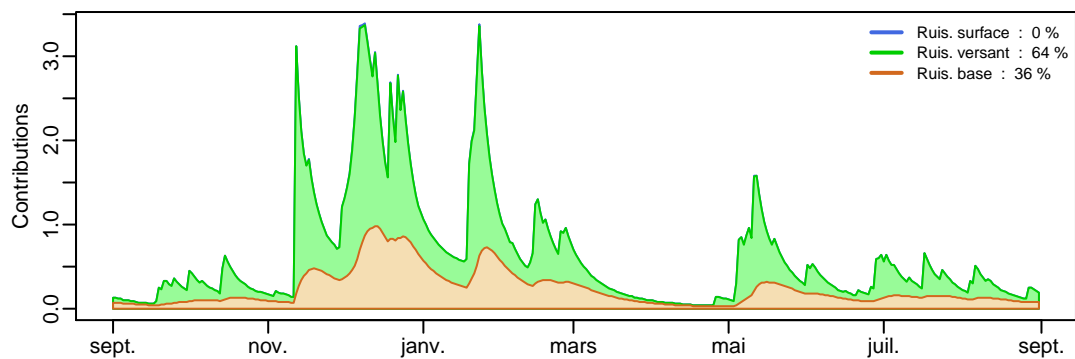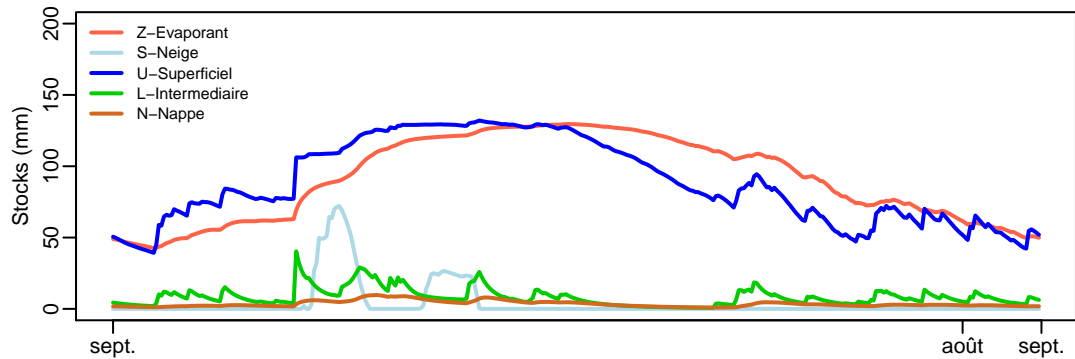



# k2316210 (126.07 km<sup>2</sup>) – année 1997–1998

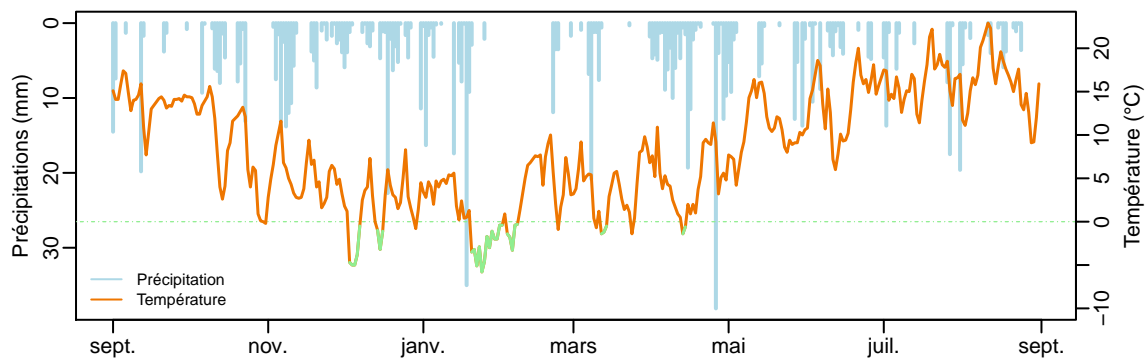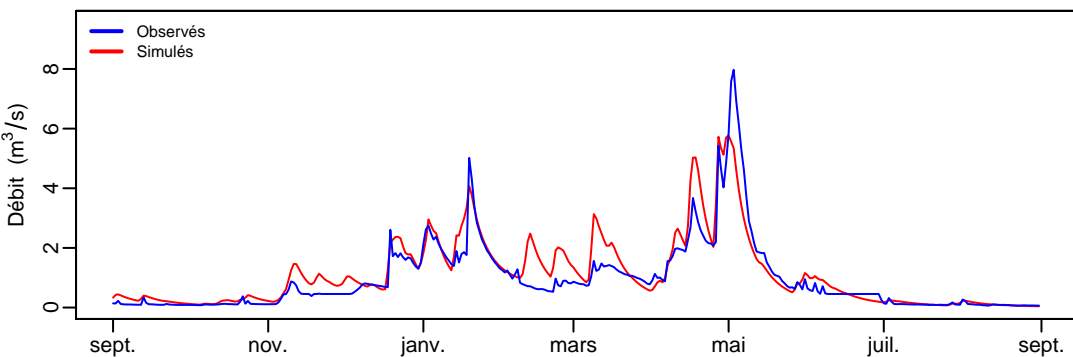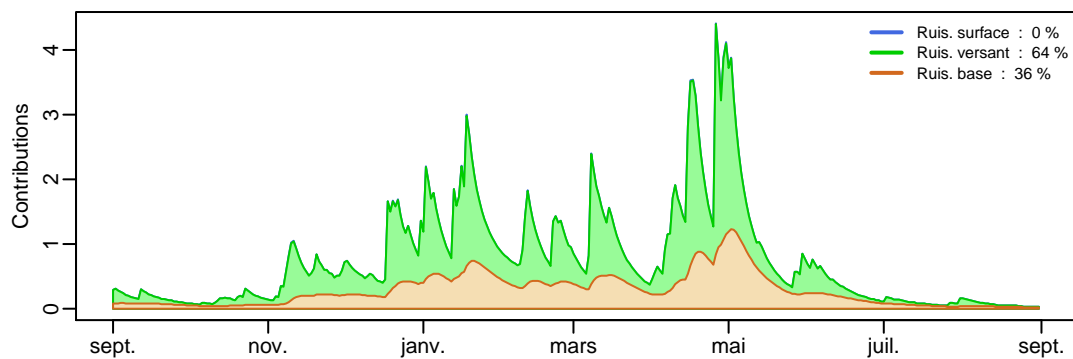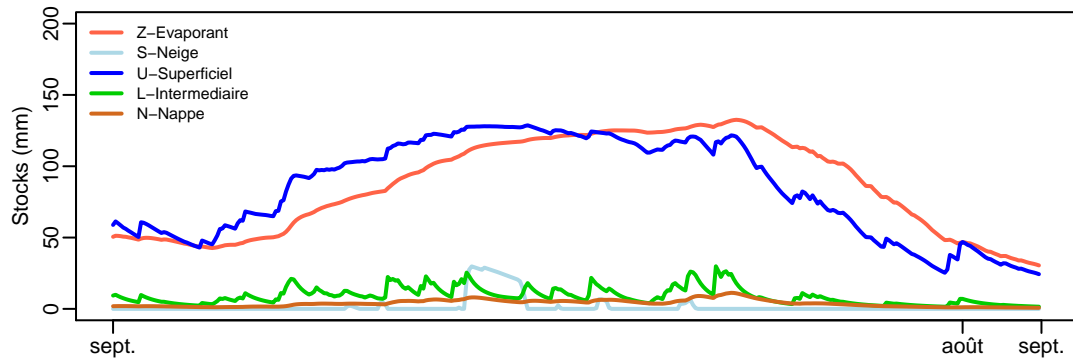

# k2316210 (126.07 km<sup>2</sup>) – année 1998–1999

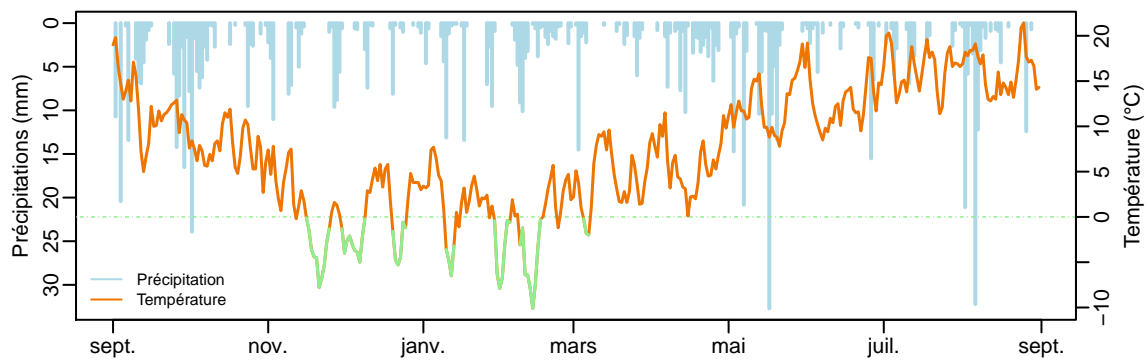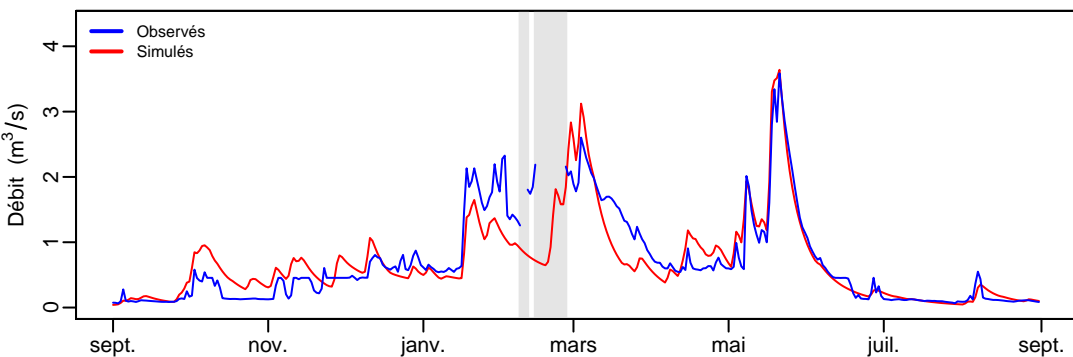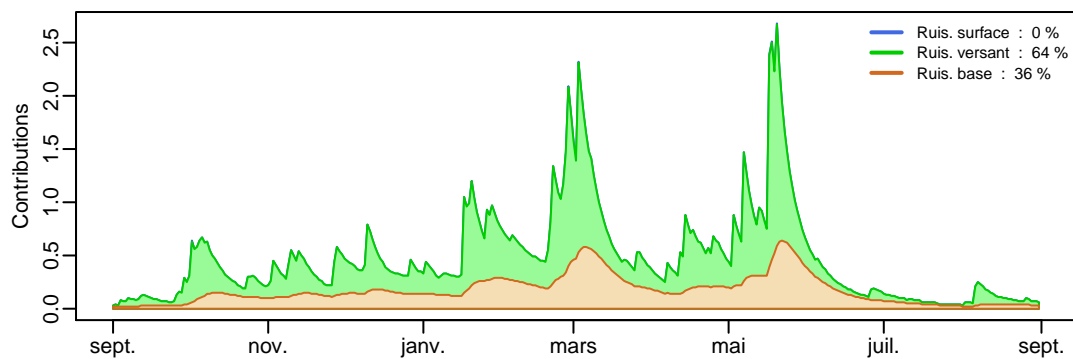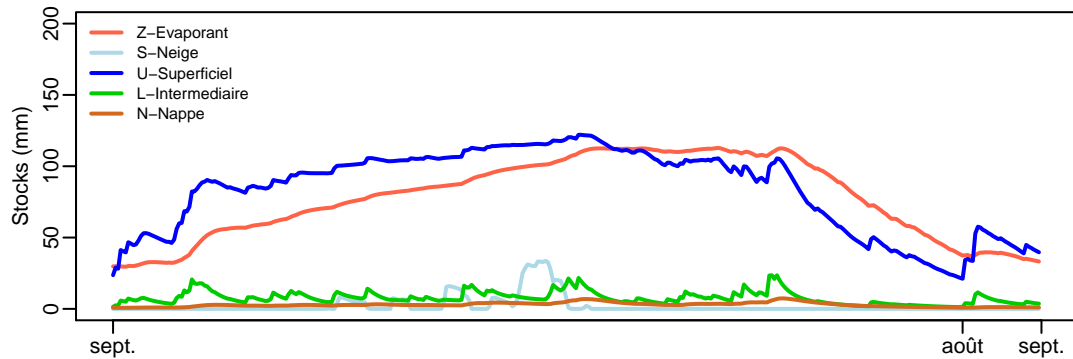

# k2316210 (126.07 km<sup>2</sup>) – année 1999–2000

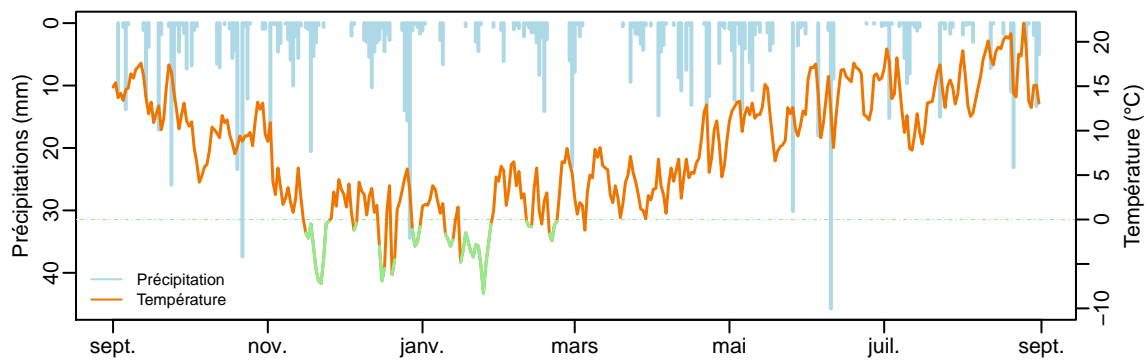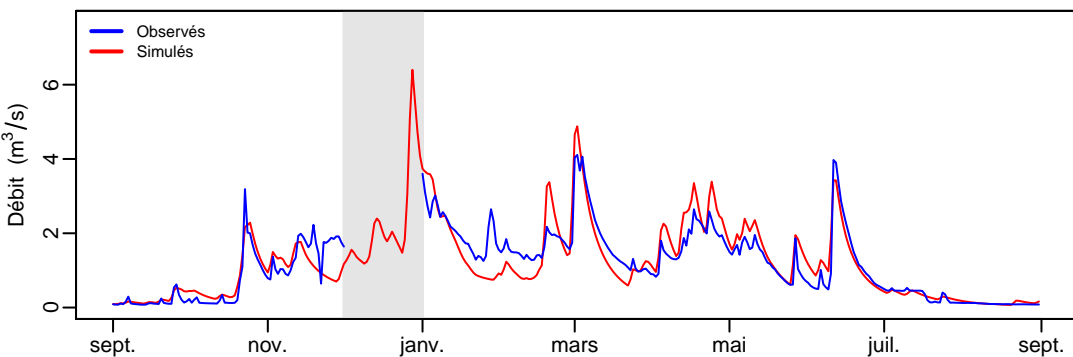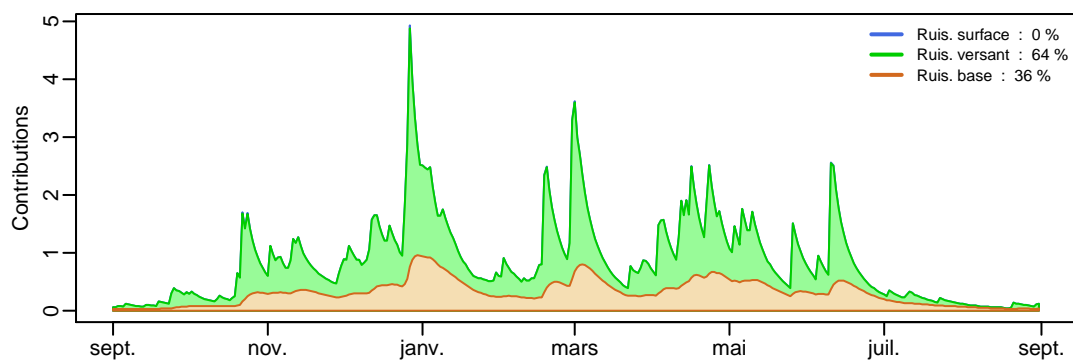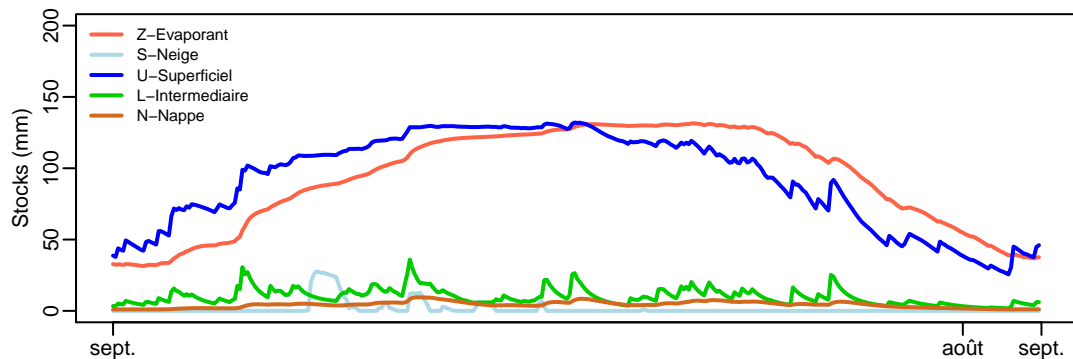

# k2316210 (126.07 km<sup>2</sup>) – année 2000–2001

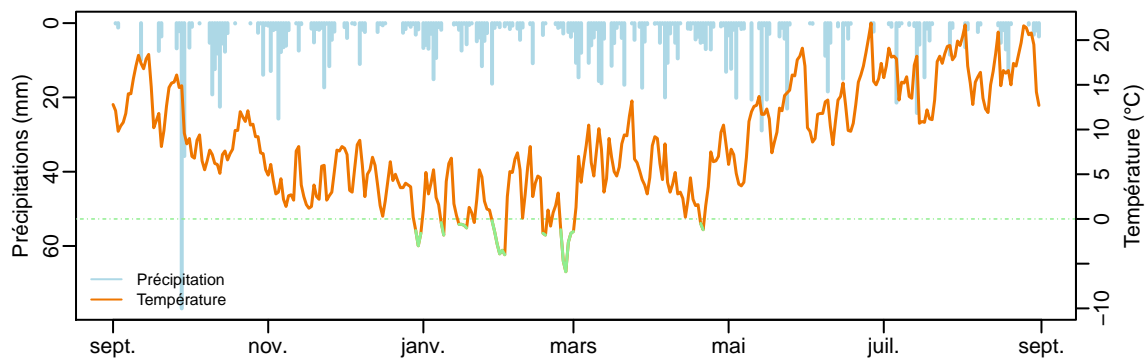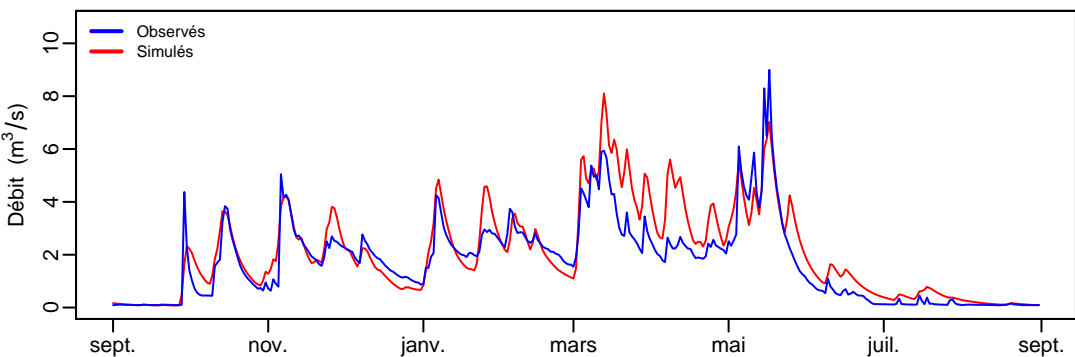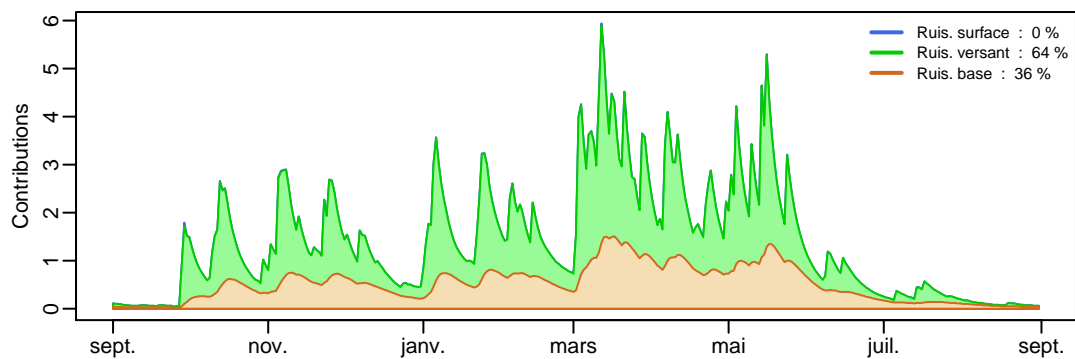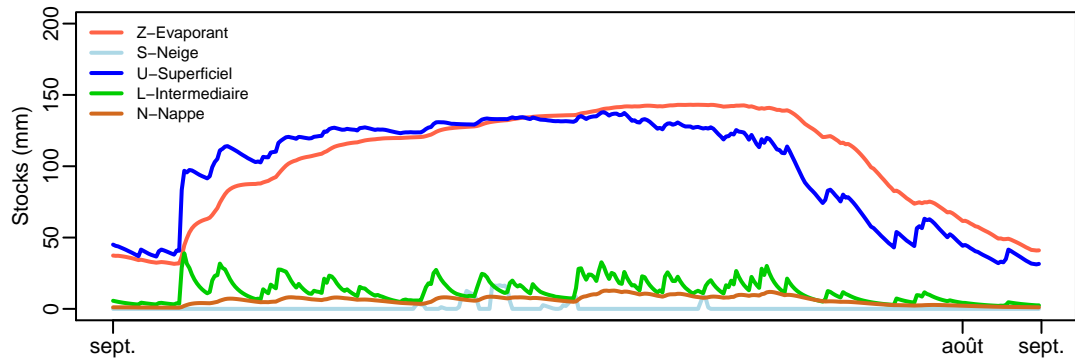

# k2316210 (126.07 km²) – année 2001–2002

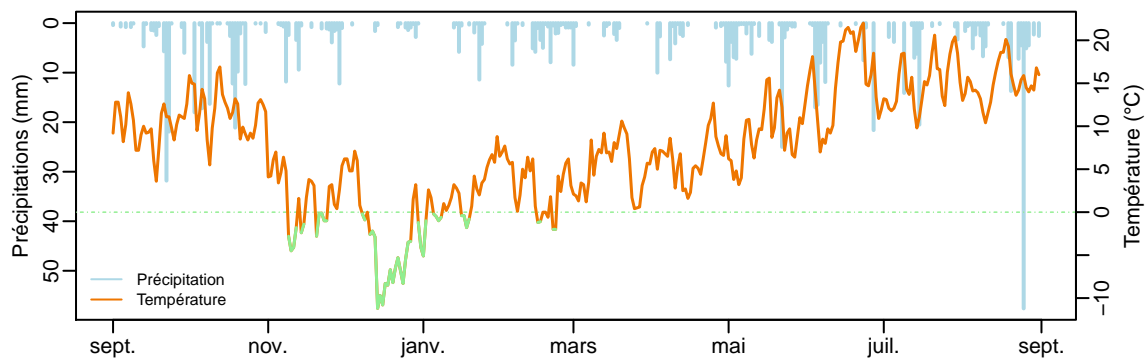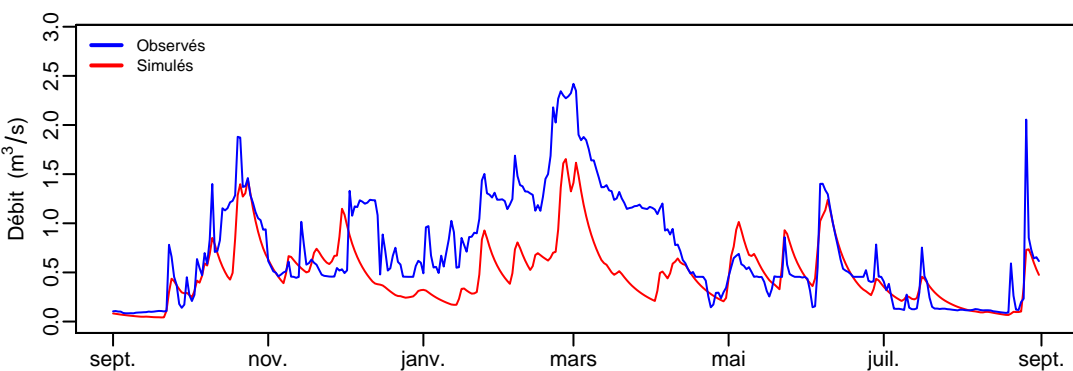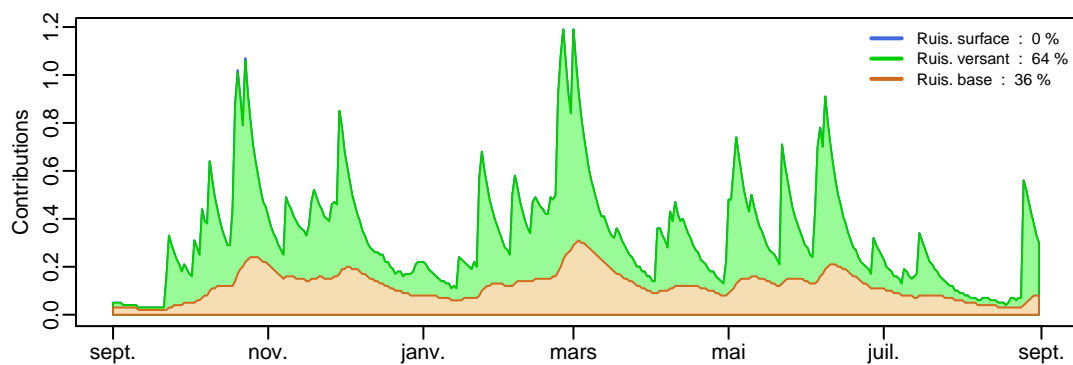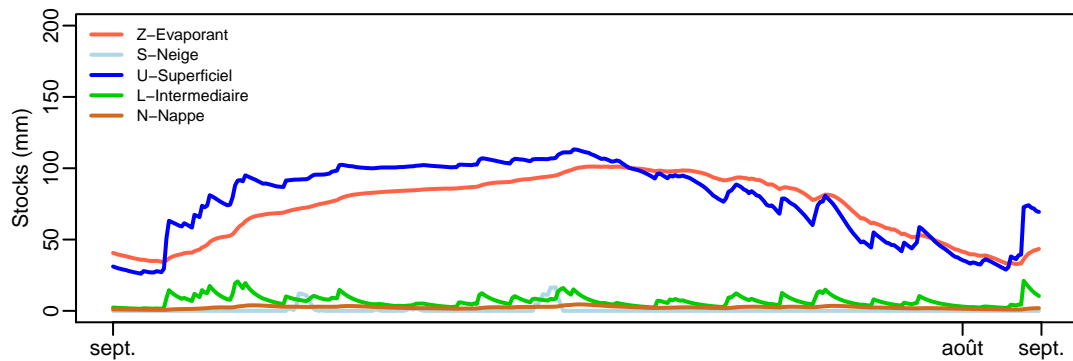

# k2316210 (126.07 km<sup>2</sup>) – année 2002–2003

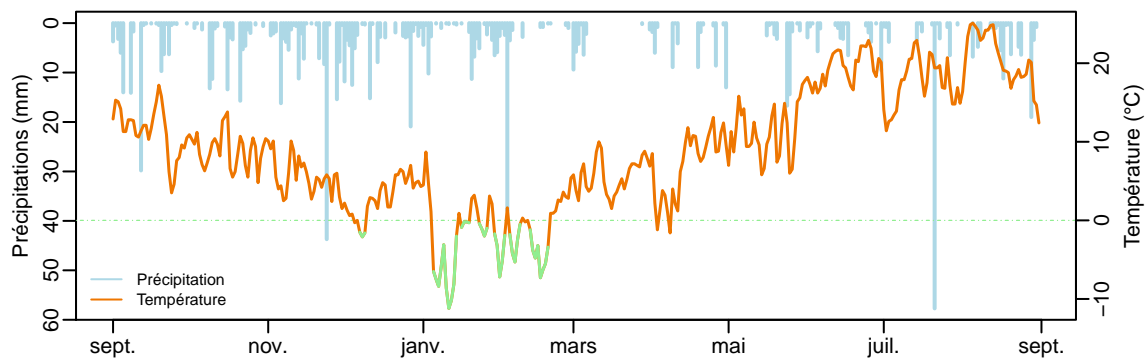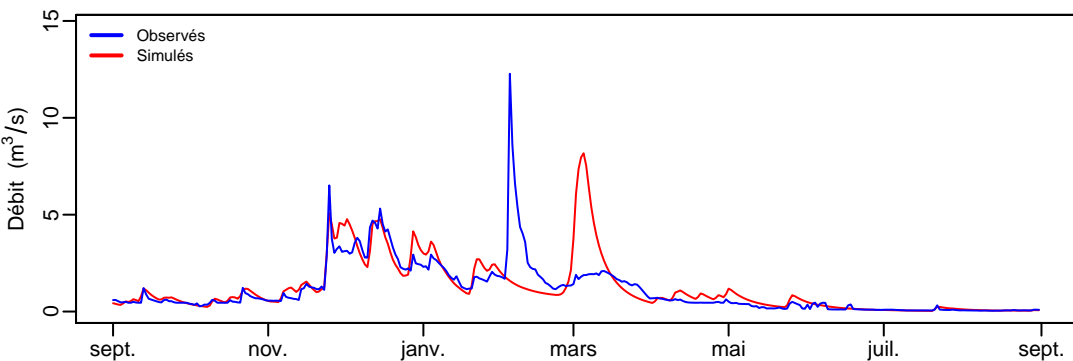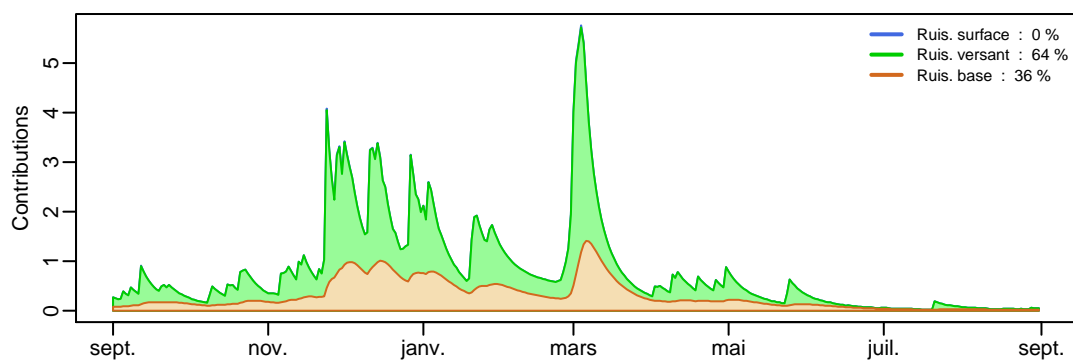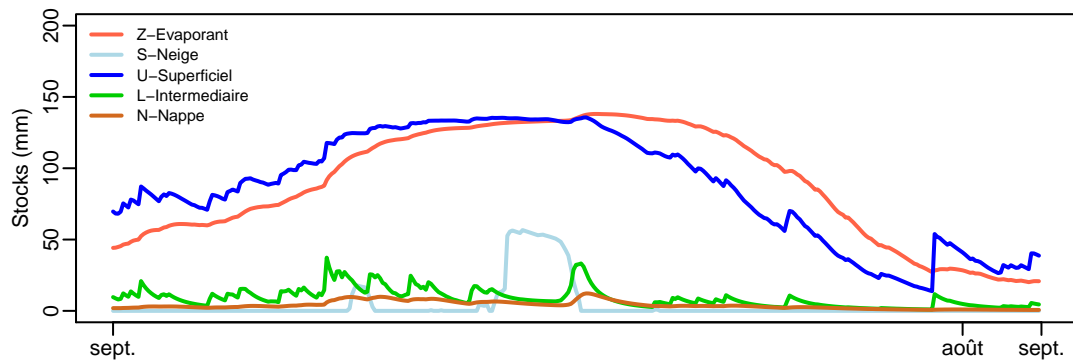

# k2316210 (126.07 km<sup>2</sup>) – année 2003–2004

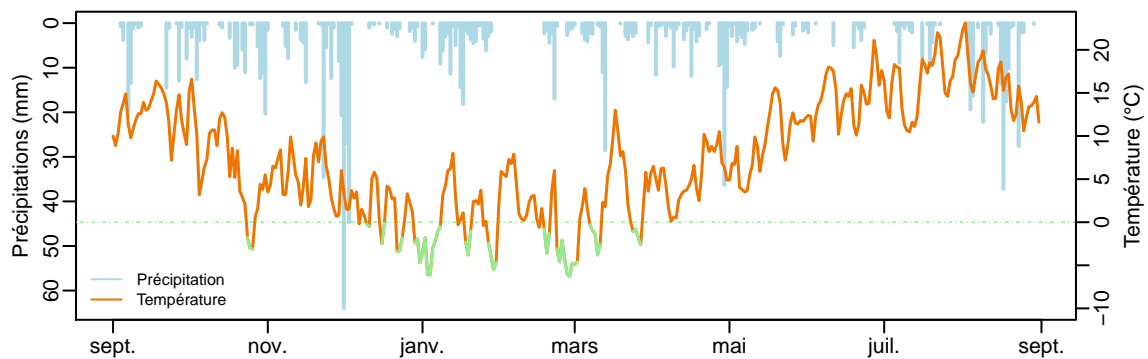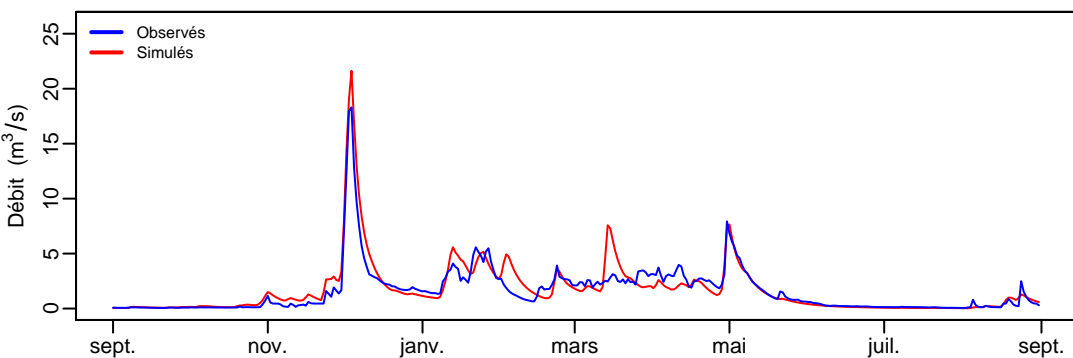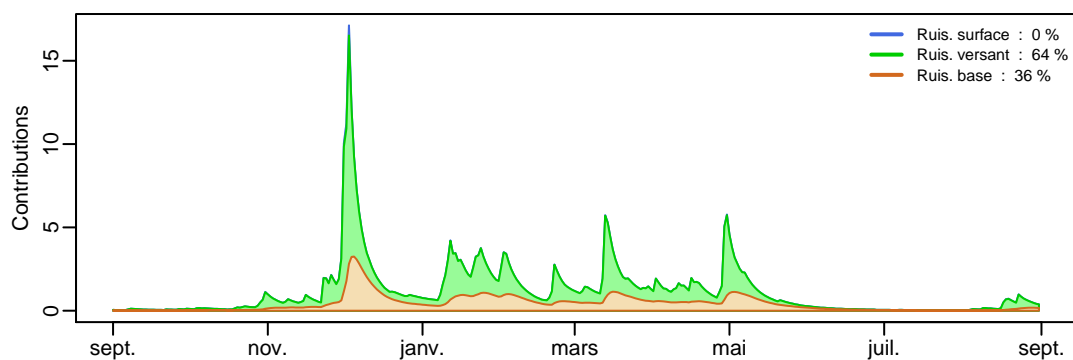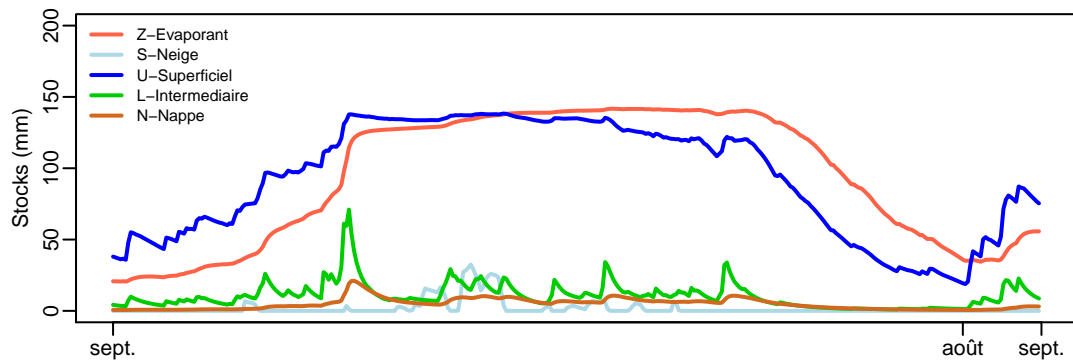

# k2316210 (126.07 km<sup>2</sup>) – année 2004–2005

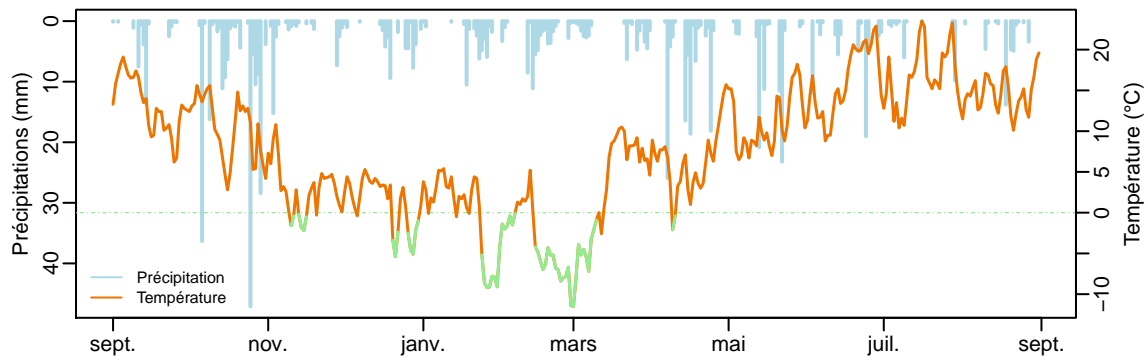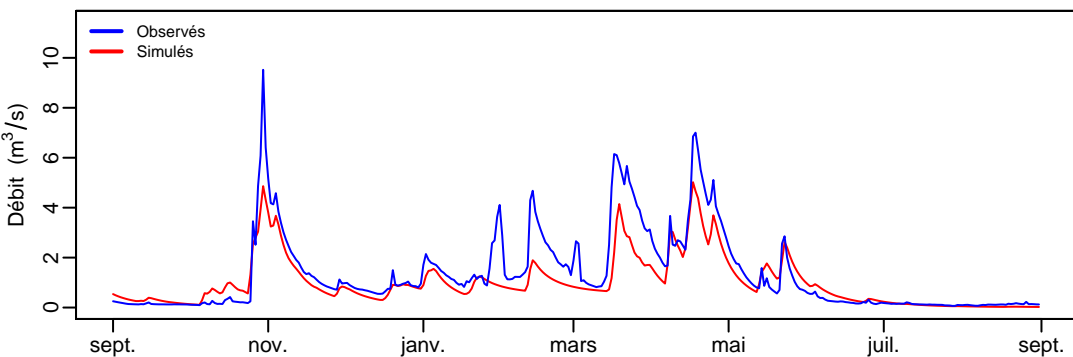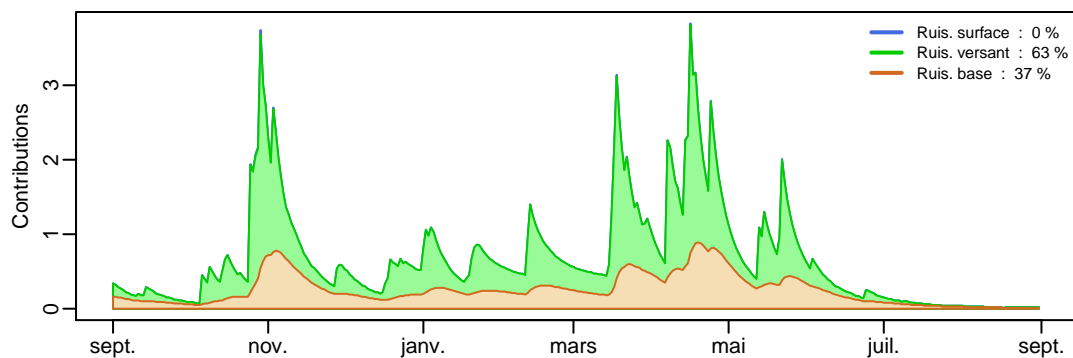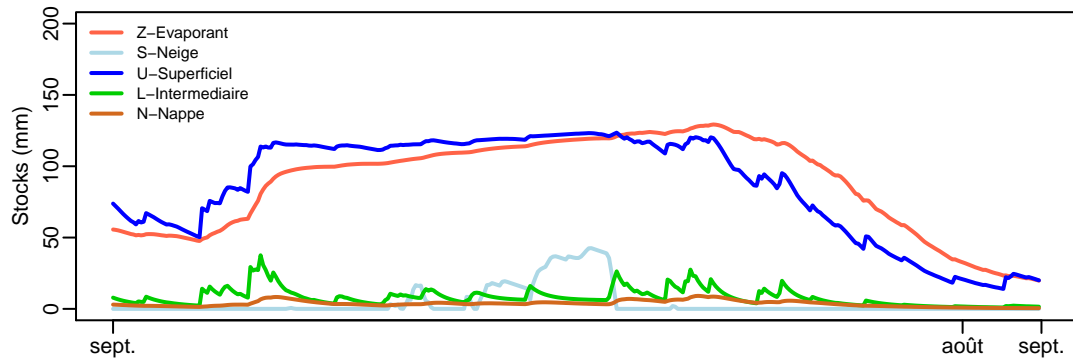



# k2316210 (126.07 km<sup>2</sup>) – année 2005–2006

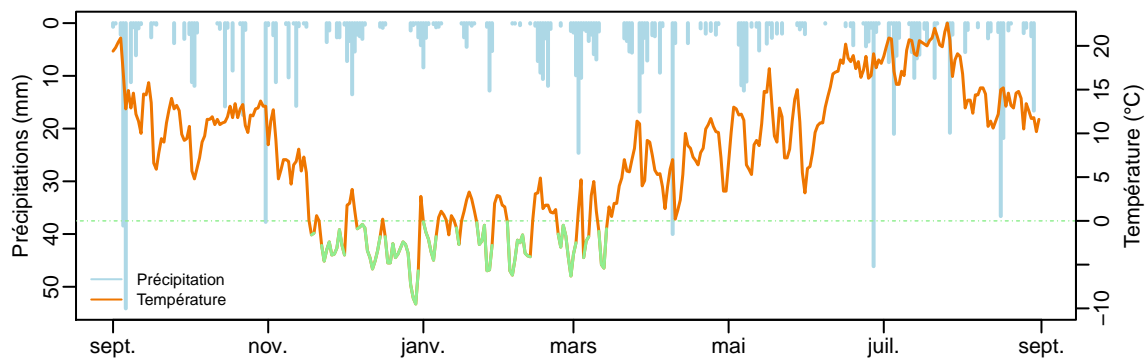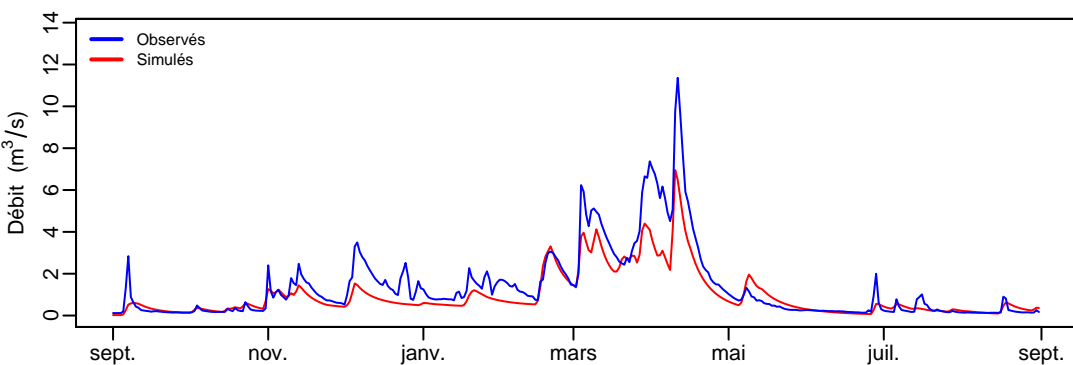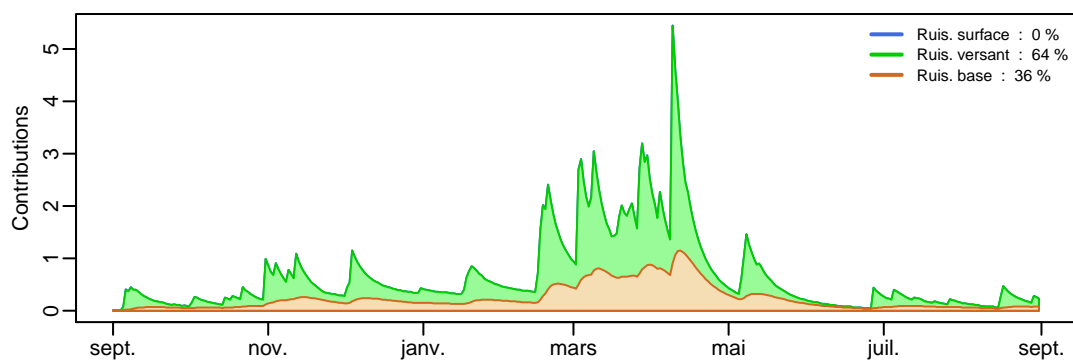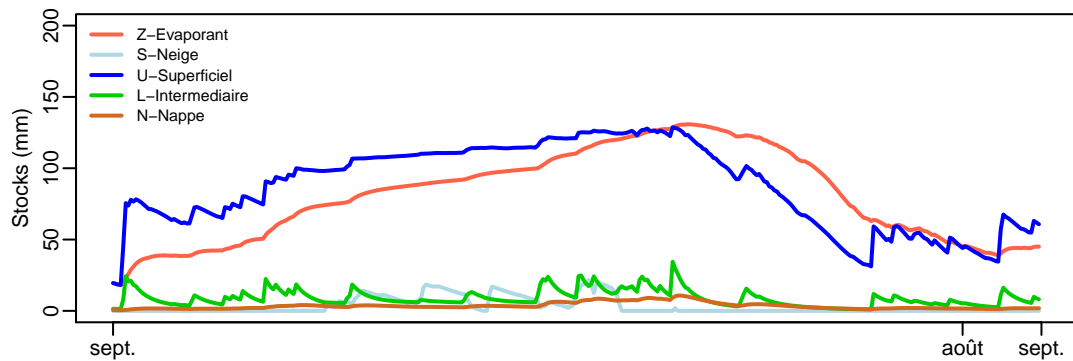

# k2316210 (126.07 km²) – année 2006–2007

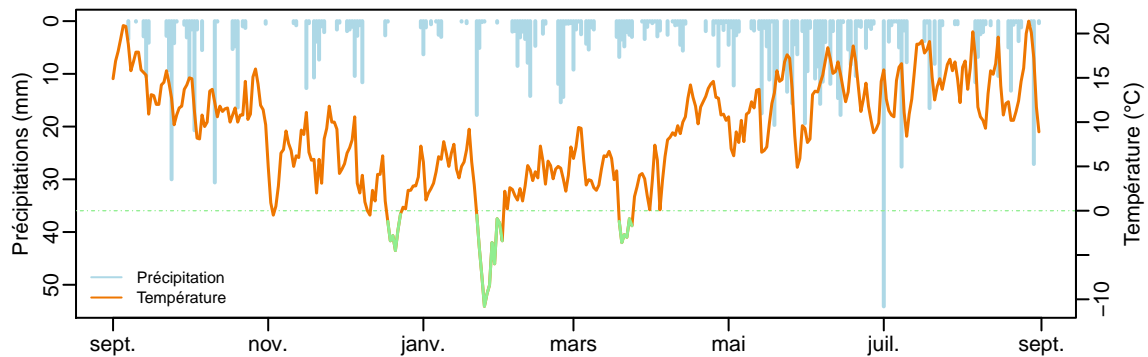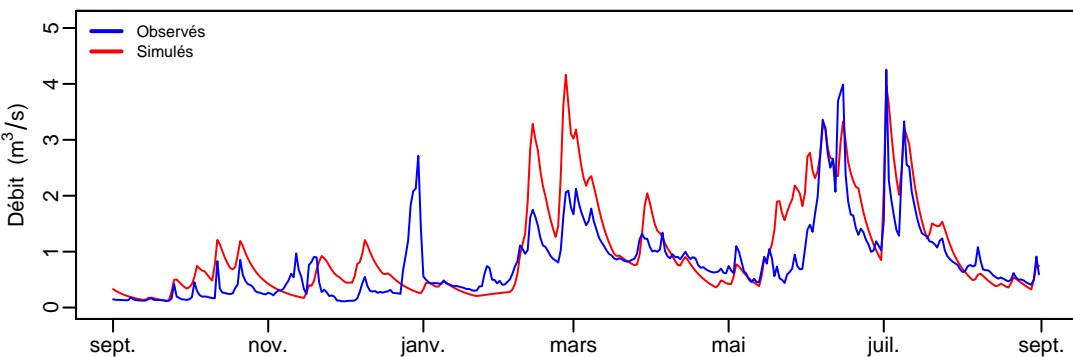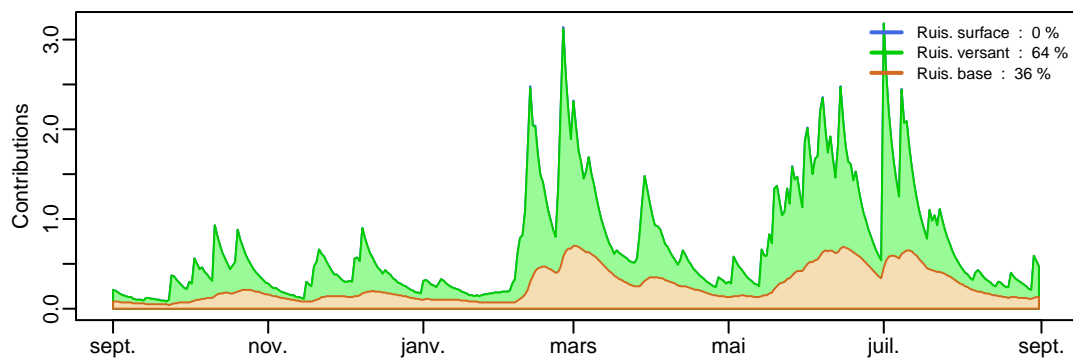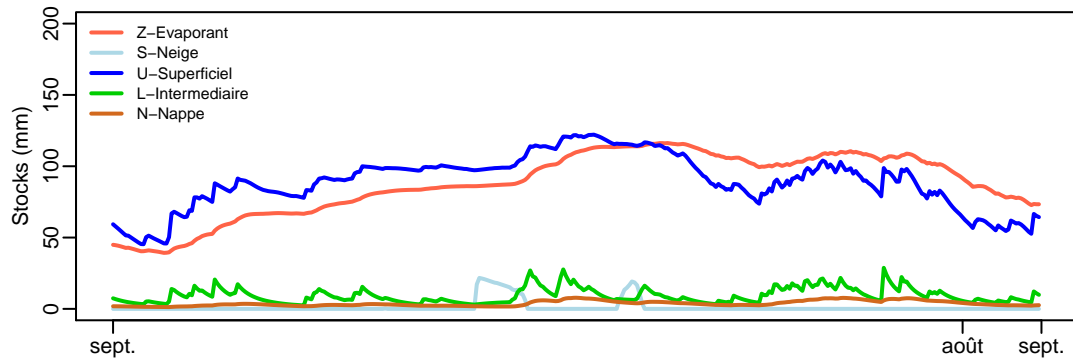

# k2316210 (126.07 km<sup>2</sup>) – année 2007–2008

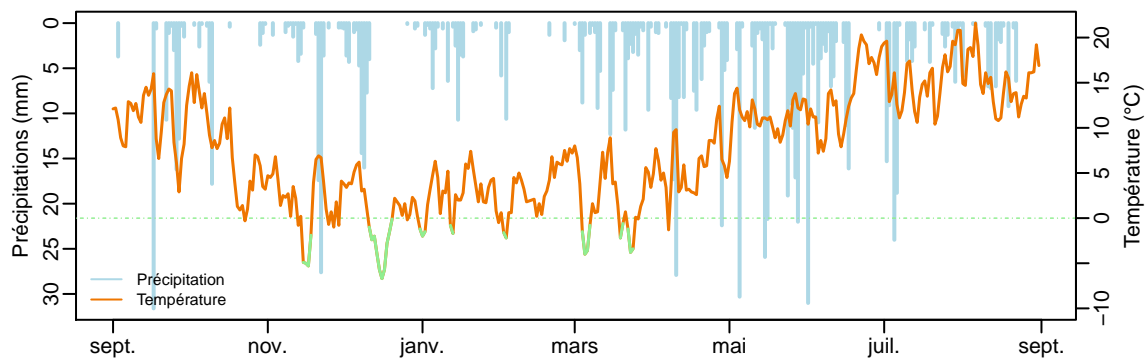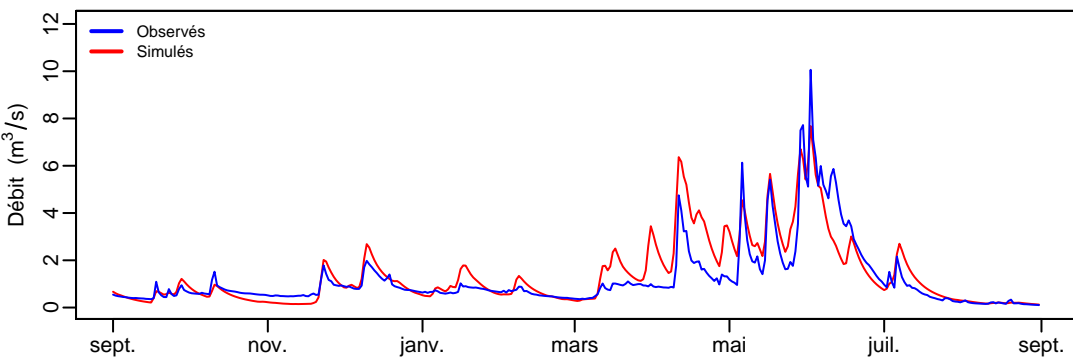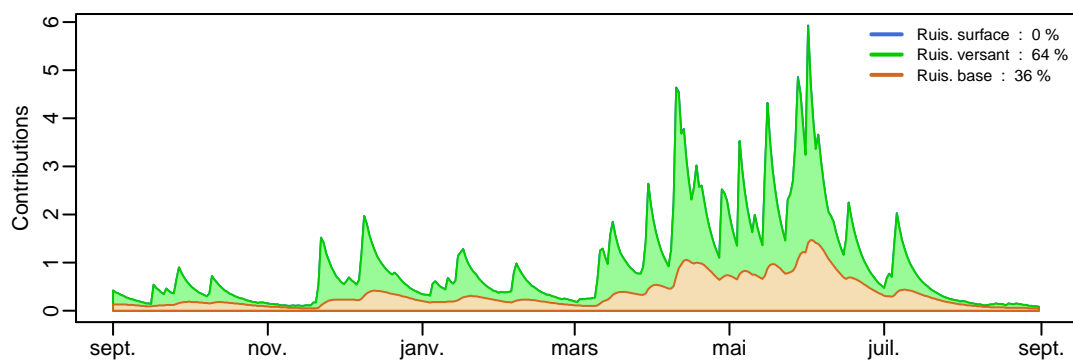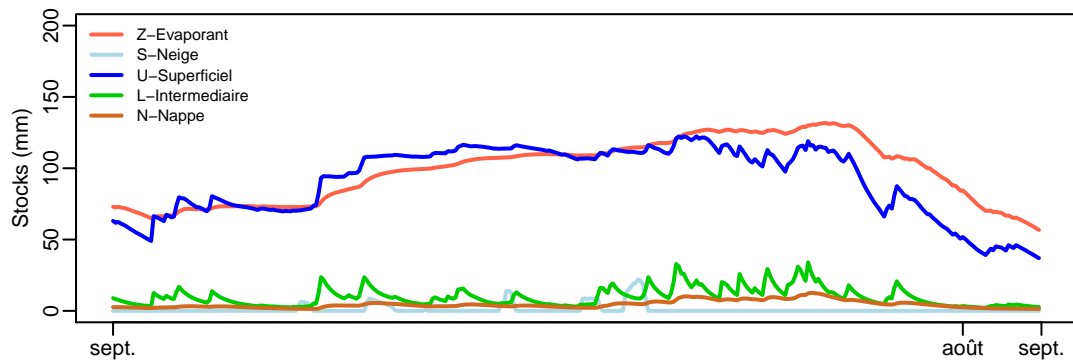

# k2316210 (126.07 km²) – année 2008–2009

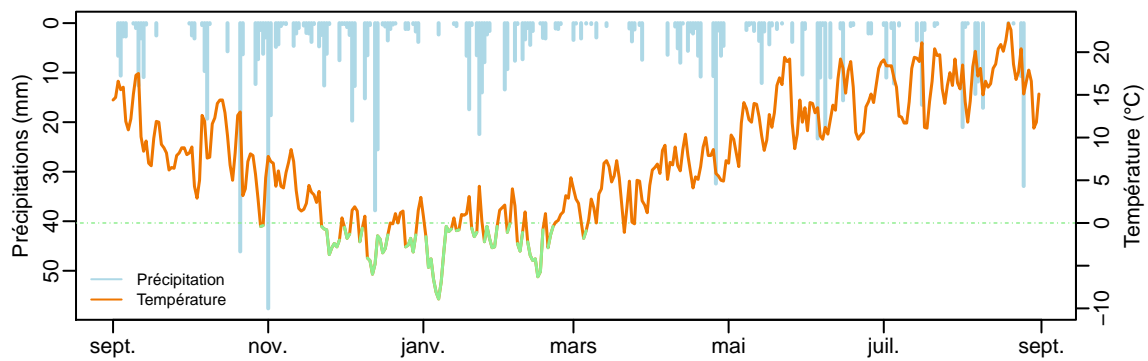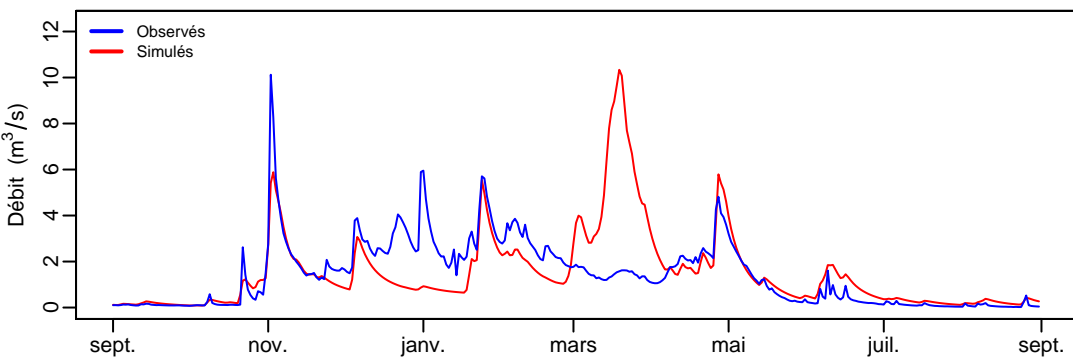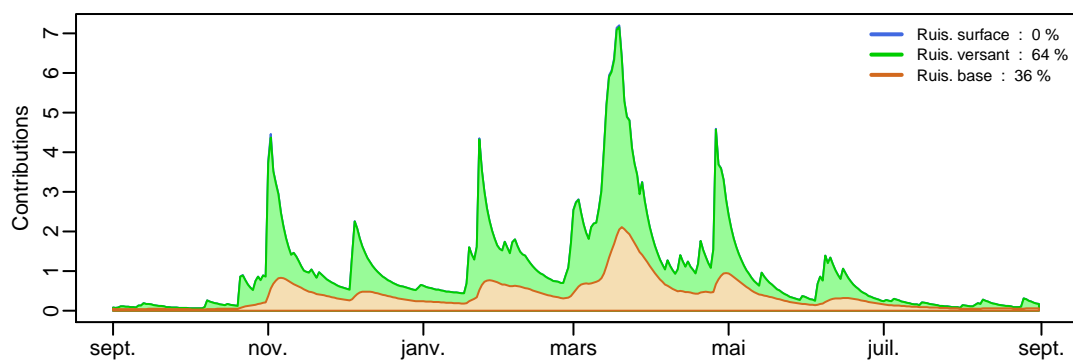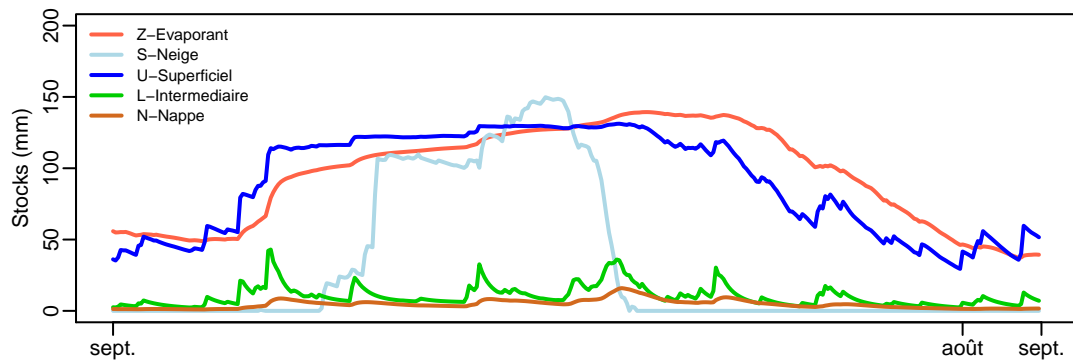

# k2330810 (2169.42 km<sup>2</sup>) – année 1981–1982

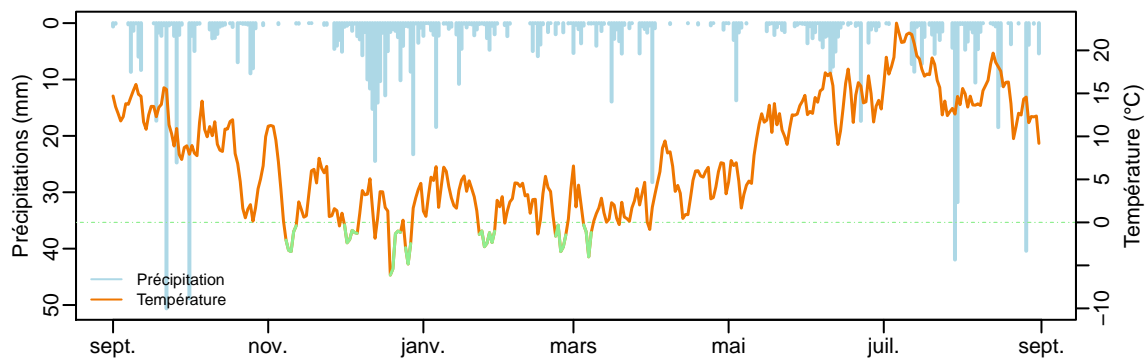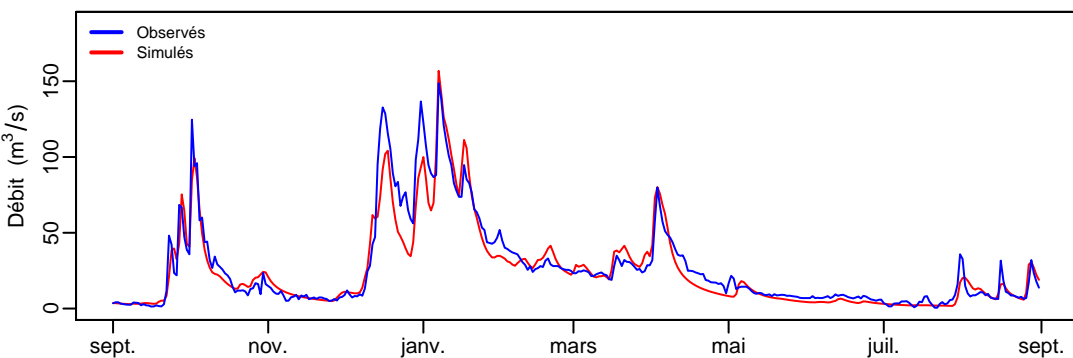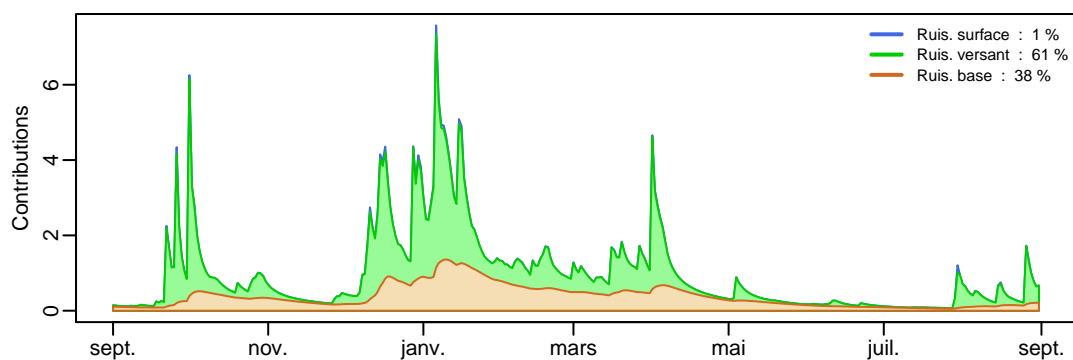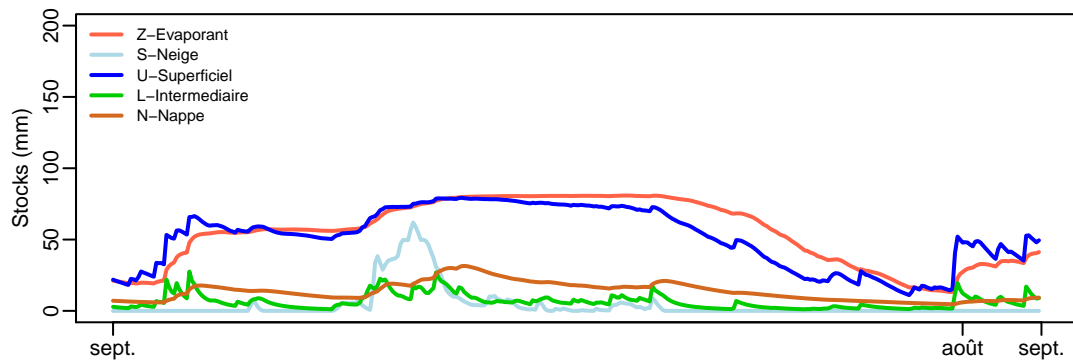

# k2330810 (2169.42 km<sup>2</sup>) – année 1982–1983

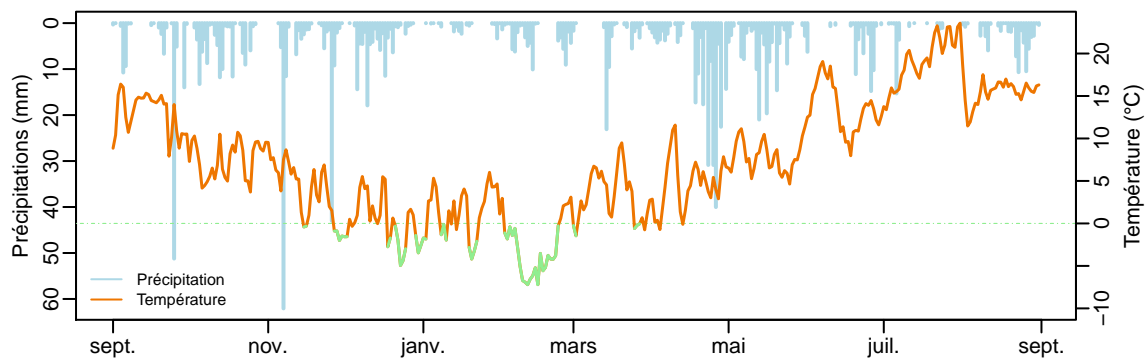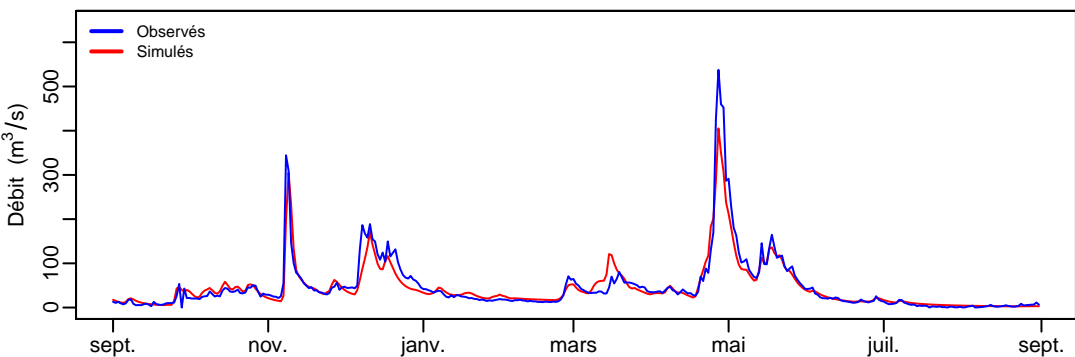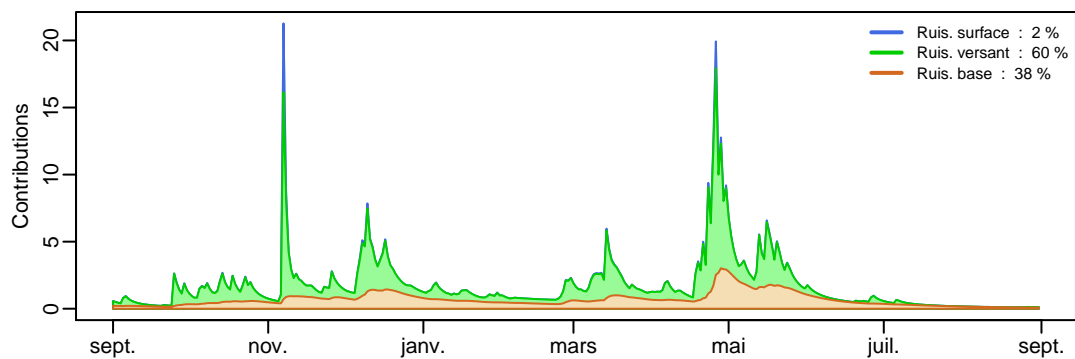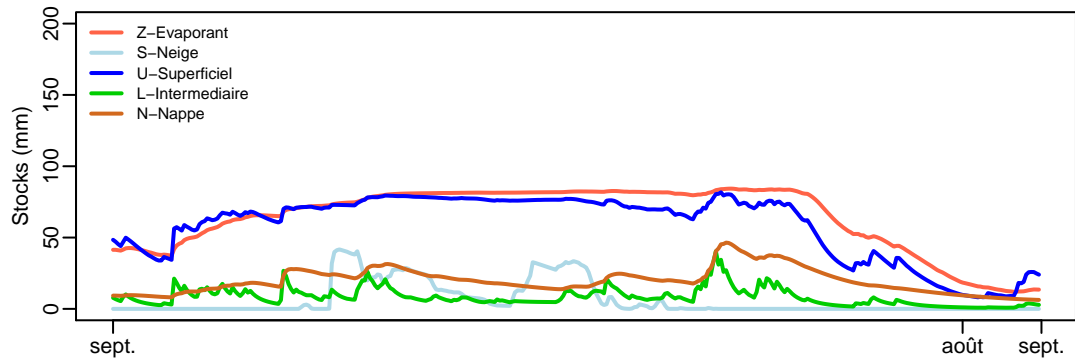

# k2330810 (2169.42 km<sup>2</sup>) – année 1983–1984

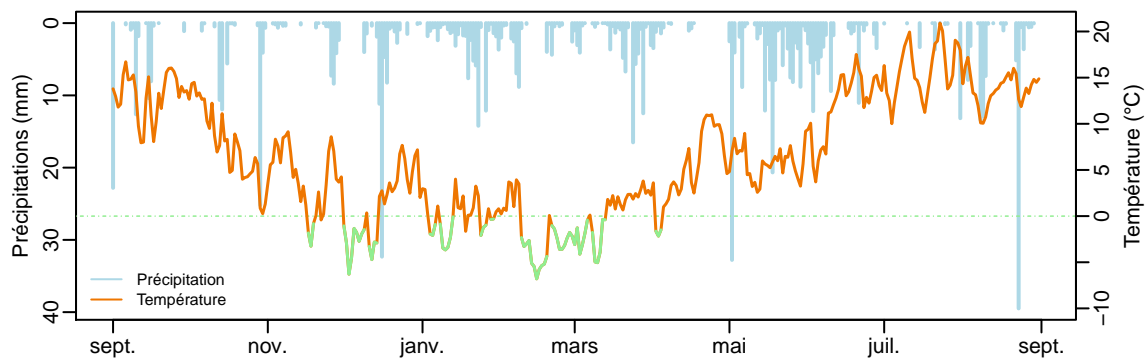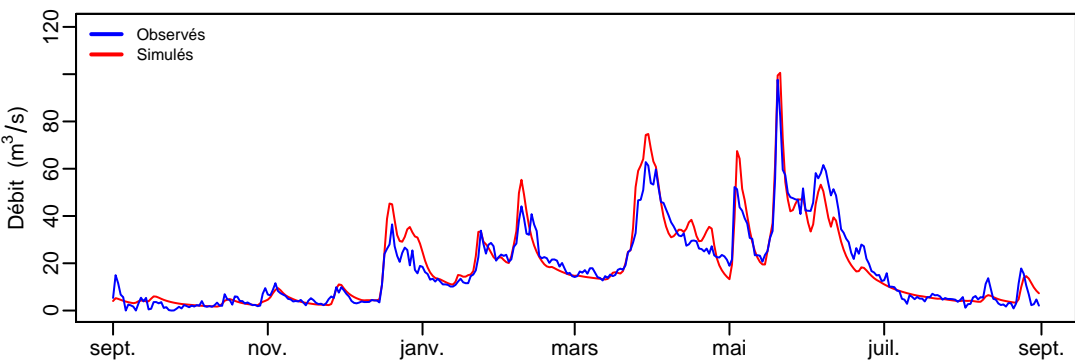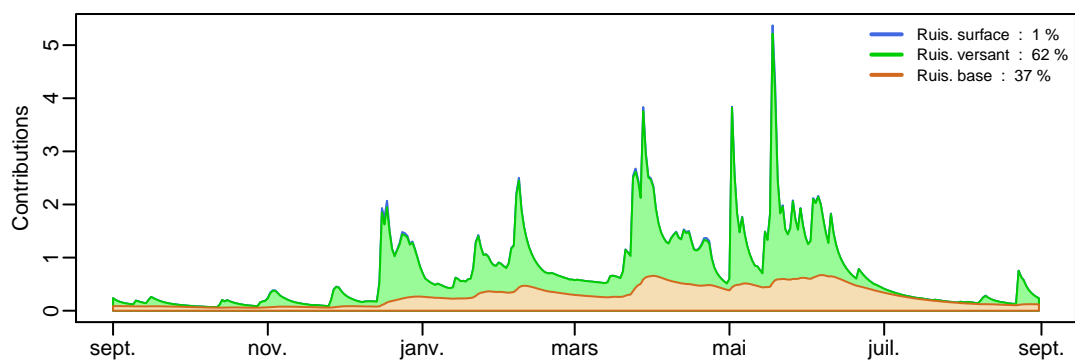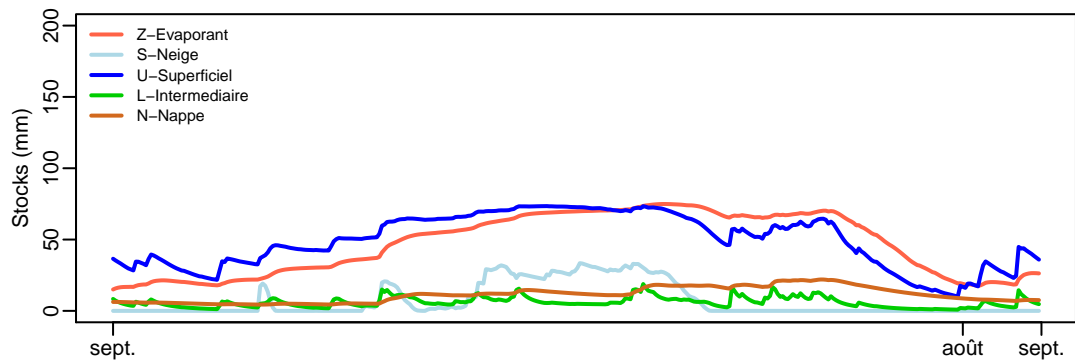

# k2330810 (2169.42 km²) – année 1984–1985

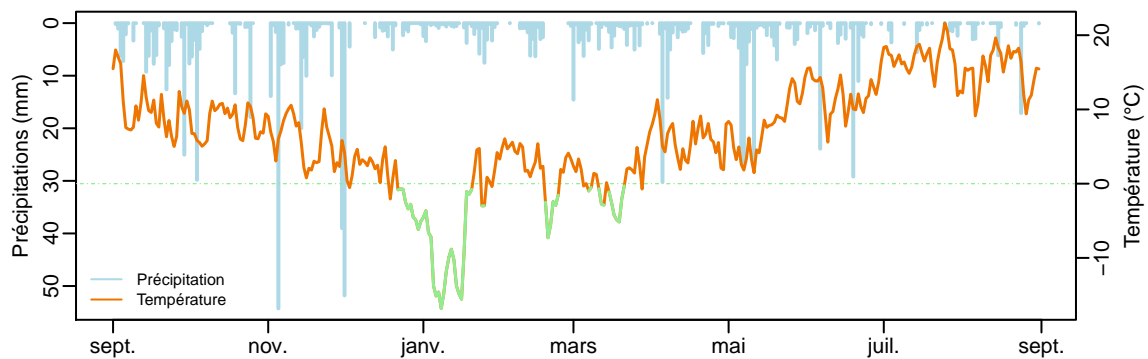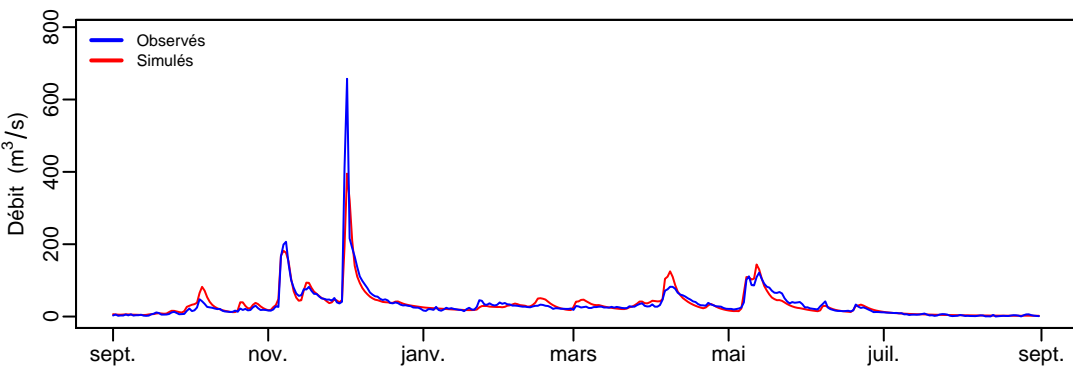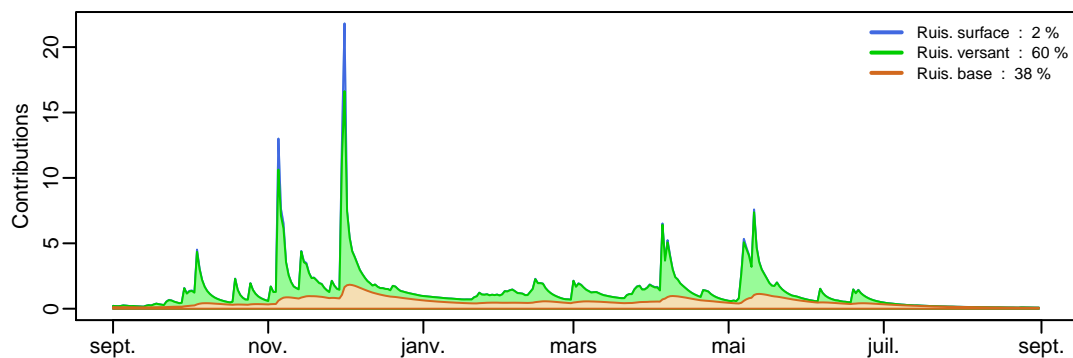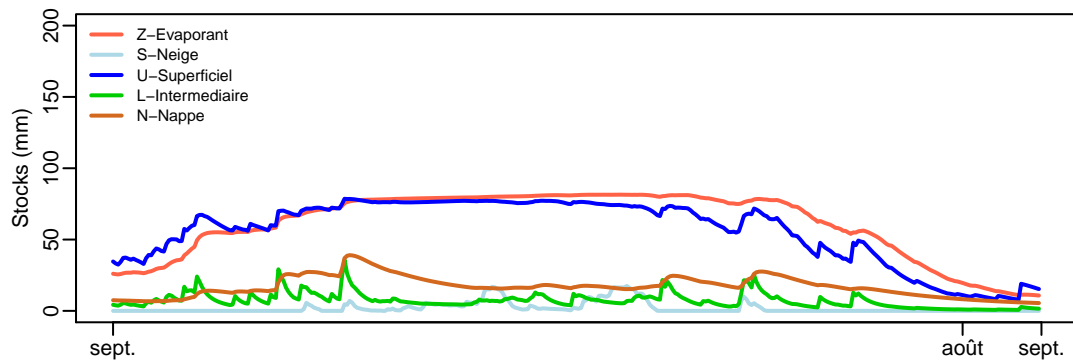



# k2330810 (2169.42 km<sup>2</sup>) – année 1985–1986

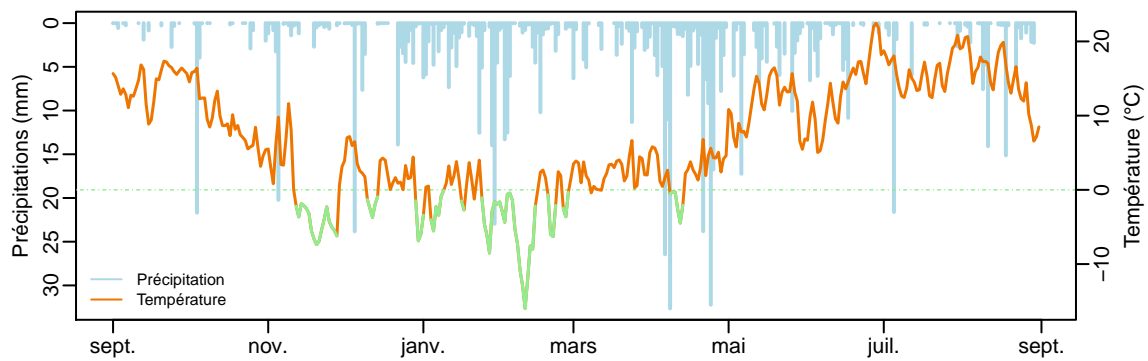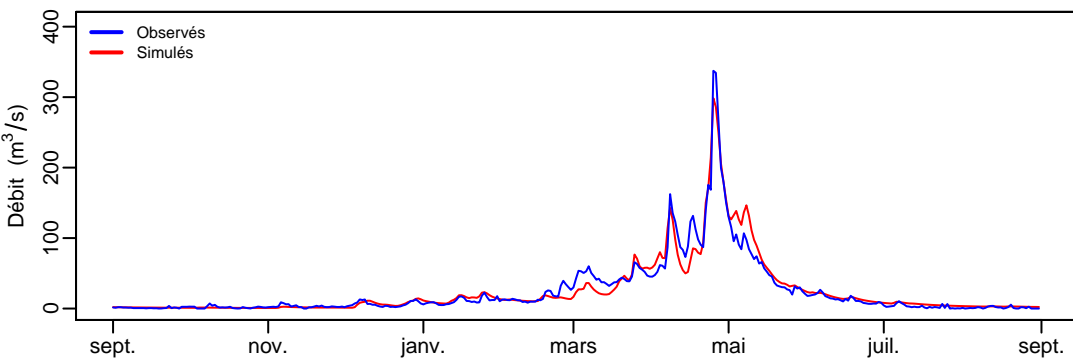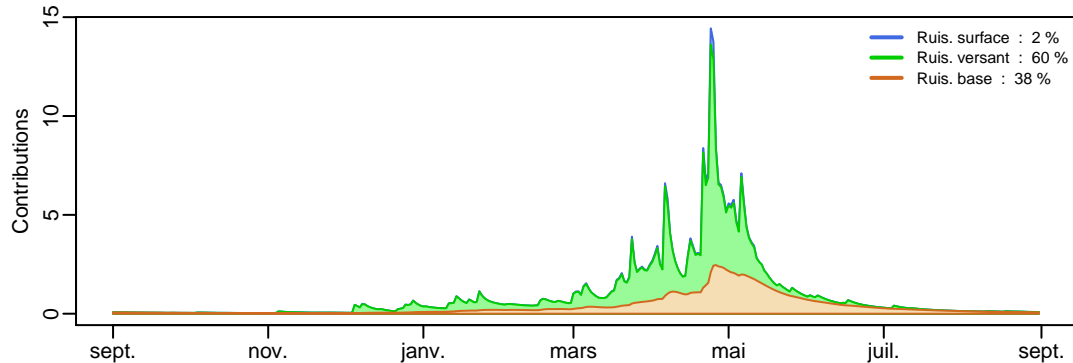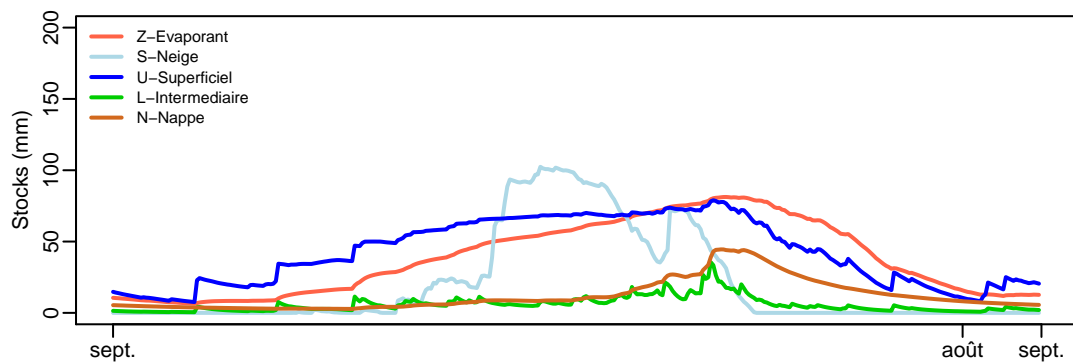

# k2330810 (2169.42 km<sup>2</sup>) – année 1986–1987

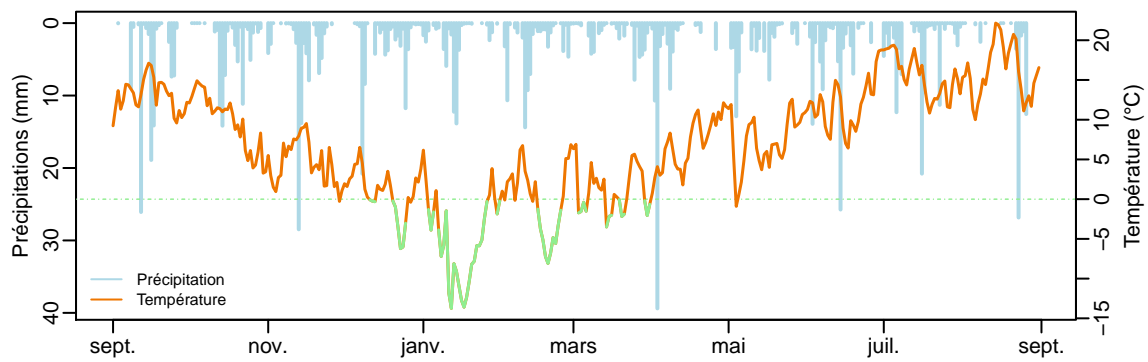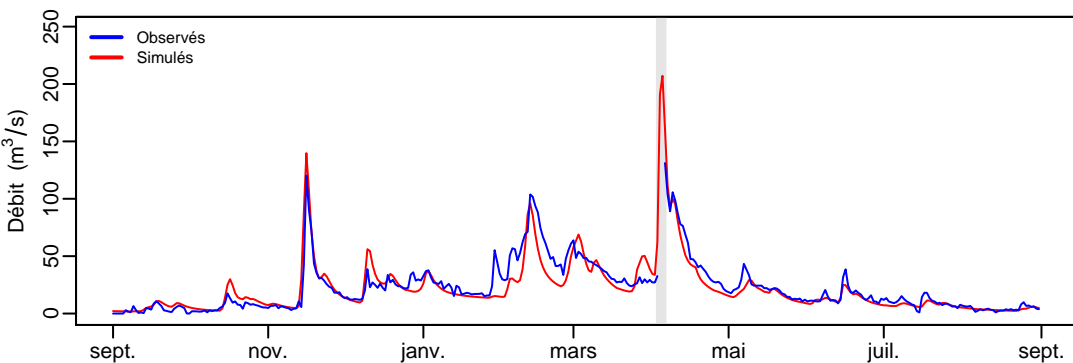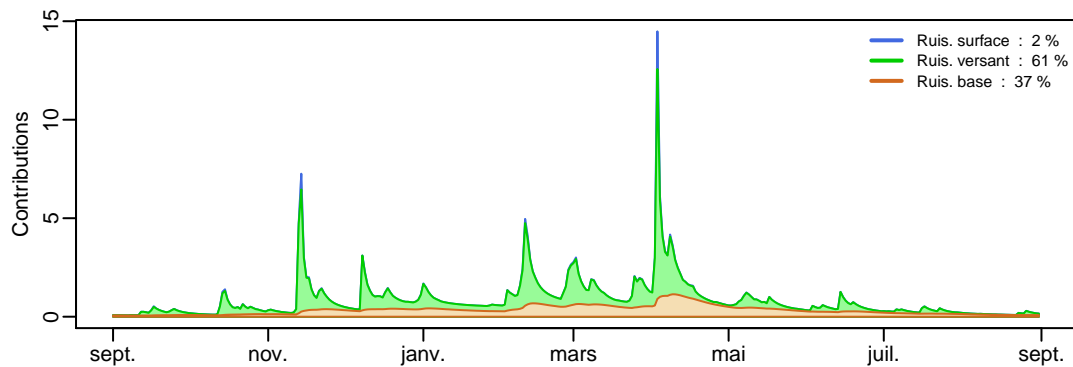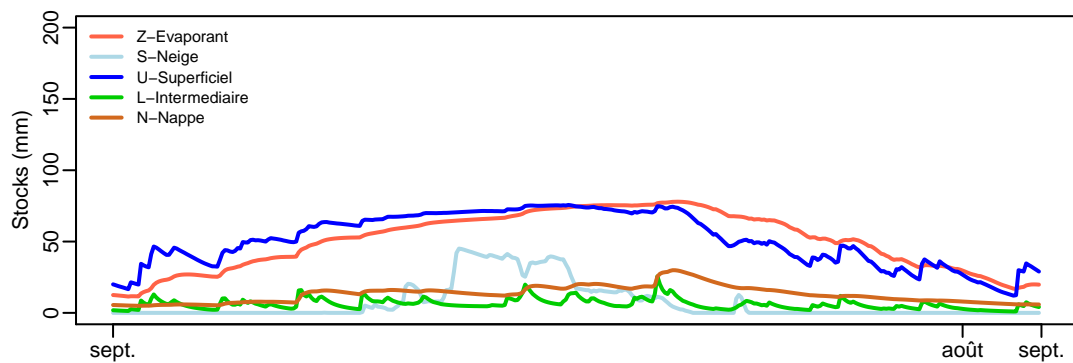

# k2330810 (2169.42 km²) – année 1987–1988

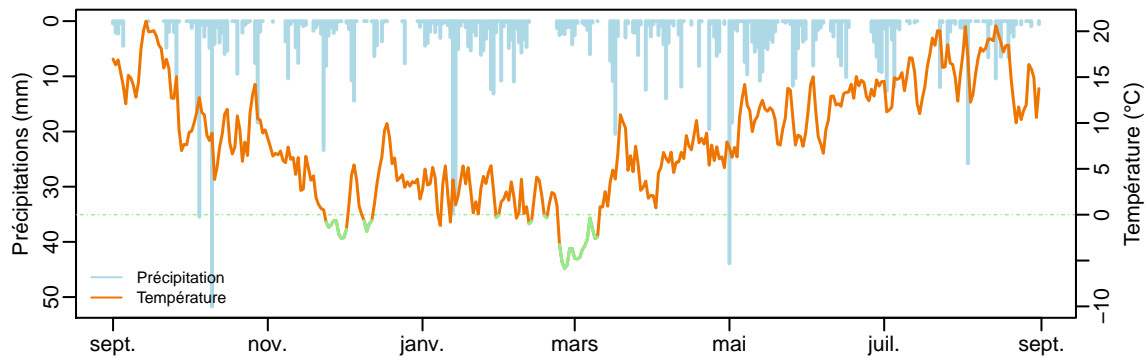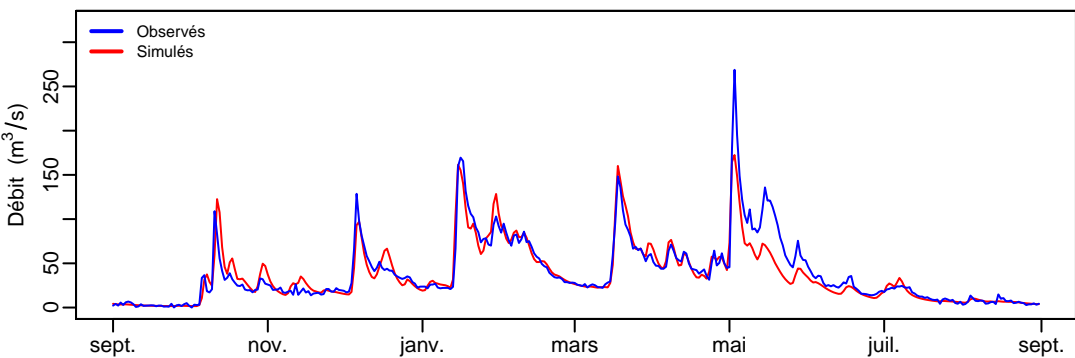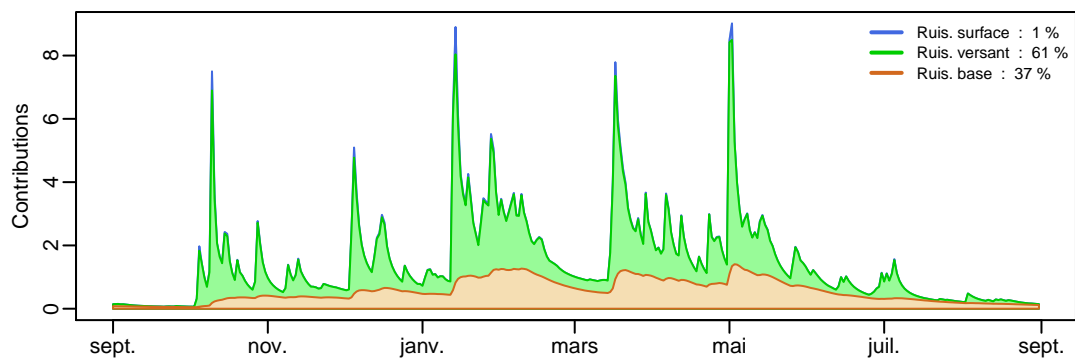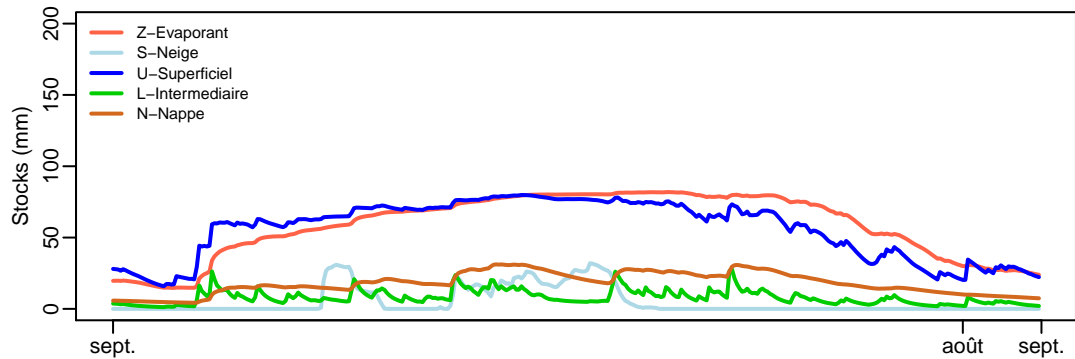

# k2330810 (2169.42 km²) – année 1988–1989

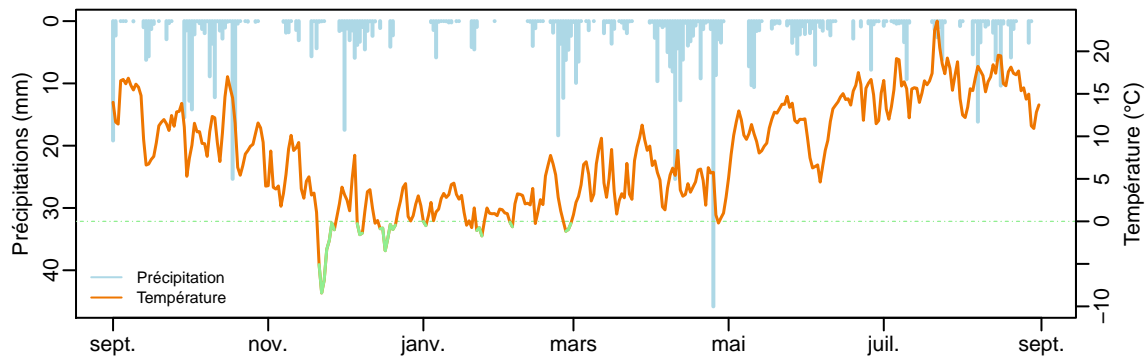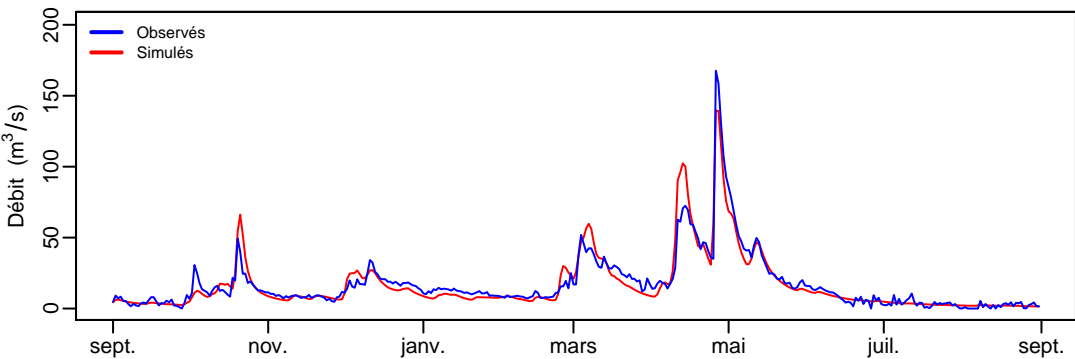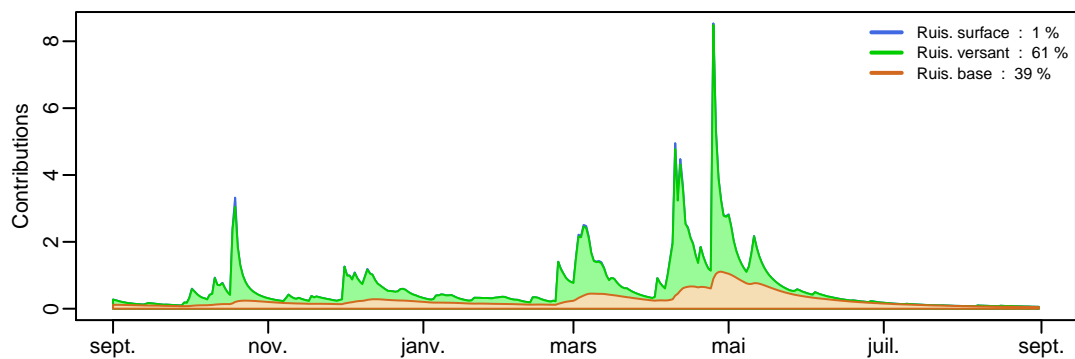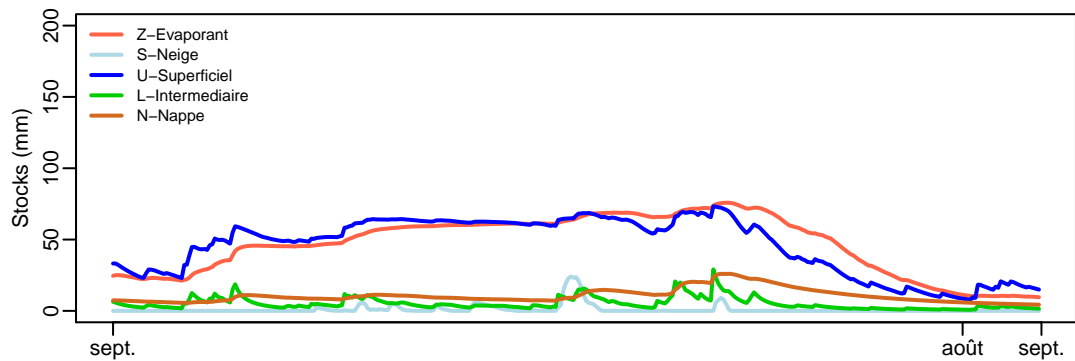

# k2330810 (2169.42 km<sup>2</sup>) – année 1989–1990

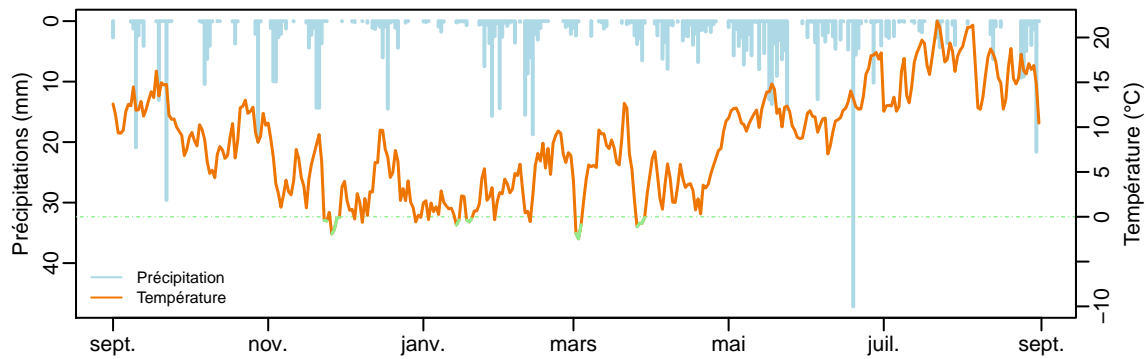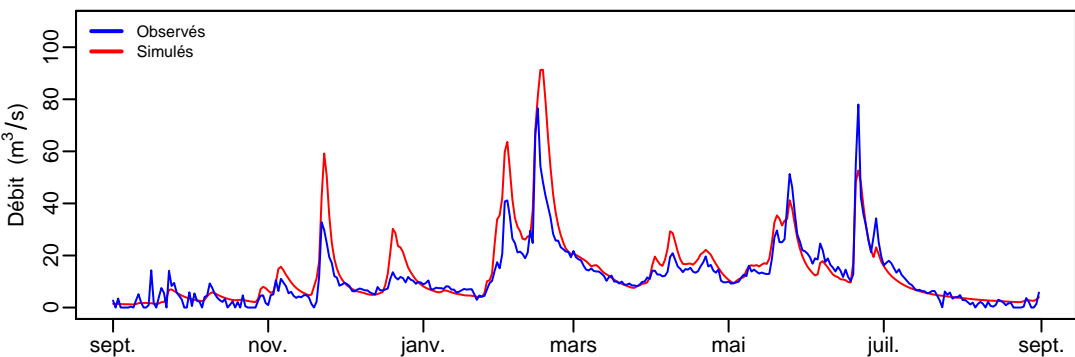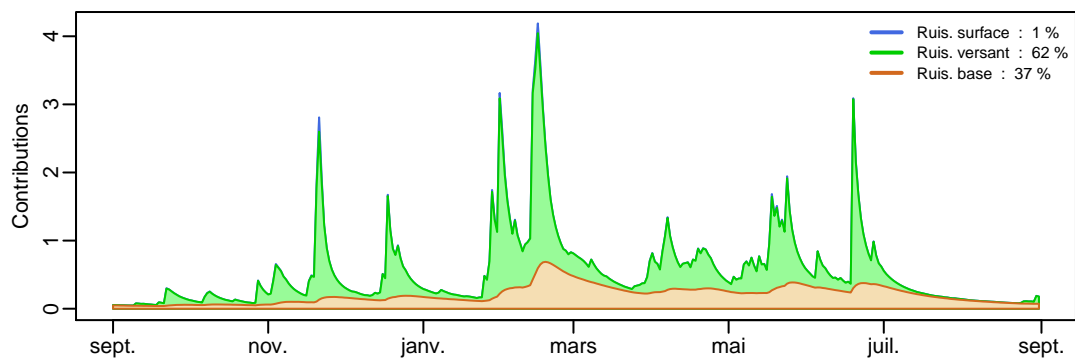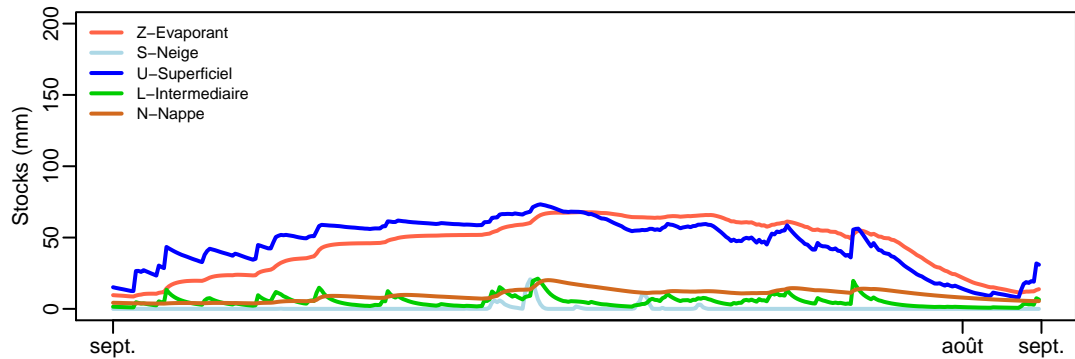

# k2330810 (2169.42 km<sup>2</sup>) – année 1990–1991

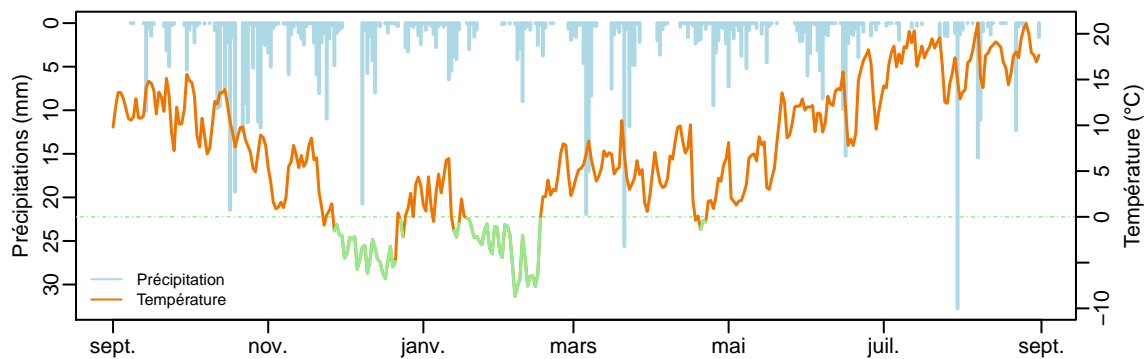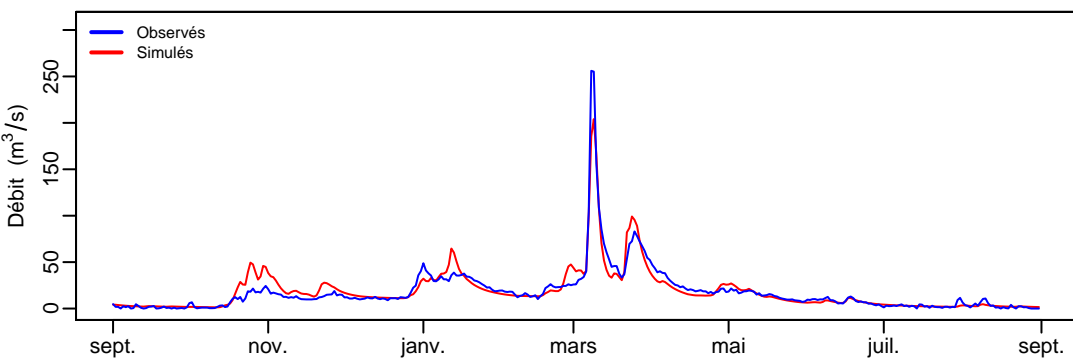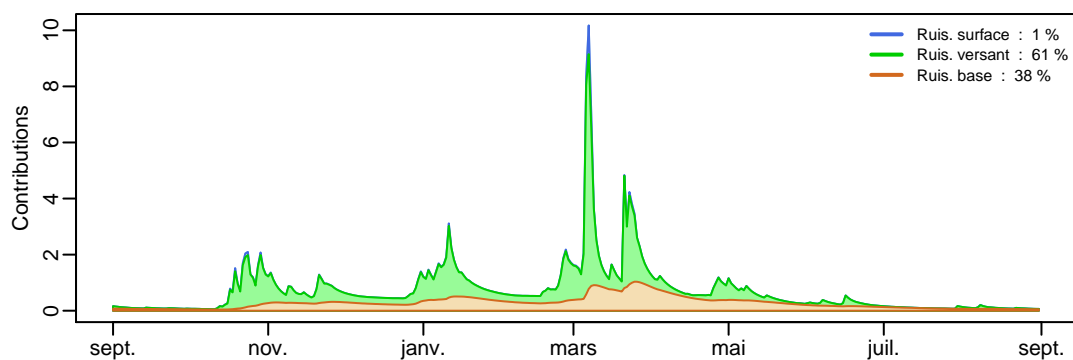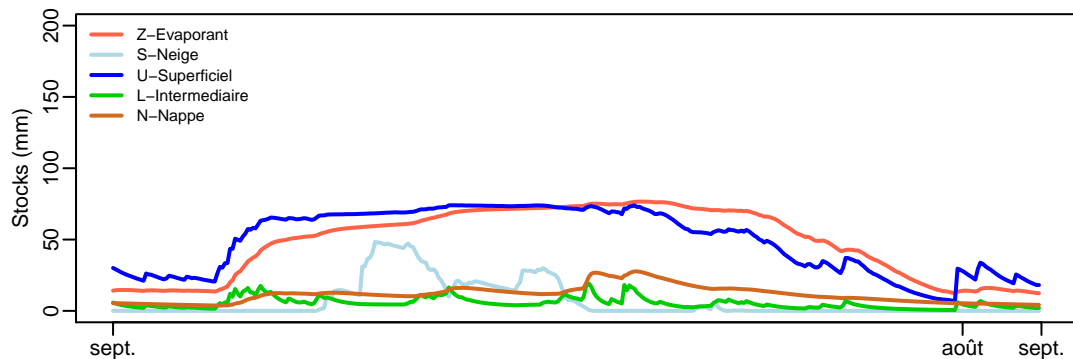

# k2330810 (2169.42 km²) – année 1991–1992

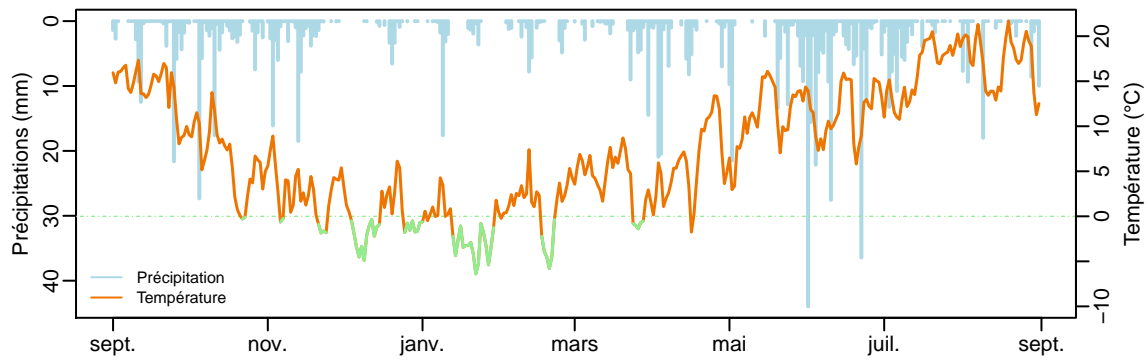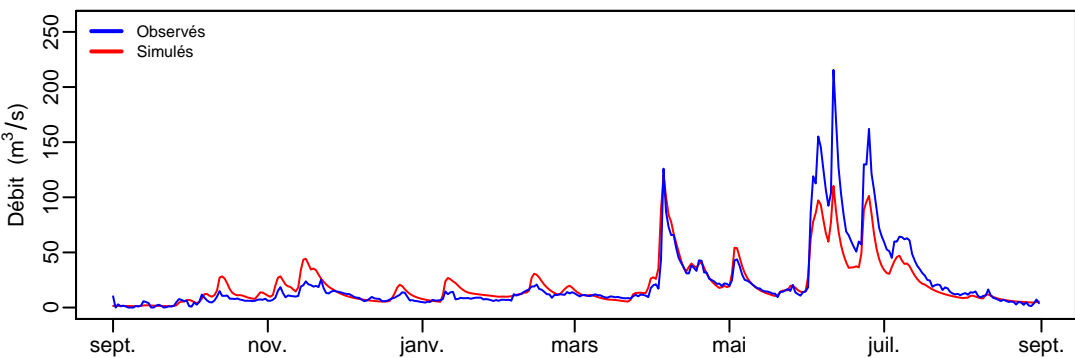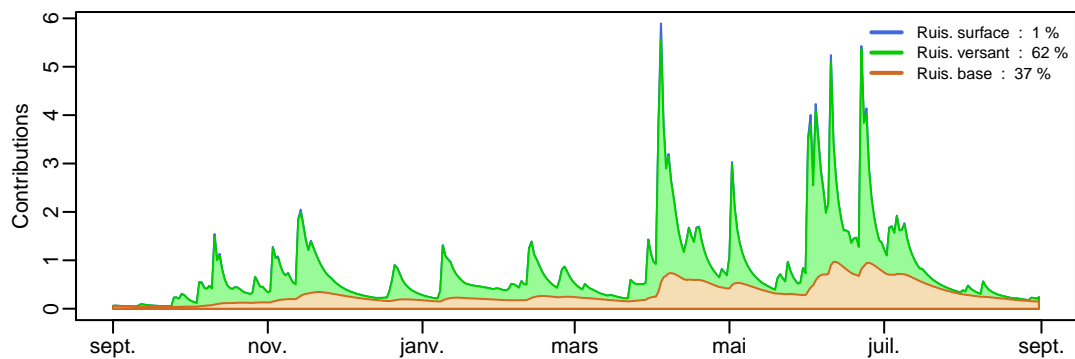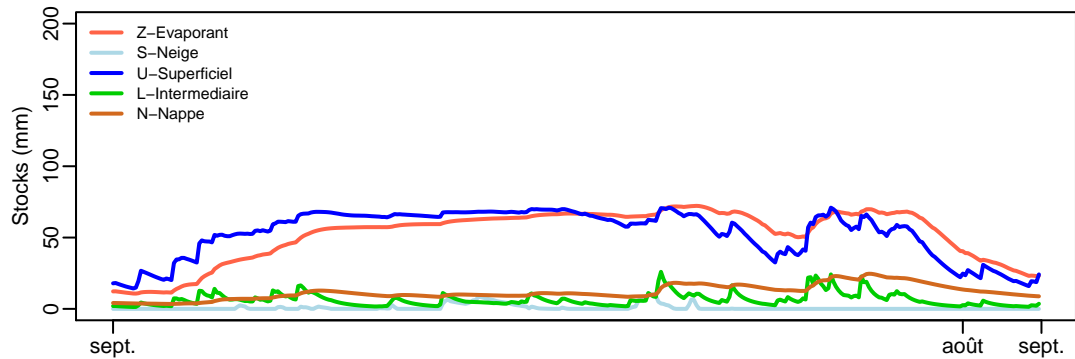

# k2330810 (2169.42 km<sup>2</sup>) – année 1992–1993

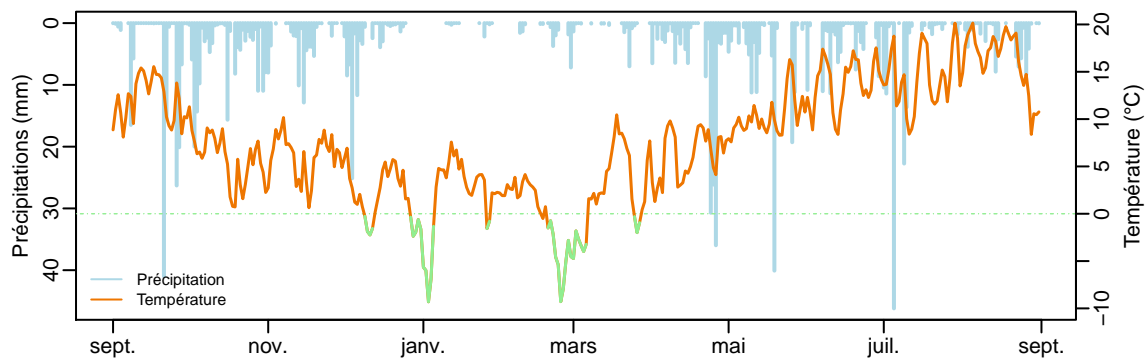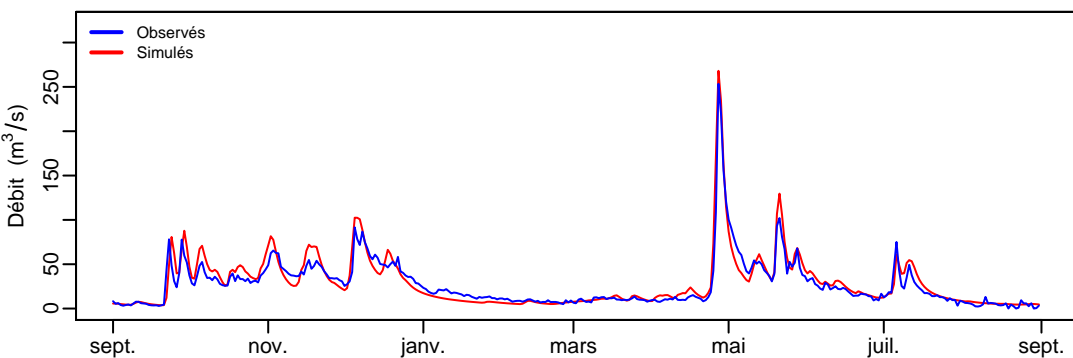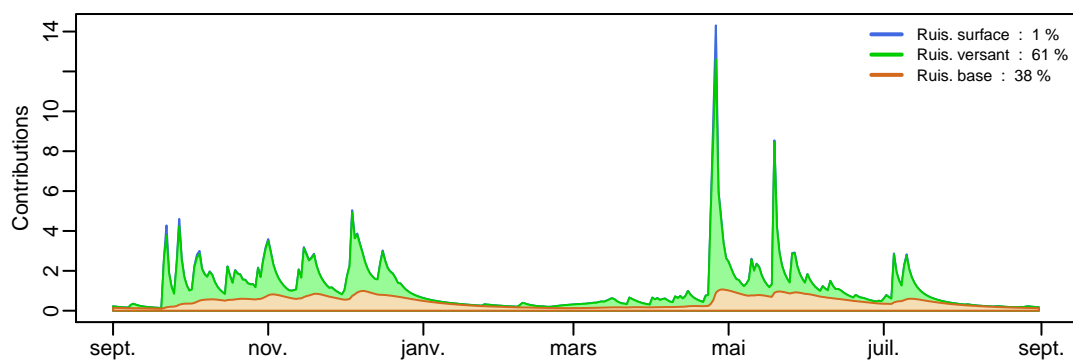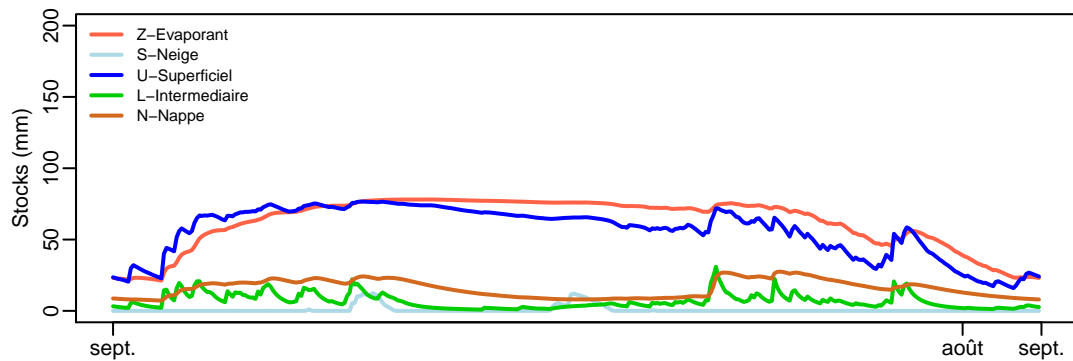



# k2330810 (2169.42 km<sup>2</sup>) – année 1993–1994

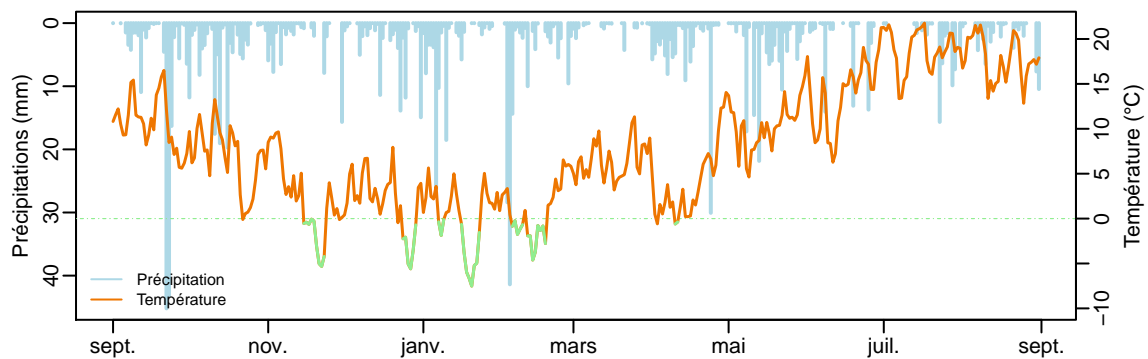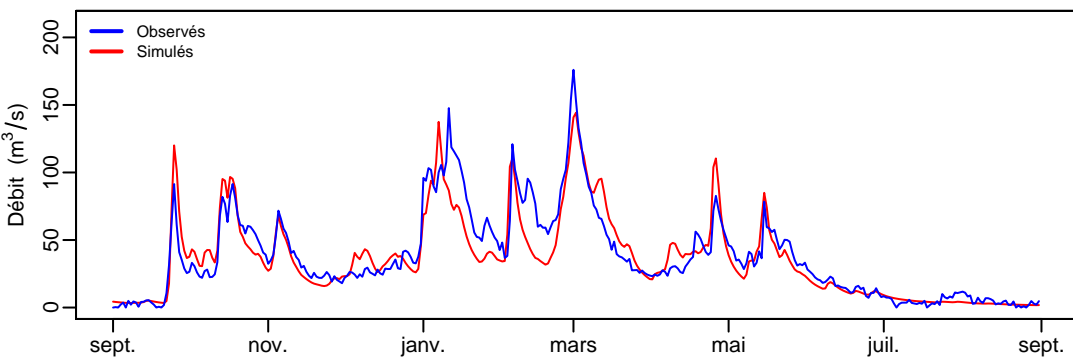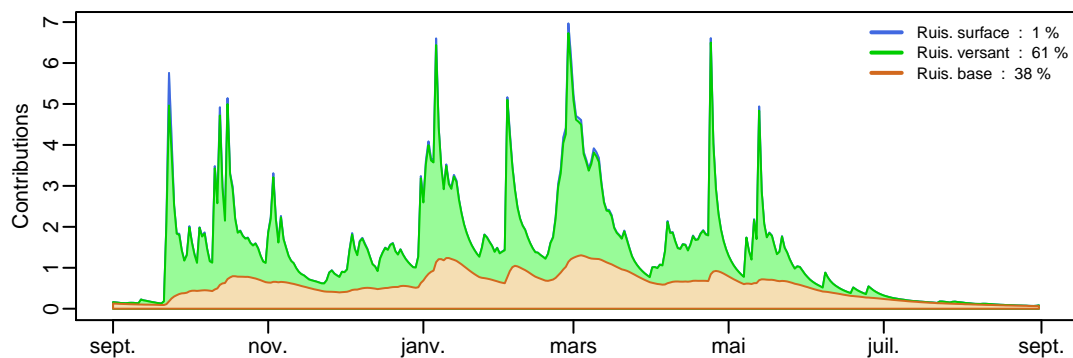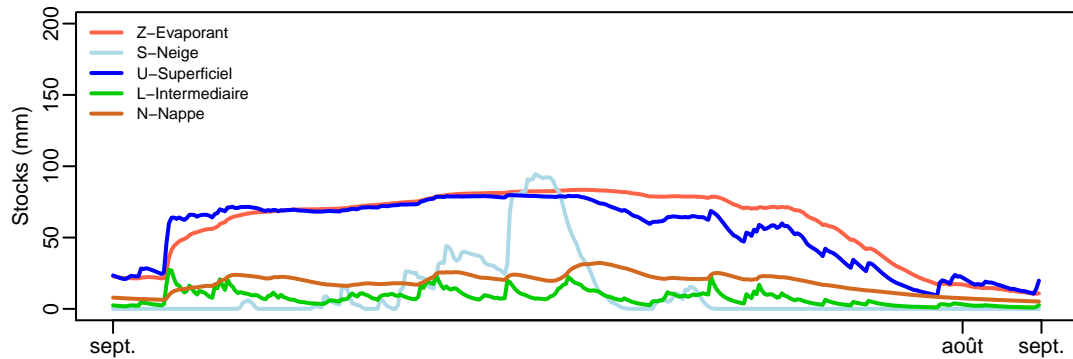

# k2330810 (2169.42 km²) – année 1994–1995

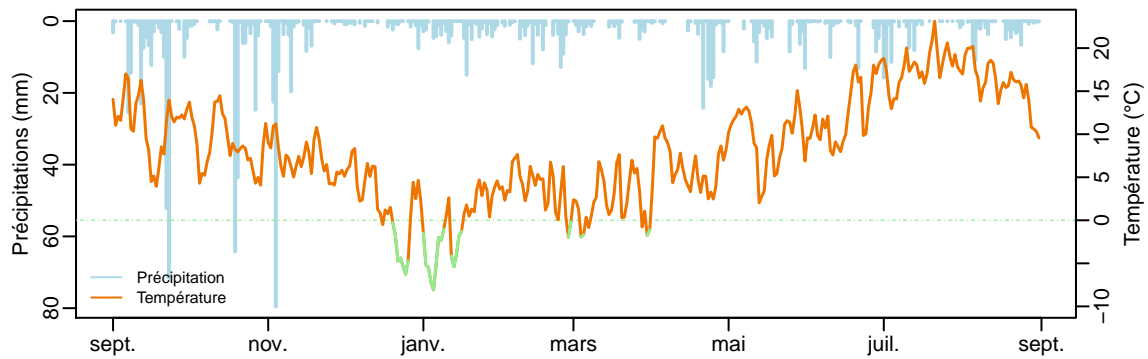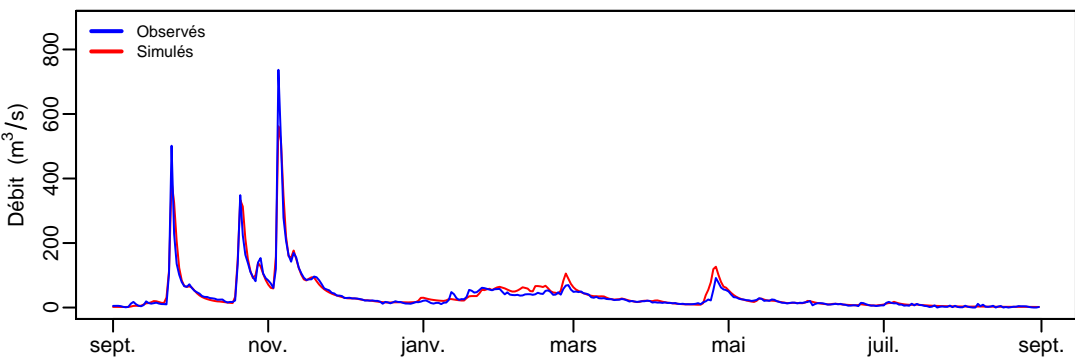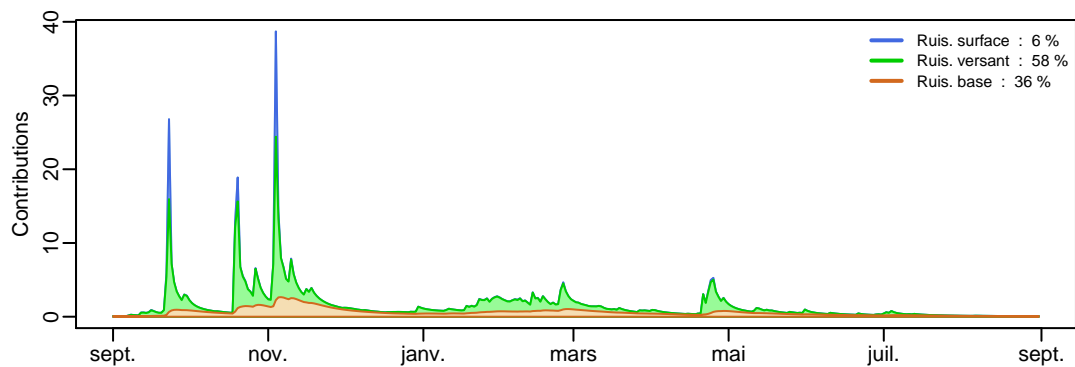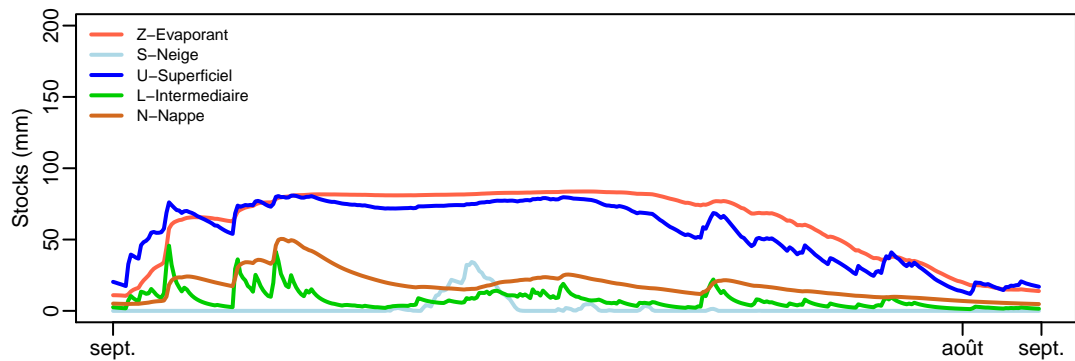

# k2330810 (2169.42 km²) – année 1995–1996

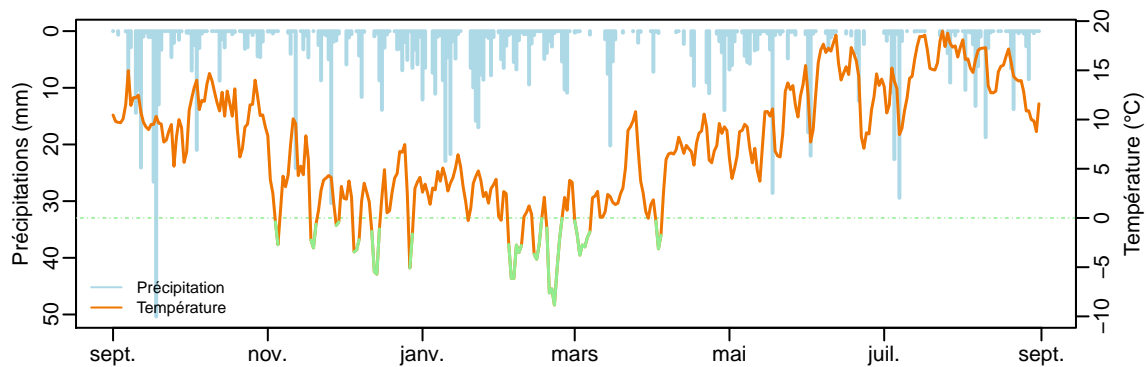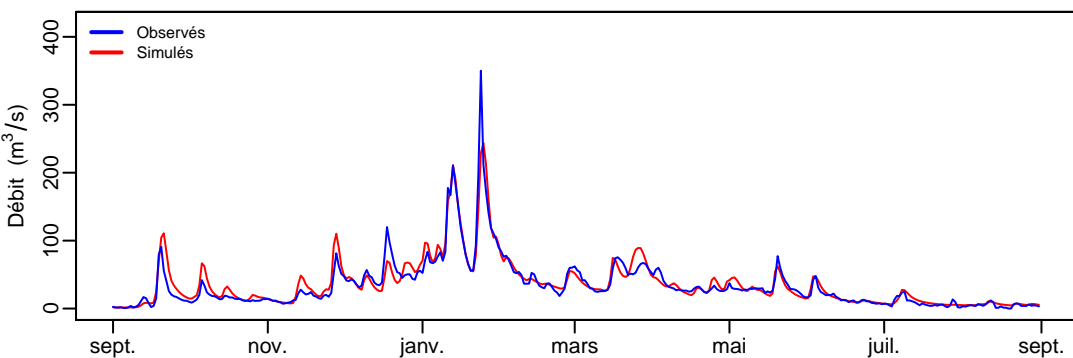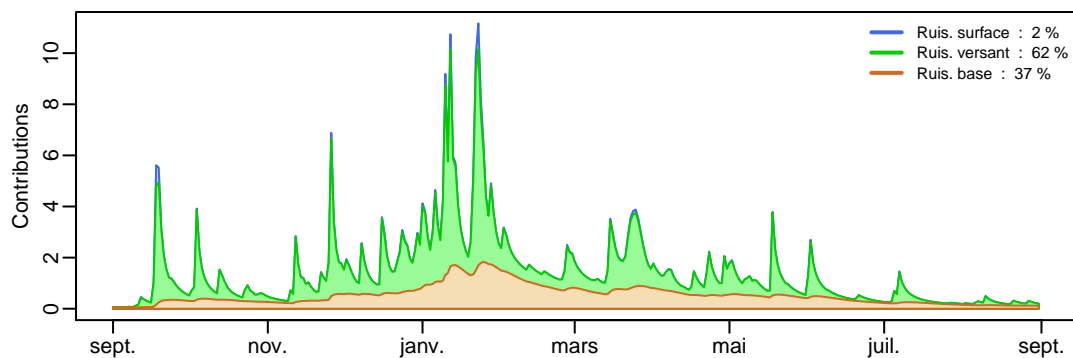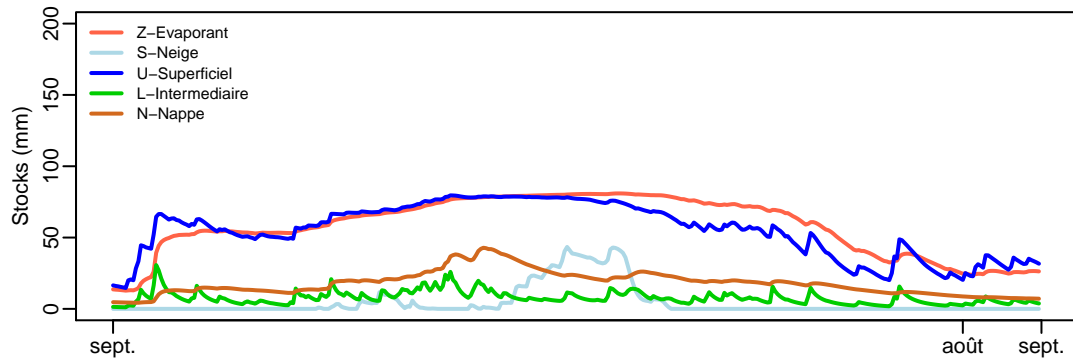

# k2330810 (2169.42 km<sup>2</sup>) – année 1996–1997

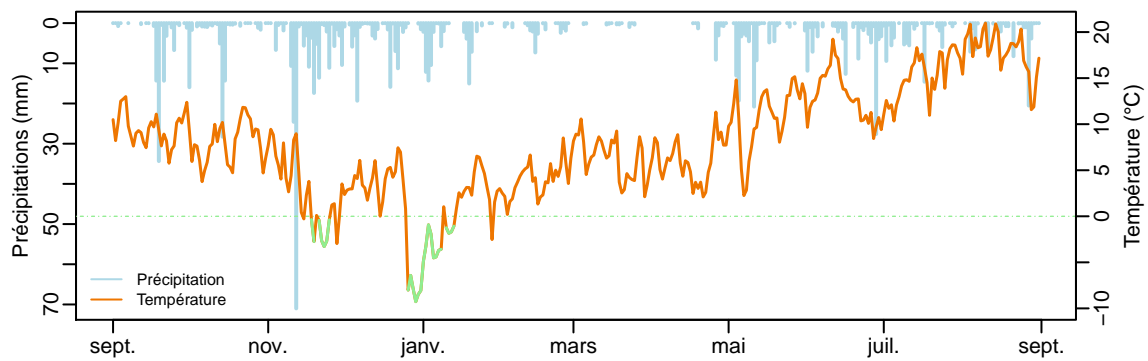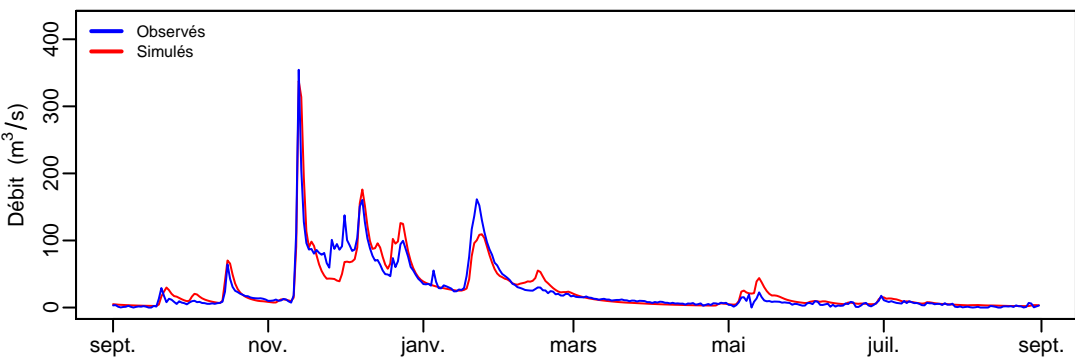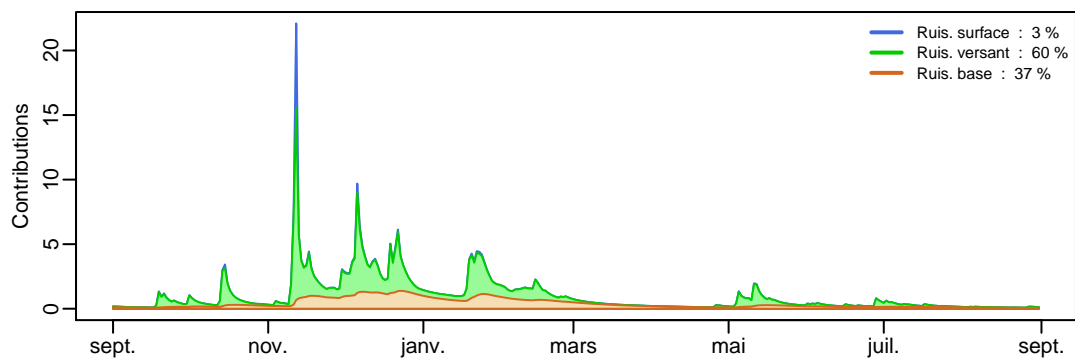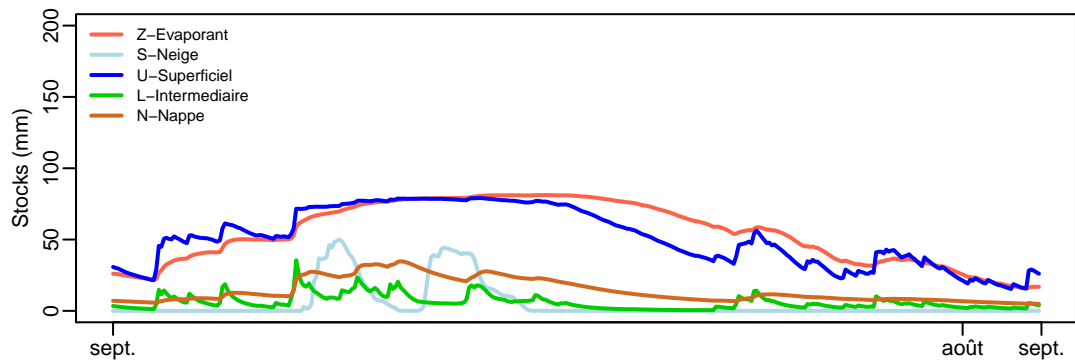

# k2330810 (2169.42 km<sup>2</sup>) – année 1997–1998

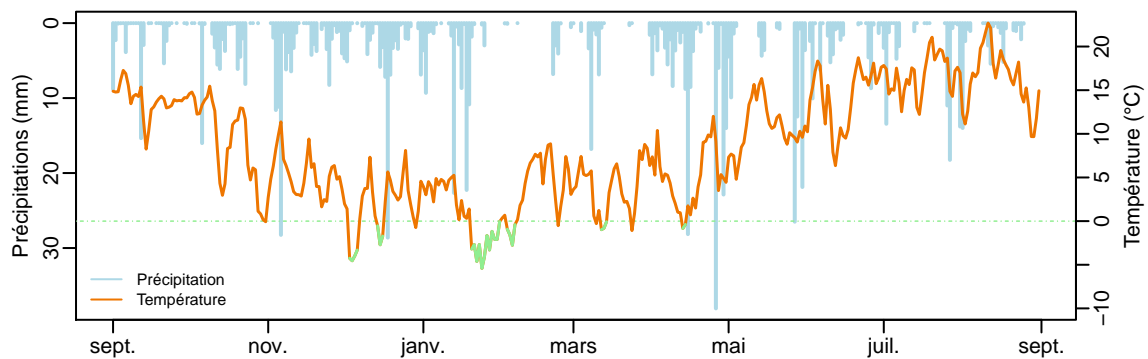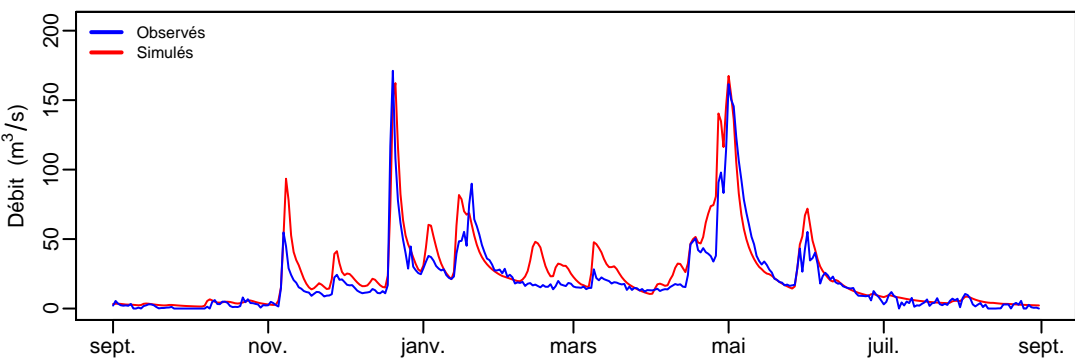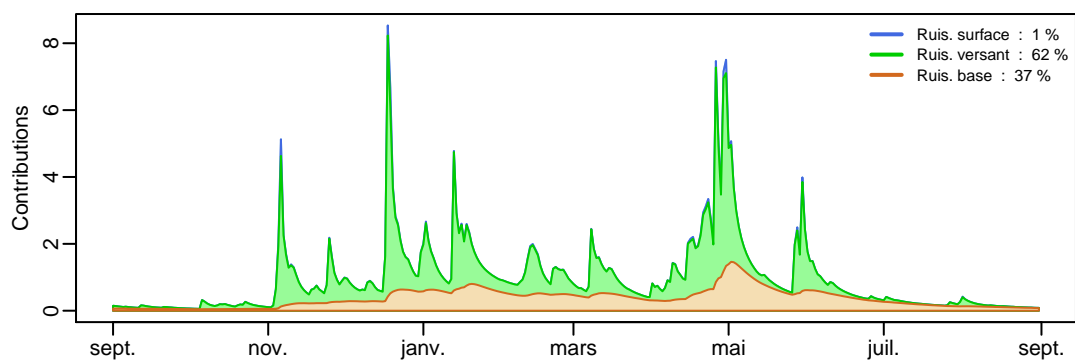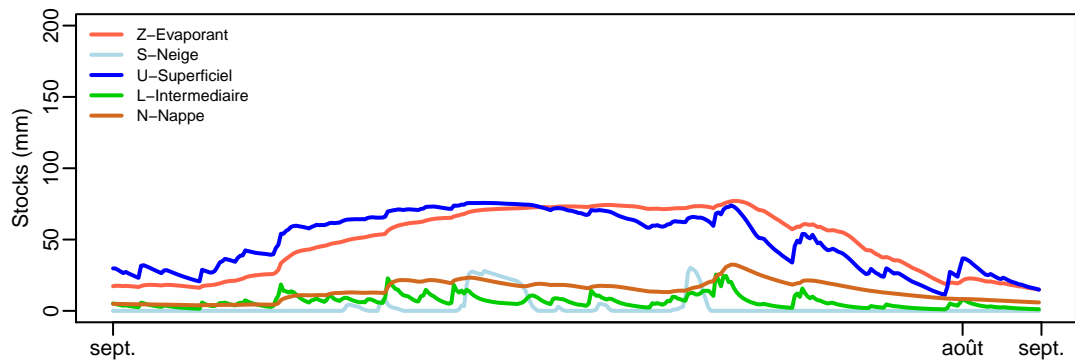

# k2330810 (2169.42 km²) – année 1998–1999

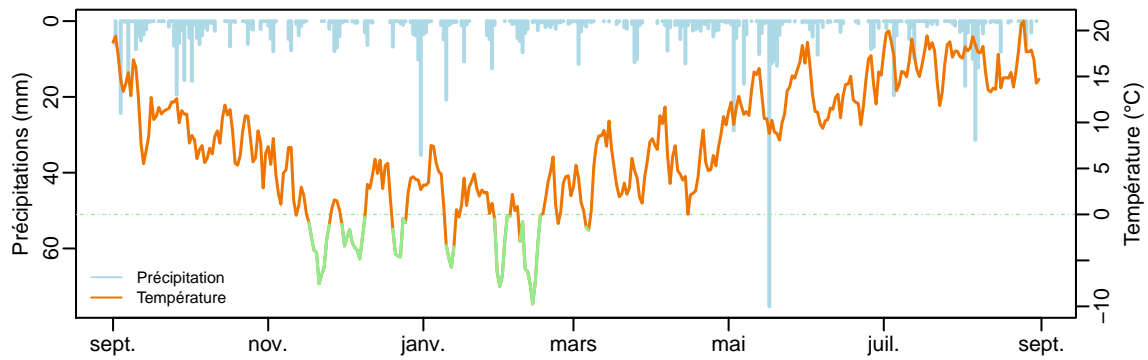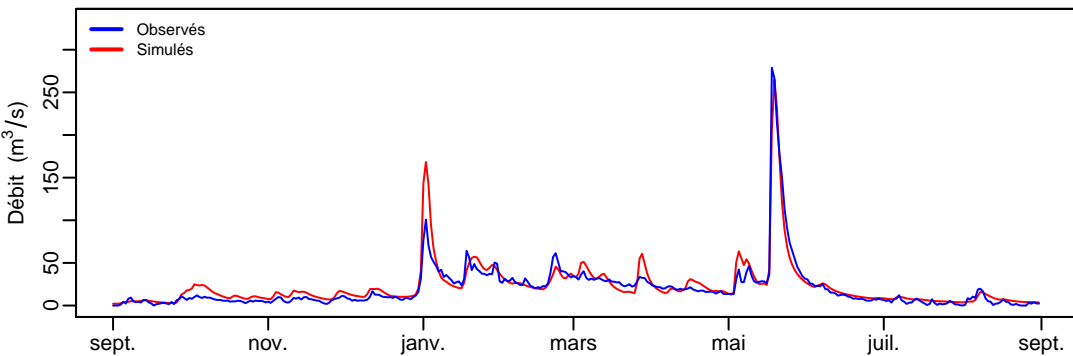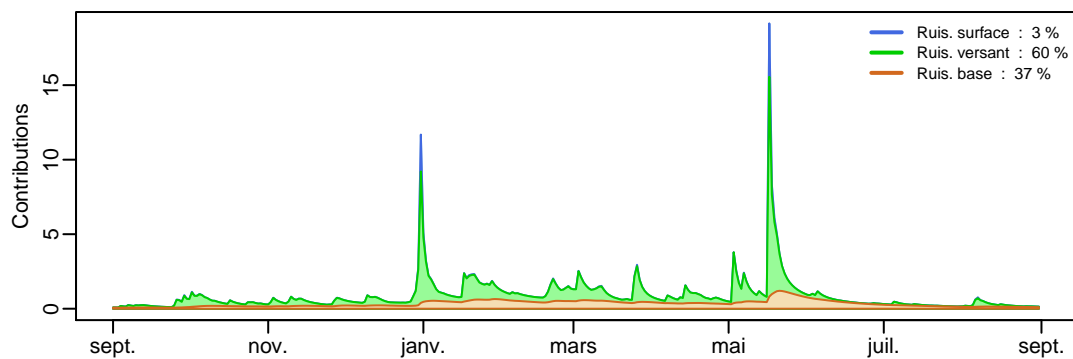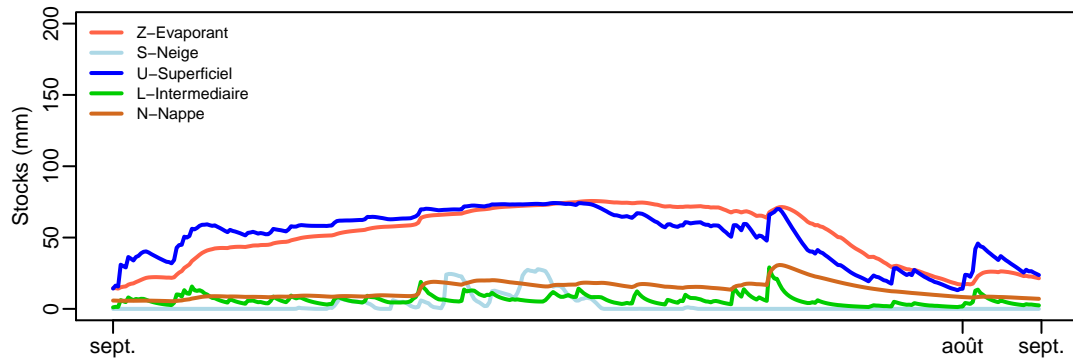

# k2330810 (2169.42 km<sup>2</sup>) – année 1999–2000

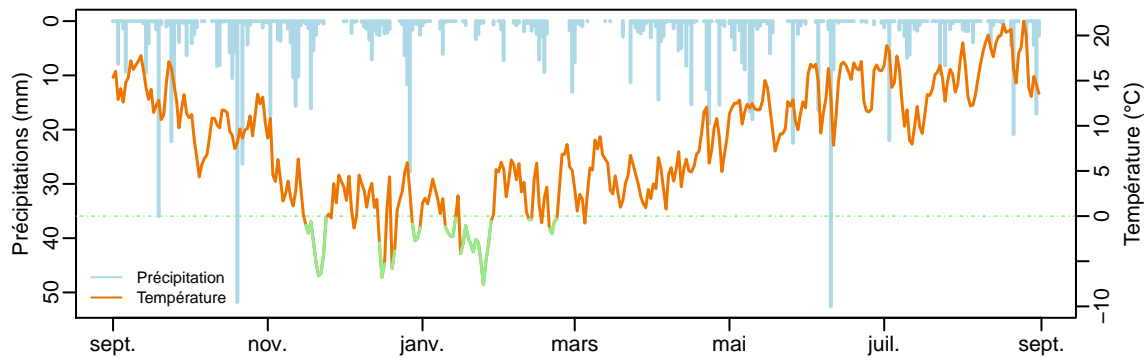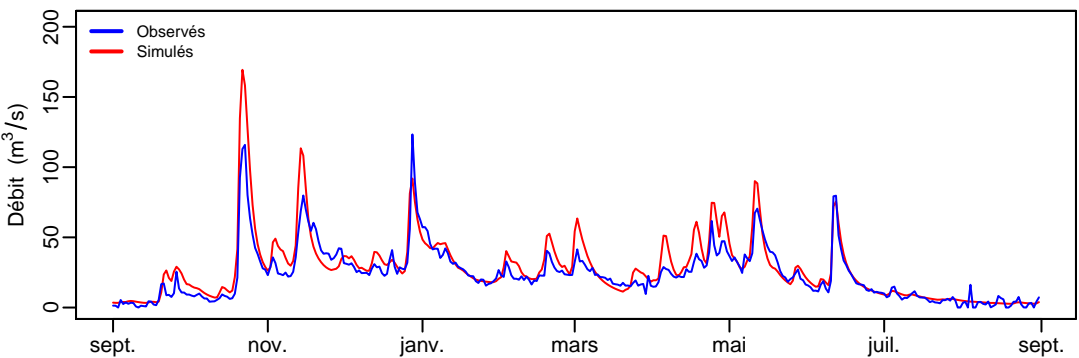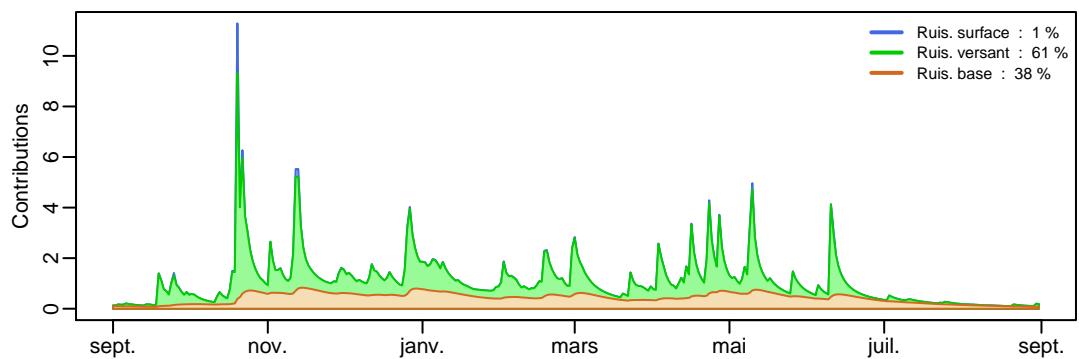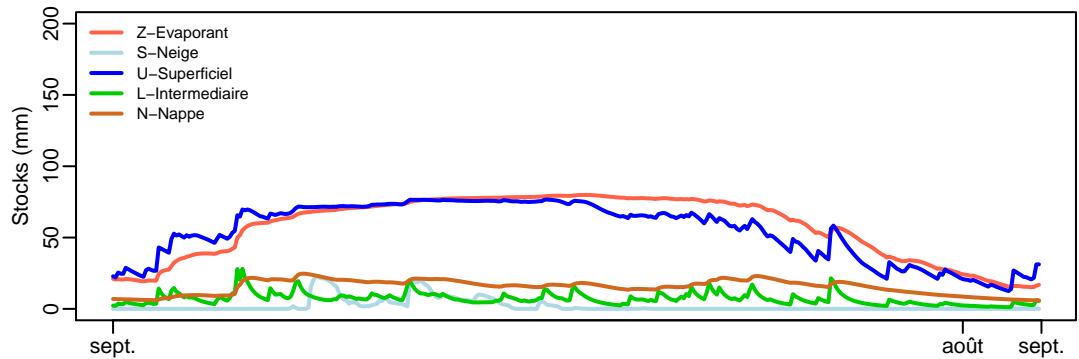

# k2330810 (2169.42 km²) – année 2000–2001

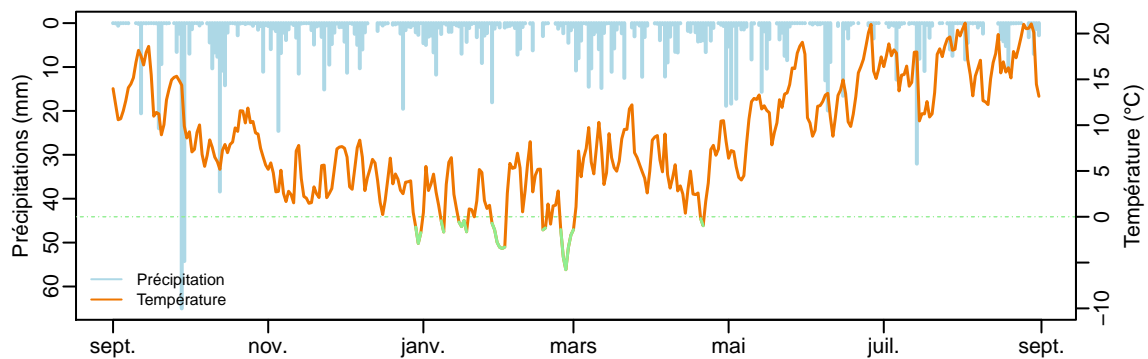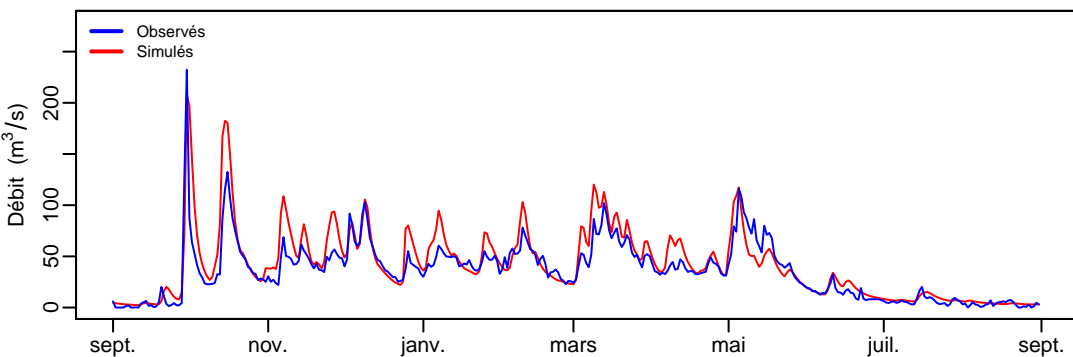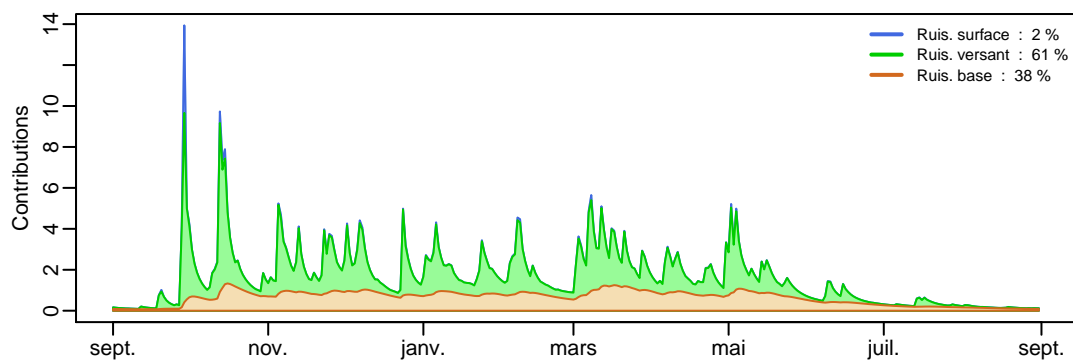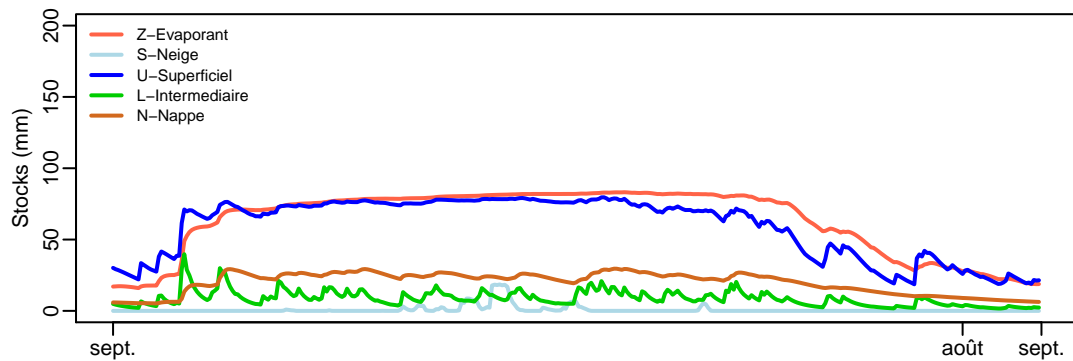



# k2330810 (2169.42 km<sup>2</sup>) – année 2001–2002

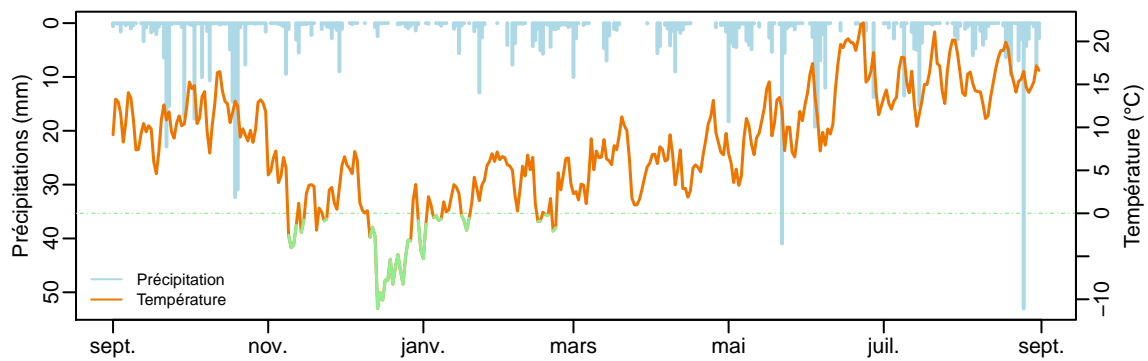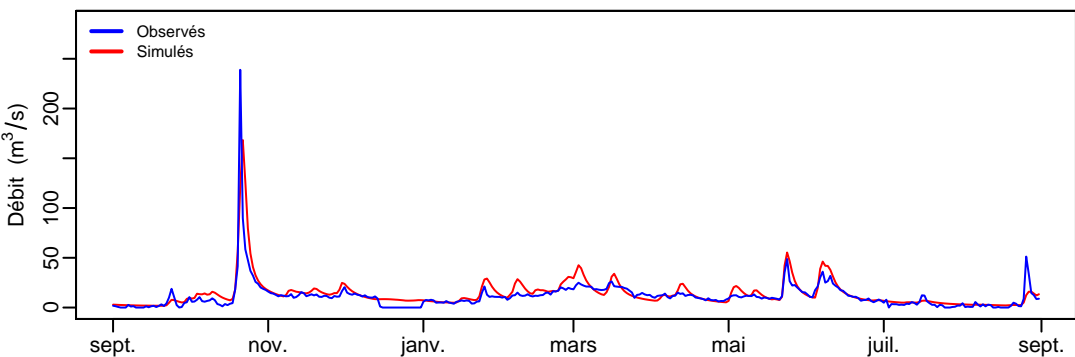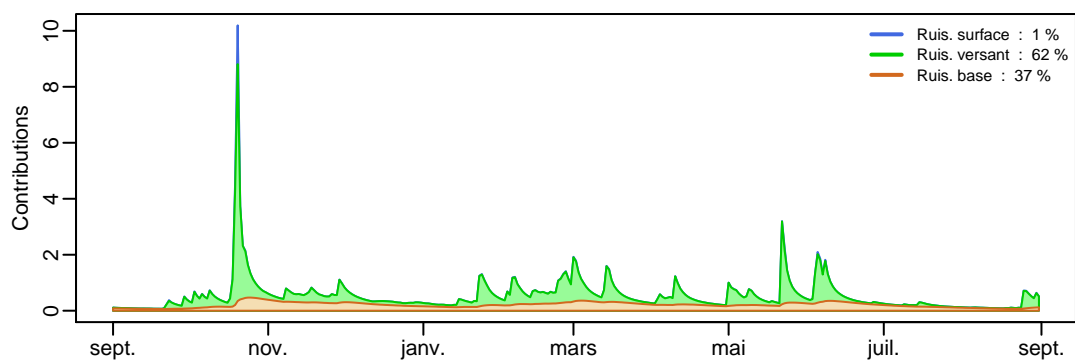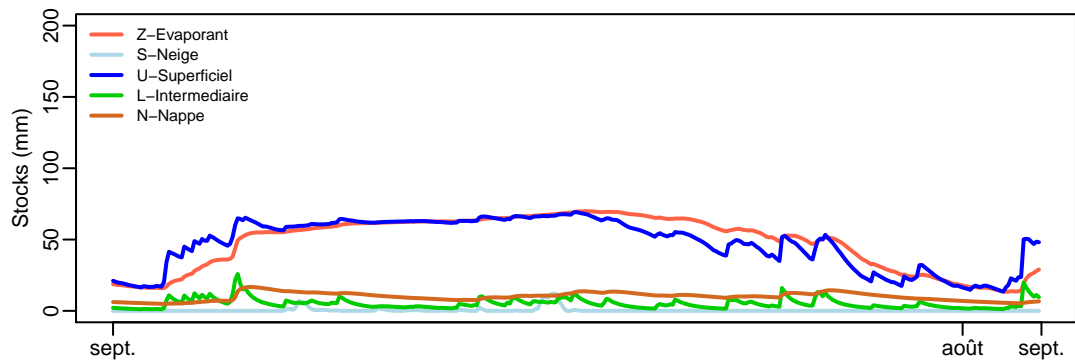

# k2330810 (2169.42 km<sup>2</sup>) – année 2002–2003

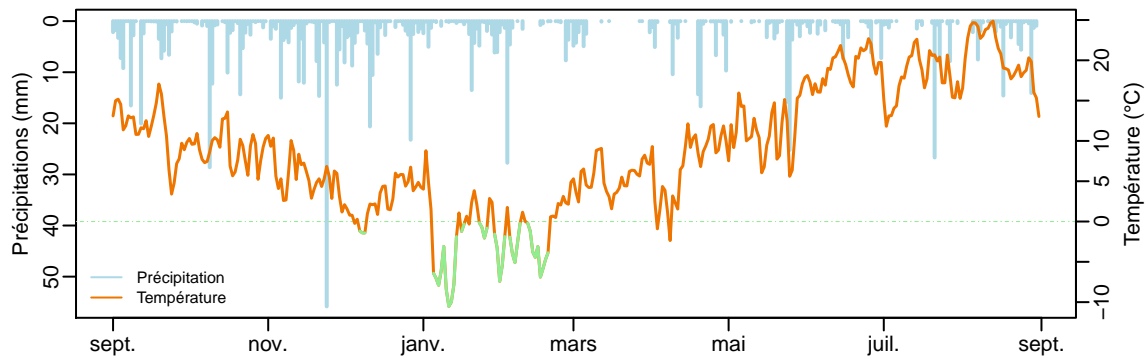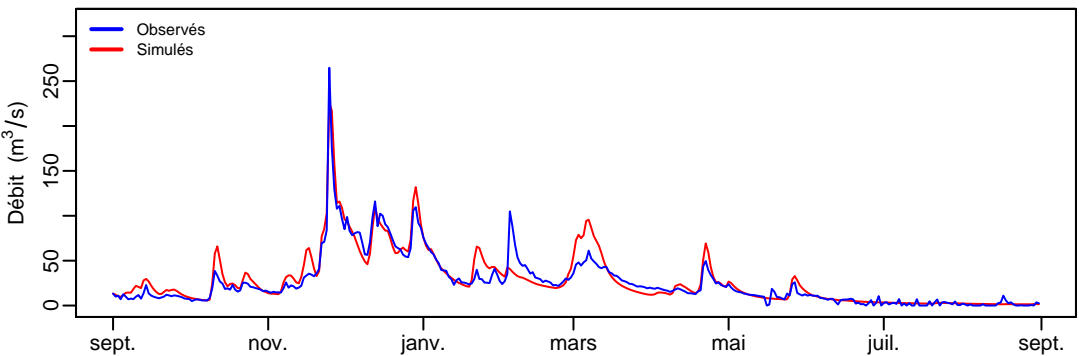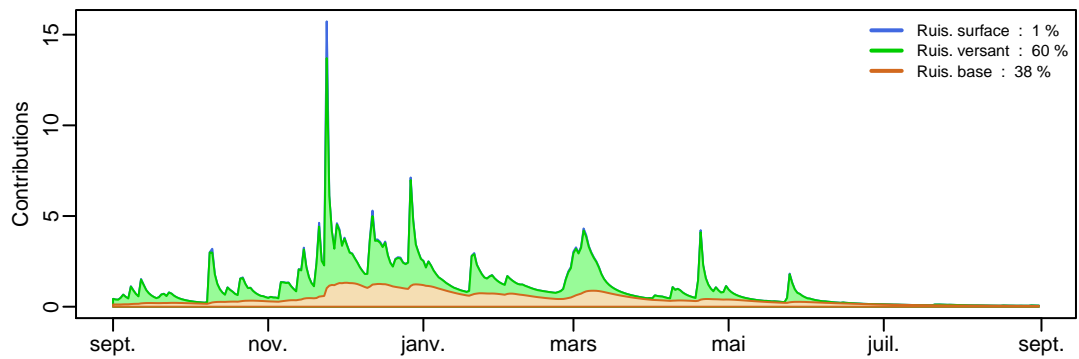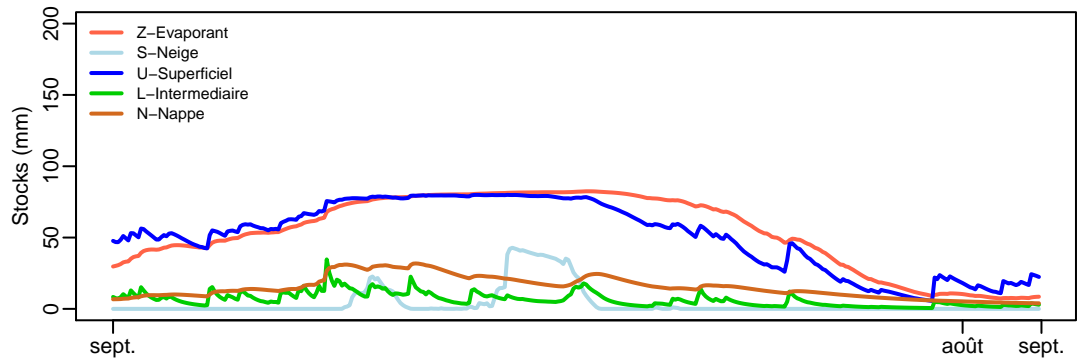

# k2330810 (2169.42 km<sup>2</sup>) – année 2003–2004

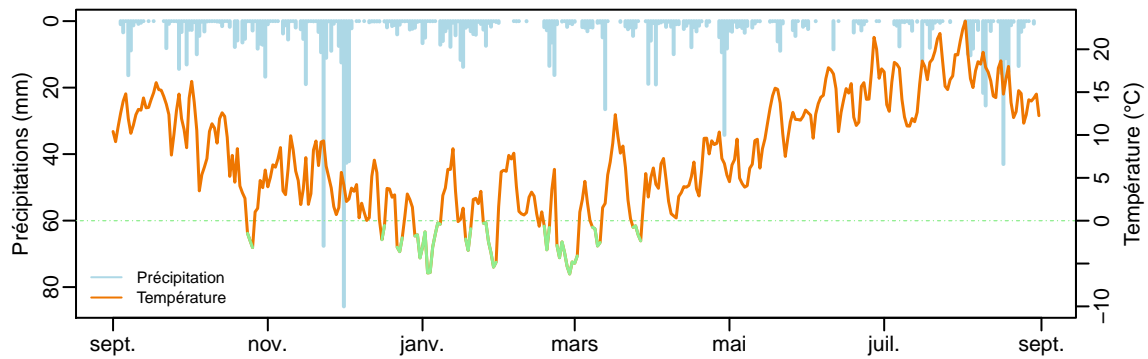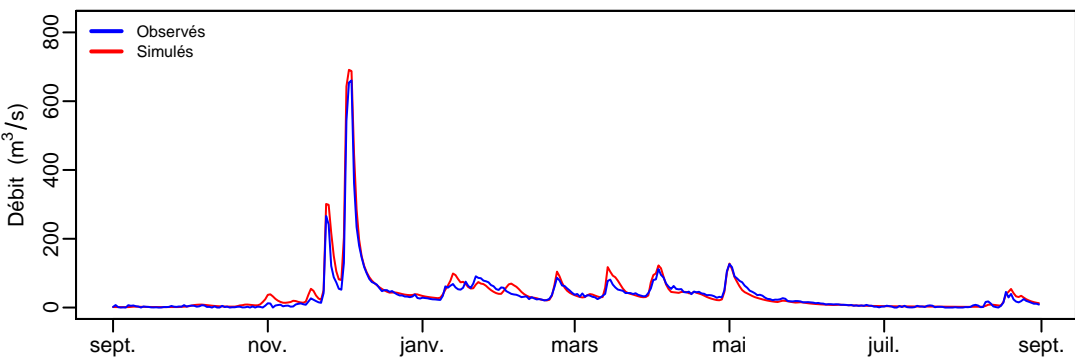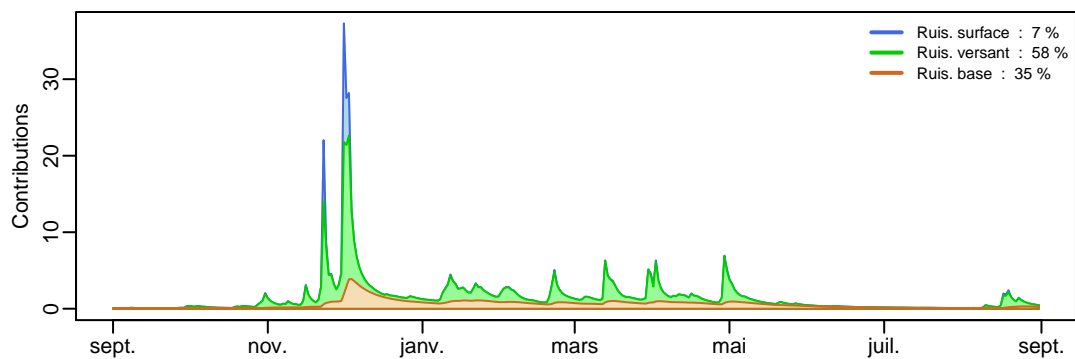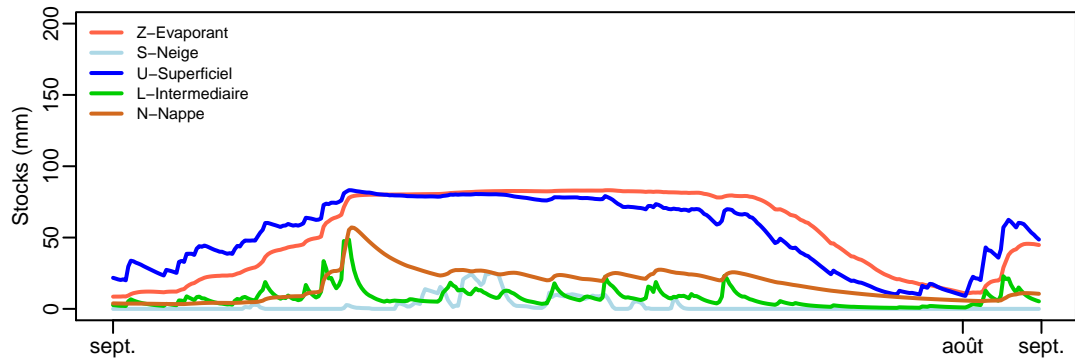

# k2330810 (2169.42 km<sup>2</sup>) – année 2004–2005

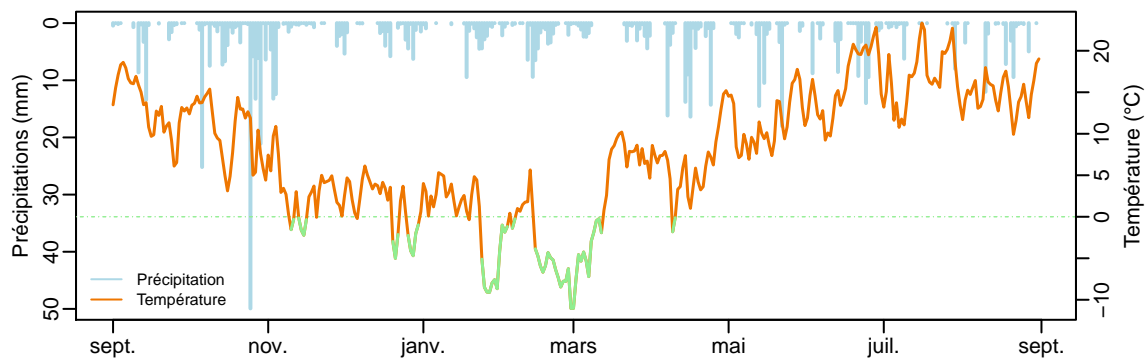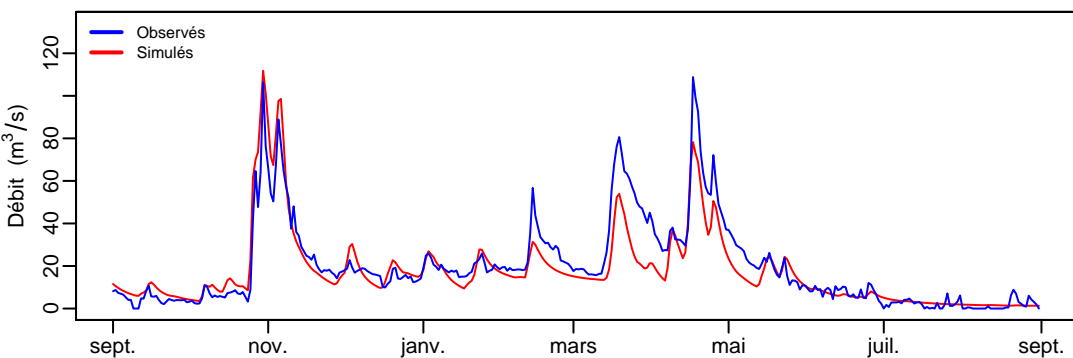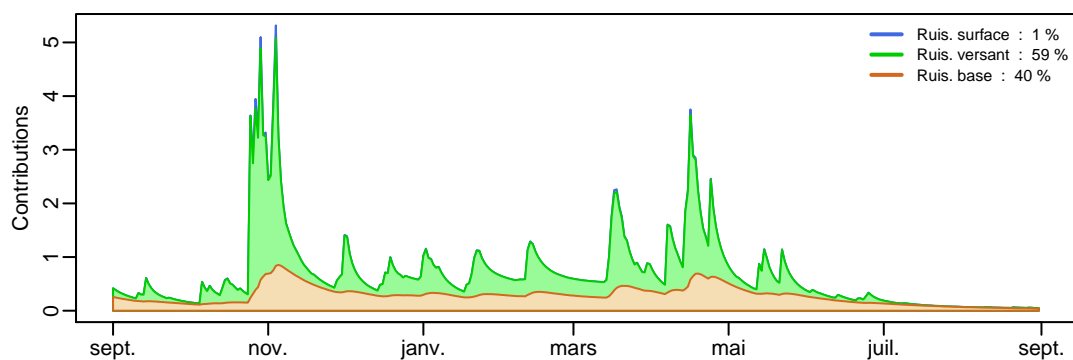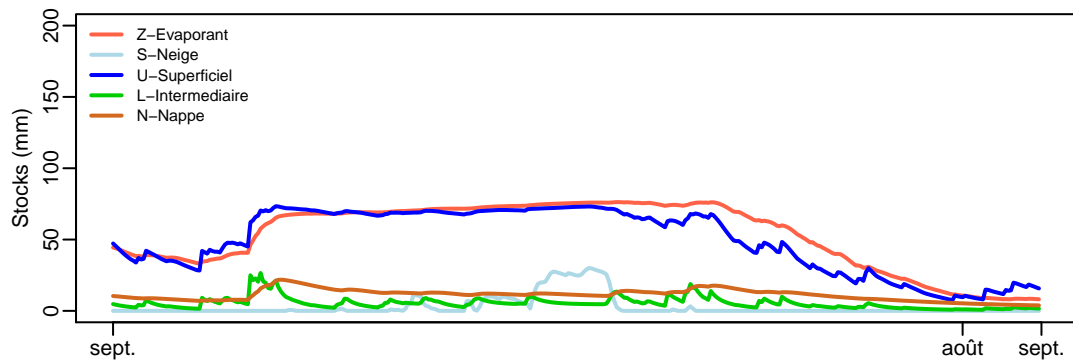

# k2330810 (2169.42 km<sup>2</sup>) – année 2005–2006

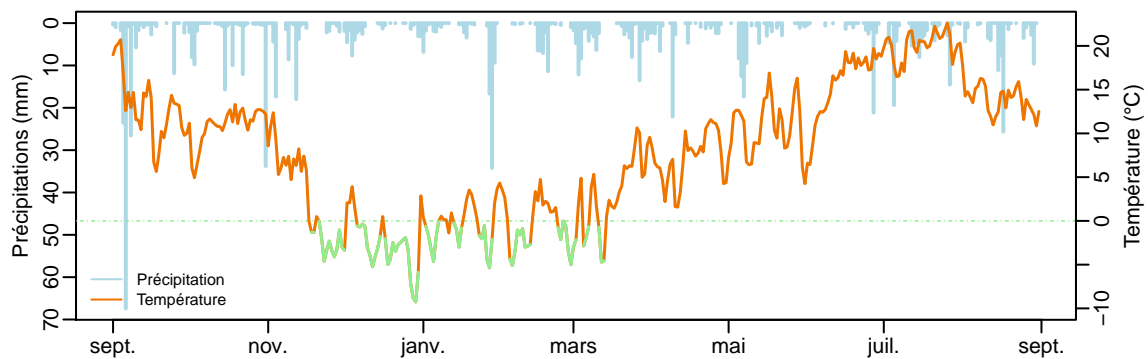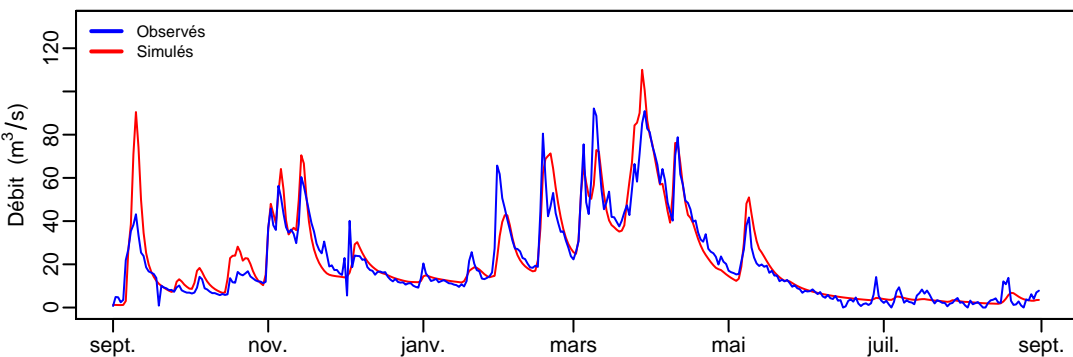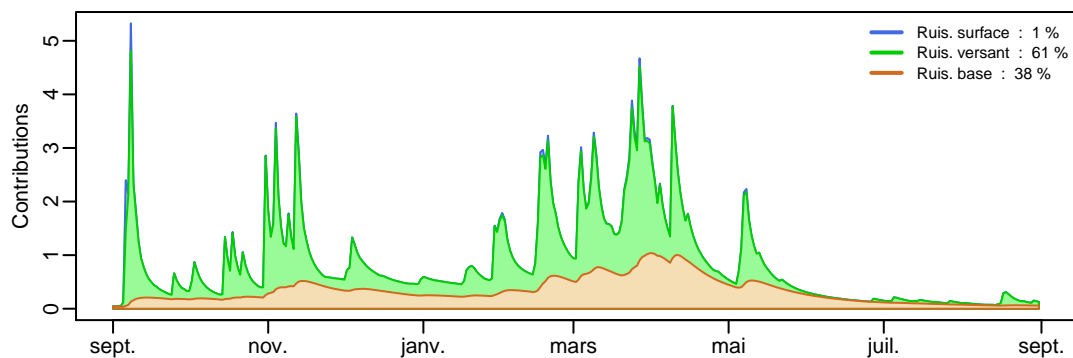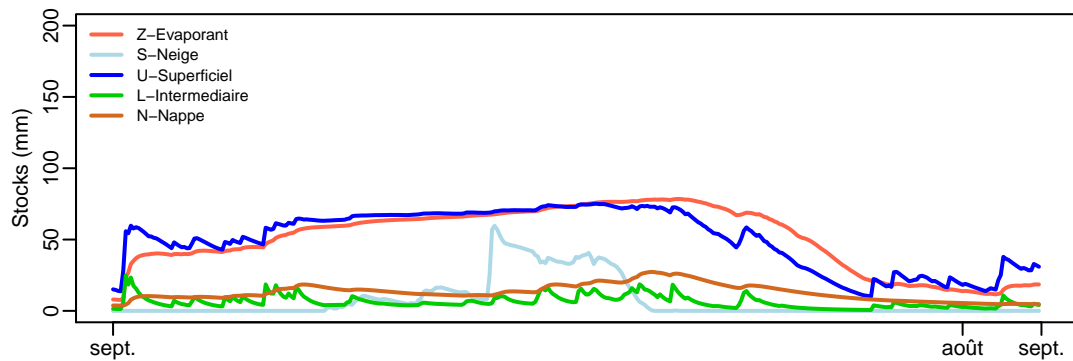

# k2330810 (2169.42 km<sup>2</sup>) – année 2006–2007

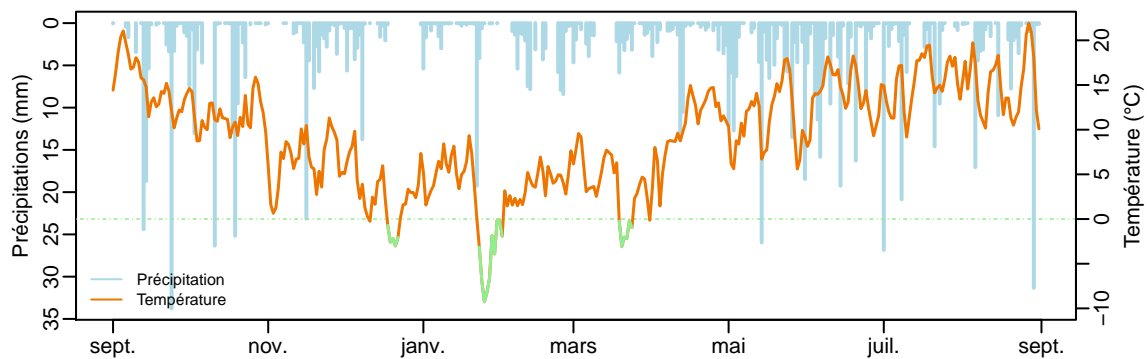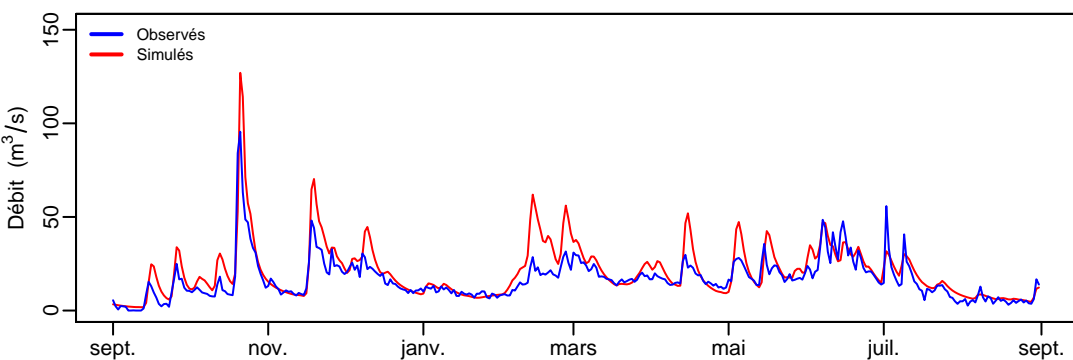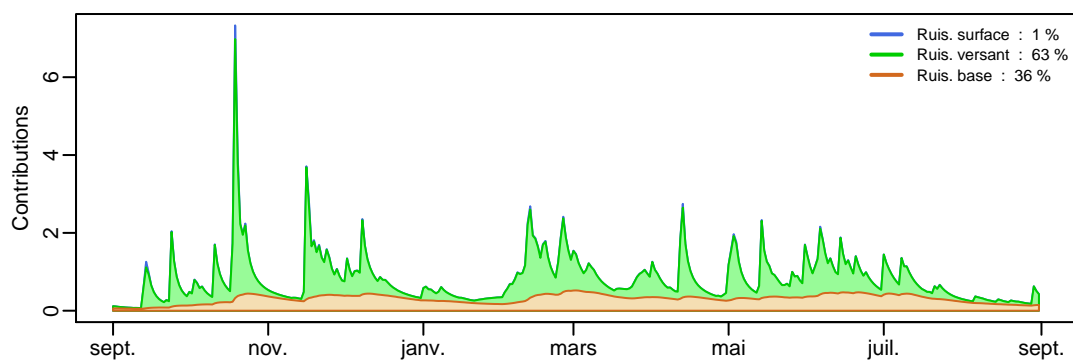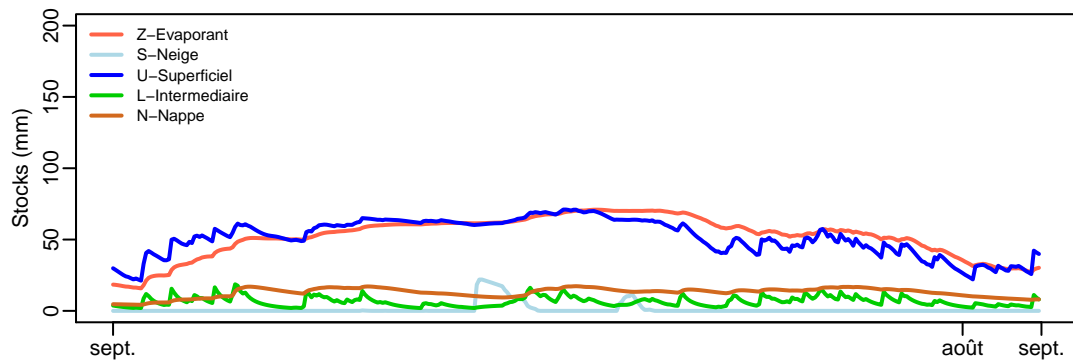

# k2330810 (2169.42 km²) – année 2007–2008

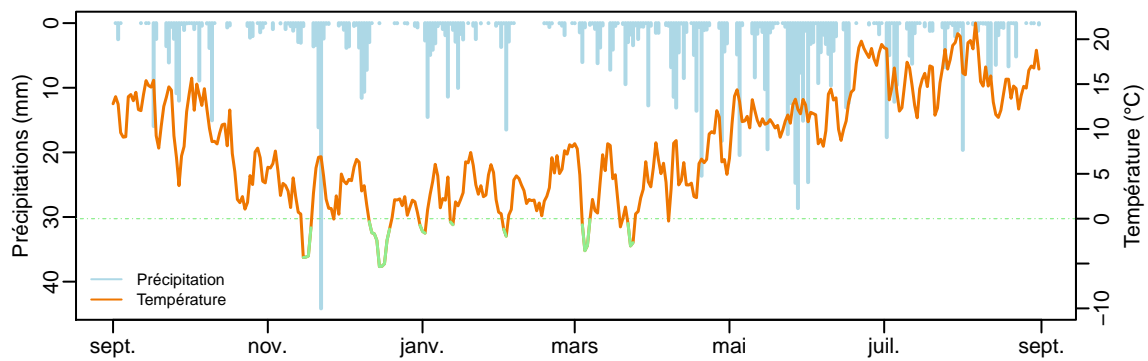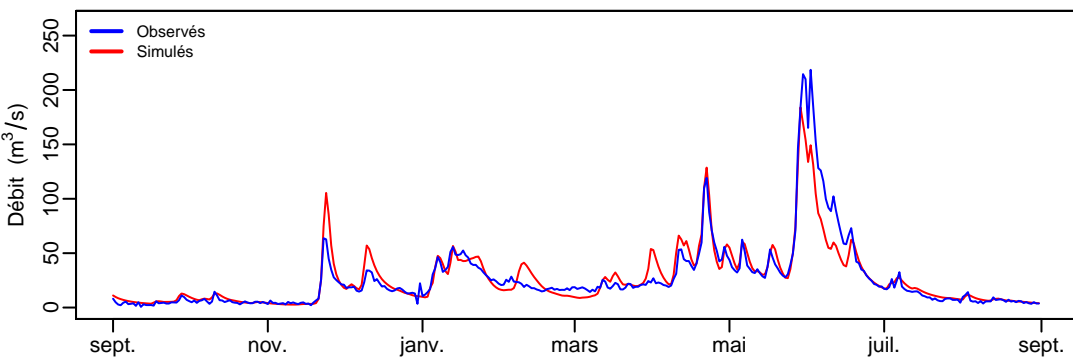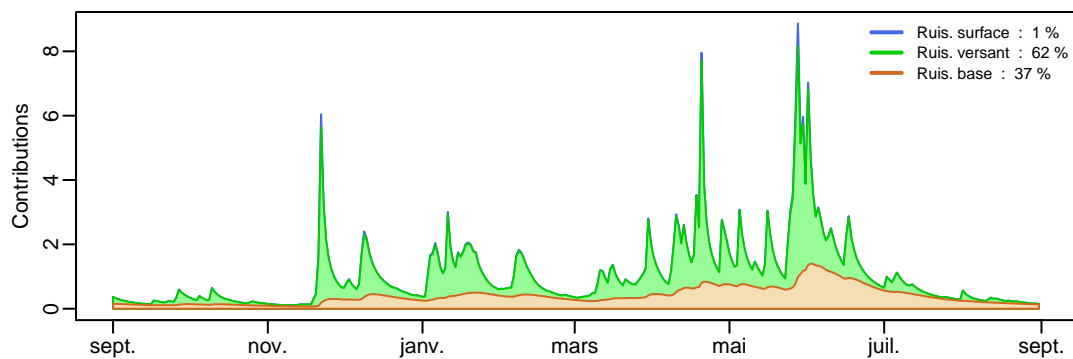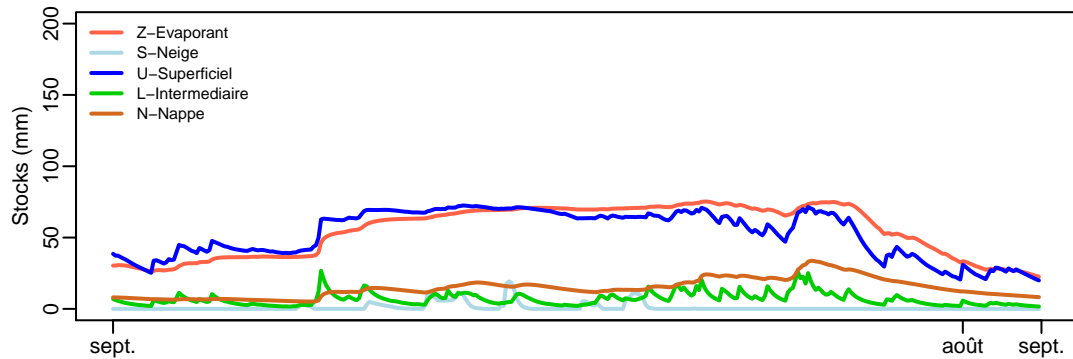

# k2330810 (2169.42 km²) – année 2008–2009

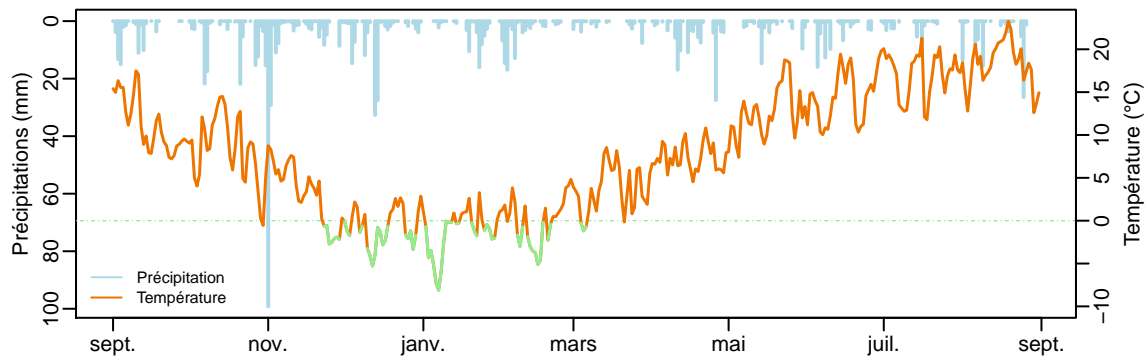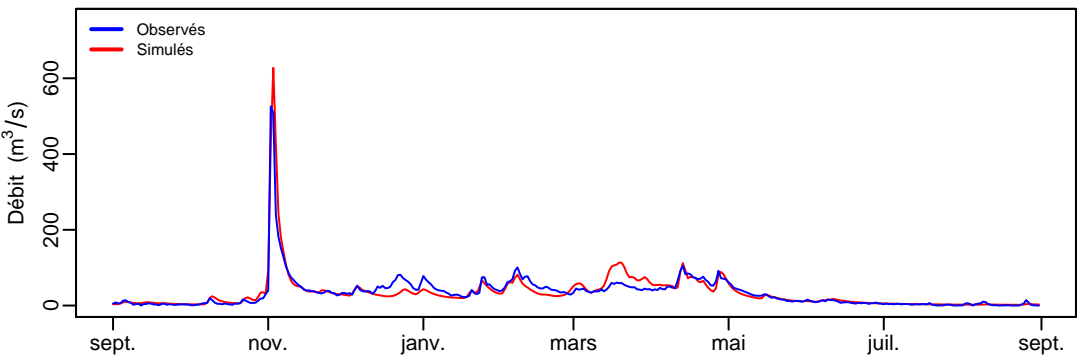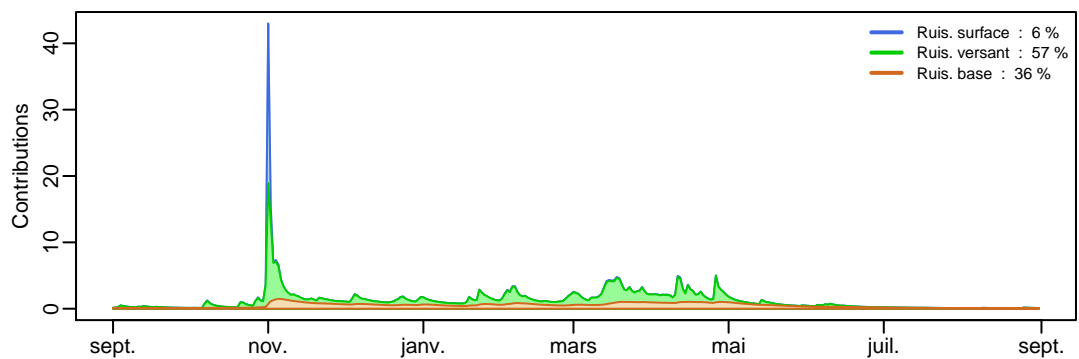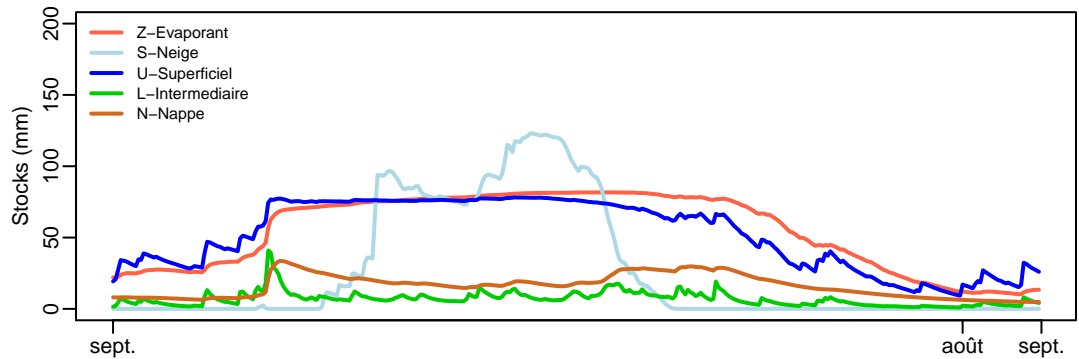



# k2330810 (2169.42 km<sup>2</sup>) – année 2009–2010

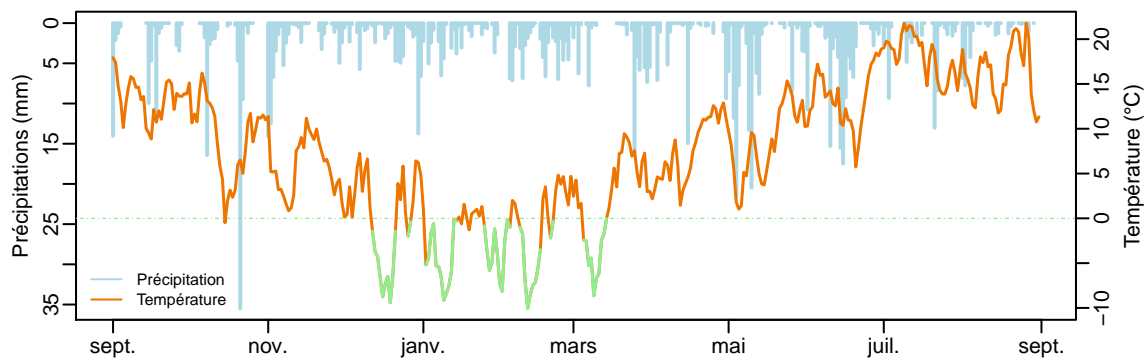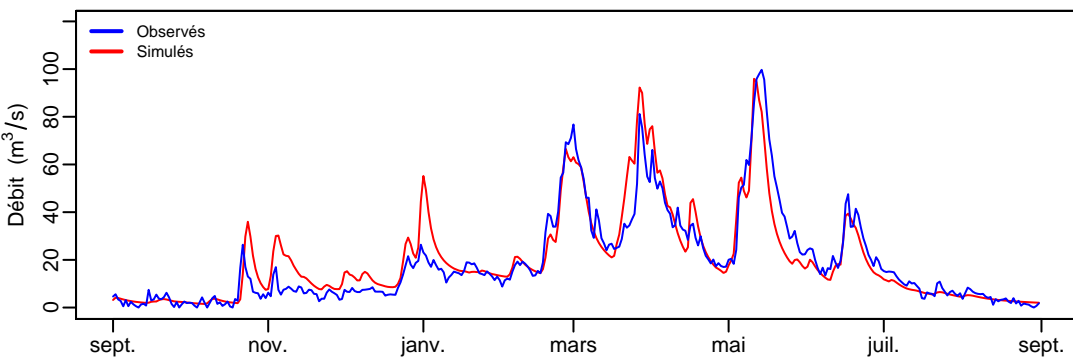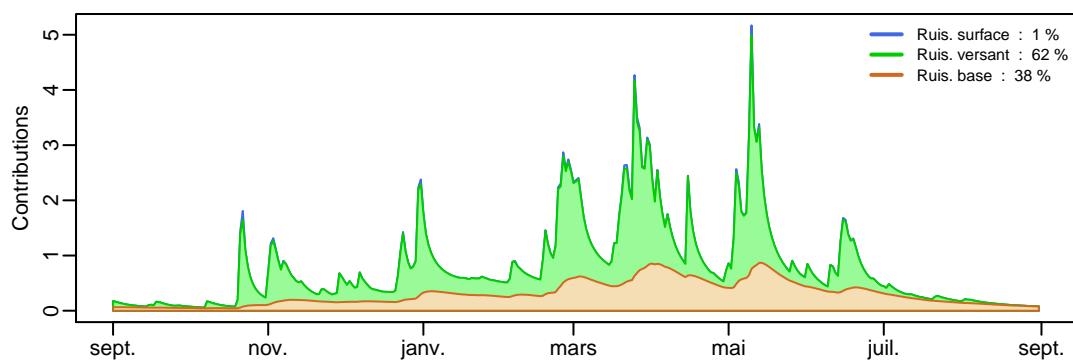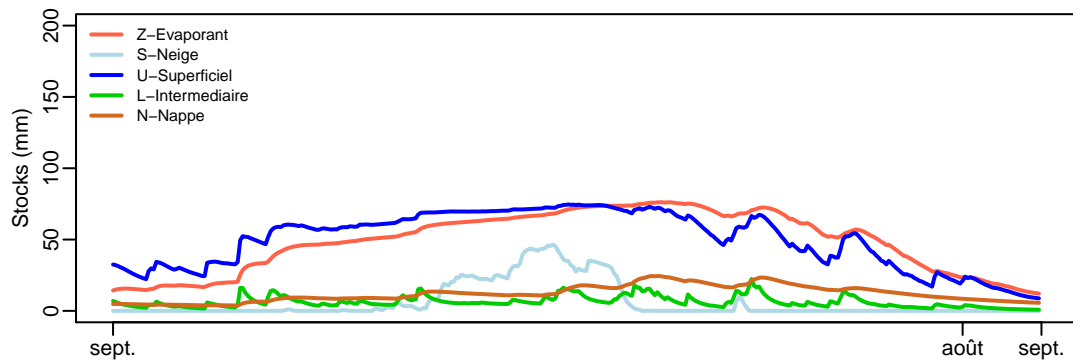

# k2330810 (2169.42 km²) – année 2010–2011

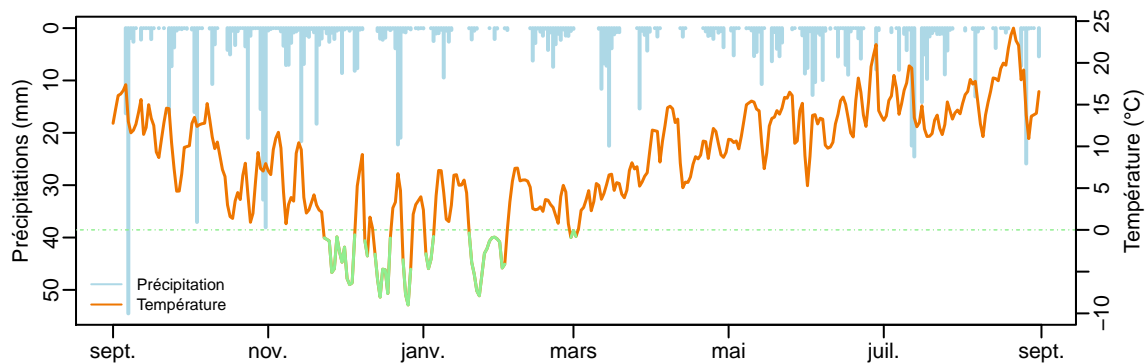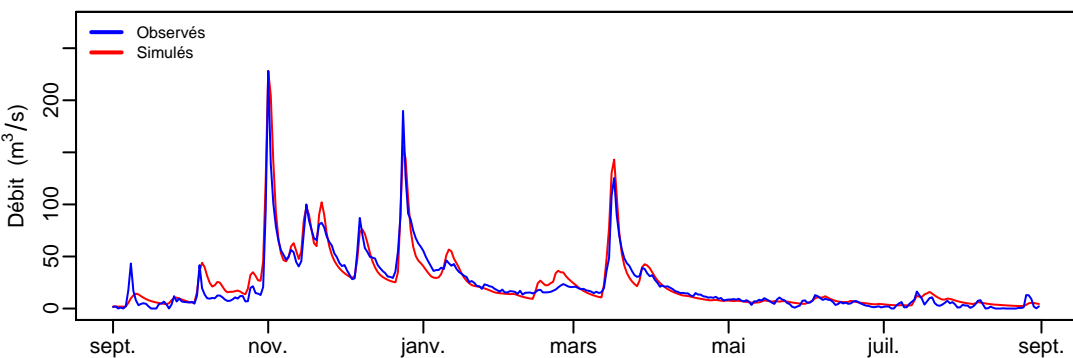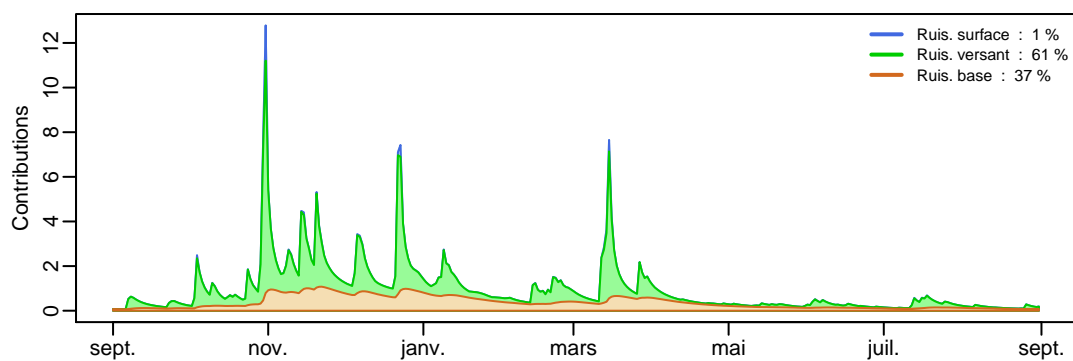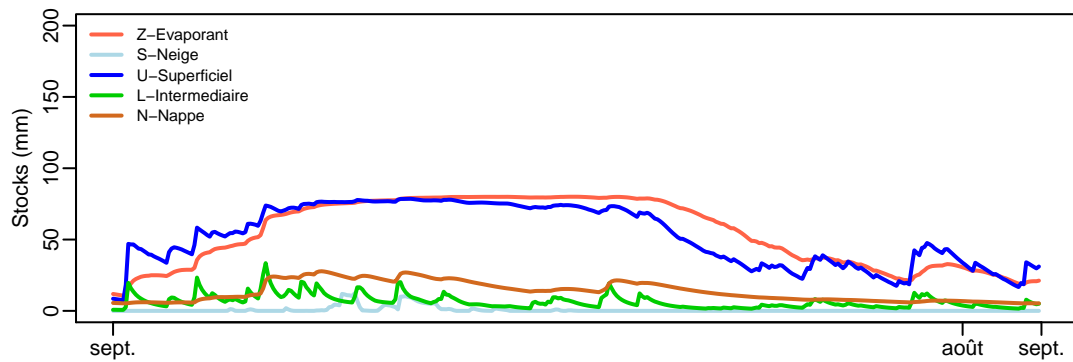

# k2330810 (2169.42 km<sup>2</sup>) – année 2011–2012

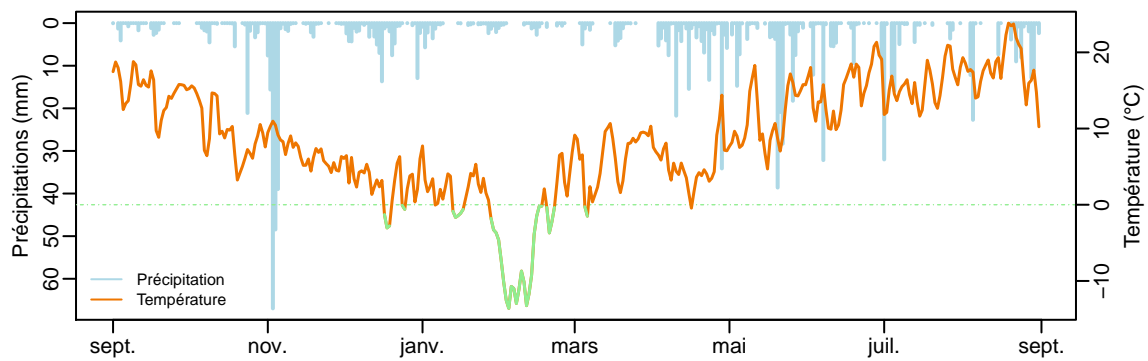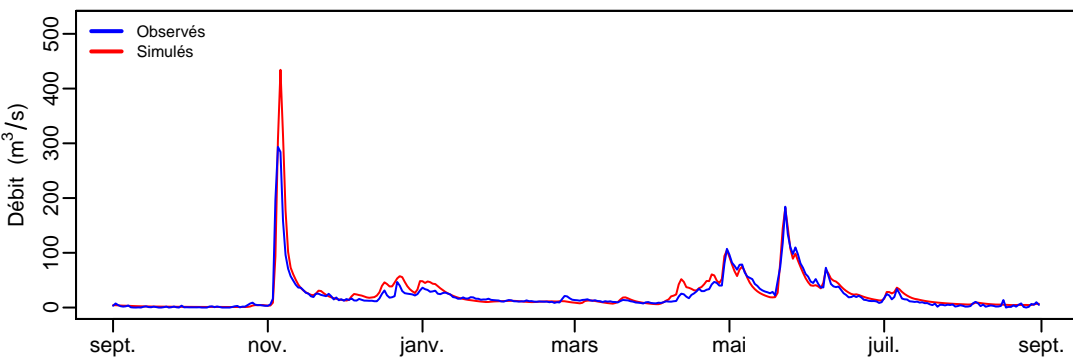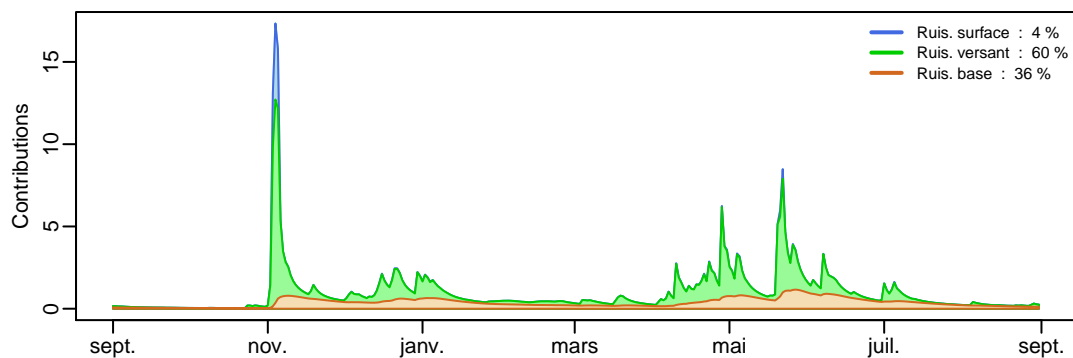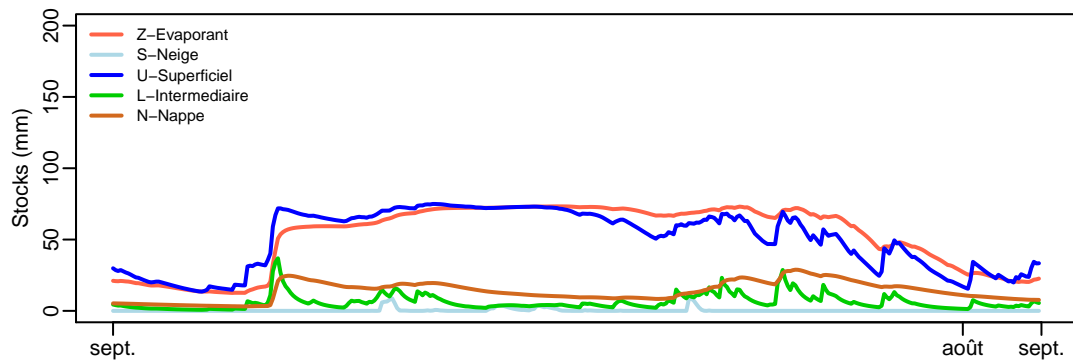

# k2363010 (156.44 km<sup>2</sup>) – année 1990–1991

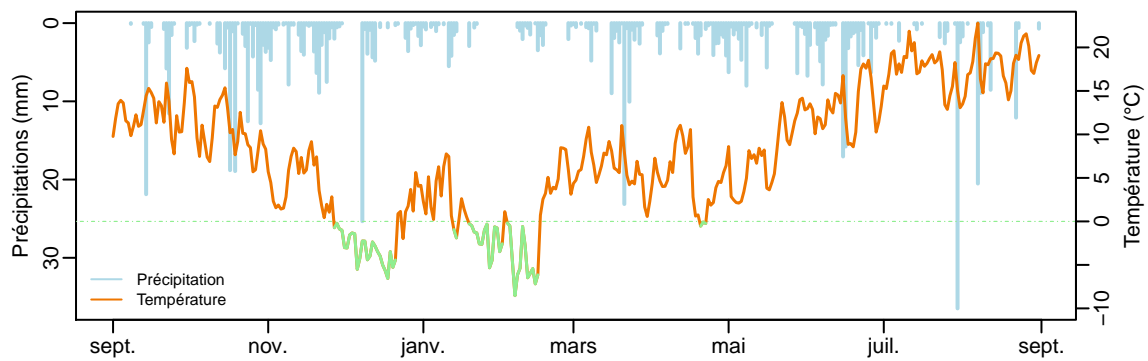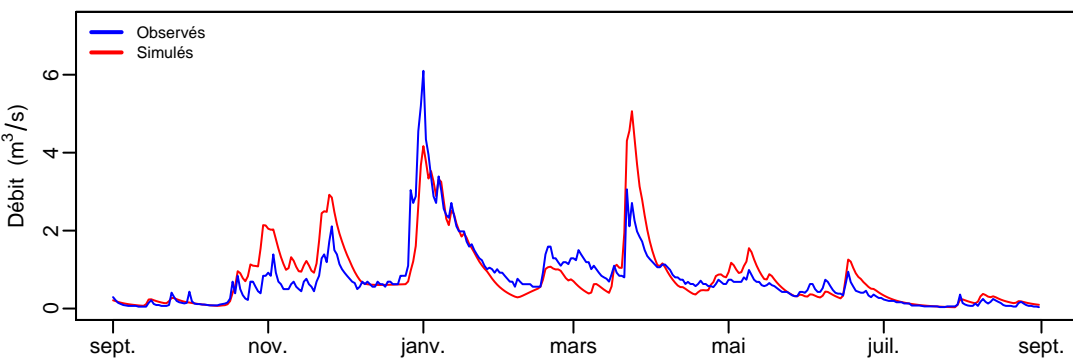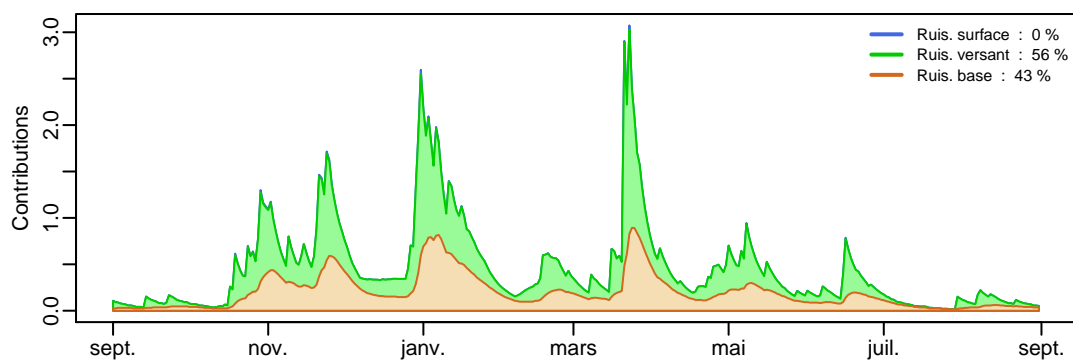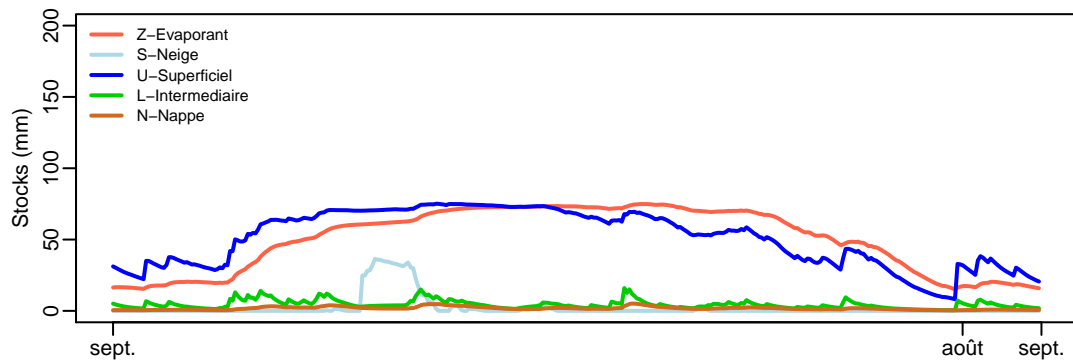

# k2363010 (156.44 km<sup>2</sup>) – année 1991–1992

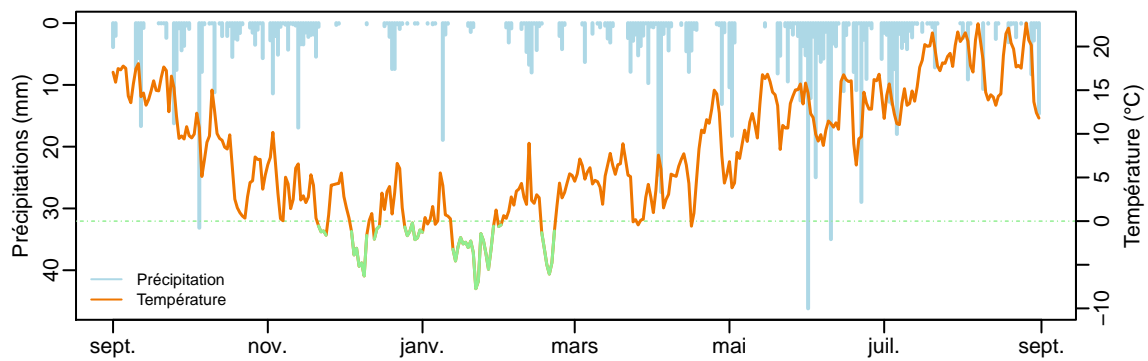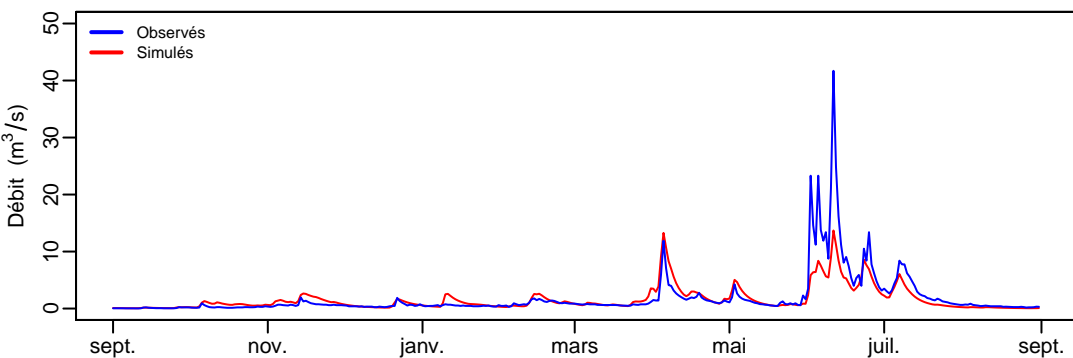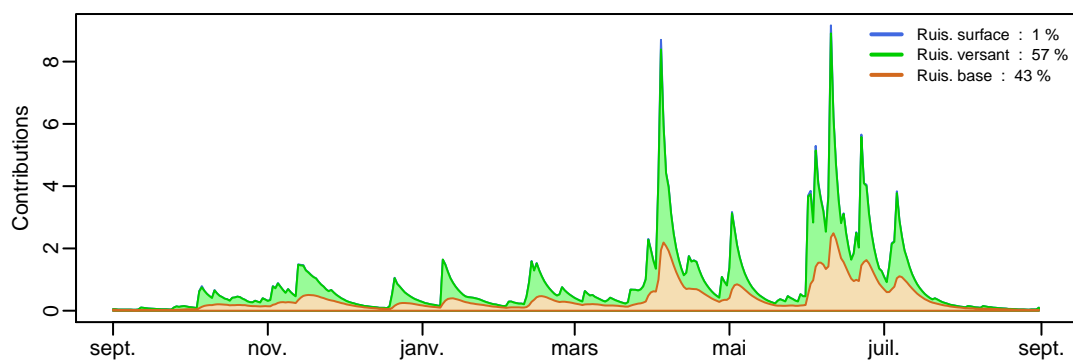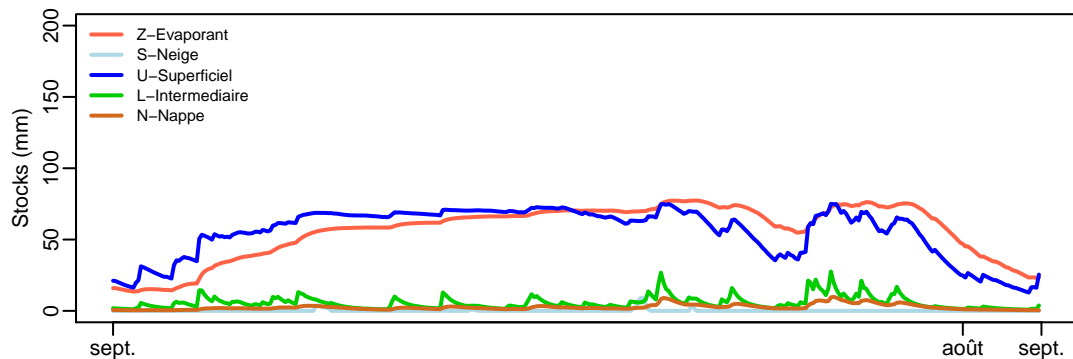

# k2363010 (156.44 km<sup>2</sup>) – année 1992–1993

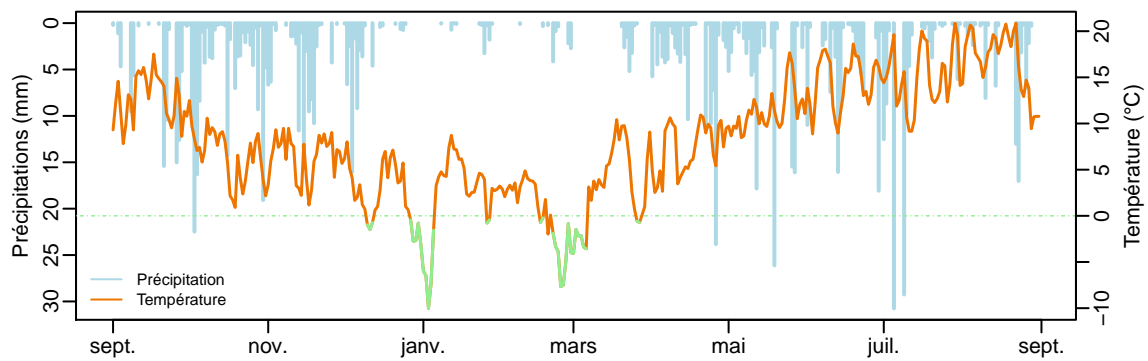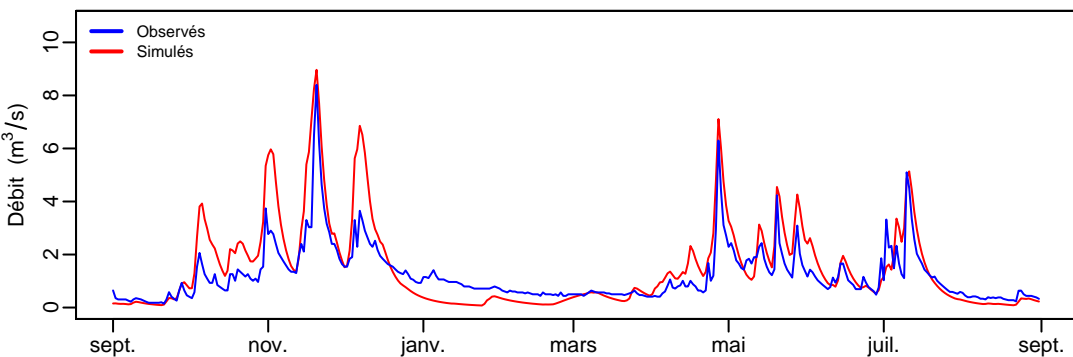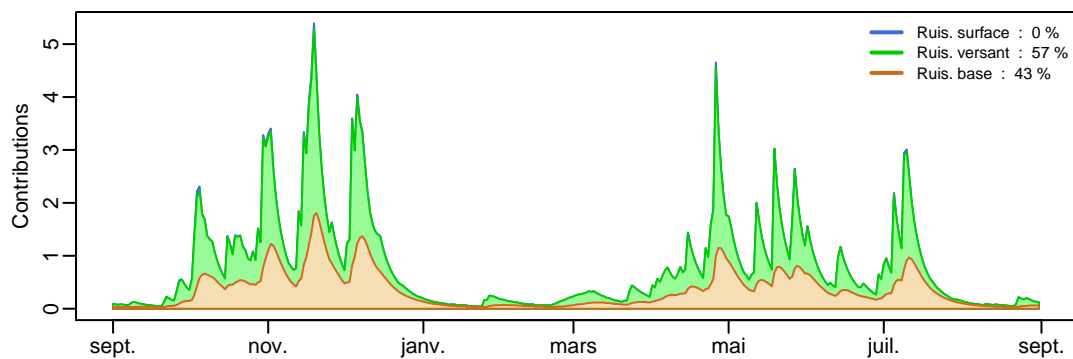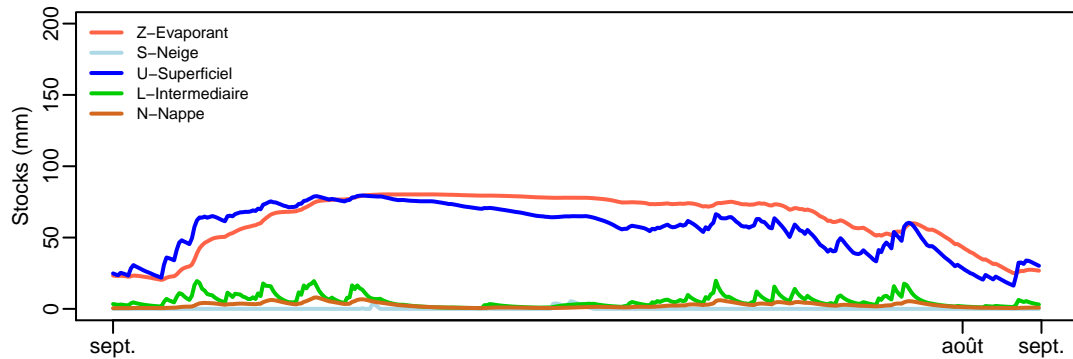

# k2363010 (156.44 km<sup>2</sup>) – année 1993–1994

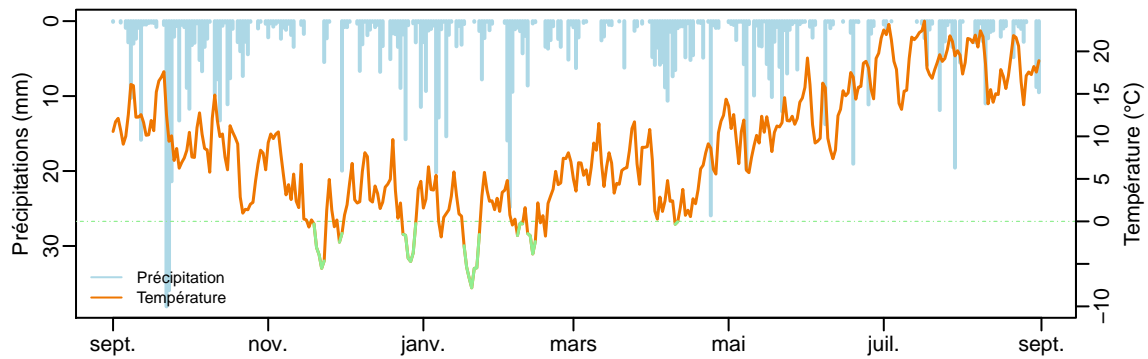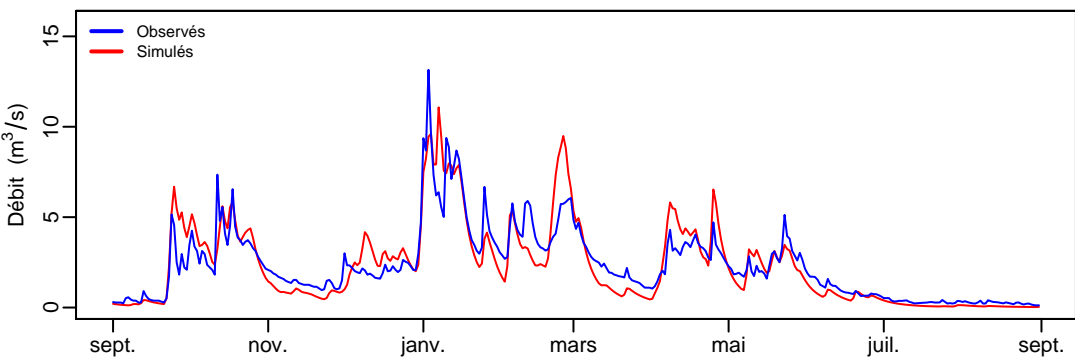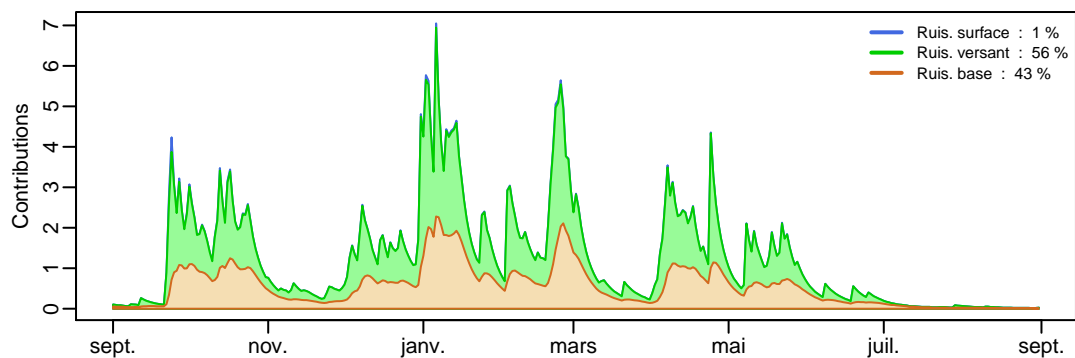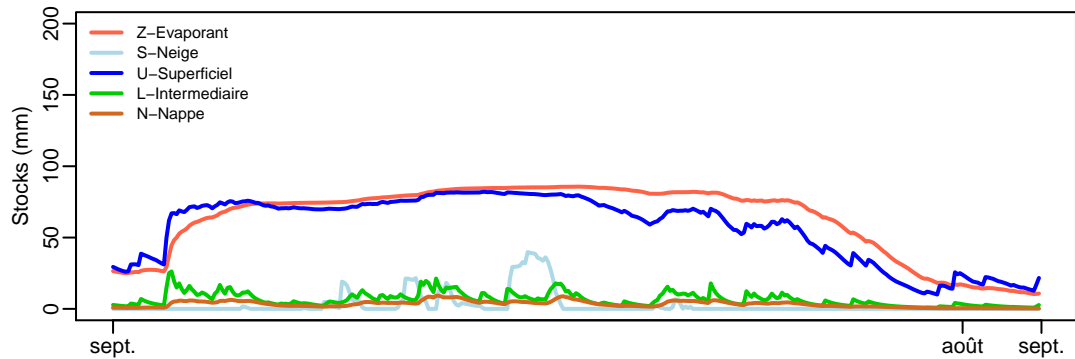

# k2363010 (156.44 km<sup>2</sup>) – année 1994–1995

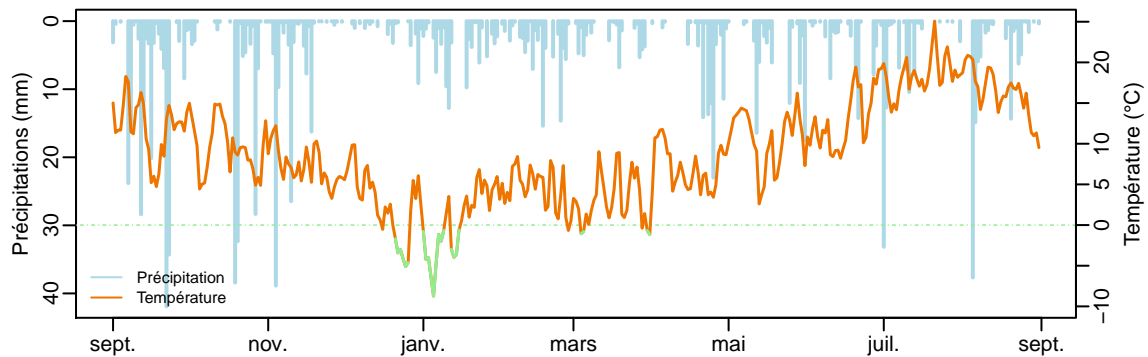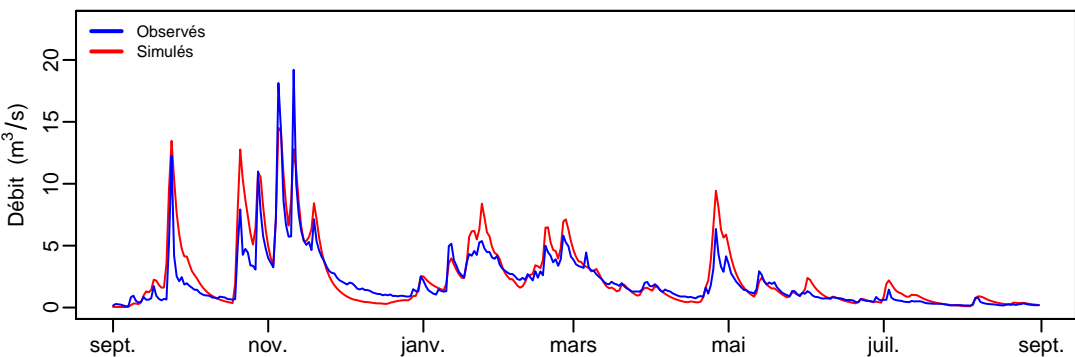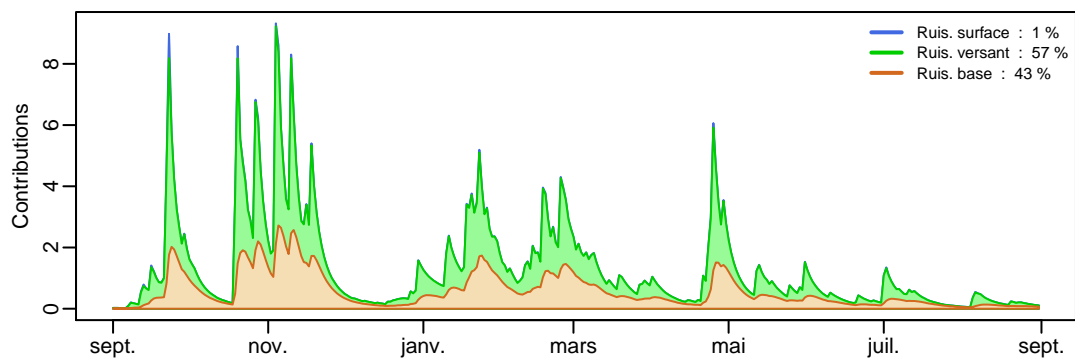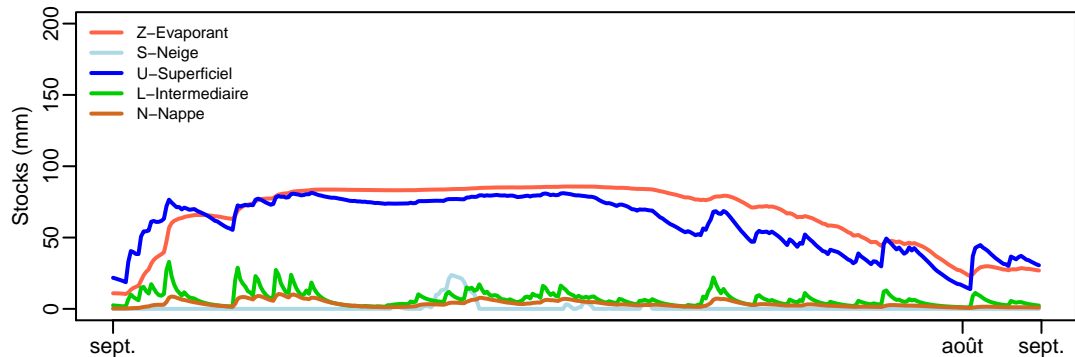



# k2363010 (156.44 km<sup>2</sup>) – année 1995–1996

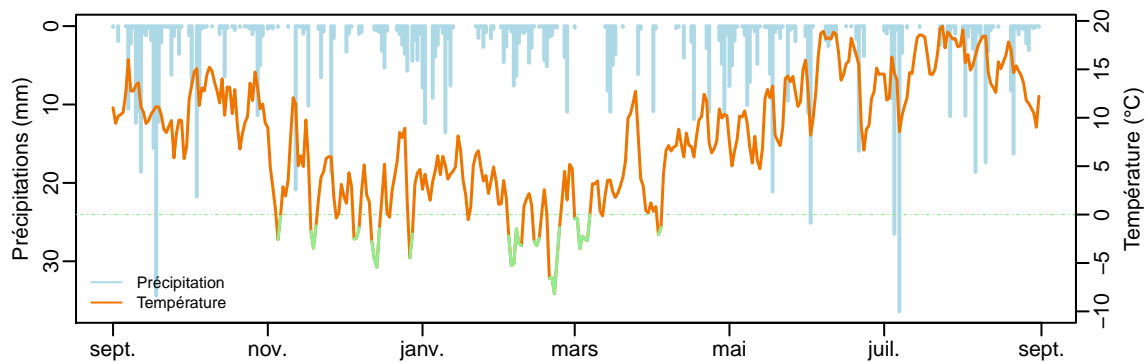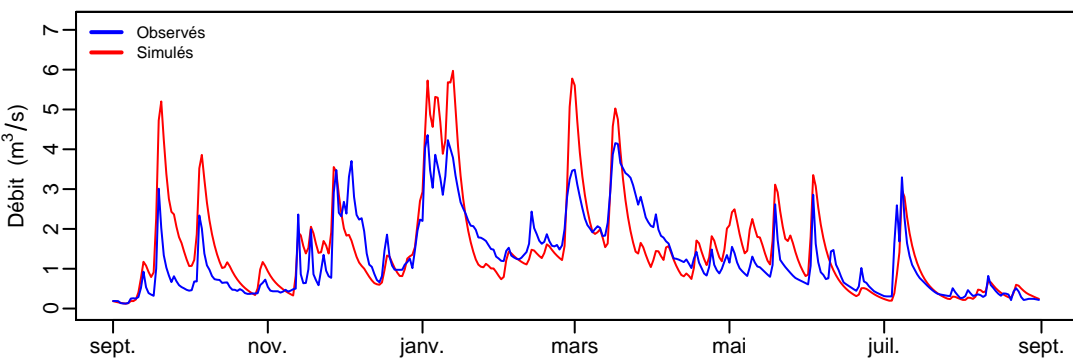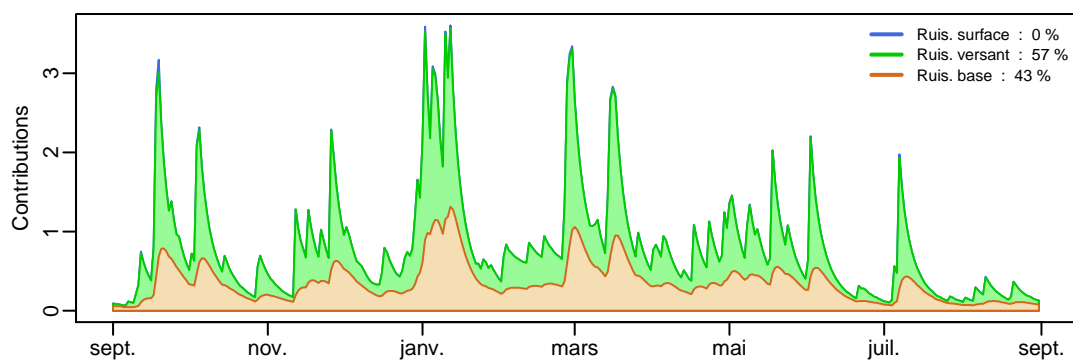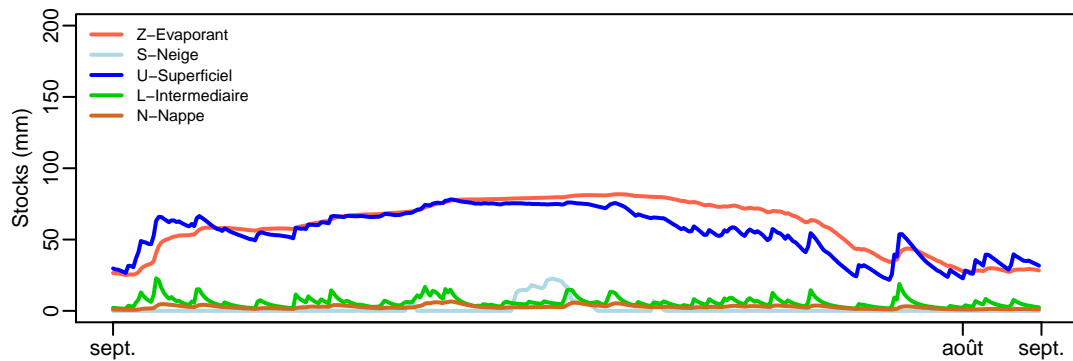

# k2363010 (156.44 km<sup>2</sup>) – année 1996–1997

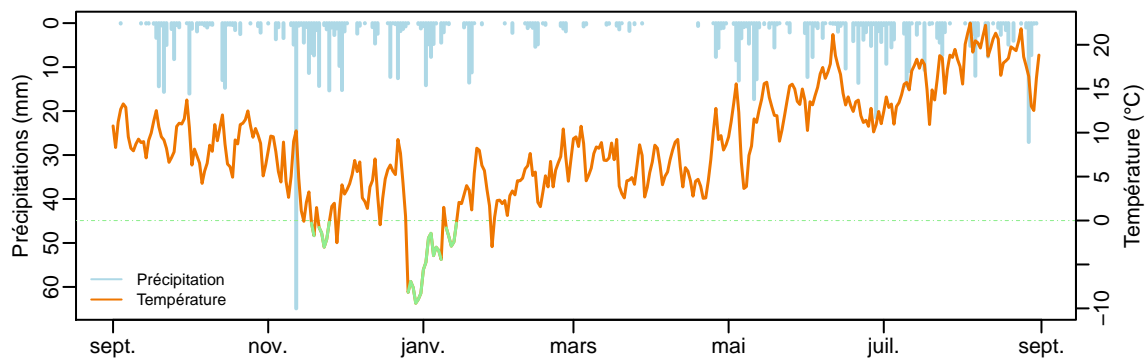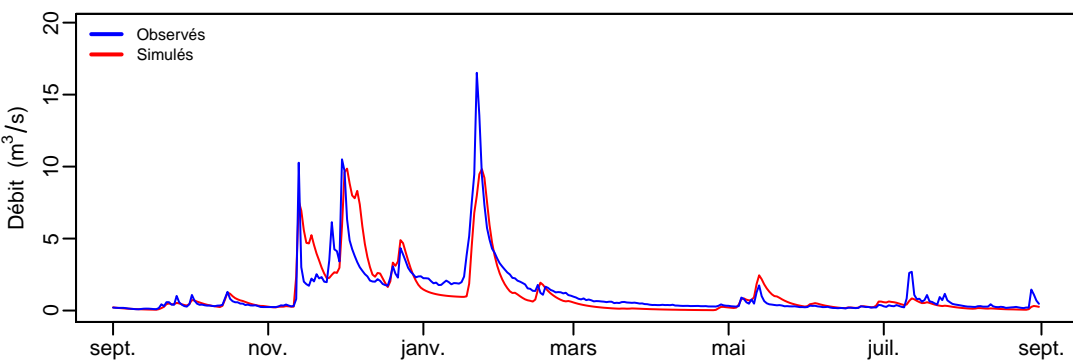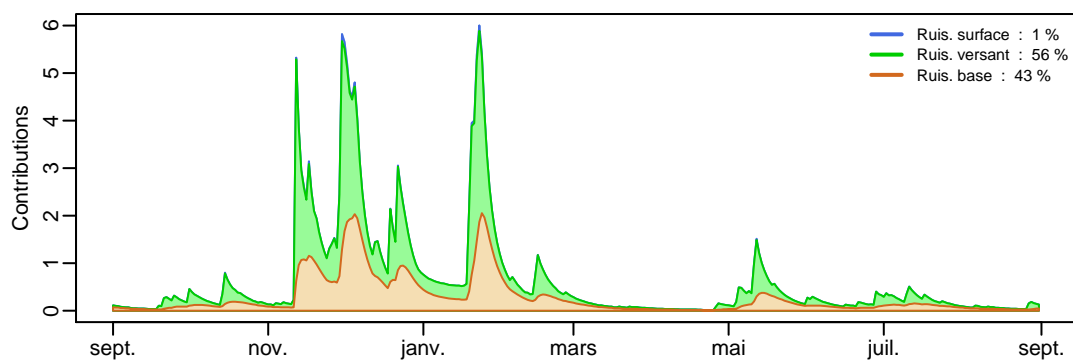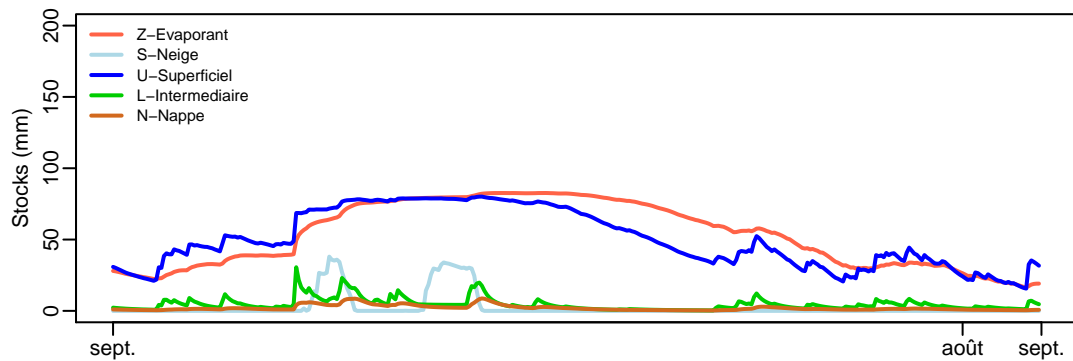

# k2363010 (156.44 km²) – année 1997–1998

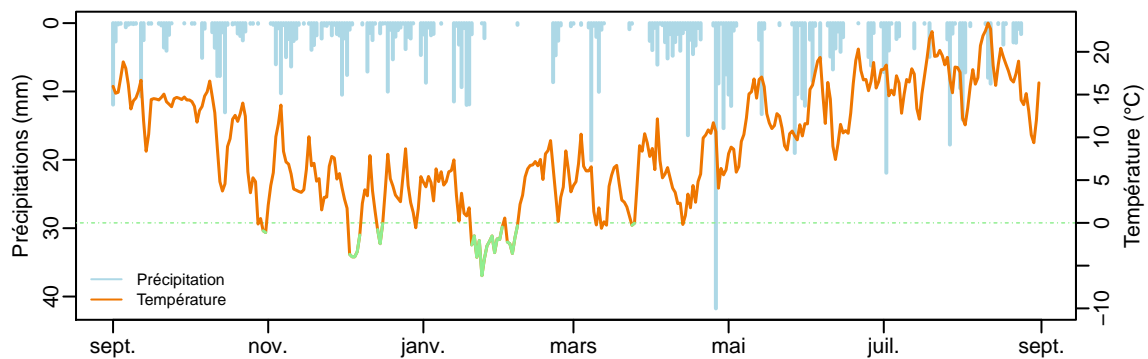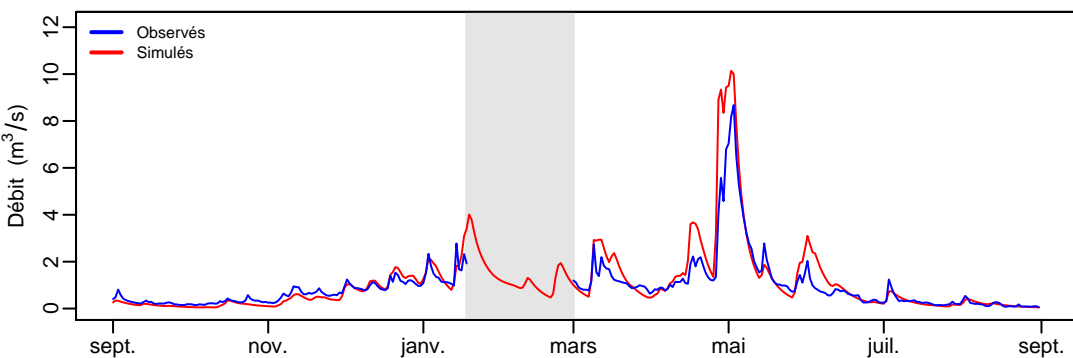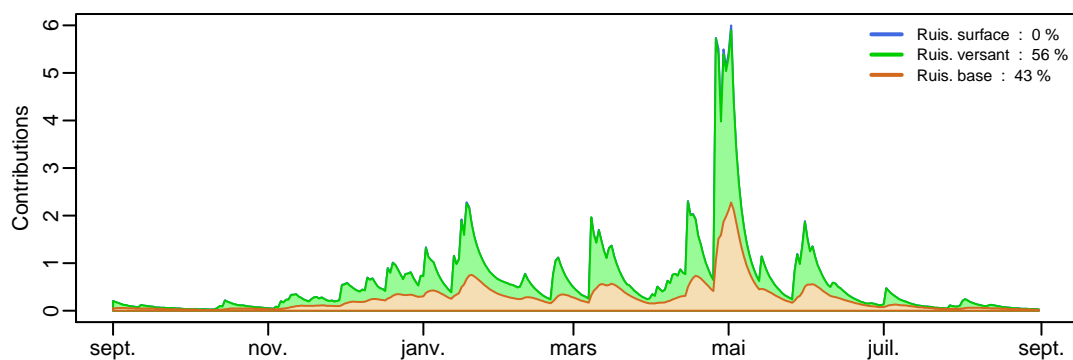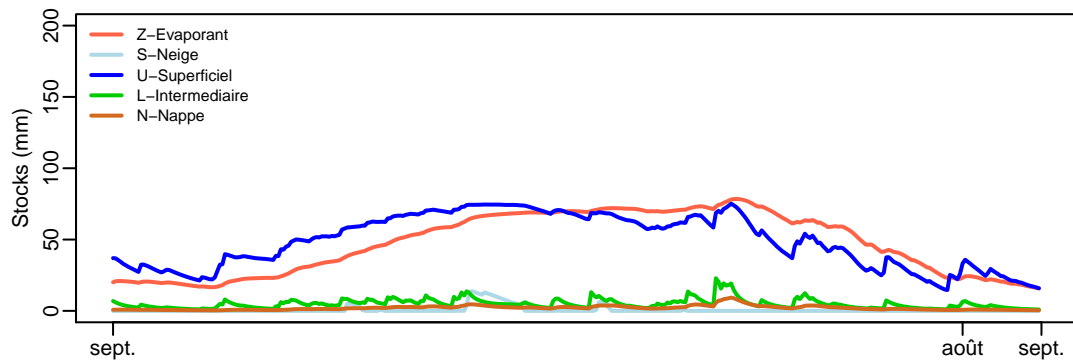

# k2363010 (156.44 km<sup>2</sup>) – année 1998–1999

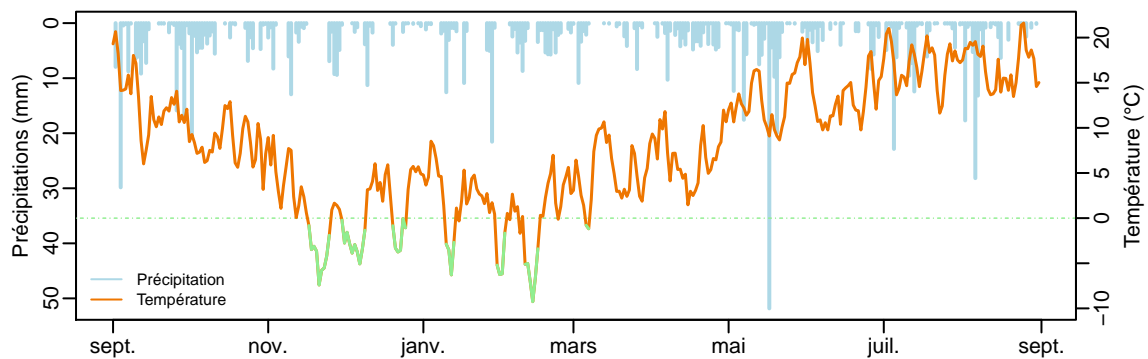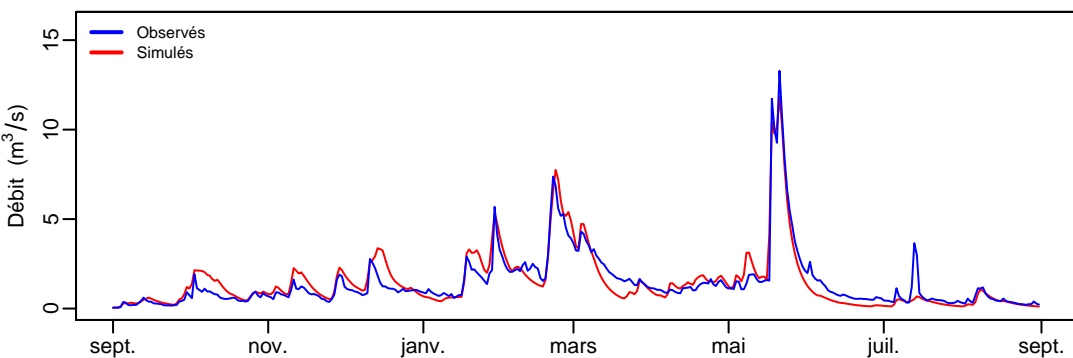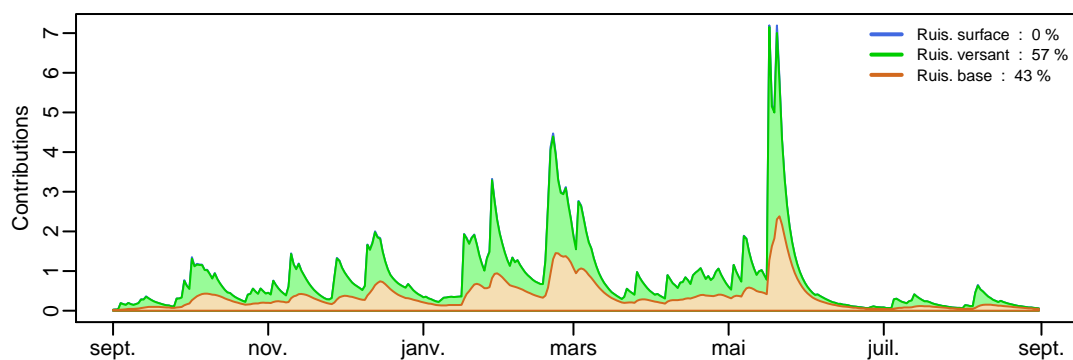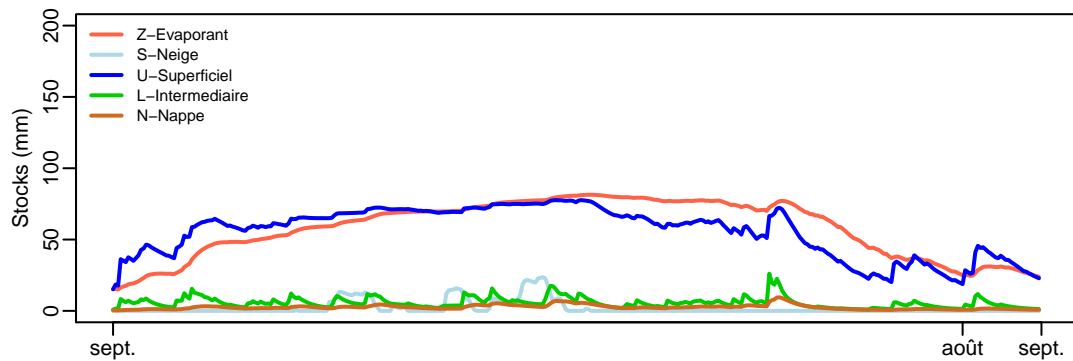

# k2363010 (156.44 km<sup>2</sup>) – année 1999–2000

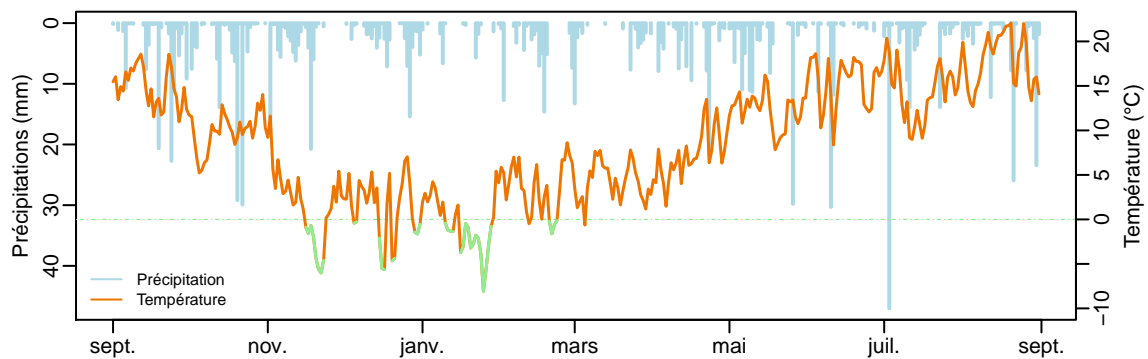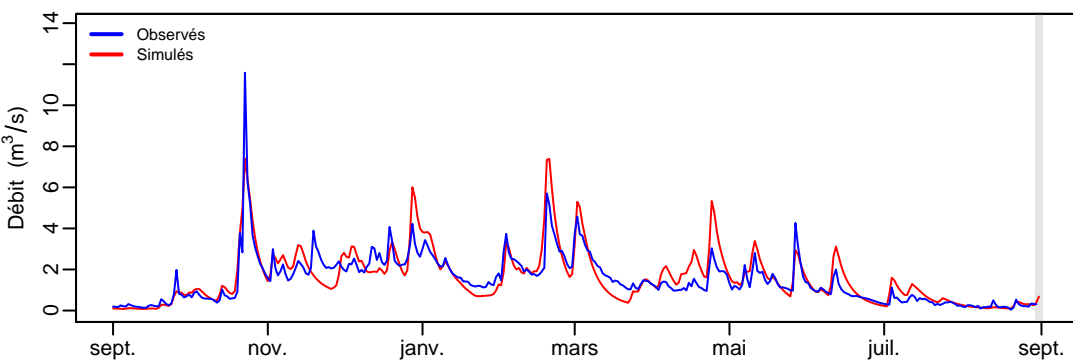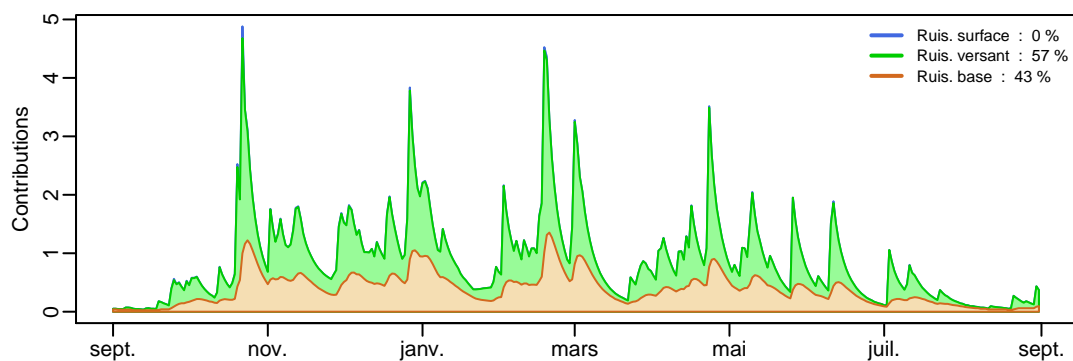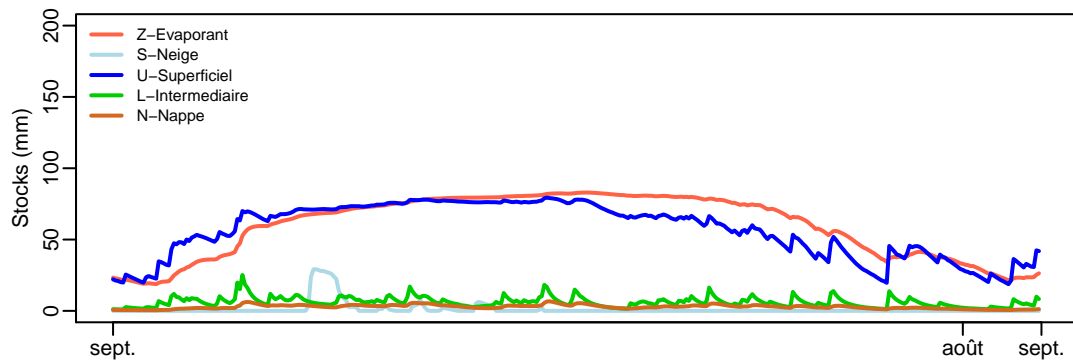

# k2363010 (156.44 km<sup>2</sup>) – année 2000–2001

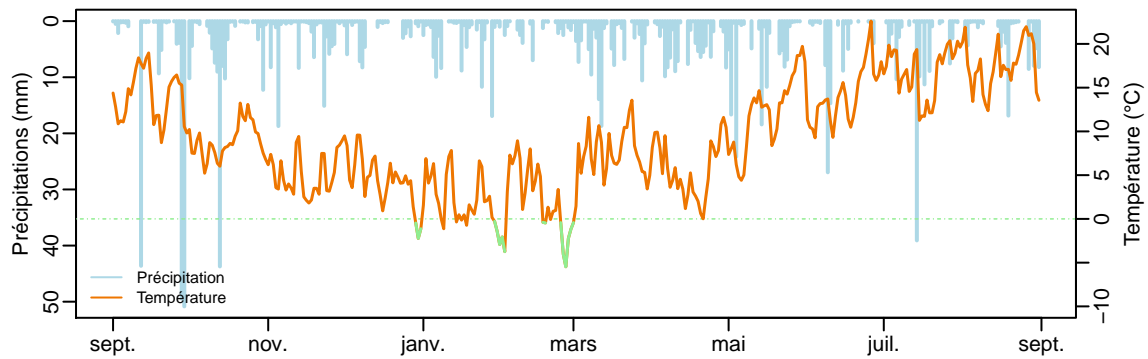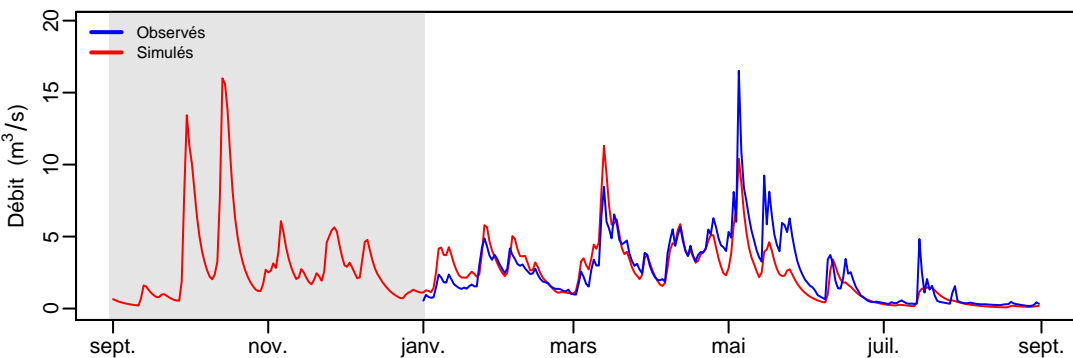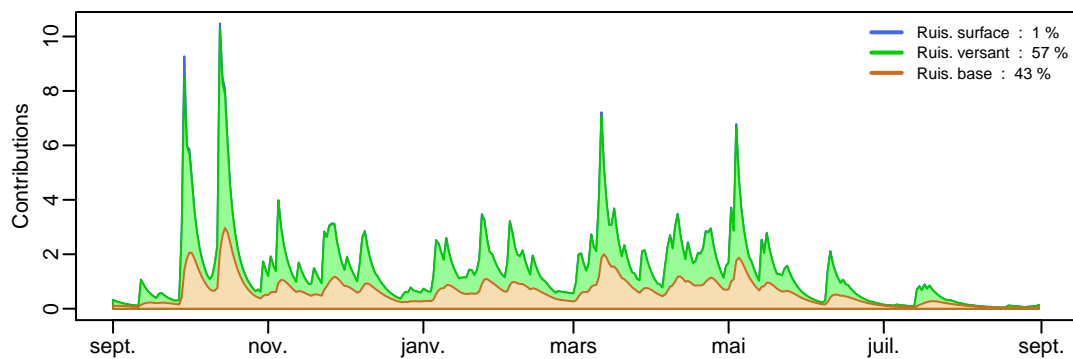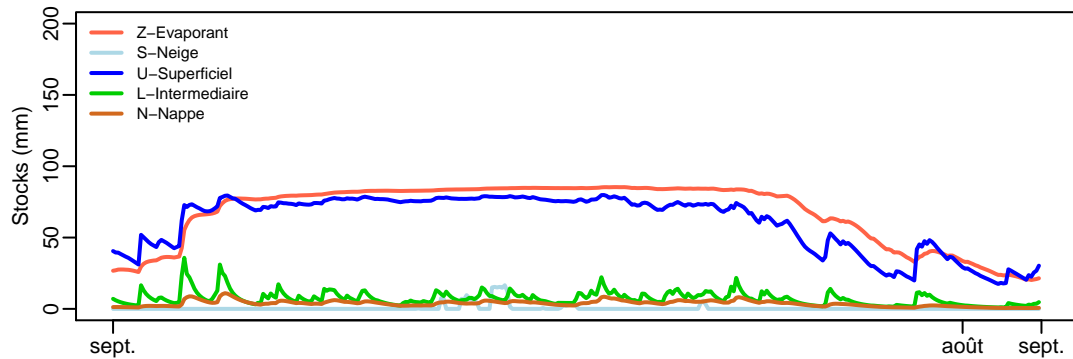

# k2363010 (156.44 km<sup>2</sup>) – année 2001–2002

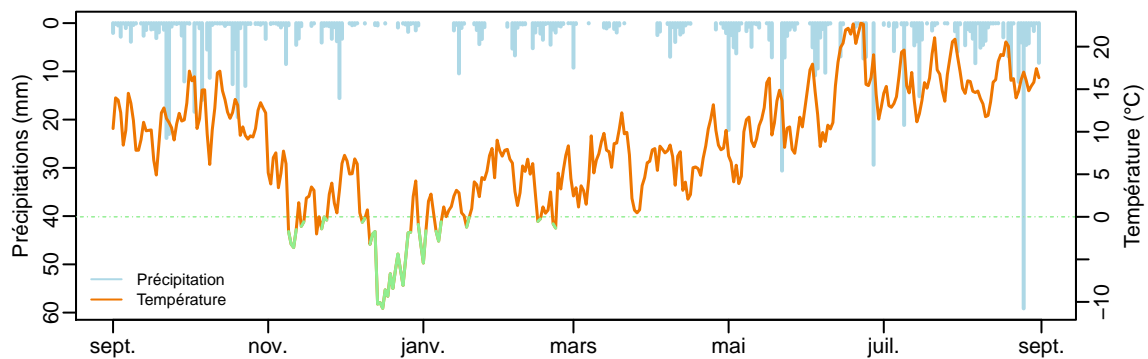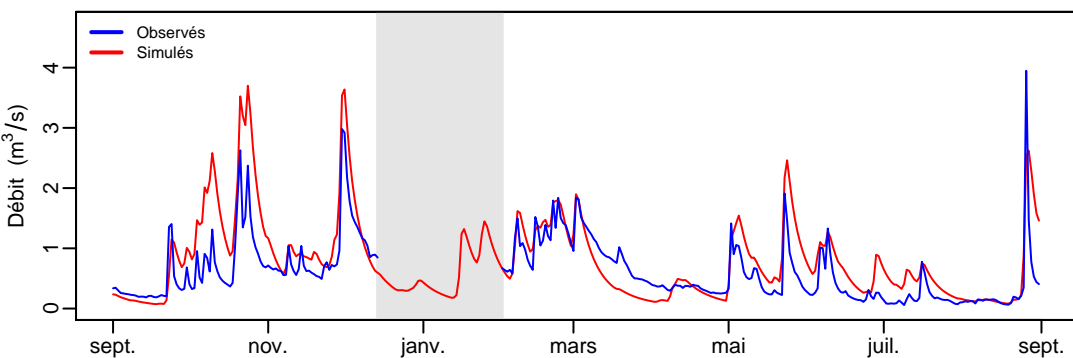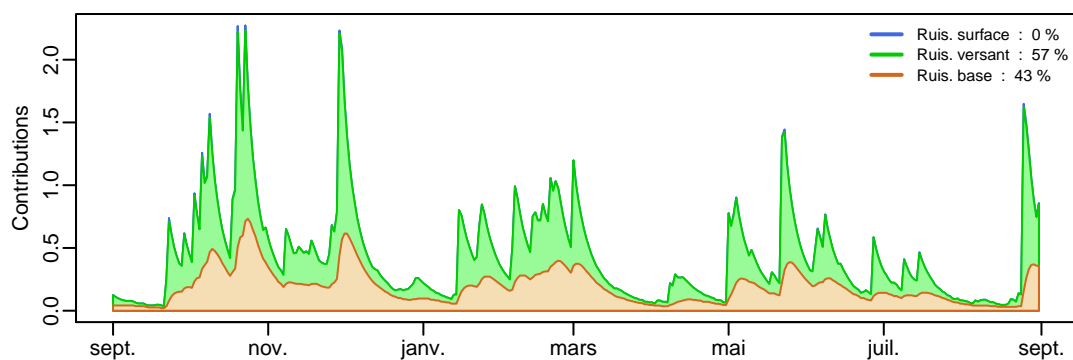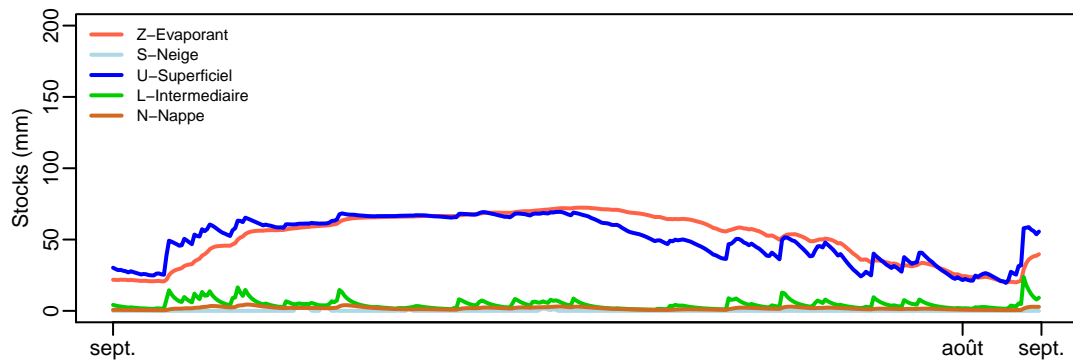

# k2363010 (156.44 km<sup>2</sup>) – année 2002–2003

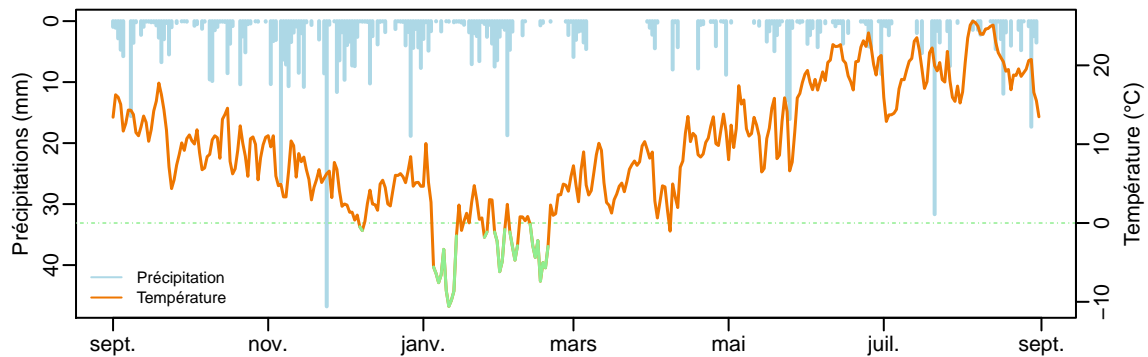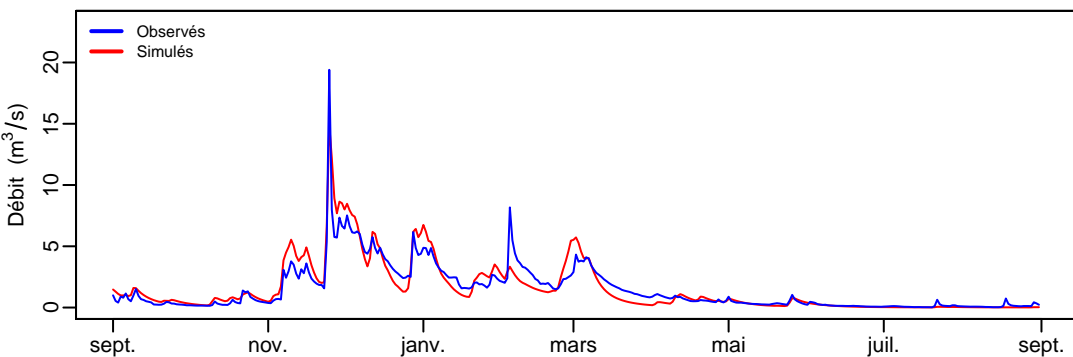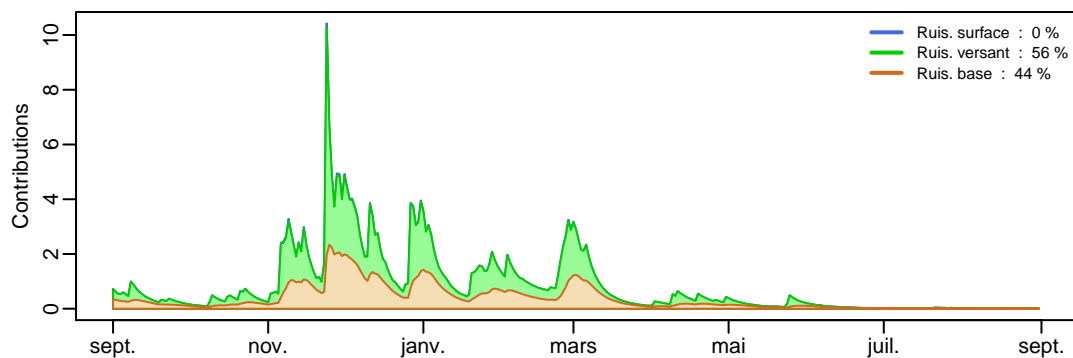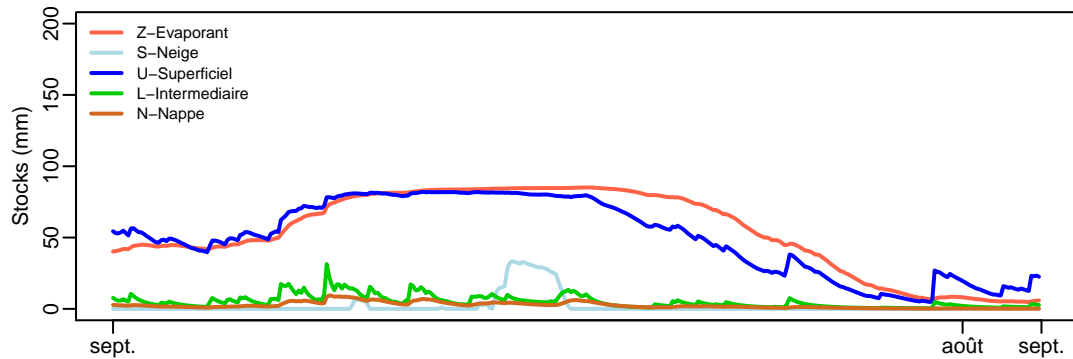



# k2363010 (156.44 km<sup>2</sup>) – année 2003–2004

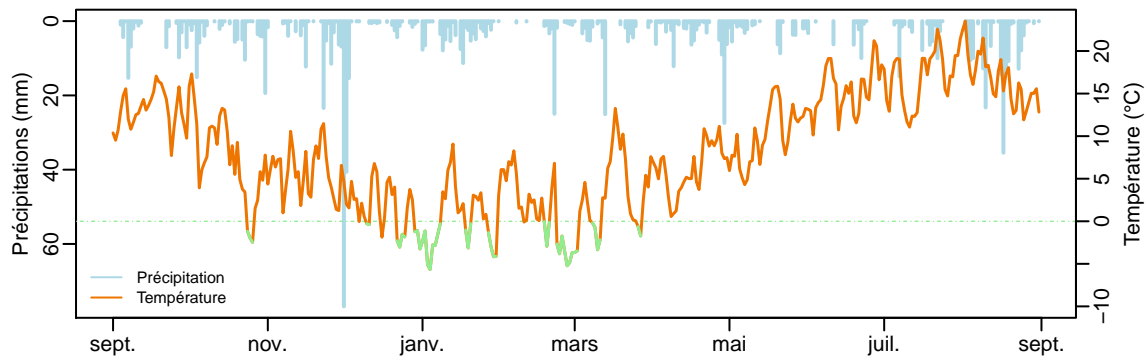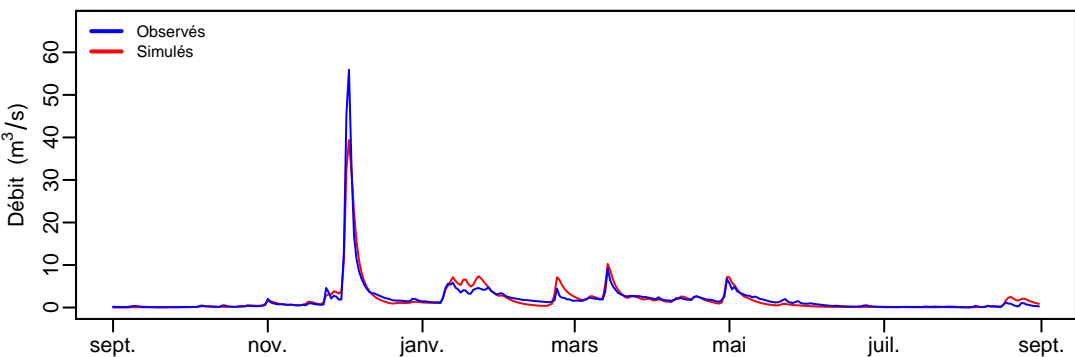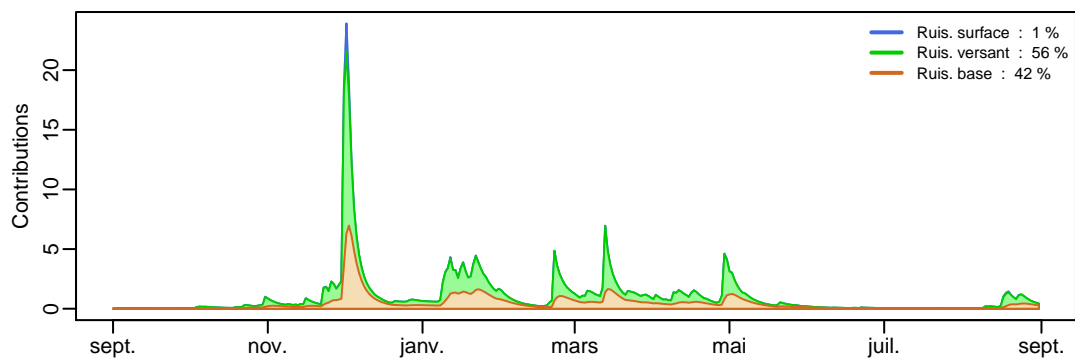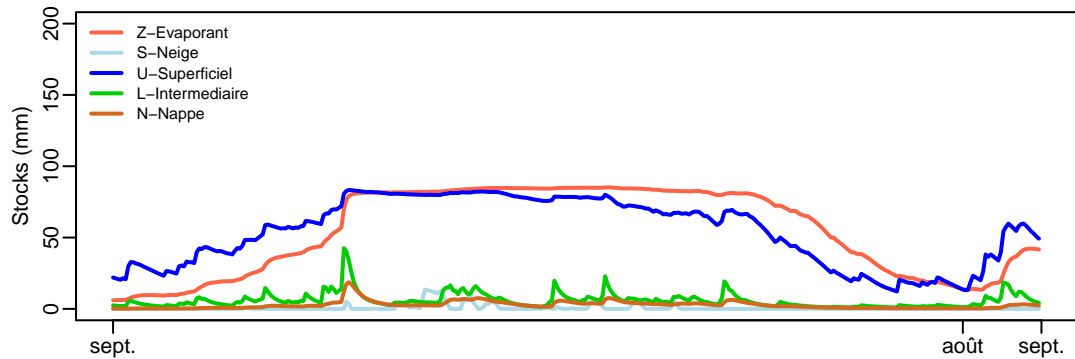

# k2363010 (156.44 km<sup>2</sup>) – année 2004–2005

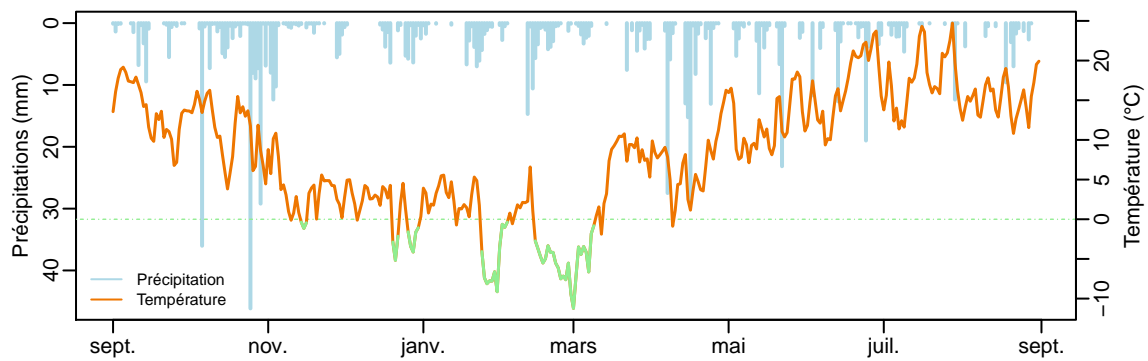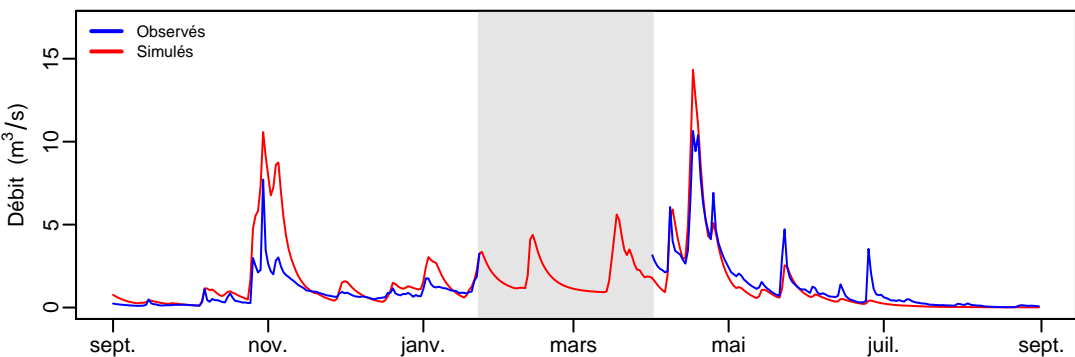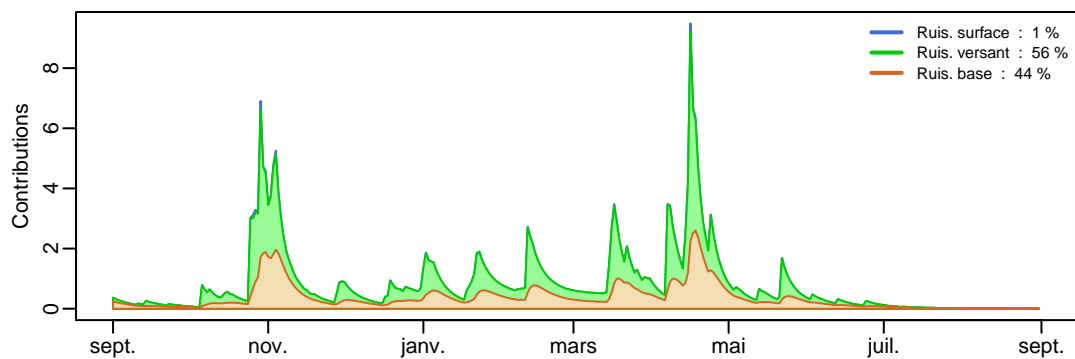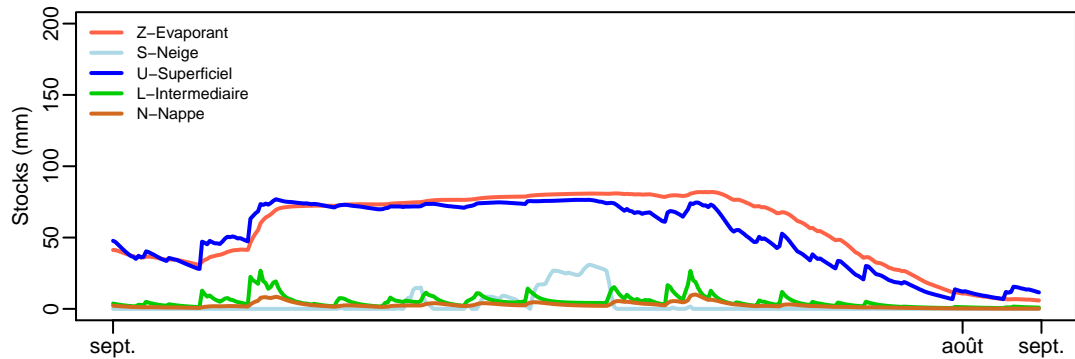

# k2363010 (156.44 km<sup>2</sup>) – année 2005–2006

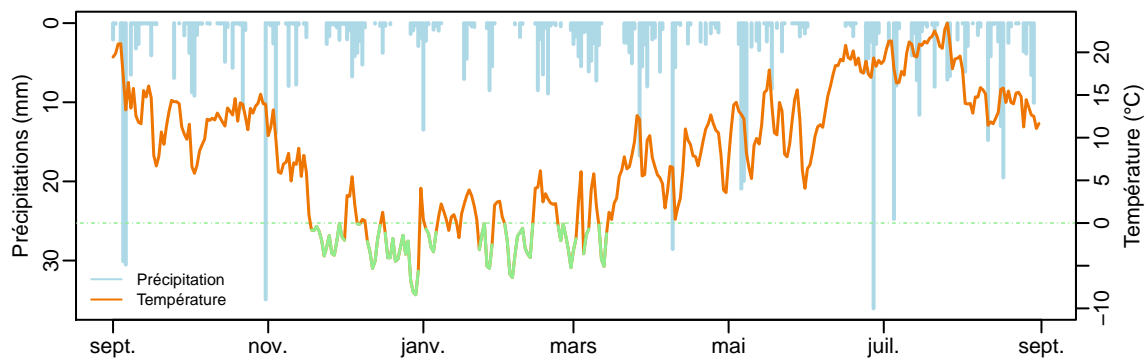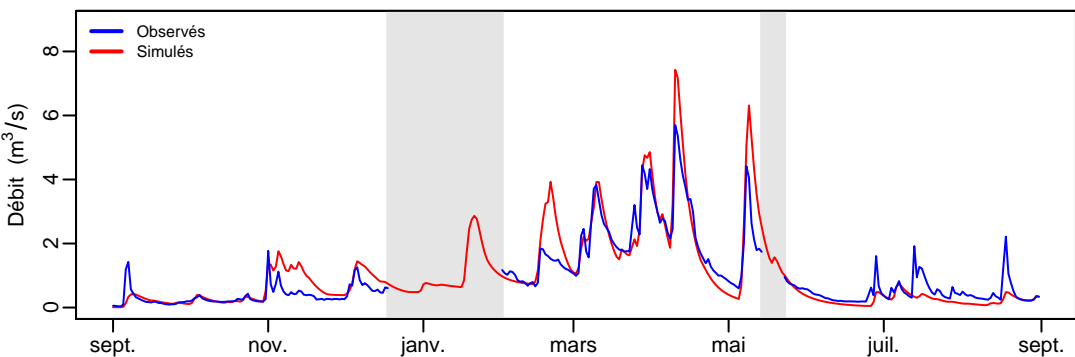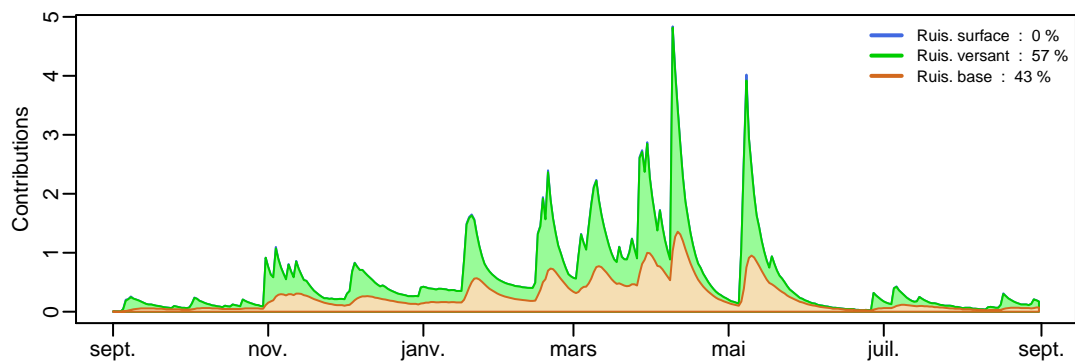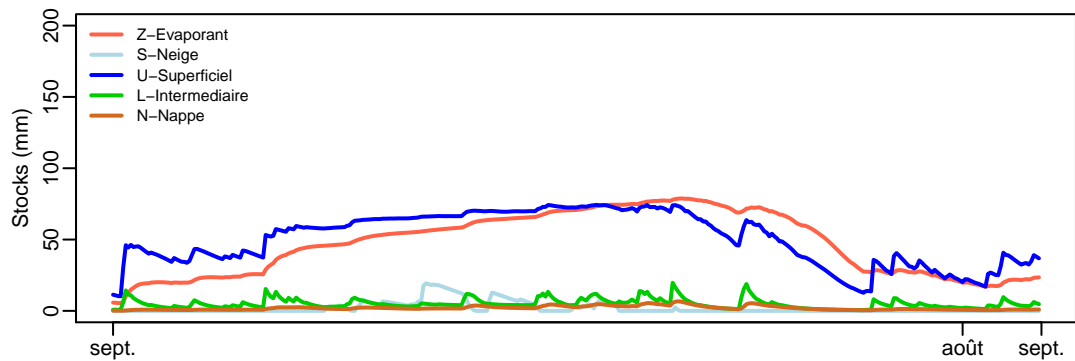

# k2363010 (156.44 km<sup>2</sup>) – année 2006–2007

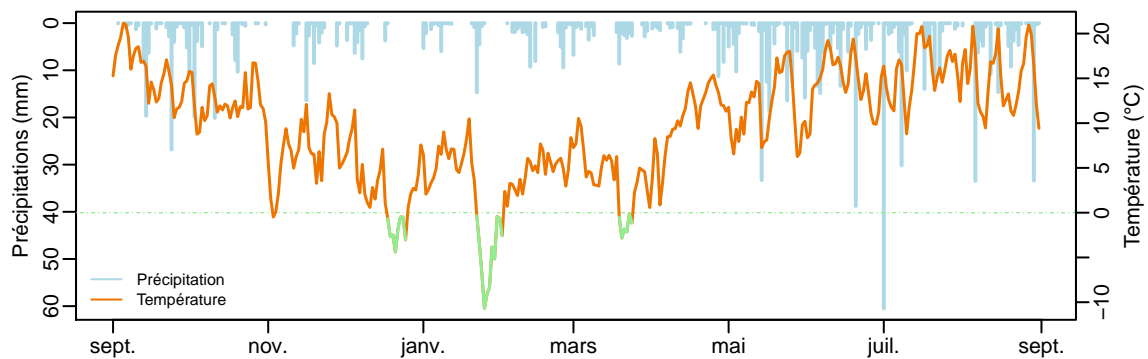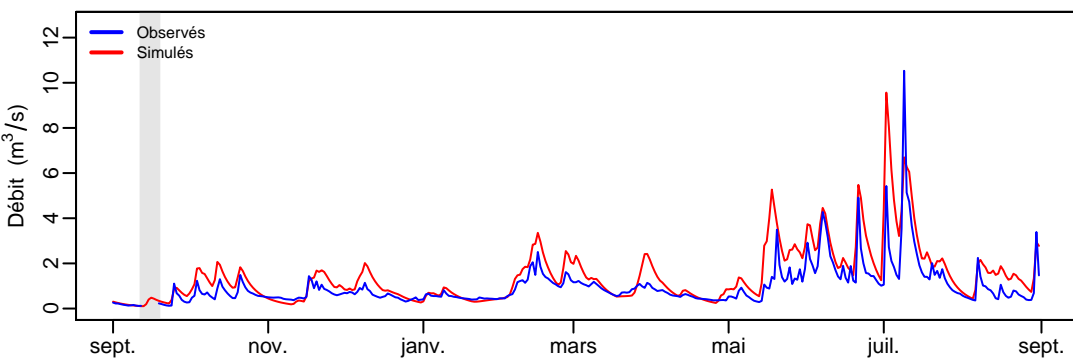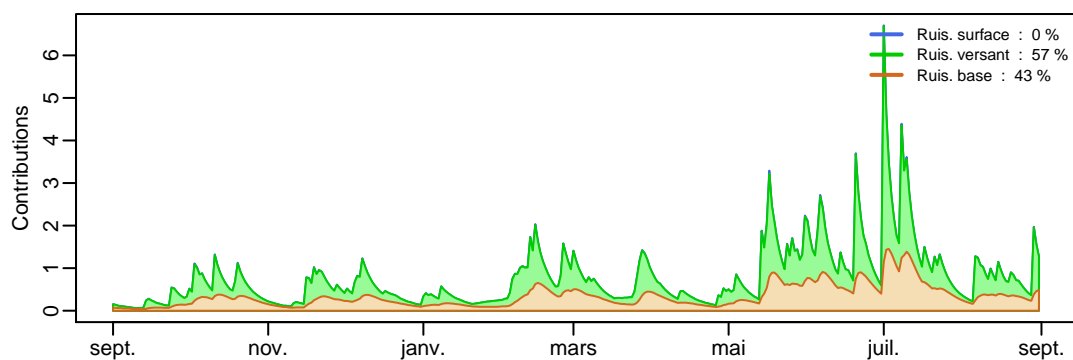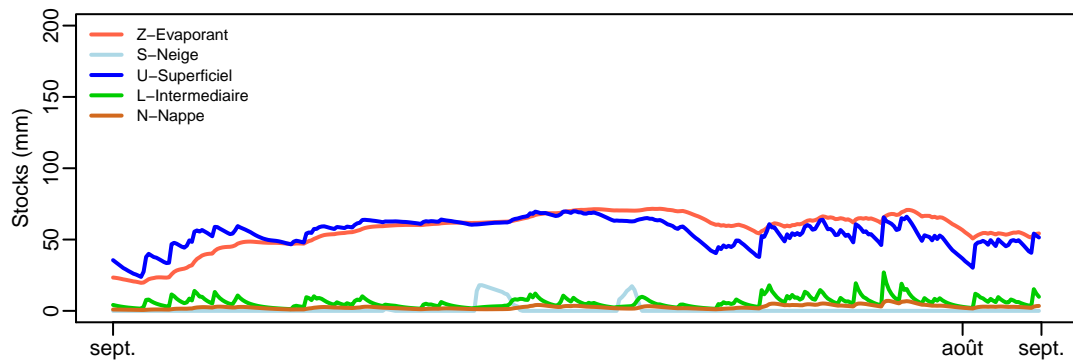

# k2363010 (156.44 km<sup>2</sup>) – année 2007–2008

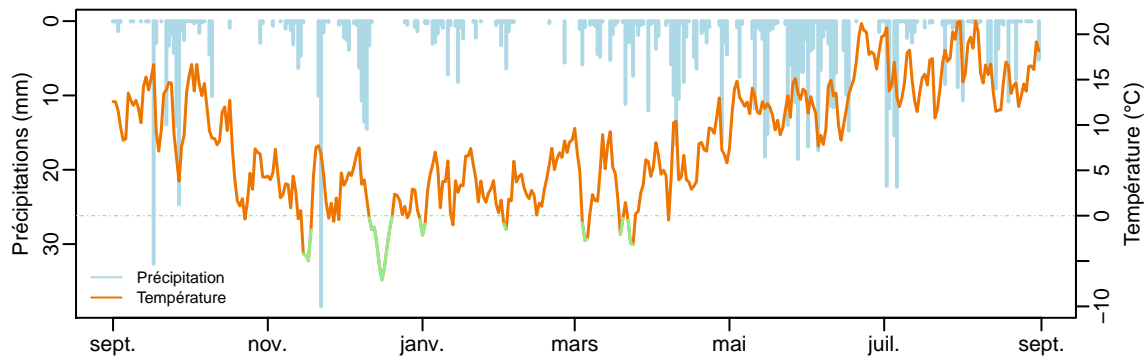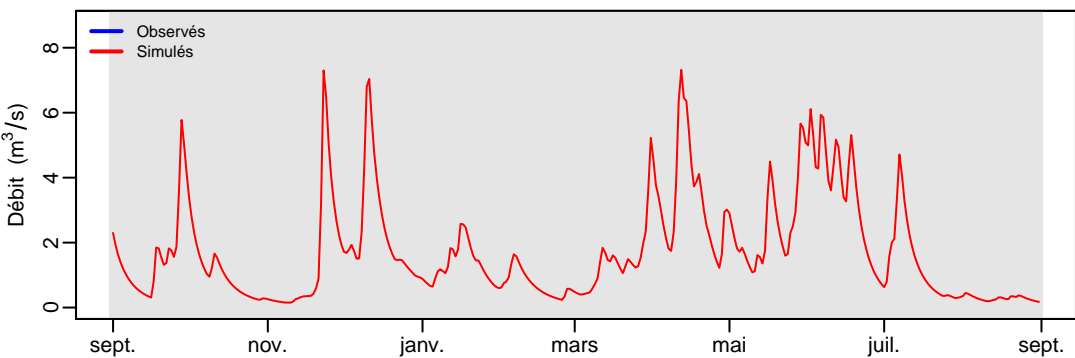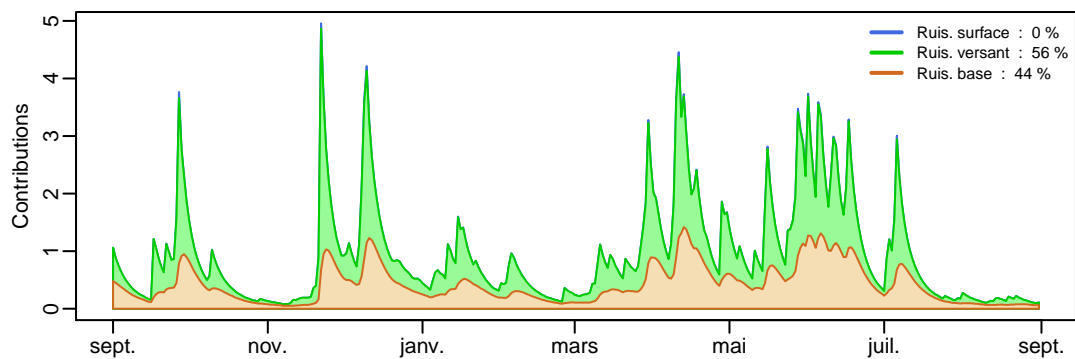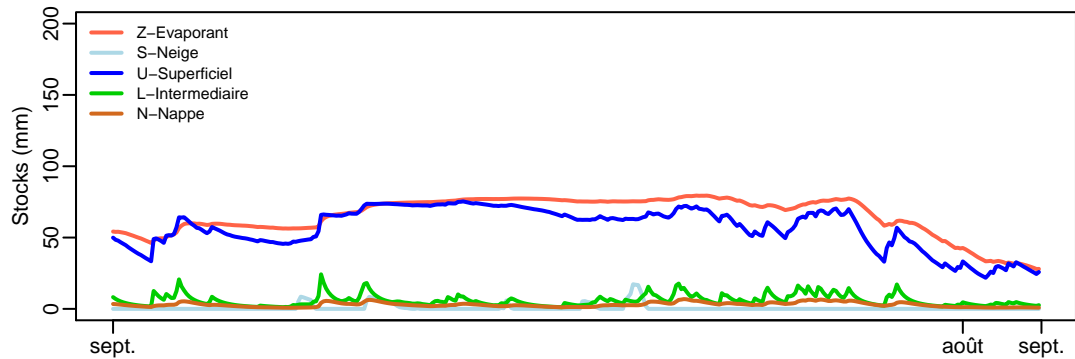

# k2363010 (156.44 km<sup>2</sup>) – année 2008–2009

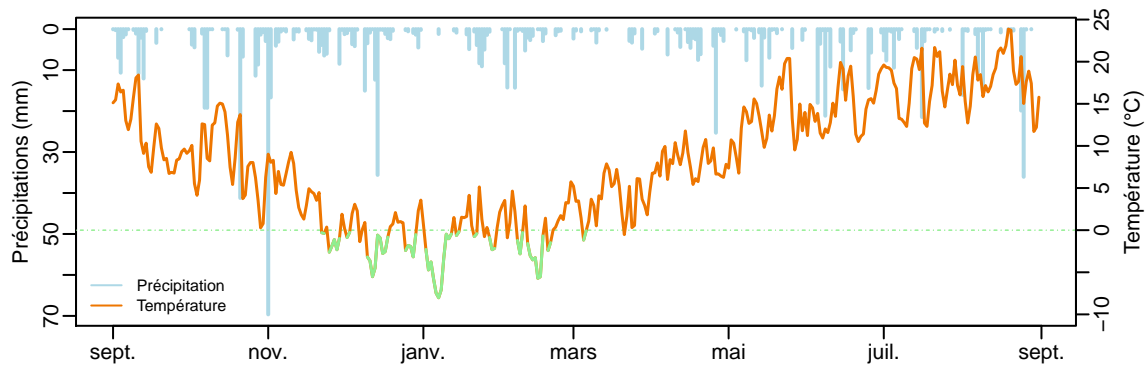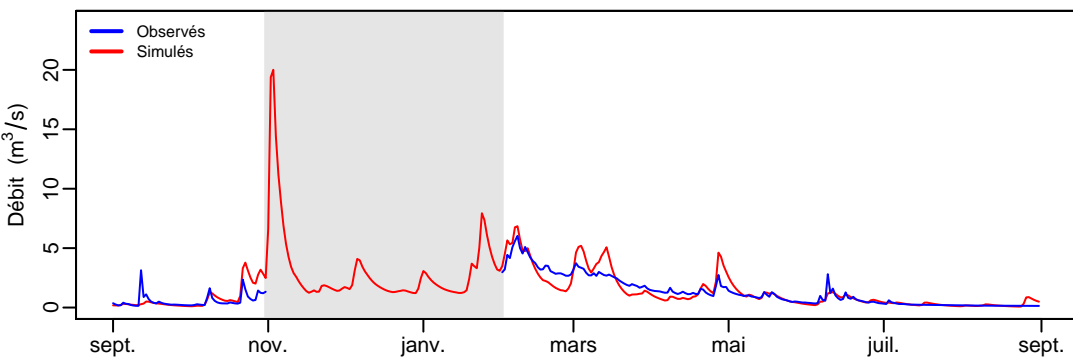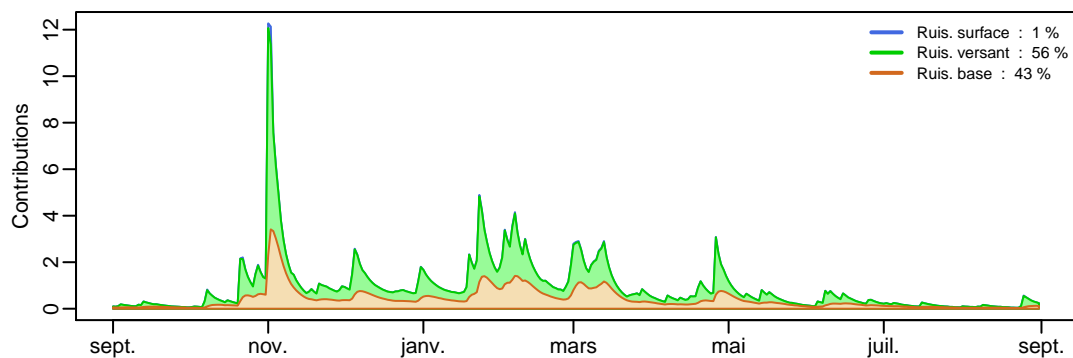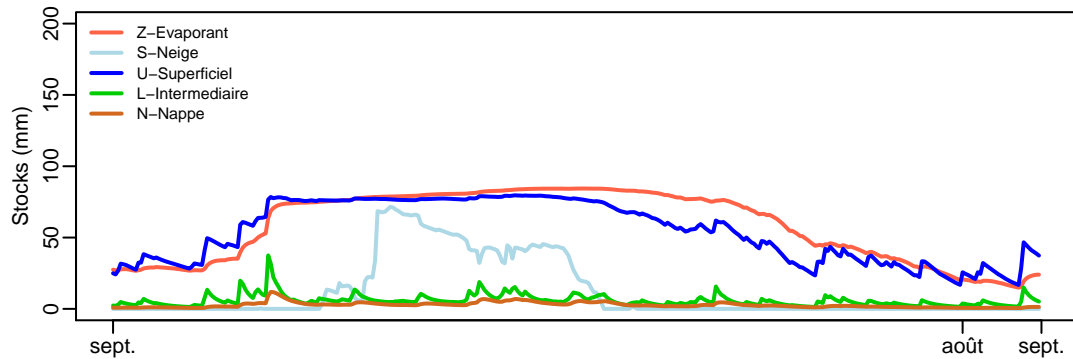

# k2363020 (206.76 km<sup>2</sup>) – année 2001–2002

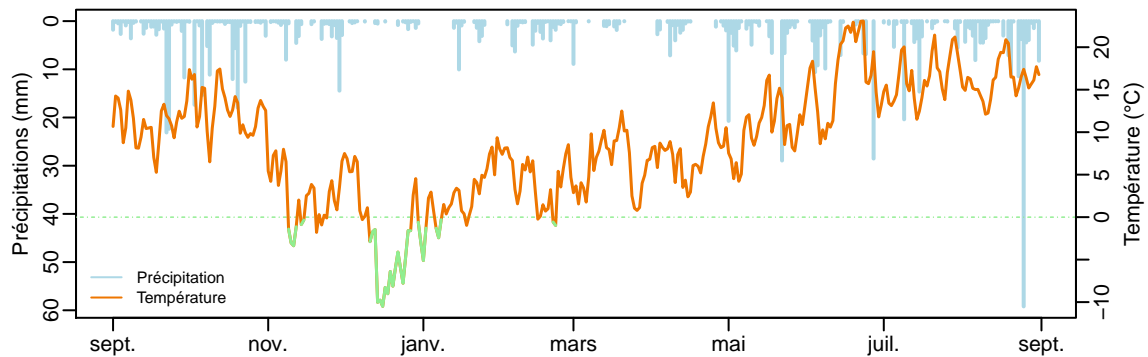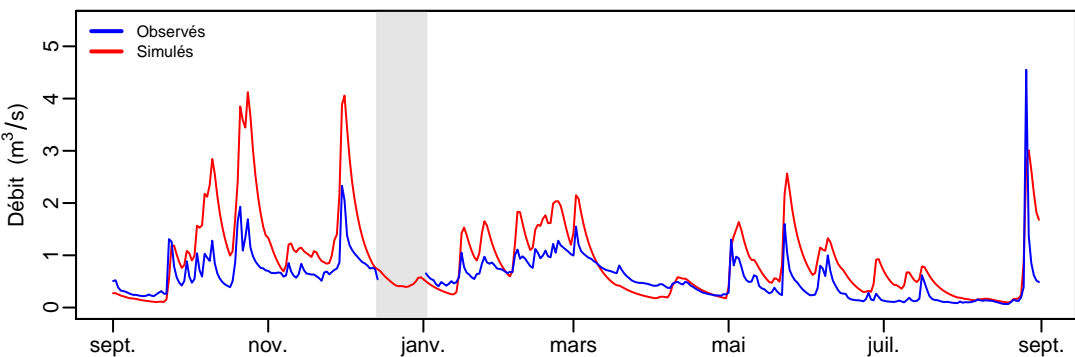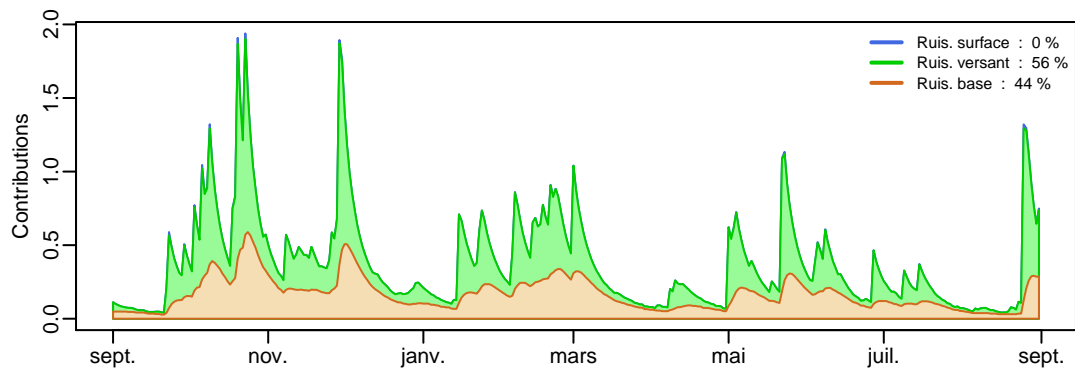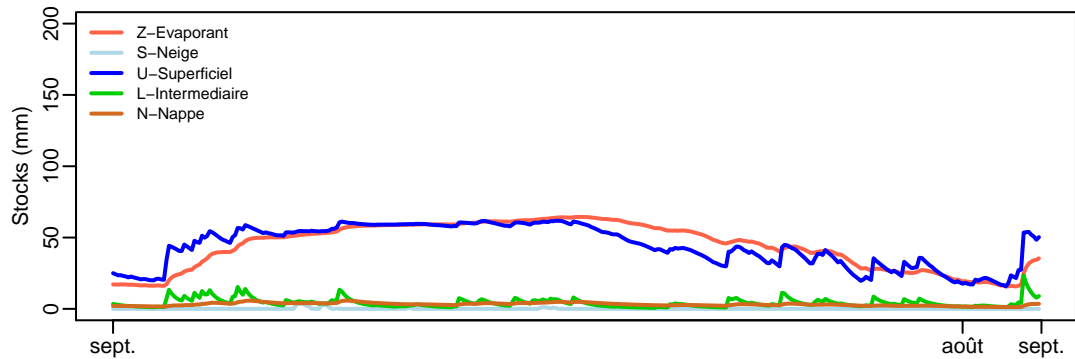

# k2363020 (206.76 km<sup>2</sup>) – année 2002–2003

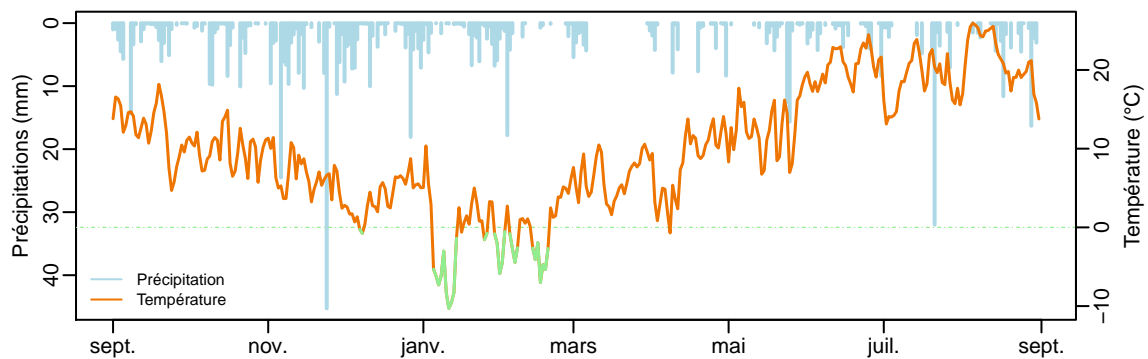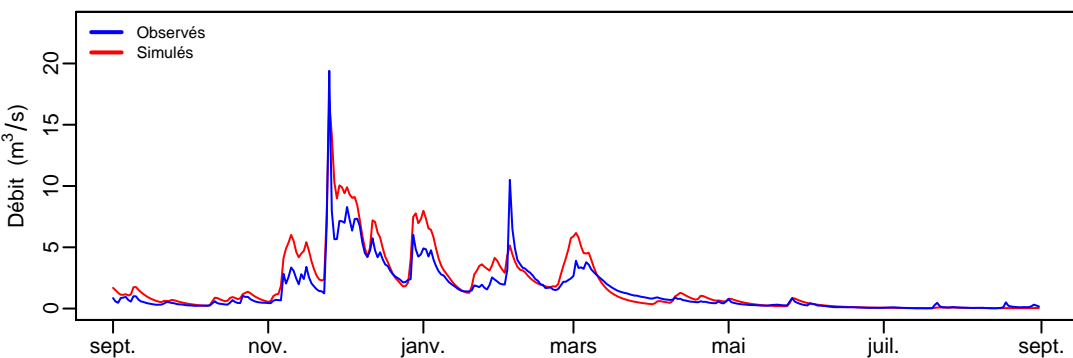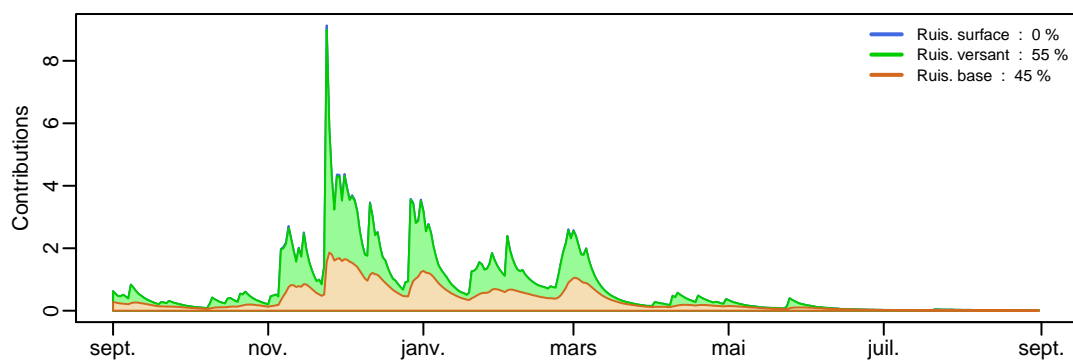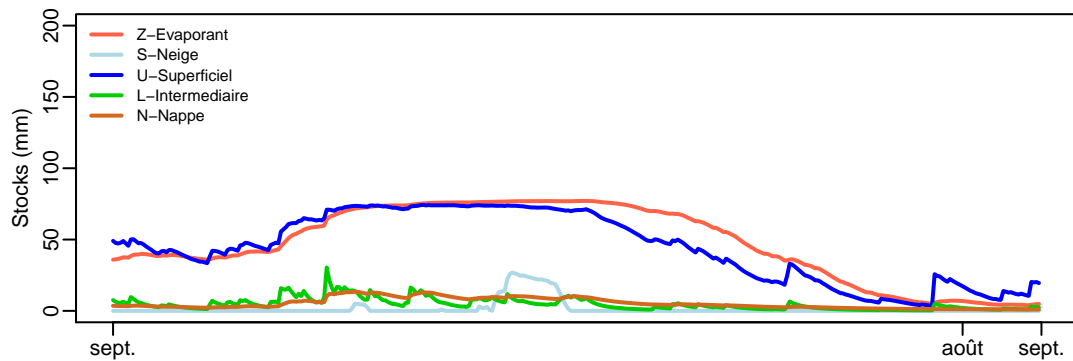



# k2363020 (206.76 km<sup>2</sup>) – année 2003–2004

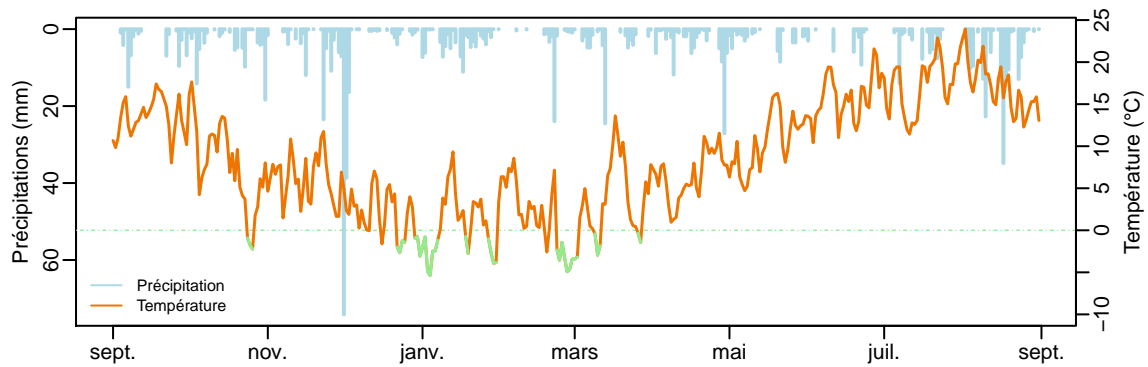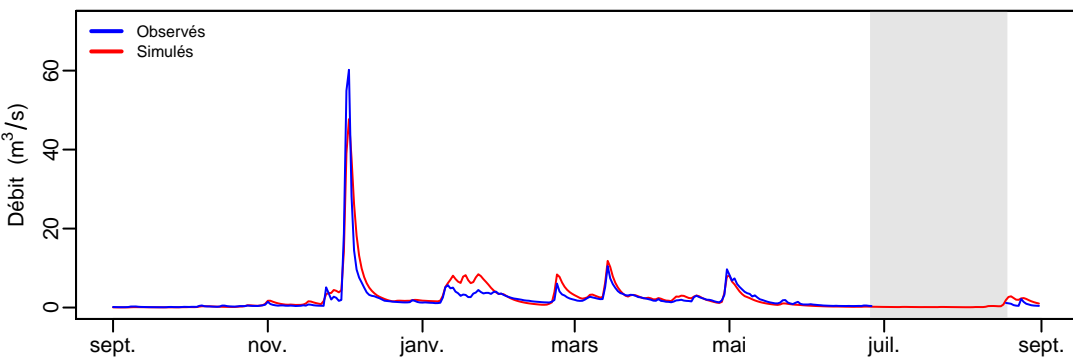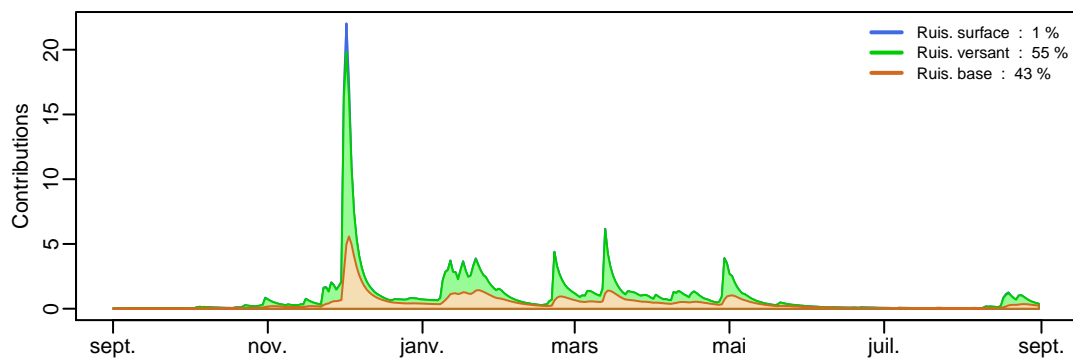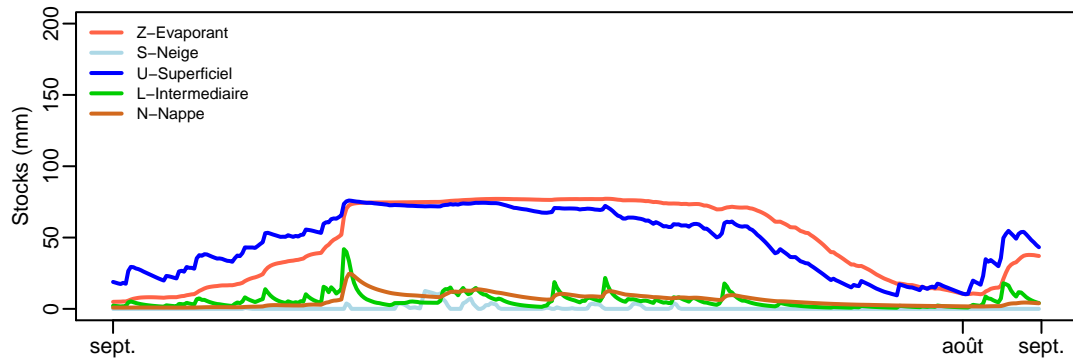

# k2363020 (206.76 km<sup>2</sup>) – année 2004–2005

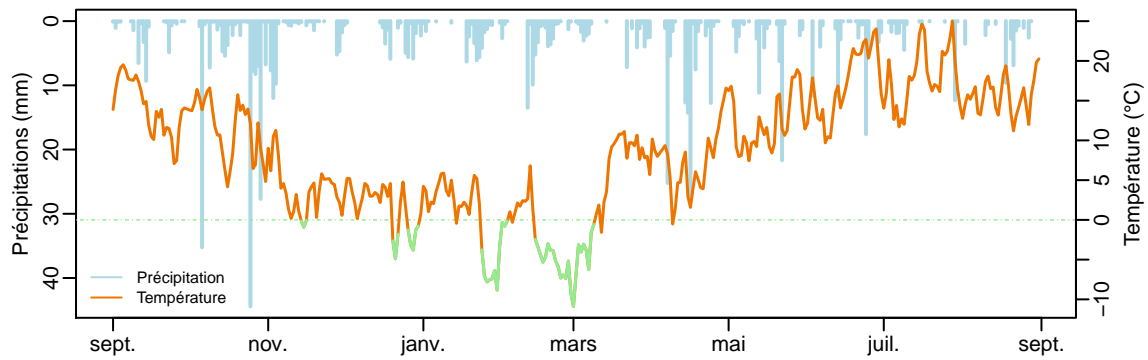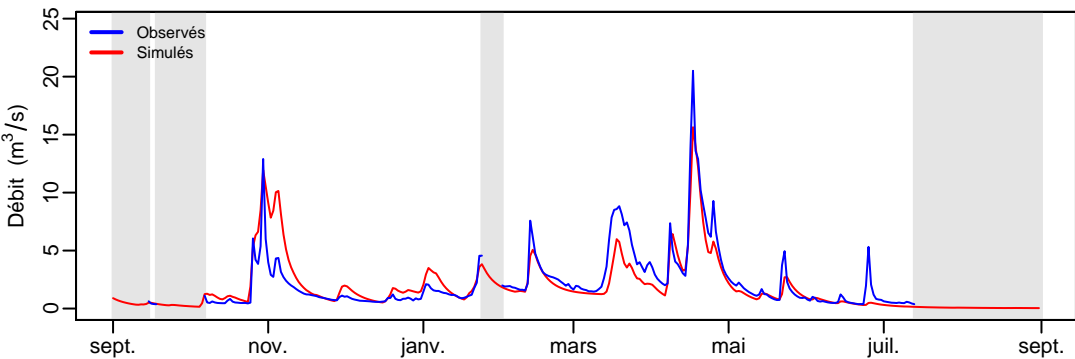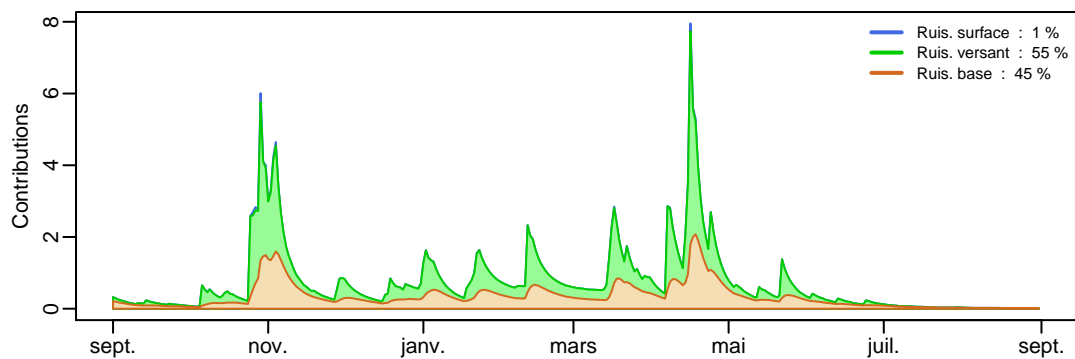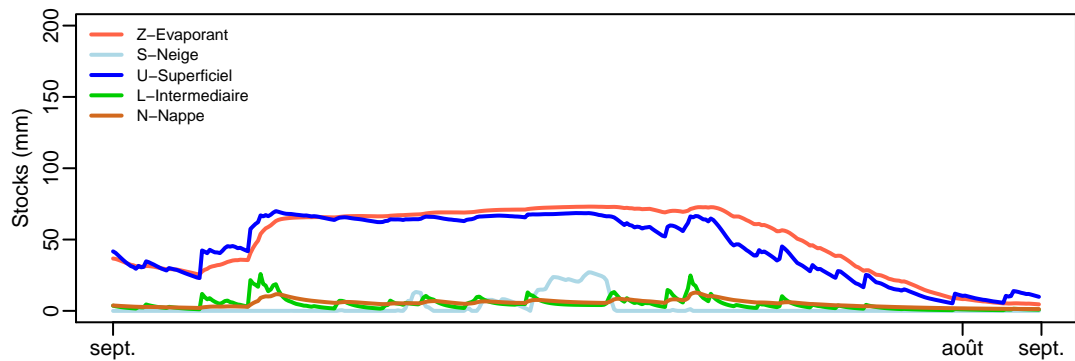

# k2363020 (206.76 km<sup>2</sup>) – année 2005–2006

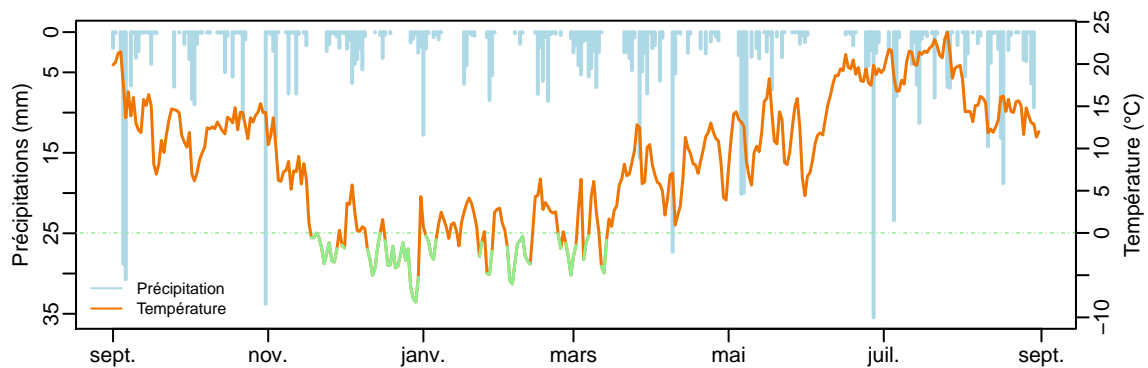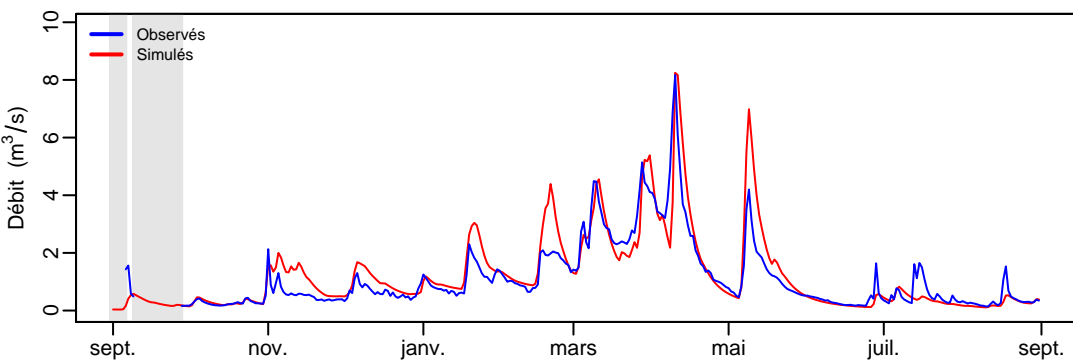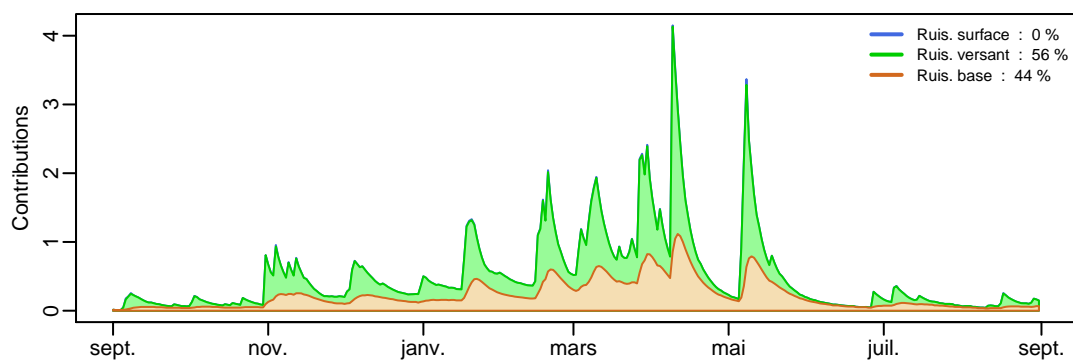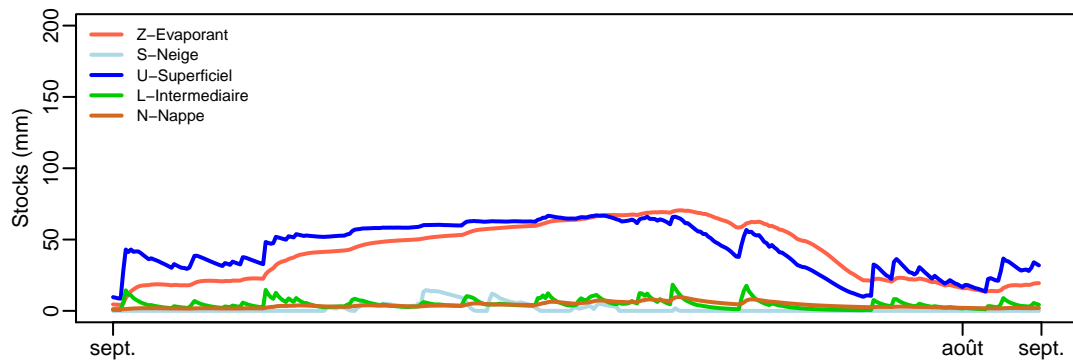

# k2363020 (206.76 km<sup>2</sup>) – année 2006–2007

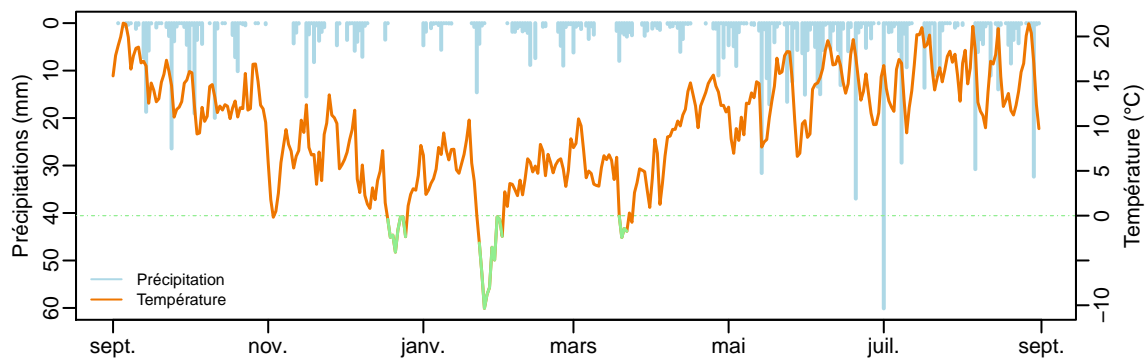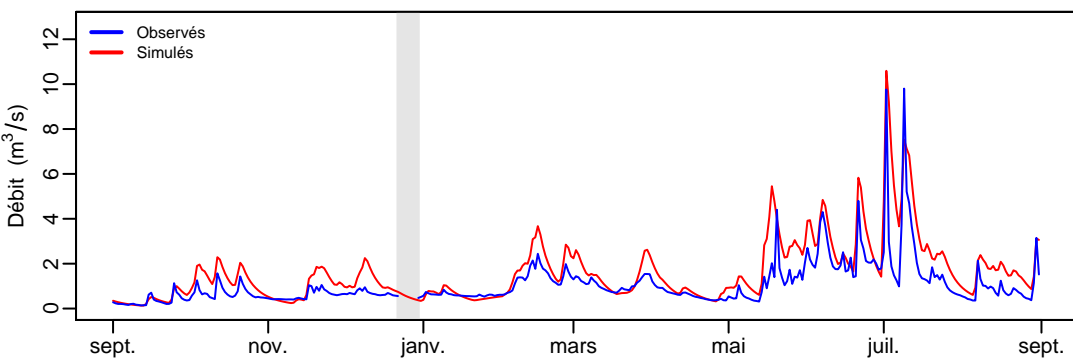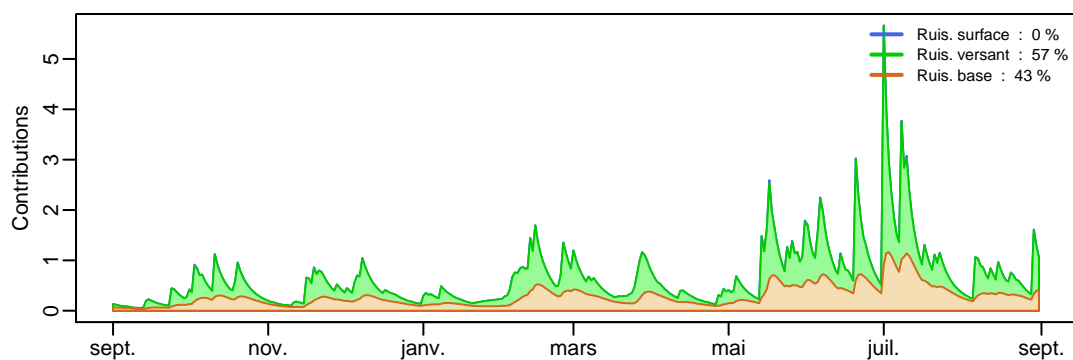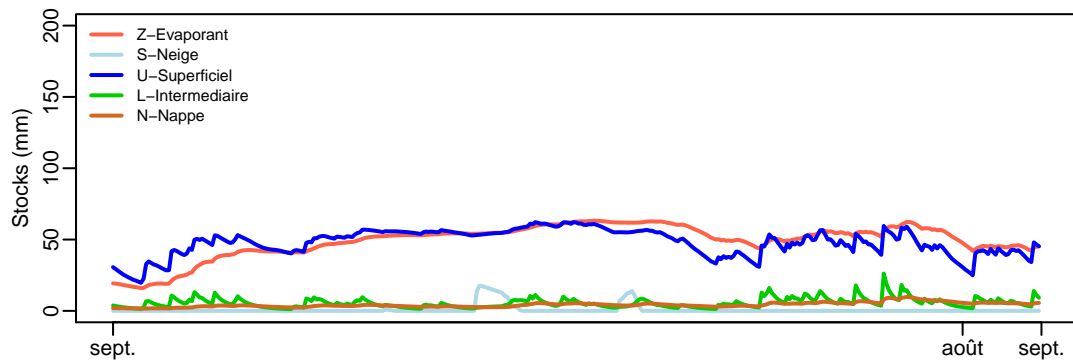

# k2363020 (206.76 km<sup>2</sup>) – année 2007–2008

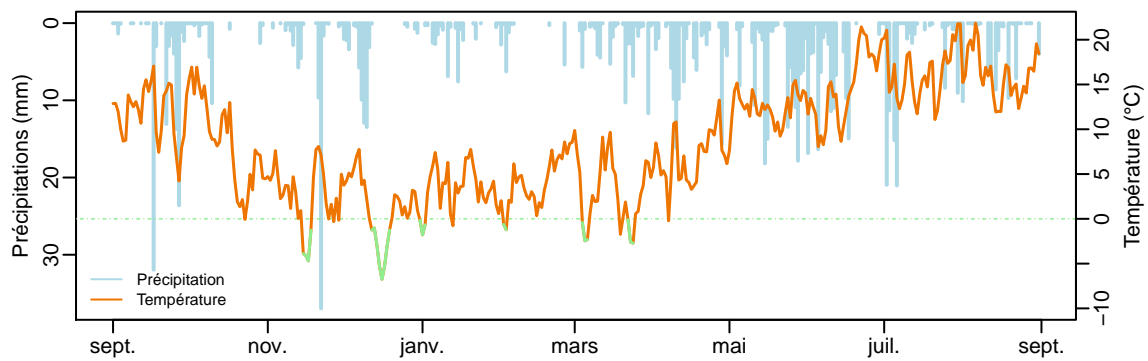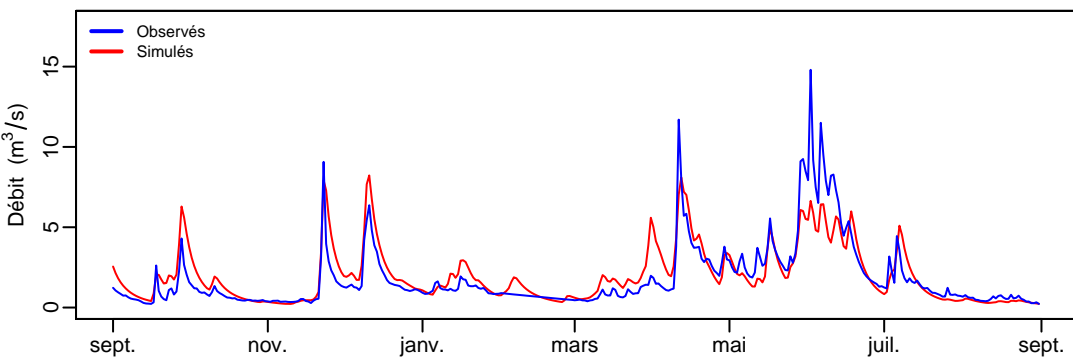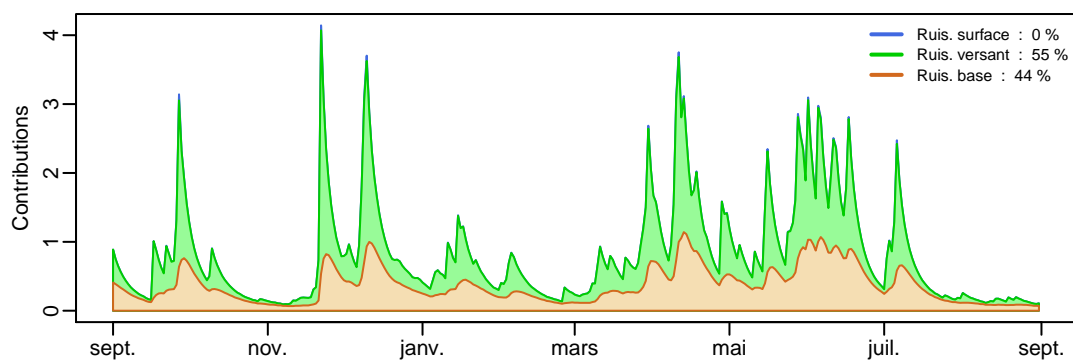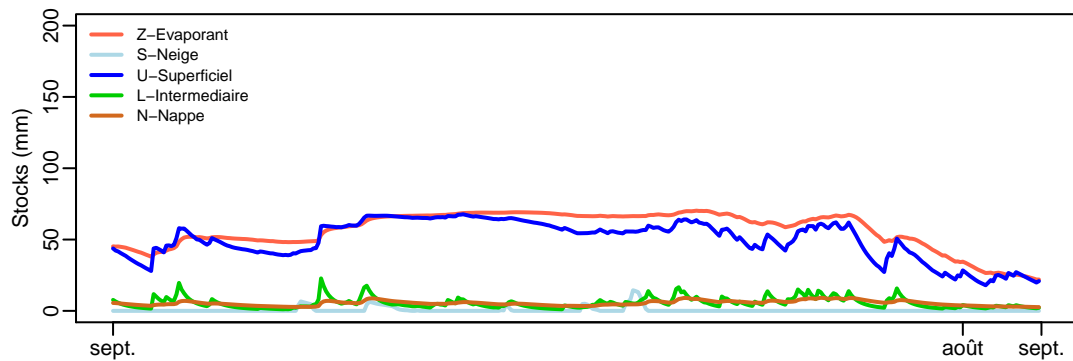

# k2363020 (206.76 km<sup>2</sup>) – année 2008–2009

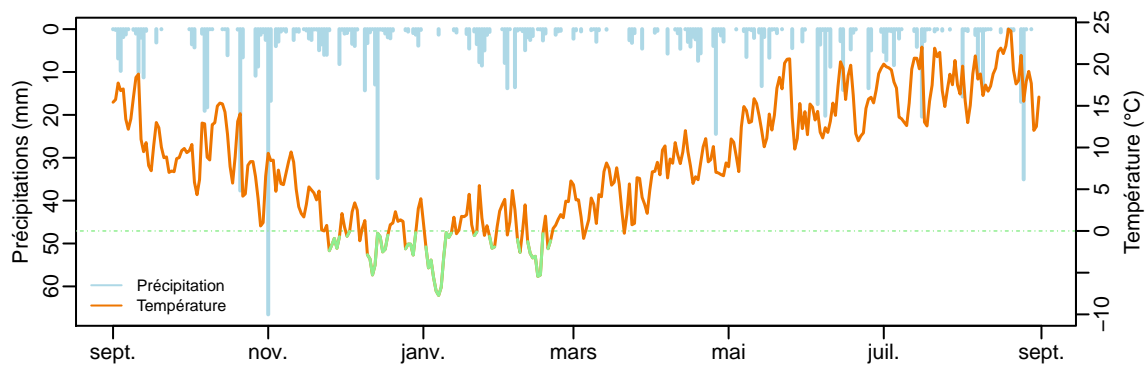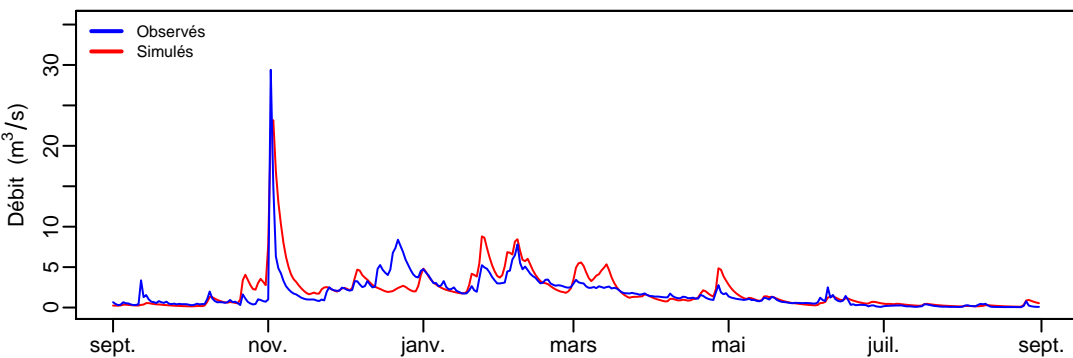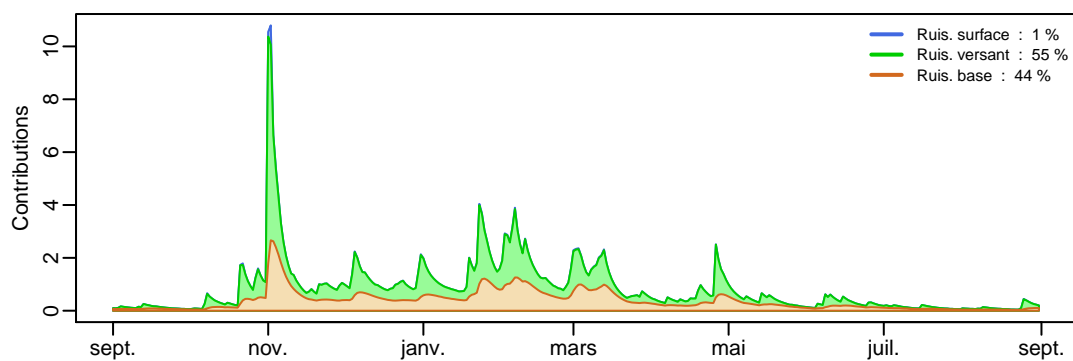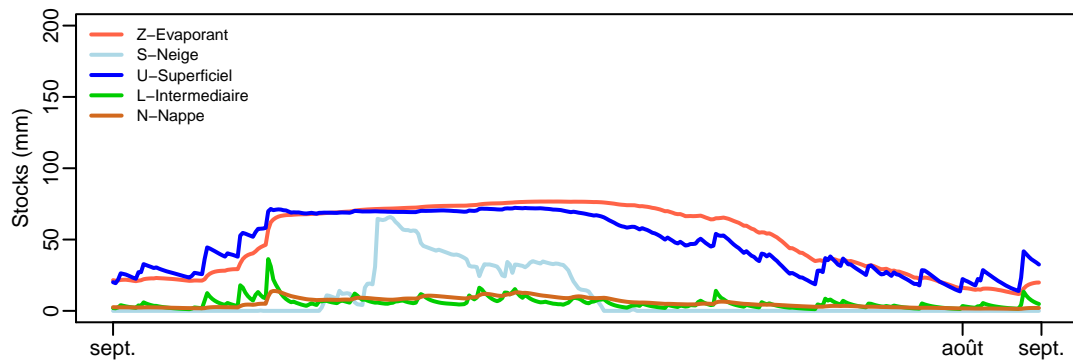

# k2363020 (206.76 km<sup>2</sup>) – année 2009–2010

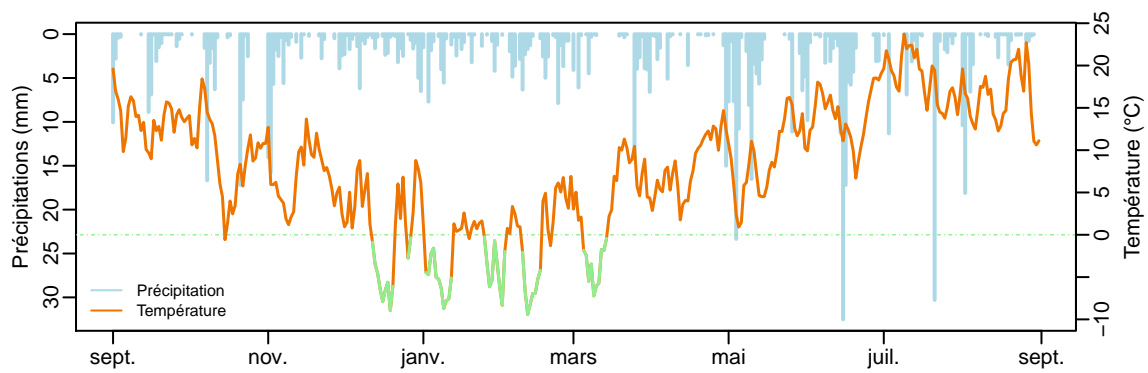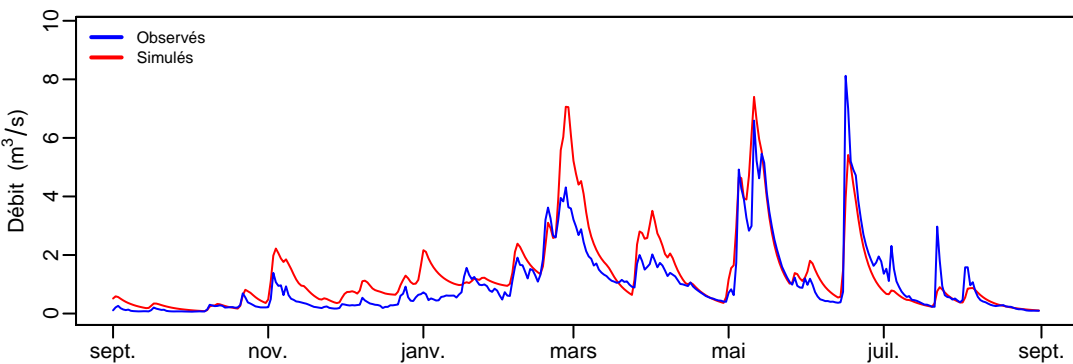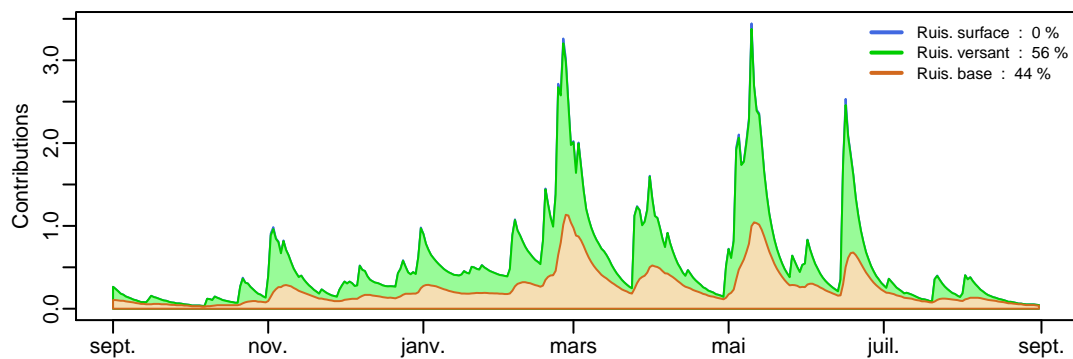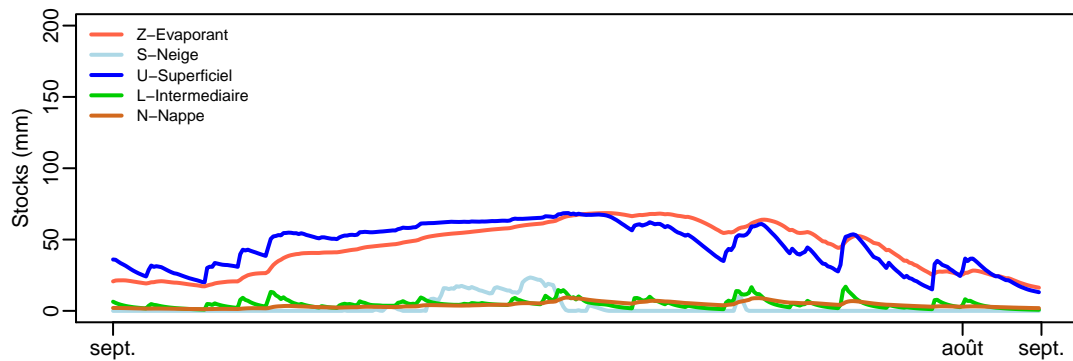

# k2363020 (206.76 km<sup>2</sup>) – année 2010–2011

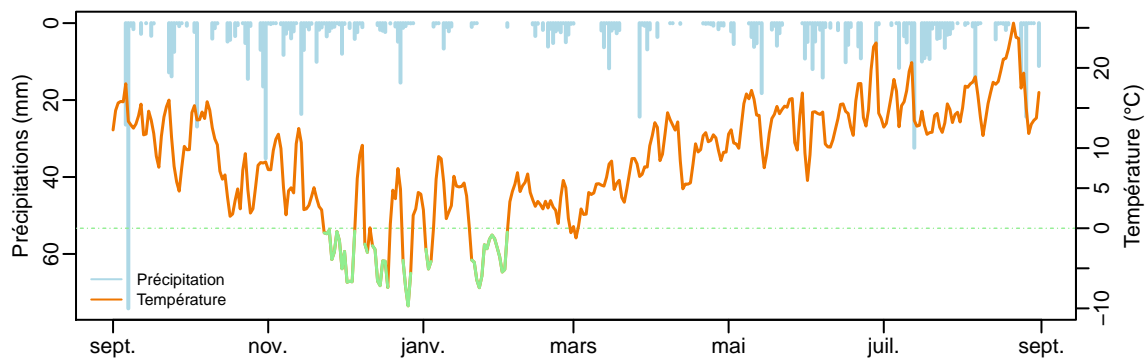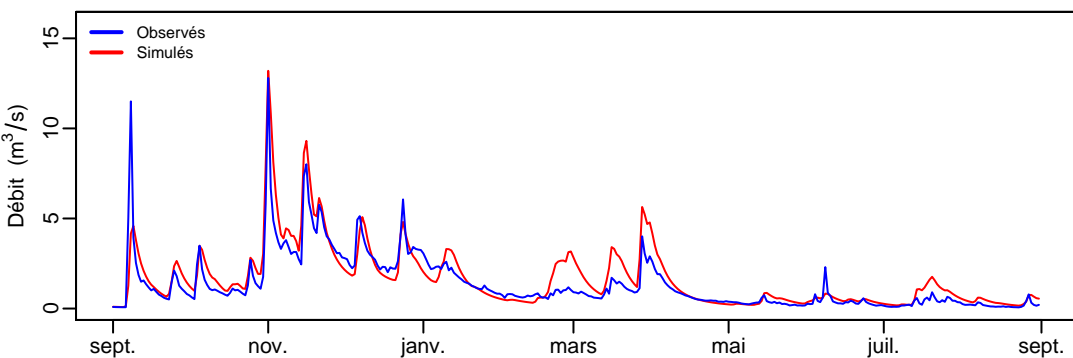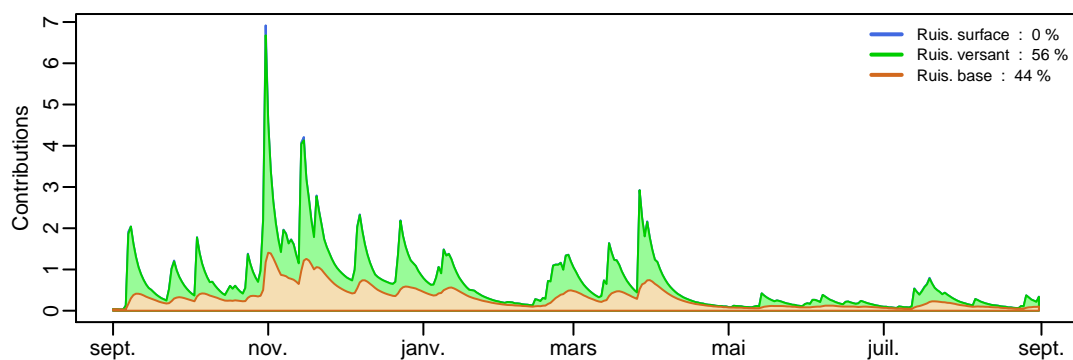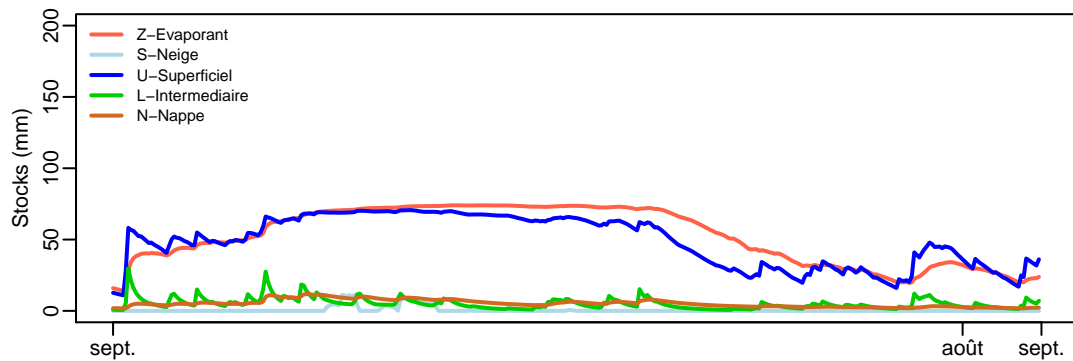



# k2363020 (206.76 km<sup>2</sup>) – année 2011–2012

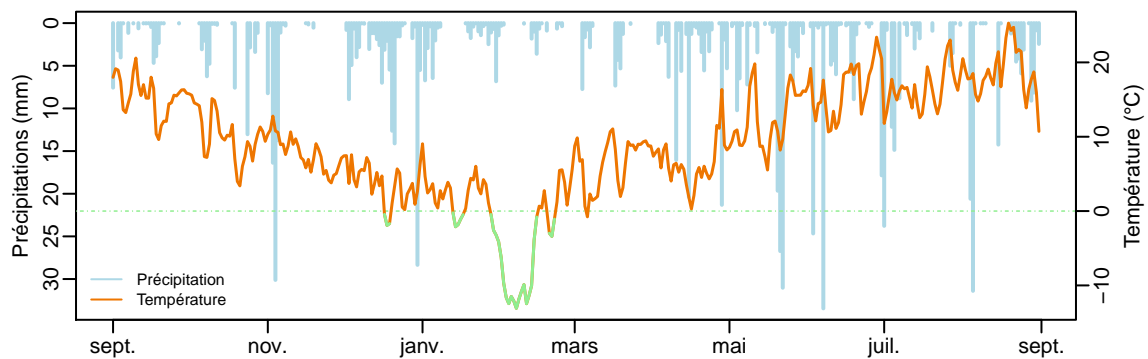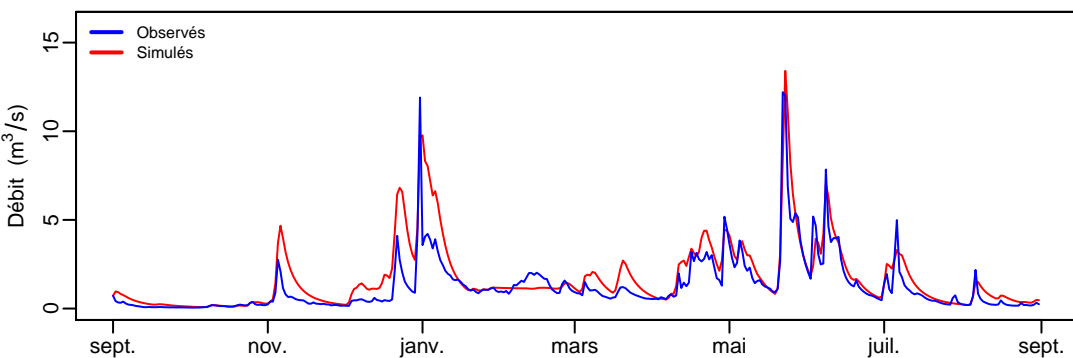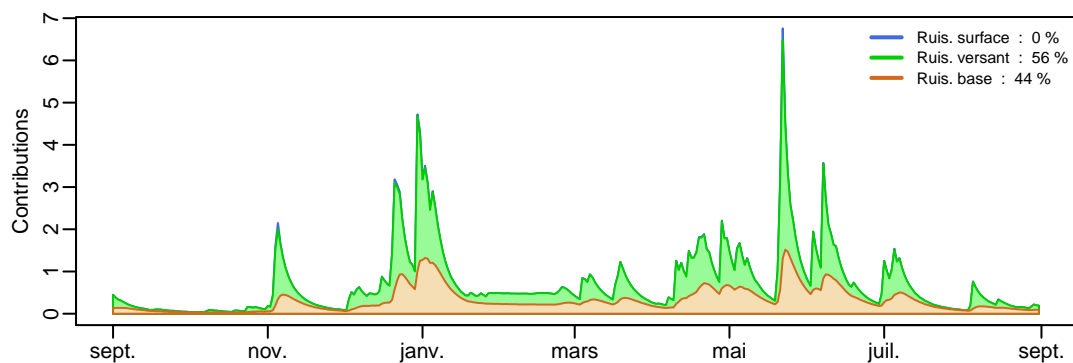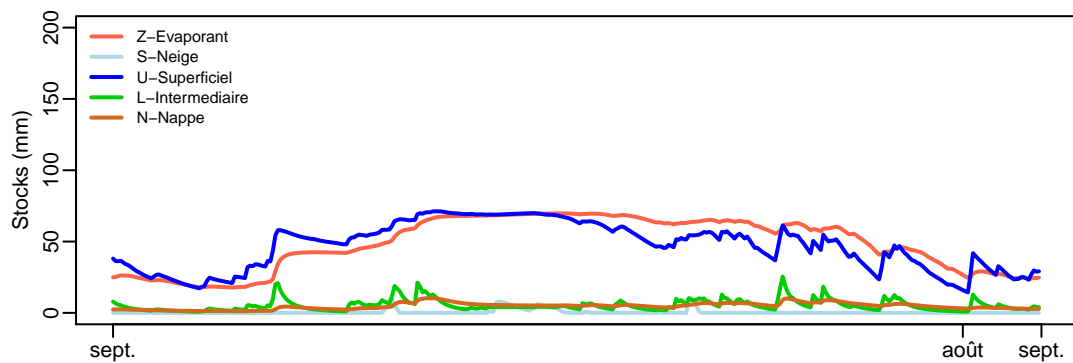

# k2430810 (2954.96 km<sup>2</sup>) – année 1993–1994

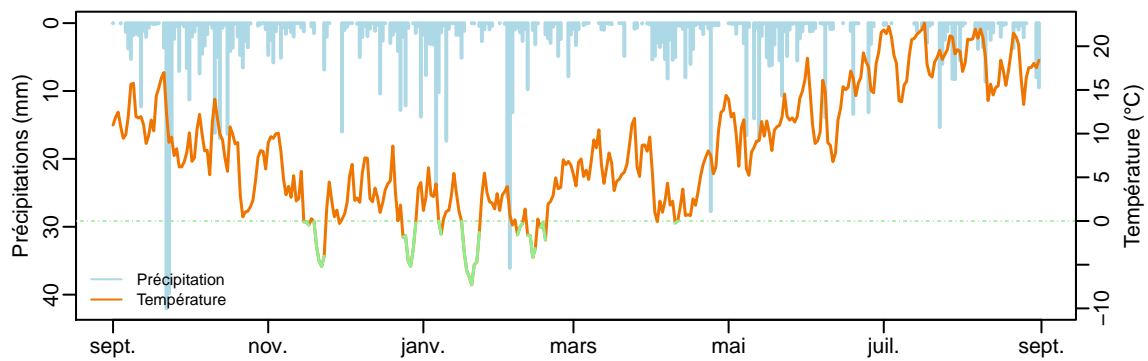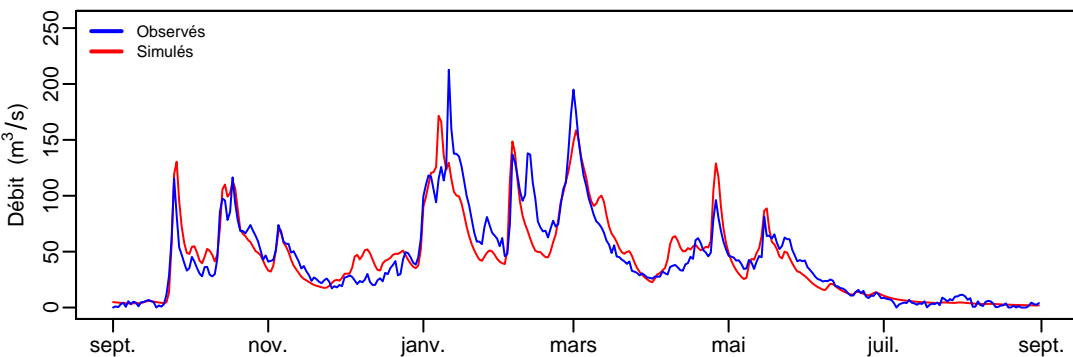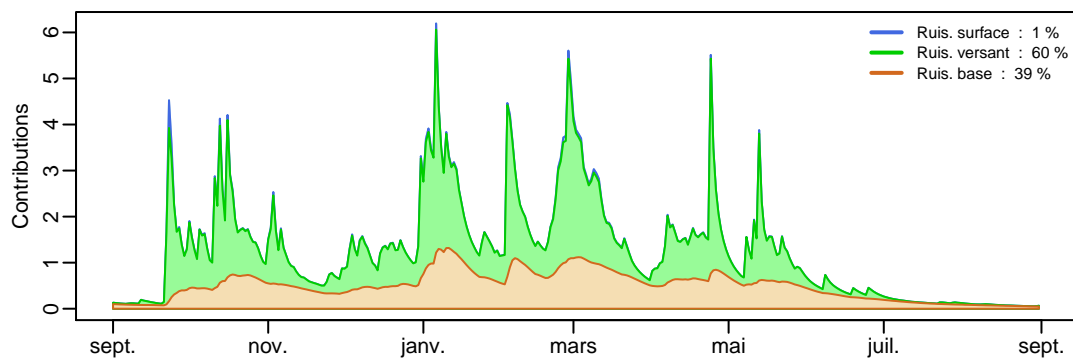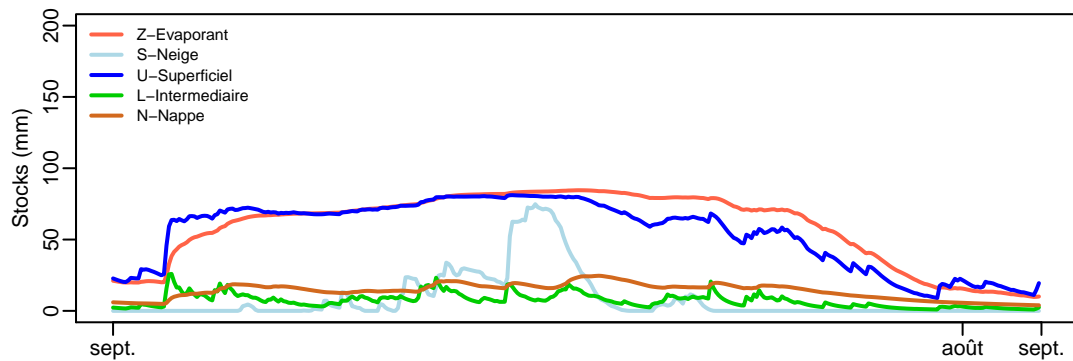

# k2430810 (2954.96 km<sup>2</sup>) – année 1994–1995

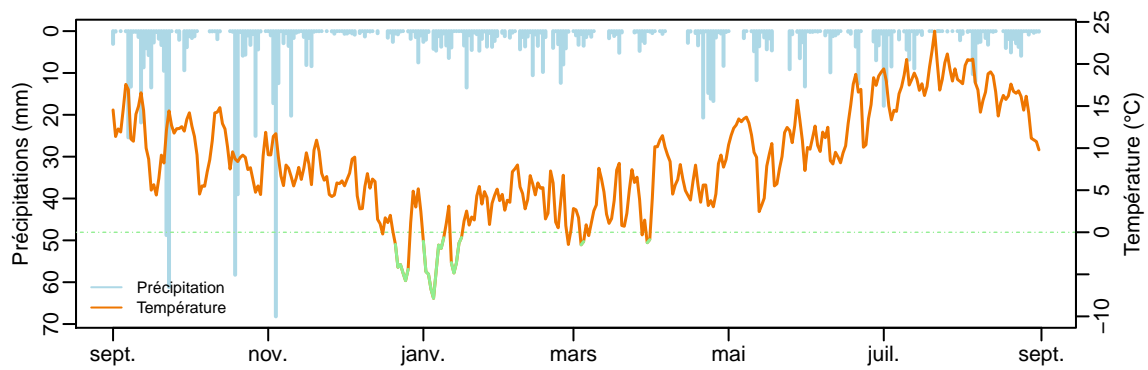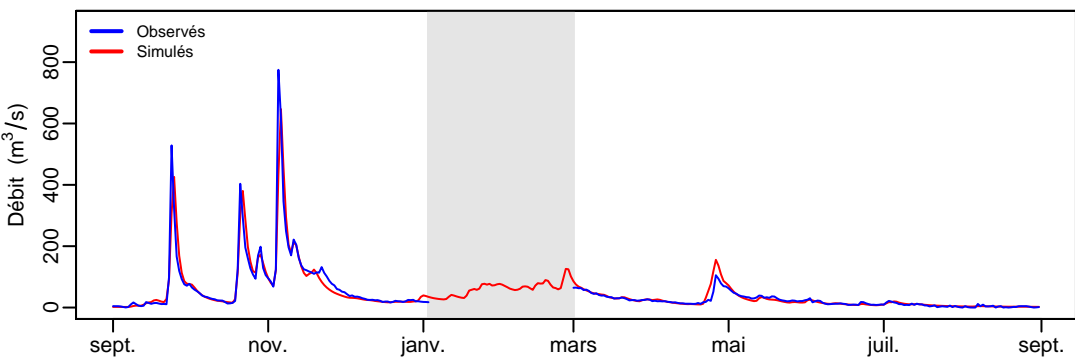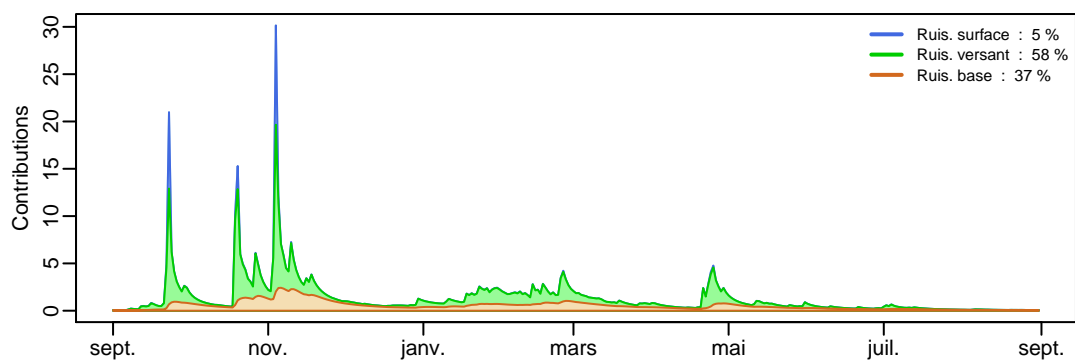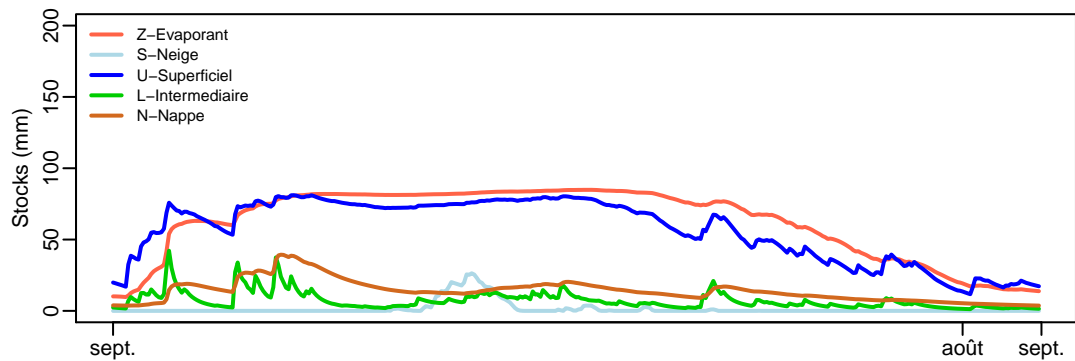

# k2430810 (2954.96 km<sup>2</sup>) – année 1995–1996

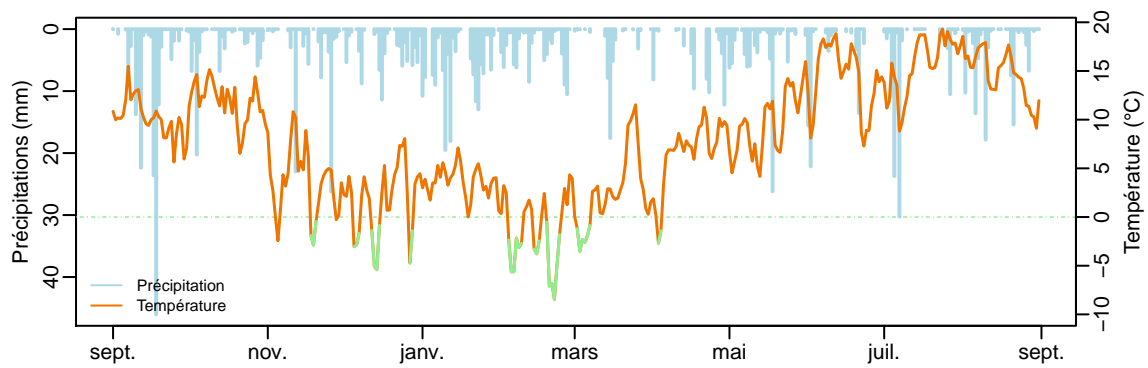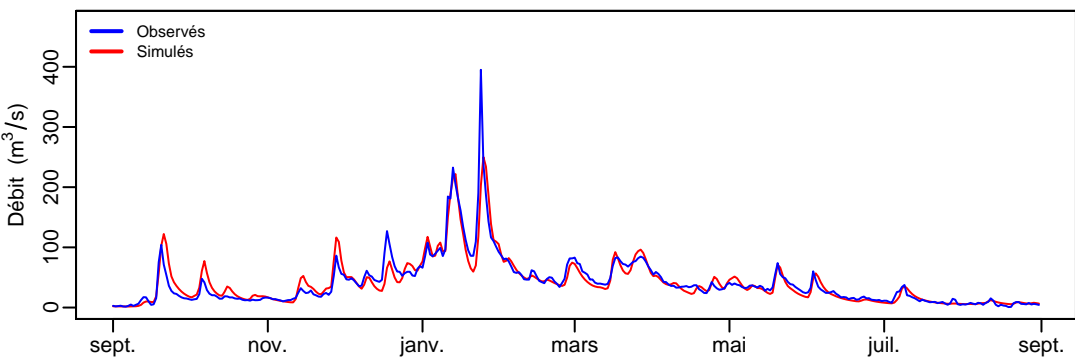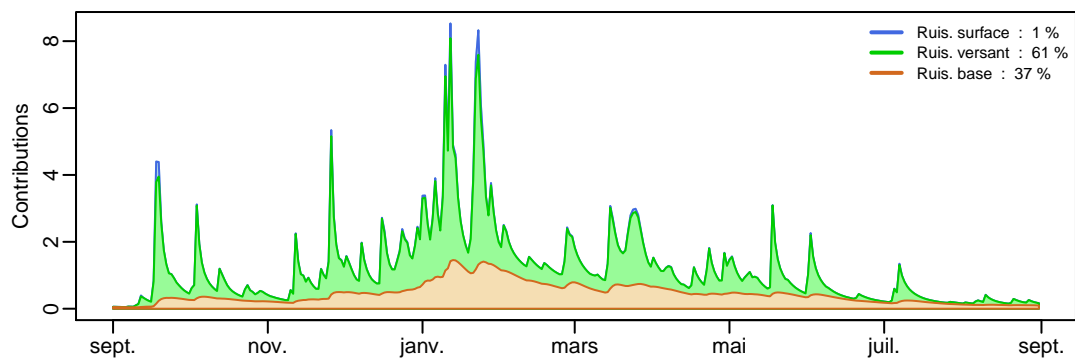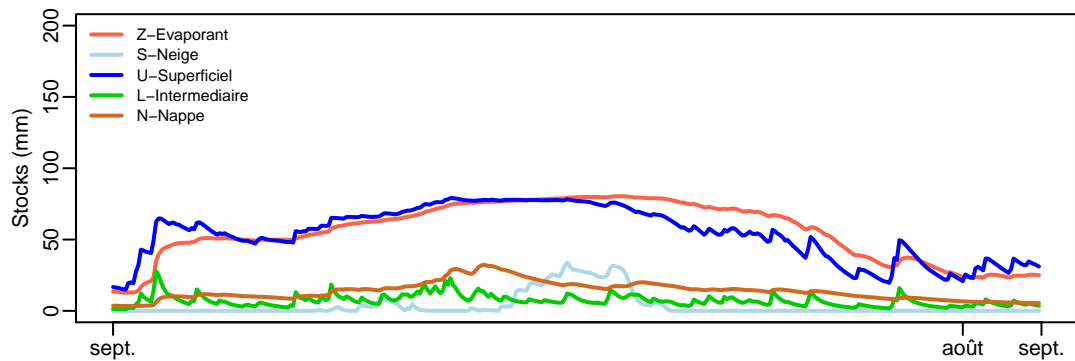

# k2430810 (2954.96 km²) – année 1996–1997

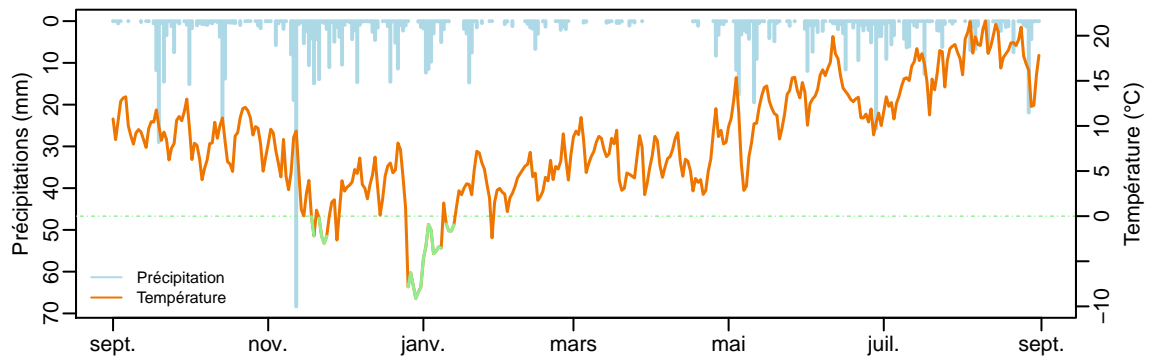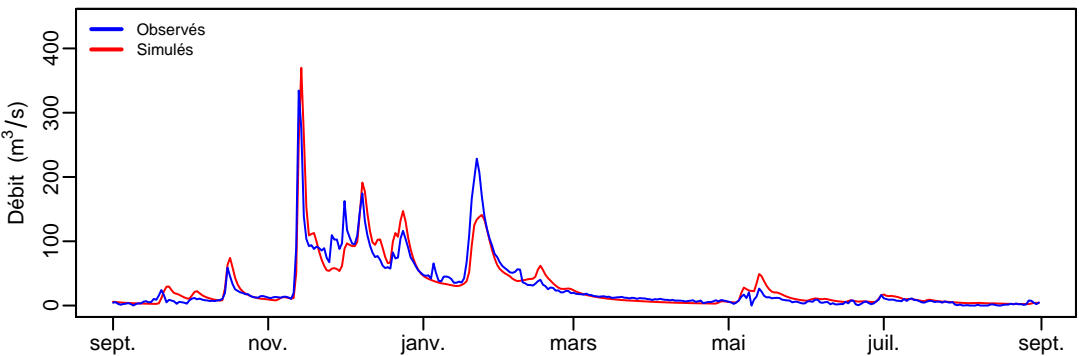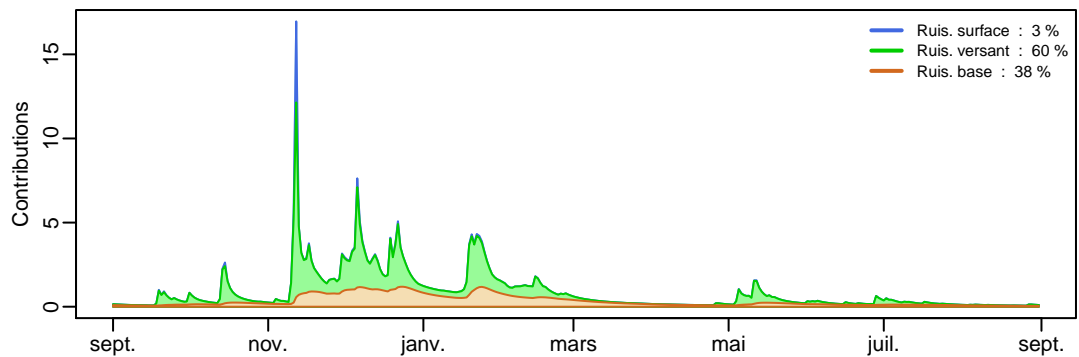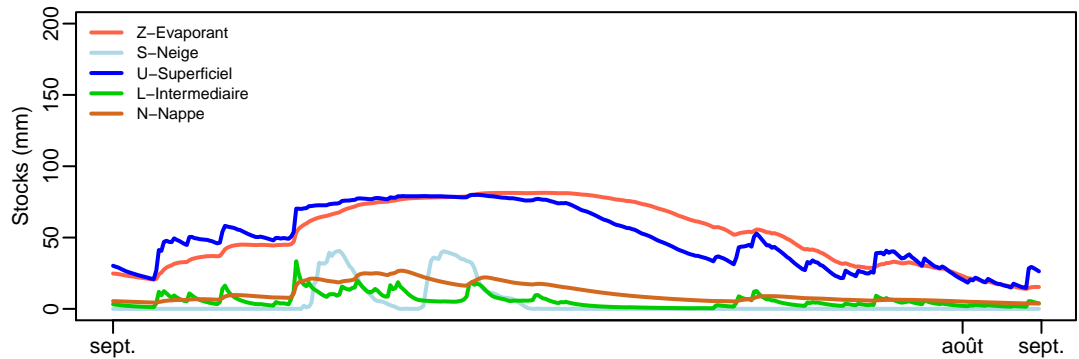

# k2430810 (2954.96 km<sup>2</sup>) – année 1997–1998

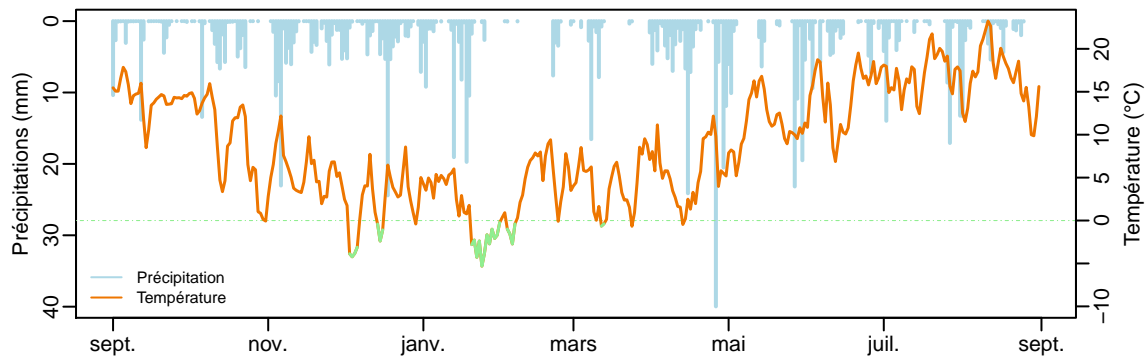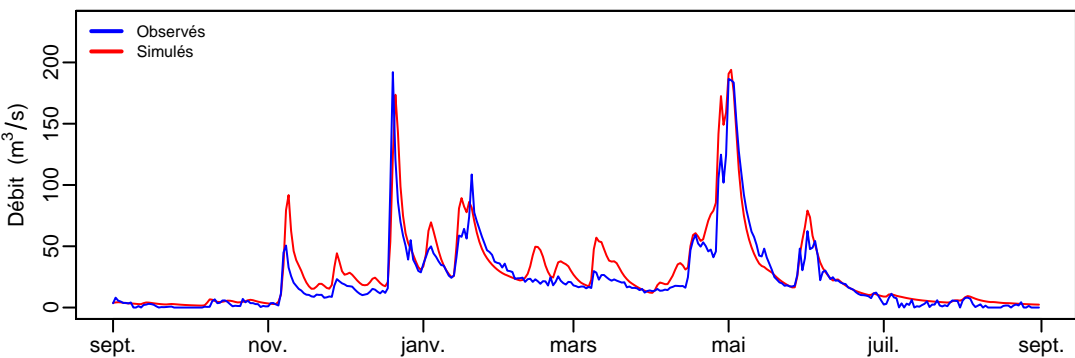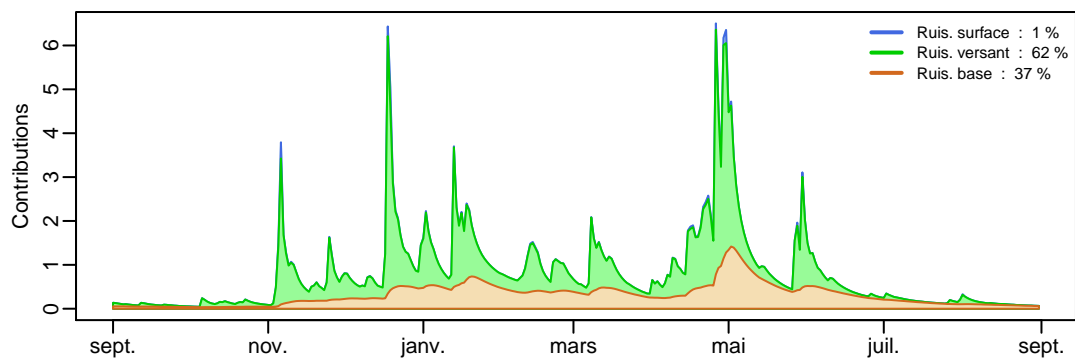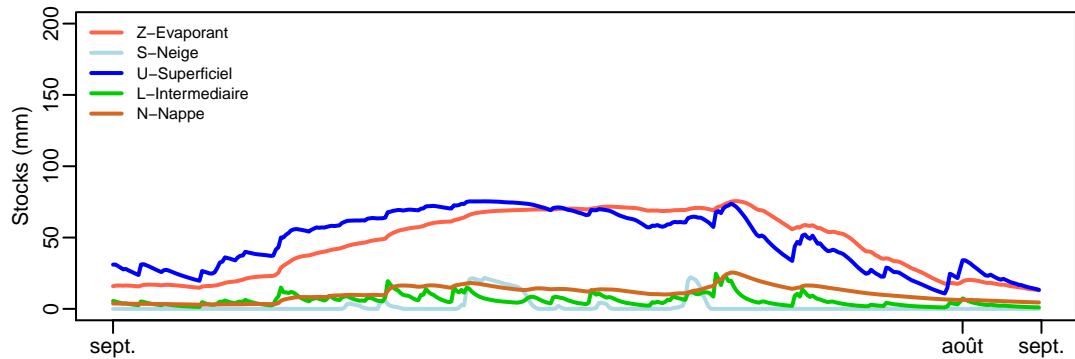

# k2430810 (2954.96 km<sup>2</sup>) – année 1998–1999

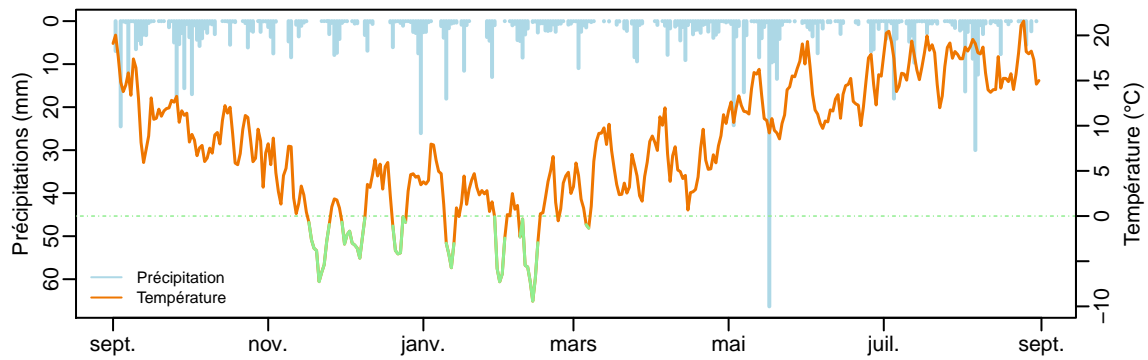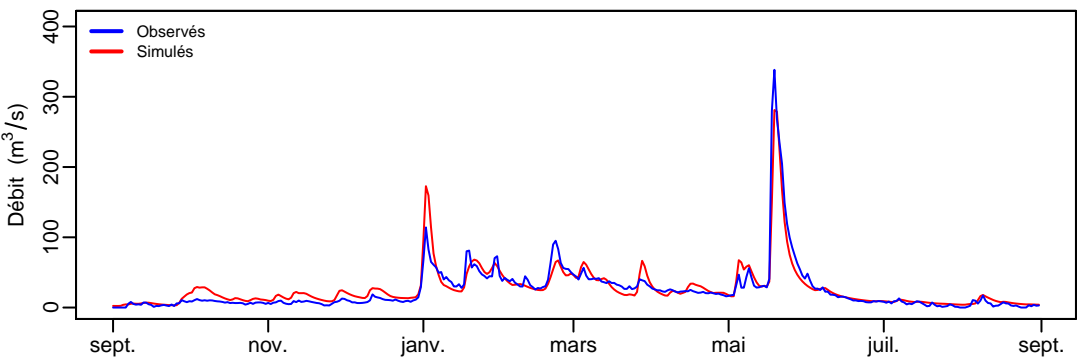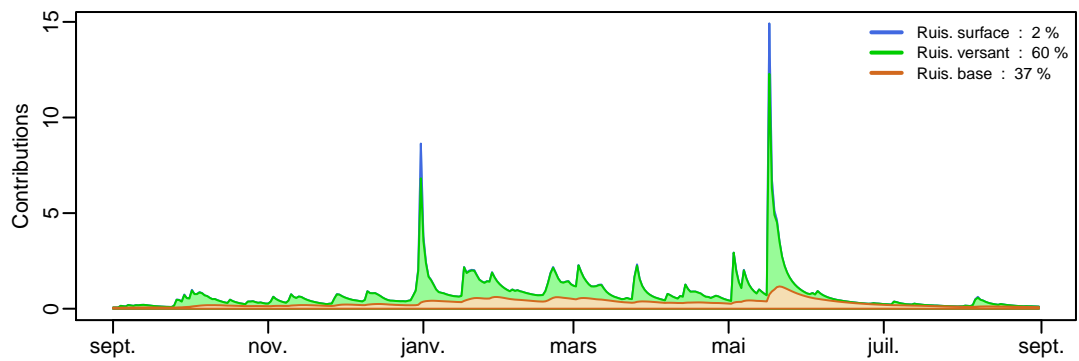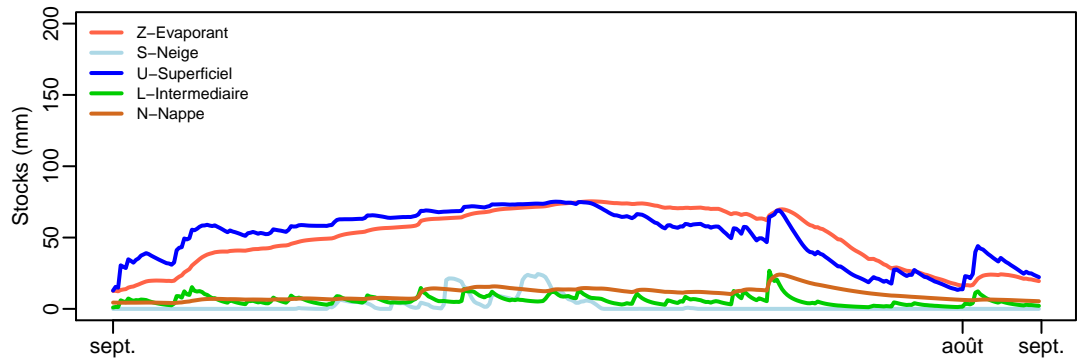

# k2430810 (2954.96 km<sup>2</sup>) – année 1999–2000

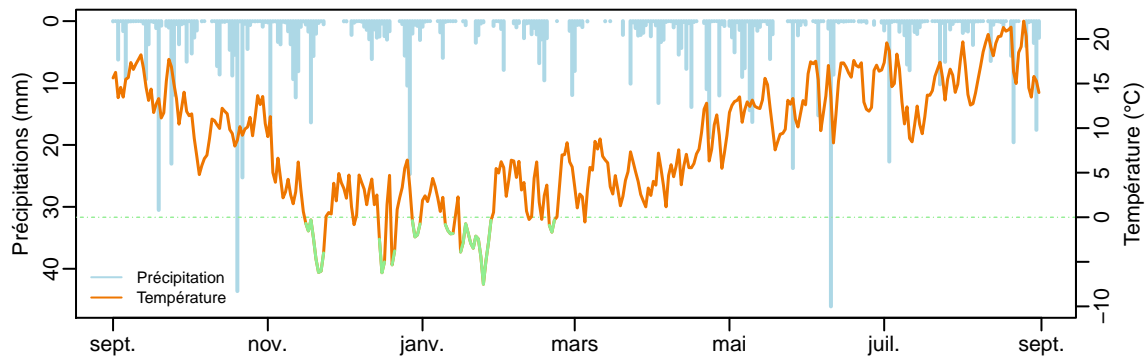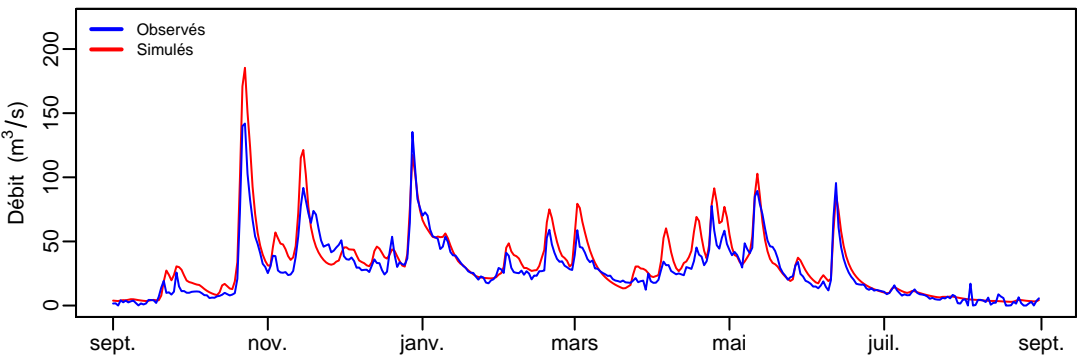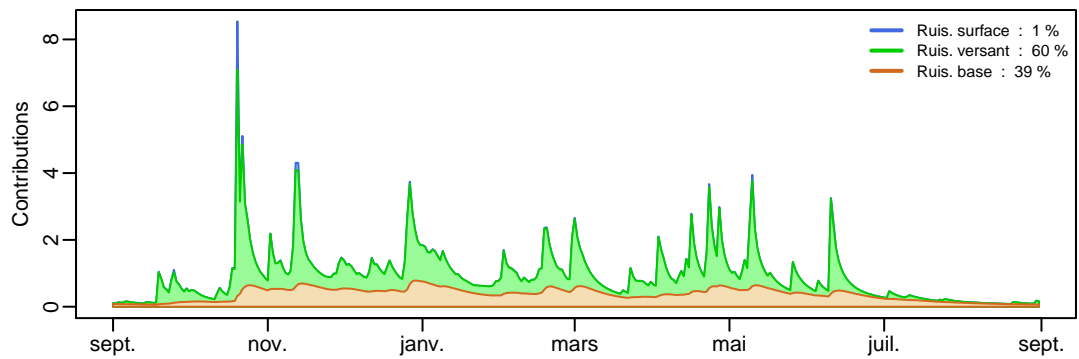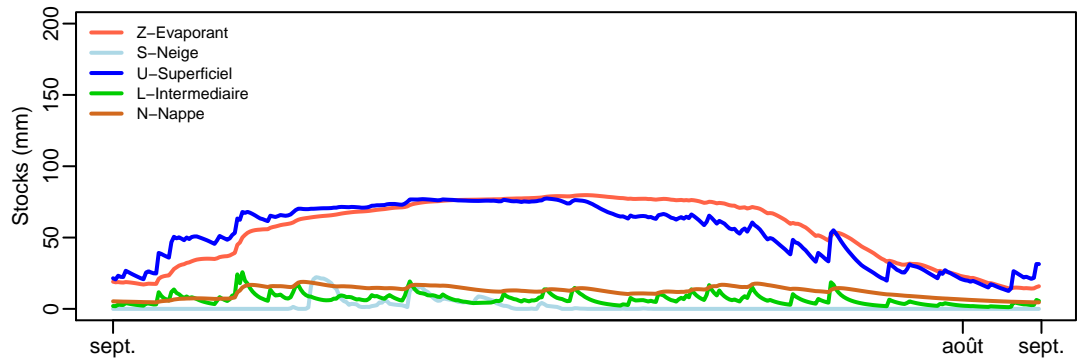



# k2430810 (2954.96 km<sup>2</sup>) – année 2000–2001

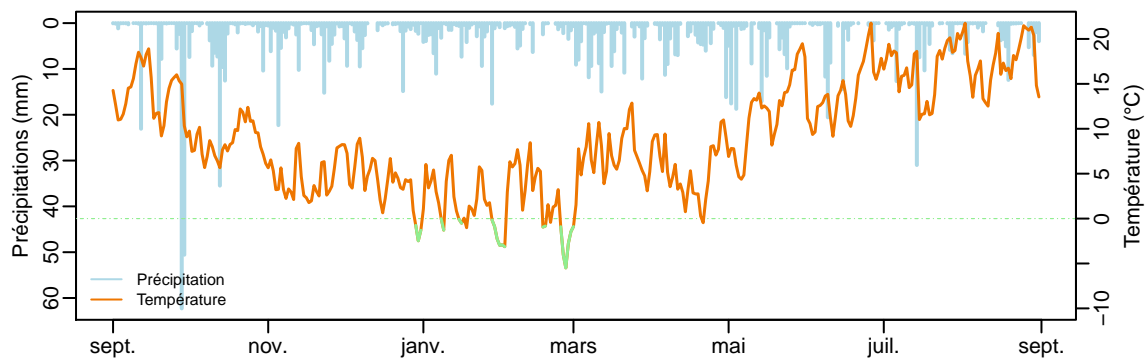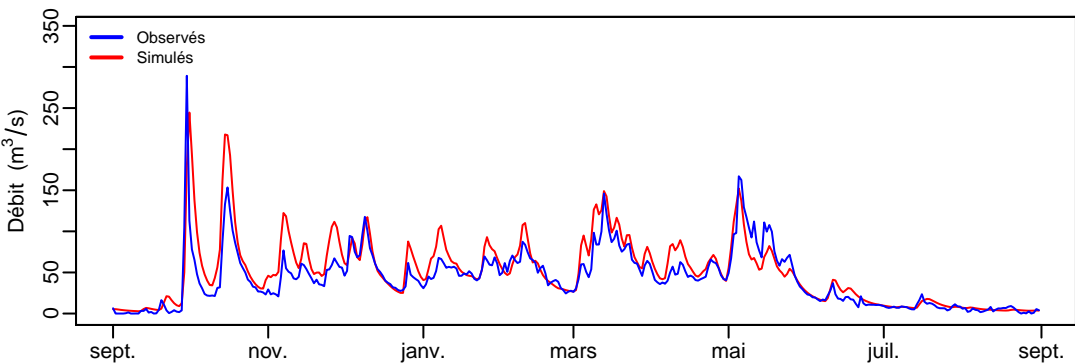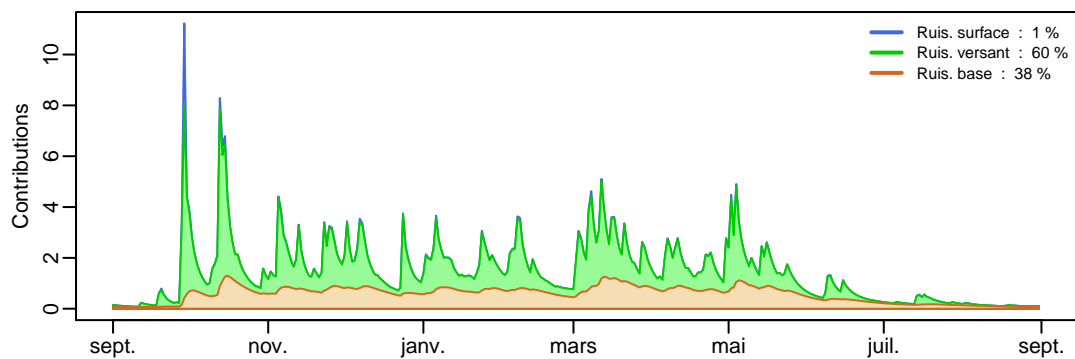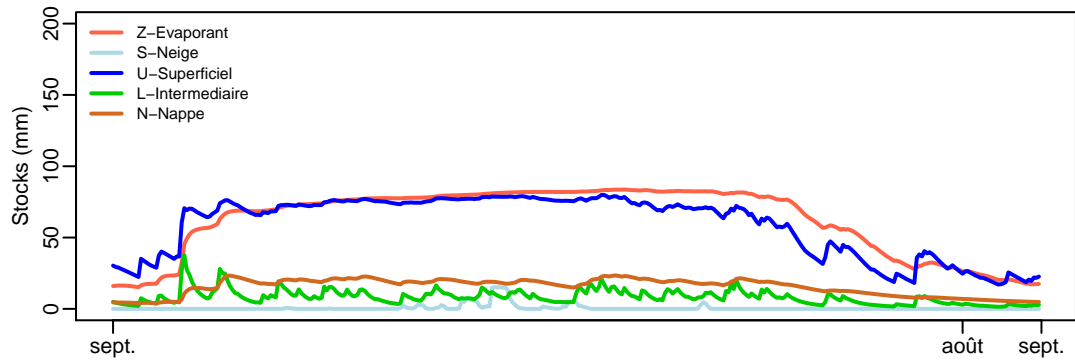

# k2430810 (2954.96 km²) – année 2001–2002

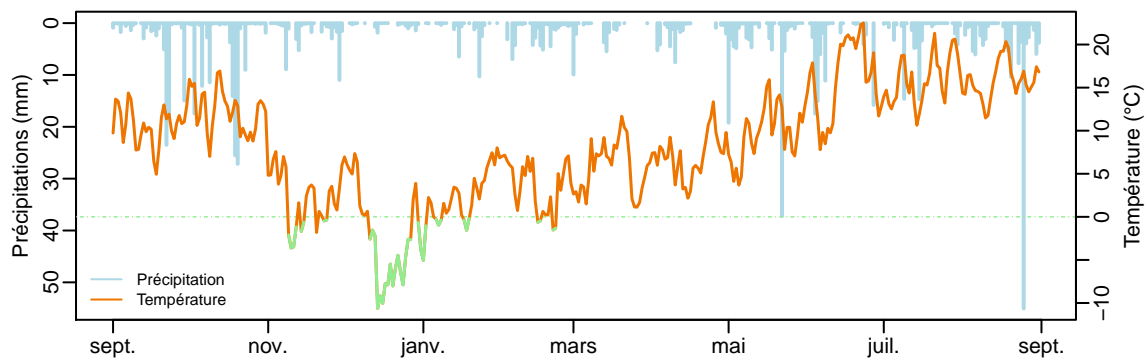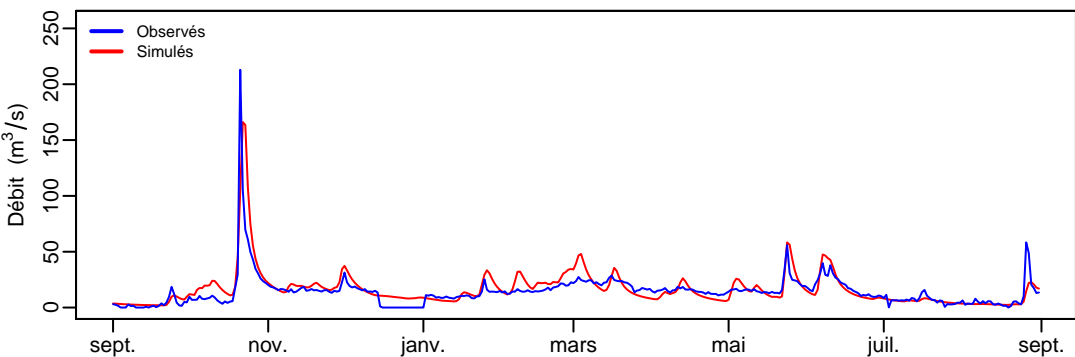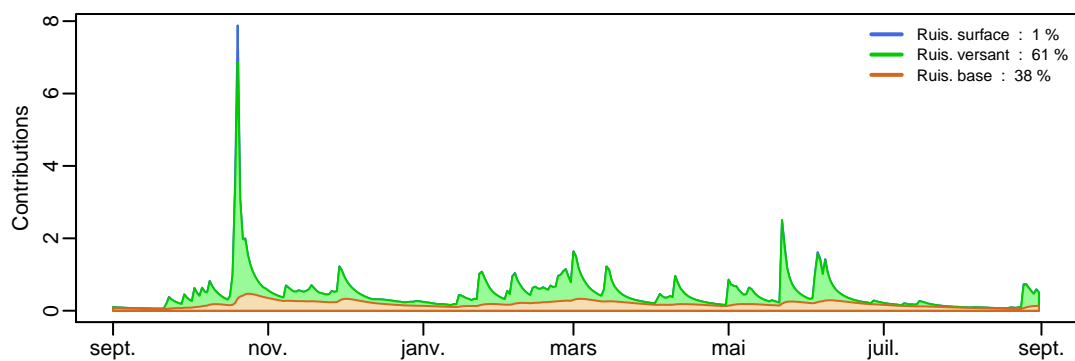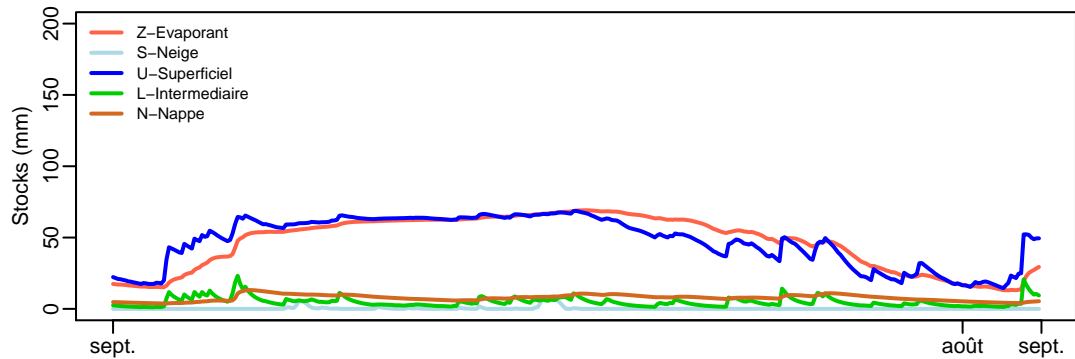

# k2430810 (2954.96 km²) – année 2002–2003

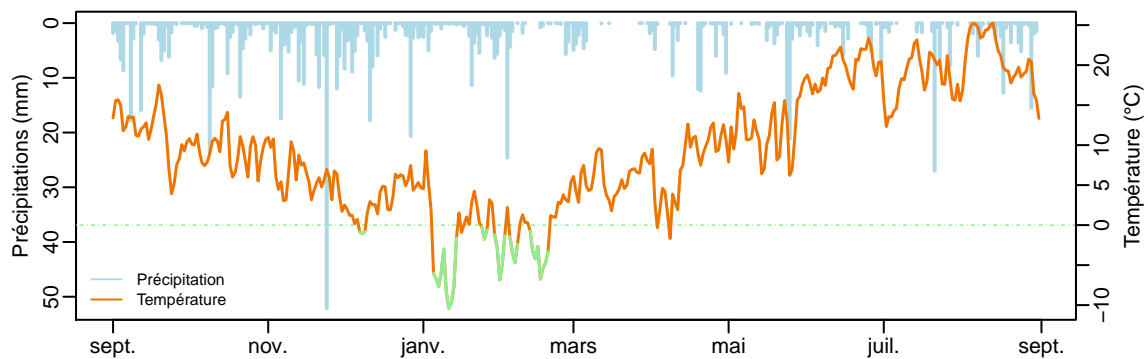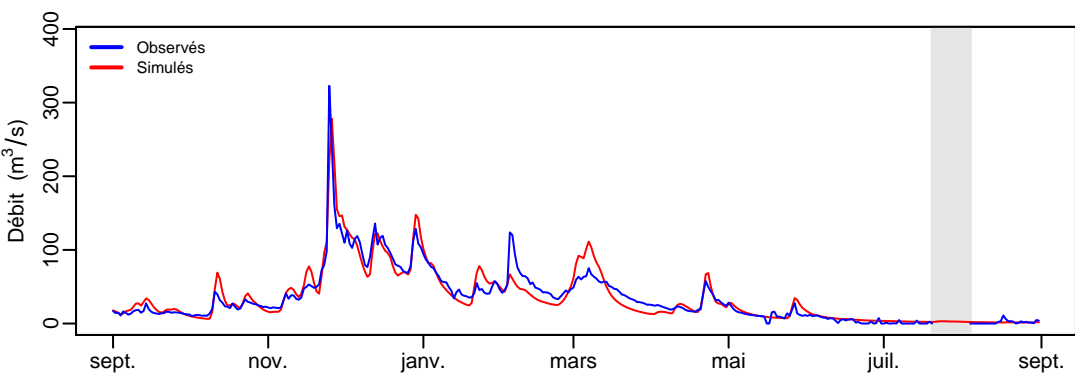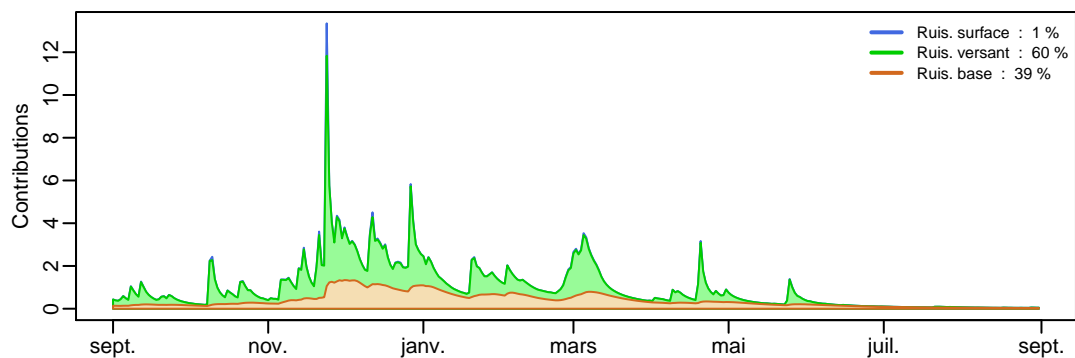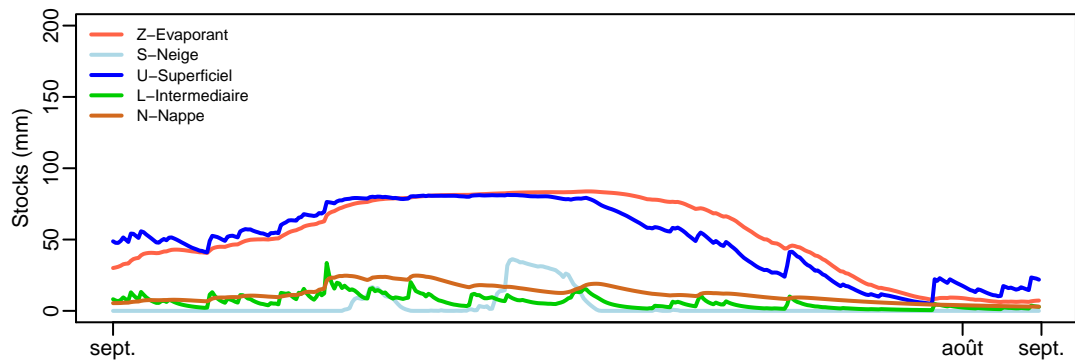

# k2430810 (2954.96 km<sup>2</sup>) – année 2003–2004

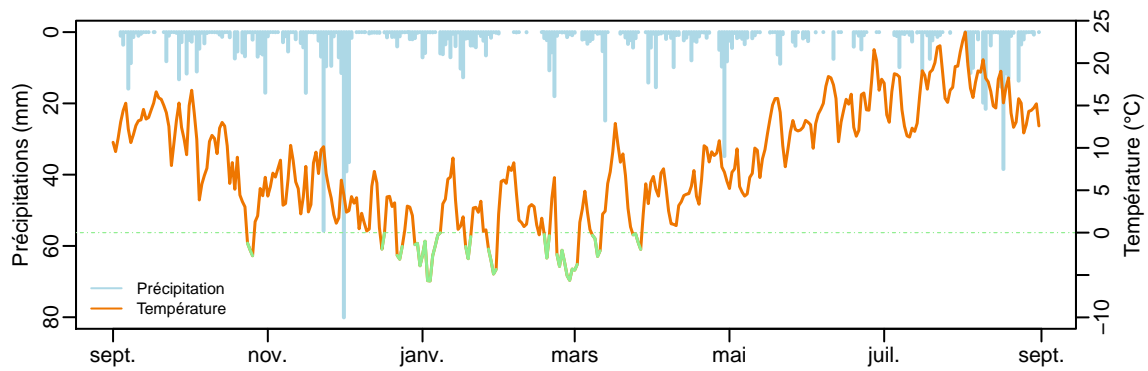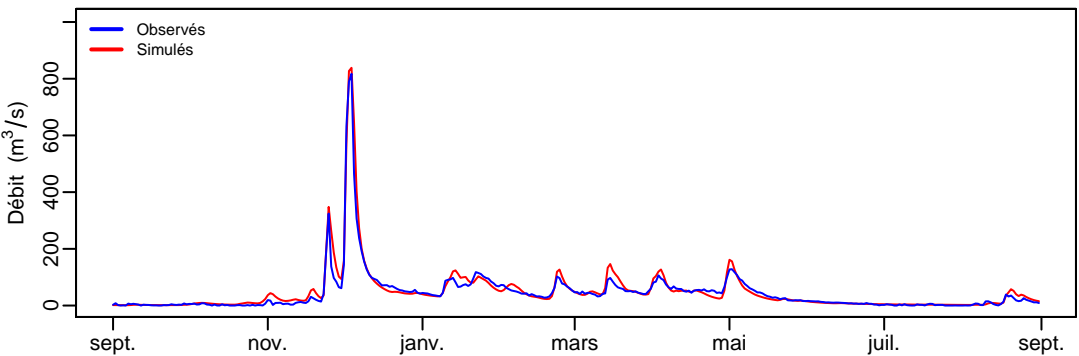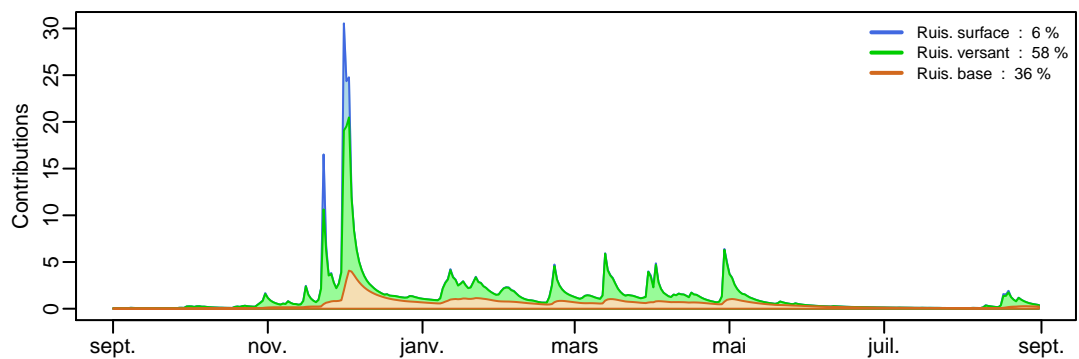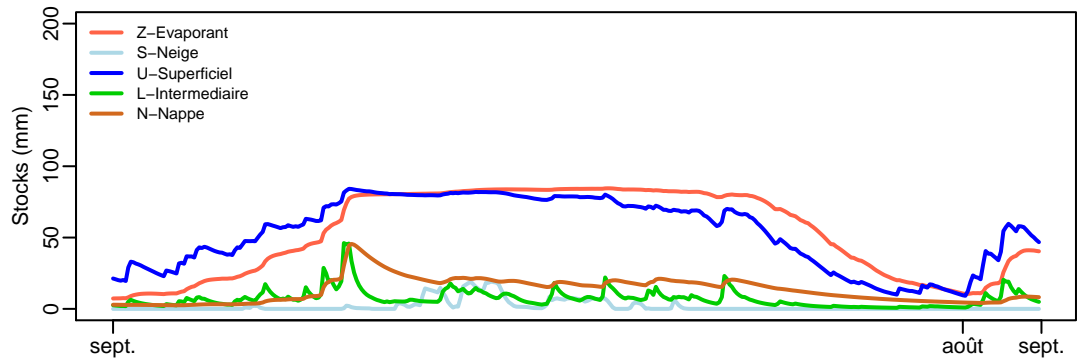

# k2430810 (2954.96 km<sup>2</sup>) – année 2004–2005

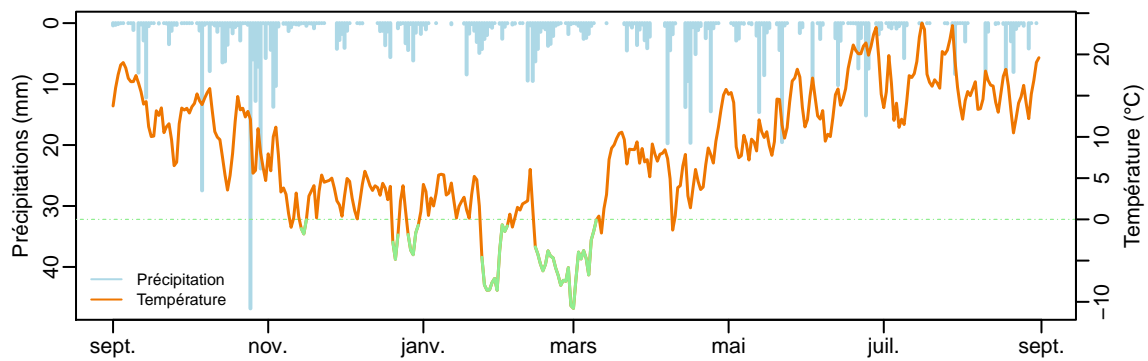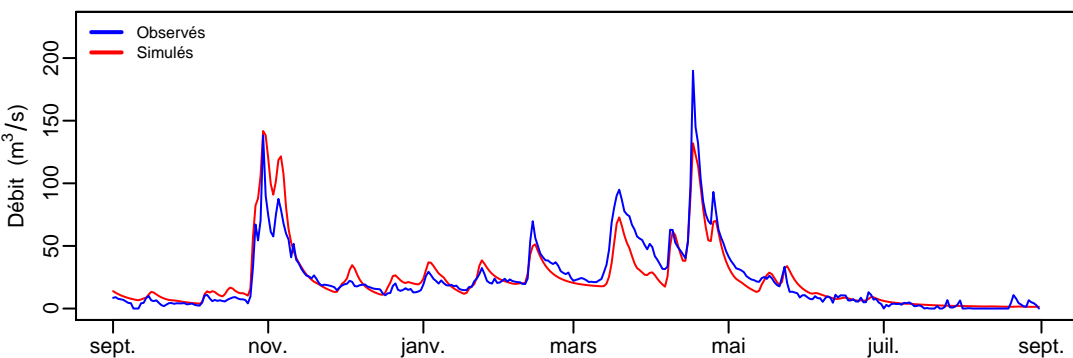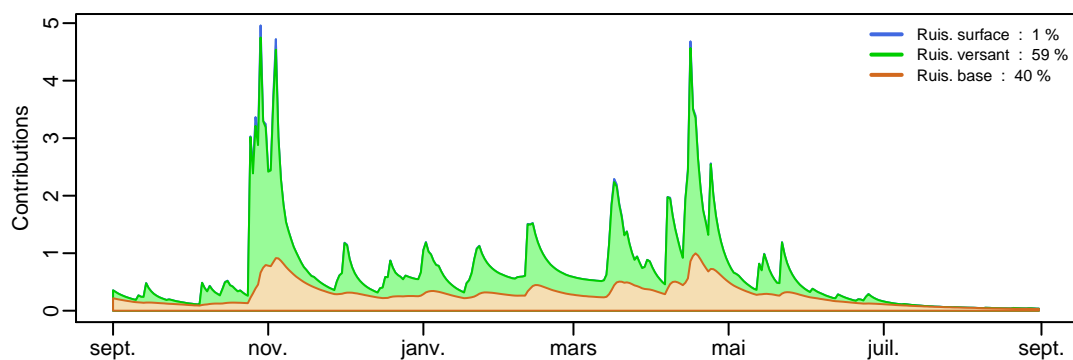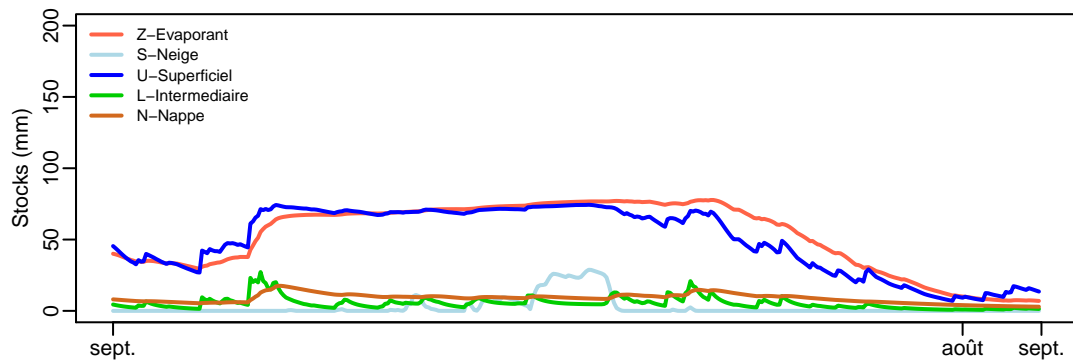

# k2430810 (2954.96 km<sup>2</sup>) – année 2005–2006

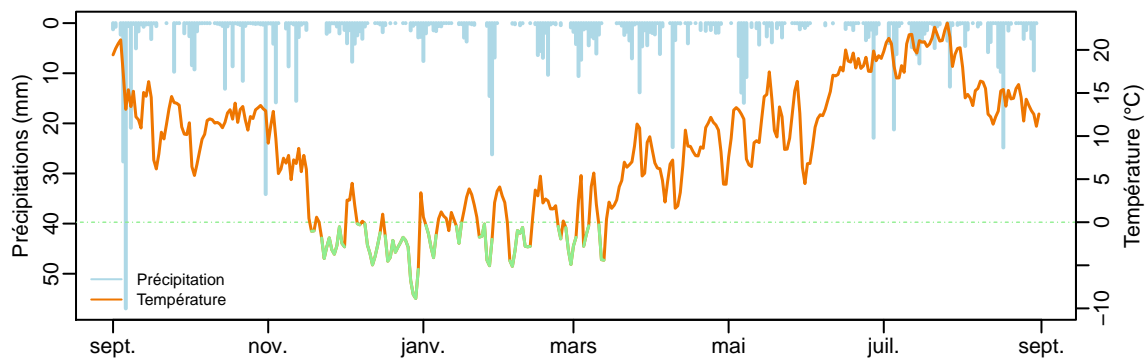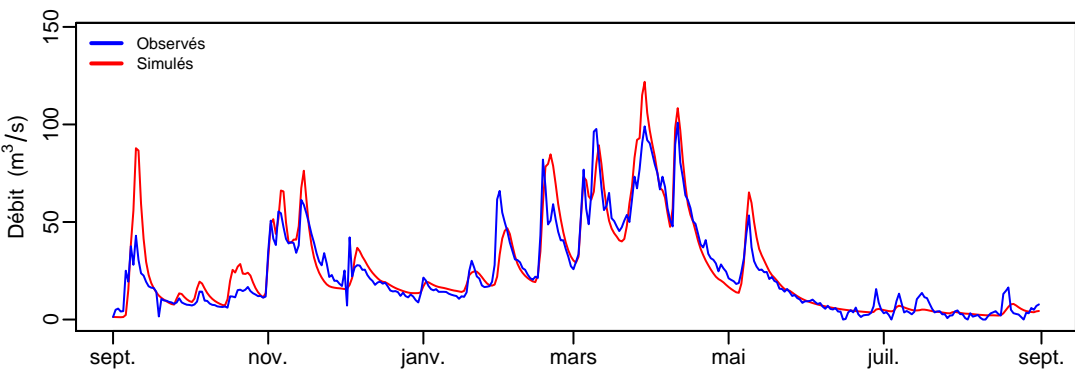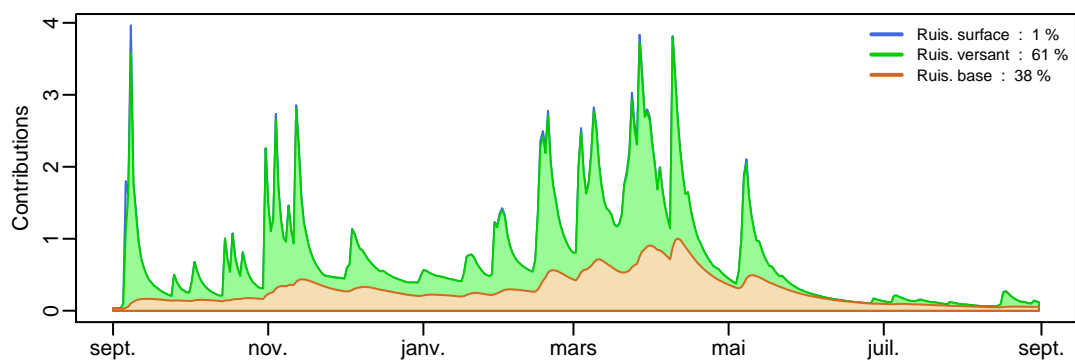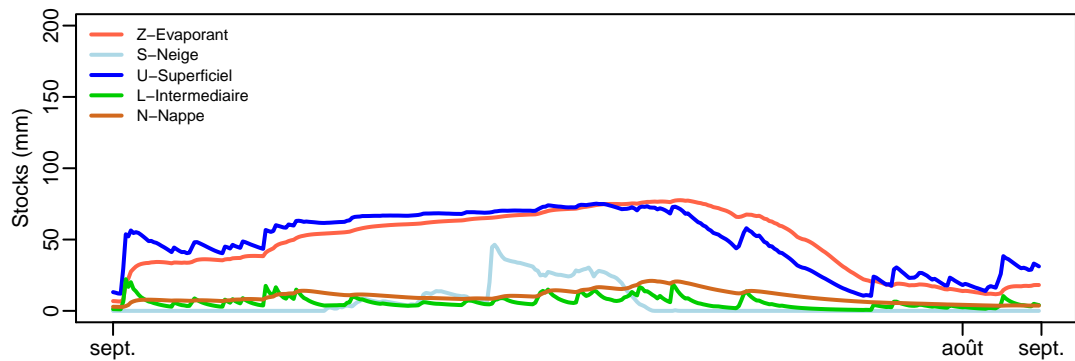

# k2430810 (2954.96 km<sup>2</sup>) – année 2006–2007

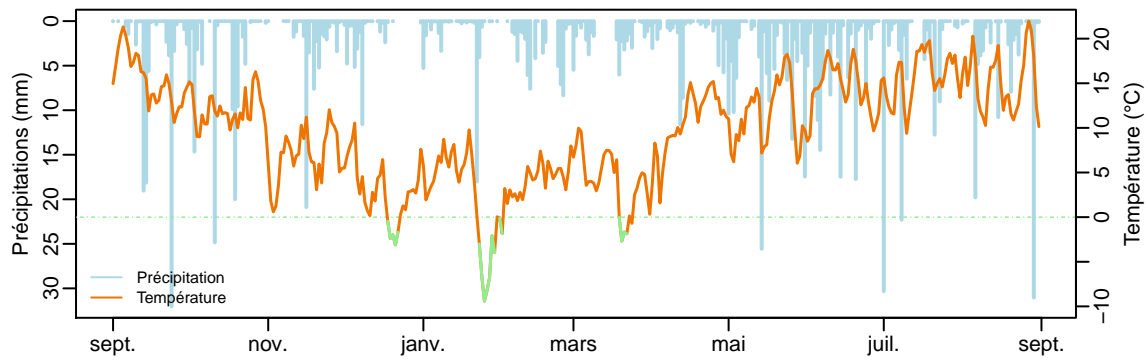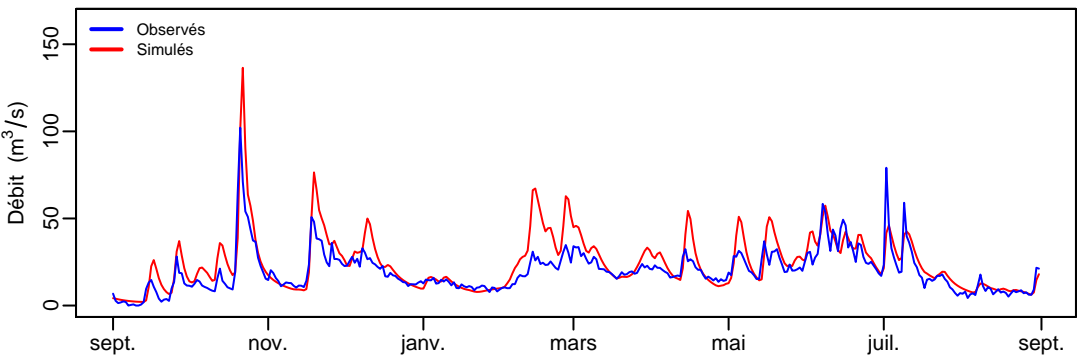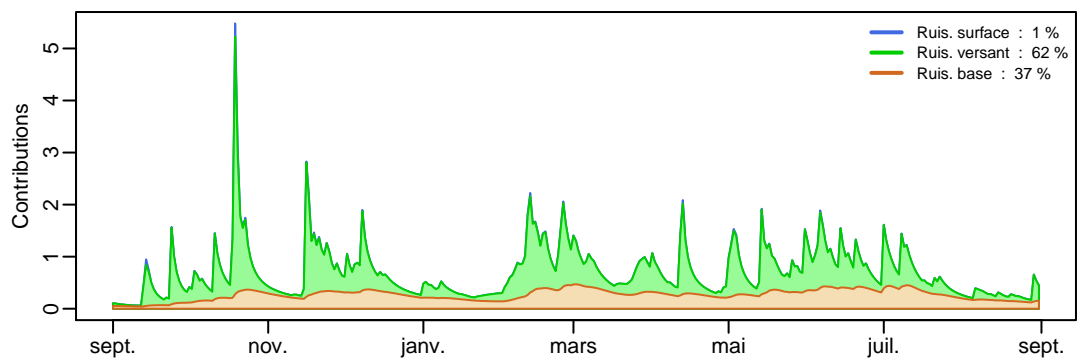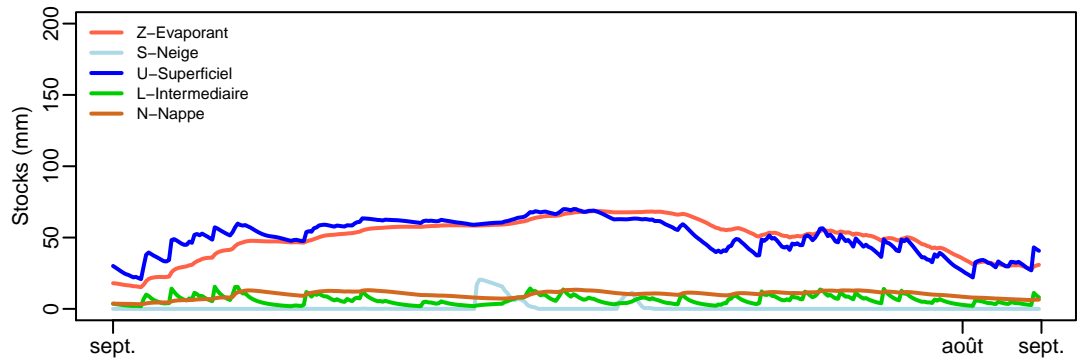

# k2430810 (2954.96 km²) – année 2007–2008

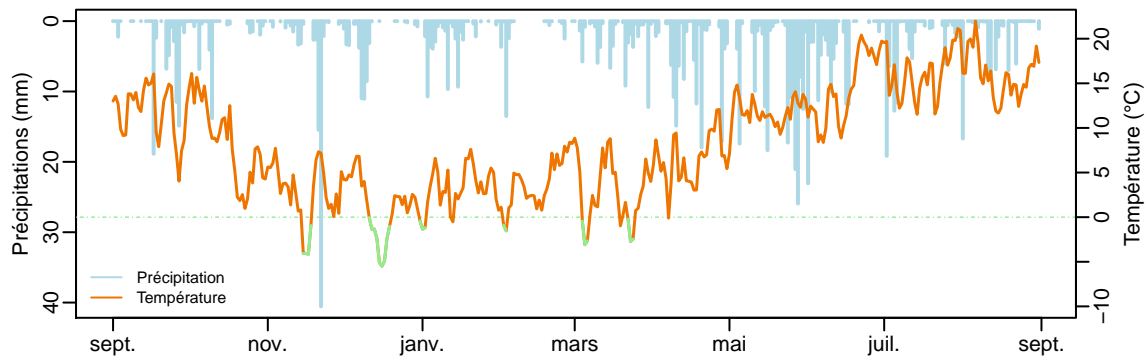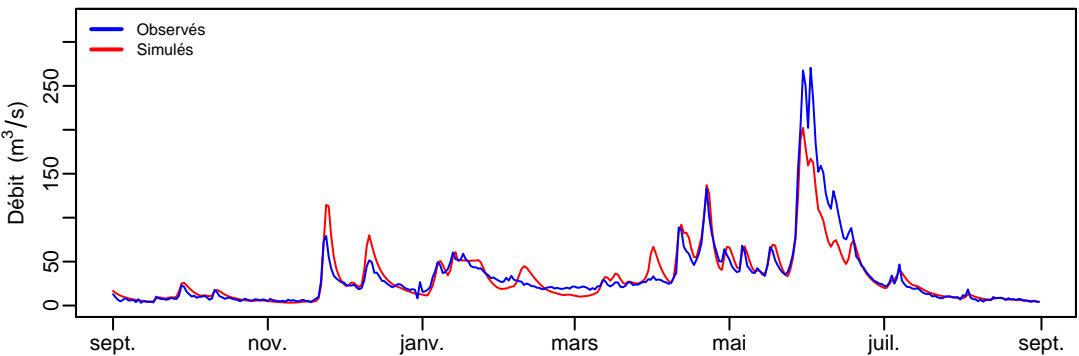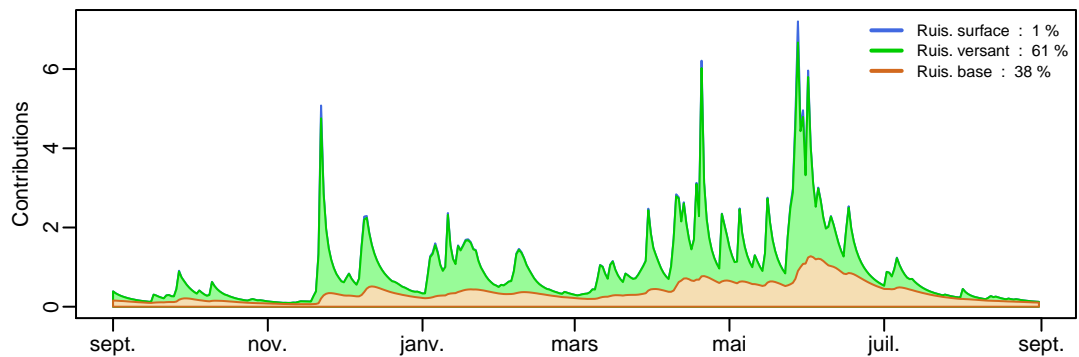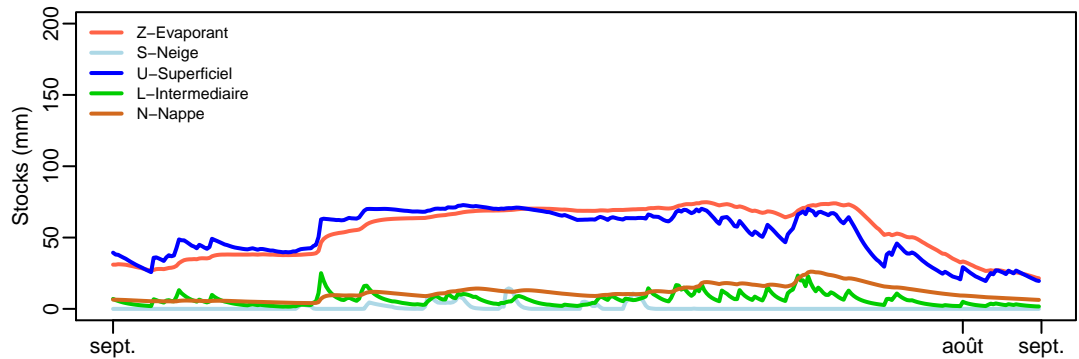



# k2430810 (2954.96 km<sup>2</sup>) – année 2008–2009

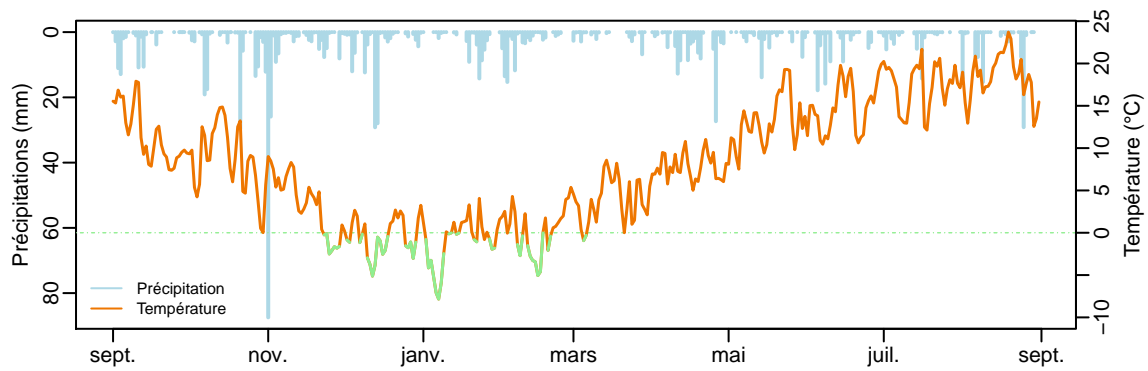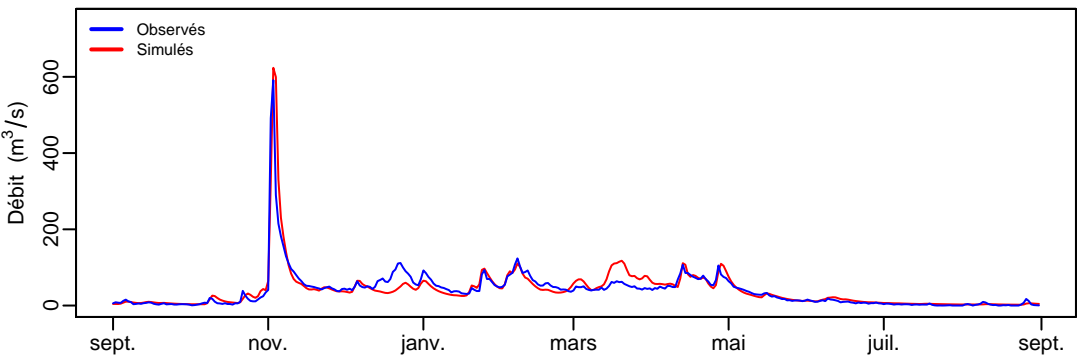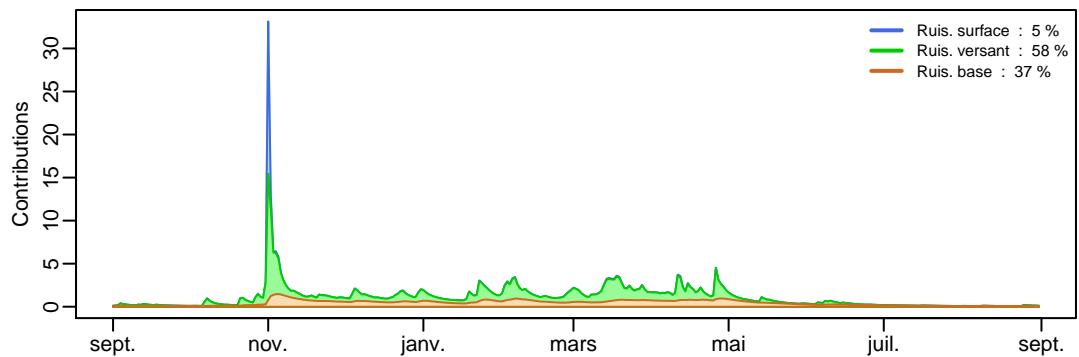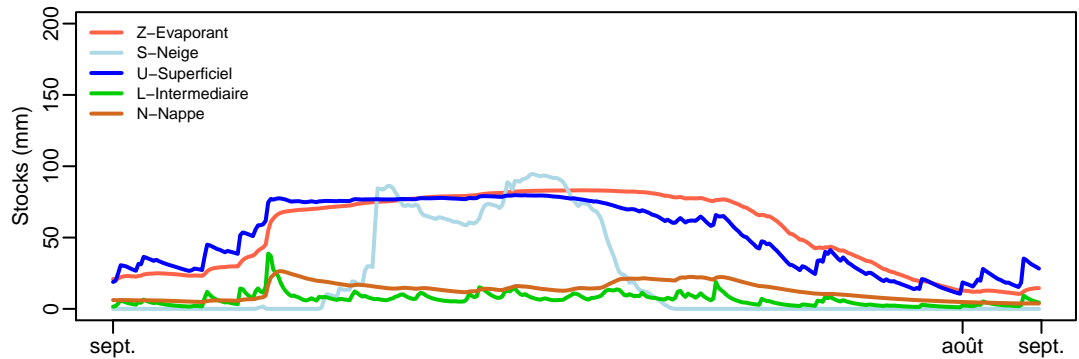

# k2430810 (2954.96 km<sup>2</sup>) – année 2009–2010

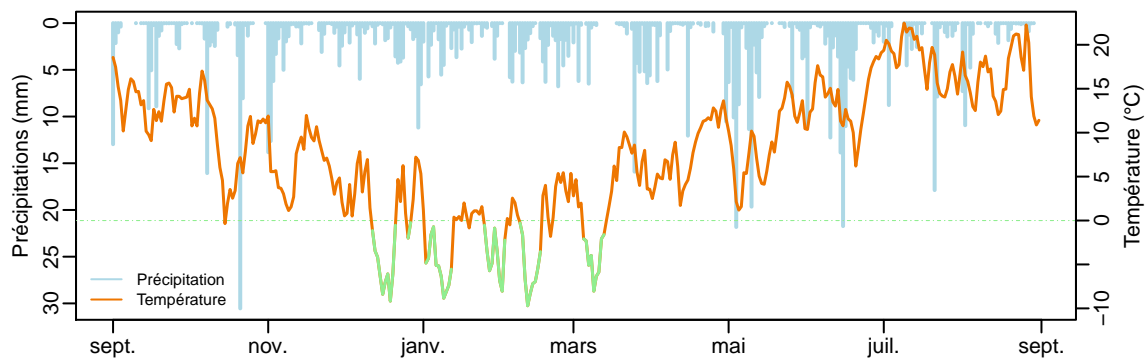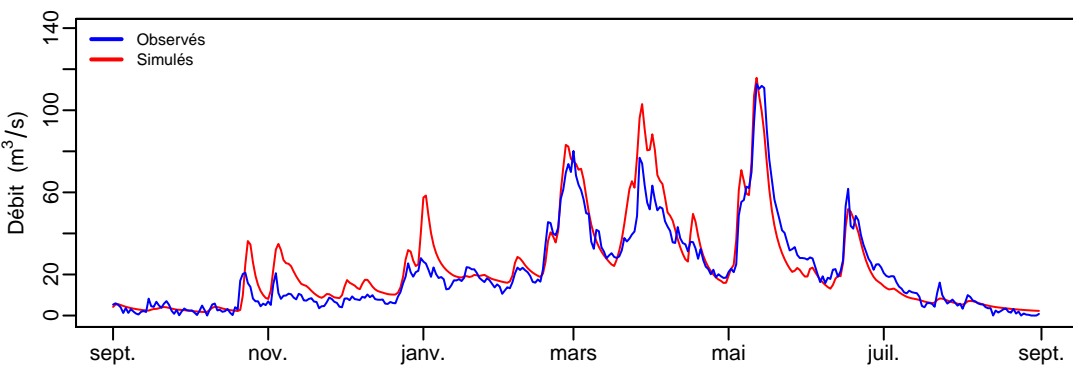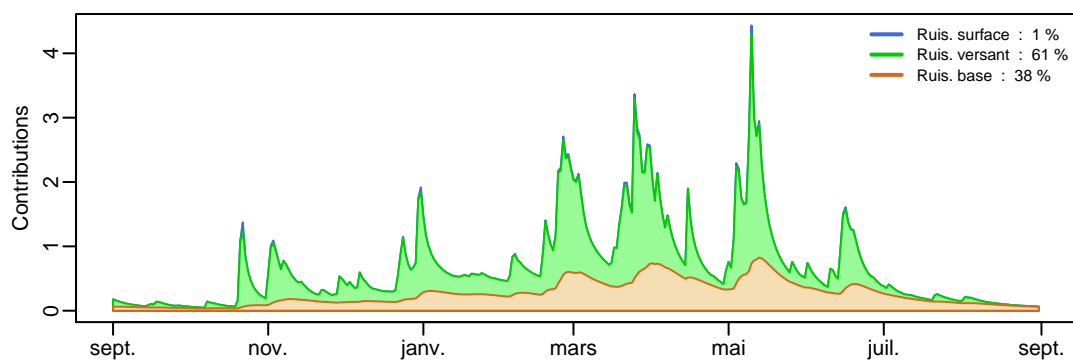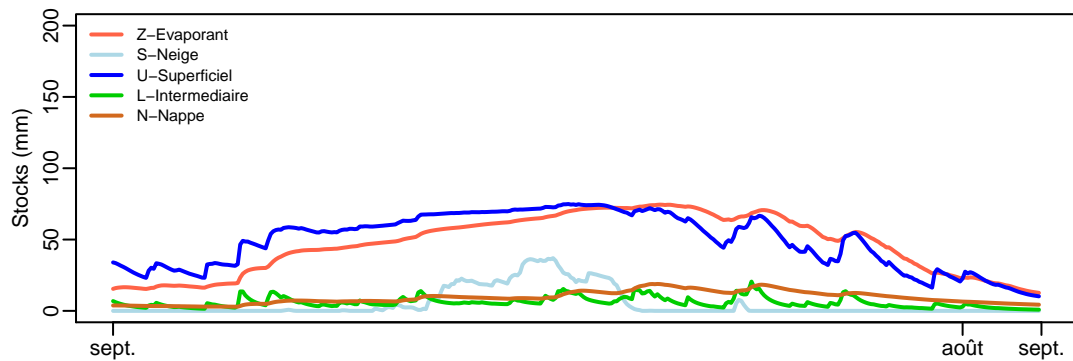

# k2430810 (2954.96 km<sup>2</sup>) – année 2010–2011

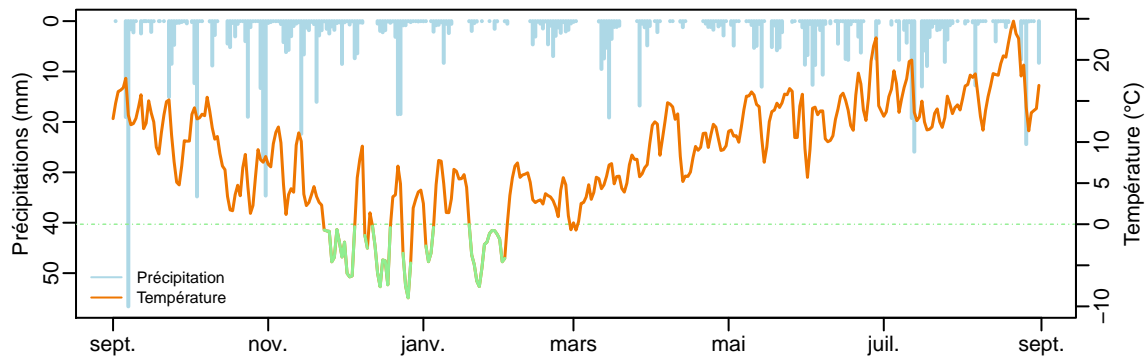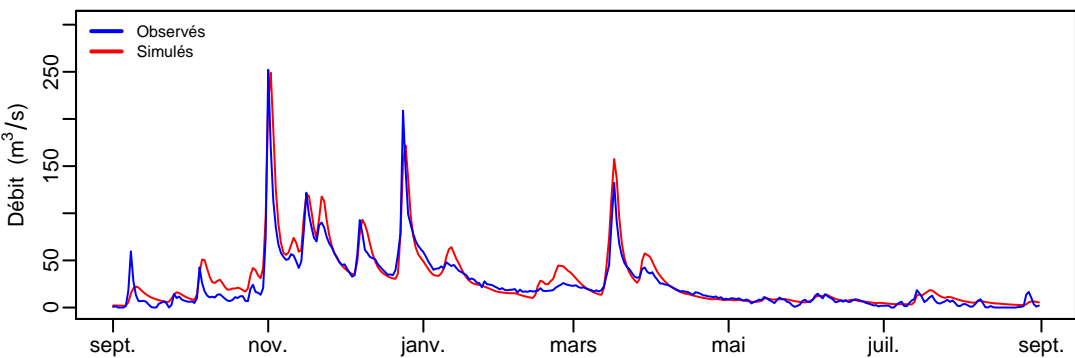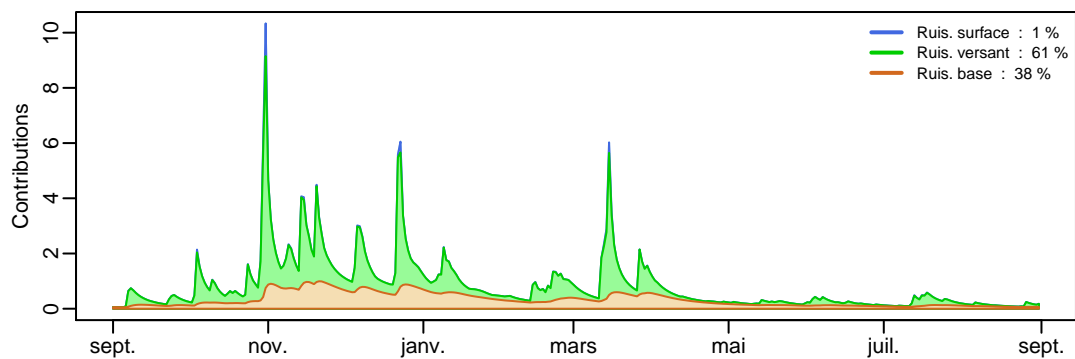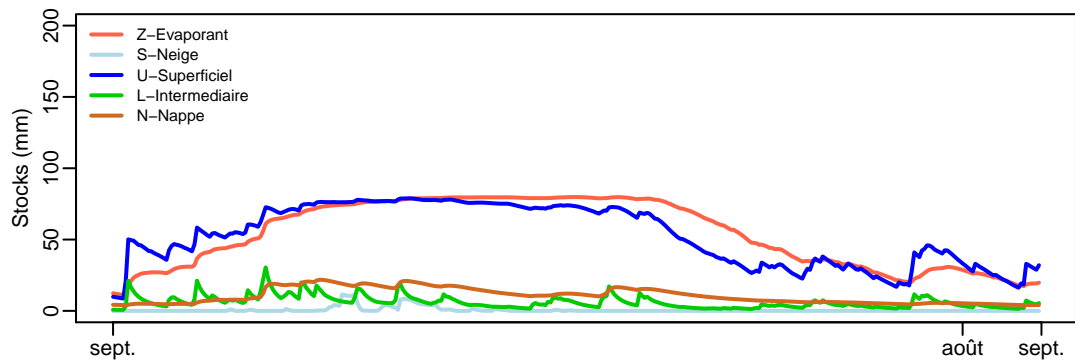

# k2430810 (2954.96 km<sup>2</sup>) – année 2011–2012

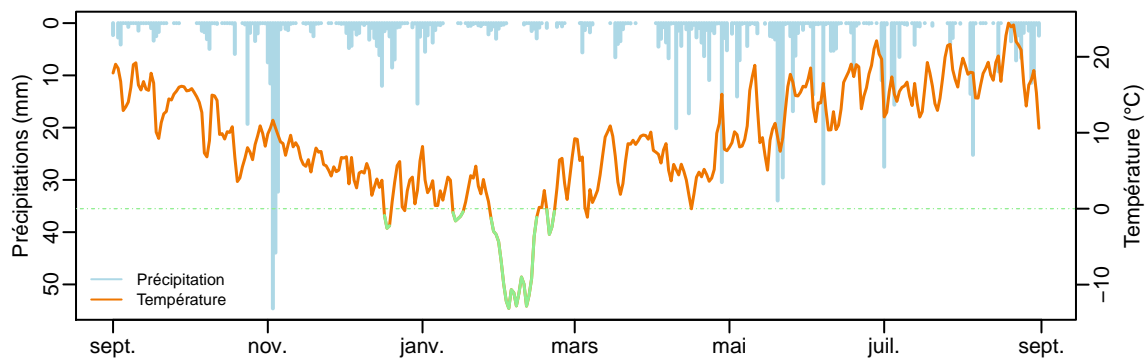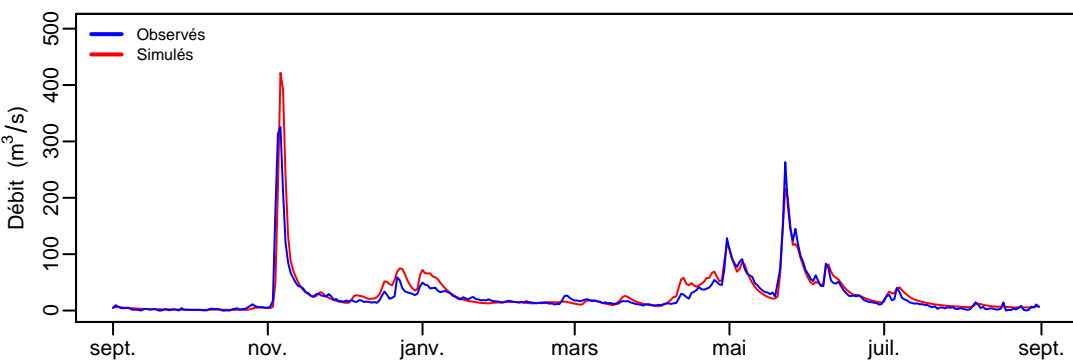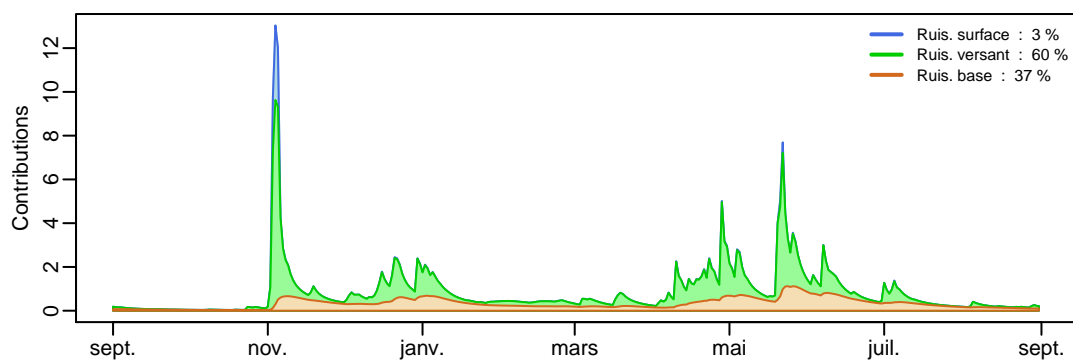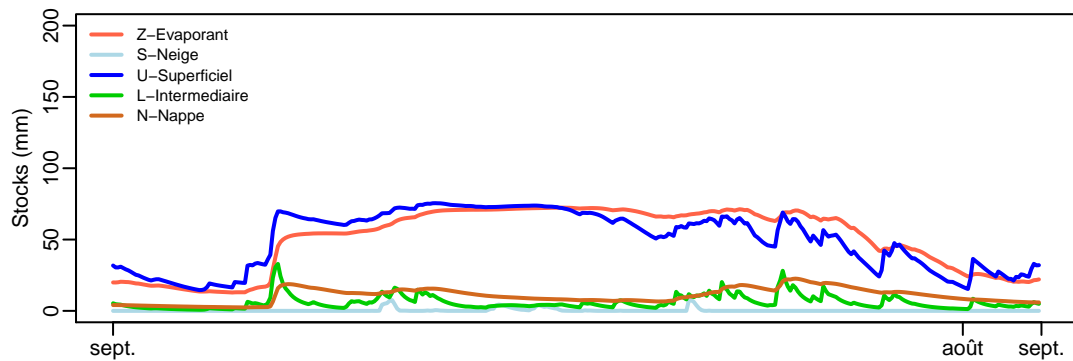

# k2514010 (155.84 km<sup>2</sup>) – année 1990–1991

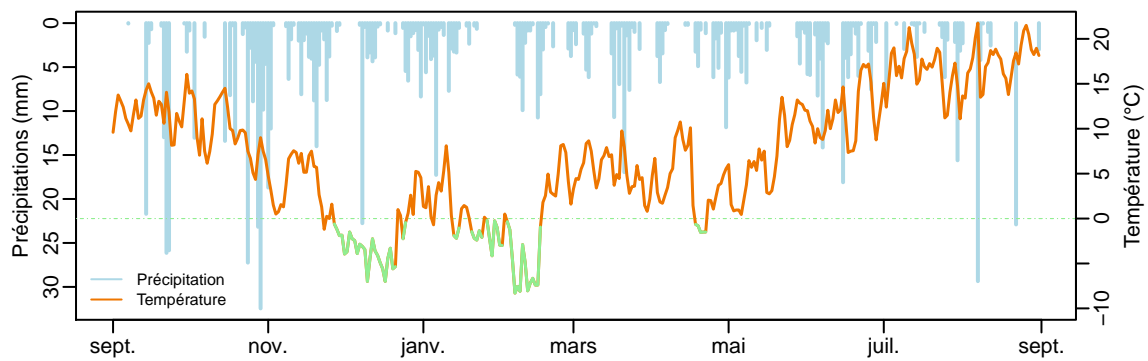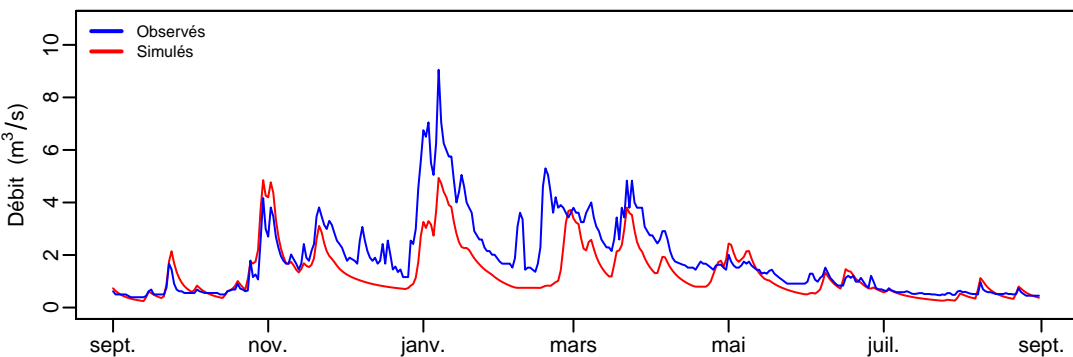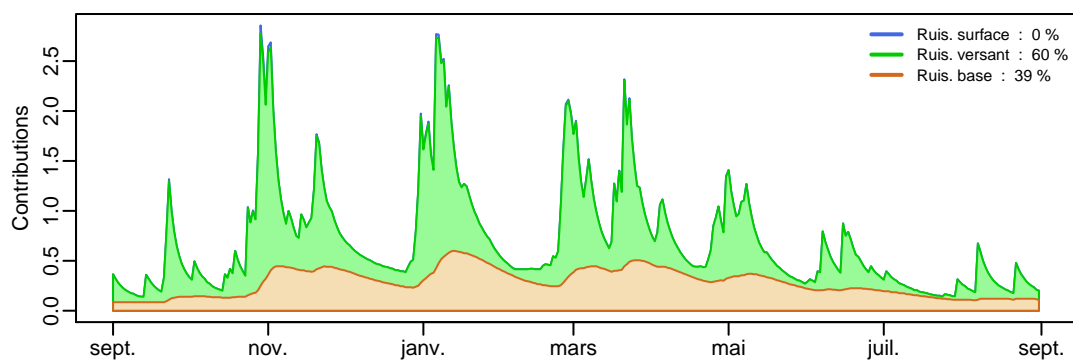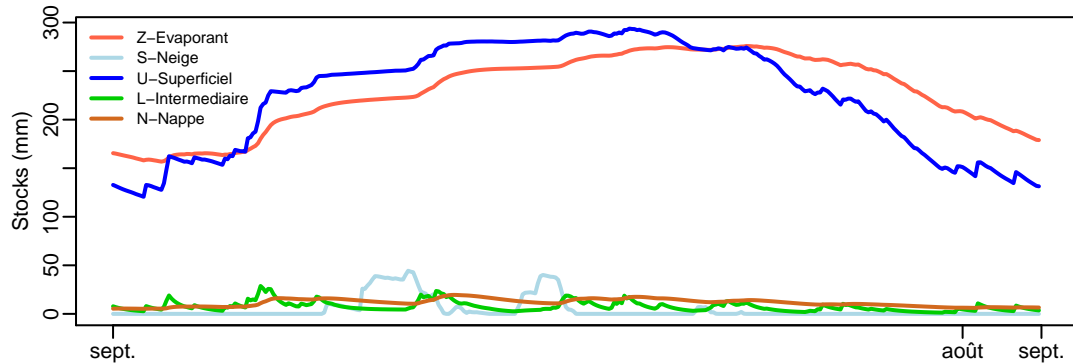

# k2514010 (155.84 km<sup>2</sup>) – année 1991–1992

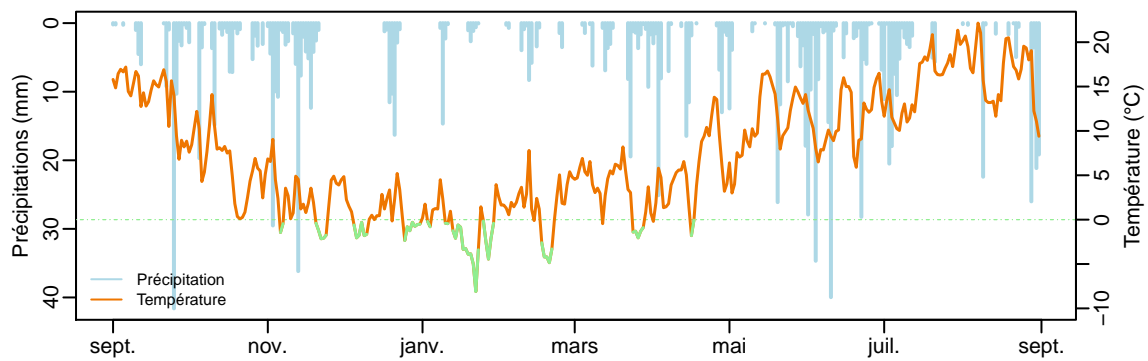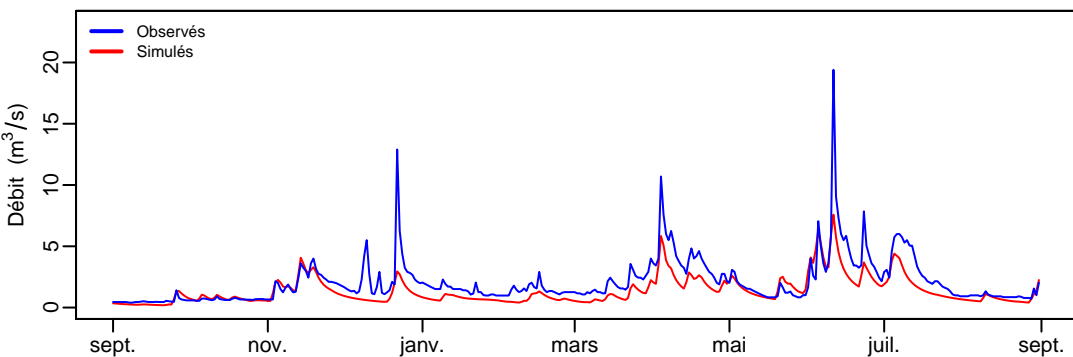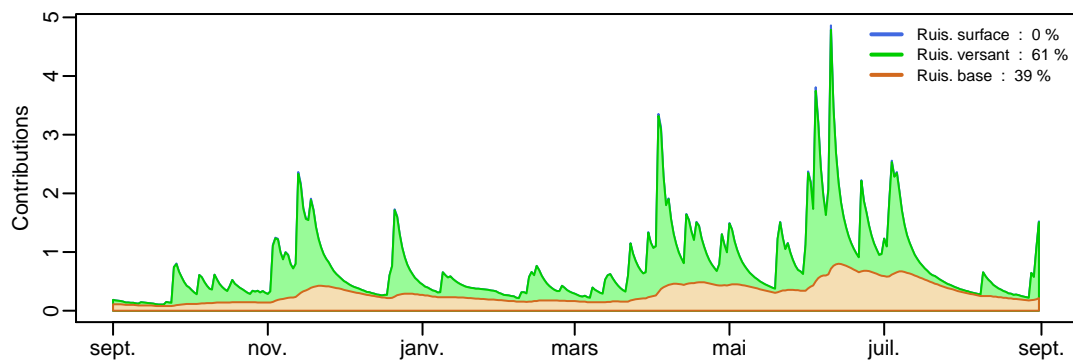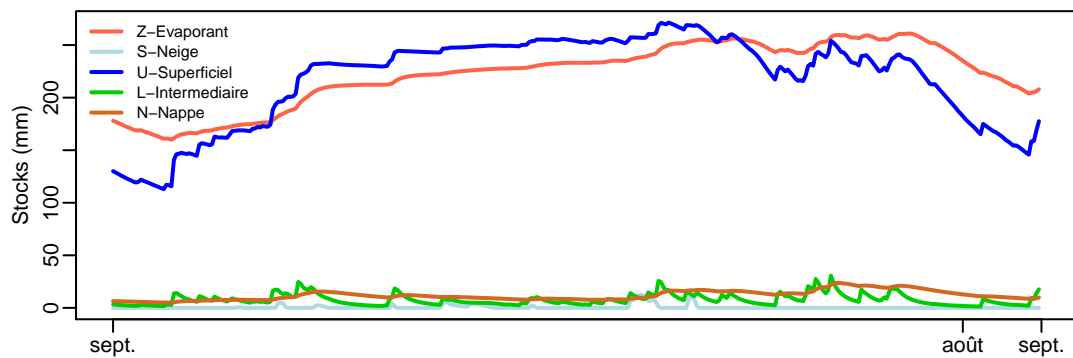

# k2514010 (155.84 km<sup>2</sup>) – année 1992–1993

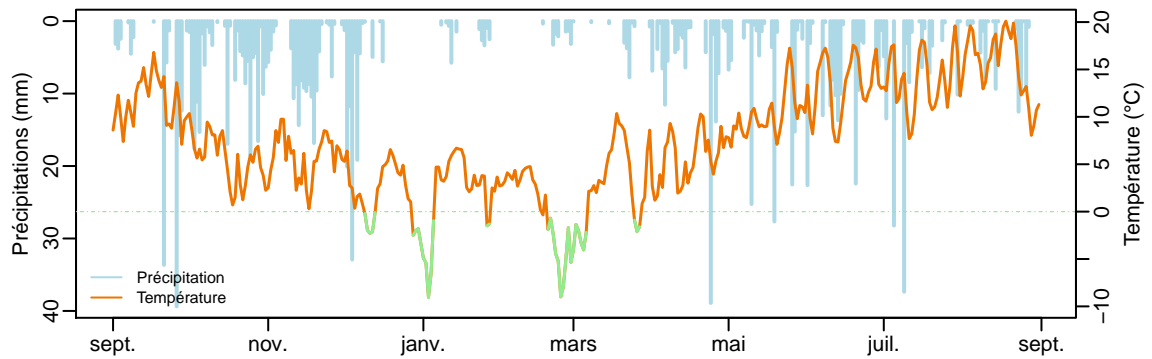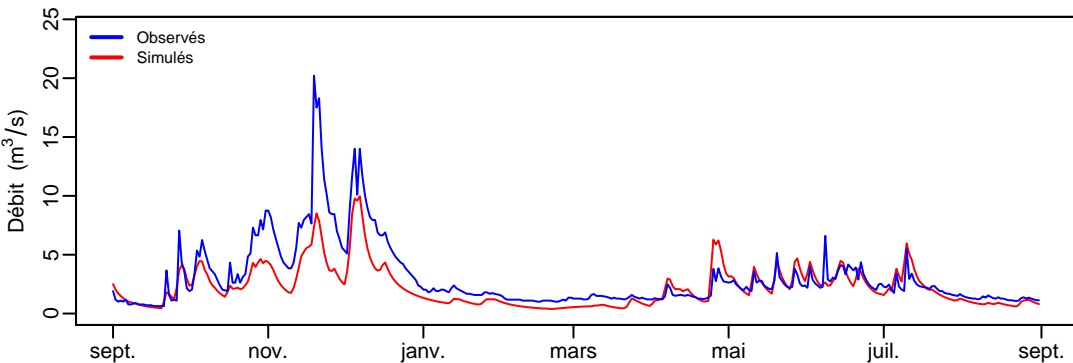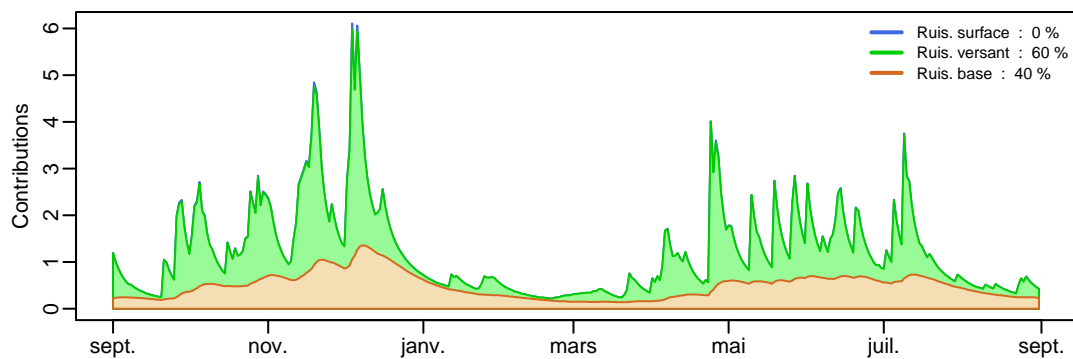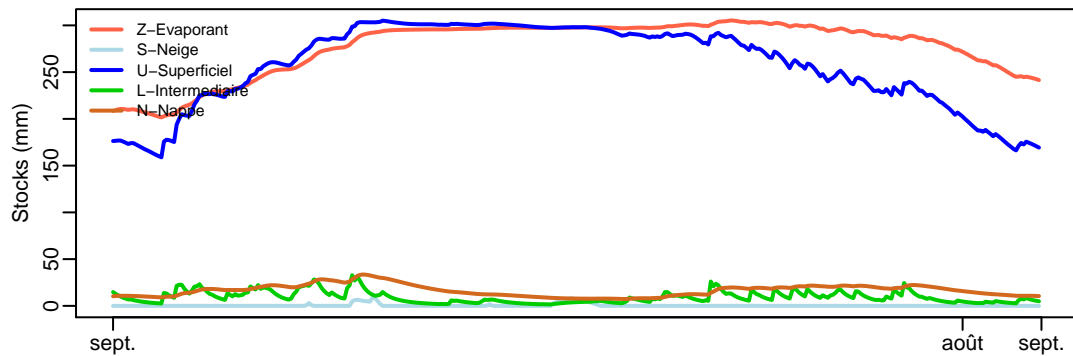

# k2514010 (155.84 km<sup>2</sup>) – année 1993–1994

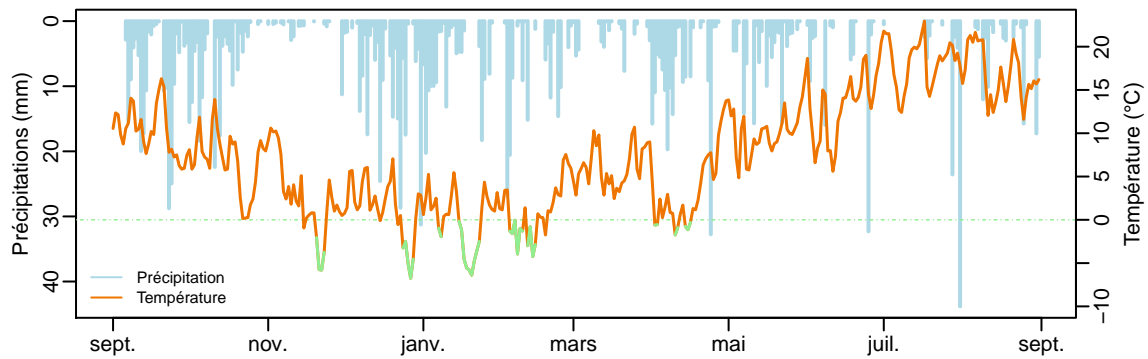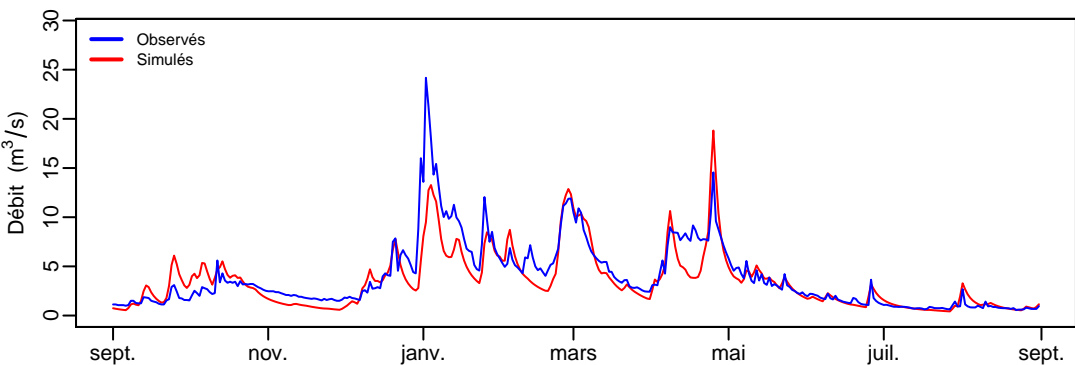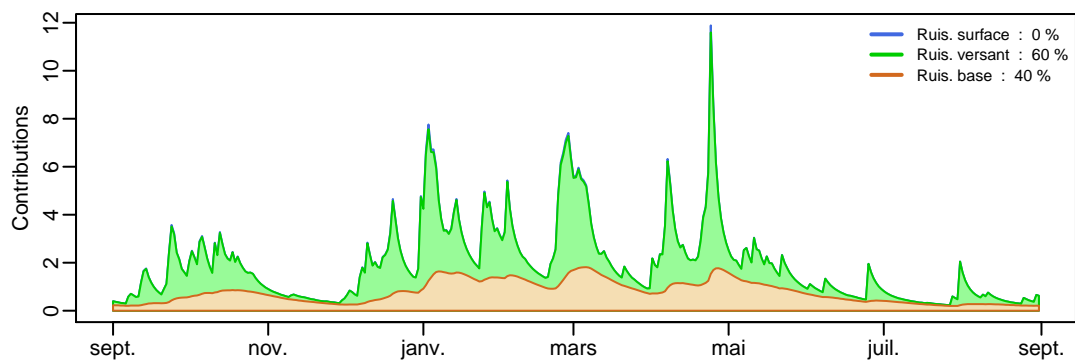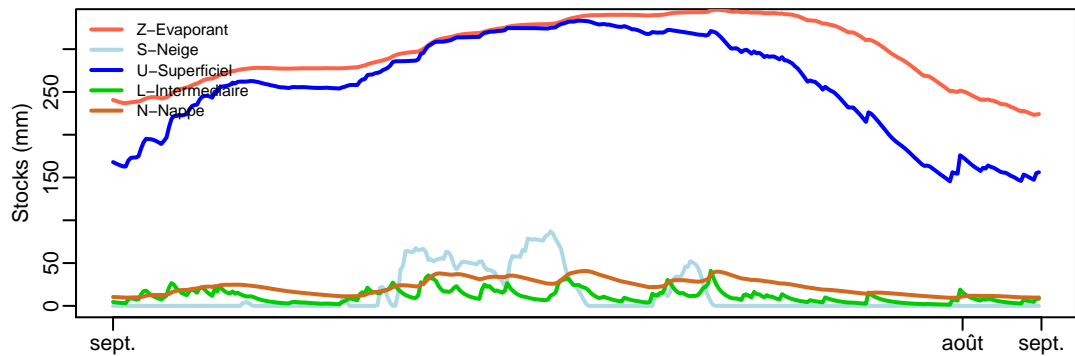



# k2514010 (155.84 km<sup>2</sup>) – année 1994–1995

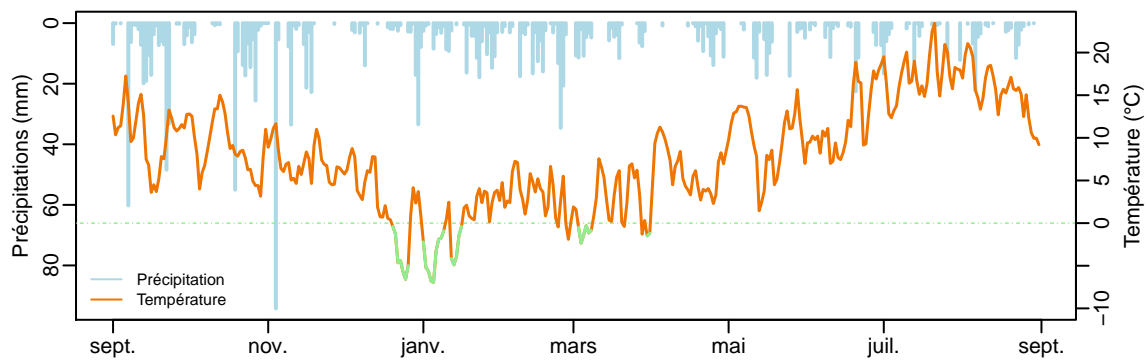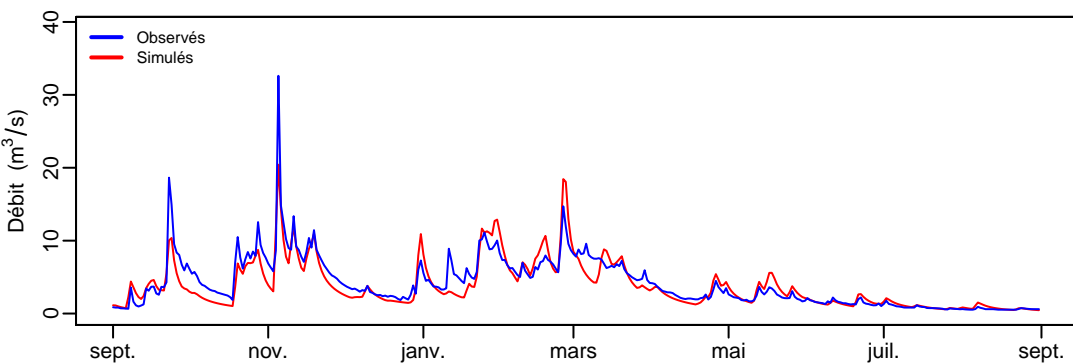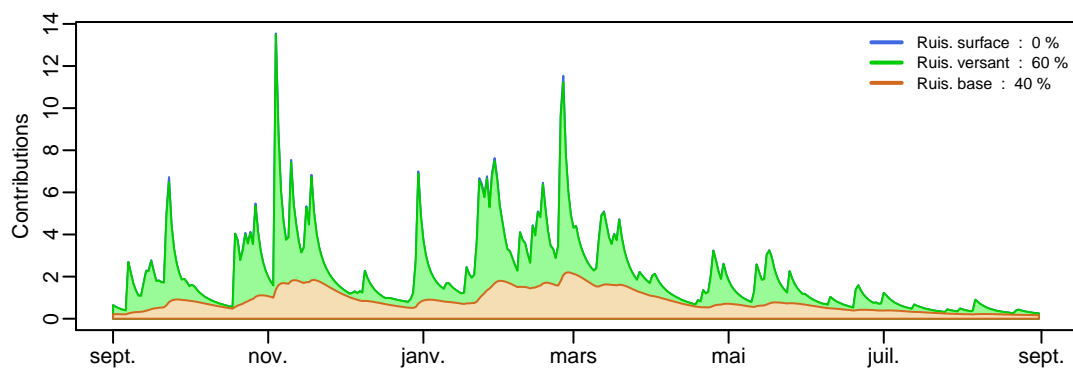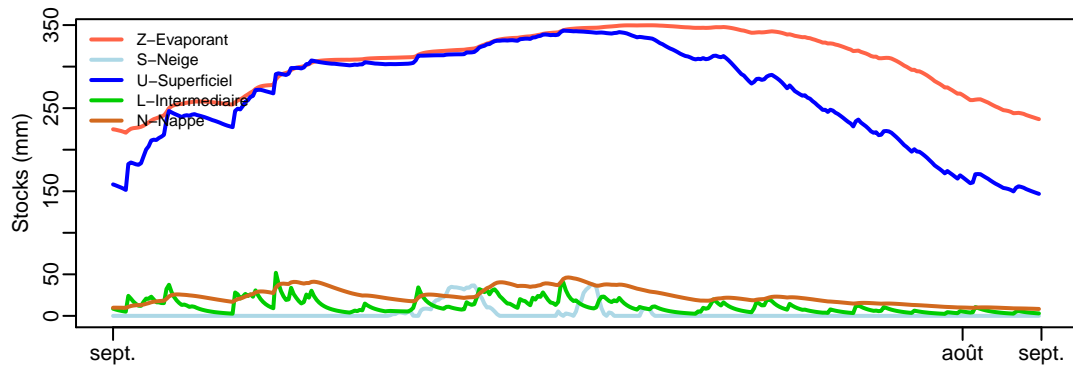

# k2514010 (155.84 km<sup>2</sup>) – année 1995–1996

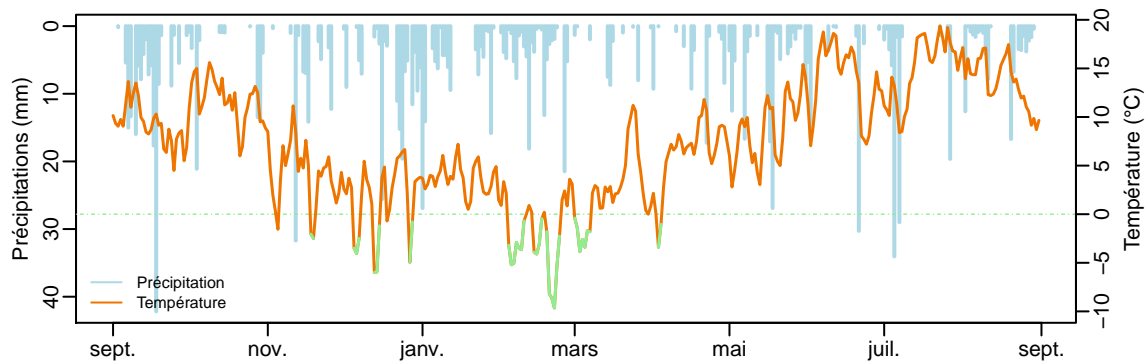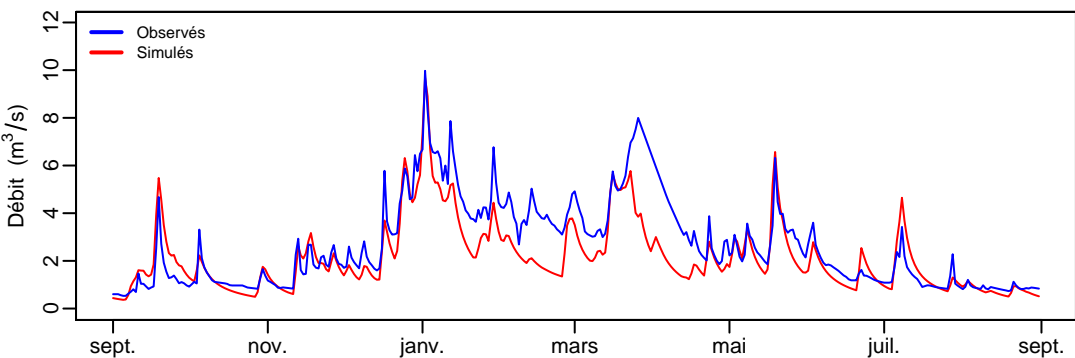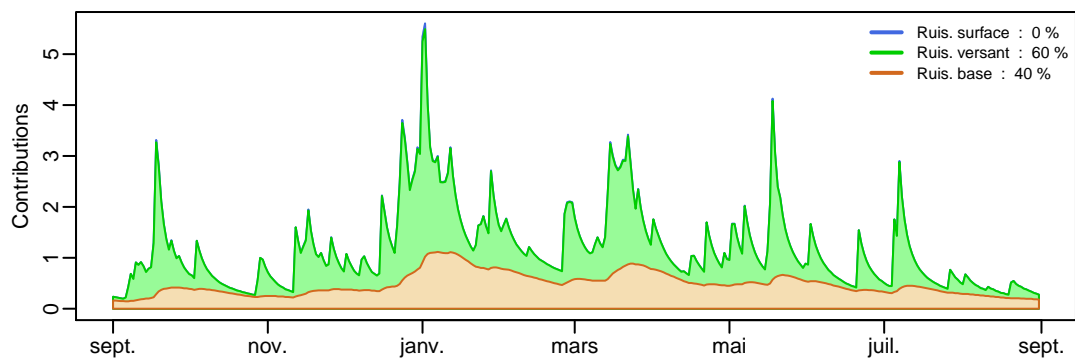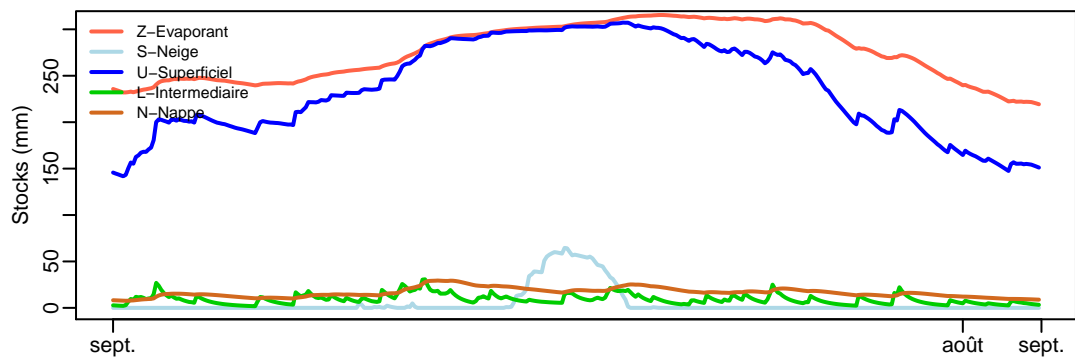

# k2514010 (155.84 km<sup>2</sup>) – année 1996–1997

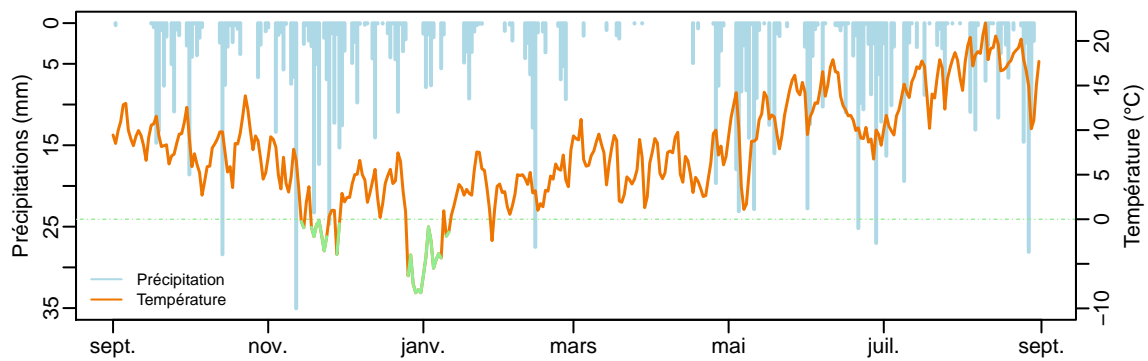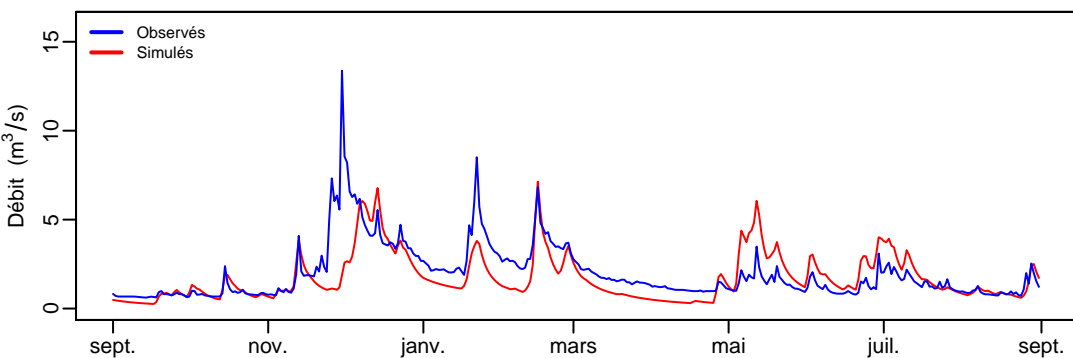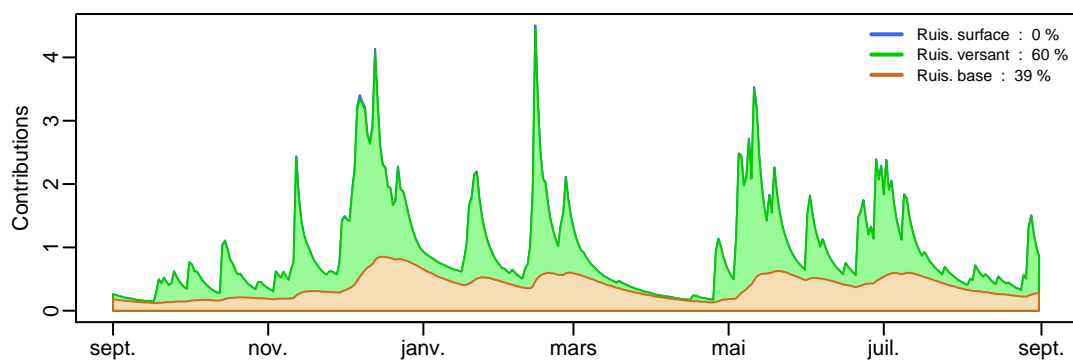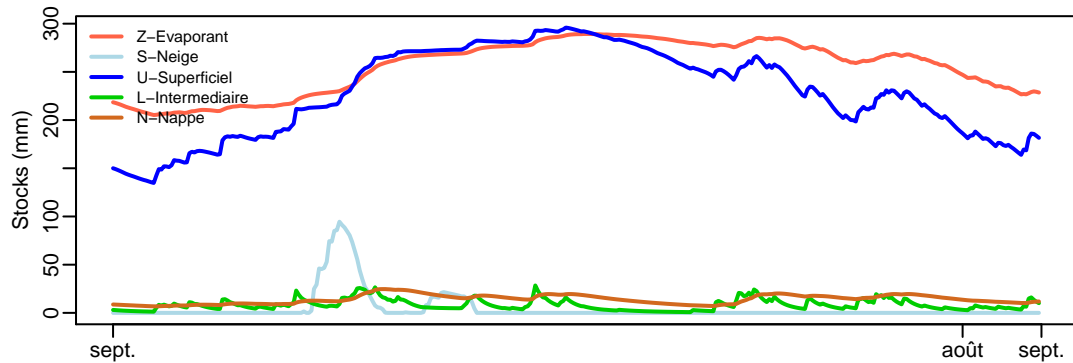

# k2514010 (155.84 km<sup>2</sup>) – année 1997–1998

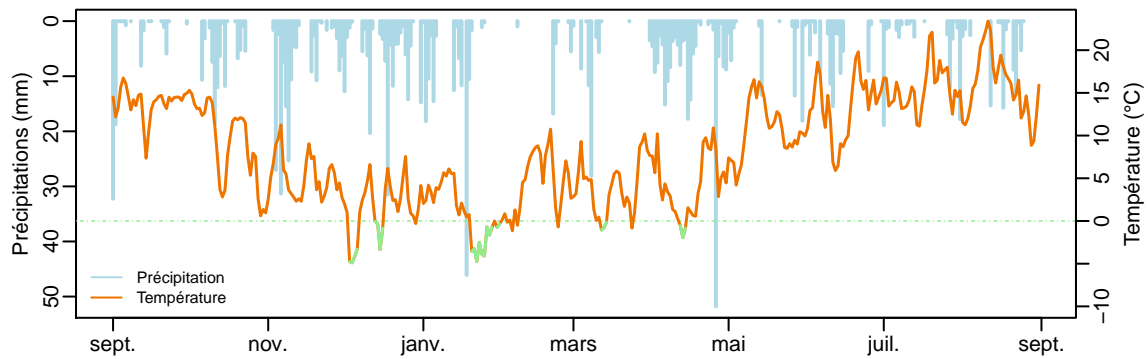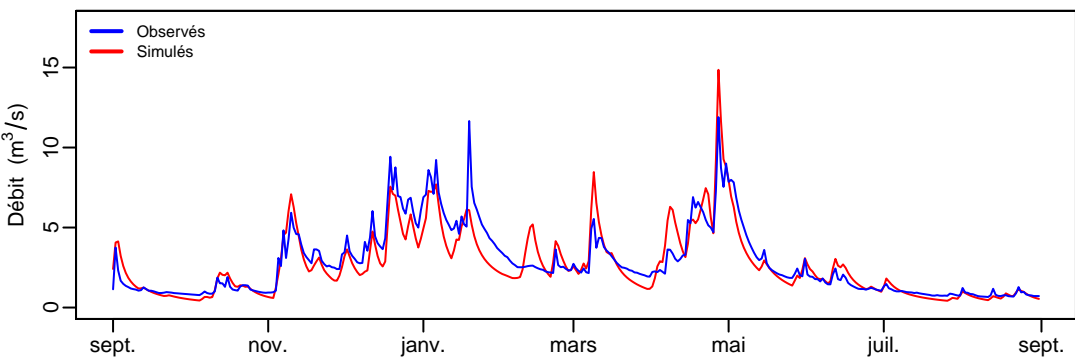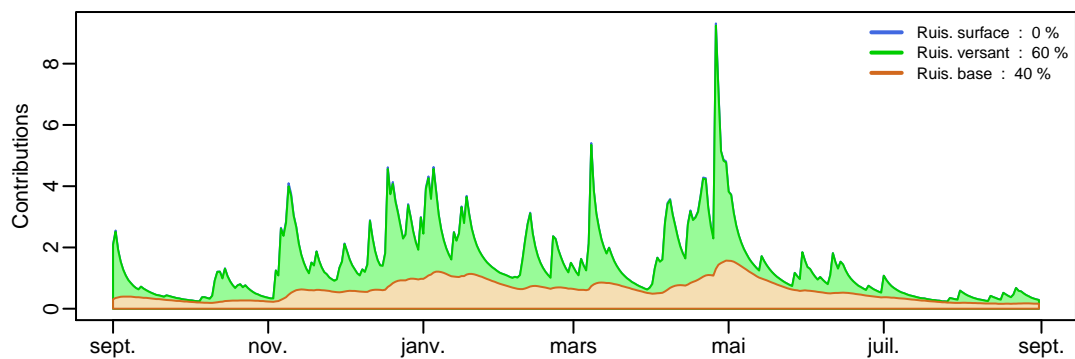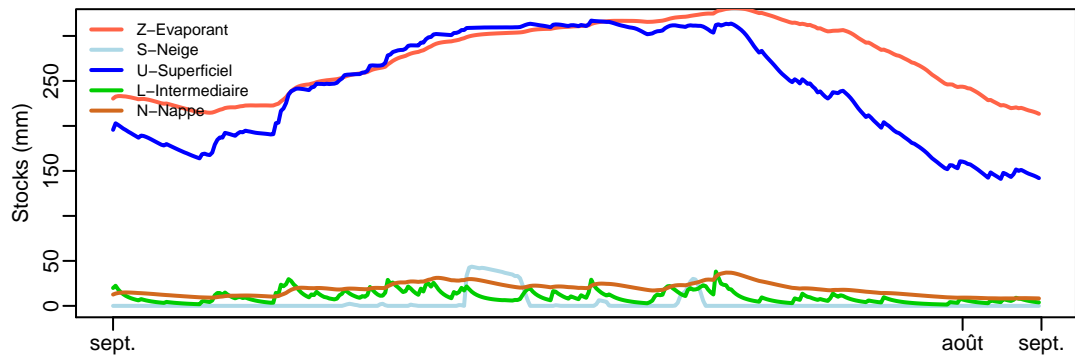

# k2514010 (155.84 km<sup>2</sup>) – année 1998–1999

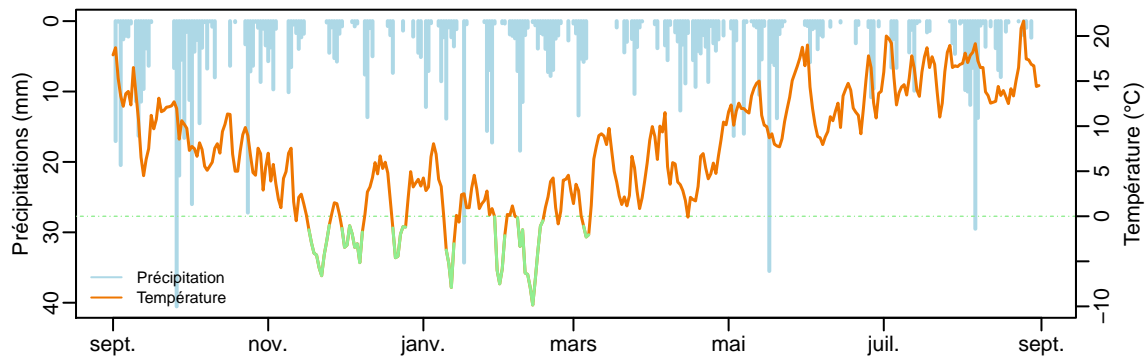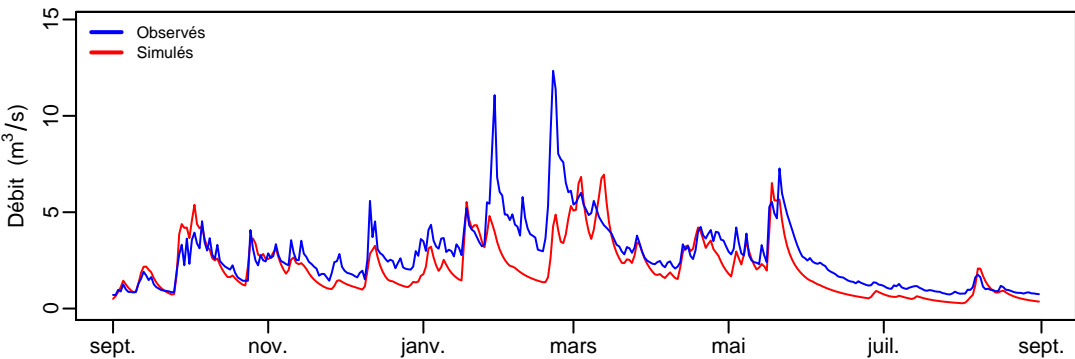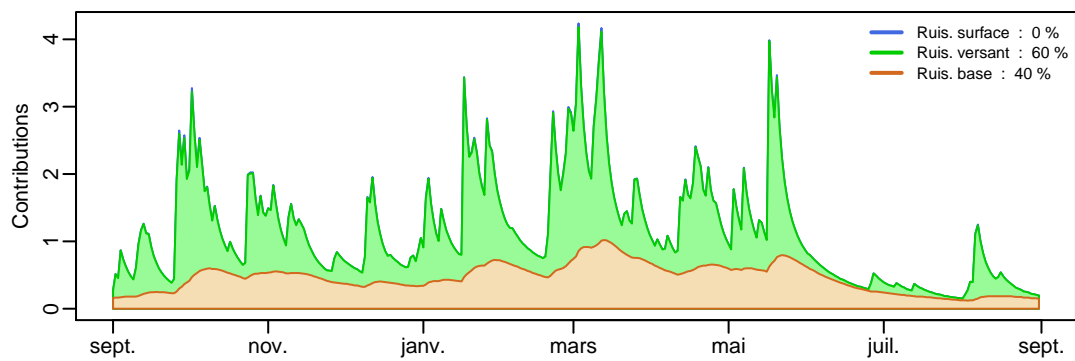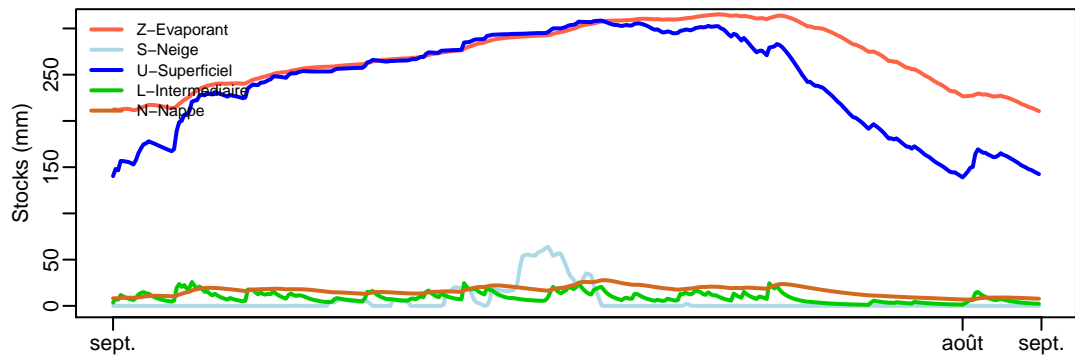

# k2514010 (155.84 km<sup>2</sup>) – année 1999–2000

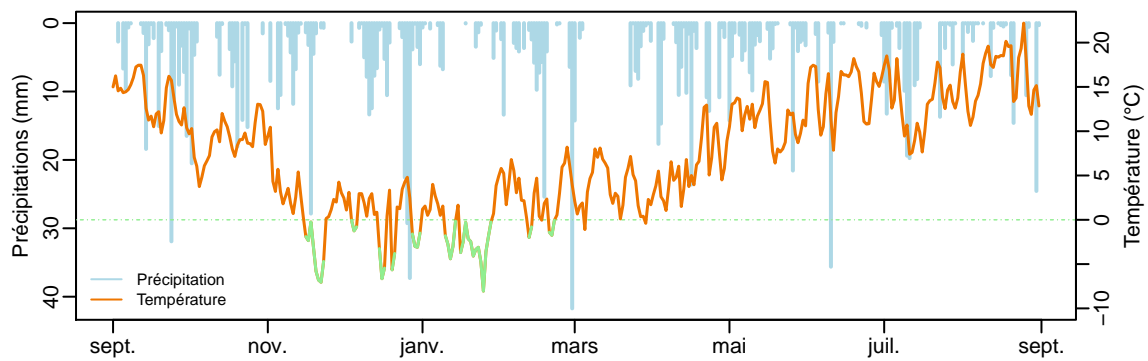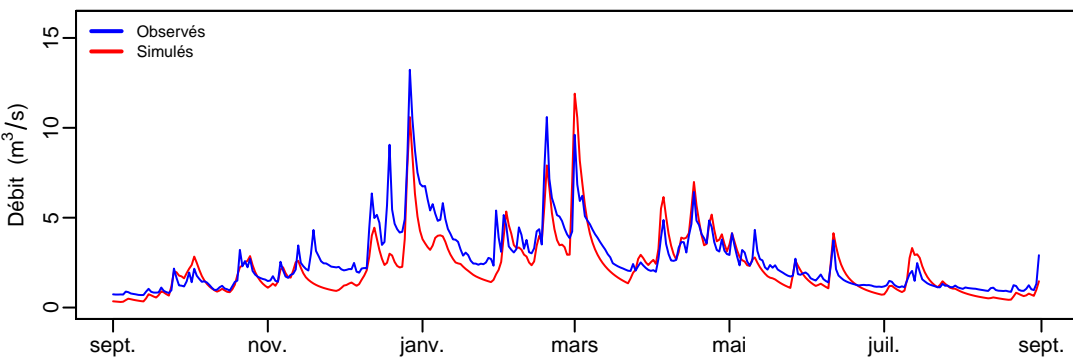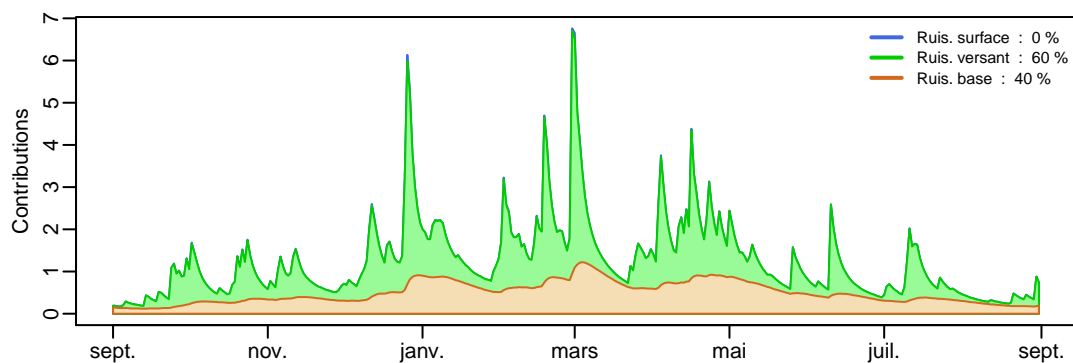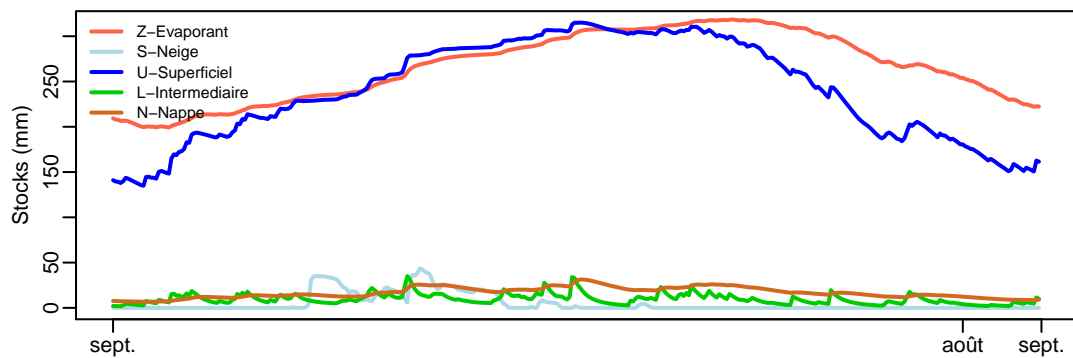

# k2514010 (155.84 km<sup>2</sup>) – année 2000–2001

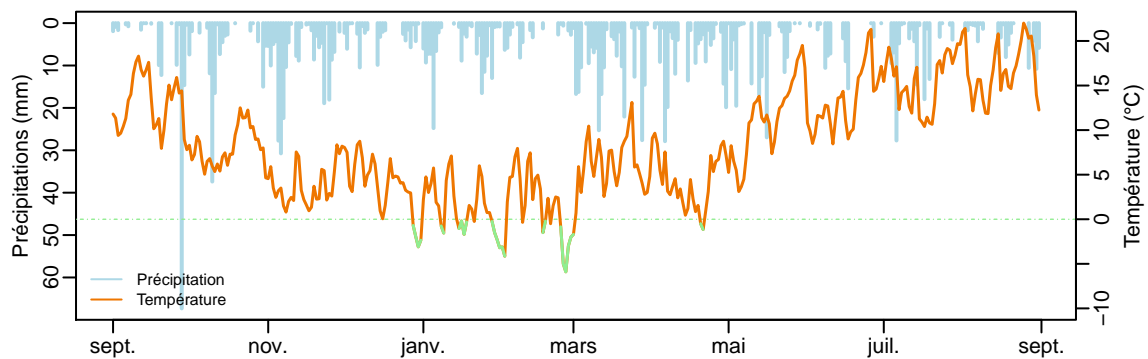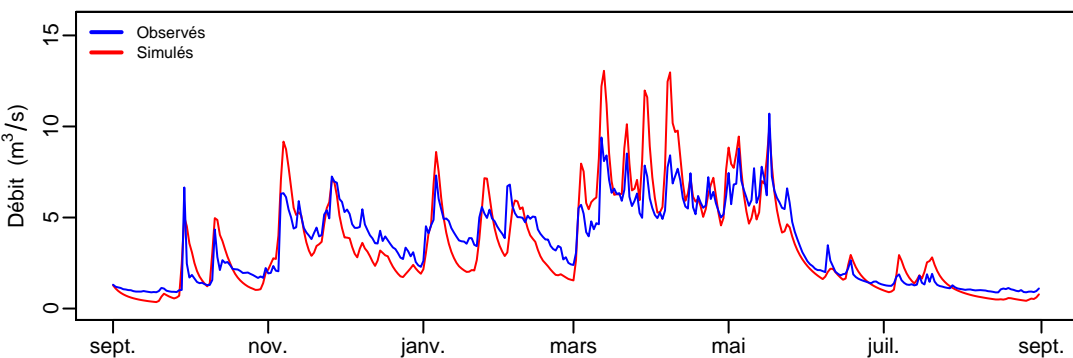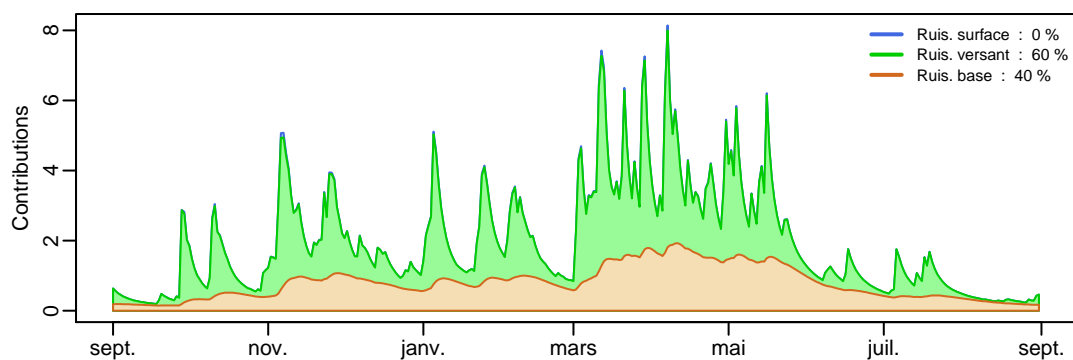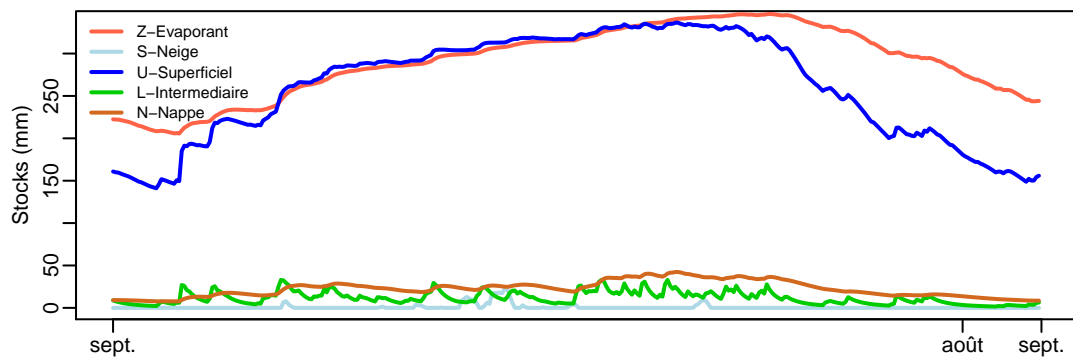

# k2514010 (155.84 km<sup>2</sup>) – année 2001–2002

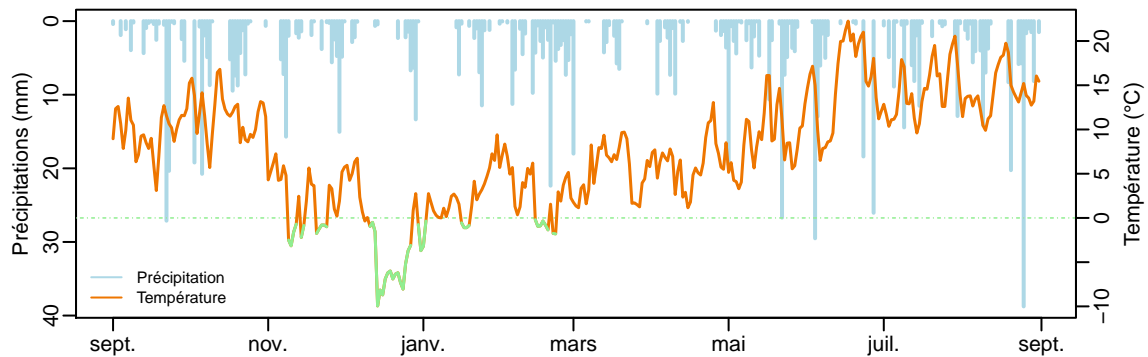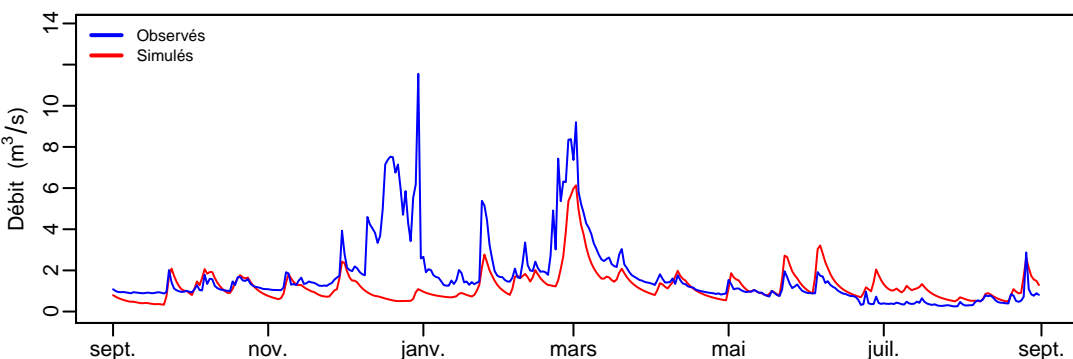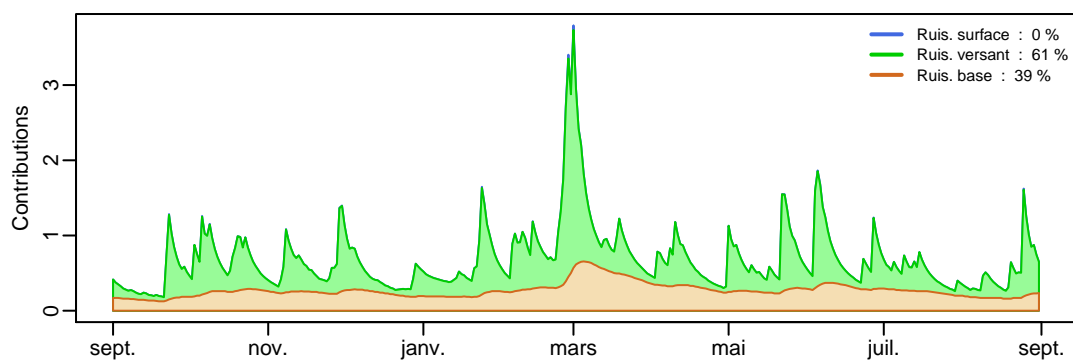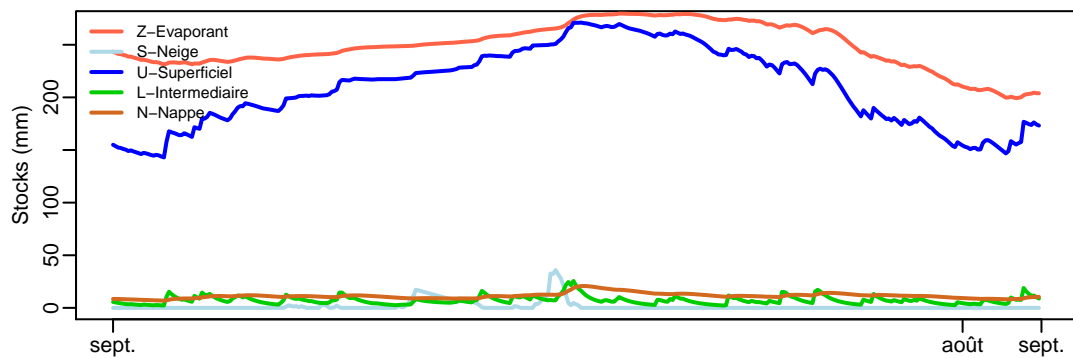



# k2514010 (155.84 km<sup>2</sup>) – année 2002–2003

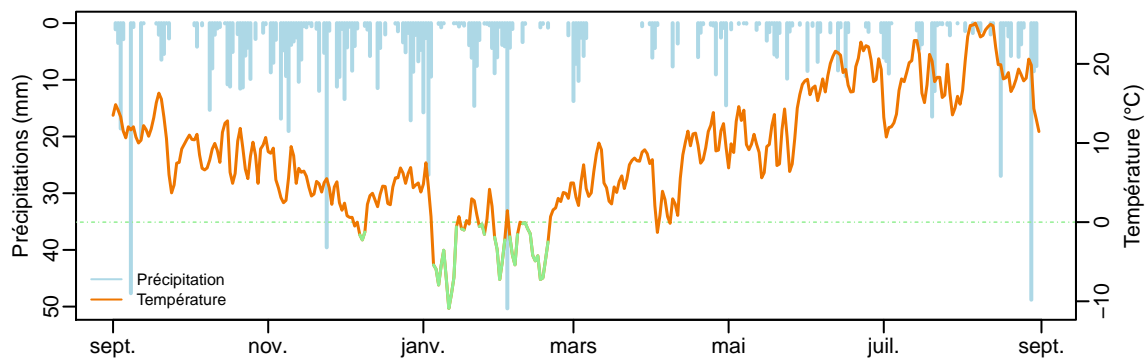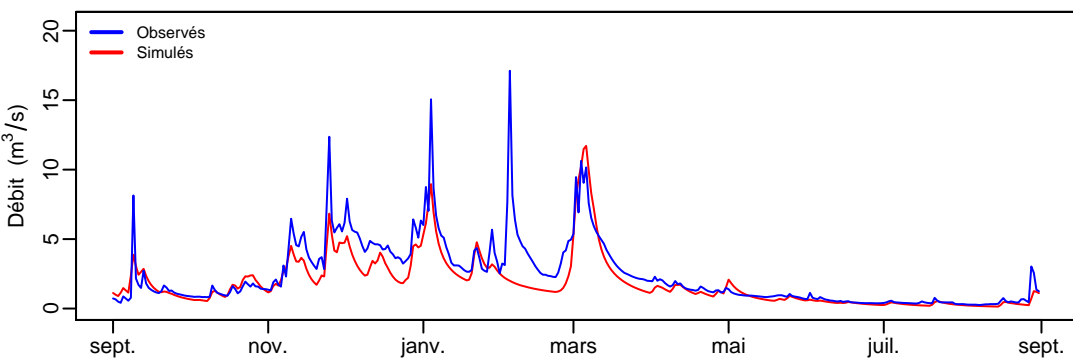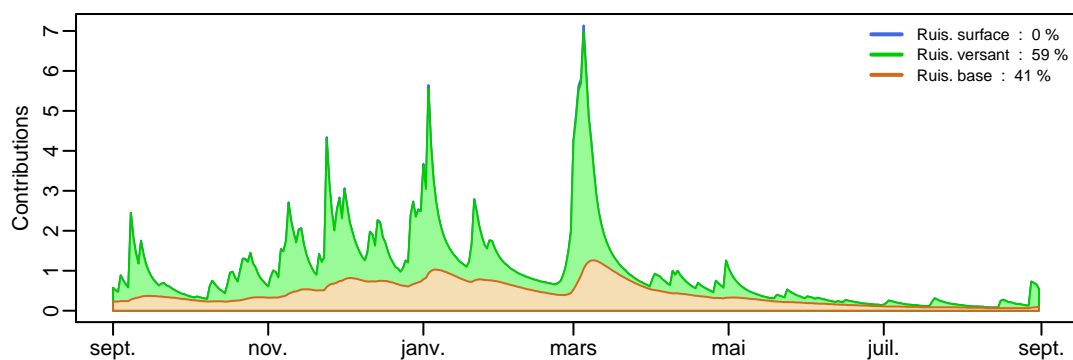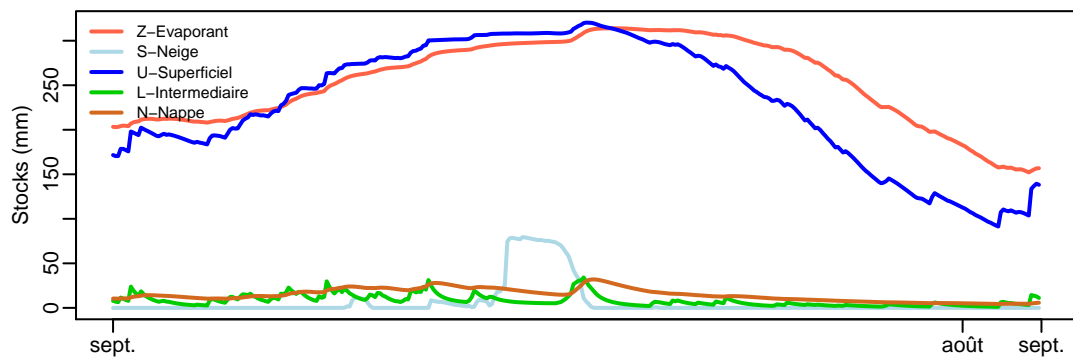

# k2514010 (155.84 km<sup>2</sup>) – année 2003–2004

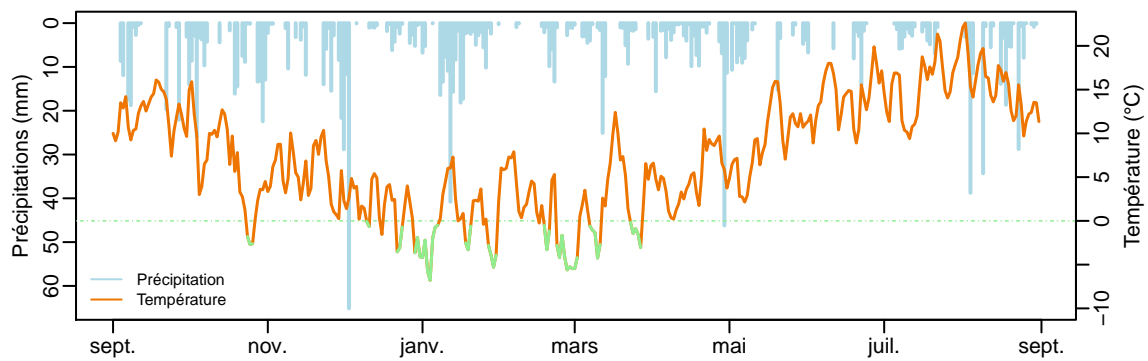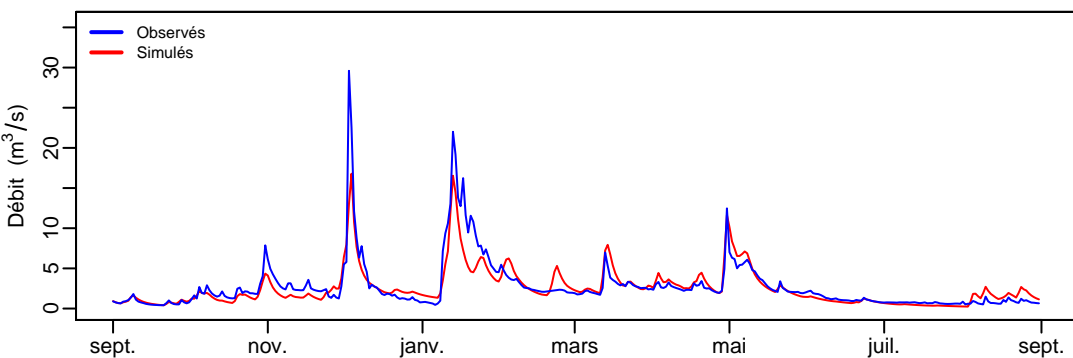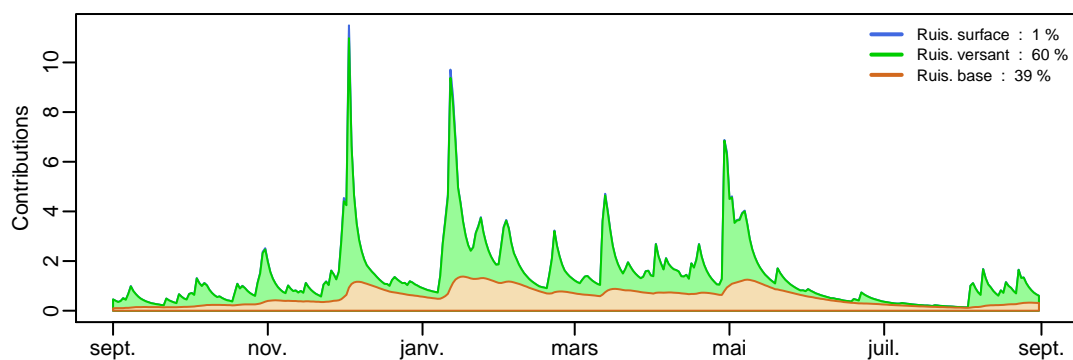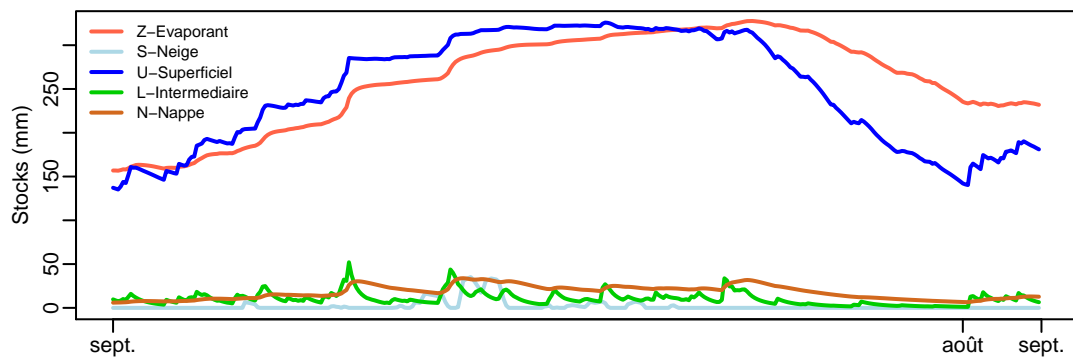

# k2514010 (155.84 km<sup>2</sup>) – année 2004–2005

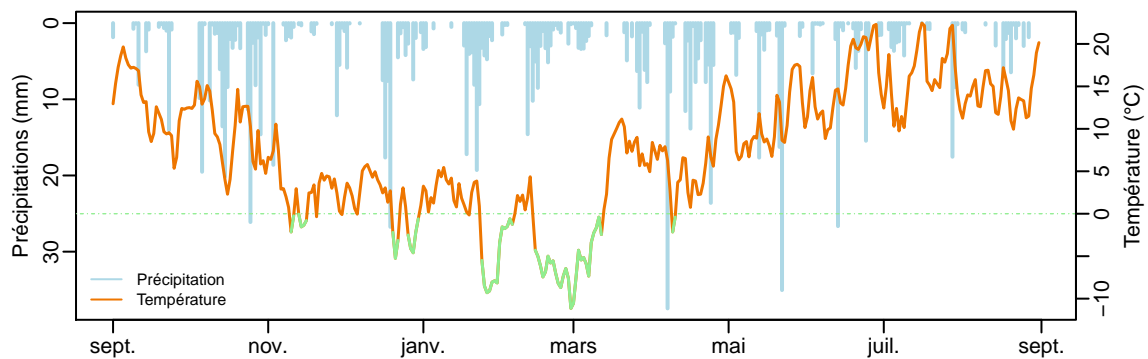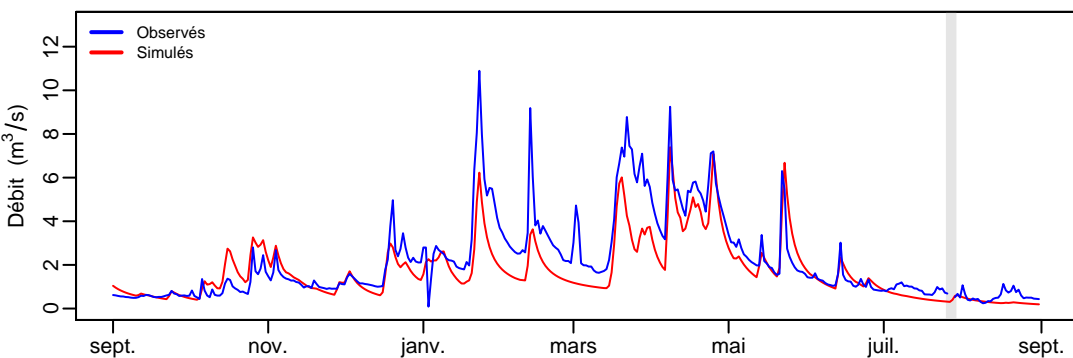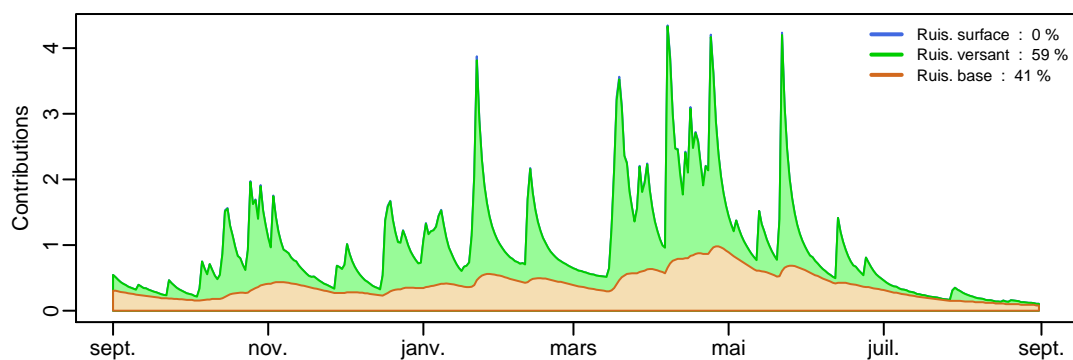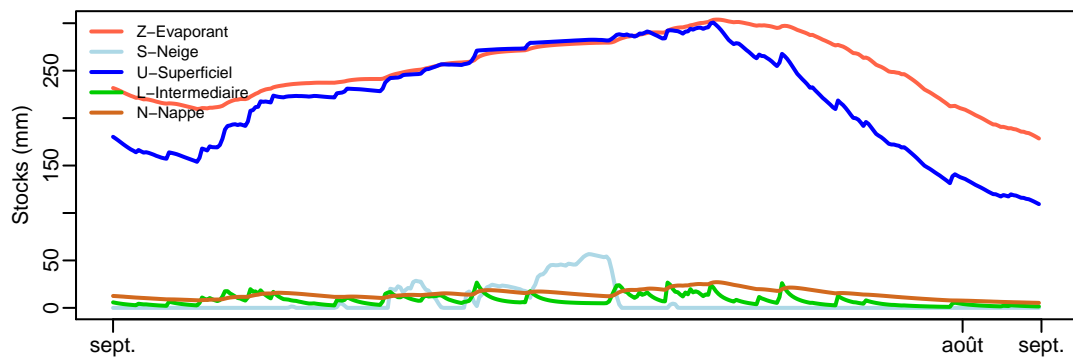

# k2514010 (155.84 km²) – année 2005–2006

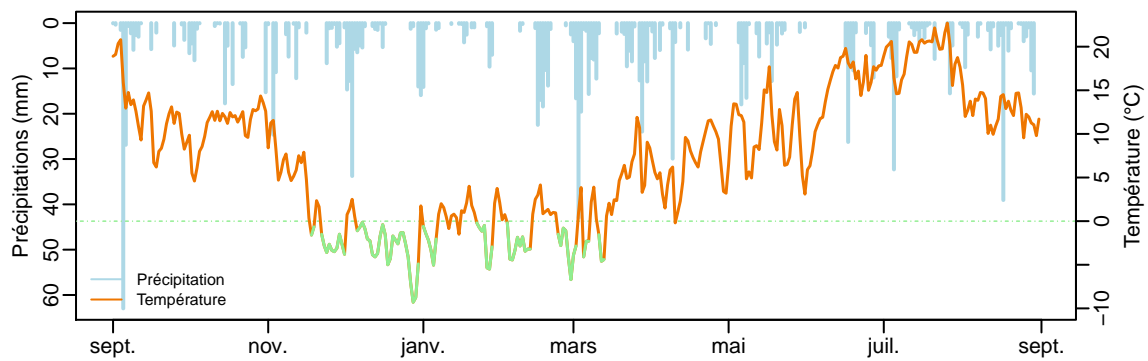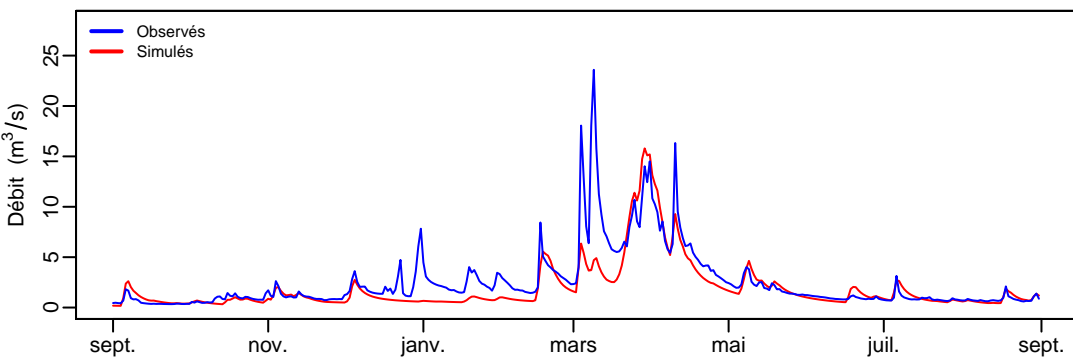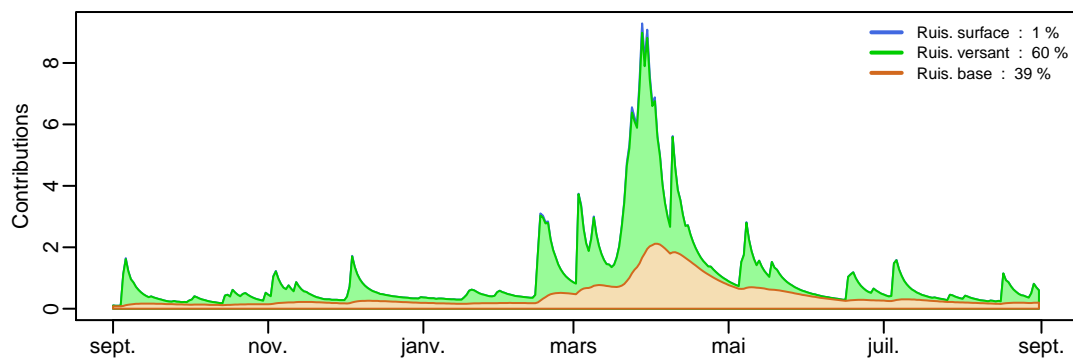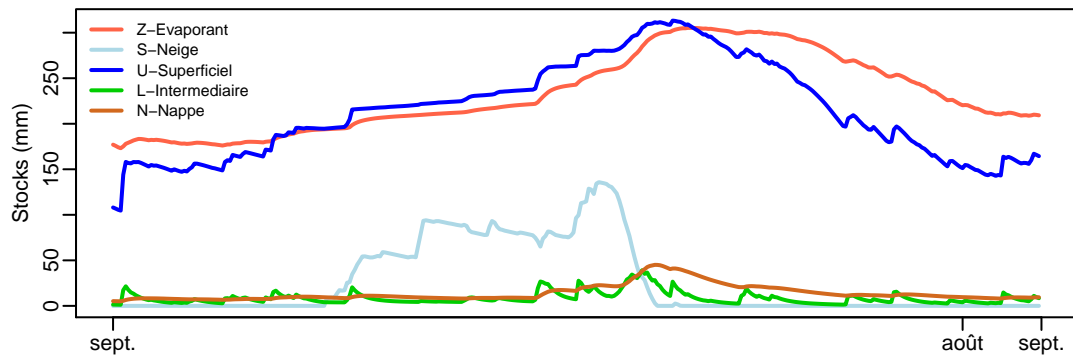

# k2514010 (155.84 km<sup>2</sup>) – année 2006–2007

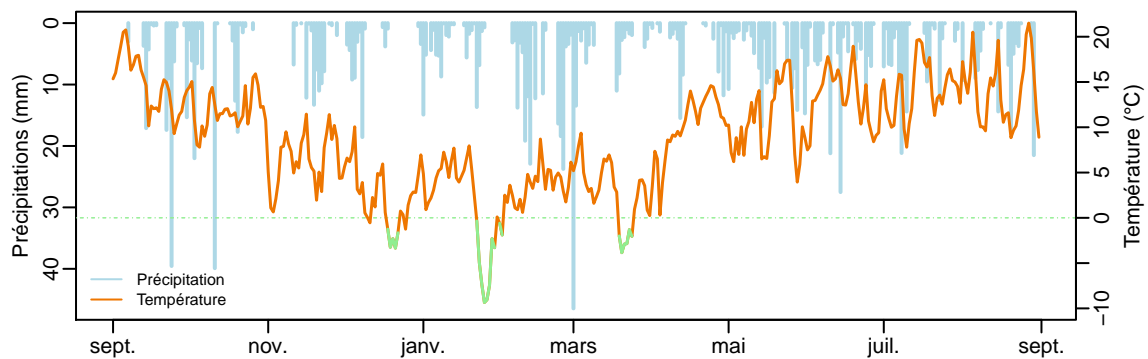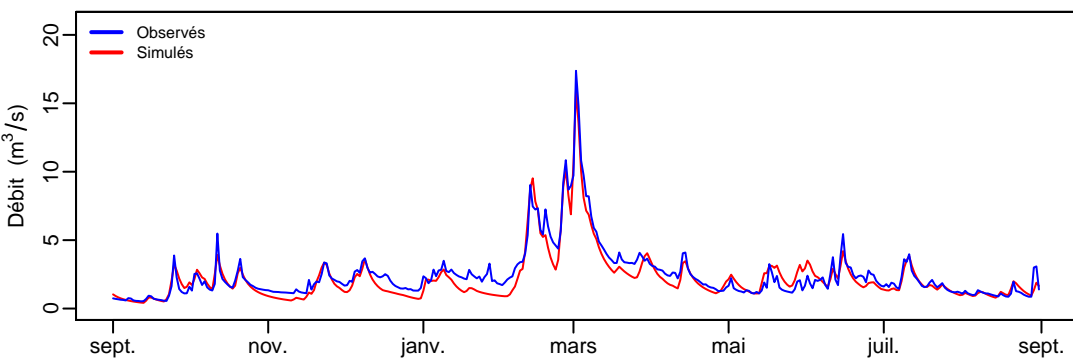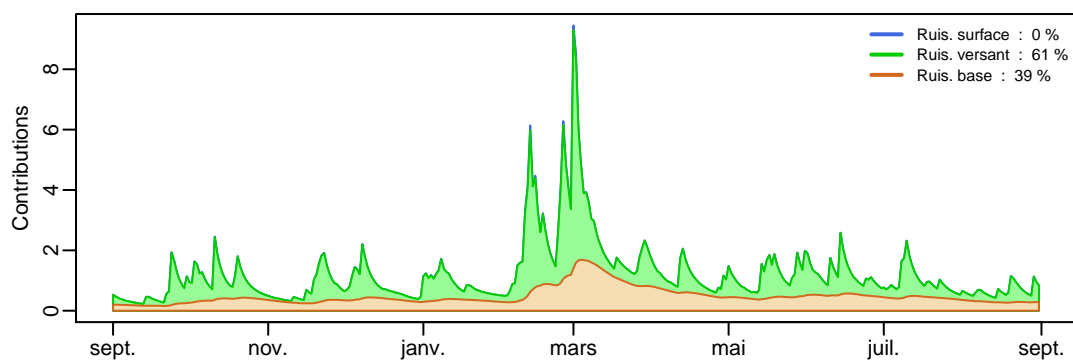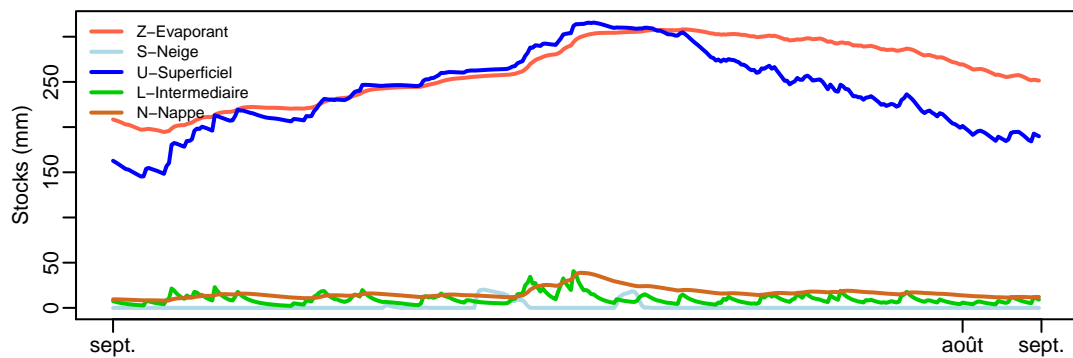

# k2514010 (155.84 km<sup>2</sup>) – année 2007–2008

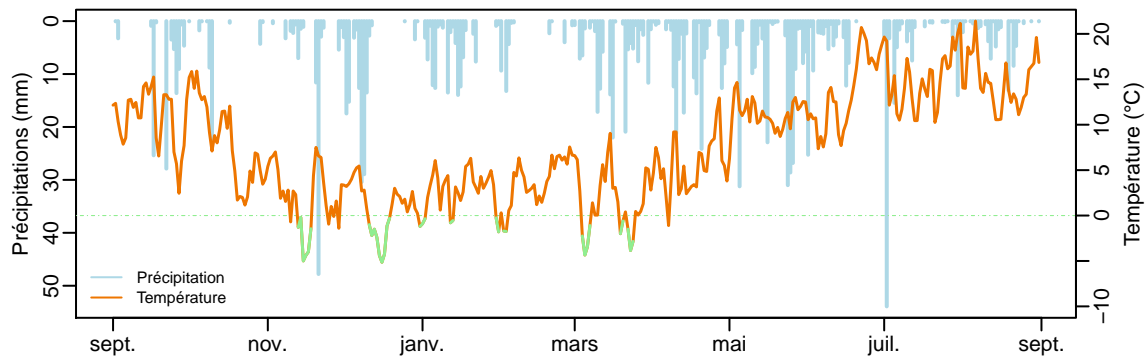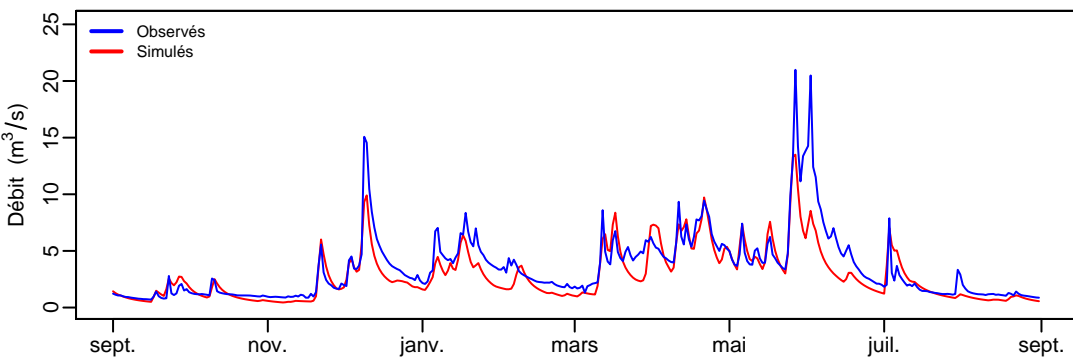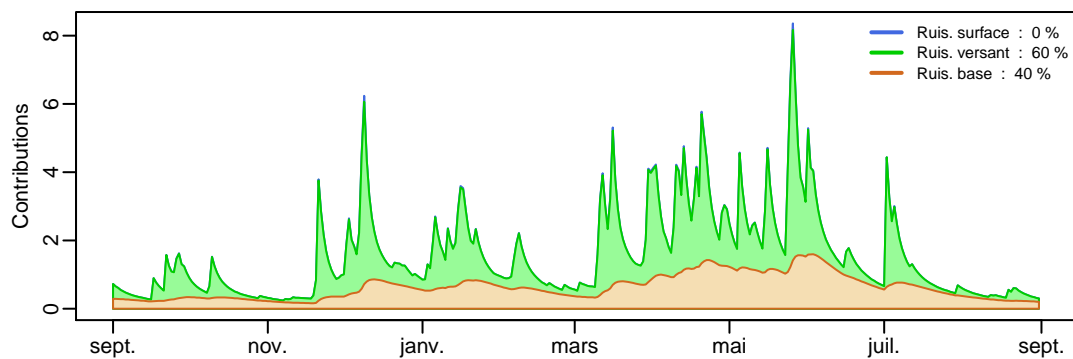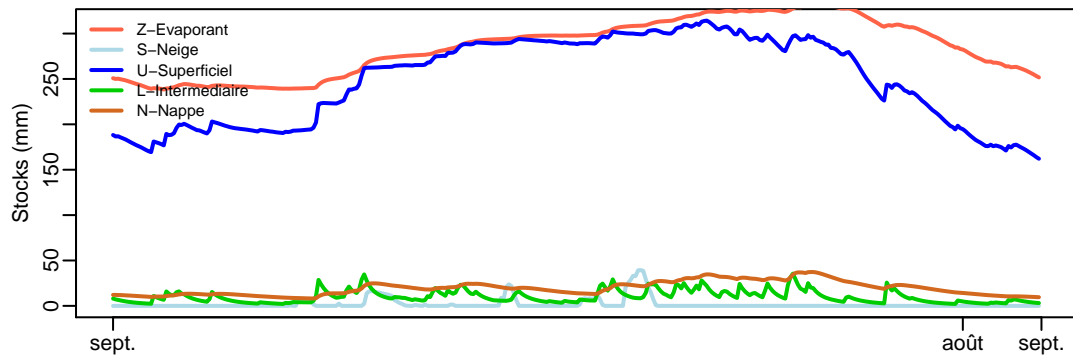

# k2514010 (155.84 km<sup>2</sup>) – année 2008–2009

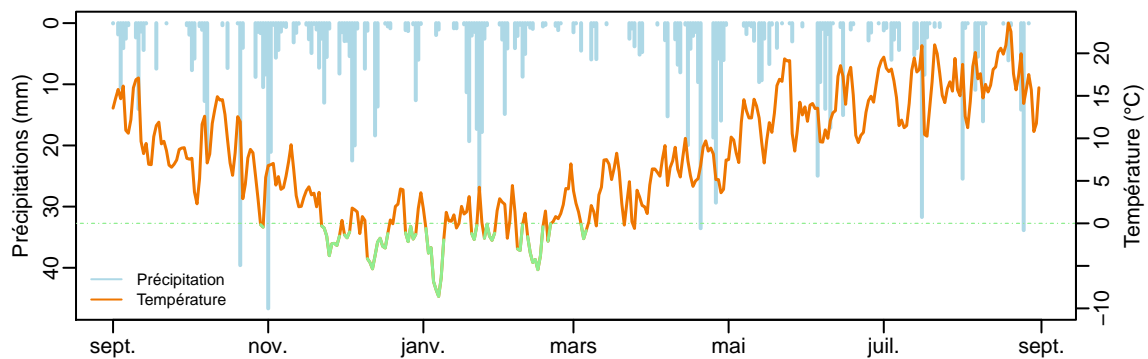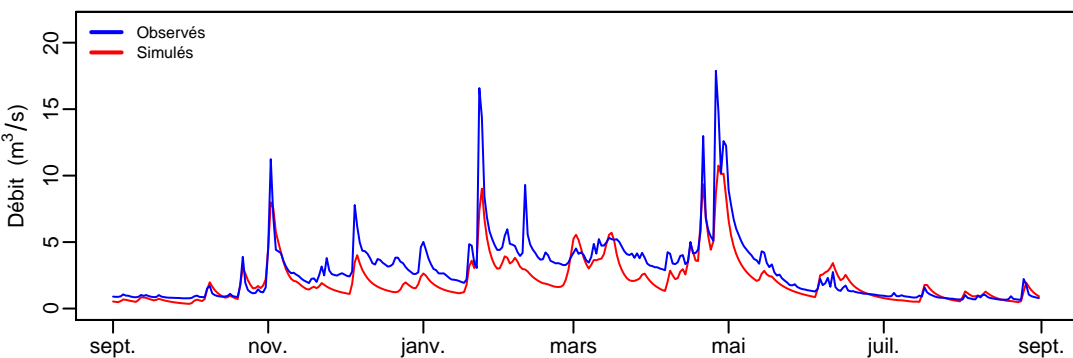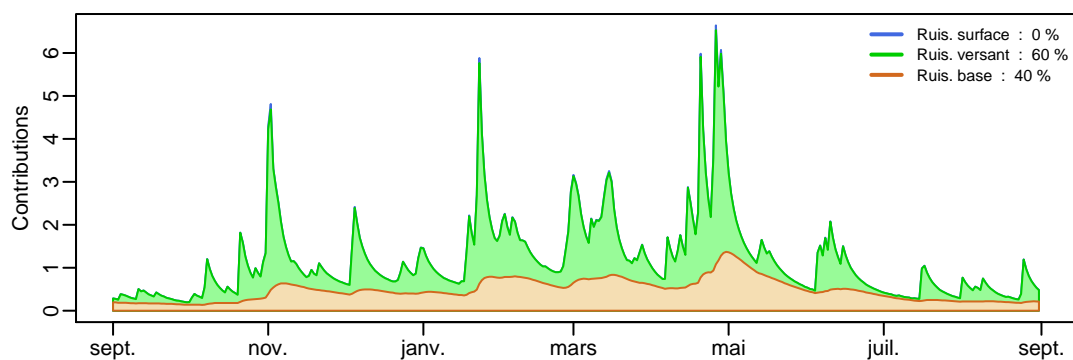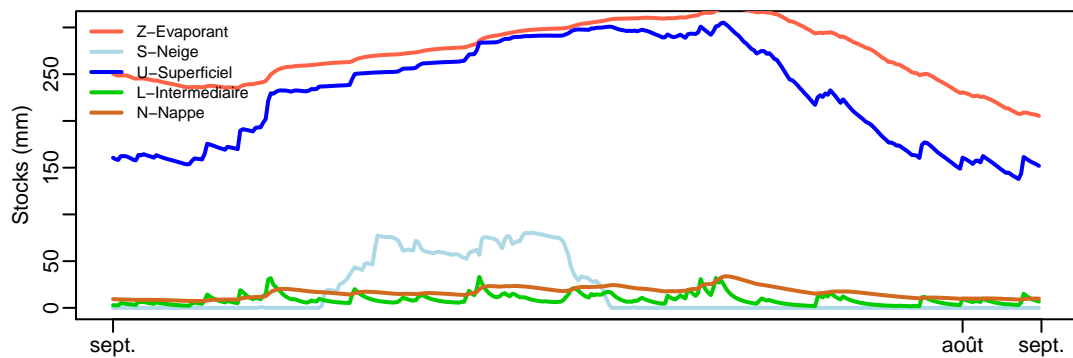

# k2523010 (317.3 km<sup>2</sup>) – année 1981–1982

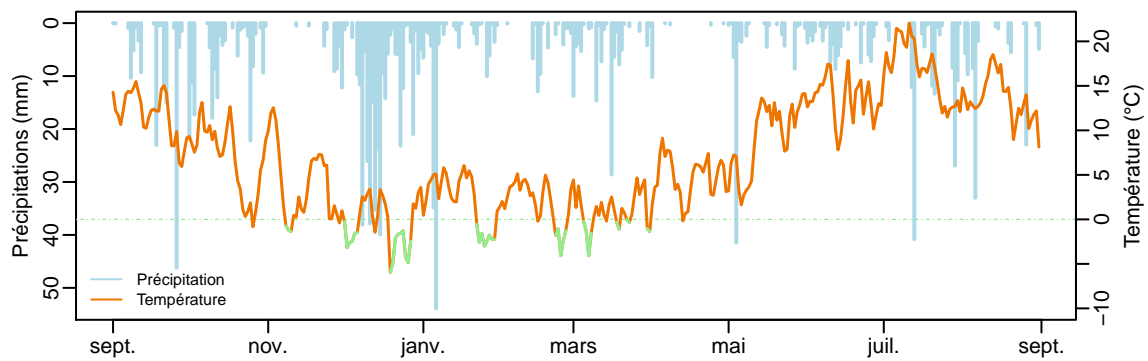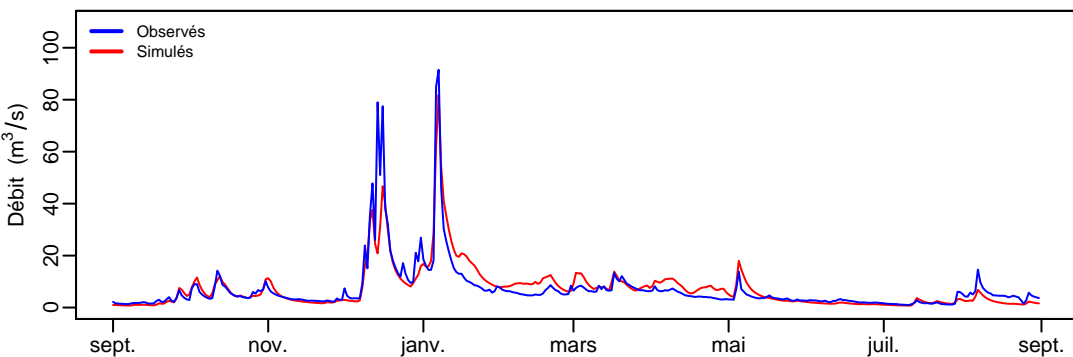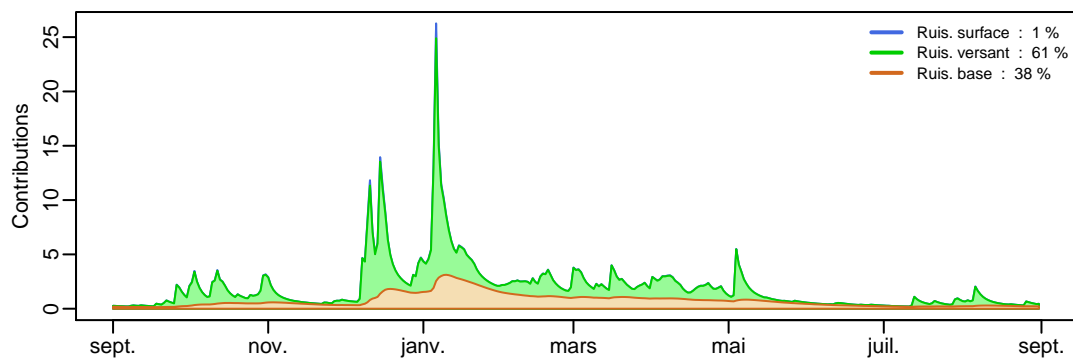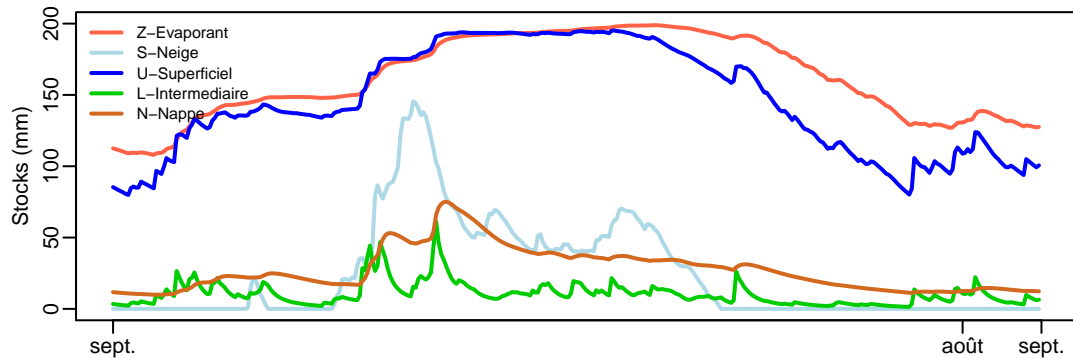



# k2523010 (317.3 km<sup>2</sup>) – année 1982–1983

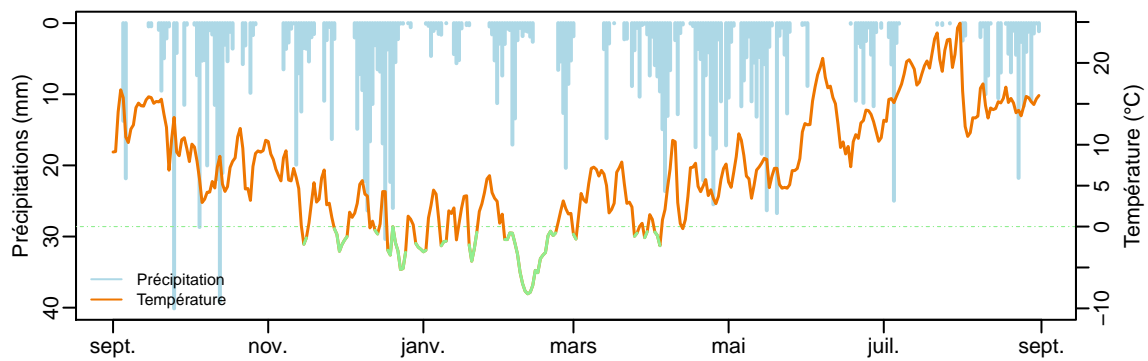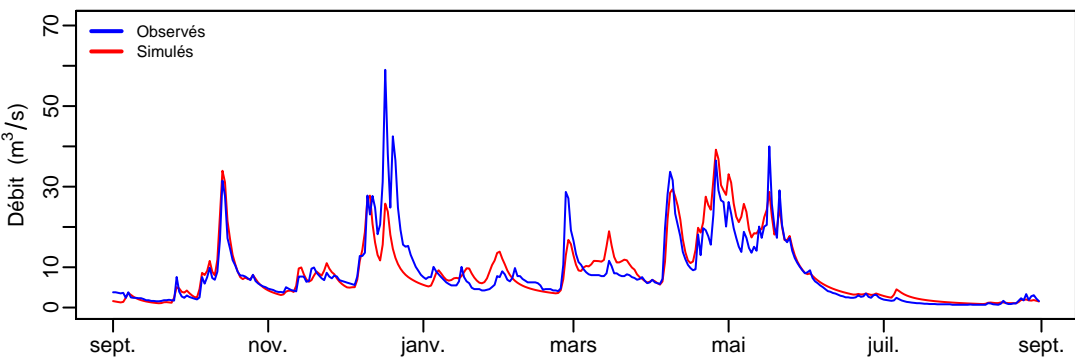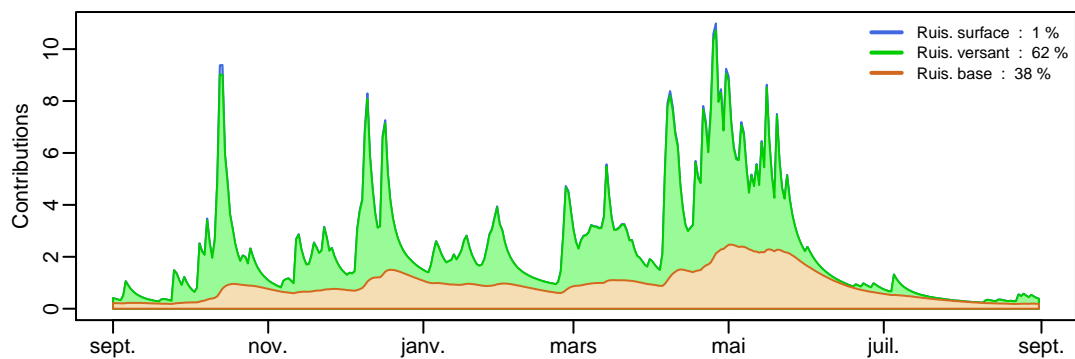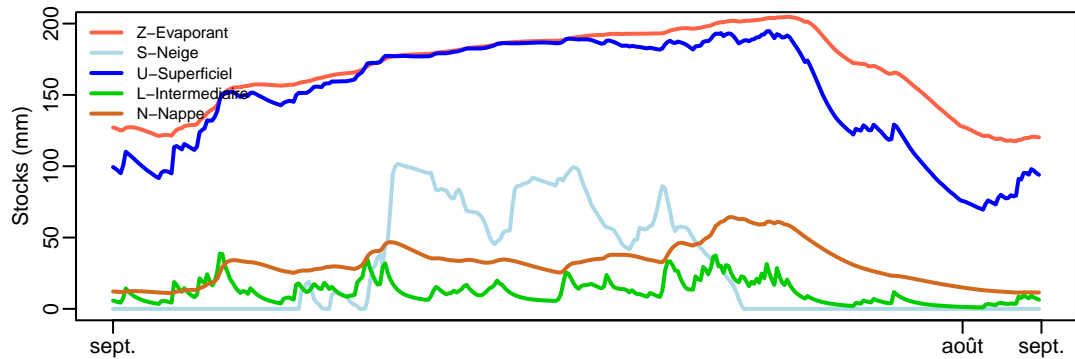

# k2523010 (317.3 km<sup>2</sup>) – année 1983–1984

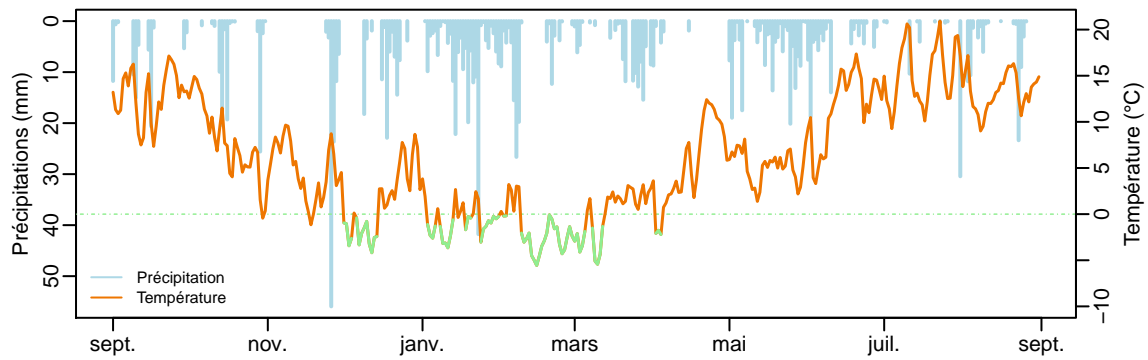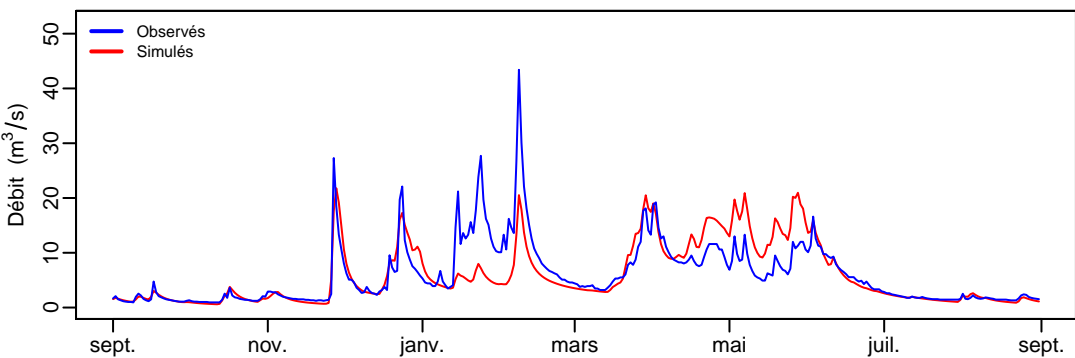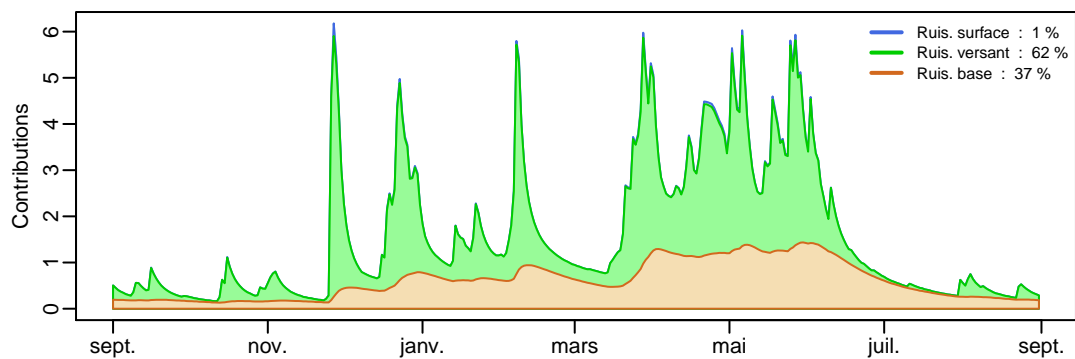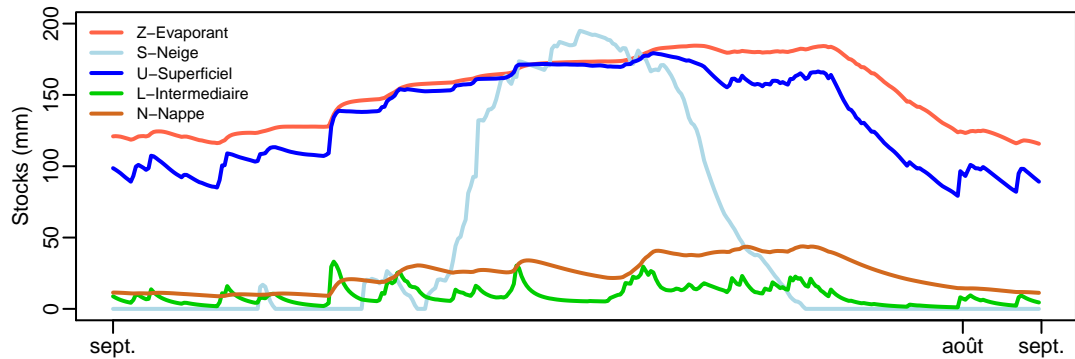

# k2523010 (317.3 km<sup>2</sup>) – année 1984–1985

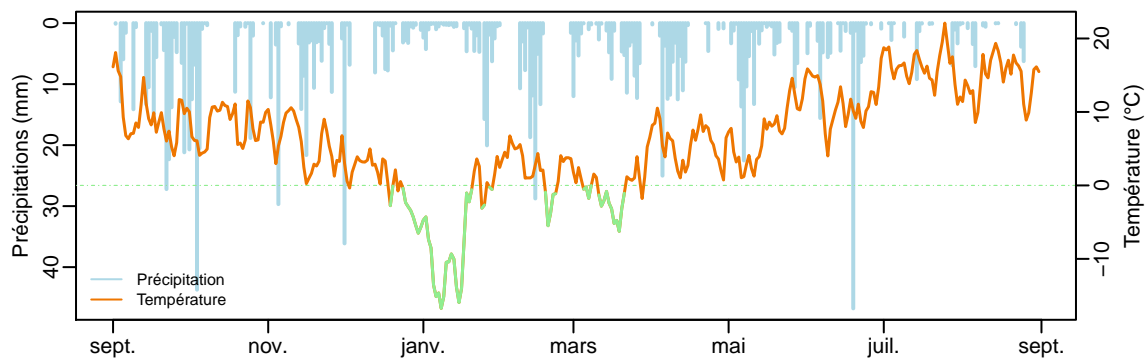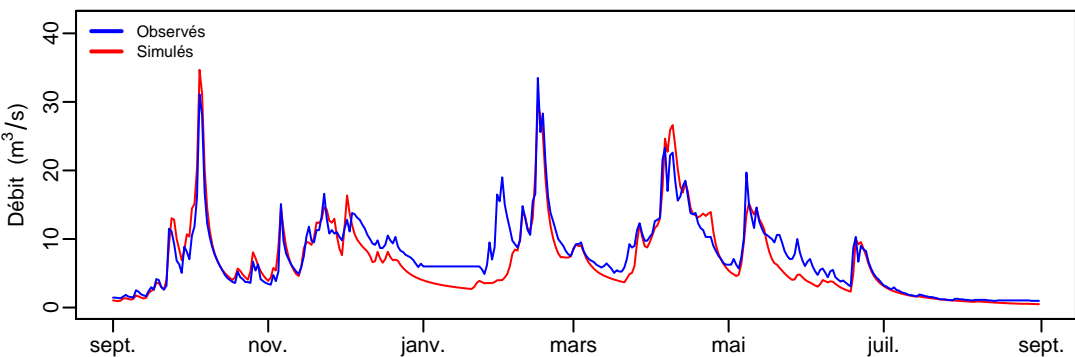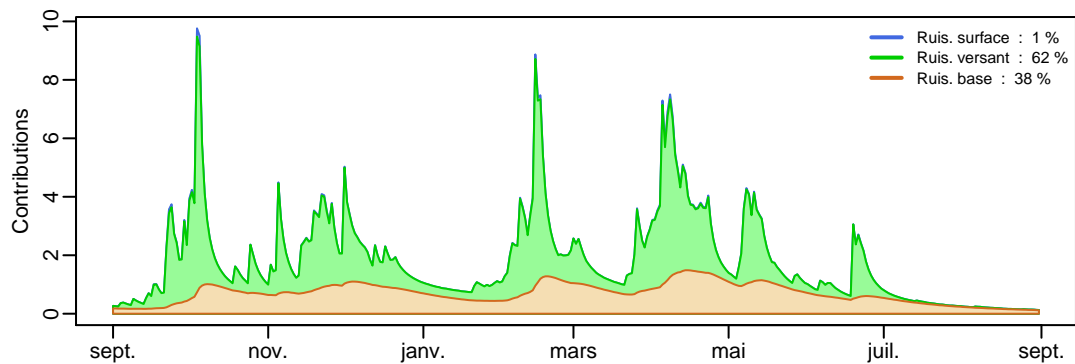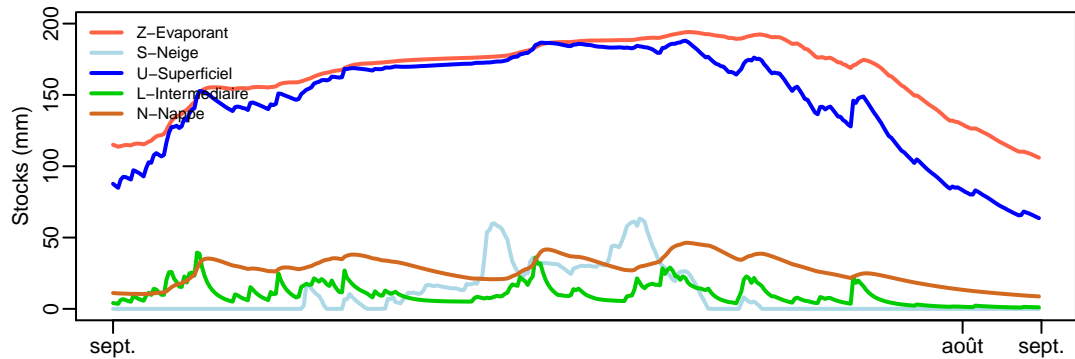

# k2523010 (317.3 km<sup>2</sup>) – année 1985–1986

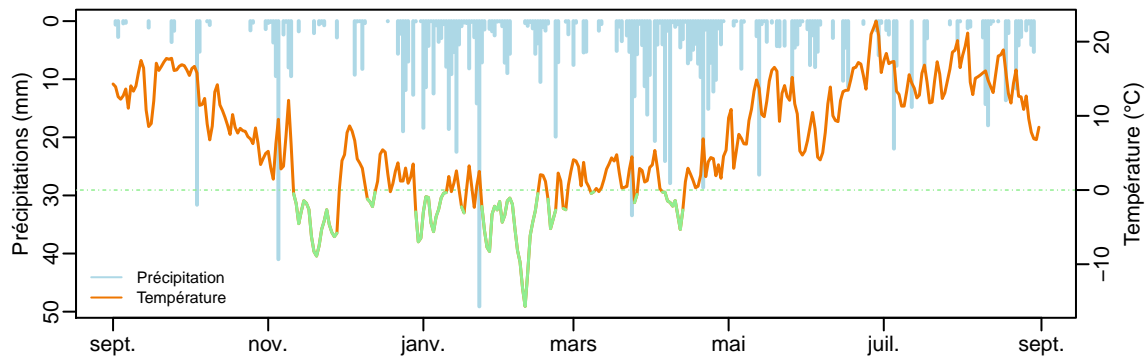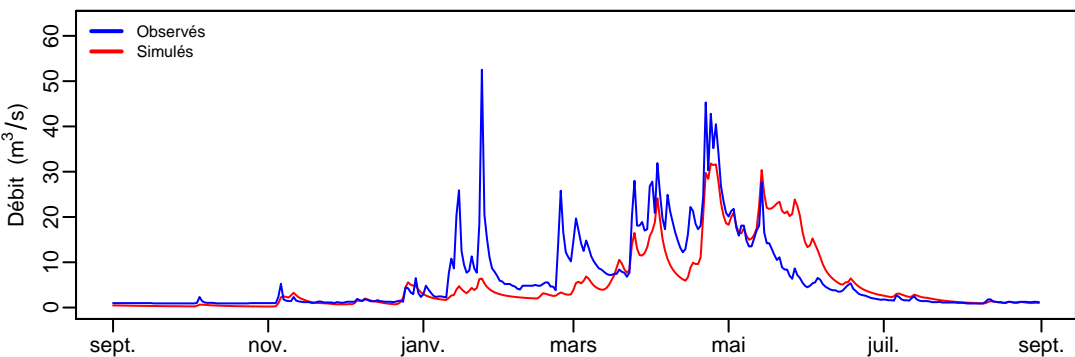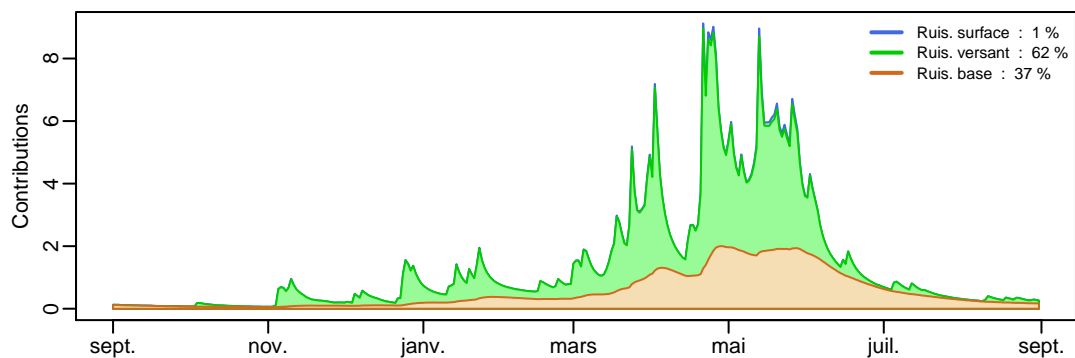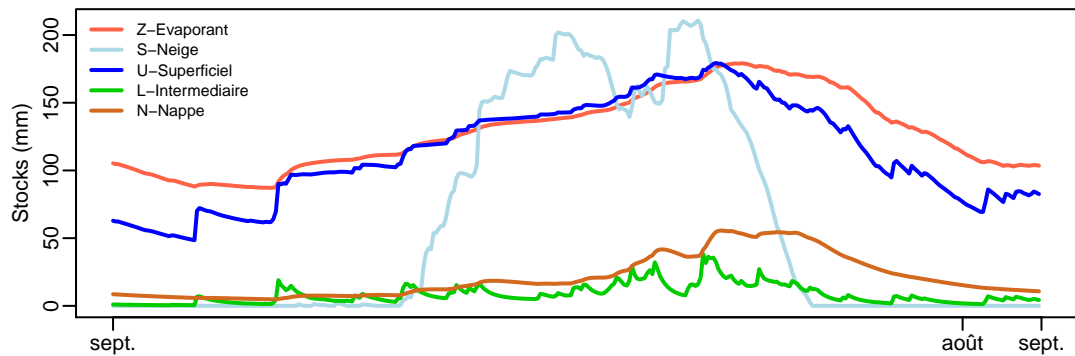

# k2523010 (317.3 km<sup>2</sup>) – année 1986–1987

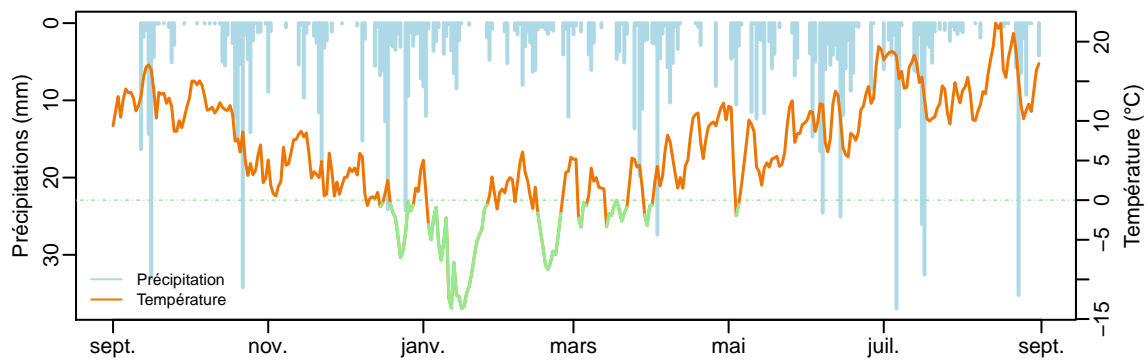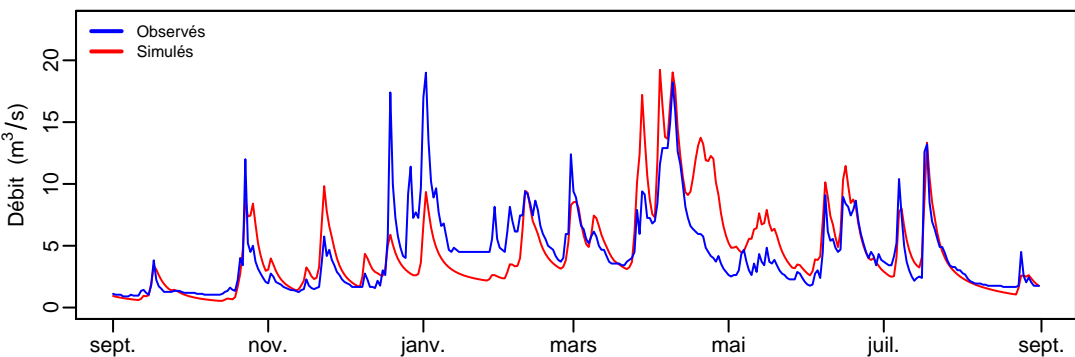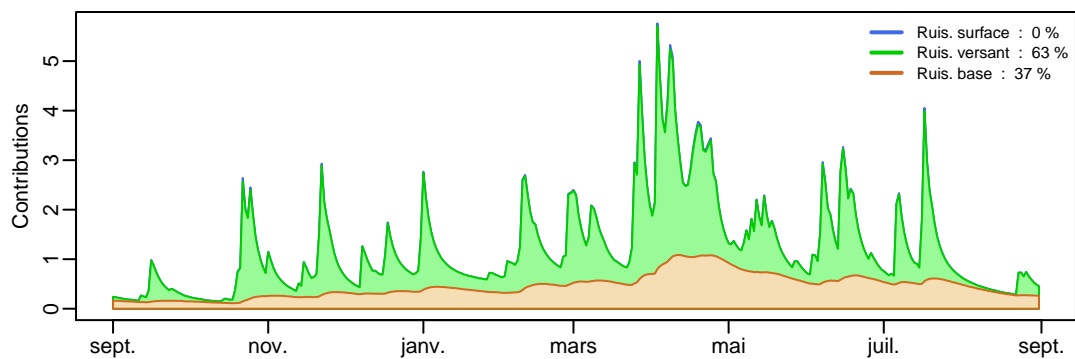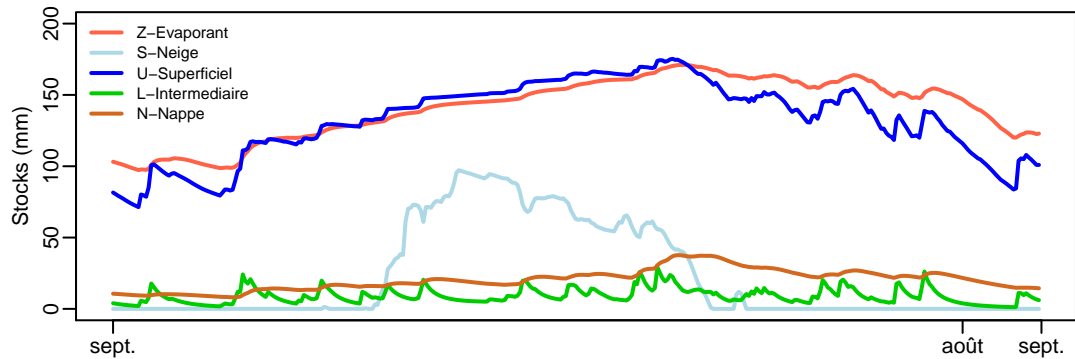

# k2523010 (317.3 km<sup>2</sup>) – année 1987–1988

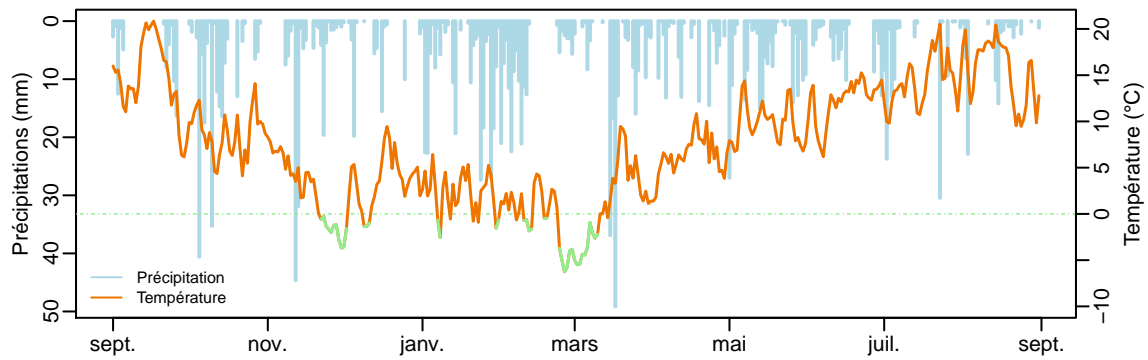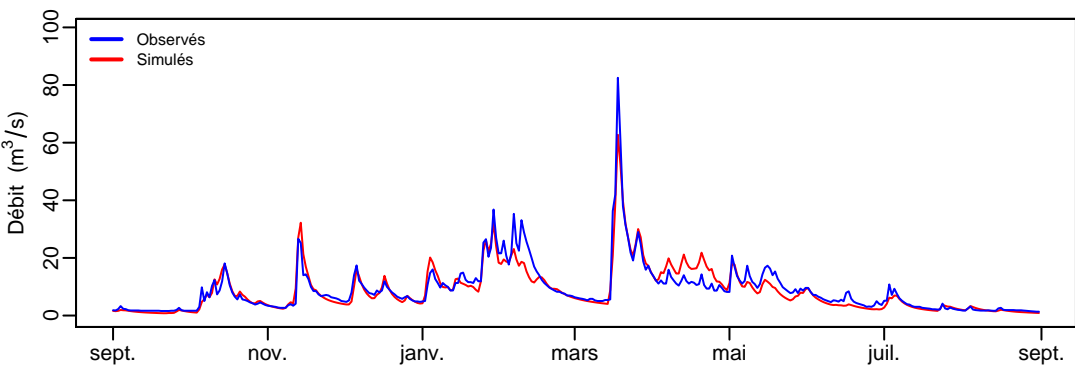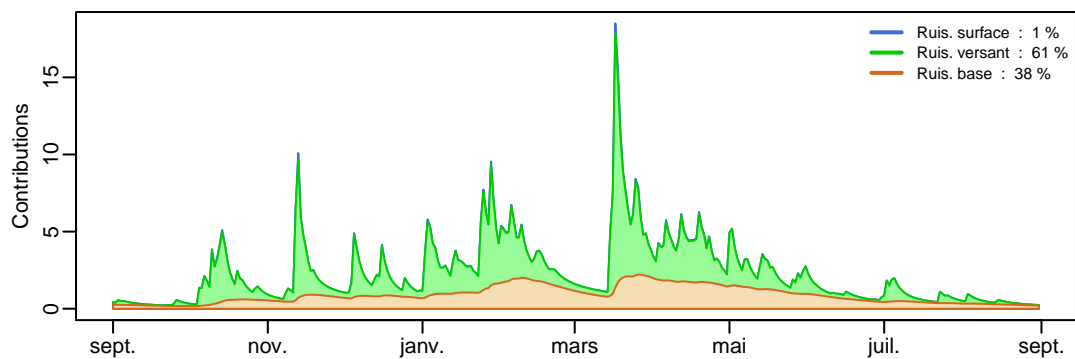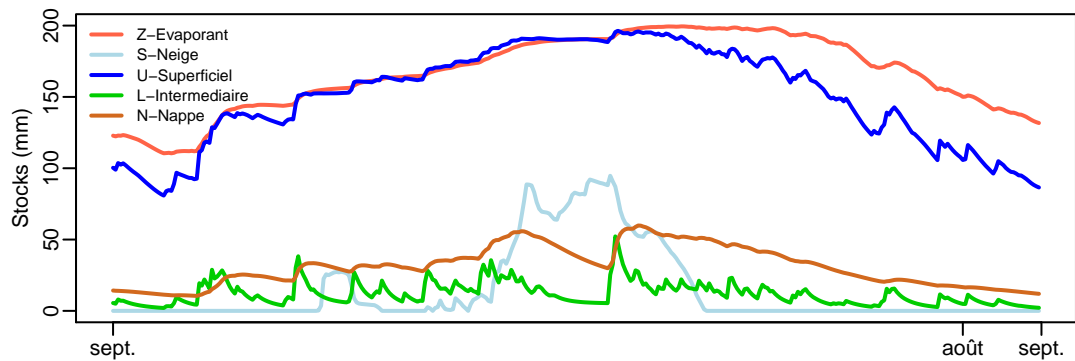

# k2523010 (317.3 km<sup>2</sup>) – année 1988–1989

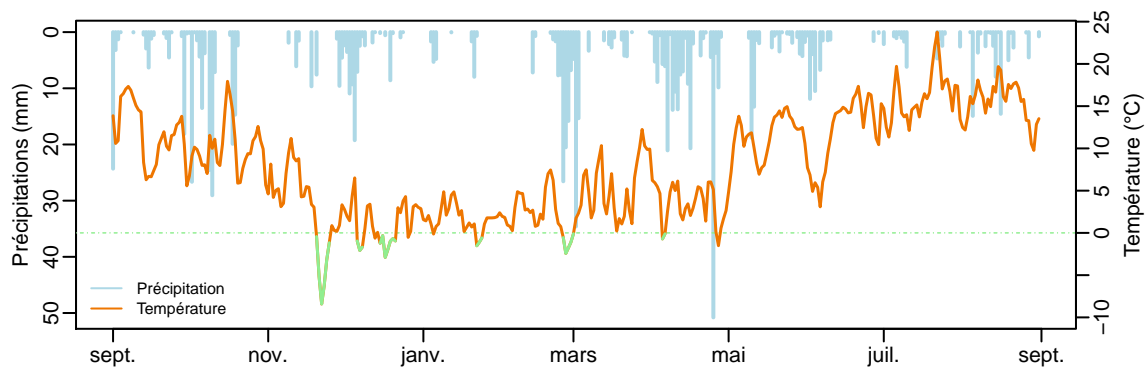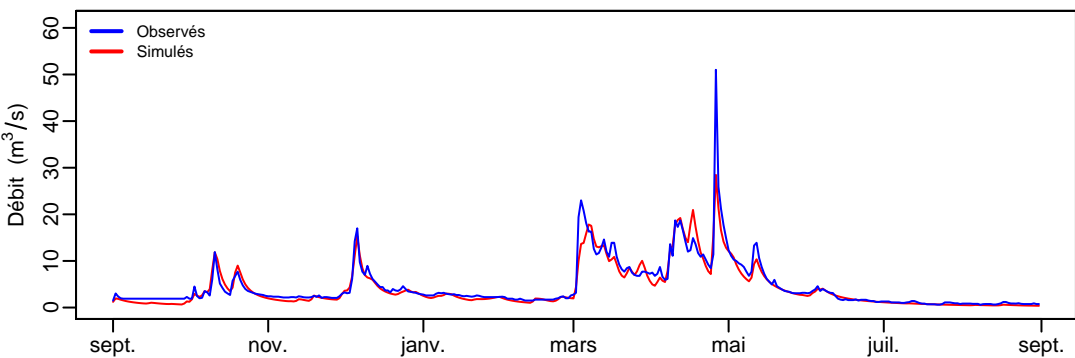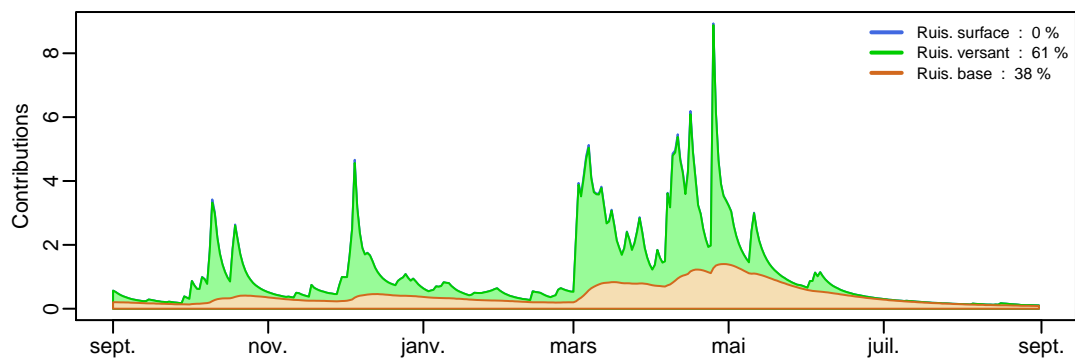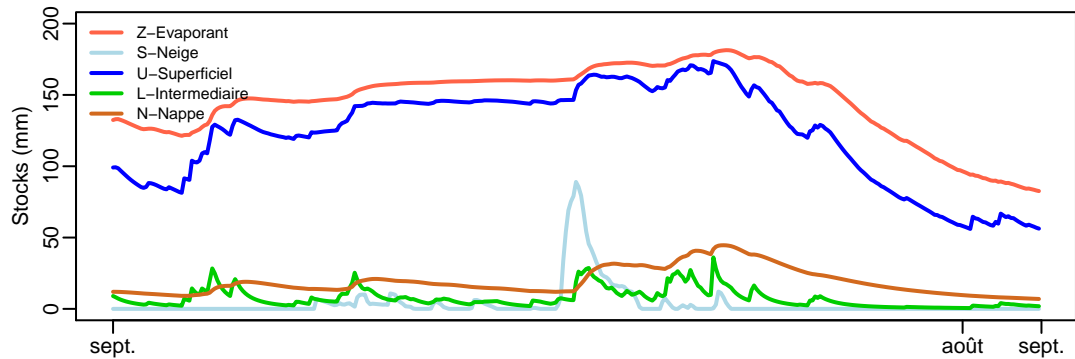

# k2523010 (317.3 km<sup>2</sup>) – année 1989–1990

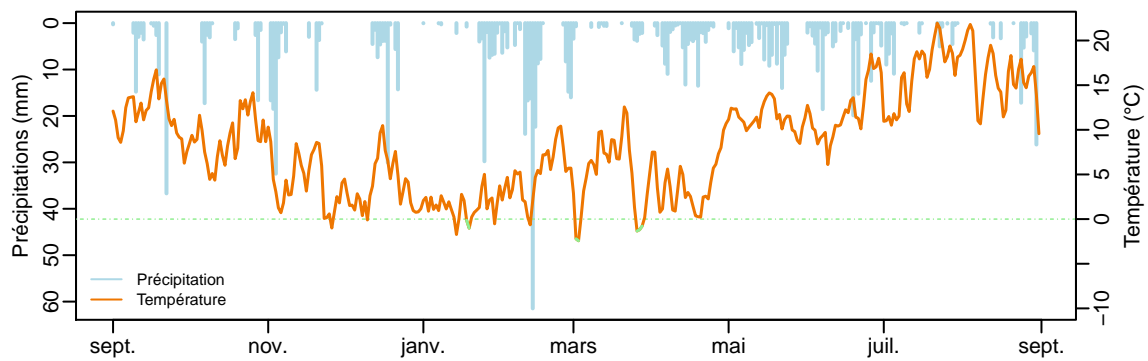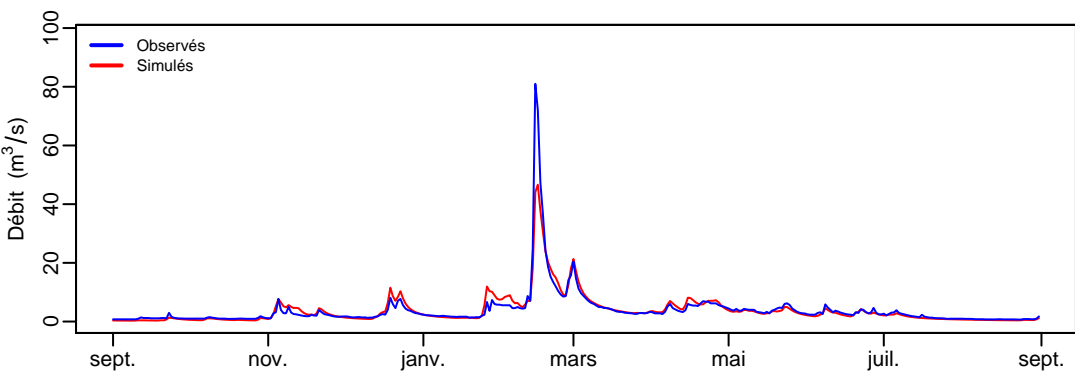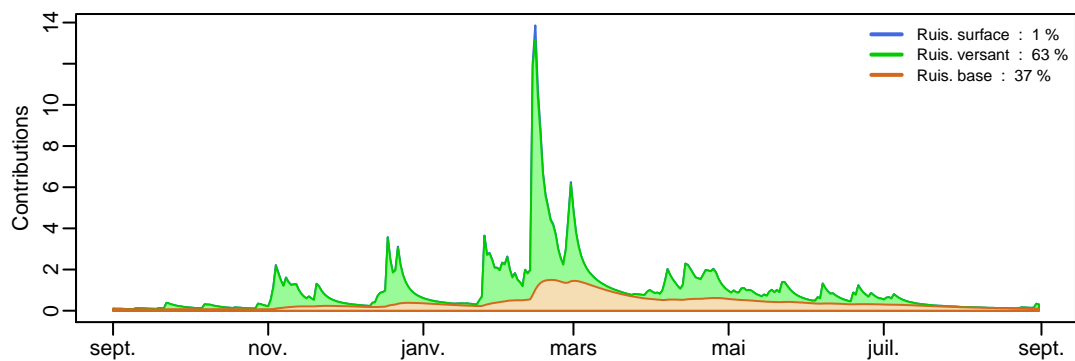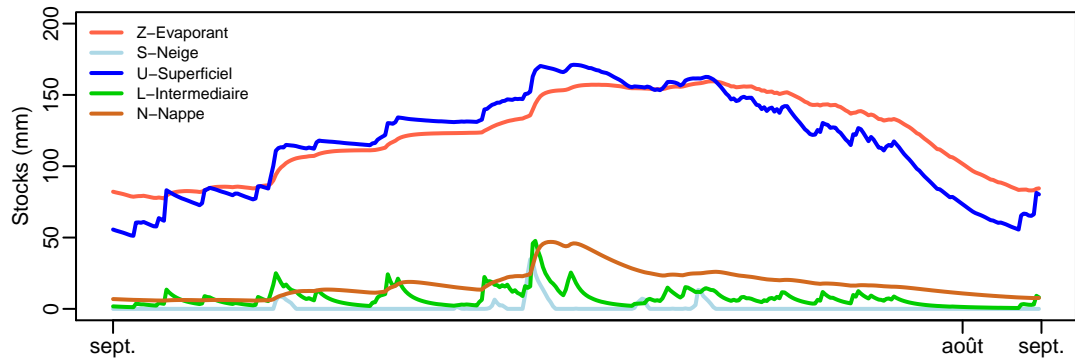



# k2523010 (317.3 km<sup>2</sup>) – année 1990–1991

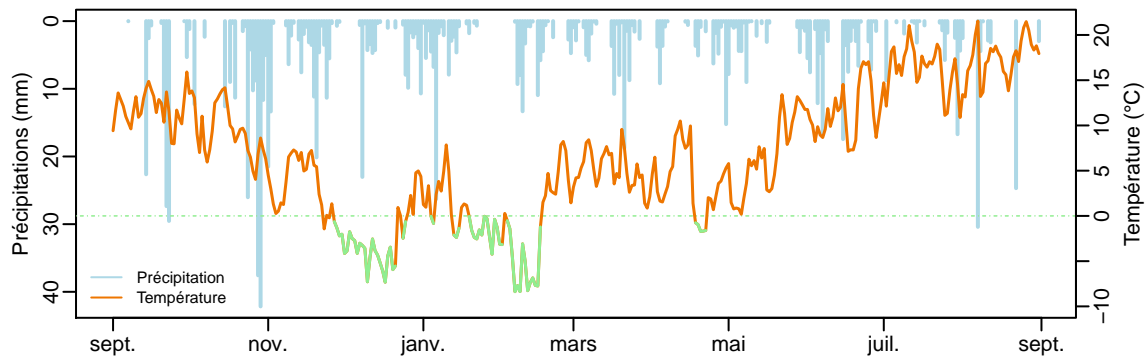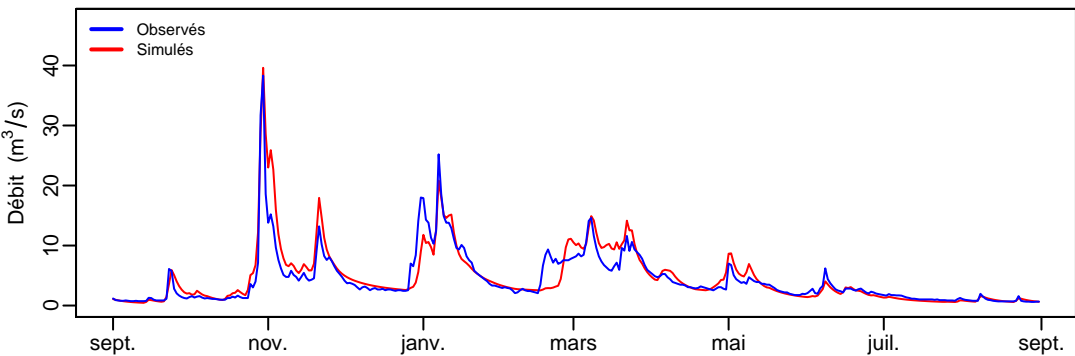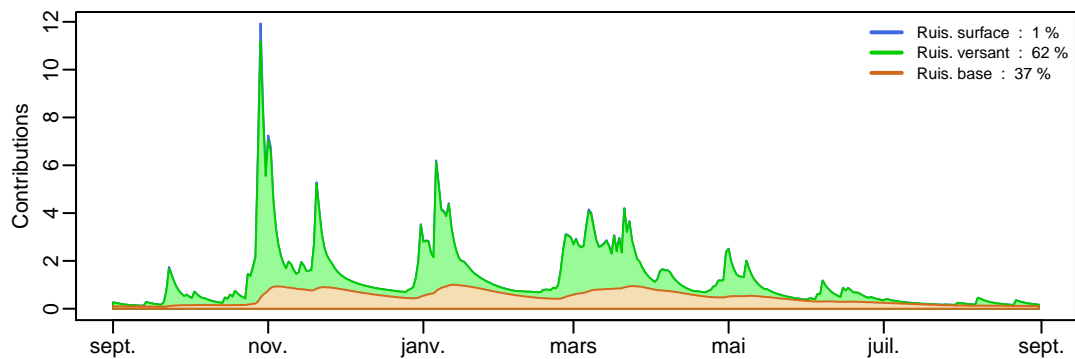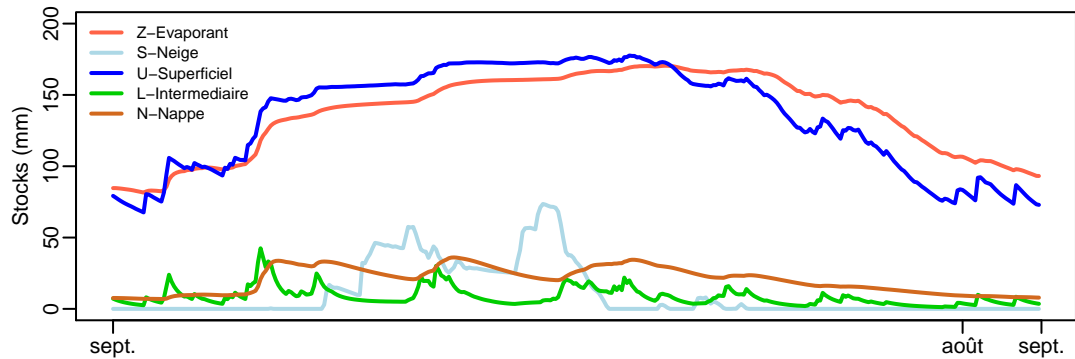

# k2523010 (317.3 km<sup>2</sup>) – année 1991–1992

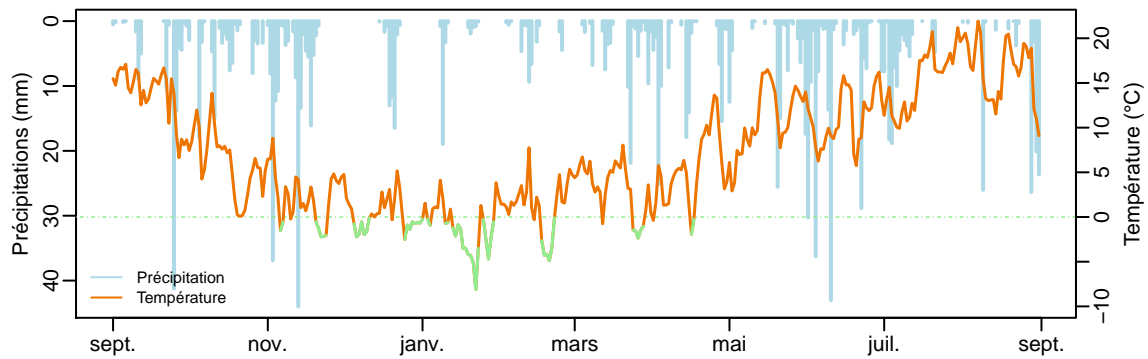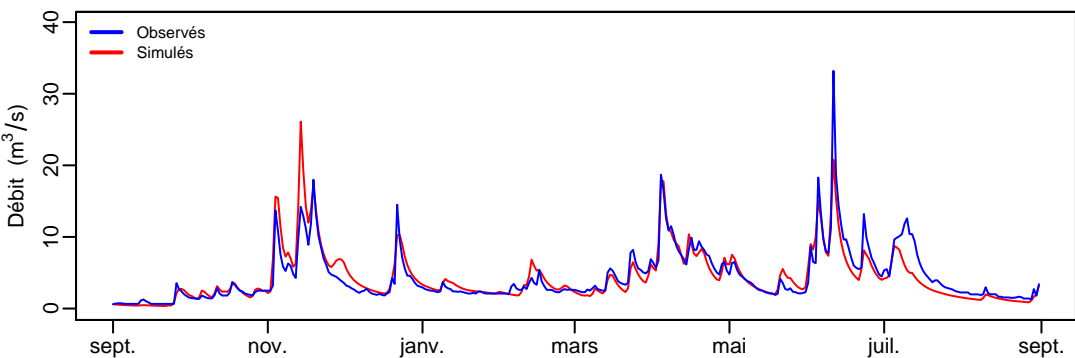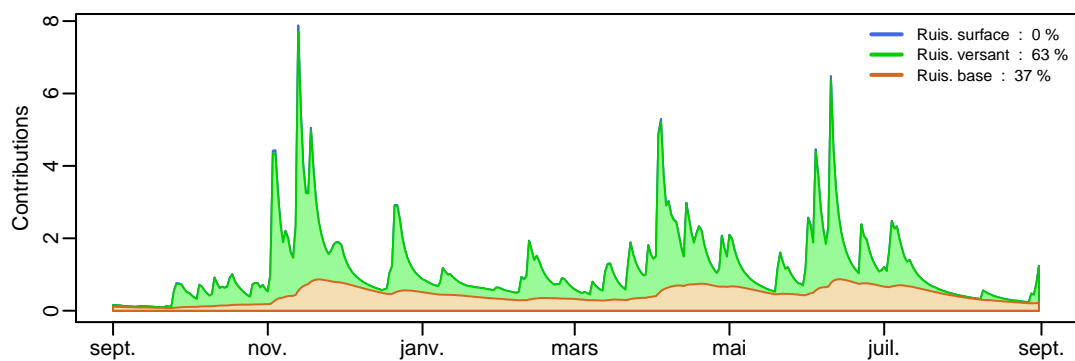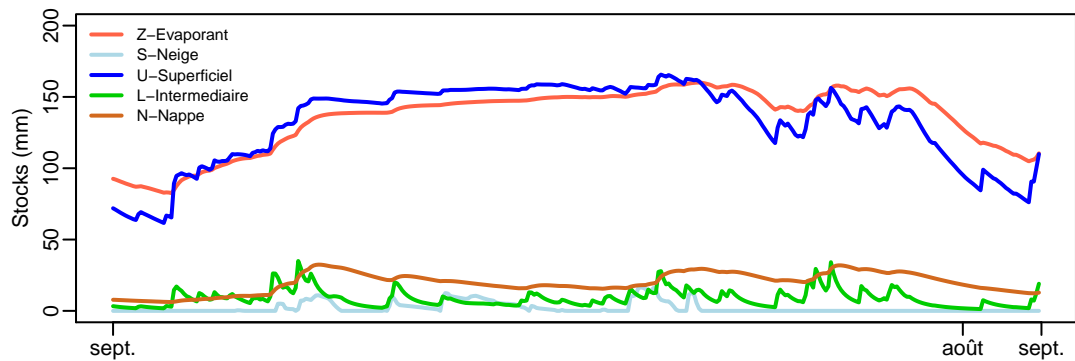

# k2523010 (317.3 km<sup>2</sup>) – année 1992–1993

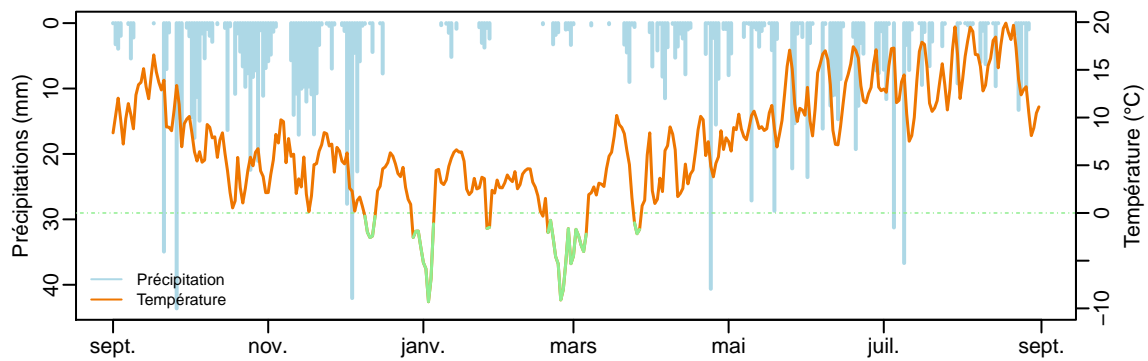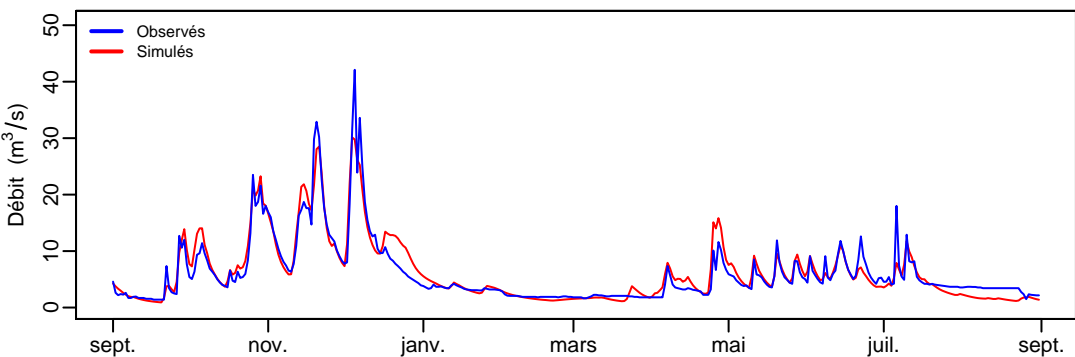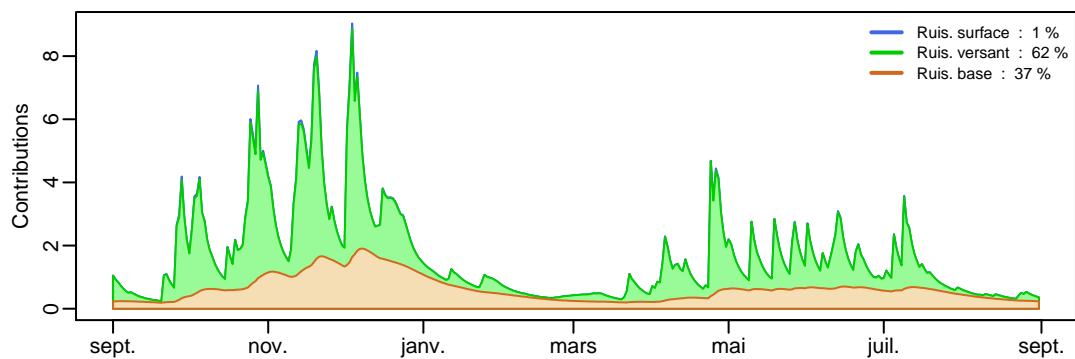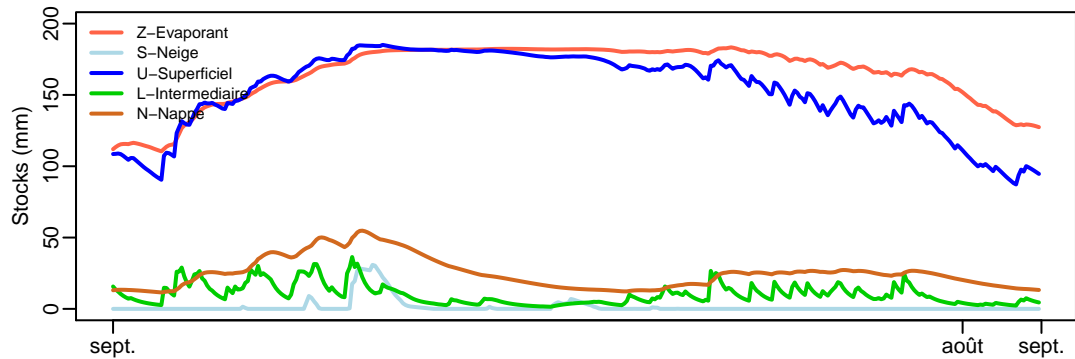

# k2523010 (317.3 km<sup>2</sup>) – année 1993–1994

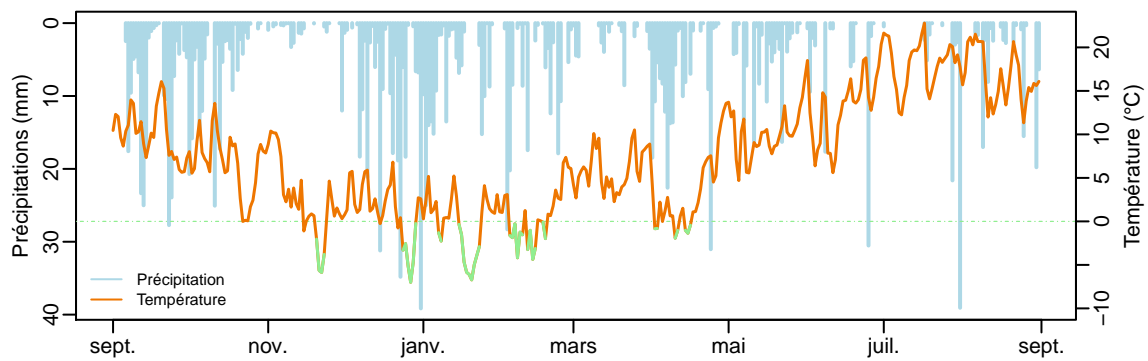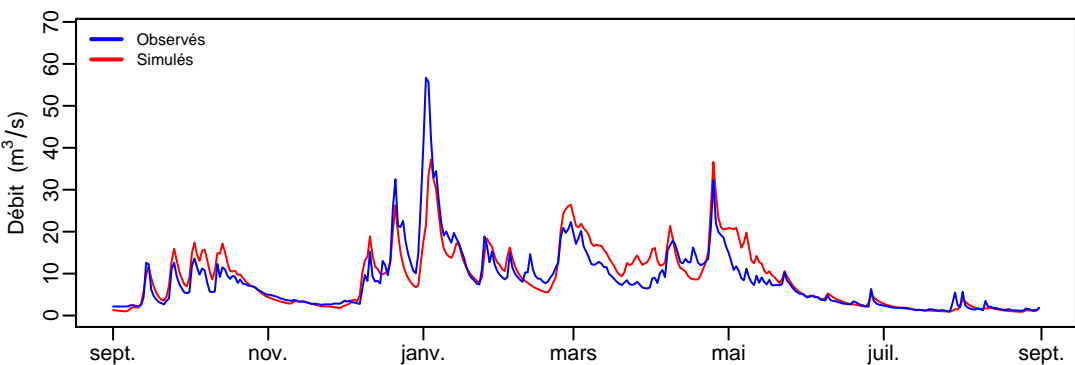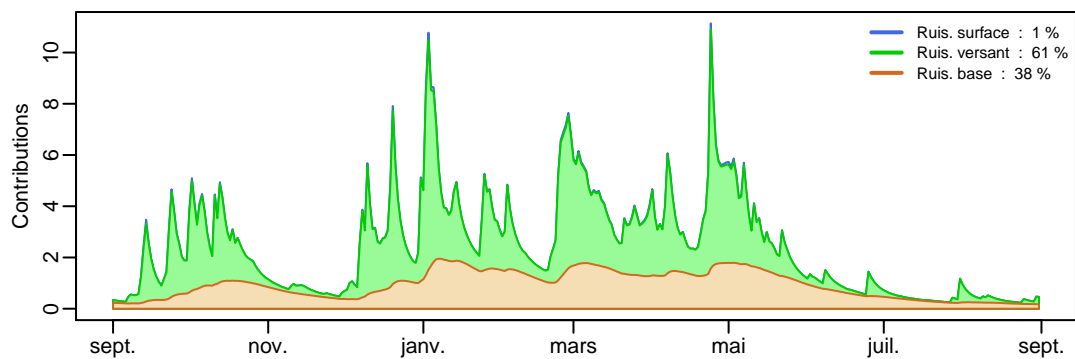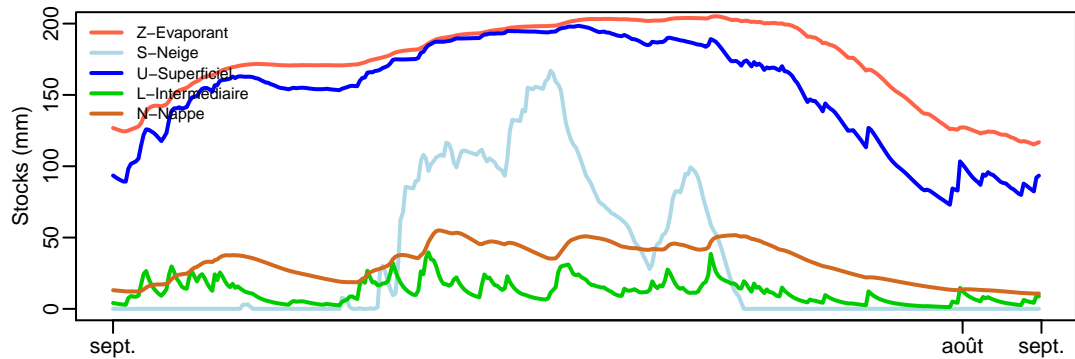

# k2523010 (317.3 km<sup>2</sup>) – année 1994–1995

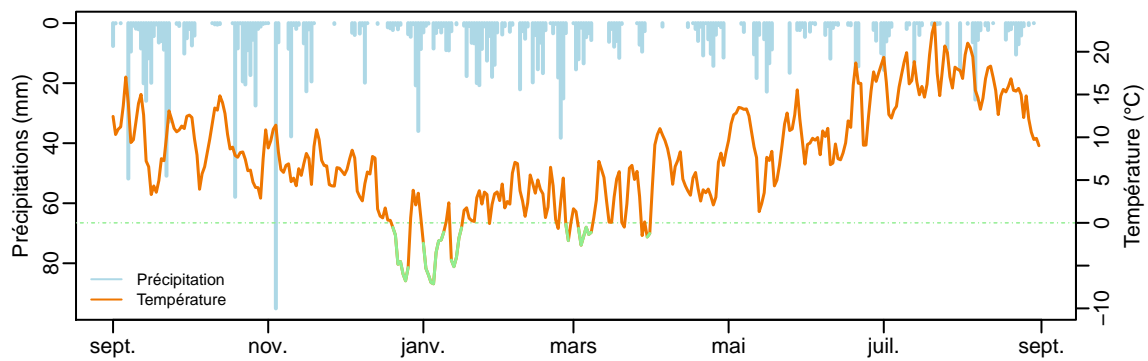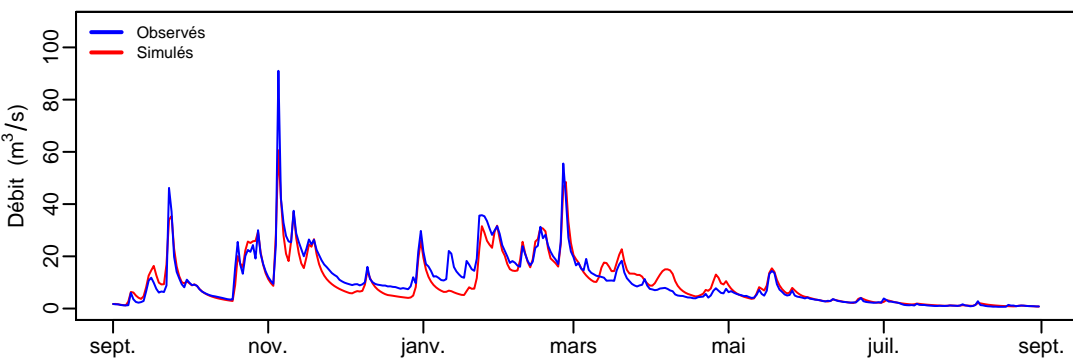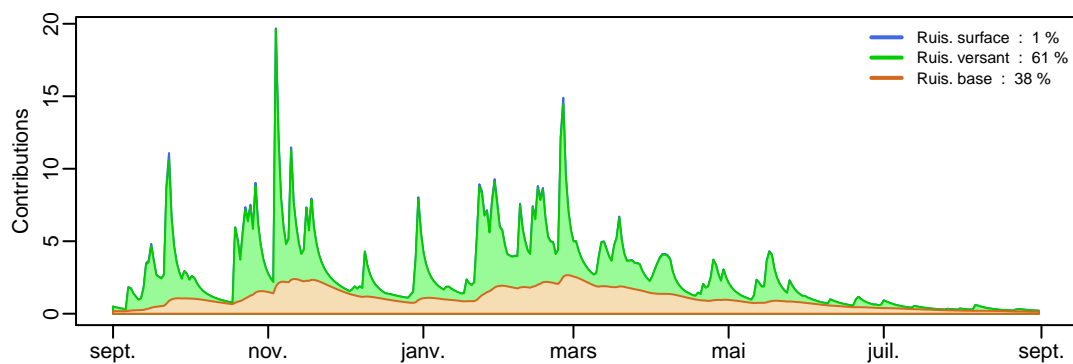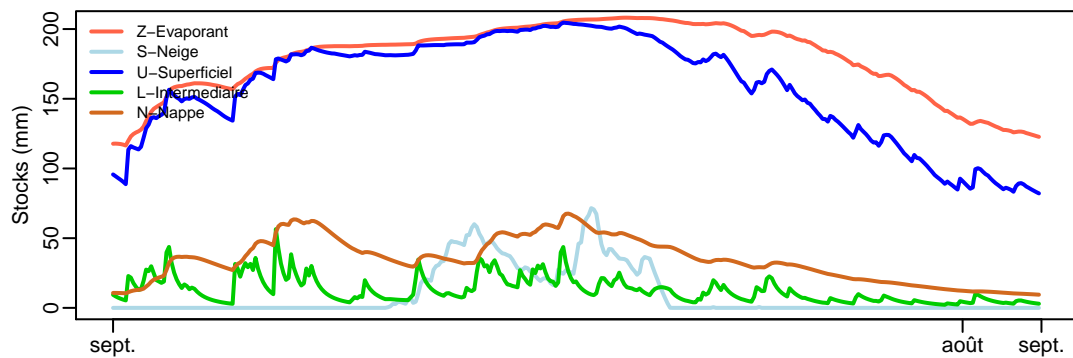

# k2523010 (317.3 km<sup>2</sup>) – année 1995–1996

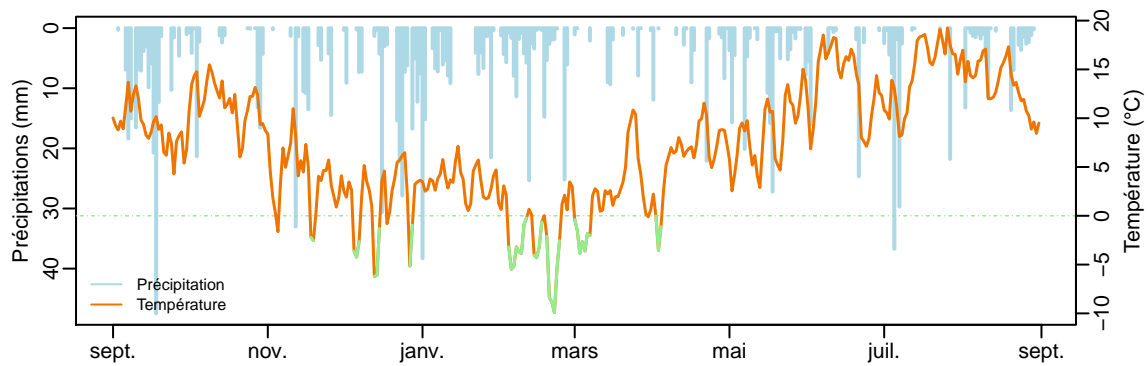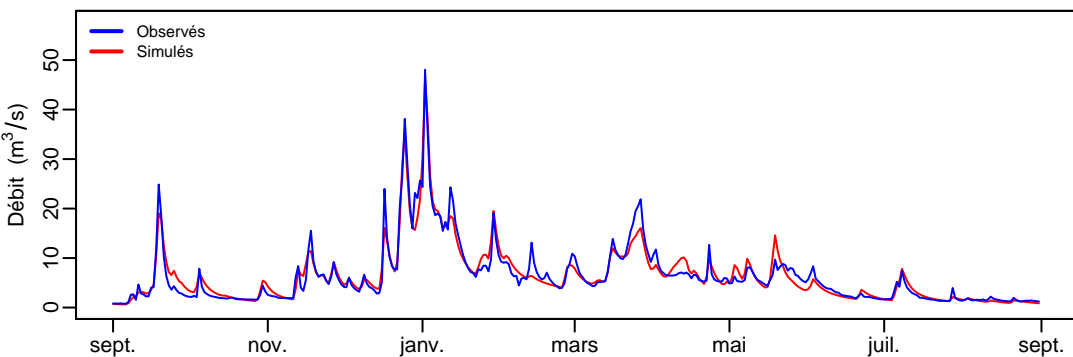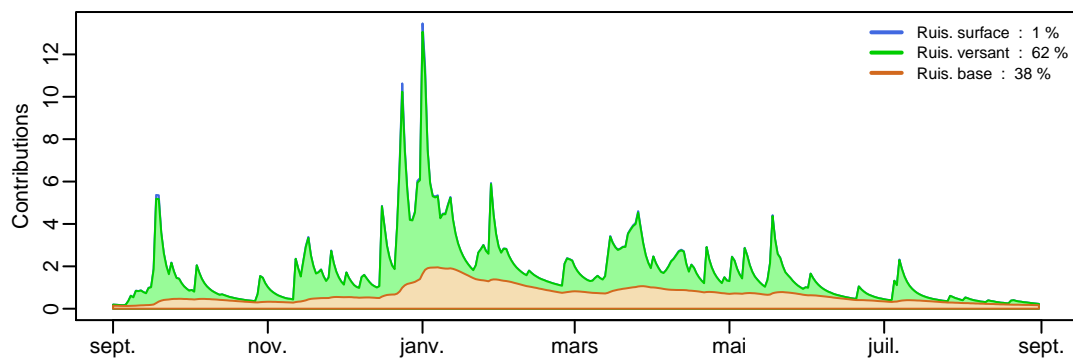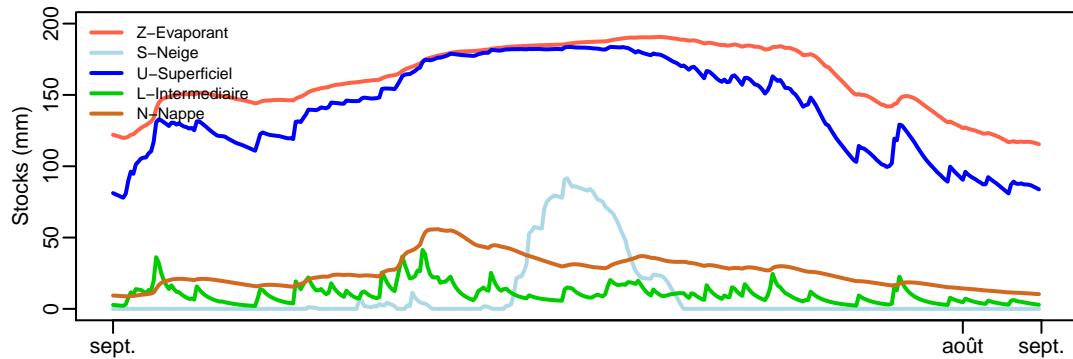

# k2523010 (317.3 km<sup>2</sup>) – année 1996–1997

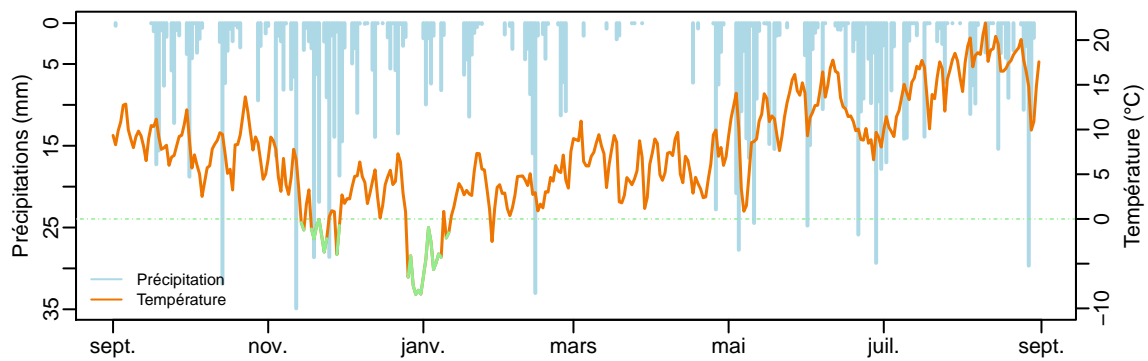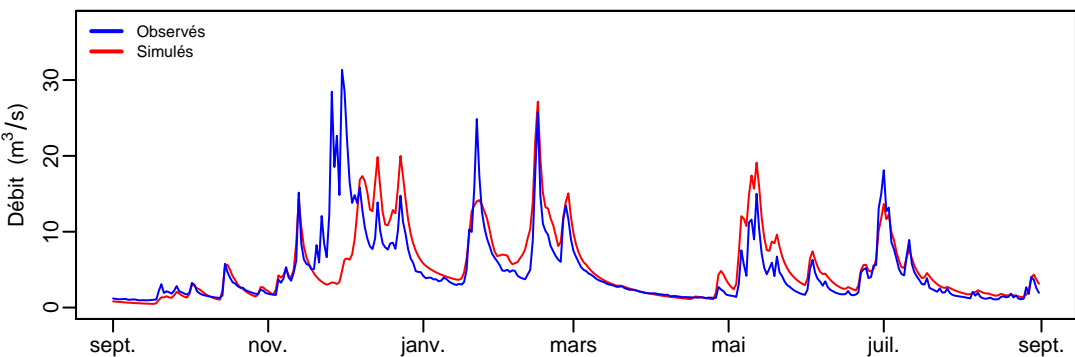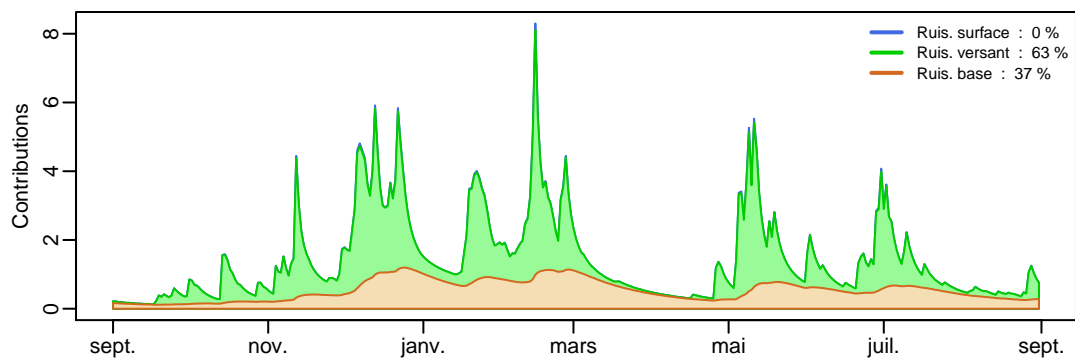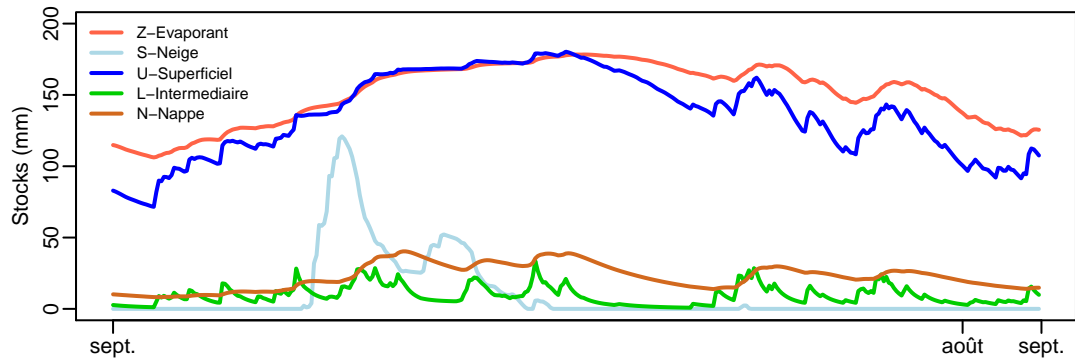

# k2523010 (317.3 km<sup>2</sup>) – année 1997–1998

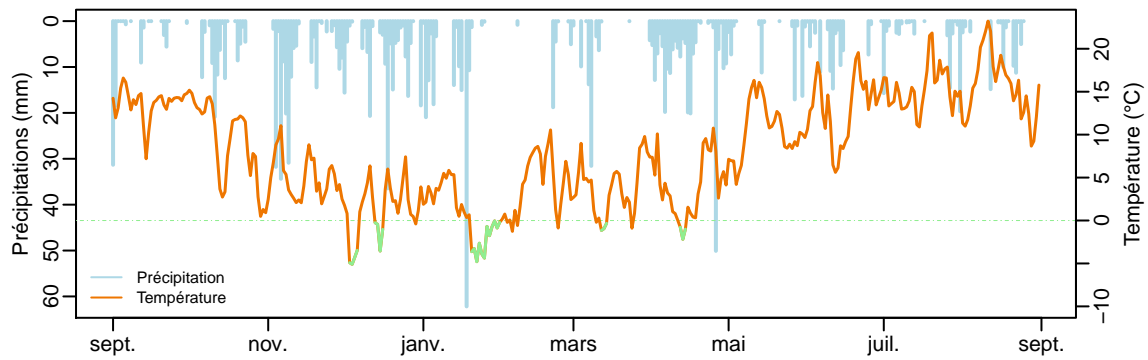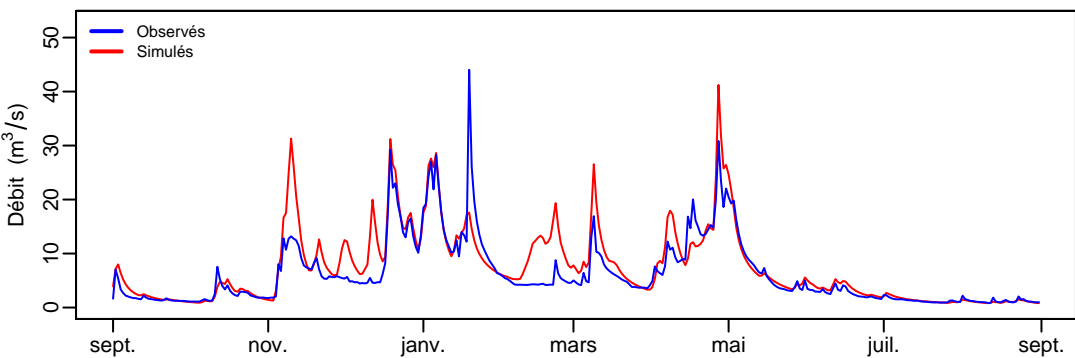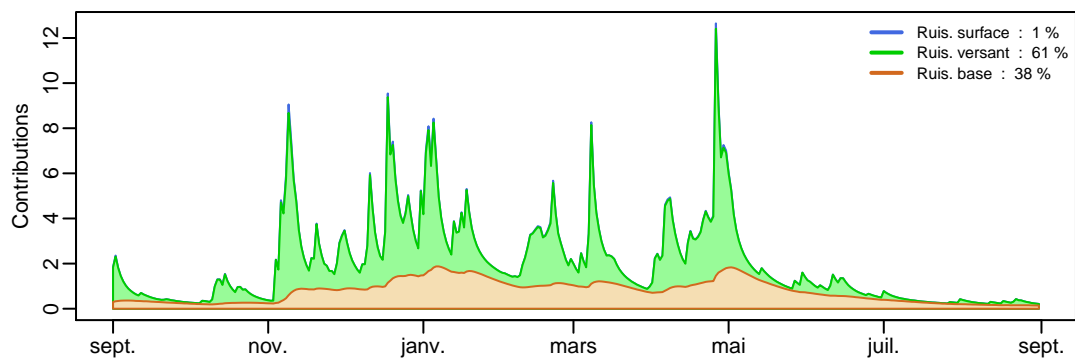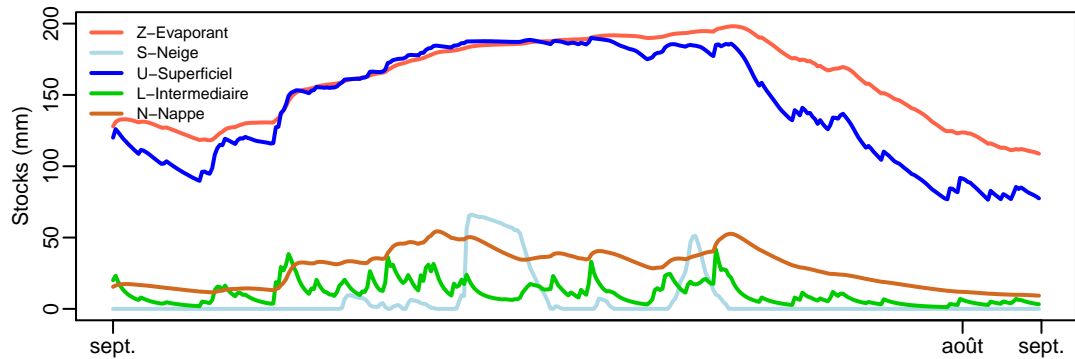



# k2523010 (317.3 km<sup>2</sup>) – année 1998–1999

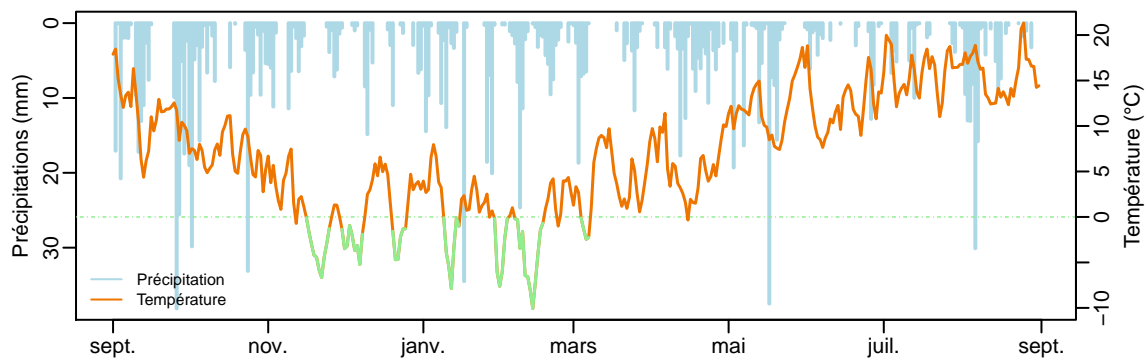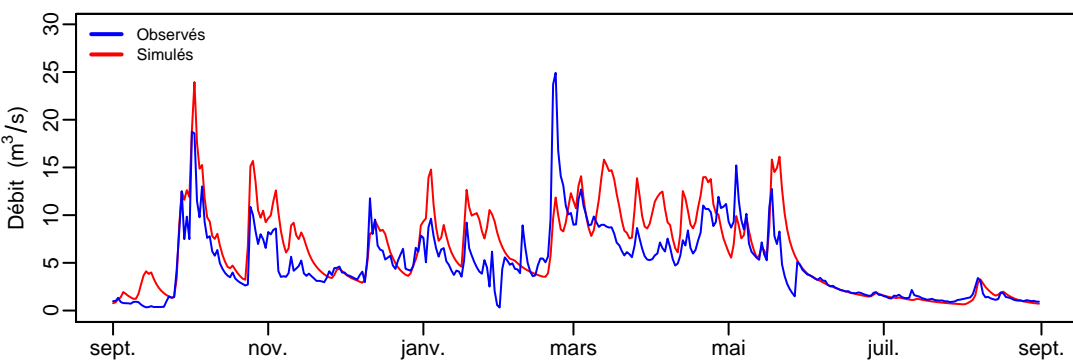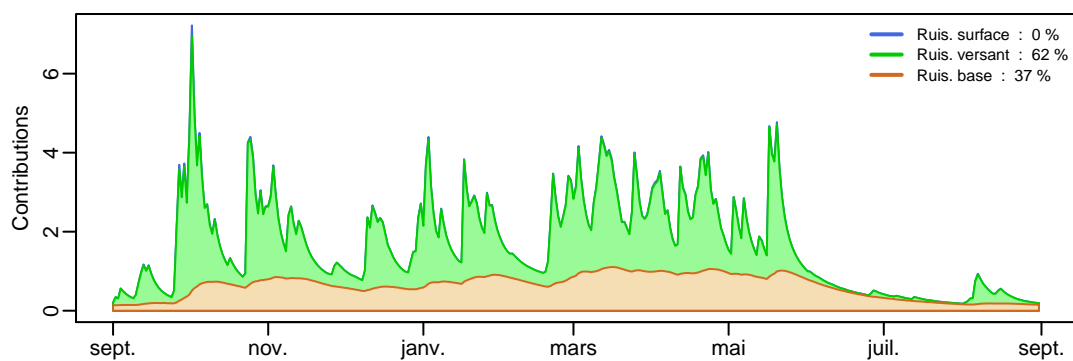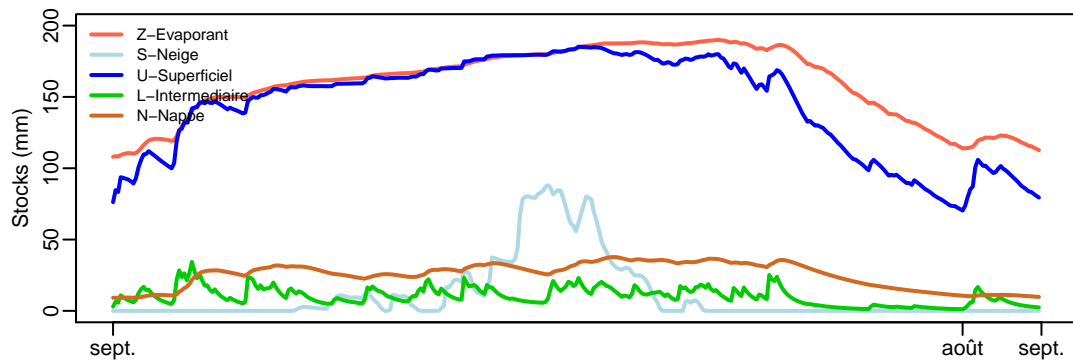

# k2523010 (317.3 km<sup>2</sup>) – année 1999–2000

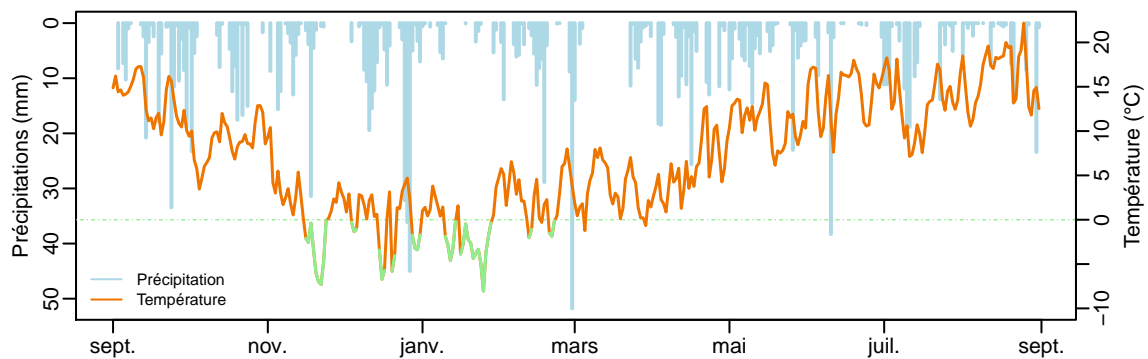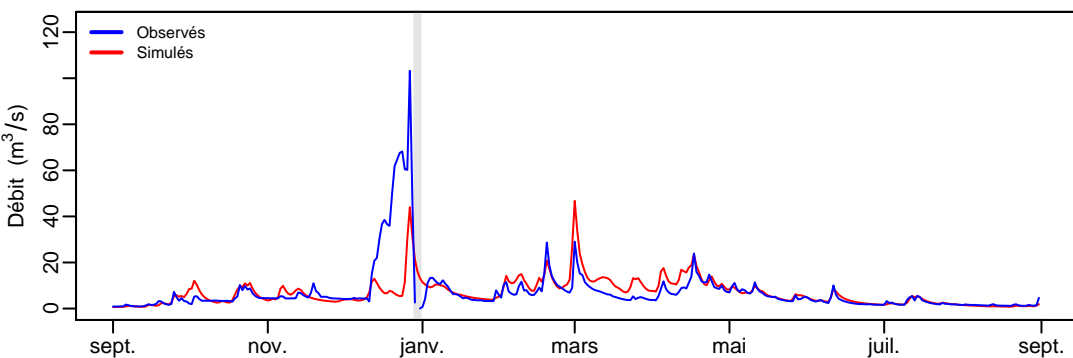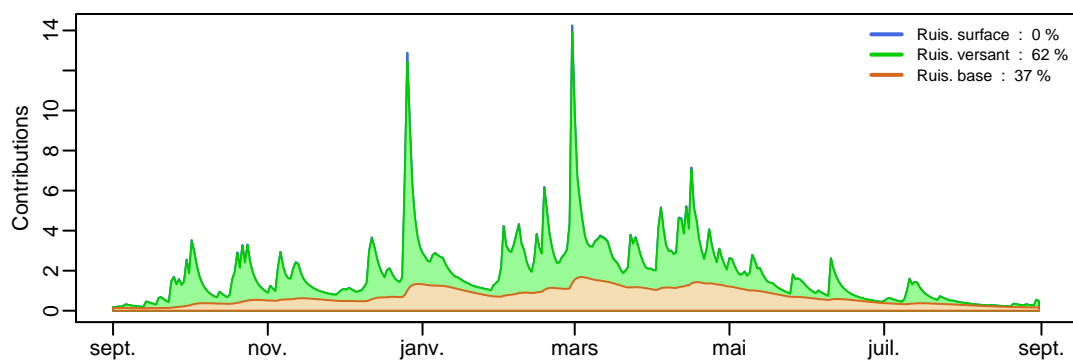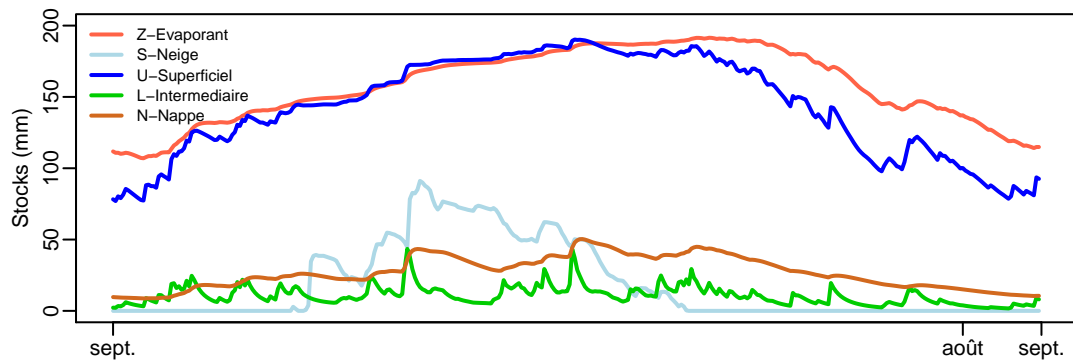

# k2523010 (317.3 km<sup>2</sup>) – année 2000–2001

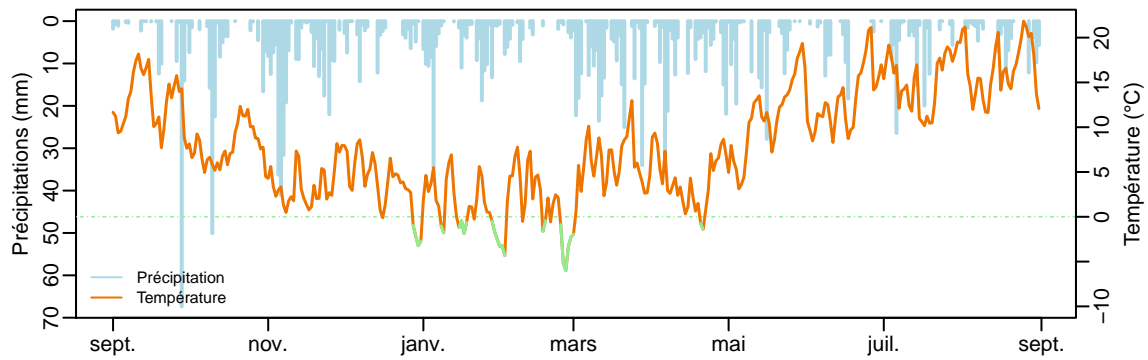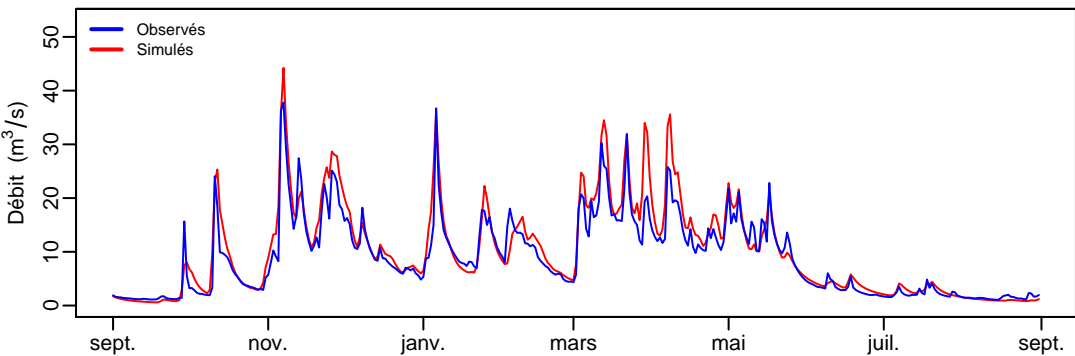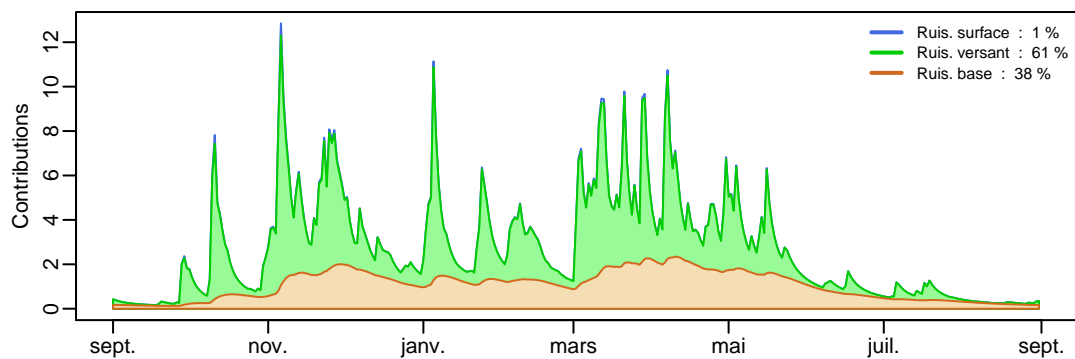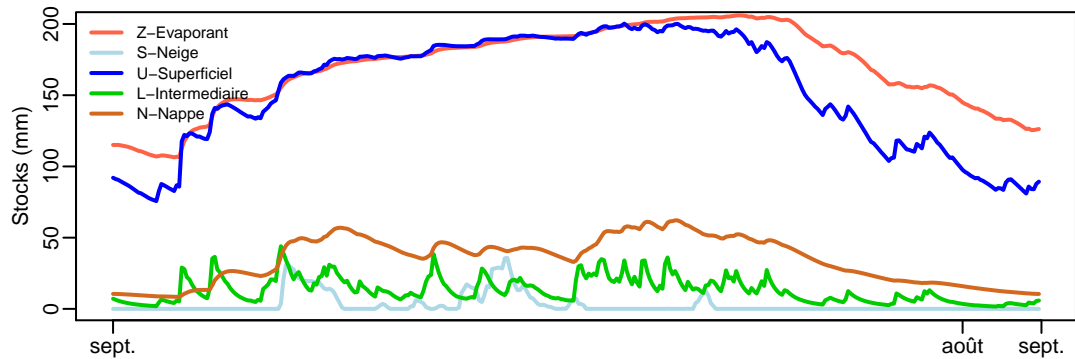

# k2523010 (317.3 km<sup>2</sup>) – année 2001–2002

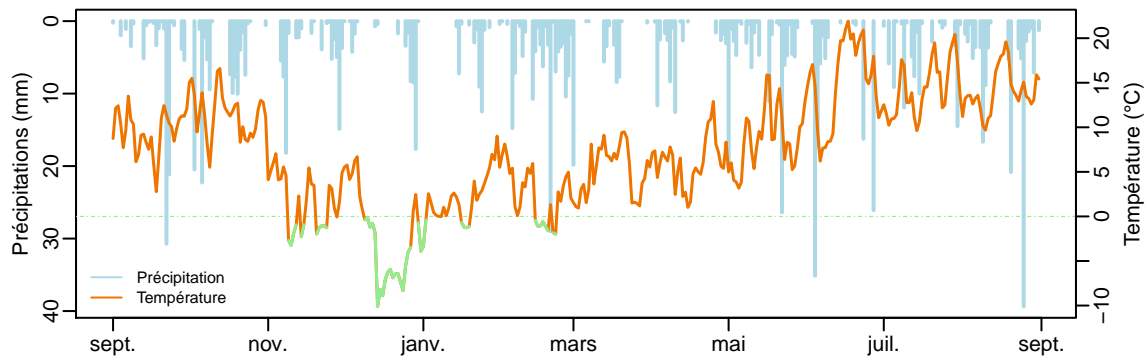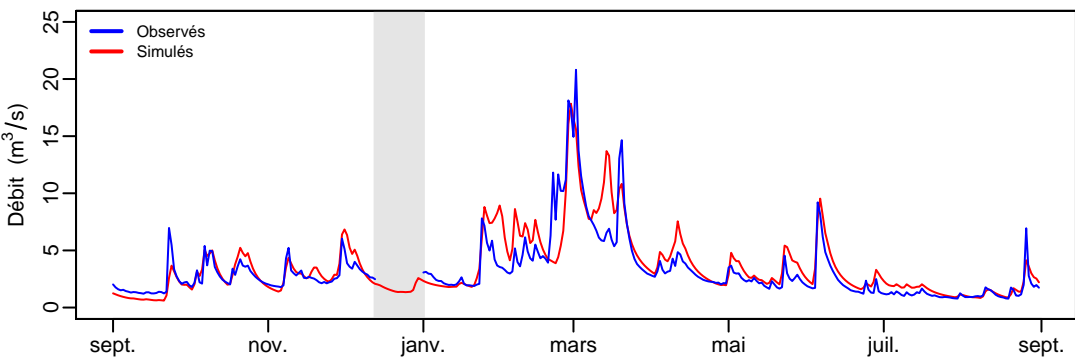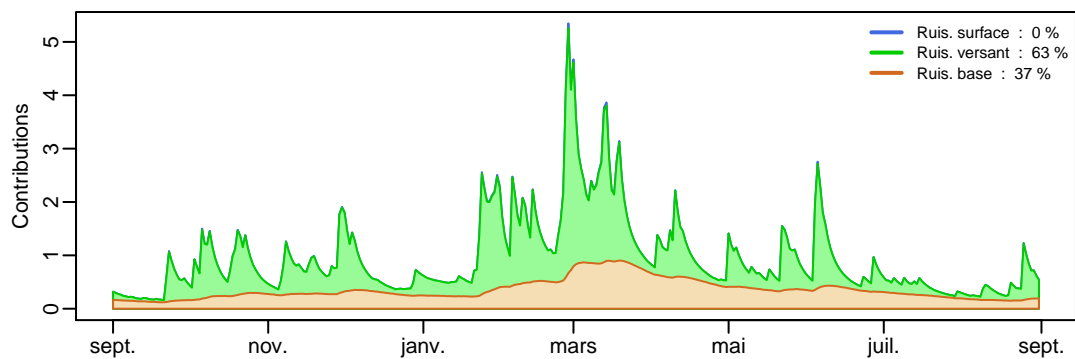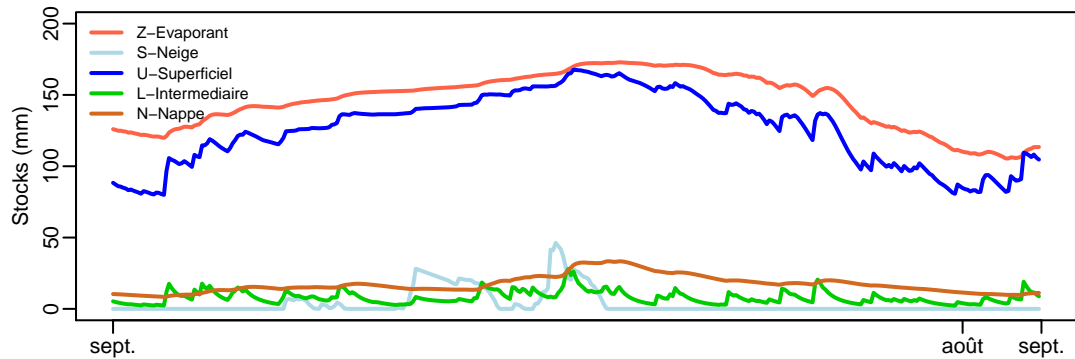

# k2523010 (317.3 km<sup>2</sup>) – année 2002–2003

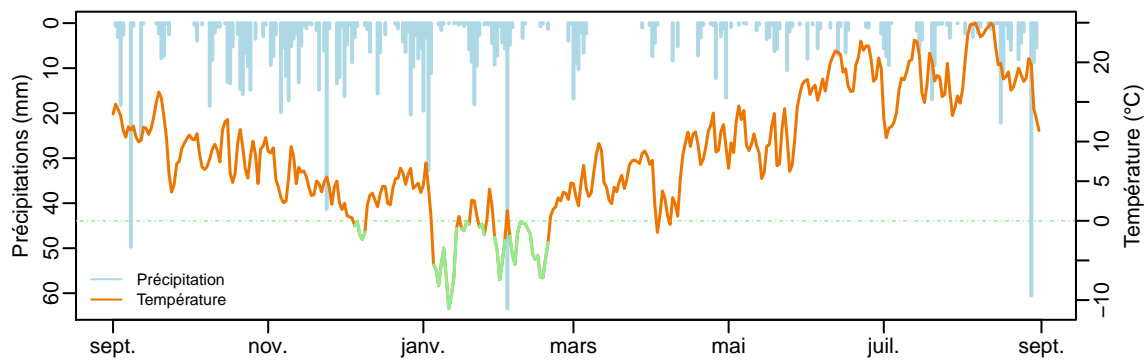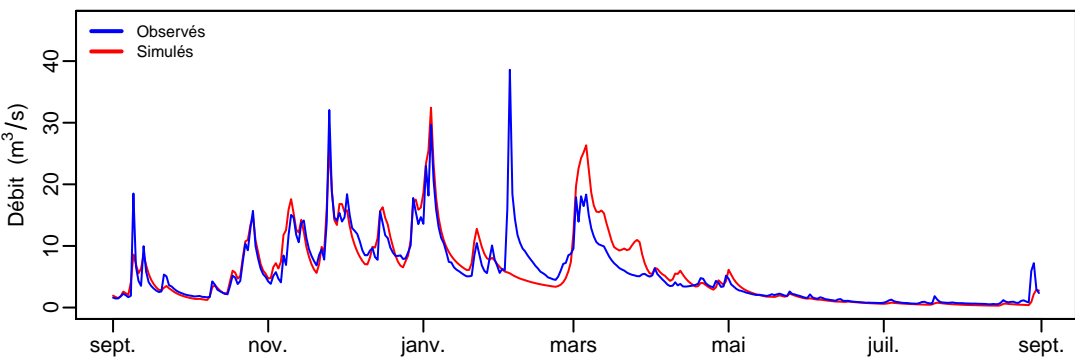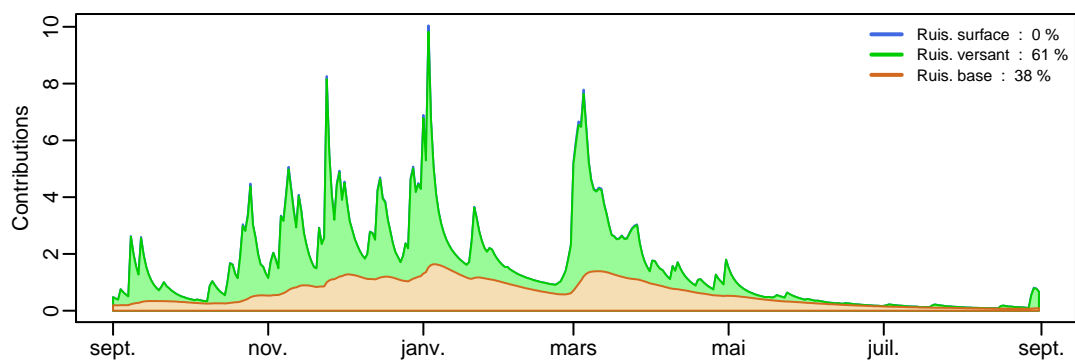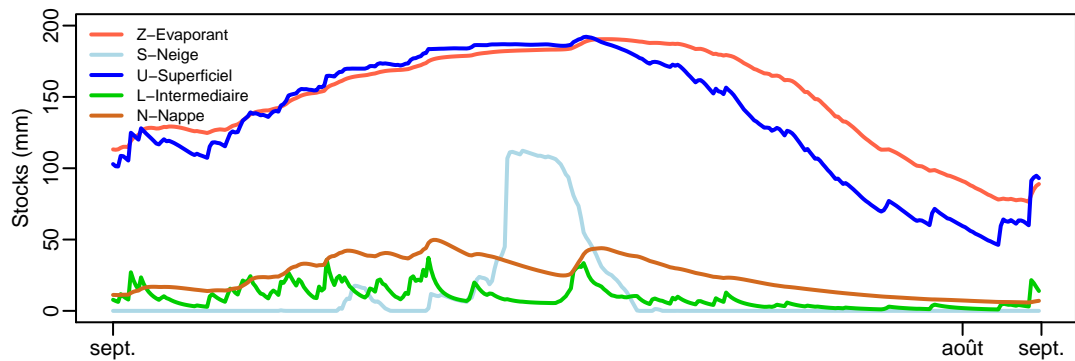

# k2523010 (317.3 km<sup>2</sup>) – année 2003–2004

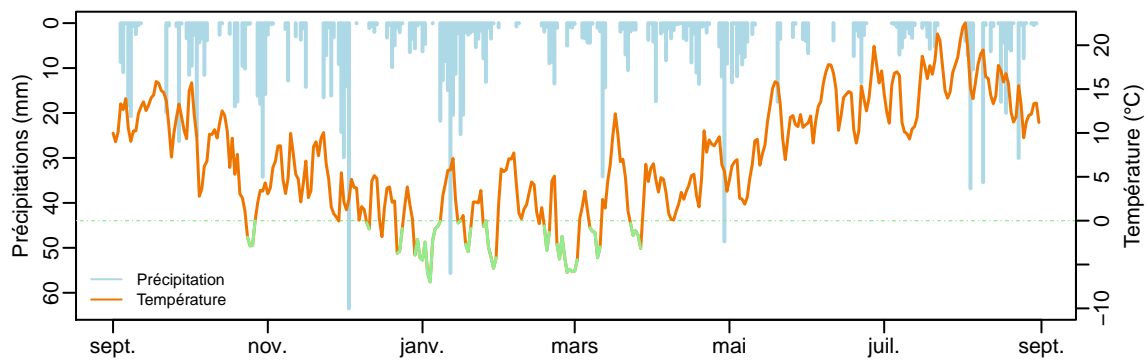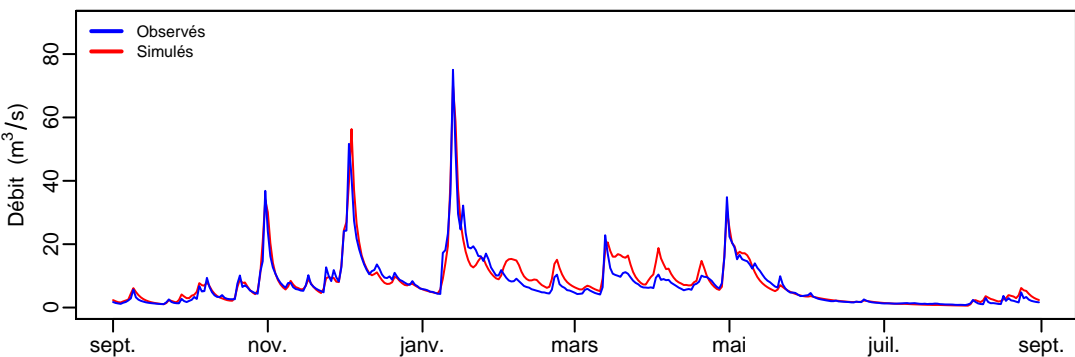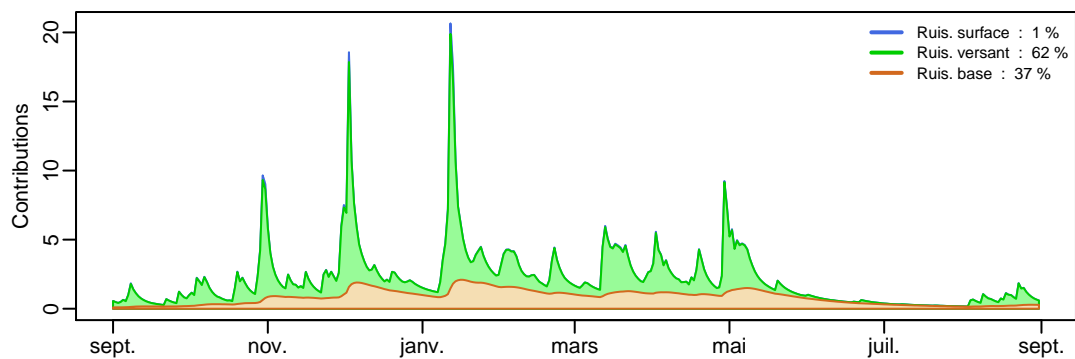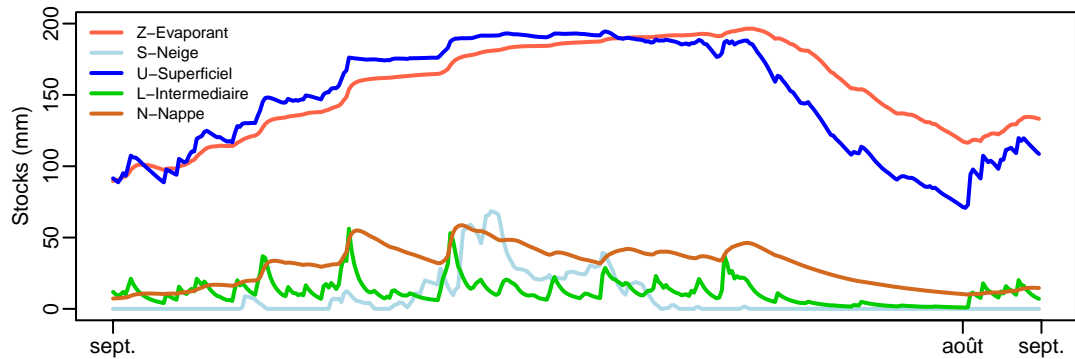

# k2523010 (317.3 km<sup>2</sup>) – année 2004–2005

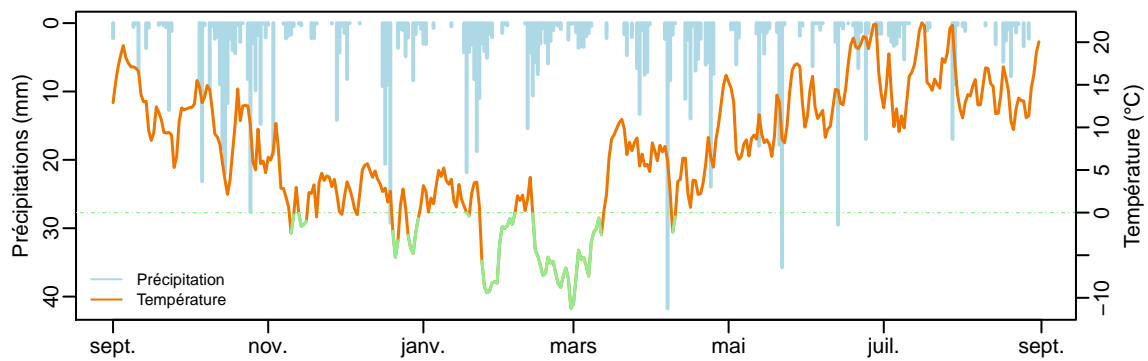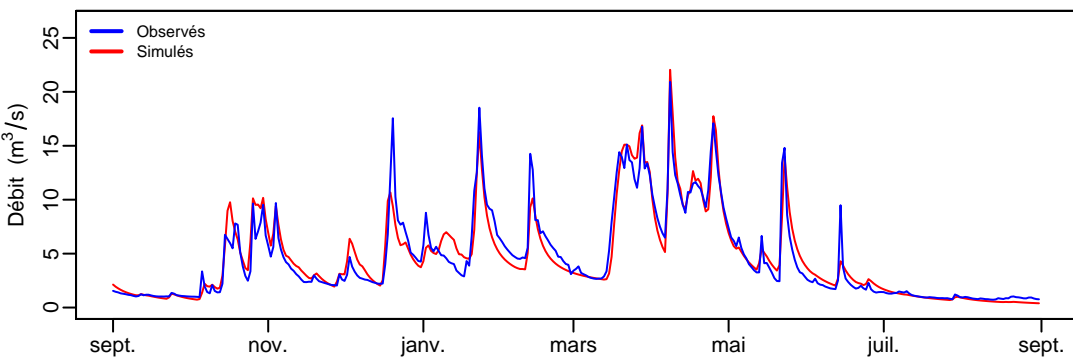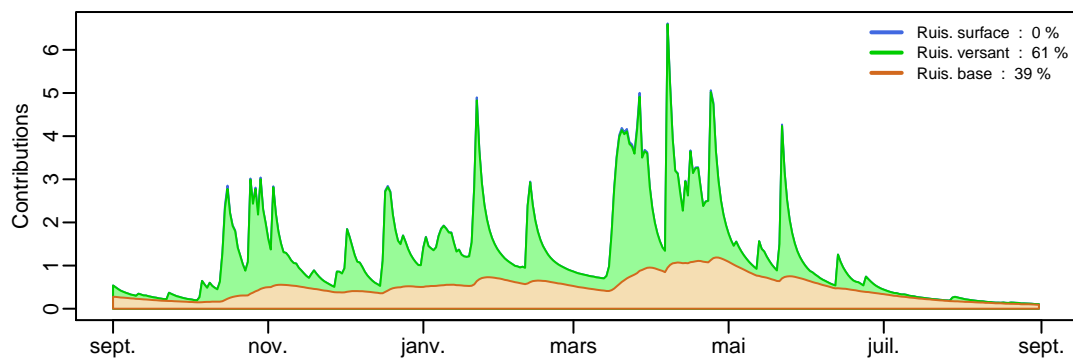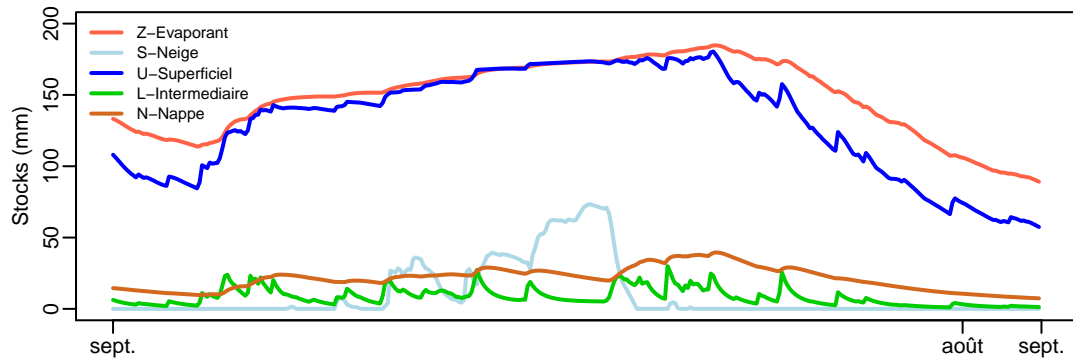

# k2523010 (317.3 km<sup>2</sup>) – année 2005–2006

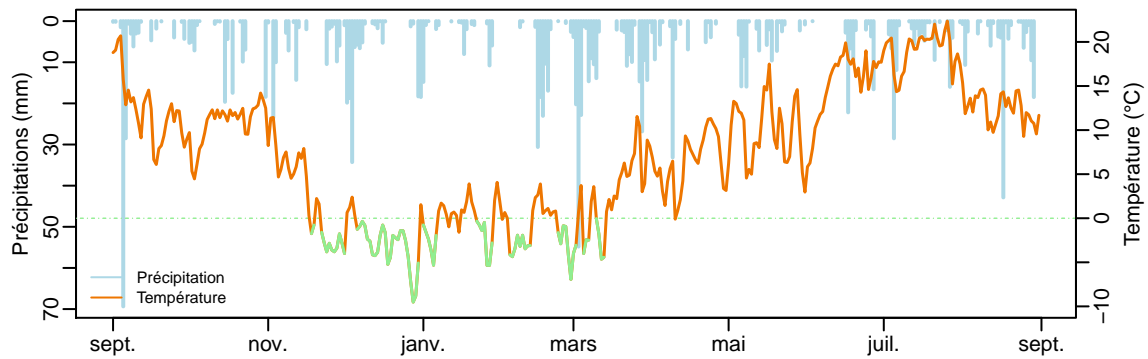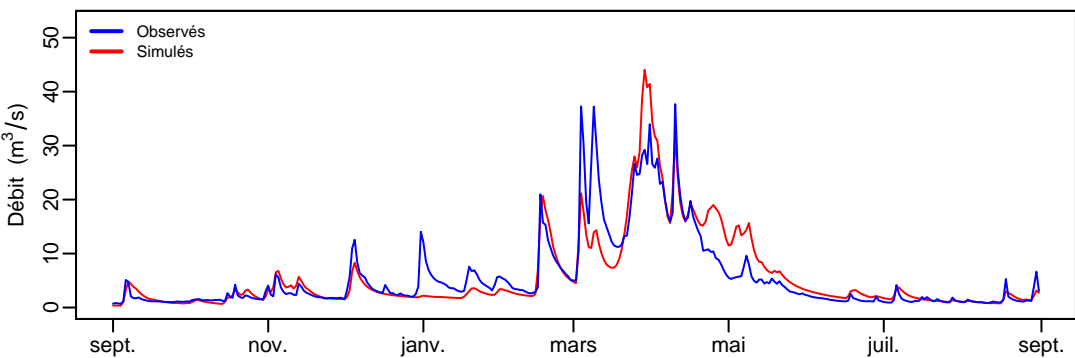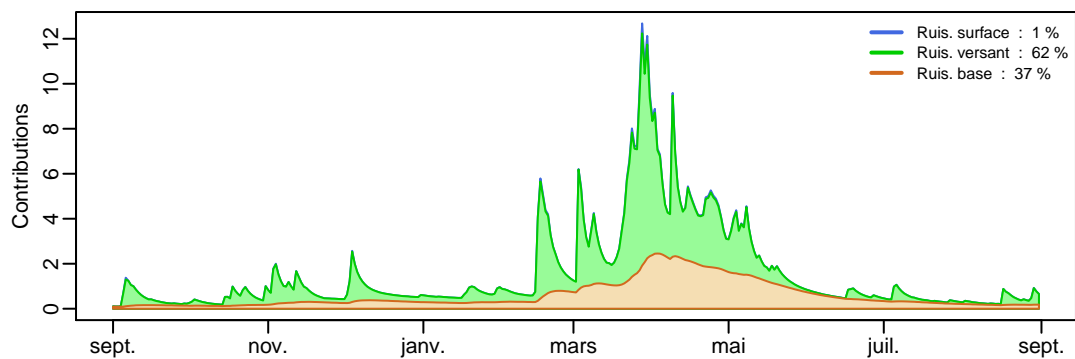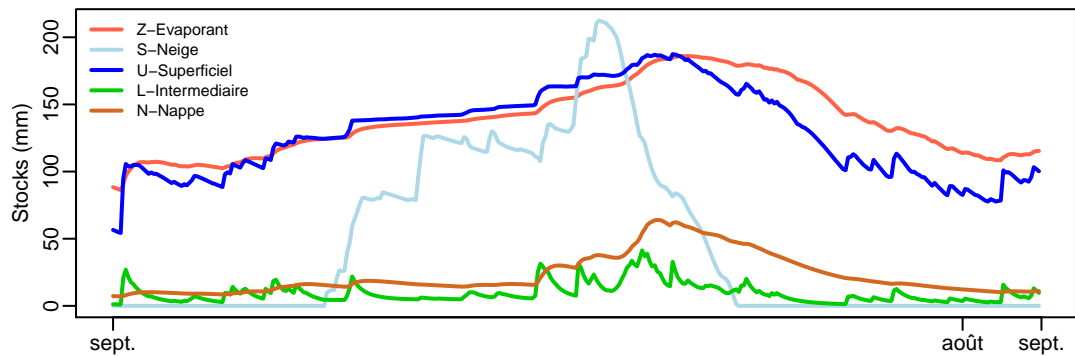



# k2523010 (317.3 km<sup>2</sup>) – année 2006–2007

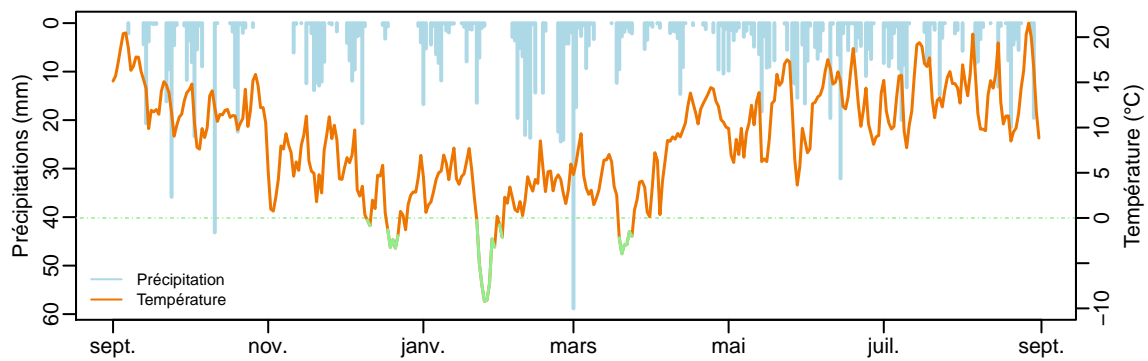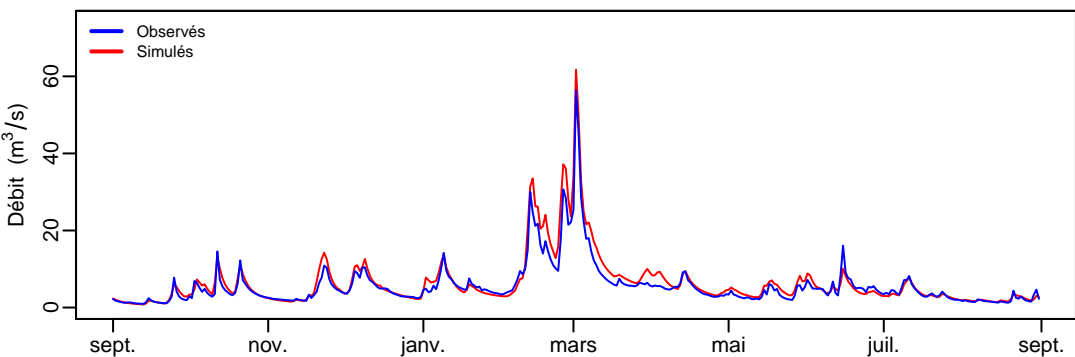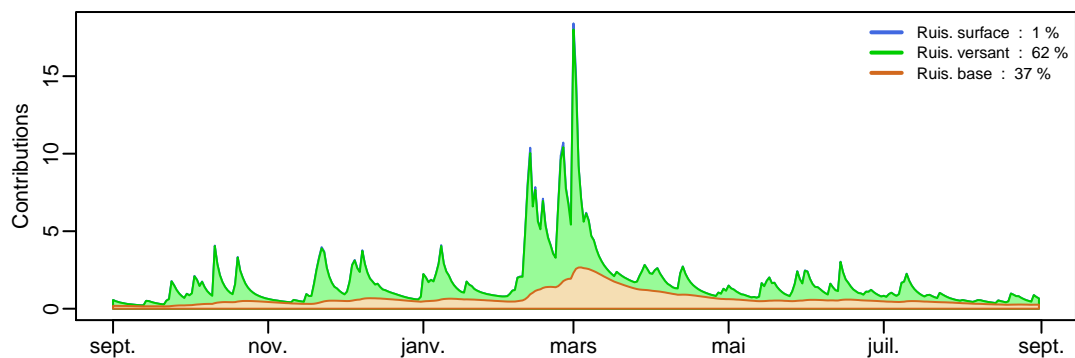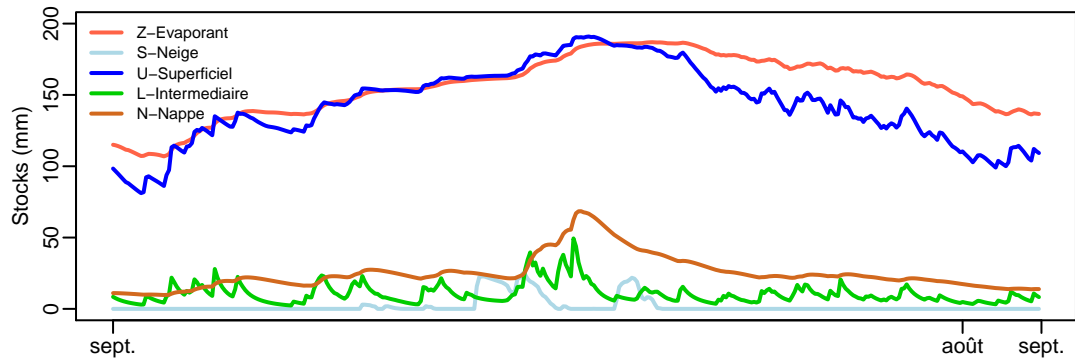

# k2523010 (317.3 km<sup>2</sup>) – année 2007–2008

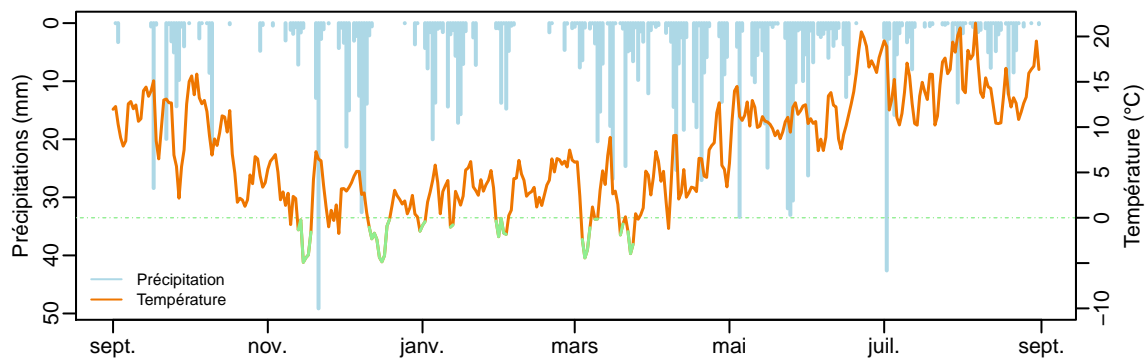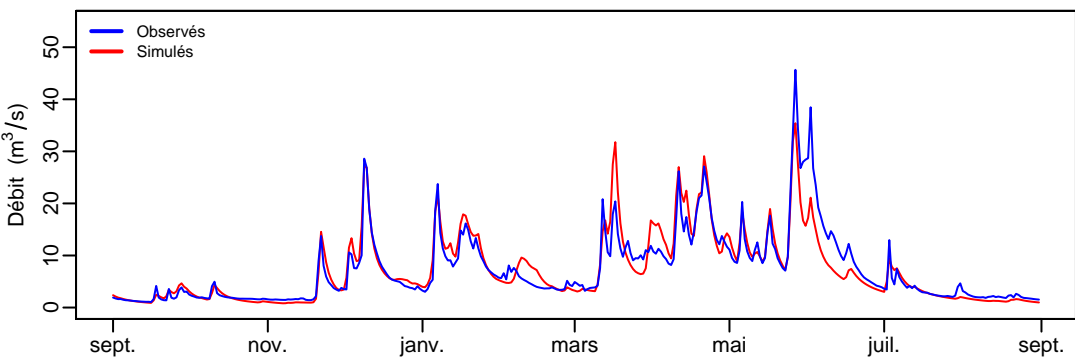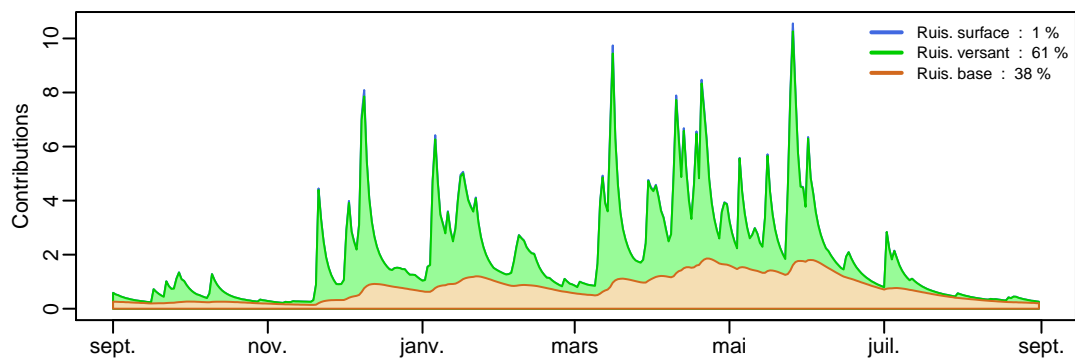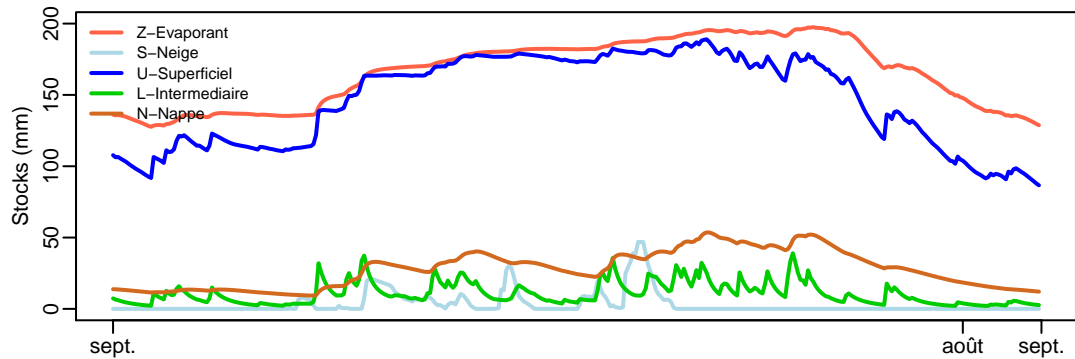

# k2523010 (317.3 km<sup>2</sup>) – année 2008–2009

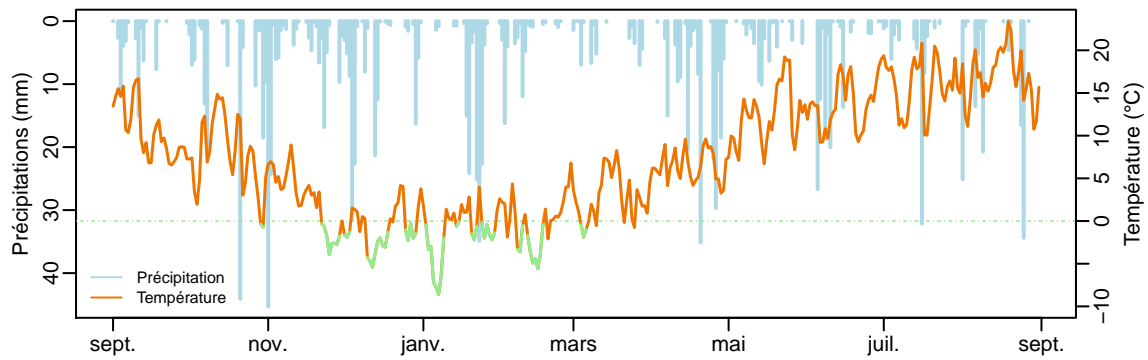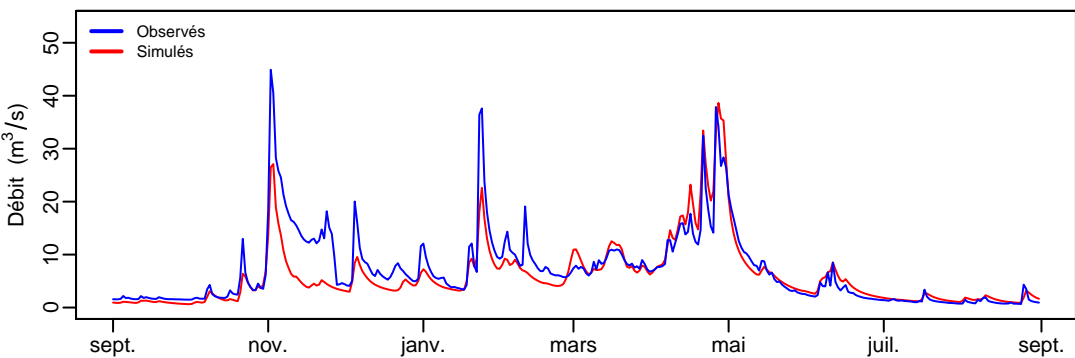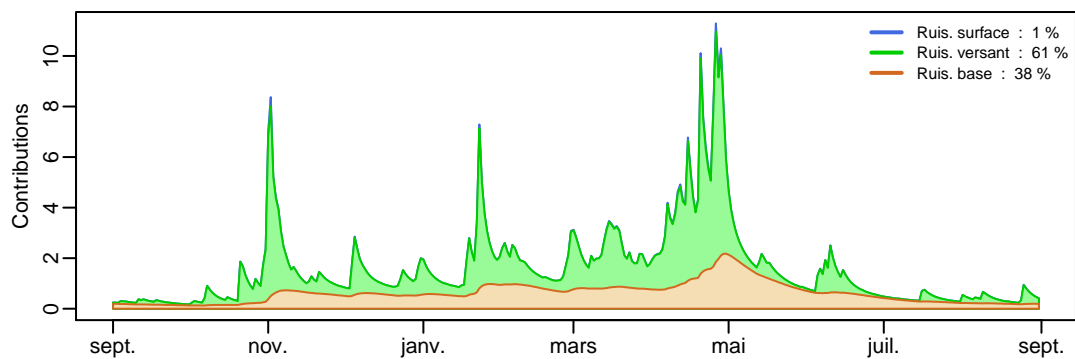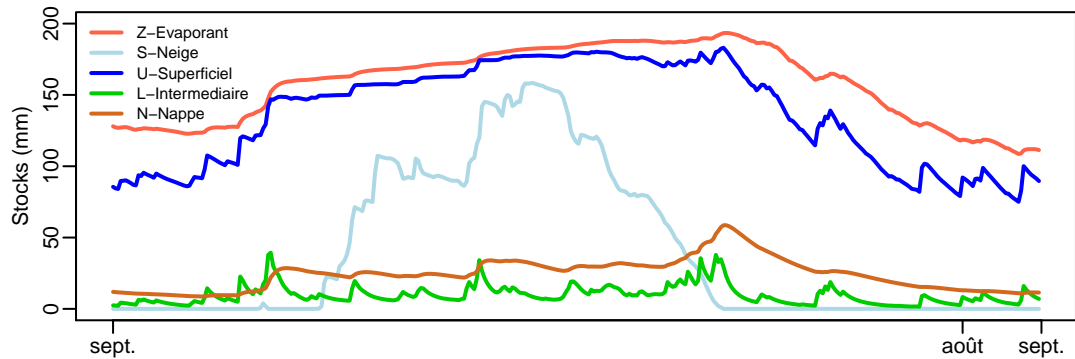

# k2534010 (99.87 km<sup>2</sup>) – année 1995–1996

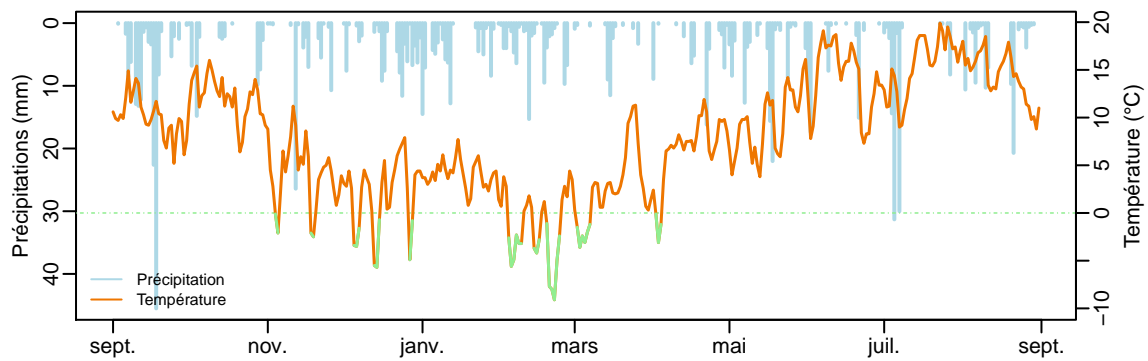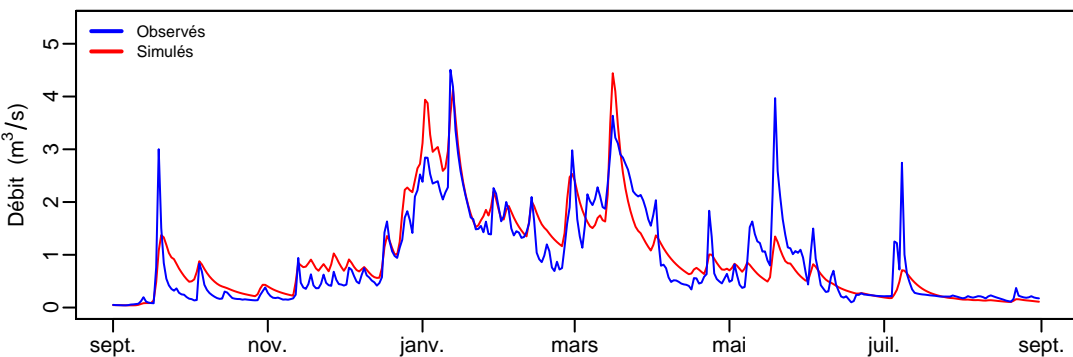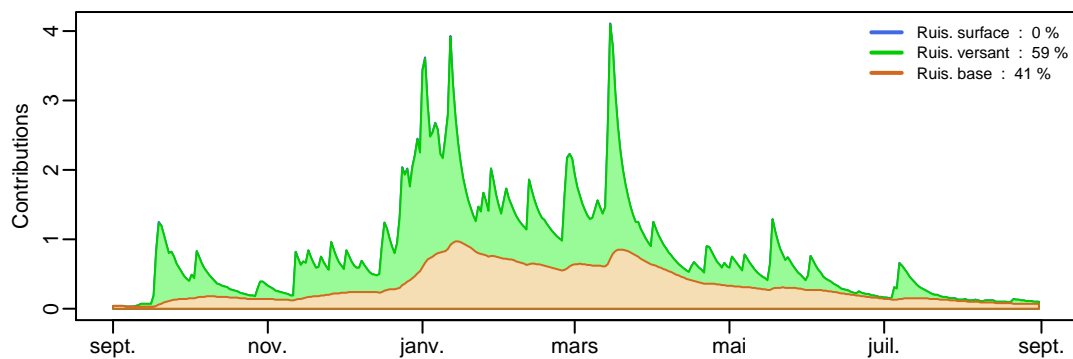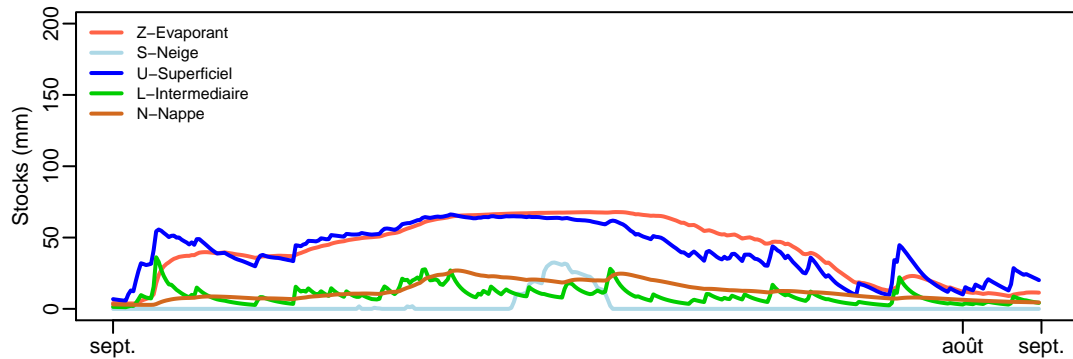

# k2534010 (99.87 km<sup>2</sup>) – année 1996–1997

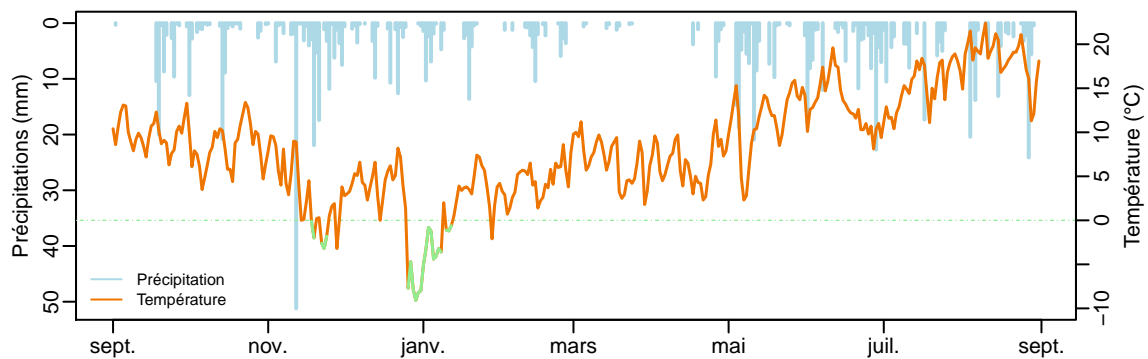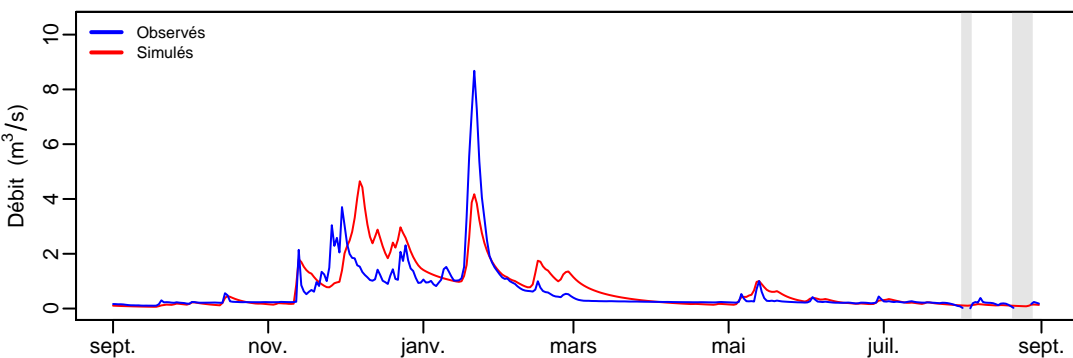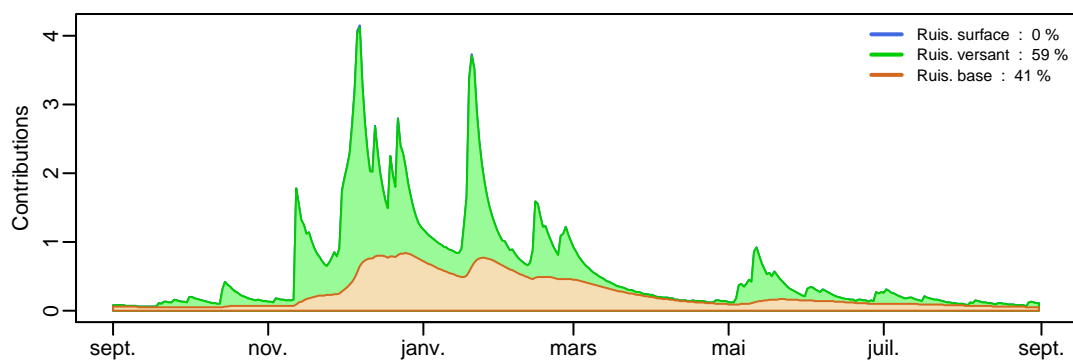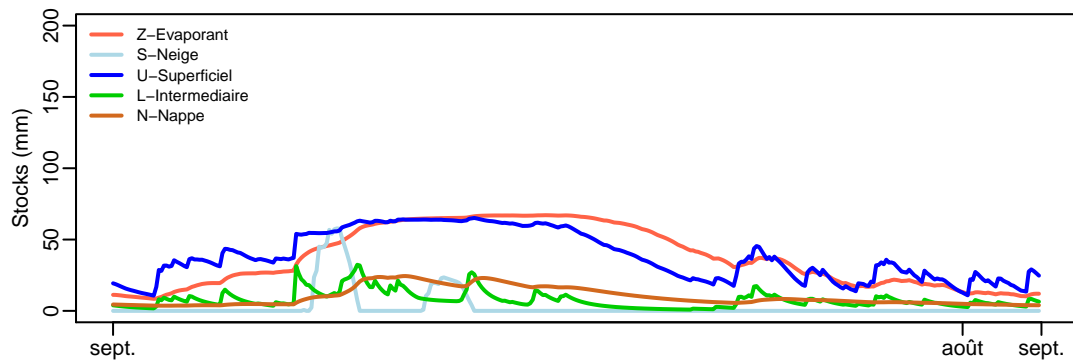

# k2534010 (99.87 km<sup>2</sup>) – année 1997–1998

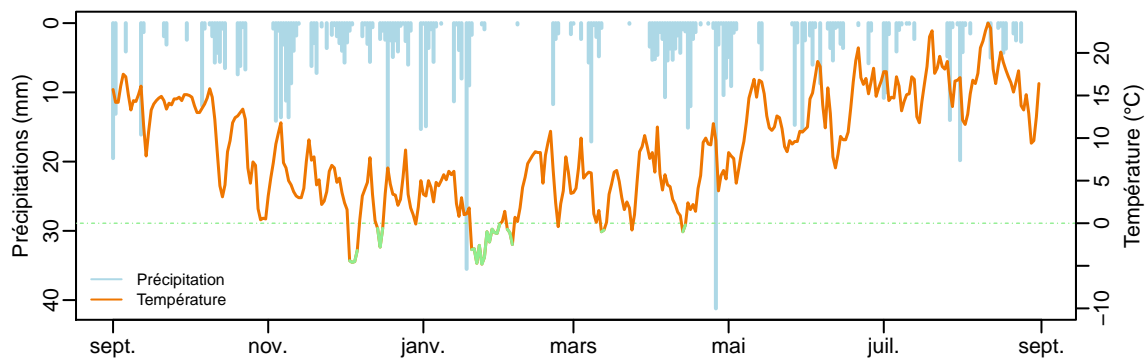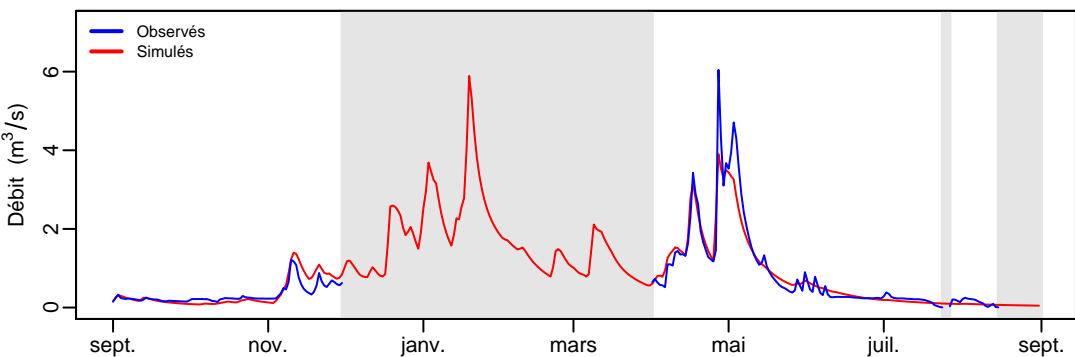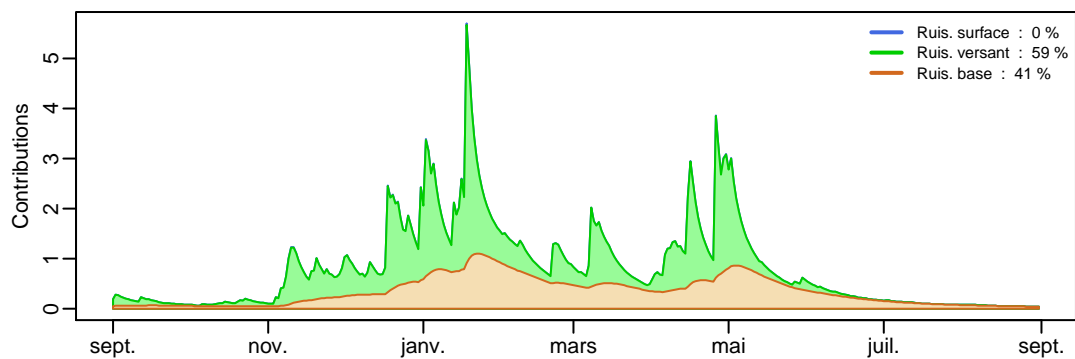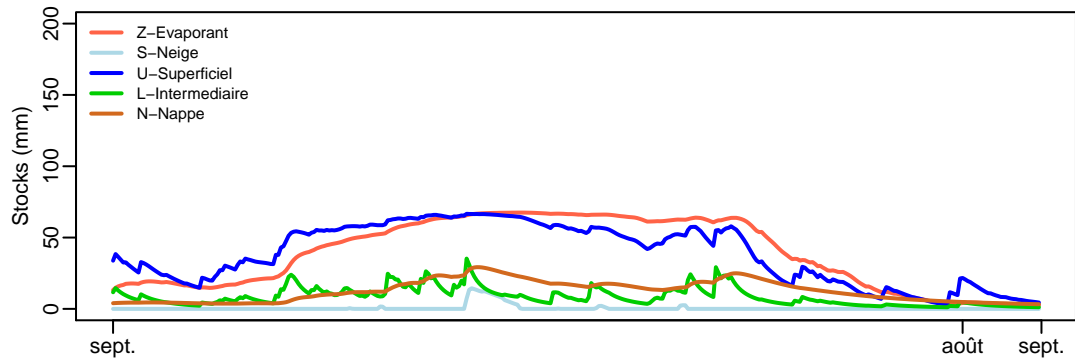

# k2534010 (99.87 km<sup>2</sup>) – année 1998–1999

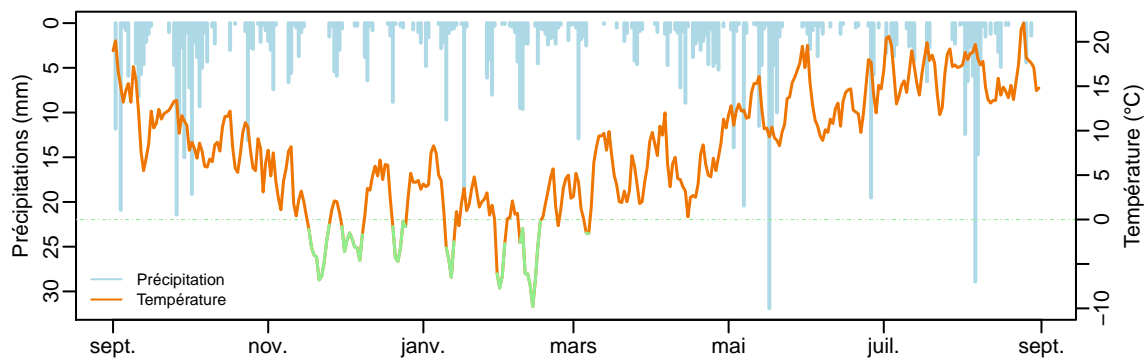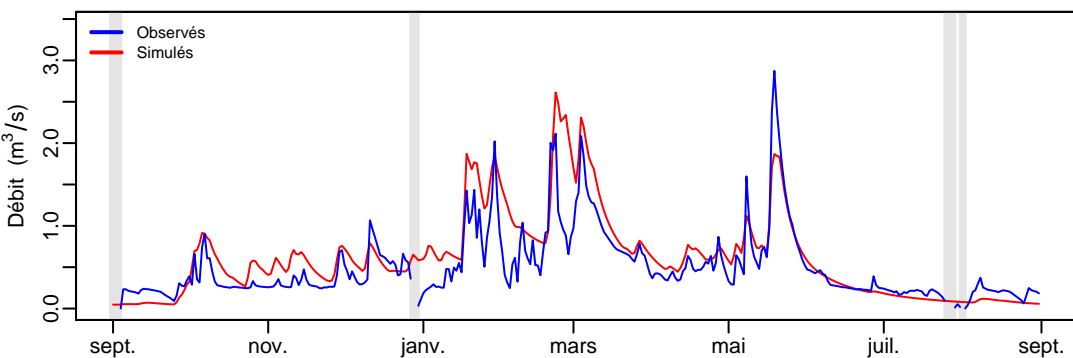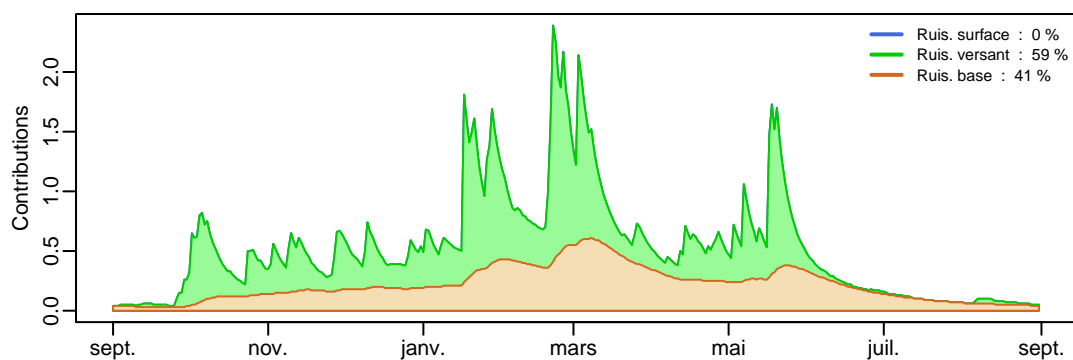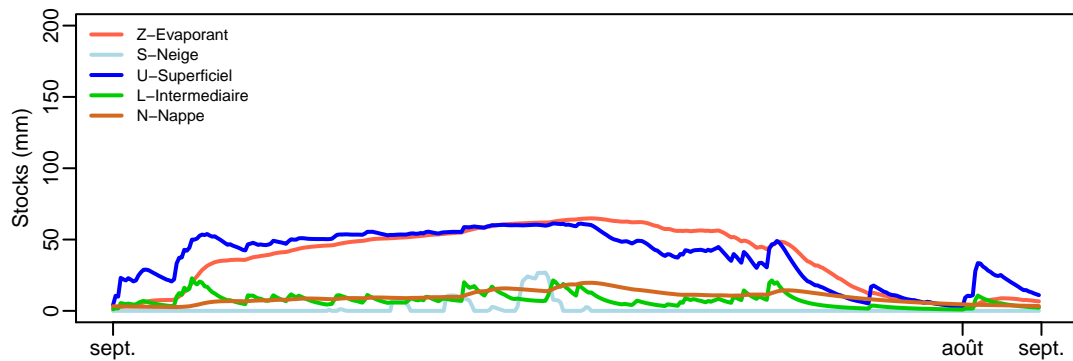

# k2534010 (99.87 km<sup>2</sup>) – année 1999–2000

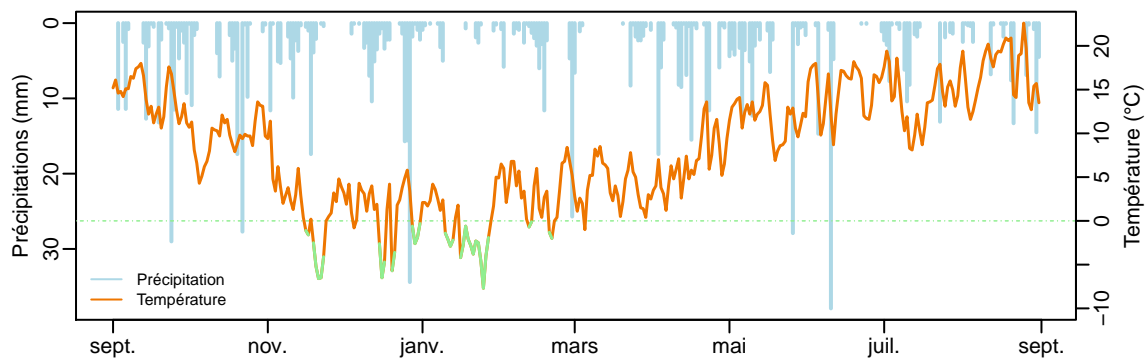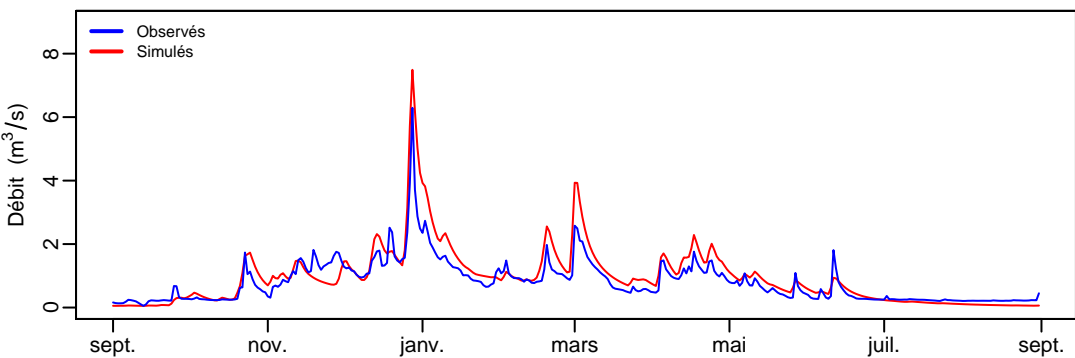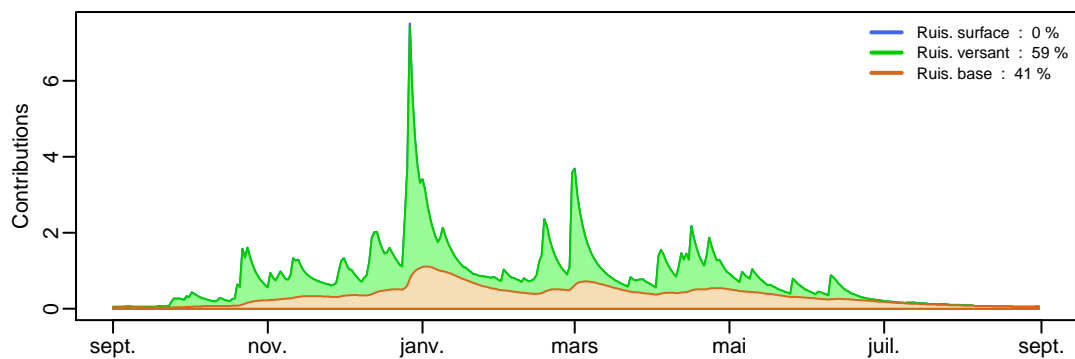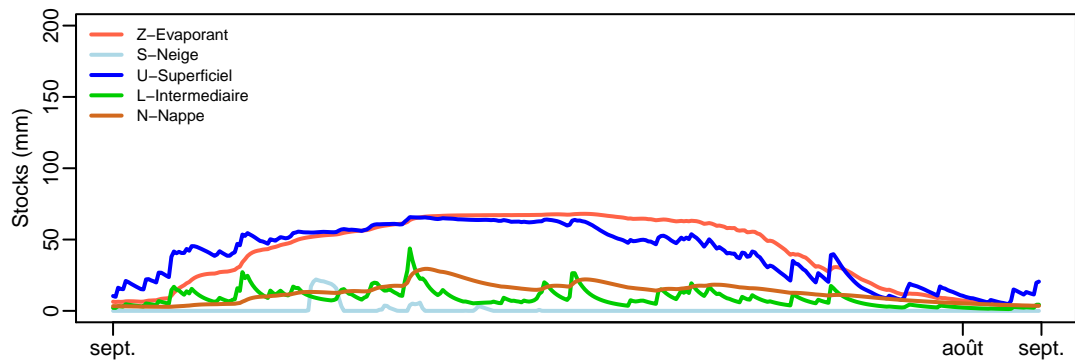



# k2534010 (99.87 km<sup>2</sup>) – année 2000–2001

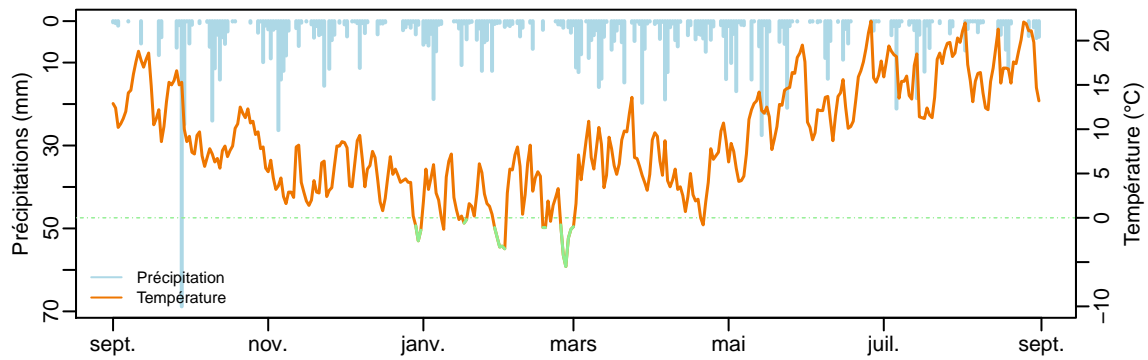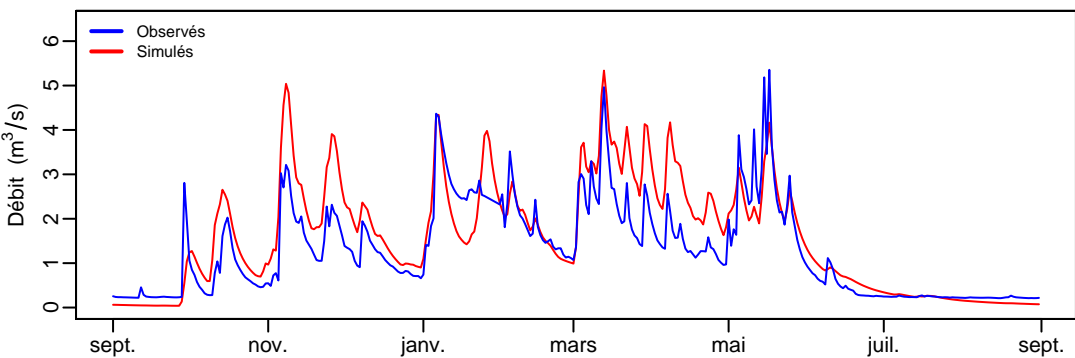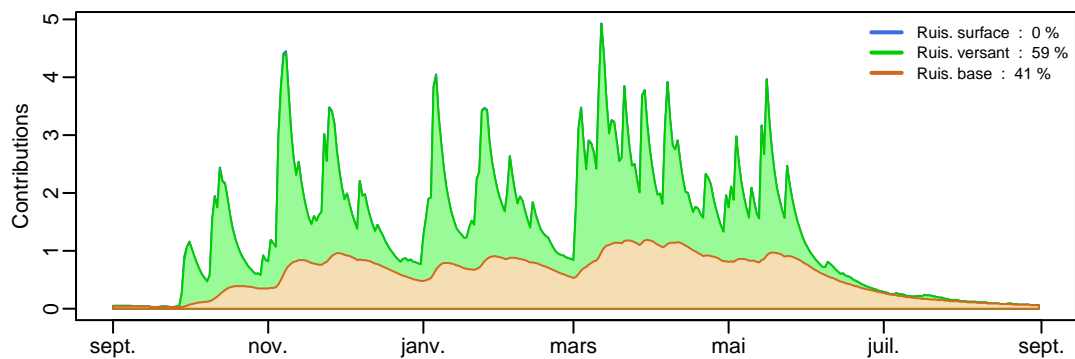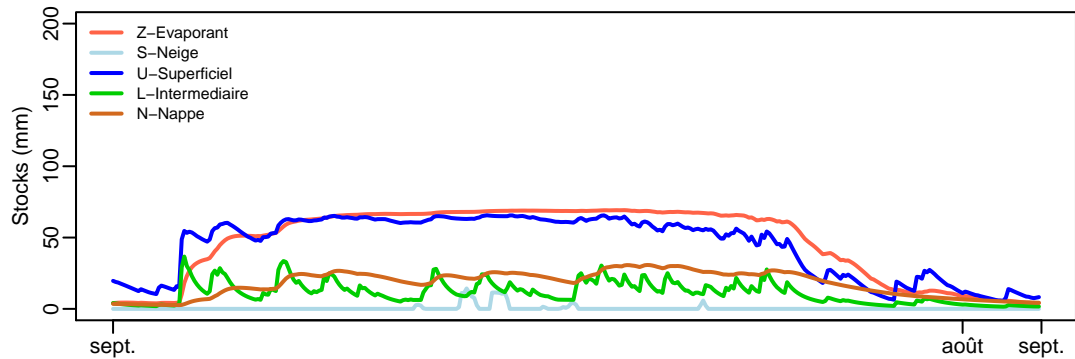

# k2534010 (99.87 km<sup>2</sup>) – année 2001–2002

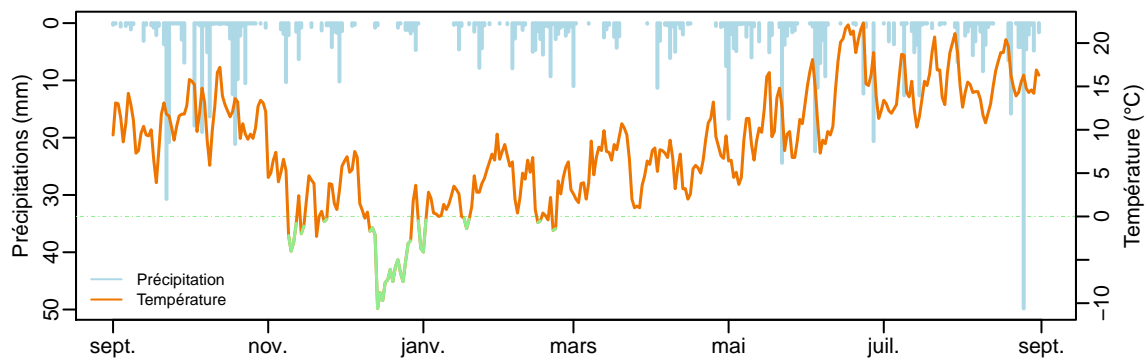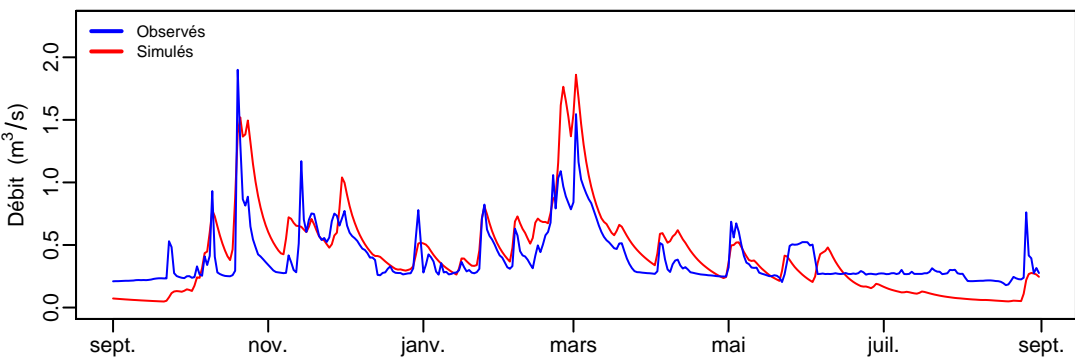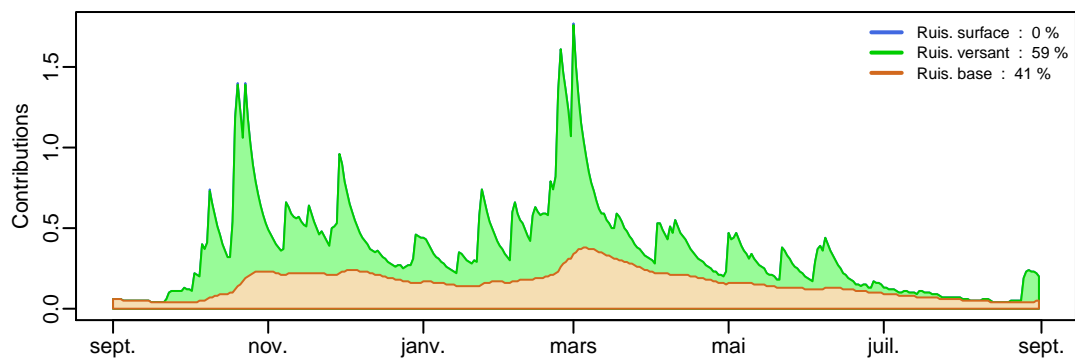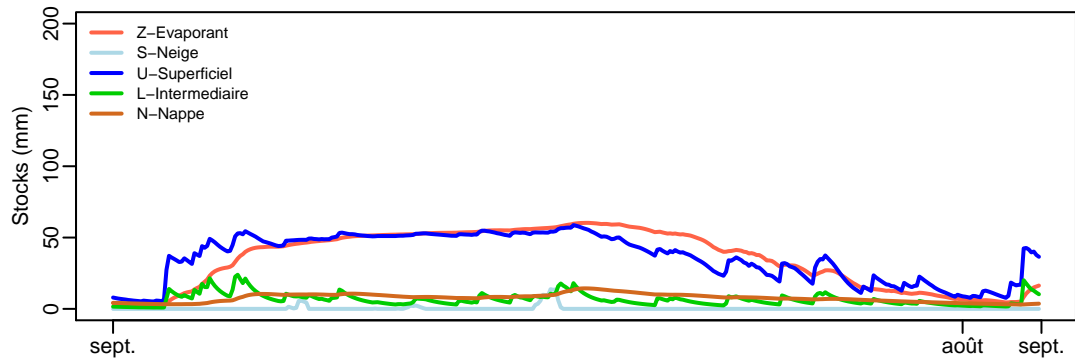

# k2534010 (99.87 km<sup>2</sup>) – année 2002–2003

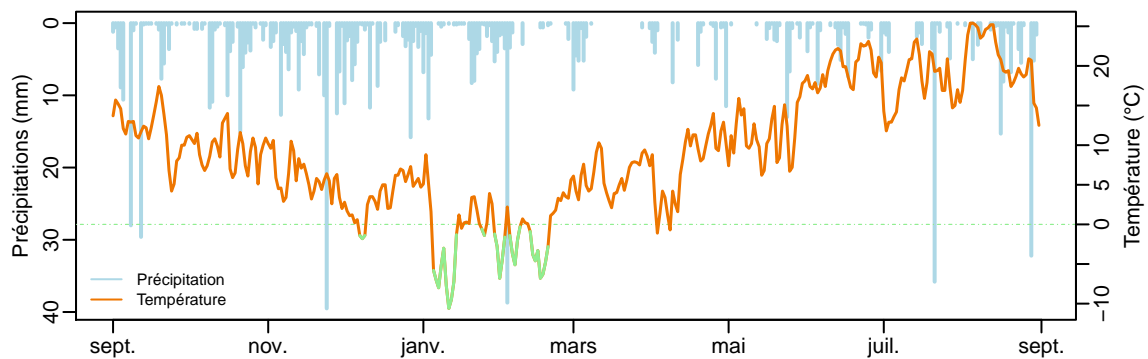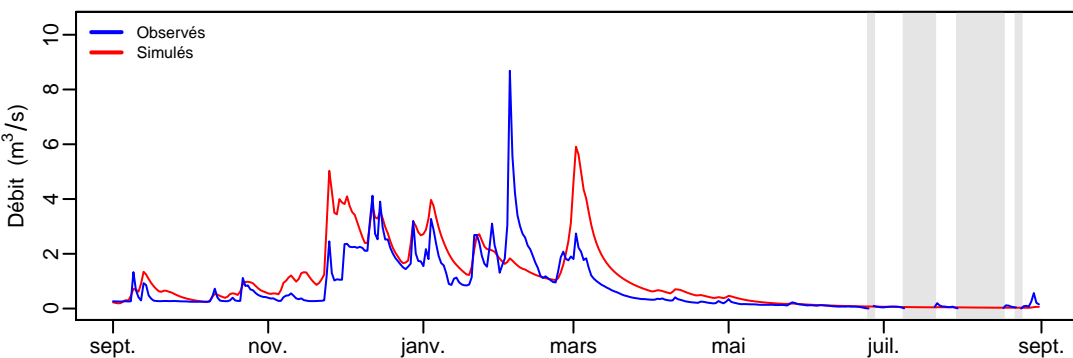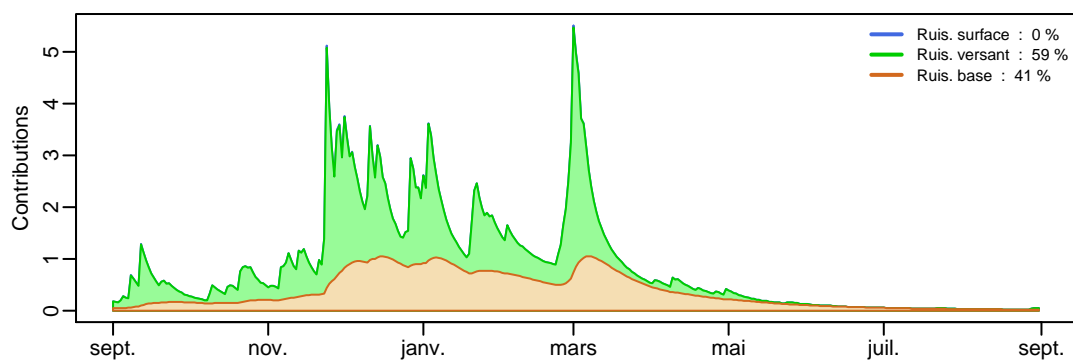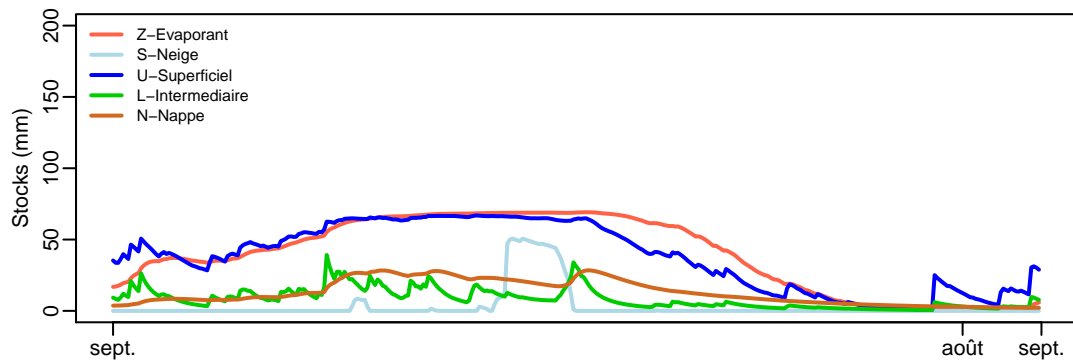

# k2534010 (99.87 km<sup>2</sup>) – année 2003–2004

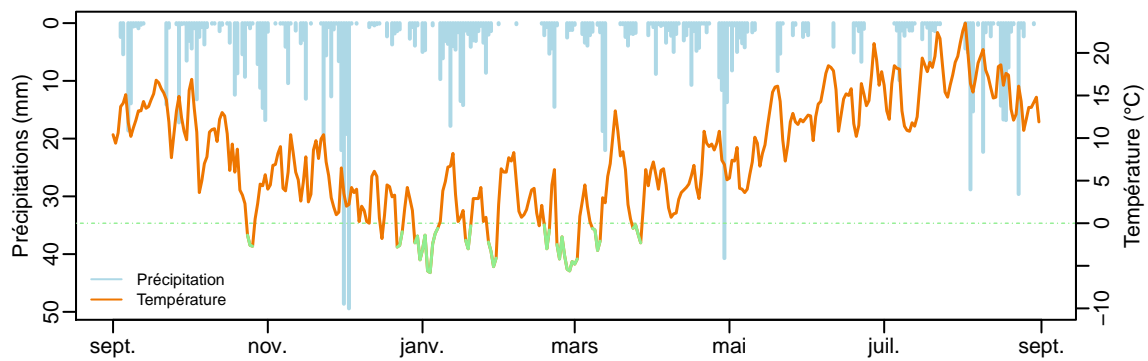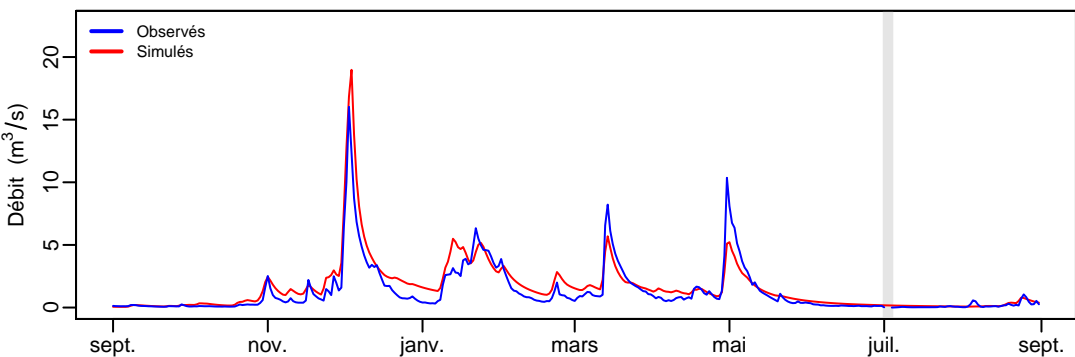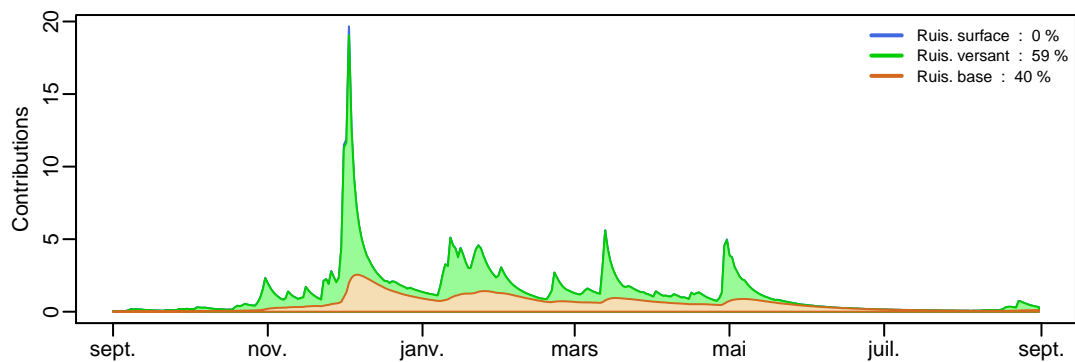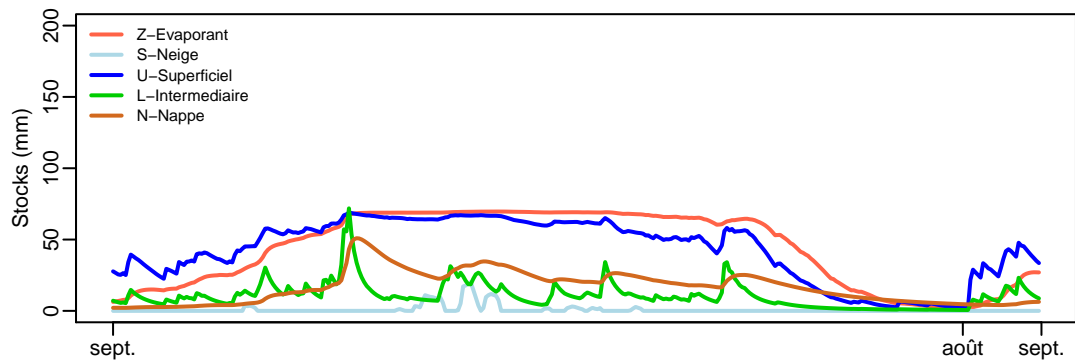

# k2534010 (99.87 km<sup>2</sup>) – année 2004–2005

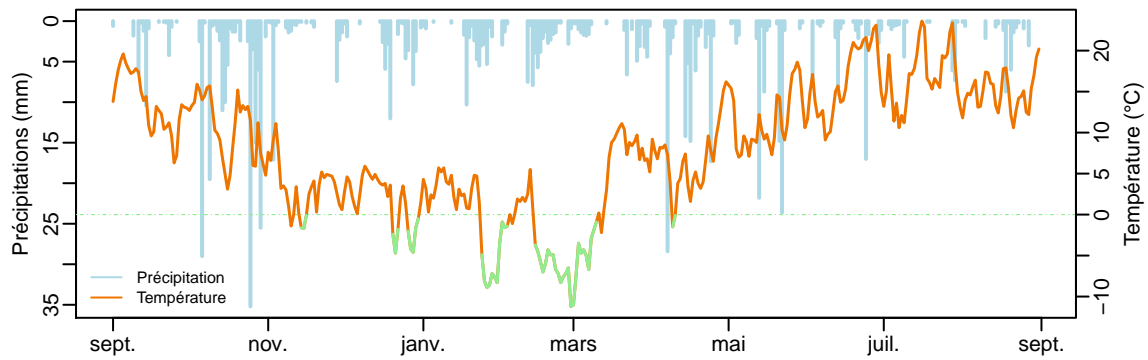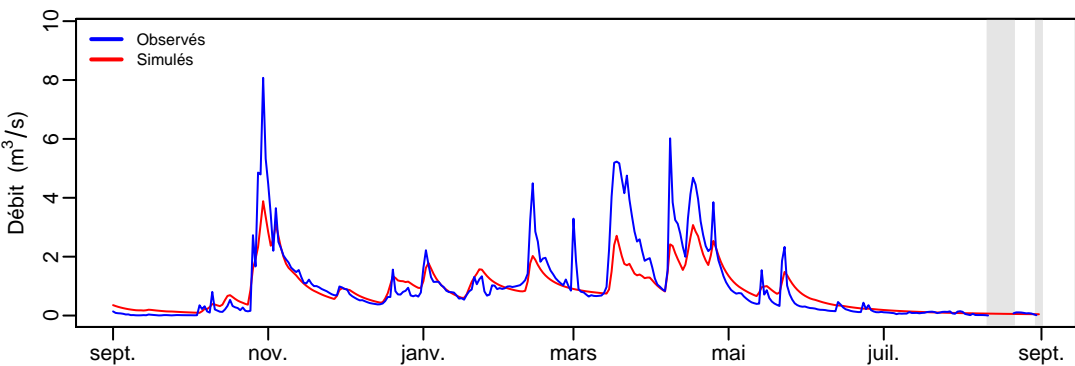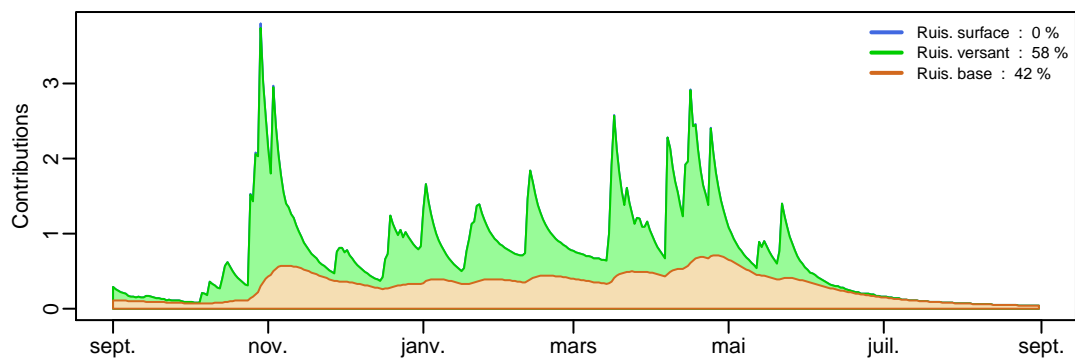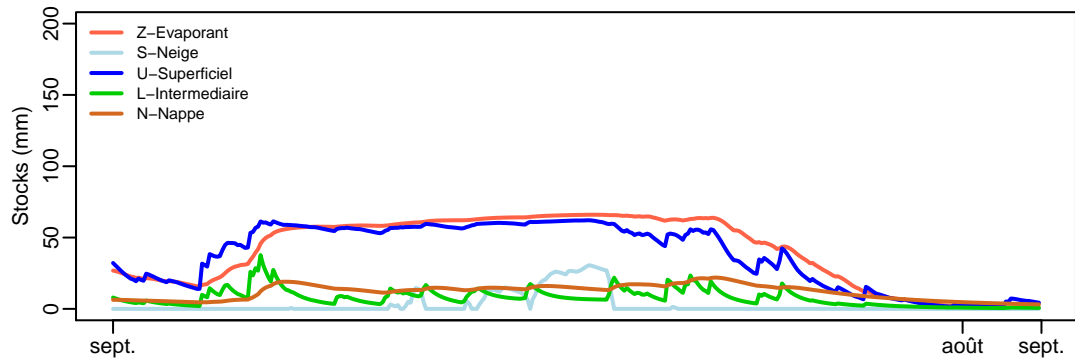

# k2534010 (99.87 km<sup>2</sup>) – année 2005–2006

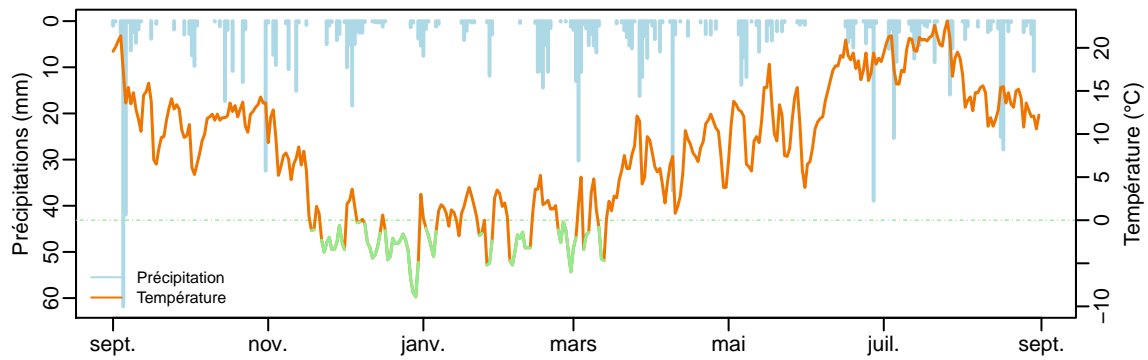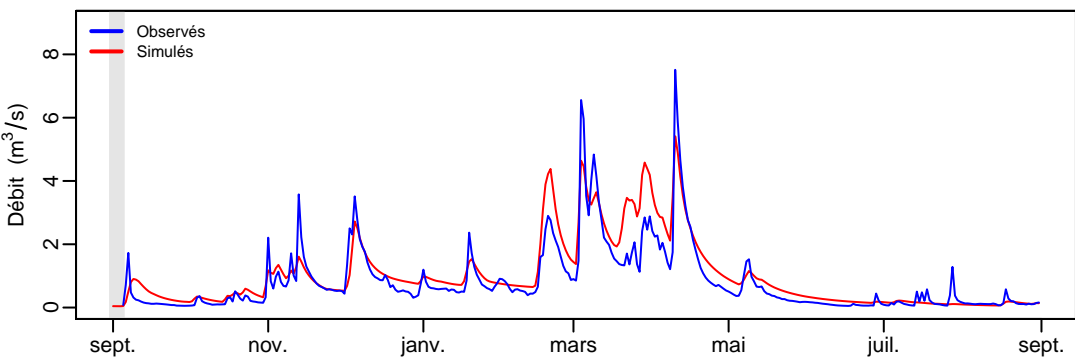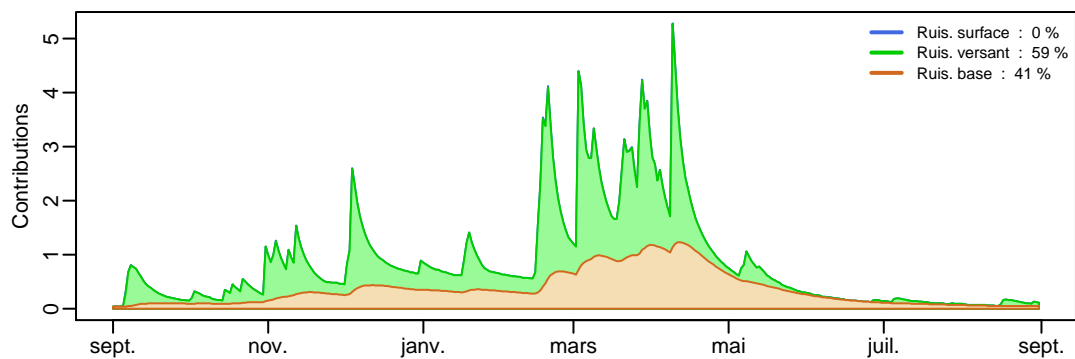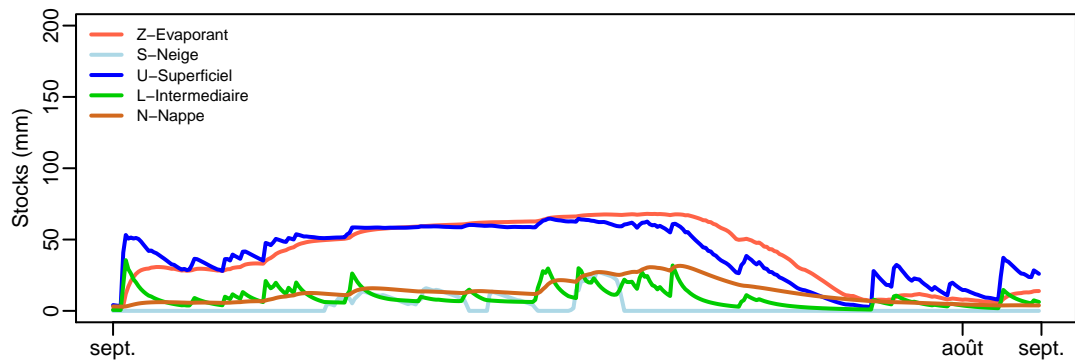

# k2534010 (99.87 km<sup>2</sup>) – année 2006–2007

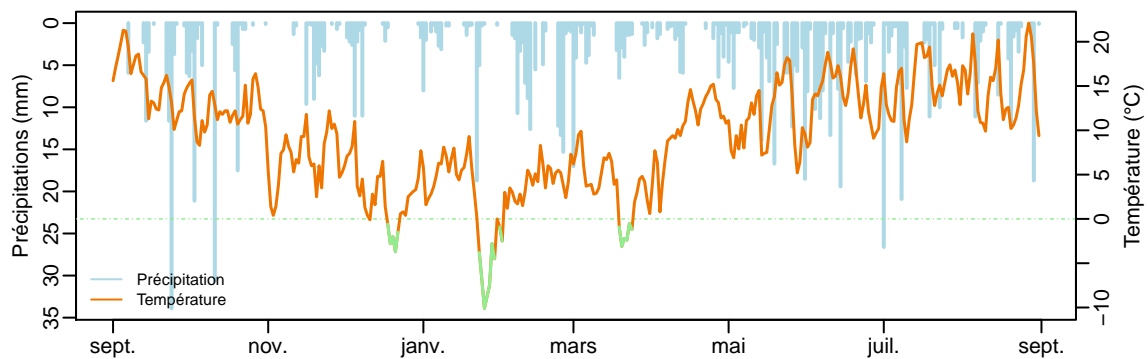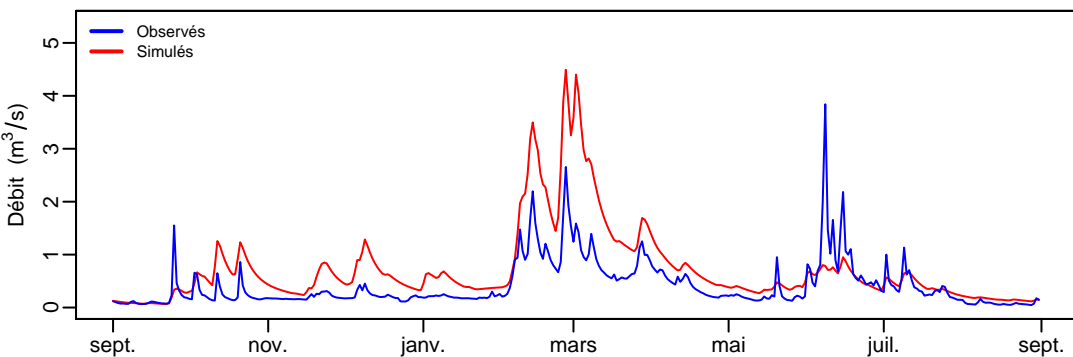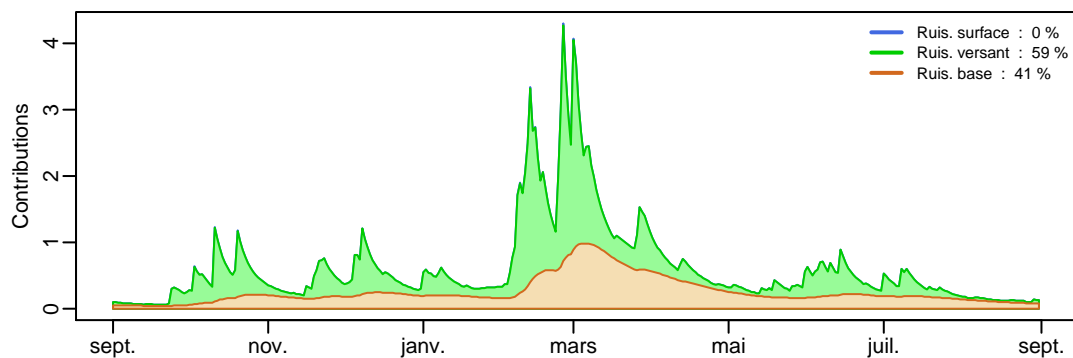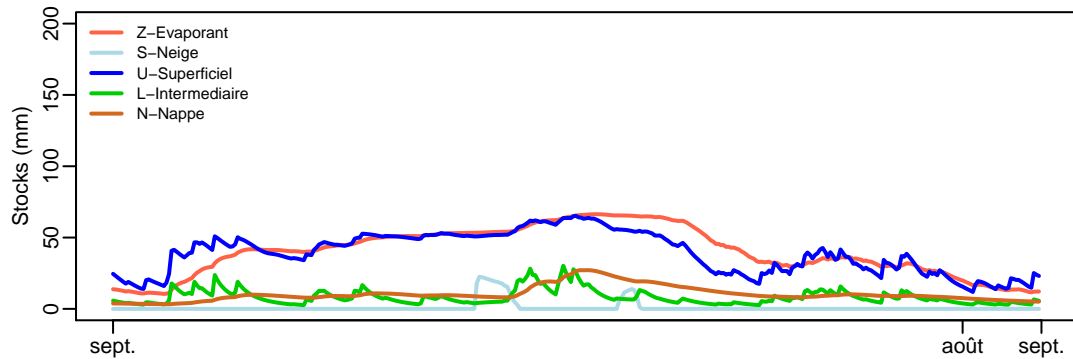

# k2534010 (99.87 km<sup>2</sup>) – année 2007–2008

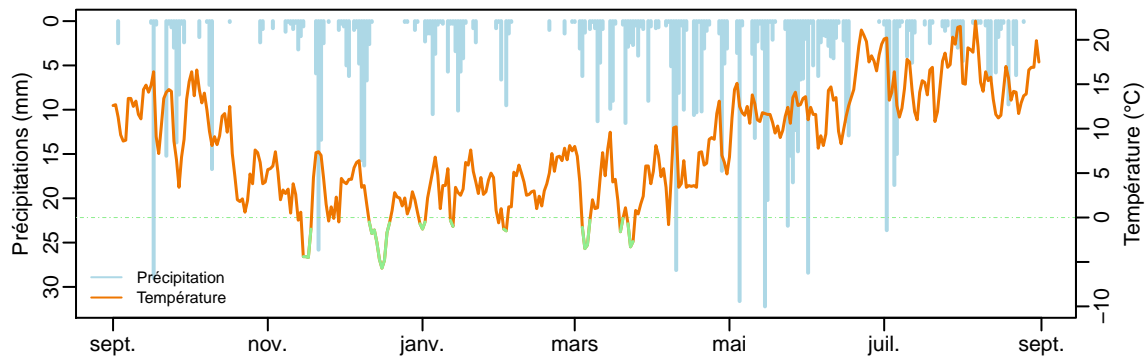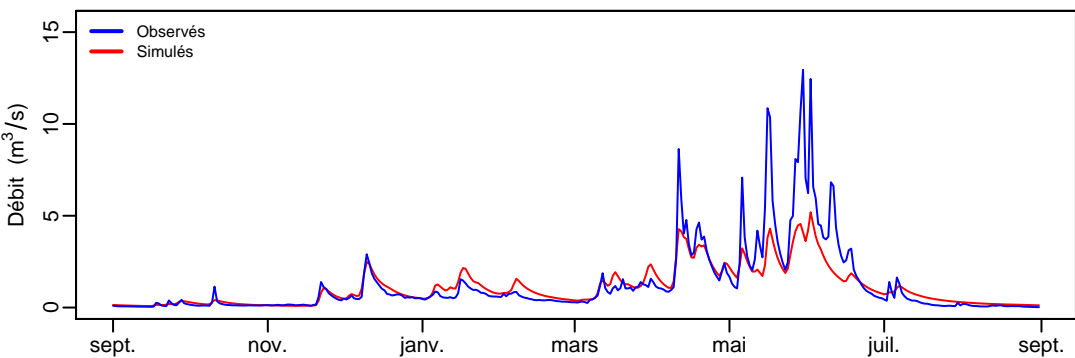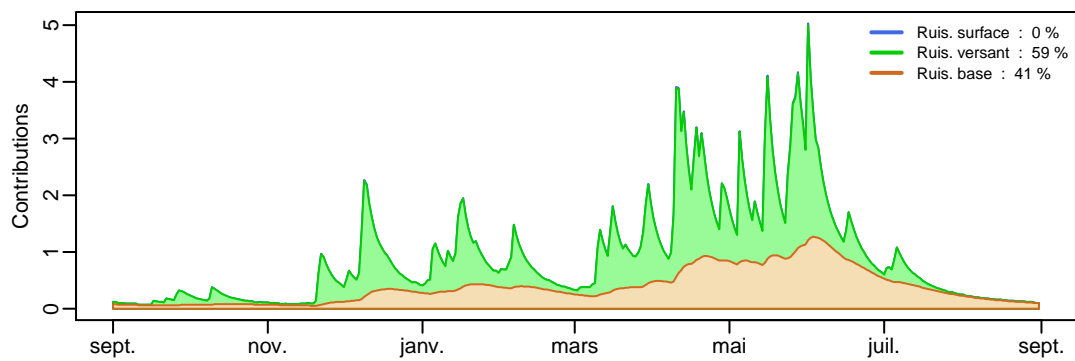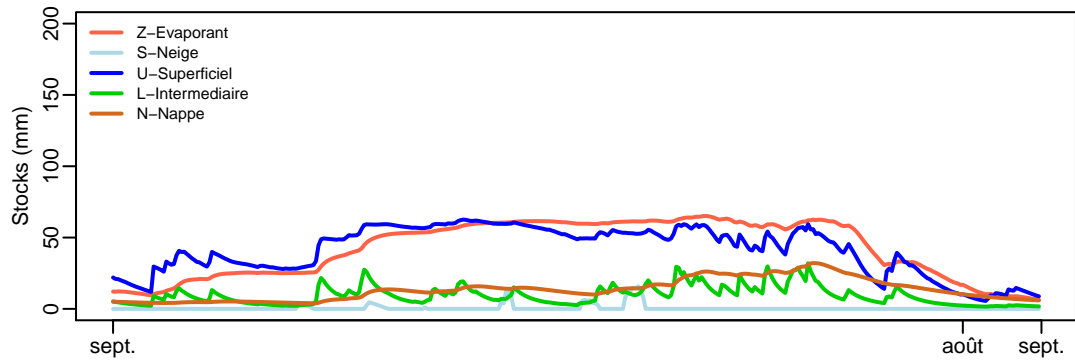



# k2534010 (99.87 km<sup>2</sup>) – année 2008–2009

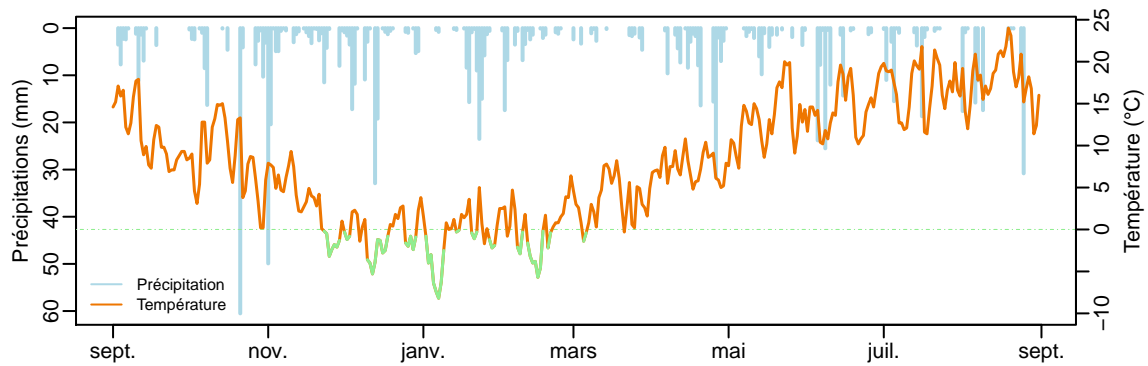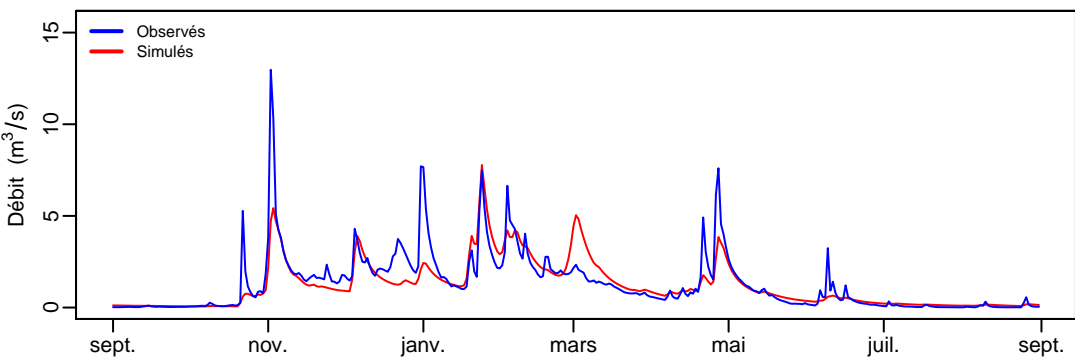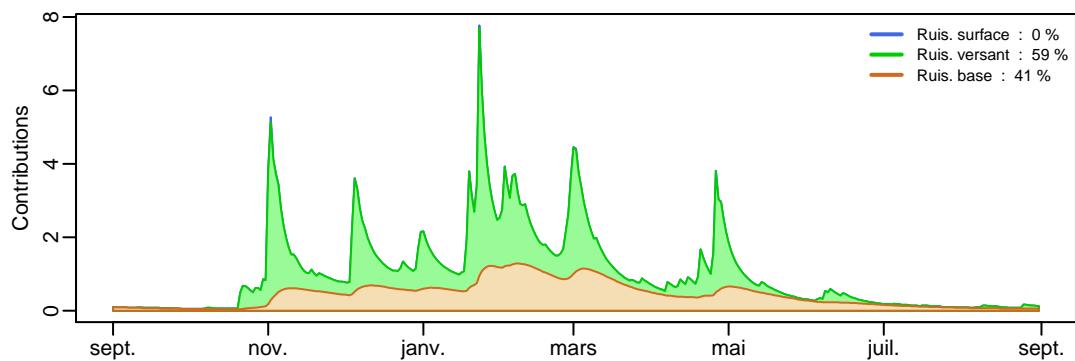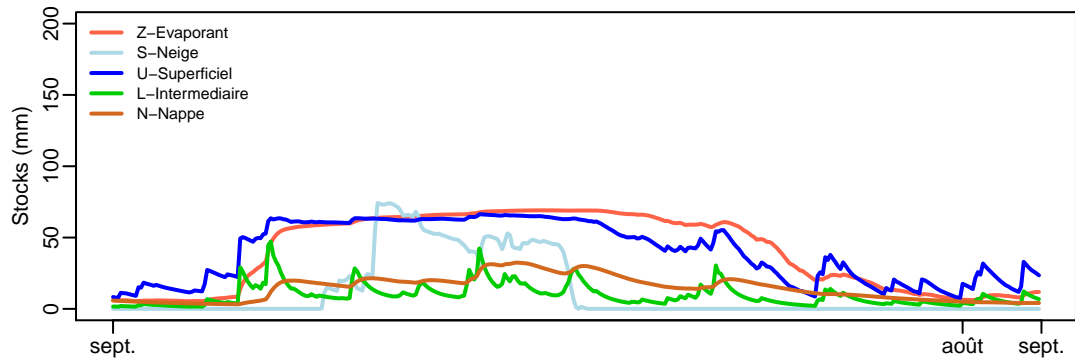

# k2593010 (993.44 km<sup>2</sup>) – année 1982–1983

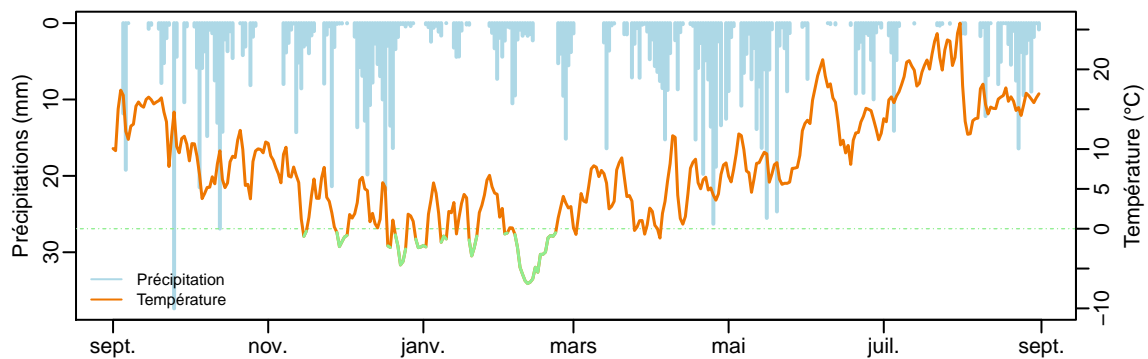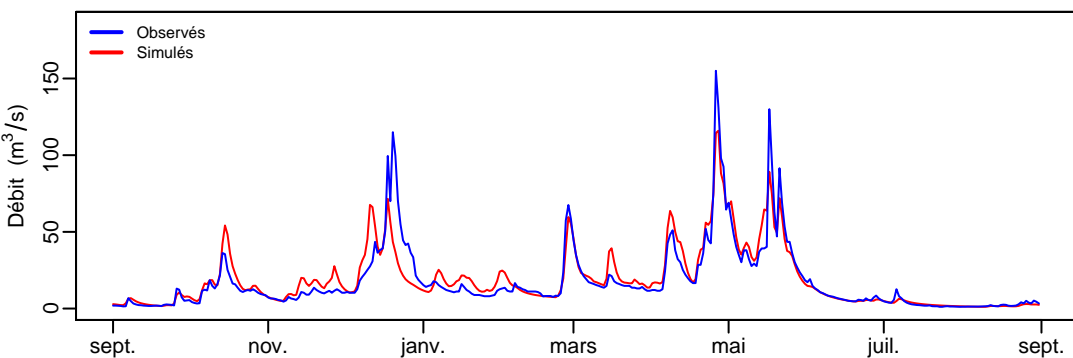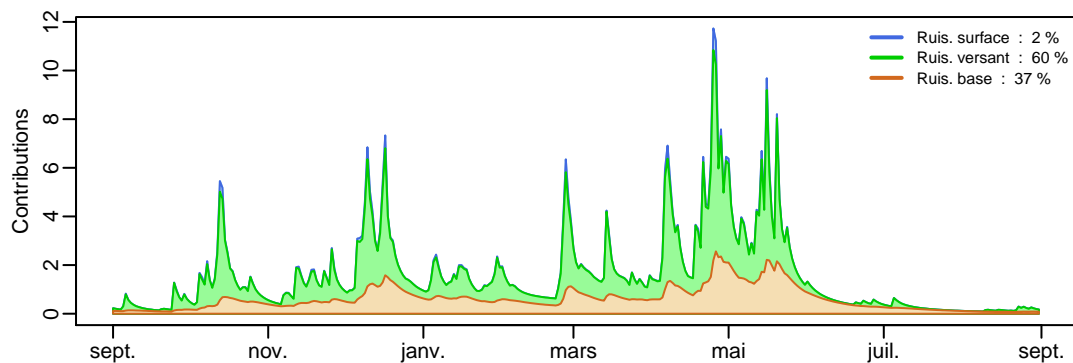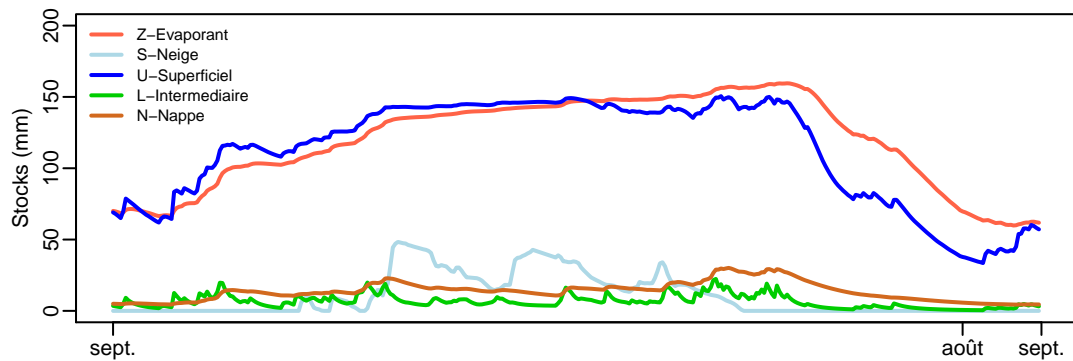

# k2593010 (993.44 km<sup>2</sup>) – année 1983–1984

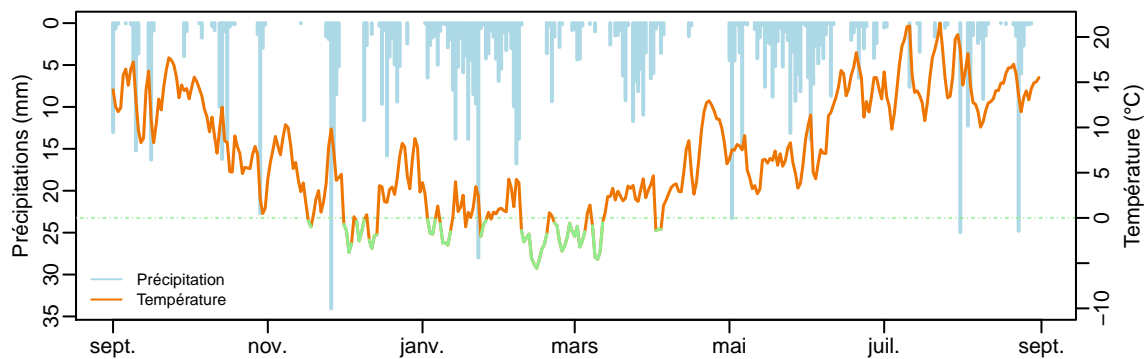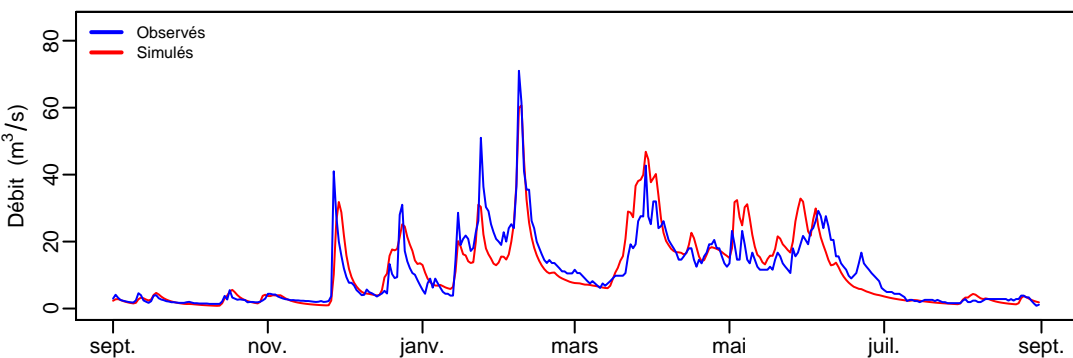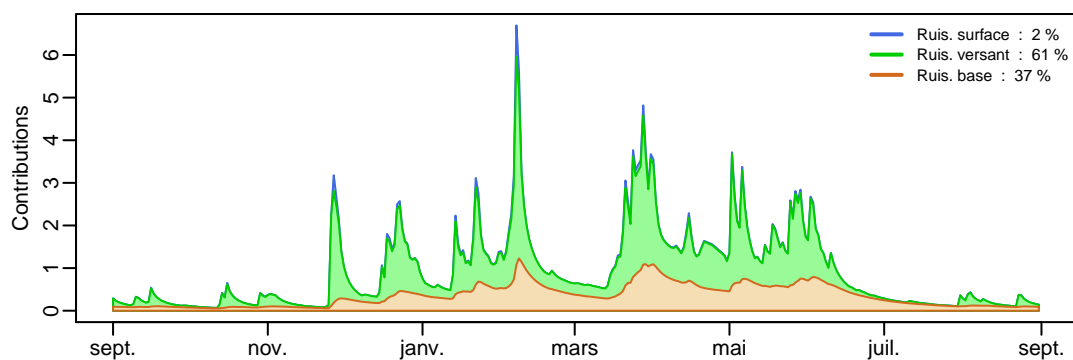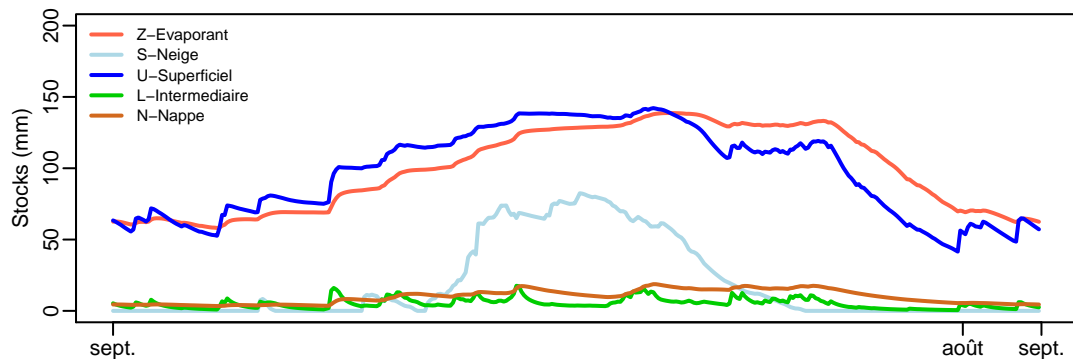

# k2593010 (993.44 km<sup>2</sup>) – année 1984–1985

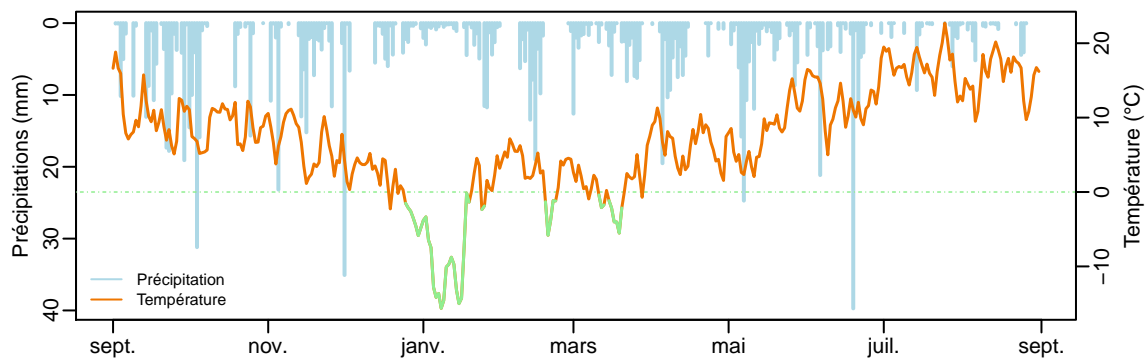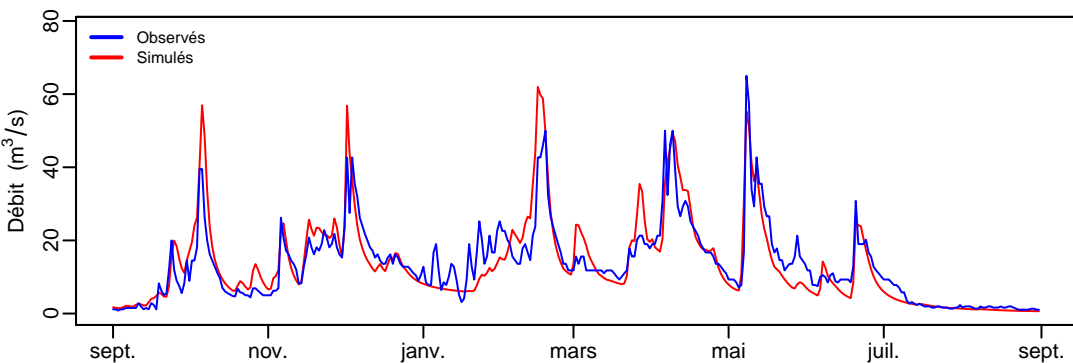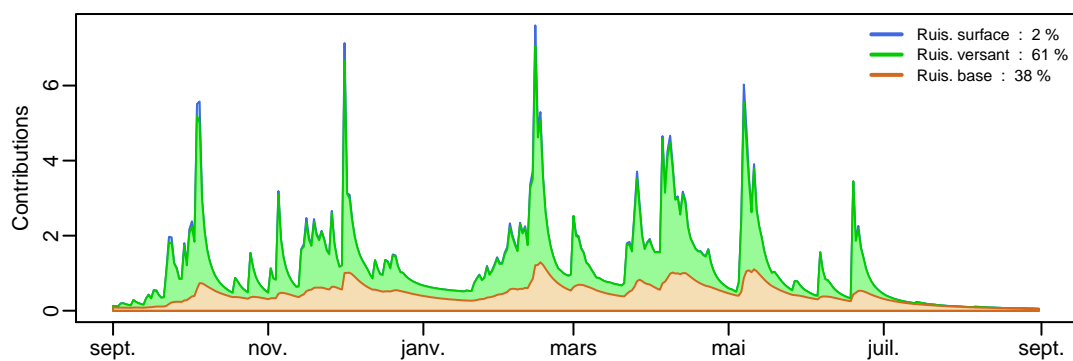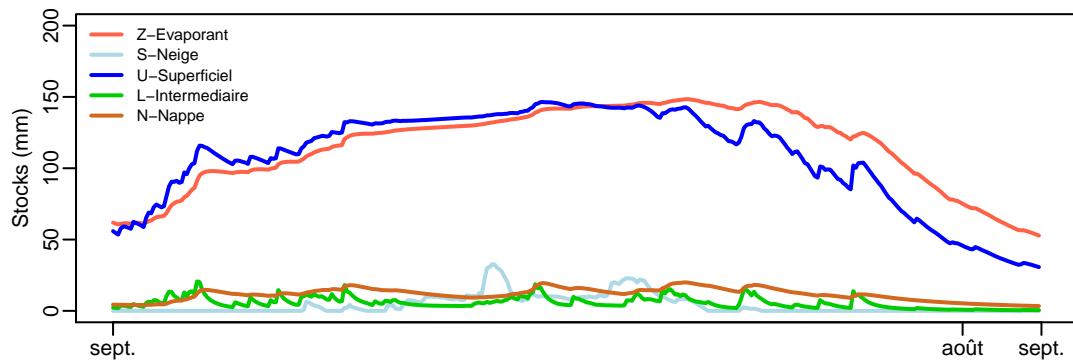

# k2593010 (993.44 km<sup>2</sup>) – année 1985–1986

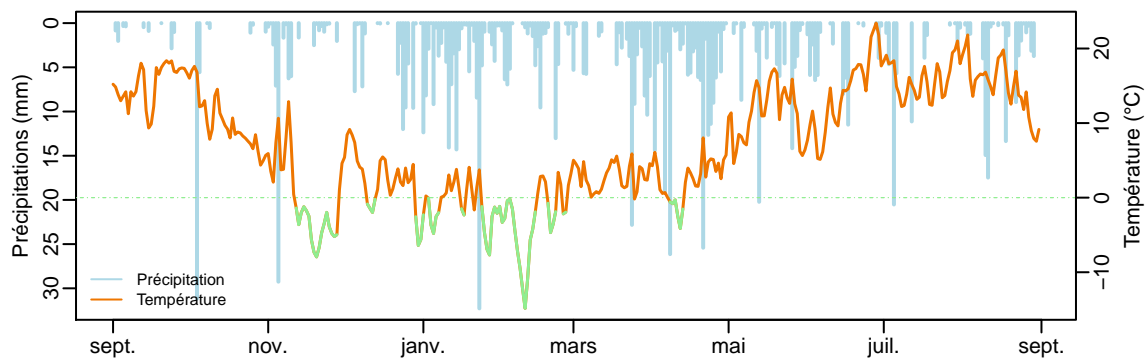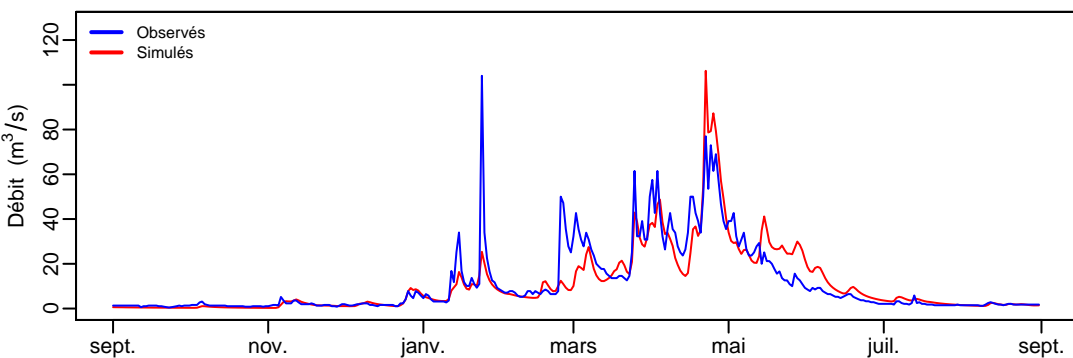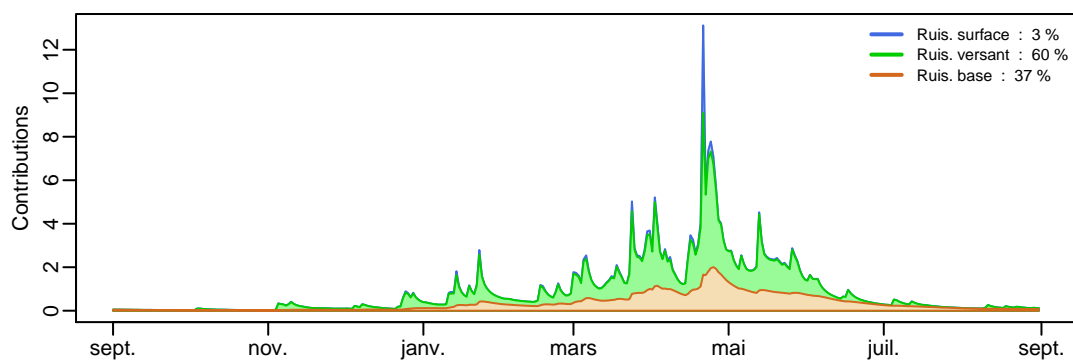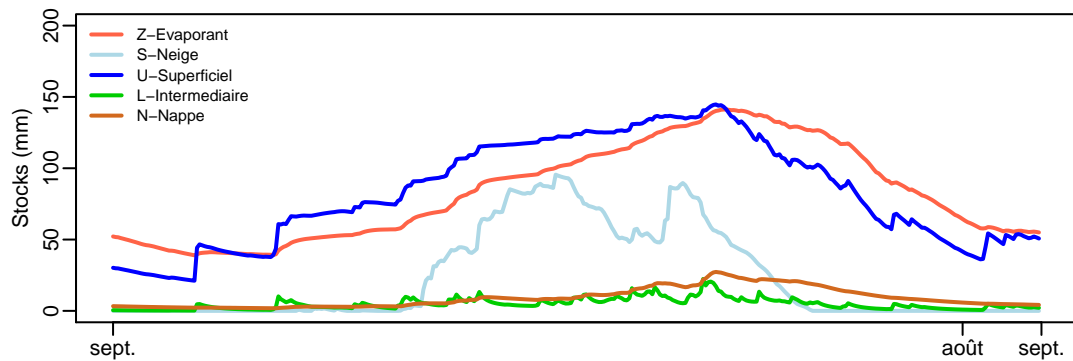

# k2593010 (993.44 km<sup>2</sup>) – année 1986–1987

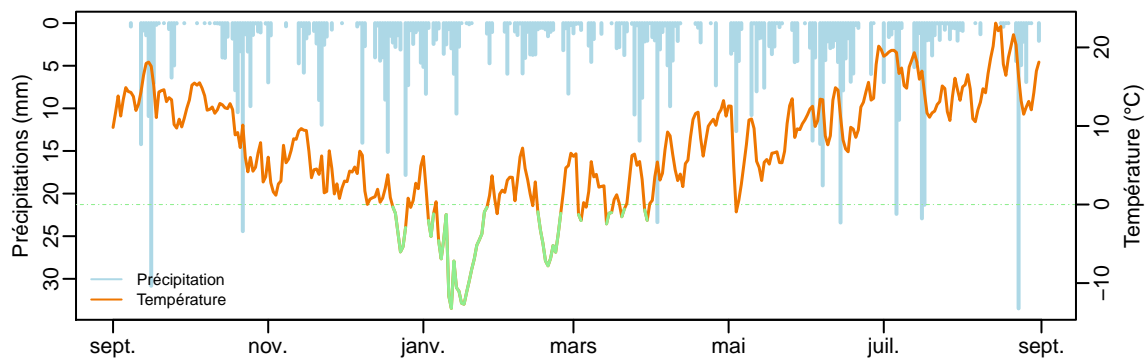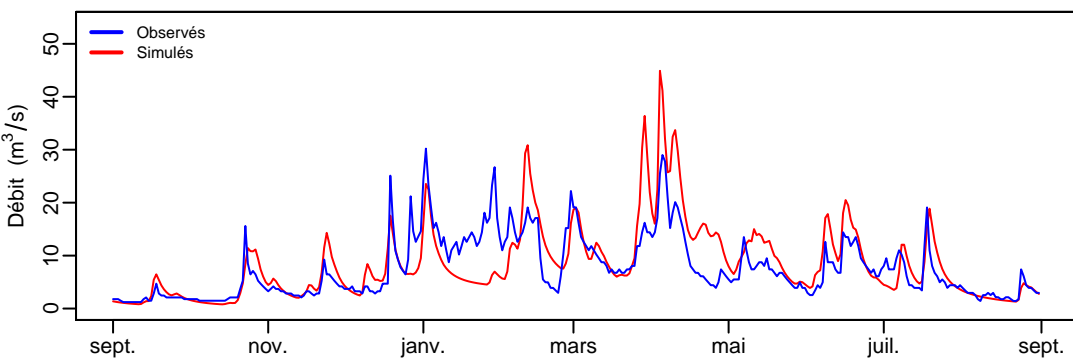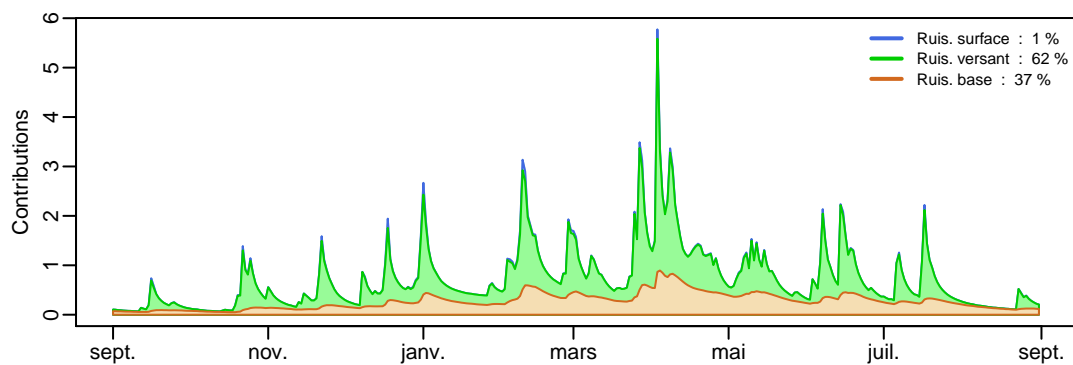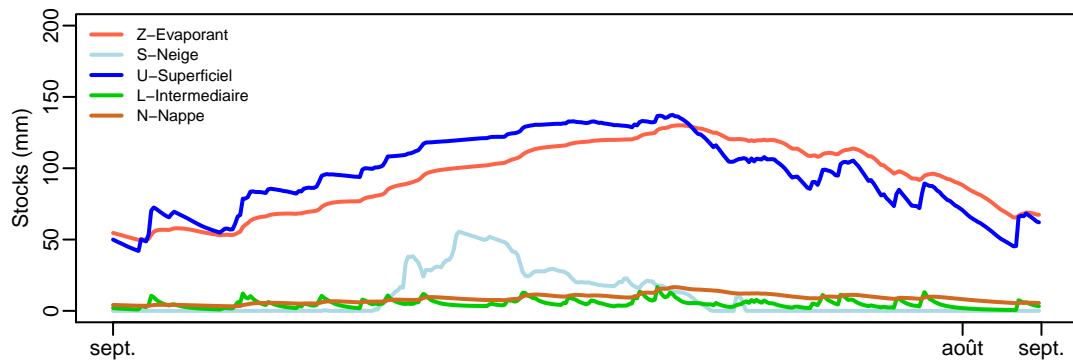

# k2593010 (993.44 km<sup>2</sup>) – année 1987–1988

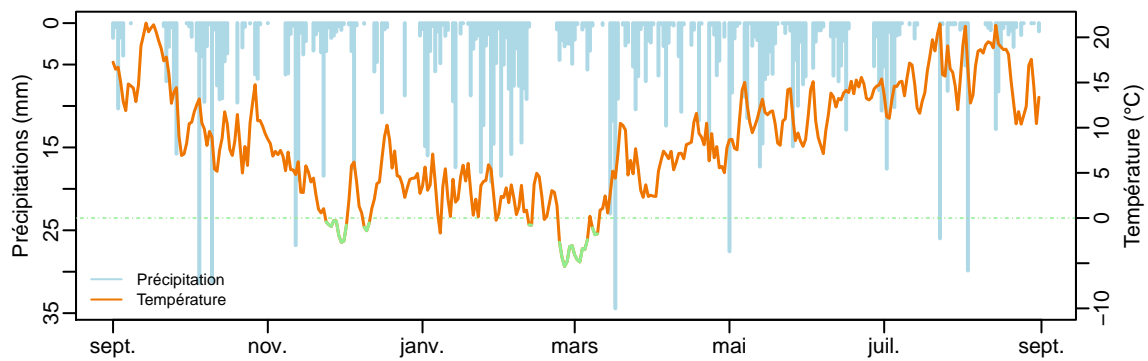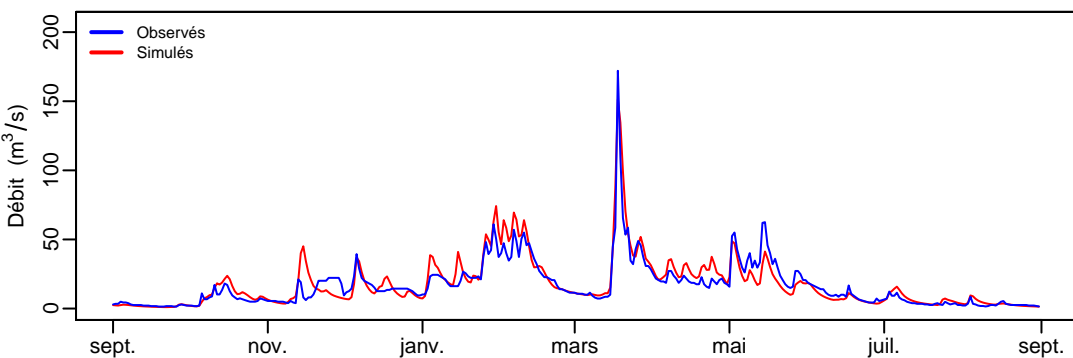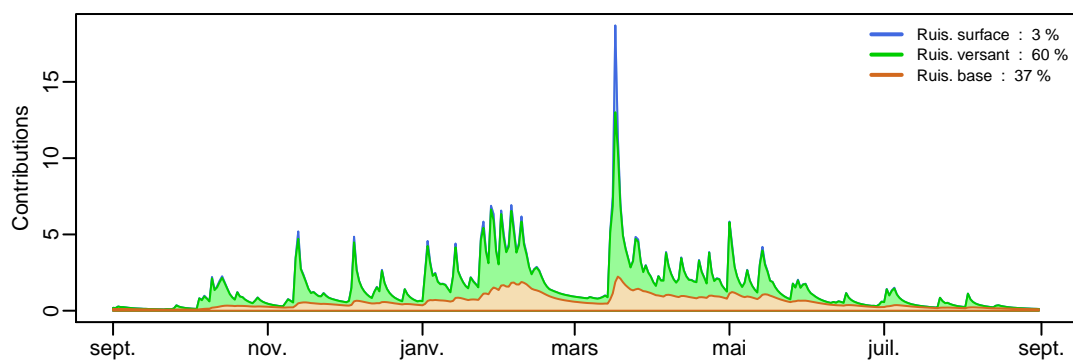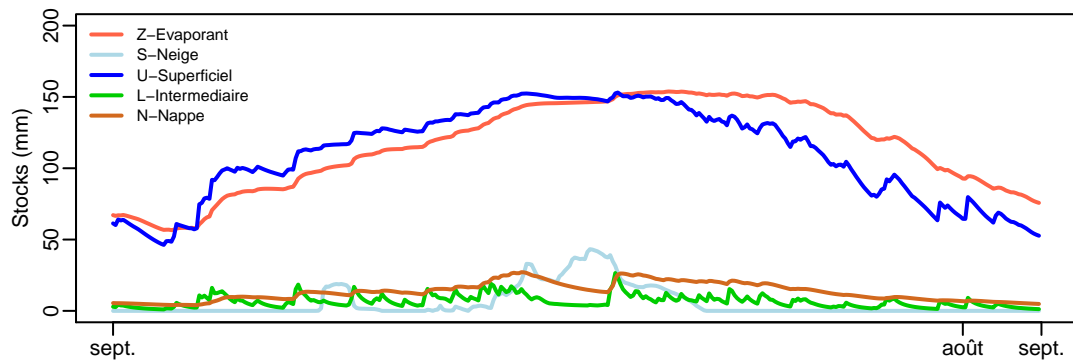

# k2593010 (993.44 km<sup>2</sup>) – année 1988–1989

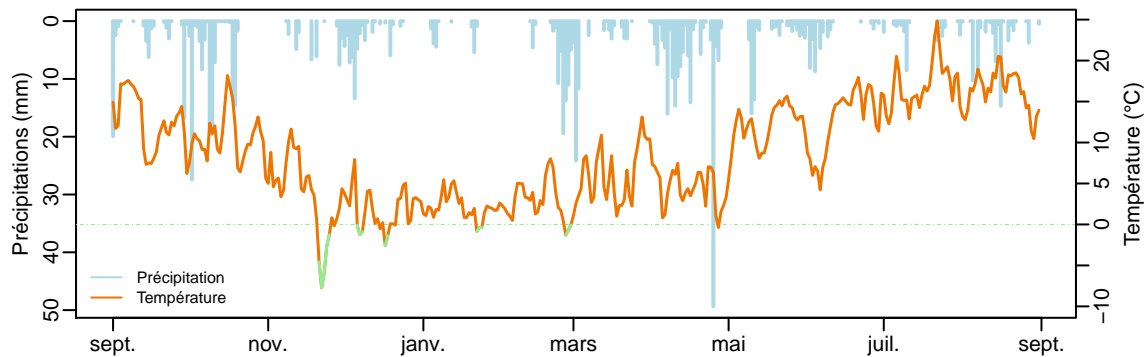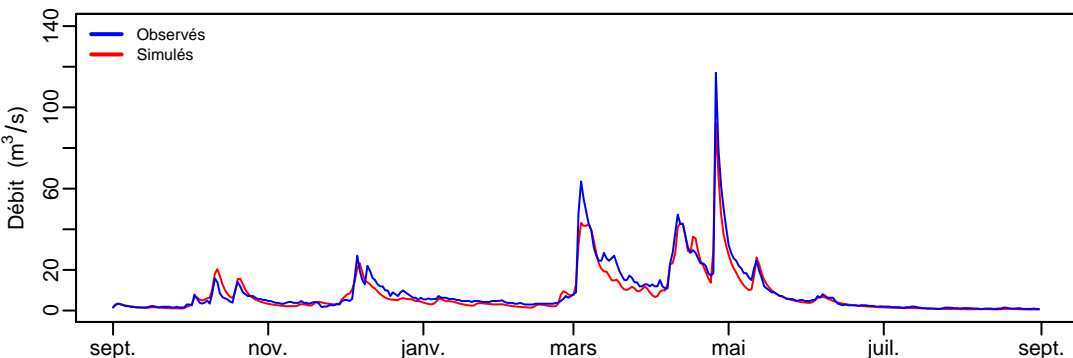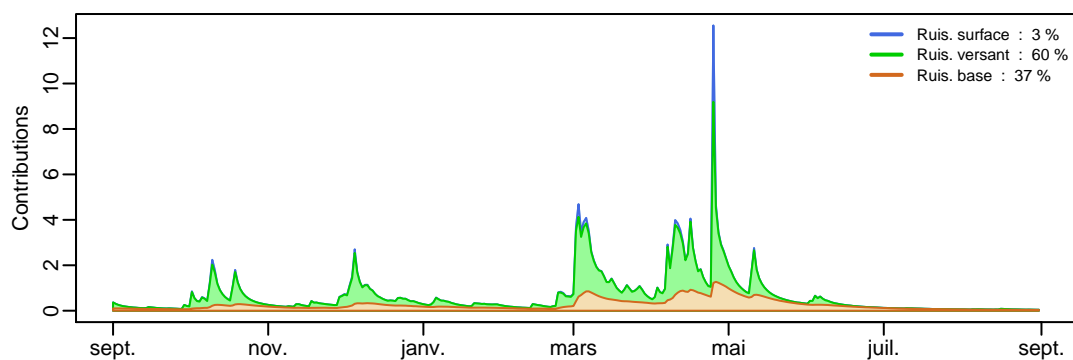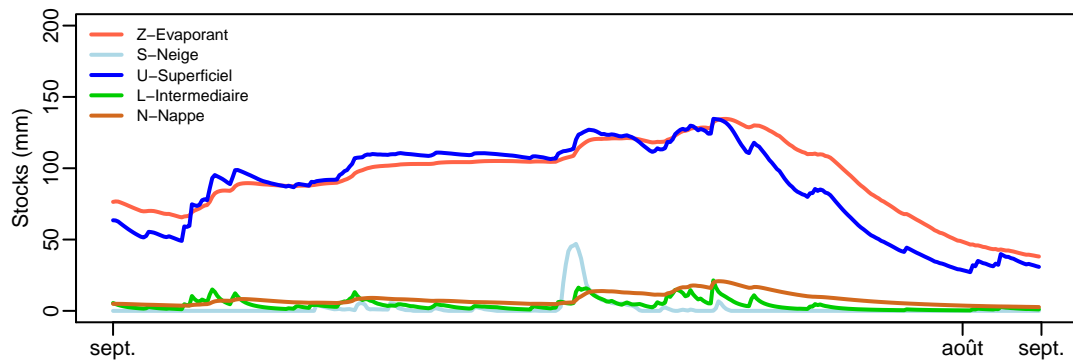



# k2593010 (993.44 km<sup>2</sup>) – année 1989–1990

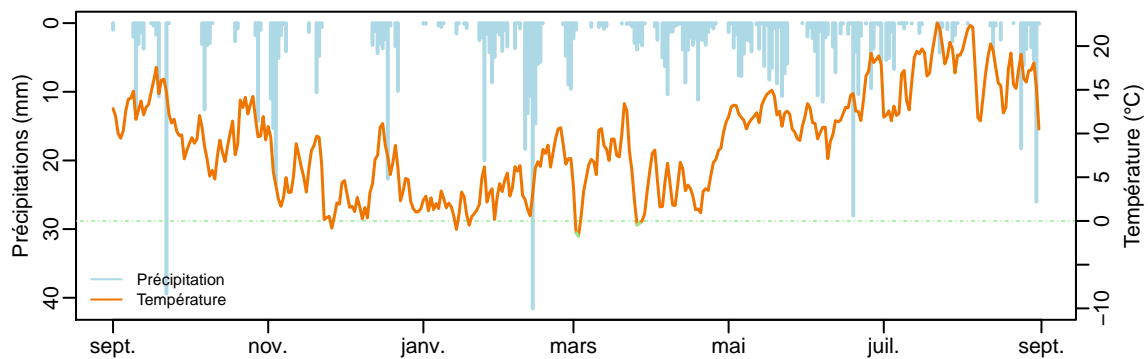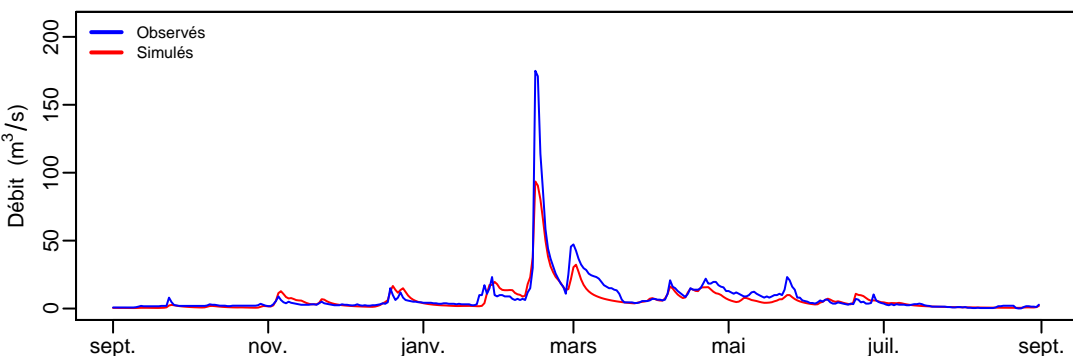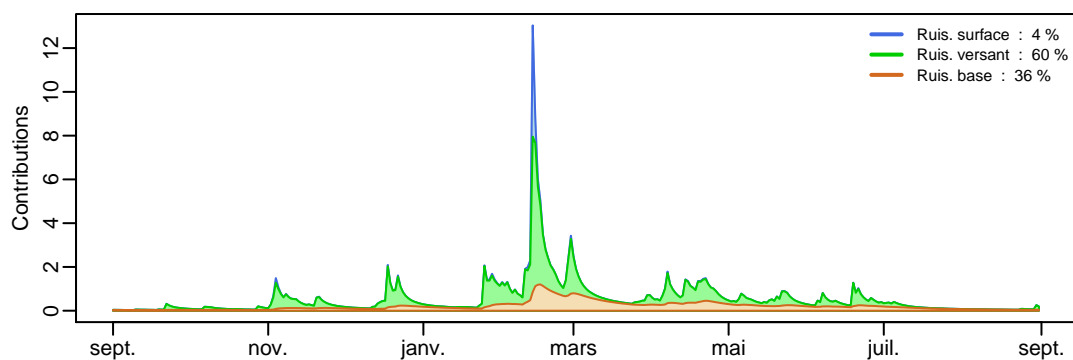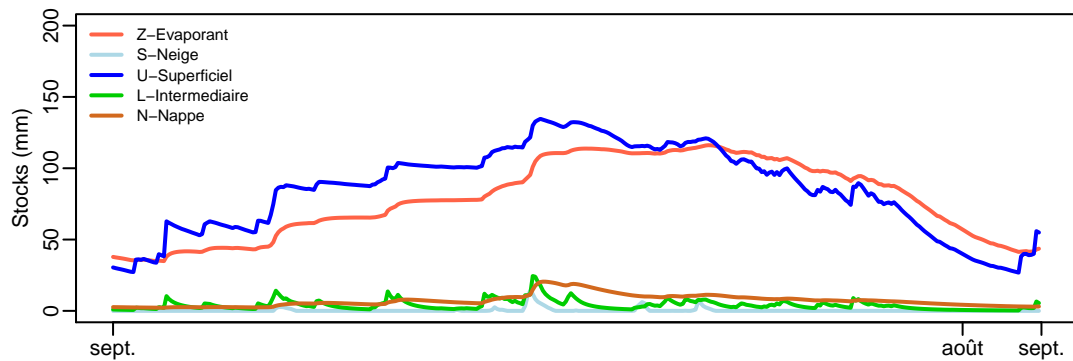

# k2593010 (993.44 km<sup>2</sup>) – année 1990–1991

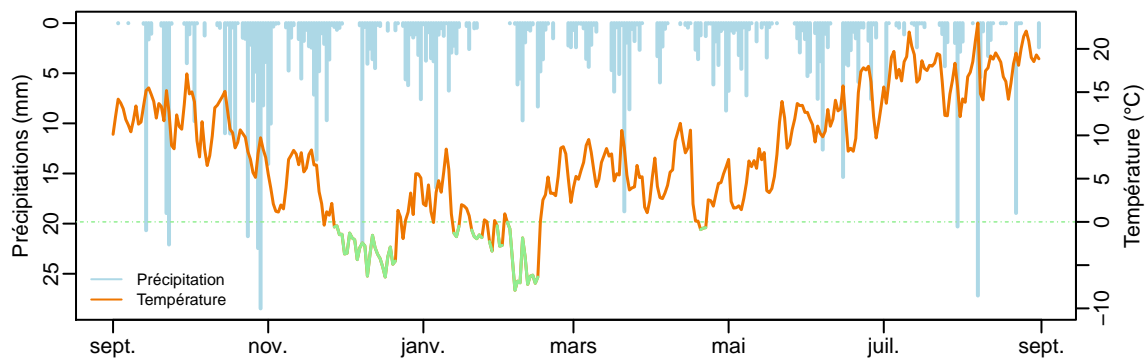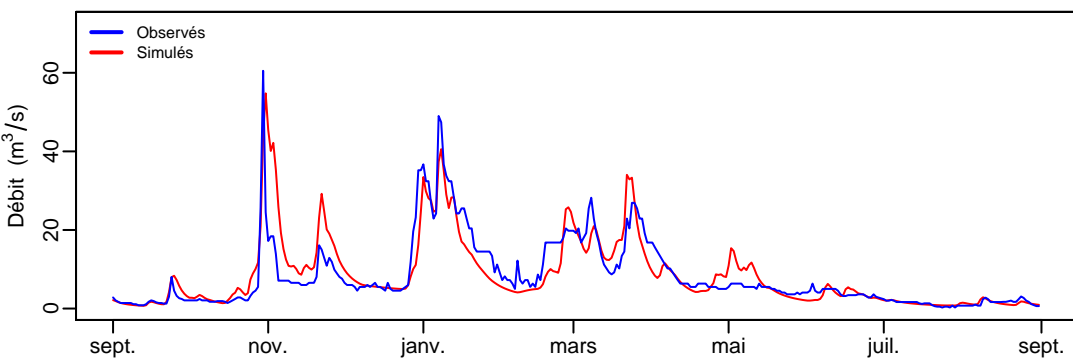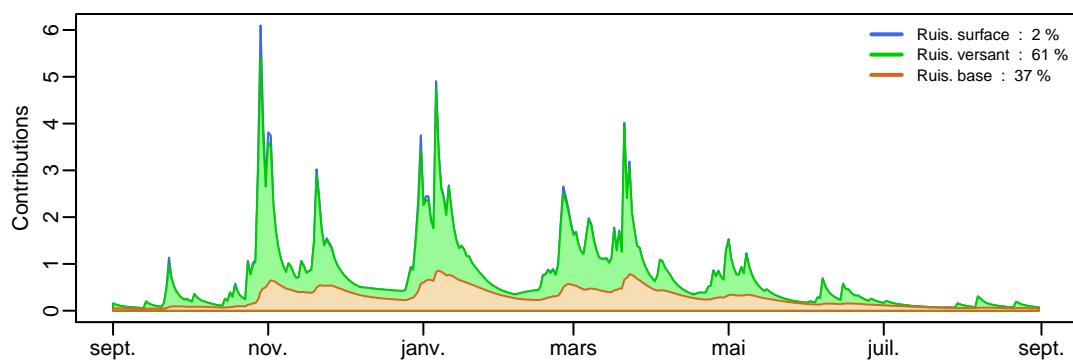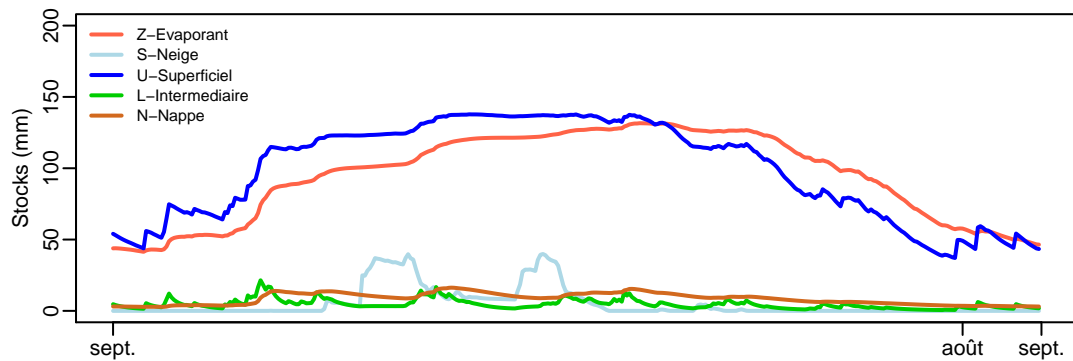

# k2593010 (993.44 km<sup>2</sup>) – année 1991–1992

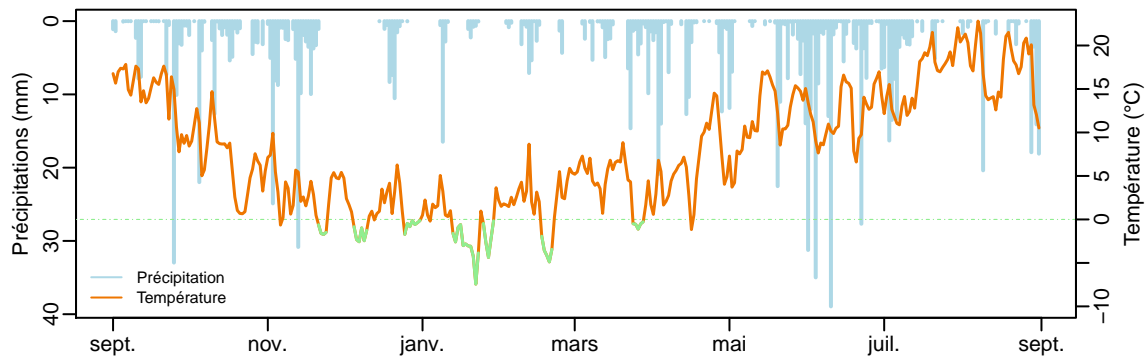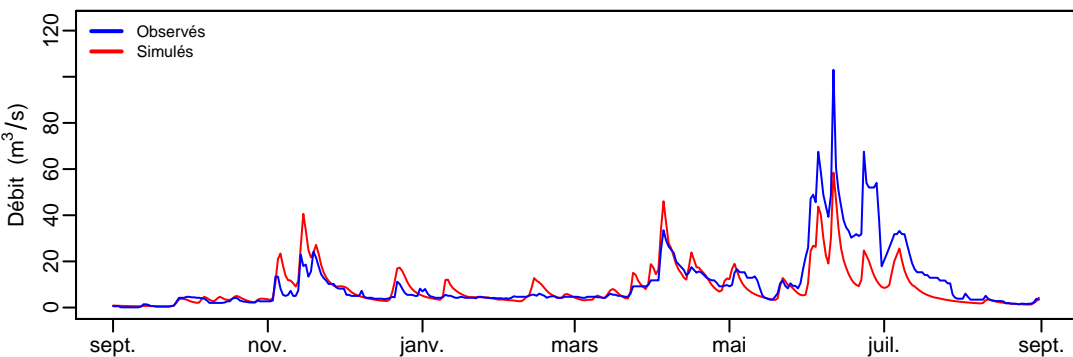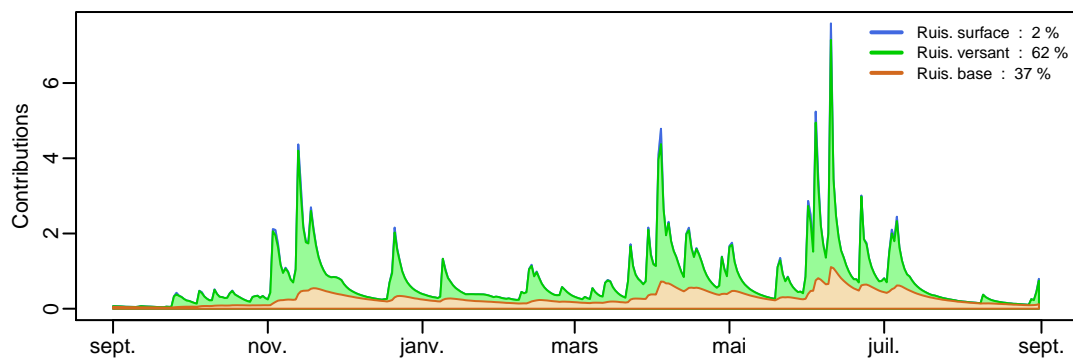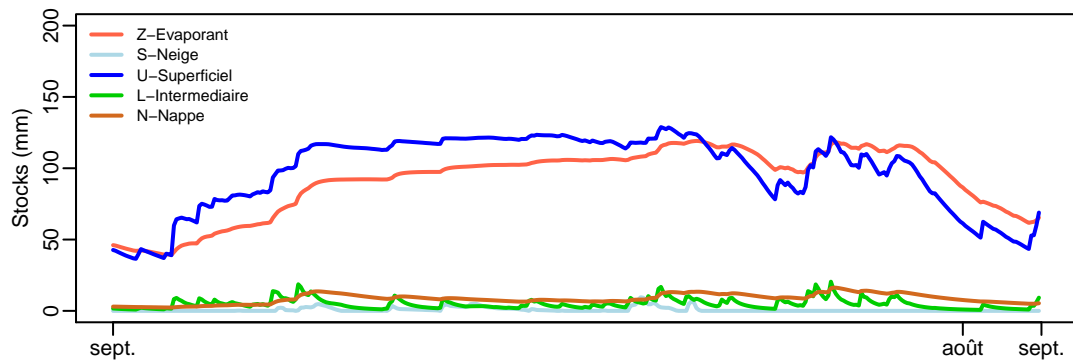

# k2593010 (993.44 km<sup>2</sup>) – année 1992–1993

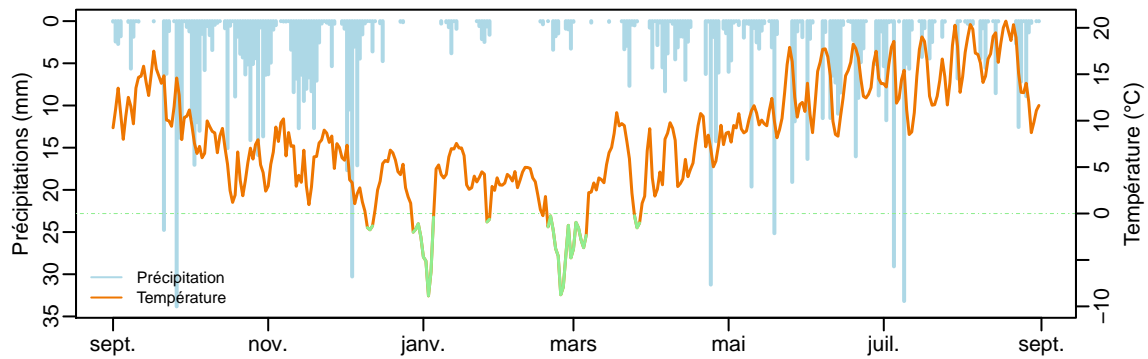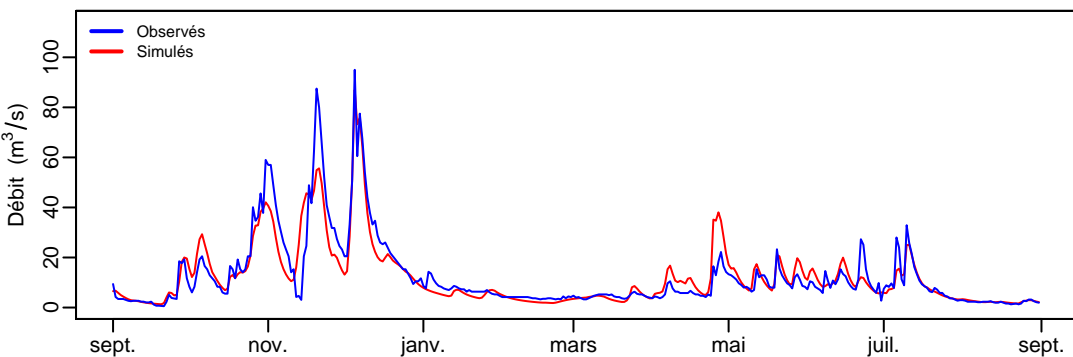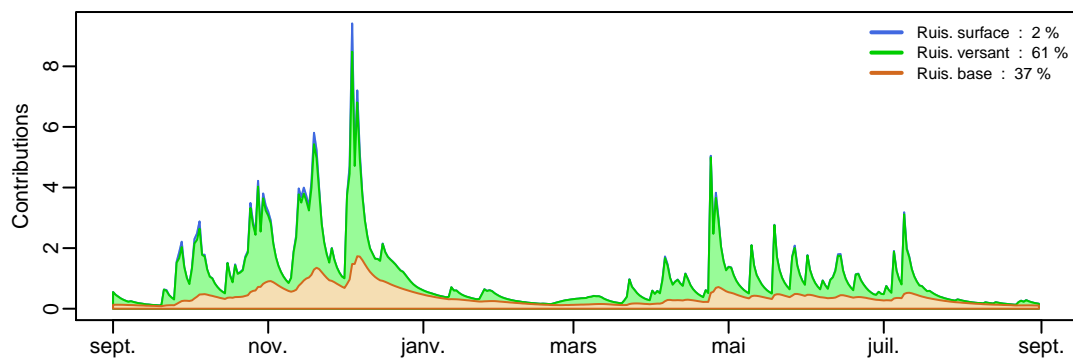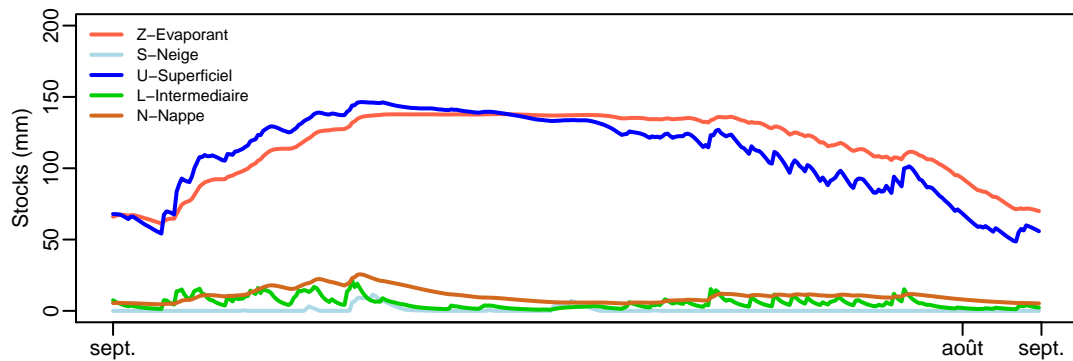

# k2593010 (993.44 km<sup>2</sup>) – année 1993–1994

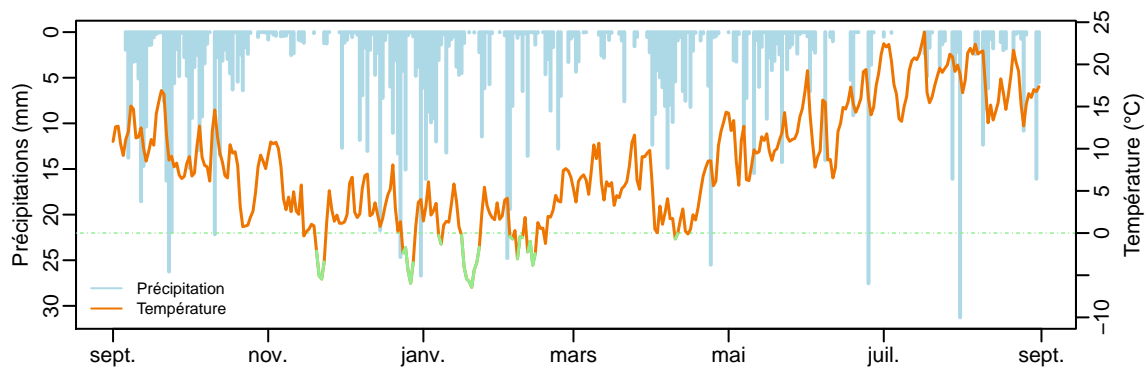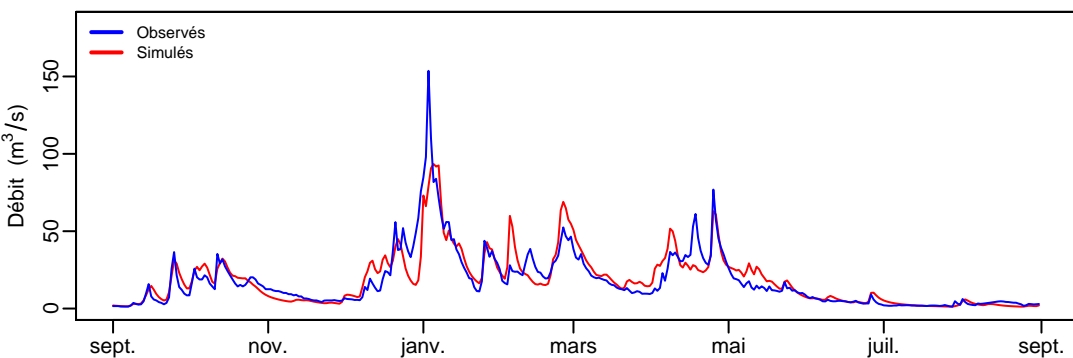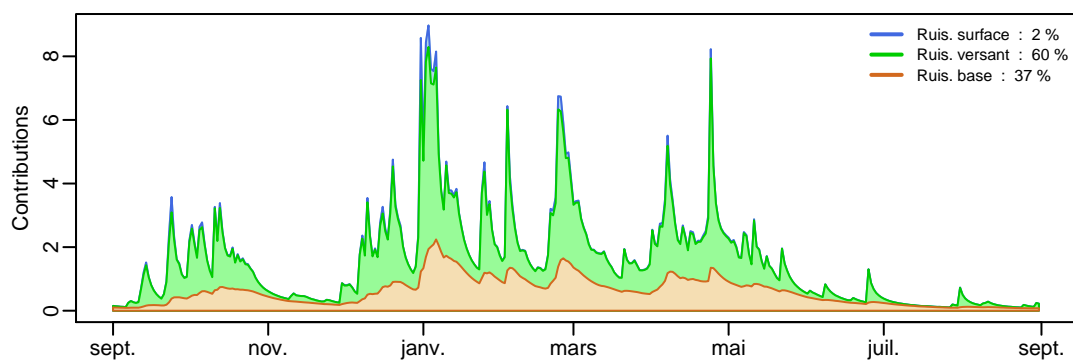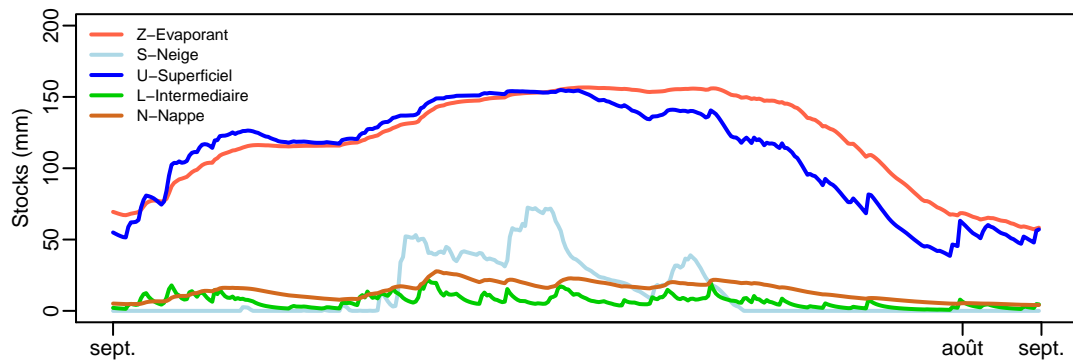

# k2593010 (993.44 km<sup>2</sup>) – année 1994–1995

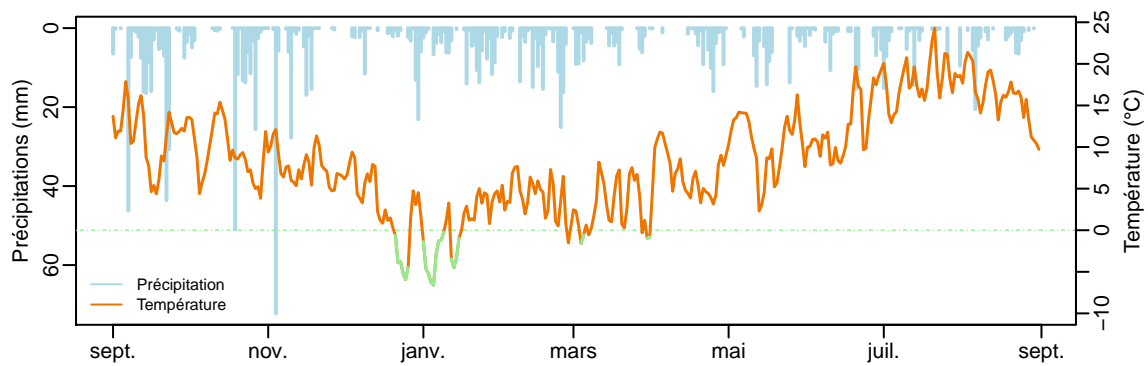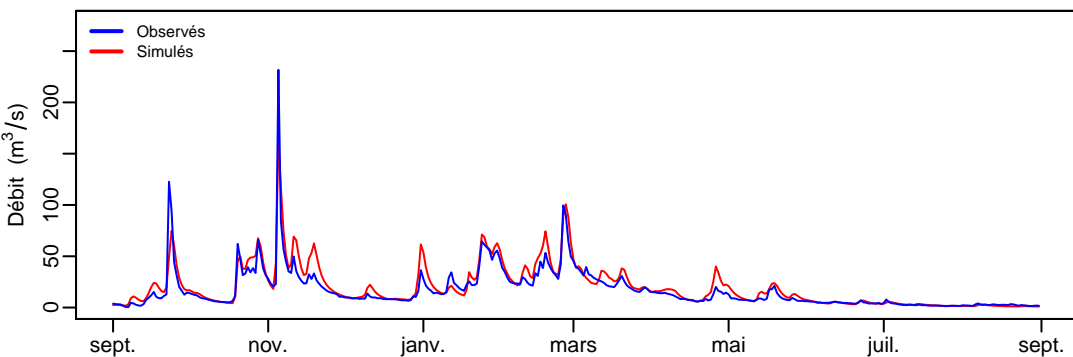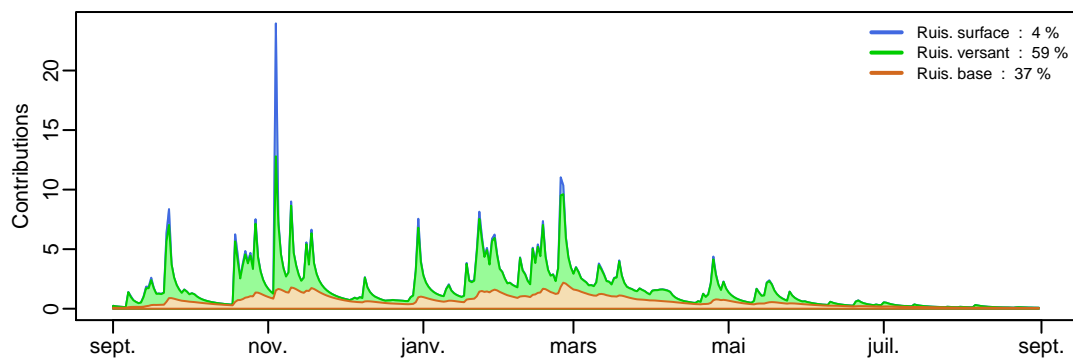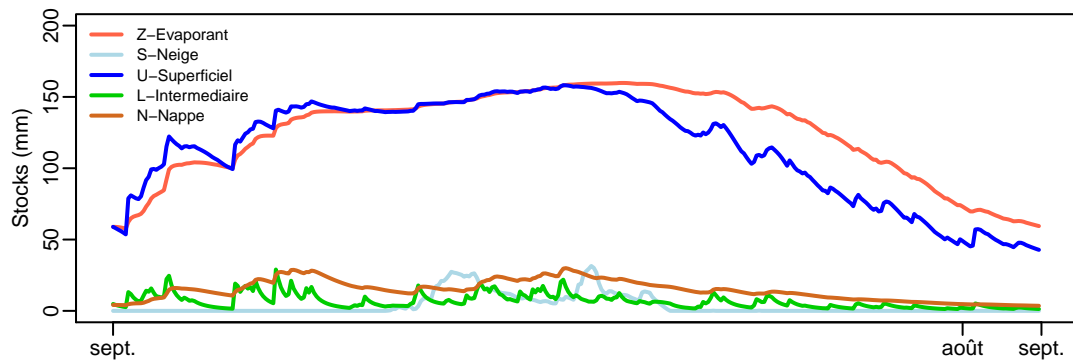

# k2593010 (993.44 km<sup>2</sup>) – année 1995–1996

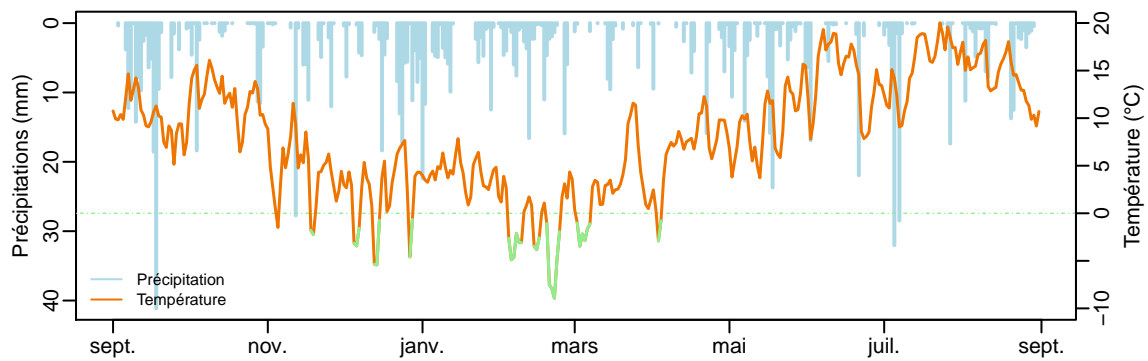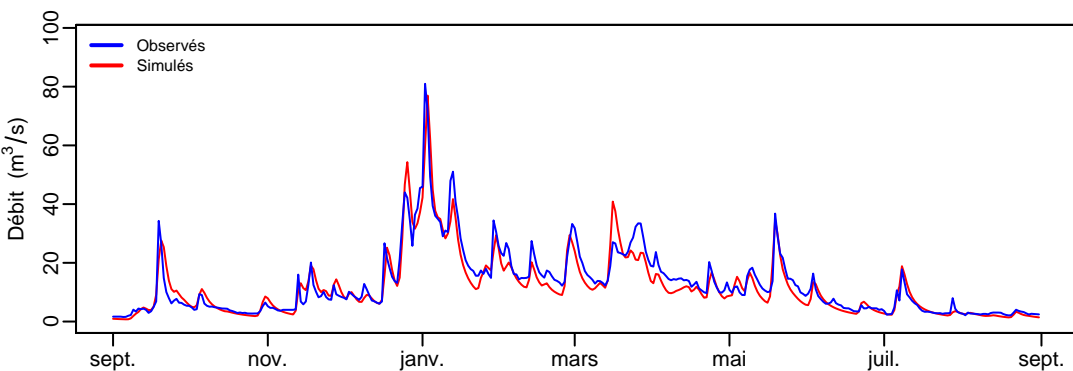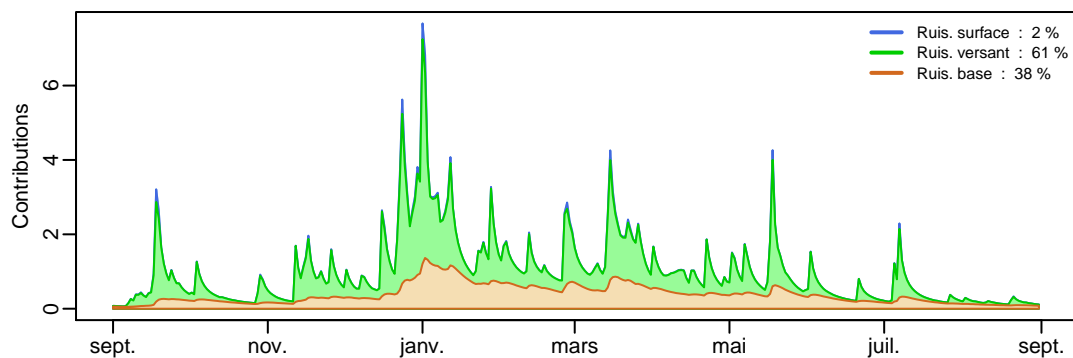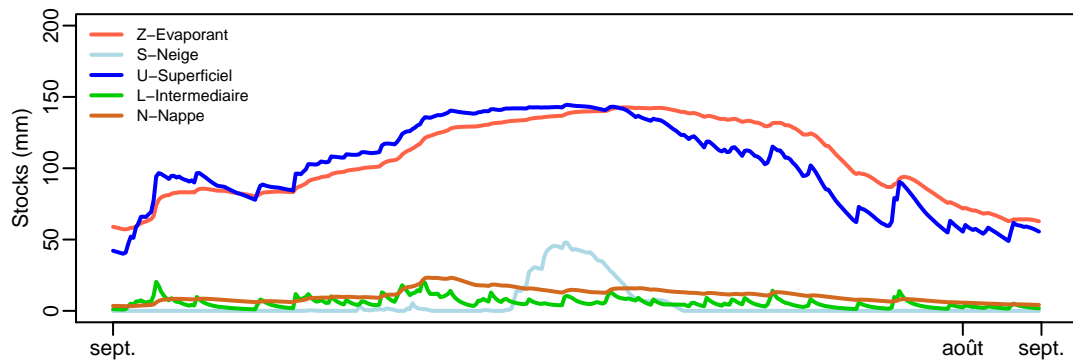

# k2593010 (993.44 km<sup>2</sup>) – année 1996–1997

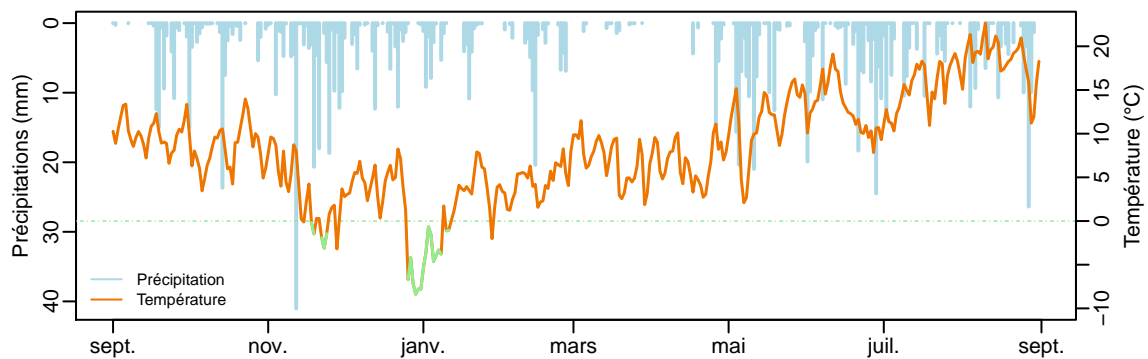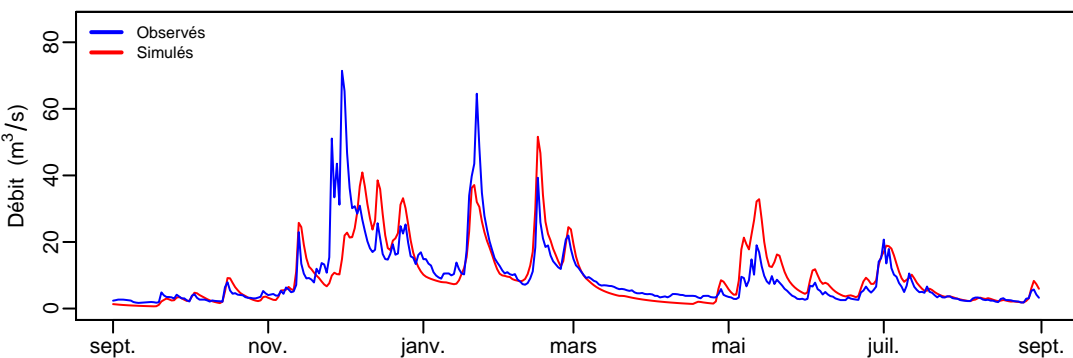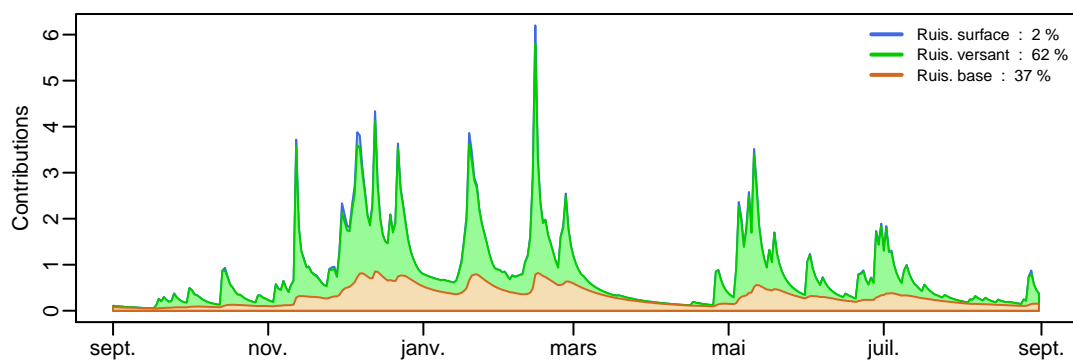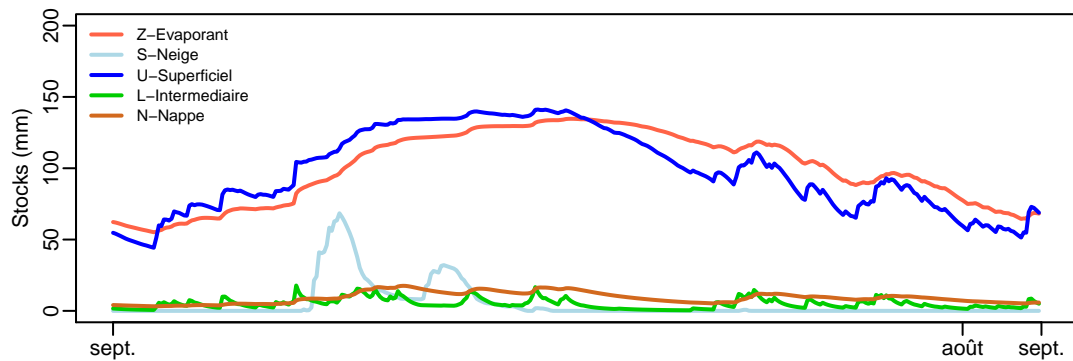



# k2593010 (993.44 km<sup>2</sup>) – année 1997–1998

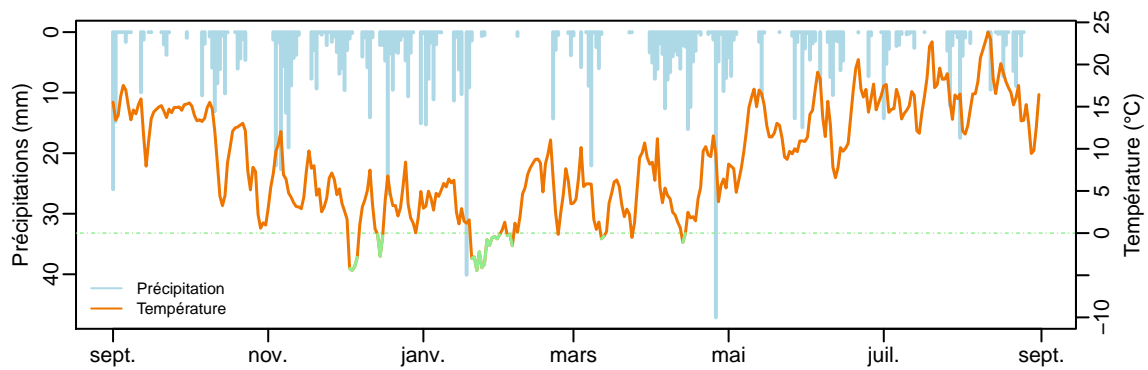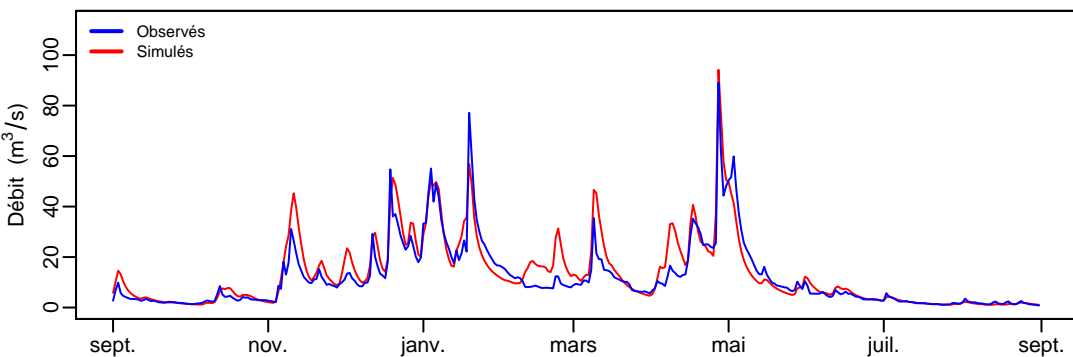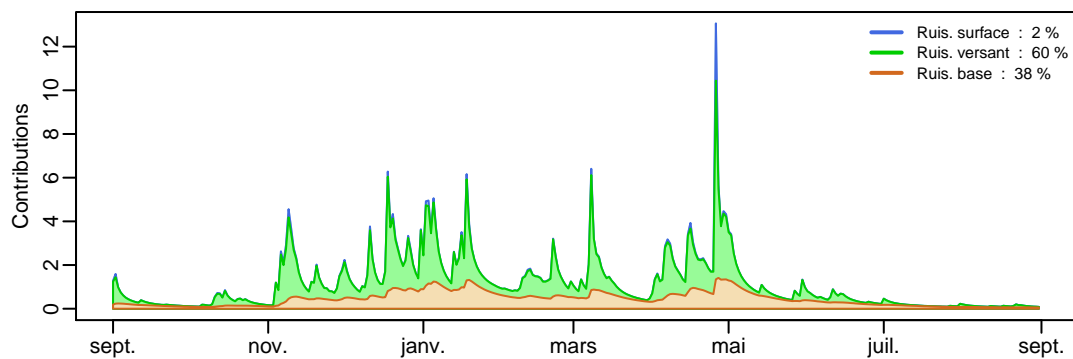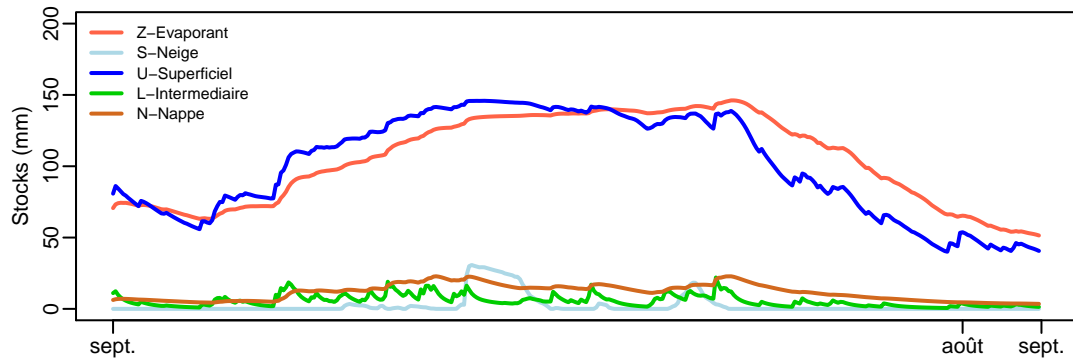

# k2593010 (993.44 km<sup>2</sup>) – année 1998–1999

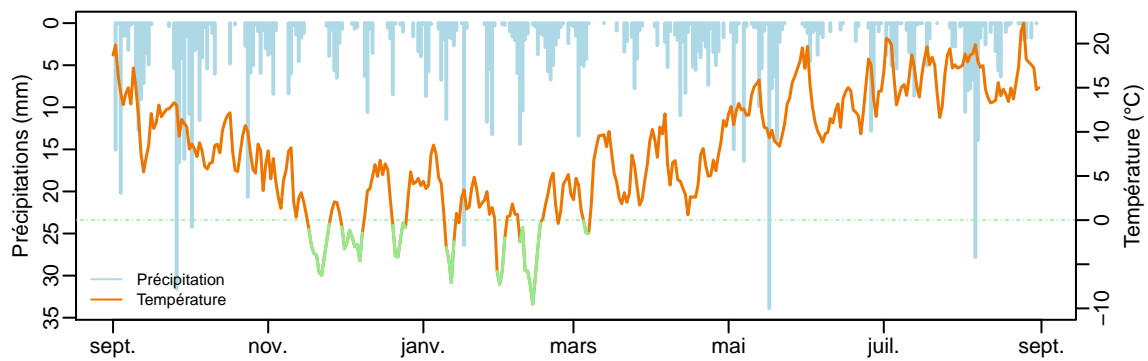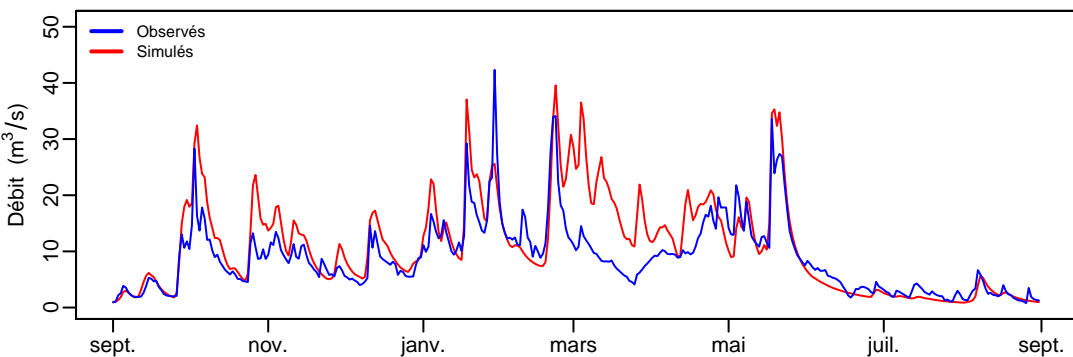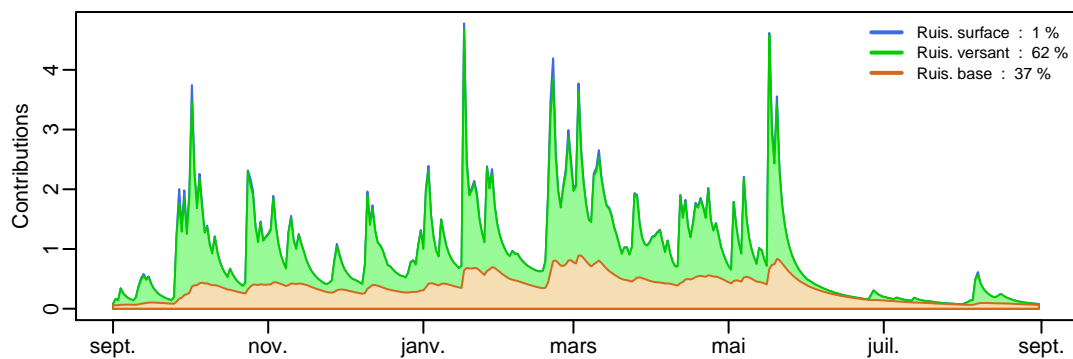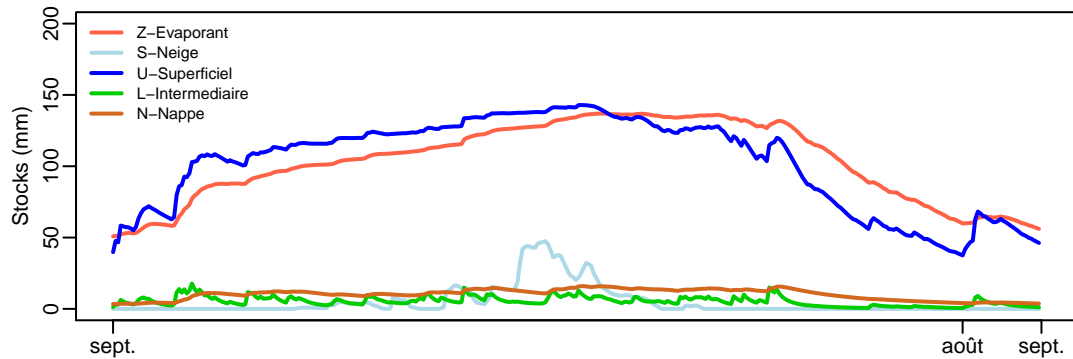

# k2593010 (993.44 km<sup>2</sup>) – année 1999–2000

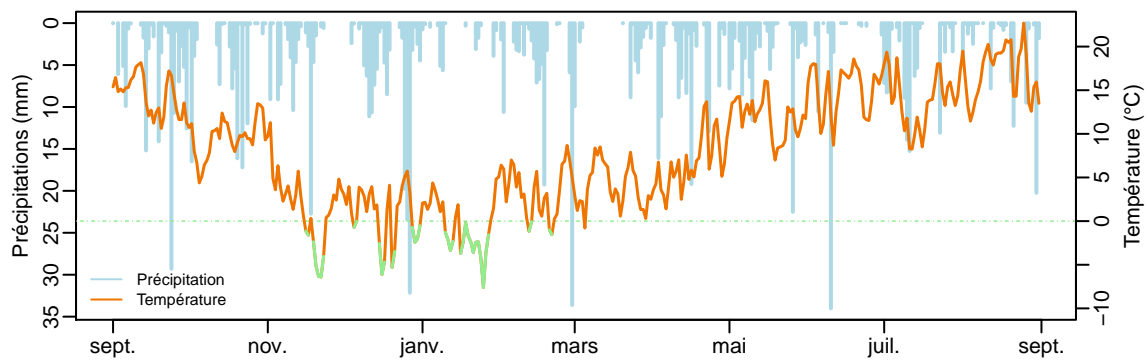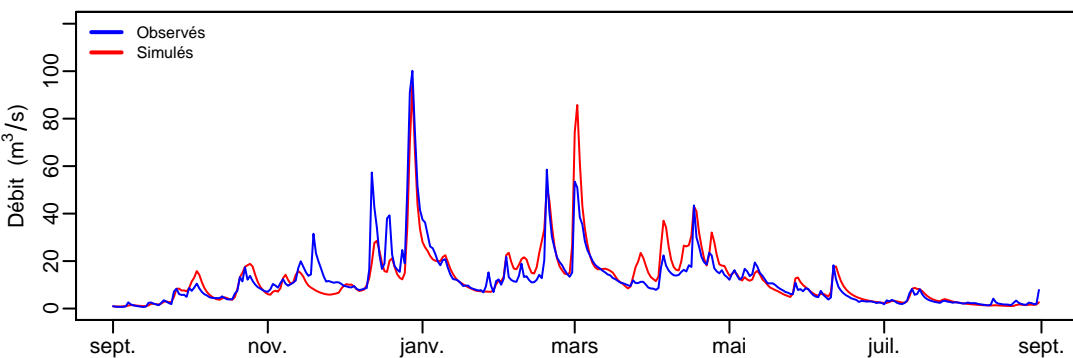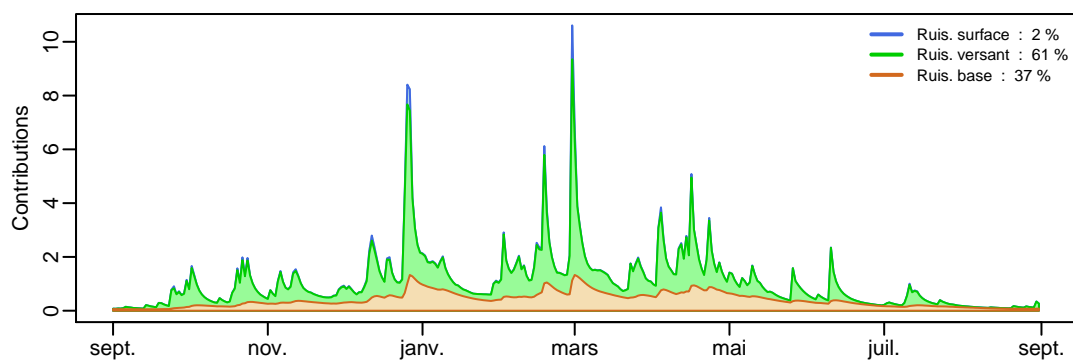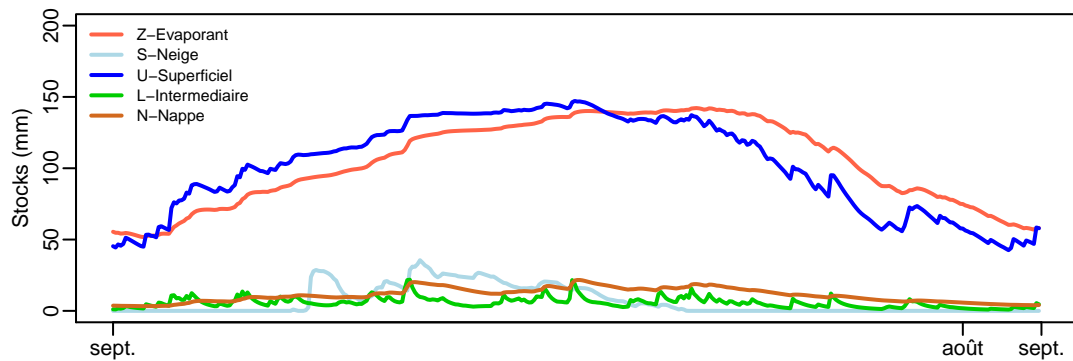

# k2593010 (993.44 km<sup>2</sup>) – année 2000–2001

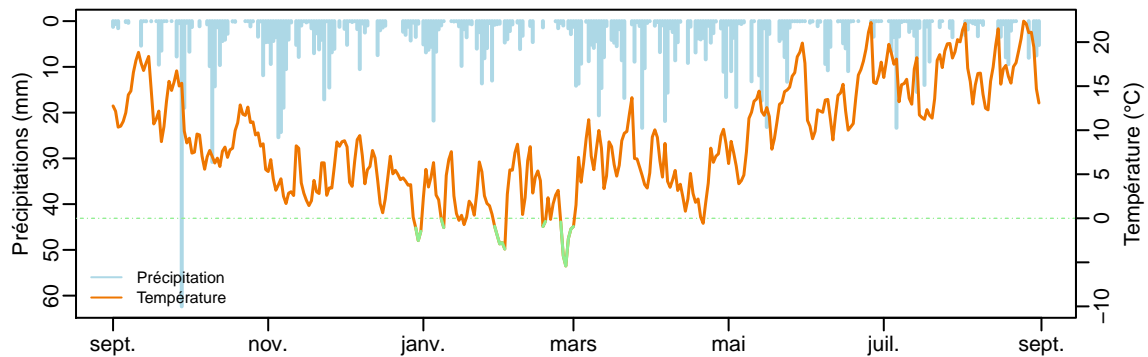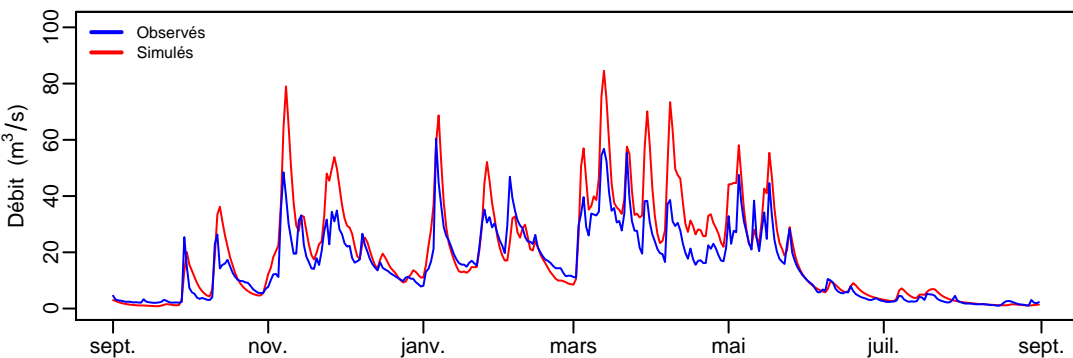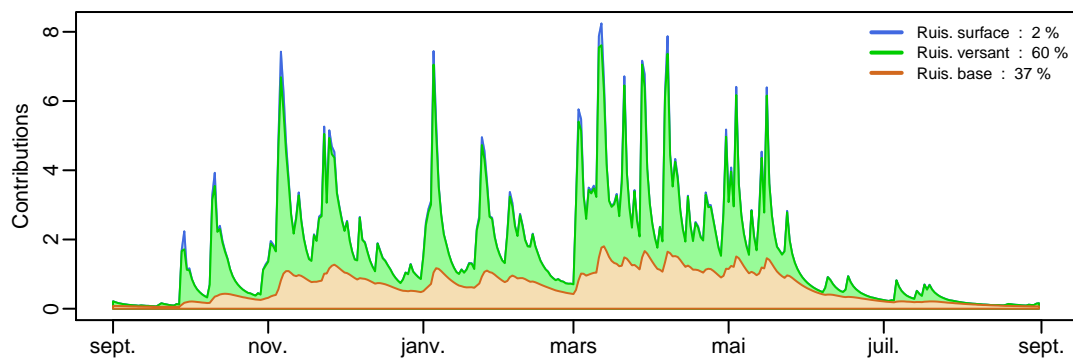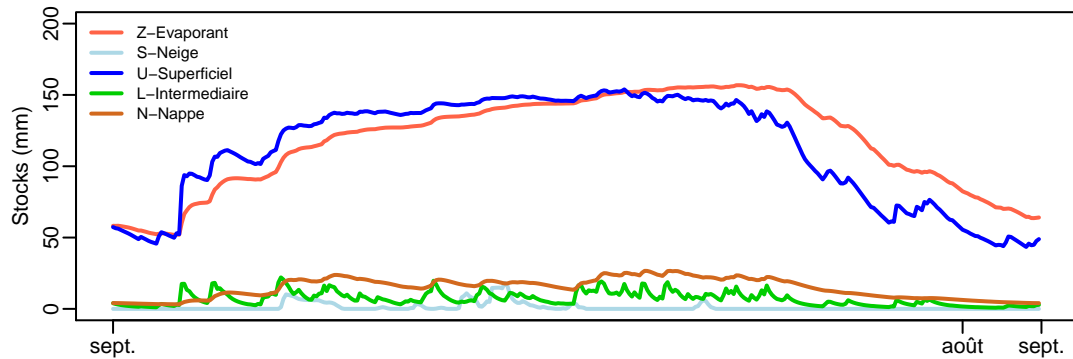

# k2593010 (993.44 km<sup>2</sup>) – année 2001–2002

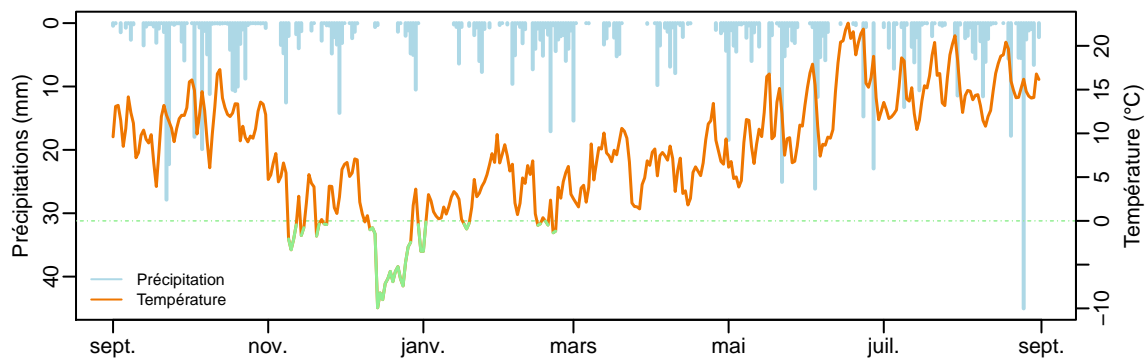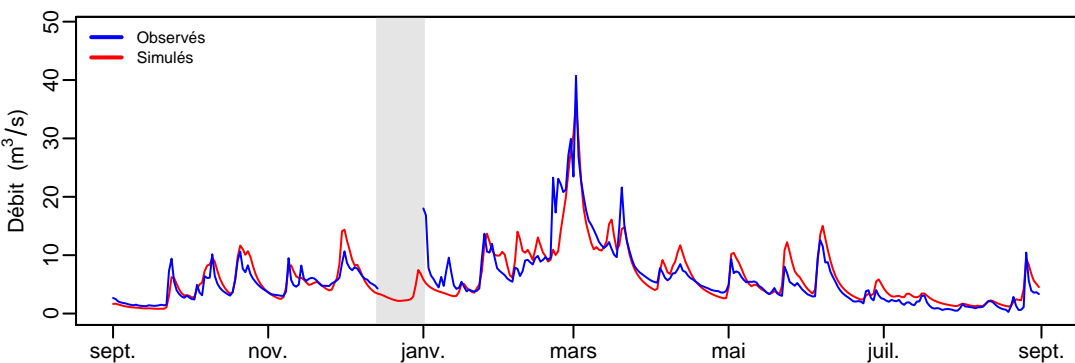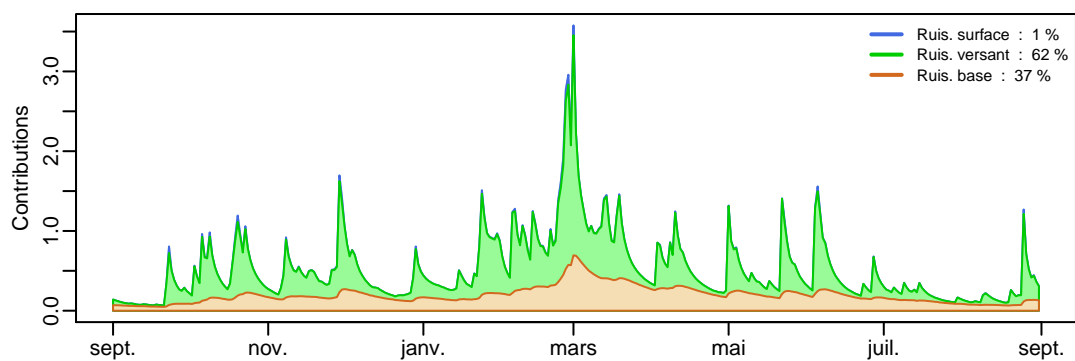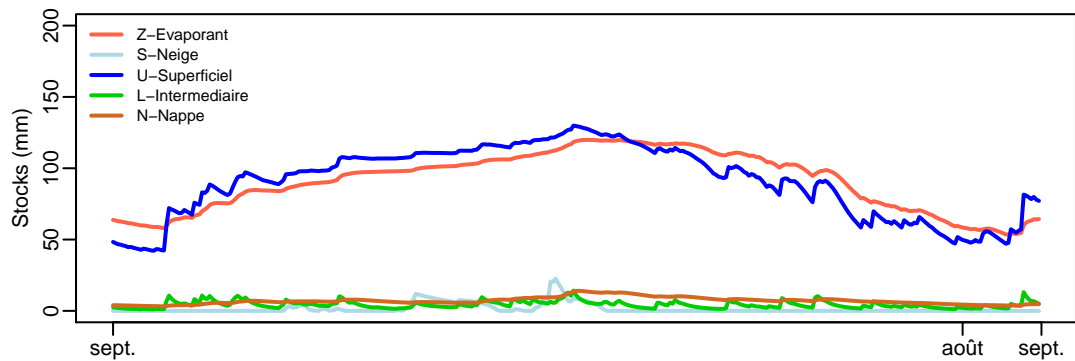

# k2593010 (993.44 km<sup>2</sup>) – année 2002–2003

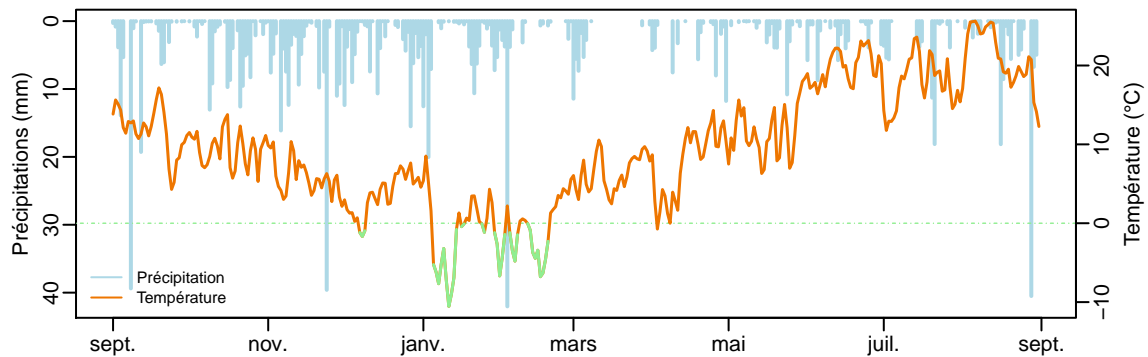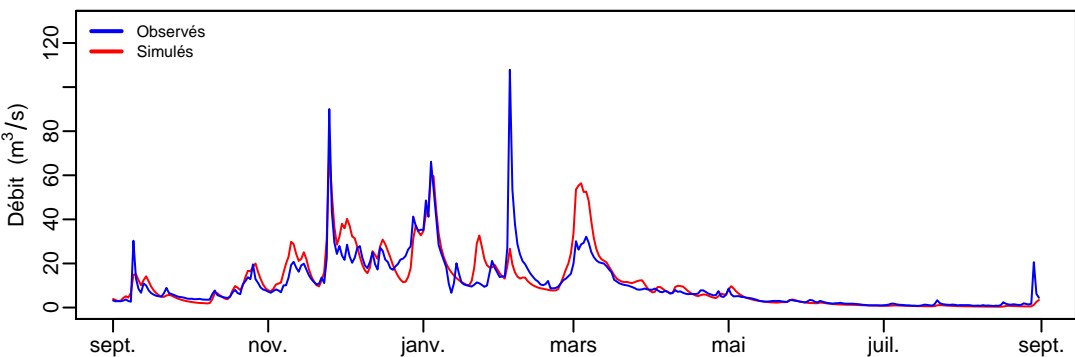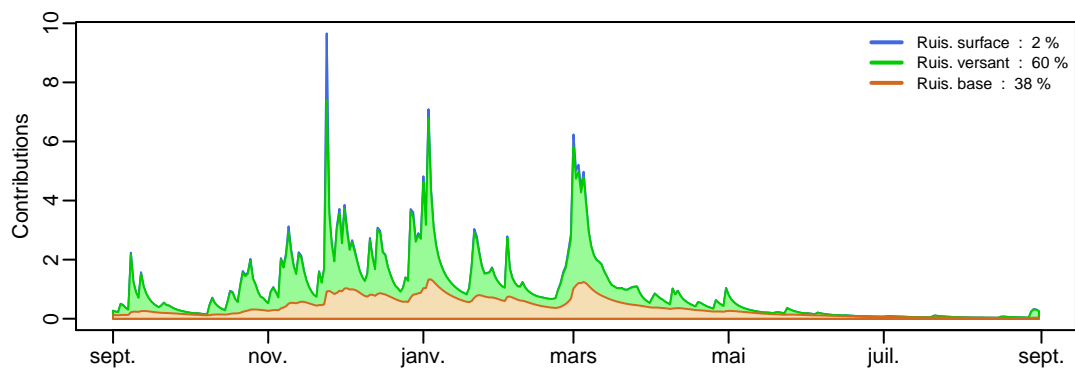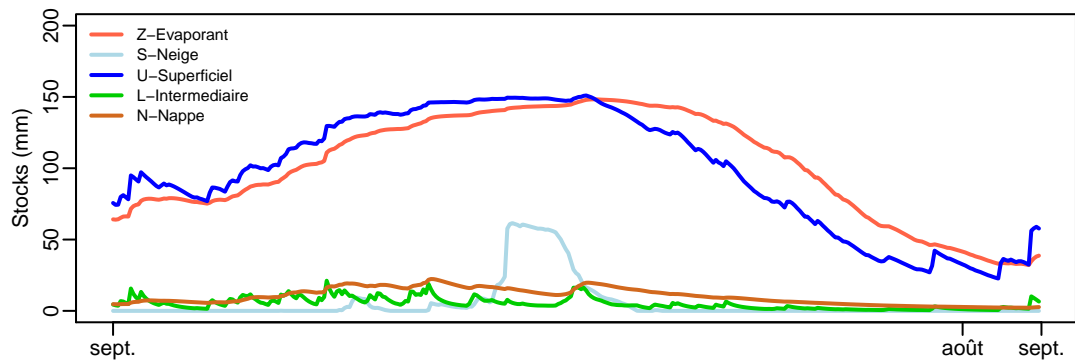

# k2593010 (993.44 km<sup>2</sup>) – année 2003–2004

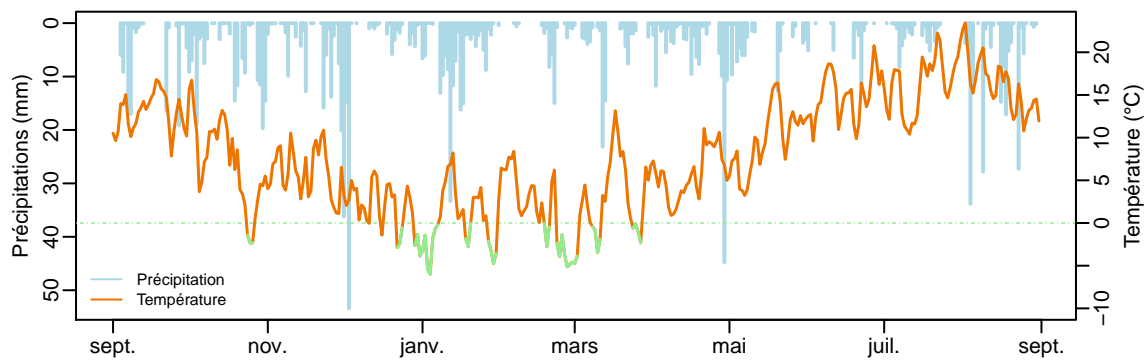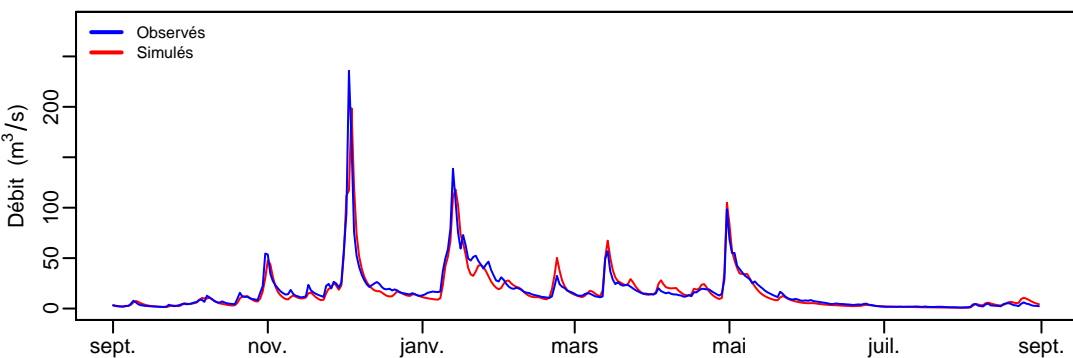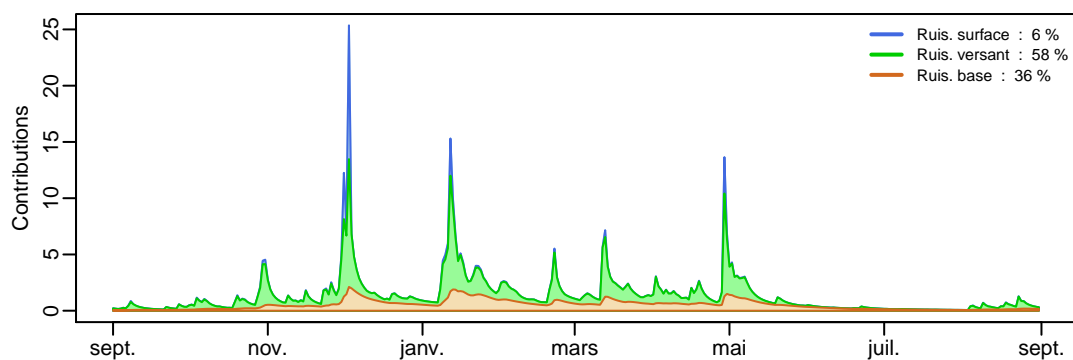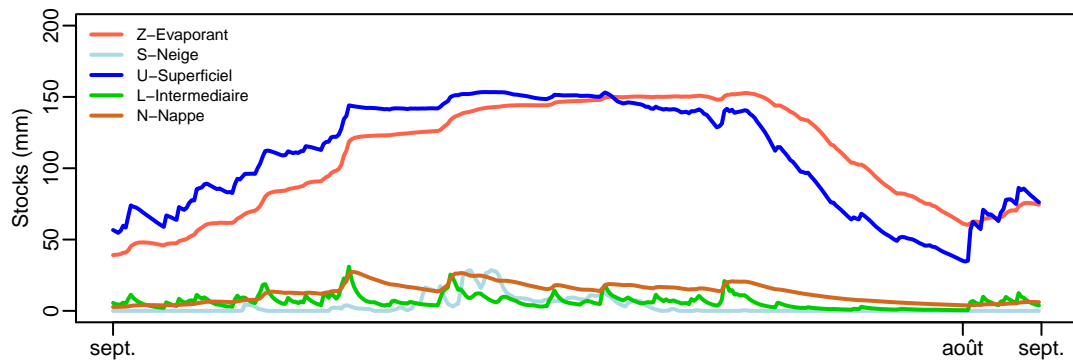

# k2593010 (993.44 km<sup>2</sup>) – année 2004–2005

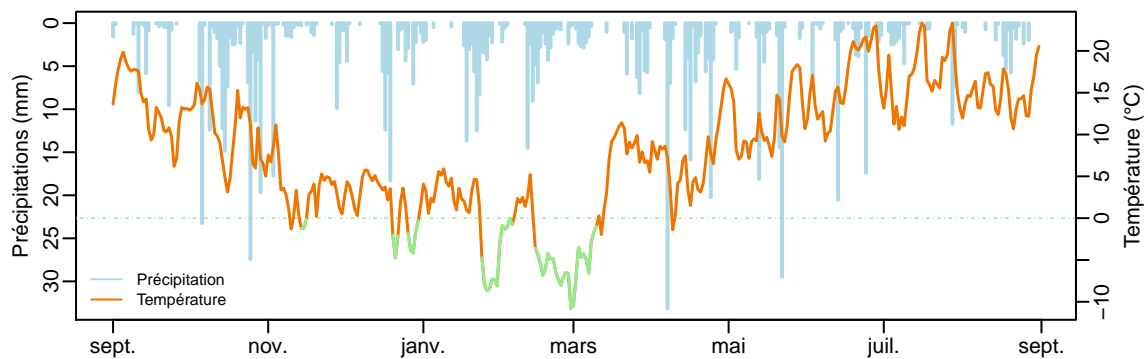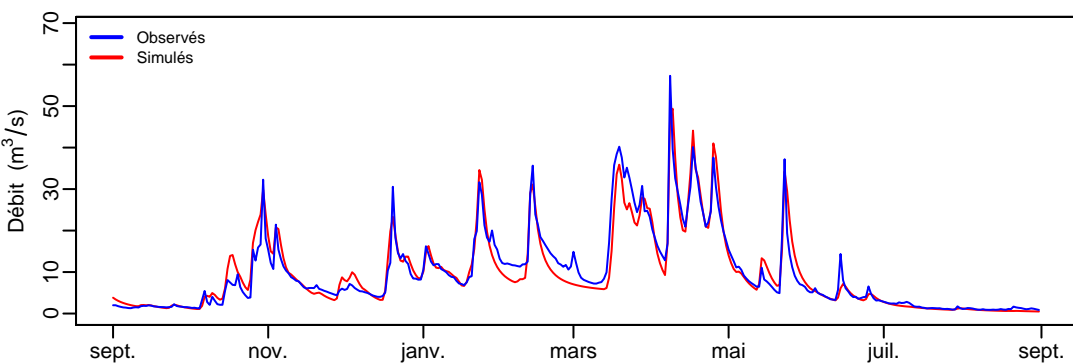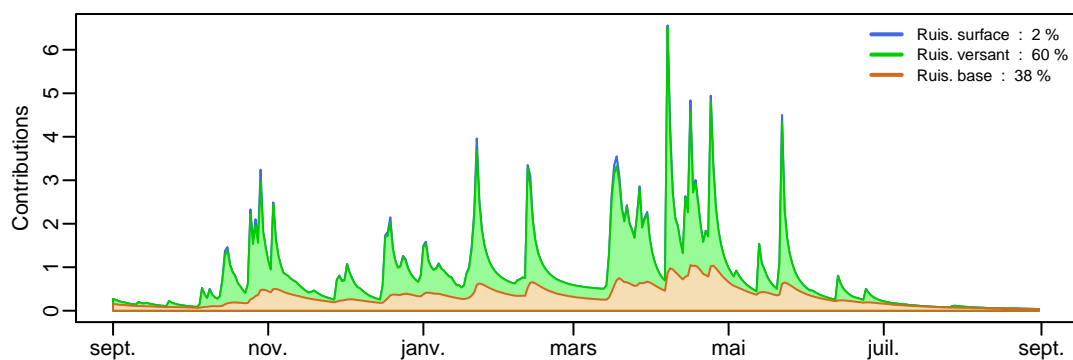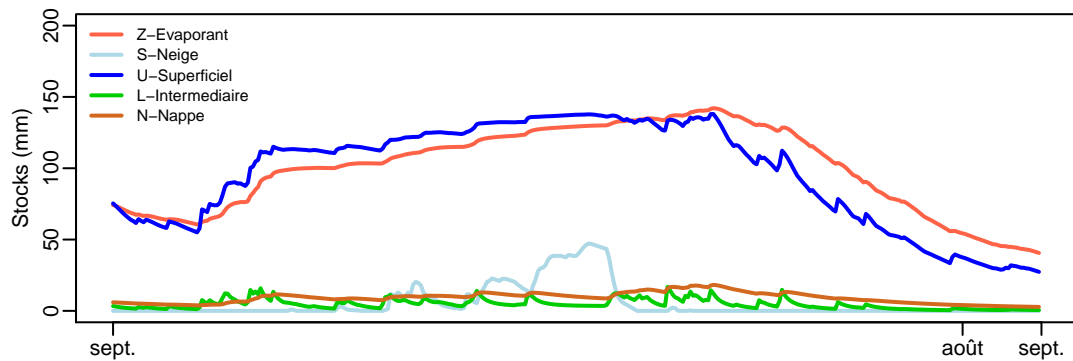



# k2593010 (993.44 km<sup>2</sup>) – année 2005–2006

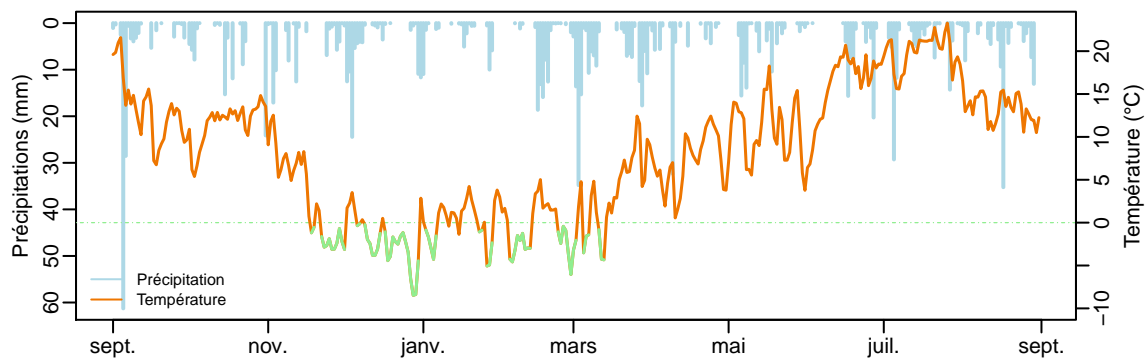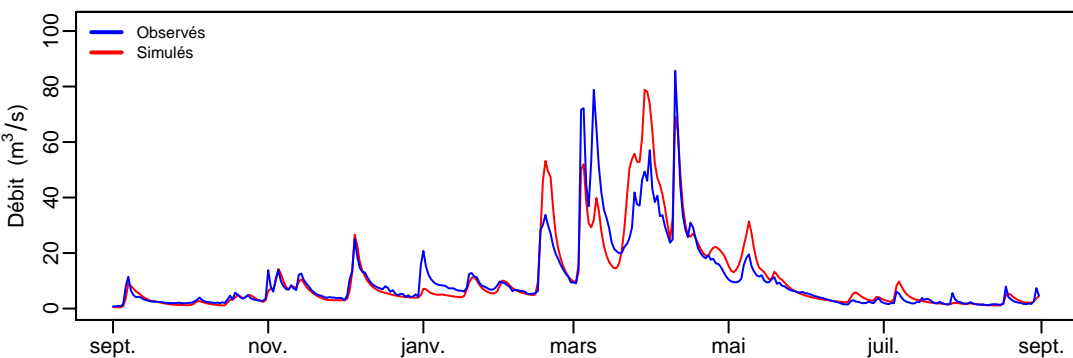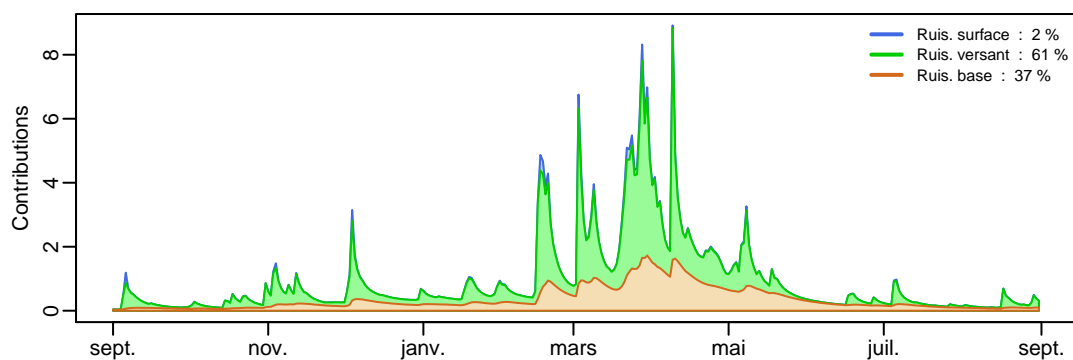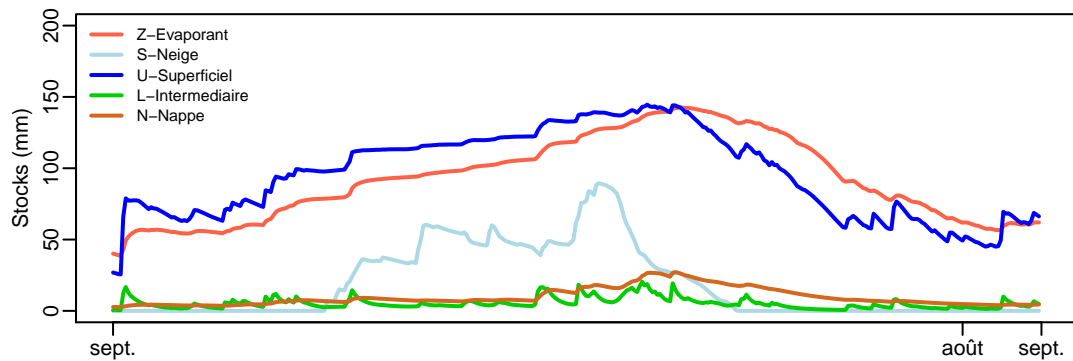

# k2593010 (993.44 km<sup>2</sup>) – année 2006–2007

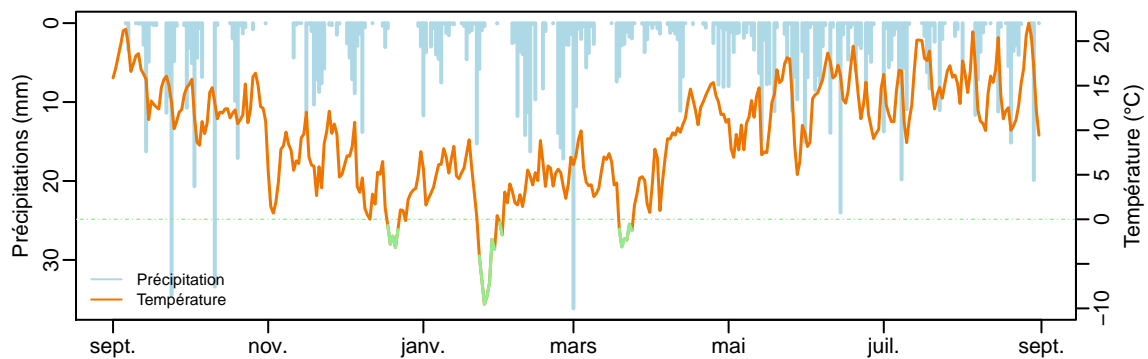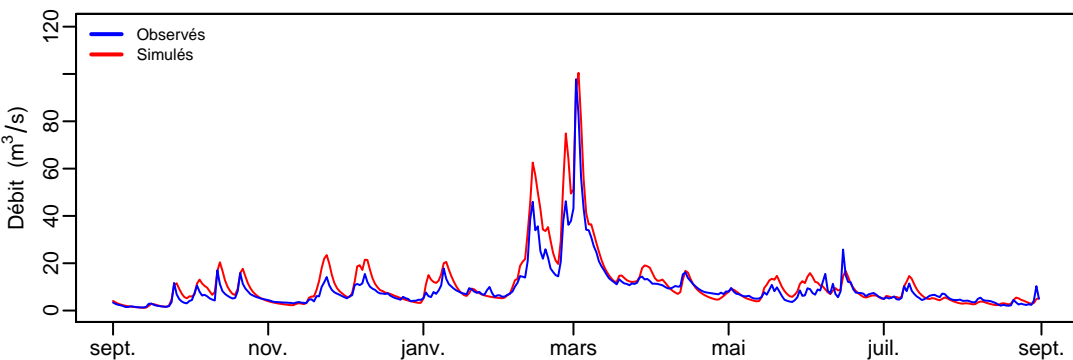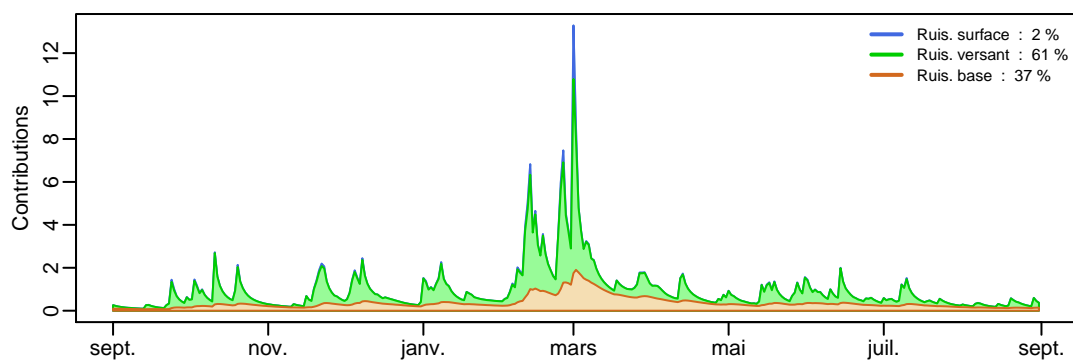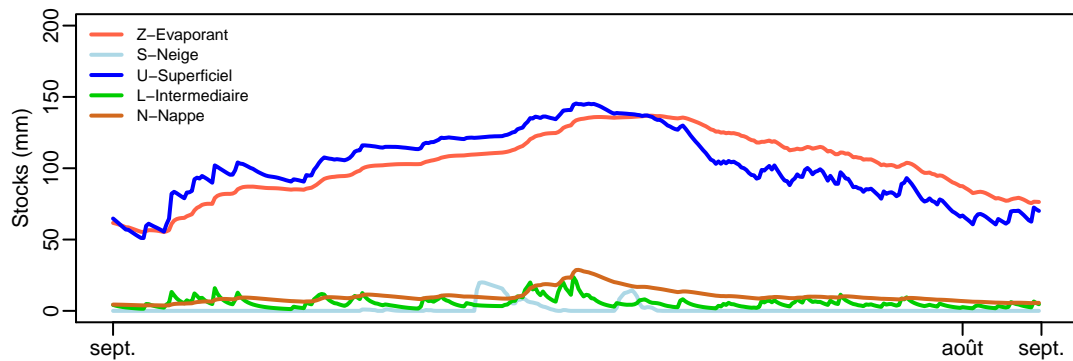

# k2593010 (993.44 km<sup>2</sup>) – année 2007–2008

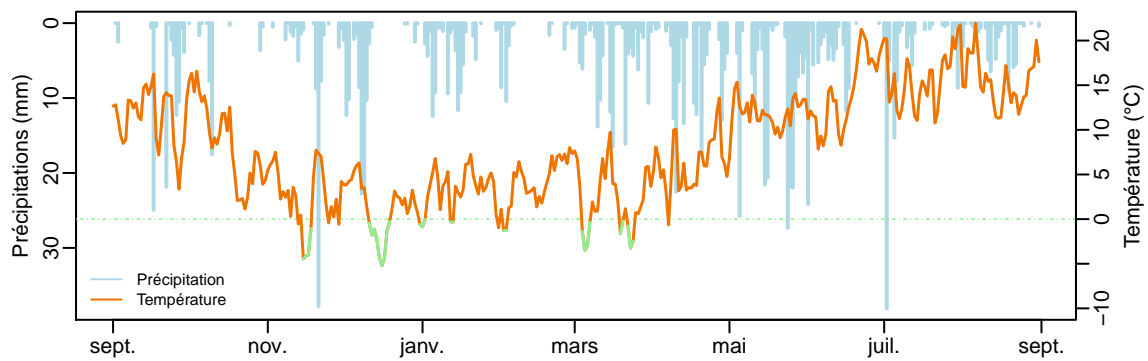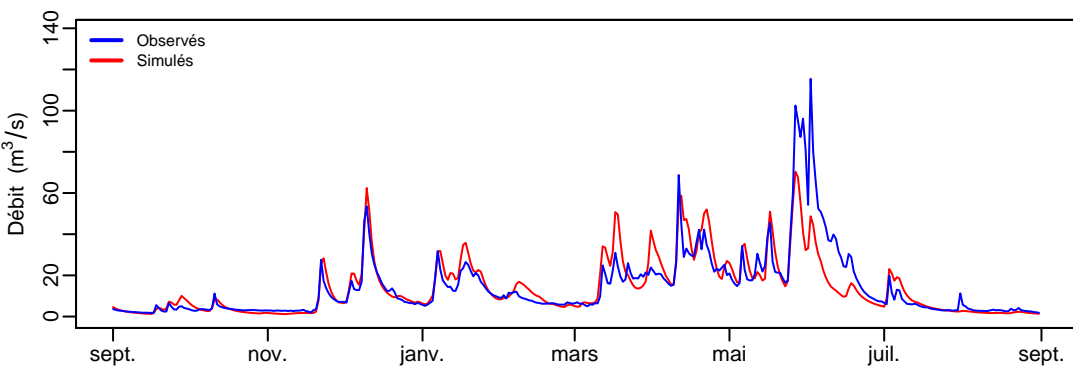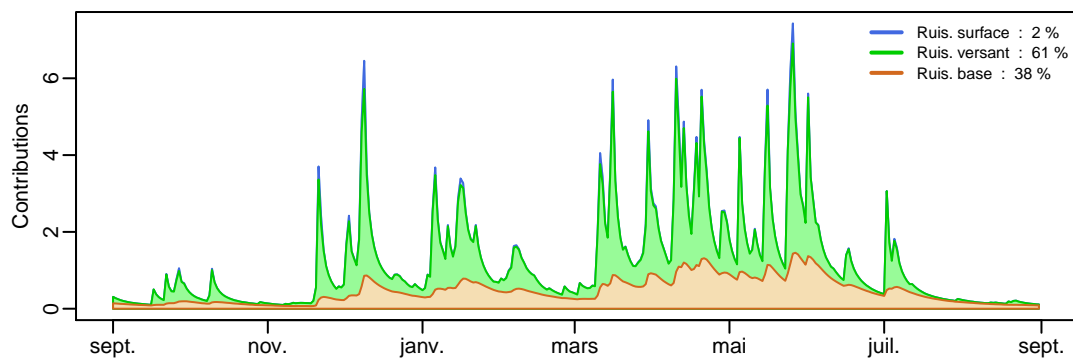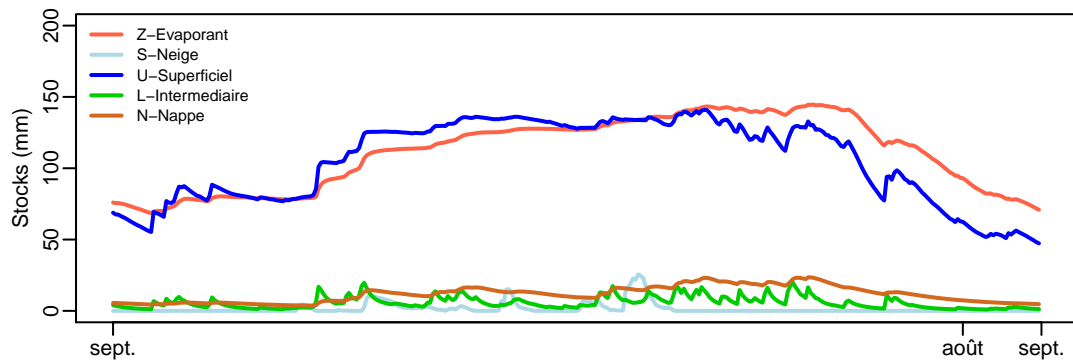

# k2593010 (993.44 km<sup>2</sup>) – année 2008–2009

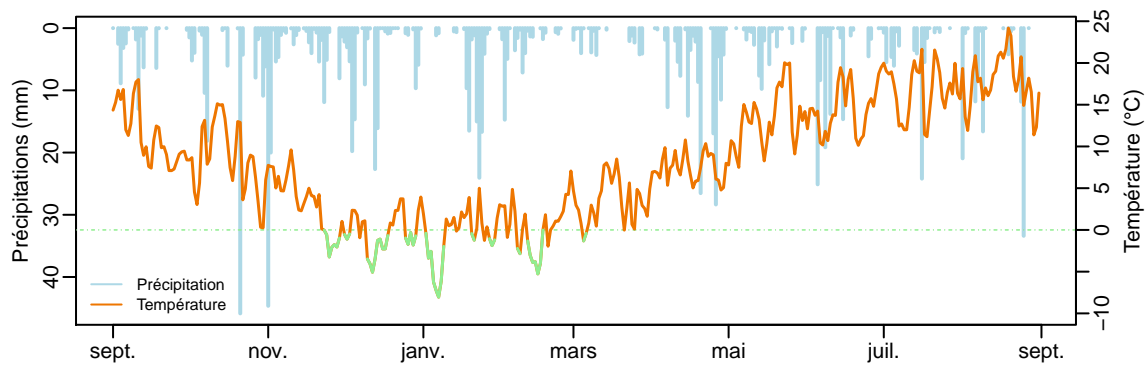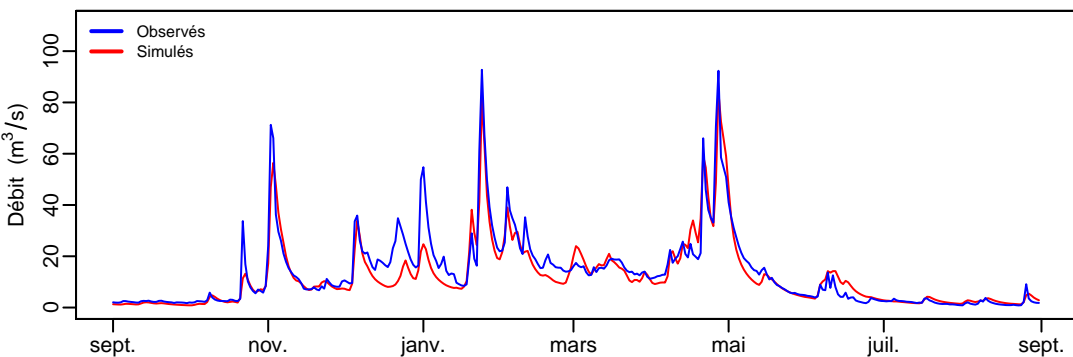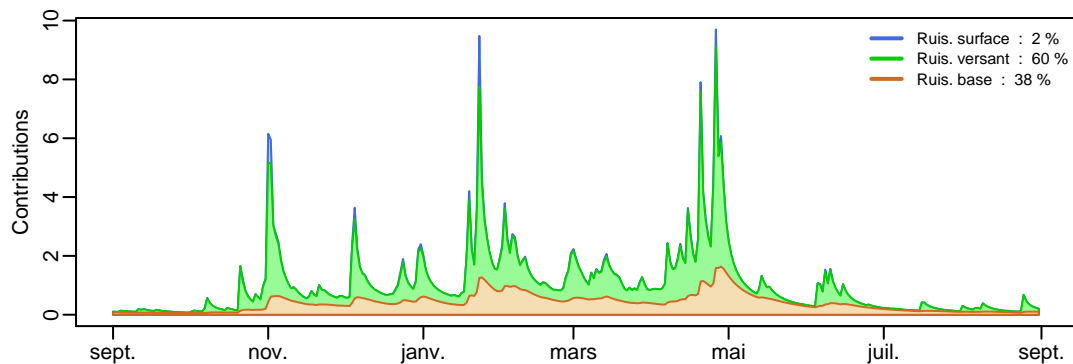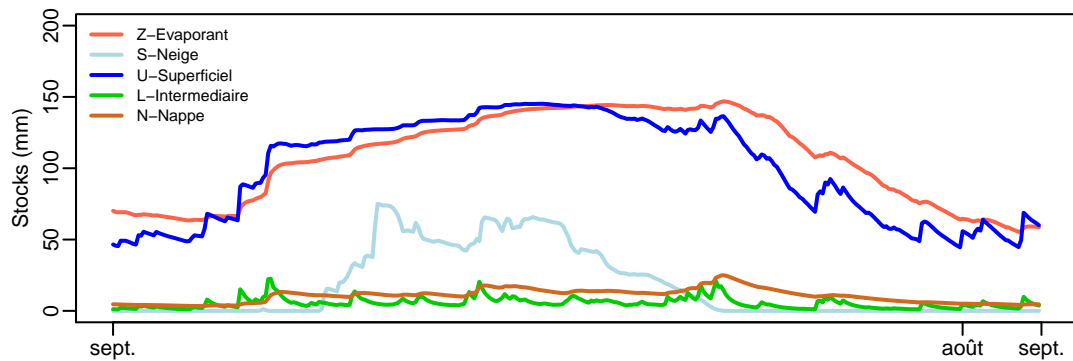

# k2654010 (213.96 km<sup>2</sup>) – année 1981–1982

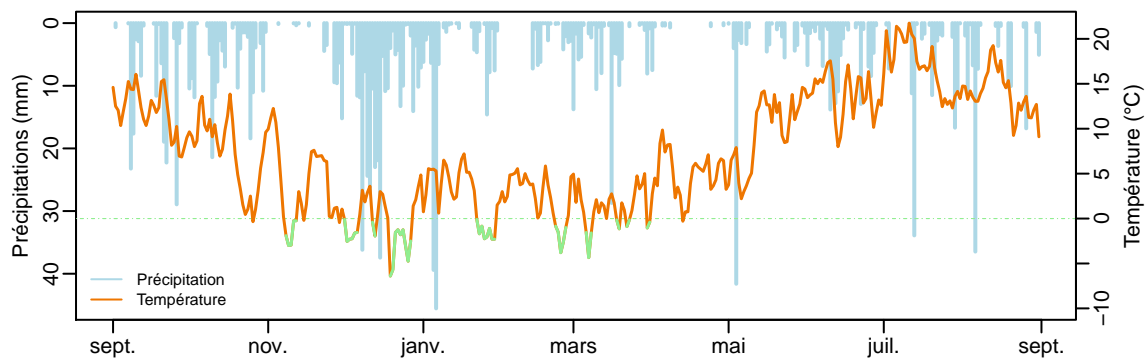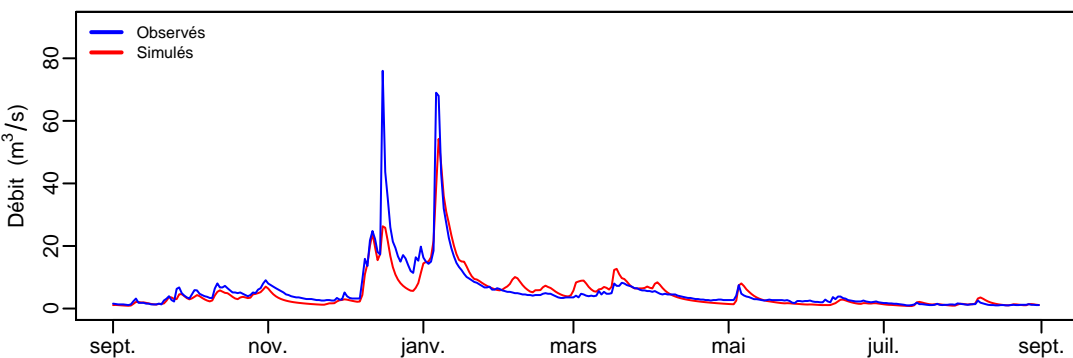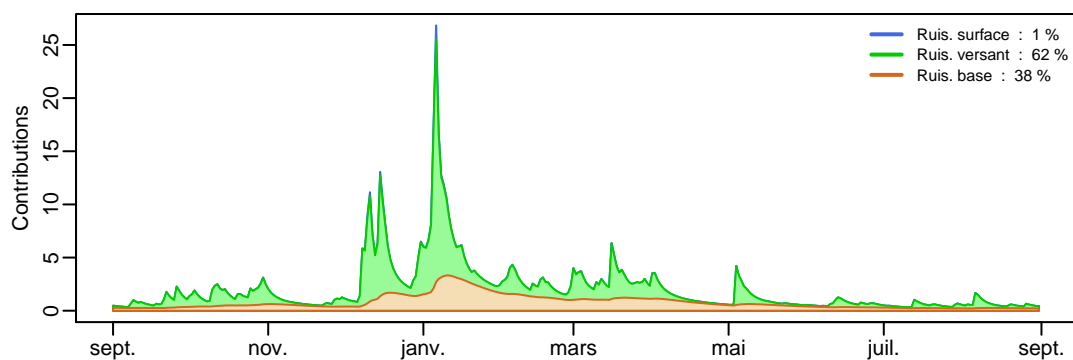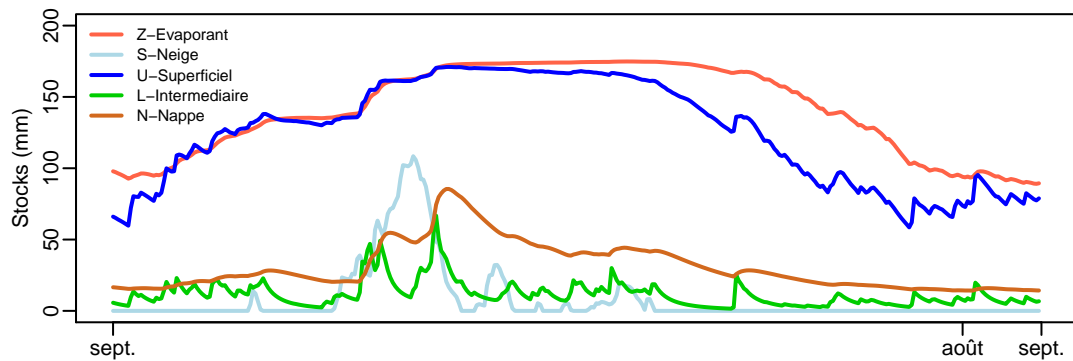

# k2654010 (213.96 km<sup>2</sup>) – année 1982–1983

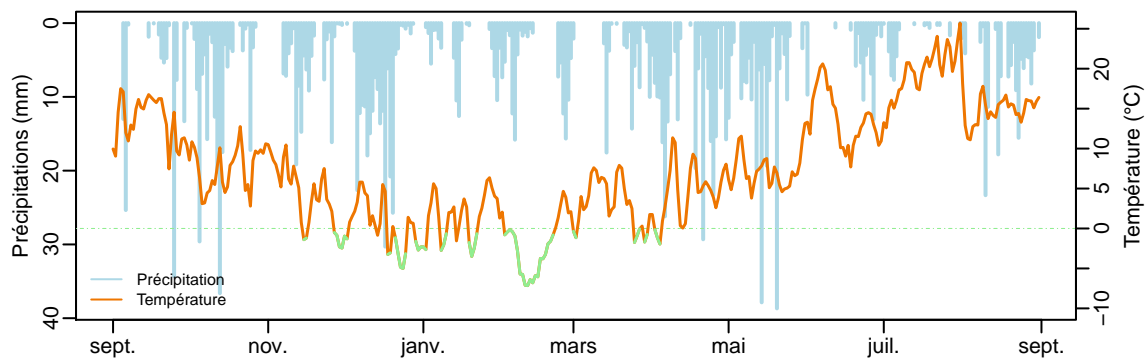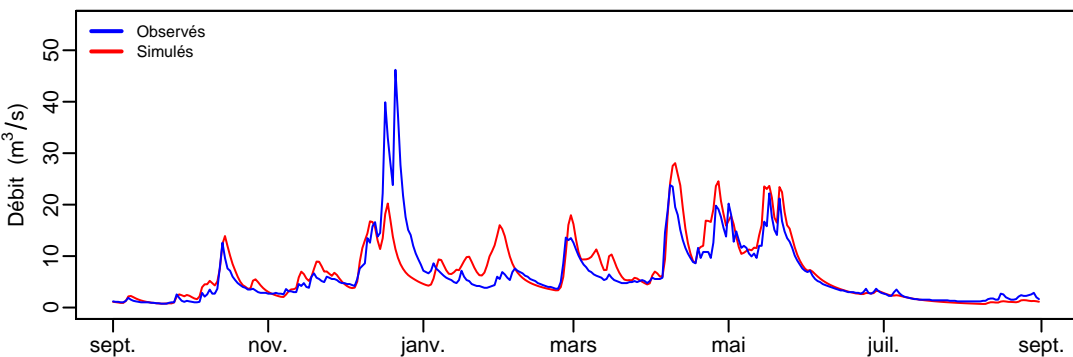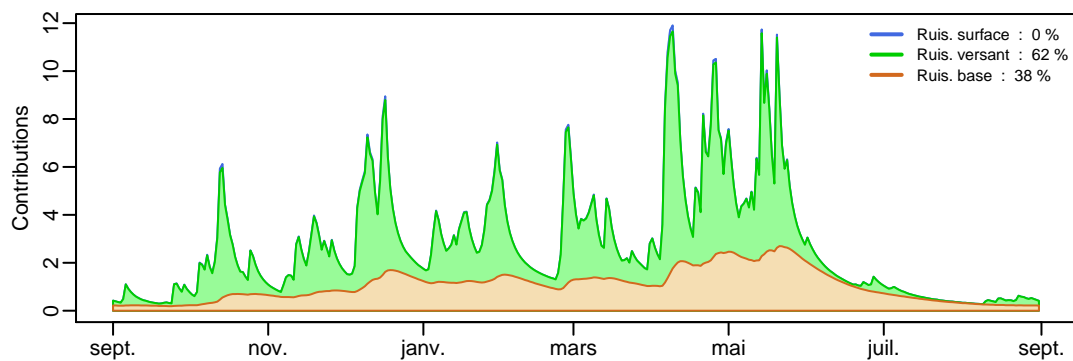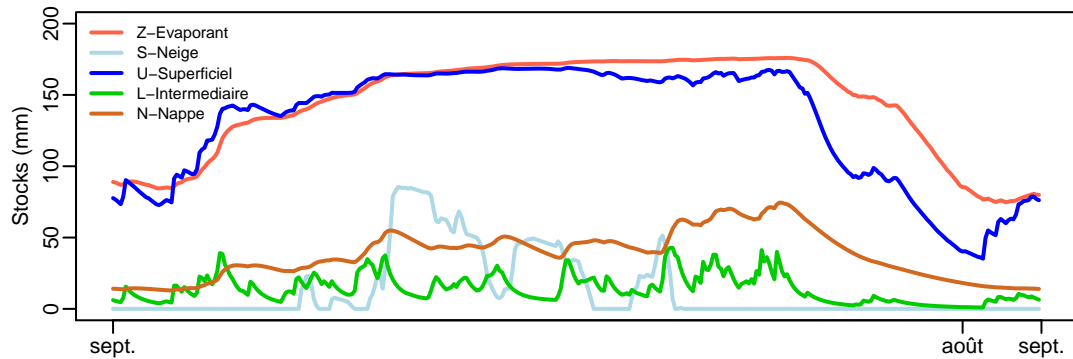

# k2654010 (213.96 km<sup>2</sup>) – année 1983–1984

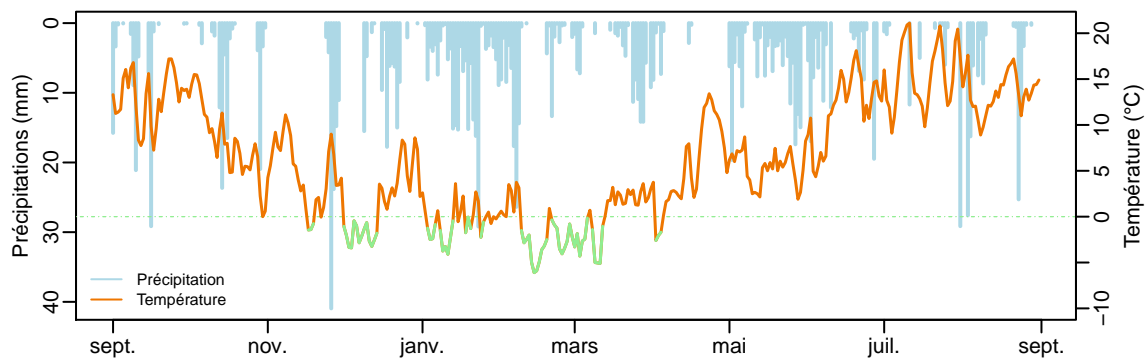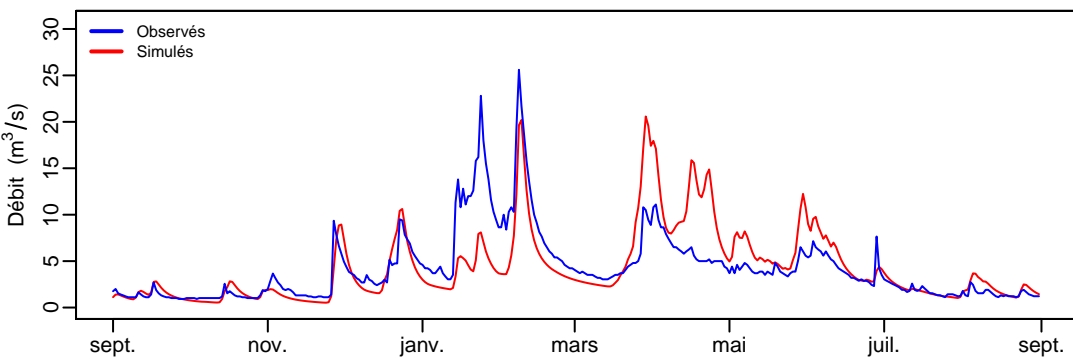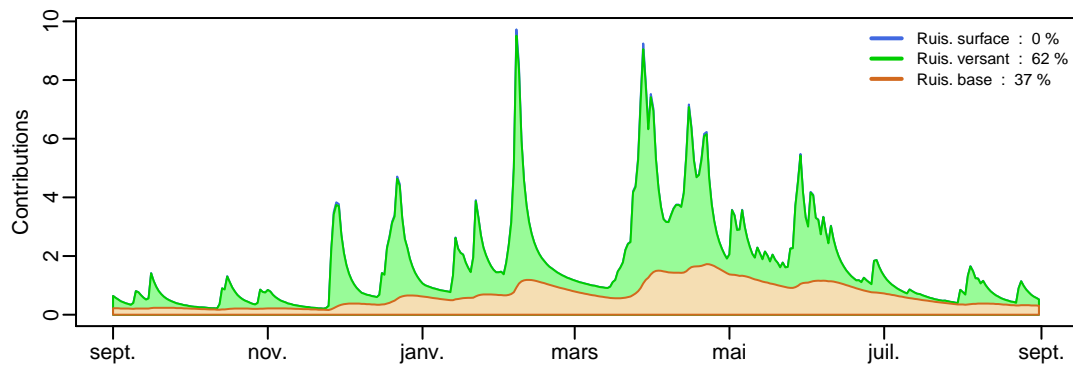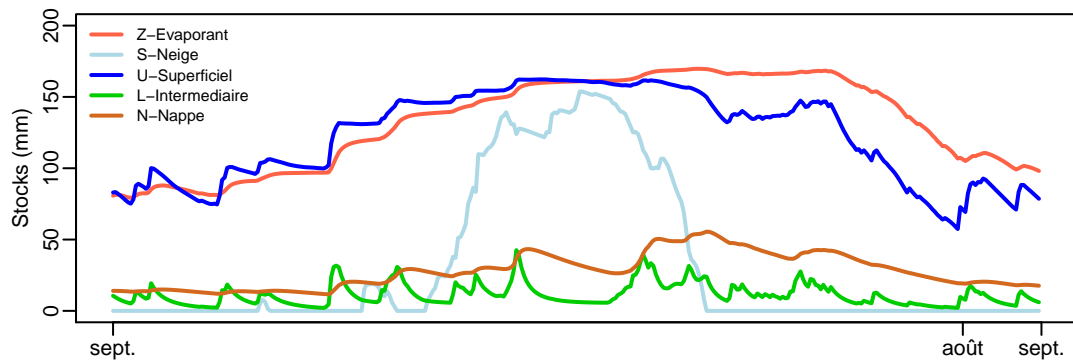

# k2654010 (213.96 km<sup>2</sup>) – année 1984–1985

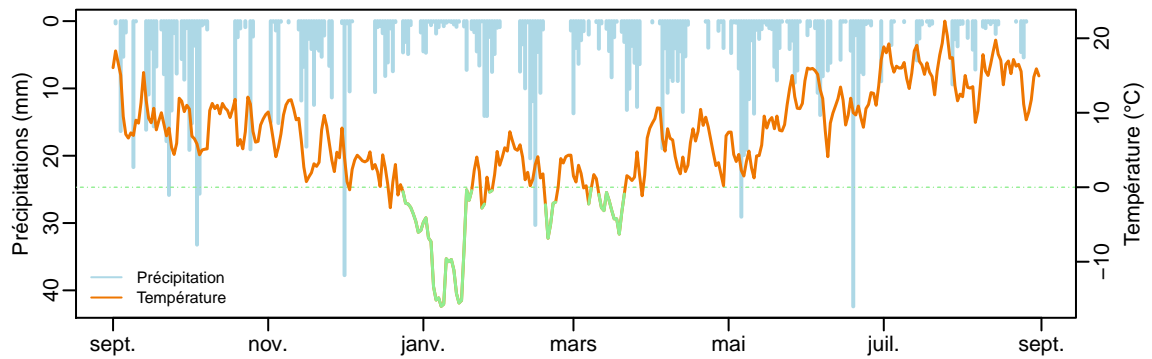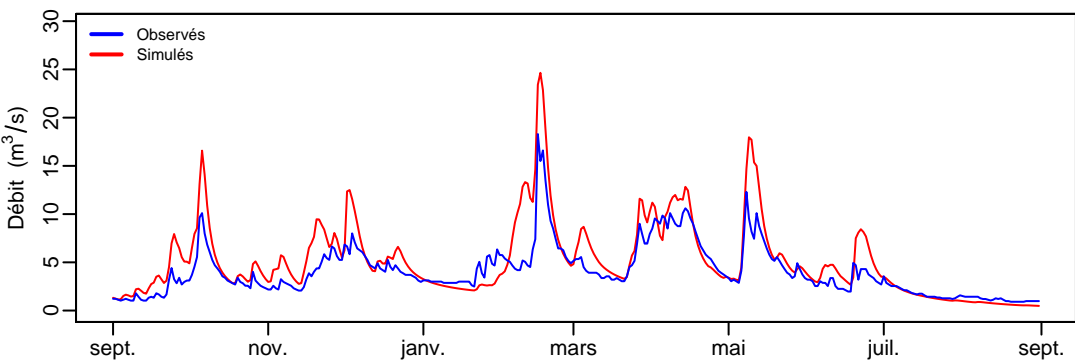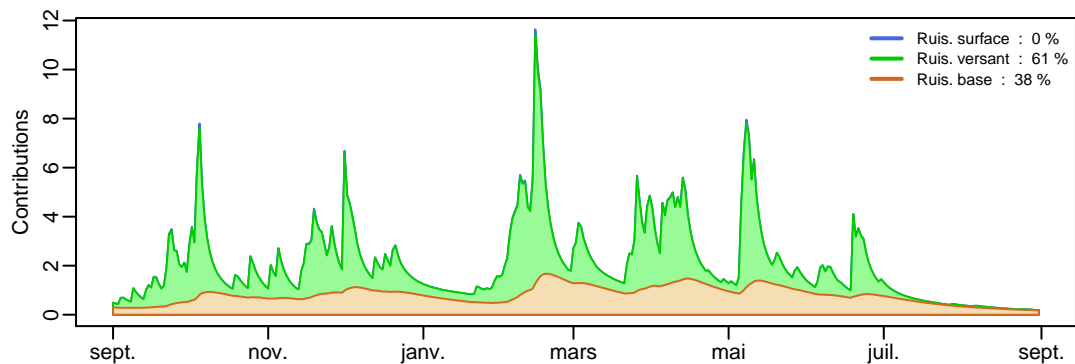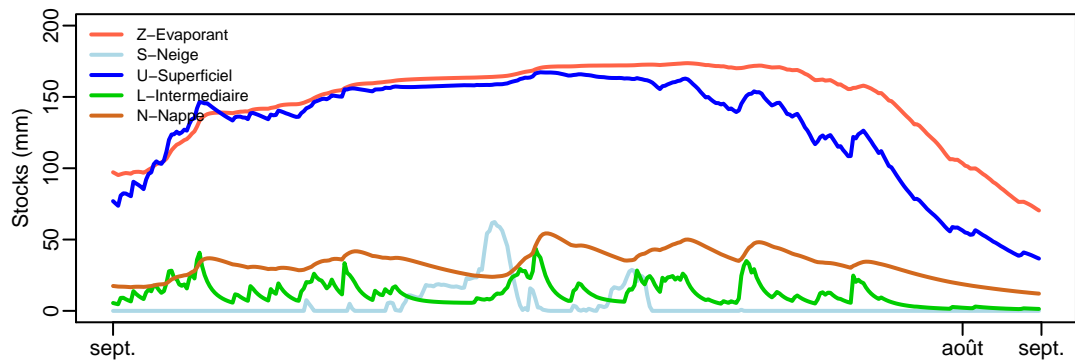



# k2654010 (213.96 km<sup>2</sup>) – année 1985–1986

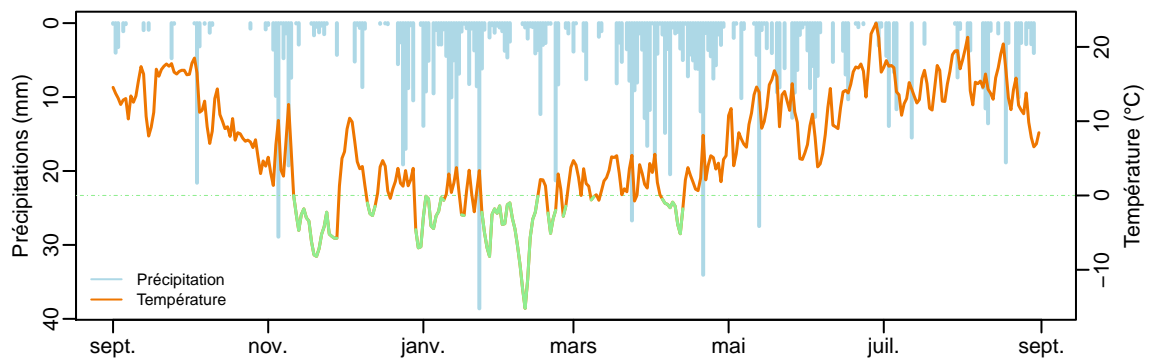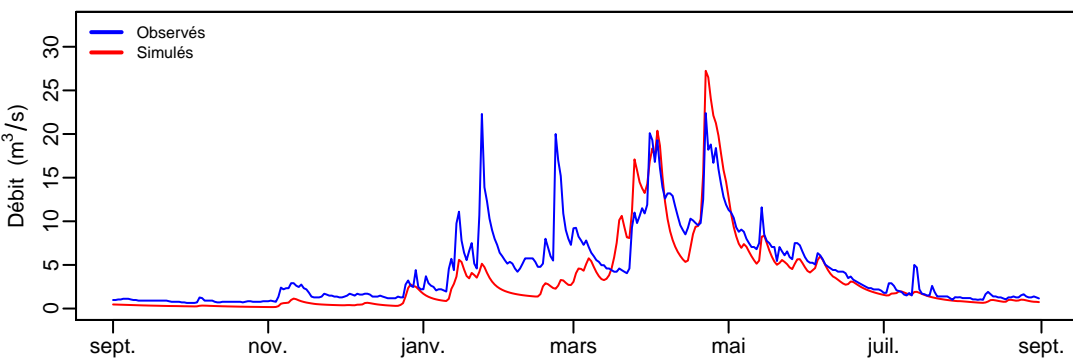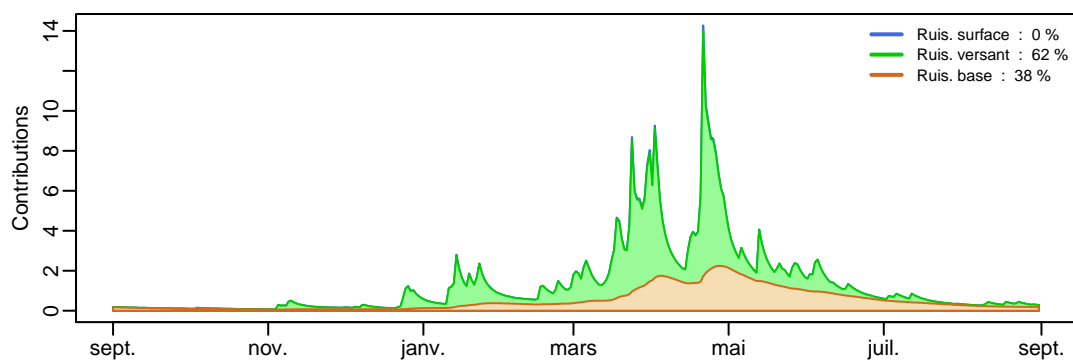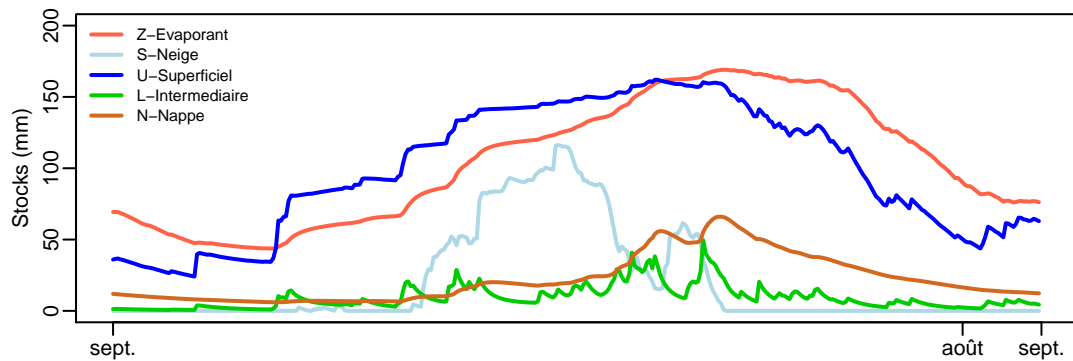

# k2654010 (213.96 km<sup>2</sup>) – année 1986–1987

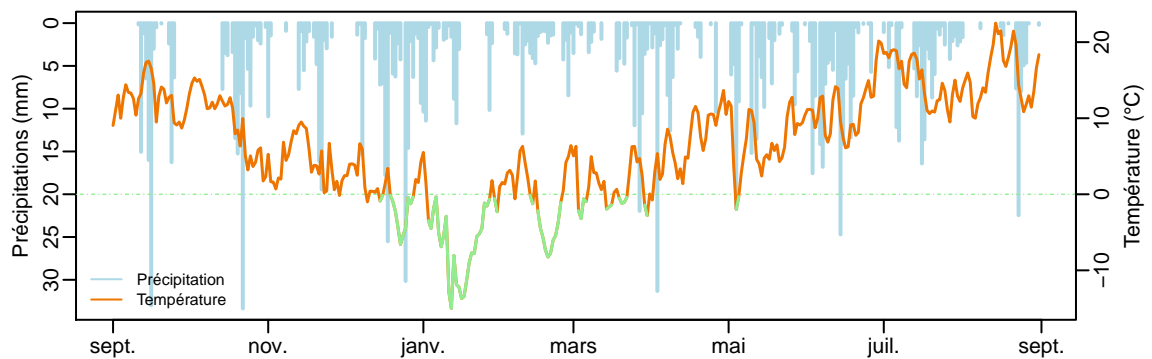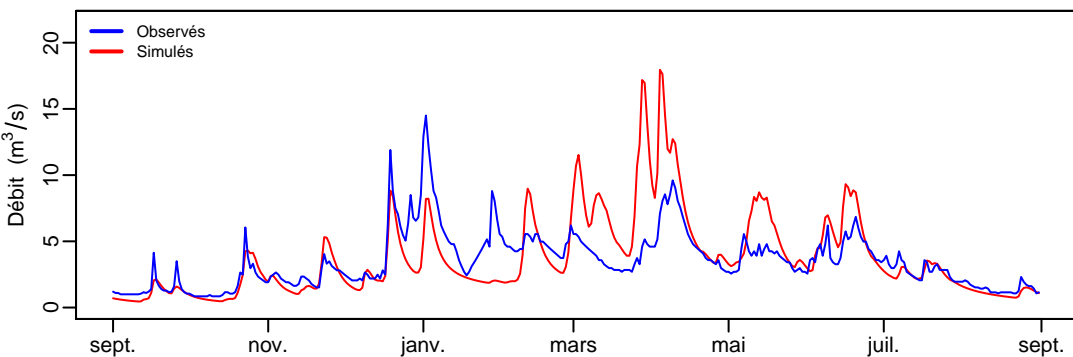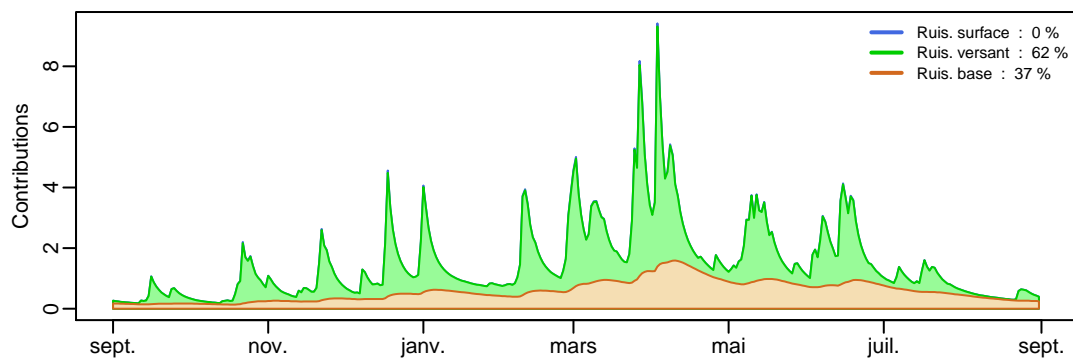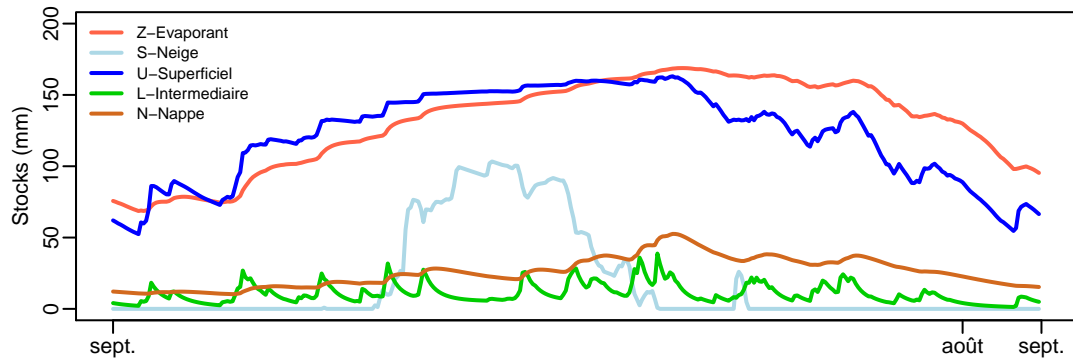

# k2654010 (213.96 km<sup>2</sup>) – année 1987–1988

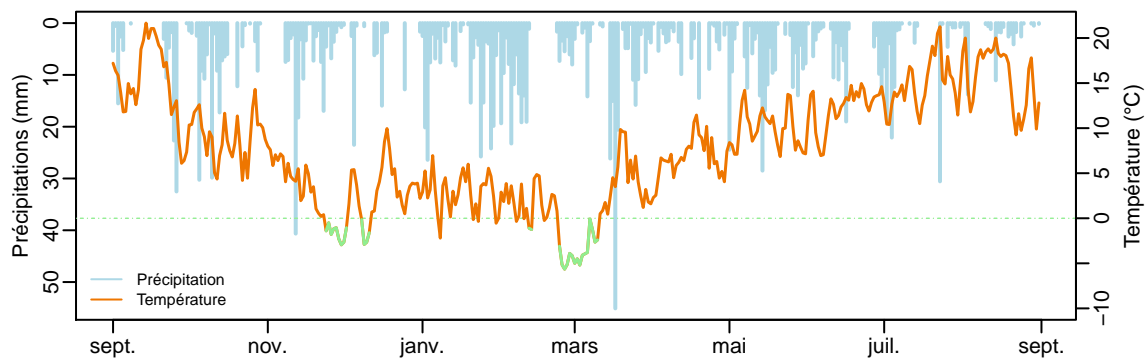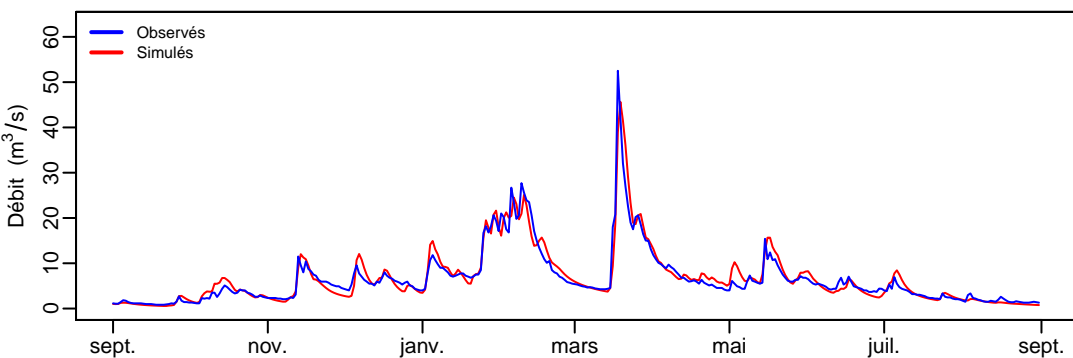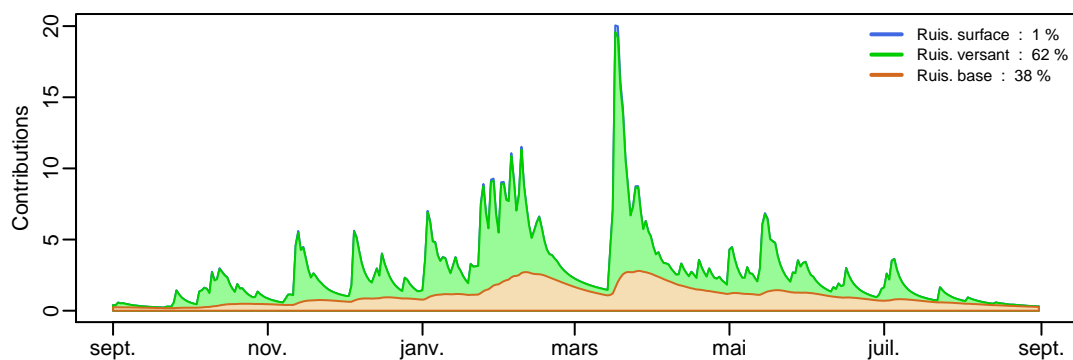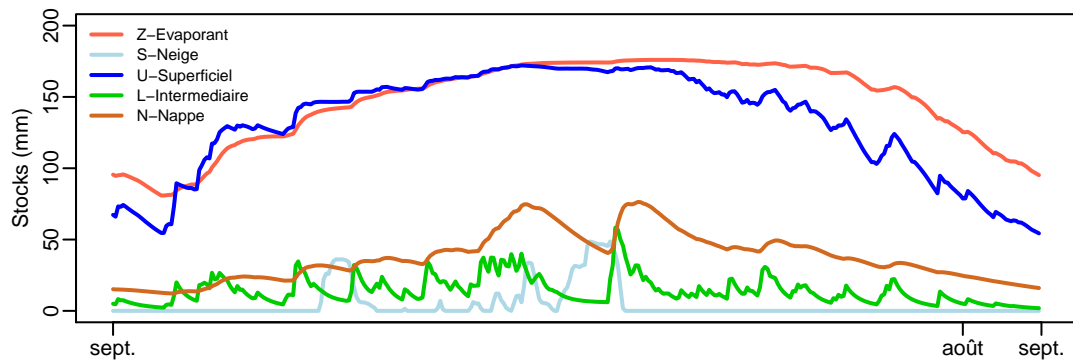

# k2654010 (213.96 km<sup>2</sup>) – année 1988–1989

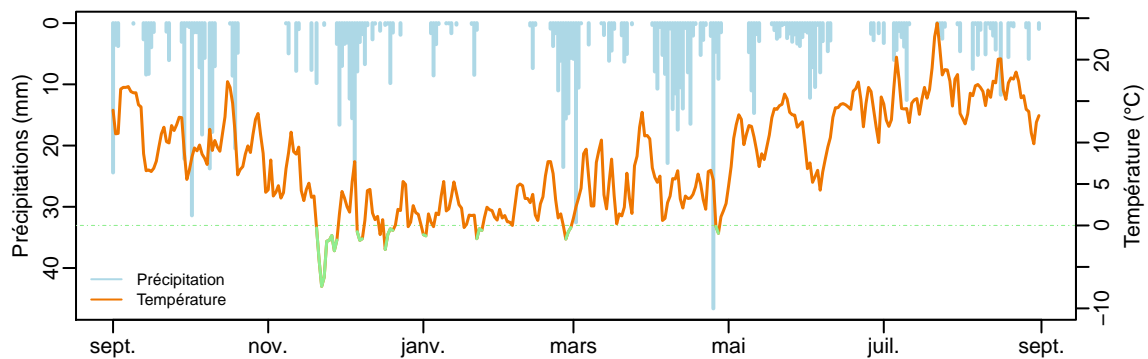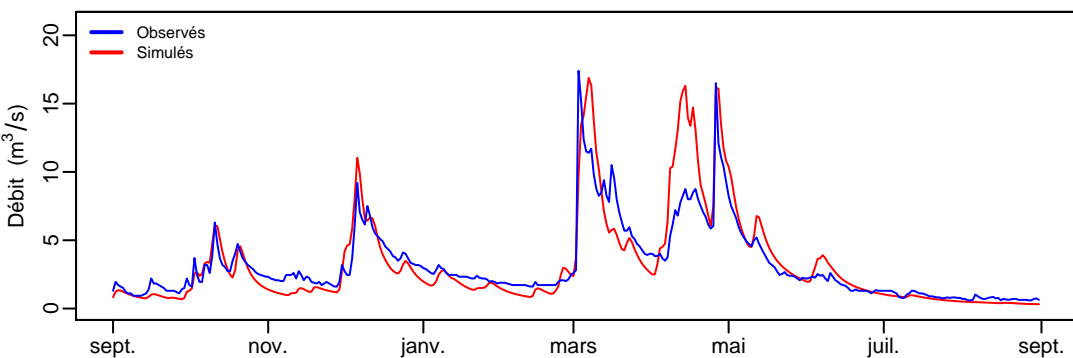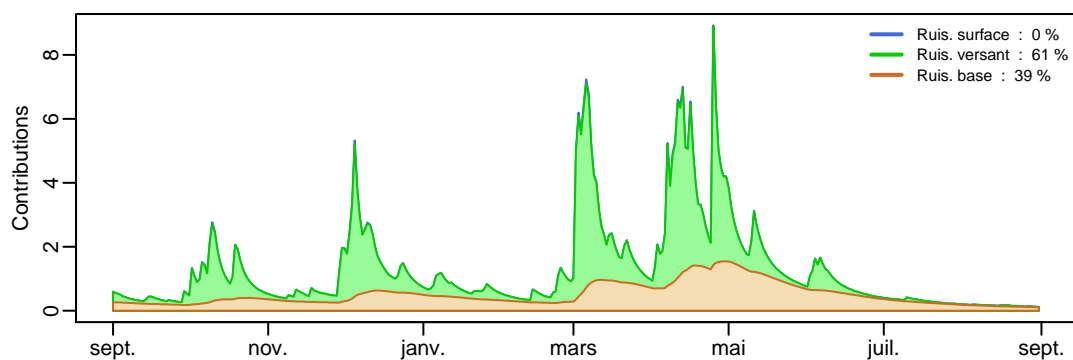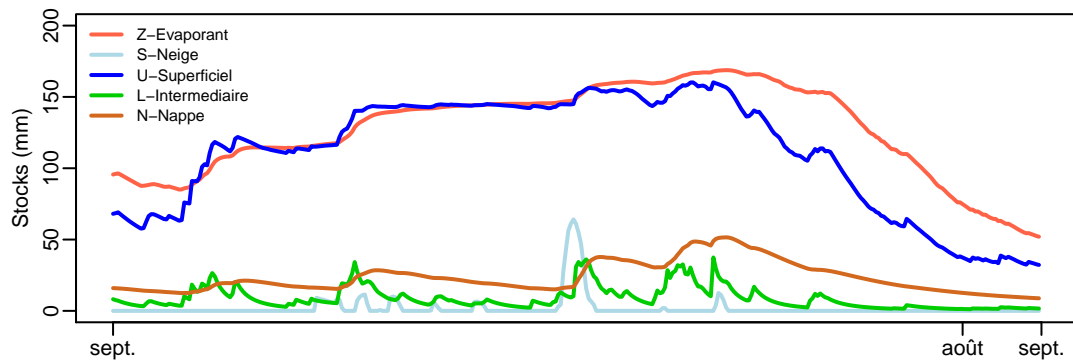

# k2654010 (213.96 km<sup>2</sup>) – année 1989–1990

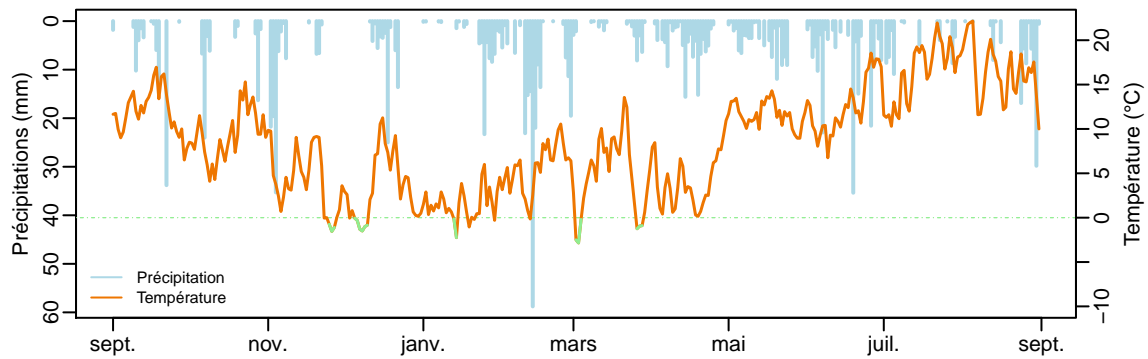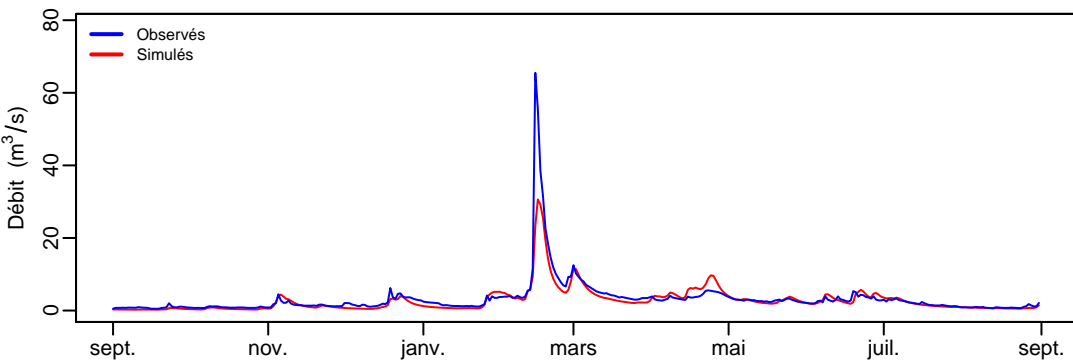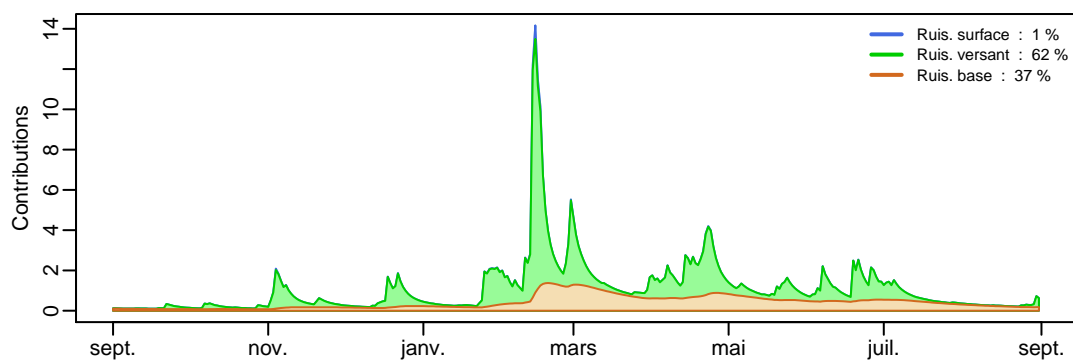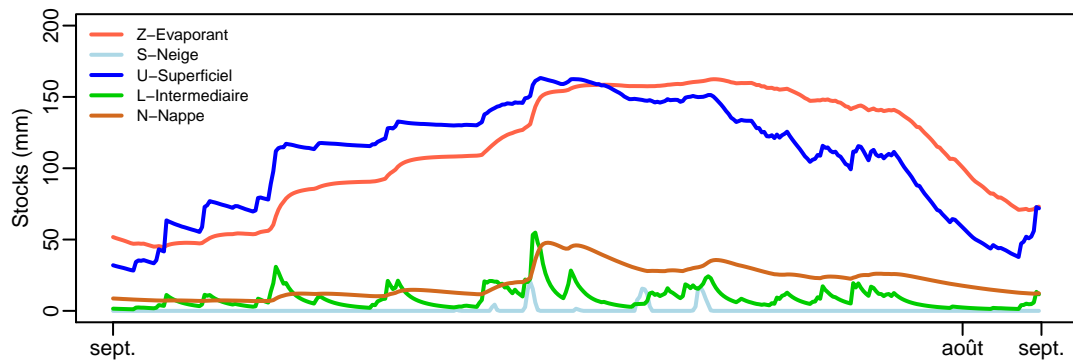

# k2654010 (213.96 km<sup>2</sup>) – année 1990–1991

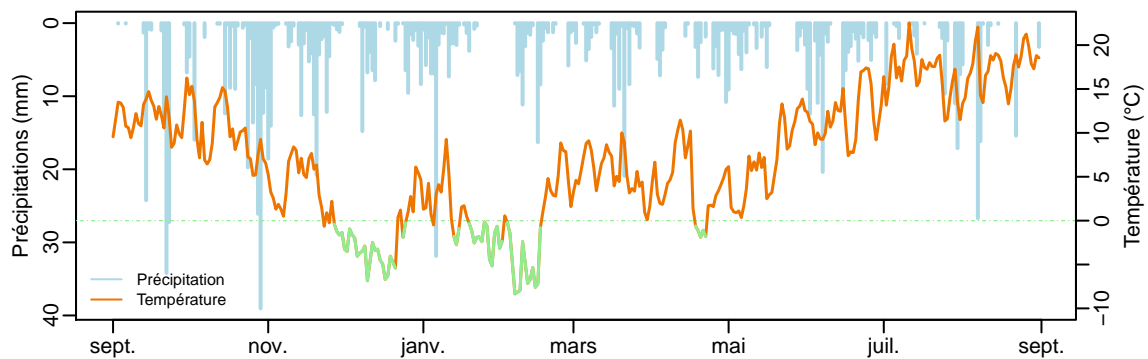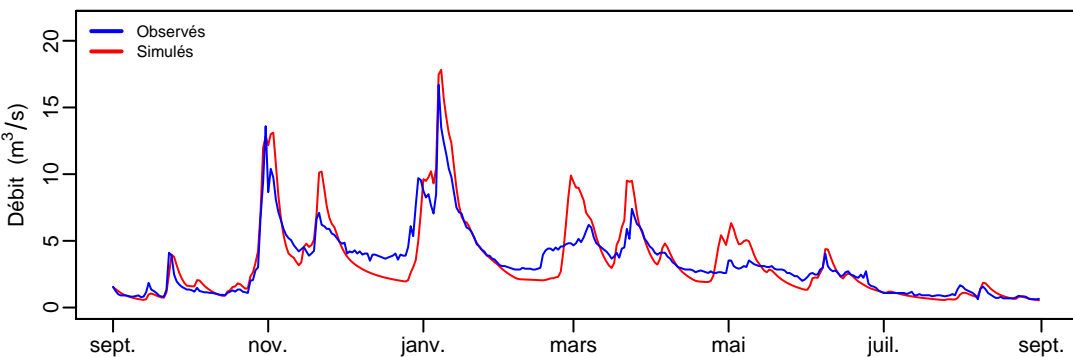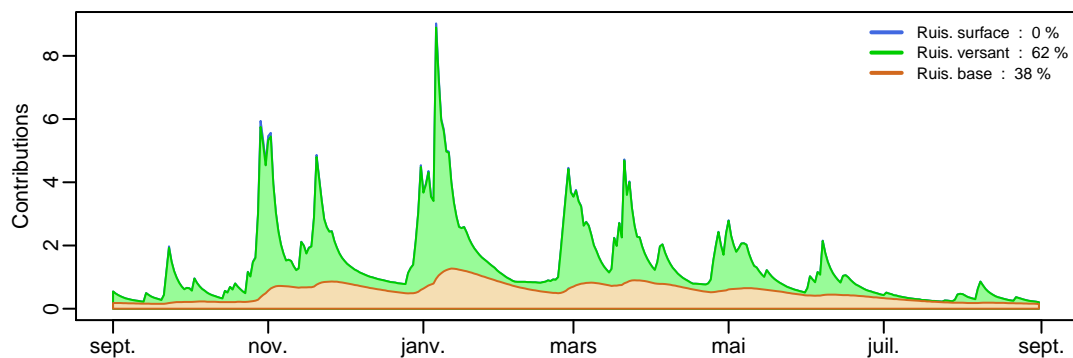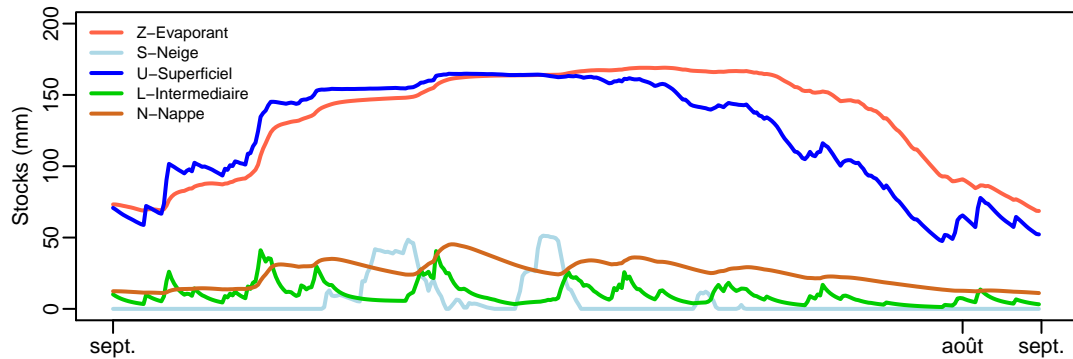

# k2654010 (213.96 km<sup>2</sup>) – année 1991–1992

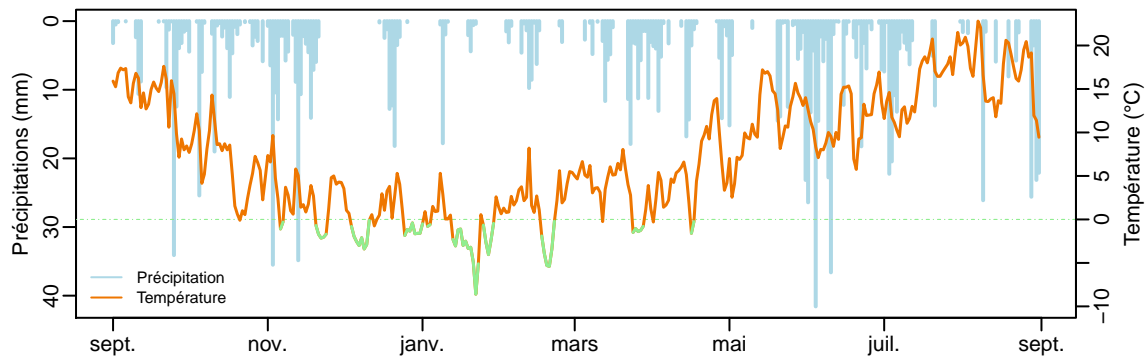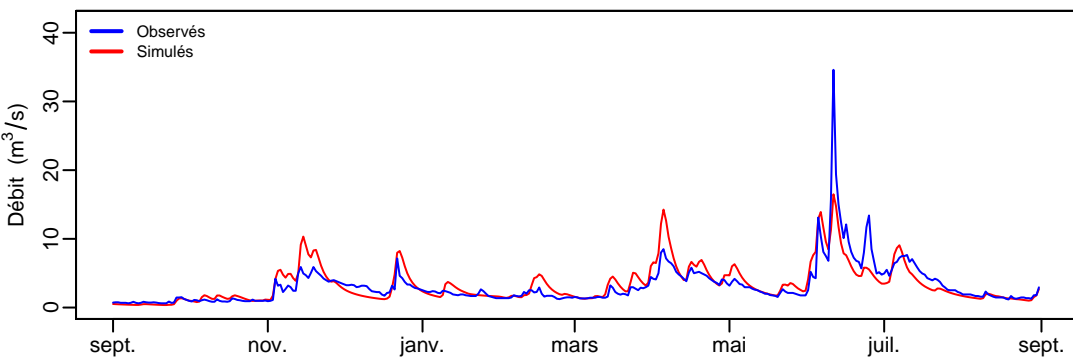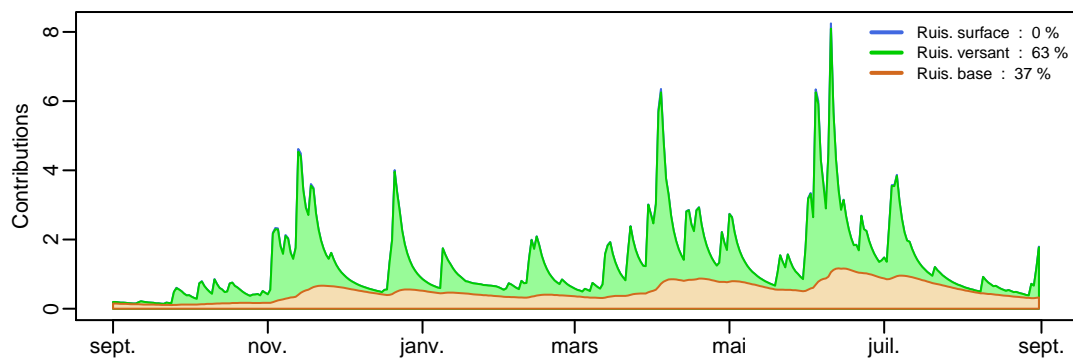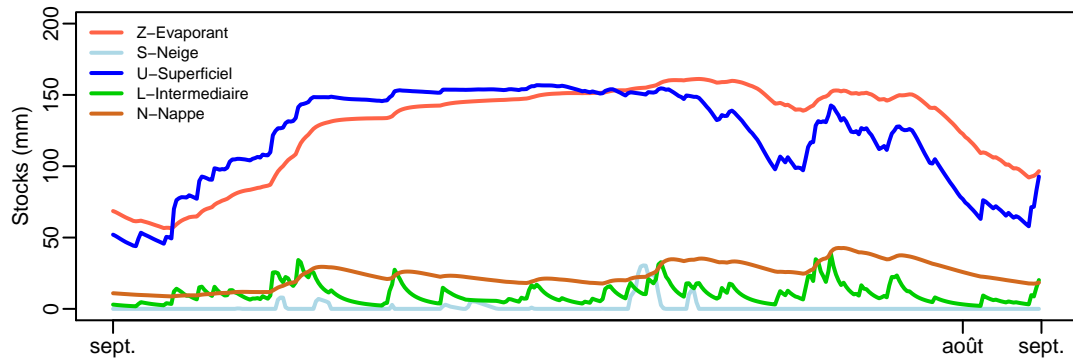

# k2654010 (213.96 km<sup>2</sup>) – année 1992–1993

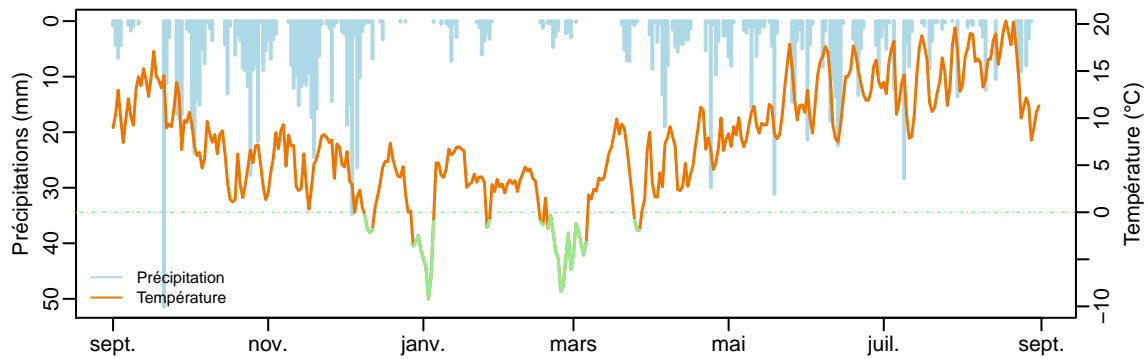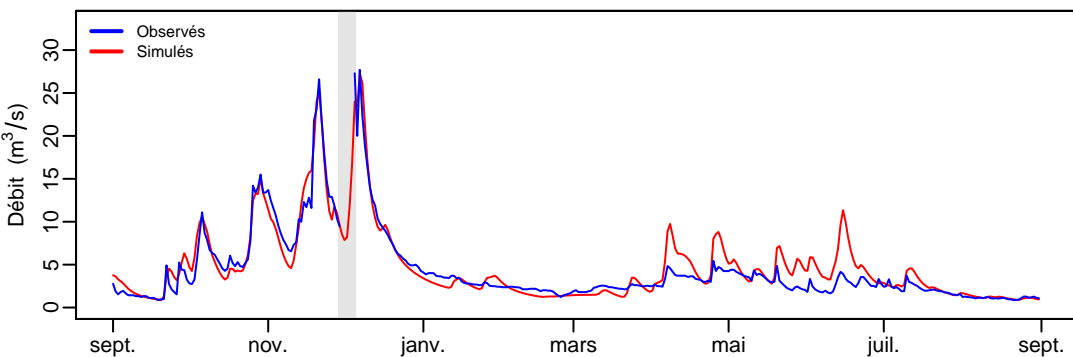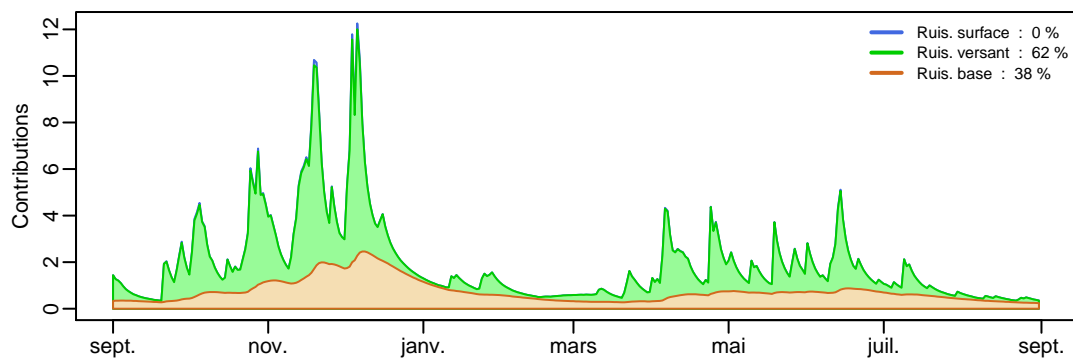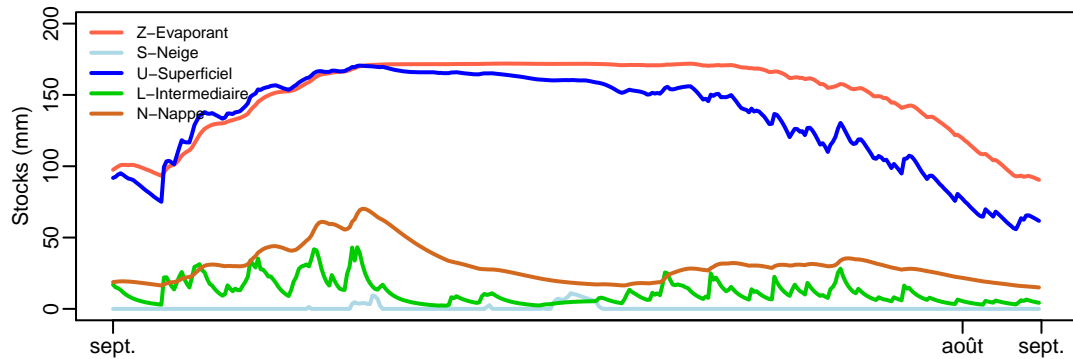



# k2654010 (213.96 km<sup>2</sup>) – année 1993–1994

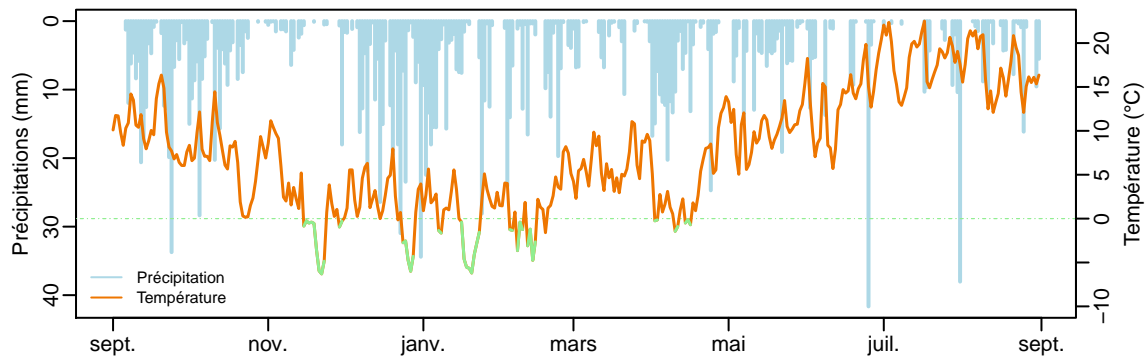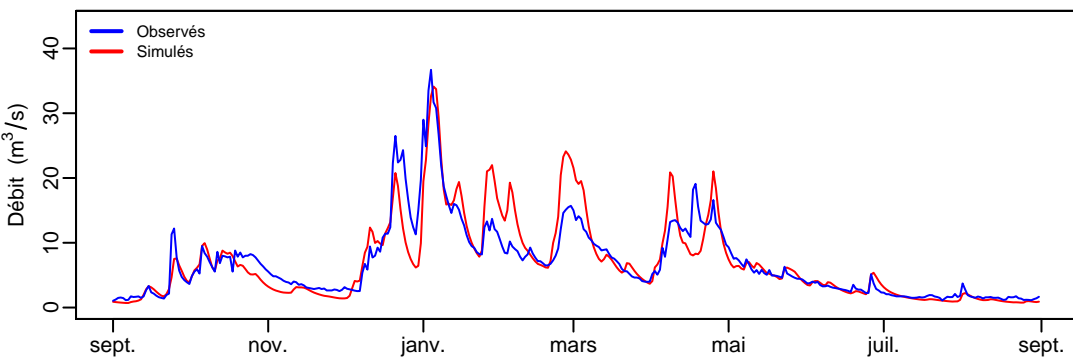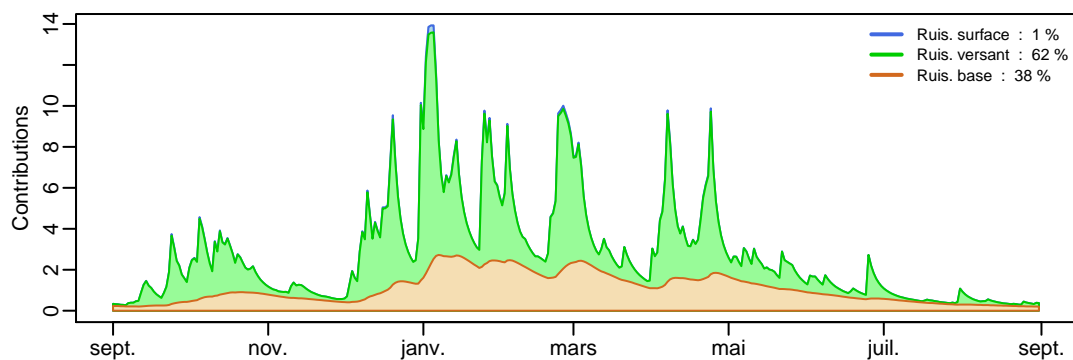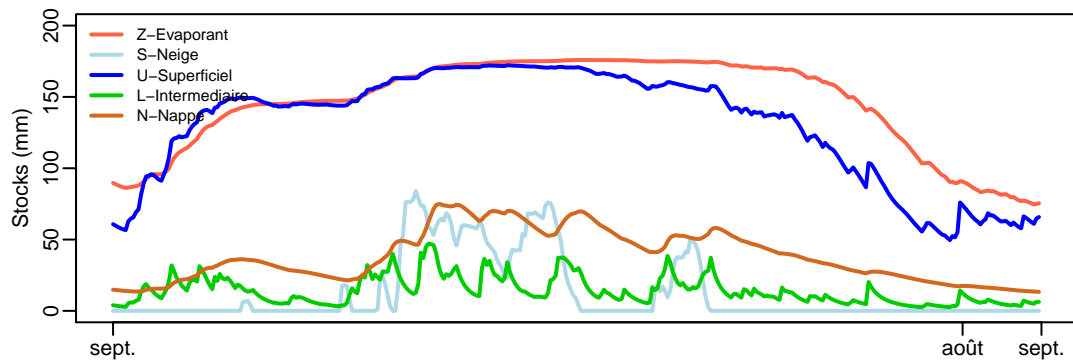

# k2654010 (213.96 km<sup>2</sup>) – année 1994–1995

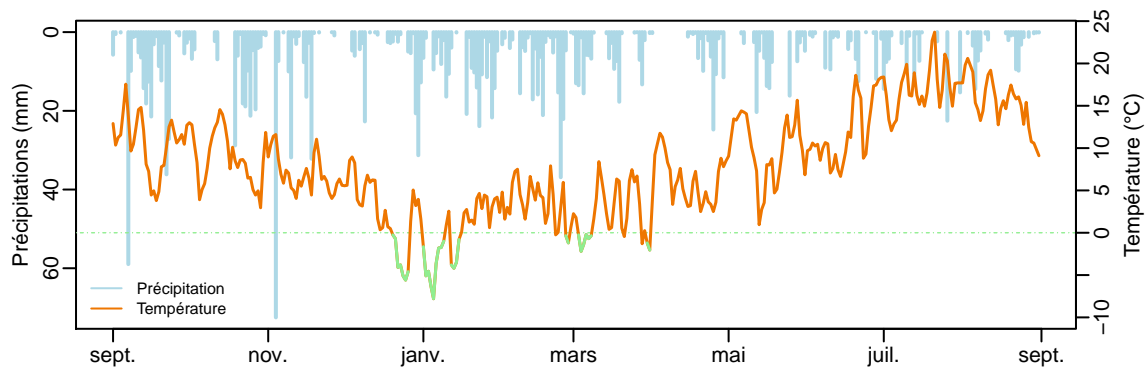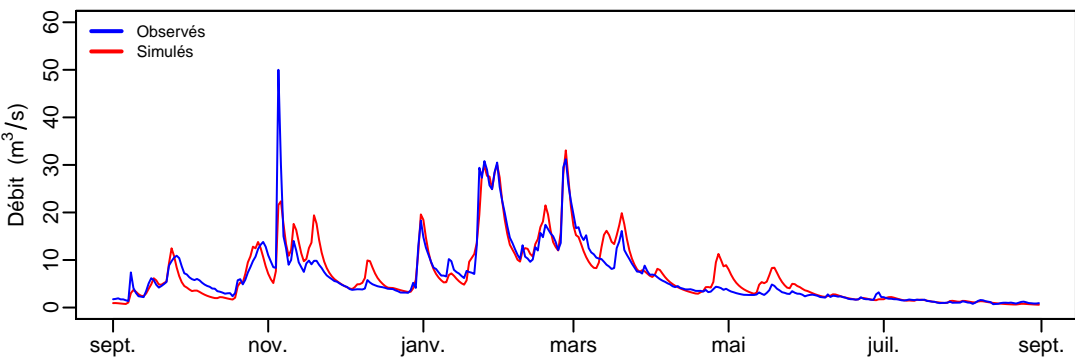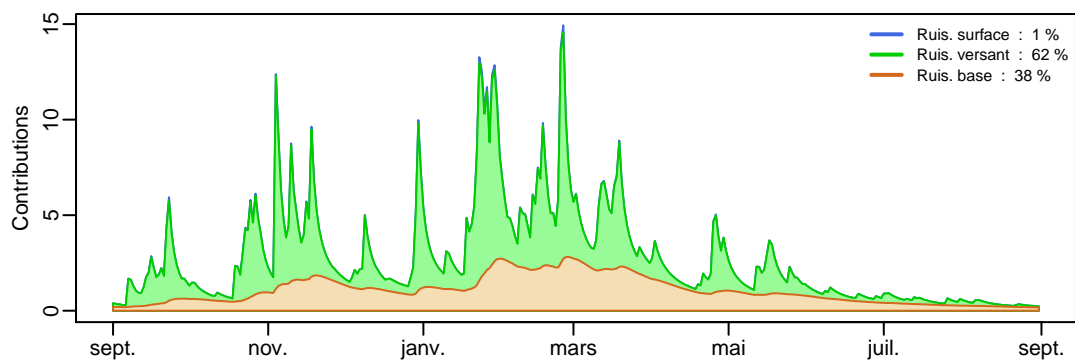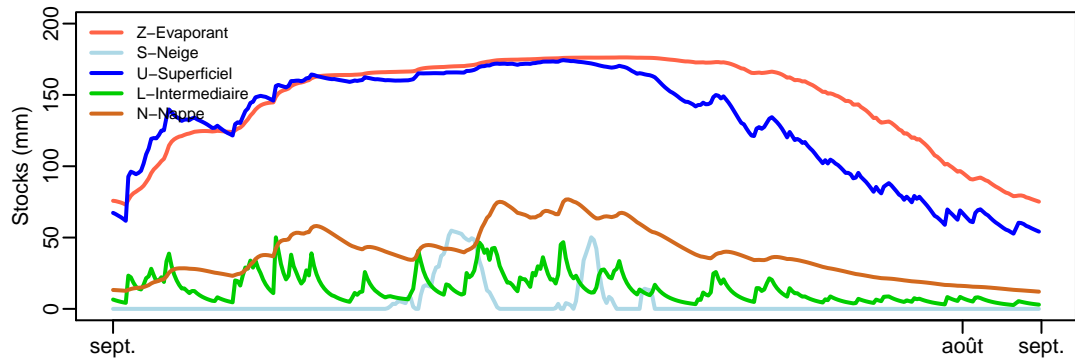

# k2654010 (213.96 km<sup>2</sup>) – année 1995–1996

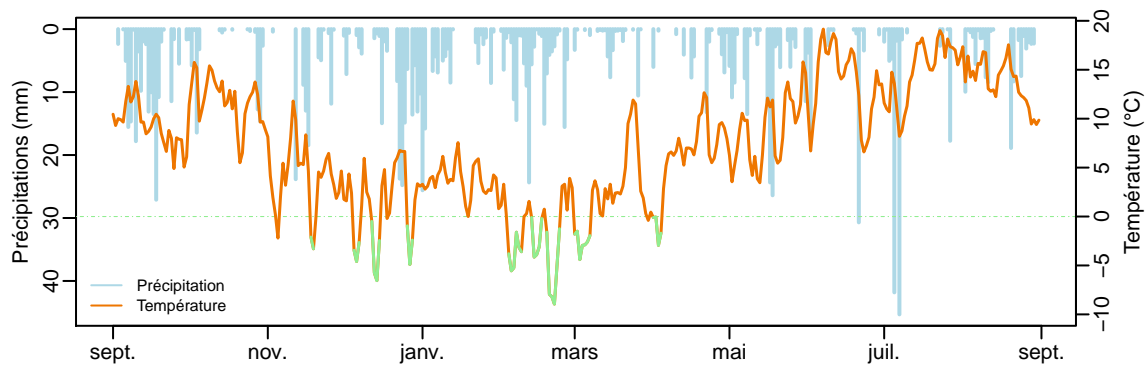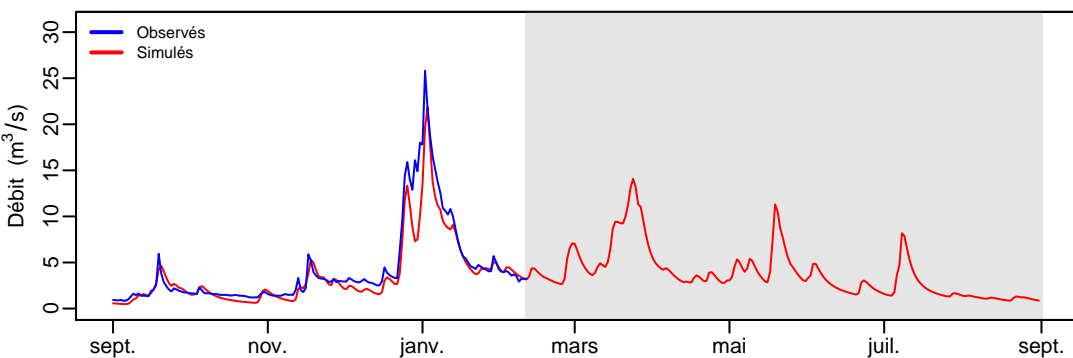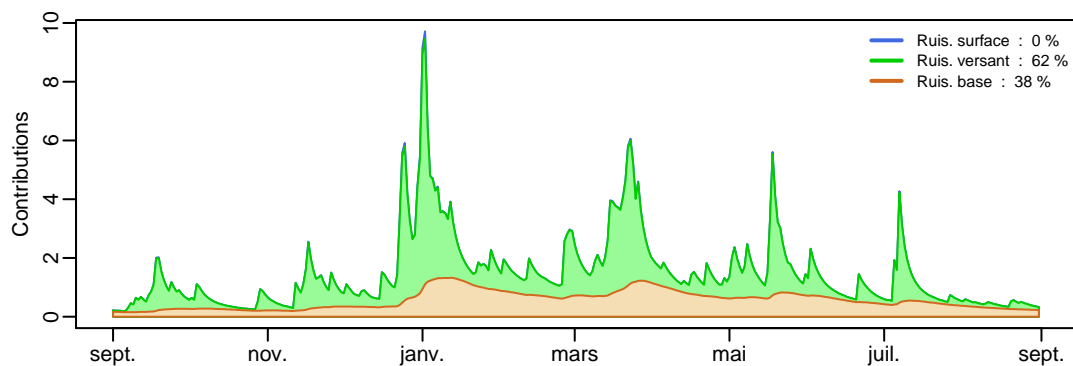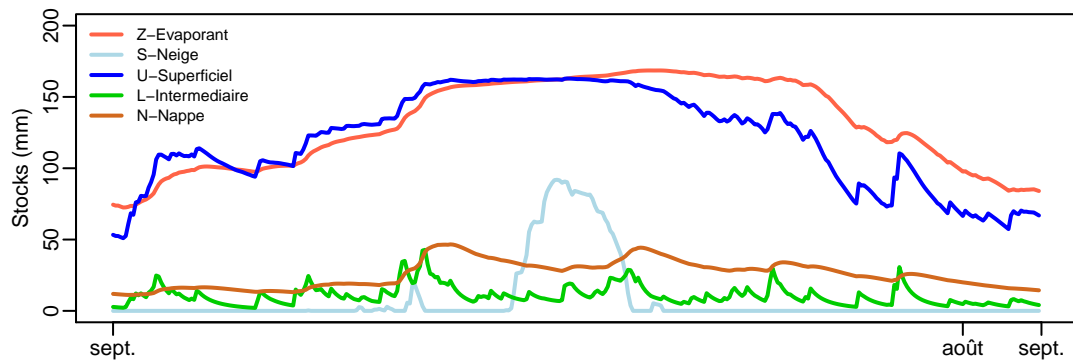

# k2654010 (213.96 km<sup>2</sup>) – année 1996–1997

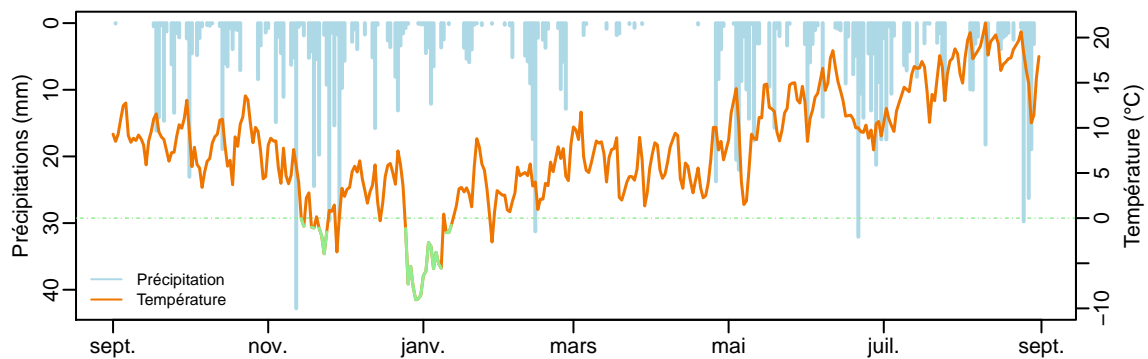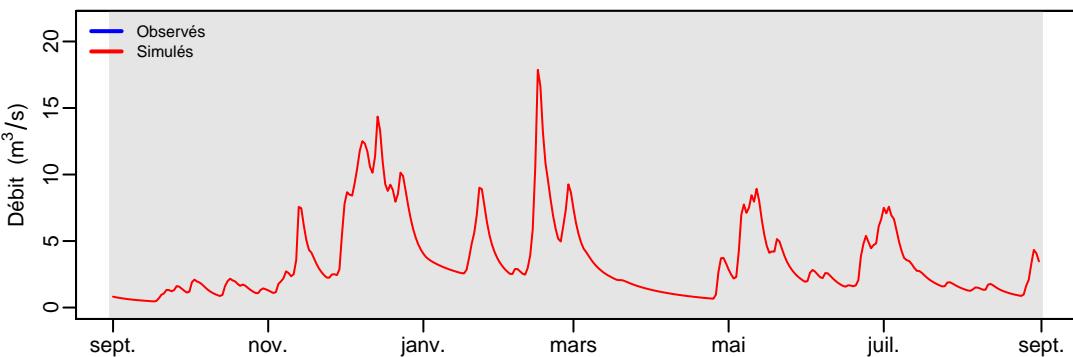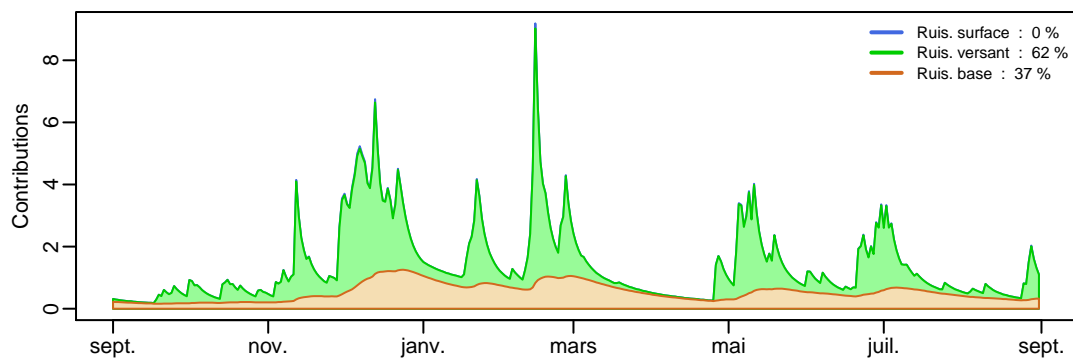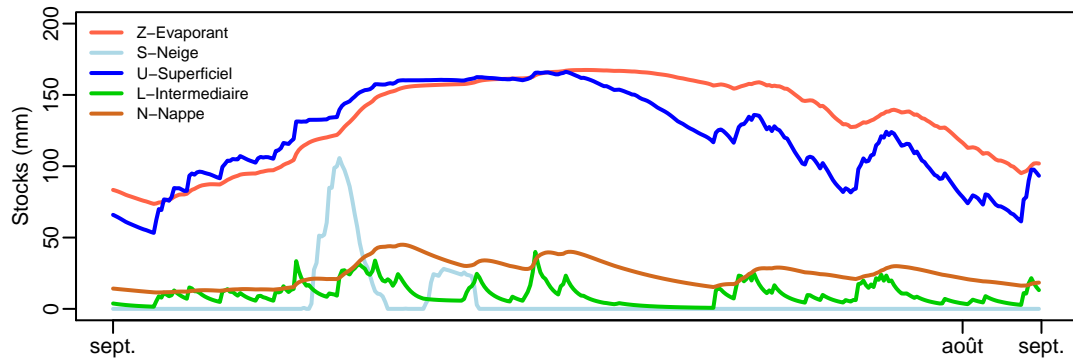

# k2654010 (213.96 km<sup>2</sup>) – année 1997–1998

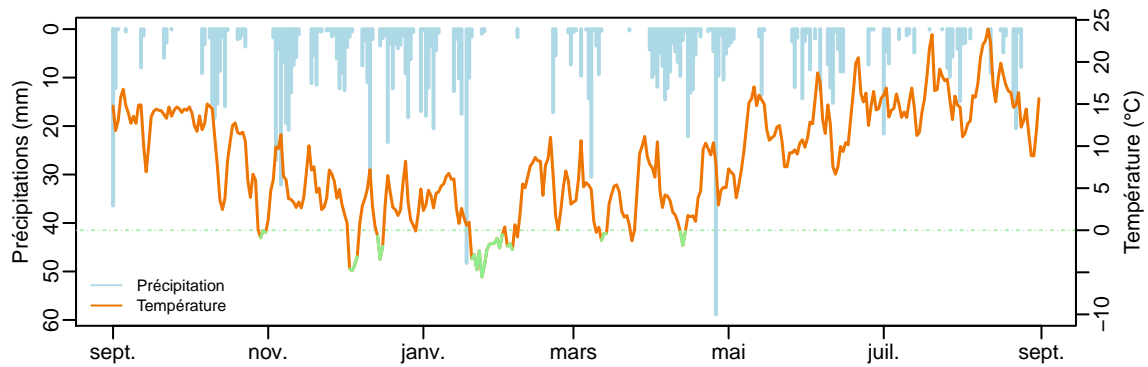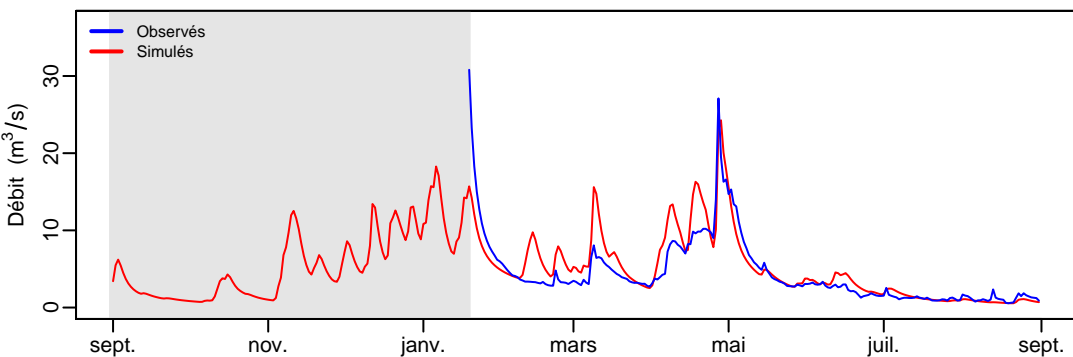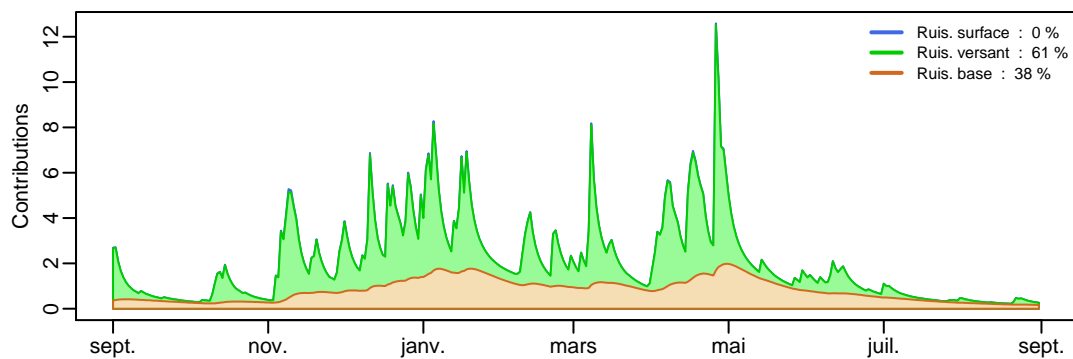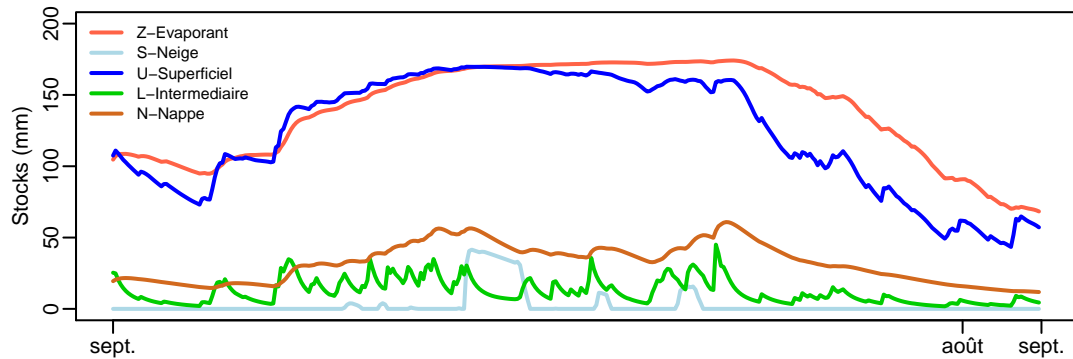

# k2654010 (213.96 km<sup>2</sup>) – année 1998–1999

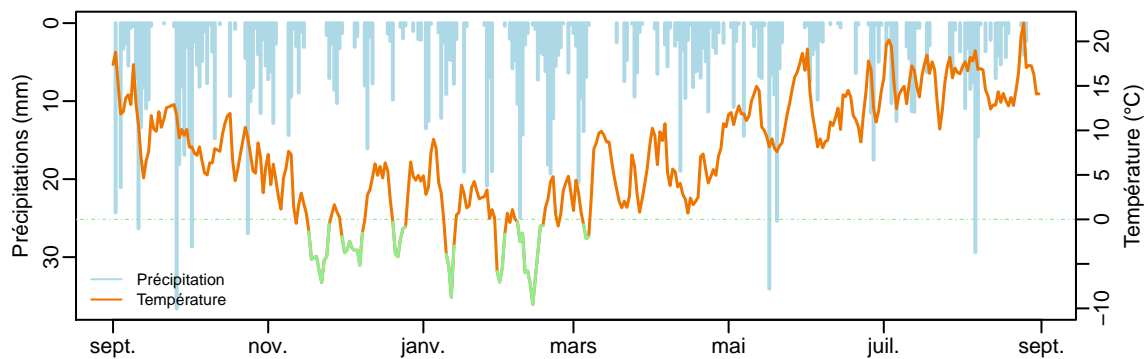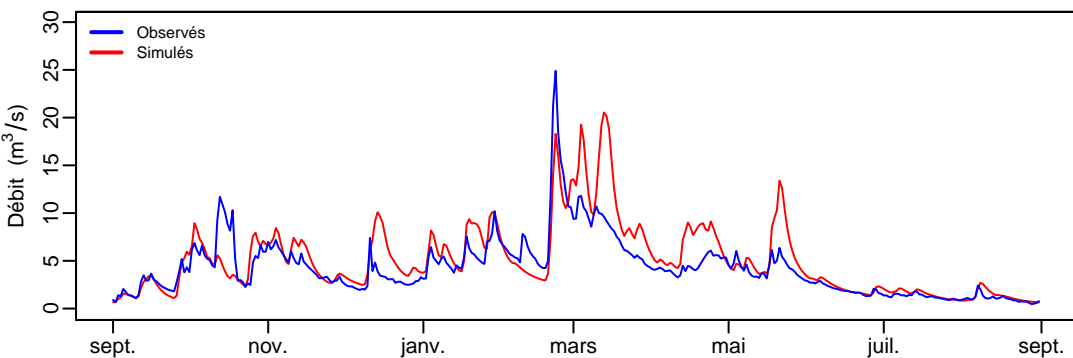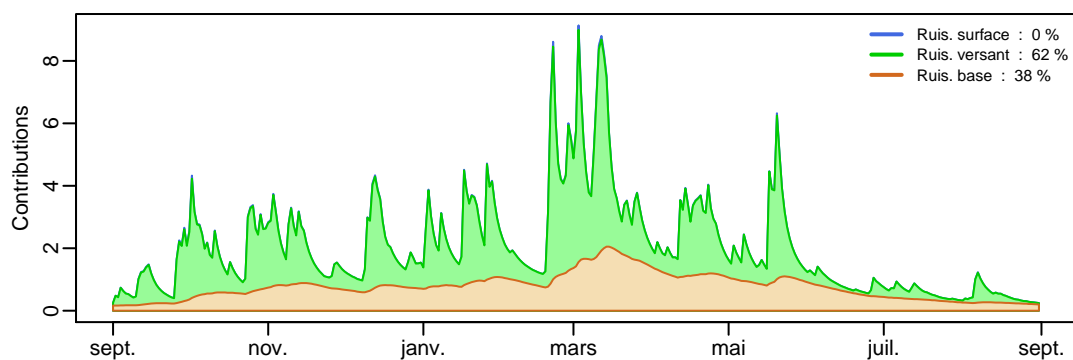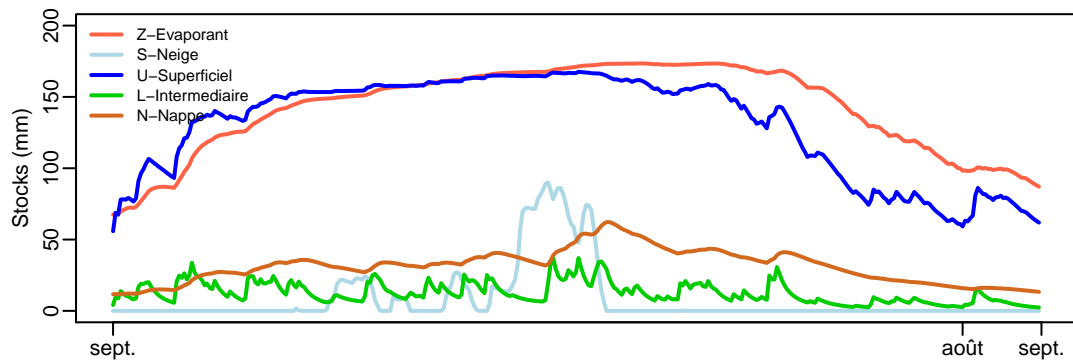

# k2654010 (213.96 km<sup>2</sup>) – année 1999–2000

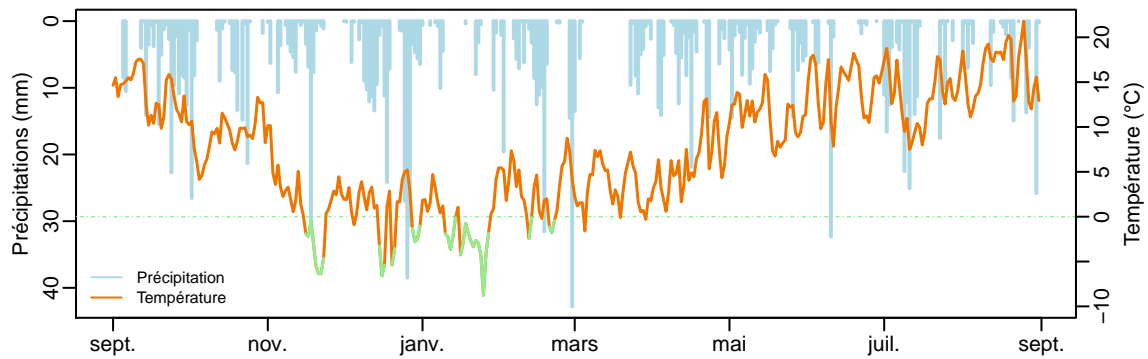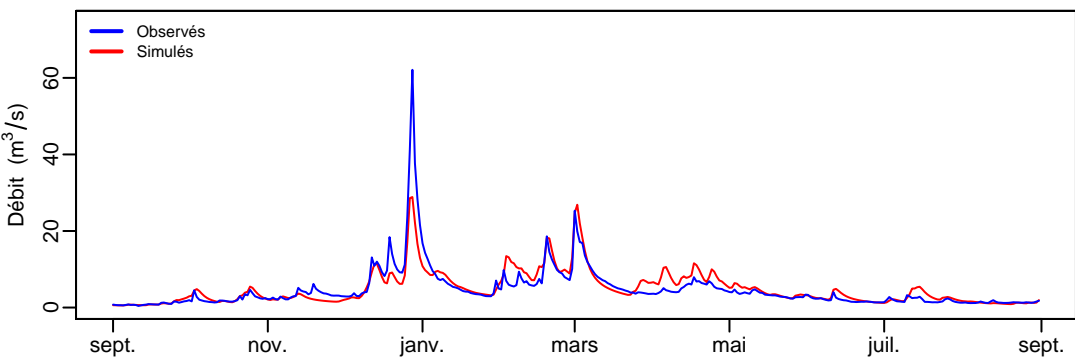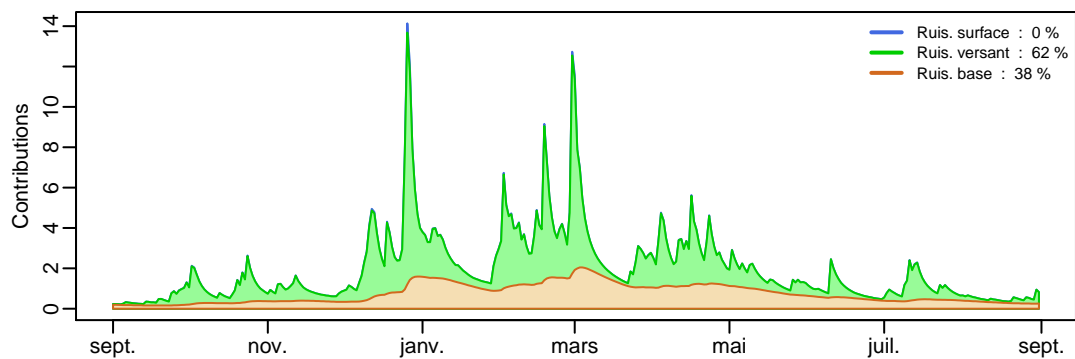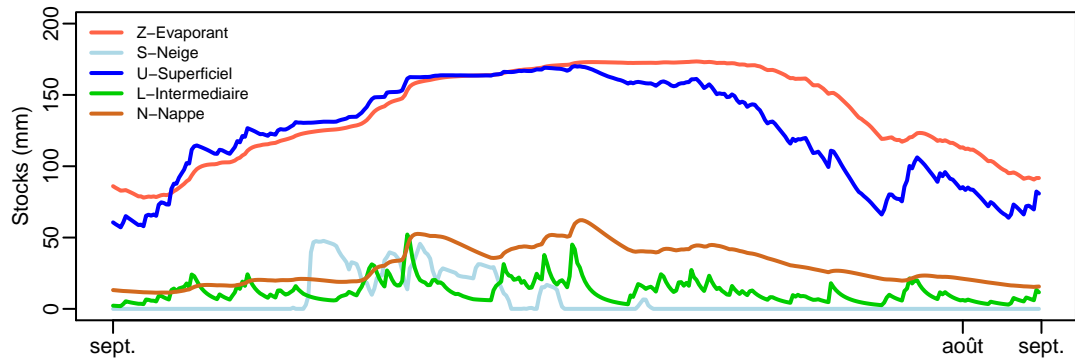

# k2654010 (213.96 km<sup>2</sup>) – année 2000–2001

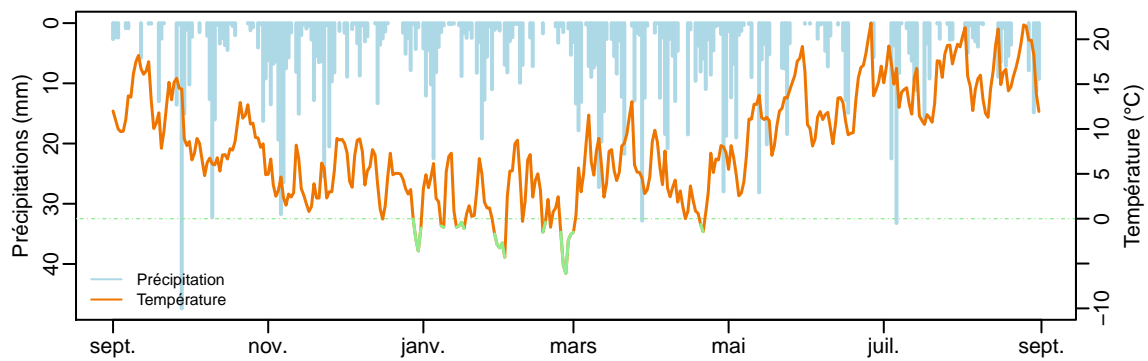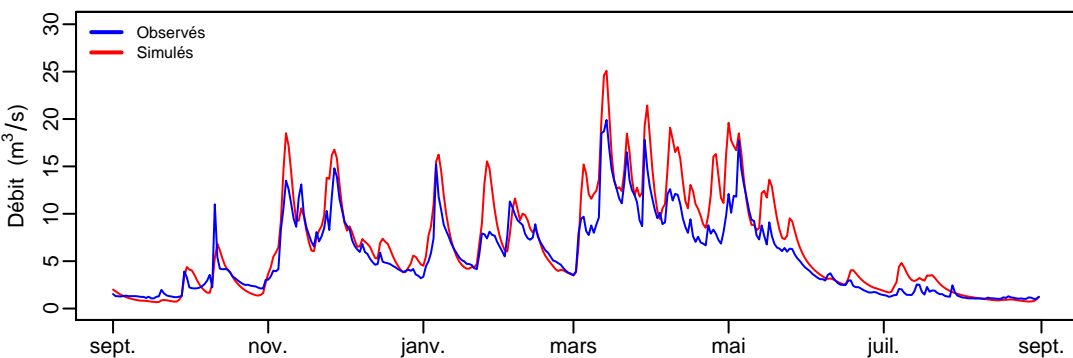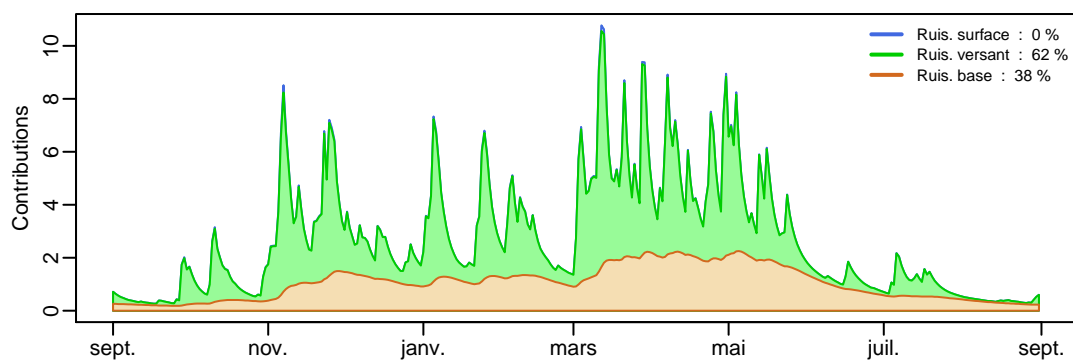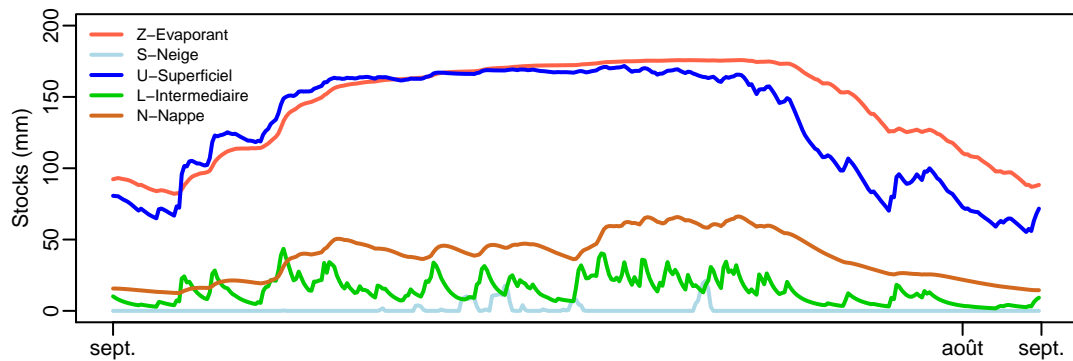



# k2654010 (213.96 km<sup>2</sup>) – année 2001–2002

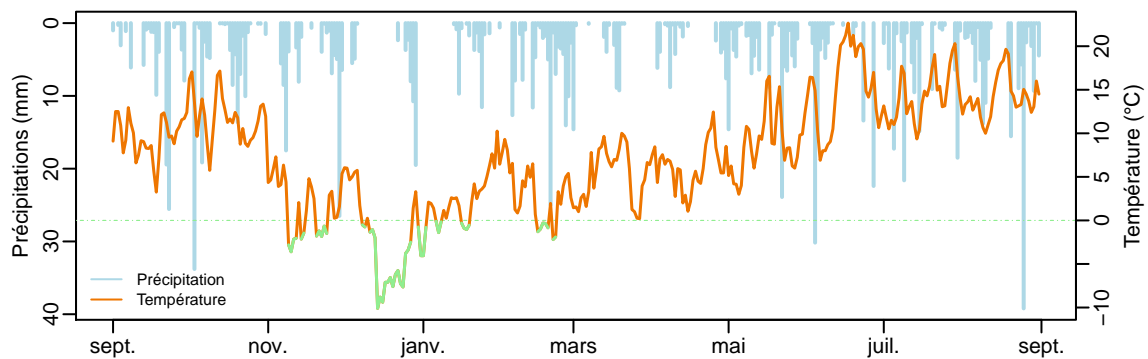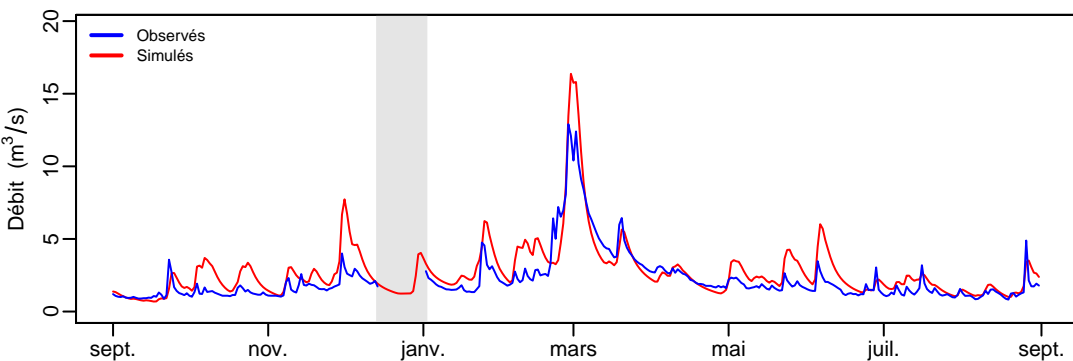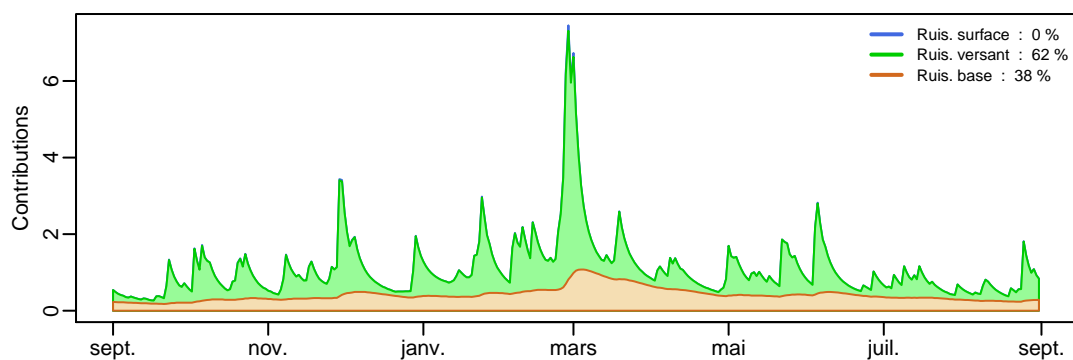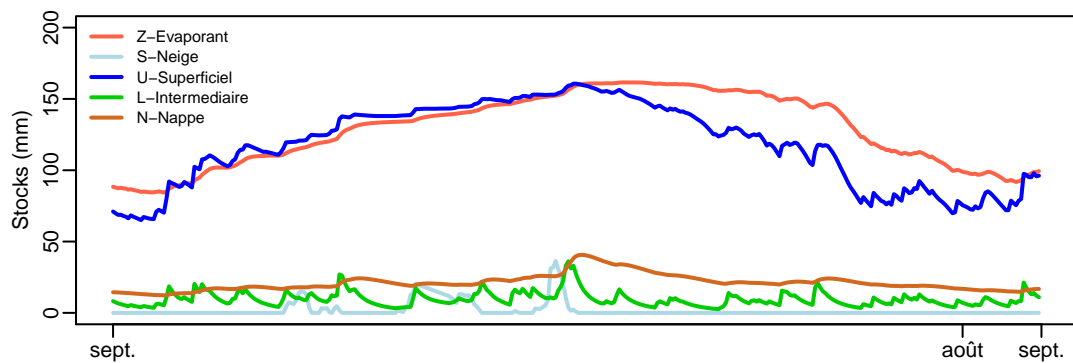

# k2654010 (213.96 km²) – année 2002–2003

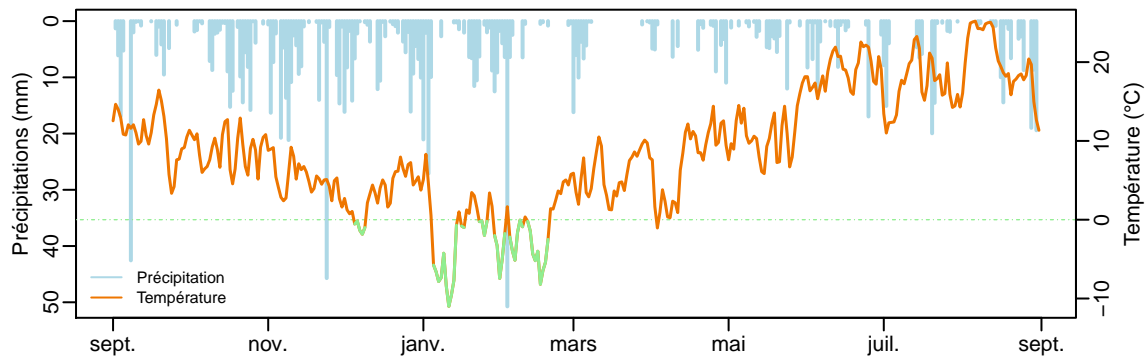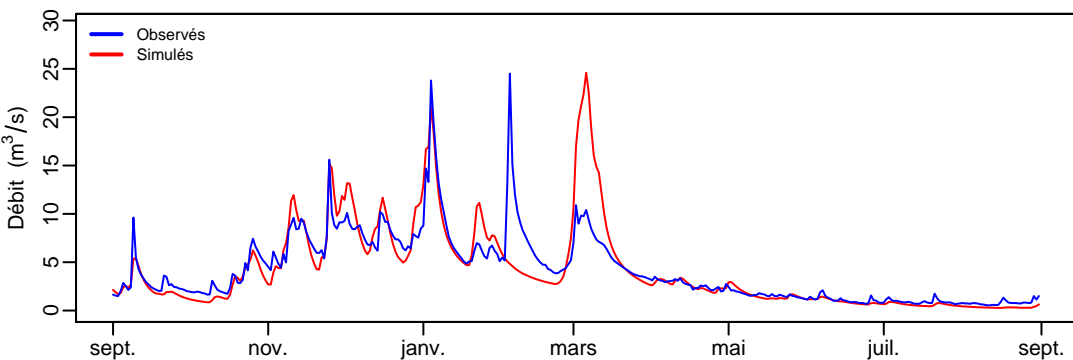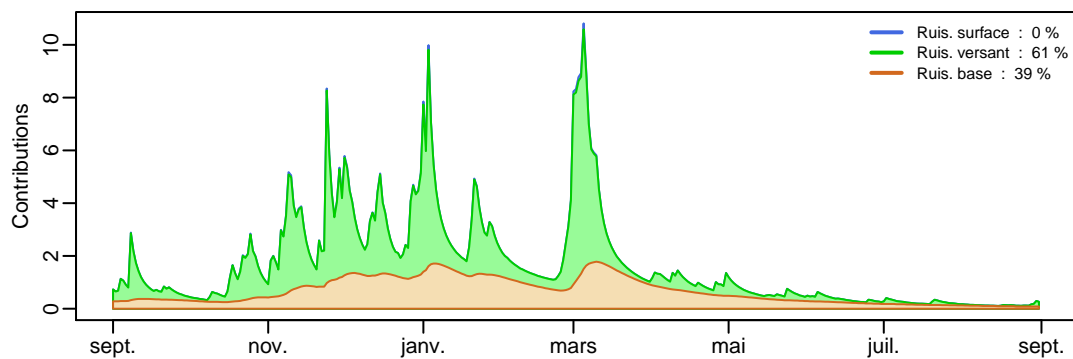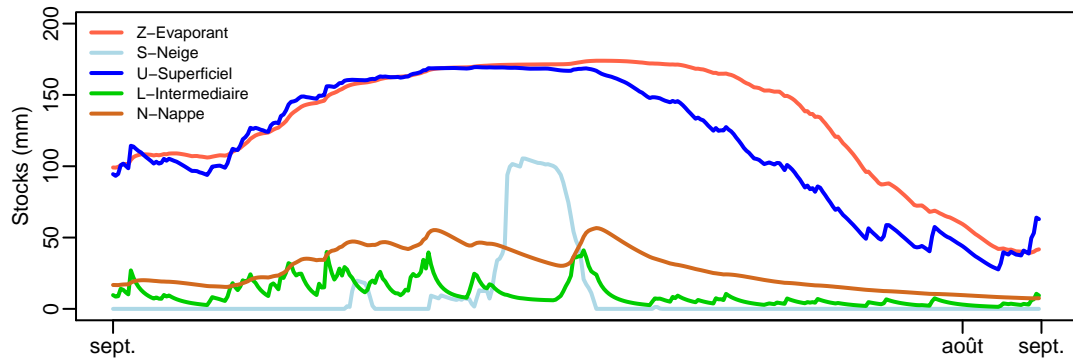

# k2654010 (213.96 km<sup>2</sup>) – année 2003–2004

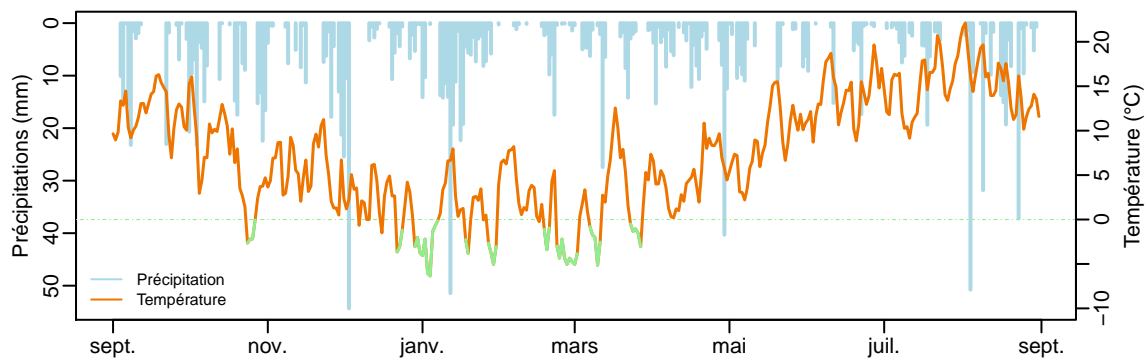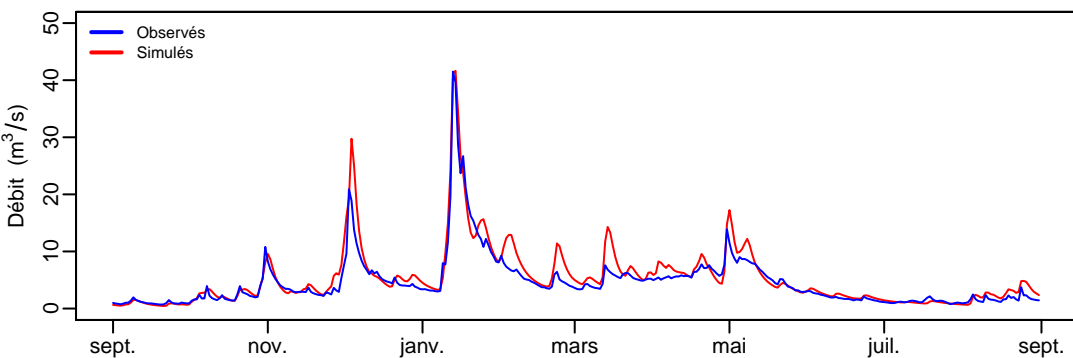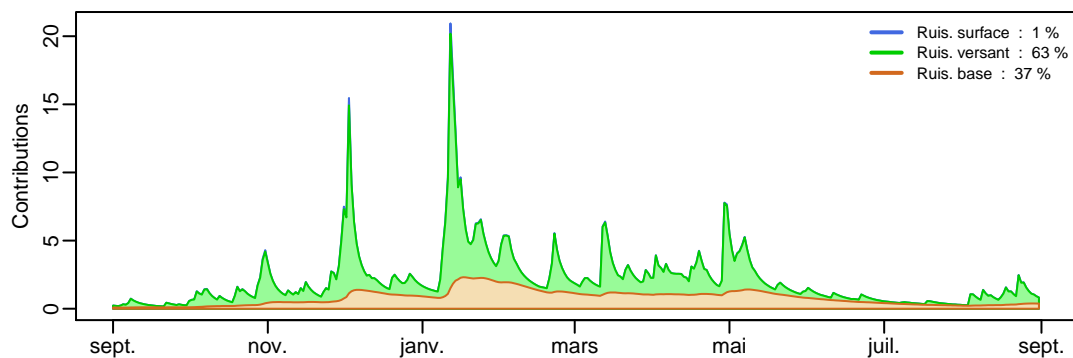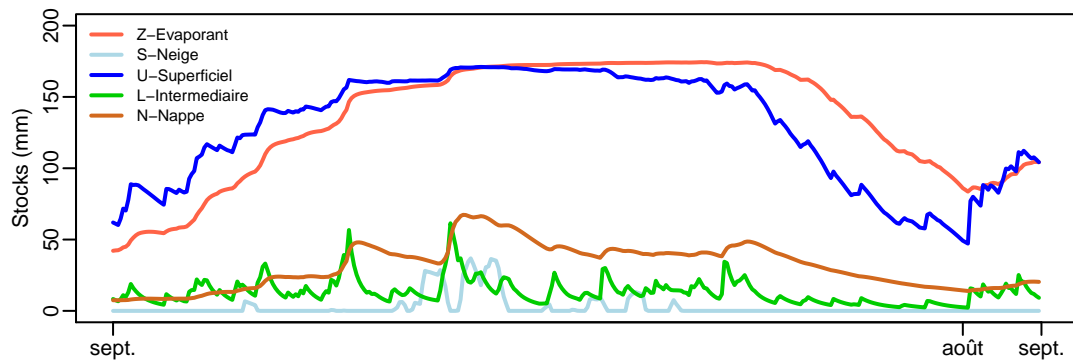

# k2654010 (213.96 km²) – année 2004–2005

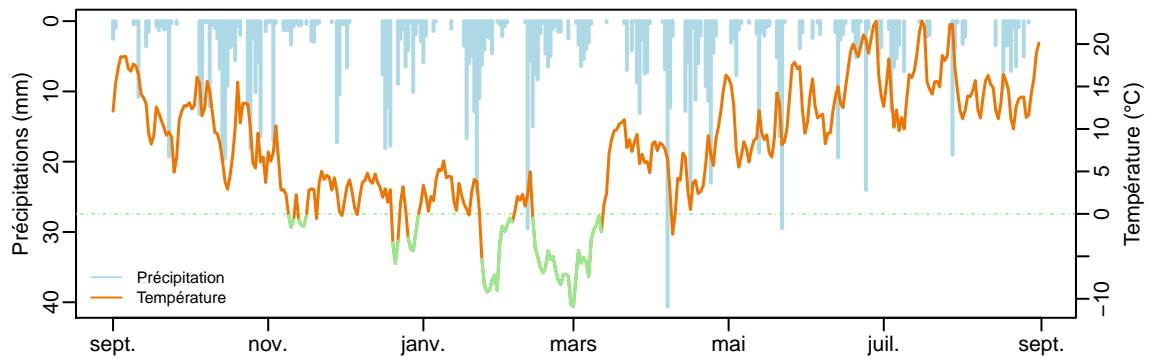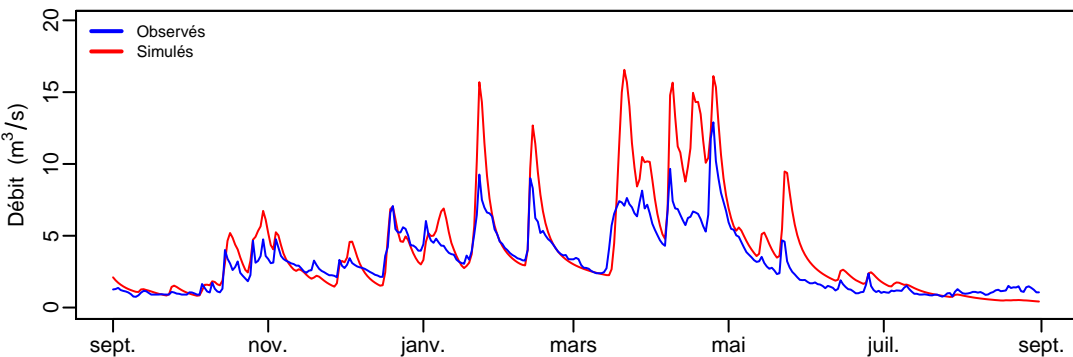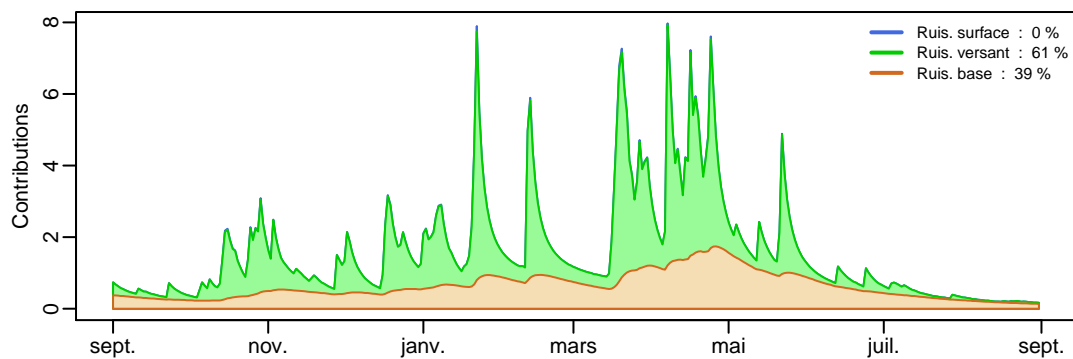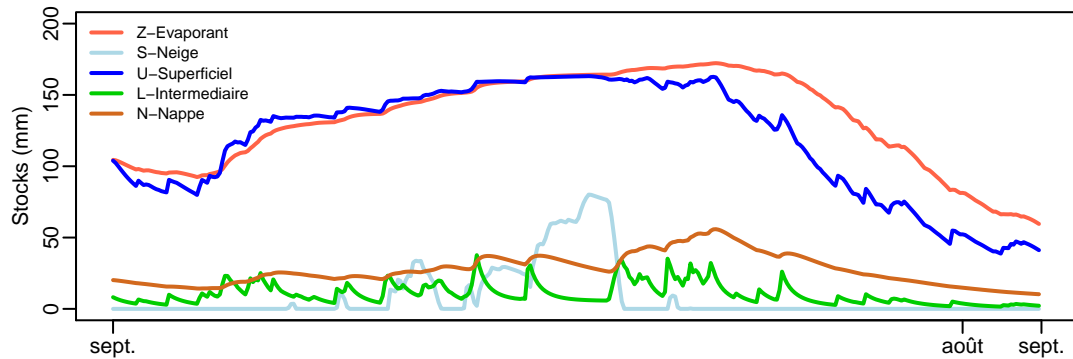

# k2654010 (213.96 km²) – année 2005–2006

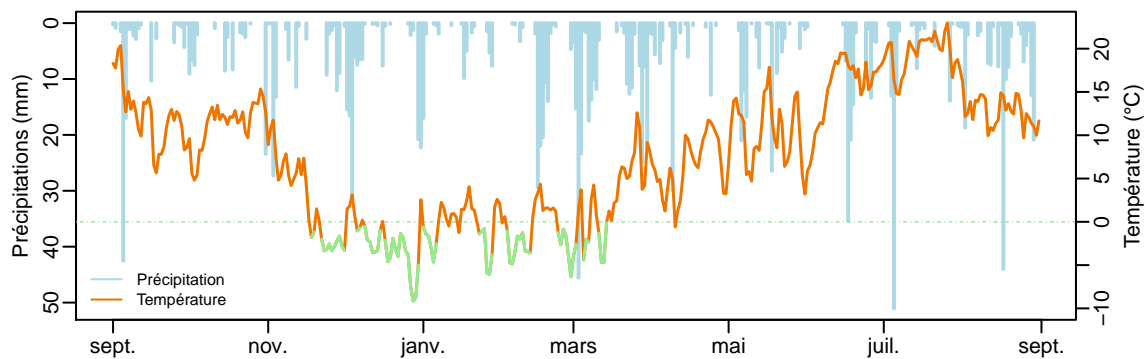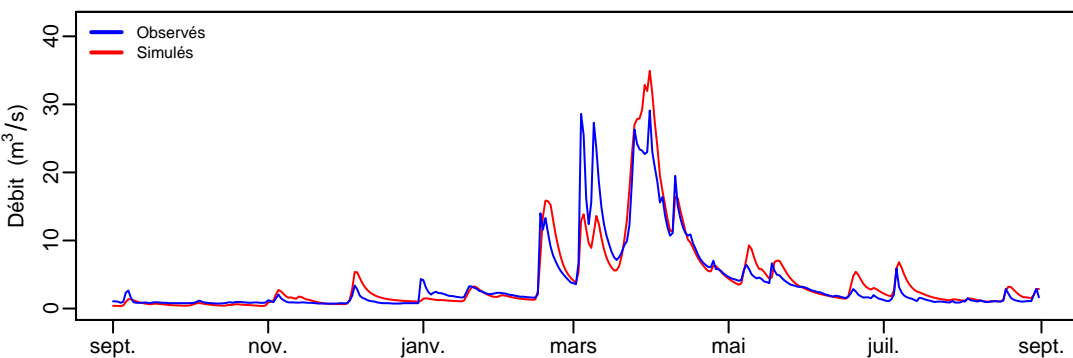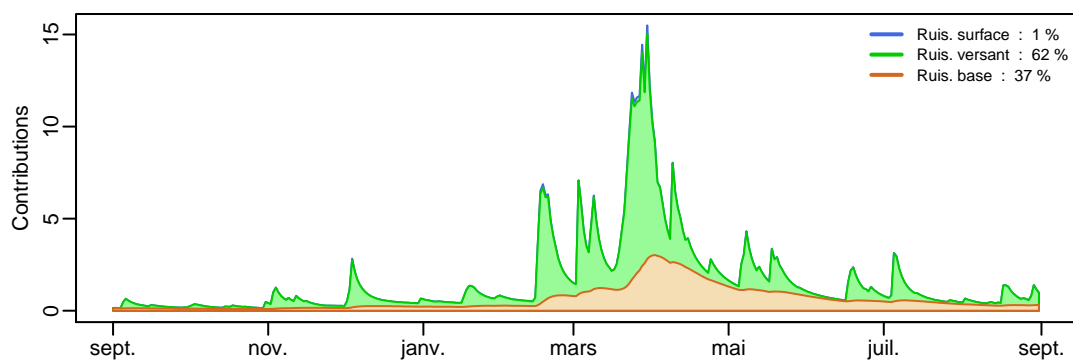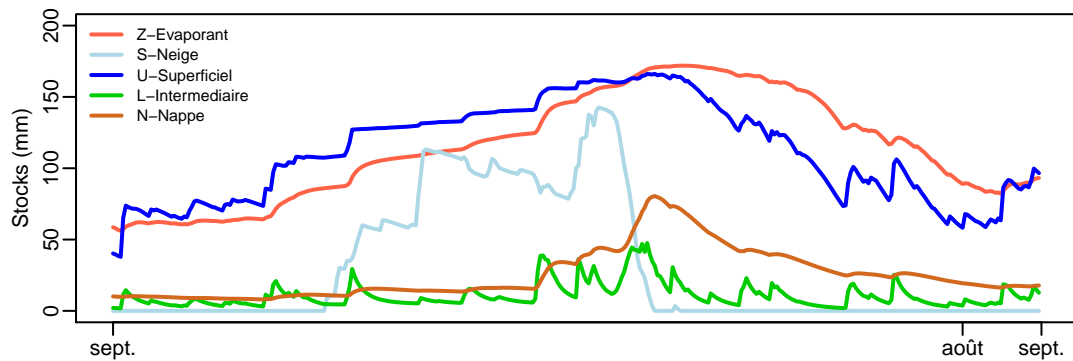

# k2654010 (213.96 km²) – année 2006–2007

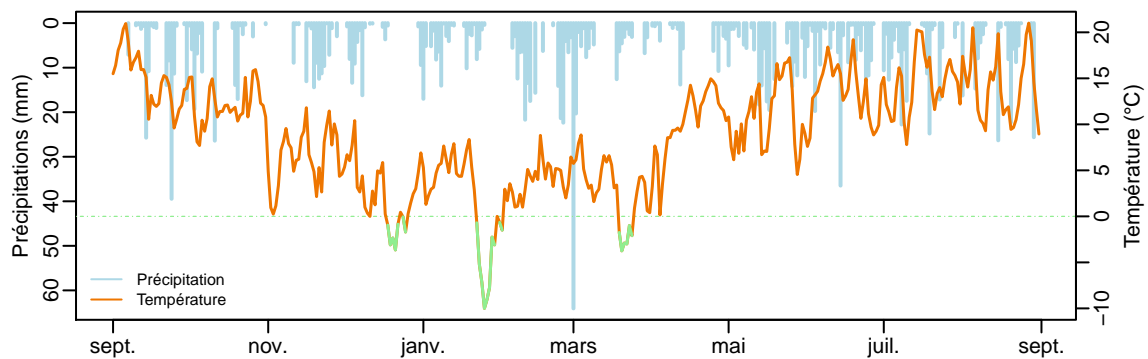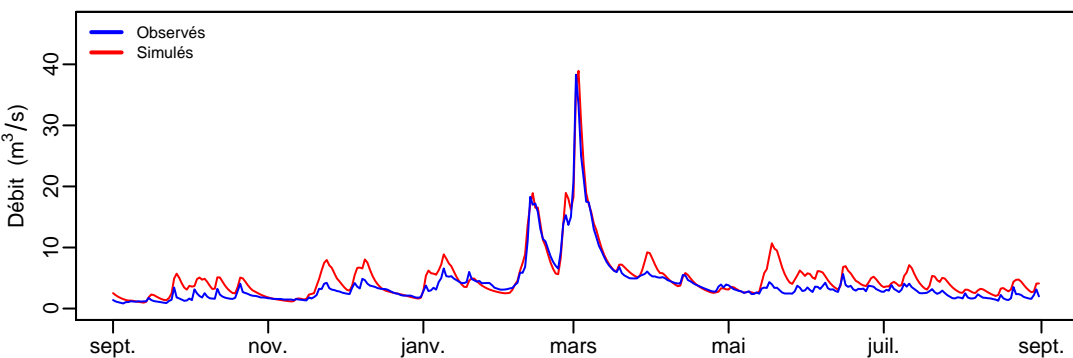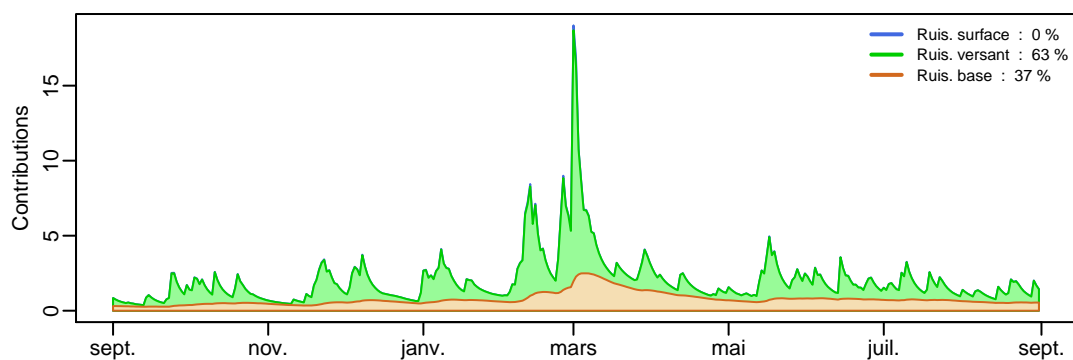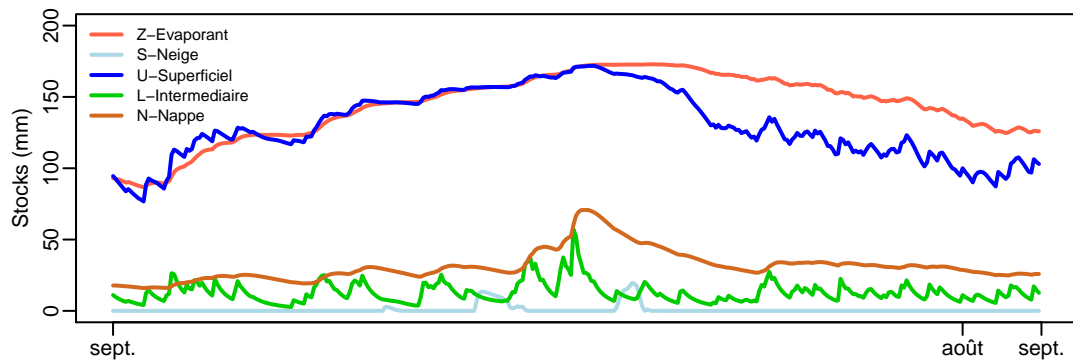

# k2654010 (213.96 km²) – année 2007–2008

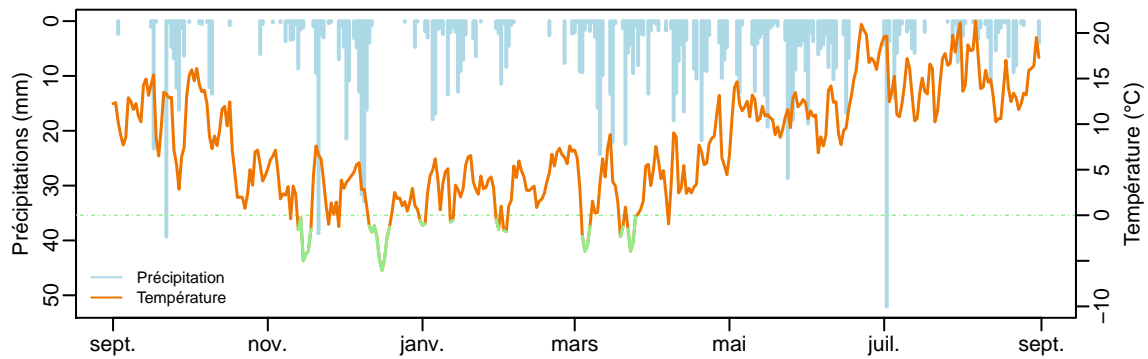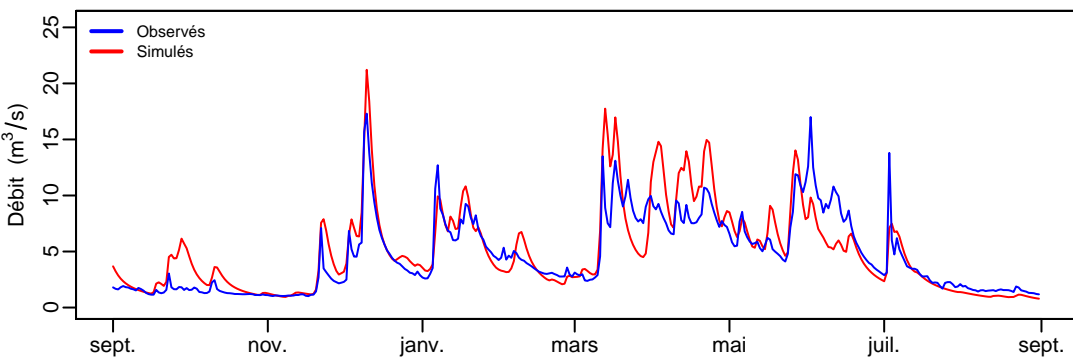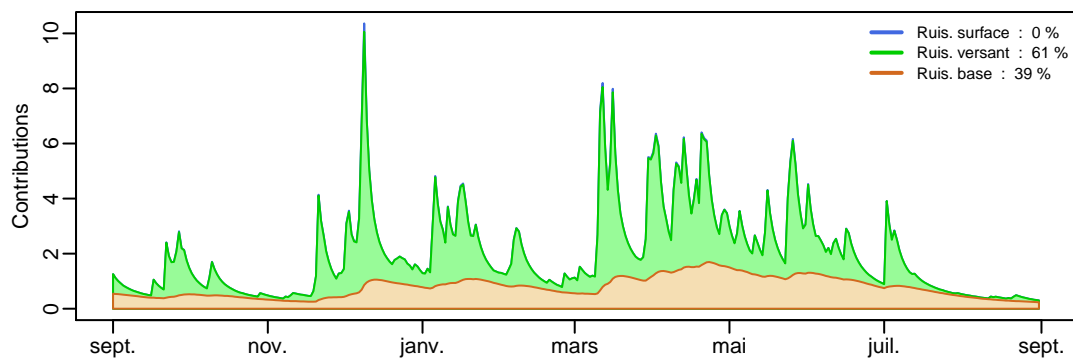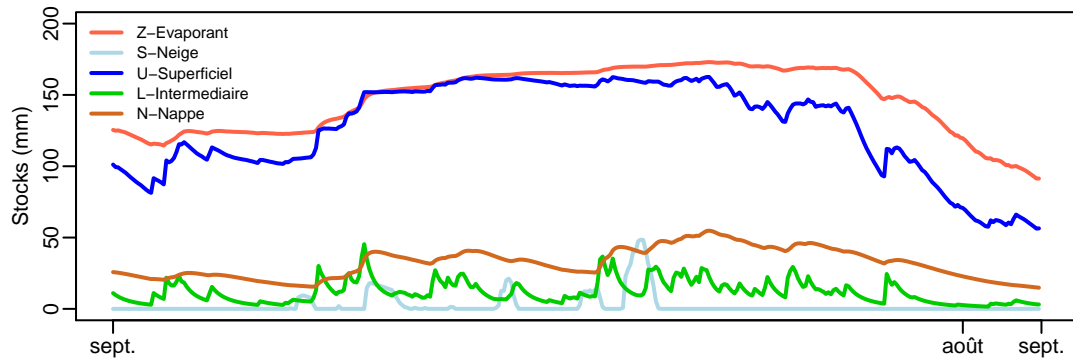

# k2654010 (213.96 km²) – année 2008–2009

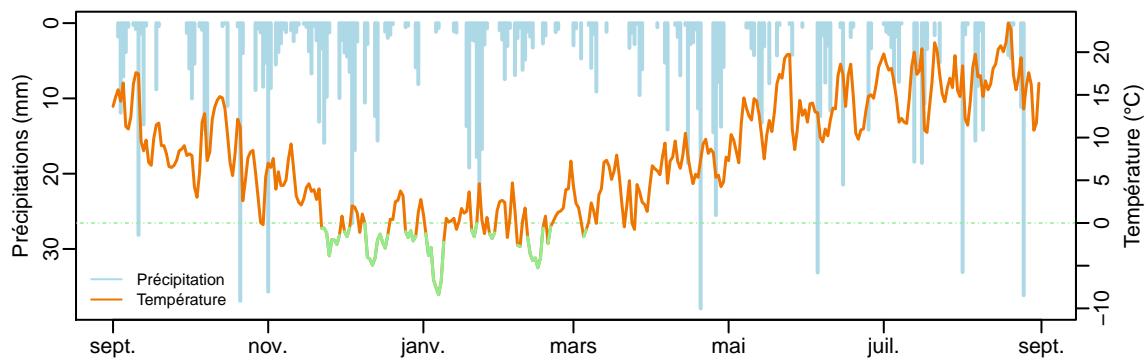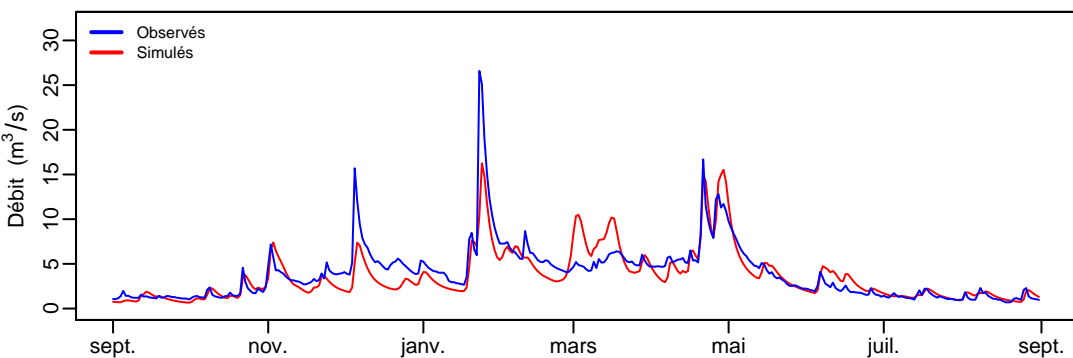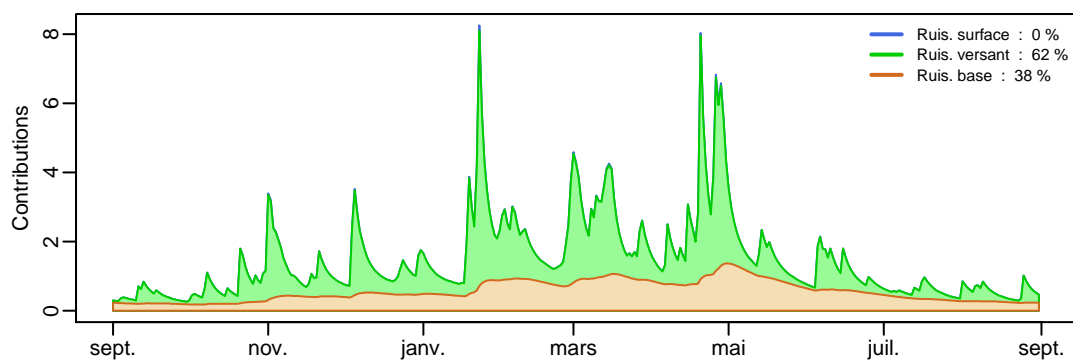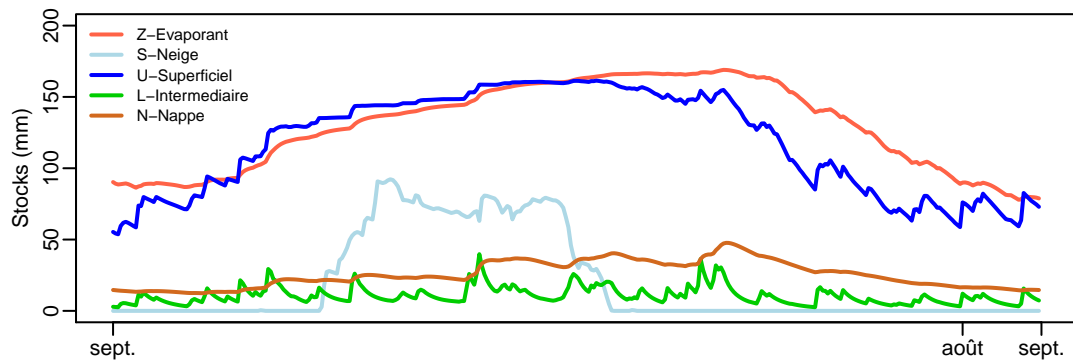



# k2654010 (213.96 km<sup>2</sup>) – année 2009–2010

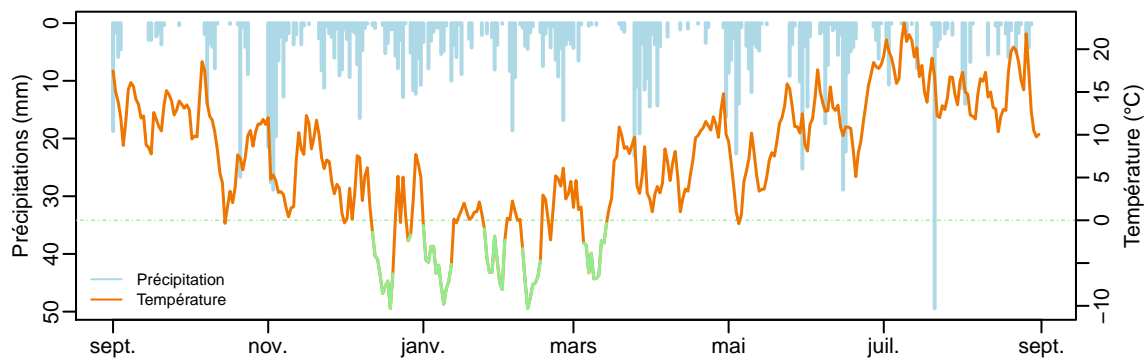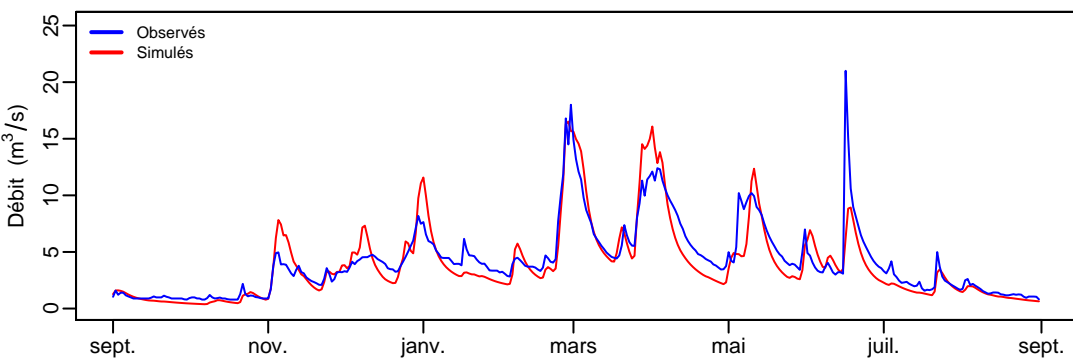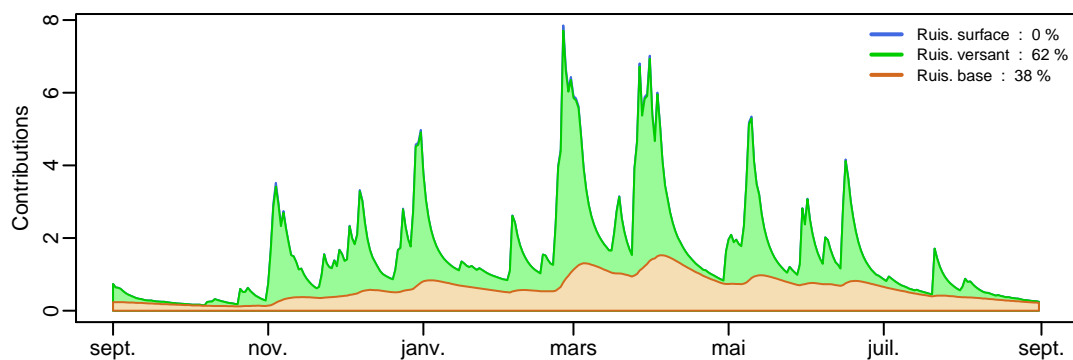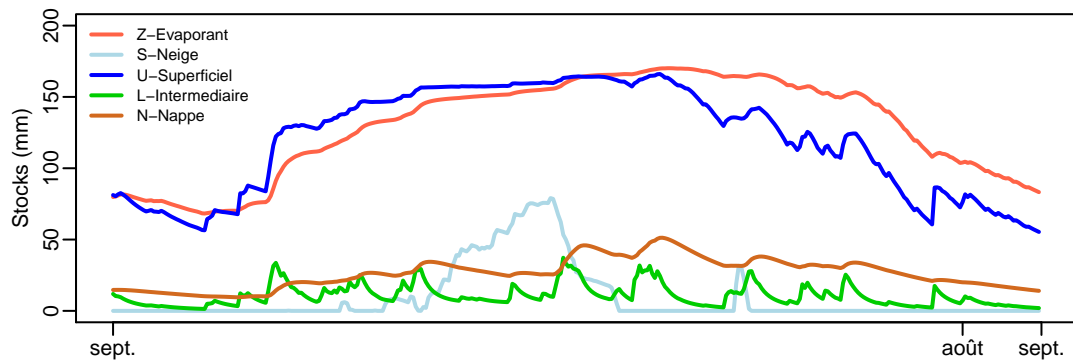

# k2654010 (213.96 km<sup>2</sup>) – année 2010–2011

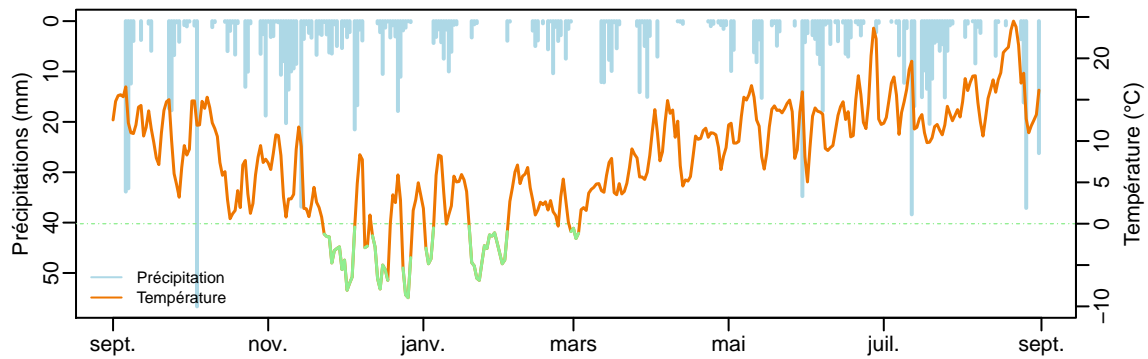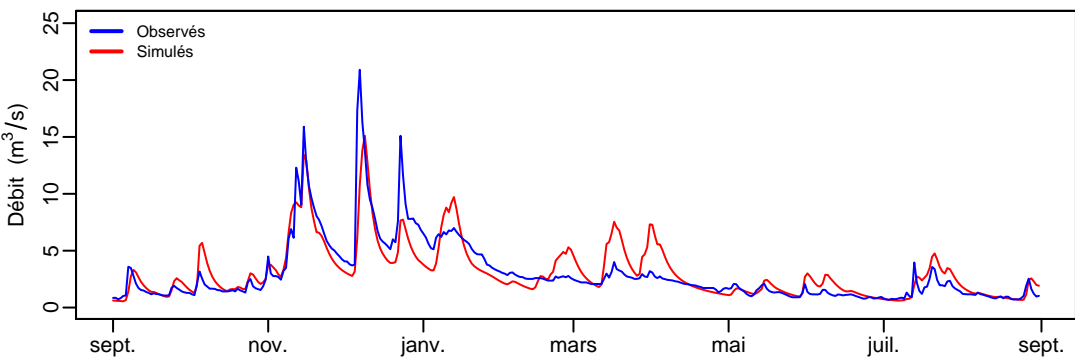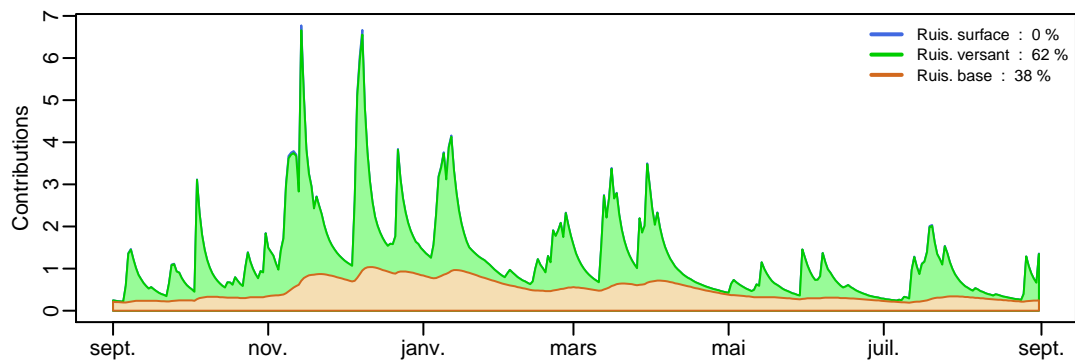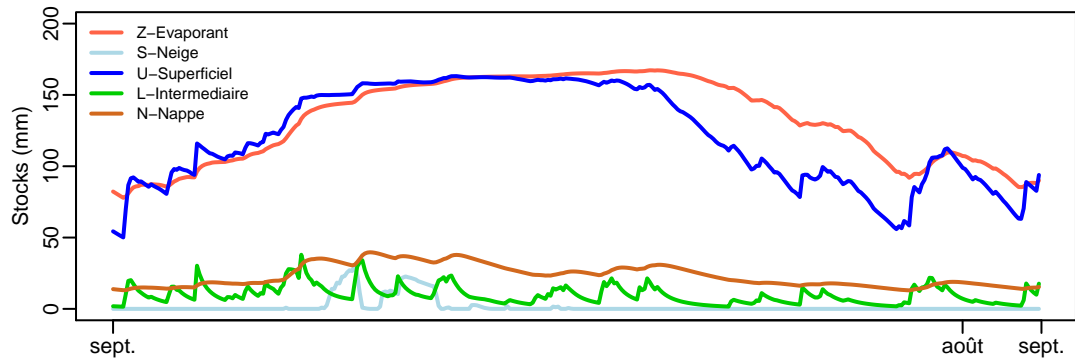

# k2654010 (213.96 km<sup>2</sup>) – année 2011–2012

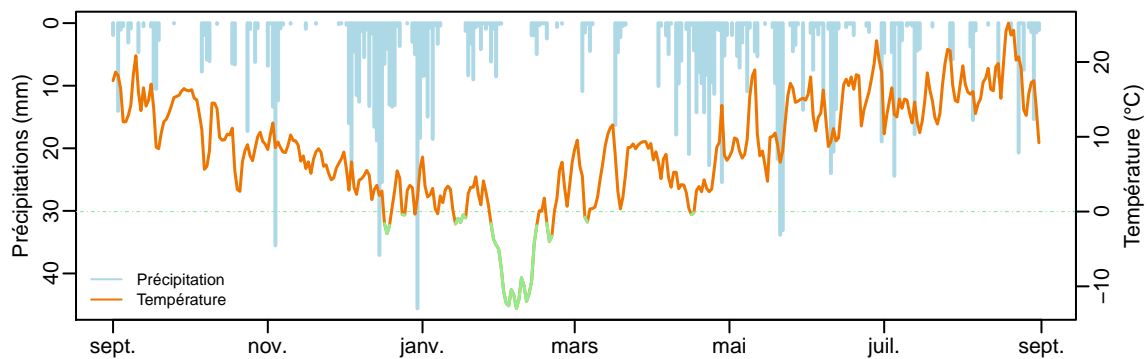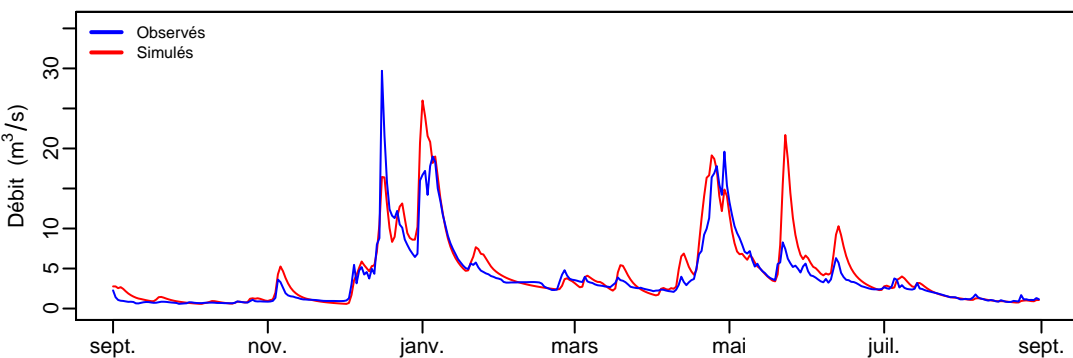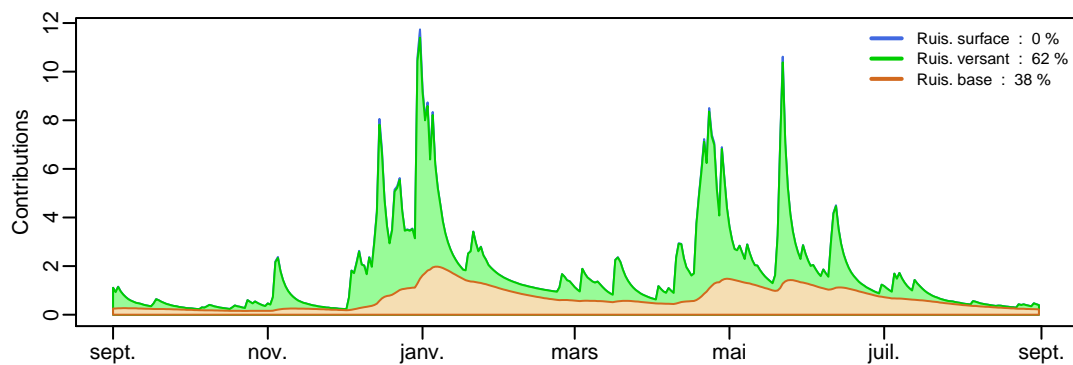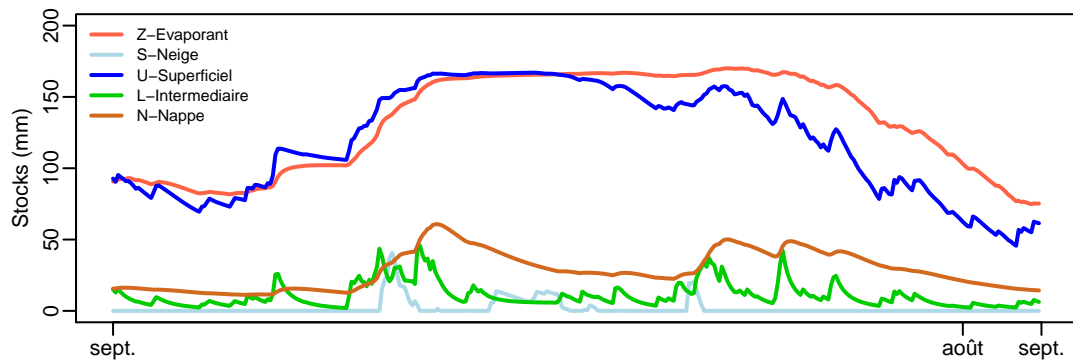

# k2674010 (158.6 km<sup>2</sup>) – année 1981–1982

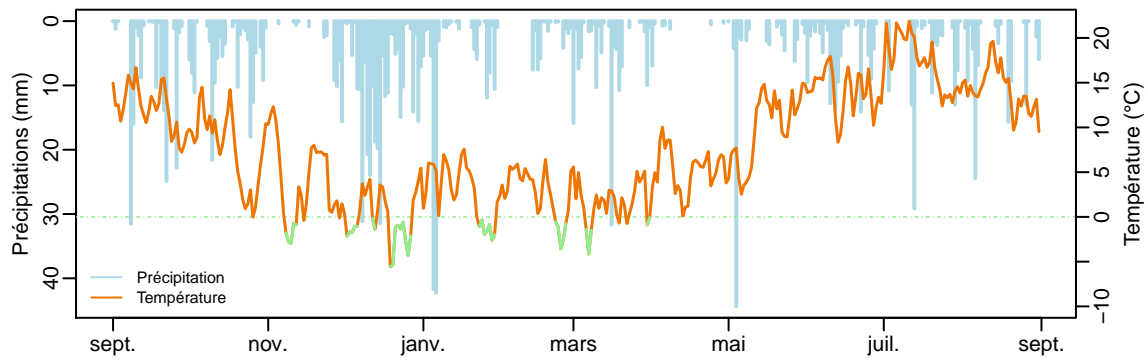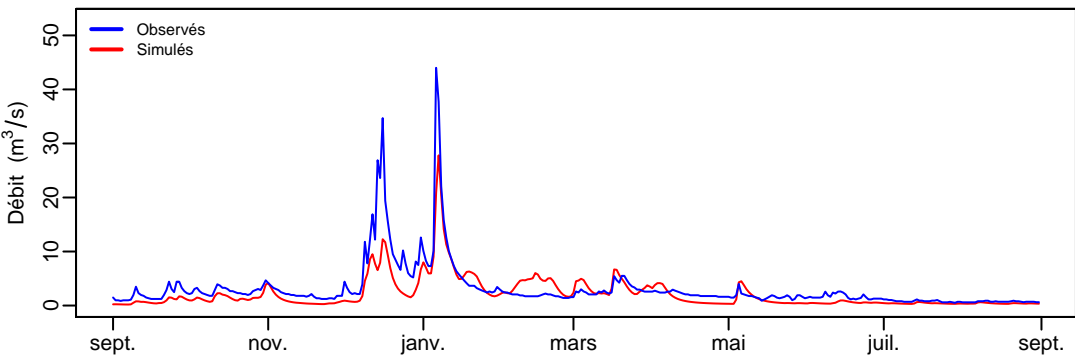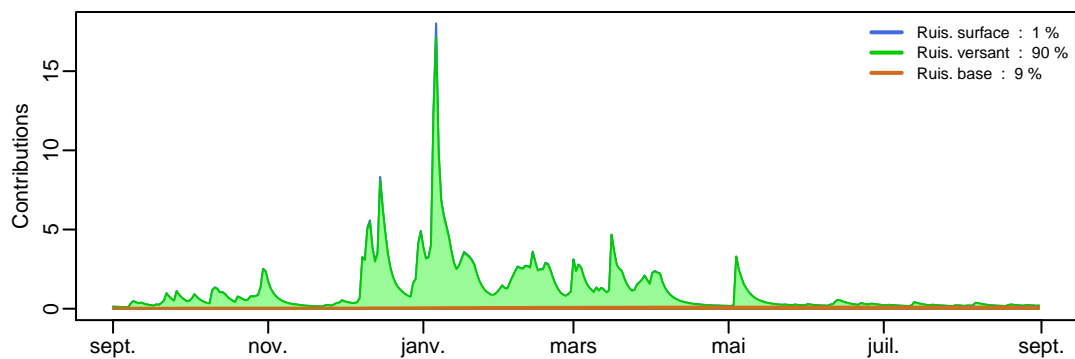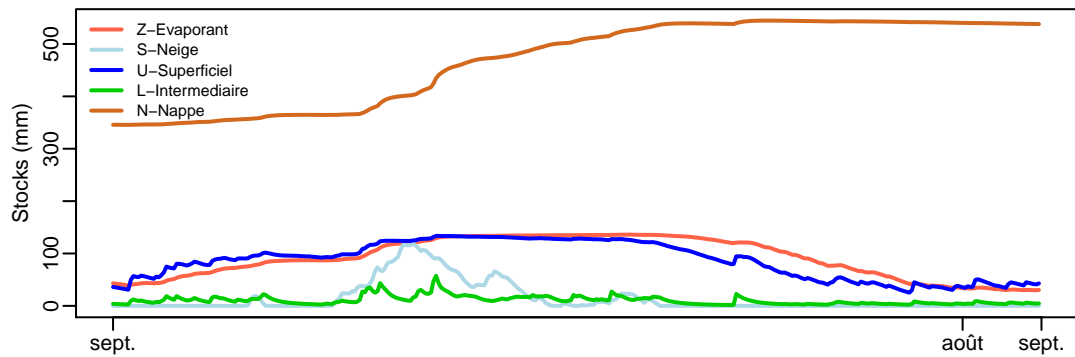

# k2674010 (158.6 km<sup>2</sup>) – année 1982–1983

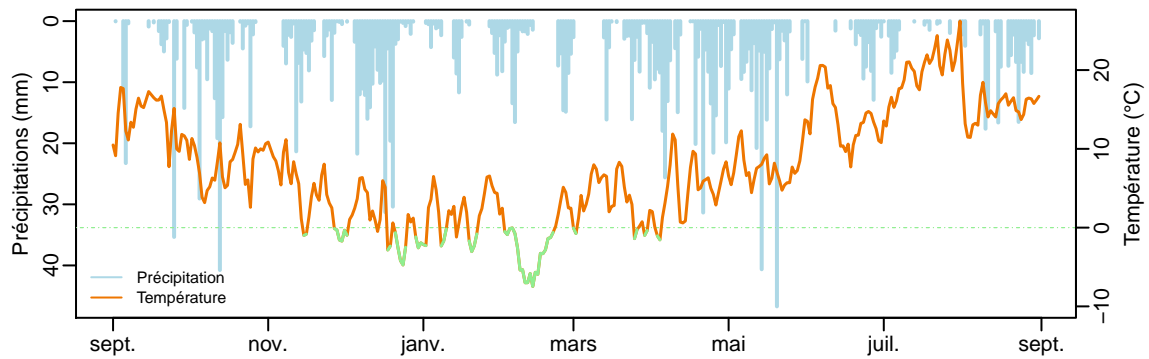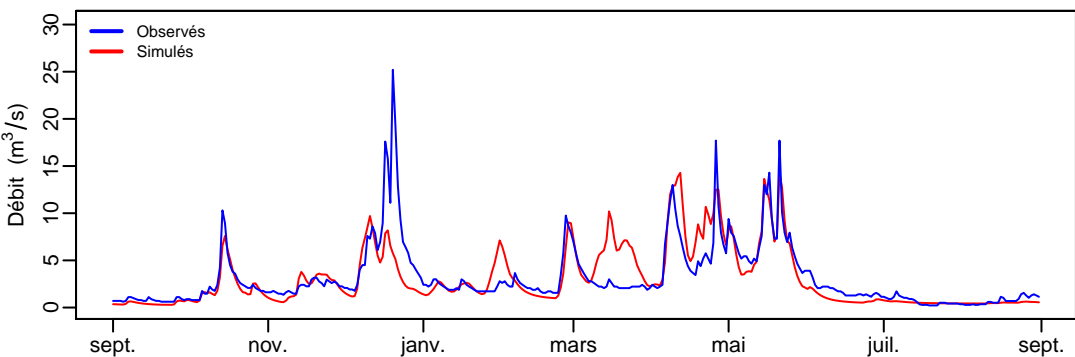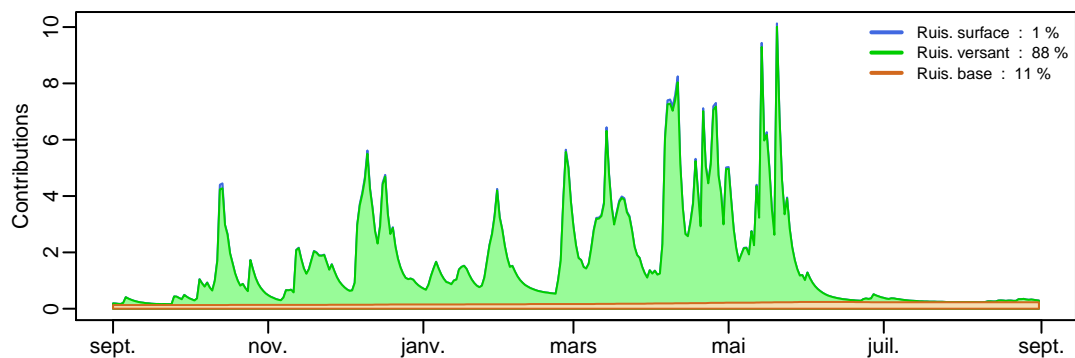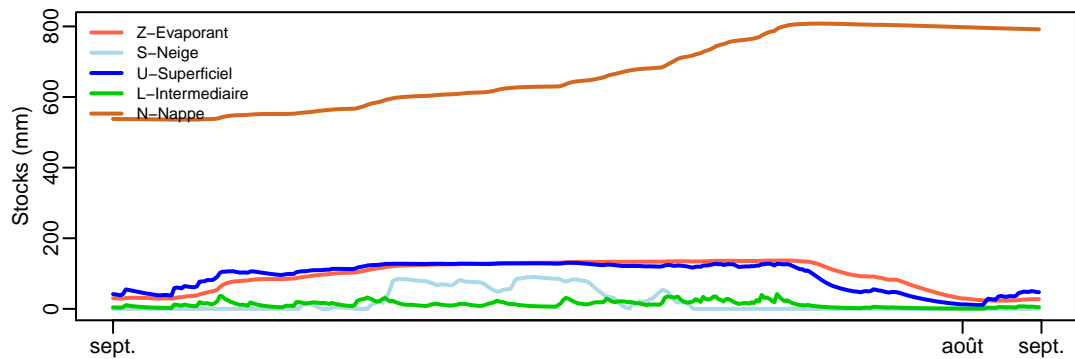

# k2674010 (158.6 km<sup>2</sup>) – année 1983–1984

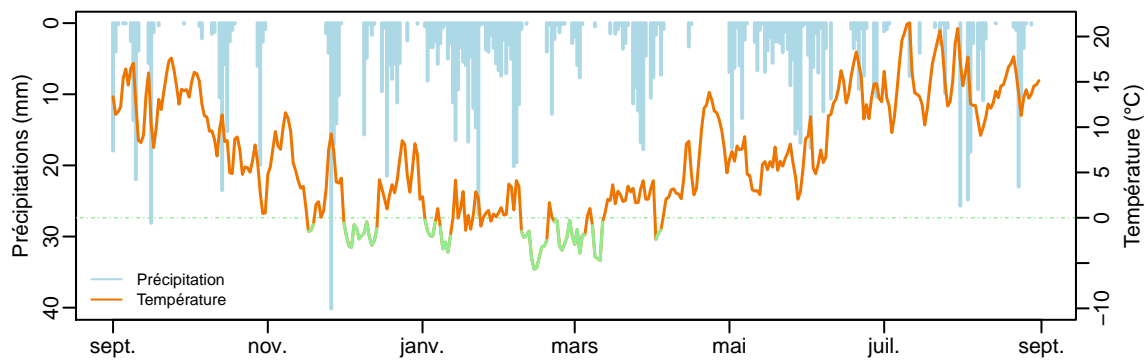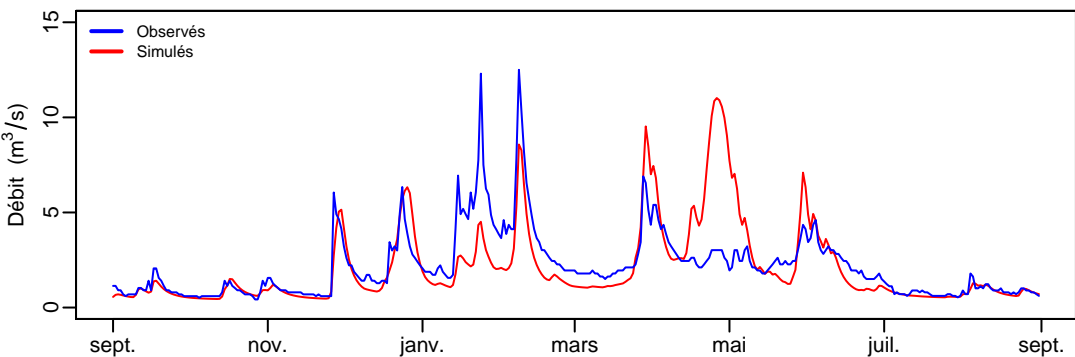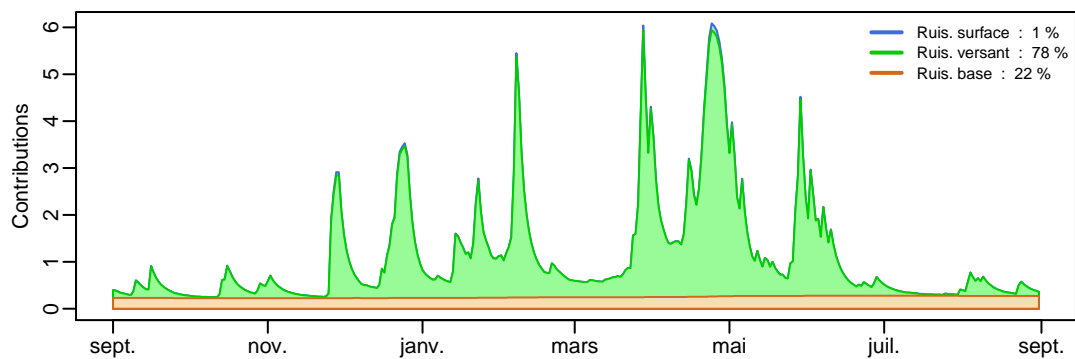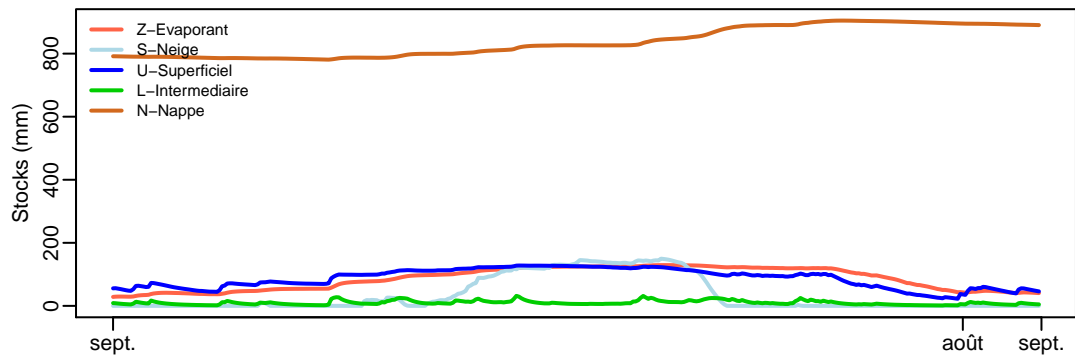

# k2674010 (158.6 km<sup>2</sup>) – année 1984–1985

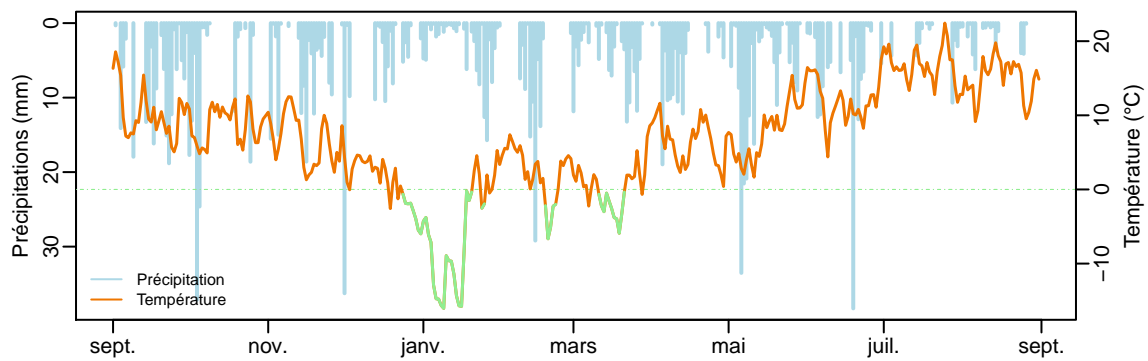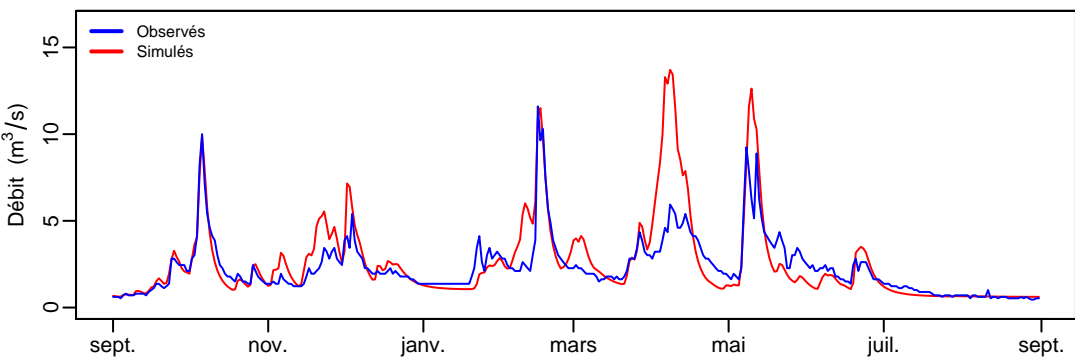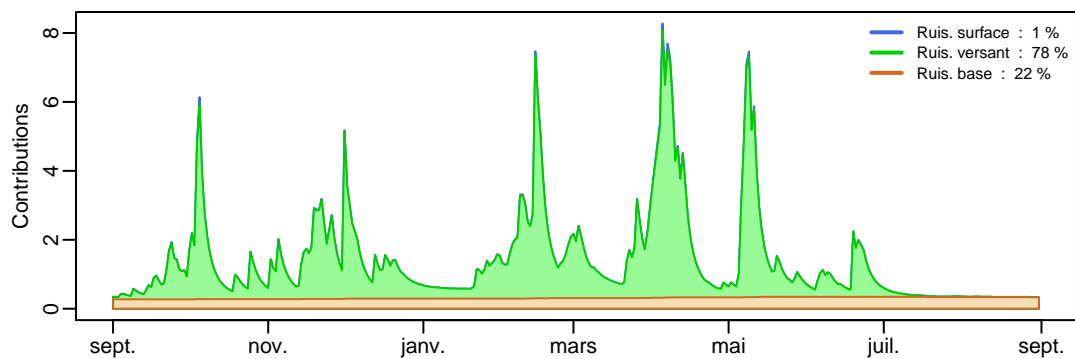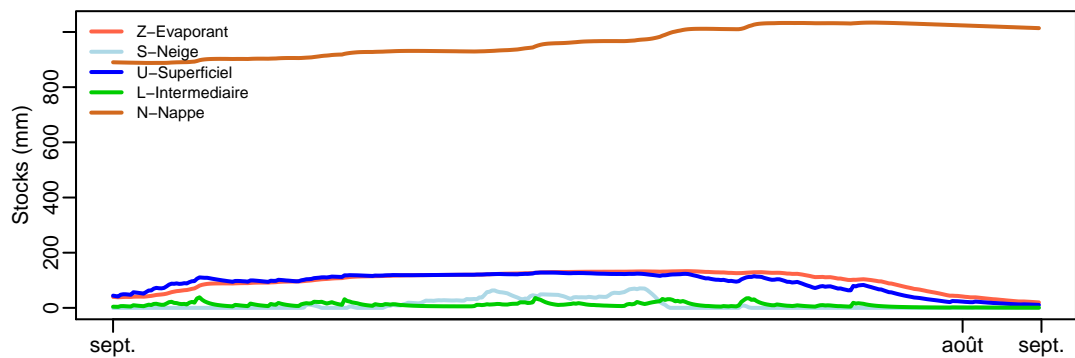

# k2674010 (158.6 km<sup>2</sup>) – année 1985–1986

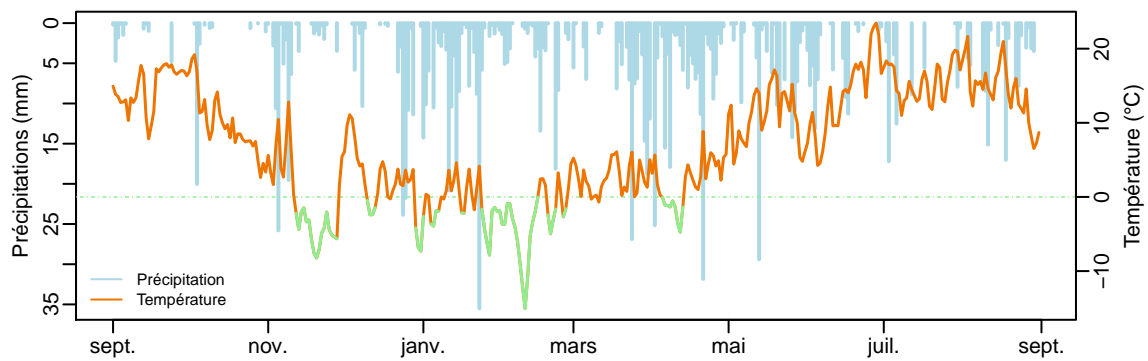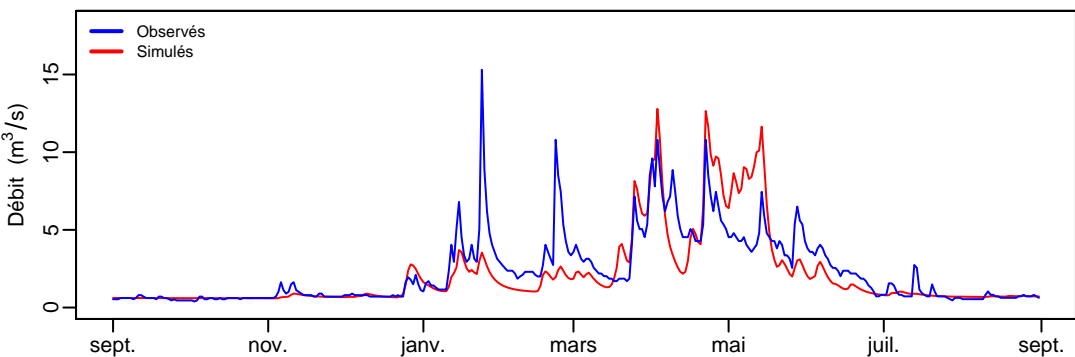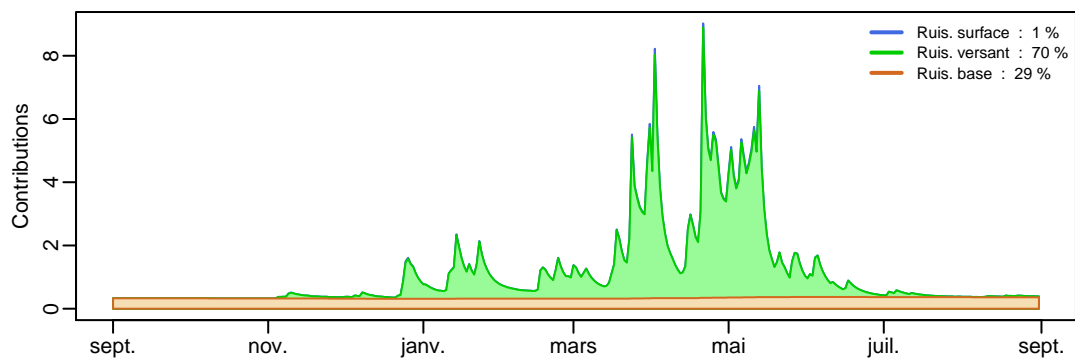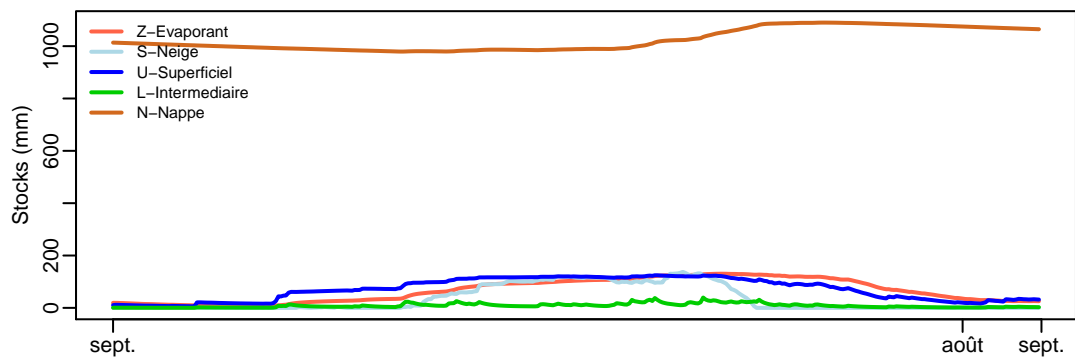



# k2674010 (158.6 km<sup>2</sup>) – année 1986–1987

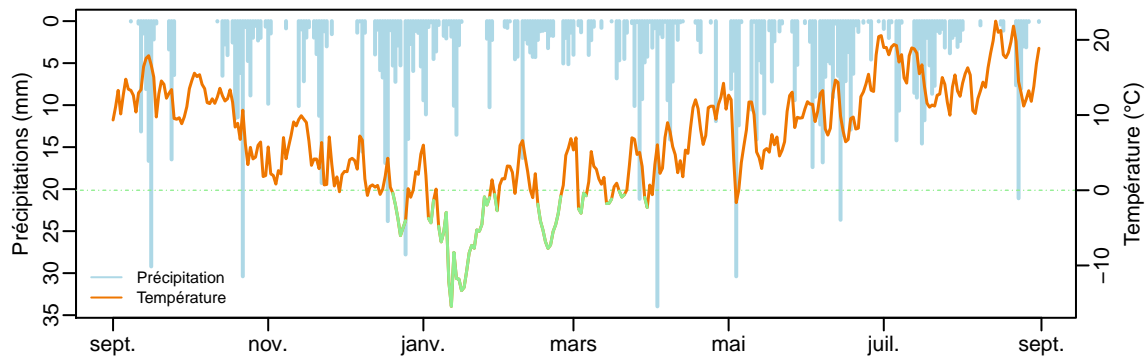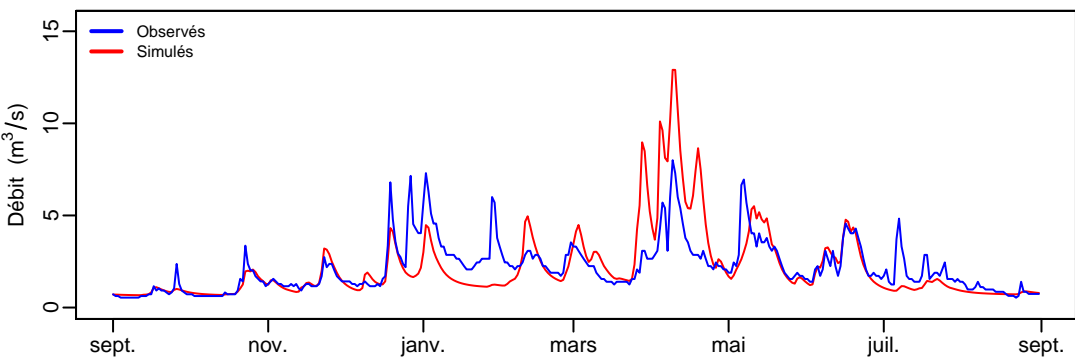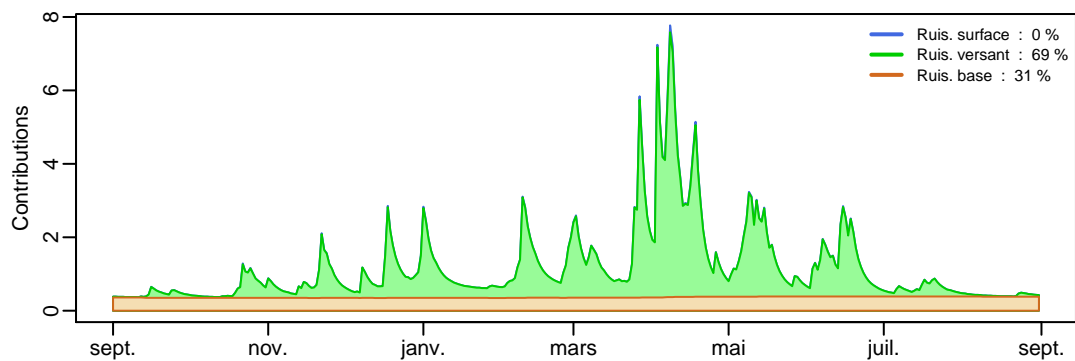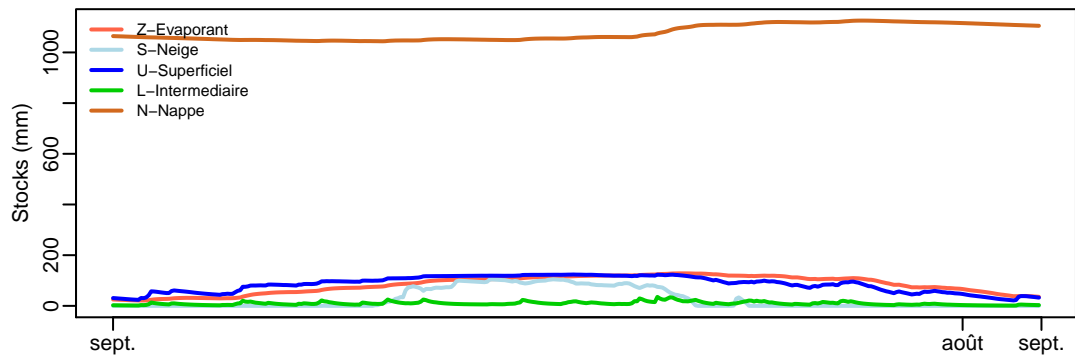

# k2674010 (158.6 km<sup>2</sup>) – année 1987–1988

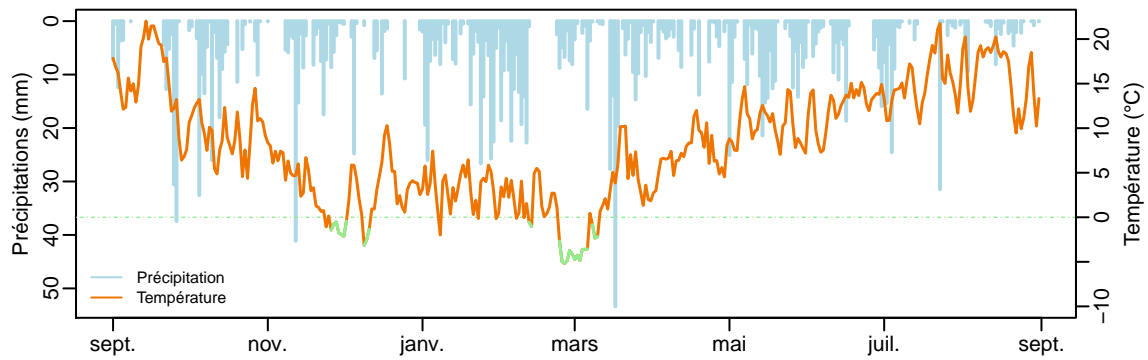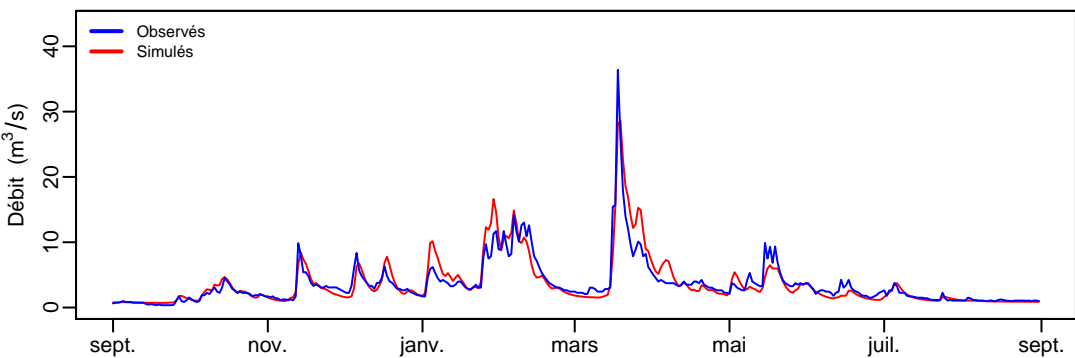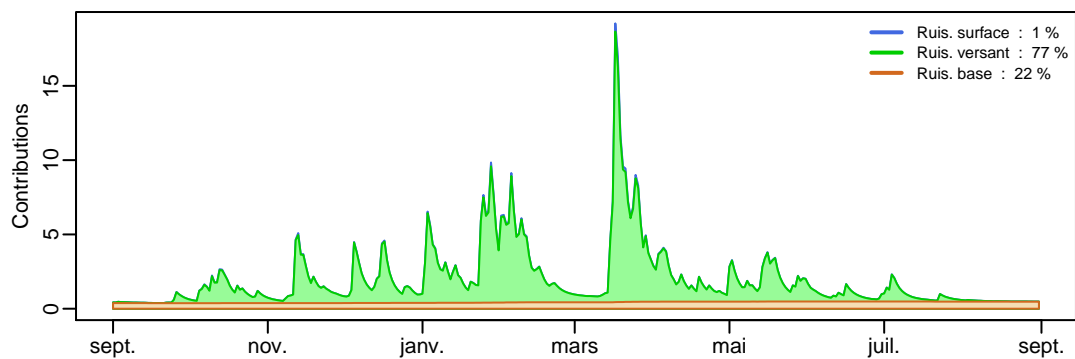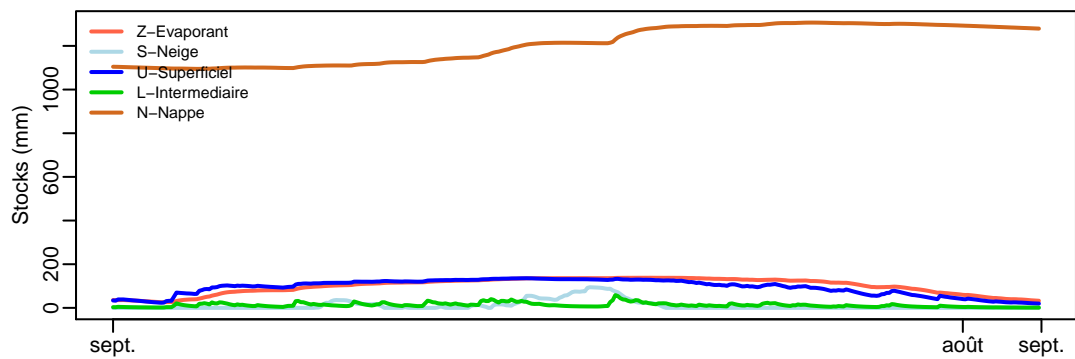

# k2674010 (158.6 km<sup>2</sup>) – année 1988–1989

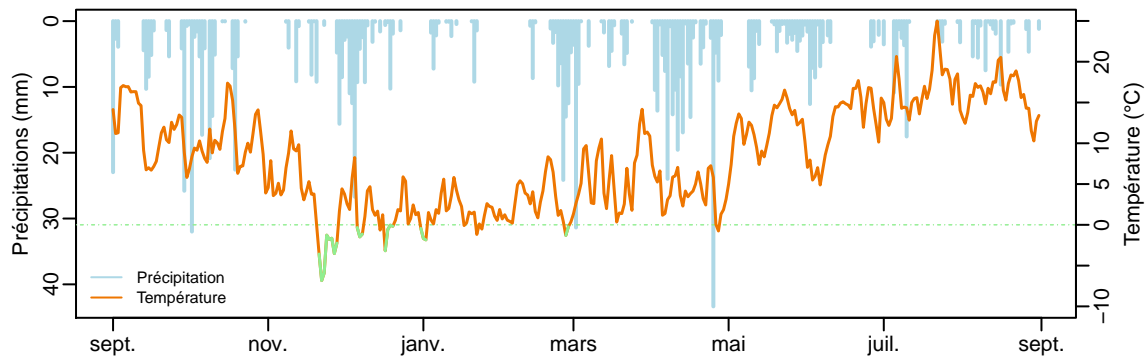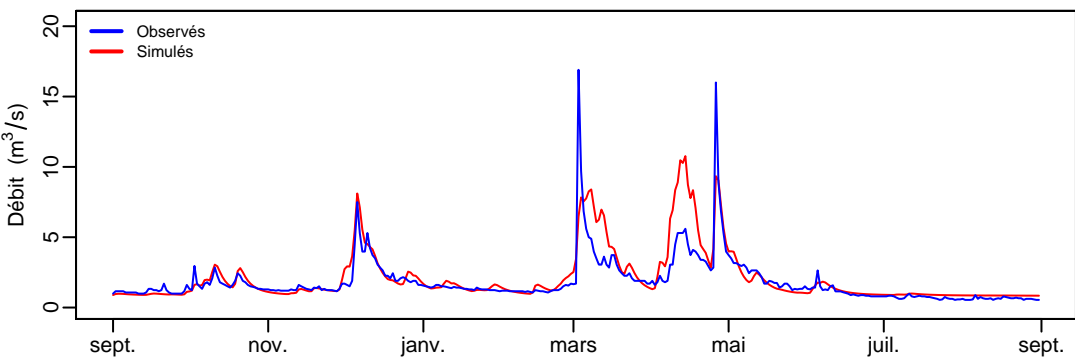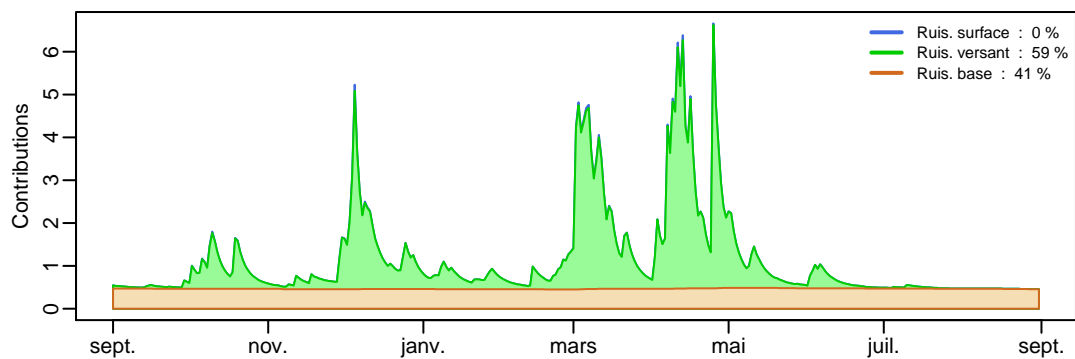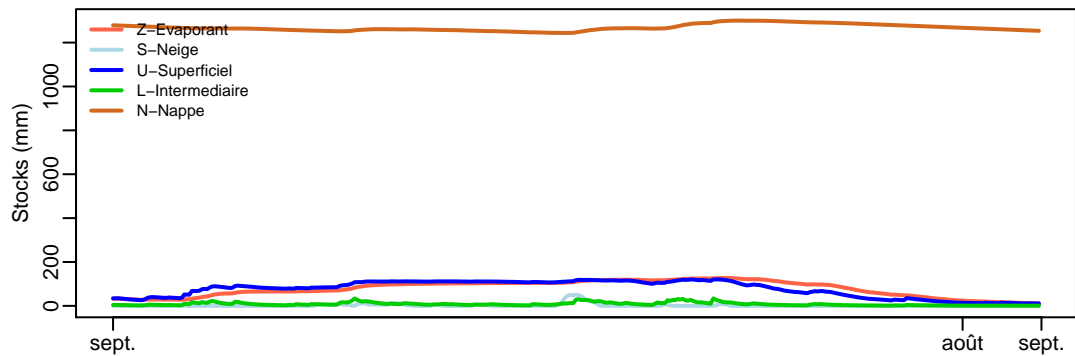

# k2674010 (158.6 km<sup>2</sup>) – année 1989–1990

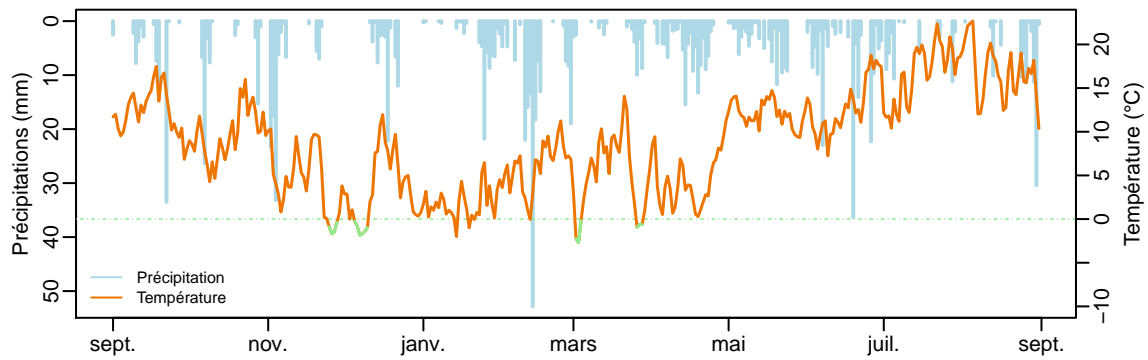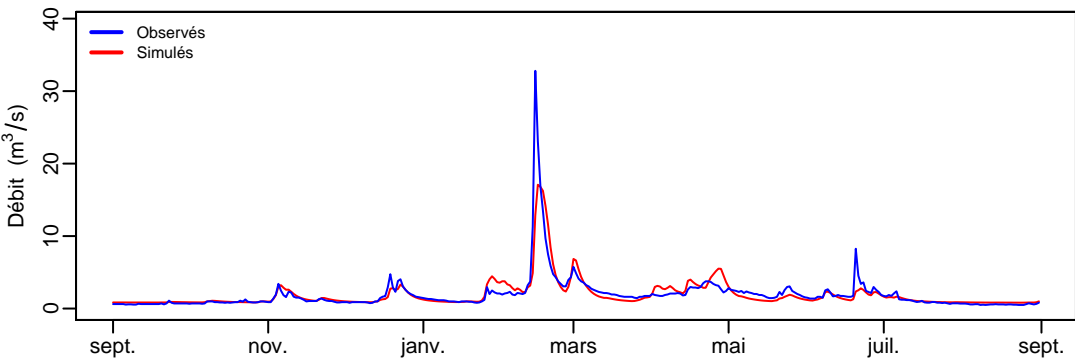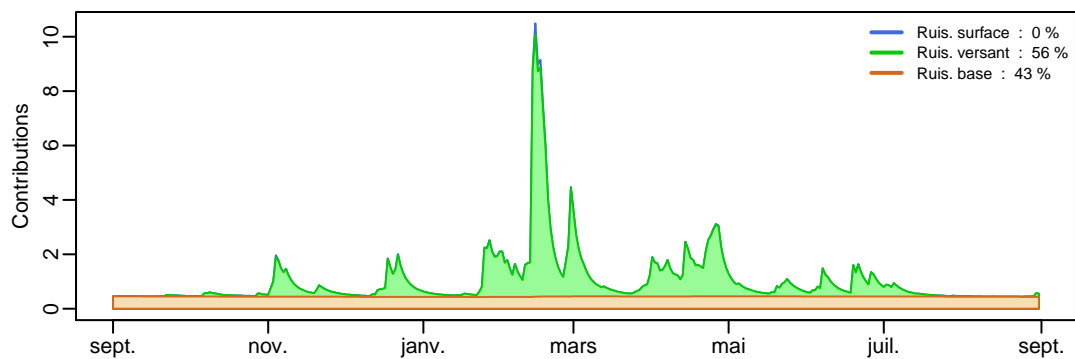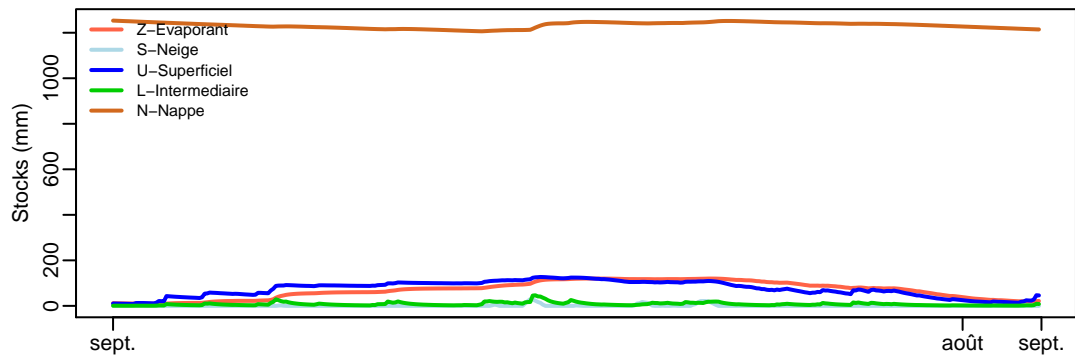

# k2674010 (158.6 km<sup>2</sup>) – année 1990–1991

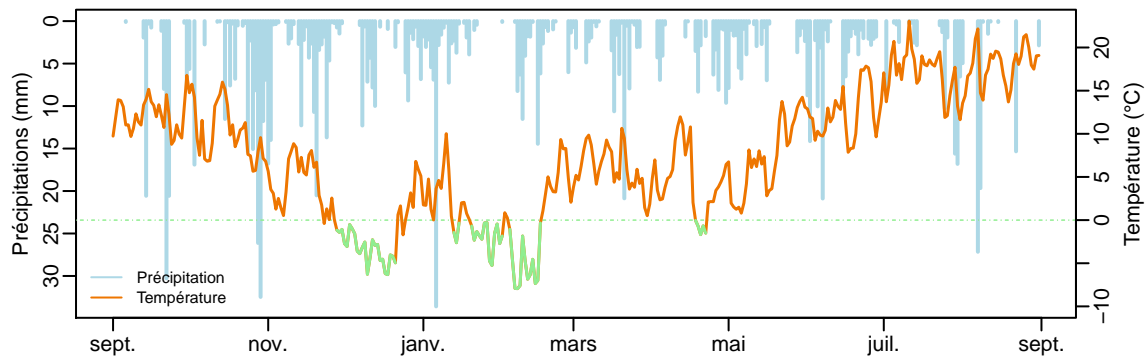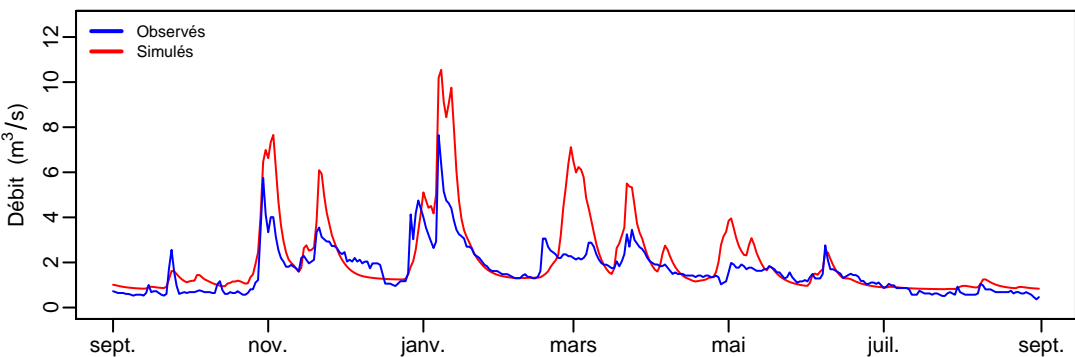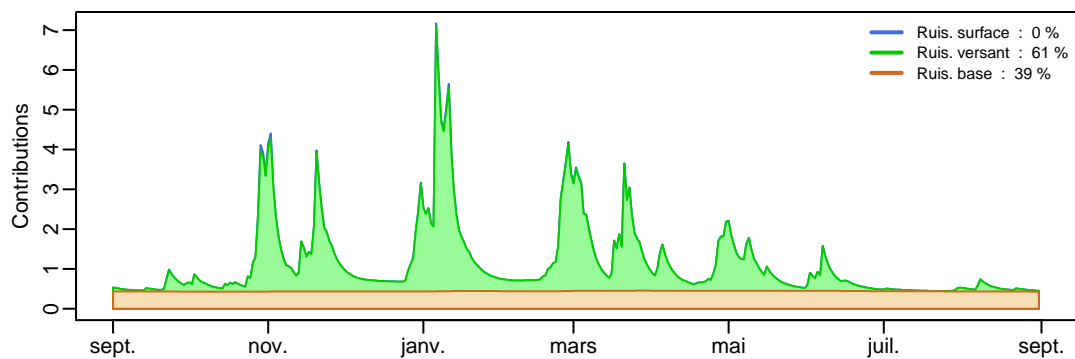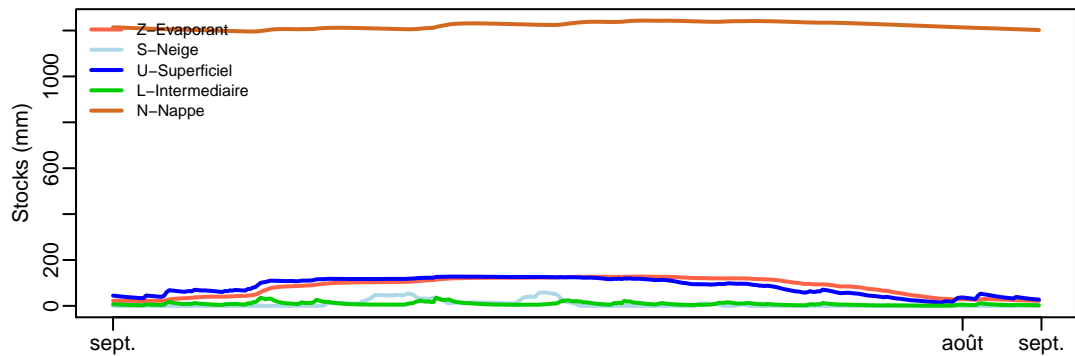

# k2674010 (158.6 km<sup>2</sup>) – année 1991–1992

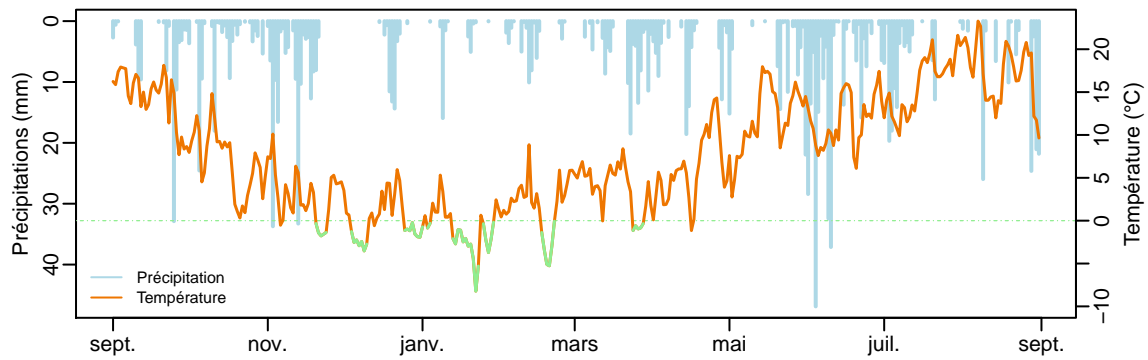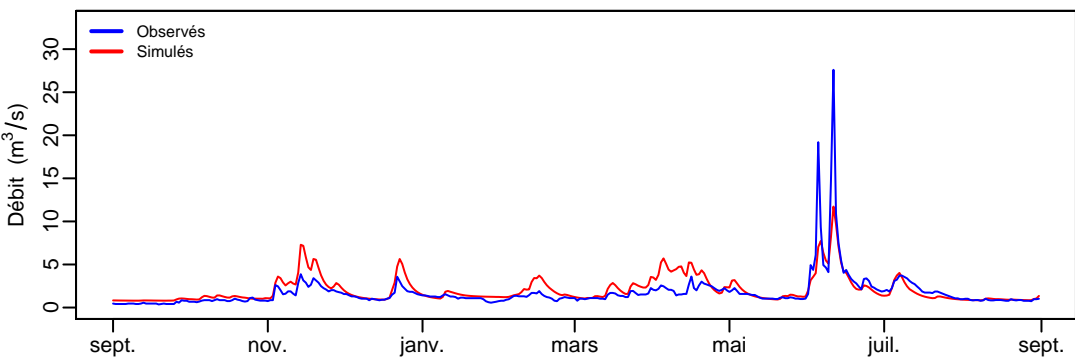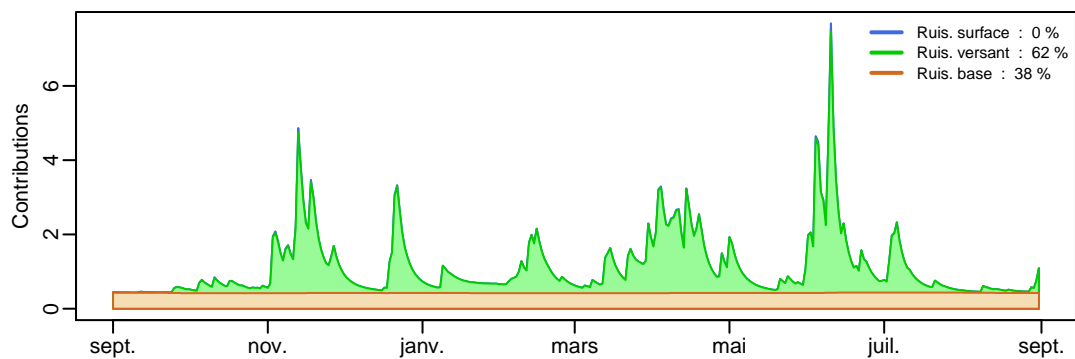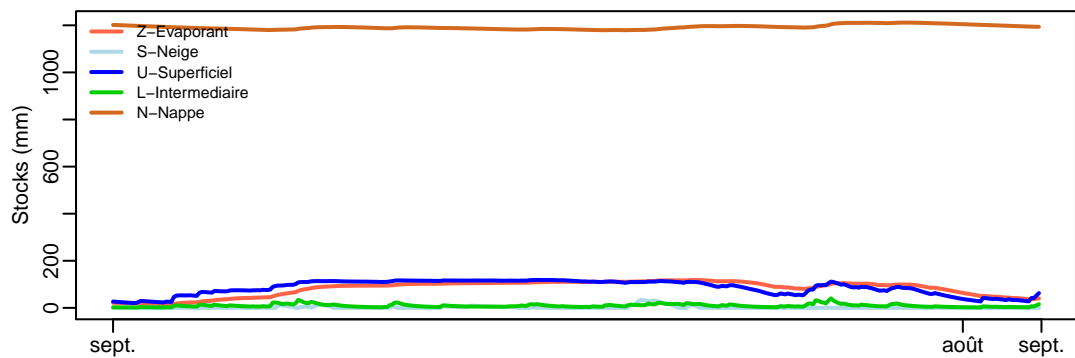

# k2674010 (158.6 km<sup>2</sup>) – année 1992–1993

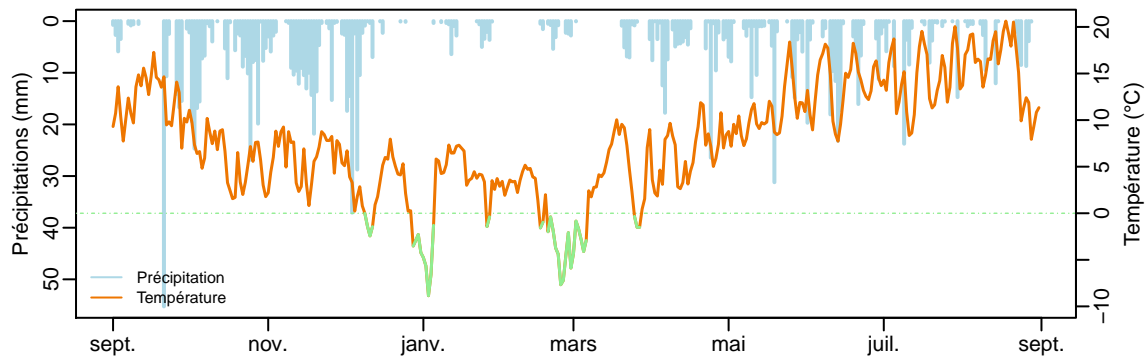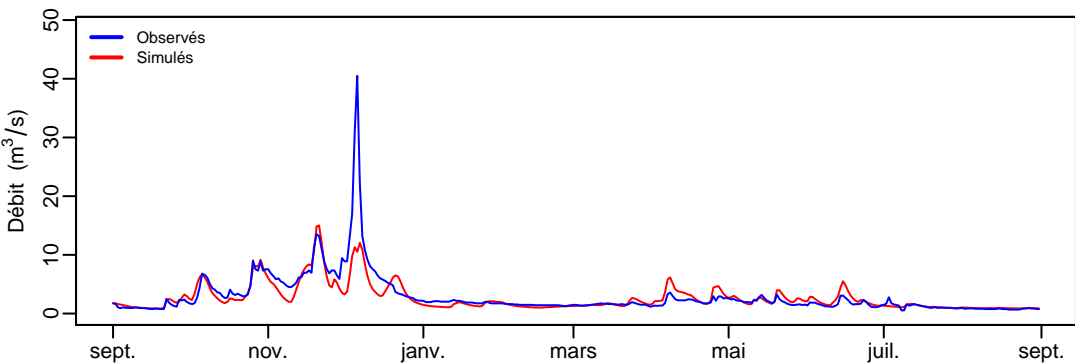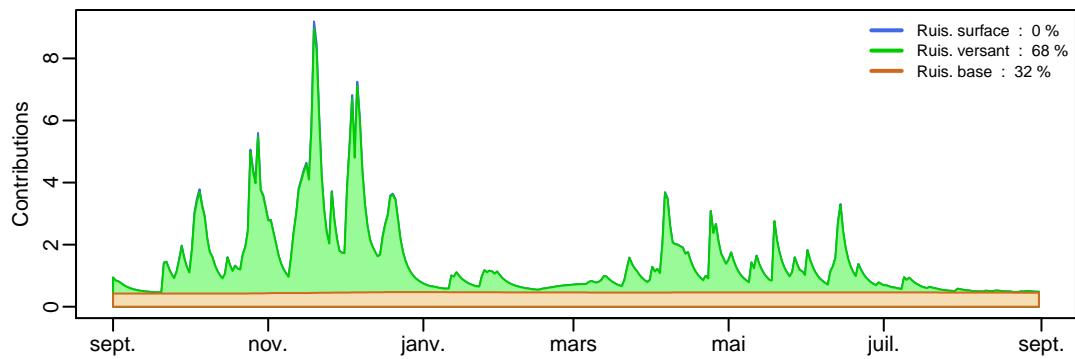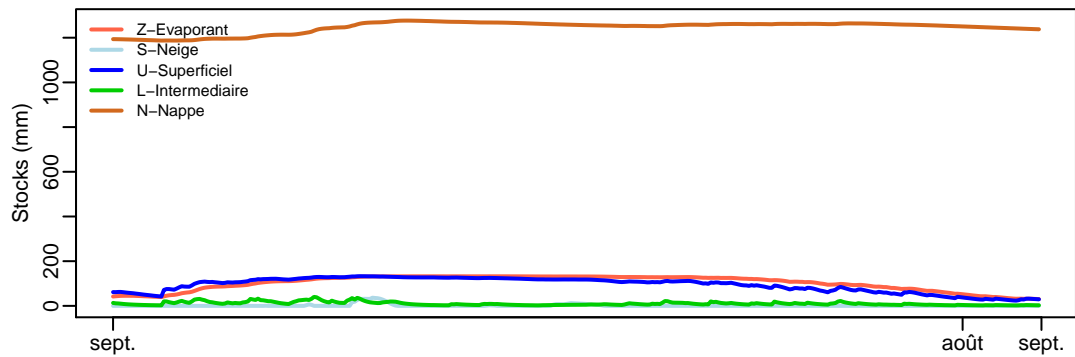

# k2674010 (158.6 km<sup>2</sup>) – année 1993–1994

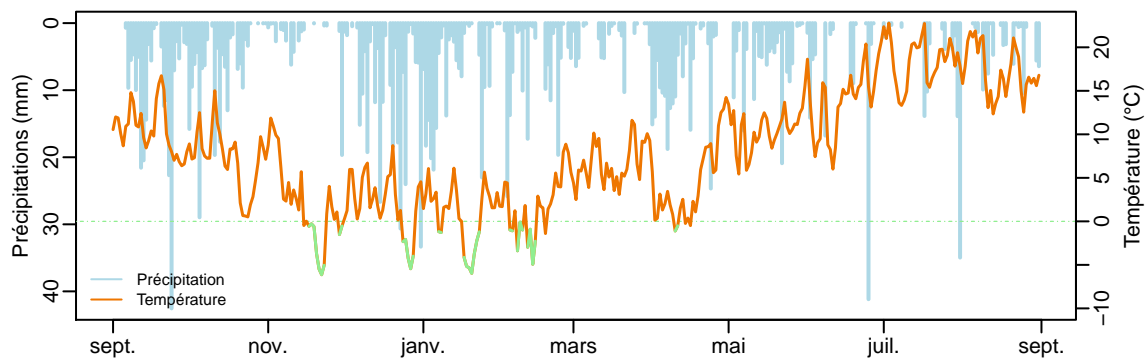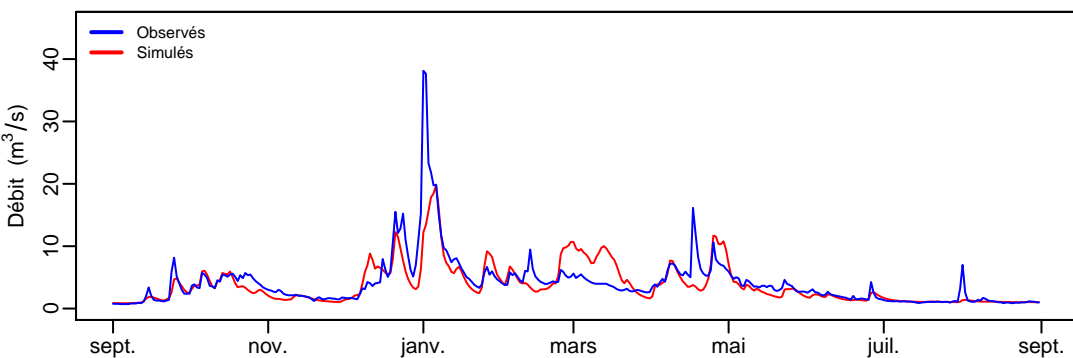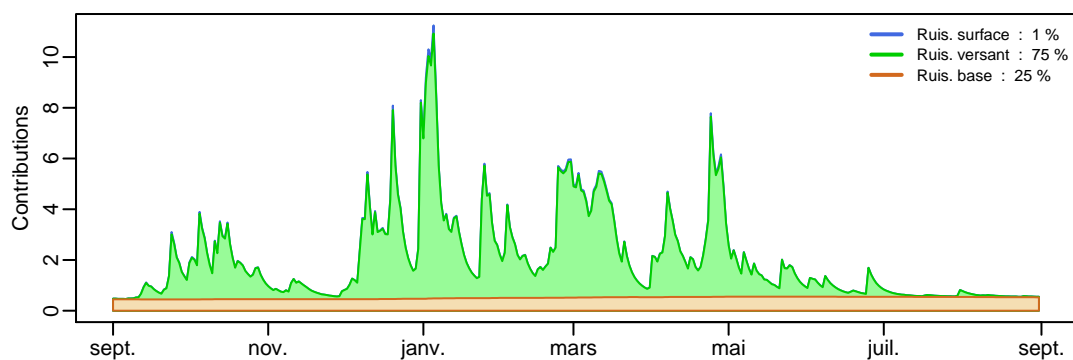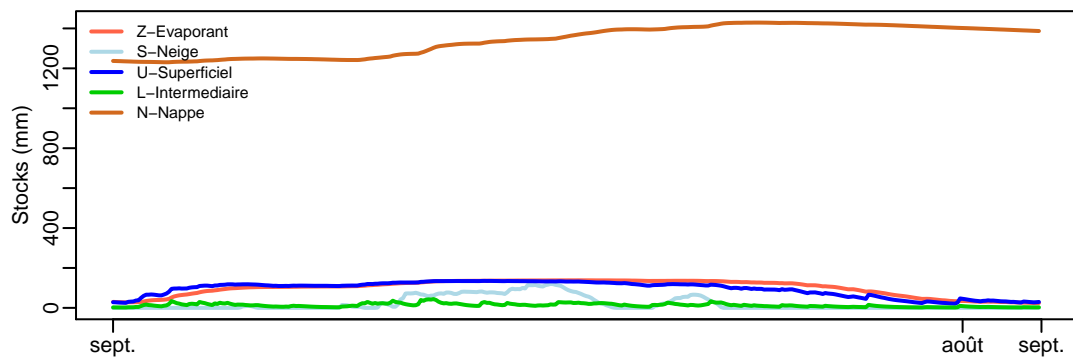



# k2674010 (158.6 km<sup>2</sup>) – année 1994–1995

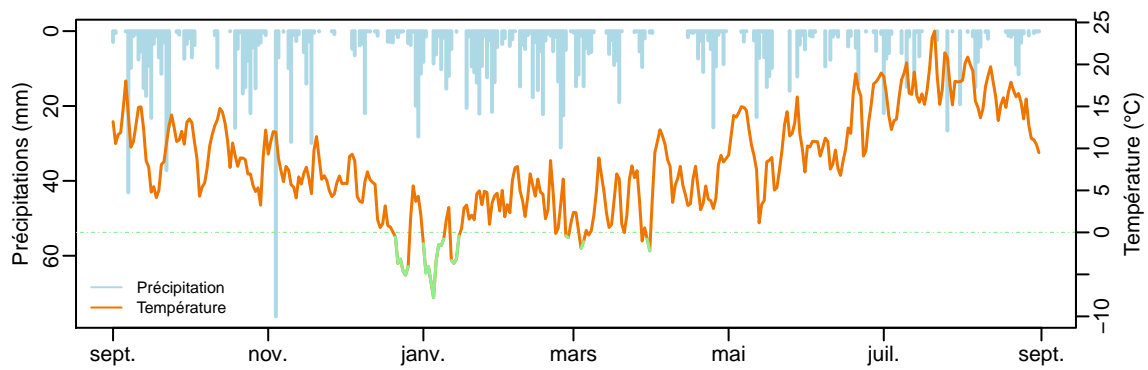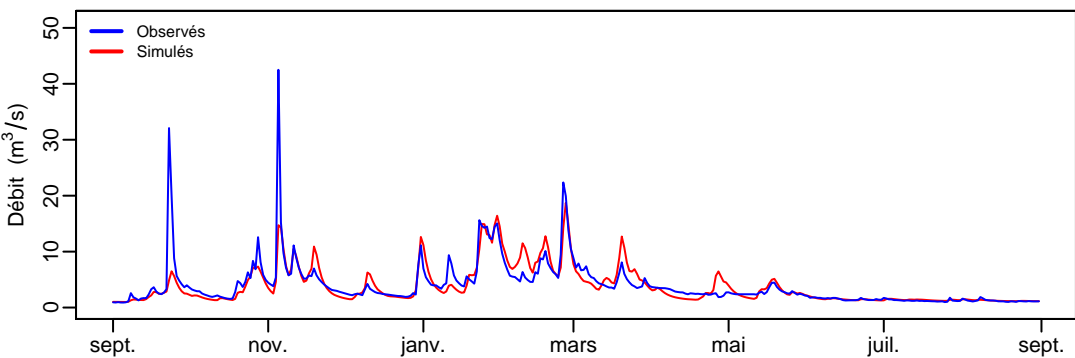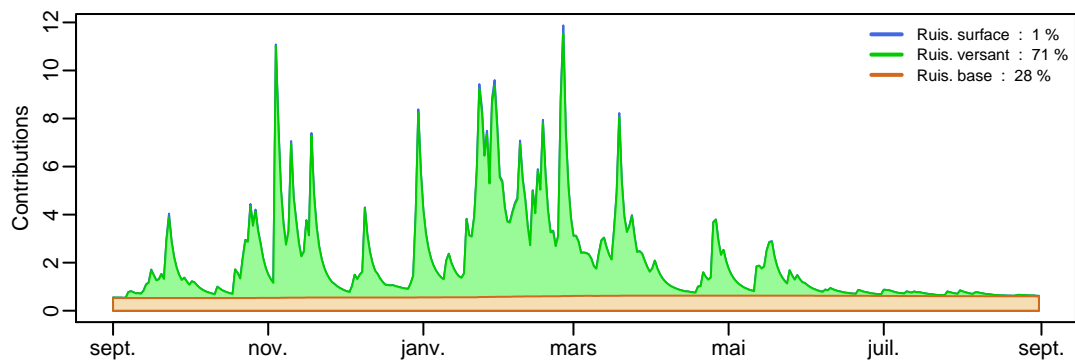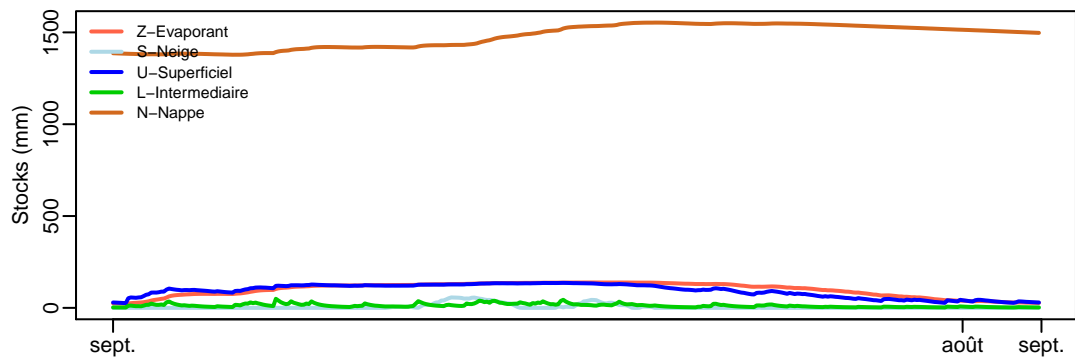

# k2674010 (158.6 km<sup>2</sup>) – année 1995–1996

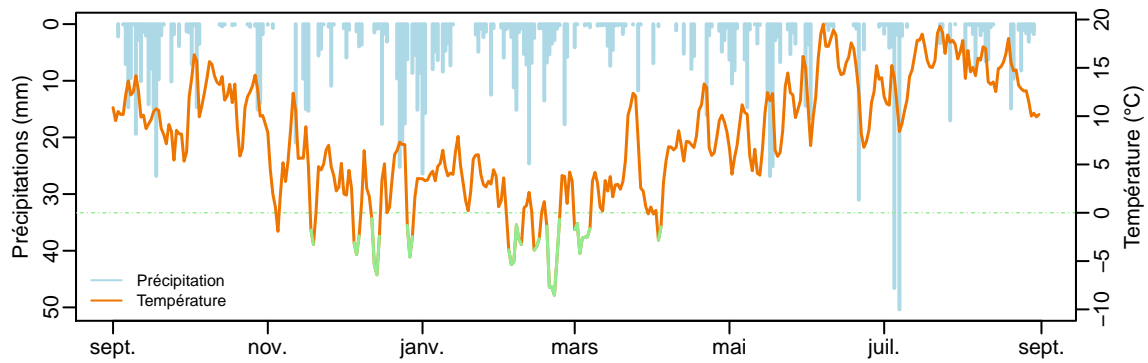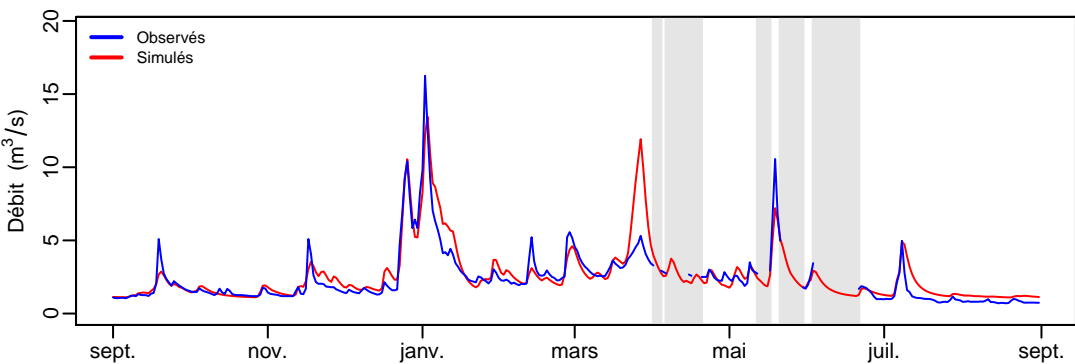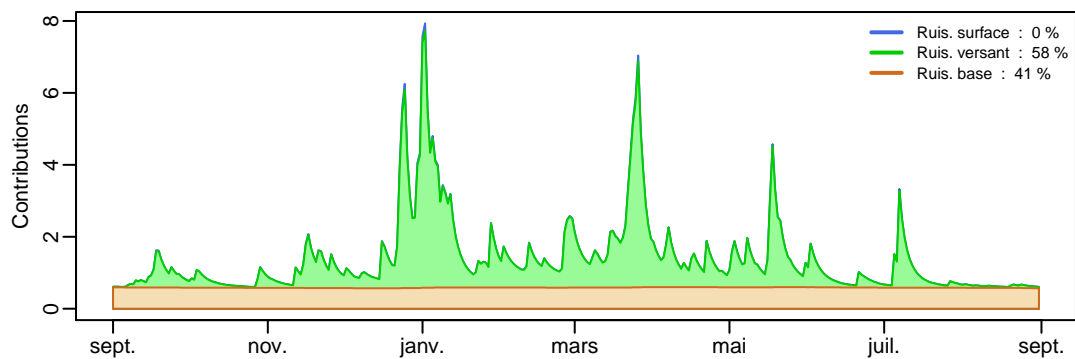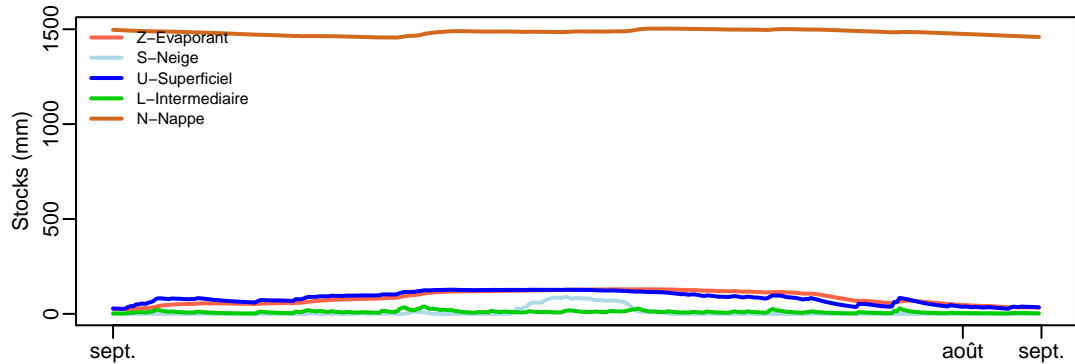

# k2674010 (158.6 km<sup>2</sup>) – année 1996–1997

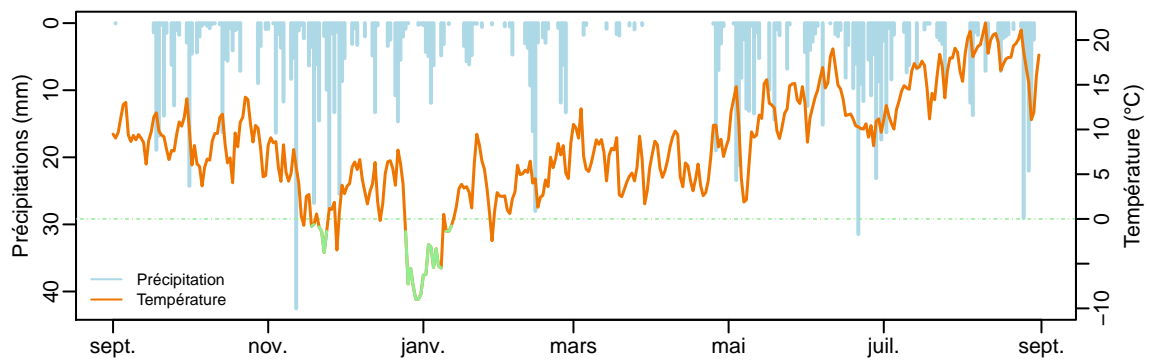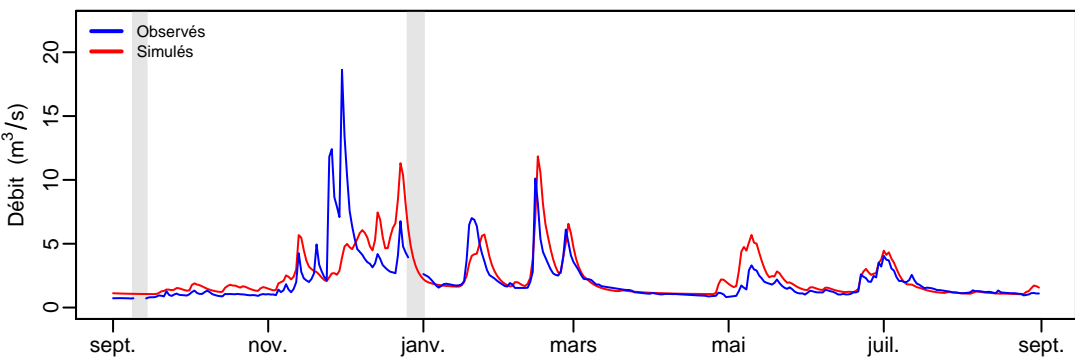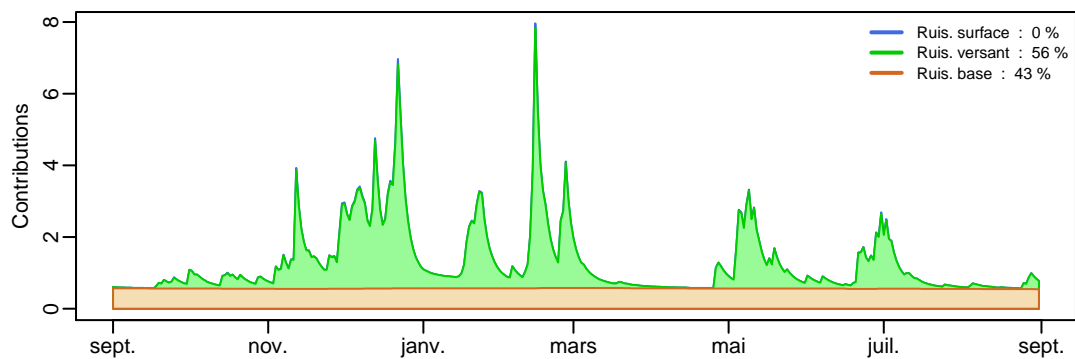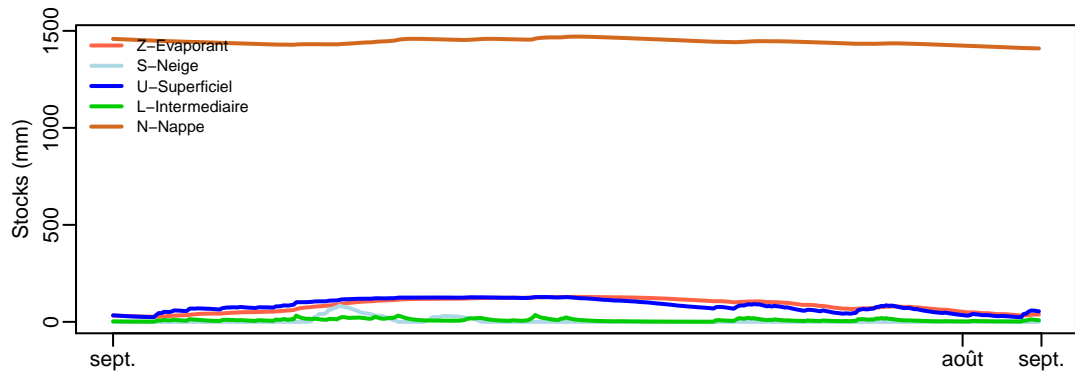

# k2674010 (158.6 km<sup>2</sup>) – année 1997–1998

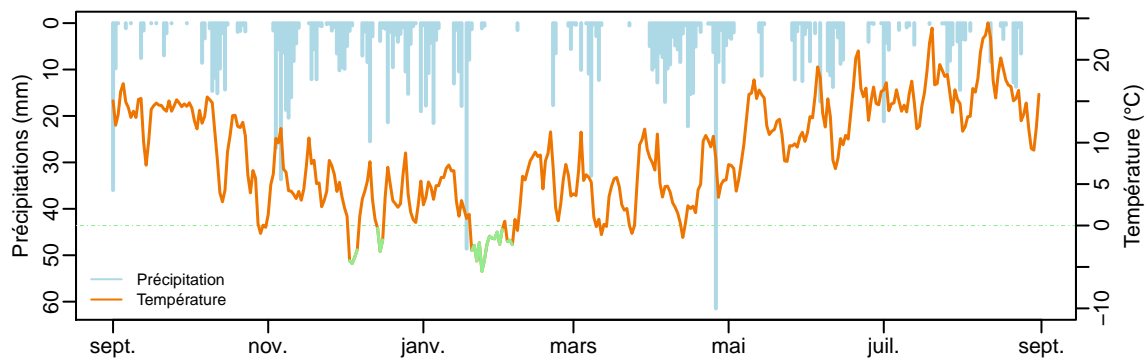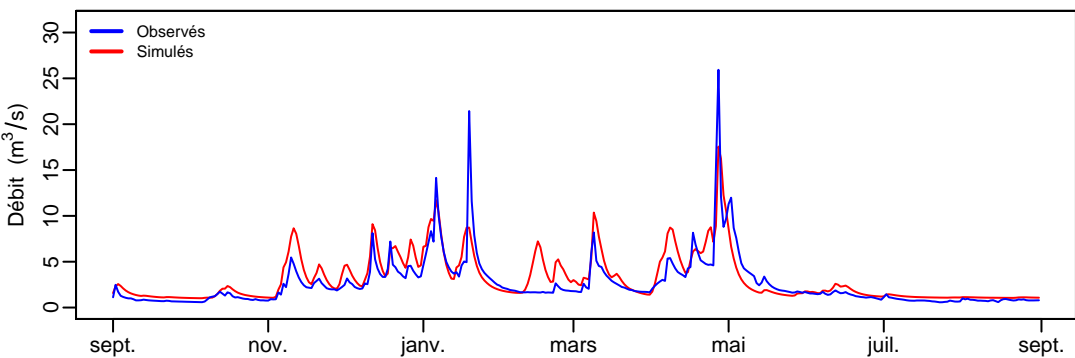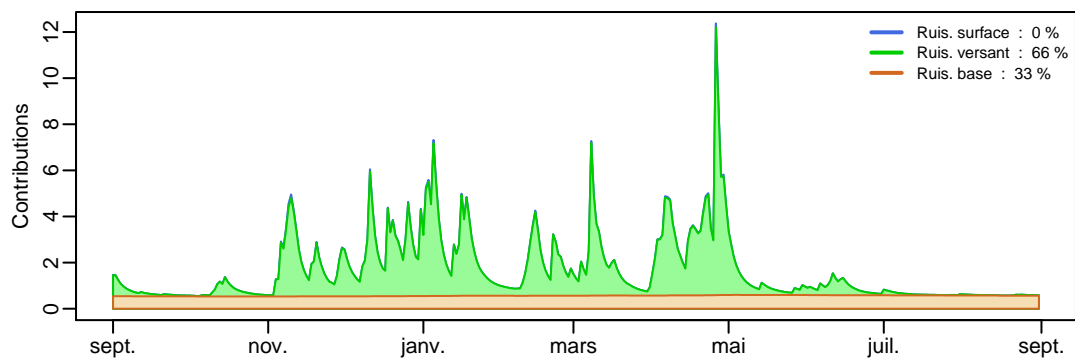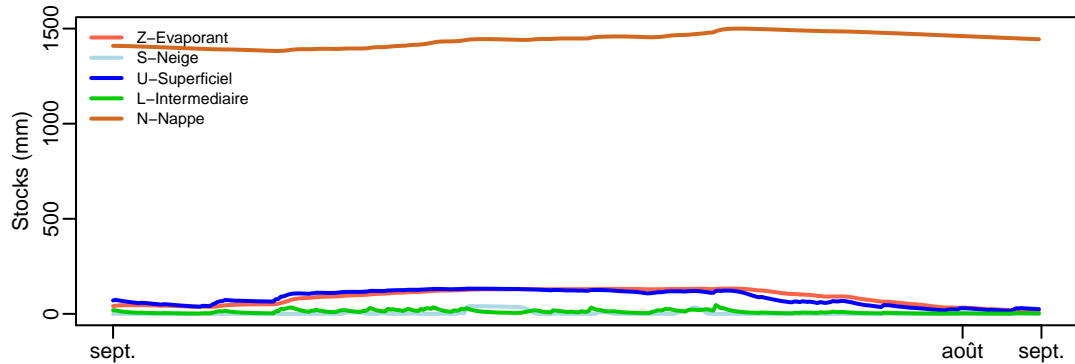

# k2674010 (158.6 km<sup>2</sup>) – année 1998–1999

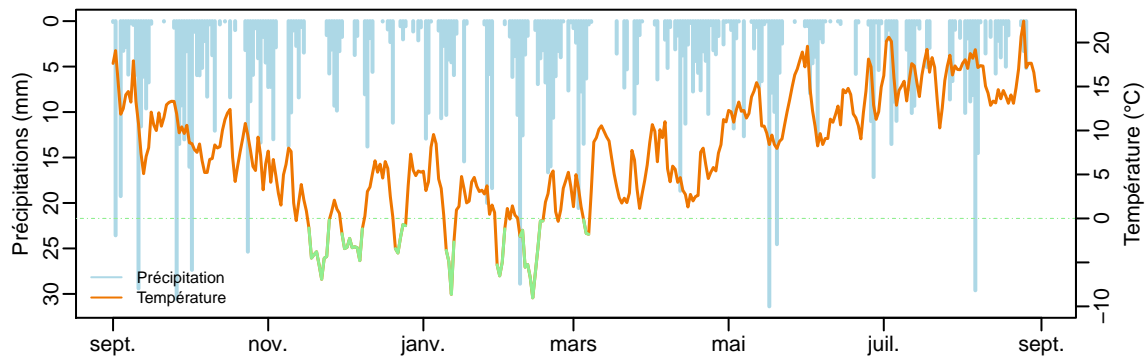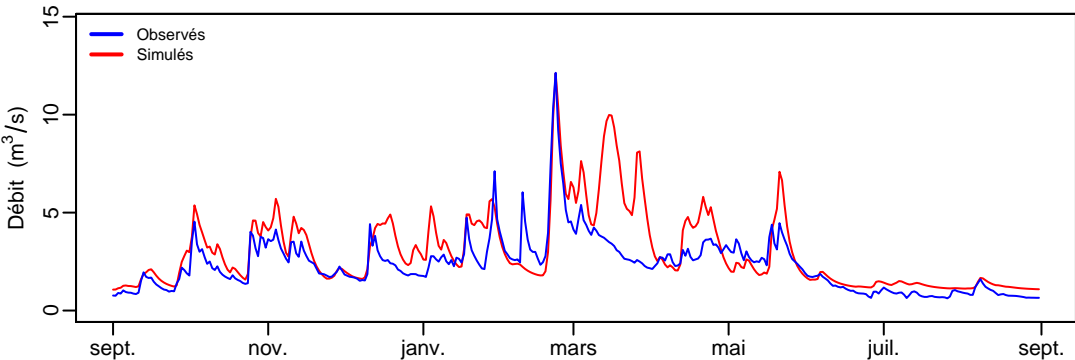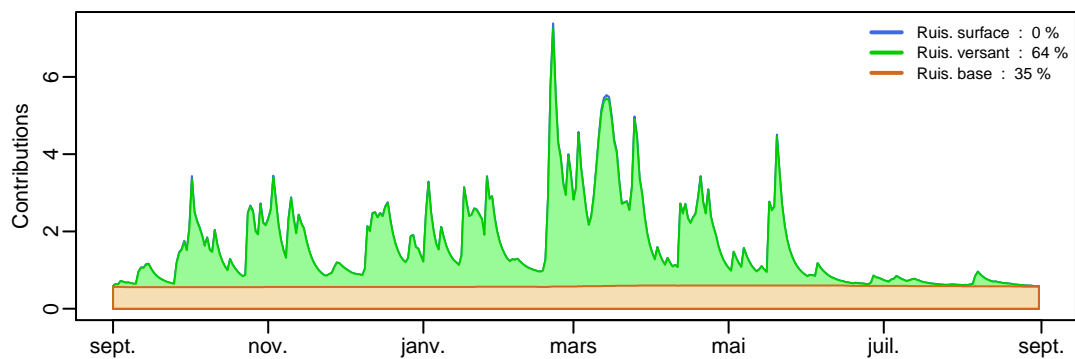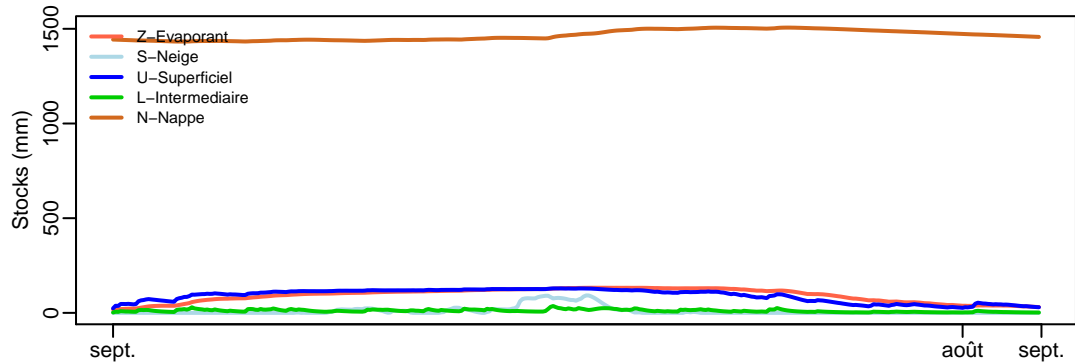

# k2674010 (158.6 km<sup>2</sup>) – année 1999–2000

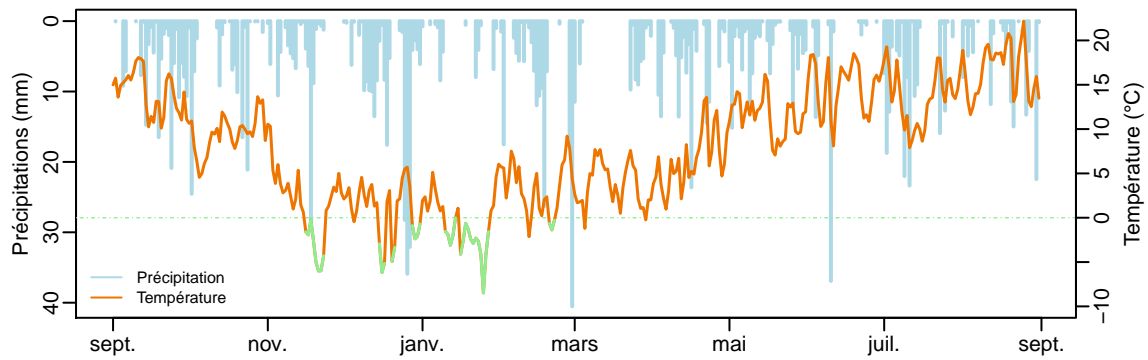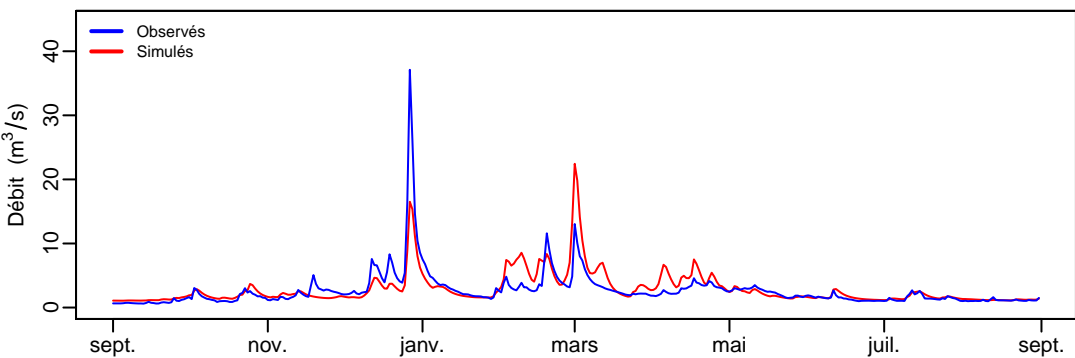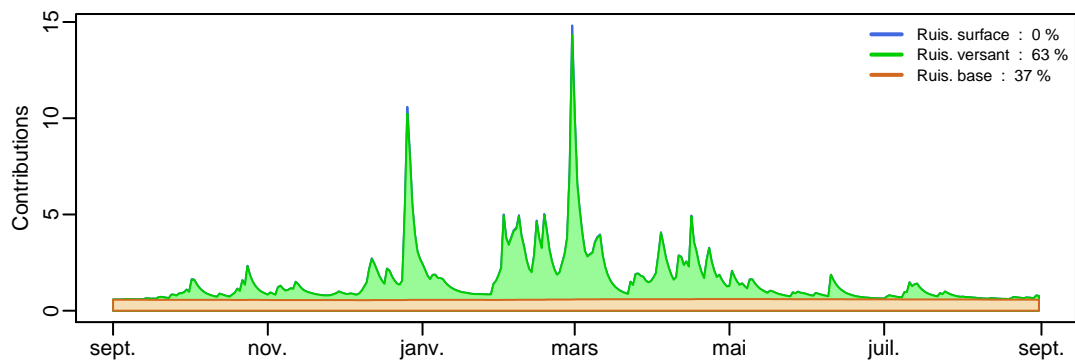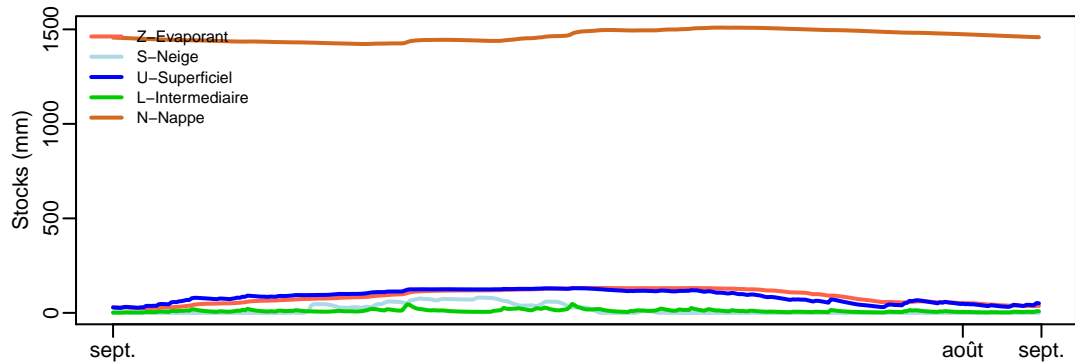

# k2674010 (158.6 km<sup>2</sup>) – année 2000–2001

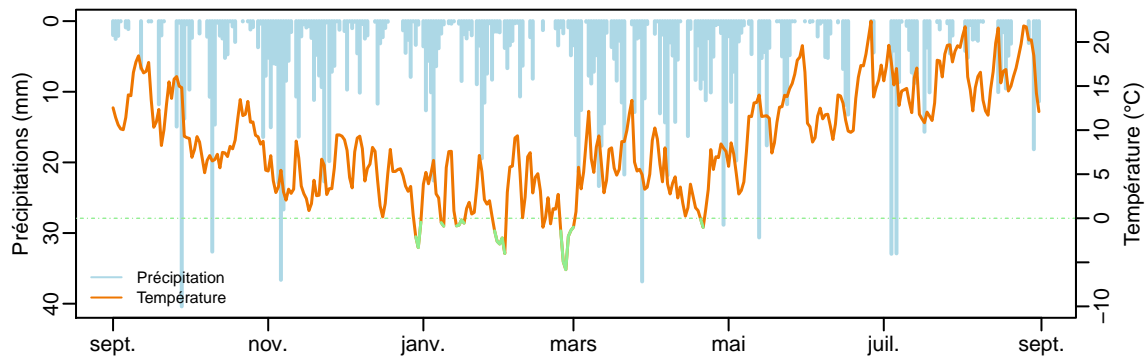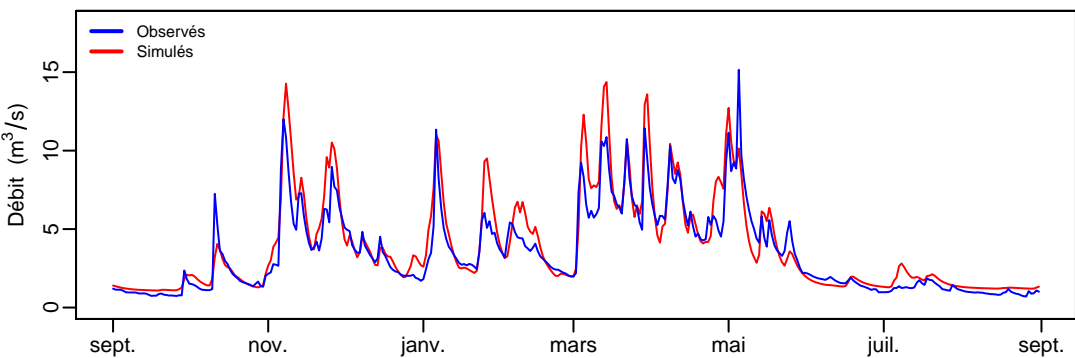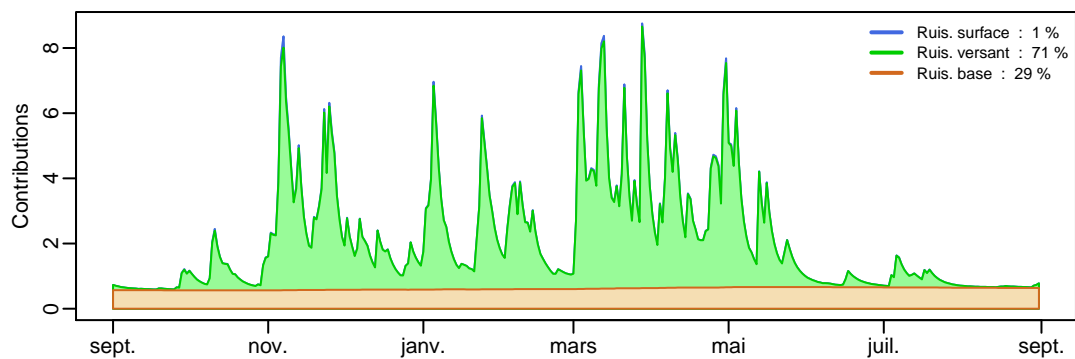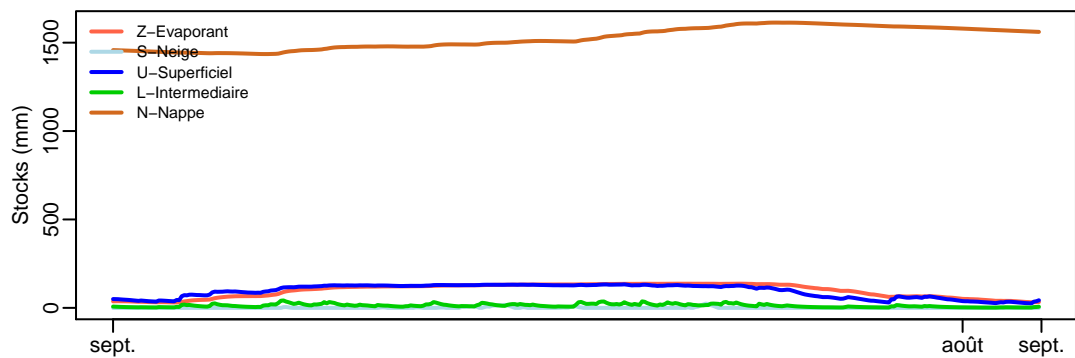

# k2674010 (158.6 km<sup>2</sup>) – année 2001–2002

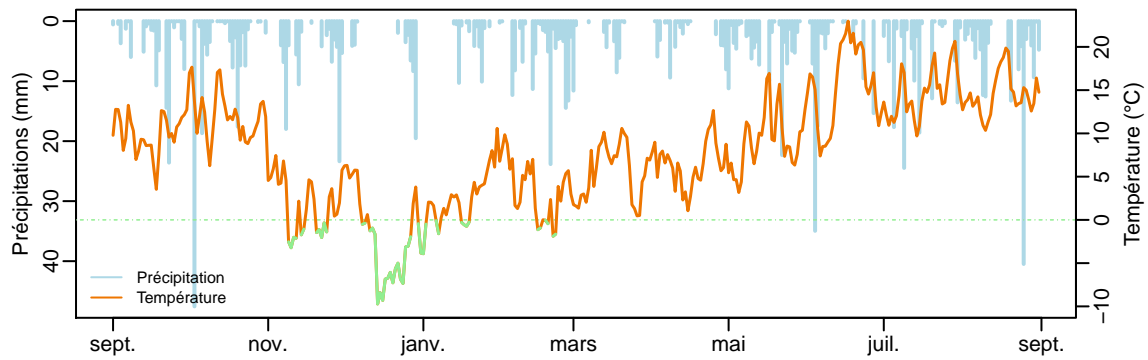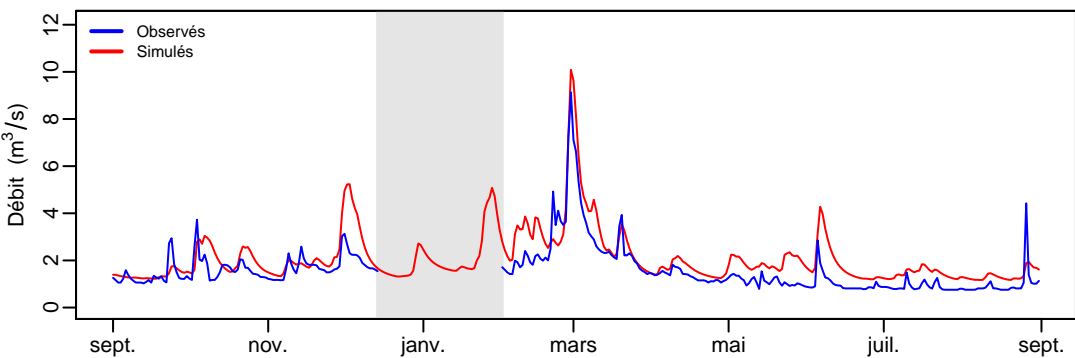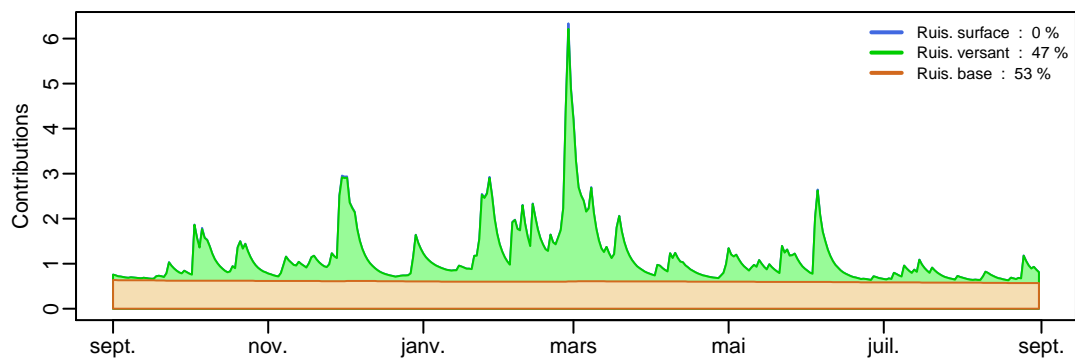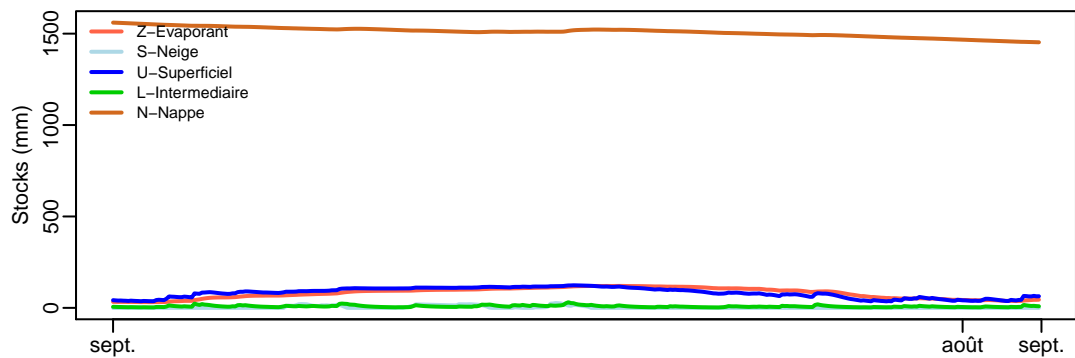



# k2674010 (158.6 km<sup>2</sup>) – année 2002–2003

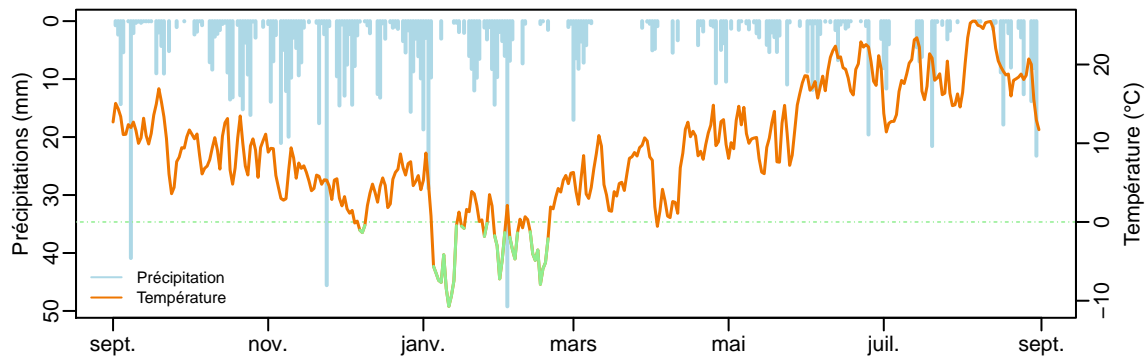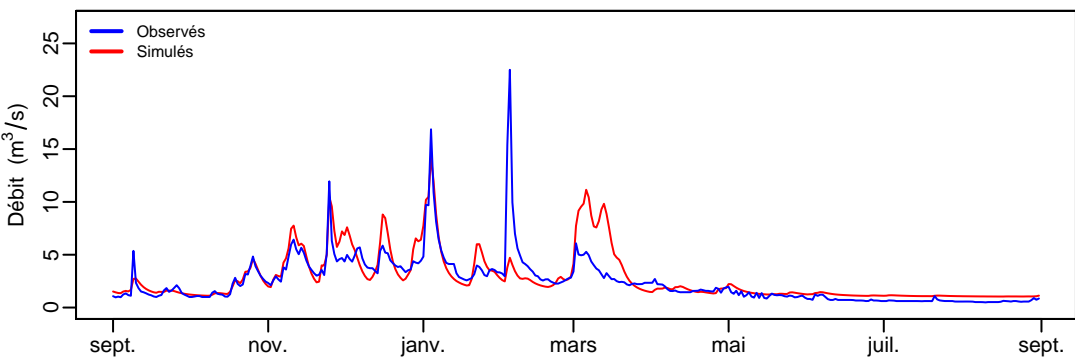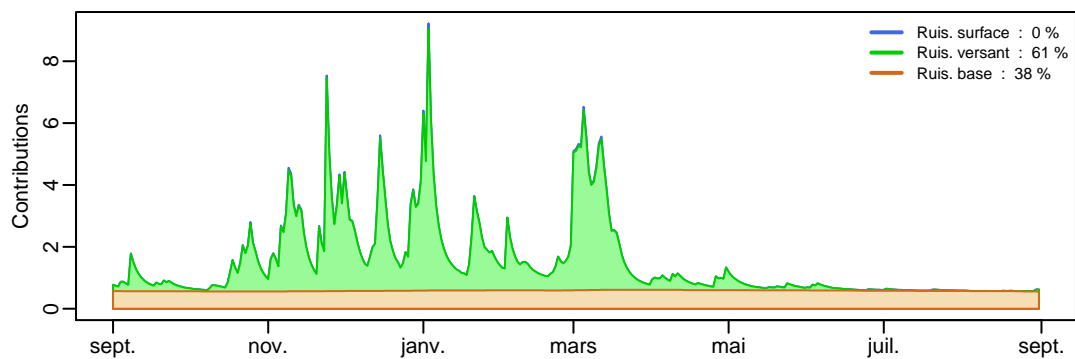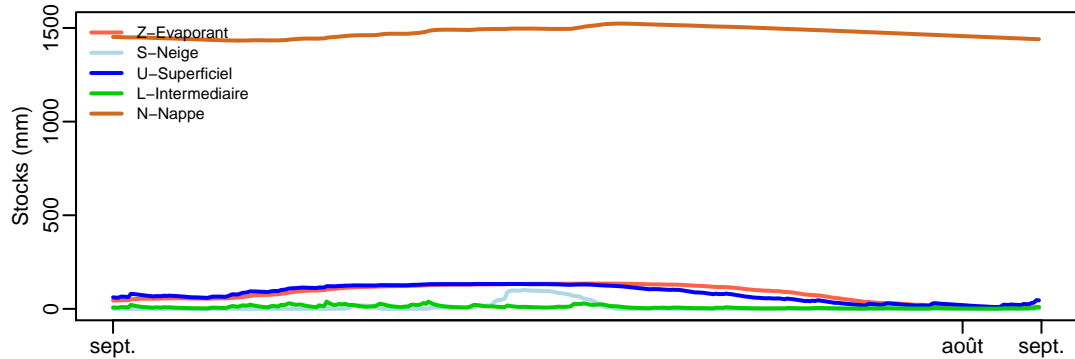

# k2674010 (158.6 km<sup>2</sup>) – année 2003–2004

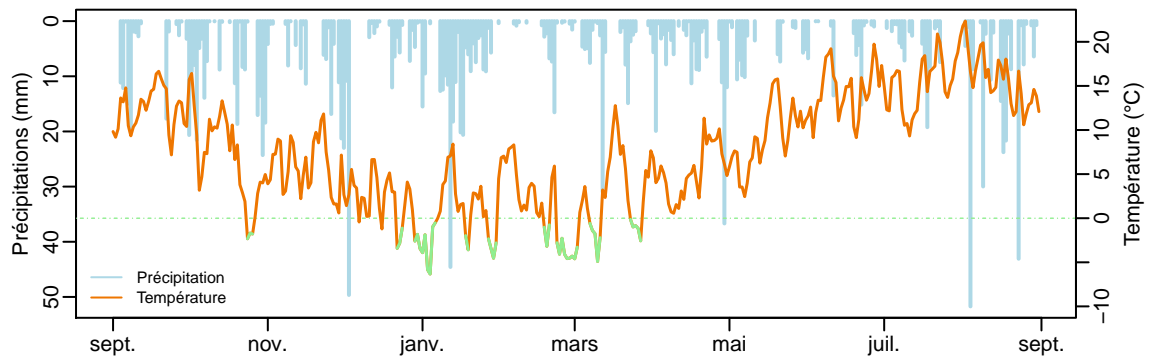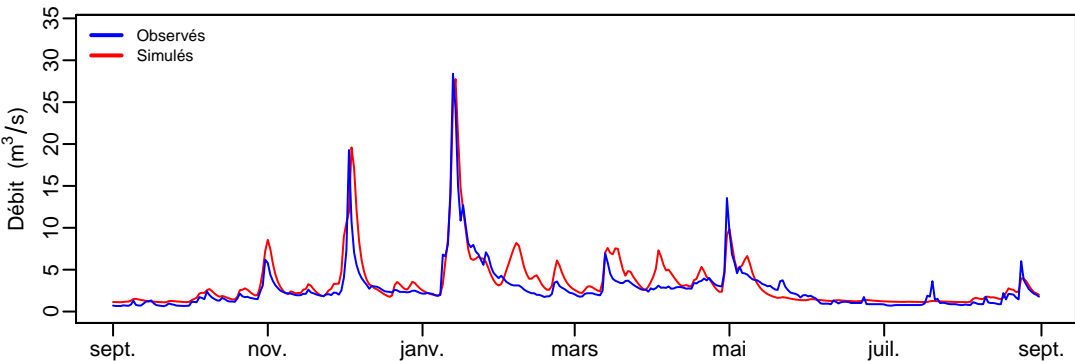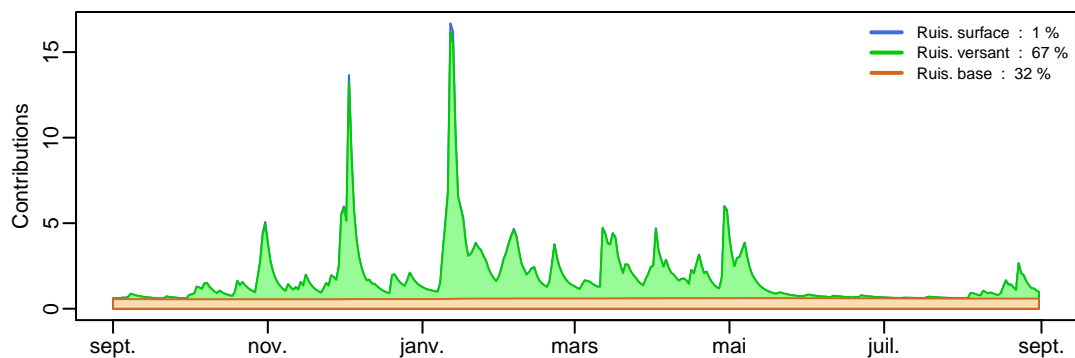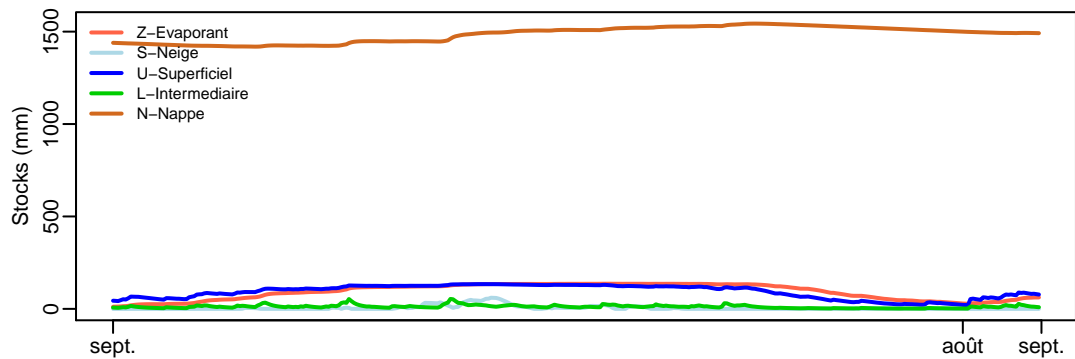

# k2674010 (158.6 km<sup>2</sup>) – année 2004–2005

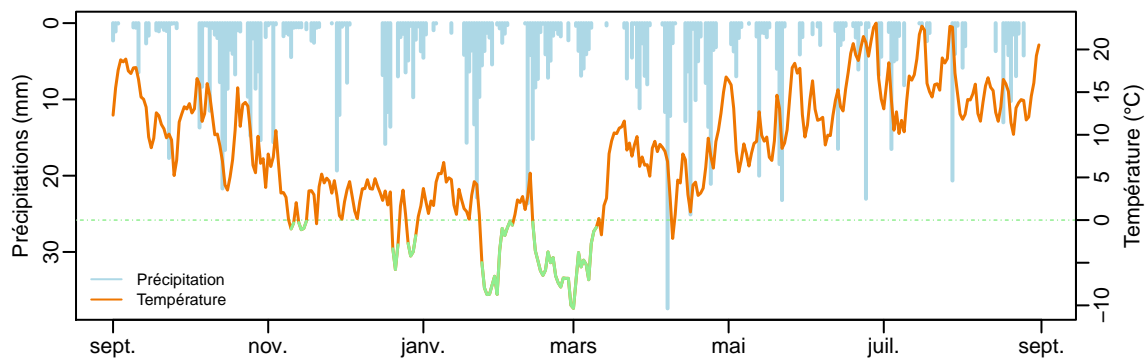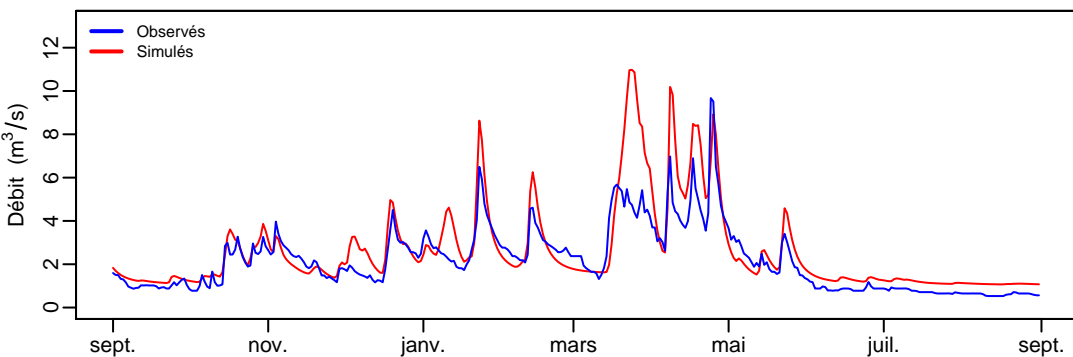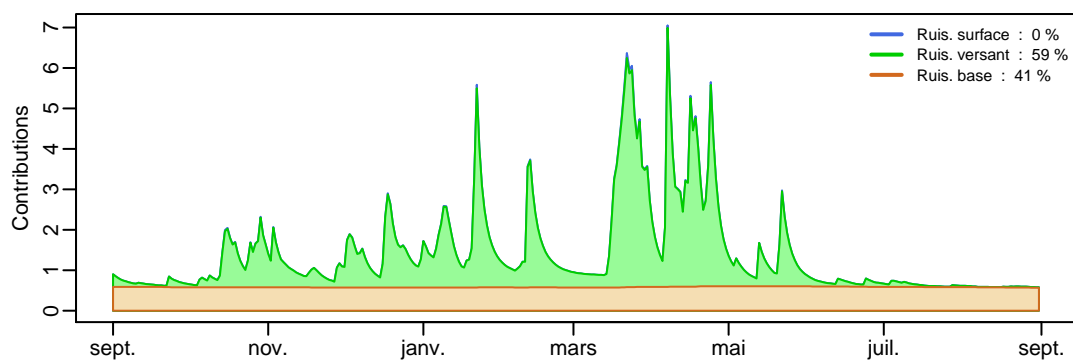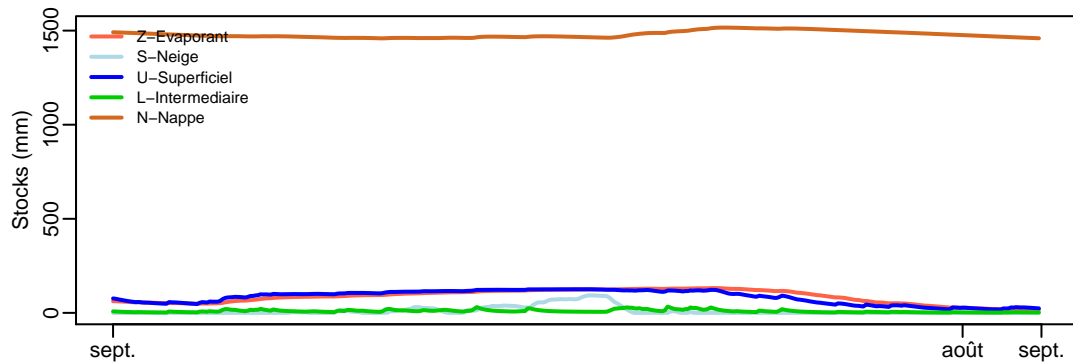

# k2674010 (158.6 km<sup>2</sup>) – année 2005–2006

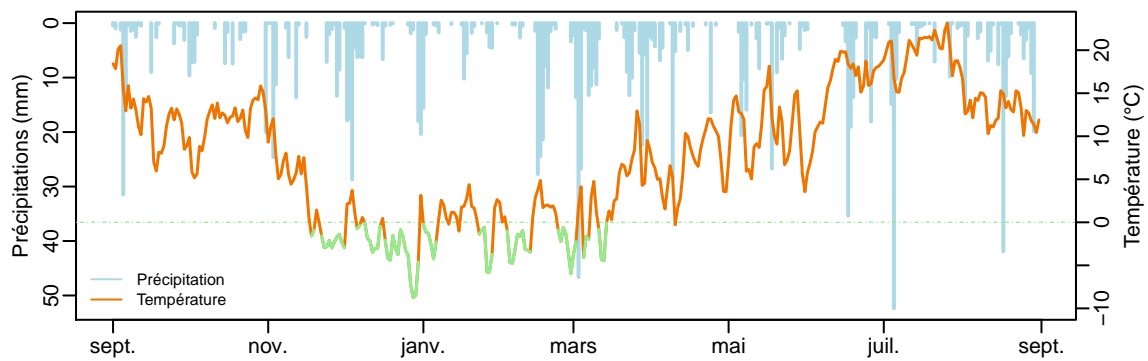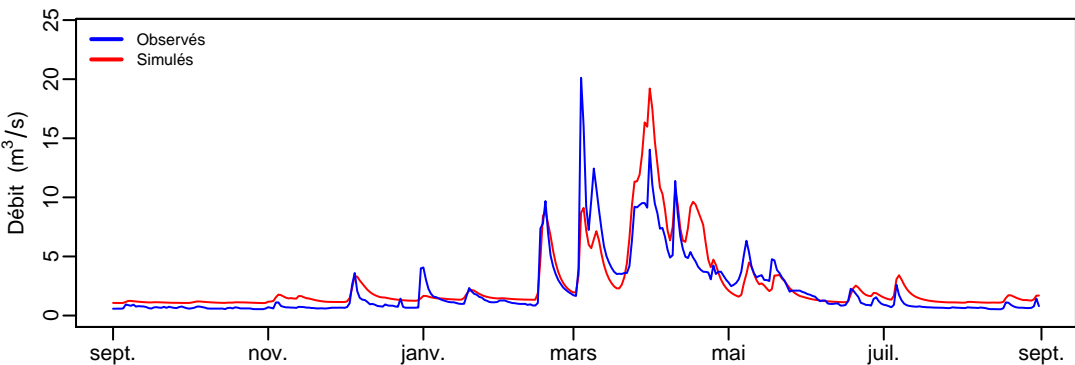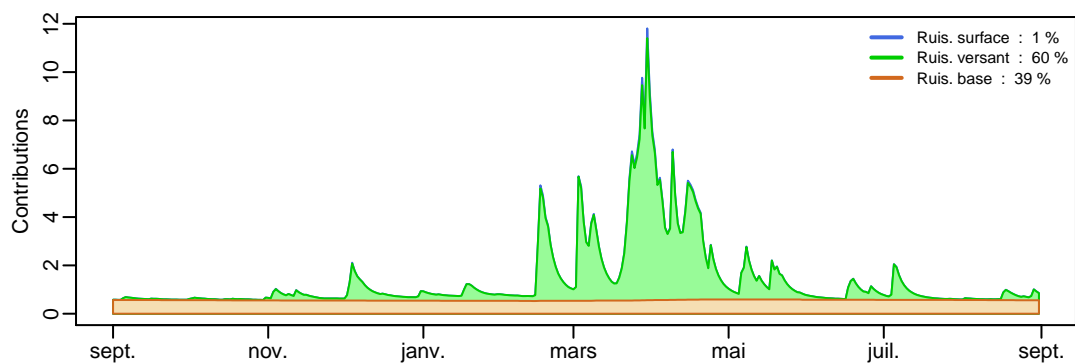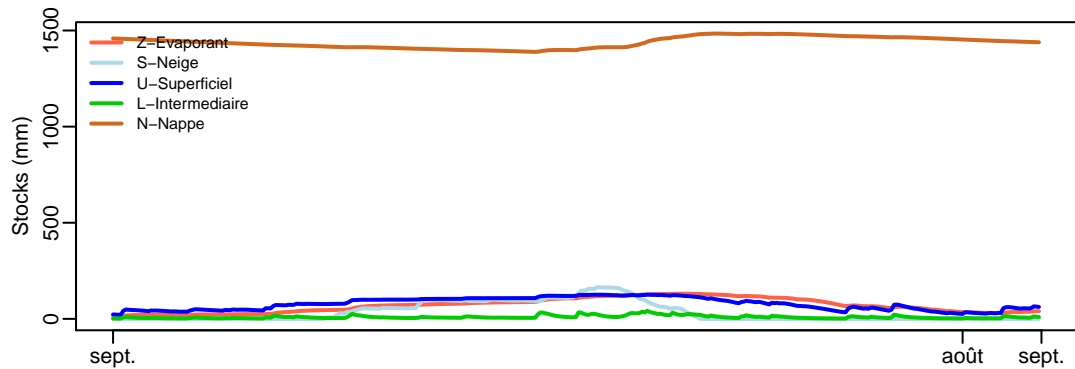

# k2674010 (158.6 km<sup>2</sup>) – année 2006–2007

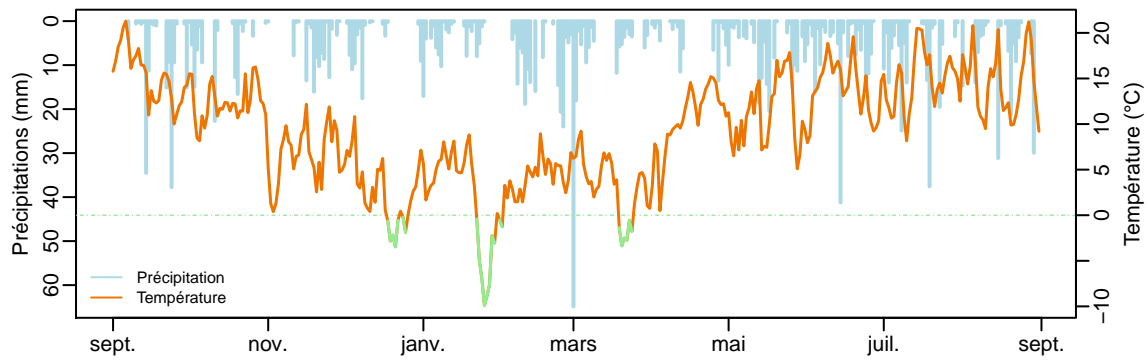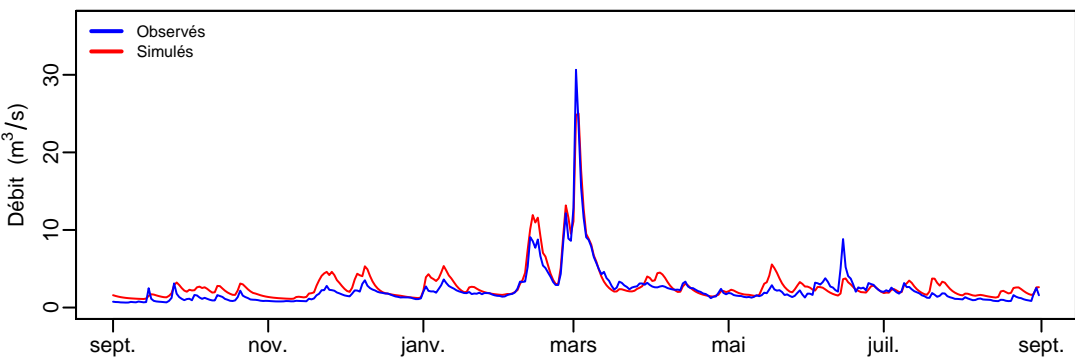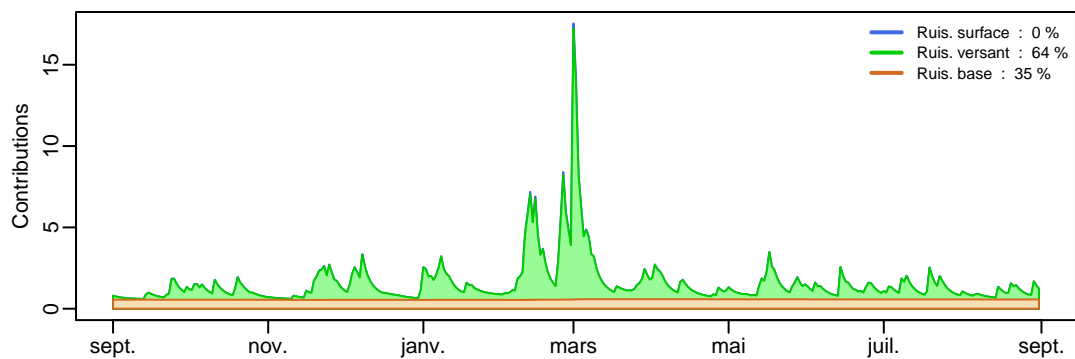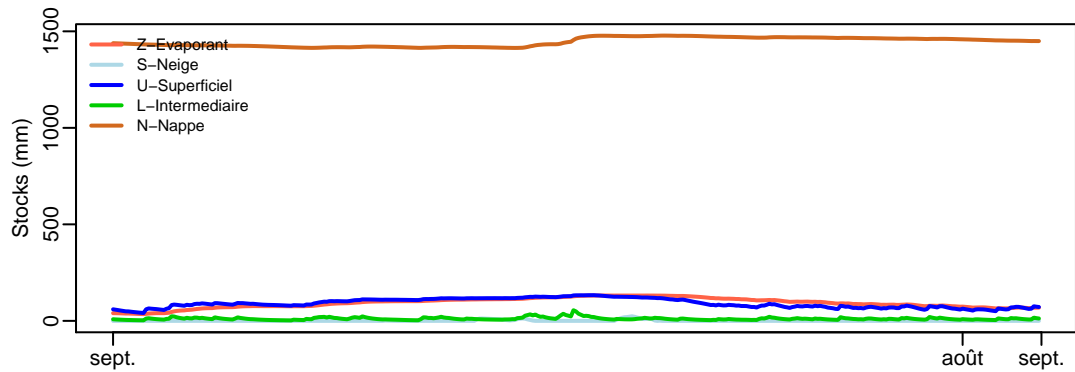

# k2674010 (158.6 km<sup>2</sup>) – année 2007–2008

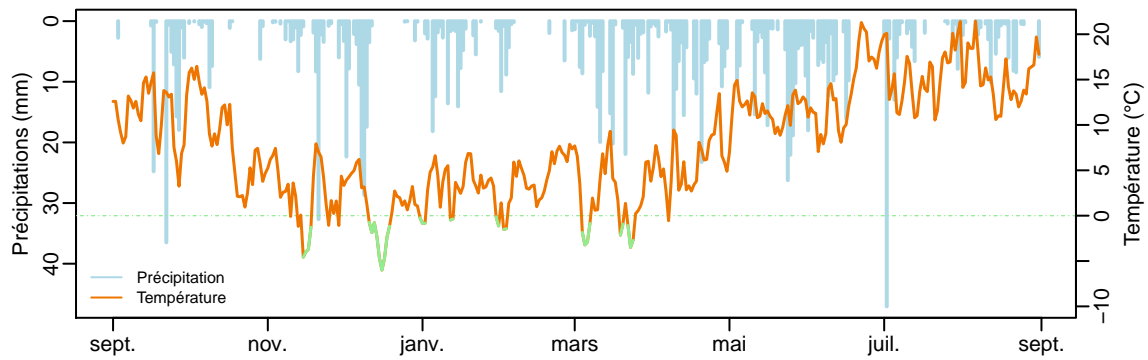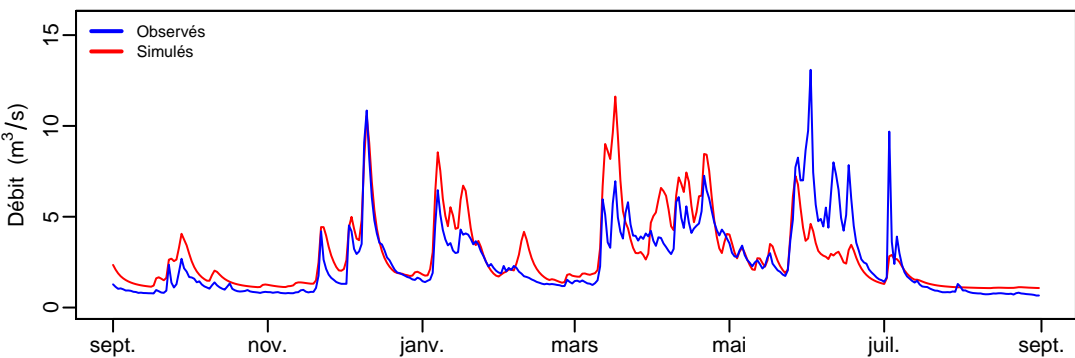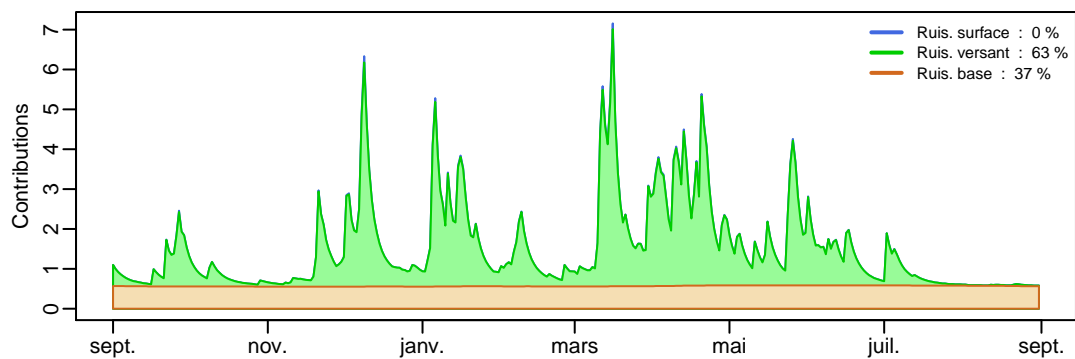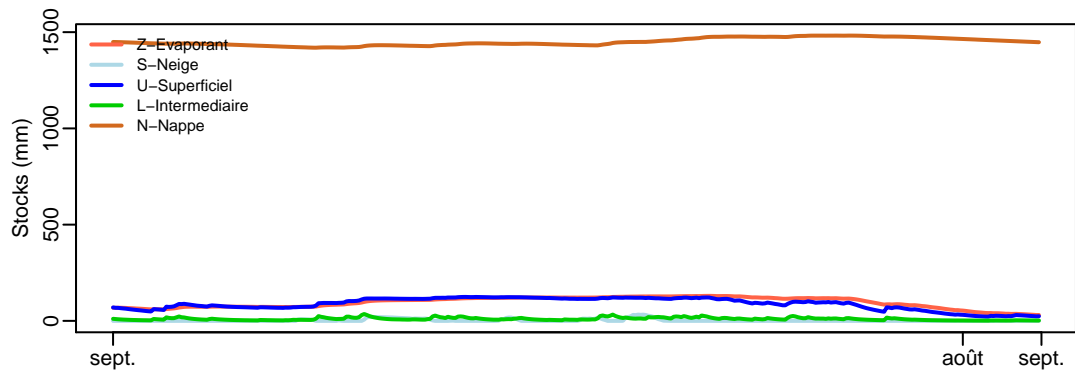

# k2674010 (158.6 km<sup>2</sup>) – année 2008–2009

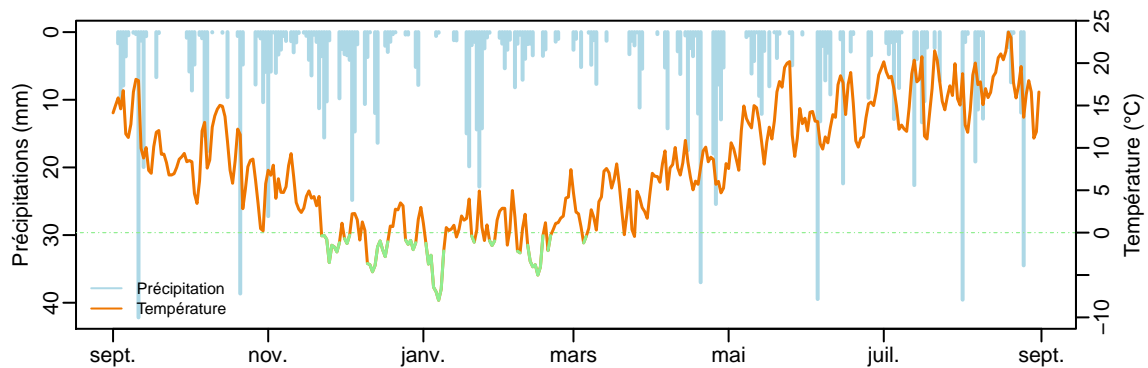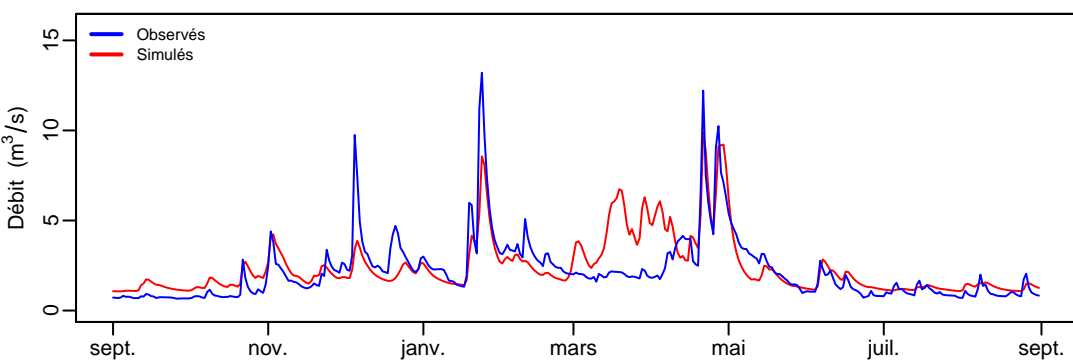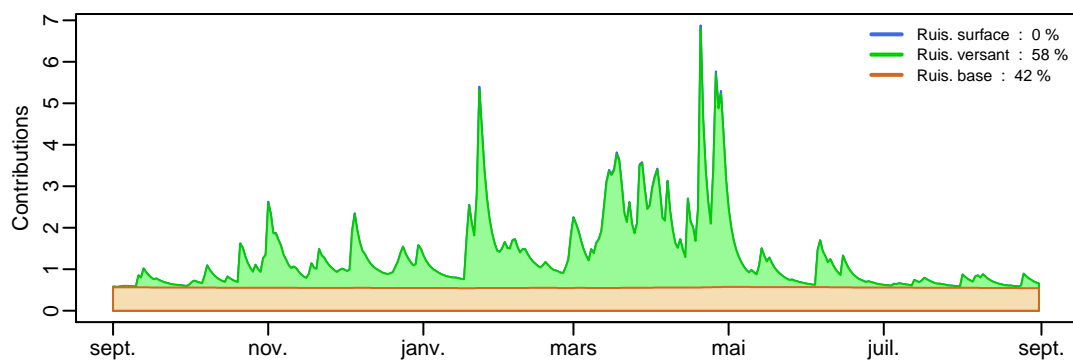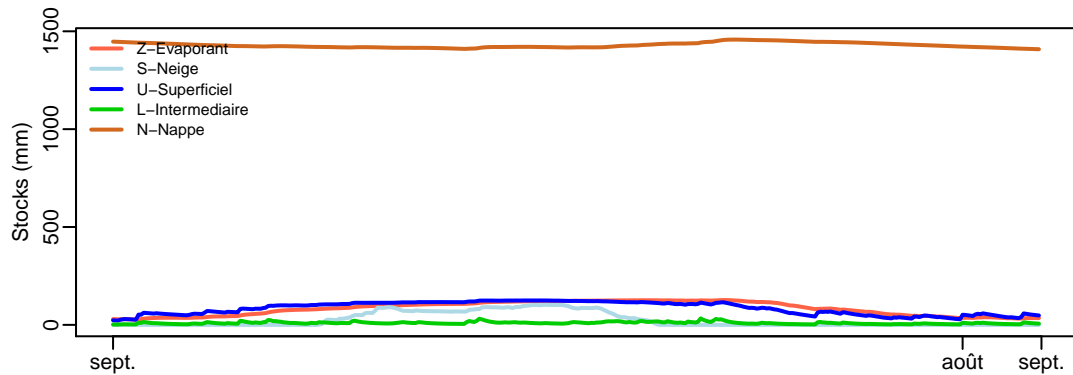

# k2680810 (5394.92 km²) – année 1981–1982

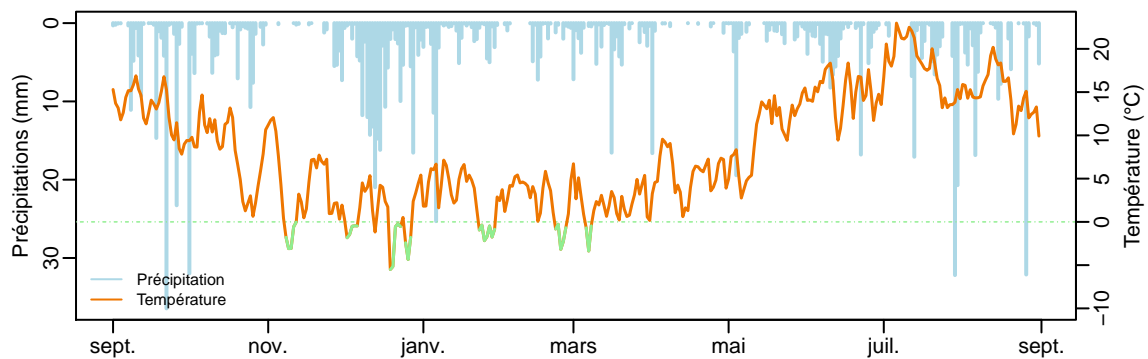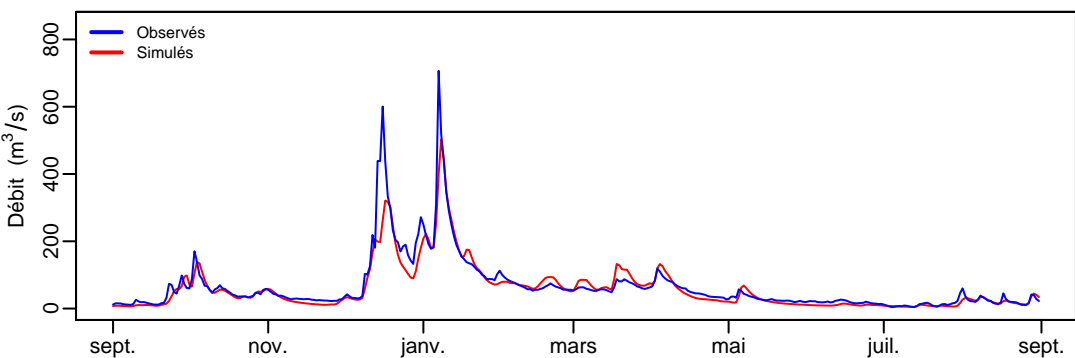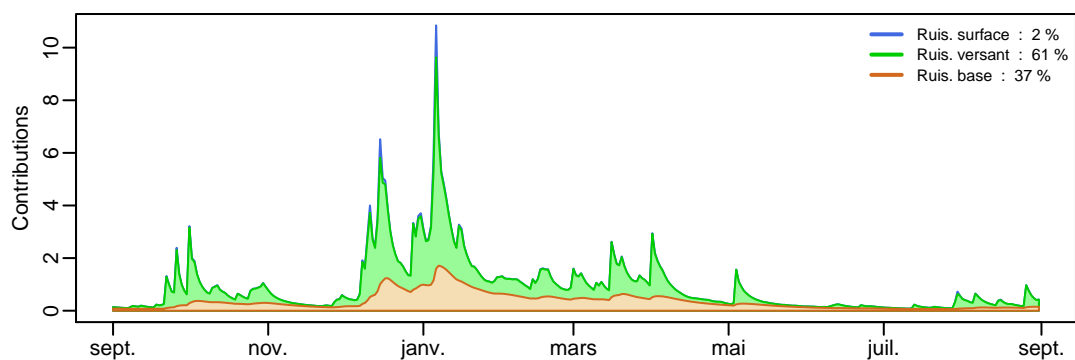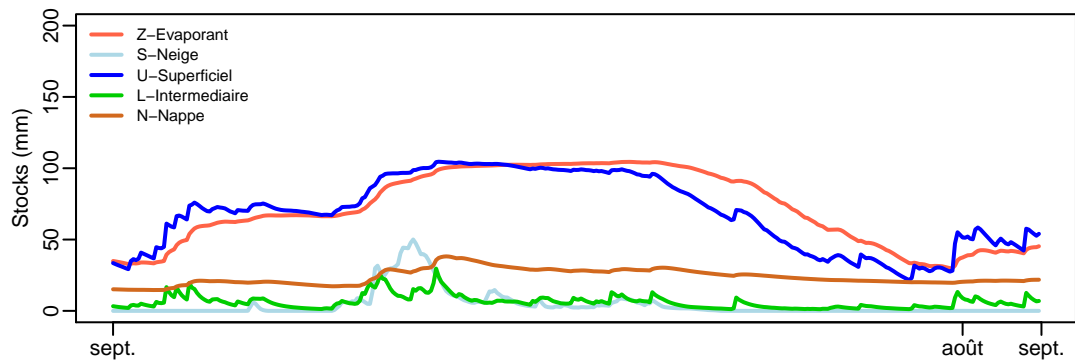



# k2680810 (5394.92 km<sup>2</sup>) – année 1982–1983

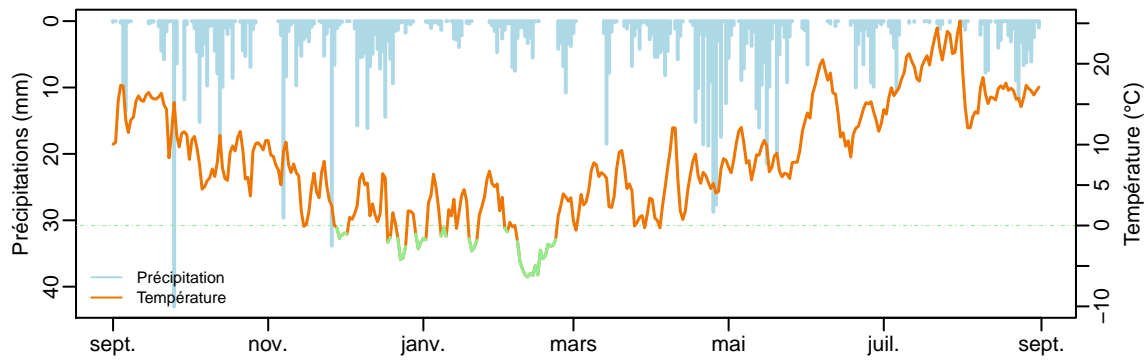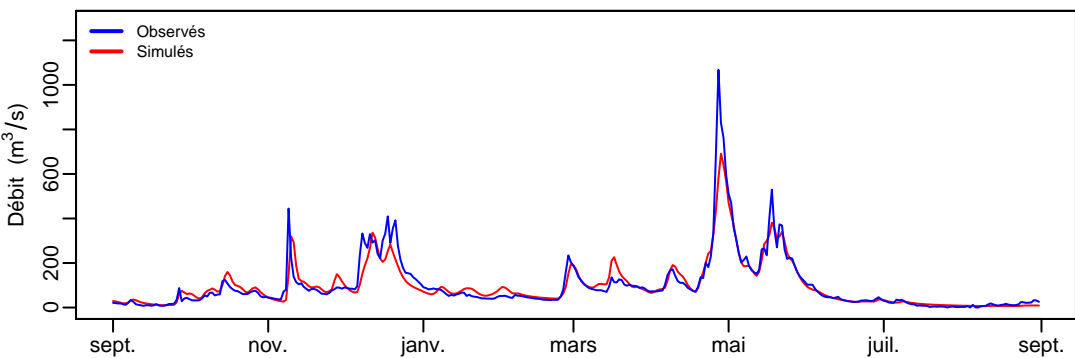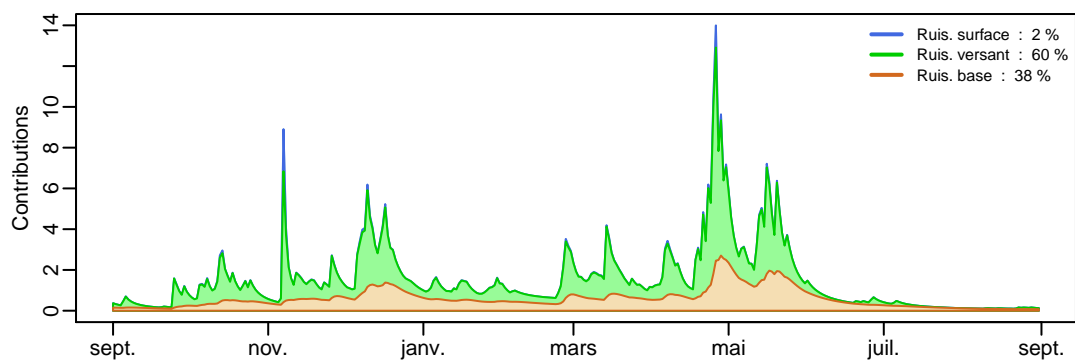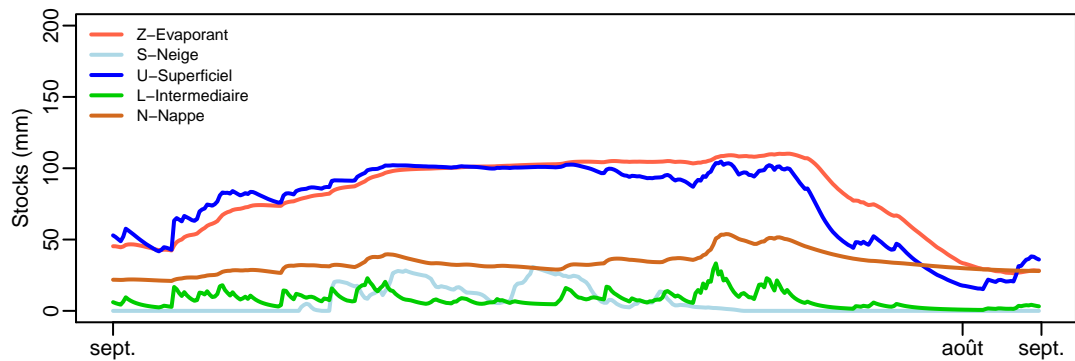

# k2680810 (5394.92 km<sup>2</sup>) – année 1983–1984

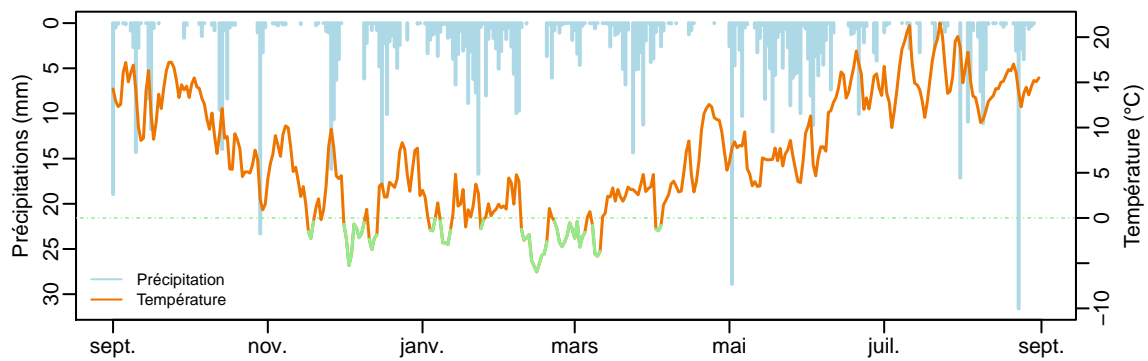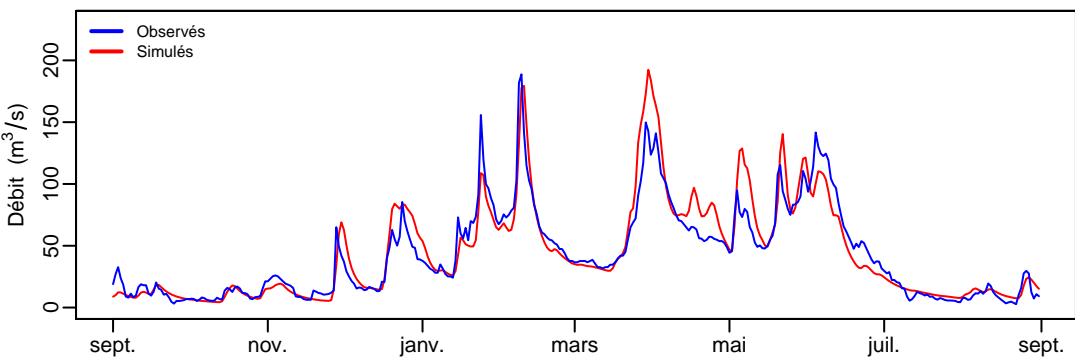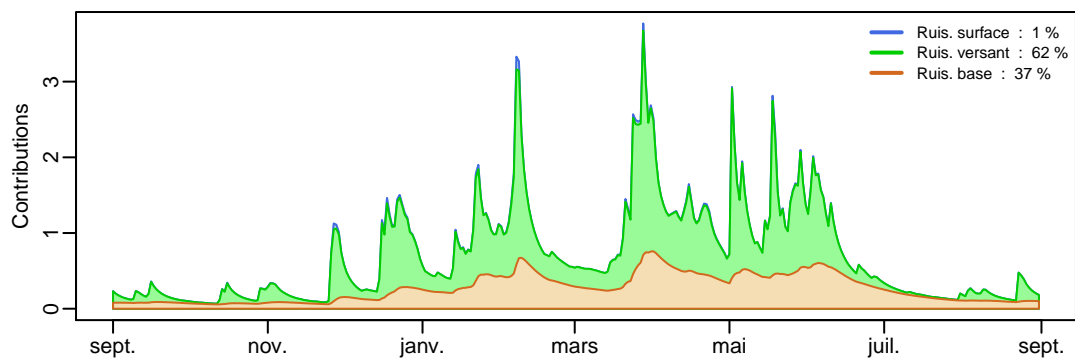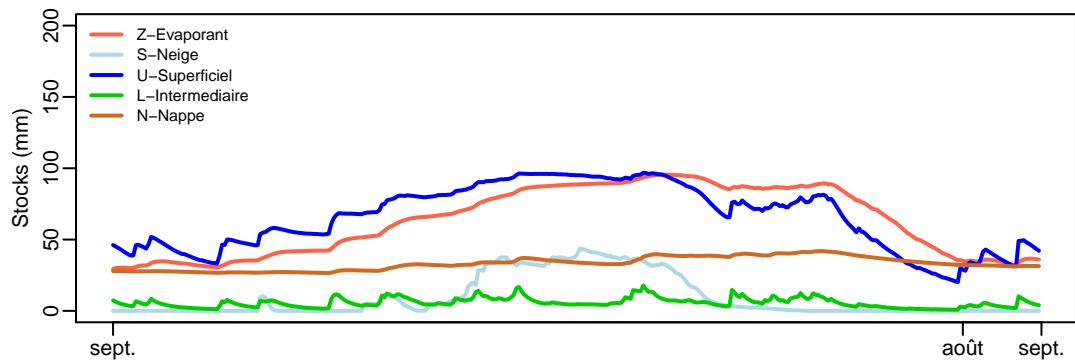

# k2680810 (5394.92 km<sup>2</sup>) – année 1984–1985

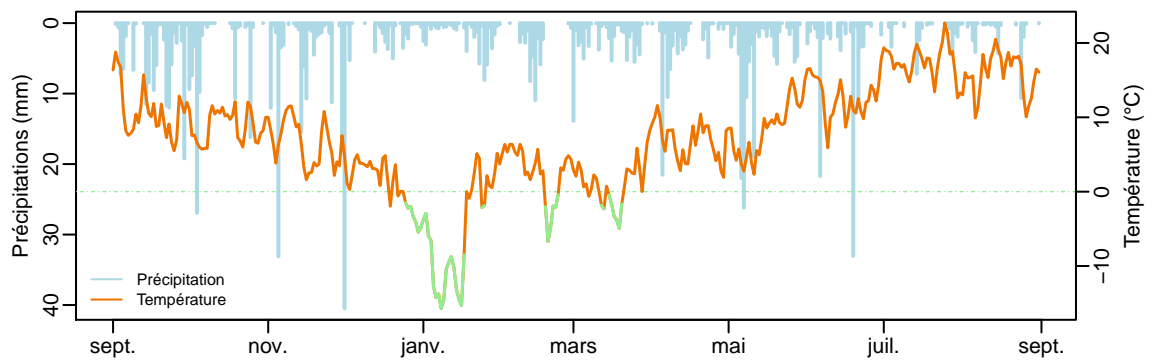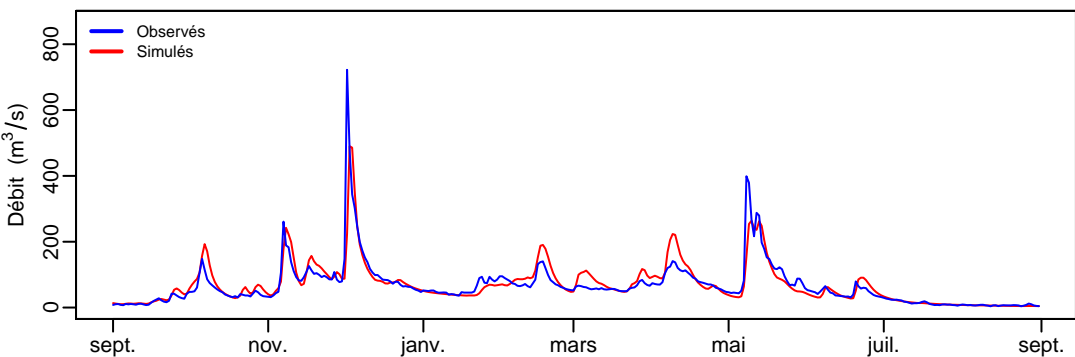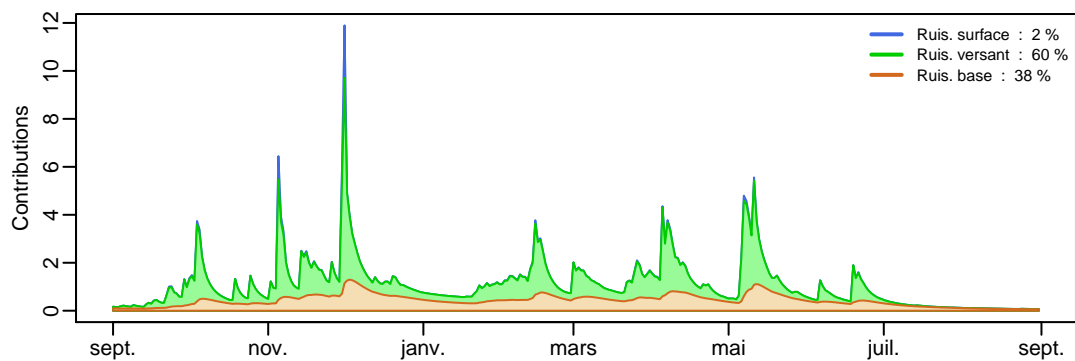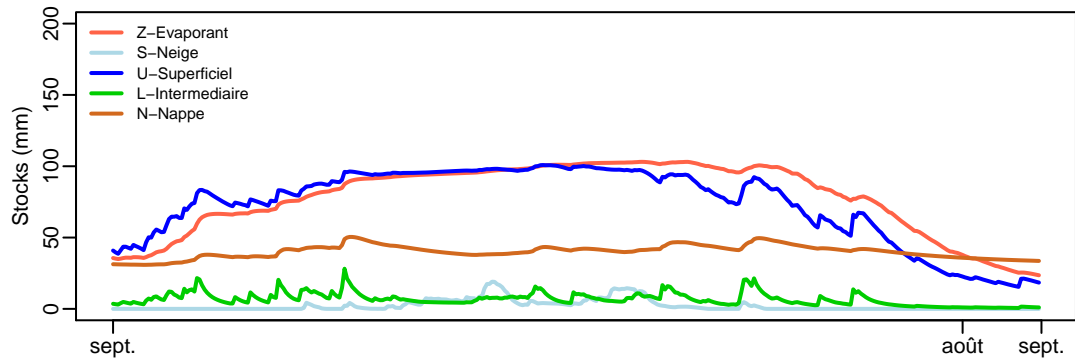

# k2680810 (5394.92 km²) – année 1985–1986

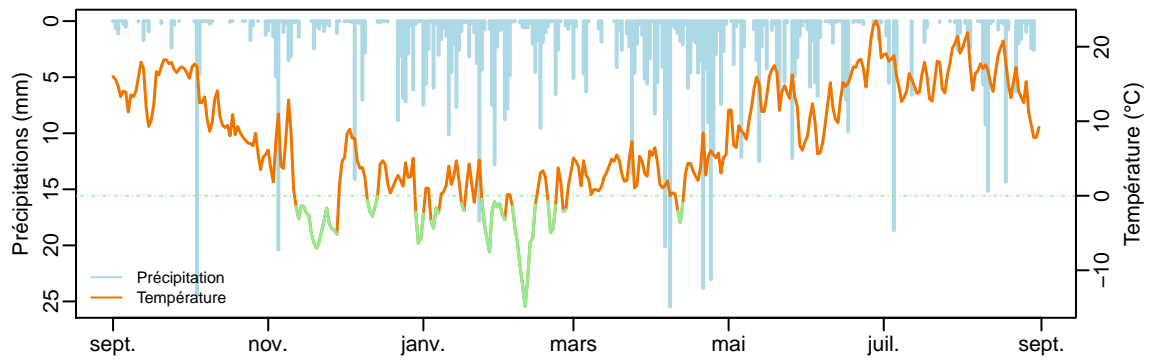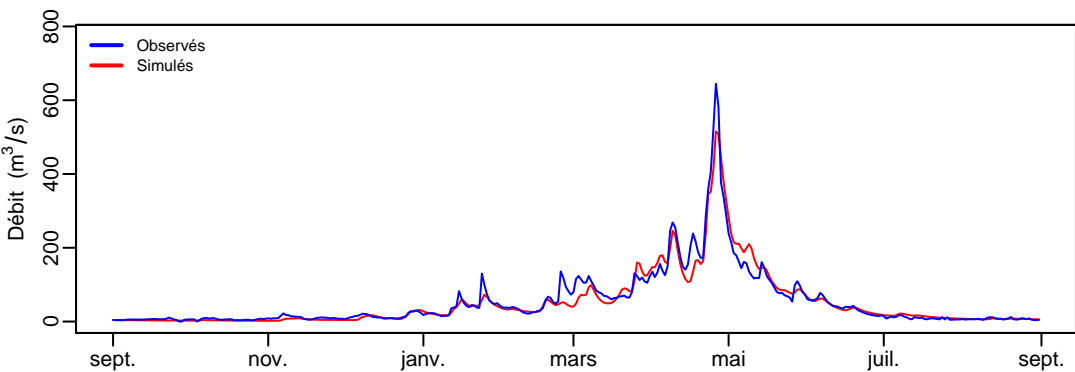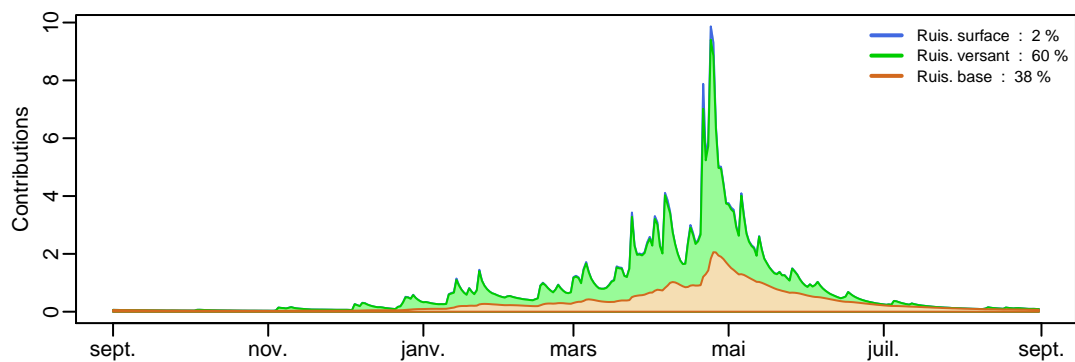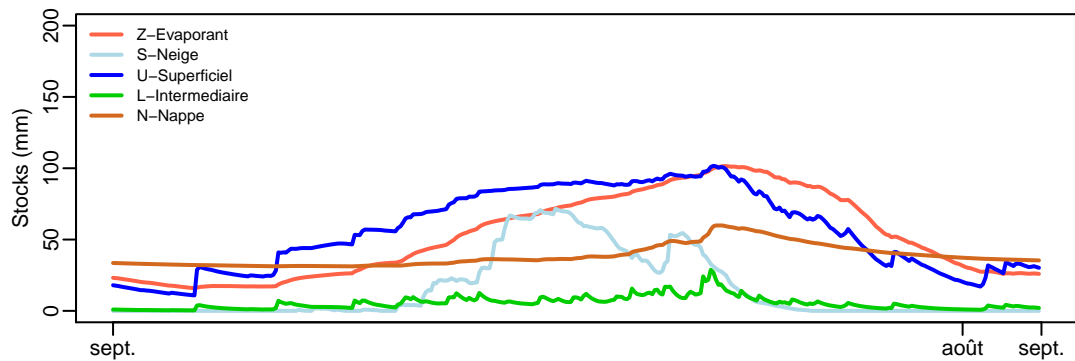

# k2680810 (5394.92 km<sup>2</sup>) – année 1986–1987

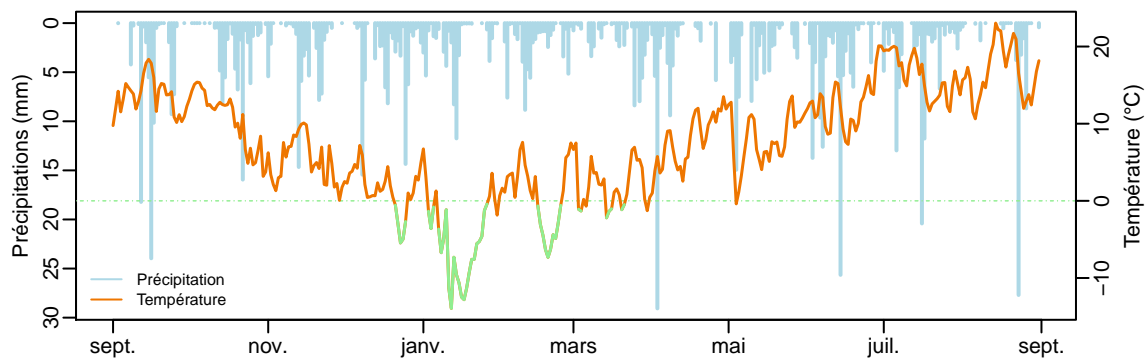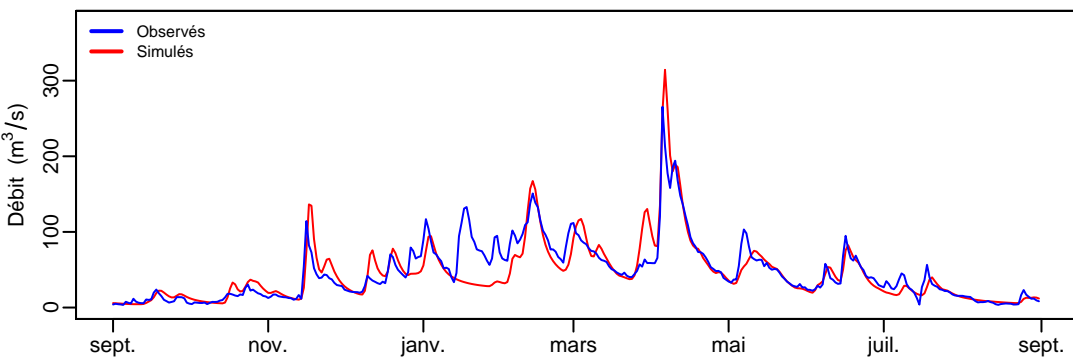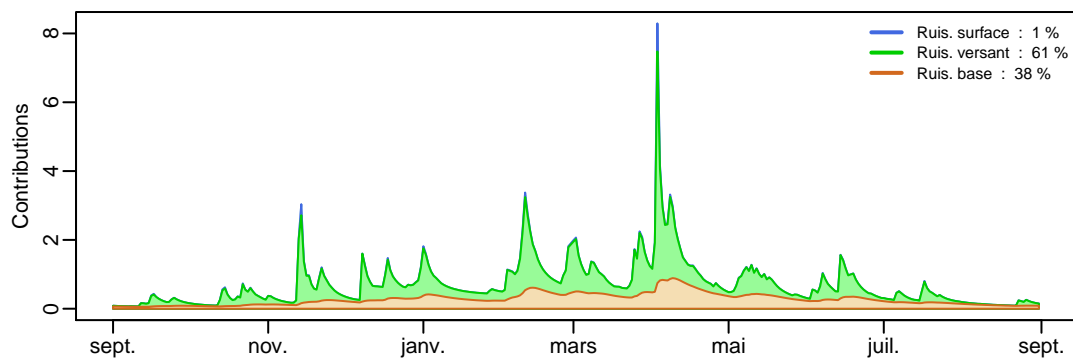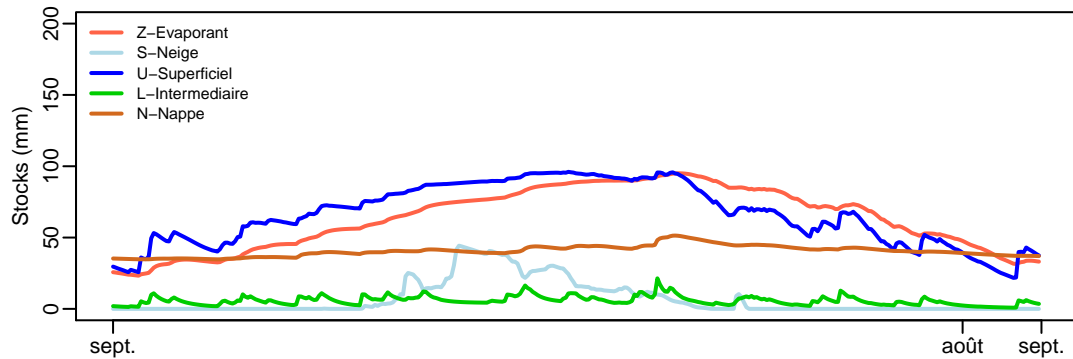

# k2680810 (5394.92 km<sup>2</sup>) – année 1987–1988

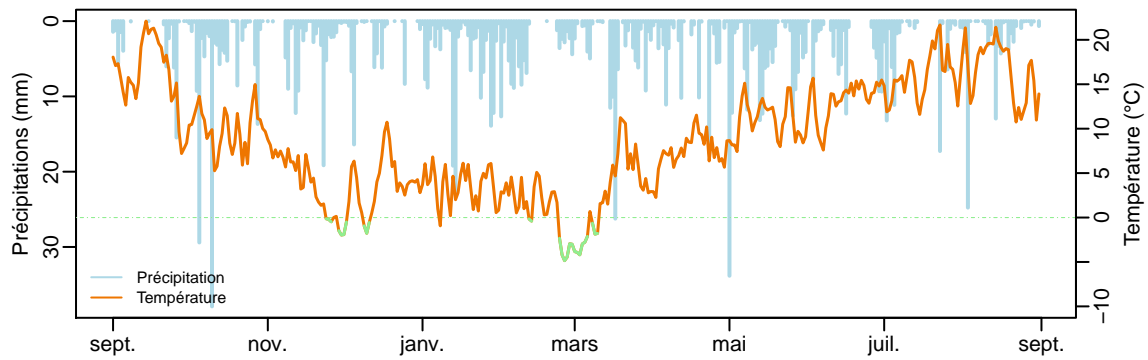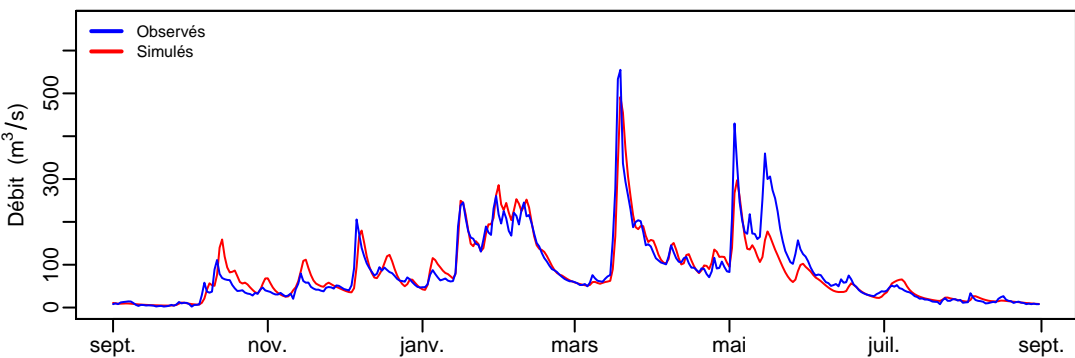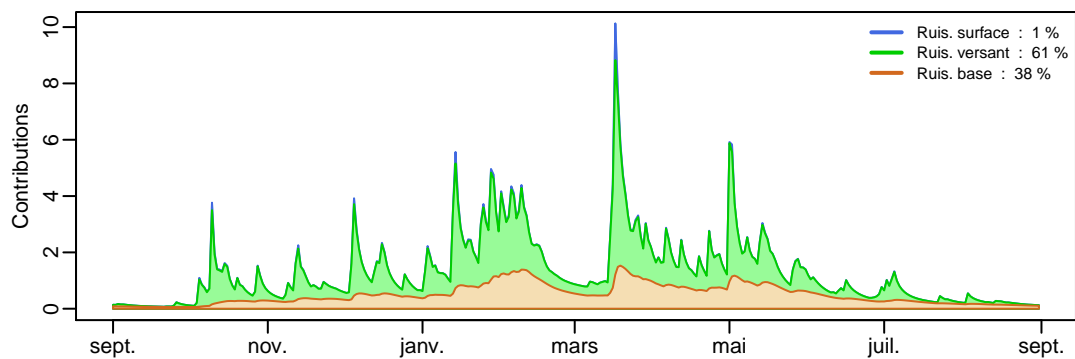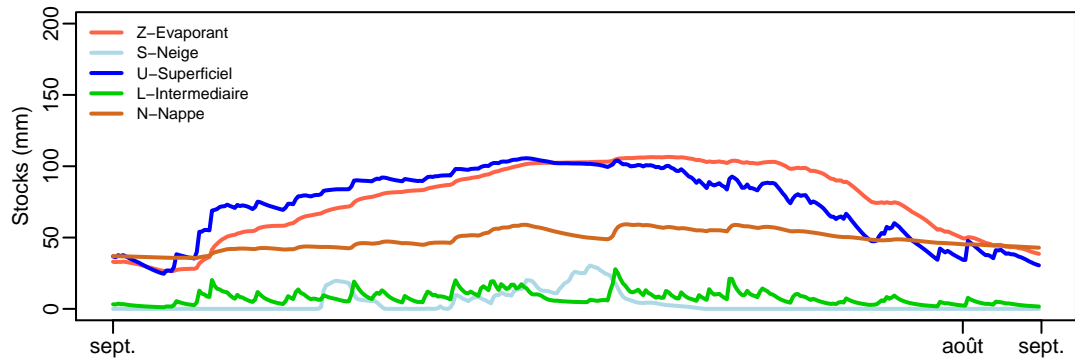

# k2680810 (5394.92 km²) – année 1988–1989

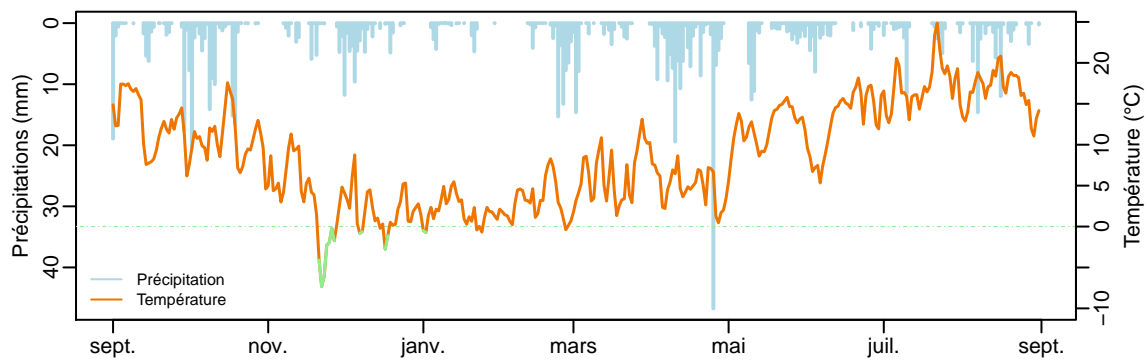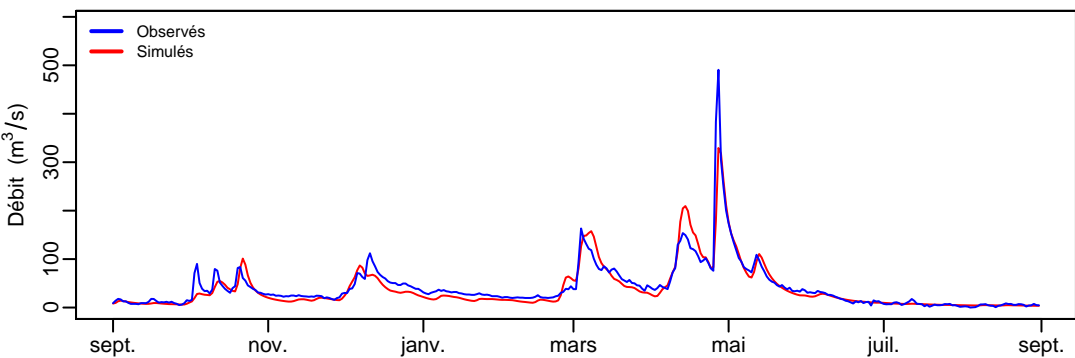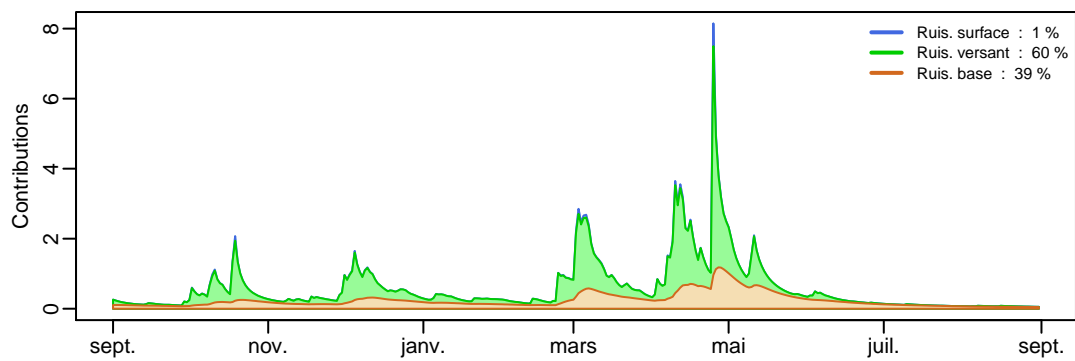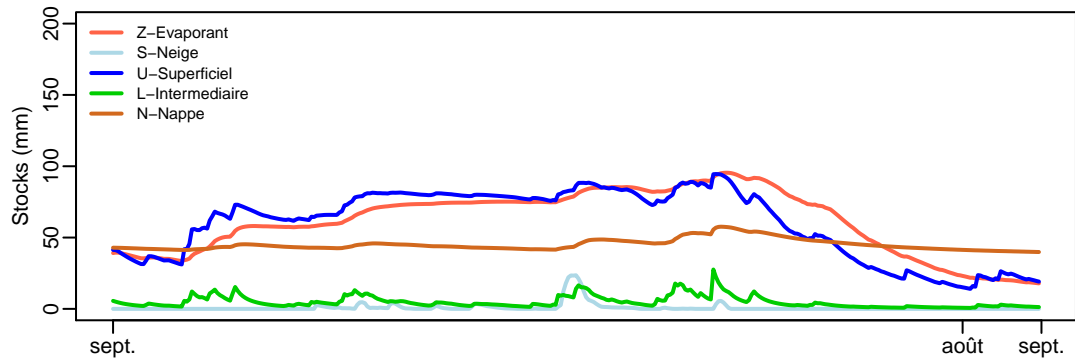

# k2680810 (5394.92 km<sup>2</sup>) – année 1989–1990

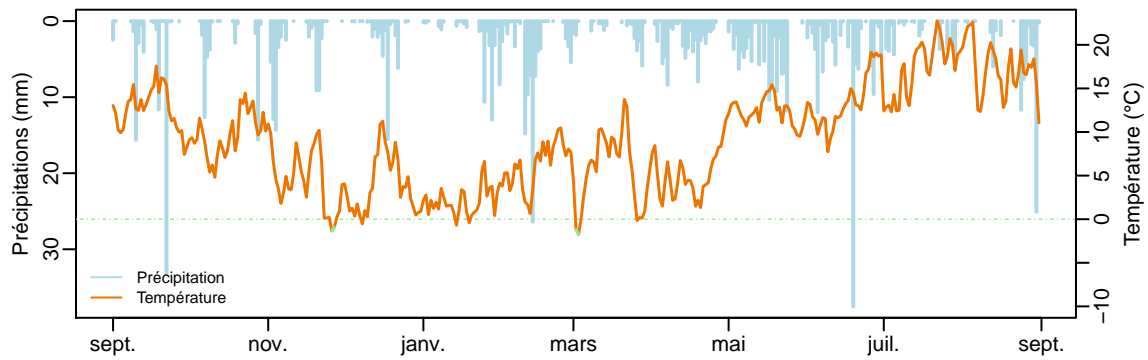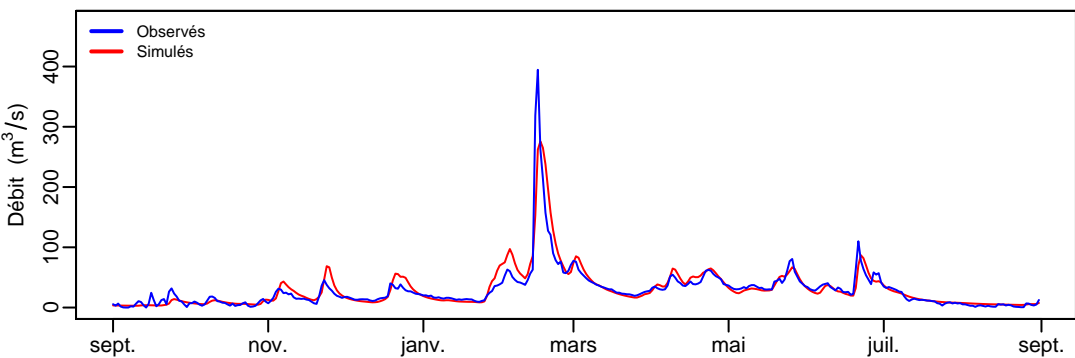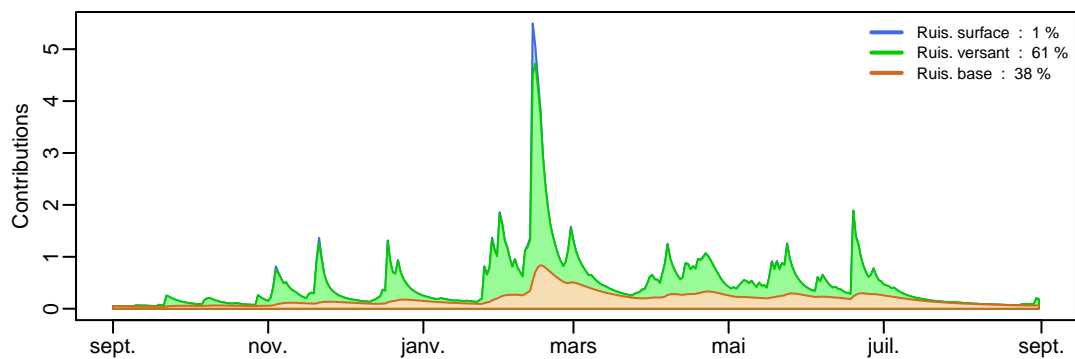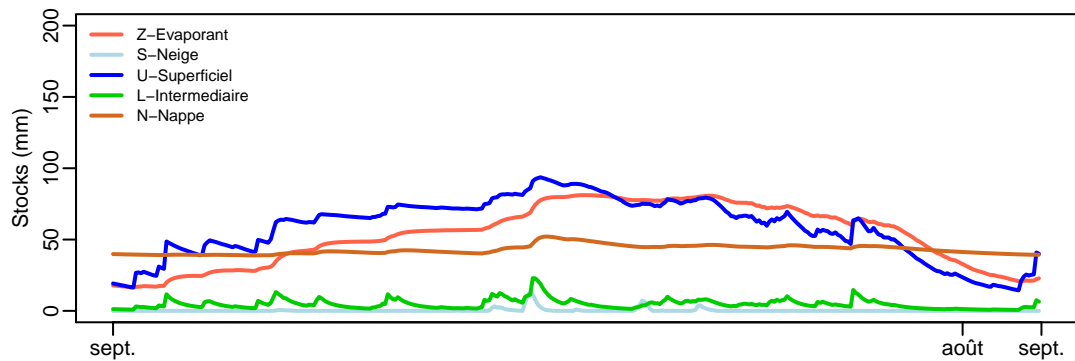



# k2680810 (5394.92 km<sup>2</sup>) – année 1990–1991

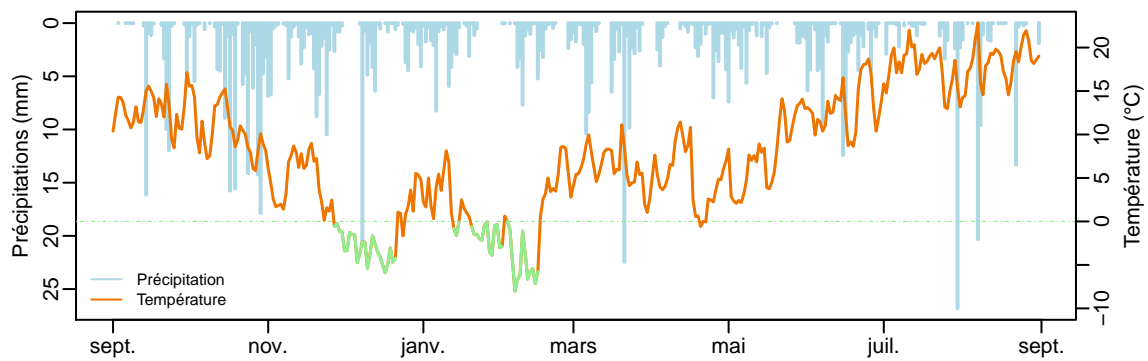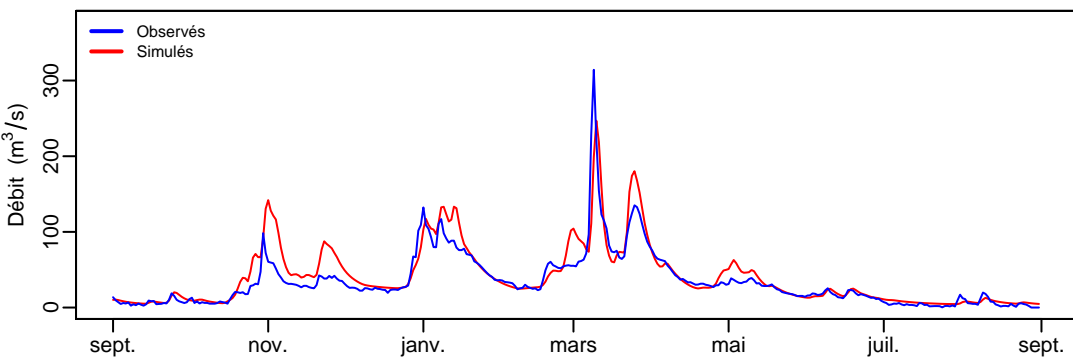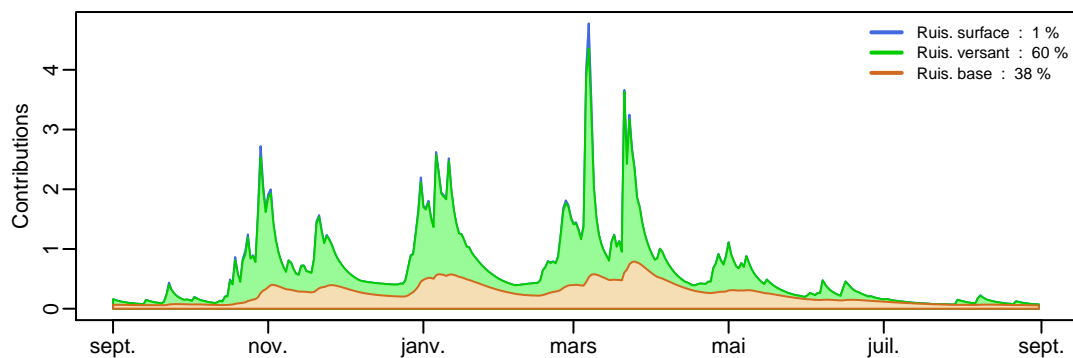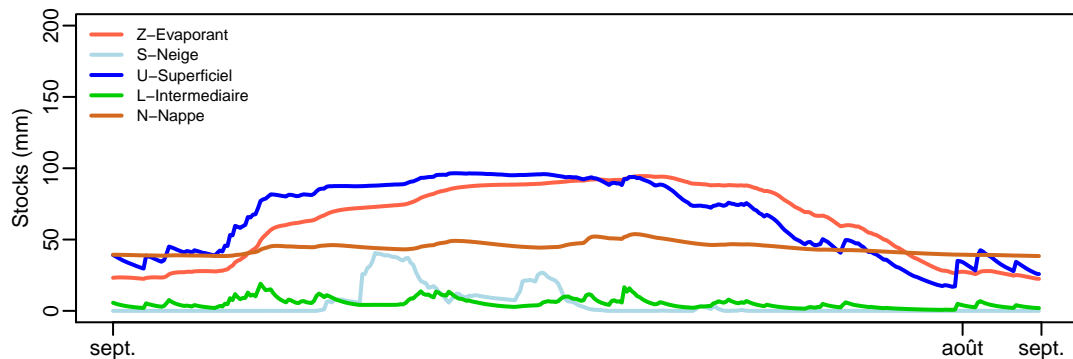

# k2680810 (5394.92 km²) – année 1991–1992

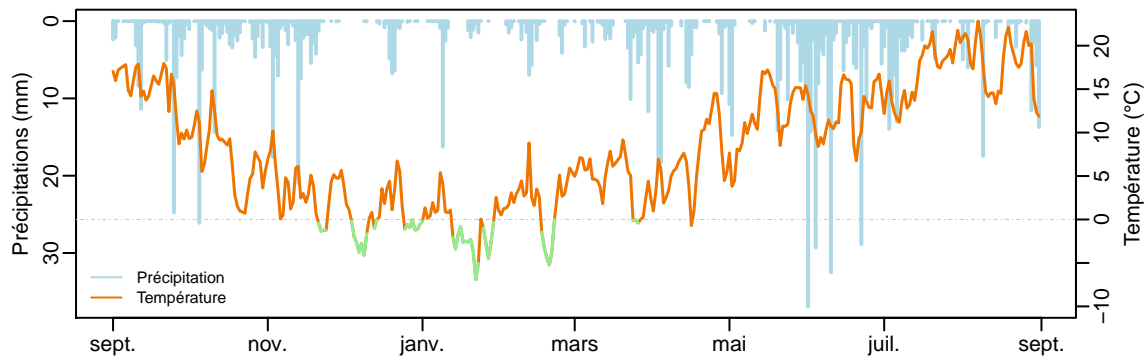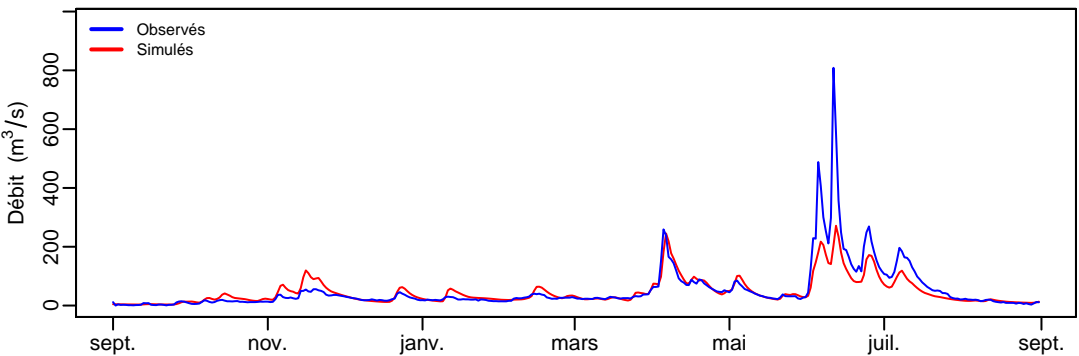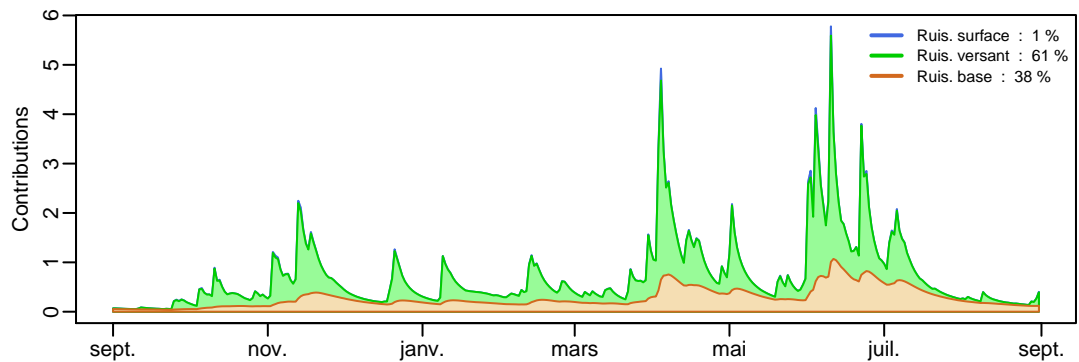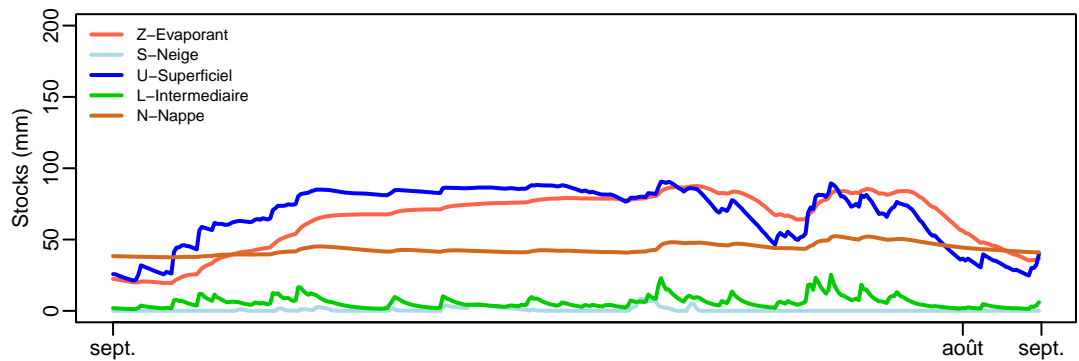

# k2680810 (5394.92 km<sup>2</sup>) – année 1992–1993

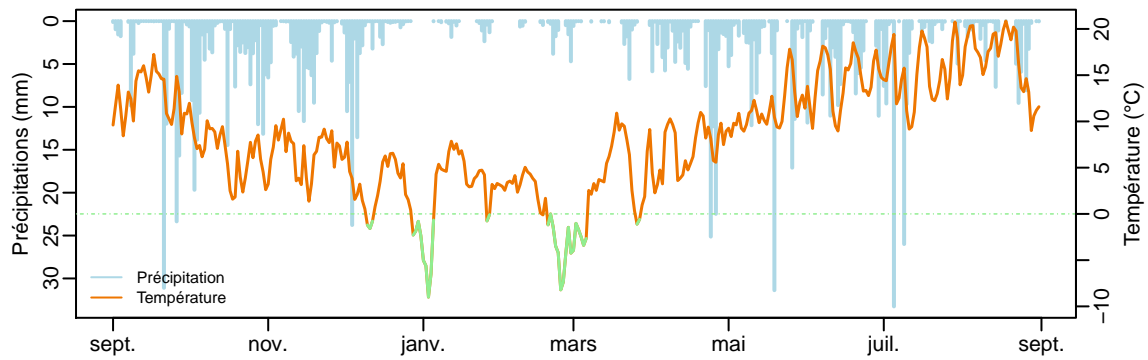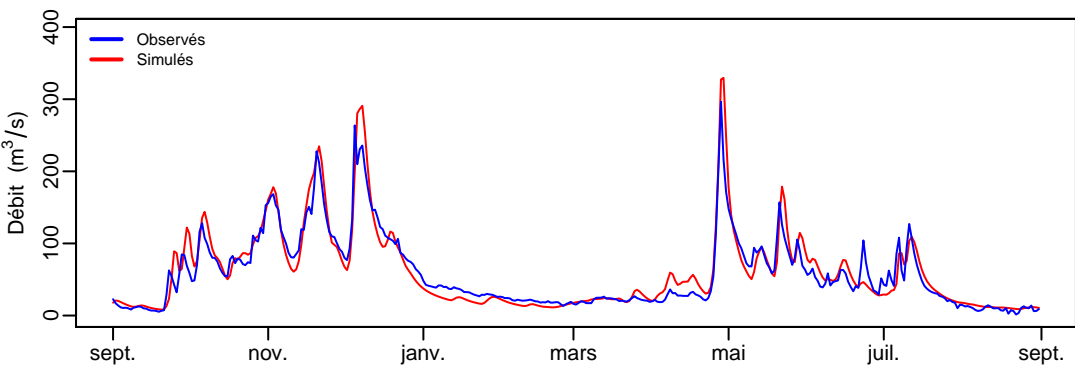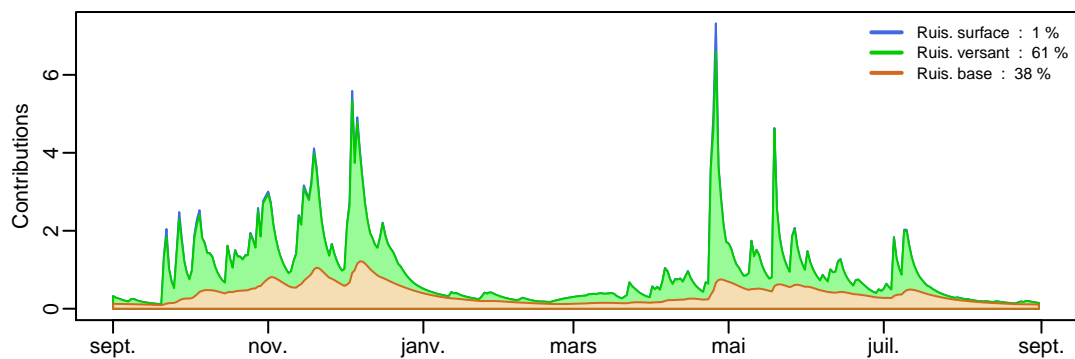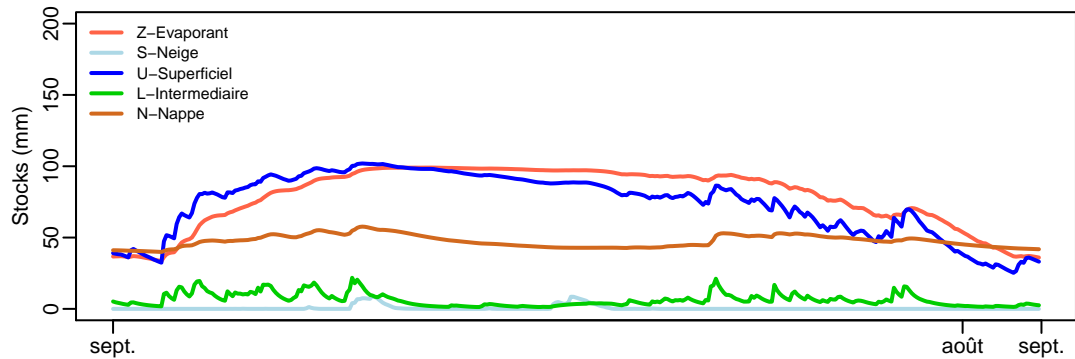

# k2680810 (5394.92 km<sup>2</sup>) – année 1993–1994

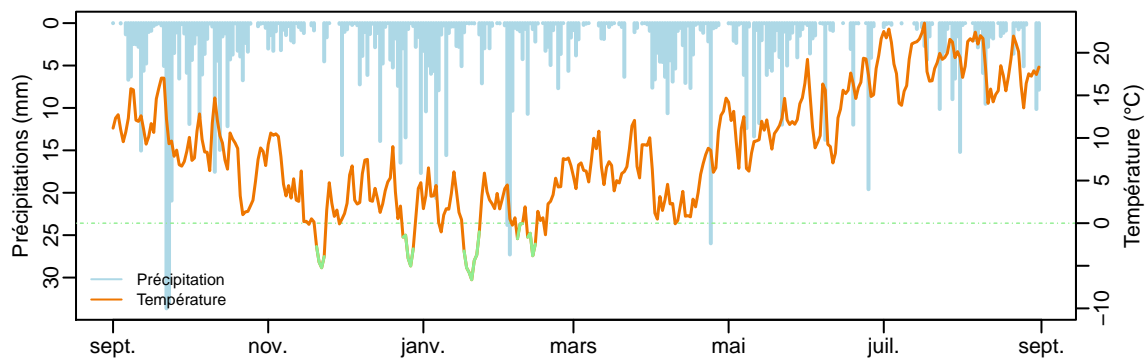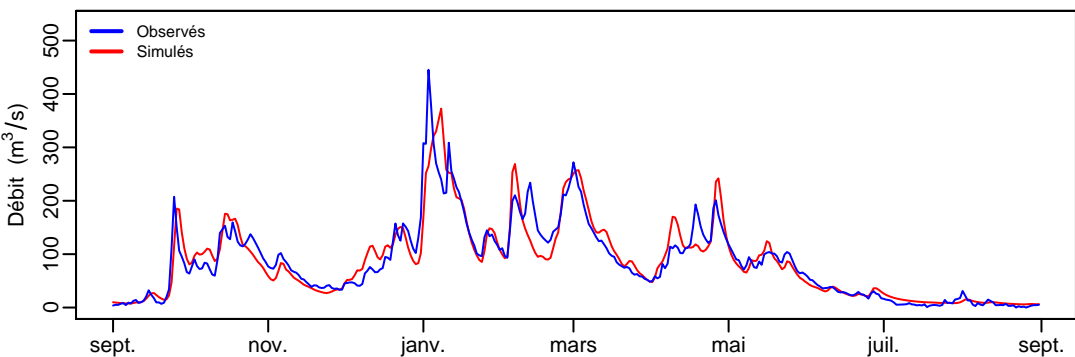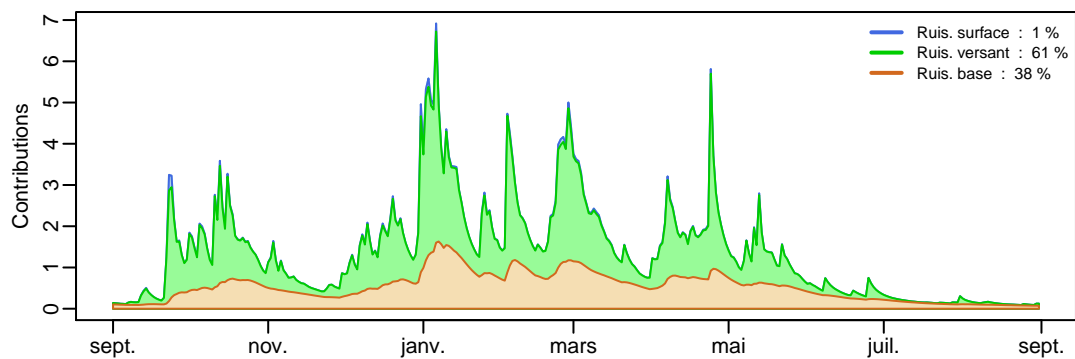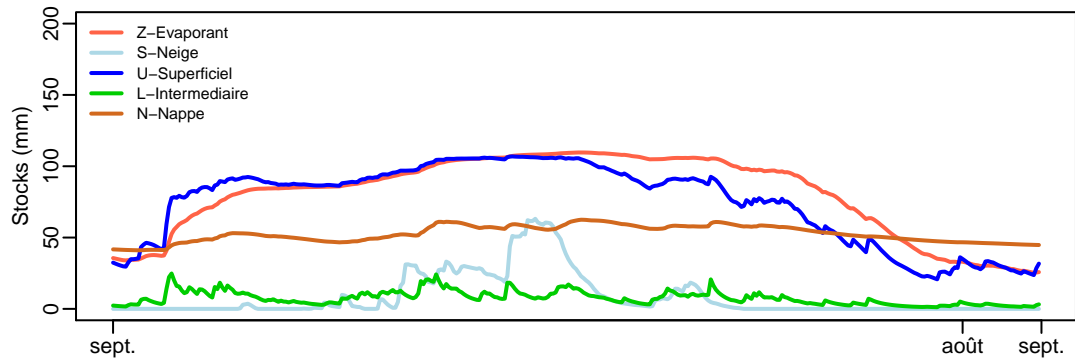

# k2680810 (5394.92 km²) – année 1994–1995

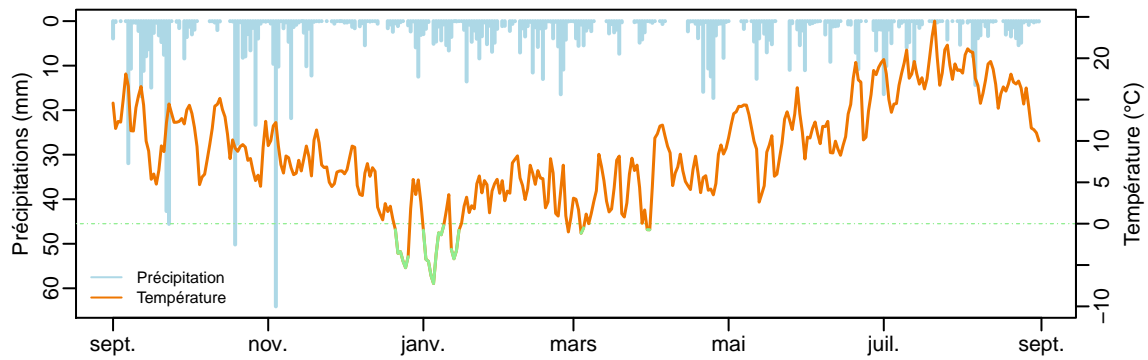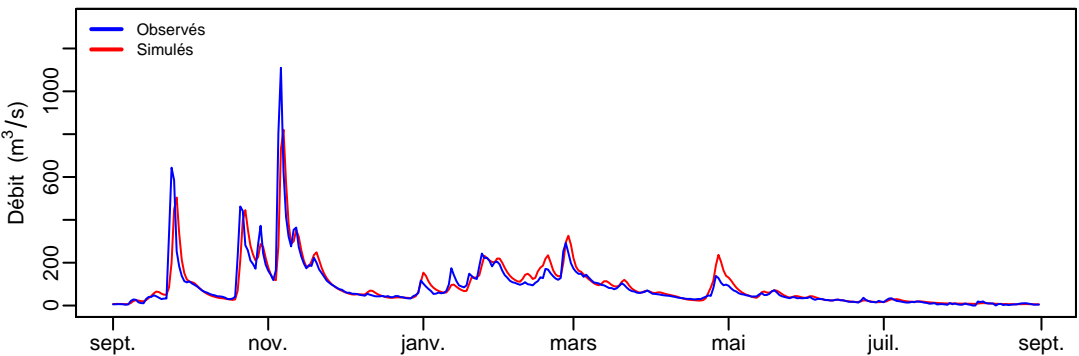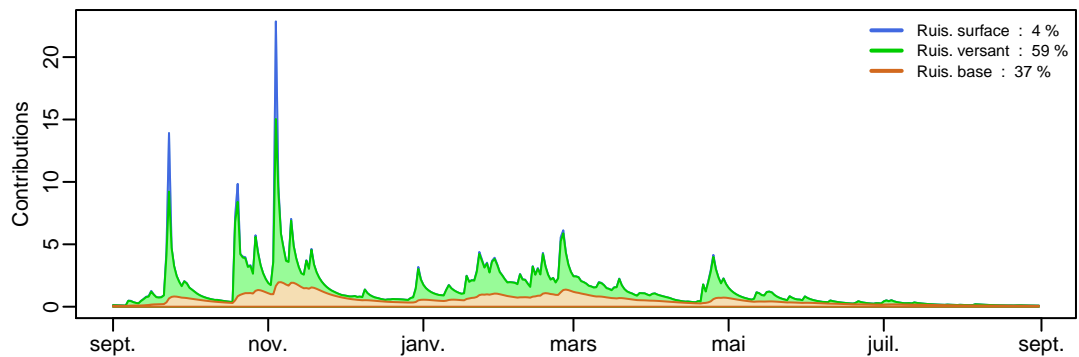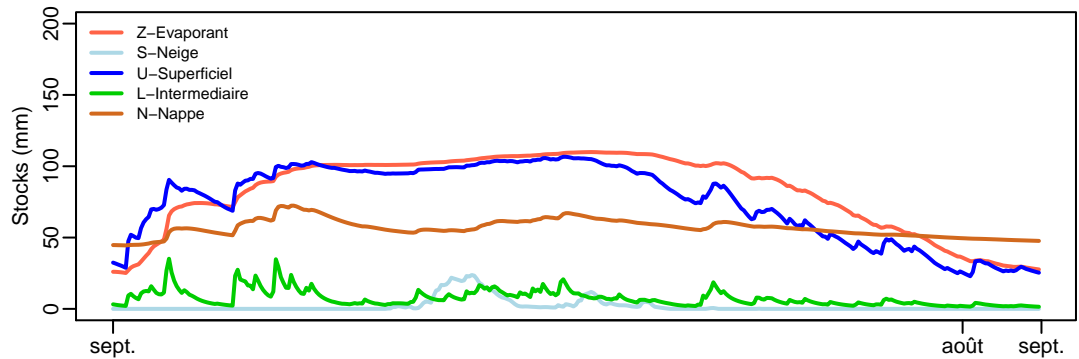

# k2680810 (5394.92 km<sup>2</sup>) – année 1995–1996

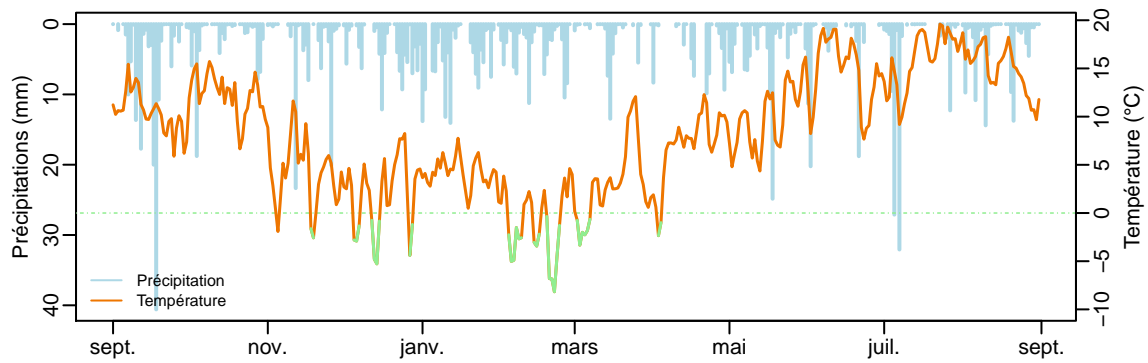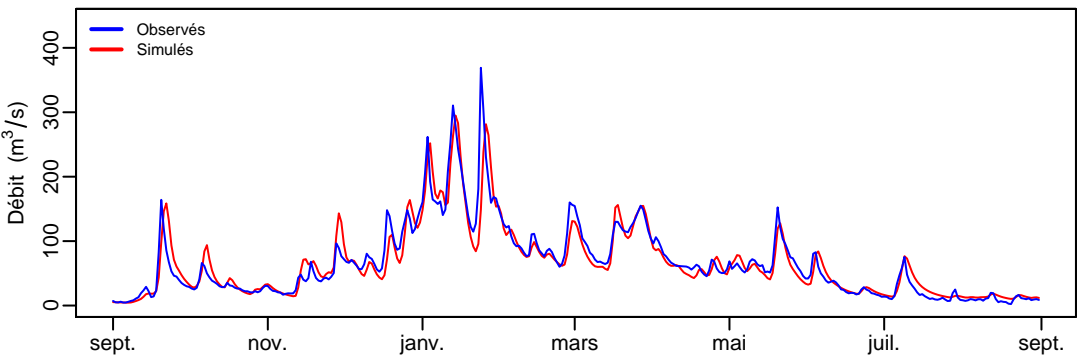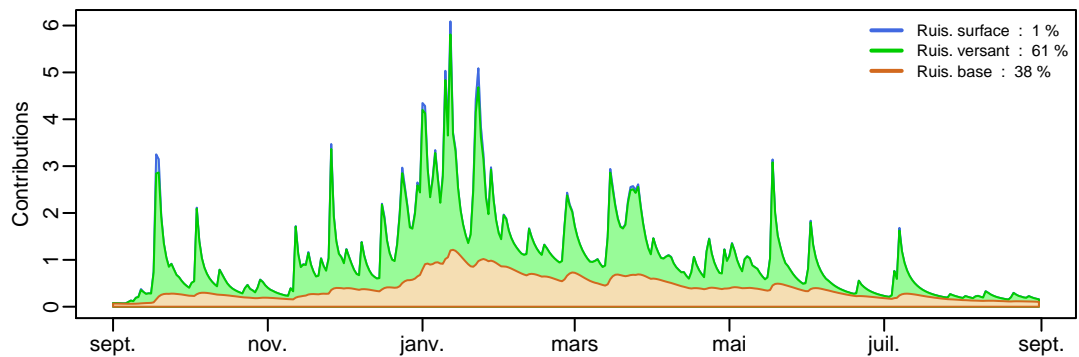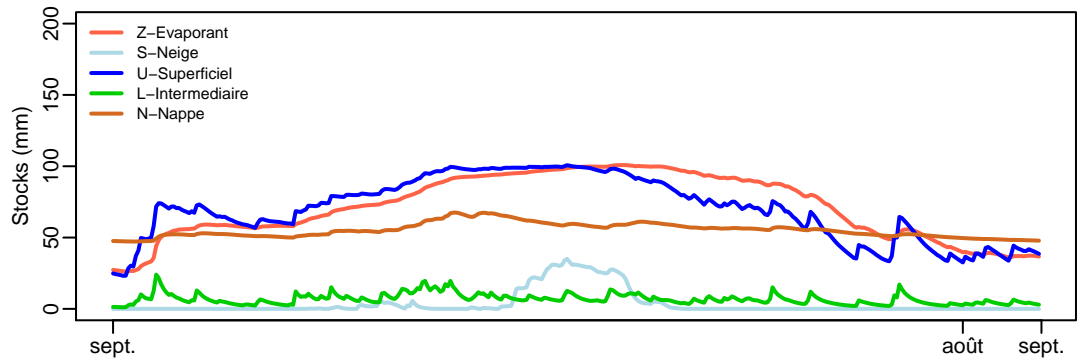

# k2680810 (5394.92 km²) – année 1996–1997

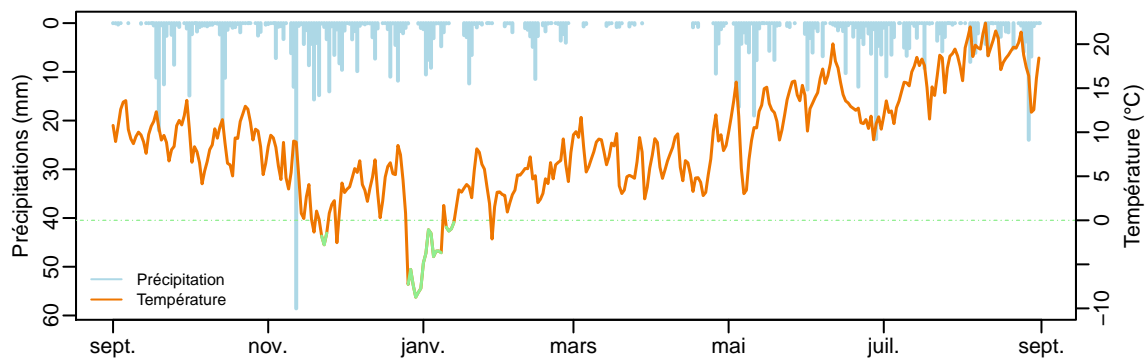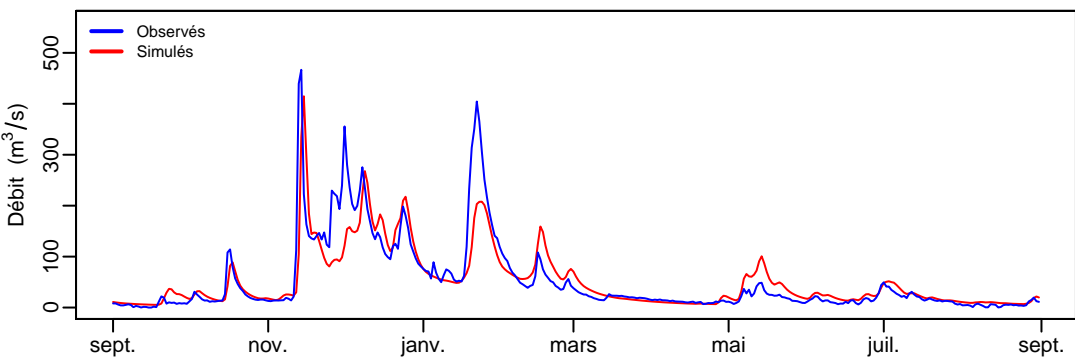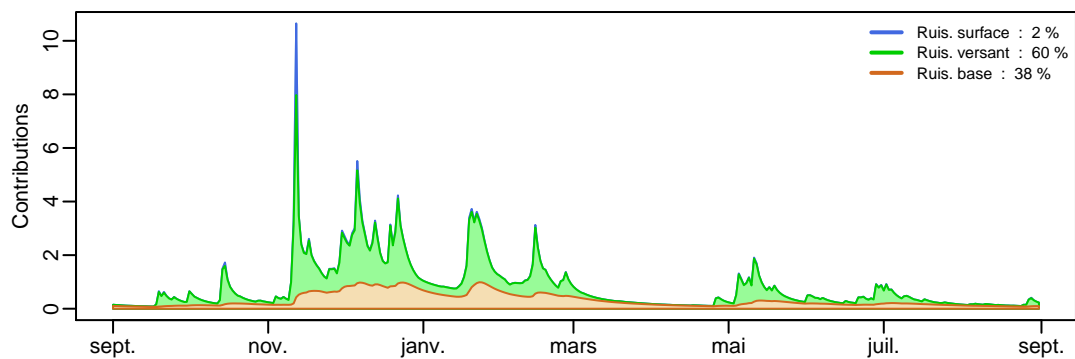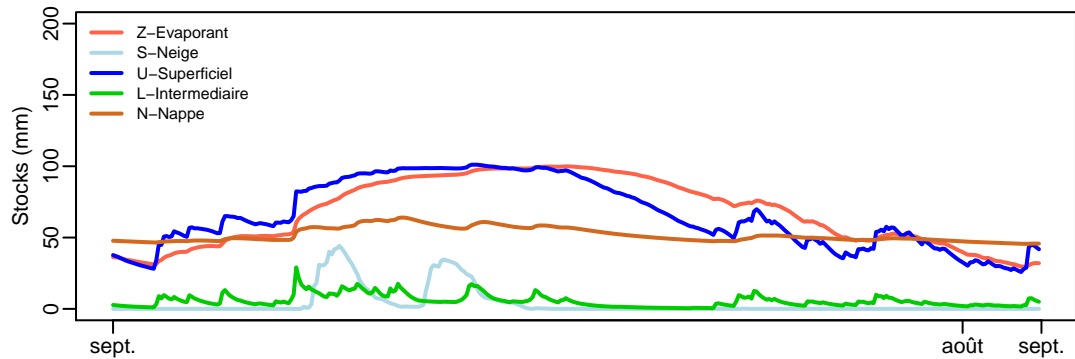

# k2680810 (5394.92 km²) – année 1997–1998

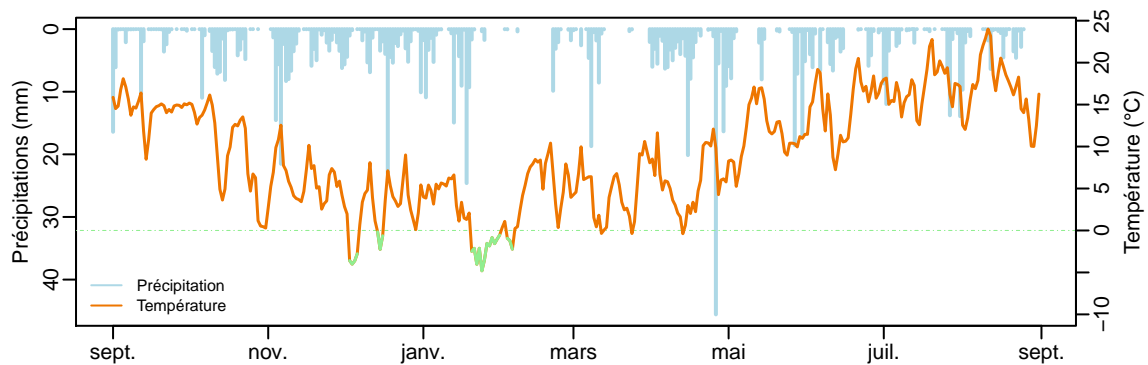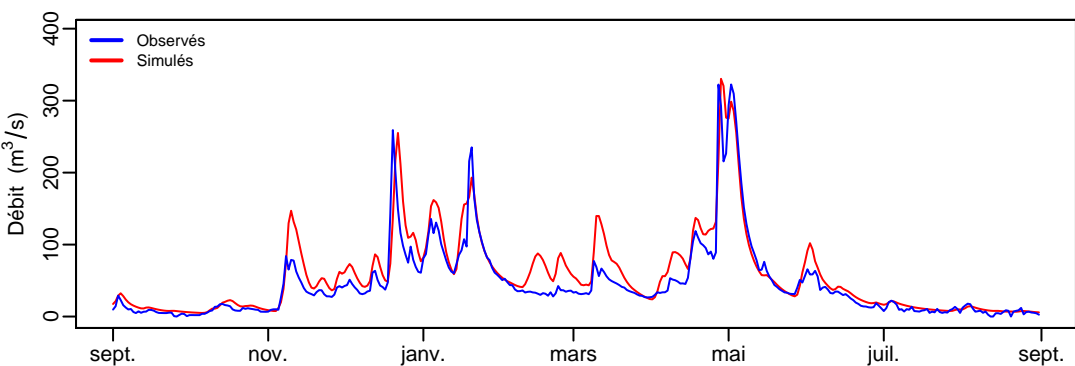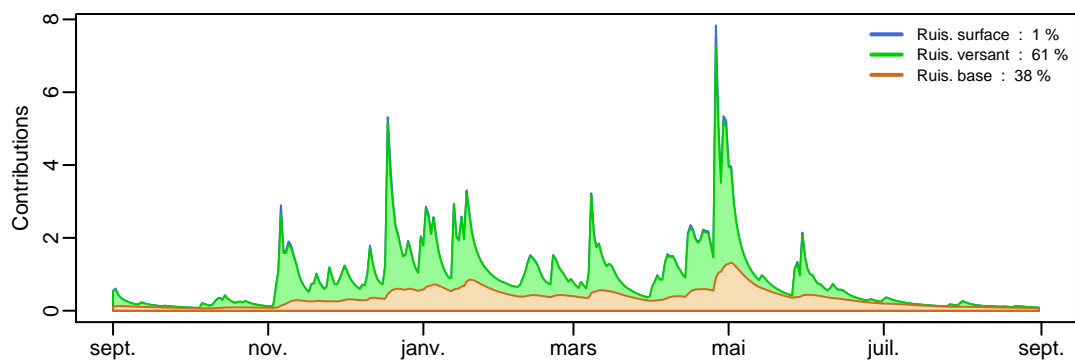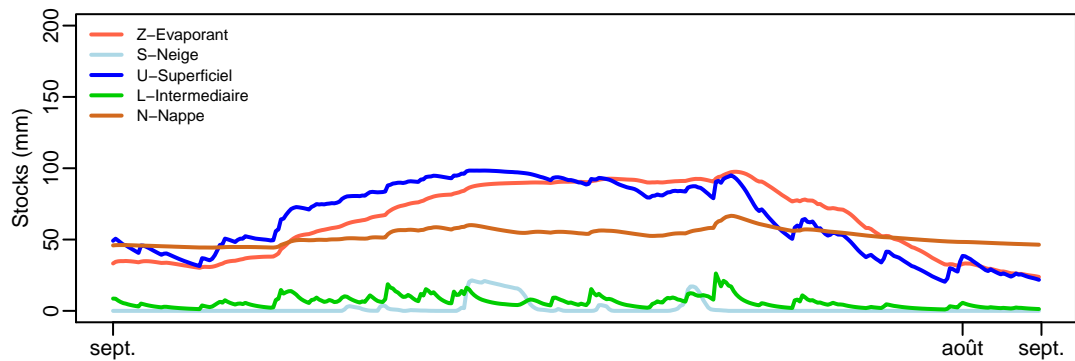



# k2680810 (5394.92 km²) – année 1998–1999

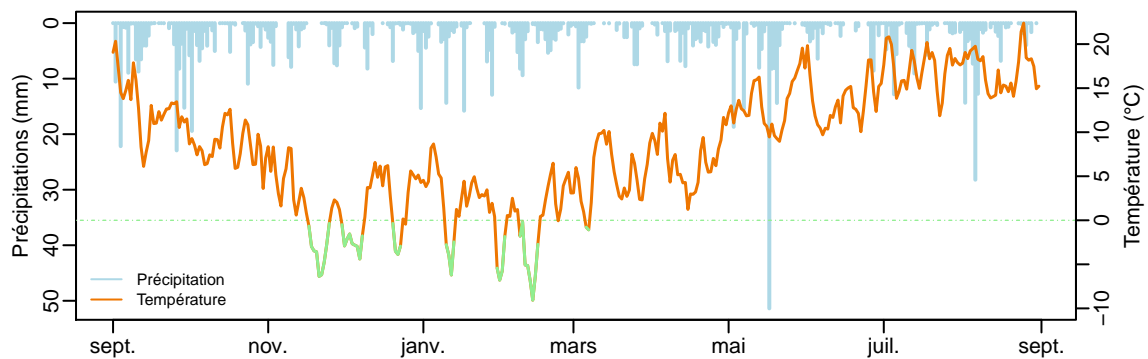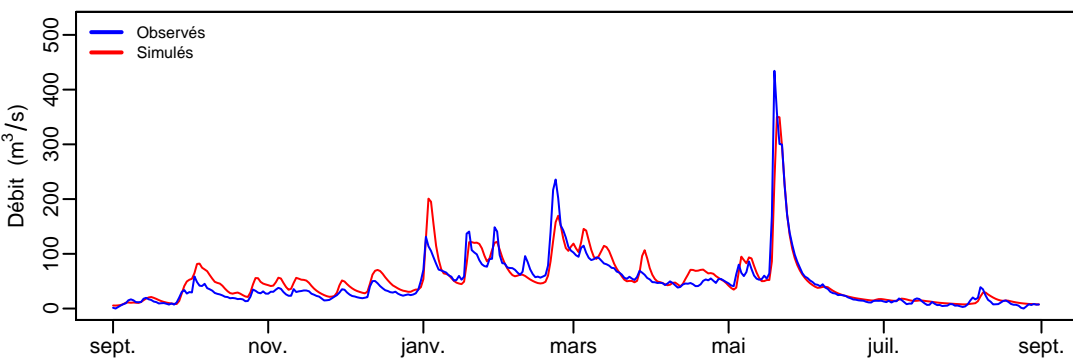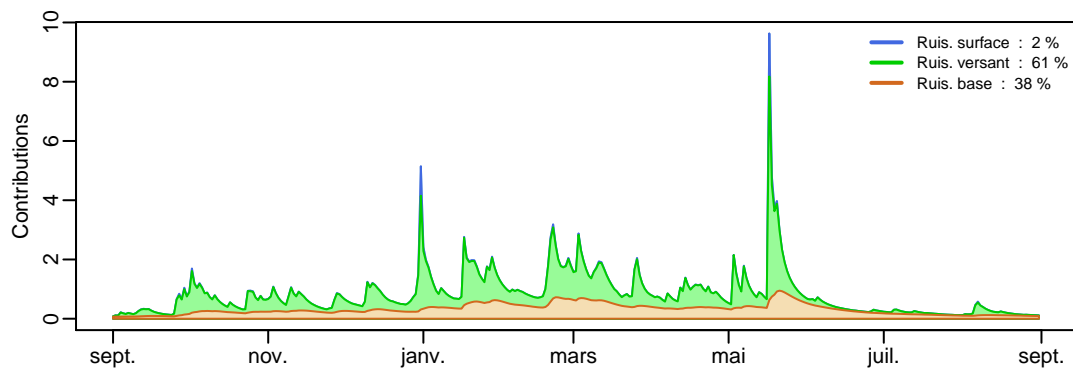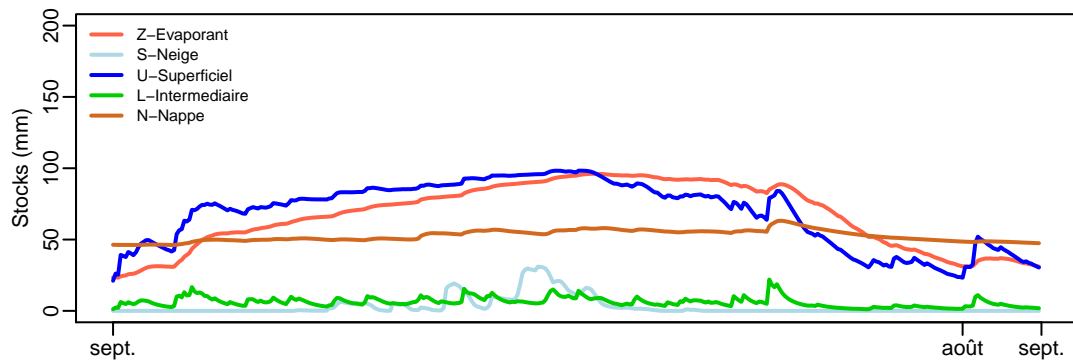

# k2680810 (5394.92 km<sup>2</sup>) – année 1999–2000

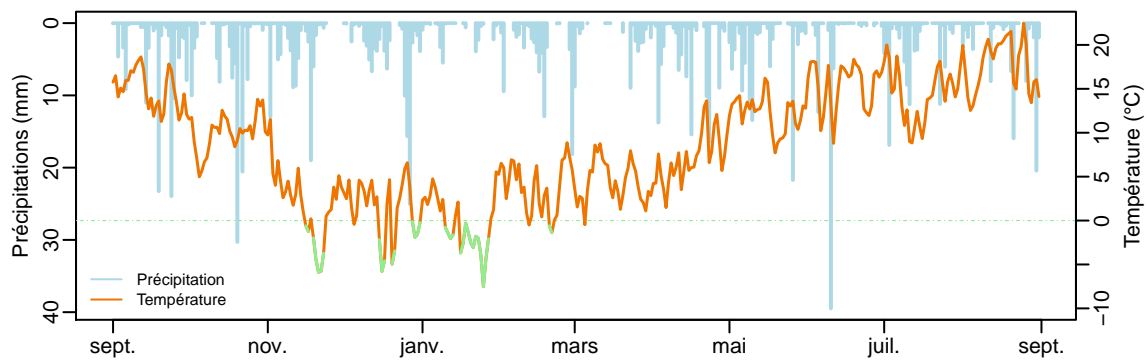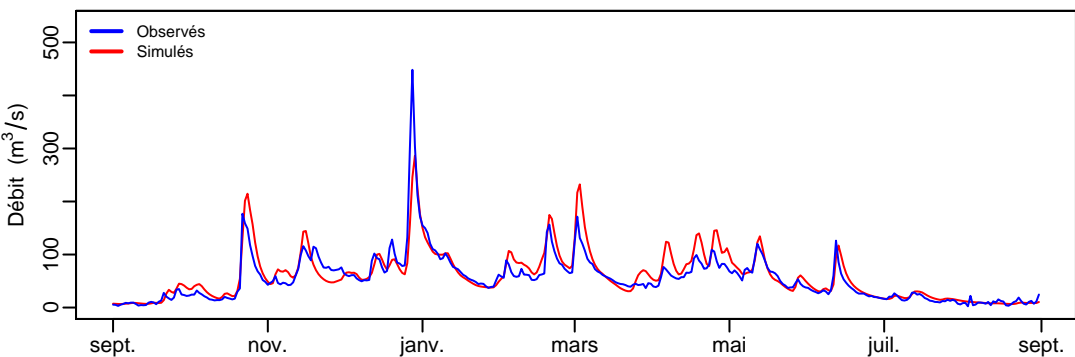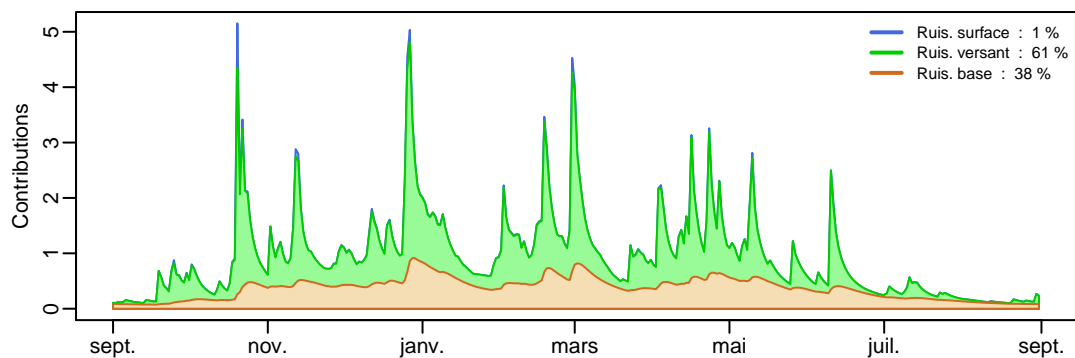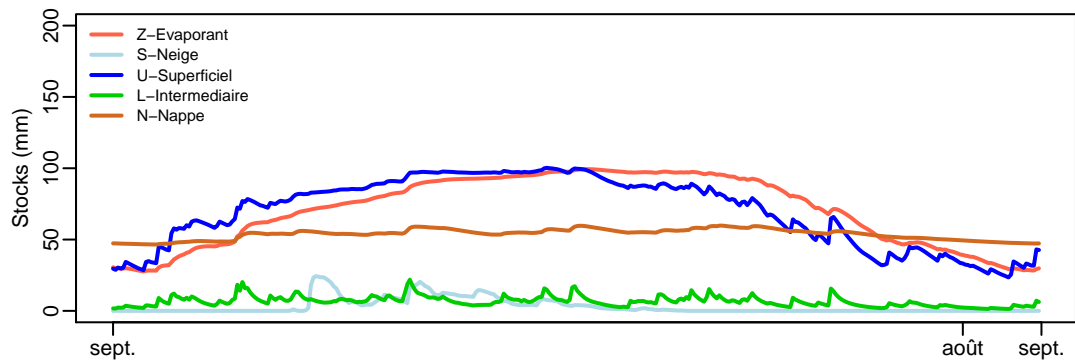

# k2680810 (5394.92 km<sup>2</sup>) – année 2000–2001

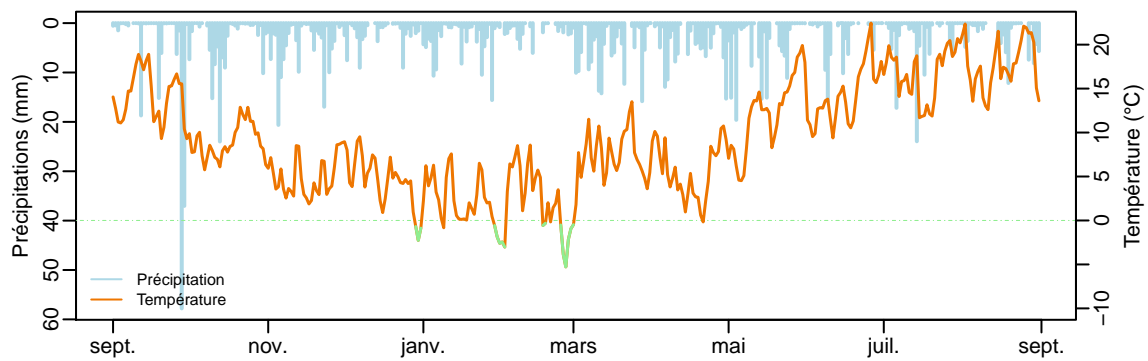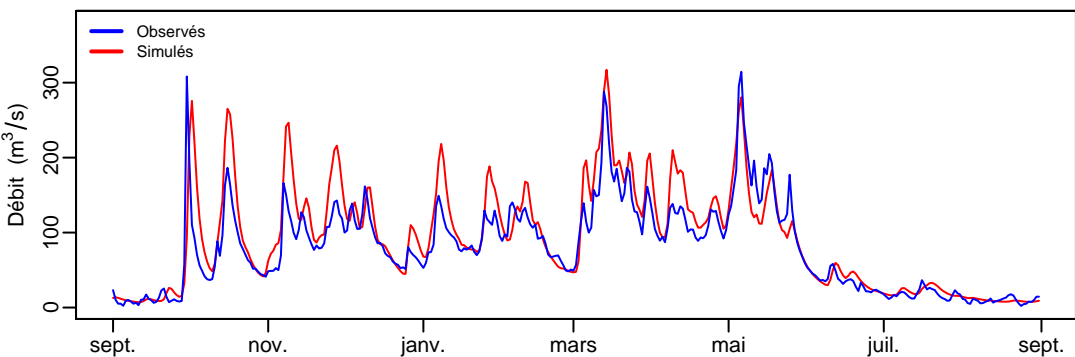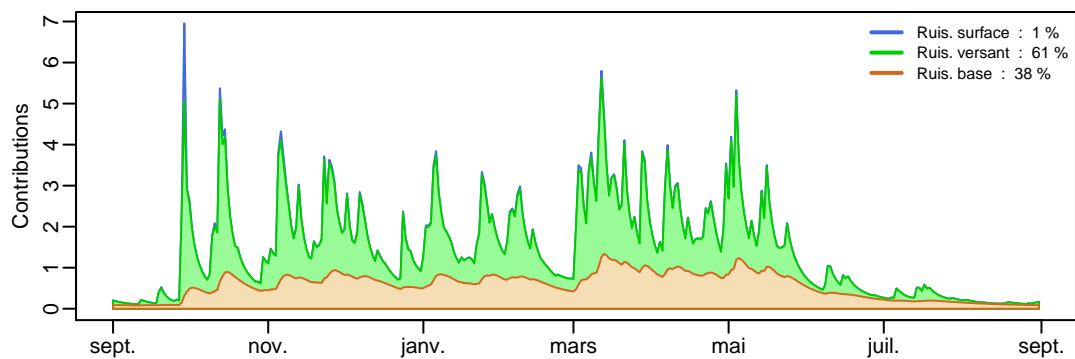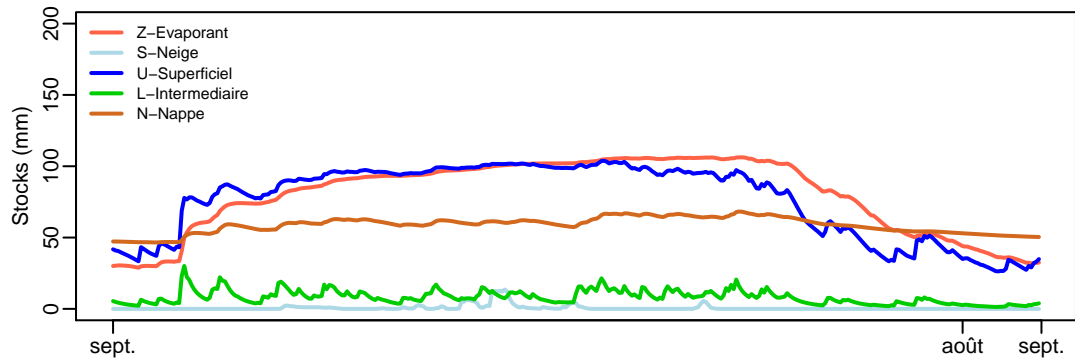

# k2680810 (5394.92 km<sup>2</sup>) – année 2001–2002

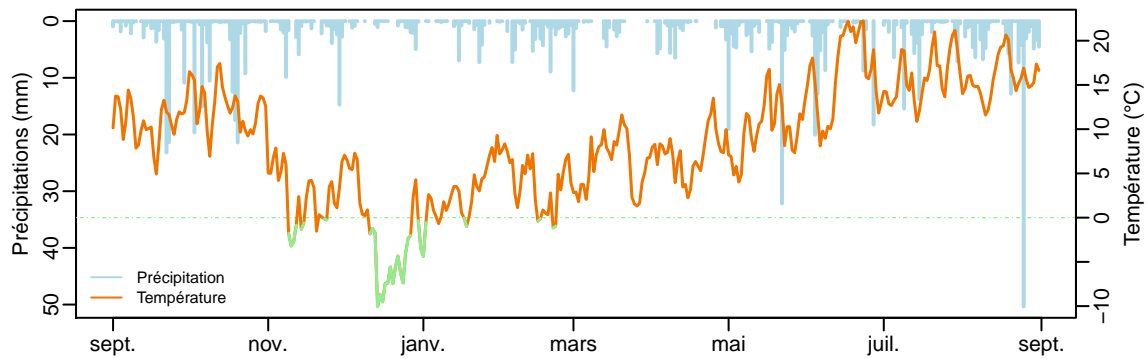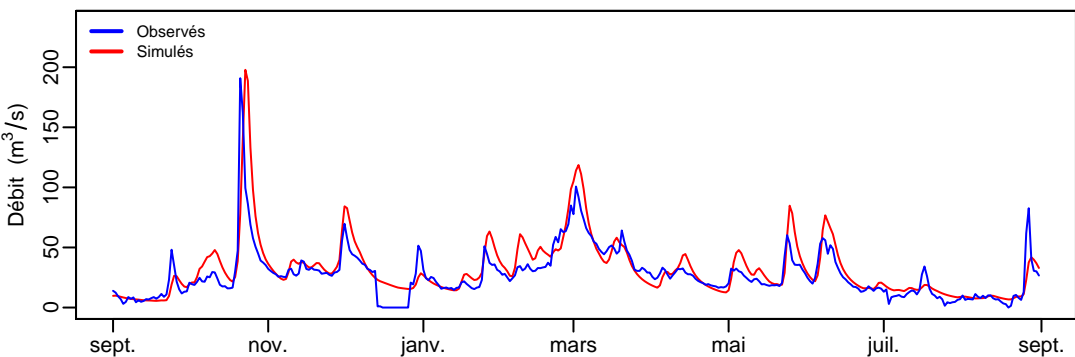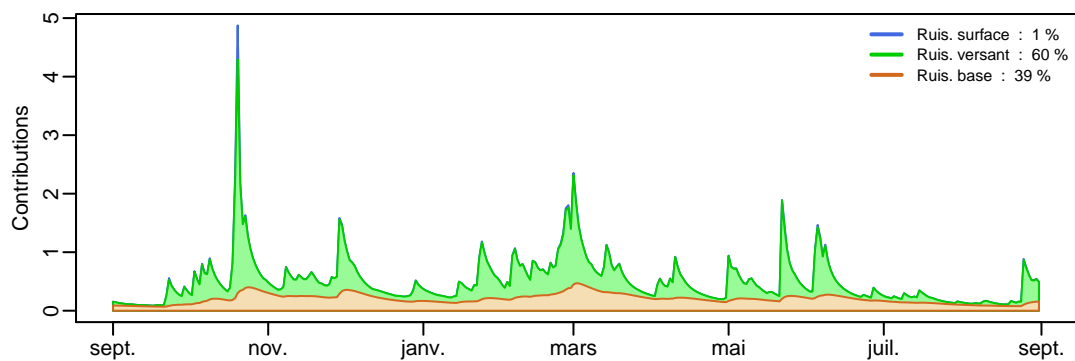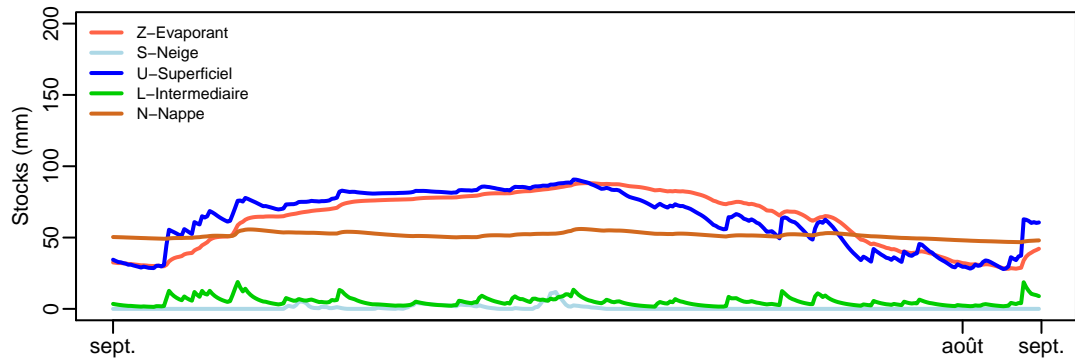

# k2680810 (5394.92 km<sup>2</sup>) – année 2002–2003

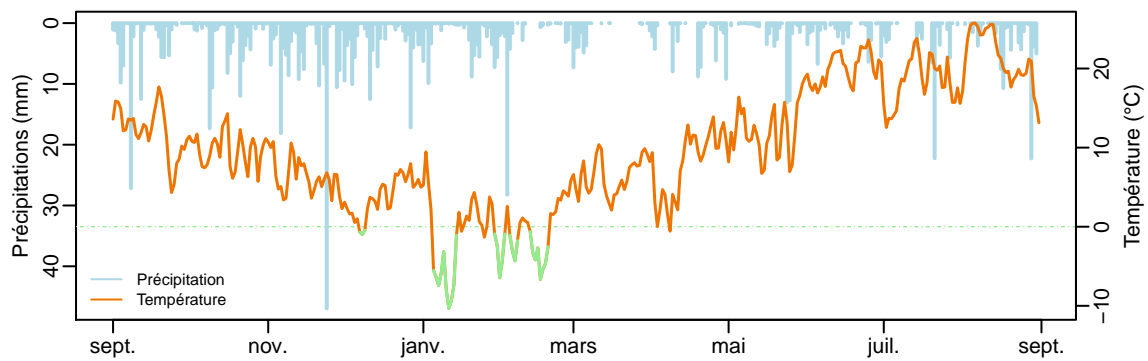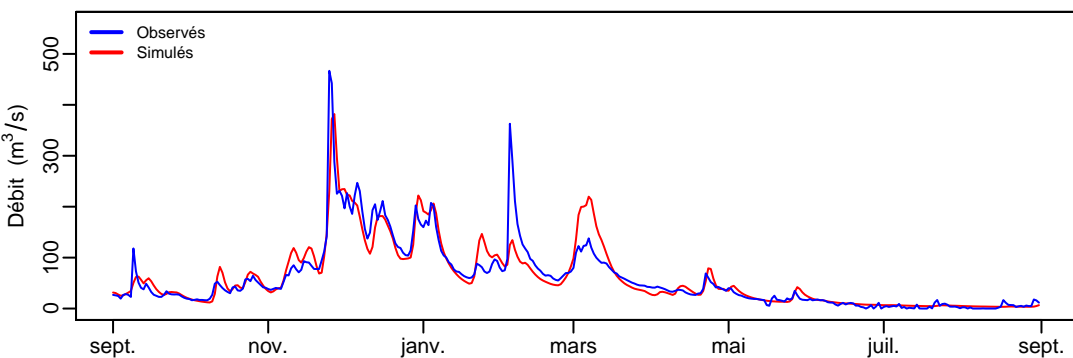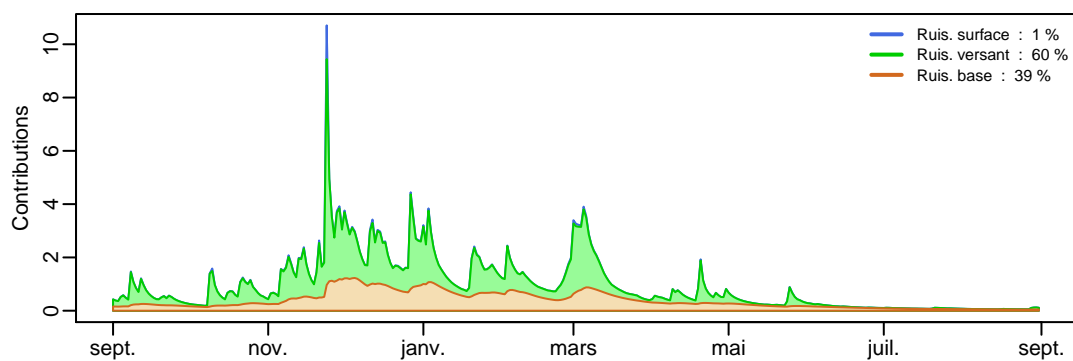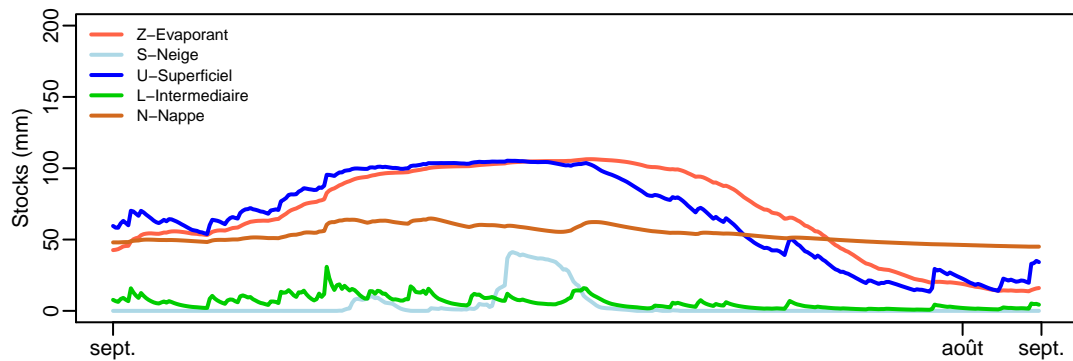

# k2680810 (5394.92 km<sup>2</sup>) – année 2003–2004

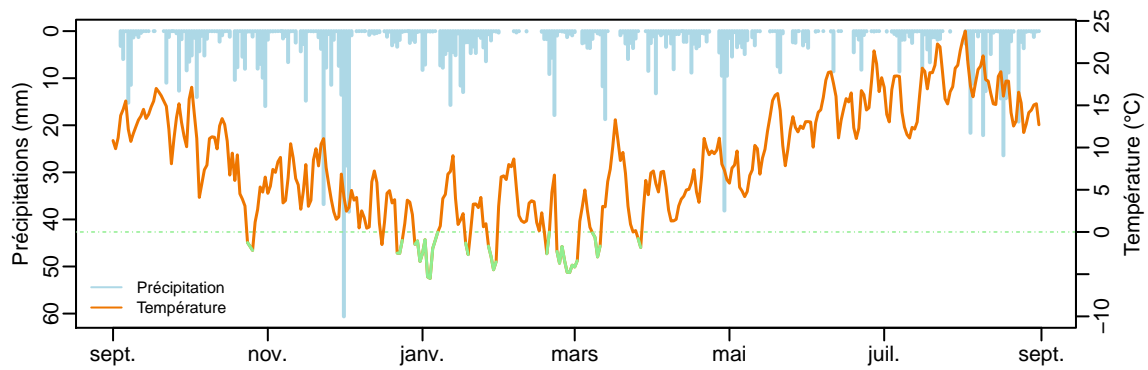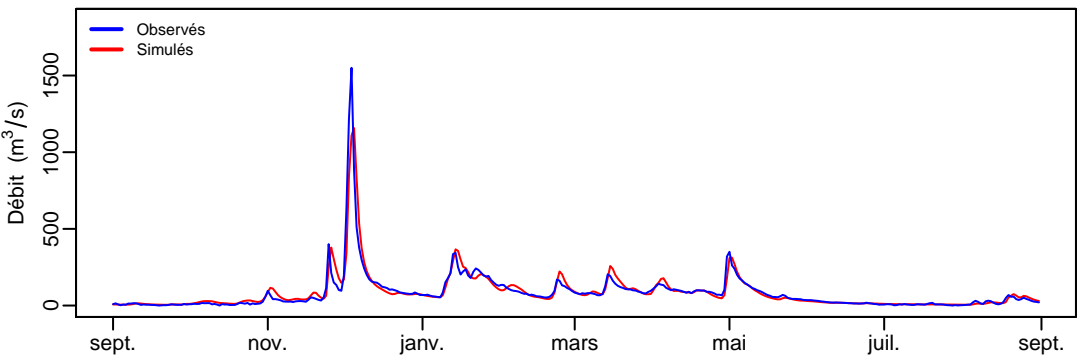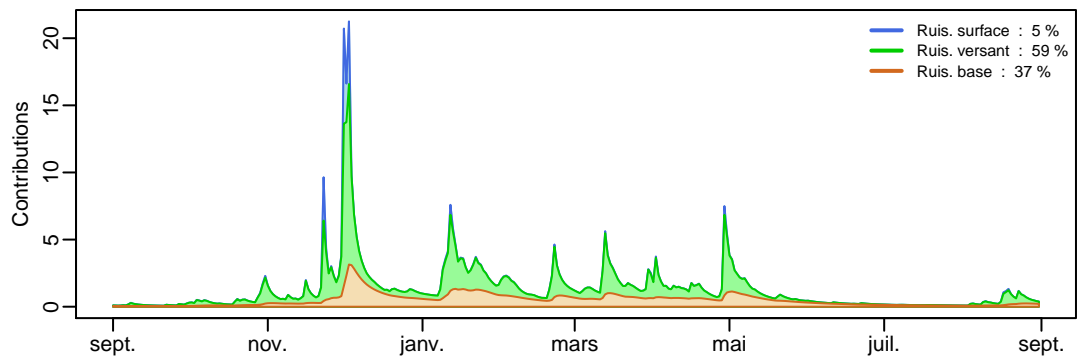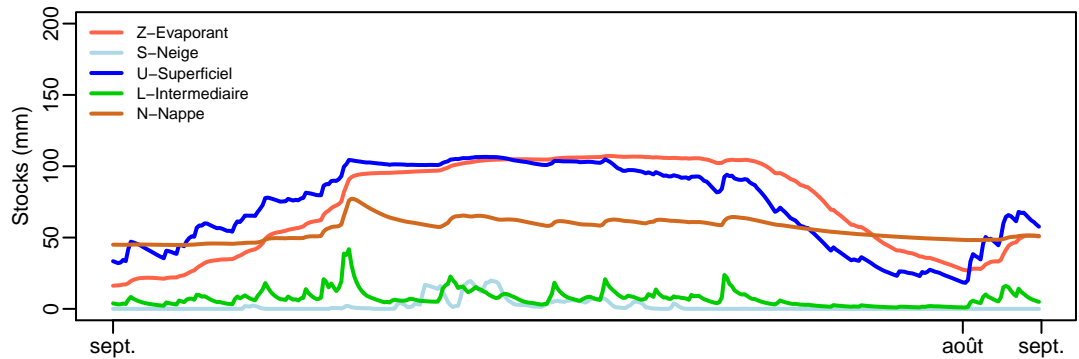

# k2680810 (5394.92 km<sup>2</sup>) – année 2004–2005

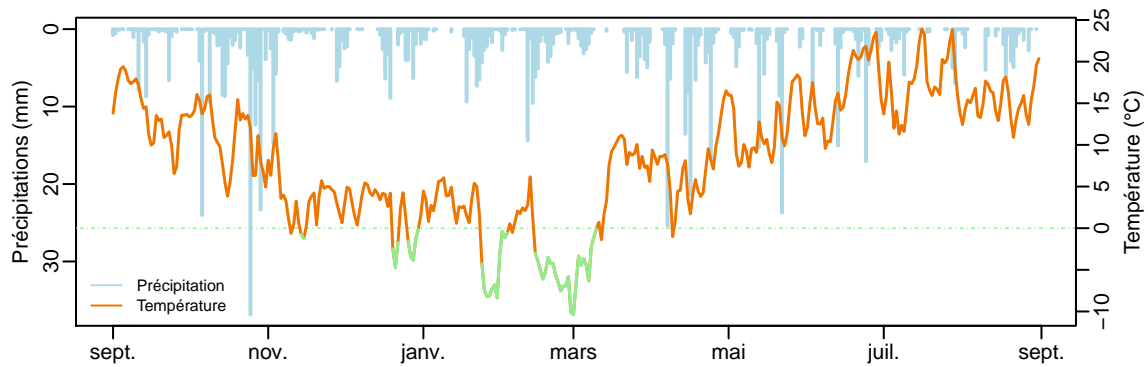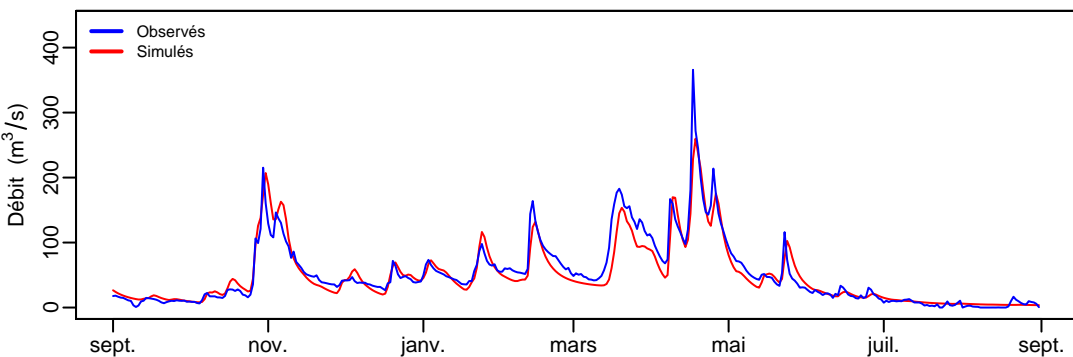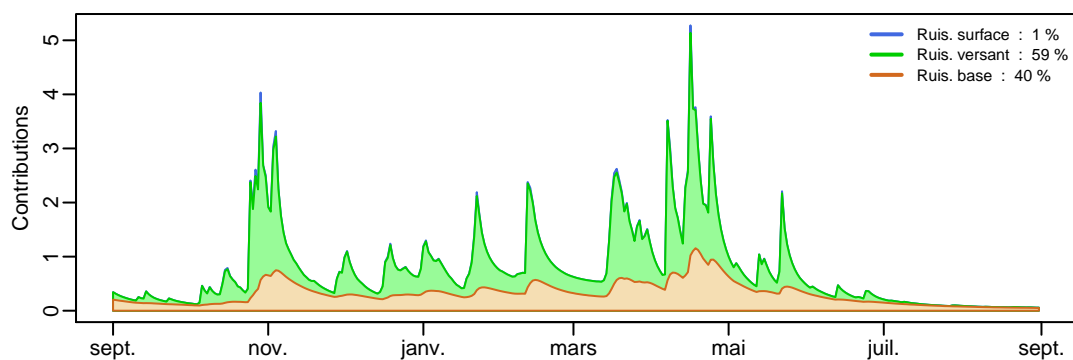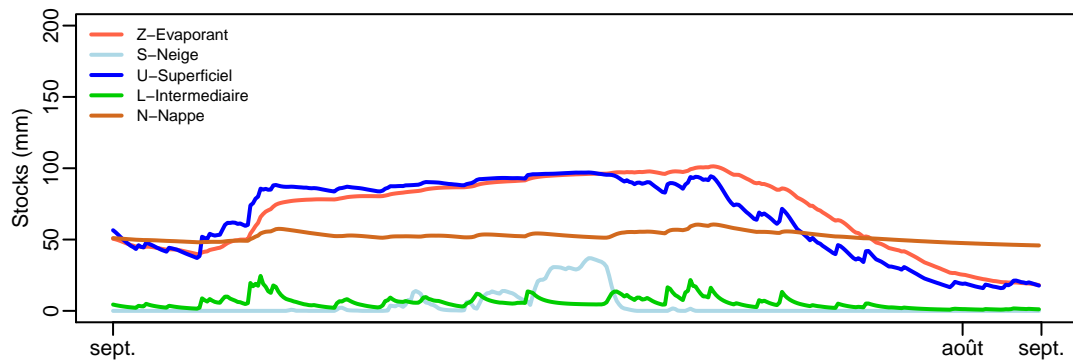

# k2680810 (5394.92 km<sup>2</sup>) – année 2005–2006

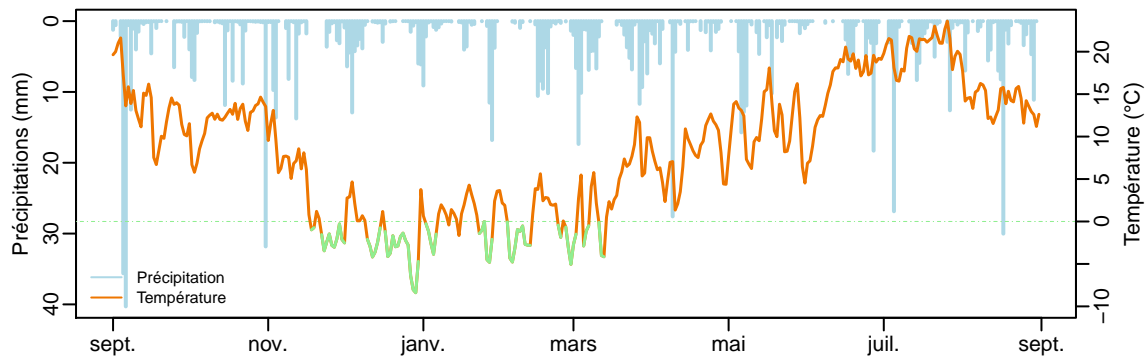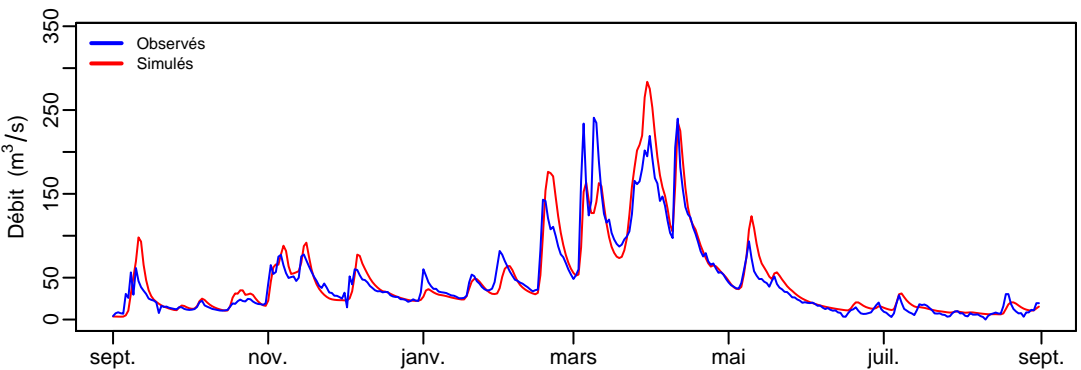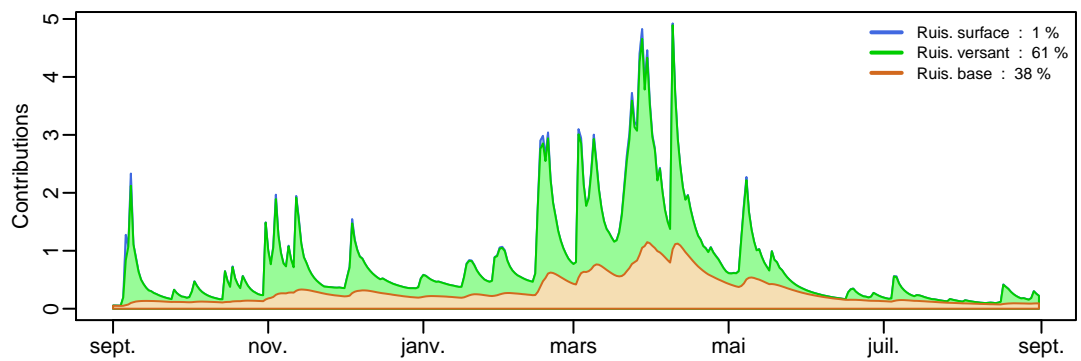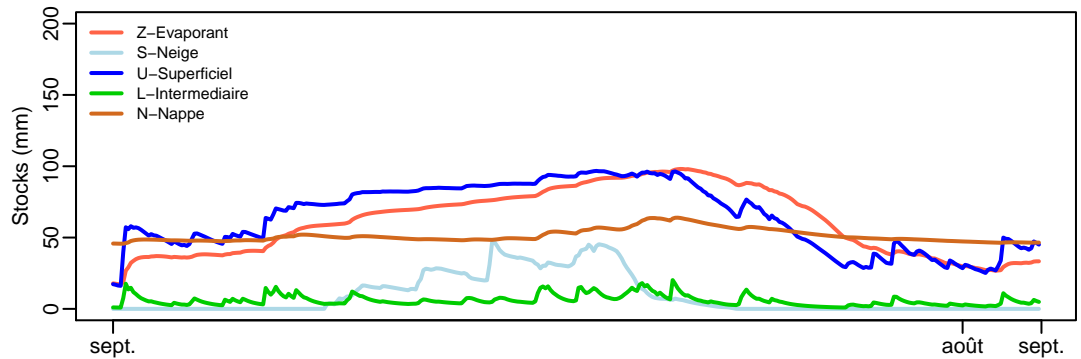



# k2680810 (5394.92 km<sup>2</sup>) – année 2006–2007

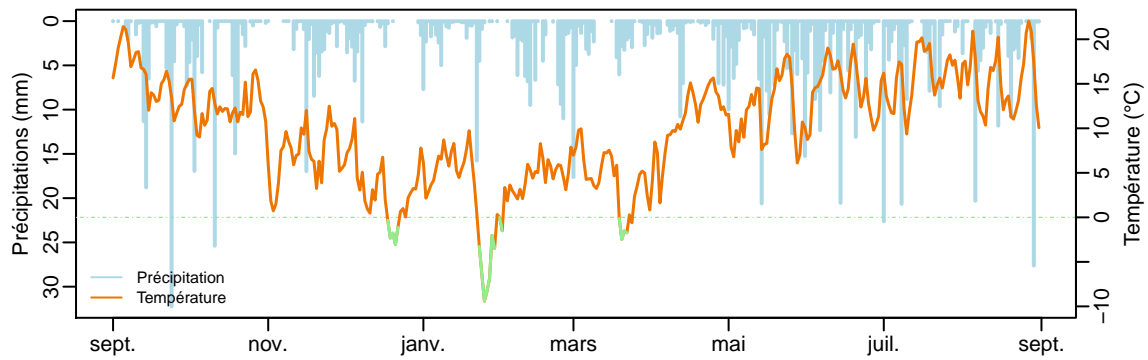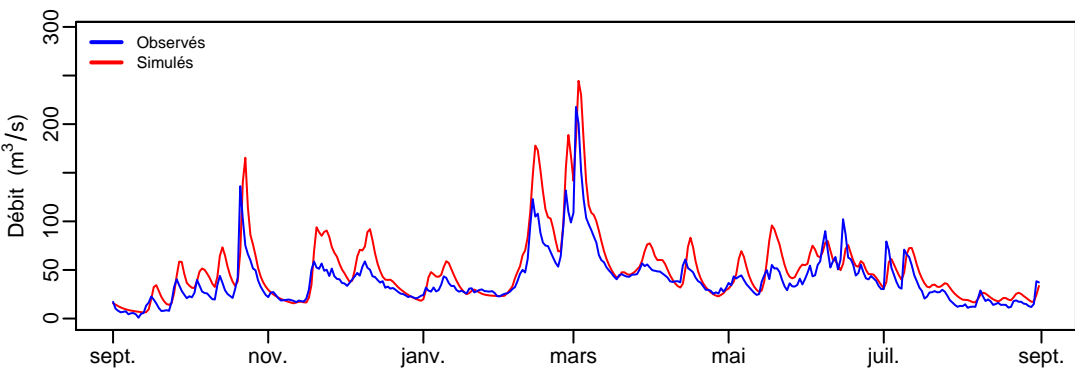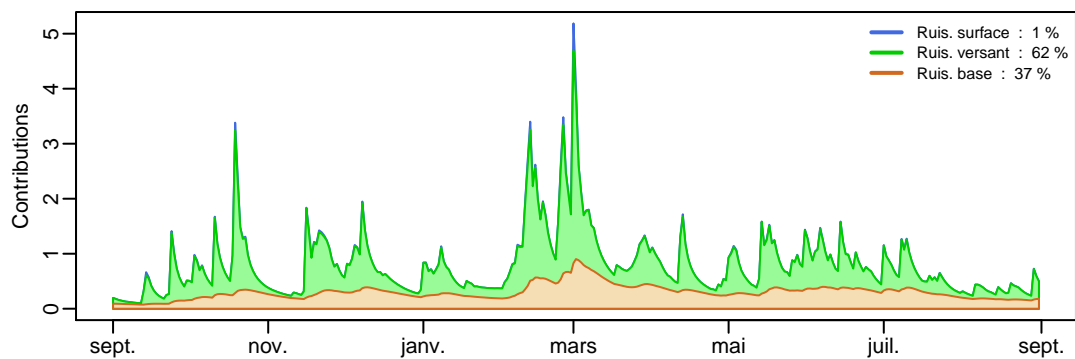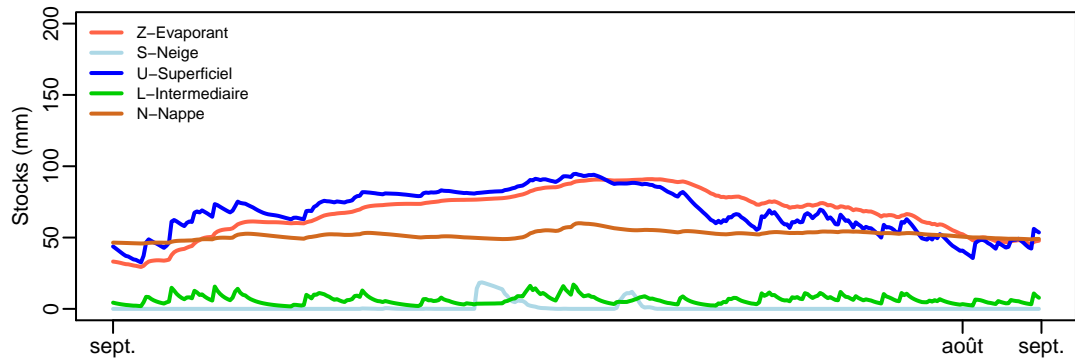

# k2680810 (5394.92 km<sup>2</sup>) – année 2007–2008

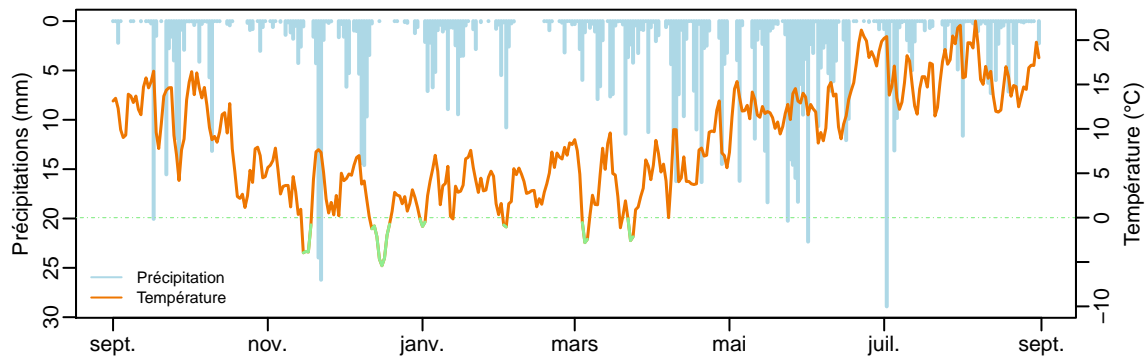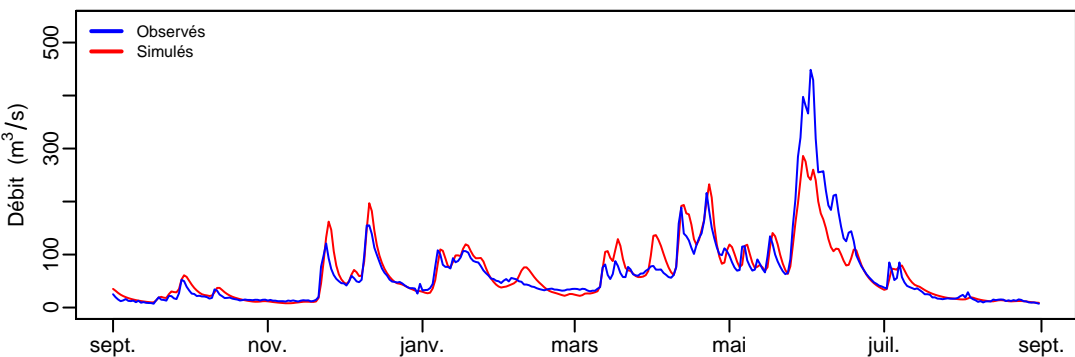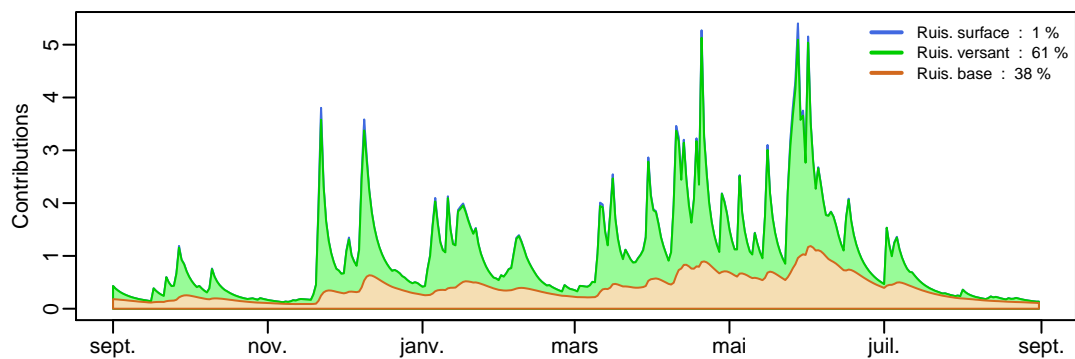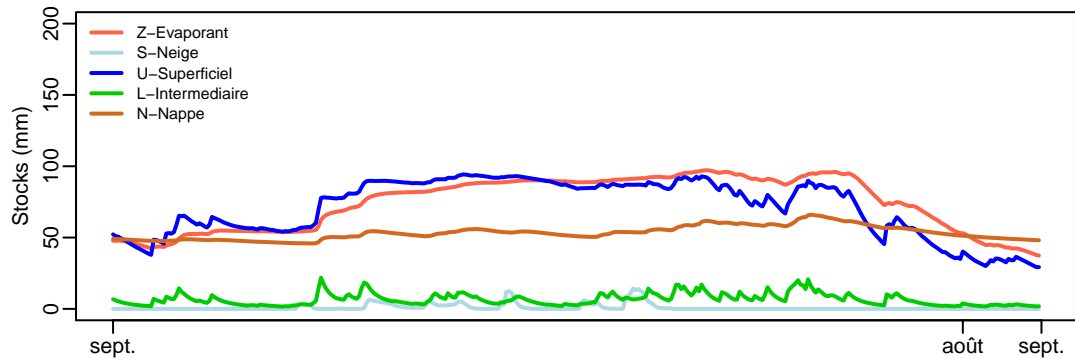

# k2680810 (5394.92 km<sup>2</sup>) – année 2008–2009

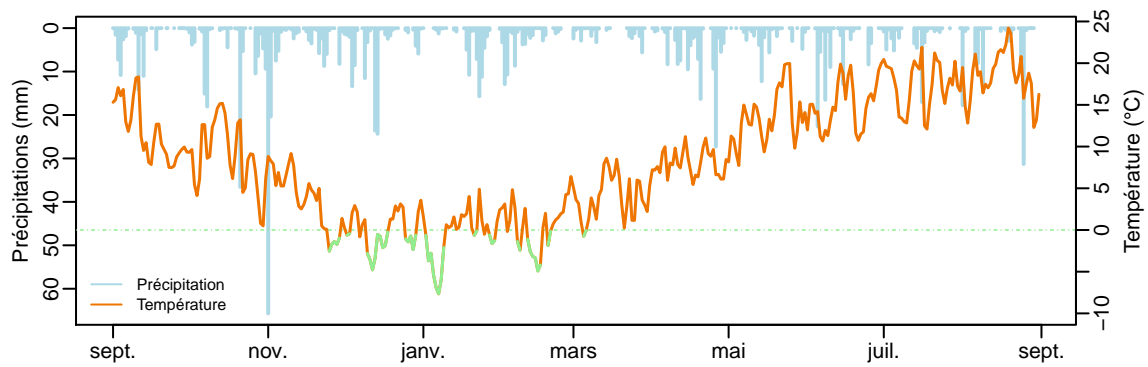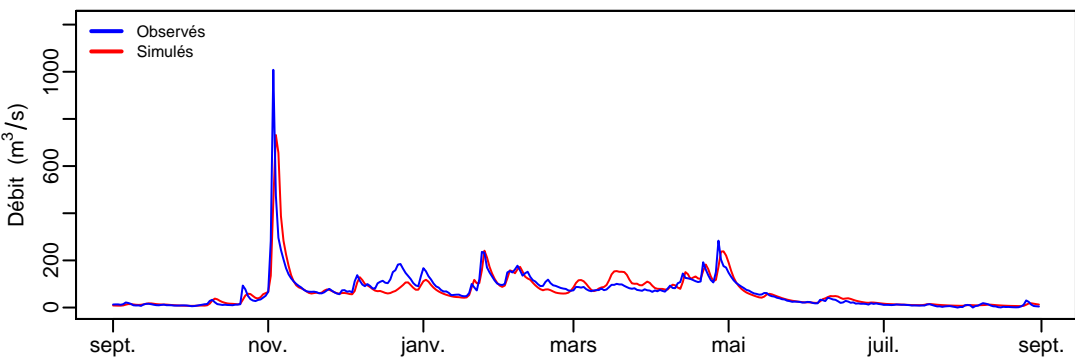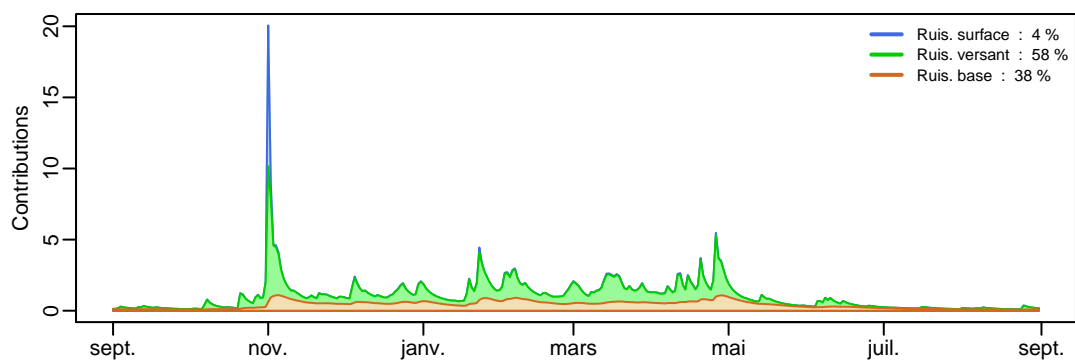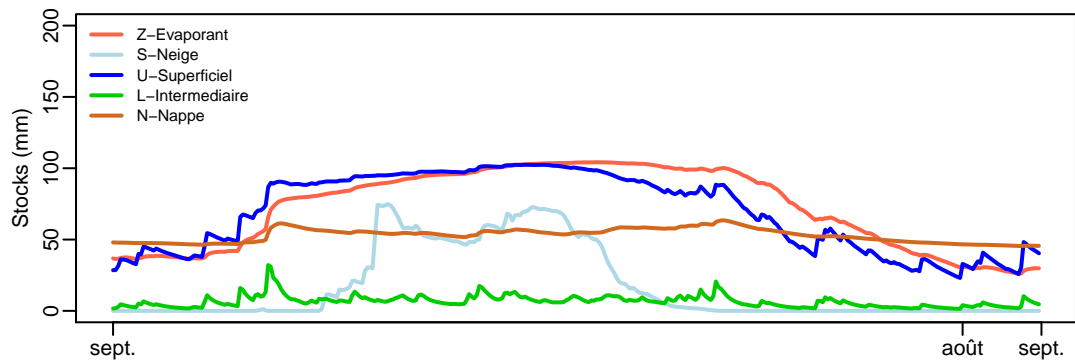

# k2680810 (5394.92 km<sup>2</sup>) – année 2009–2010

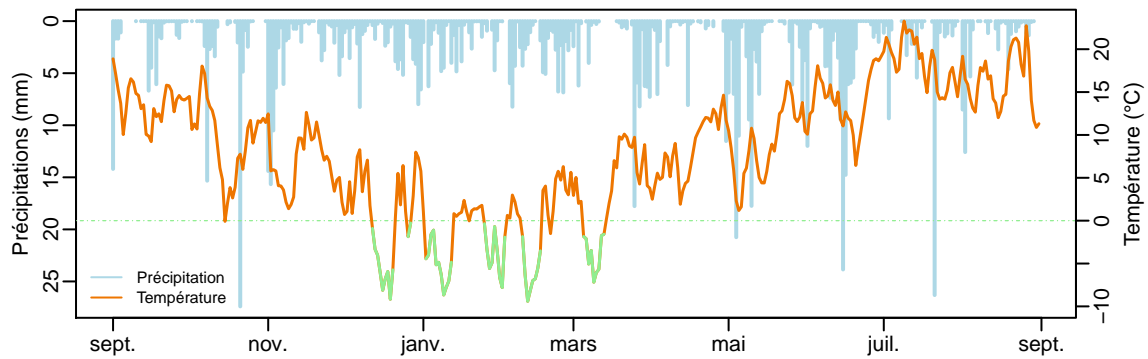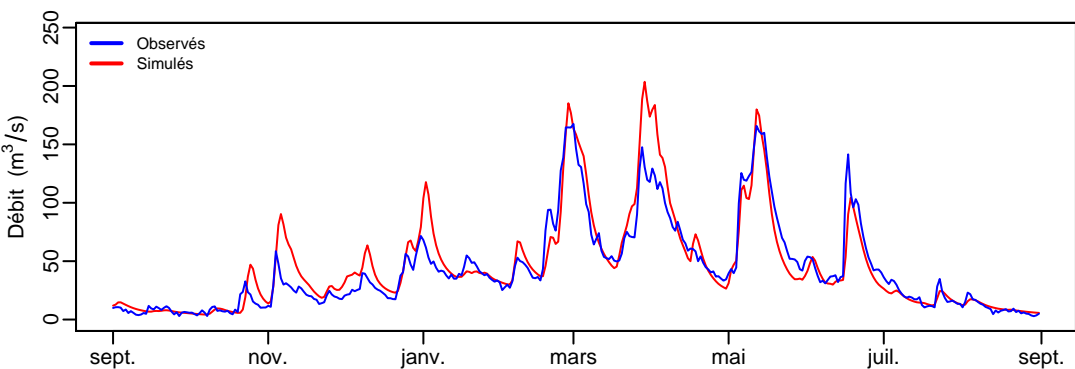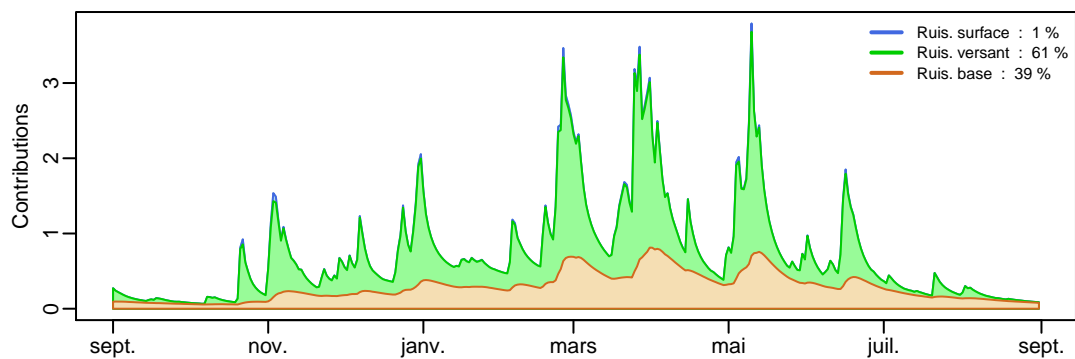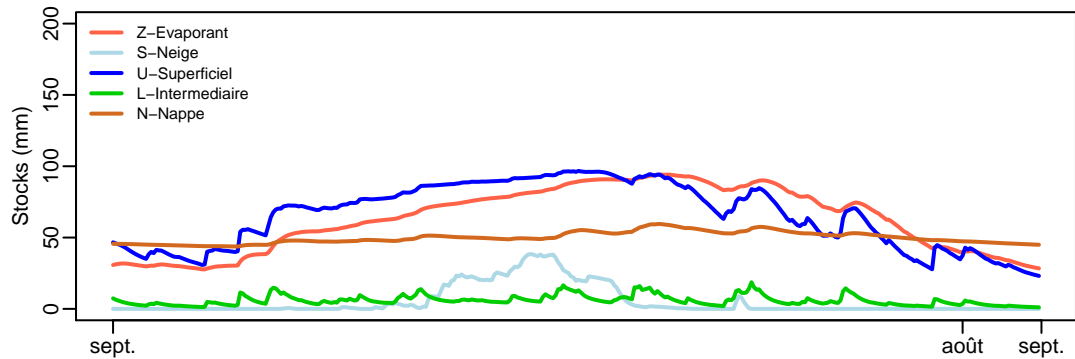

# k2680810 (5394.92 km<sup>2</sup>) – année 2010–2011

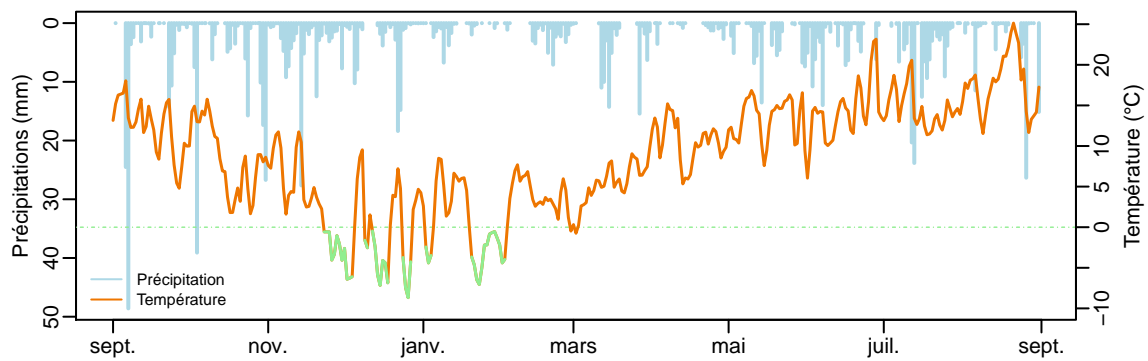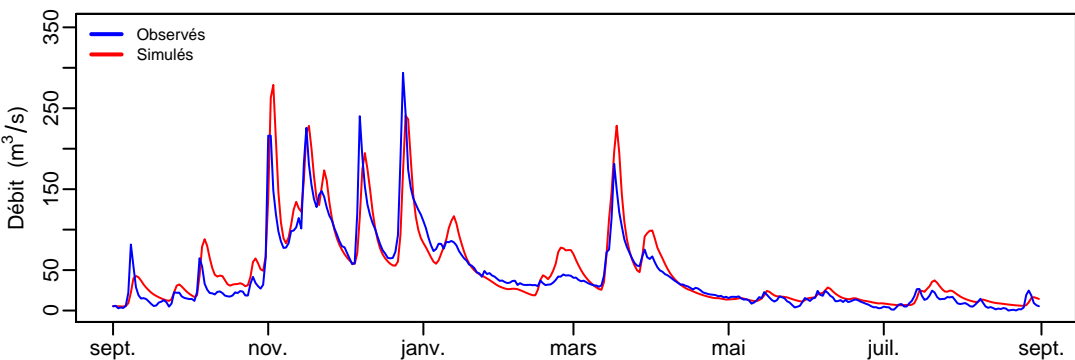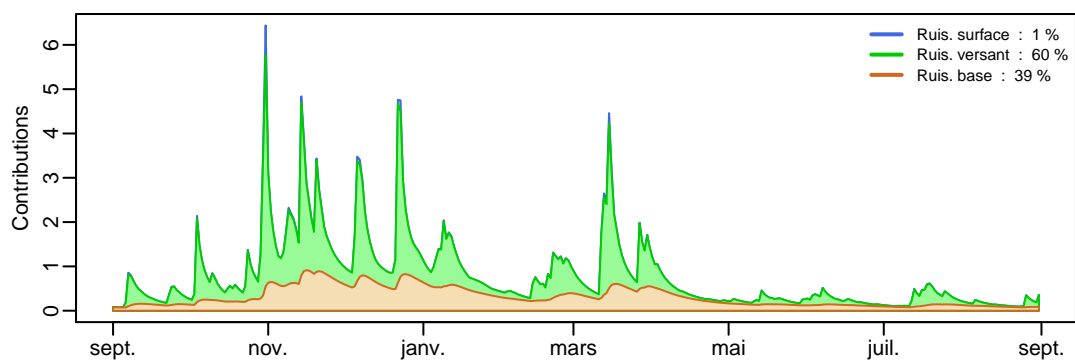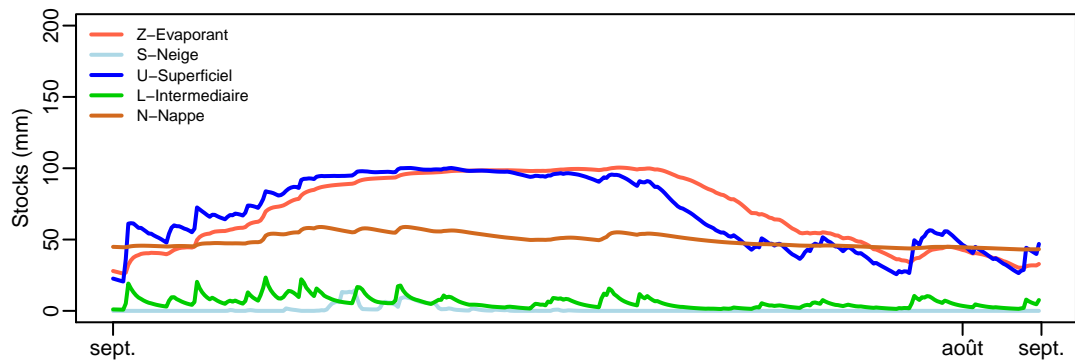

# k2680810 (5394.92 km²) – année 2011–2012

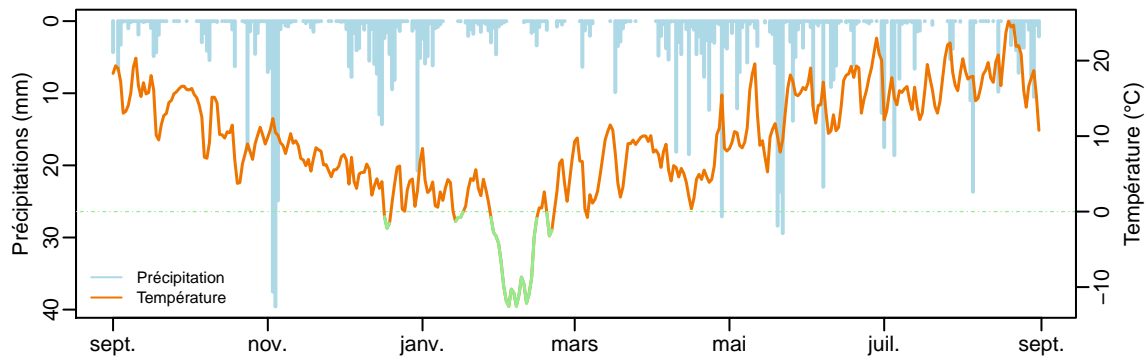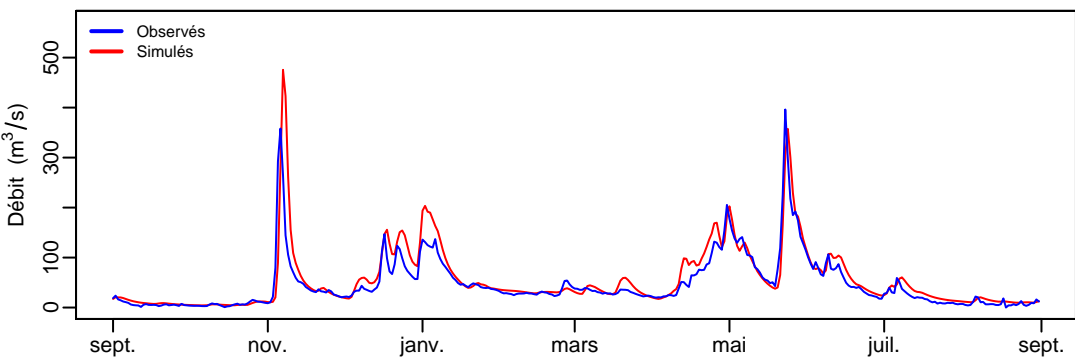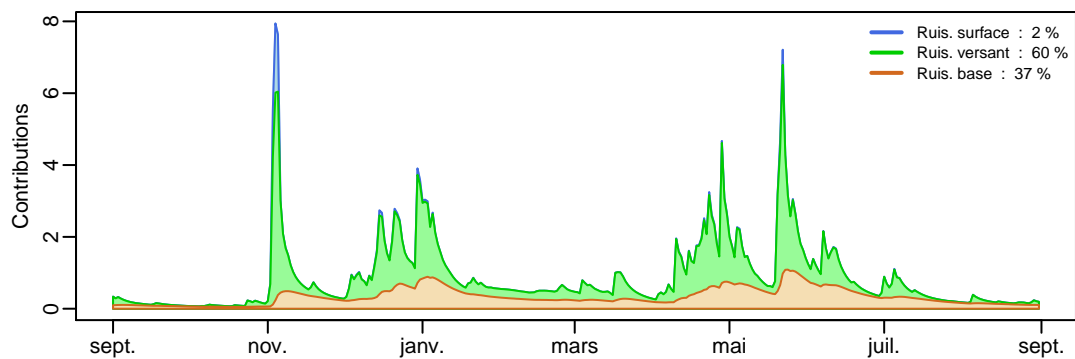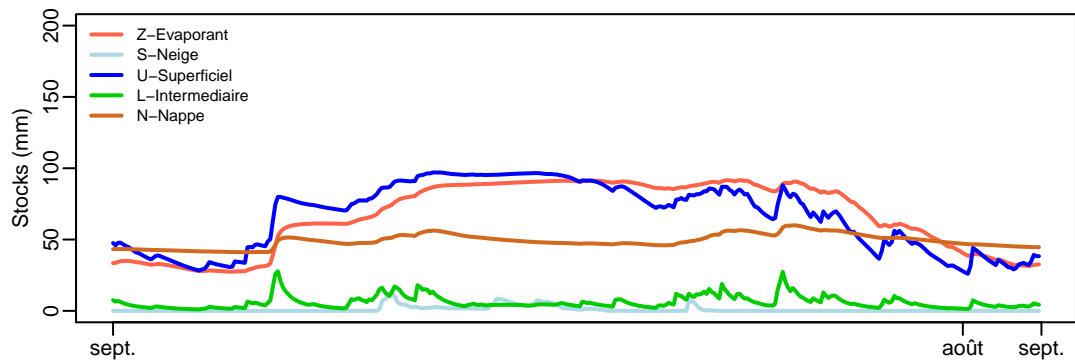

# k2680820 (5144.3 km<sup>2</sup>) – année 1985–1986

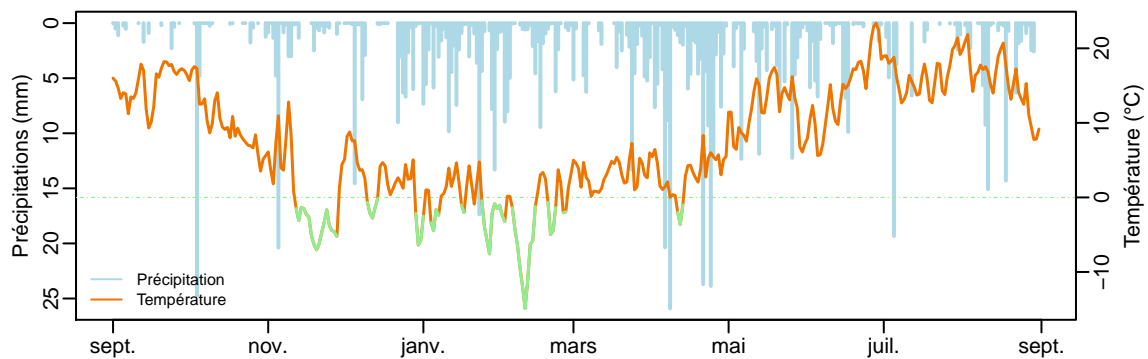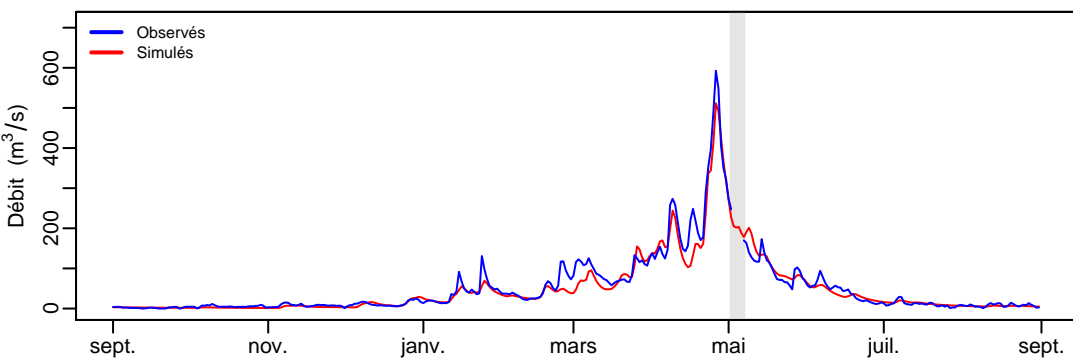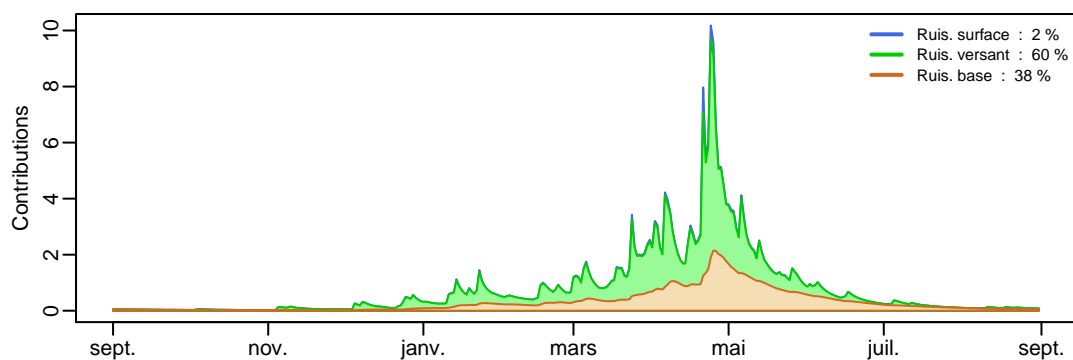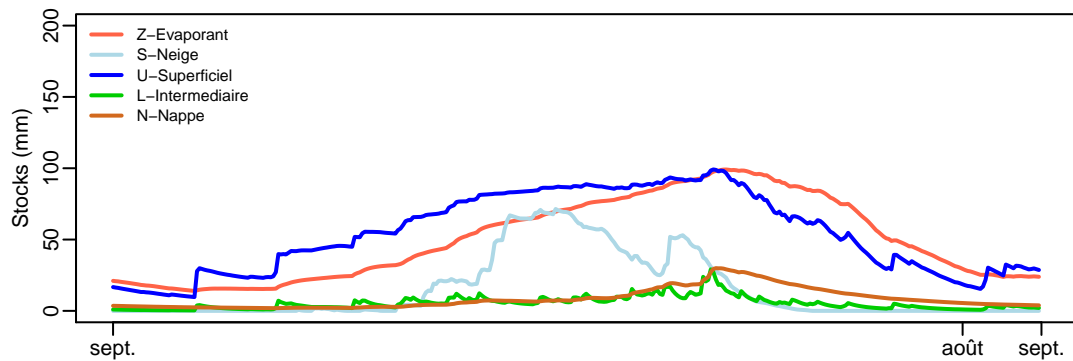

# k2680820 (5144.3 km<sup>2</sup>) – année 1986–1987

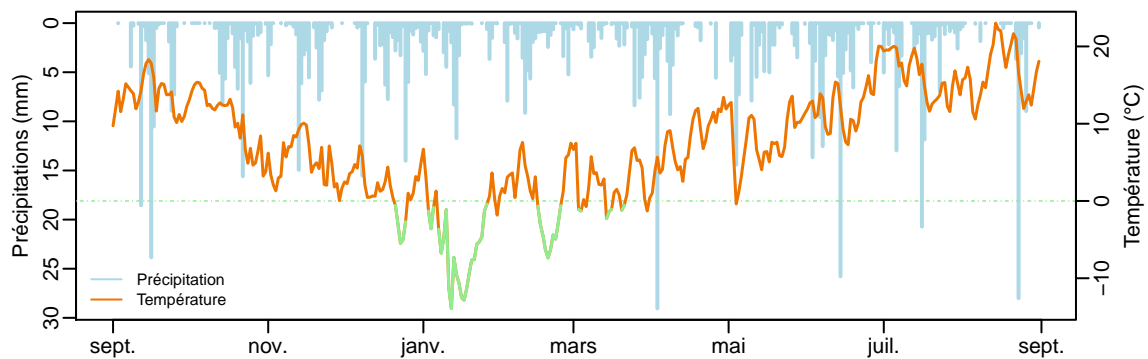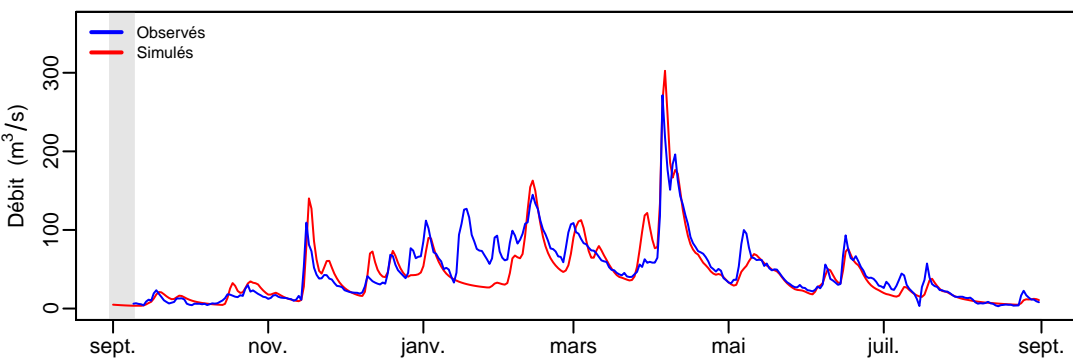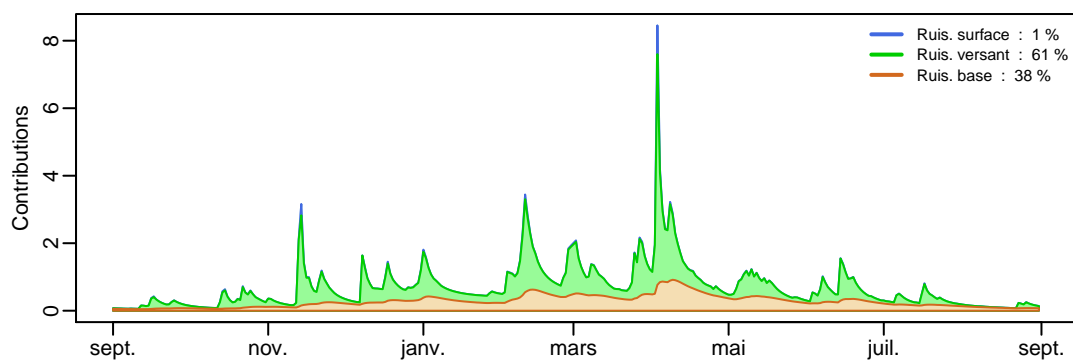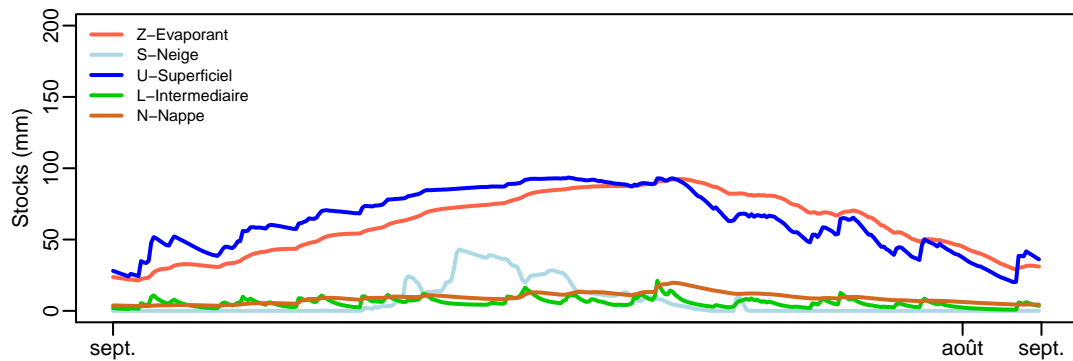



# k2680820 (5144.3 km<sup>2</sup>) – année 1987–1988

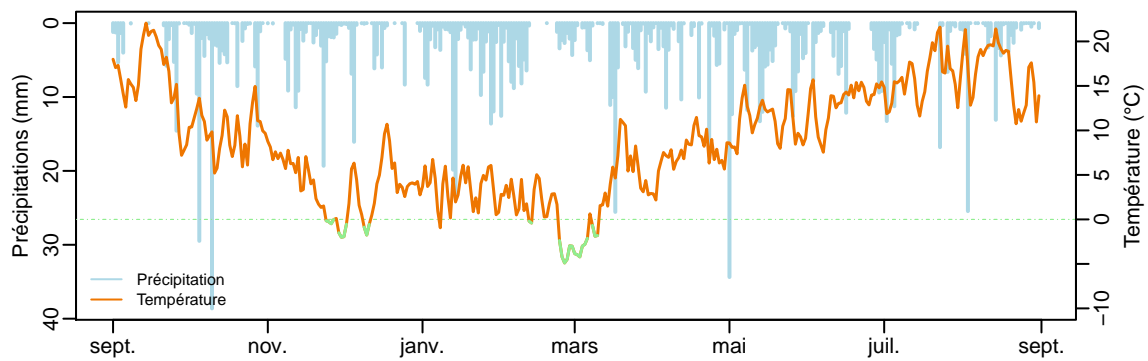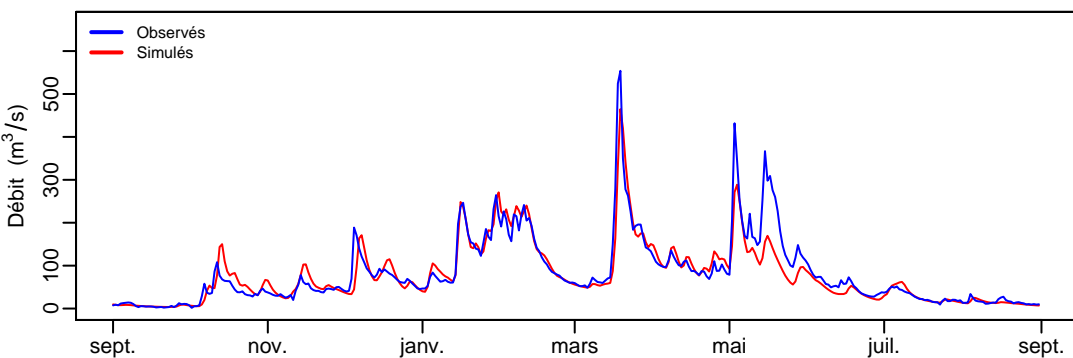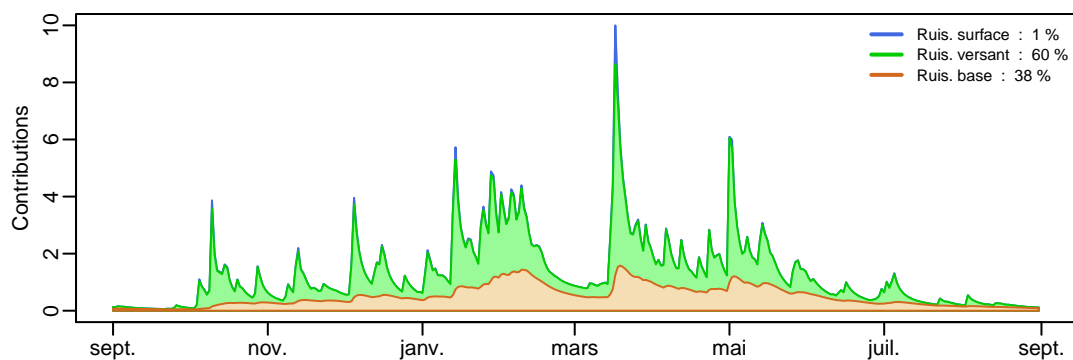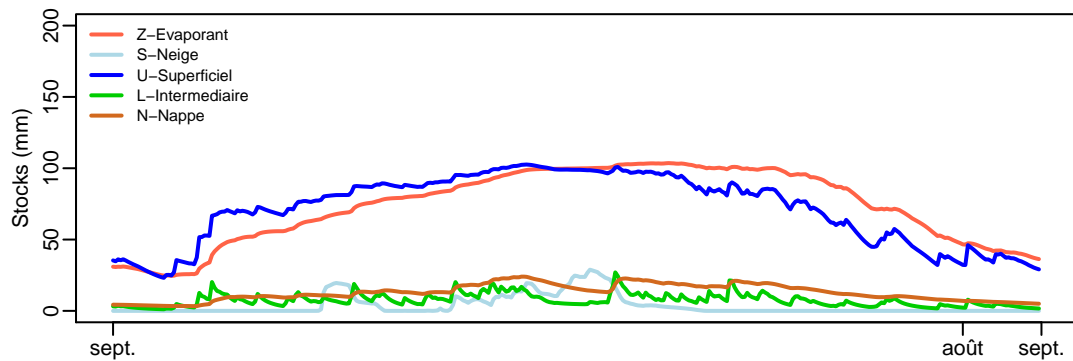

# k2680820 (5144.3 km<sup>2</sup>) – année 1988–1989

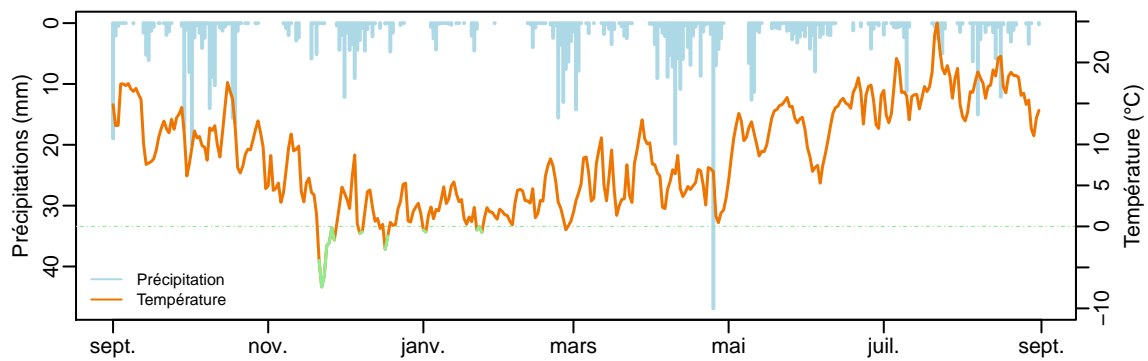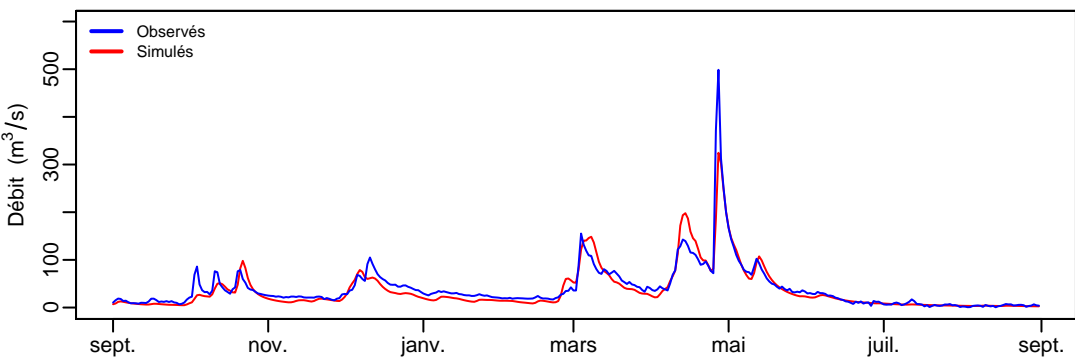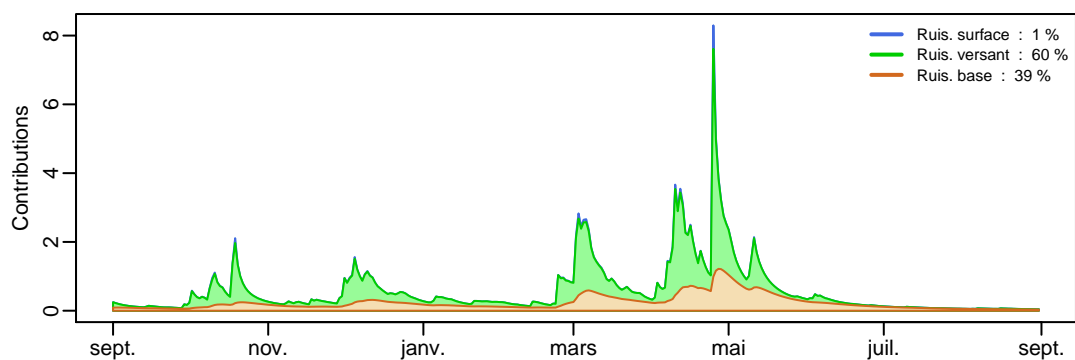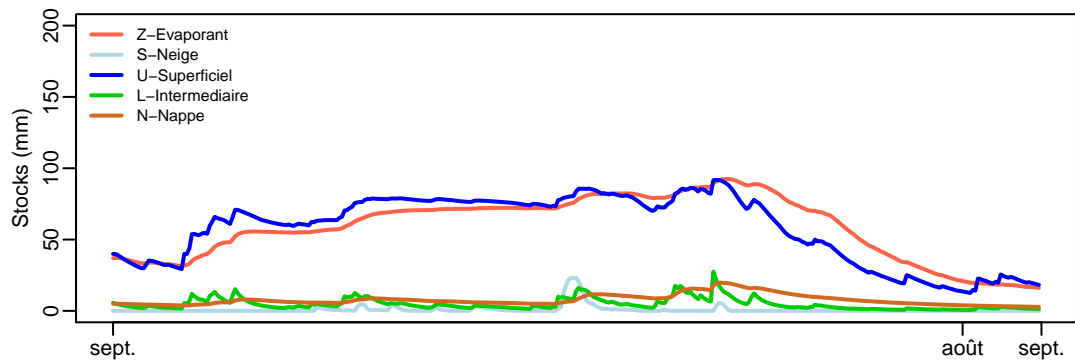

# k2680820 (5144.3 km<sup>2</sup>) – année 1989–1990

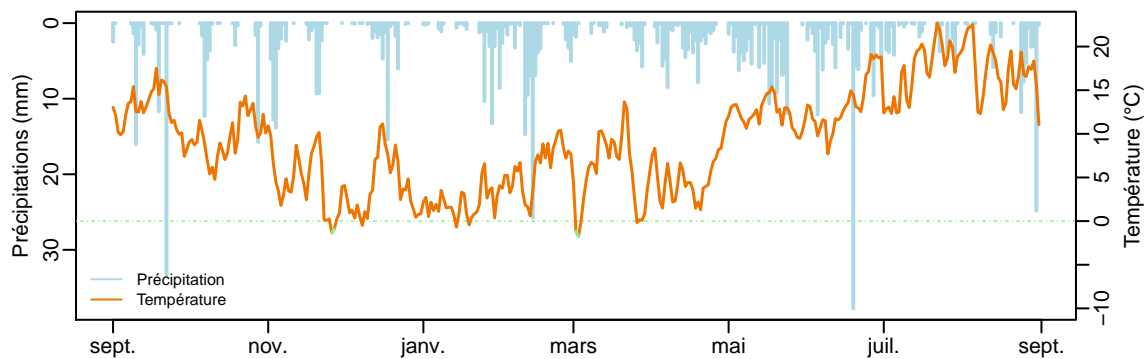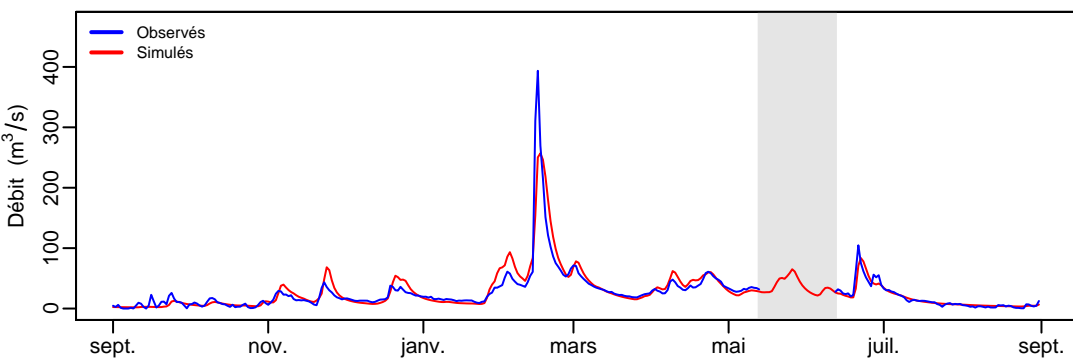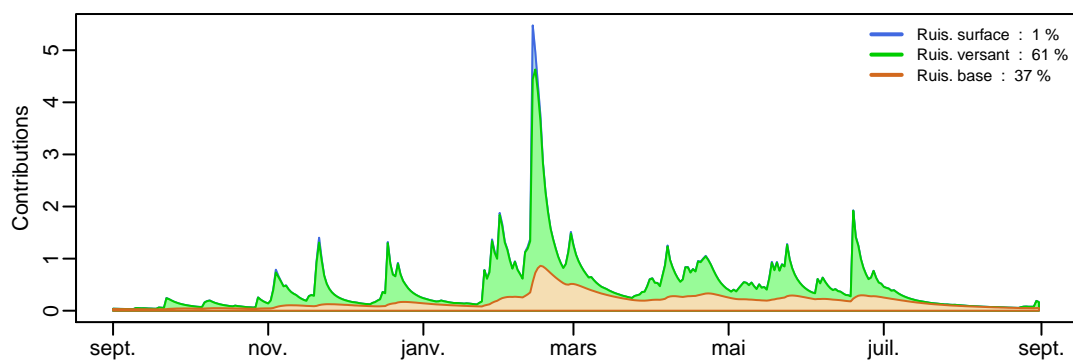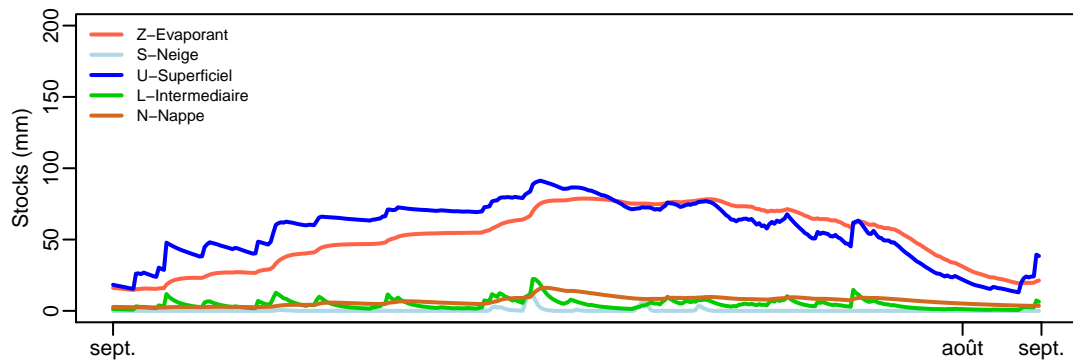

# k2680820 (5144.3 km<sup>2</sup>) – année 1990–1991

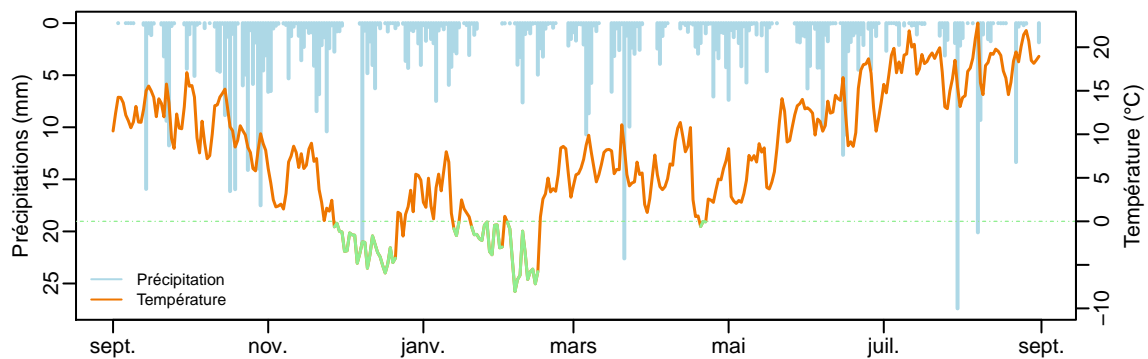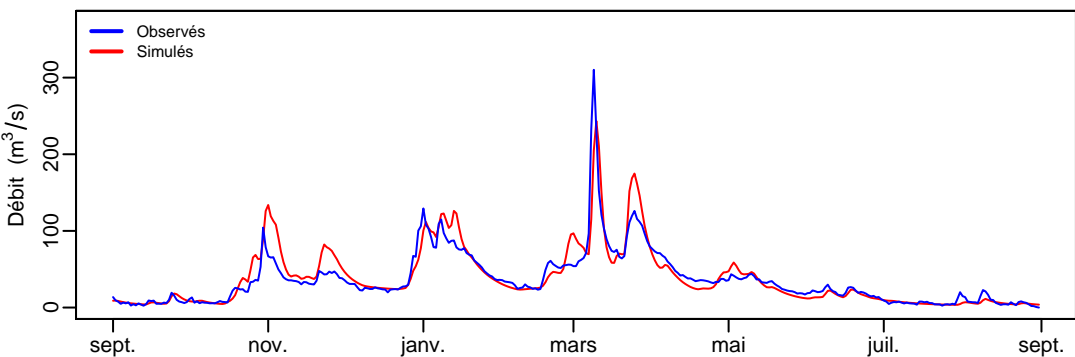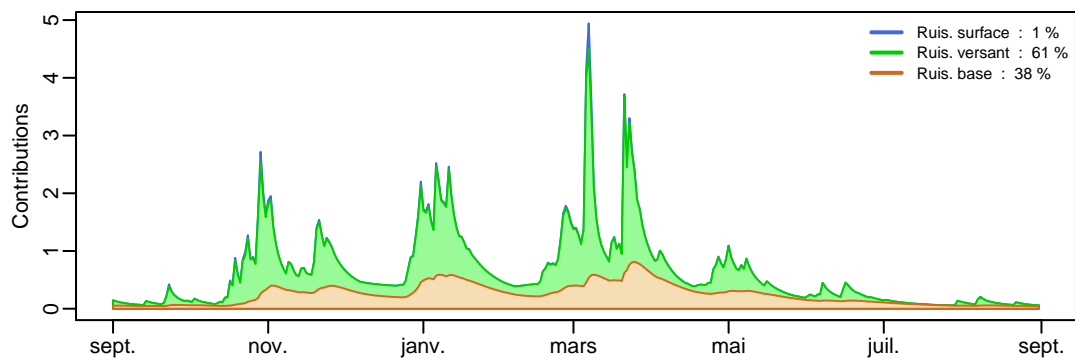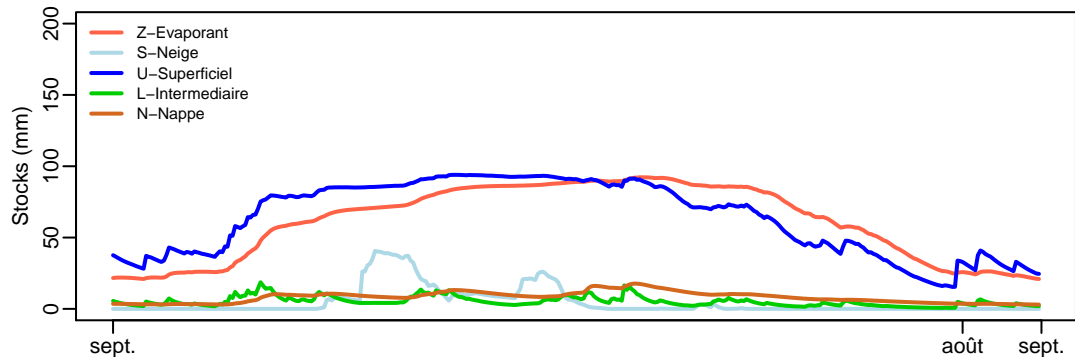

# k2680820 (5144.3 km<sup>2</sup>) – année 1991–1992

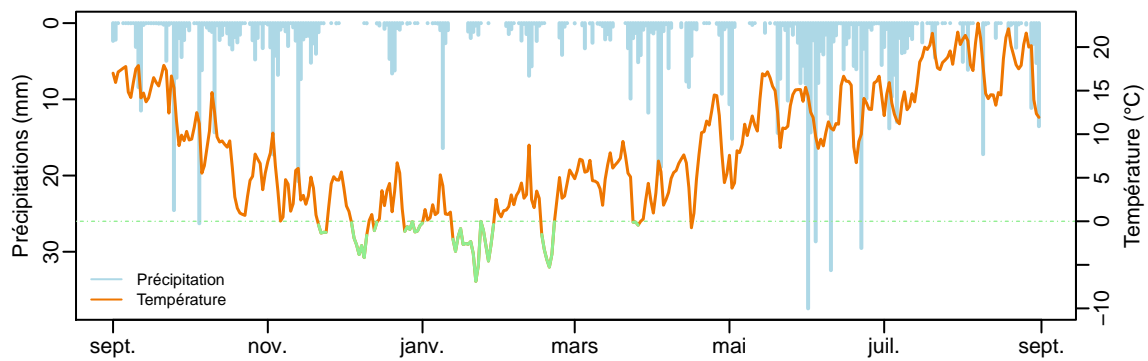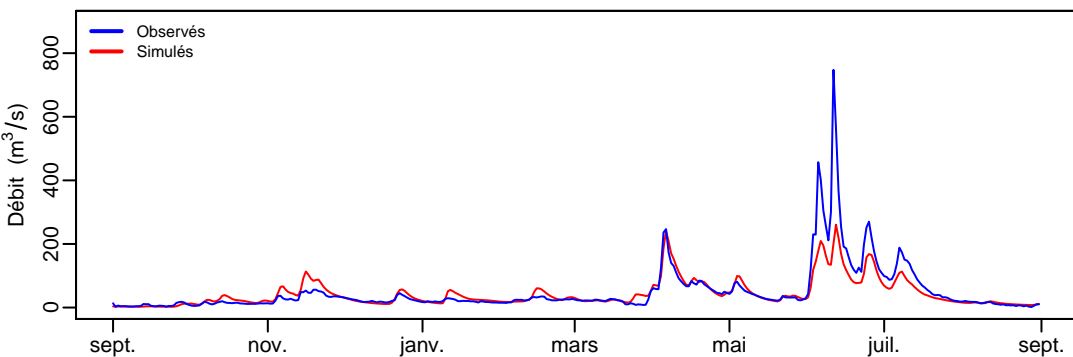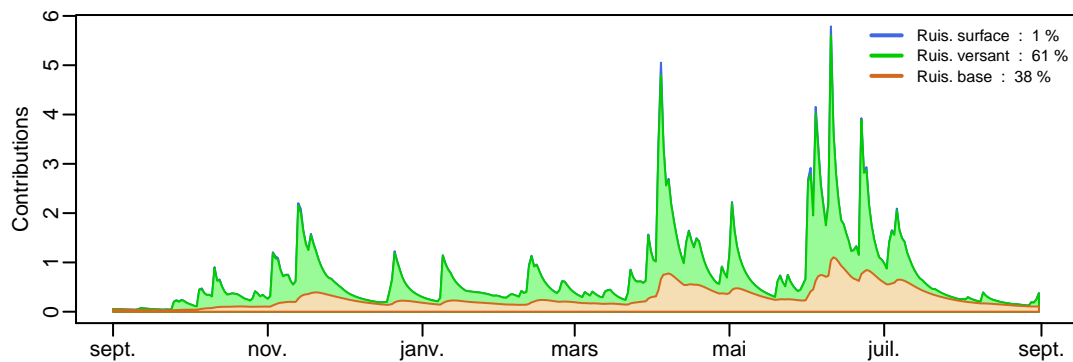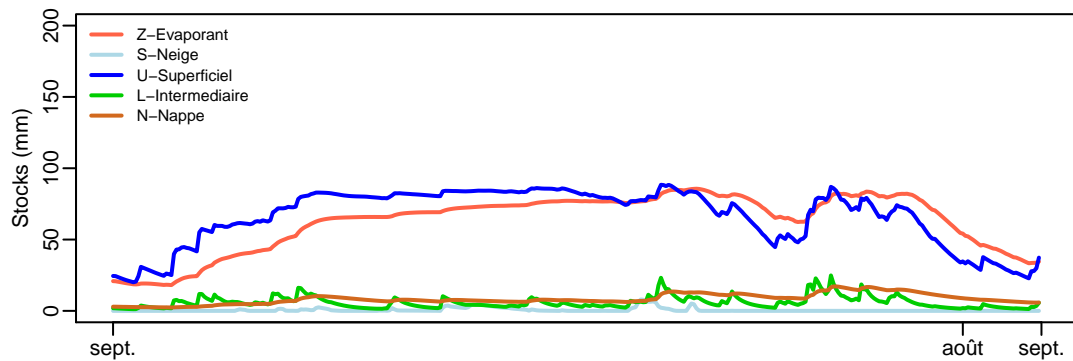

# k2680820 (5144.3 km<sup>2</sup>) – année 1992–1993

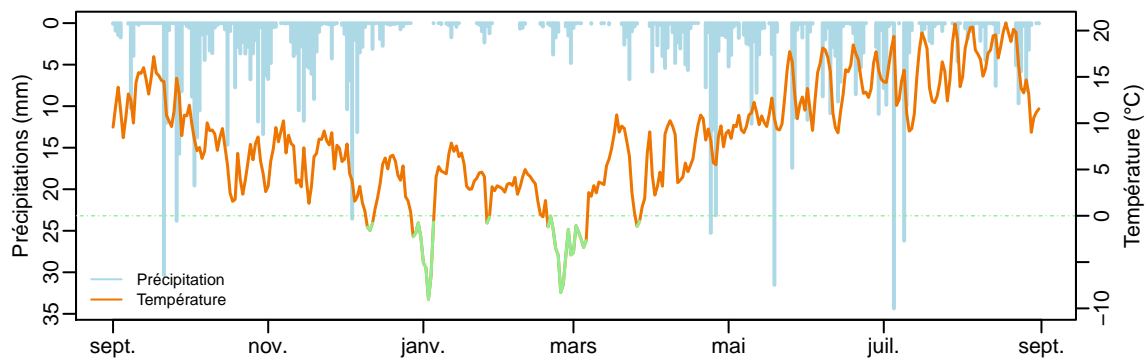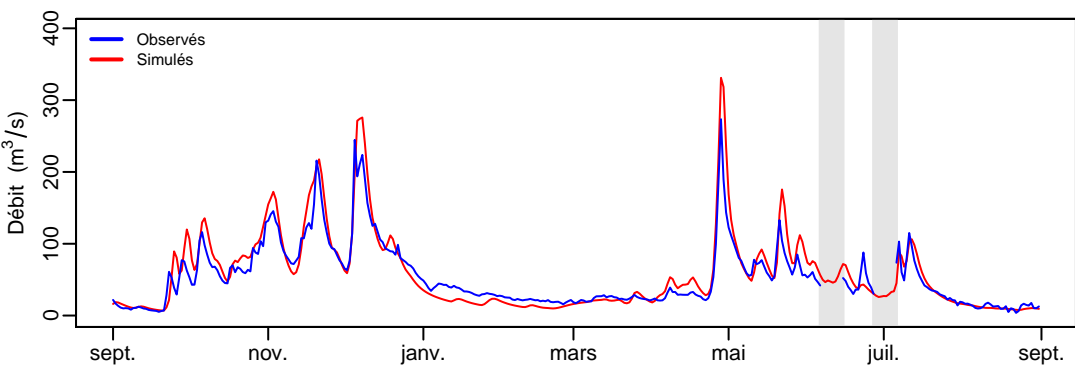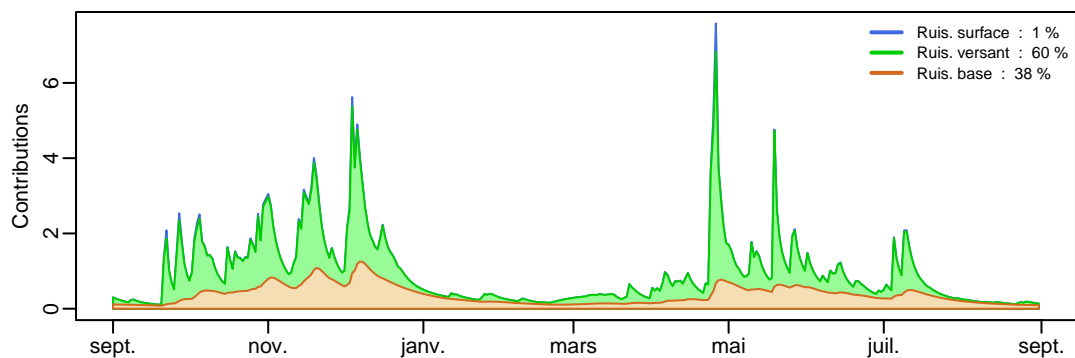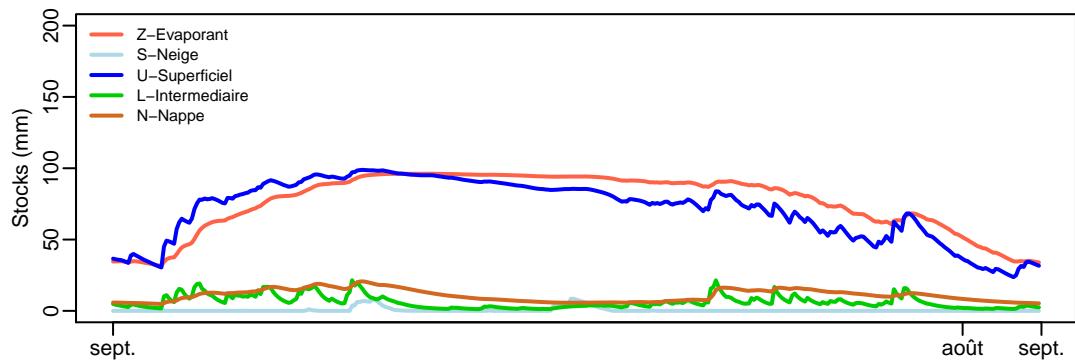

# k2680820 (5144.3 km<sup>2</sup>) – année 1993–1994

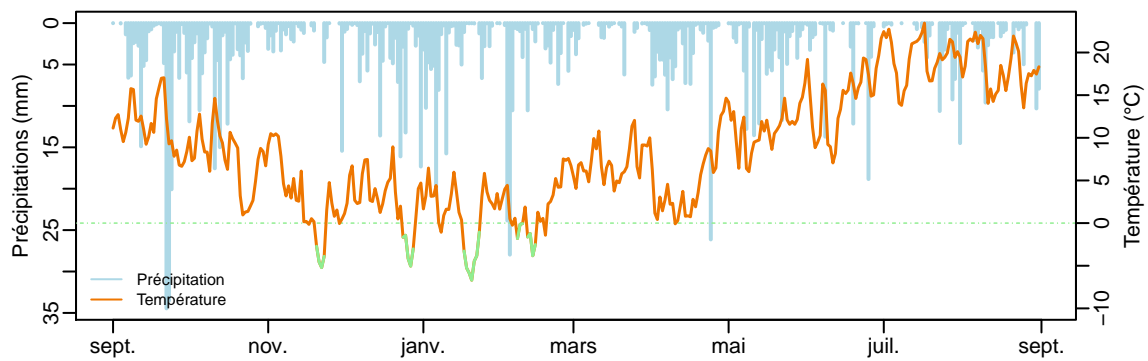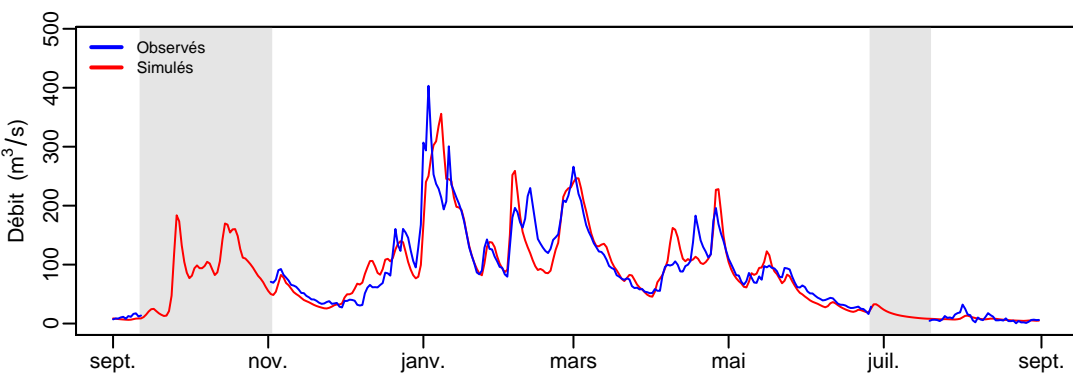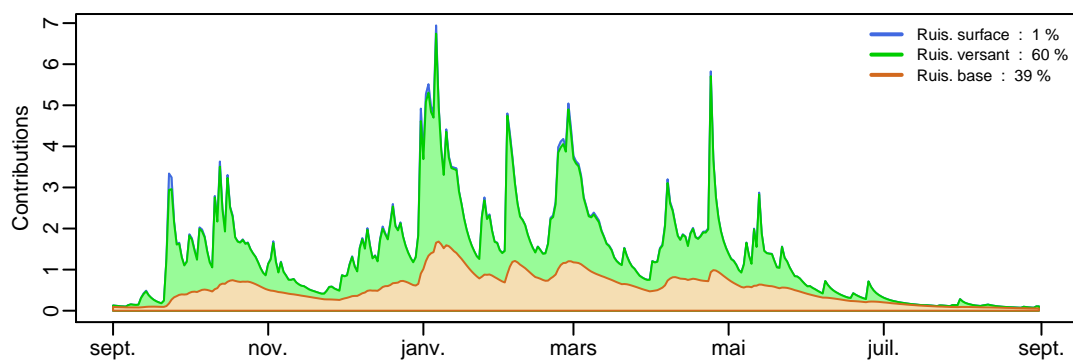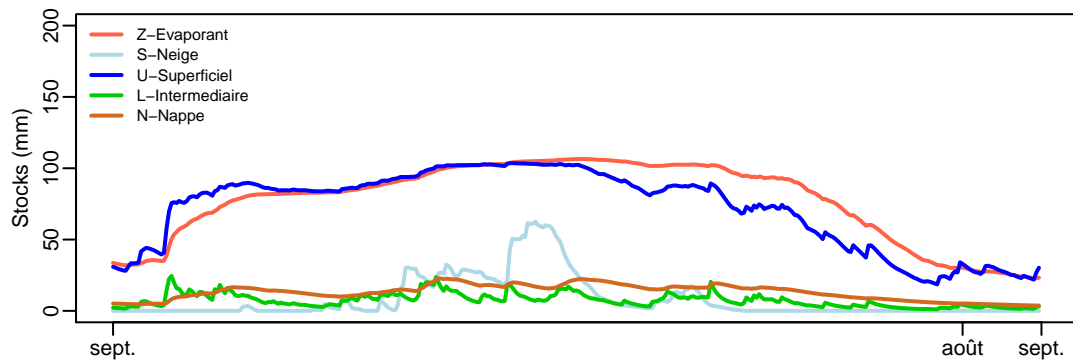

# k2680820 (5144.3 km<sup>2</sup>) – année 1994–1995

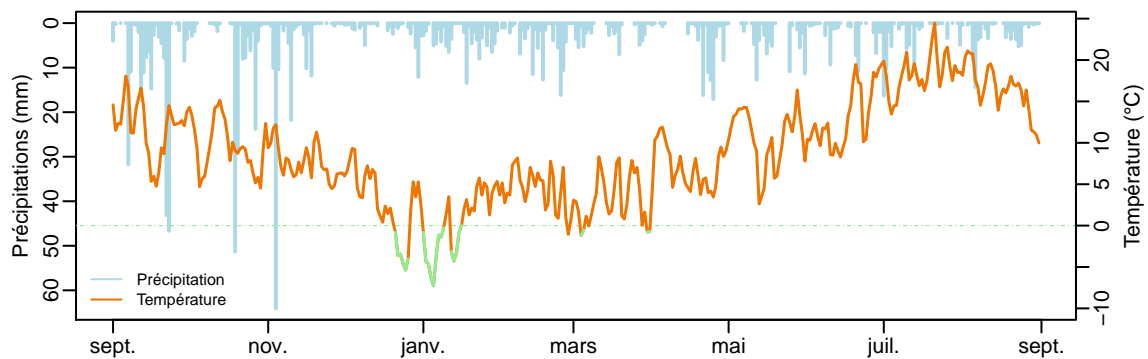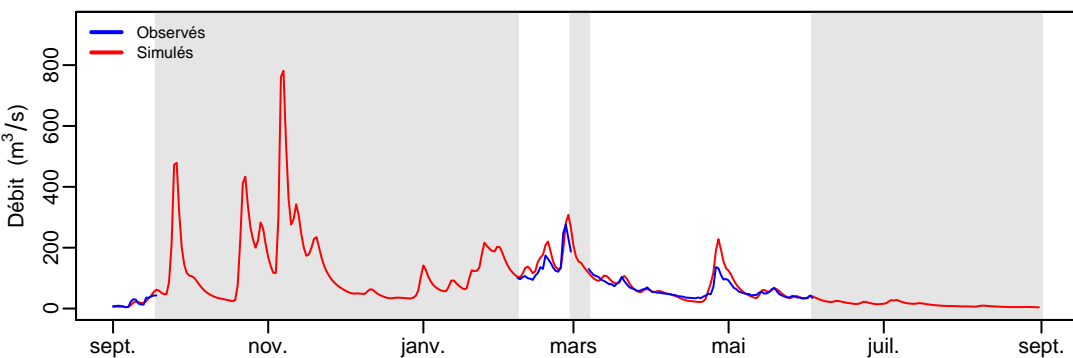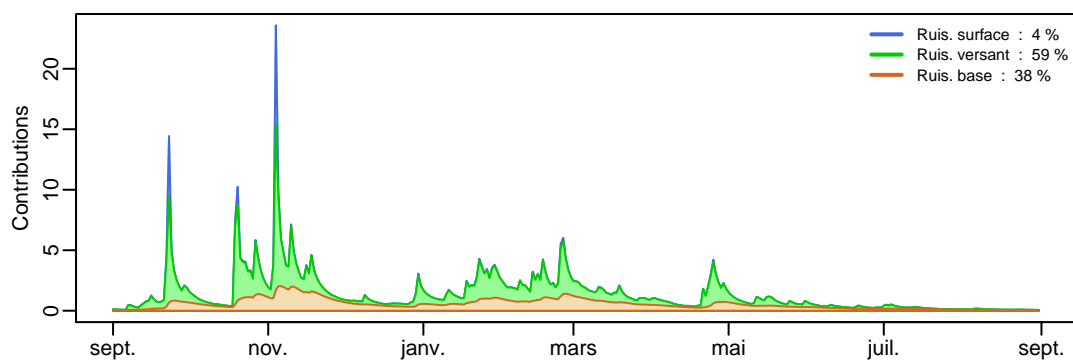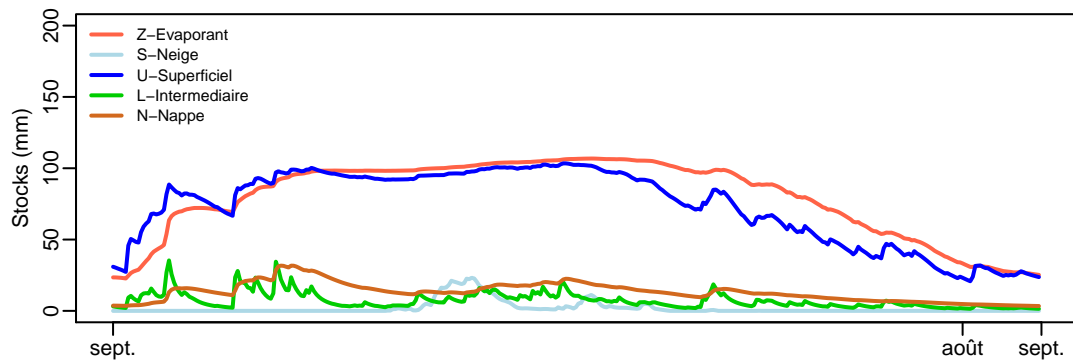



# k2680820 (5144.3 km<sup>2</sup>) – année 1995–1996

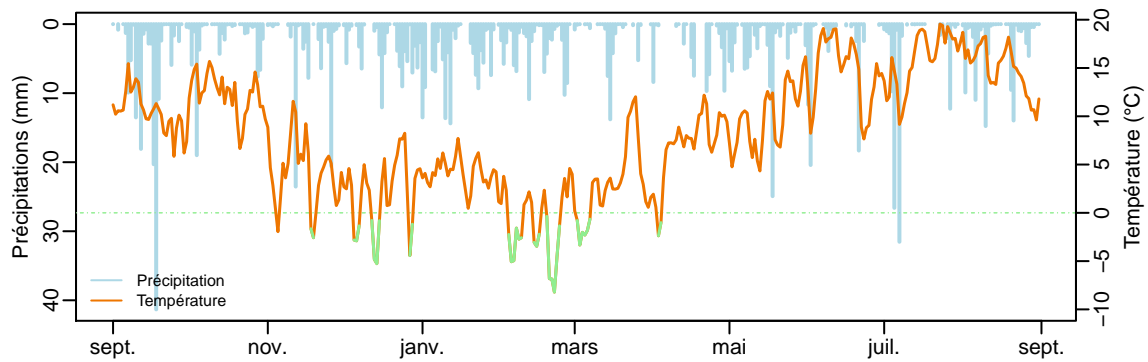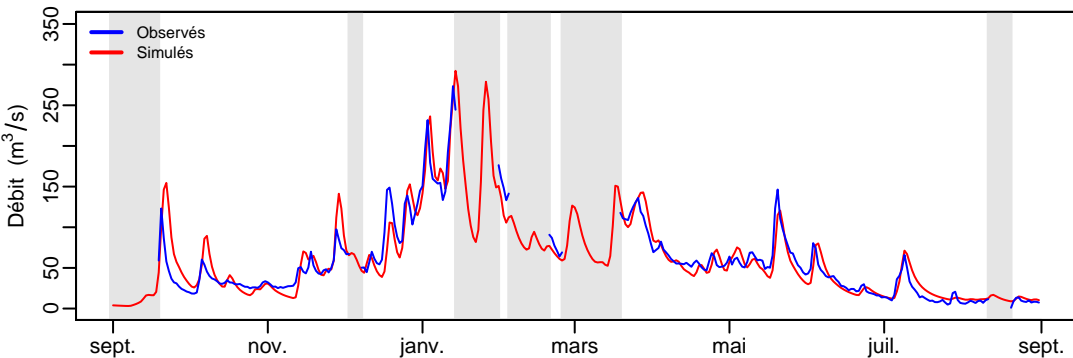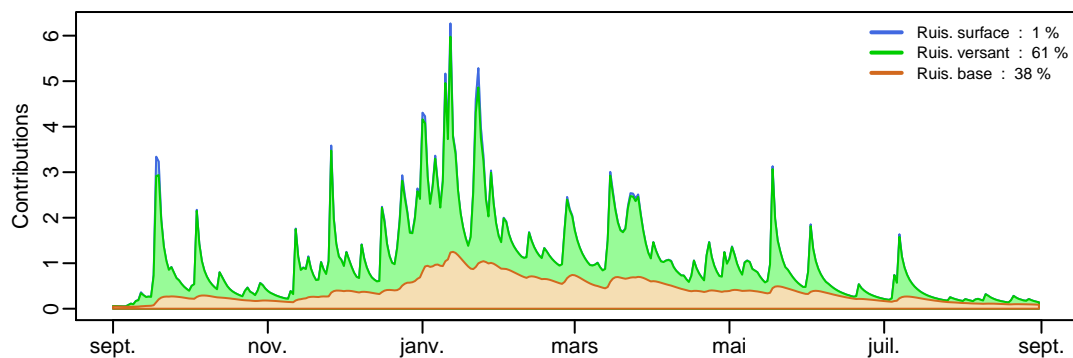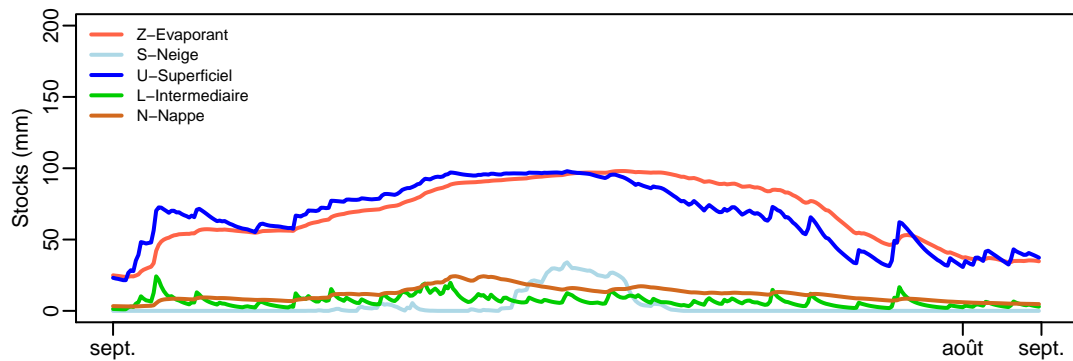

# k2680820 (5144.3 km<sup>2</sup>) – année 1996–1997

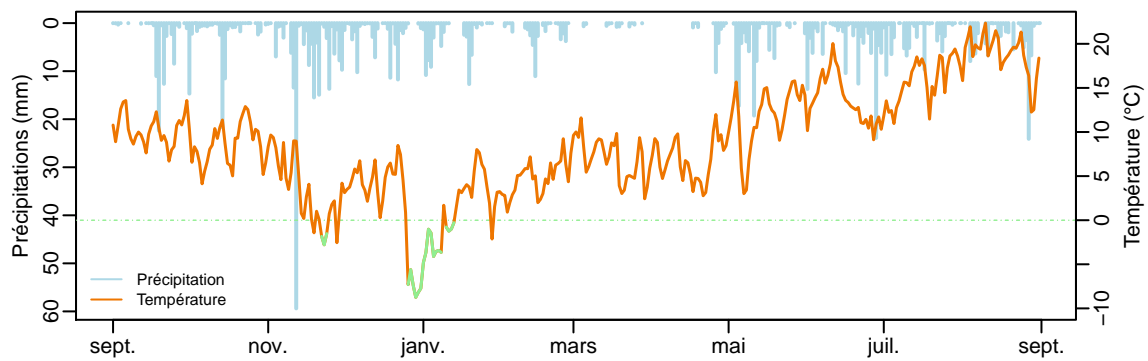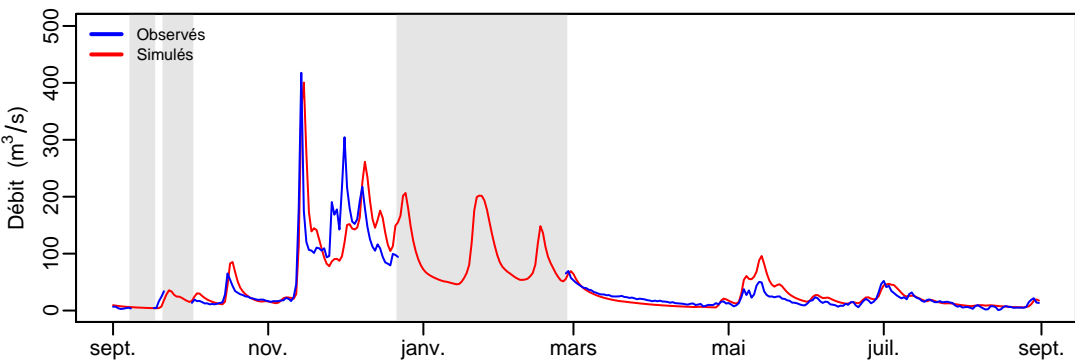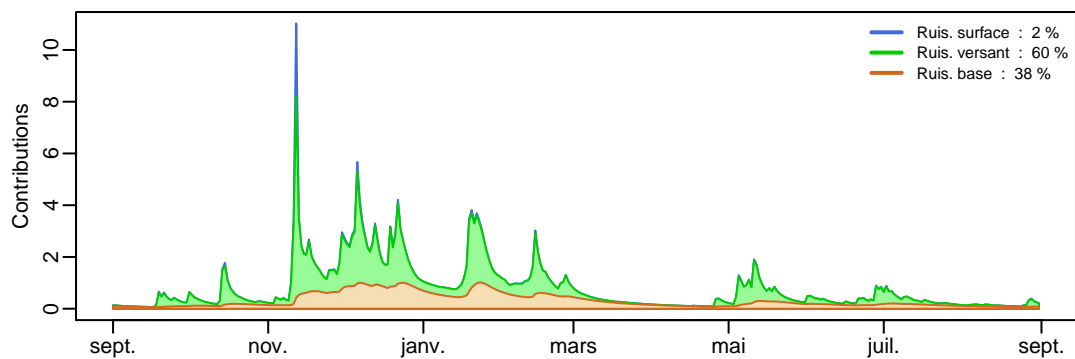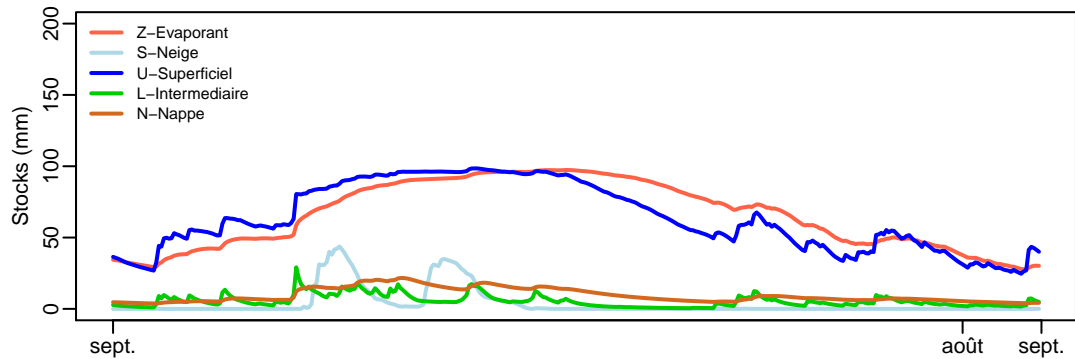

# k2680820 (5144.3 km<sup>2</sup>) – année 1997–1998

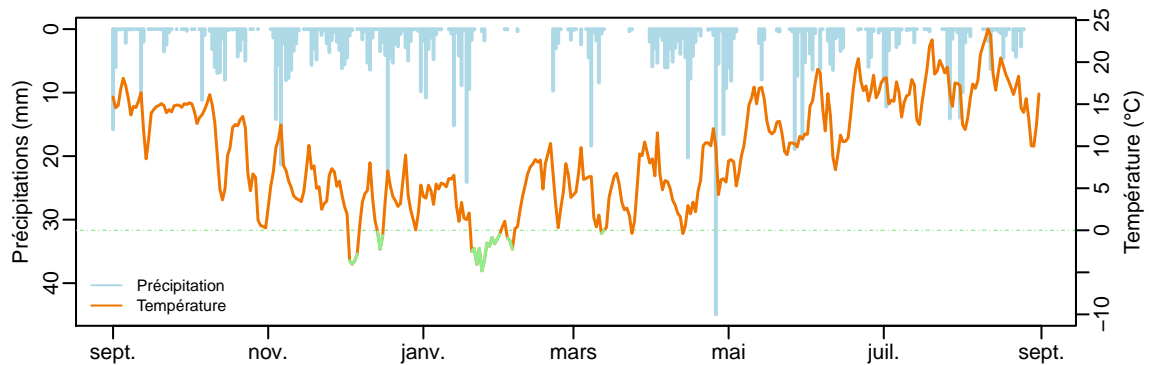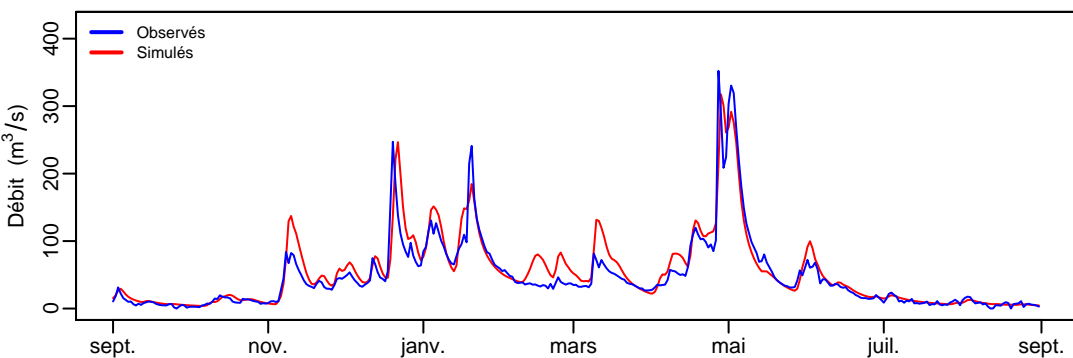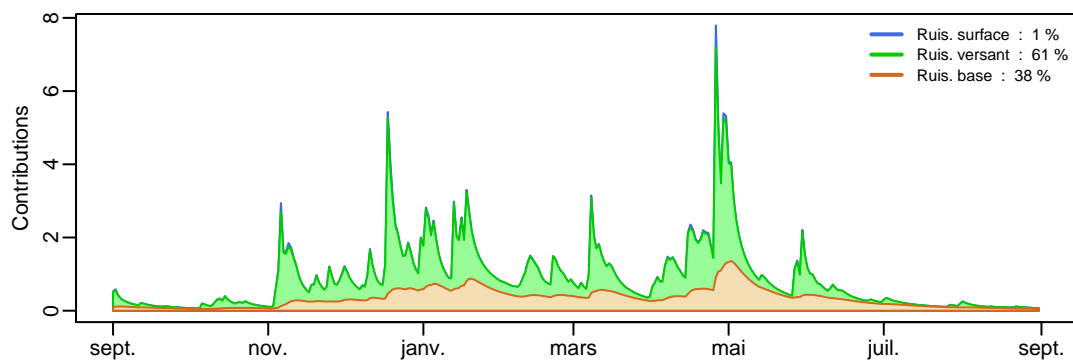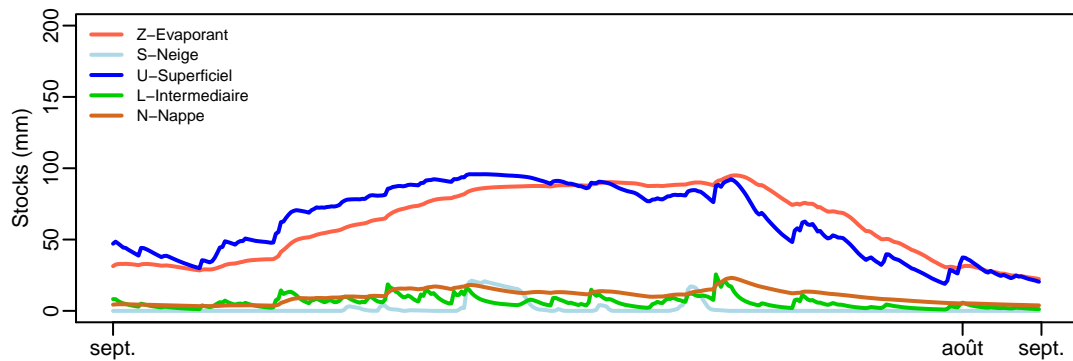

# k2680820 (5144.3 km<sup>2</sup>) – année 1998–1999

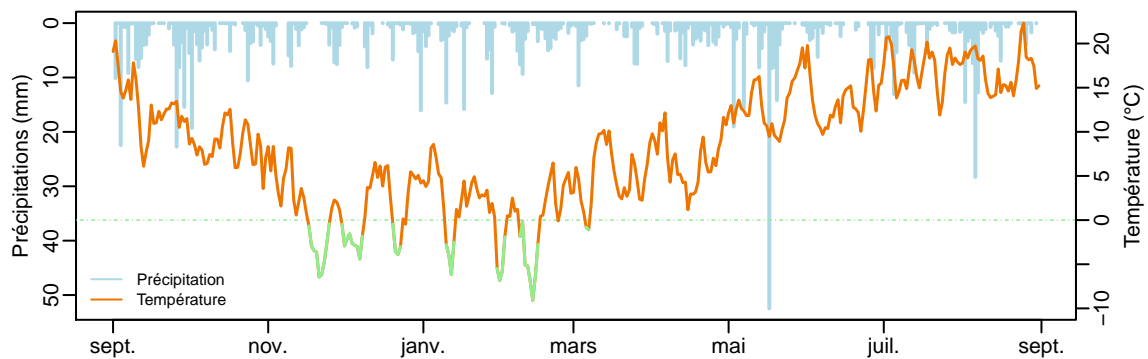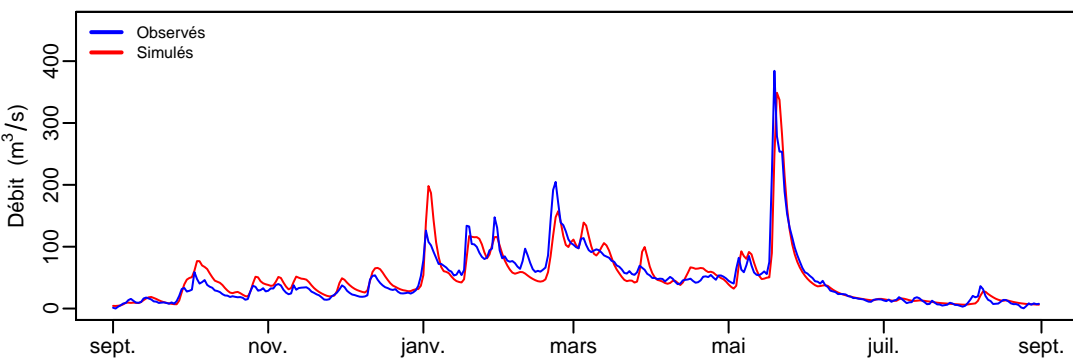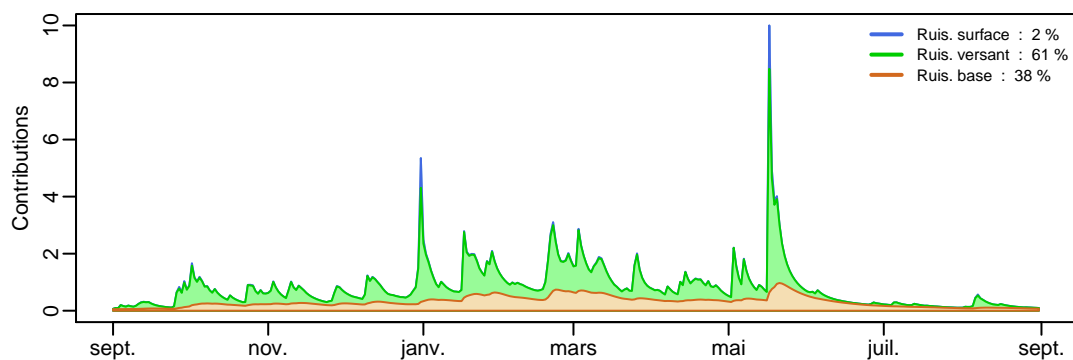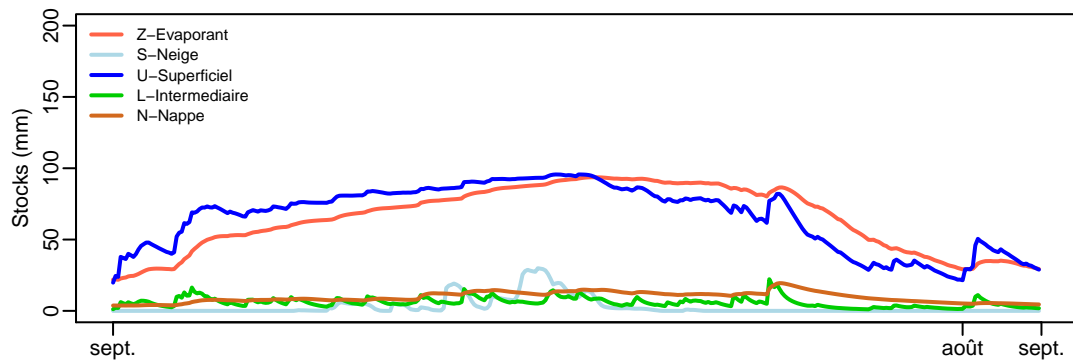

# k2680820 (5144.3 km<sup>2</sup>) – année 1999–2000

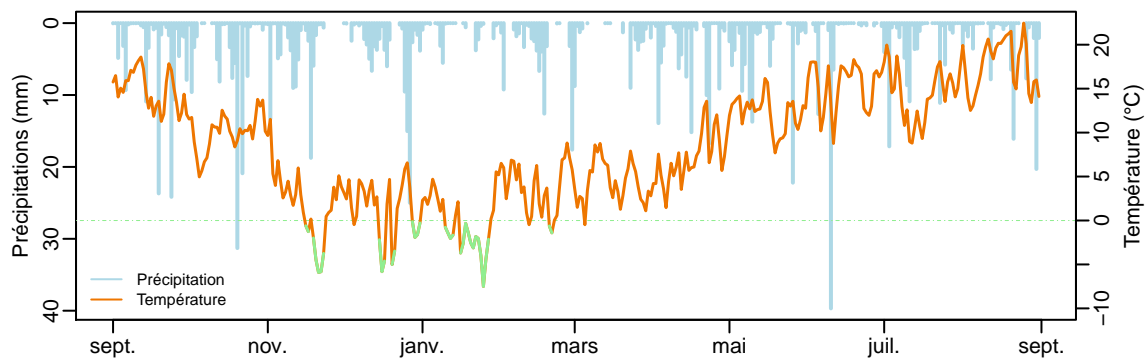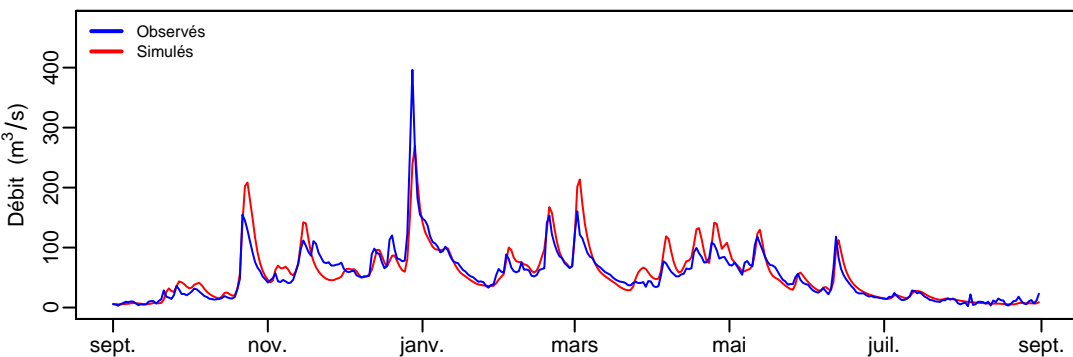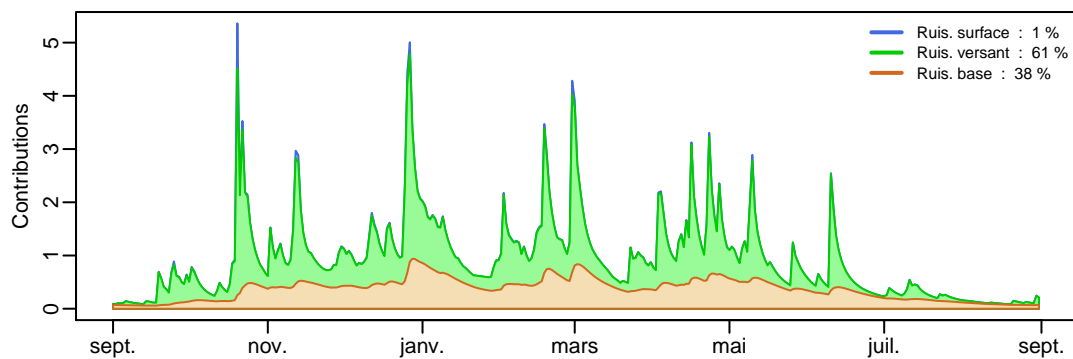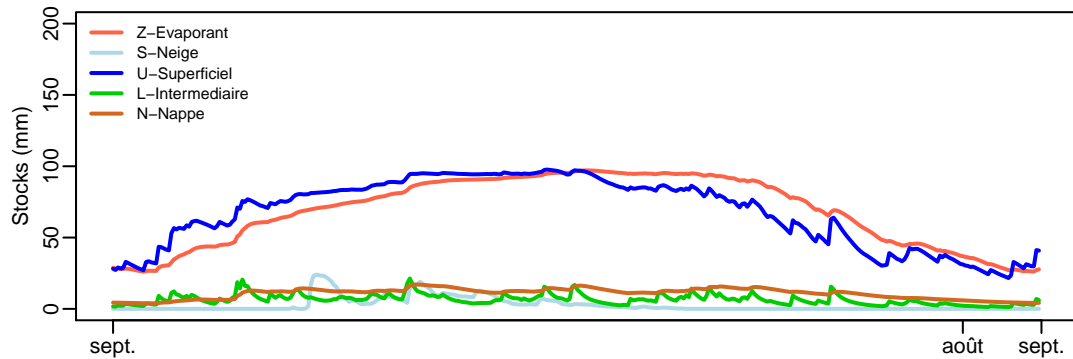

# k2680820 (5144.3 km²) – année 2000–2001

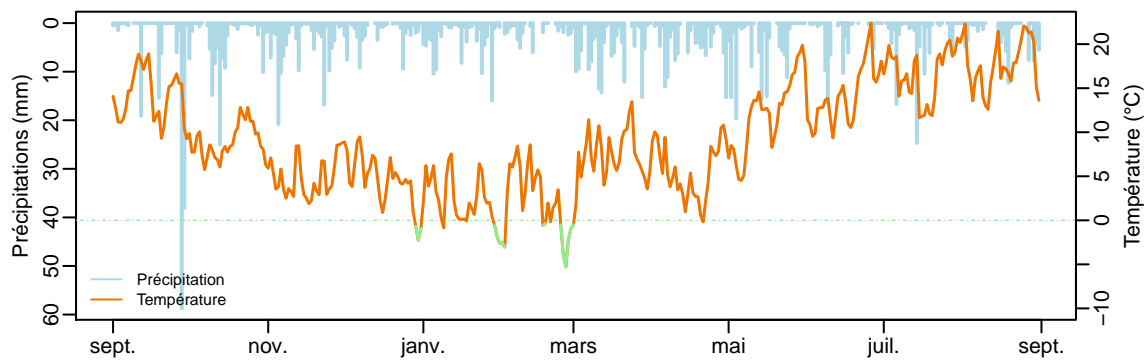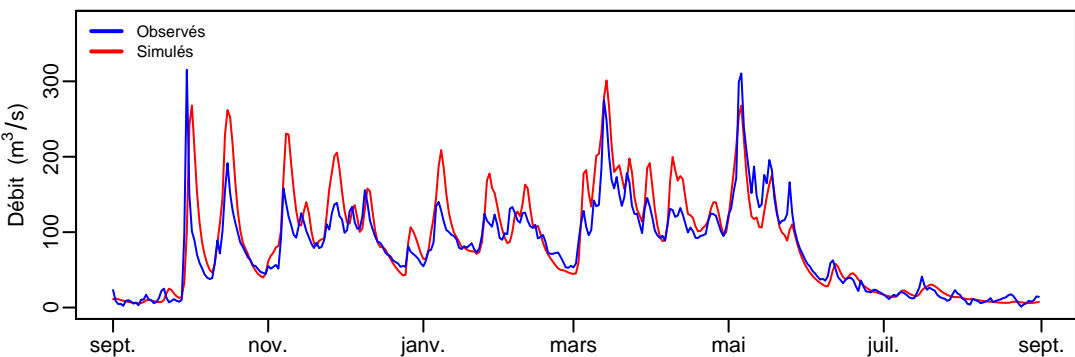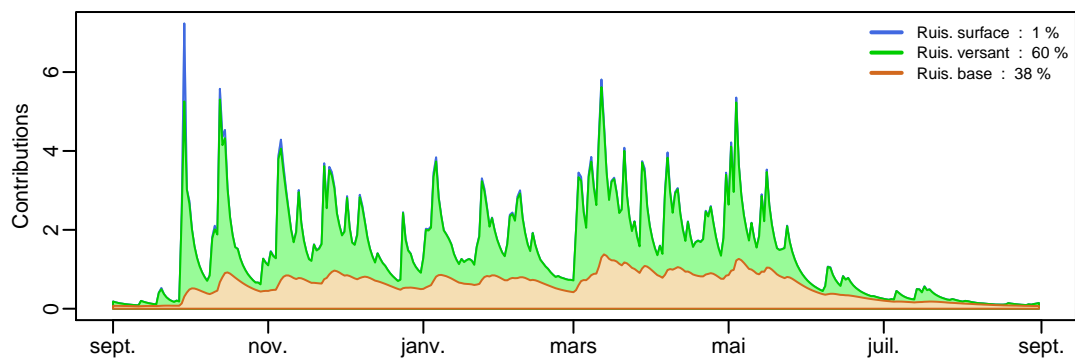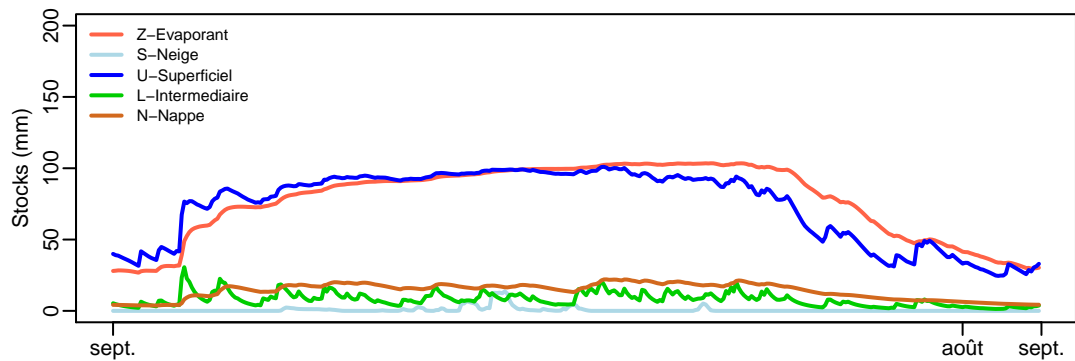

# k2680820 (5144.3 km<sup>2</sup>) – année 2001–2002

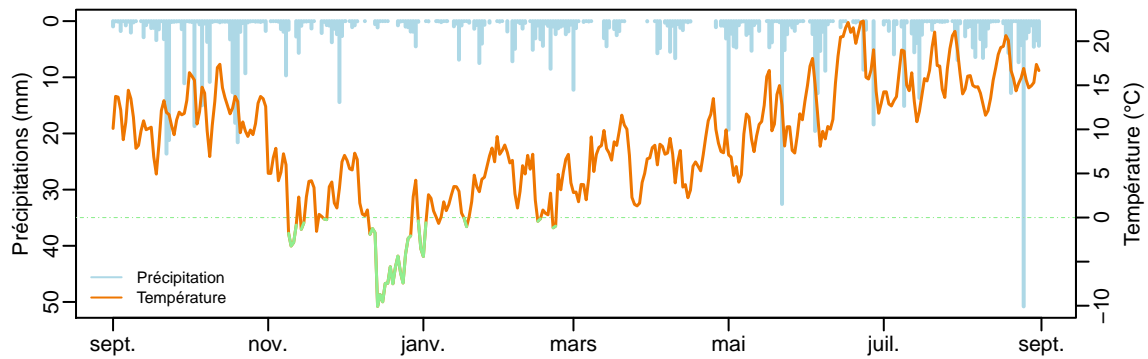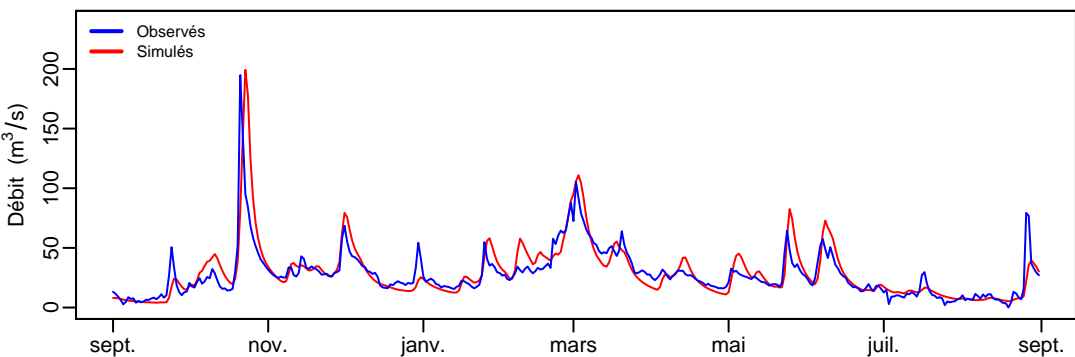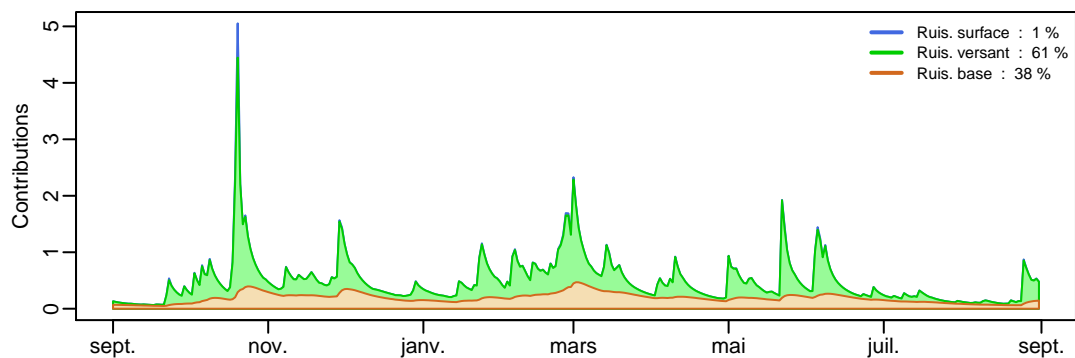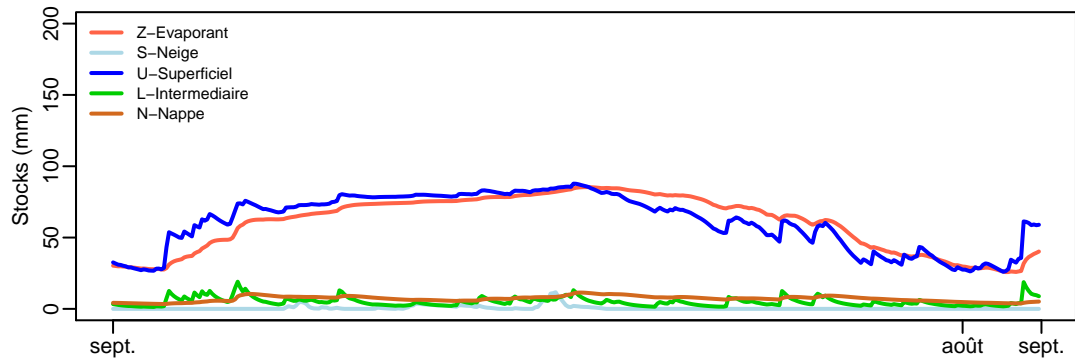

# k2680820 (5144.3 km<sup>2</sup>) – année 2002–2003

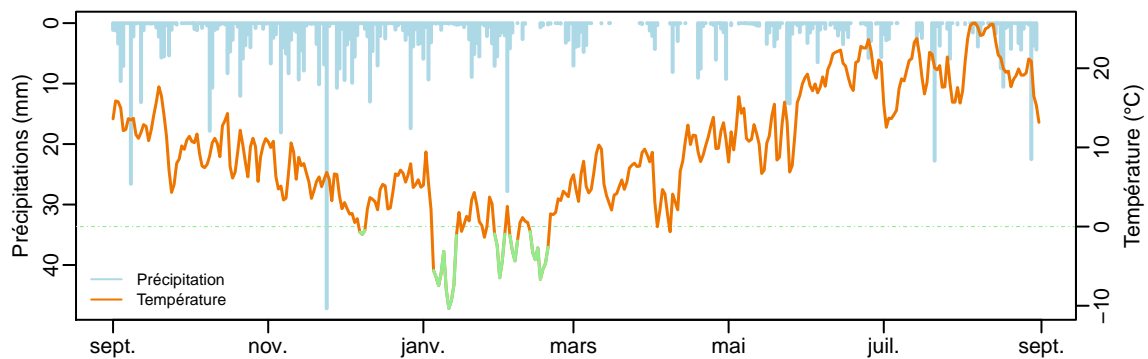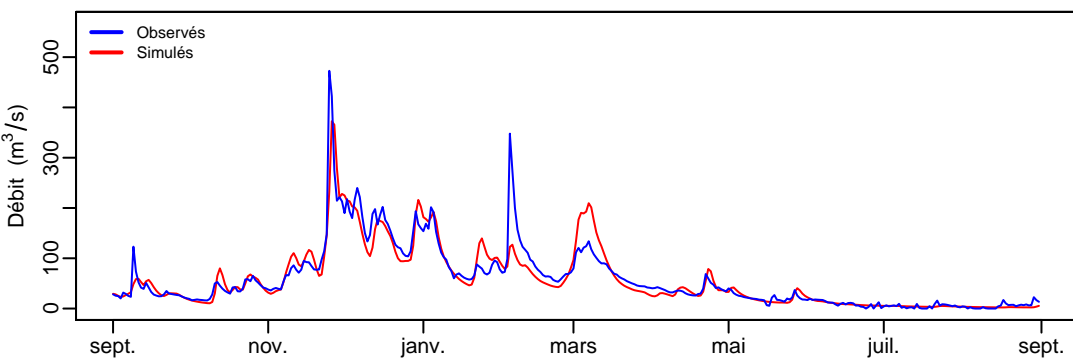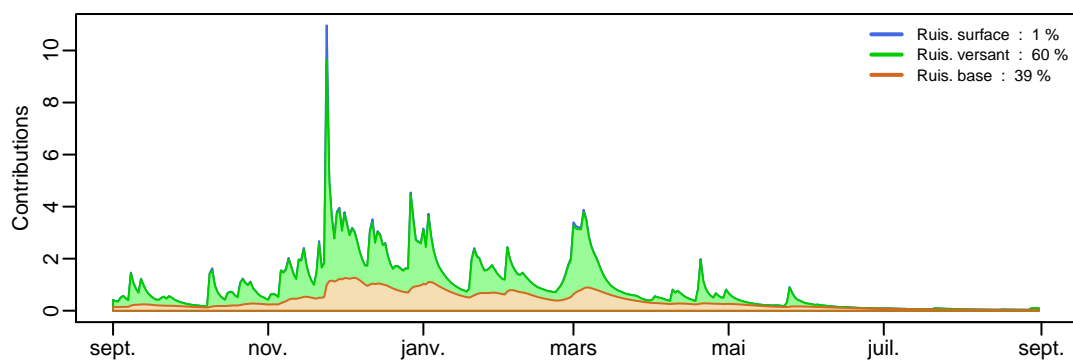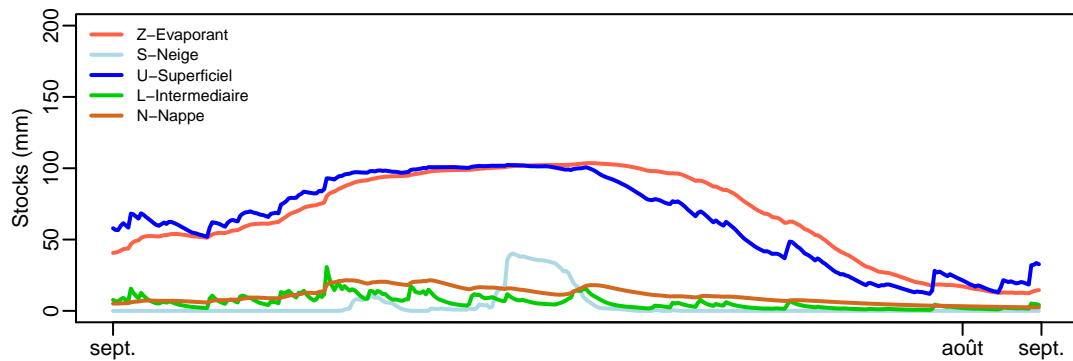



# k2680820 (5144.3 km<sup>2</sup>) – année 2003–2004

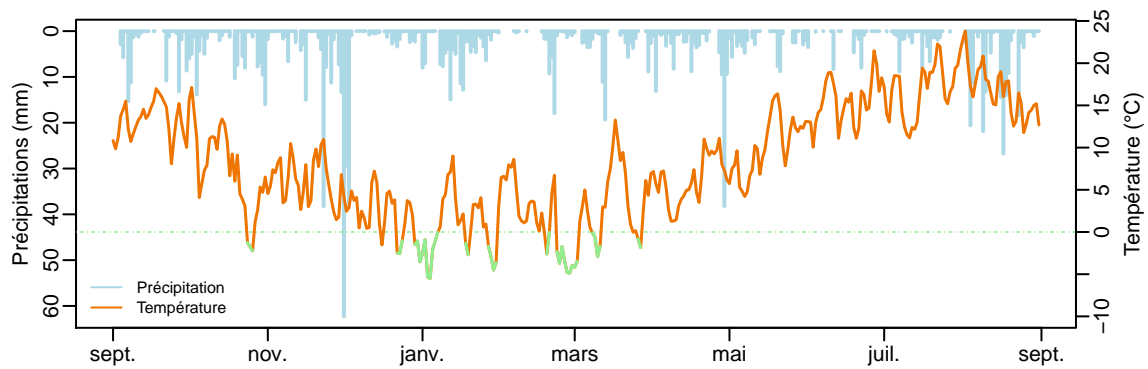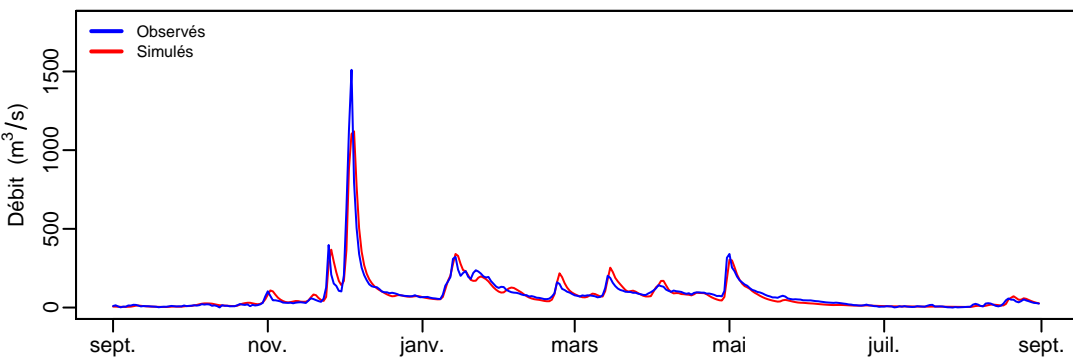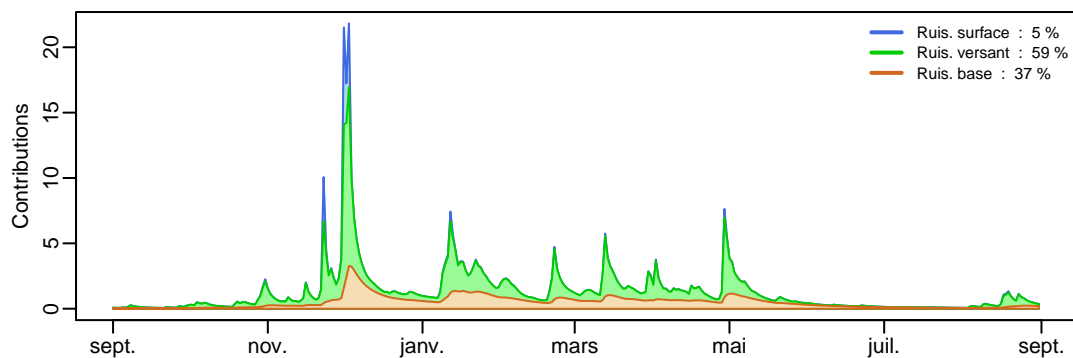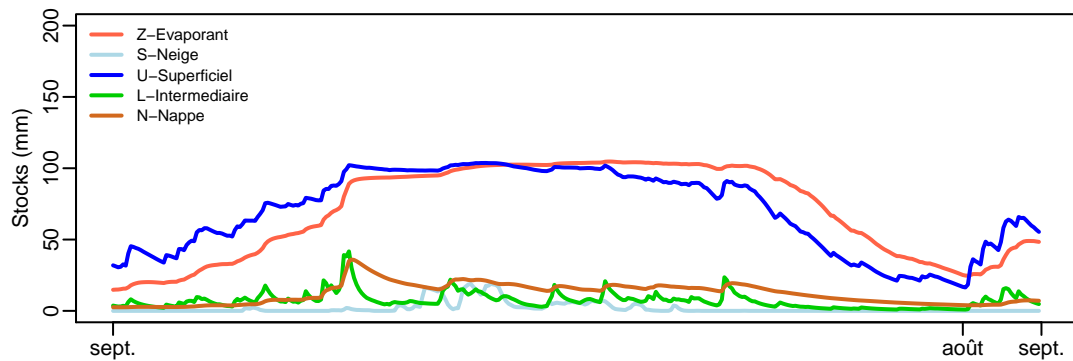

# k2680820 (5144.3 km<sup>2</sup>) – année 2004–2005

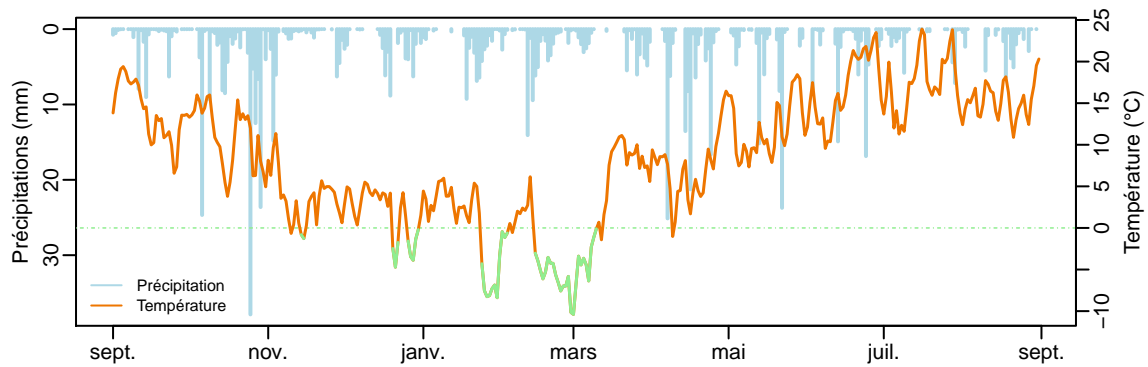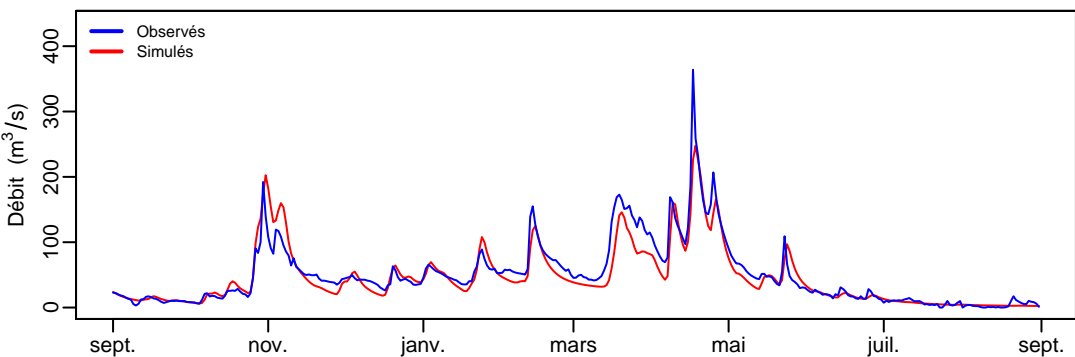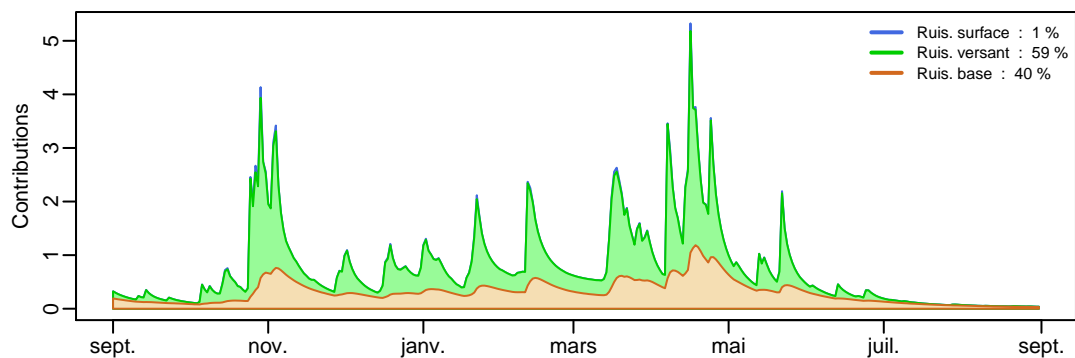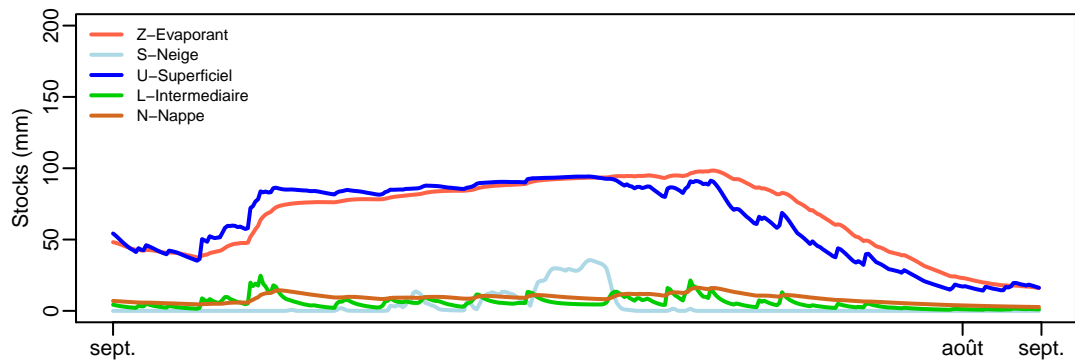

# k2680820 (5144.3 km²) – année 2005–2006

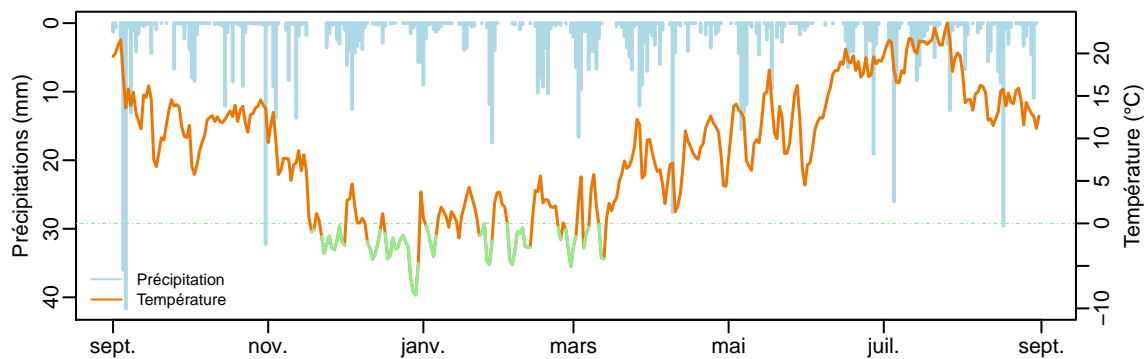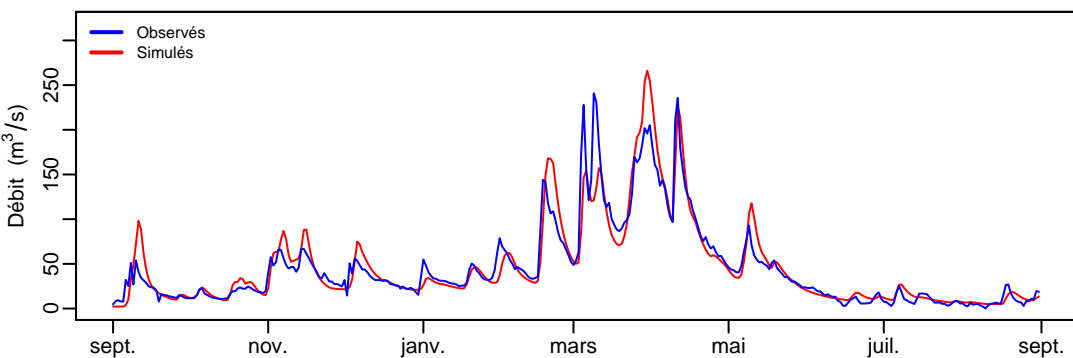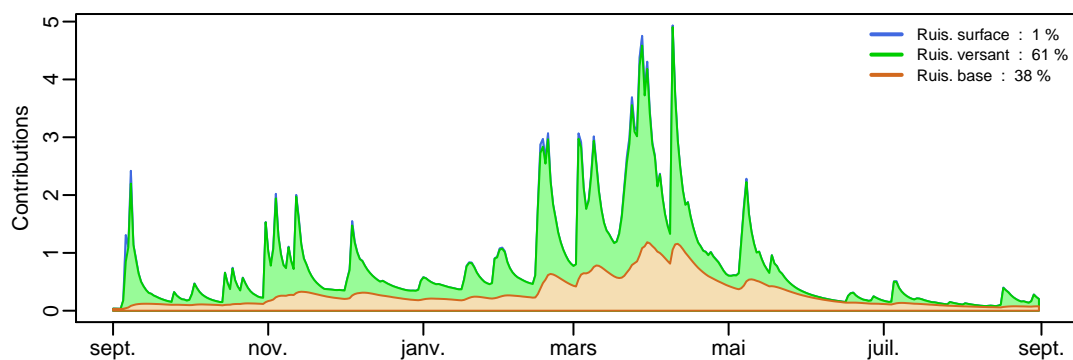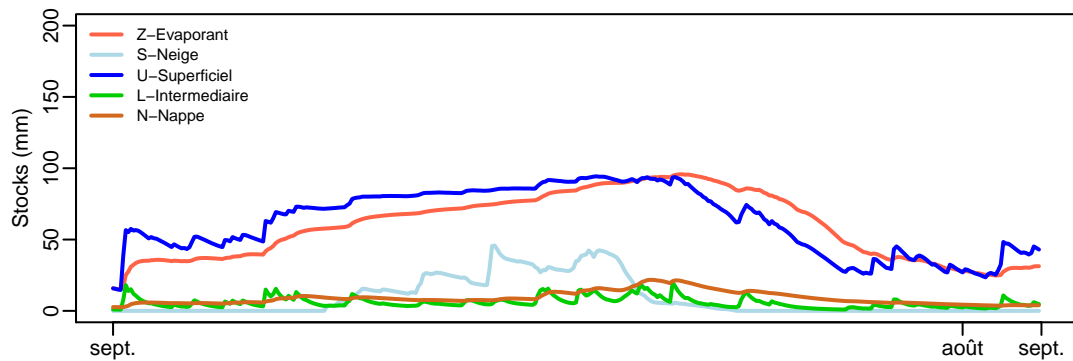

# k2680820 (5144.3 km<sup>2</sup>) – année 2006–2007

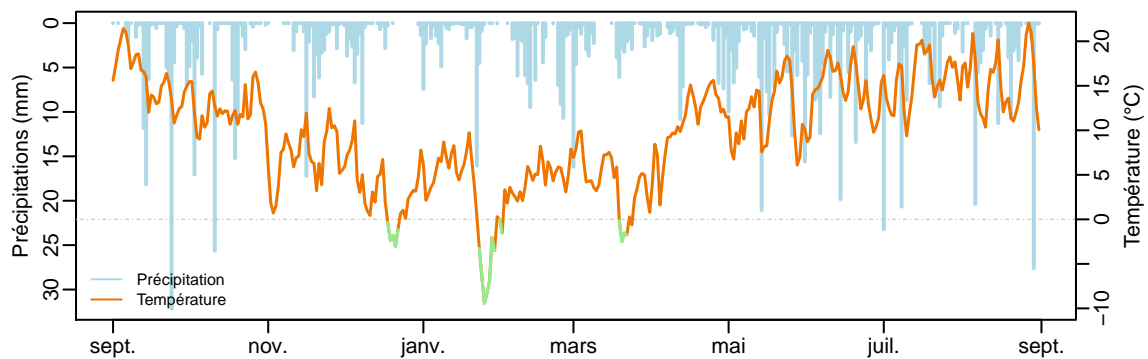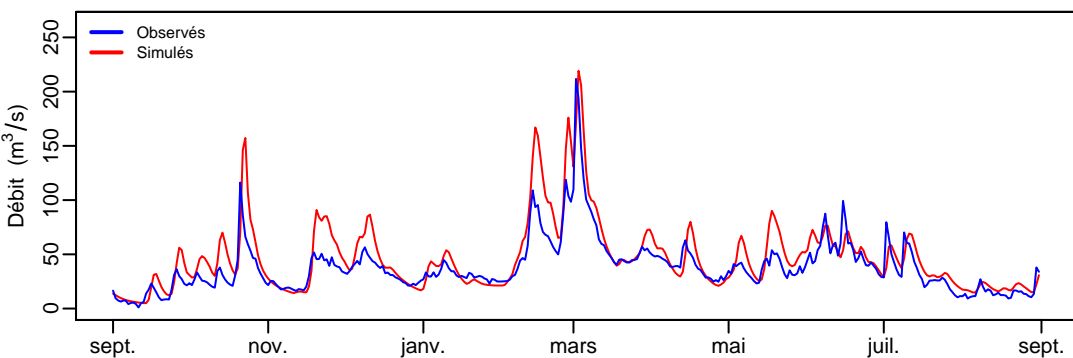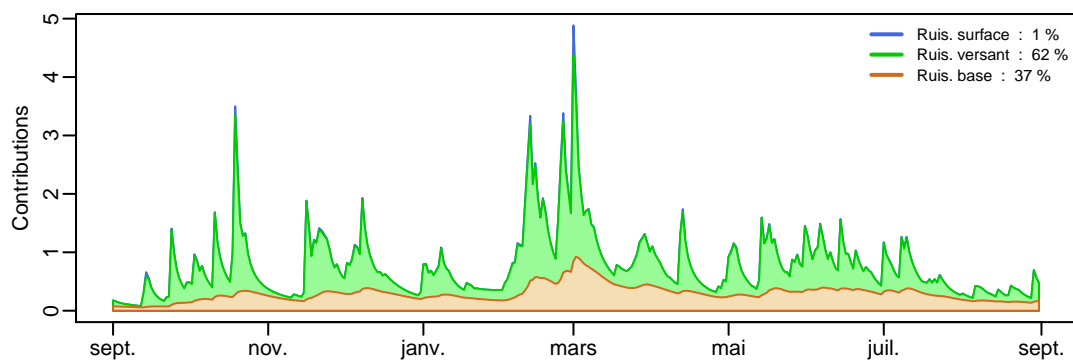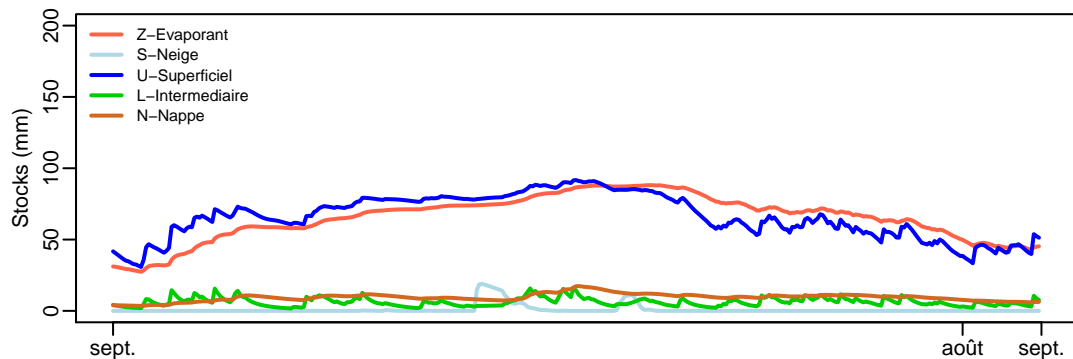

# k2680820 (5144.3 km<sup>2</sup>) – année 2007–2008

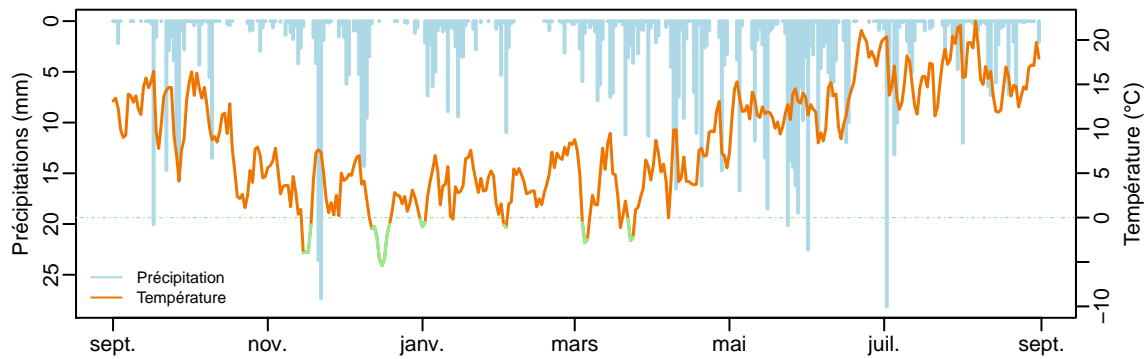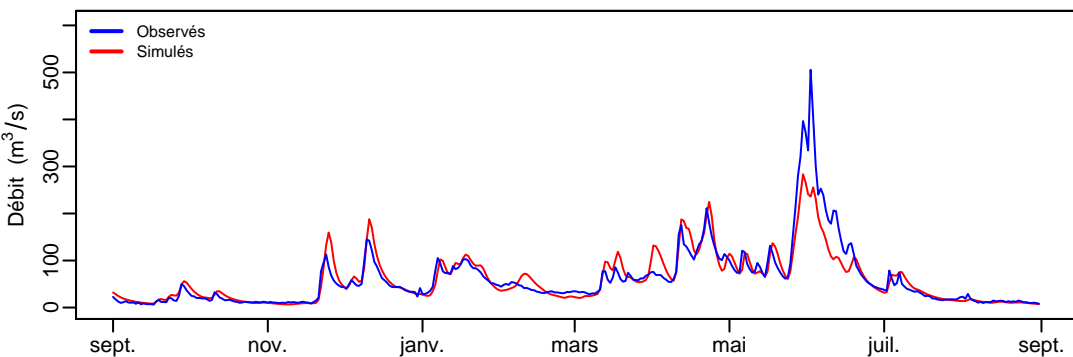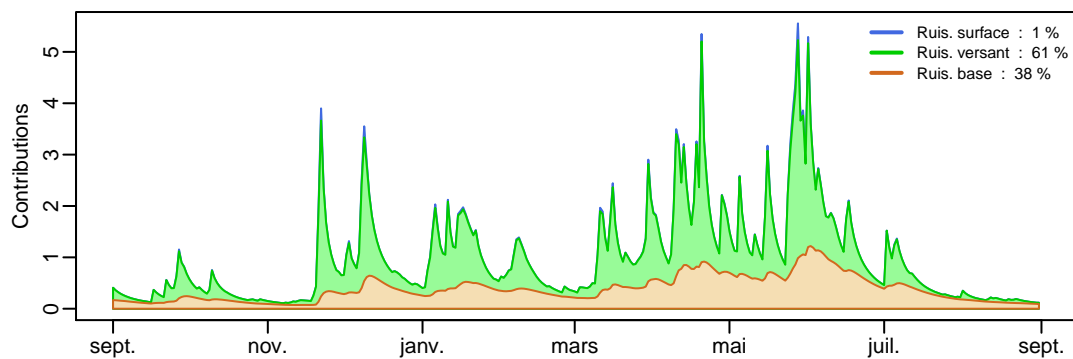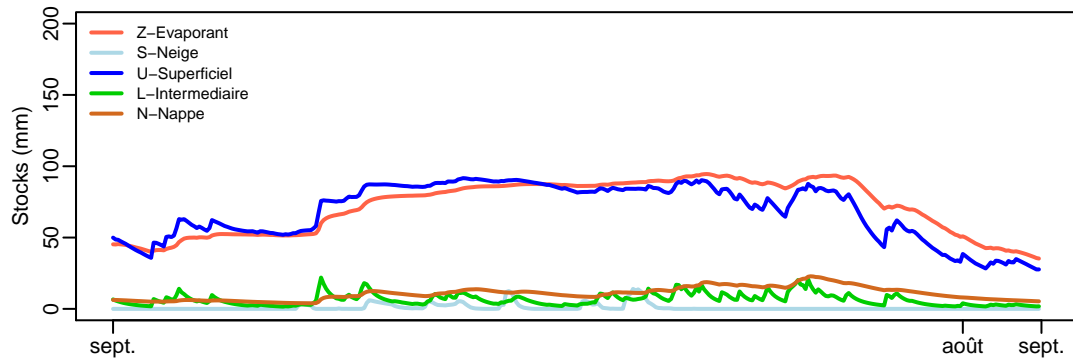

# k2680820 (5144.3 km<sup>2</sup>) – année 2008–2009

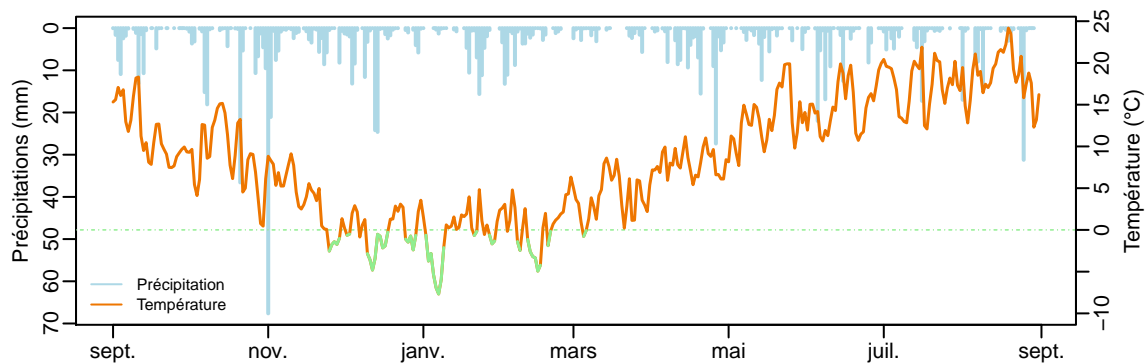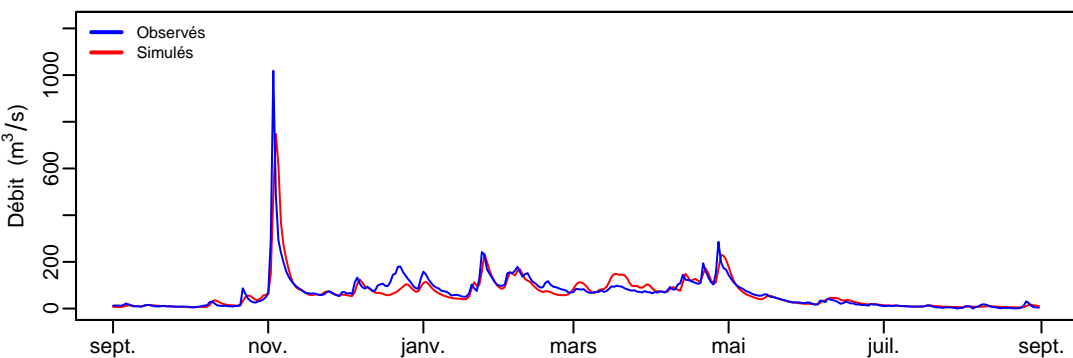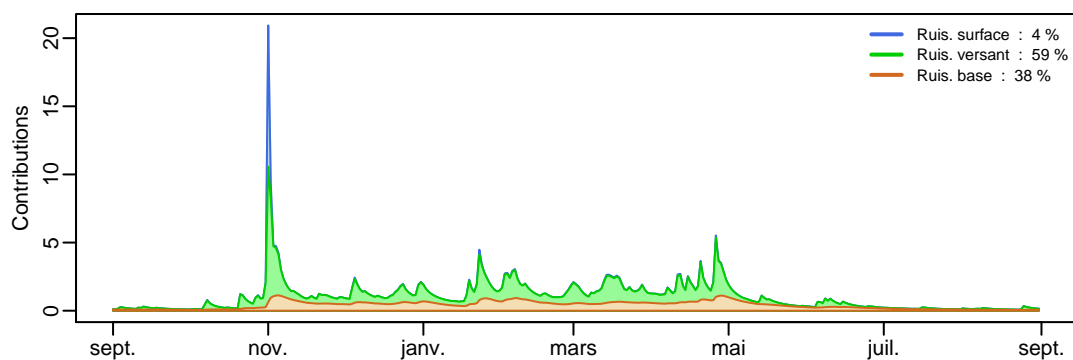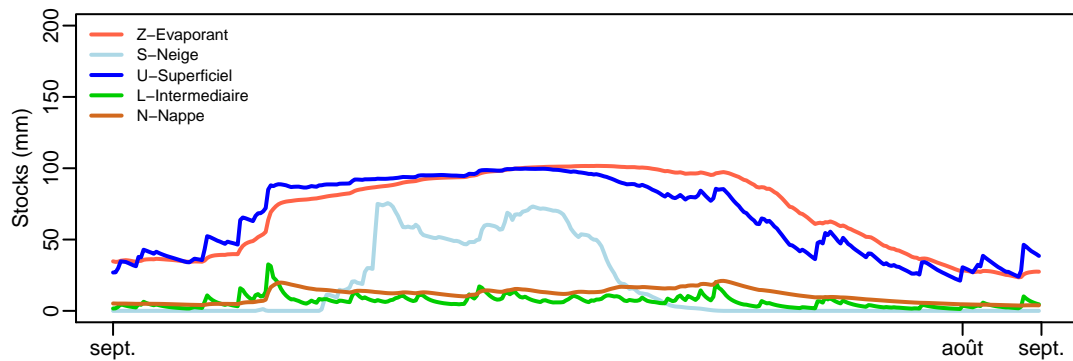

# k2680820 (5144.3 km²) – année 2009–2010

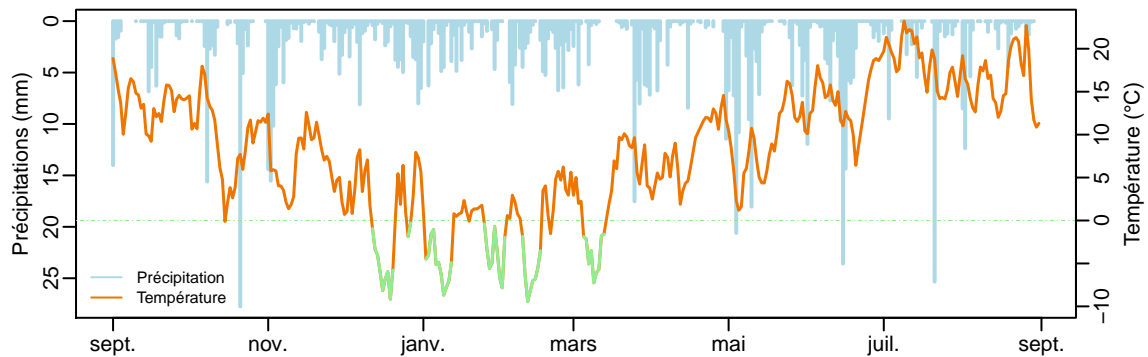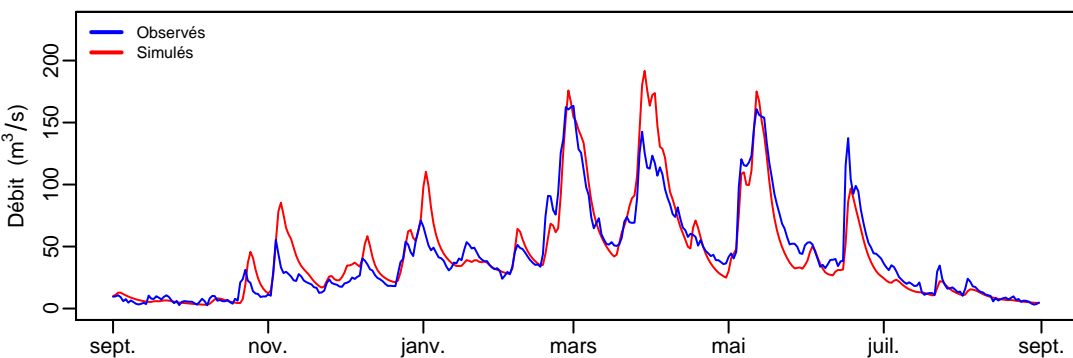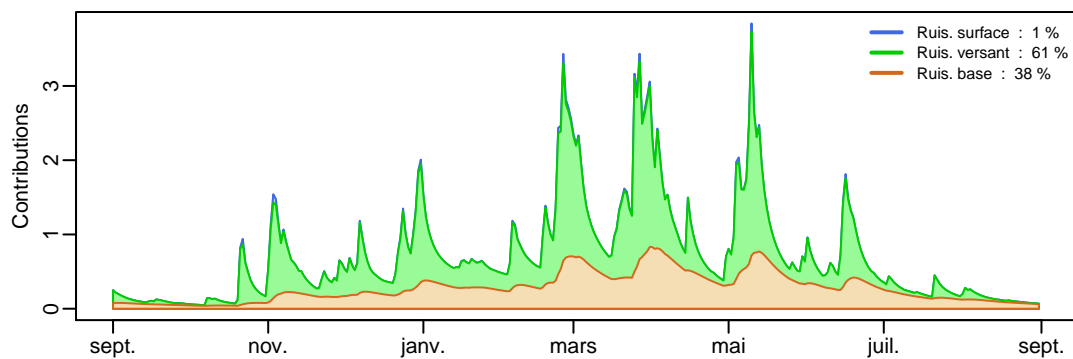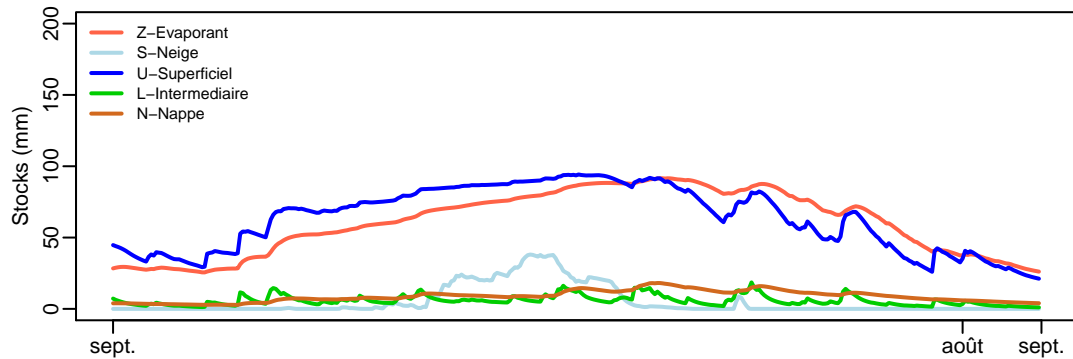

# k2680820 (5144.3 km<sup>2</sup>) – année 2010–2011

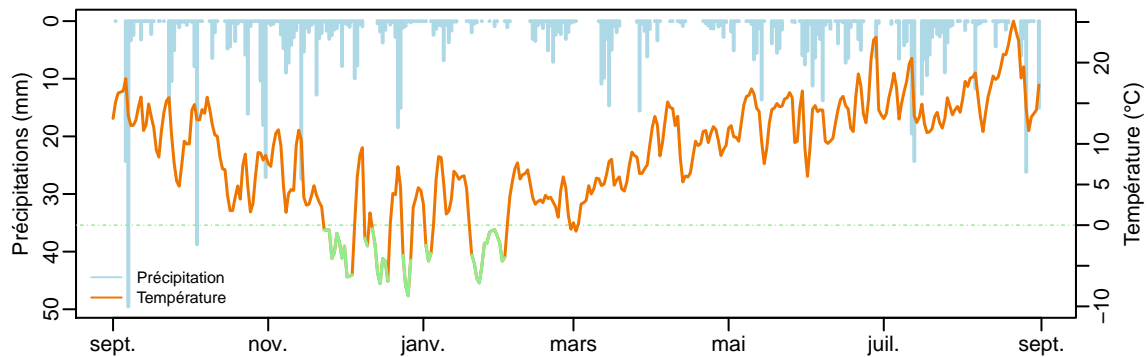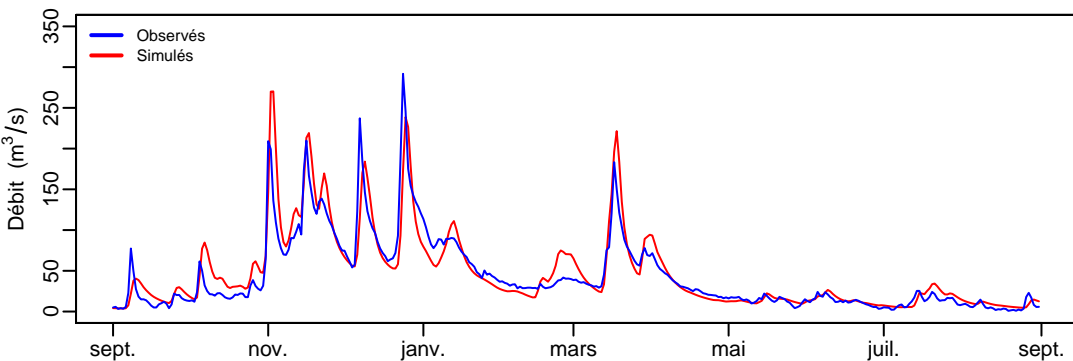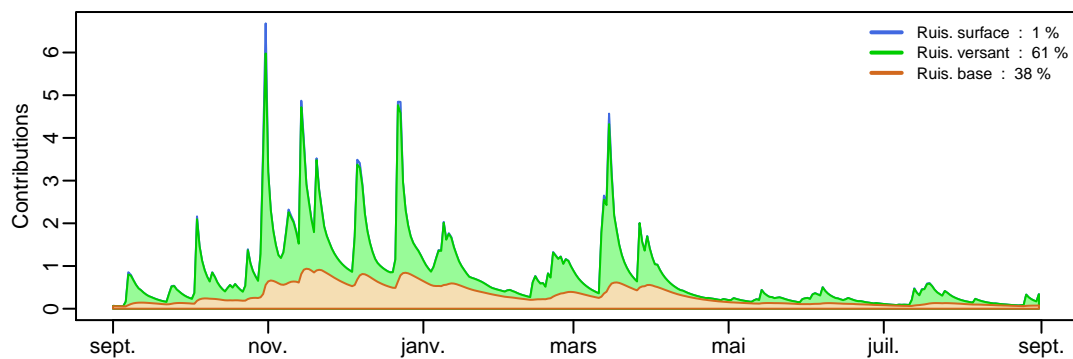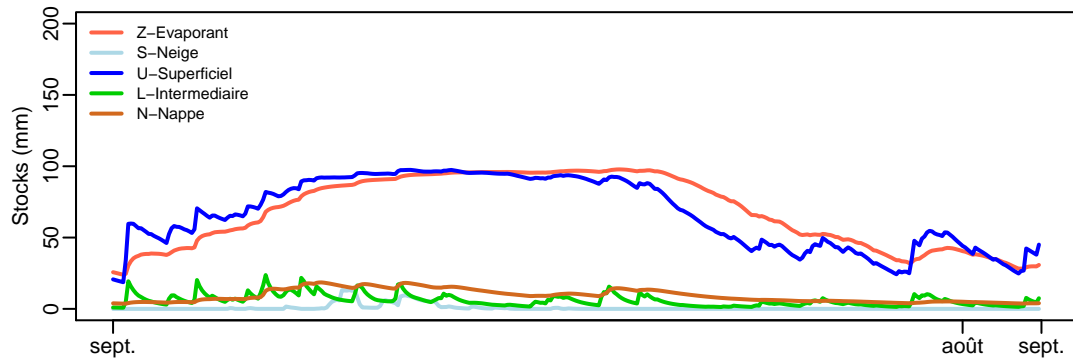



# k2680820 (5144.3 km<sup>2</sup>) – année 2011–2012

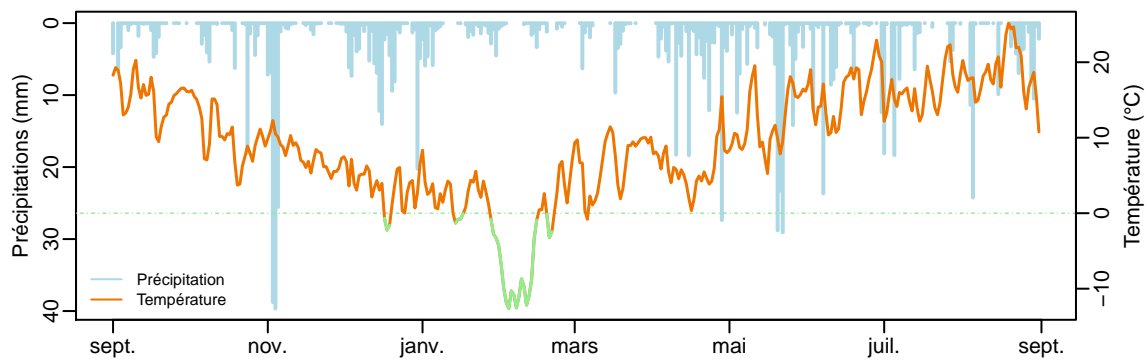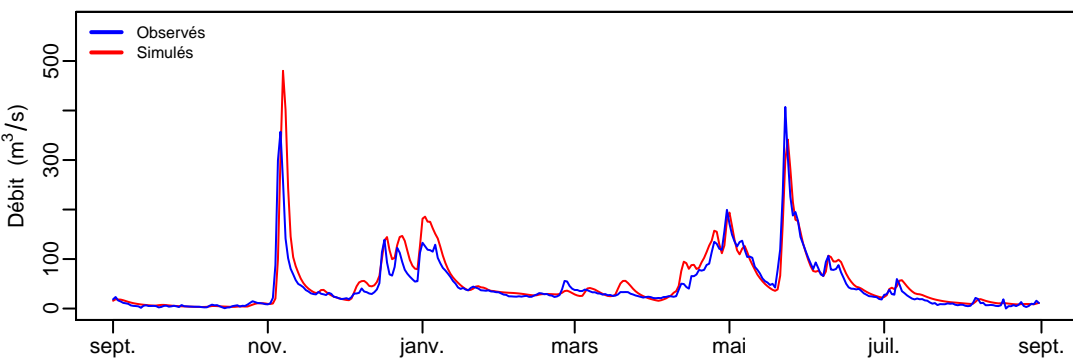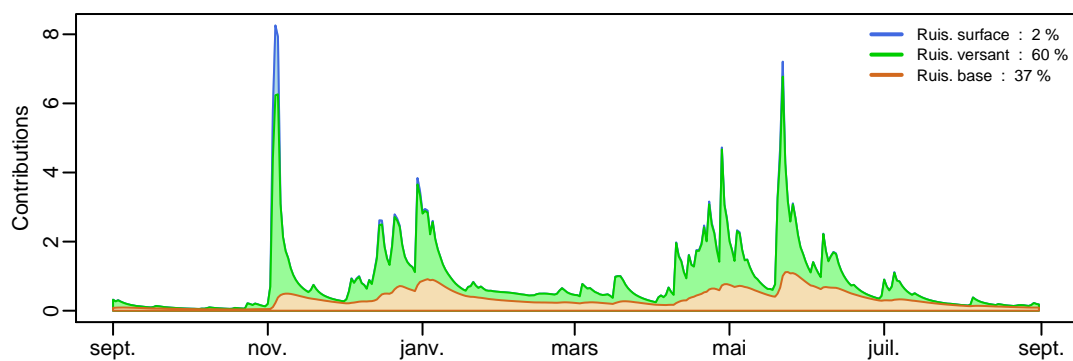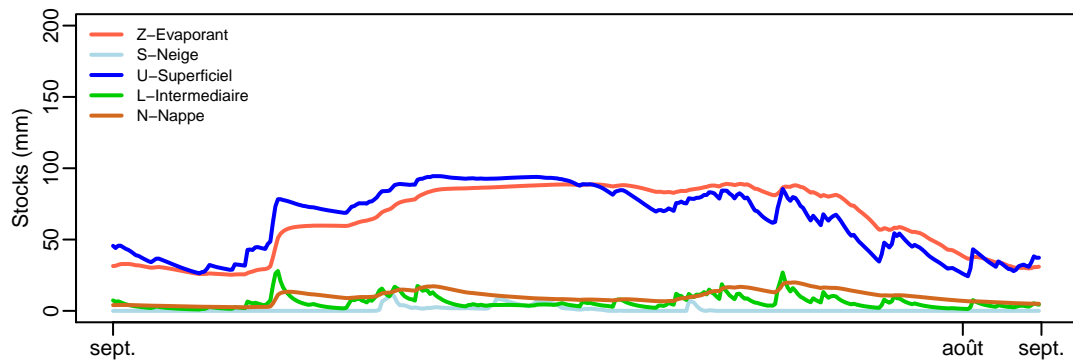

# k2714010 (119.01 km<sup>2</sup>) – année 2001–2002

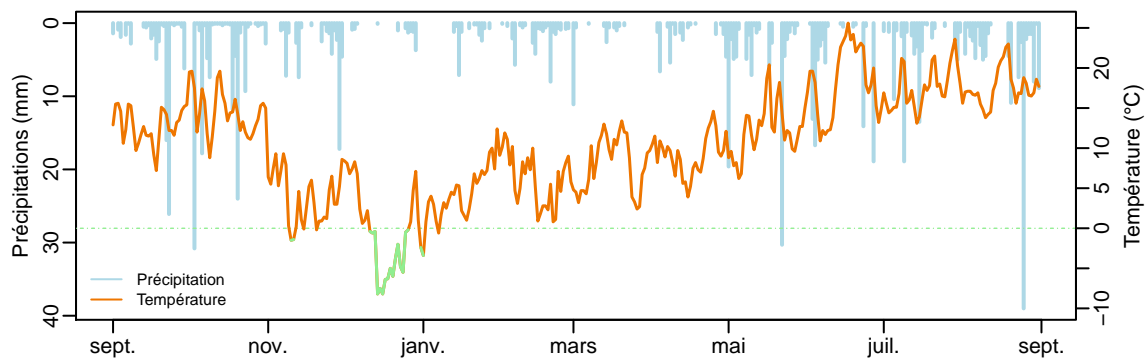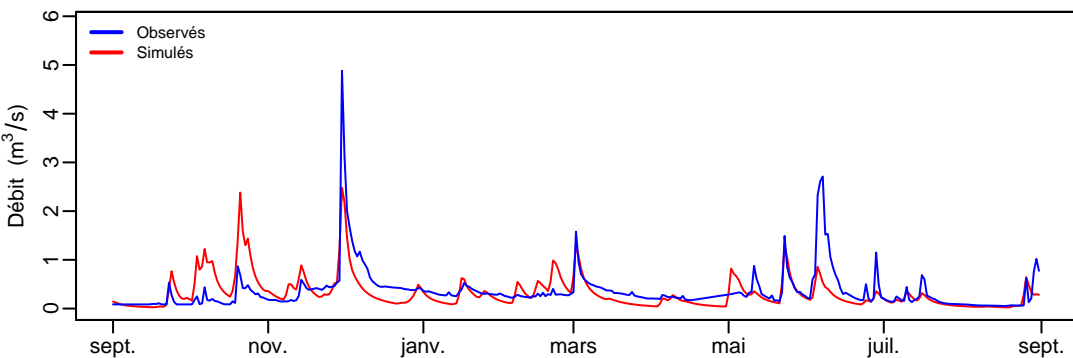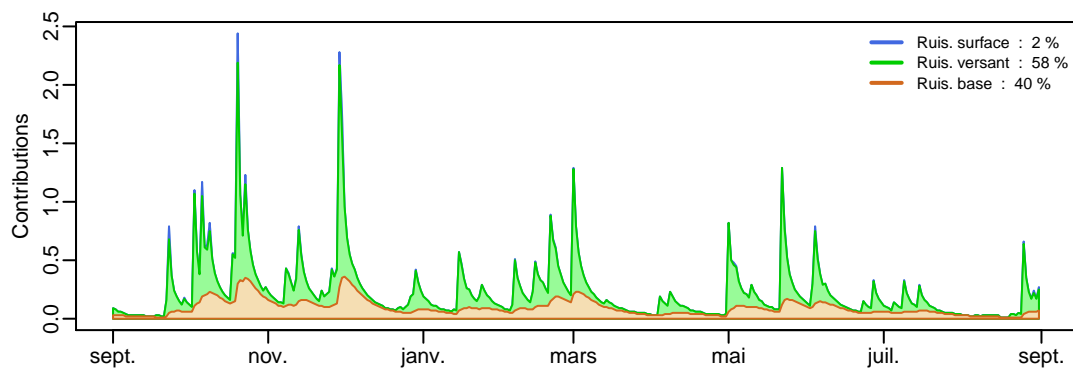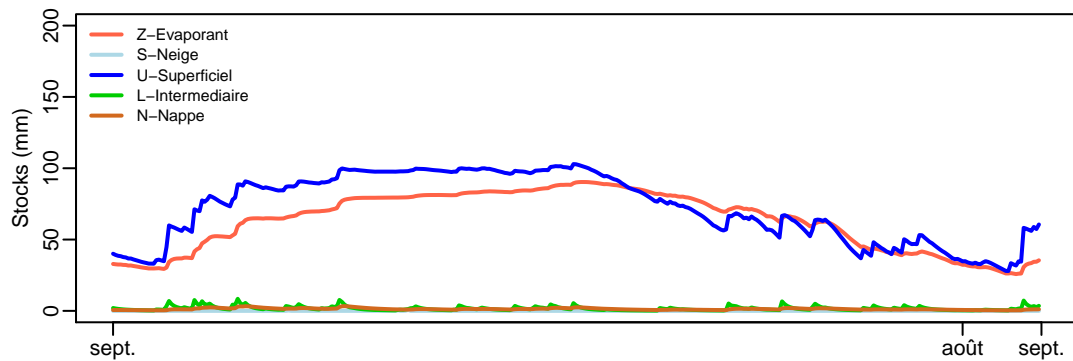

# k2714010 (119.01 km<sup>2</sup>) – année 2002–2003

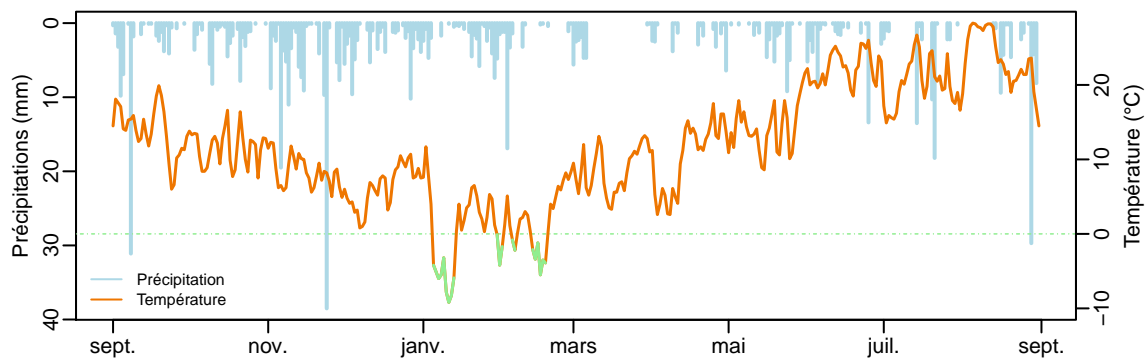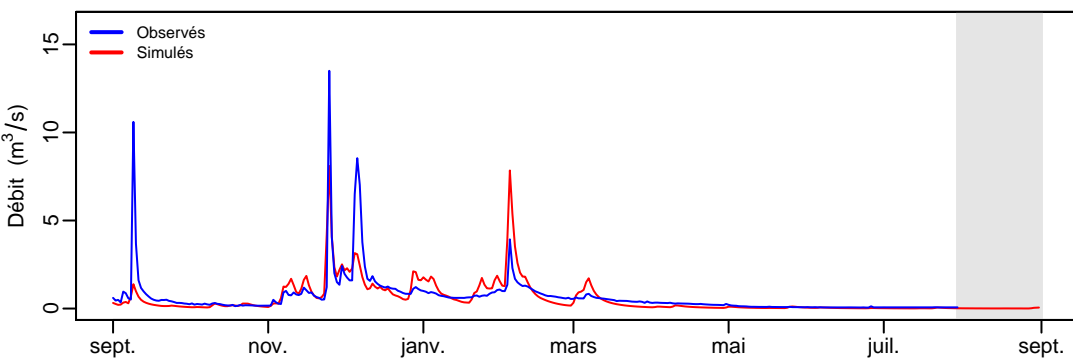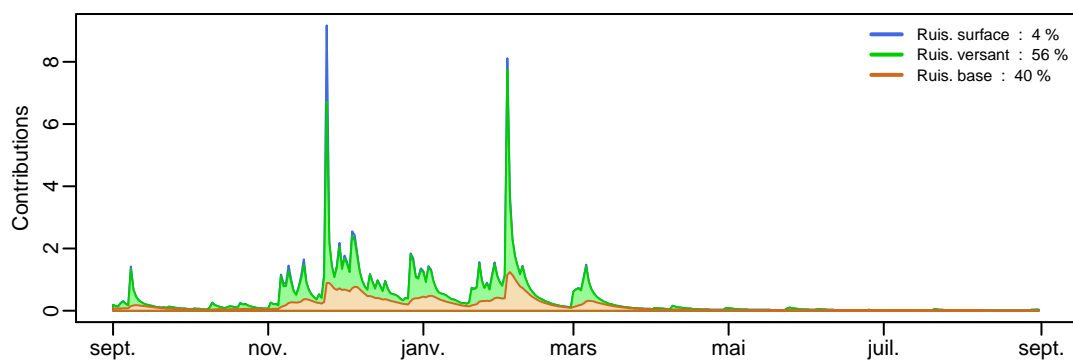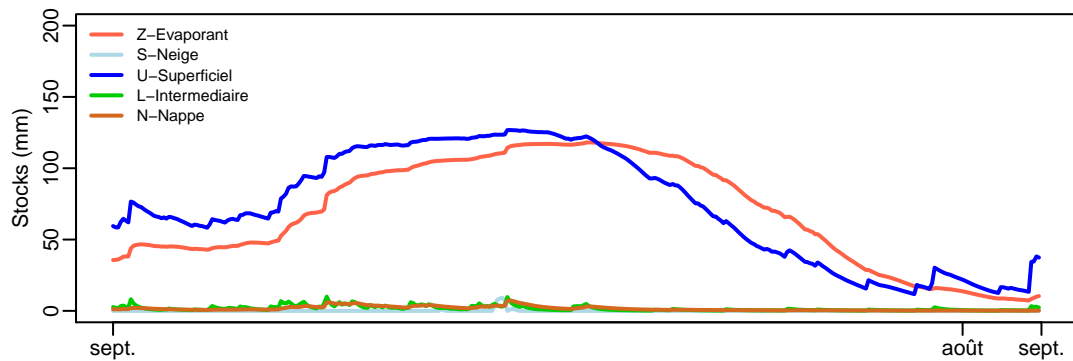

# k2714010 (119.01 km<sup>2</sup>) – année 2003–2004

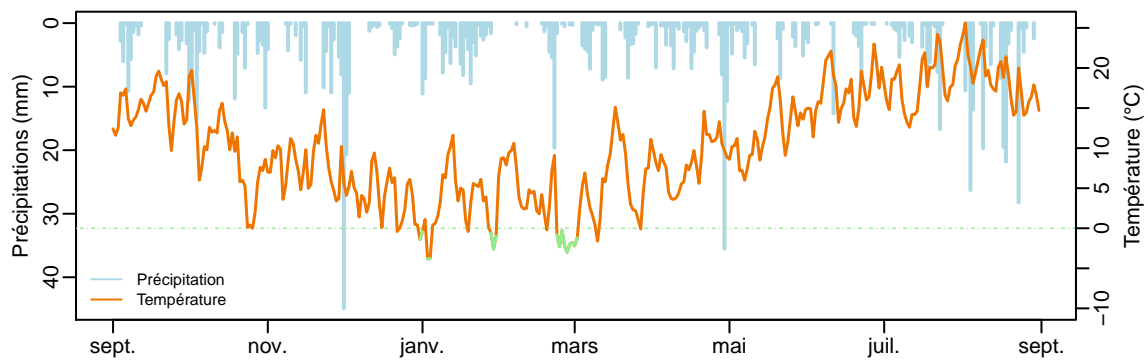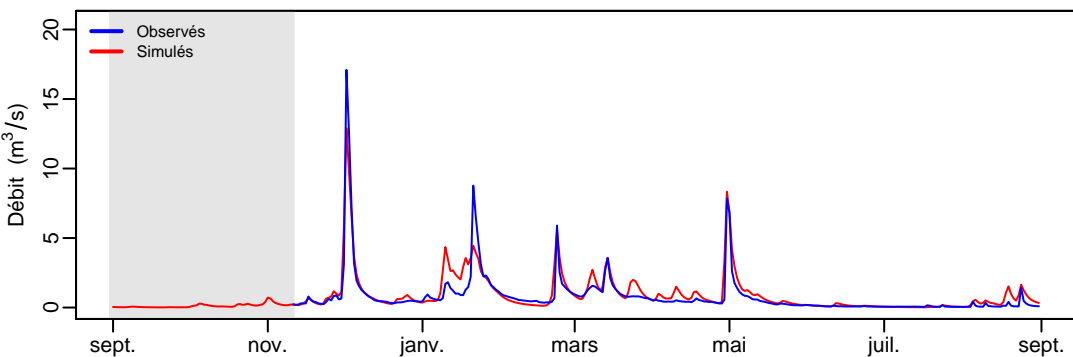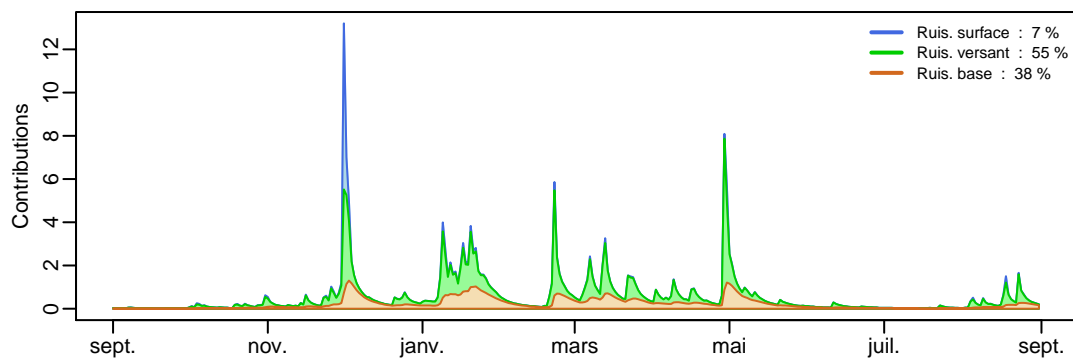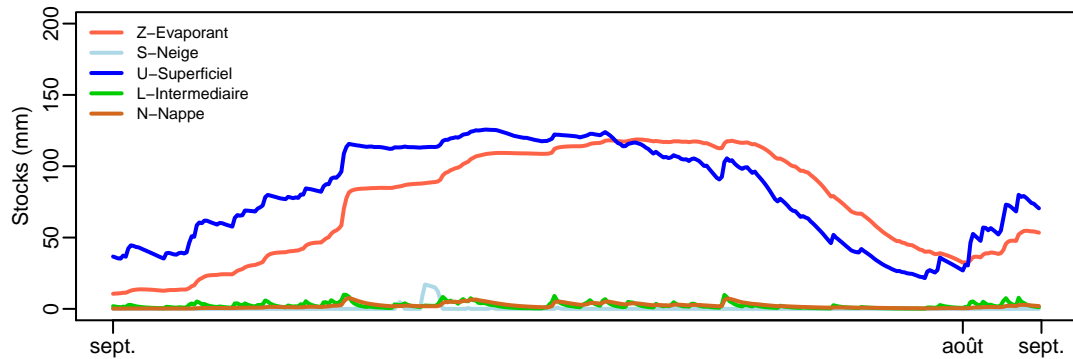

# k2714010 (119.01 km<sup>2</sup>) – année 2004–2005

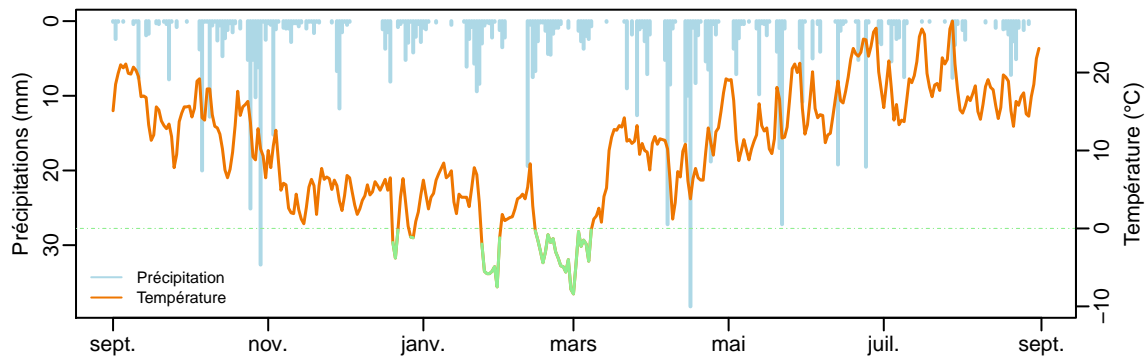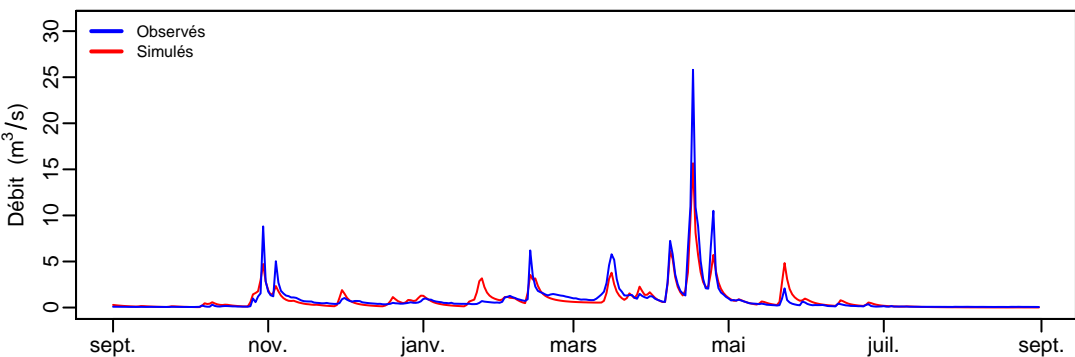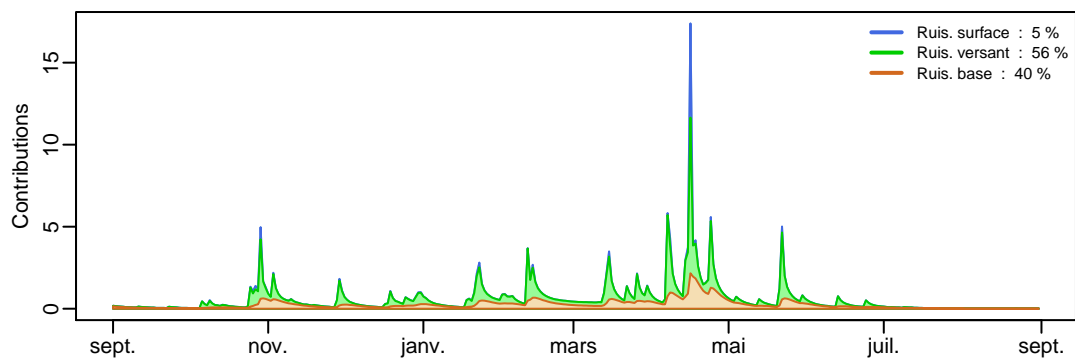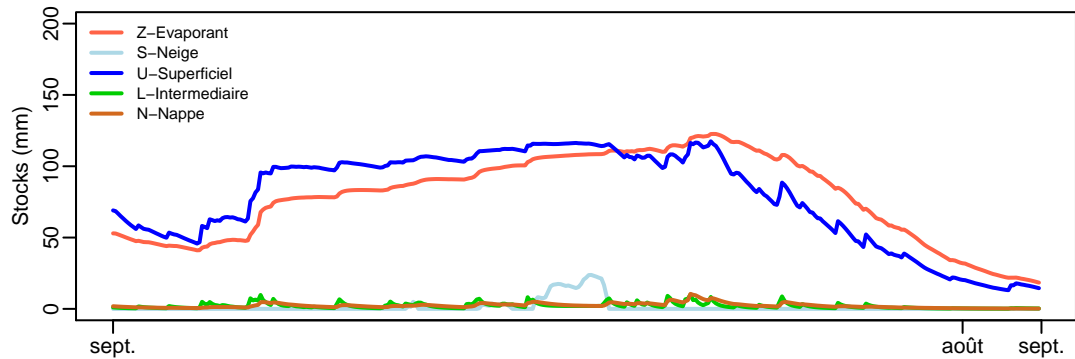

# k2714010 (119.01 km<sup>2</sup>) – année 2005–2006

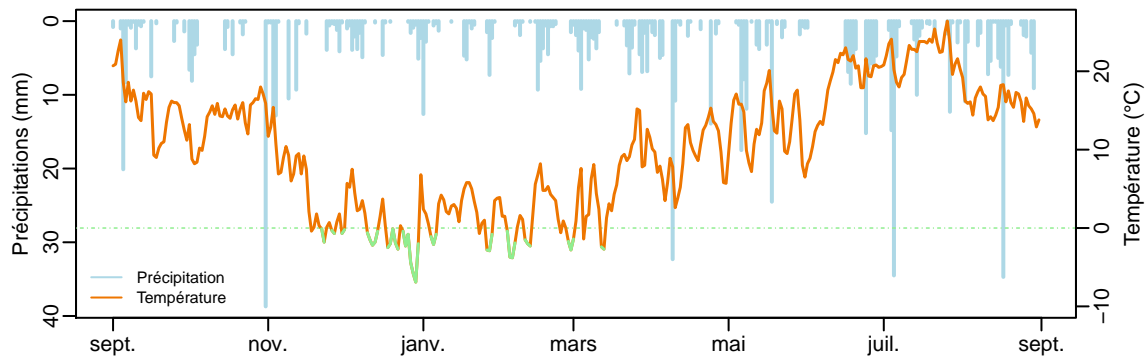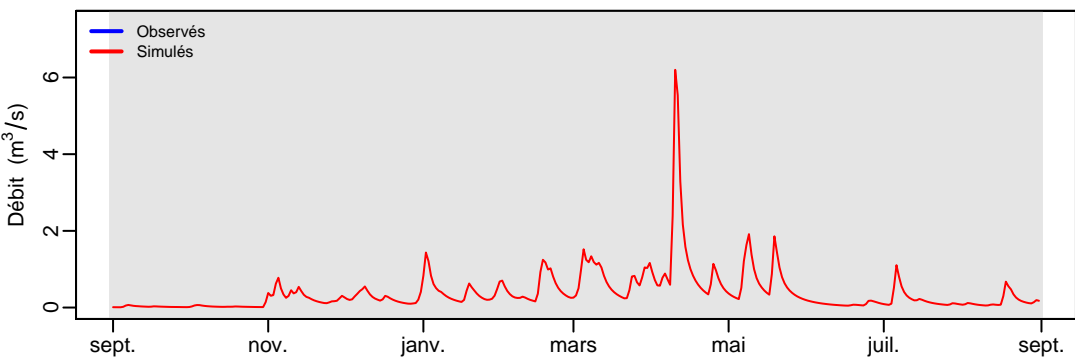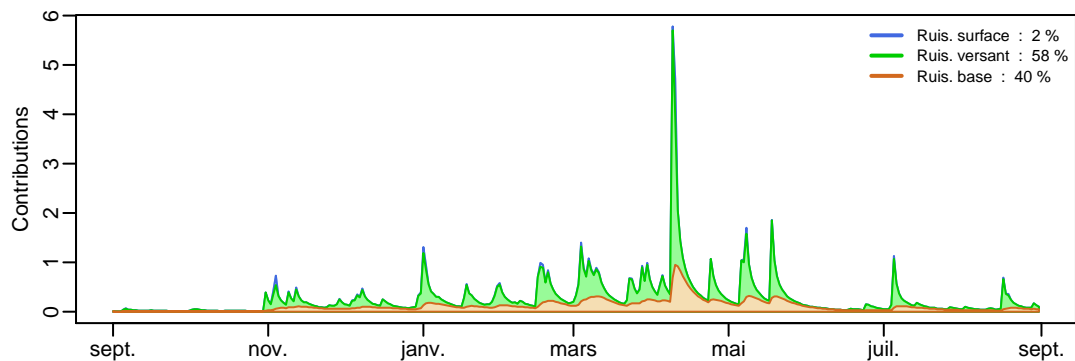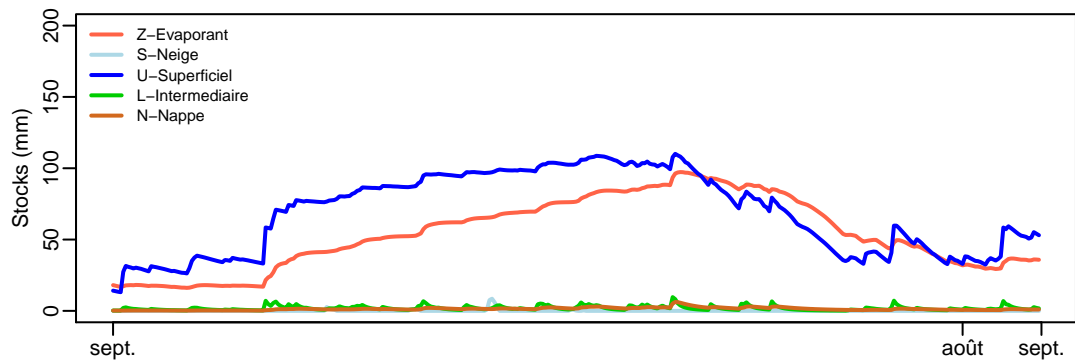

# k2714010 (119.01 km<sup>2</sup>) – année 2006–2007

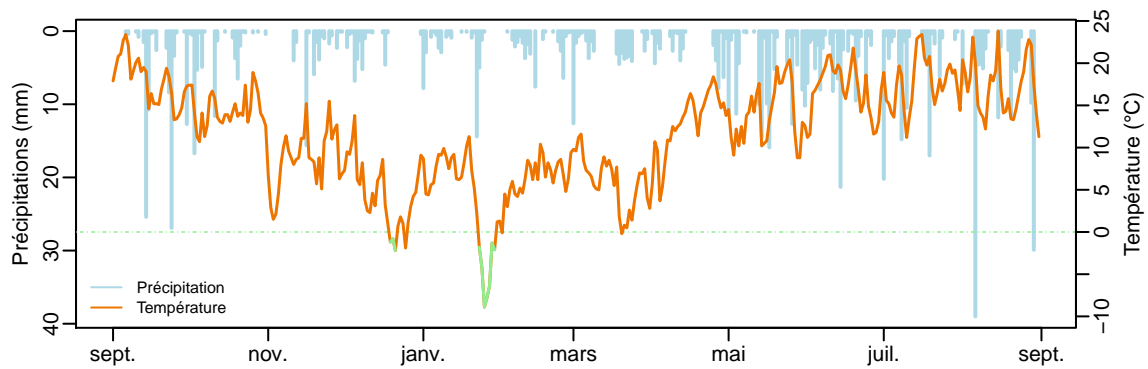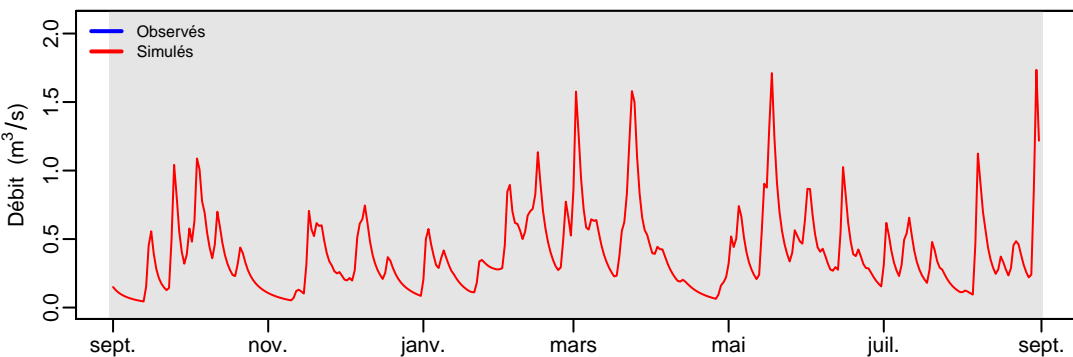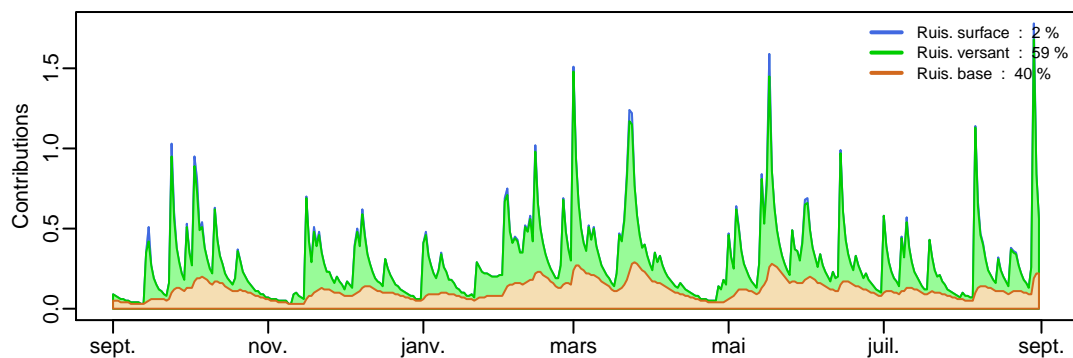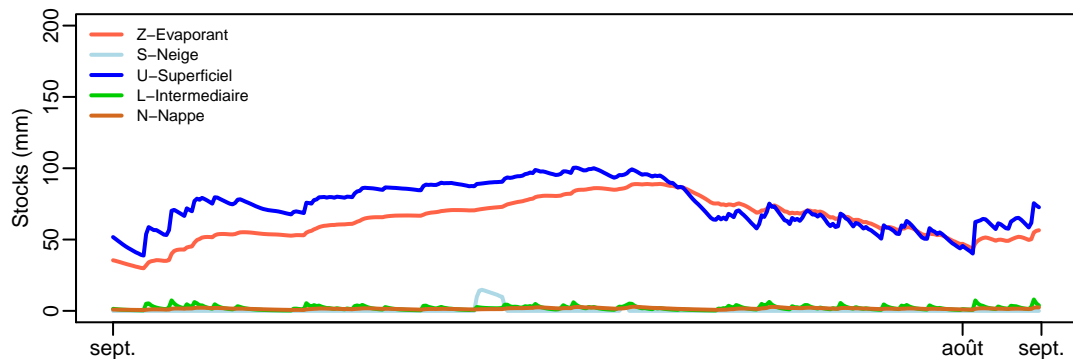

# k2714010 (119.01 km<sup>2</sup>) – année 2007–2008

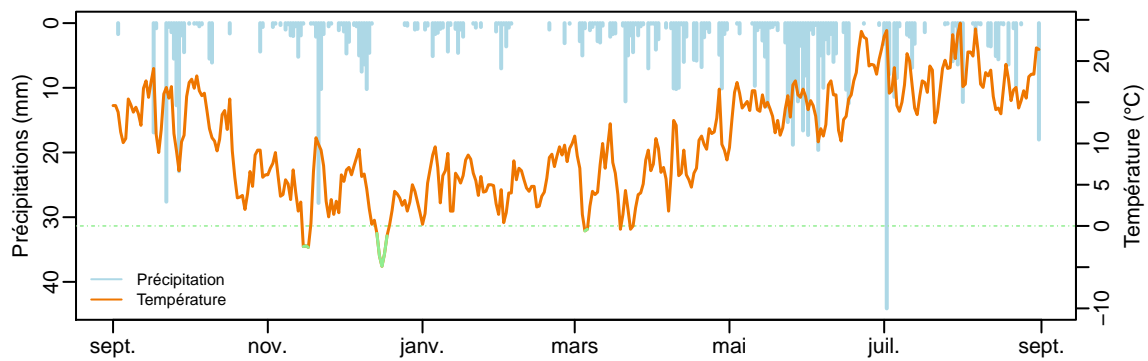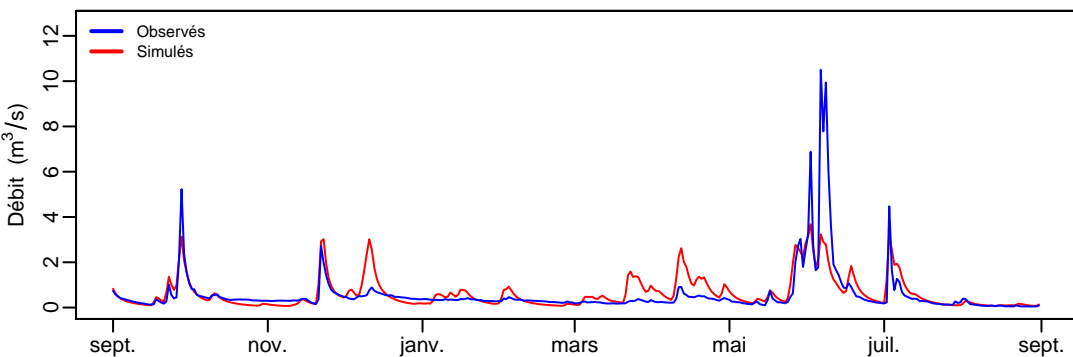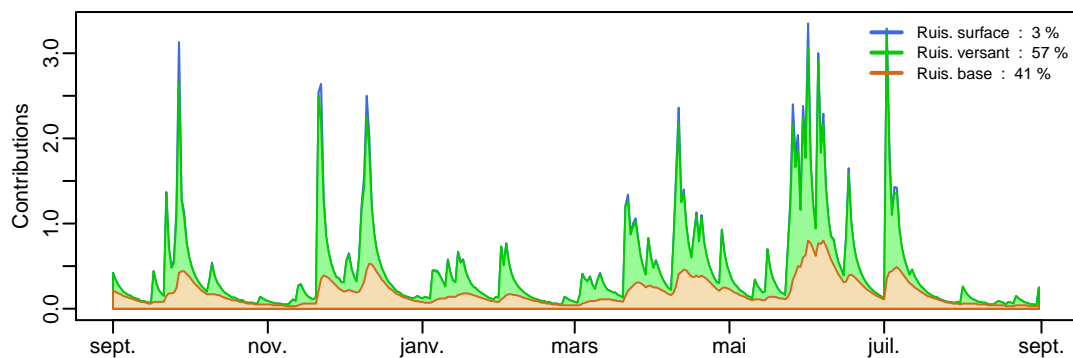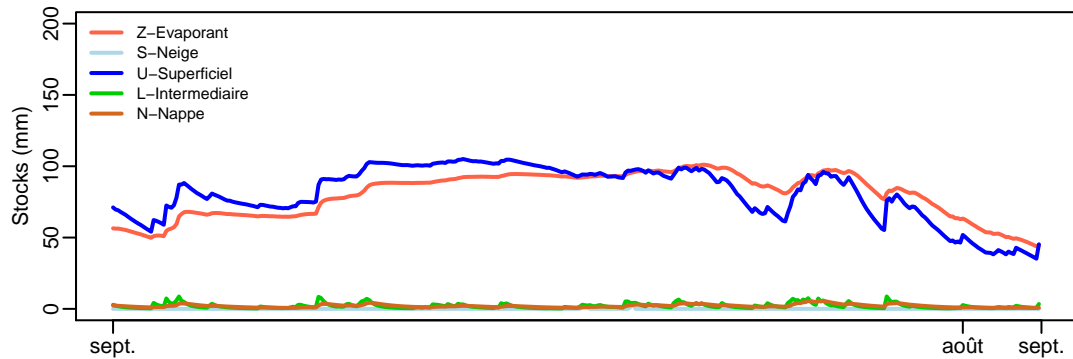



# k2714010 (119.01 km<sup>2</sup>) – année 2008–2009

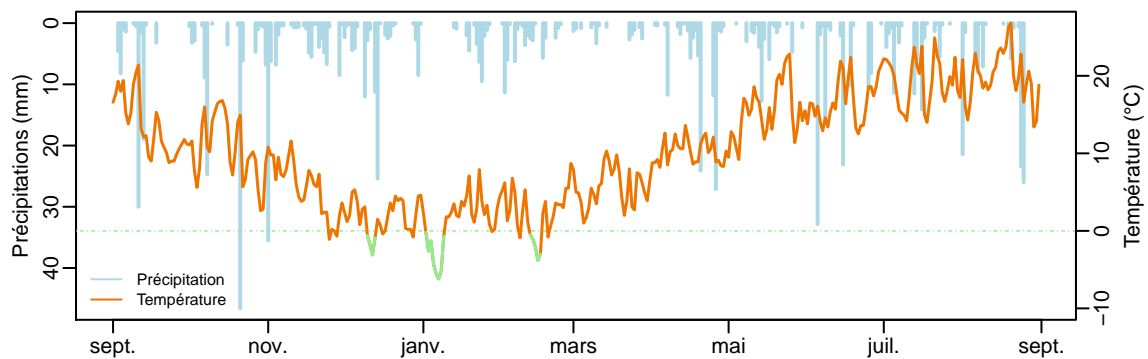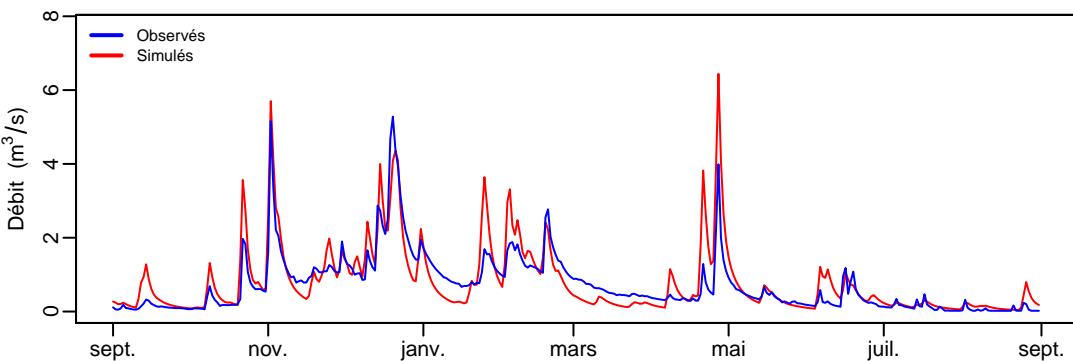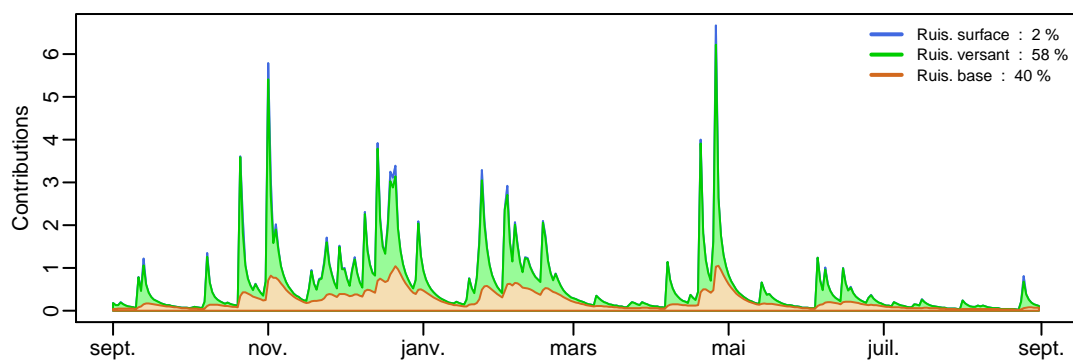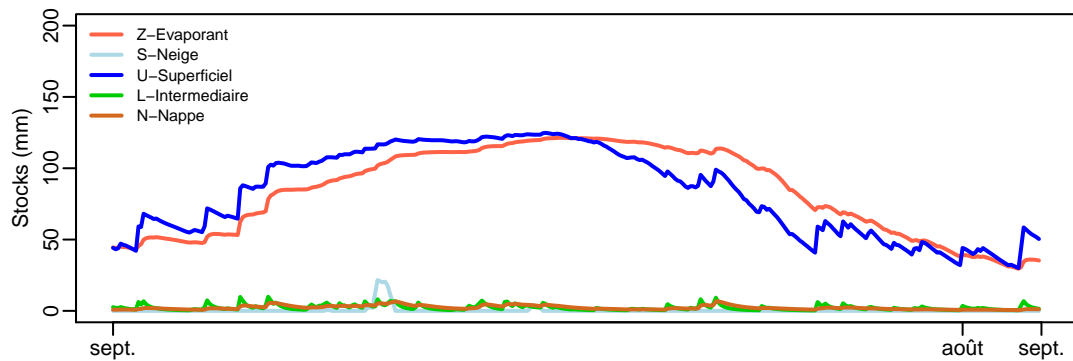

# k2714010 (119.01 km<sup>2</sup>) – année 2009–2010

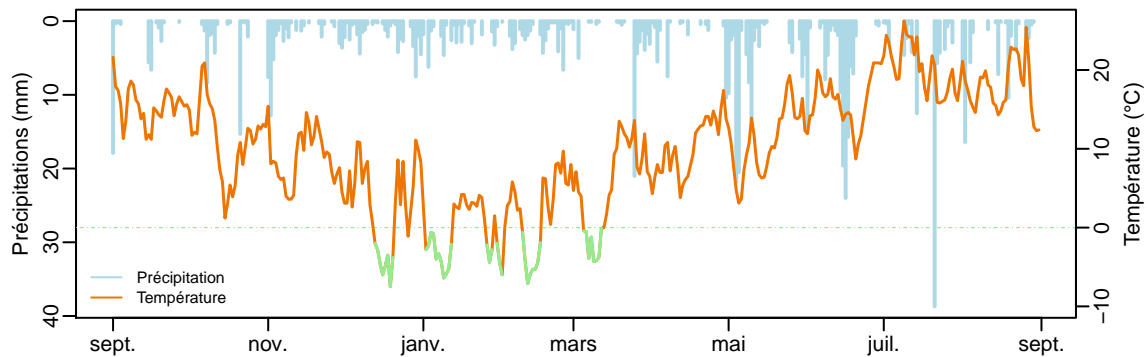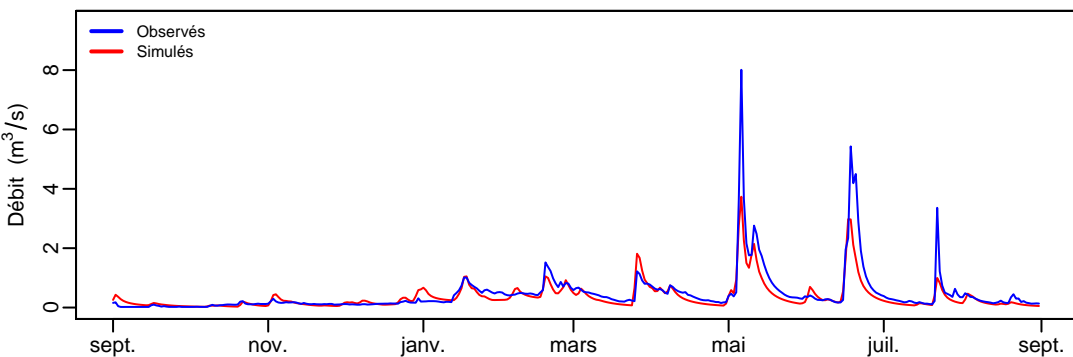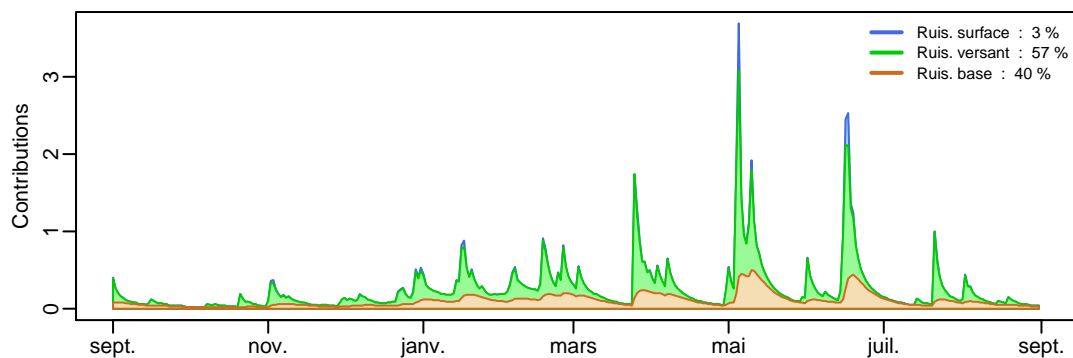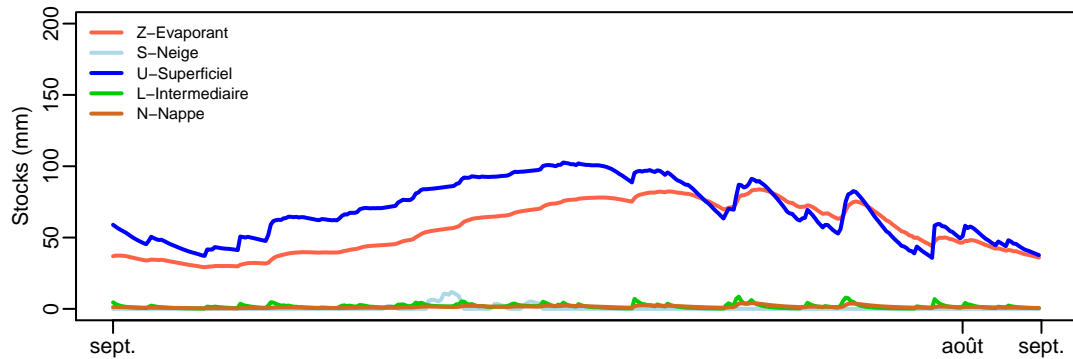

# k2714010 (119.01 km<sup>2</sup>) – année 2010–2011

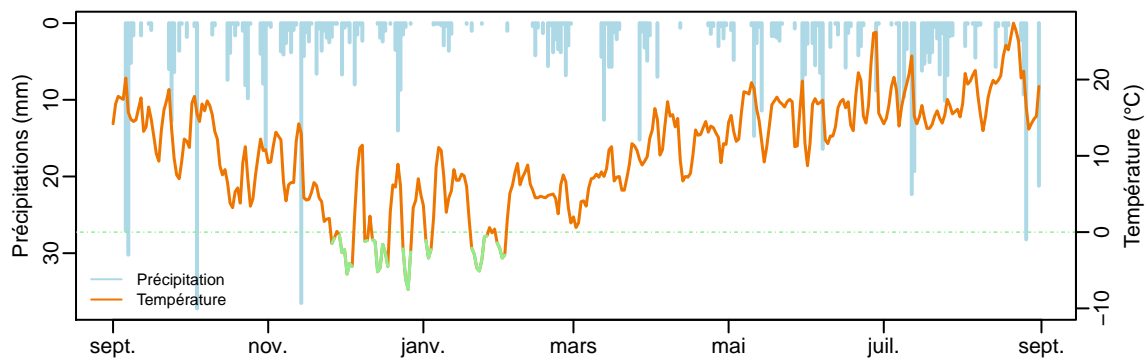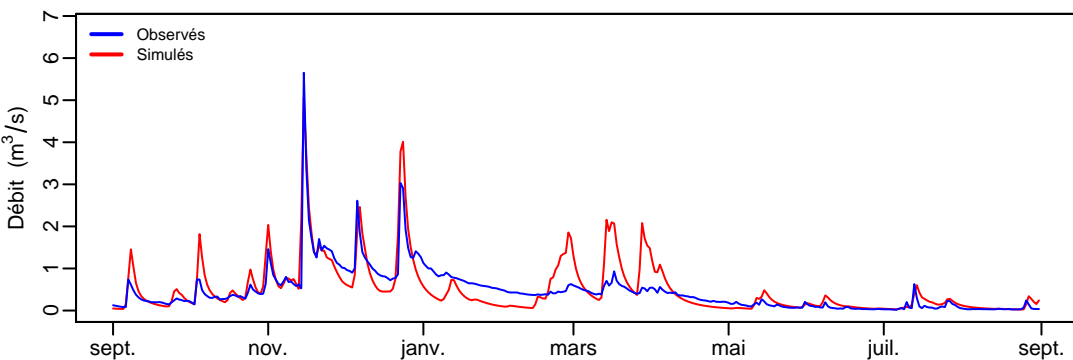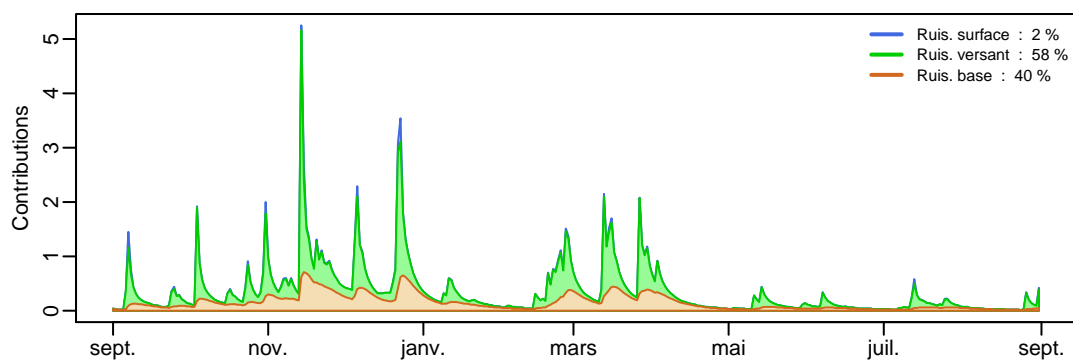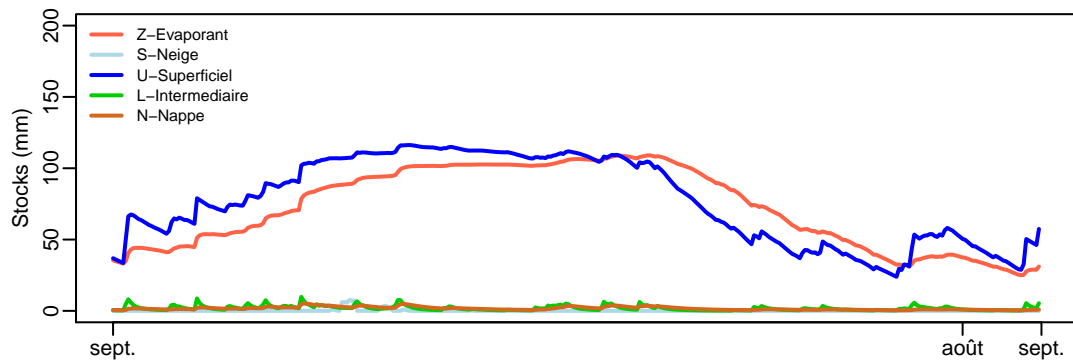

# k2714010 (119.01 km<sup>2</sup>) – année 2011–2012

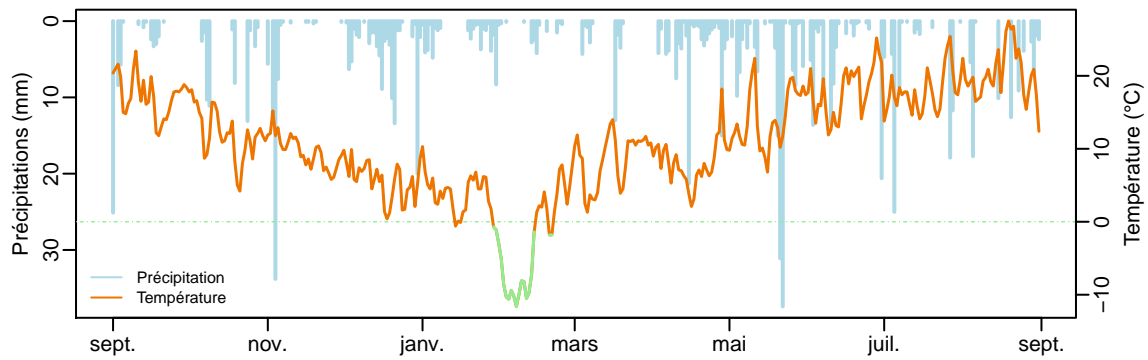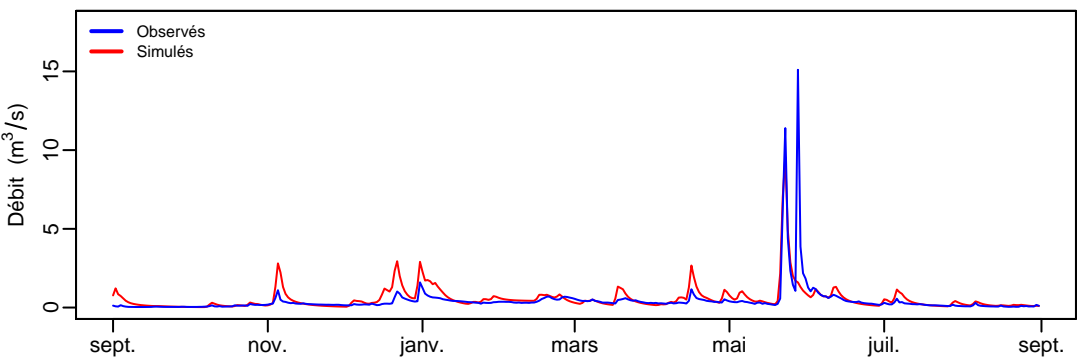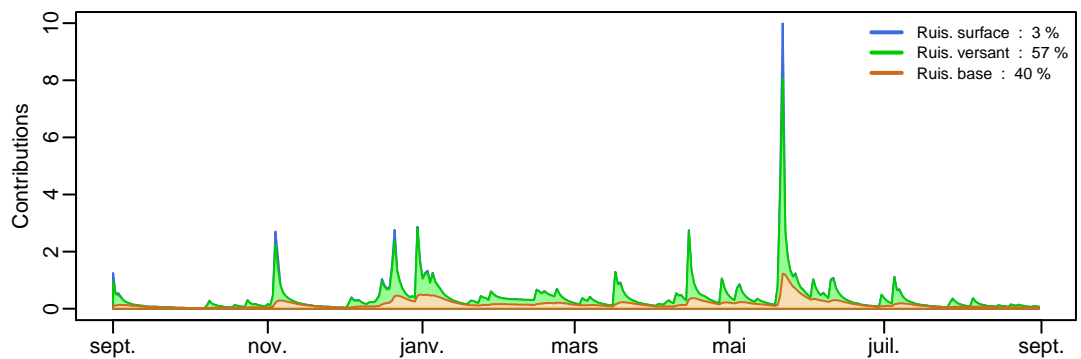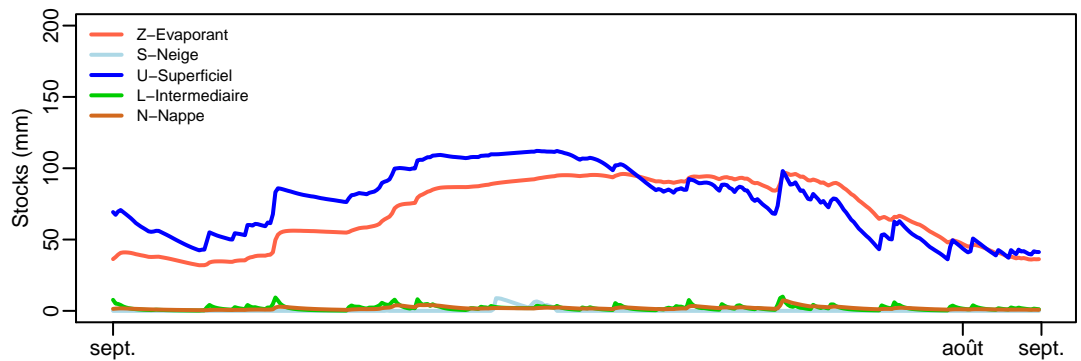

# k2773120 (344.99 km²) – année 2004–2005

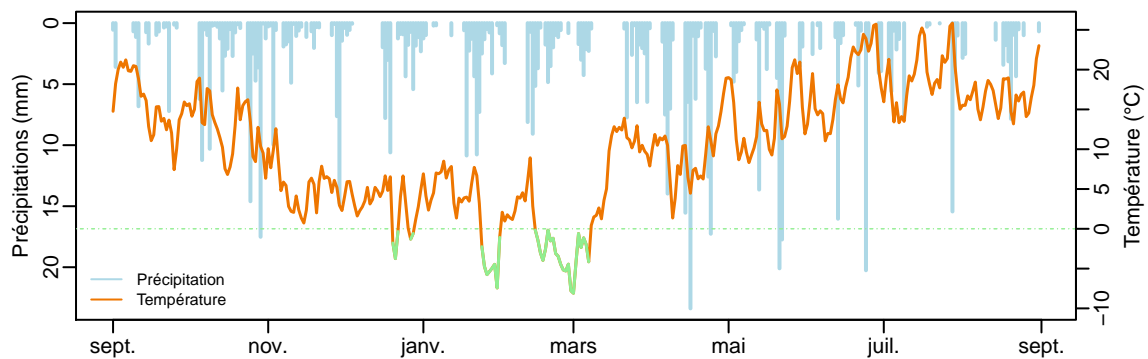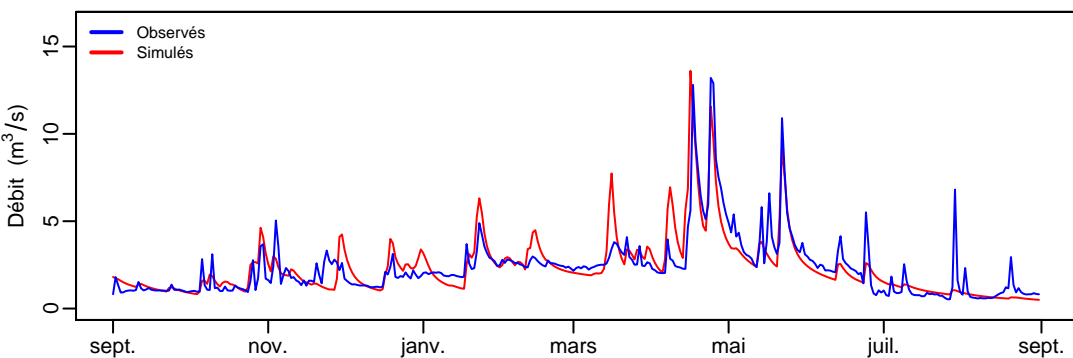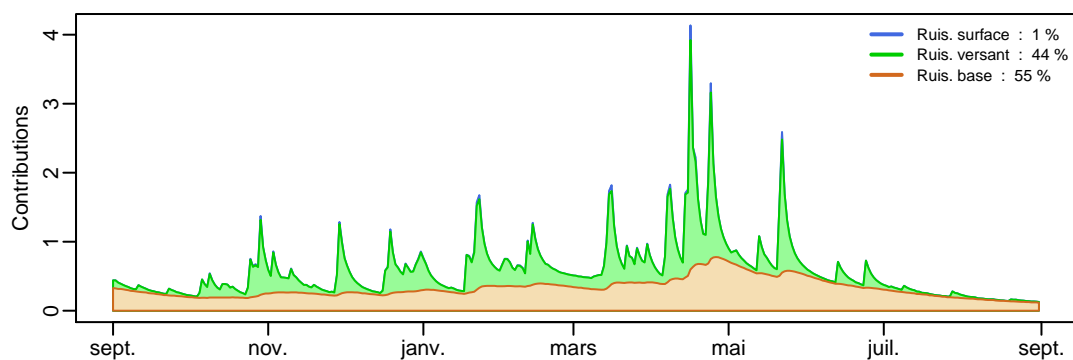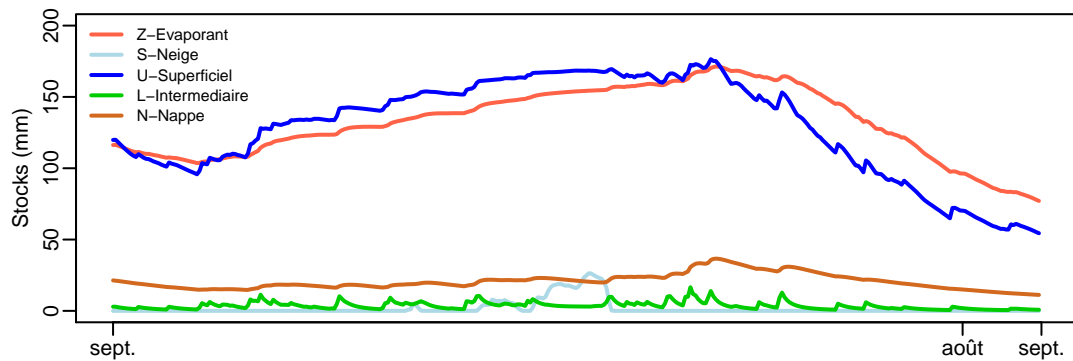

# k2773120 (344.99 km²) – année 2005–2006

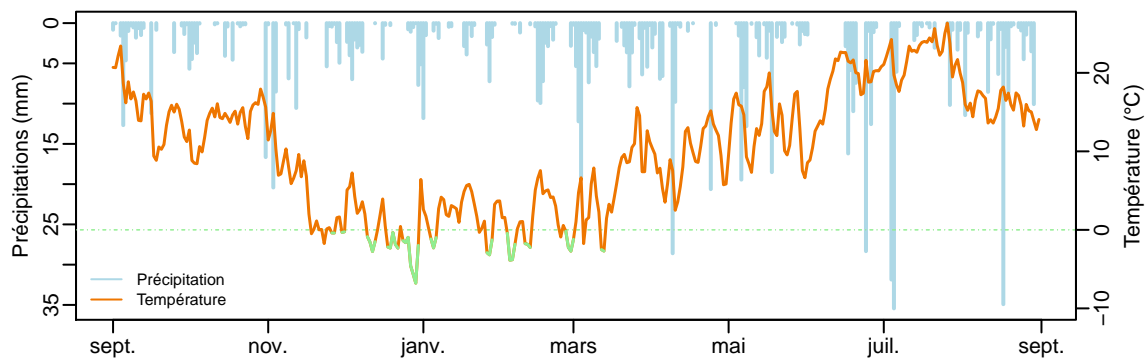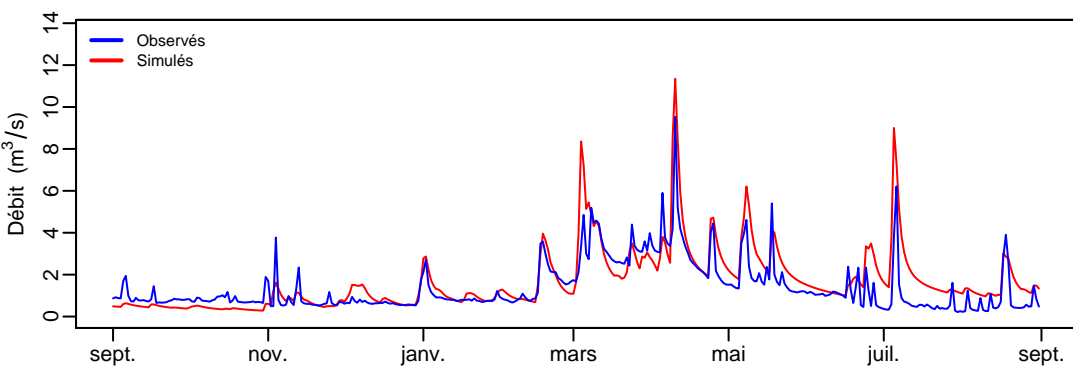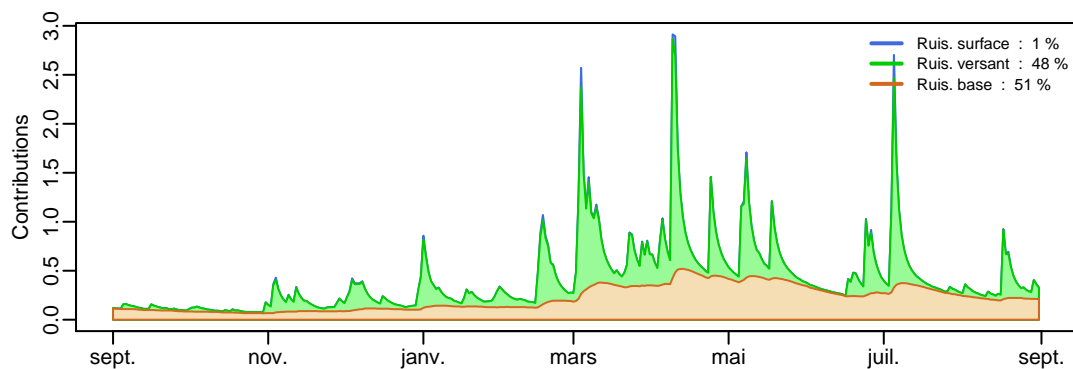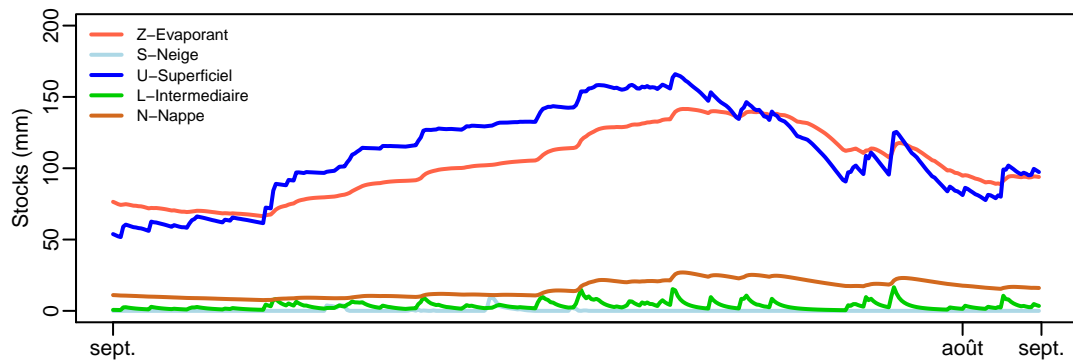

# k2773120 (344.99 km<sup>2</sup>) – année 2006–2007

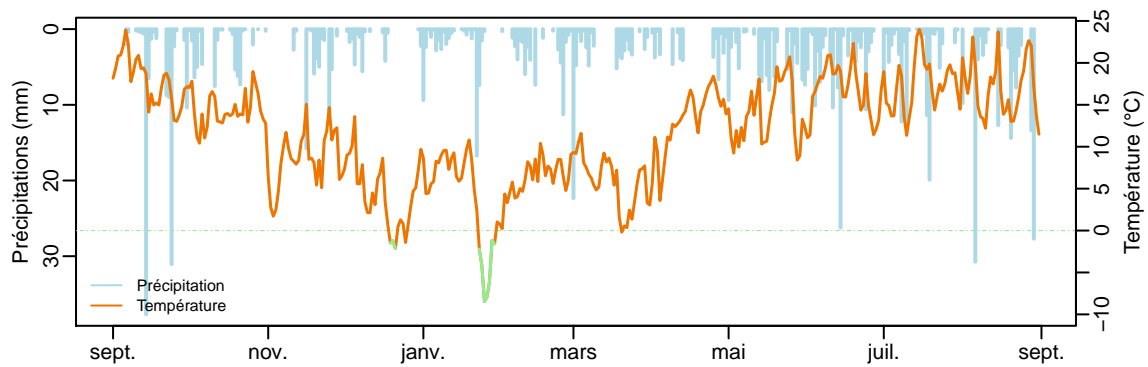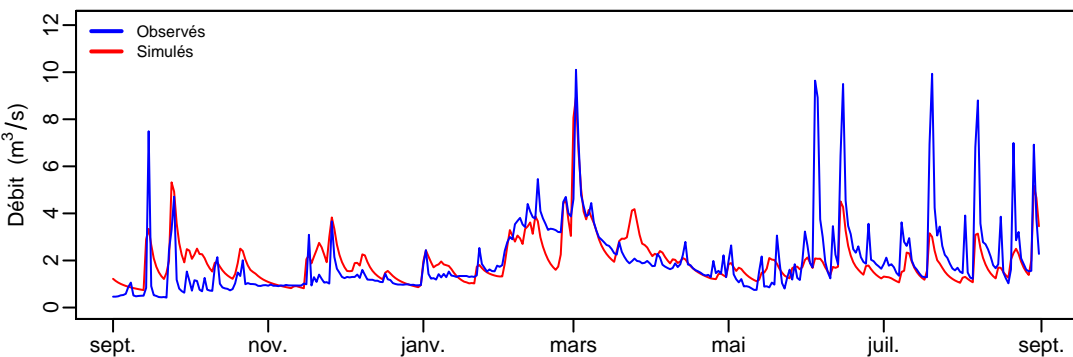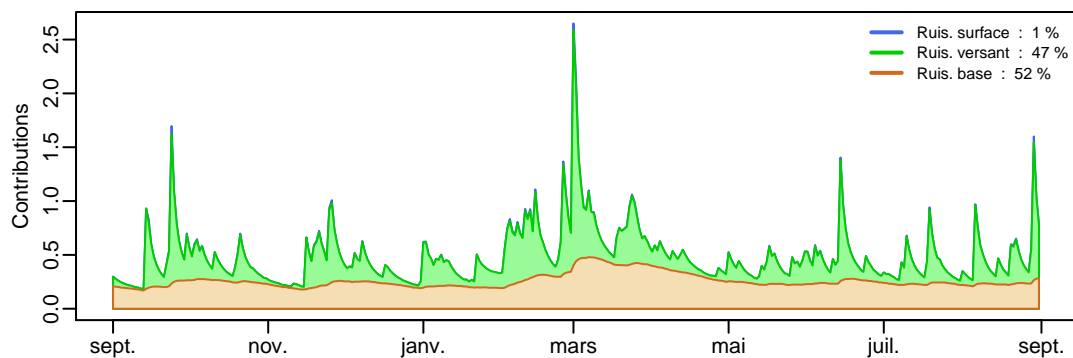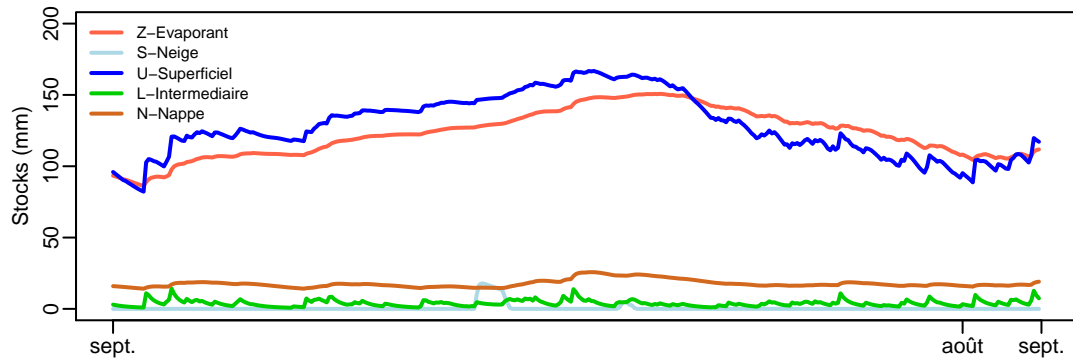

# k2773120 (344.99 km²) – année 2007–2008

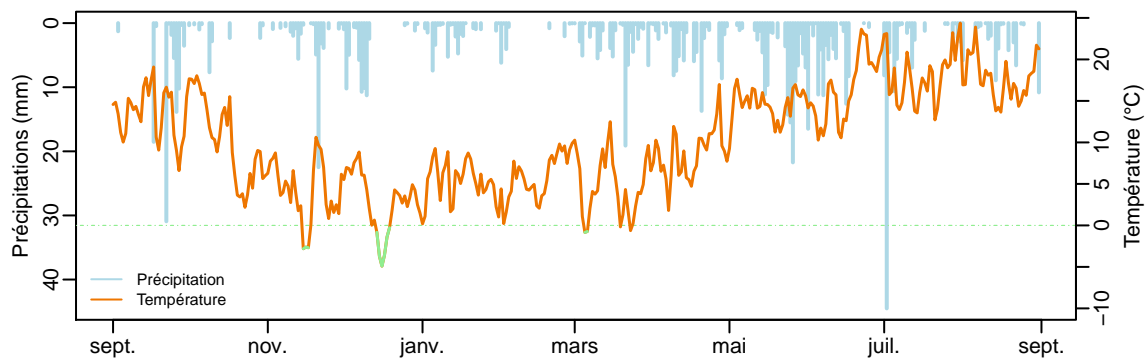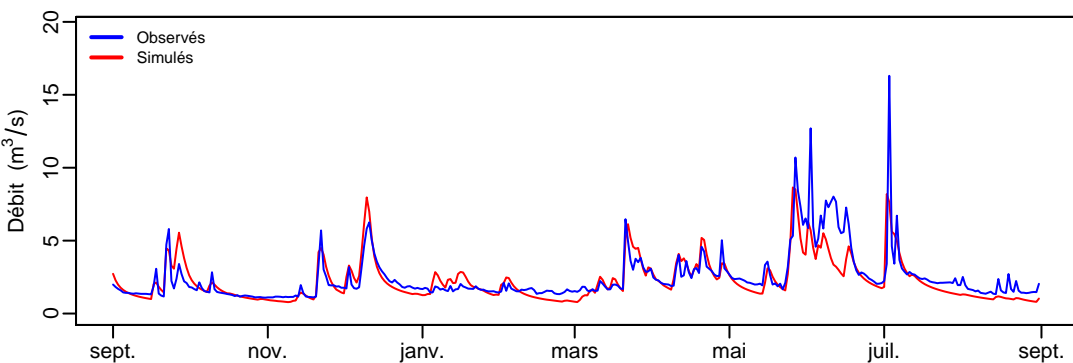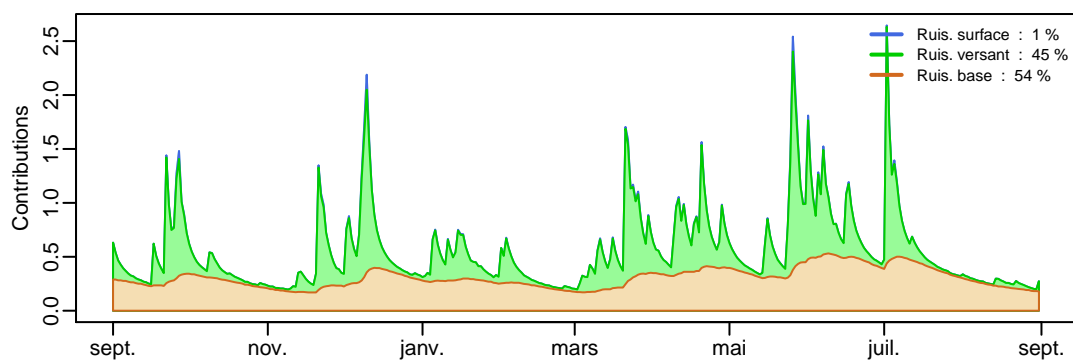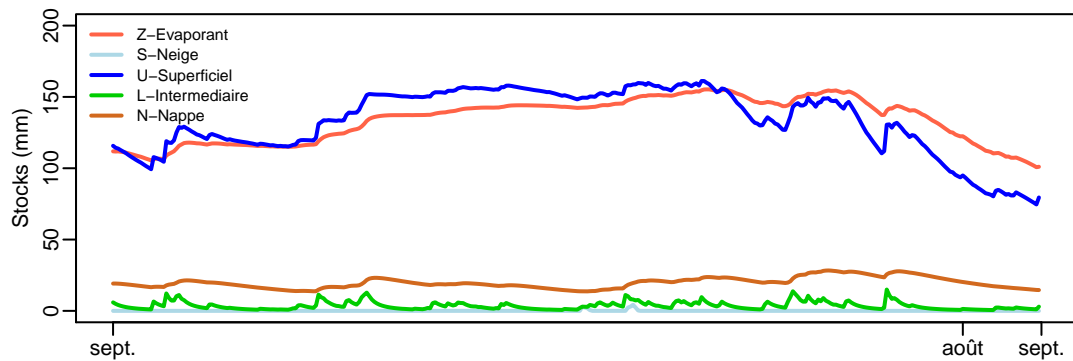



# k2773120 (344.99 km<sup>2</sup>) – année 2008–2009

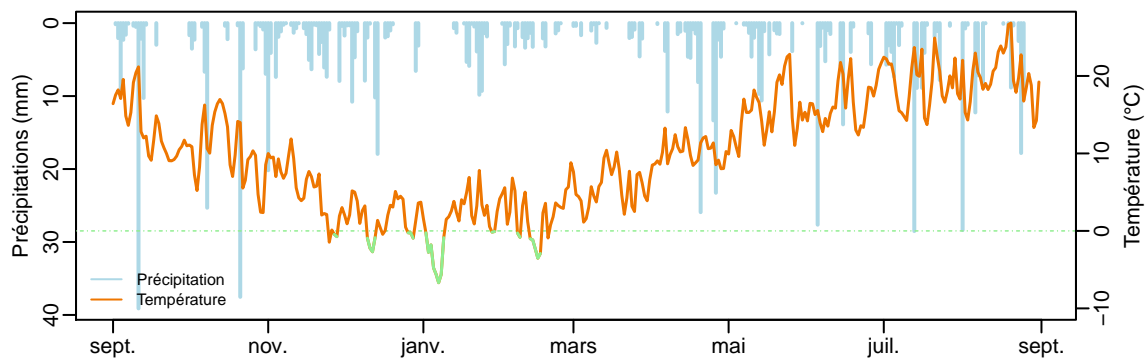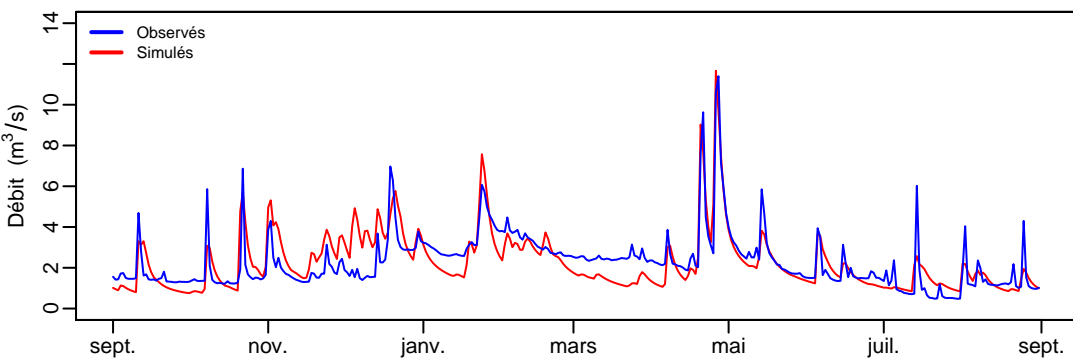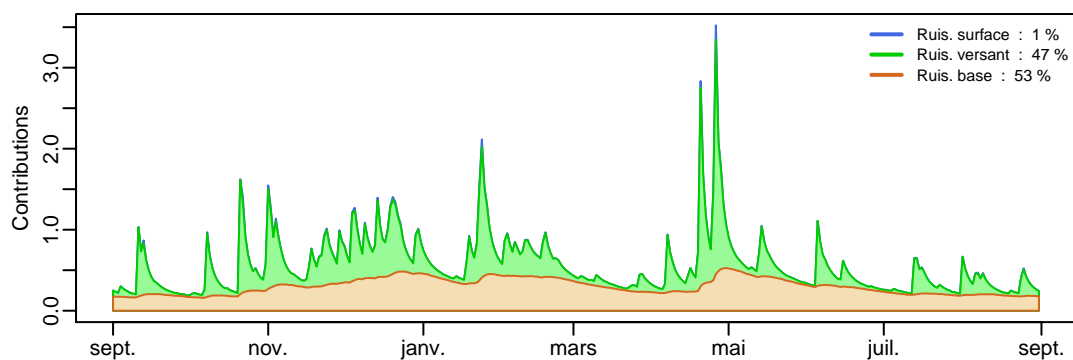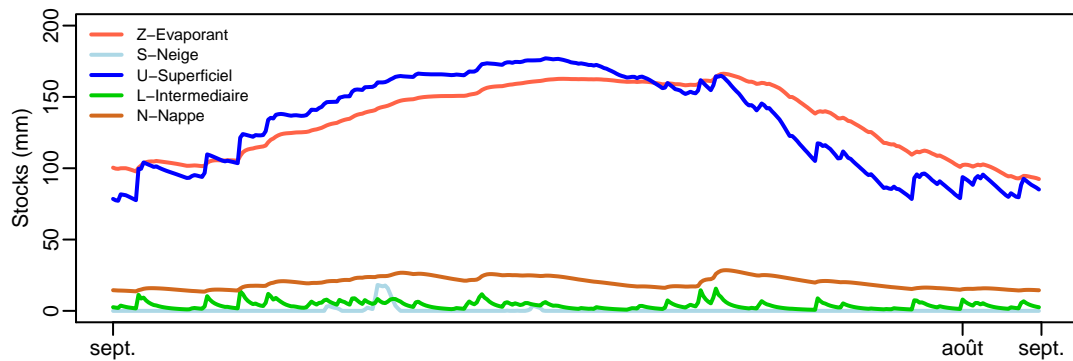

# k2773120 (344.99 km<sup>2</sup>) – année 2009–2010

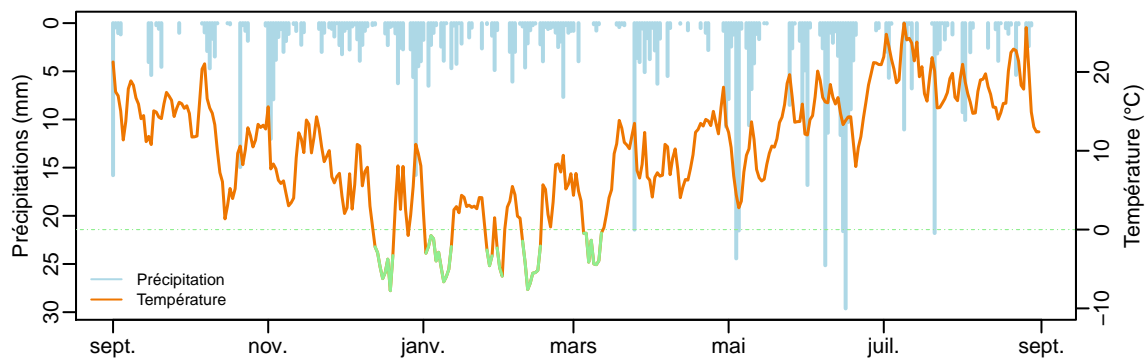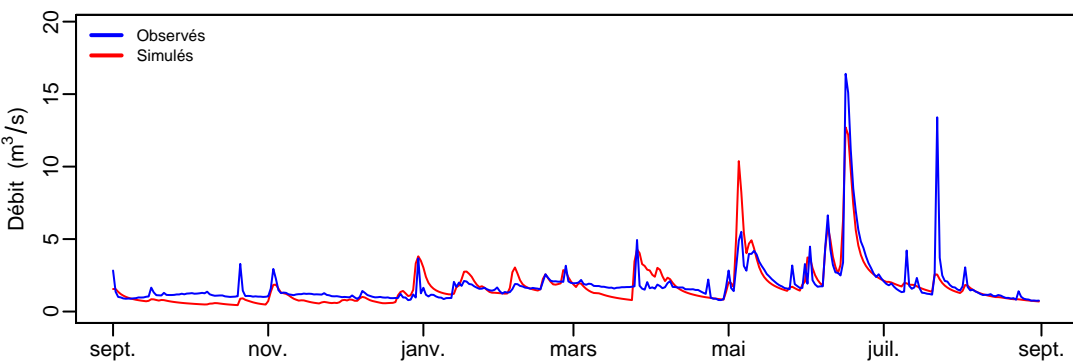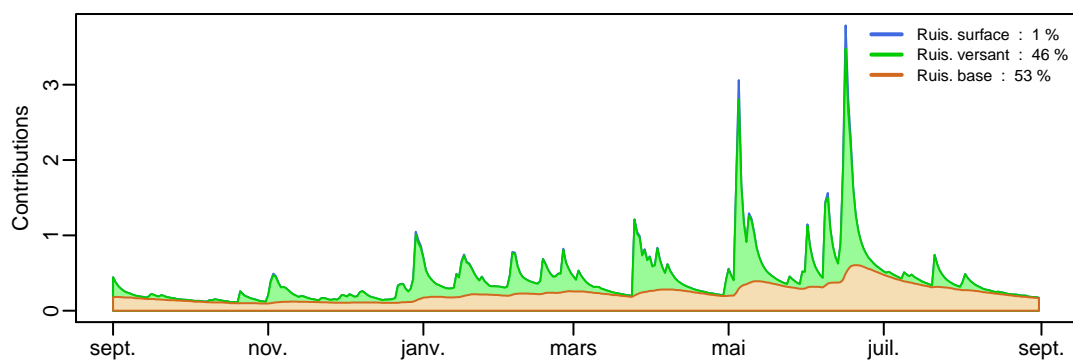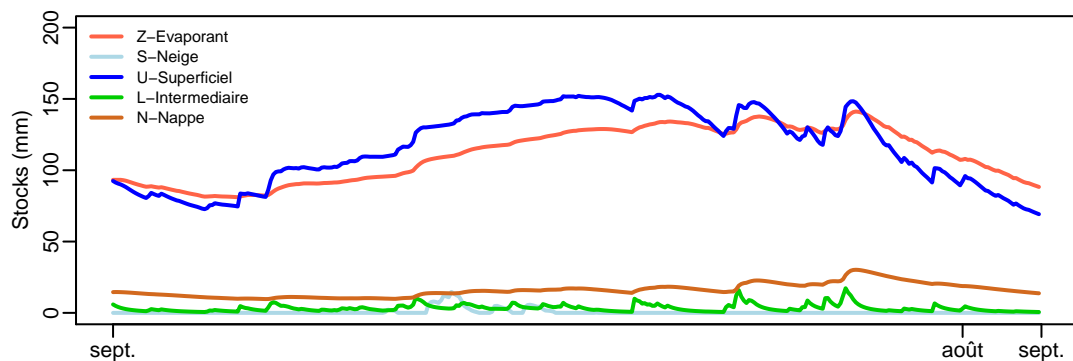

# k2773120 (344.99 km<sup>2</sup>) – année 2010–2011

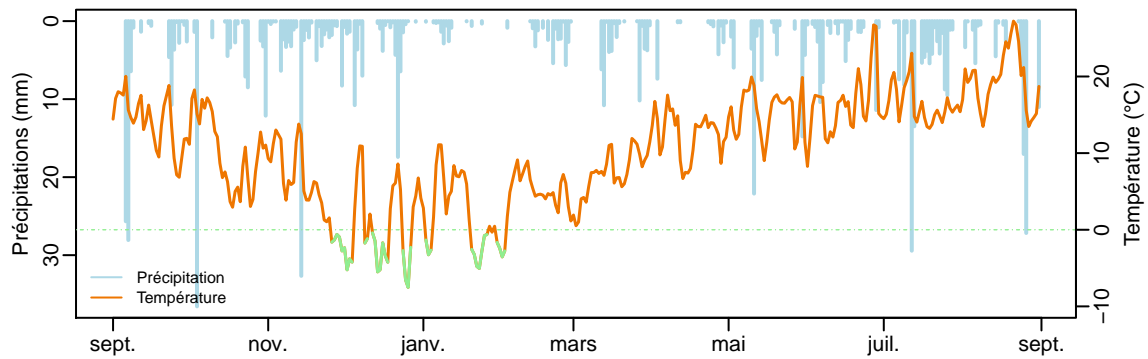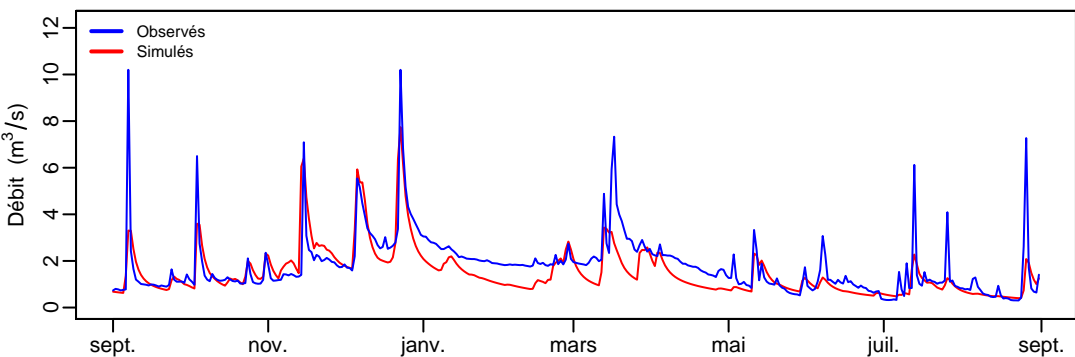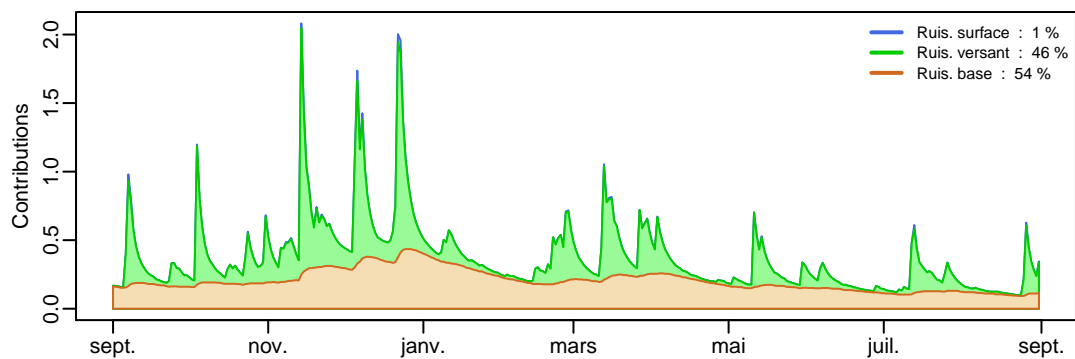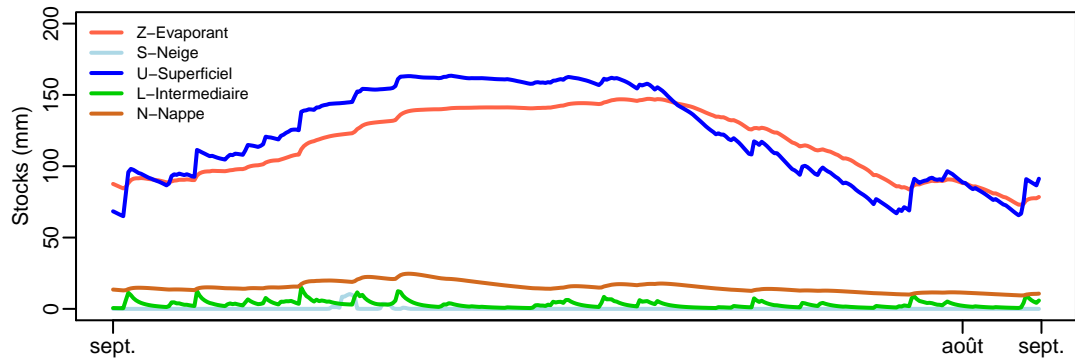

# k2773120 (344.99 km<sup>2</sup>) – année 2011–2012

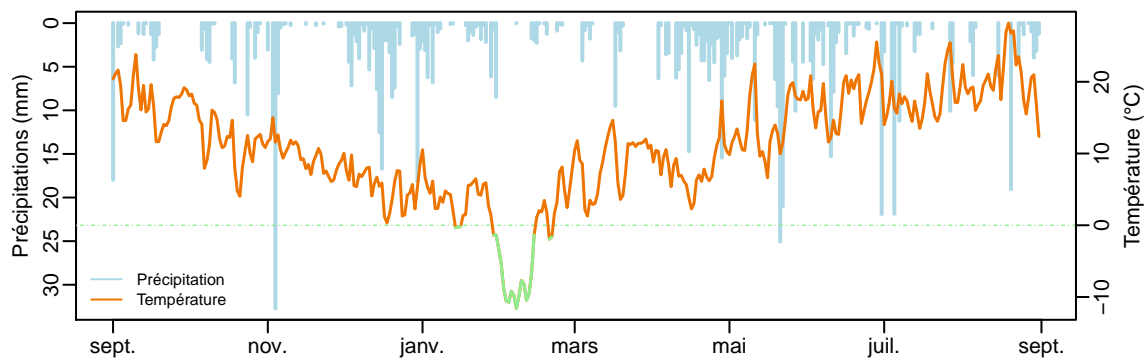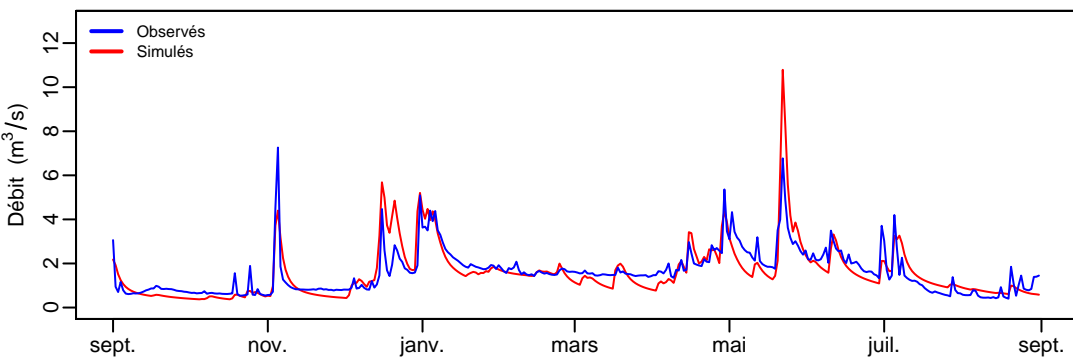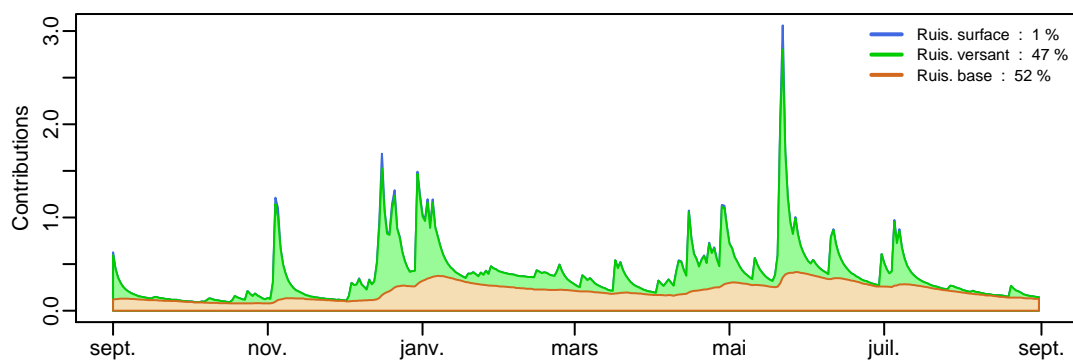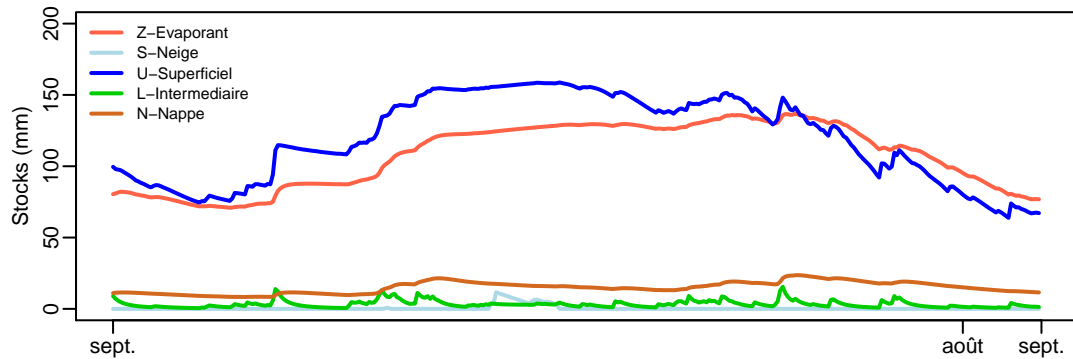

# k2774020 (106.6 km<sup>2</sup>) – année 2004–2005

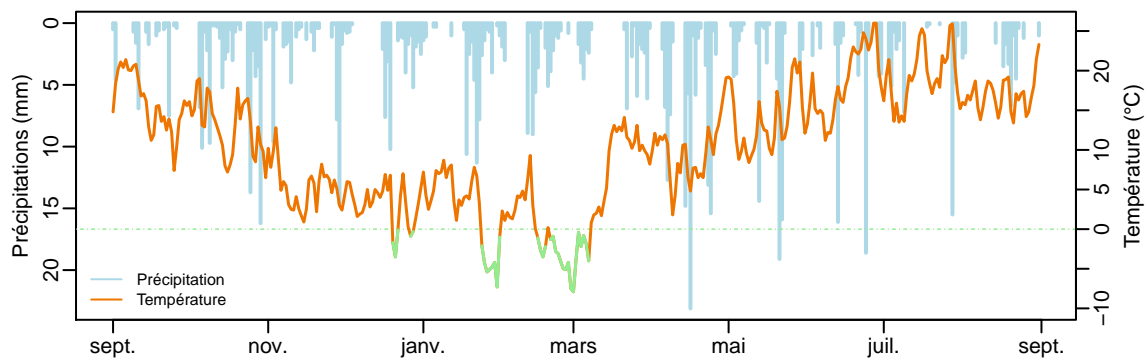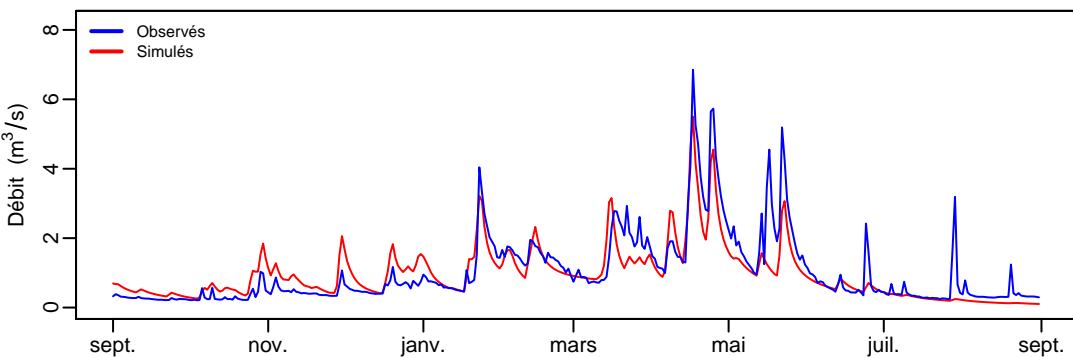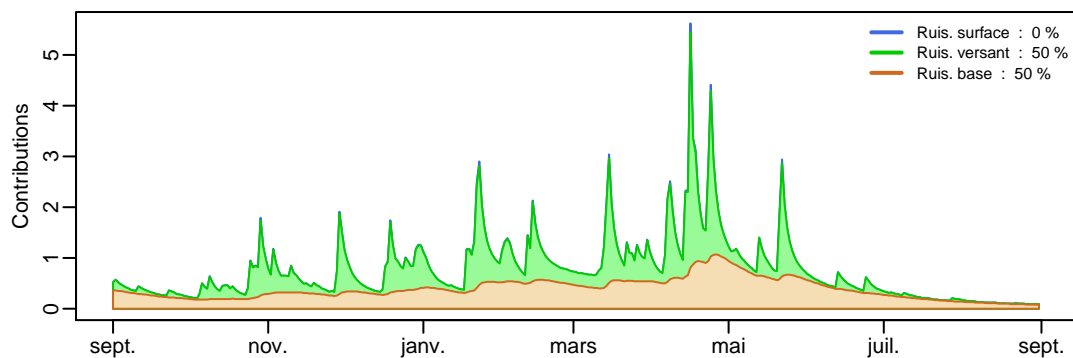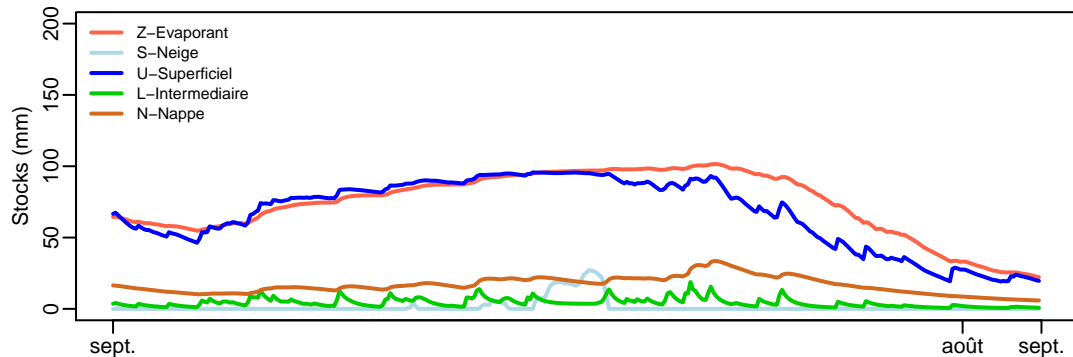

# k2774020 (106.6 km<sup>2</sup>) – année 2005–2006

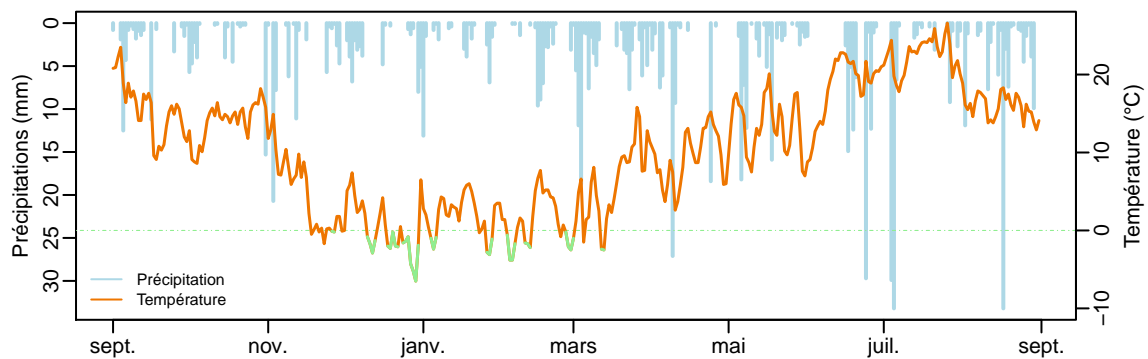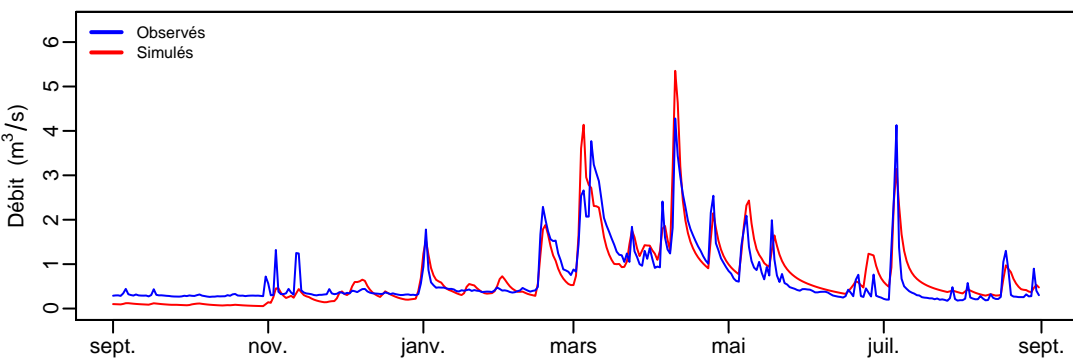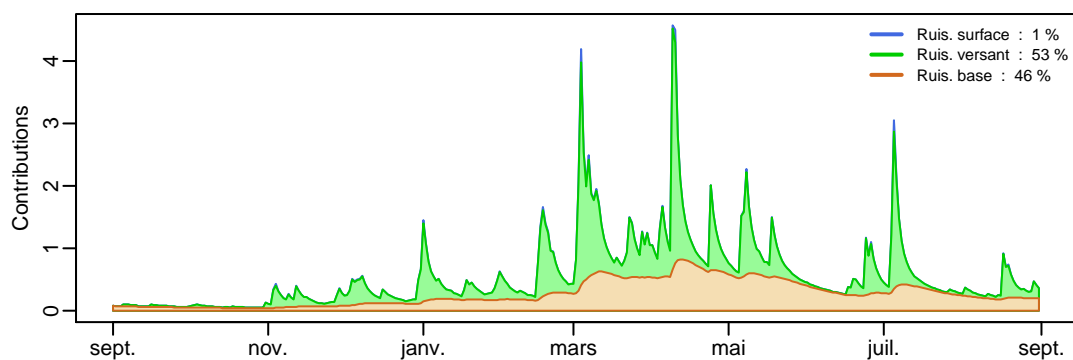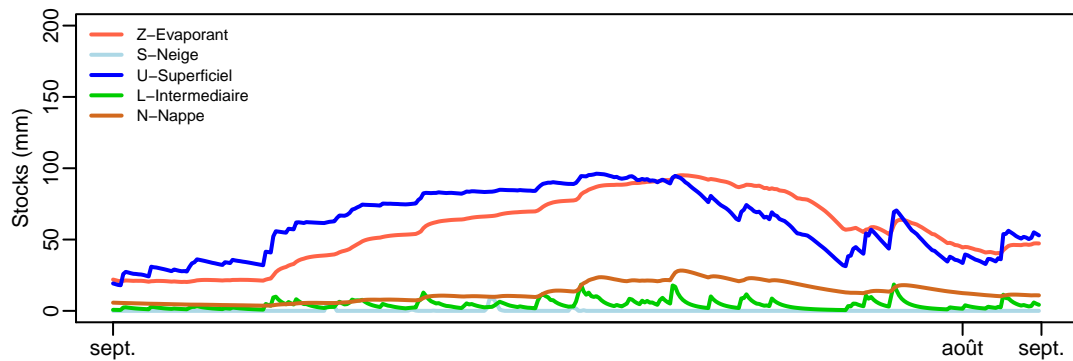

# k2774020 (106.6 km<sup>2</sup>) – année 2006–2007

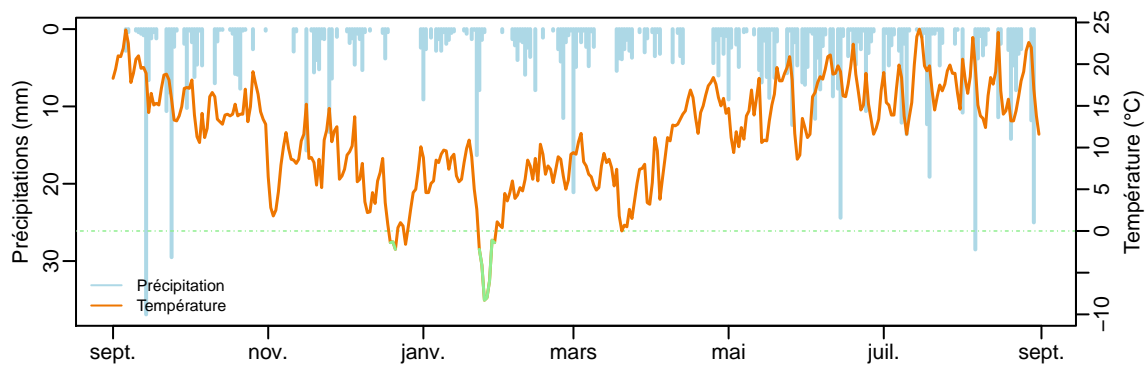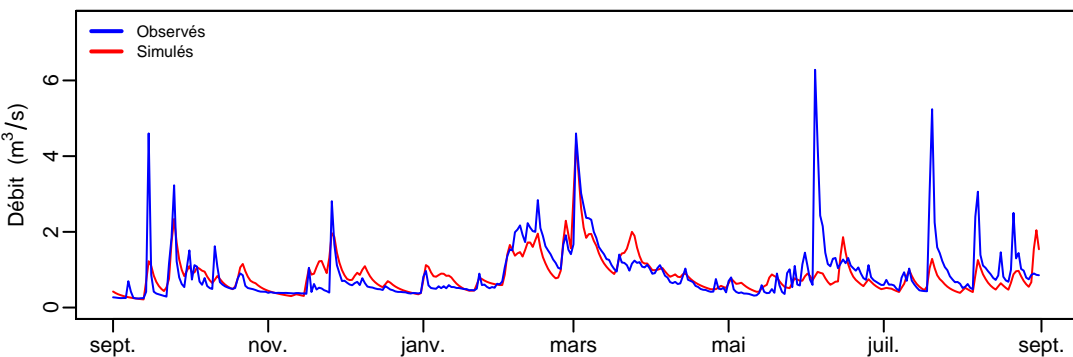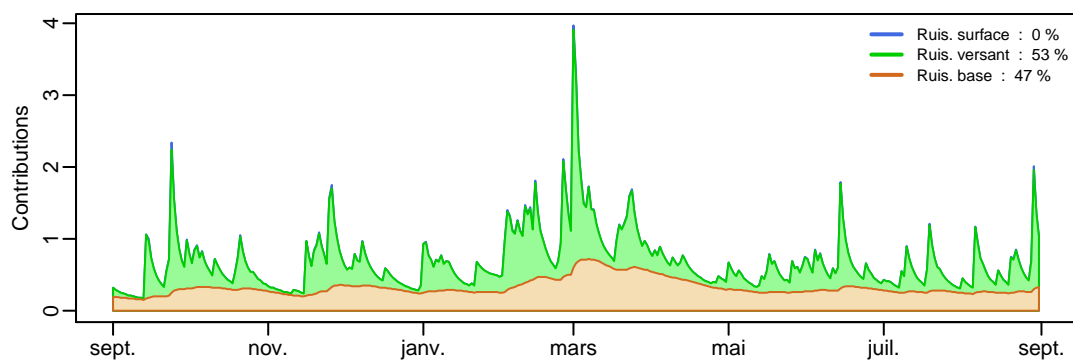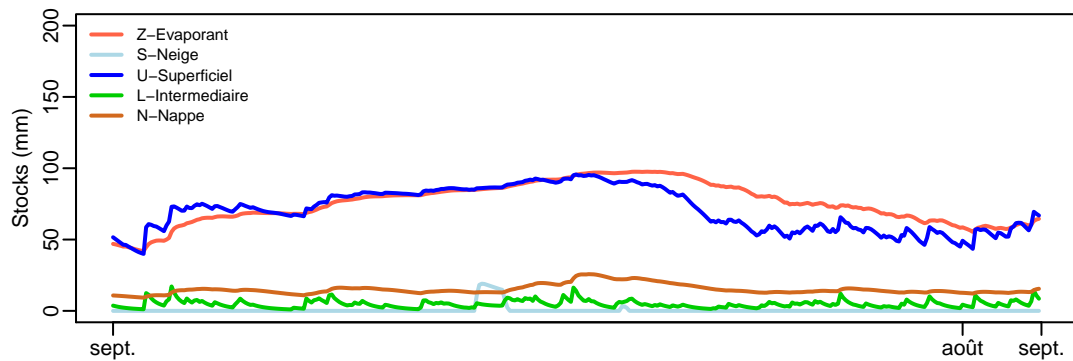

# k2774020 (106.6 km<sup>2</sup>) – année 2007–2008

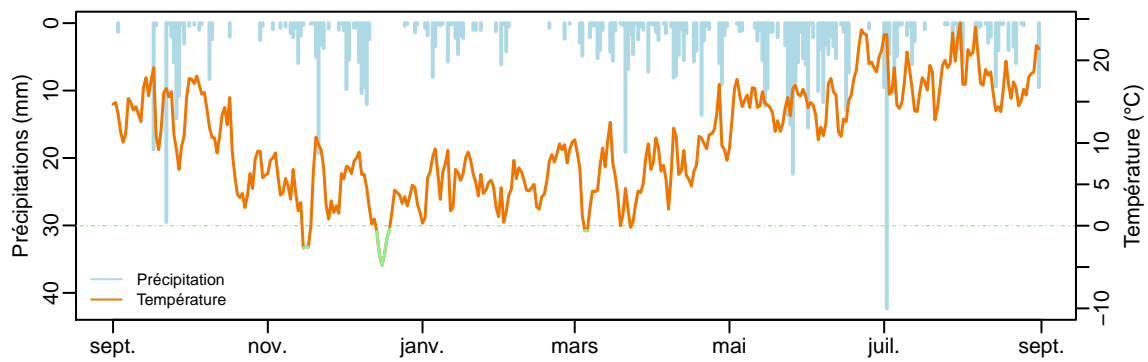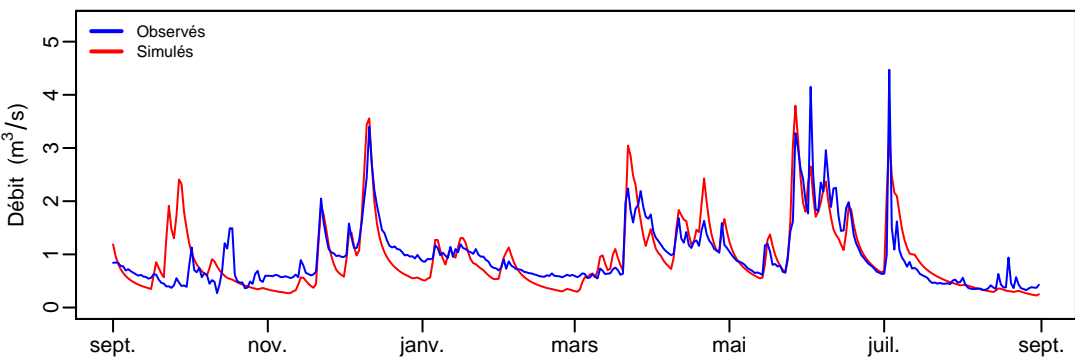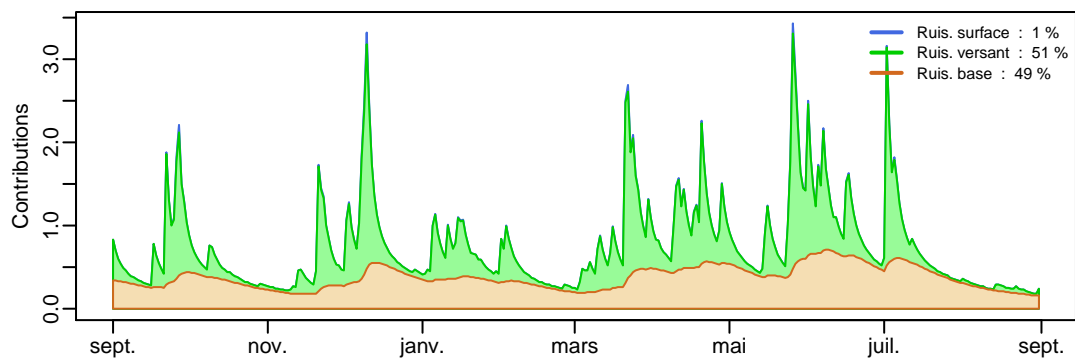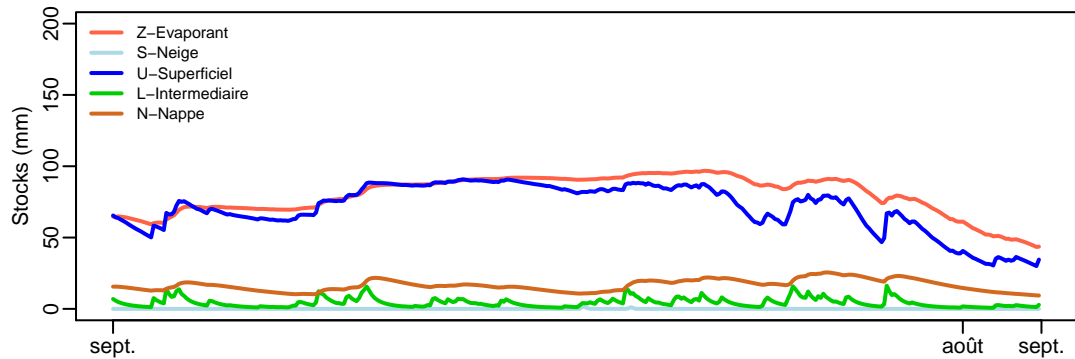



# k2774020 (106.6 km<sup>2</sup>) – année 2008–2009

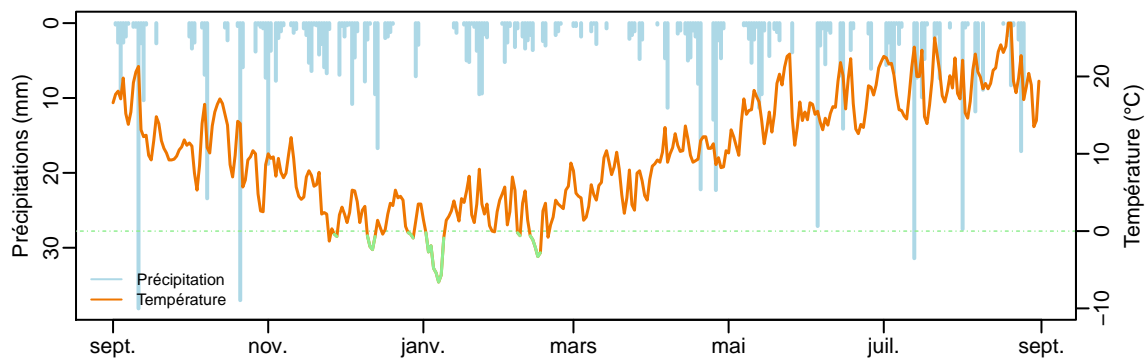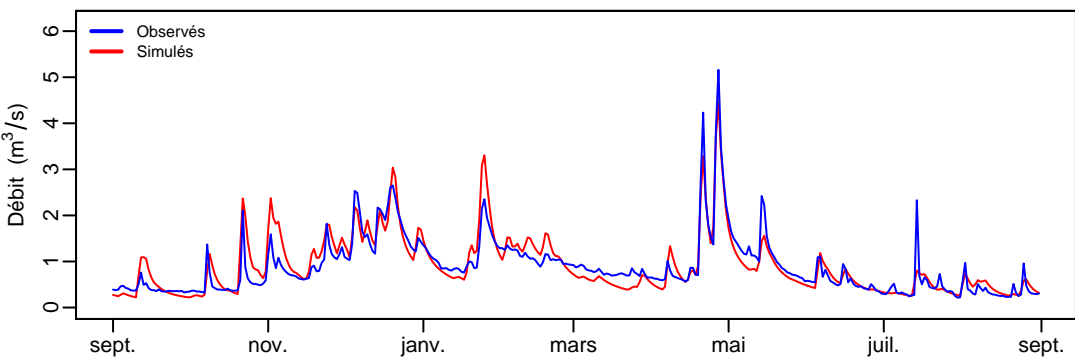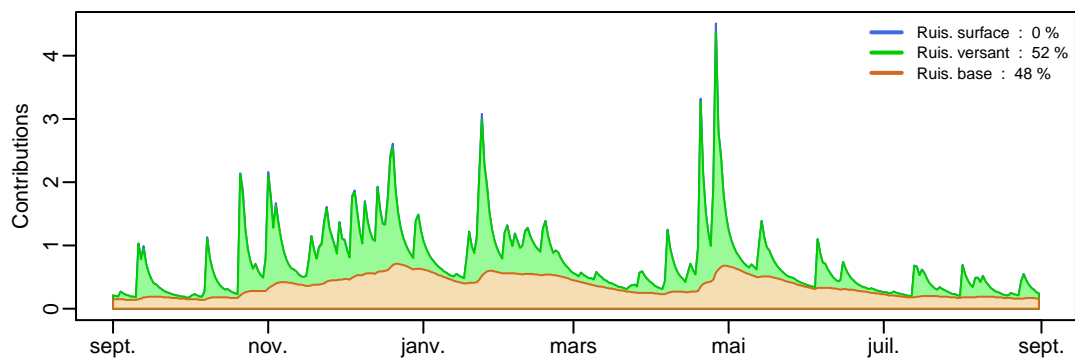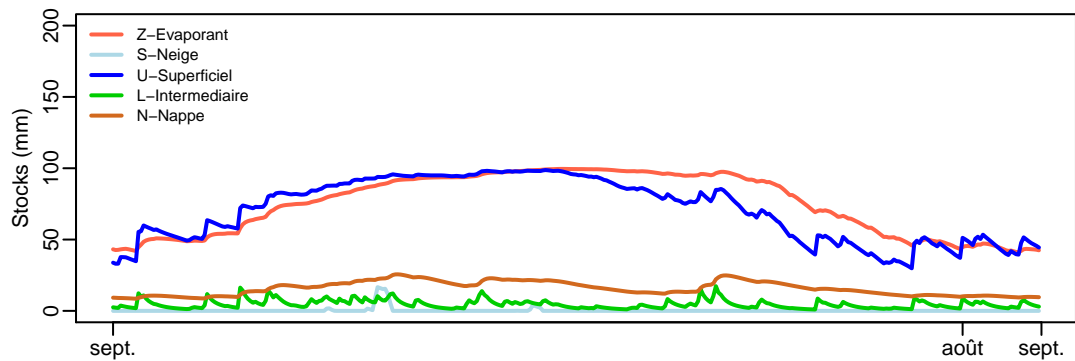

# k2774020 (106.6 km<sup>2</sup>) – année 2009–2010

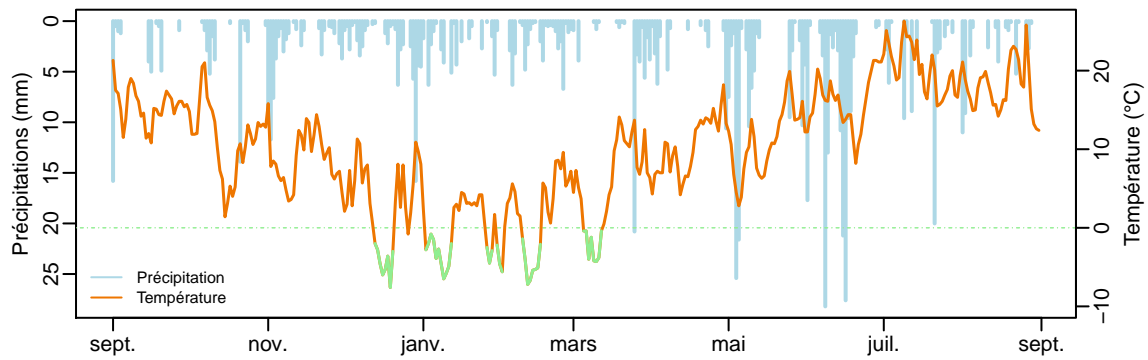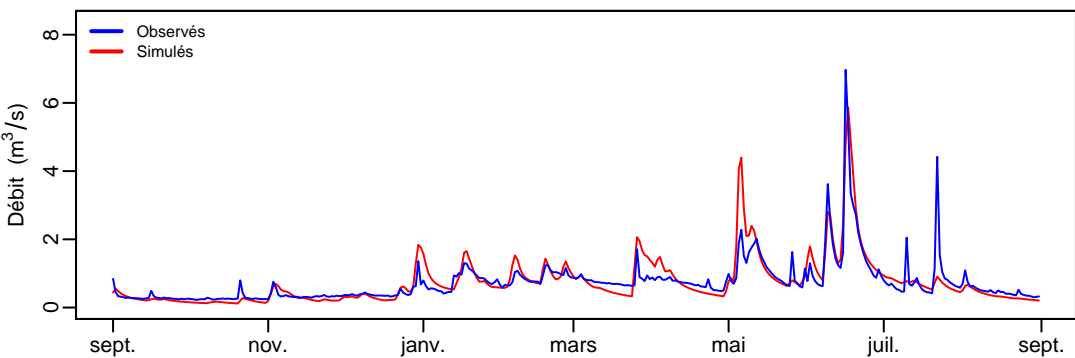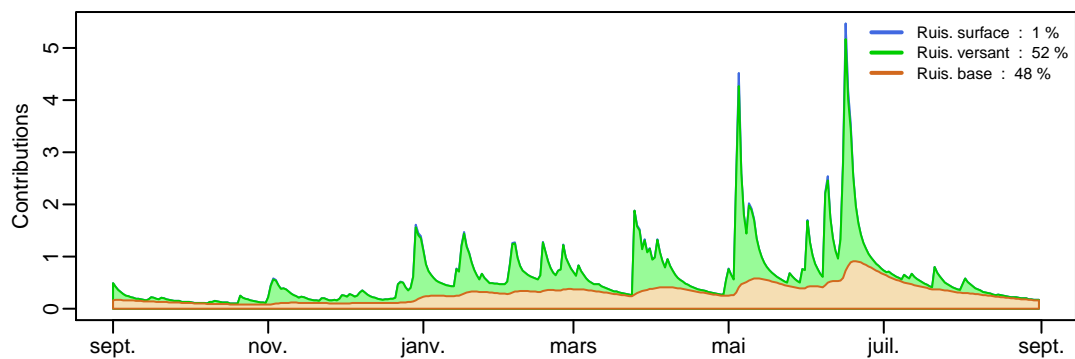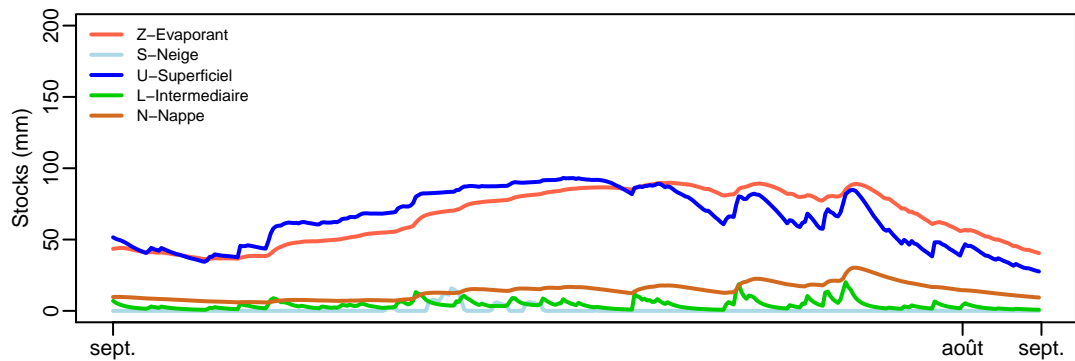

# k2774020 (106.6 km<sup>2</sup>) – année 2010–2011

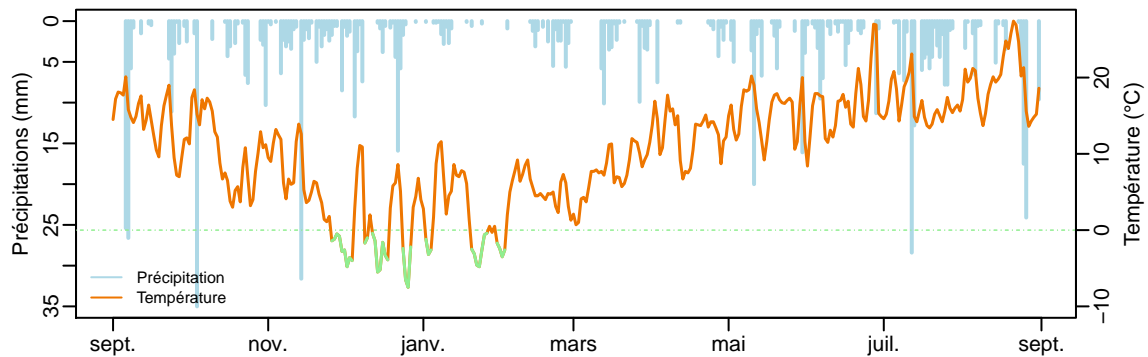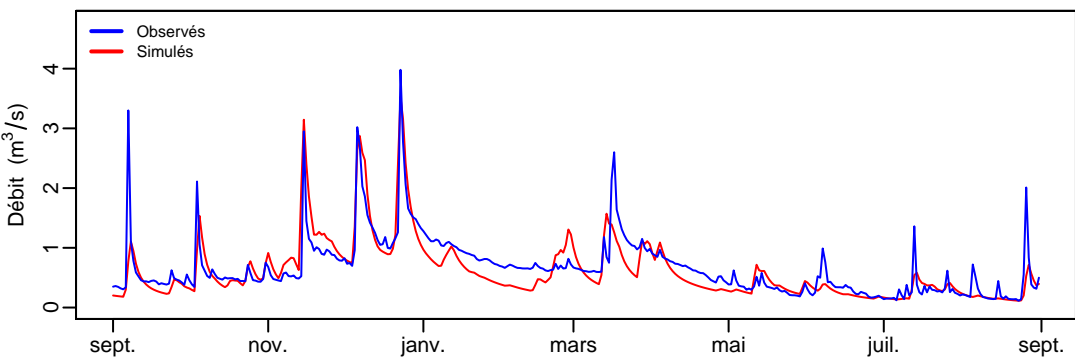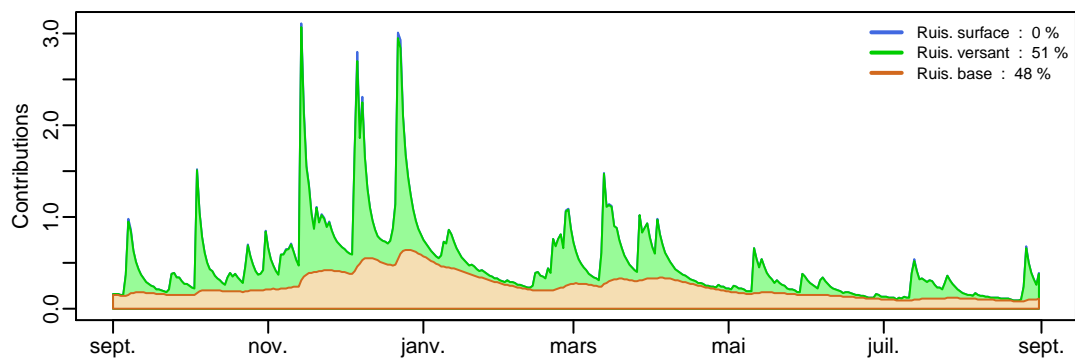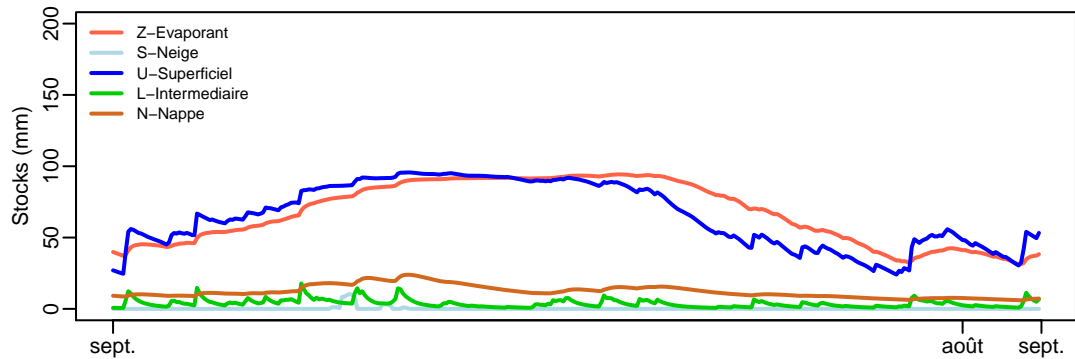

# k2774020 (106.6 km<sup>2</sup>) – année 2011–2012

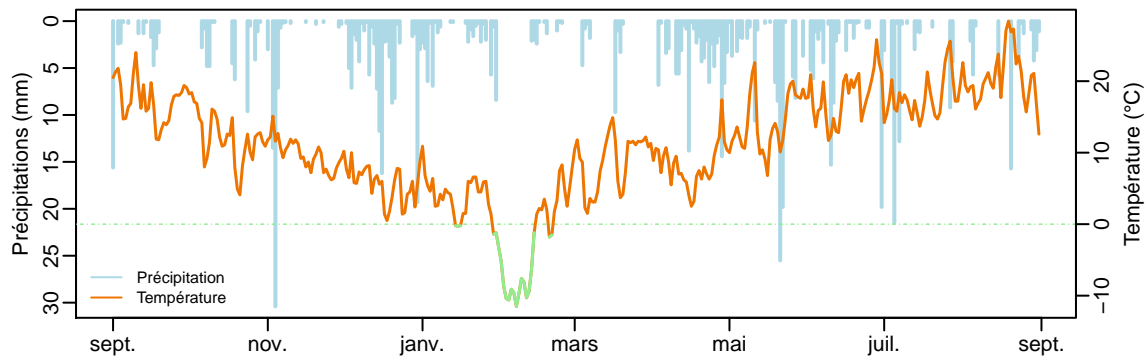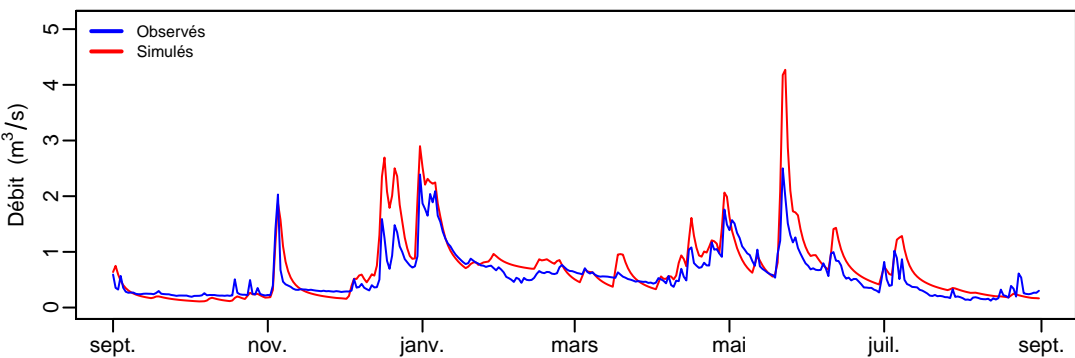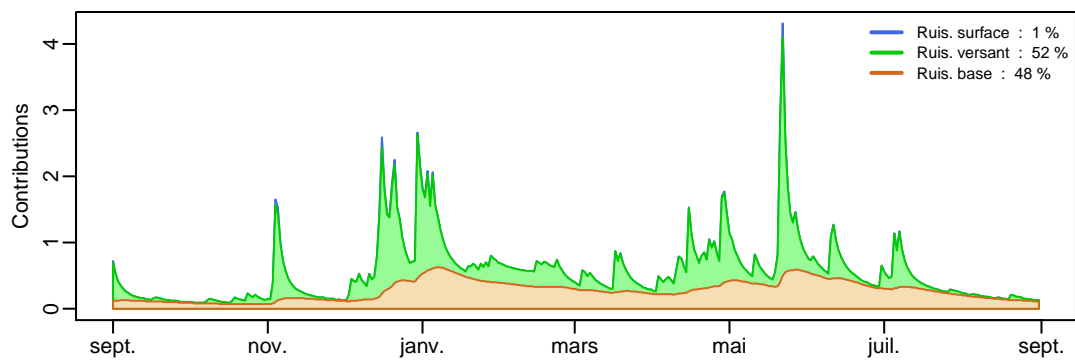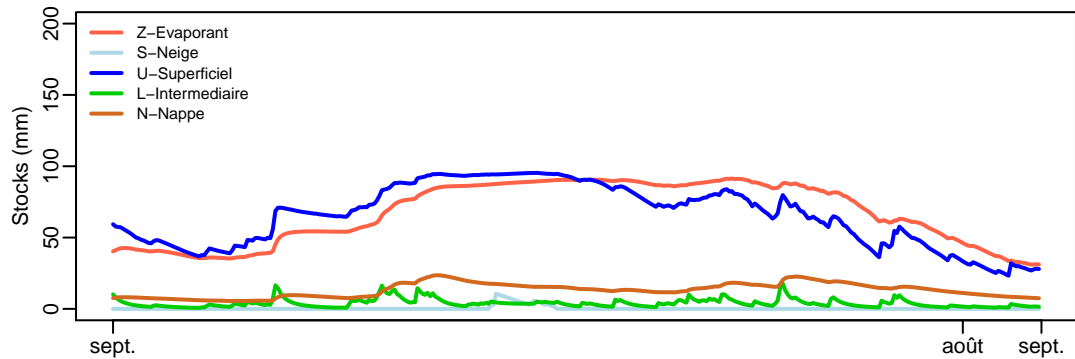

# k2783010 (668.18 km<sup>2</sup>) – année 1990–1991

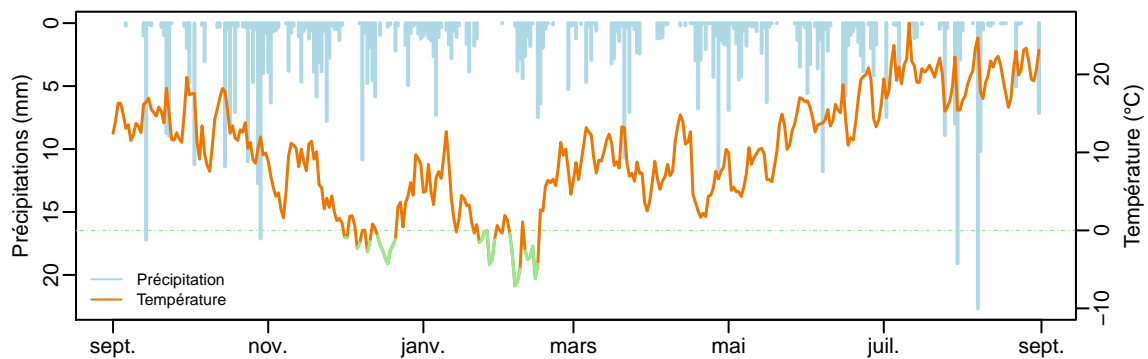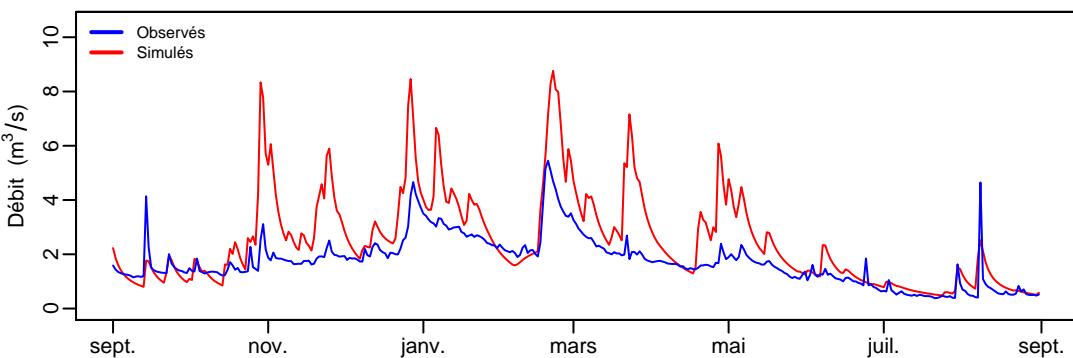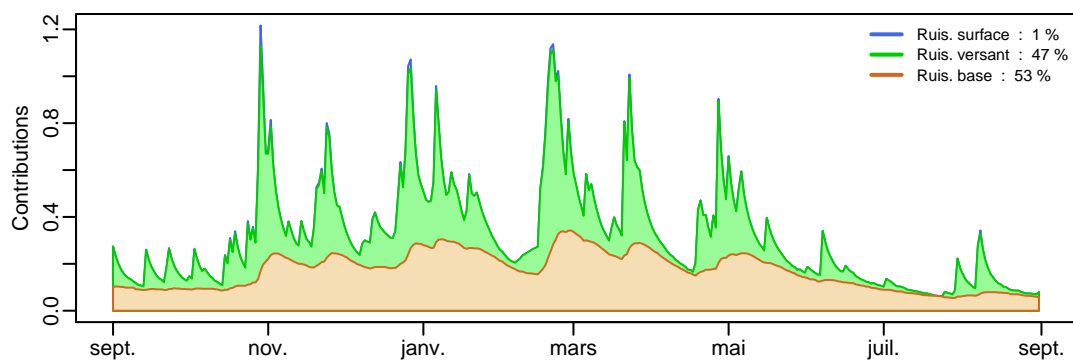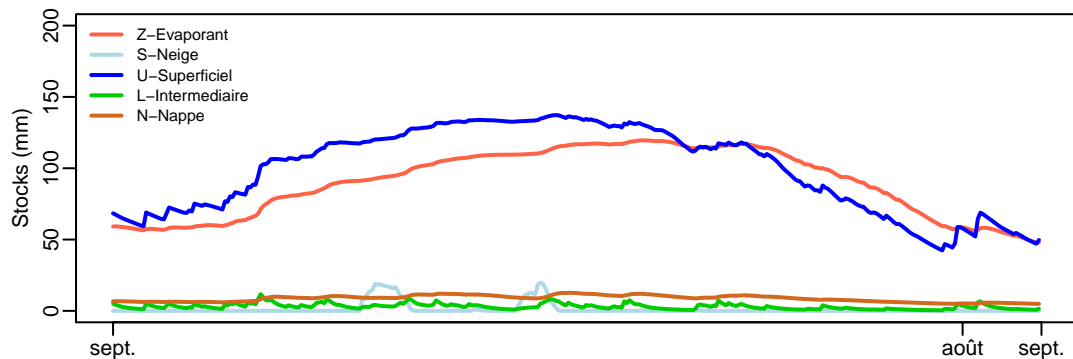

# k2783010 (668.18 km<sup>2</sup>) – année 1991–1992

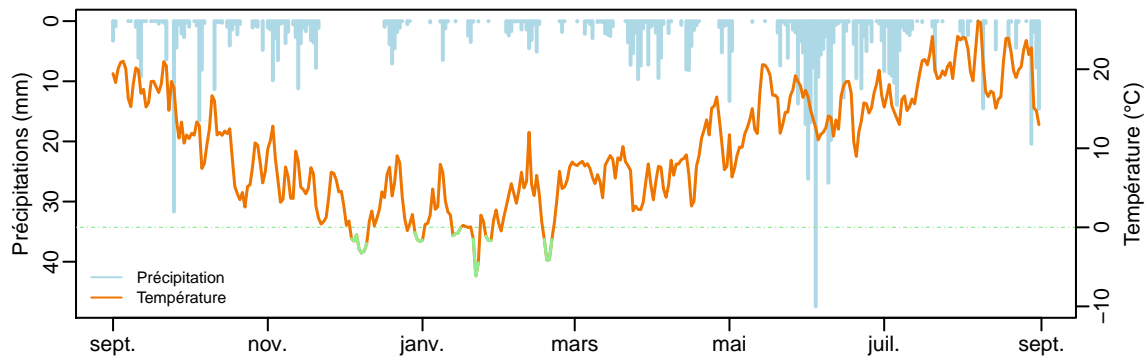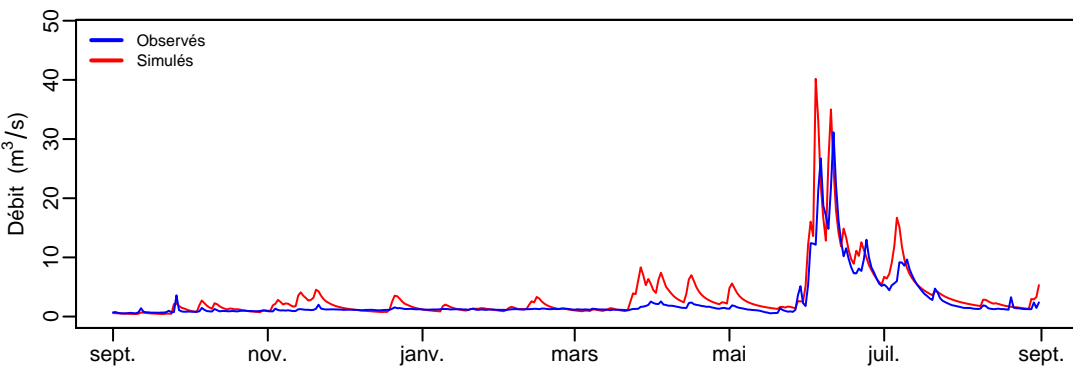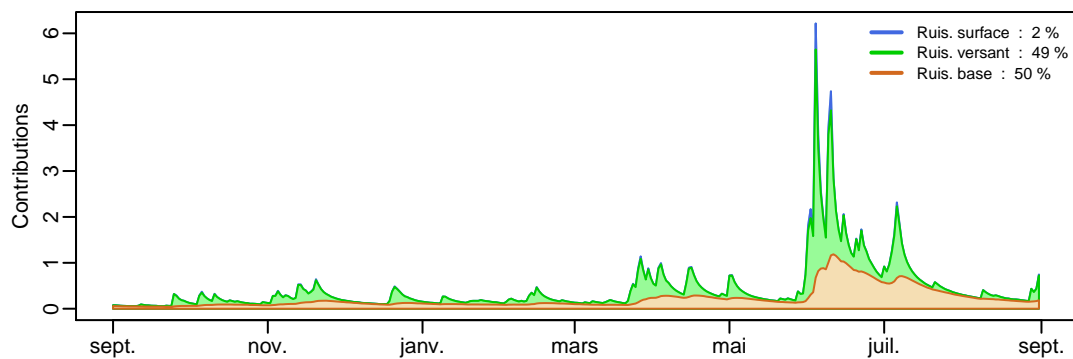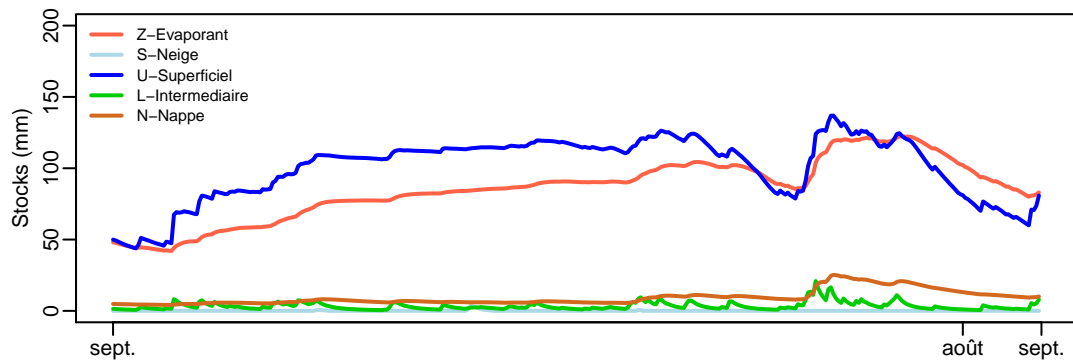

# k2783010 (668.18 km<sup>2</sup>) – année 1992–1993

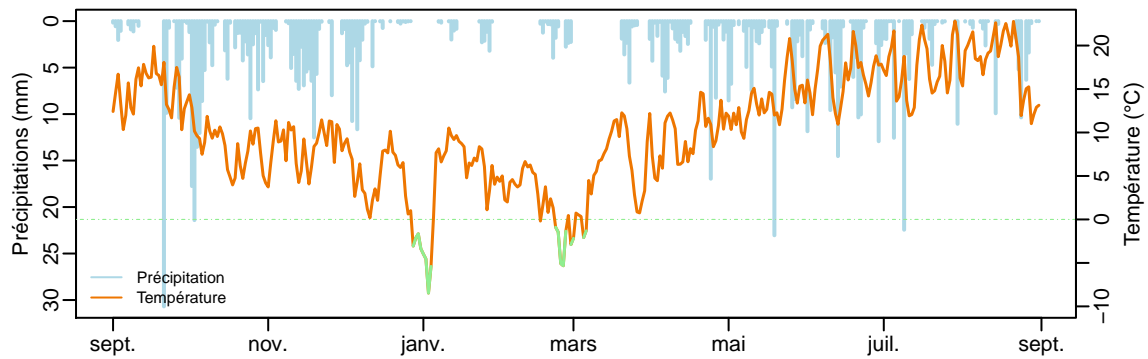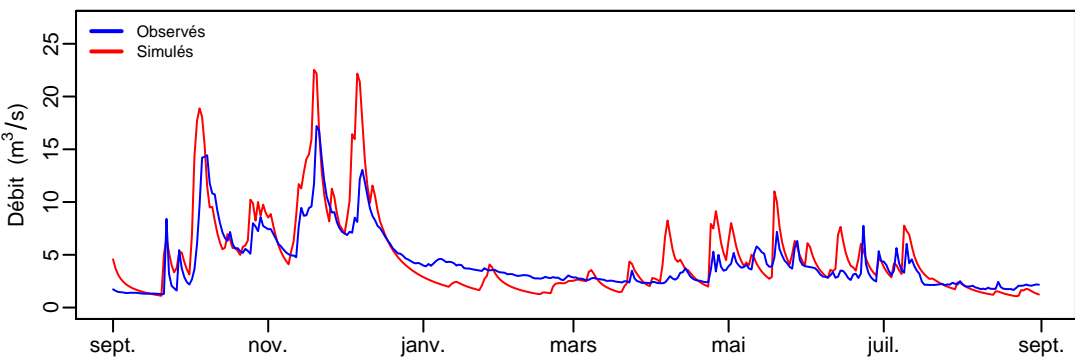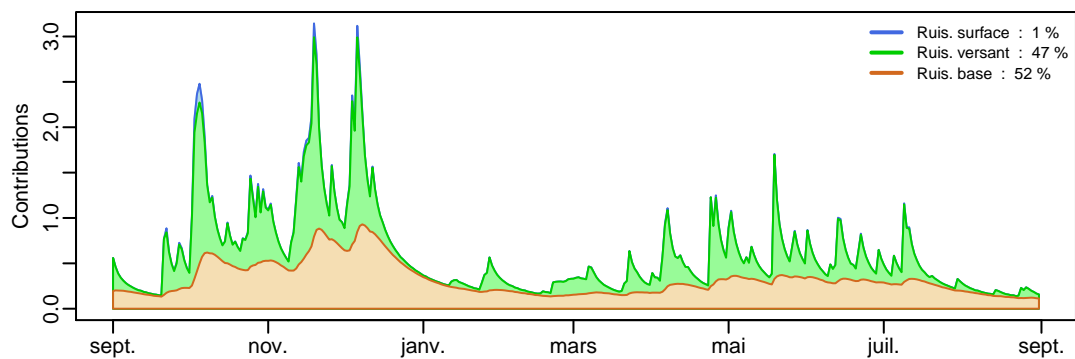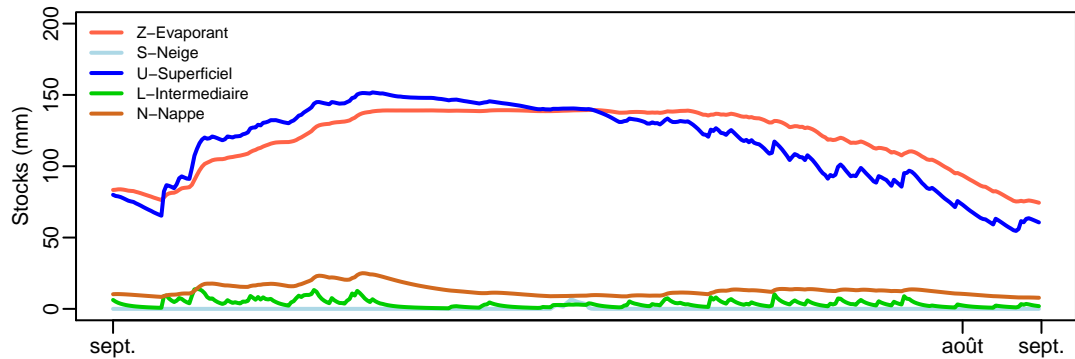

# k2783010 (668.18 km<sup>2</sup>) – année 1993–1994

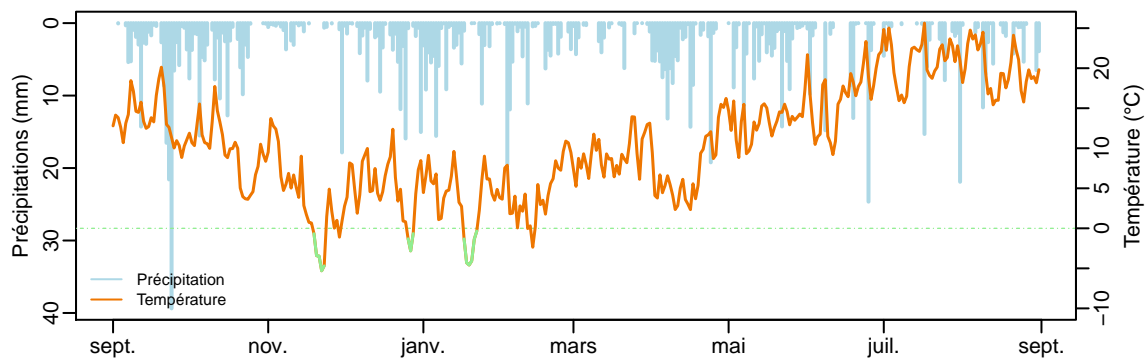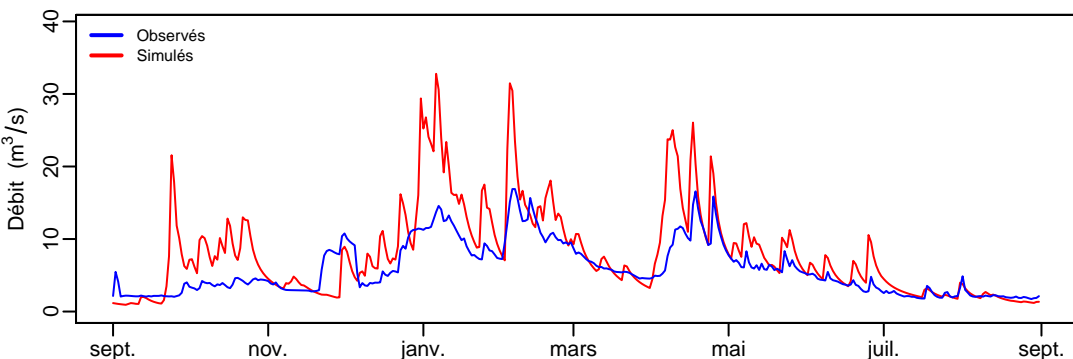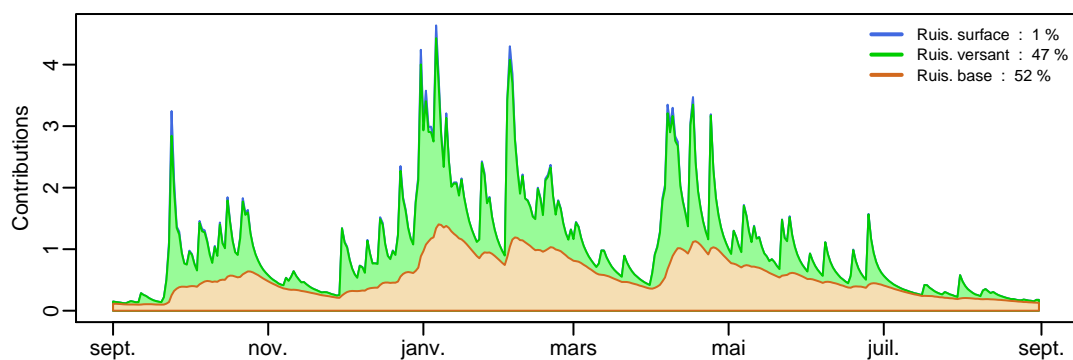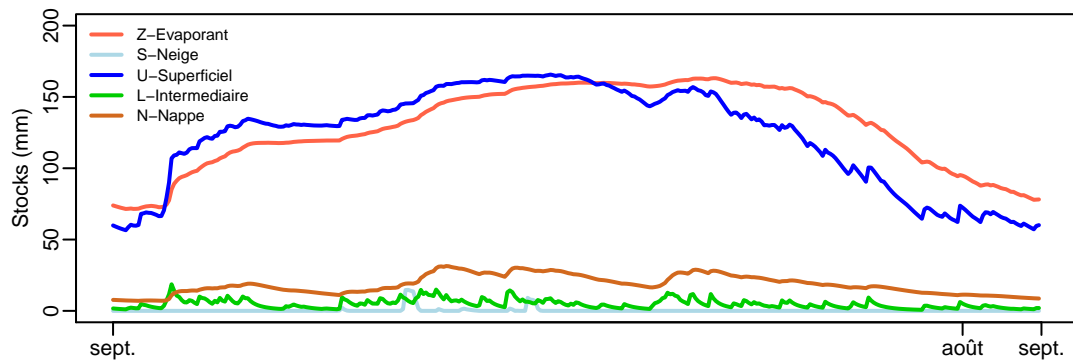



# k2783010 (668.18 km<sup>2</sup>) – année 1994–1995

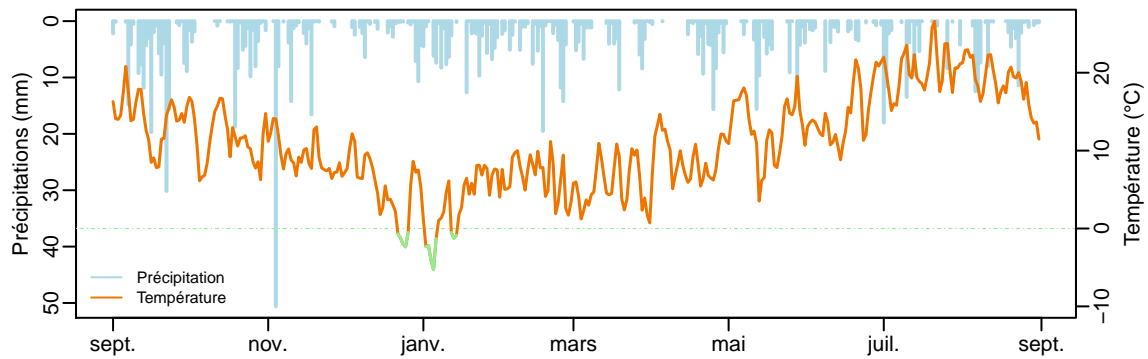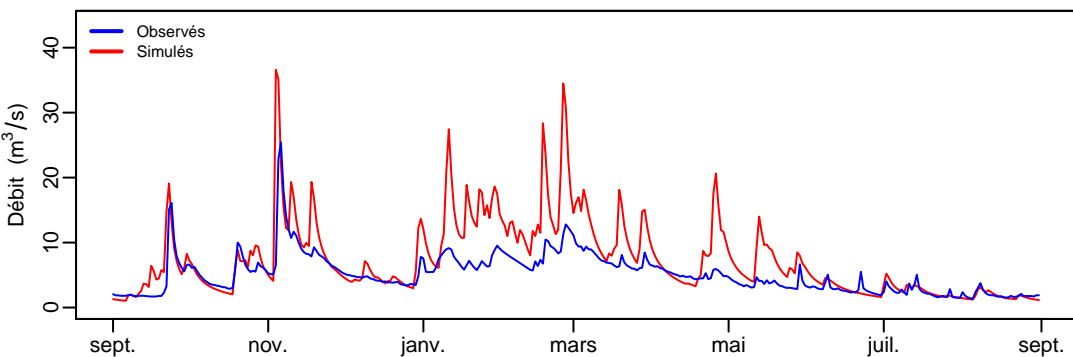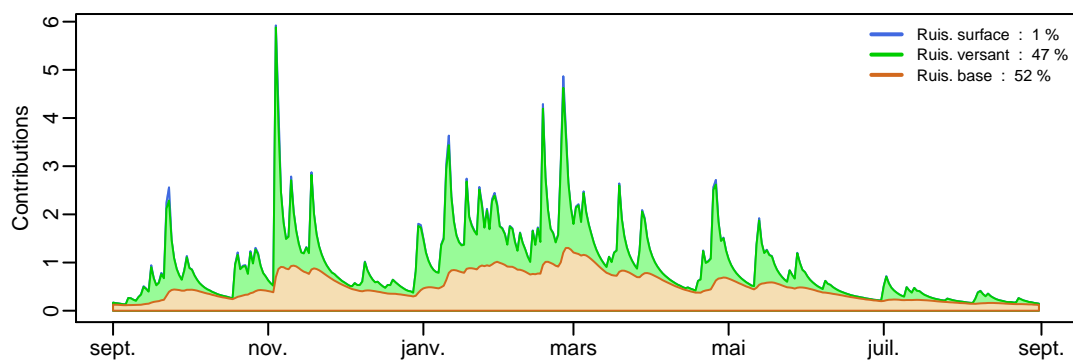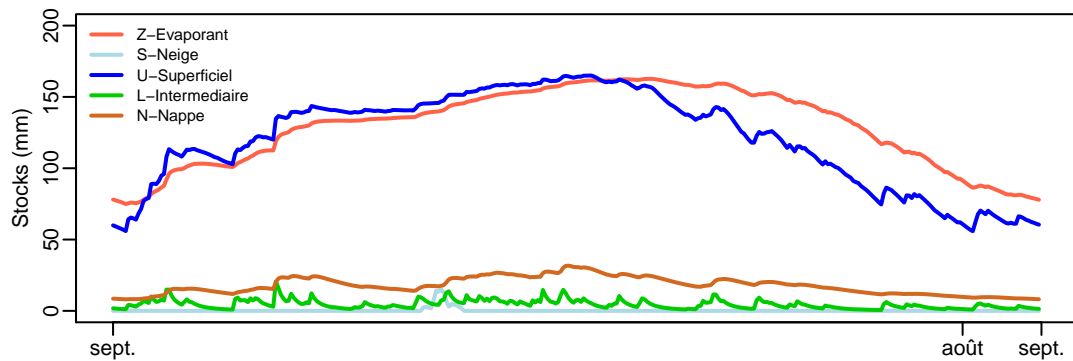

# k2783010 (668.18 km<sup>2</sup>) – année 1995–1996

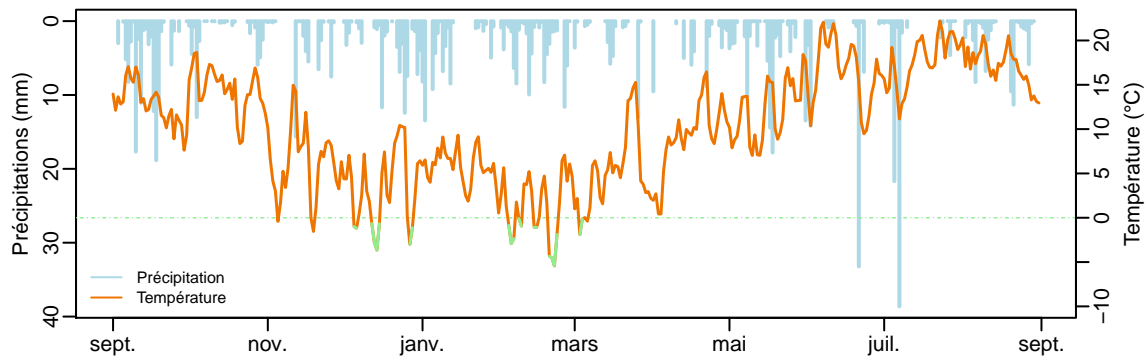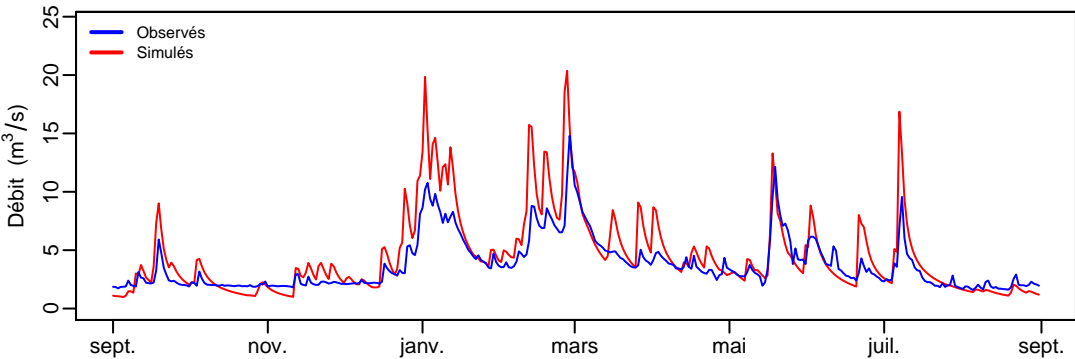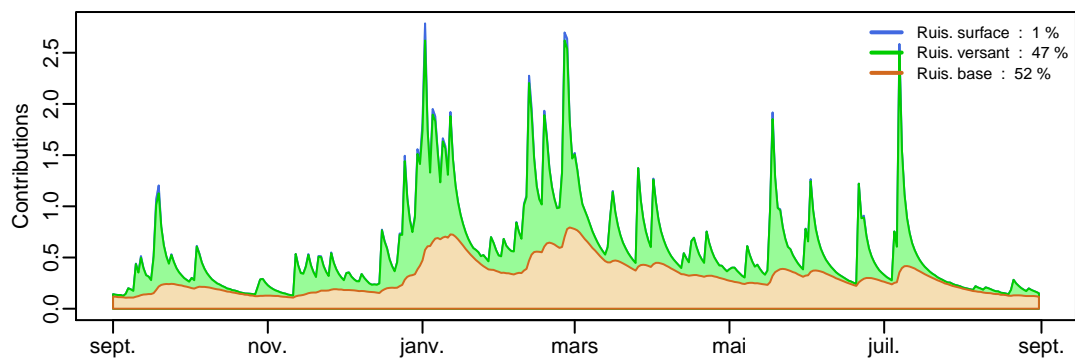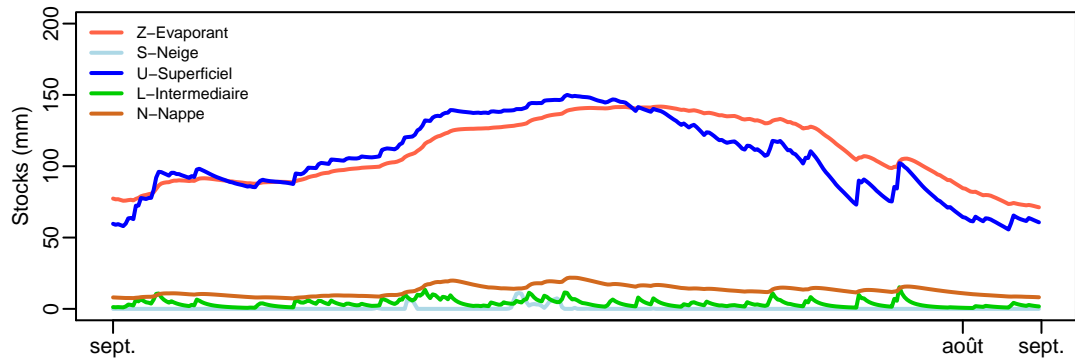

# k2783010 (668.18 km<sup>2</sup>) – année 1996–1997

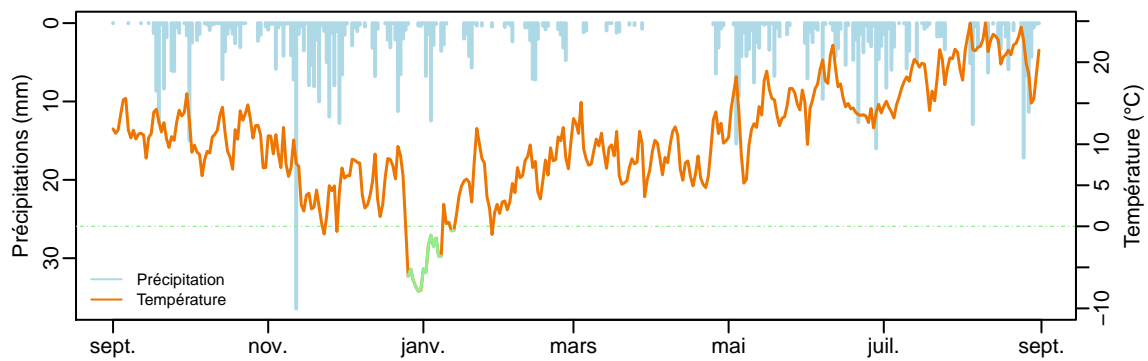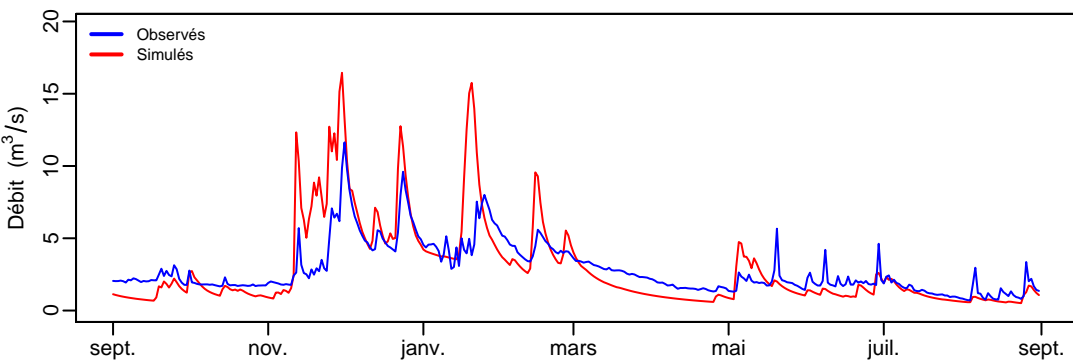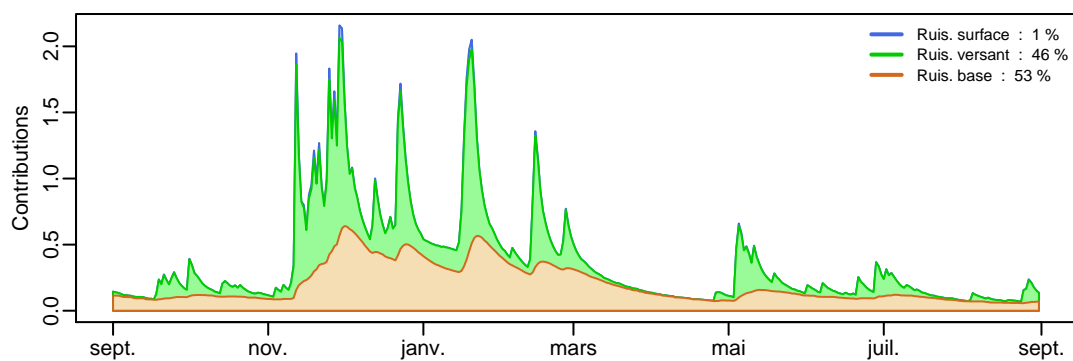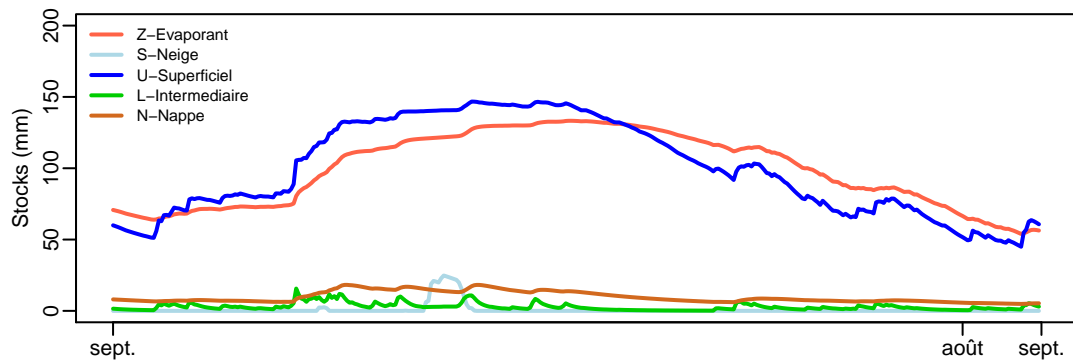

# k2783010 (668.18 km<sup>2</sup>) – année 1997–1998

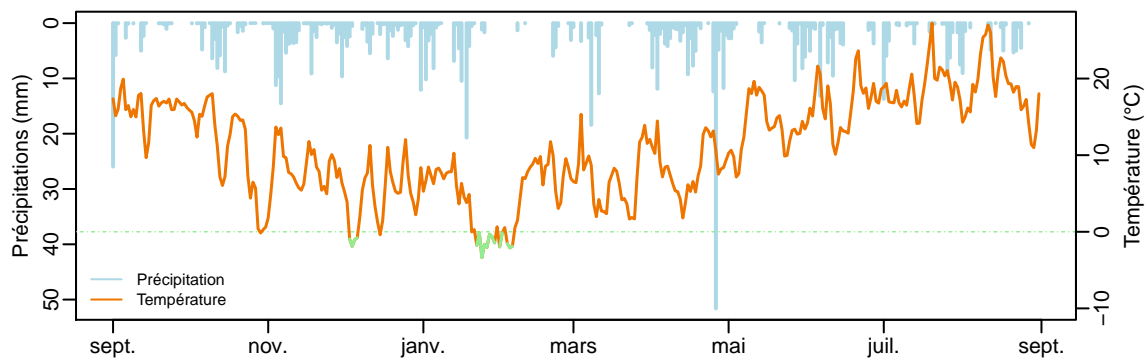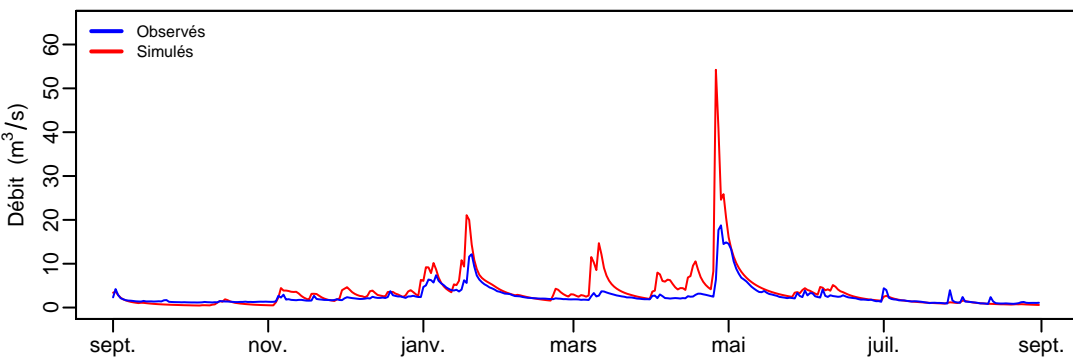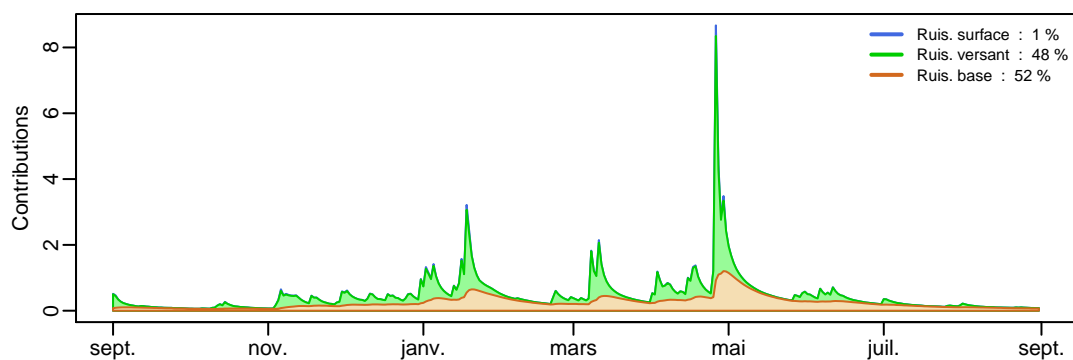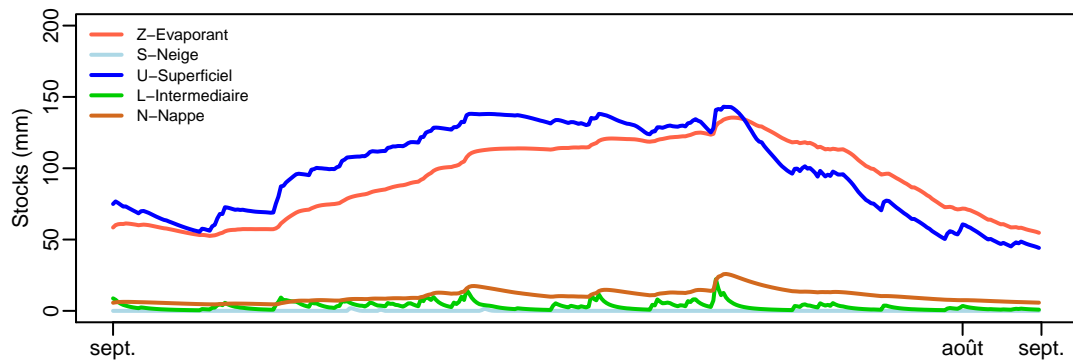

# k2783010 (668.18 km<sup>2</sup>) – année 1998–1999

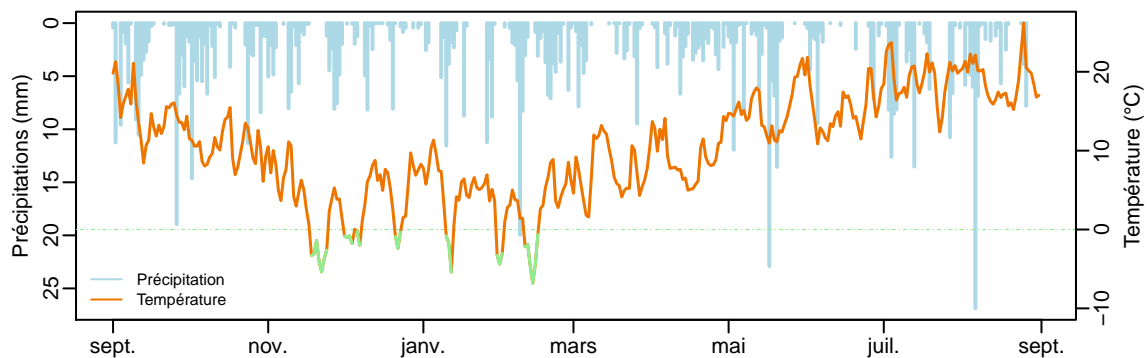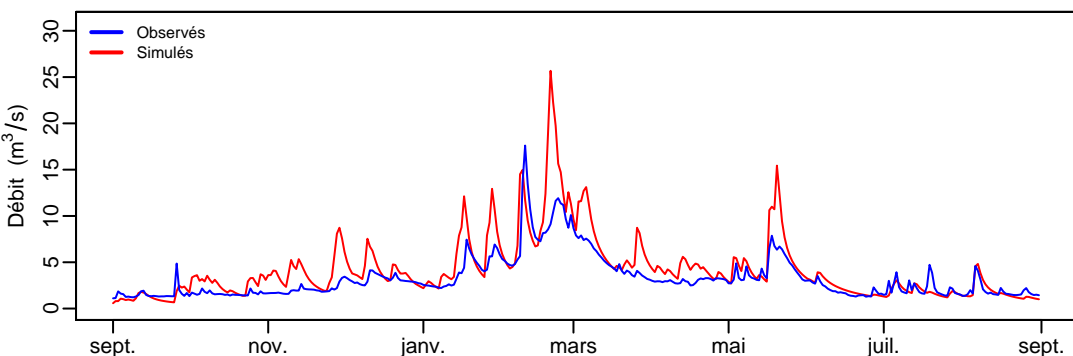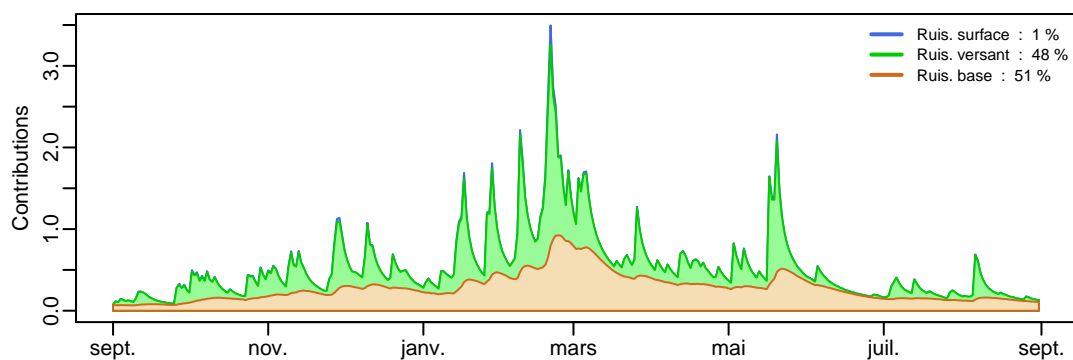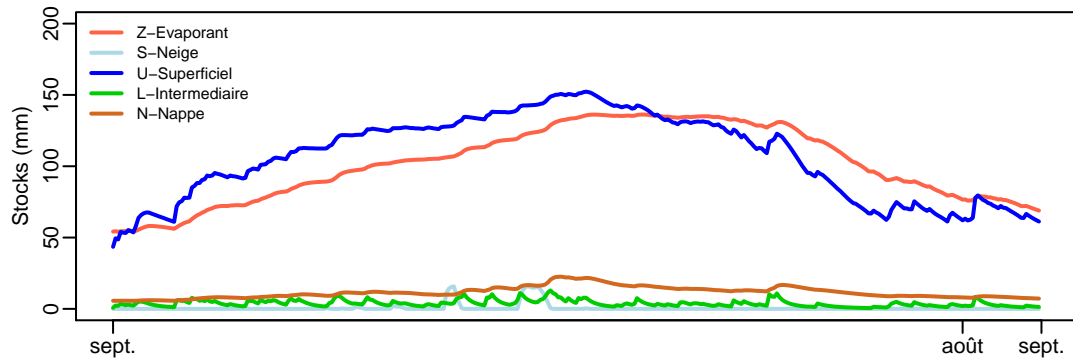

# k2783010 (668.18 km²) – année 1999–2000

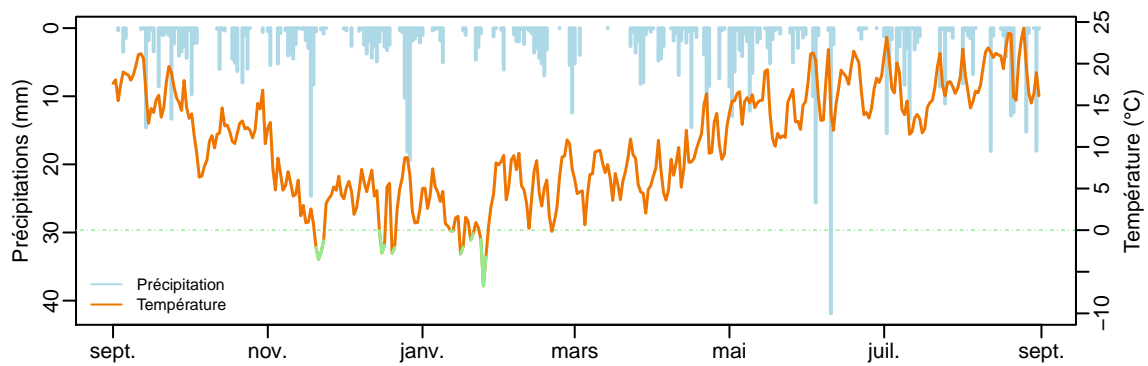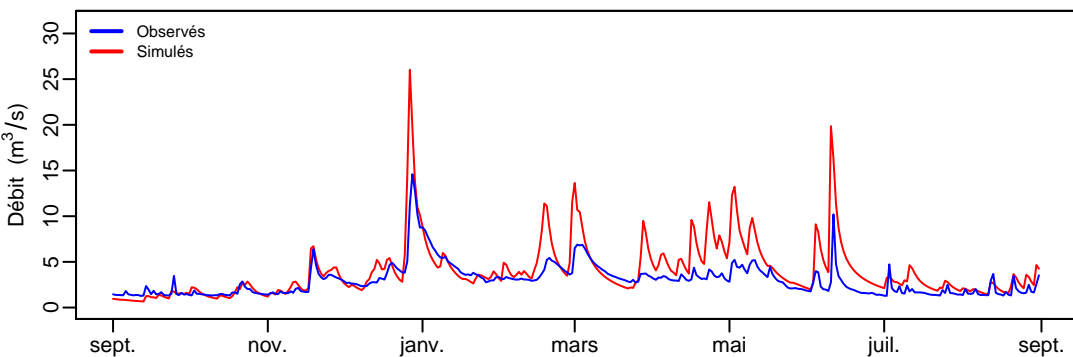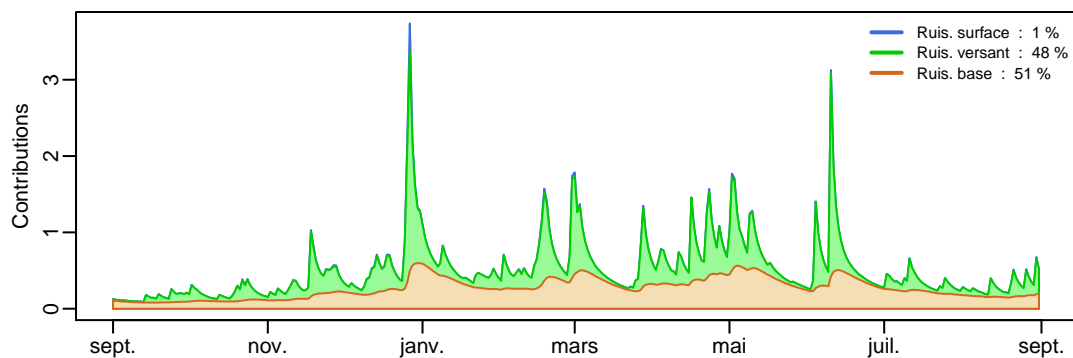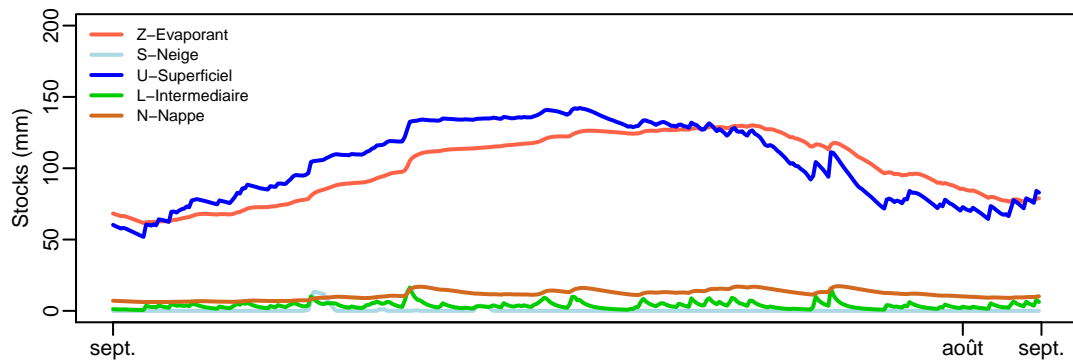

# k2783010 (668.18 km²) – année 2000–2001

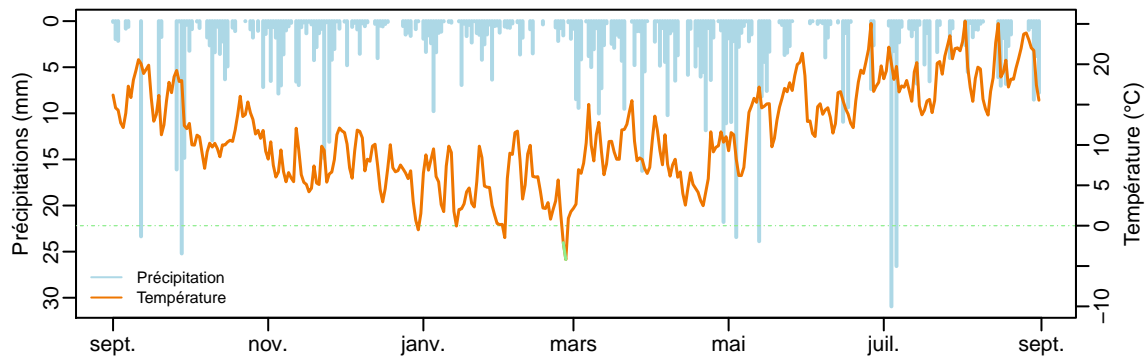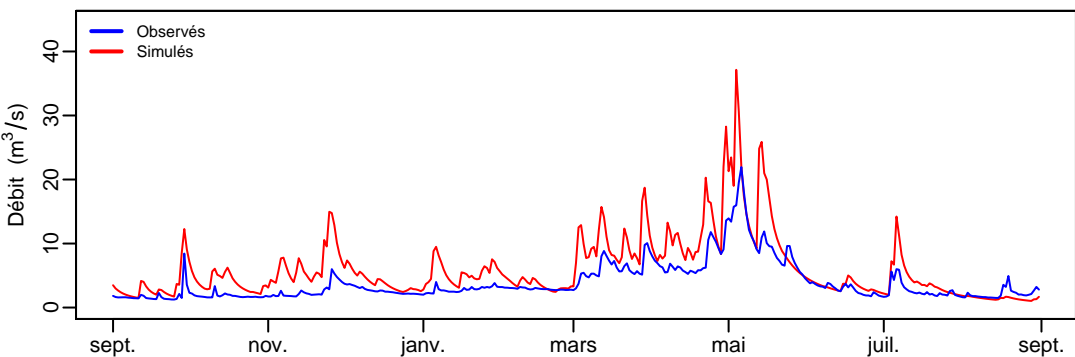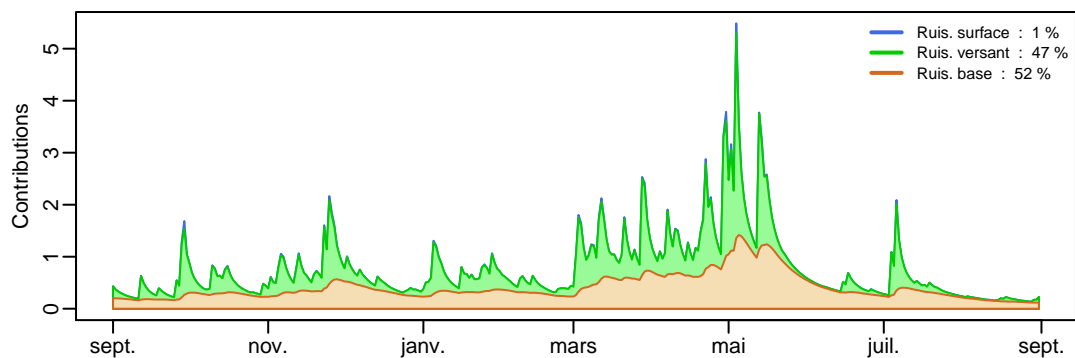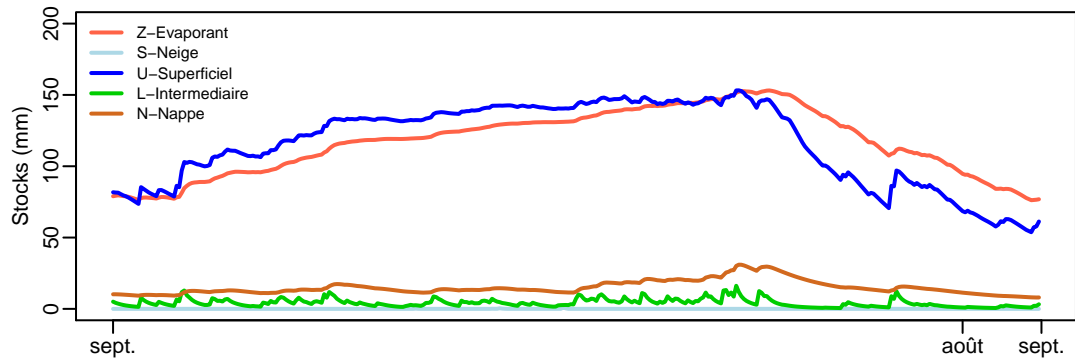

# k2783010 (668.18 km<sup>2</sup>) – année 2001–2002

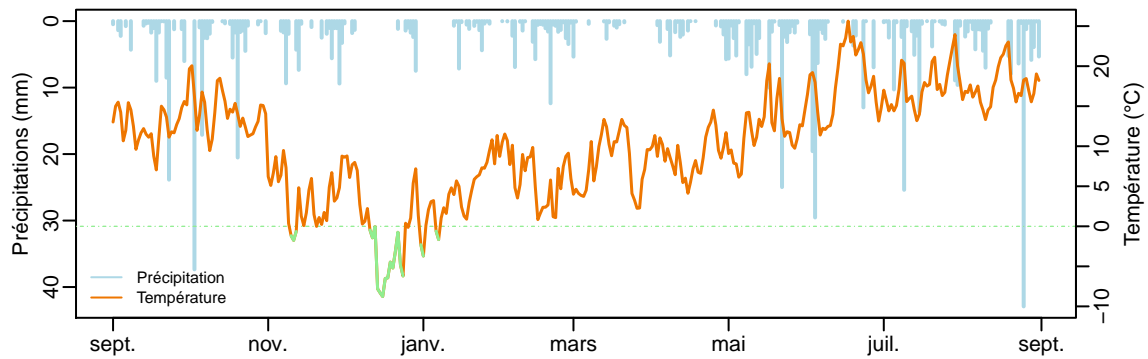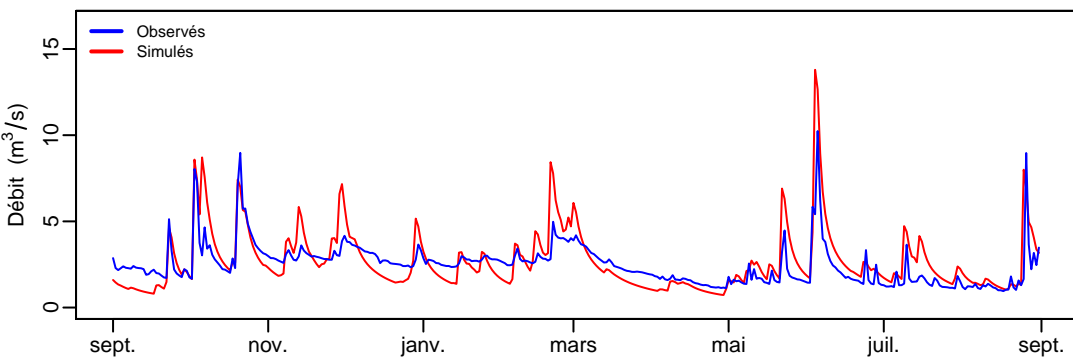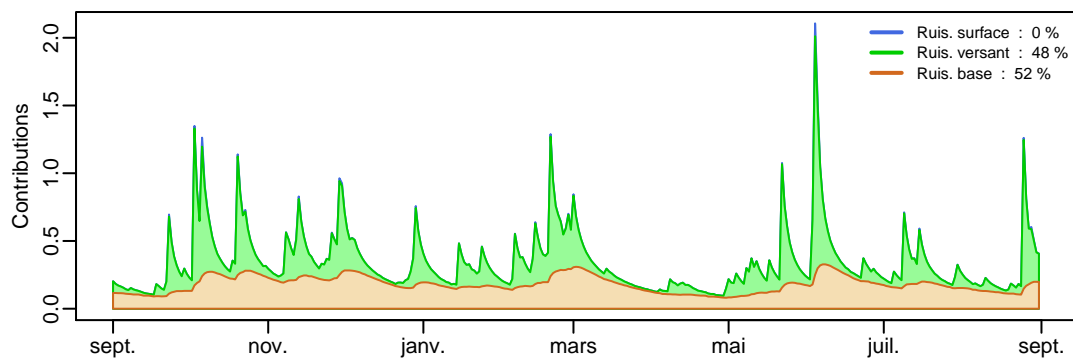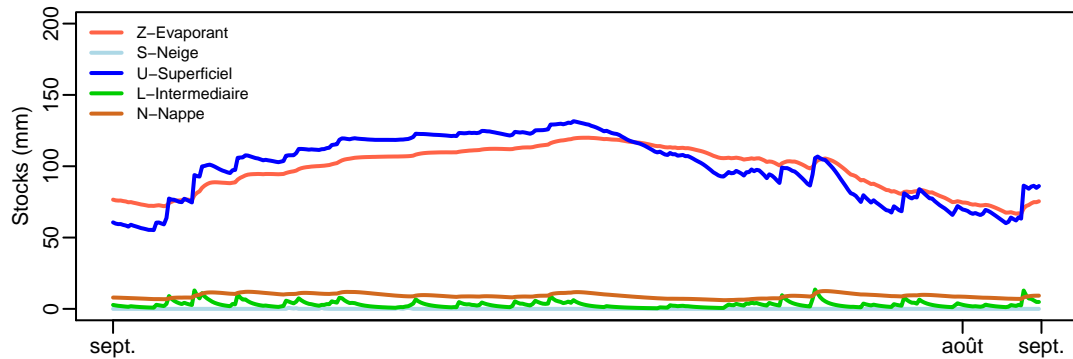



# k2783010 (668.18 km<sup>2</sup>) – année 2002–2003

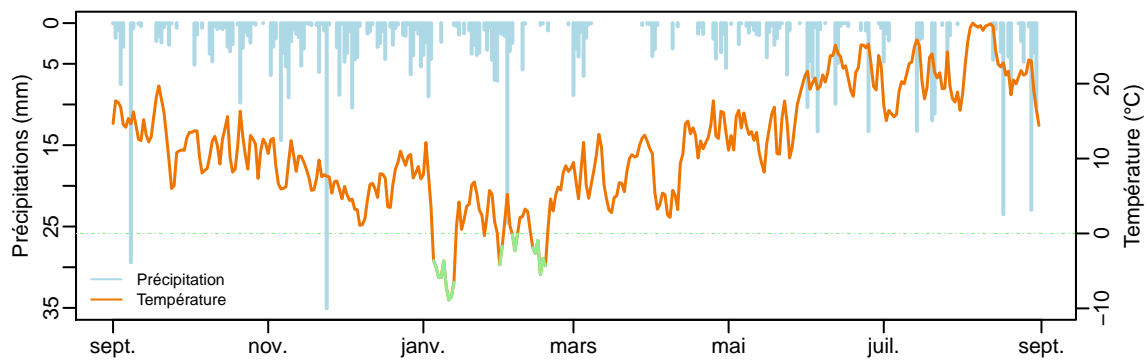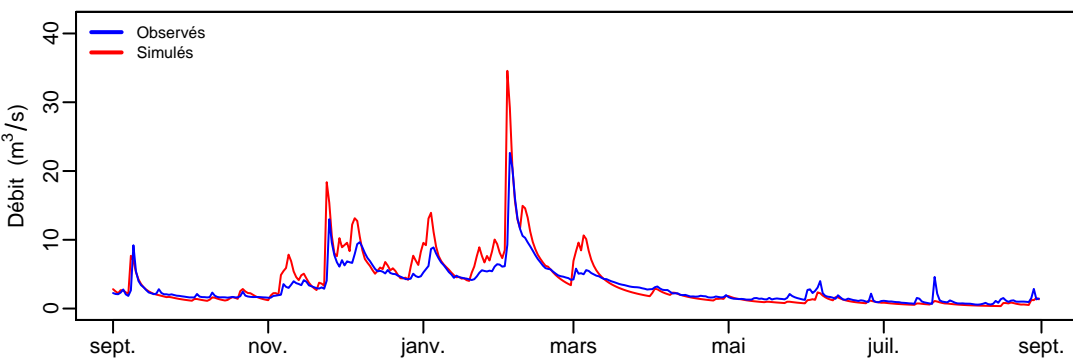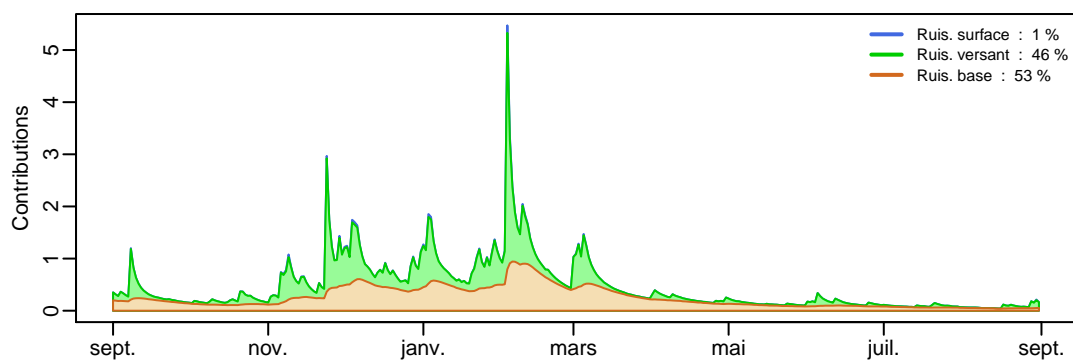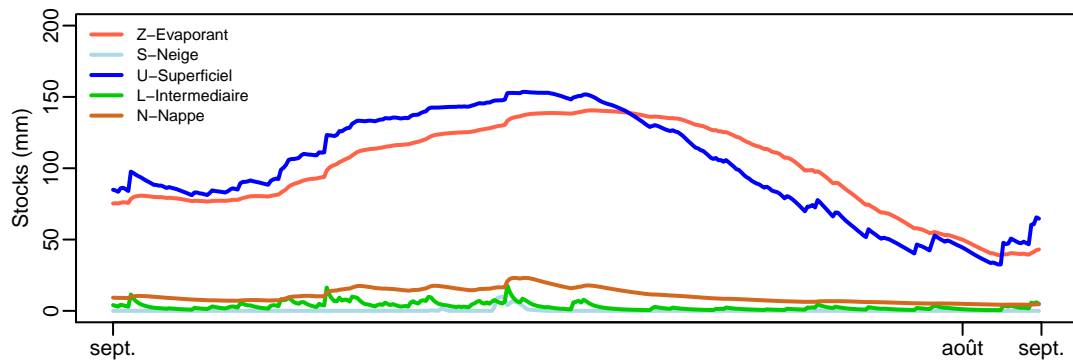

# k2783010 (668.18 km<sup>2</sup>) – année 2003–2004

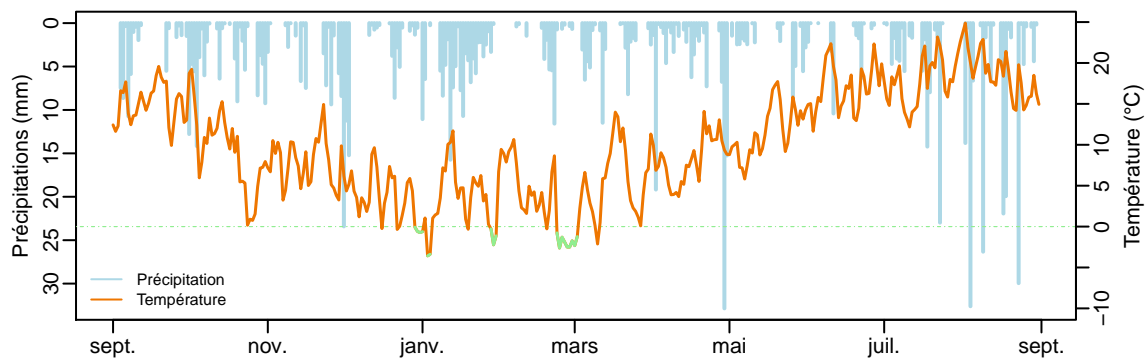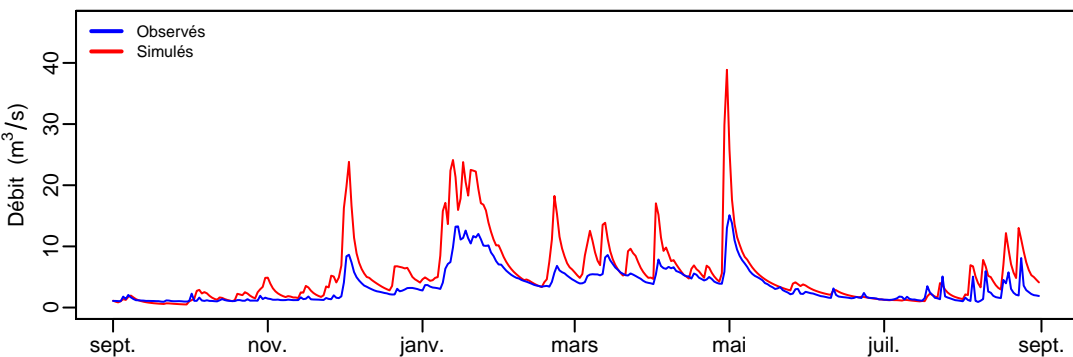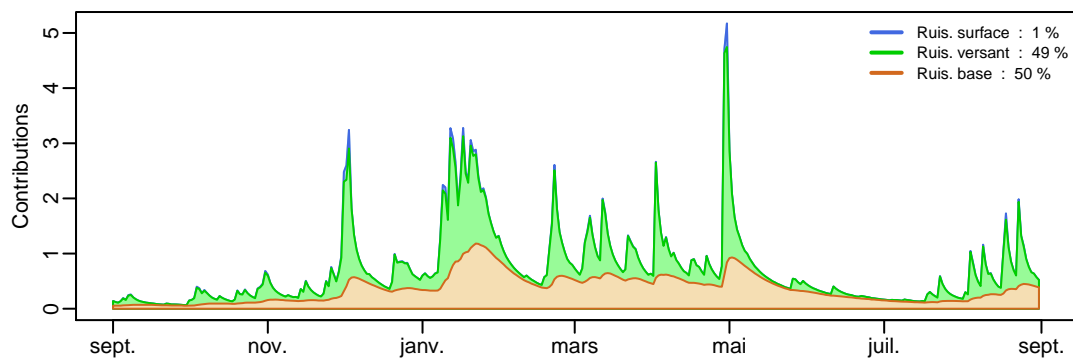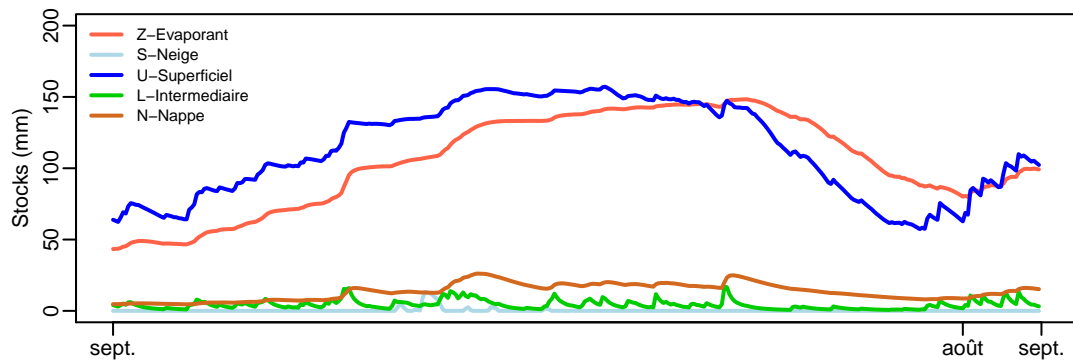

# k2783010 (668.18 km<sup>2</sup>) – année 2004–2005

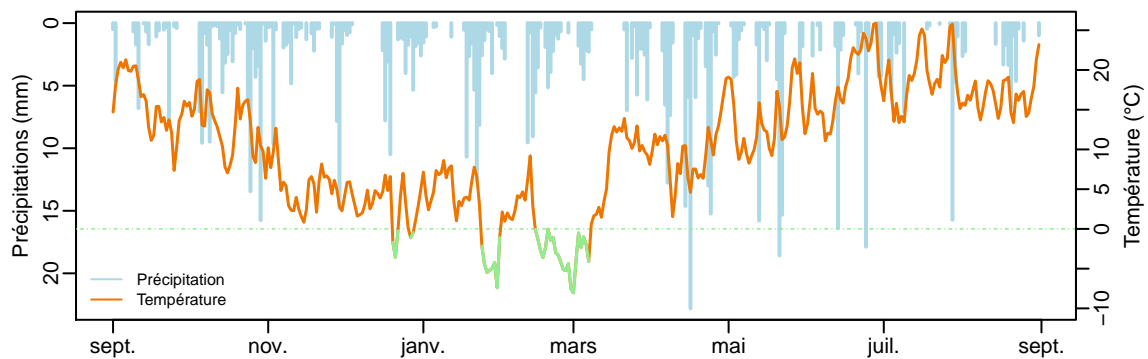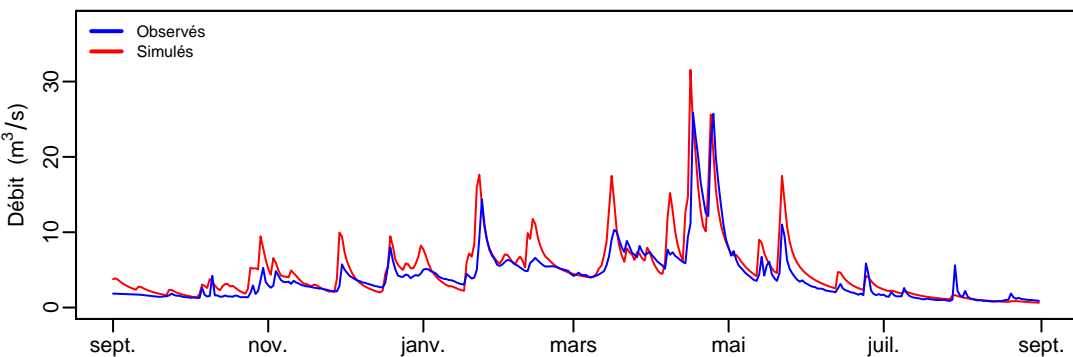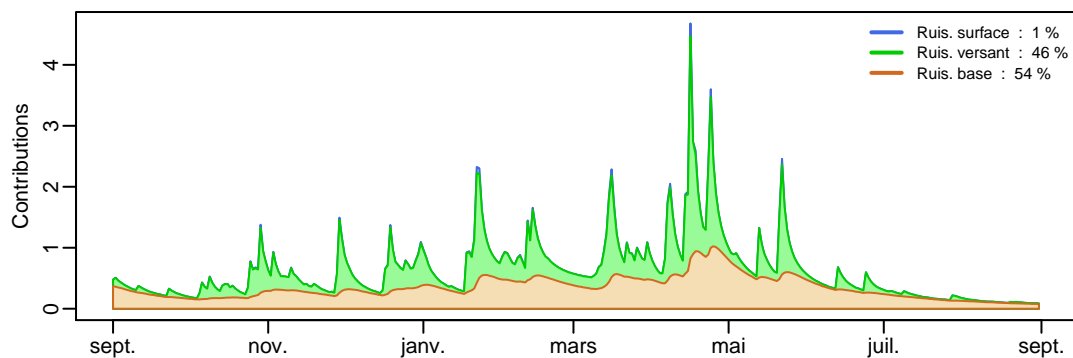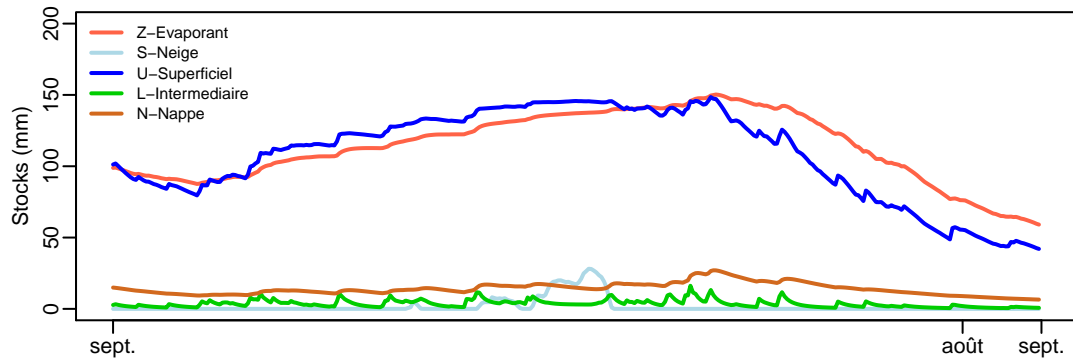

# k2783010 (668.18 km<sup>2</sup>) – année 2005–2006

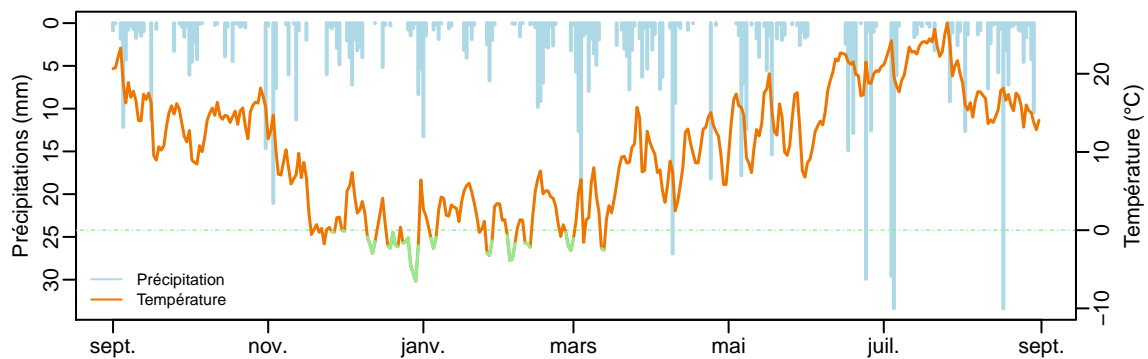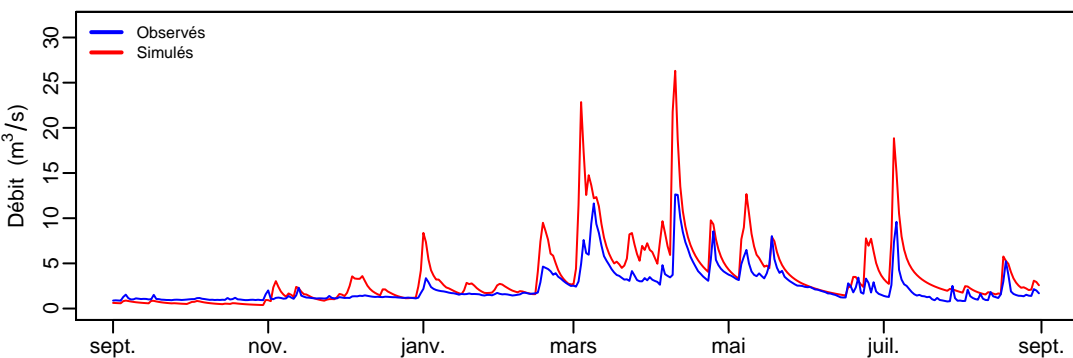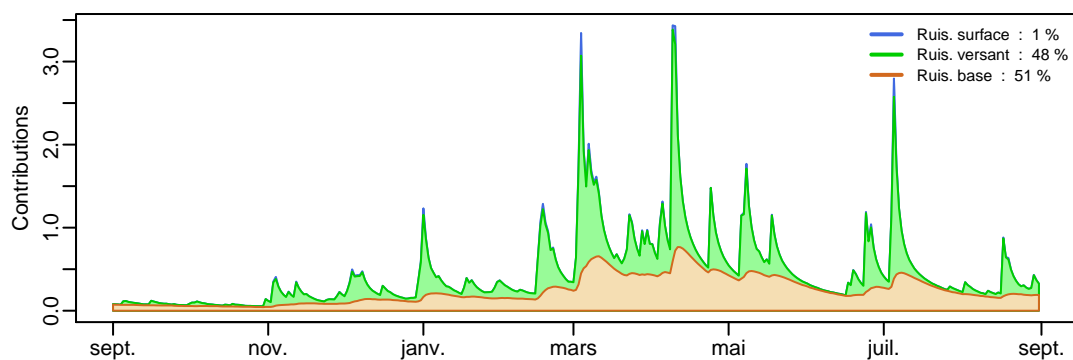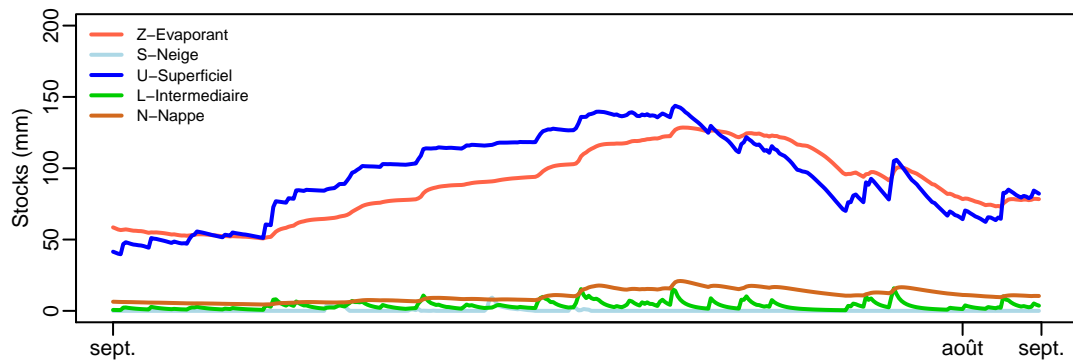

# k2783010 (668.18 km<sup>2</sup>) – année 2006–2007

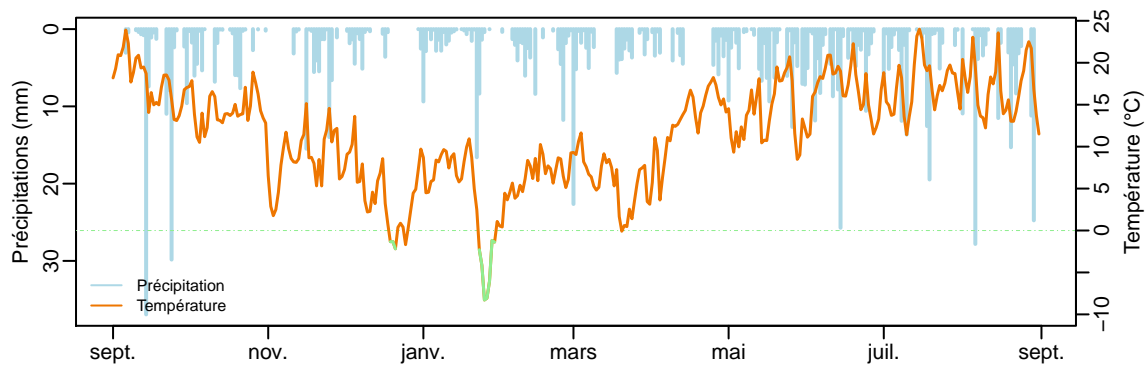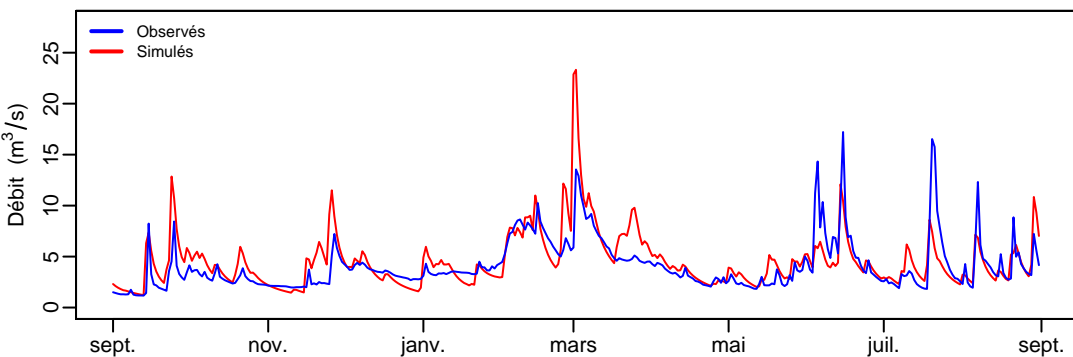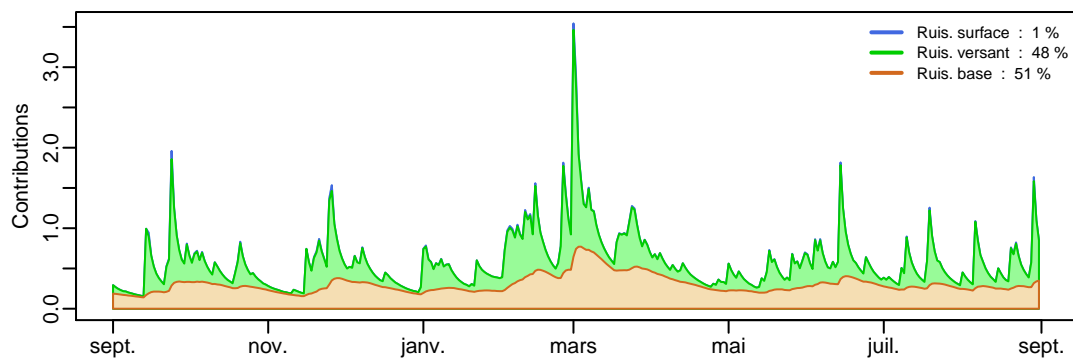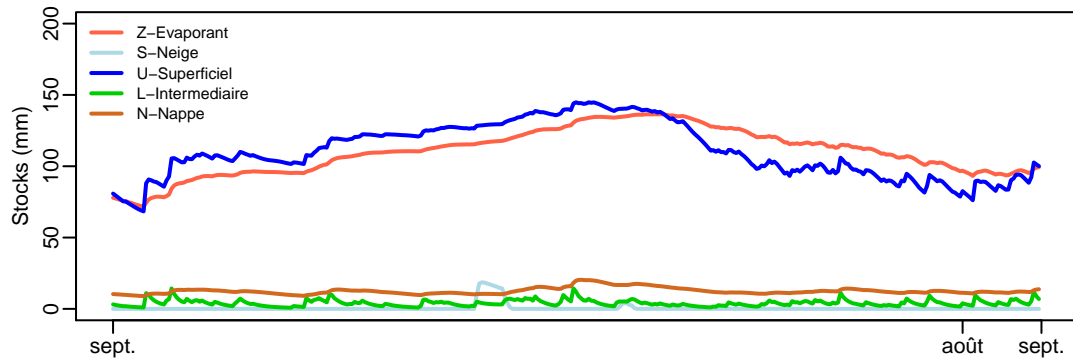

# k2783010 (668.18 km<sup>2</sup>) – année 2007–2008

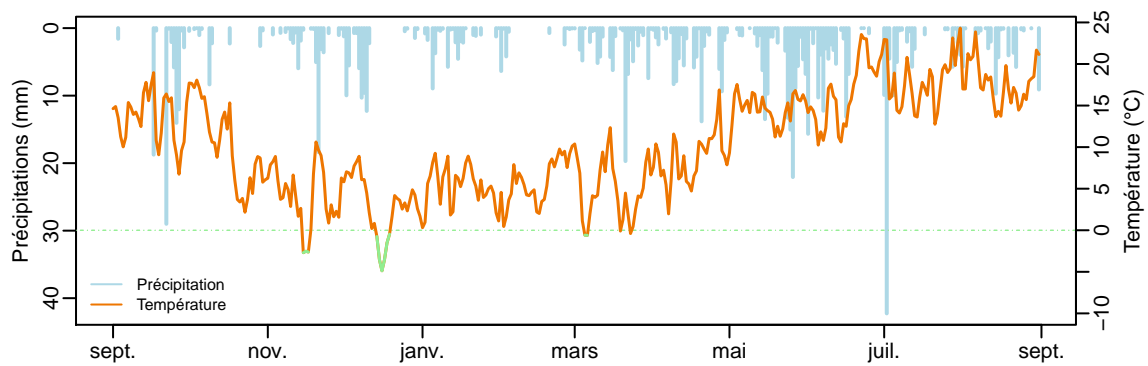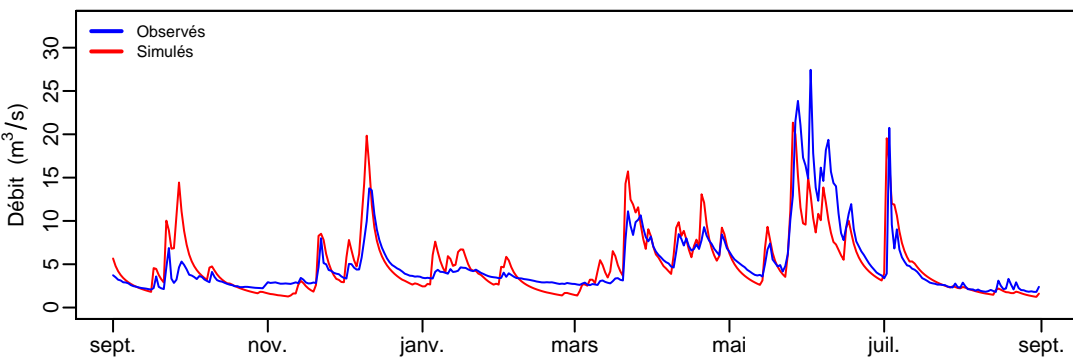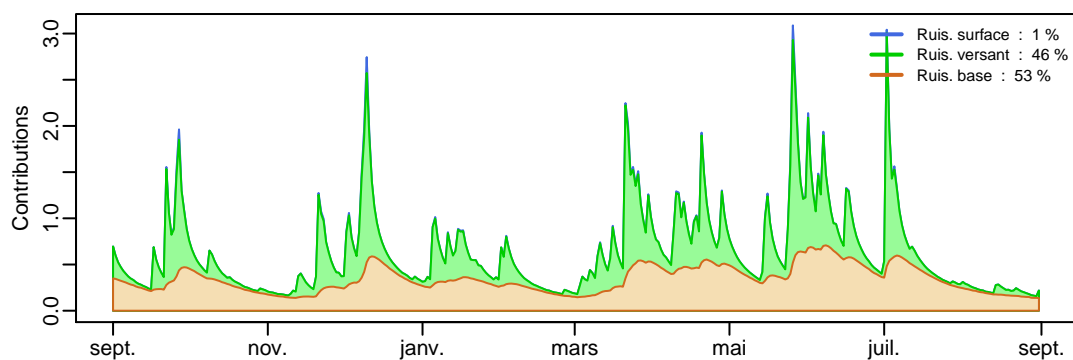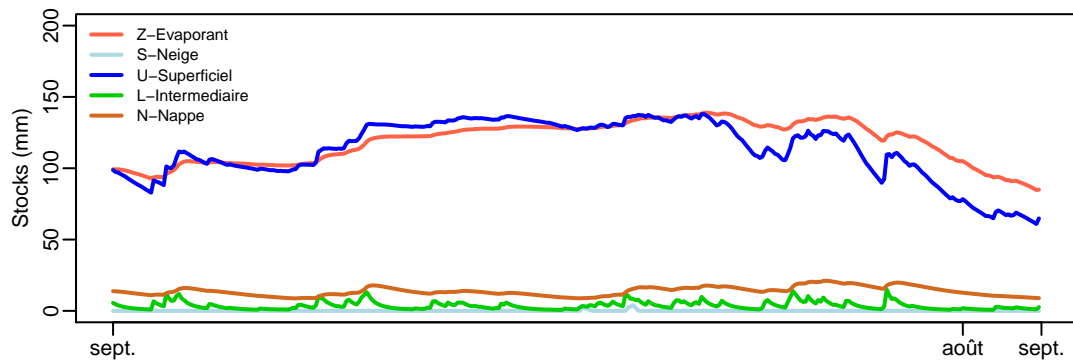

# k2783010 (668.18 km<sup>2</sup>) – année 2008–2009

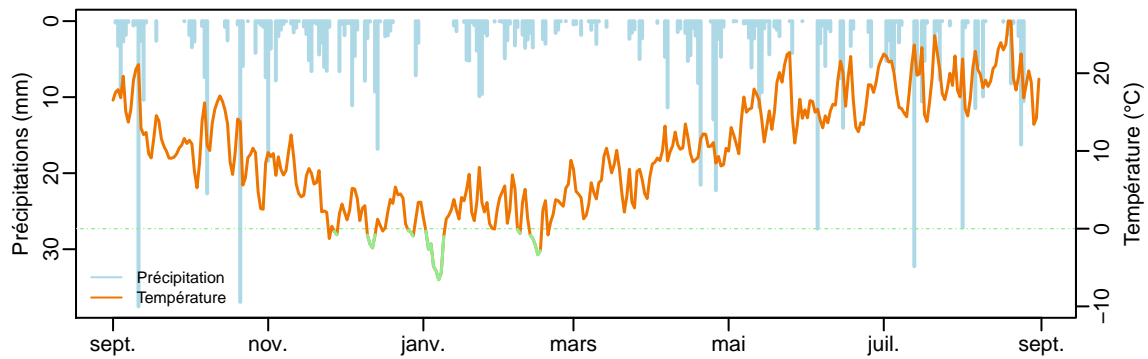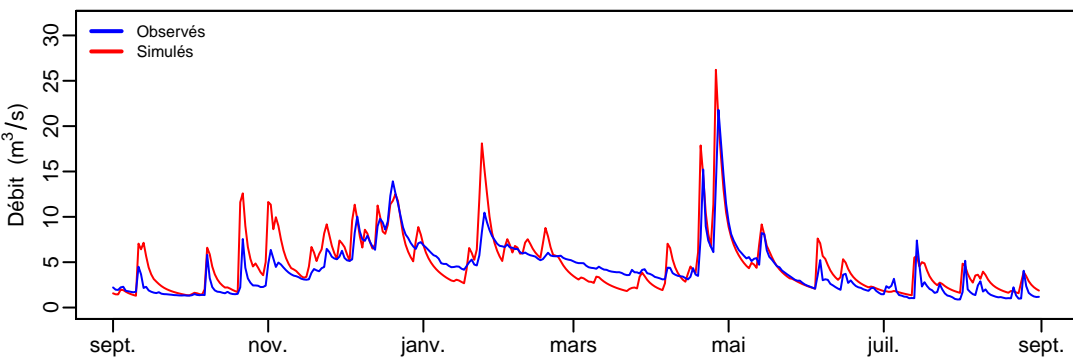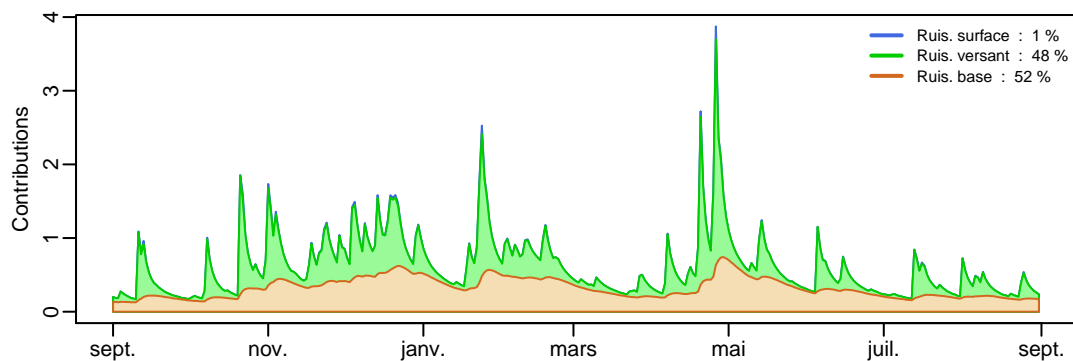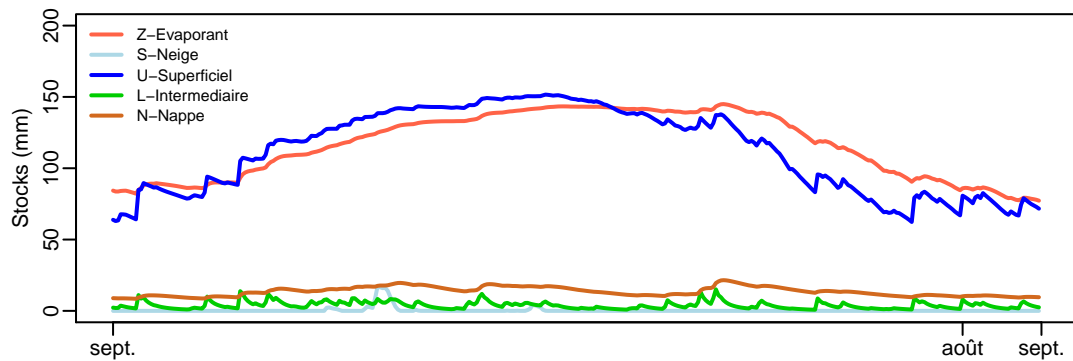

# k2790810 (7035.32 km<sup>2</sup>) – année 1981–1982

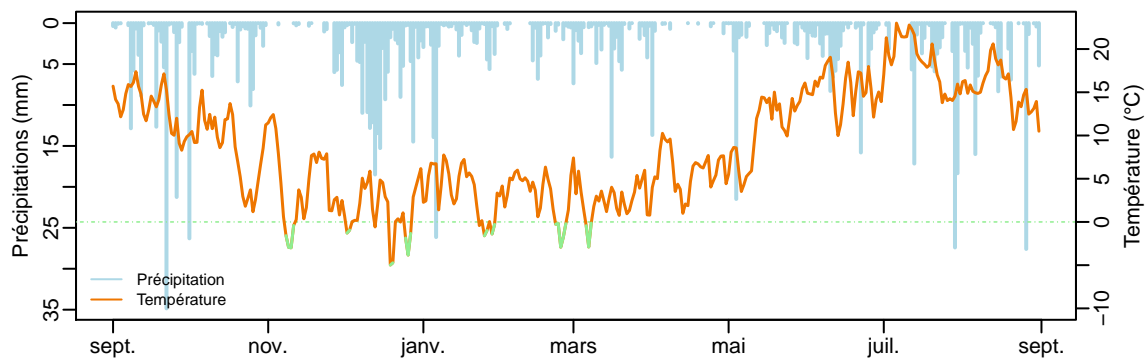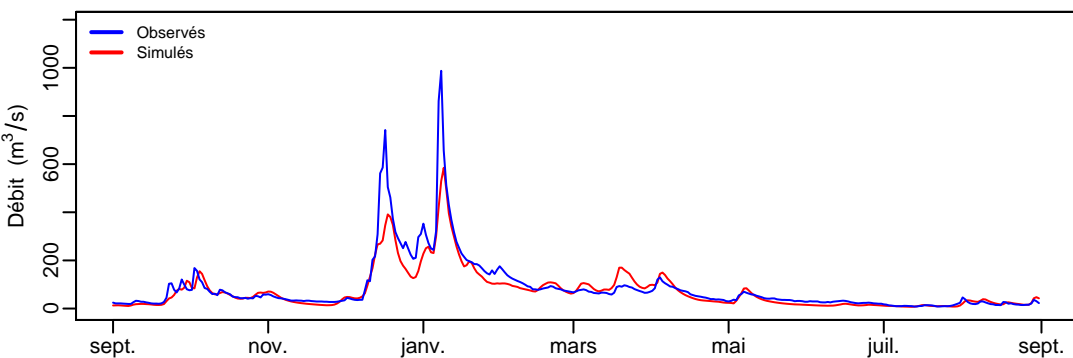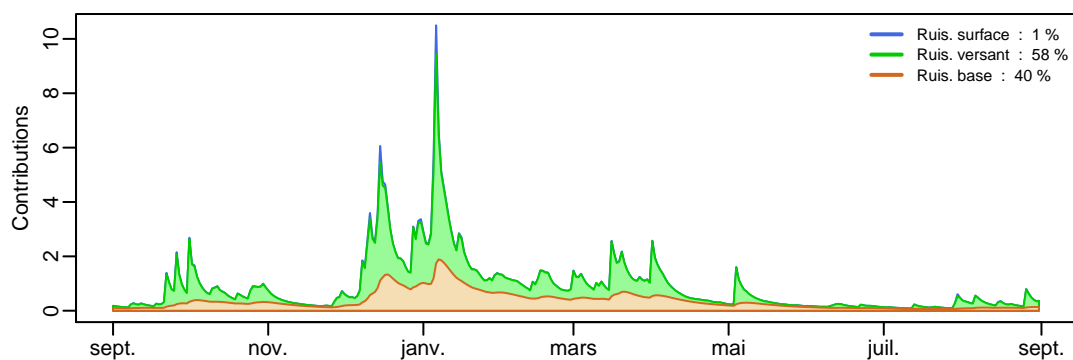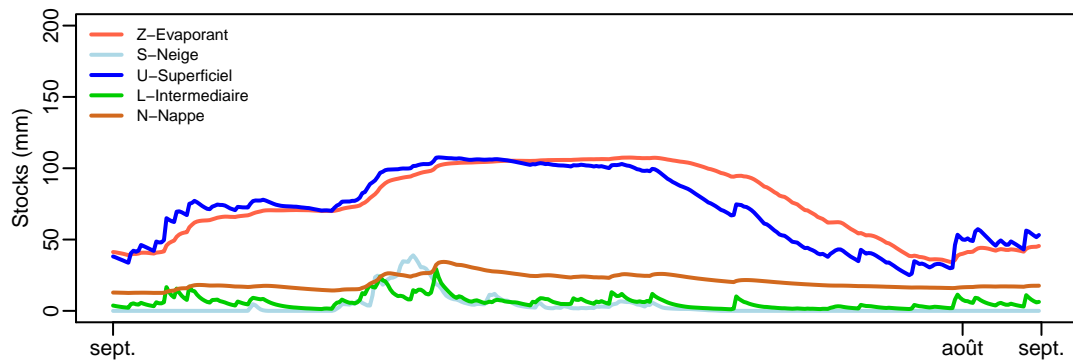



# k2790810 (7035.32 km<sup>2</sup>) – année 1982–1983

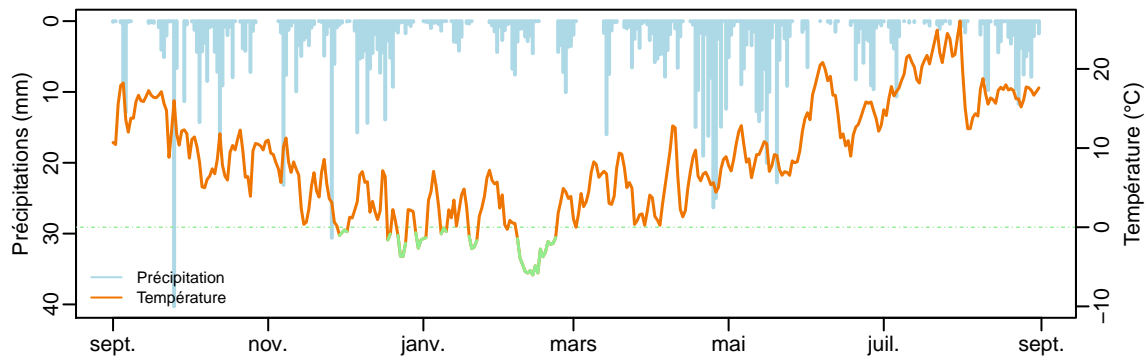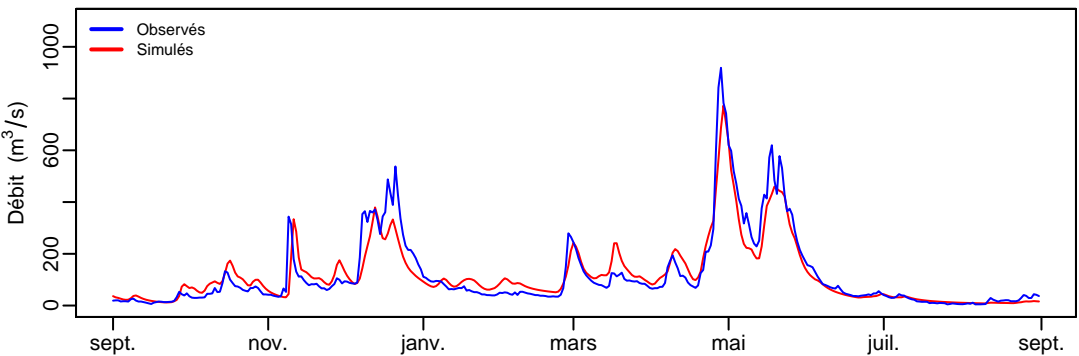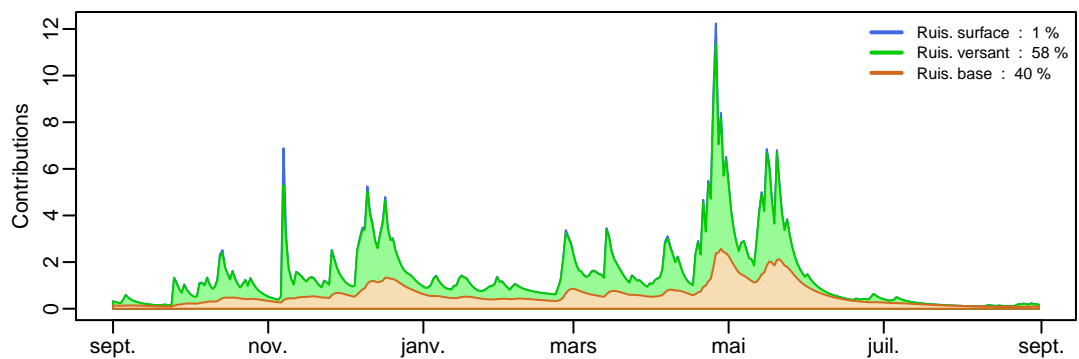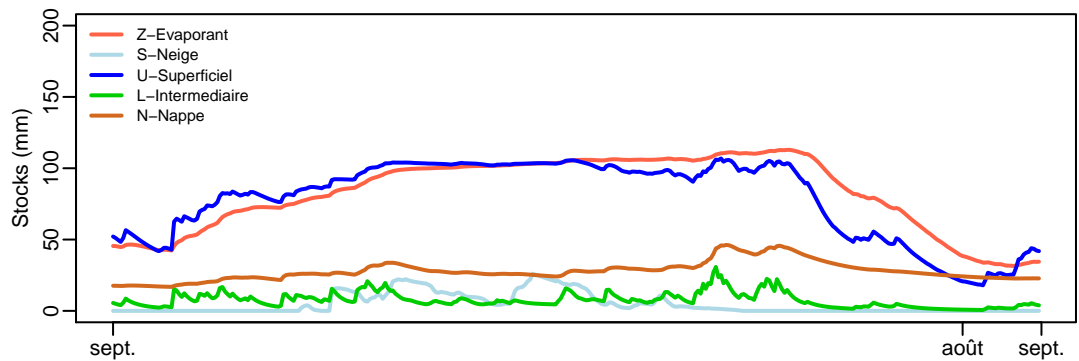

# k2790810 (7035.32 km²) – année 1983–1984

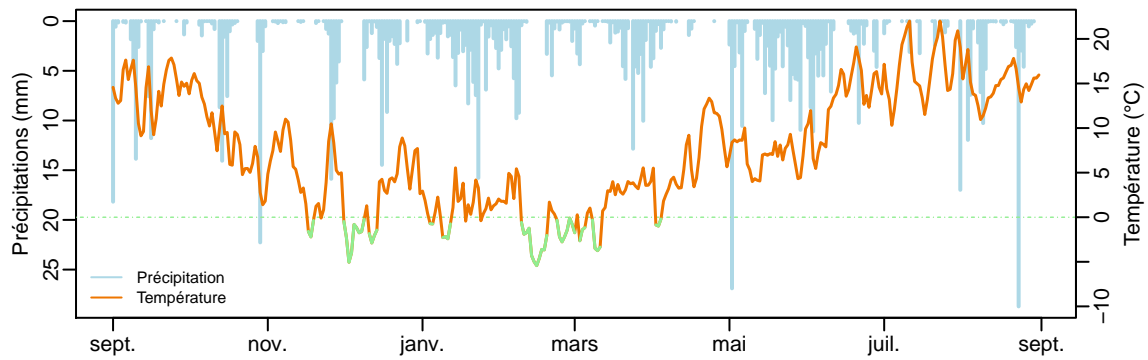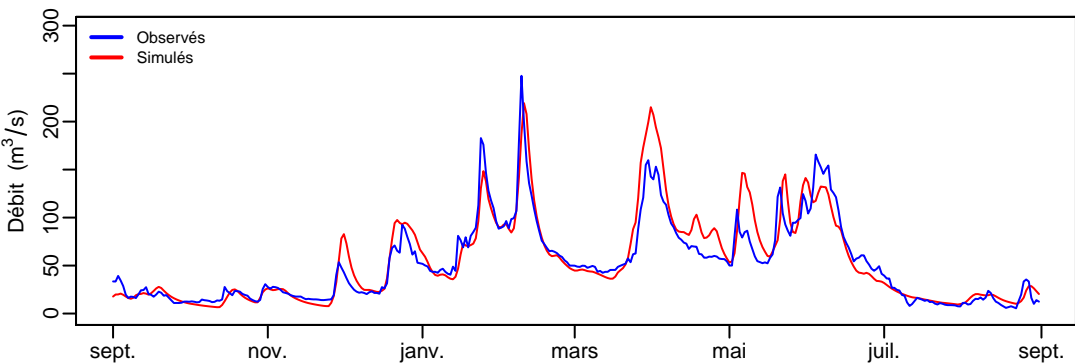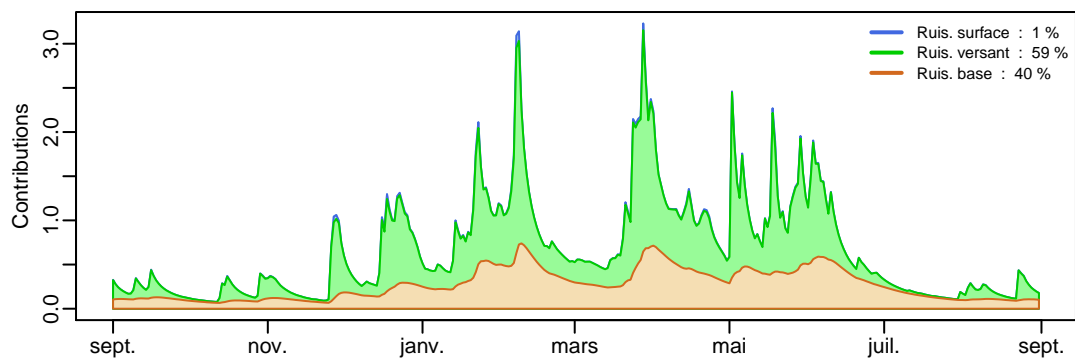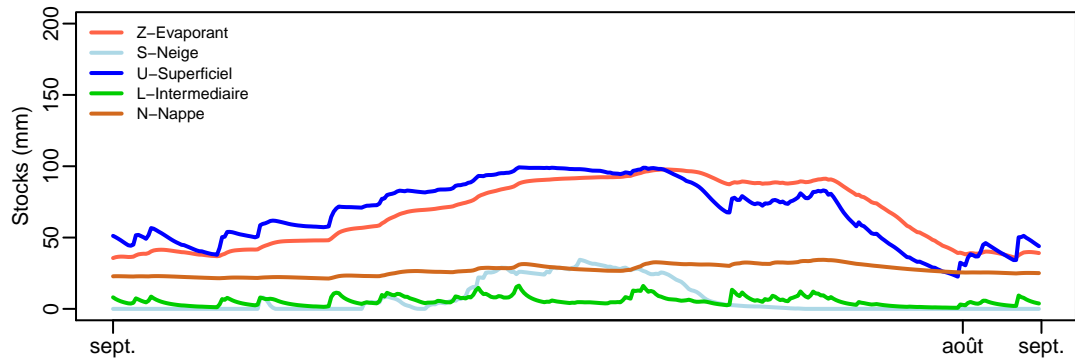

# k2790810 (7035.32 km<sup>2</sup>) – année 1984–1985

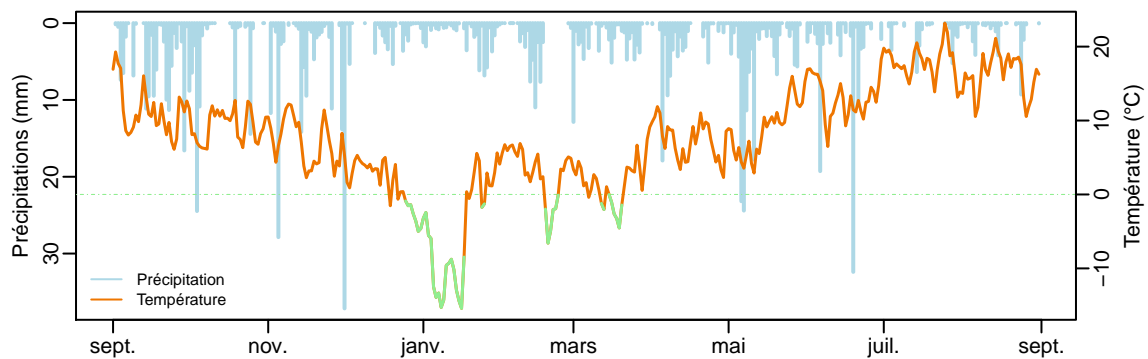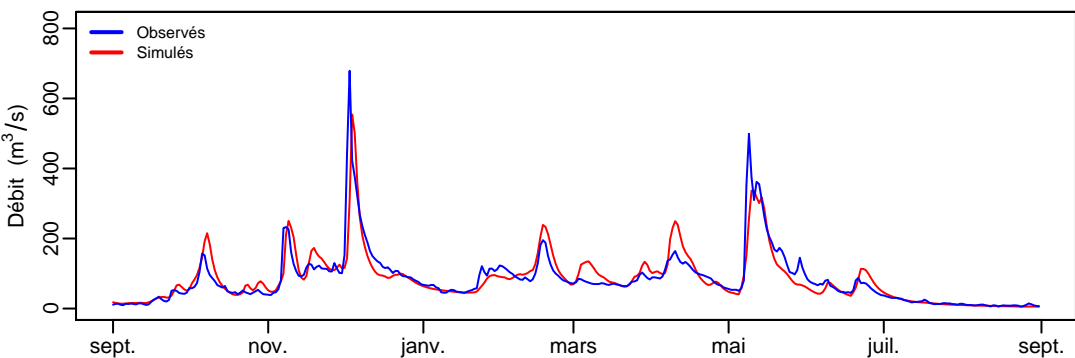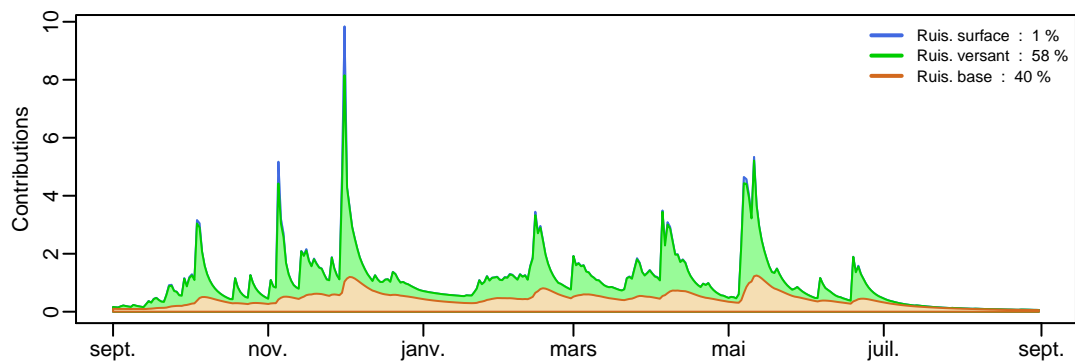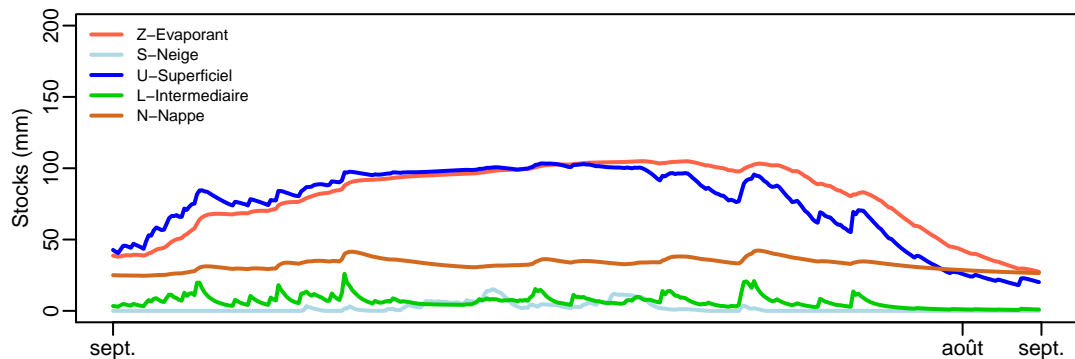

# k2790810 (7035.32 km<sup>2</sup>) – année 1985–1986

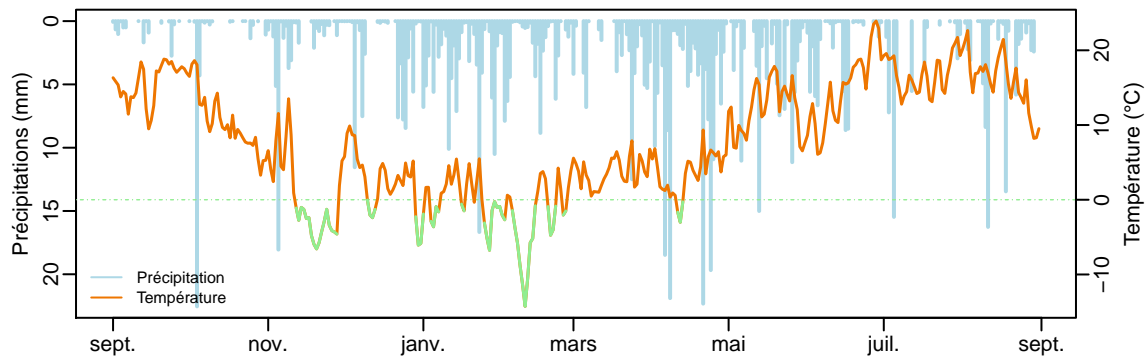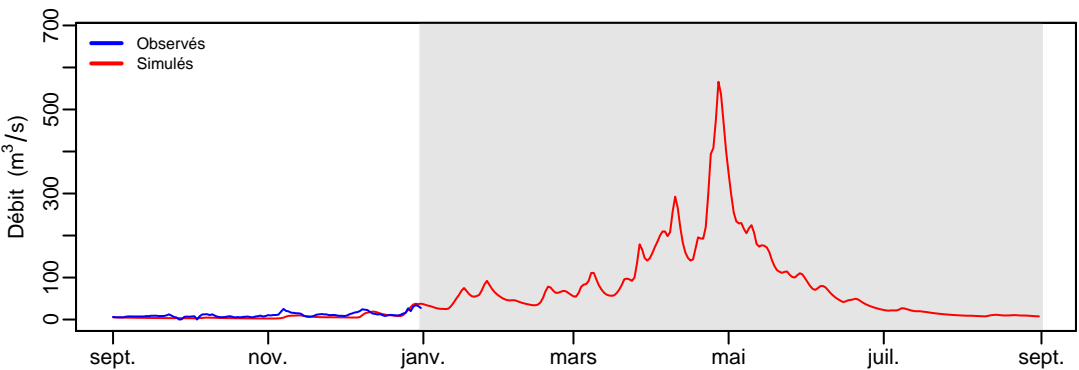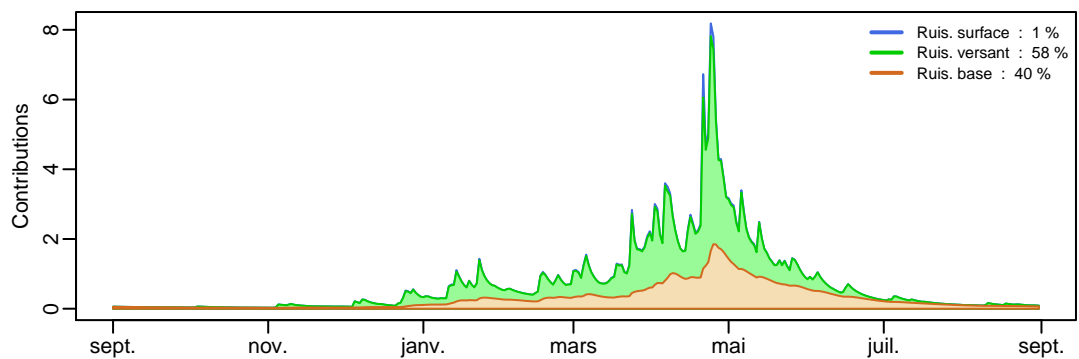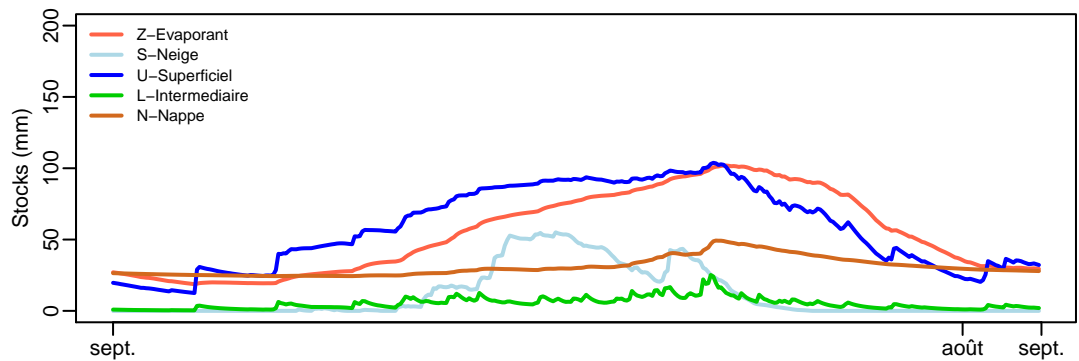

# k2790810 (7035.32 km<sup>2</sup>) – année 1986–1987

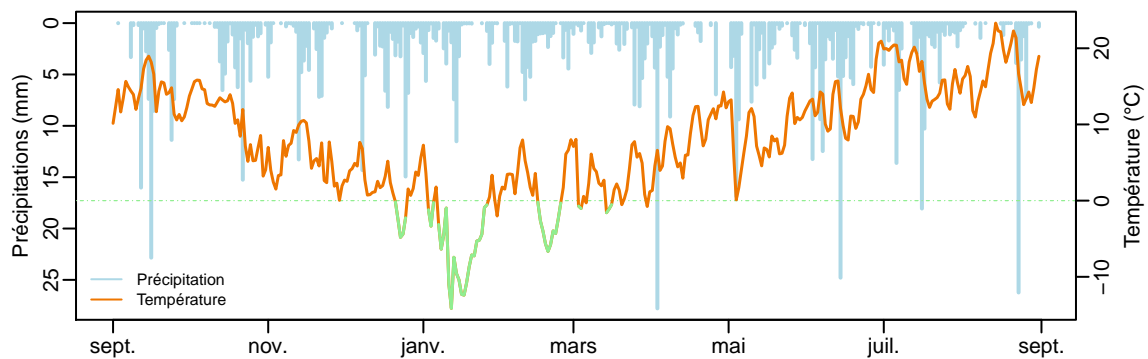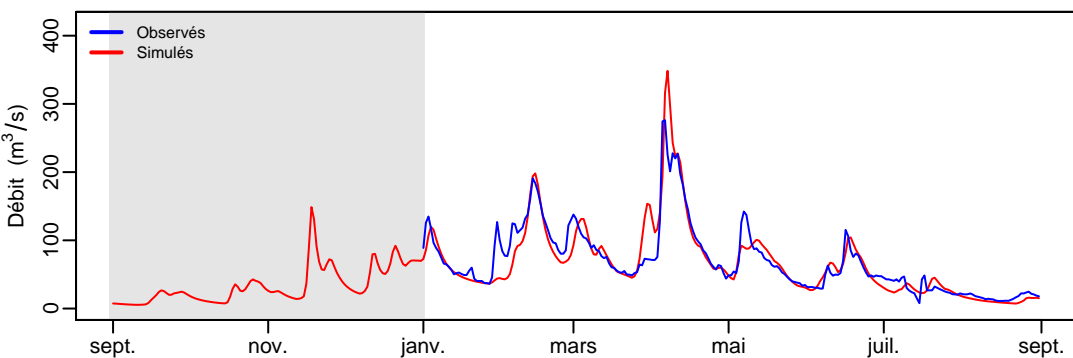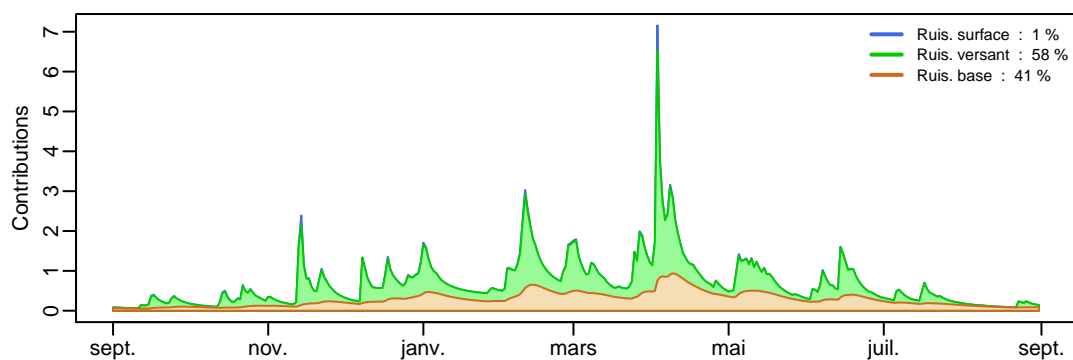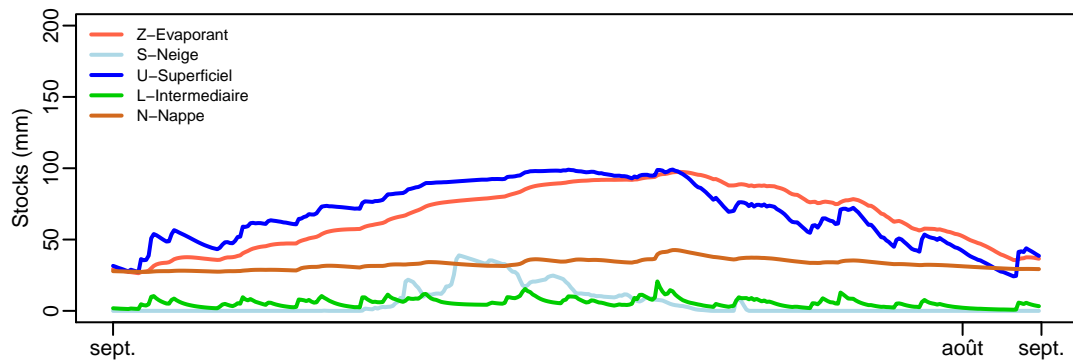

# k2790810 (7035.32 km<sup>2</sup>) – année 1987–1988

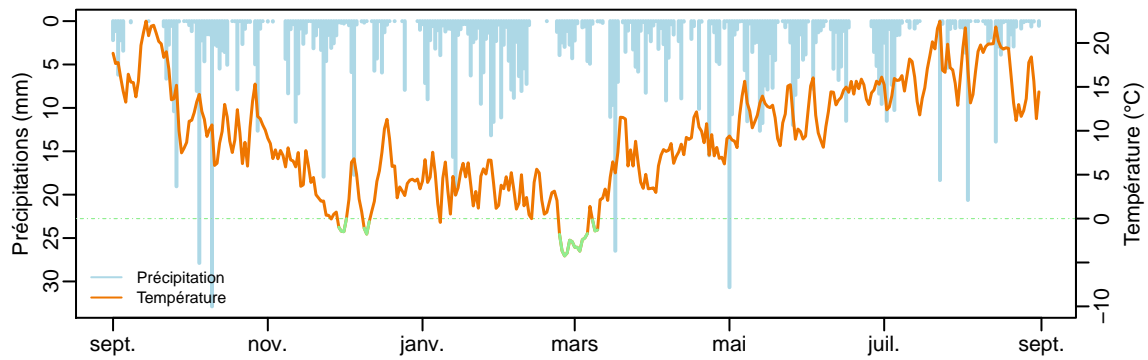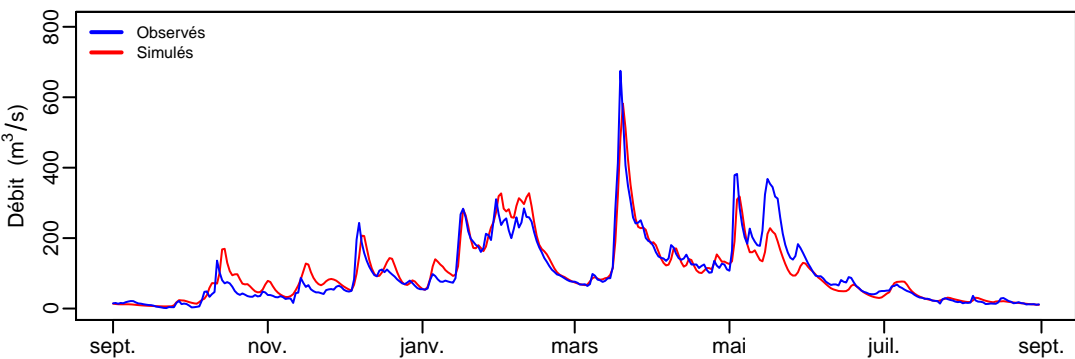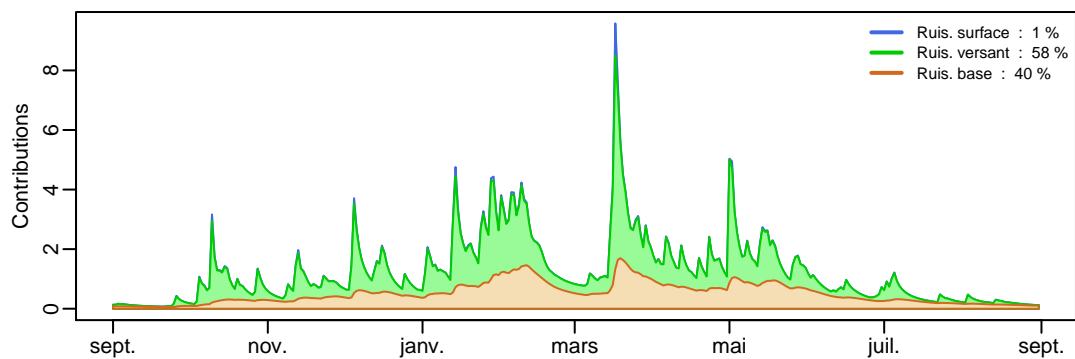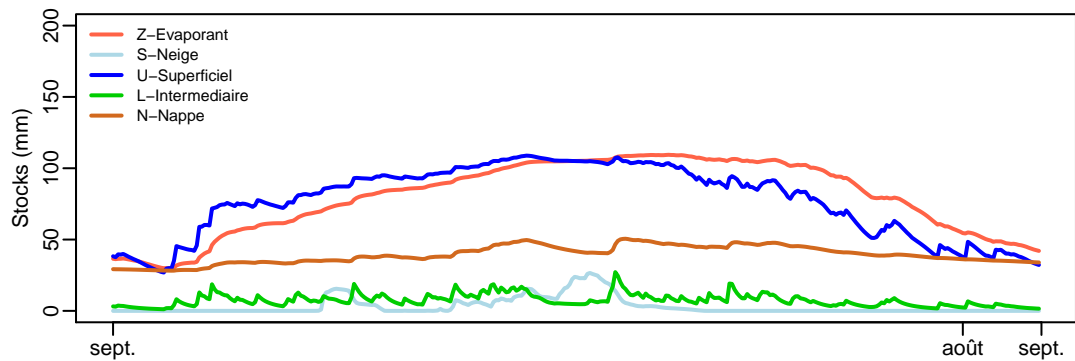

# k2790810 (7035.32 km<sup>2</sup>) – année 1988–1989

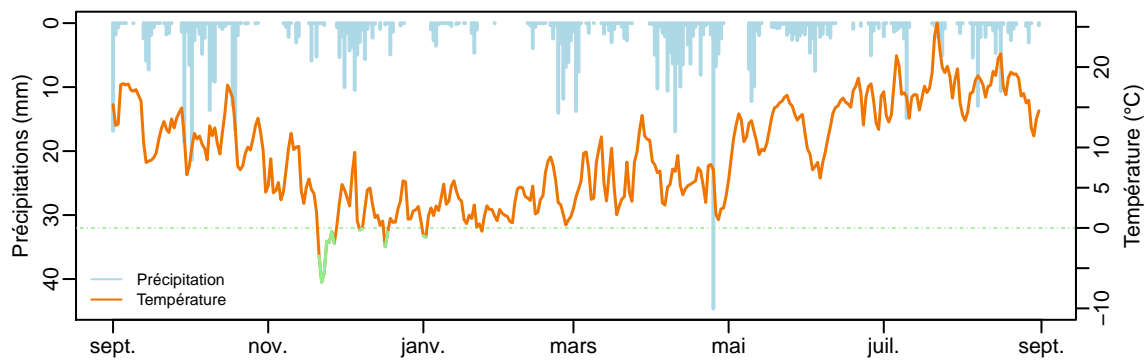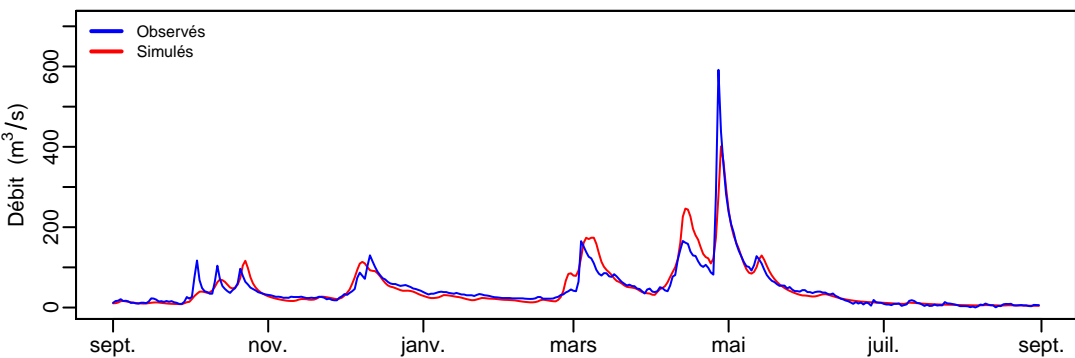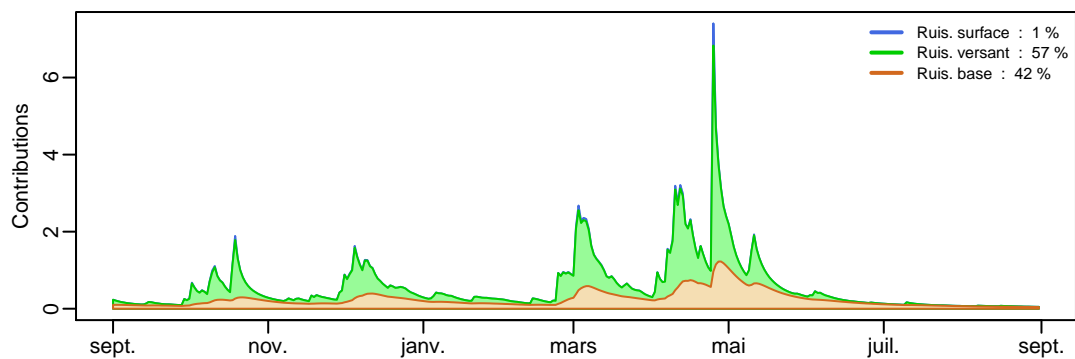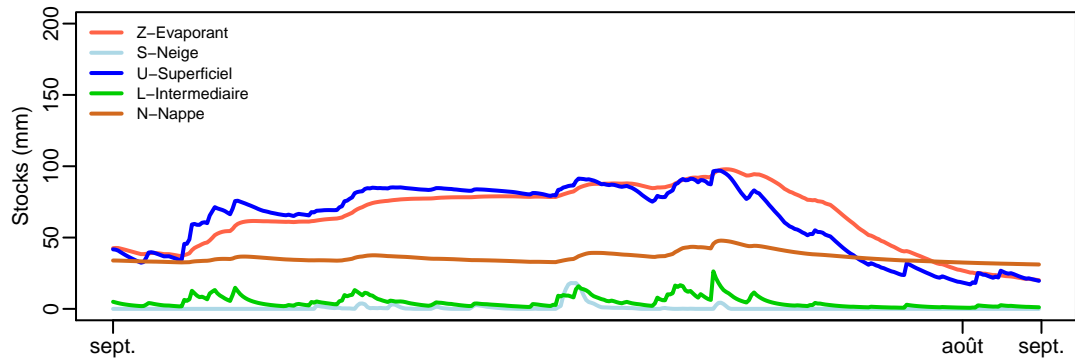

# k2790810 (7035.32 km<sup>2</sup>) – année 1989–1990

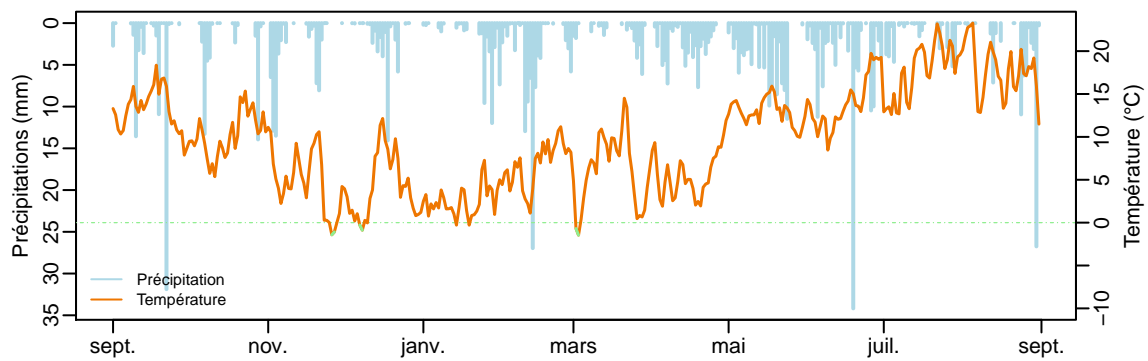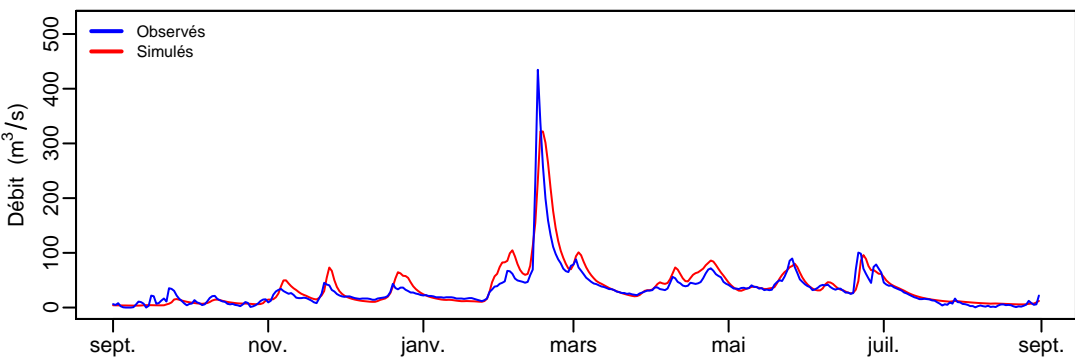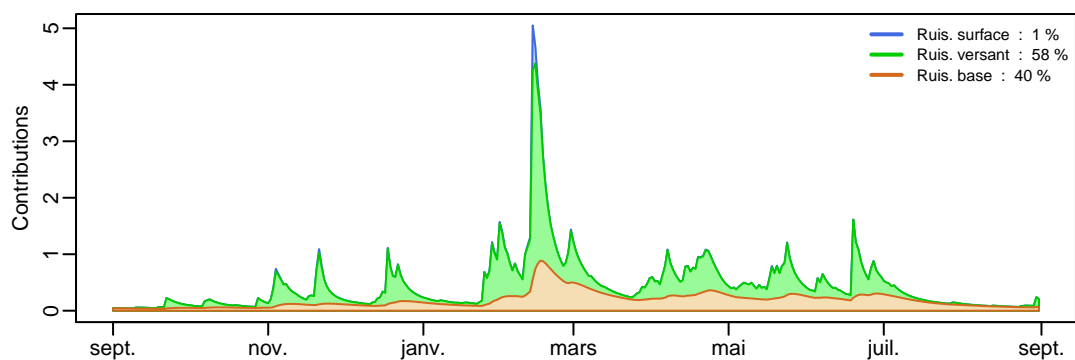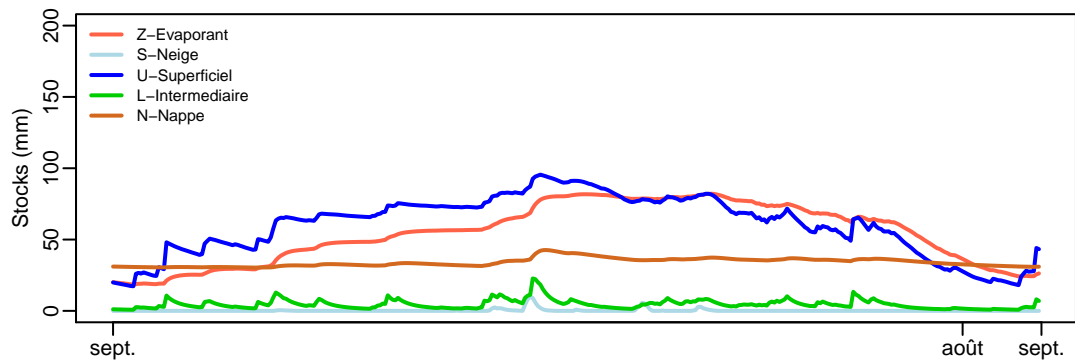



# k2790810 (7035.32 km<sup>2</sup>) – année 1990–1991

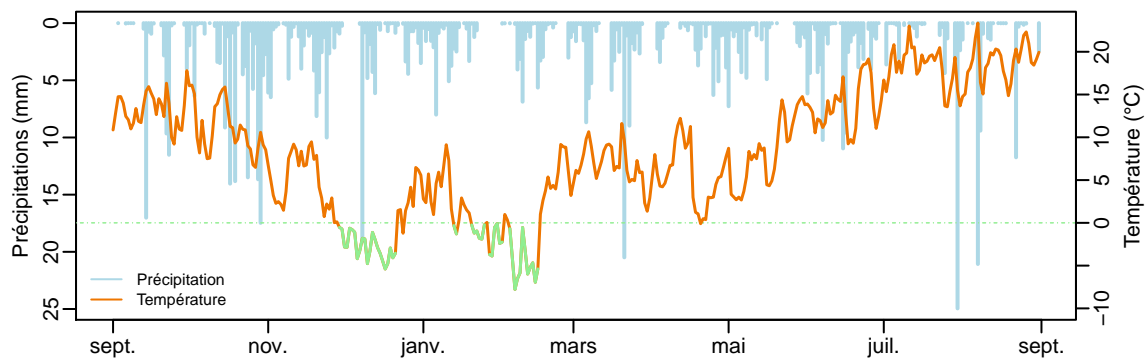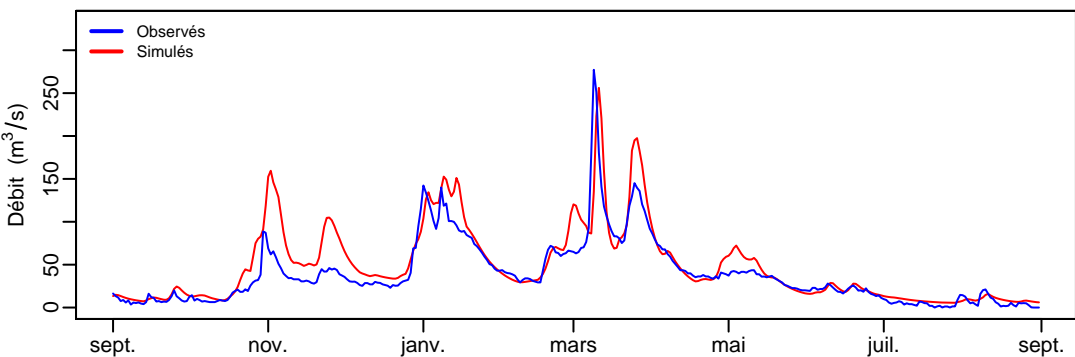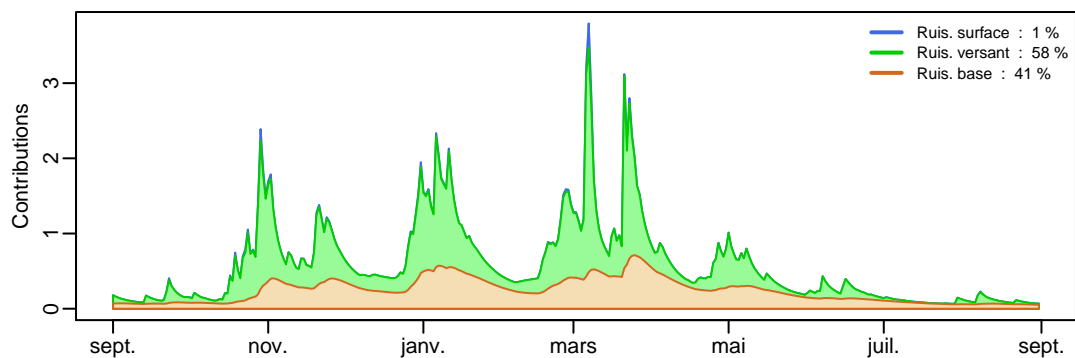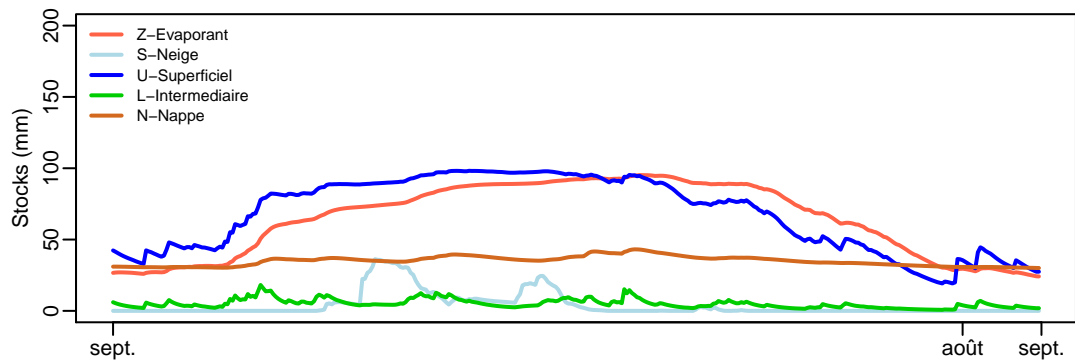

# k2790810 (7035.32 km²) – année 1991–1992

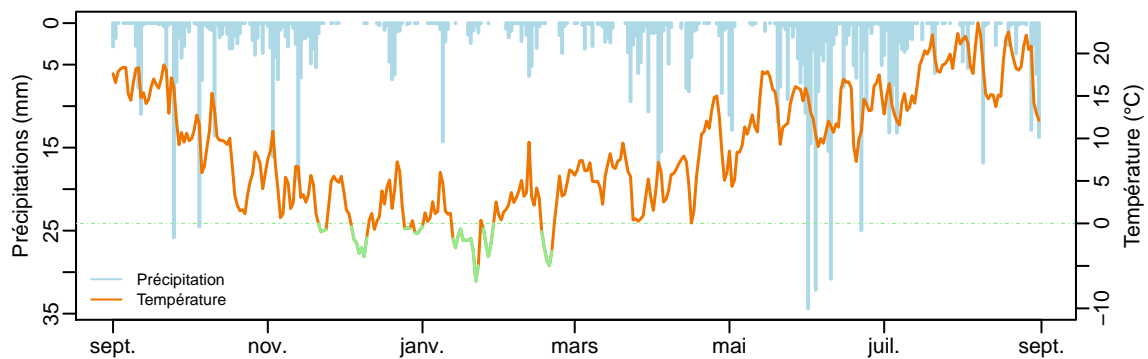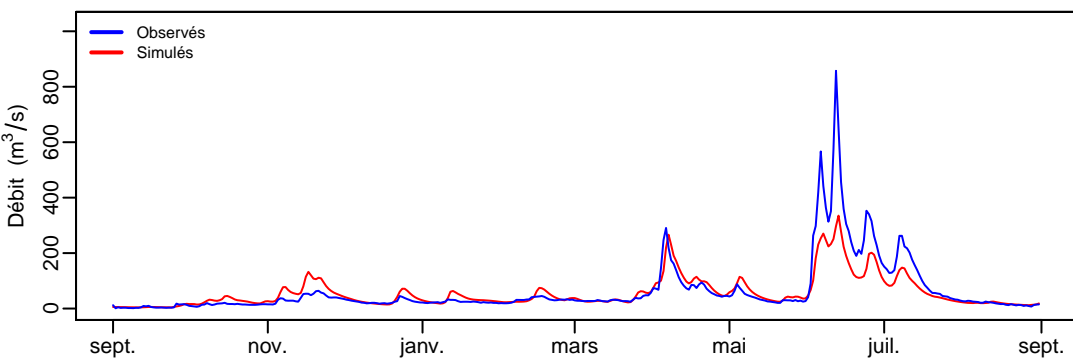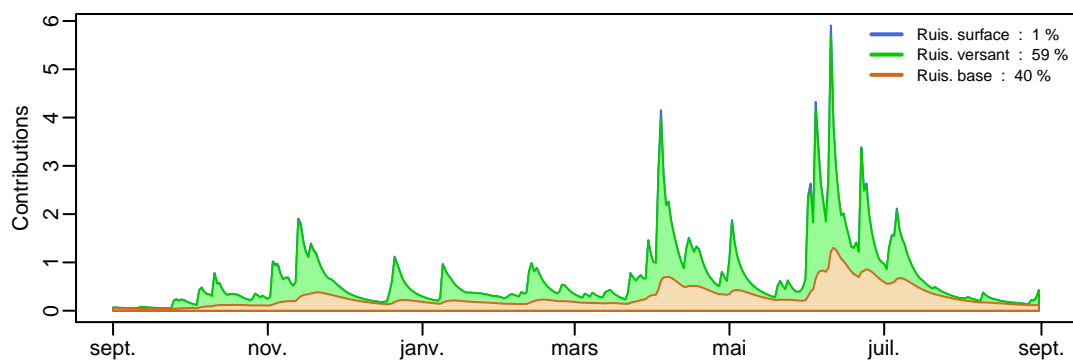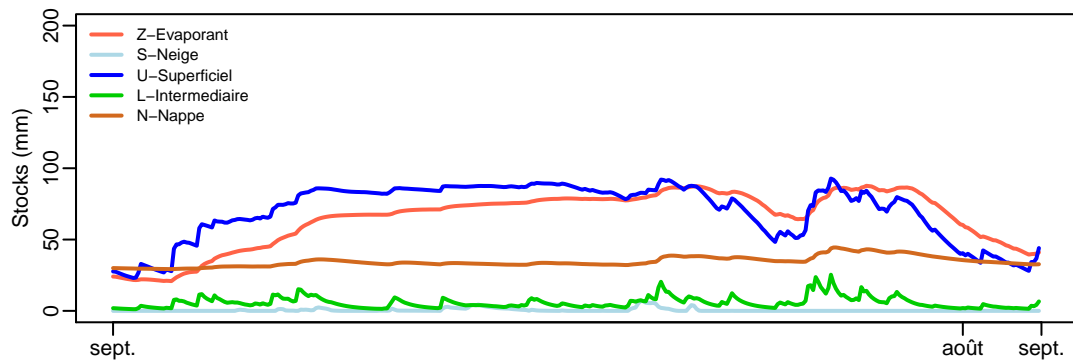

# k2790810 (7035.32 km<sup>2</sup>) – année 1992–1993

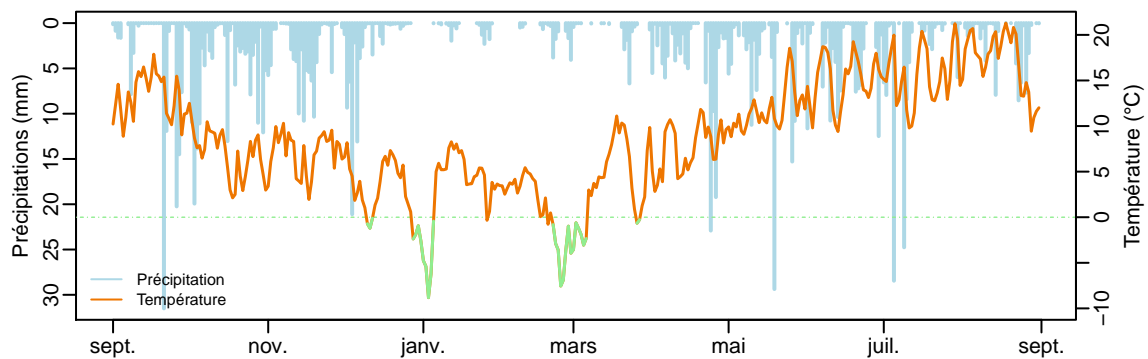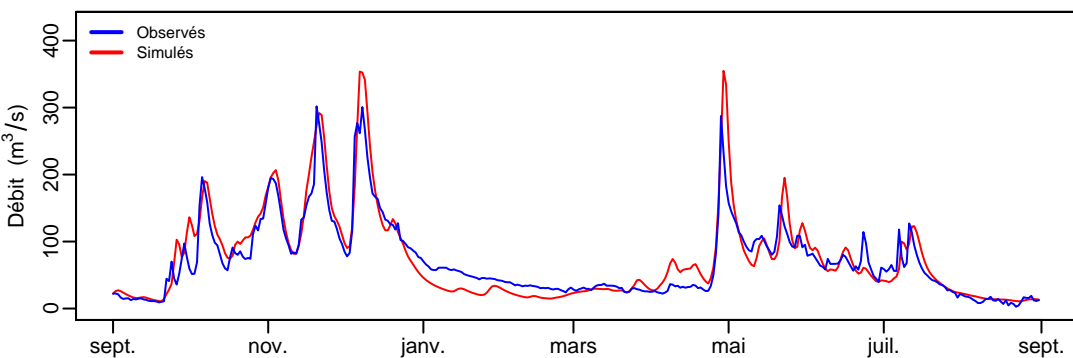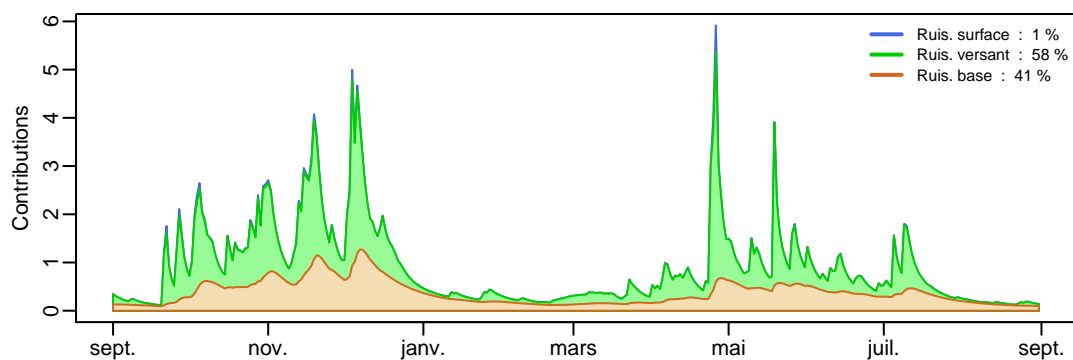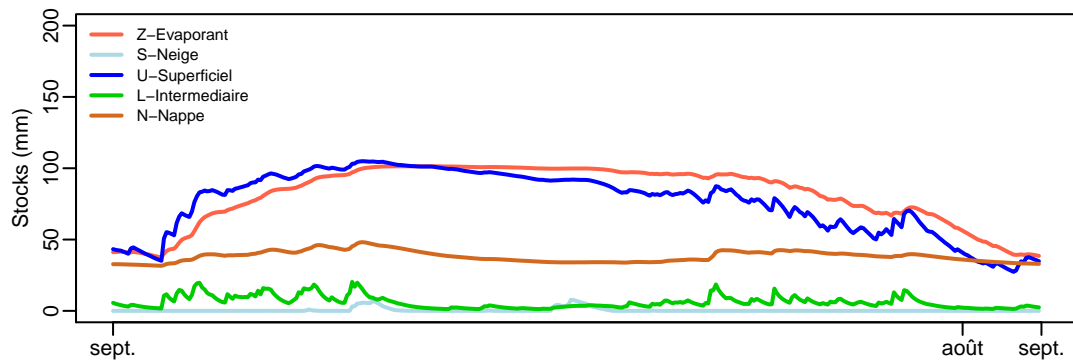

# k2790810 (7035.32 km<sup>2</sup>) – année 1993–1994

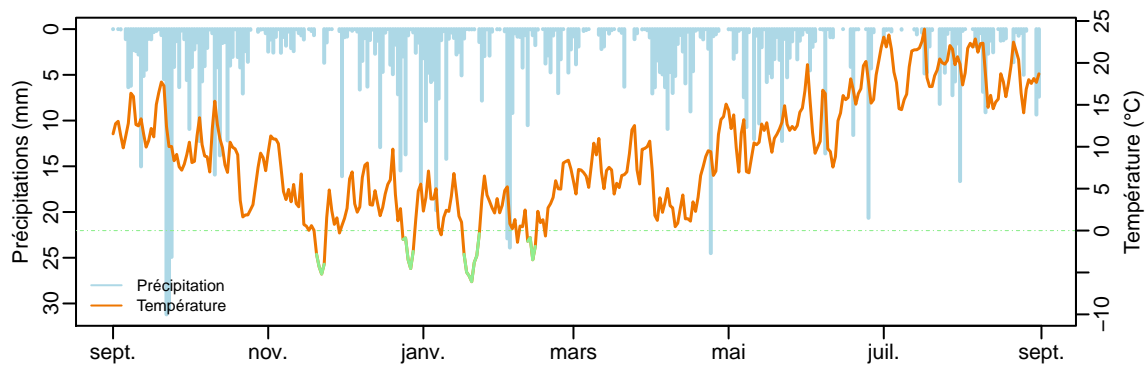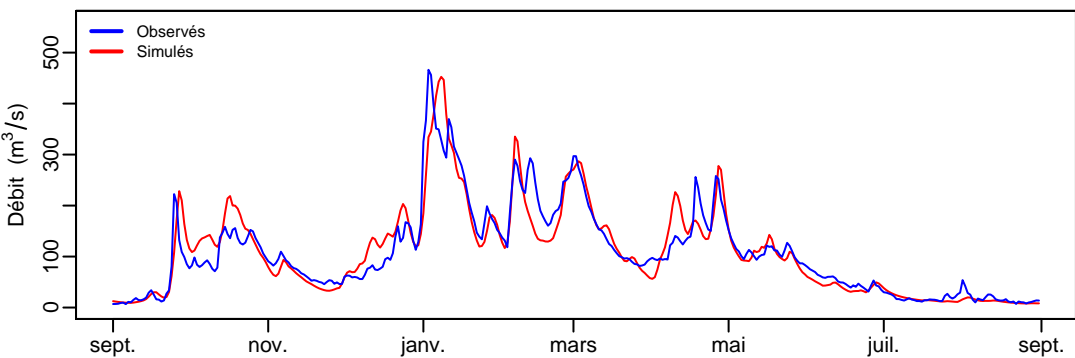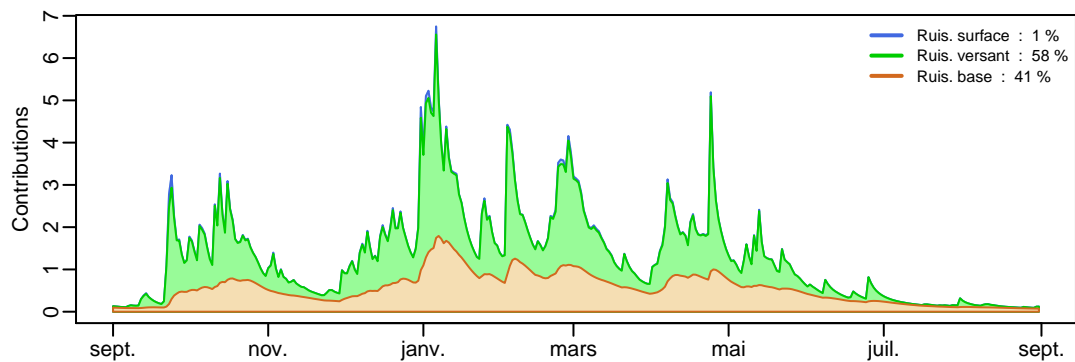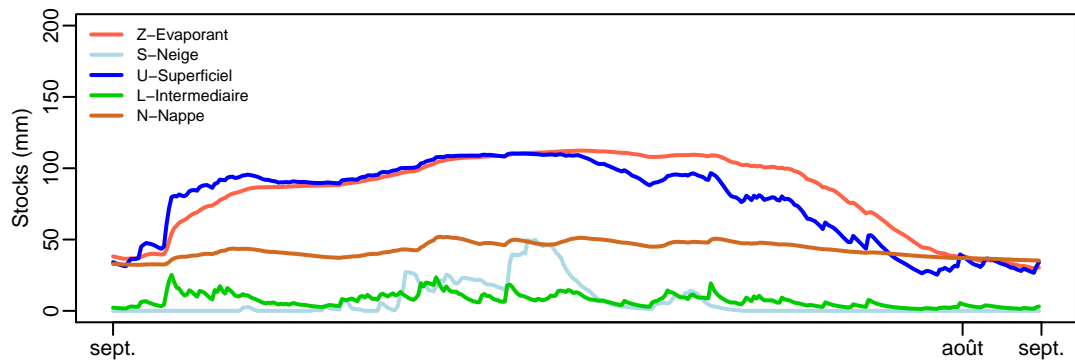

# k2790810 (7035.32 km<sup>2</sup>) – année 1994–1995

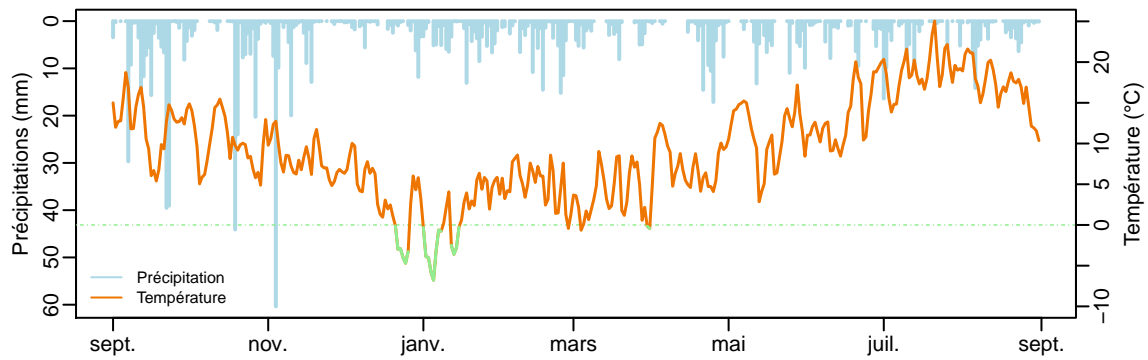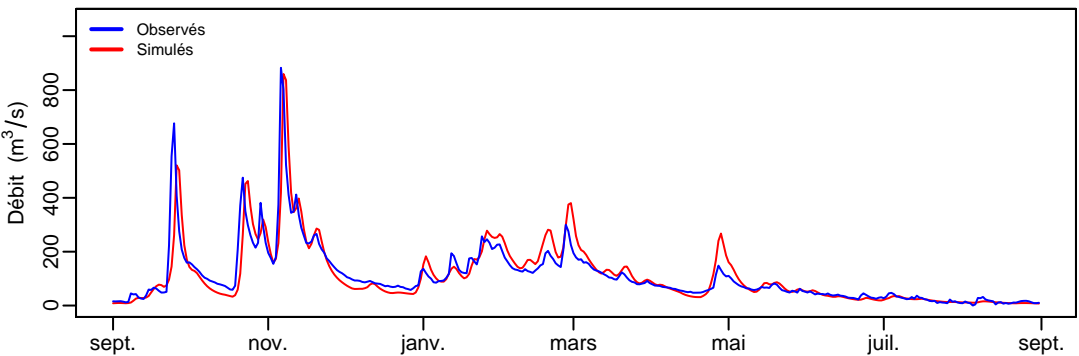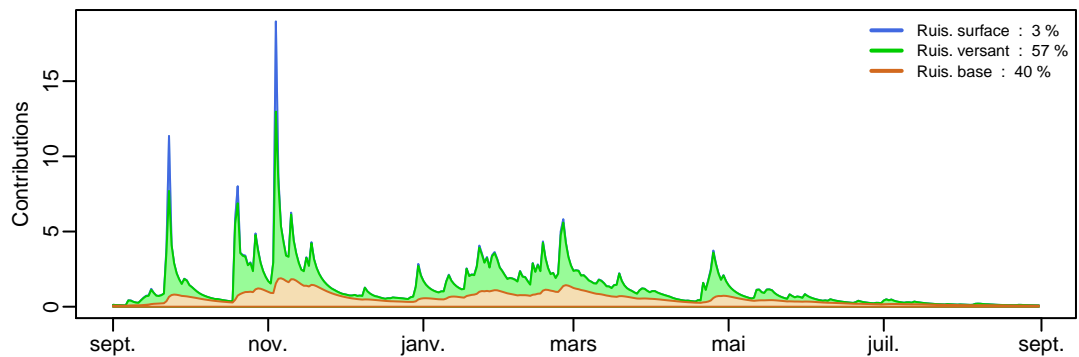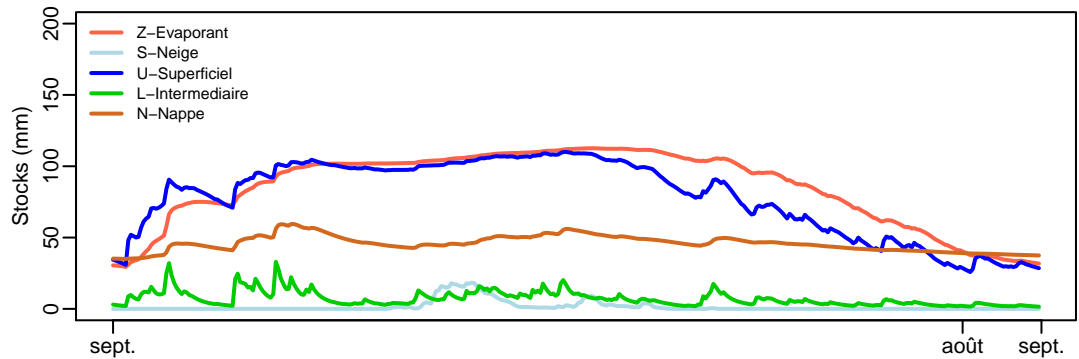

# k2790810 (7035.32 km<sup>2</sup>) – année 1995–1996

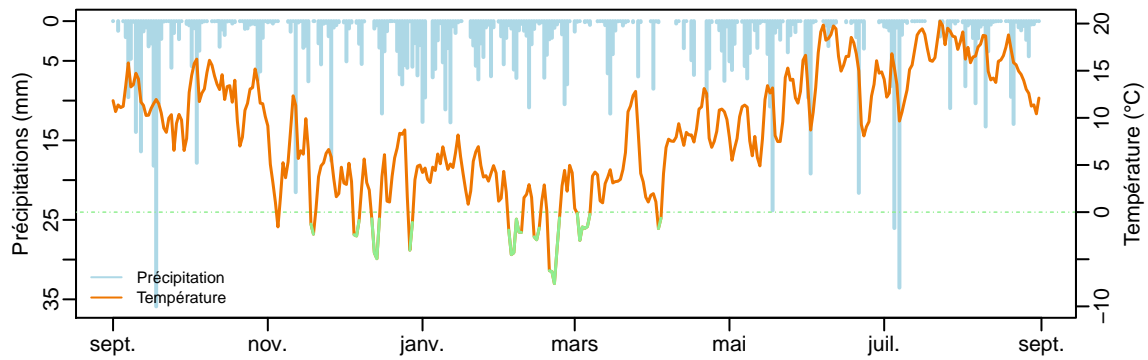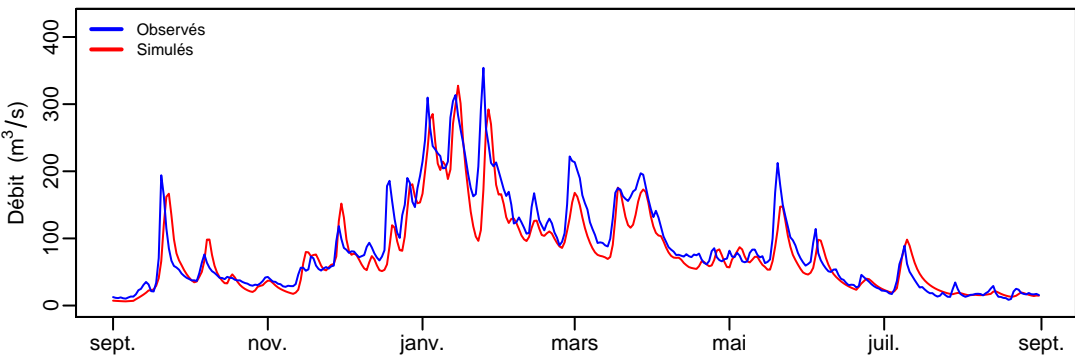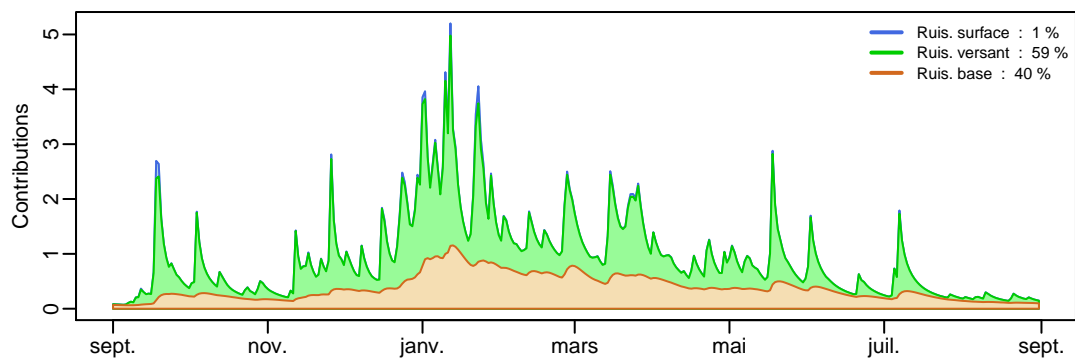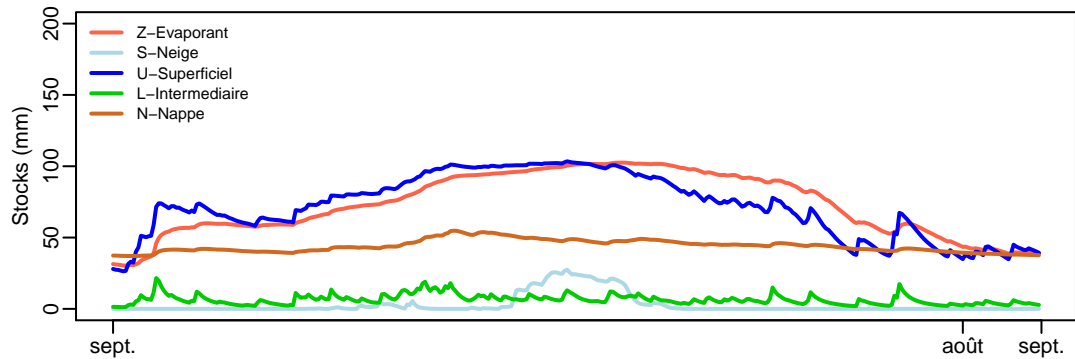

# k2790810 (7035.32 km<sup>2</sup>) – année 1996–1997

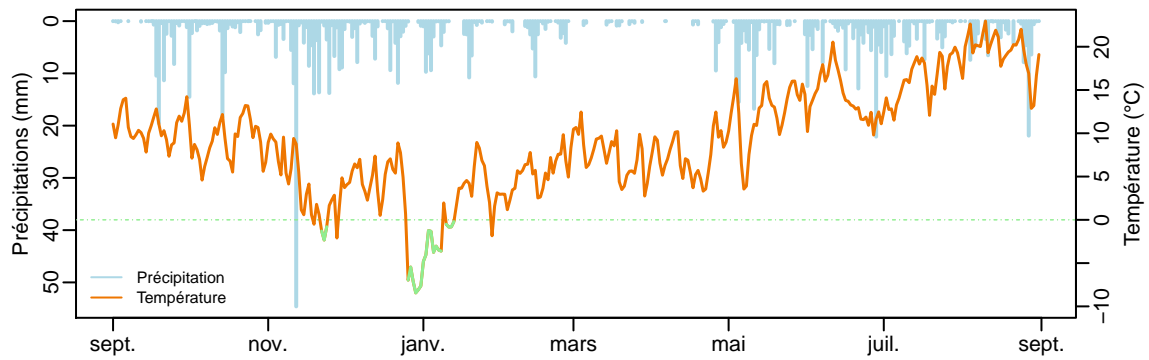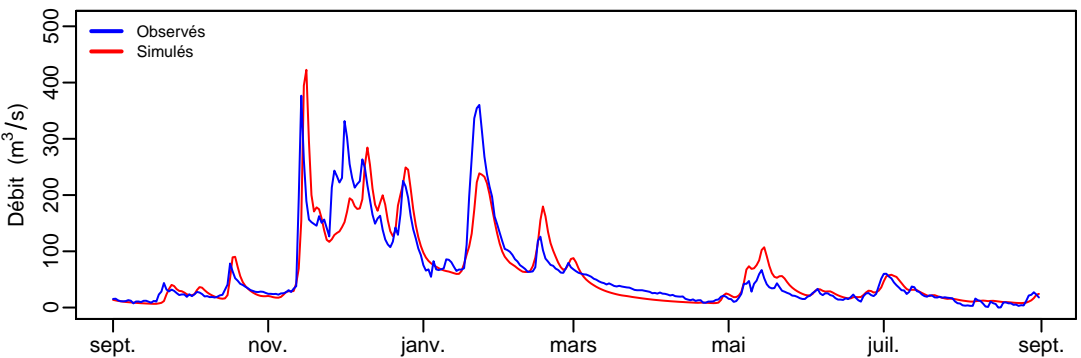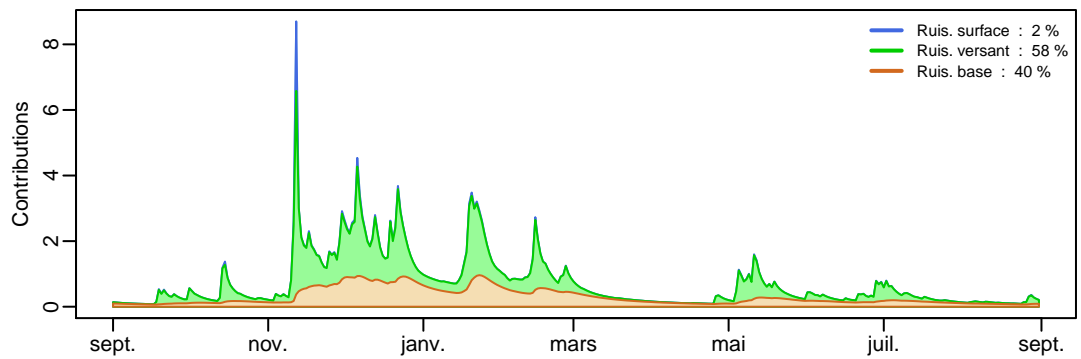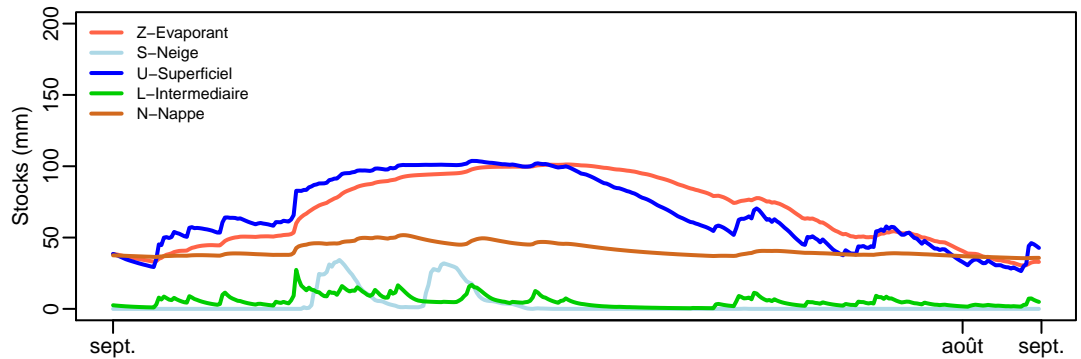

# k2790810 (7035.32 km<sup>2</sup>) – année 1997–1998

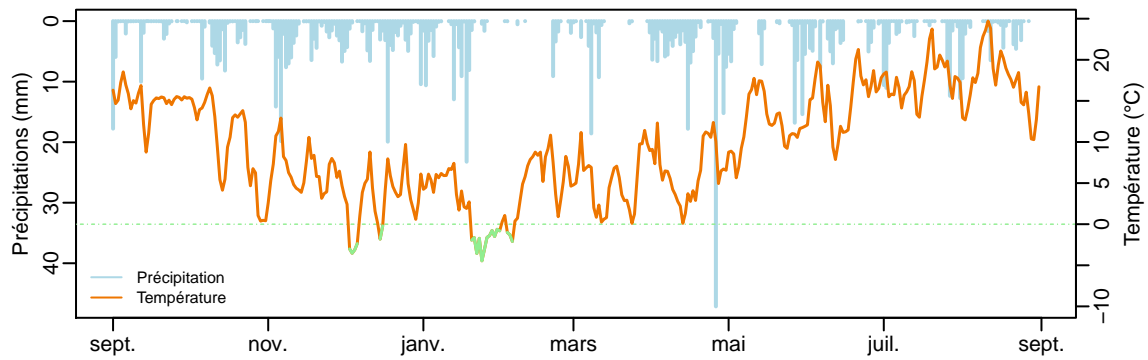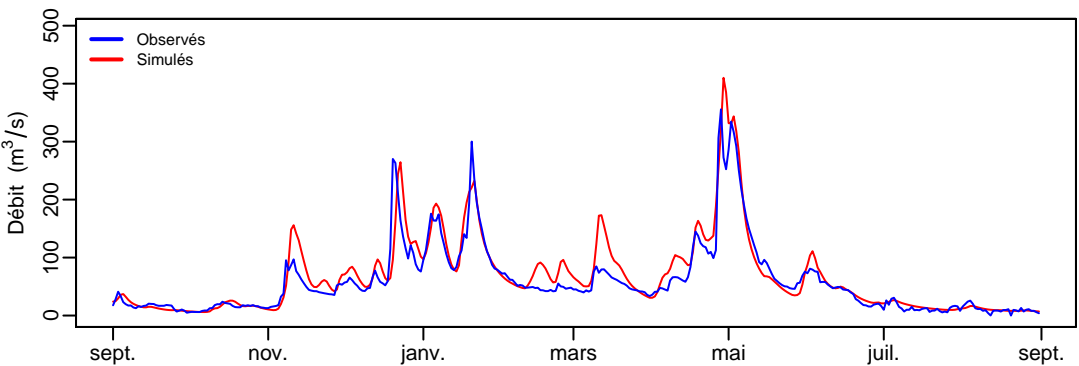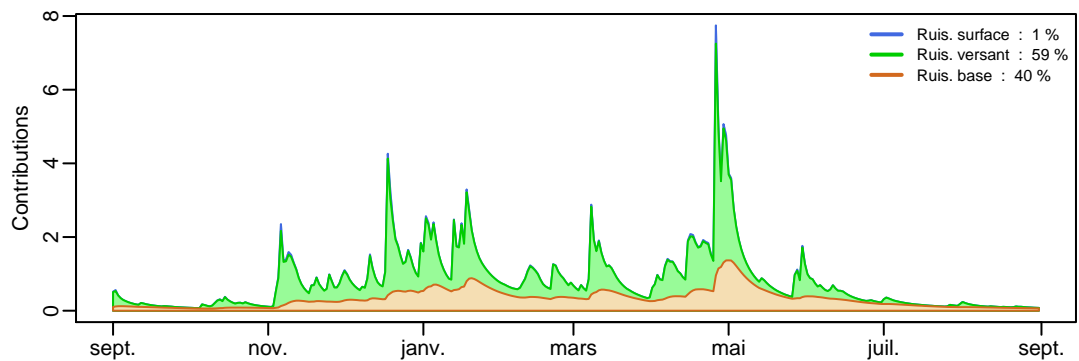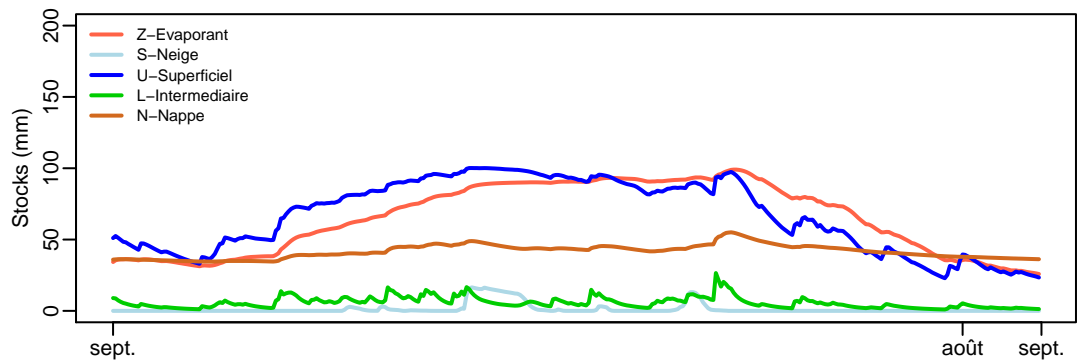



# k2790810 (7035.32 km<sup>2</sup>) – année 1998–1999

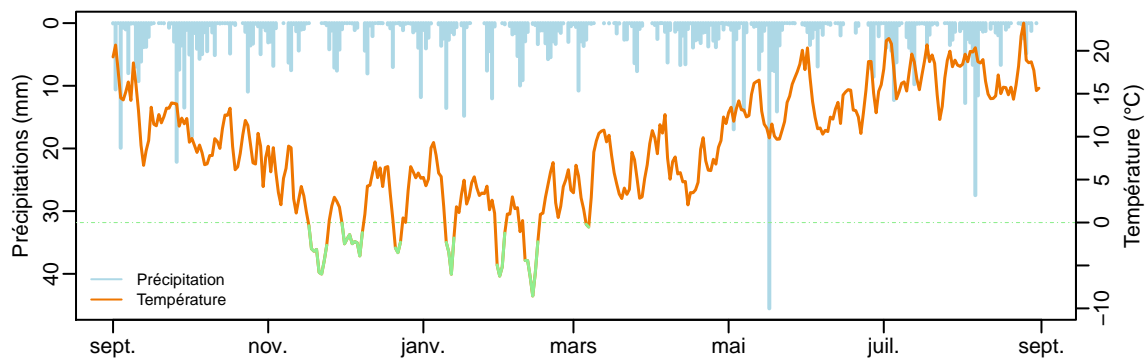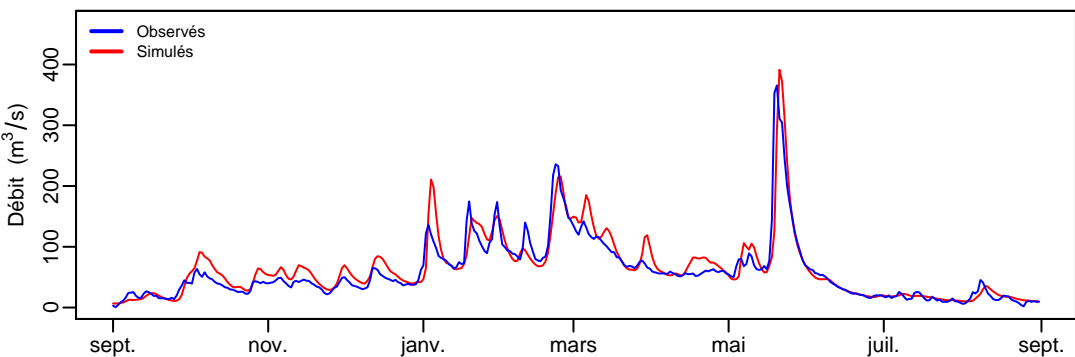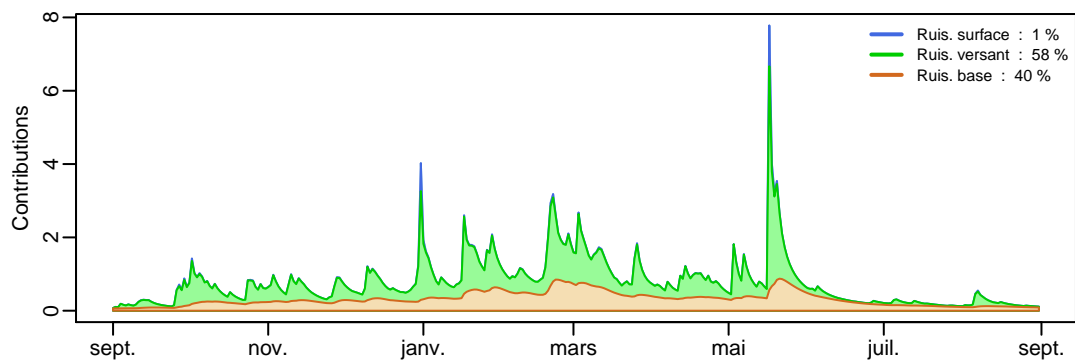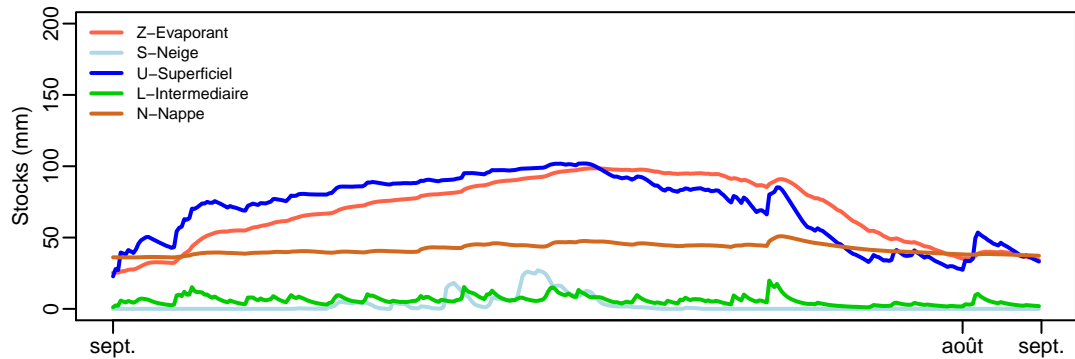

# k2790810 (7035.32 km<sup>2</sup>) – année 1999–2000

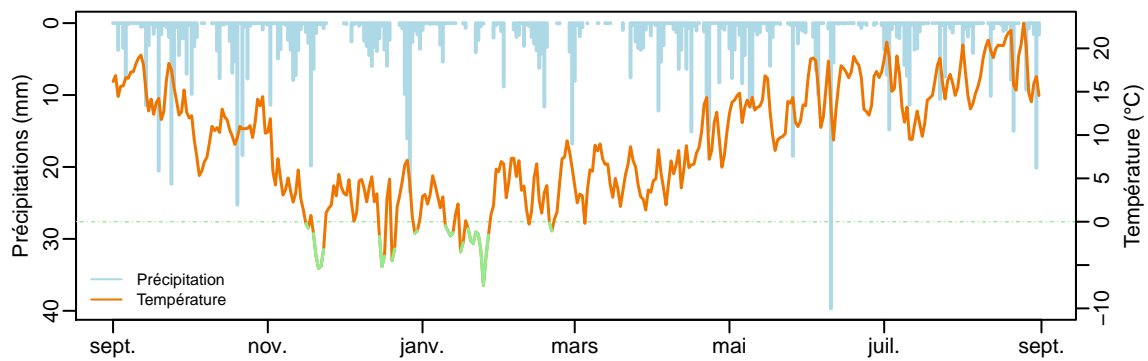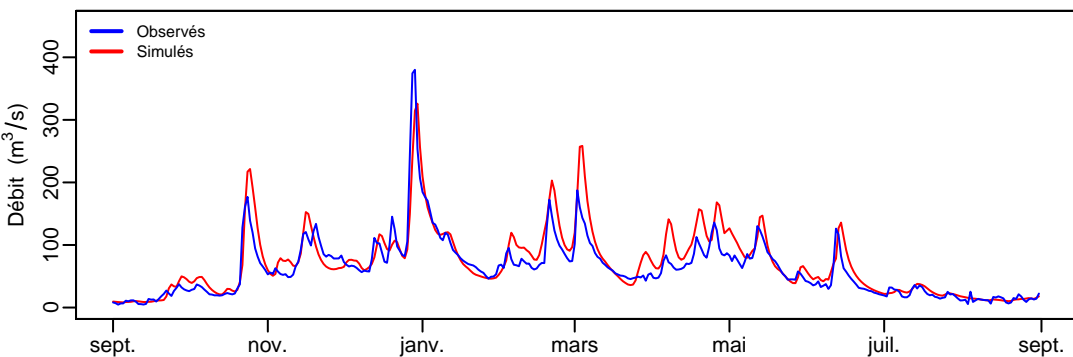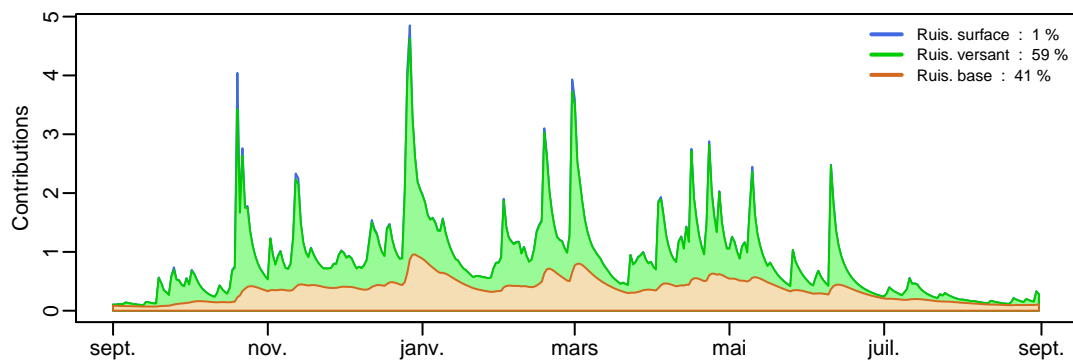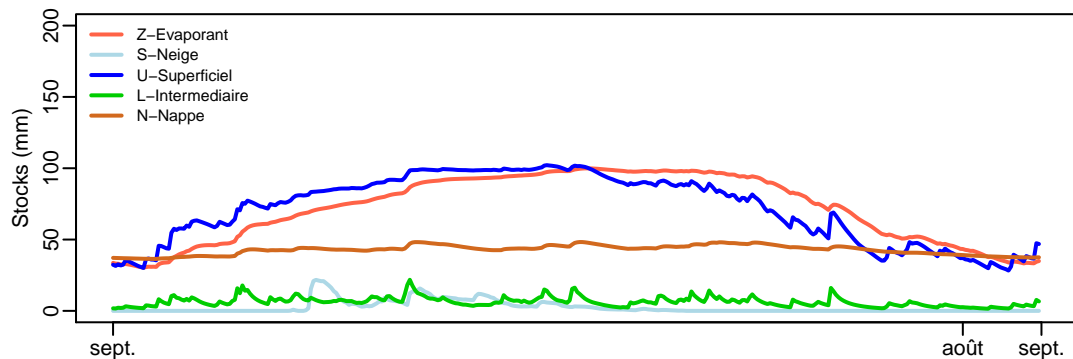

# k2790810 (7035.32 km²) – année 2000–2001

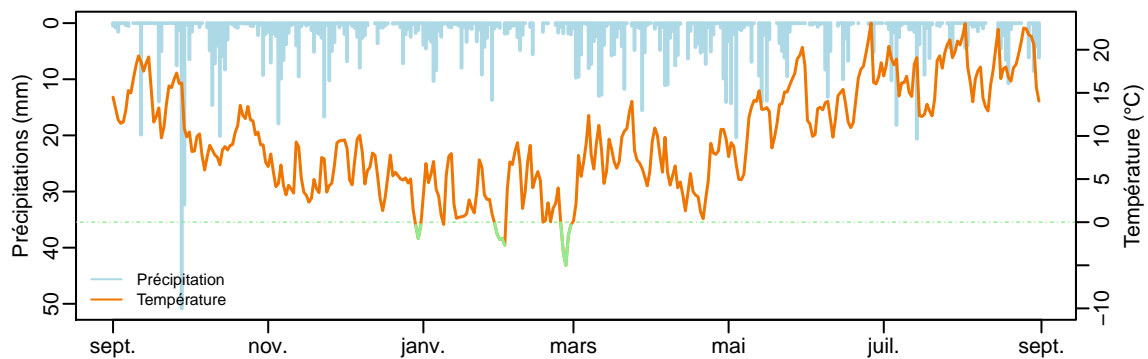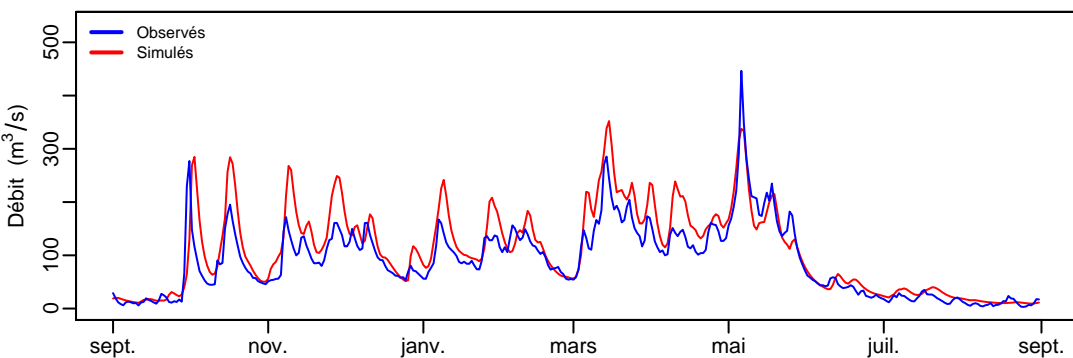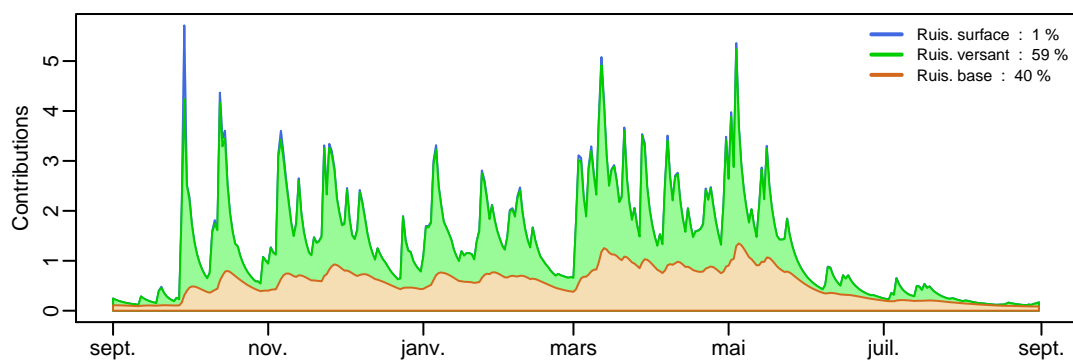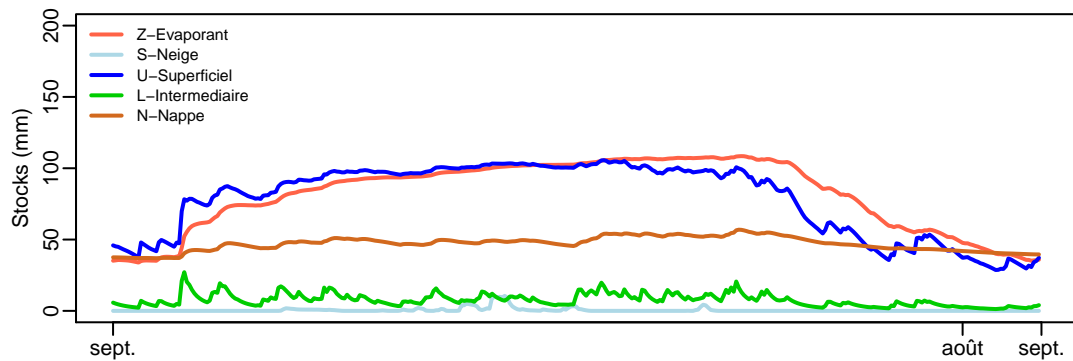

# k2790810 (7035.32 km<sup>2</sup>) – année 2001–2002

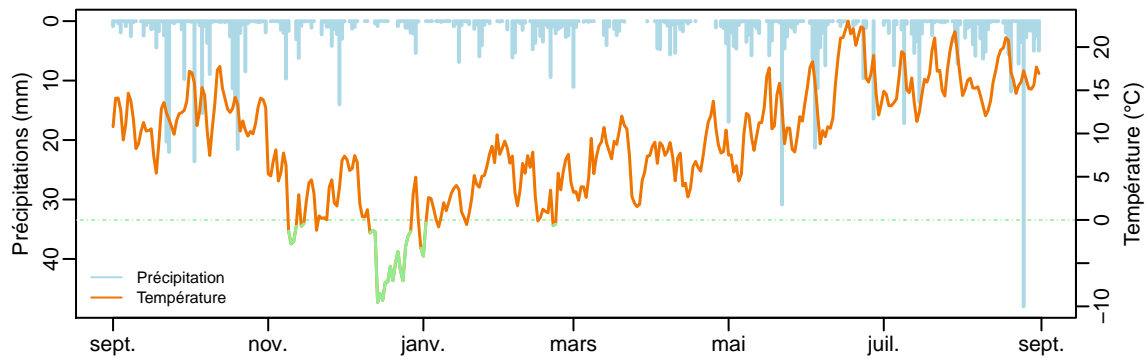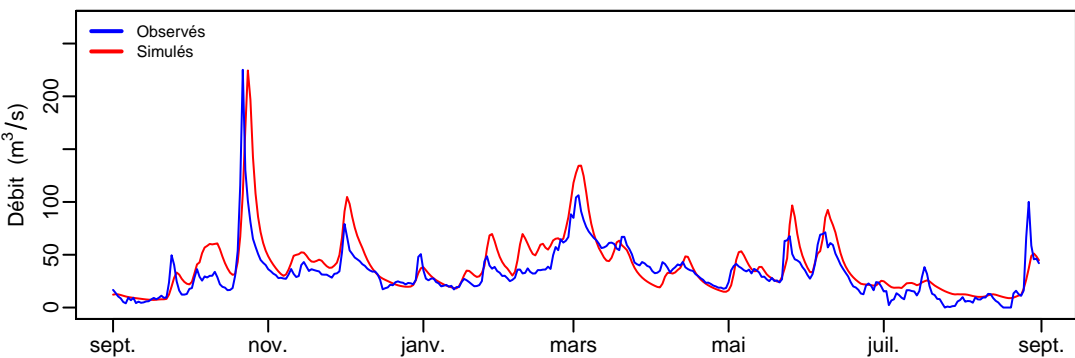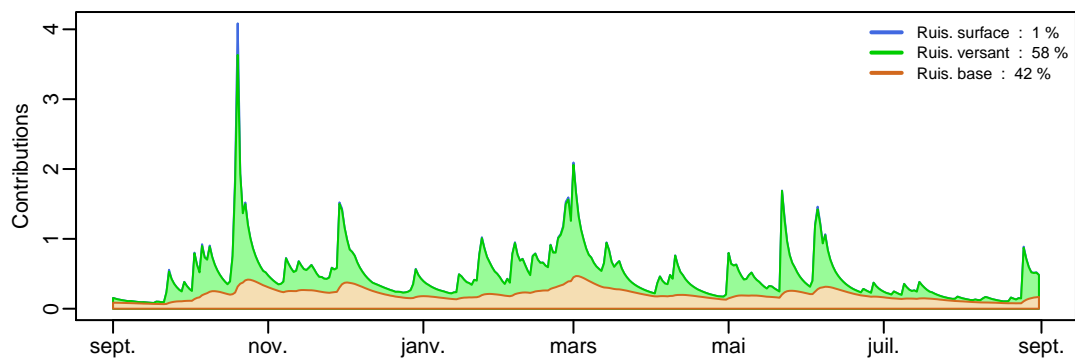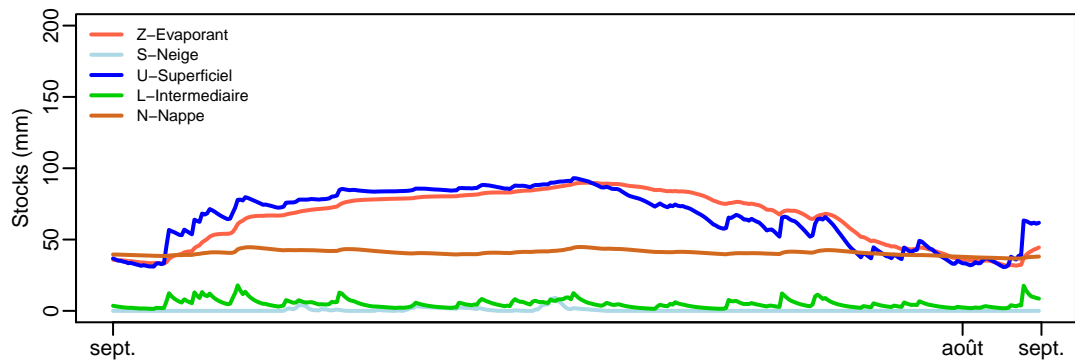

# k2790810 (7035.32 km<sup>2</sup>) – année 2002–2003

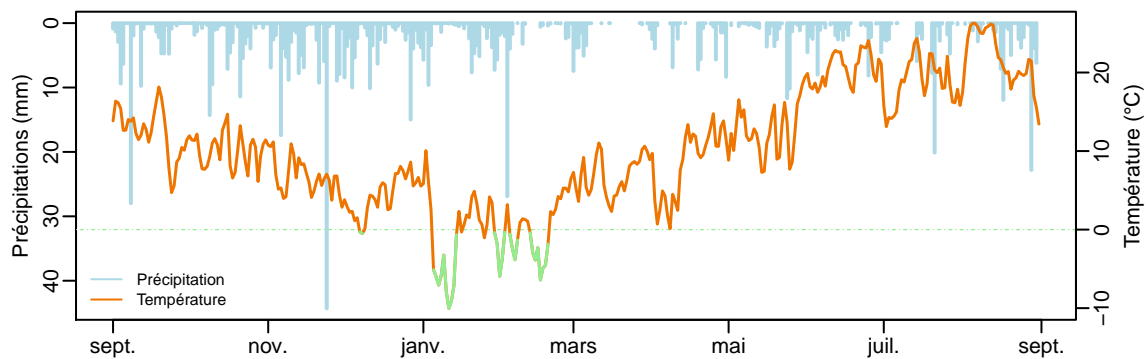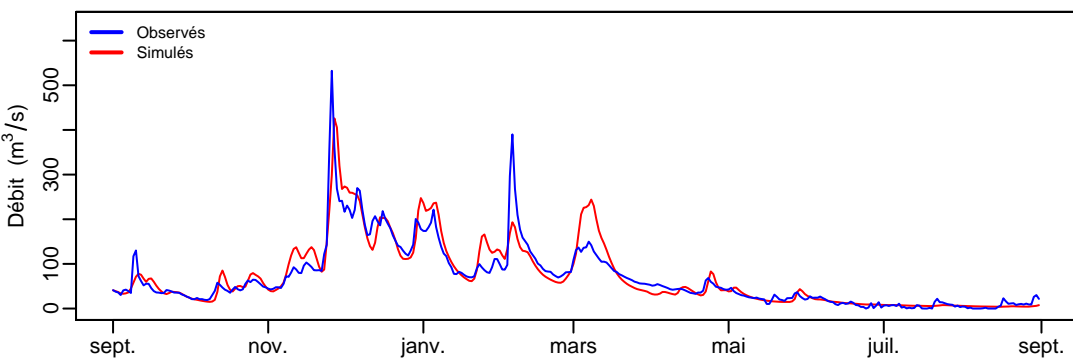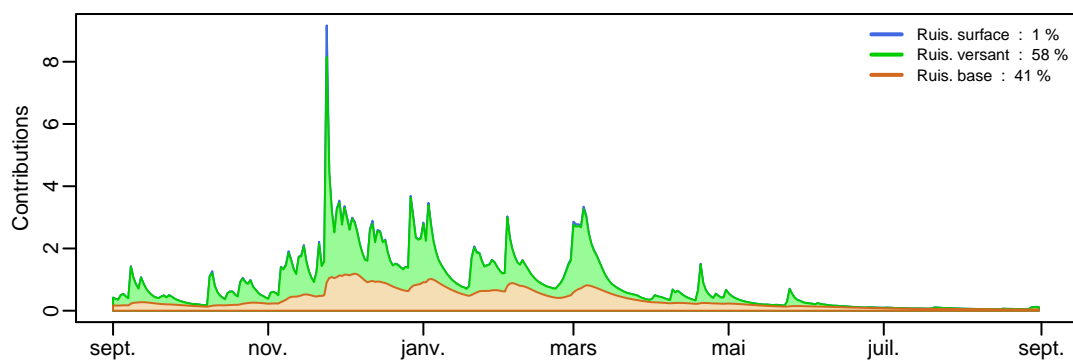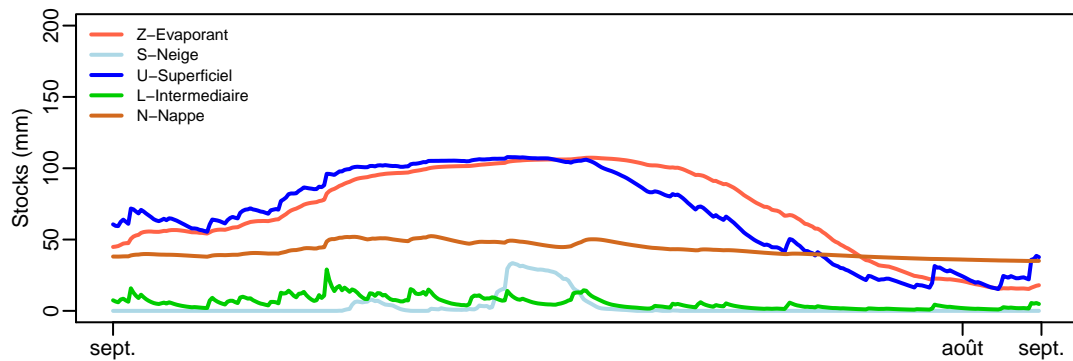

# k2790810 (7035.32 km<sup>2</sup>) – année 2003–2004

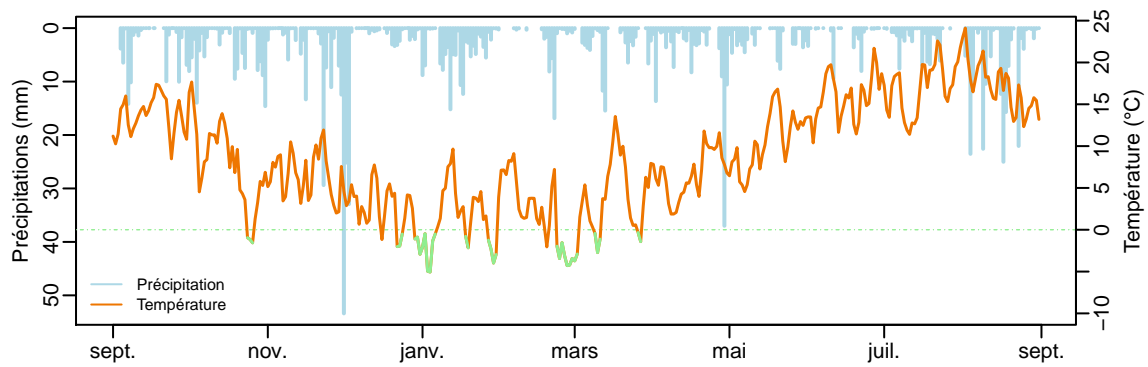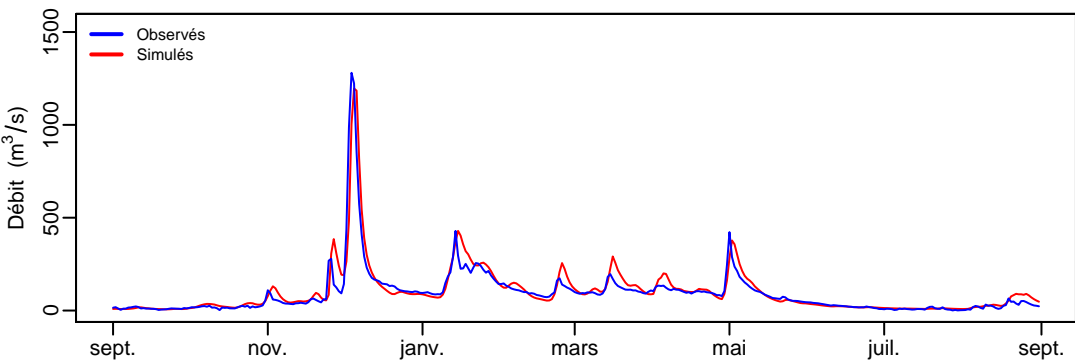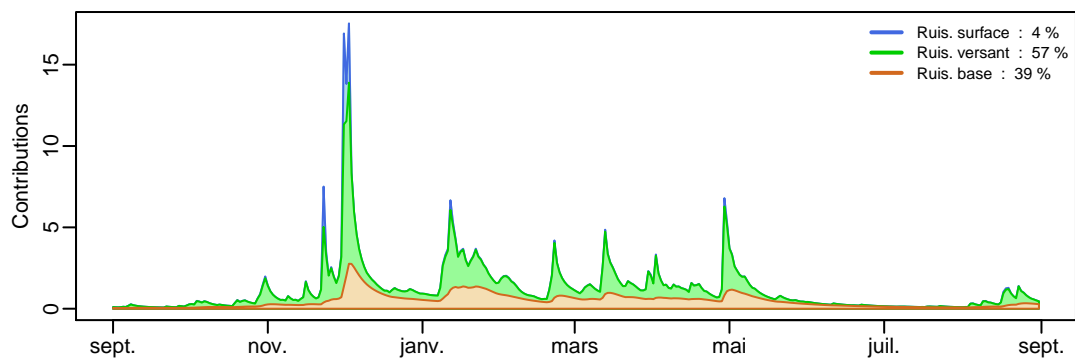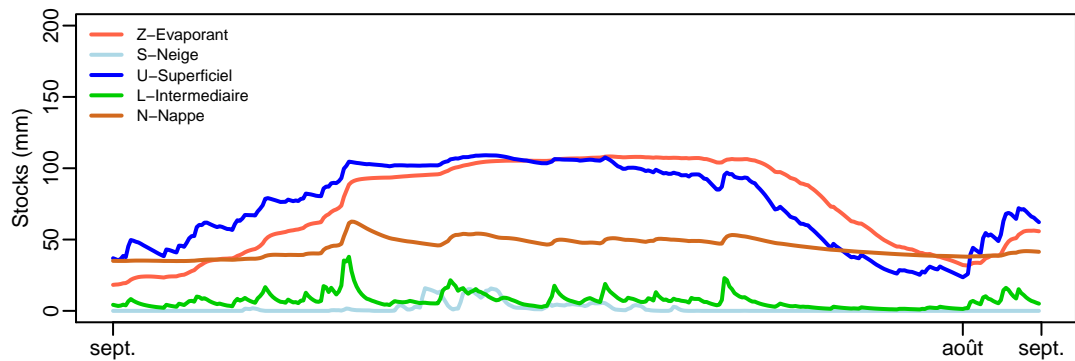

# k2790810 (7035.32 km<sup>2</sup>) – année 2004–2005

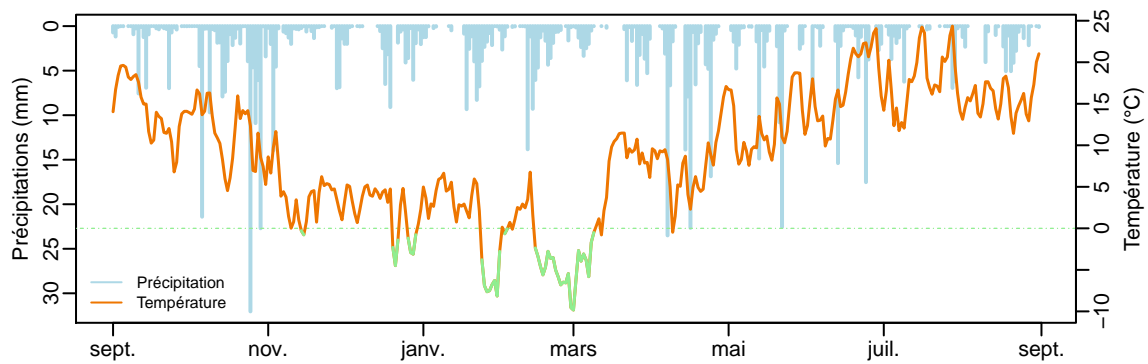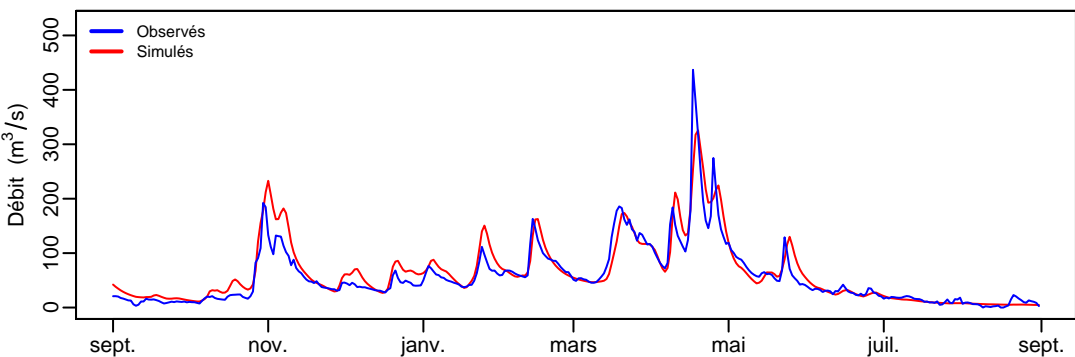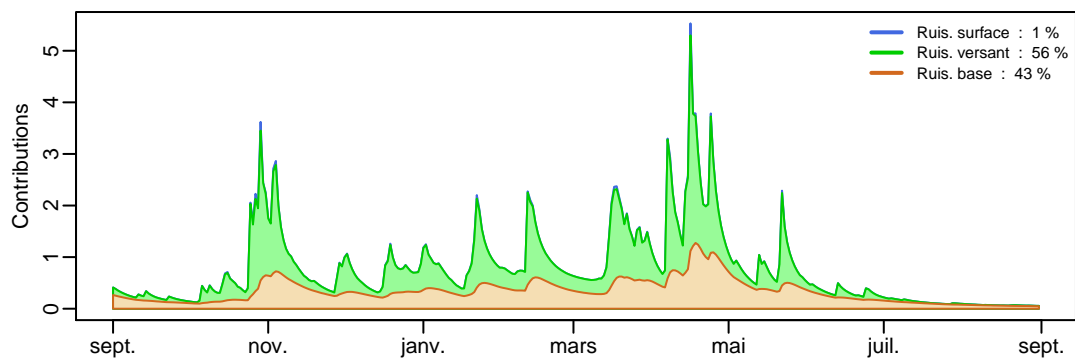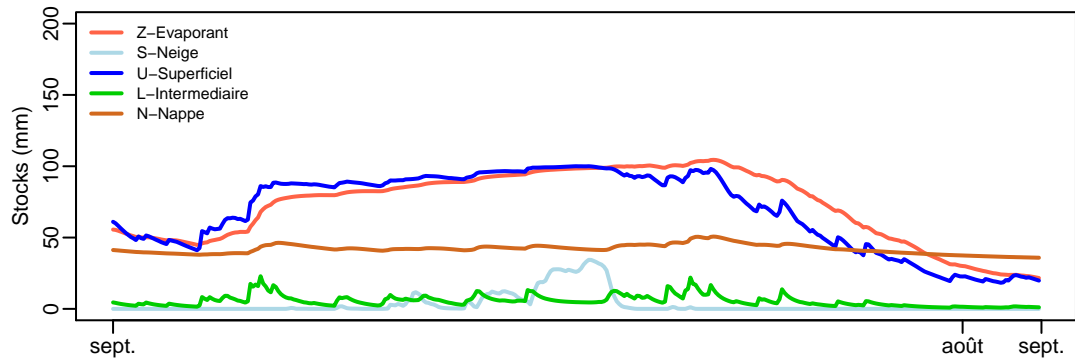

# k2790810 (7035.32 km<sup>2</sup>) – année 2005–2006

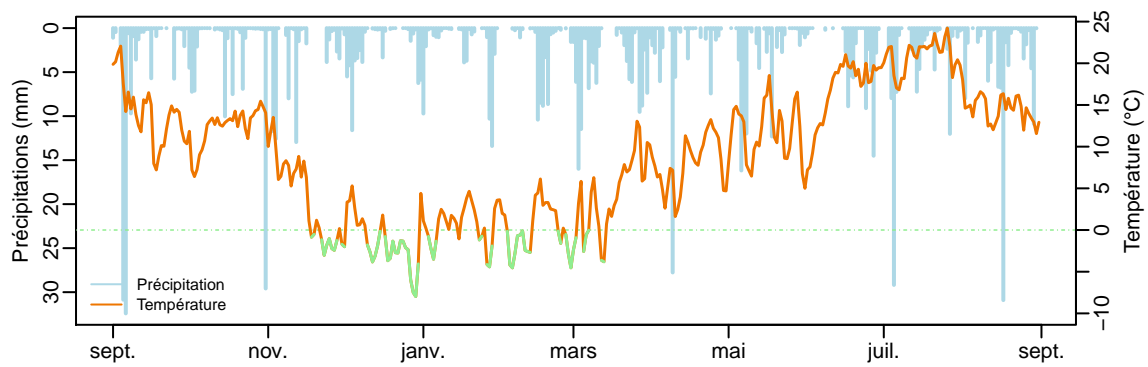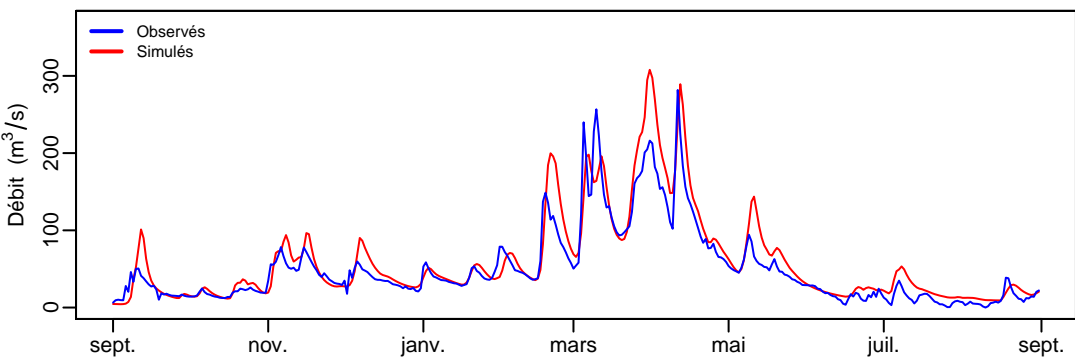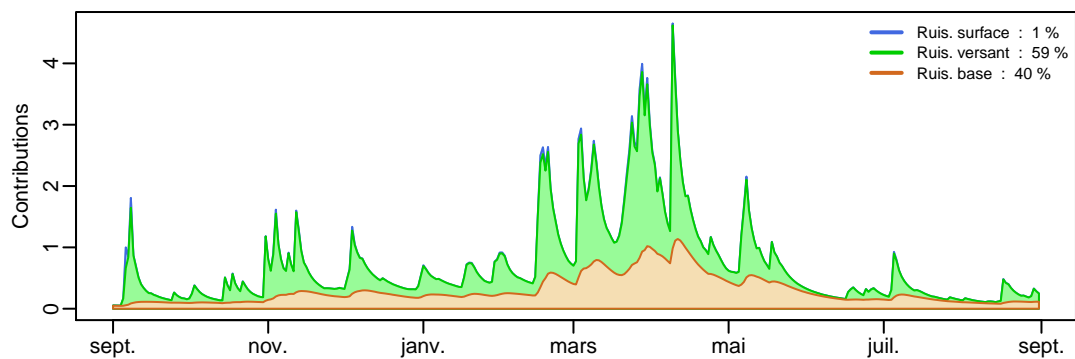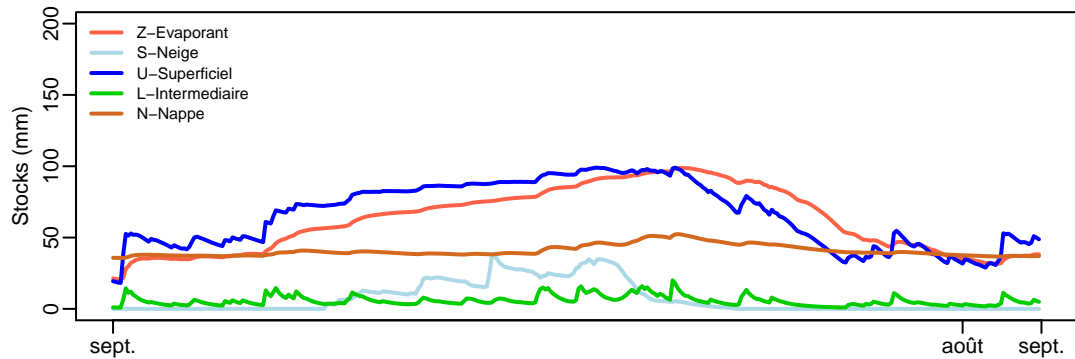



# k2790810 (7035.32 km<sup>2</sup>) – année 2006–2007

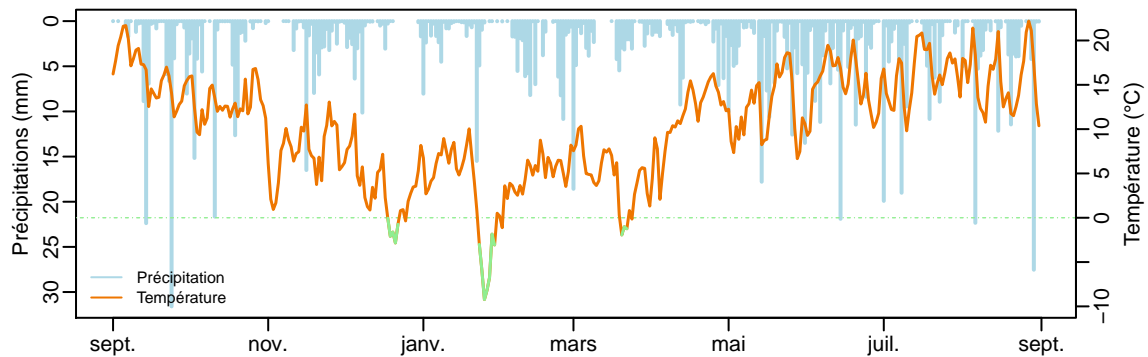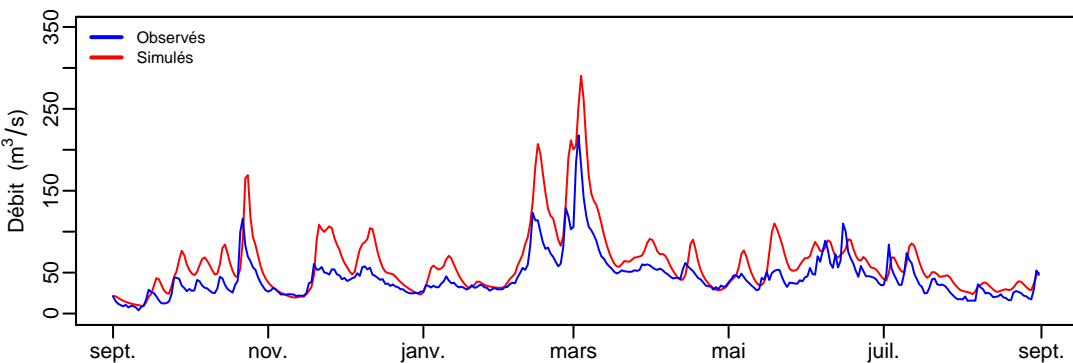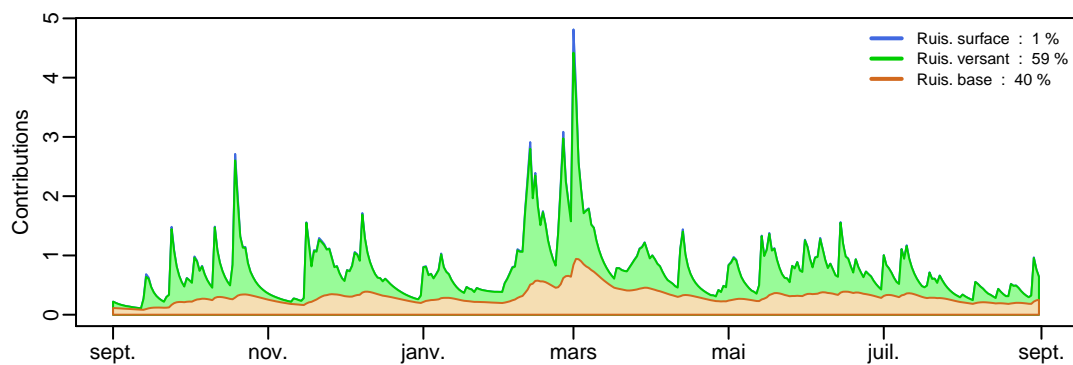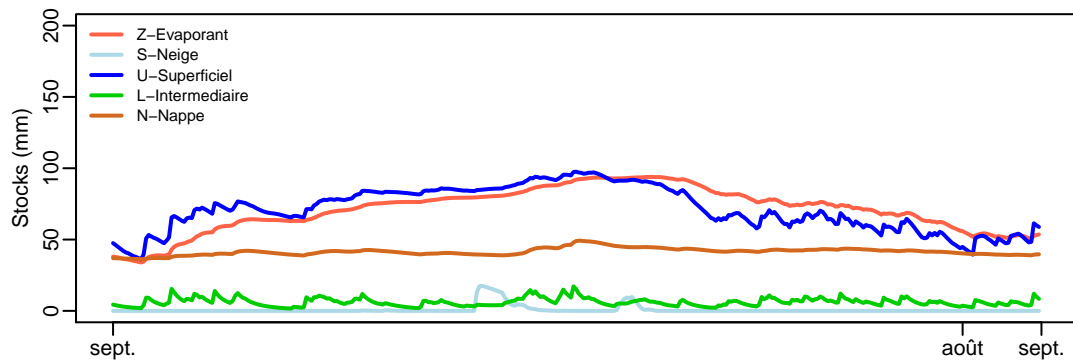

# k2790810 (7035.32 km²) – année 2007–2008

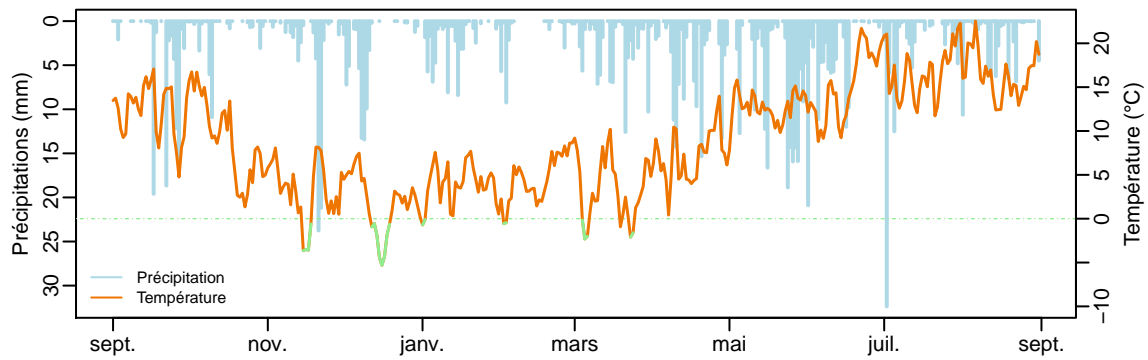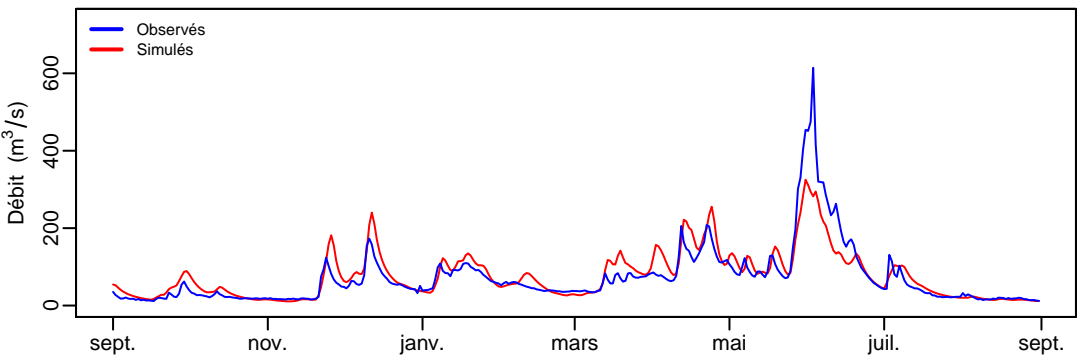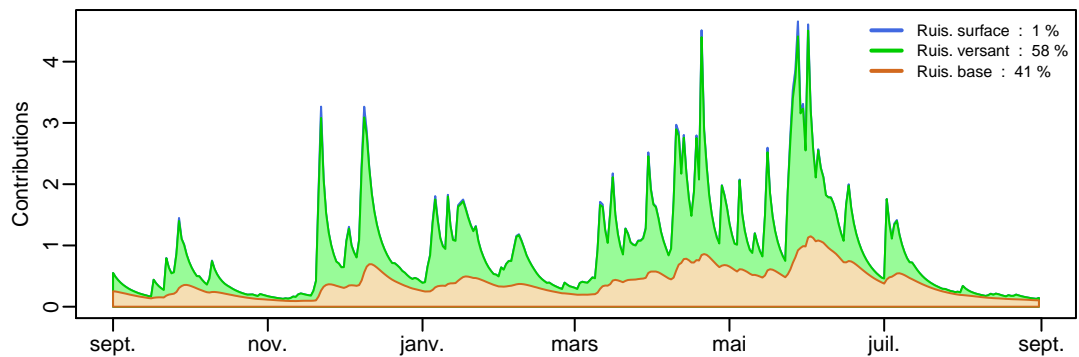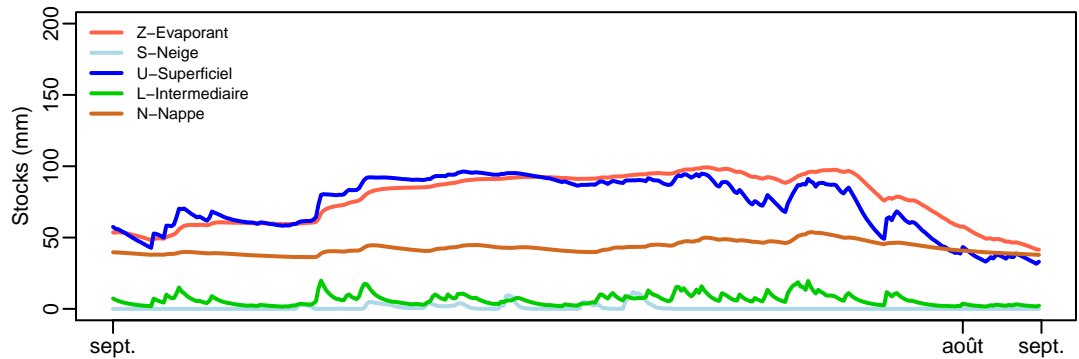

# k2790810 (7035.32 km²) – année 2008–2009

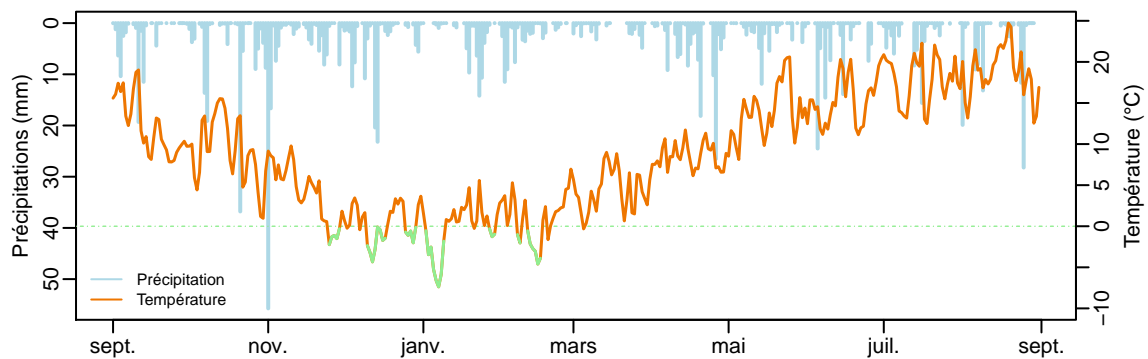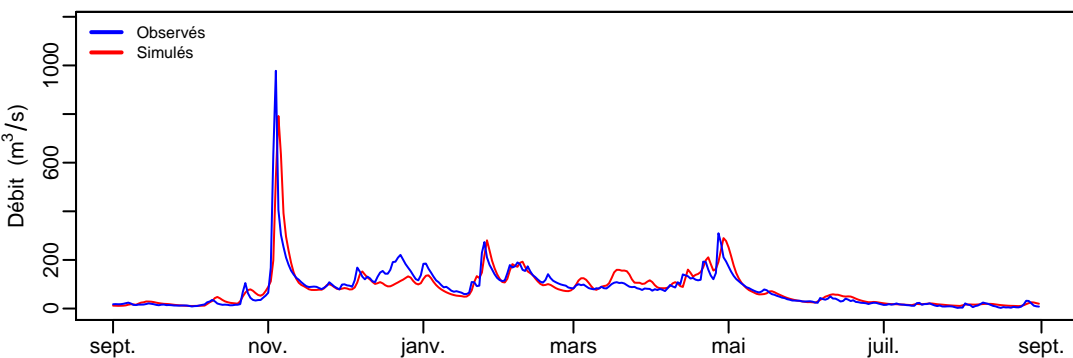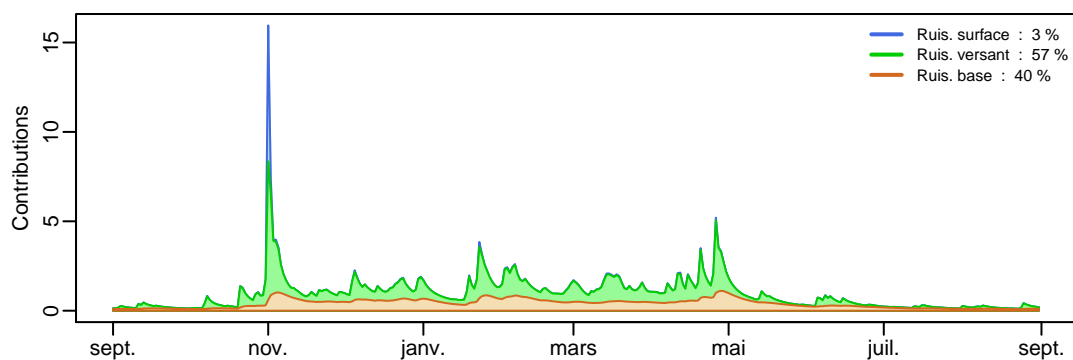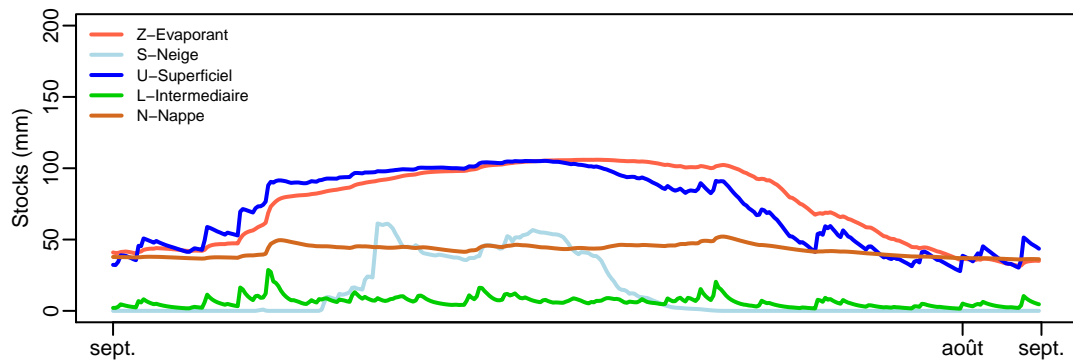

# k2790810 (7035.32 km²) – année 2009–2010

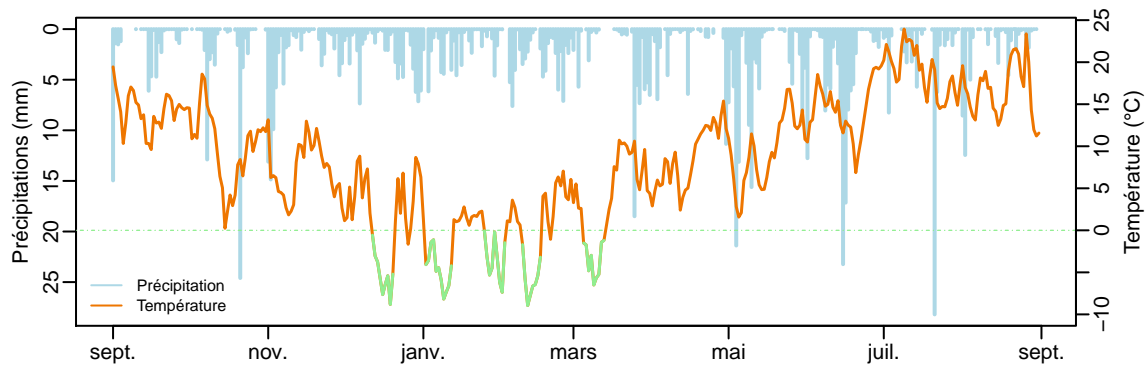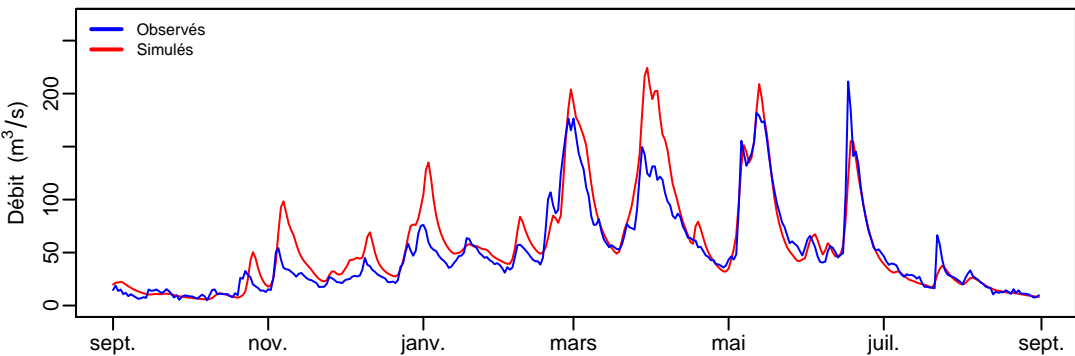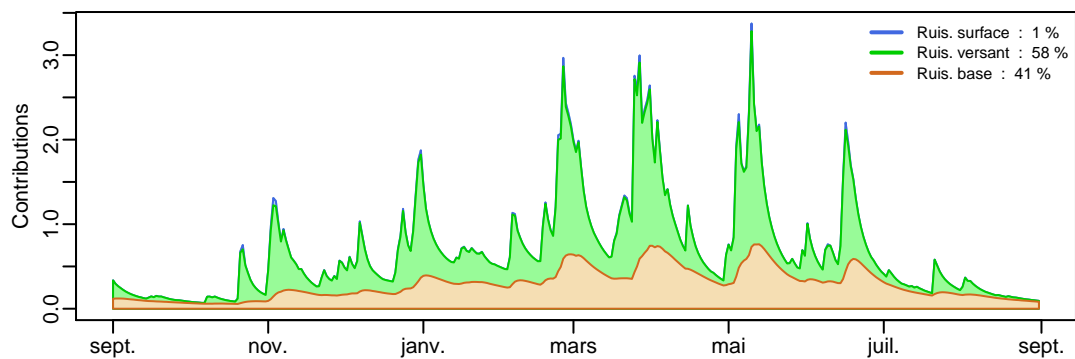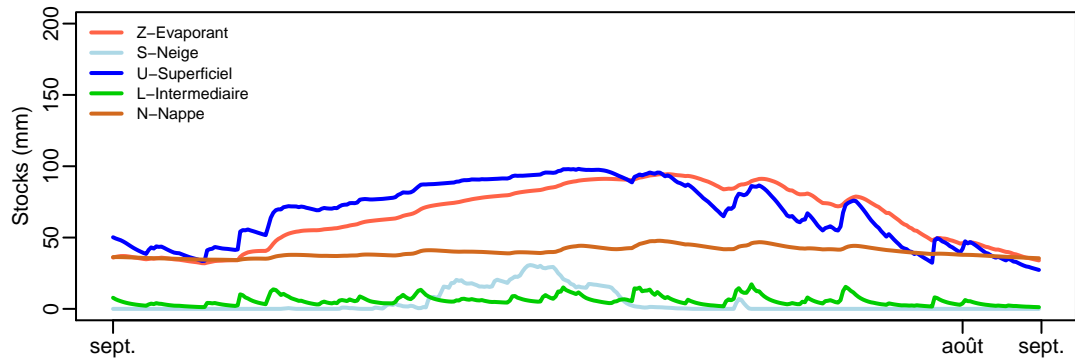

# k2790810 (7035.32 km<sup>2</sup>) – année 2010–2011

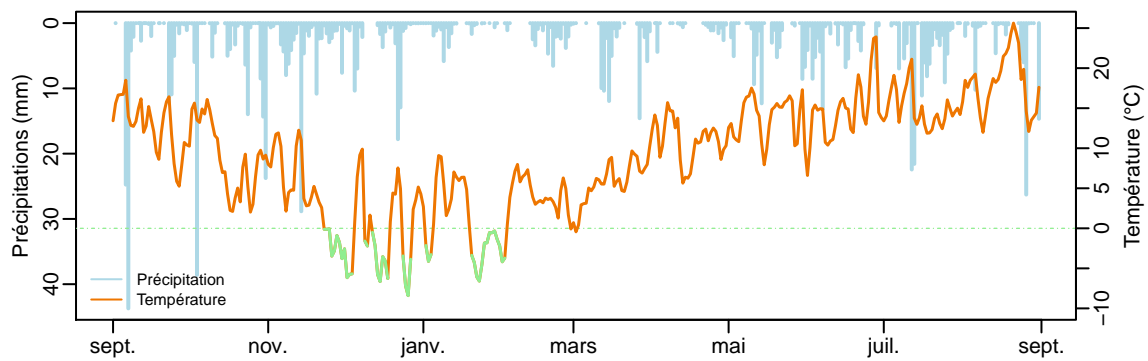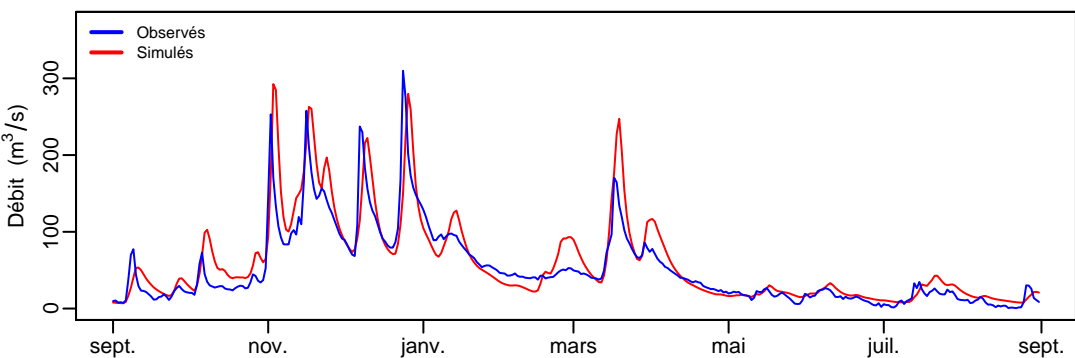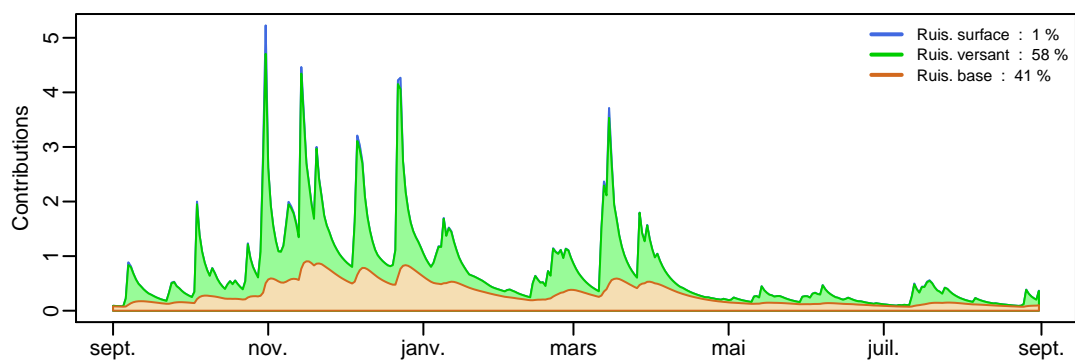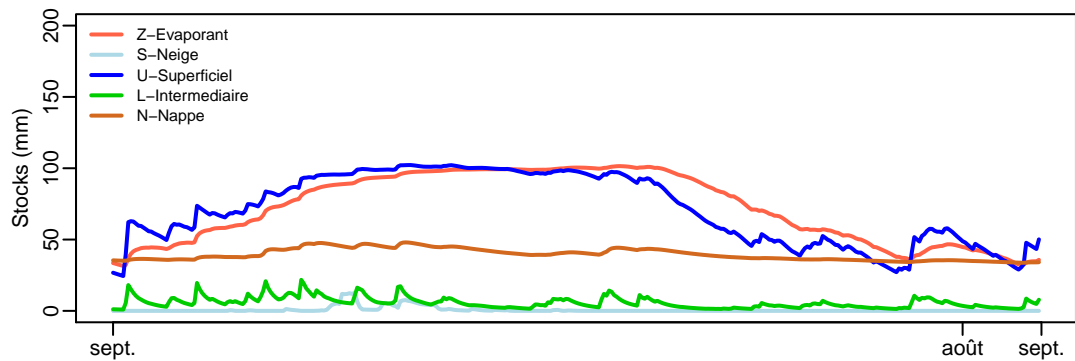

# k2790810 (7035.32 km<sup>2</sup>) – année 2011–2012

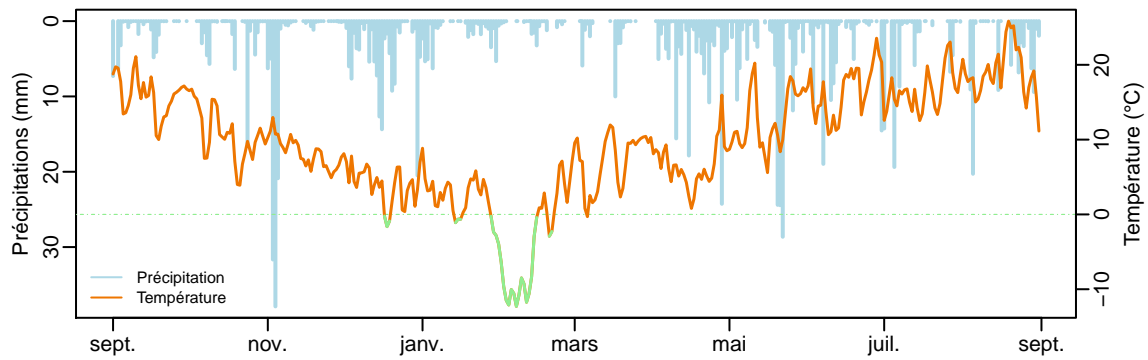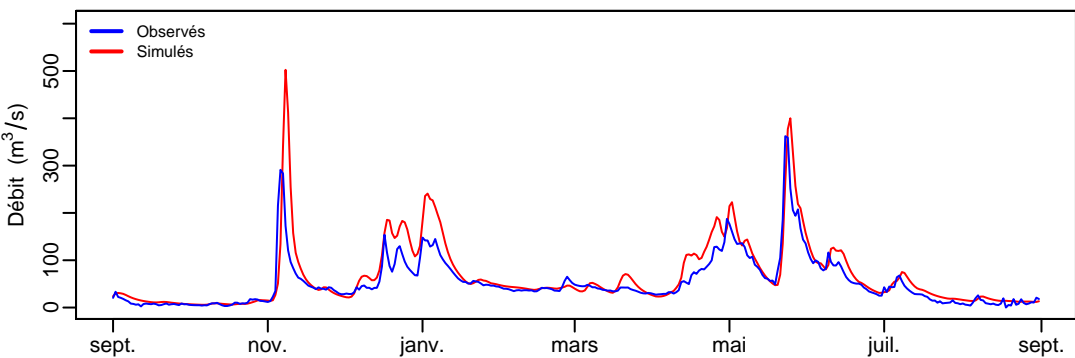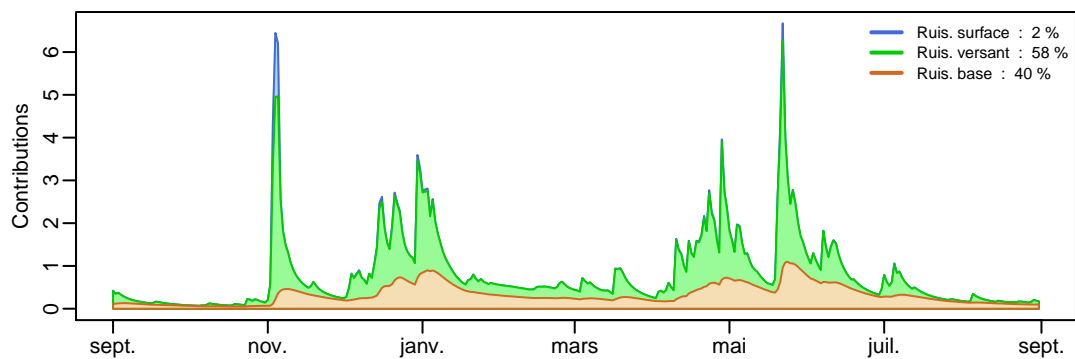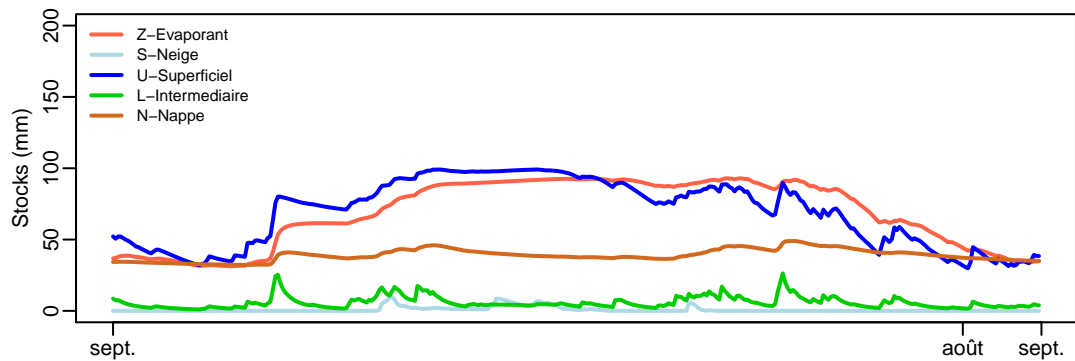

# k2821910 (105.33 km<sup>2</sup>) – année 1994–1995

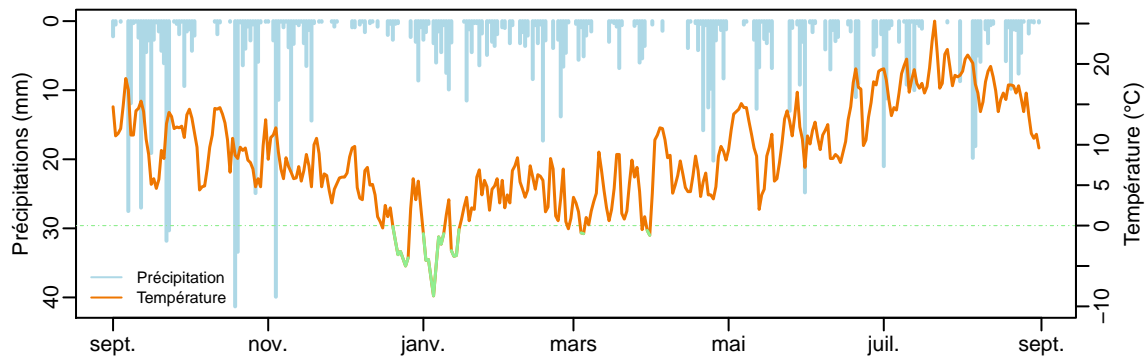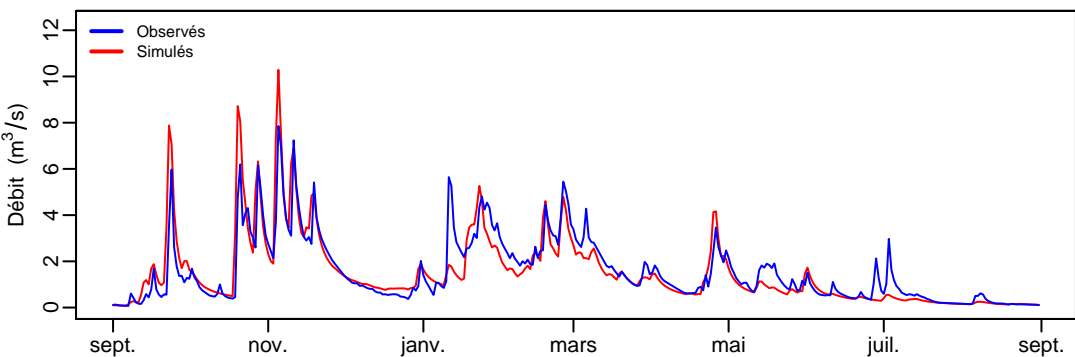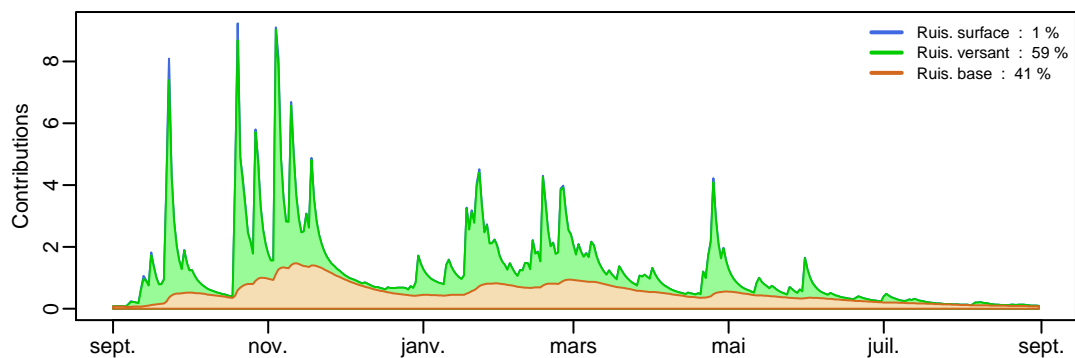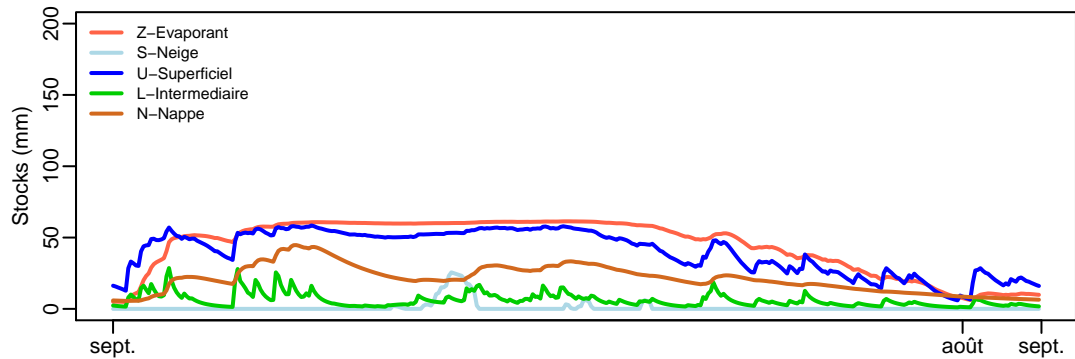

# k2821910 (105.33 km²) – année 1995–1996

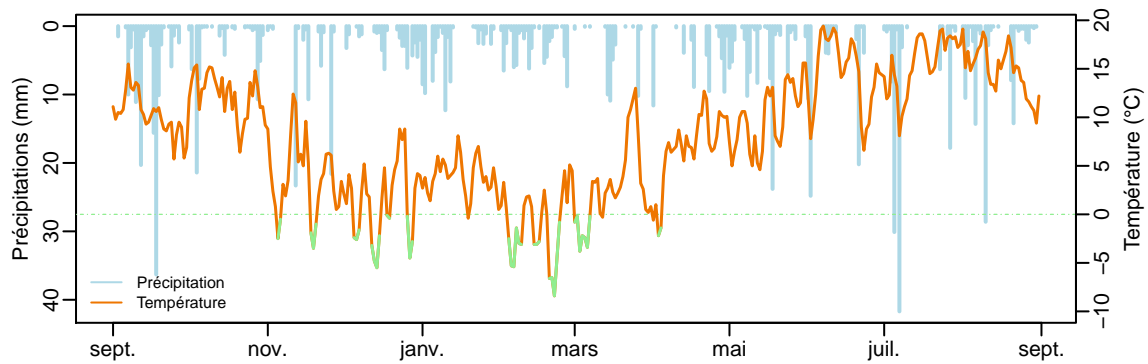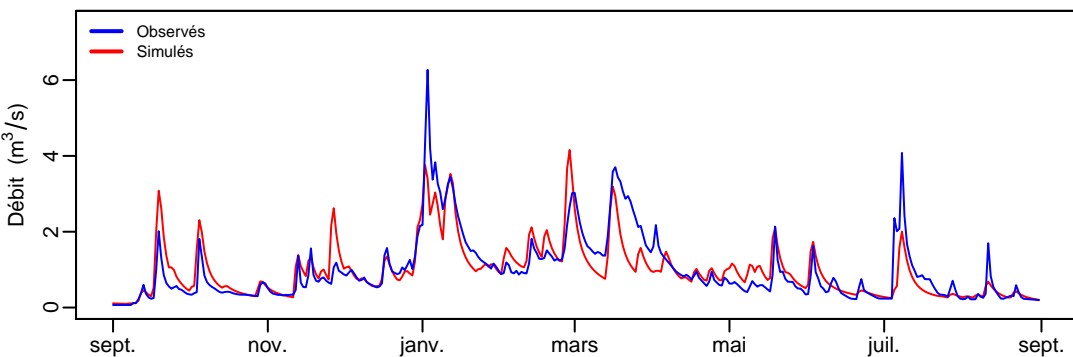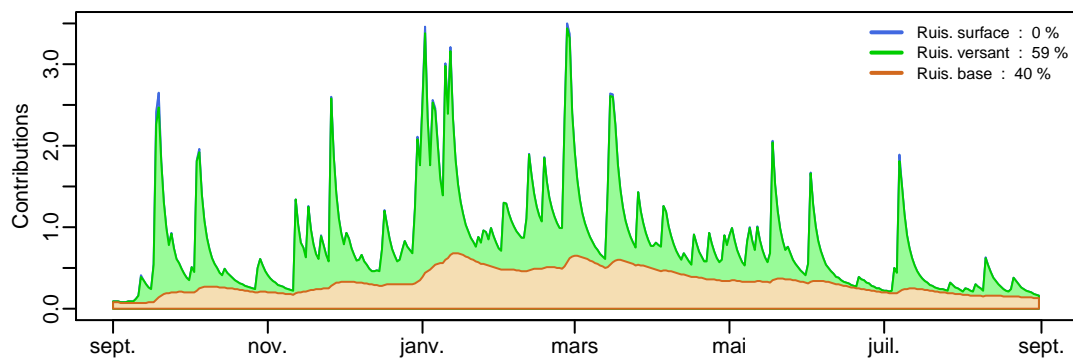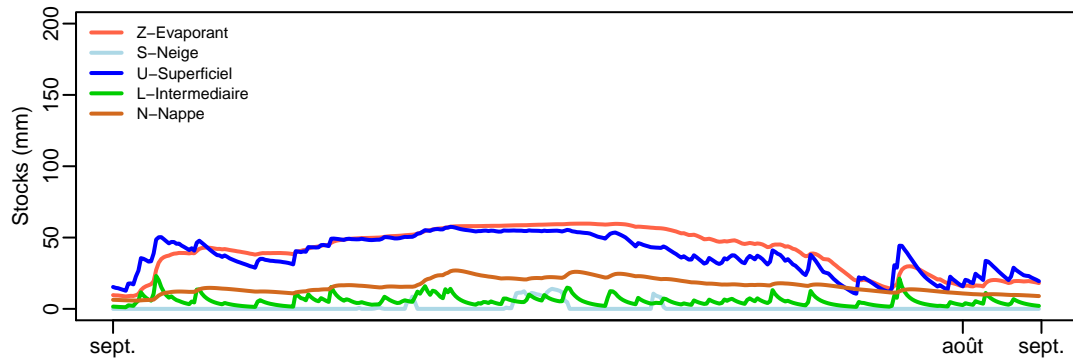



# k2821910 (105.33 km²) – année 1996–1997

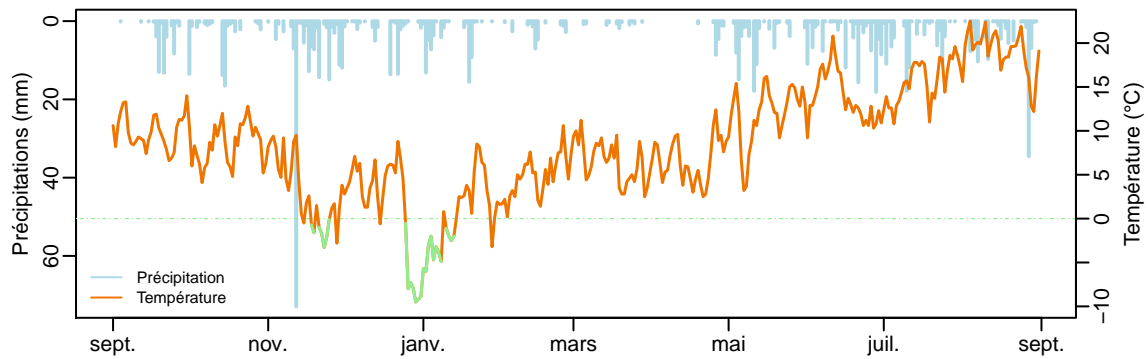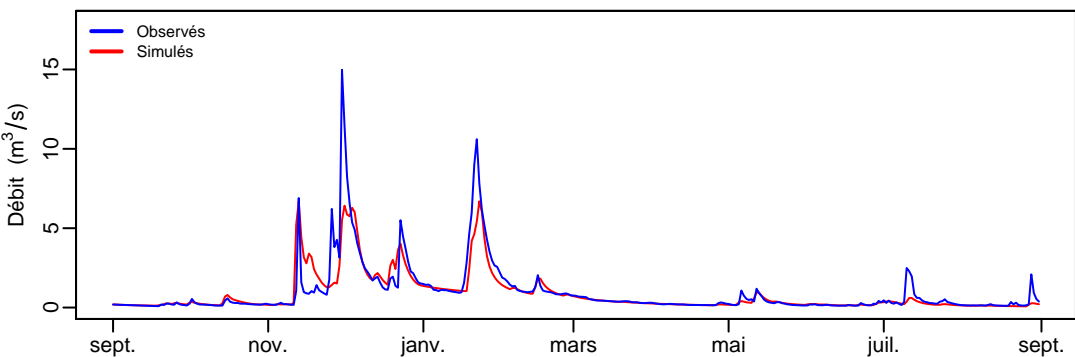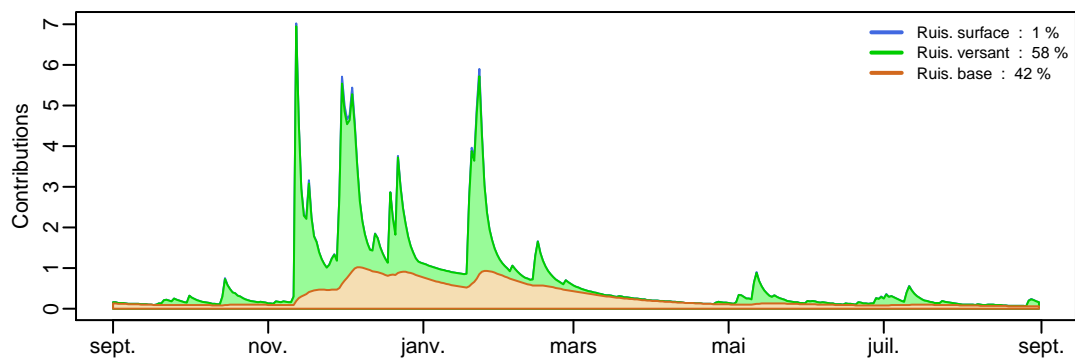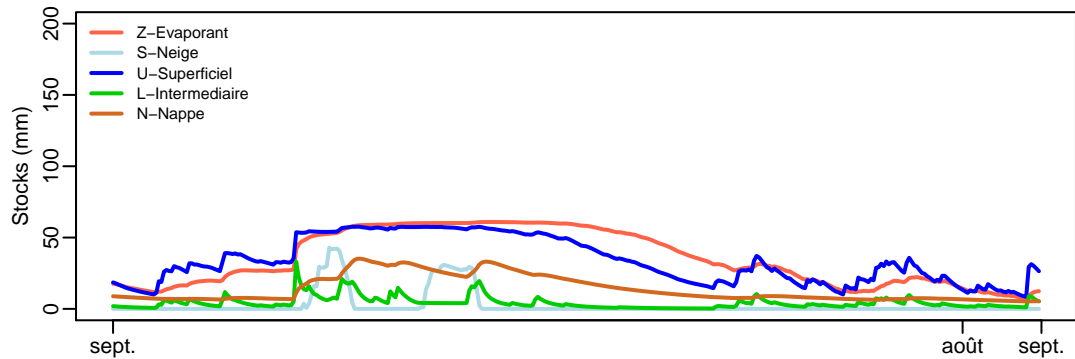

# k2821910 (105.33 km<sup>2</sup>) – année 1997–1998

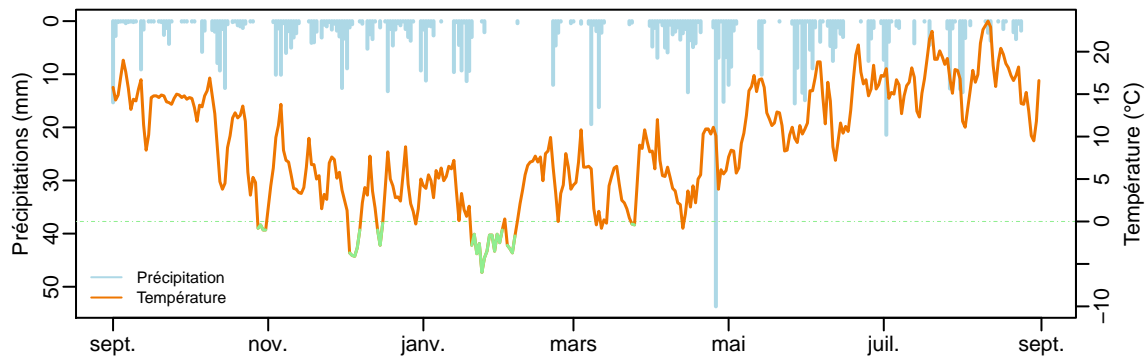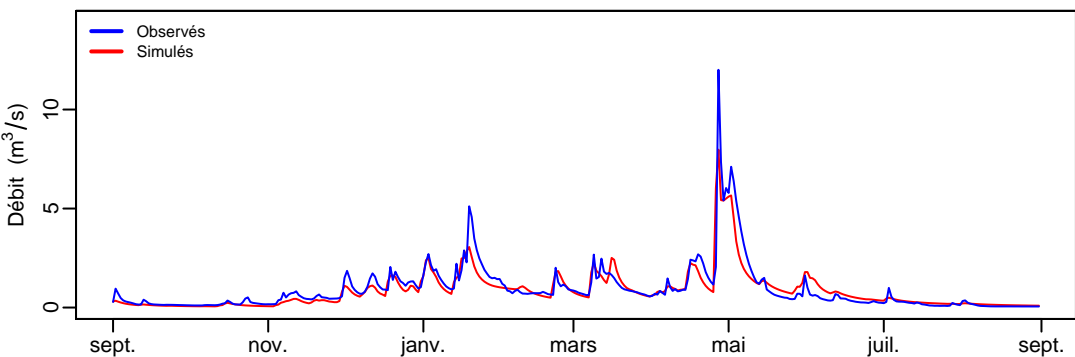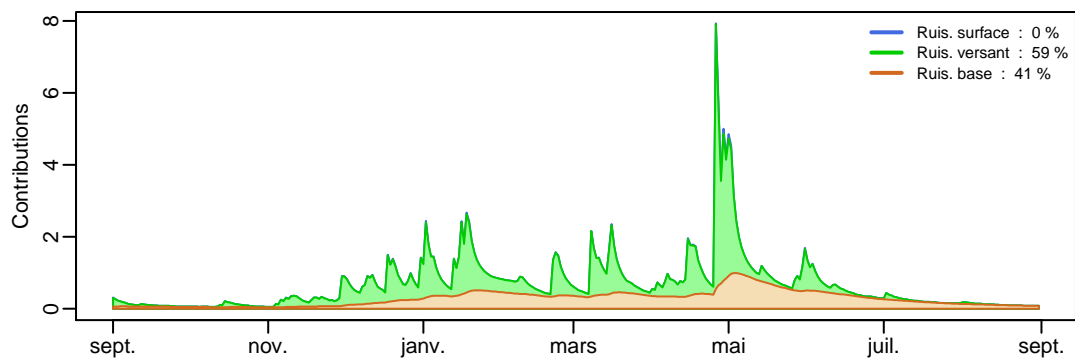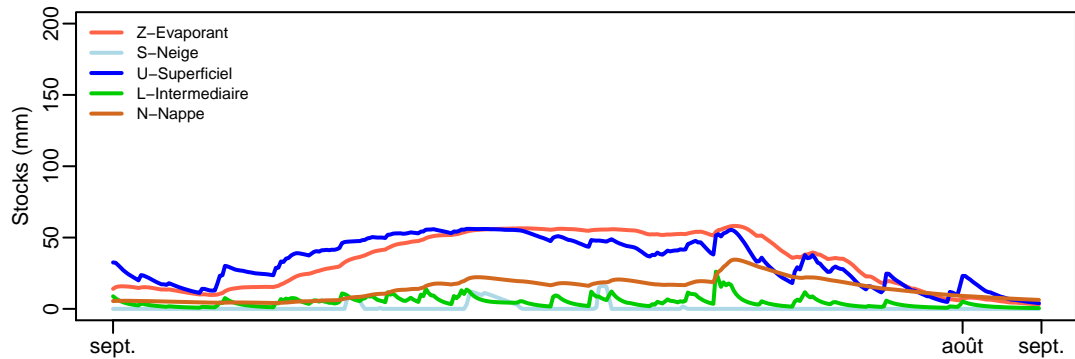

# k2821910 (105.33 km<sup>2</sup>) – année 1998–1999

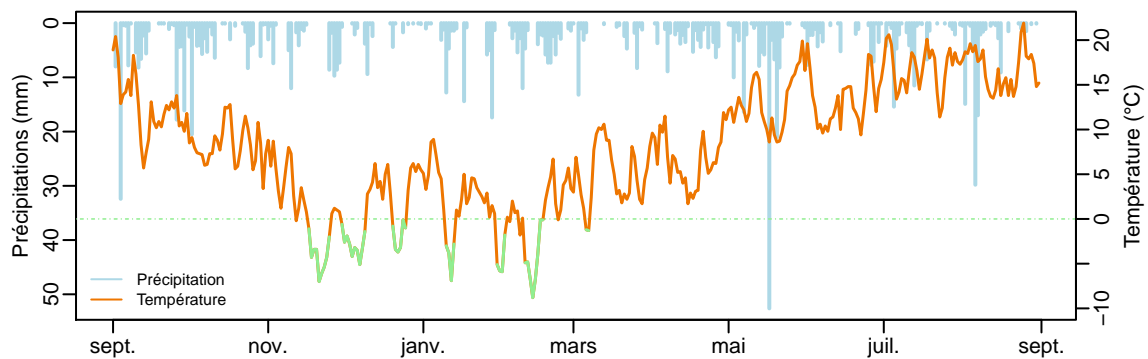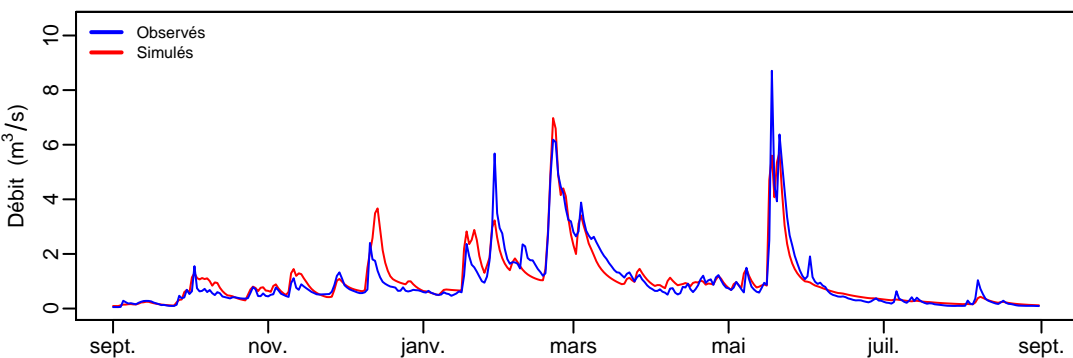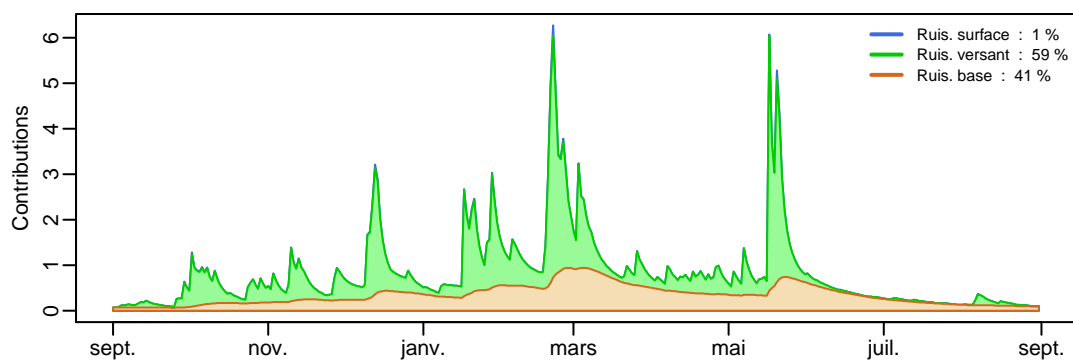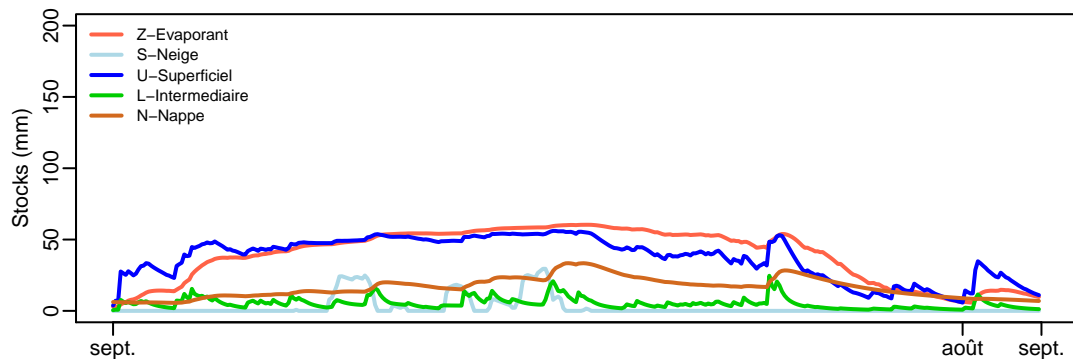

# k2821910 (105.33 km²) – année 1999–2000

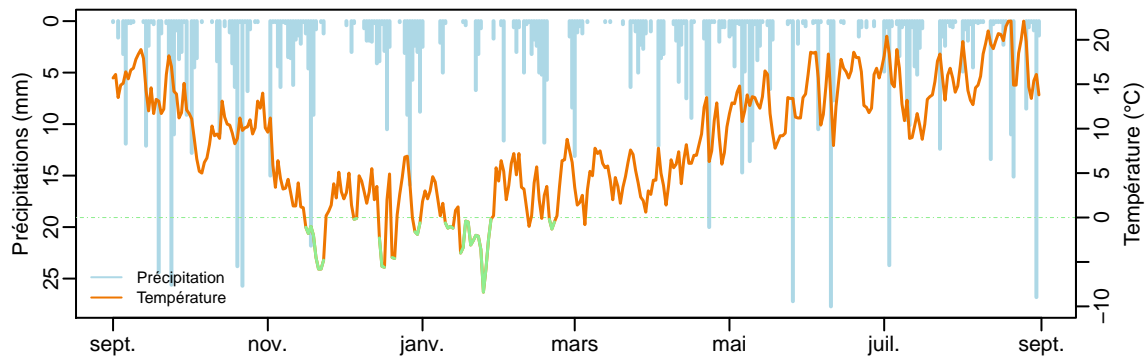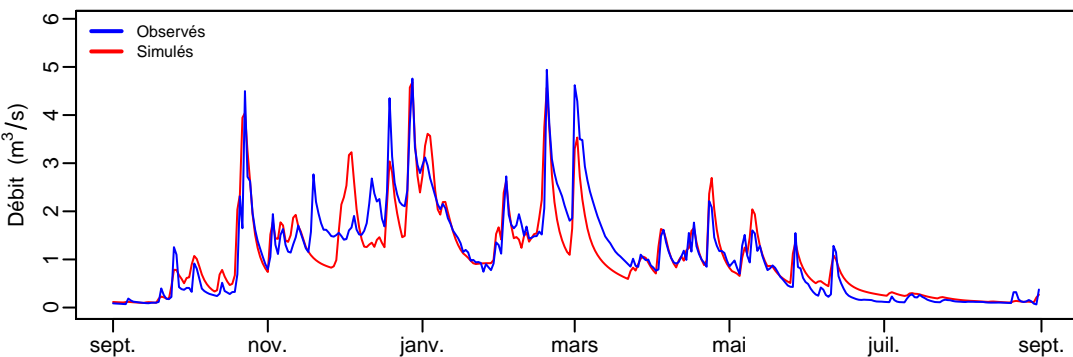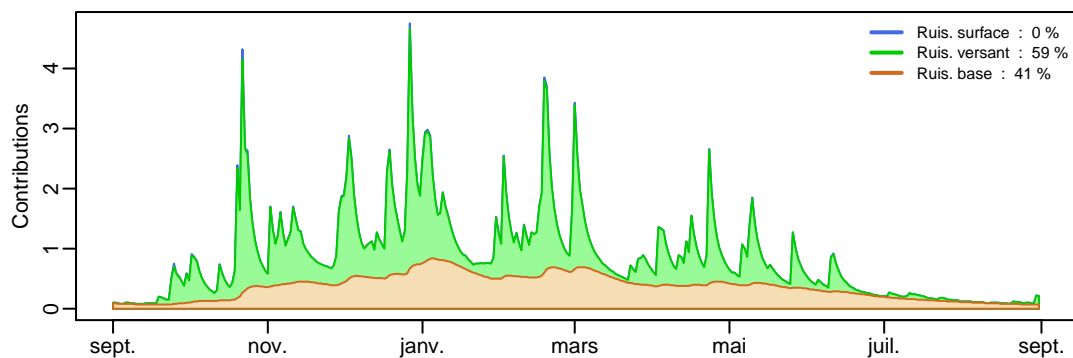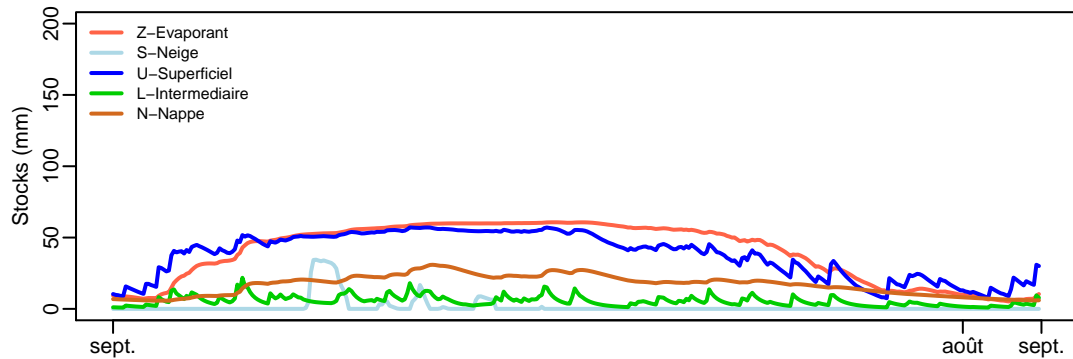

# k2821910 (105.33 km<sup>2</sup>) – année 2000–2001

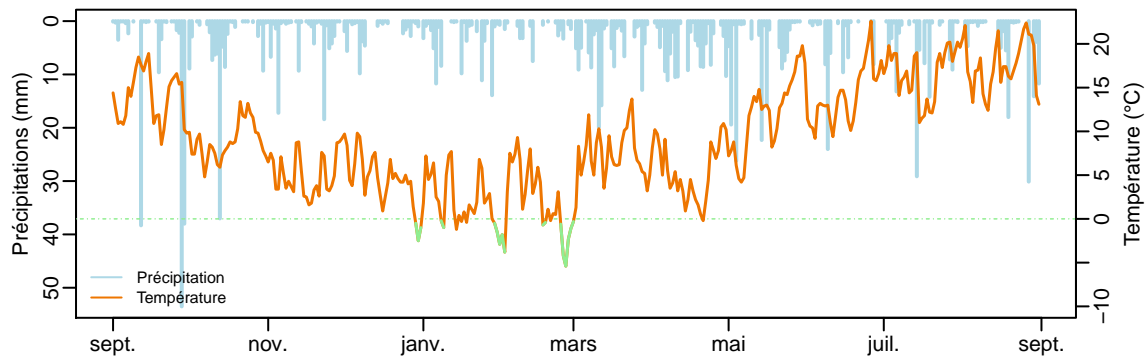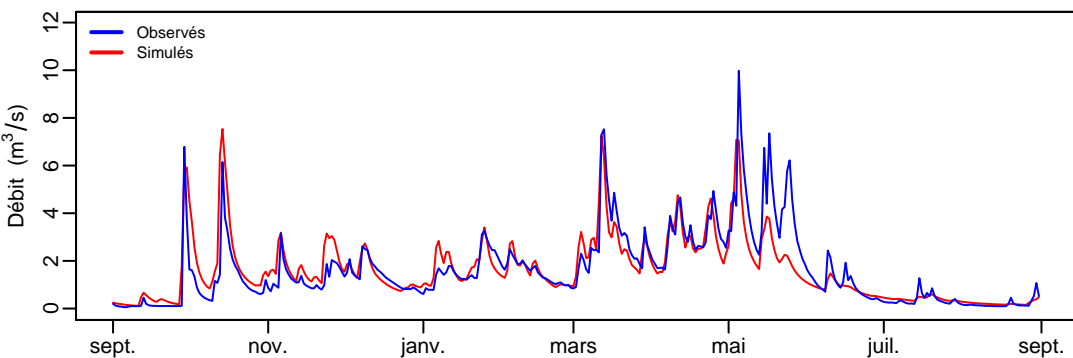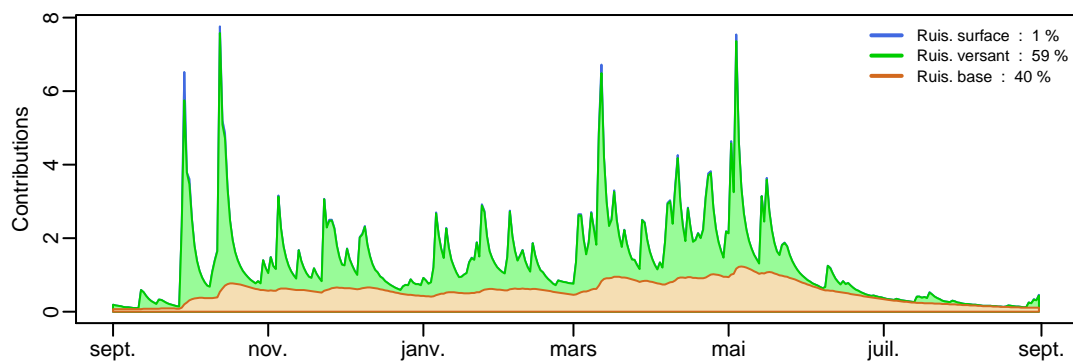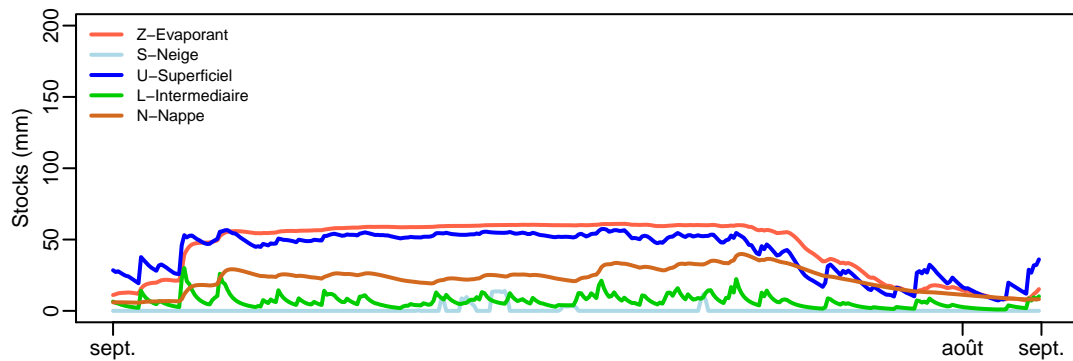

# k2821910 (105.33 km<sup>2</sup>) – année 2001–2002

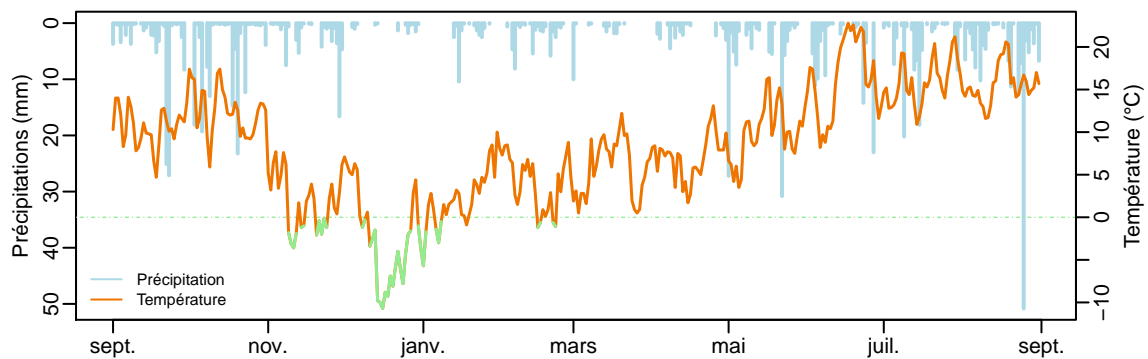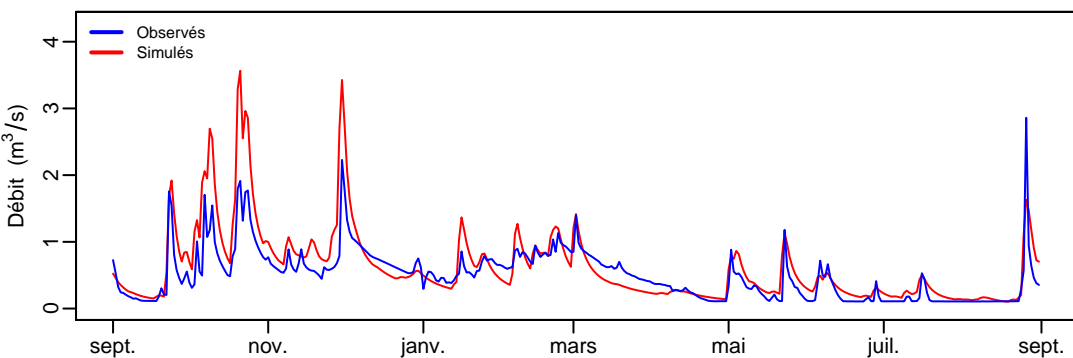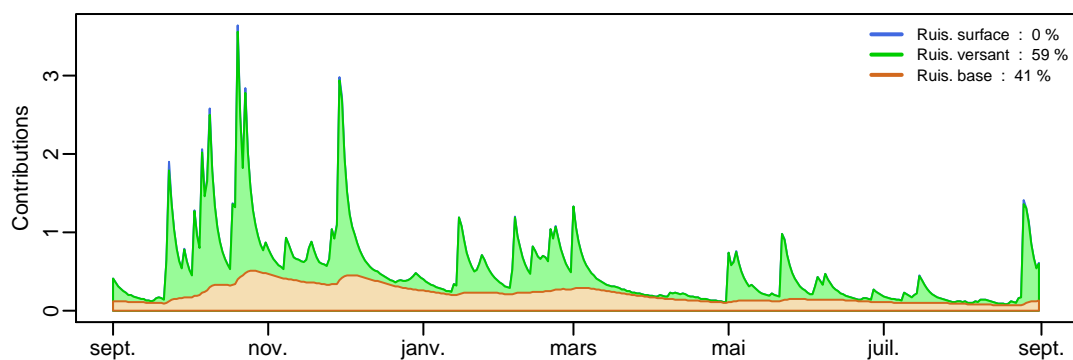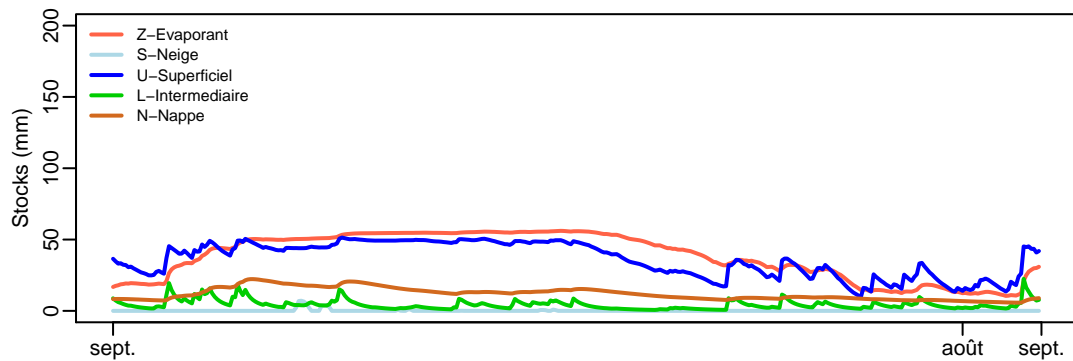

# k2821910 (105.33 km<sup>2</sup>) – année 2002–2003

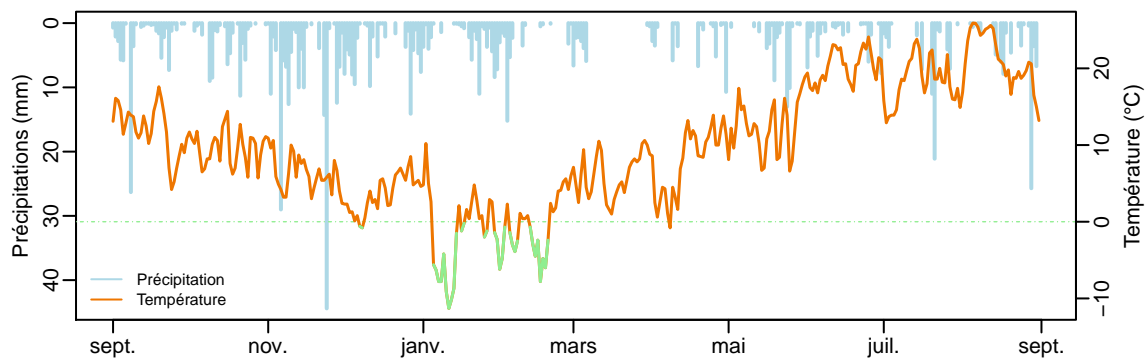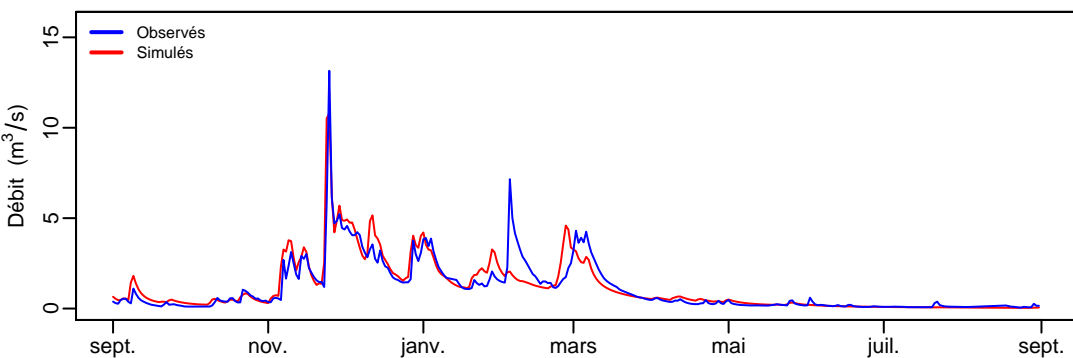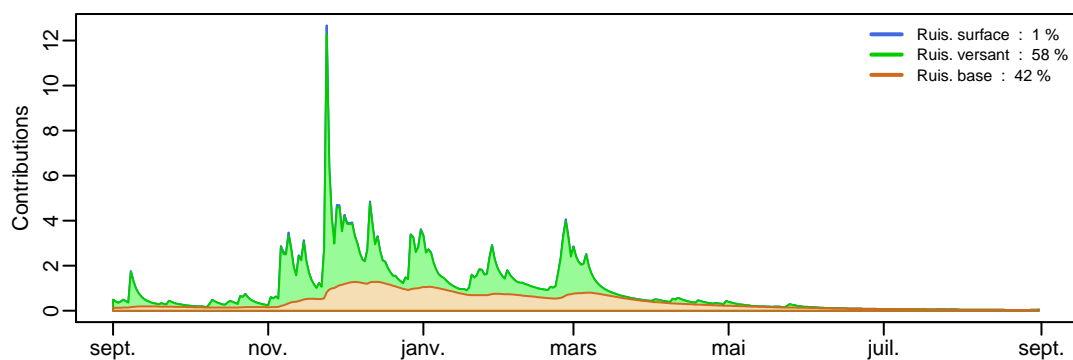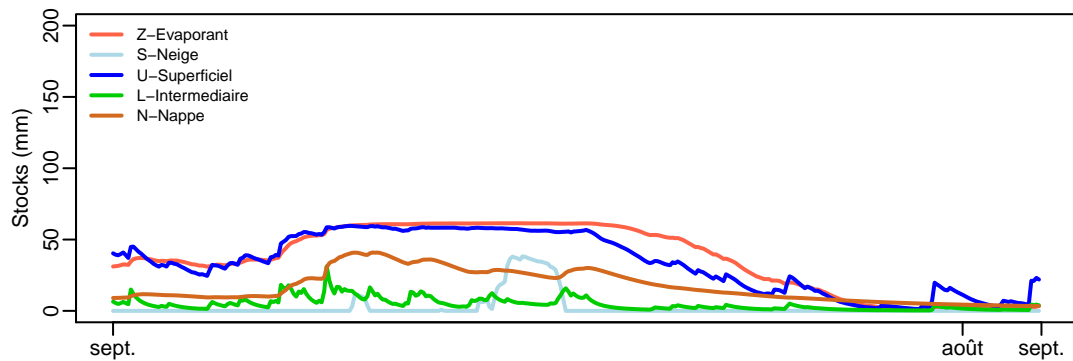

# k2821910 (105.33 km<sup>2</sup>) – année 2003–2004

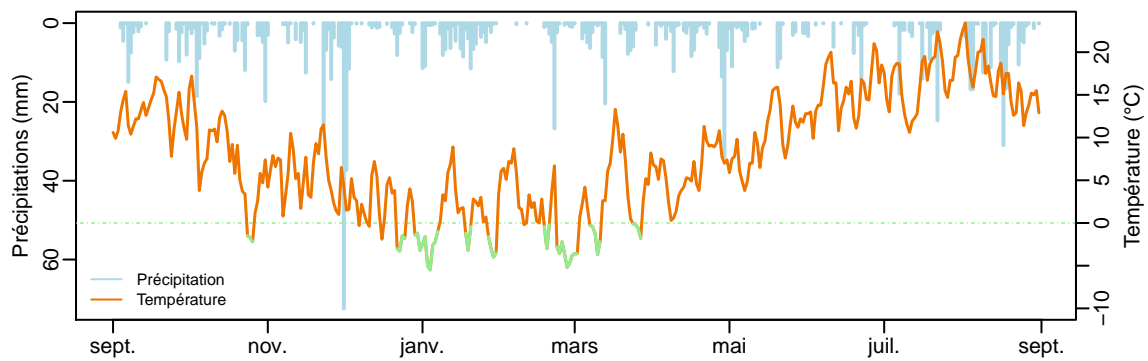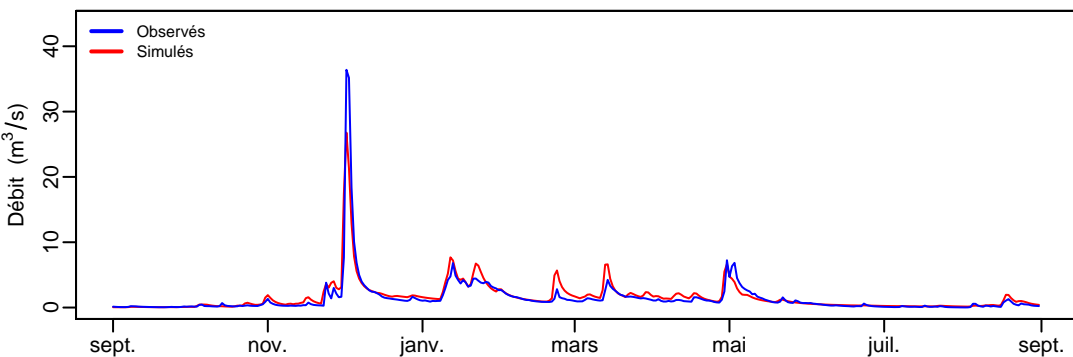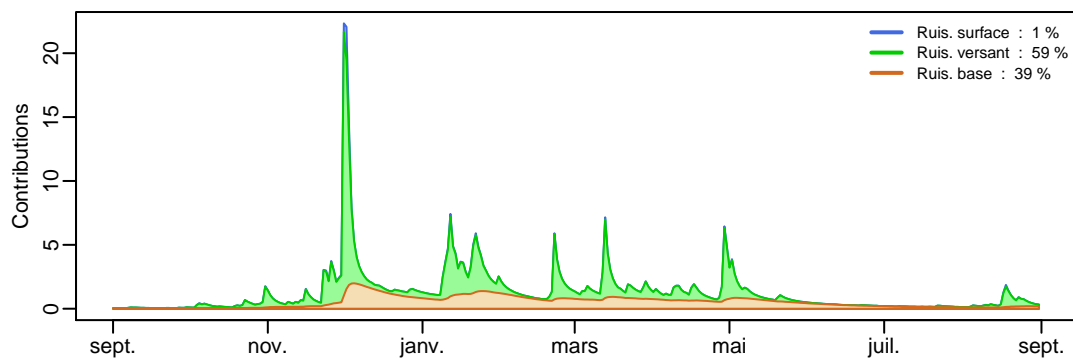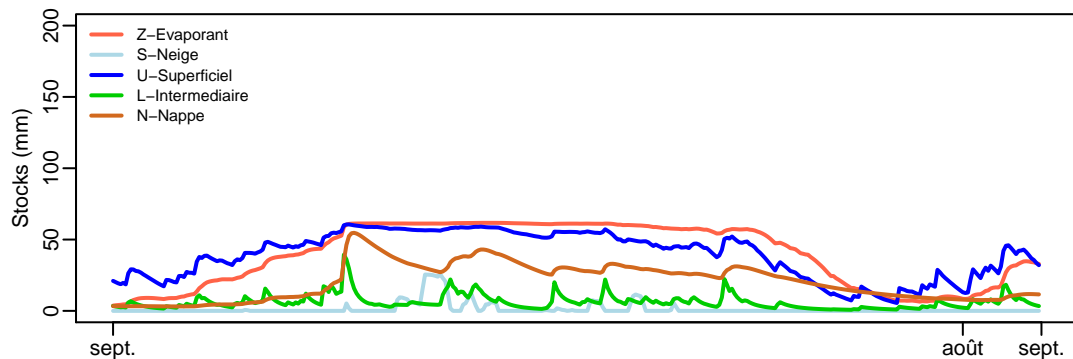



# k2821910 (105.33 km<sup>2</sup>) – année 2004–2005

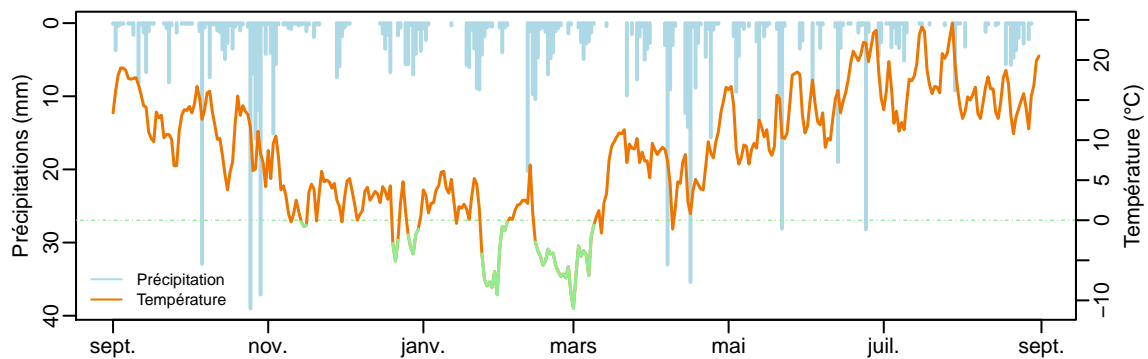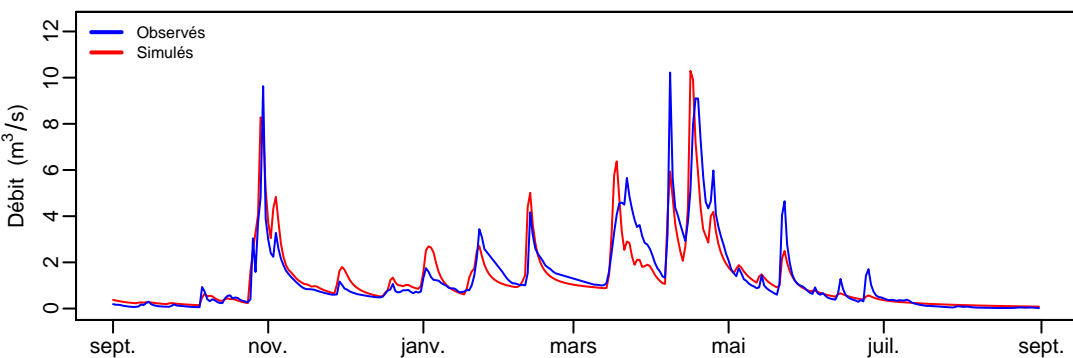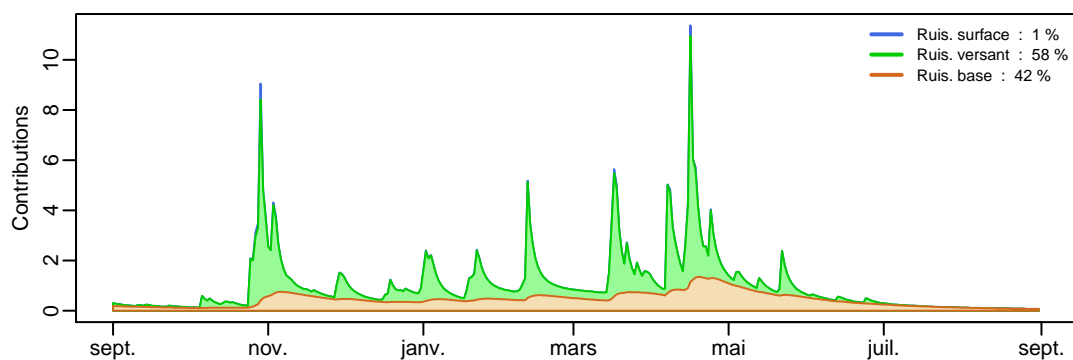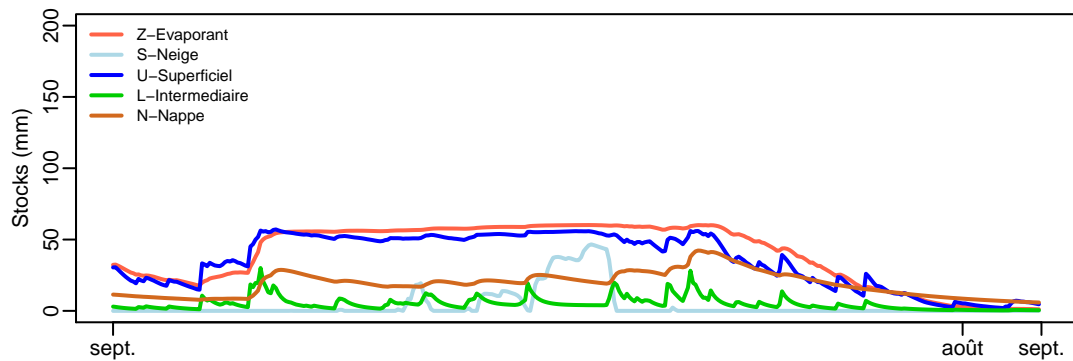

# k2821910 (105.33 km<sup>2</sup>) – année 2005–2006

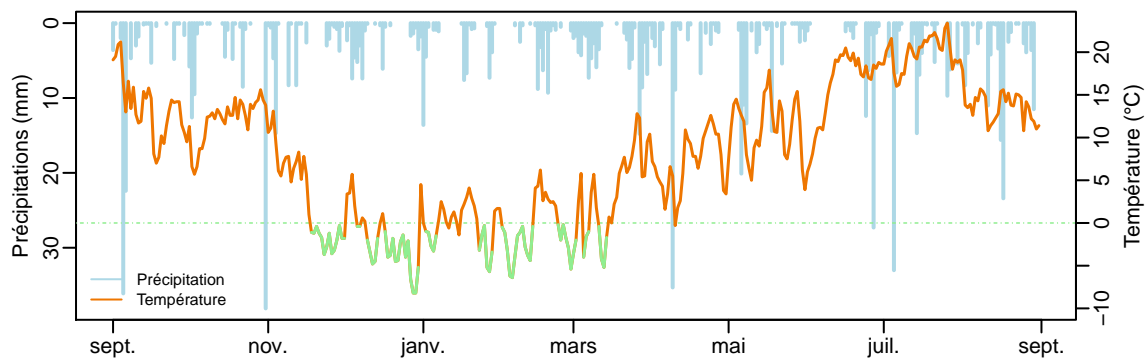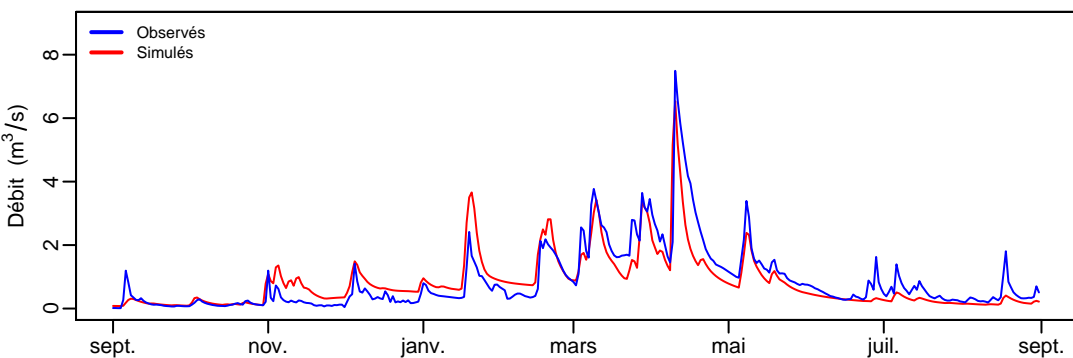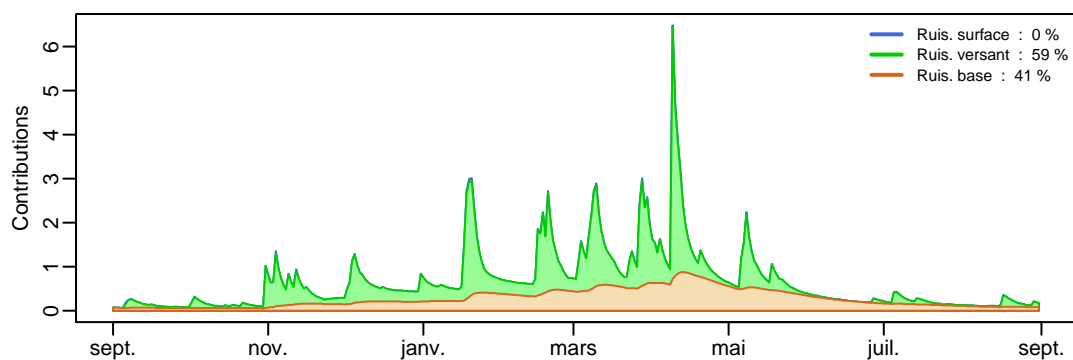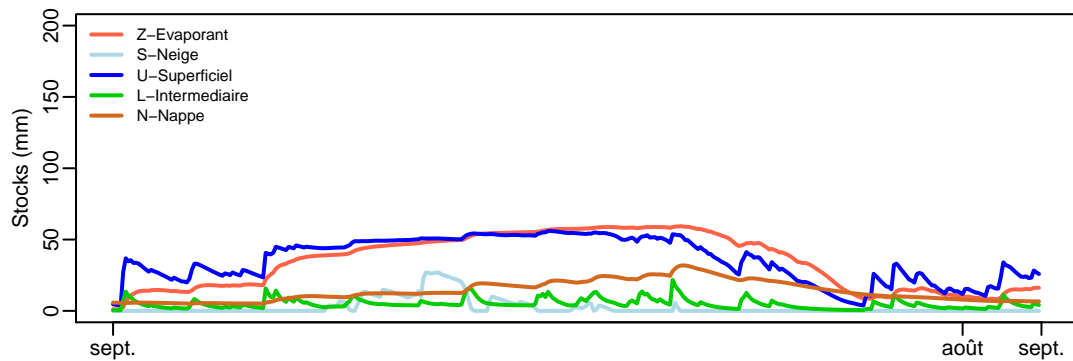

# k2821910 (105.33 km<sup>2</sup>) – année 2006–2007

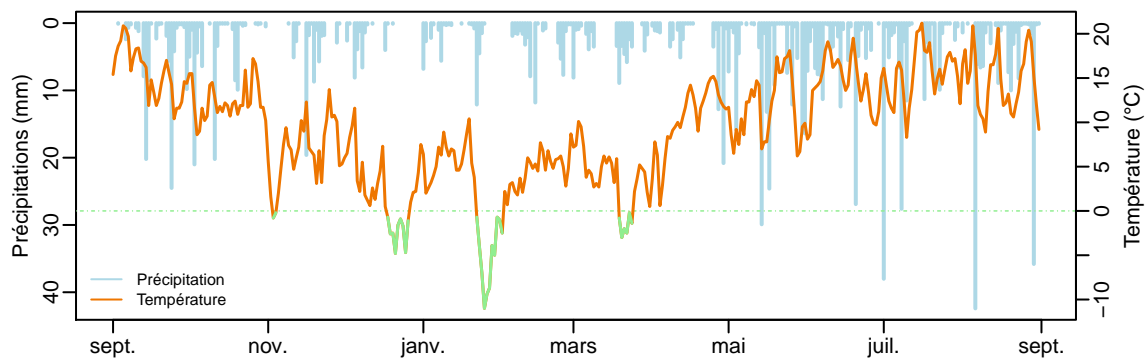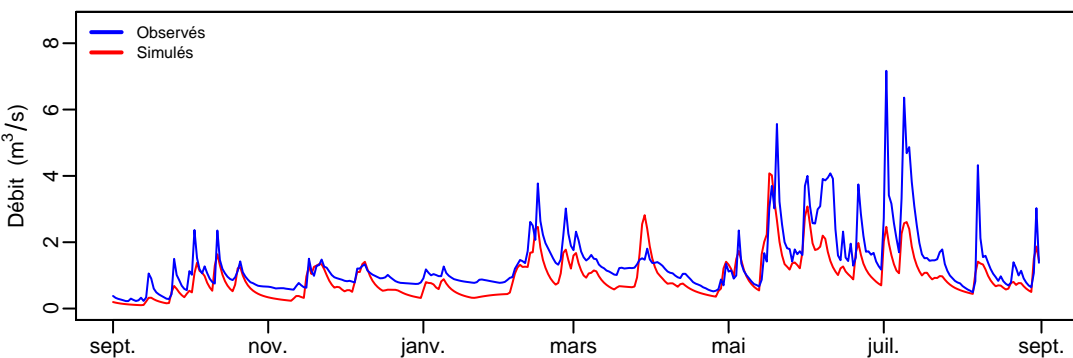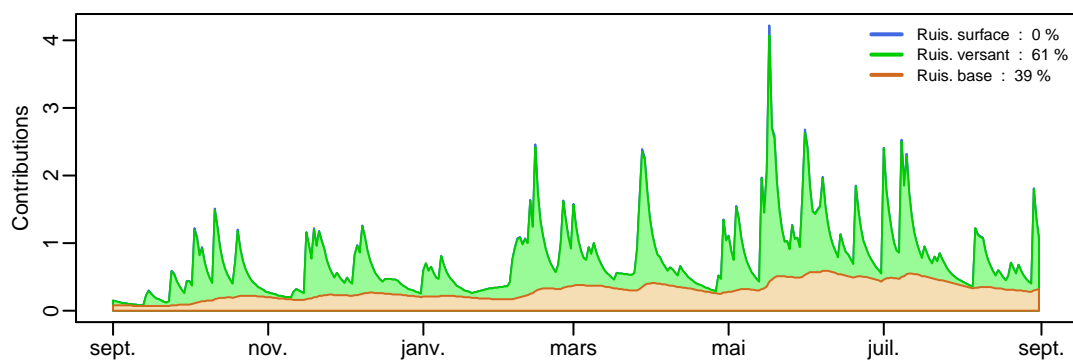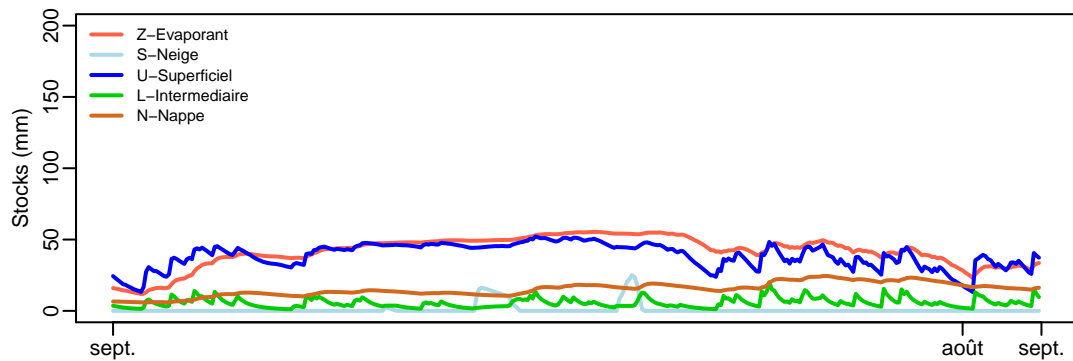

# k2821910 (105.33 km<sup>2</sup>) – année 2007–2008

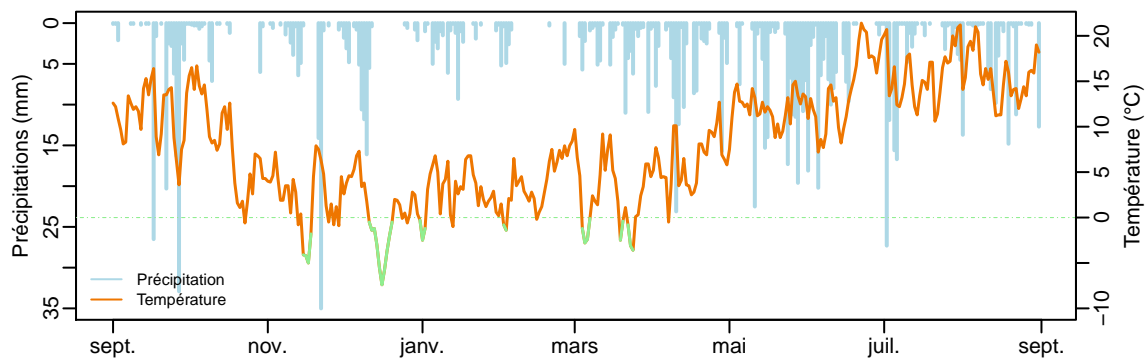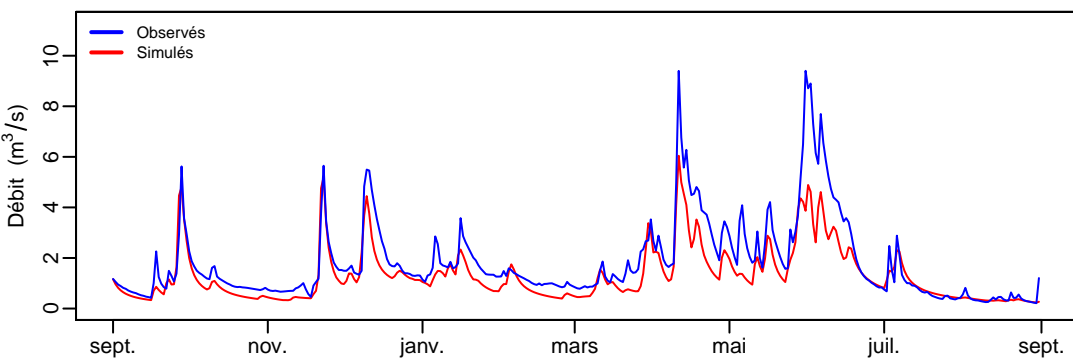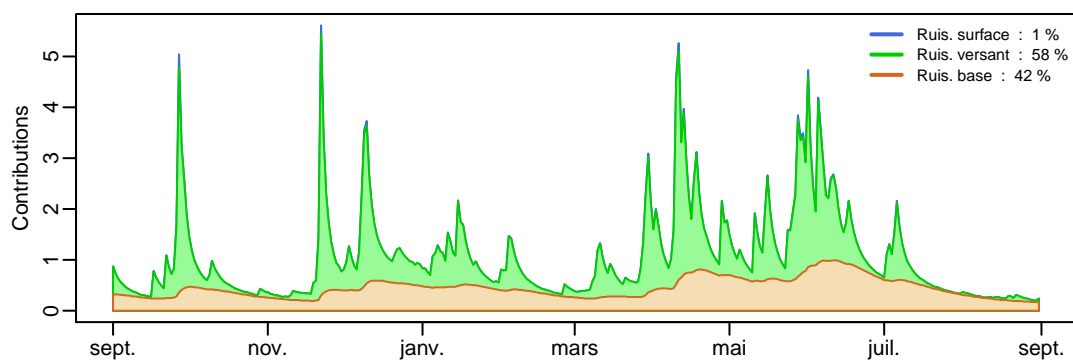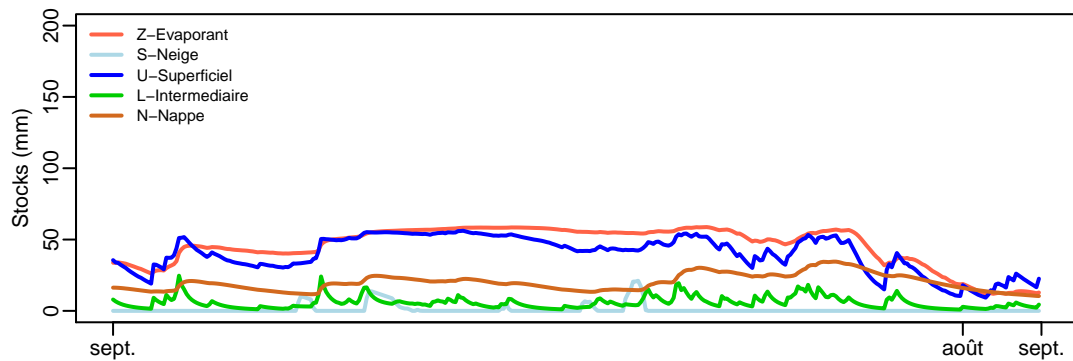

# k2821910 (105.33 km<sup>2</sup>) – année 2008–2009

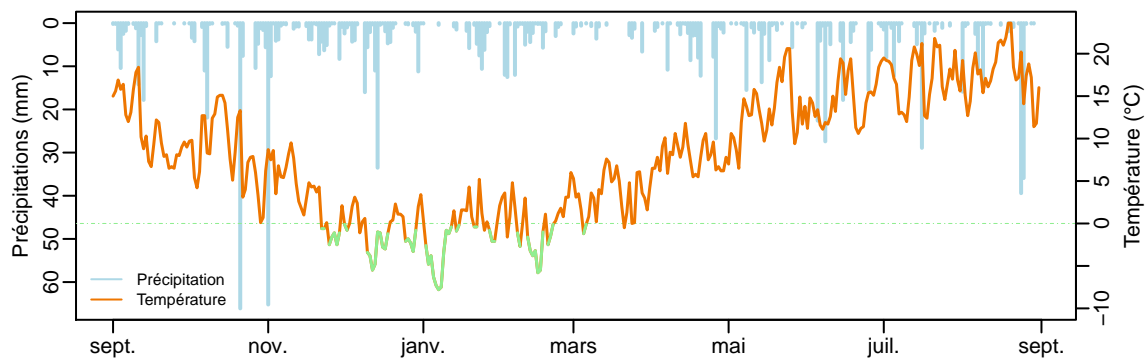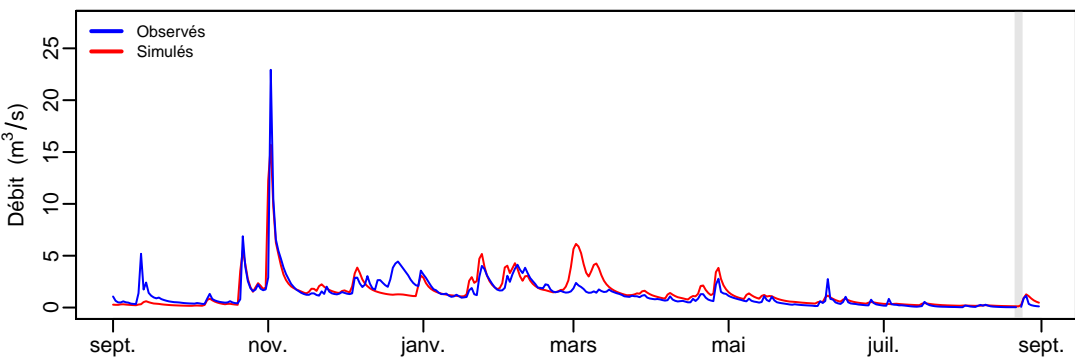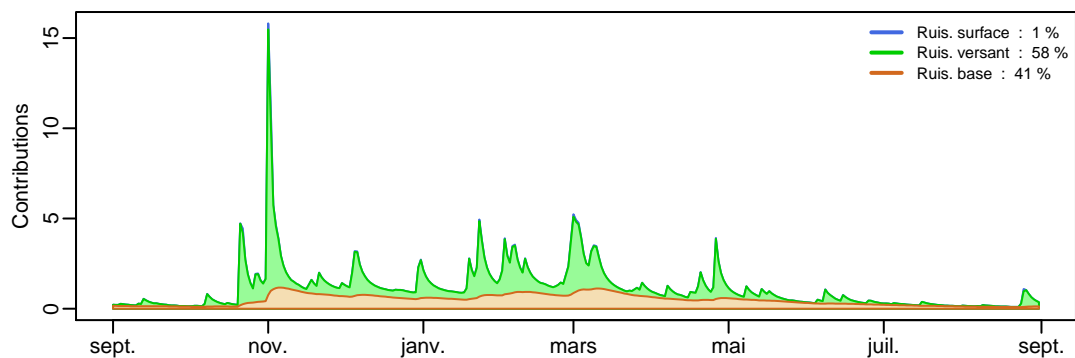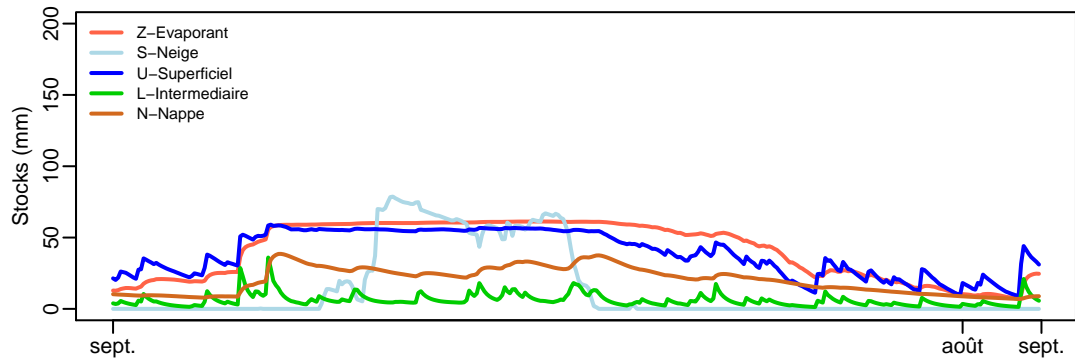

# k2821910 (105.33 km<sup>2</sup>) – année 2009–2010

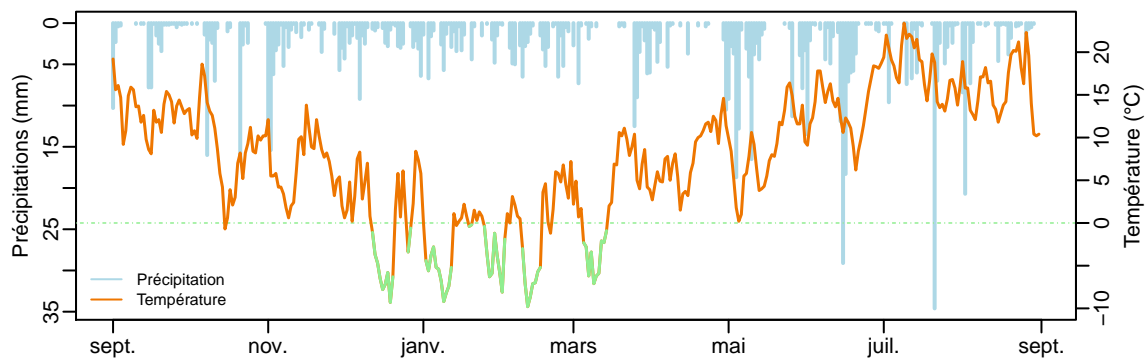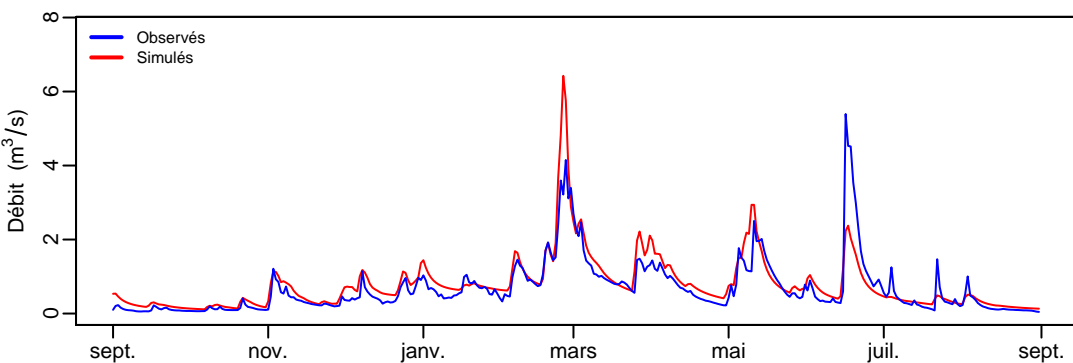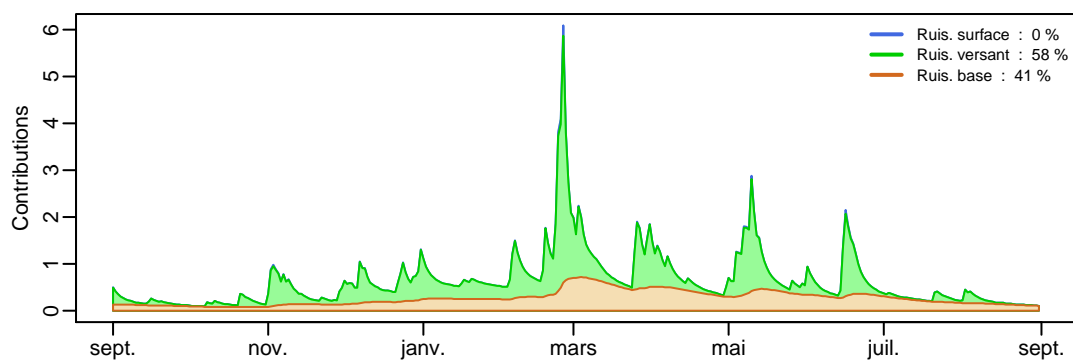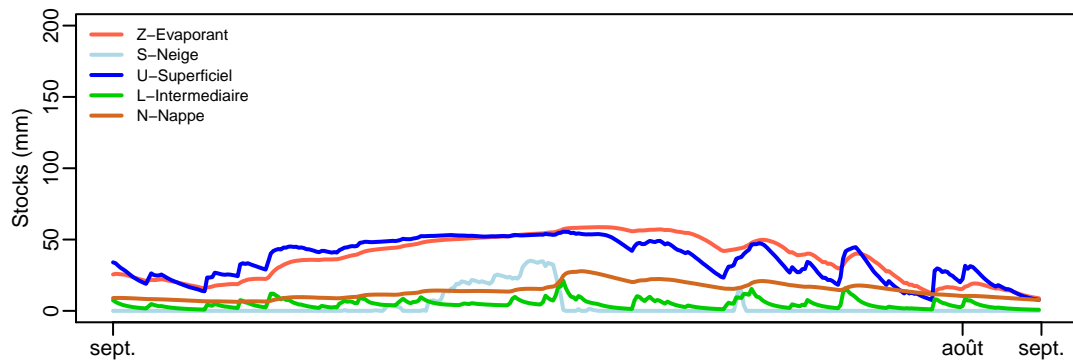

# k2821910 (105.33 km<sup>2</sup>) – année 2010–2011

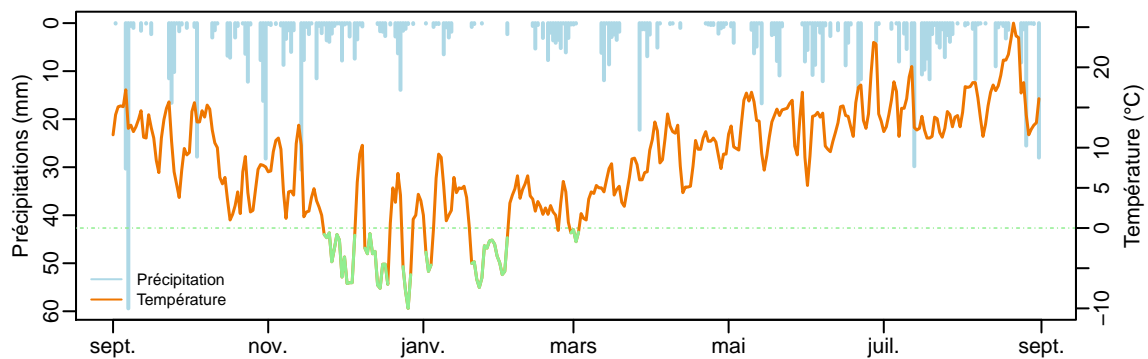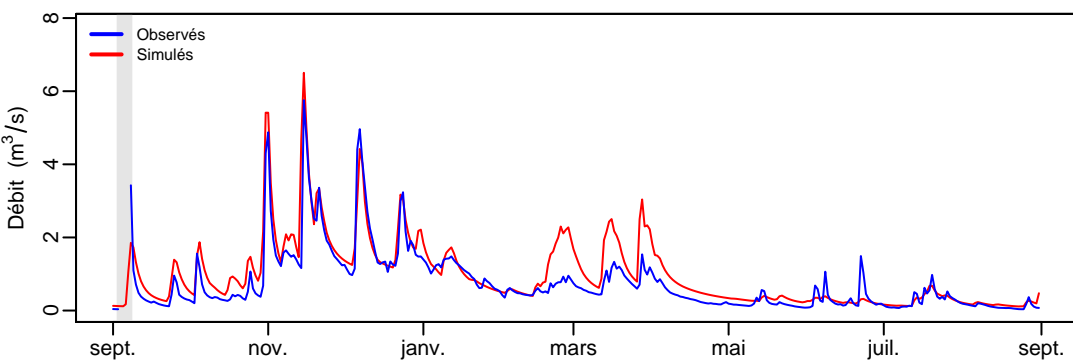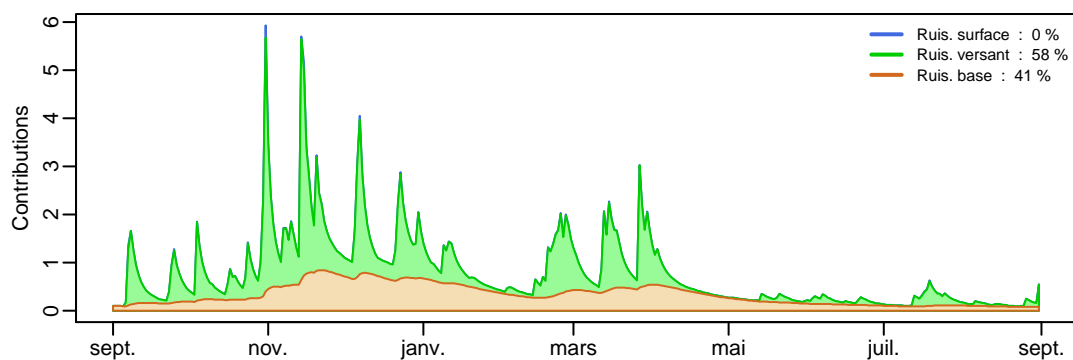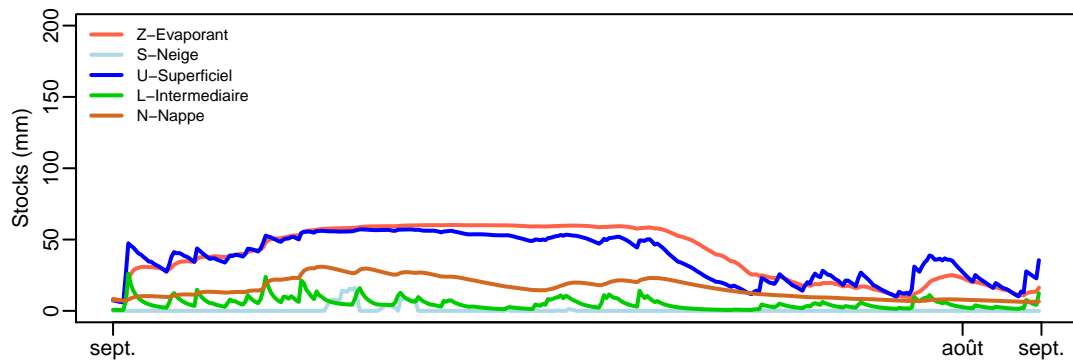

# k2821910 (105.33 km<sup>2</sup>) – année 2011–2012

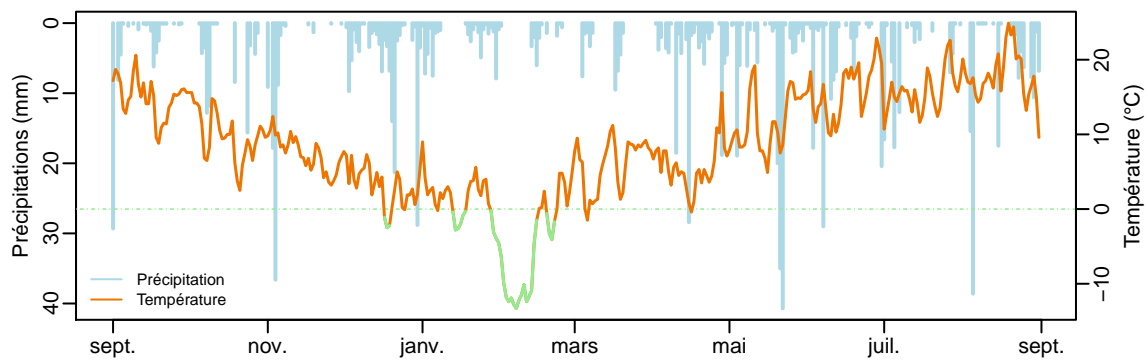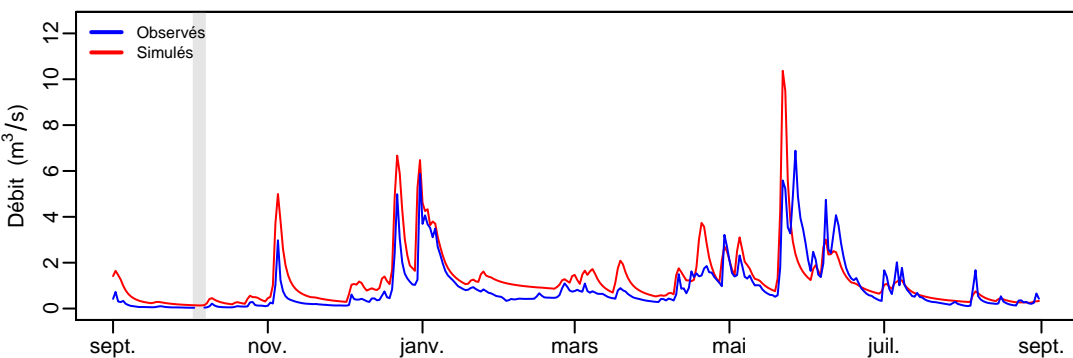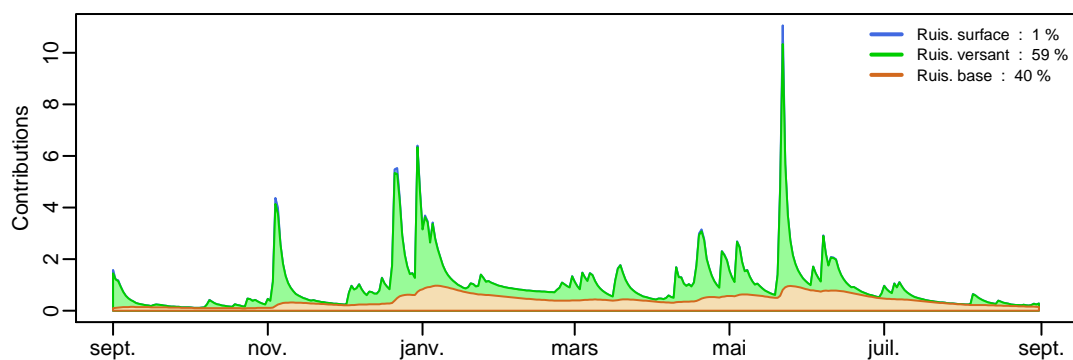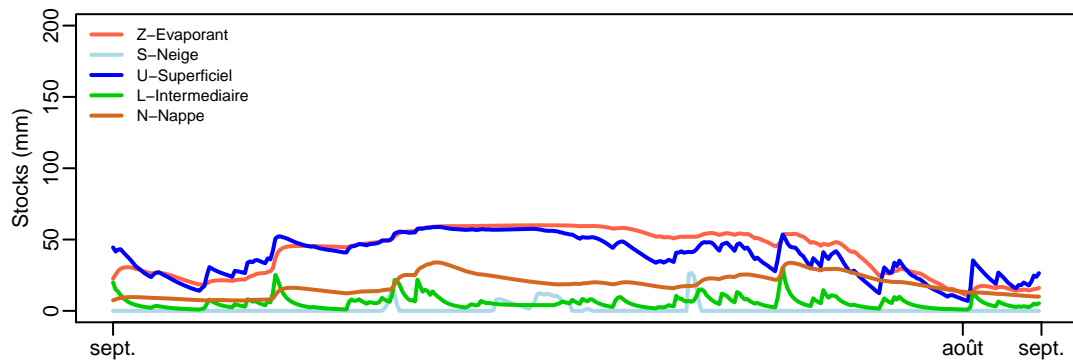



# k2851910 (489.85 km<sup>2</sup>) – année 1996–1997

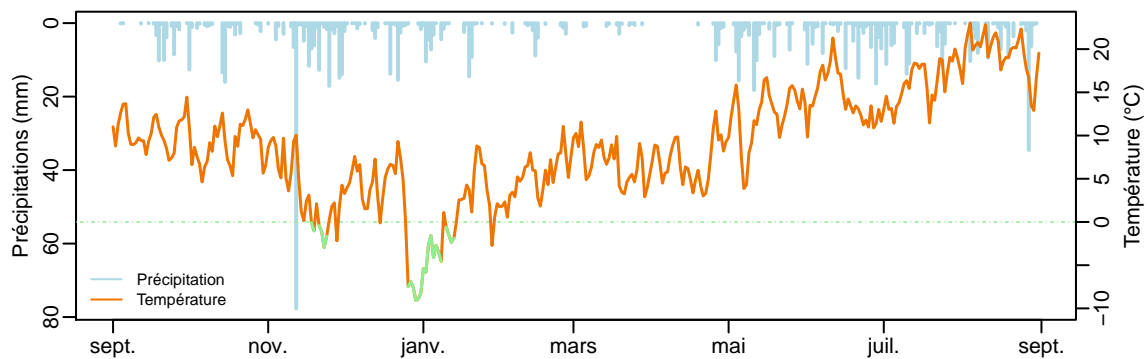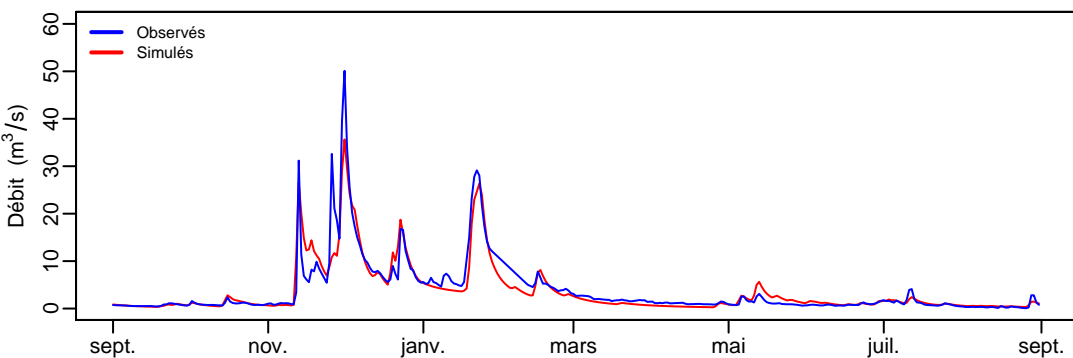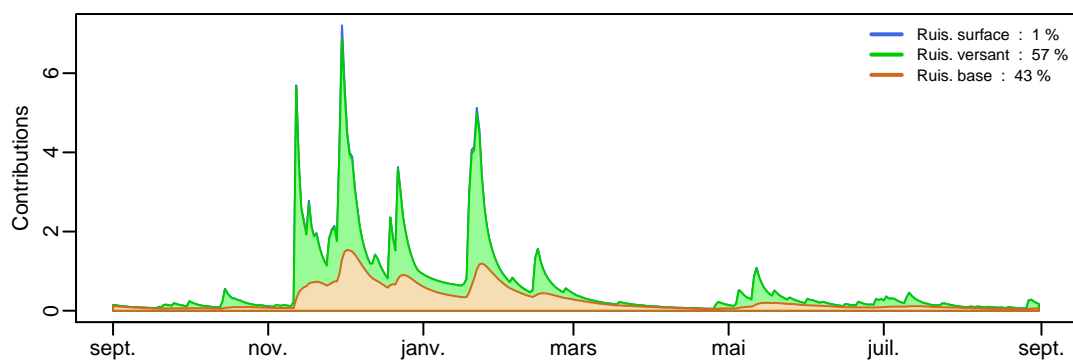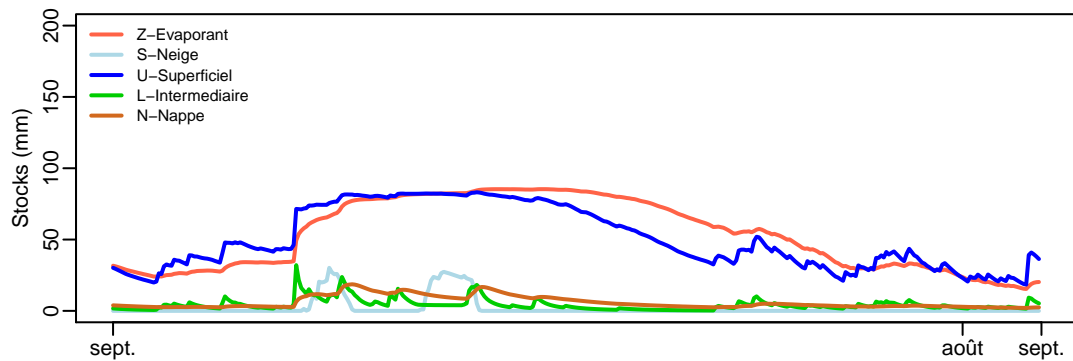

# k2851910 (489.85 km<sup>2</sup>) – année 1997–1998

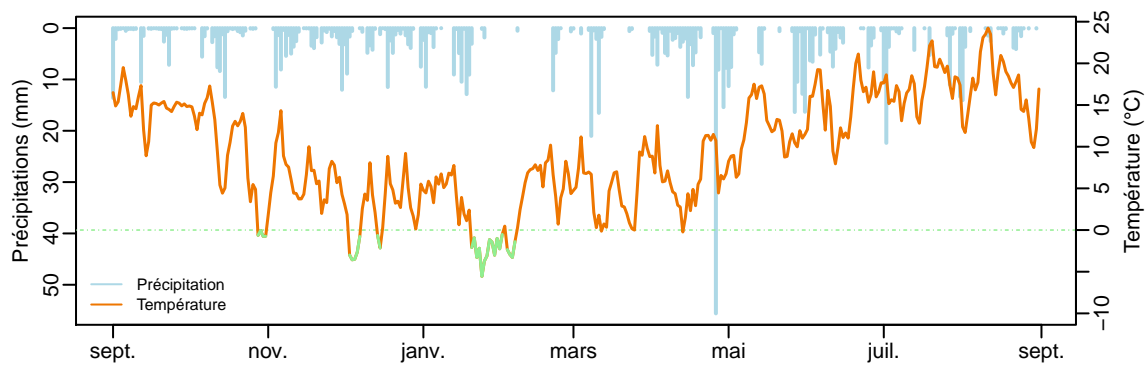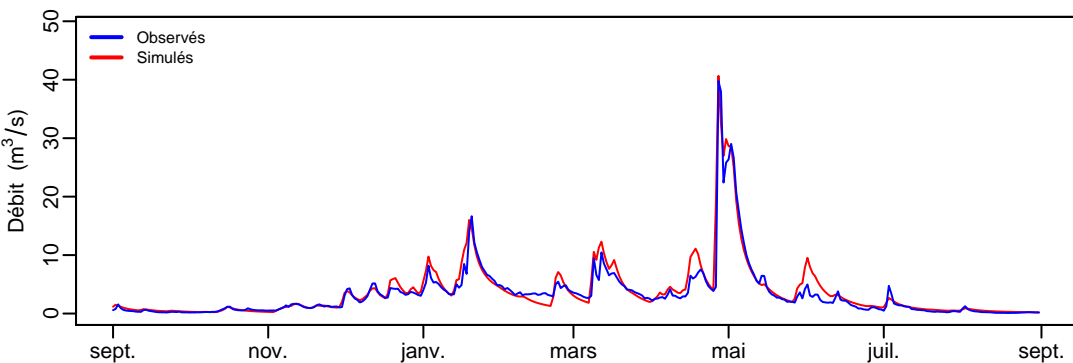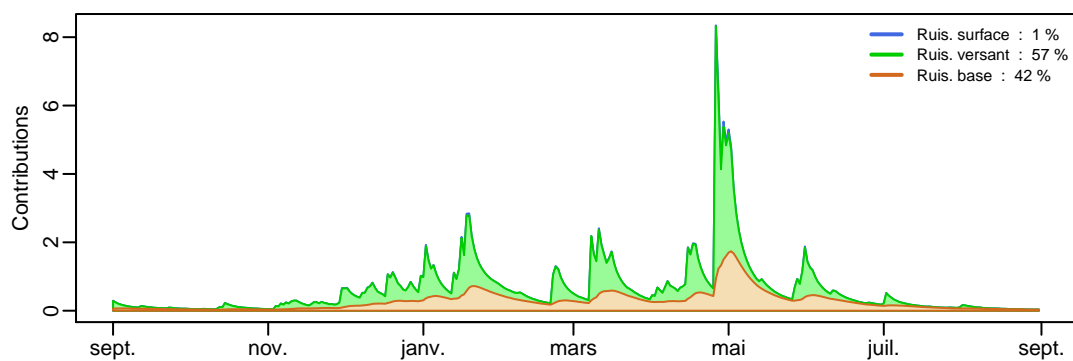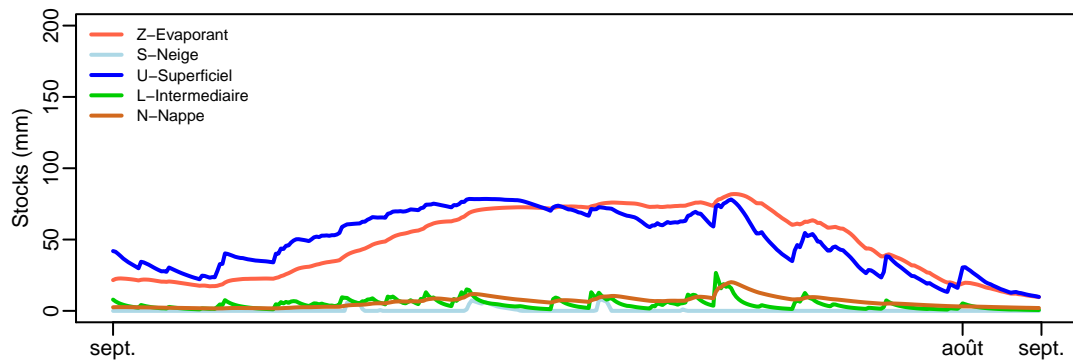

# k2851910 (489.85 km²) – année 1998–1999

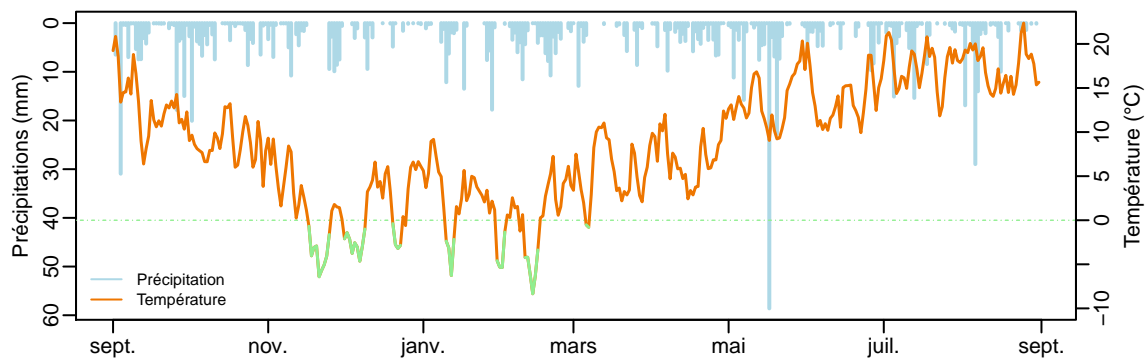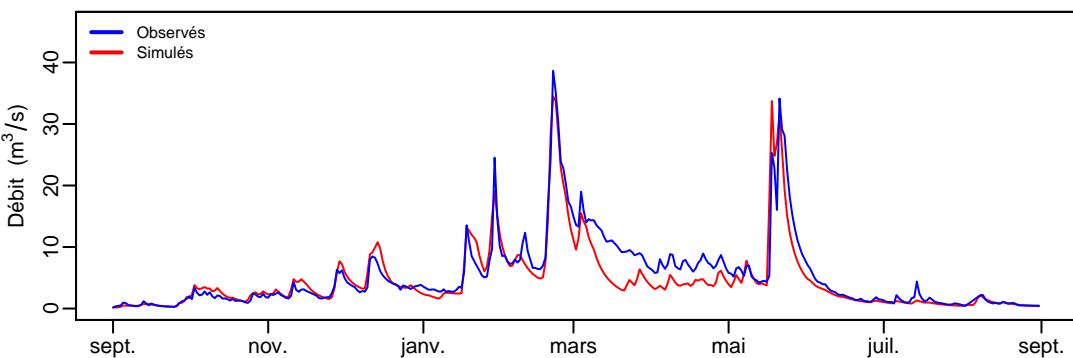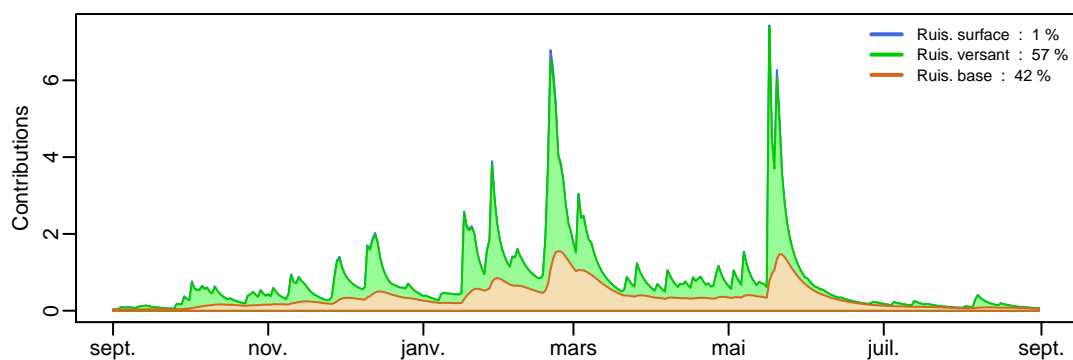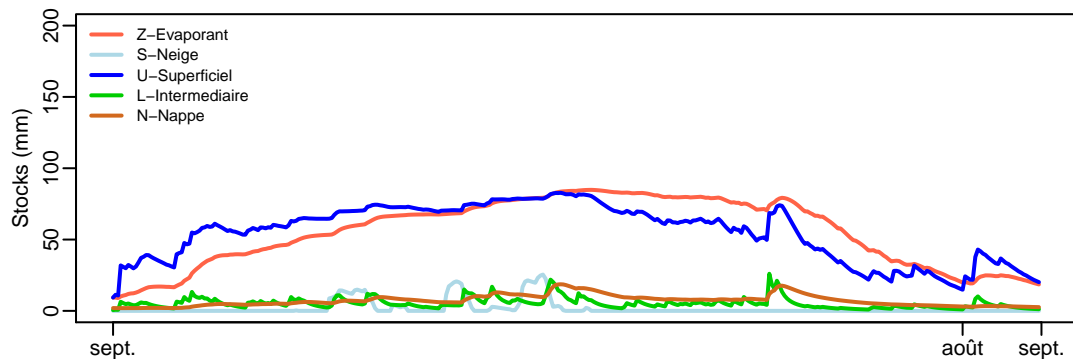

# k2851910 (489.85 km<sup>2</sup>) – année 1999–2000

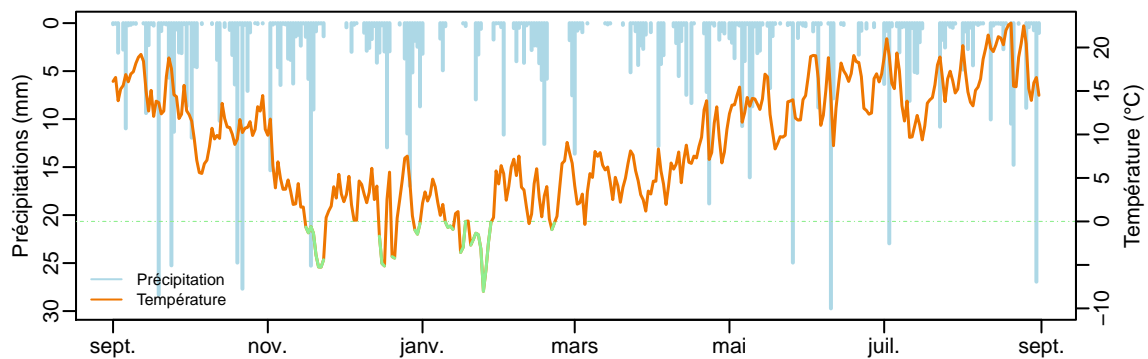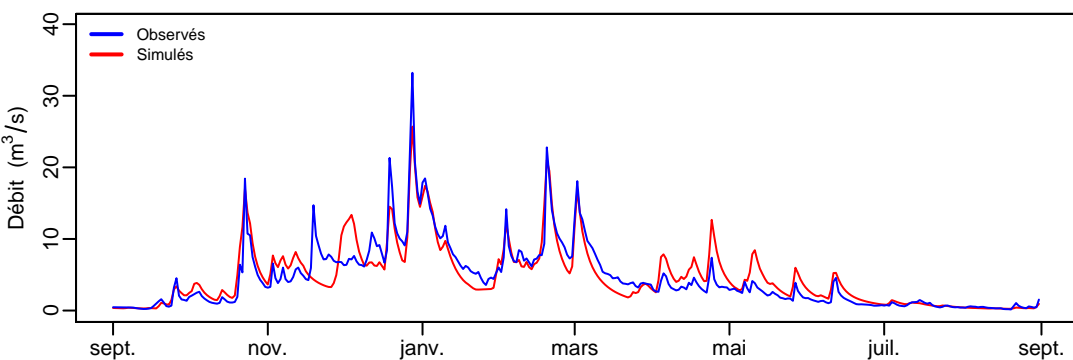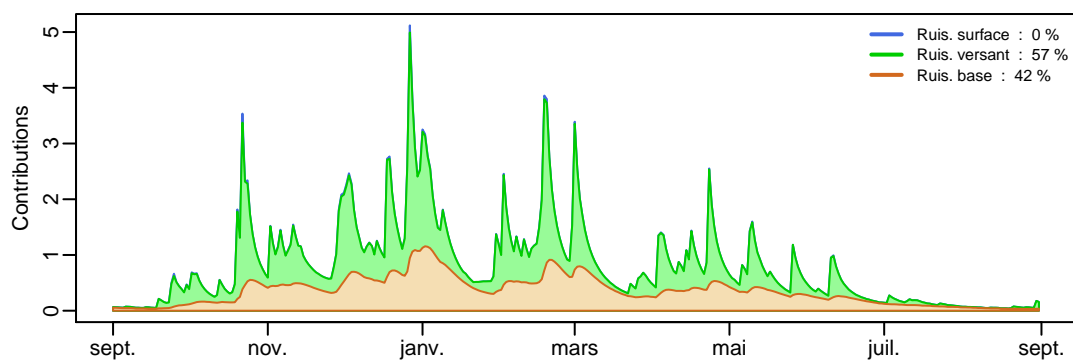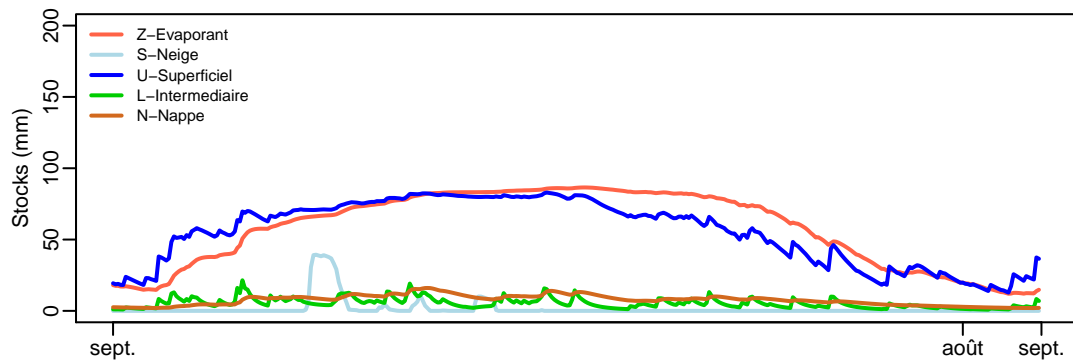

# k2851910 (489.85 km<sup>2</sup>) – année 2000–2001

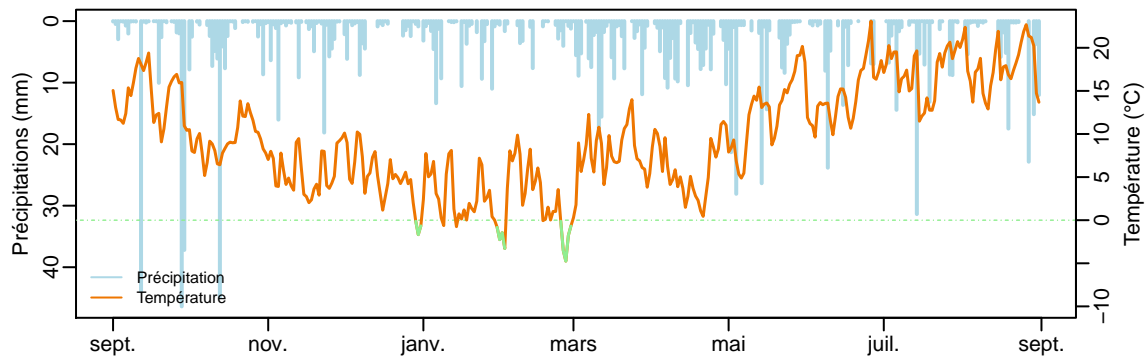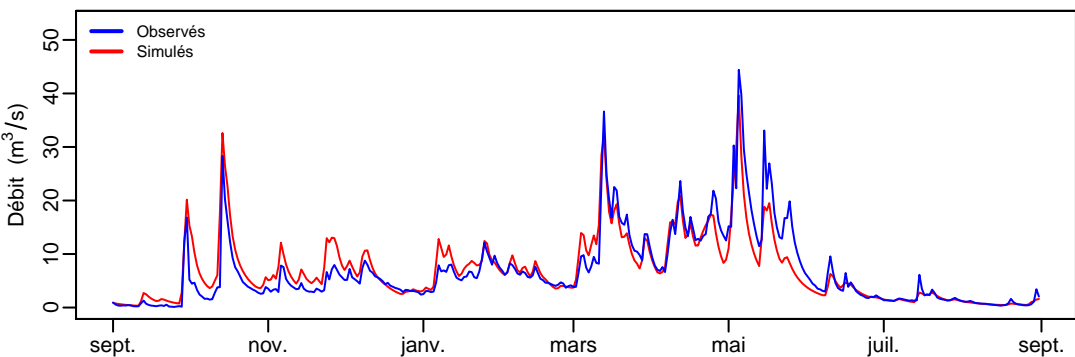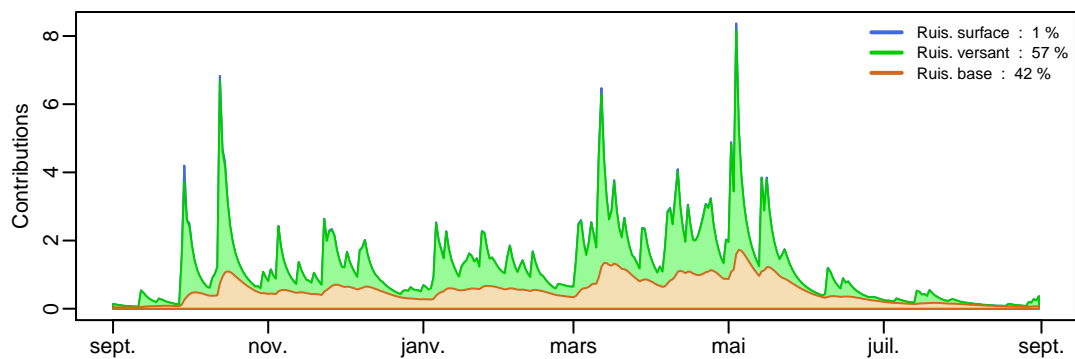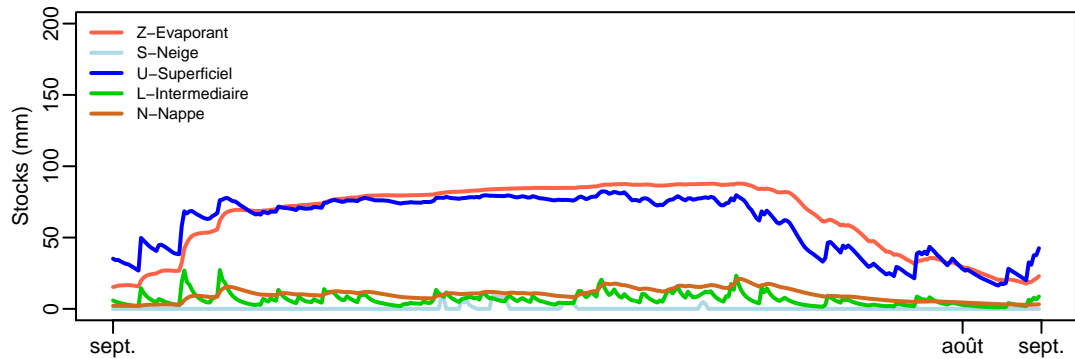

# k2851910 (489.85 km<sup>2</sup>) – année 2001–2002

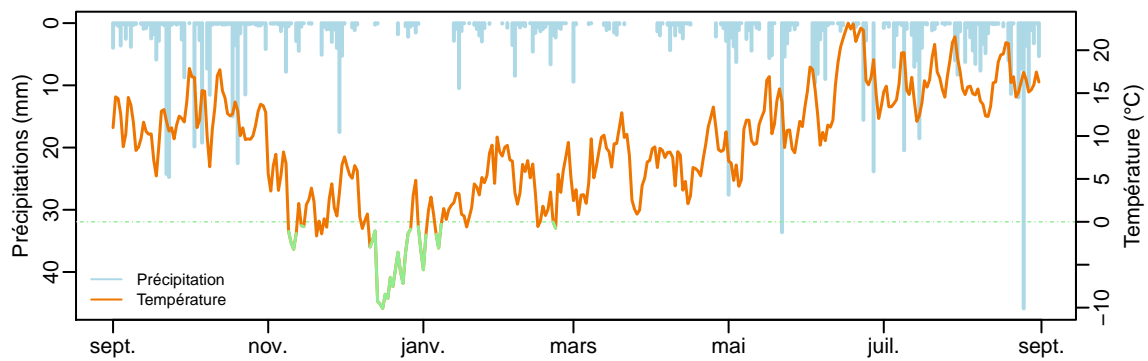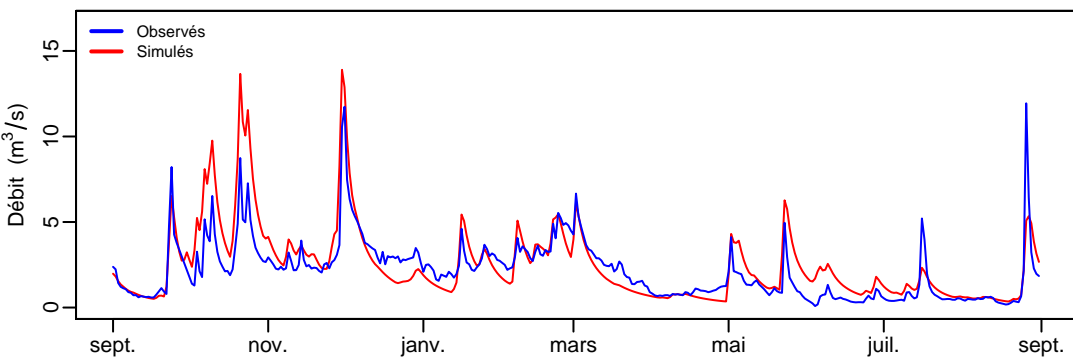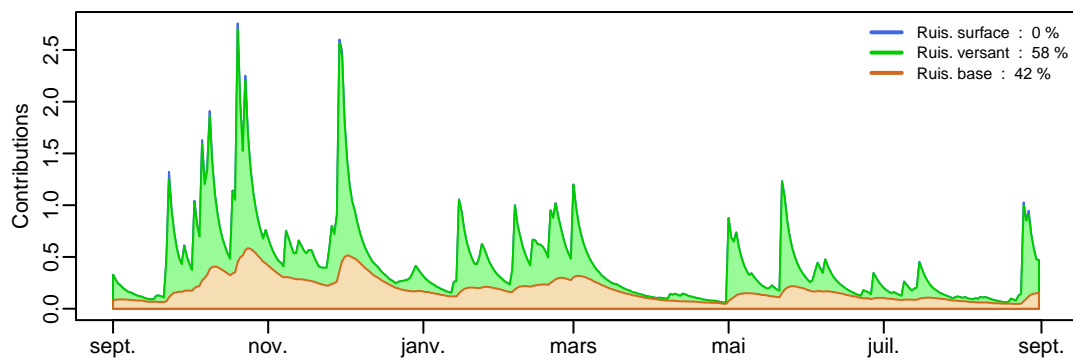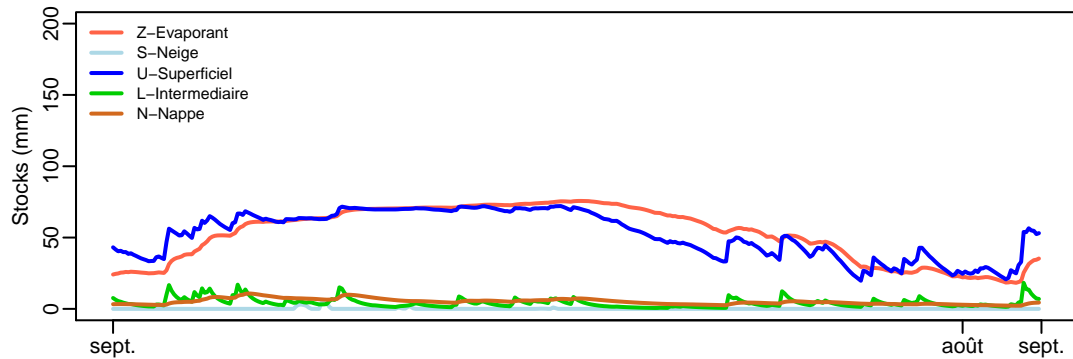

# k2851910 (489.85 km²) – année 2002–2003

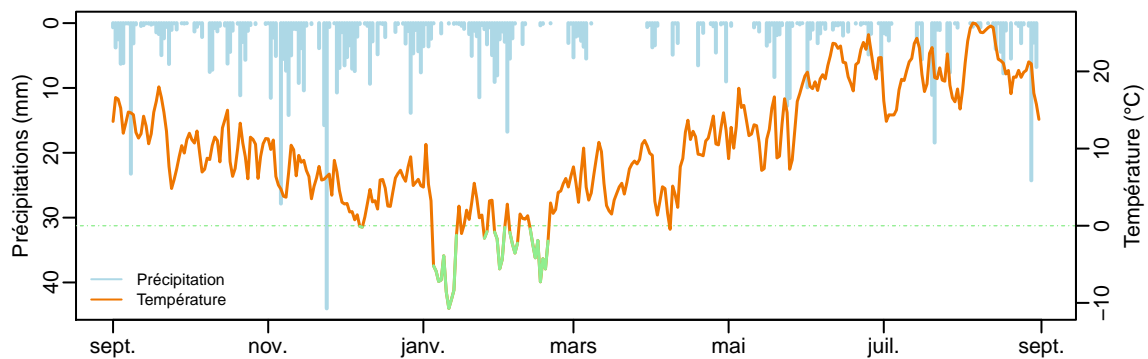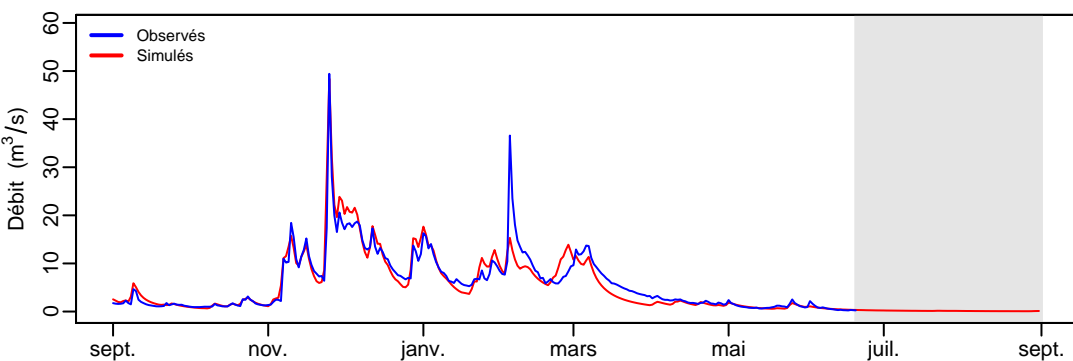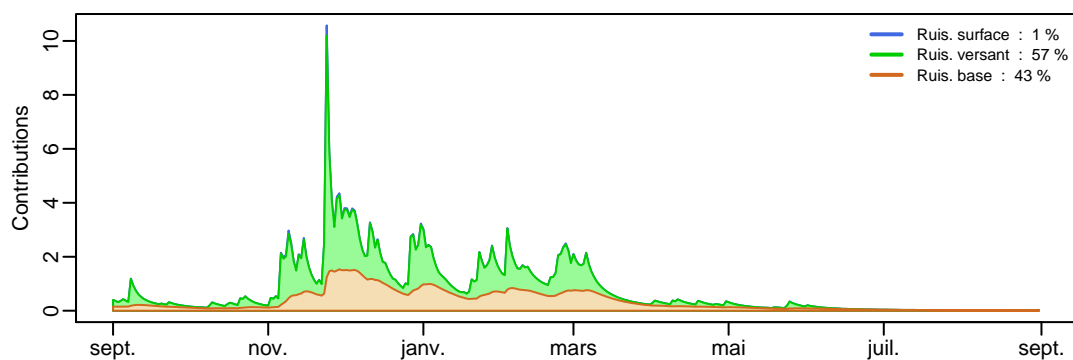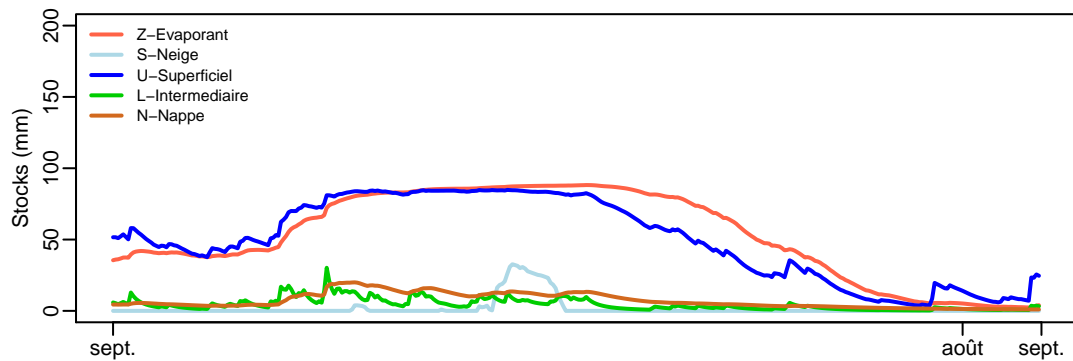

# k2851910 (489.85 km<sup>2</sup>) – année 2003–2004

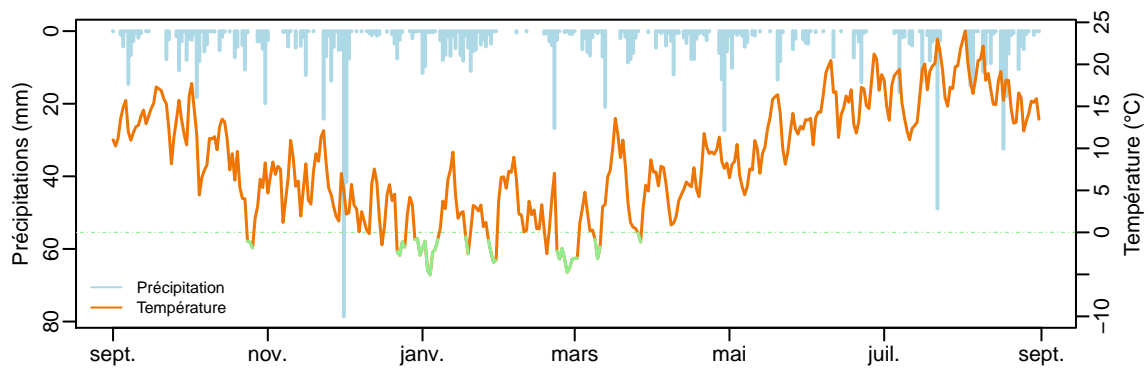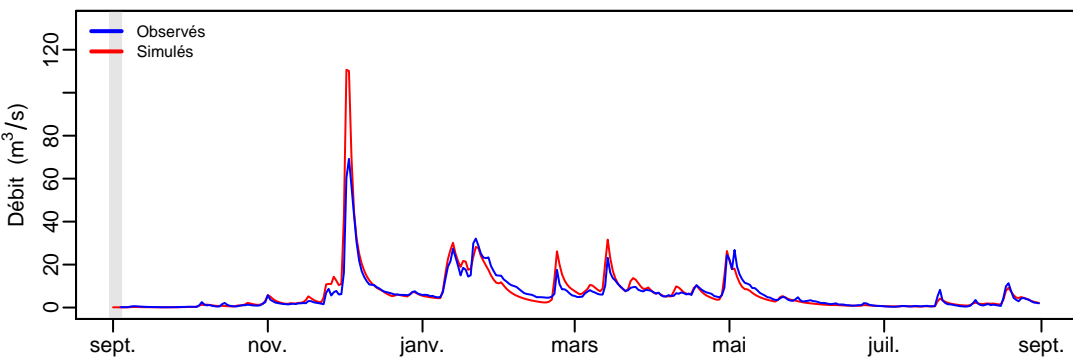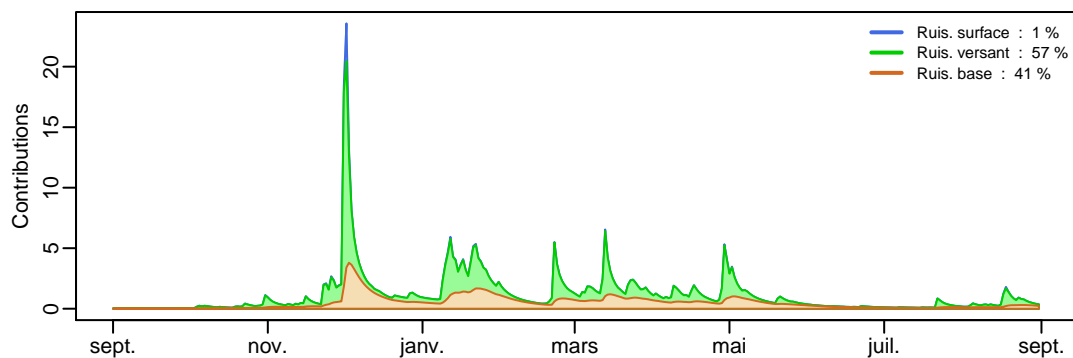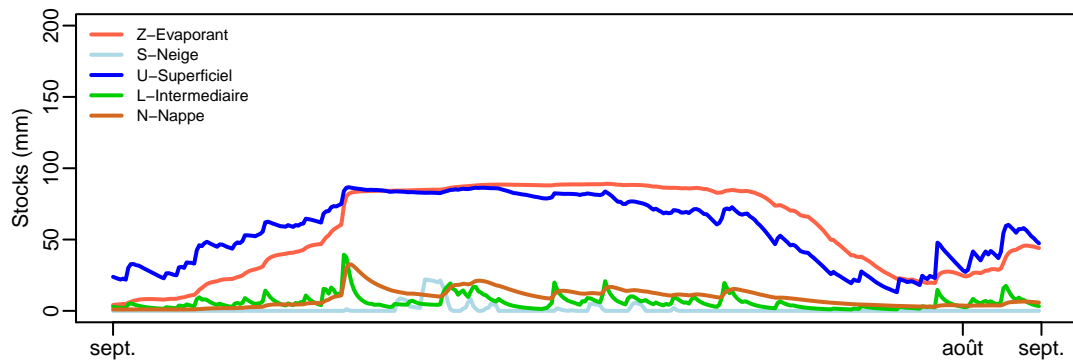



# k2851910 (489.85 km<sup>2</sup>) – année 2004–2005

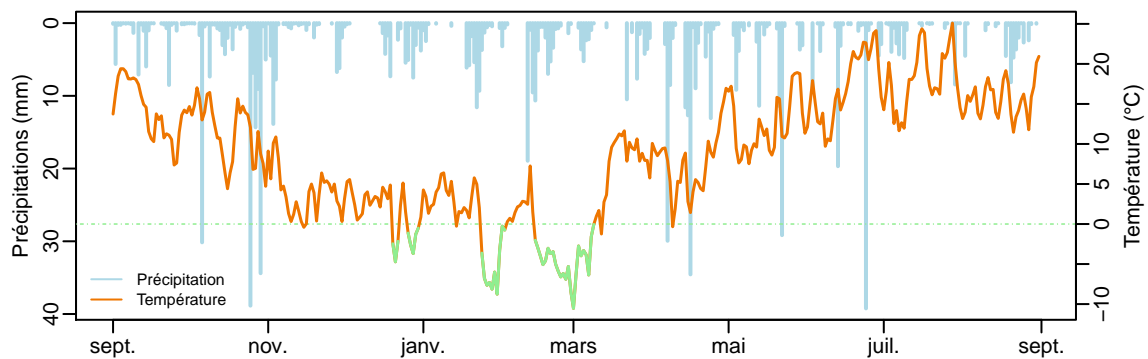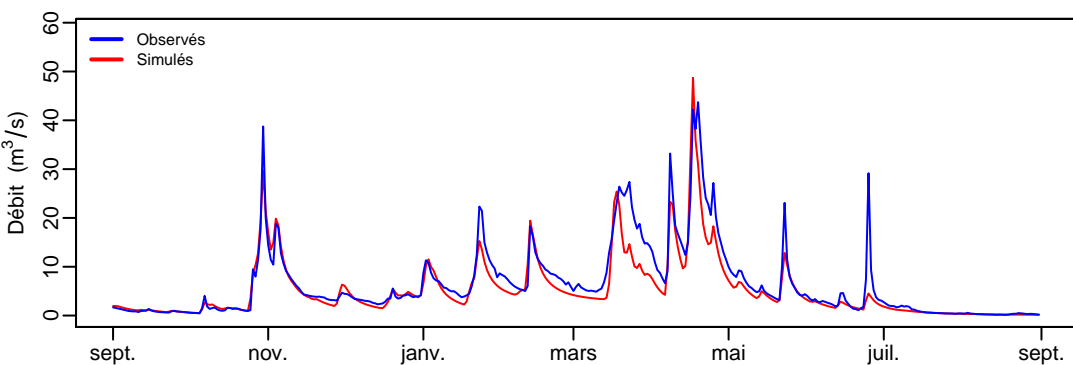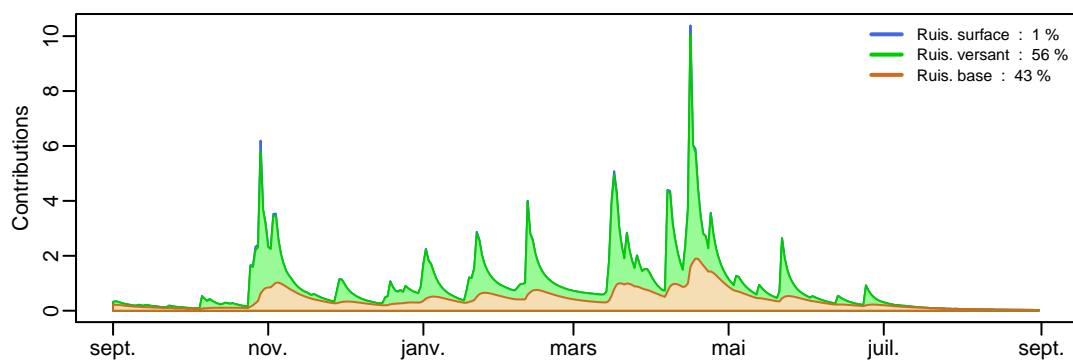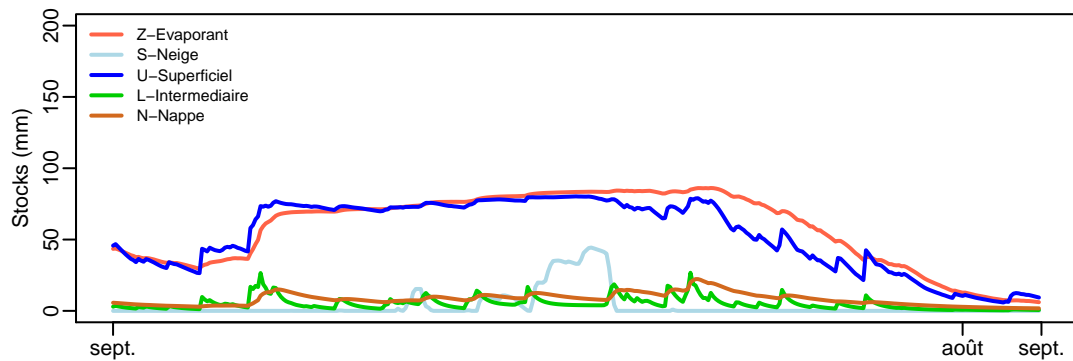

# k2851910 (489.85 km<sup>2</sup>) – année 2005–2006

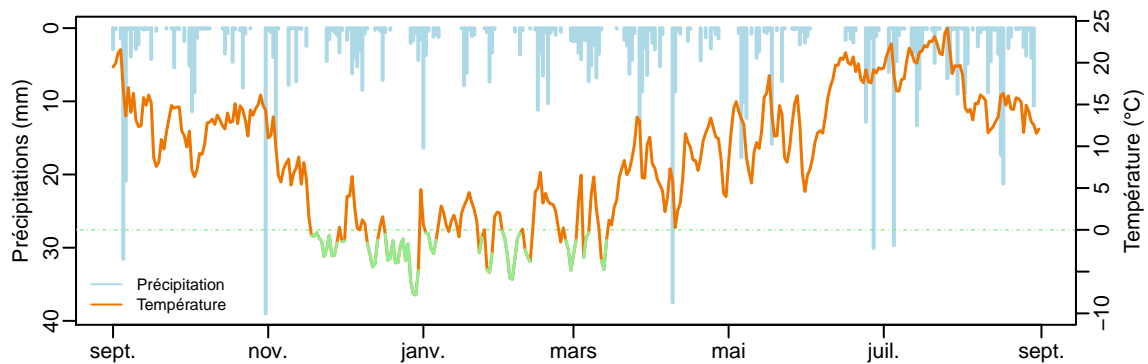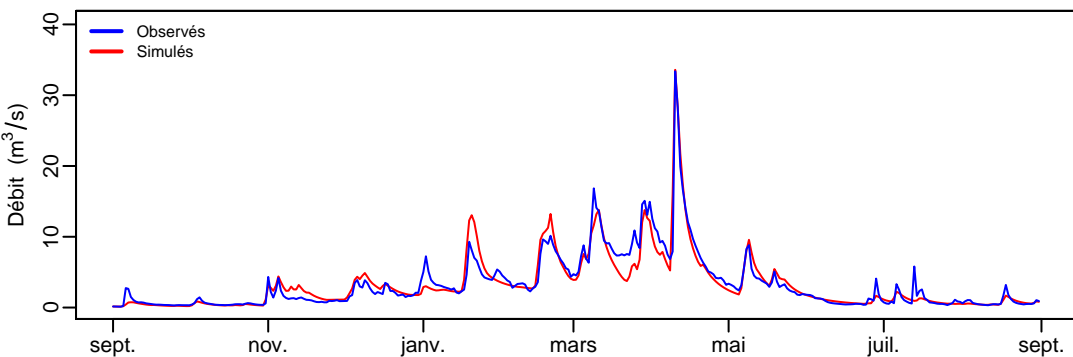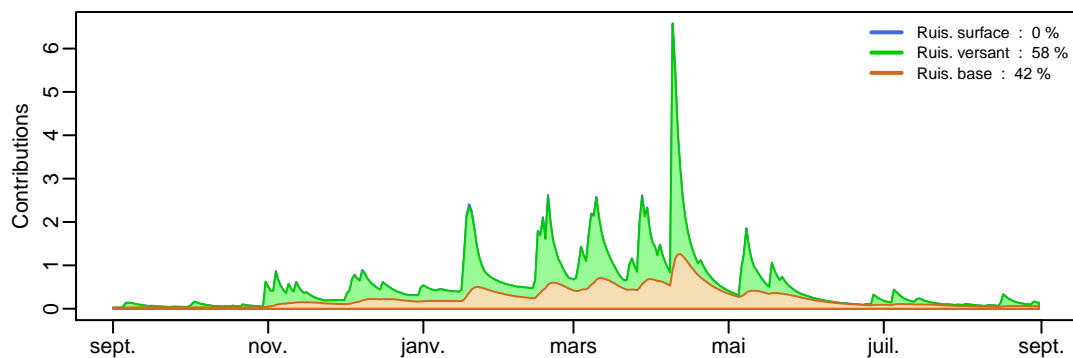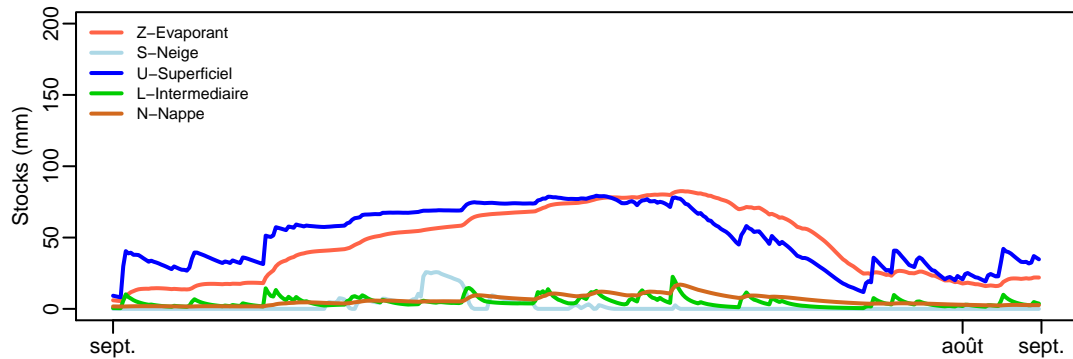

# k2851910 (489.85 km<sup>2</sup>) – année 2006–2007

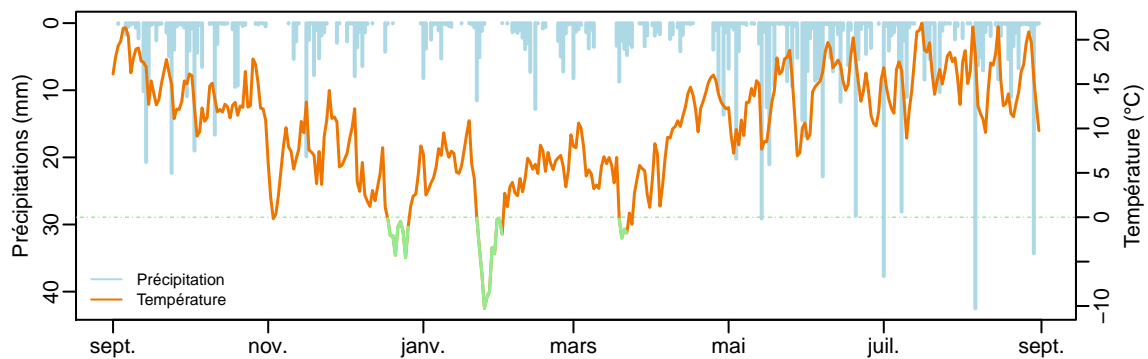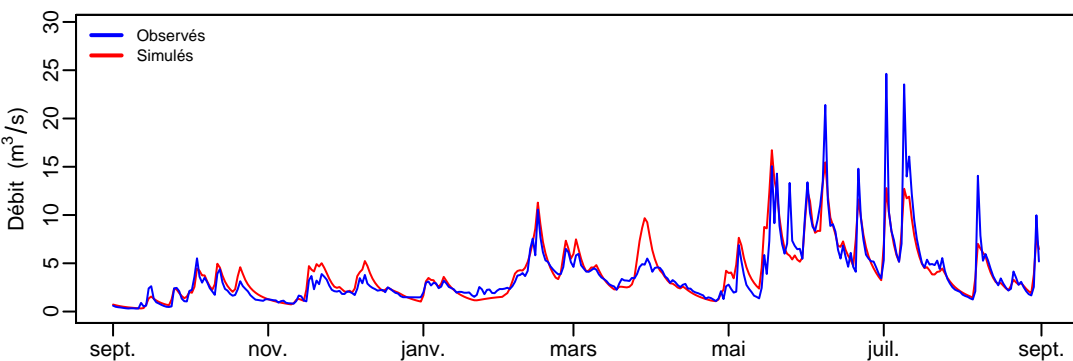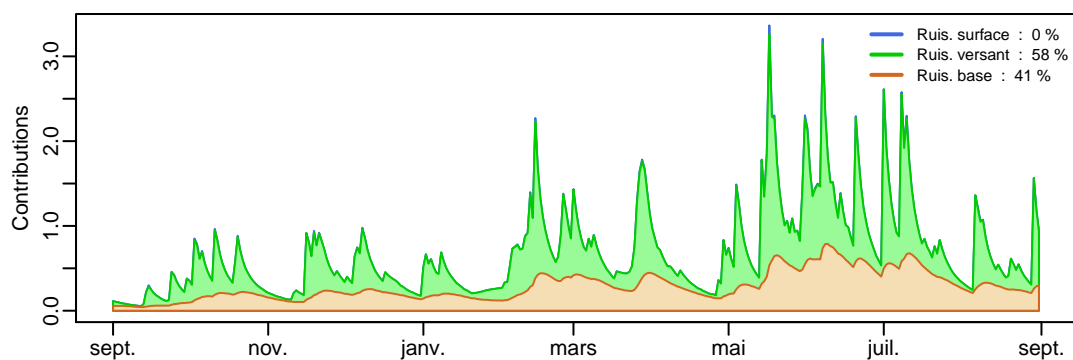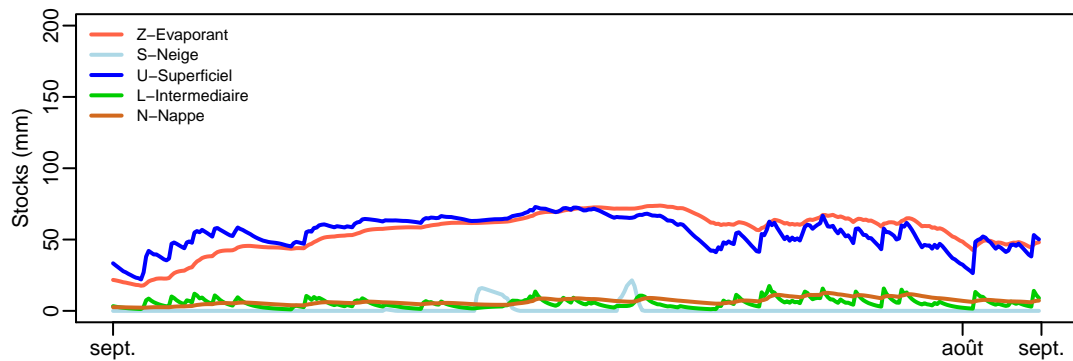

# k2851910 (489.85 km<sup>2</sup>) – année 2007–2008

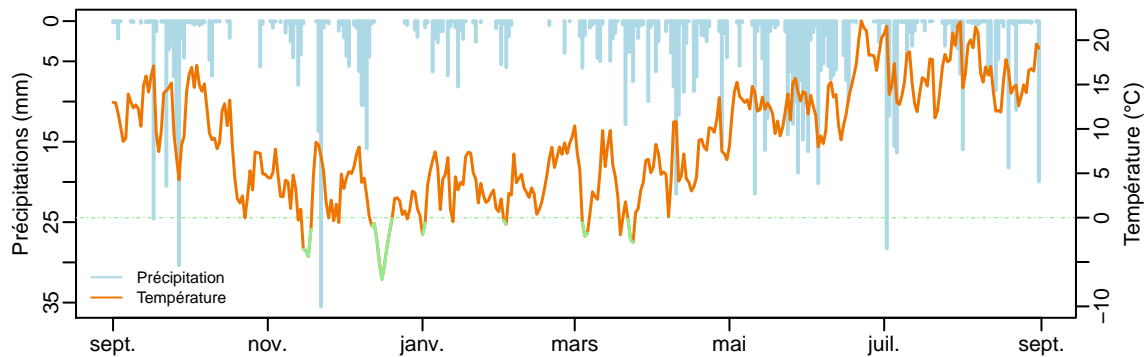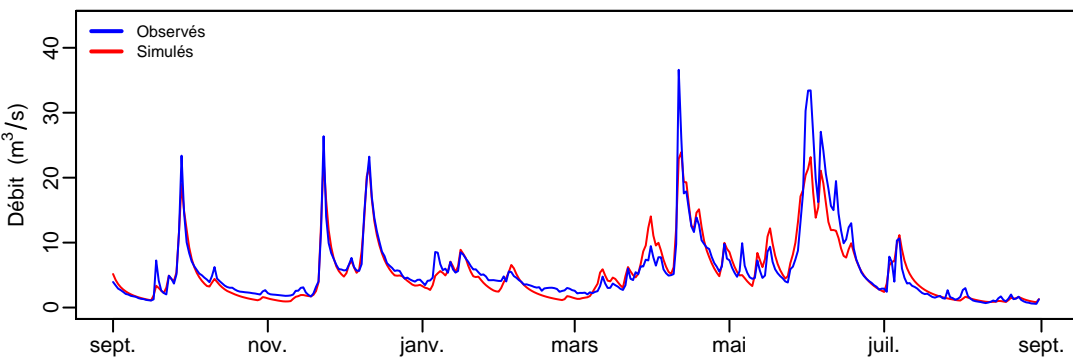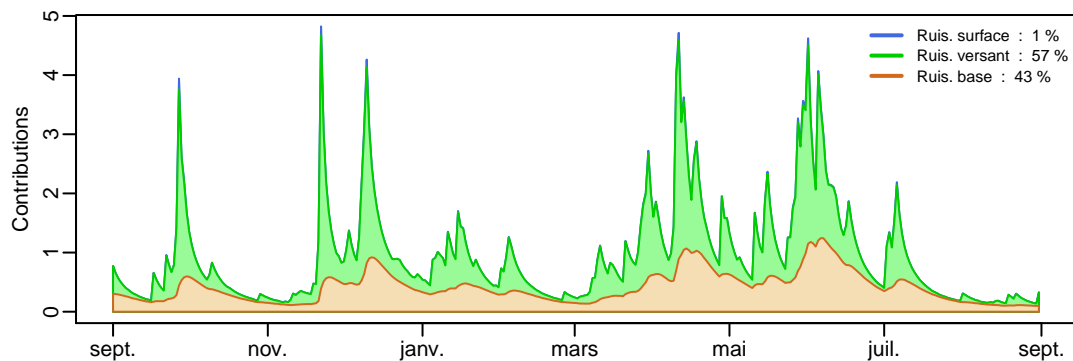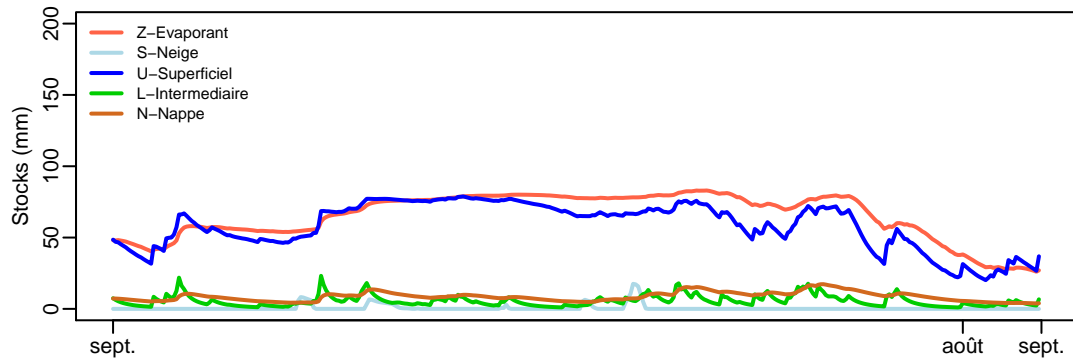

# k2851910 (489.85 km<sup>2</sup>) – année 2008–2009

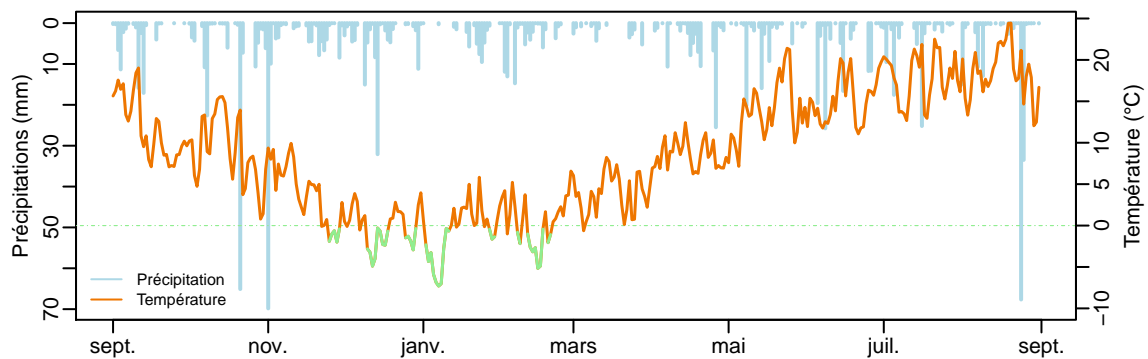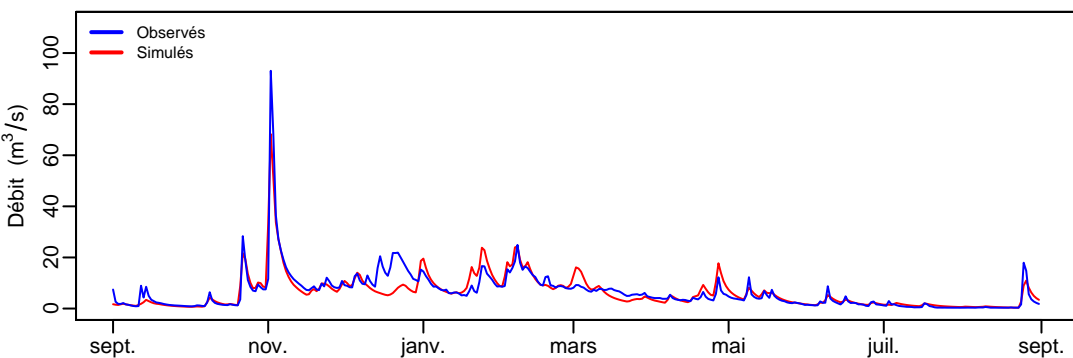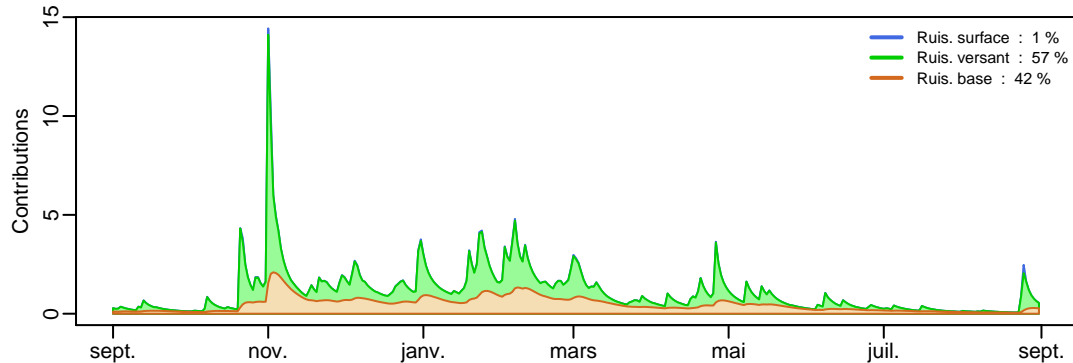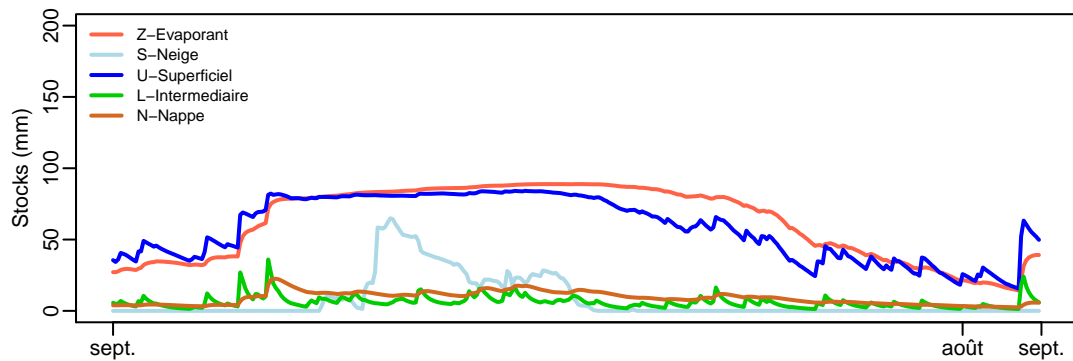

# k2851910 (489.85 km²) – année 2009–2010

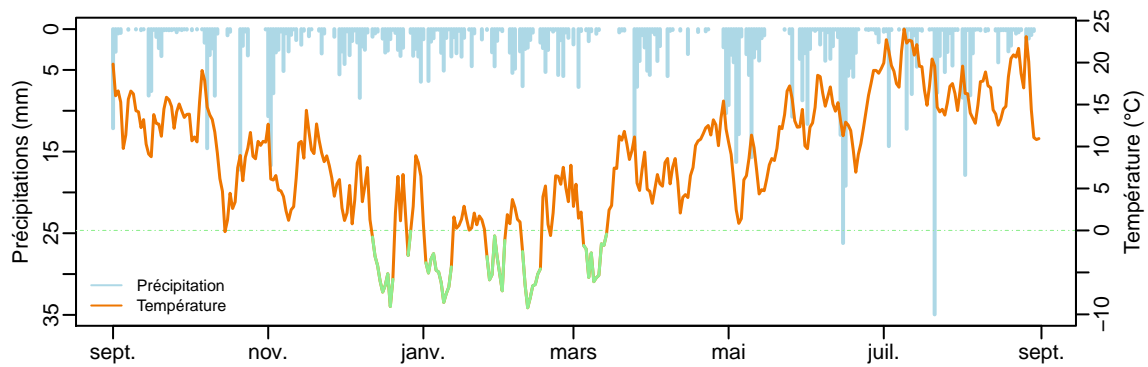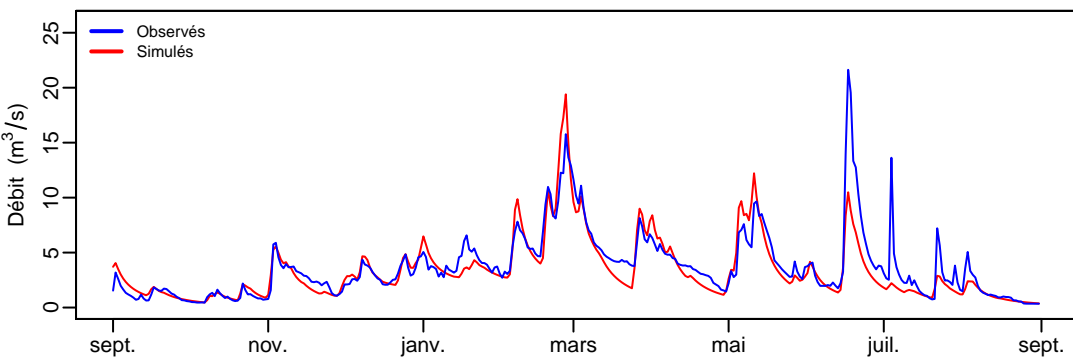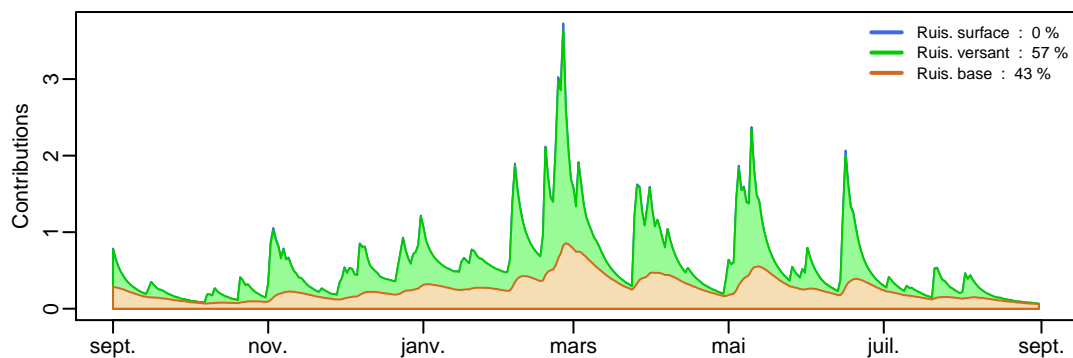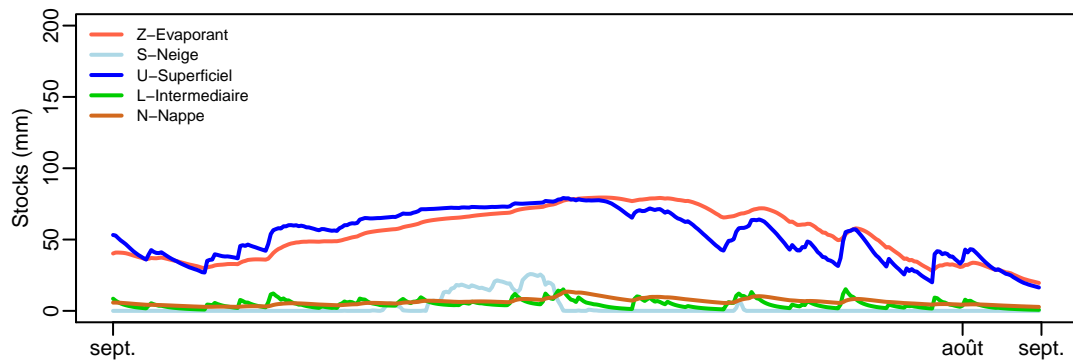

# k2851910 (489.85 km<sup>2</sup>) – année 2010–2011

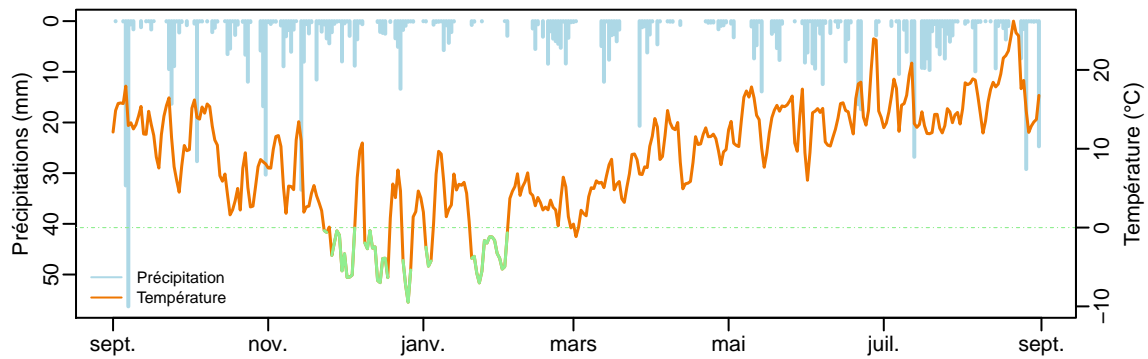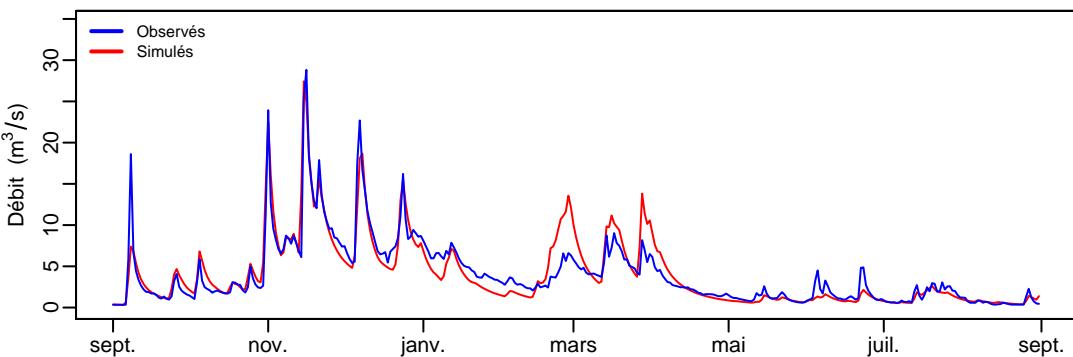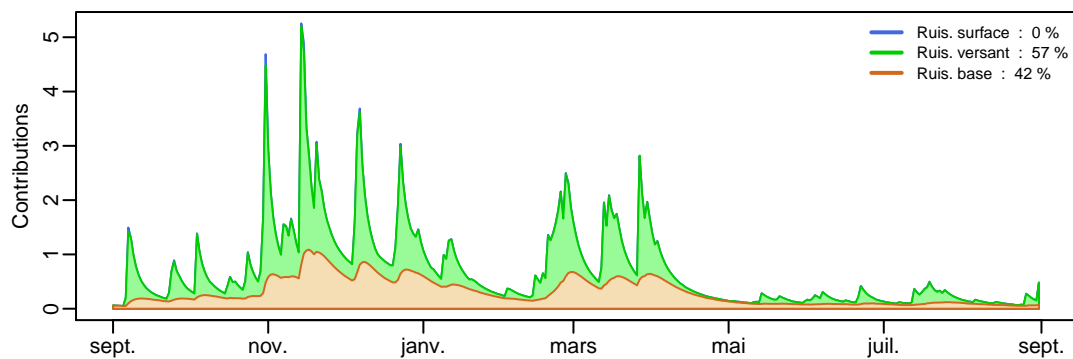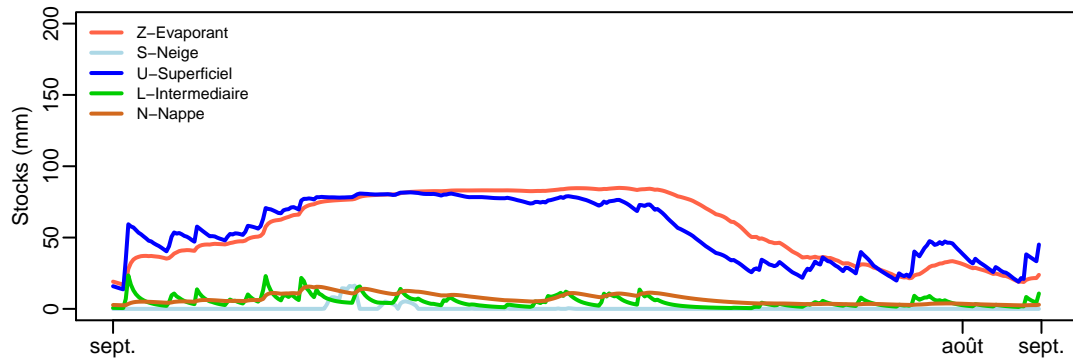

# k2851910 (489.85 km<sup>2</sup>) – année 2011–2012

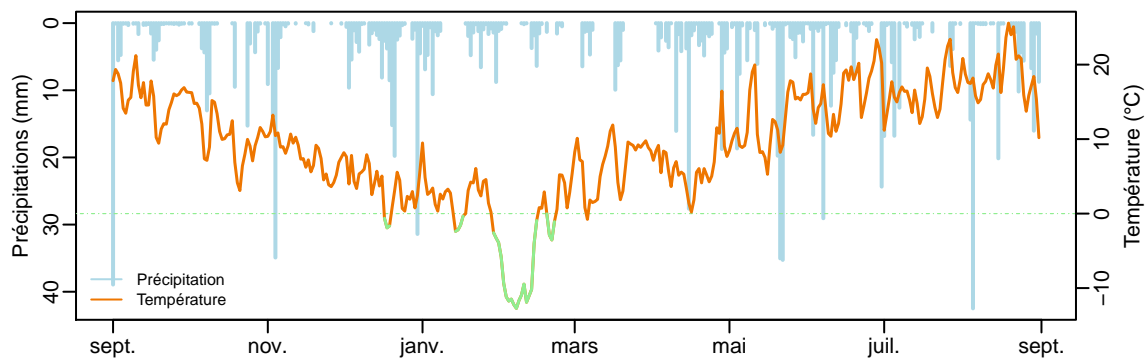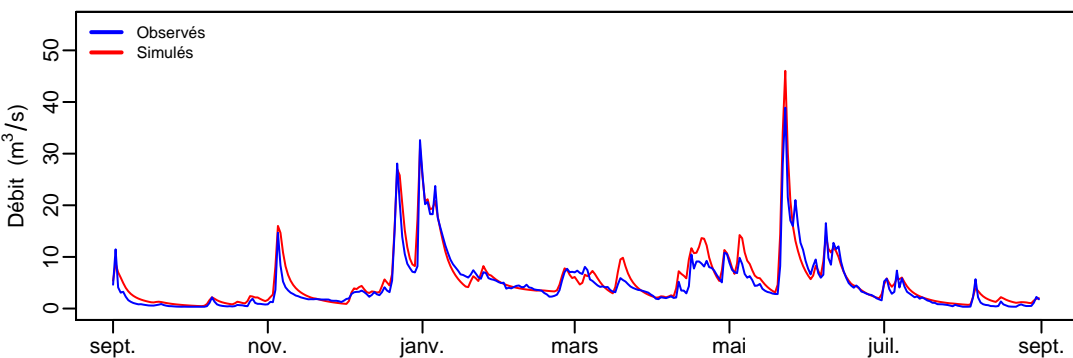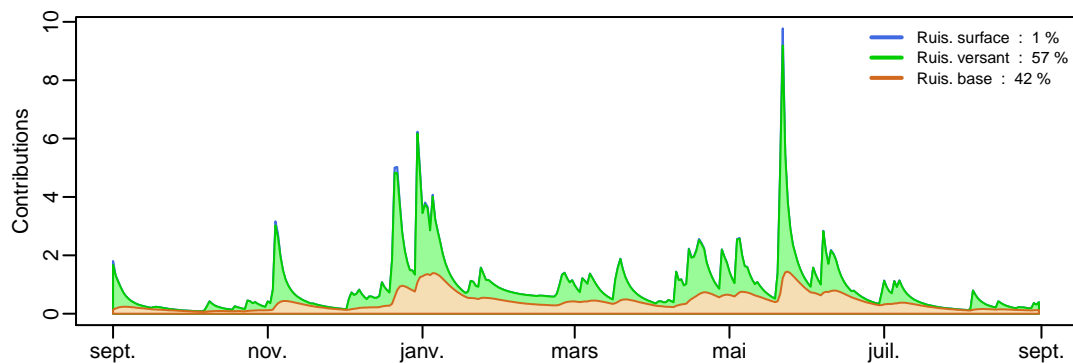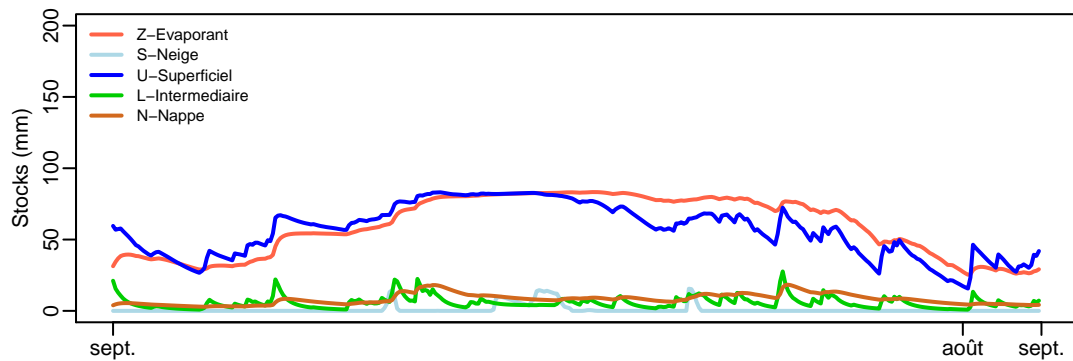



# k2871910 (795.27 km<sup>2</sup>) – année 1990–1991

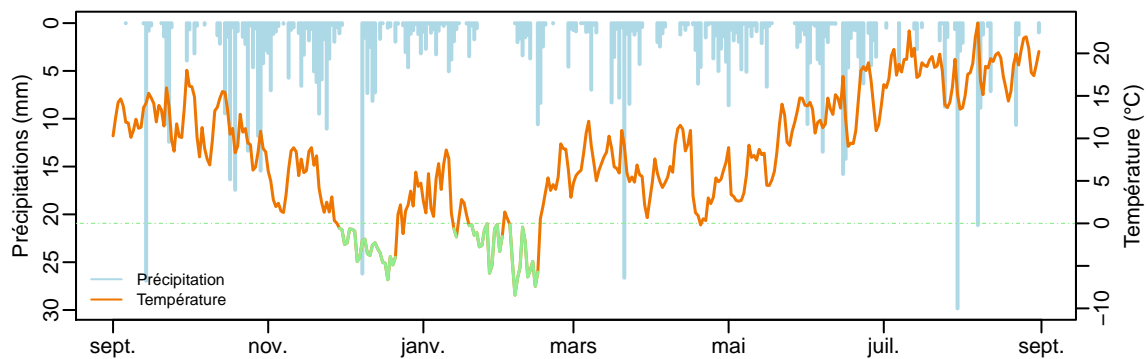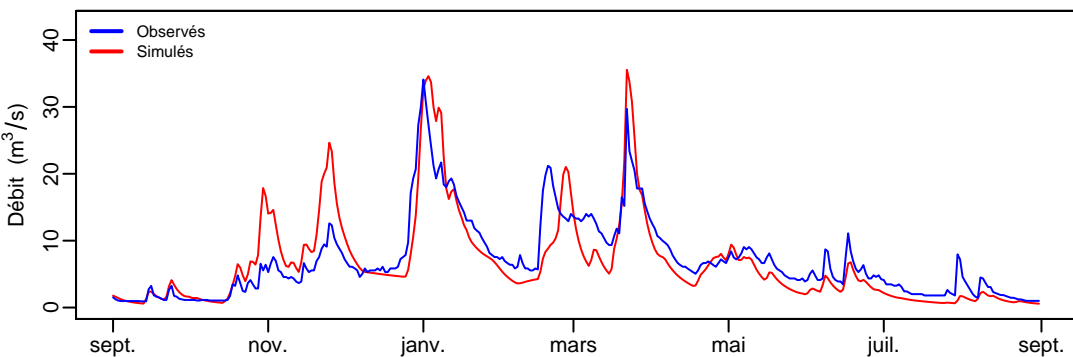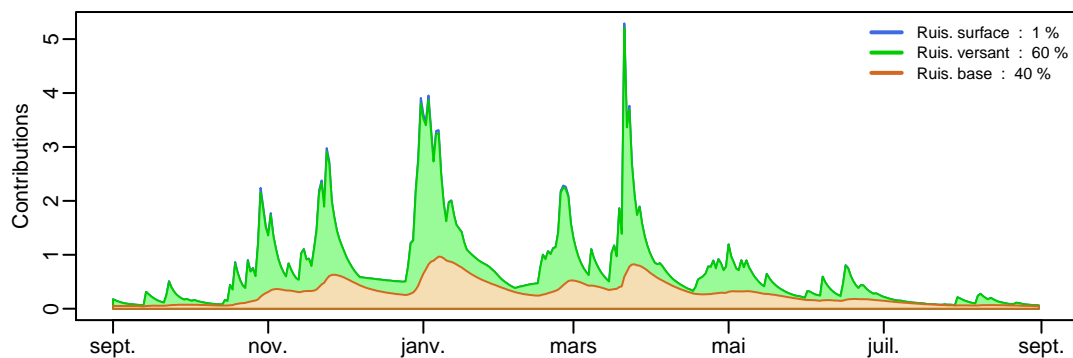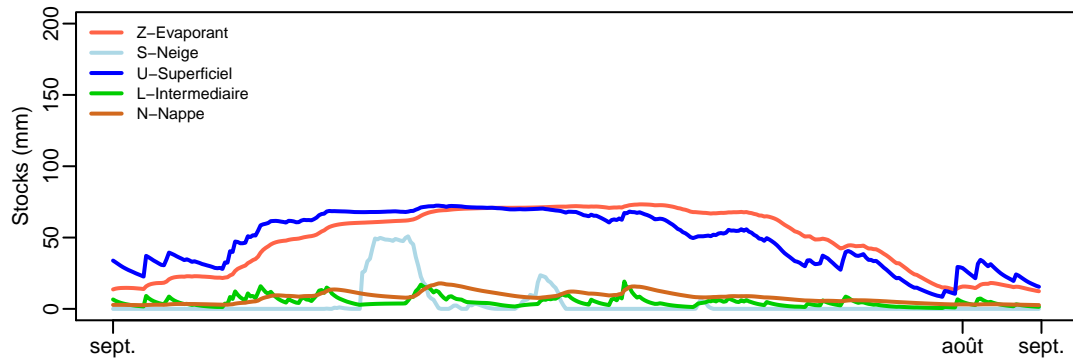

# k2871910 (795.27 km<sup>2</sup>) – année 1991–1992

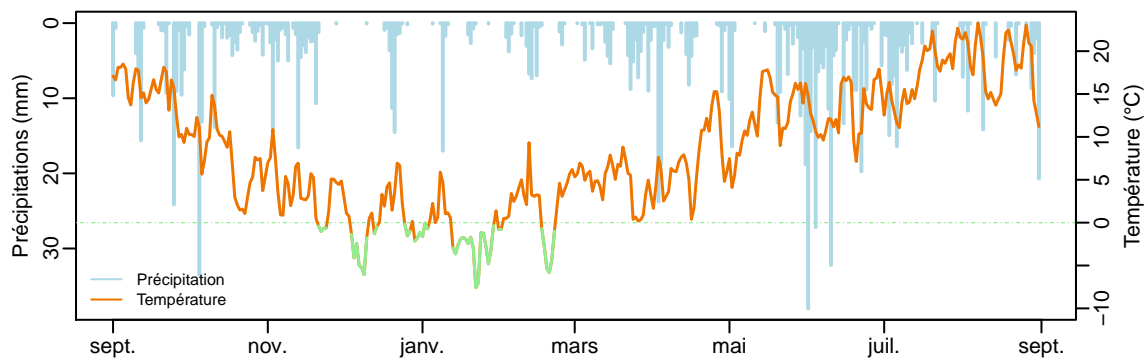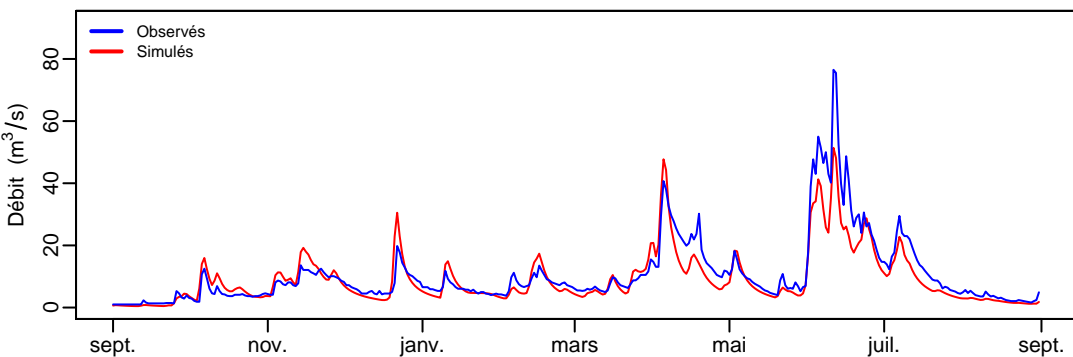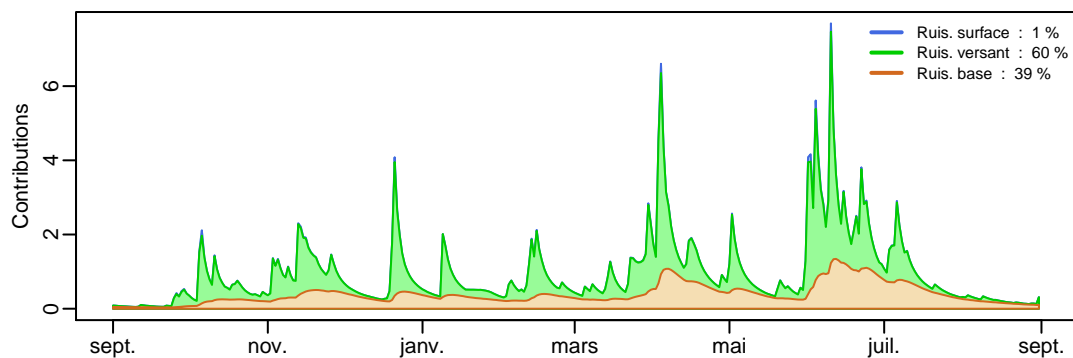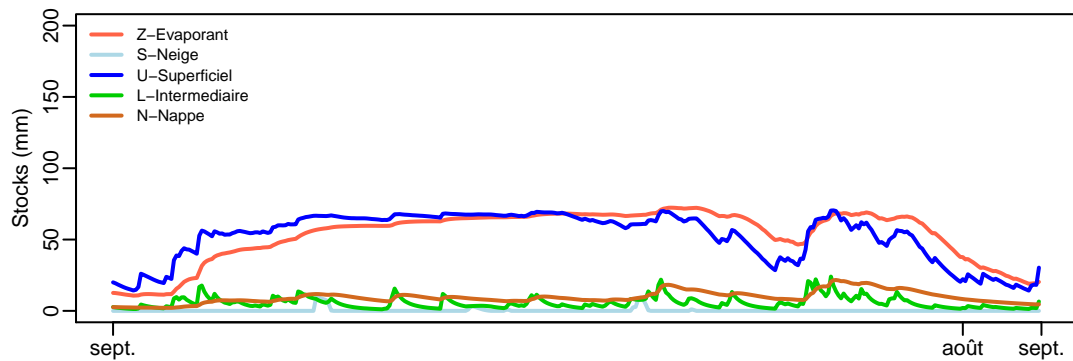

# k2871910 (795.27 km<sup>2</sup>) – année 1992–1993

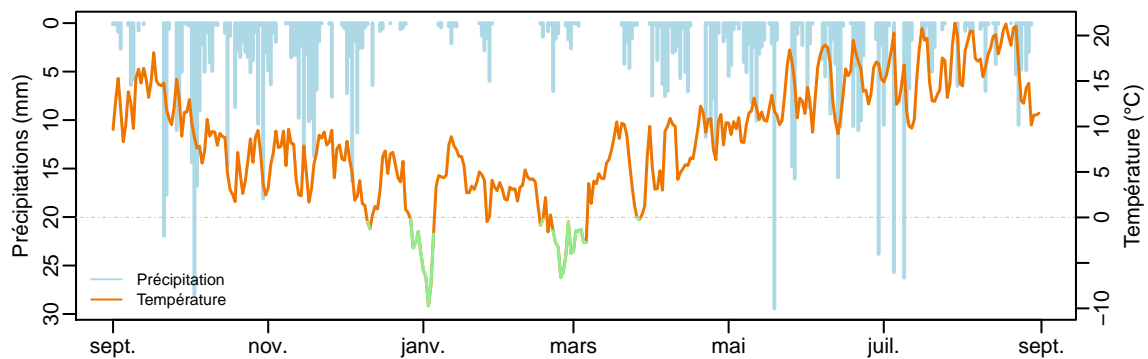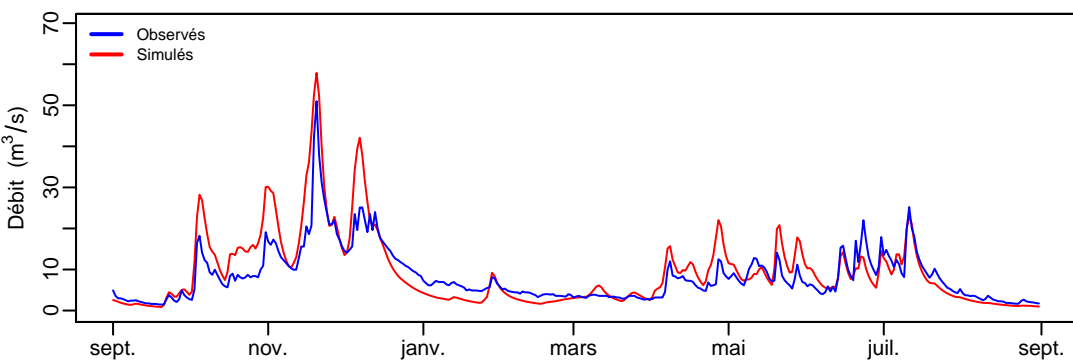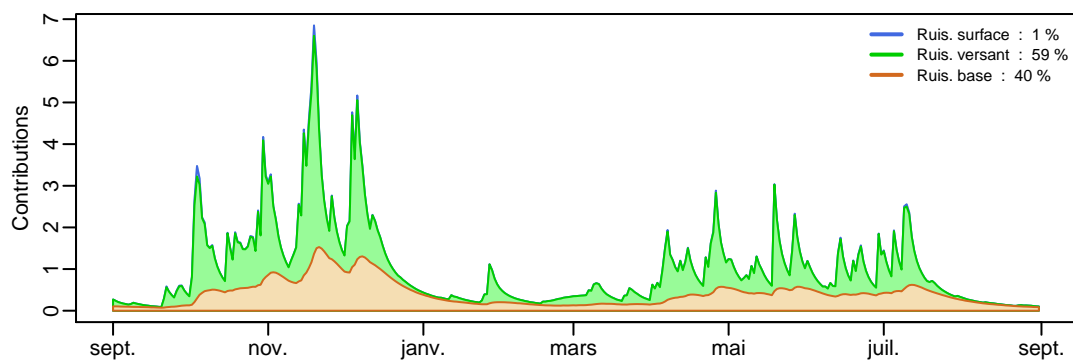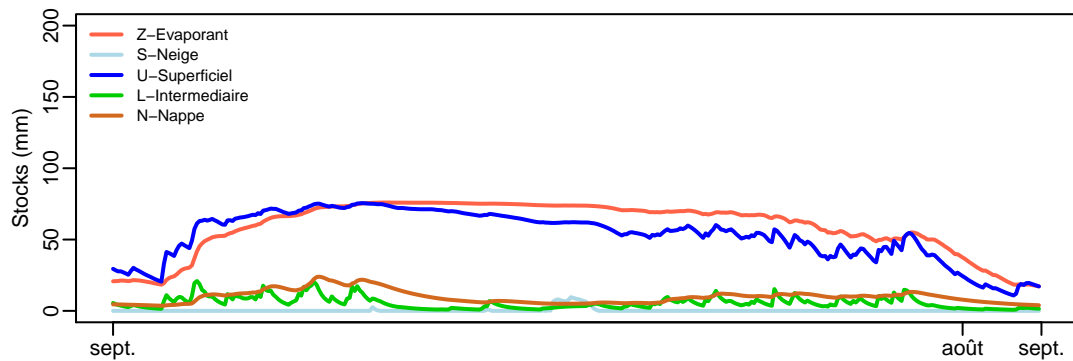

# k2871910 (795.27 km<sup>2</sup>) – année 1993–1994

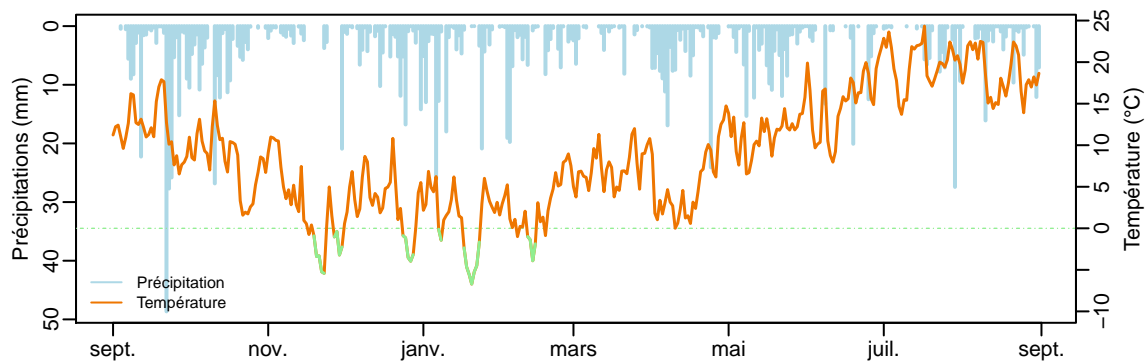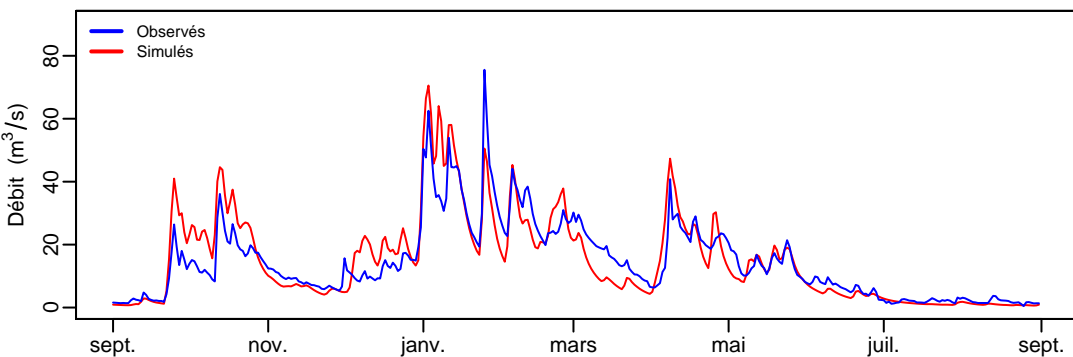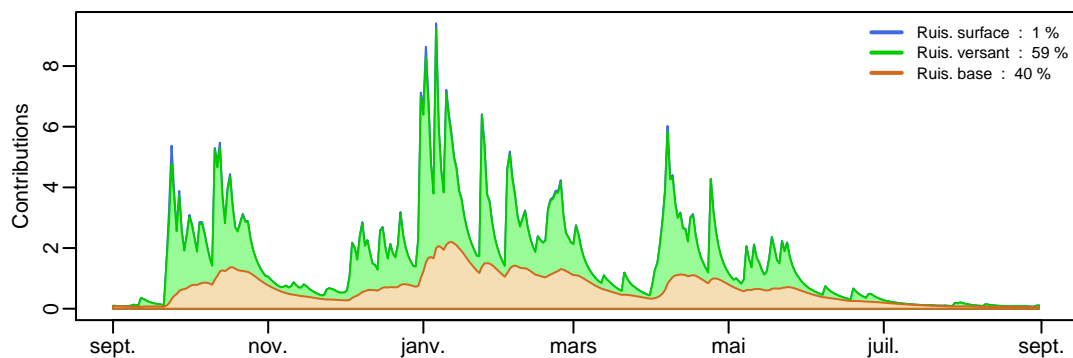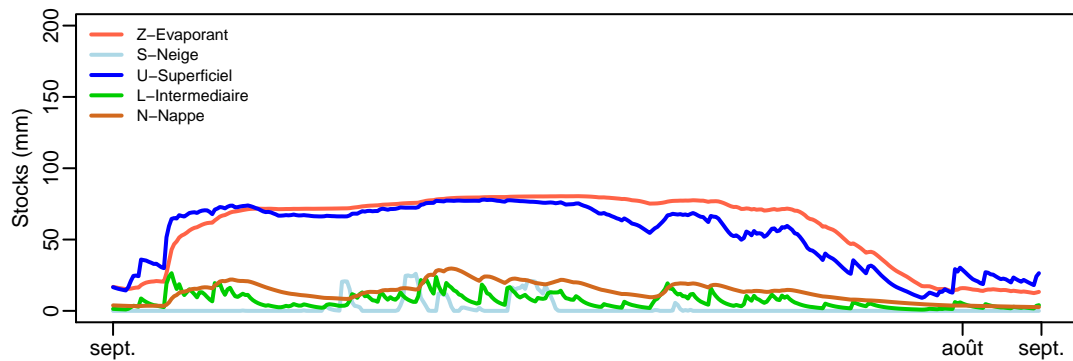

# k2871910 (795.27 km<sup>2</sup>) – année 1994–1995

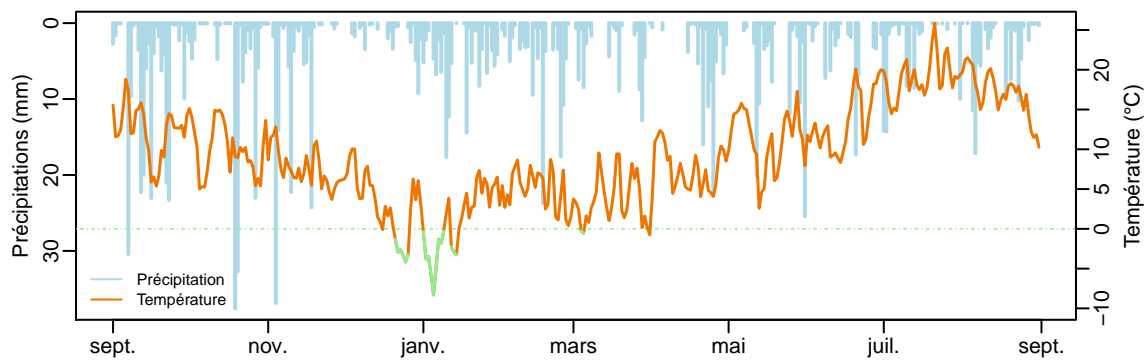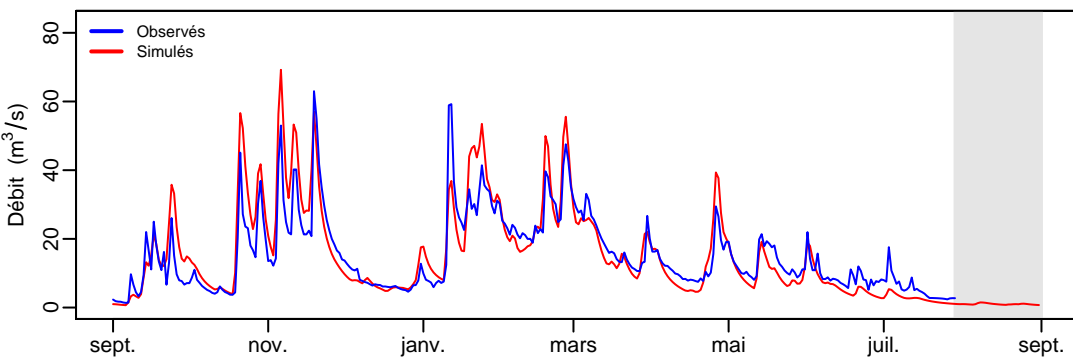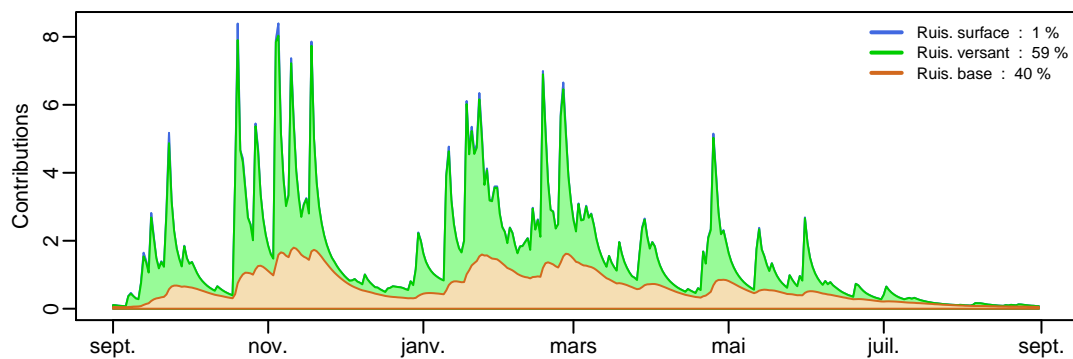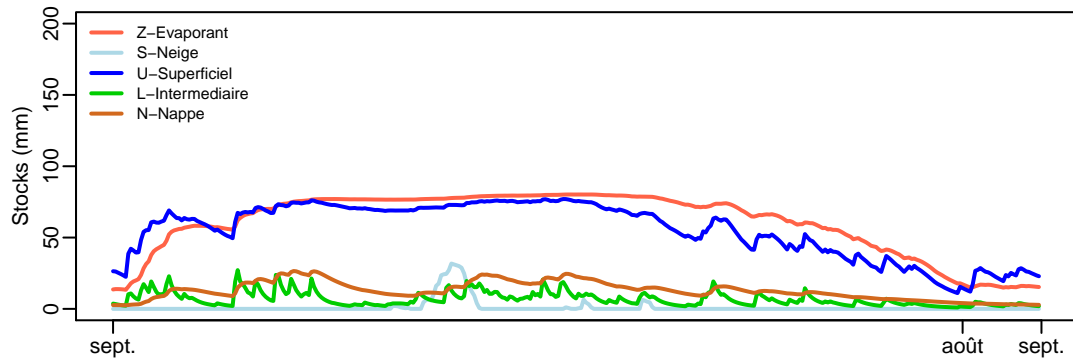

# k2871910 (795.27 km<sup>2</sup>) – année 1995–1996

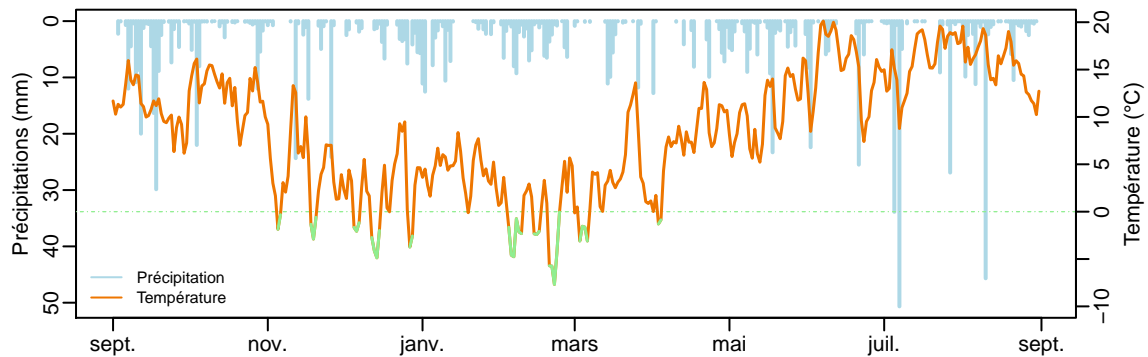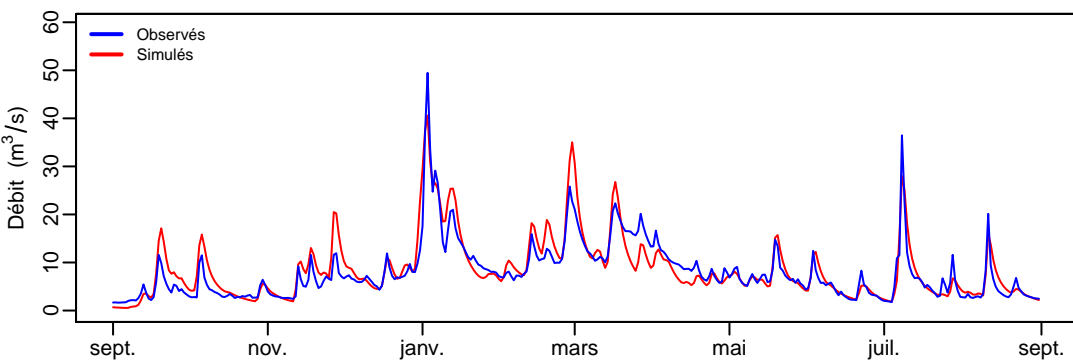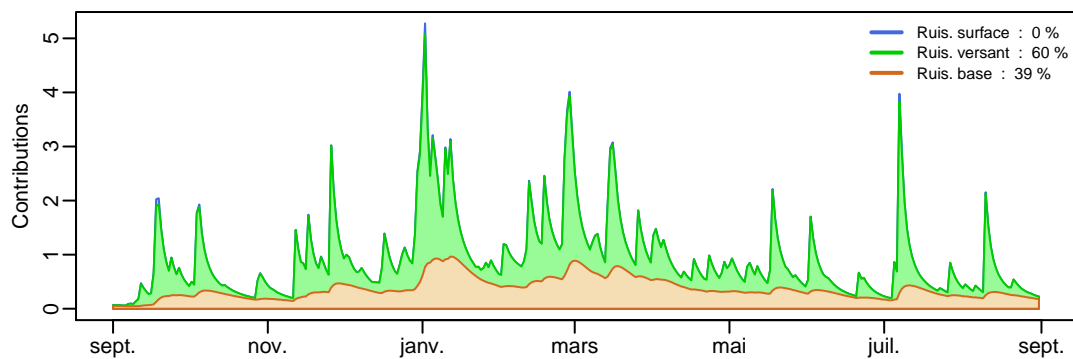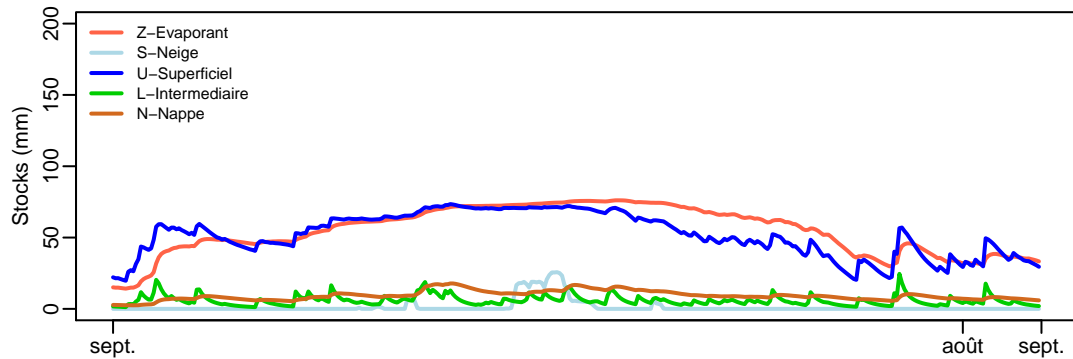

# k2871910 (795.27 km<sup>2</sup>) – année 1996–1997

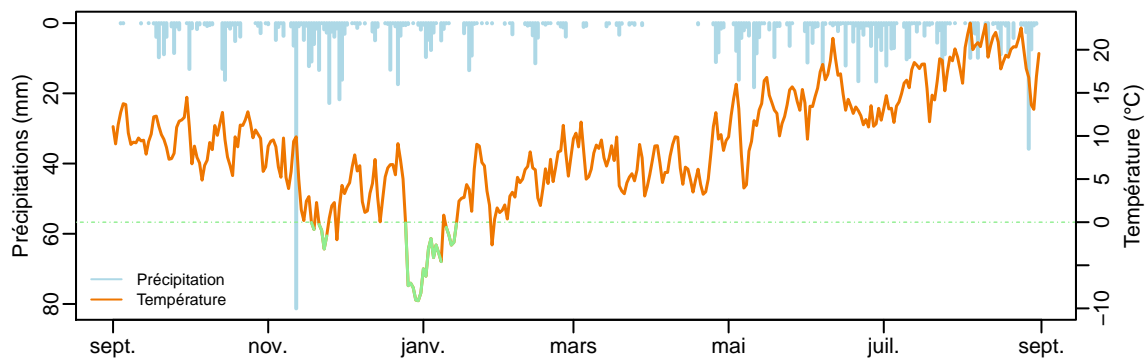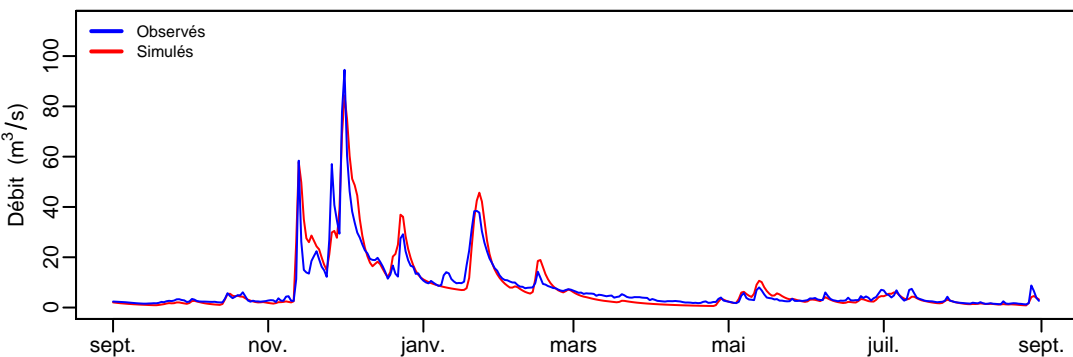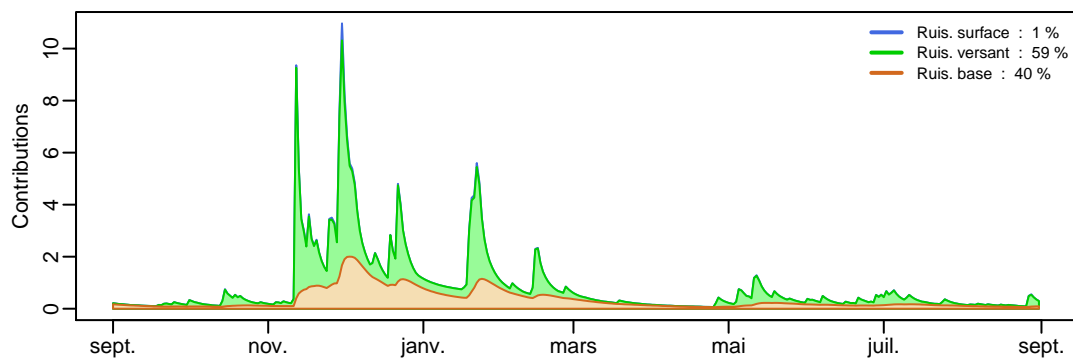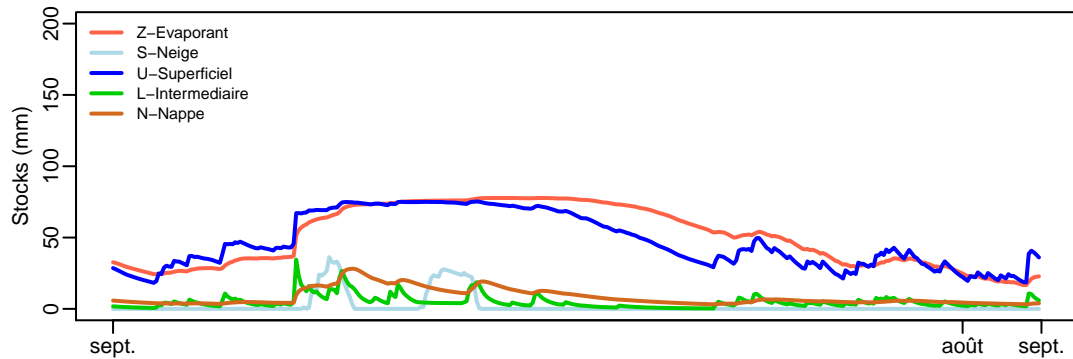

# k2871910 (795.27 km<sup>2</sup>) – année 1997–1998

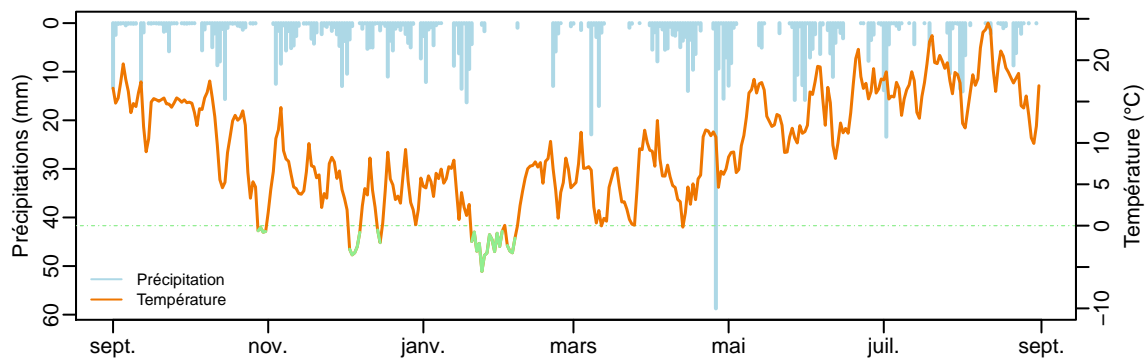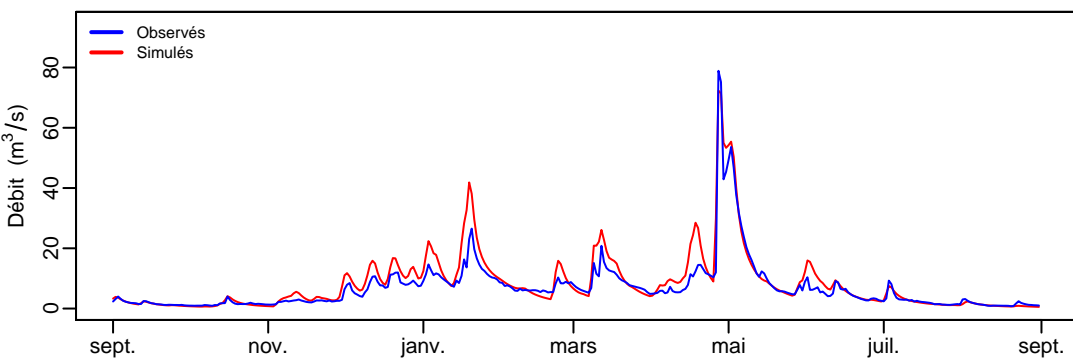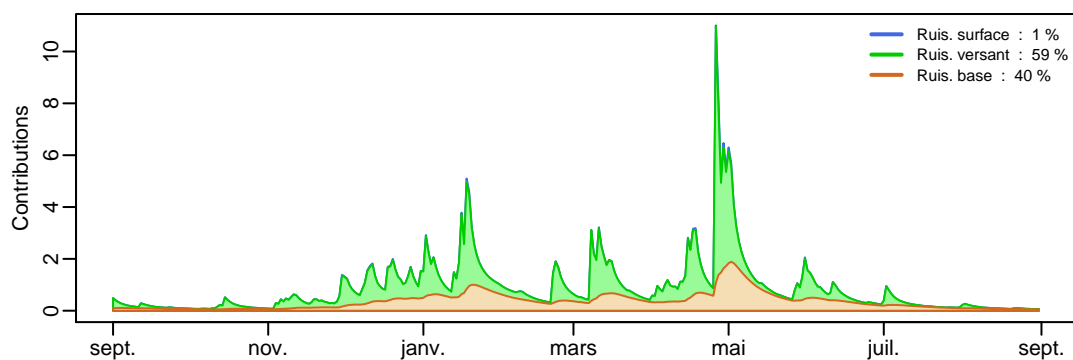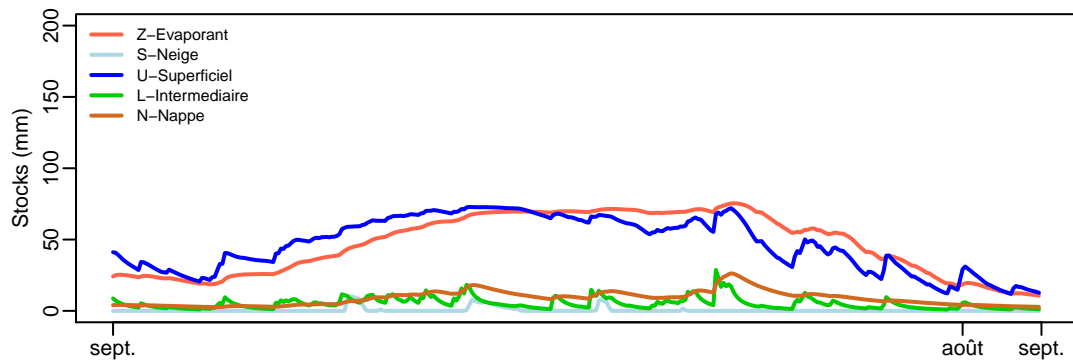



# k2871910 (795.27 km<sup>2</sup>) – année 1998–1999

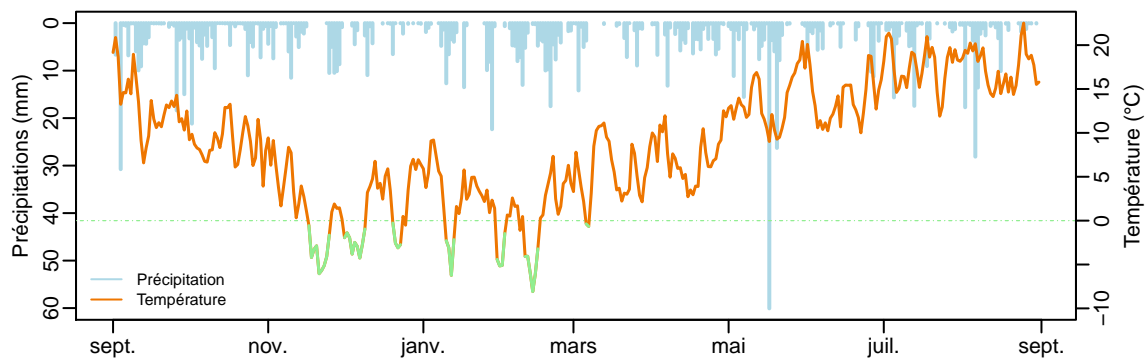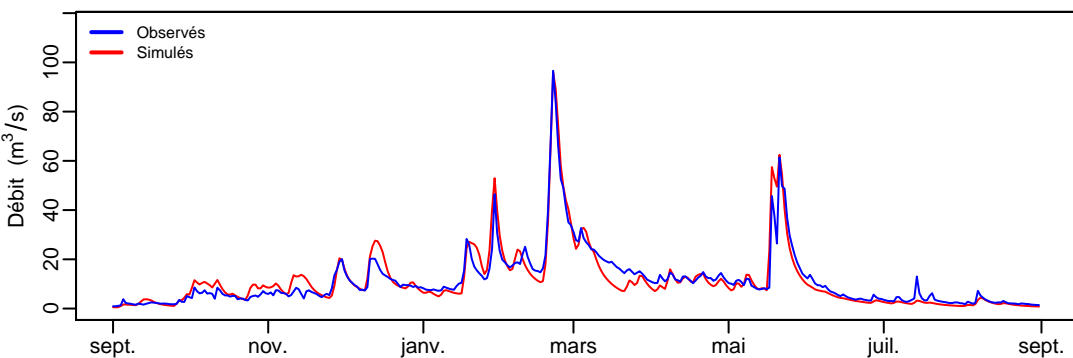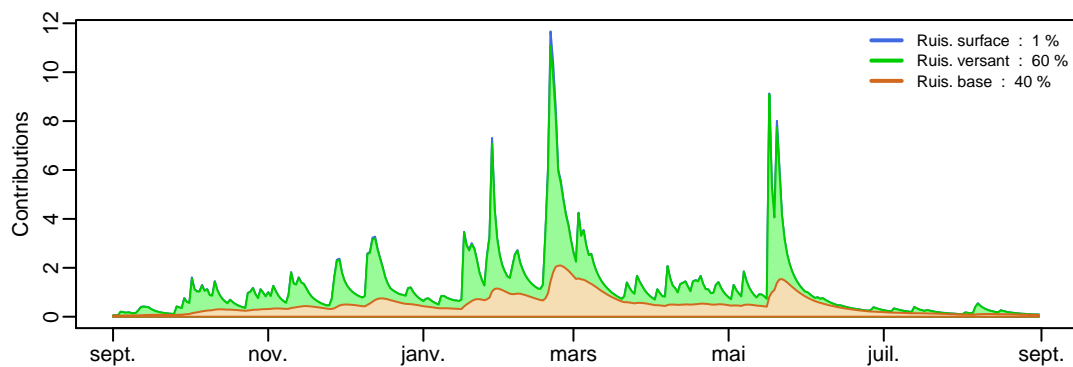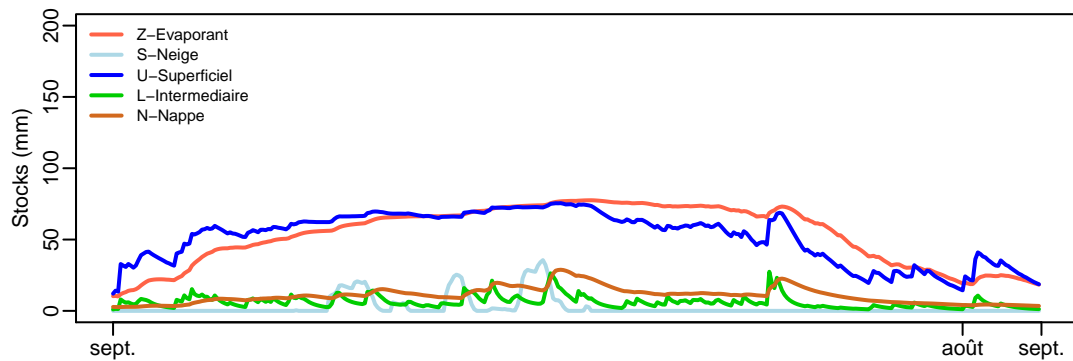

# k2871910 (795.27 km<sup>2</sup>) – année 1999–2000

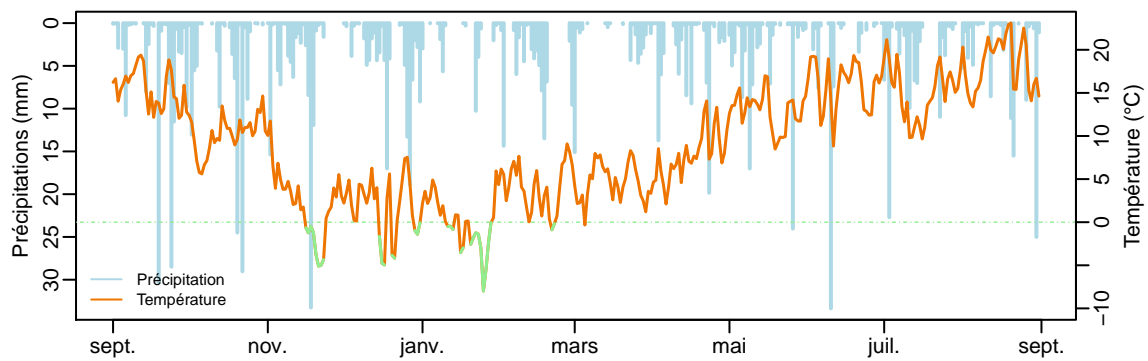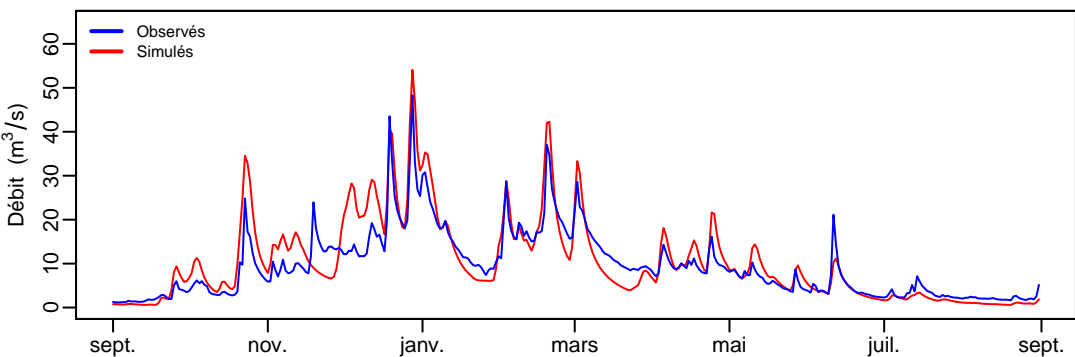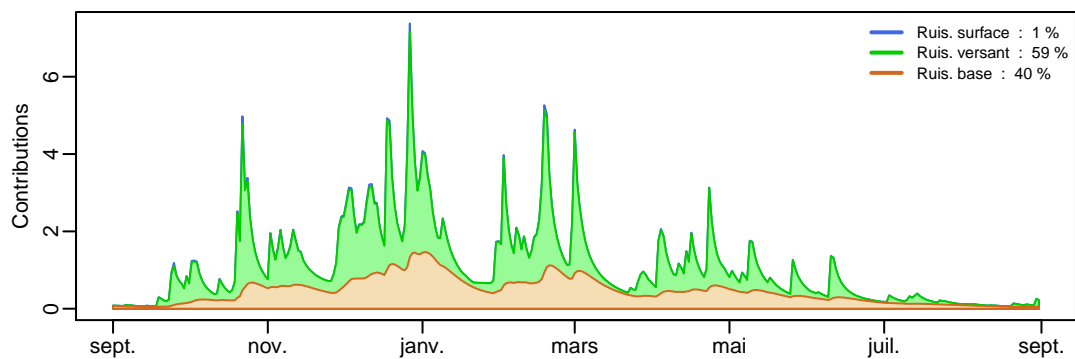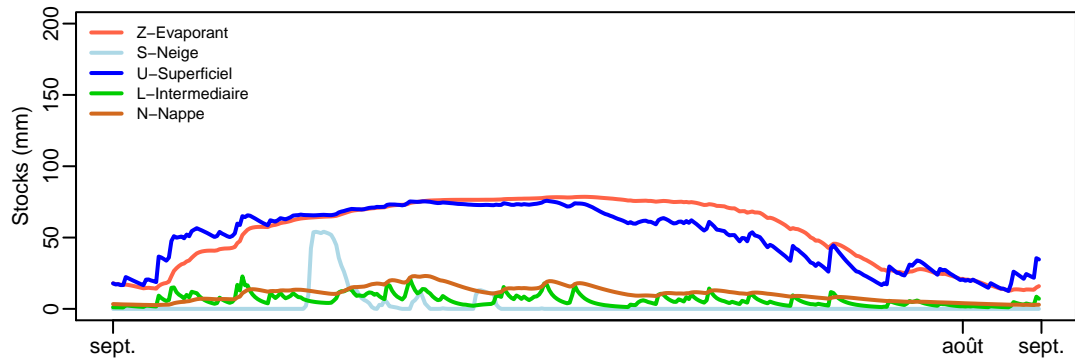

# k2871910 (795.27 km<sup>2</sup>) – année 2000–2001

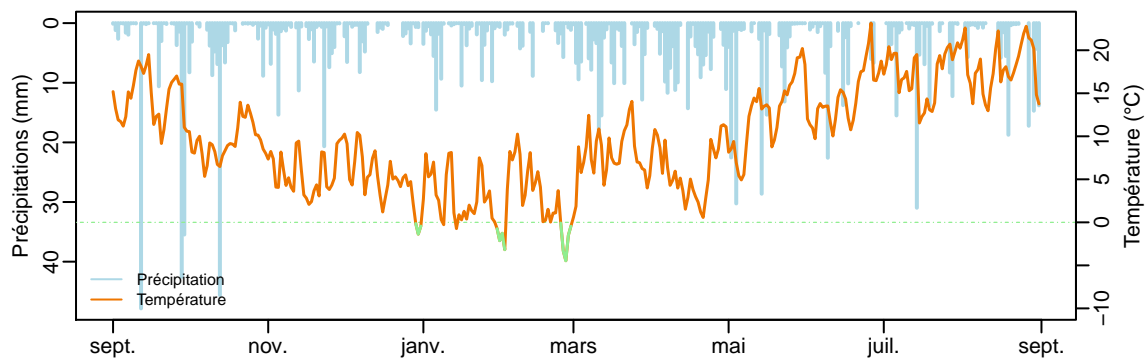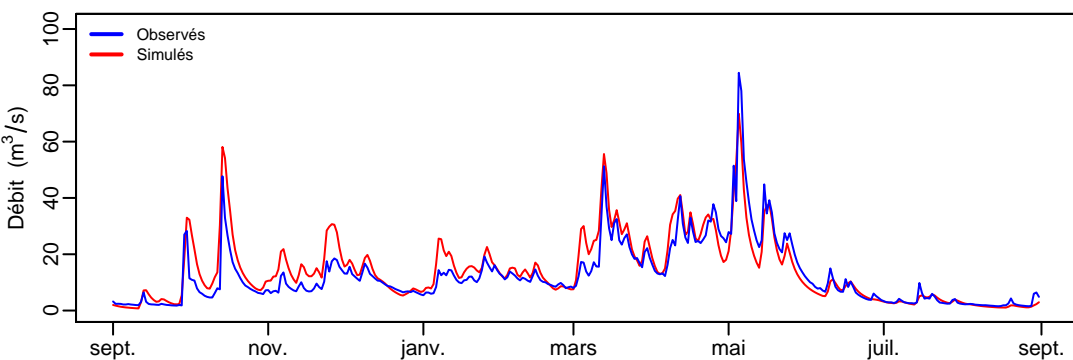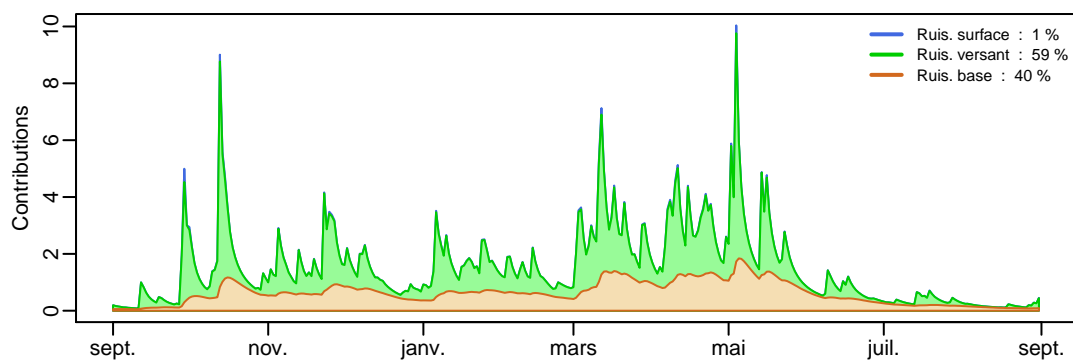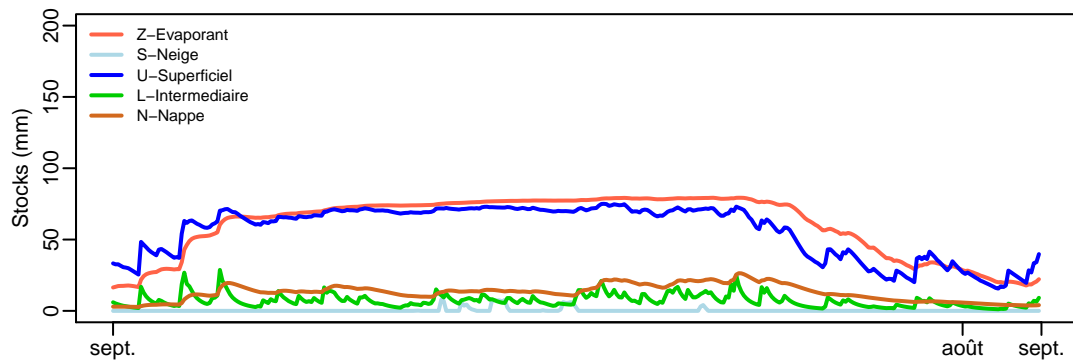

# k2871910 (795.27 km<sup>2</sup>) – année 2001–2002

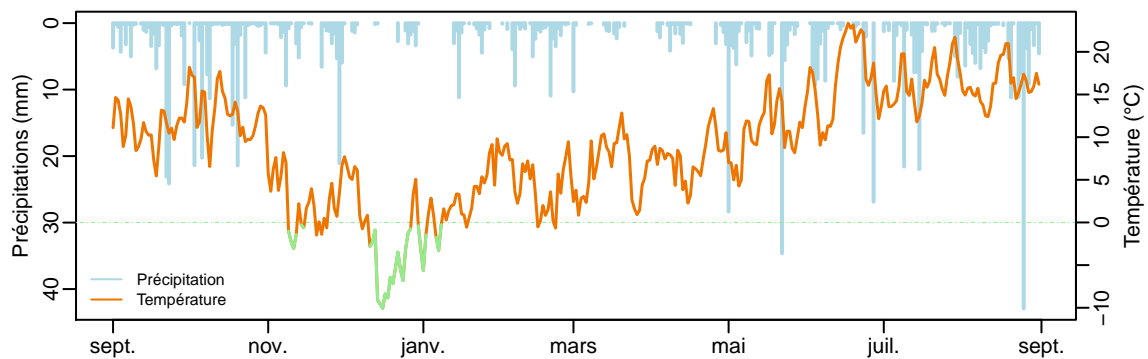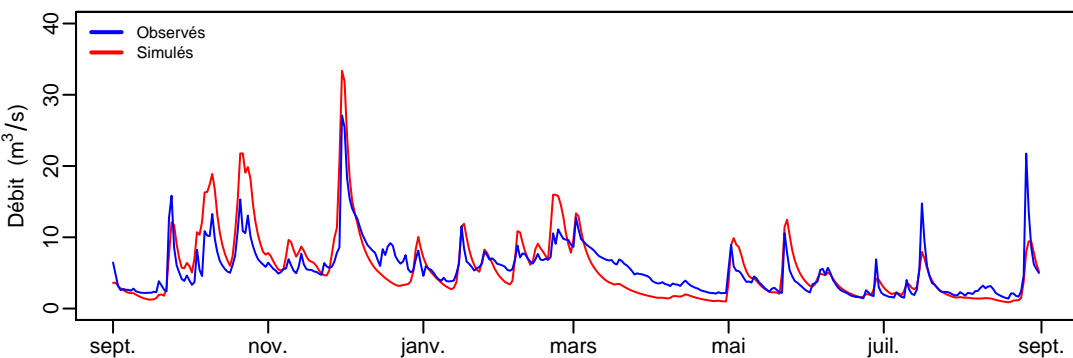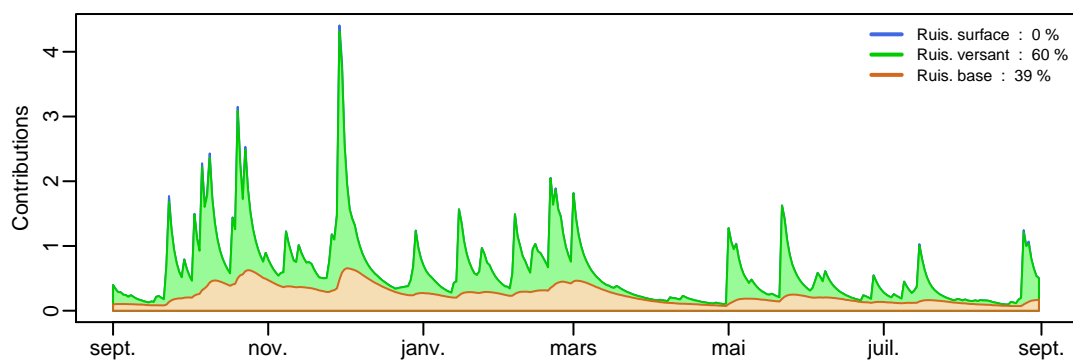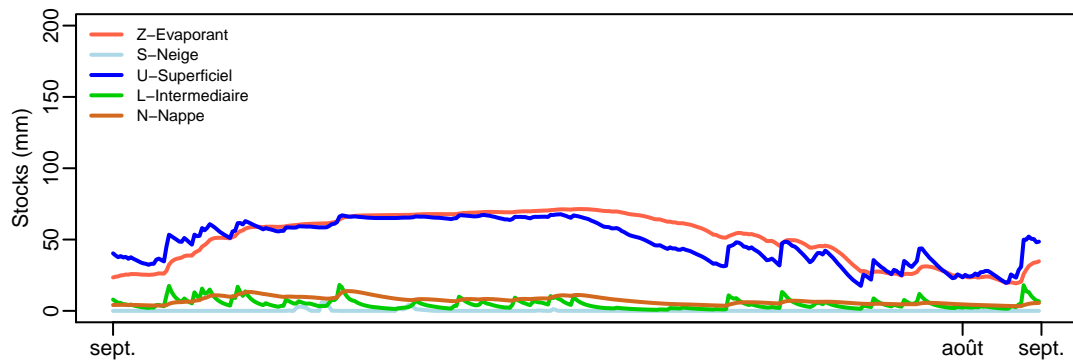

# k2871910 (795.27 km<sup>2</sup>) – année 2002–2003

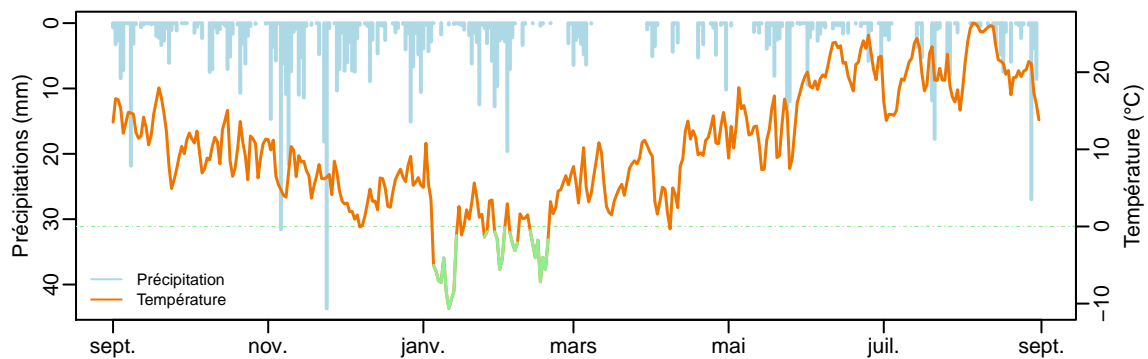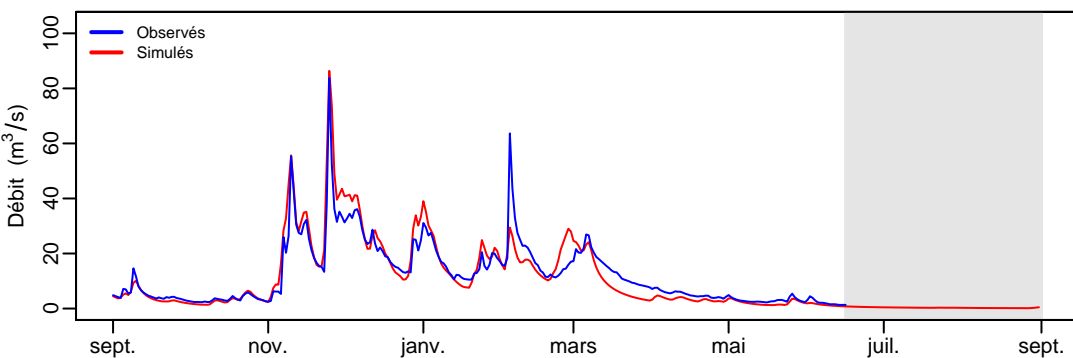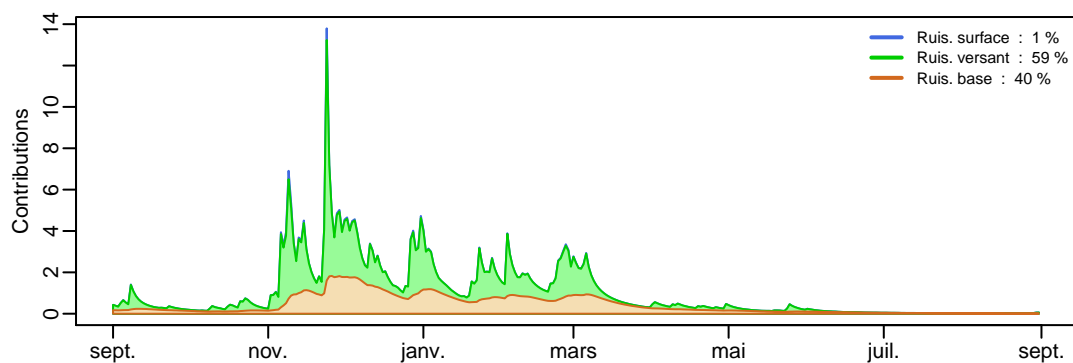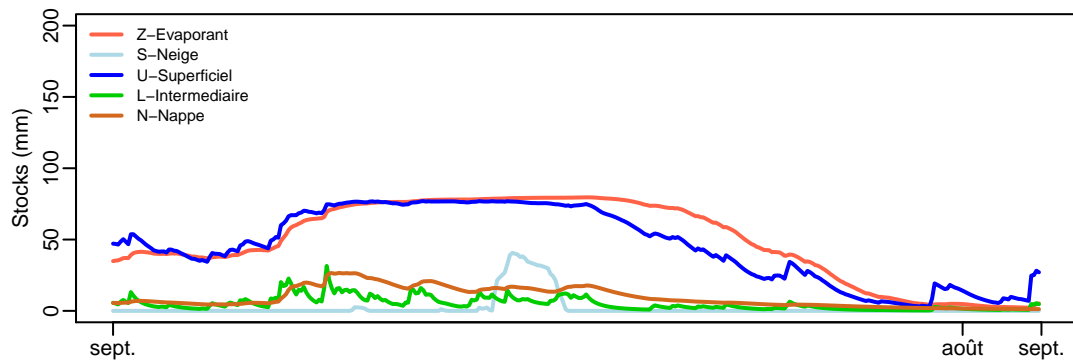

# k2871910 (795.27 km<sup>2</sup>) – année 2003–2004

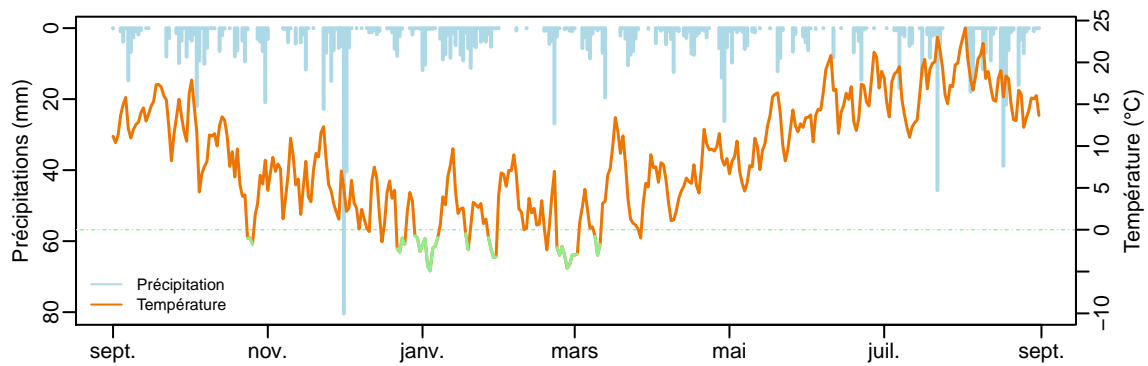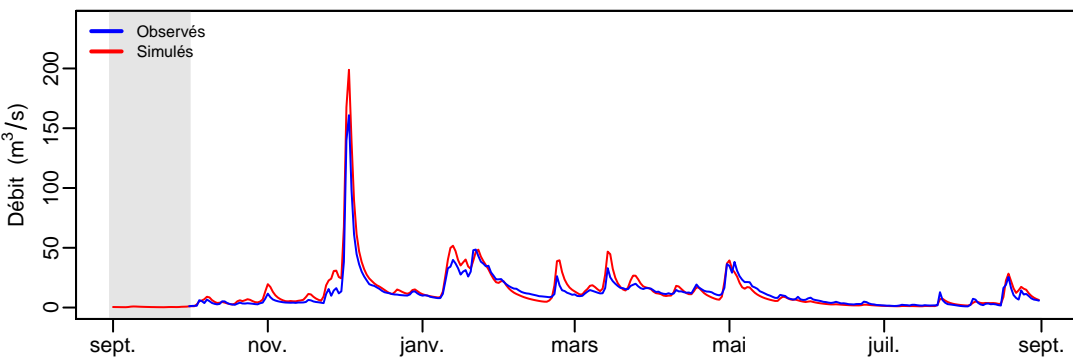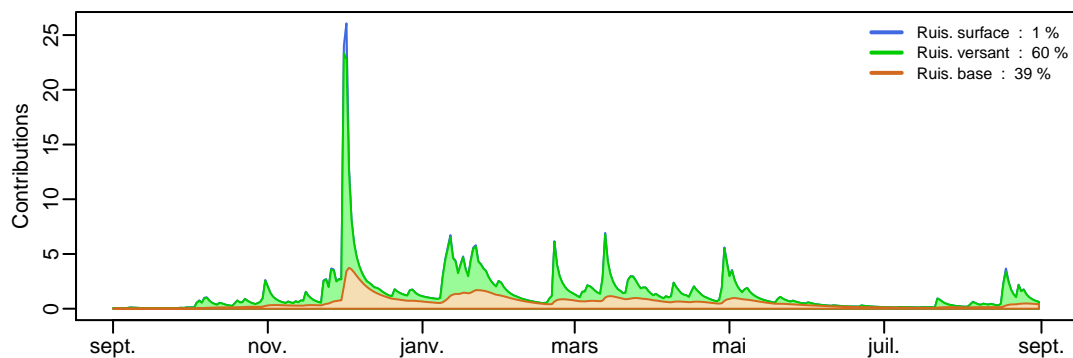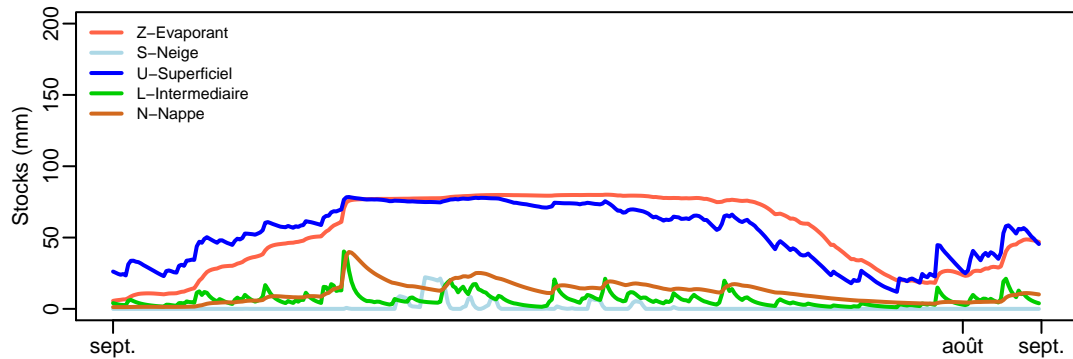

# k2871910 (795.27 km<sup>2</sup>) – année 2004–2005

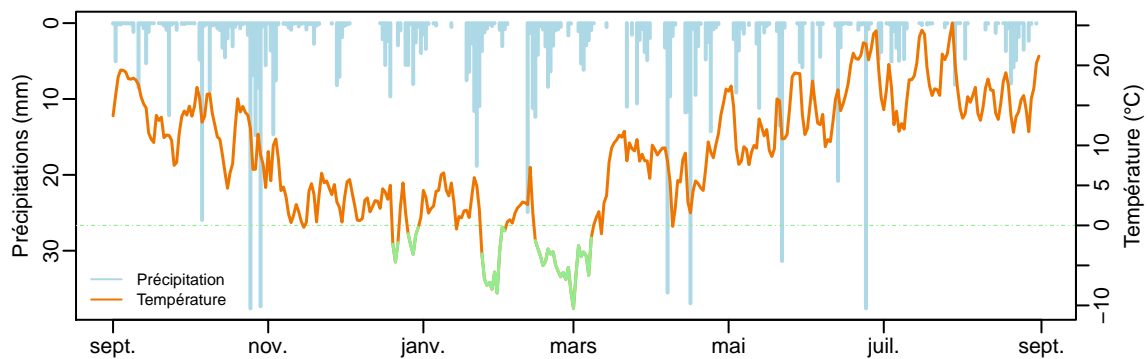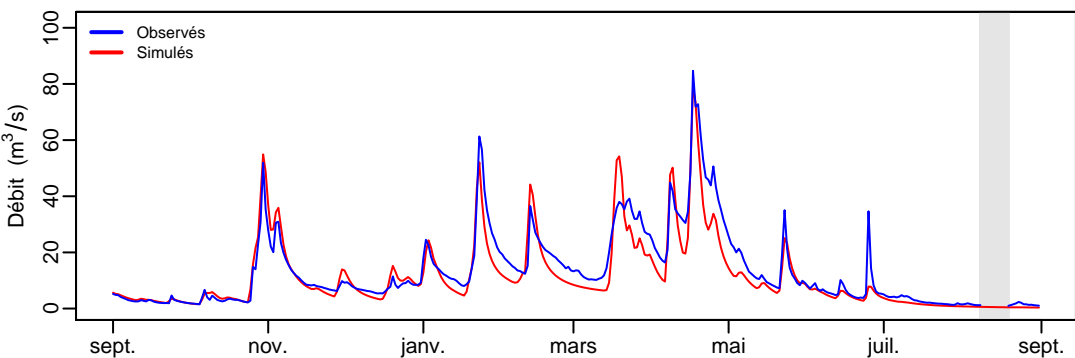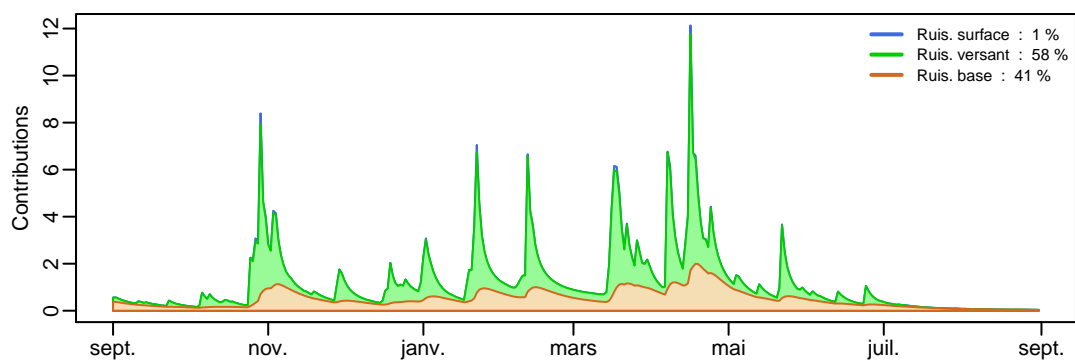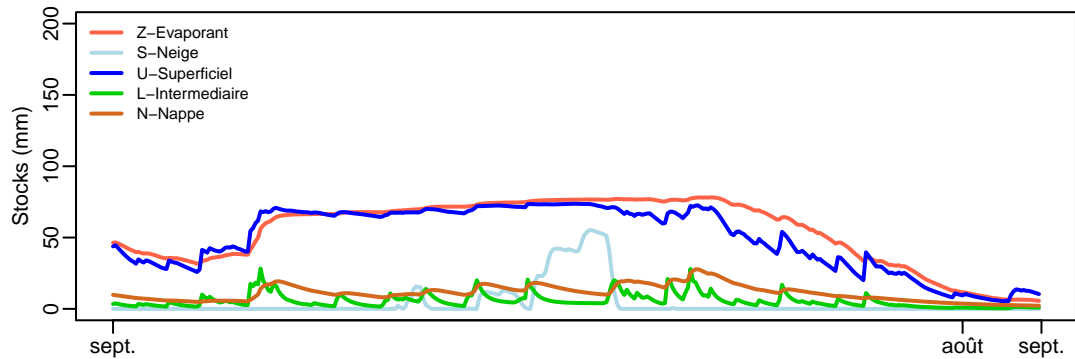

# k2871910 (795.27 km<sup>2</sup>) – année 2005–2006

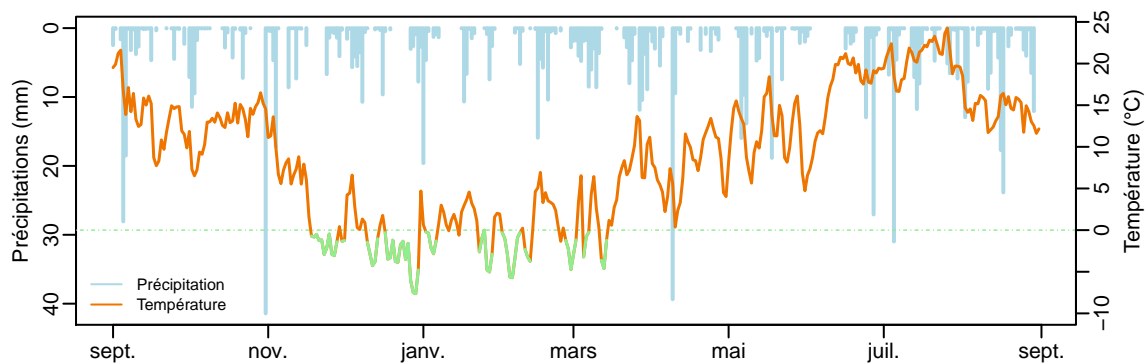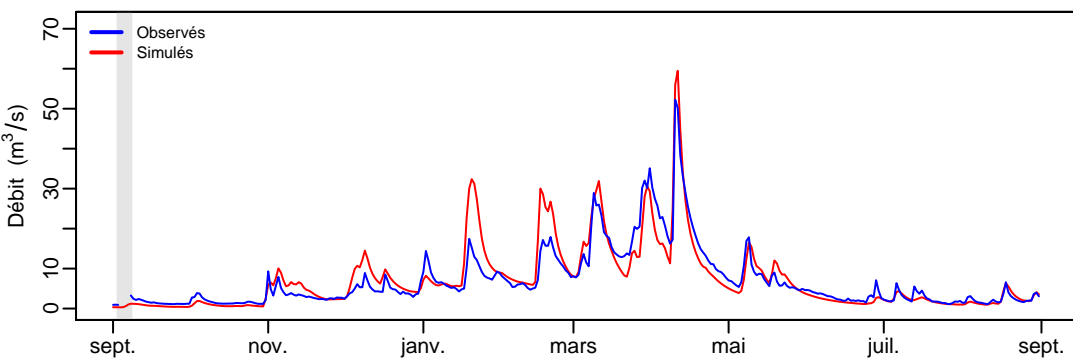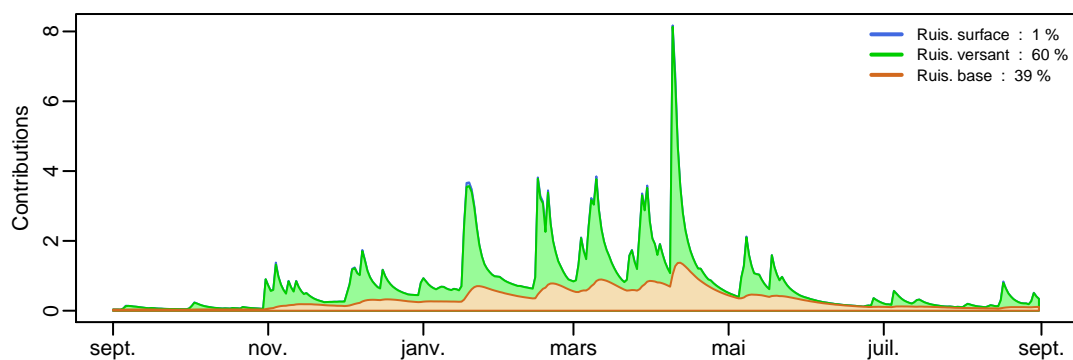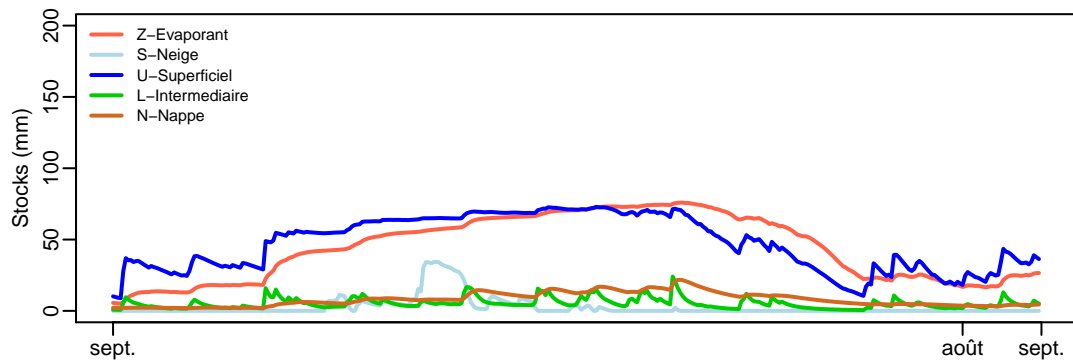



# k2871910 (795.27 km<sup>2</sup>) – année 2006–2007

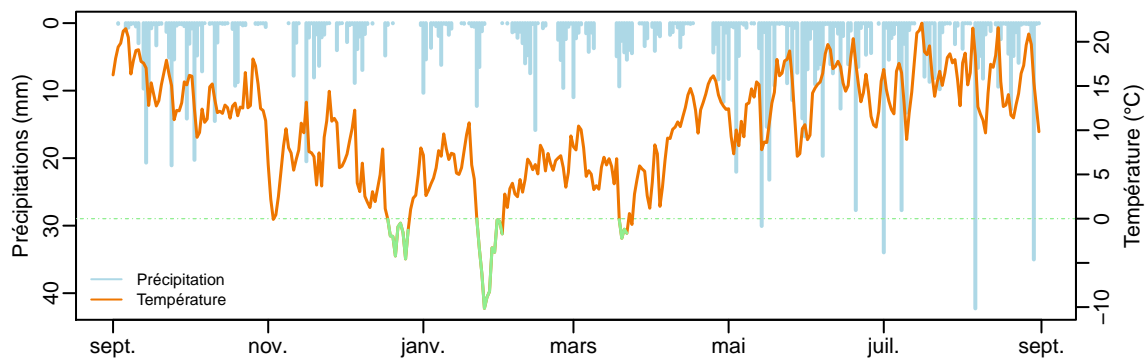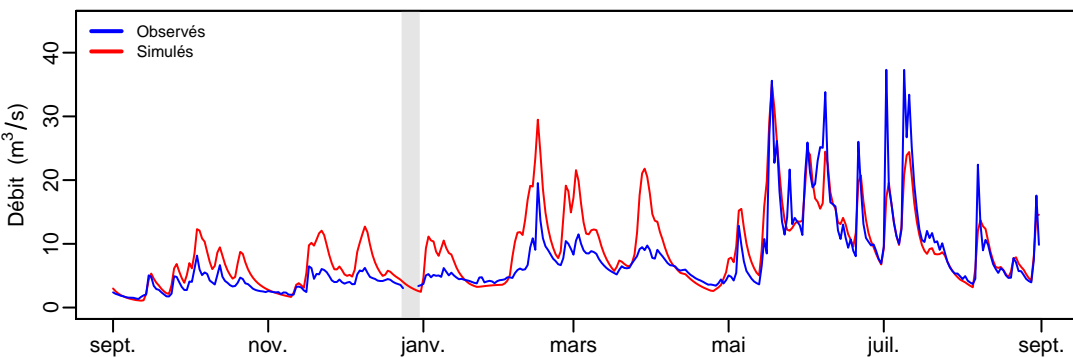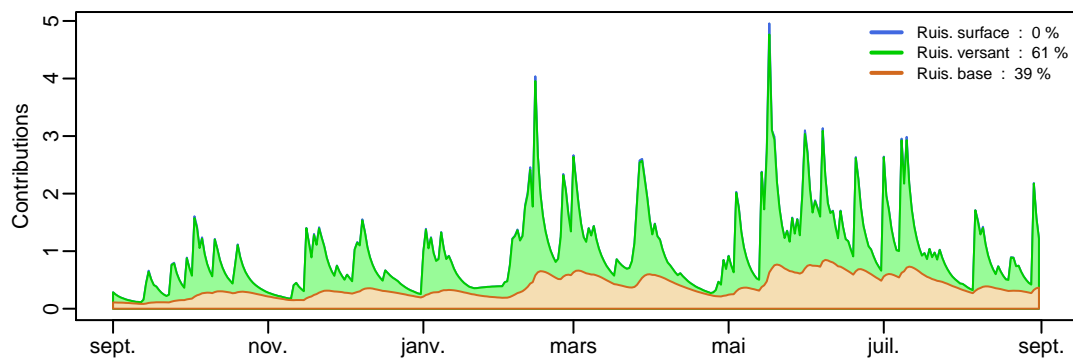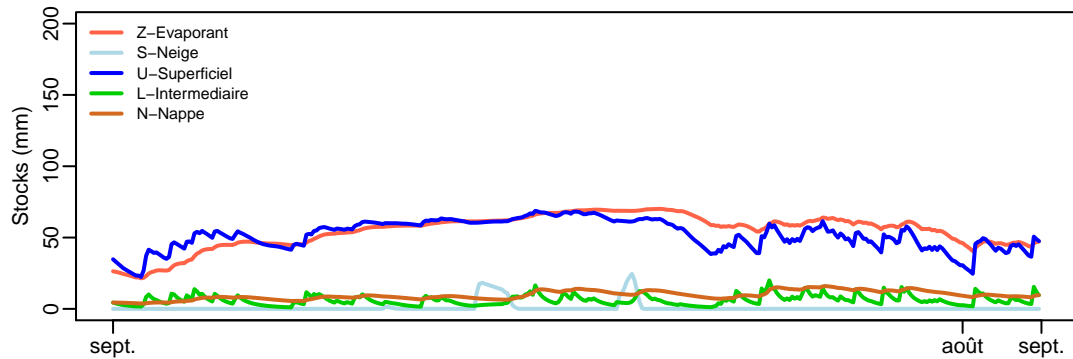

# k2871910 (795.27 km<sup>2</sup>) – année 2007–2008

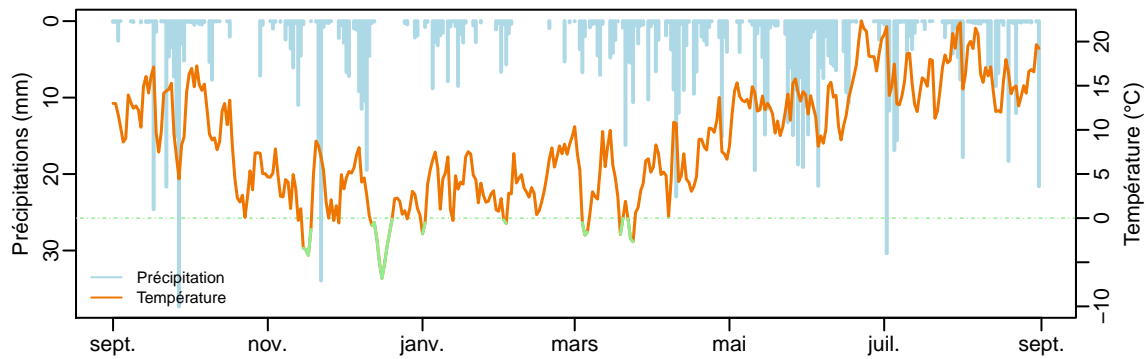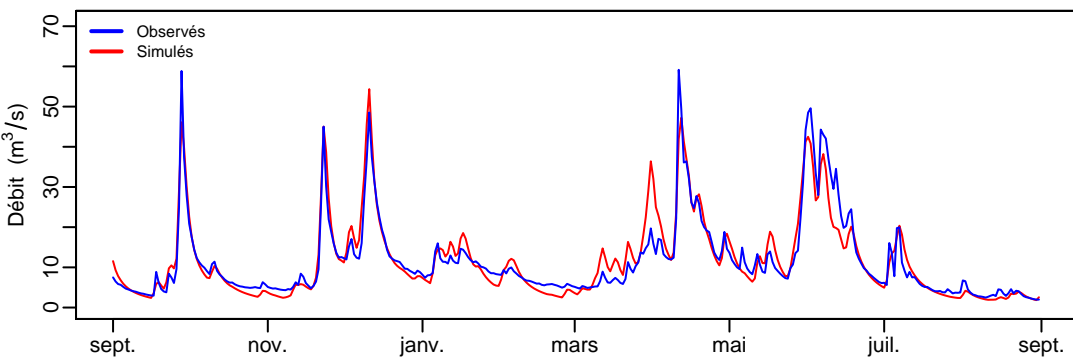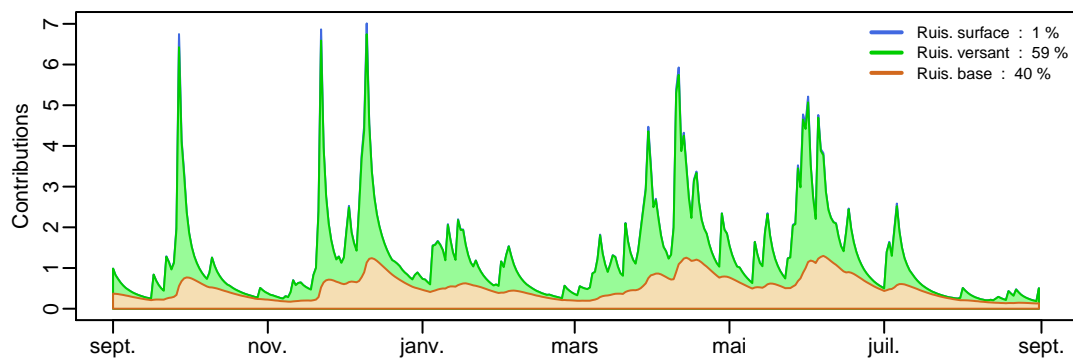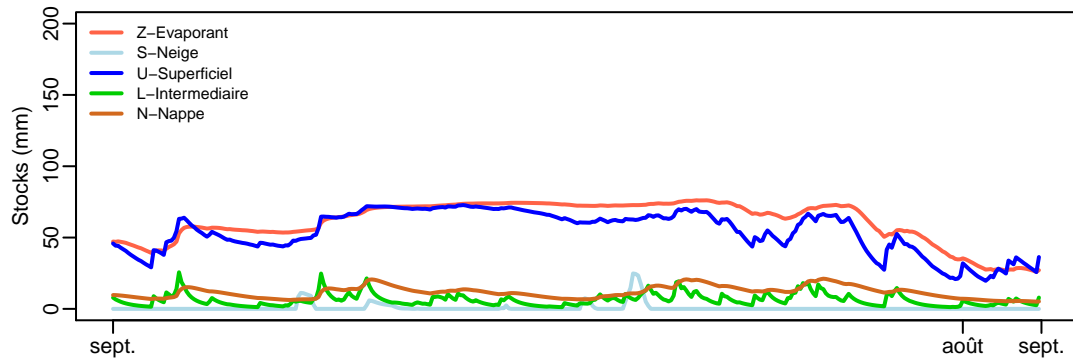

# k2871910 (795.27 km<sup>2</sup>) – année 2008–2009

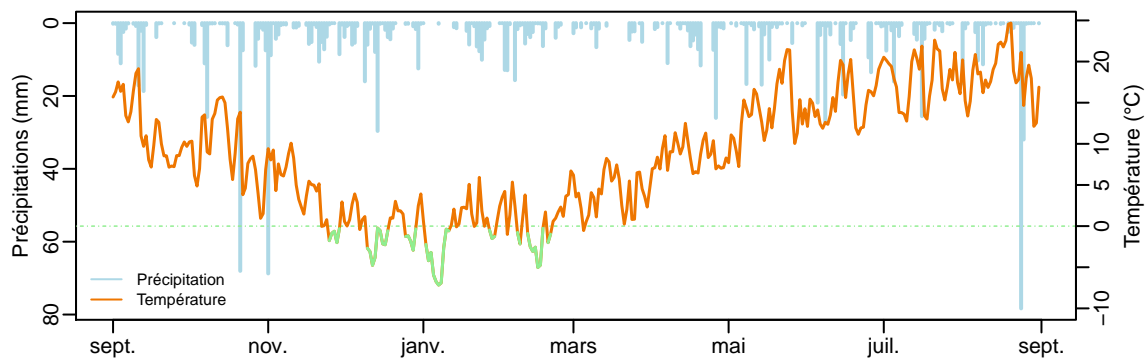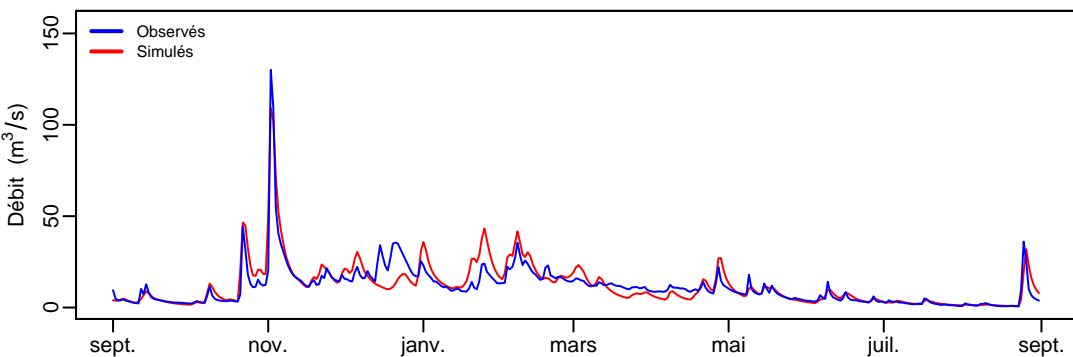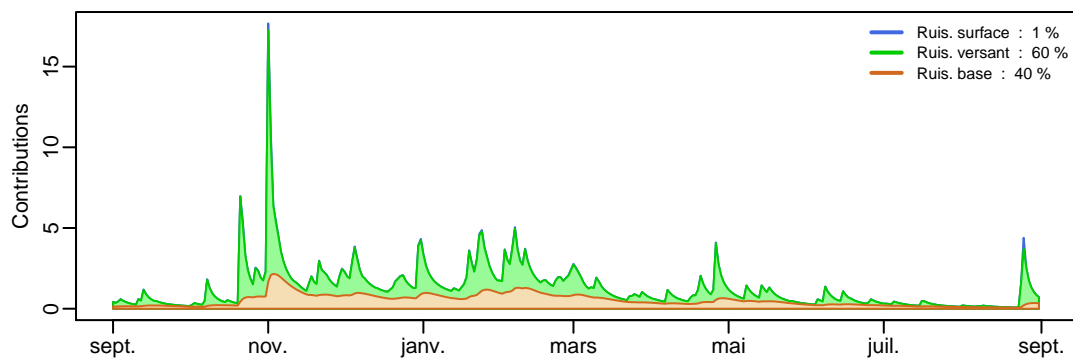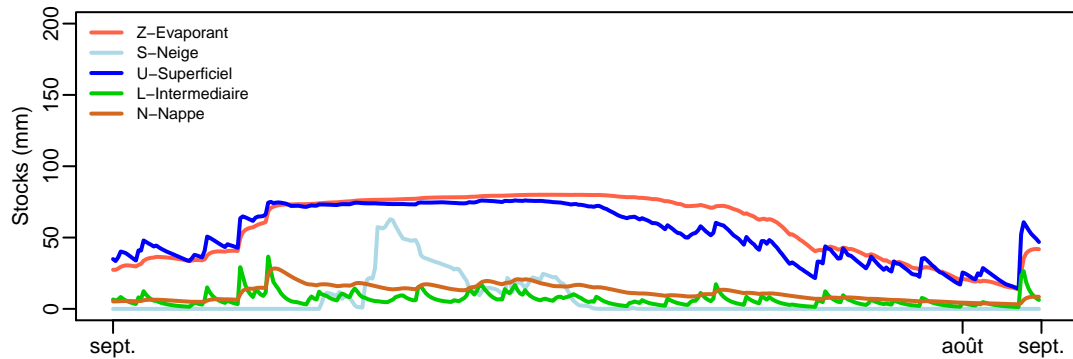

# k2981910 (1523.17 km²) – année 1994–1995

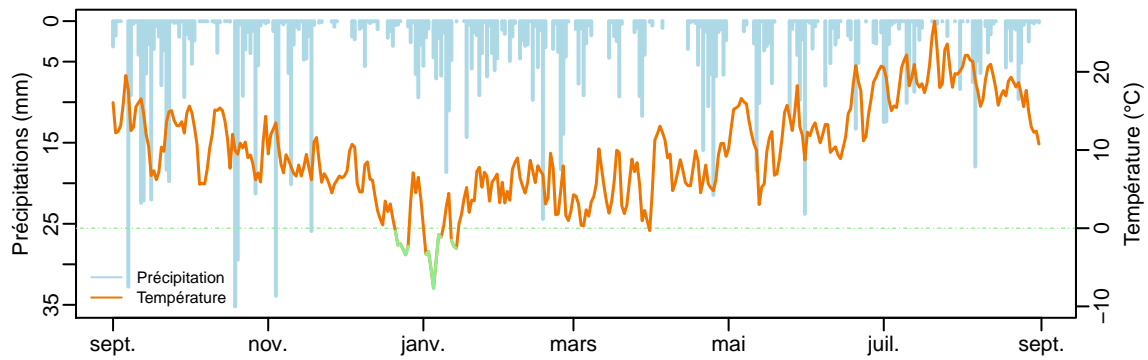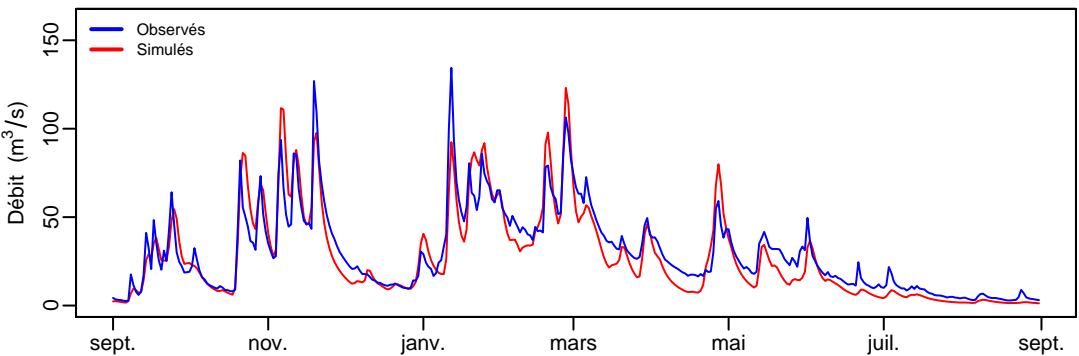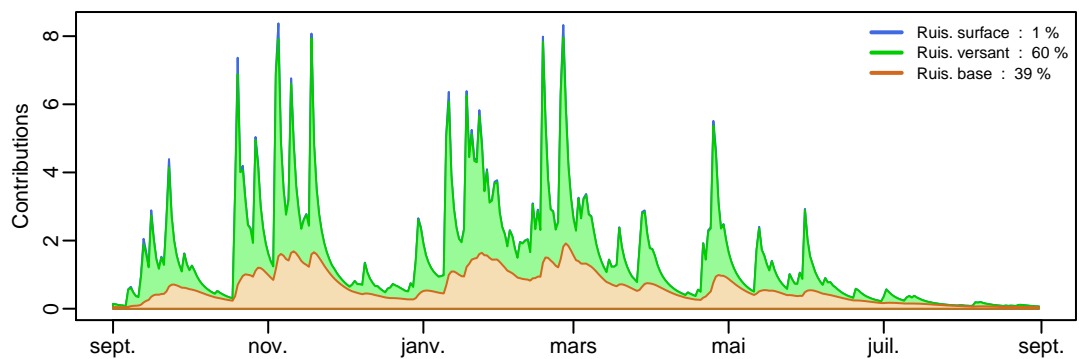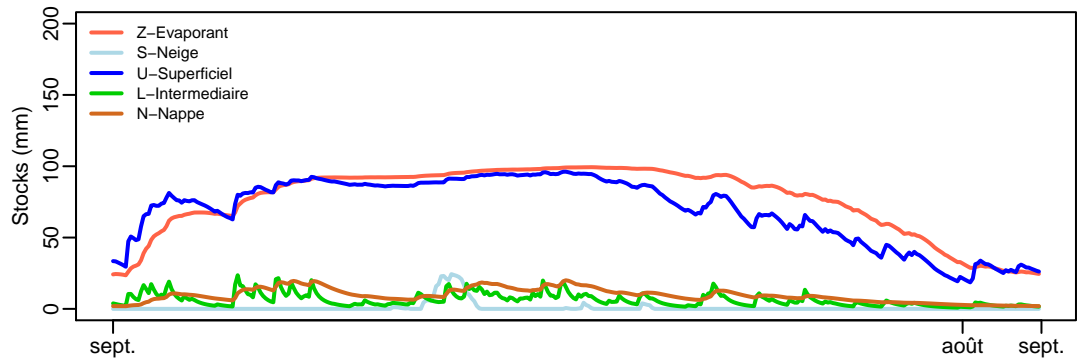

# k2981910 (1523.17 km<sup>2</sup>) – année 1995–1996

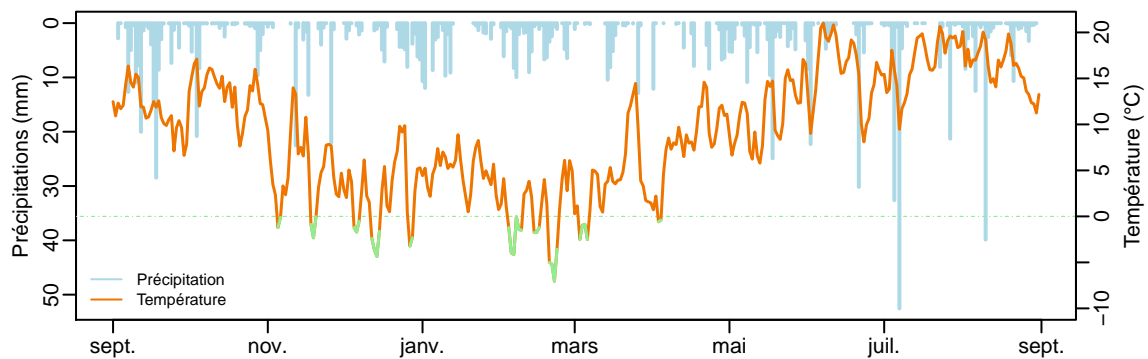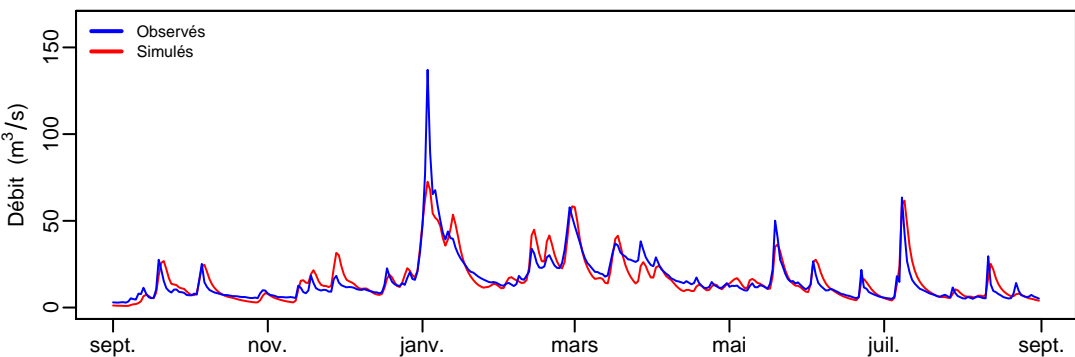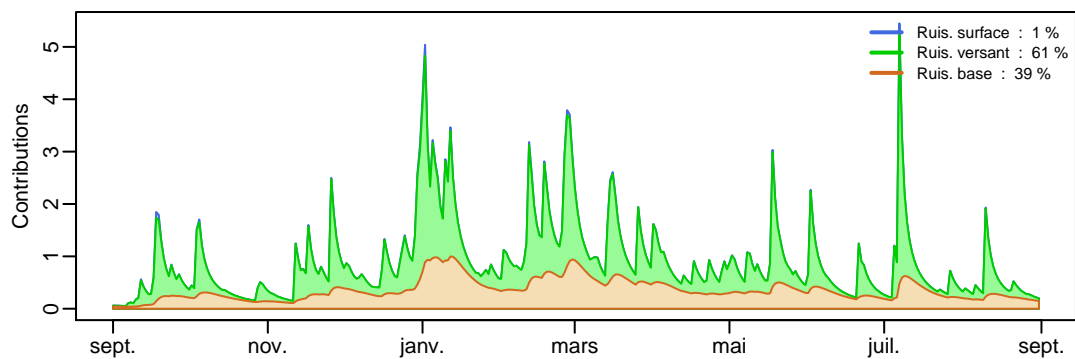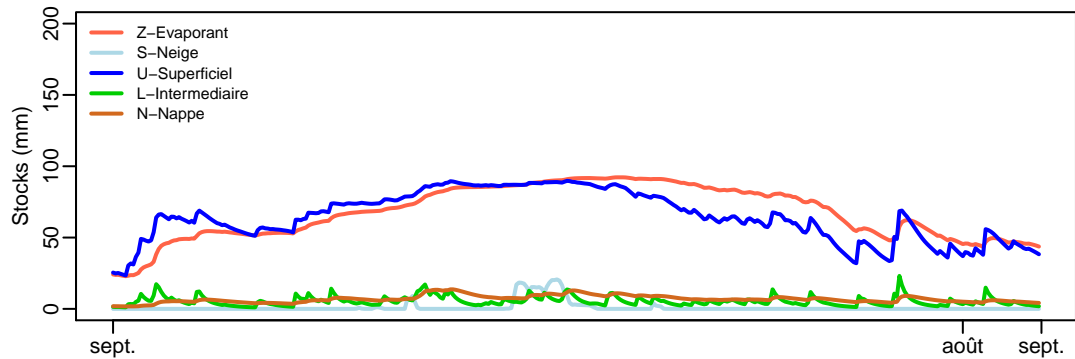

# k2981910 (1523.17 km²) – année 1996–1997

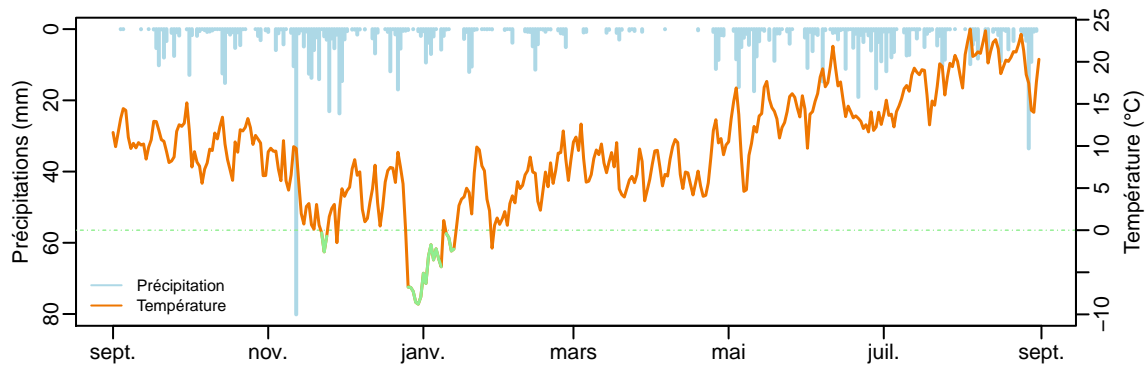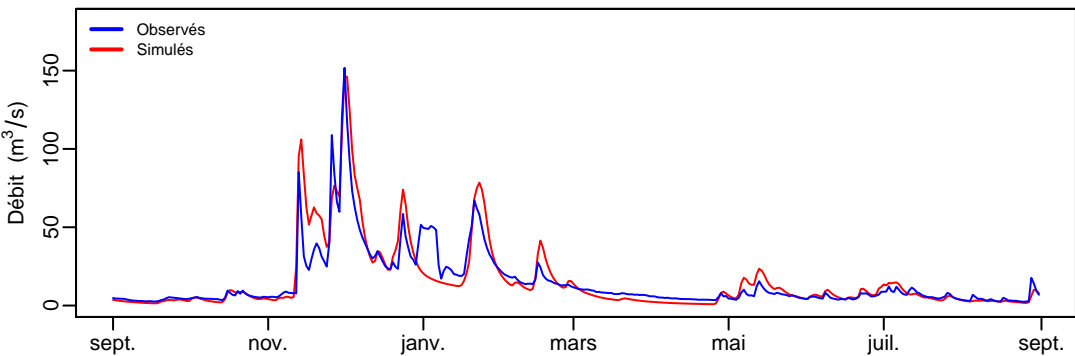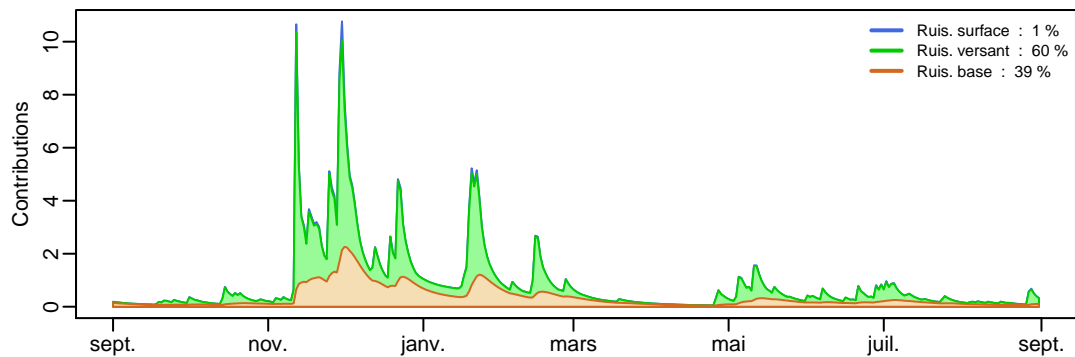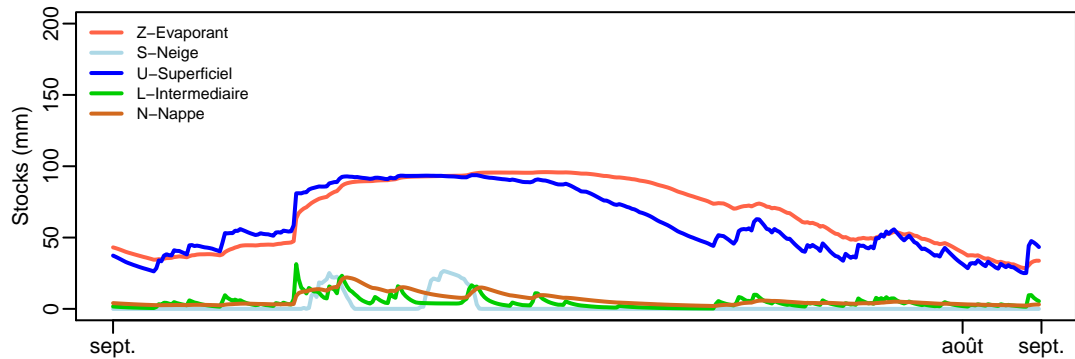

# k2981910 (1523.17 km²) – année 1997–1998

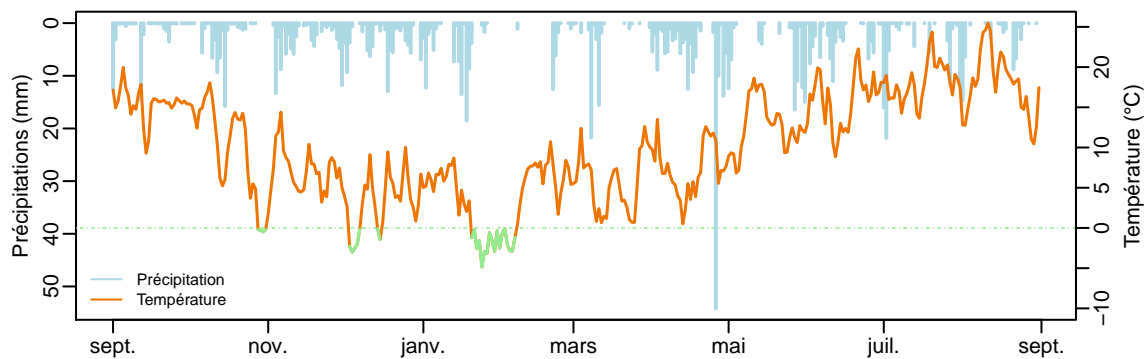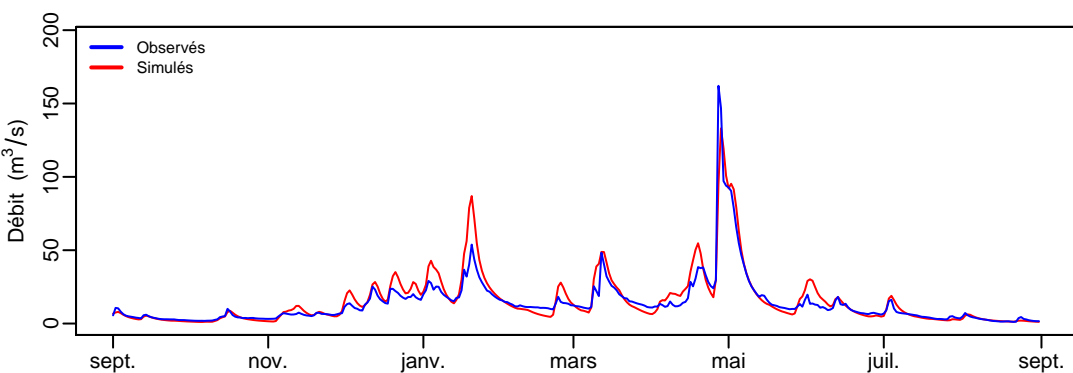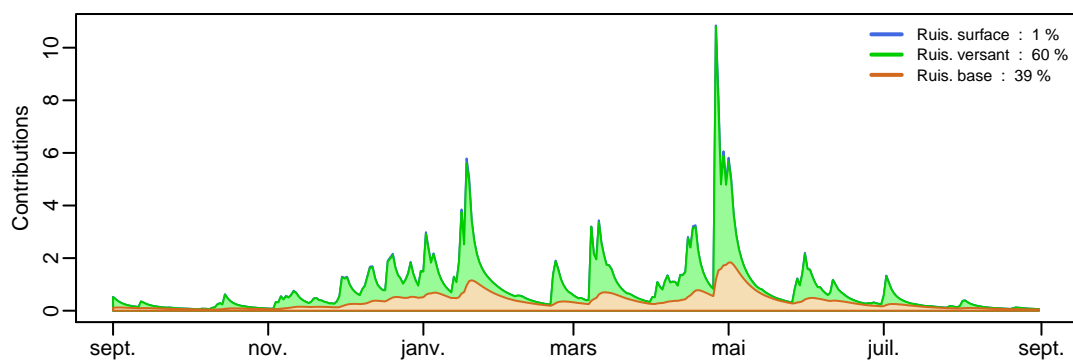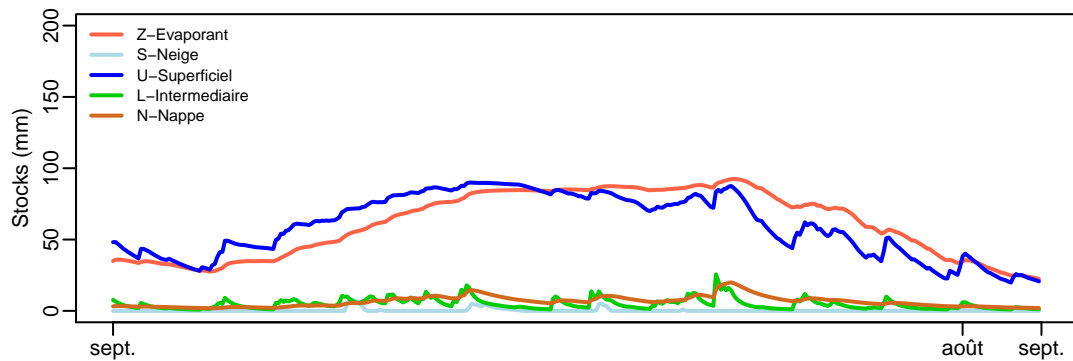

# k2981910 (1523.17 km²) – année 1998–1999

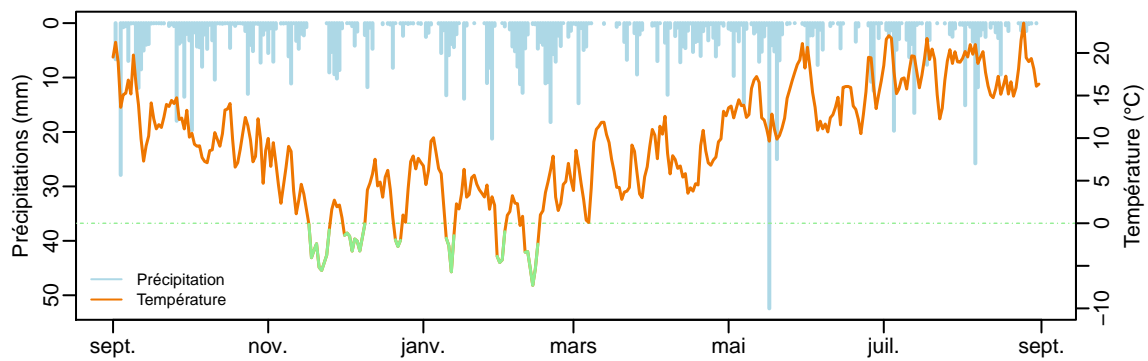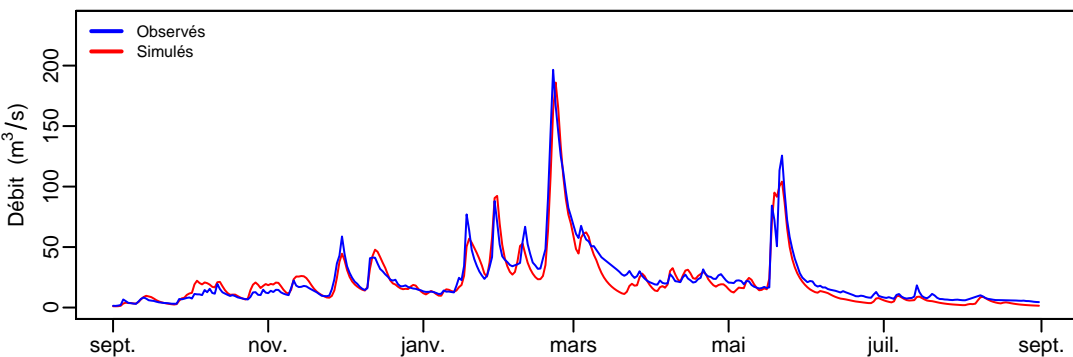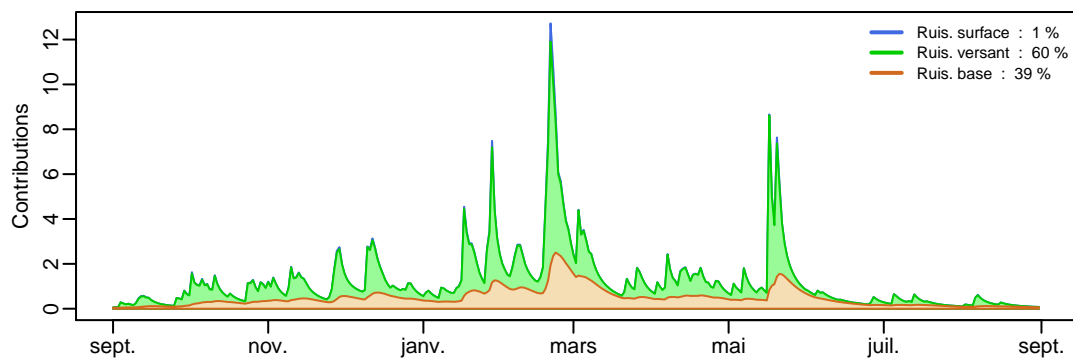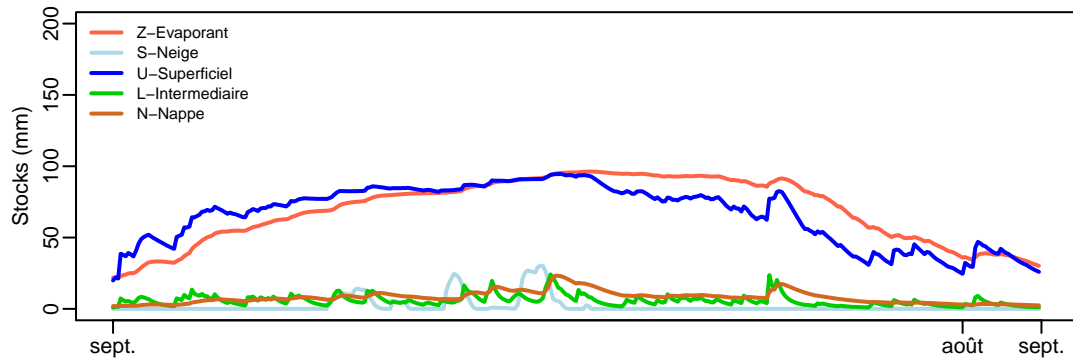



# k2981910 (1523.17 km<sup>2</sup>) – année 1999–2000

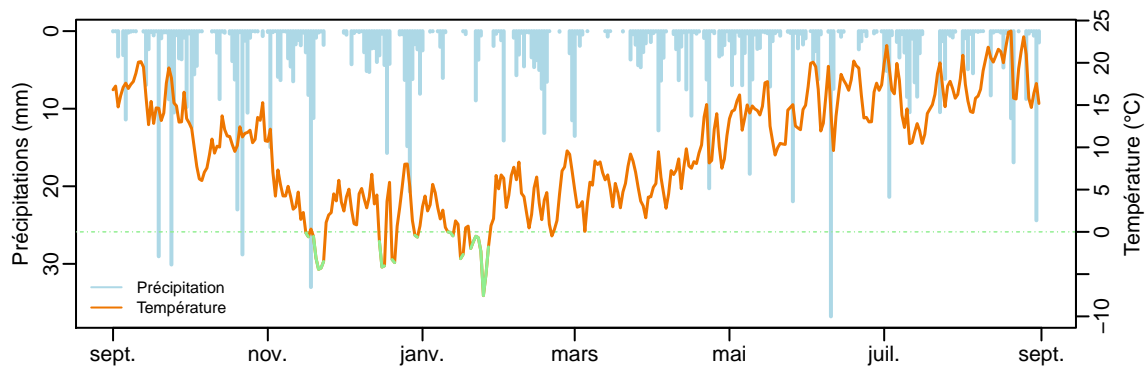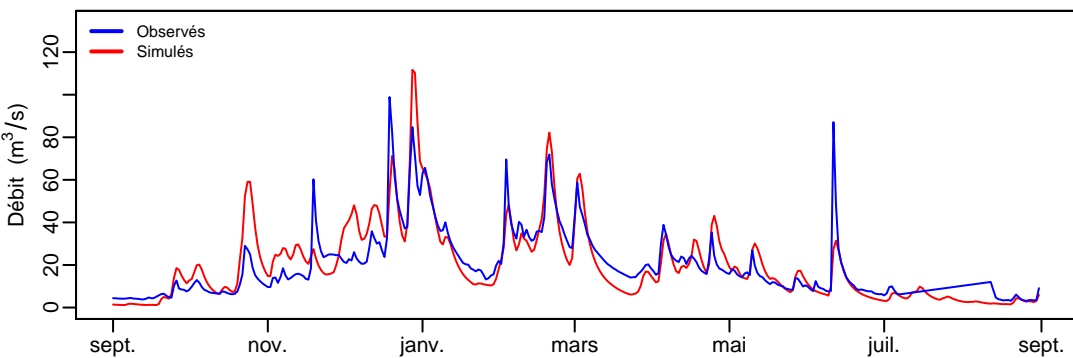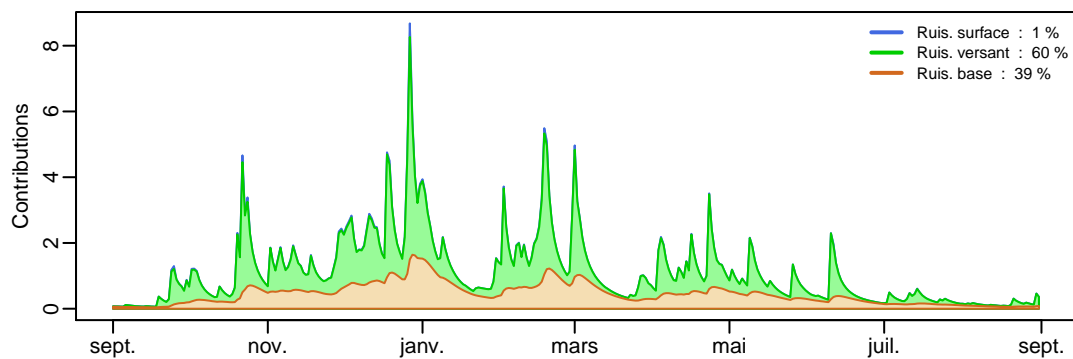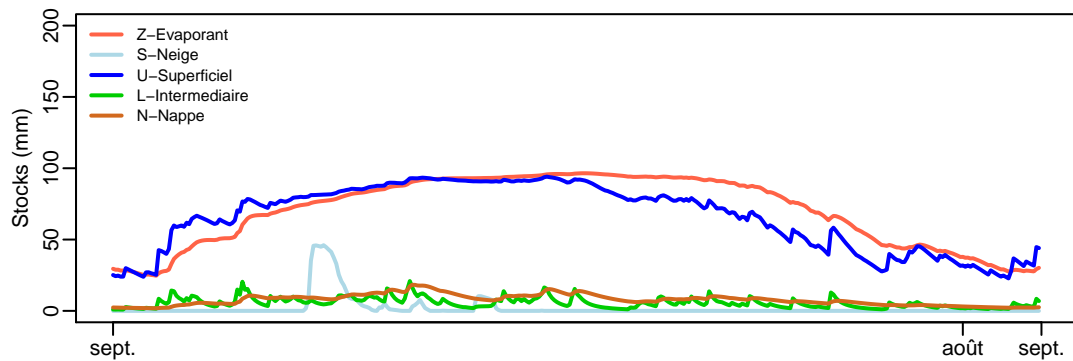

# k2981910 (1523.17 km<sup>2</sup>) – année 2000–2001

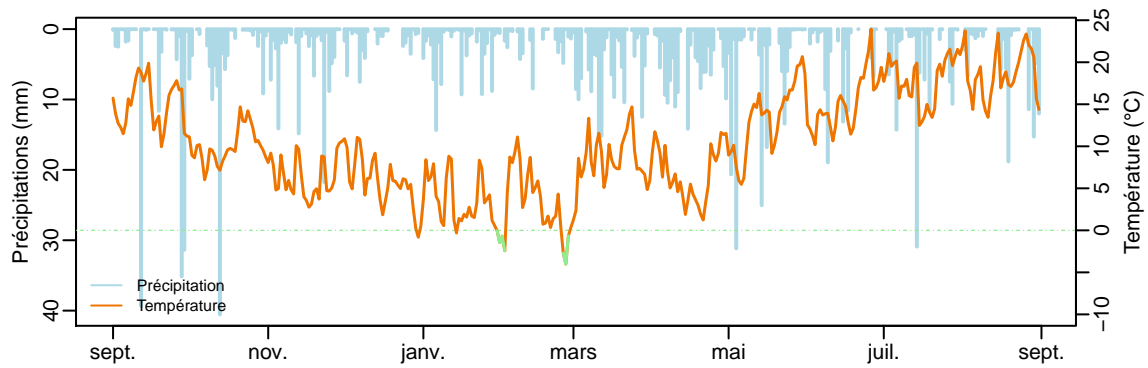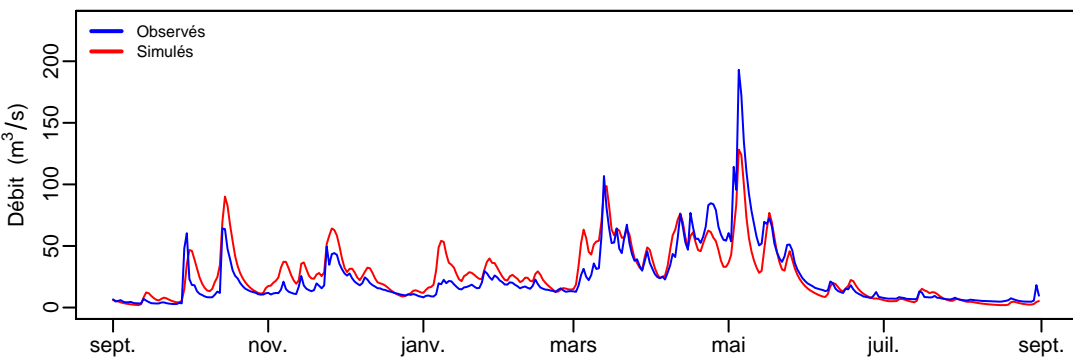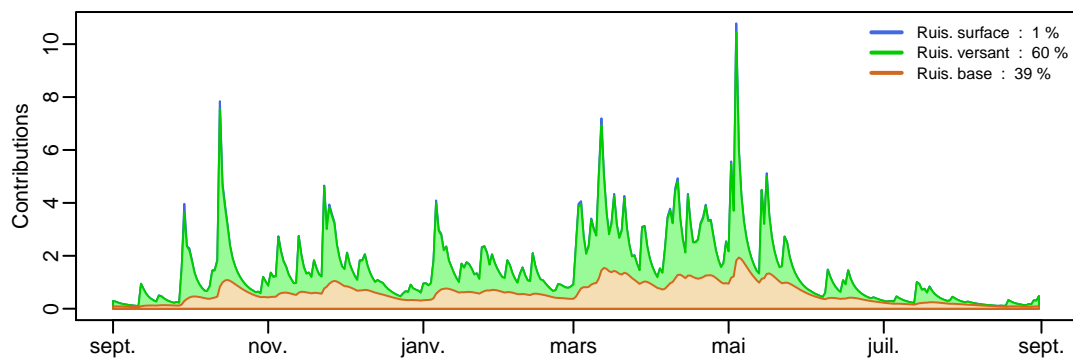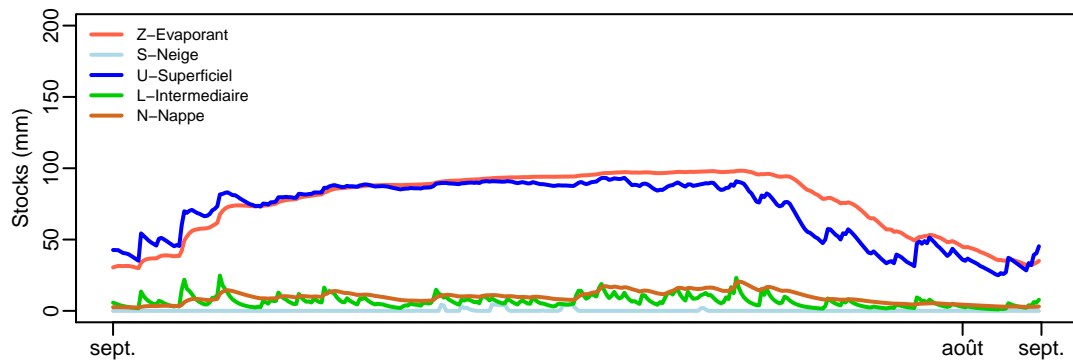

# k2981910 (1523.17 km²) – année 2001–2002

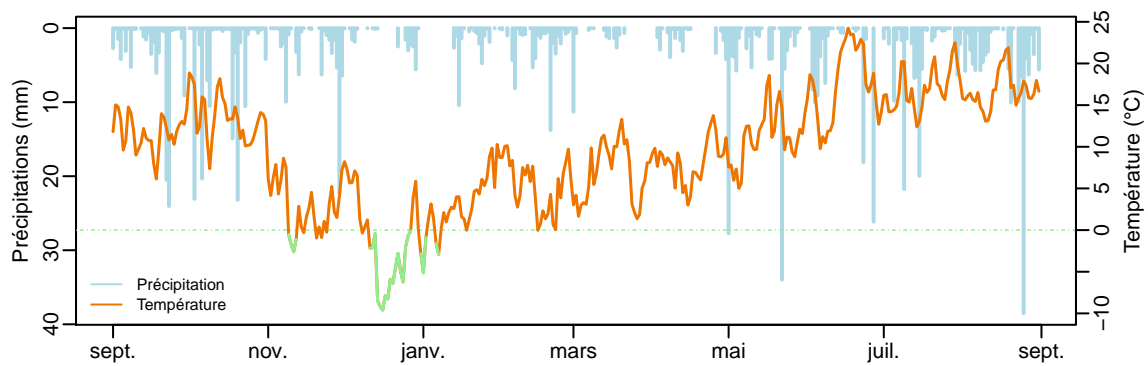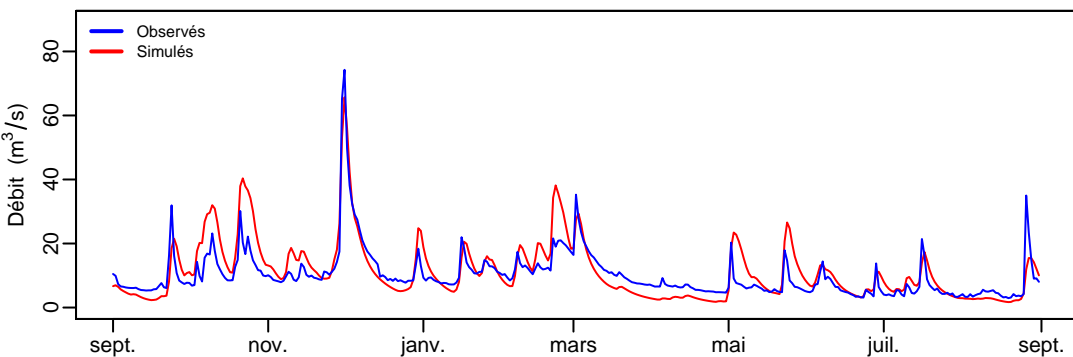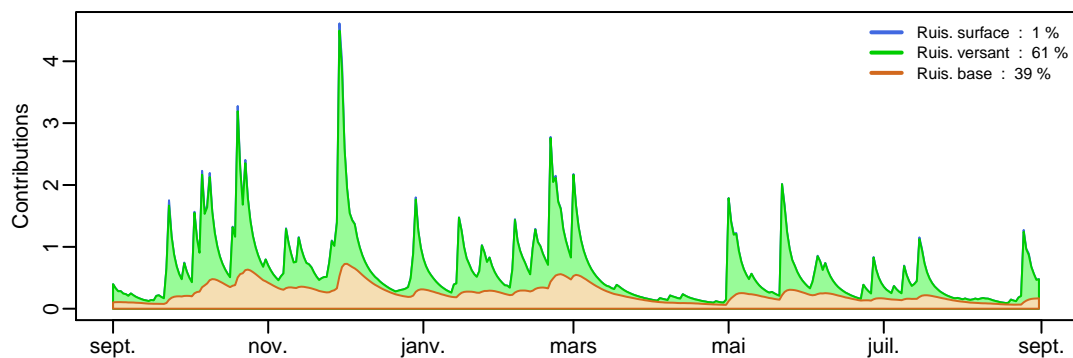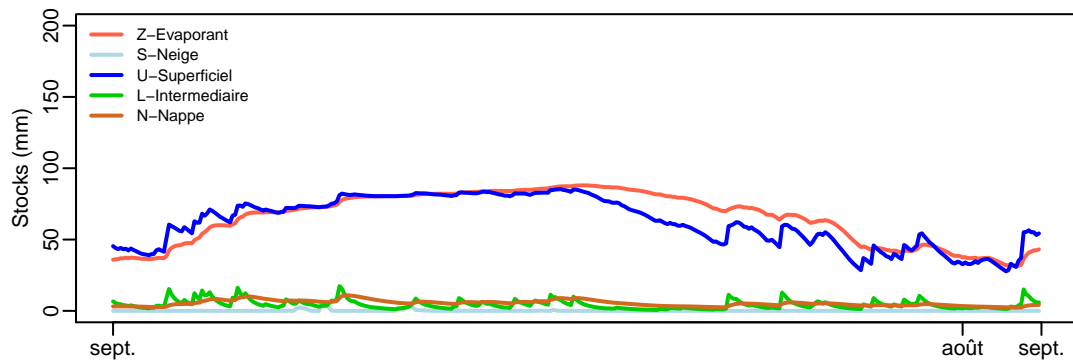

# k2981910 (1523.17 km²) – année 2002–2003

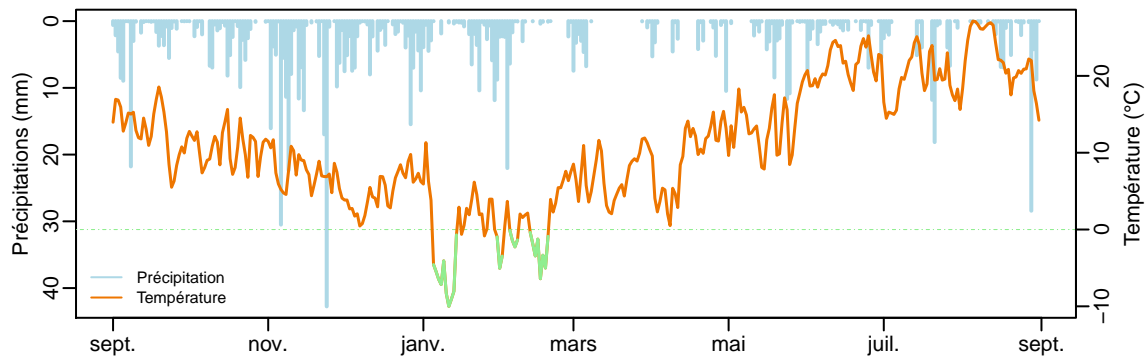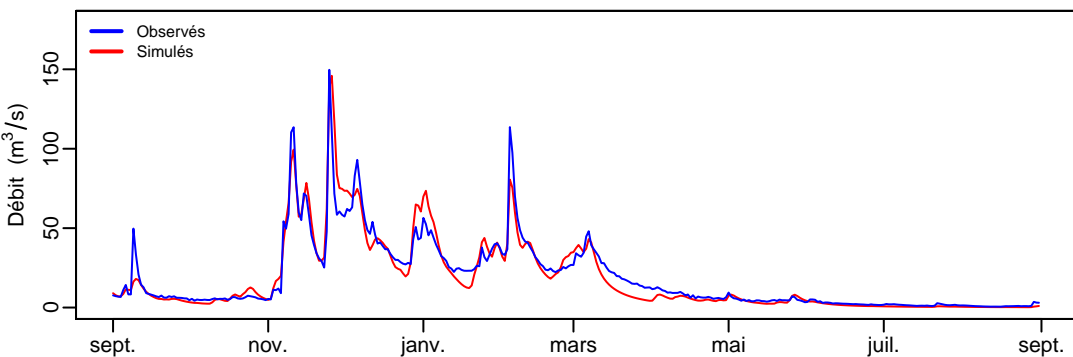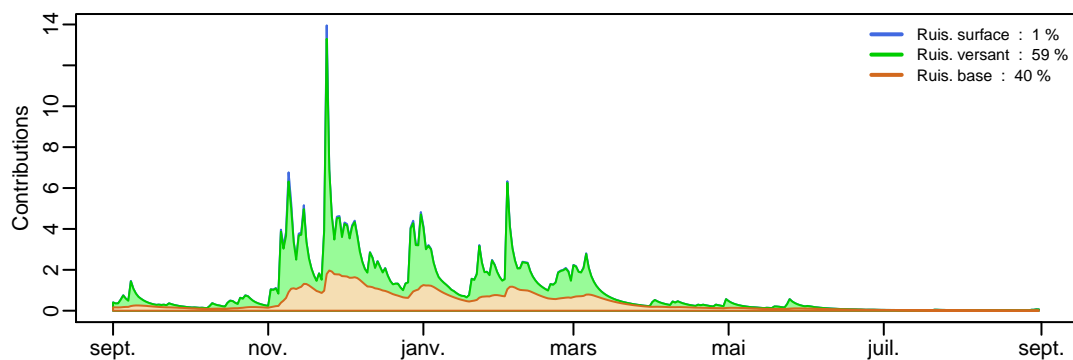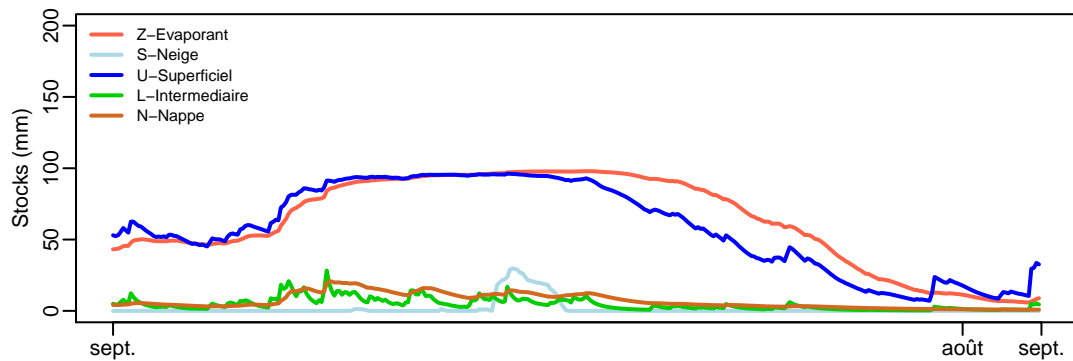

# k2981910 (1523.17 km²) – année 2003–2004

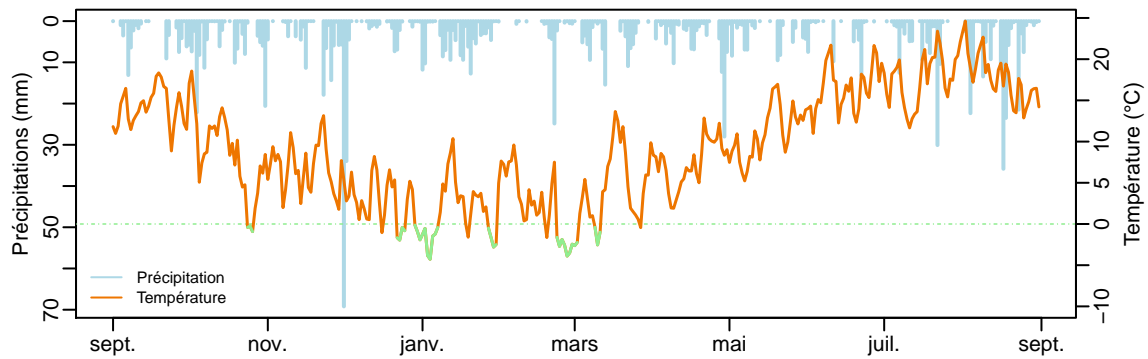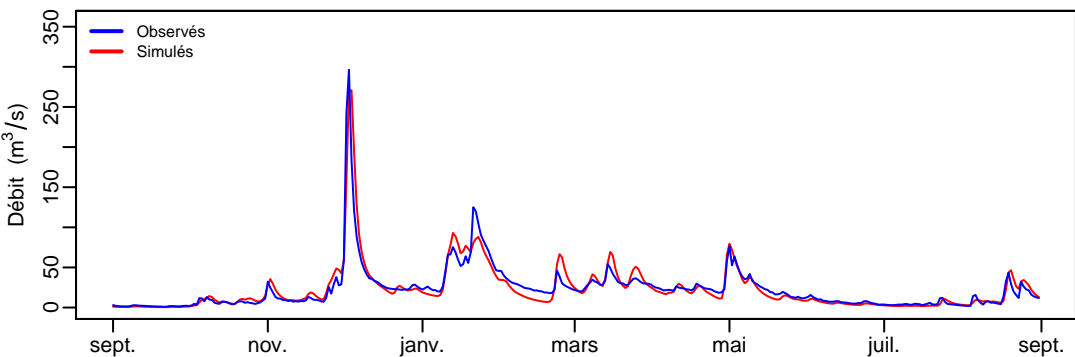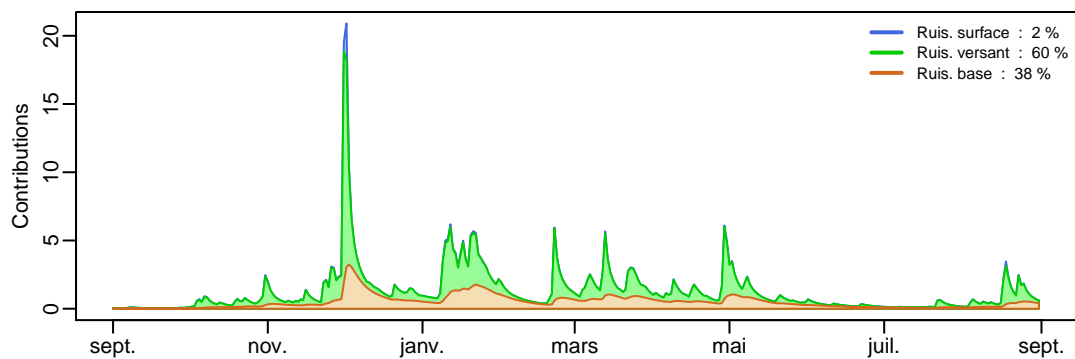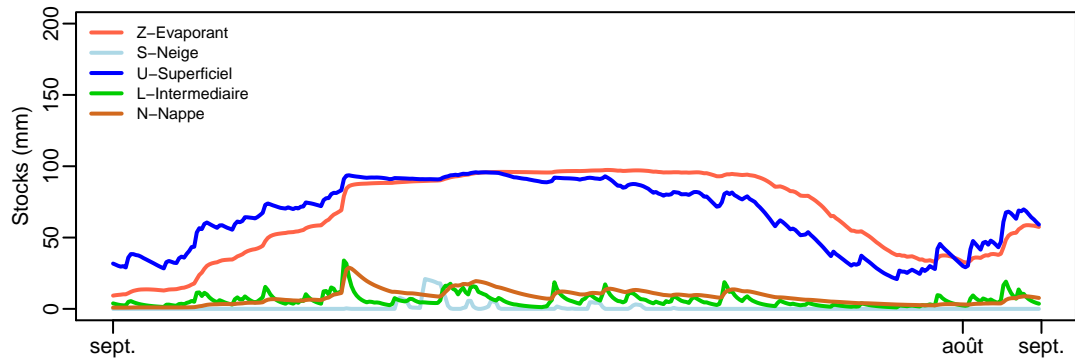

# k2981910 (1523.17 km²) – année 2004–2005

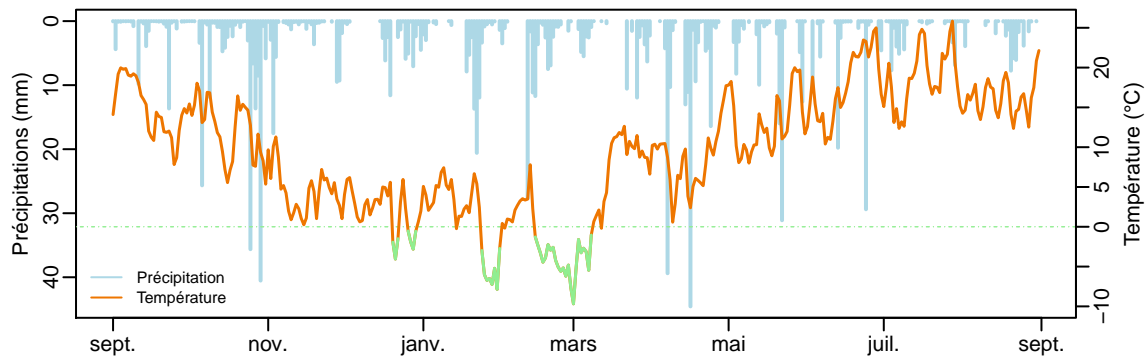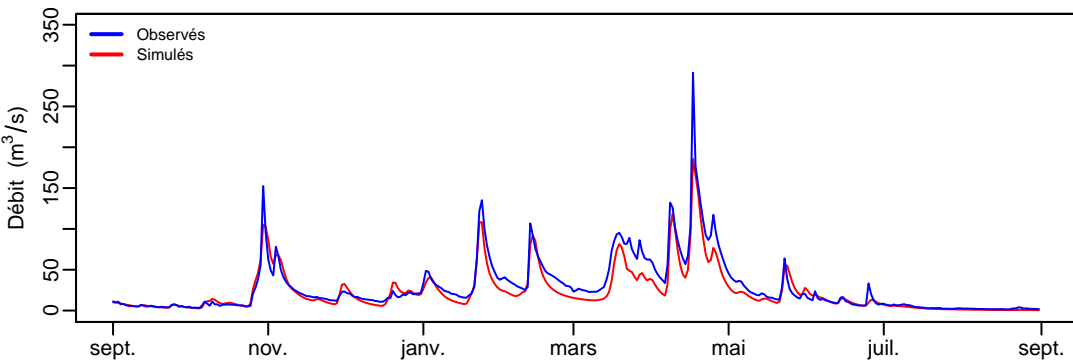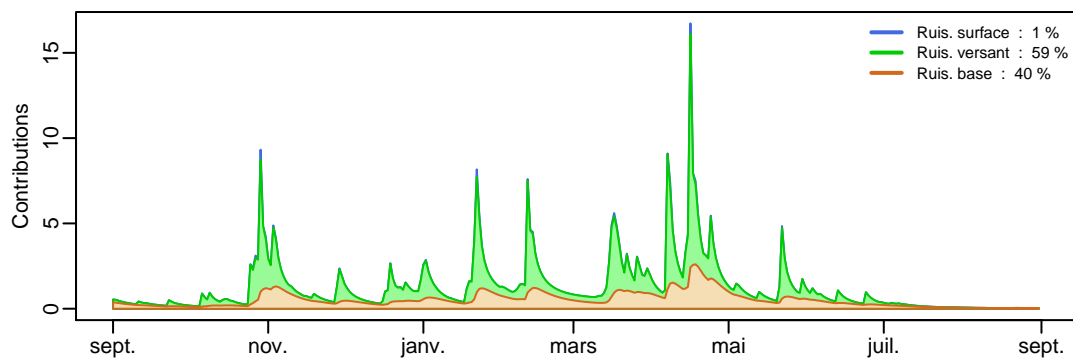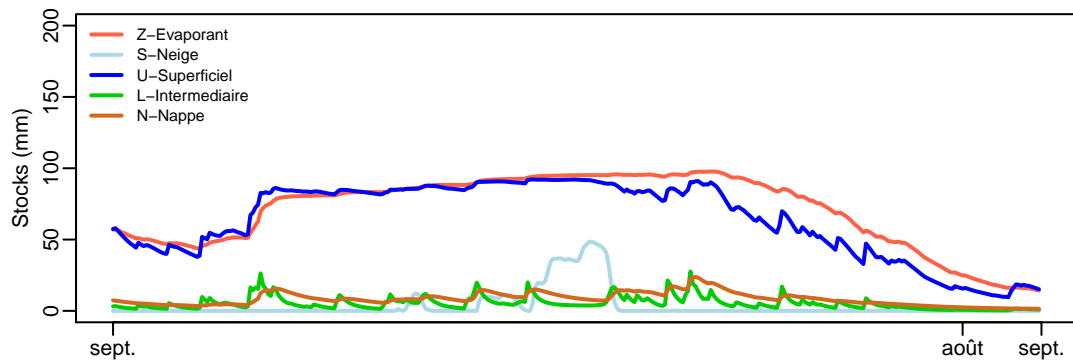

# k2981910 (1523.17 km<sup>2</sup>) – année 2005–2006

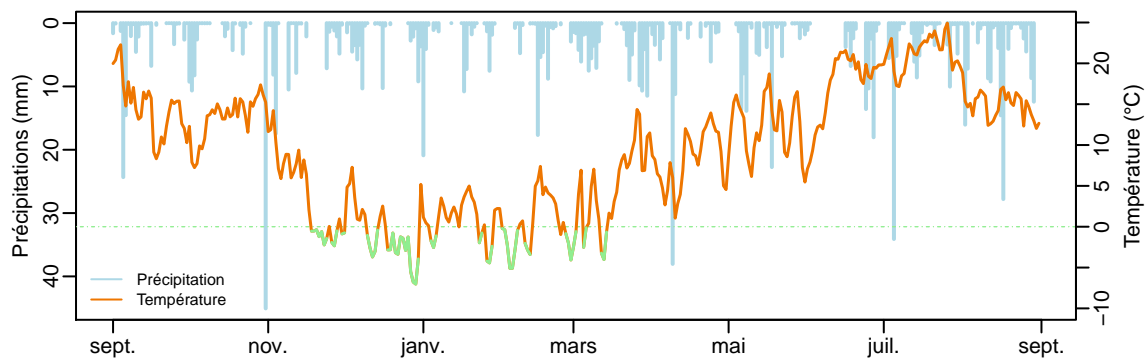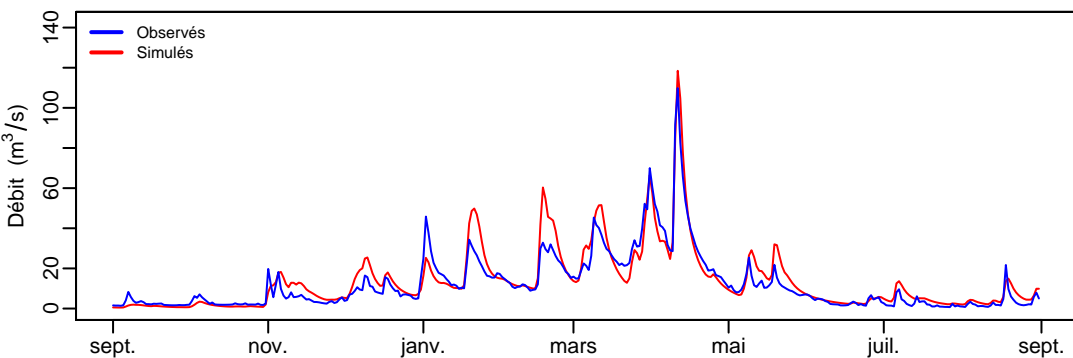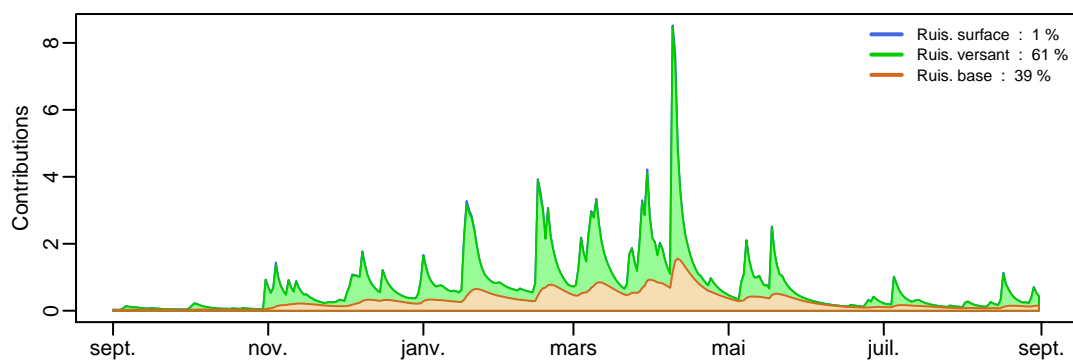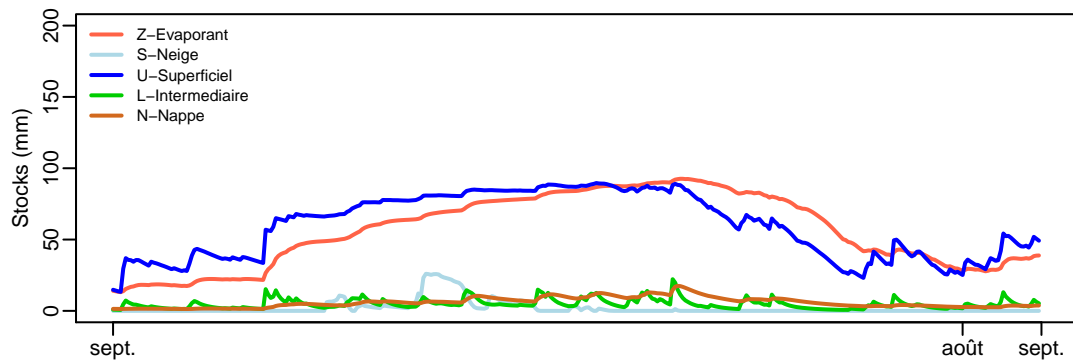

# k2981910 (1523.17 km²) – année 2006–2007

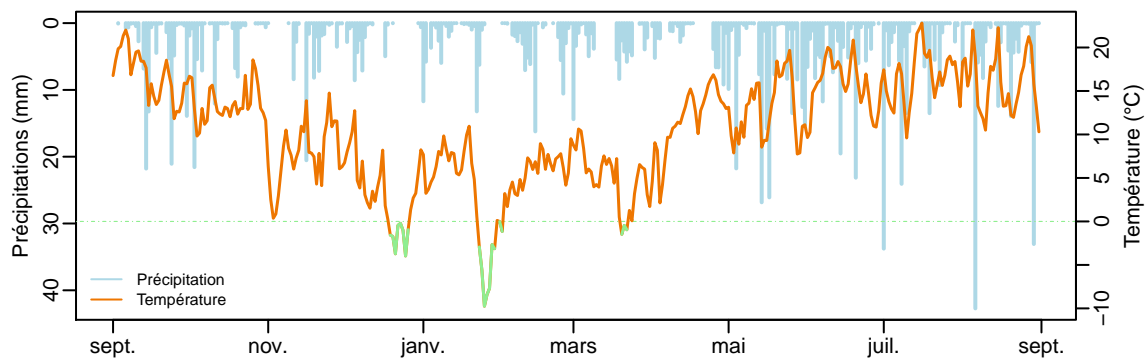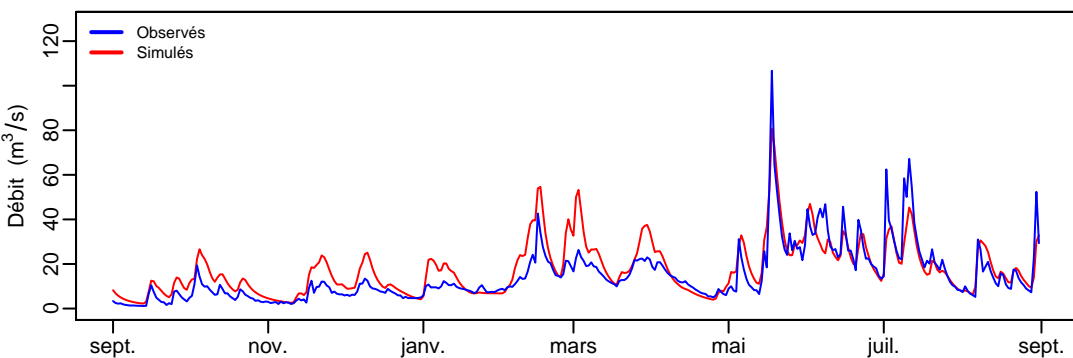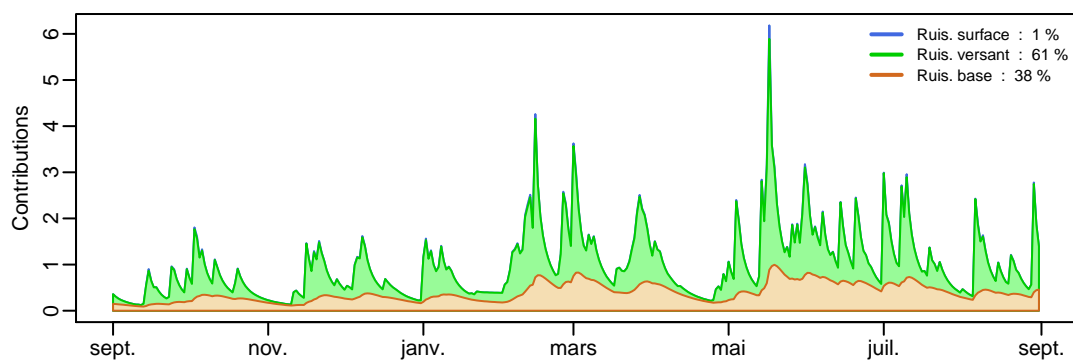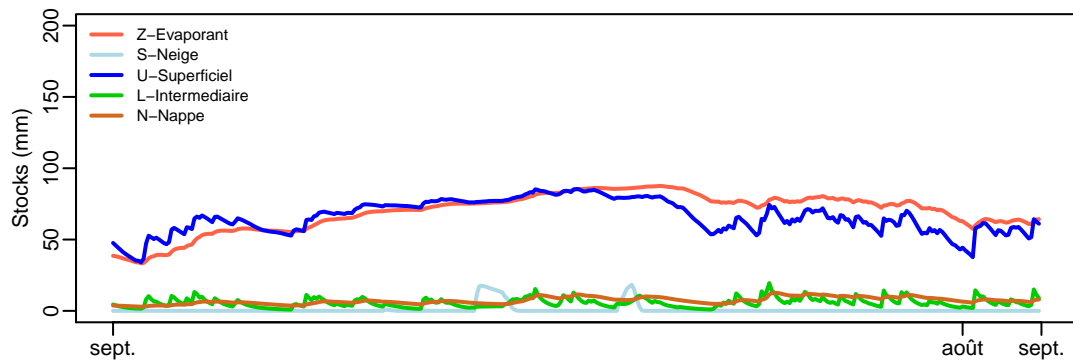



# k2981910 (1523.17 km²) – année 2007–2008

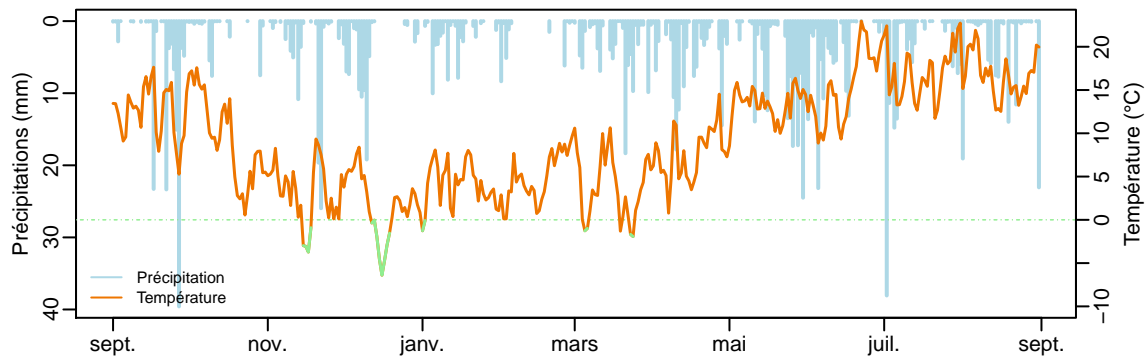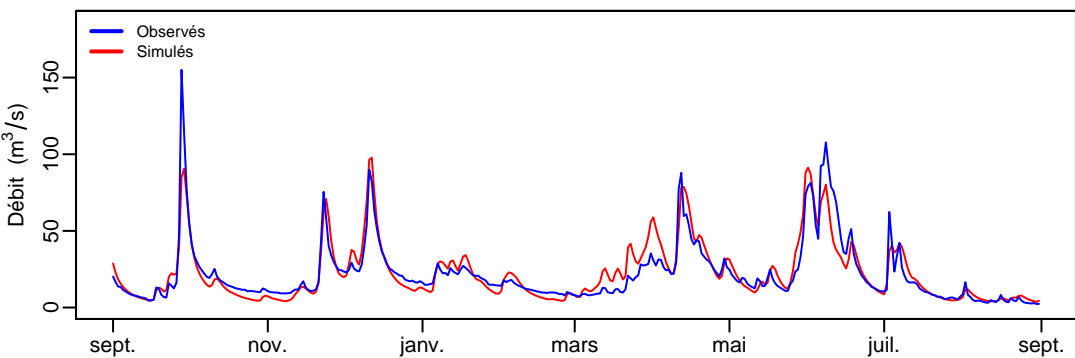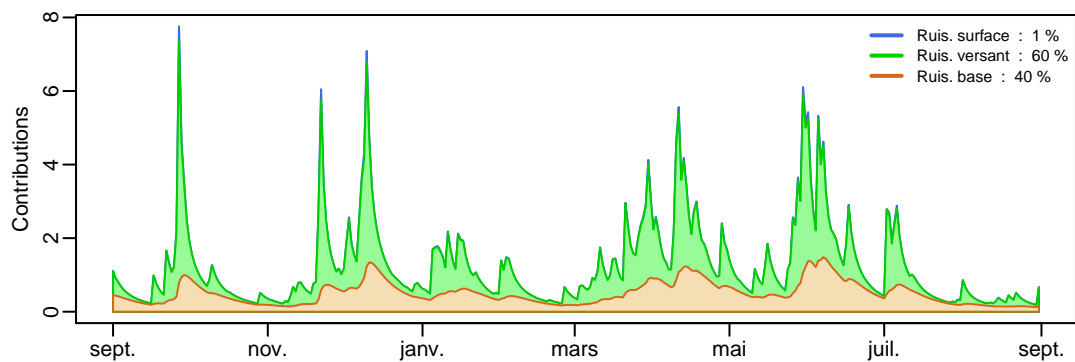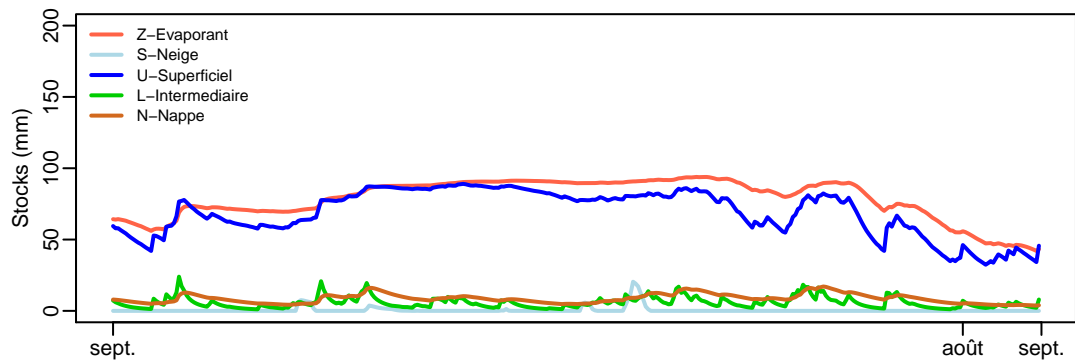

# k2981910 (1523.17 km²) – année 2008–2009

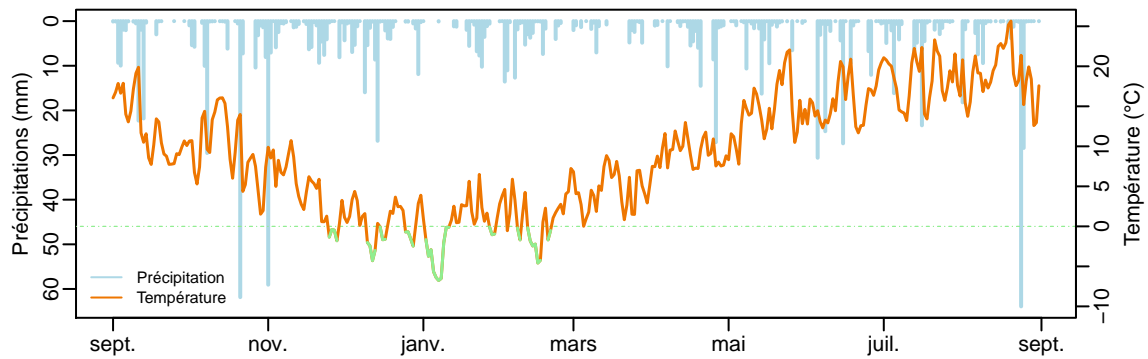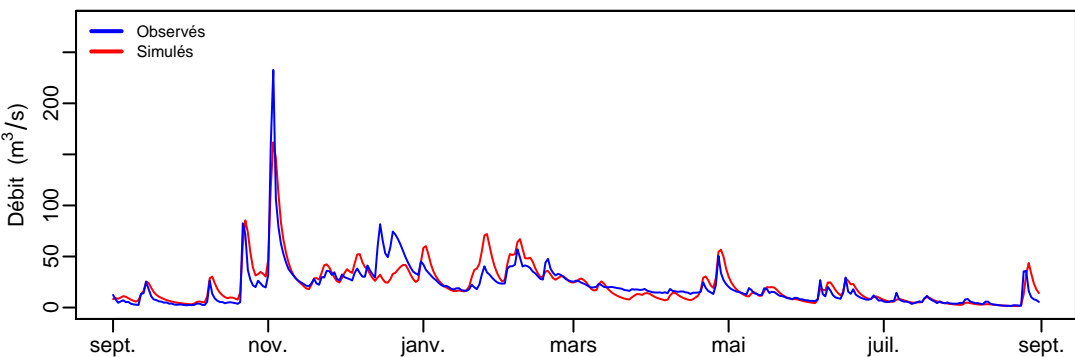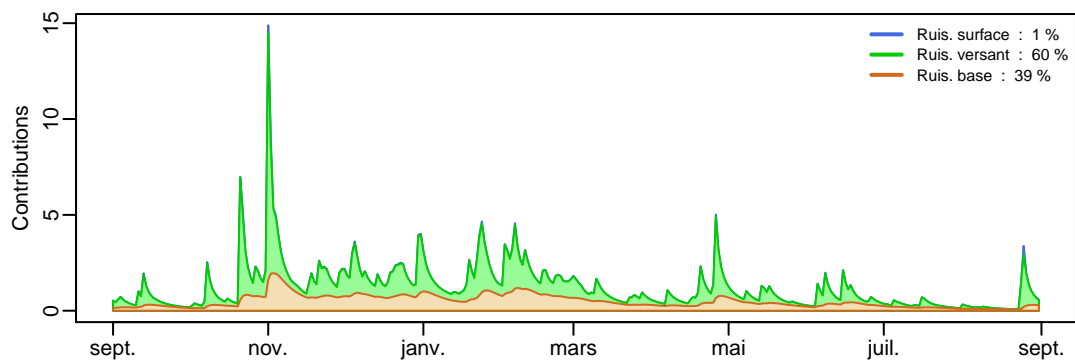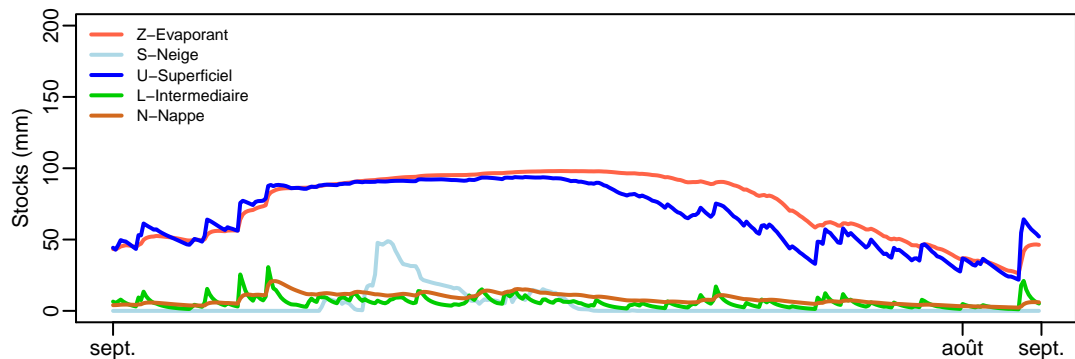

# k2981910 (1523.17 km²) – année 2009–2010

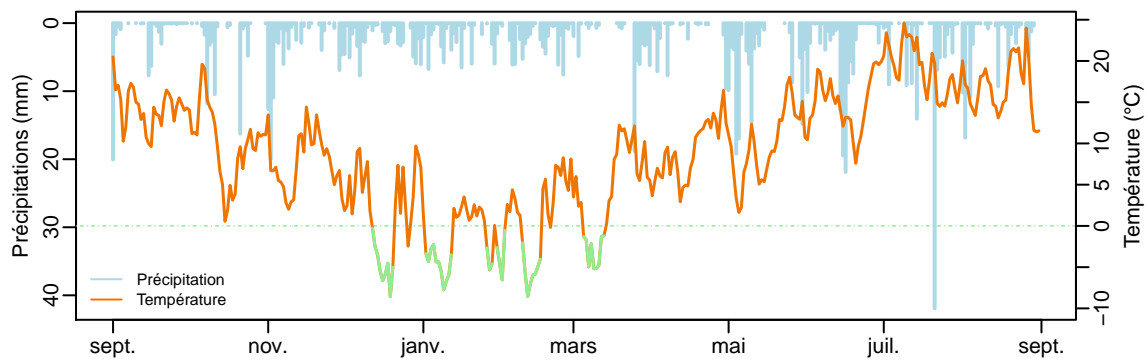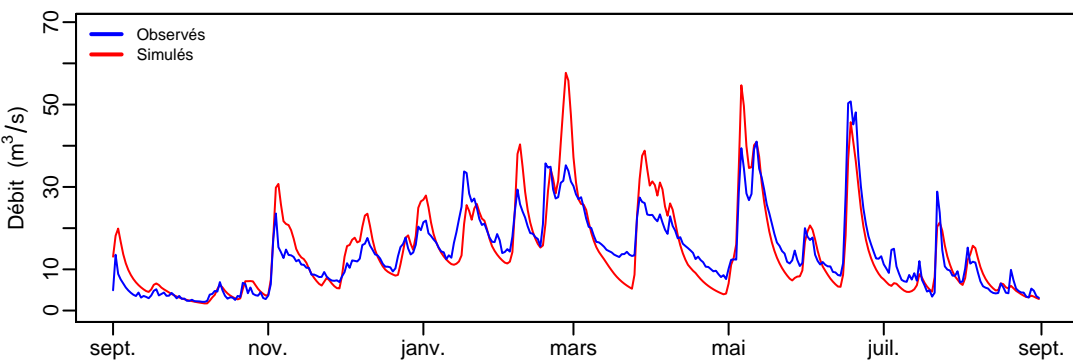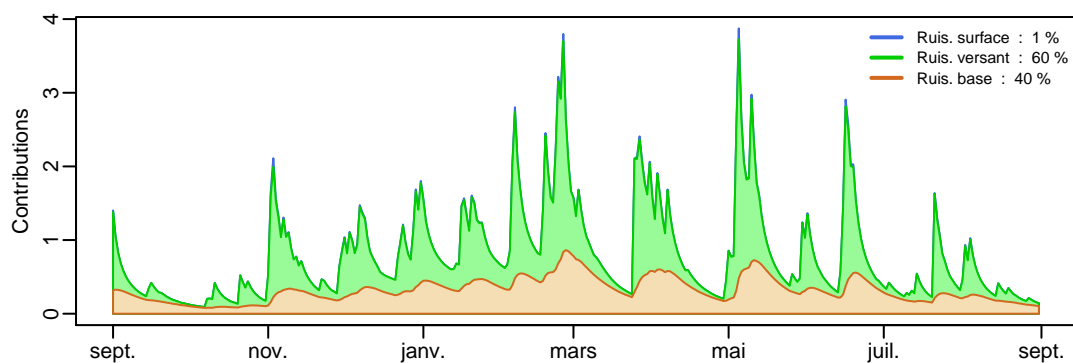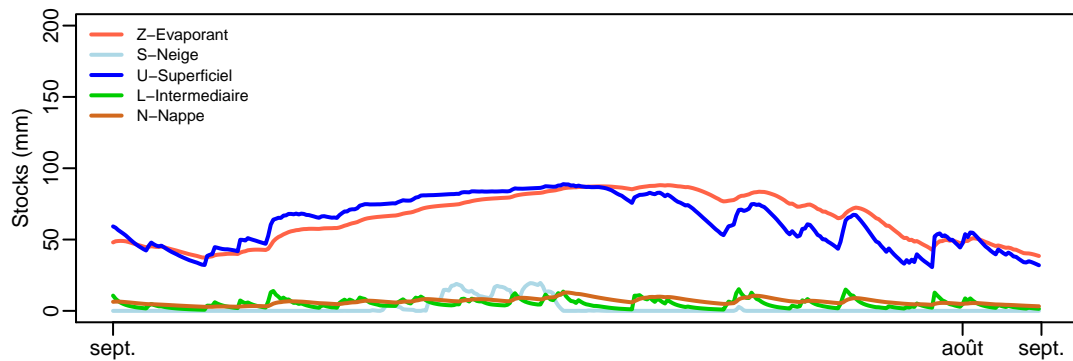

# k2981910 (1523.17 km²) – année 2010–2011

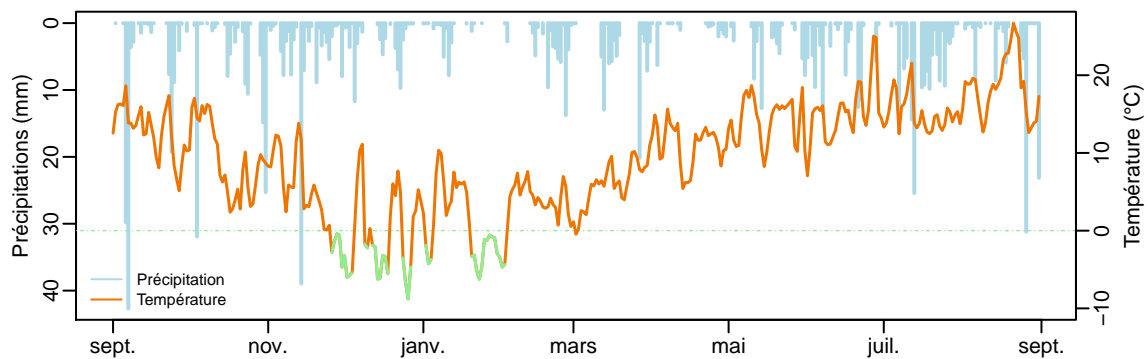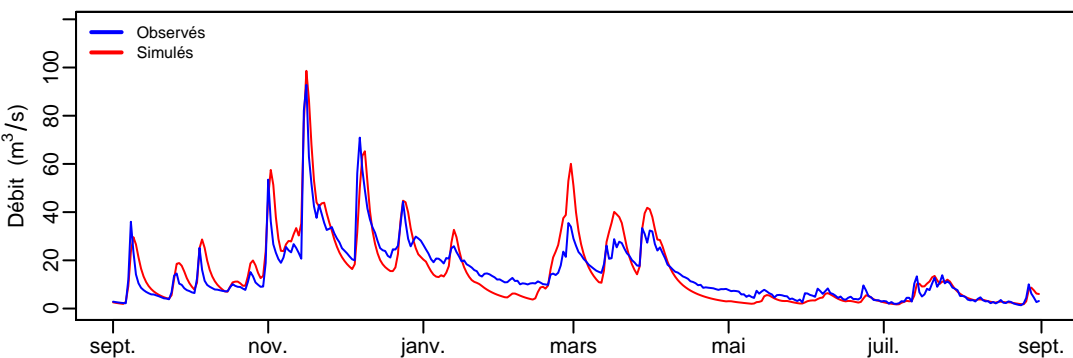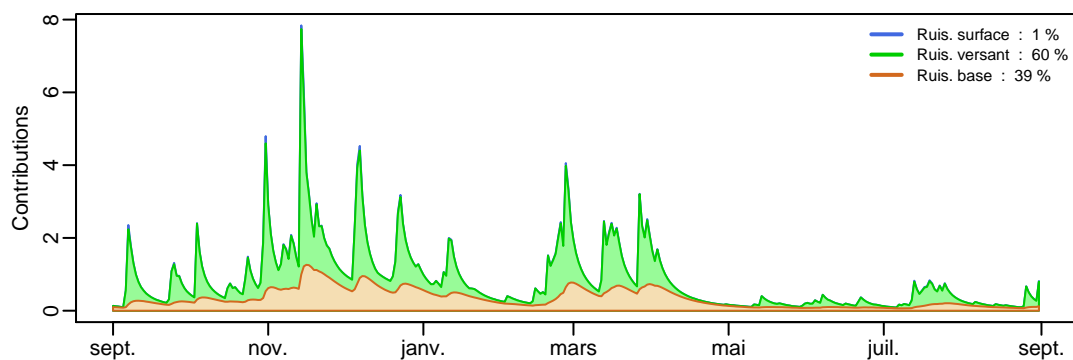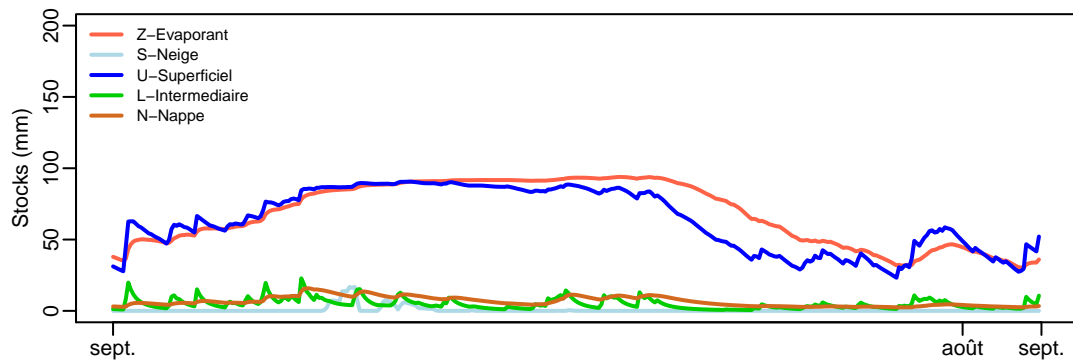

# k2981910 (1523.17 km²) – année 2011–2012

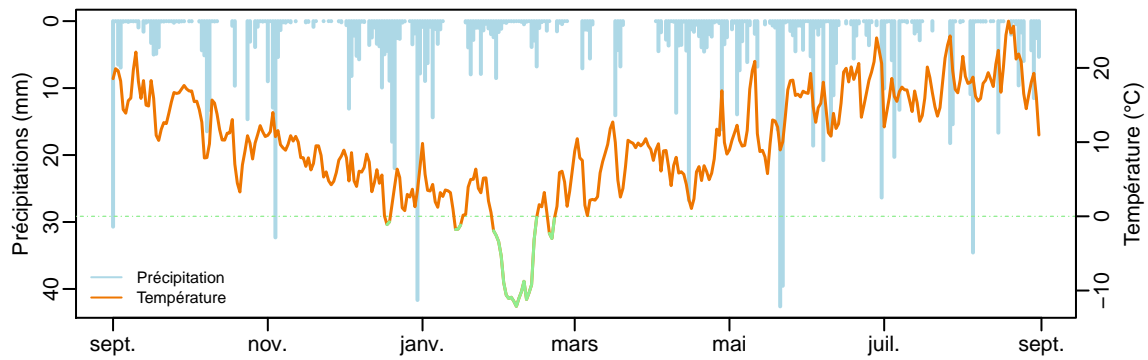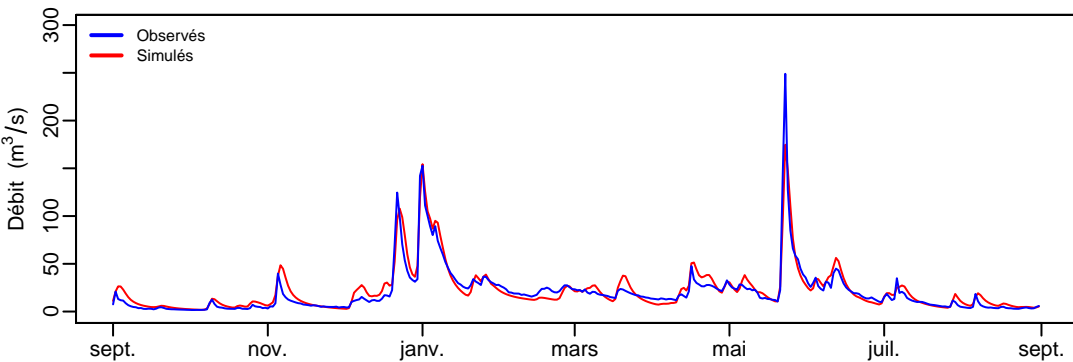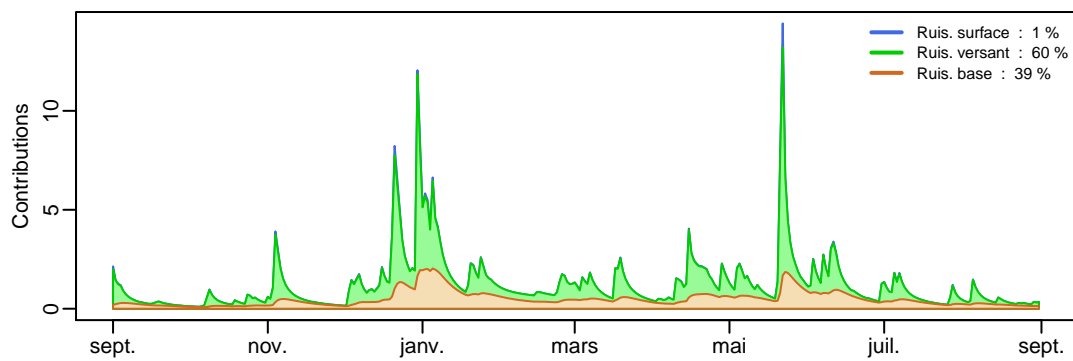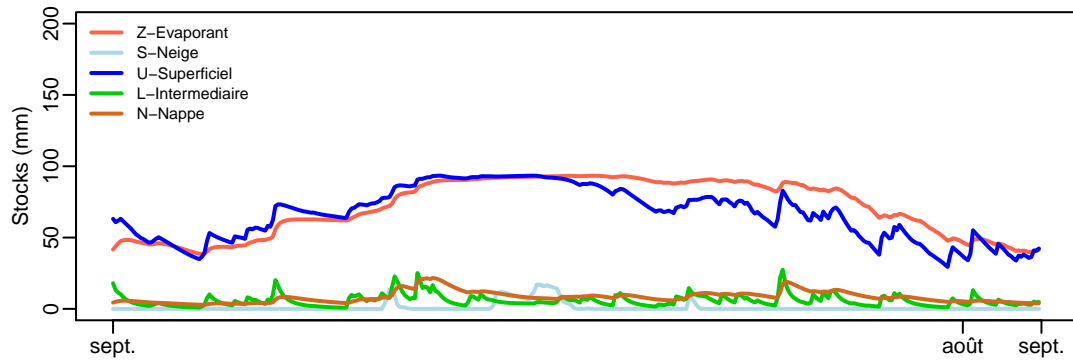

# k3030810 (8939.22 km²) – année 1981–1982

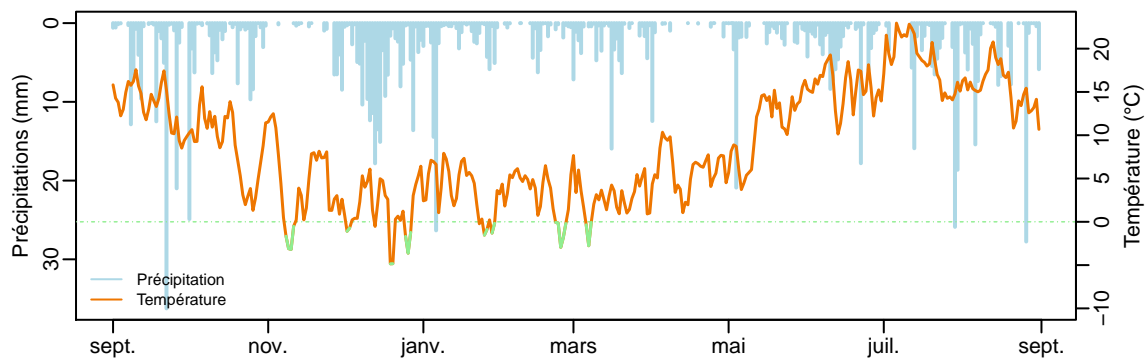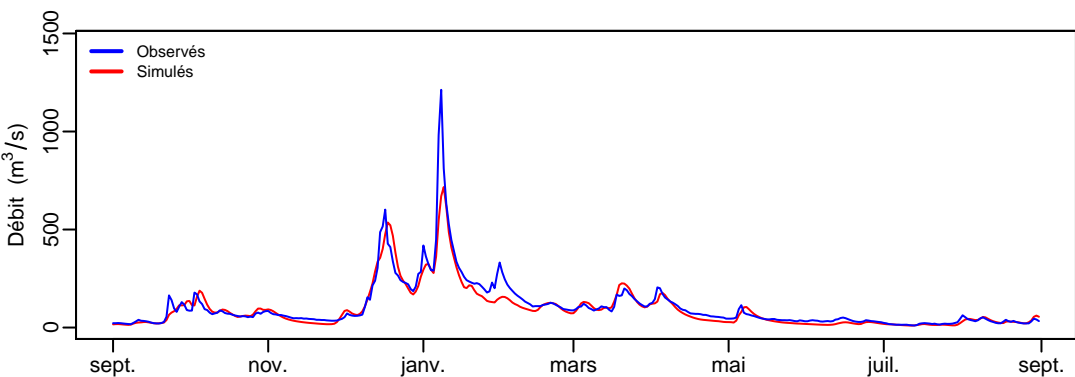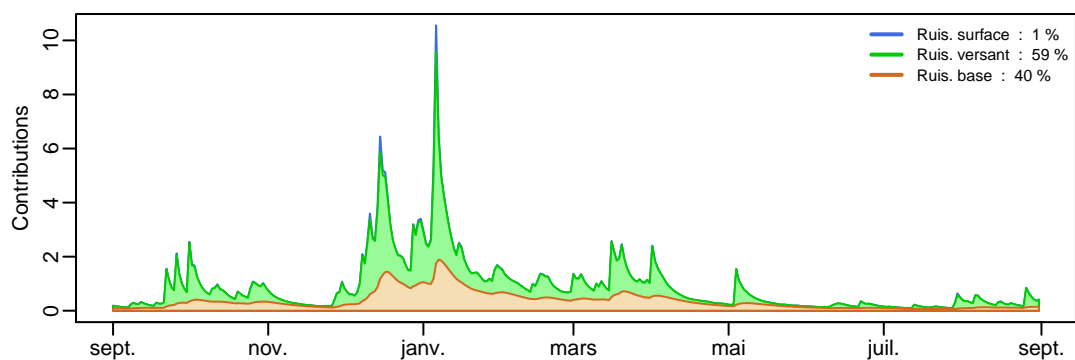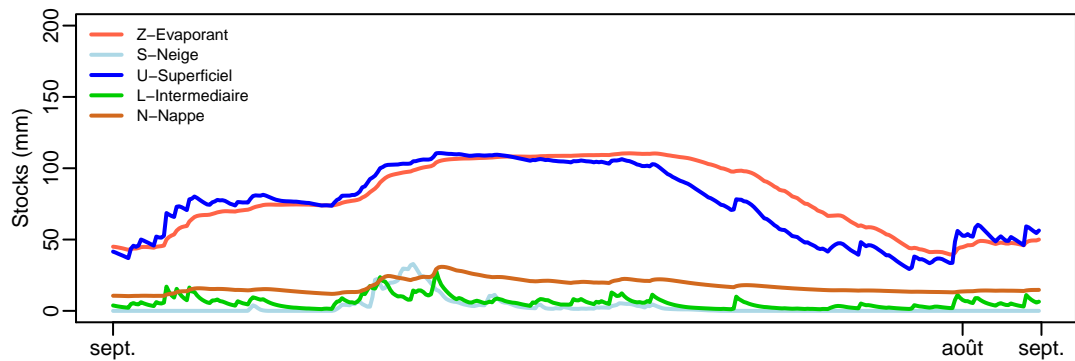

# k3030810 (8939.22 km<sup>2</sup>) – année 1982–1983

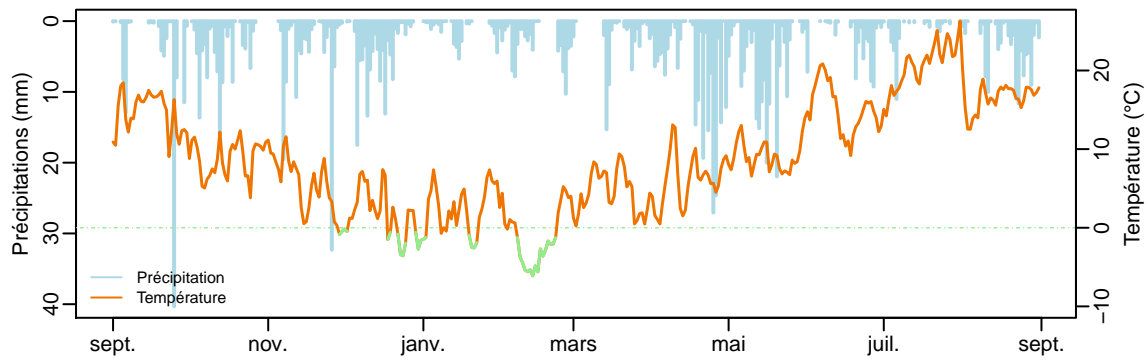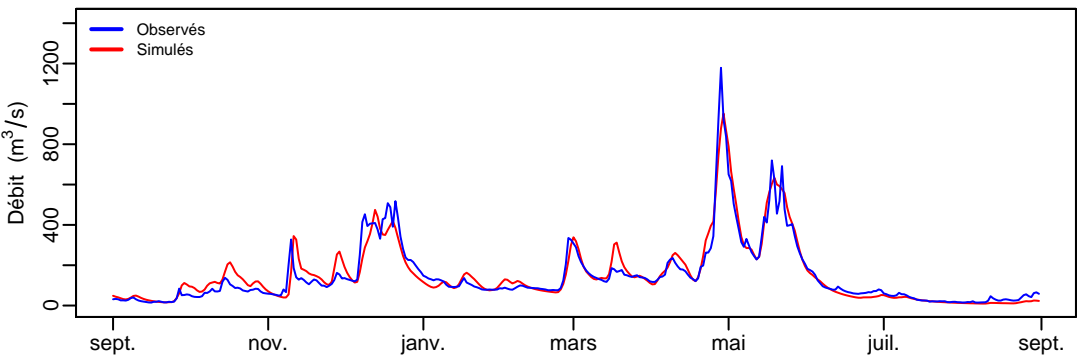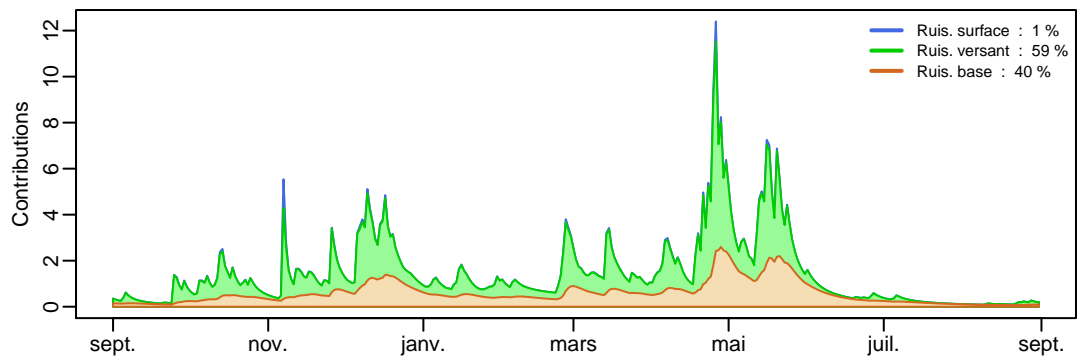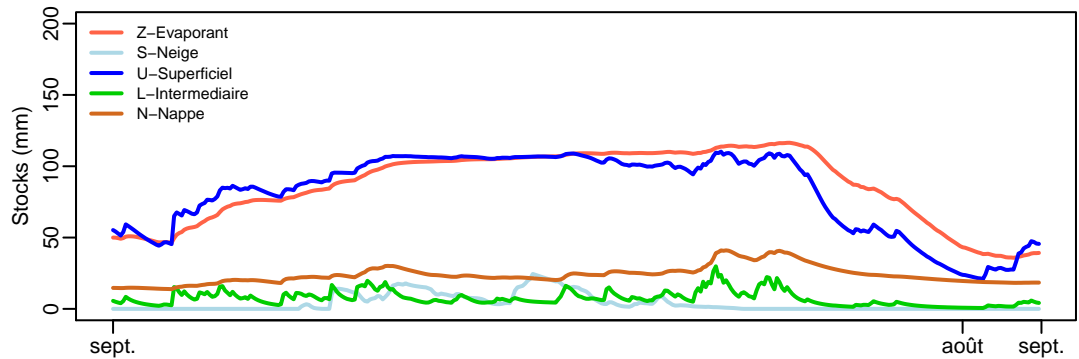

# k3030810 (8939.22 km<sup>2</sup>) – année 1983–1984

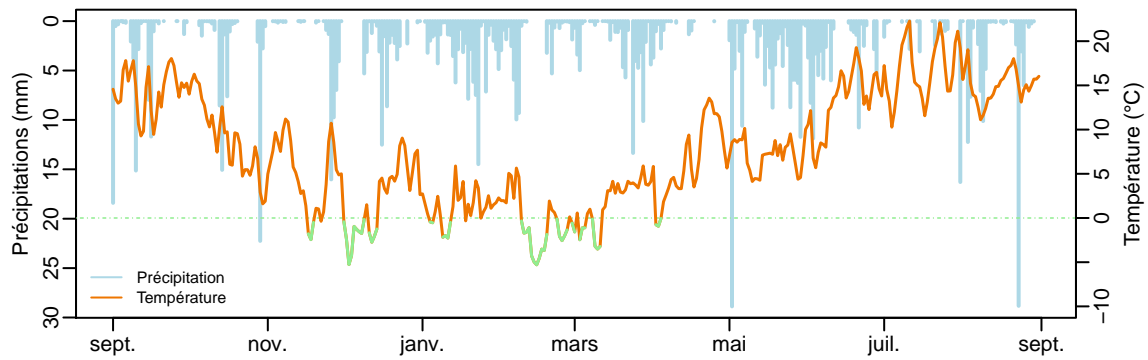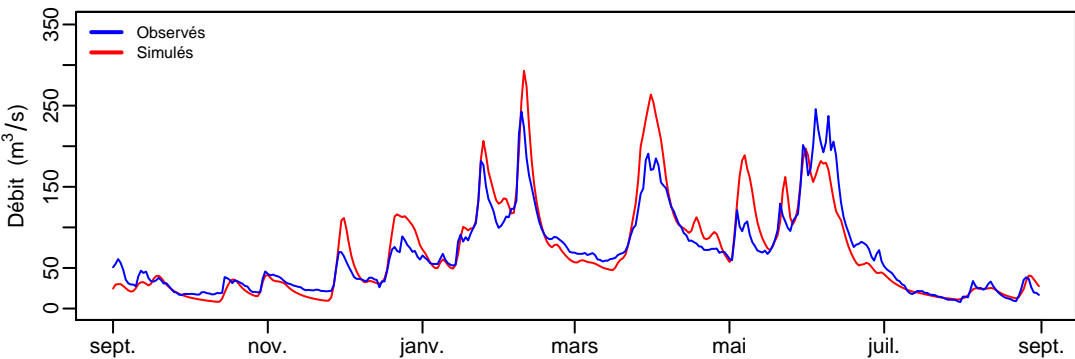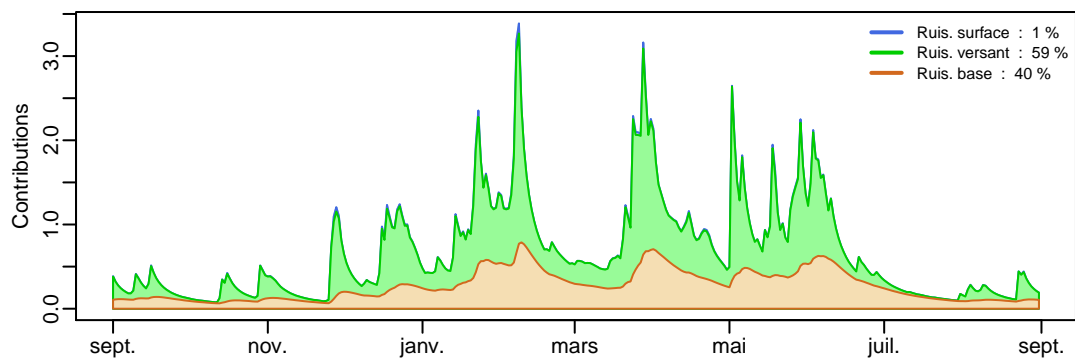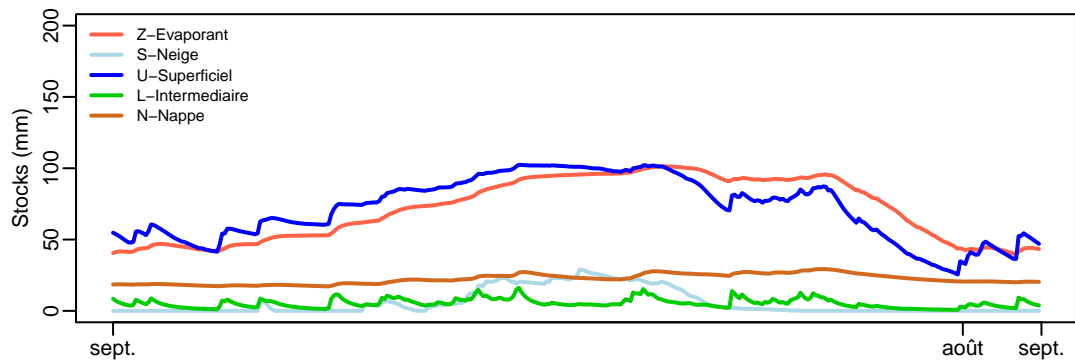



# k3030810 (8939.22 km<sup>2</sup>) – année 1984–1985

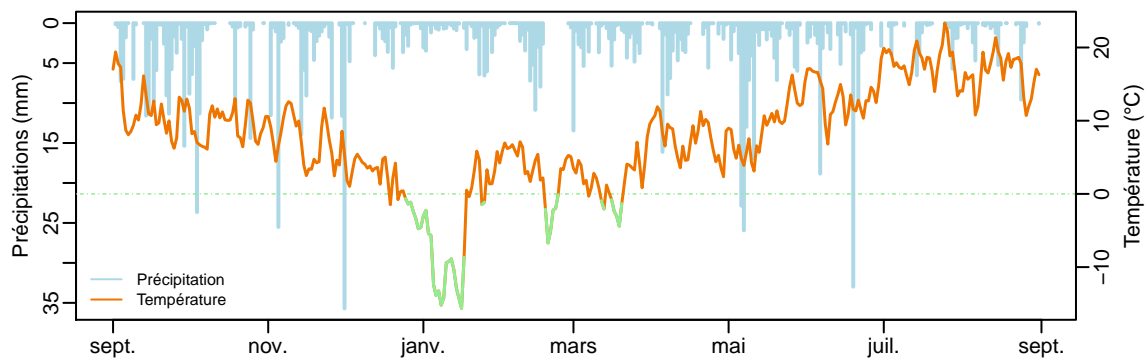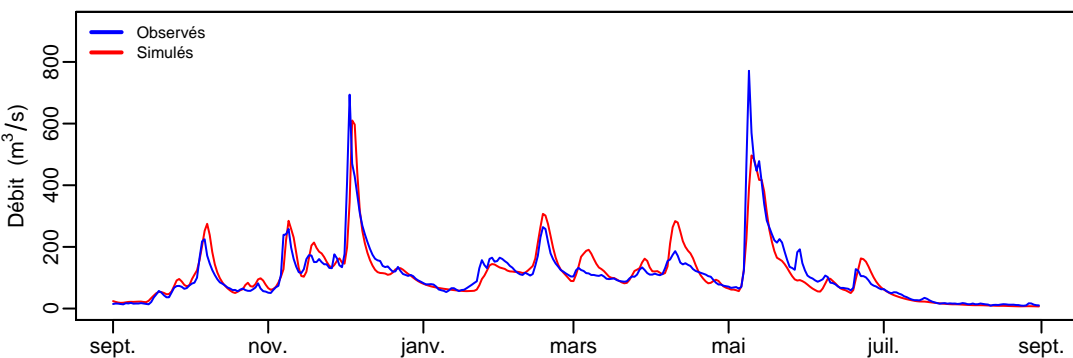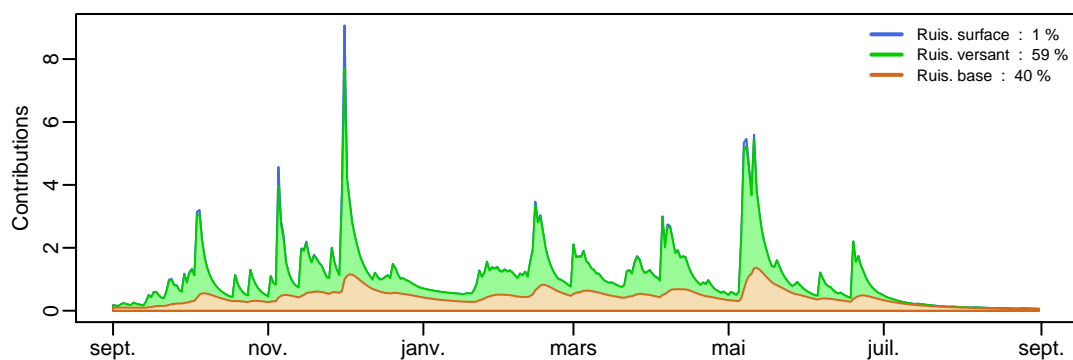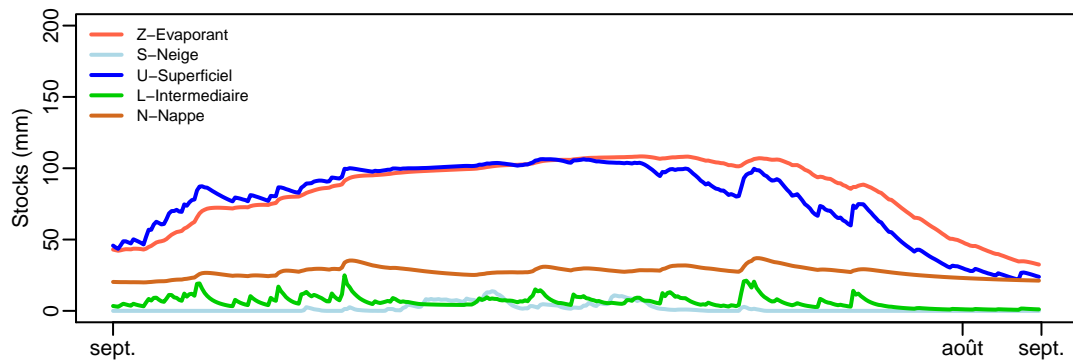

# k3030810 (8939.22 km<sup>2</sup>) – année 1985–1986

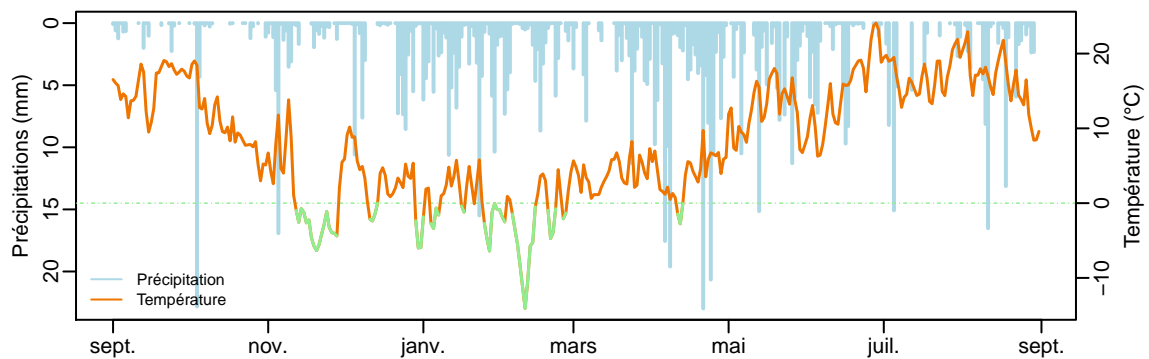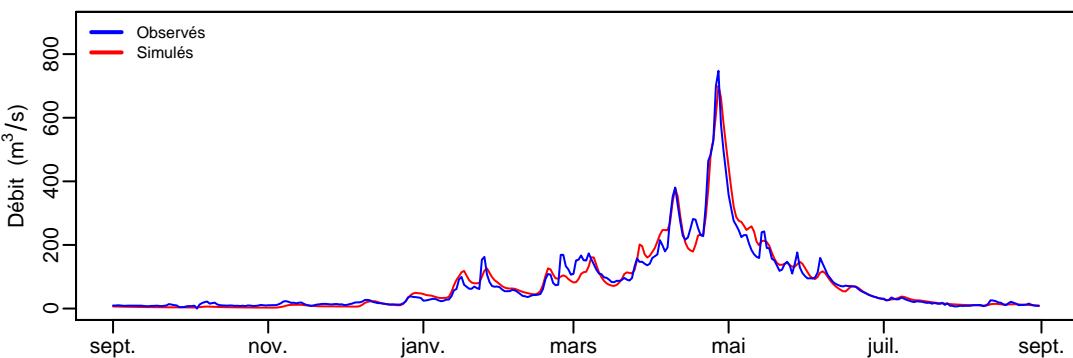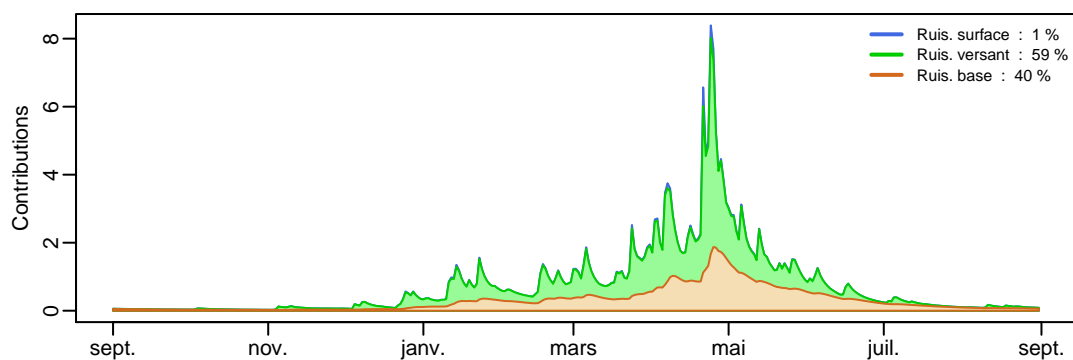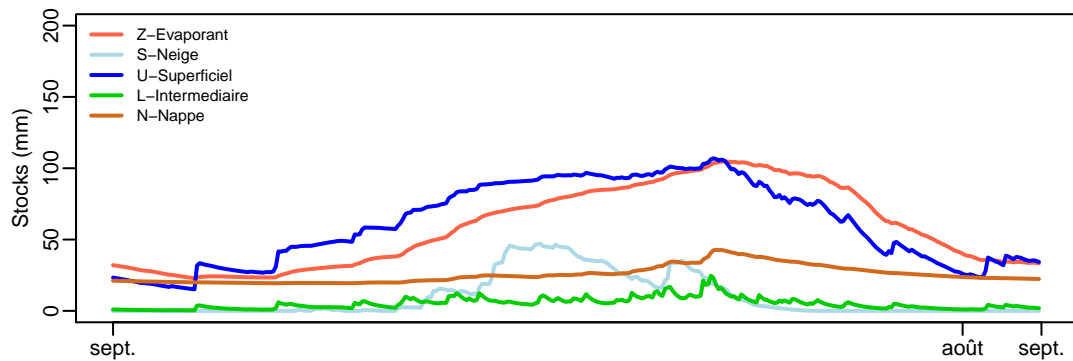

# k3030810 (8939.22 km<sup>2</sup>) – année 1986–1987

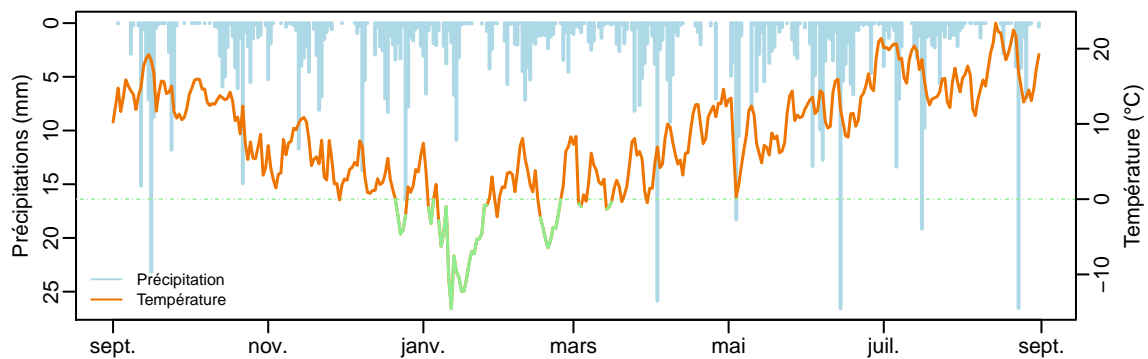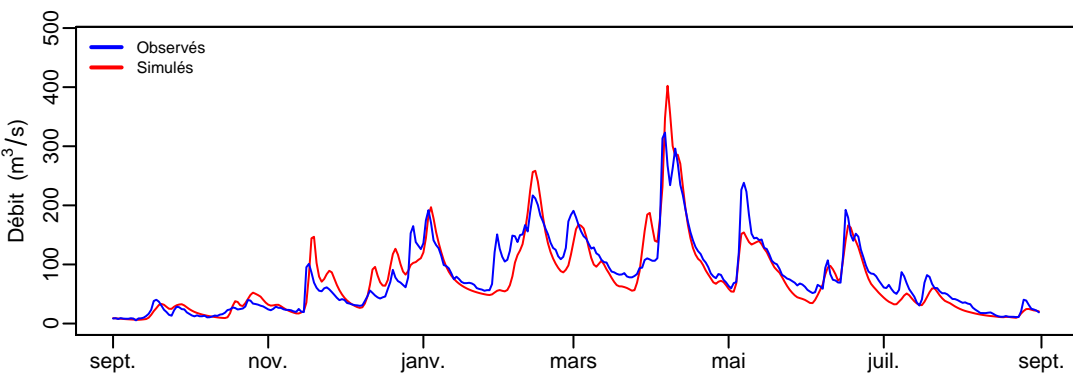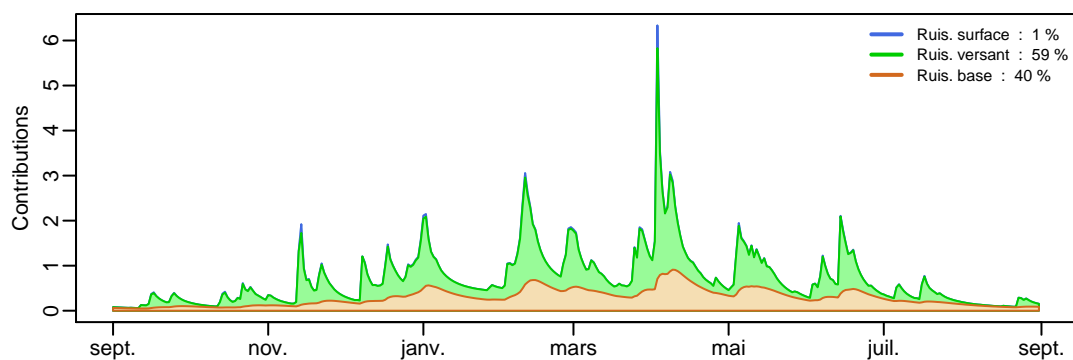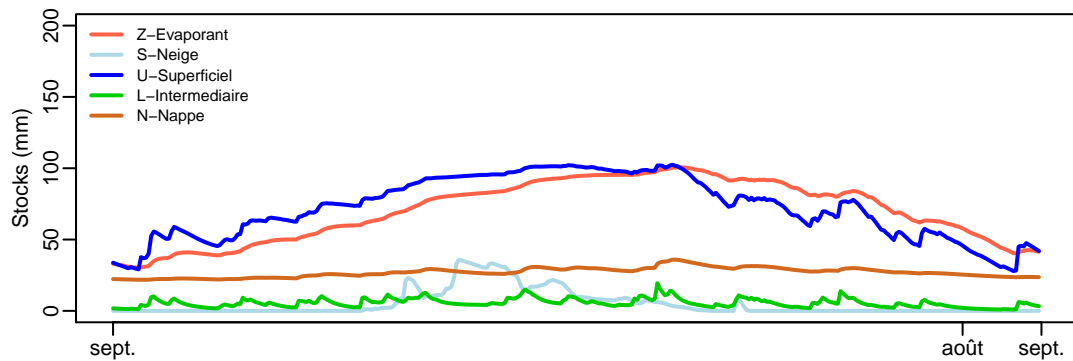

# k3030810 (8939.22 km<sup>2</sup>) – année 1987–1988

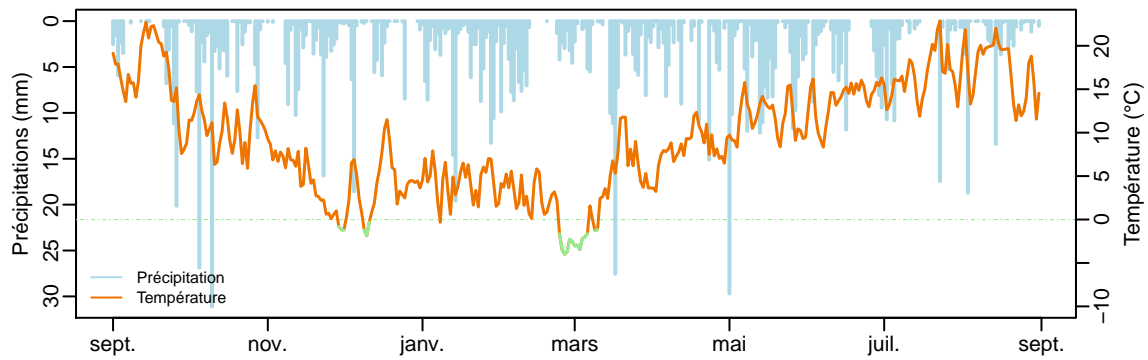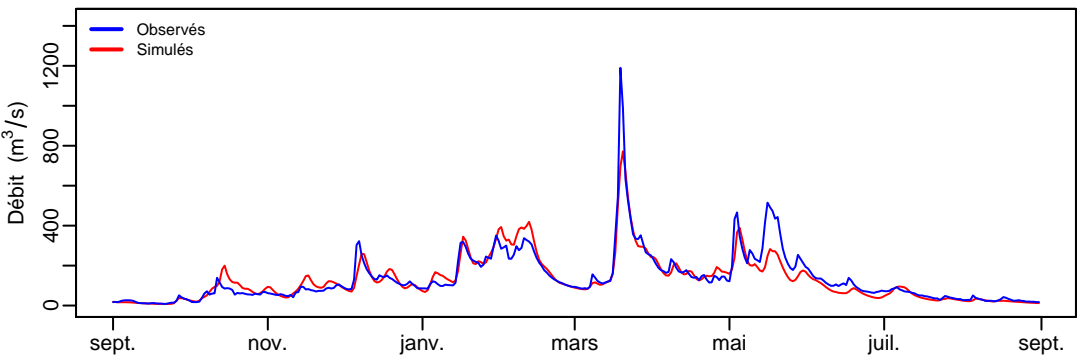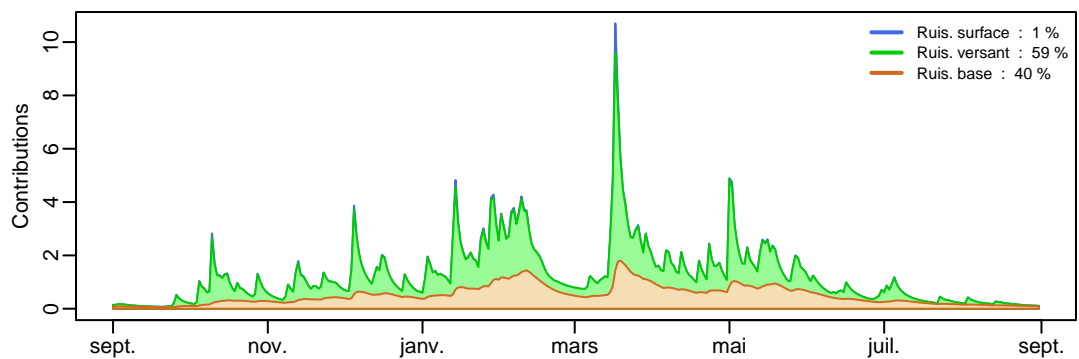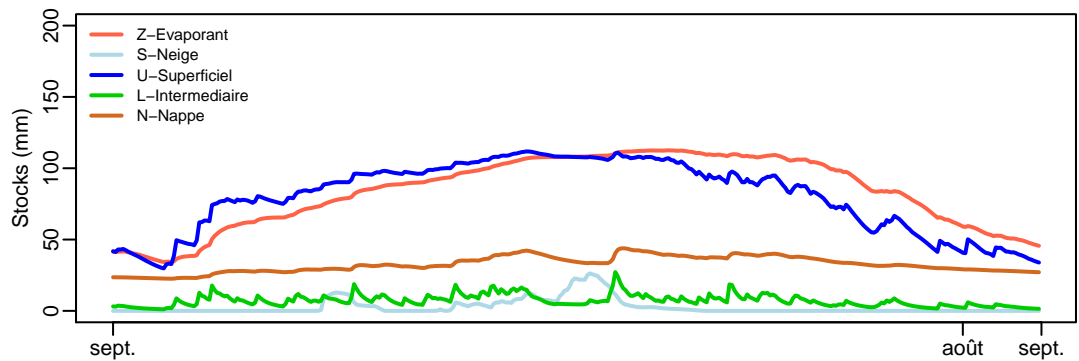

# k3030810 (8939.22 km<sup>2</sup>) – année 1988–1989

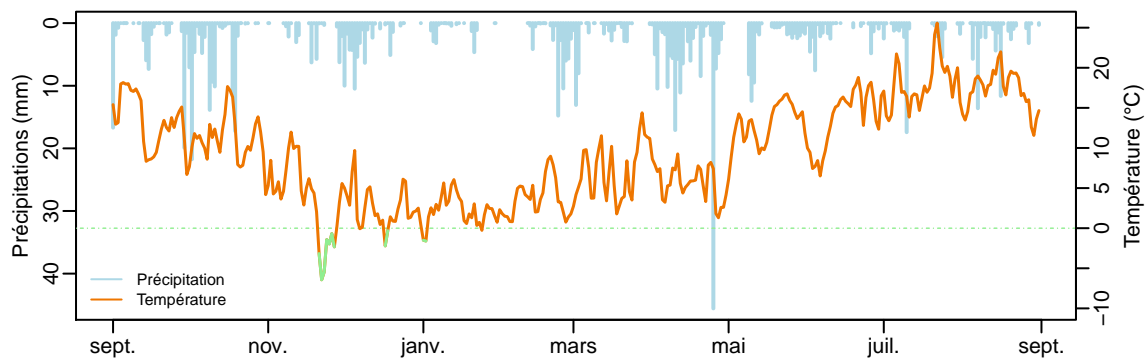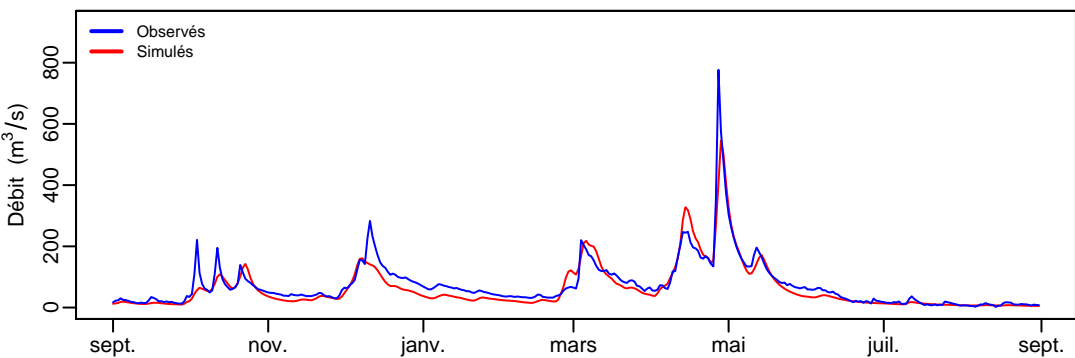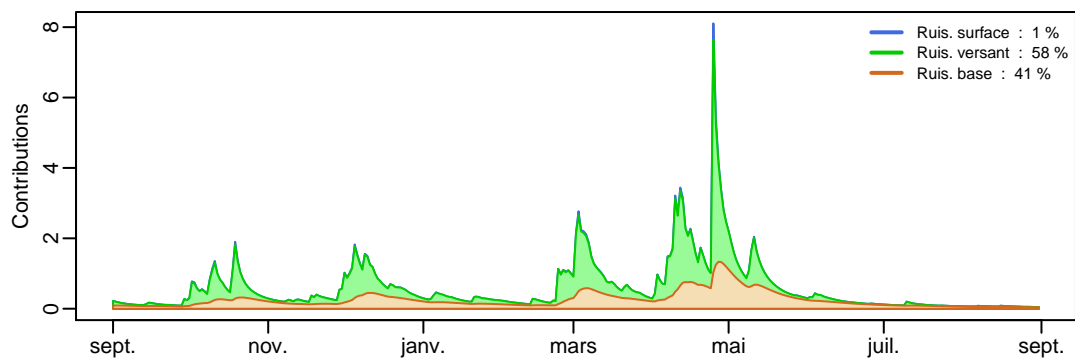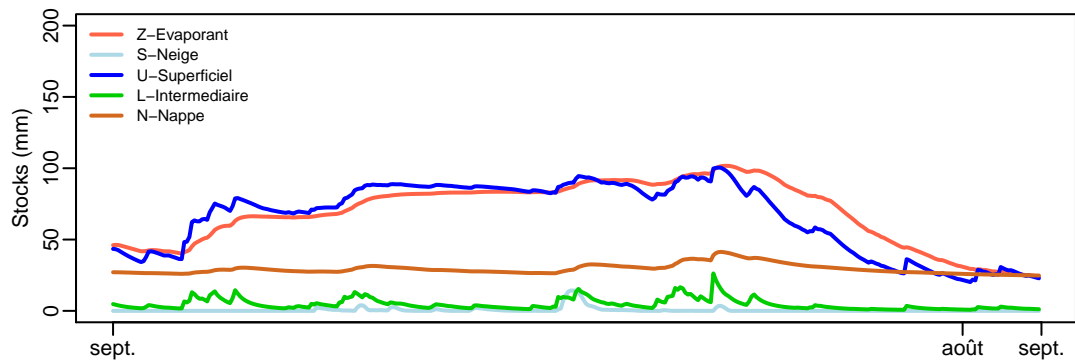

# k3030810 (8939.22 km<sup>2</sup>) – année 1989–1990

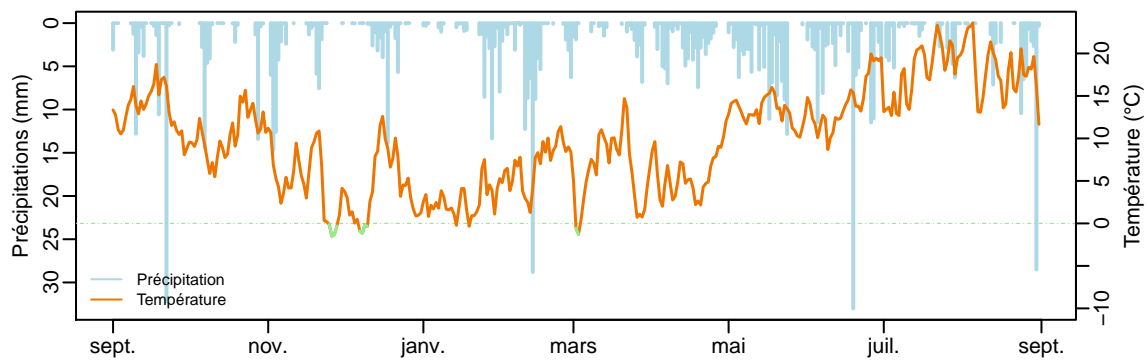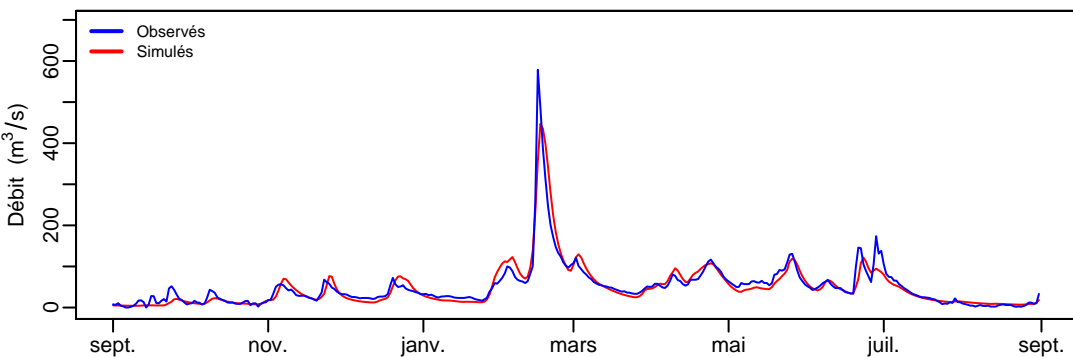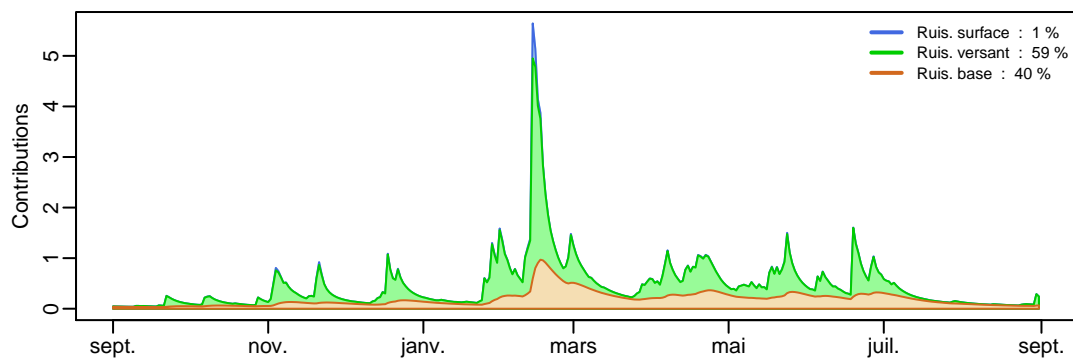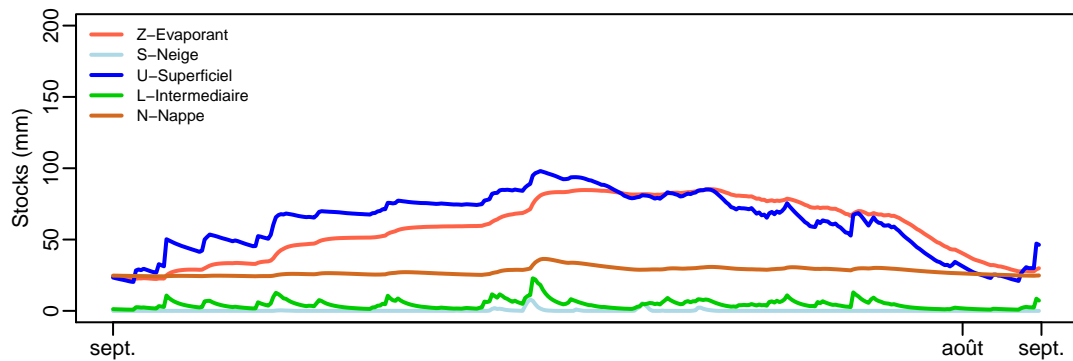

# k3030810 (8939.22 km<sup>2</sup>) – année 1990–1991

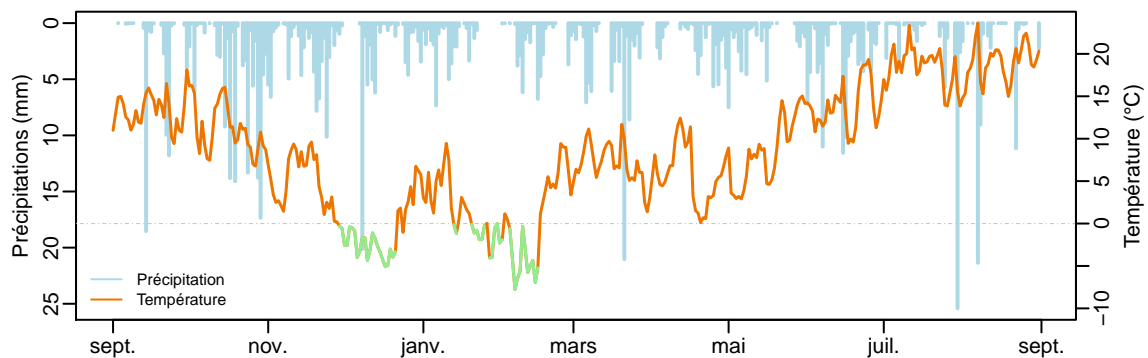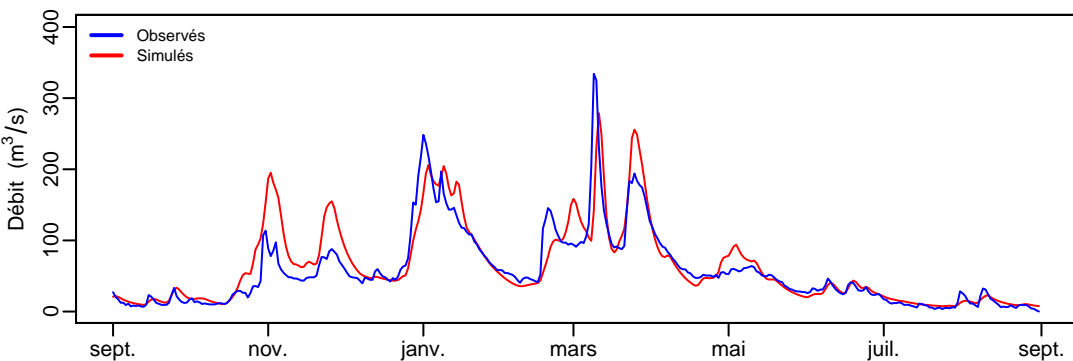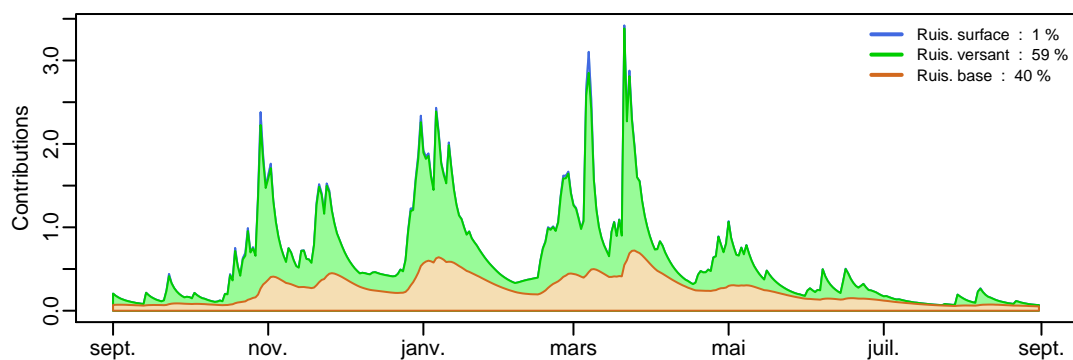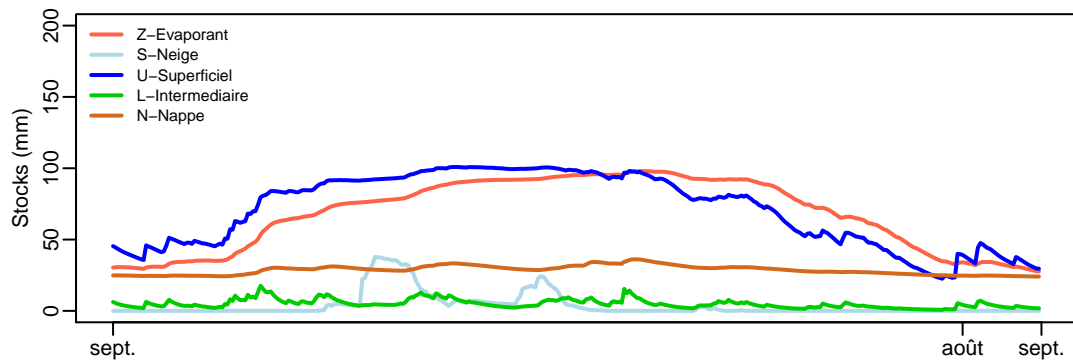

# k3030810 (8939.22 km<sup>2</sup>) – année 1991–1992

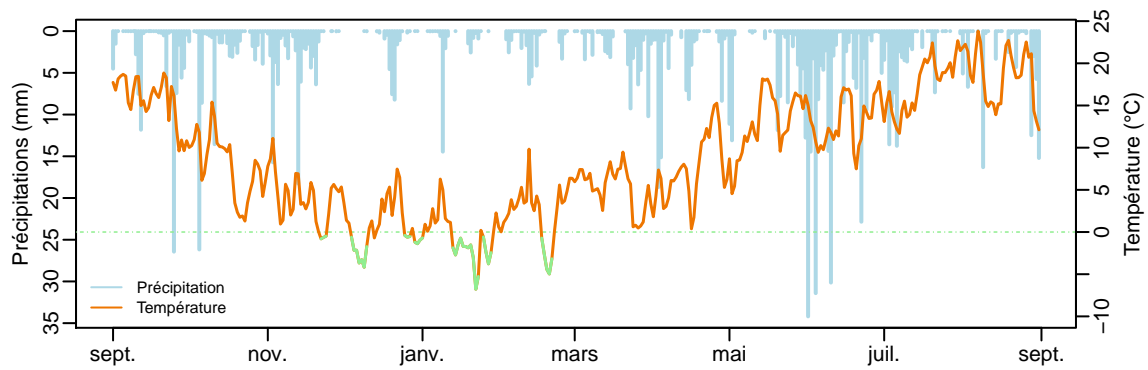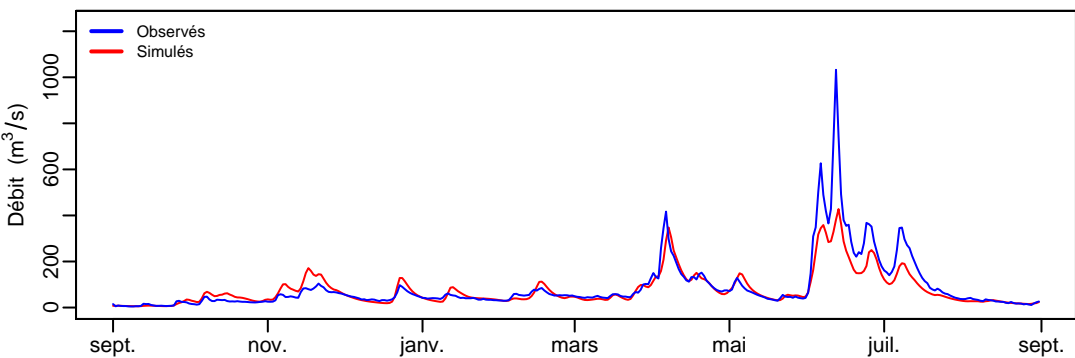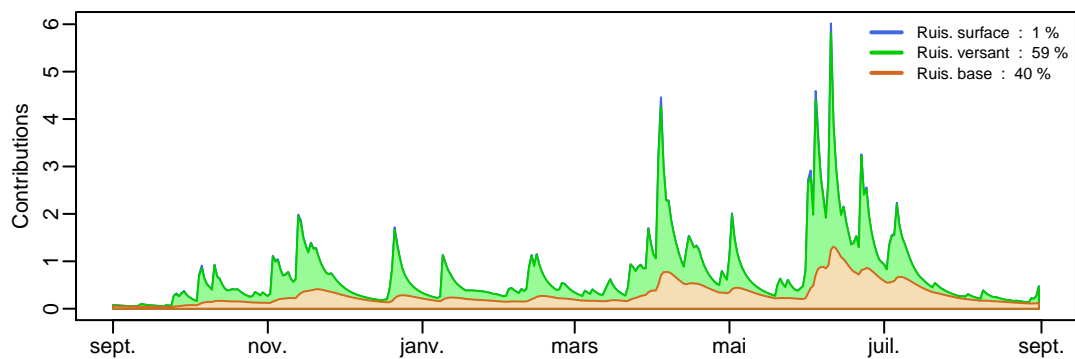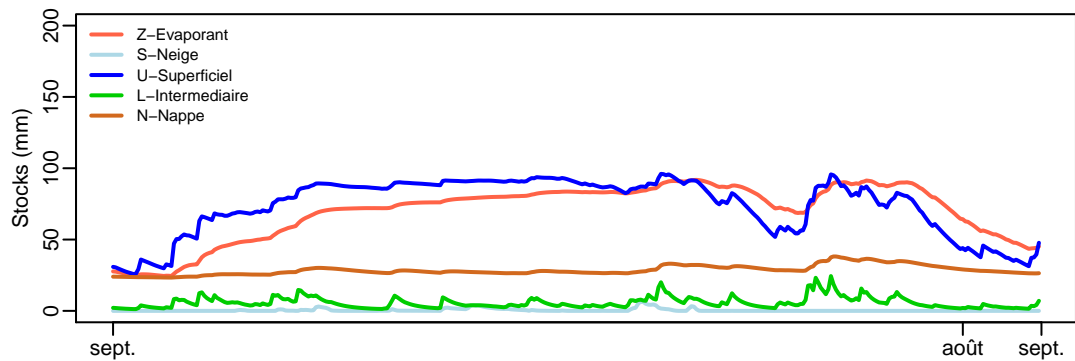



# k3030810 (8939.22 km<sup>2</sup>) – année 1992–1993

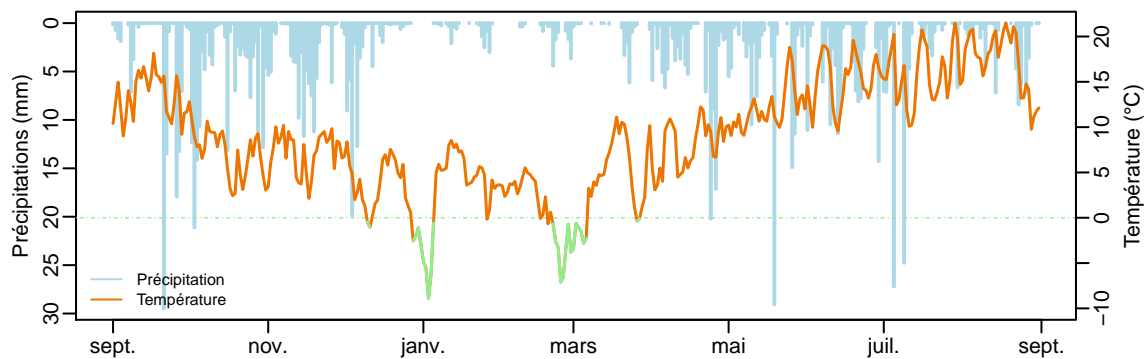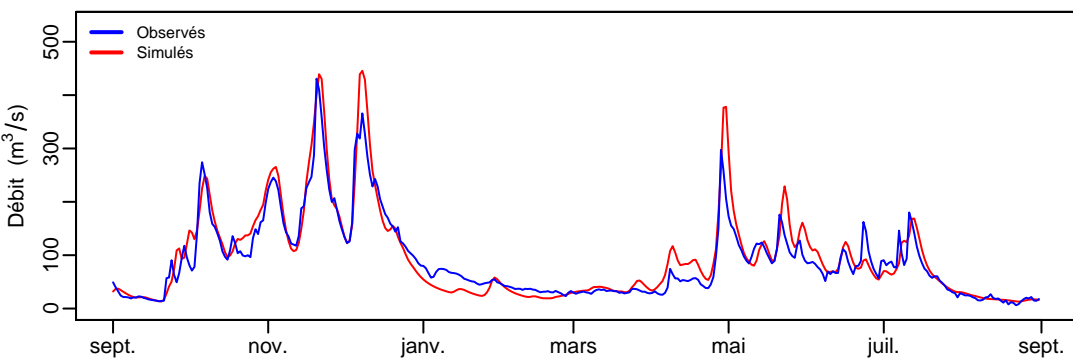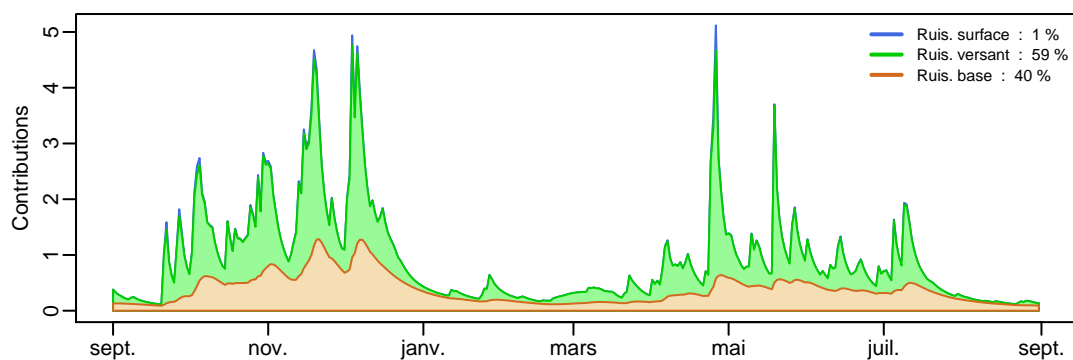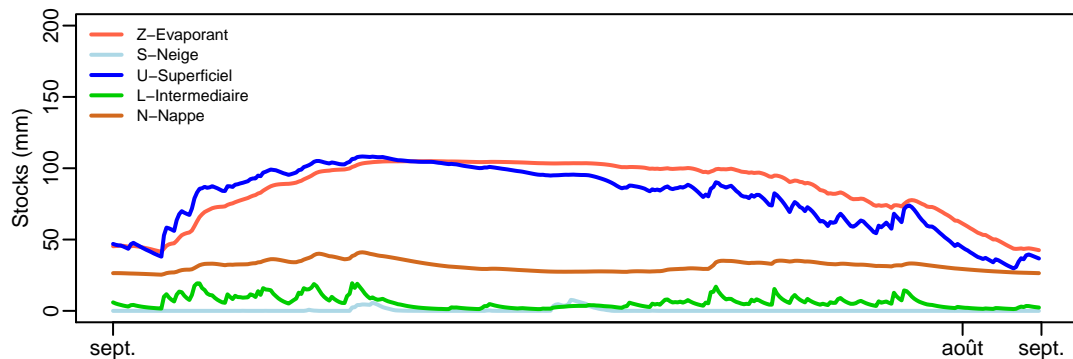

# k3030810 (8939.22 km<sup>2</sup>) – année 1993–1994

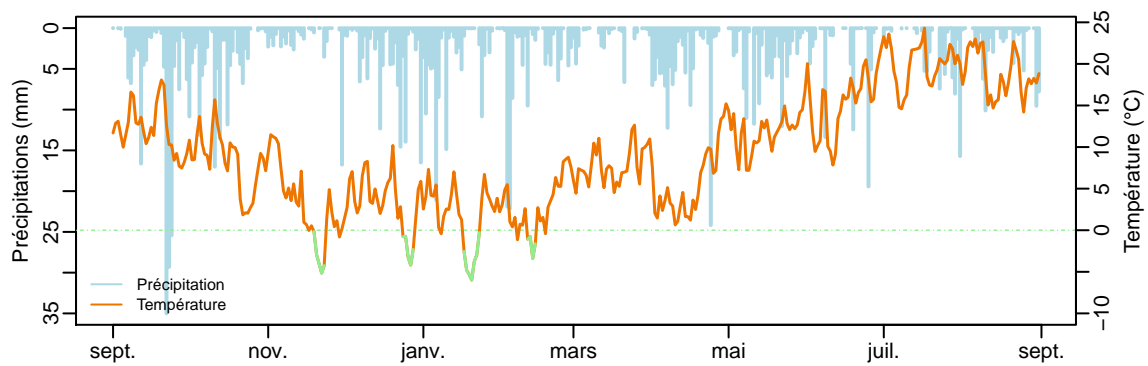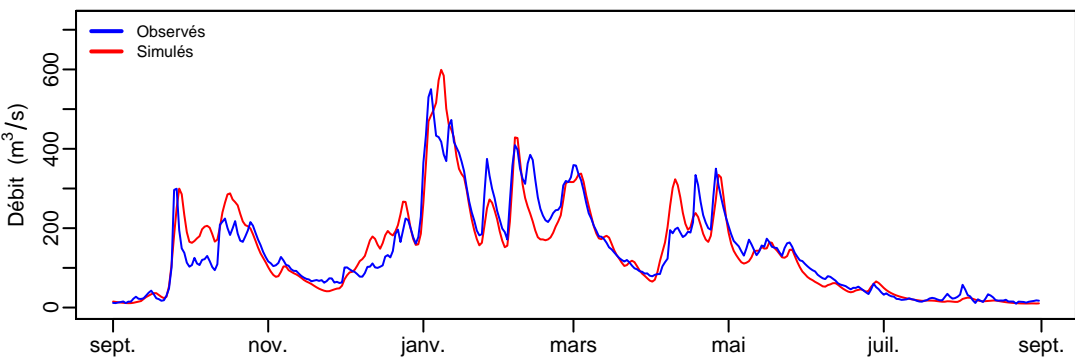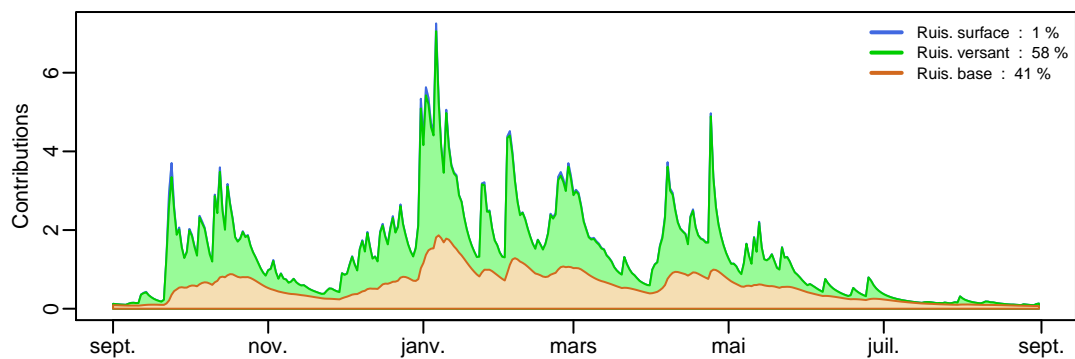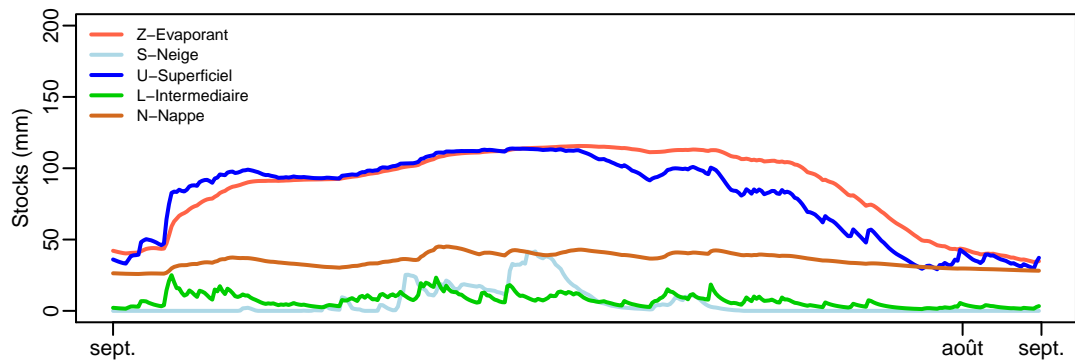

# k3030810 (8939.22 km<sup>2</sup>) – année 1994–1995

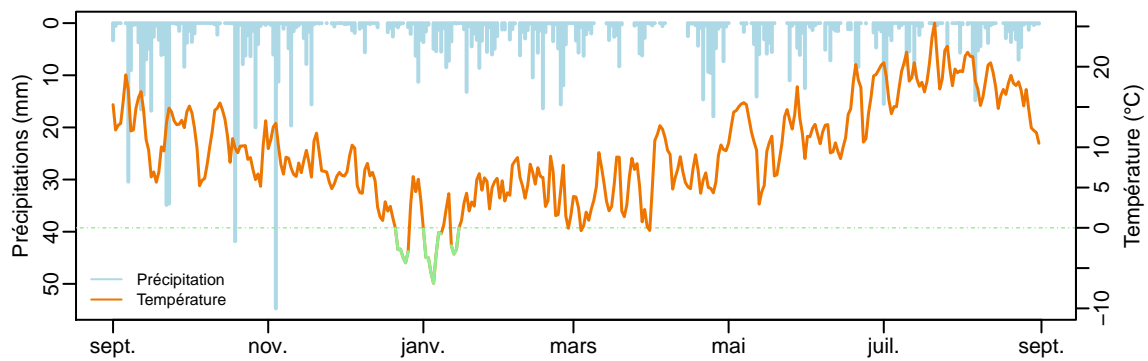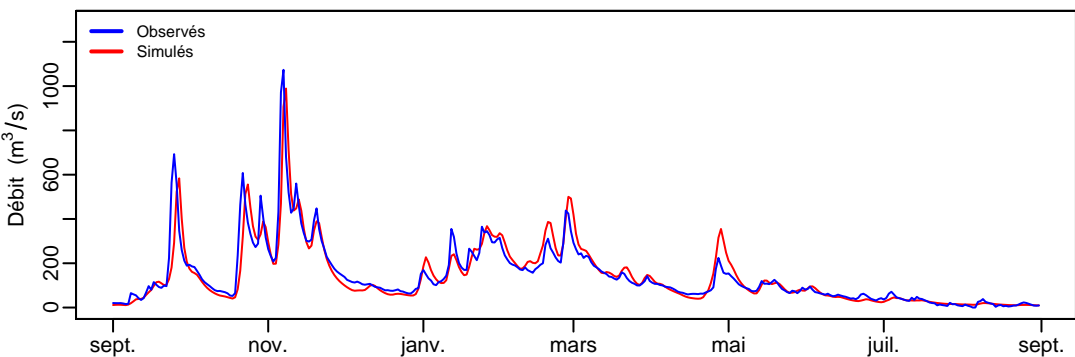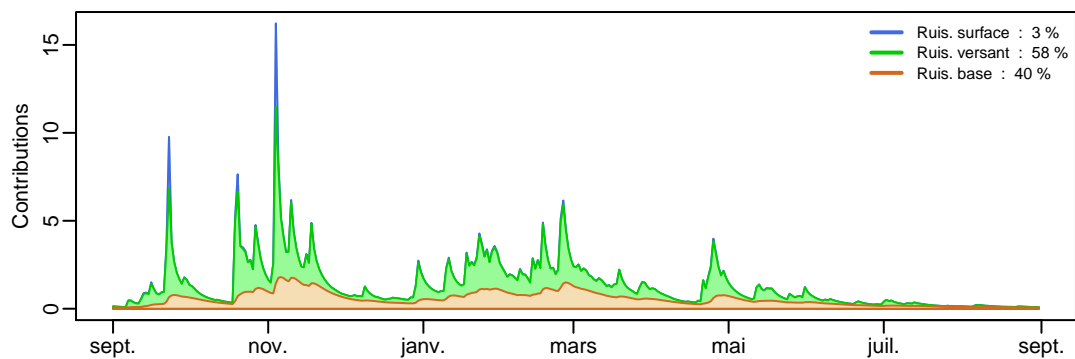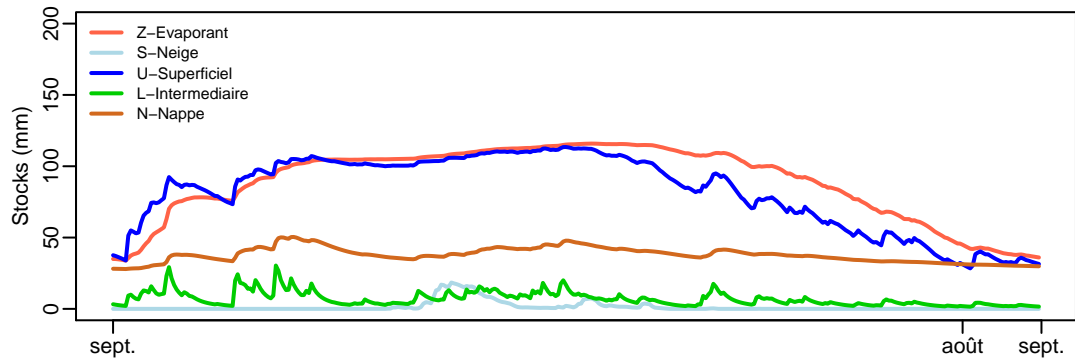

# k3030810 (8939.22 km<sup>2</sup>) – année 1995–1996

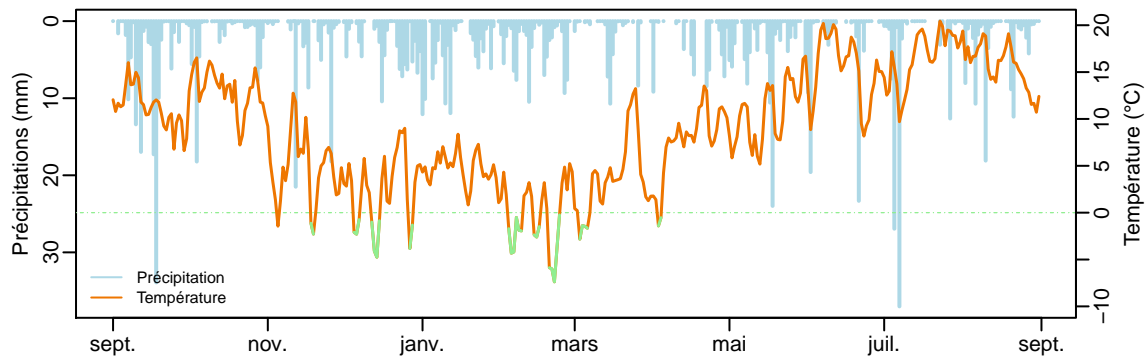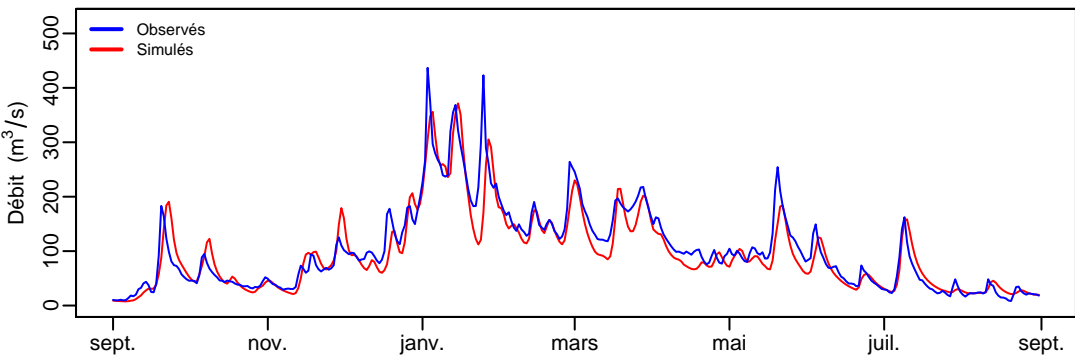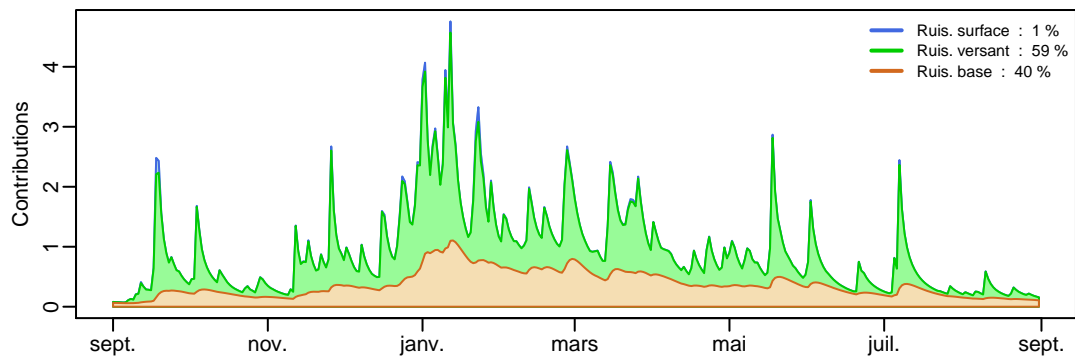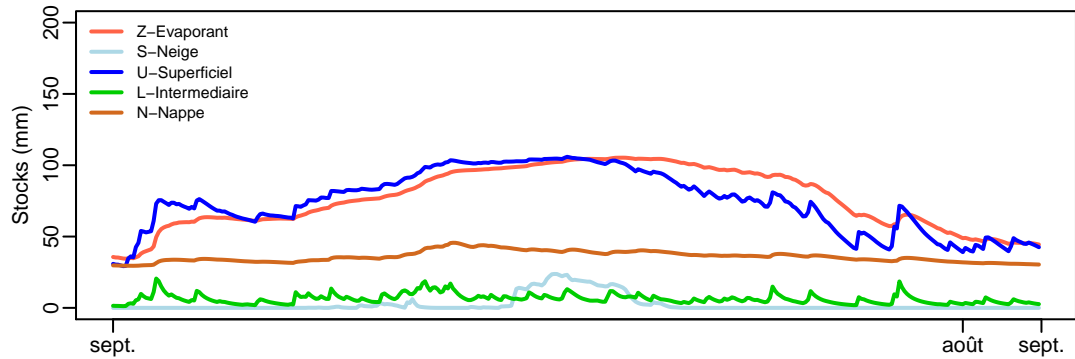

# k3030810 (8939.22 km<sup>2</sup>) – année 1996–1997

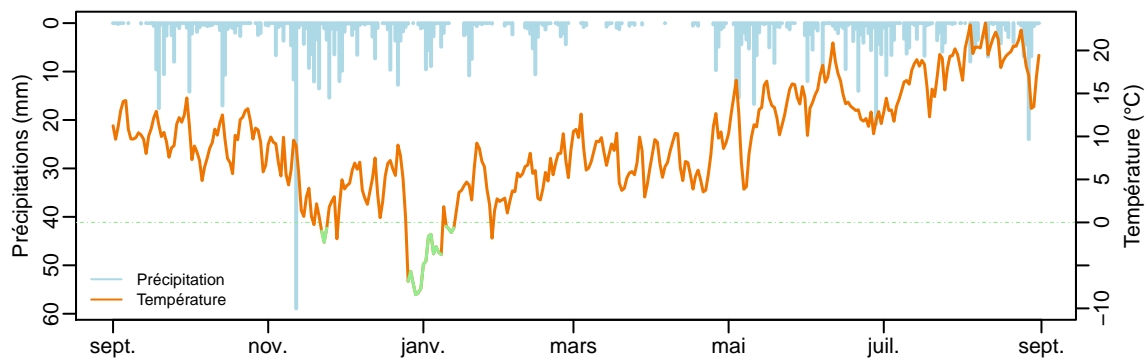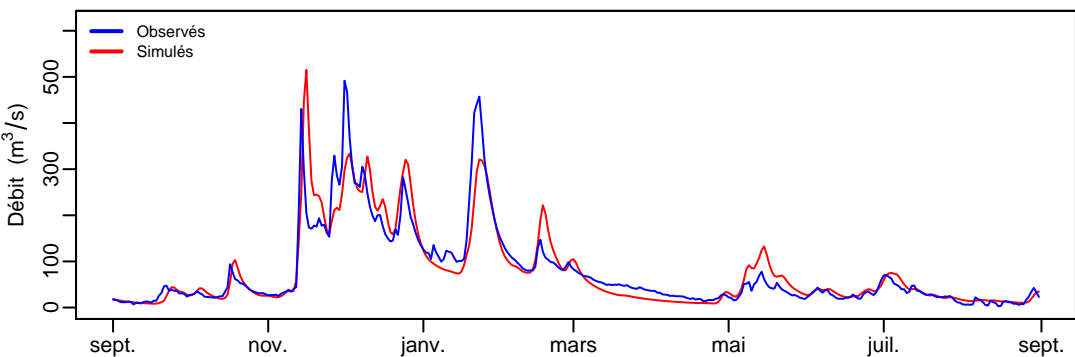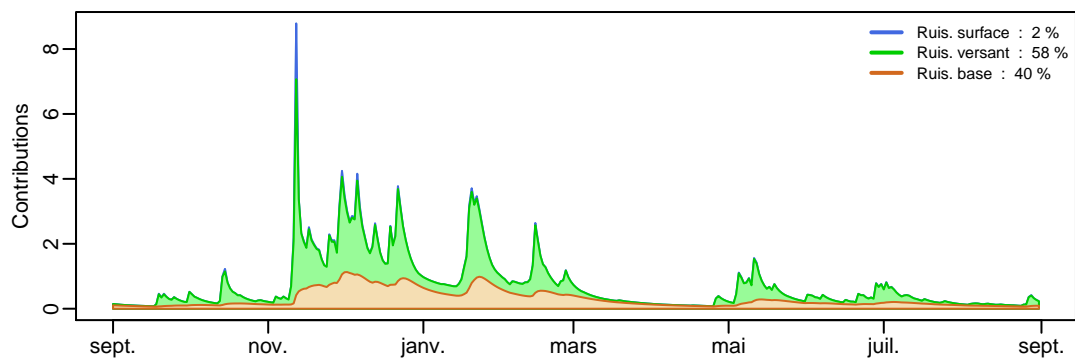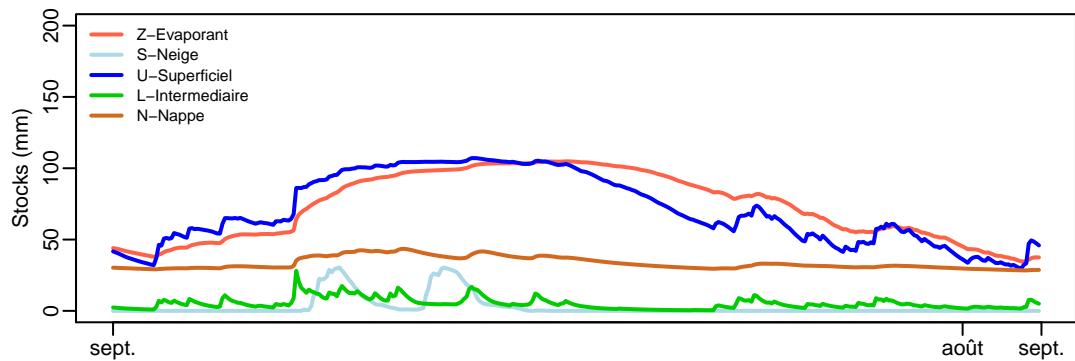

# k3030810 (8939.22 km<sup>2</sup>) – année 1997–1998

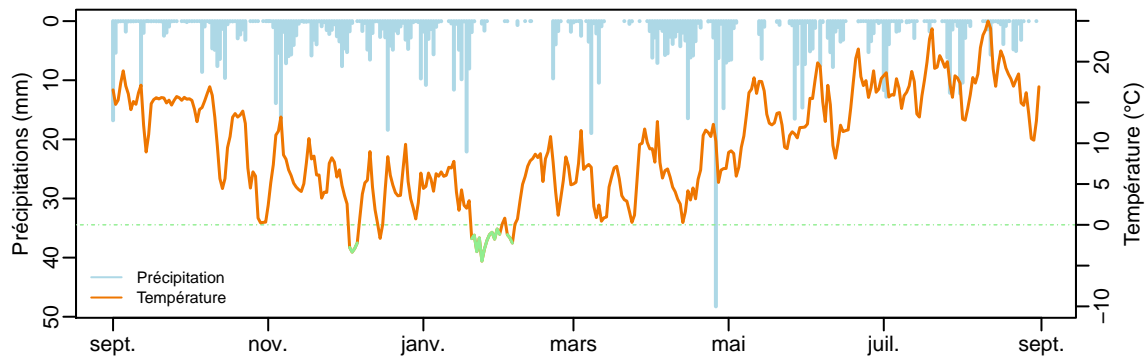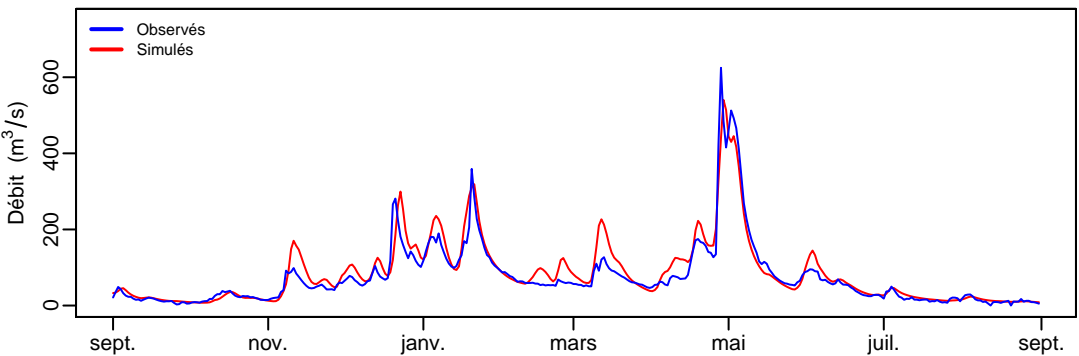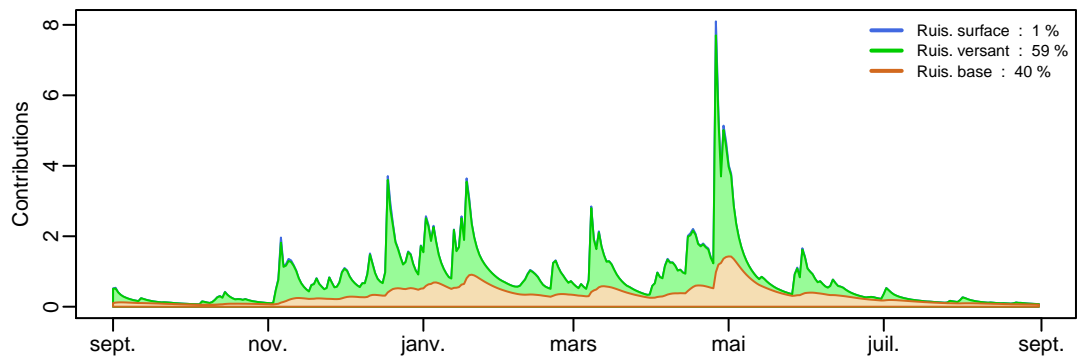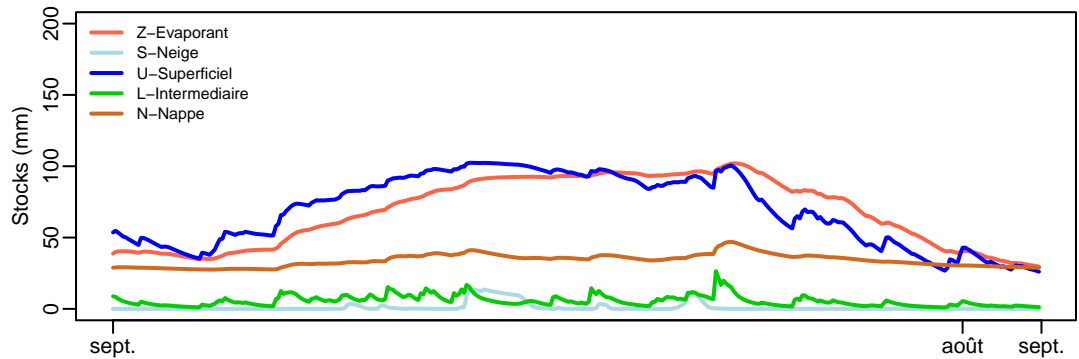

# k3030810 (8939.22 km<sup>2</sup>) – année 1998–1999

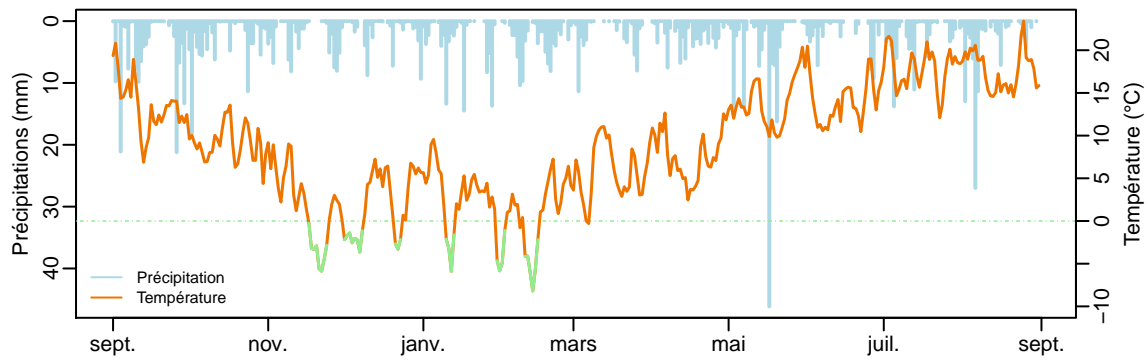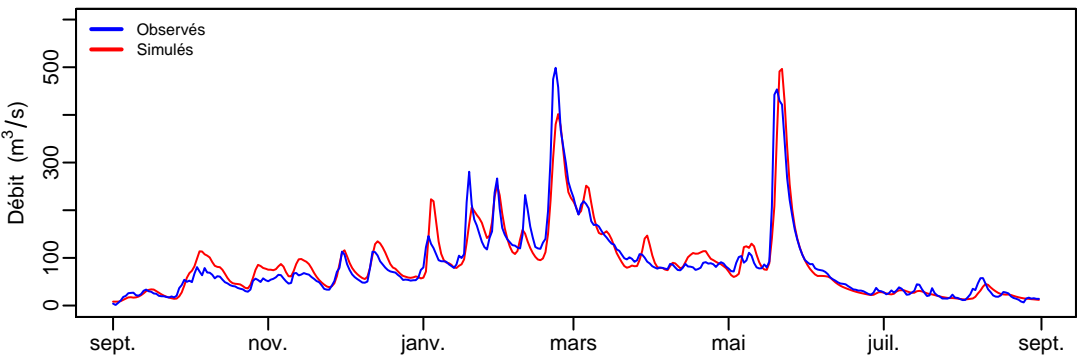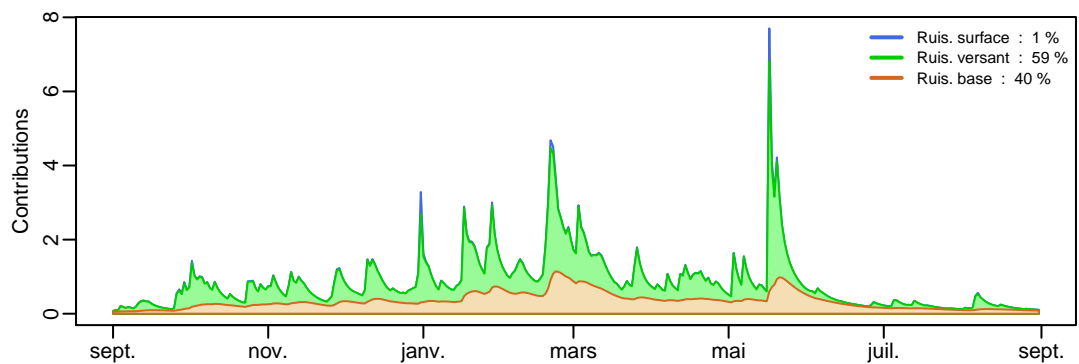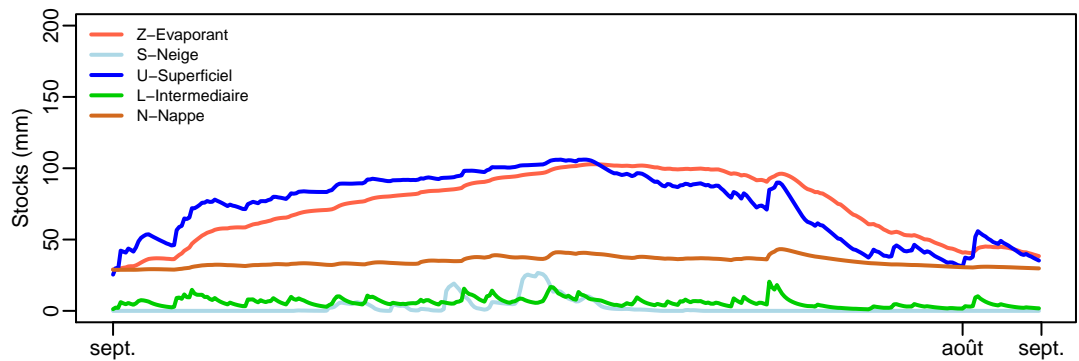

# k3030810 (8939.22 km<sup>2</sup>) – année 1999–2000

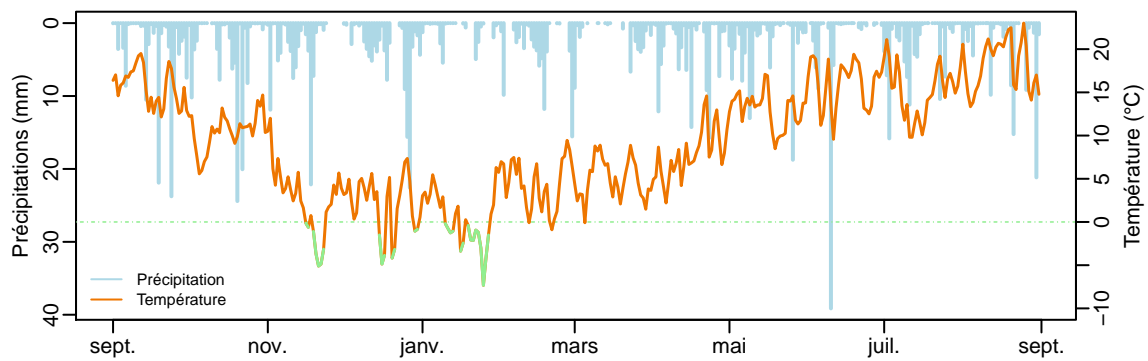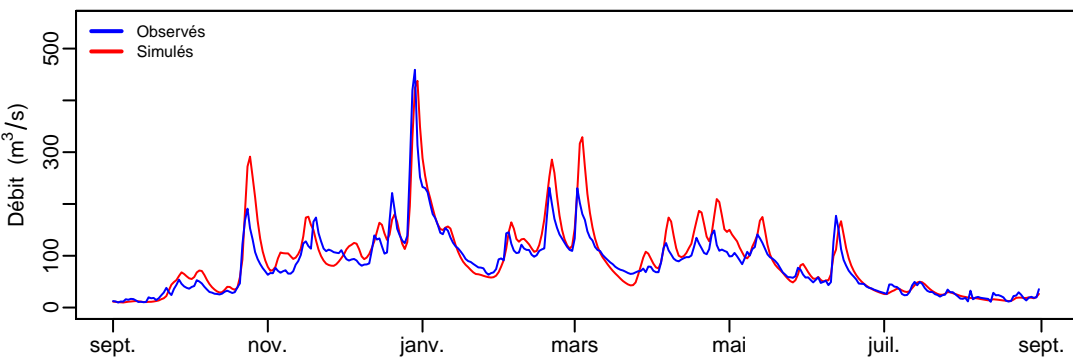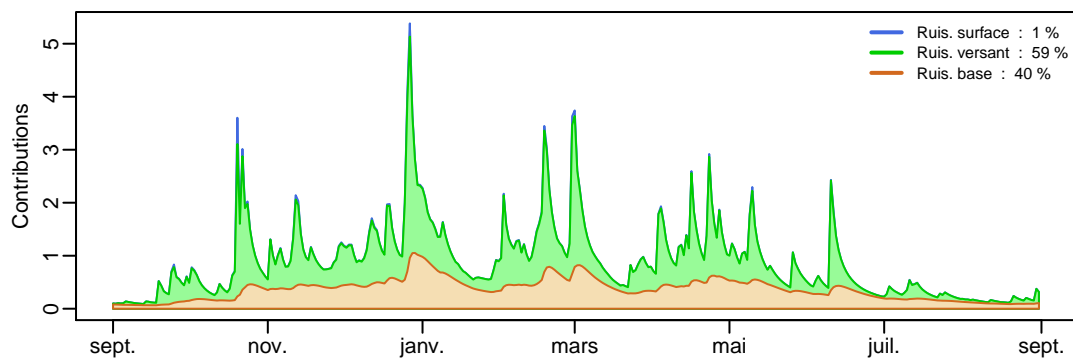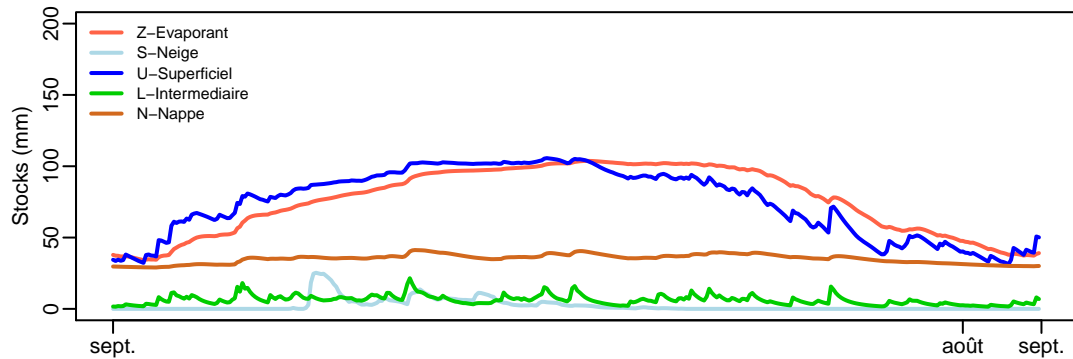



# k3030810 (8939.22 km<sup>2</sup>) – année 2000–2001

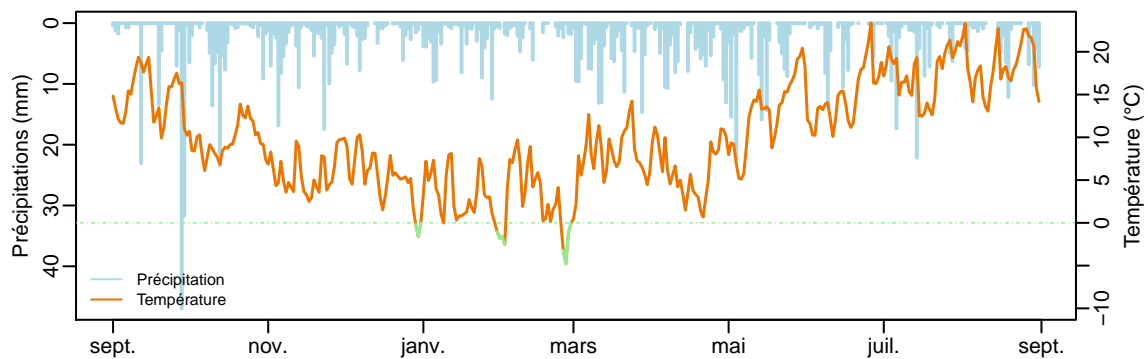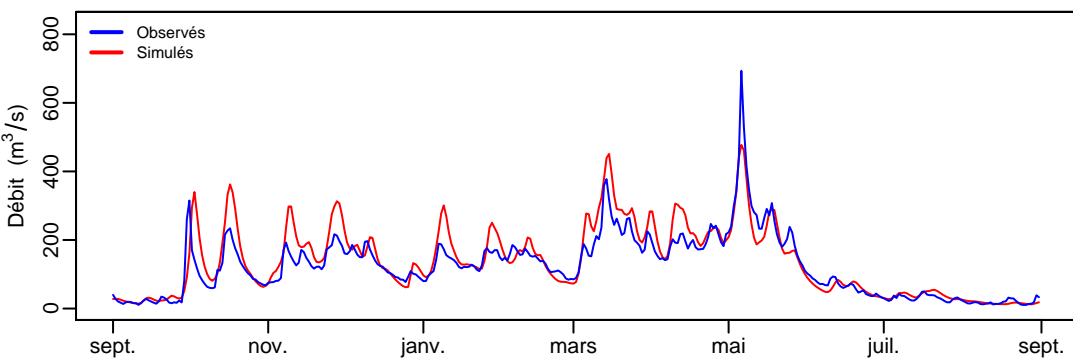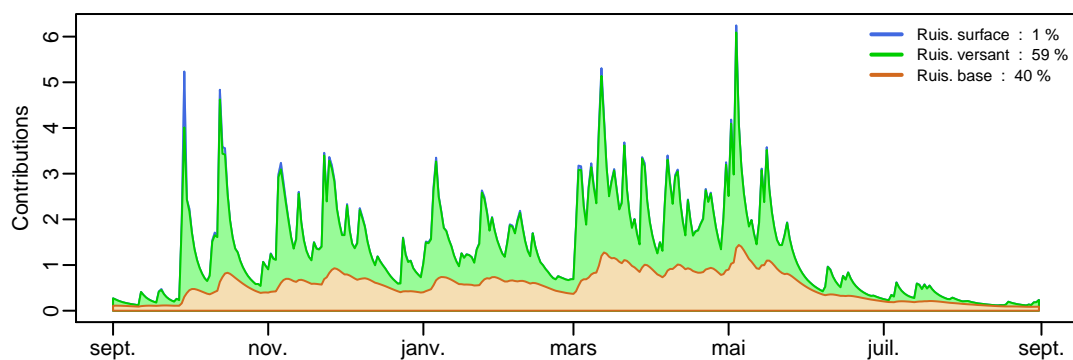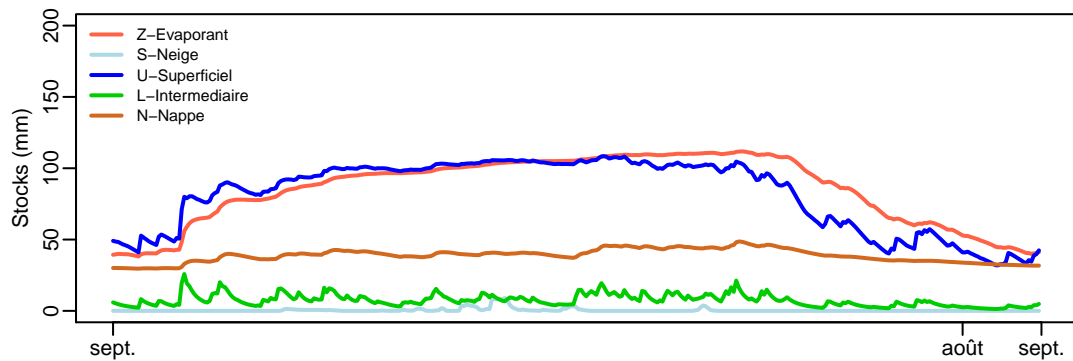

# k3030810 (8939.22 km<sup>2</sup>) – année 2001–2002

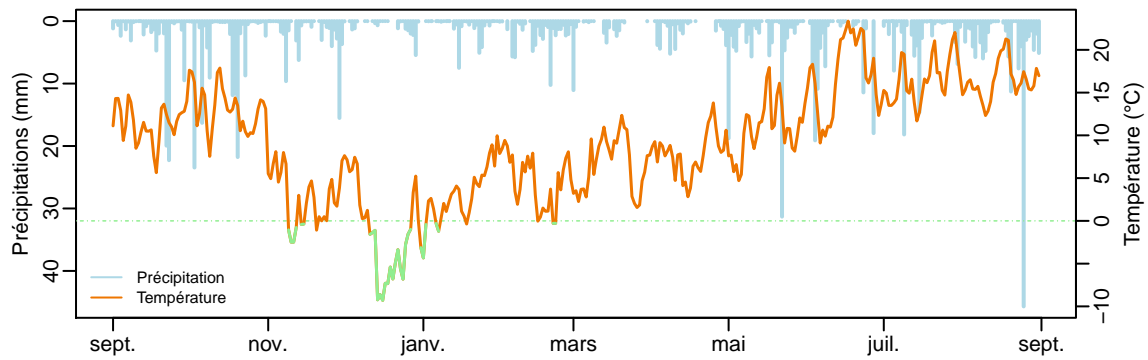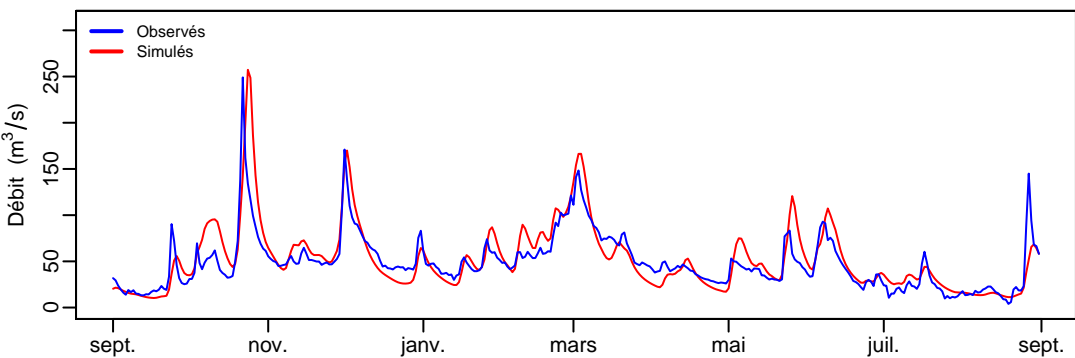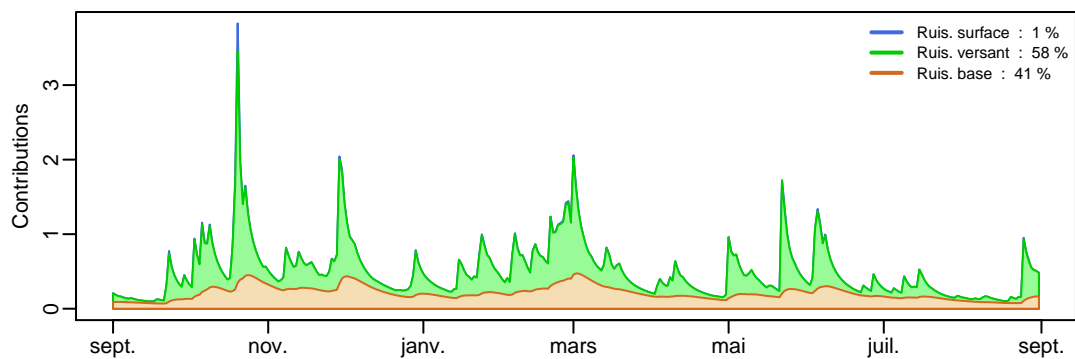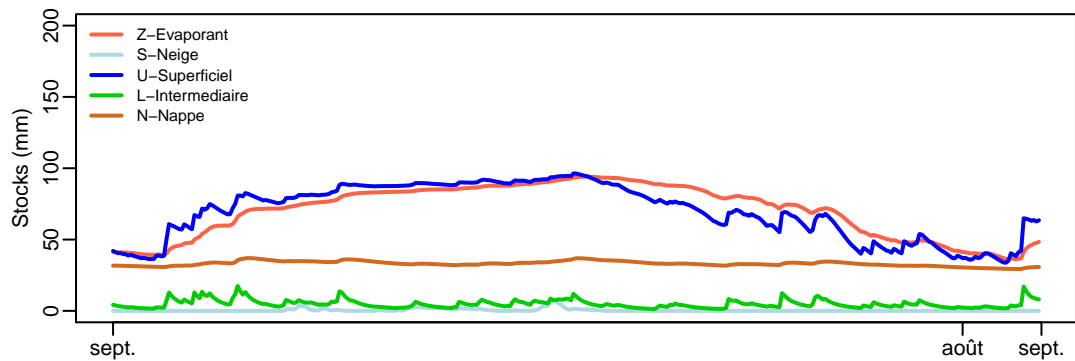

# k3030810 (8939.22 km<sup>2</sup>) – année 2002–2003

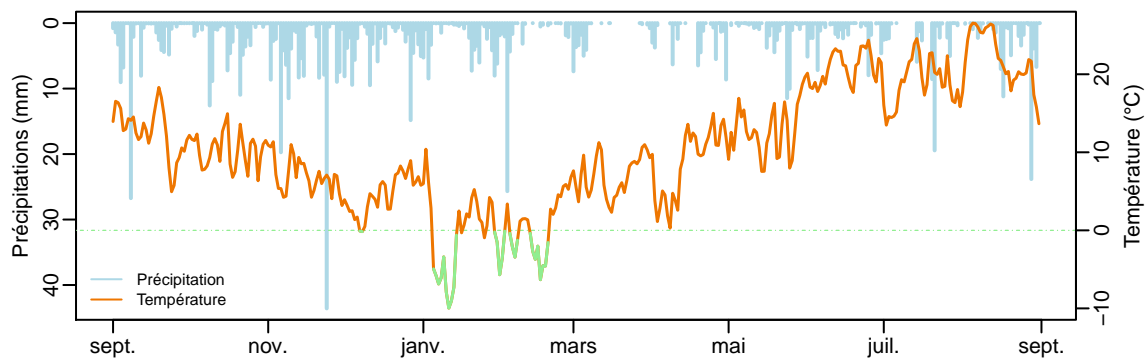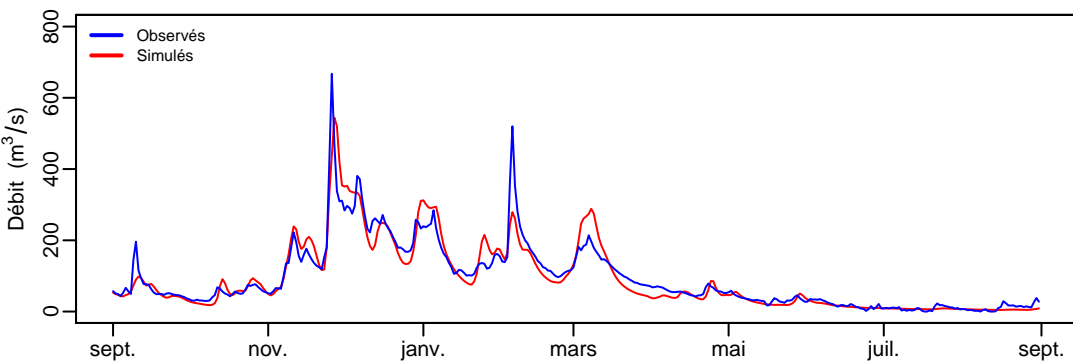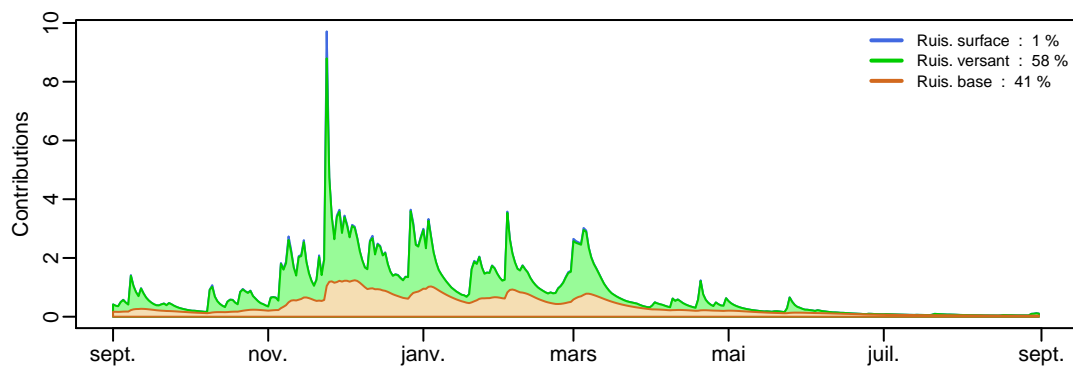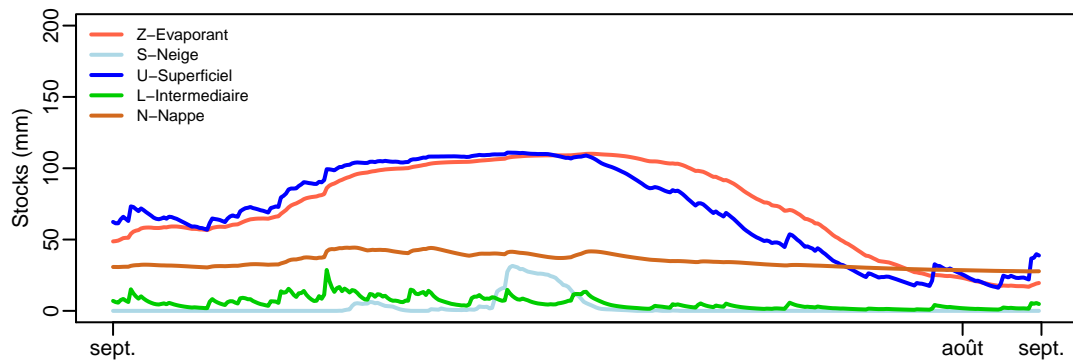

# k3030810 (8939.22 km<sup>2</sup>) – année 2003–2004

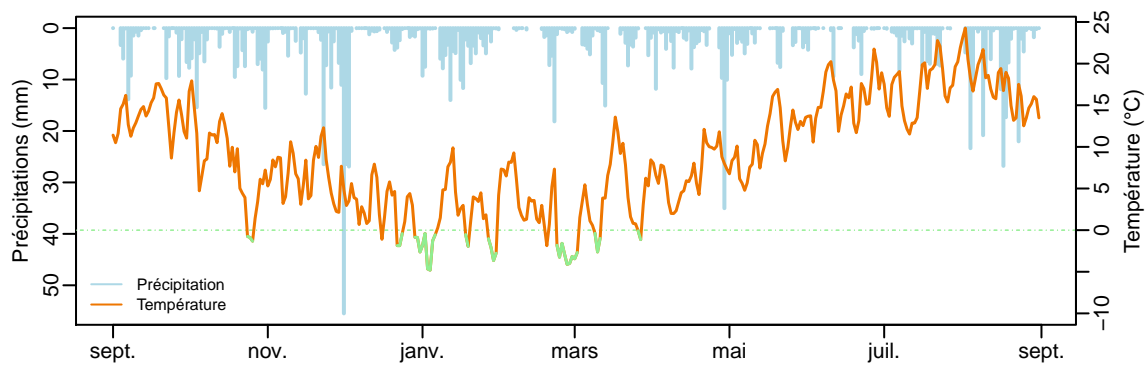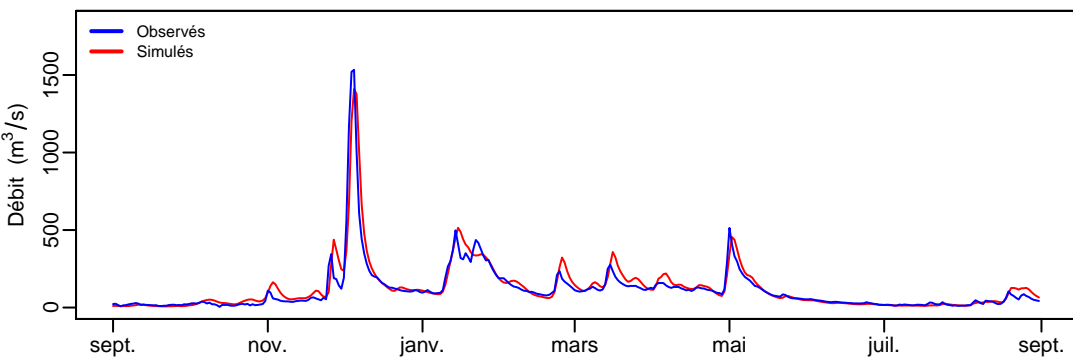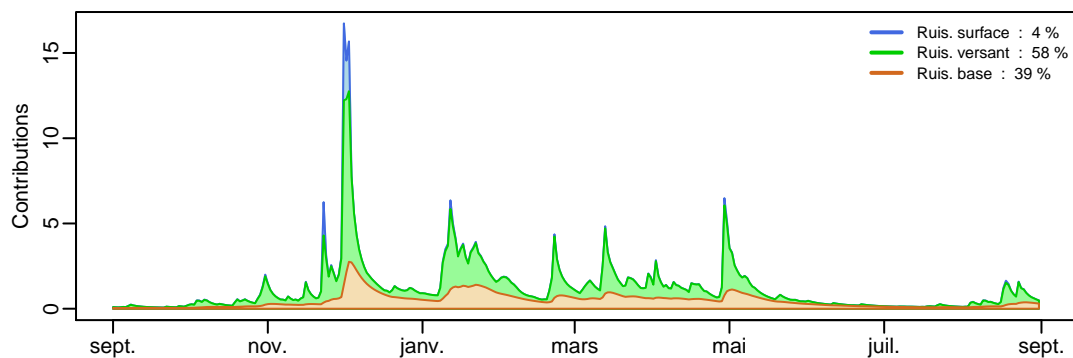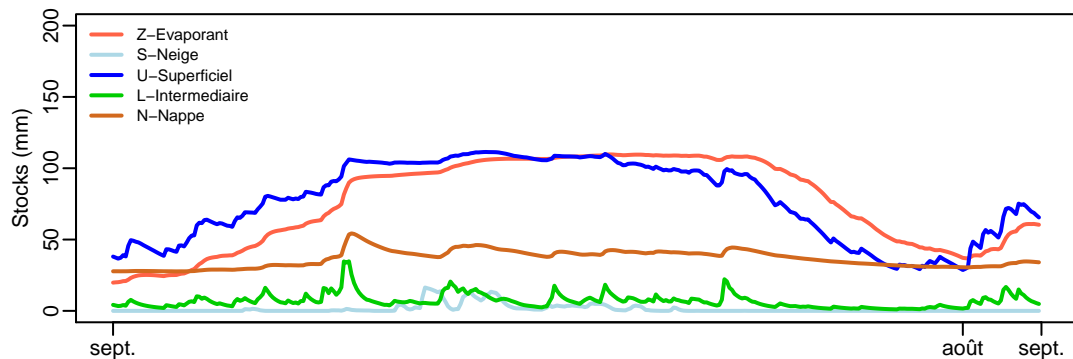

# k3030810 (8939.22 km<sup>2</sup>) – année 2004–2005

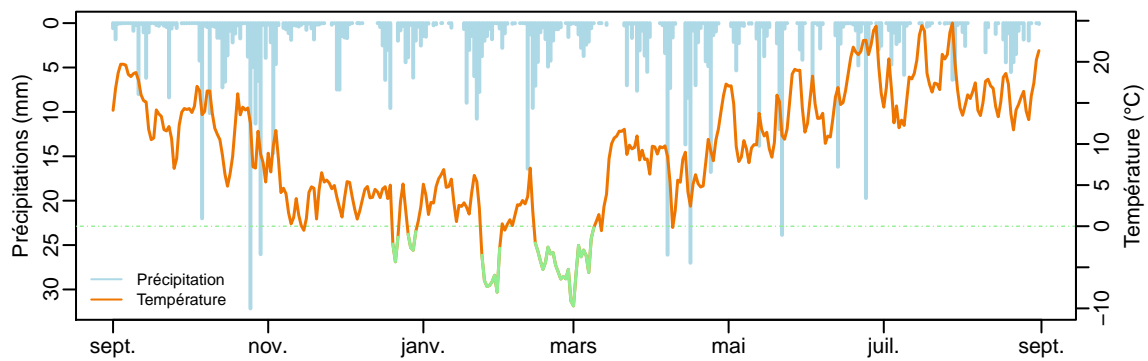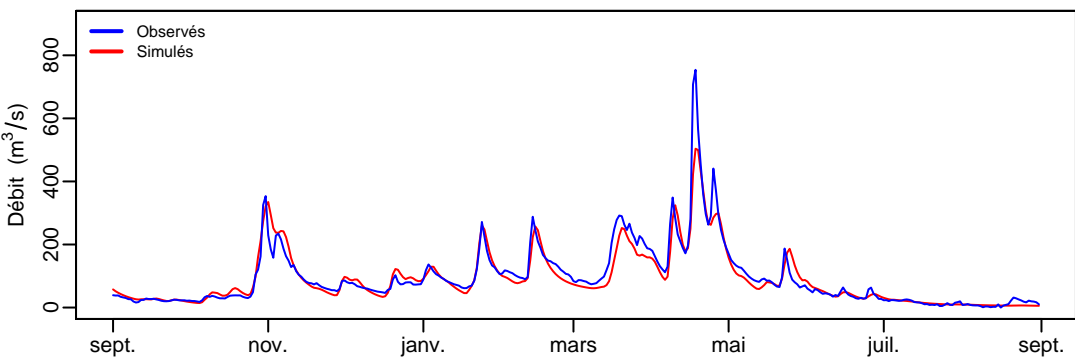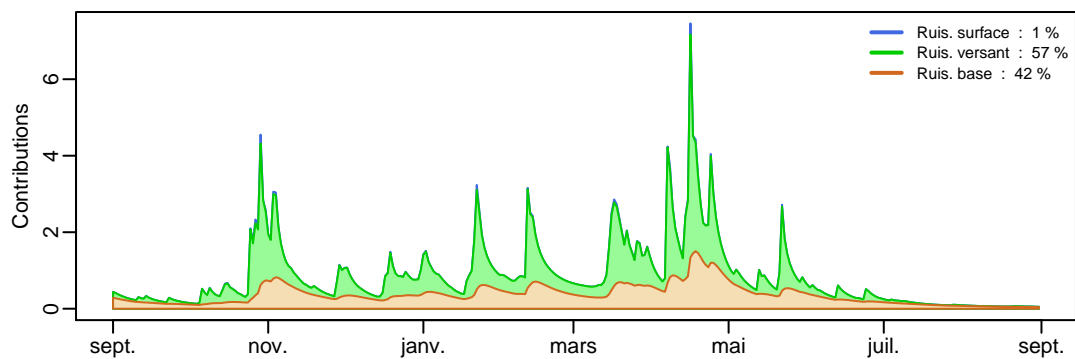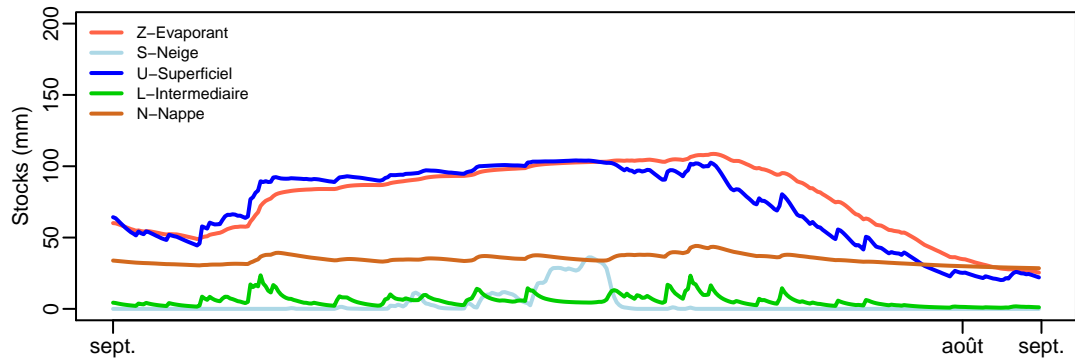

# k3030810 (8939.22 km<sup>2</sup>) – année 2005–2006

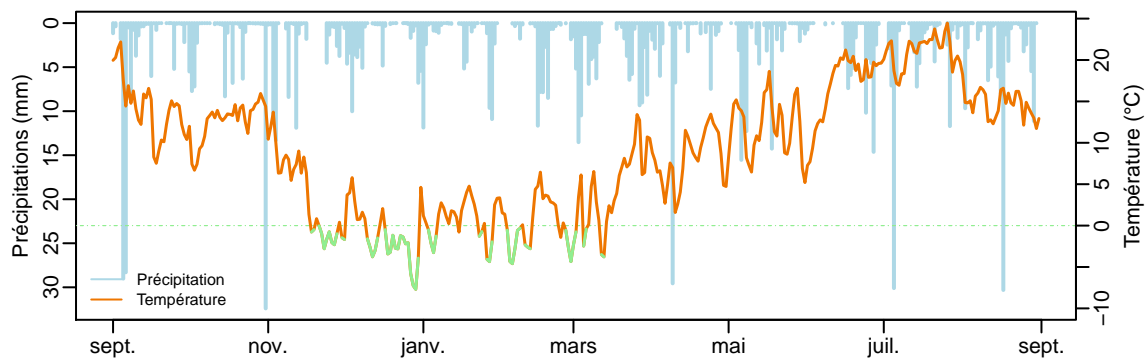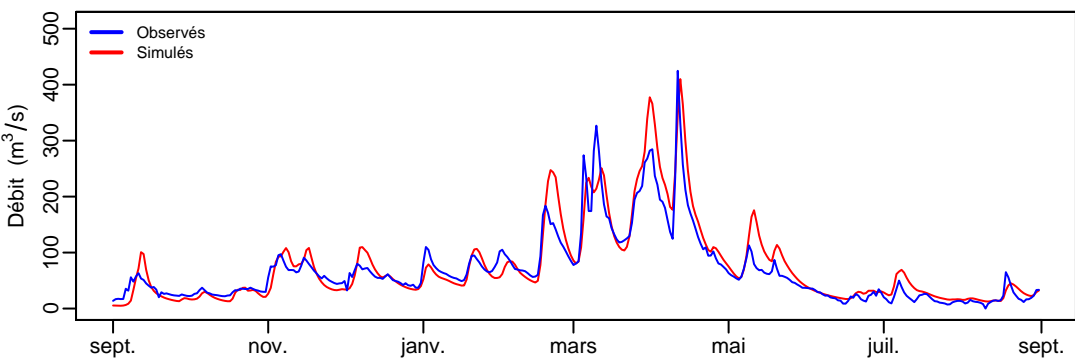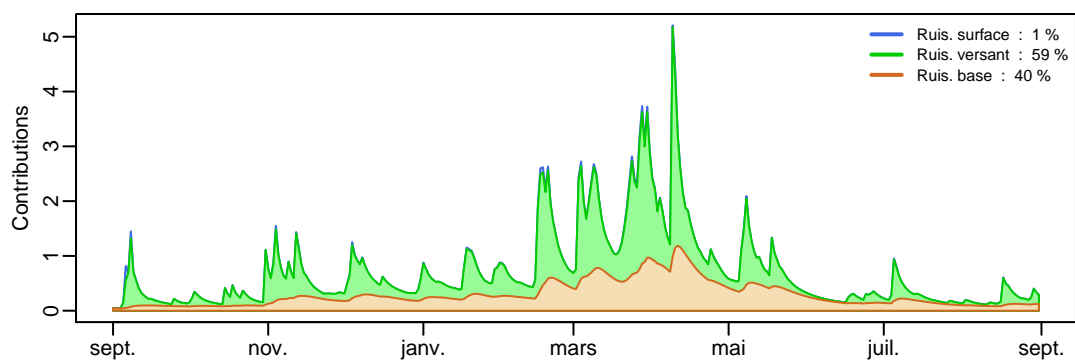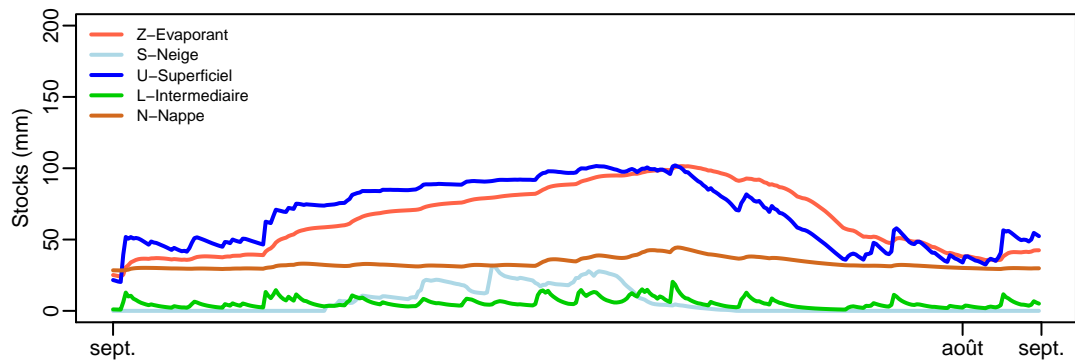

# k3030810 (8939.22 km<sup>2</sup>) – année 2006–2007

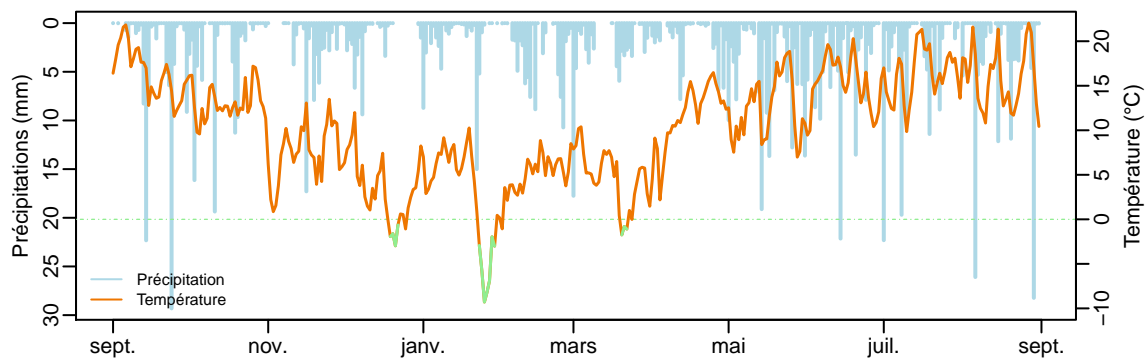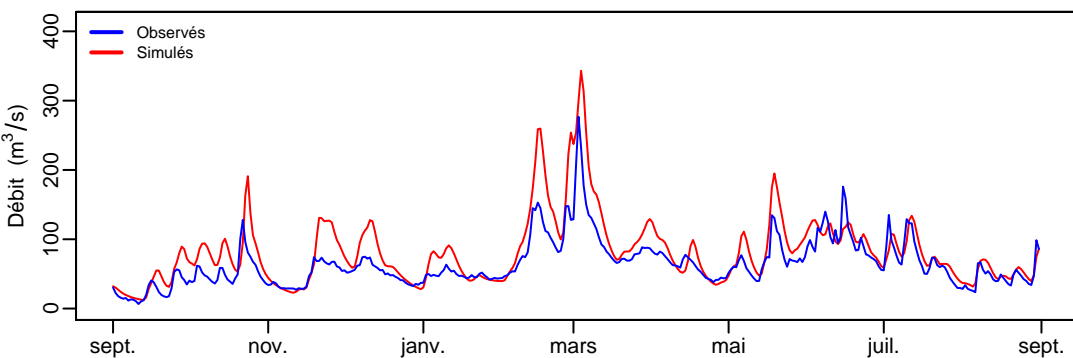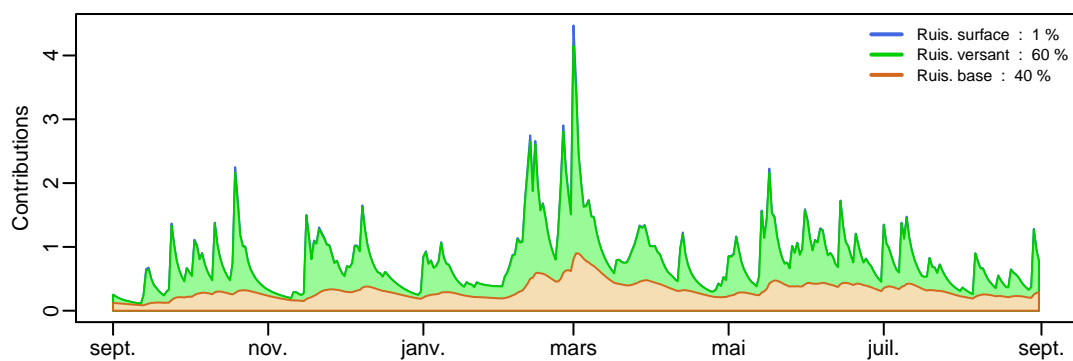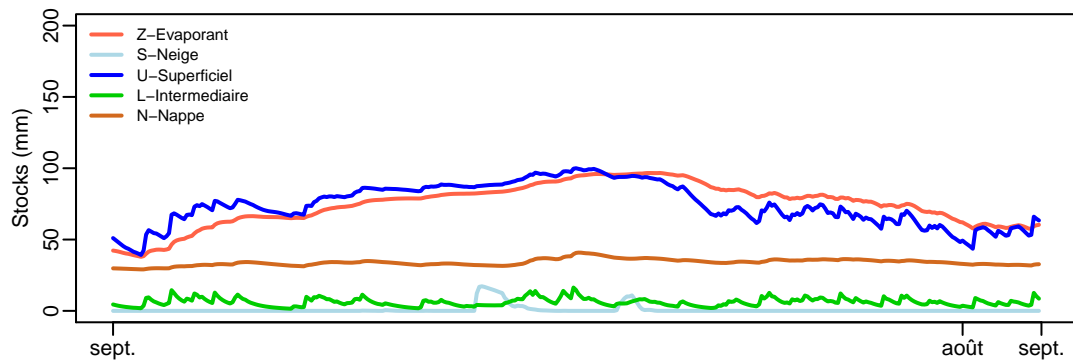

# k3030810 (8939.22 km<sup>2</sup>) – année 2007–2008

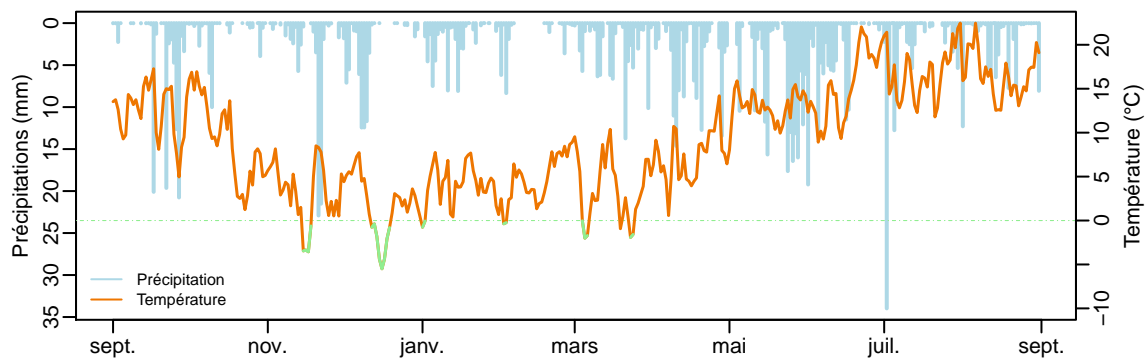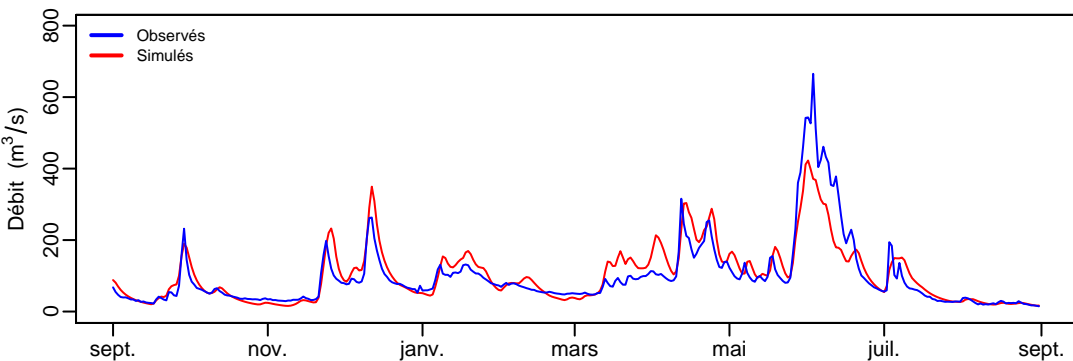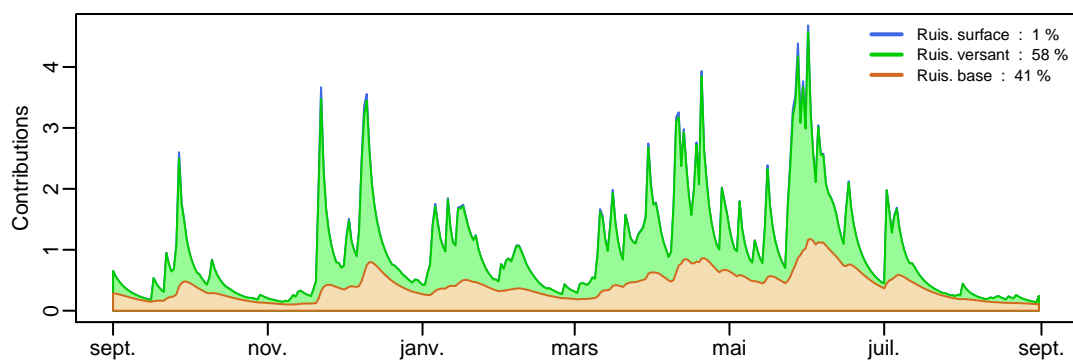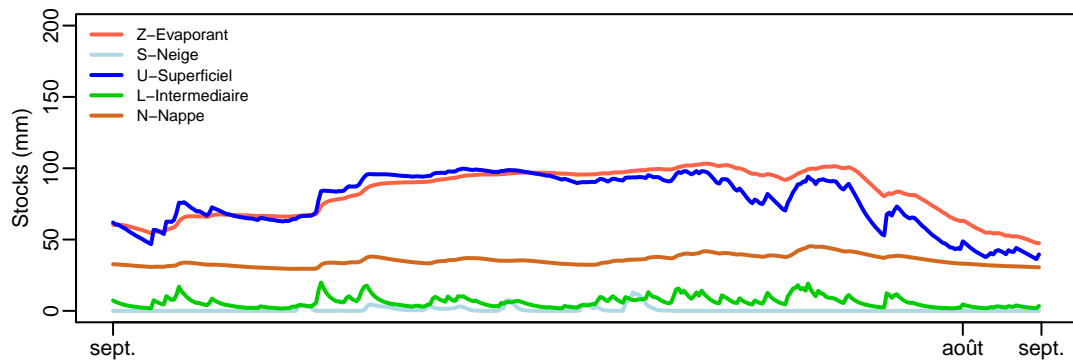



# k3030810 (8939.22 km<sup>2</sup>) – année 2008–2009

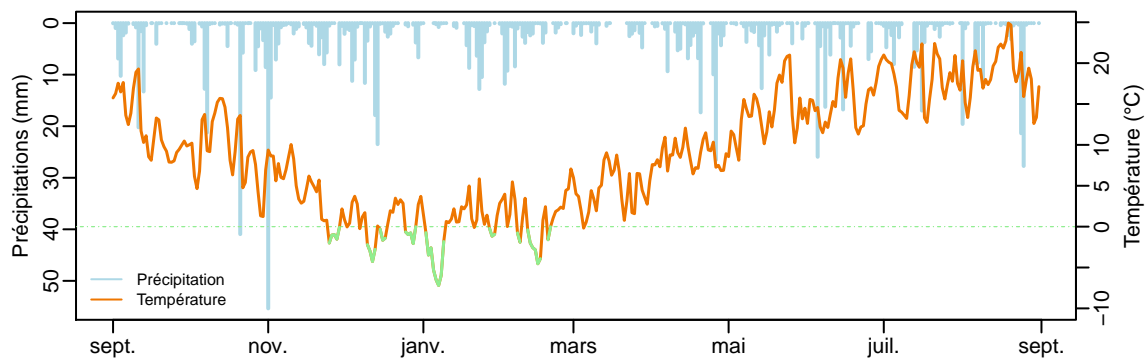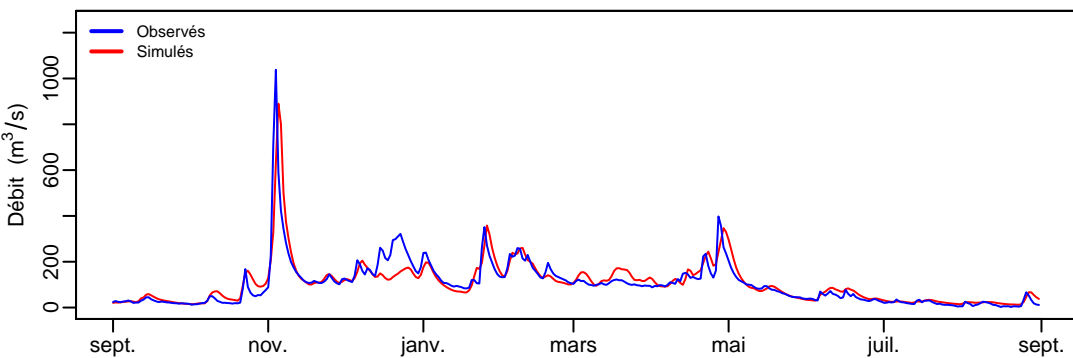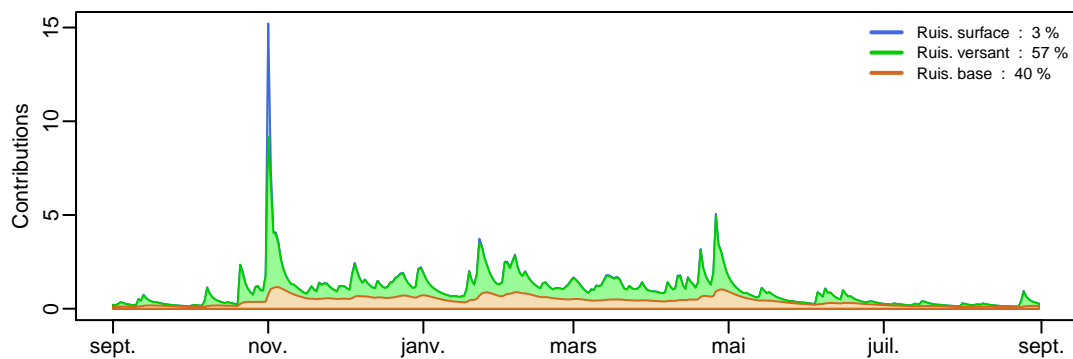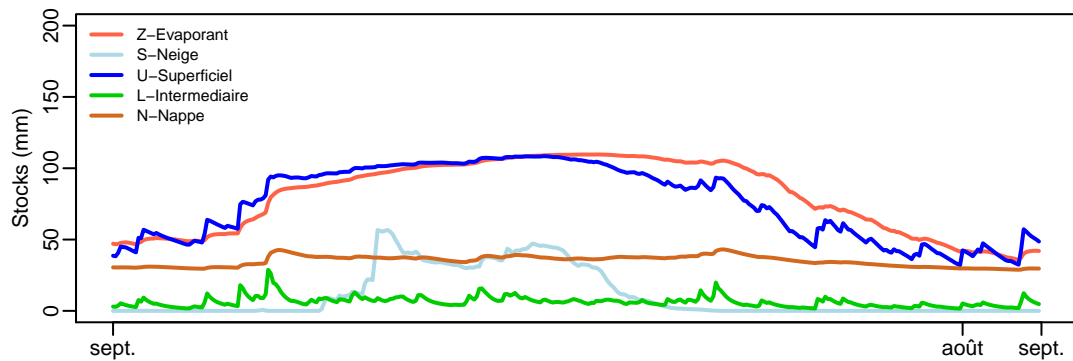

# k3030810 (8939.22 km²) – année 2009–2010

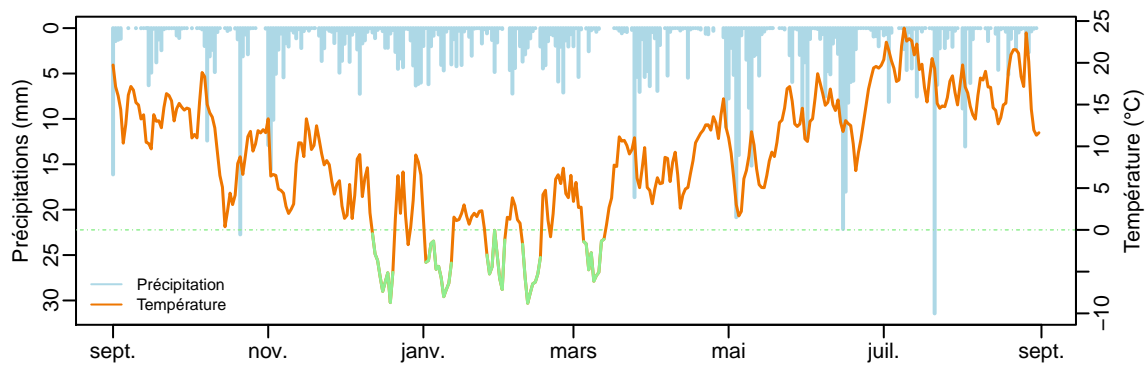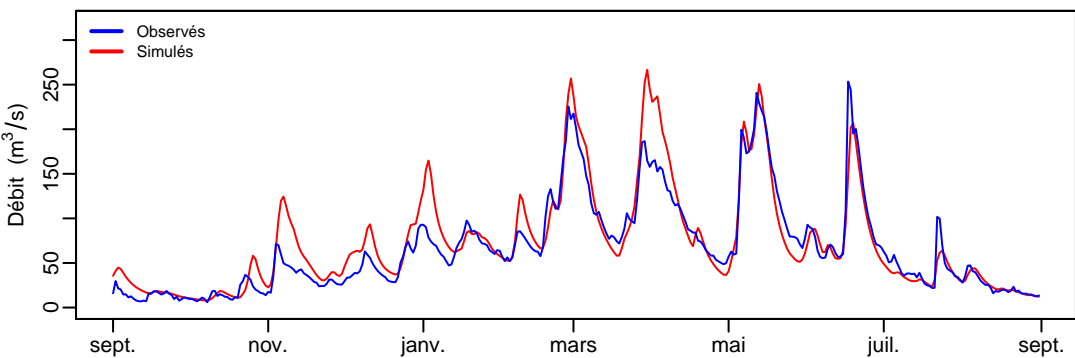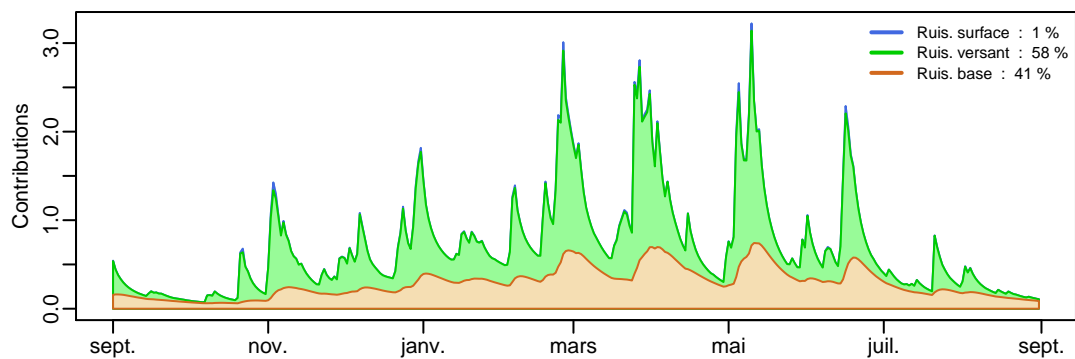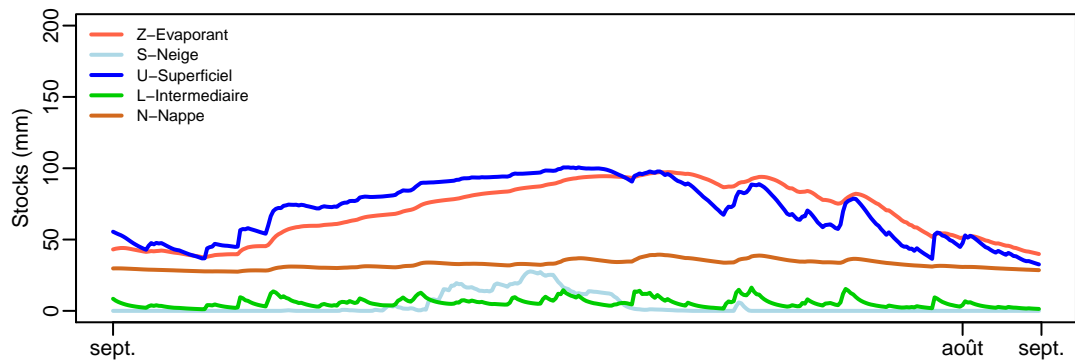

# k3030810 (8939.22 km<sup>2</sup>) – année 2010–2011

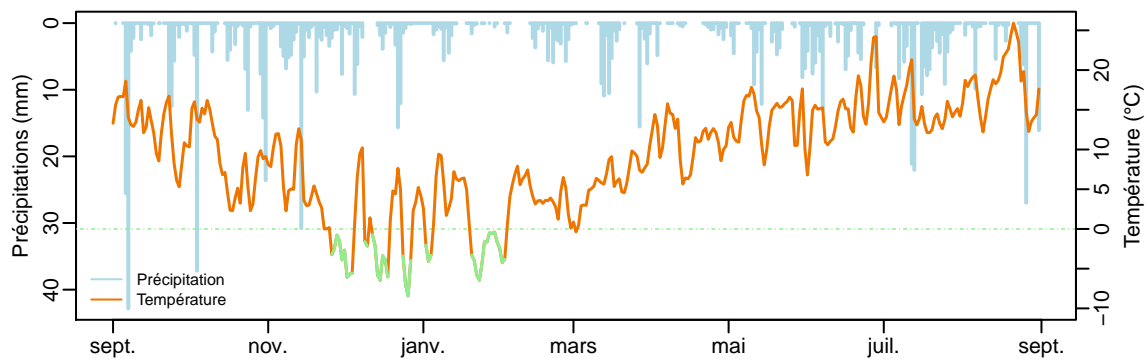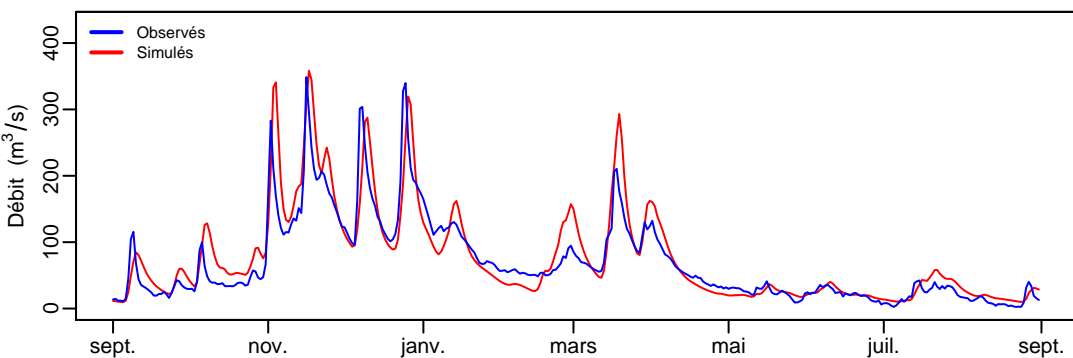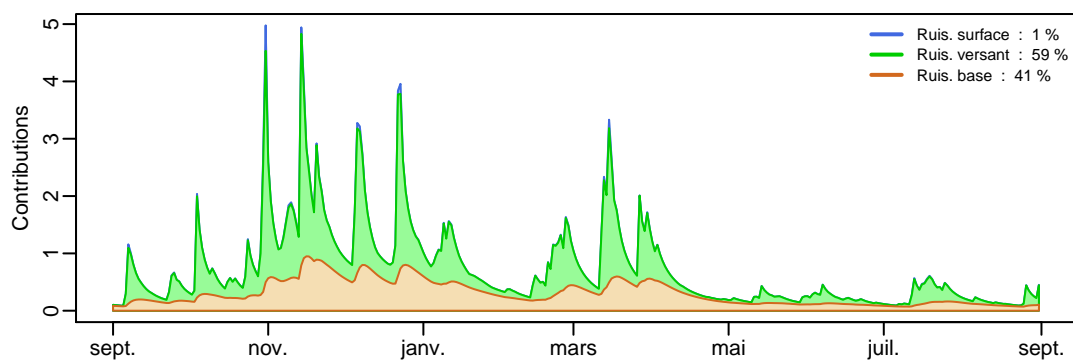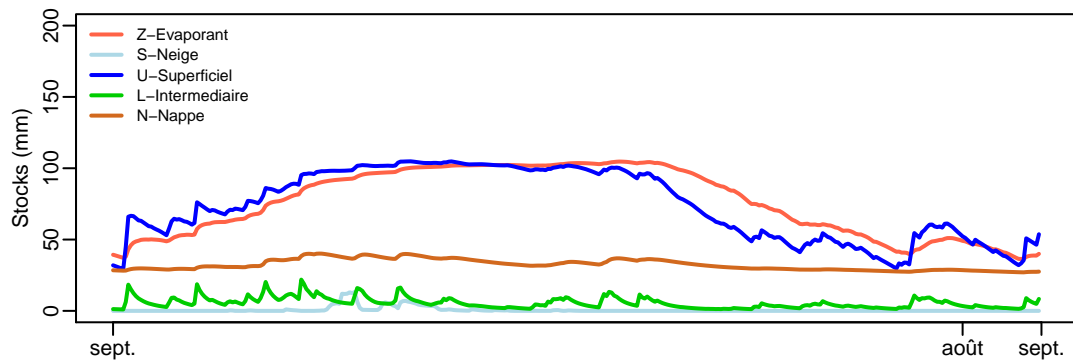

# k3030810 (8939.22 km<sup>2</sup>) – année 2011–2012

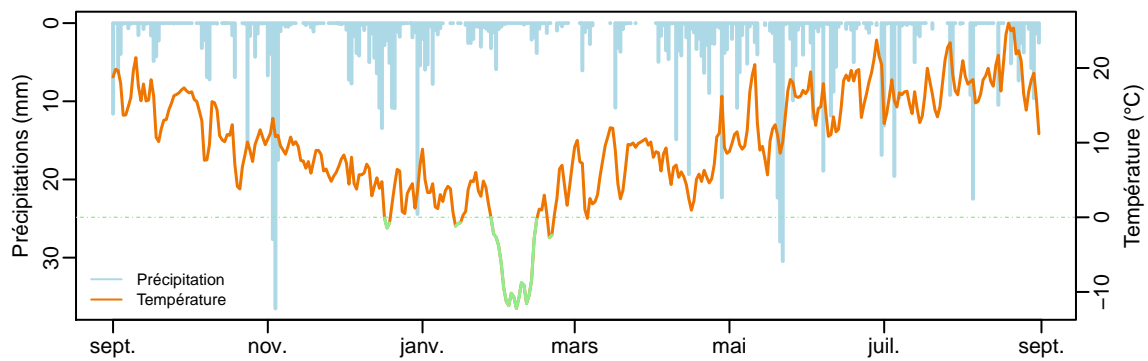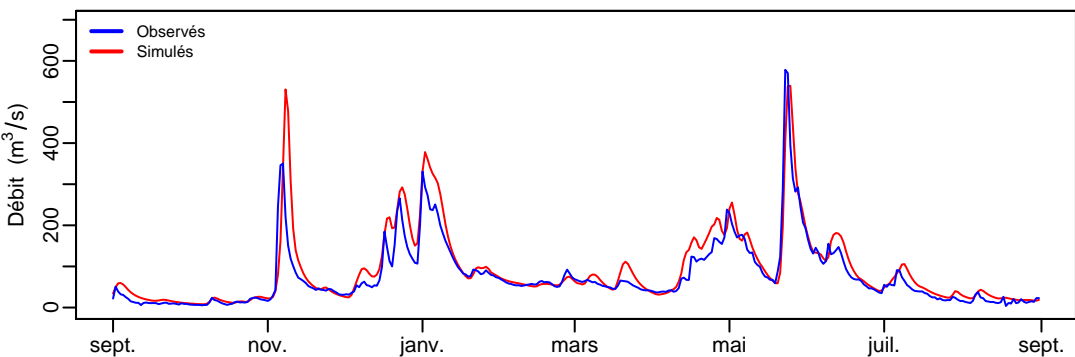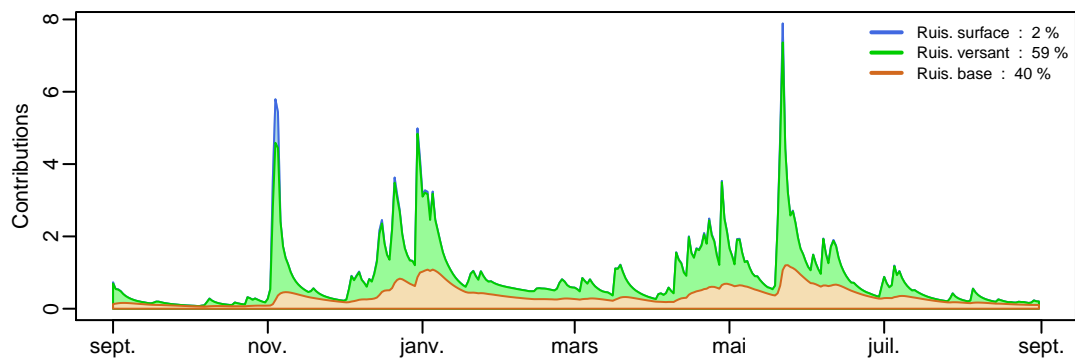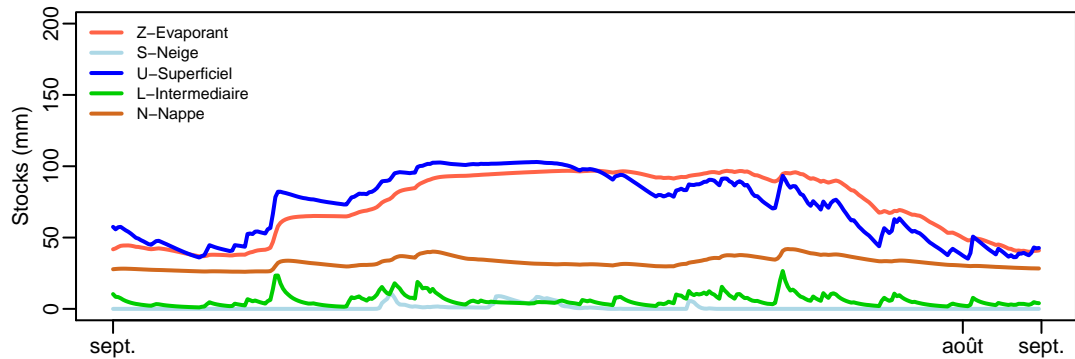

# k3060310 (158.88 km<sup>2</sup>) – année 2000–2001

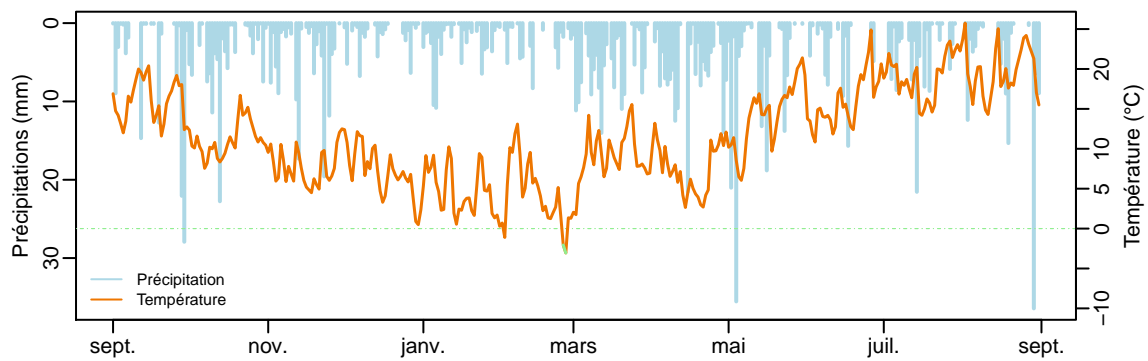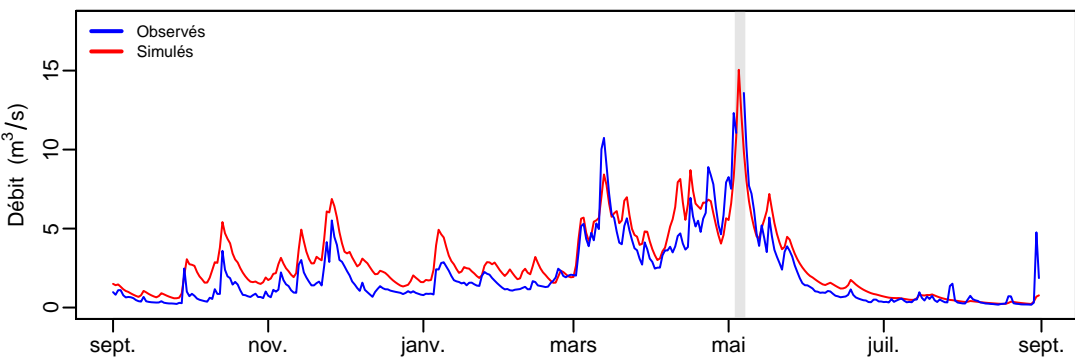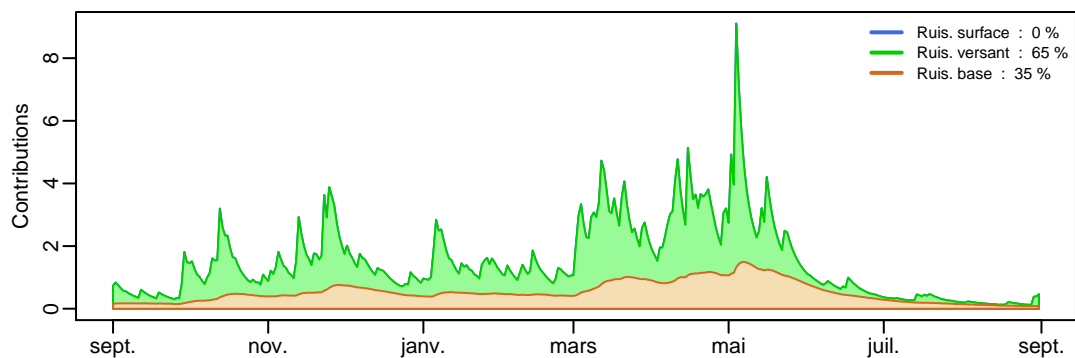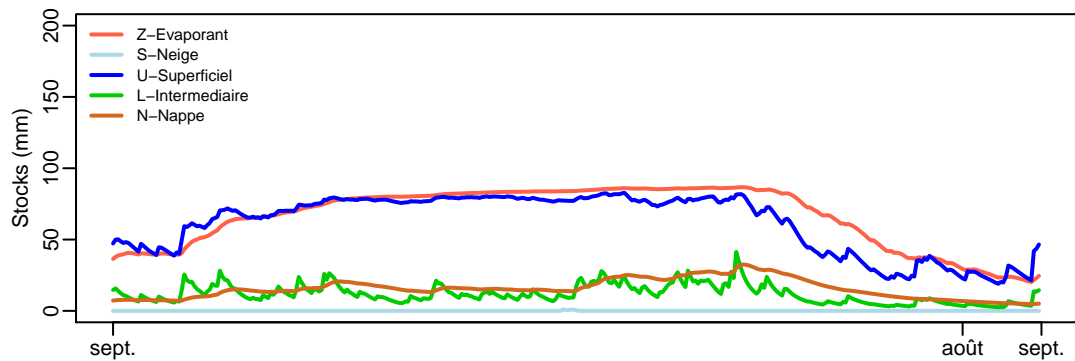

# k3060310 (158.88 km<sup>2</sup>) – année 2001–2002

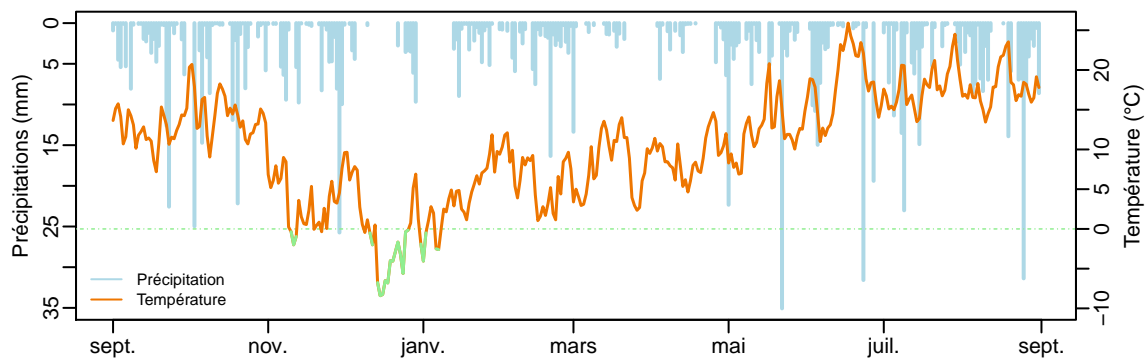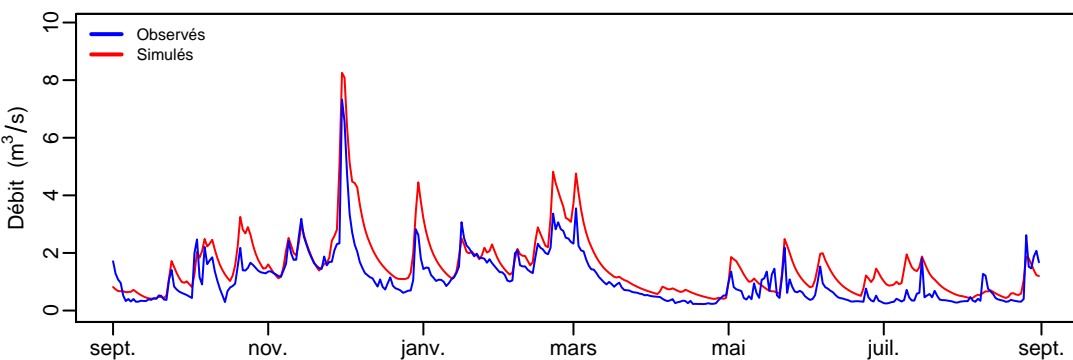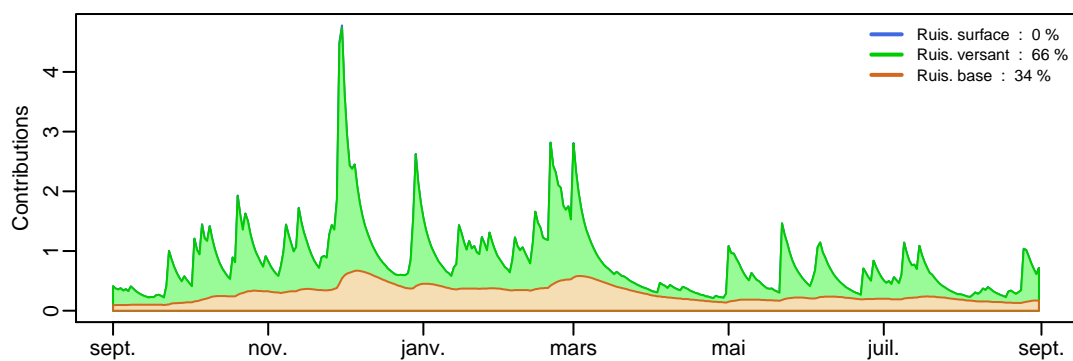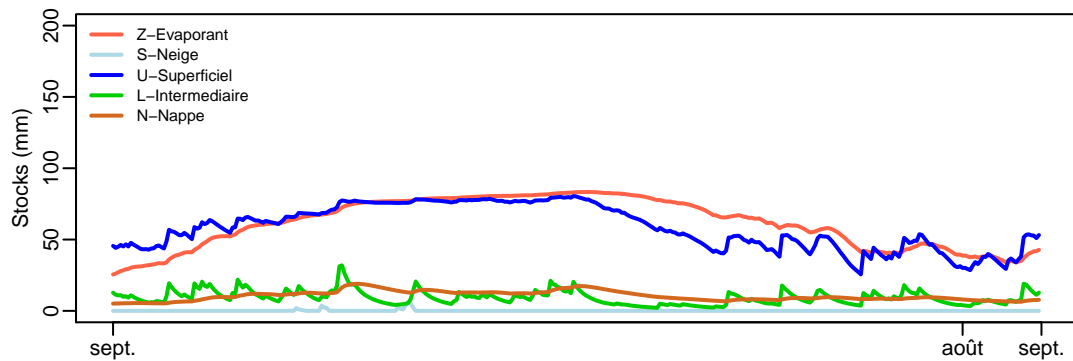

# k3060310 (158.88 km<sup>2</sup>) – année 2002–2003

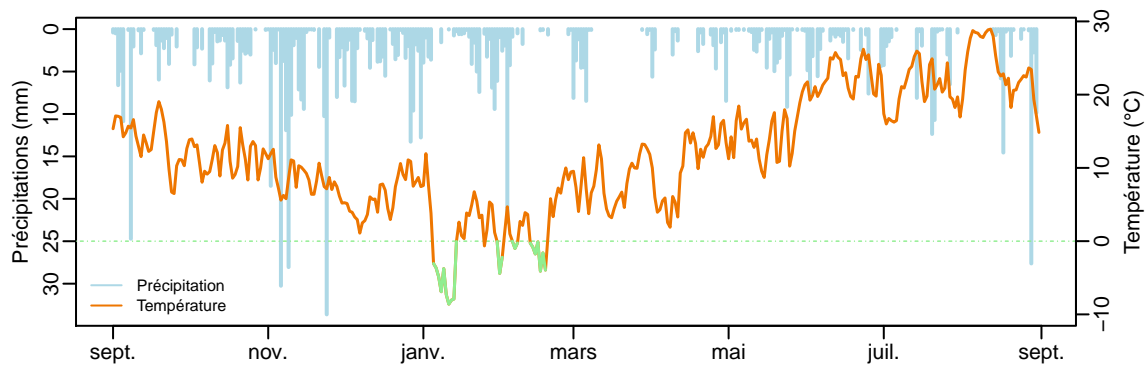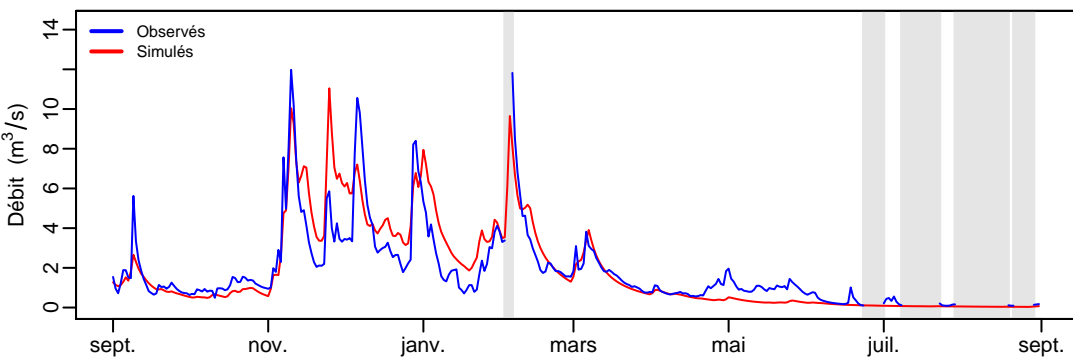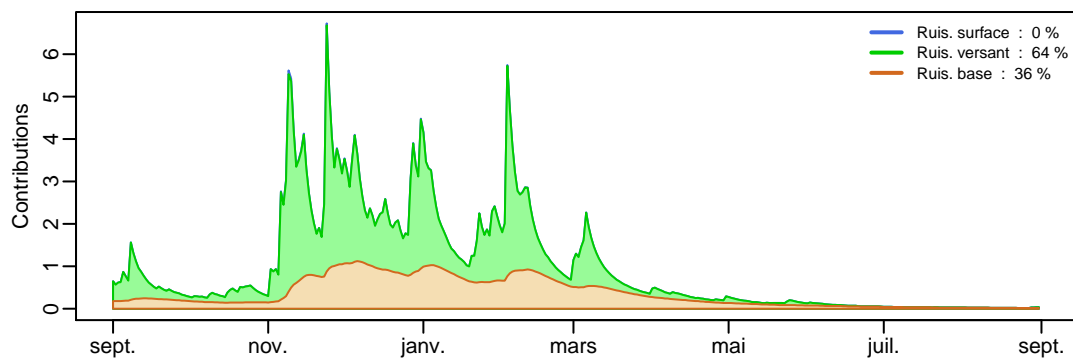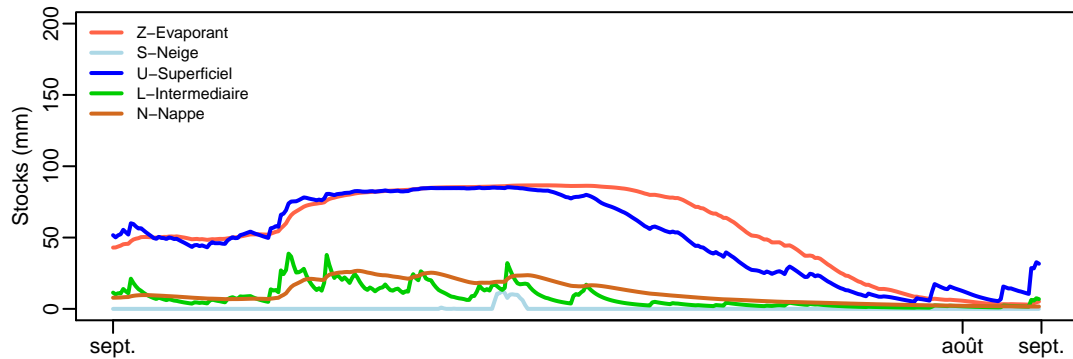

# k3060310 (158.88 km<sup>2</sup>) – année 2003–2004

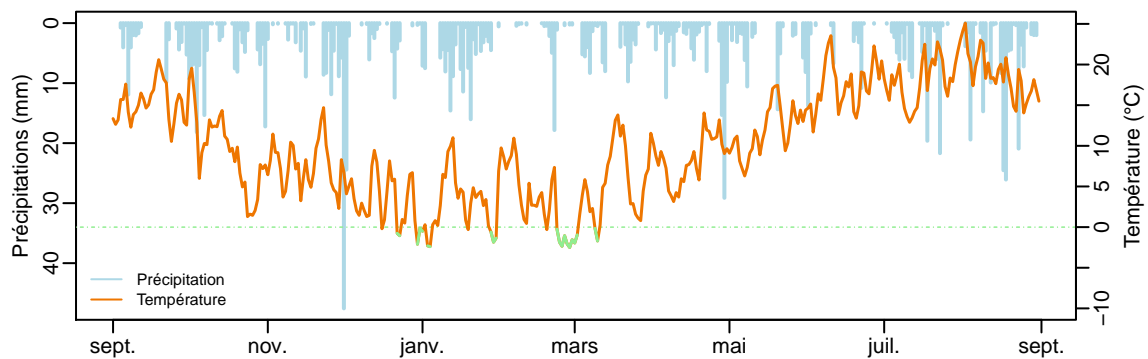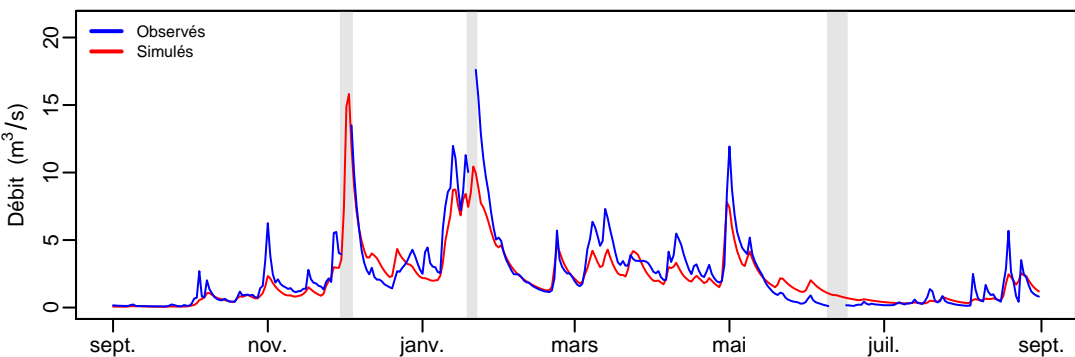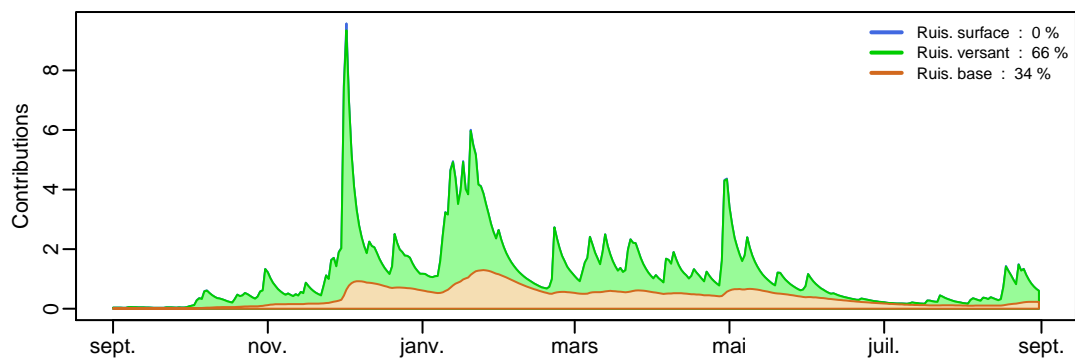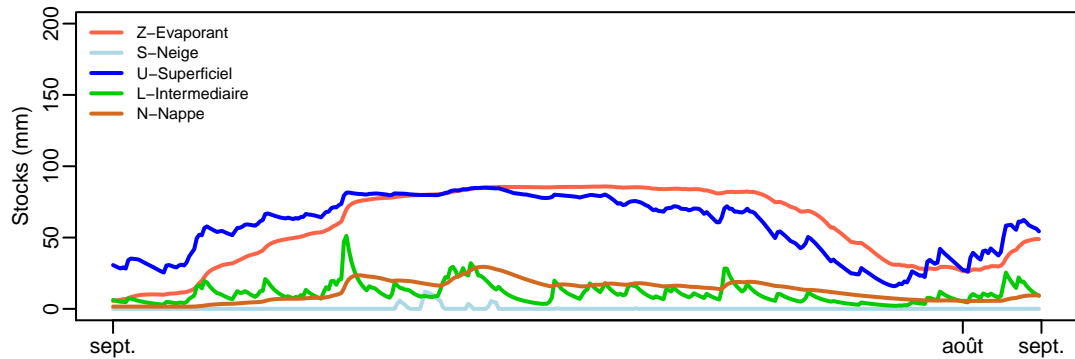



# k3060310 (158.88 km<sup>2</sup>) – année 2004–2005

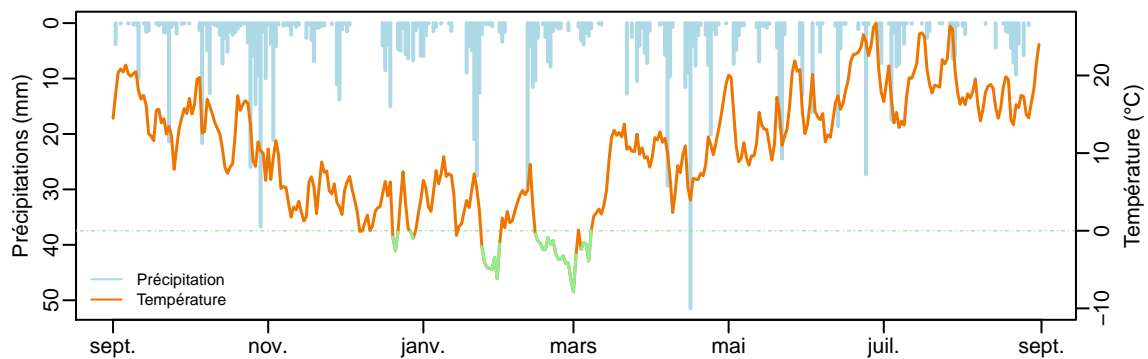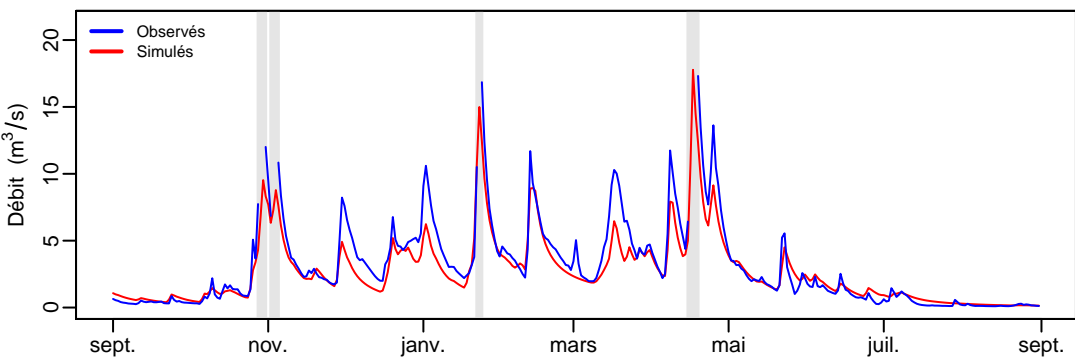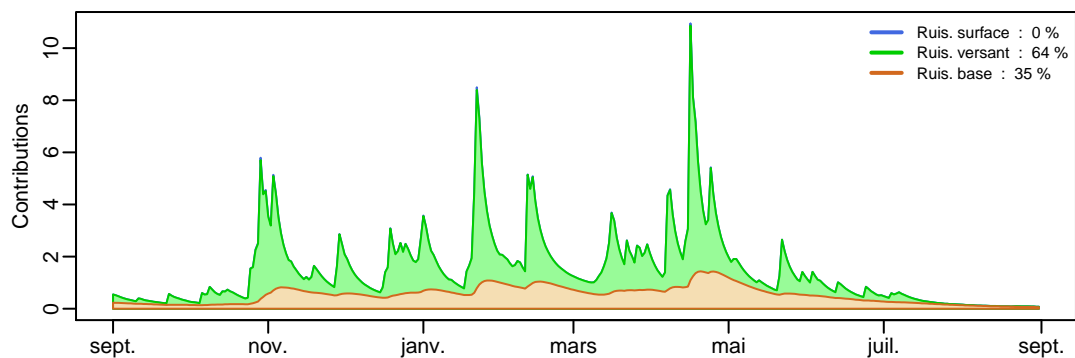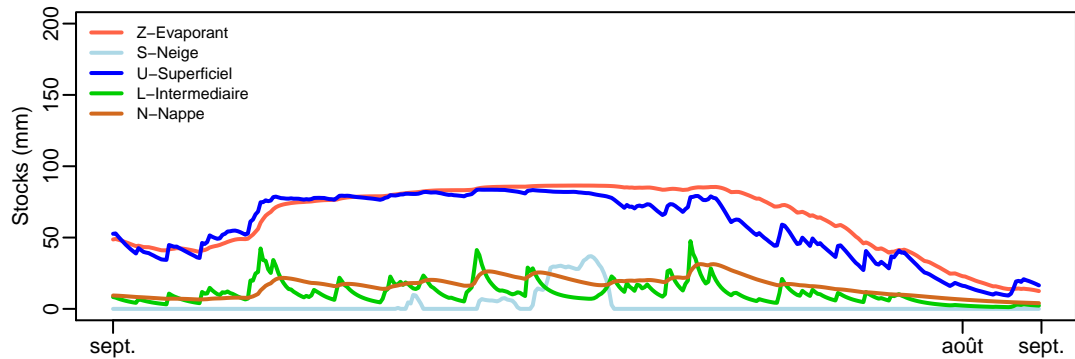

# k3060310 (158.88 km<sup>2</sup>) – année 2005–2006

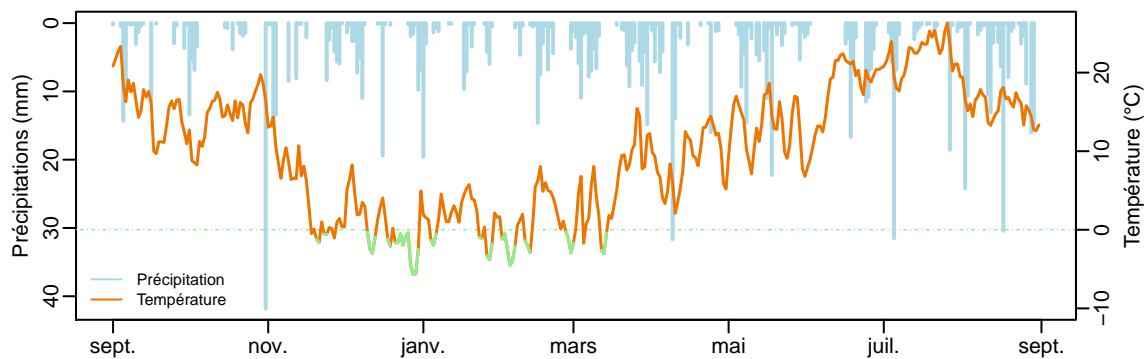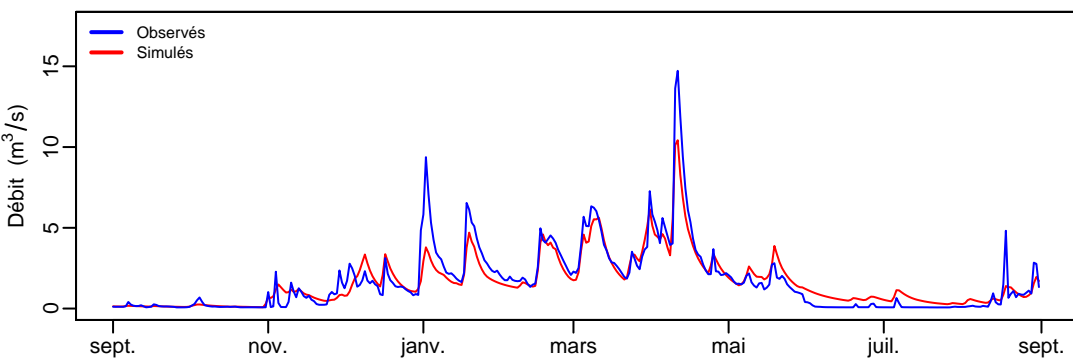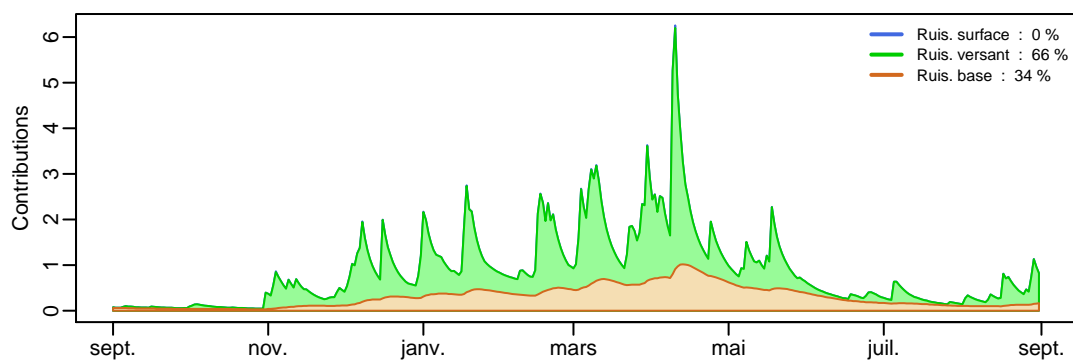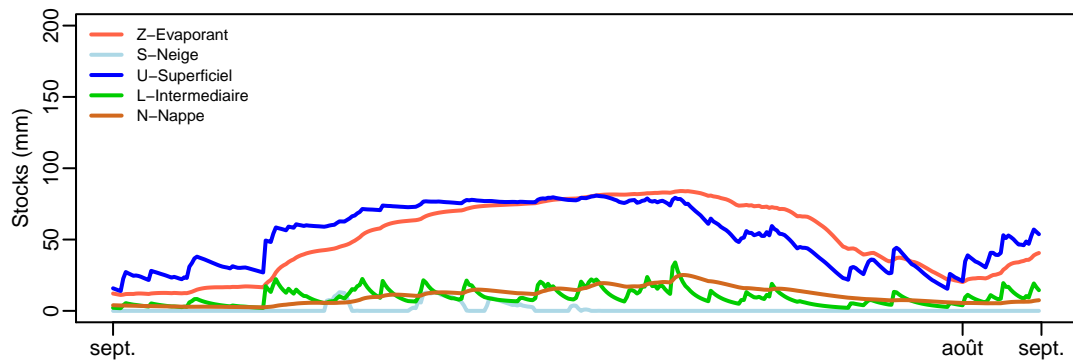

# k3060310 (158.88 km<sup>2</sup>) – année 2006–2007

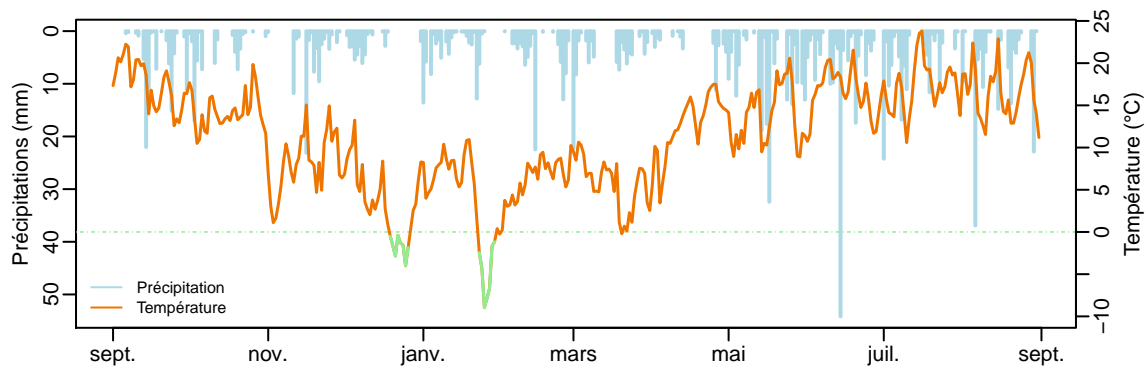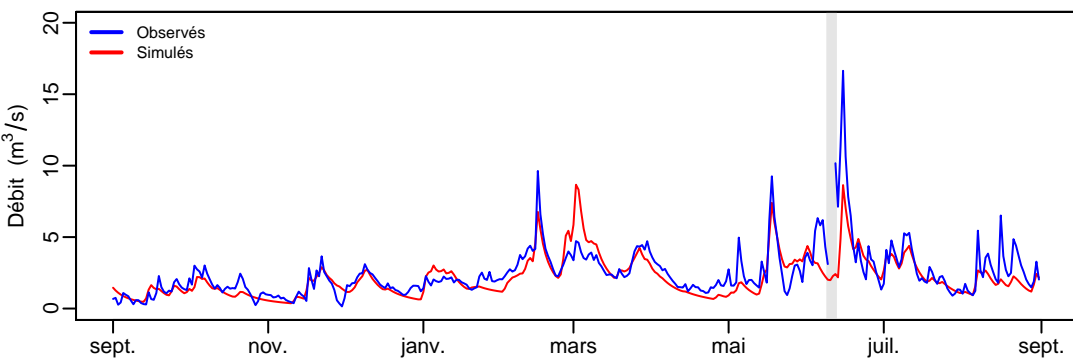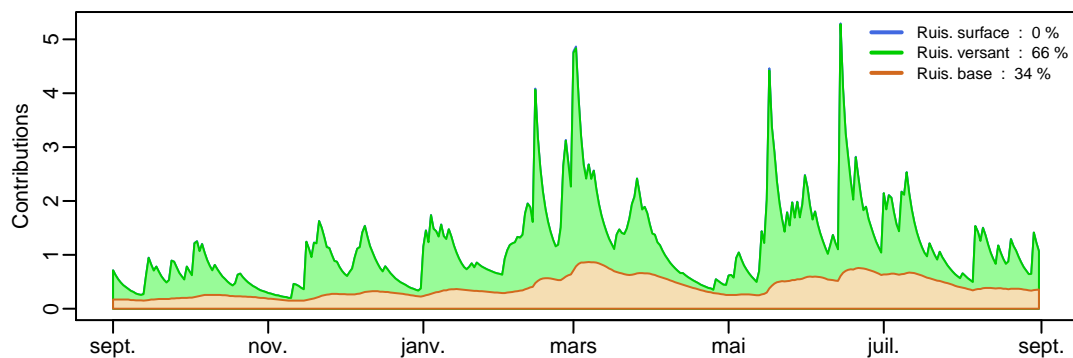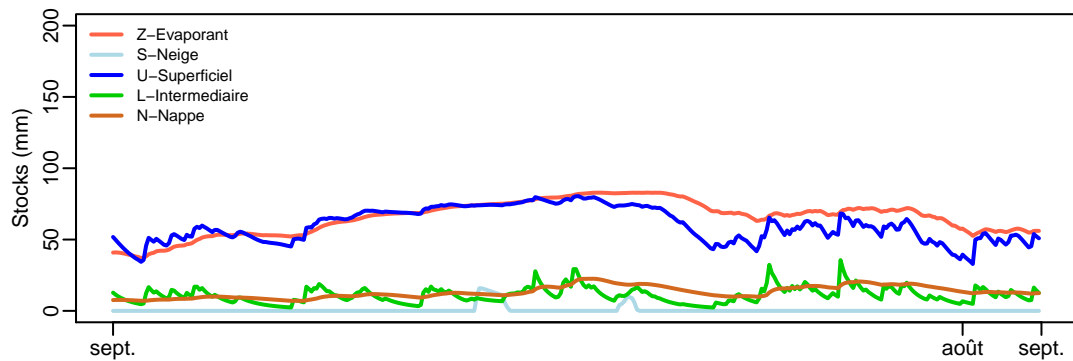

# k3060310 (158.88 km<sup>2</sup>) – année 2007–2008

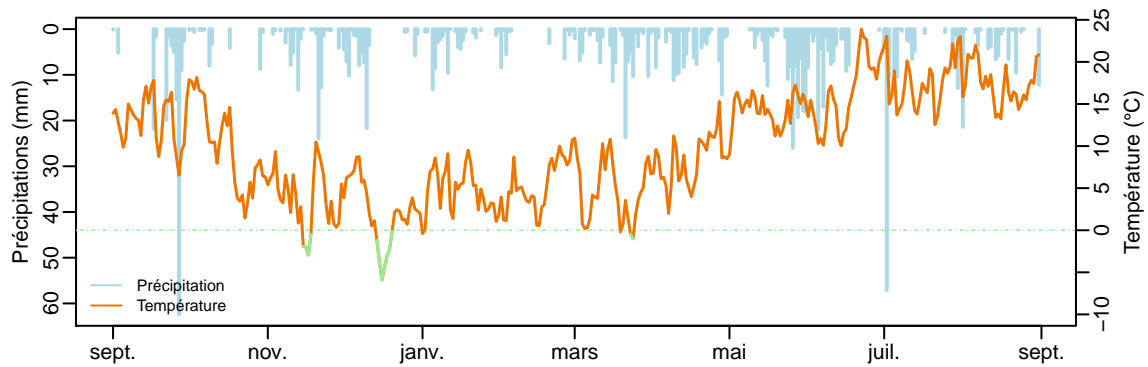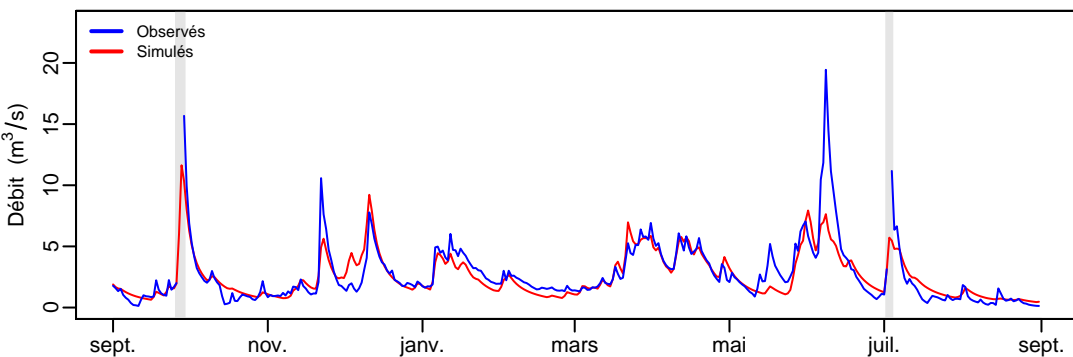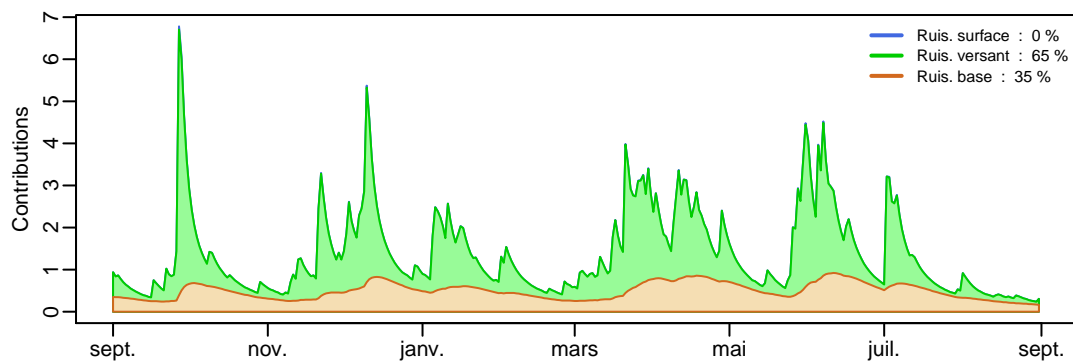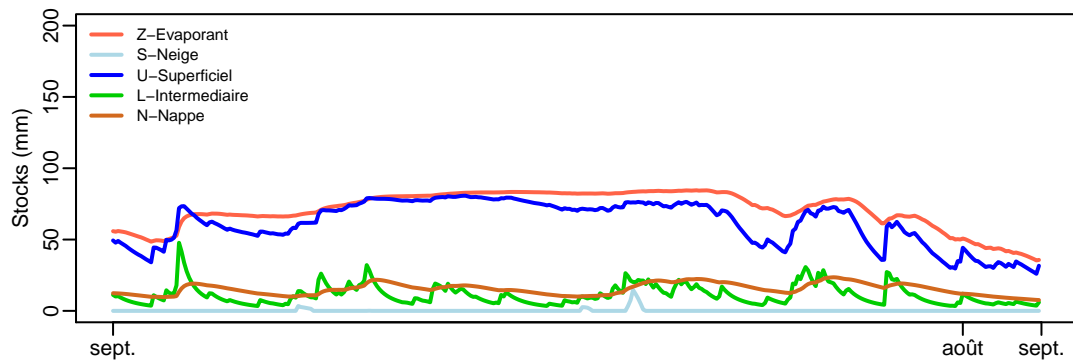

# k3060310 (158.88 km<sup>2</sup>) – année 2008–2009

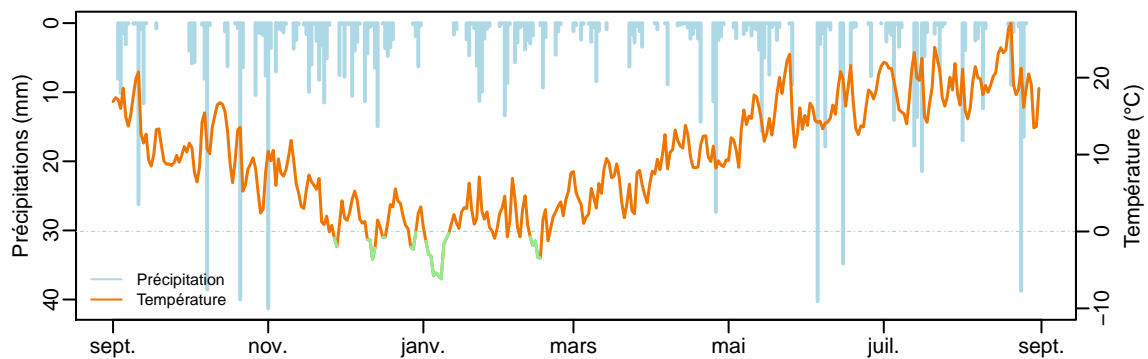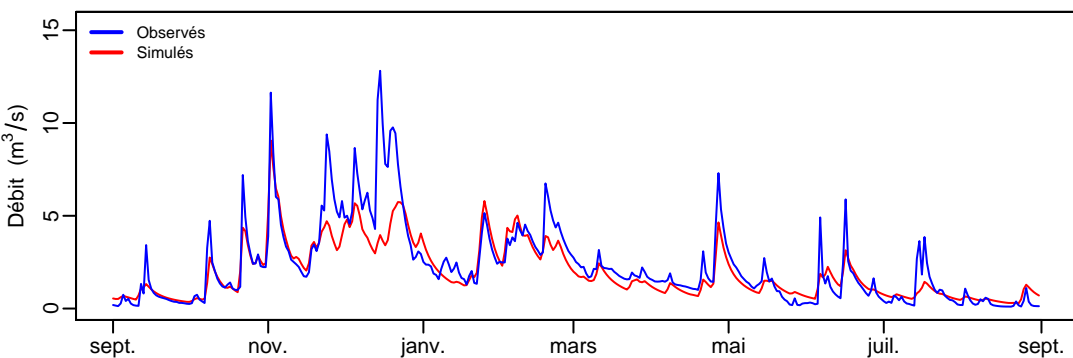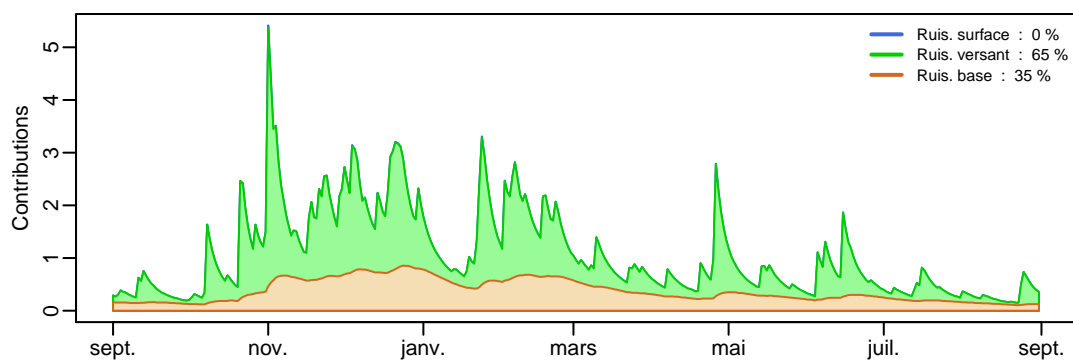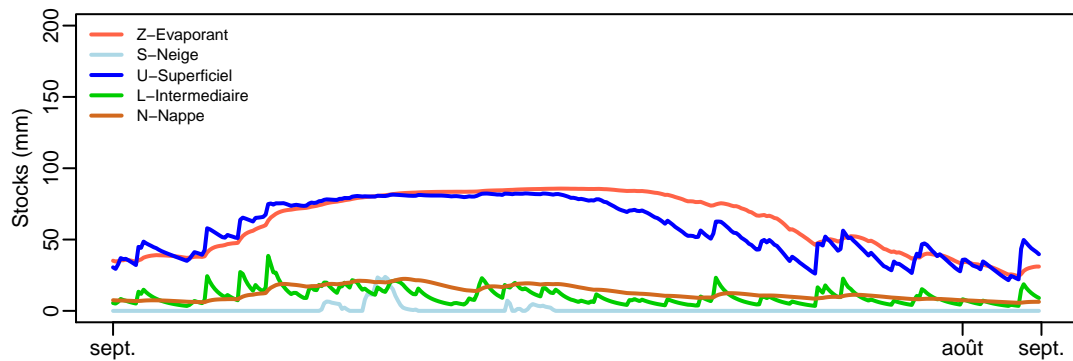

# k3060310 (158.88 km<sup>2</sup>) – année 2009–2010

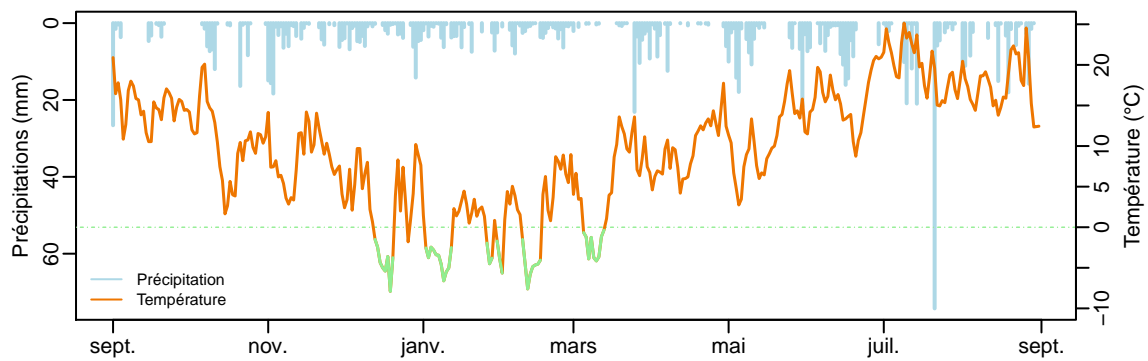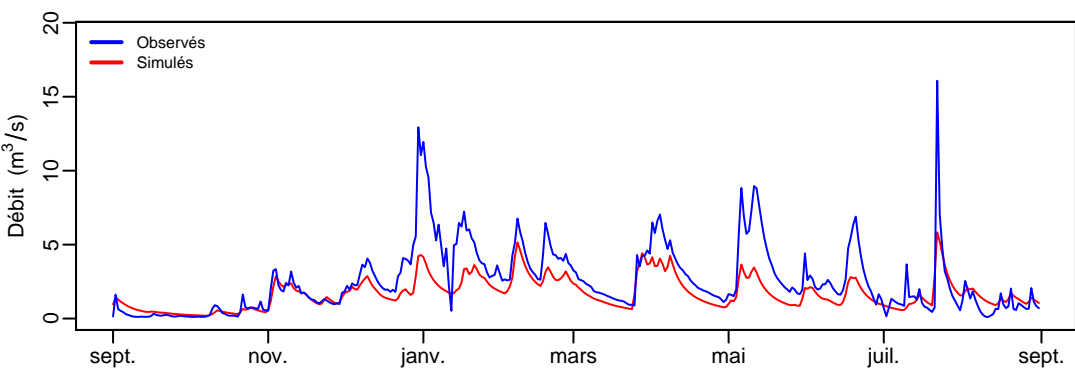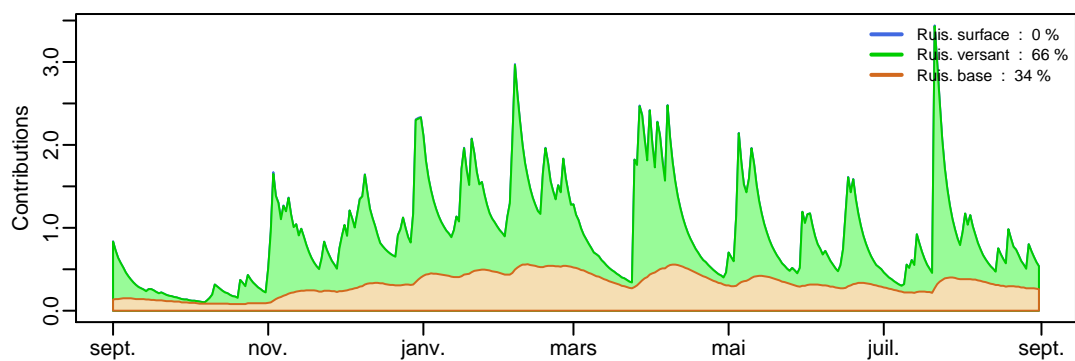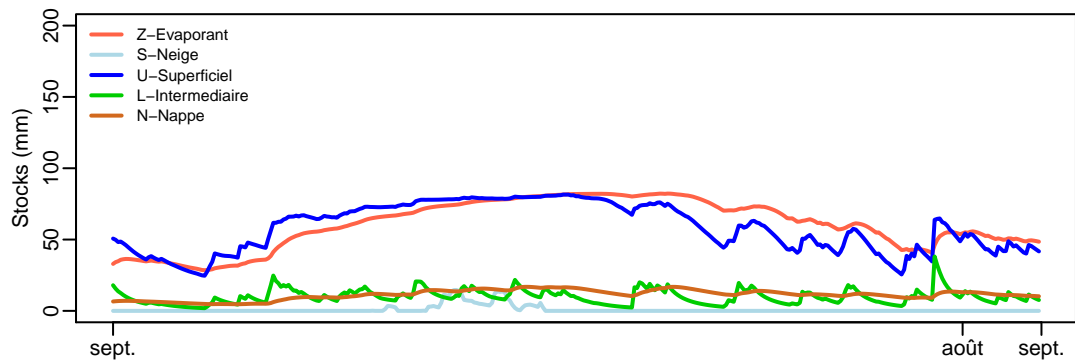

# k3060310 (158.88 km<sup>2</sup>) – année 2010–2011

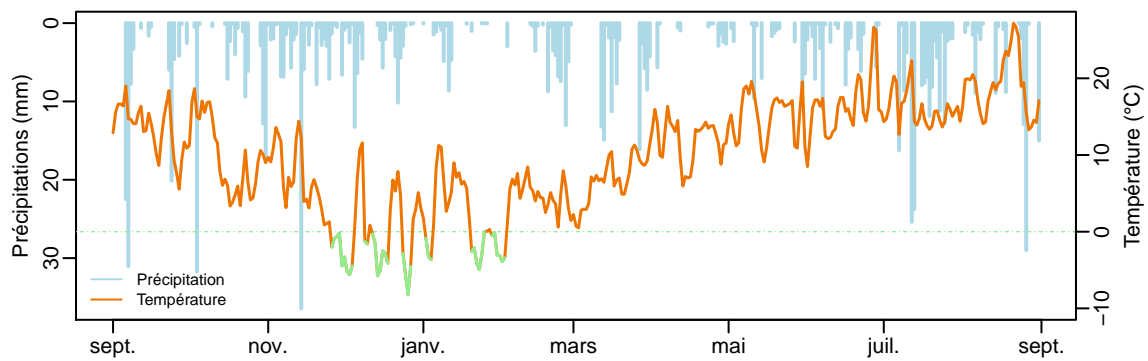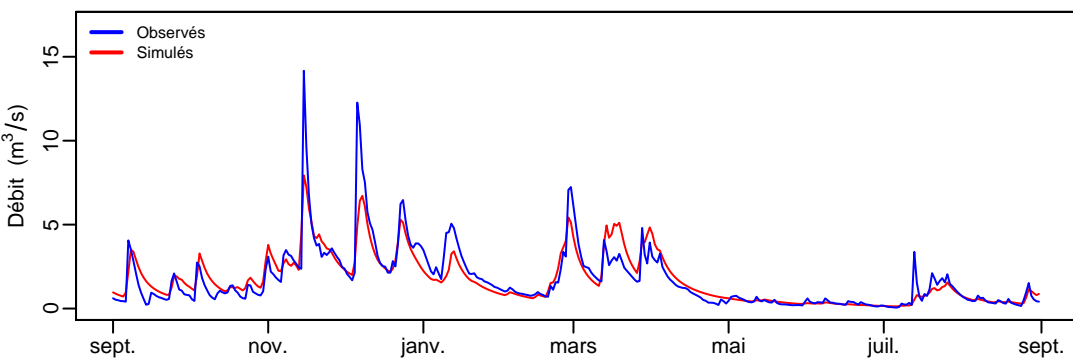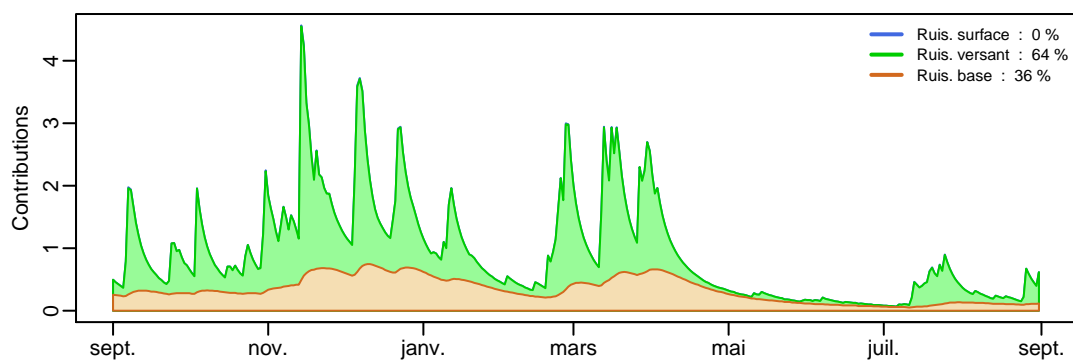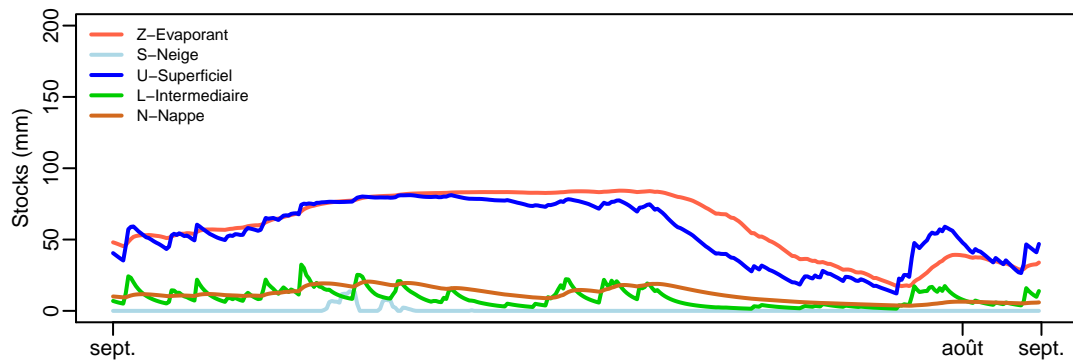

# k3060310 (158.88 km<sup>2</sup>) – année 2011–2012

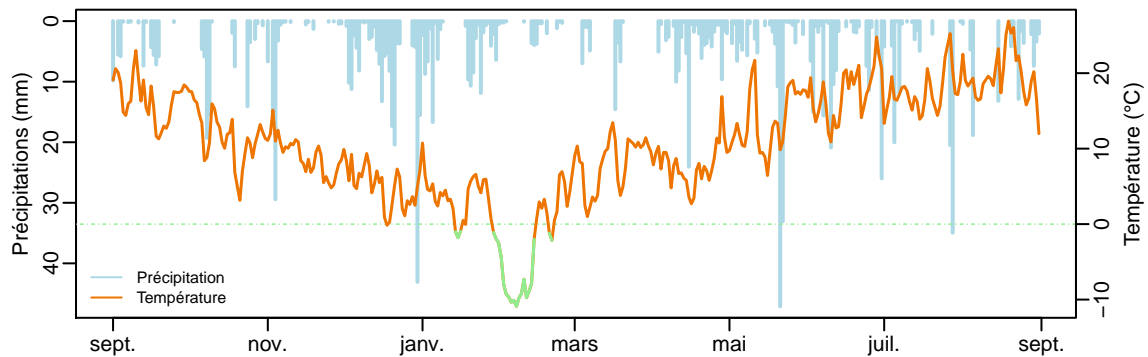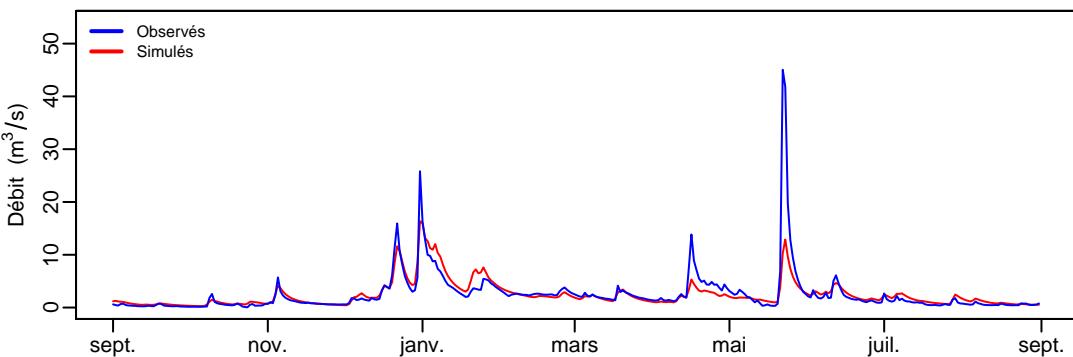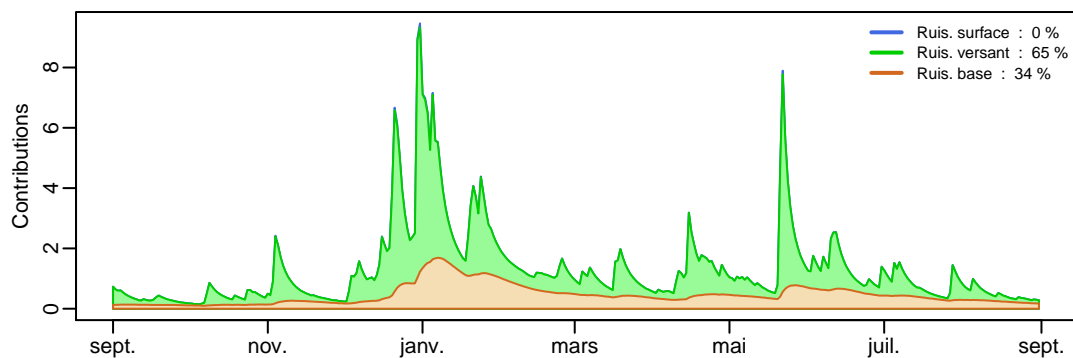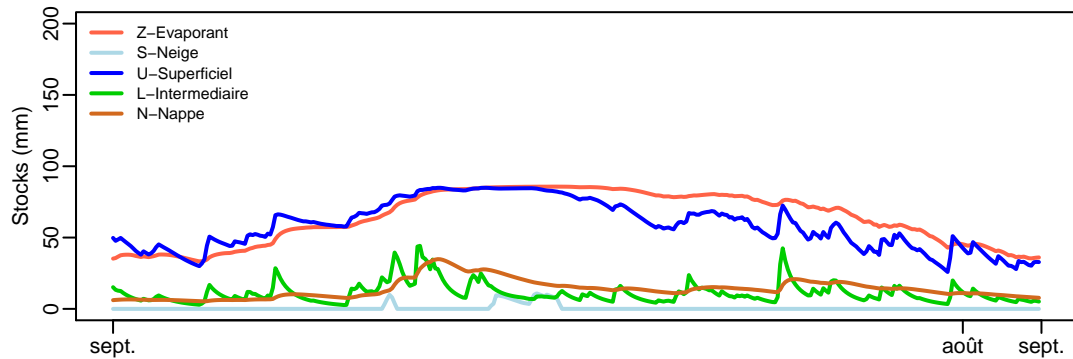



# k3222010 (359.79 km<sup>2</sup>) – année 1981–1982

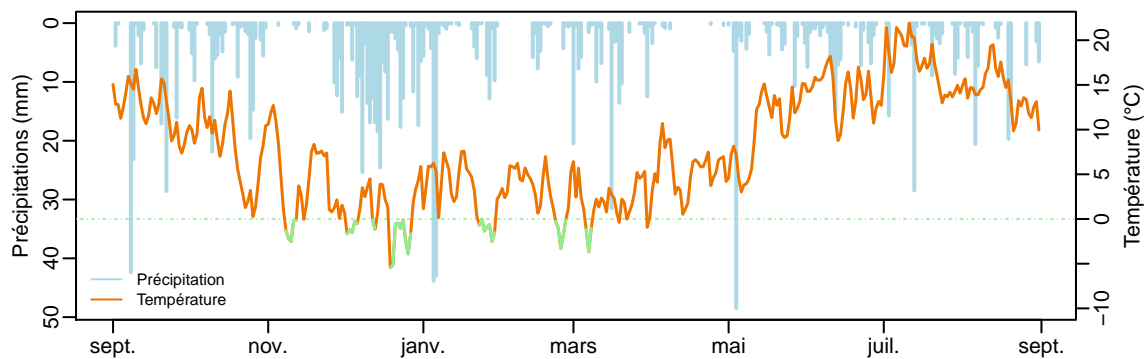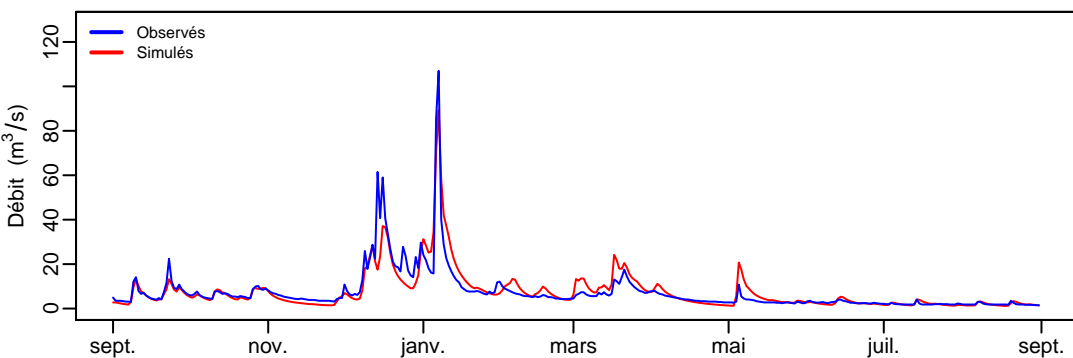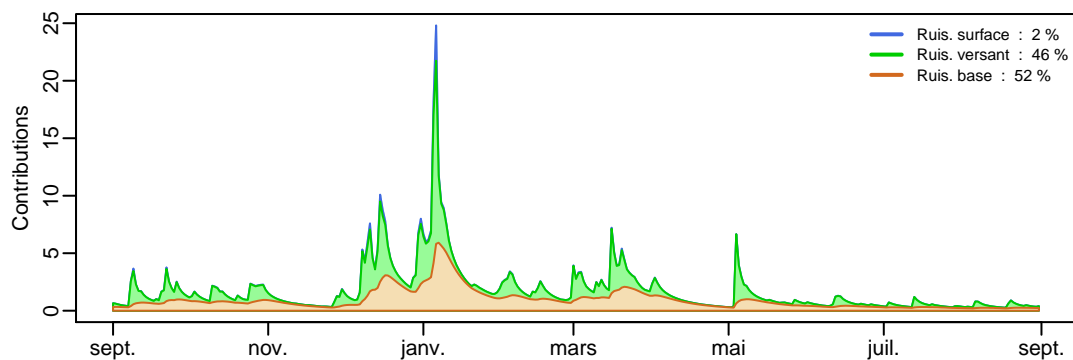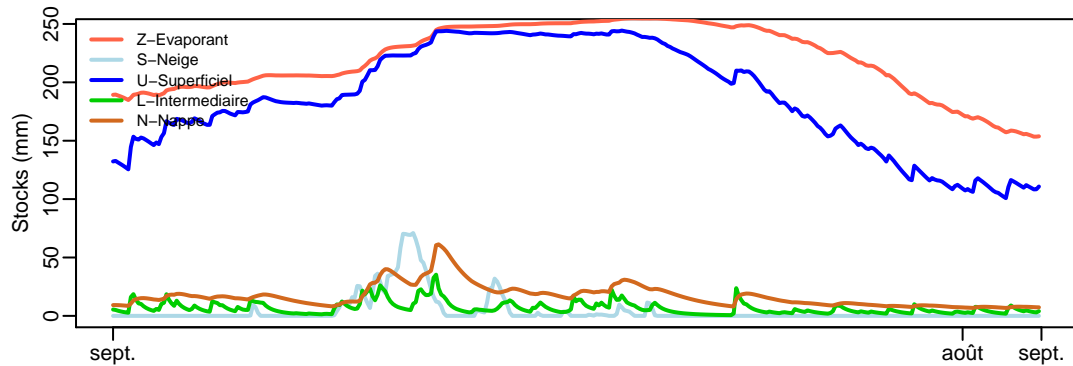

# k3222010 (359.79 km<sup>2</sup>) – année 1982–1983

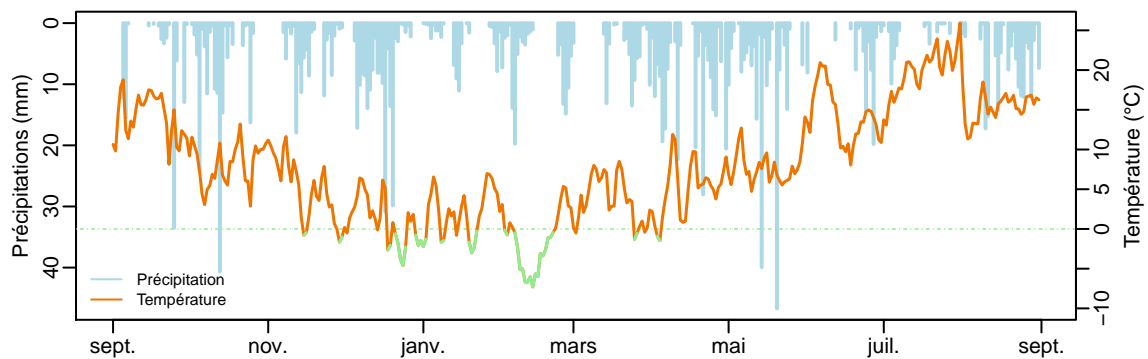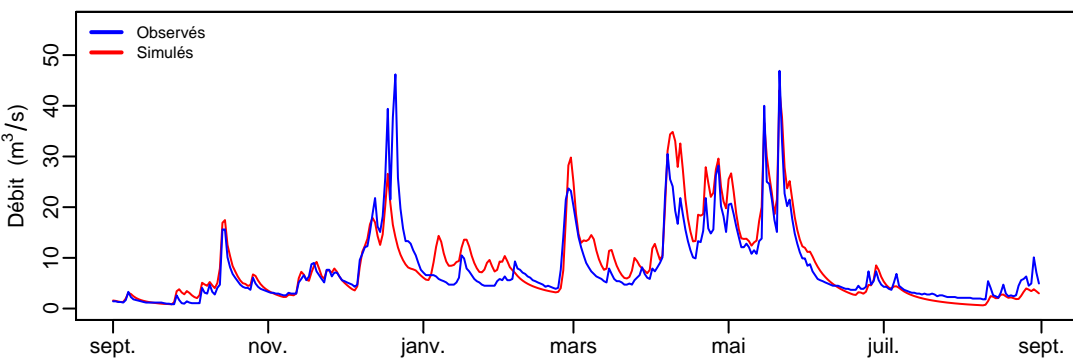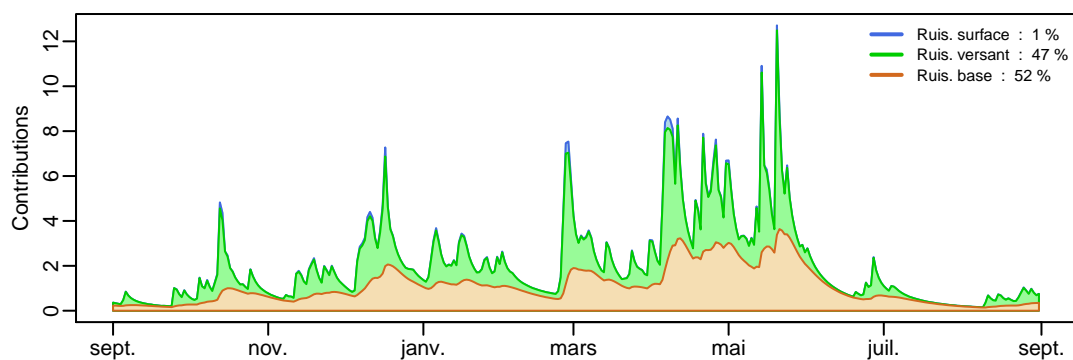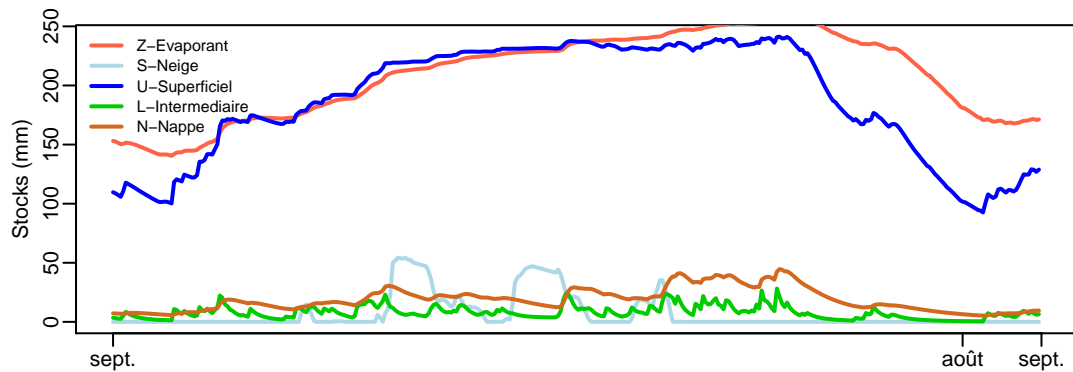

# k3222010 (359.79 km<sup>2</sup>) – année 1983–1984

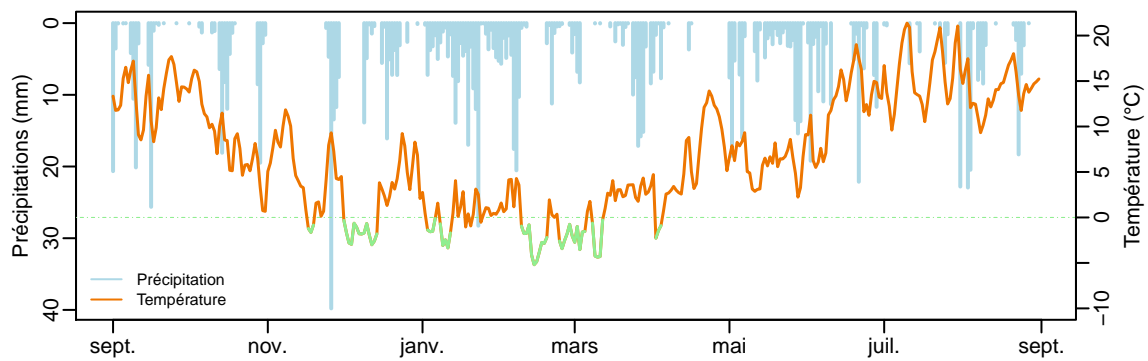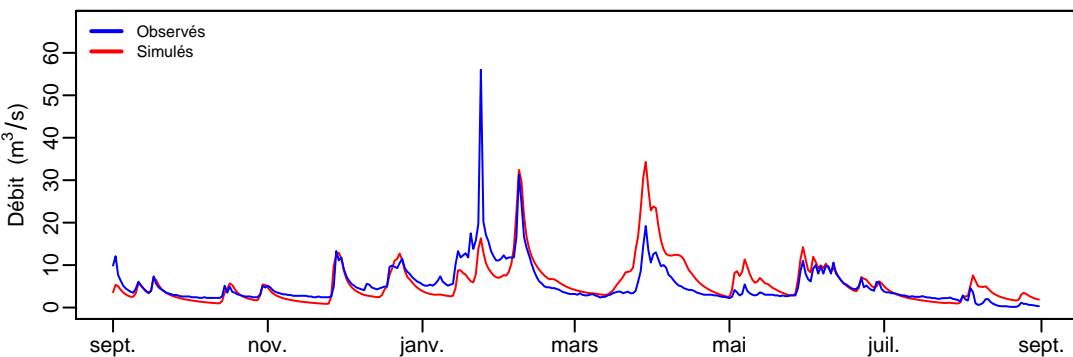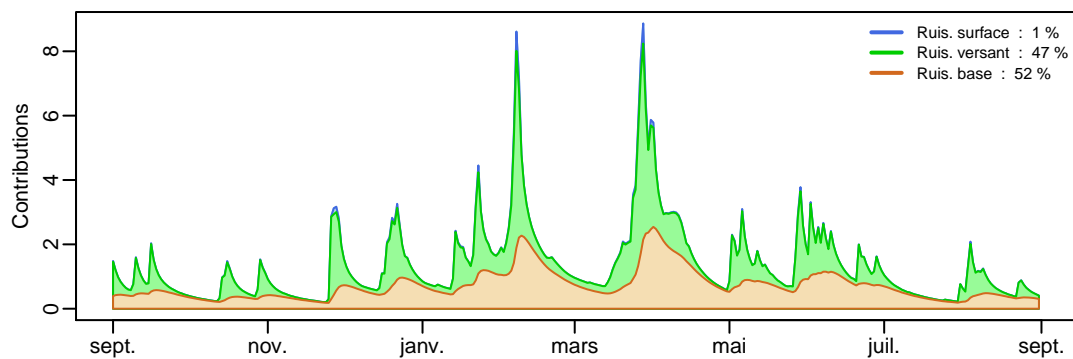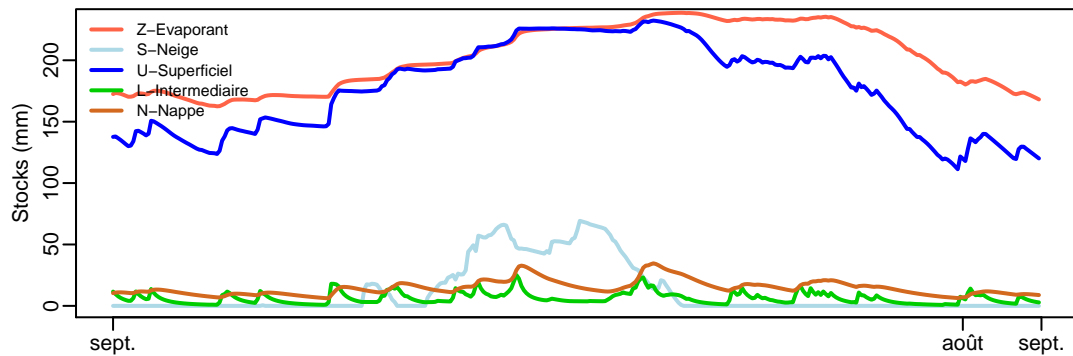

# k3222010 (359.79 km<sup>2</sup>) – année 1984–1985

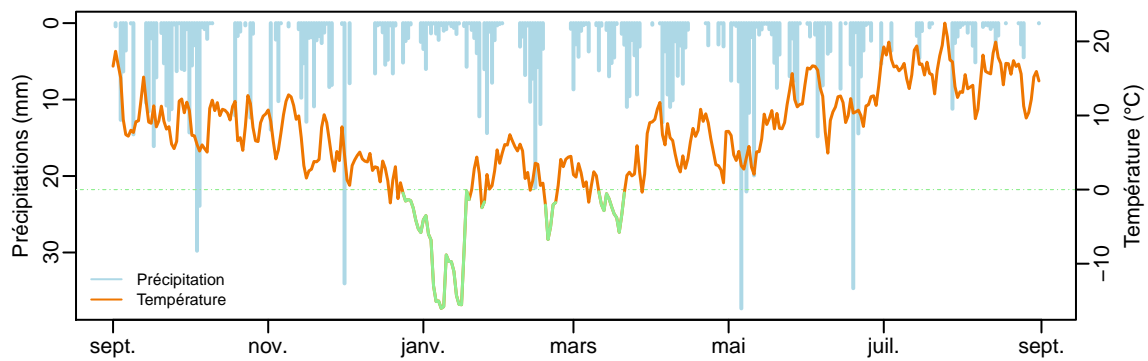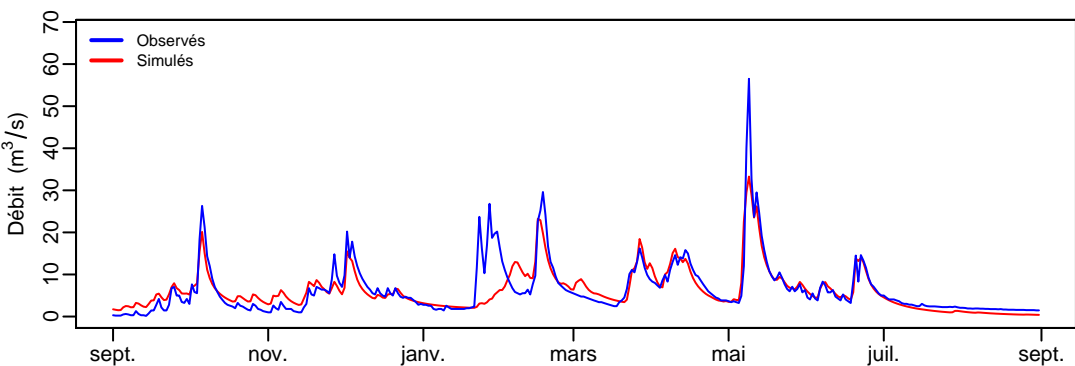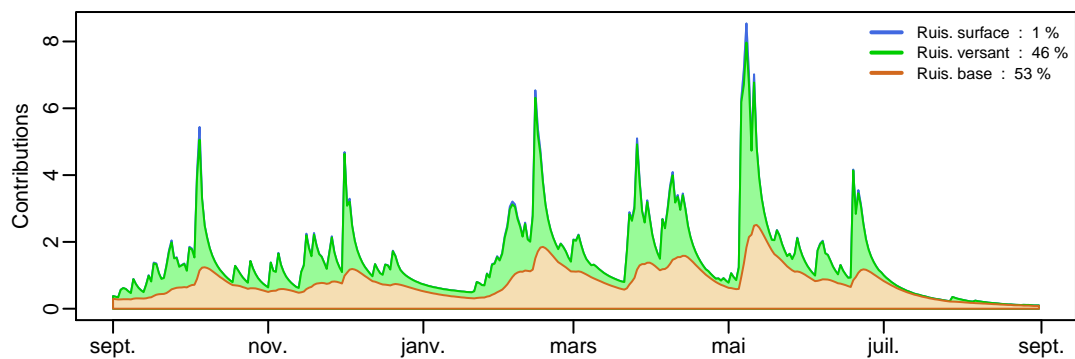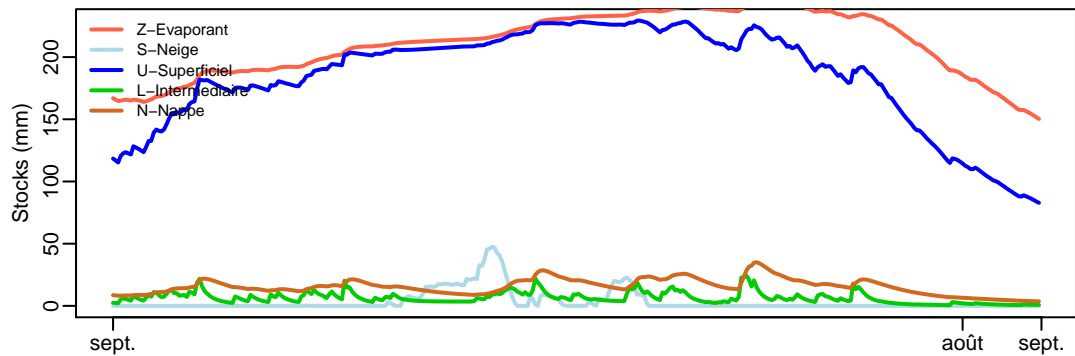

# k3222010 (359.79 km<sup>2</sup>) – année 1985–1986

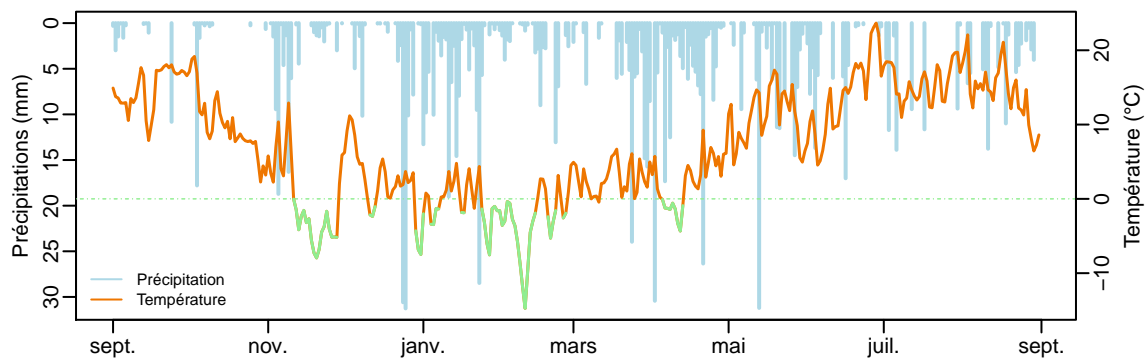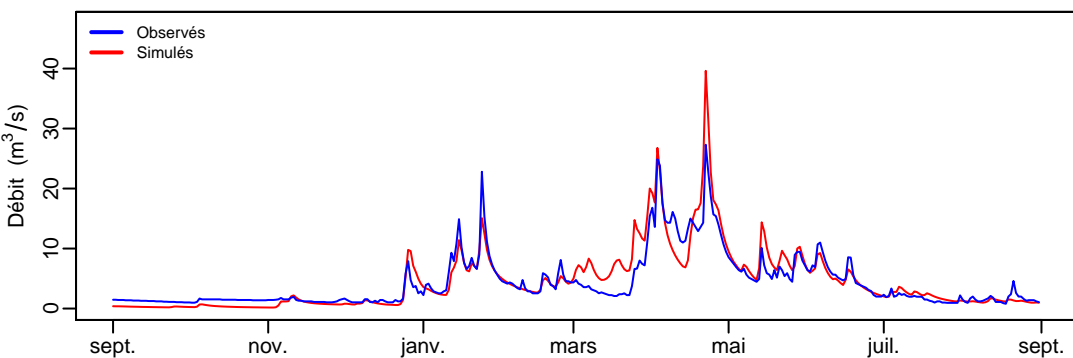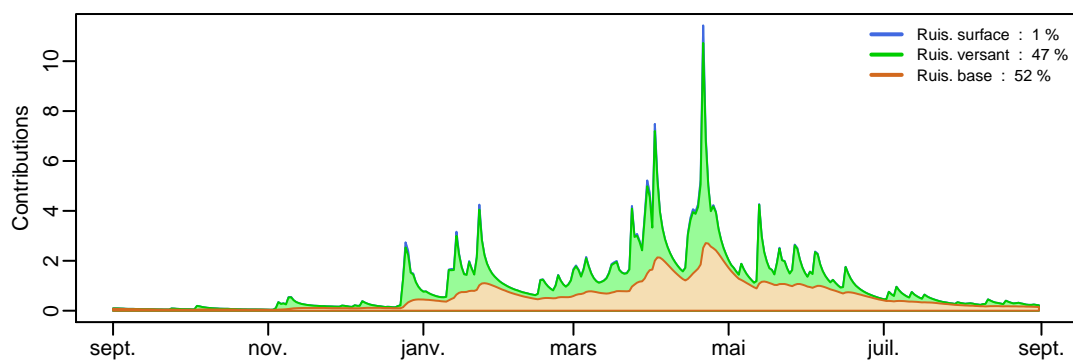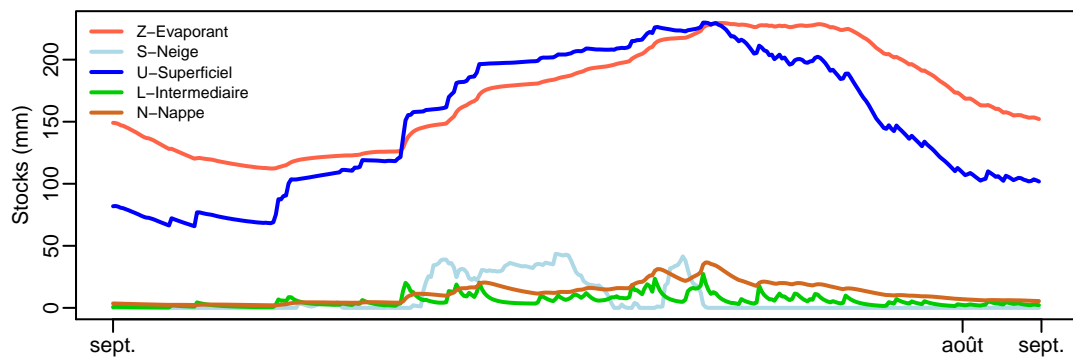

# k3222010 (359.79 km<sup>2</sup>) – année 1986–1987

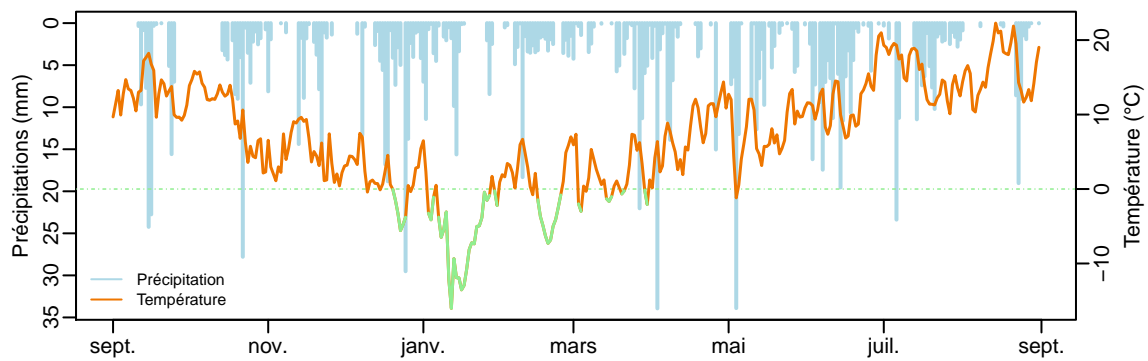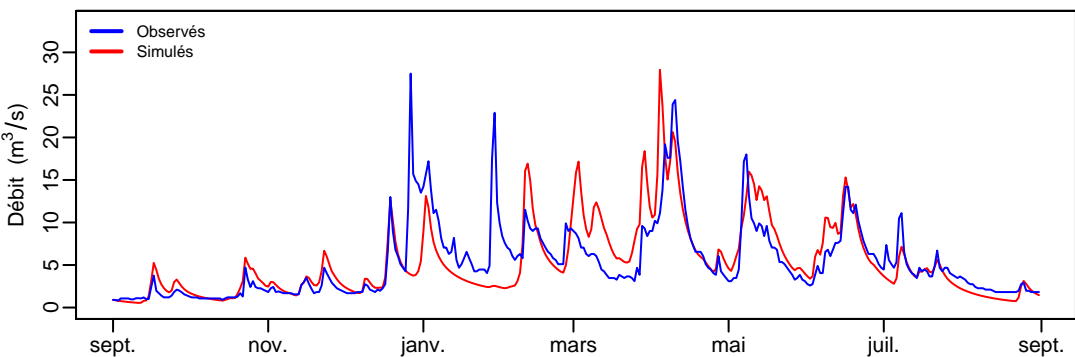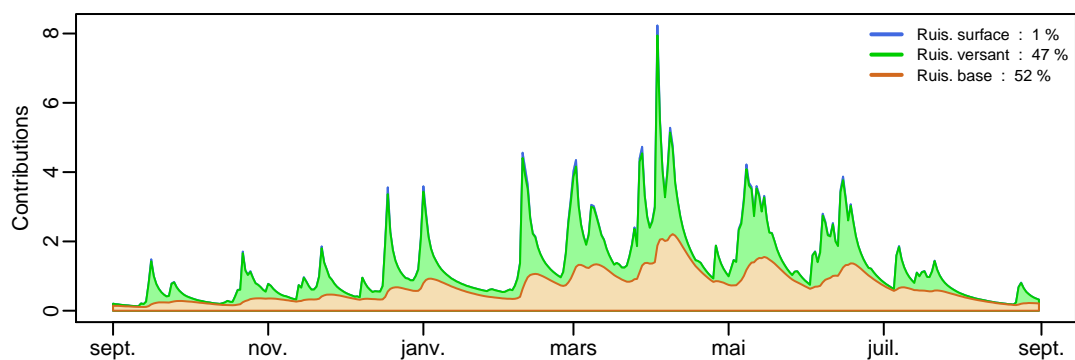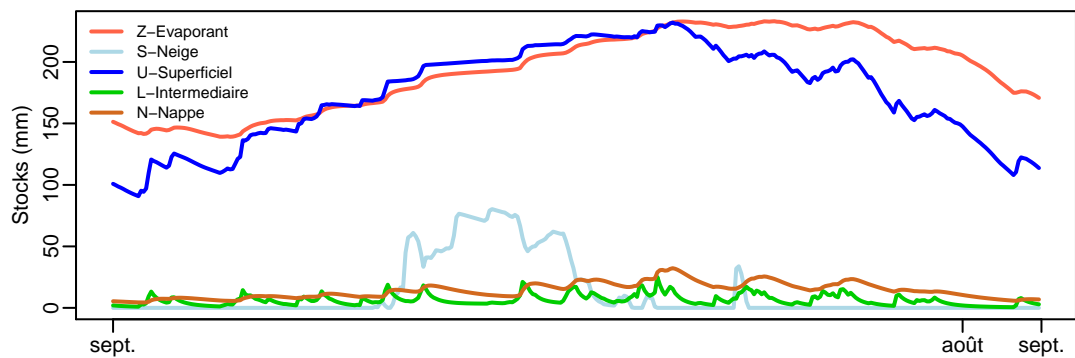

# k3222010 (359.79 km<sup>2</sup>) – année 1987–1988

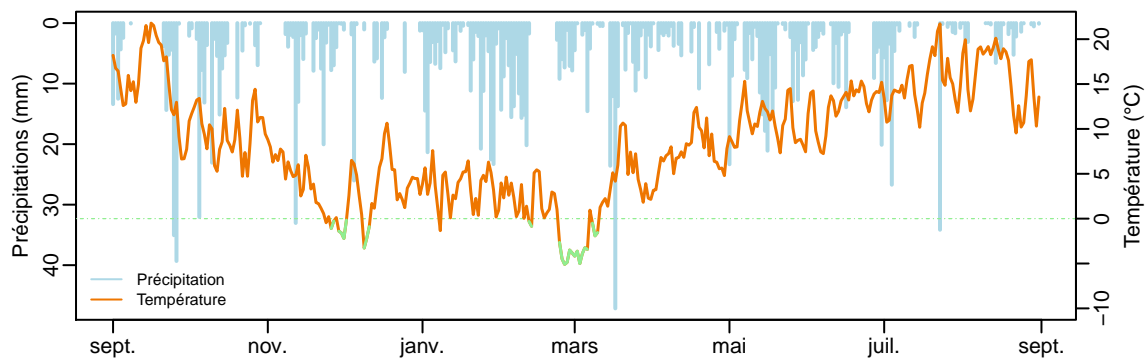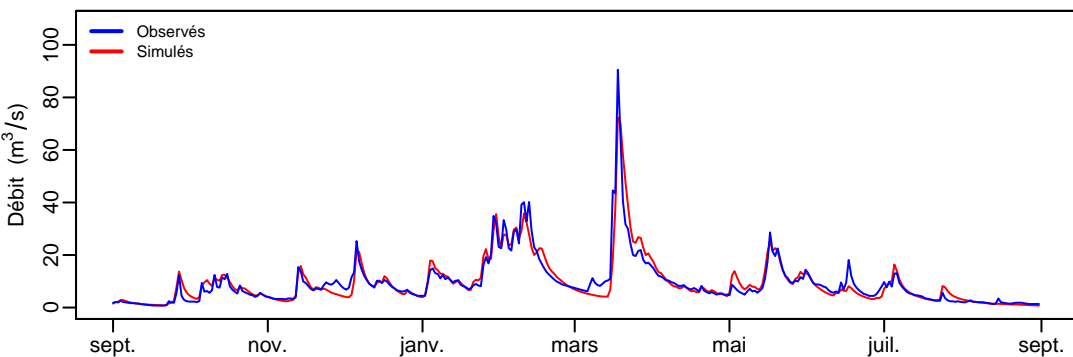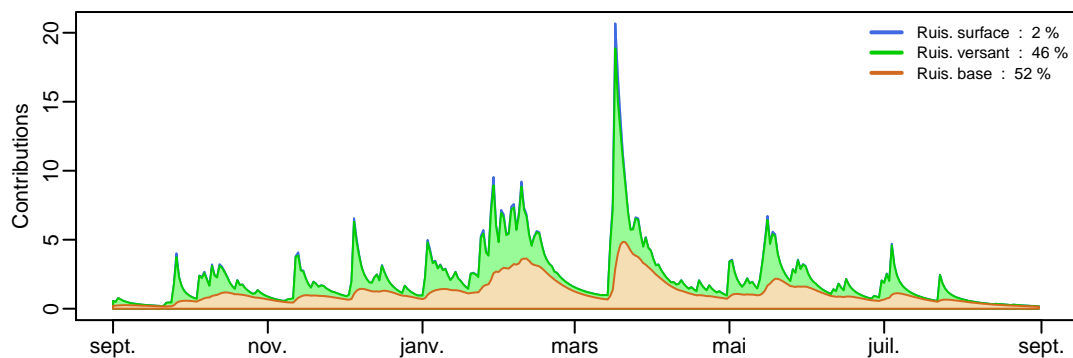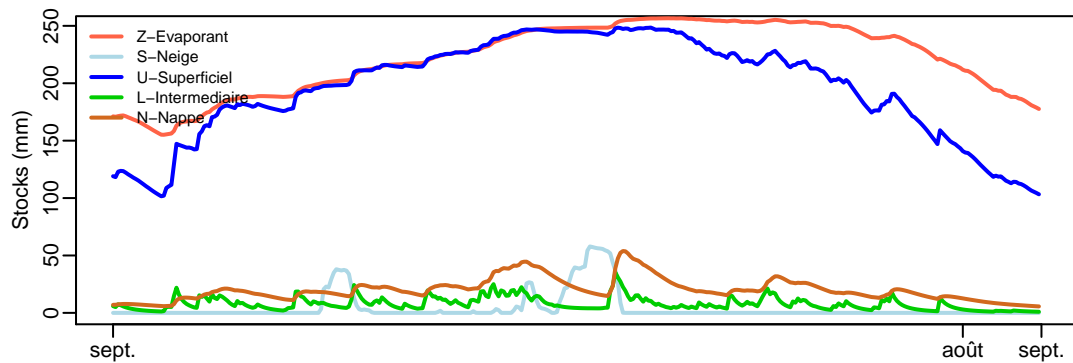

# k3222010 (359.79 km<sup>2</sup>) – année 1988–1989

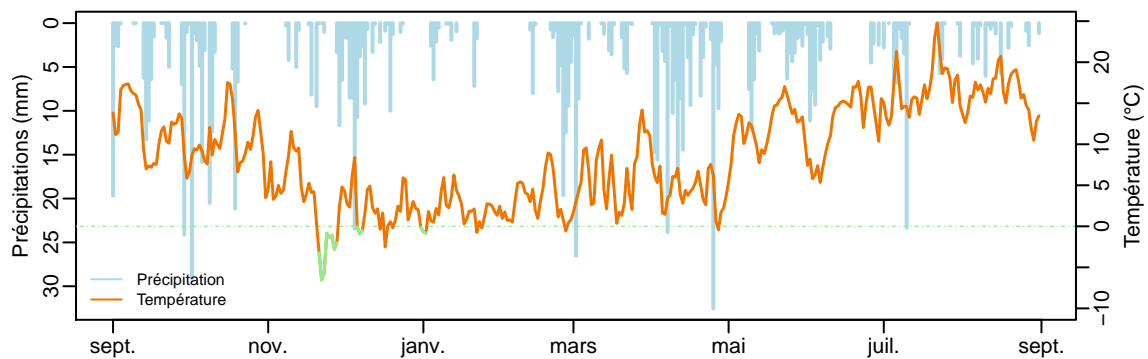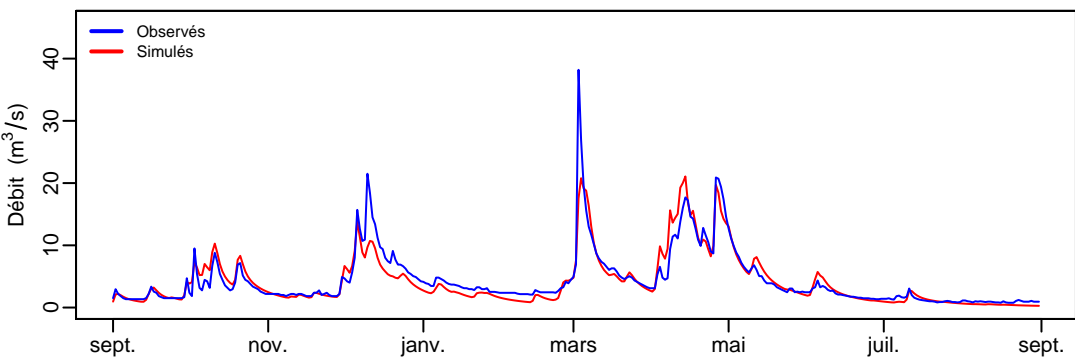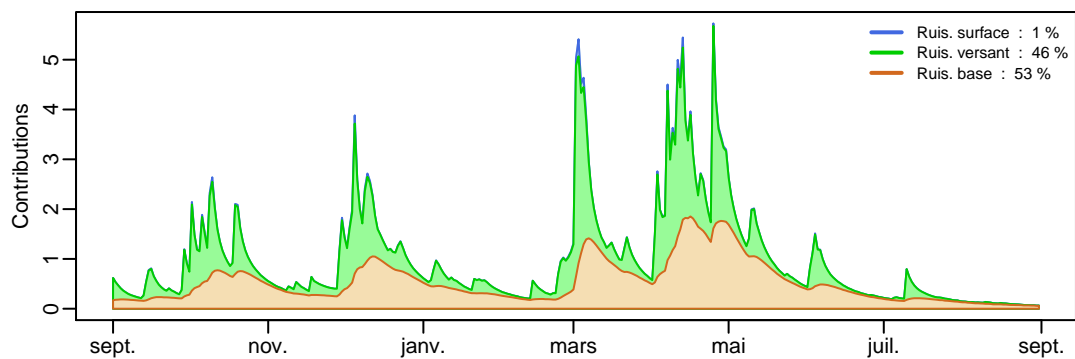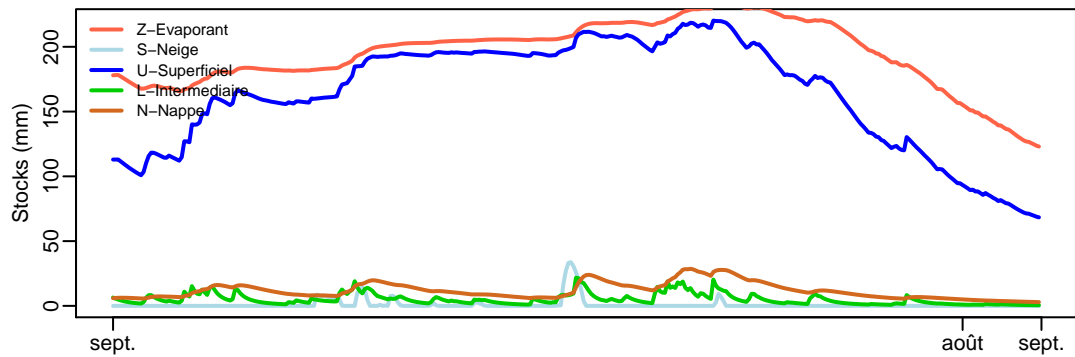



# k3222010 (359.79 km<sup>2</sup>) – année 1989–1990

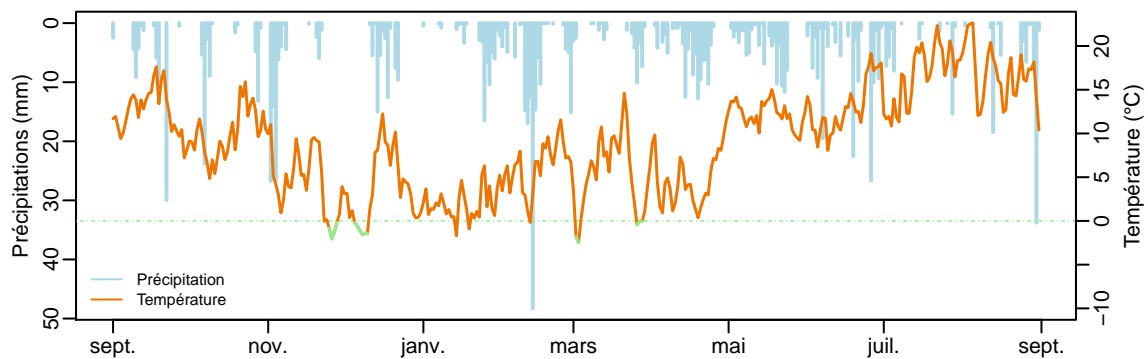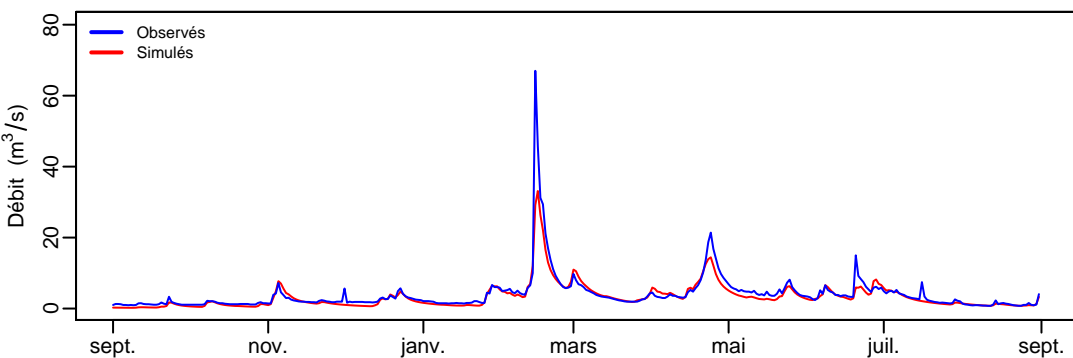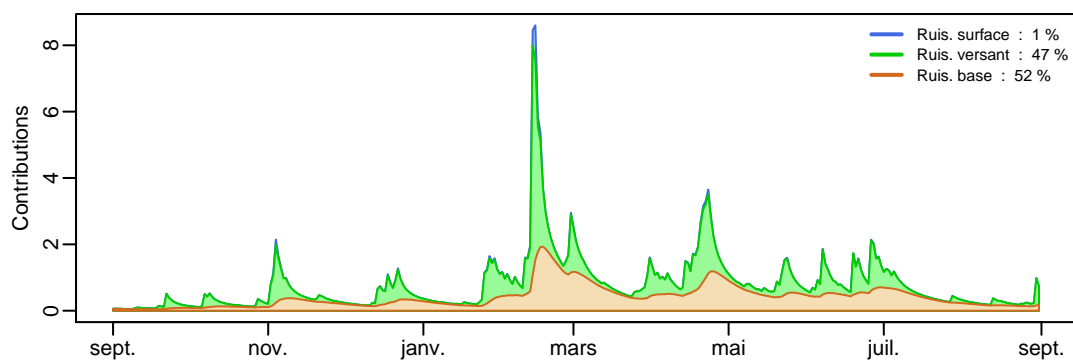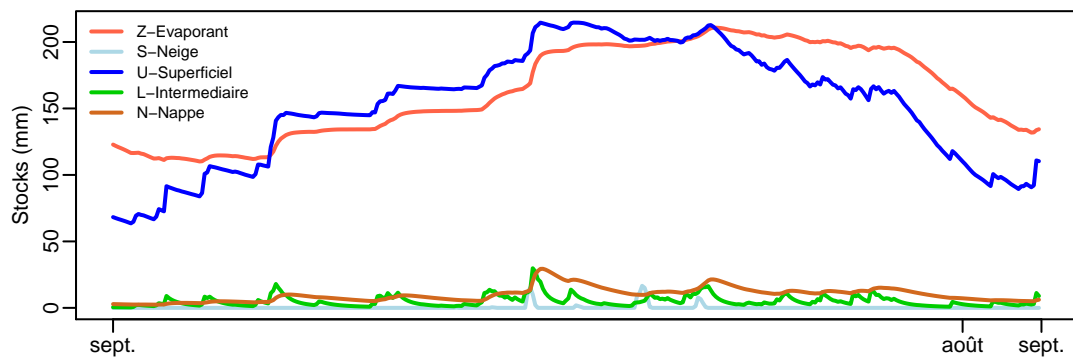

# k3222010 (359.79 km<sup>2</sup>) – année 1990–1991

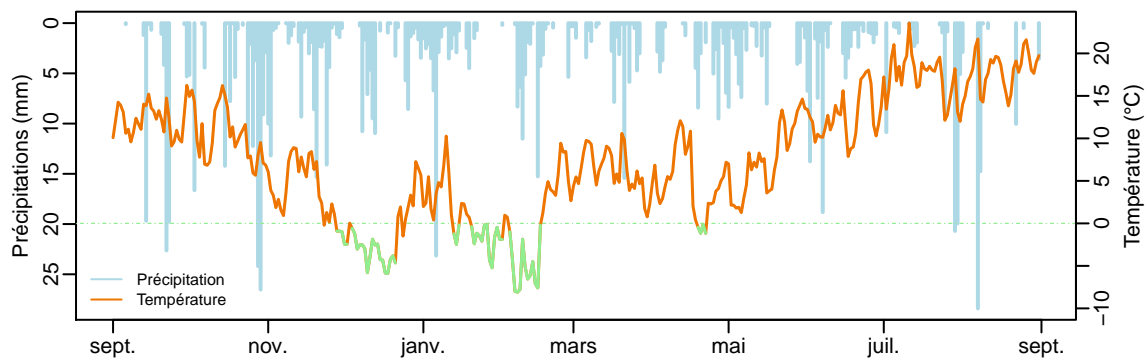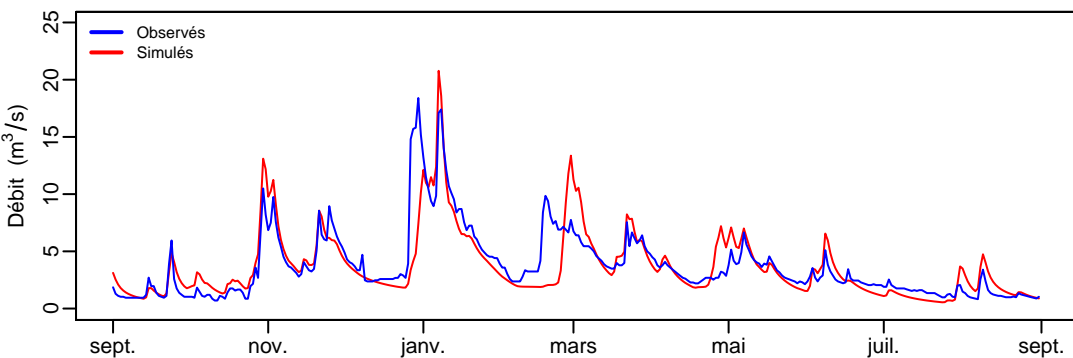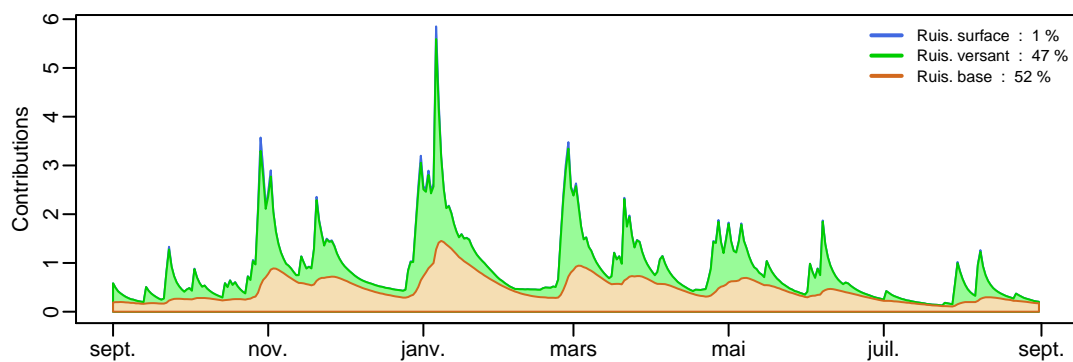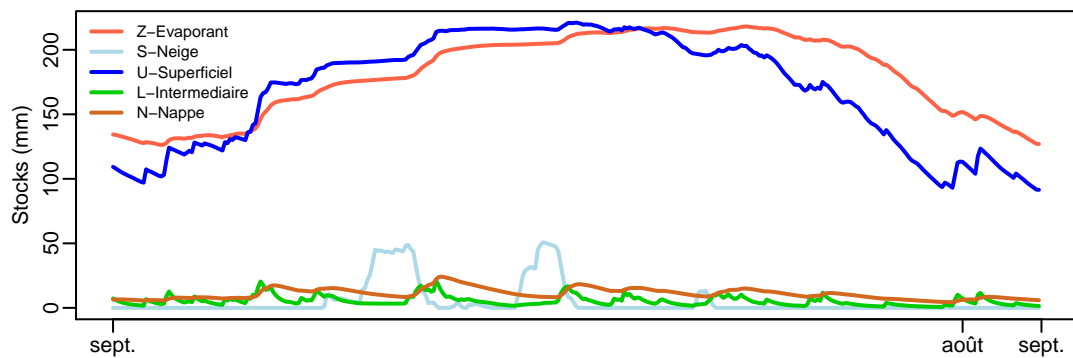

# k3222010 (359.79 km<sup>2</sup>) – année 1991–1992

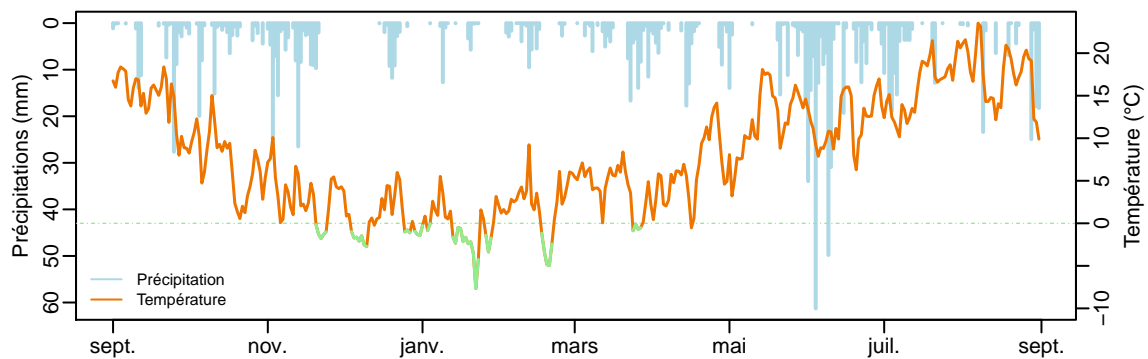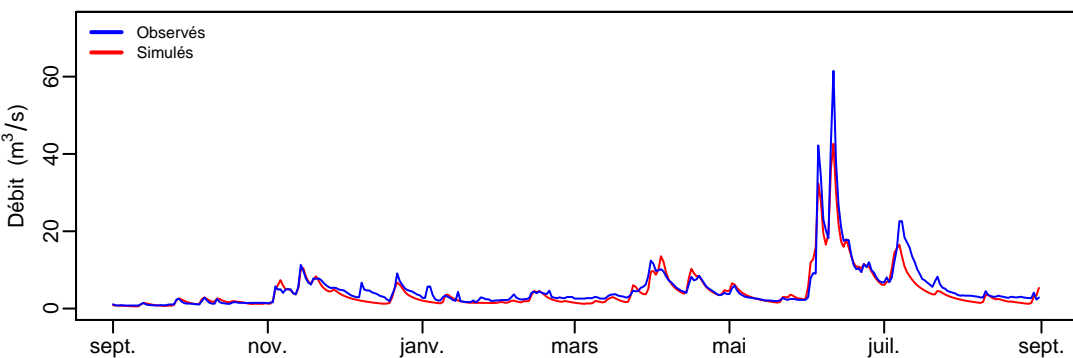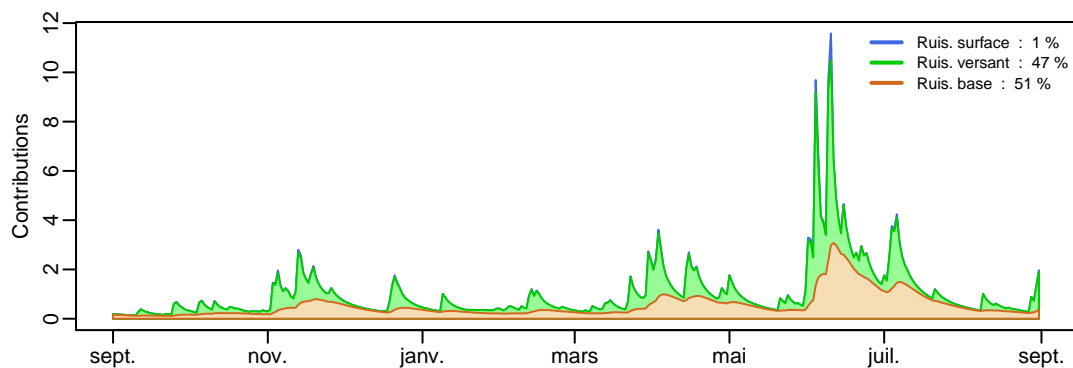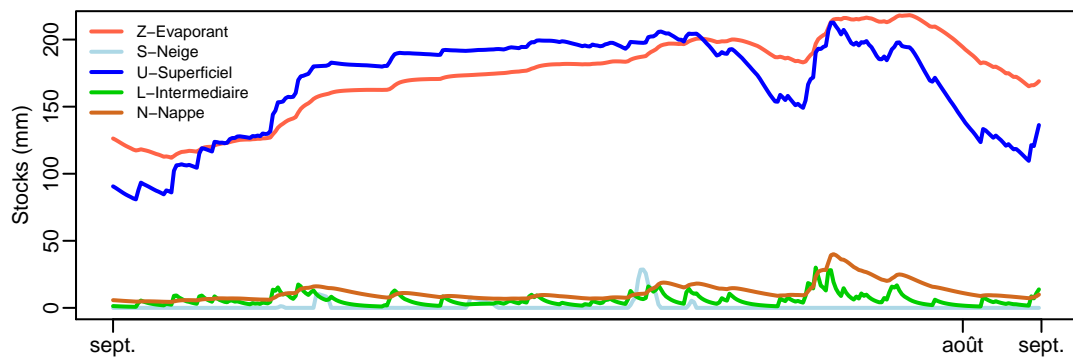

# k3222010 (359.79 km<sup>2</sup>) – année 1992–1993

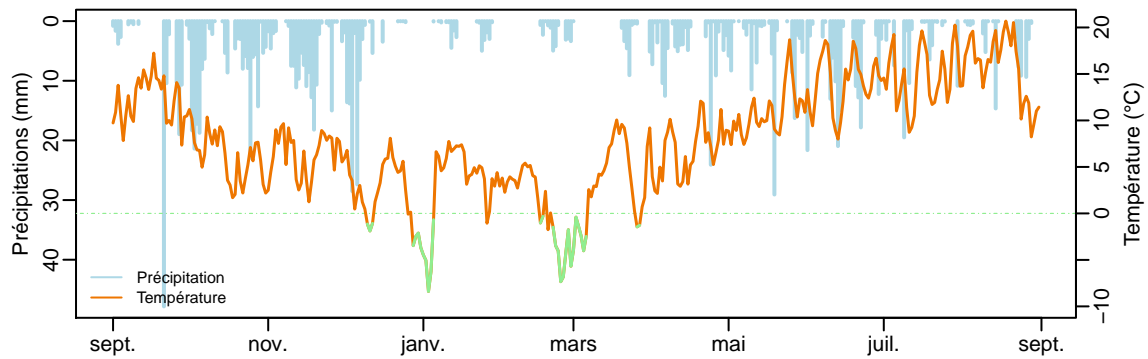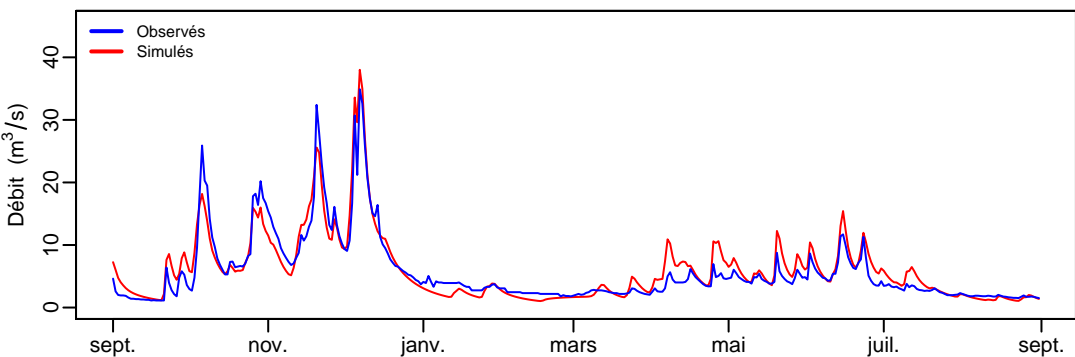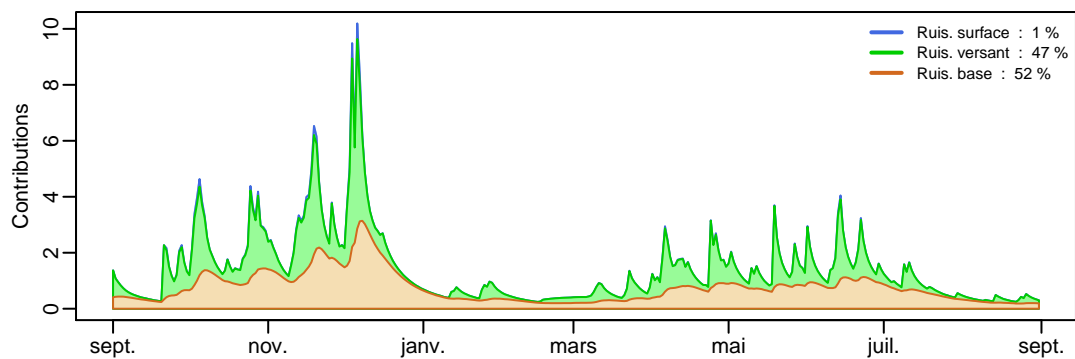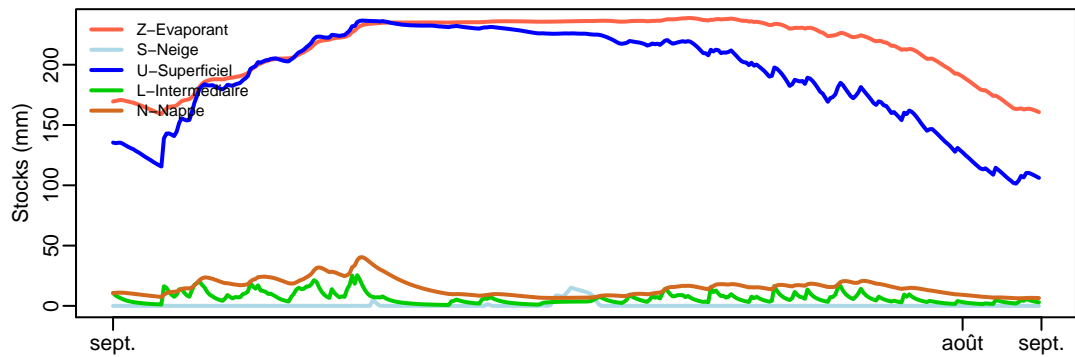

# k3222010 (359.79 km<sup>2</sup>) – année 1993–1994

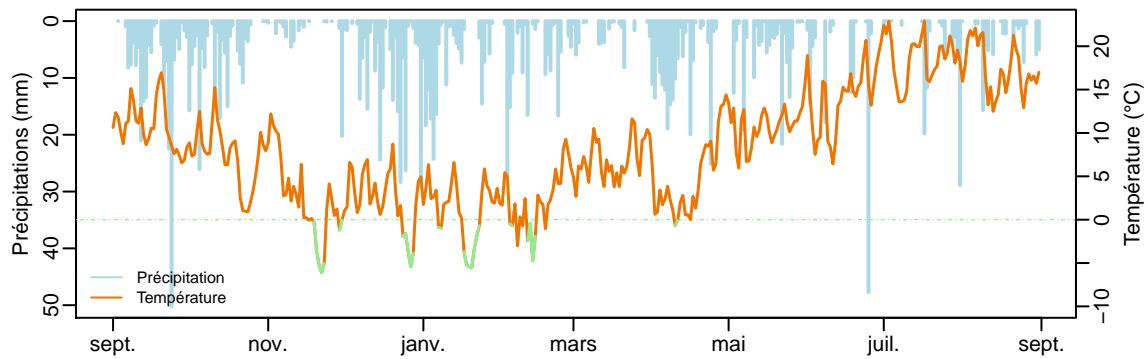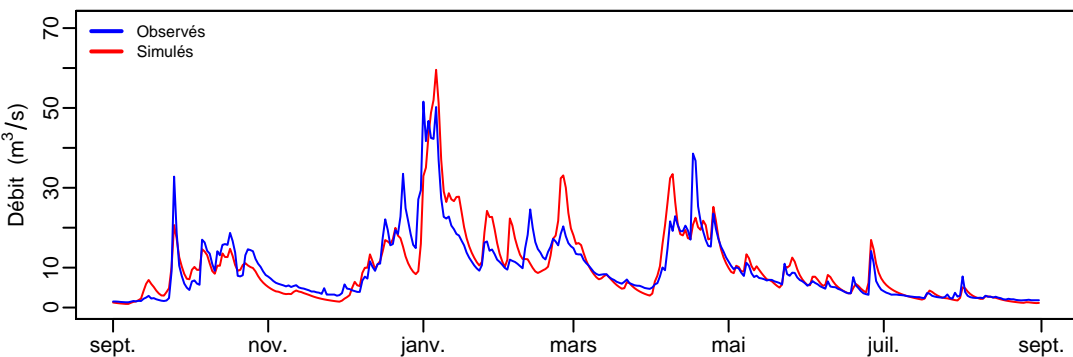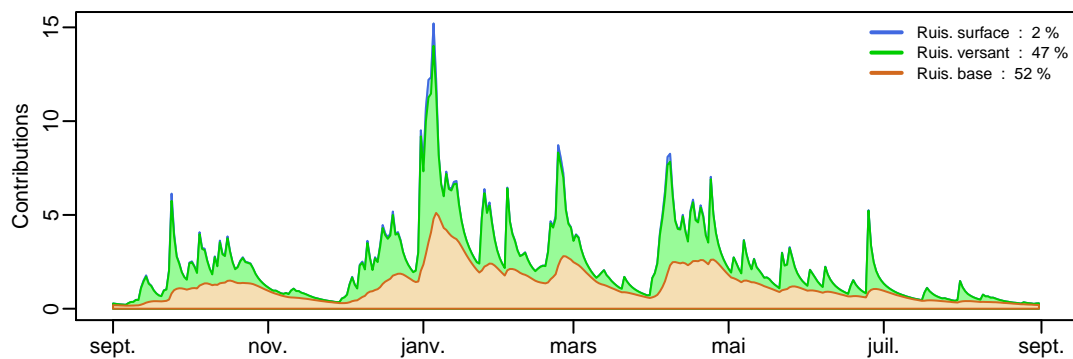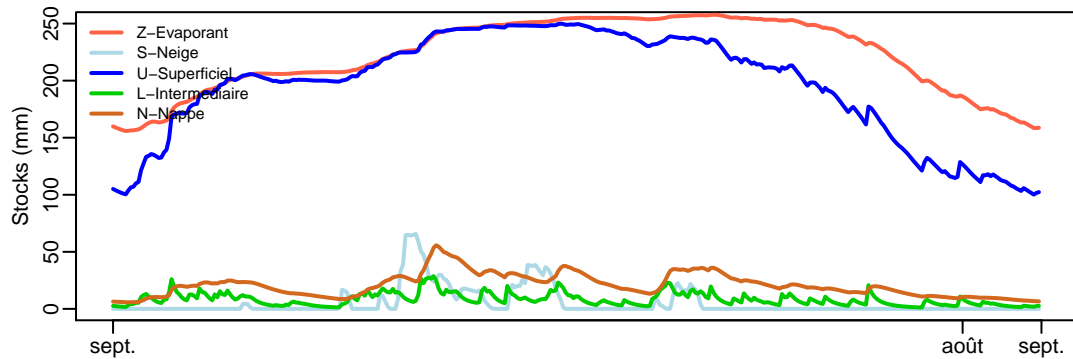

# k3222010 (359.79 km<sup>2</sup>) – année 1994–1995

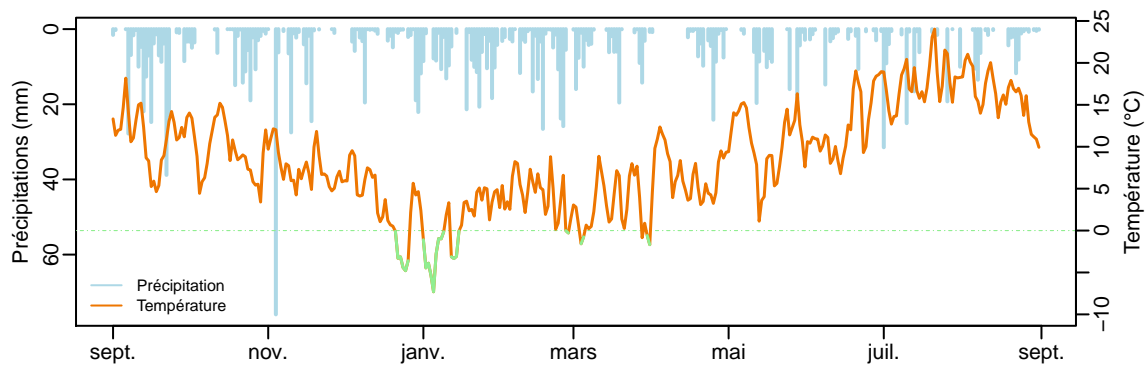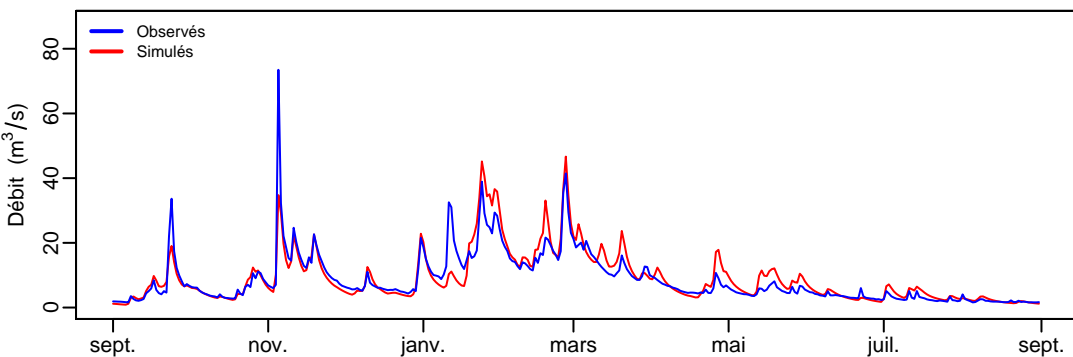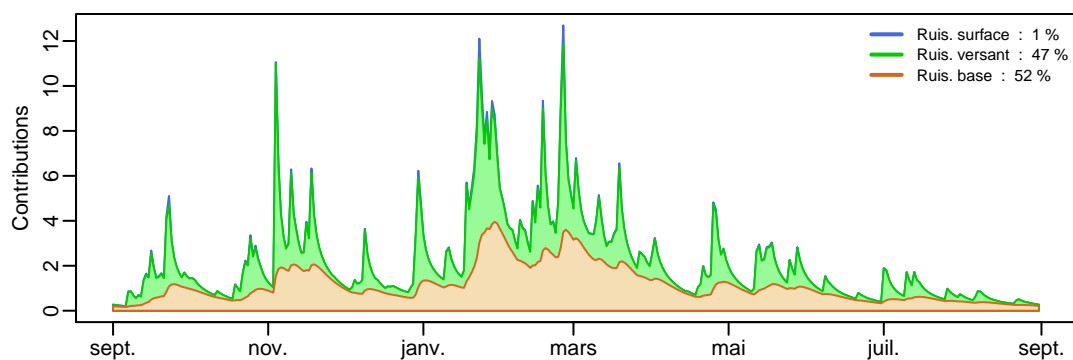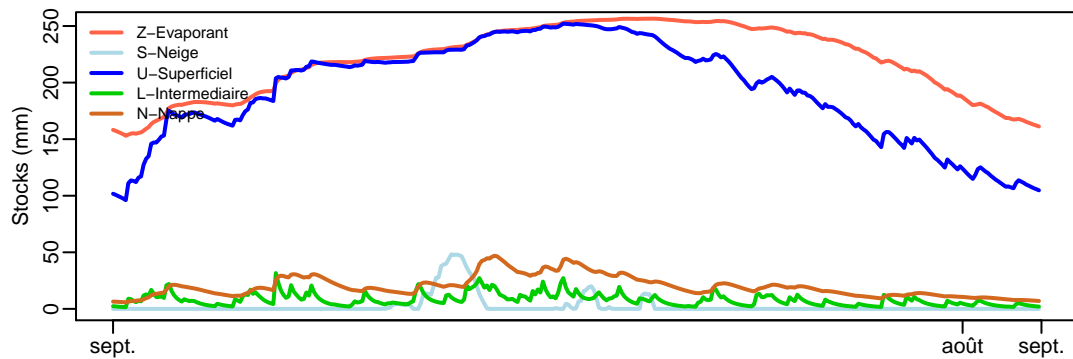

# k3222010 (359.79 km²) – année 1995–1996

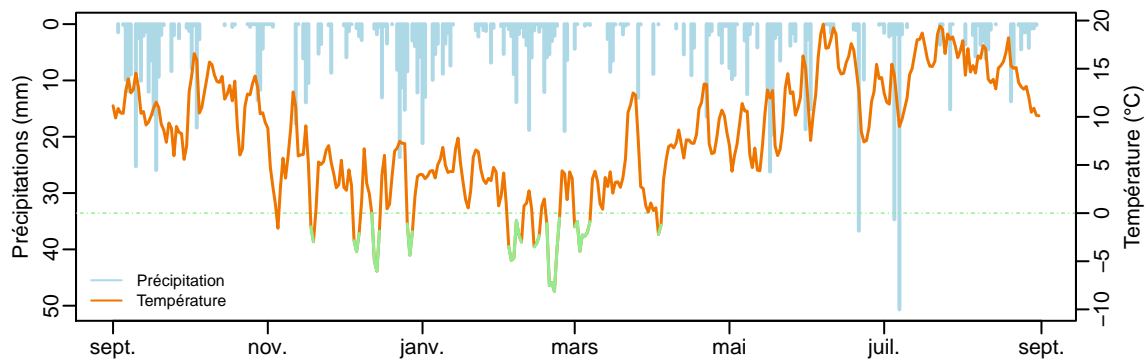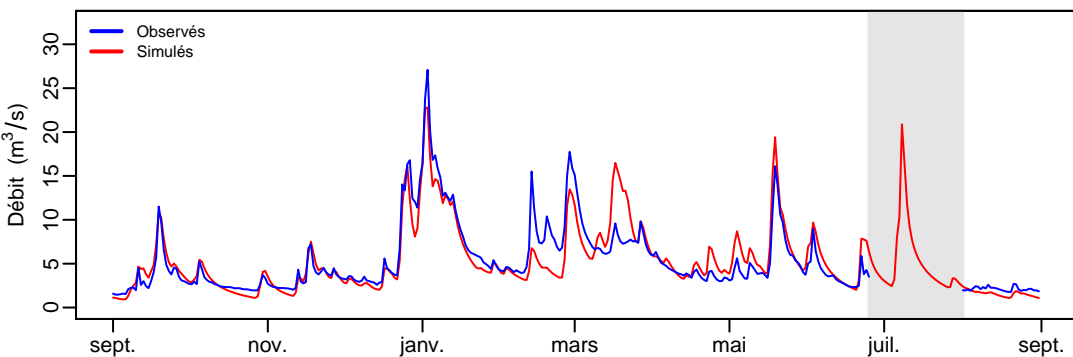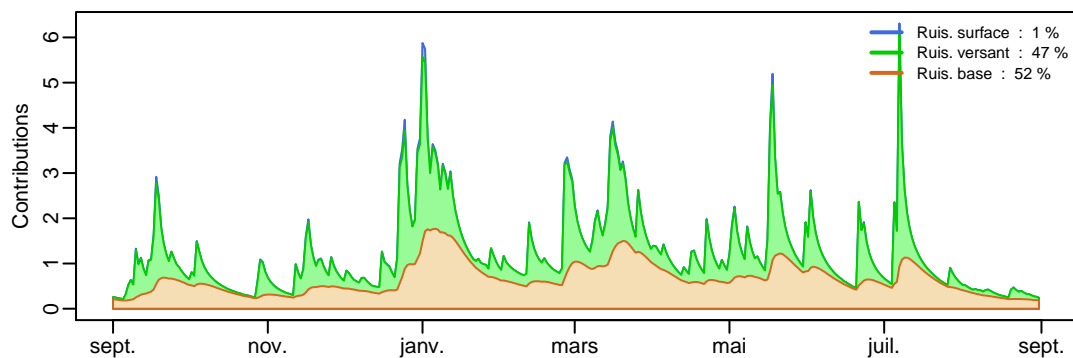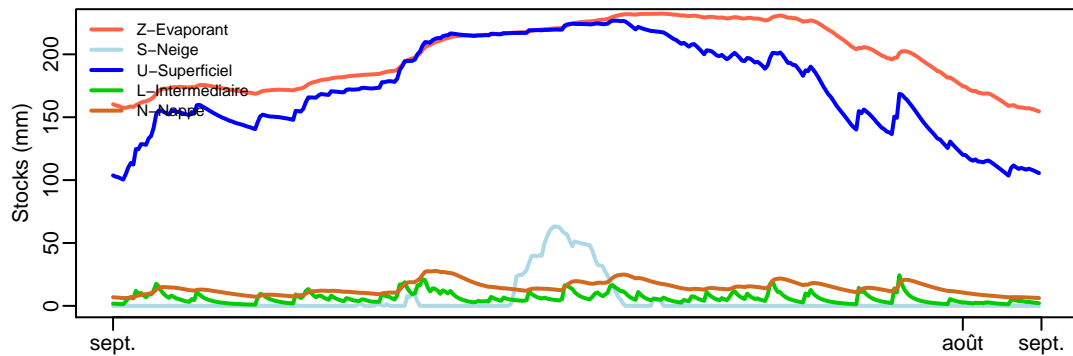

# k3222010 (359.79 km<sup>2</sup>) – année 1996–1997

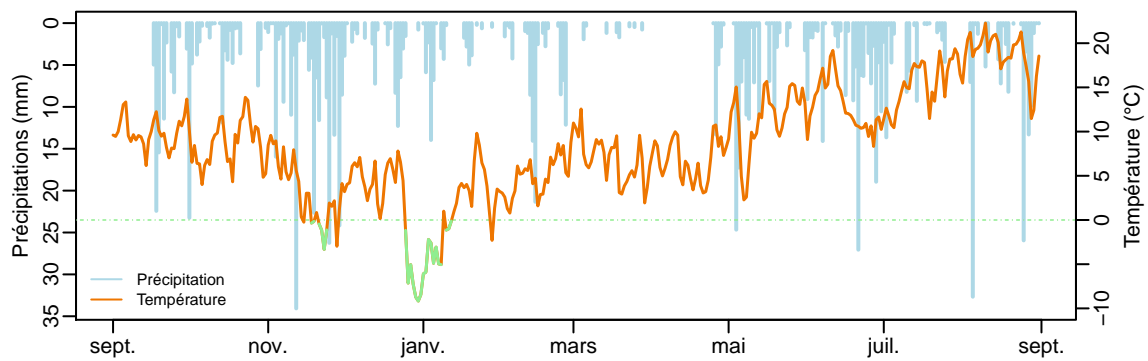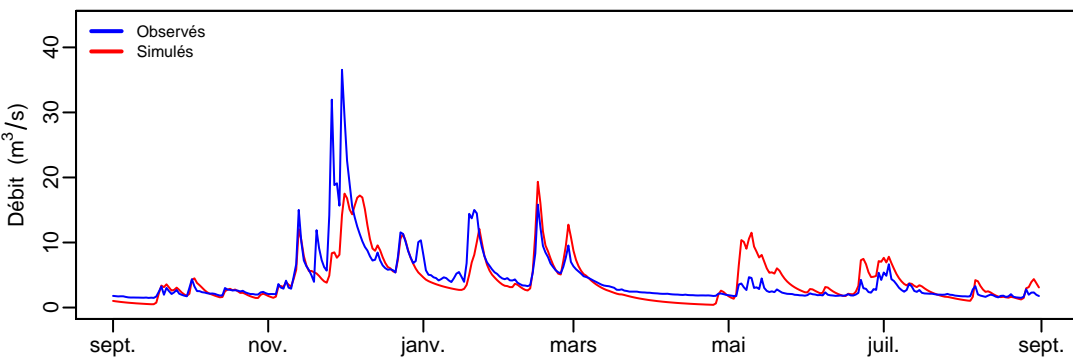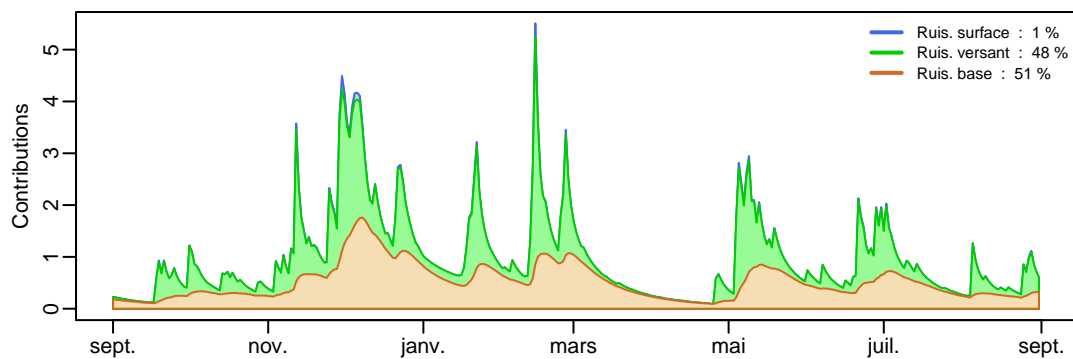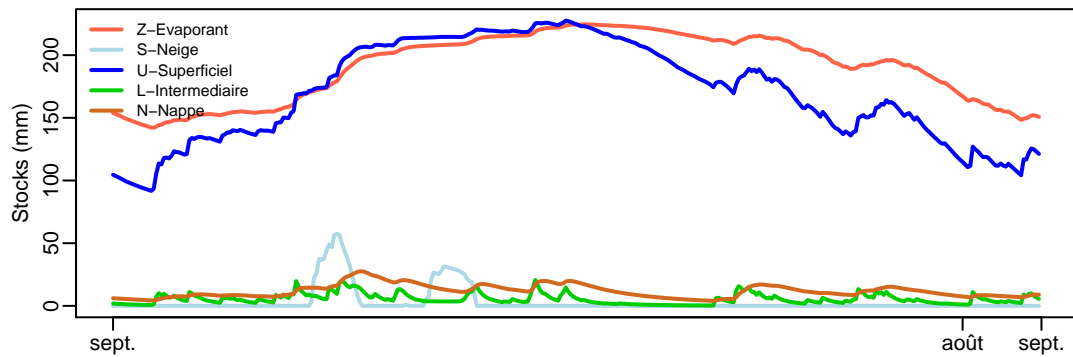



# k3222010 (359.79 km<sup>2</sup>) – année 1997–1998

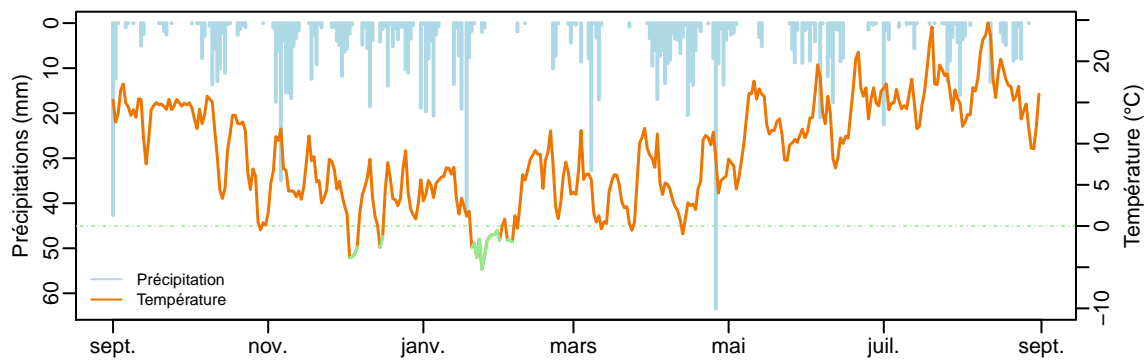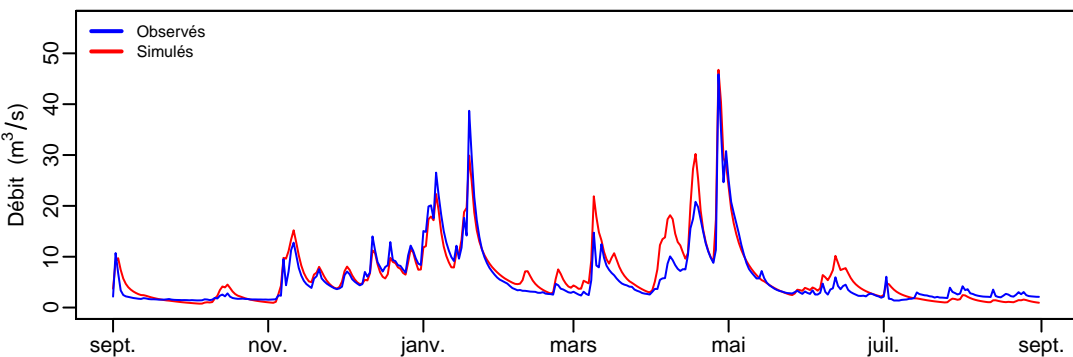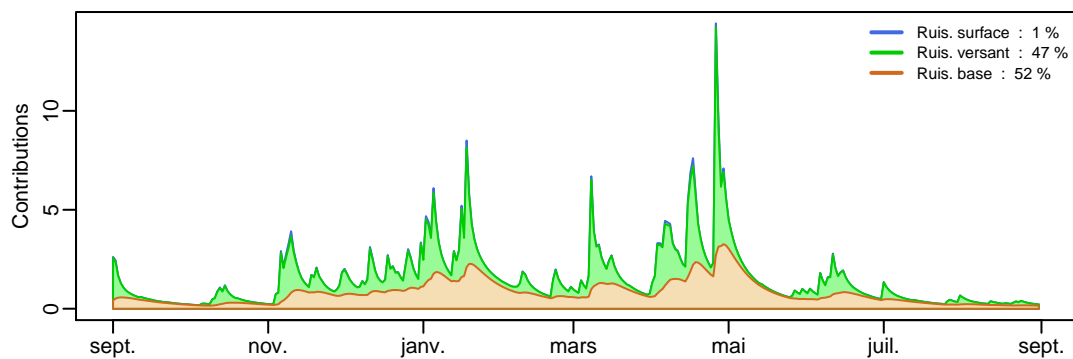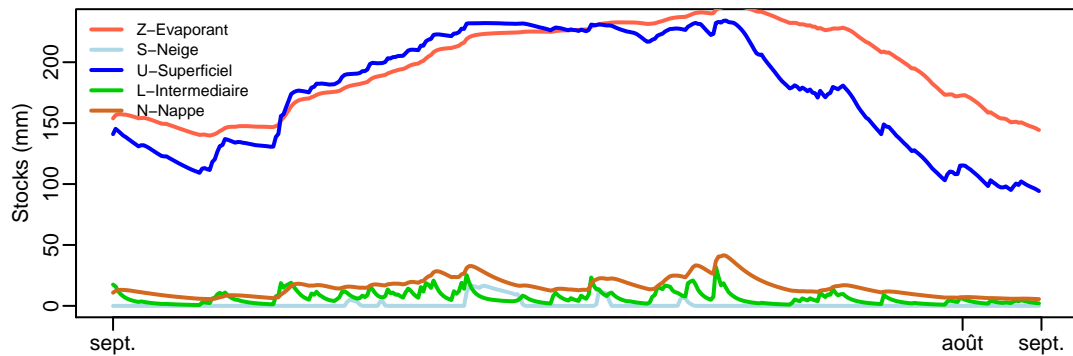

# k3222010 (359.79 km<sup>2</sup>) – année 1998–1999

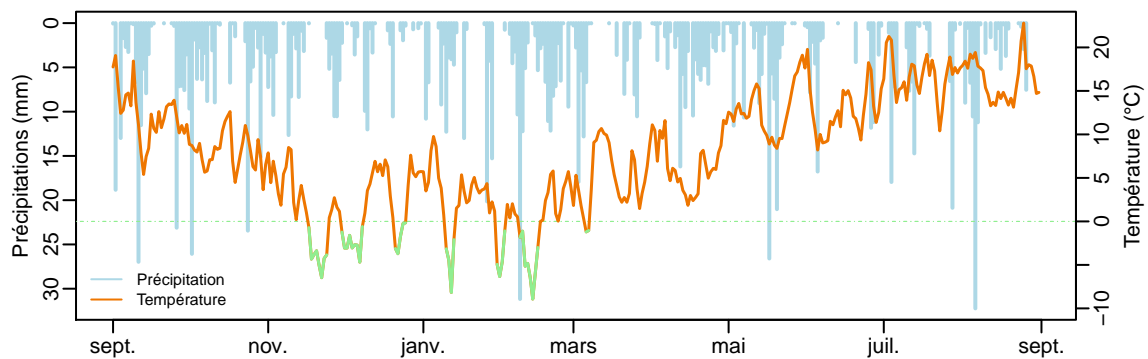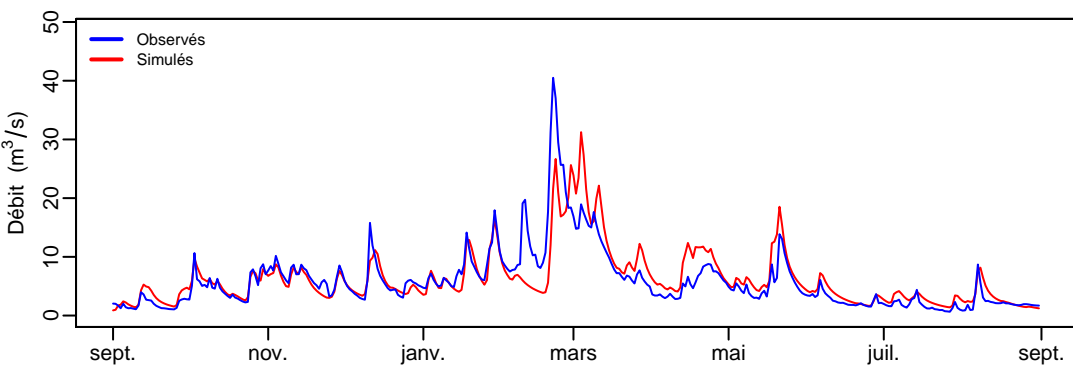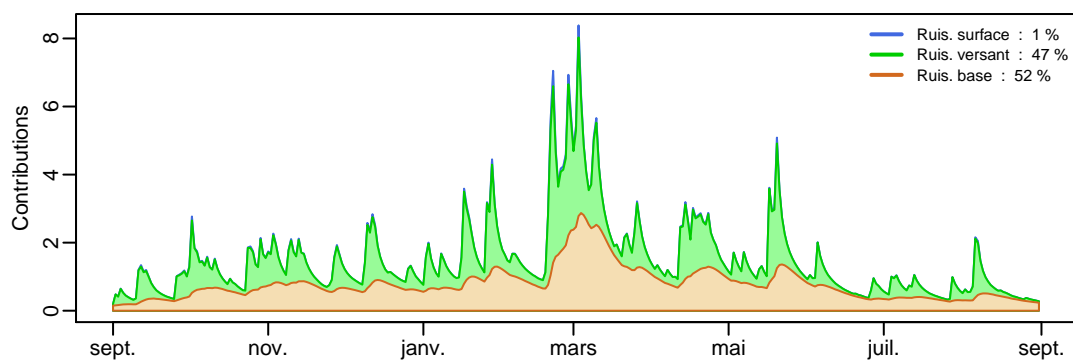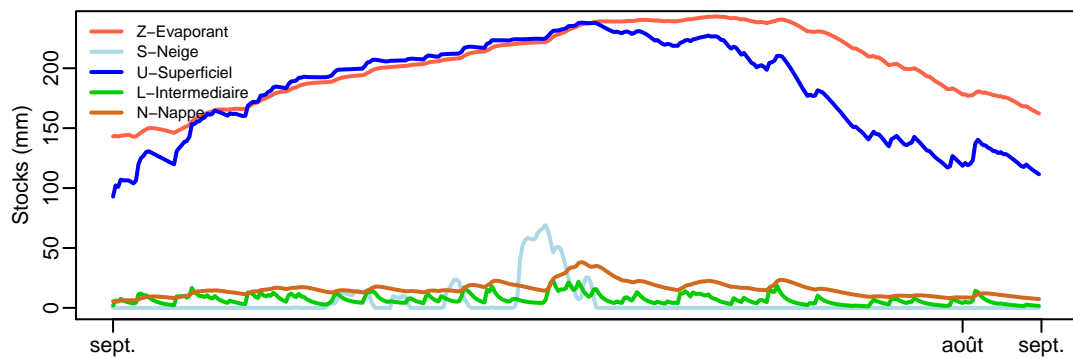

# k3222010 (359.79 km<sup>2</sup>) – année 1999–2000

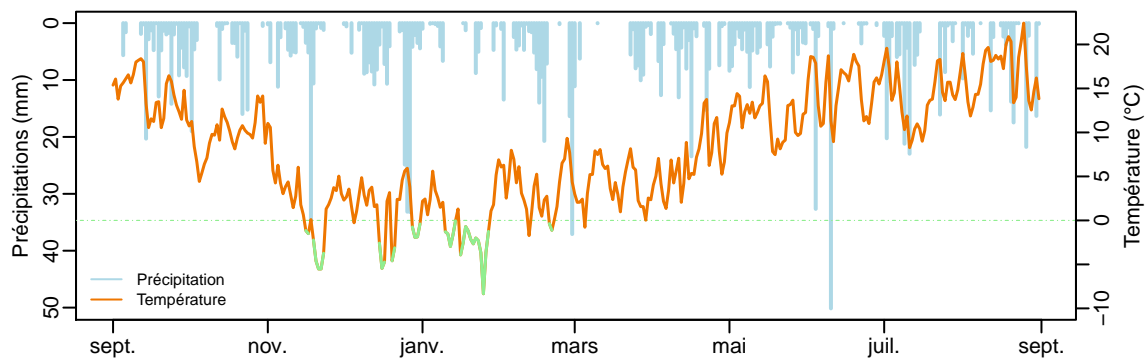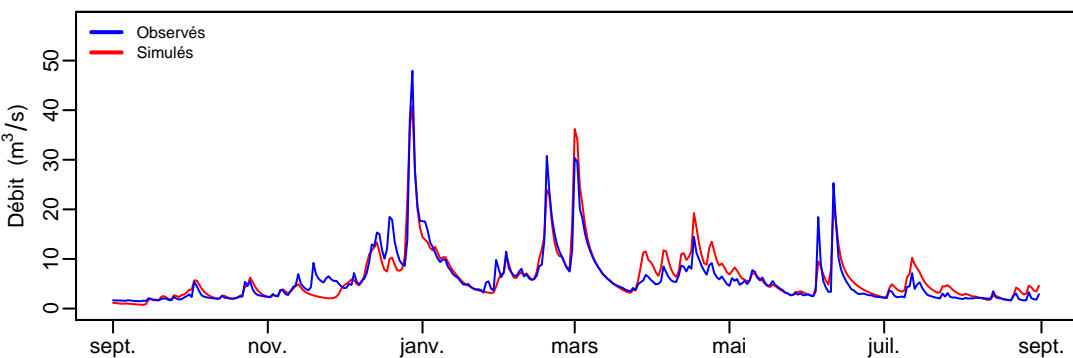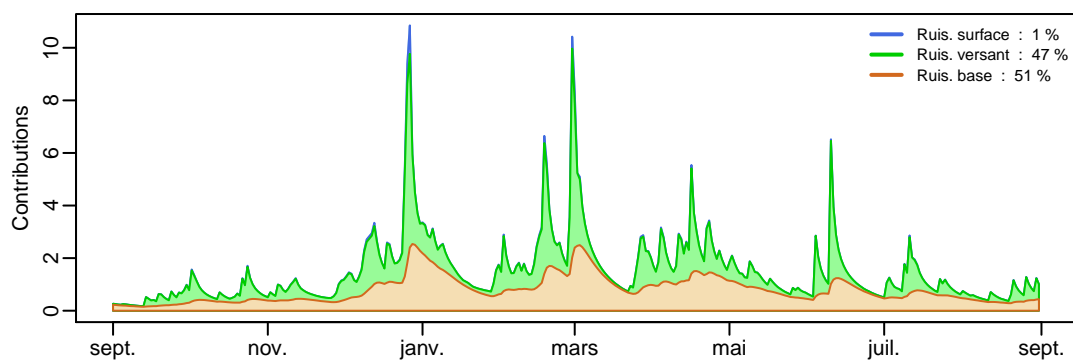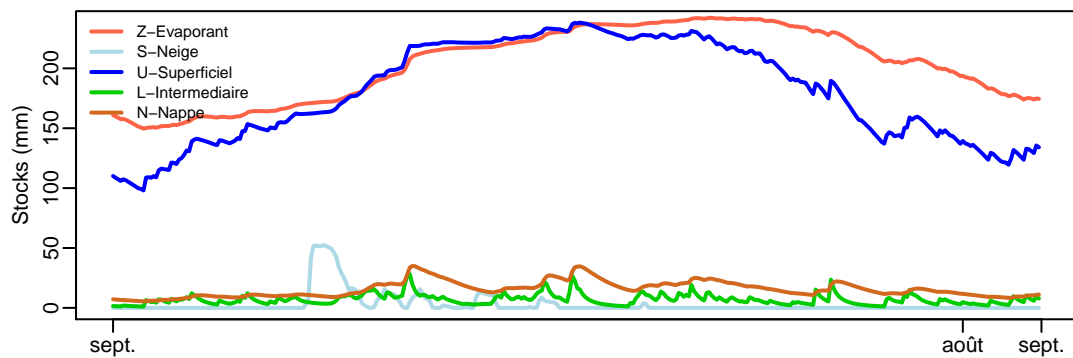

# k3222010 (359.79 km<sup>2</sup>) – année 2000–2001

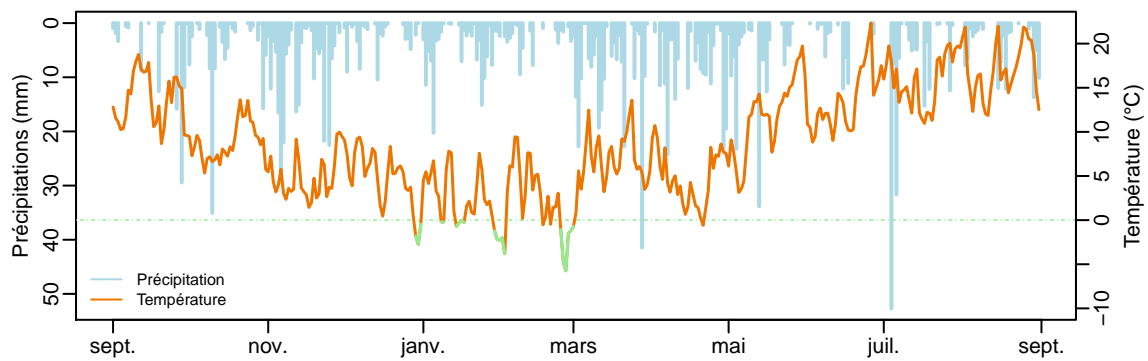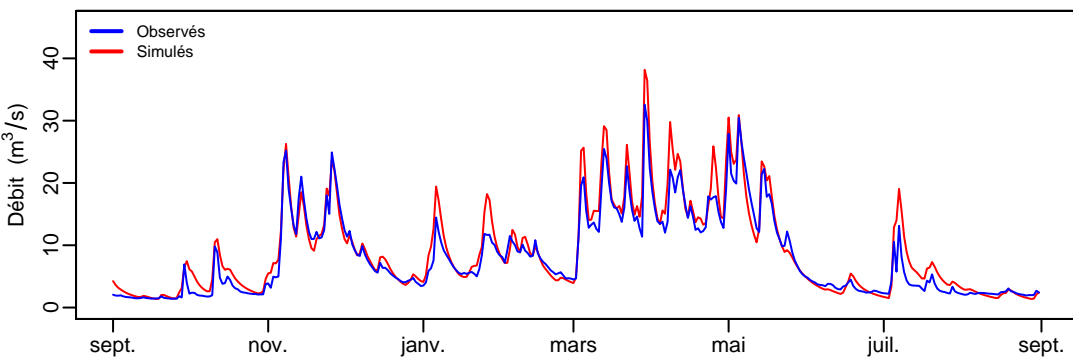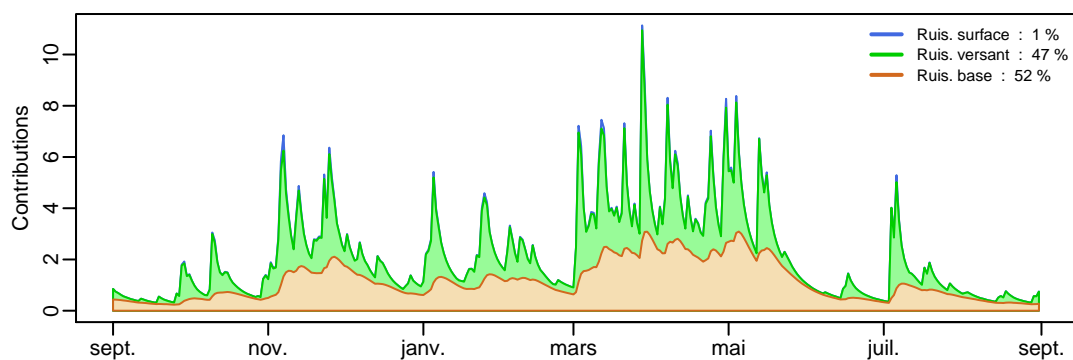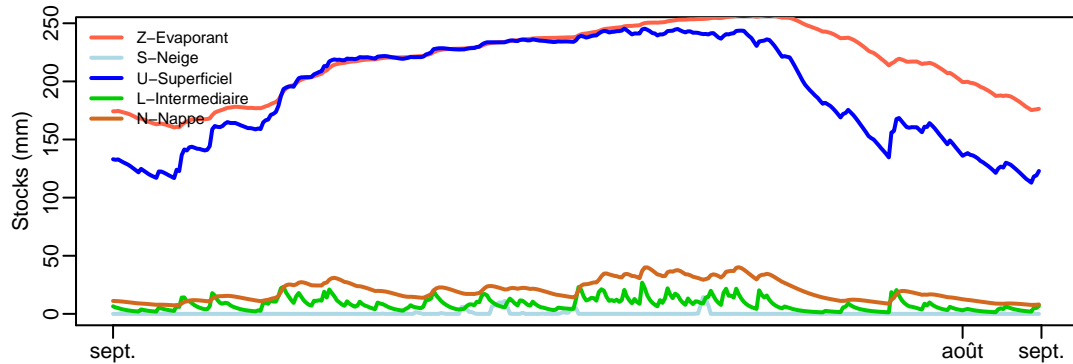

# k3222010 (359.79 km<sup>2</sup>) – année 2001–2002

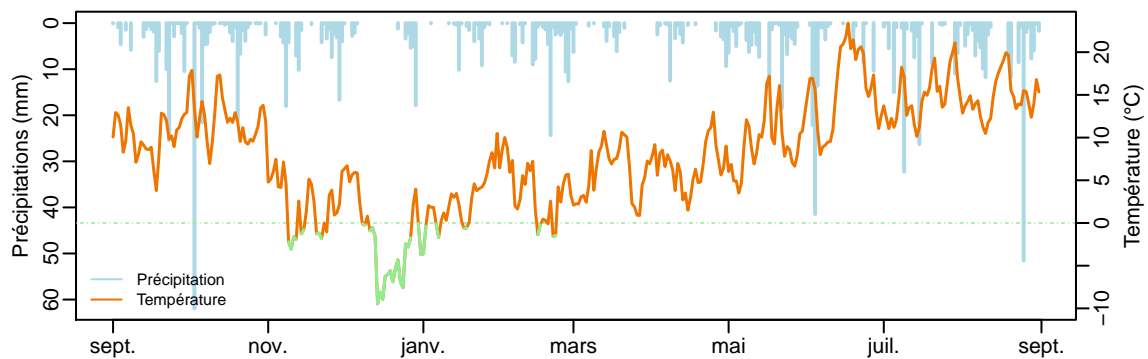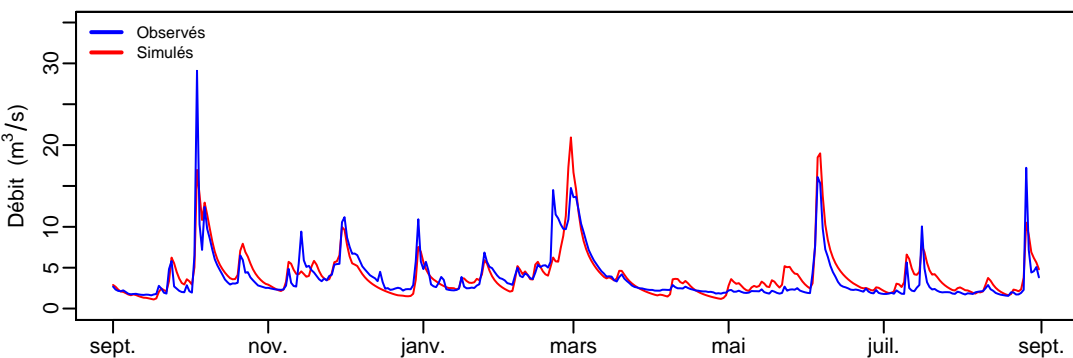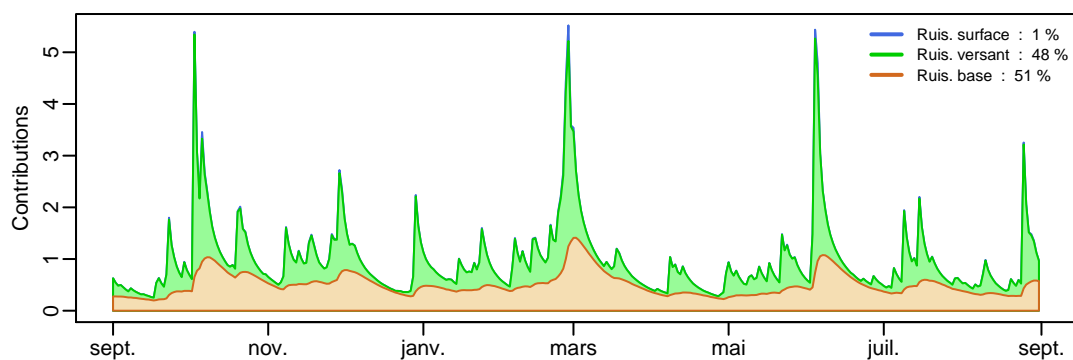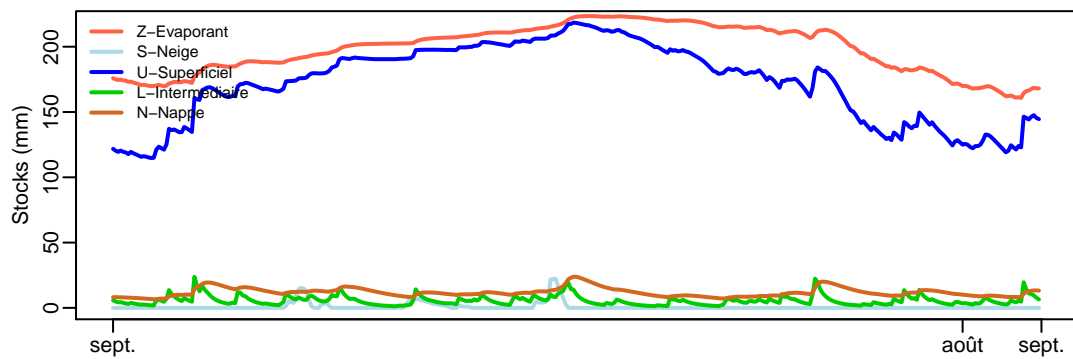

# k3222010 (359.79 km<sup>2</sup>) – année 2002–2003

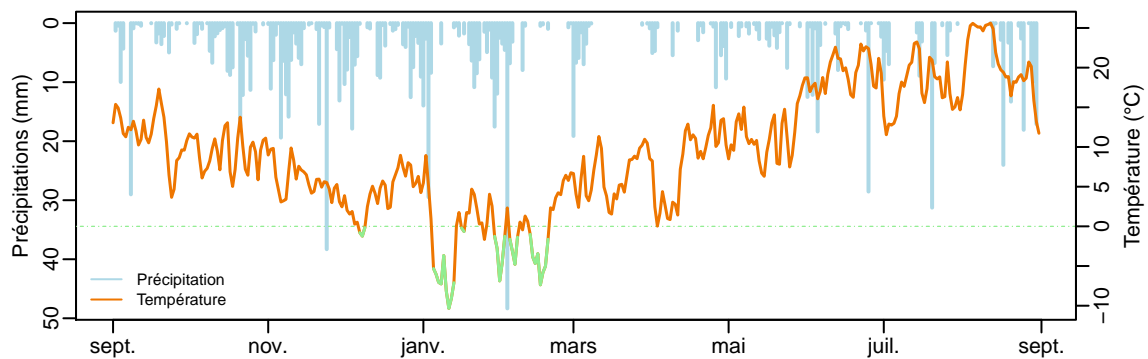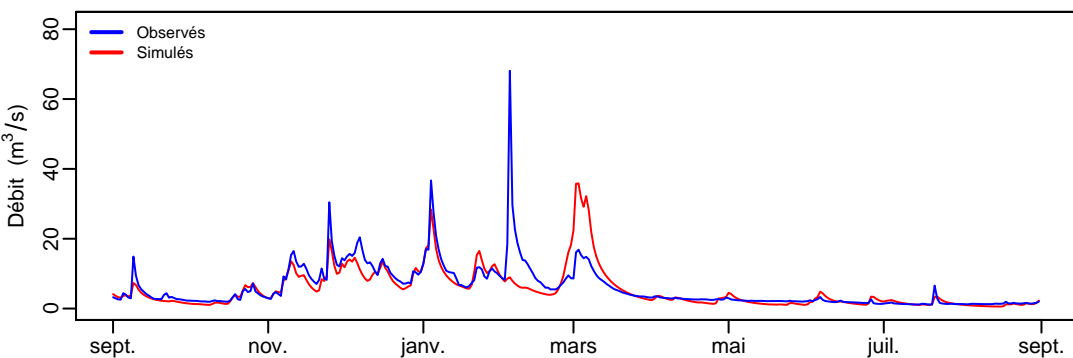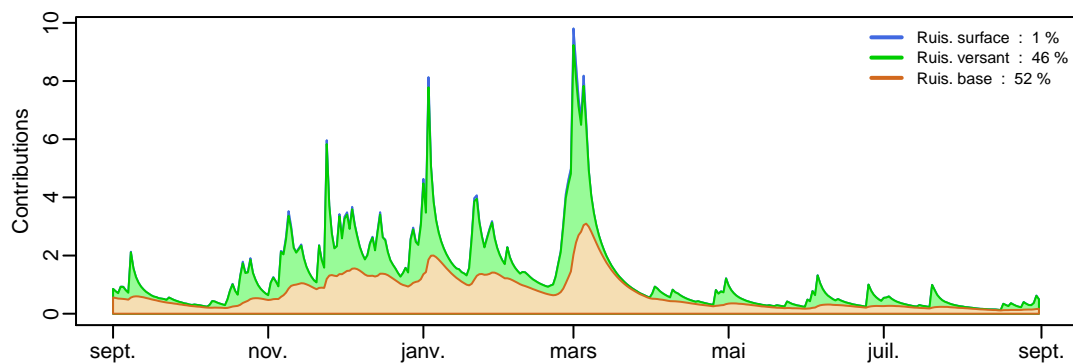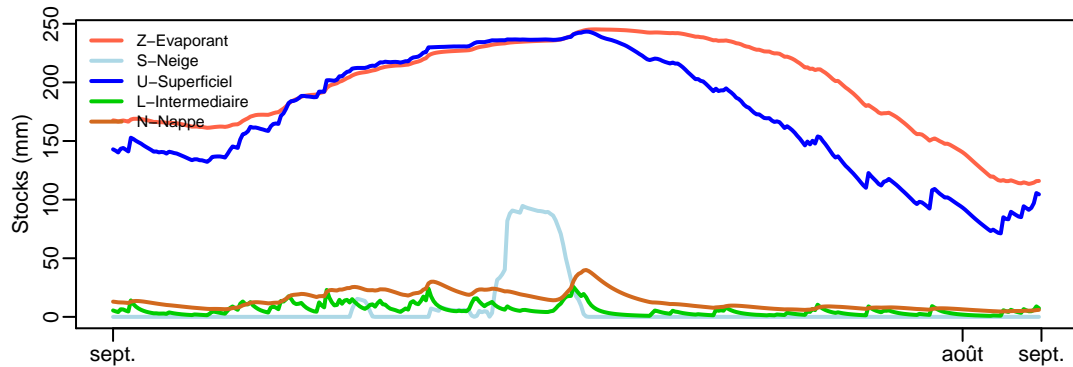

# k3222010 (359.79 km<sup>2</sup>) – année 2003–2004

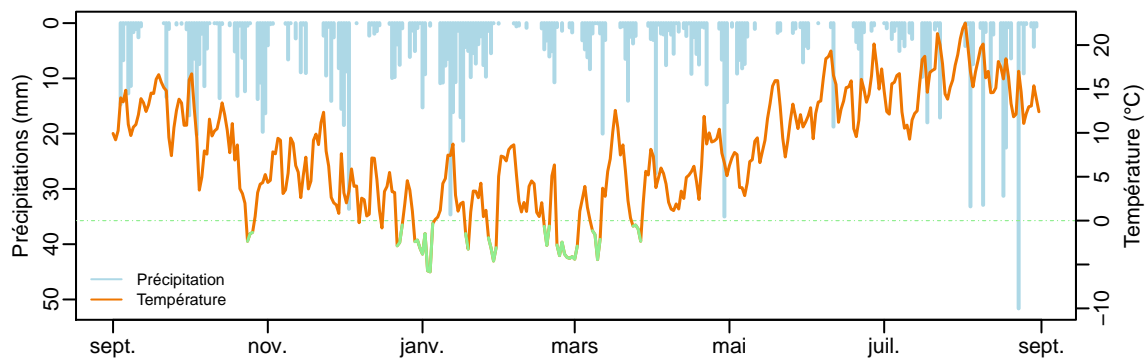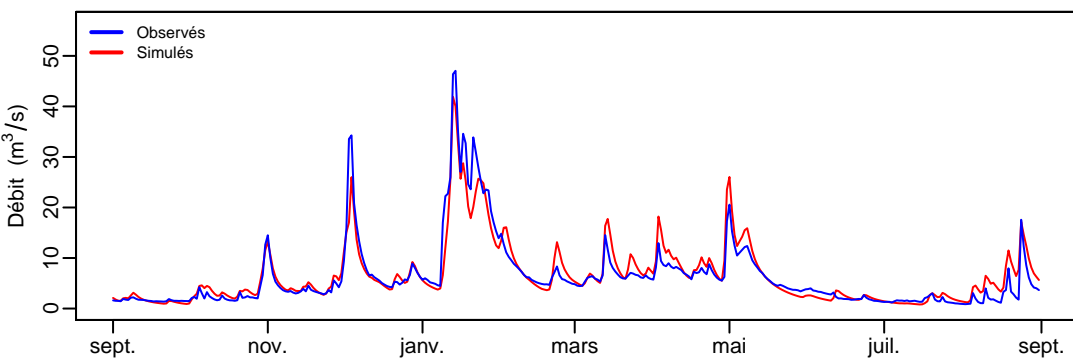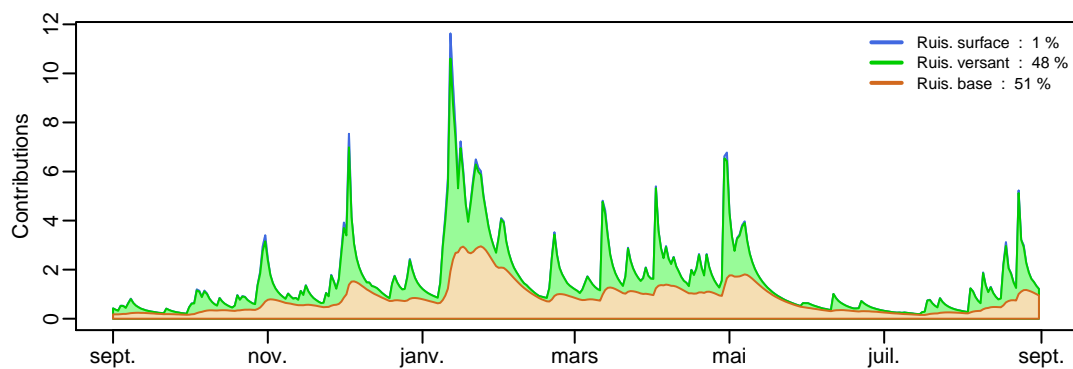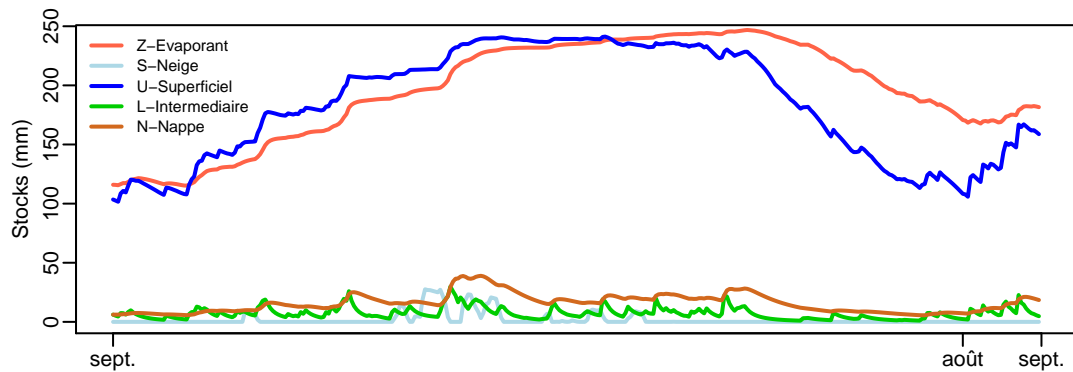

# k3222010 (359.79 km<sup>2</sup>) – année 2004–2005

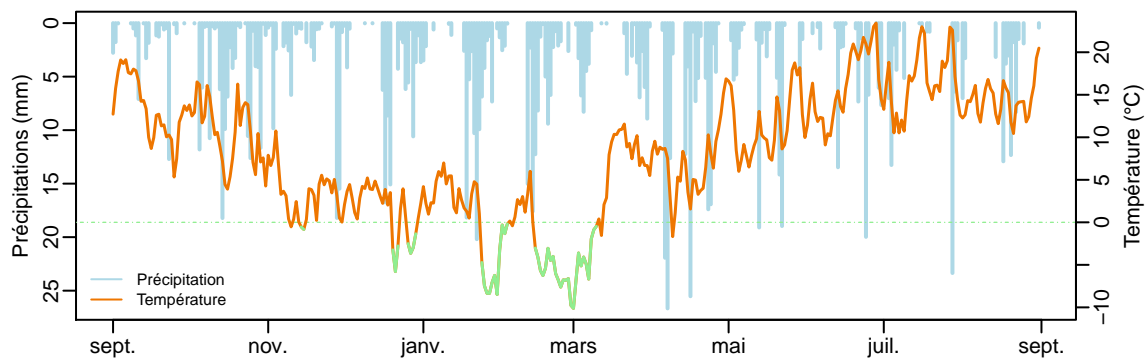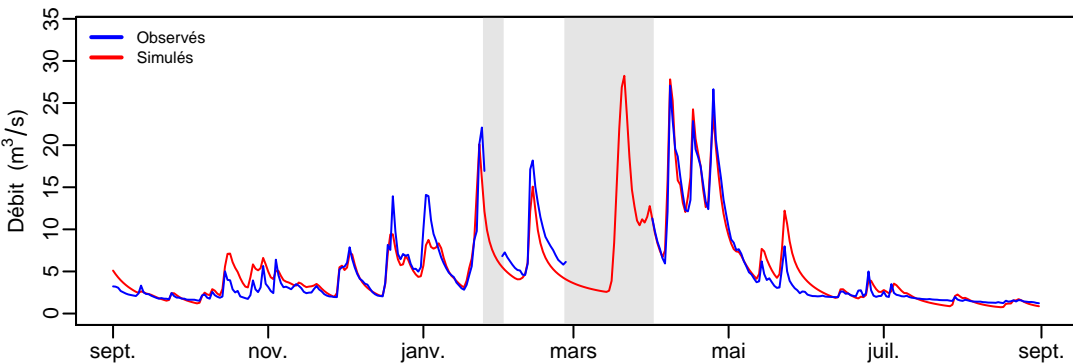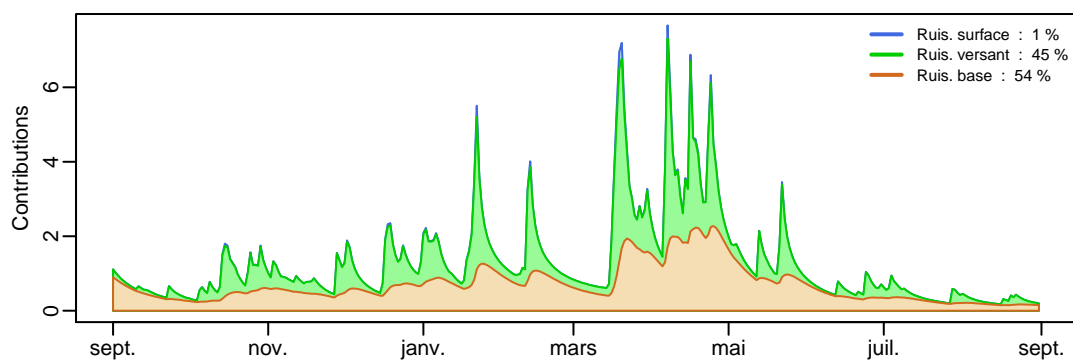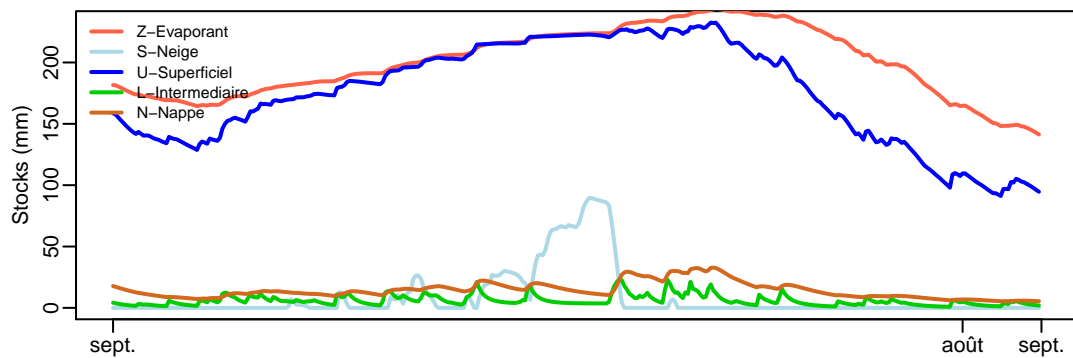



# k3222010 (359.79 km<sup>2</sup>) – année 2005–2006

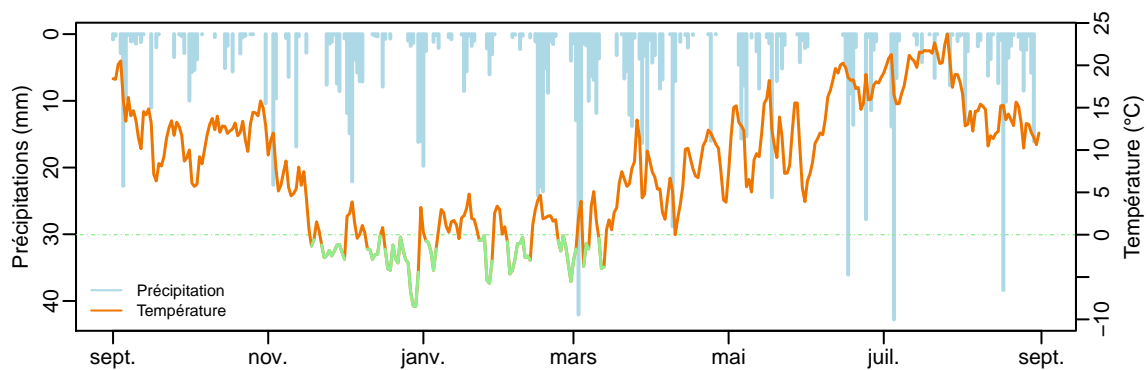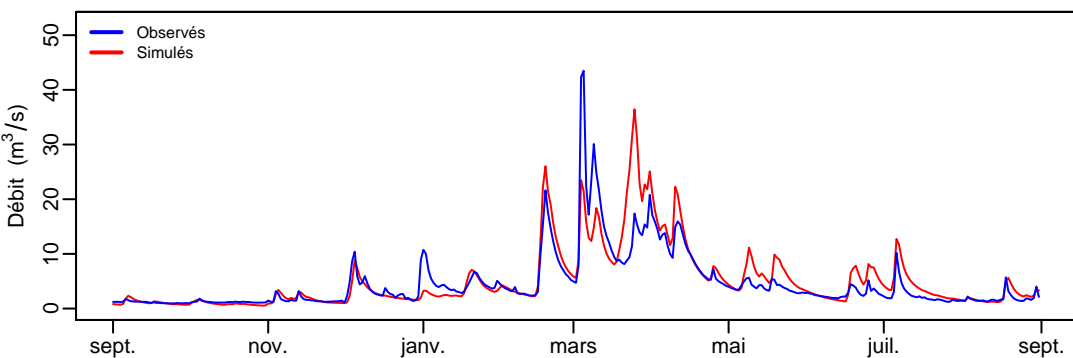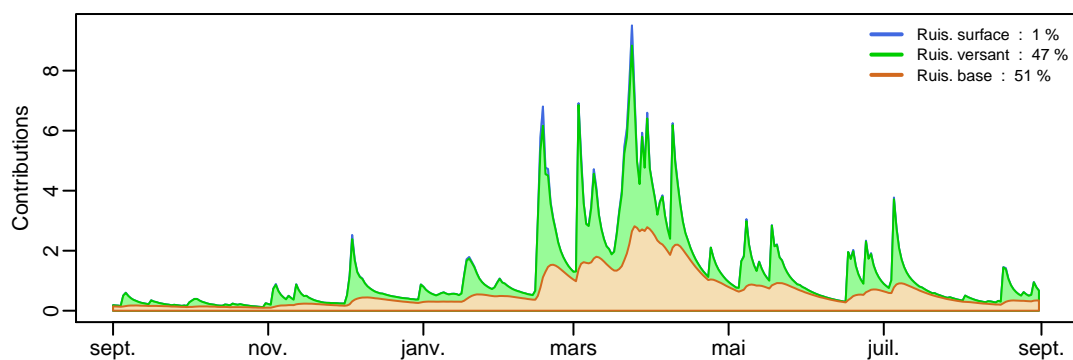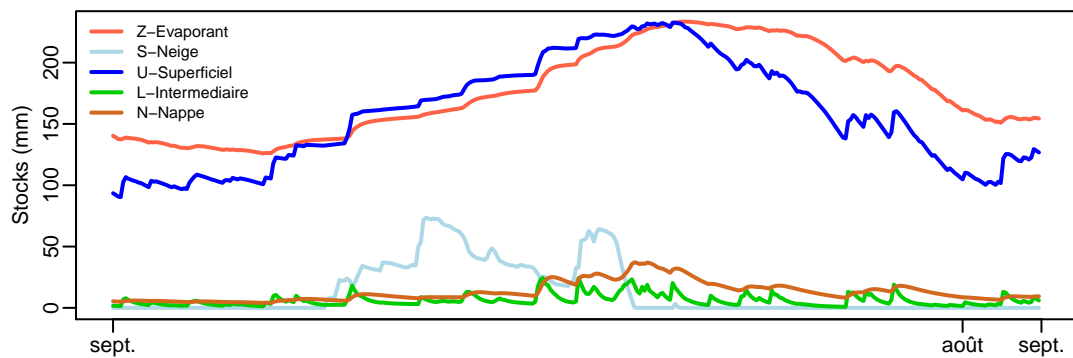

# k3222010 (359.79 km<sup>2</sup>) – année 2006–2007

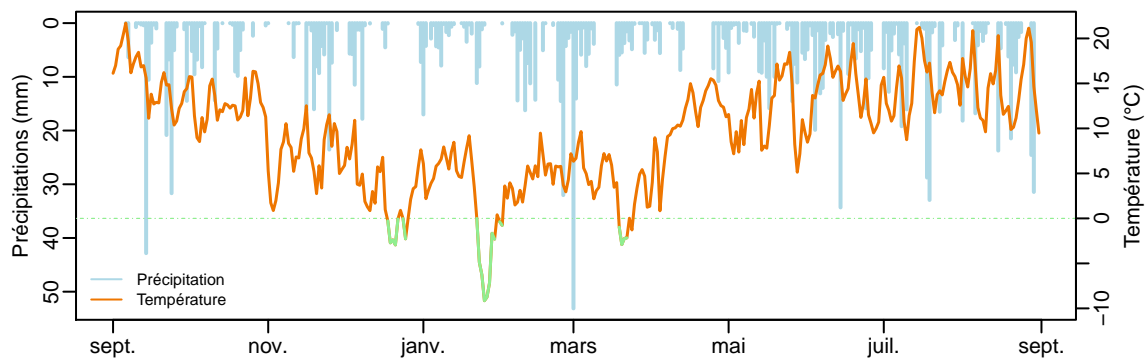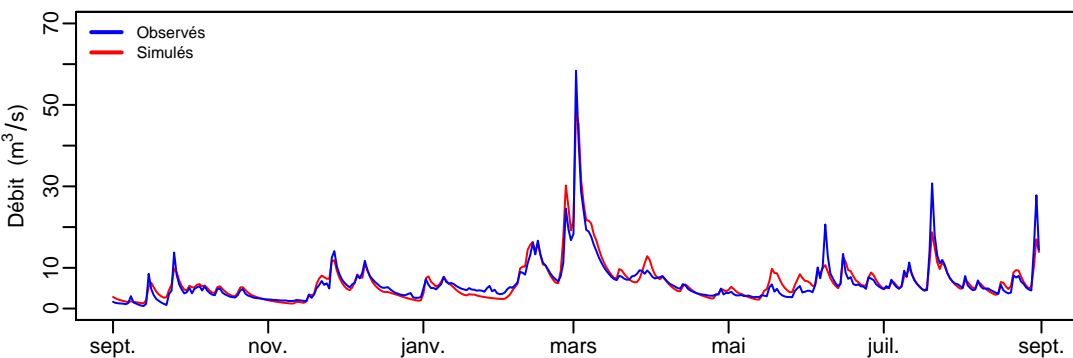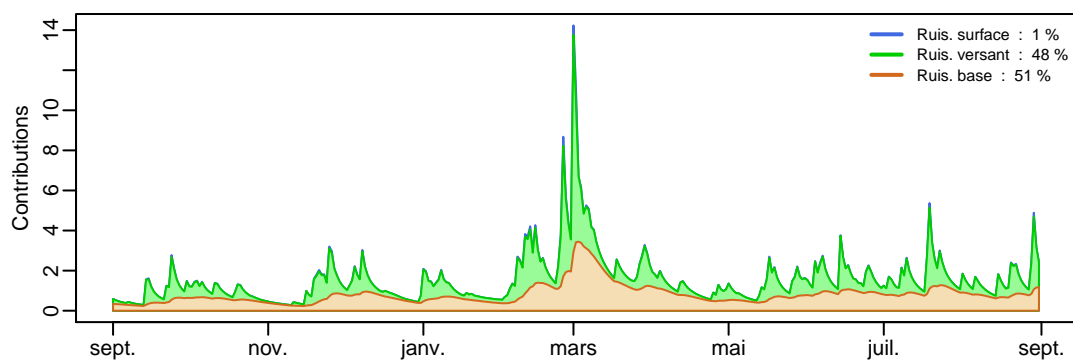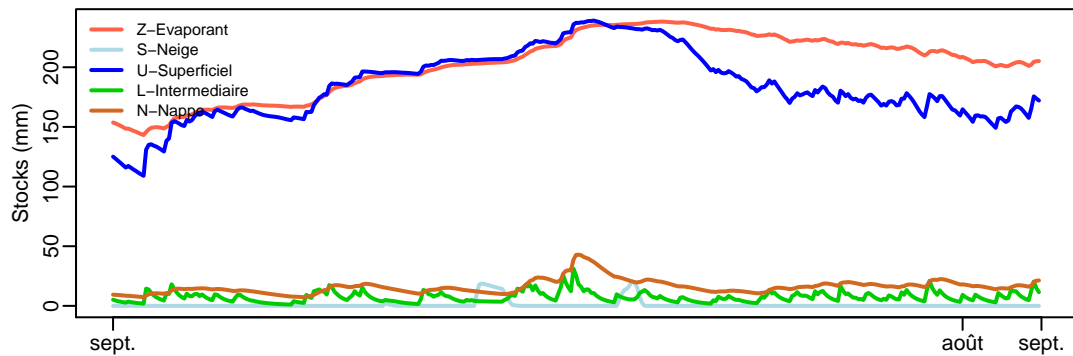

# k3222010 (359.79 km<sup>2</sup>) – année 2007–2008

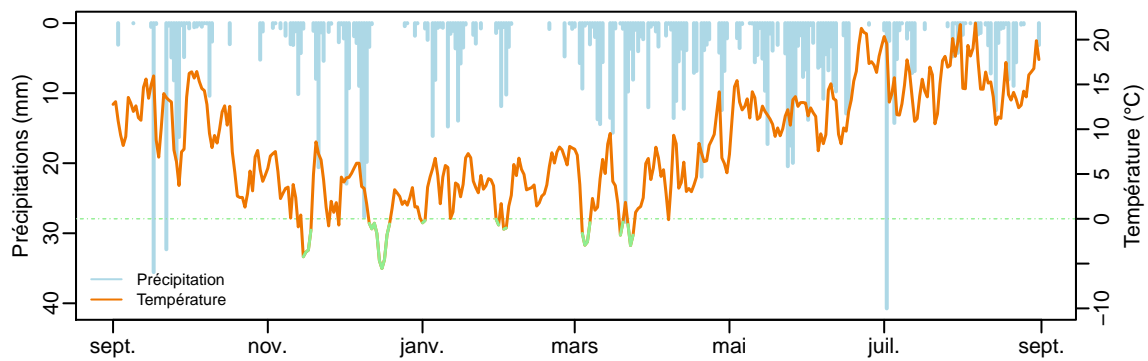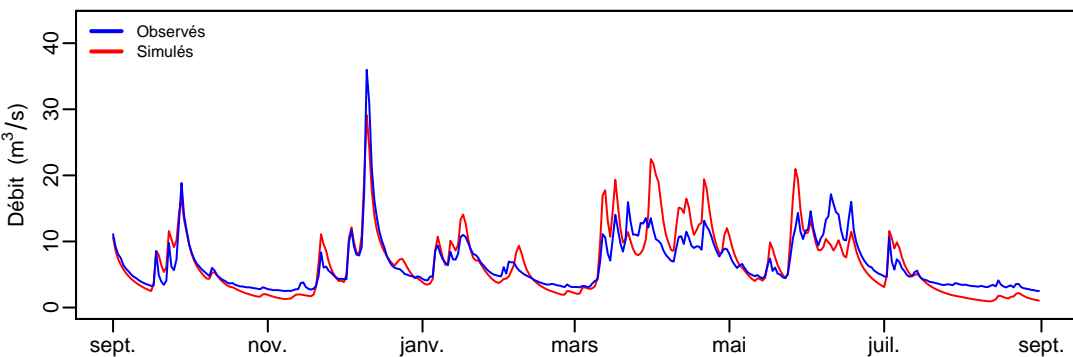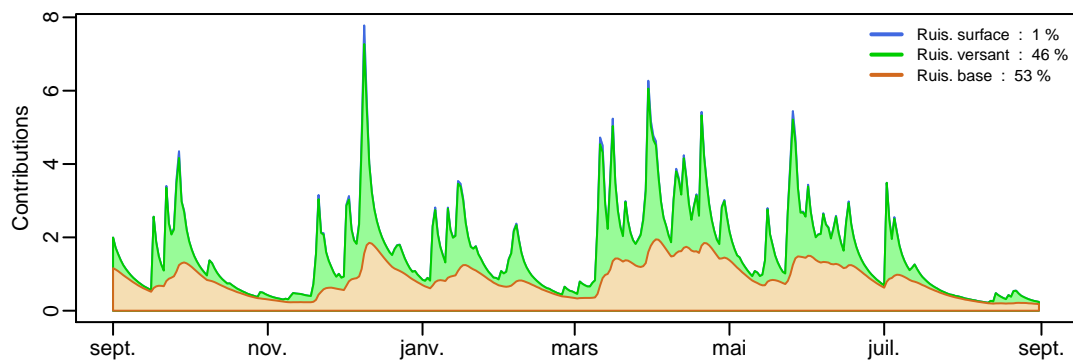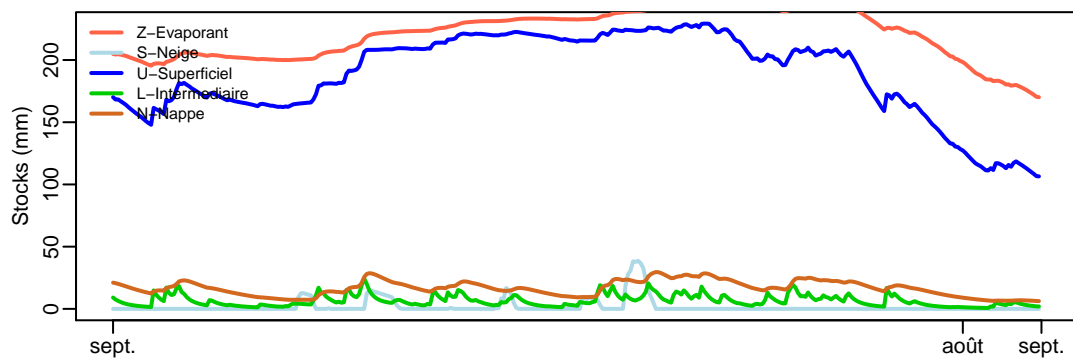

# k3222010 (359.79 km<sup>2</sup>) – année 2008–2009

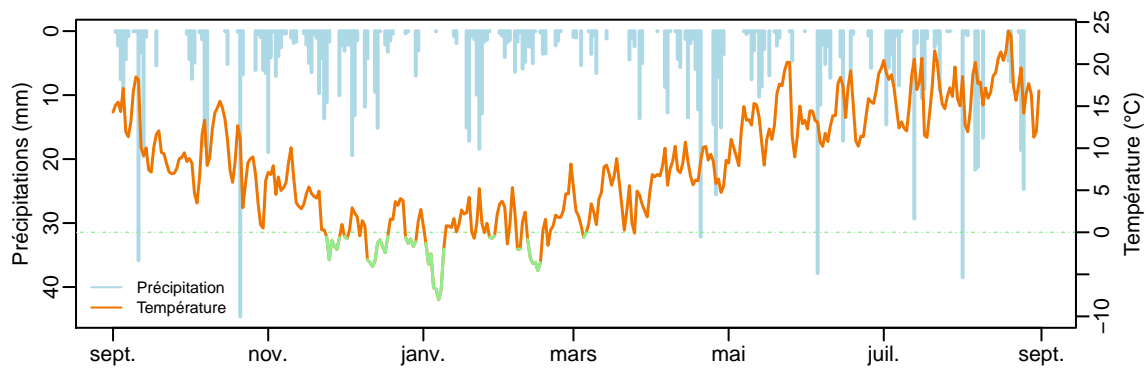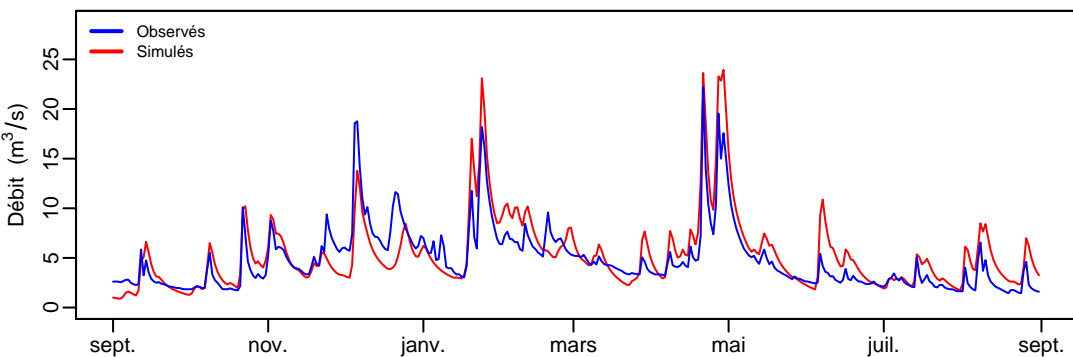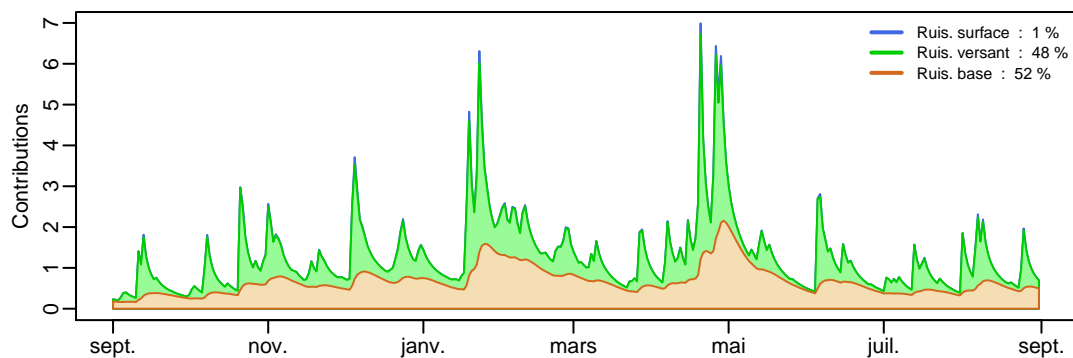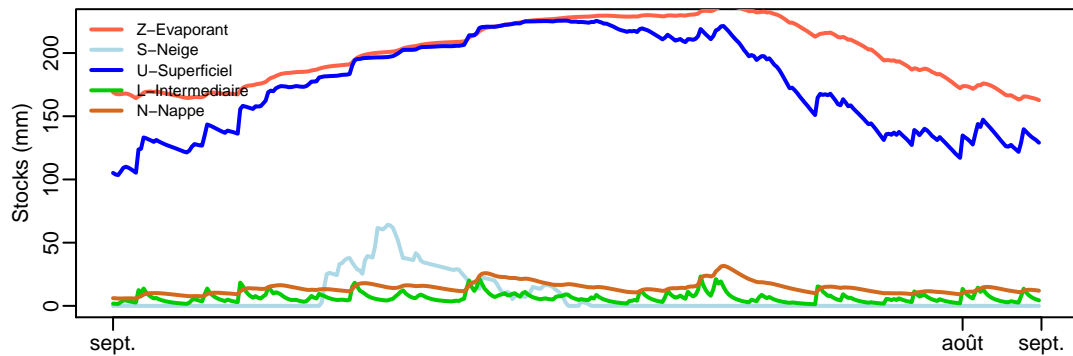

# k3264010 (113.85 km<sup>2</sup>) – année 1990–1991

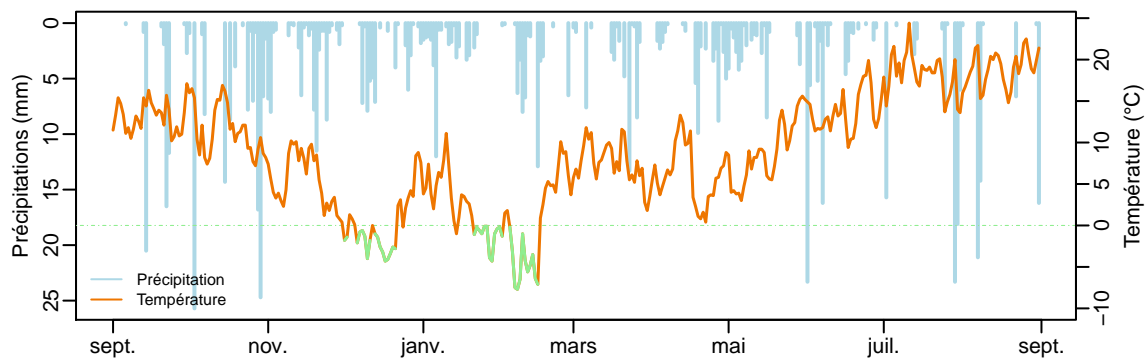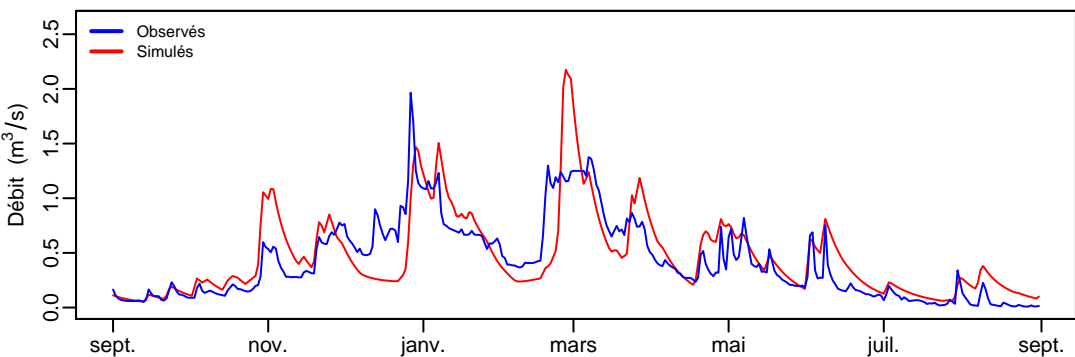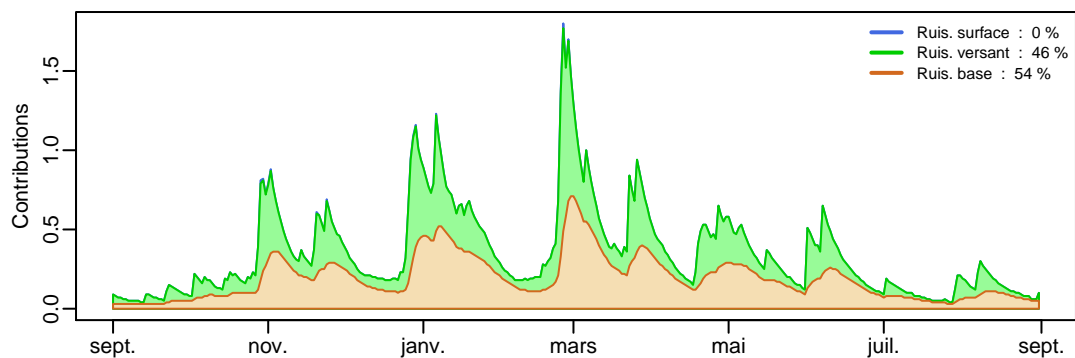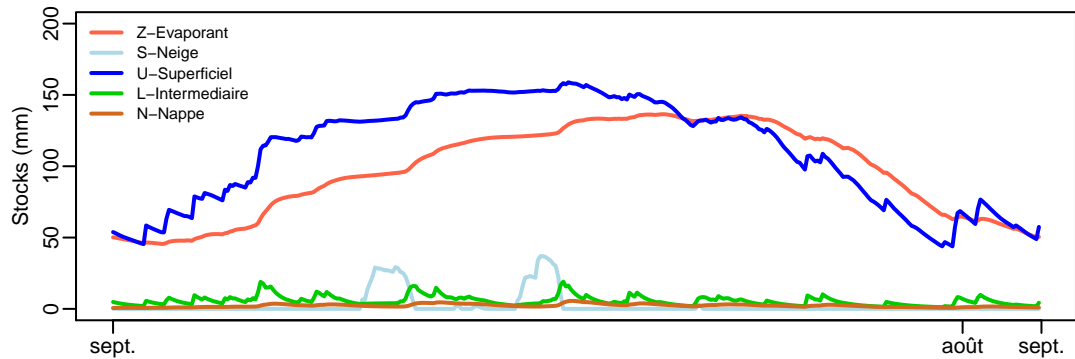

# k3264010 (113.85 km<sup>2</sup>) – année 1991–1992

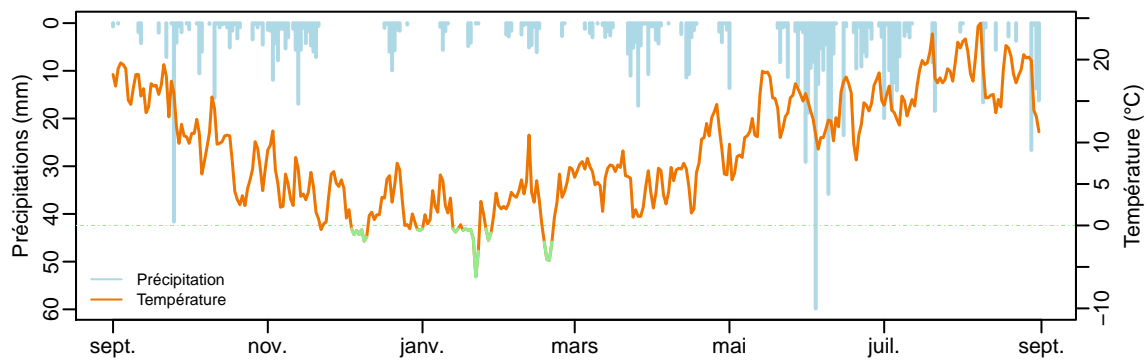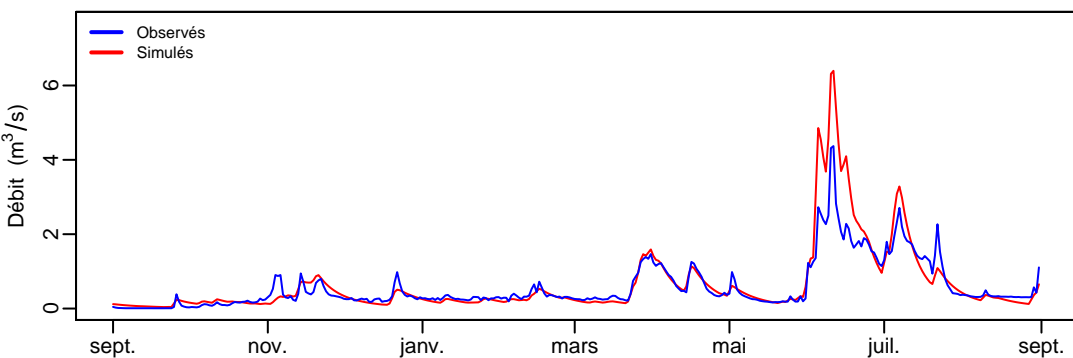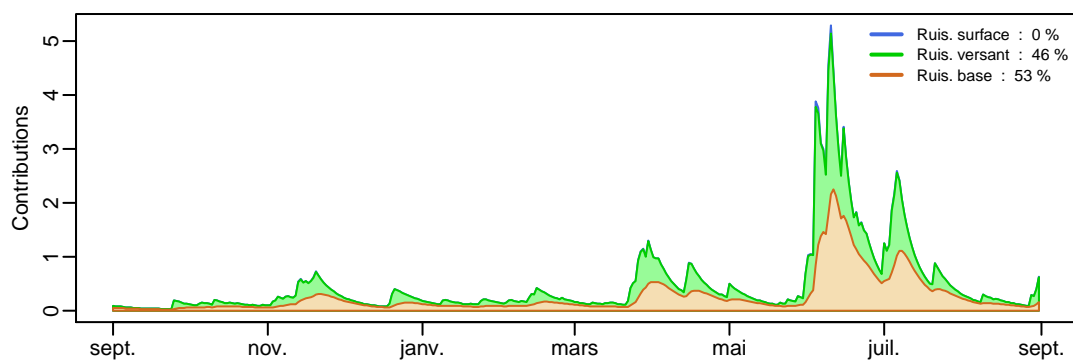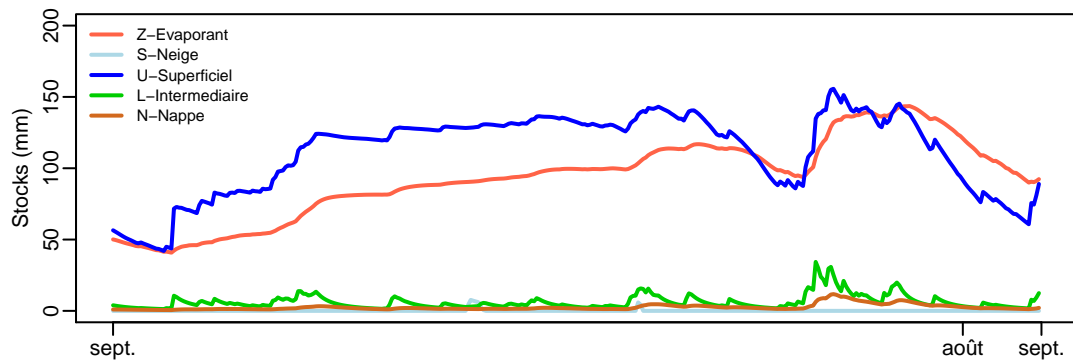

# k3264010 (113.85 km<sup>2</sup>) – année 1992–1993

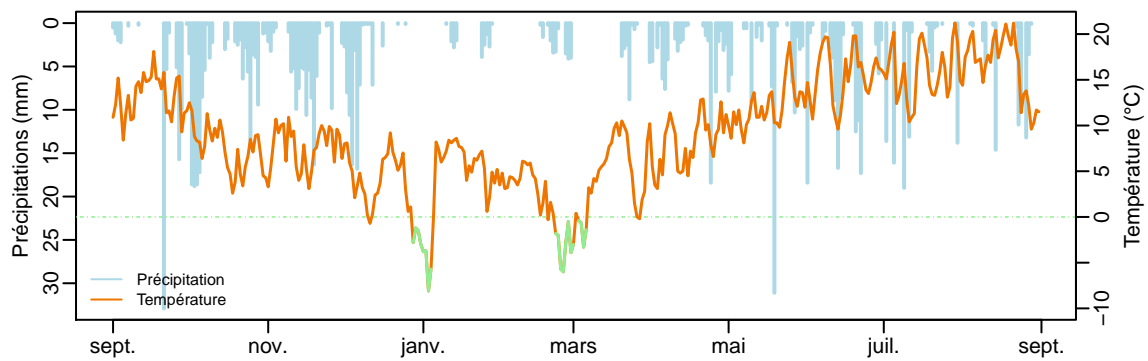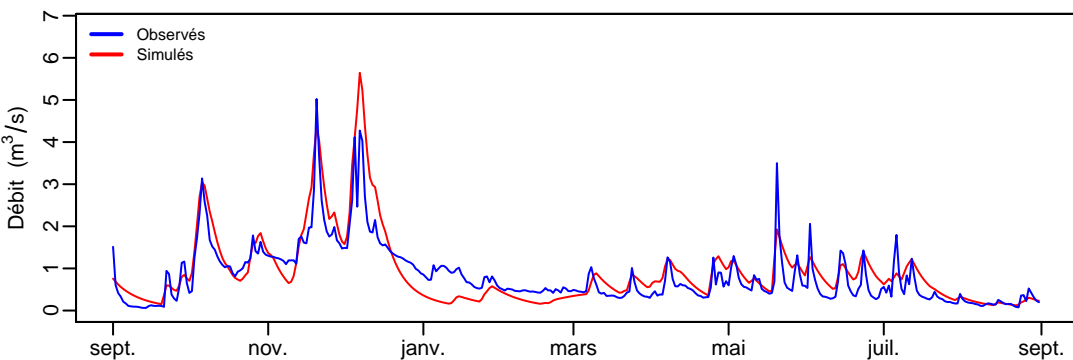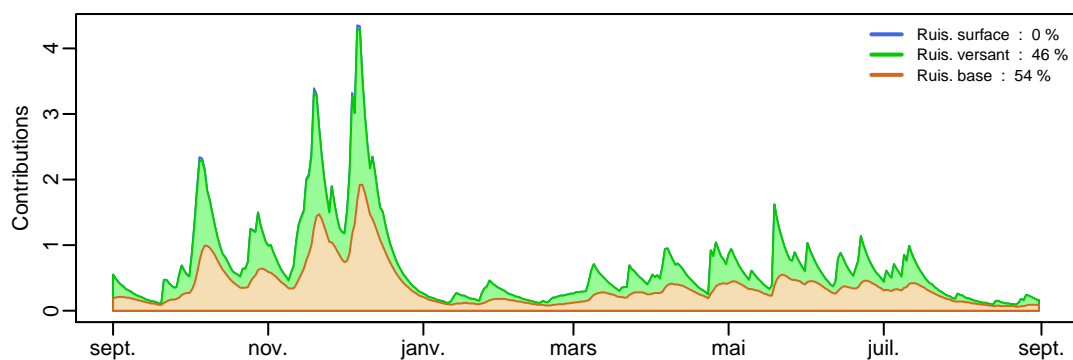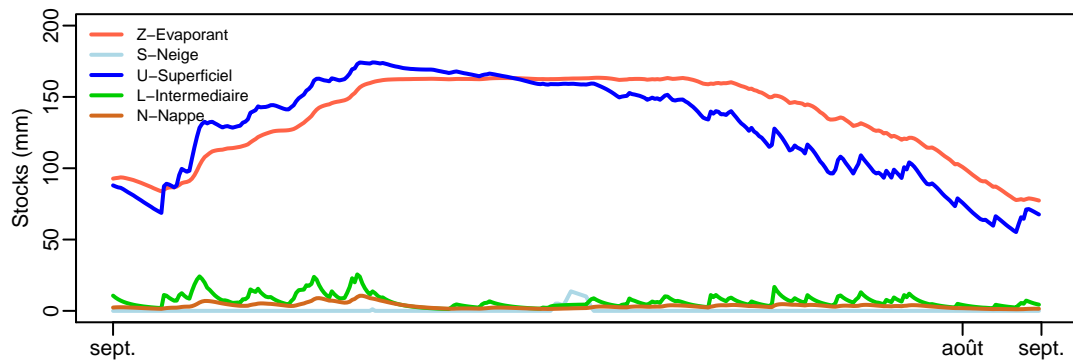

# k3264010 (113.85 km<sup>2</sup>) – année 1993–1994

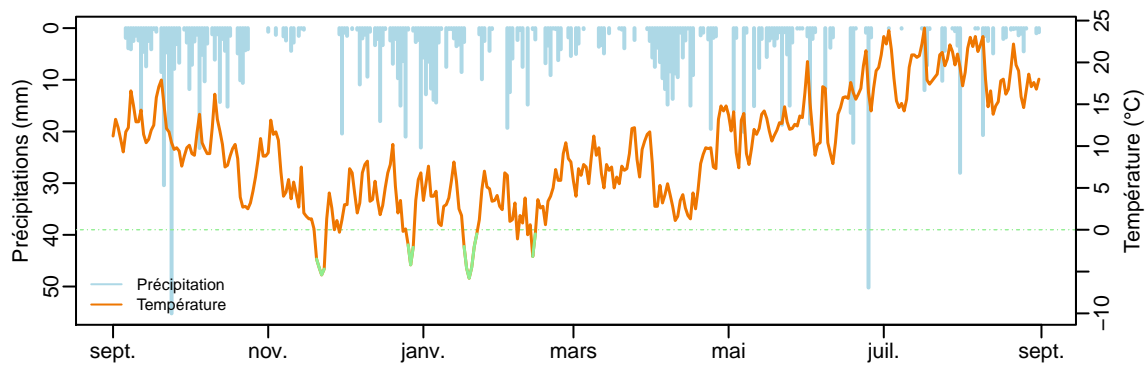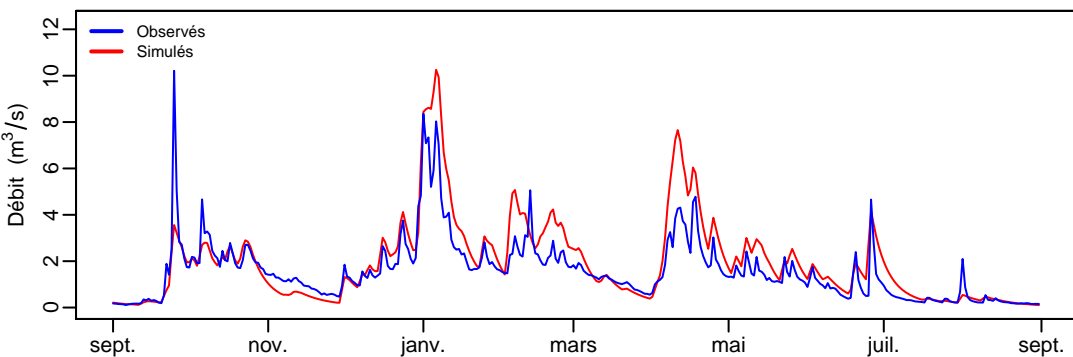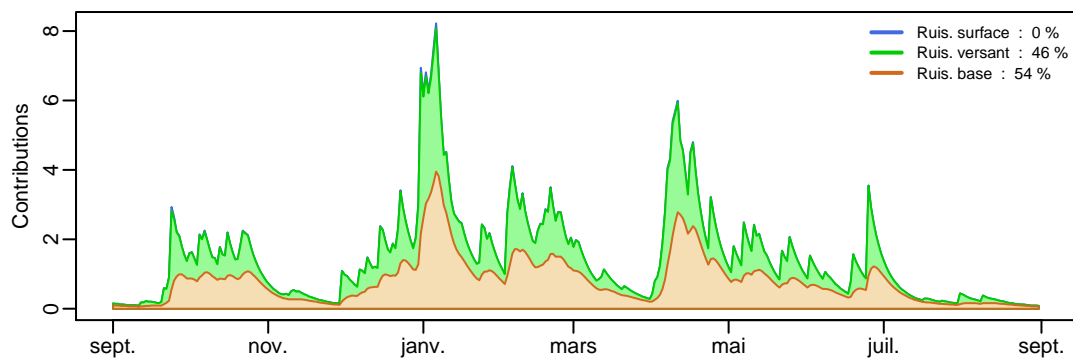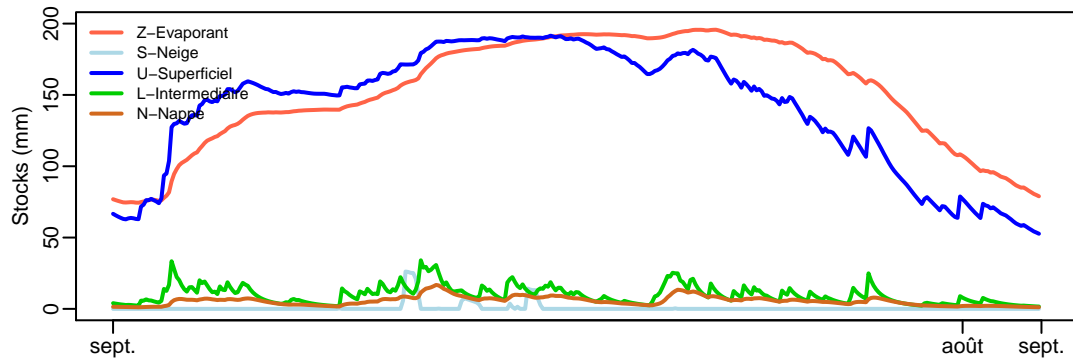



# k3264010 (113.85 km<sup>2</sup>) – année 1994–1995

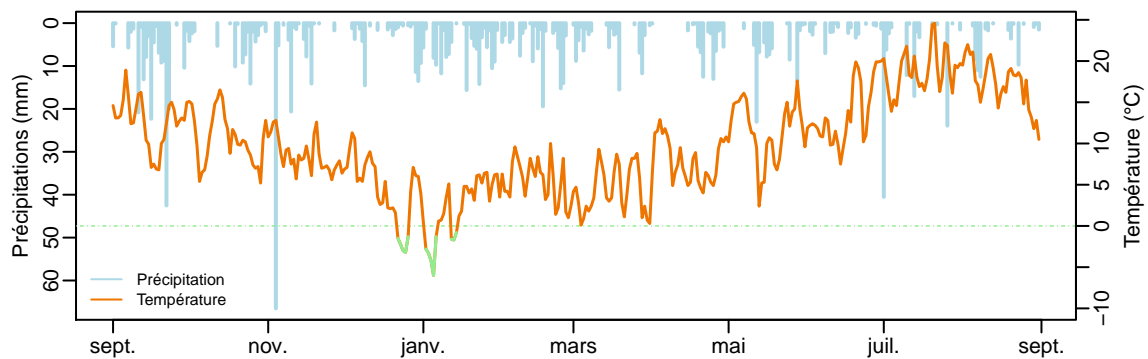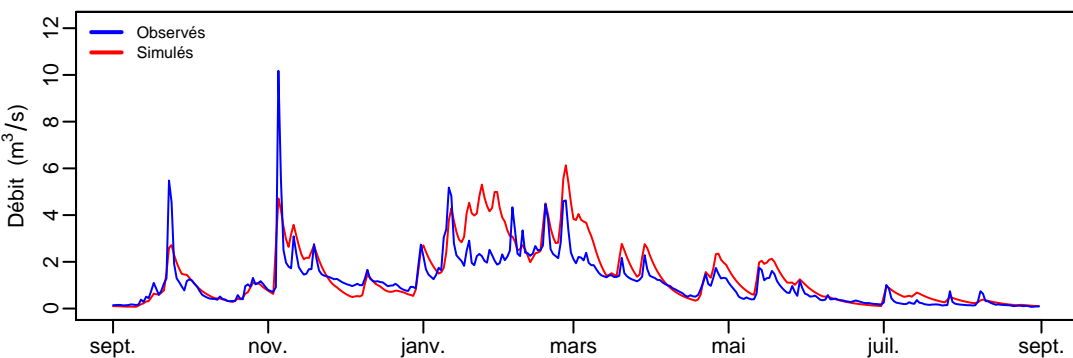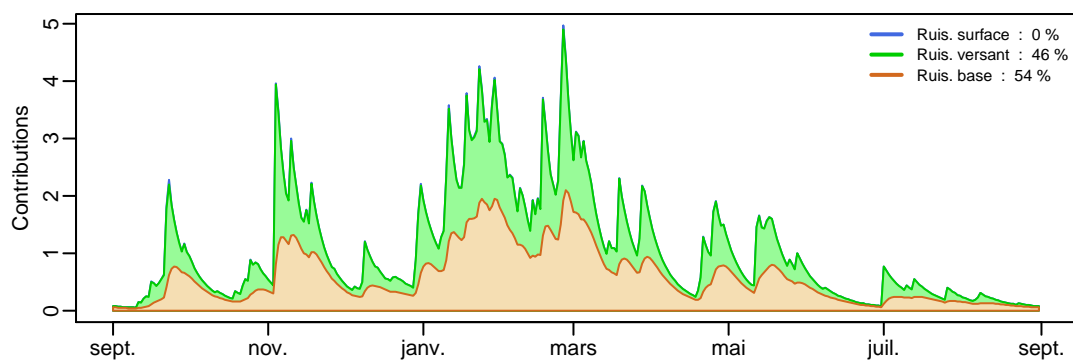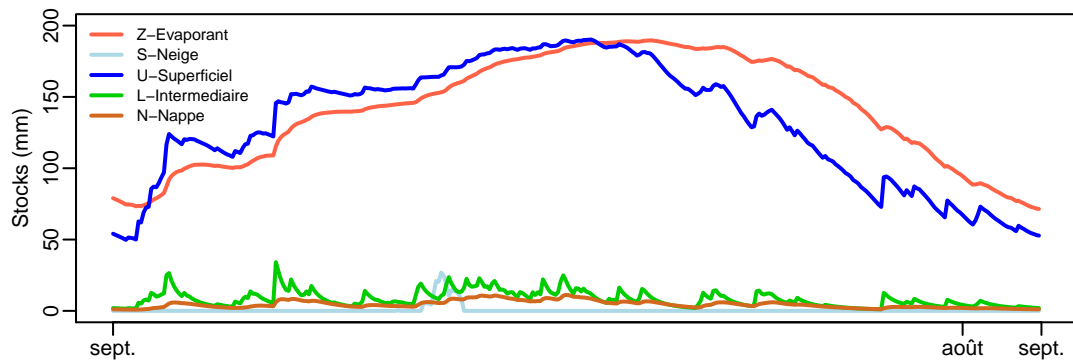

# k3264010 (113.85 km<sup>2</sup>) – année 1995–1996

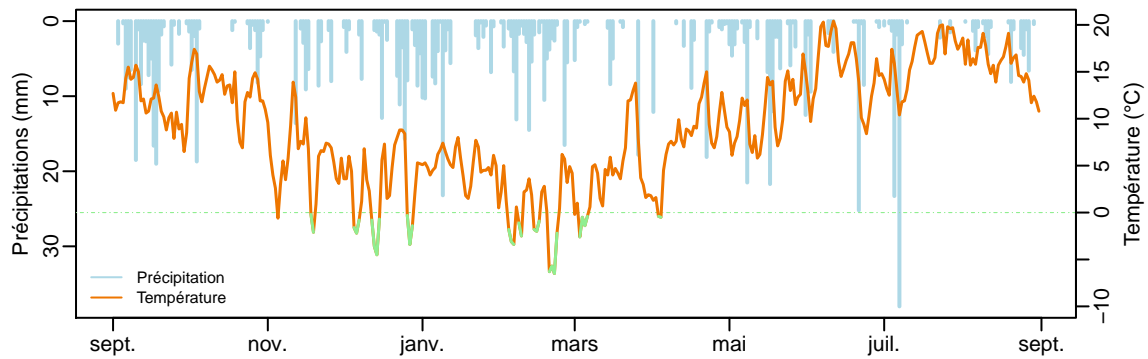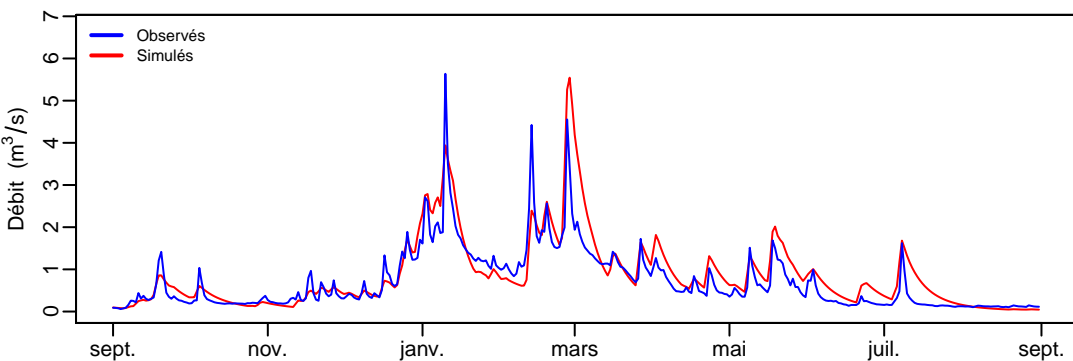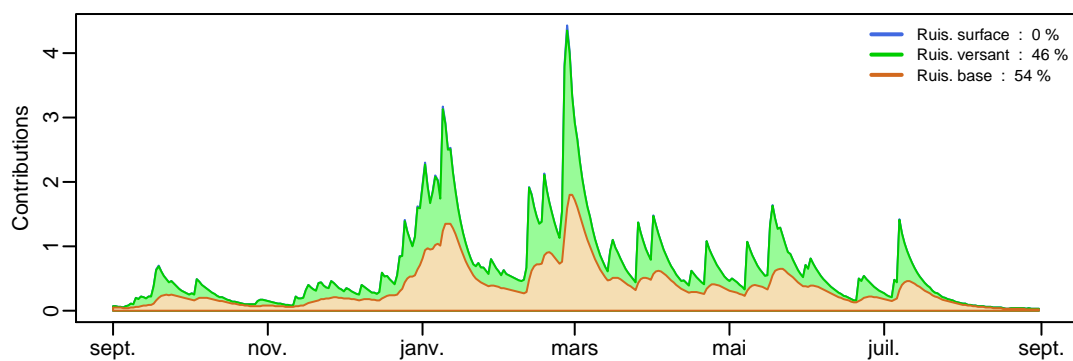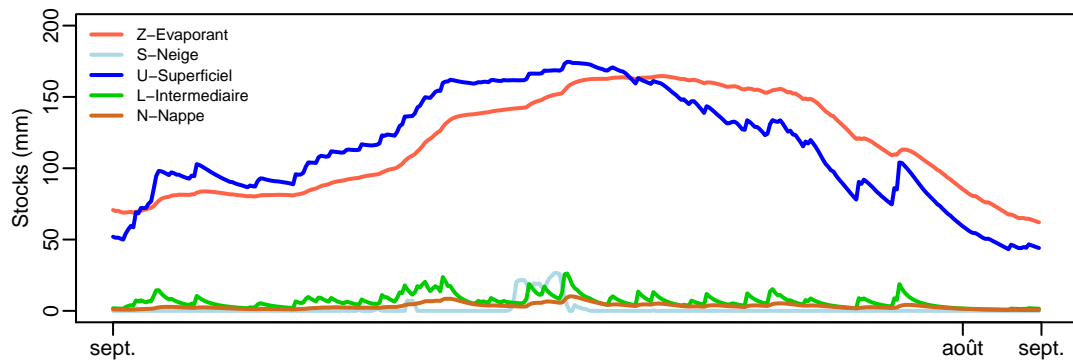

# k3264010 (113.85 km<sup>2</sup>) – année 1996–1997

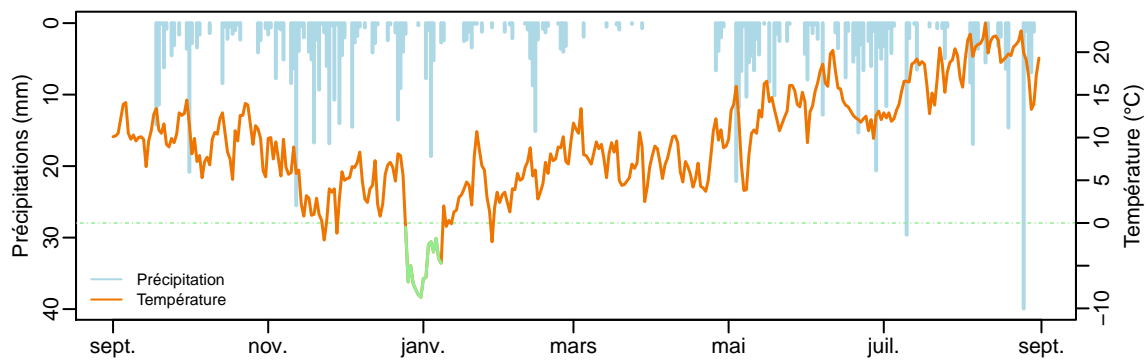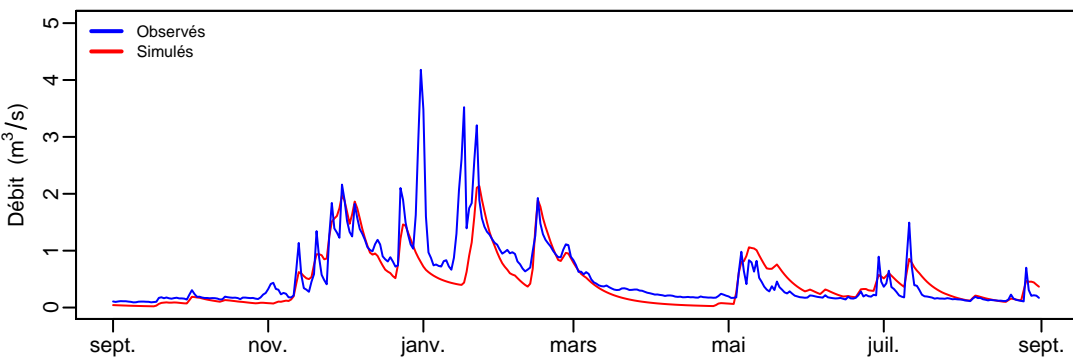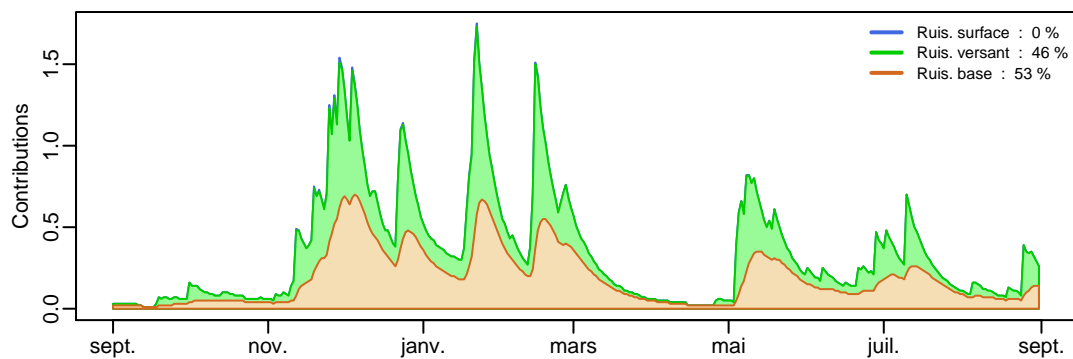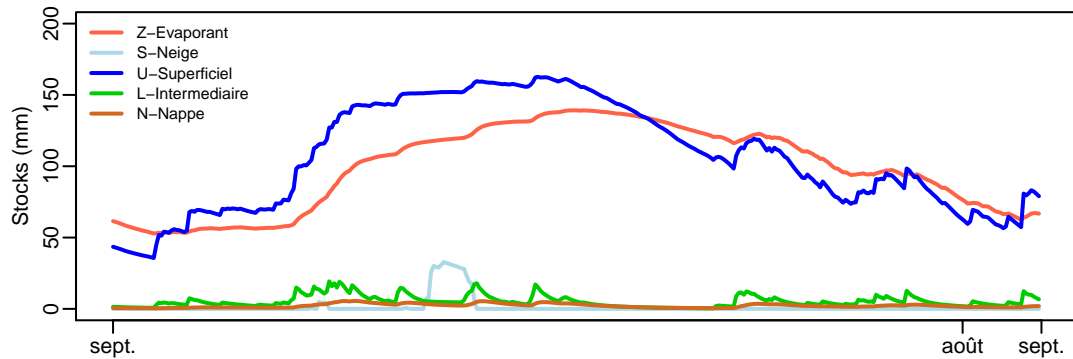

# k3264010 (113.85 km<sup>2</sup>) – année 1997–1998

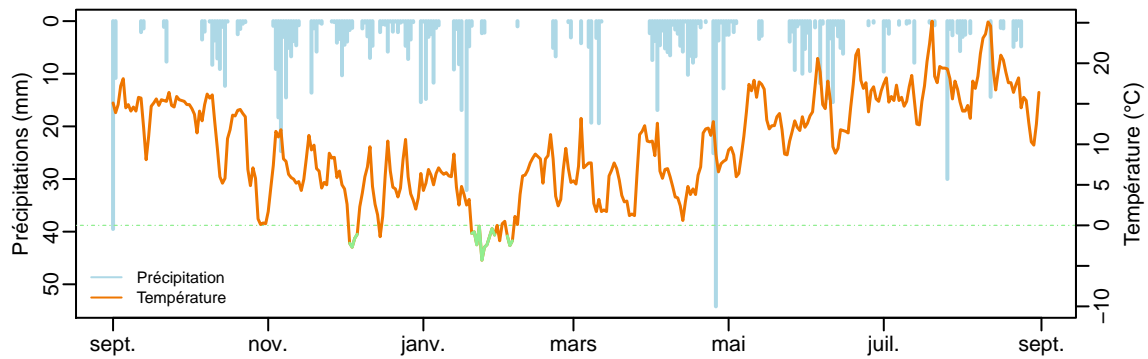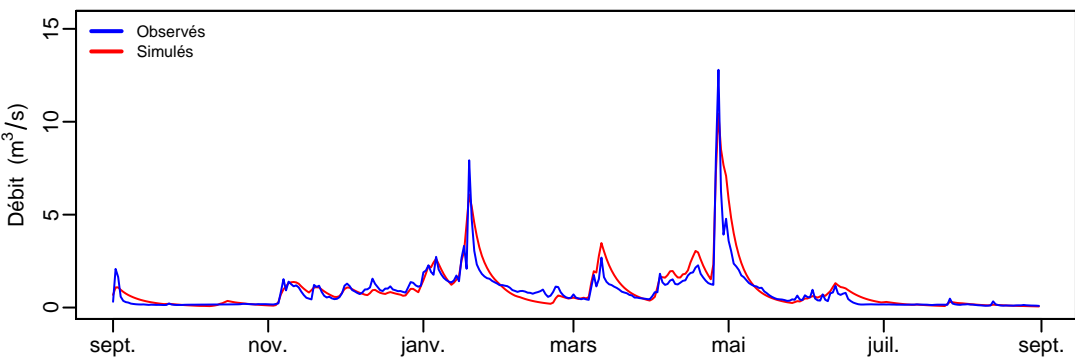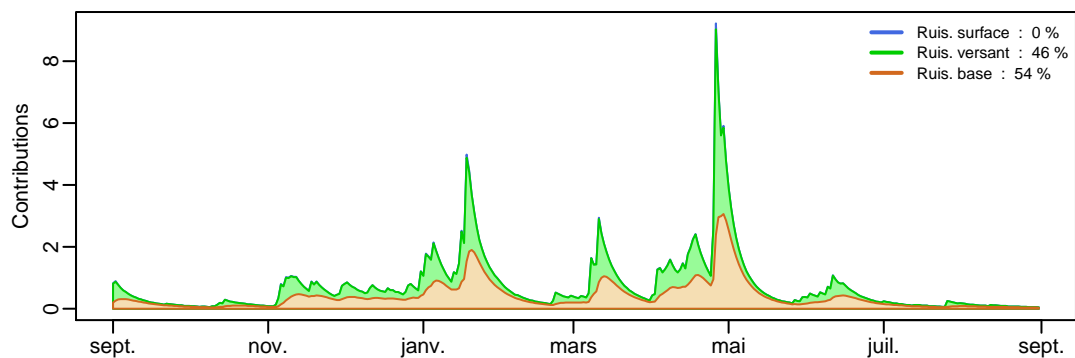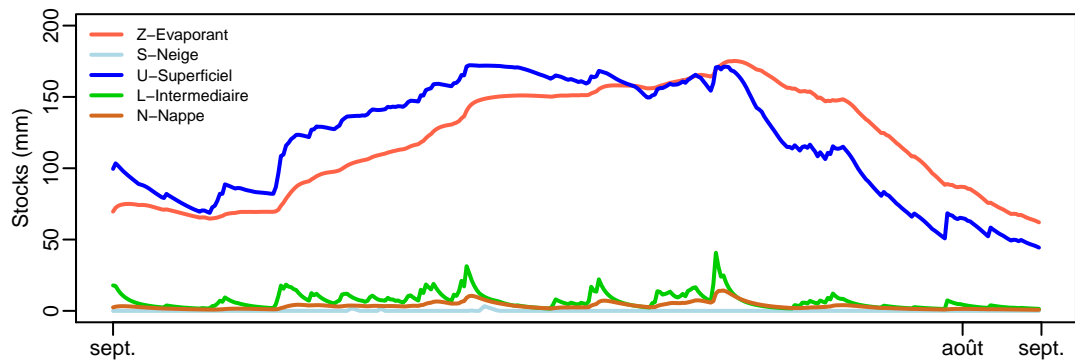

# k3264010 (113.85 km<sup>2</sup>) – année 1998–1999

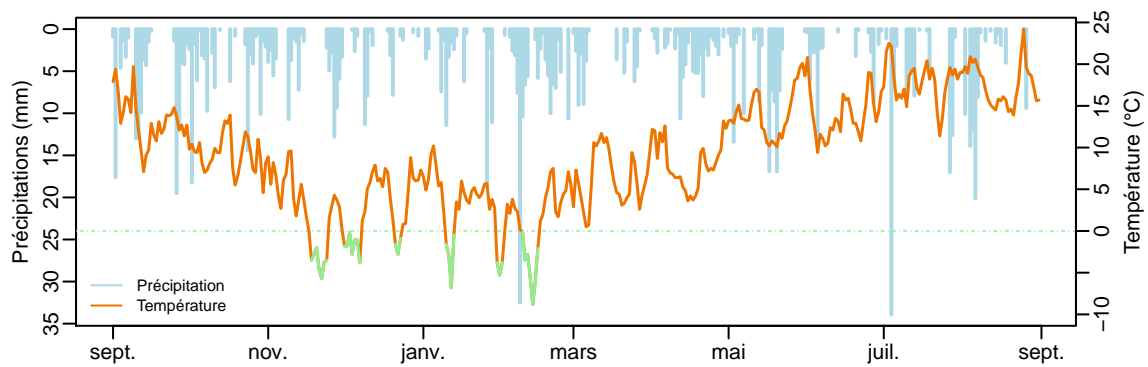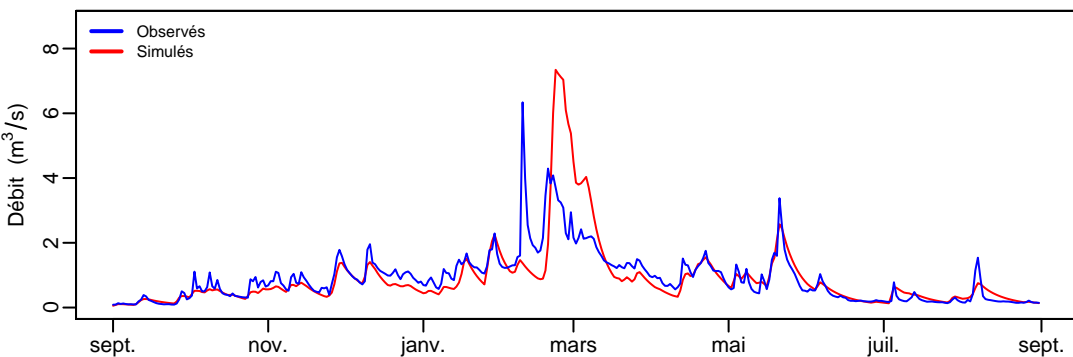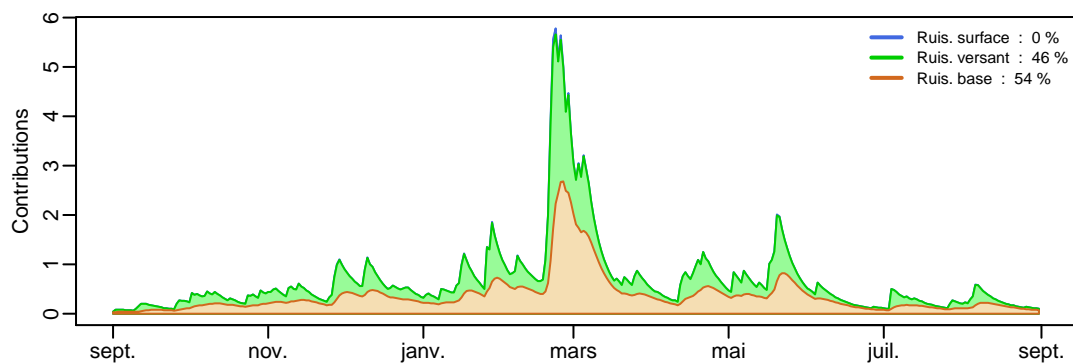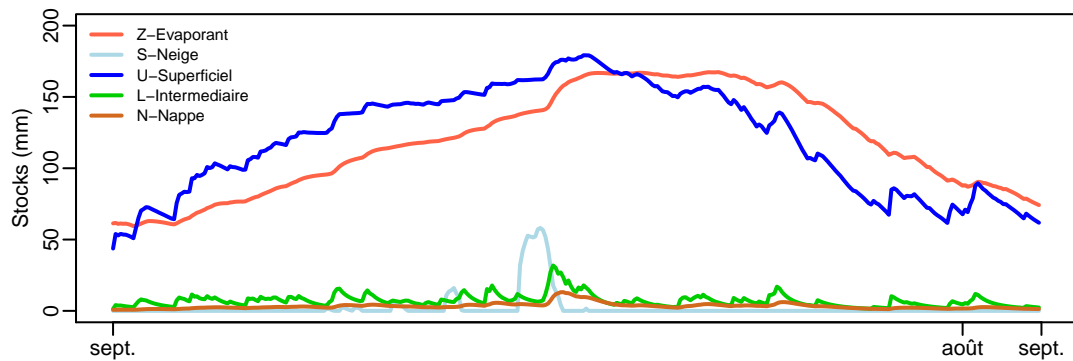

# k3264010 (113.85 km<sup>2</sup>) – année 1999–2000

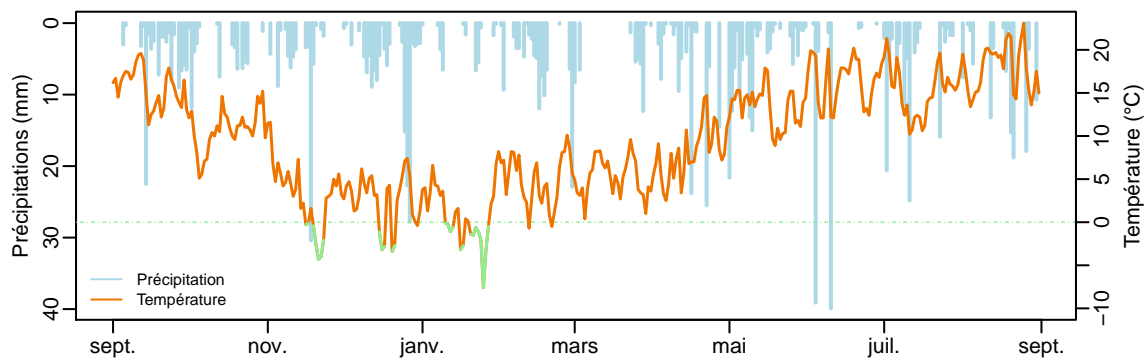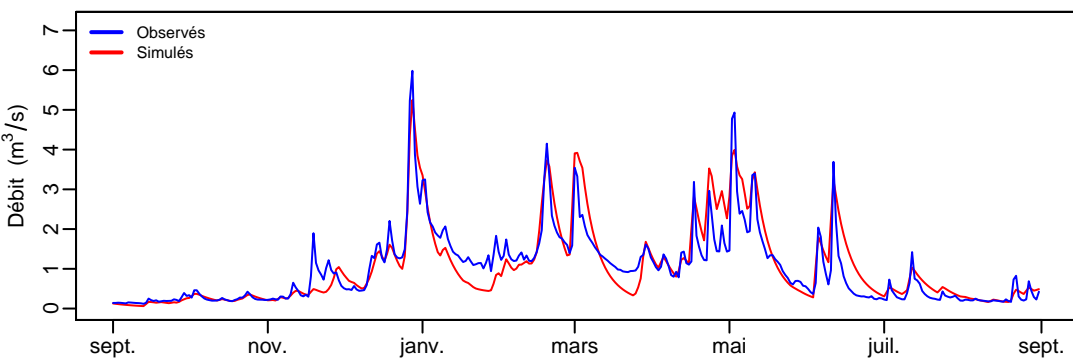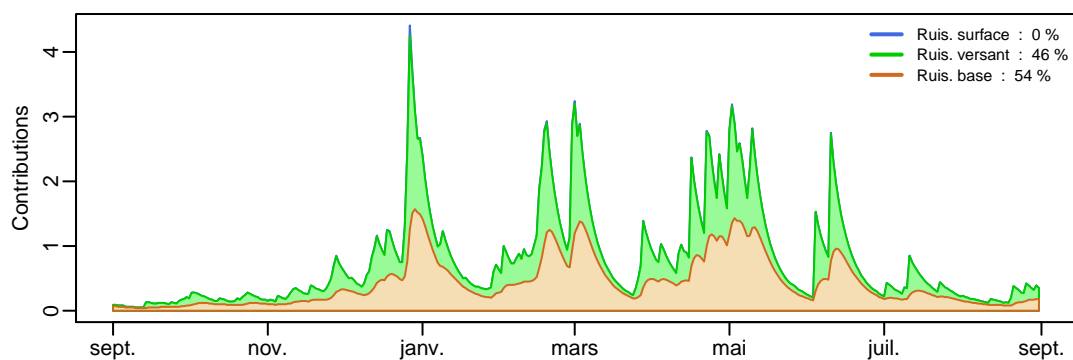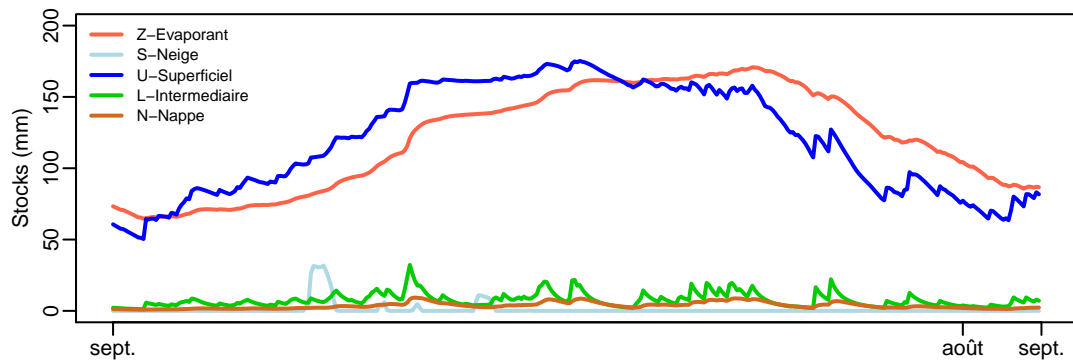

# k3264010 (113.85 km<sup>2</sup>) – année 2000–2001

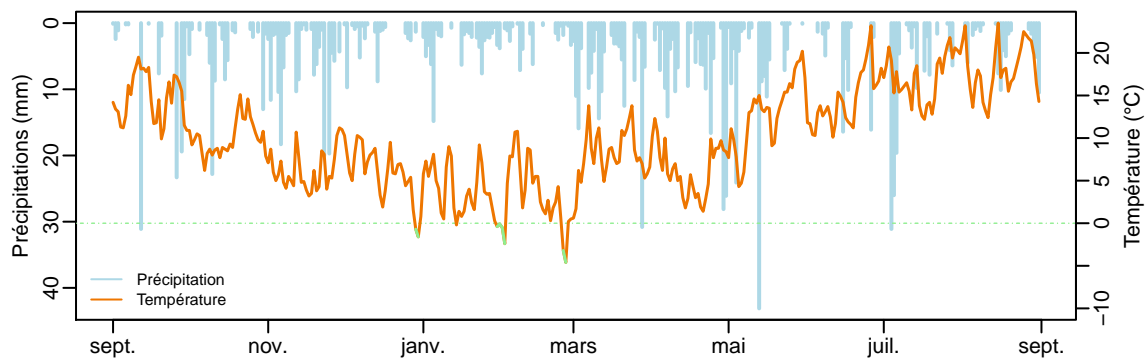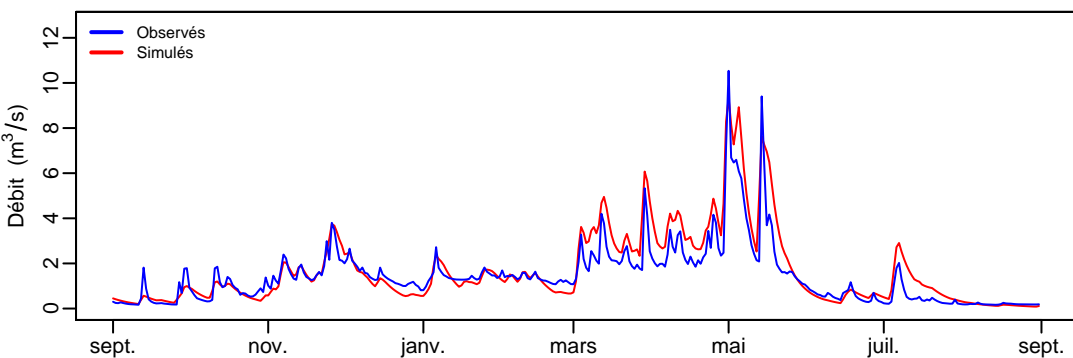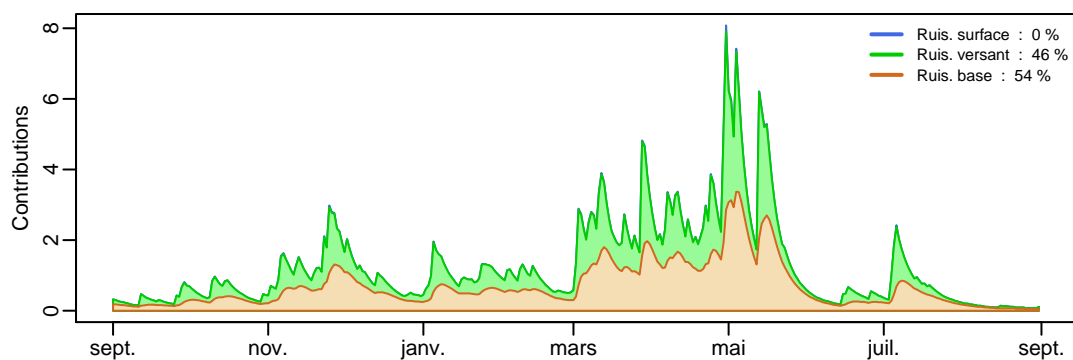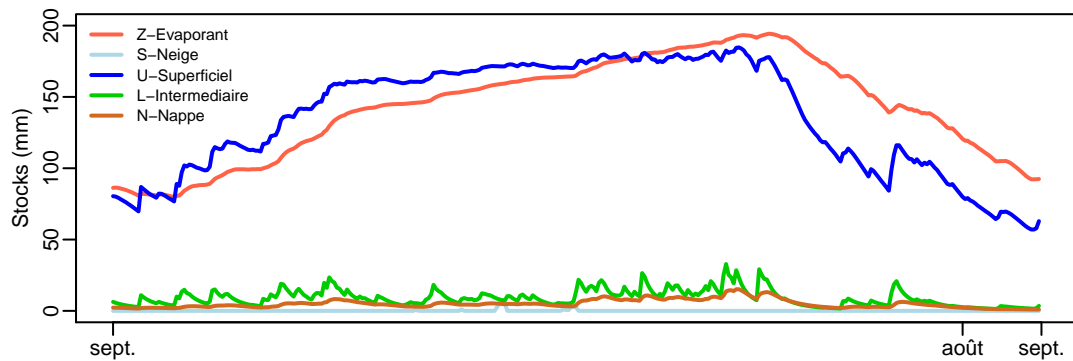

# k3264010 (113.85 km<sup>2</sup>) – année 2001–2002

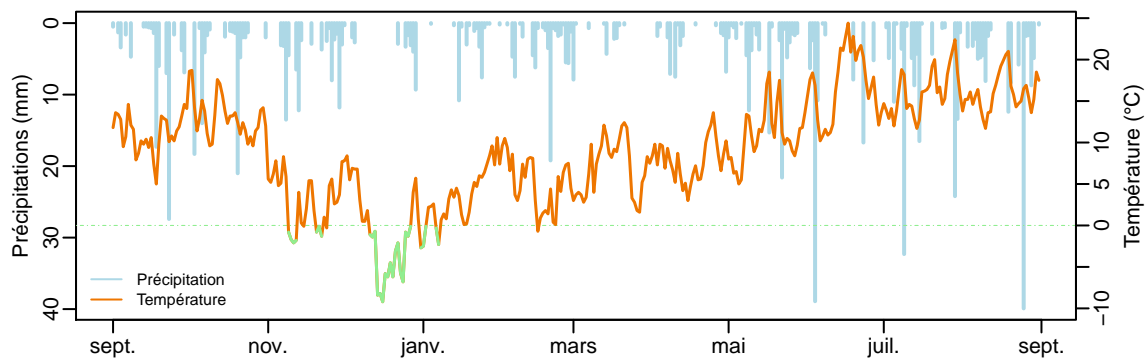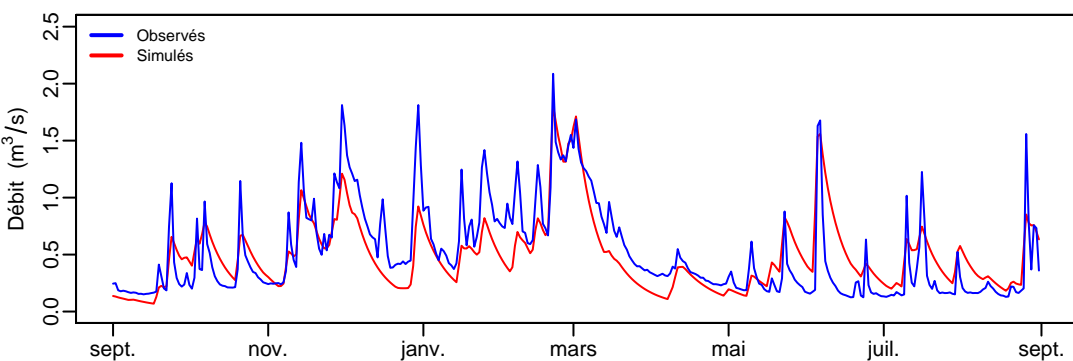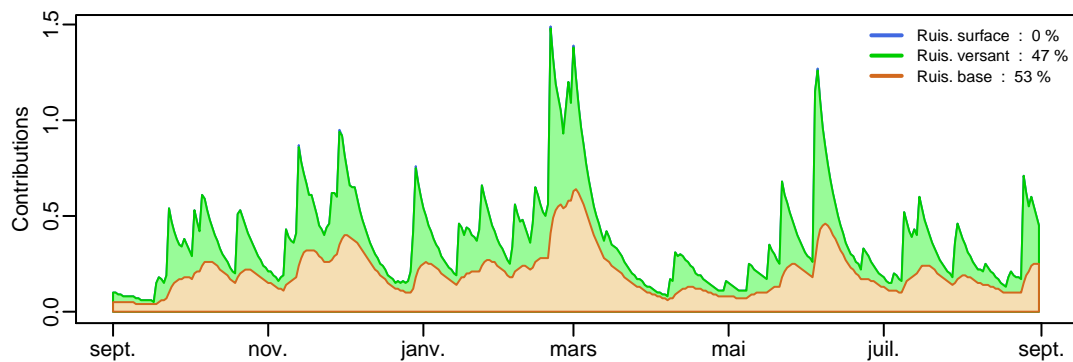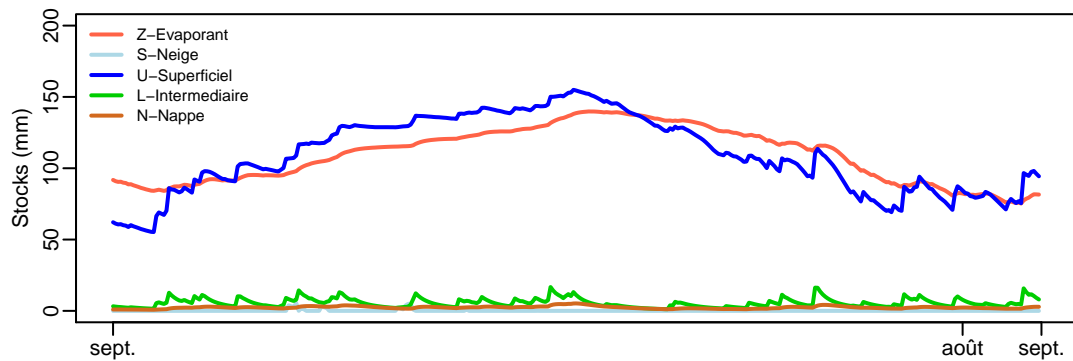



# k3264010 (113.85 km<sup>2</sup>) – année 2002–2003

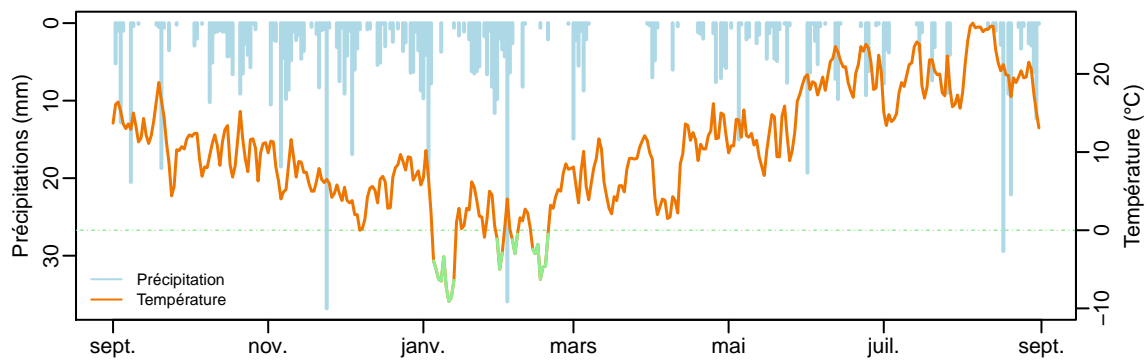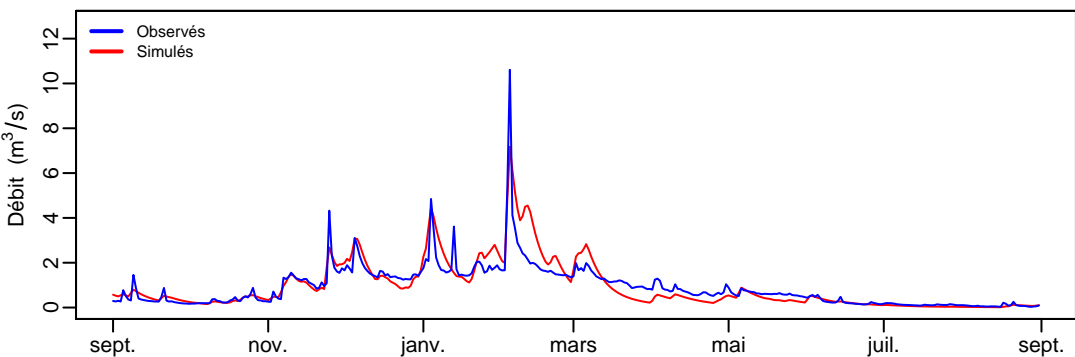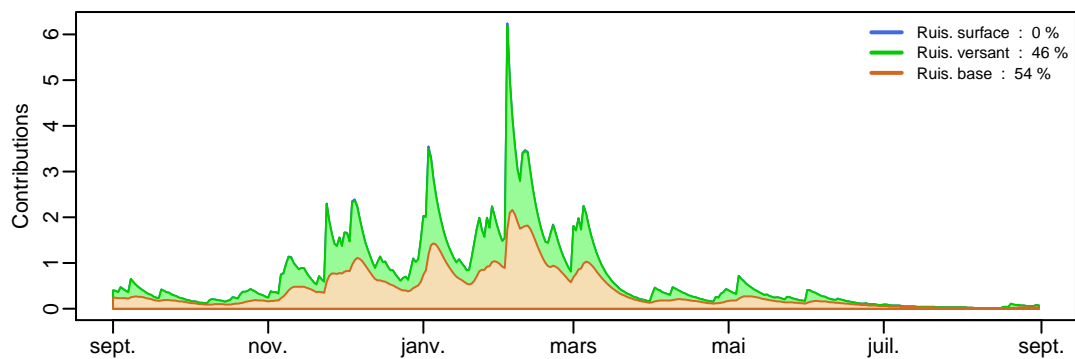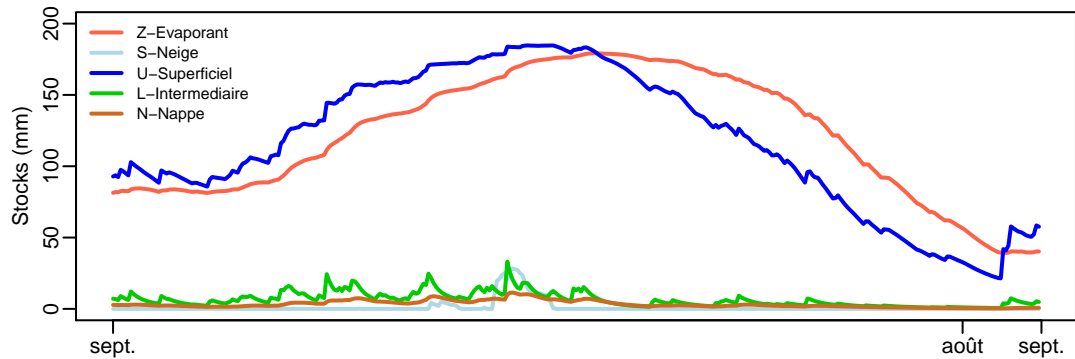

# k3264010 (113.85 km<sup>2</sup>) – année 2003–2004

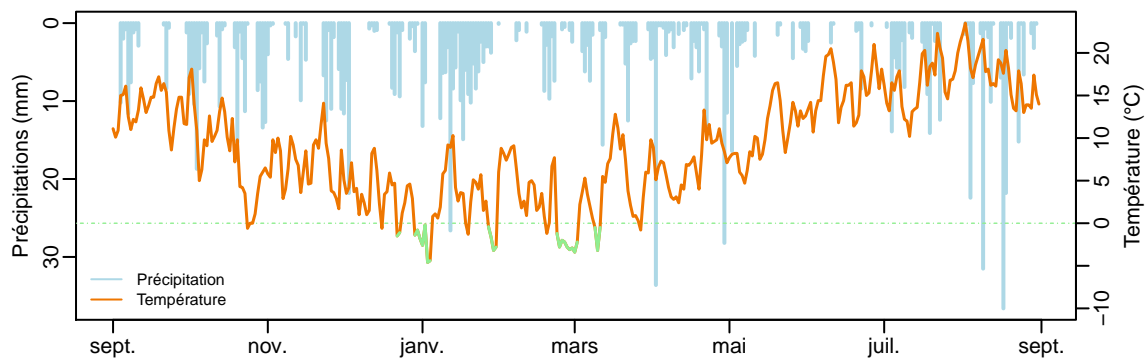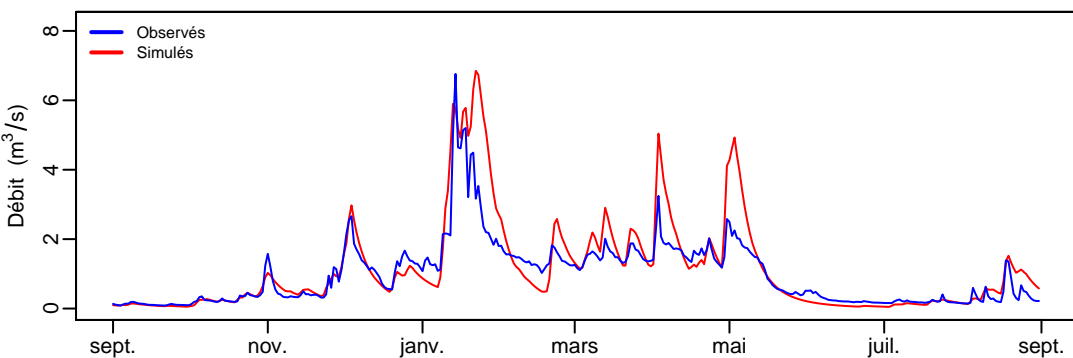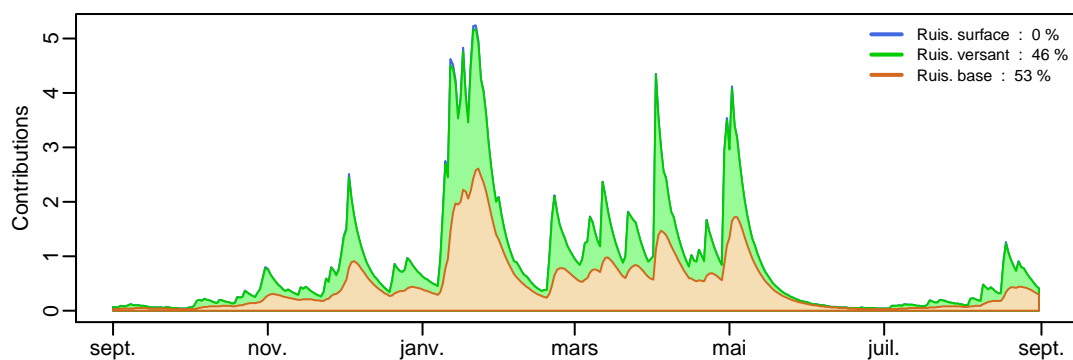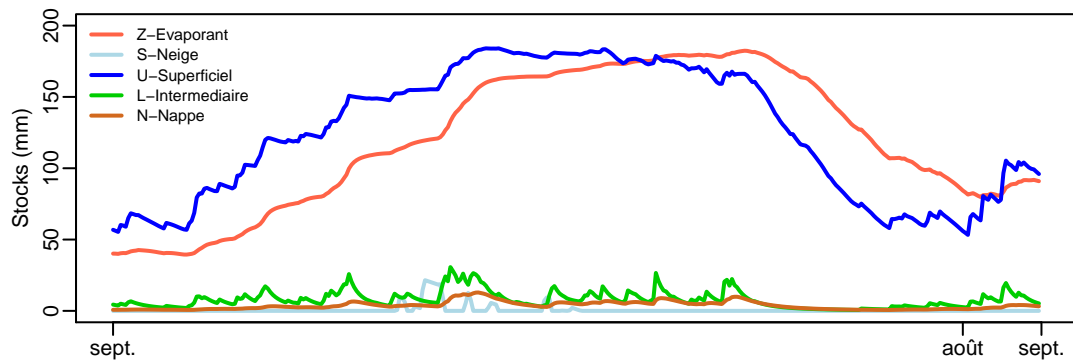

# k3264010 (113.85 km<sup>2</sup>) – année 2004–2005

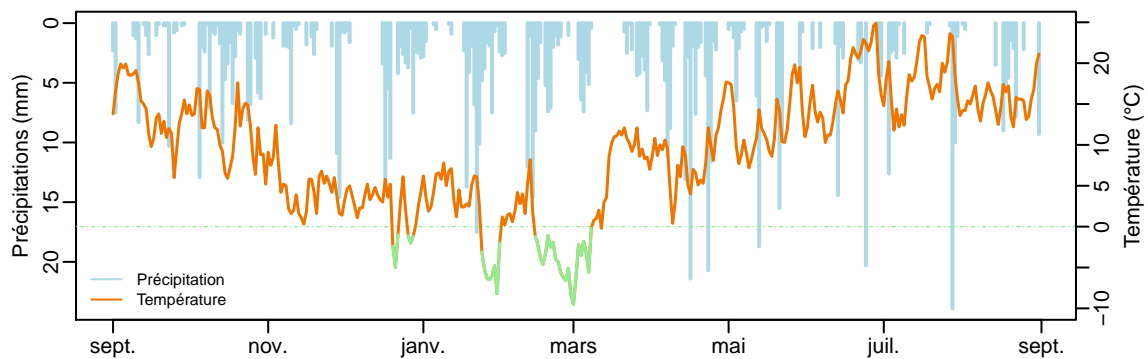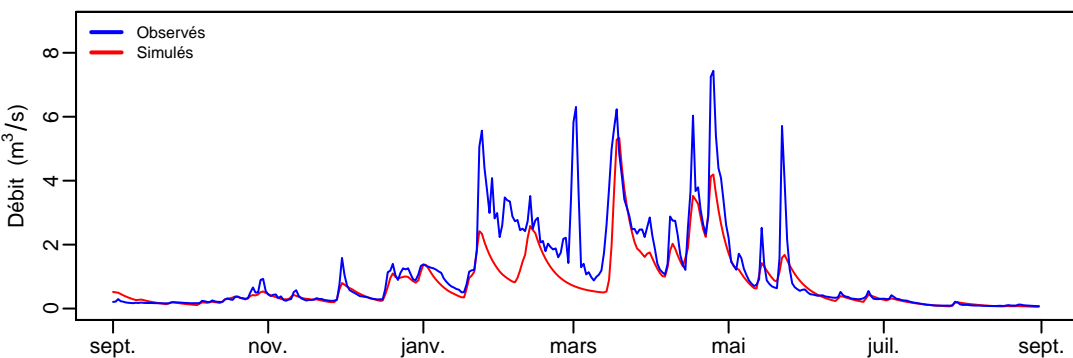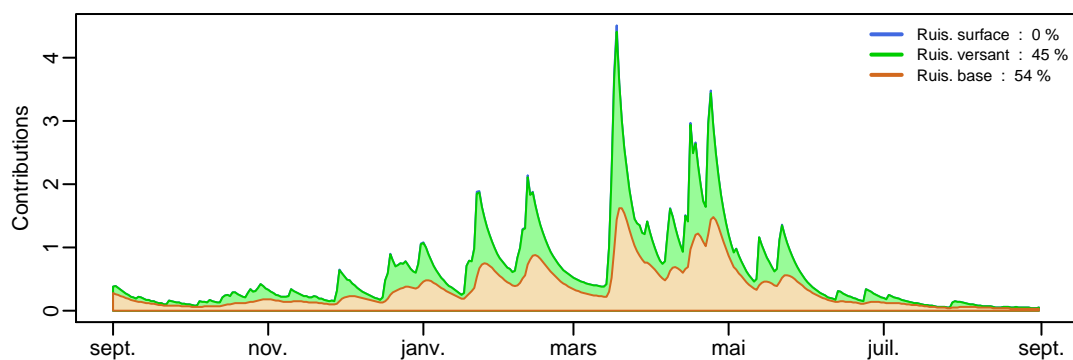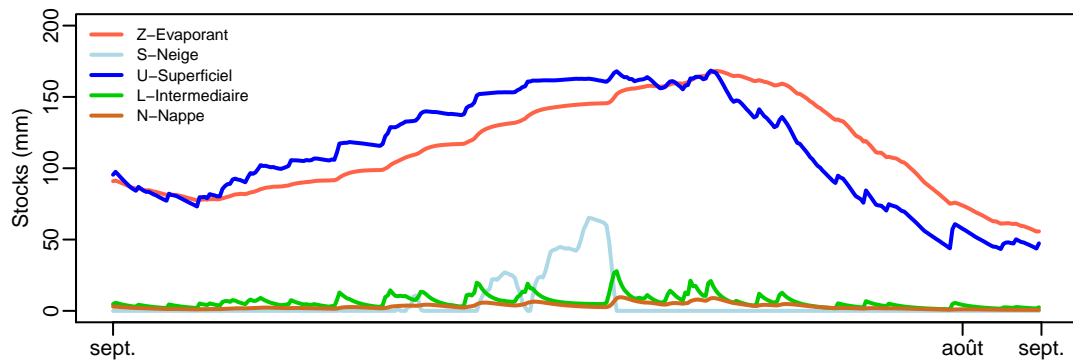

# k3264010 (113.85 km<sup>2</sup>) – année 2005–2006

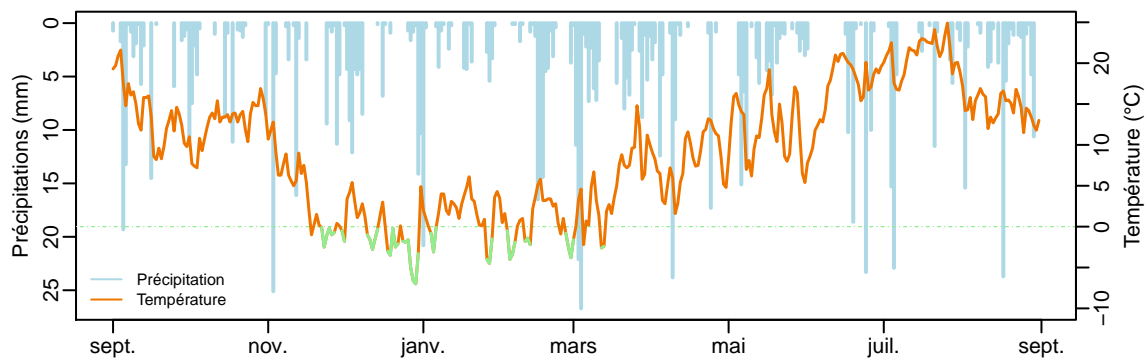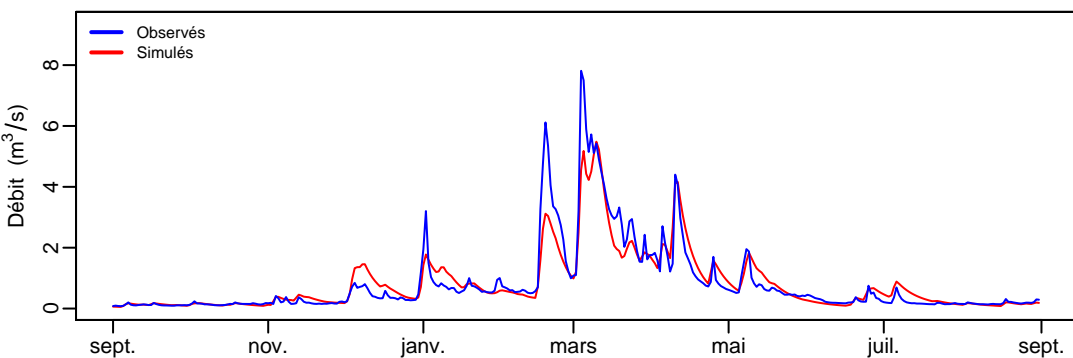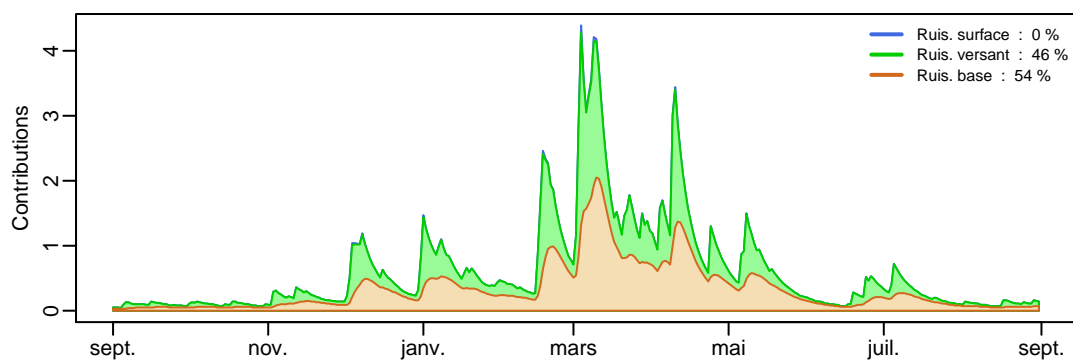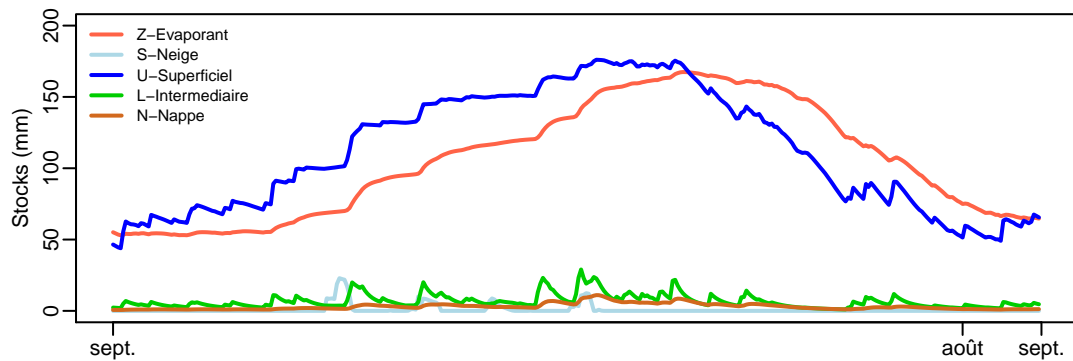

# k3264010 (113.85 km<sup>2</sup>) – année 2006–2007

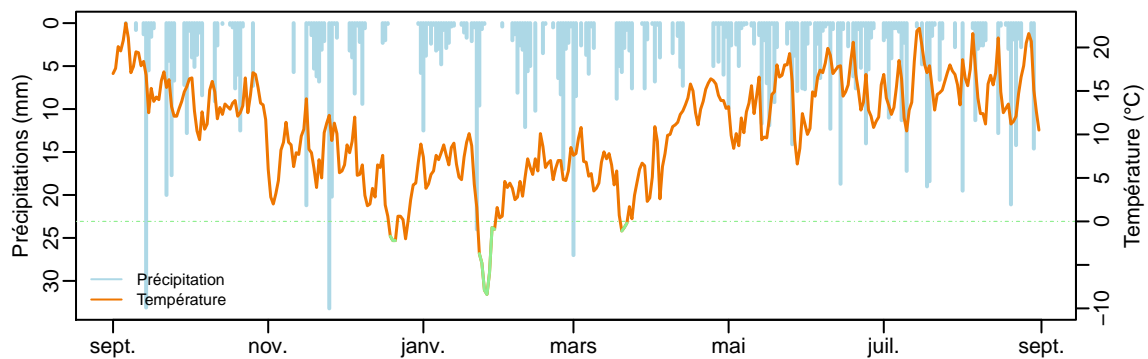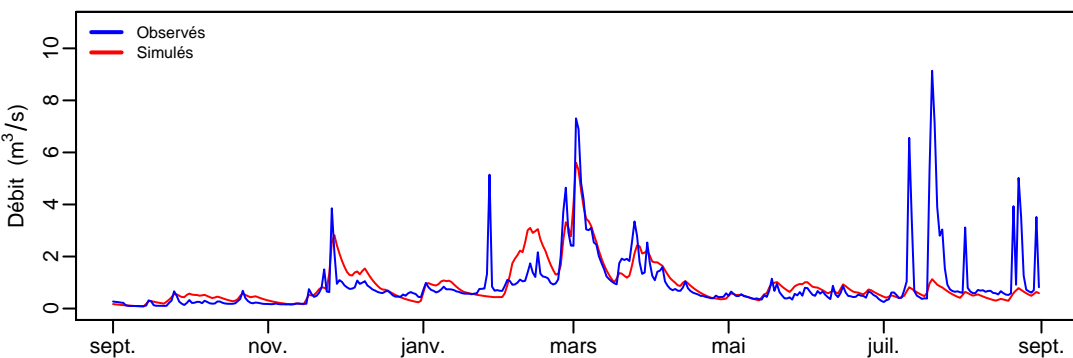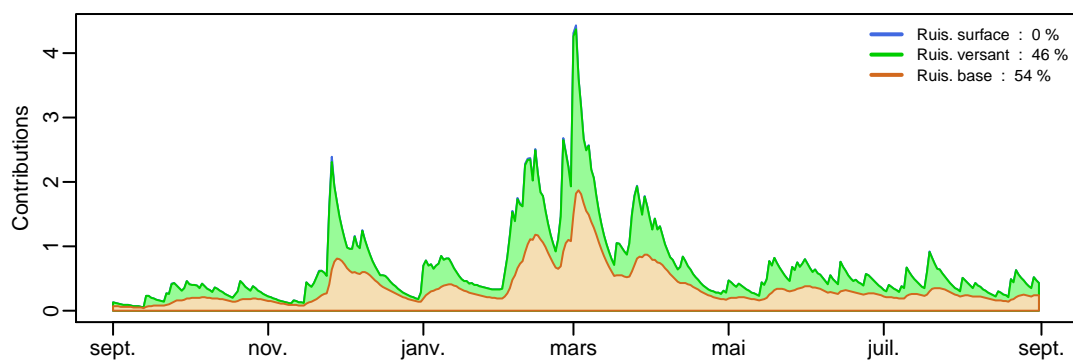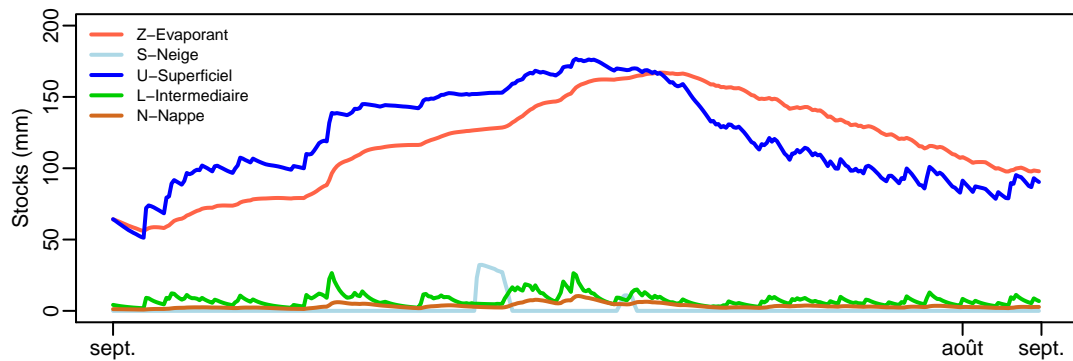

# k3264010 (113.85 km²) – année 2007–2008

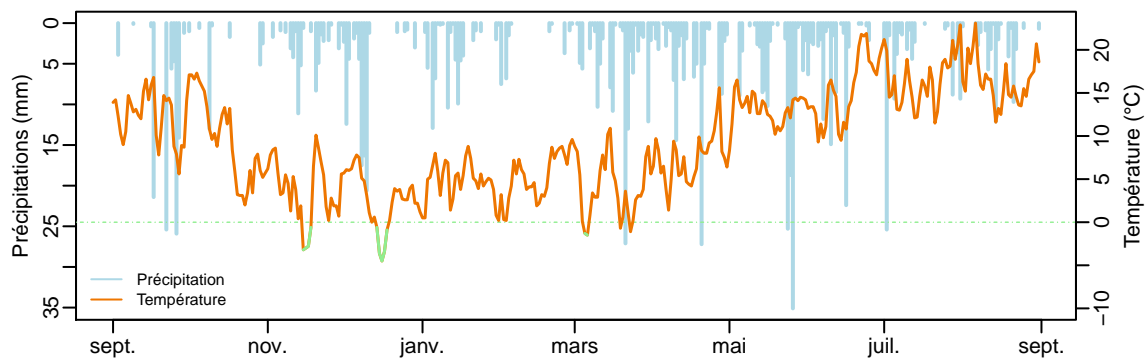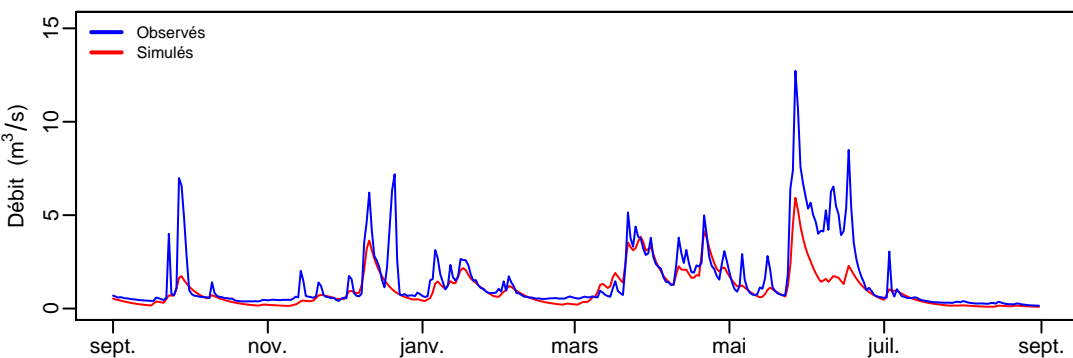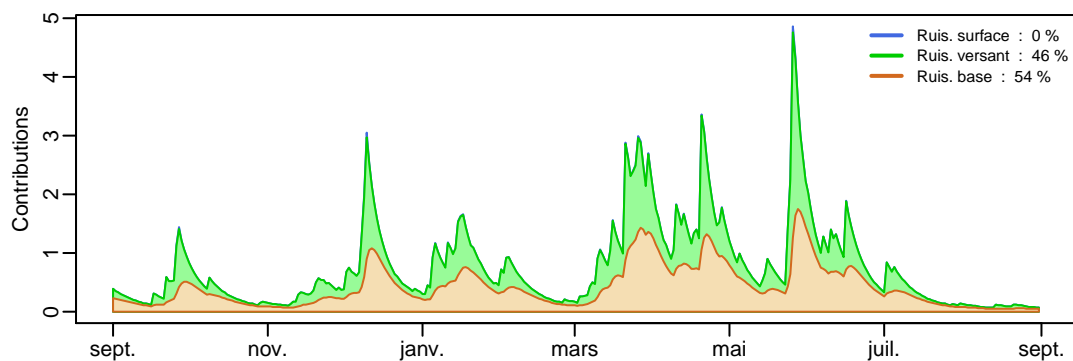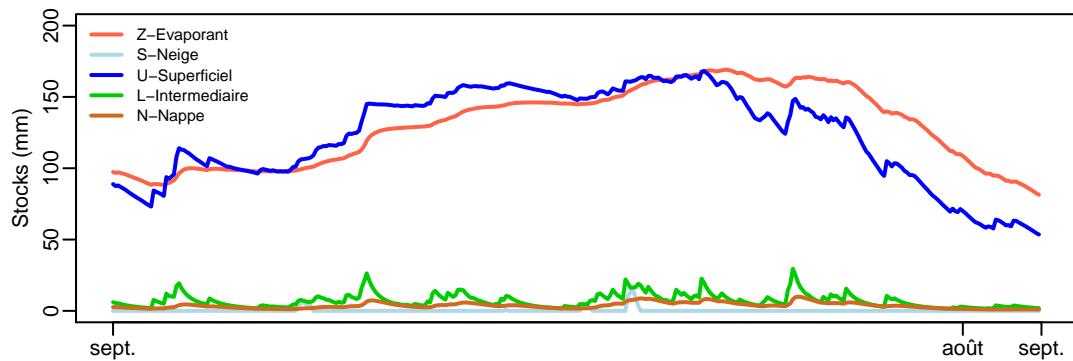

# k3264010 (113.85 km²) – année 2008–2009

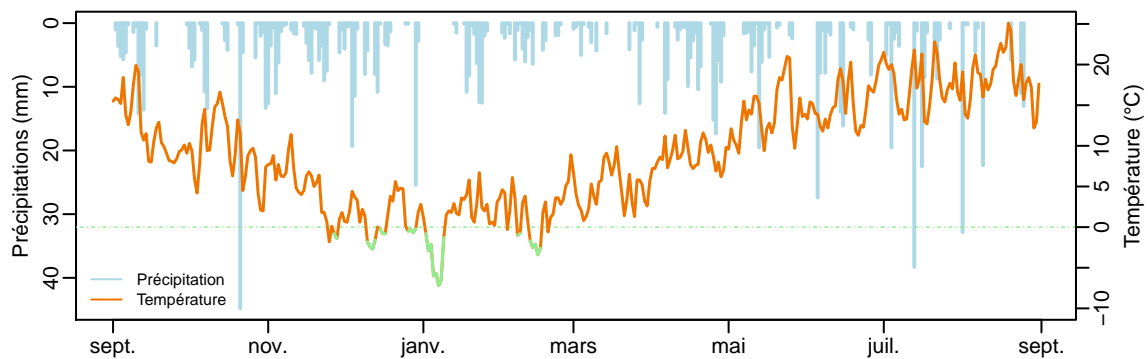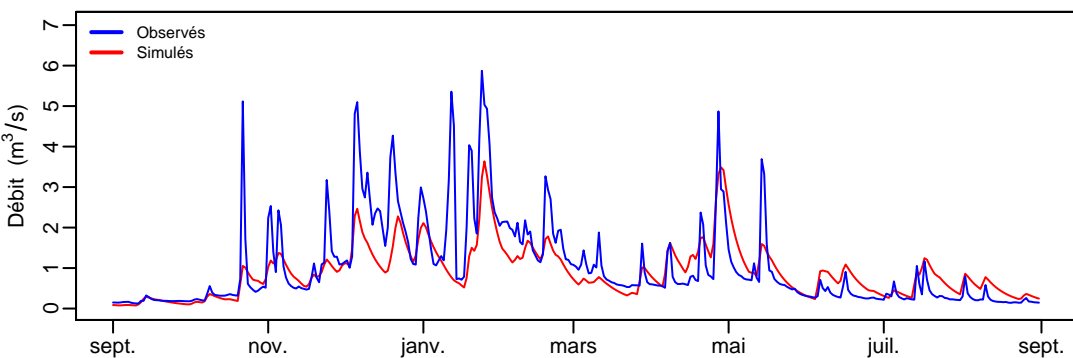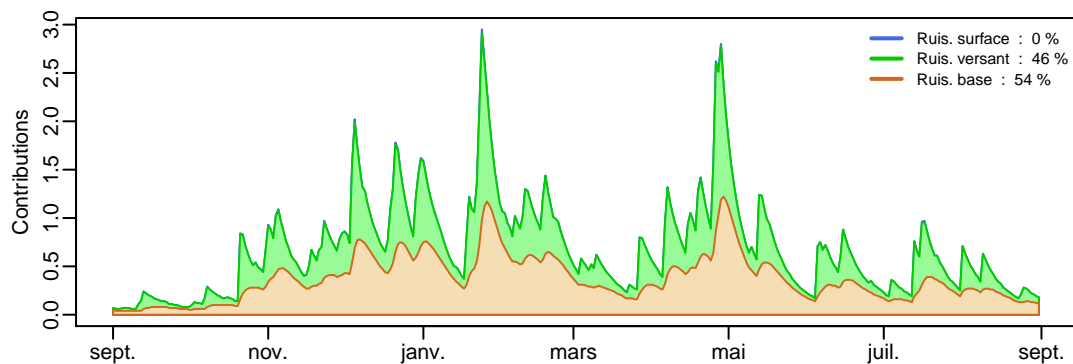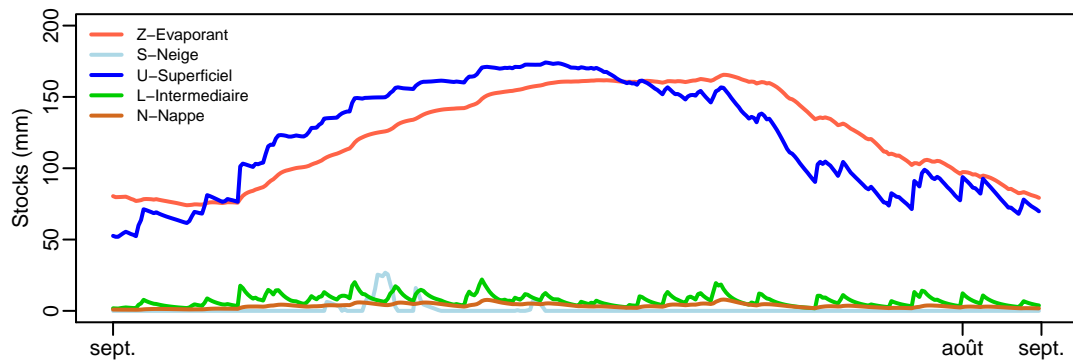

# k3273010 (469.78 km<sup>2</sup>) – année 1986–1987

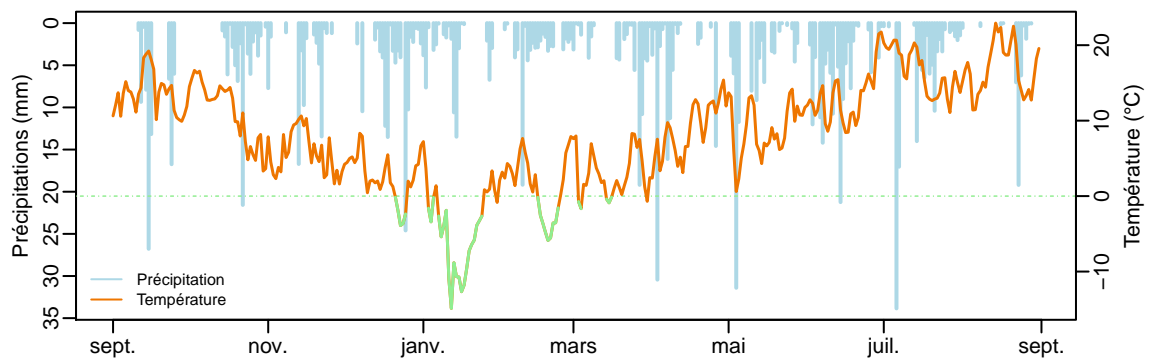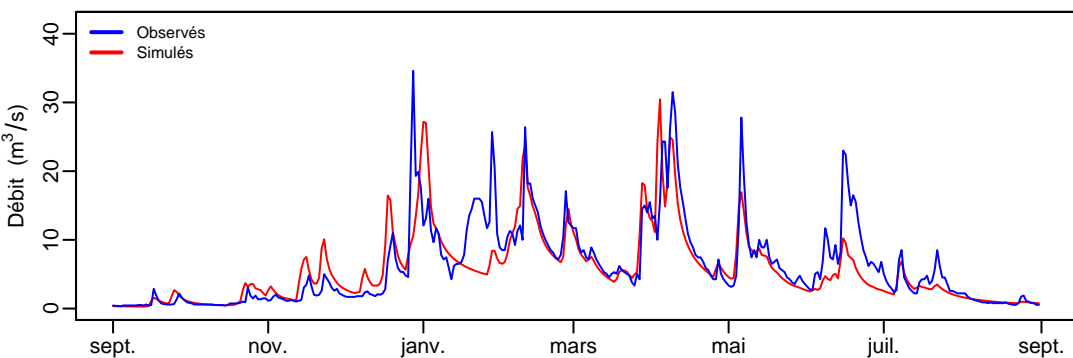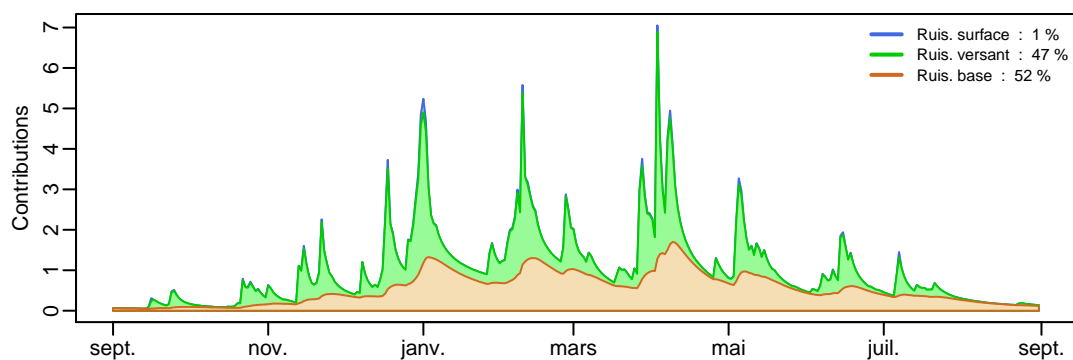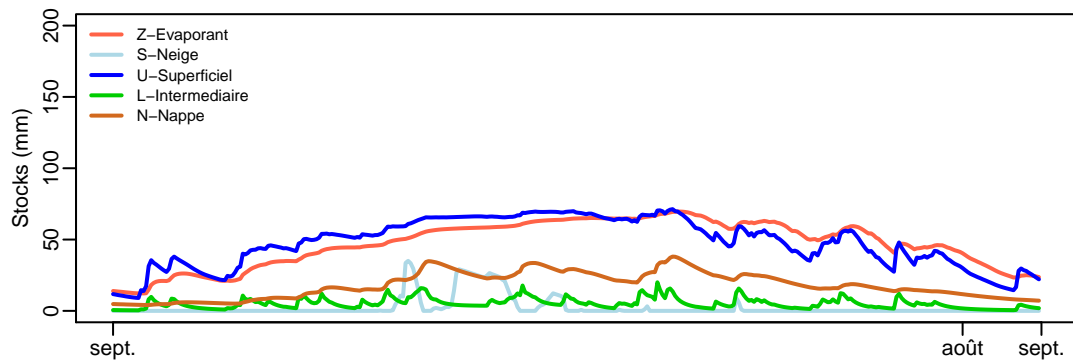



# k3273010 (469.78 km<sup>2</sup>) – année 1987–1988

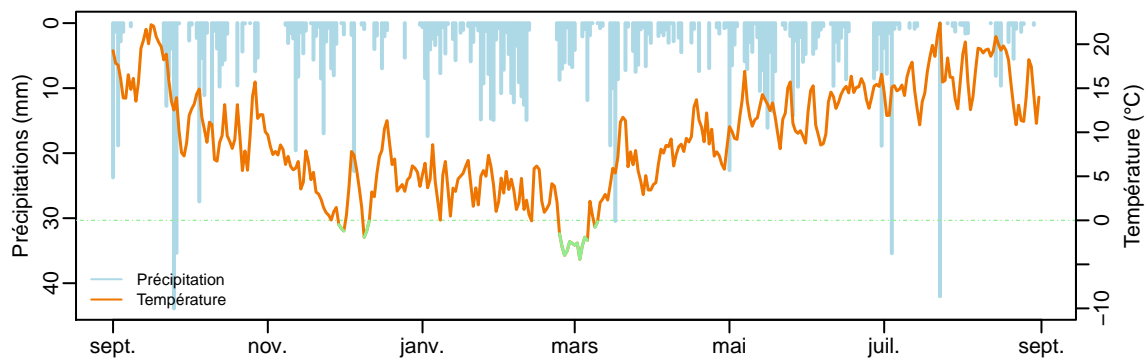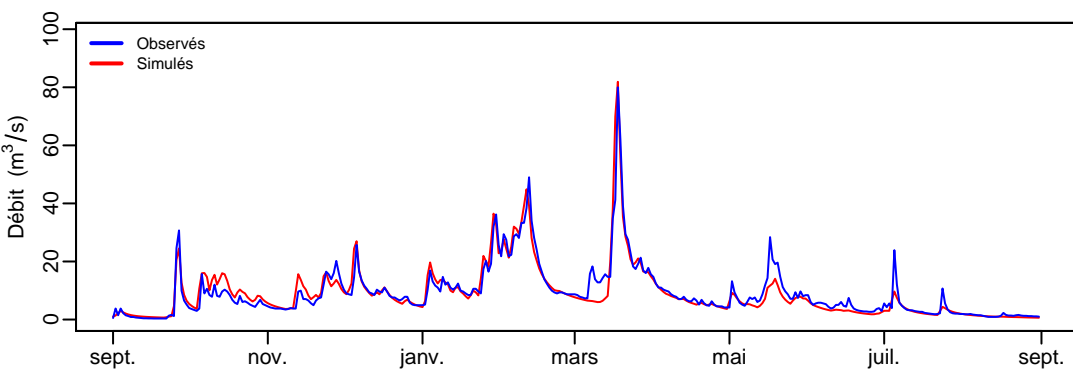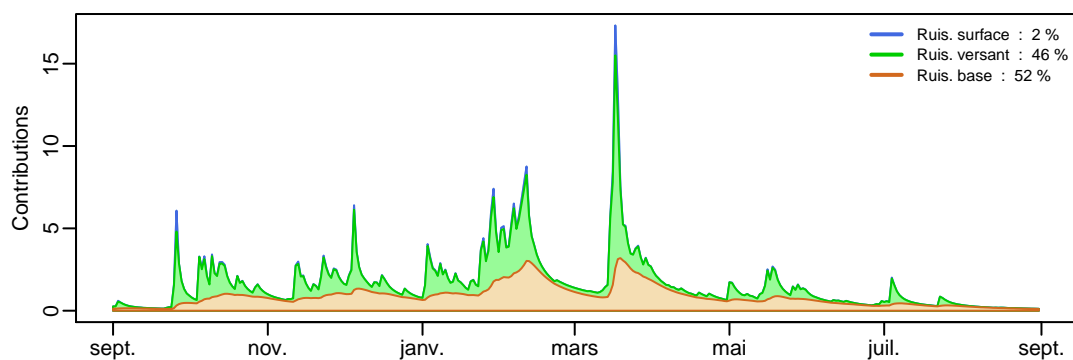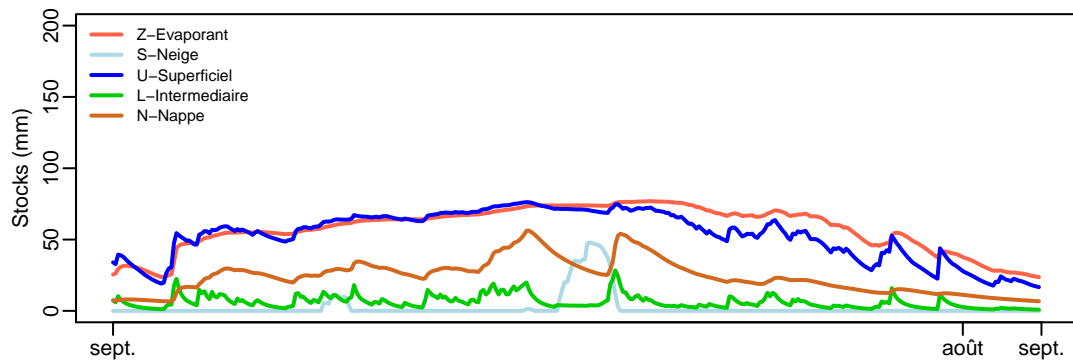

# k3273010 (469.78 km<sup>2</sup>) – année 1988–1989

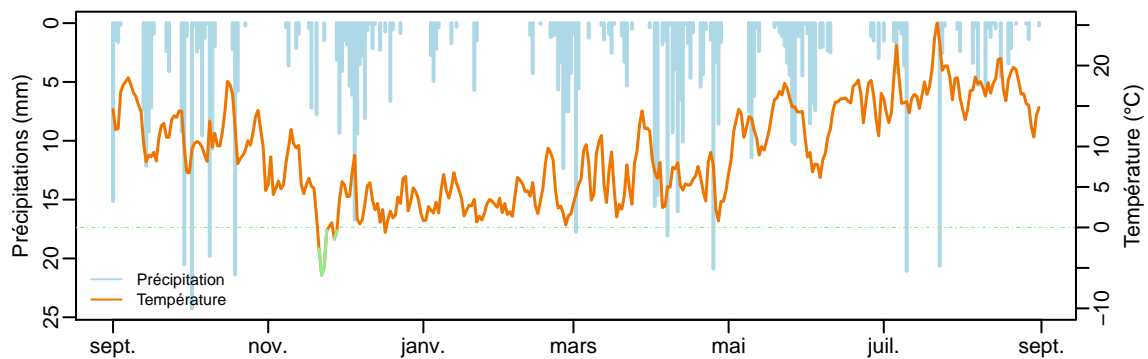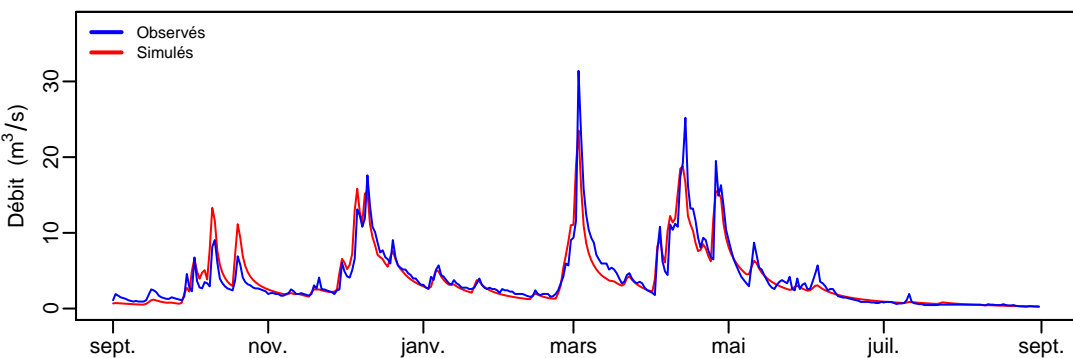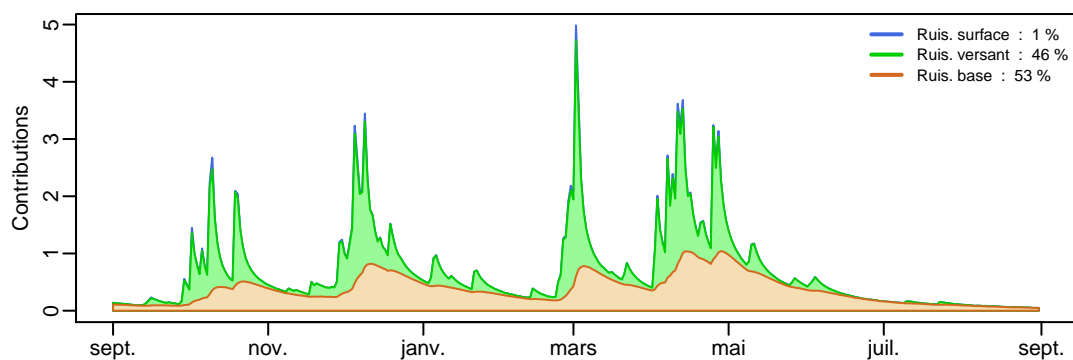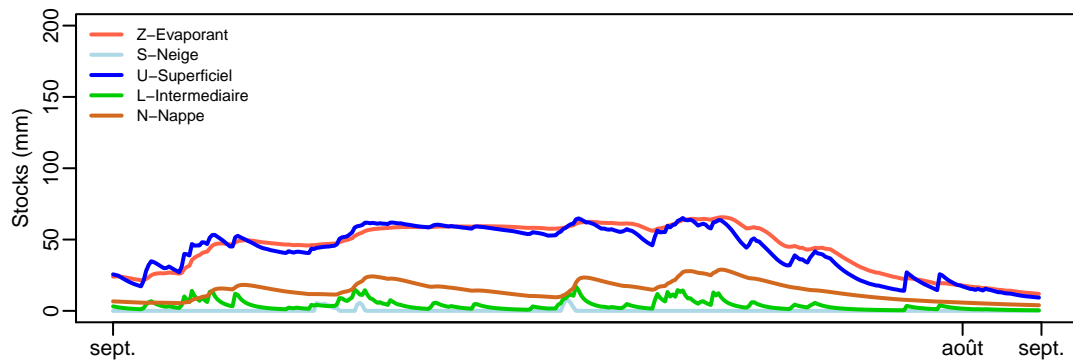

# k3273010 (469.78 km<sup>2</sup>) – année 1989–1990

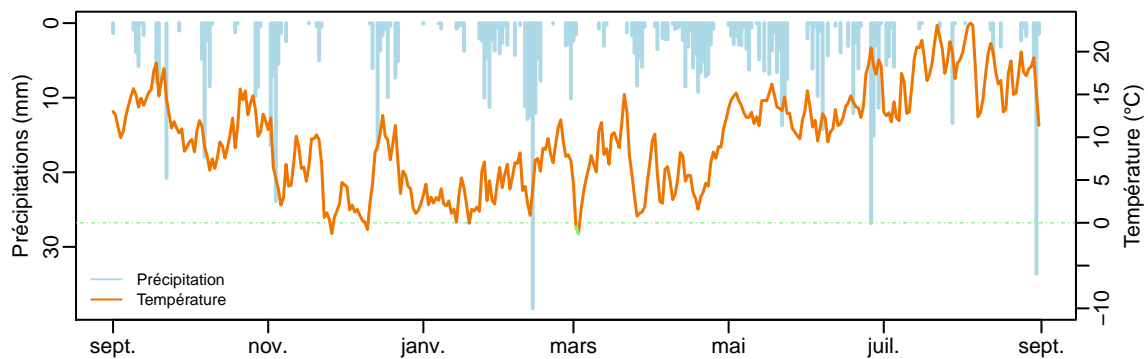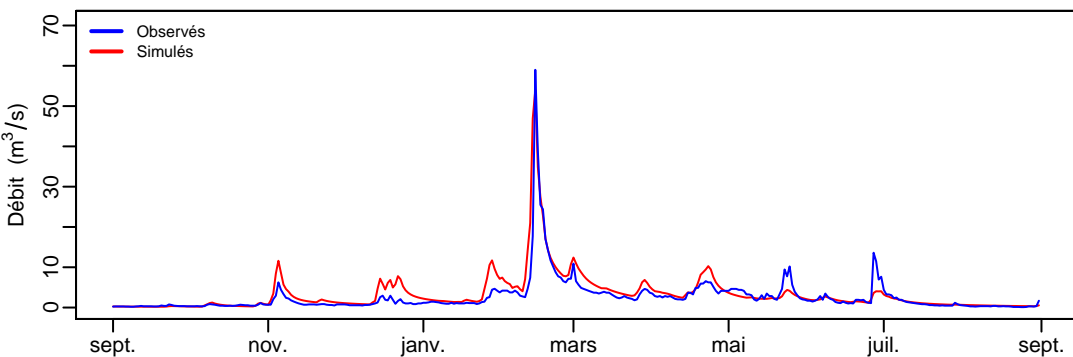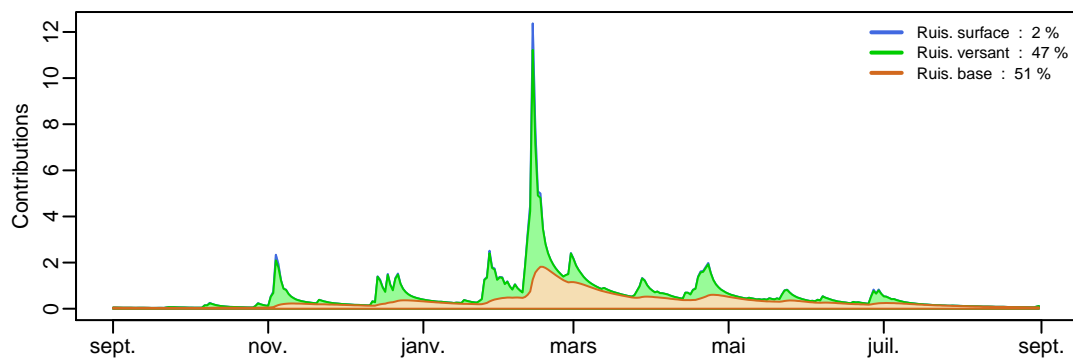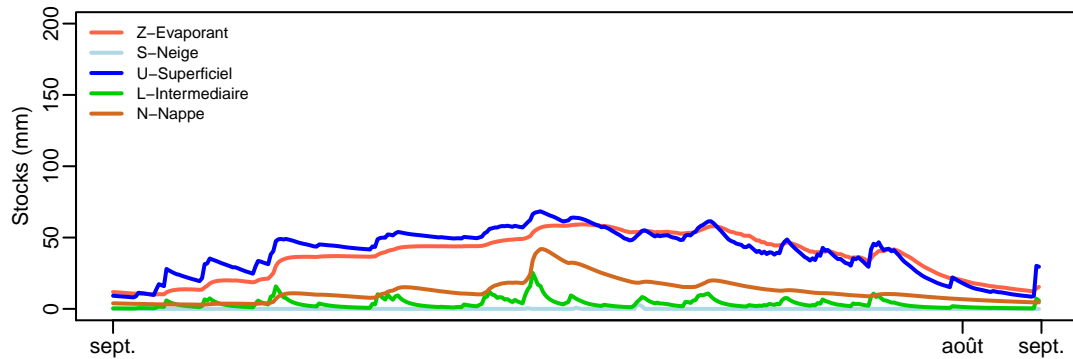

# k3273010 (469.78 km²) – année 1990–1991

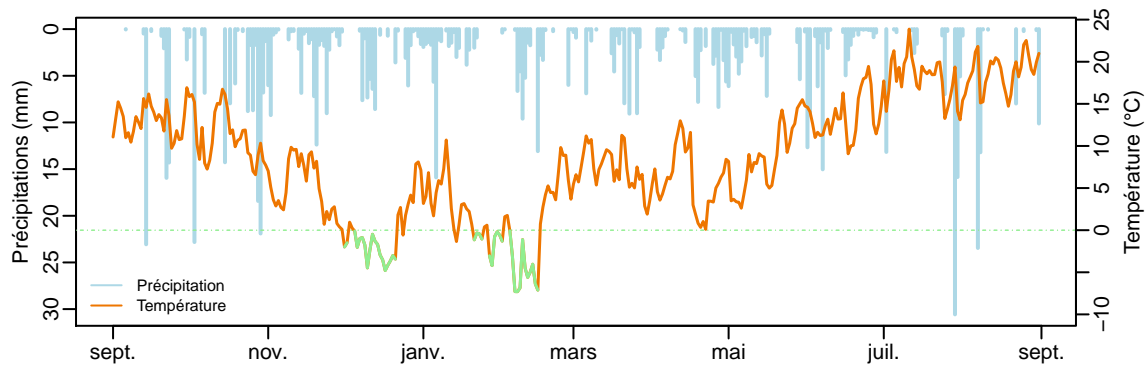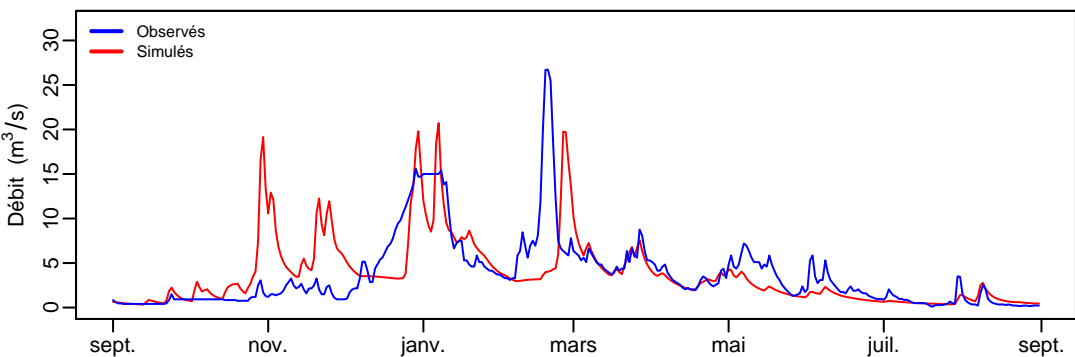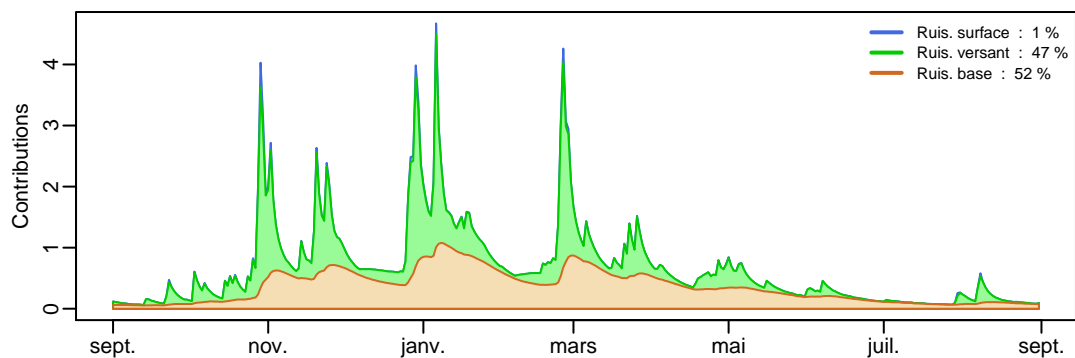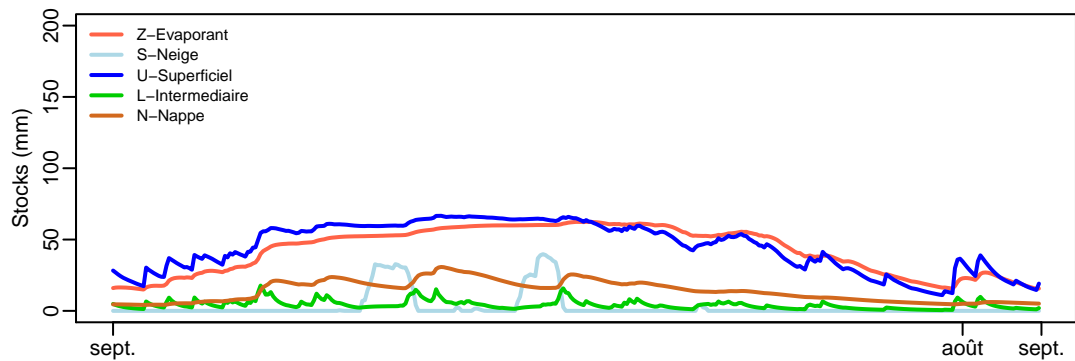

# k3273010 (469.78 km<sup>2</sup>) – année 1991–1992

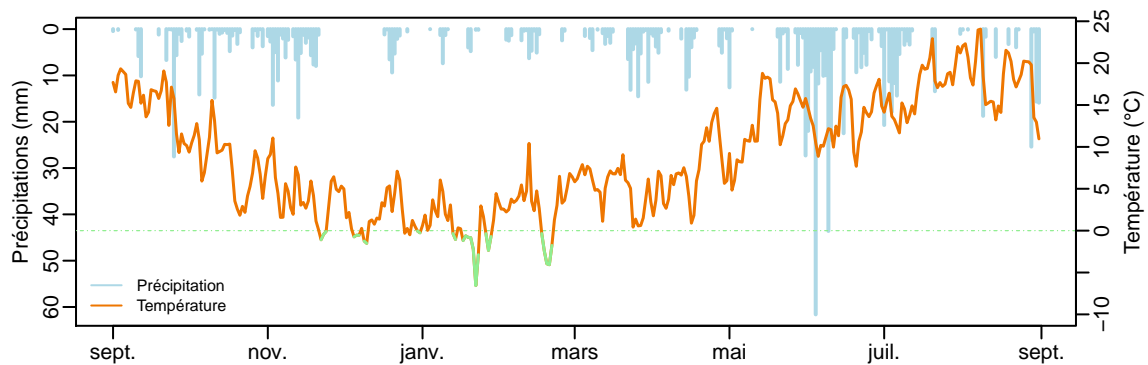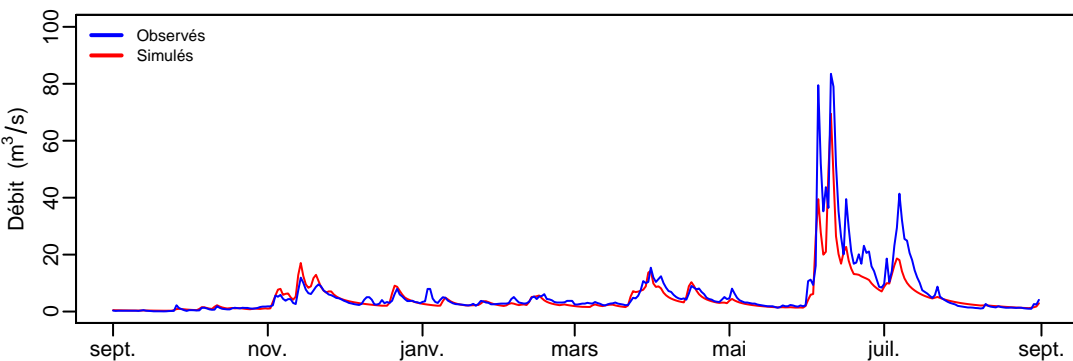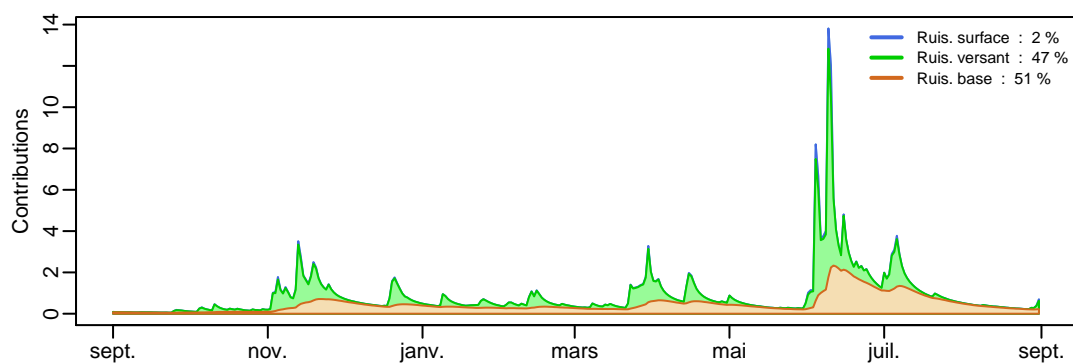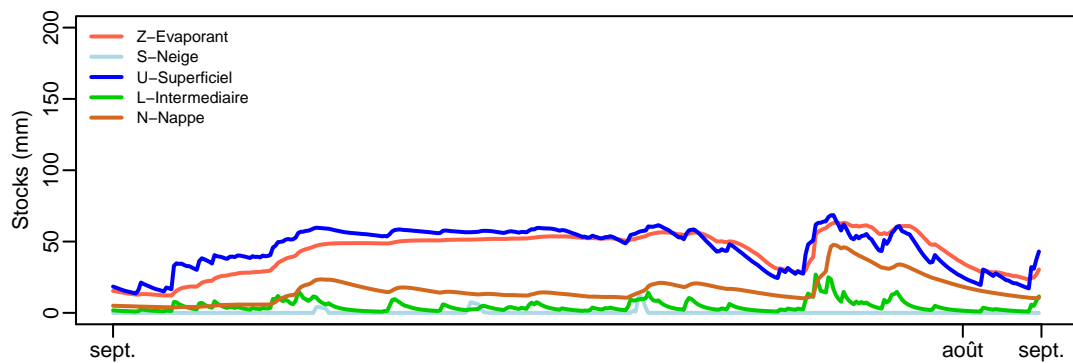

# k3273010 (469.78 km<sup>2</sup>) – année 1992–1993

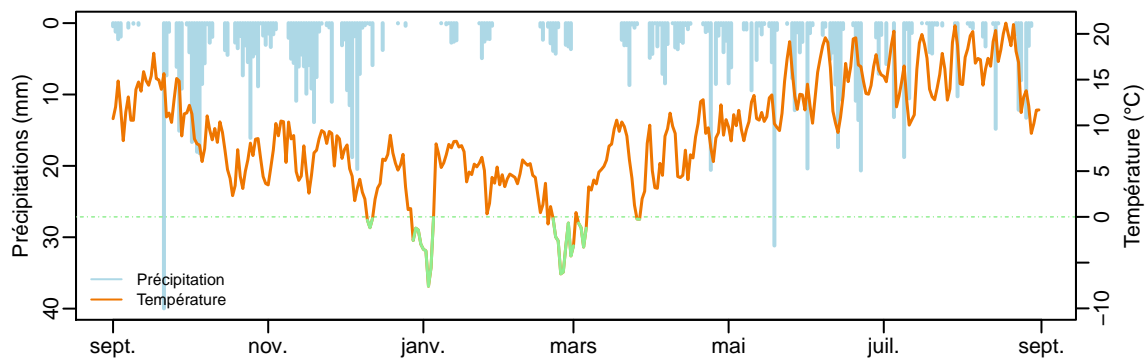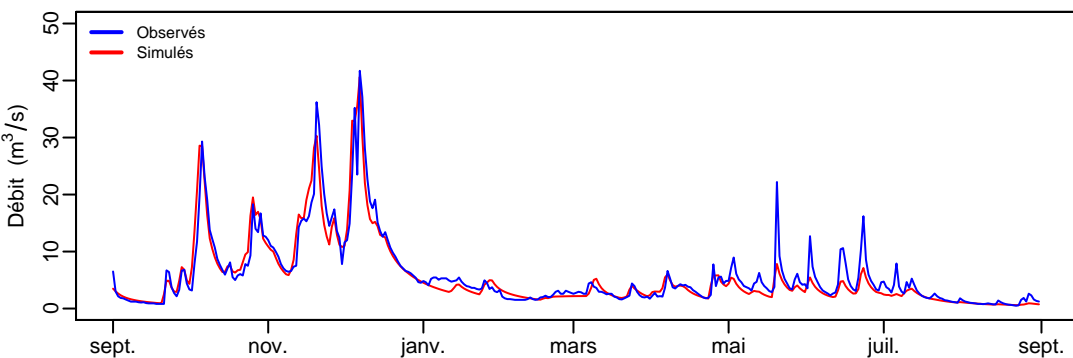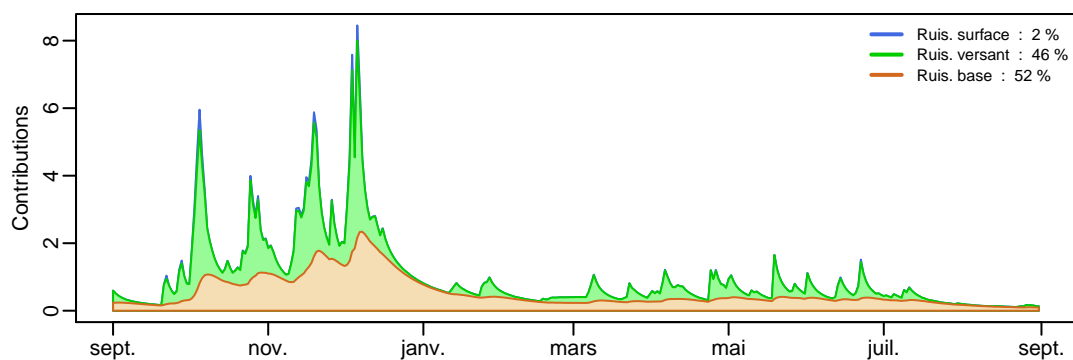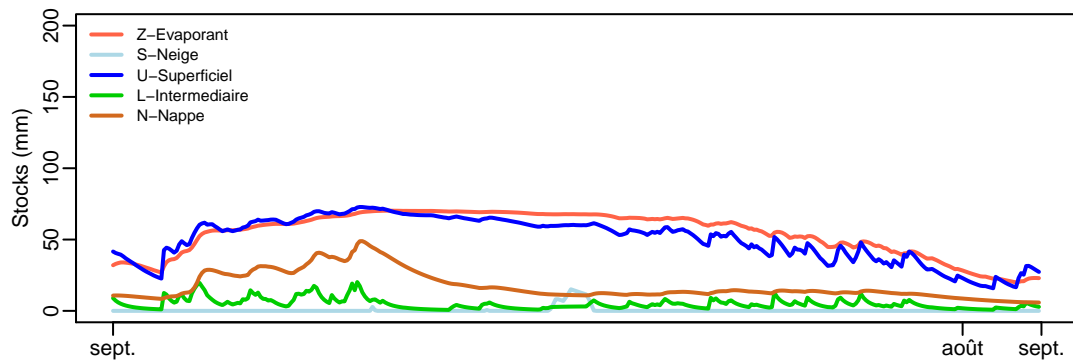

# k3273010 (469.78 km<sup>2</sup>) – année 1993–1994

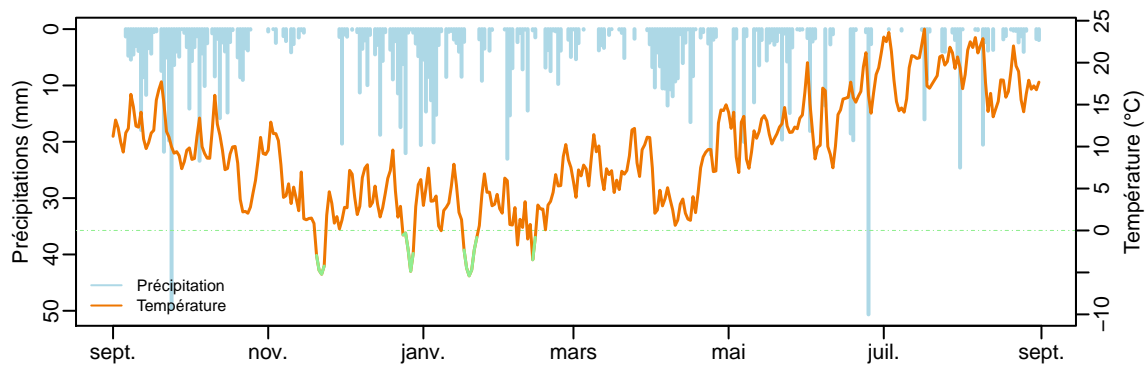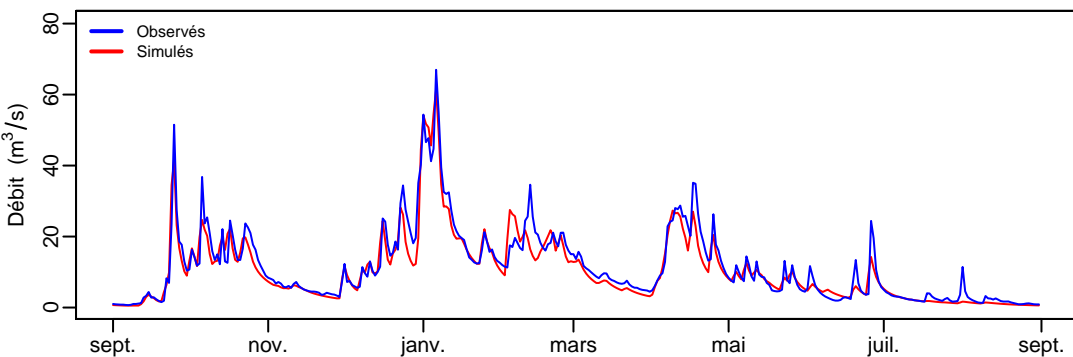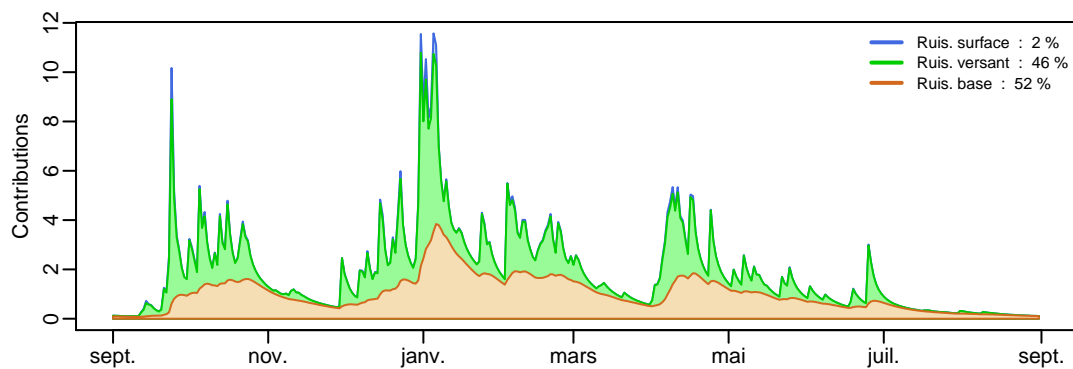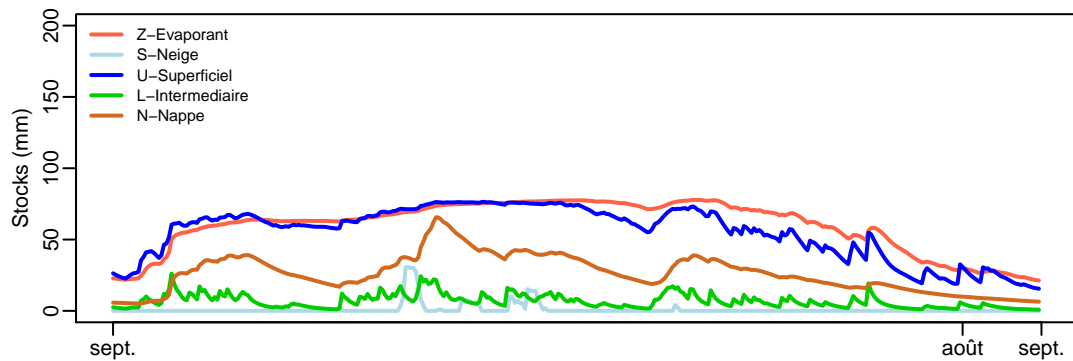

# k3273010 (469.78 km<sup>2</sup>) – année 1994–1995

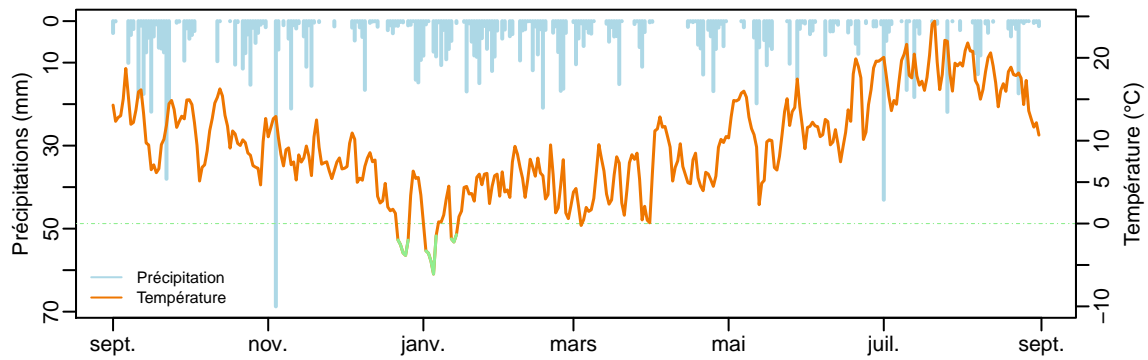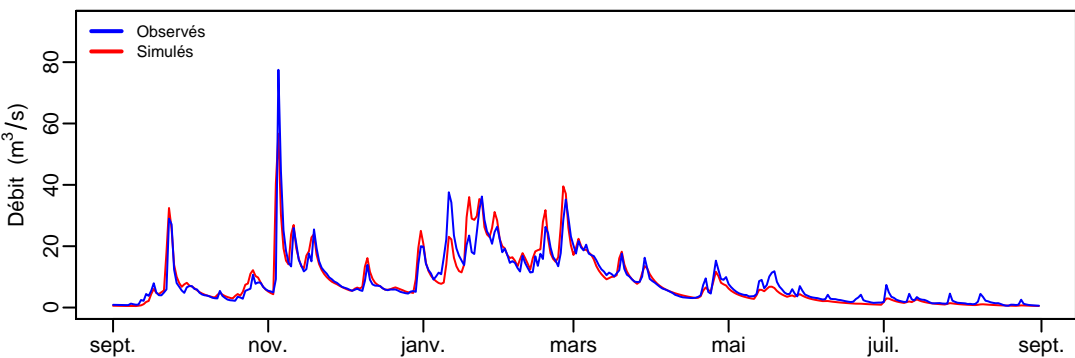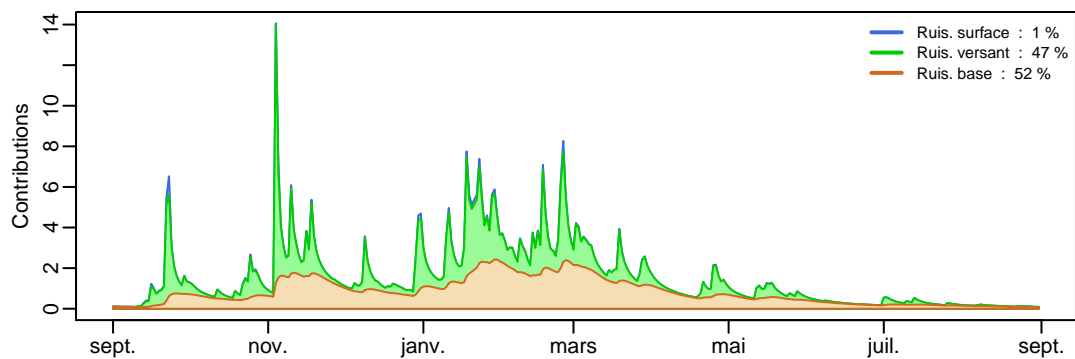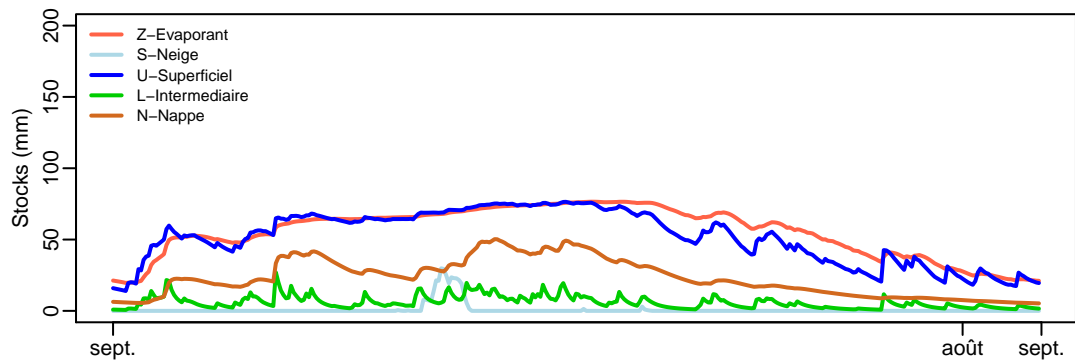



# k3273010 (469.78 km²) – année 1995–1996

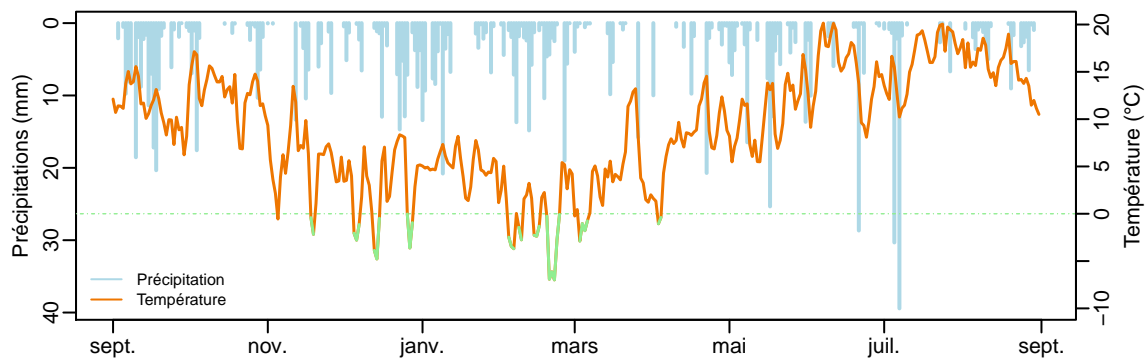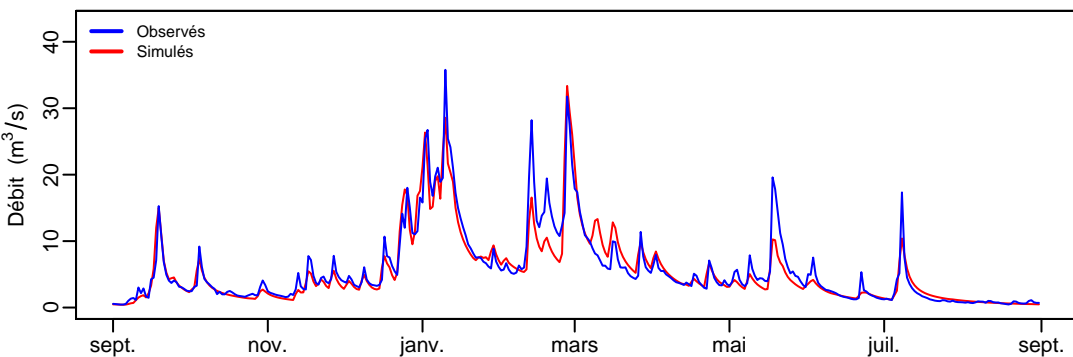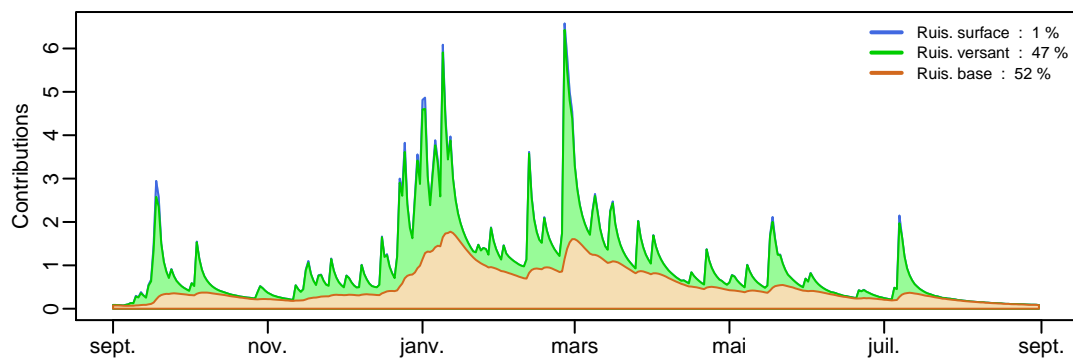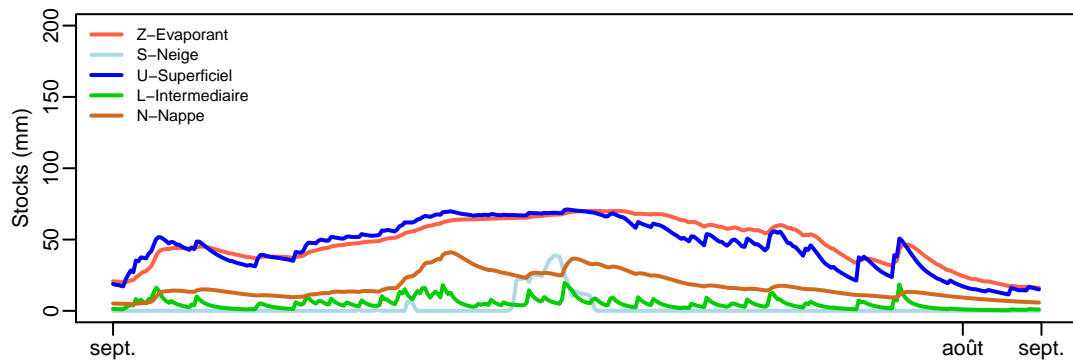

# k3273010 (469.78 km<sup>2</sup>) – année 1996–1997

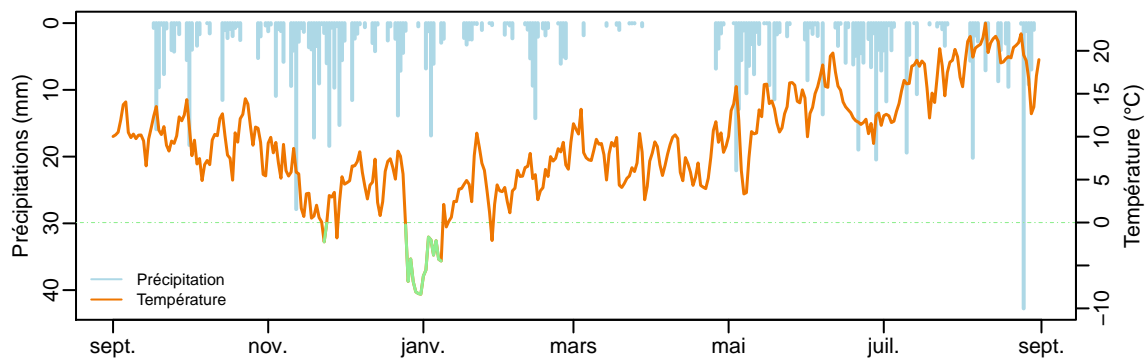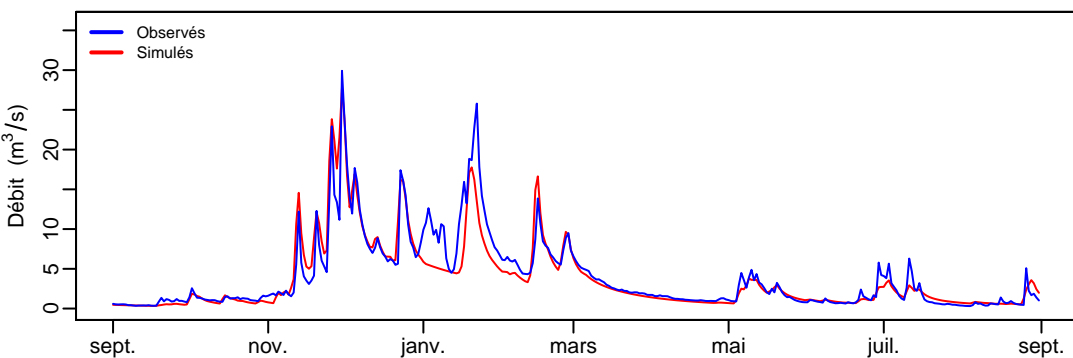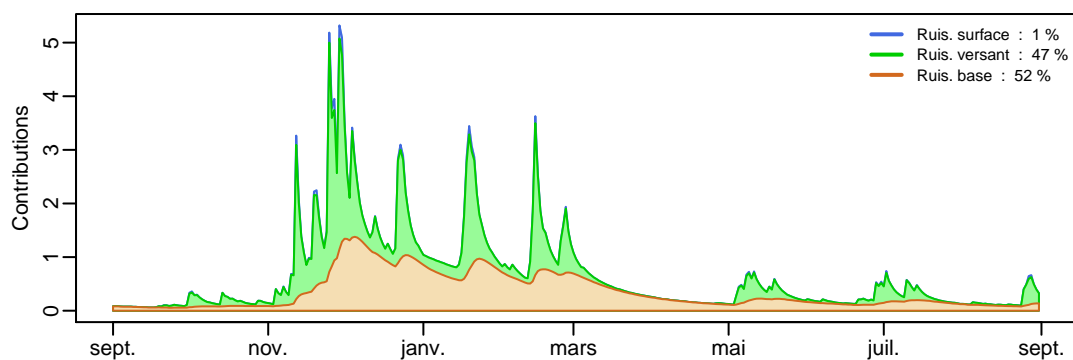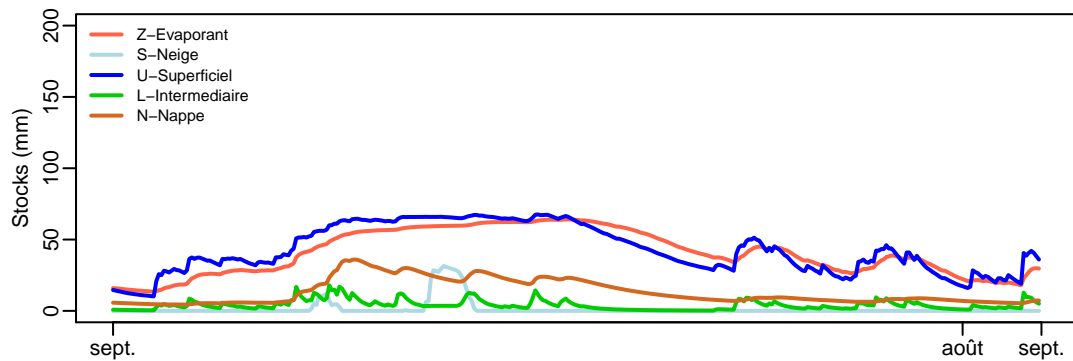

# k3273010 (469.78 km<sup>2</sup>) – année 1997–1998

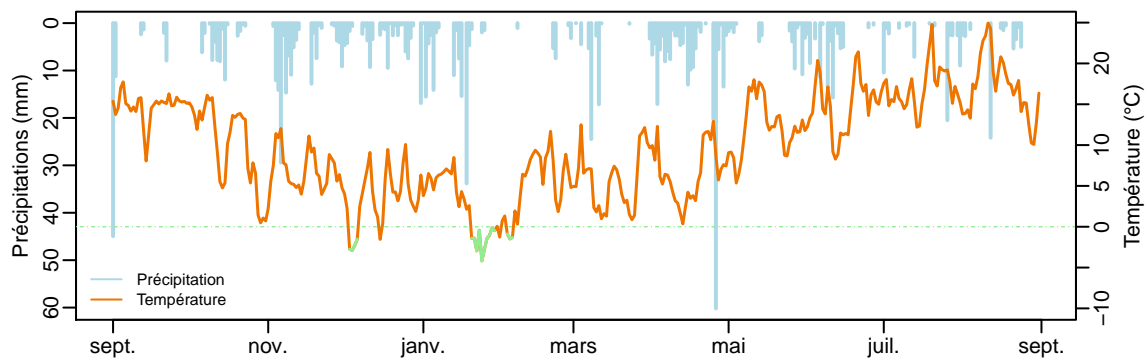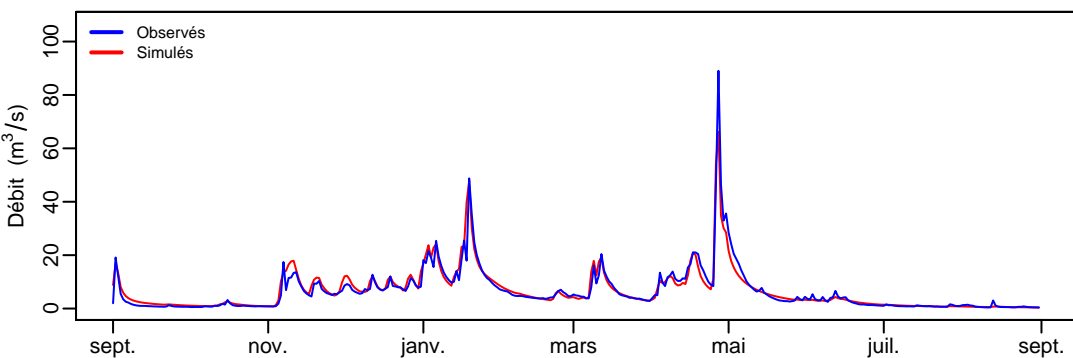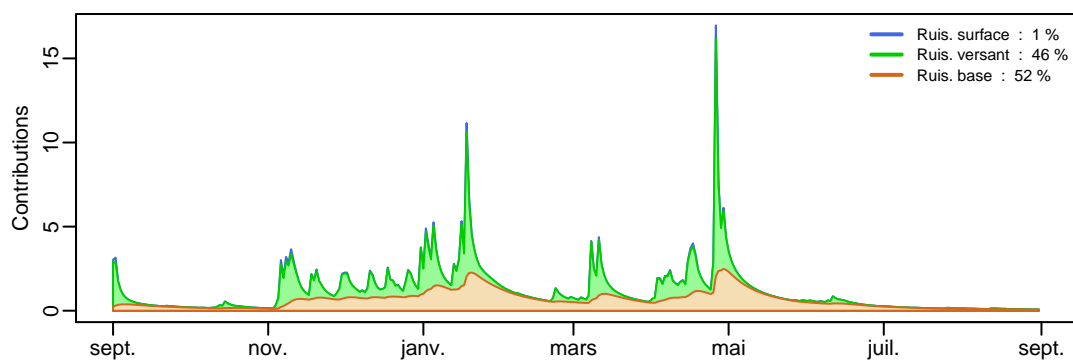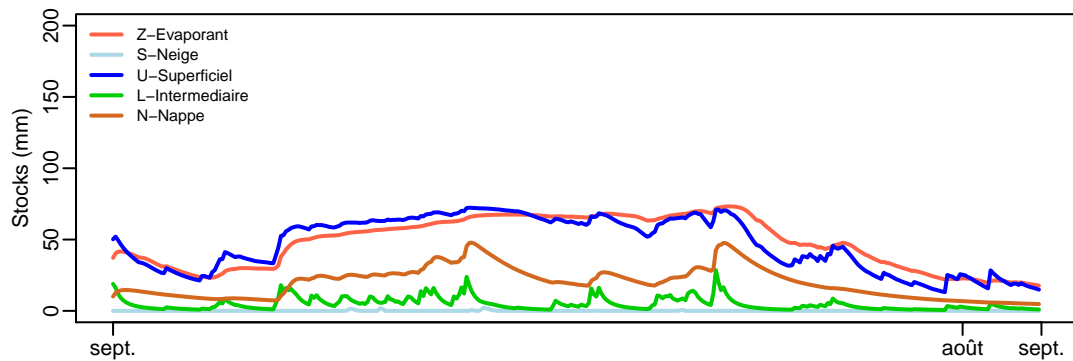

# k3273010 (469.78 km²) – année 1998–1999

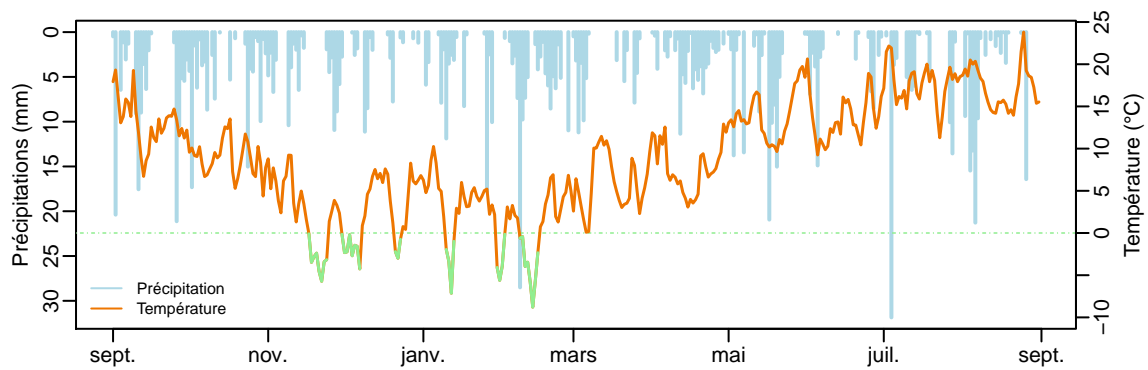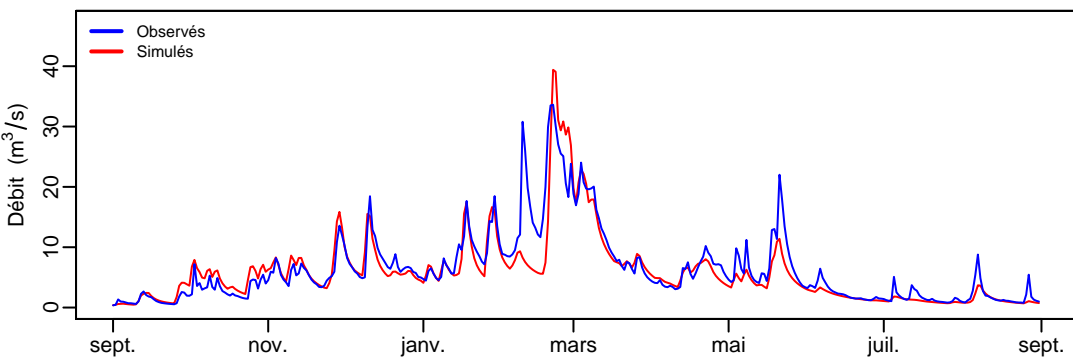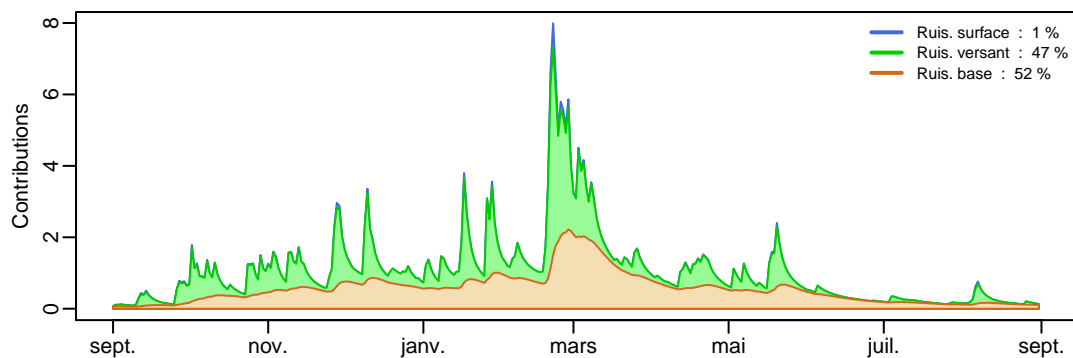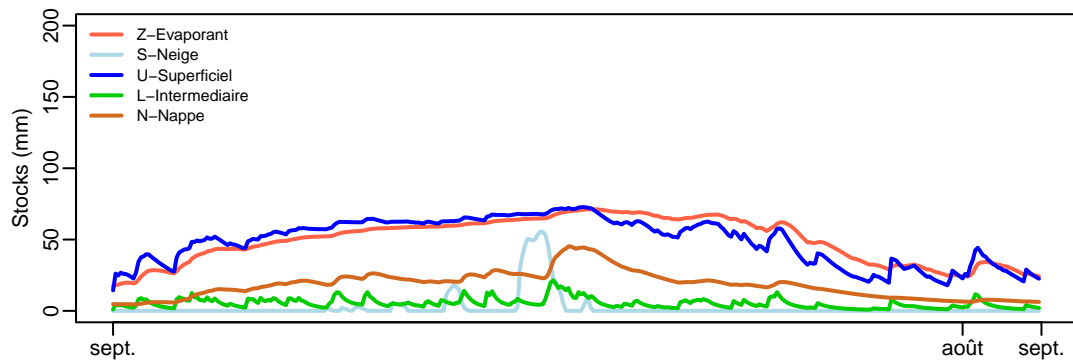

# k3273010 (469.78 km<sup>2</sup>) – année 1999–2000

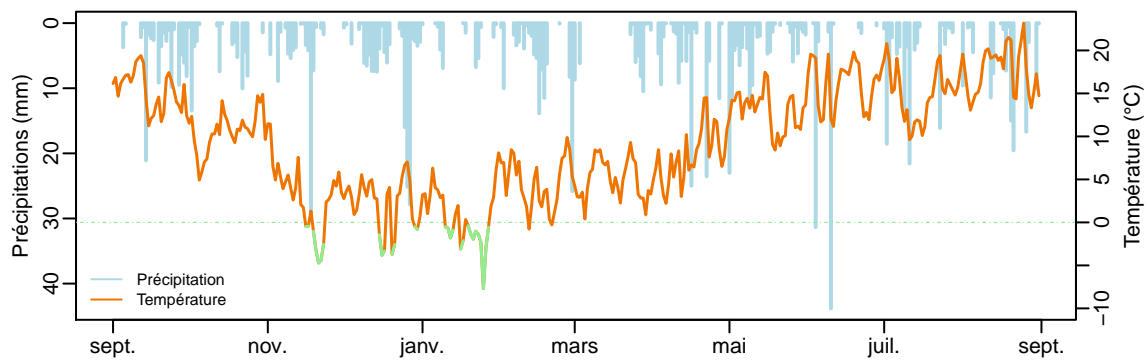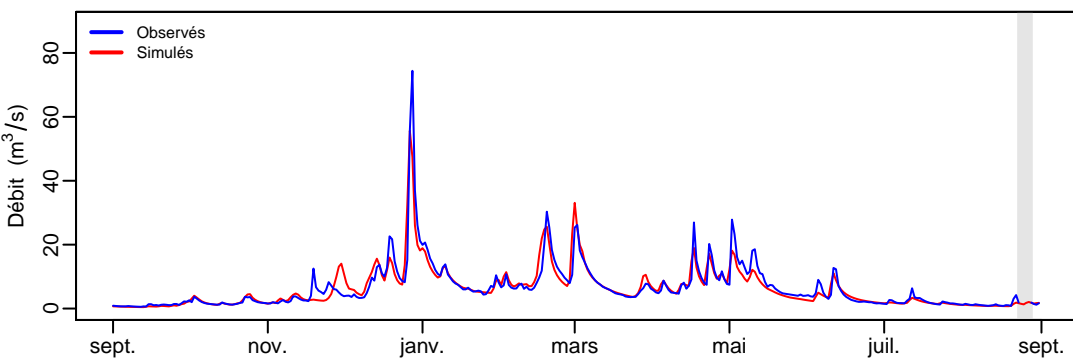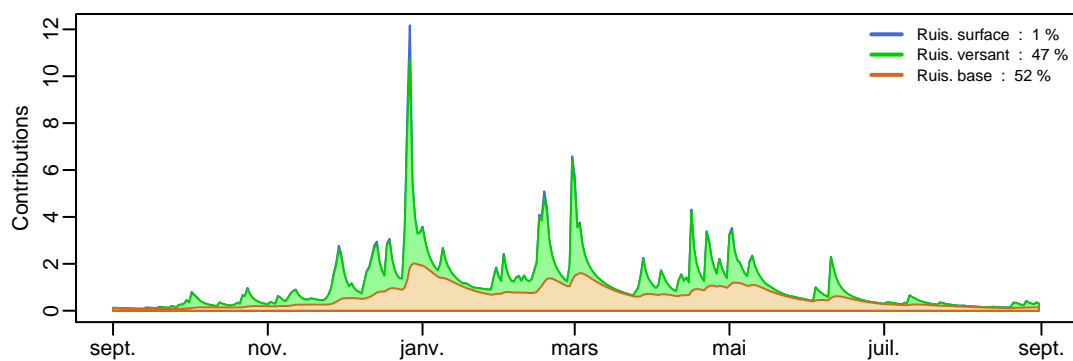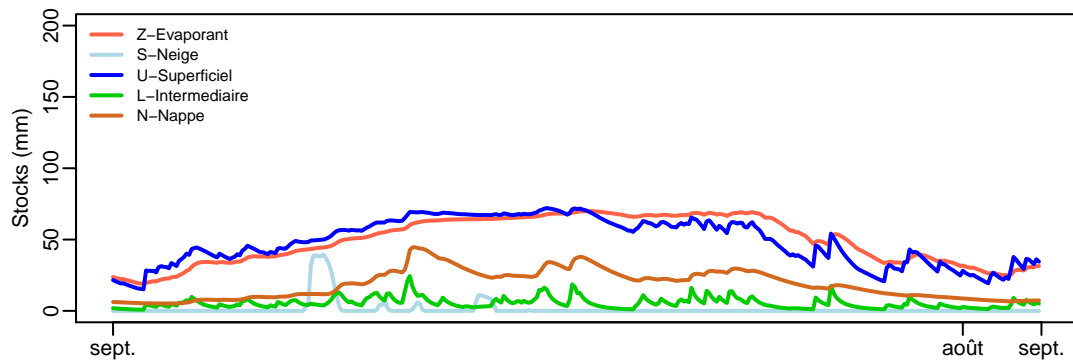

# k3273010 (469.78 km<sup>2</sup>) – année 2000–2001

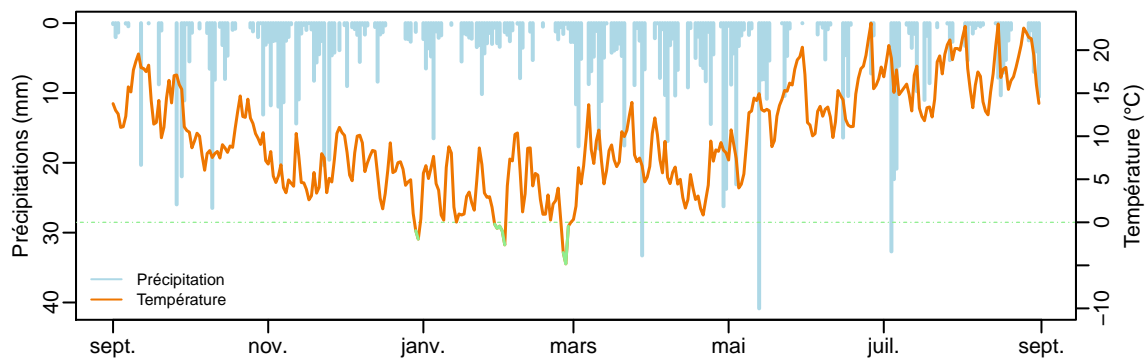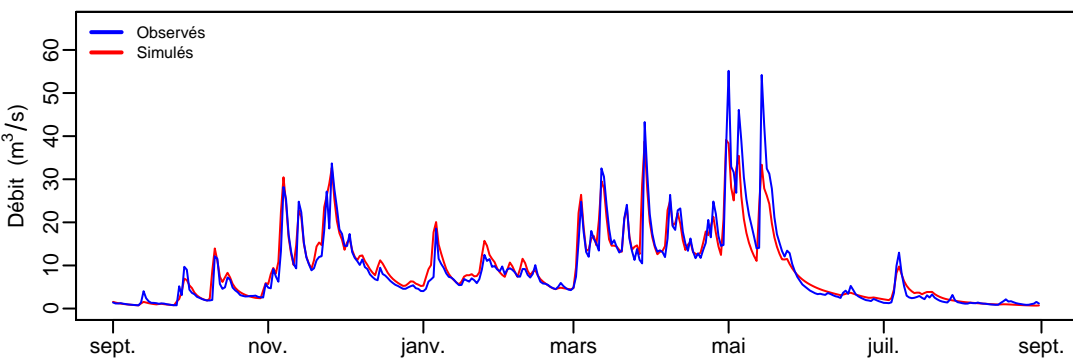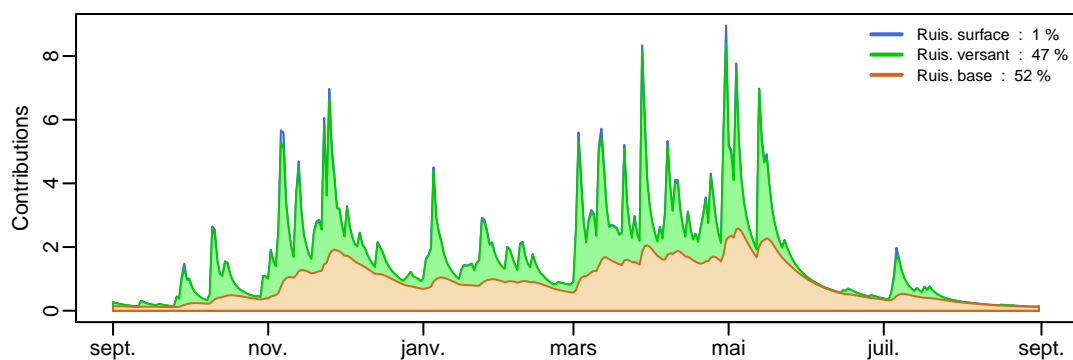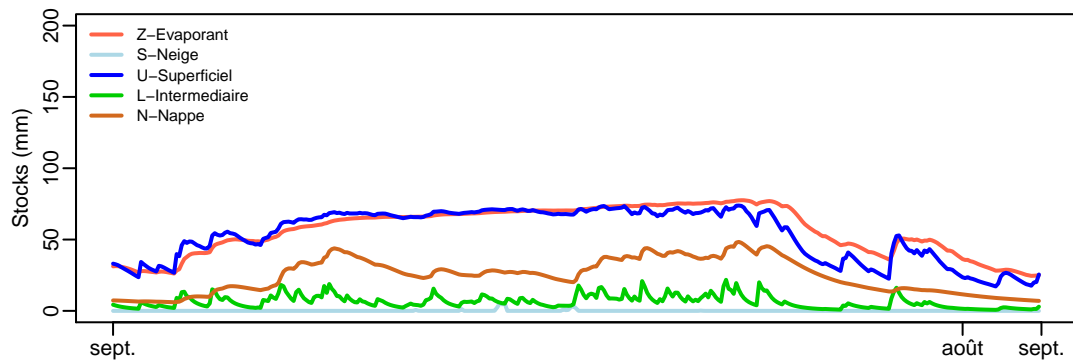

# k3273010 (469.78 km²) – année 2001–2002

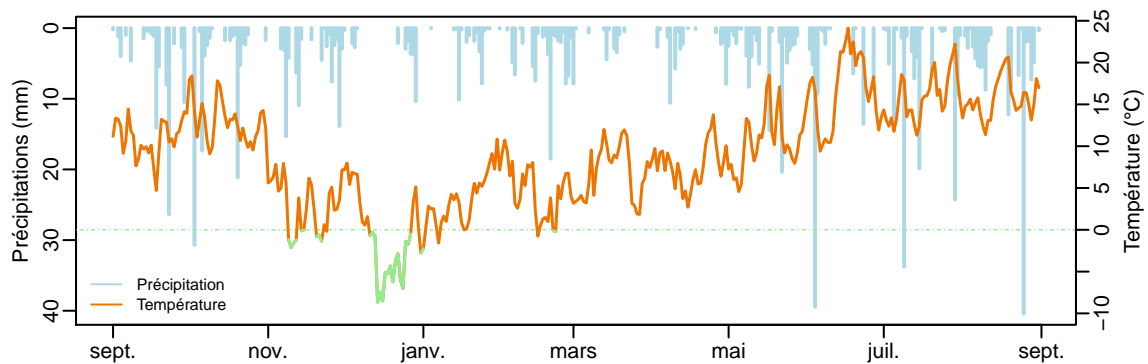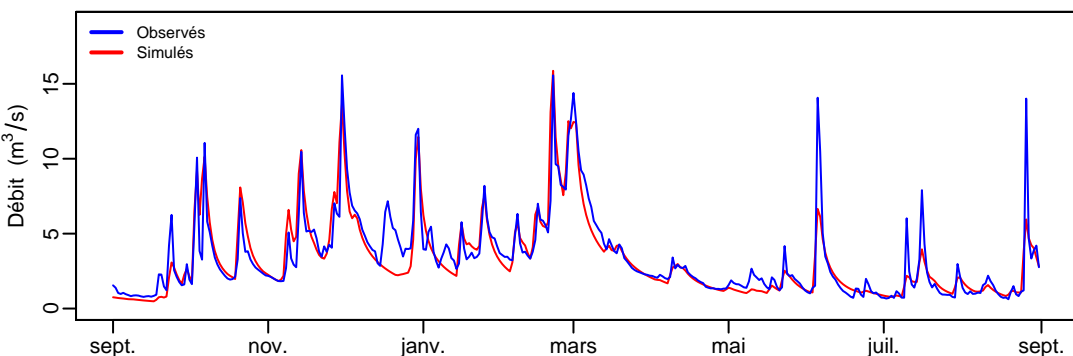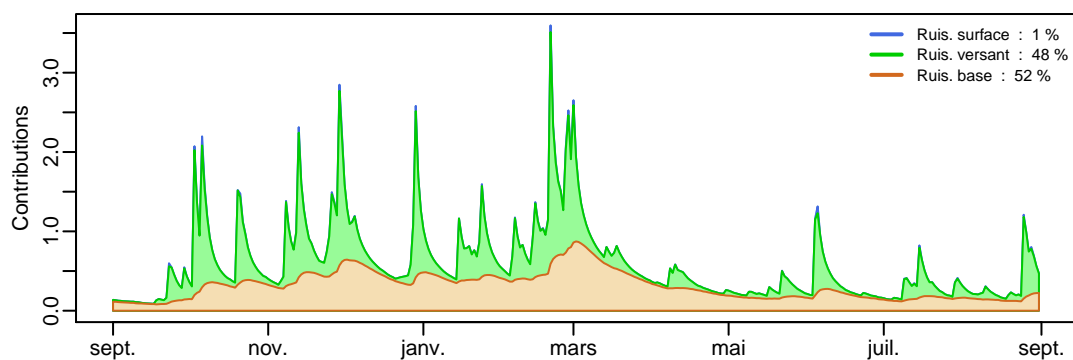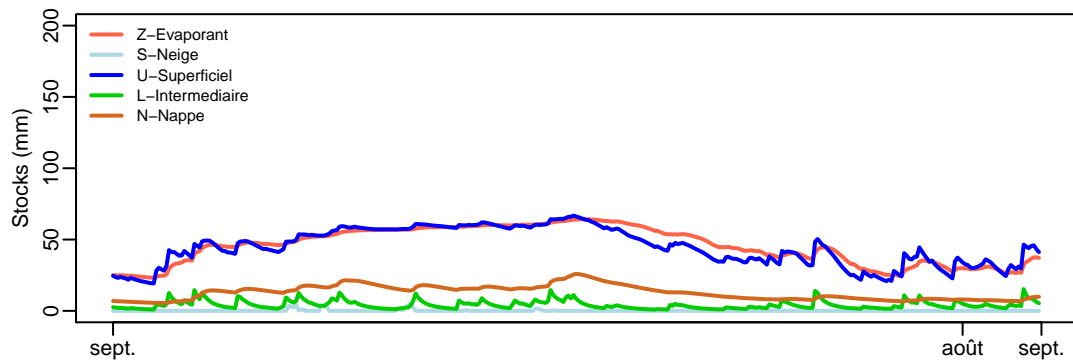

# k3273010 (469.78 km<sup>2</sup>) – année 2002–2003

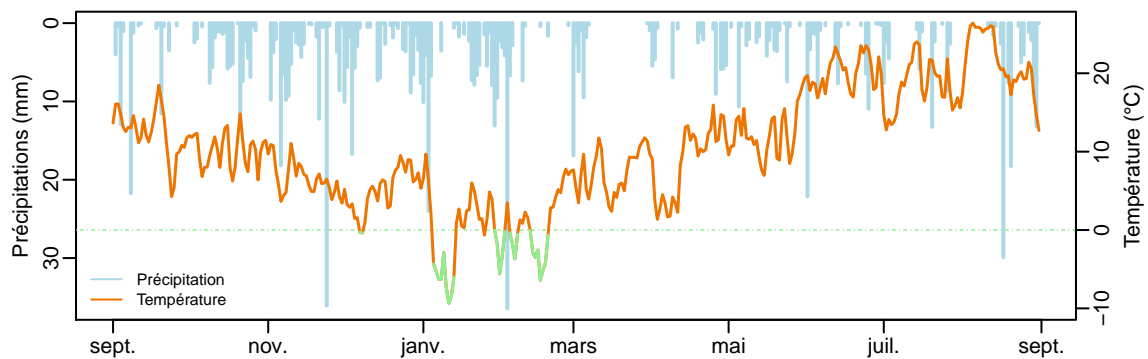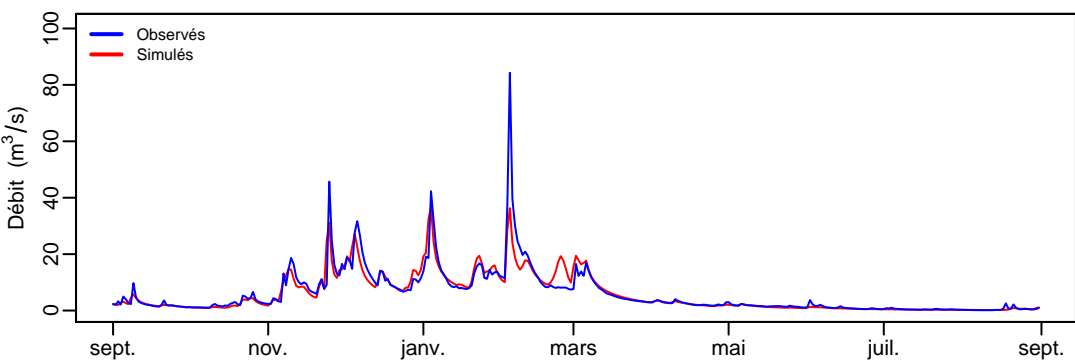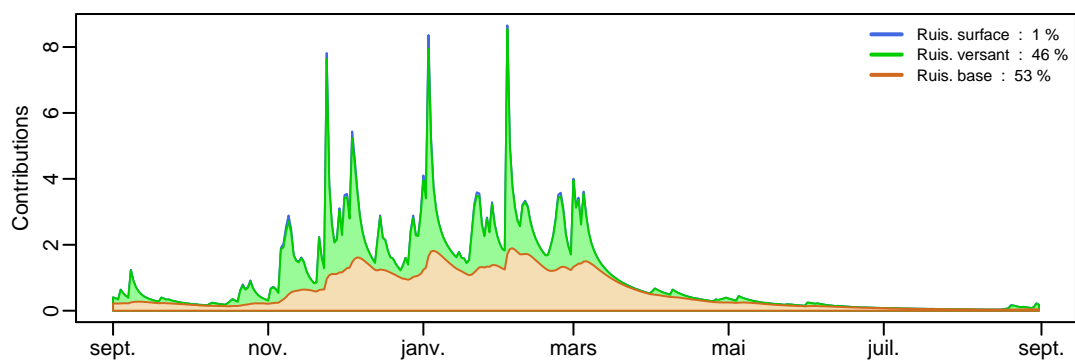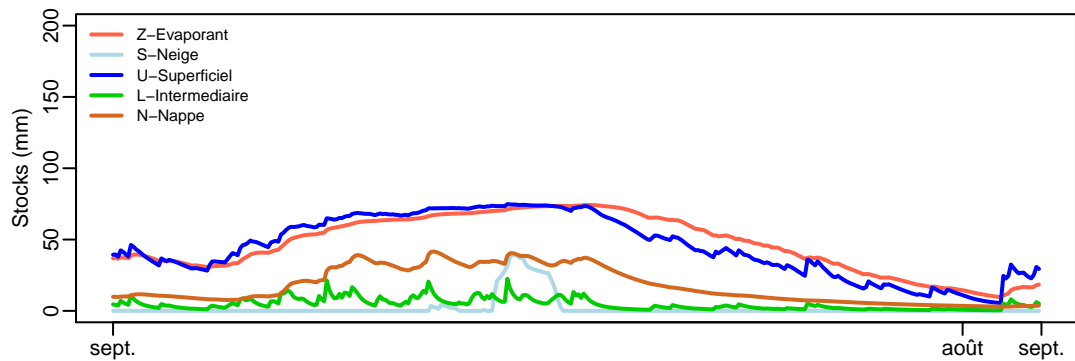



# k3273010 (469.78 km<sup>2</sup>) – année 2003–2004

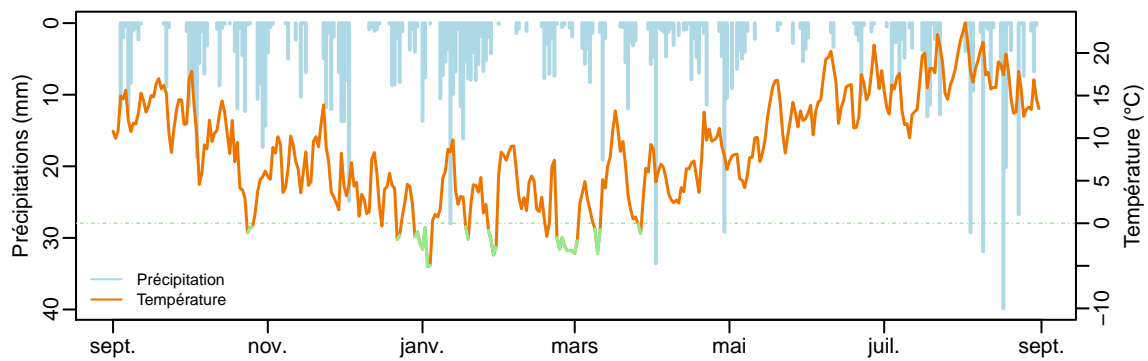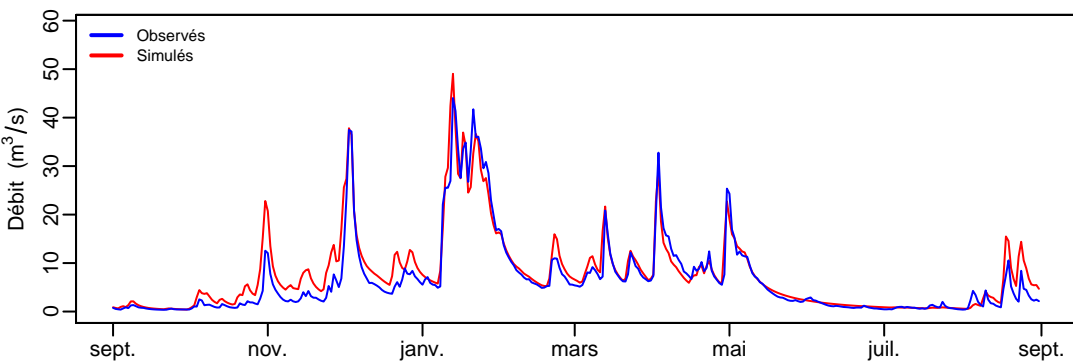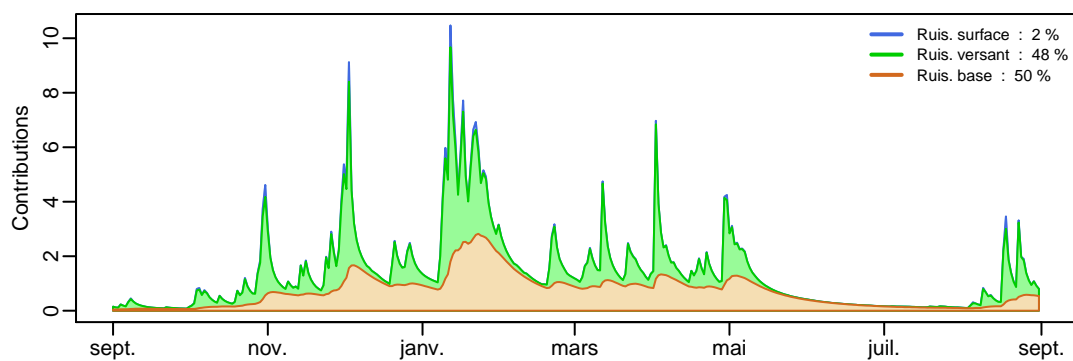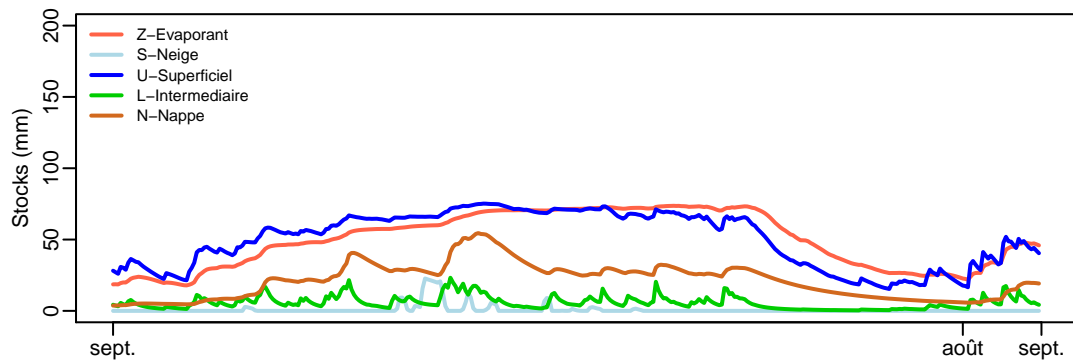

# k3273010 (469.78 km<sup>2</sup>) – année 2004–2005

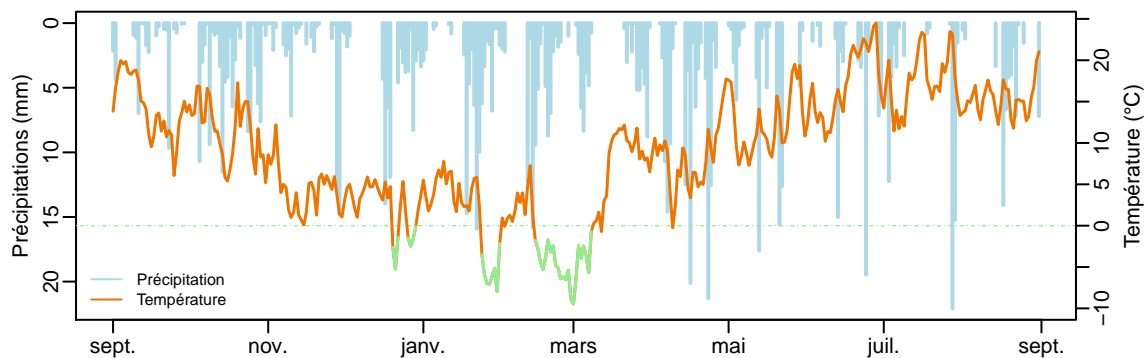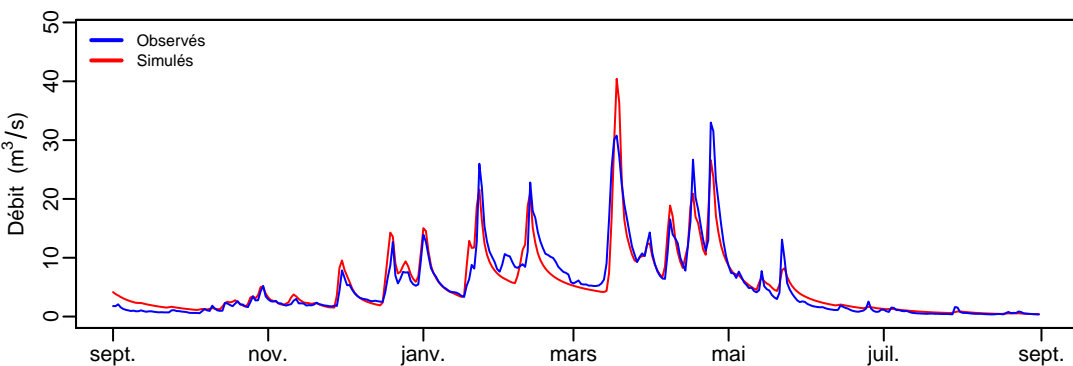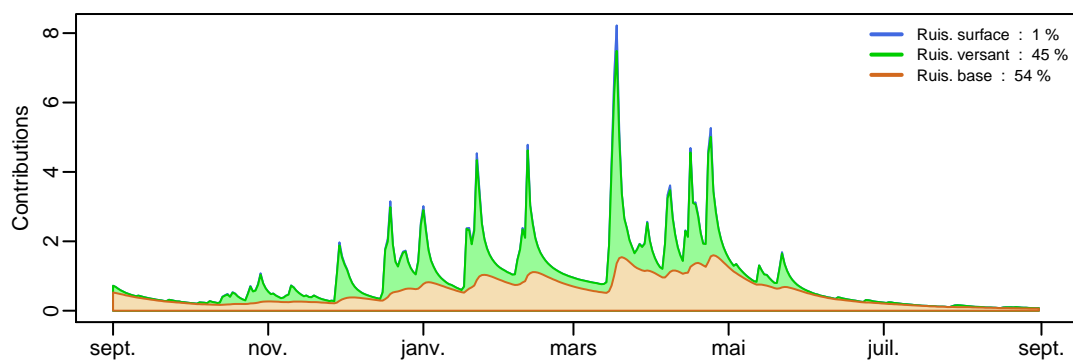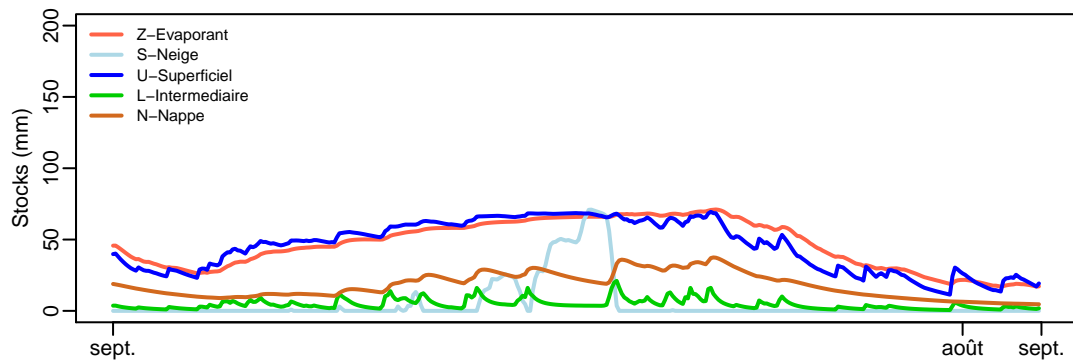

# k3273010 (469.78 km<sup>2</sup>) – année 2005–2006

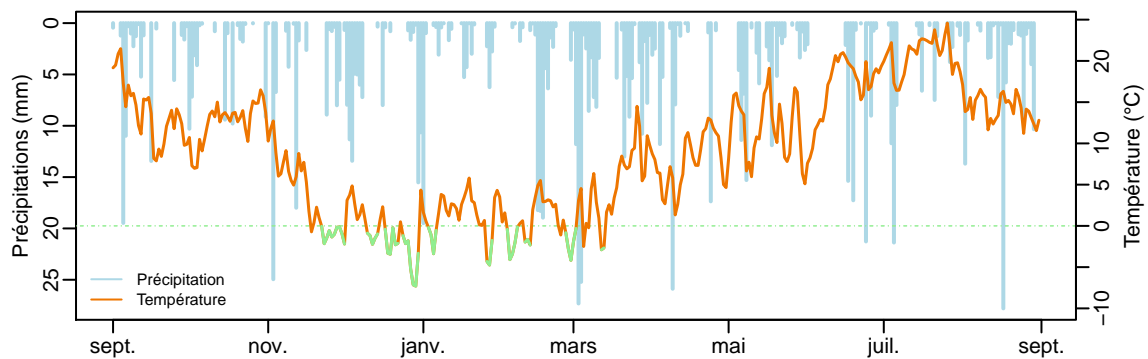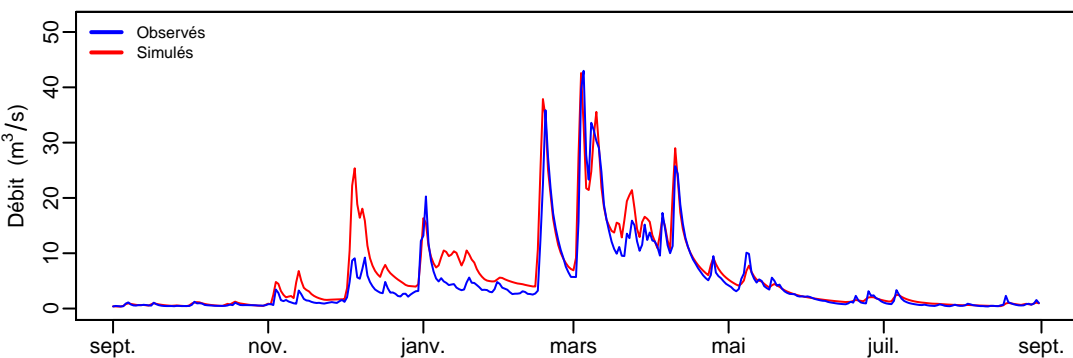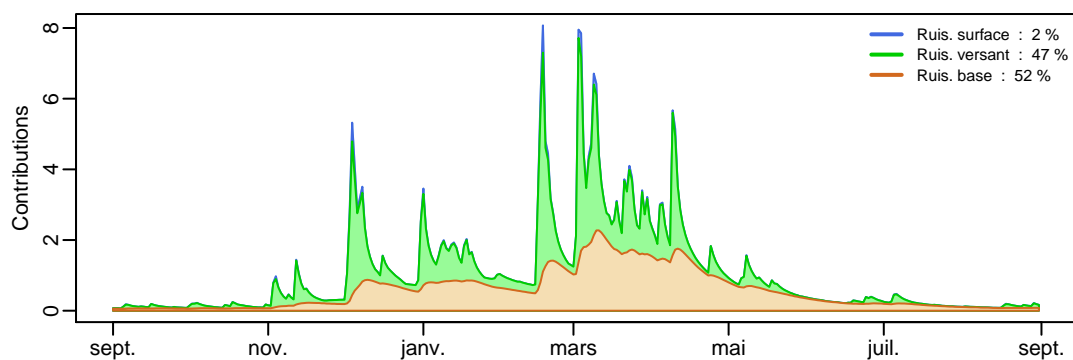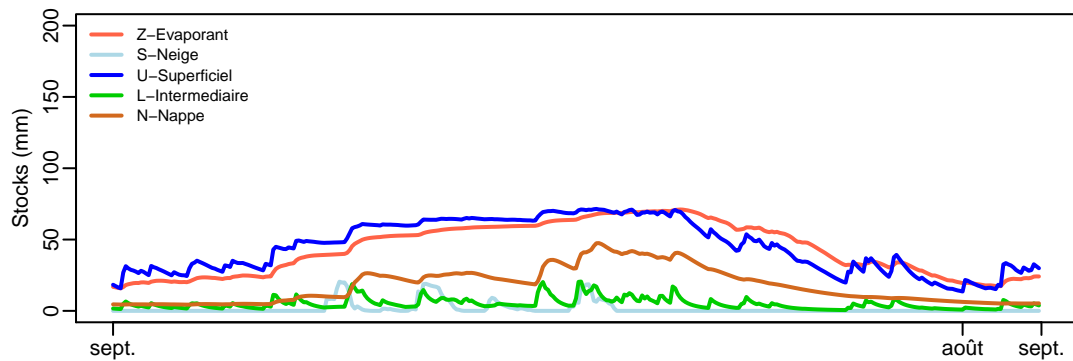

# k3273010 (469.78 km<sup>2</sup>) – année 2006–2007

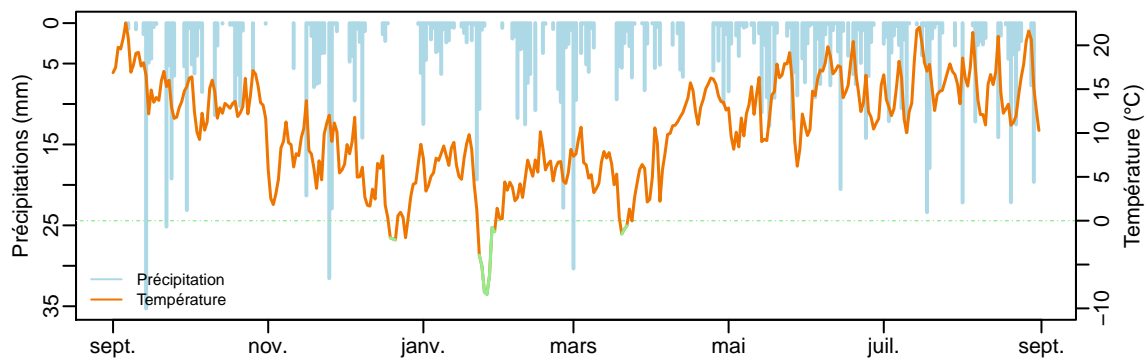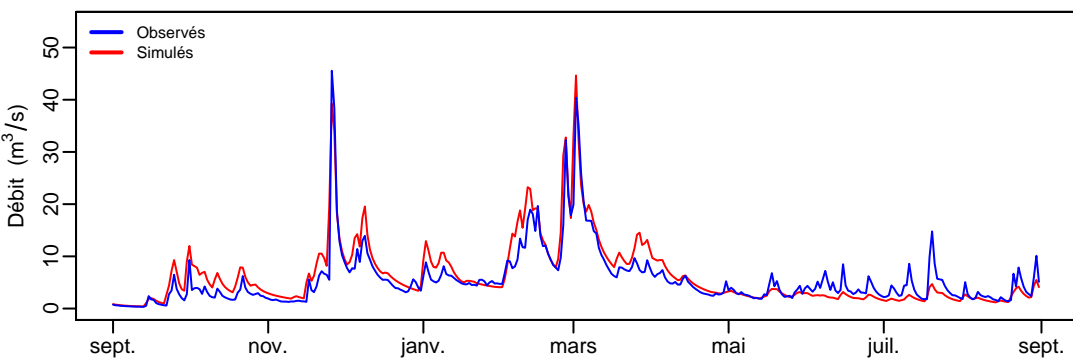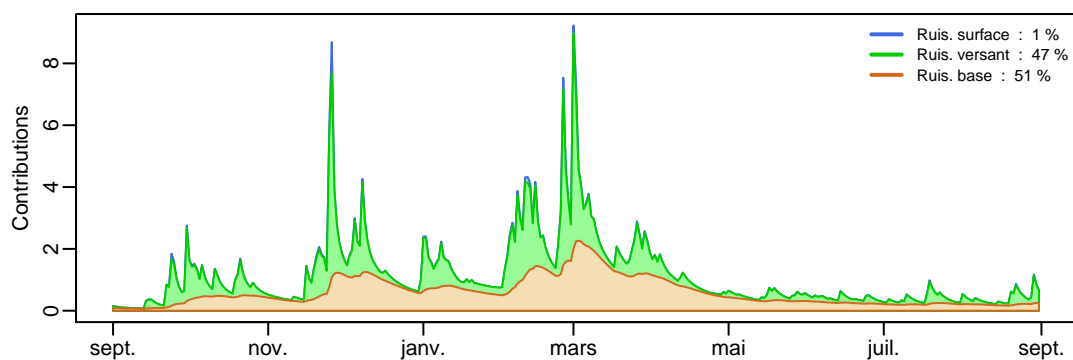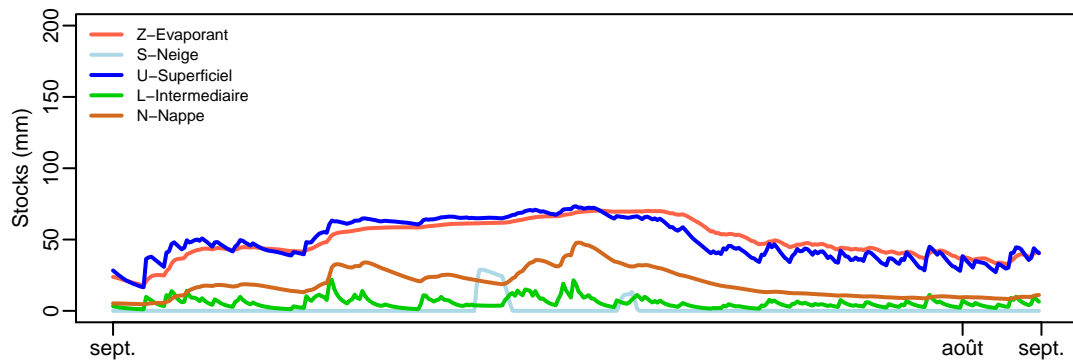

# k3273010 (469.78 km<sup>2</sup>) – année 2007–2008

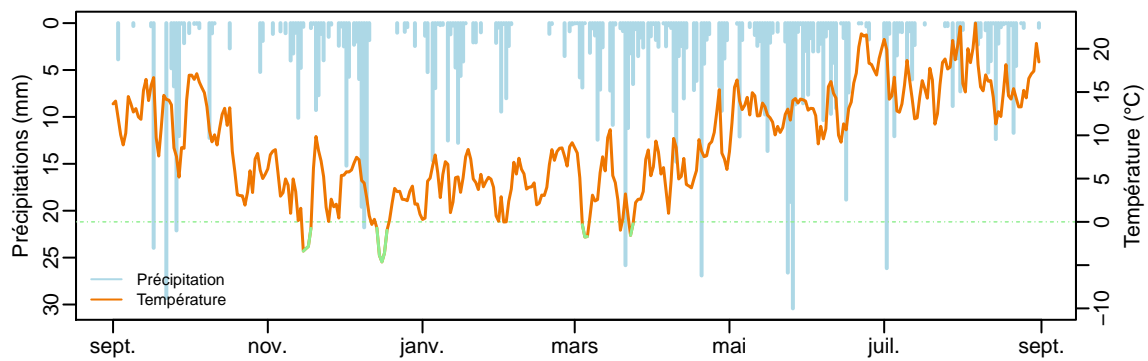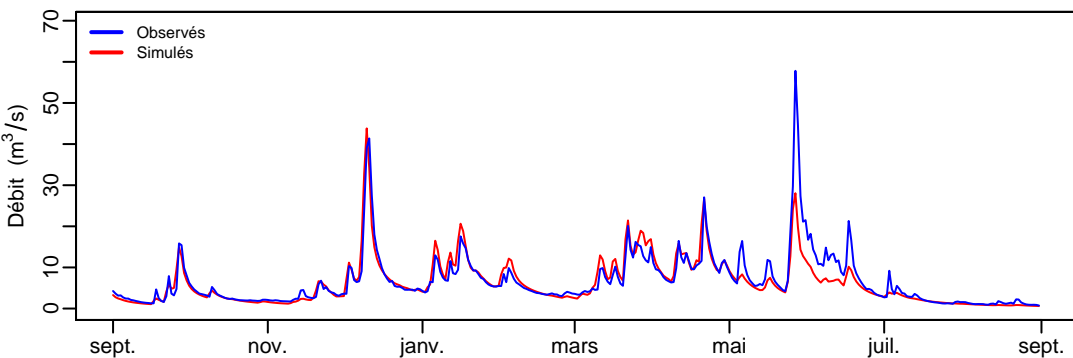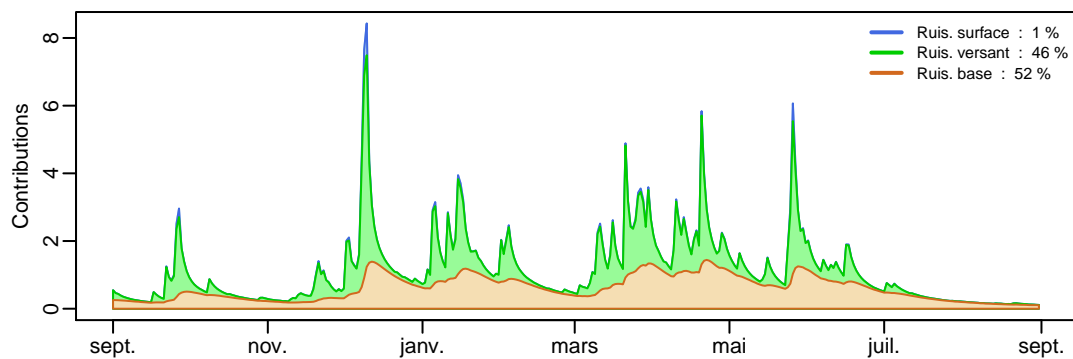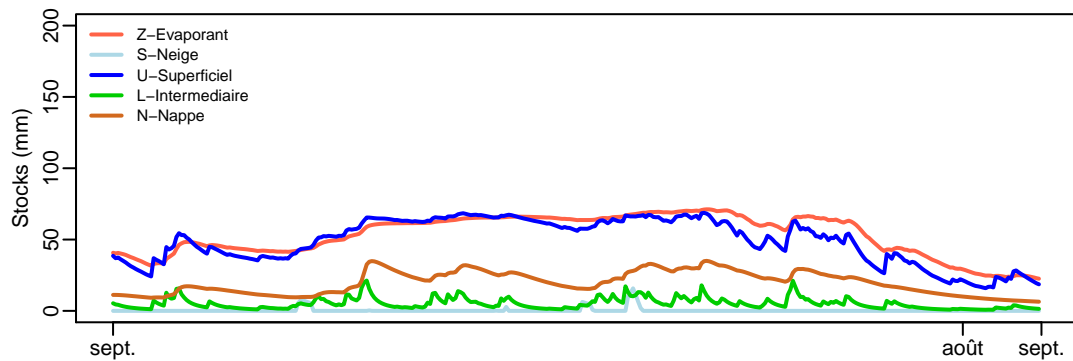

# k3273010 (469.78 km<sup>2</sup>) – année 2008–2009

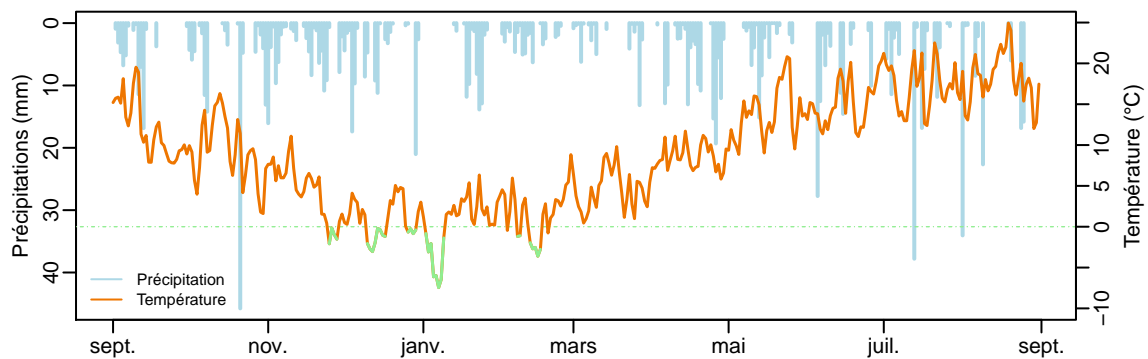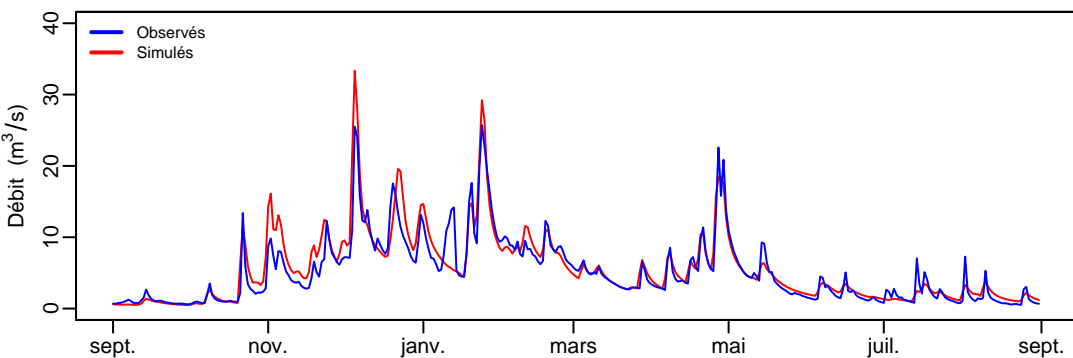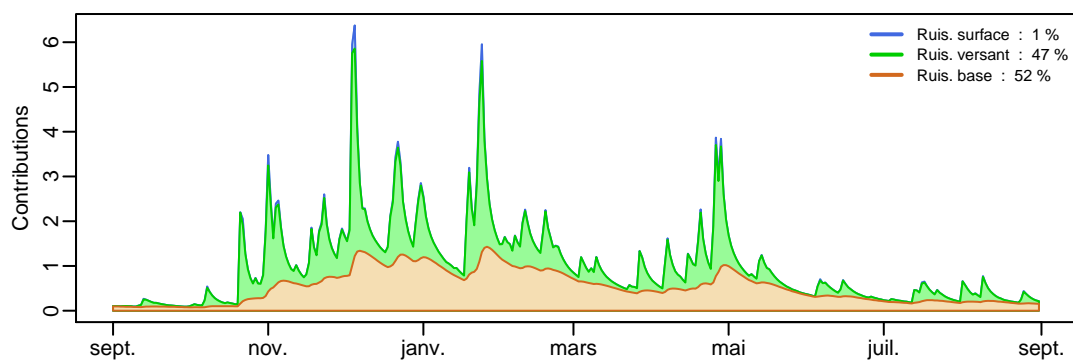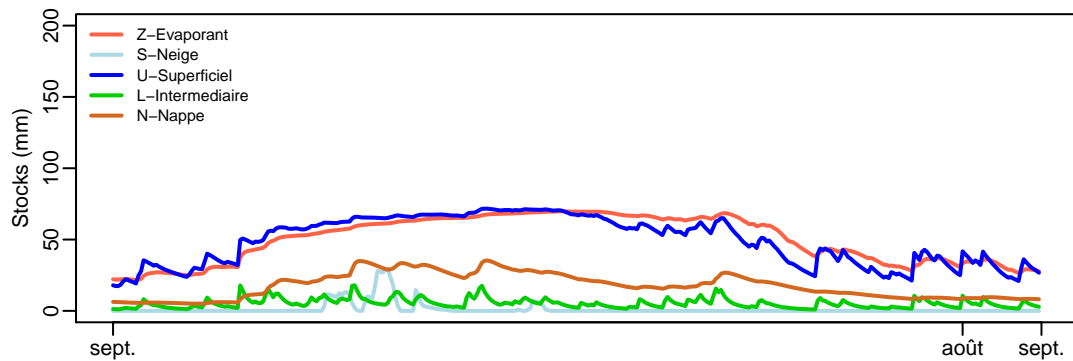

# k3373010 (562.63 km<sup>2</sup>) – année 1995–1996

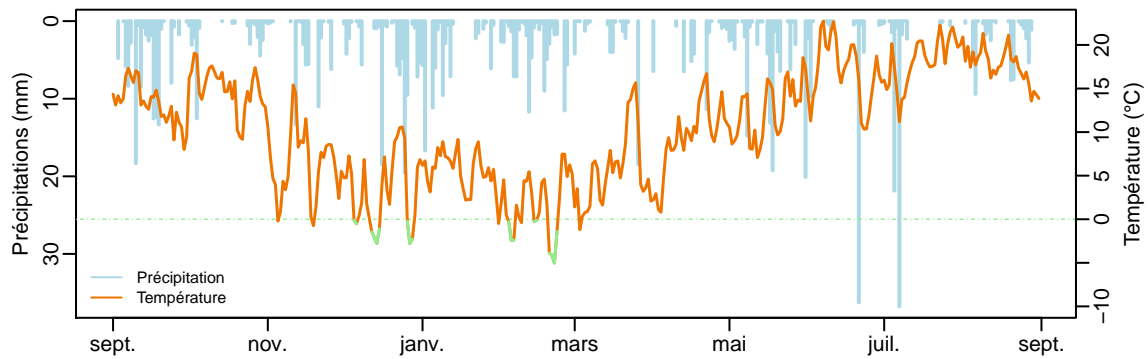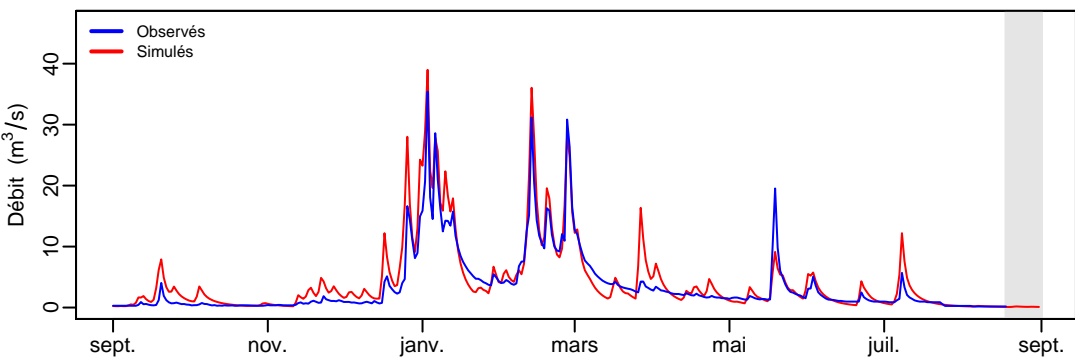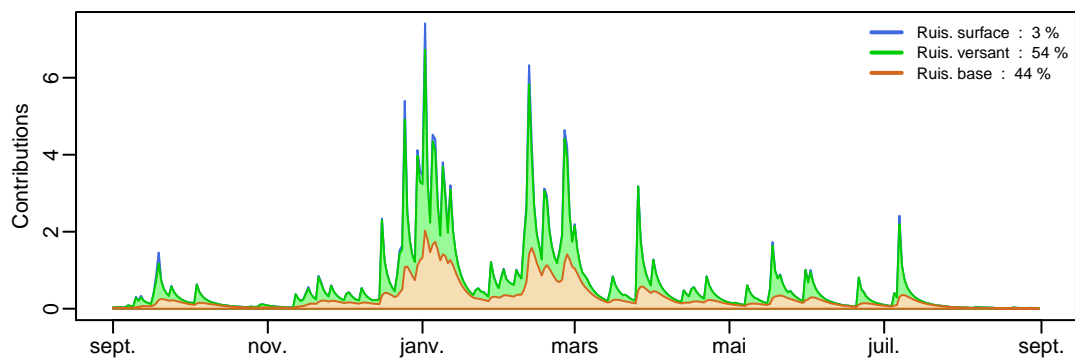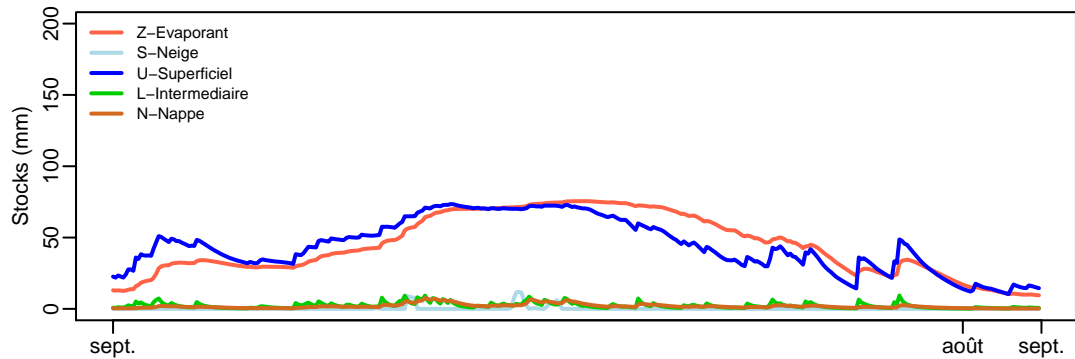

# k3373010 (562.63 km<sup>2</sup>) – année 1996–1997

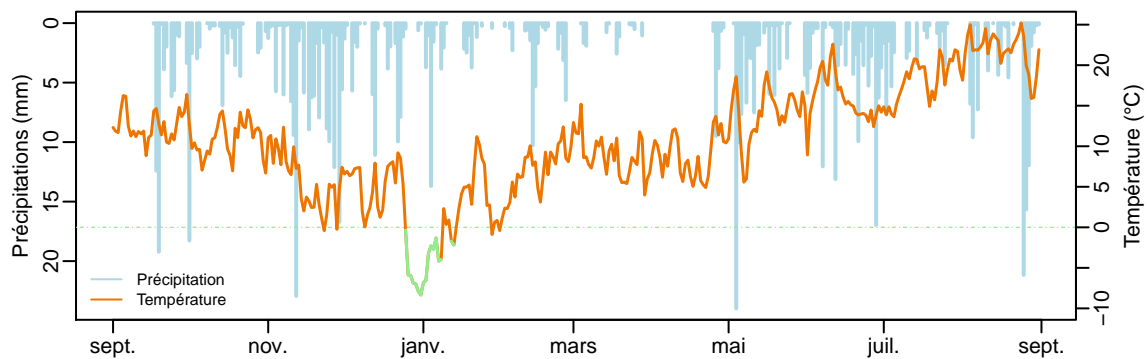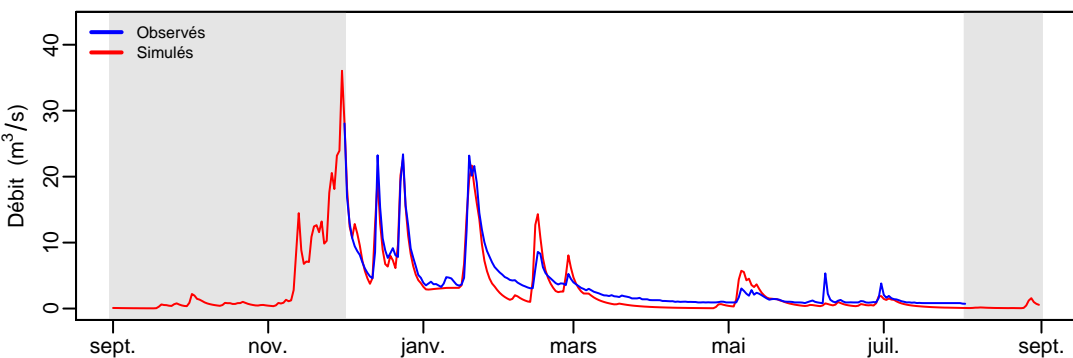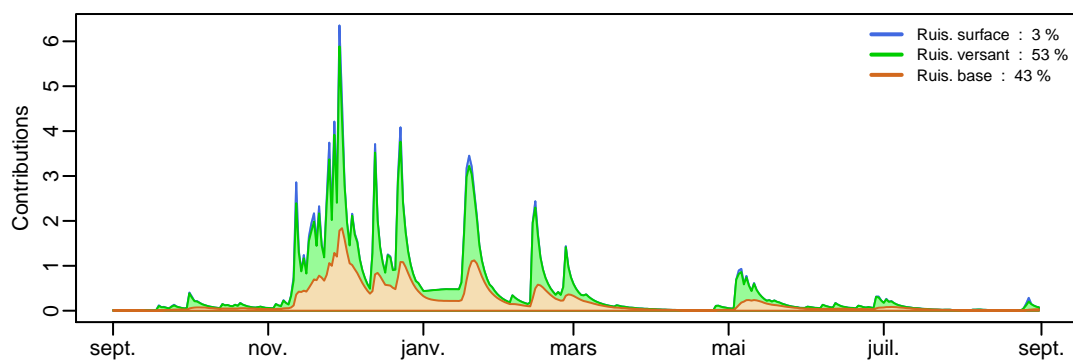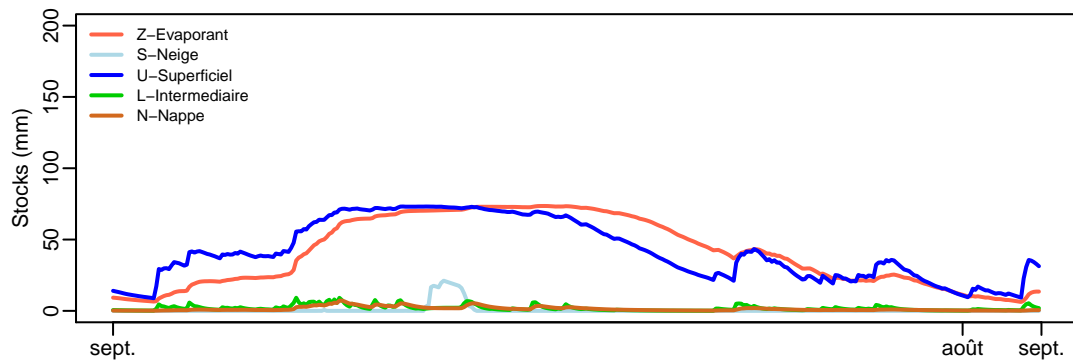



# k3373010 (562.63 km<sup>2</sup>) – année 1997–1998

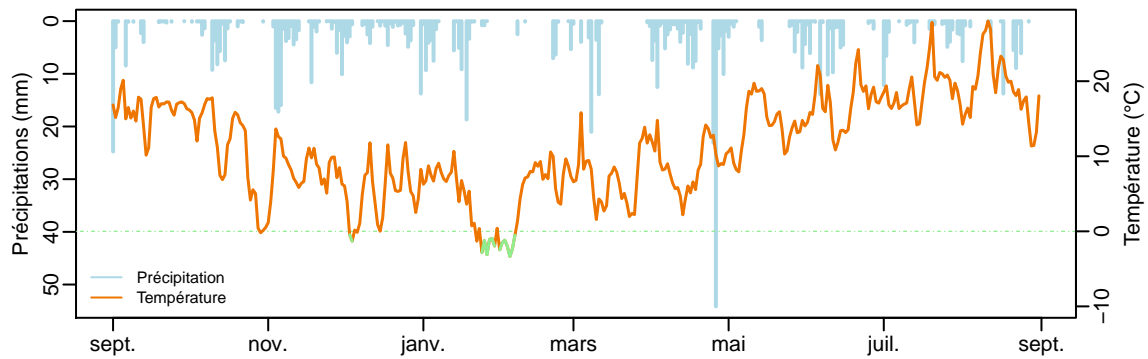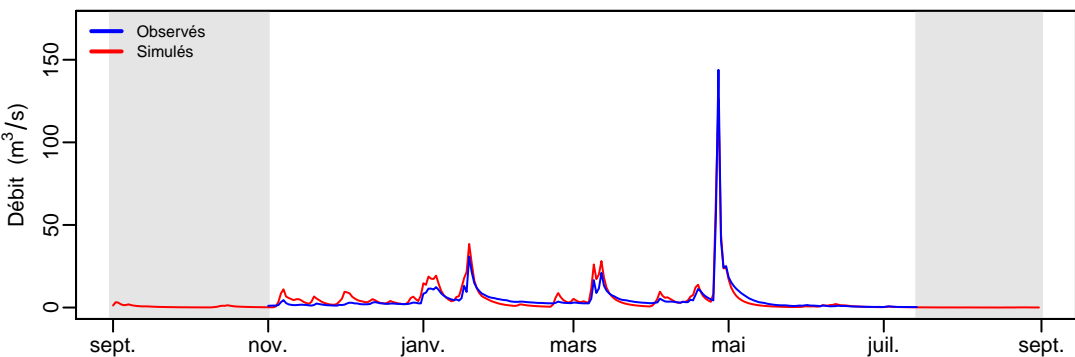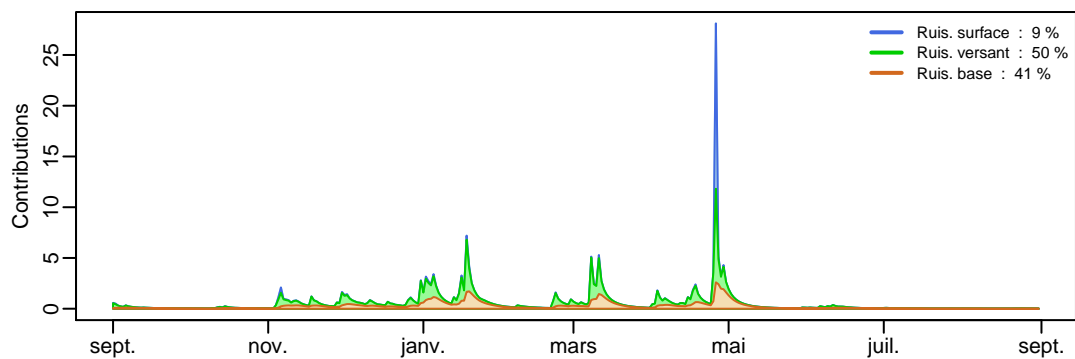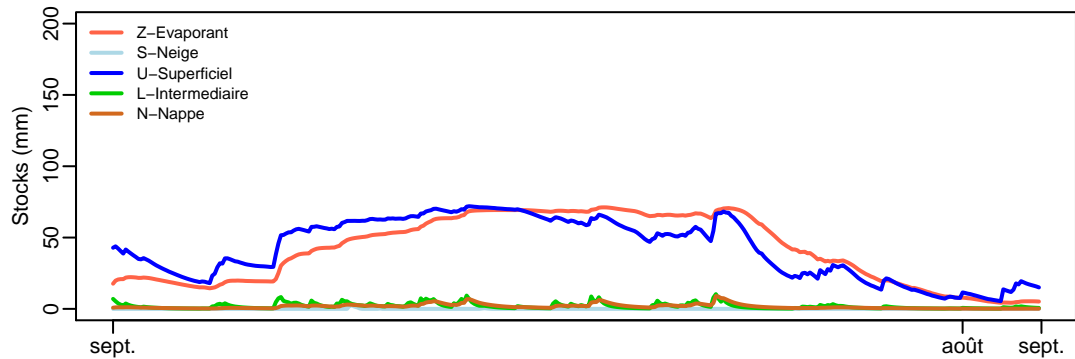

# k3373010 (562.63 km<sup>2</sup>) – année 1998–1999

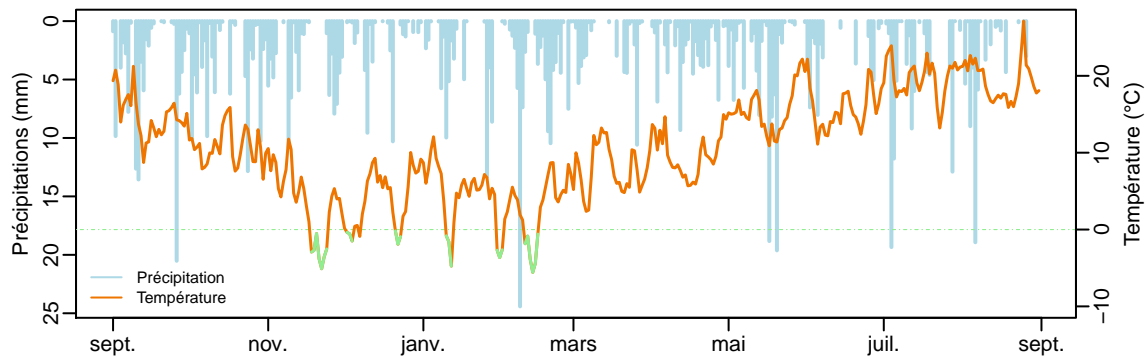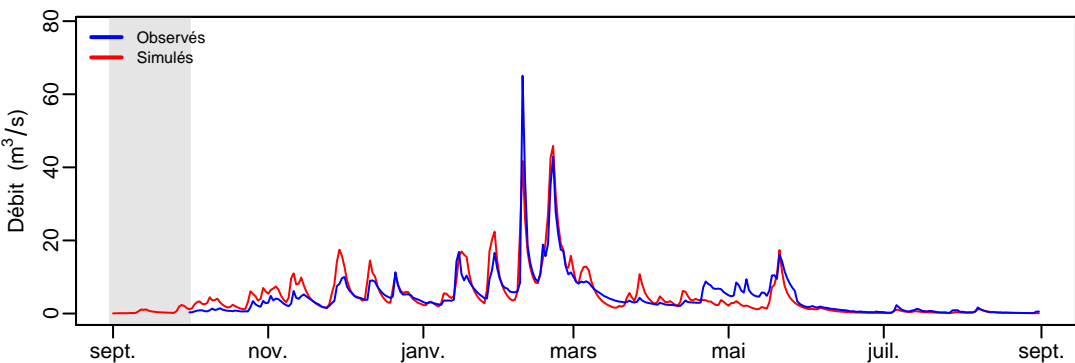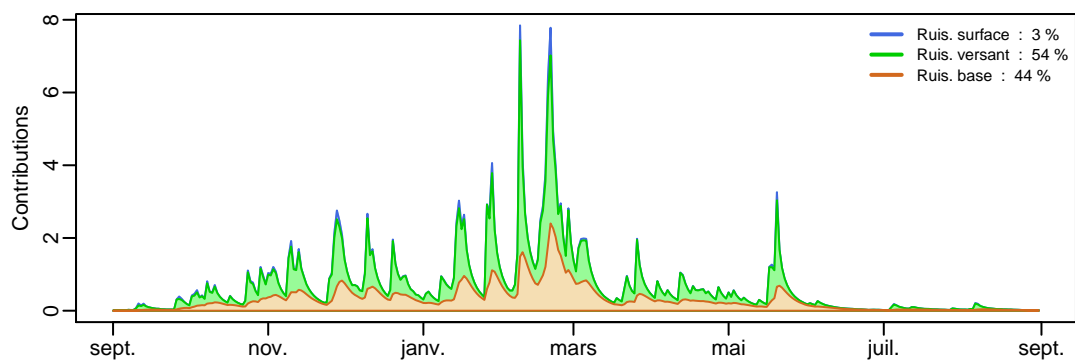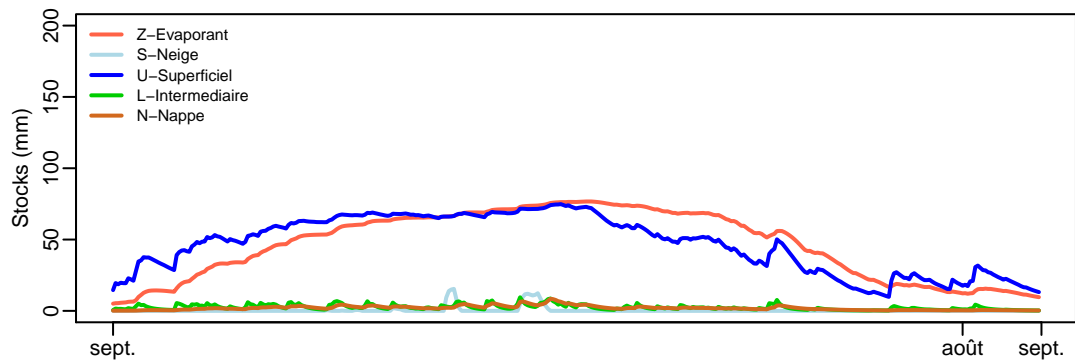

# k3373010 (562.63 km<sup>2</sup>) – année 1999–2000

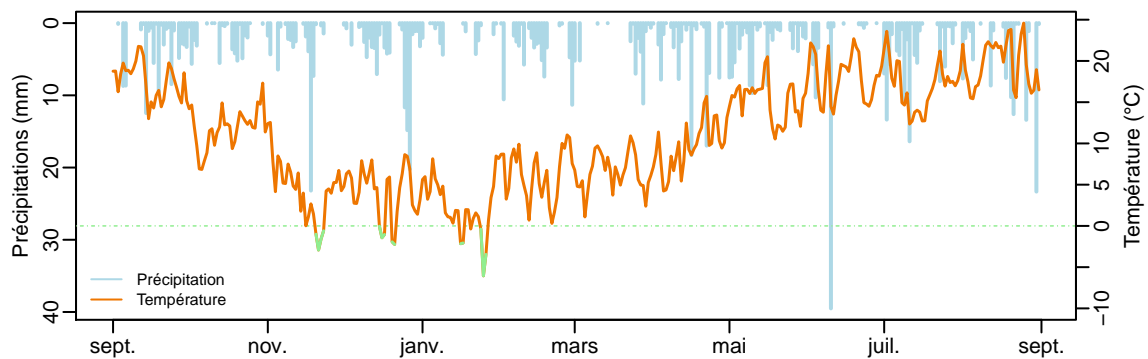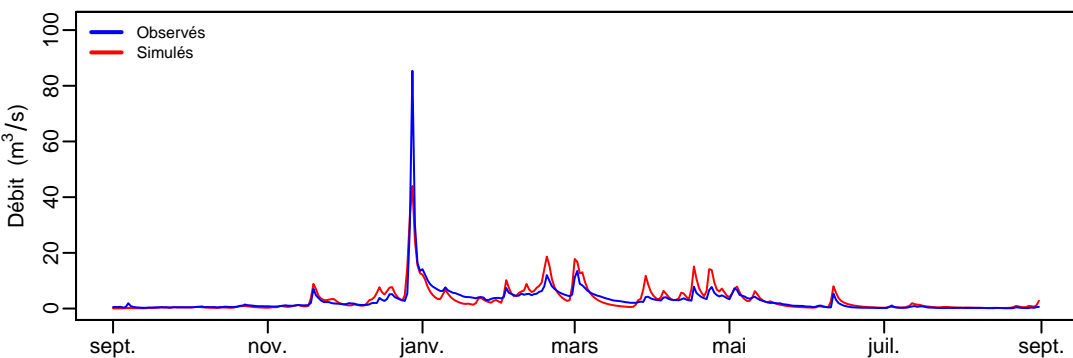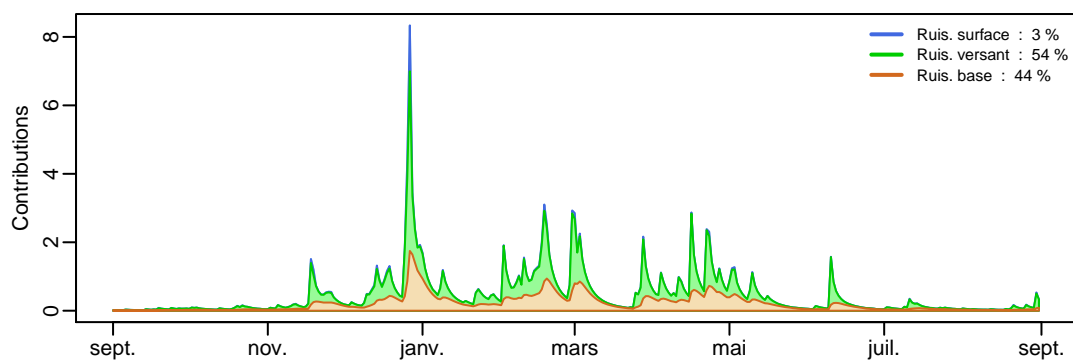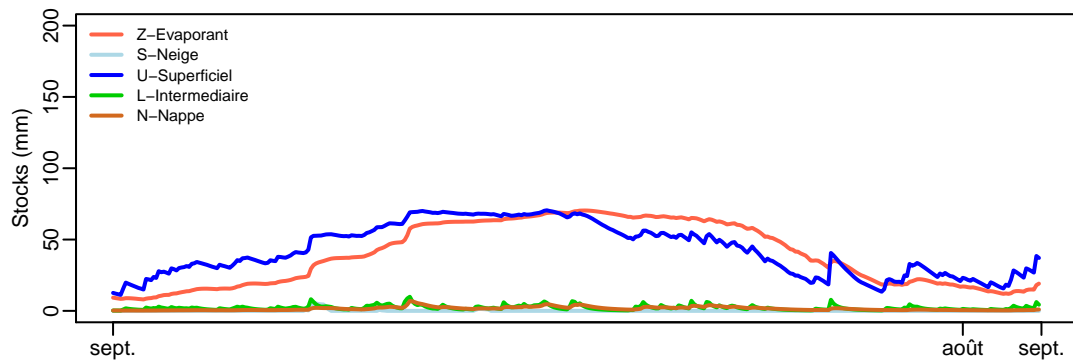

# k3373010 (562.63 km<sup>2</sup>) – année 2000–2001

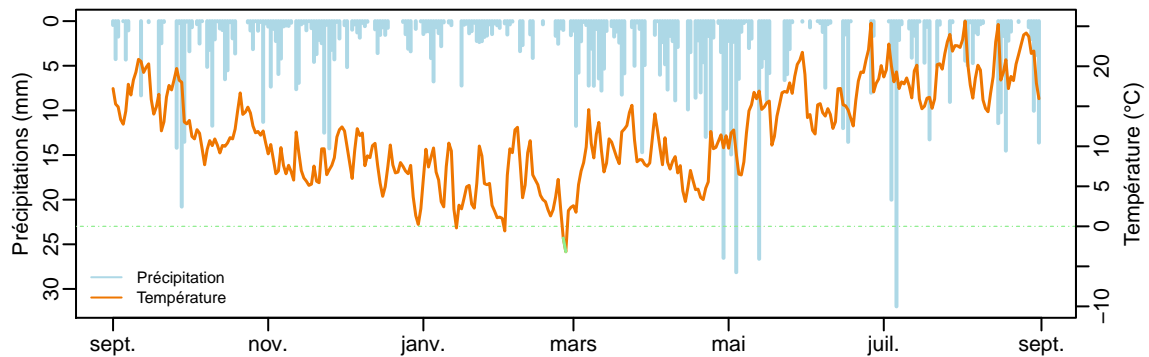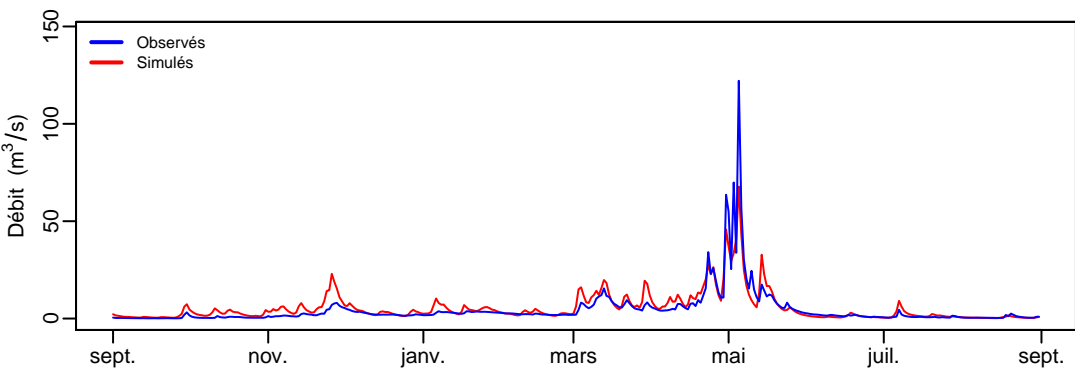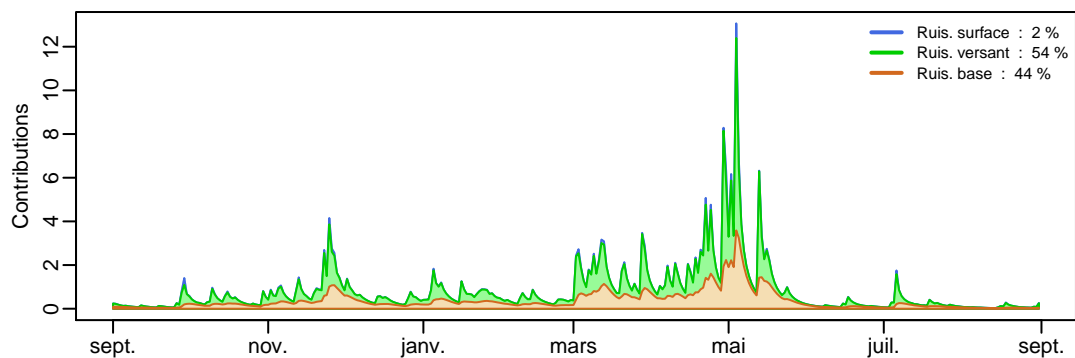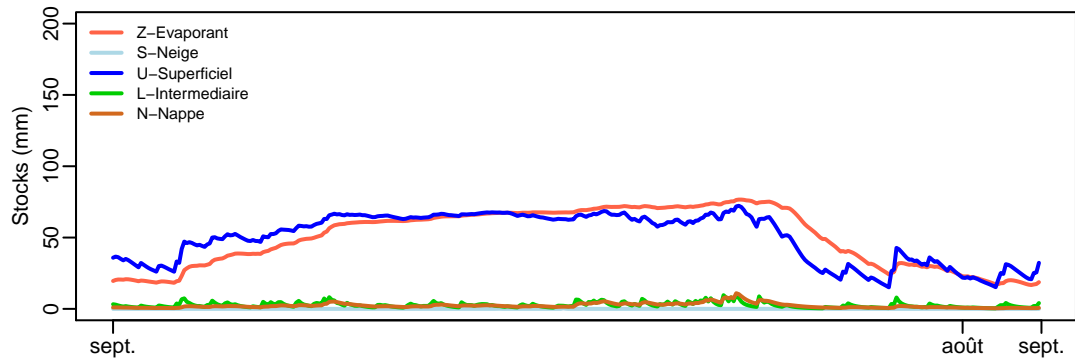

# k3373010 (562.63 km<sup>2</sup>) – année 2001–2002

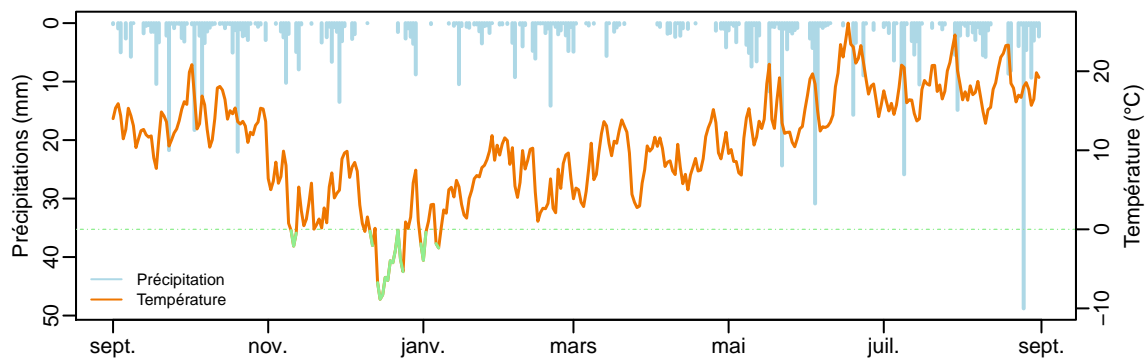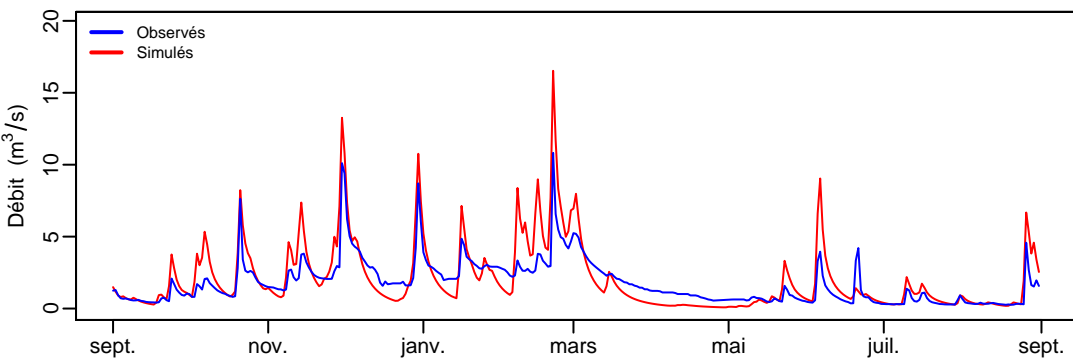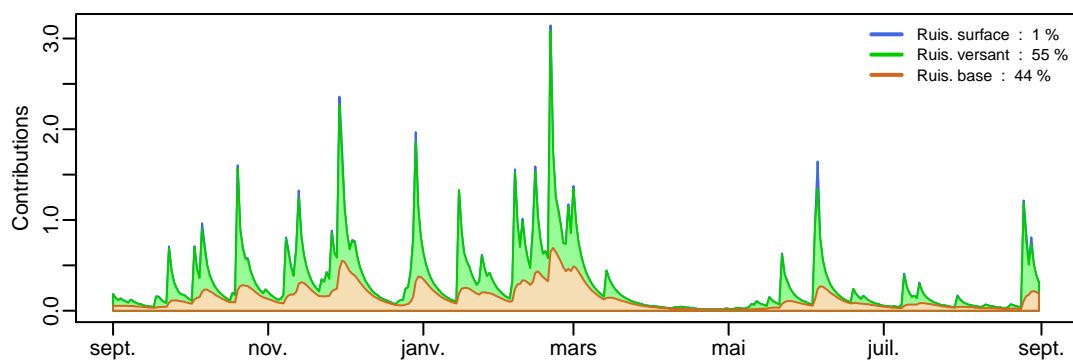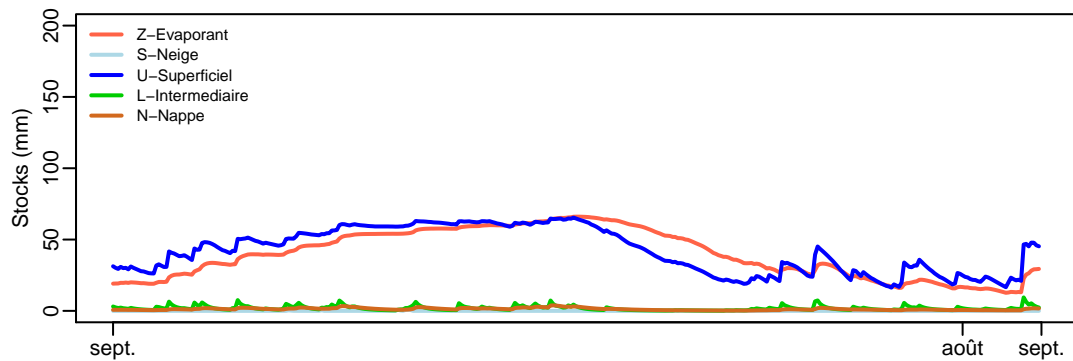

# k3373010 (562.63 km<sup>2</sup>) – année 2002–2003

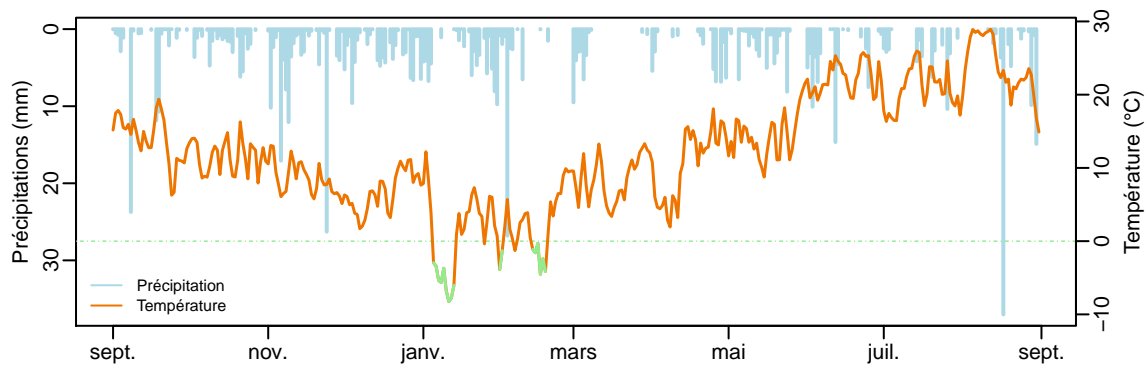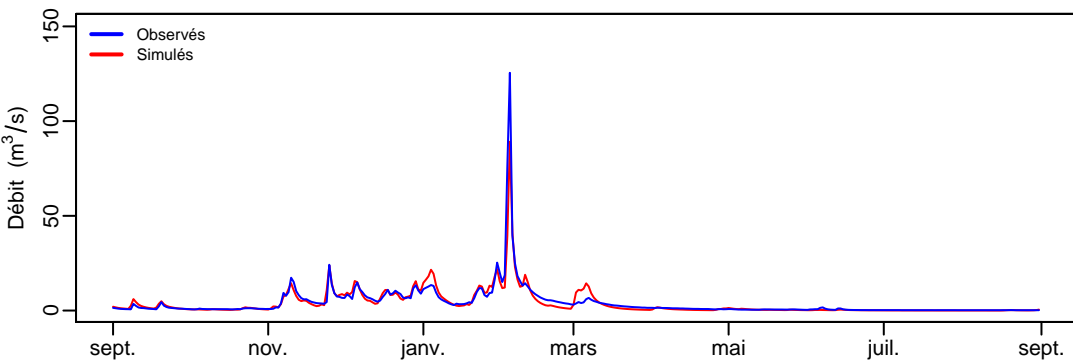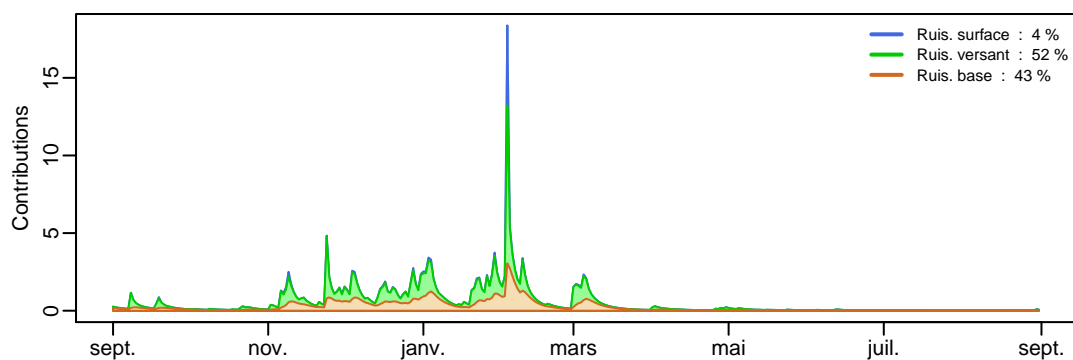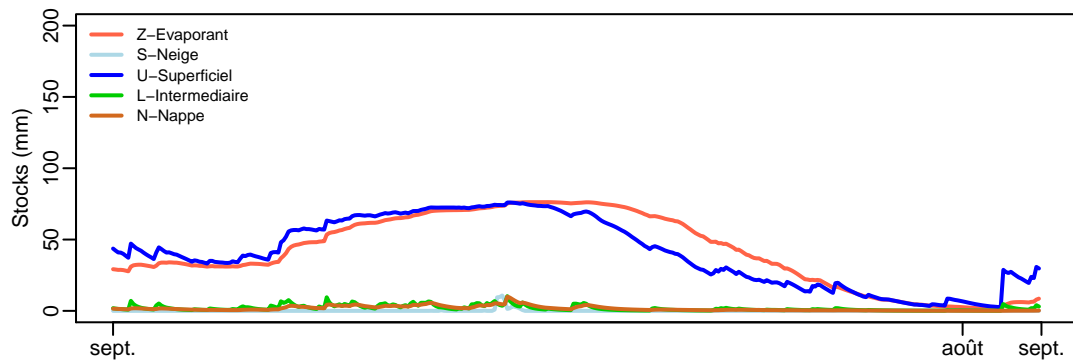

# k3373010 (562.63 km<sup>2</sup>) – année 2003–2004

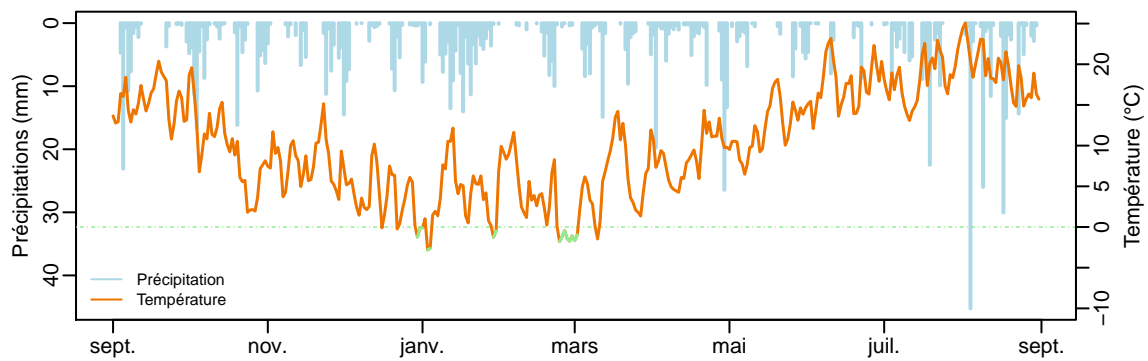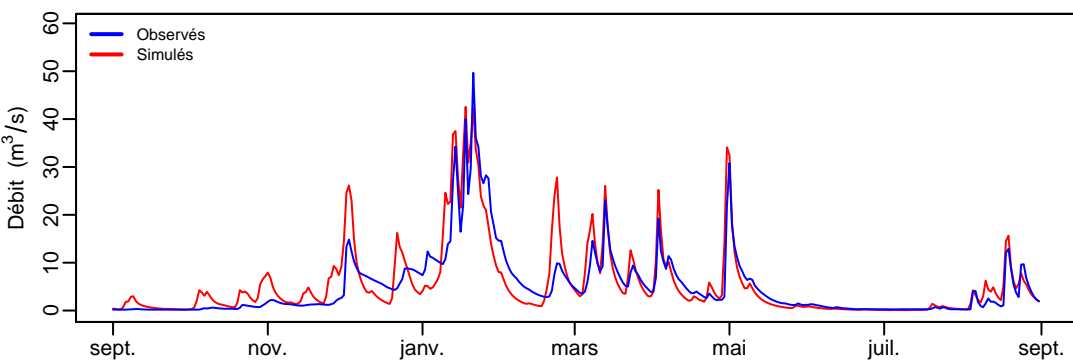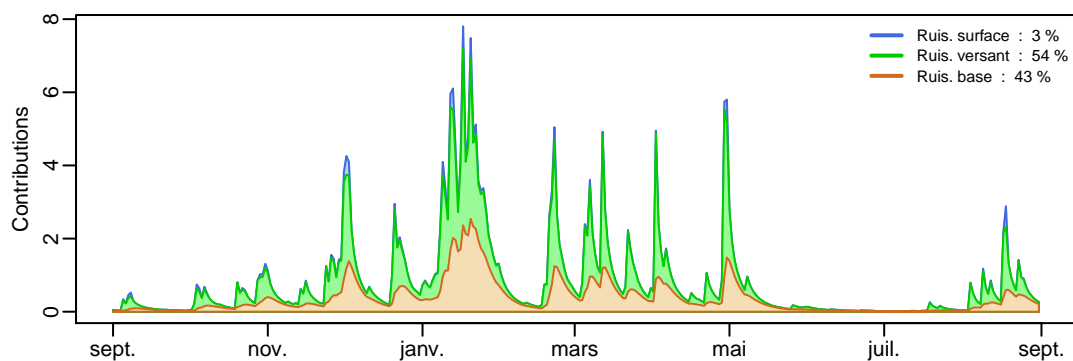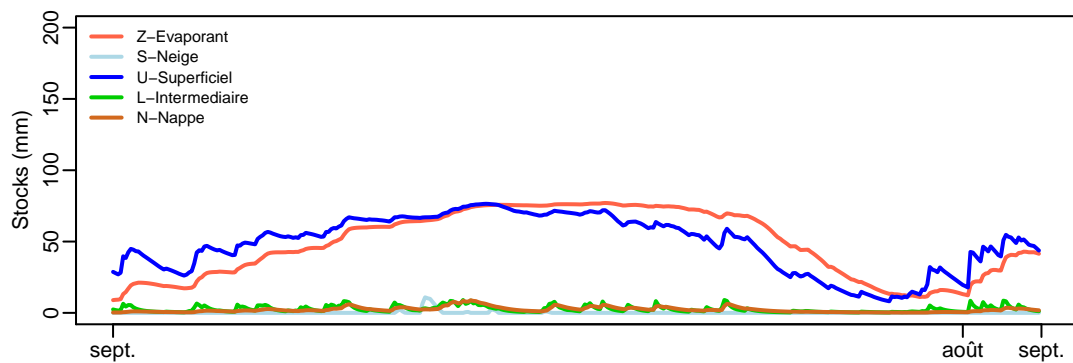

# k3373010 (562.63 km<sup>2</sup>) – année 2004–2005

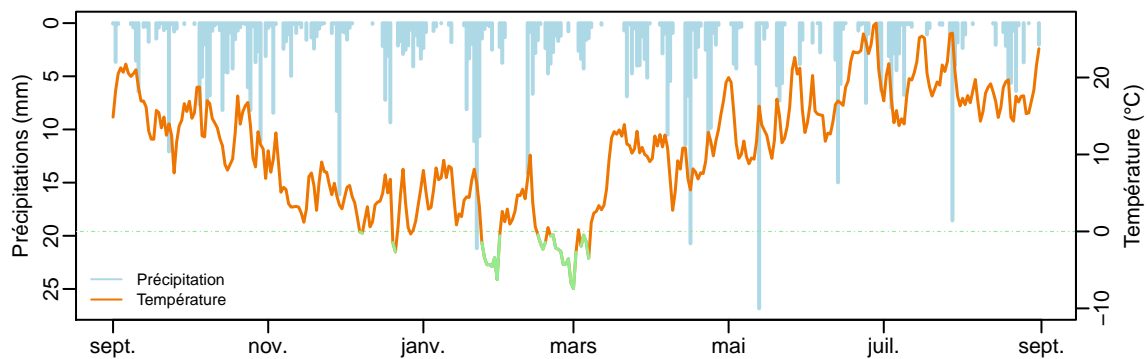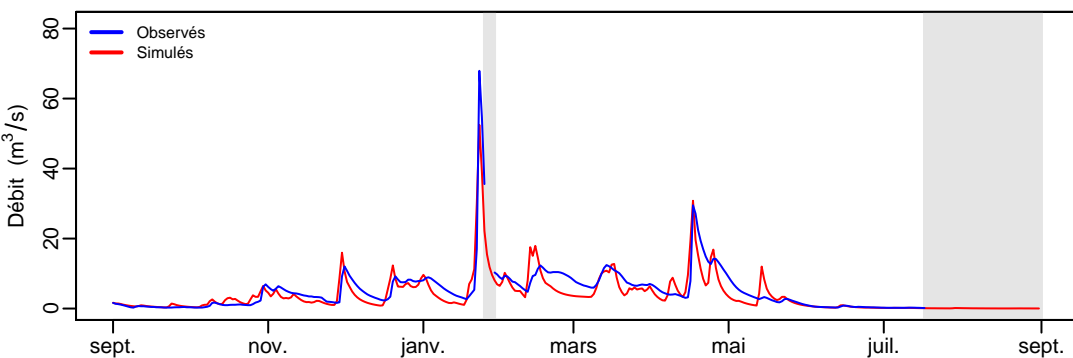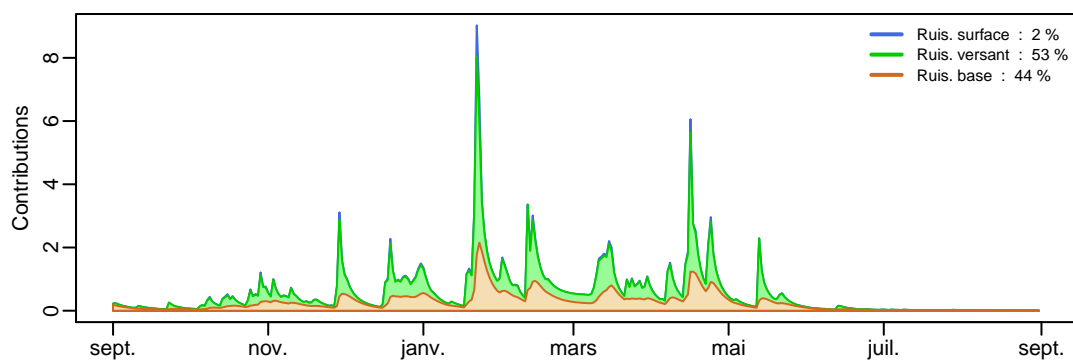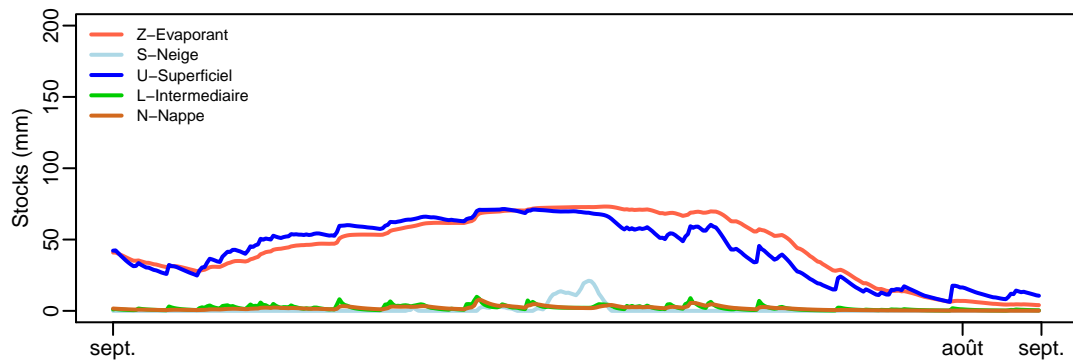



# k3373010 (562.63 km²) – année 2005–2006

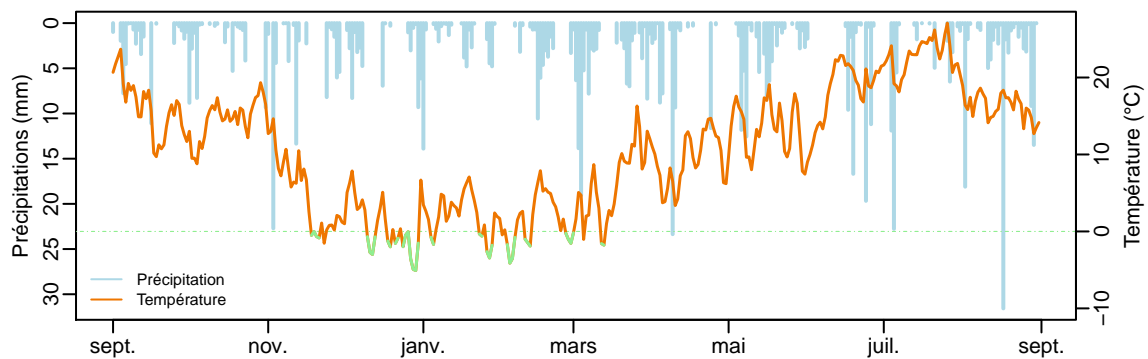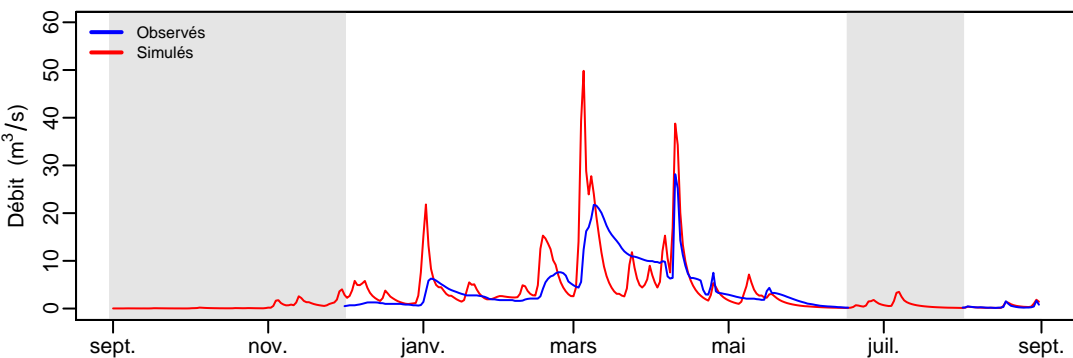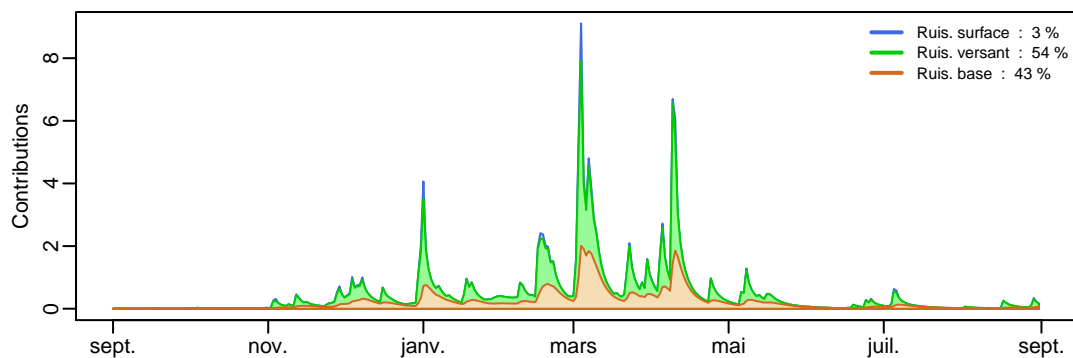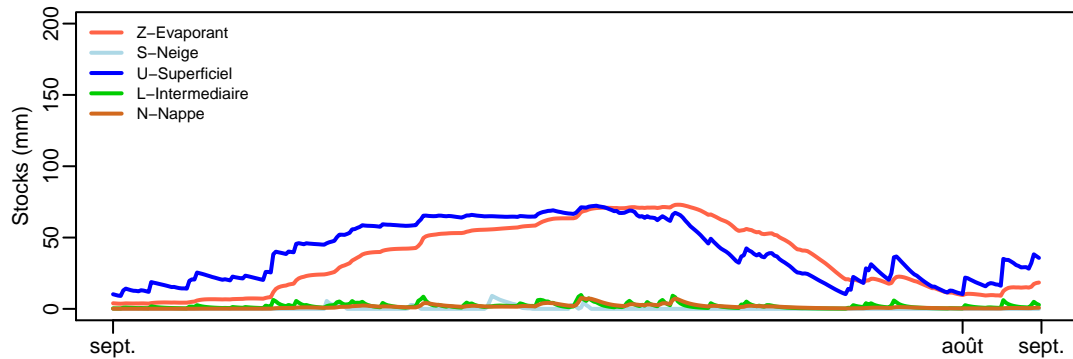

# k3373010 (562.63 km<sup>2</sup>) – année 2006–2007

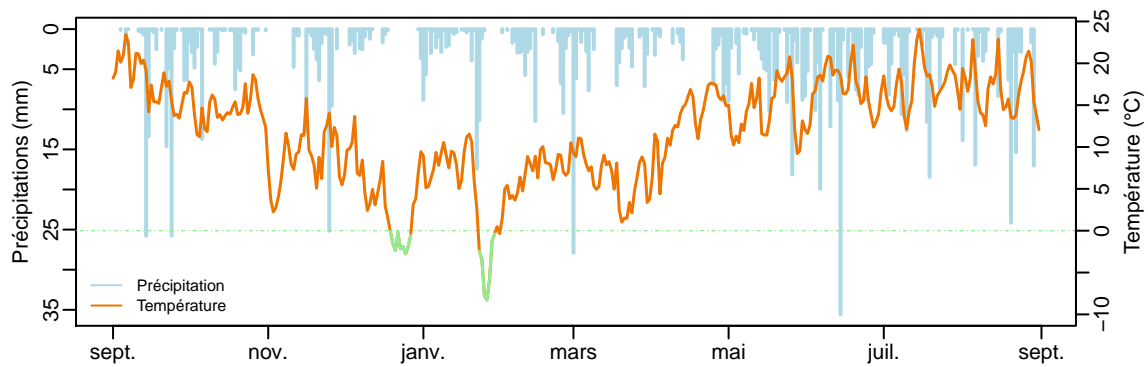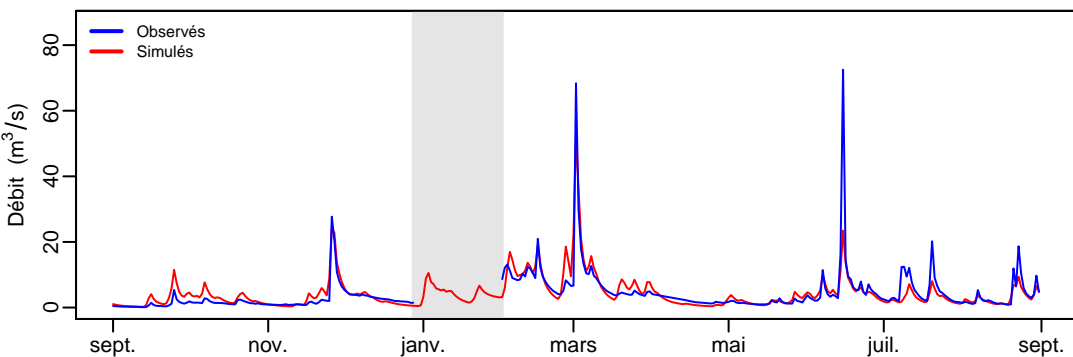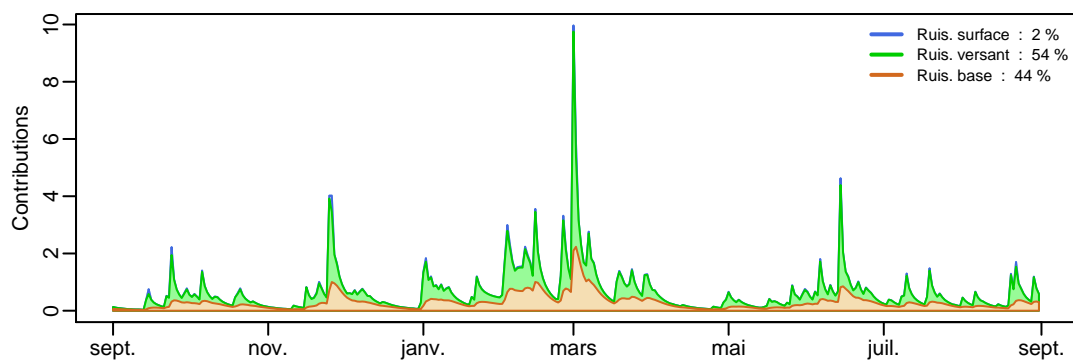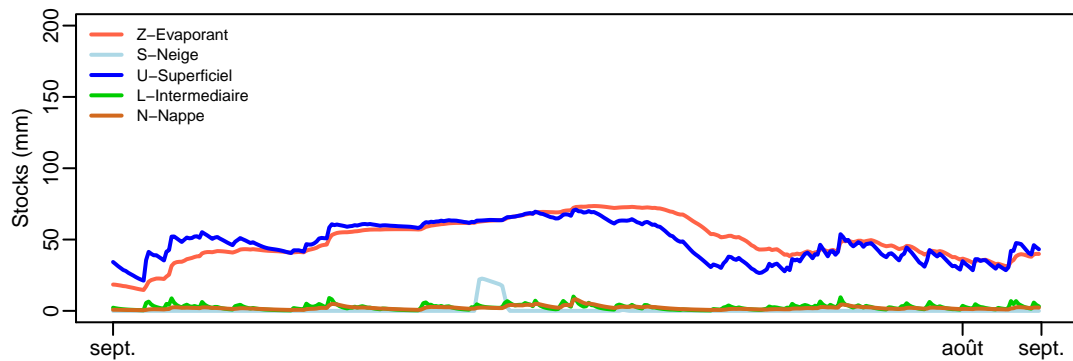

# k3373010 (562.63 km<sup>2</sup>) – année 2007–2008

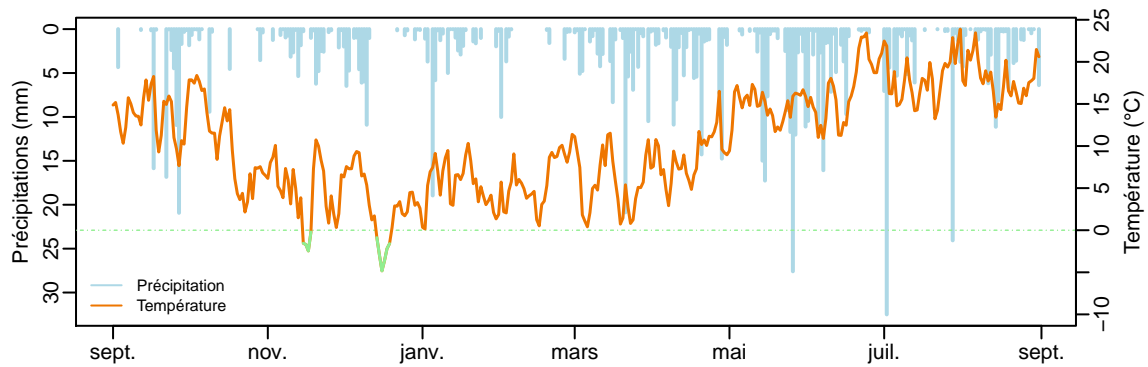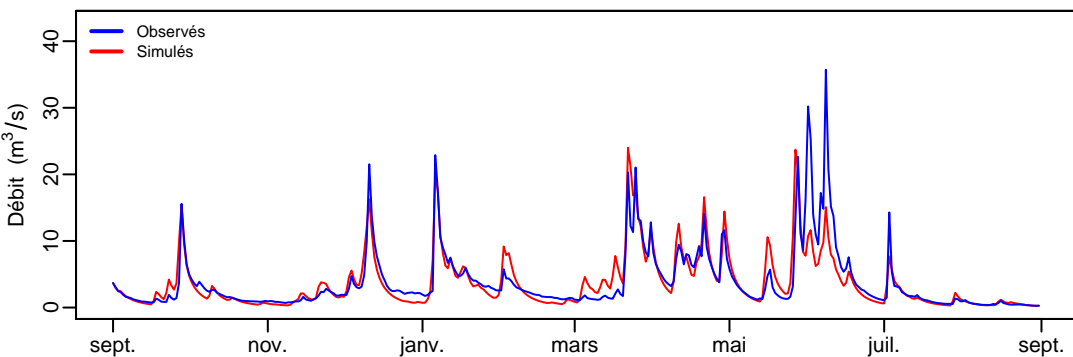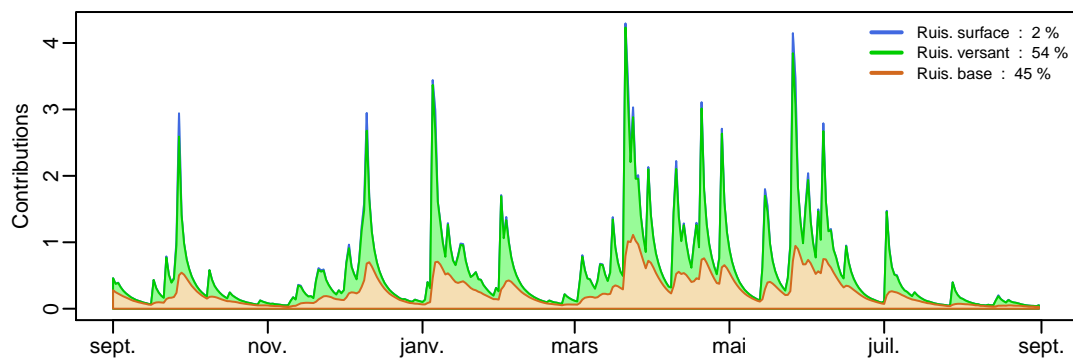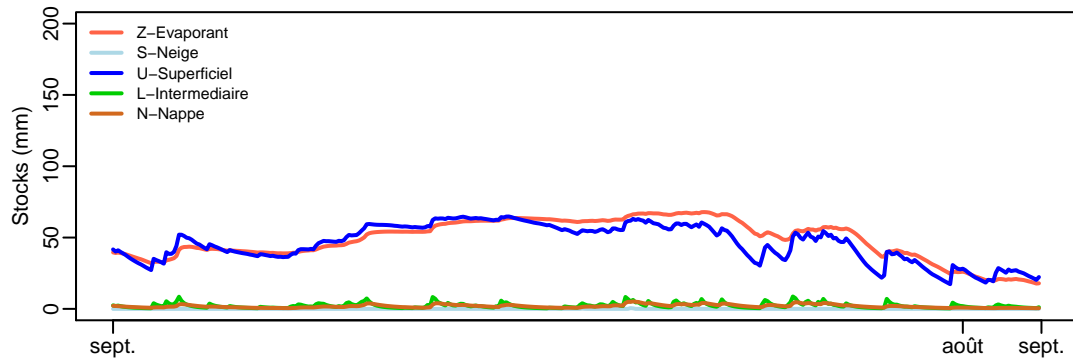

# k3373010 (562.63 km<sup>2</sup>) – année 2008–2009

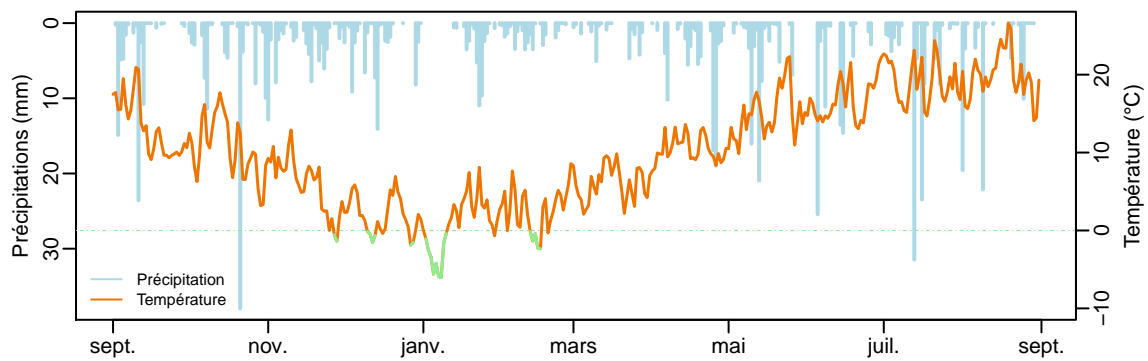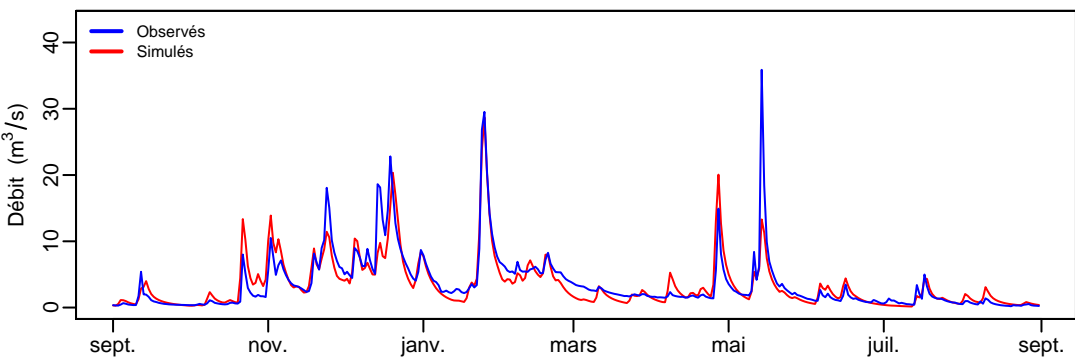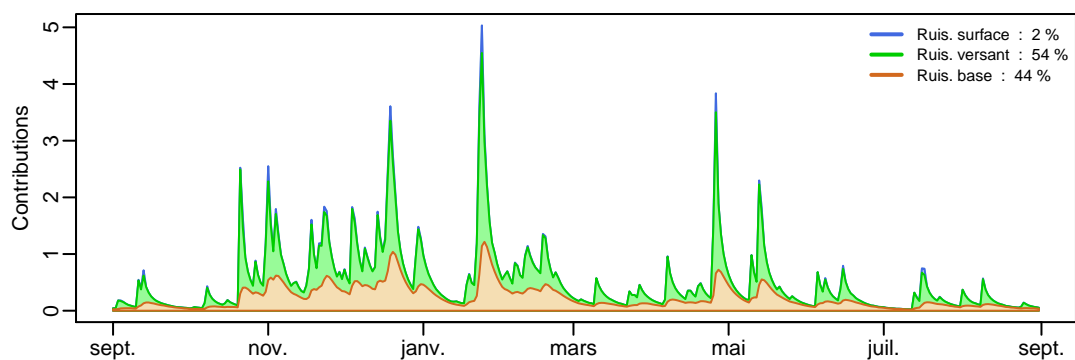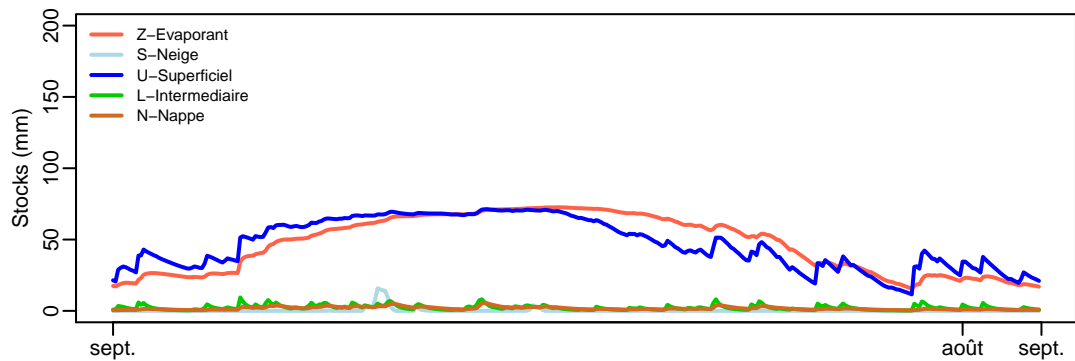

# k3400810 (12569.31 km<sup>2</sup>) – année 1986–1987

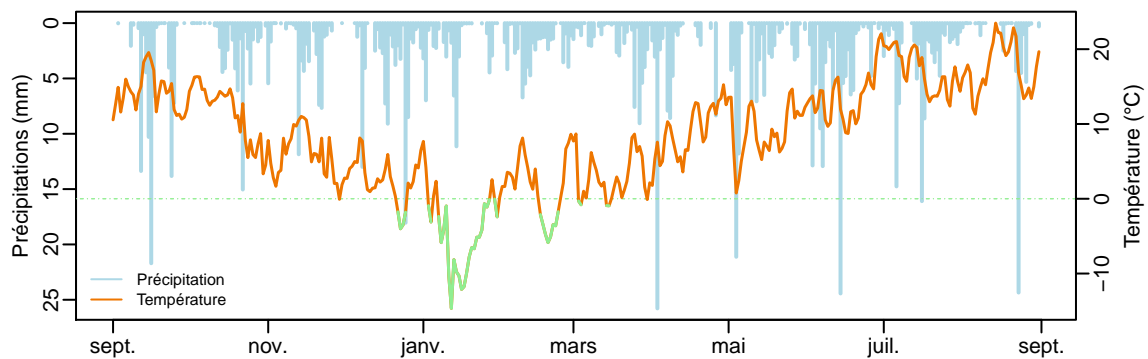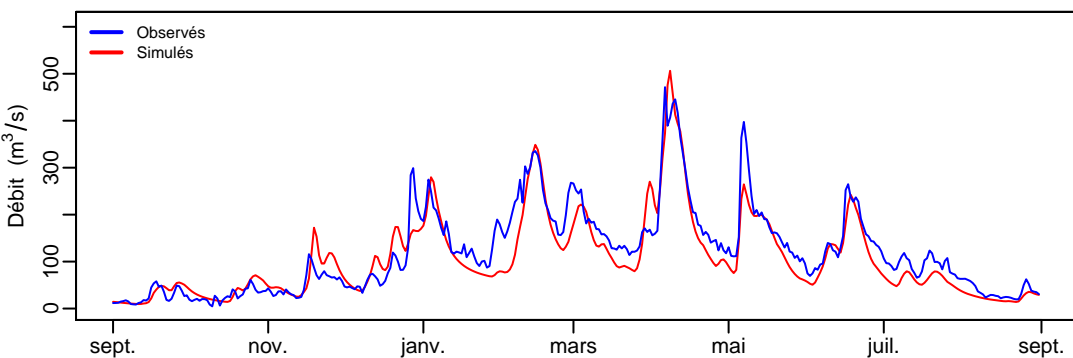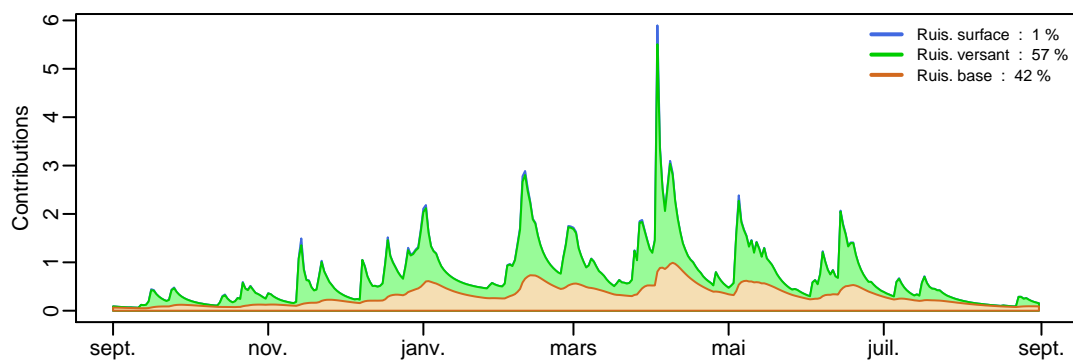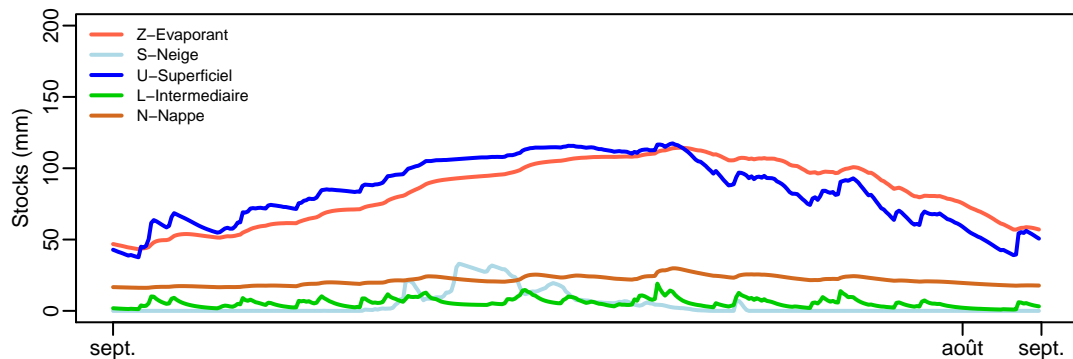

# k3400810 (12569.31 km<sup>2</sup>) – année 1987–1988

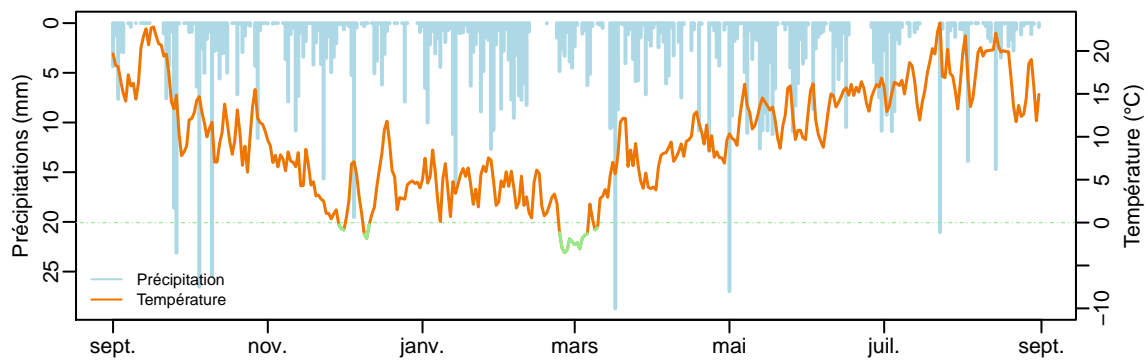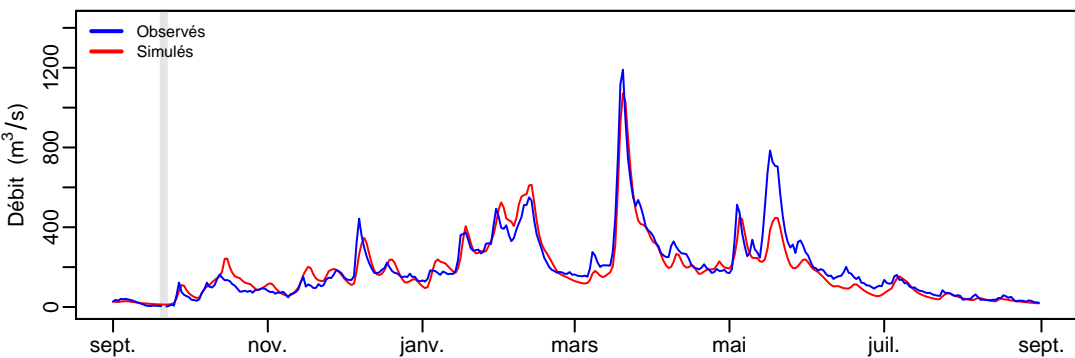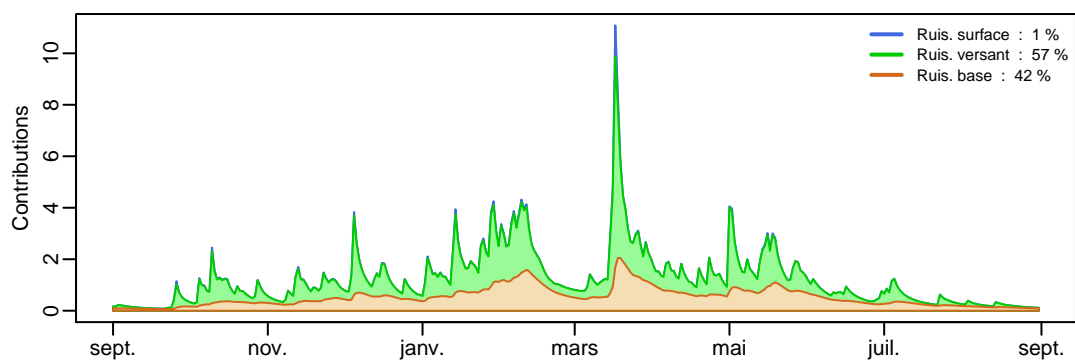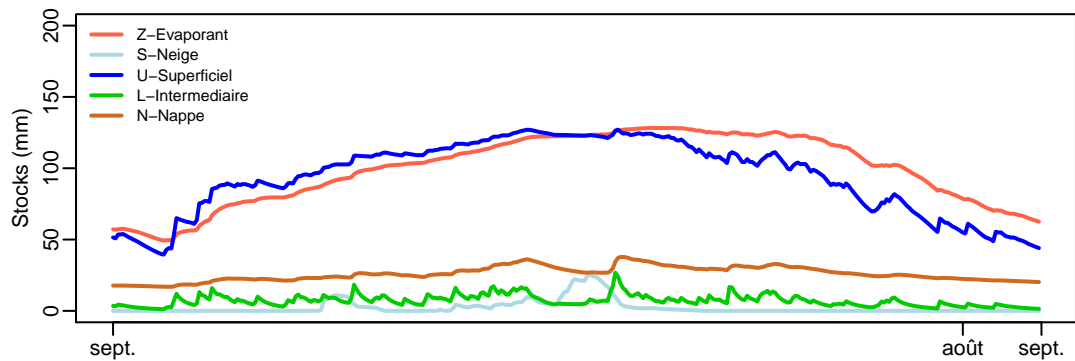

# k3400810 (12569.31 km<sup>2</sup>) – année 1988–1989

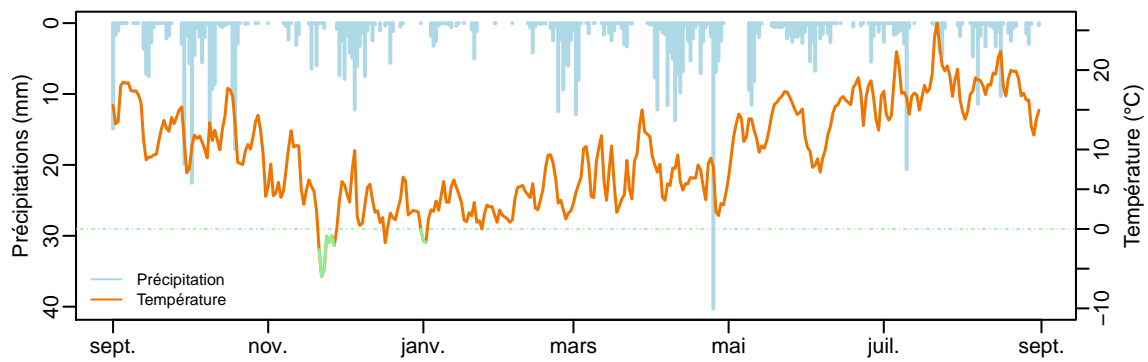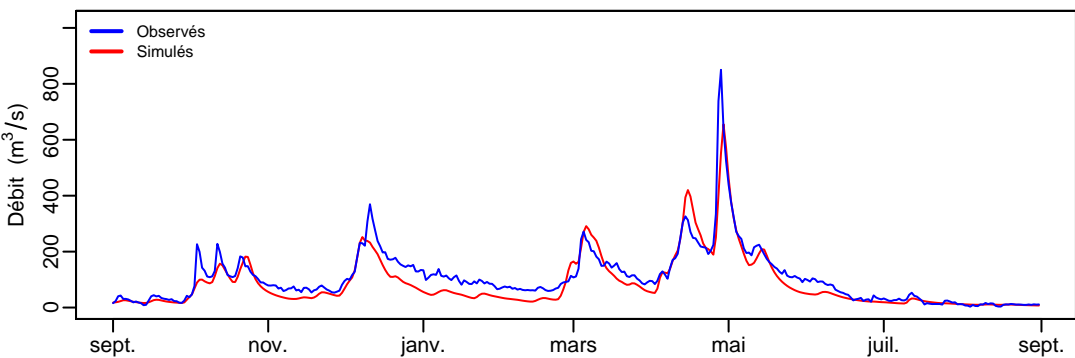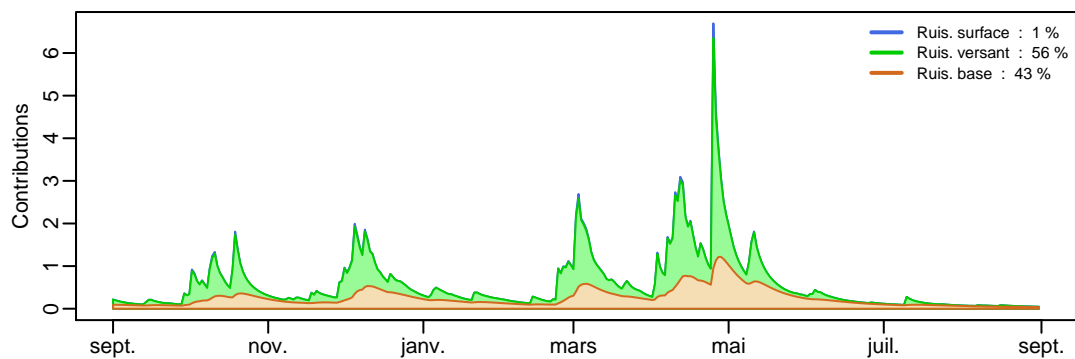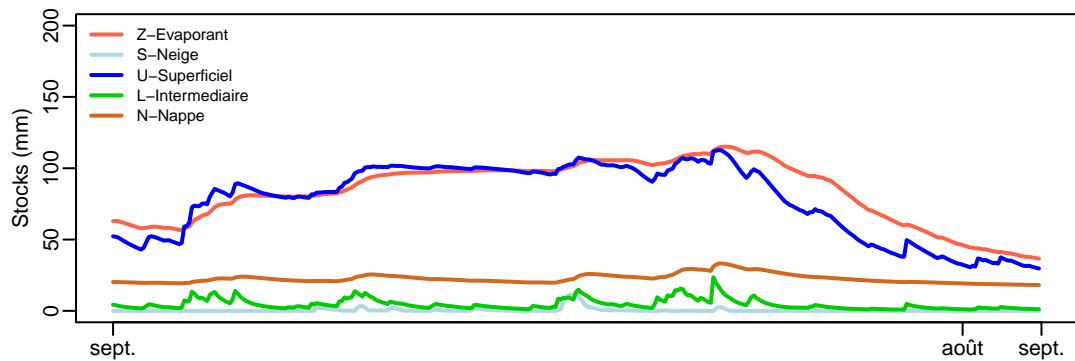

# k3400810 (12569.31 km<sup>2</sup>) – année 1989–1990

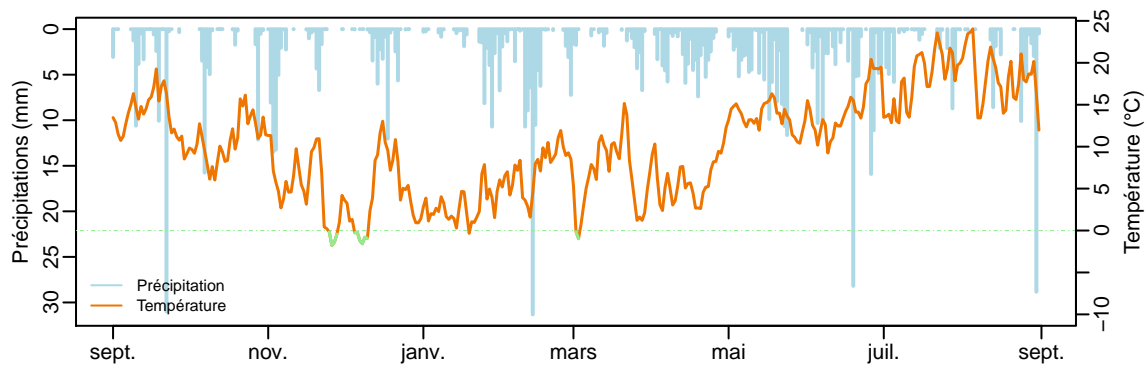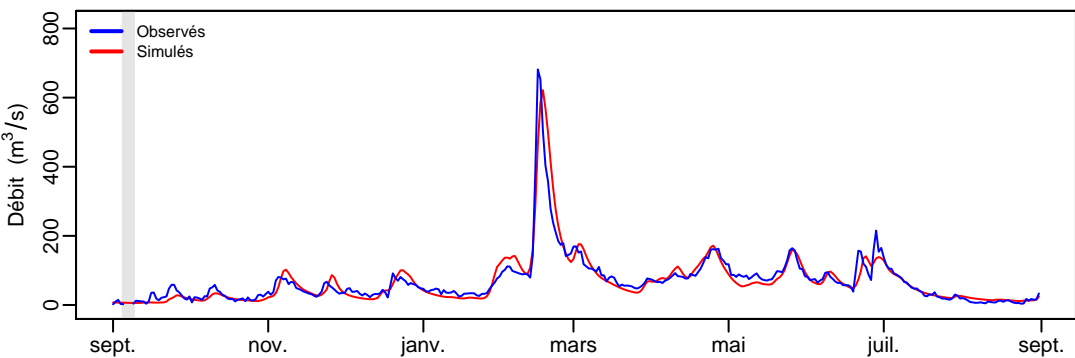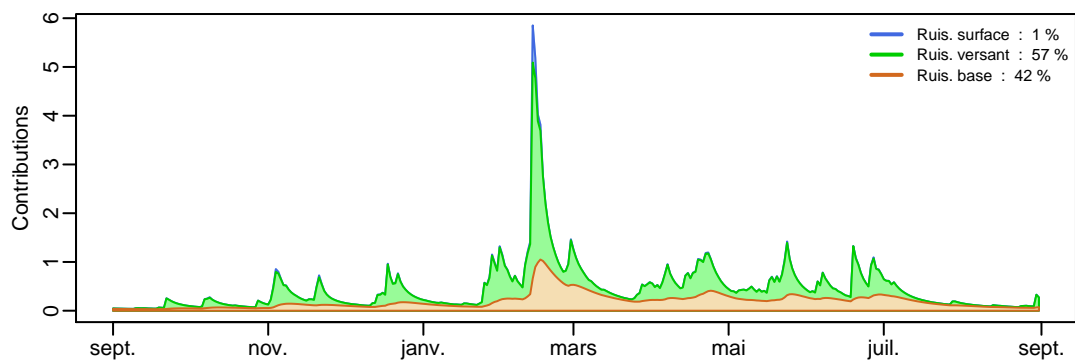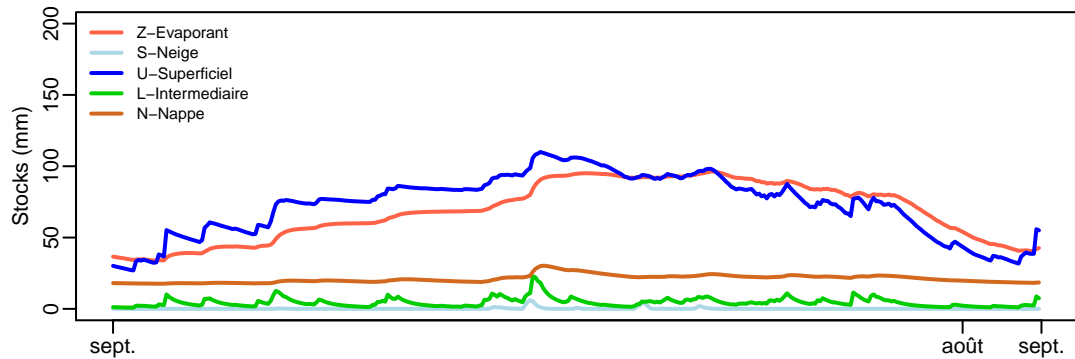



# k3400810 (12569.31 km<sup>2</sup>) – année 1990–1991

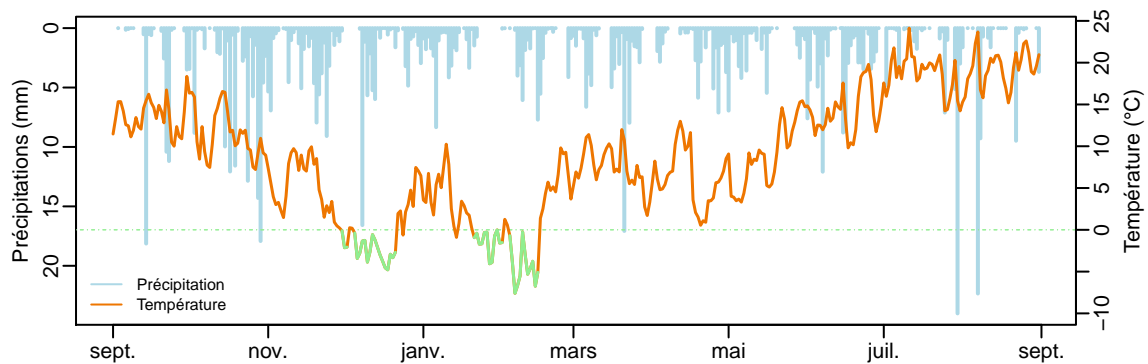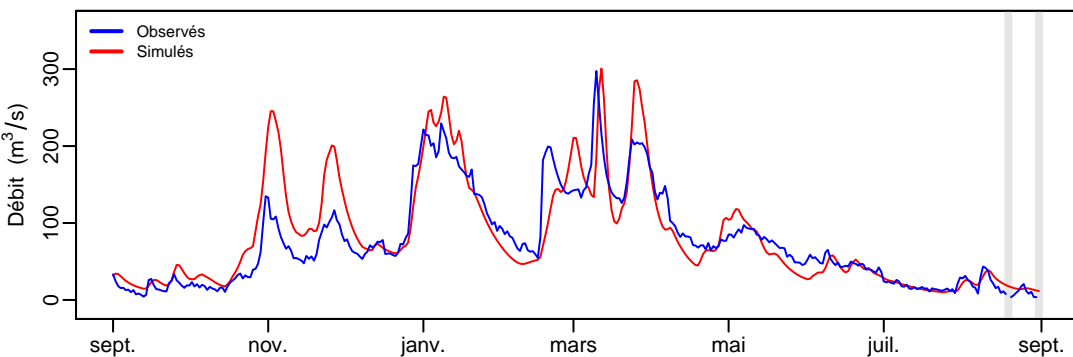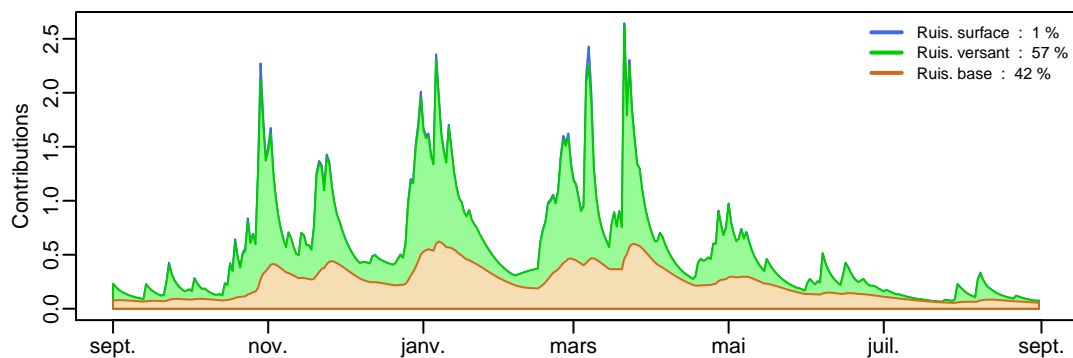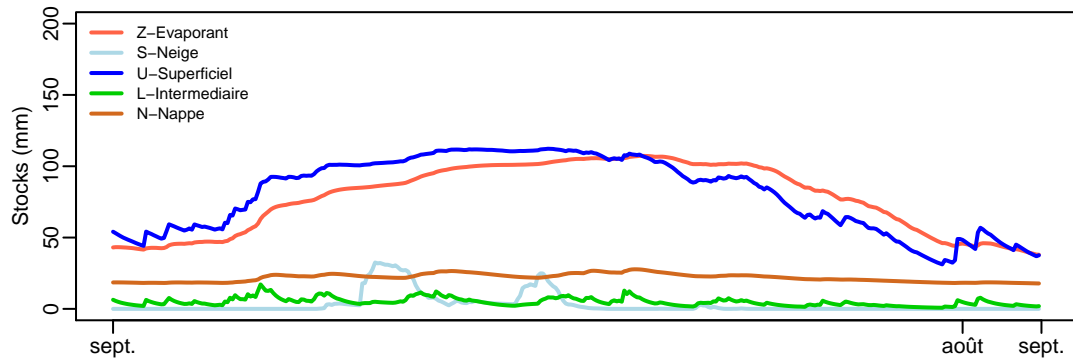

# k3400810 (12569.31 km<sup>2</sup>) – année 1991–1992

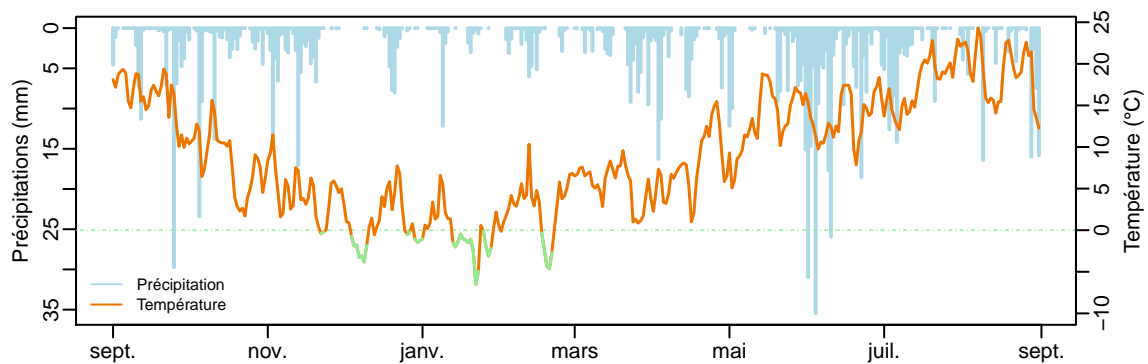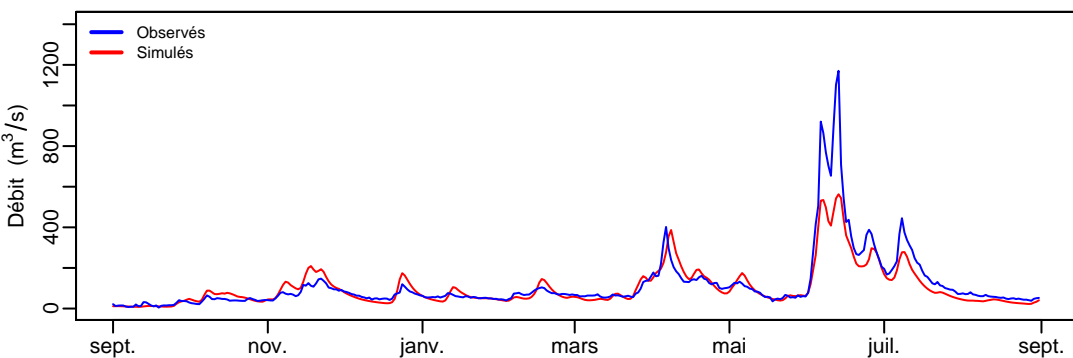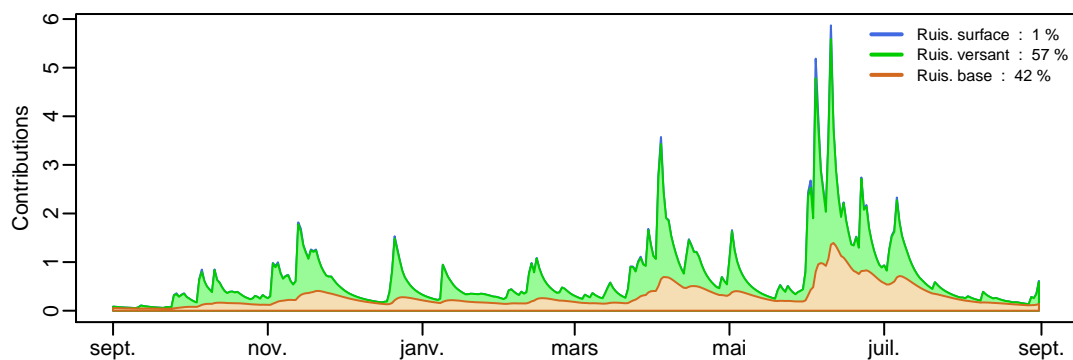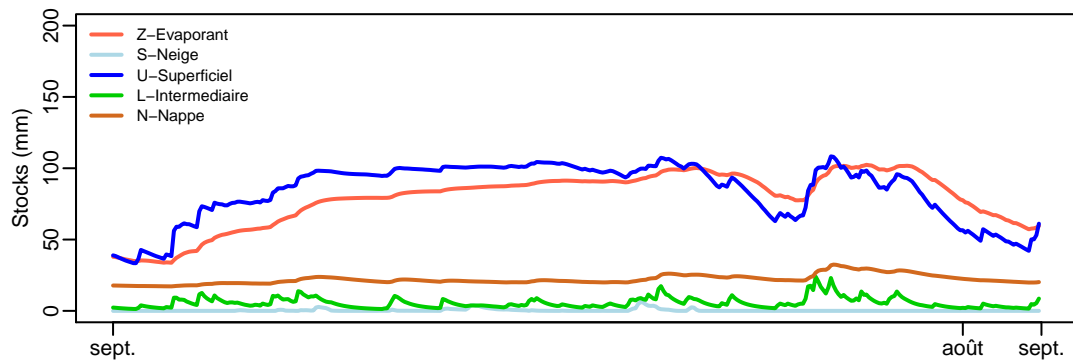

# k3400810 (12569.31 km<sup>2</sup>) – année 1992–1993

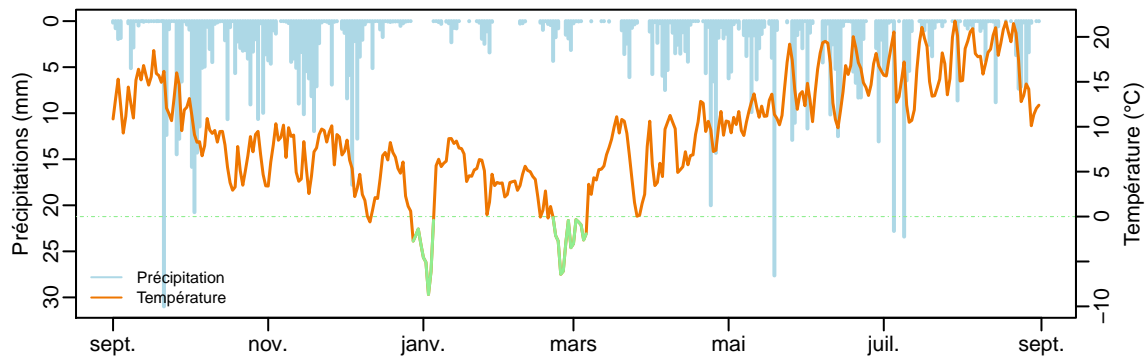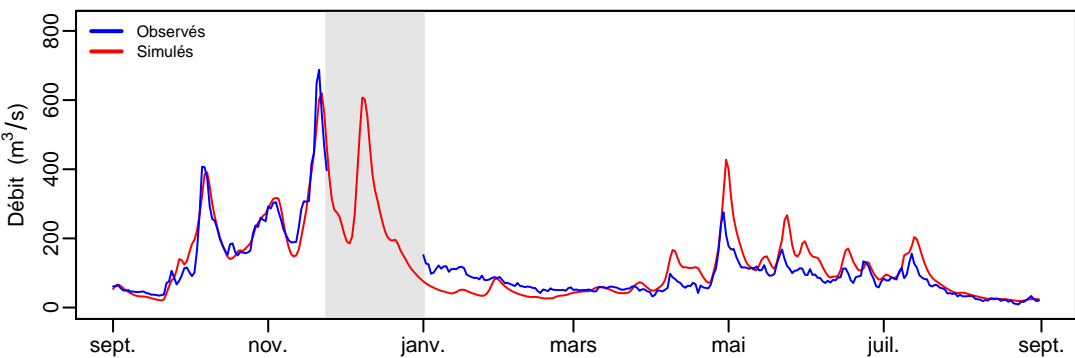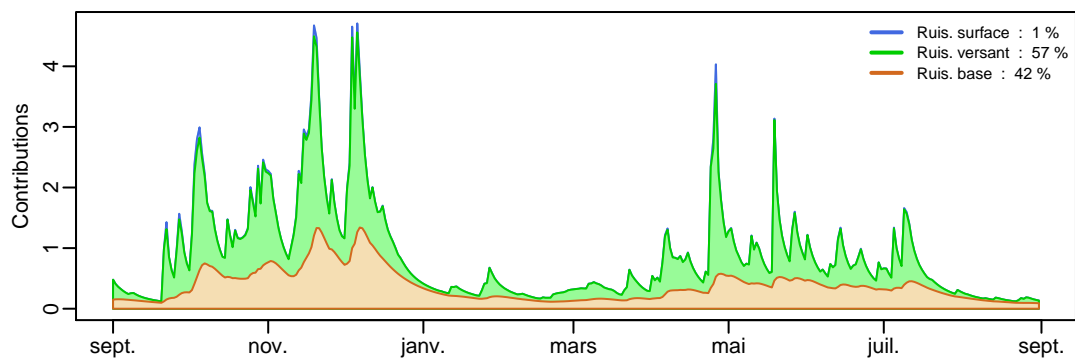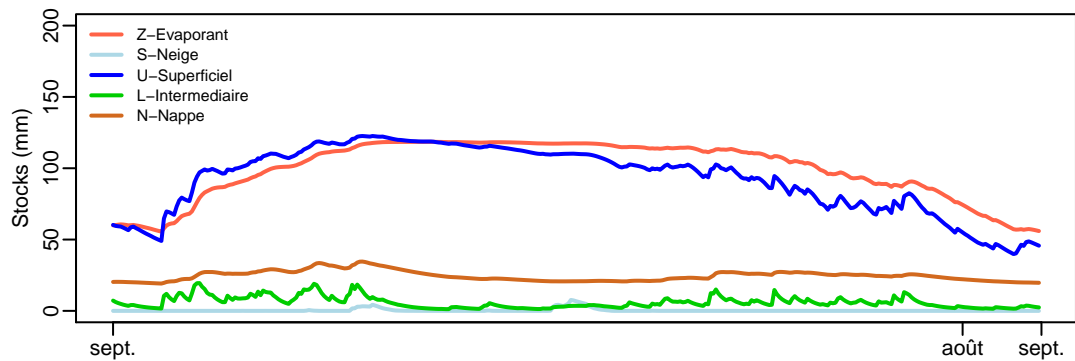

# k3400810 (12569.31 km<sup>2</sup>) – année 1993–1994

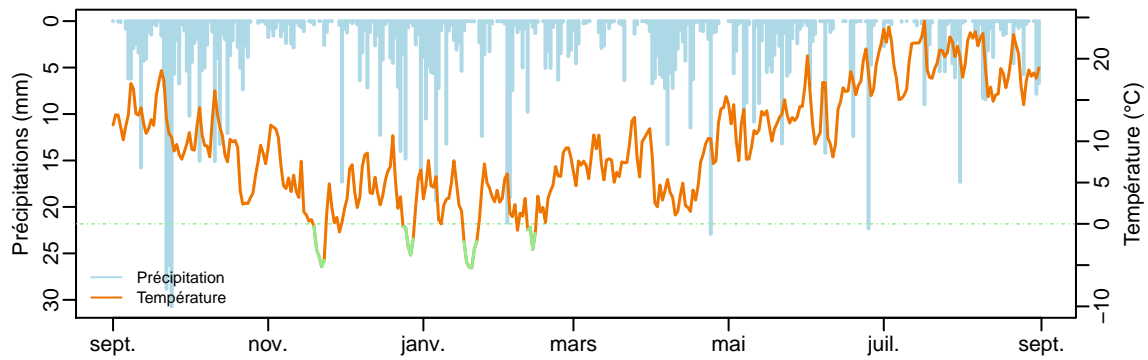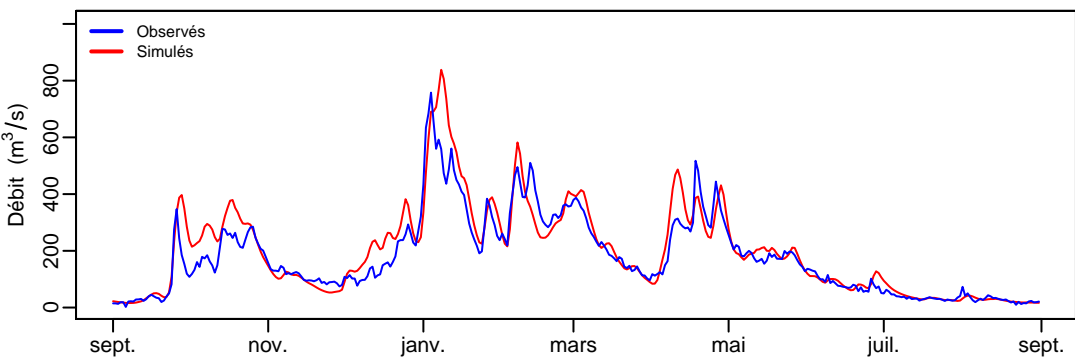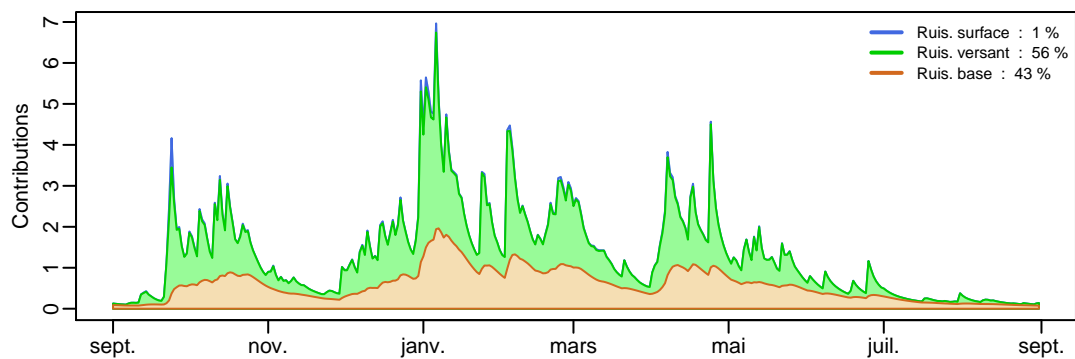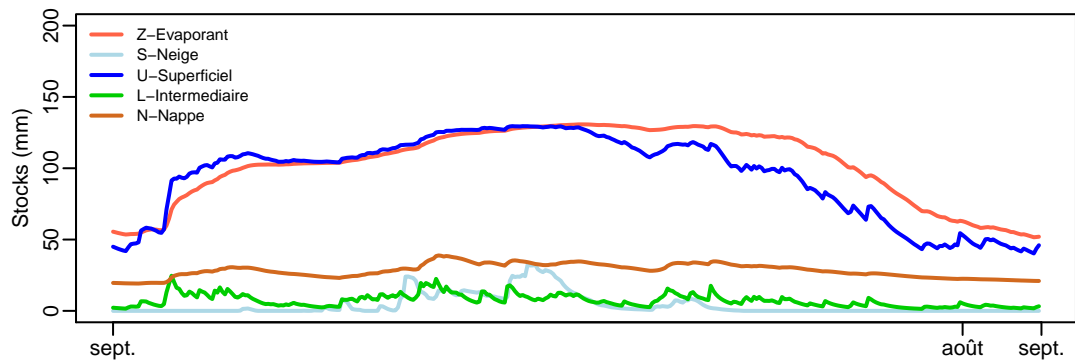

# k3400810 (12569.31 km<sup>2</sup>) – année 1994–1995

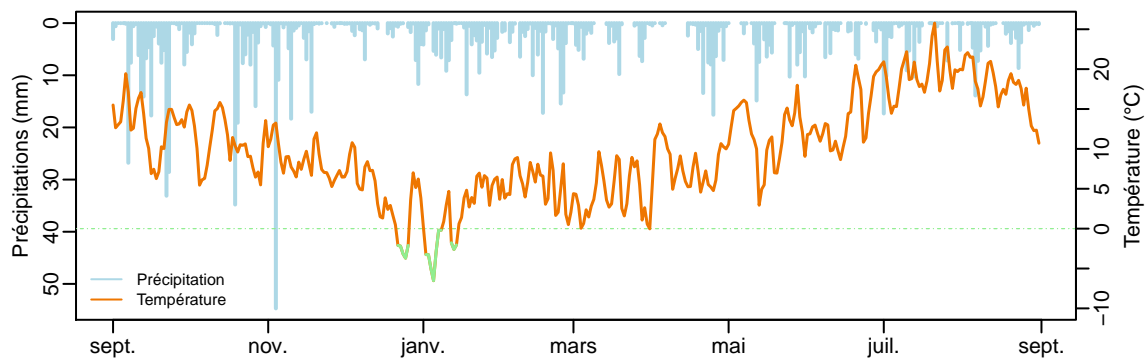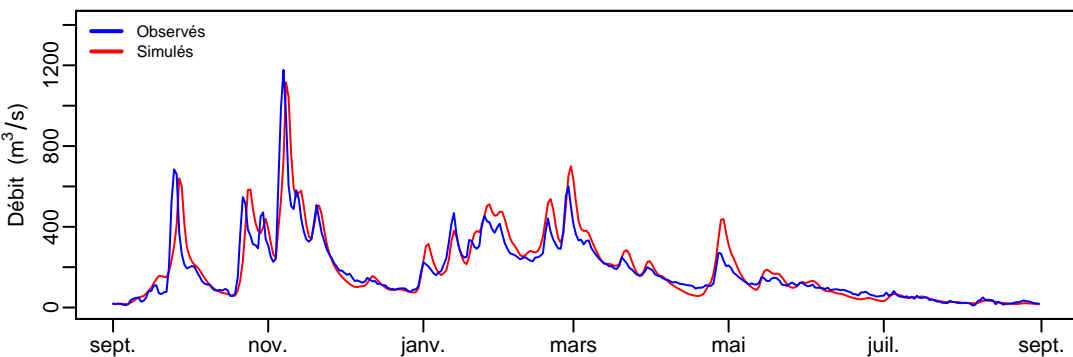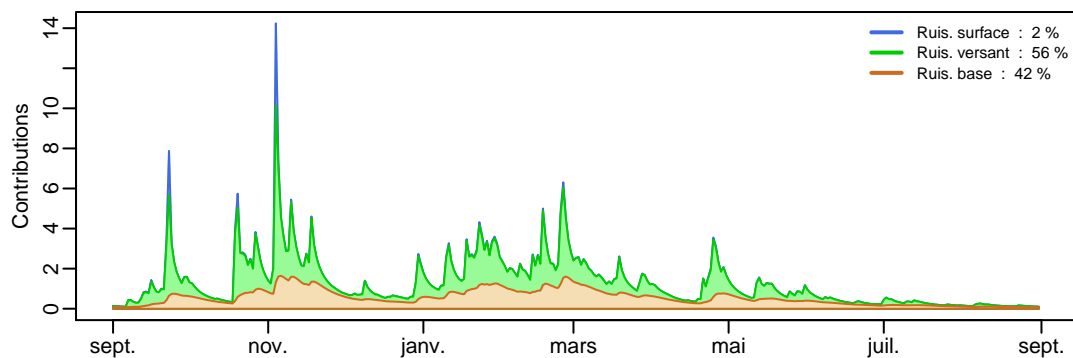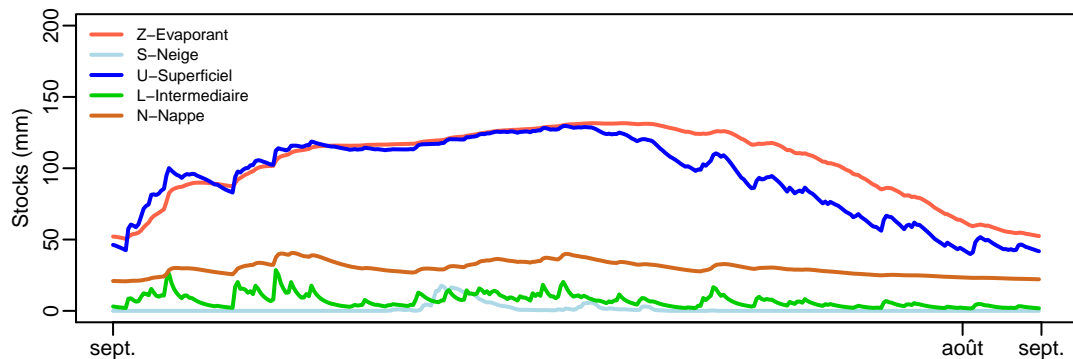

# k3400810 (12569.31 km<sup>2</sup>) – année 1995–1996

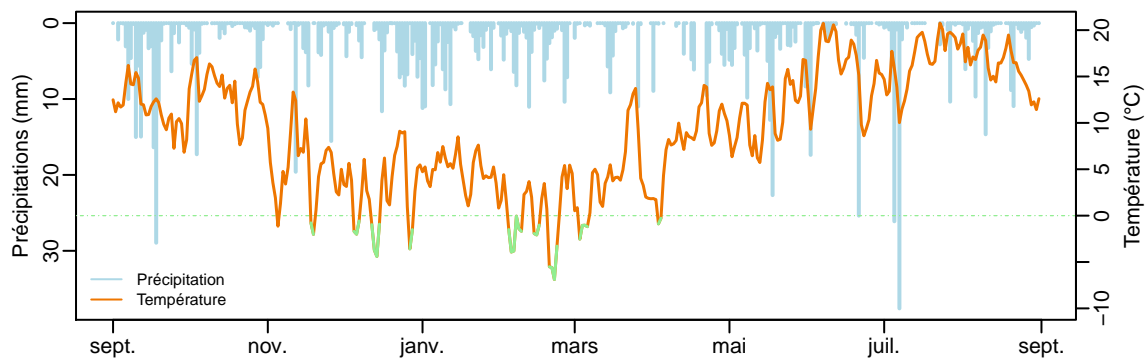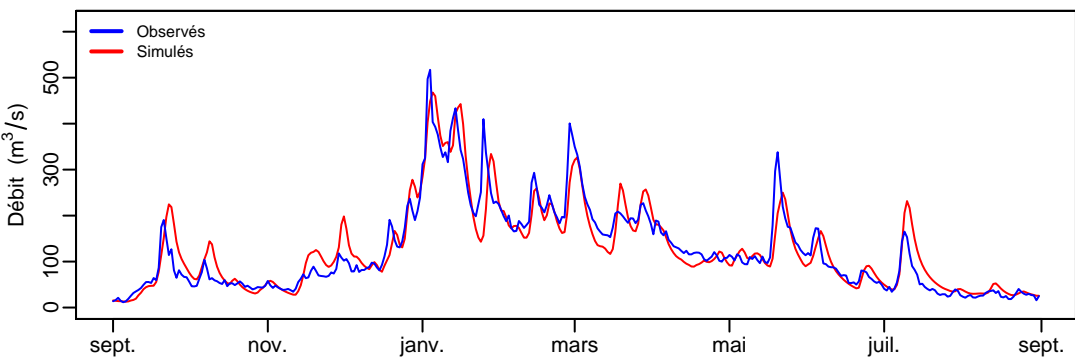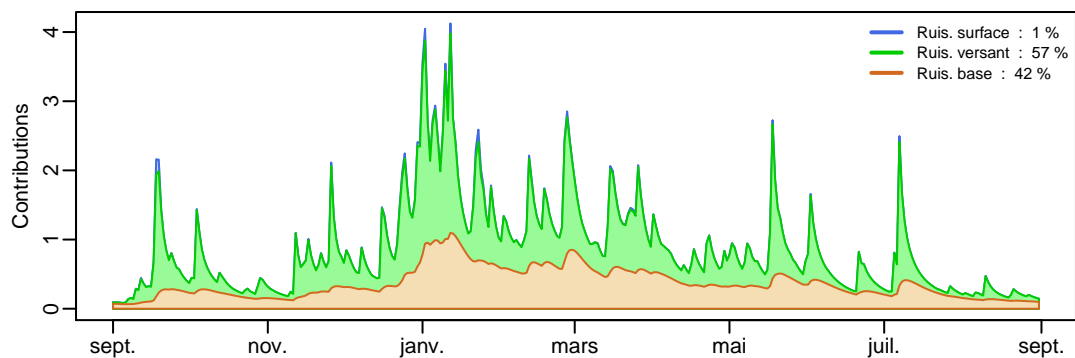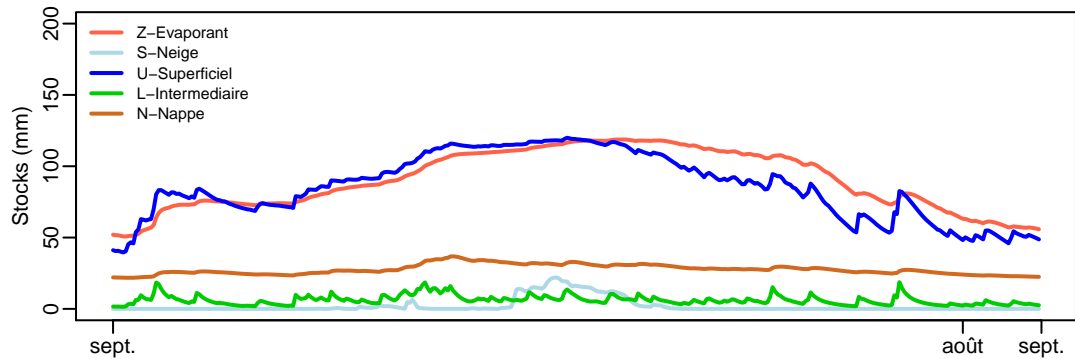

# k3400810 (12569.31 km<sup>2</sup>) – année 1996–1997

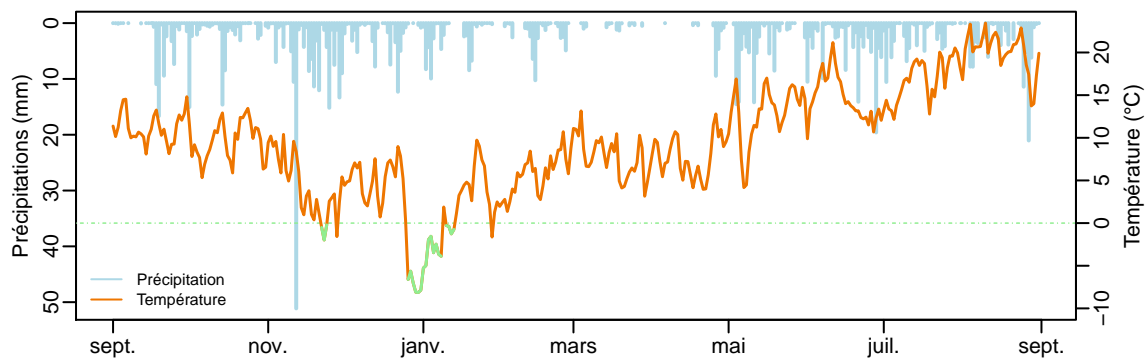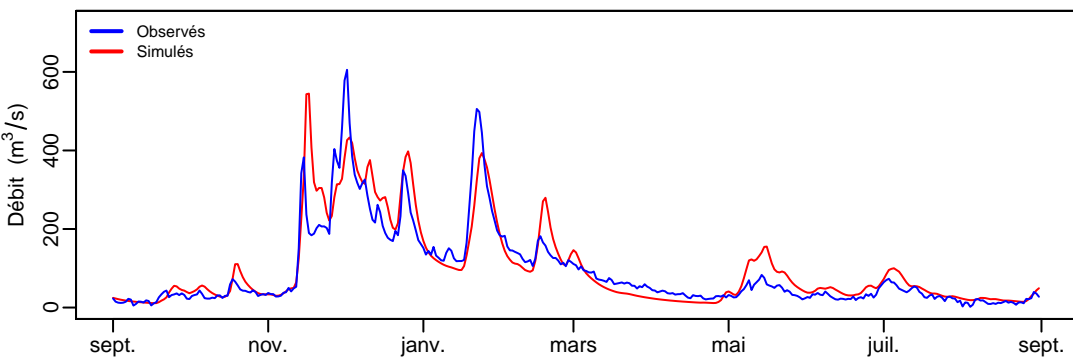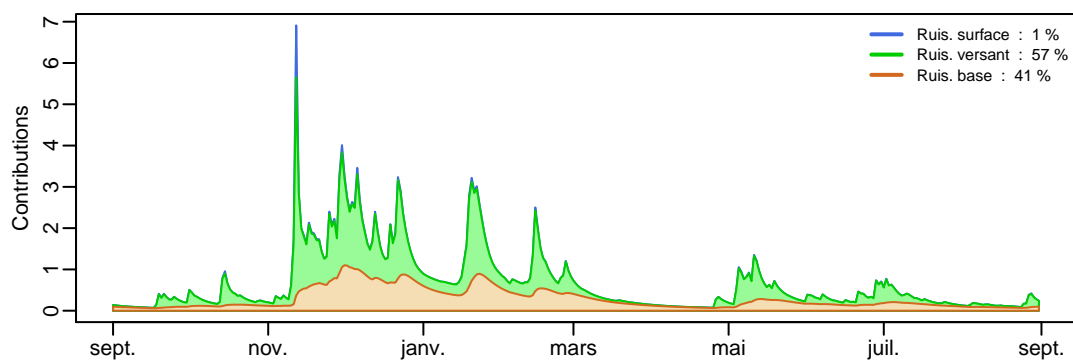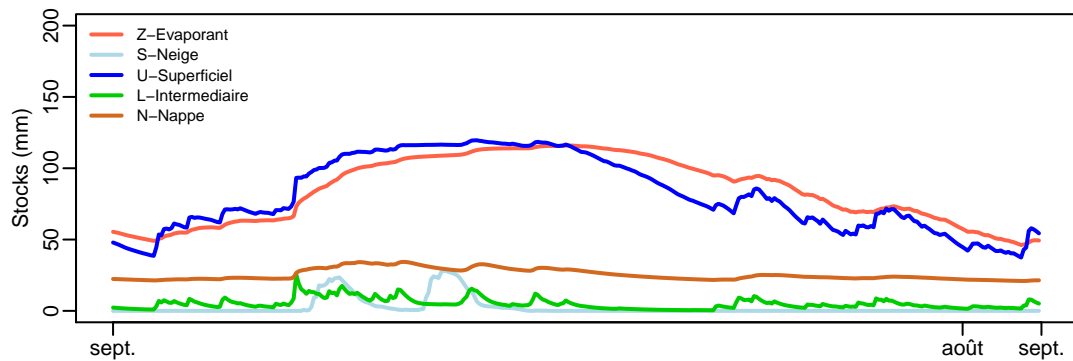

# k3400810 (12569.31 km<sup>2</sup>) – année 1997–1998

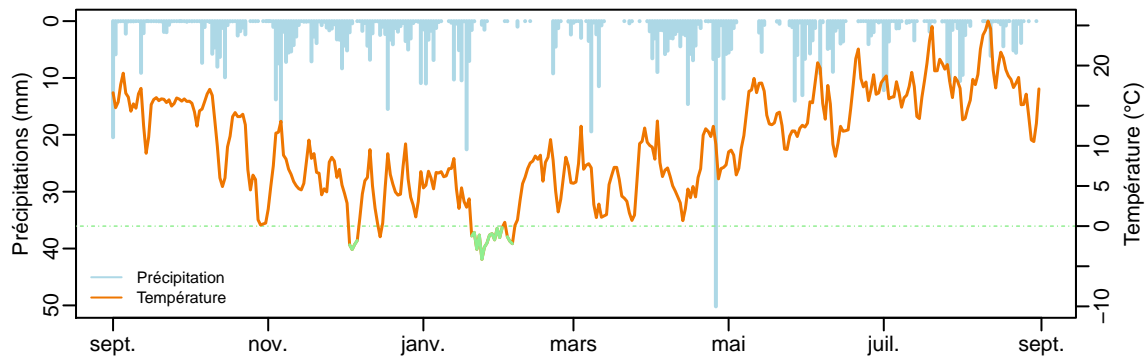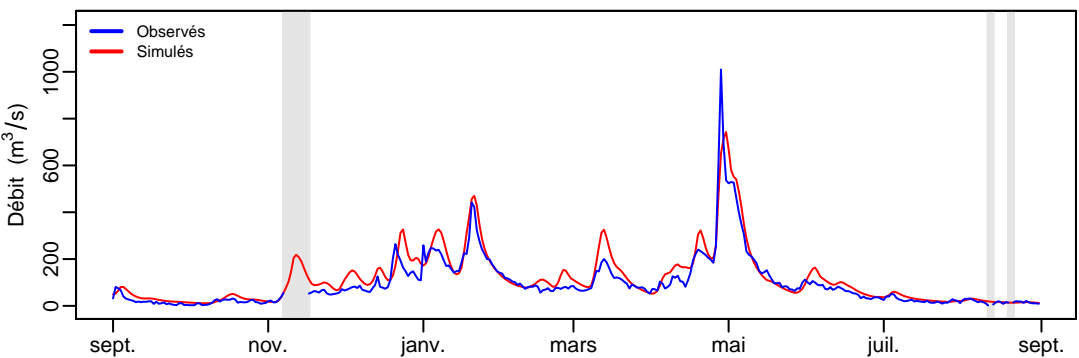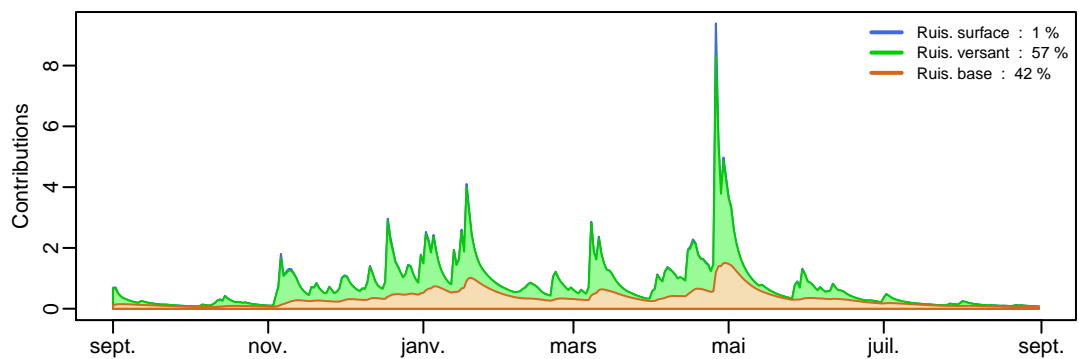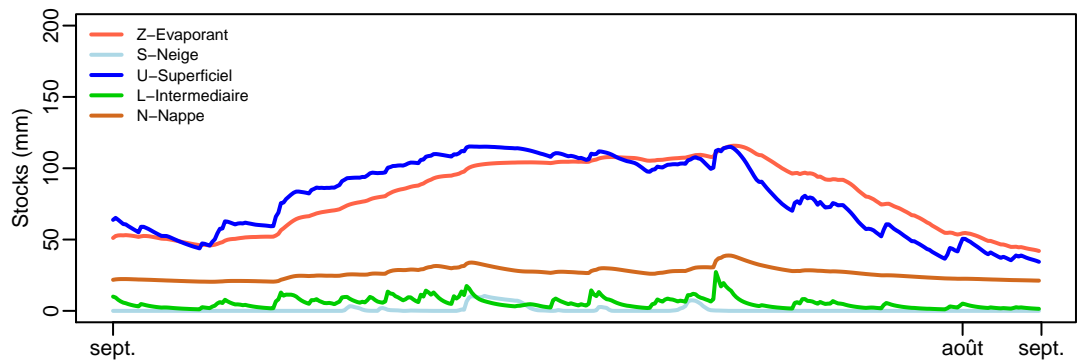



# k3400810 (12569.31 km<sup>2</sup>) – année 1998–1999

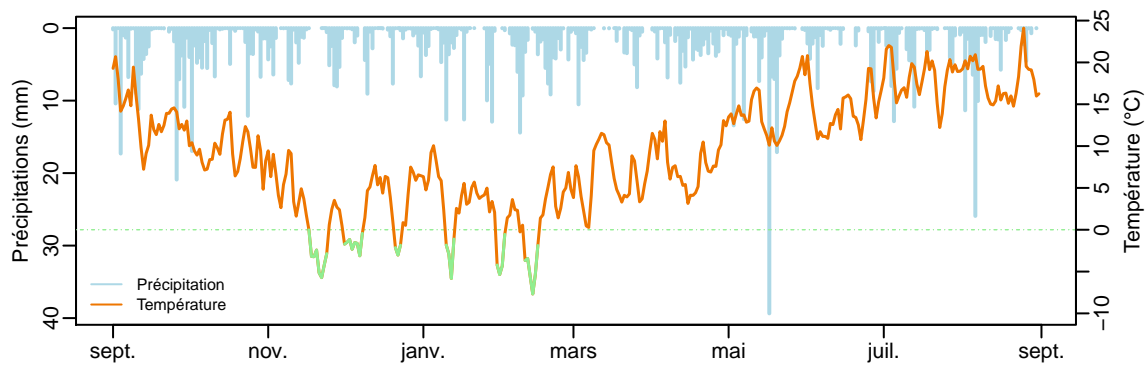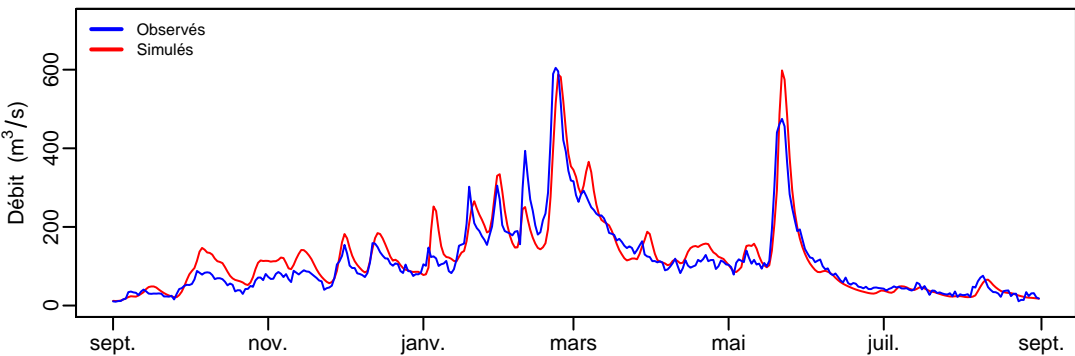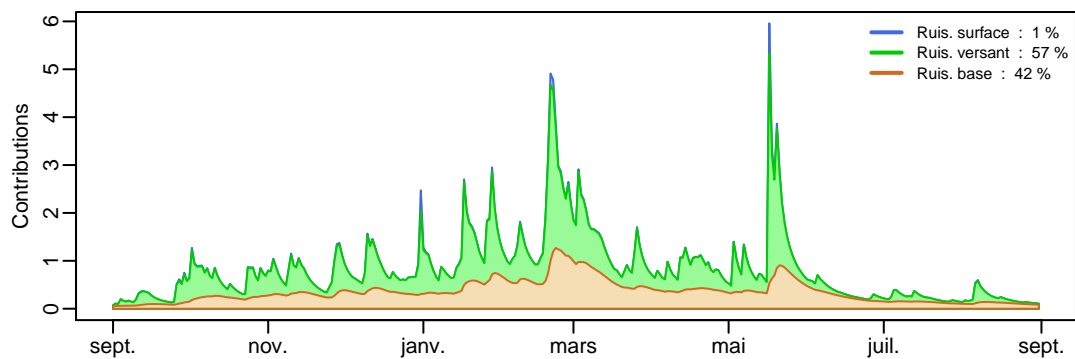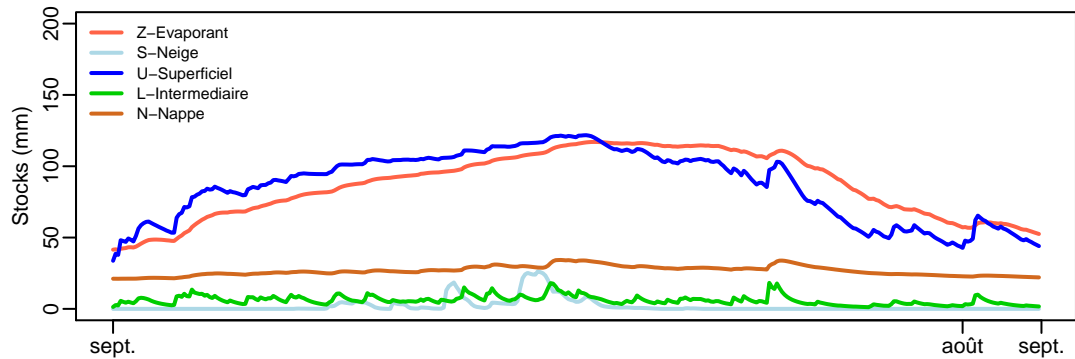

# k3400810 (12569.31 km<sup>2</sup>) – année 1999–2000

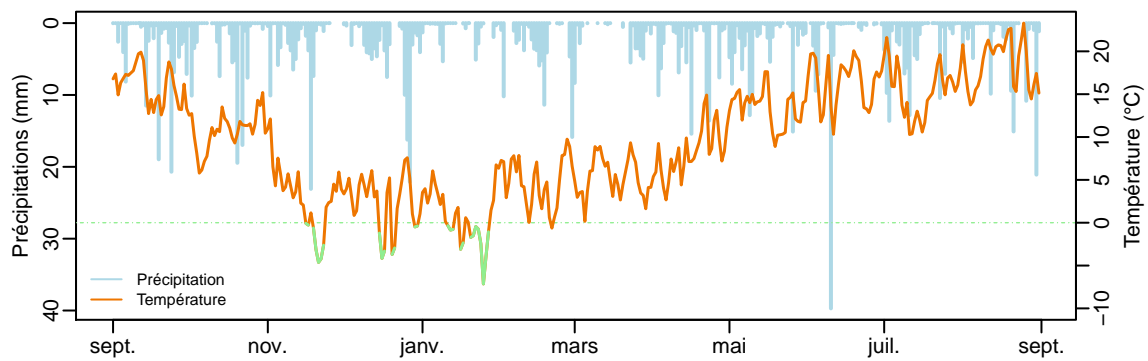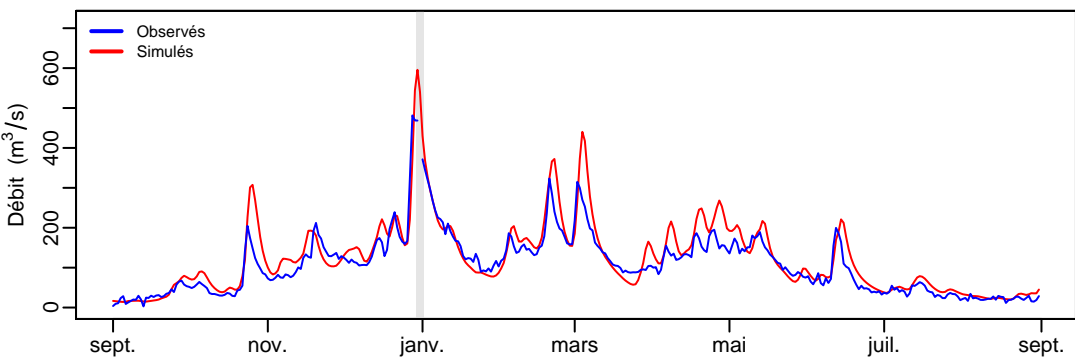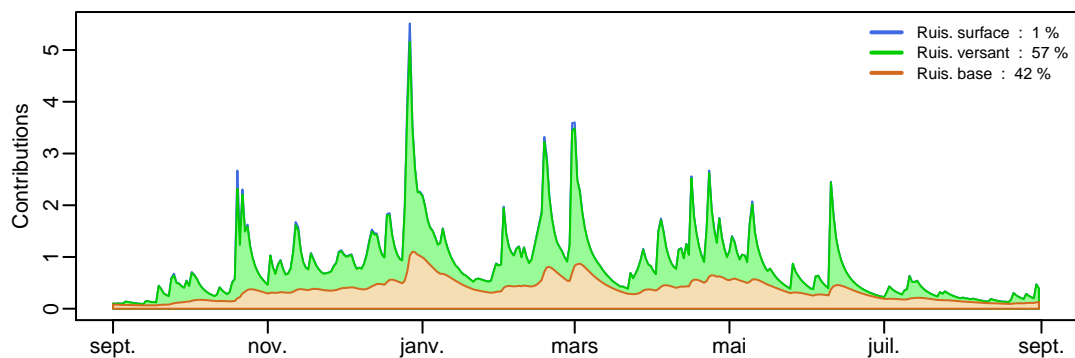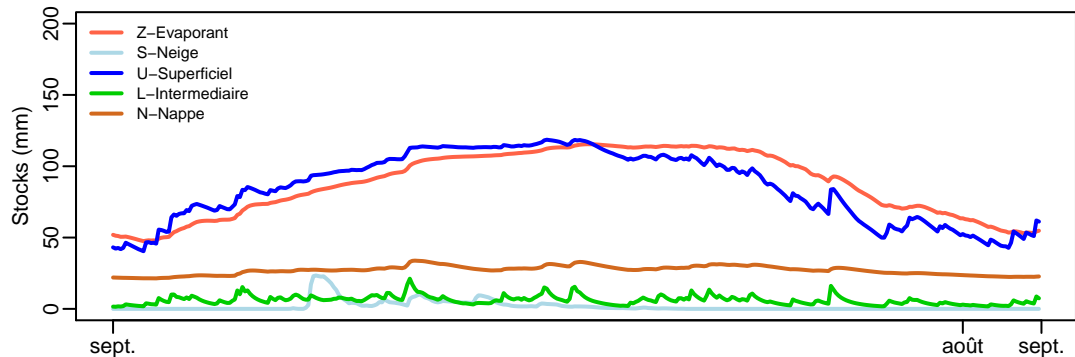

# k3400810 (12569.31 km<sup>2</sup>) – année 2000–2001

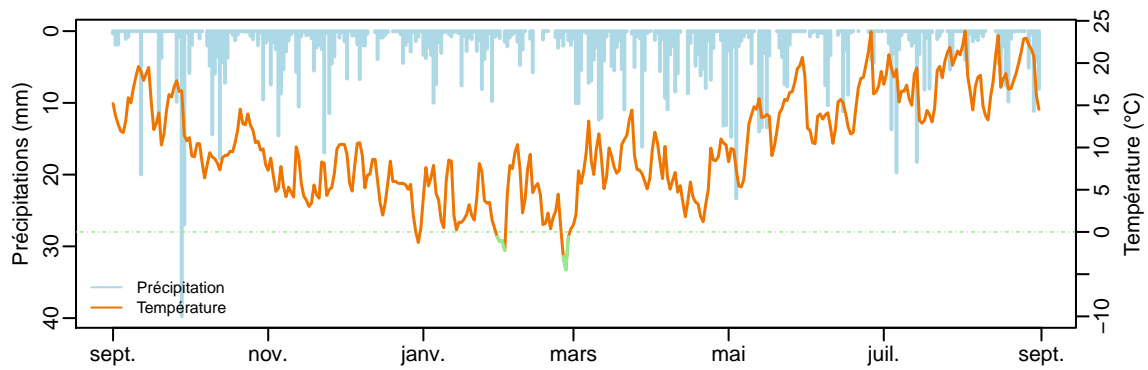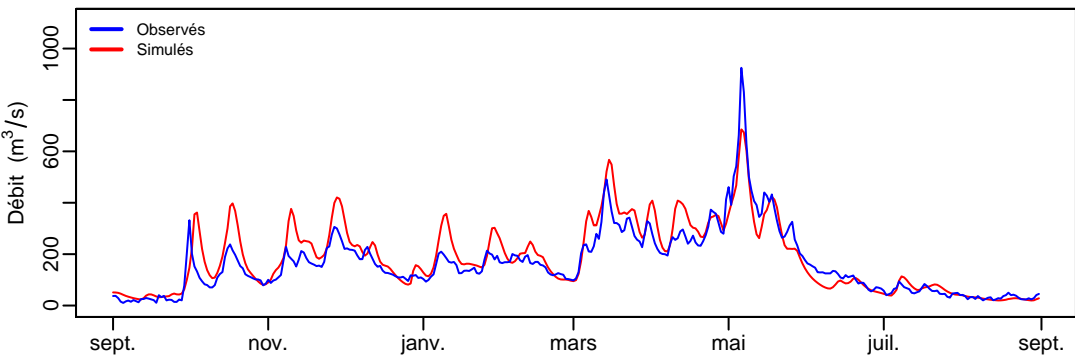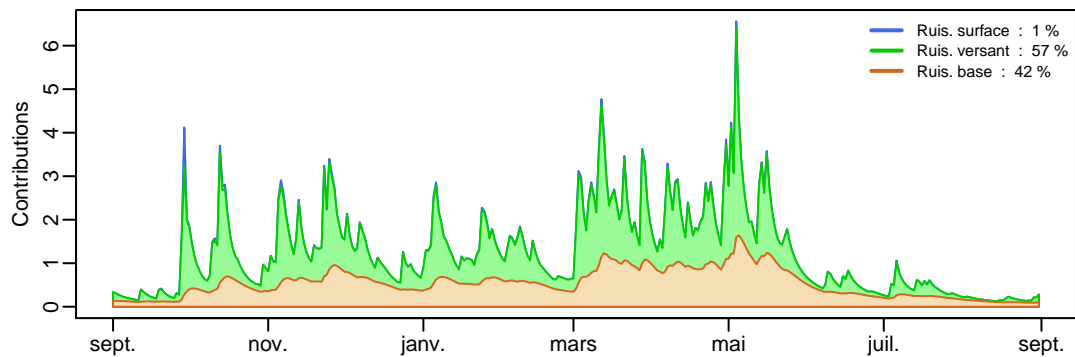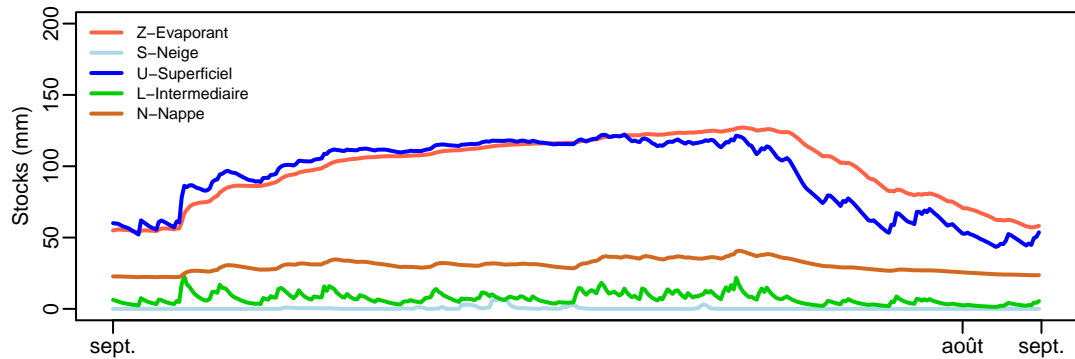

# k3400810 (12569.31 km<sup>2</sup>) – année 2001–2002

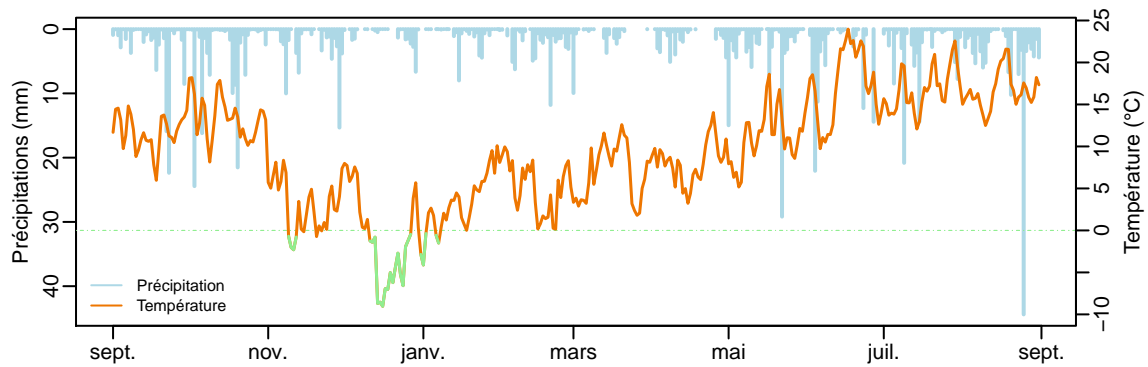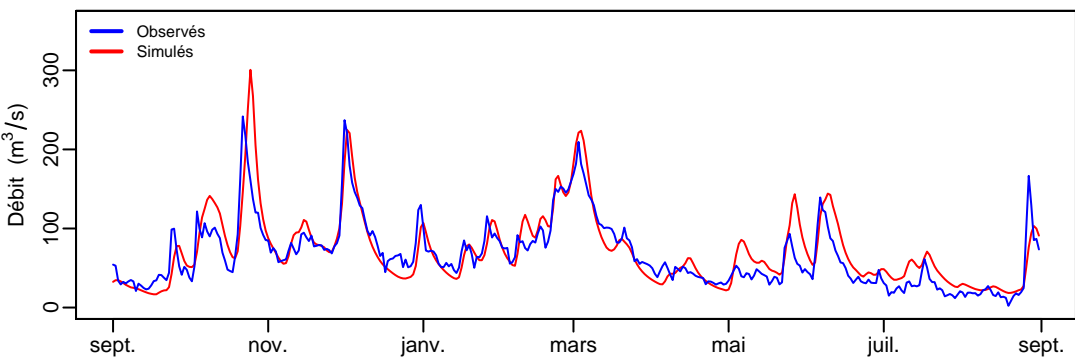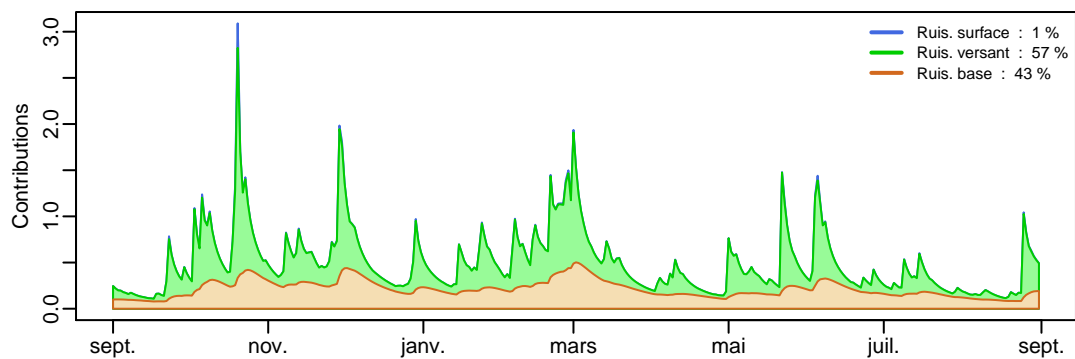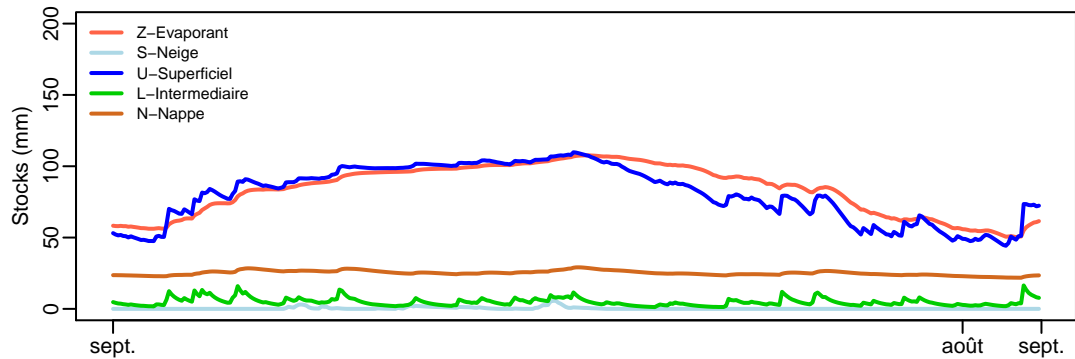

# k3400810 (12569.31 km<sup>2</sup>) – année 2002–2003

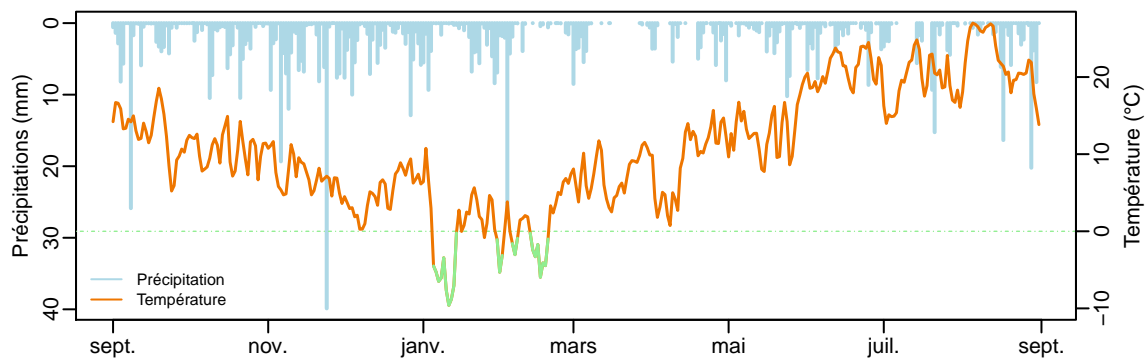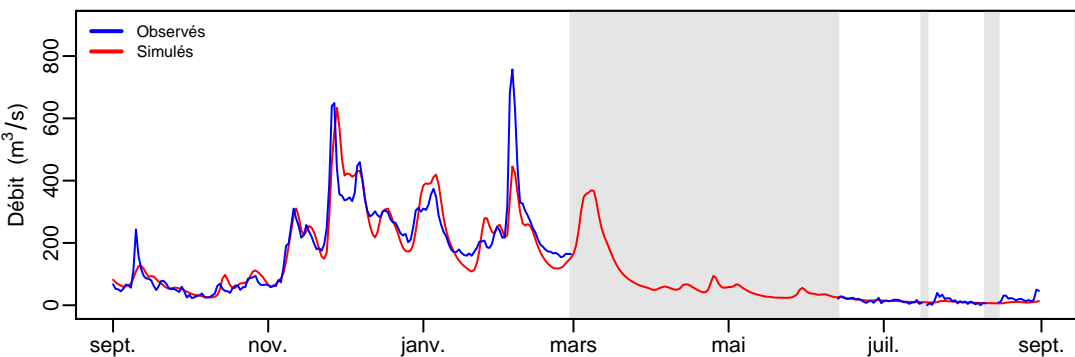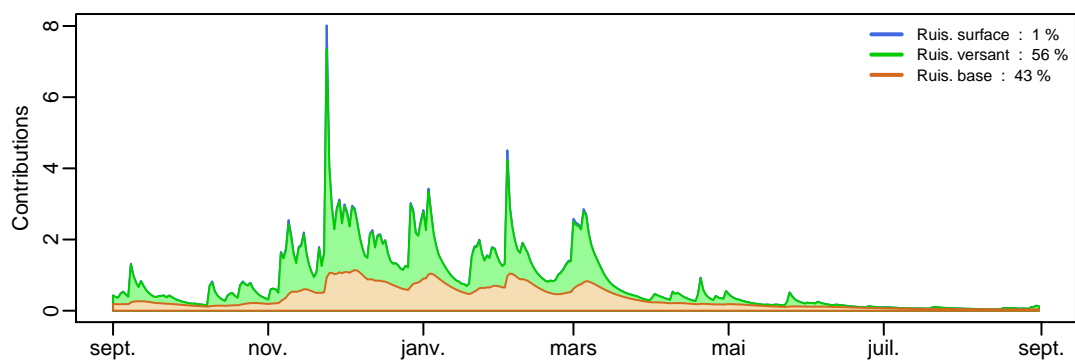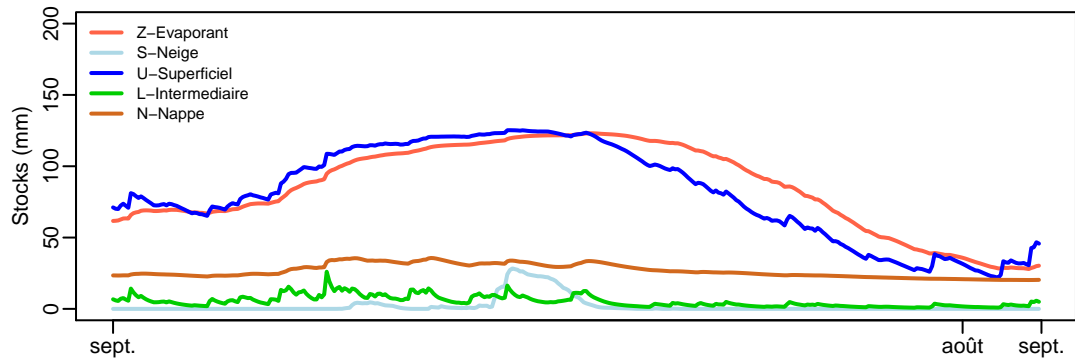

# k3400810 (12569.31 km<sup>2</sup>) – année 2003–2004

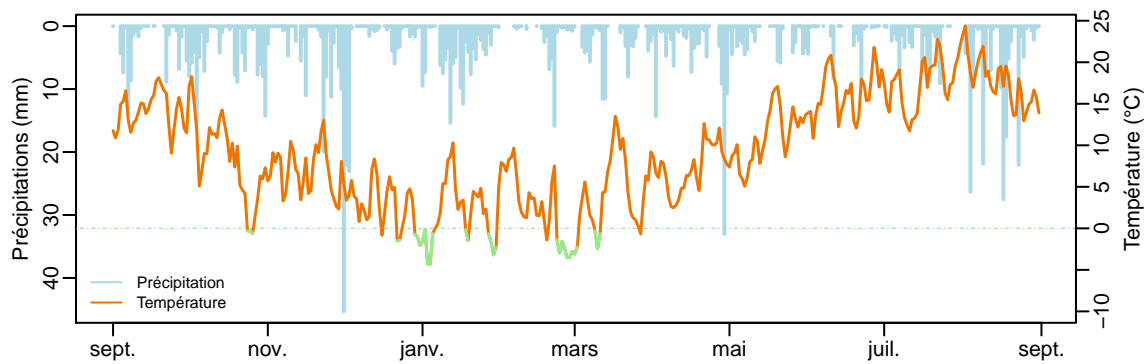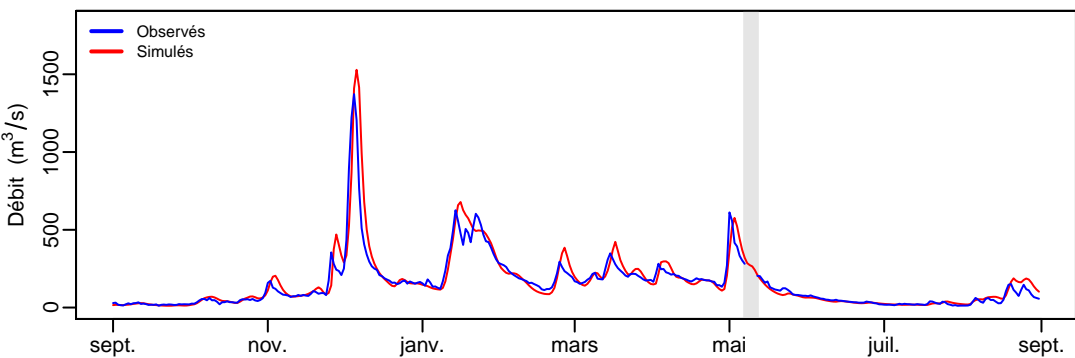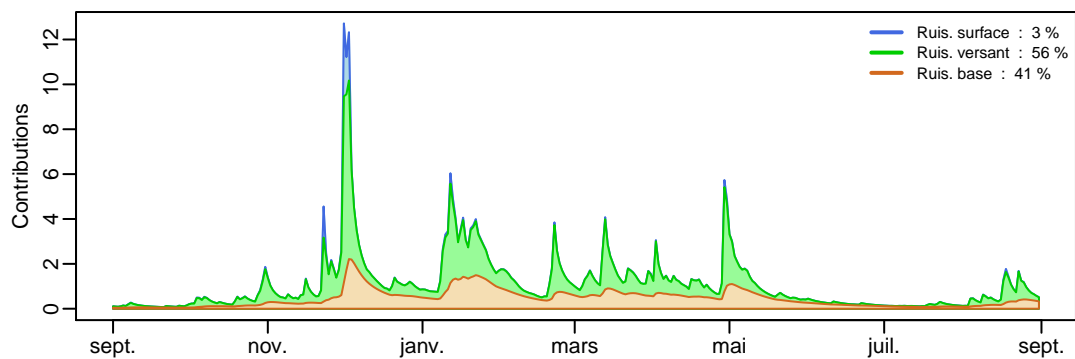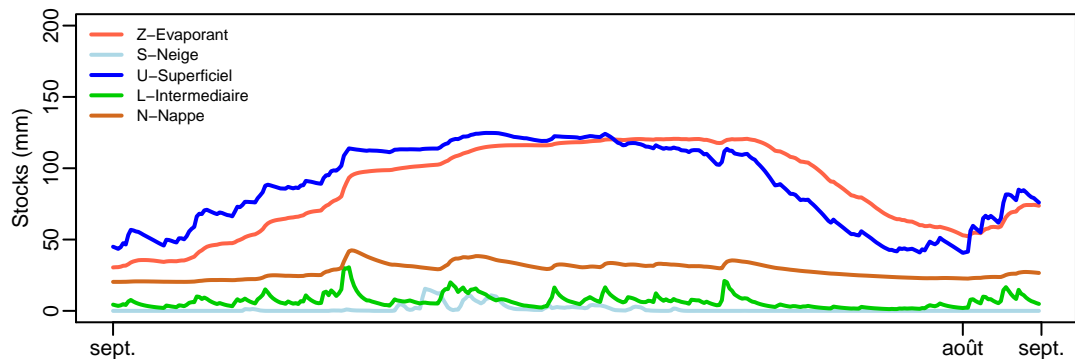

# k3400810 (12569.31 km<sup>2</sup>) – année 2004–2005

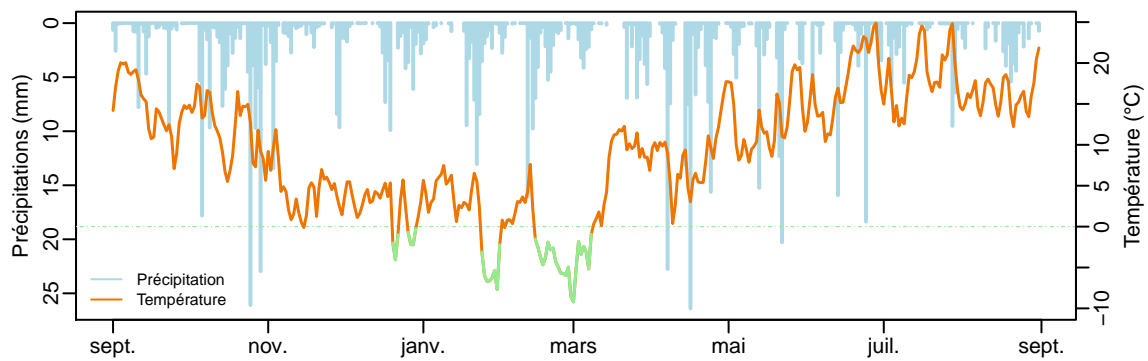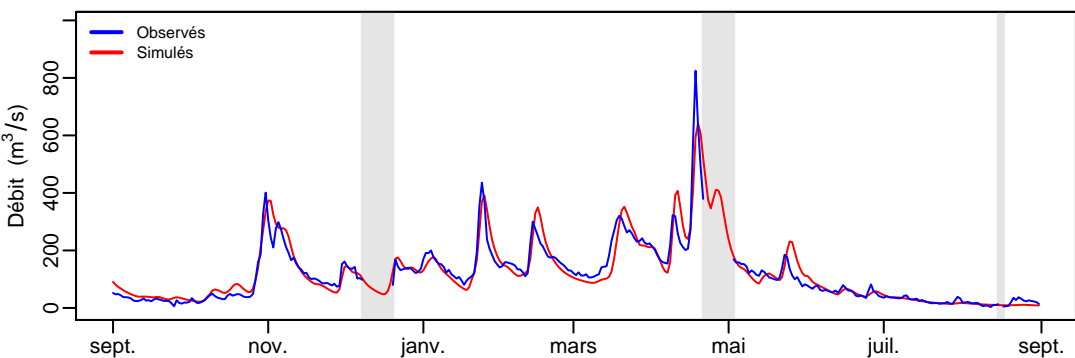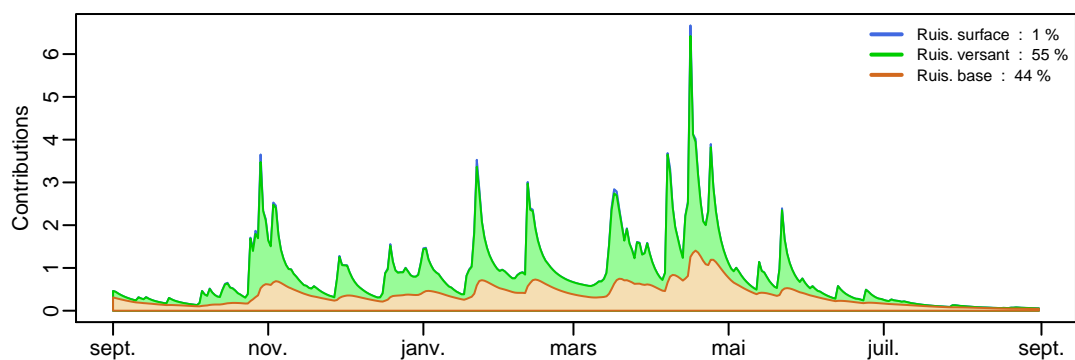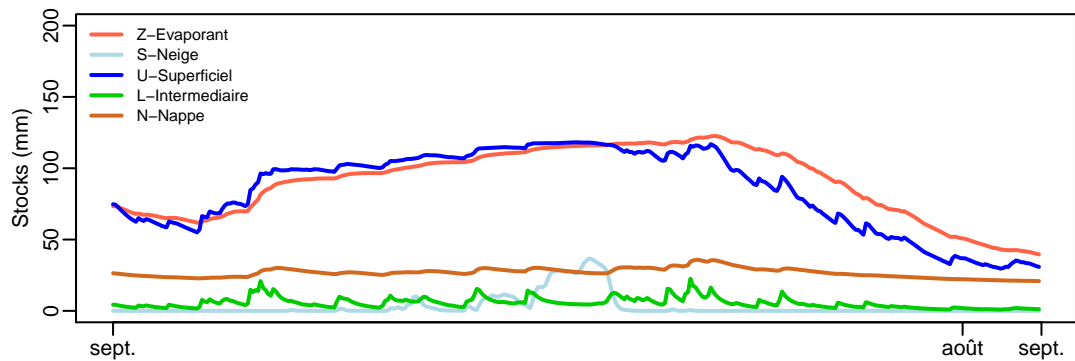

# k3400810 (12569.31 km<sup>2</sup>) – année 2005–2006

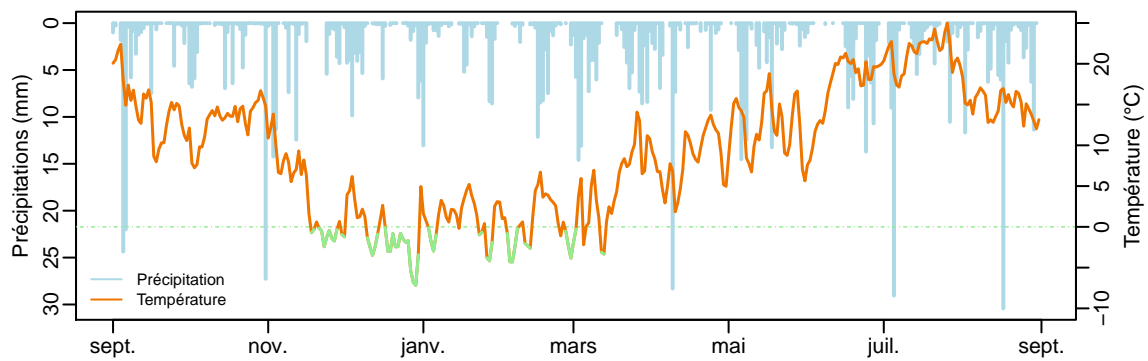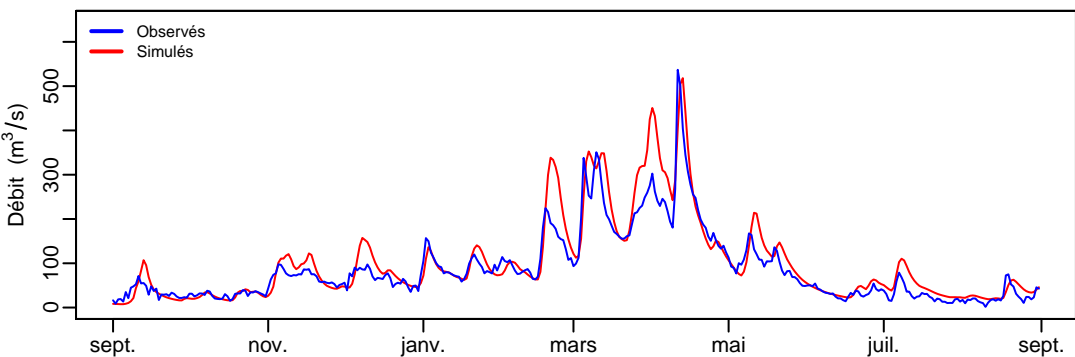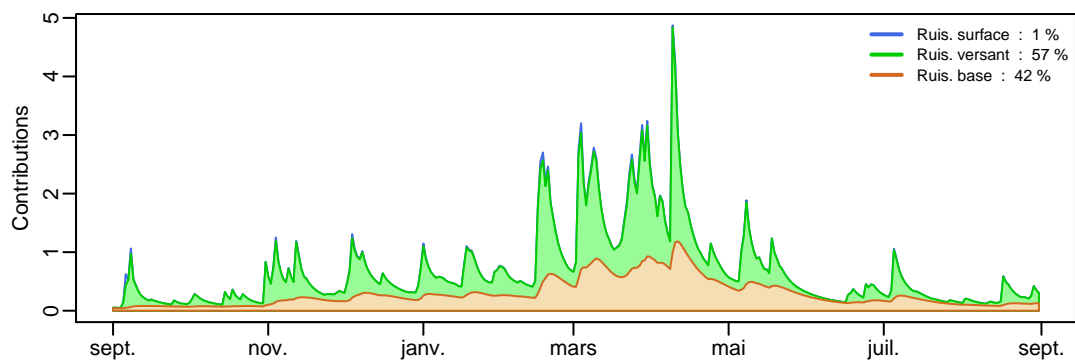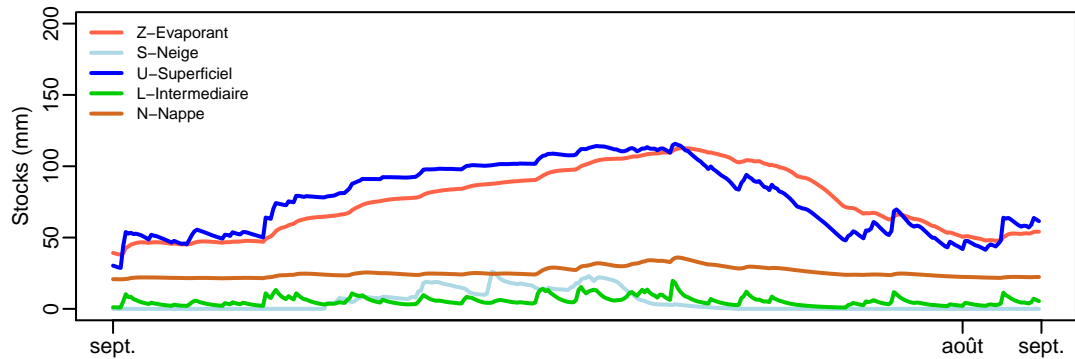



# k3400810 (12569.31 km<sup>2</sup>) – année 2006–2007

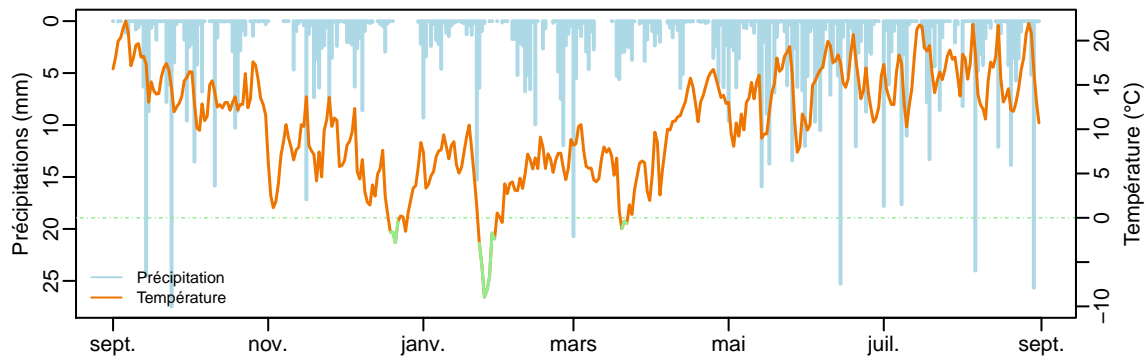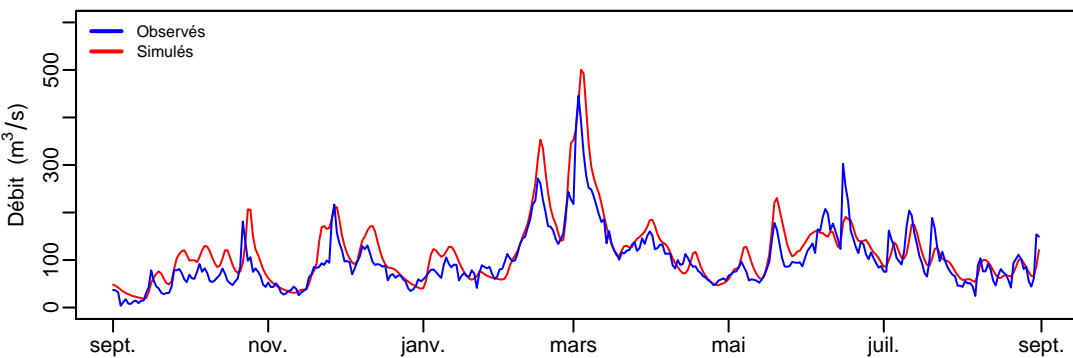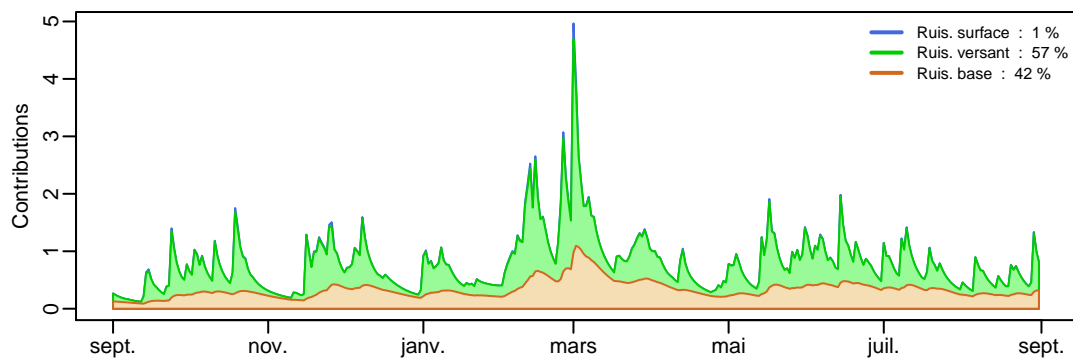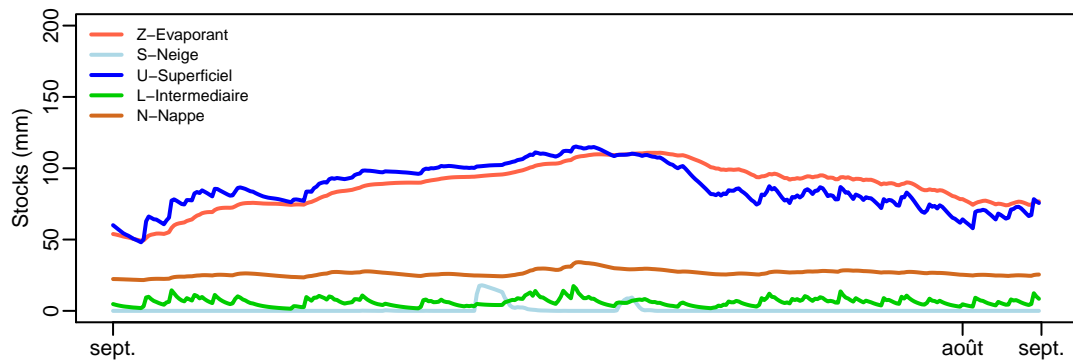

# k3400810 (12569.31 km<sup>2</sup>) – année 2007–2008

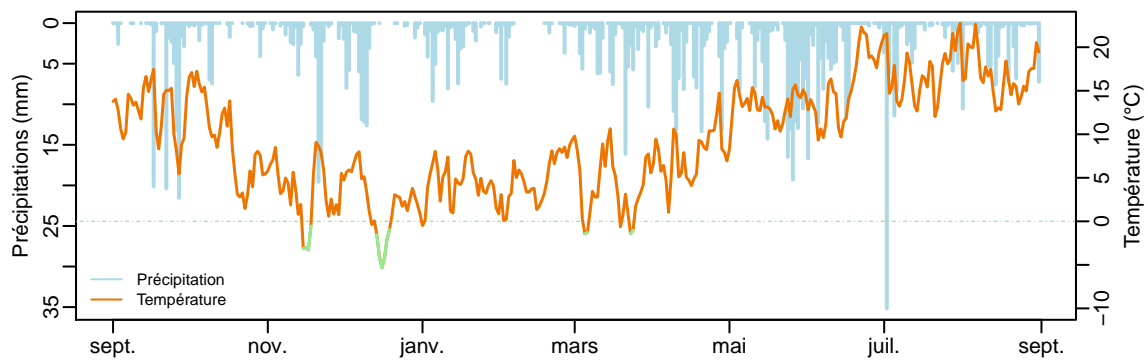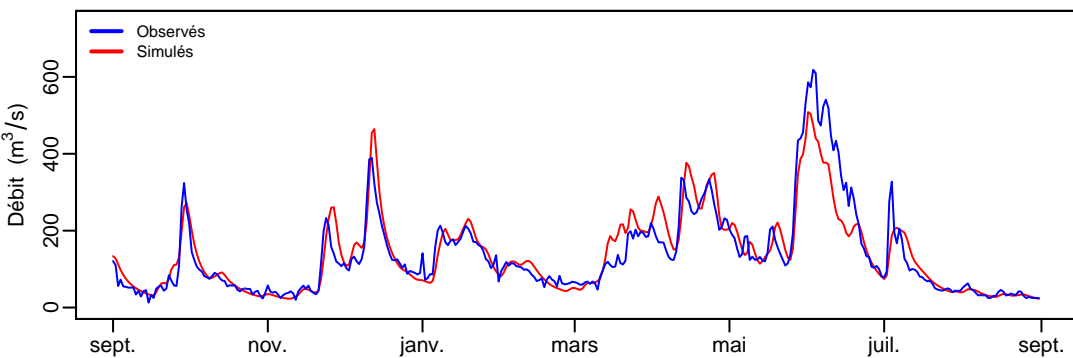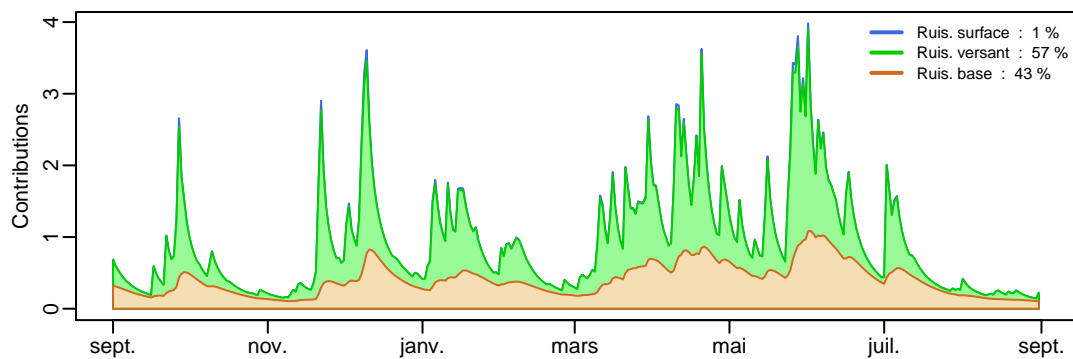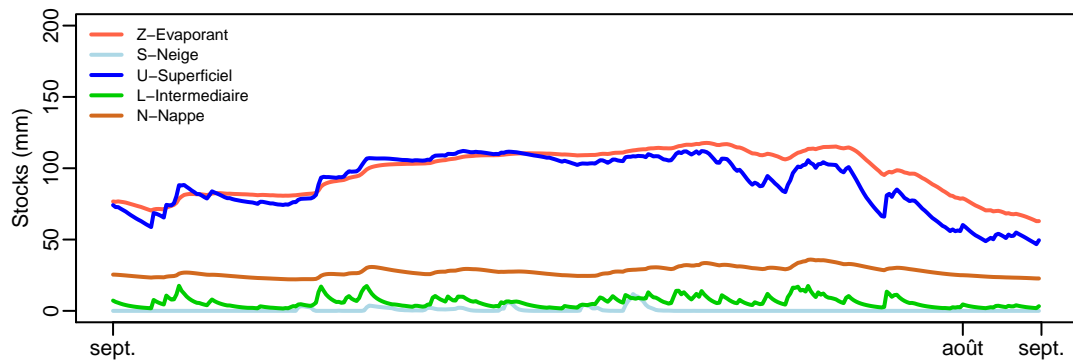

# k3400810 (12569.31 km<sup>2</sup>) – année 2008–2009

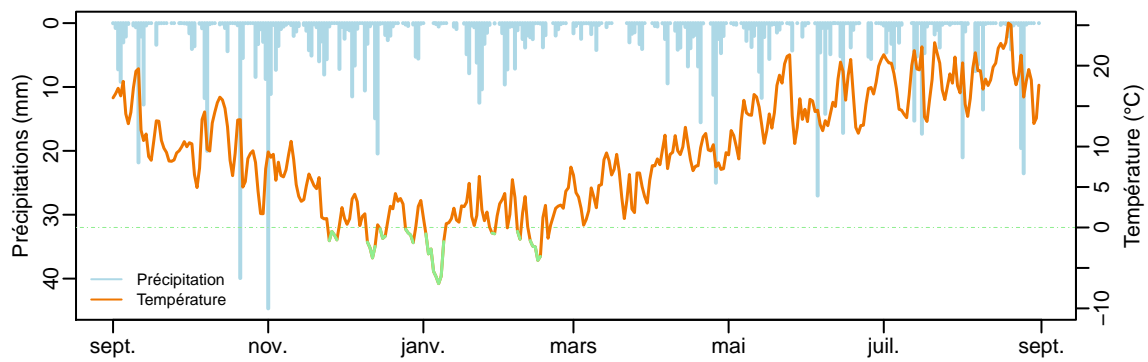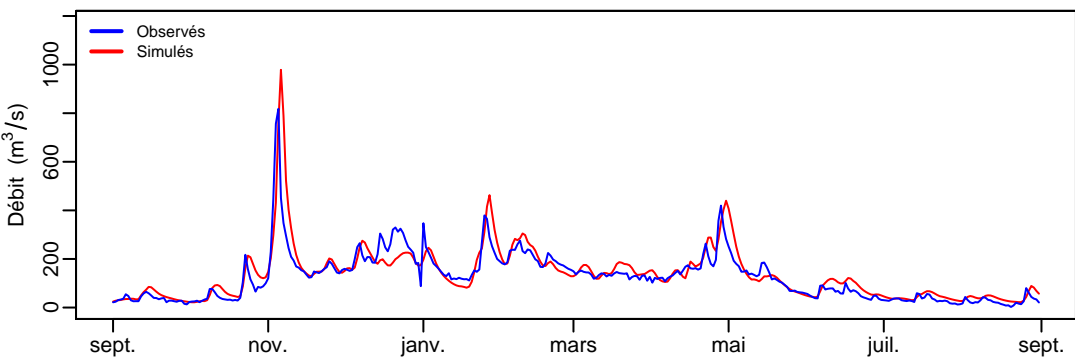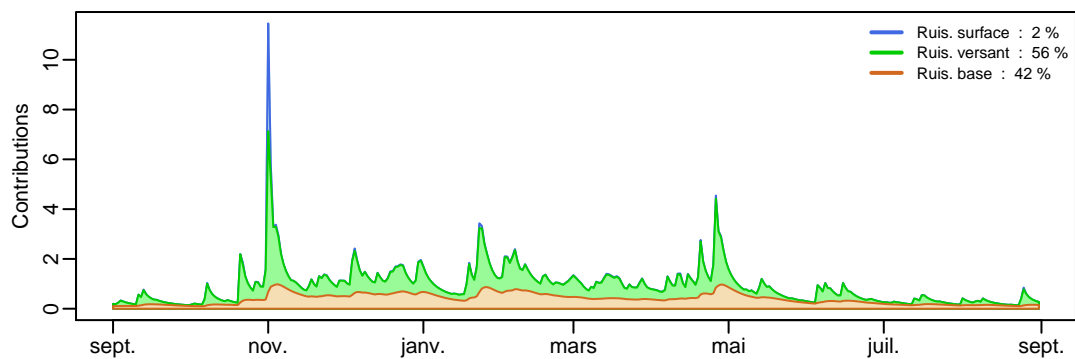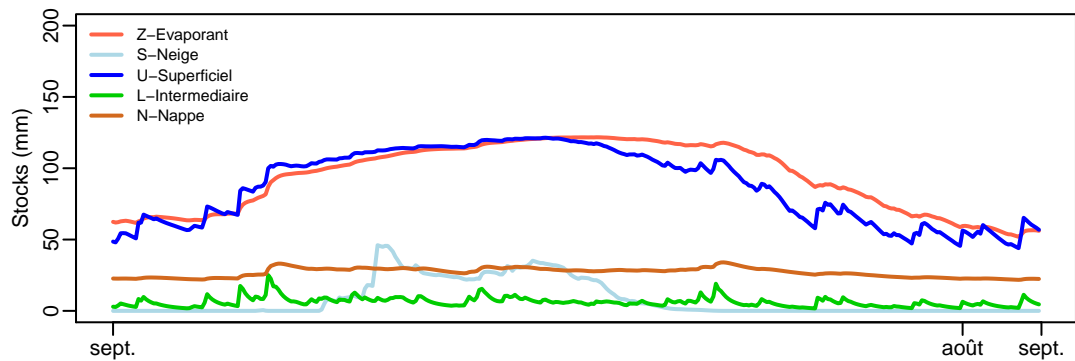

# k3400810 (12569.31 km<sup>2</sup>) – année 2009–2010

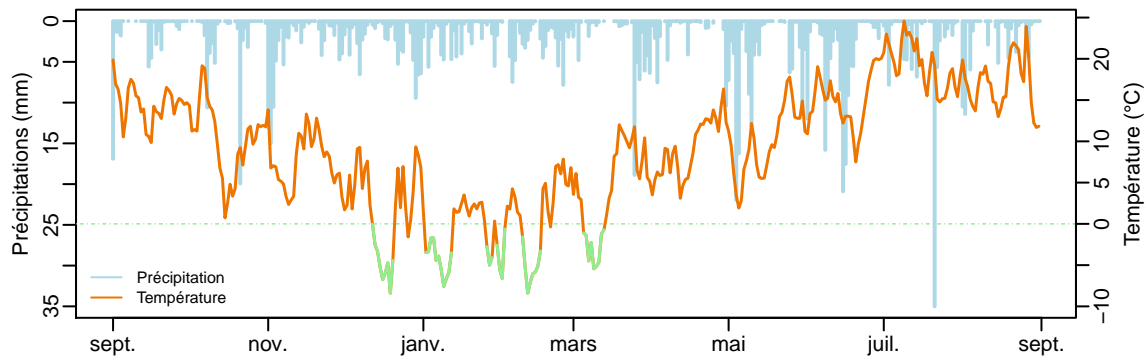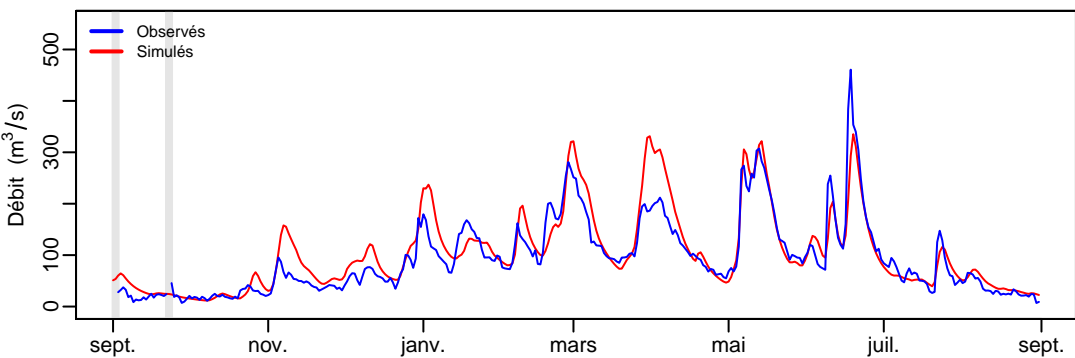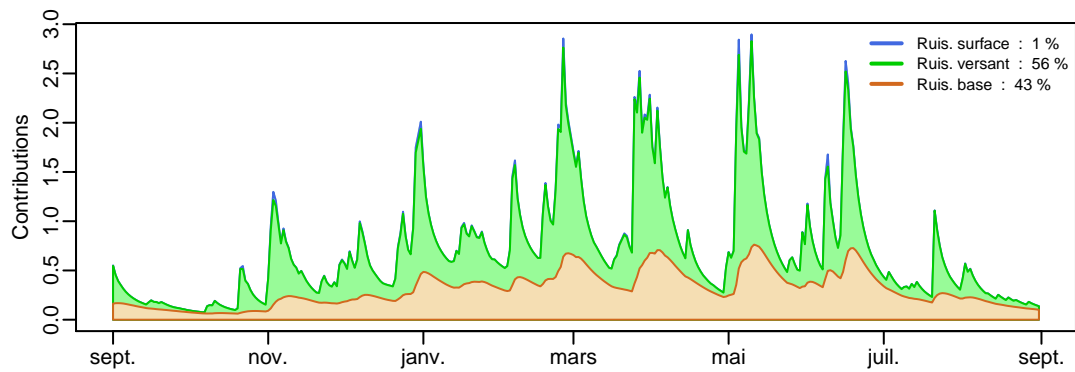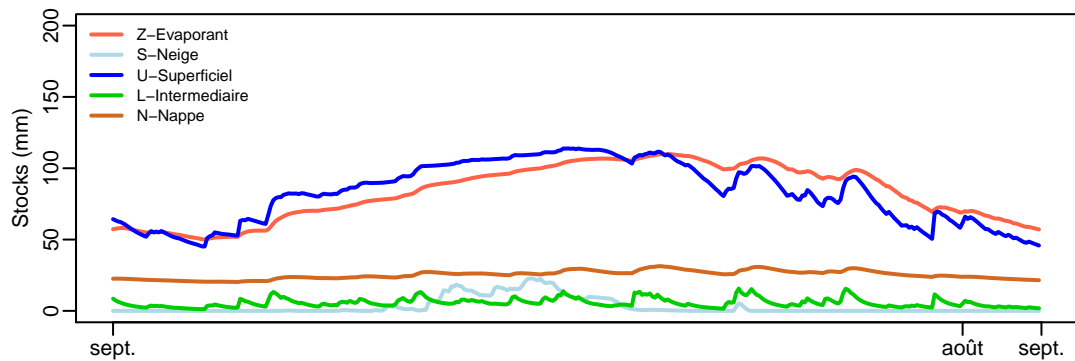

# k3400810 (12569.31 km<sup>2</sup>) – année 2010–2011

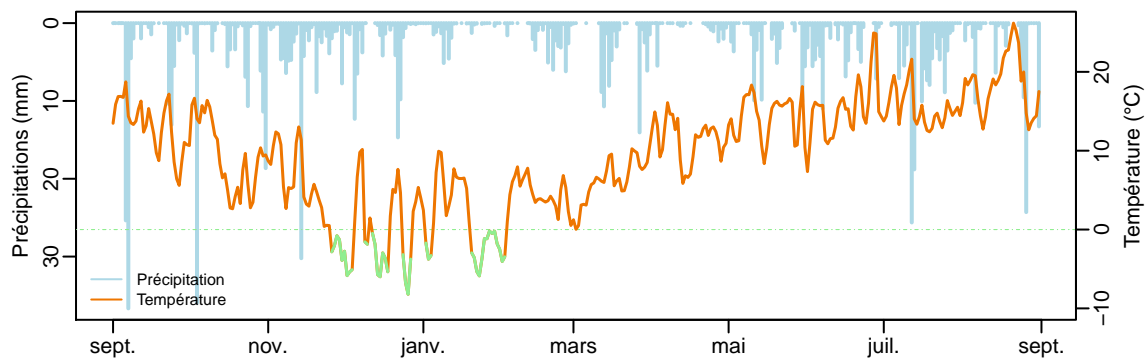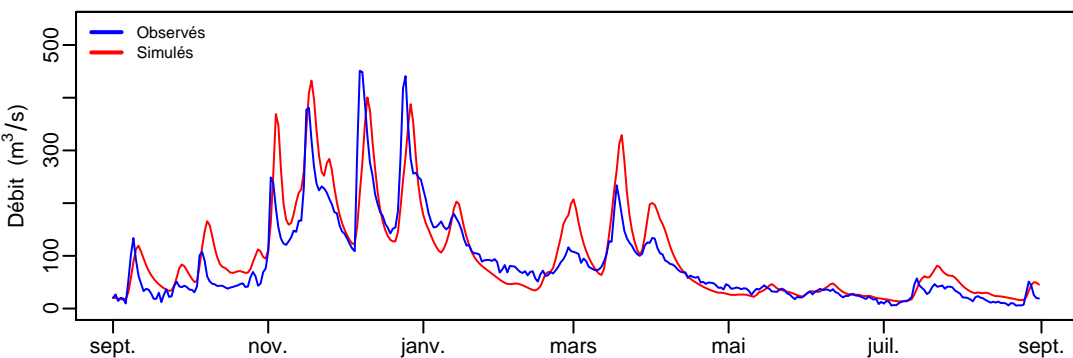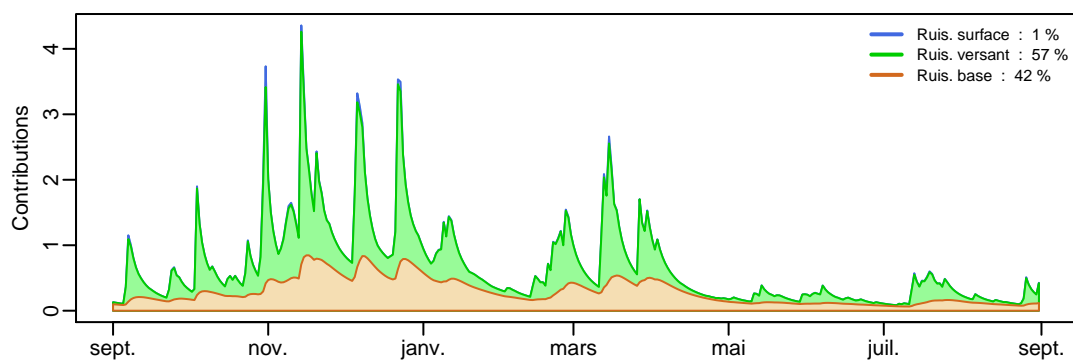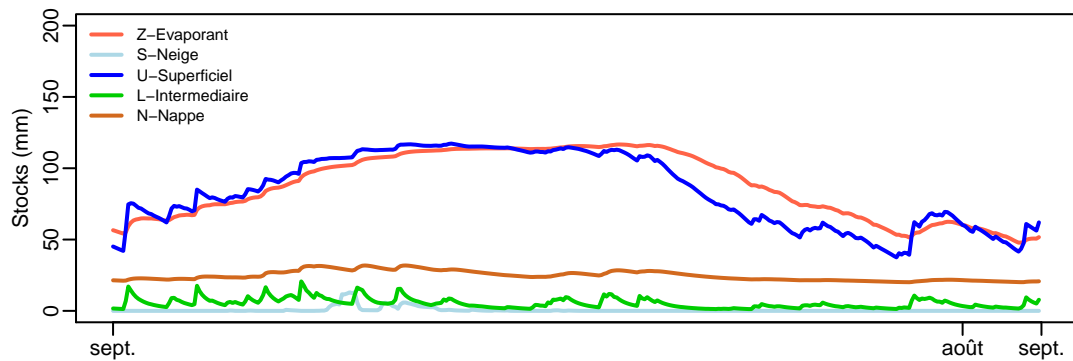

# k3400810 (12569.31 km<sup>2</sup>) – année 2011–2012

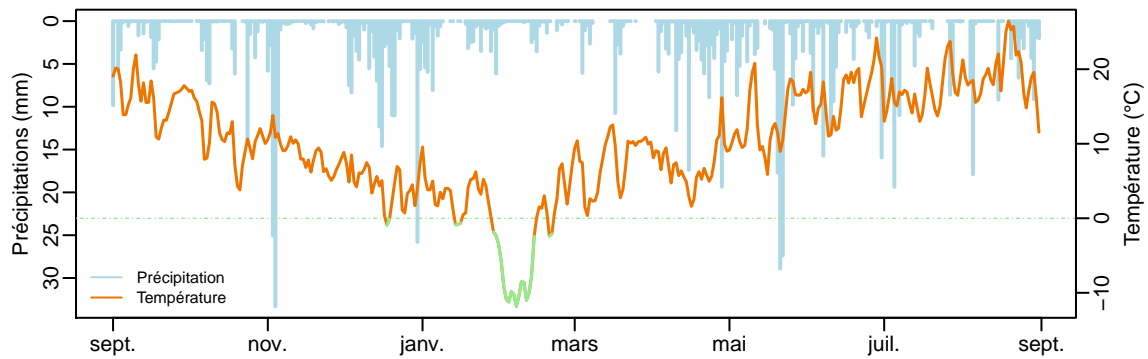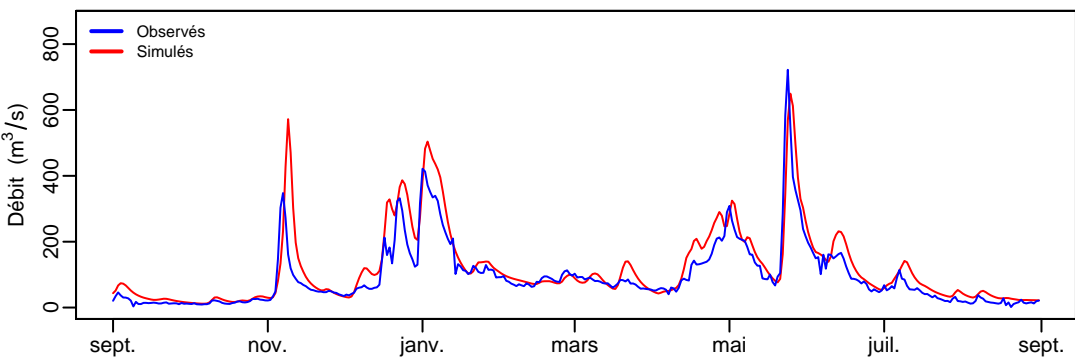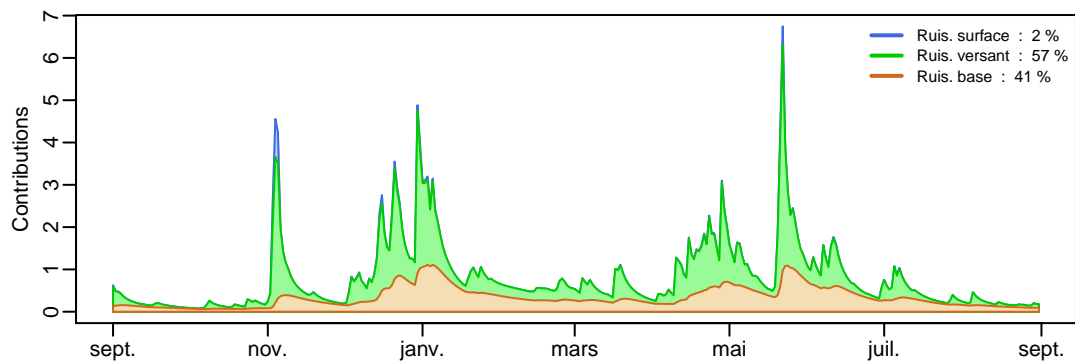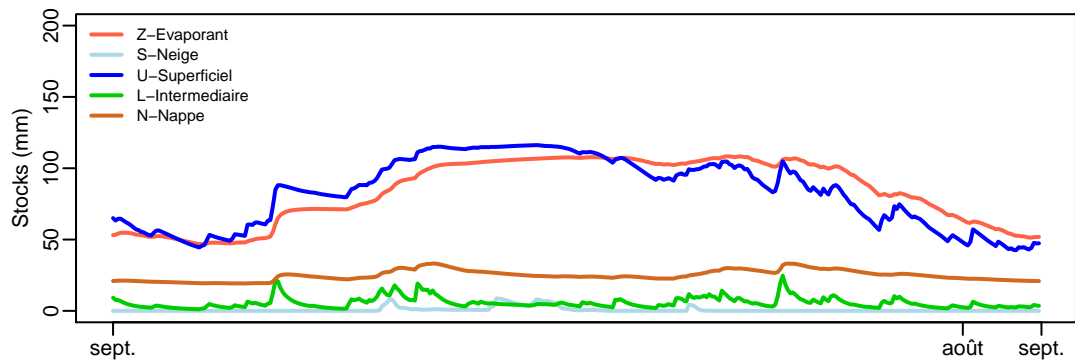

# k3450810 (13012.94 km<sup>2</sup>) – année 1981–1982

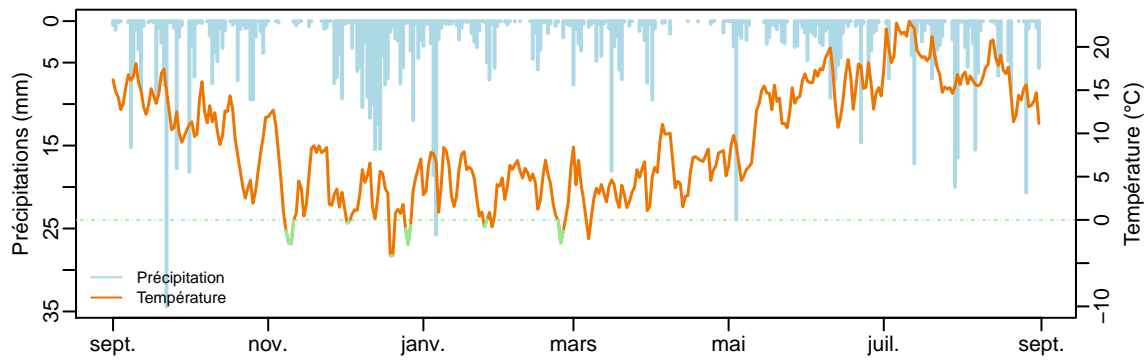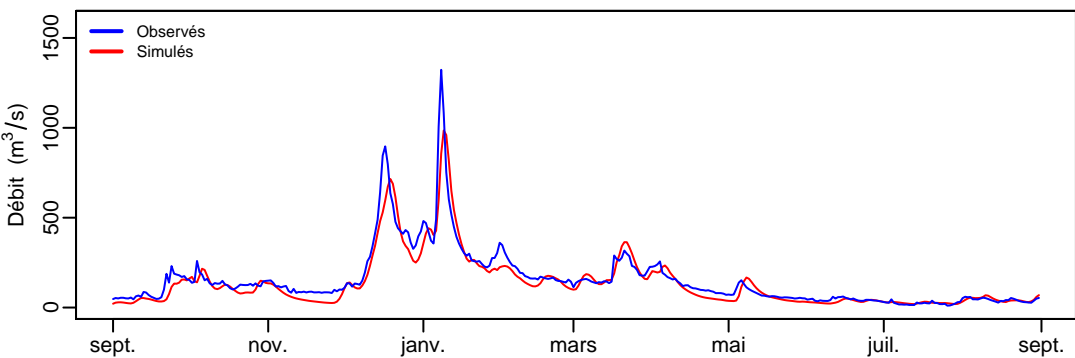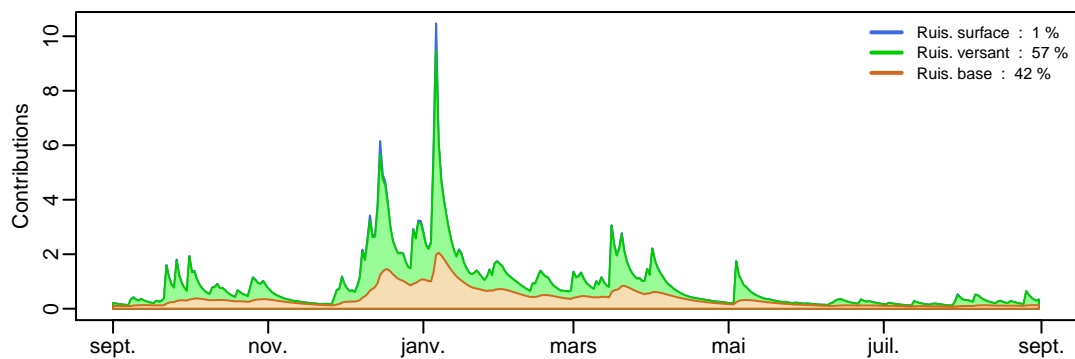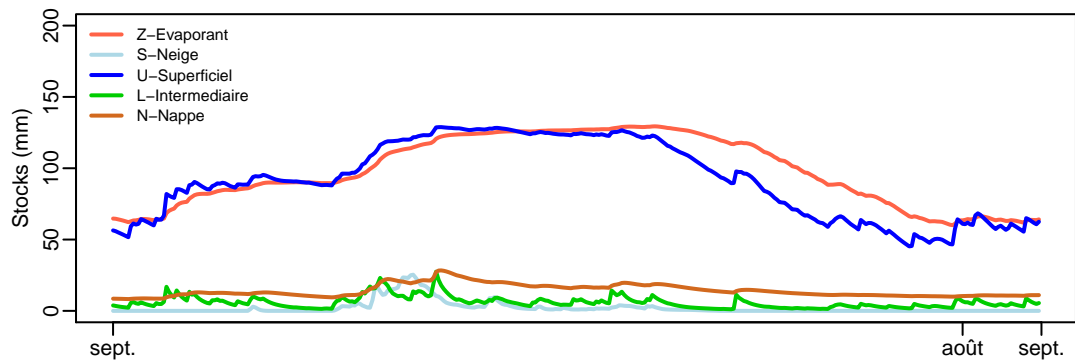

# k3450810 (13012.94 km<sup>2</sup>) – année 1982–1983

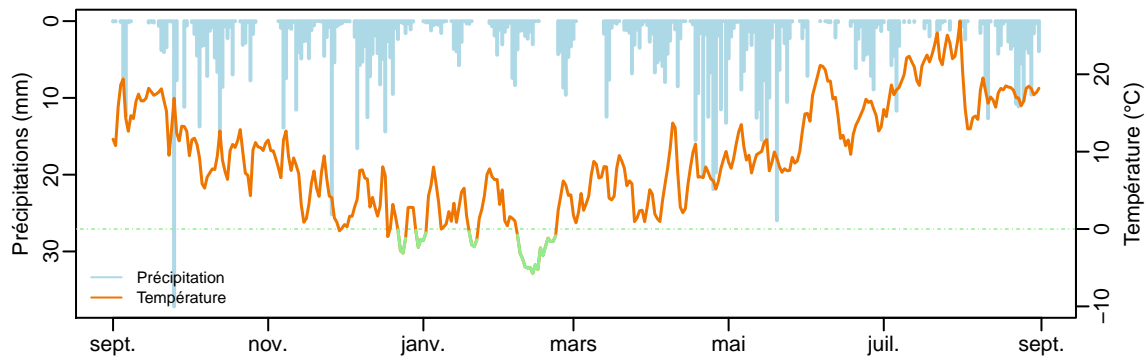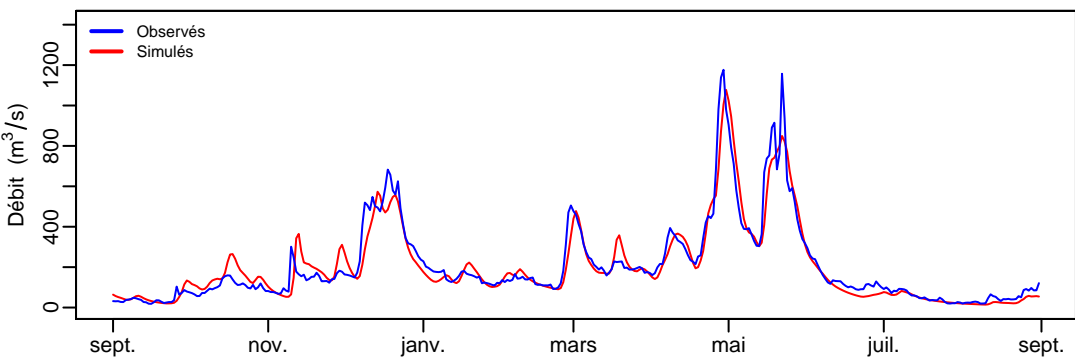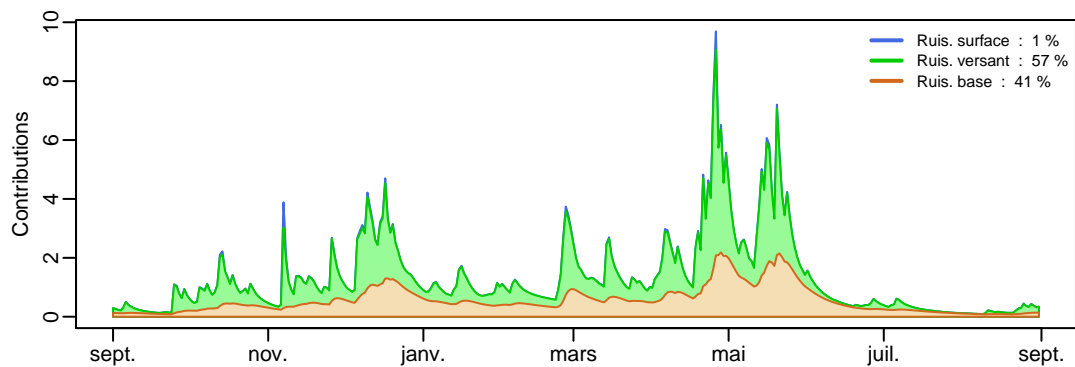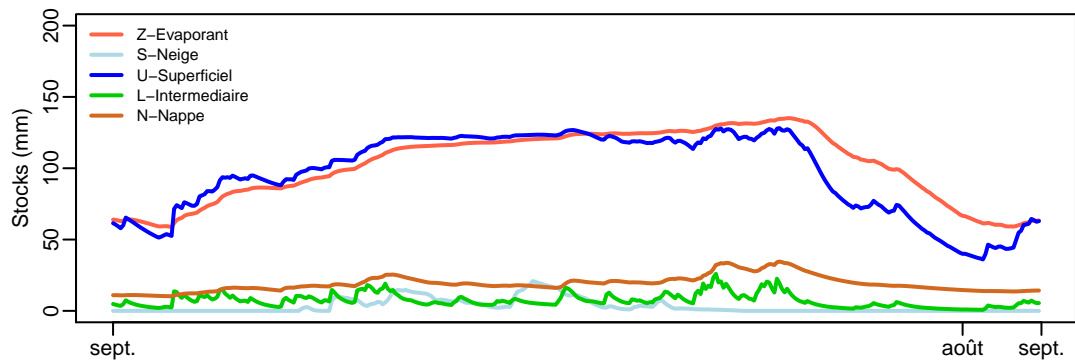



# k3450810 (13012.94 km<sup>2</sup>) – année 1983–1984

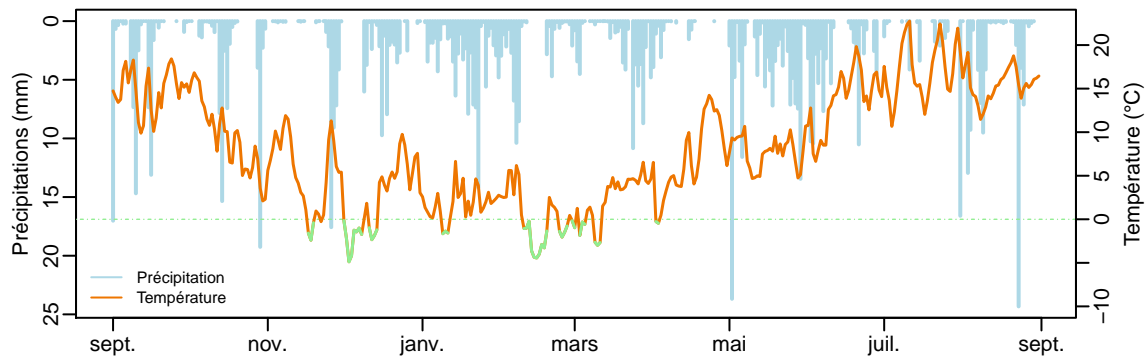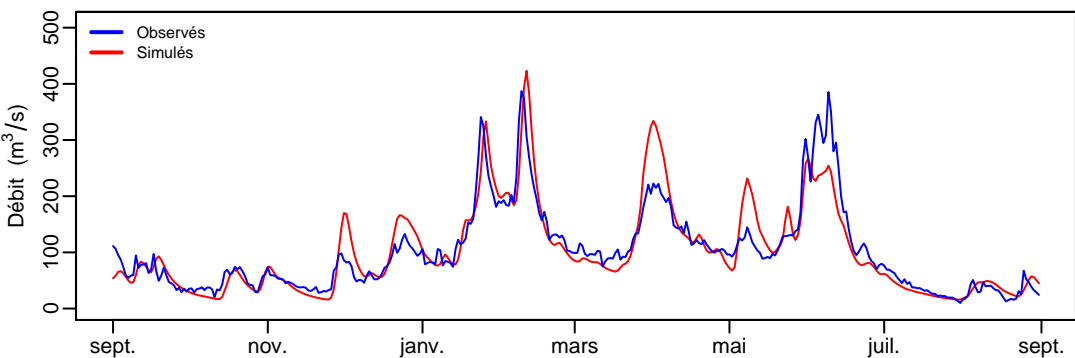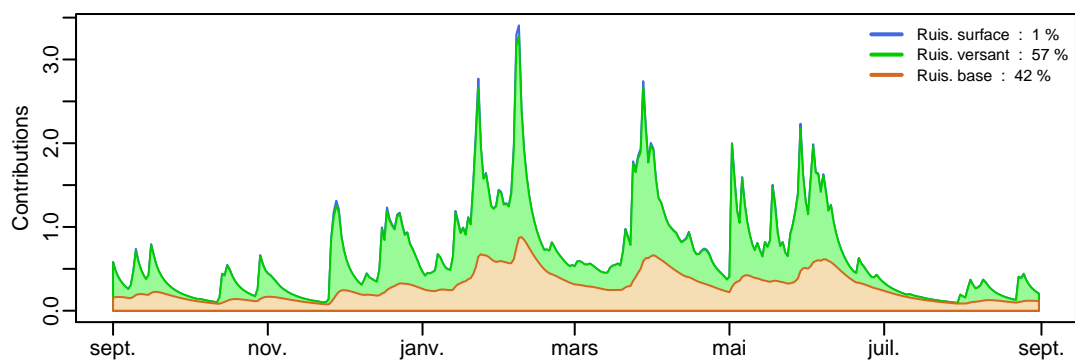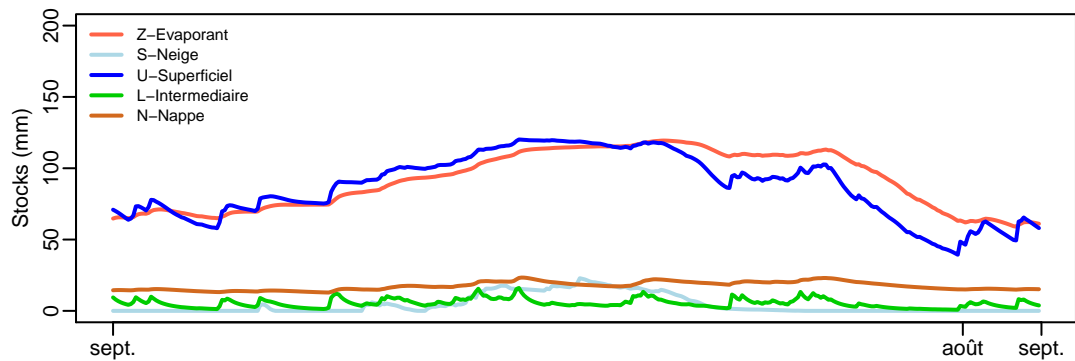

# k3450810 (13012.94 km<sup>2</sup>) – année 1984–1985

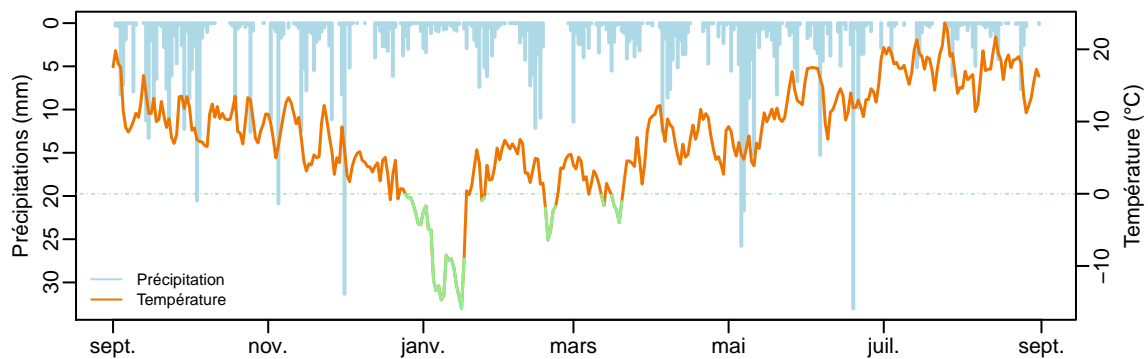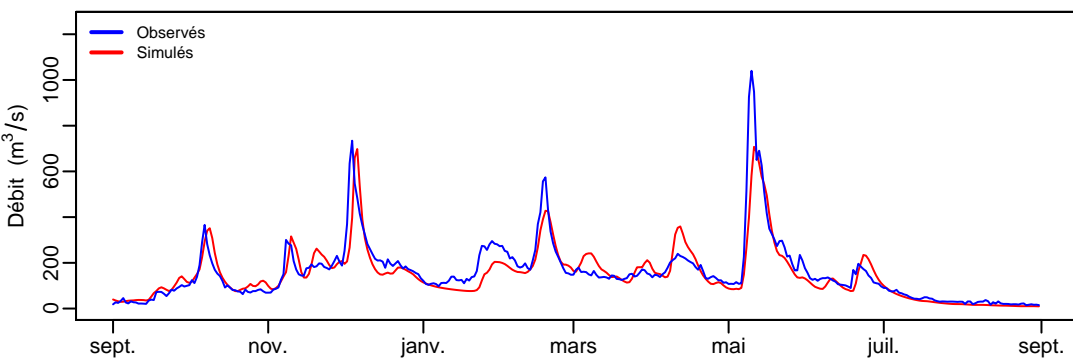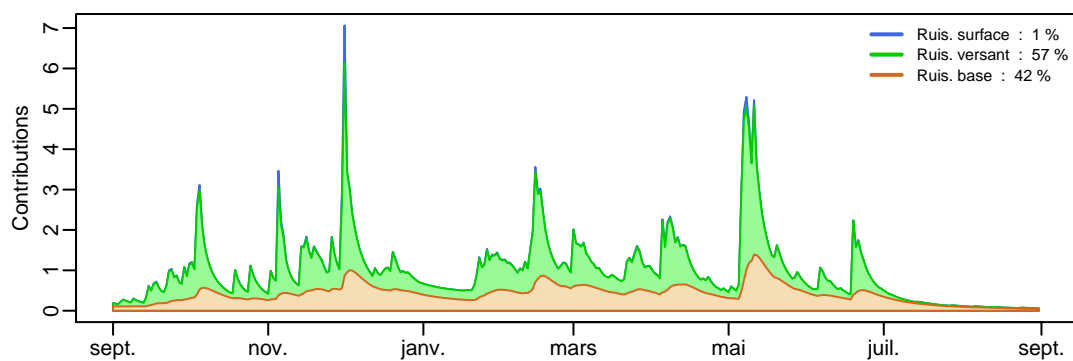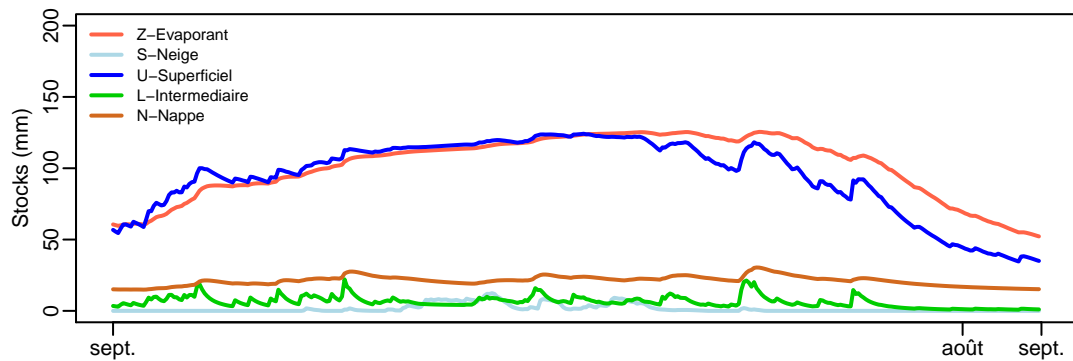

# k3450810 (13012.94 km<sup>2</sup>) – année 1985–1986

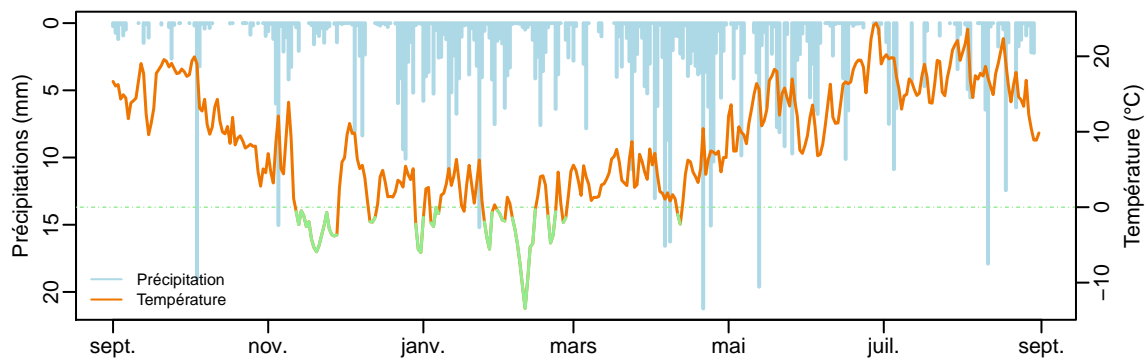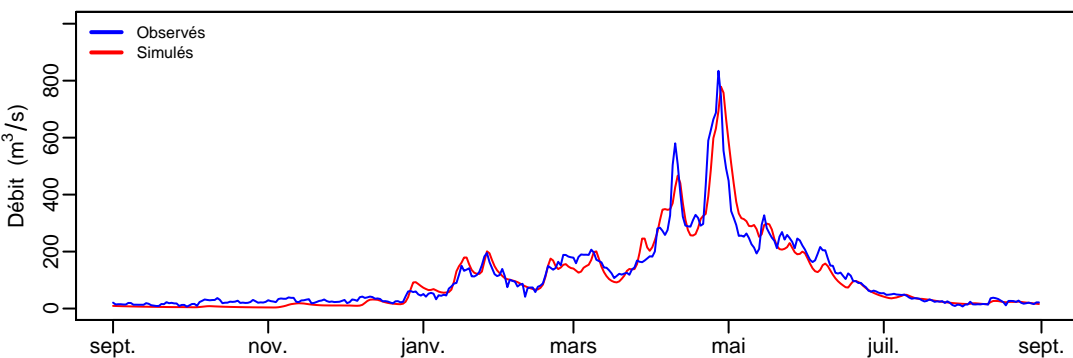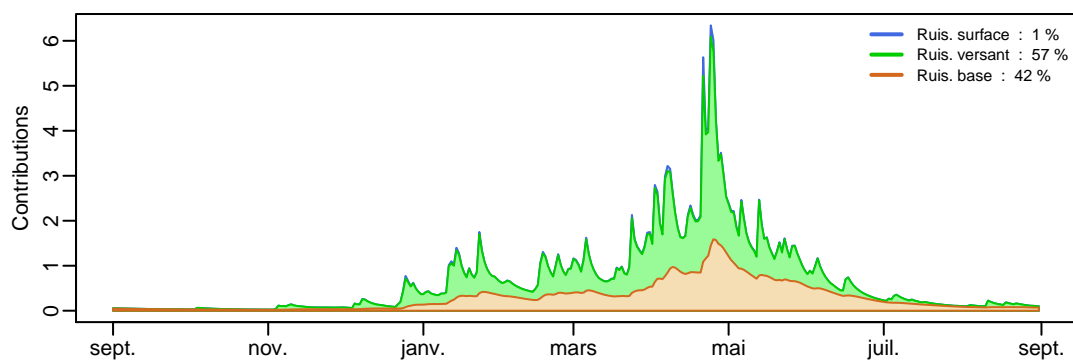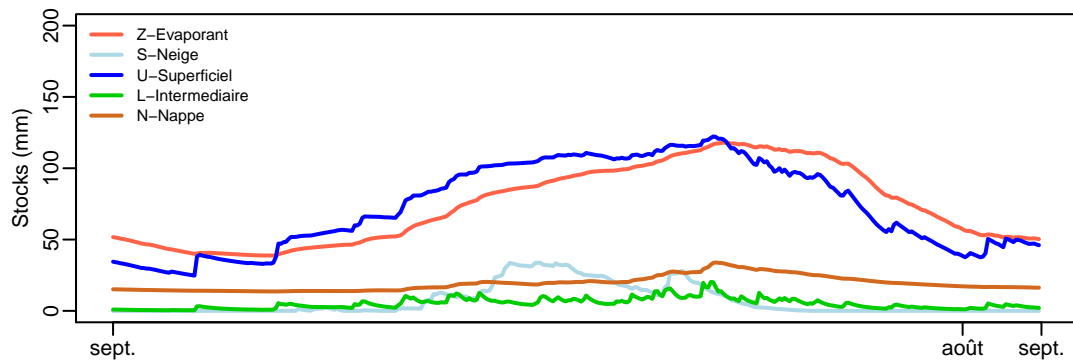

# k3450810 (13012.94 km<sup>2</sup>) – année 1986–1987

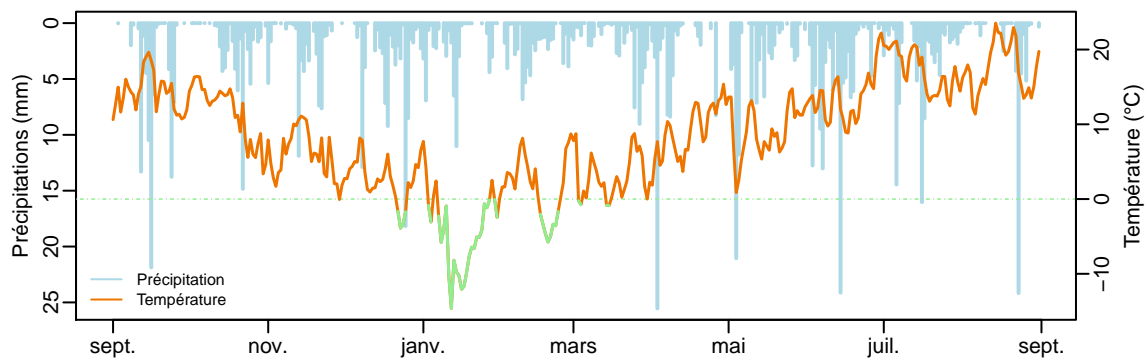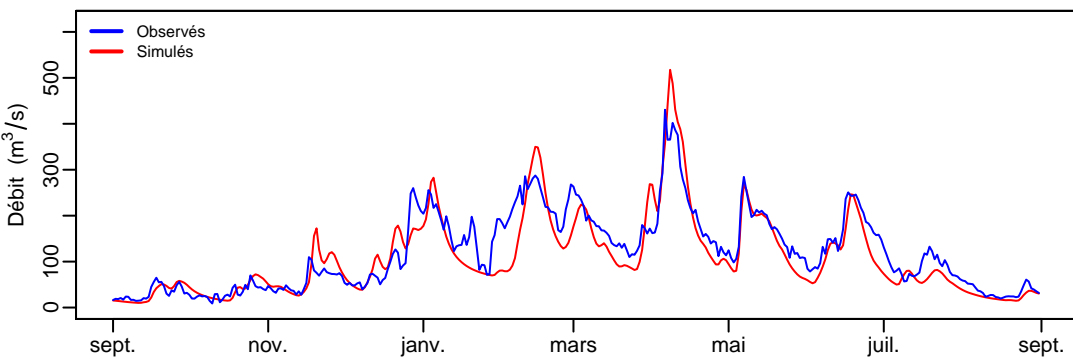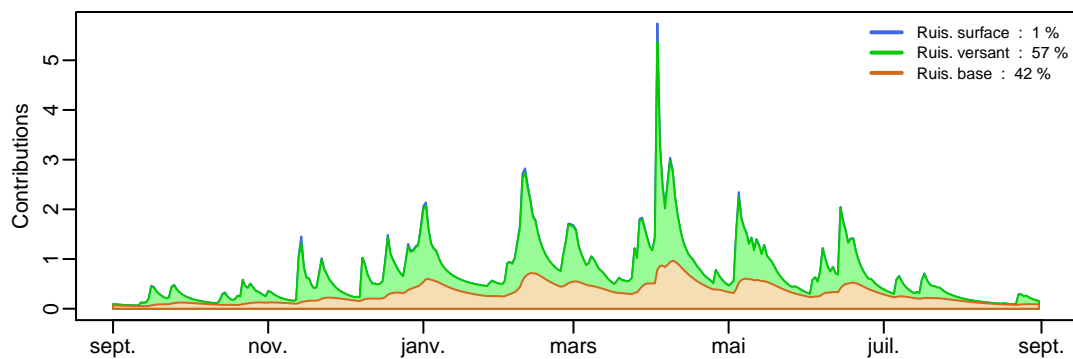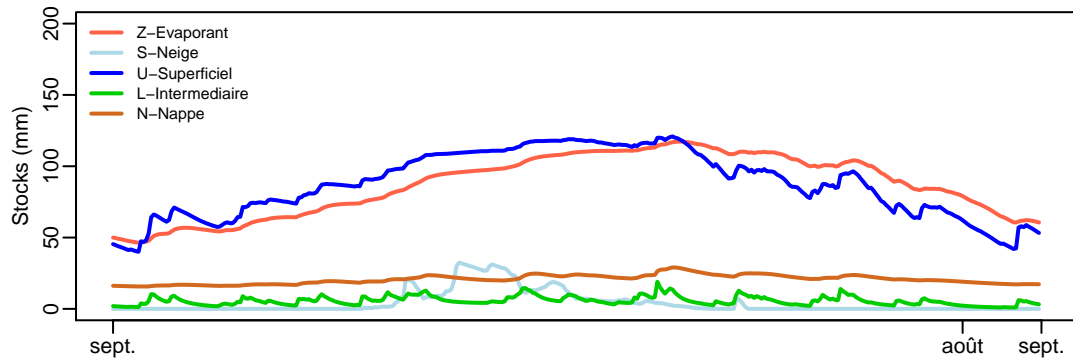

# k3450810 (13012.94 km<sup>2</sup>) – année 1987–1988

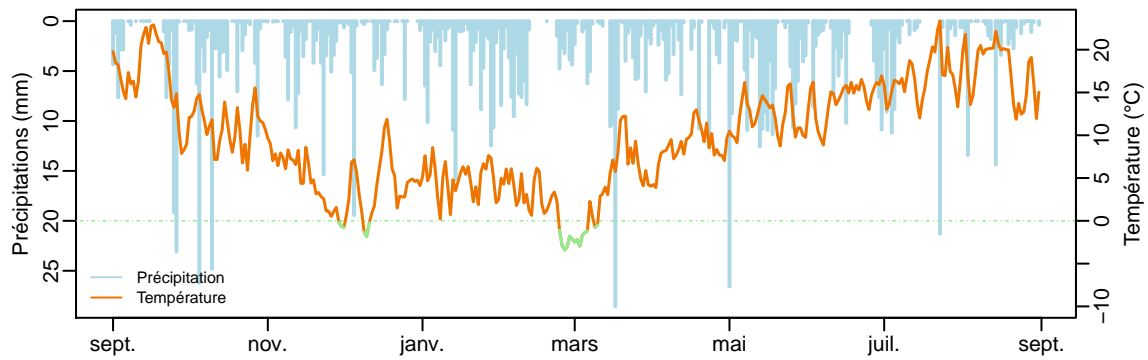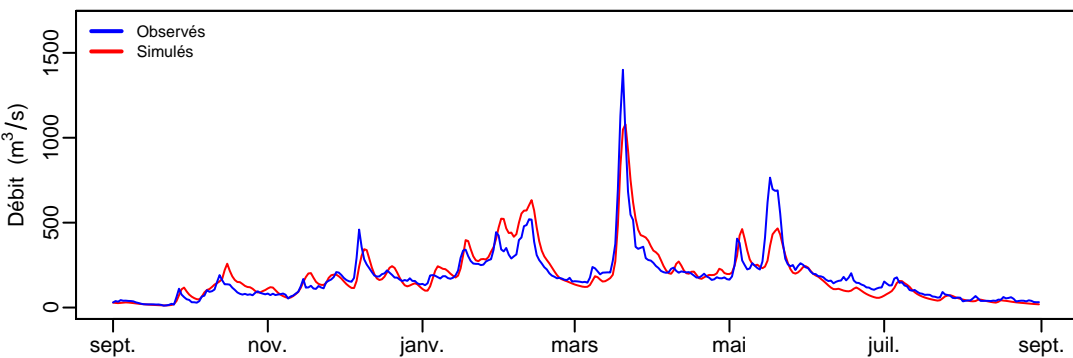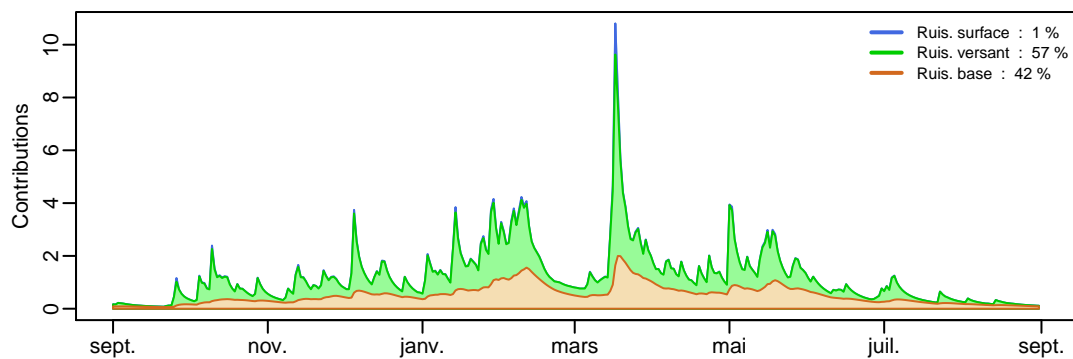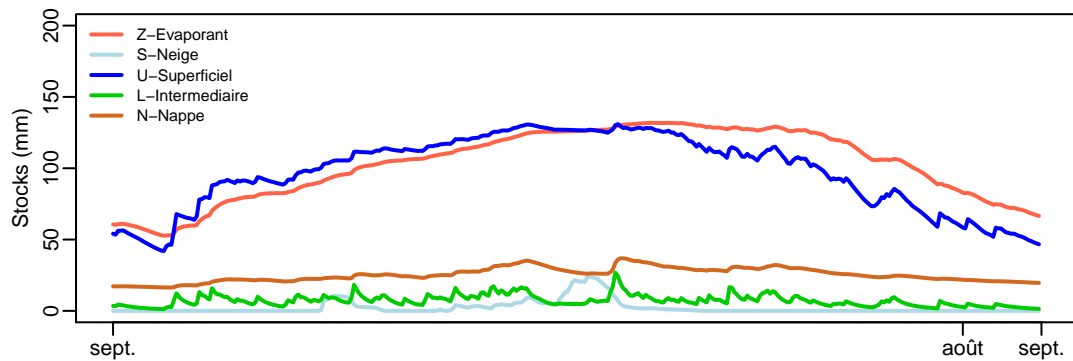

# k3450810 (13012.94 km<sup>2</sup>) – année 1988–1989

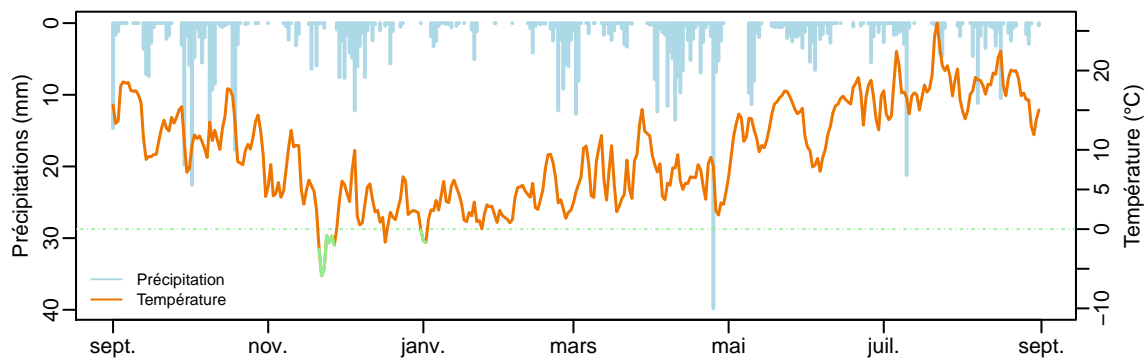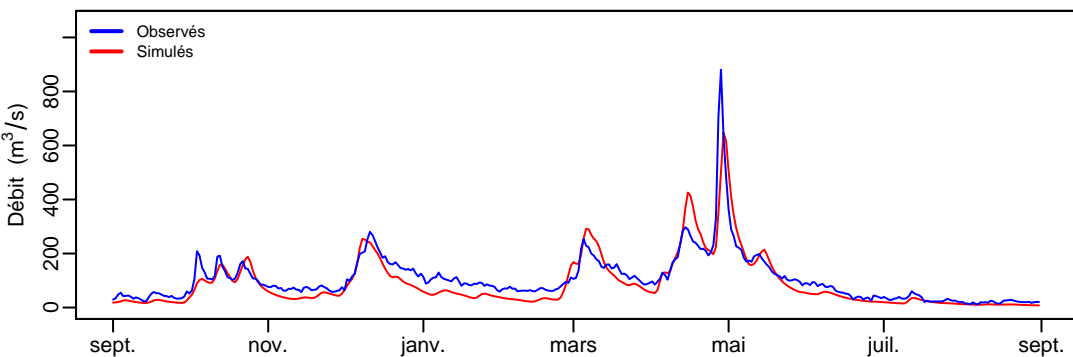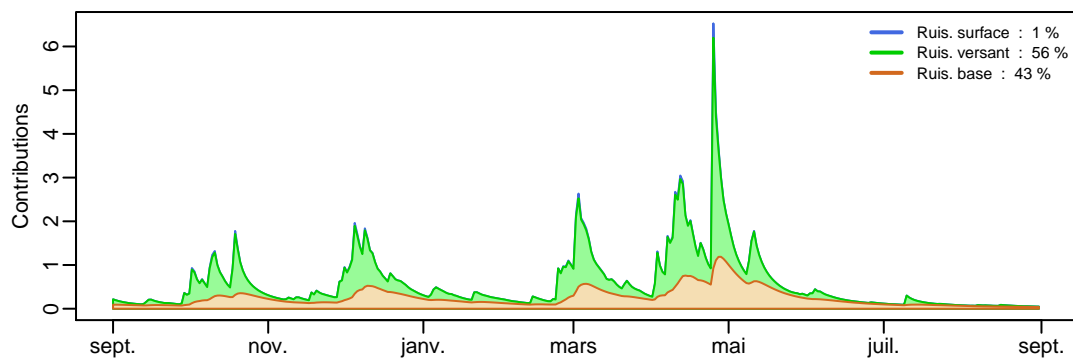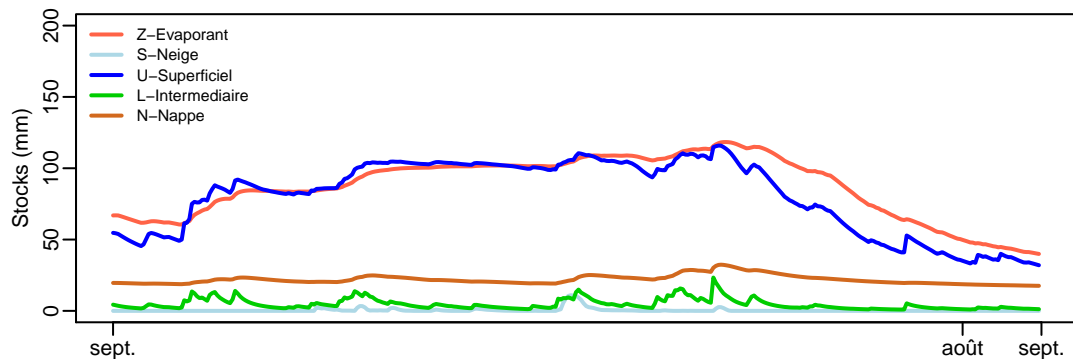

# k3450810 (13012.94 km<sup>2</sup>) – année 1989–1990

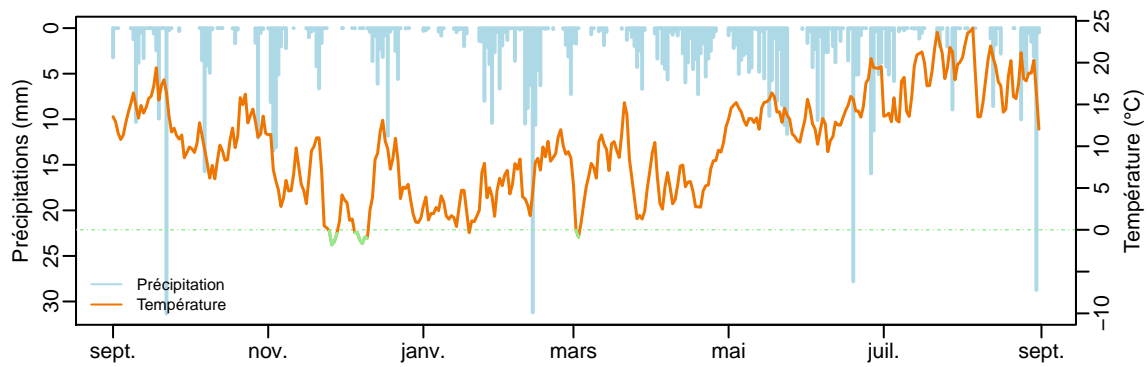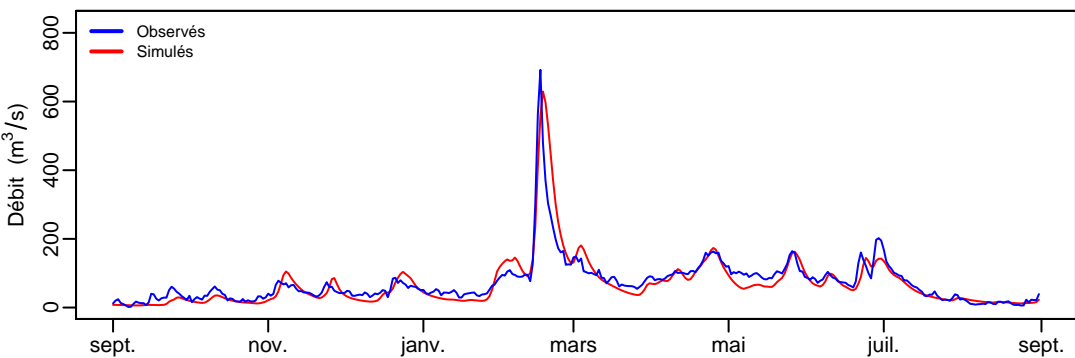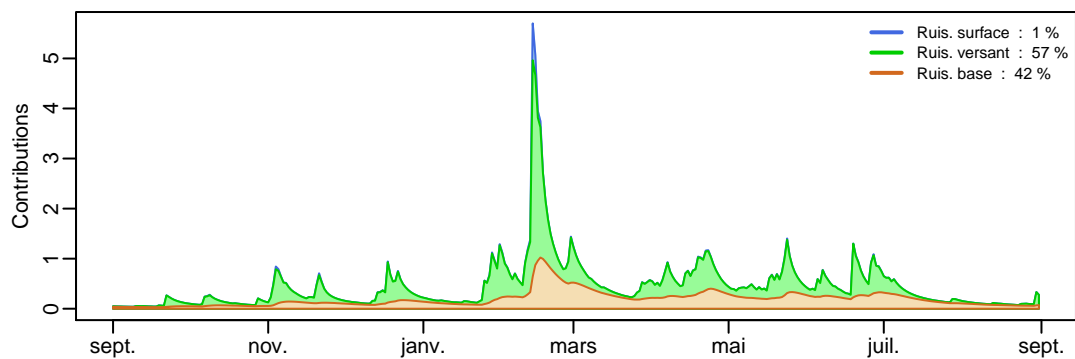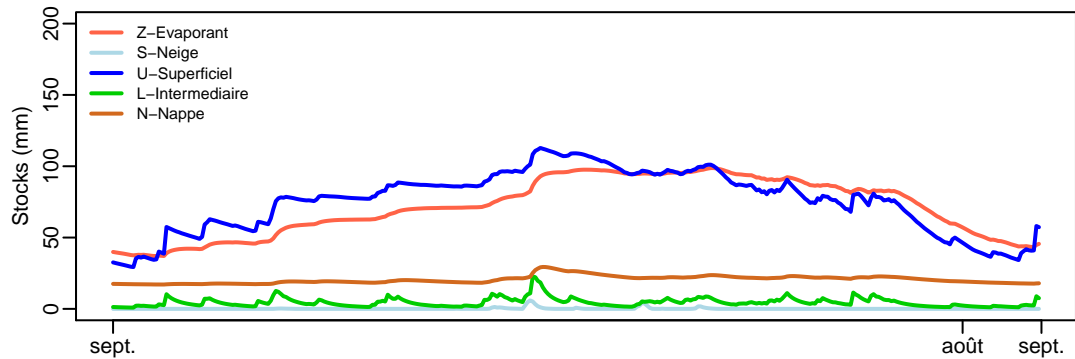

# k3450810 (13012.94 km<sup>2</sup>) – année 1990–1991

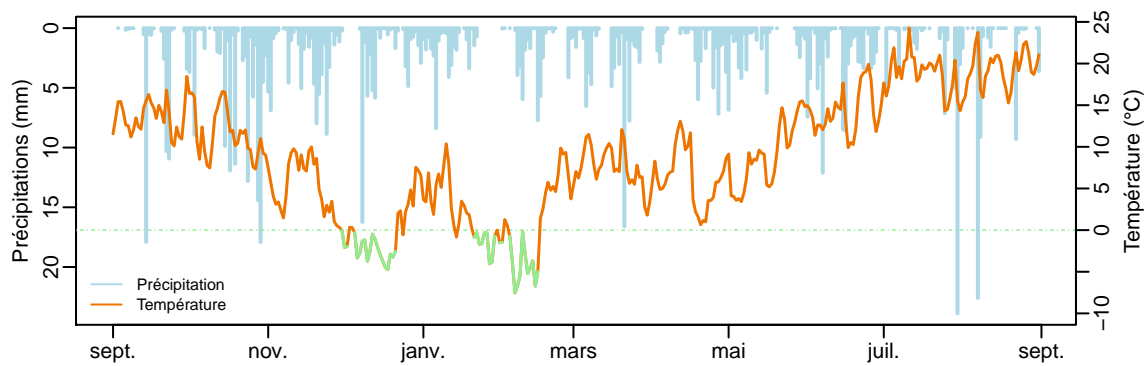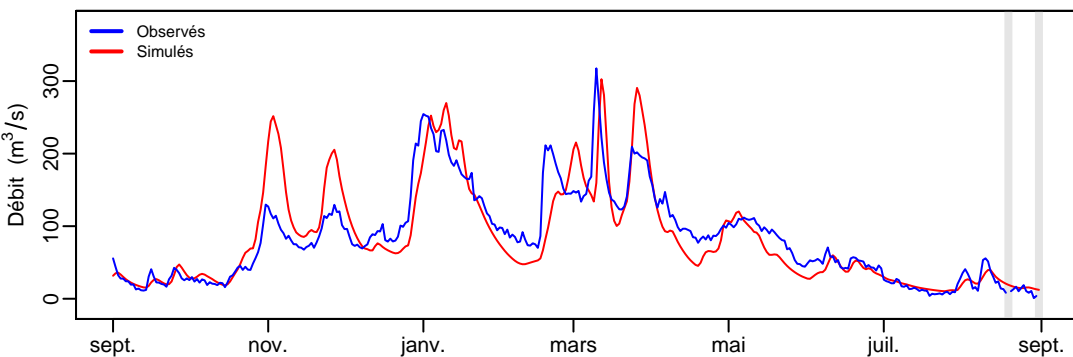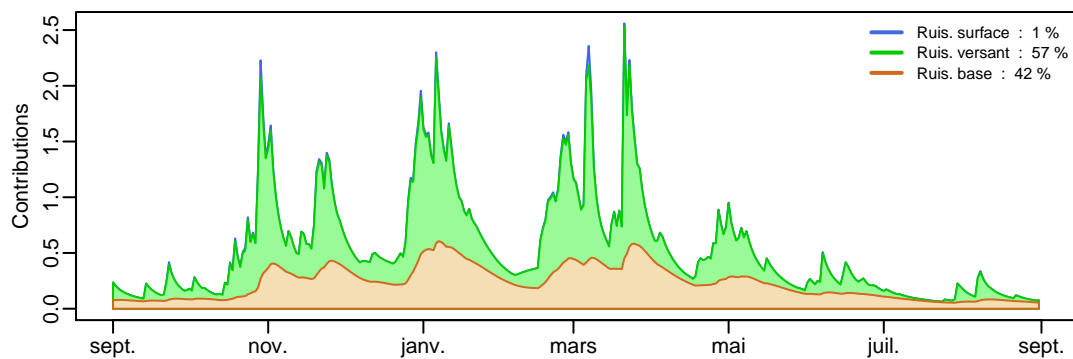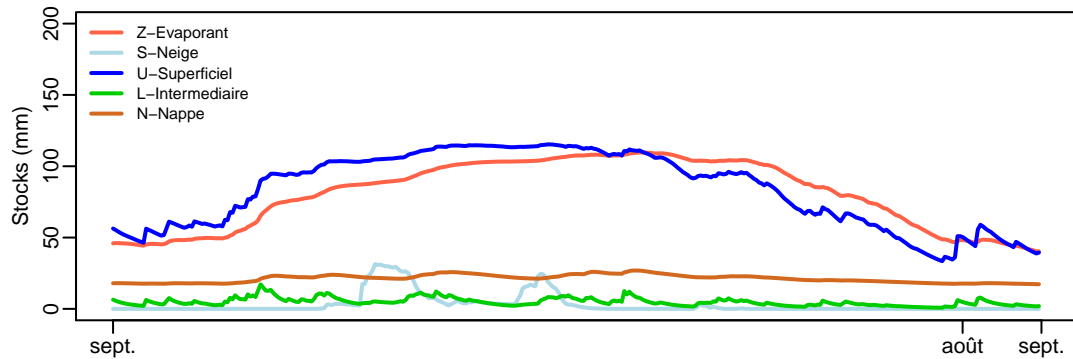



# k3450810 (13012.94 km<sup>2</sup>) – année 1991–1992

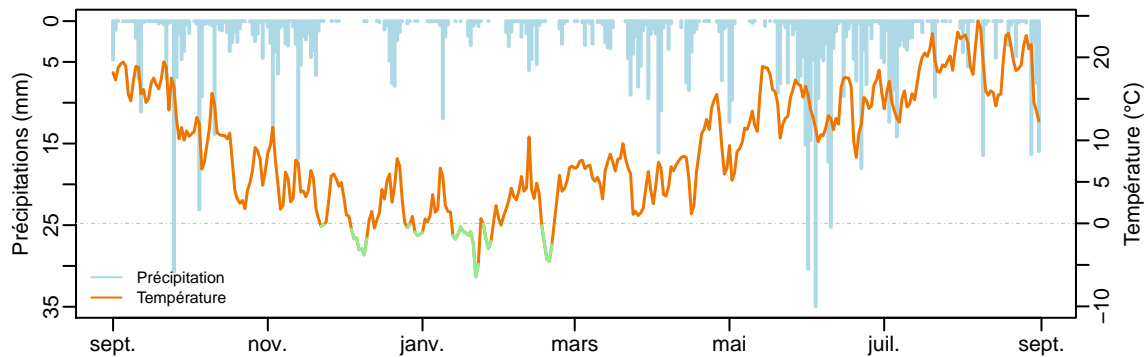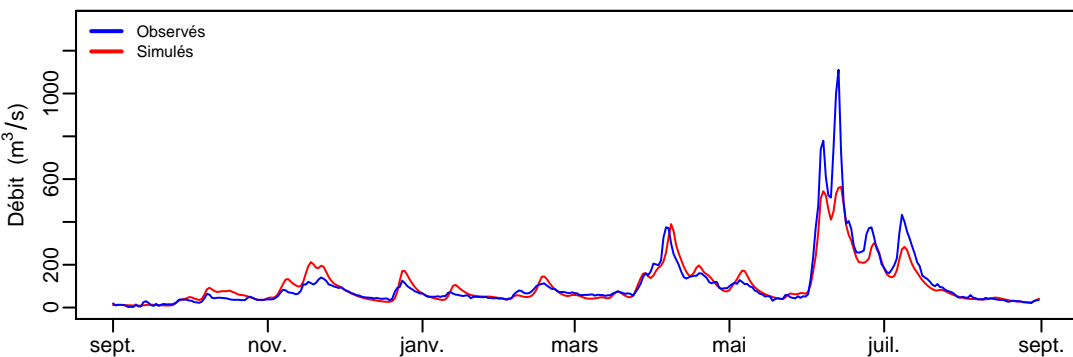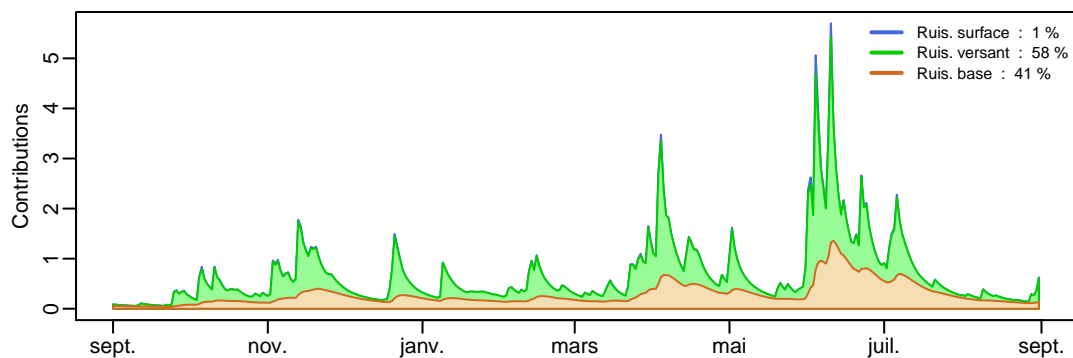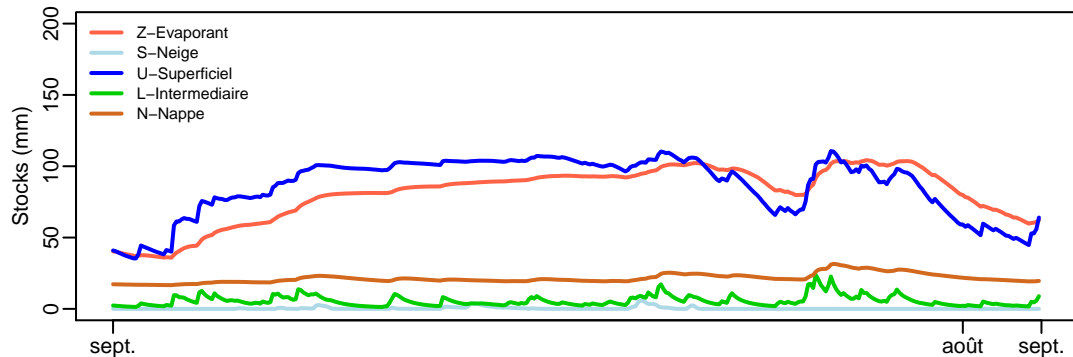

# k3450810 (13012.94 km<sup>2</sup>) – année 1992–1993

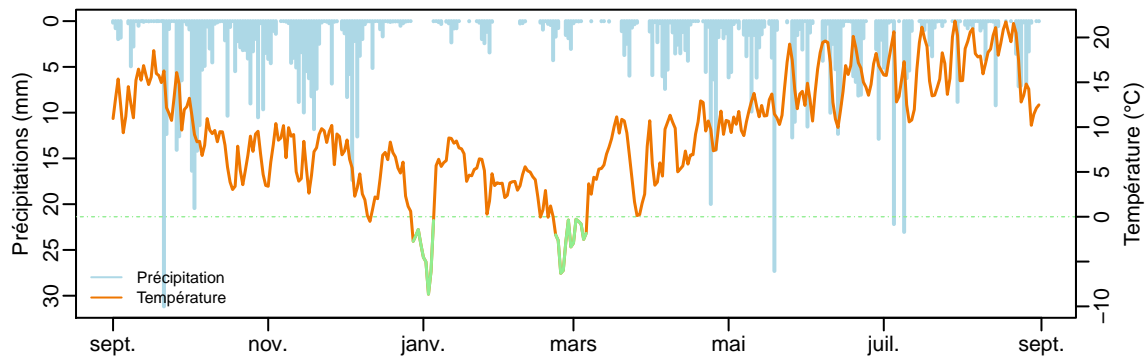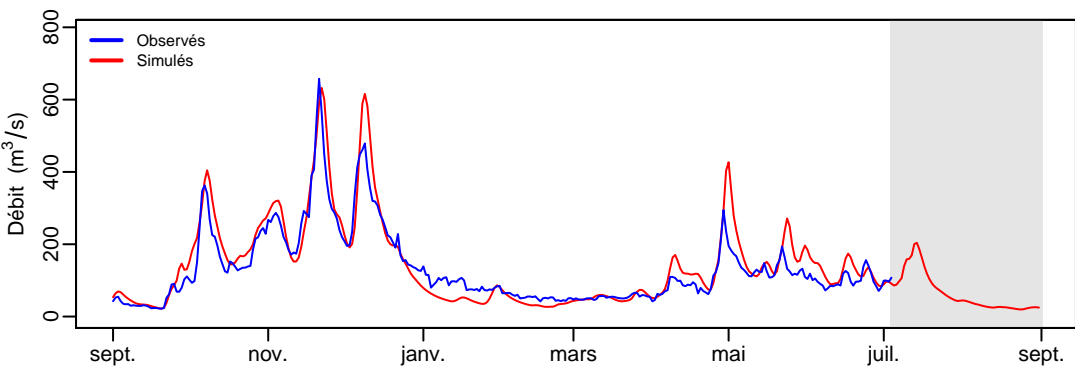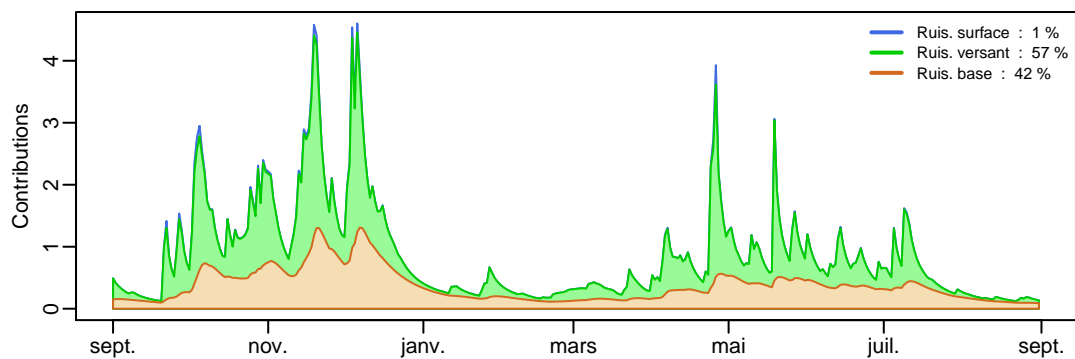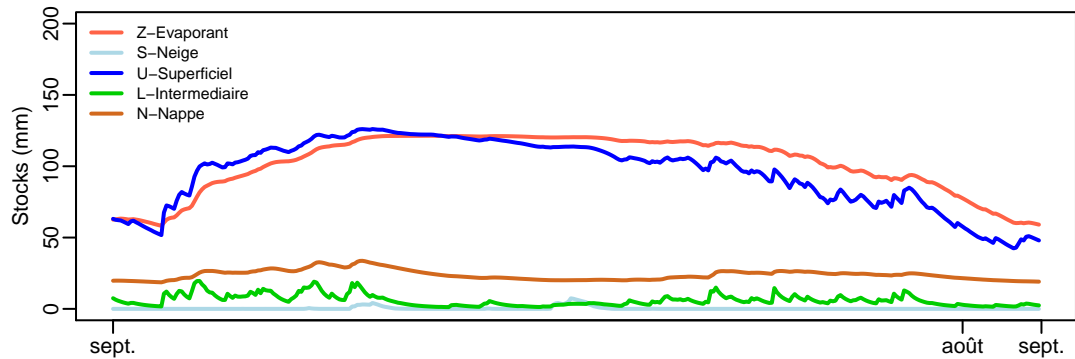

# k3450810 (13012.94 km<sup>2</sup>) – année 1993–1994

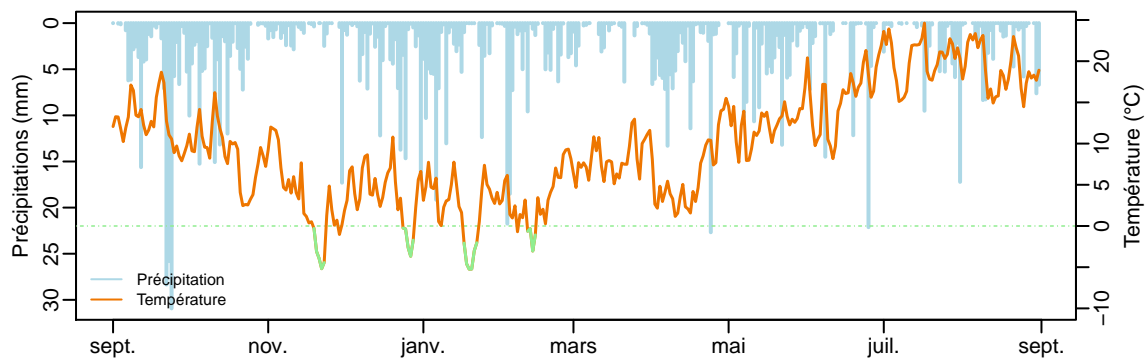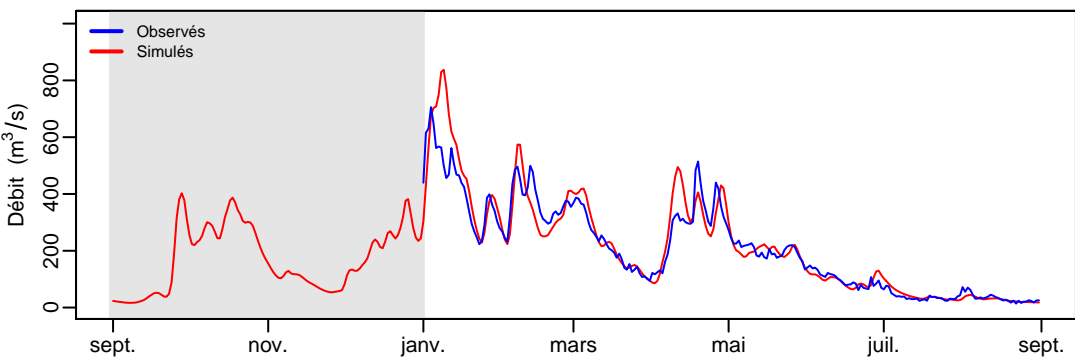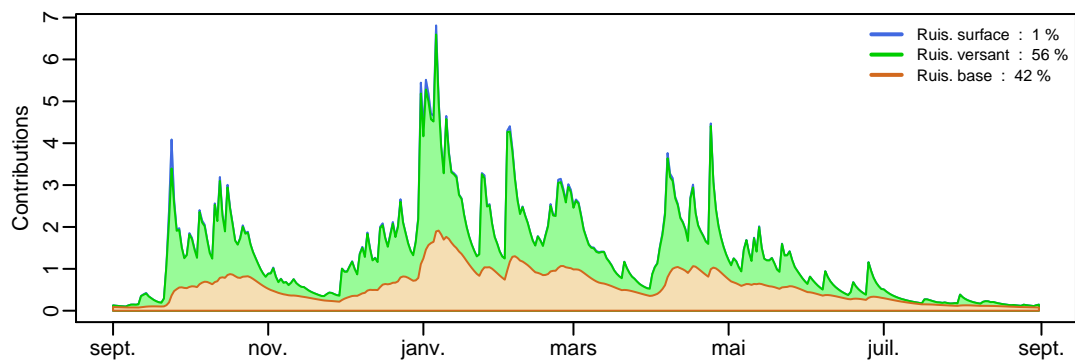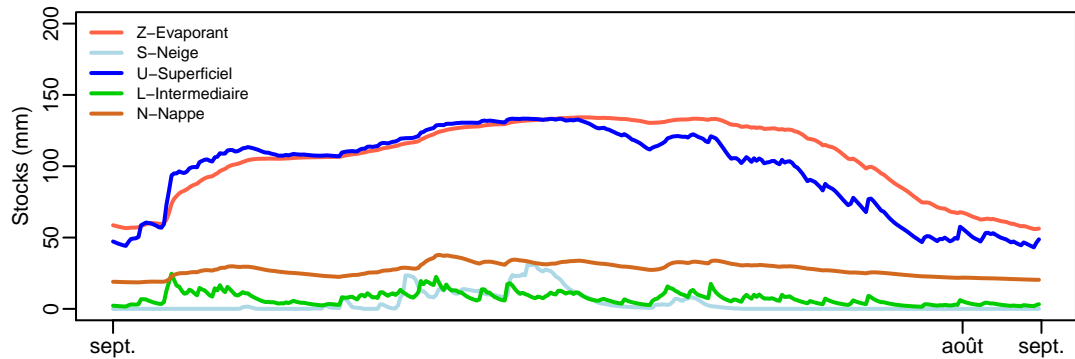

# k3450810 (13012.94 km<sup>2</sup>) – année 1994–1995

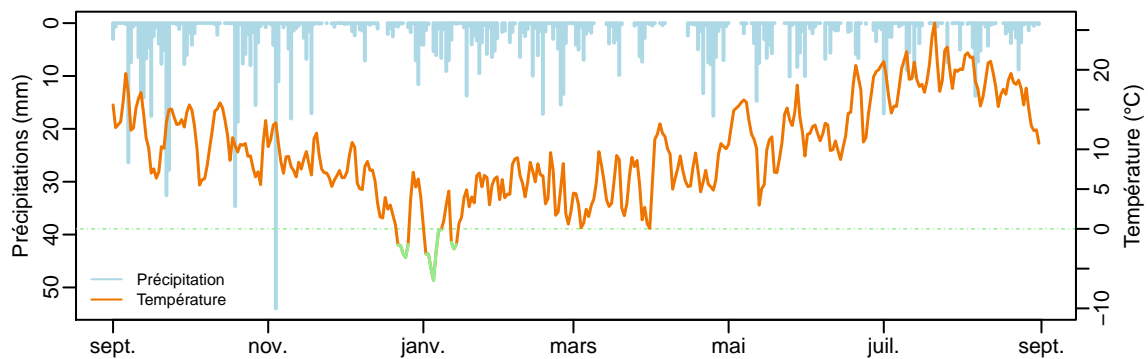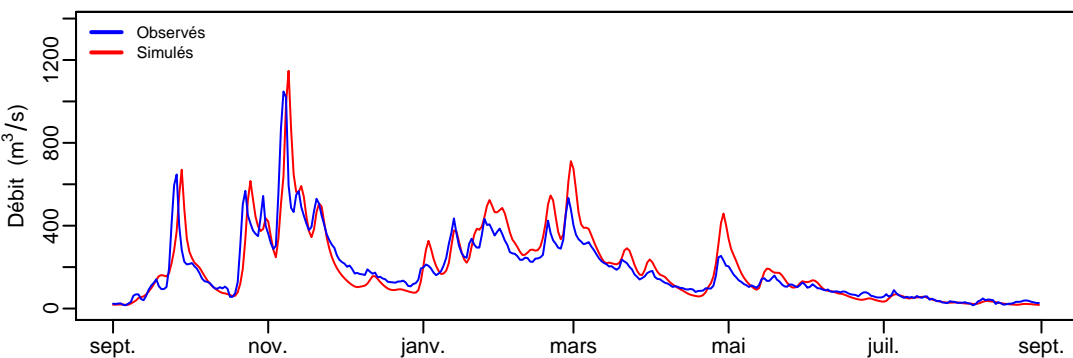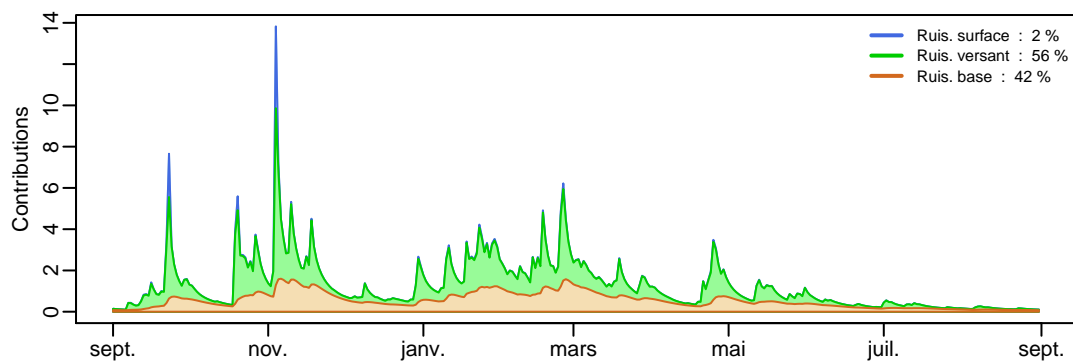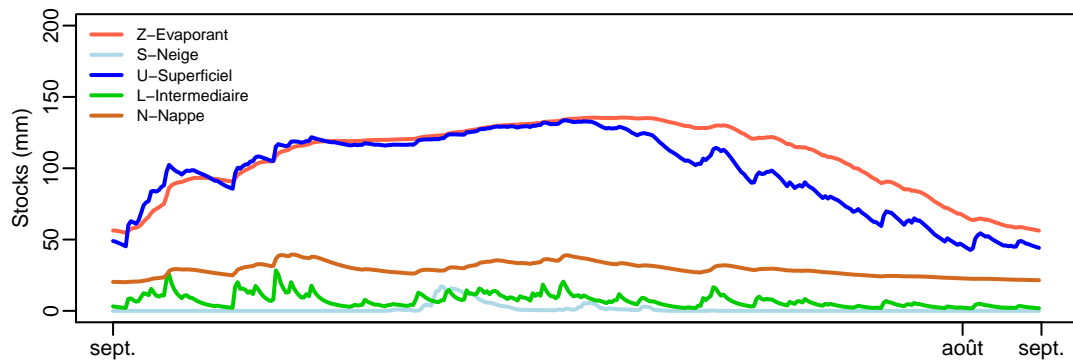

# k3450810 (13012.94 km<sup>2</sup>) – année 1995–1996

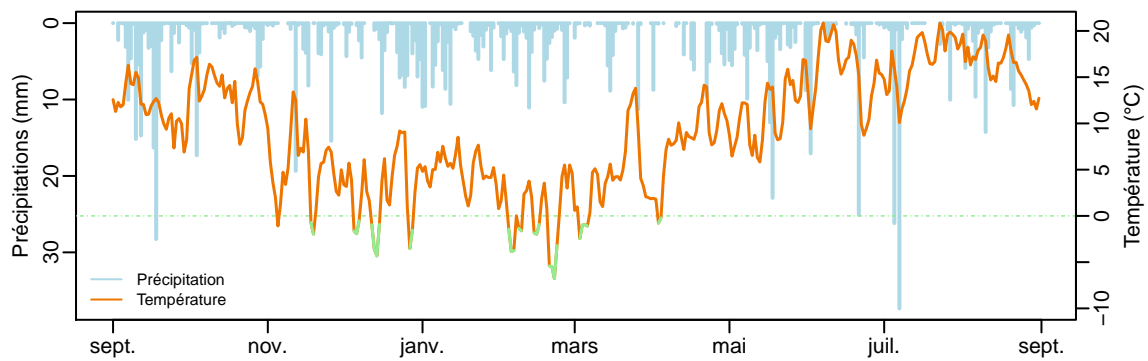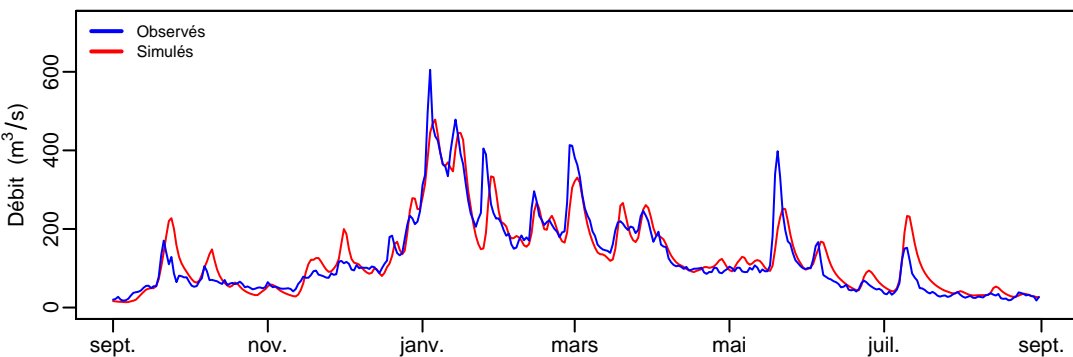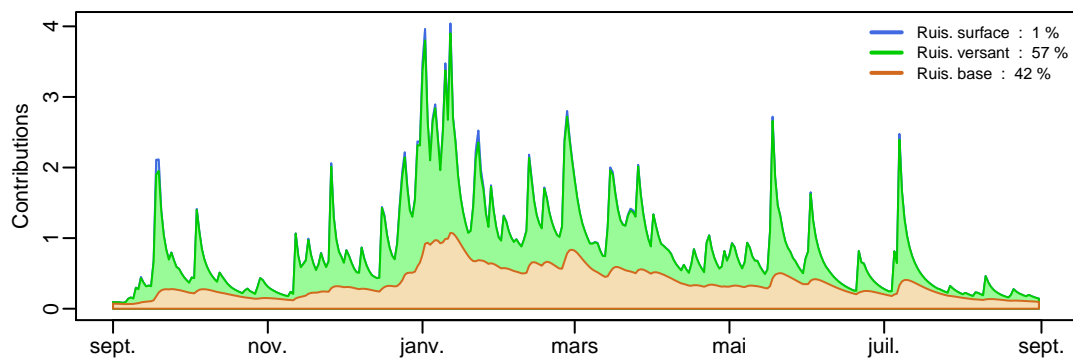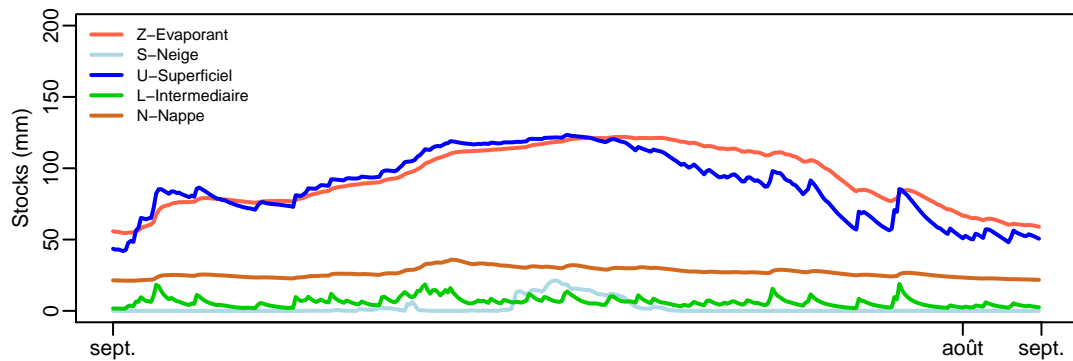

# k3450810 (13012.94 km<sup>2</sup>) – année 1996–1997

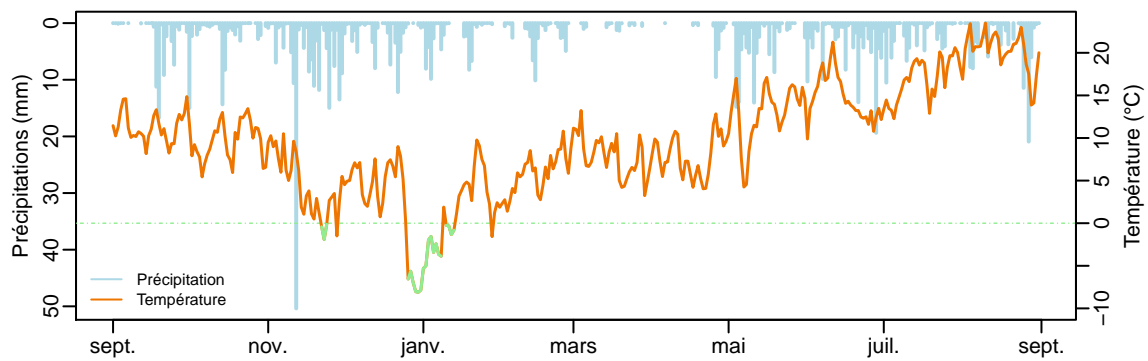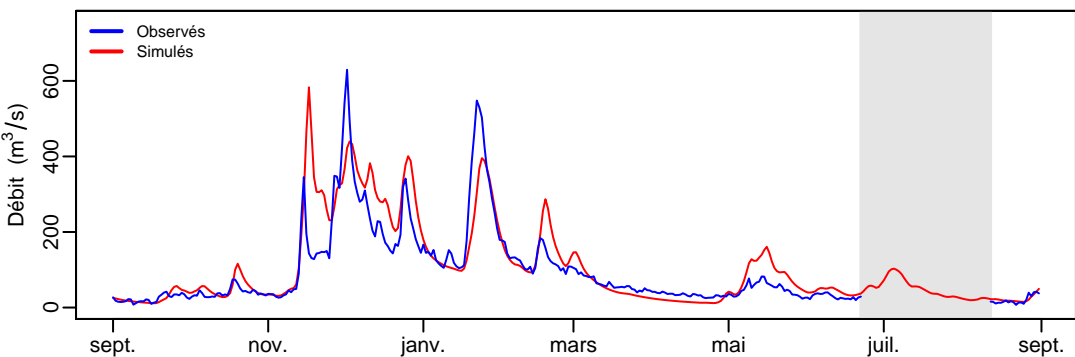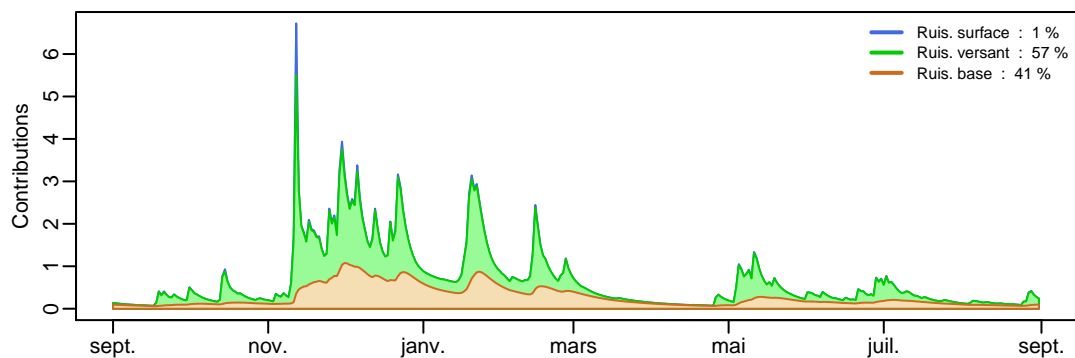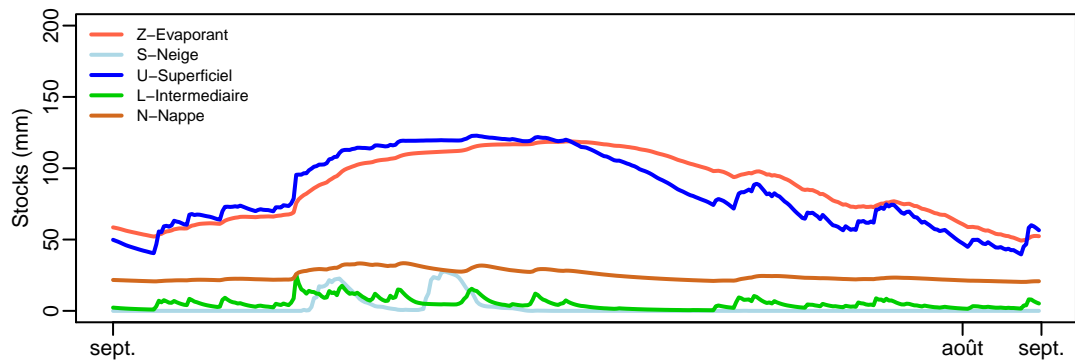

# k3450810 (13012.94 km<sup>2</sup>) – année 1997–1998

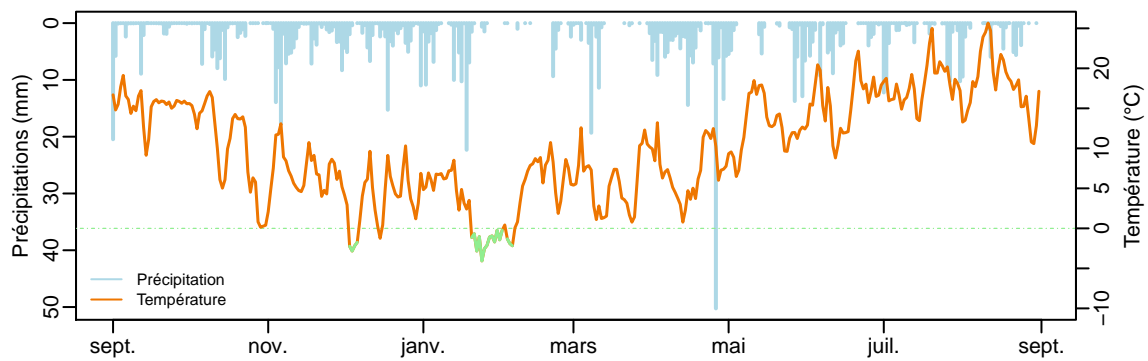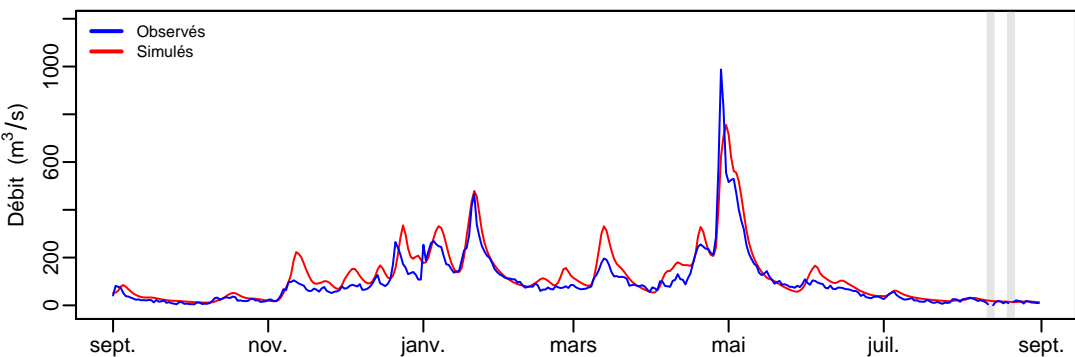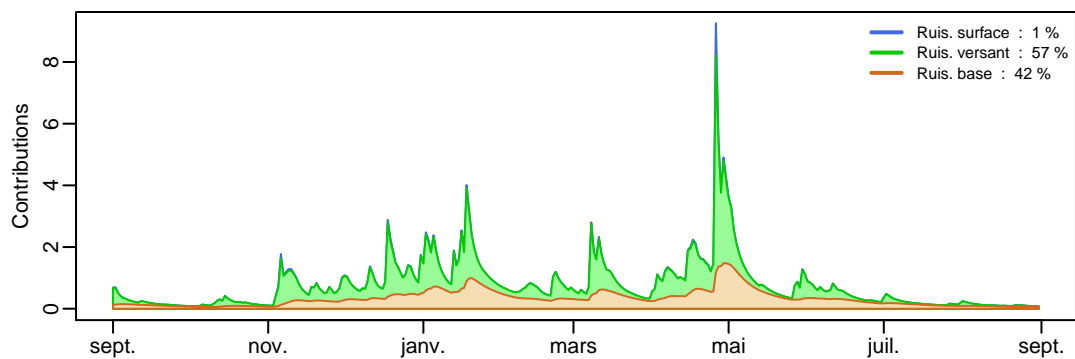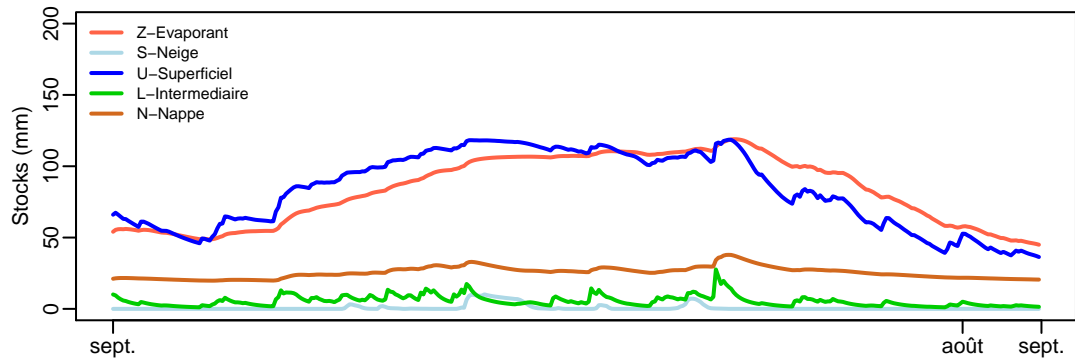

# k3450810 (13012.94 km<sup>2</sup>) – année 1998–1999

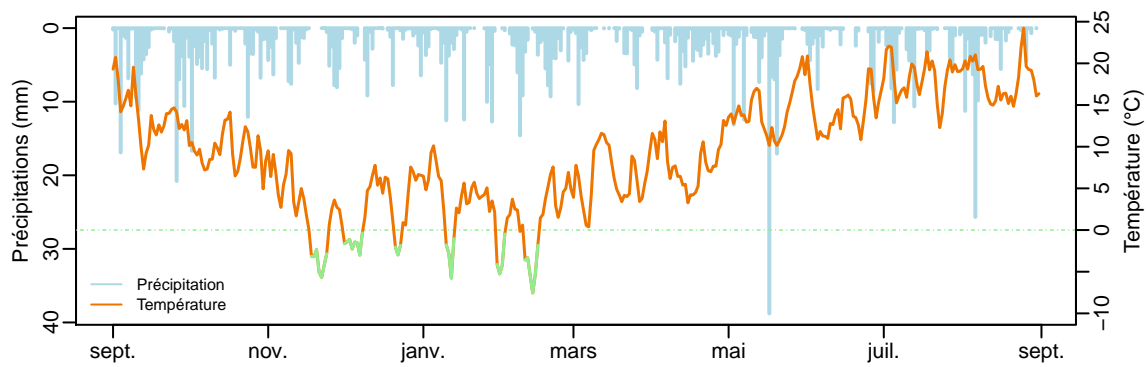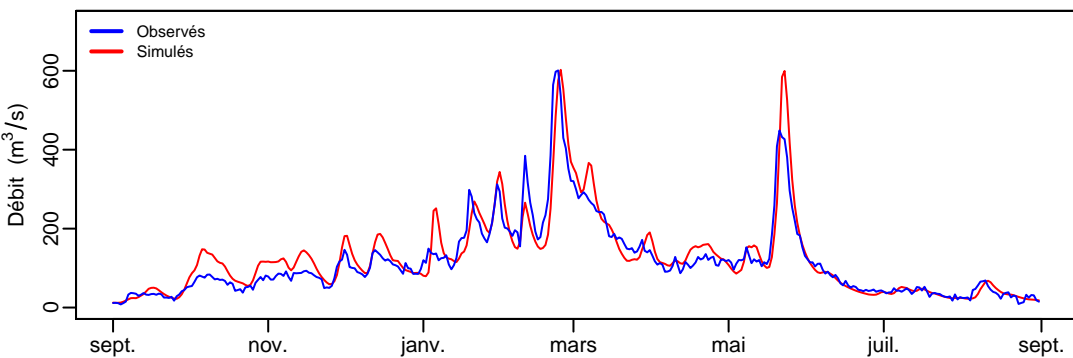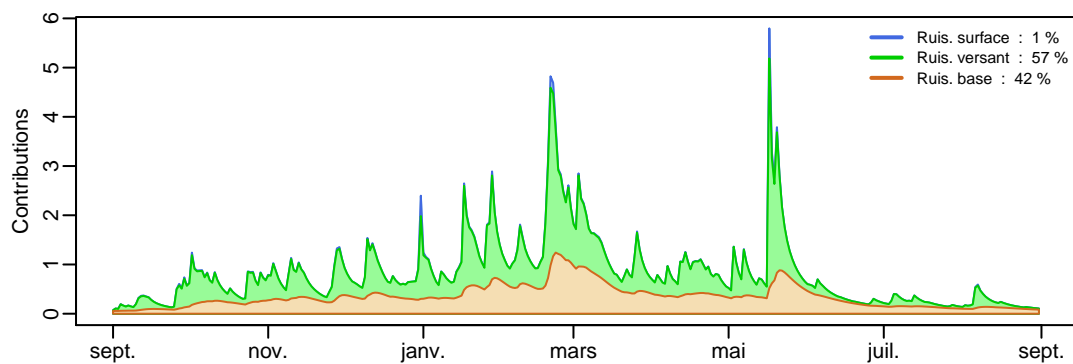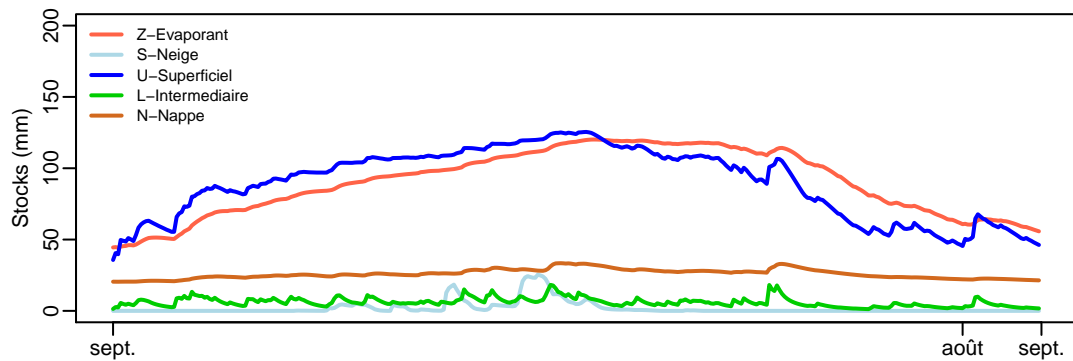



# k3450810 (13012.94 km<sup>2</sup>) – année 1999–2000

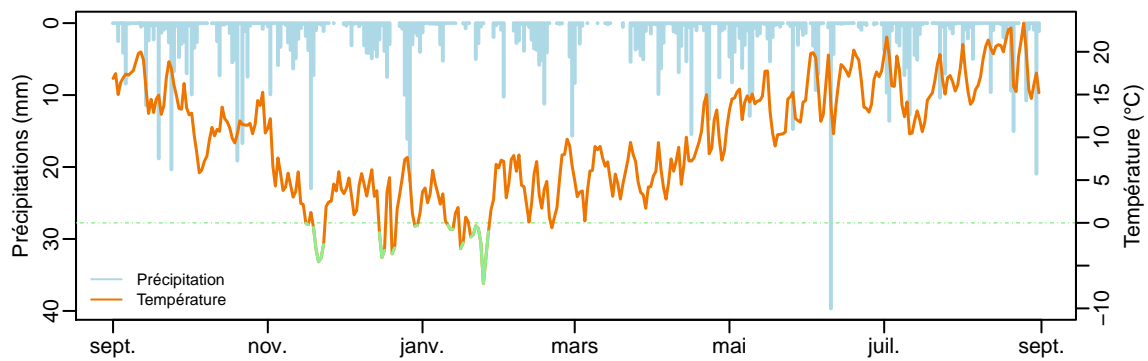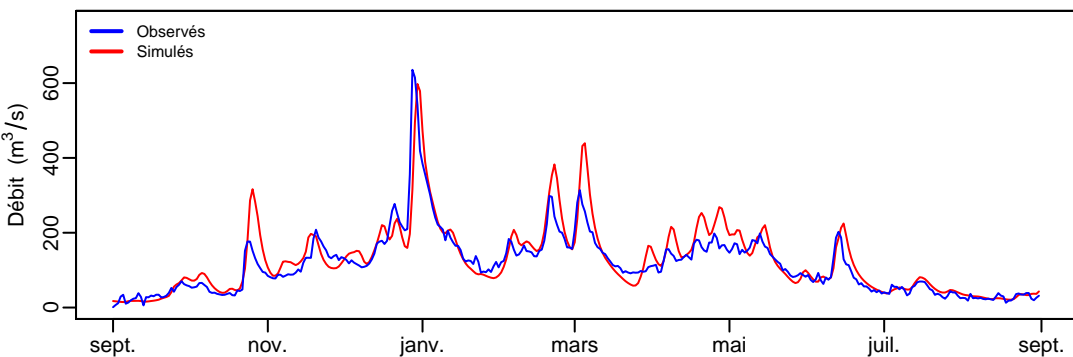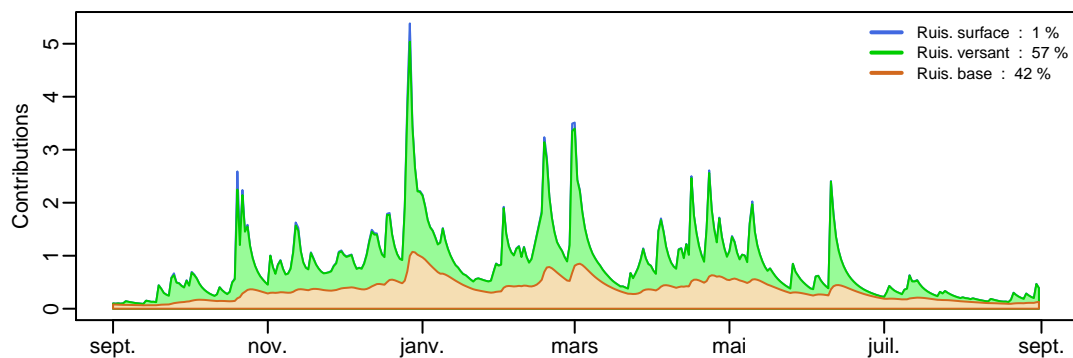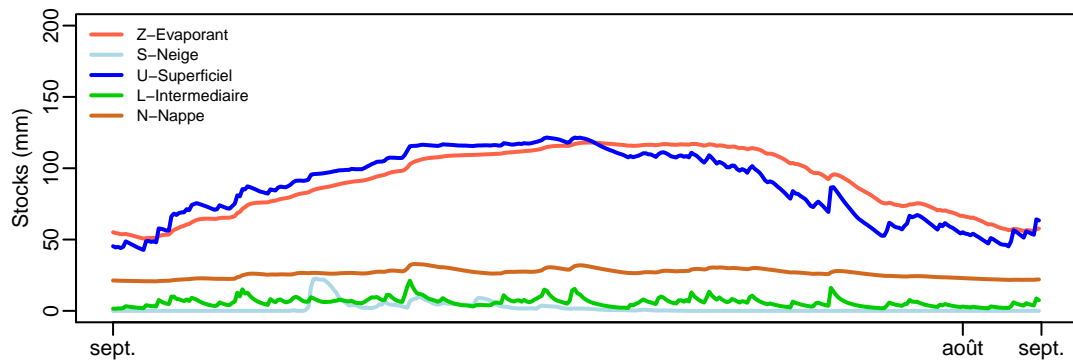

# k3450810 (13012.94 km<sup>2</sup>) – année 2000–2001

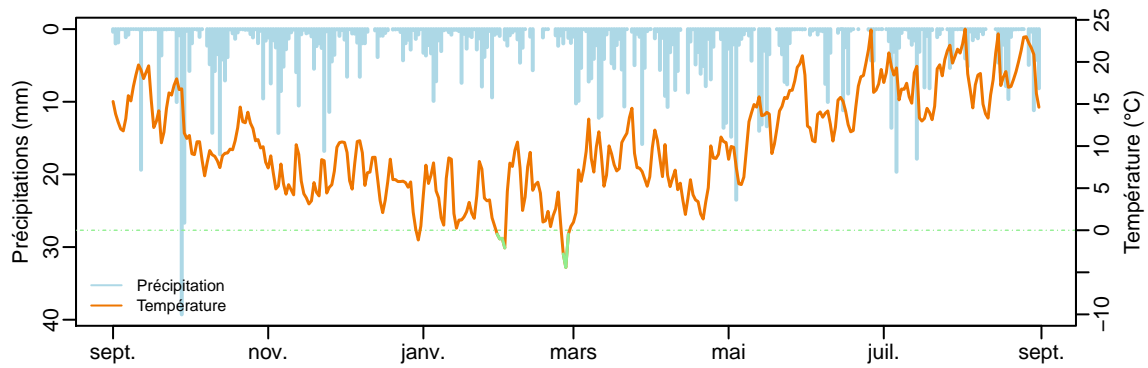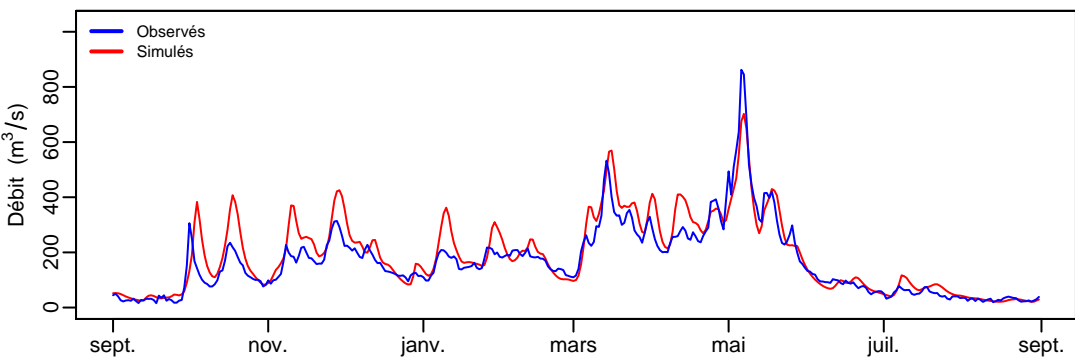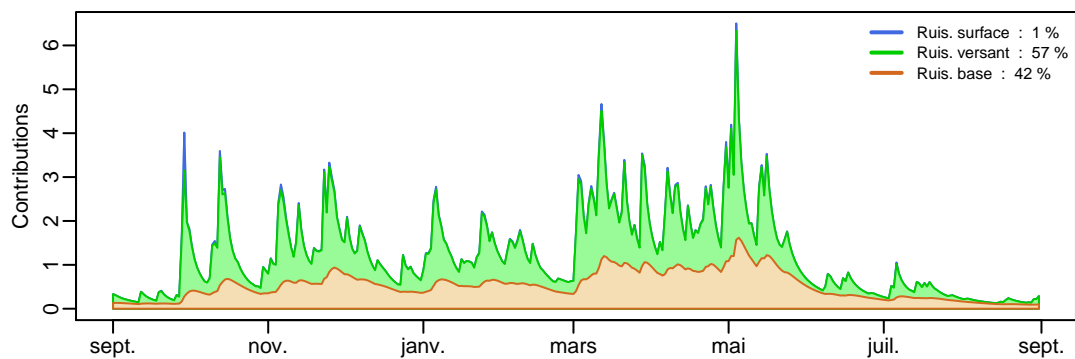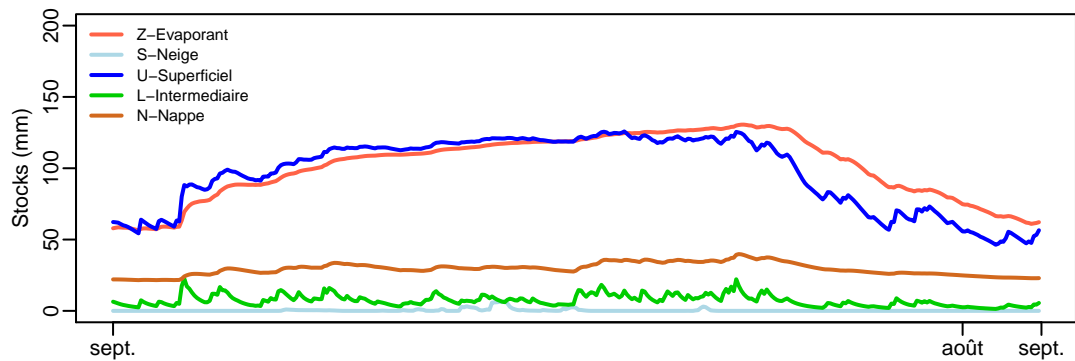

# k3450810 (13012.94 km<sup>2</sup>) – année 2001–2002

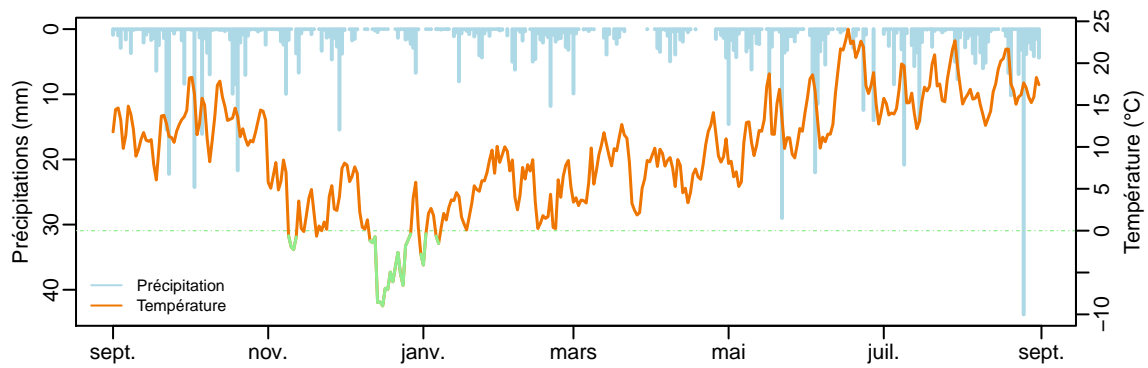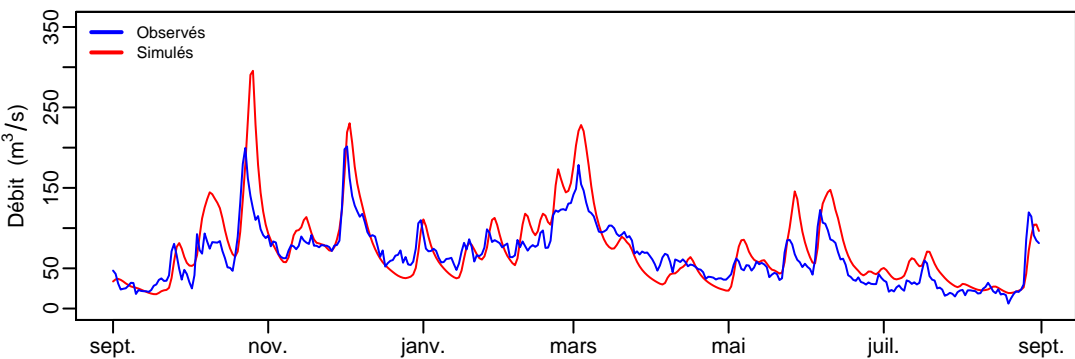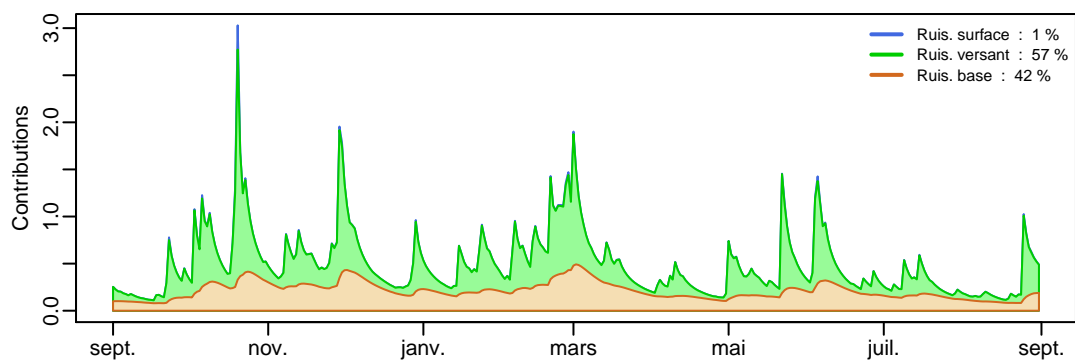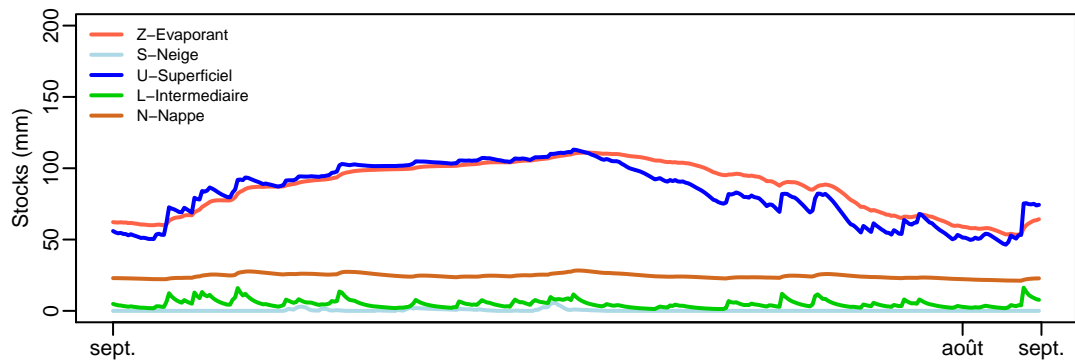

# k3450810 (13012.94 km<sup>2</sup>) – année 2002–2003

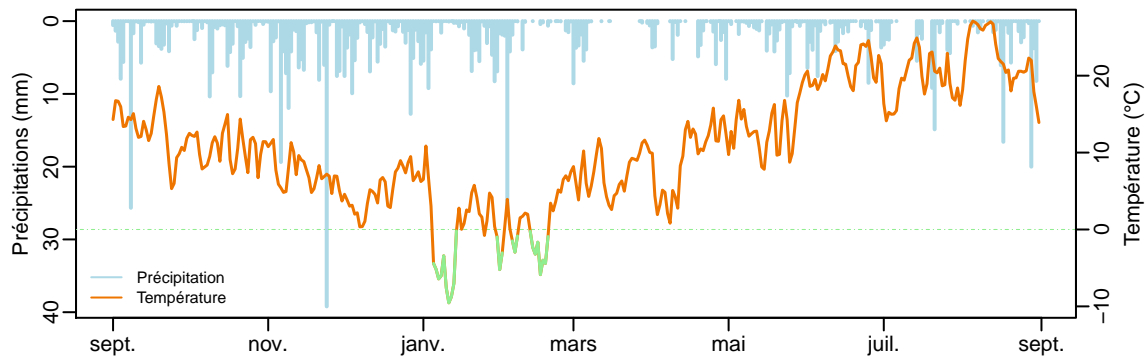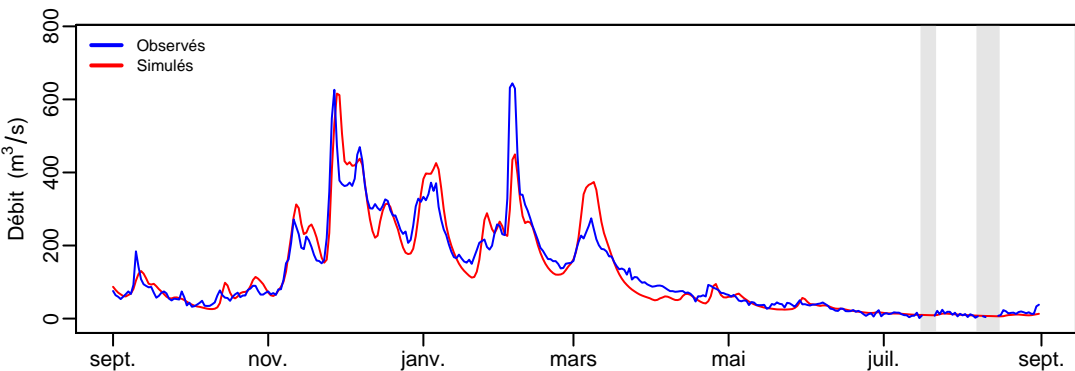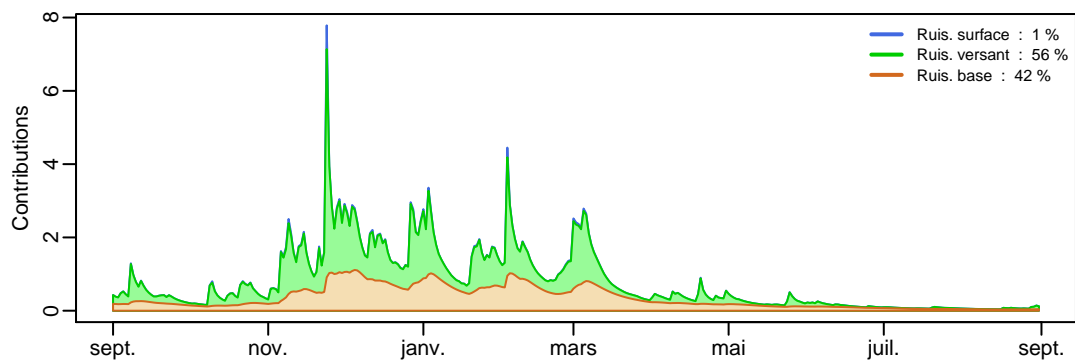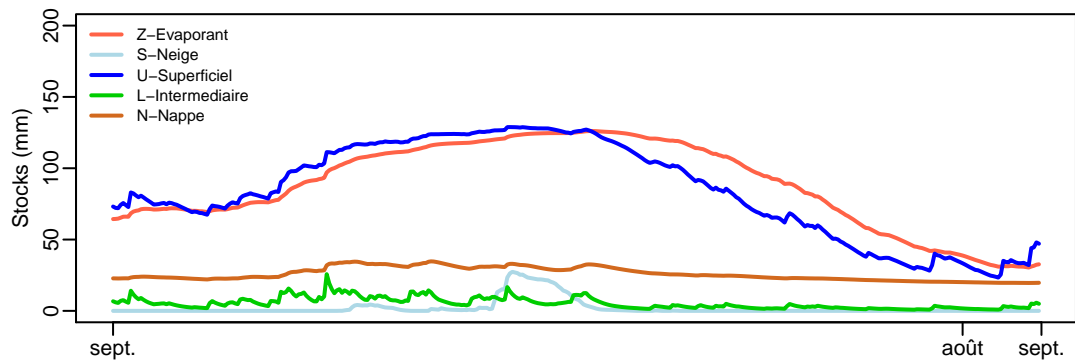

# k3450810 (13012.94 km<sup>2</sup>) – année 2003–2004

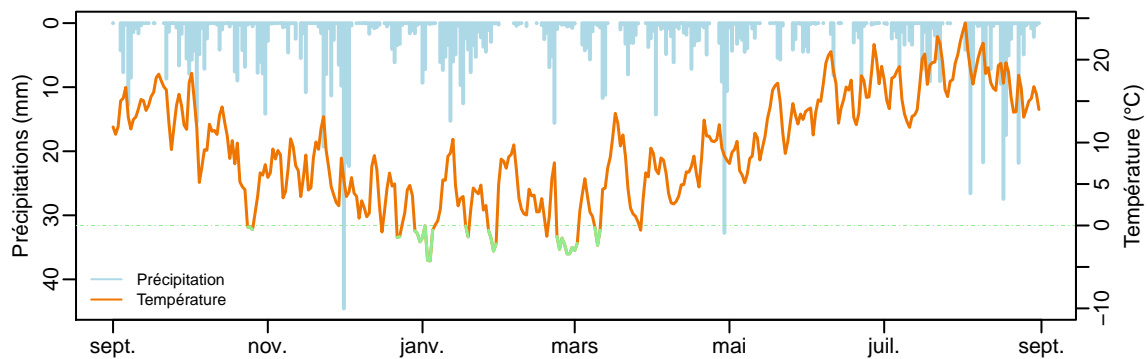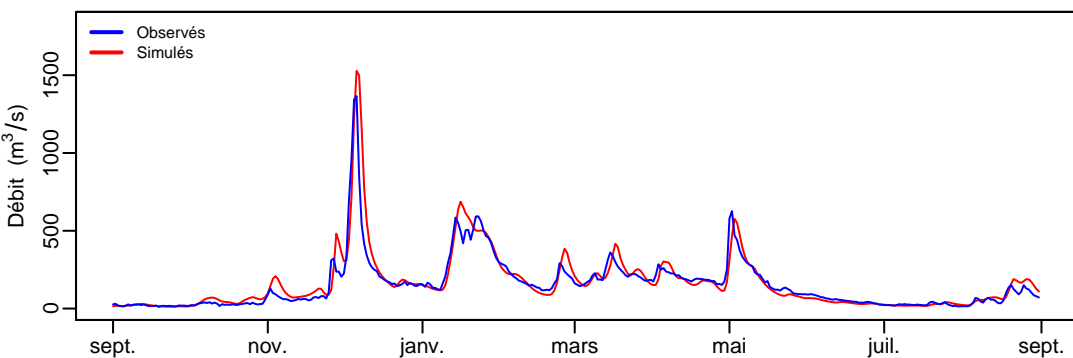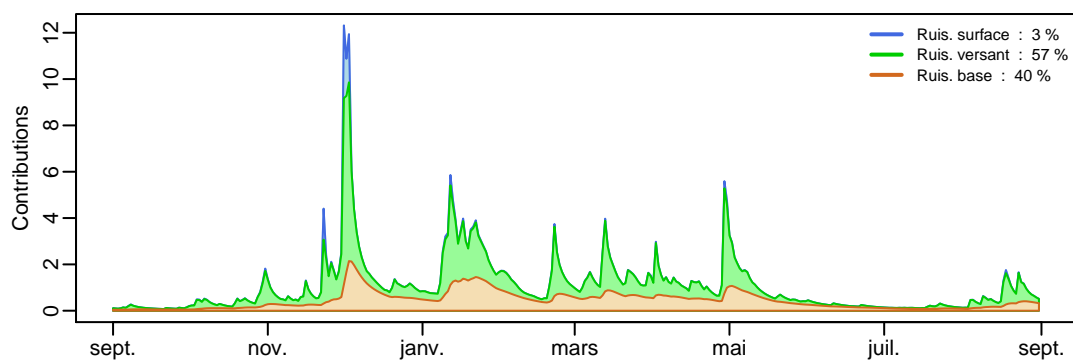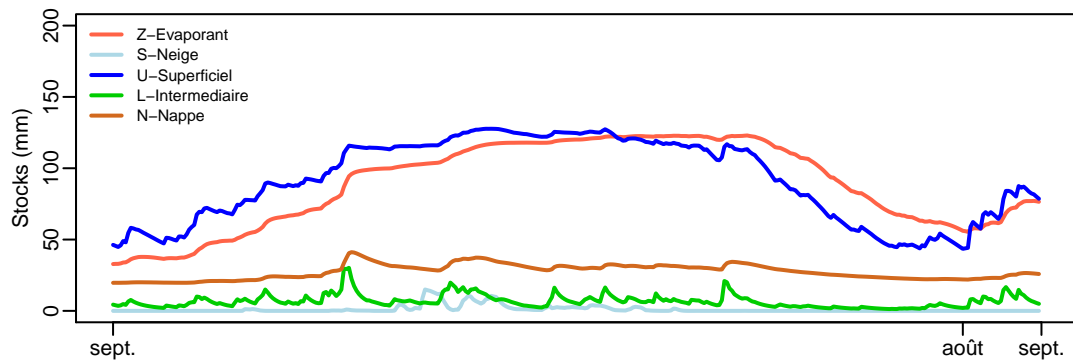

# k3450810 (13012.94 km<sup>2</sup>) – année 2004–2005

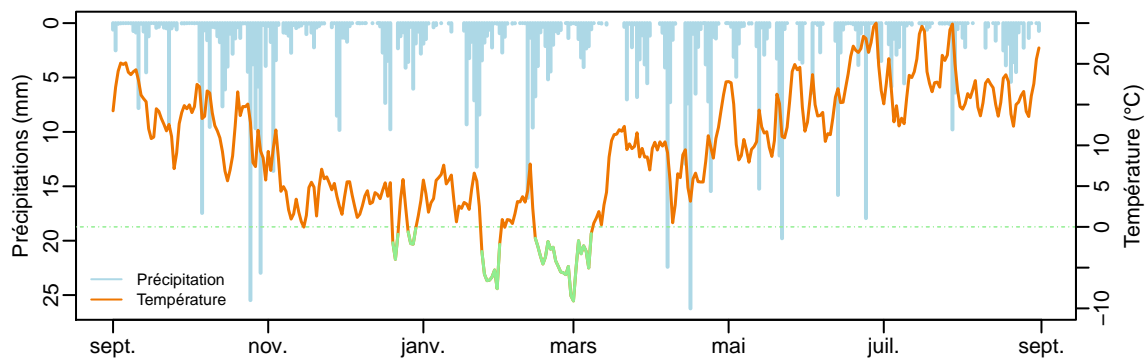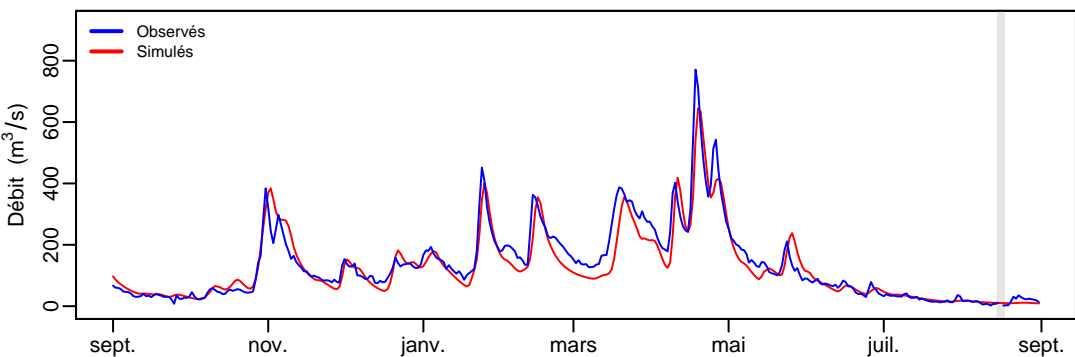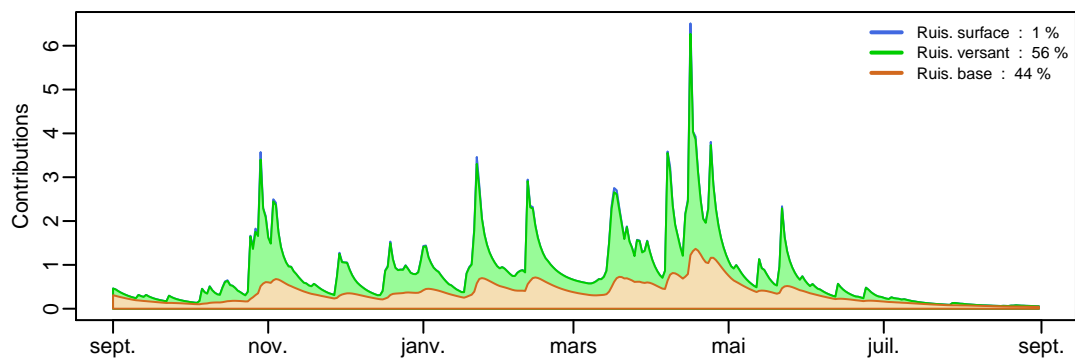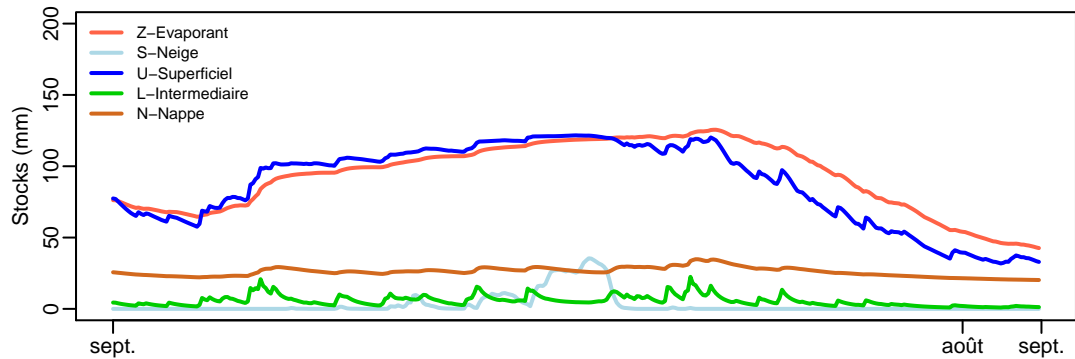

# k3450810 (13012.94 km<sup>2</sup>) – année 2005–2006

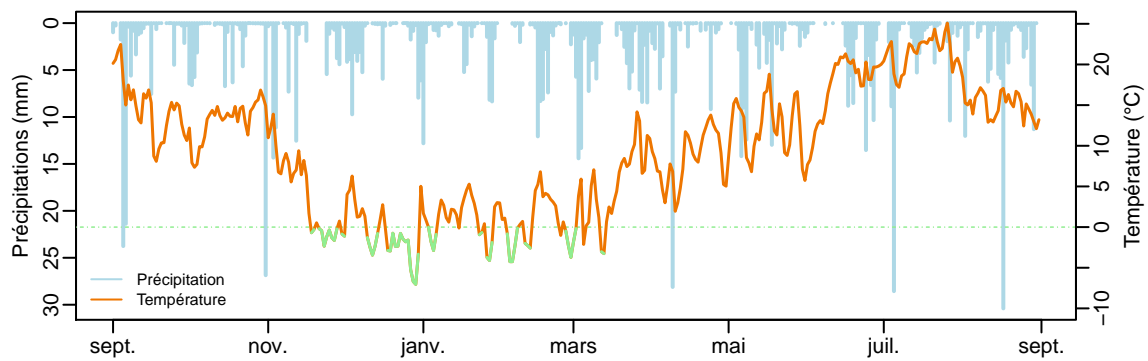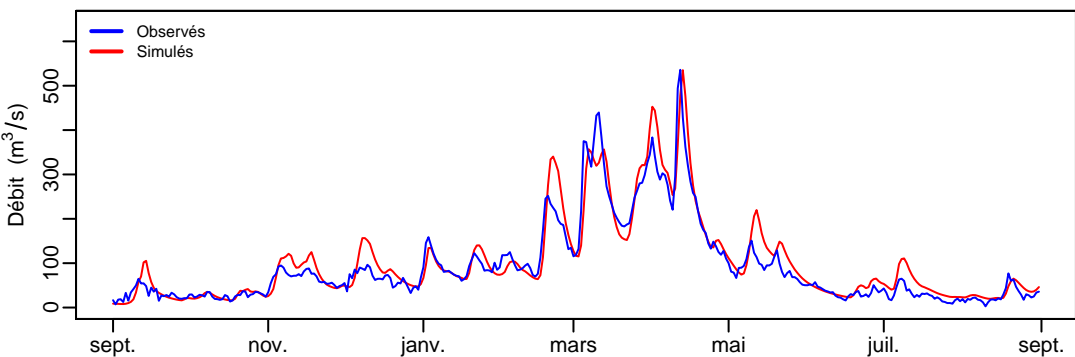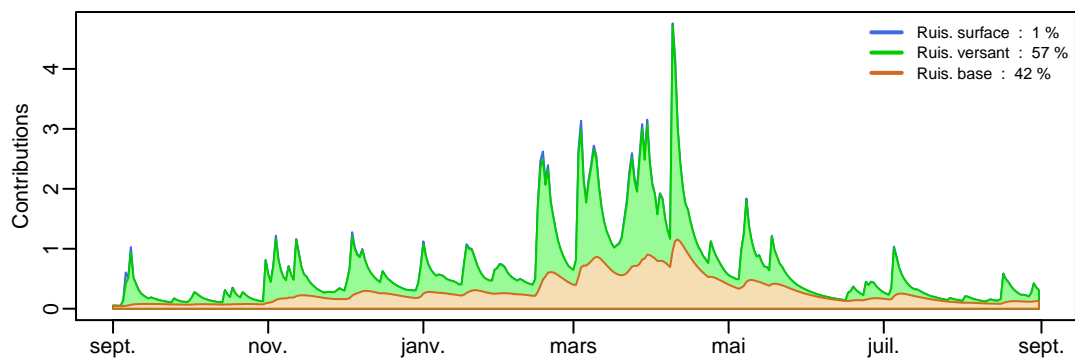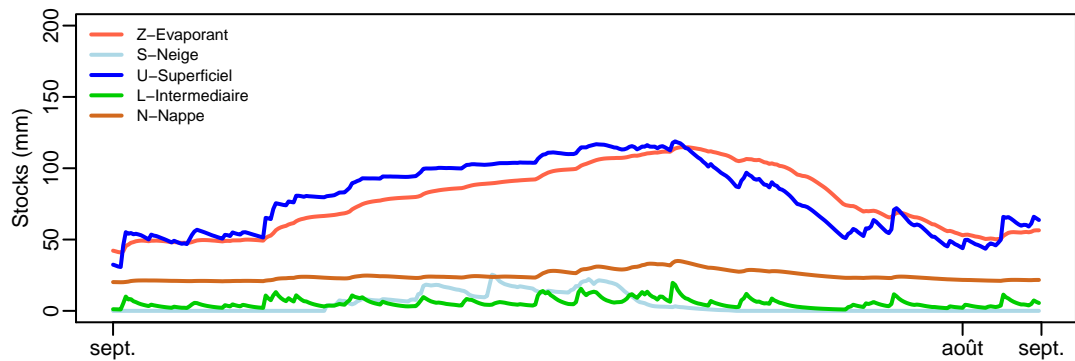

# k3450810 (13012.94 km<sup>2</sup>) – année 2006–2007

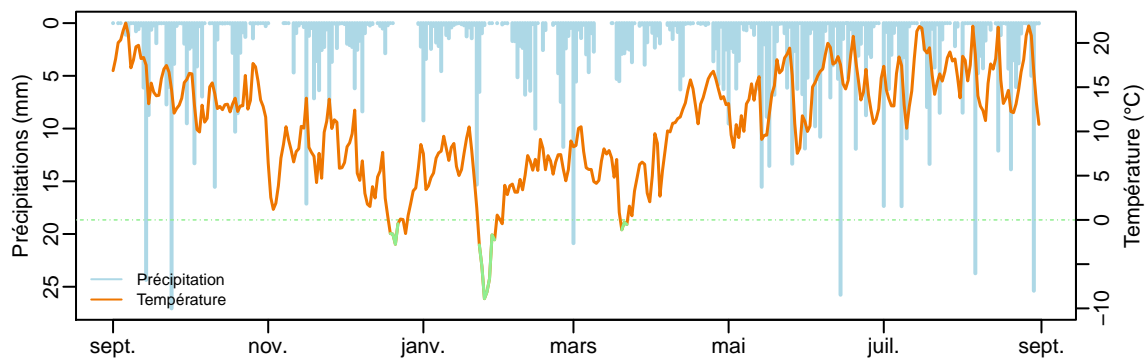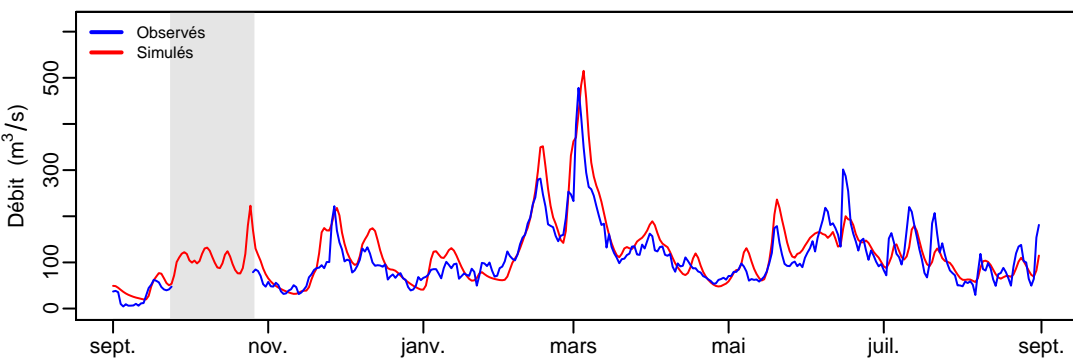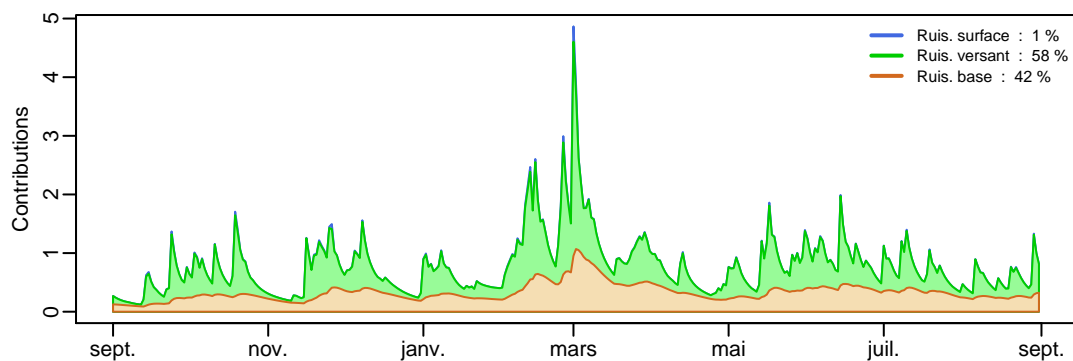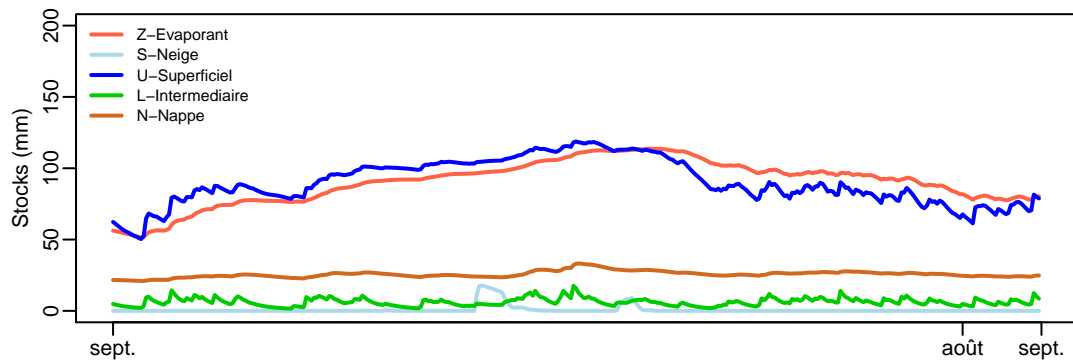



# k3450810 (13012.94 km<sup>2</sup>) – année 2007–2008

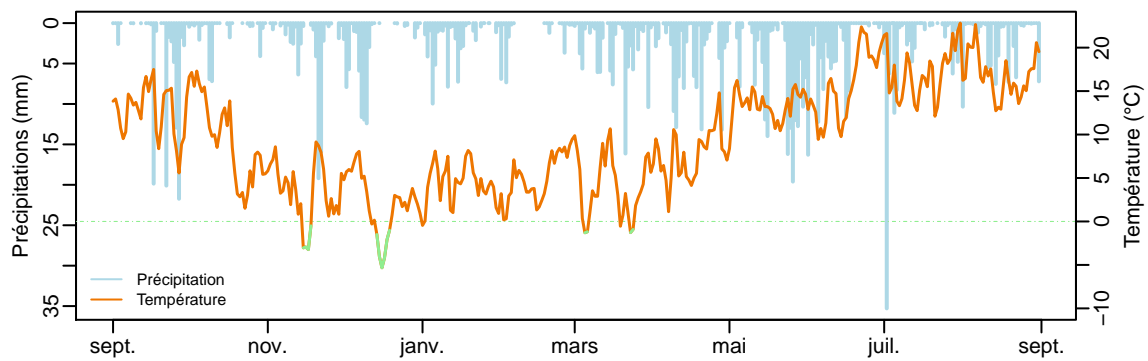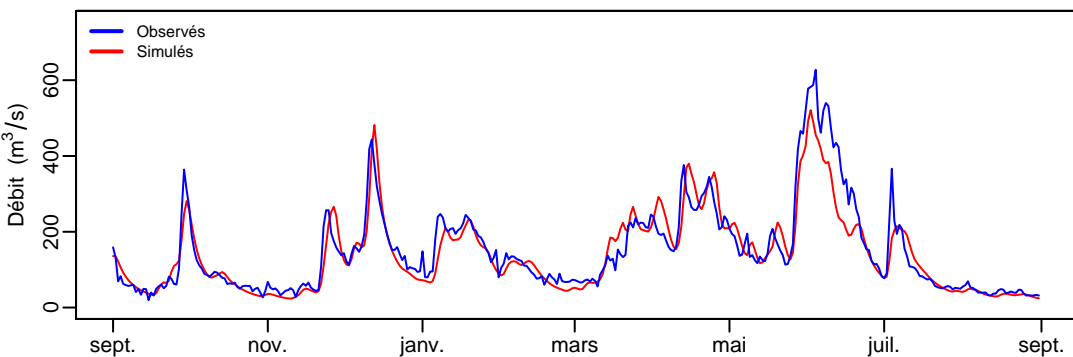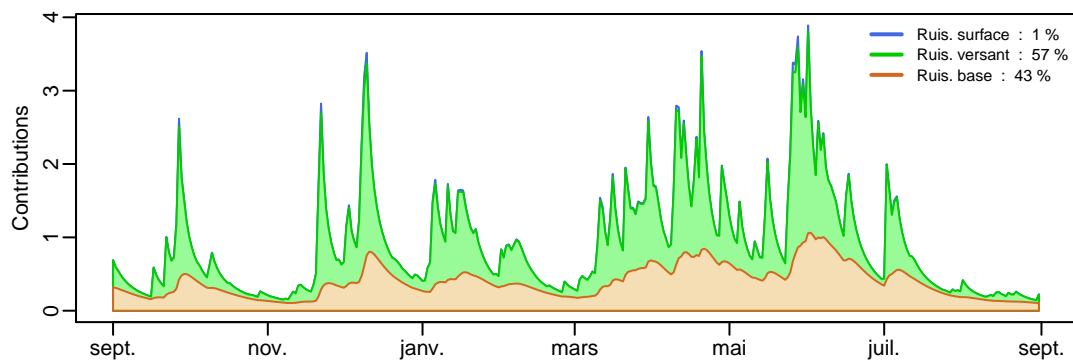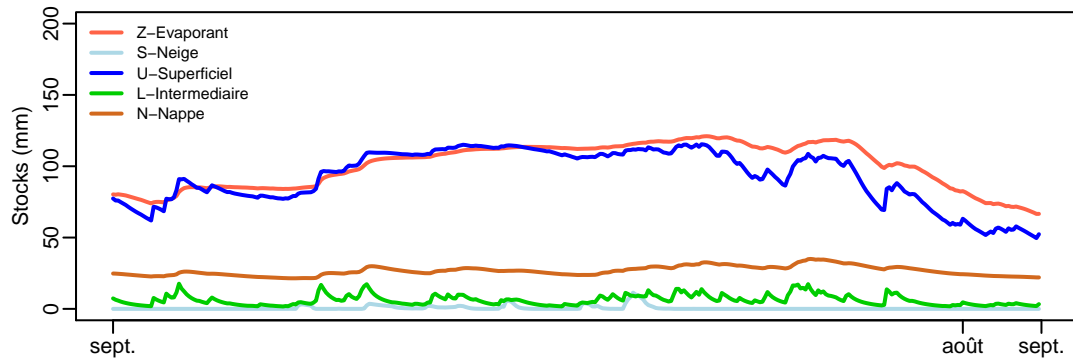

# k3450810 (13012.94 km<sup>2</sup>) – année 2008–2009

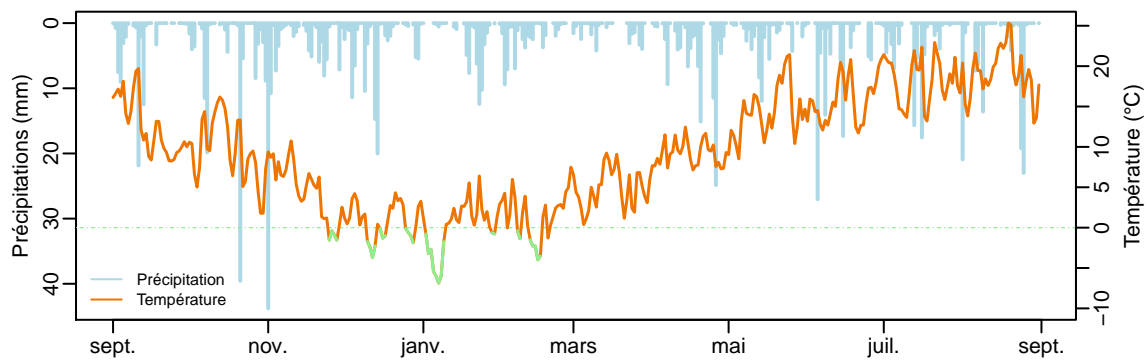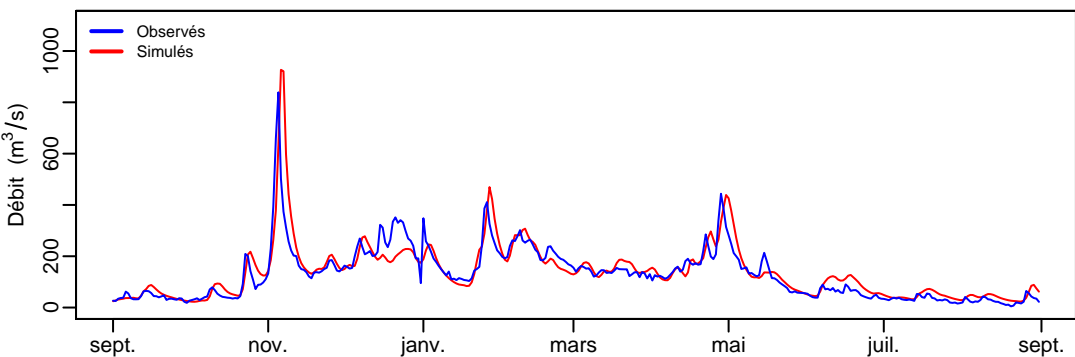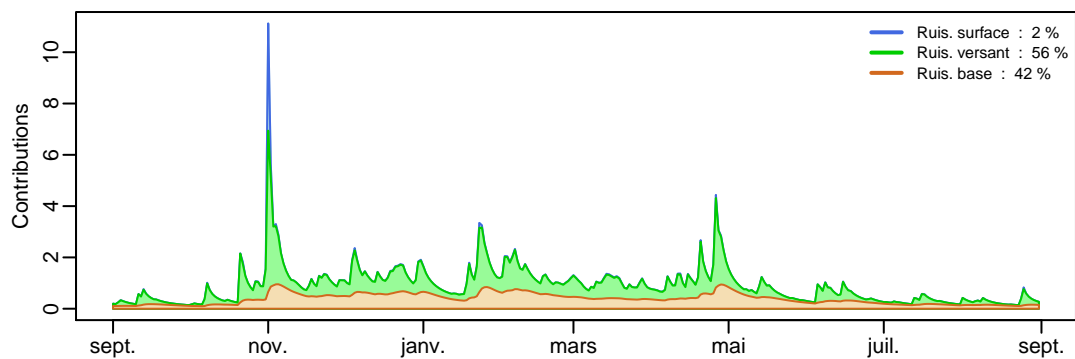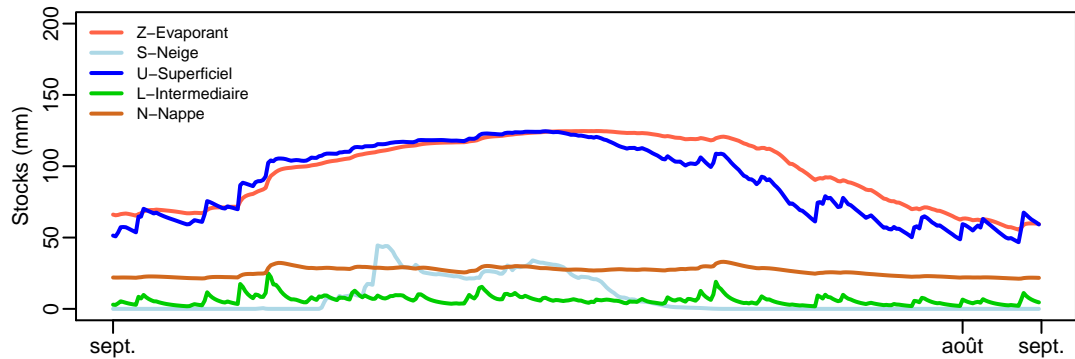

# k3450810 (13012.94 km<sup>2</sup>) – année 2009–2010

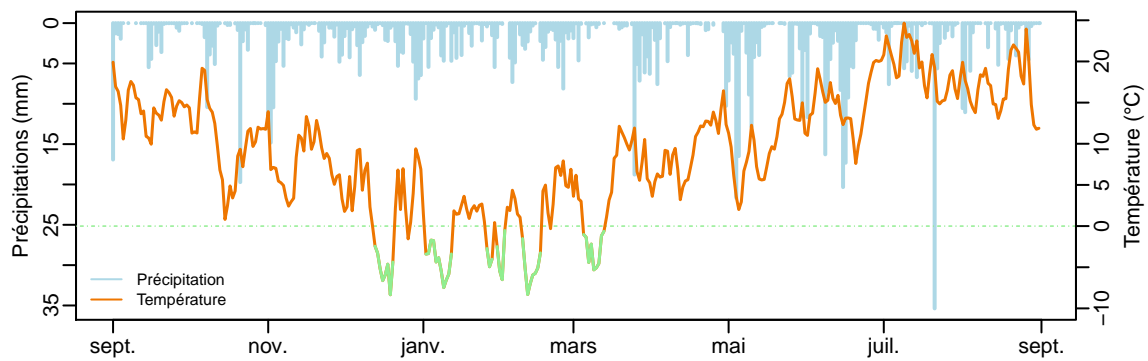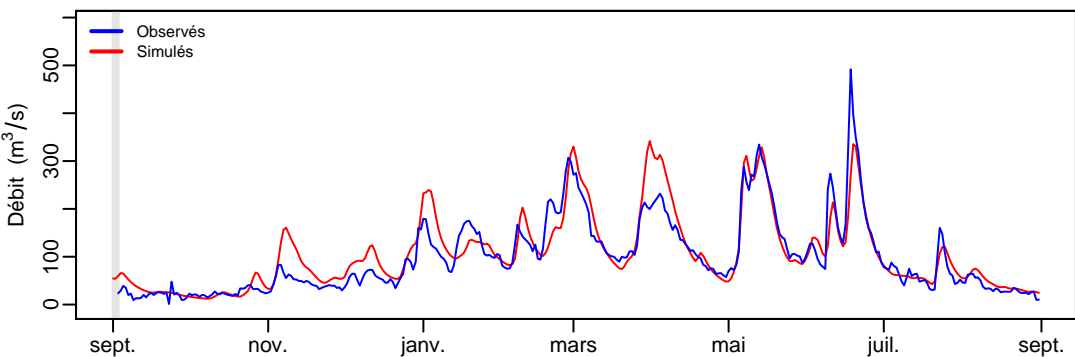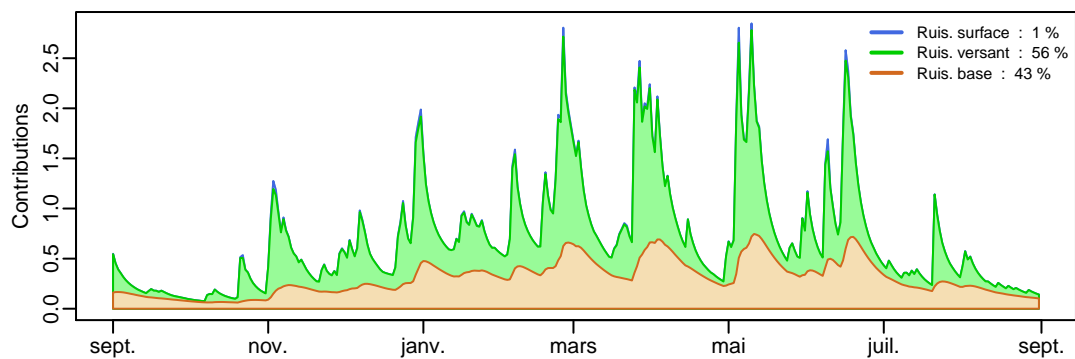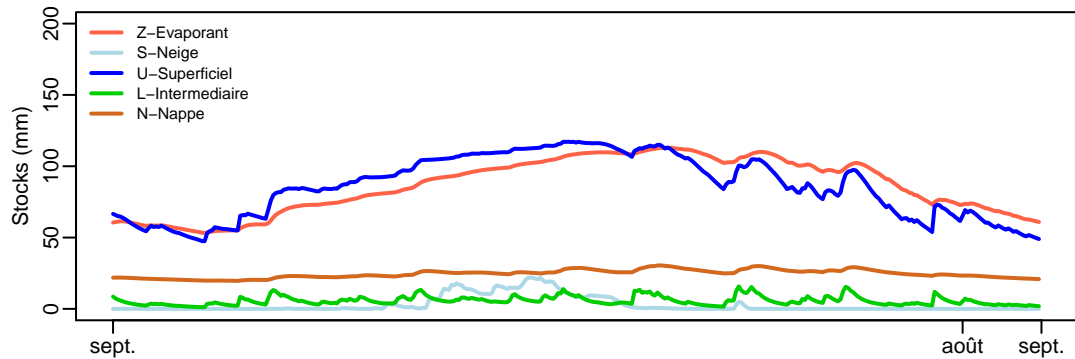

# k3450810 (13012.94 km<sup>2</sup>) – année 2010–2011

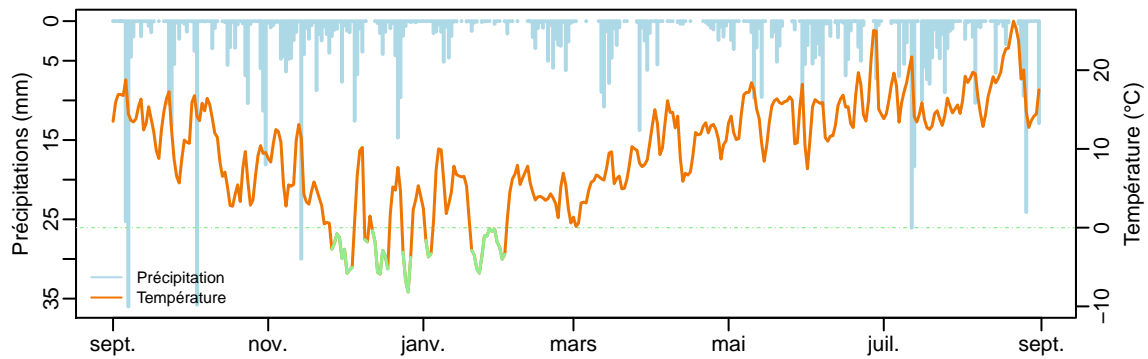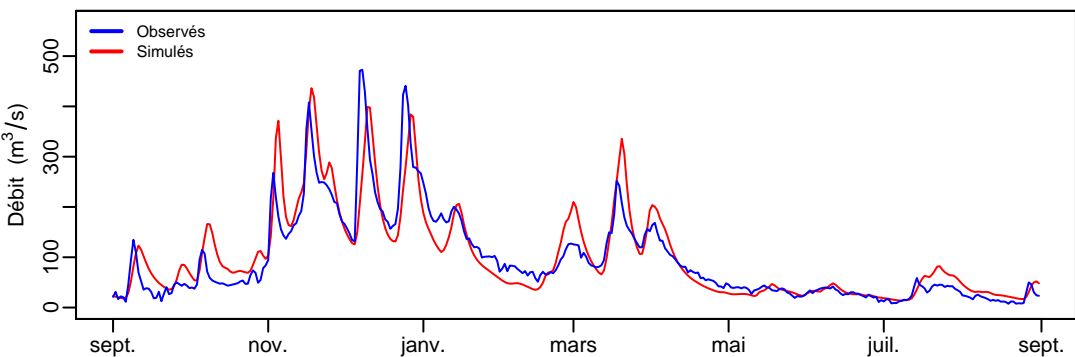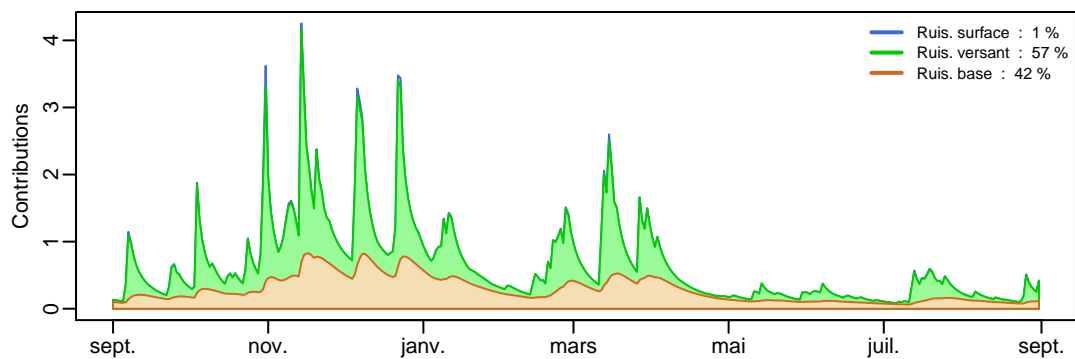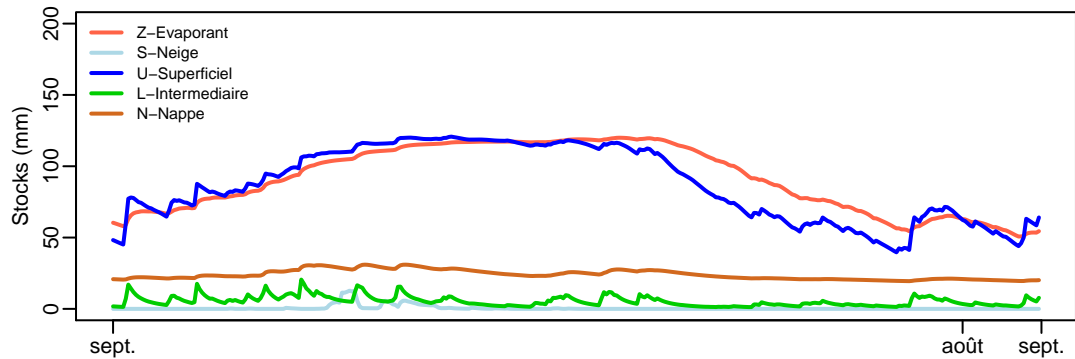

# k3450810 (13012.94 km<sup>2</sup>) – année 2011–2012

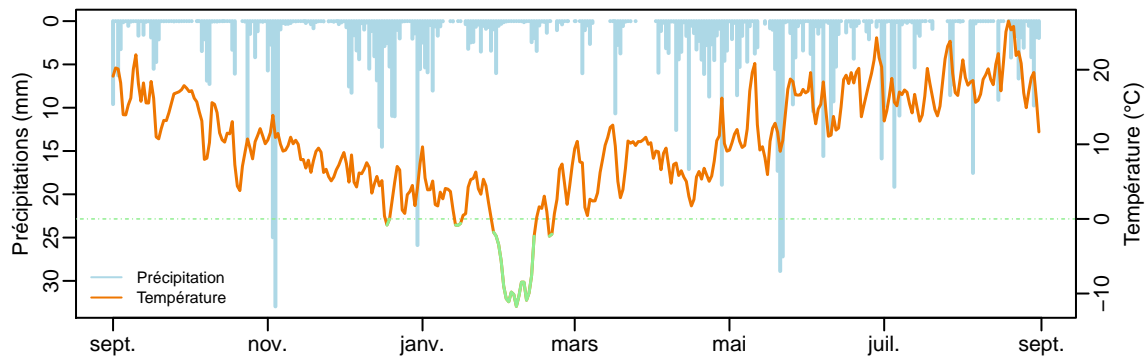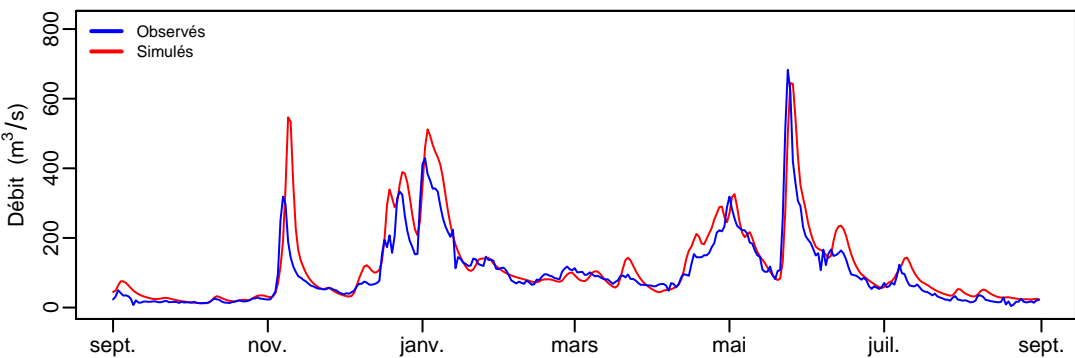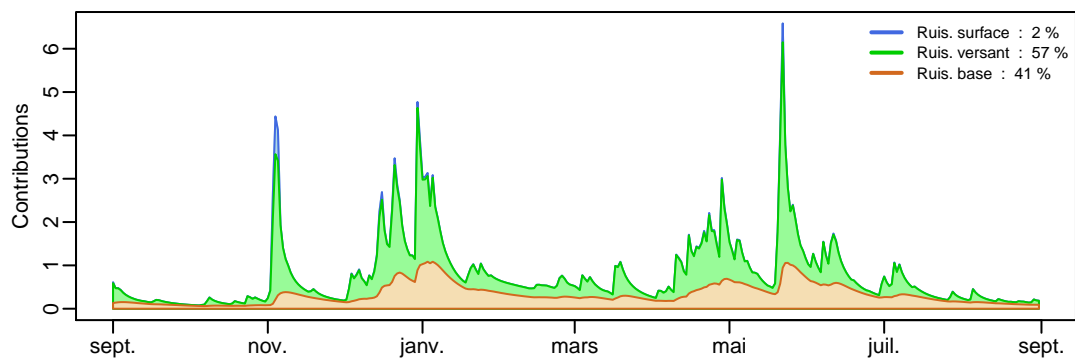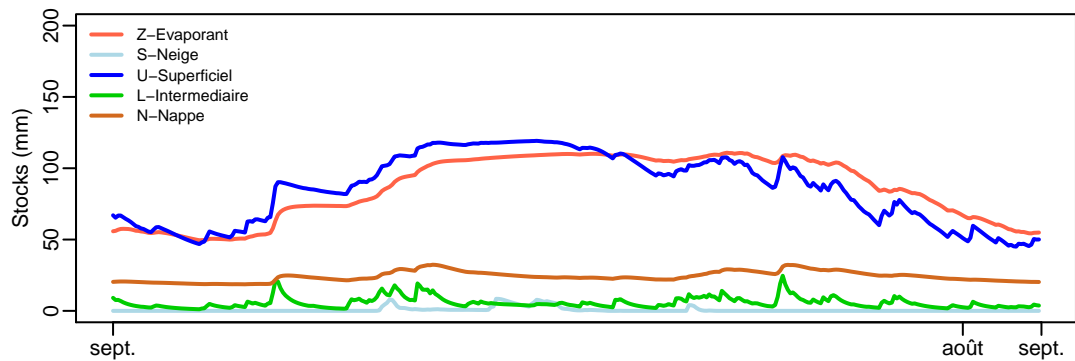

# k3464010 (111.41 km<sup>2</sup>) – année 2000–2001

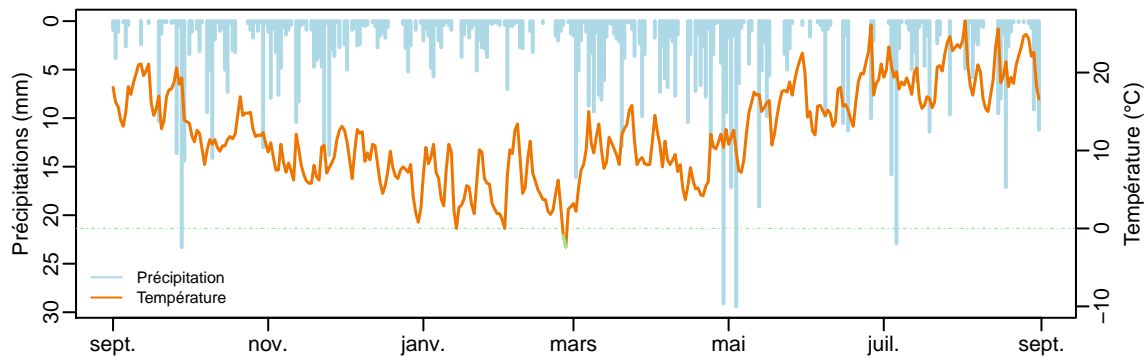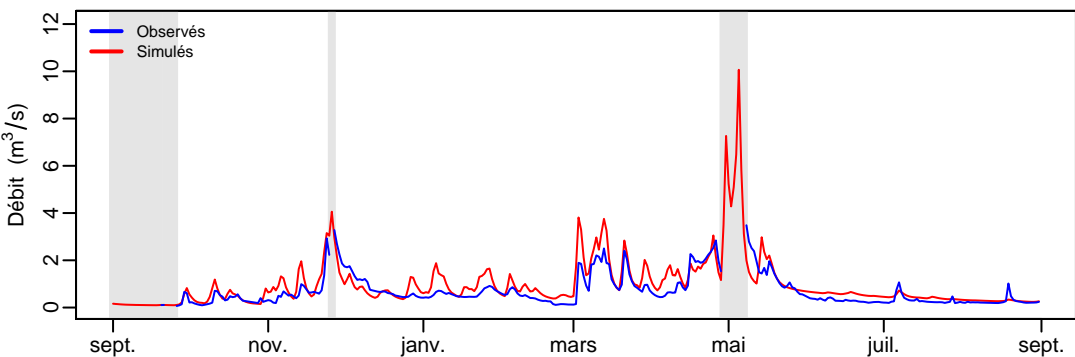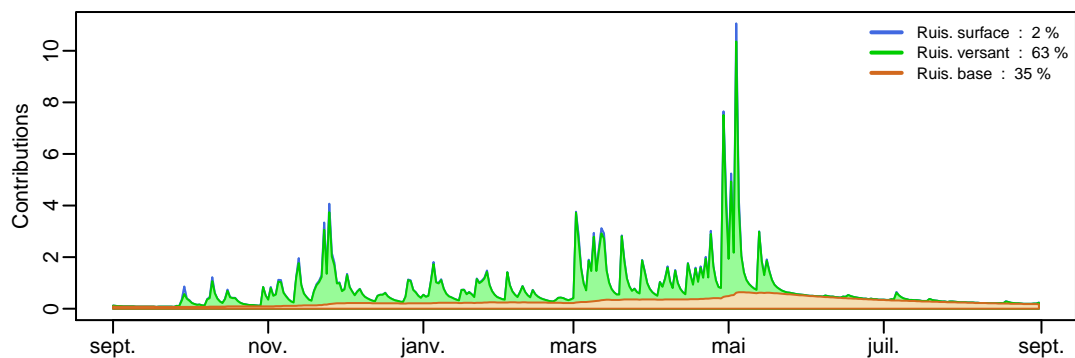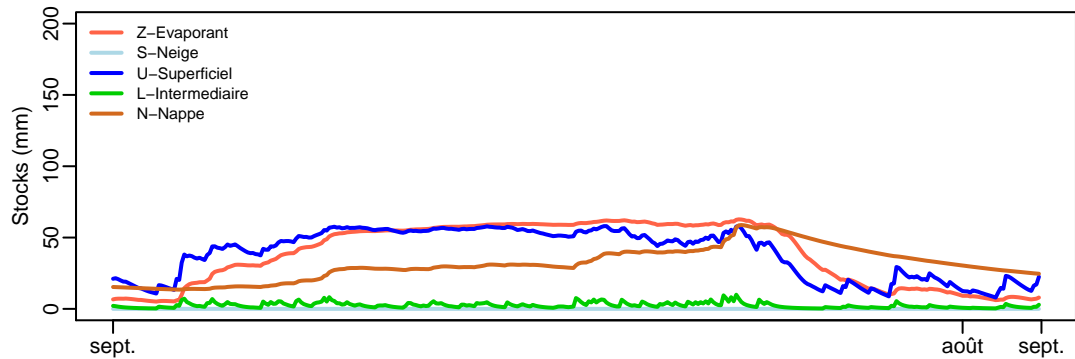

# k3464010 (111.41 km<sup>2</sup>) – année 2001–2002

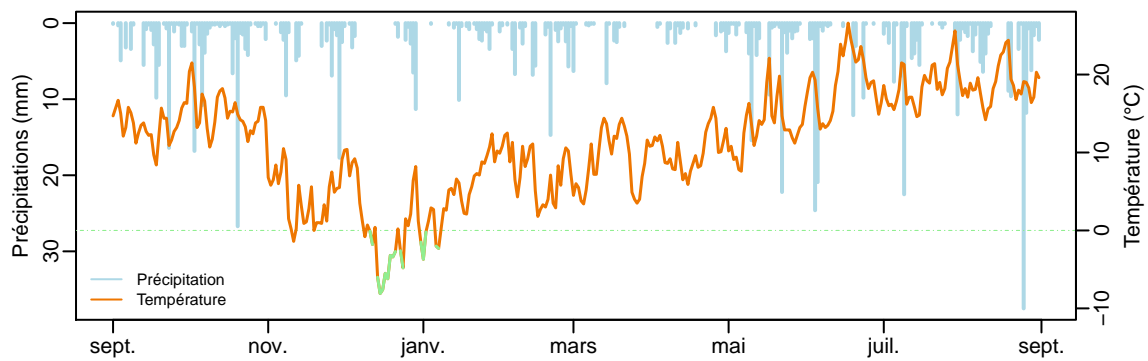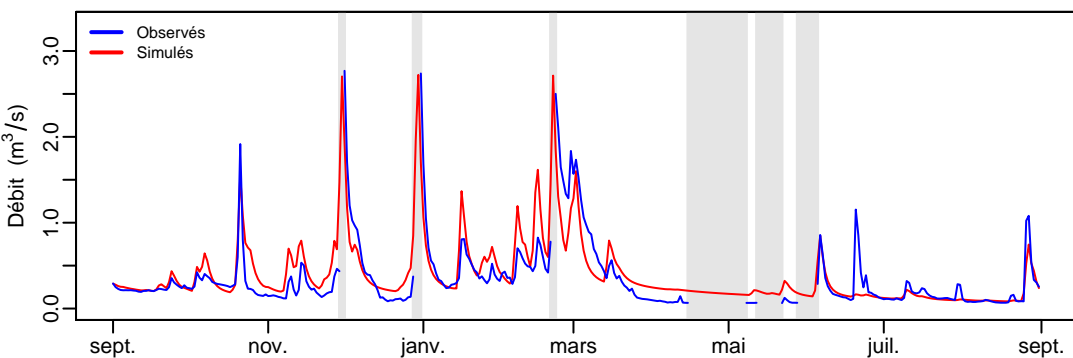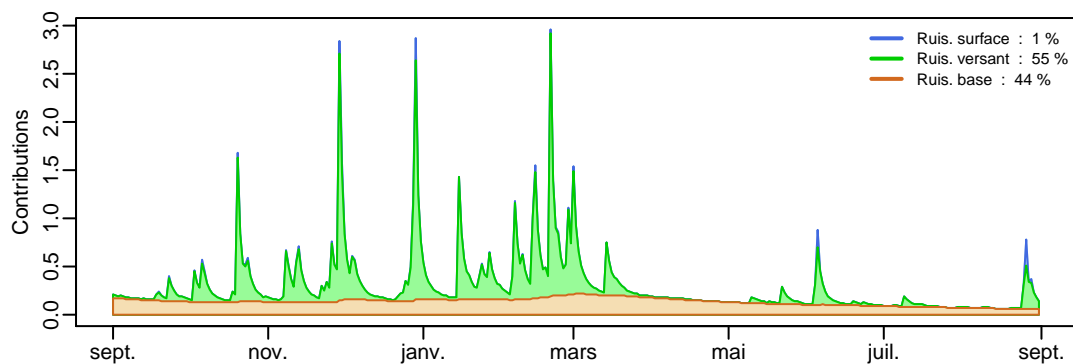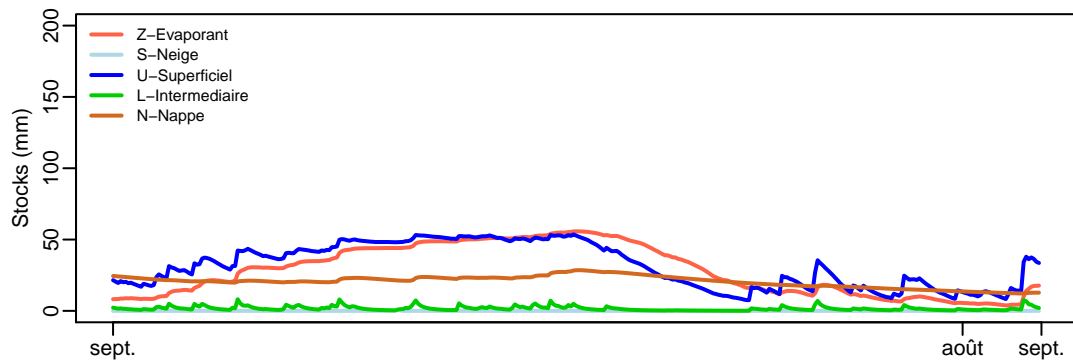

# k3464010 (111.41 km<sup>2</sup>) – année 2002–2003

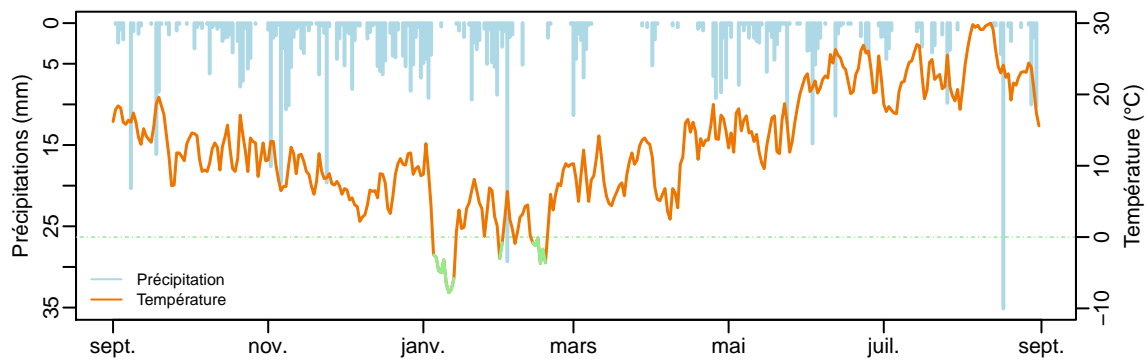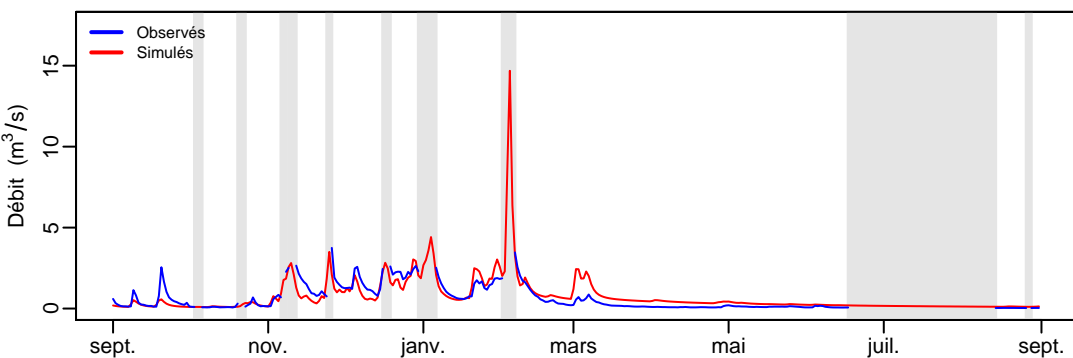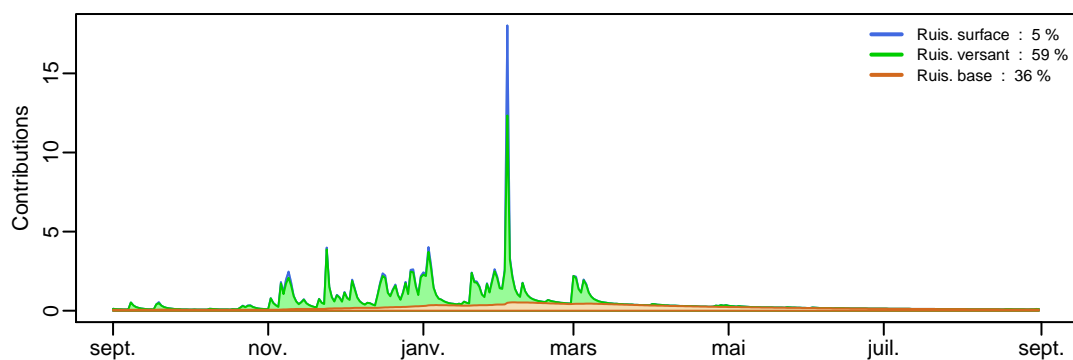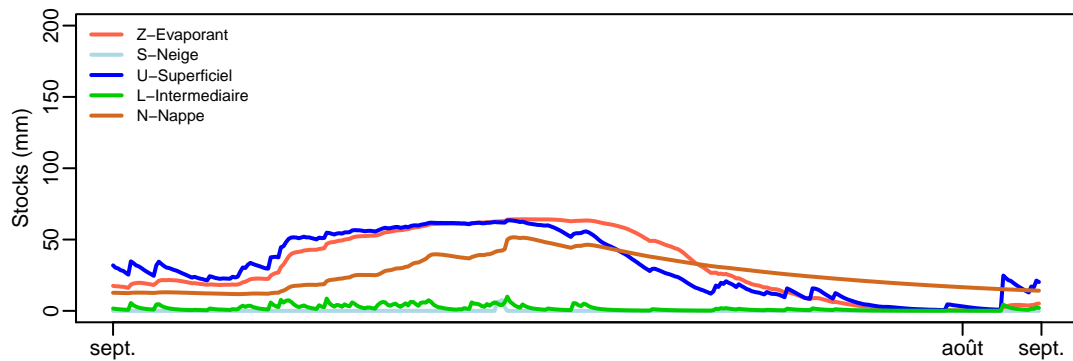



# k3464010 (111.41 km<sup>2</sup>) – année 2003–2004

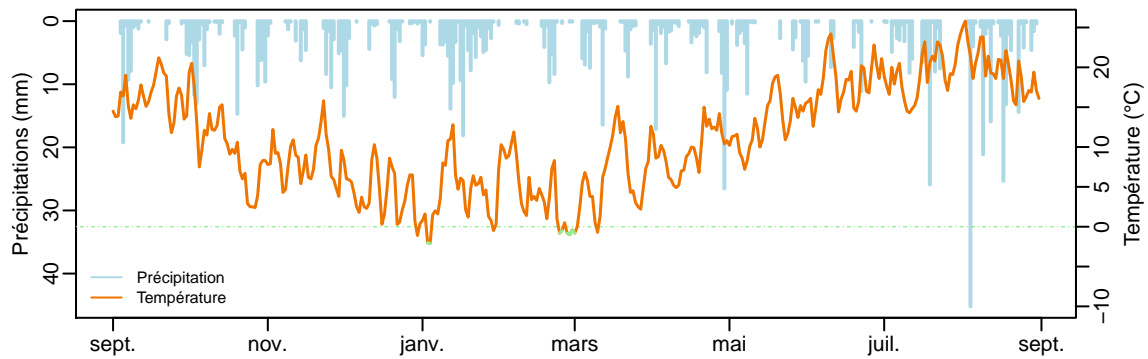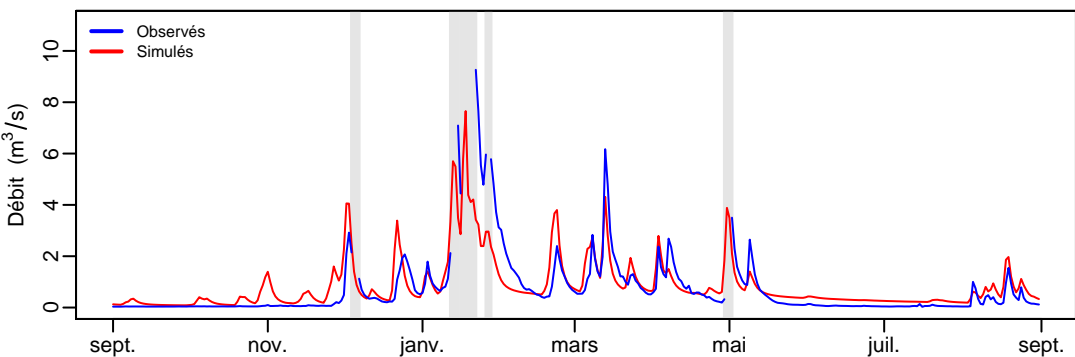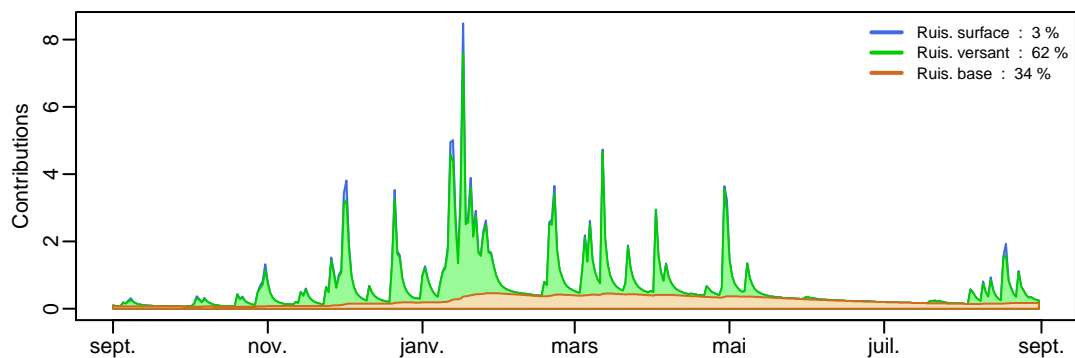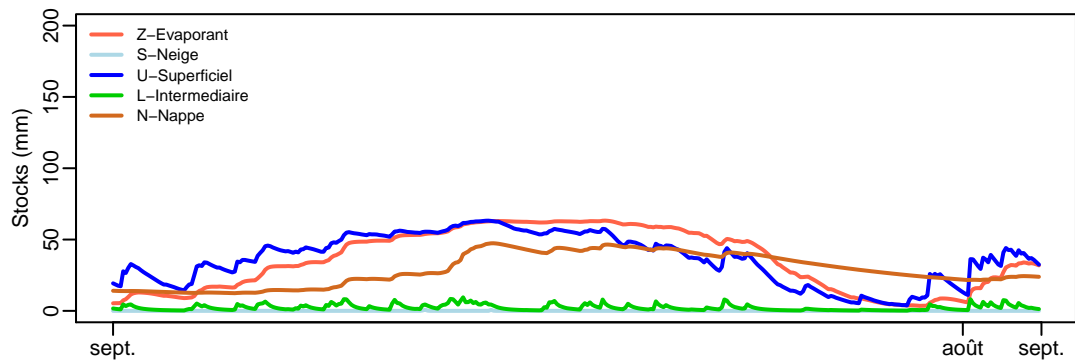

# k3464010 (111.41 km<sup>2</sup>) – année 2004–2005

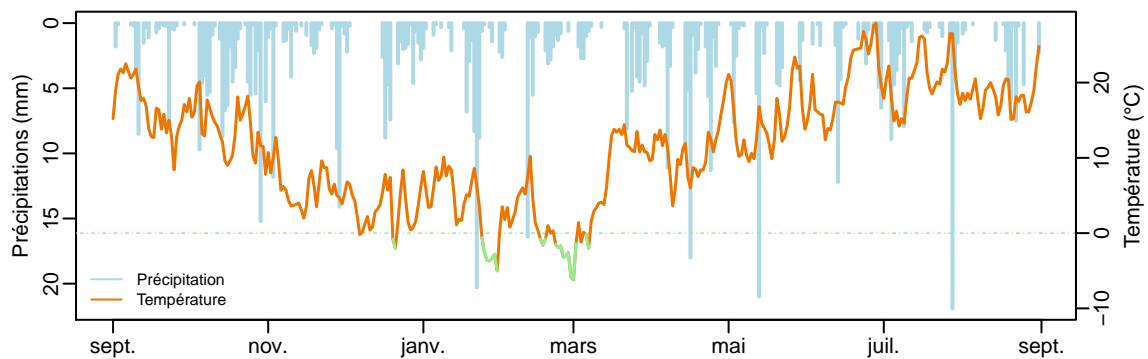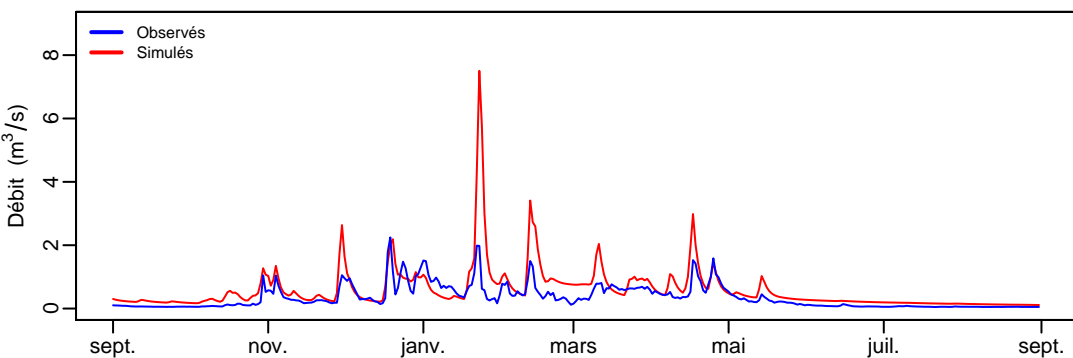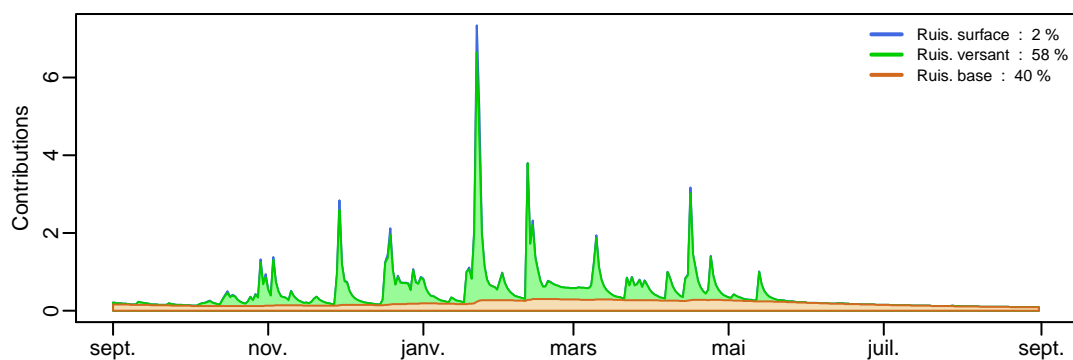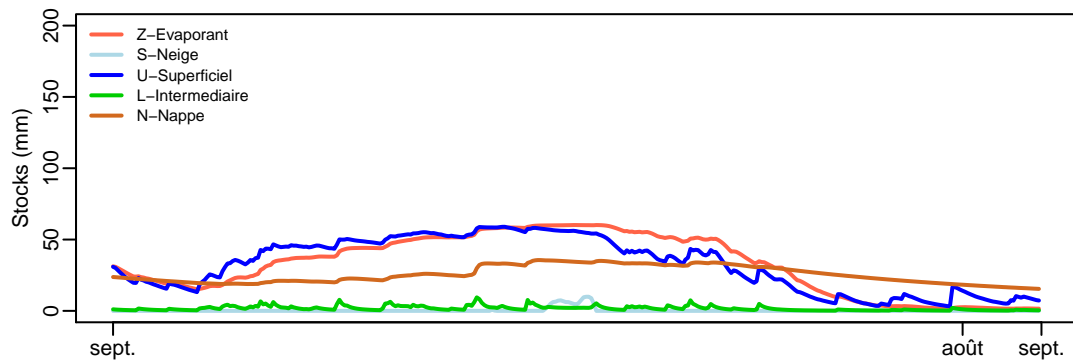

# k3464010 (111.41 km²) – année 2005–2006

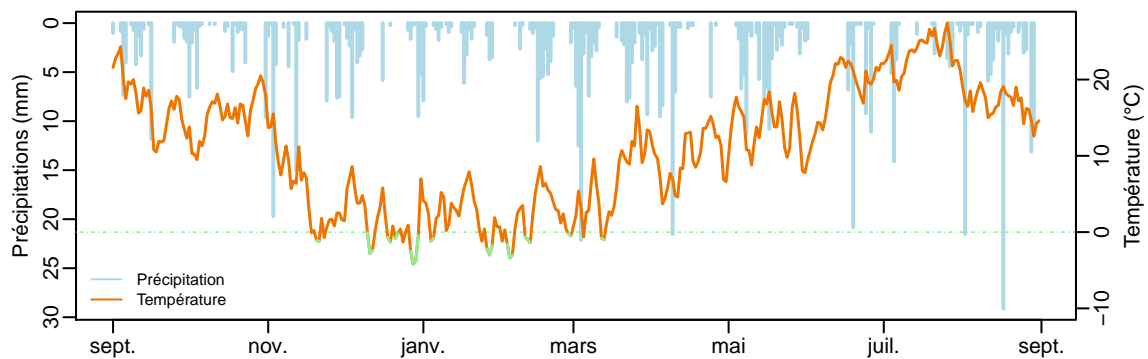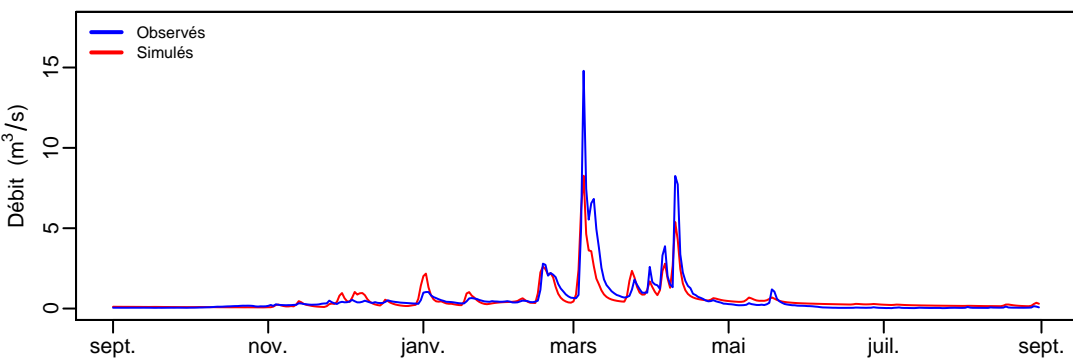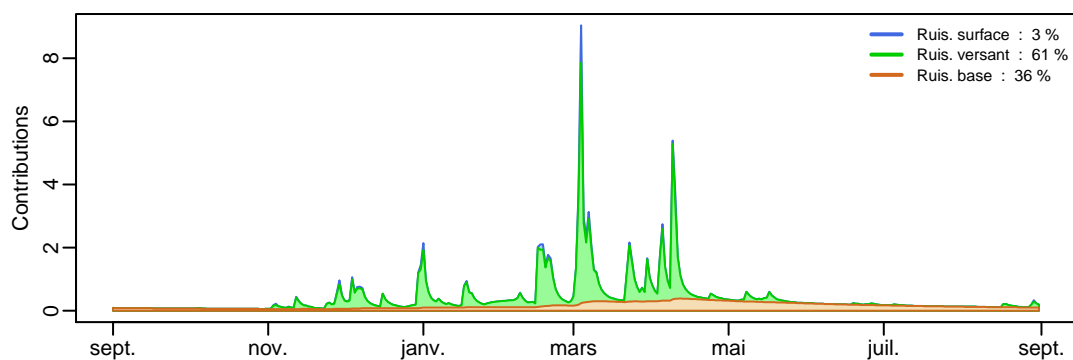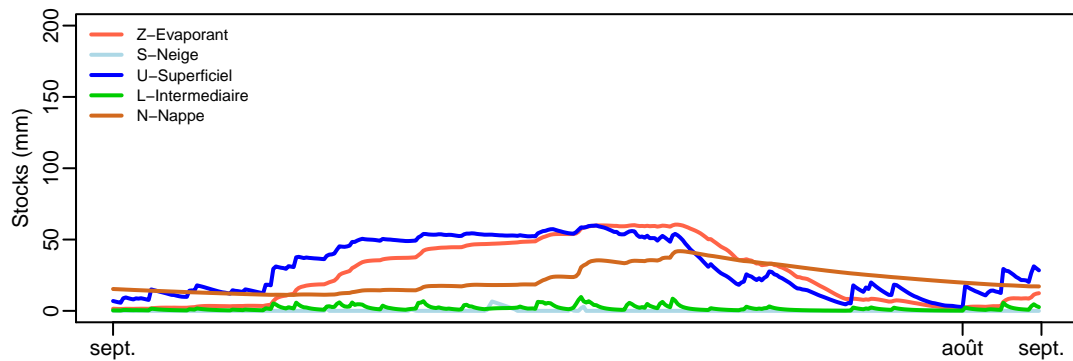

# k3464010 (111.41 km<sup>2</sup>) – année 2006–2007

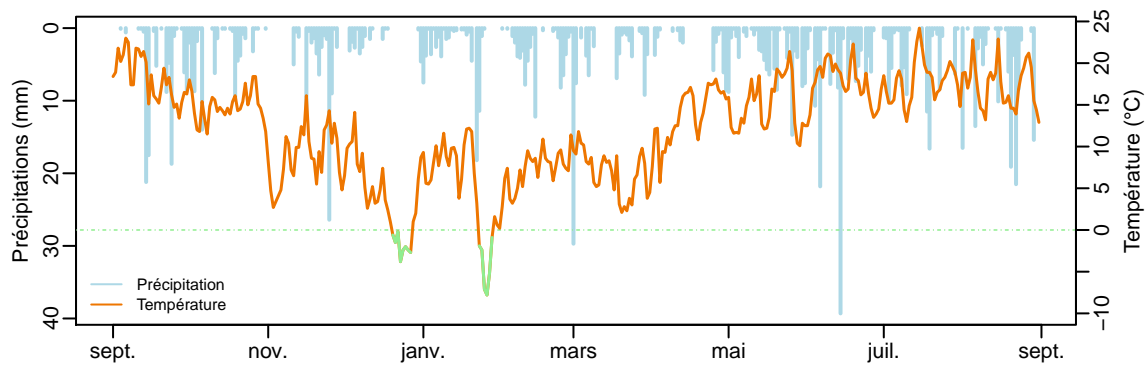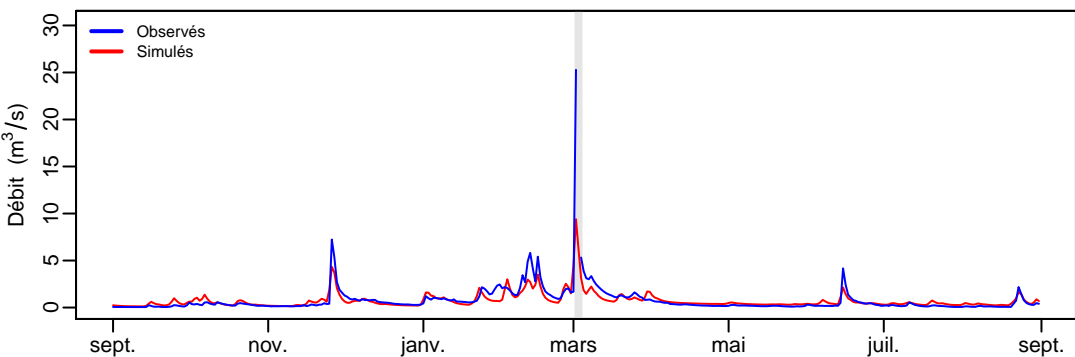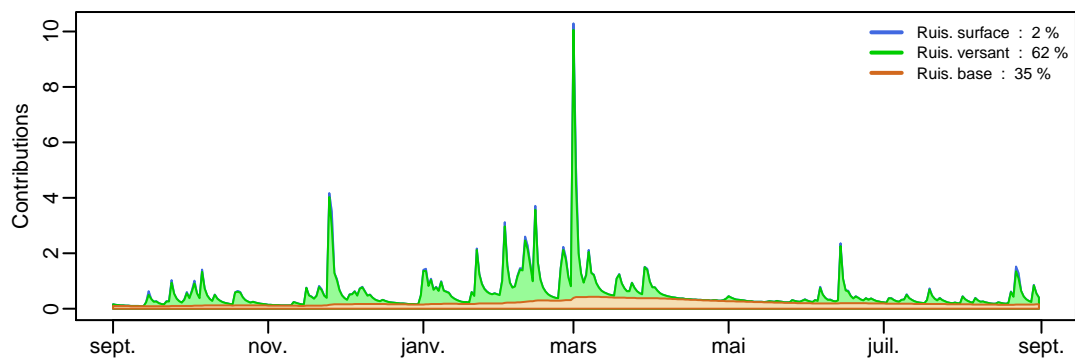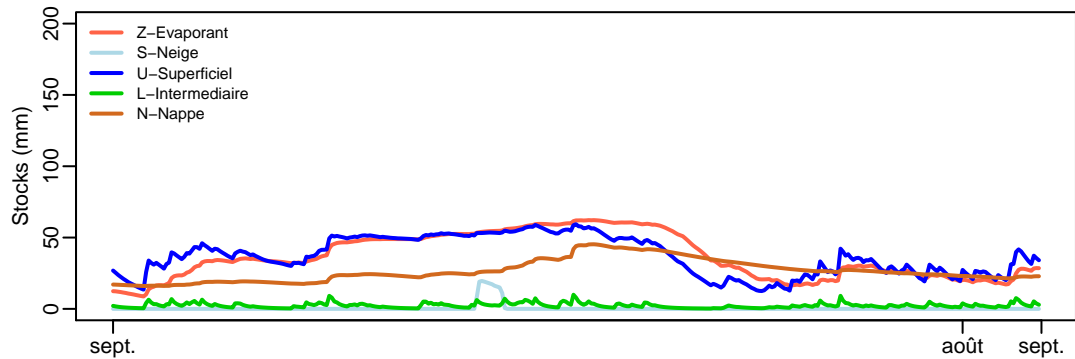

# k3464010 (111.41 km<sup>2</sup>) – année 2007–2008

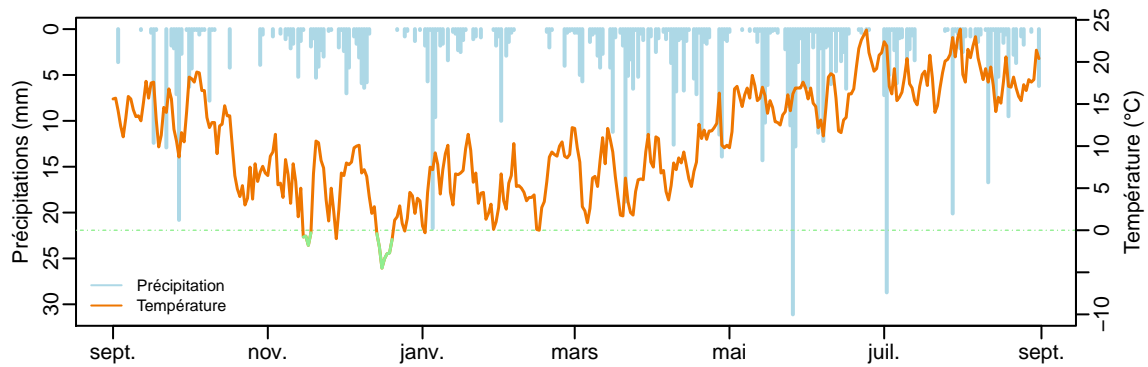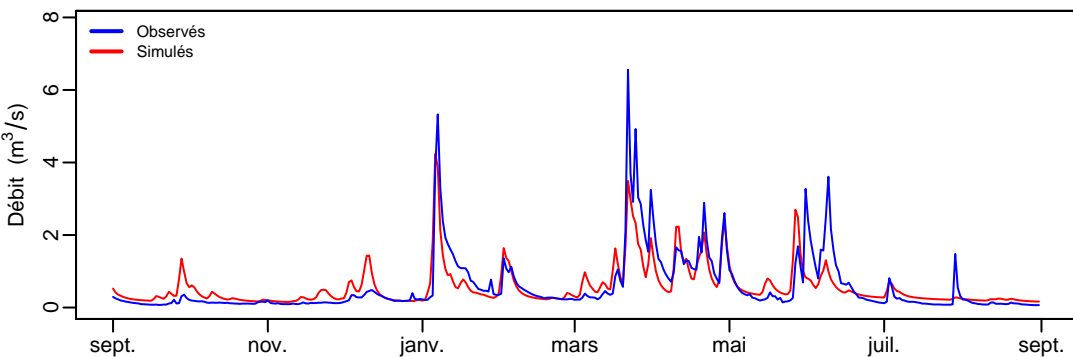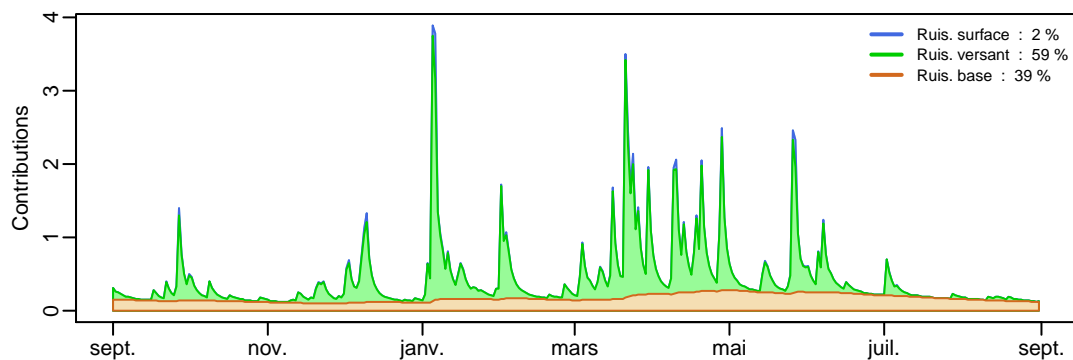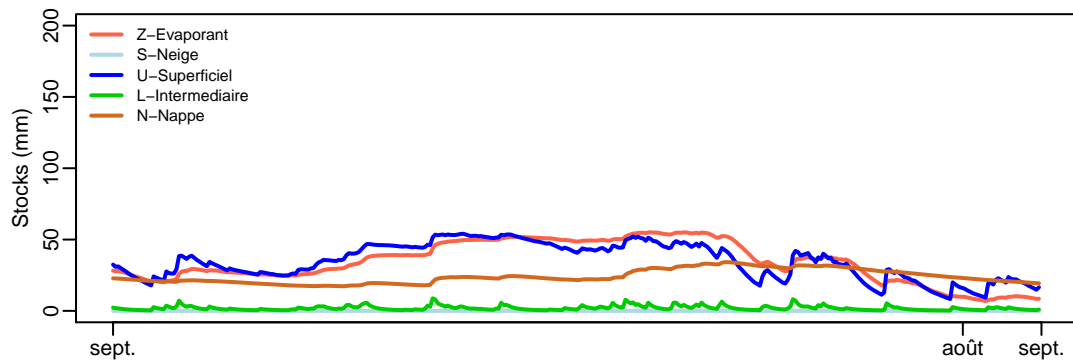

# k3464010 (111.41 km<sup>2</sup>) – année 2008–2009

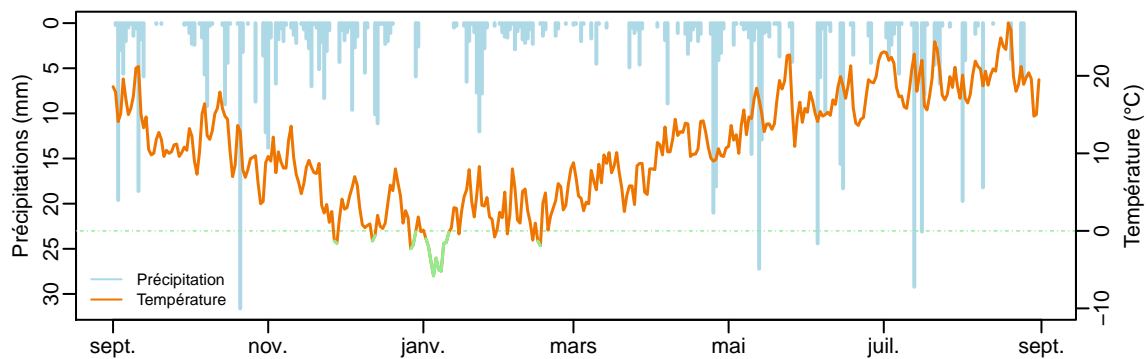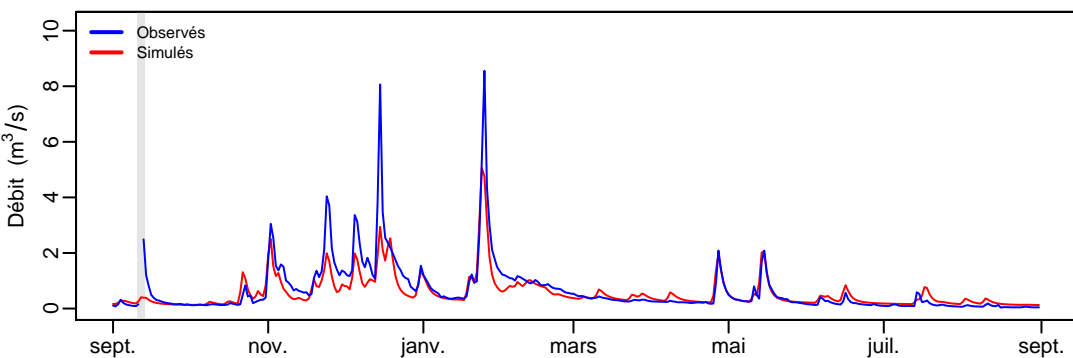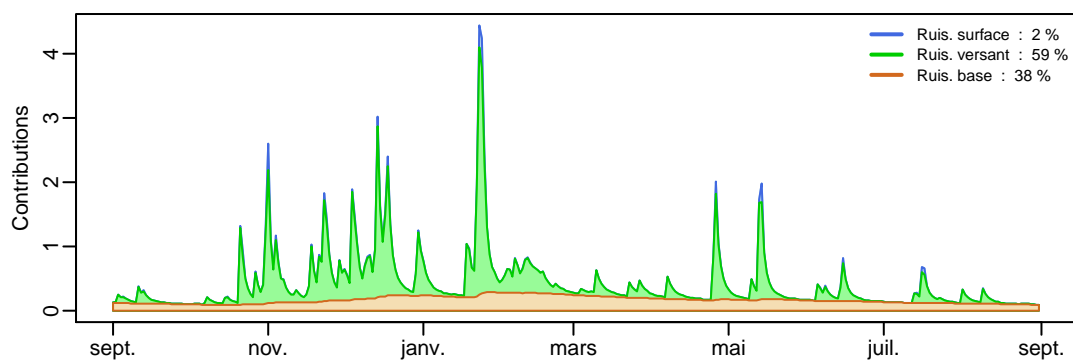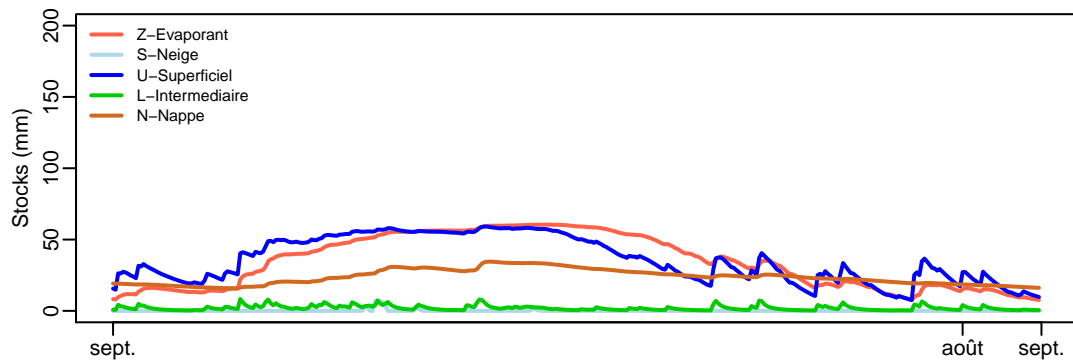

# k3464010 (111.41 km<sup>2</sup>) – année 2009–2010

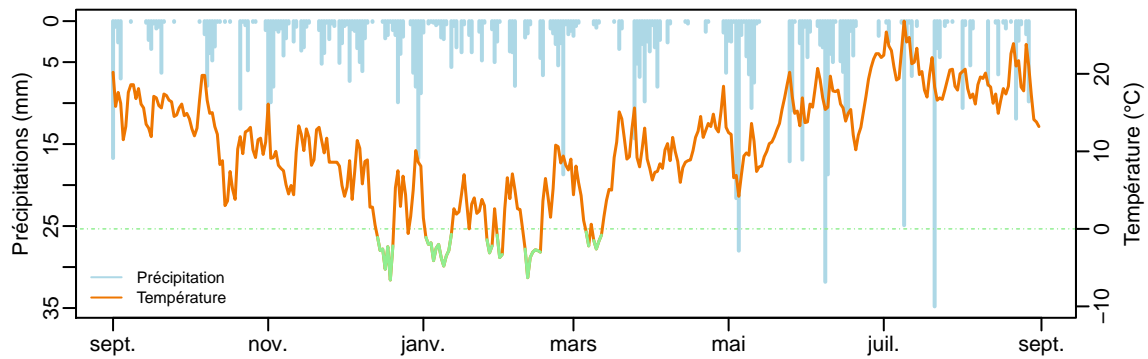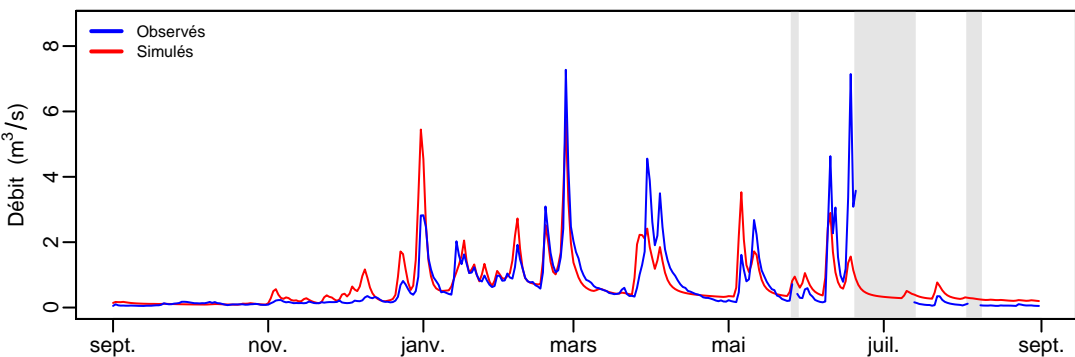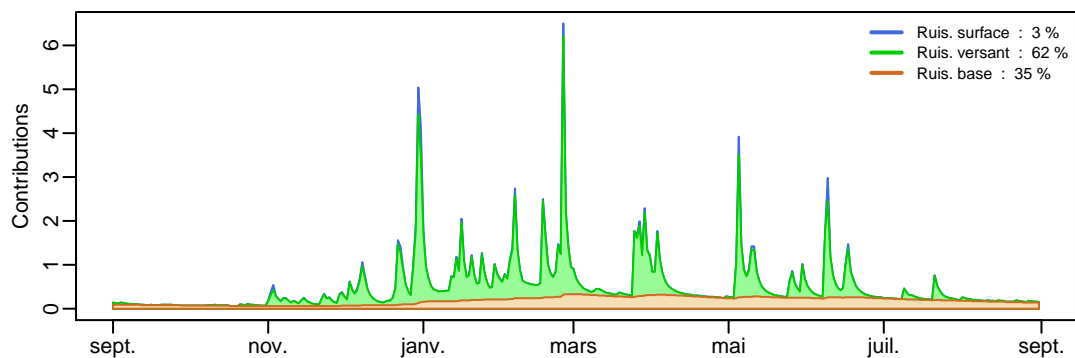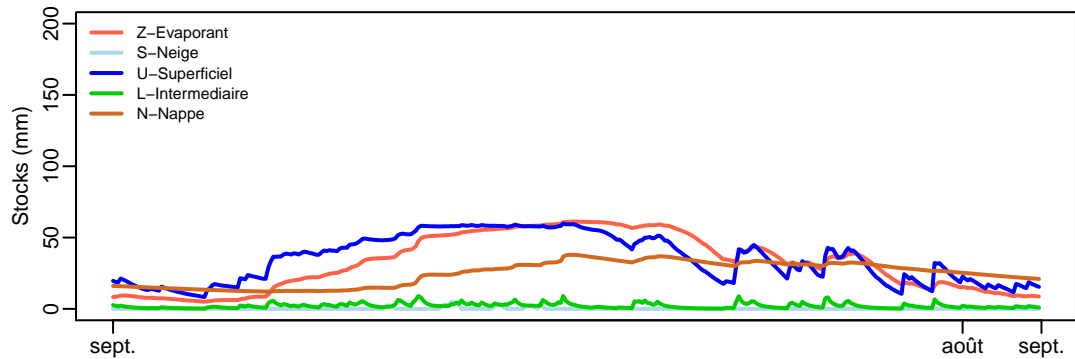

# k3464010 (111.41 km<sup>2</sup>) – année 2010–2011

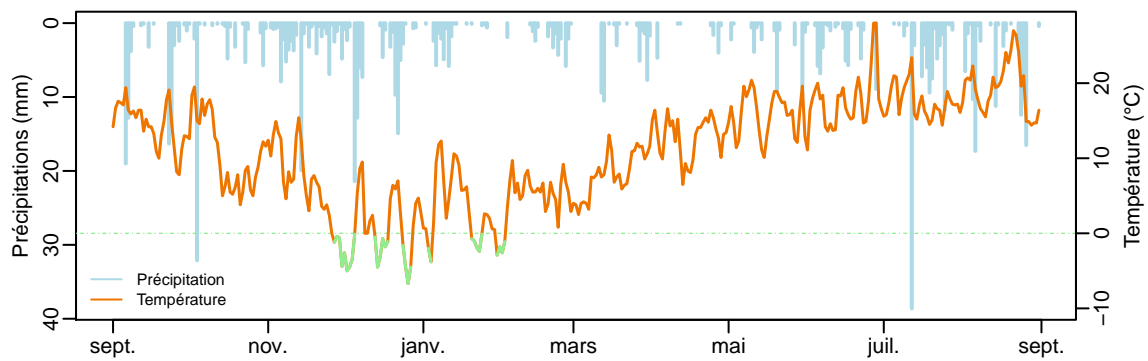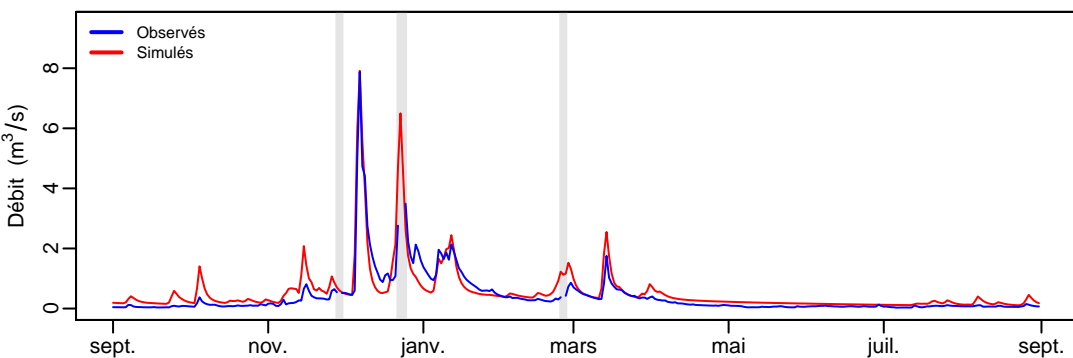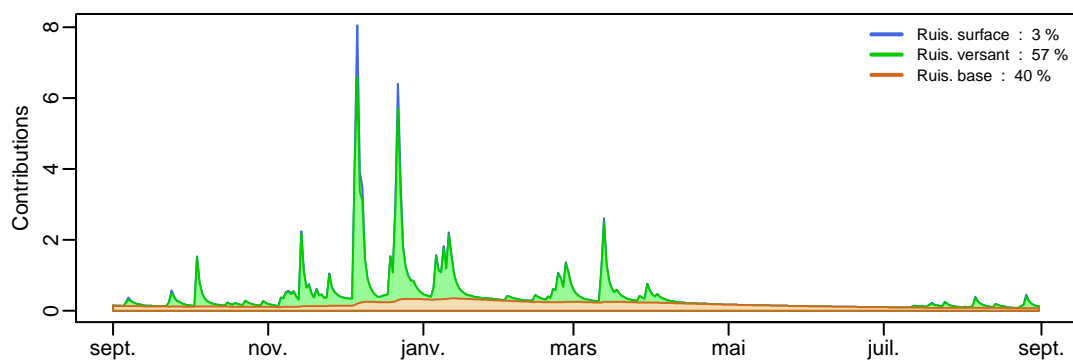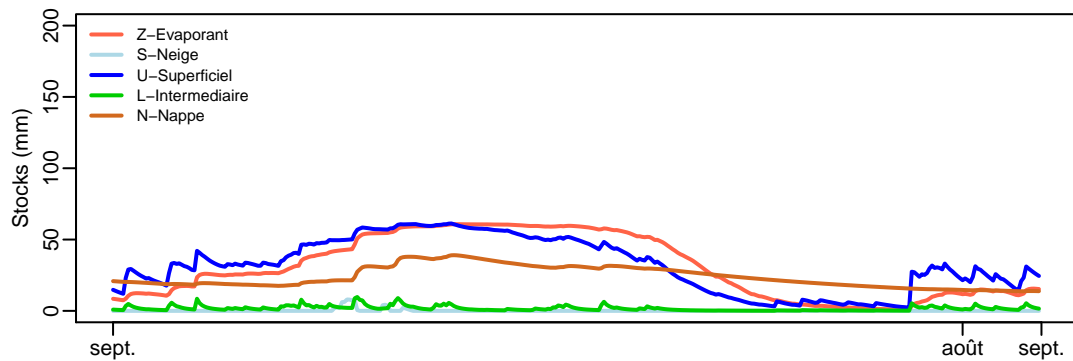



# k3464010 (111.41 km<sup>2</sup>) – année 2011–2012

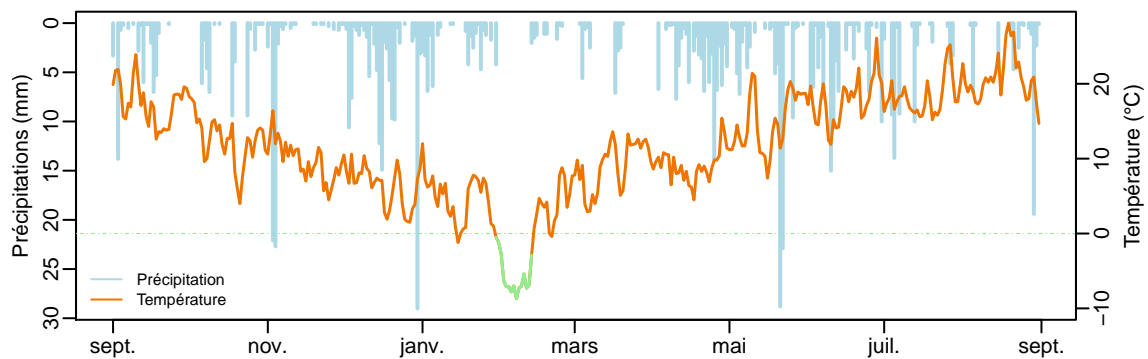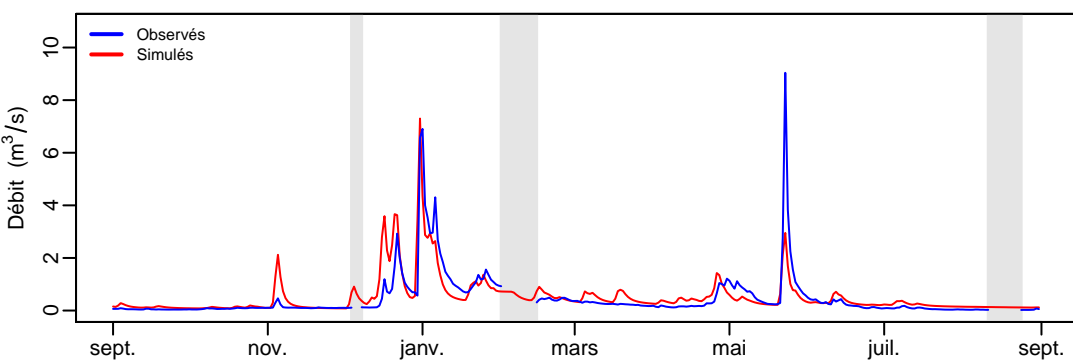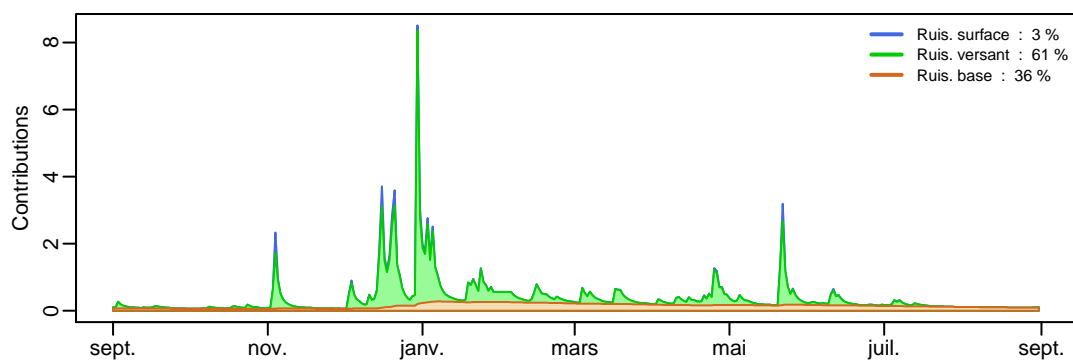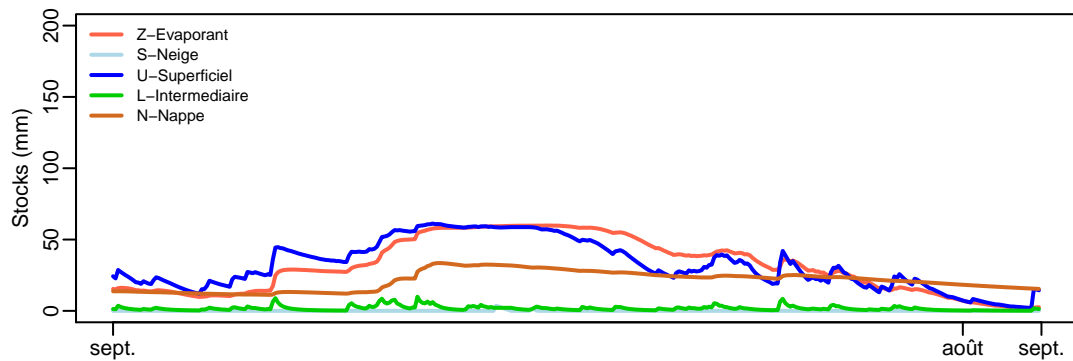

# k3553010 (222.6 km<sup>2</sup>) – année 2005–2006

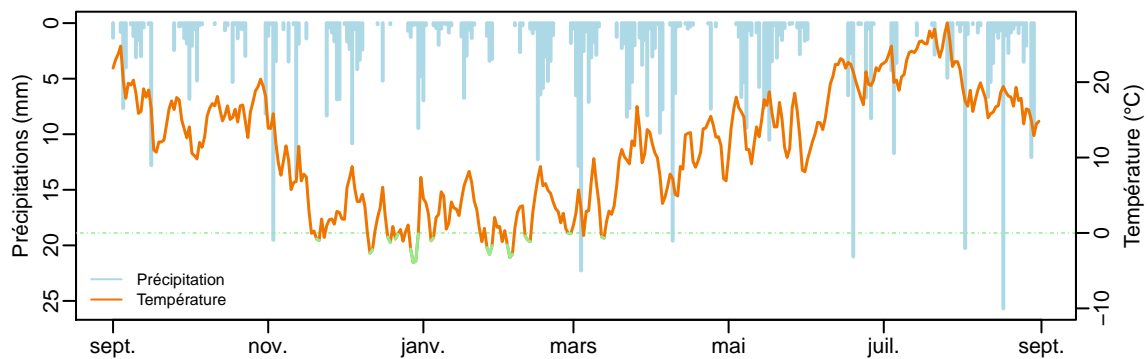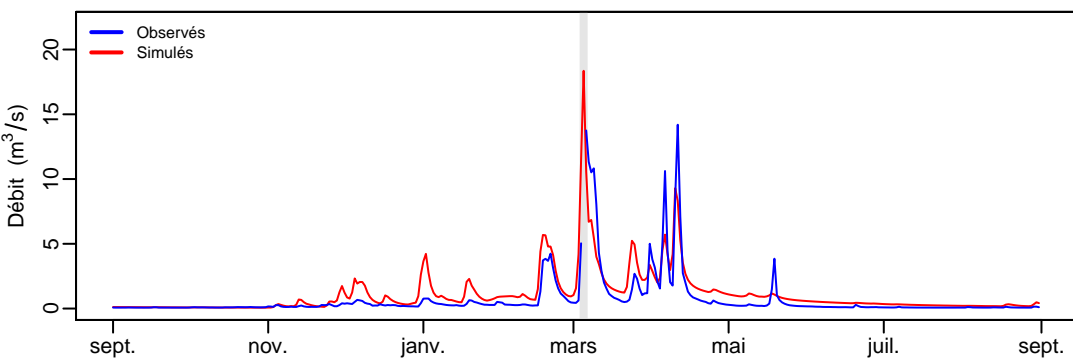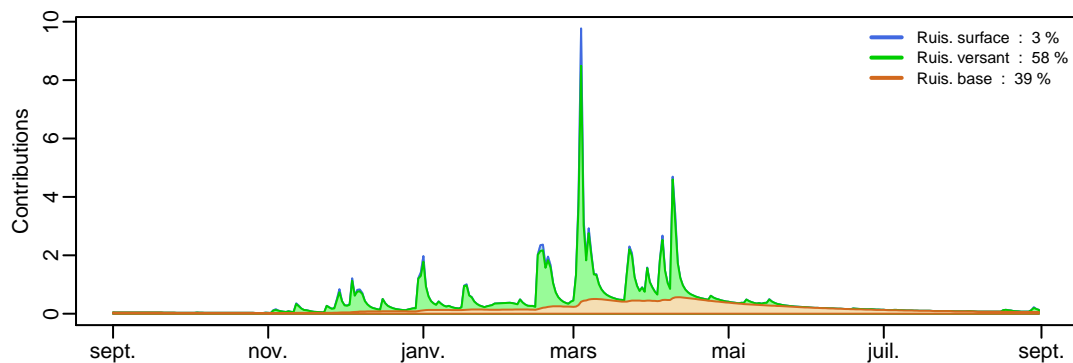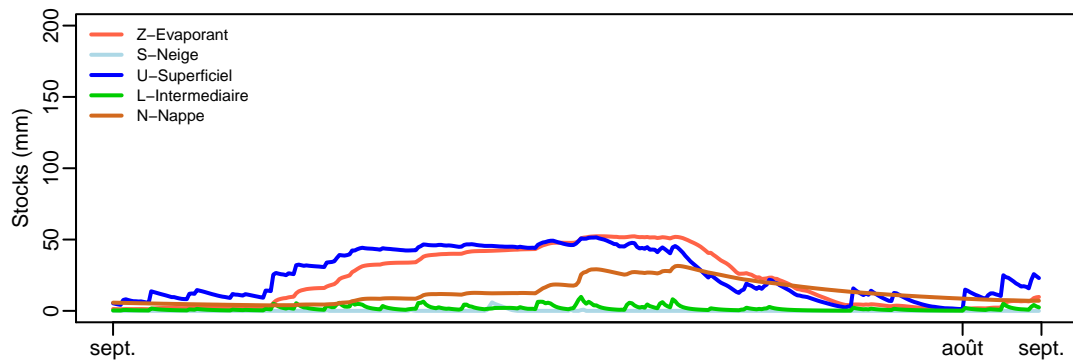

# k3553010 (222.6 km<sup>2</sup>) – année 2006–2007

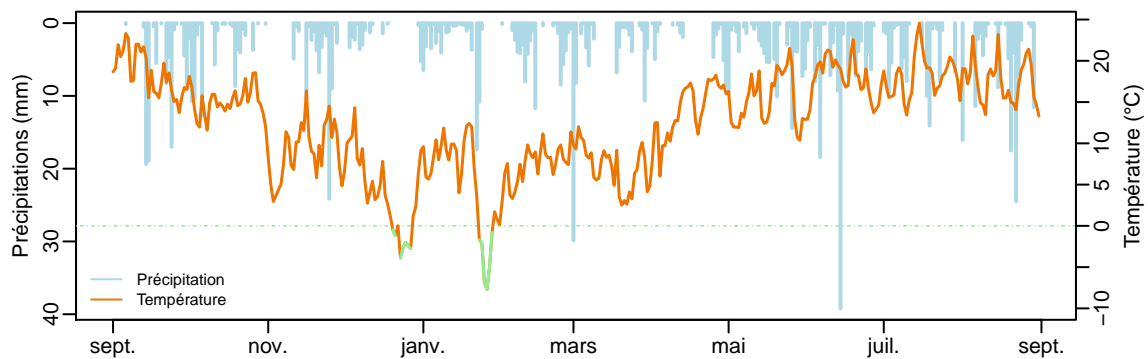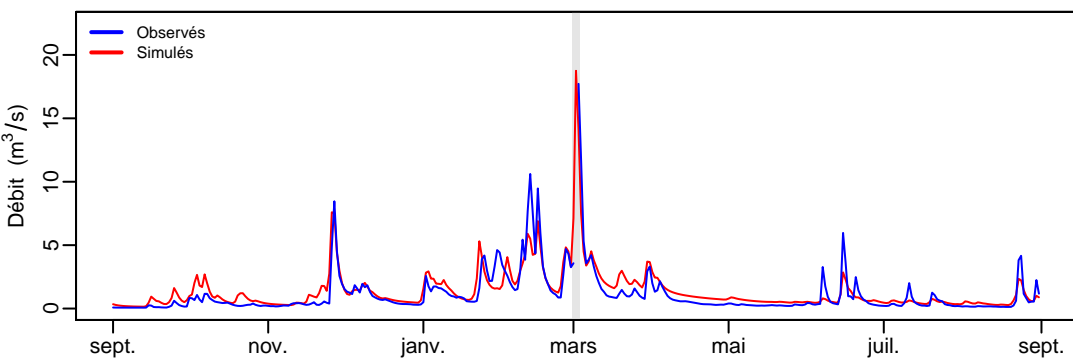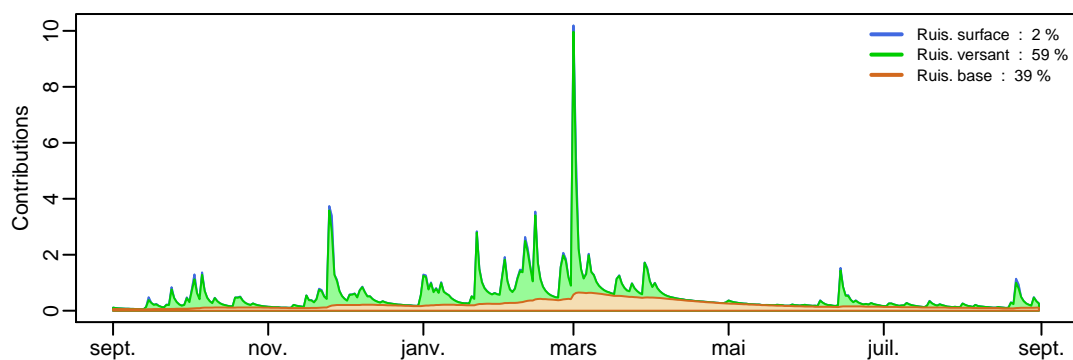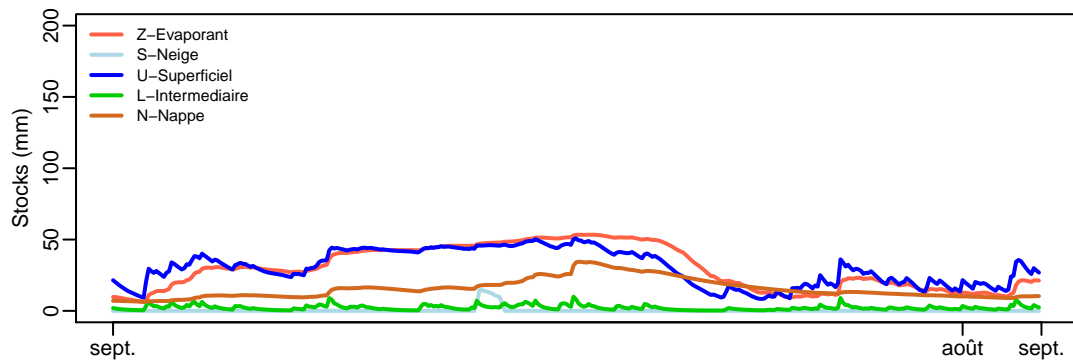

# k3553010 (222.6 km<sup>2</sup>) – année 2007–2008

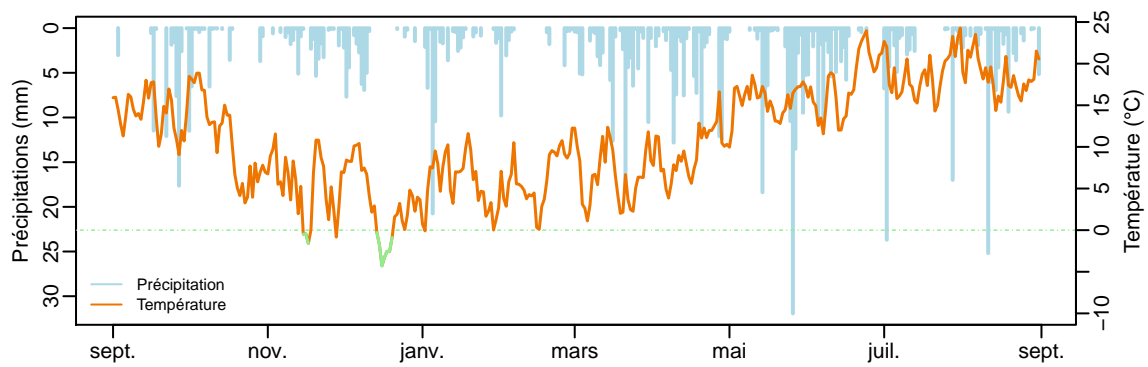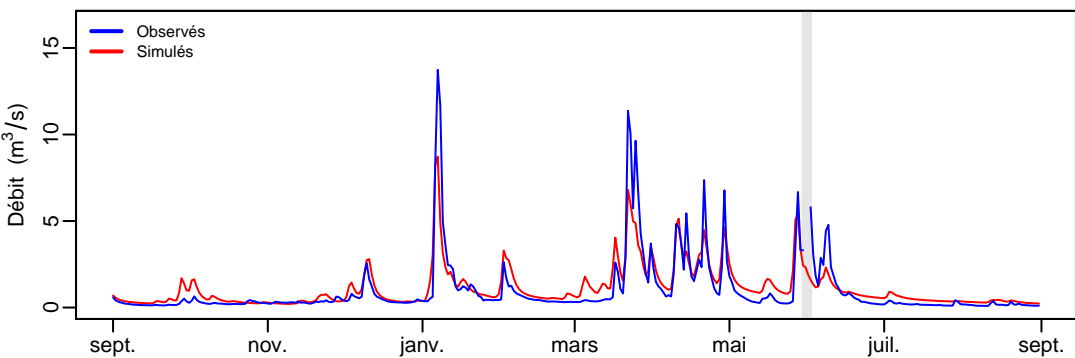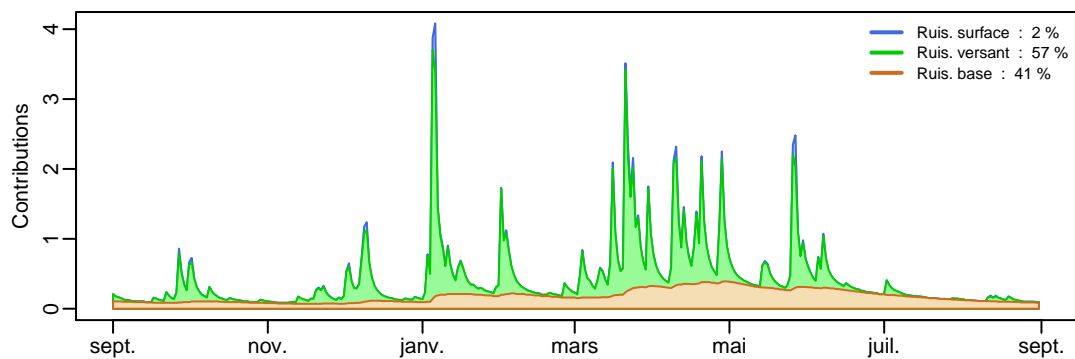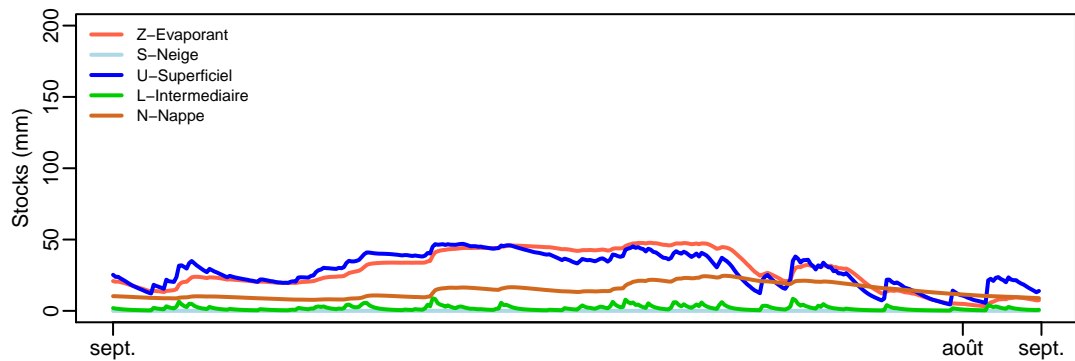

# k3553010 (222.6 km<sup>2</sup>) – année 2008–2009

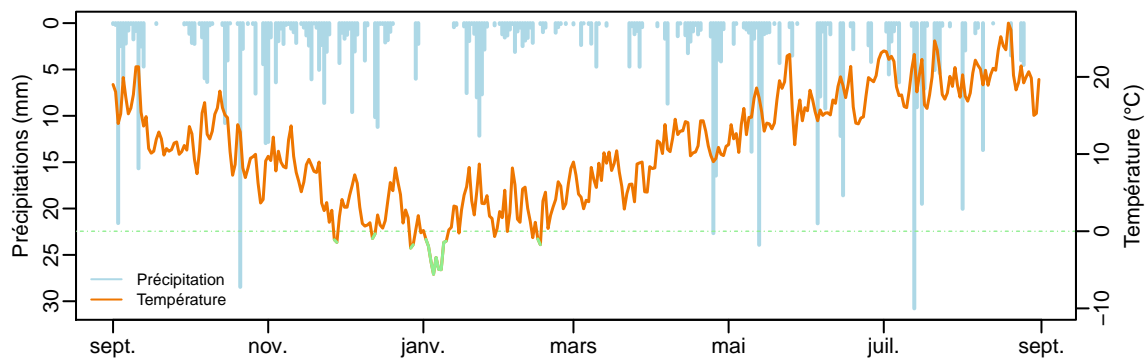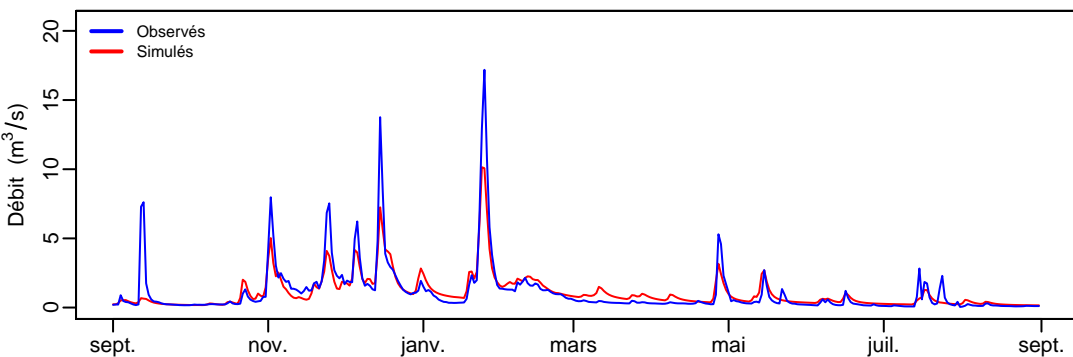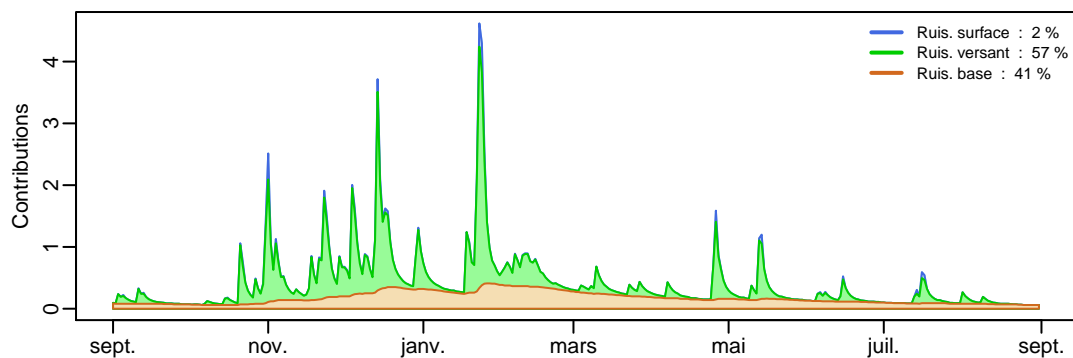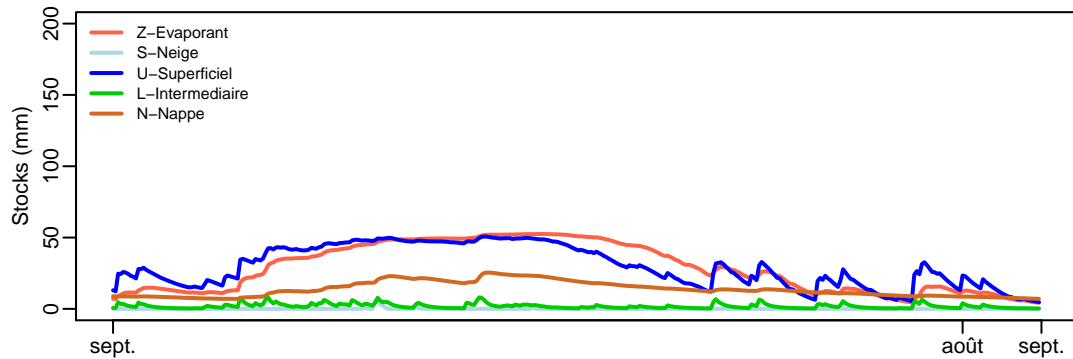

# k3553010 (222.6 km<sup>2</sup>) – année 2009–2010

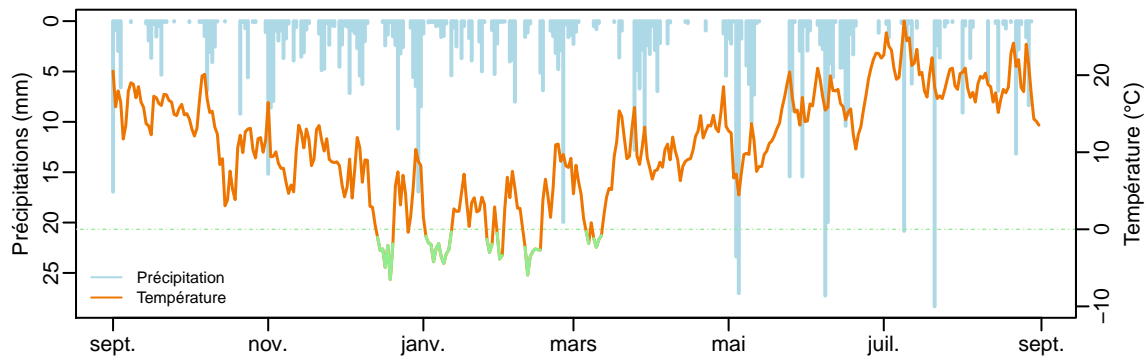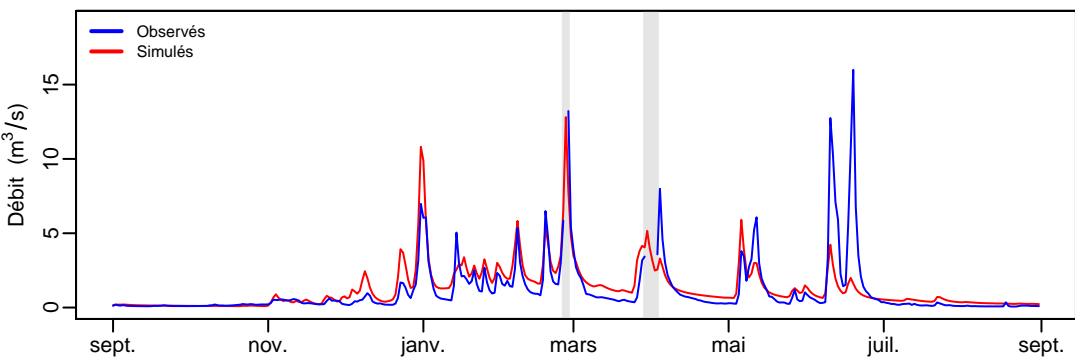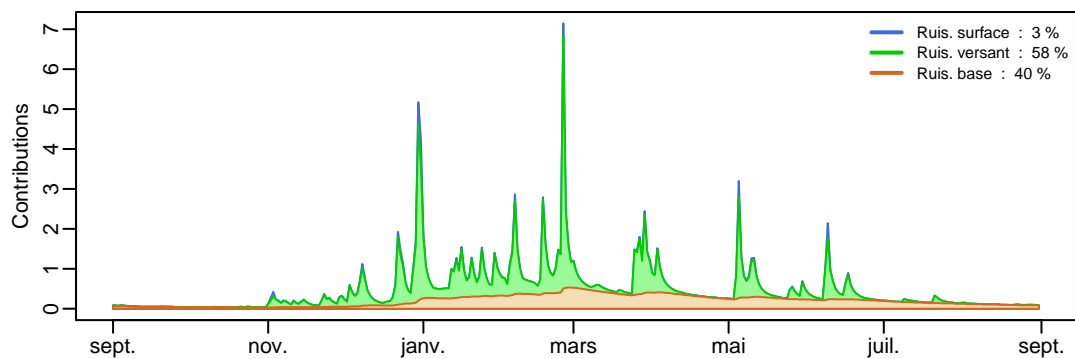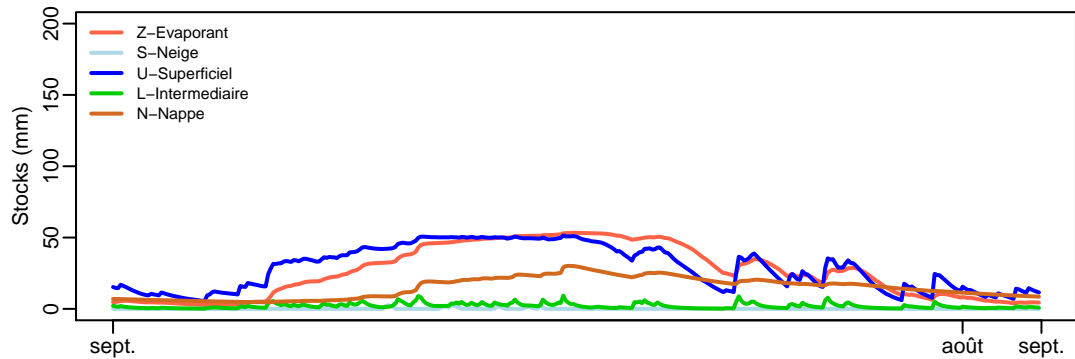

# k3553010 (222.6 km<sup>2</sup>) – année 2010–2011

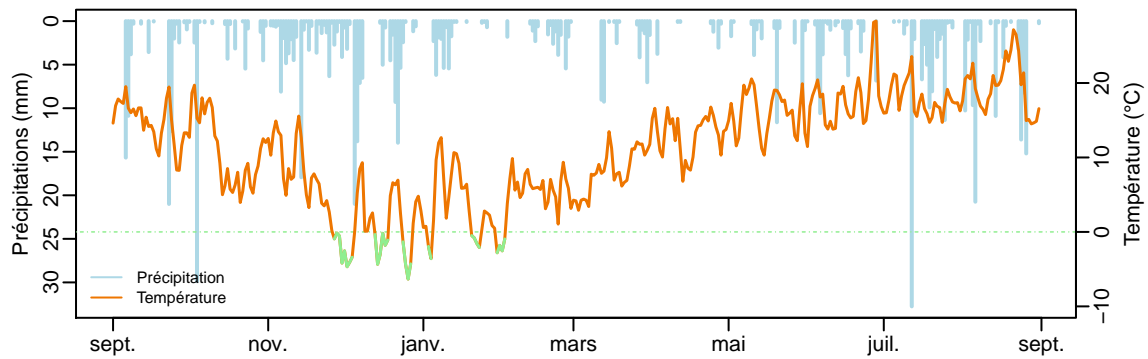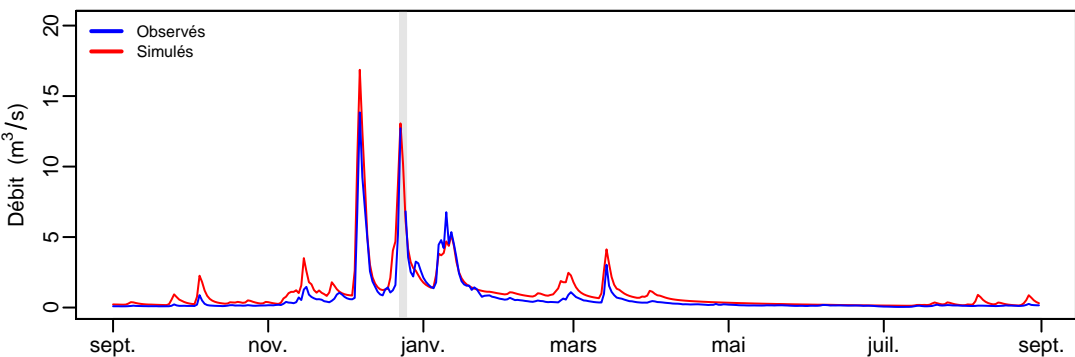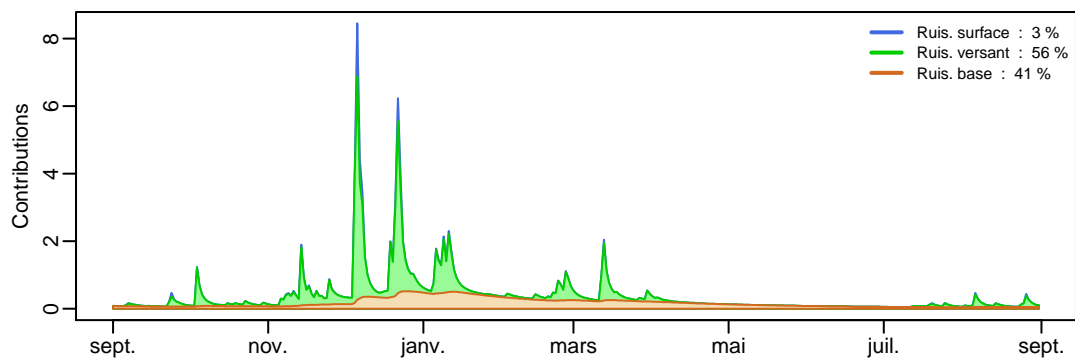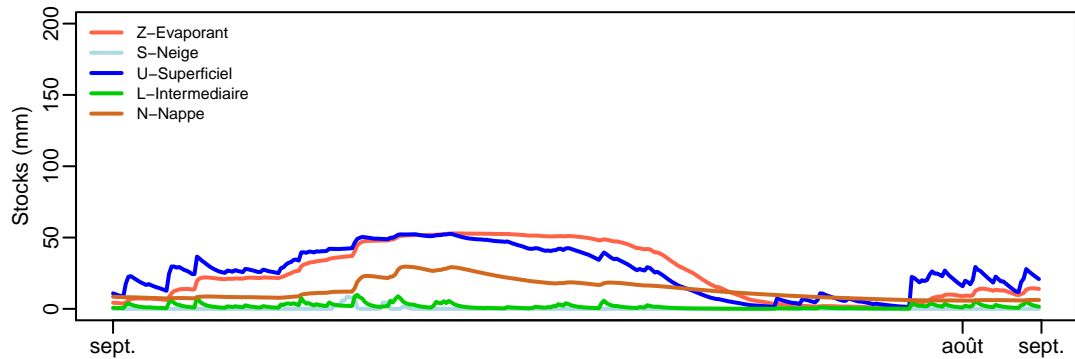

# k3553010 (222.6 km<sup>2</sup>) – année 2011–2012

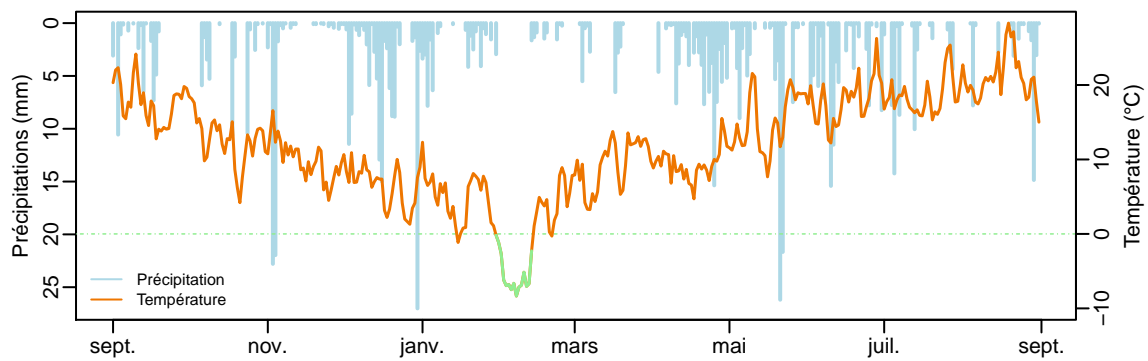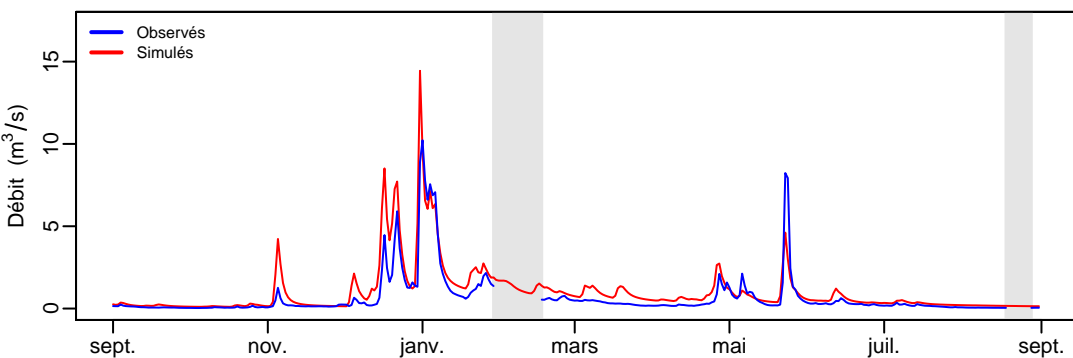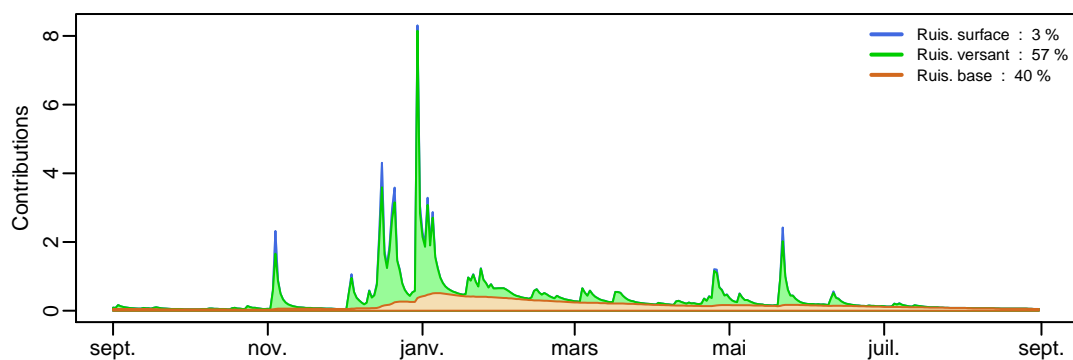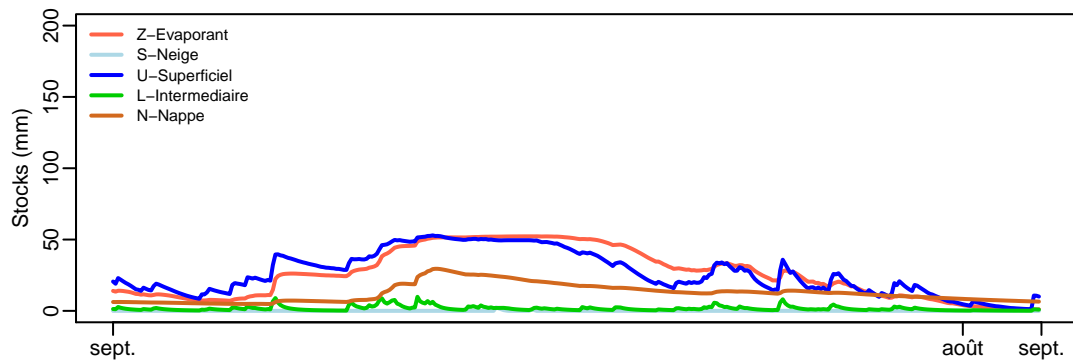



# k3570810 (13744.41 km<sup>2</sup>) – année 1982–1983

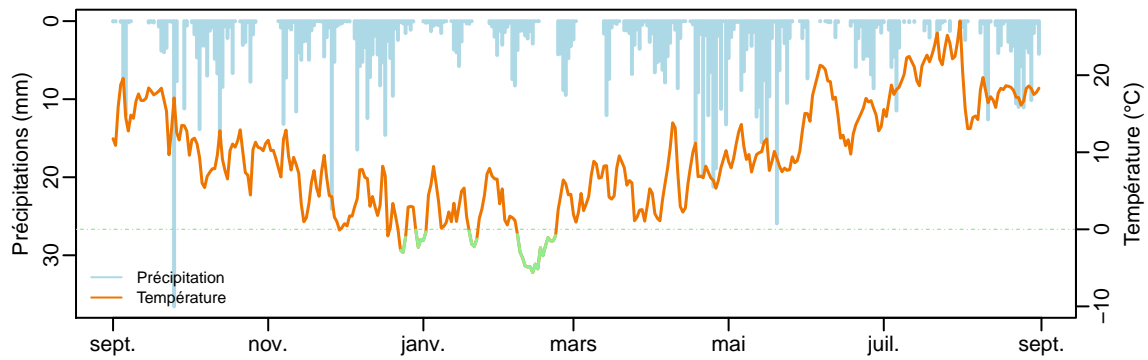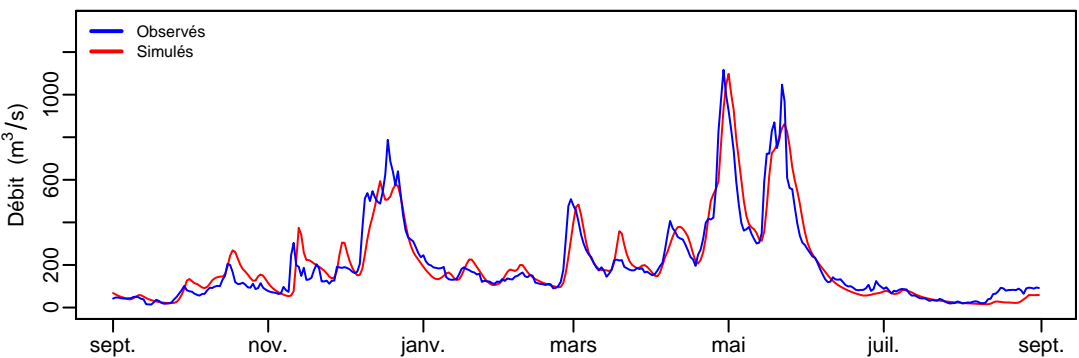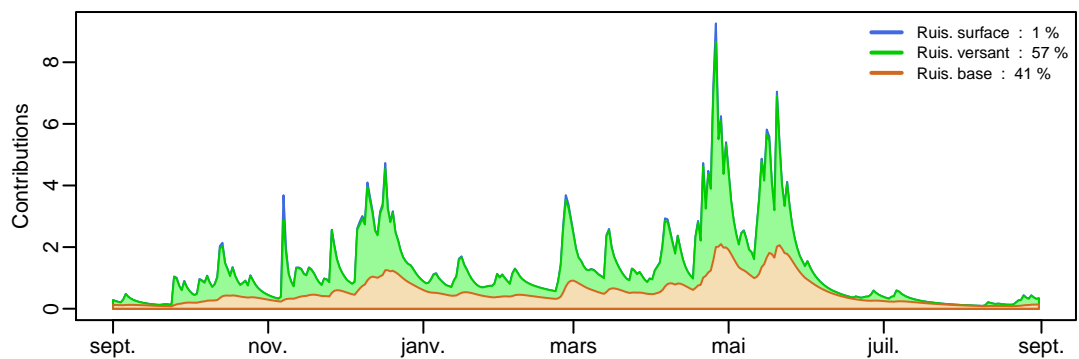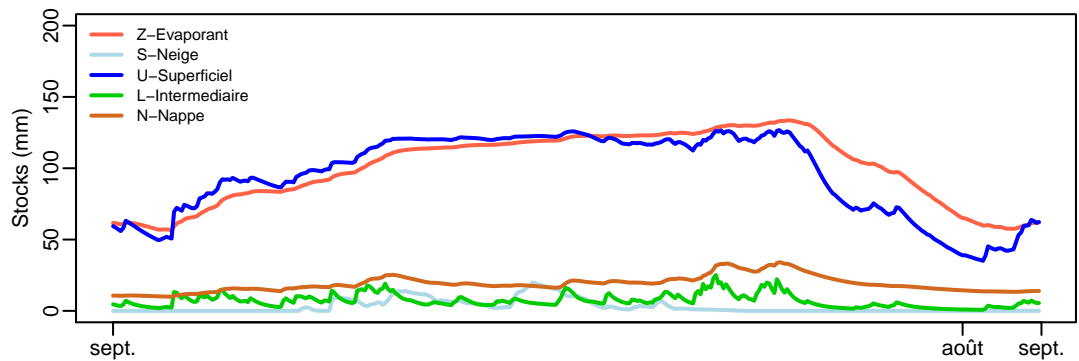

# k3570810 (13744.41 km<sup>2</sup>) – année 1983–1984

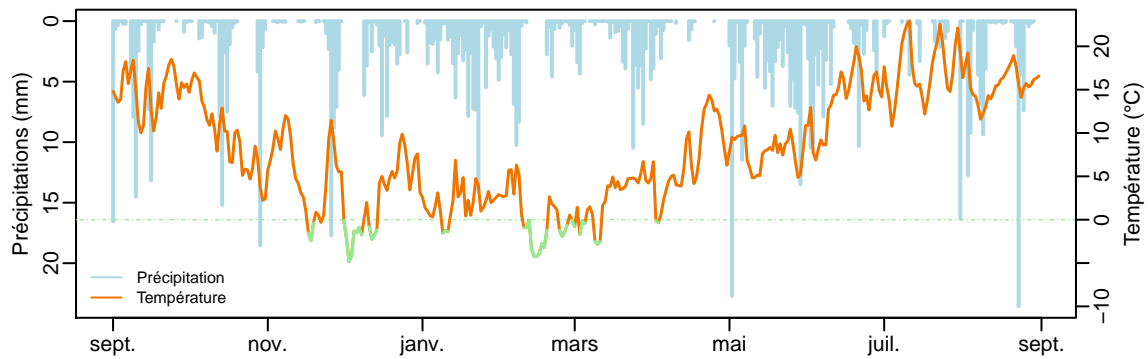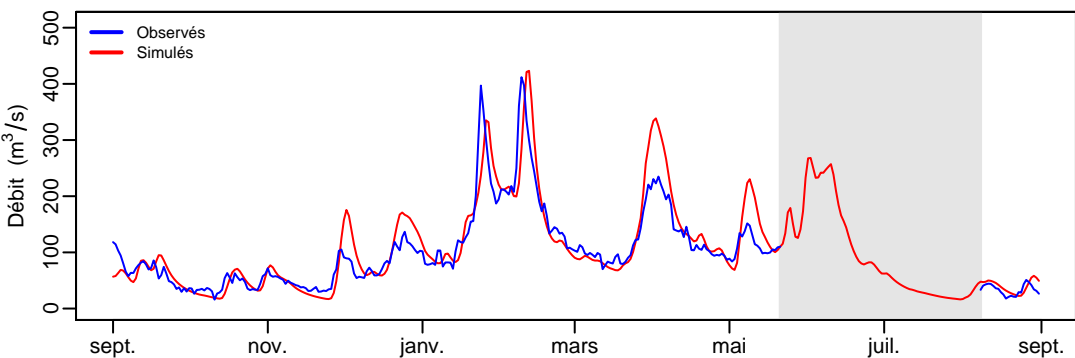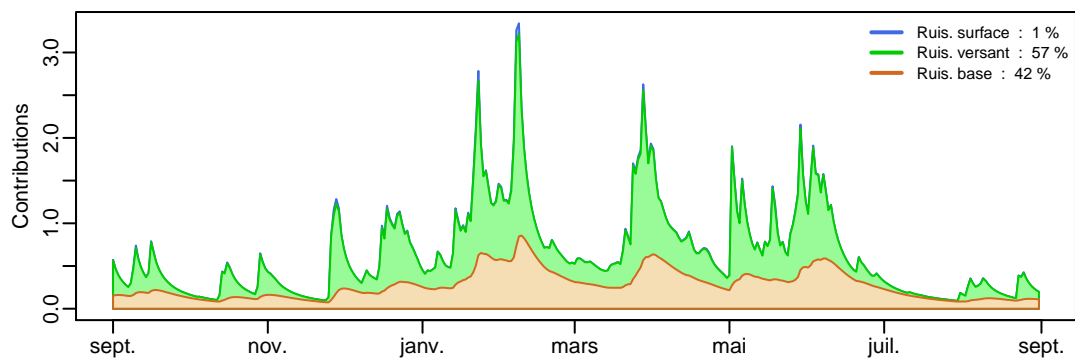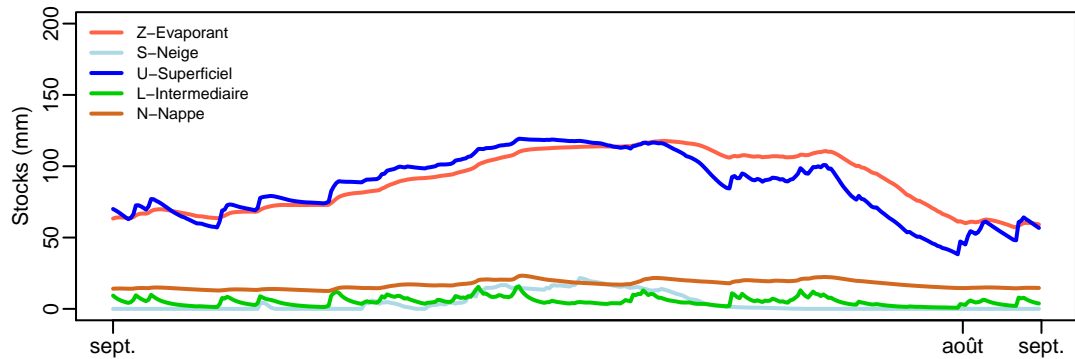

# k3570810 (13744.41 km<sup>2</sup>) – année 1984–1985

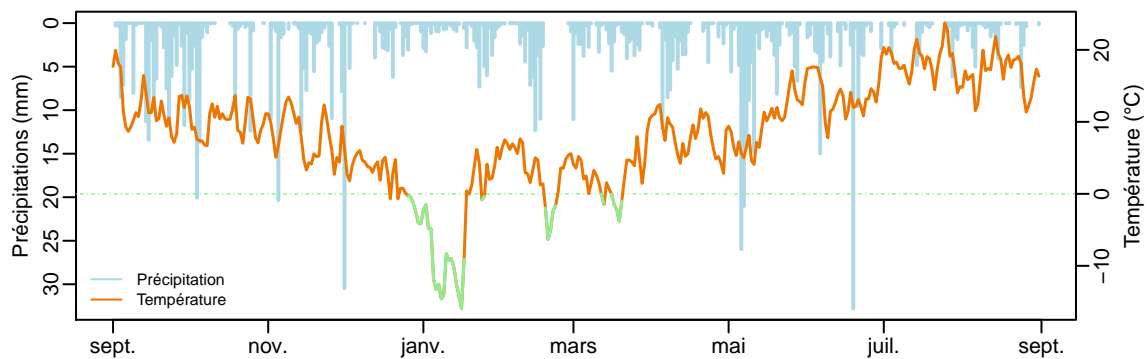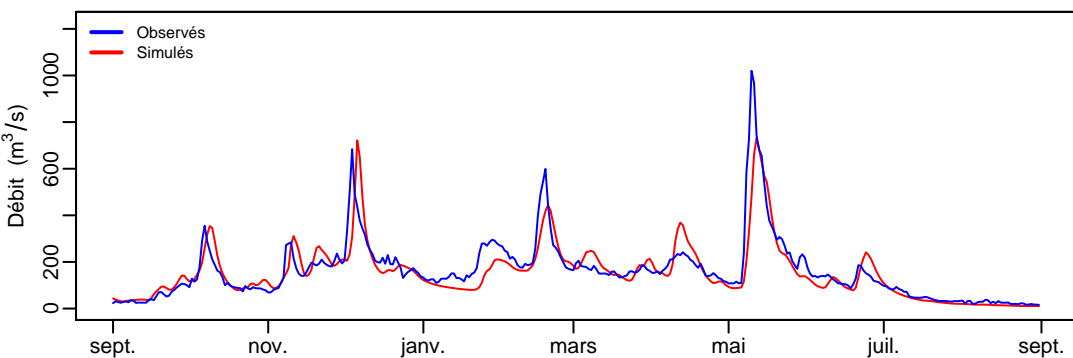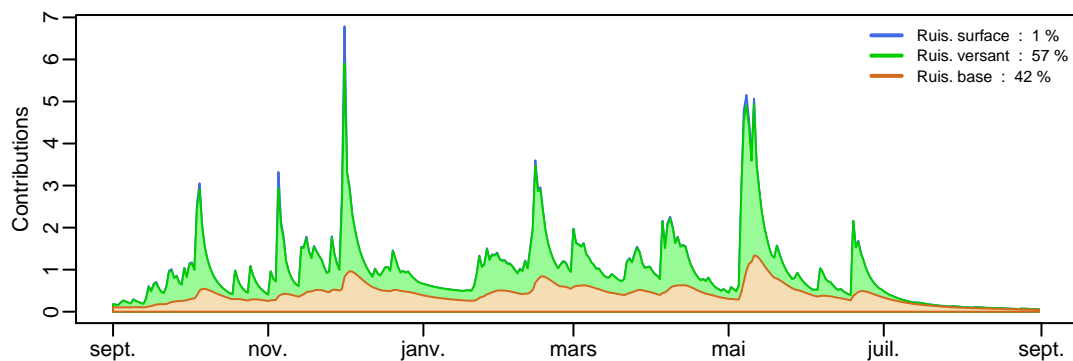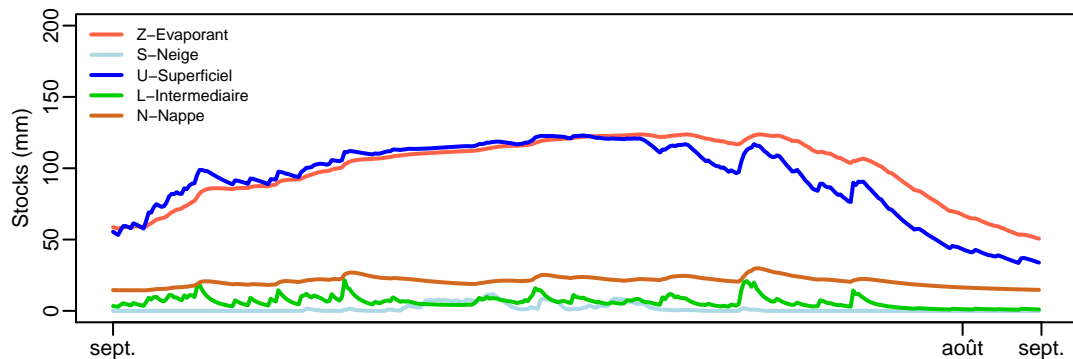

# k3570810 (13744.41 km<sup>2</sup>) – année 1985–1986

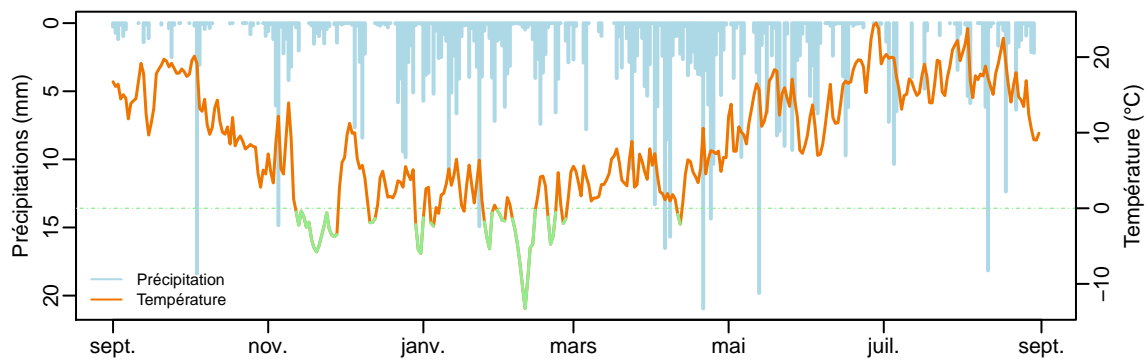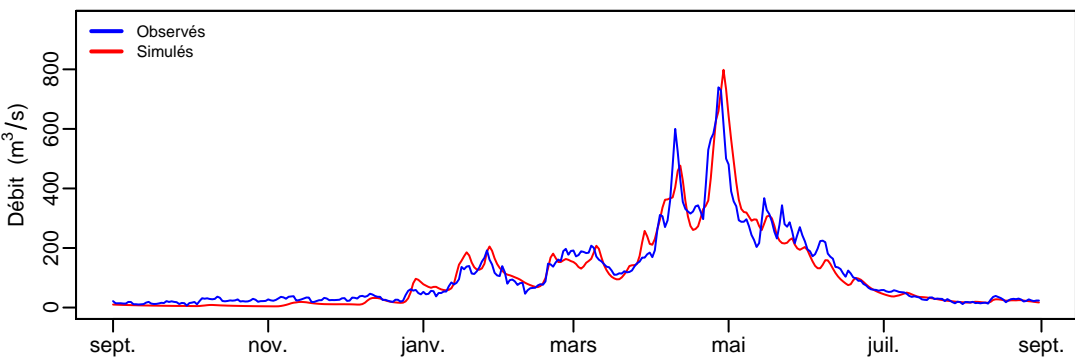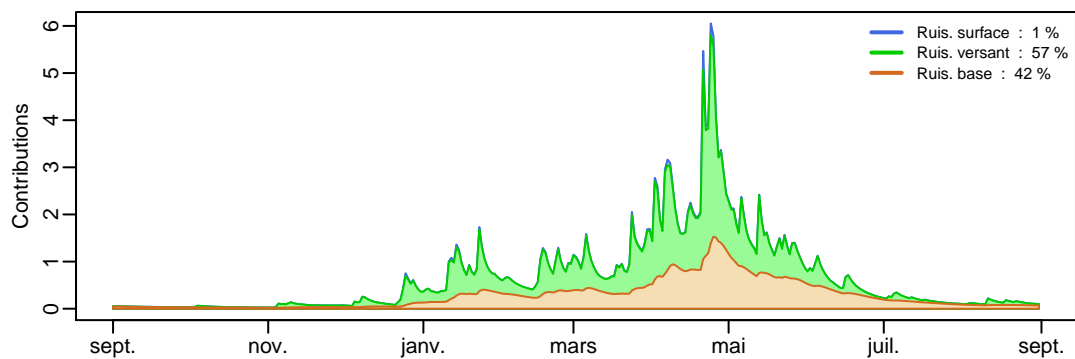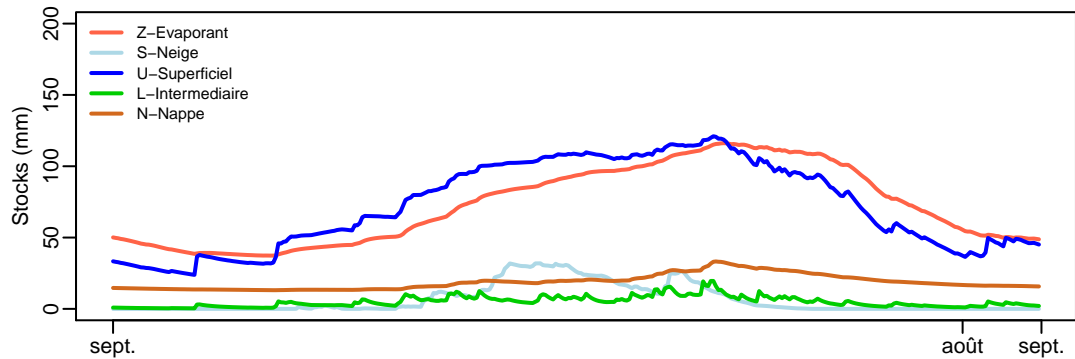

# k3570810 (13744.41 km<sup>2</sup>) – année 1986–1987

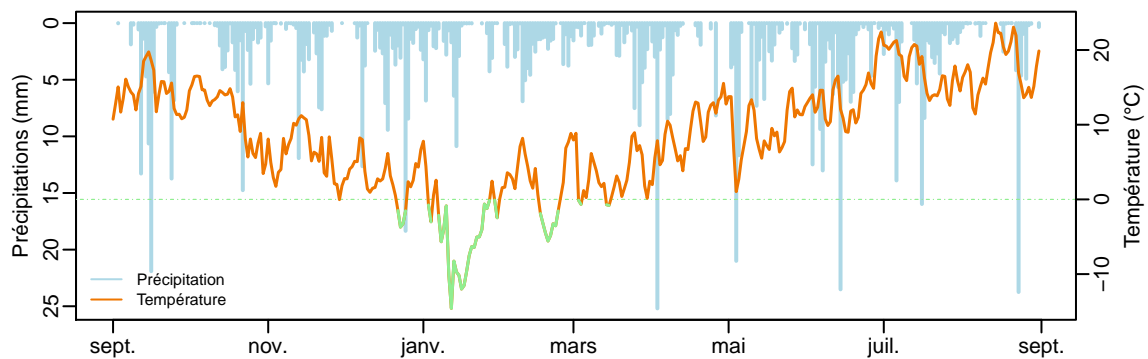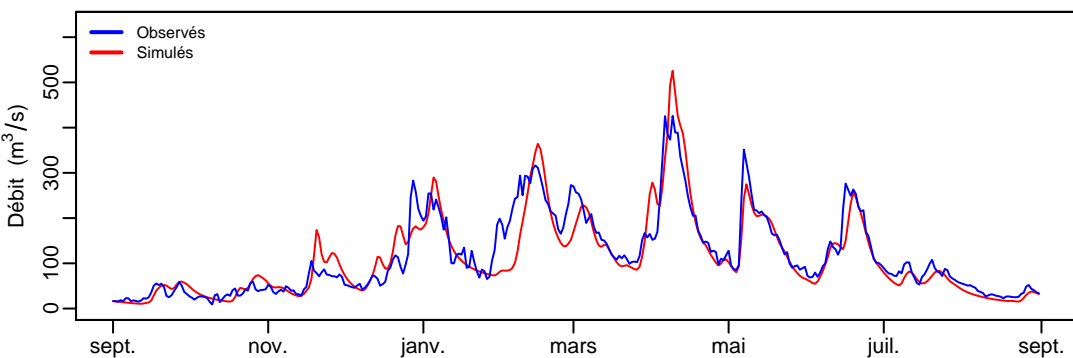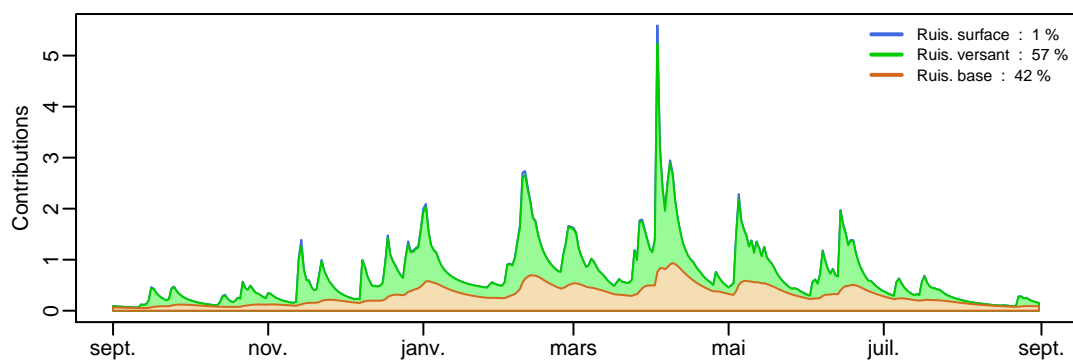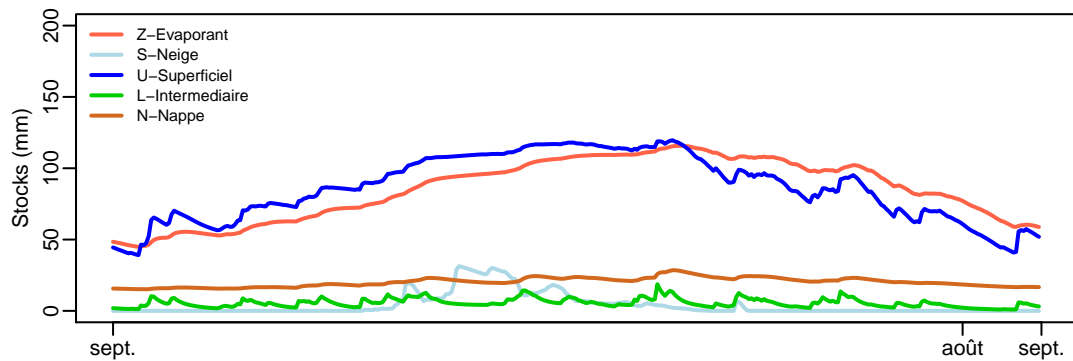

# k3570810 (13744.41 km<sup>2</sup>) – année 1987–1988

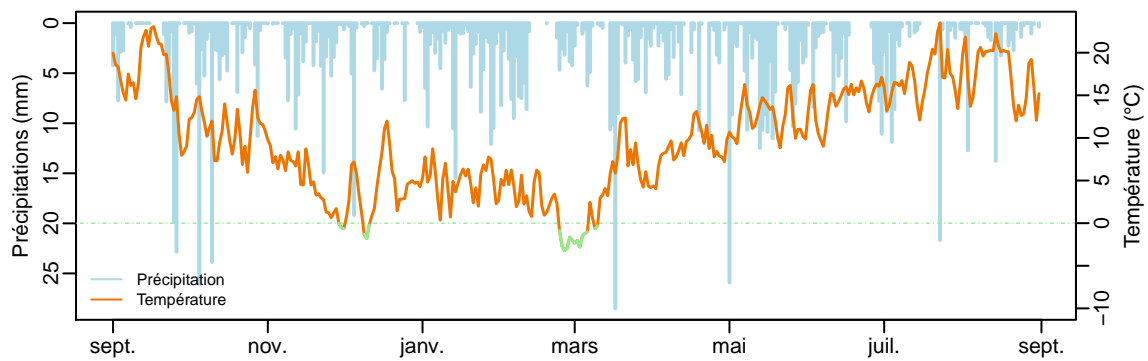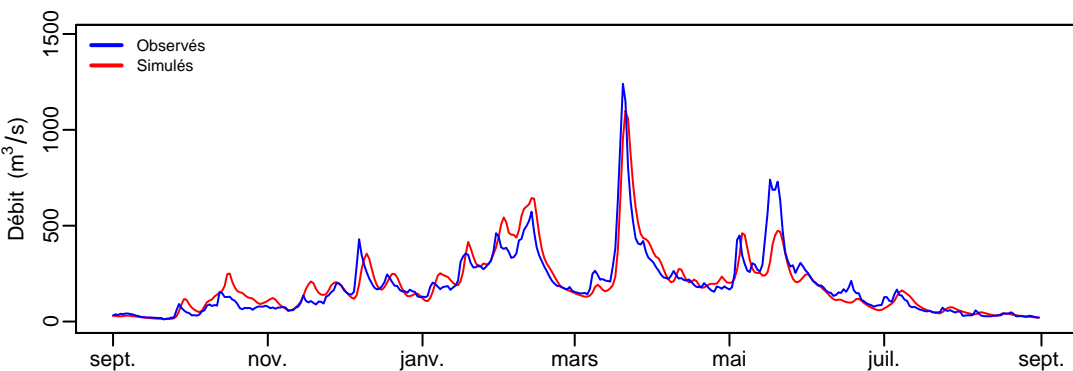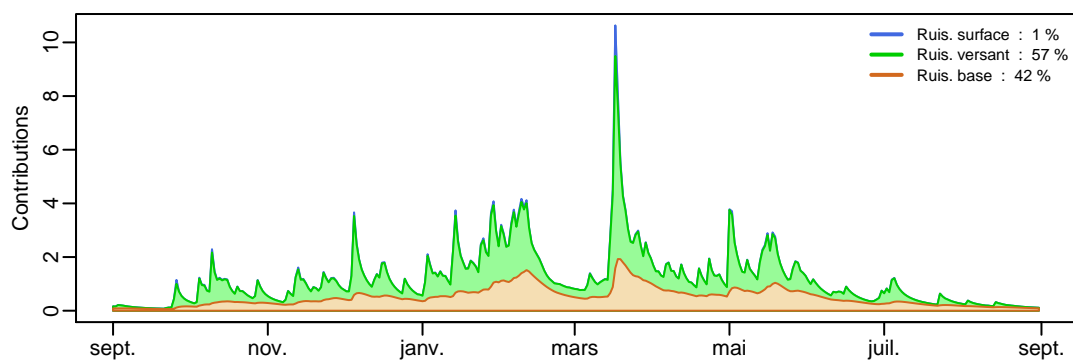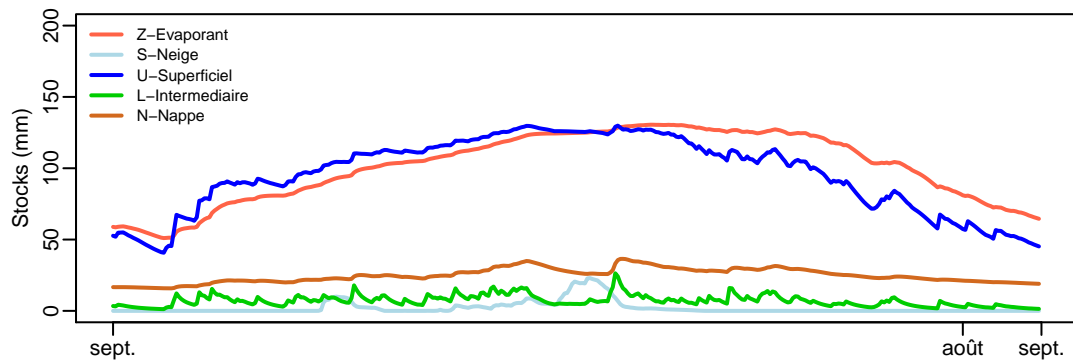

# k3570810 (13744.41 km<sup>2</sup>) – année 1988–1989

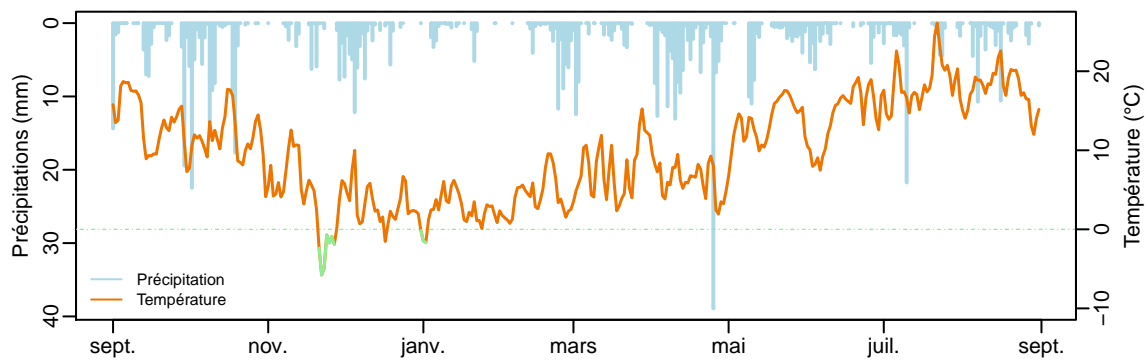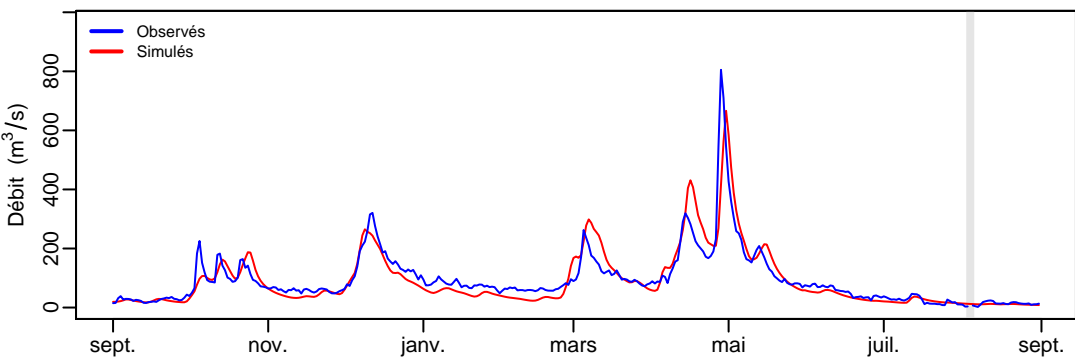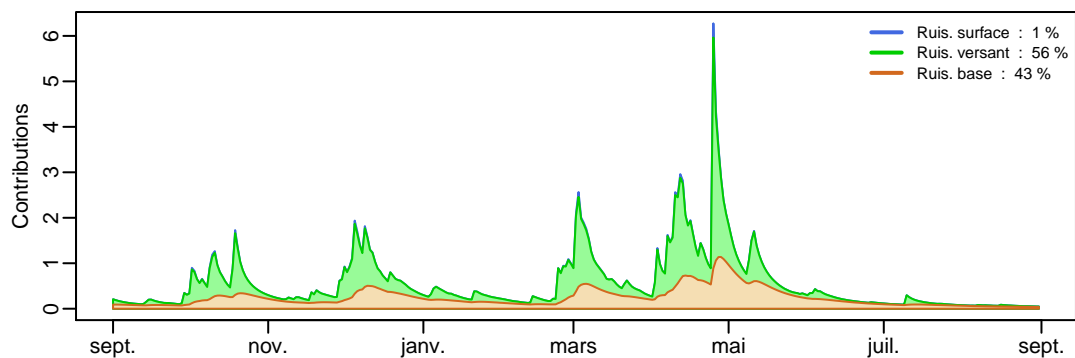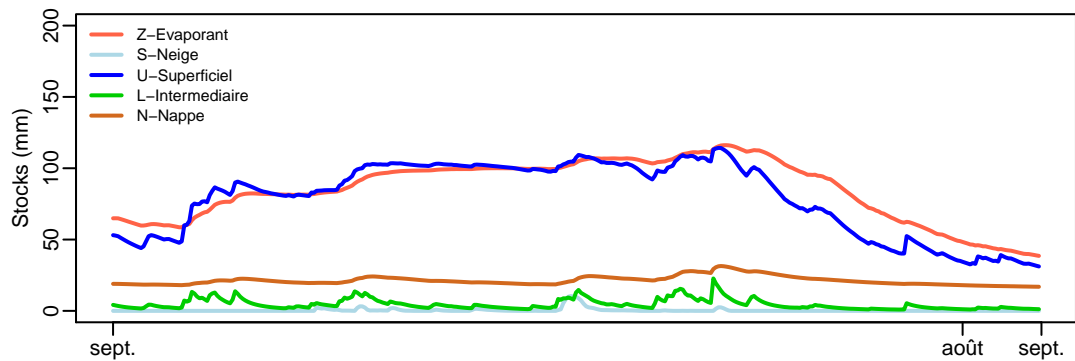

# k3570810 (13744.41 km<sup>2</sup>) – année 1989–1990

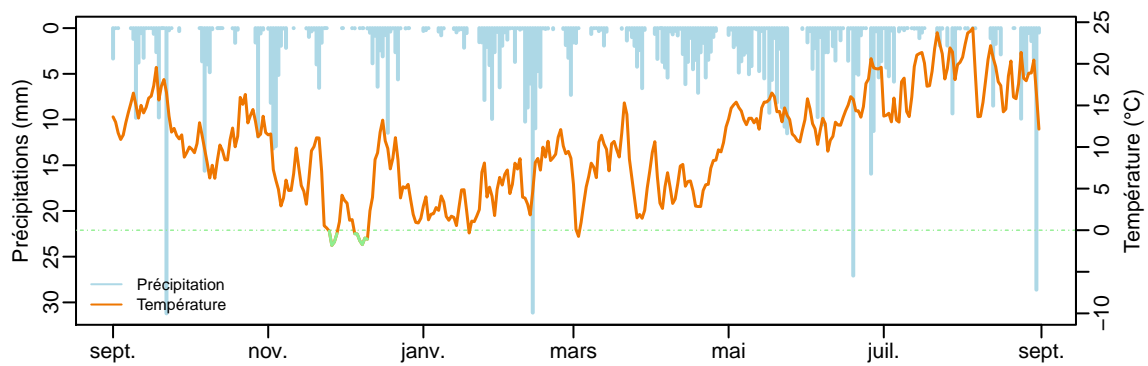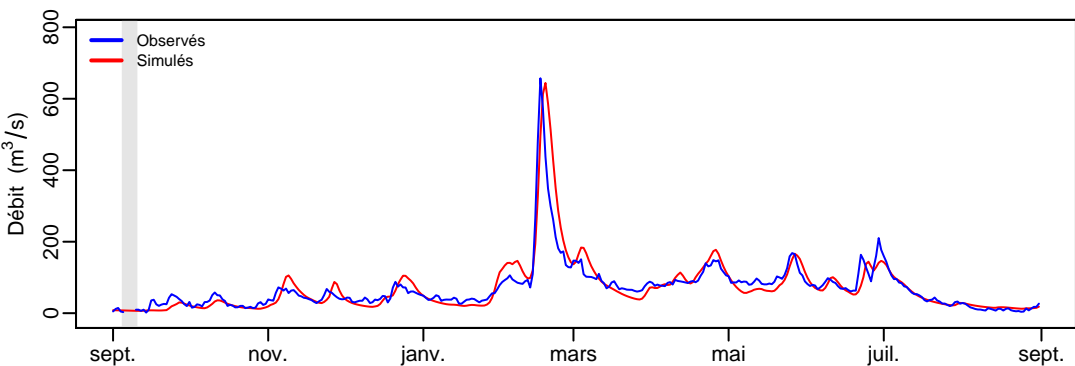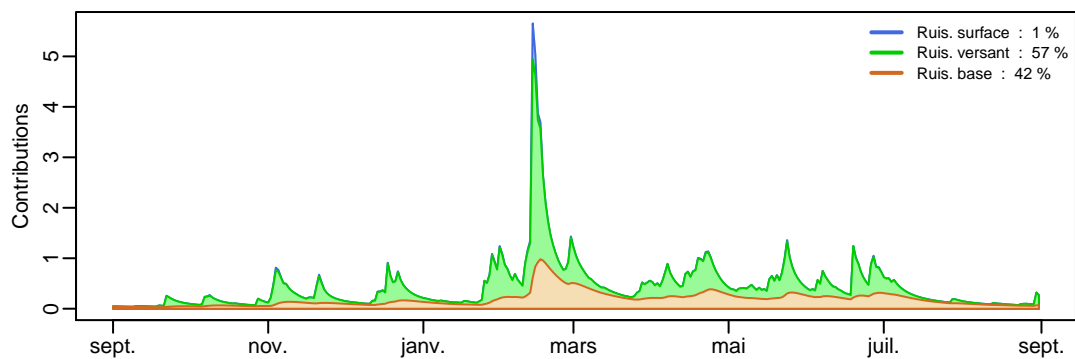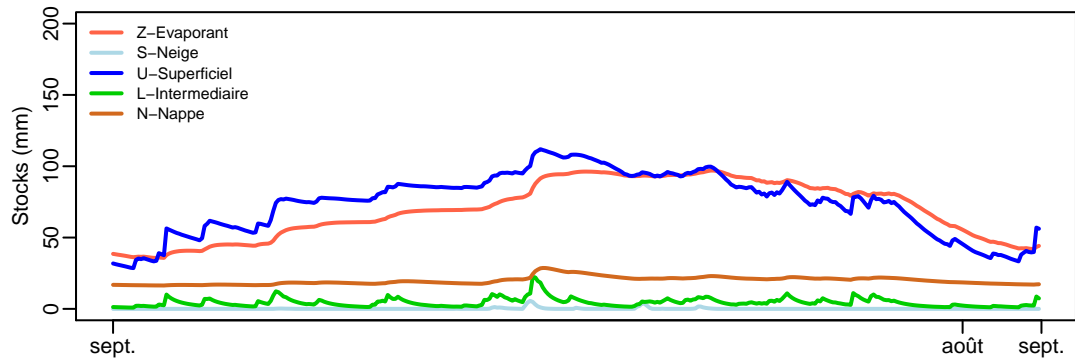



# k3570810 (13744.41 km<sup>2</sup>) – année 1990–1991

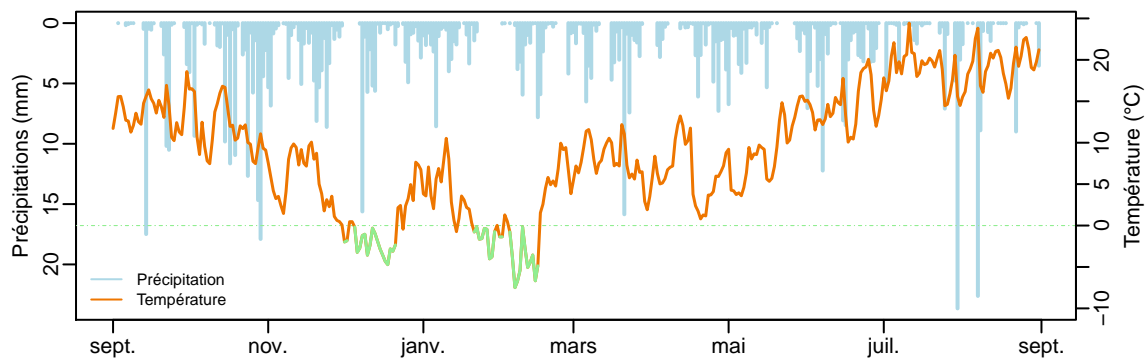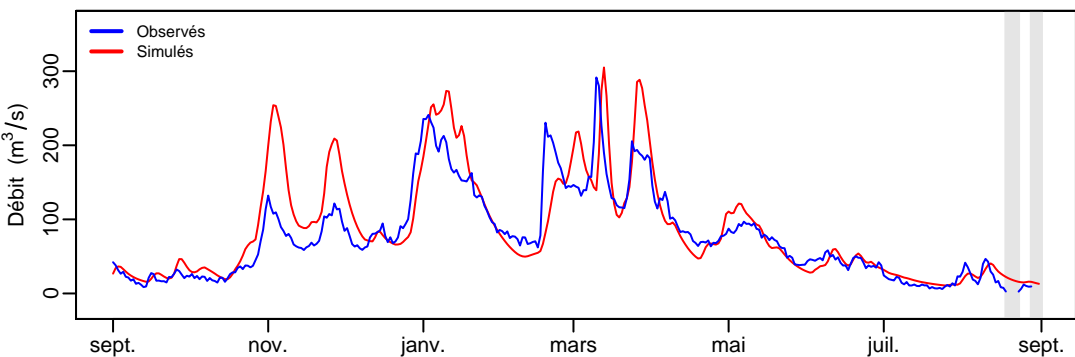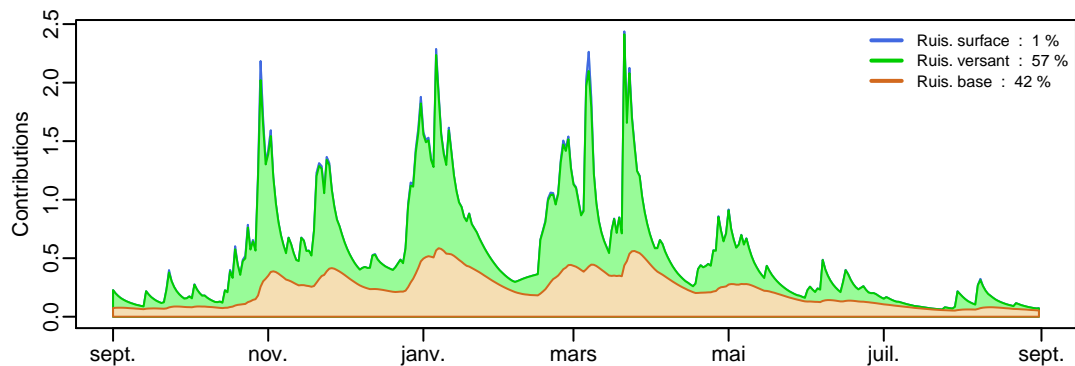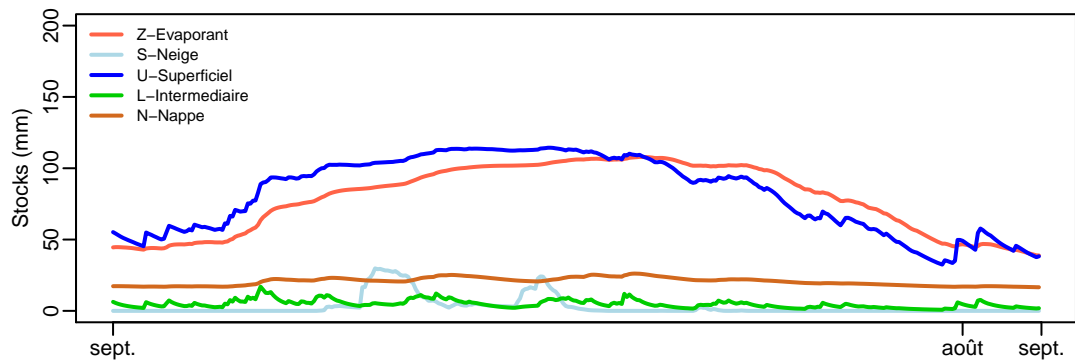

# k3570810 (13744.41 km<sup>2</sup>) – année 1991–1992

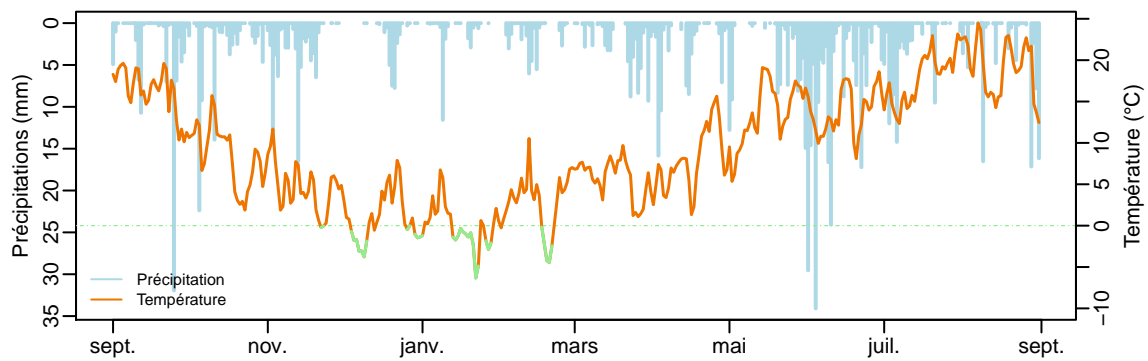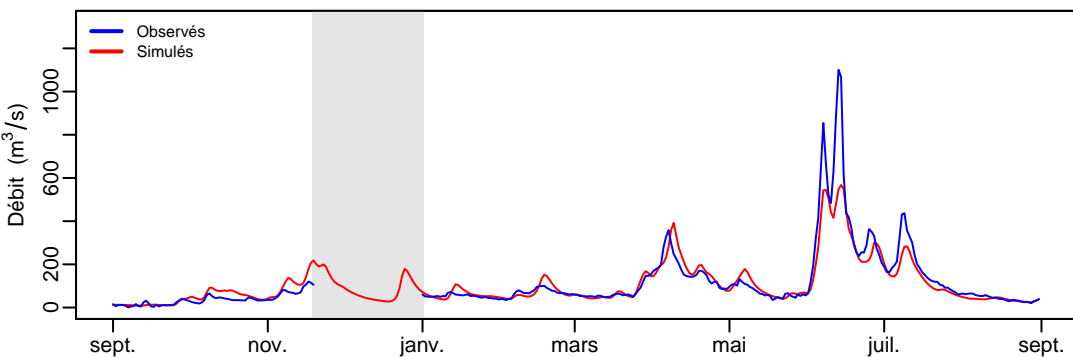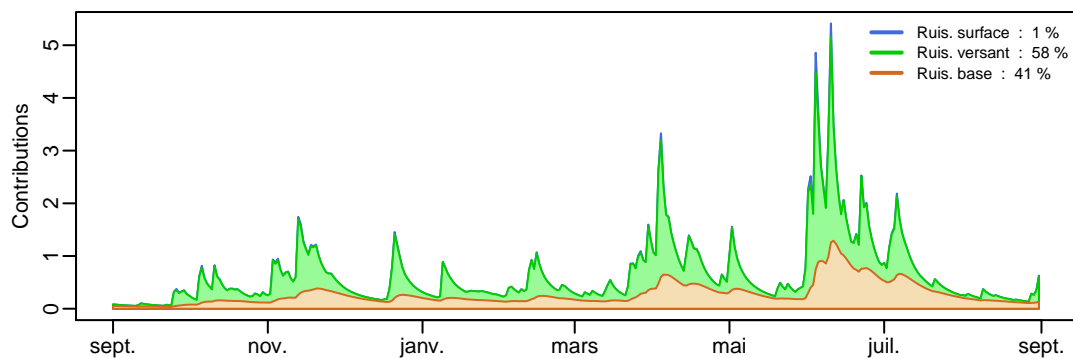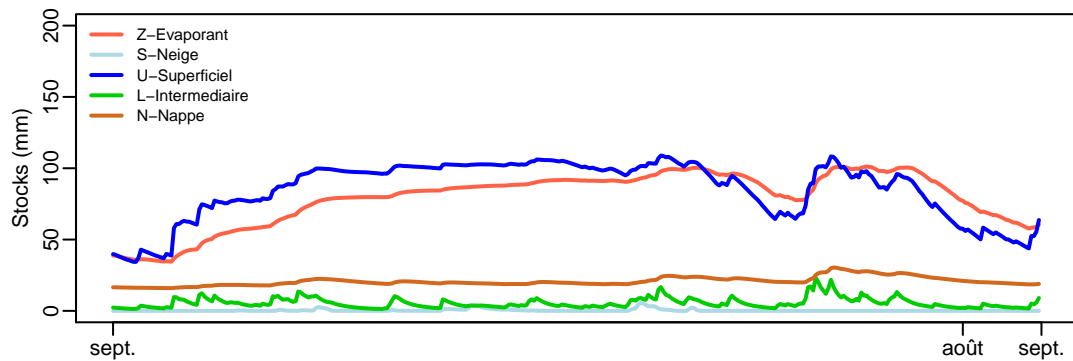

# k3570810 (13744.41 km<sup>2</sup>) – année 1992–1993

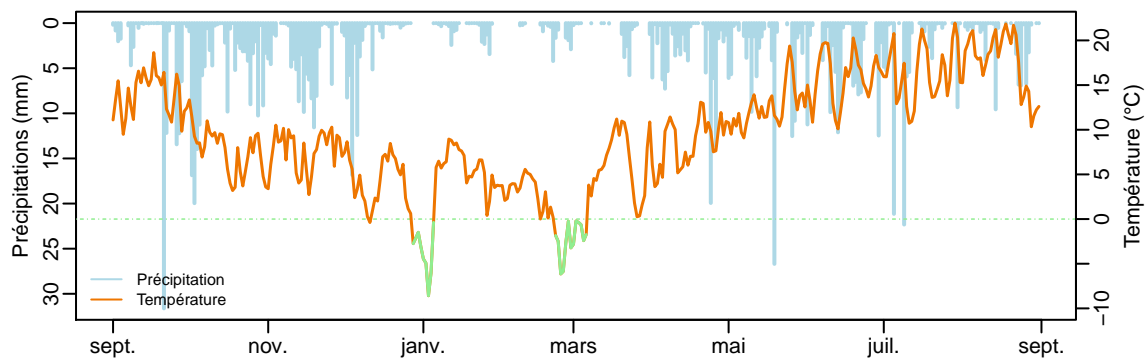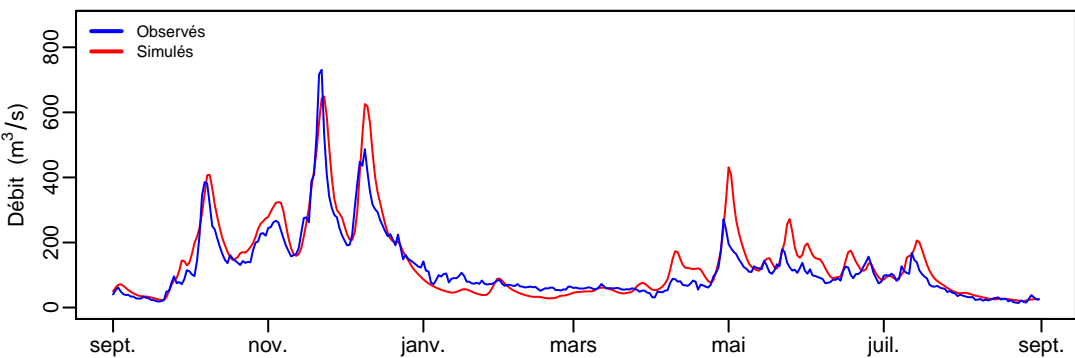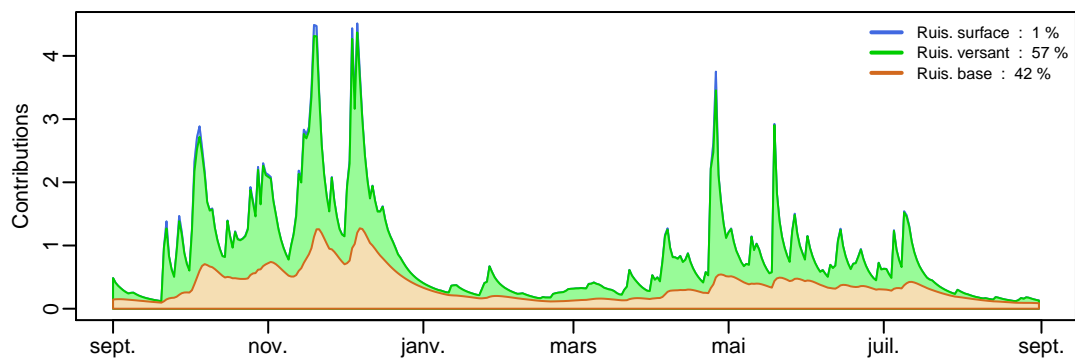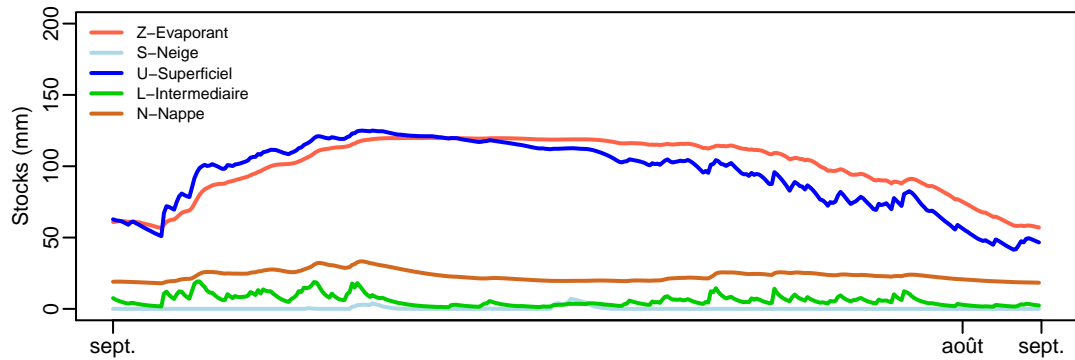

# k3570810 (13744.41 km<sup>2</sup>) – année 1993–1994

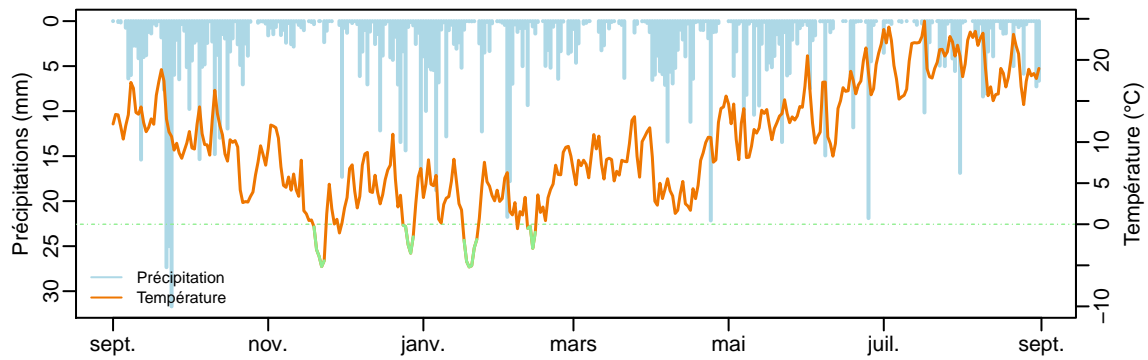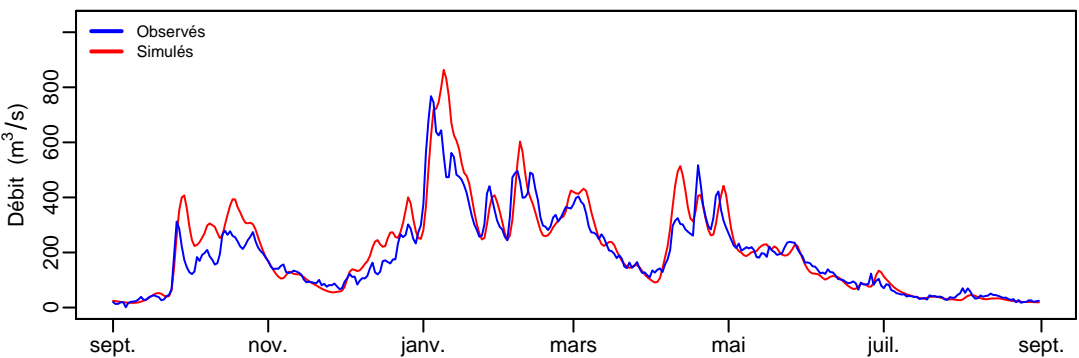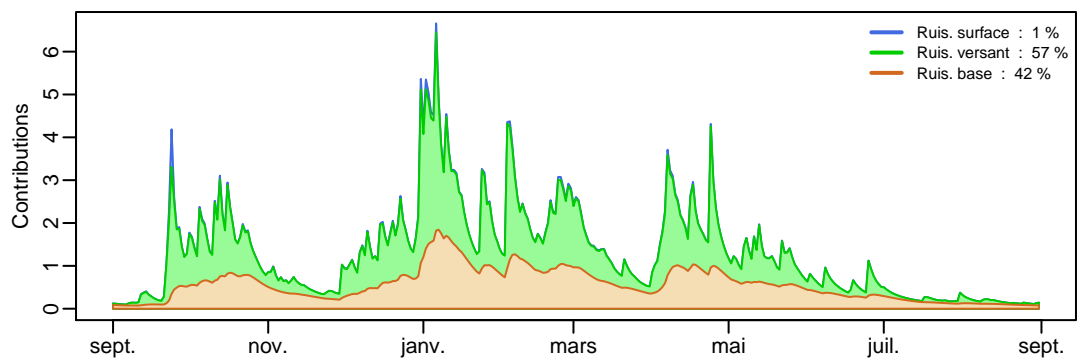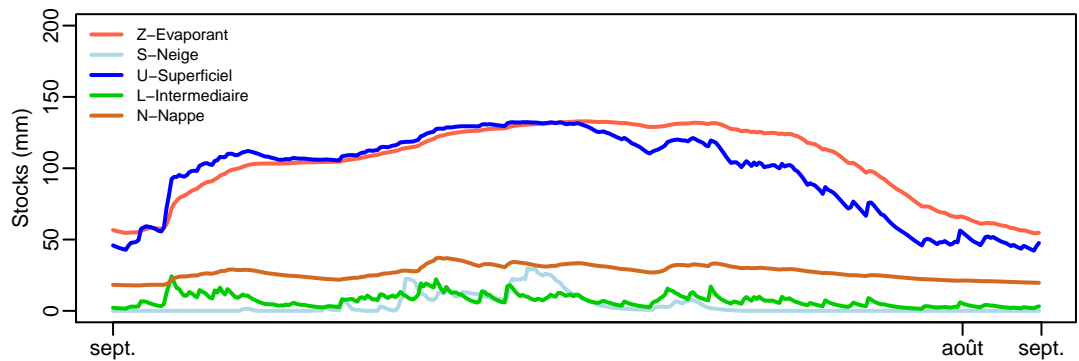

# k3570810 (13744.41 km<sup>2</sup>) – année 1994–1995

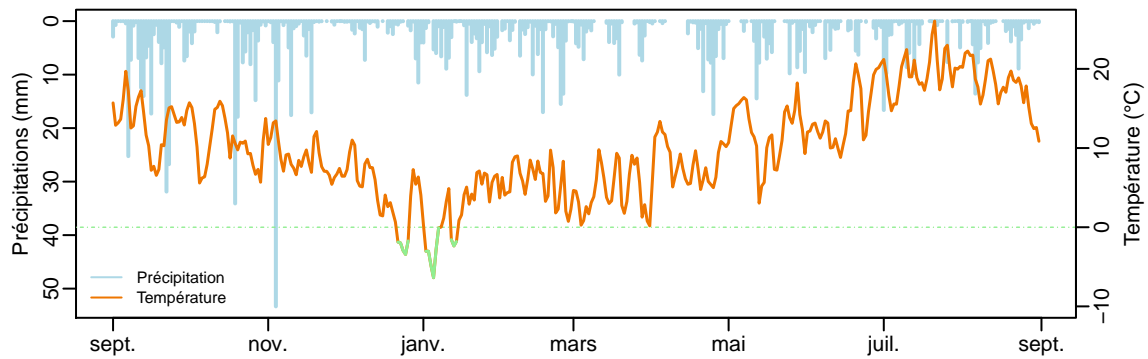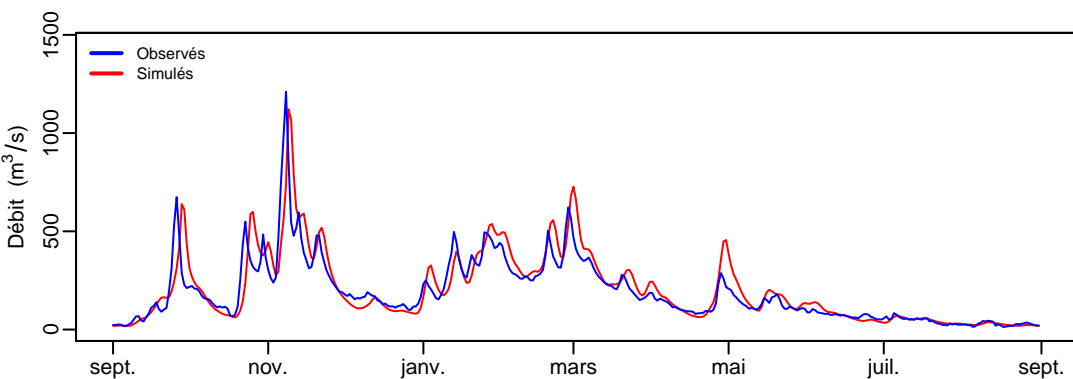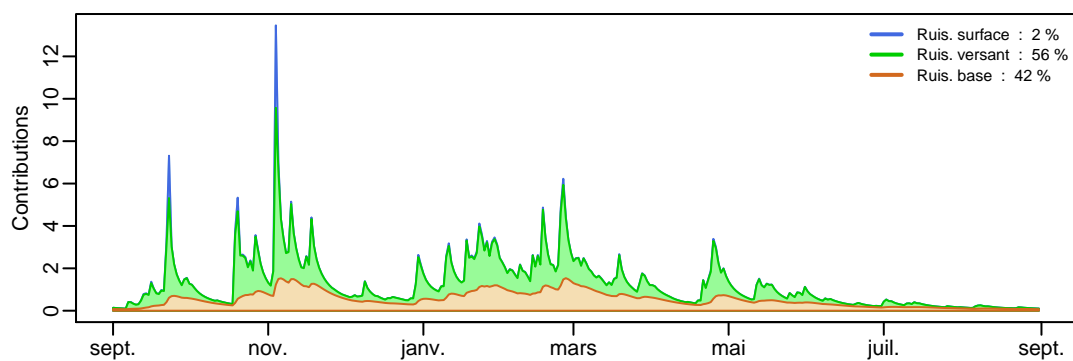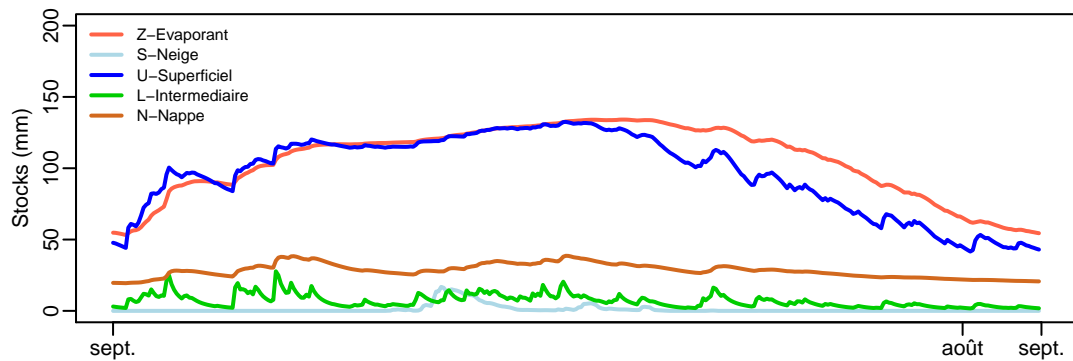

# k3570810 (13744.41 km<sup>2</sup>) – année 1995–1996

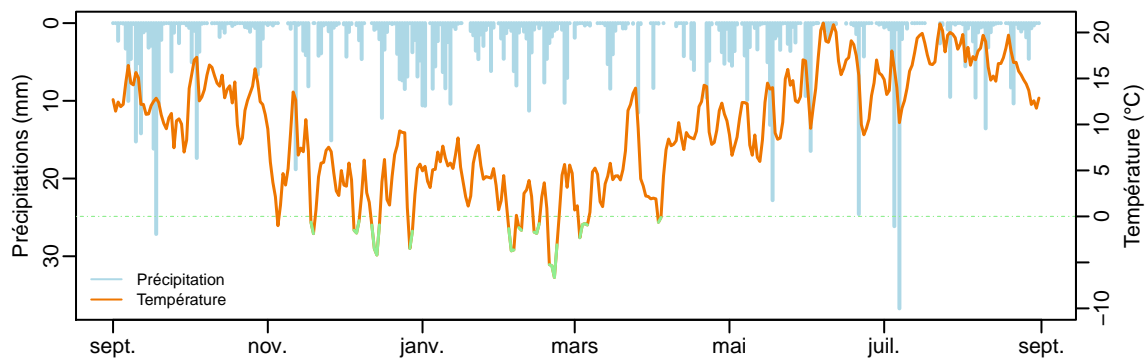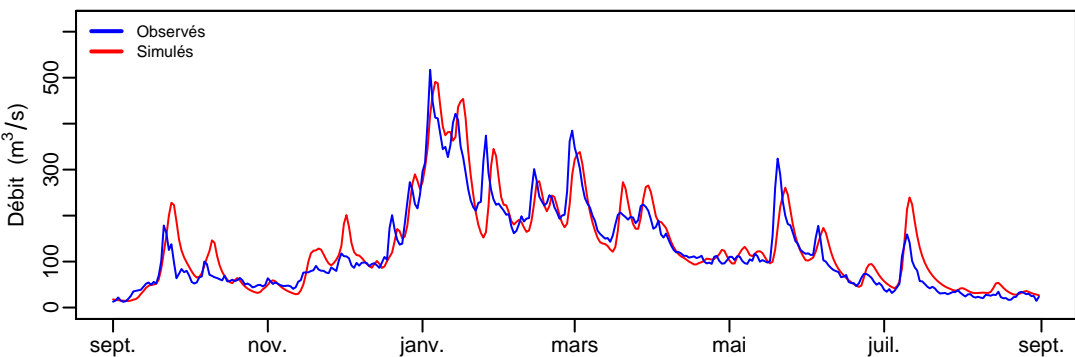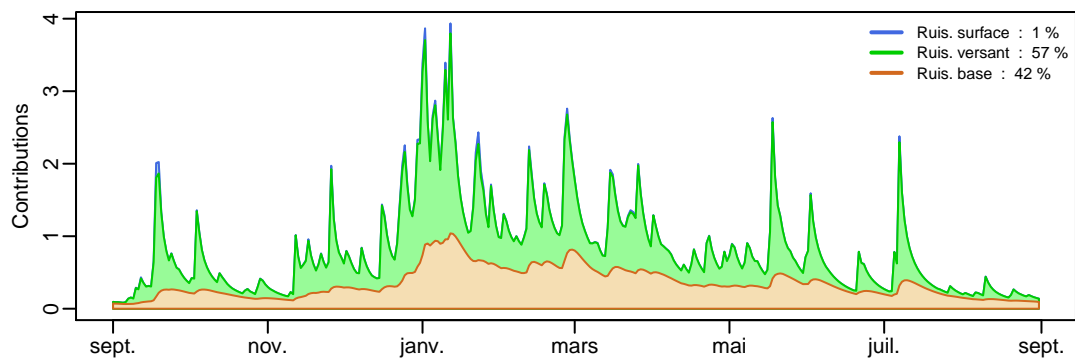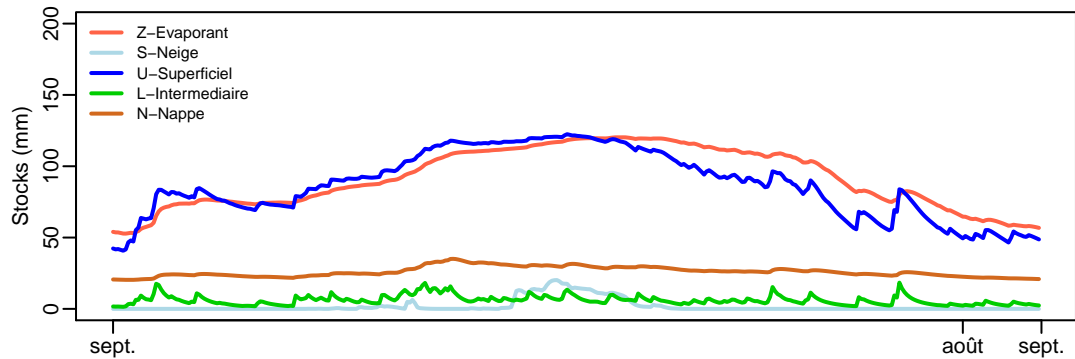

# k3570810 (13744.41 km<sup>2</sup>) – année 1996–1997

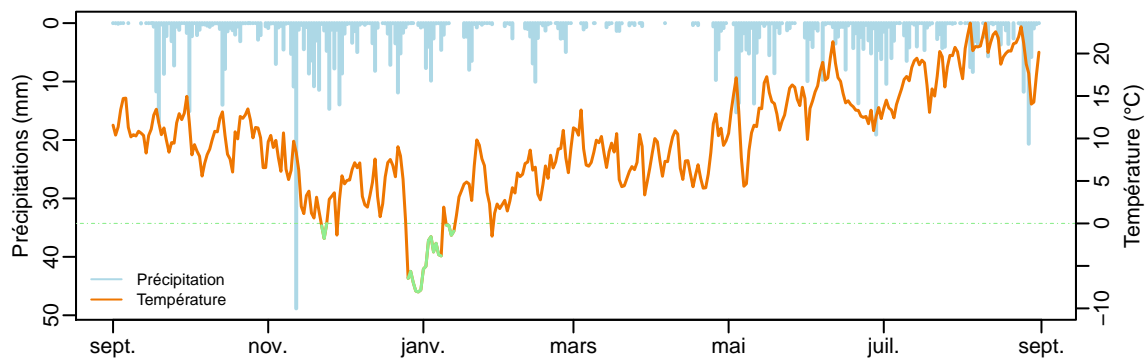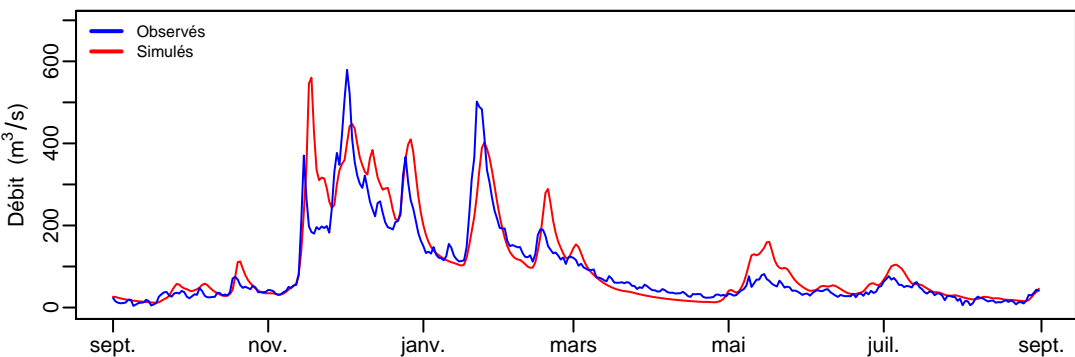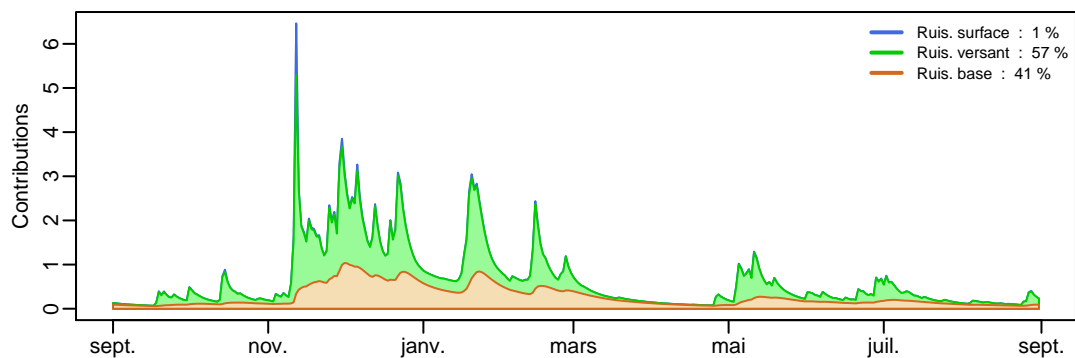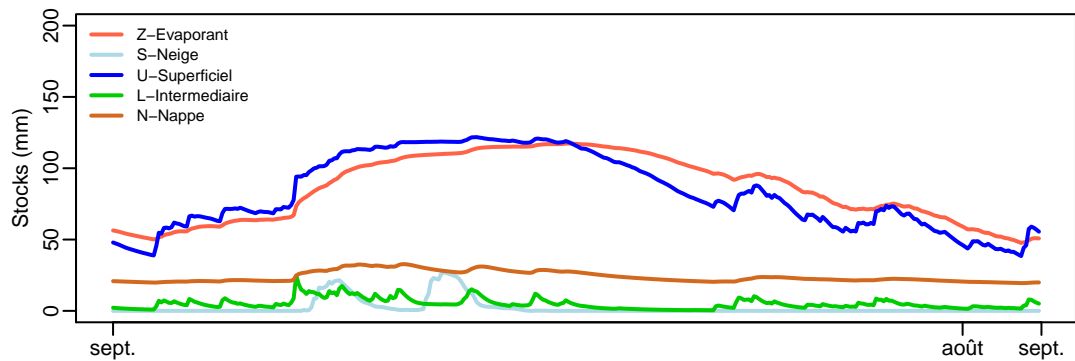

# k3603010 (144.51 km<sup>2</sup>) – année 2002–2003

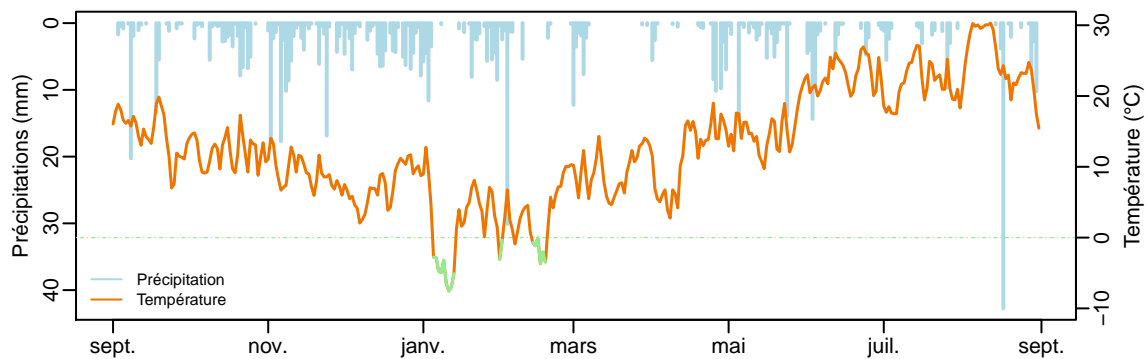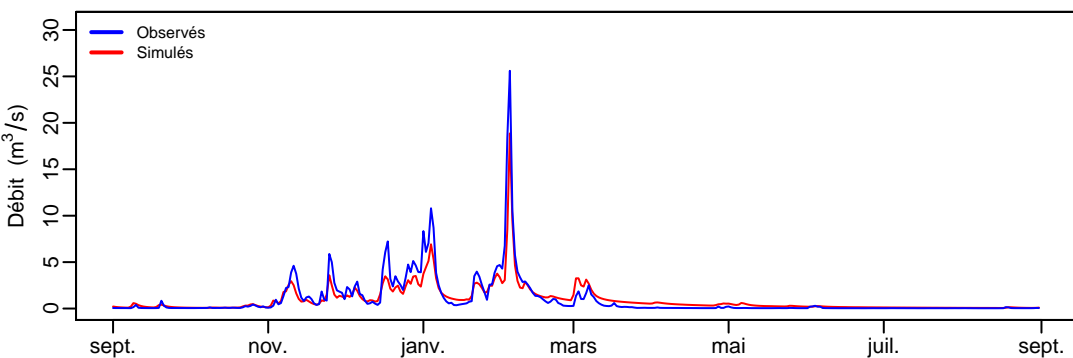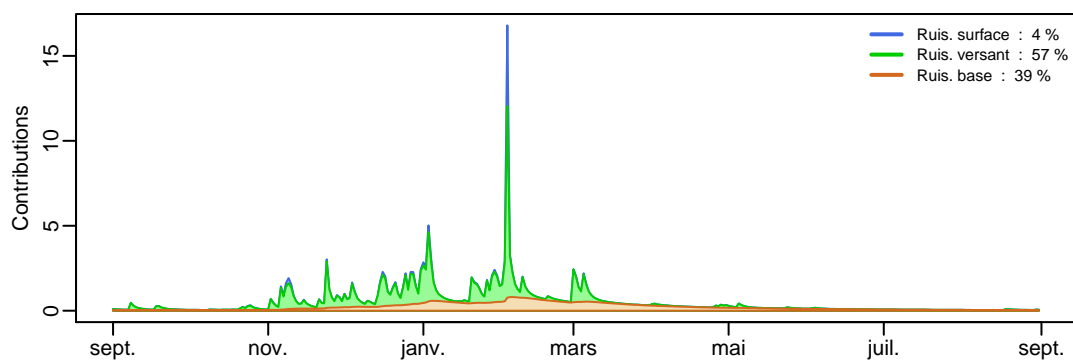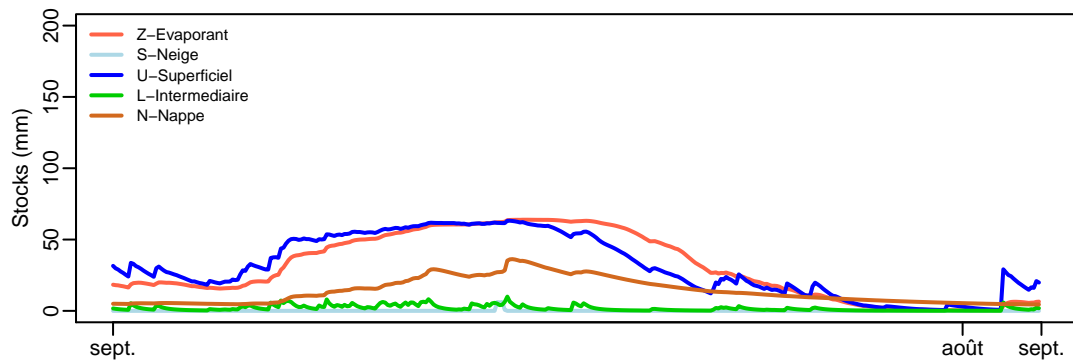



# k3603010 (144.51 km<sup>2</sup>) – année 2003–2004

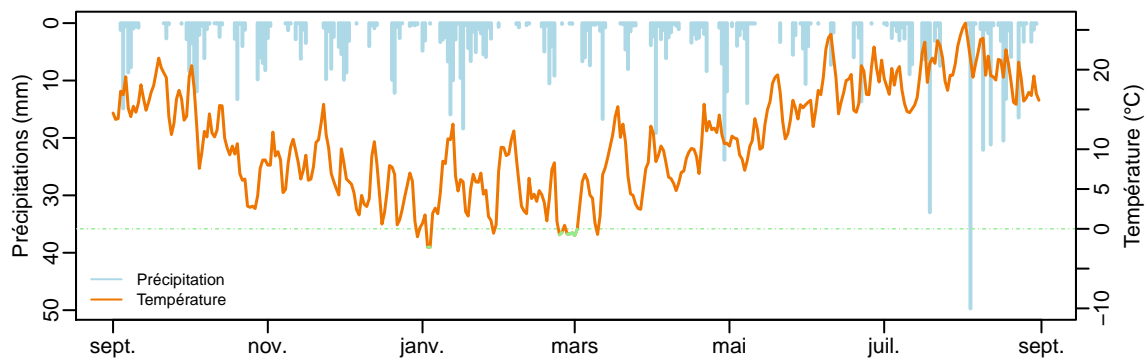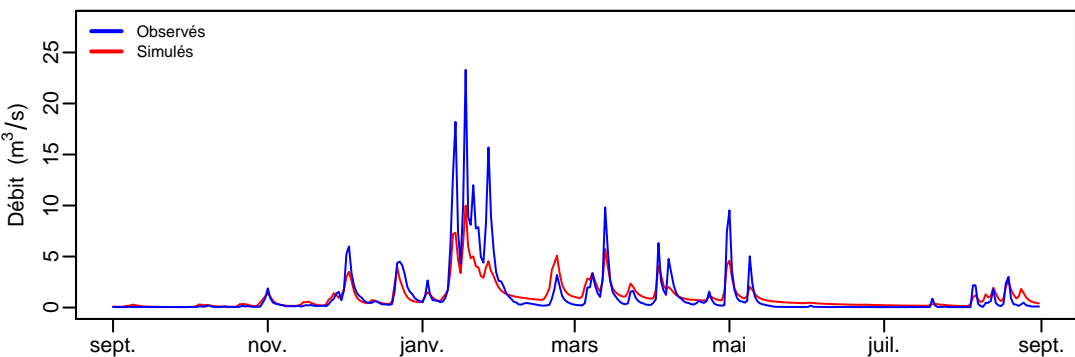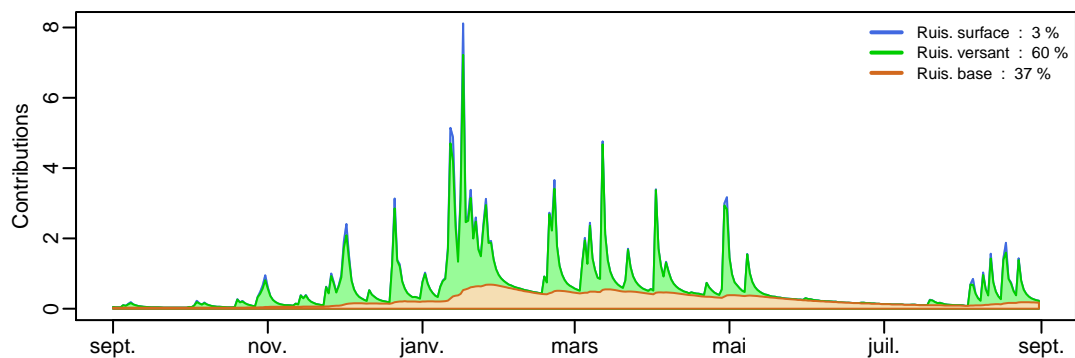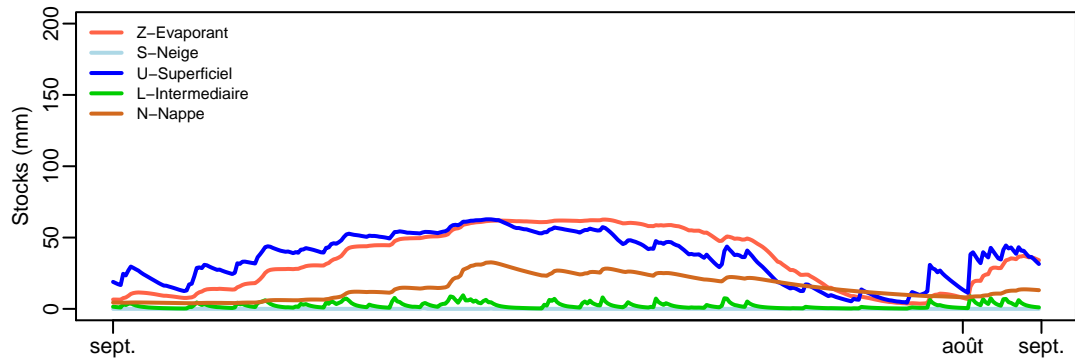

# k3603010 (144.51 km<sup>2</sup>) – année 2004–2005

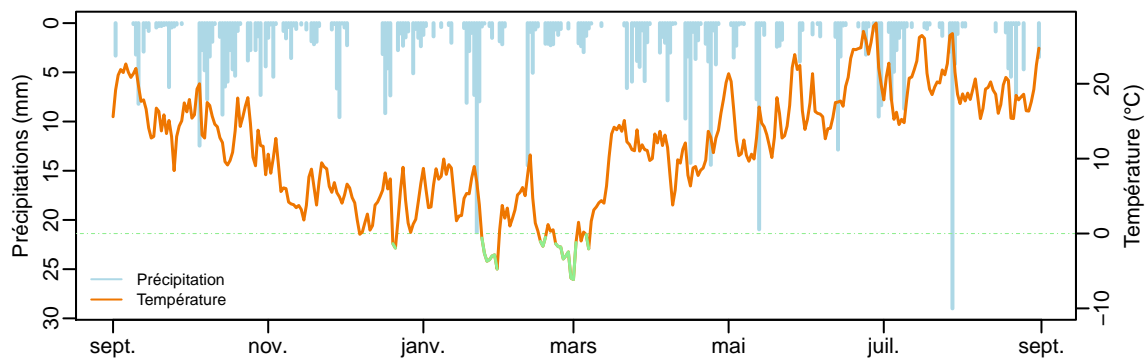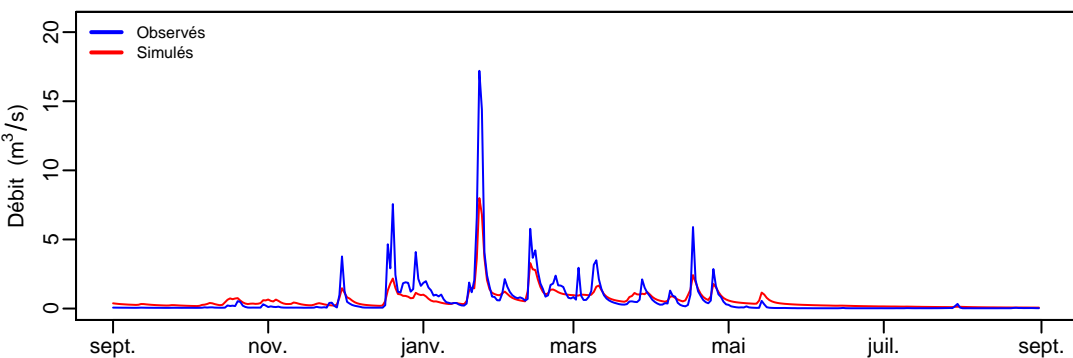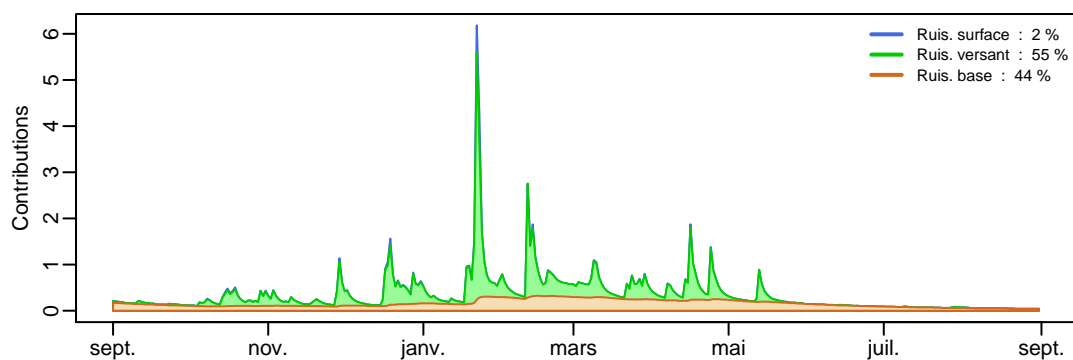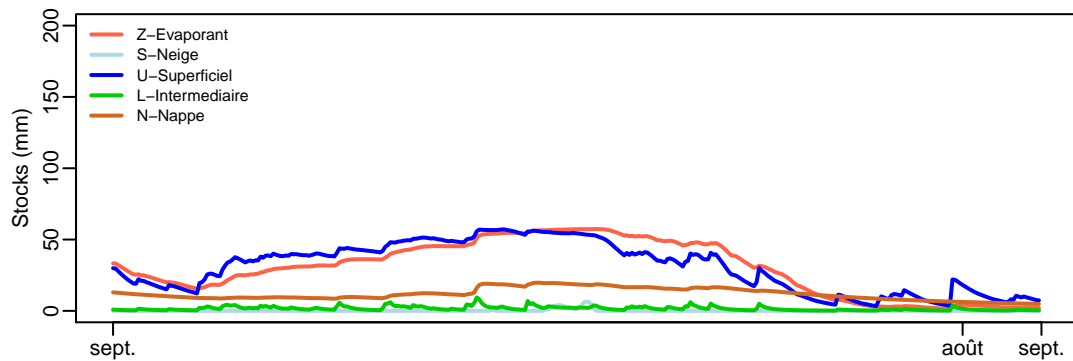

# k3603010 (144.51 km²) – année 2005–2006

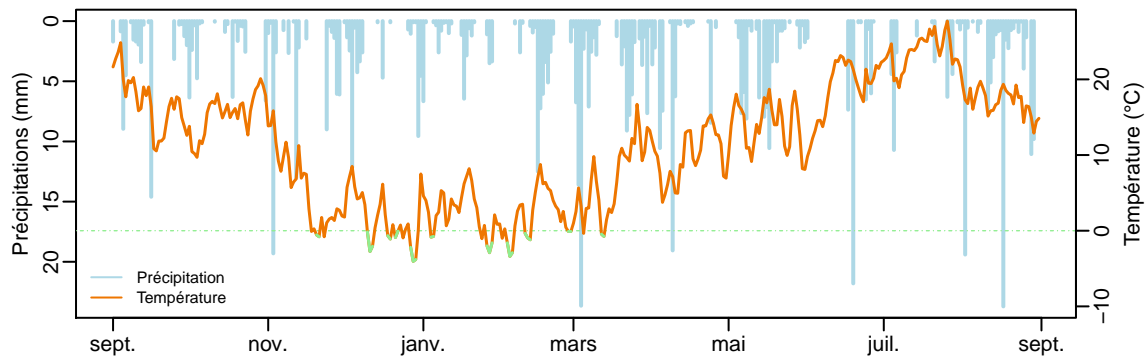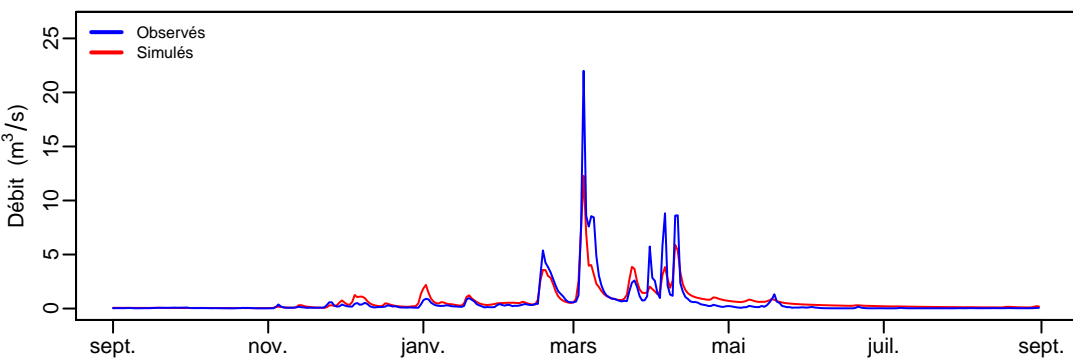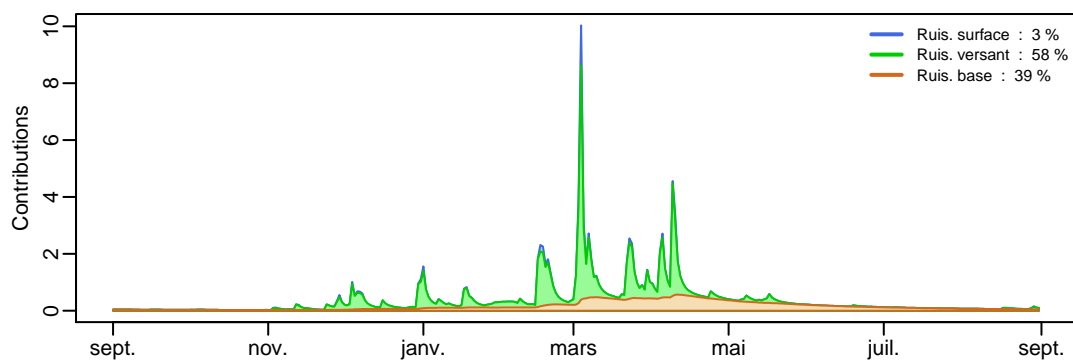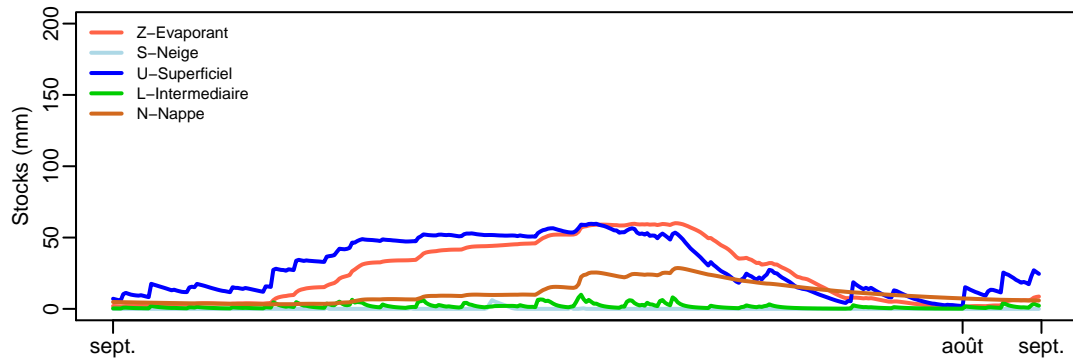

# k3603010 (144.51 km²) – année 2006–2007

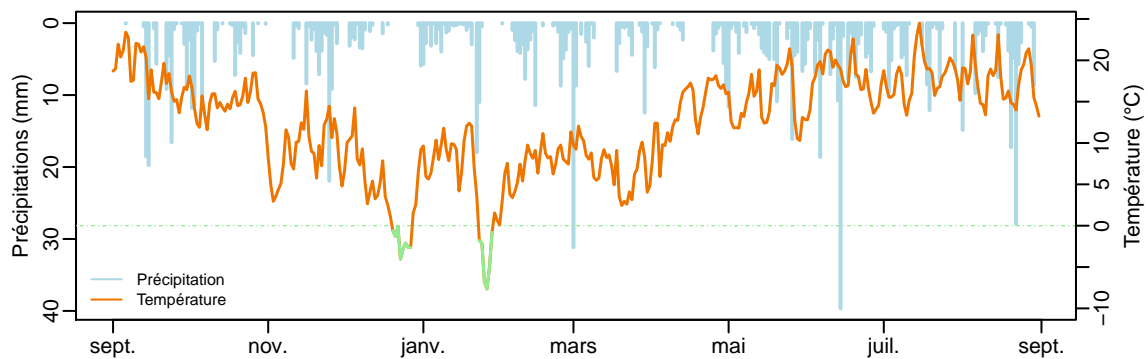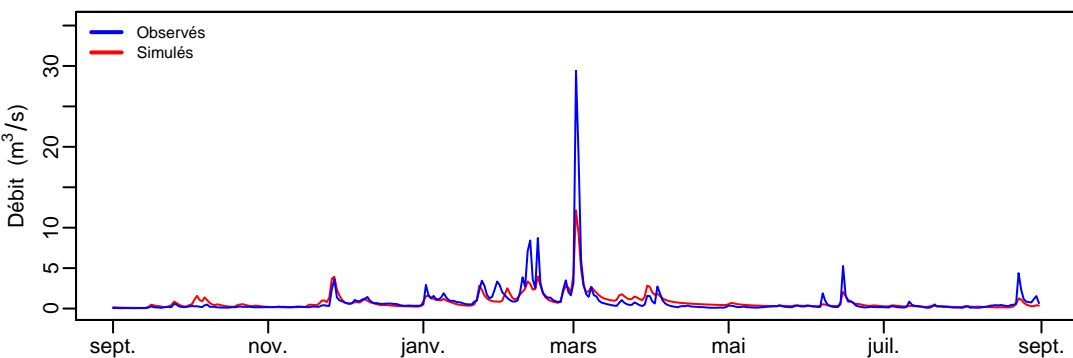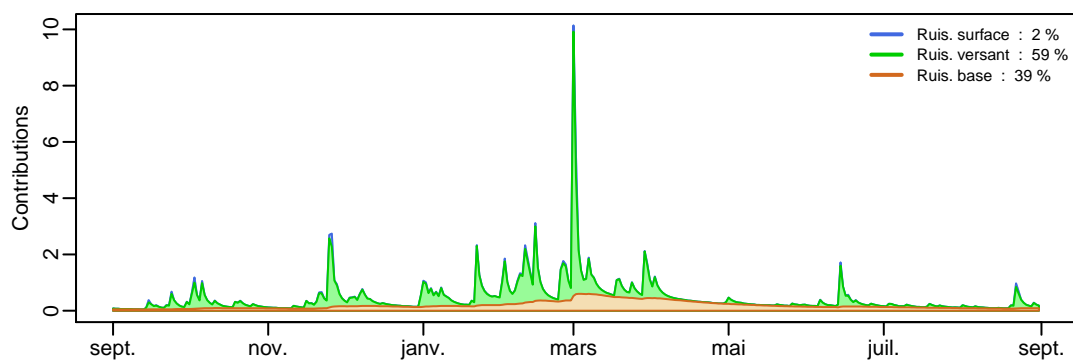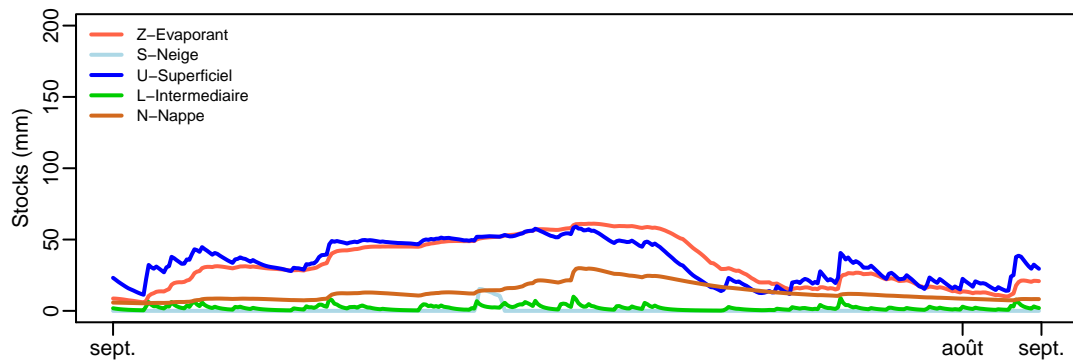

# k3603010 (144.51 km<sup>2</sup>) – année 2007–2008

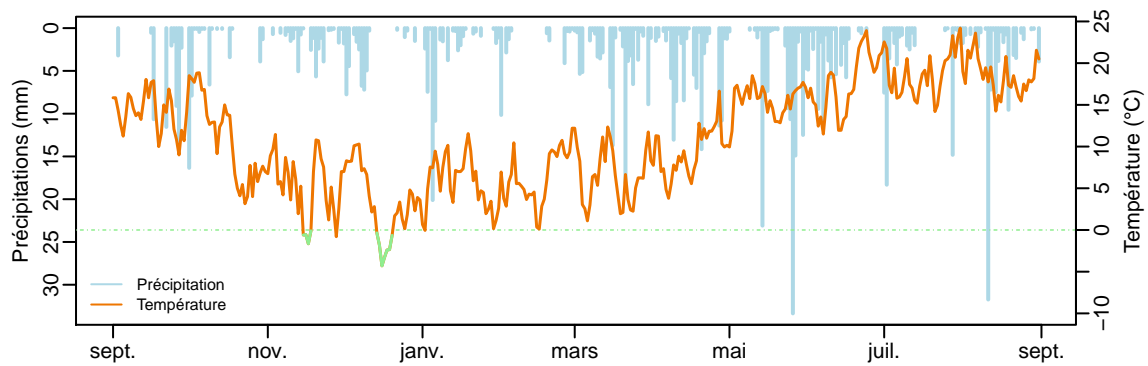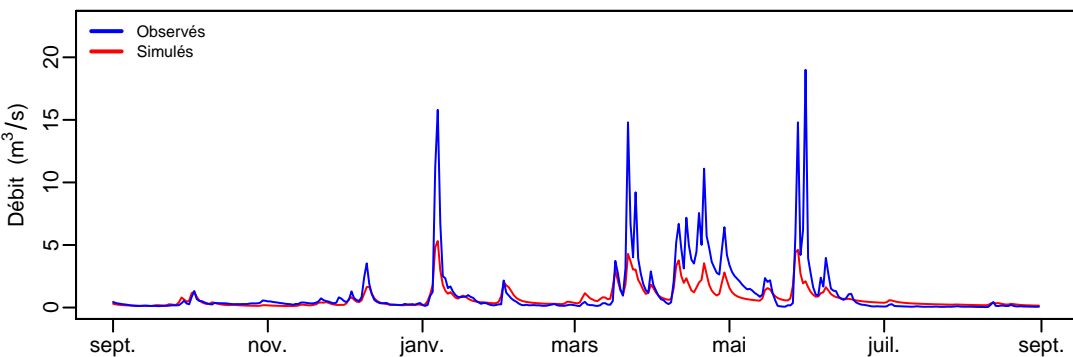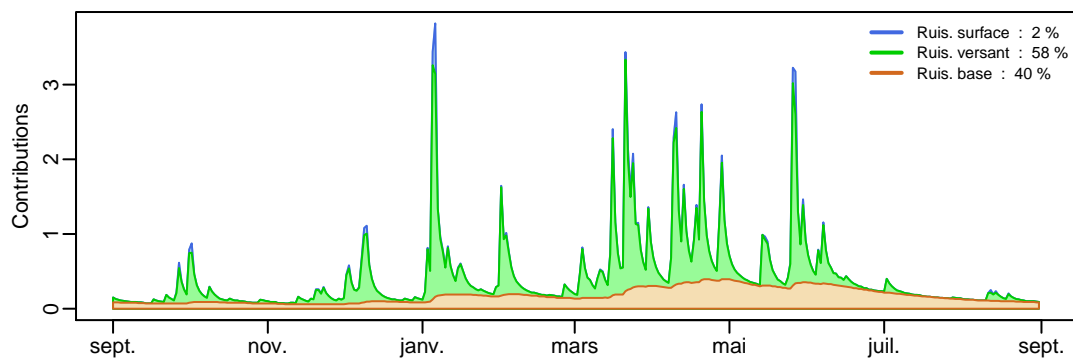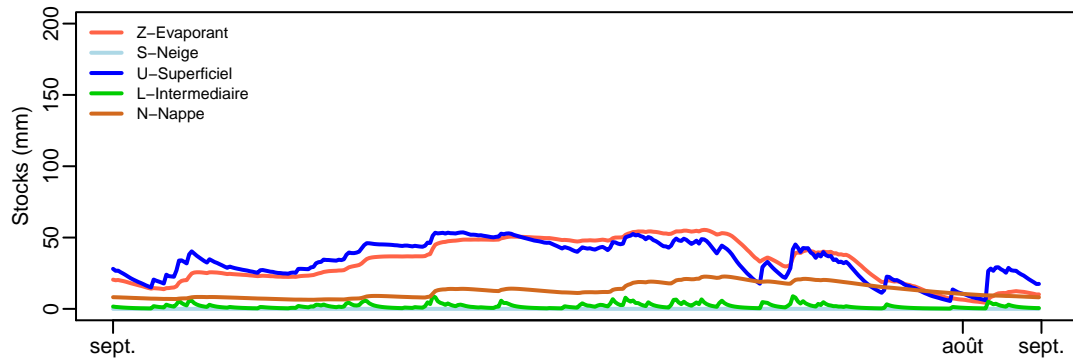

# k3603010 (144.51 km<sup>2</sup>) – année 2008–2009

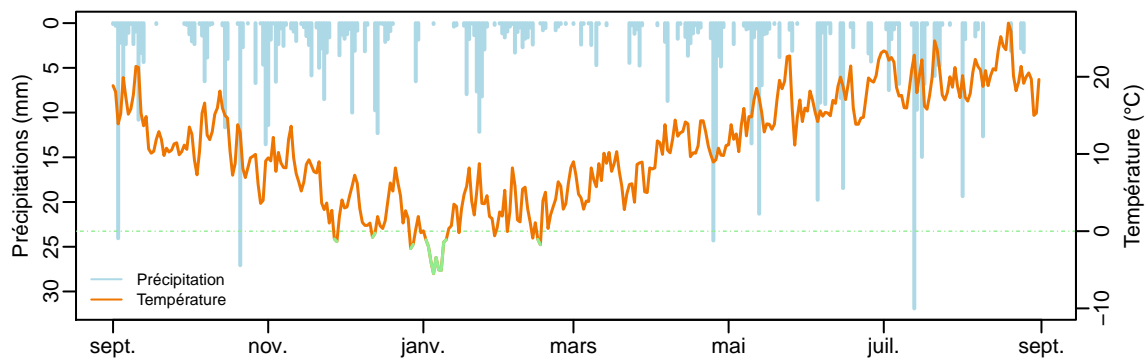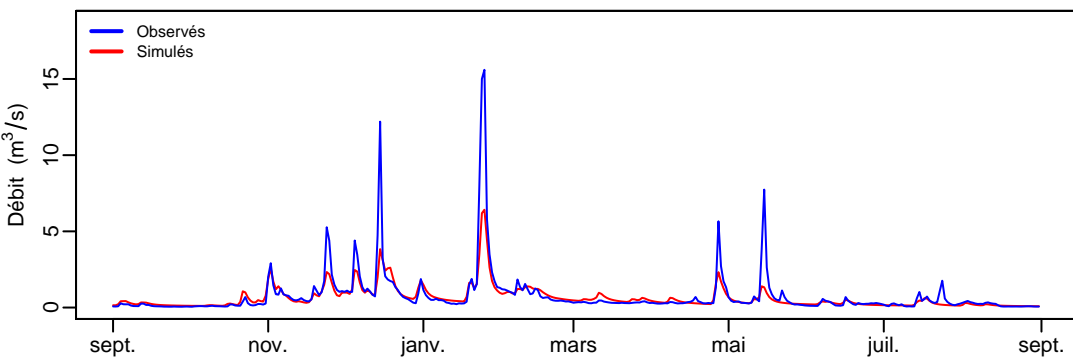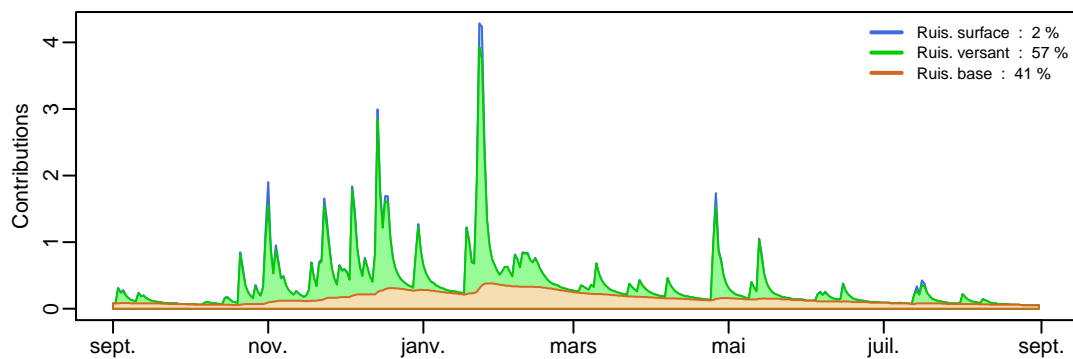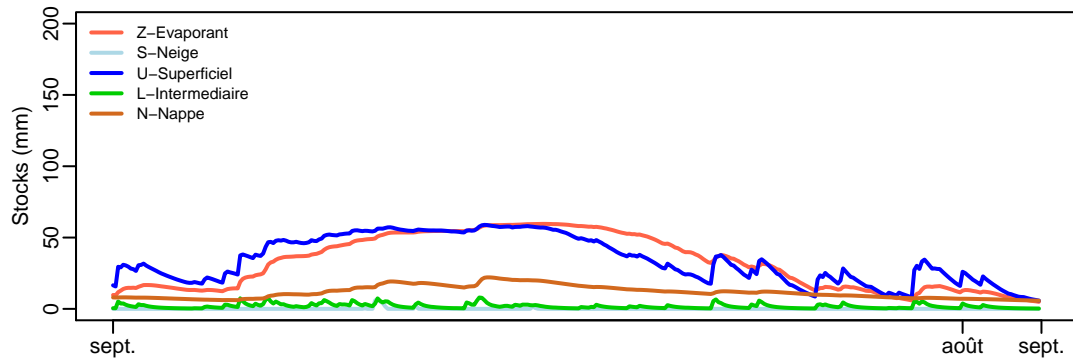

# k3603010 (144.51 km<sup>2</sup>) – année 2009–2010

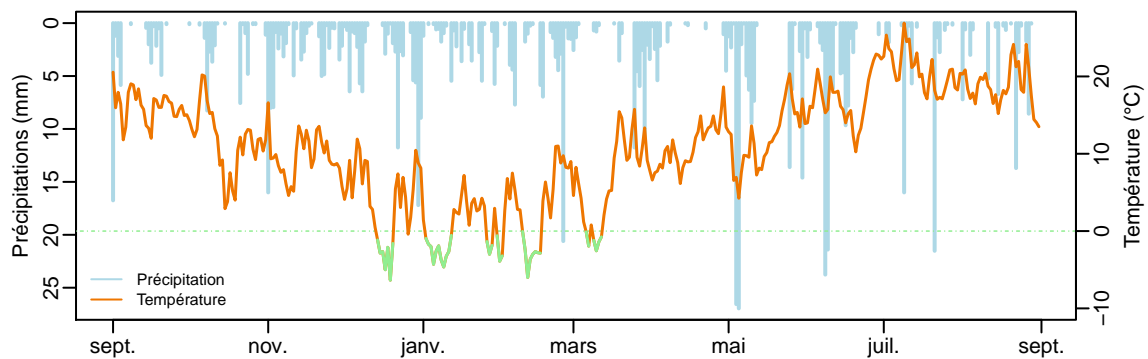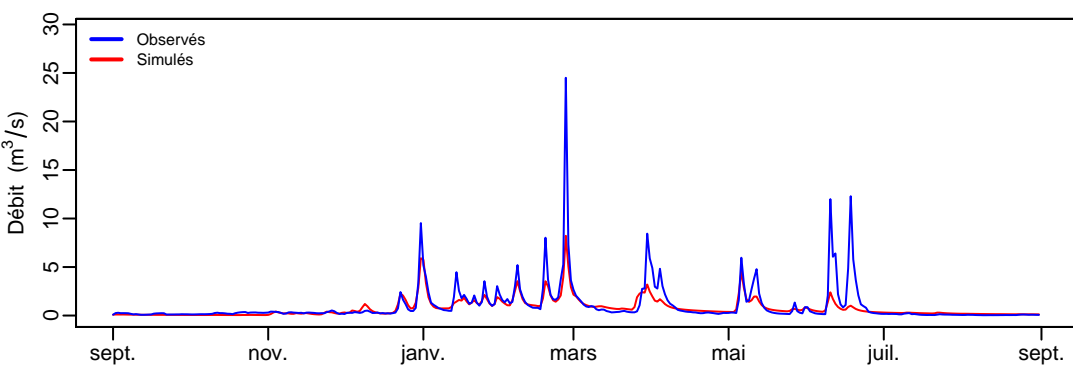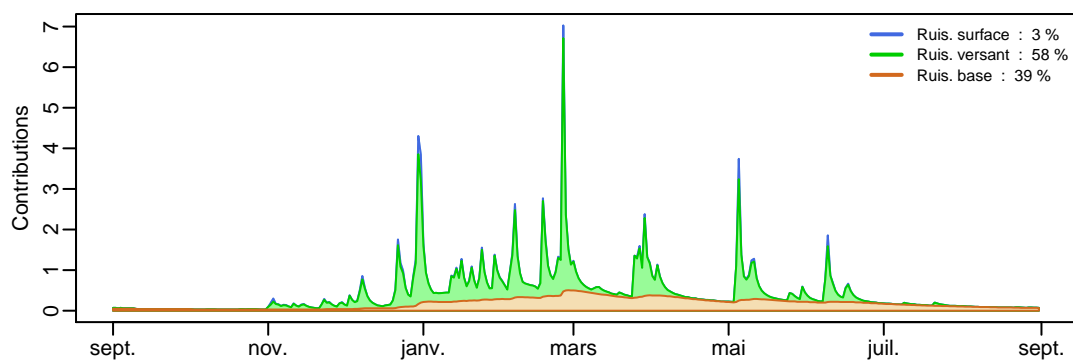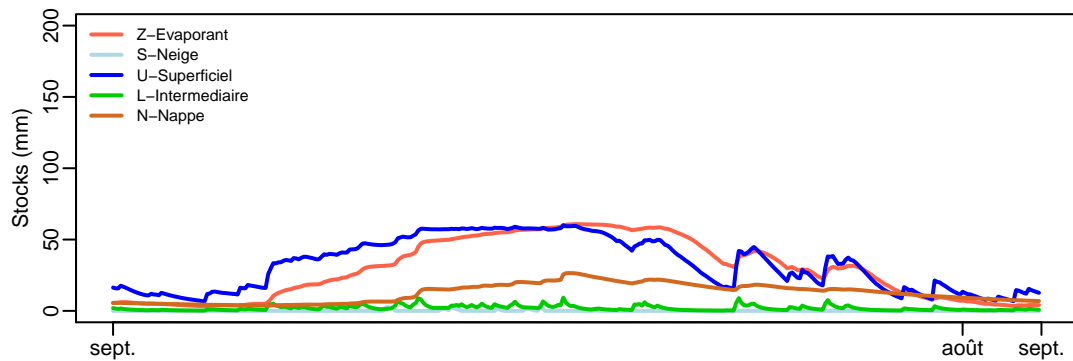

# k3603010 (144.51 km<sup>2</sup>) – année 2010–2011

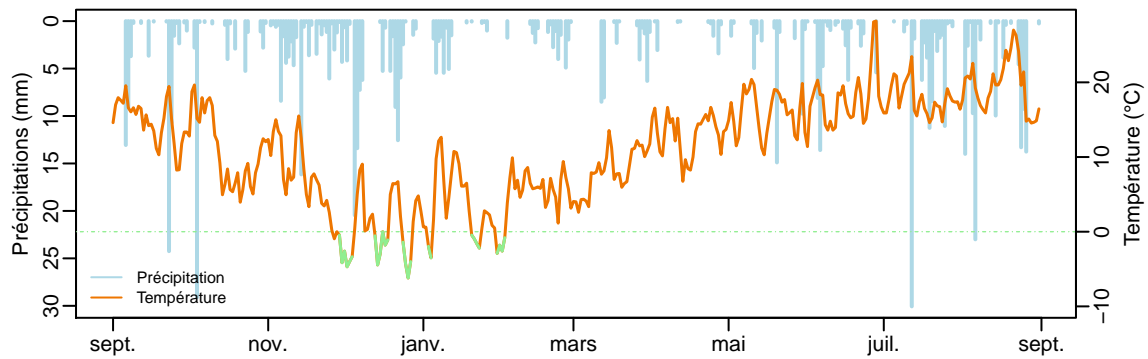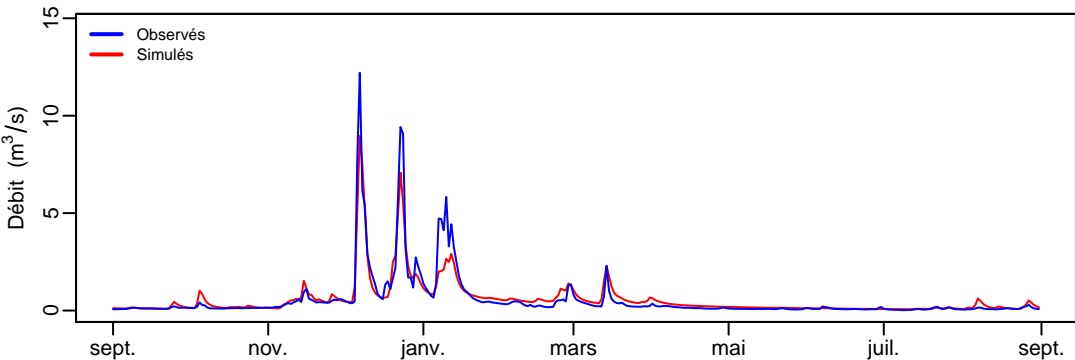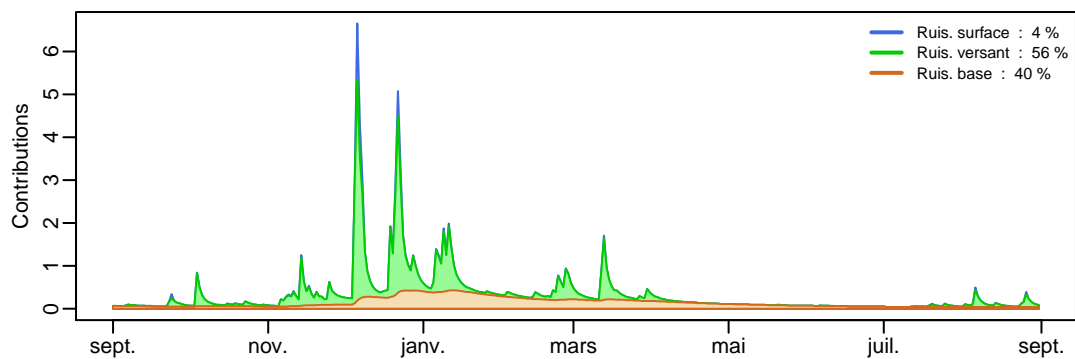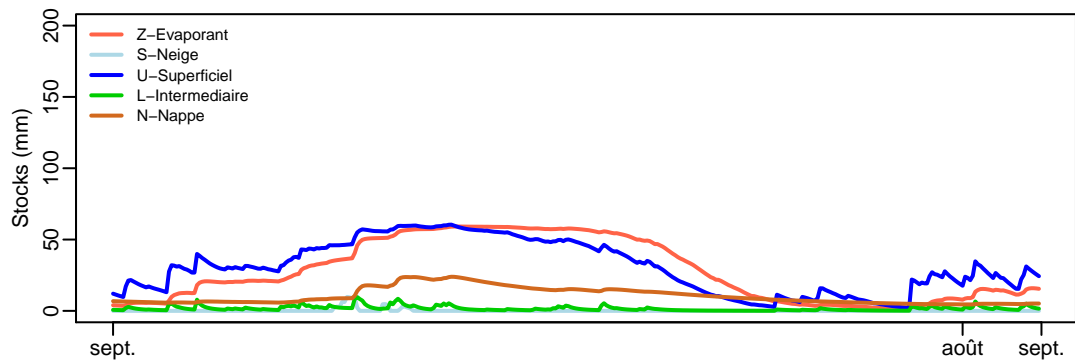



# k3603010 (144.51 km<sup>2</sup>) – année 2011–2012

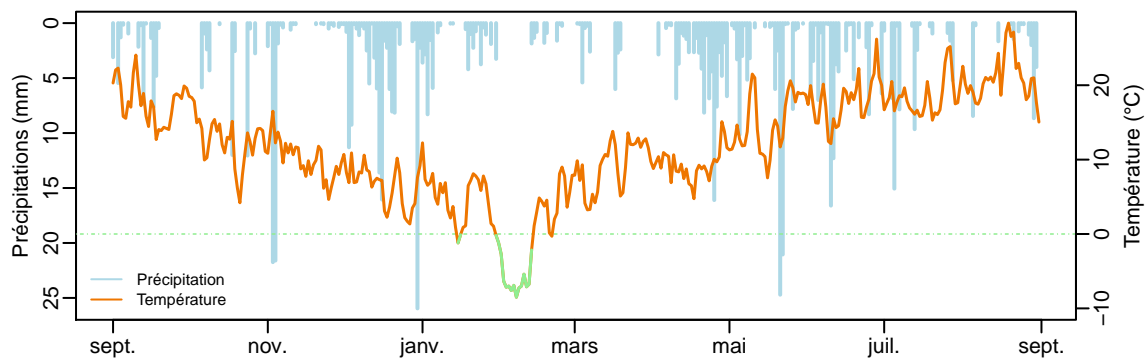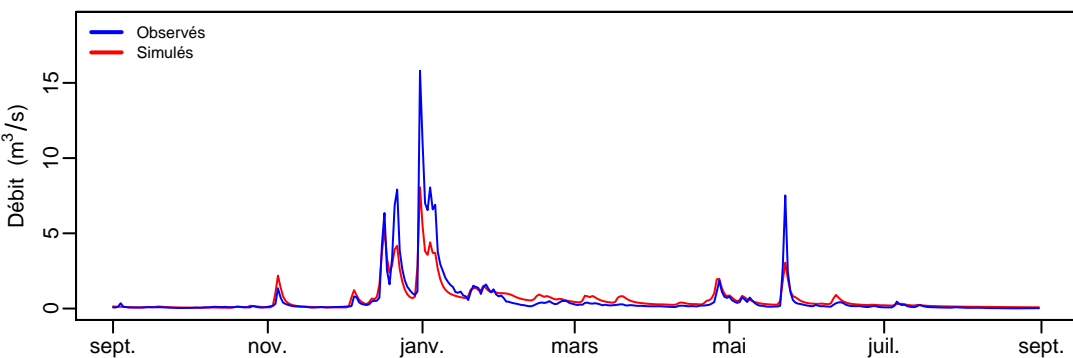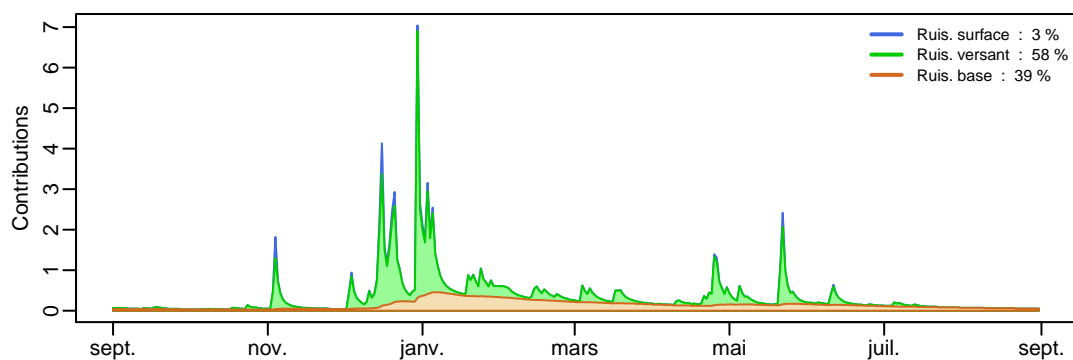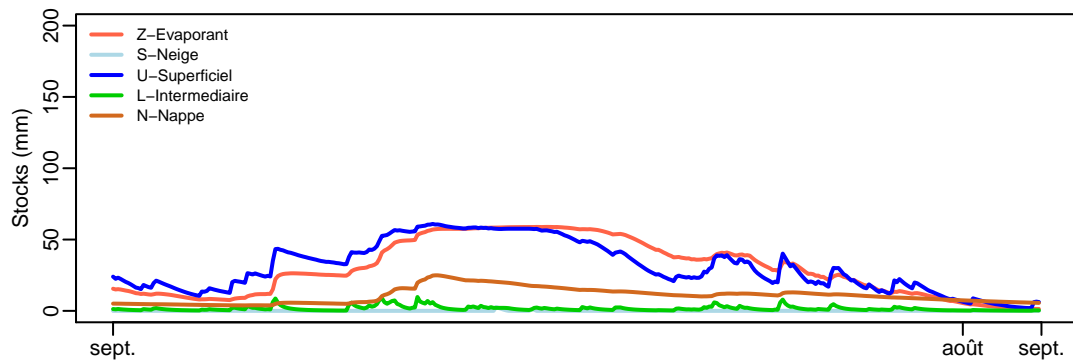

# k3650810 (14349.71 km<sup>2</sup>) – année 1981–1982

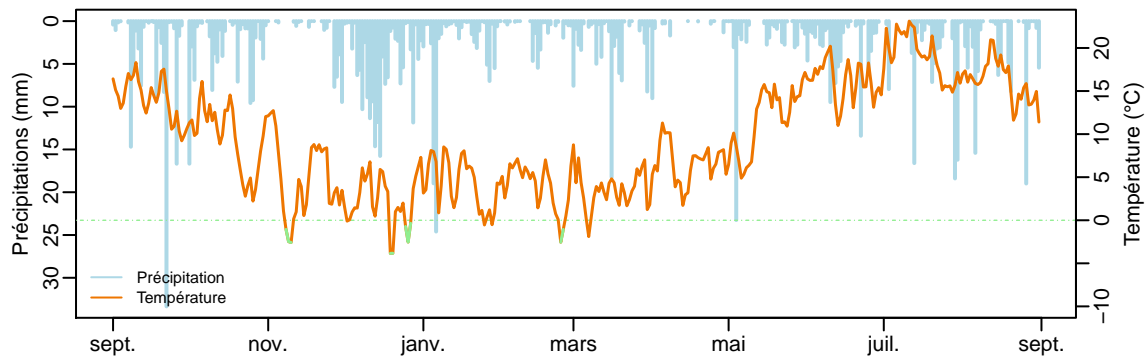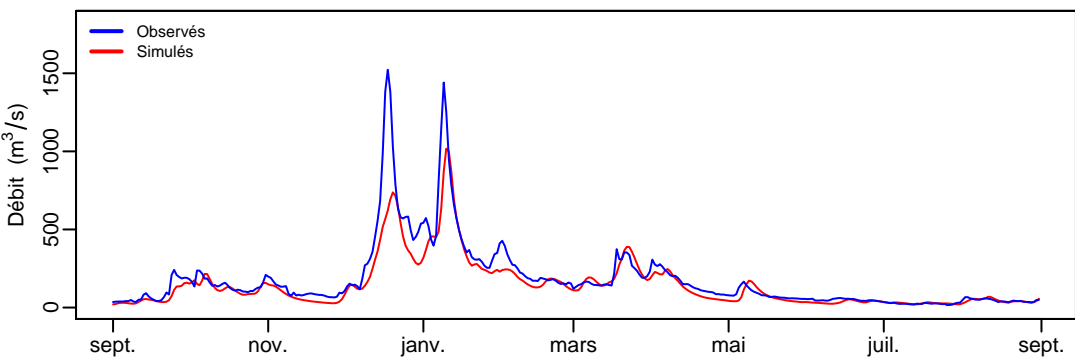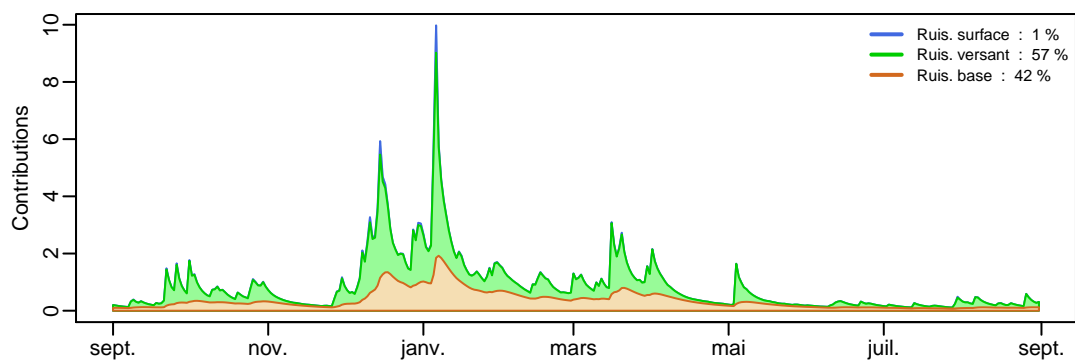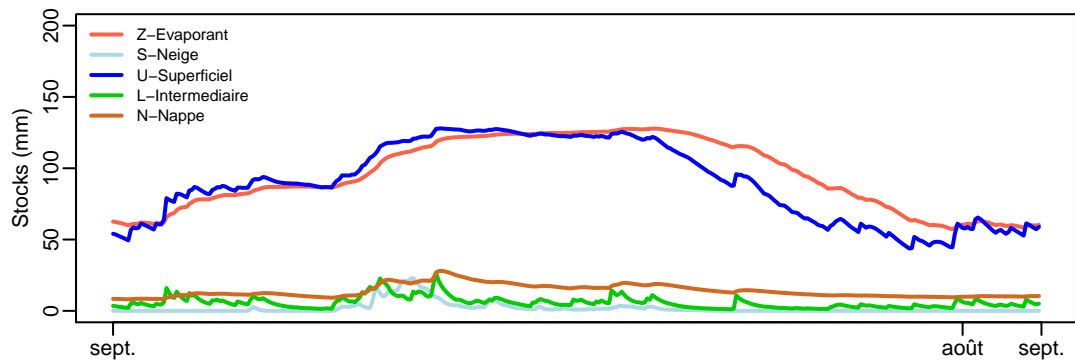

# k3650810 (14349.71 km<sup>2</sup>) – année 1982–1983

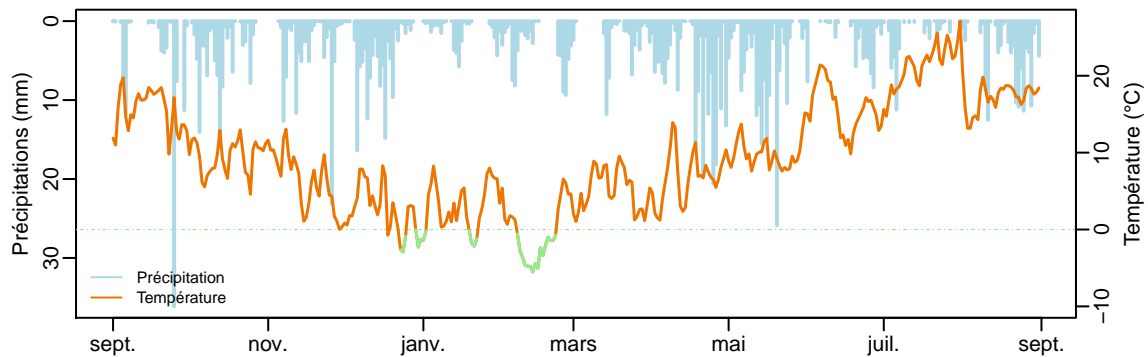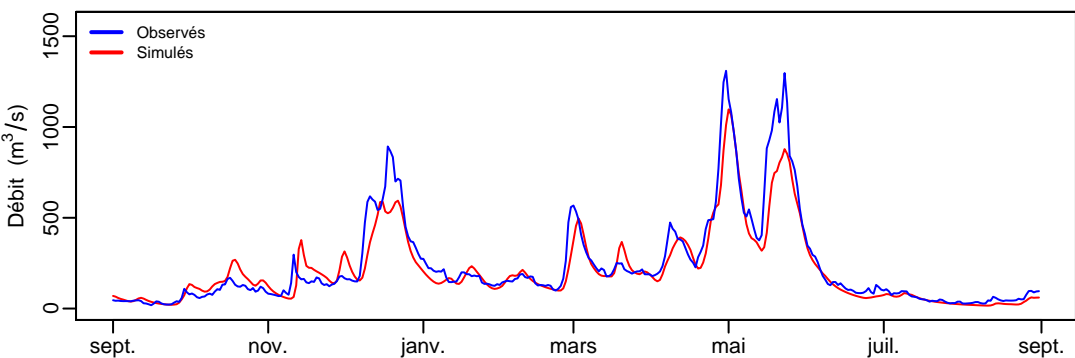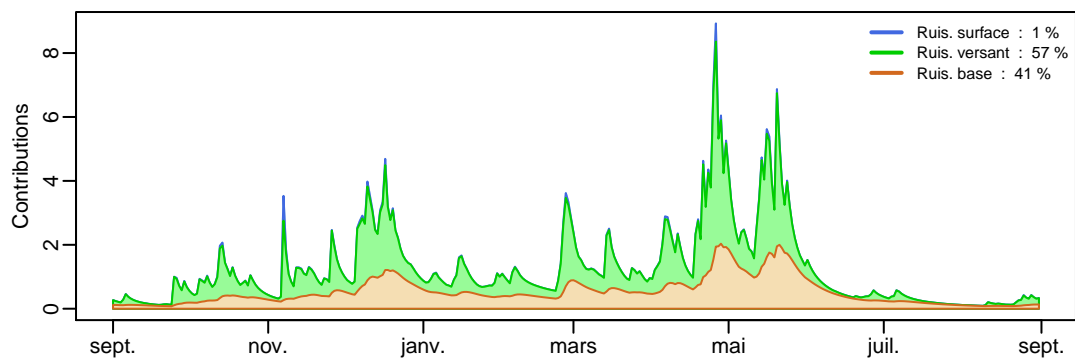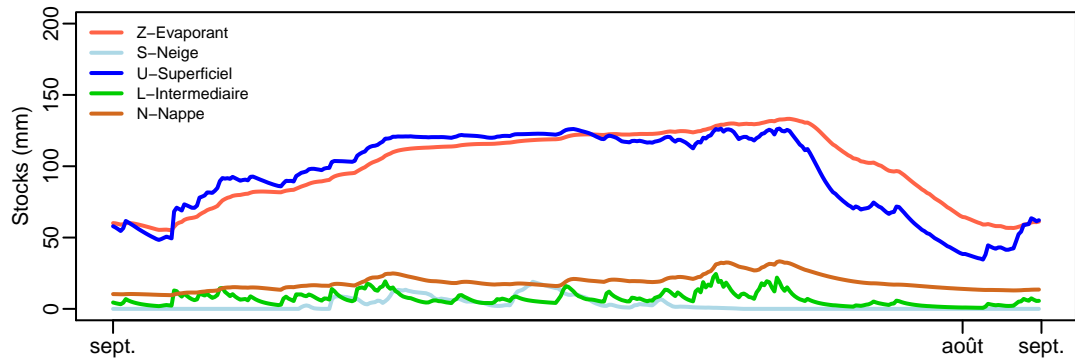

# k3650810 (14349.71 km<sup>2</sup>) – année 1983–1984

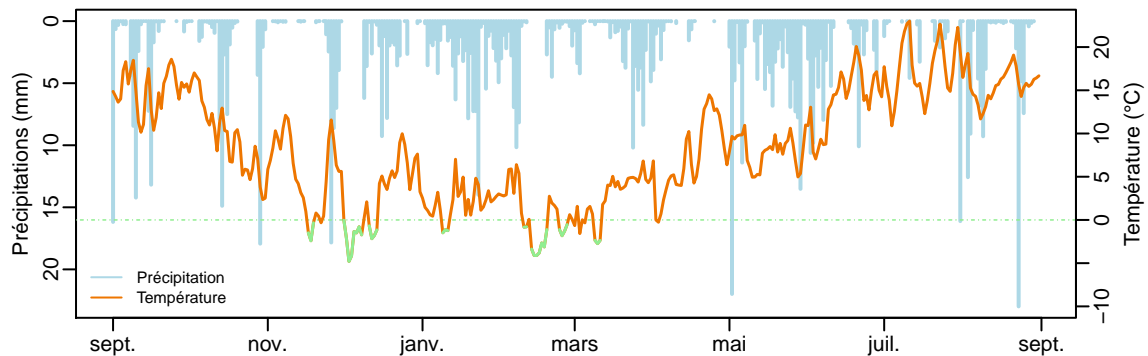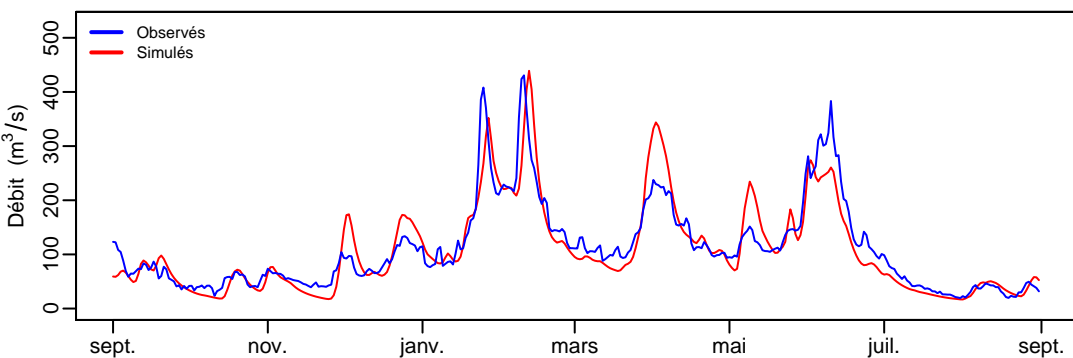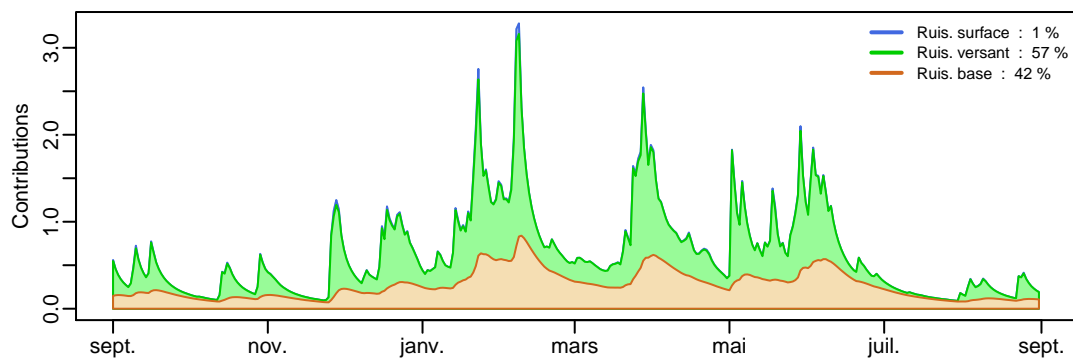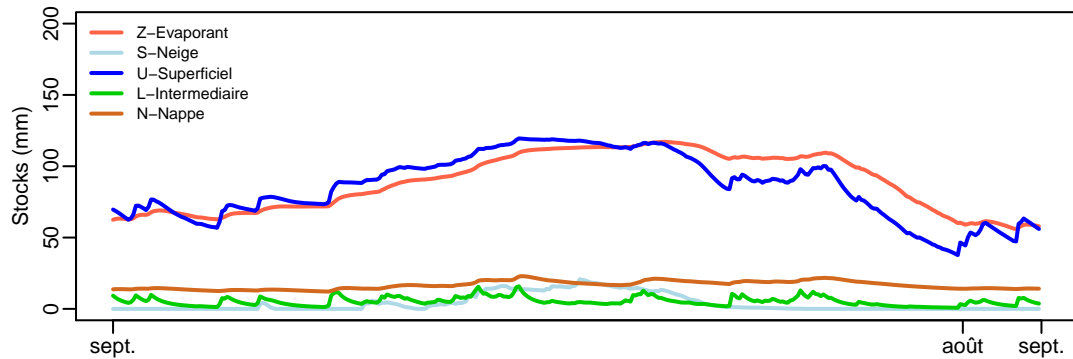

# k3650810 (14349.71 km<sup>2</sup>) – année 1984–1985

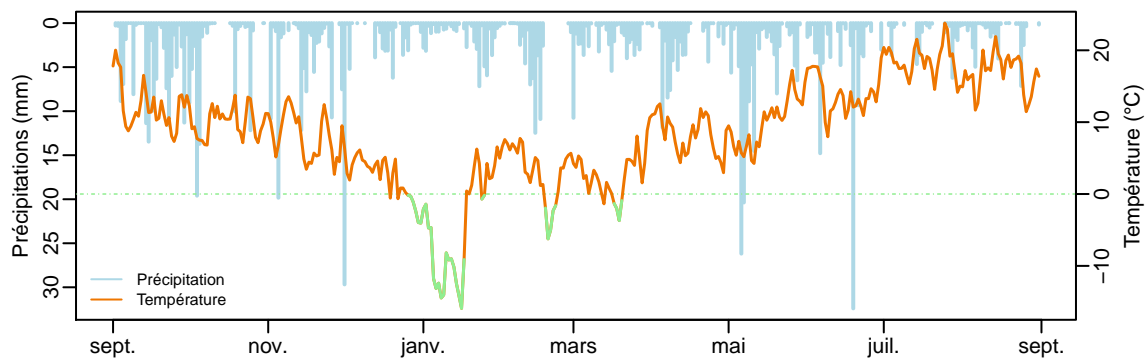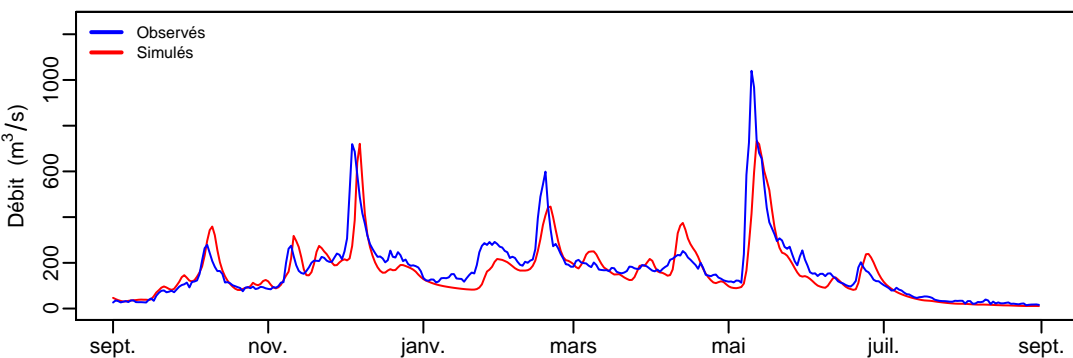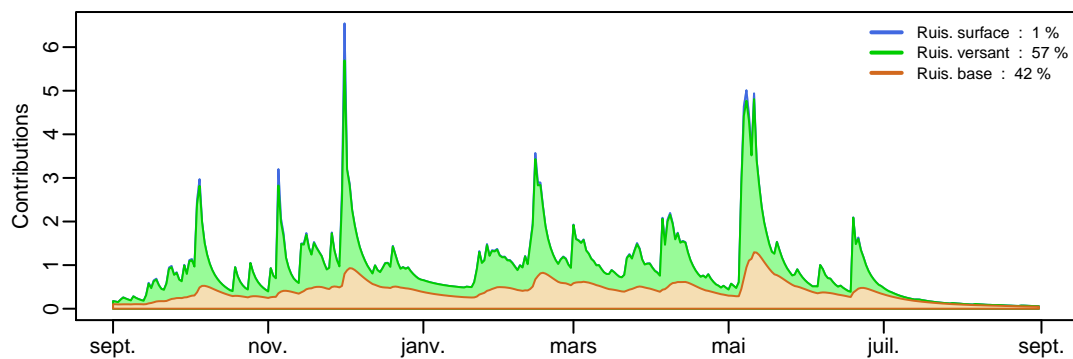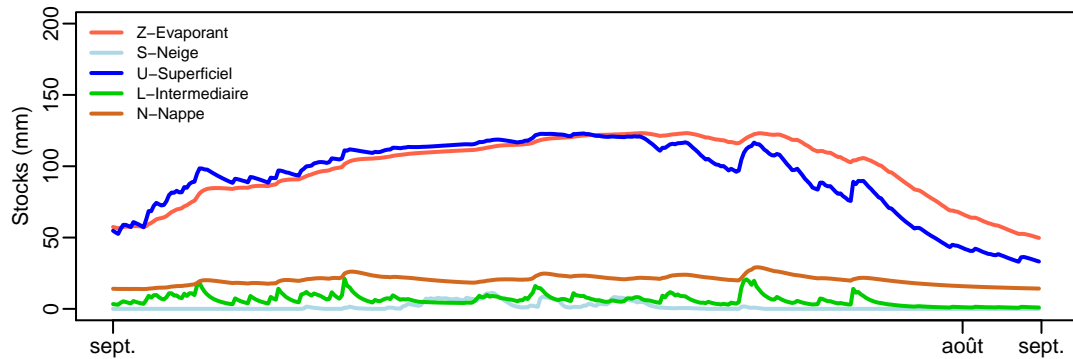

# k3650810 (14349.71 km<sup>2</sup>) – année 1985–1986

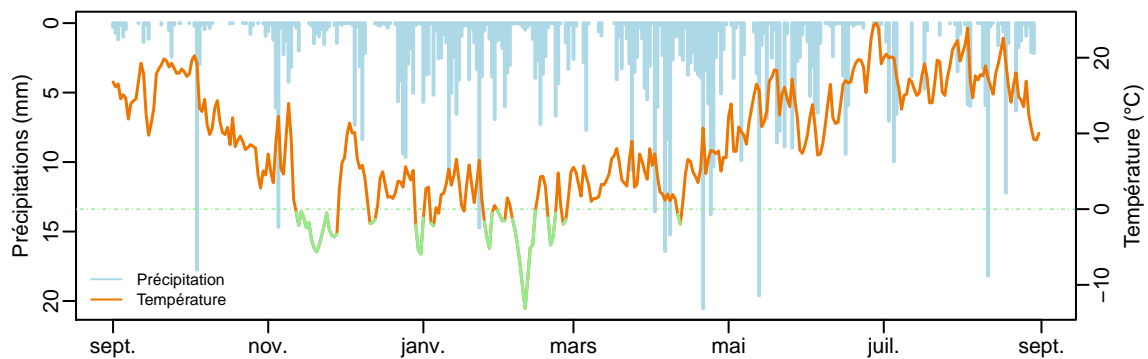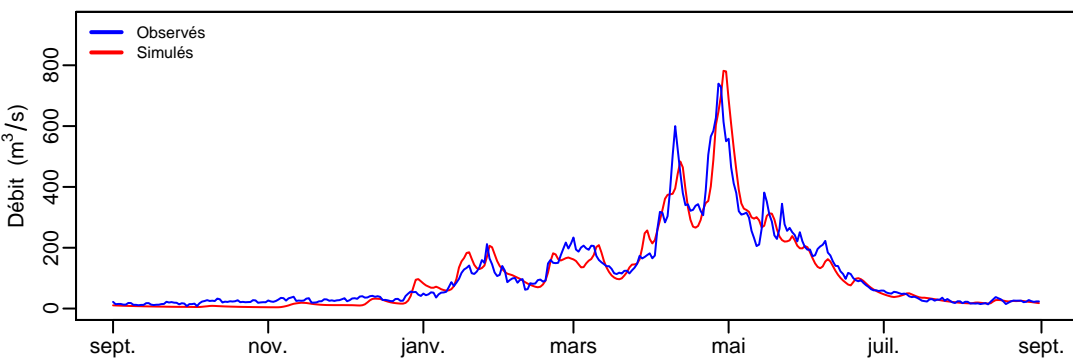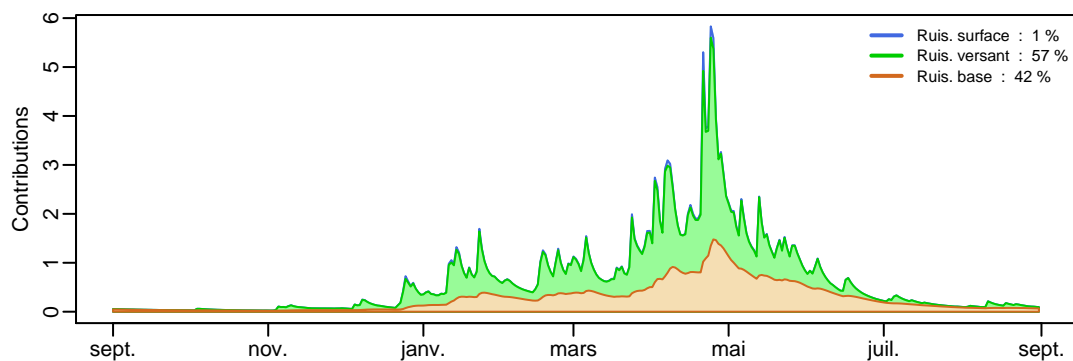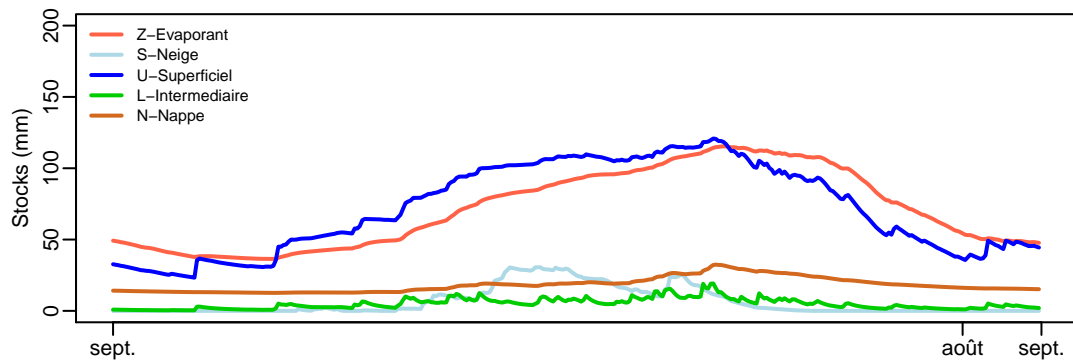

# k3650810 (14349.71 km<sup>2</sup>) – année 1986–1987

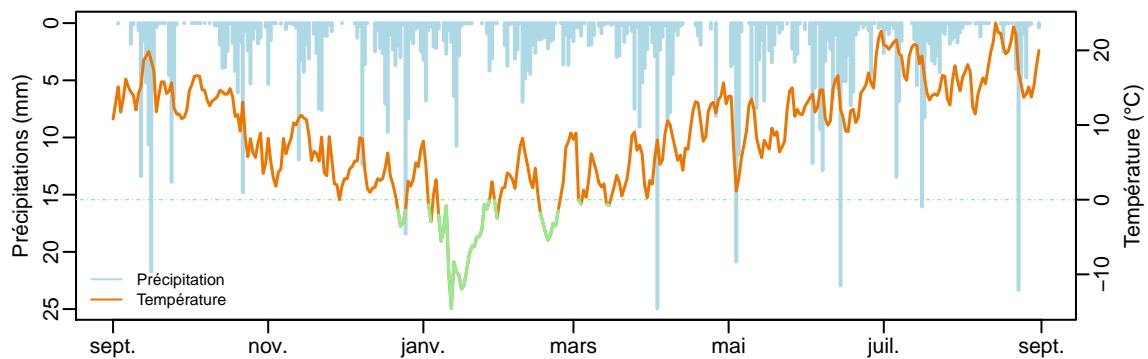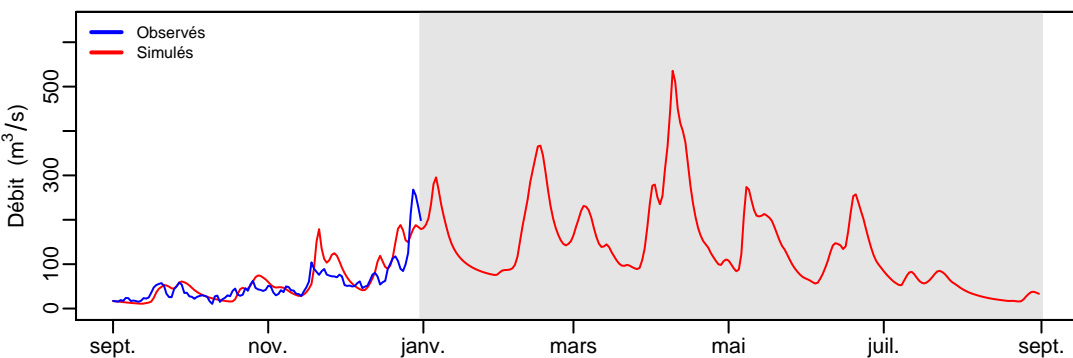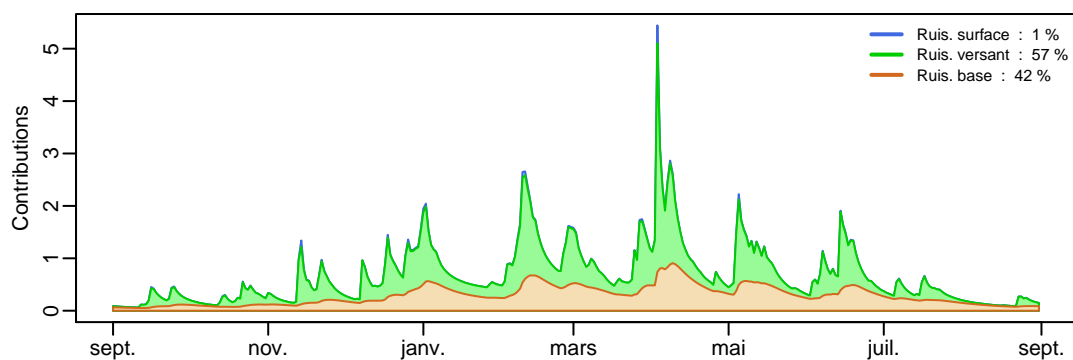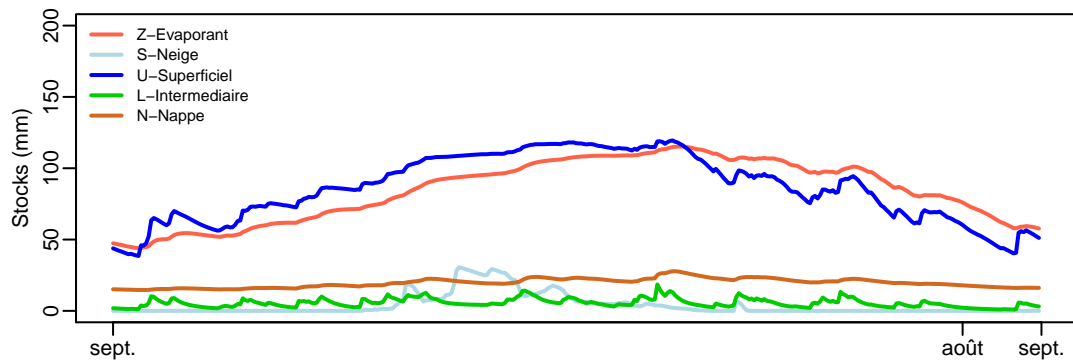

# k3650810 (14349.71 km<sup>2</sup>) – année 1987–1988

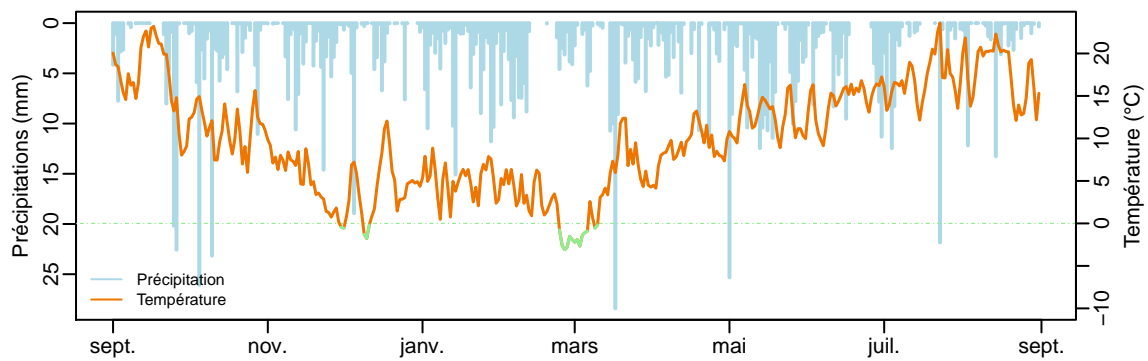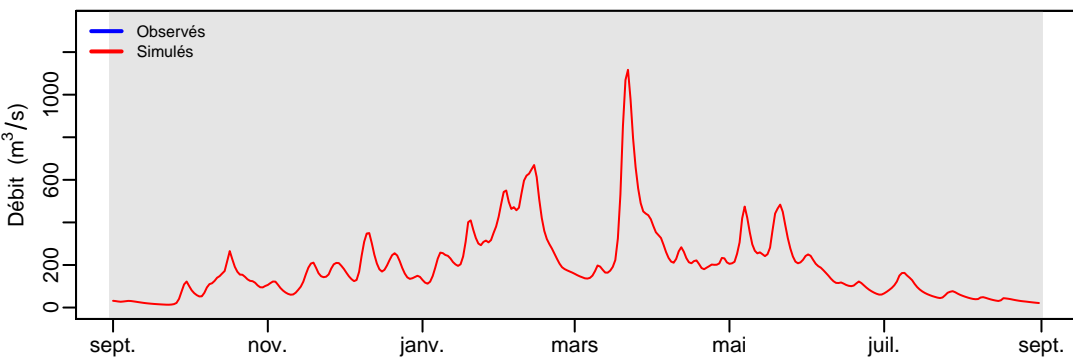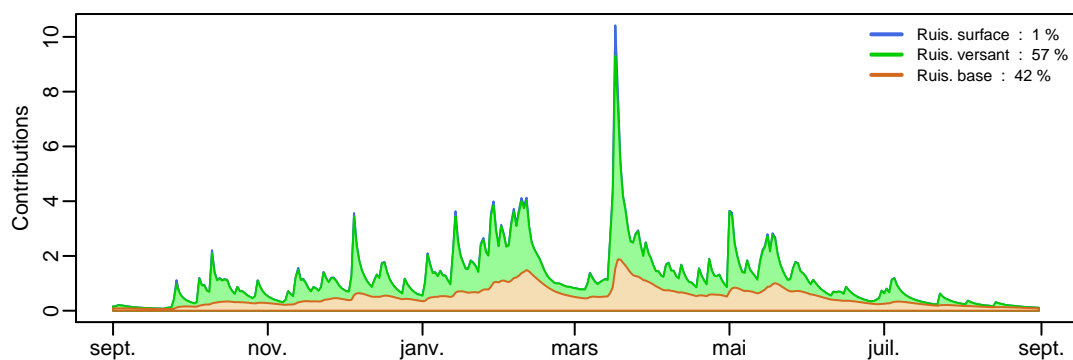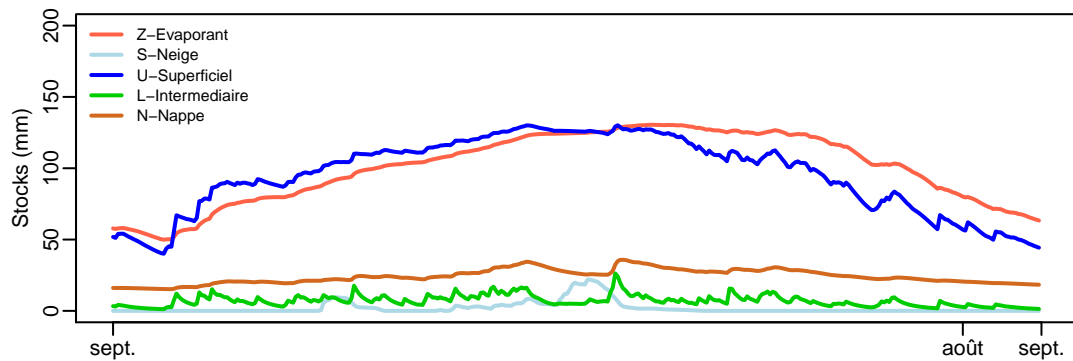



# k3650810 (14349.71 km<sup>2</sup>) – année 1988–1989

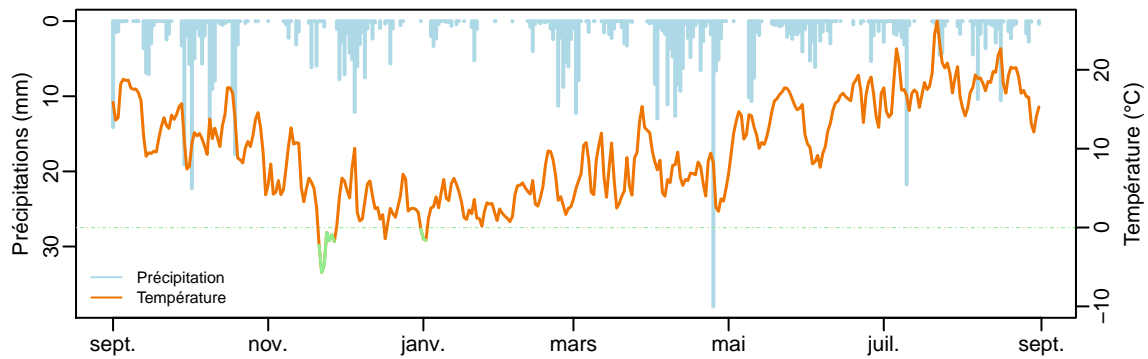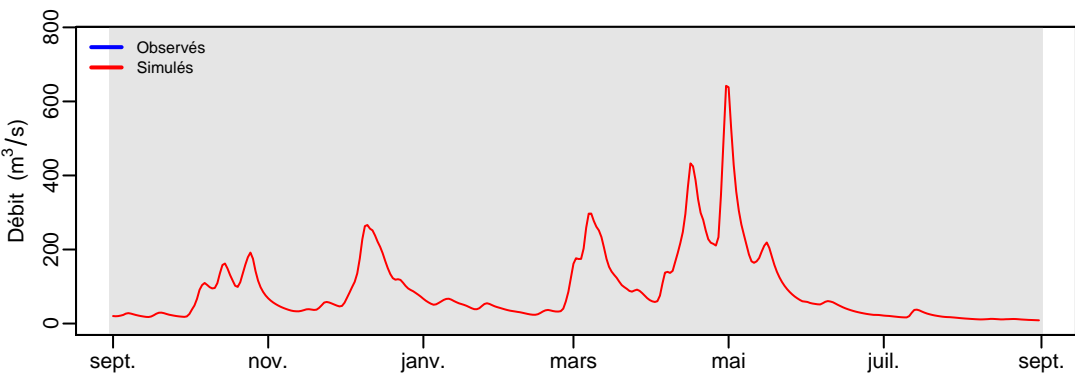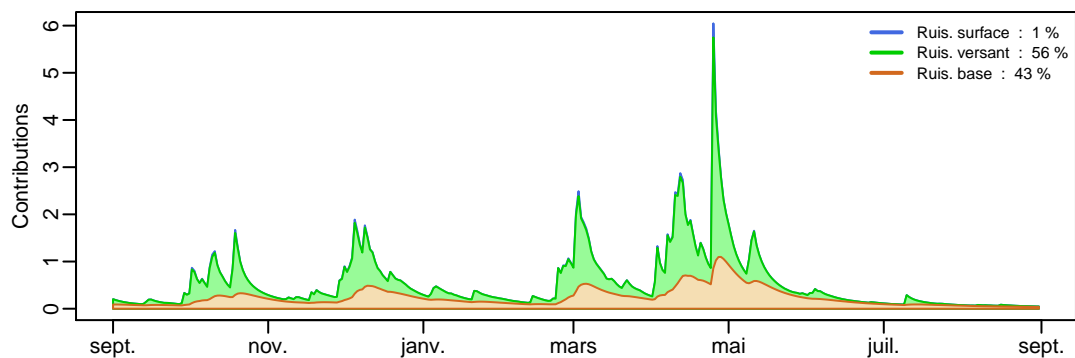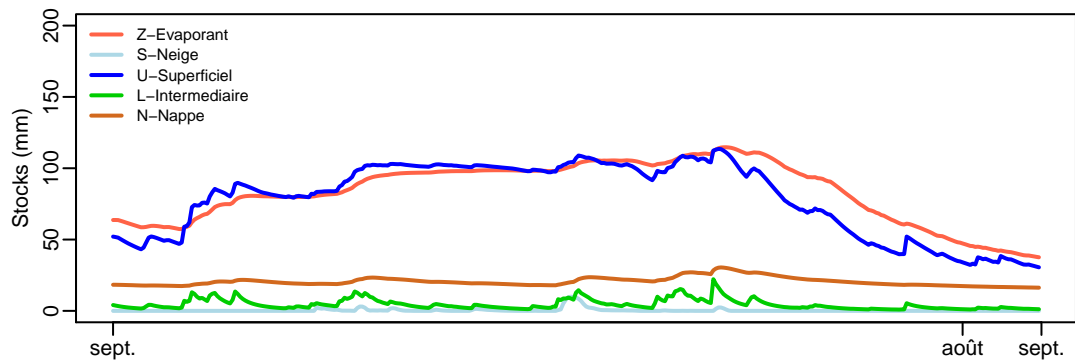

# k3650810 (14349.71 km<sup>2</sup>) – année 1989–1990

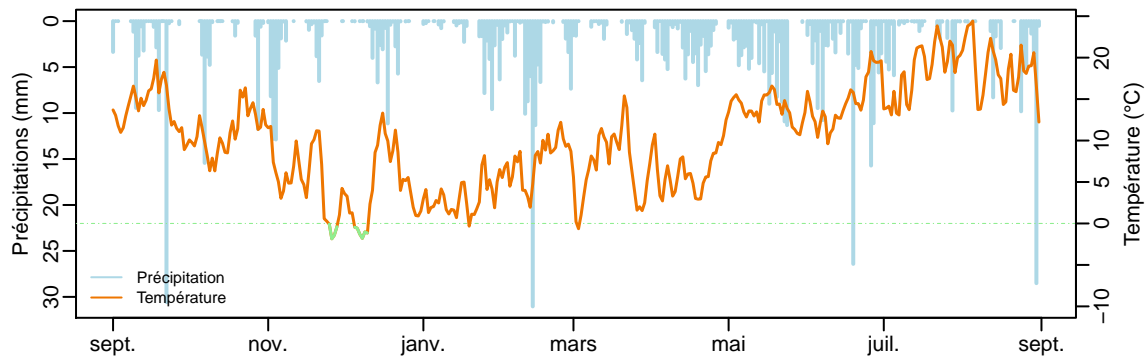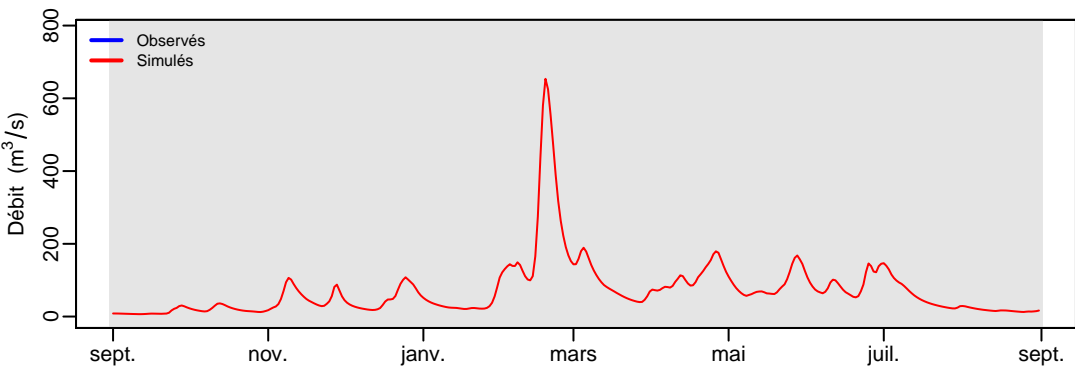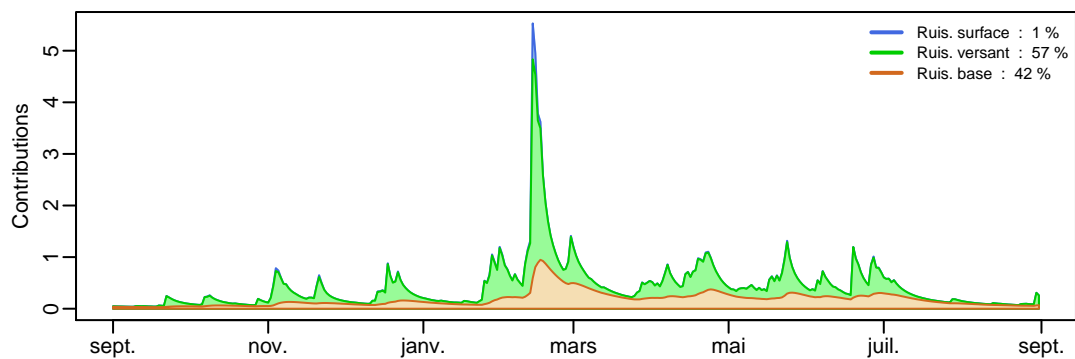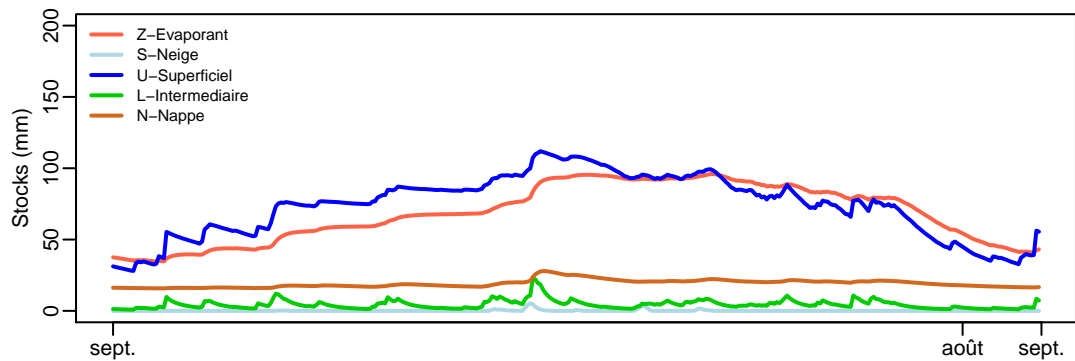

# k3650810 (14349.71 km<sup>2</sup>) – année 1990–1991

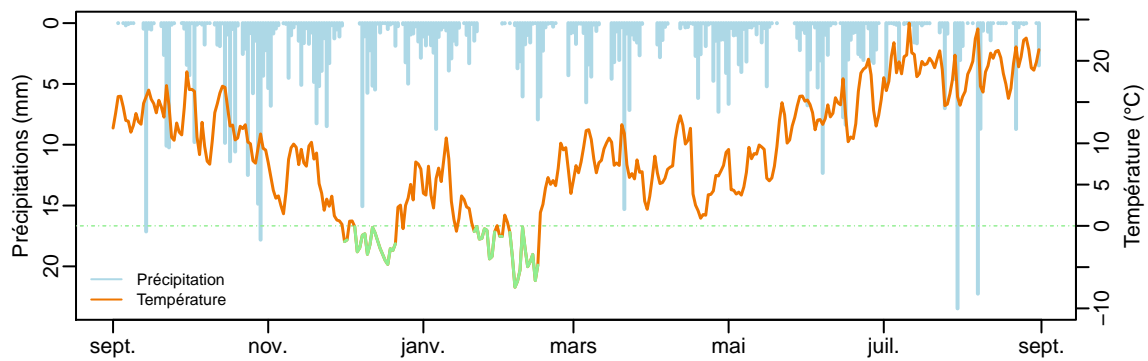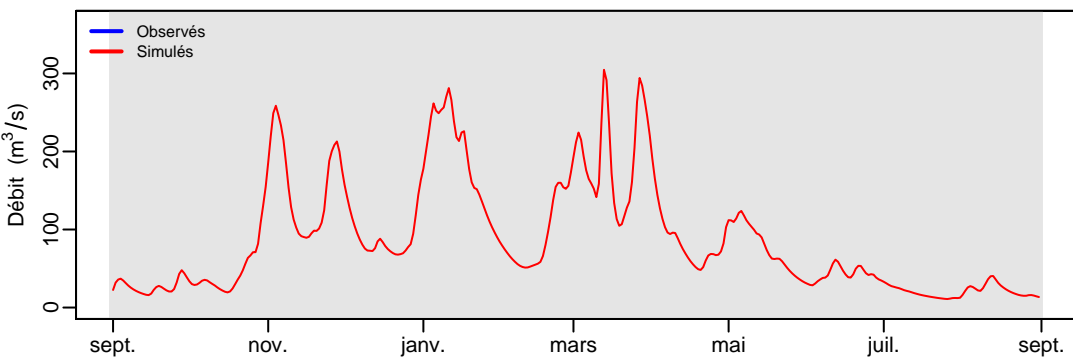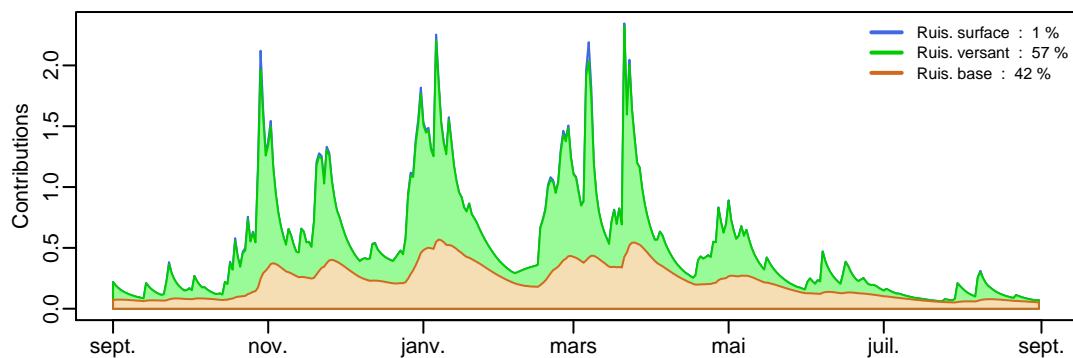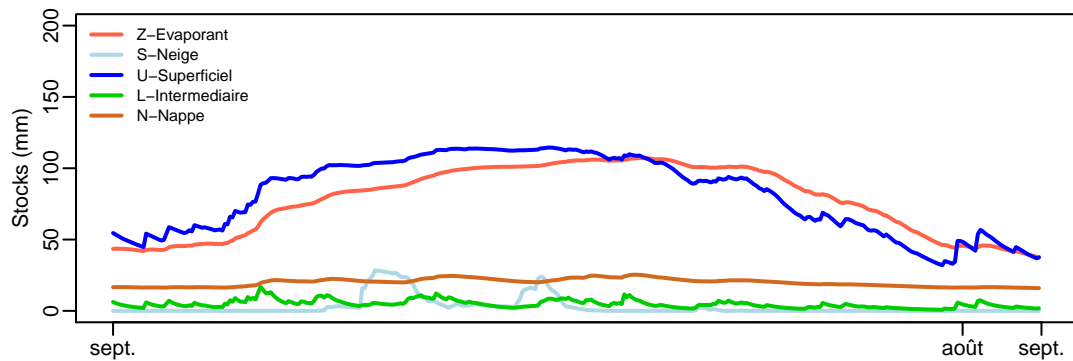

# k3650810 (14349.71 km²) – année 1991–1992

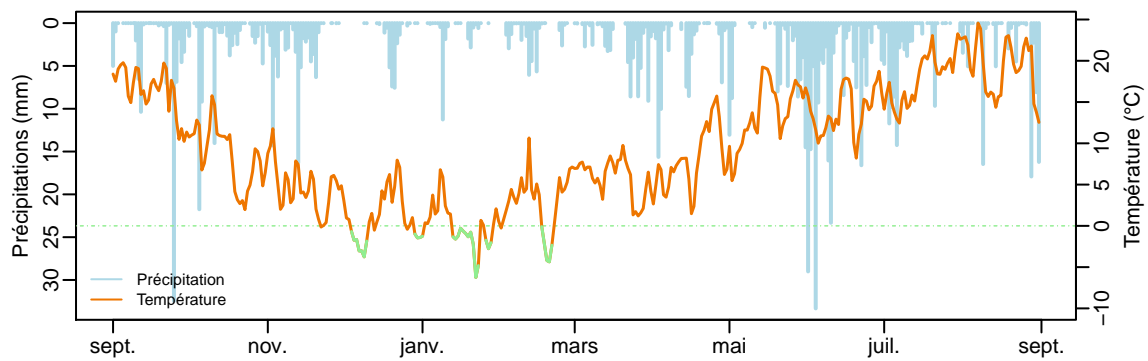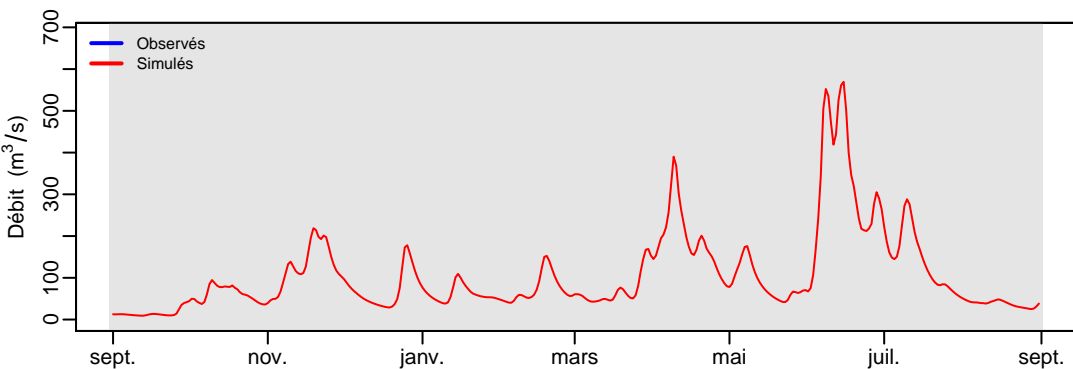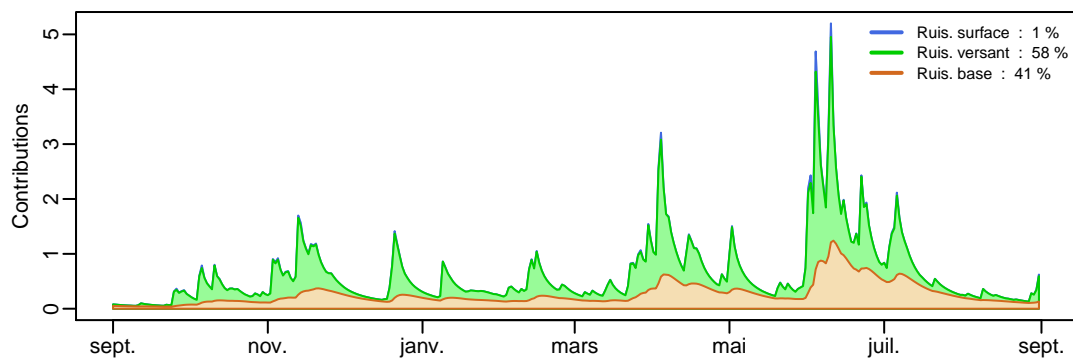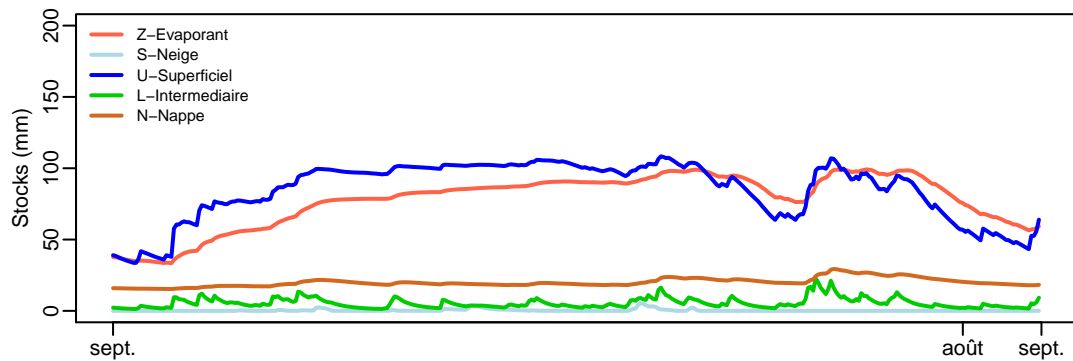

# k3650810 (14349.71 km<sup>2</sup>) – année 1992–1993

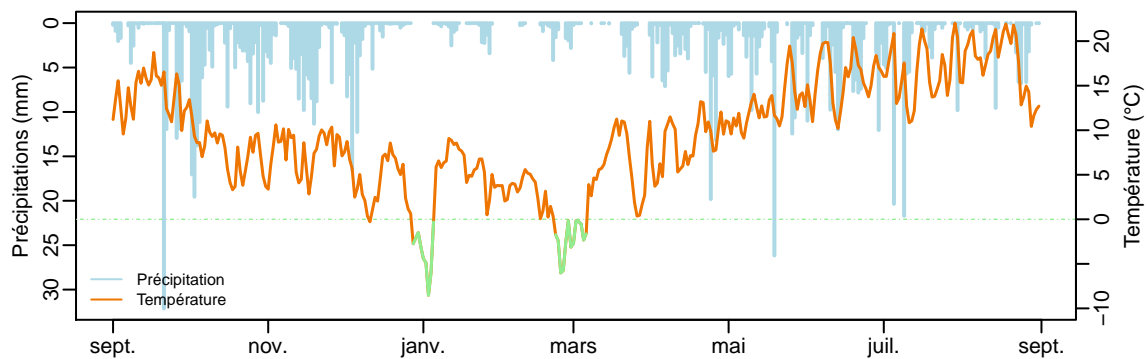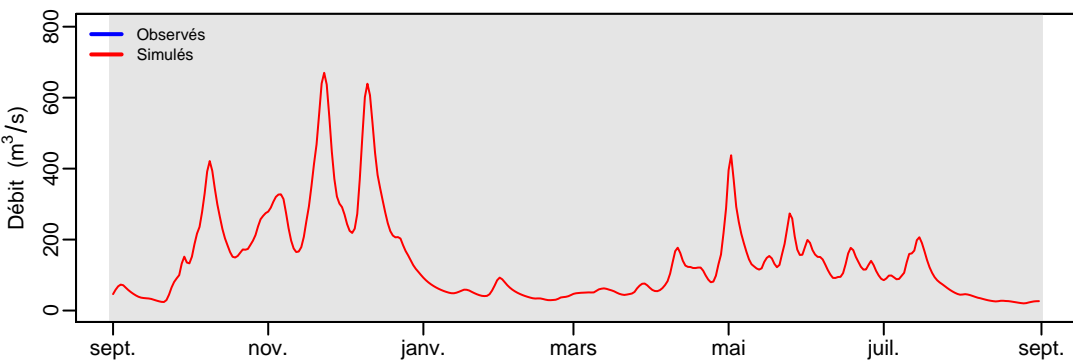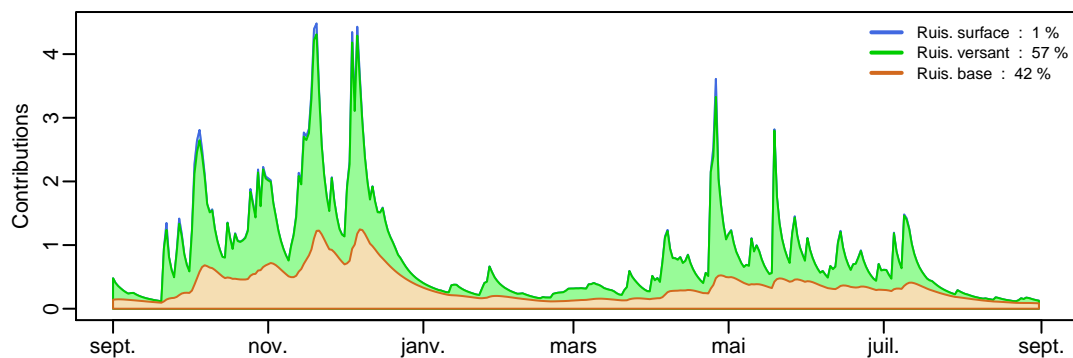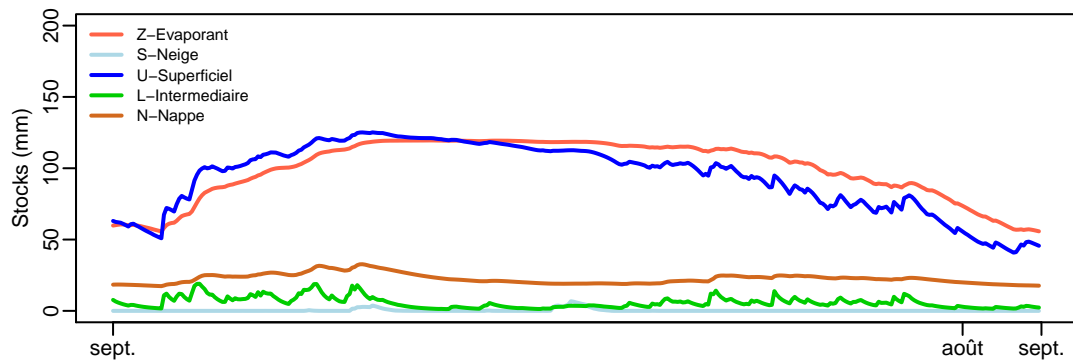

# k3650810 (14349.71 km<sup>2</sup>) – année 1993–1994

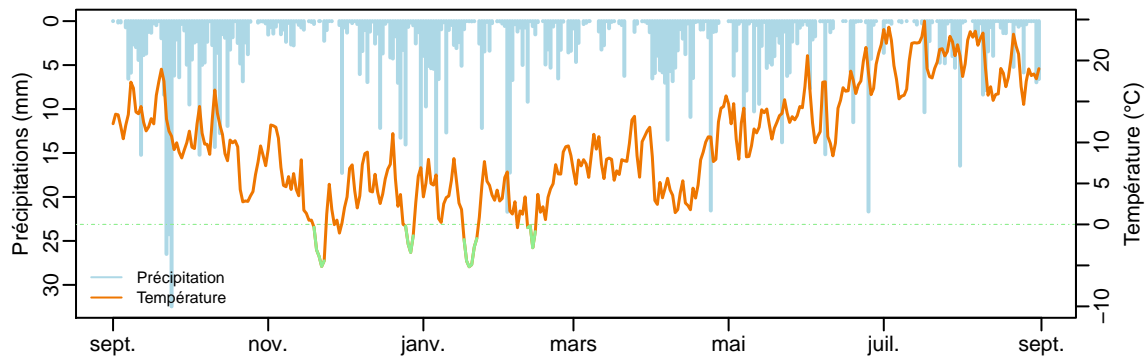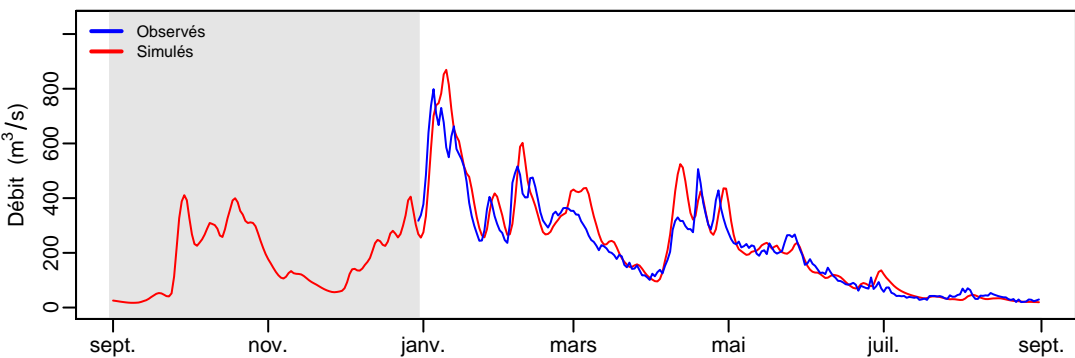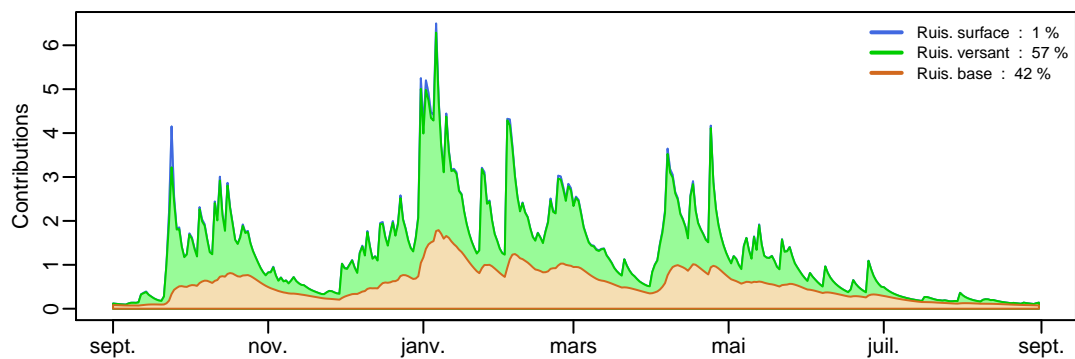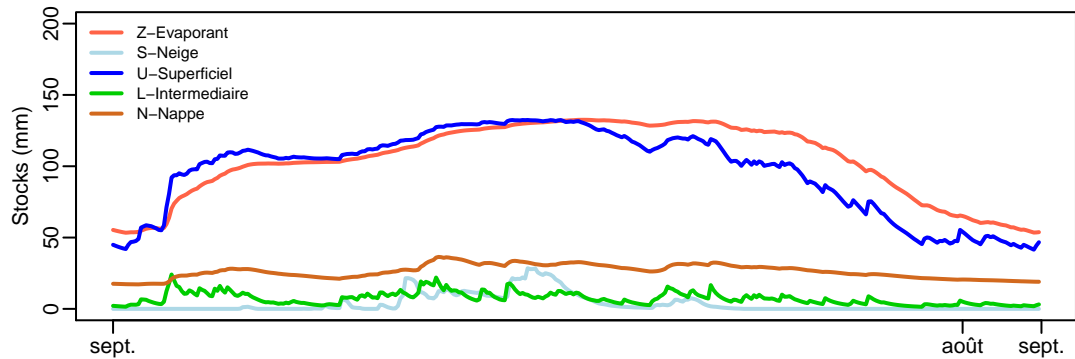

# k3650810 (14349.71 km<sup>2</sup>) – année 1994–1995

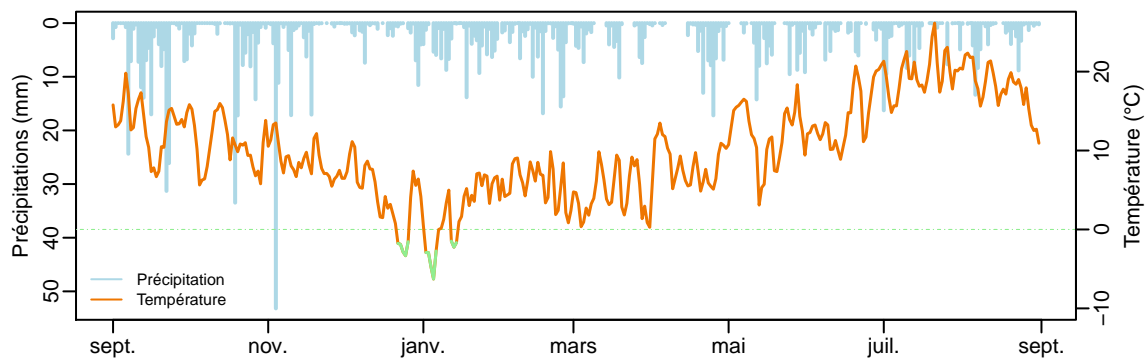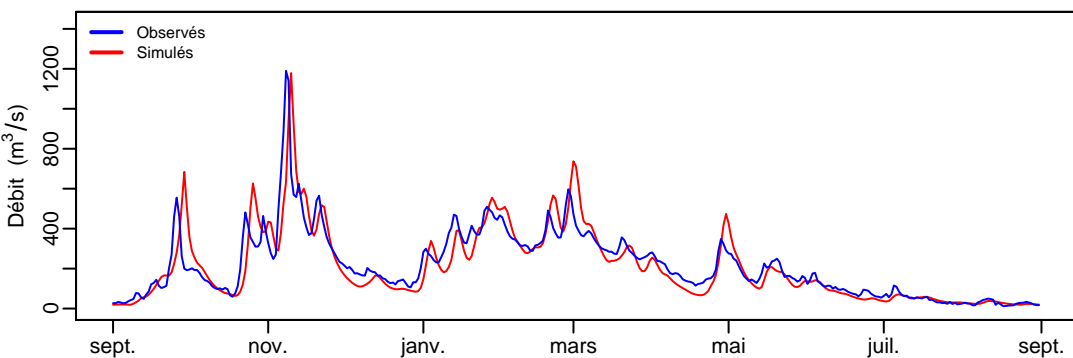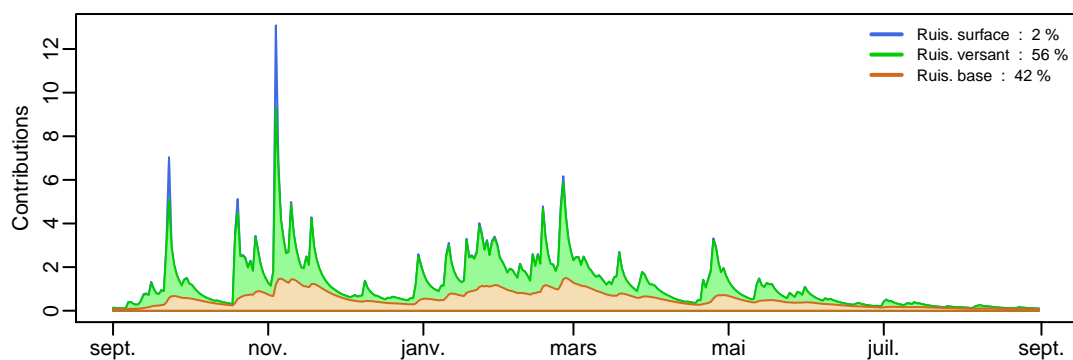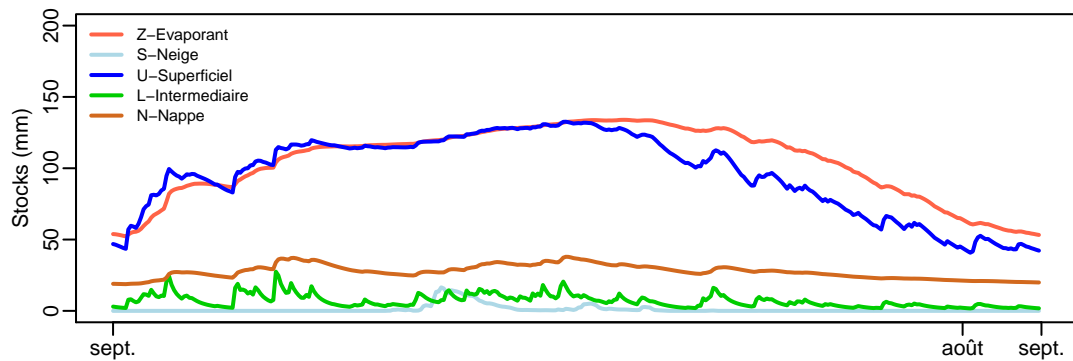

# k3650810 (14349.71 km<sup>2</sup>) – année 1995–1996

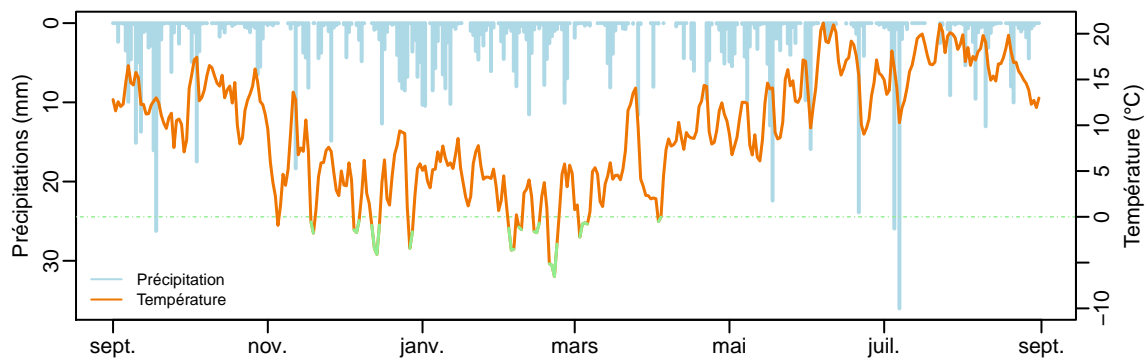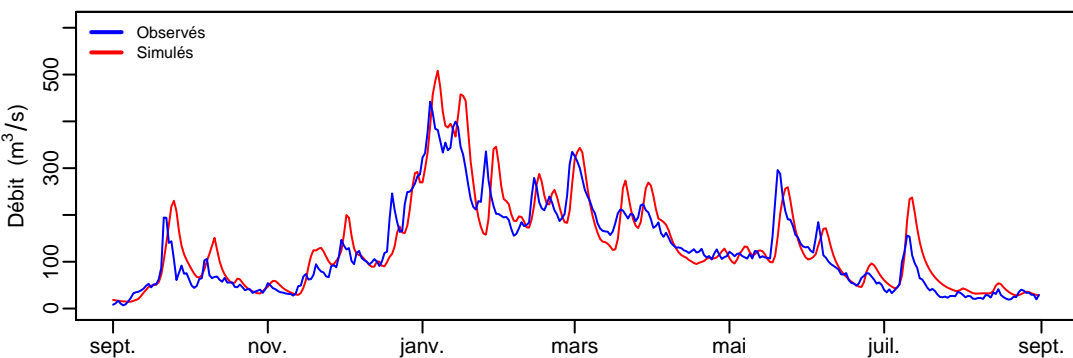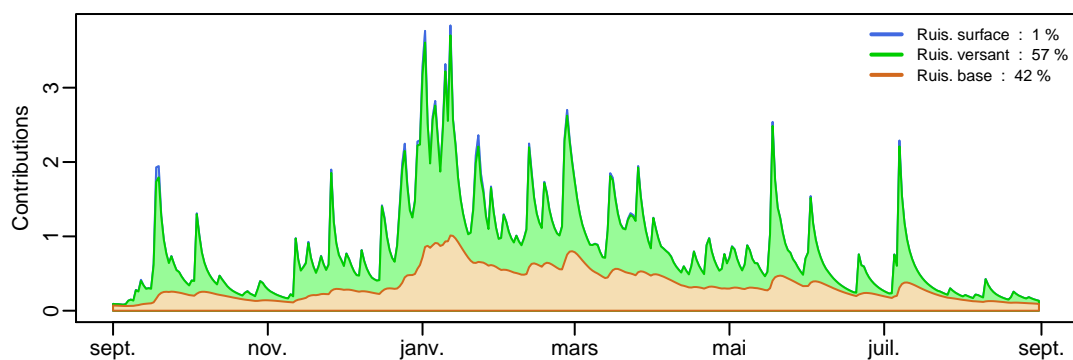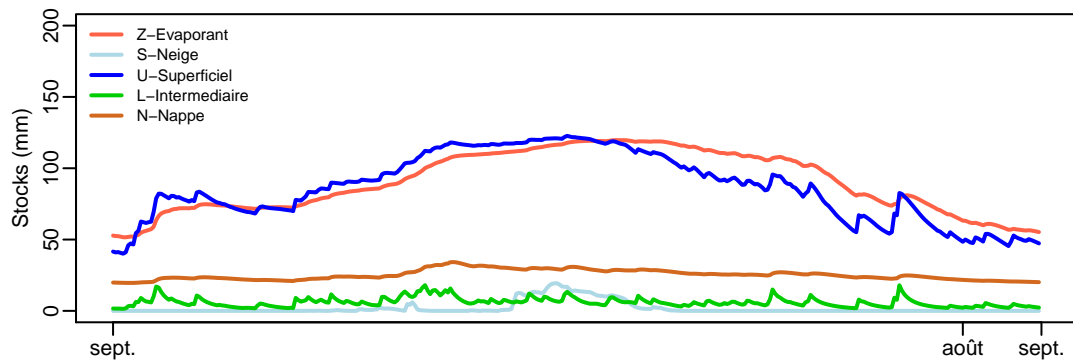



# k3650810 (14349.71 km<sup>2</sup>) – année 1996–1997

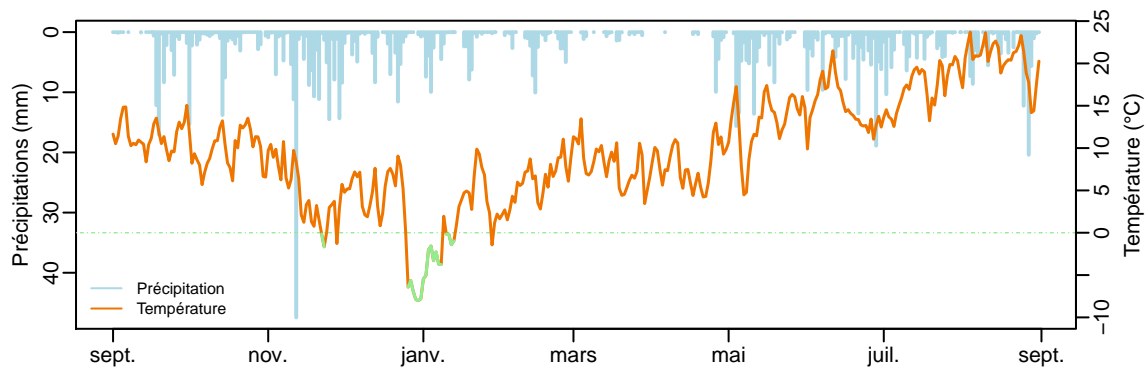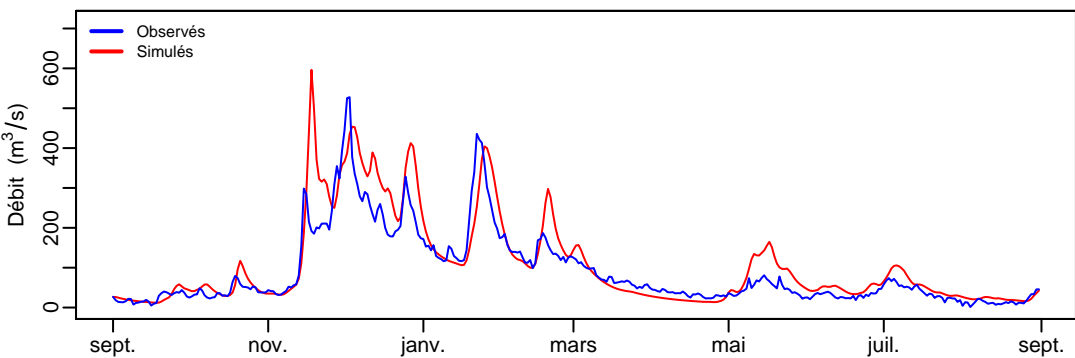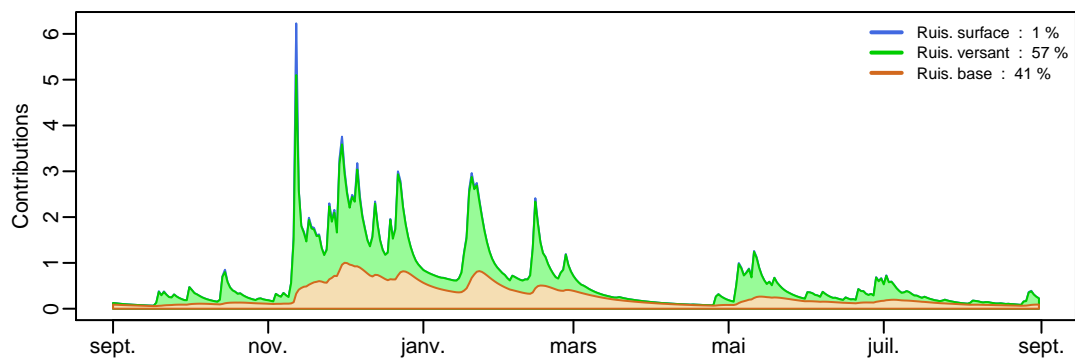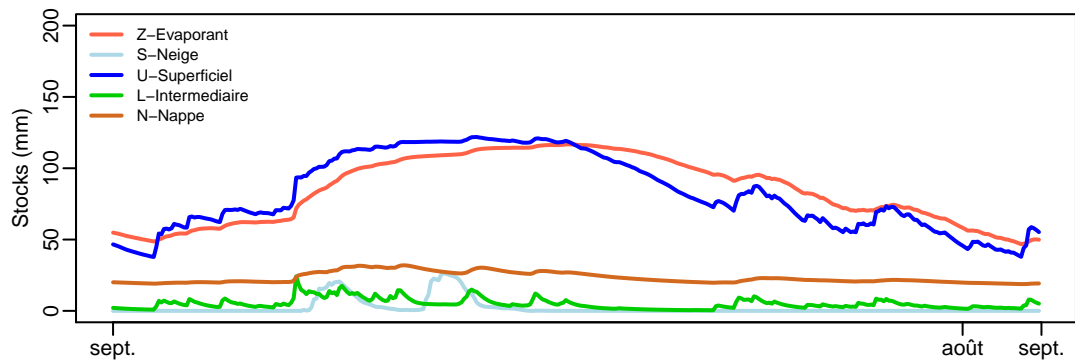

# k3650810 (14349.71 km<sup>2</sup>) – année 1997–1998

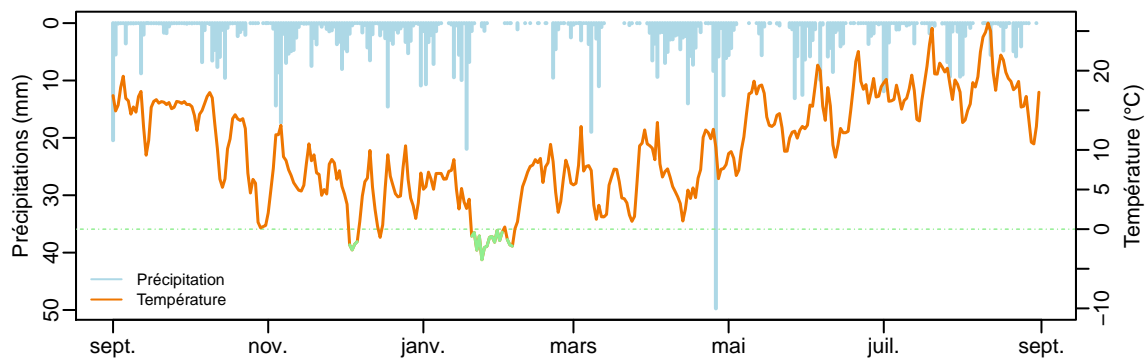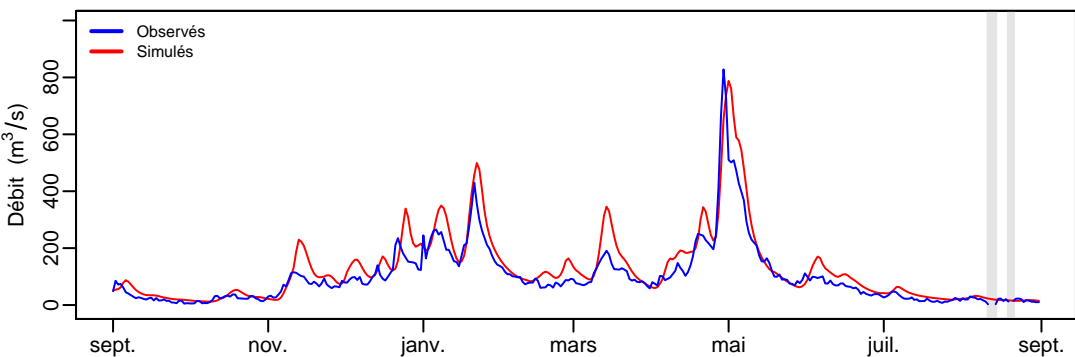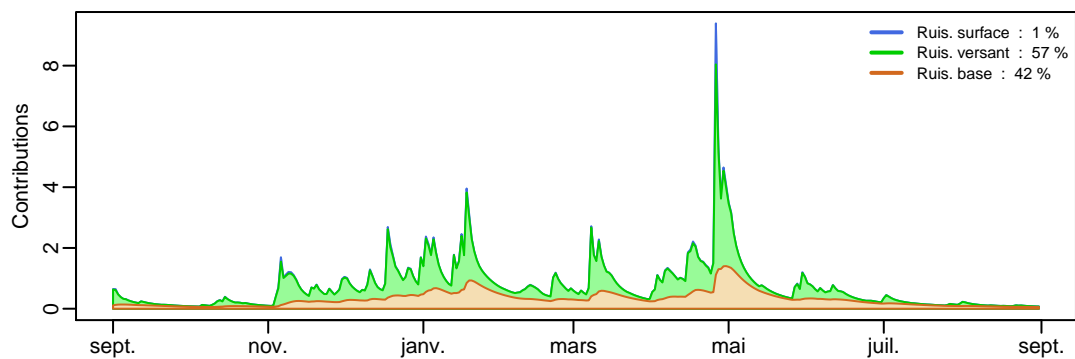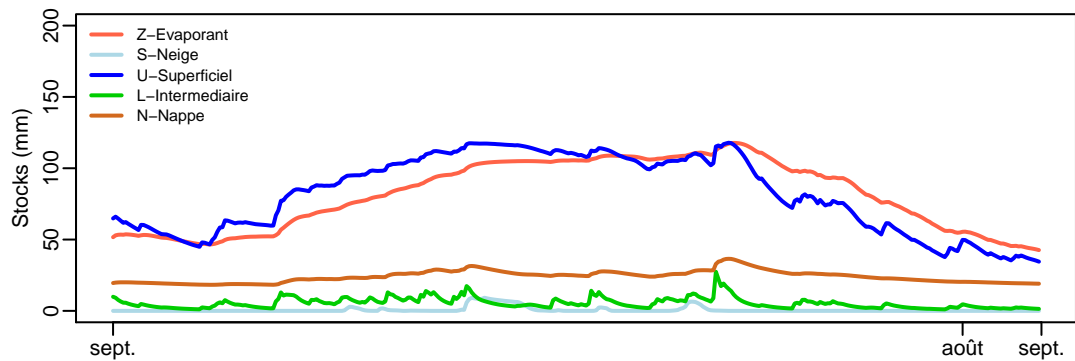

# k3650810 (14349.71 km<sup>2</sup>) – année 1998–1999

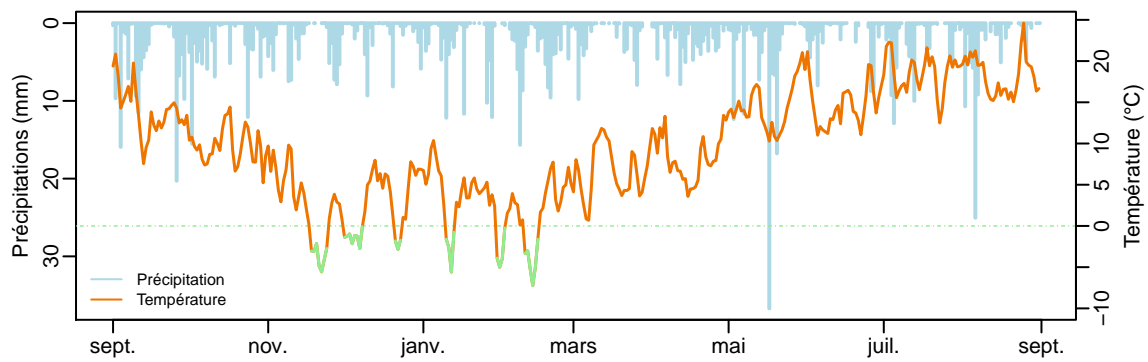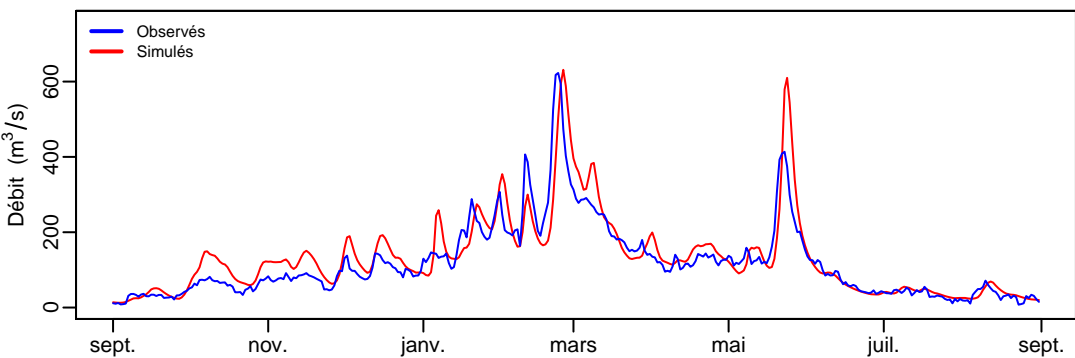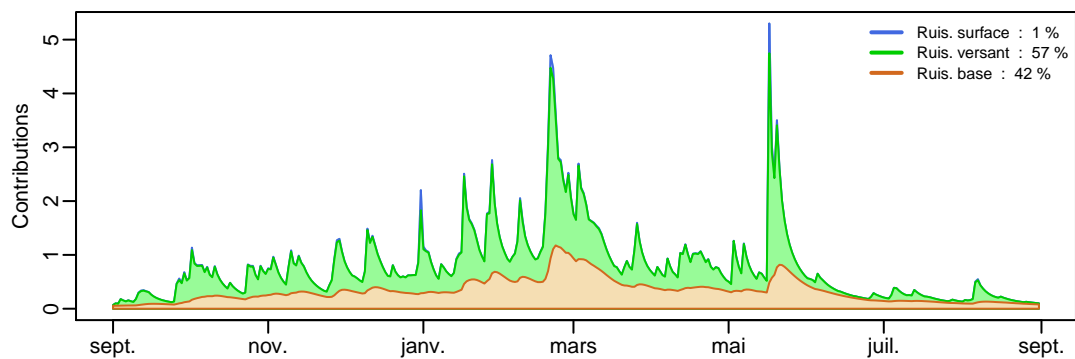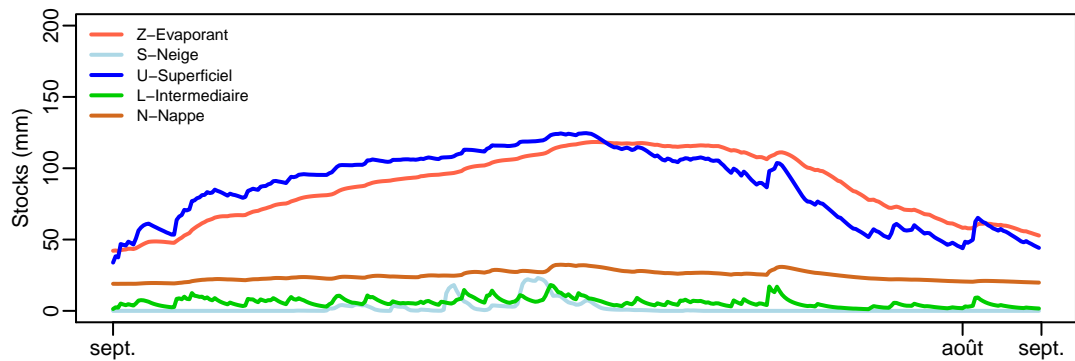

# k3650810 (14349.71 km<sup>2</sup>) – année 1999–2000

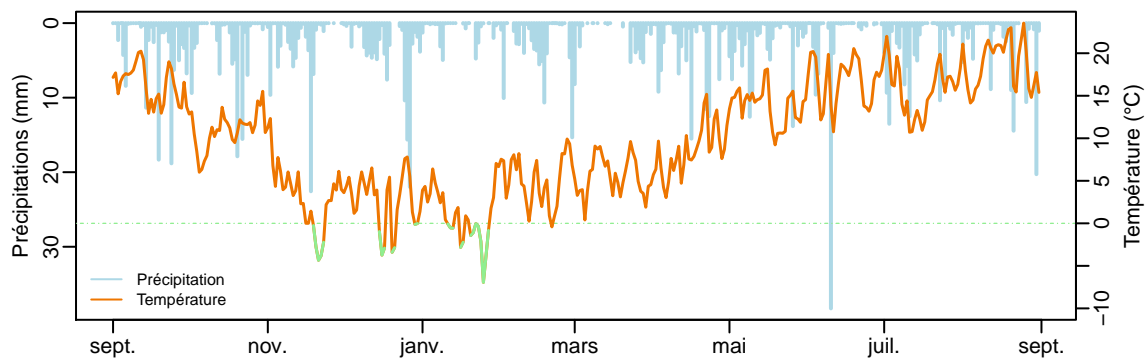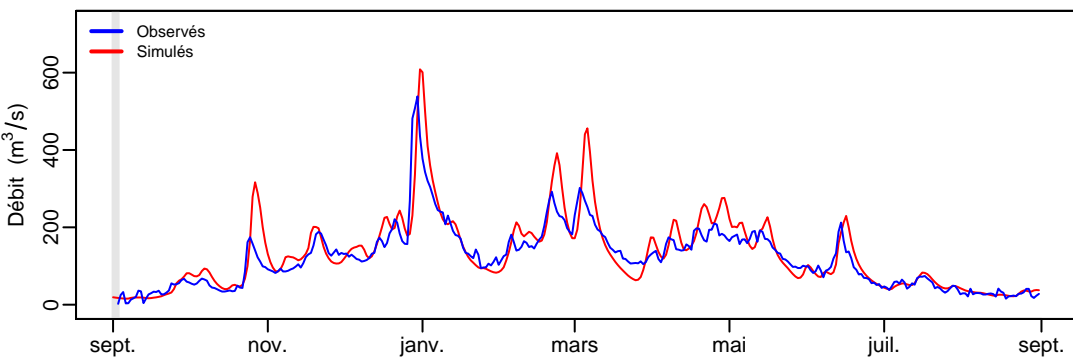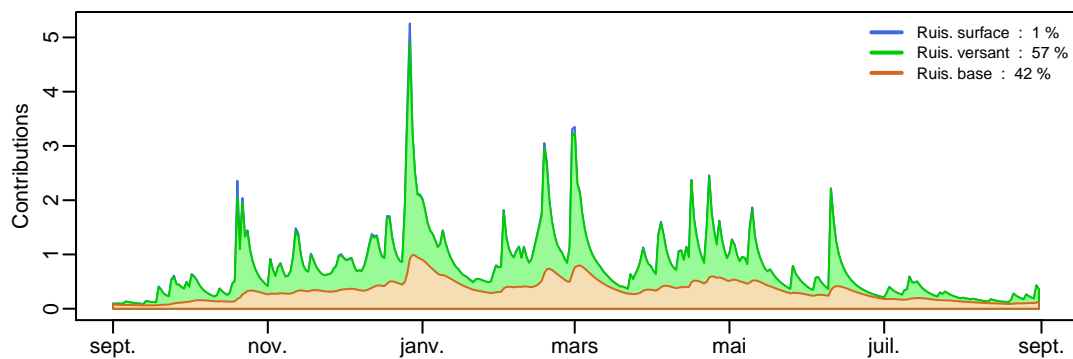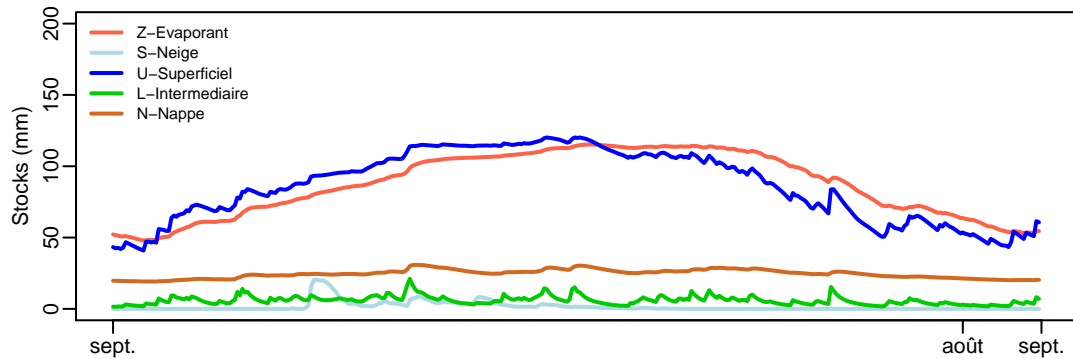

# k3650810 (14349.71 km<sup>2</sup>) – année 2000–2001

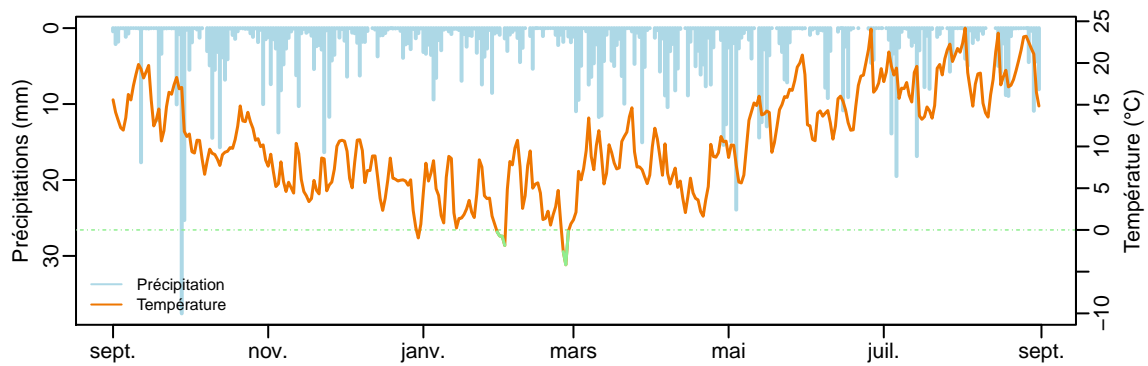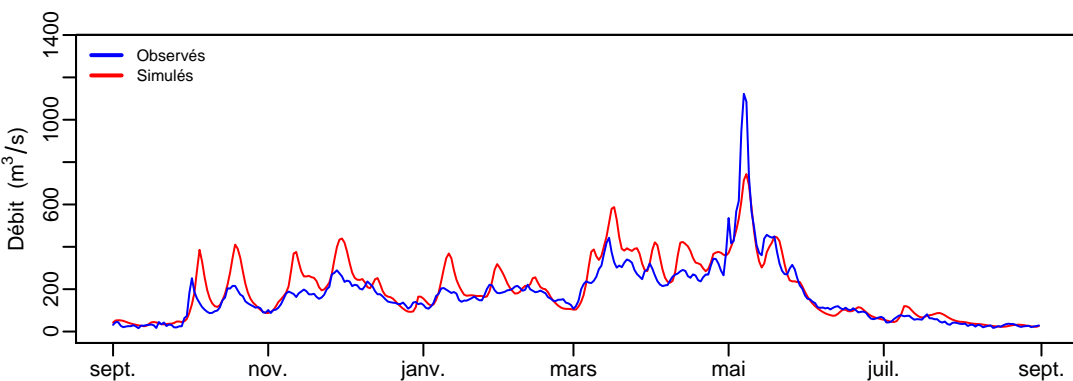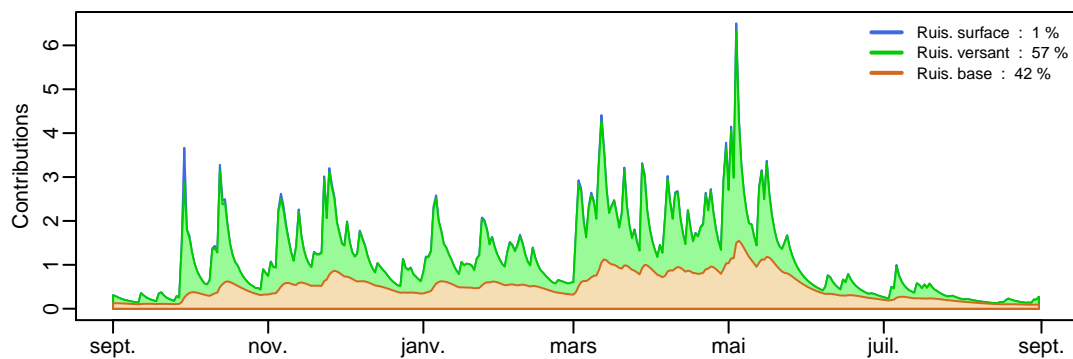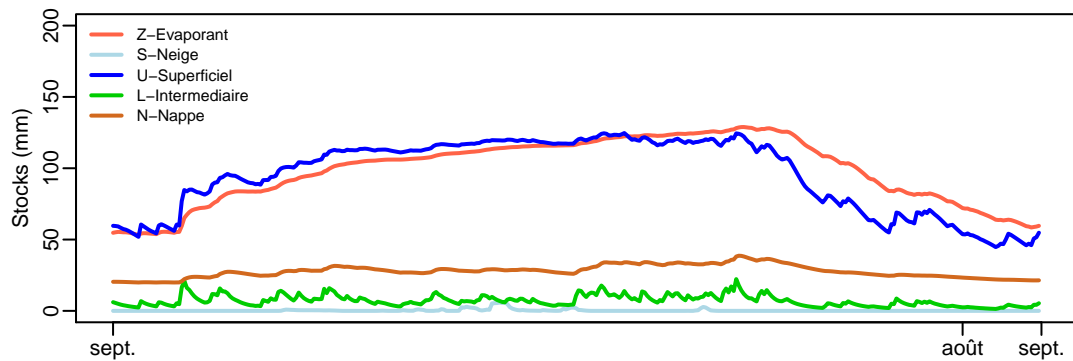

# k3650810 (14349.71 km<sup>2</sup>) – année 2001–2002

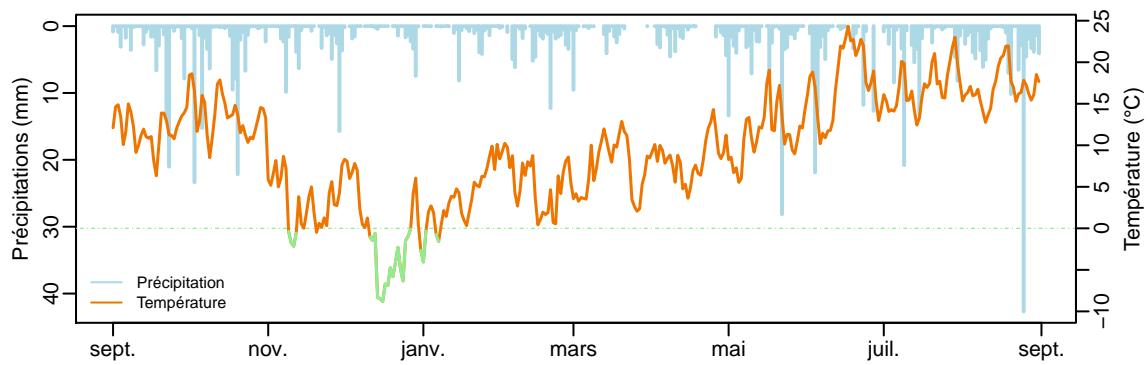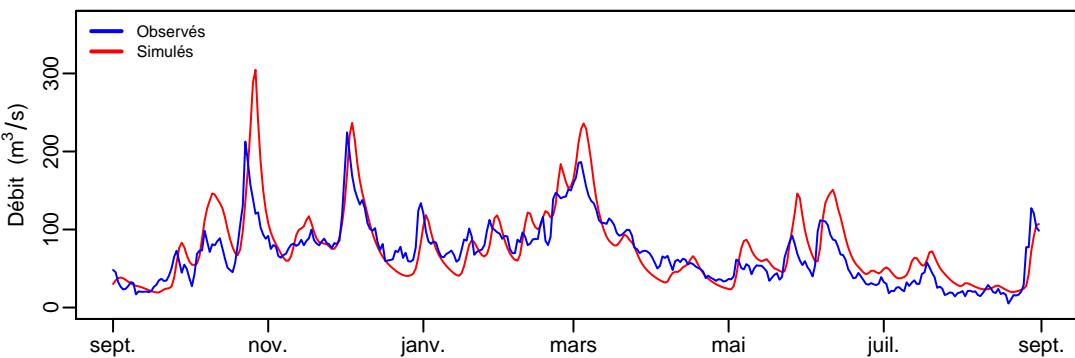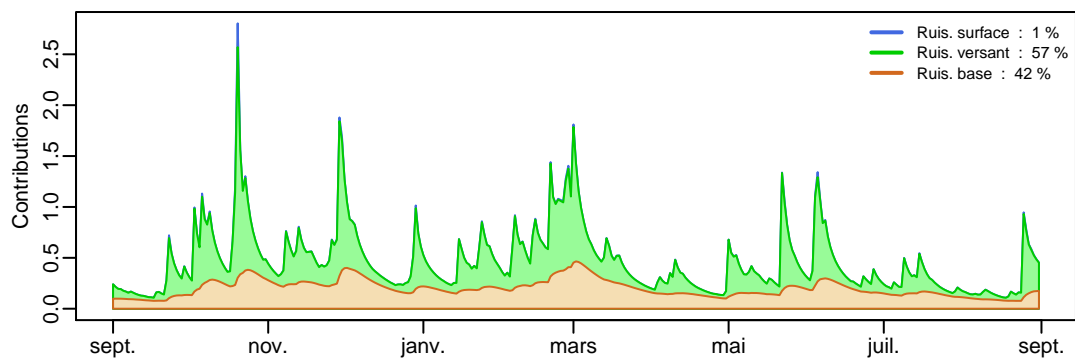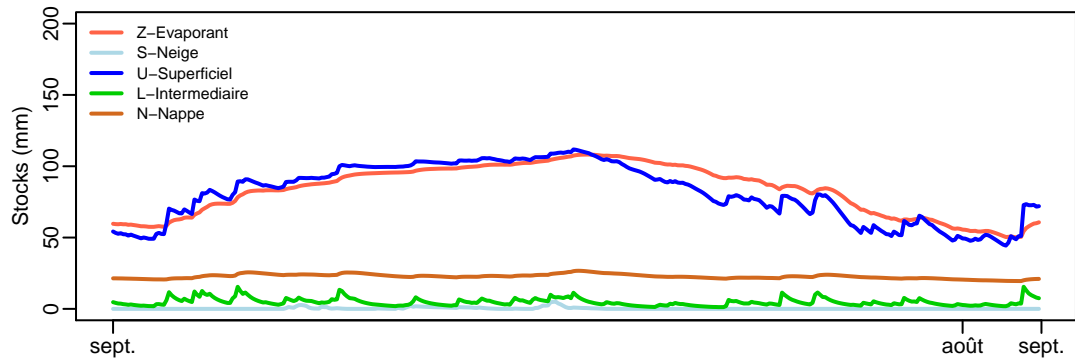

# k3650810 (14349.71 km<sup>2</sup>) – année 2002–2003

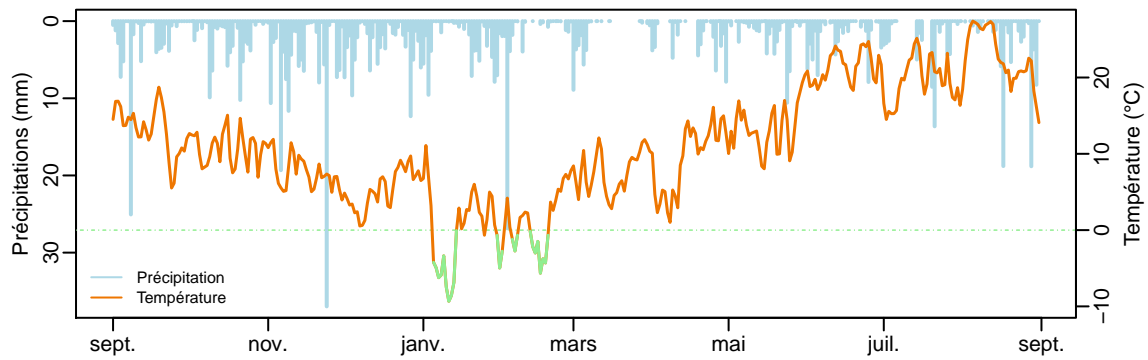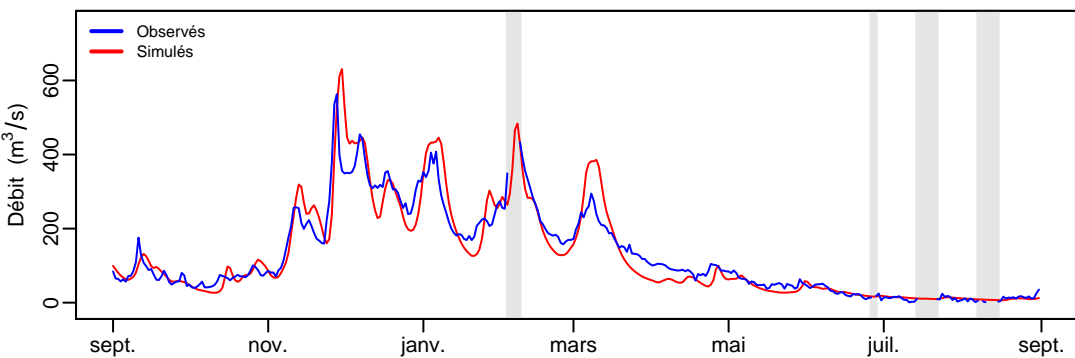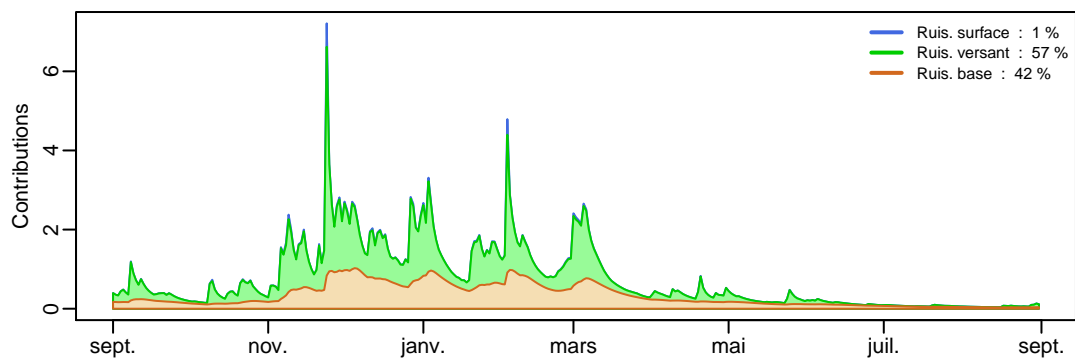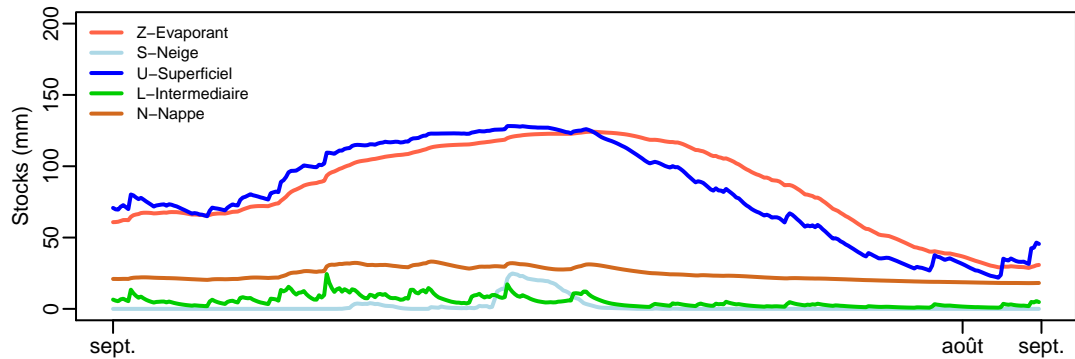

# k3650810 (14349.71 km<sup>2</sup>) – année 2003–2004

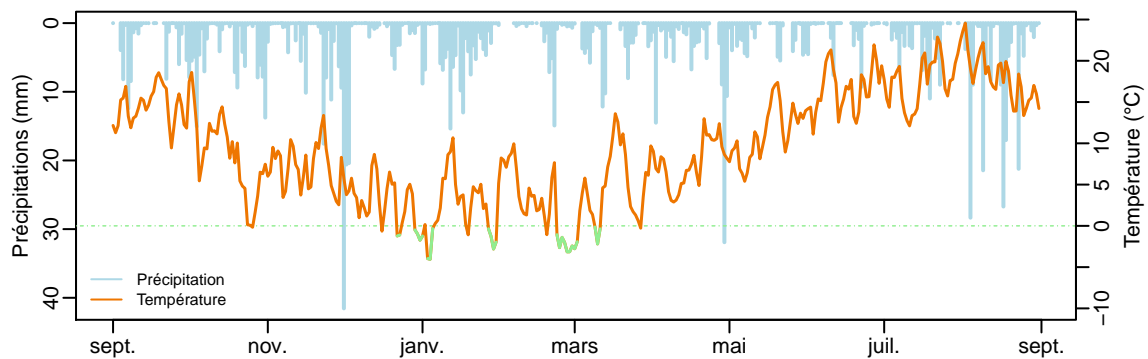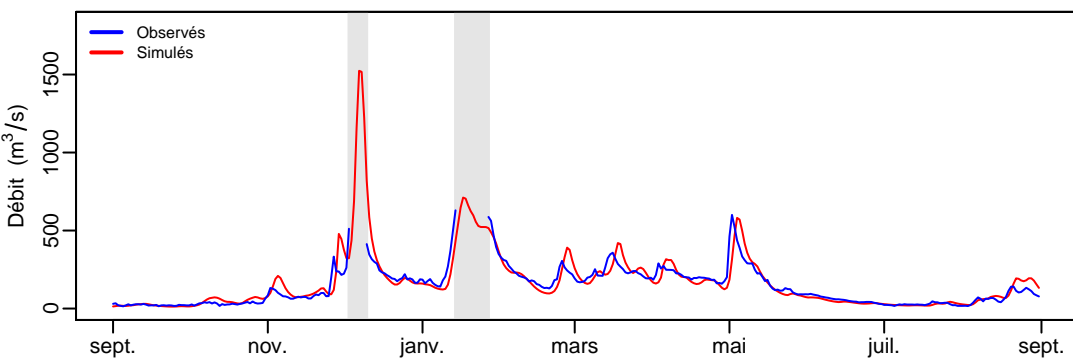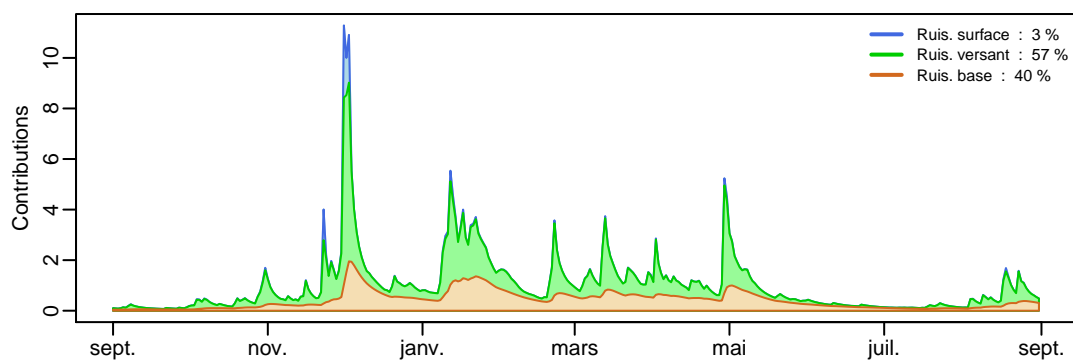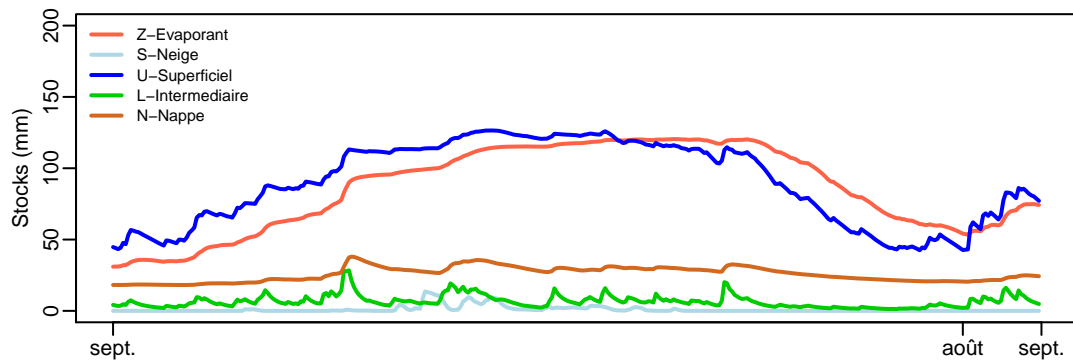



# k3650810 (14349.71 km<sup>2</sup>) – année 2004–2005

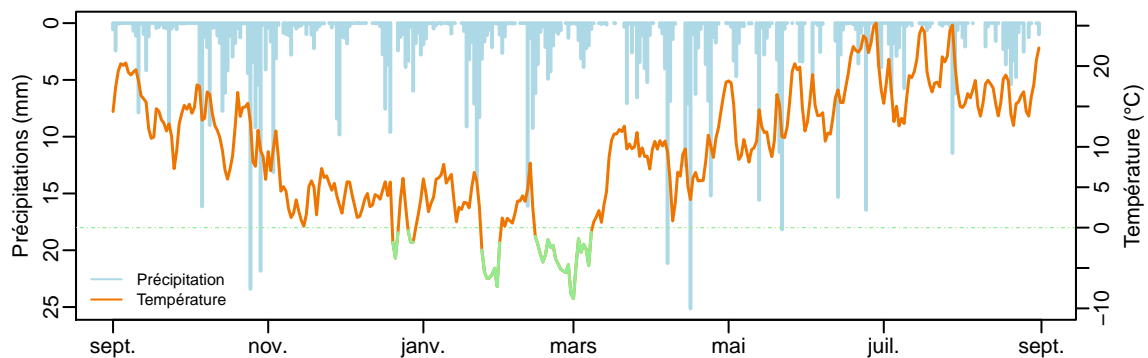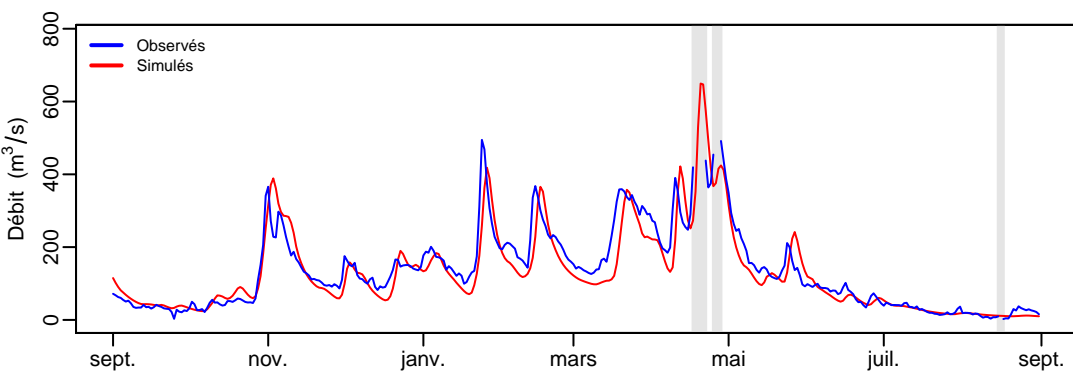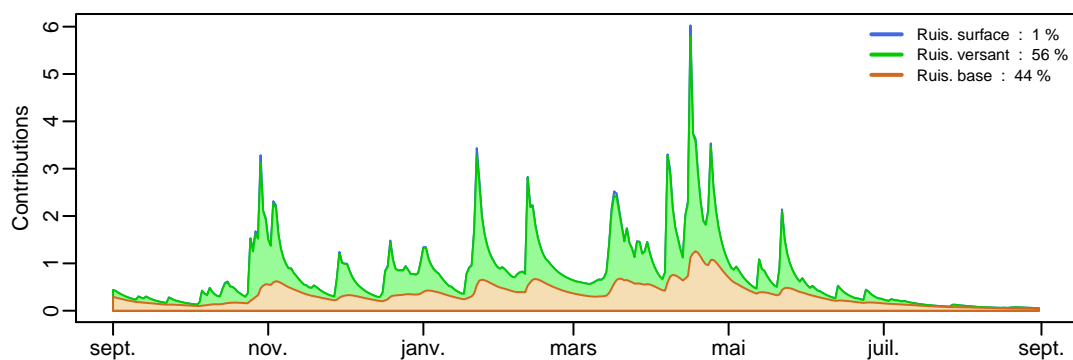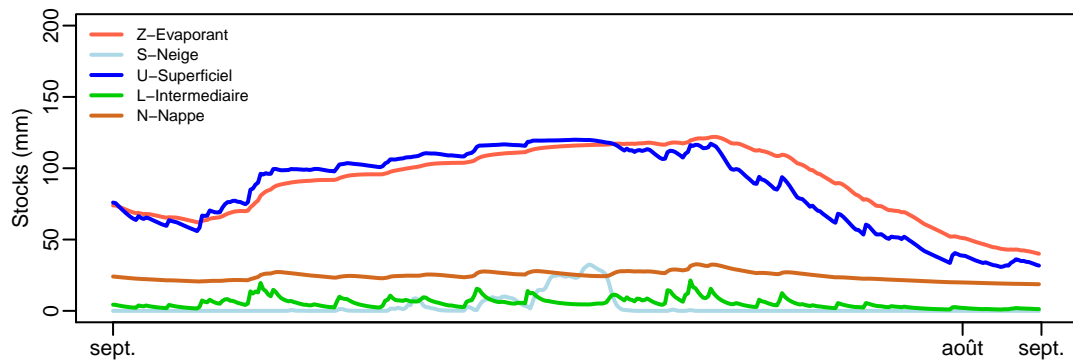

# k3650810 (14349.71 km²) – année 2005–2006

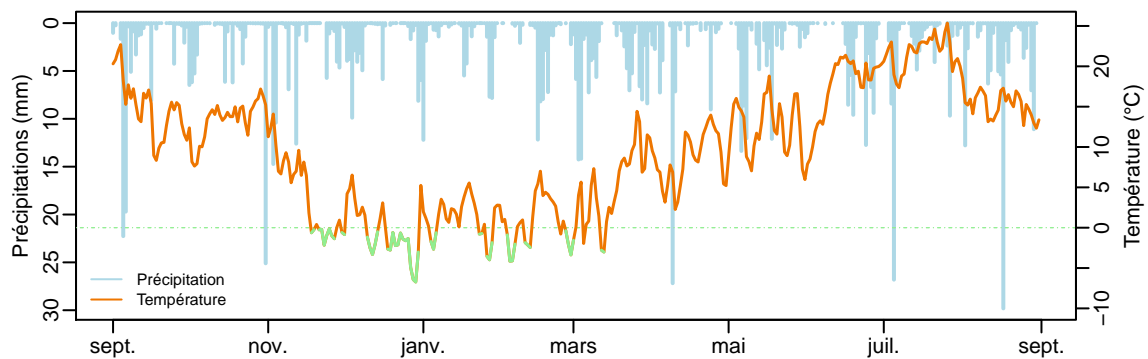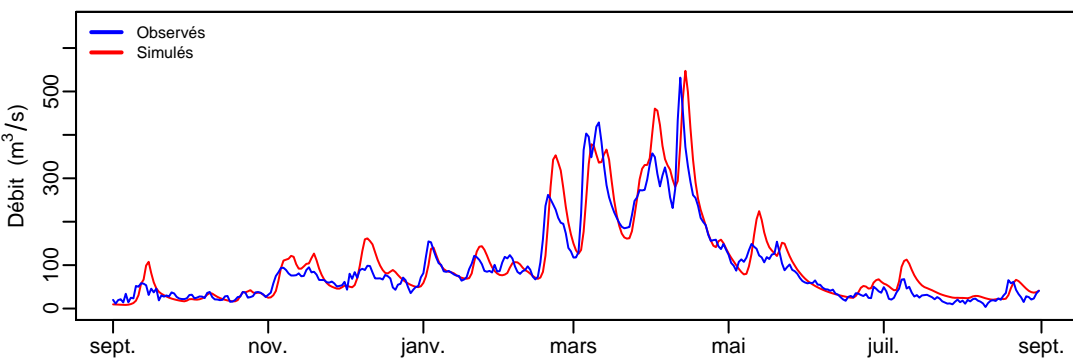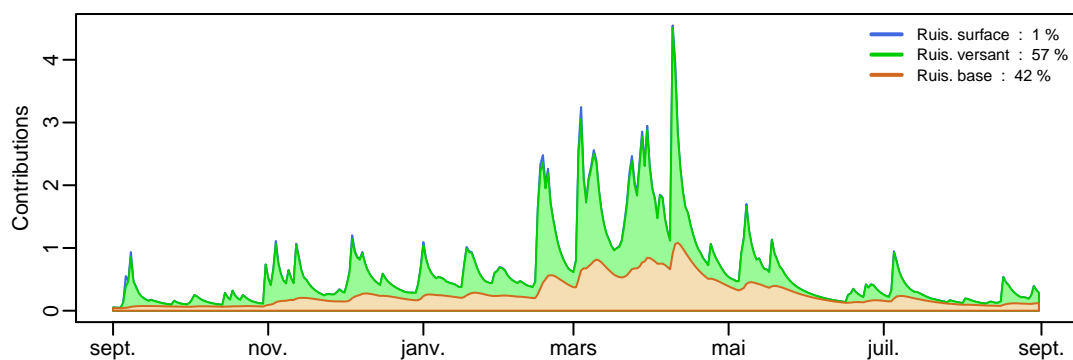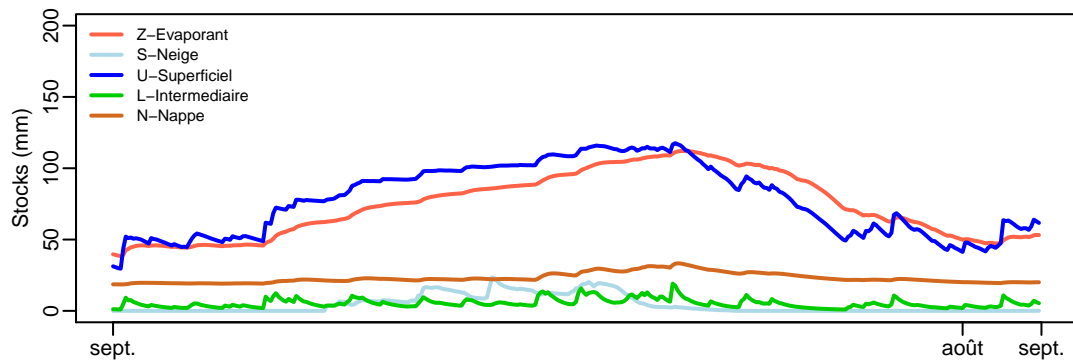

# k3650810 (14349.71 km<sup>2</sup>) – année 2006–2007

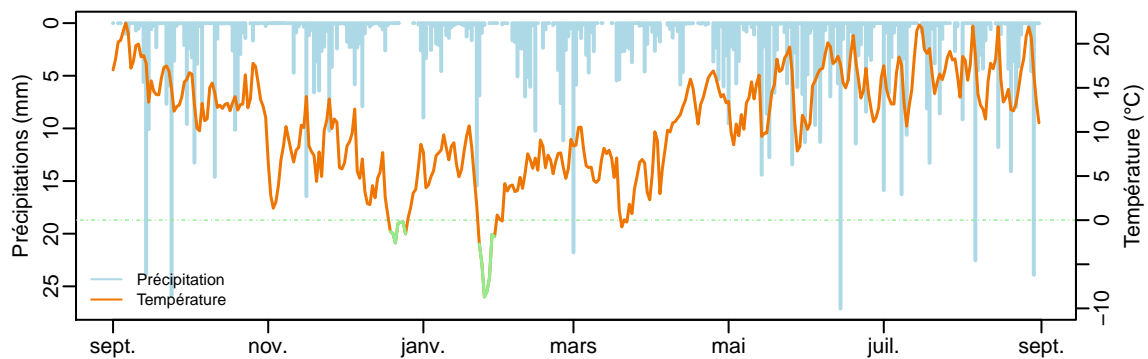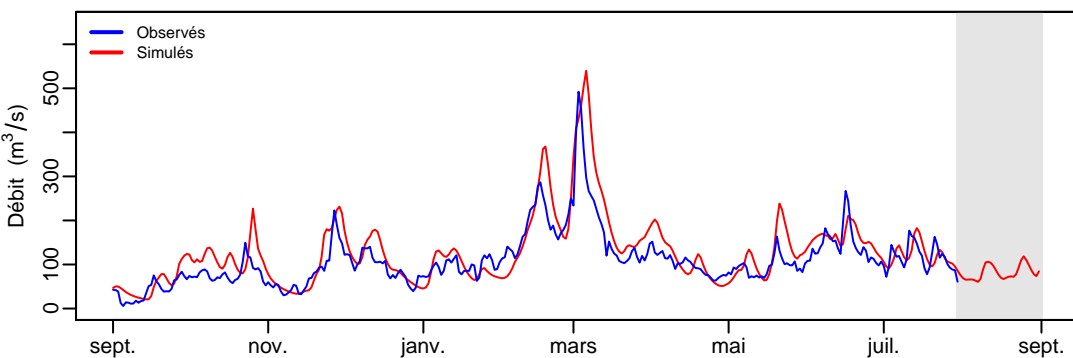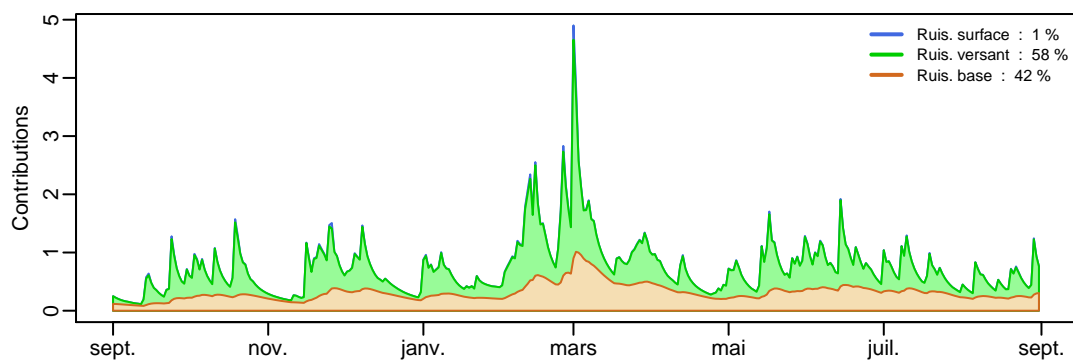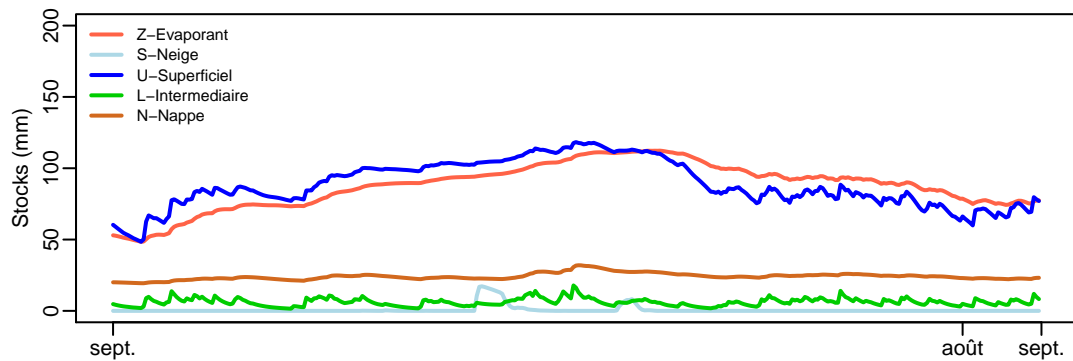

# k3650810 (14349.71 km<sup>2</sup>) – année 2007–2008

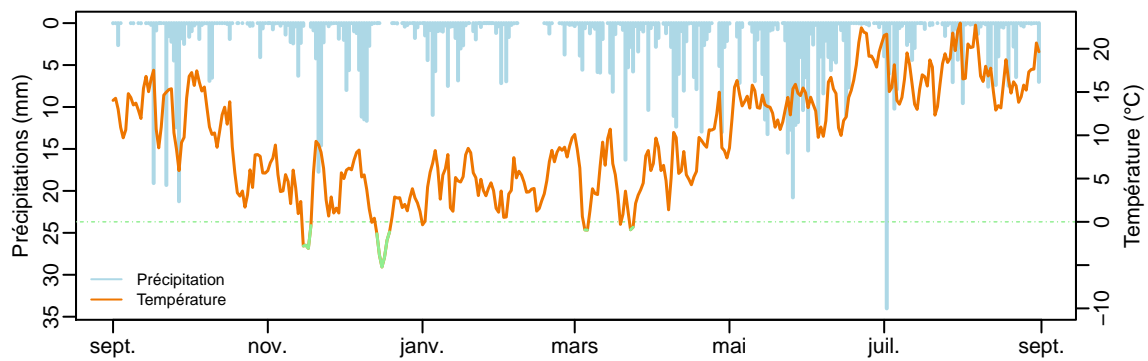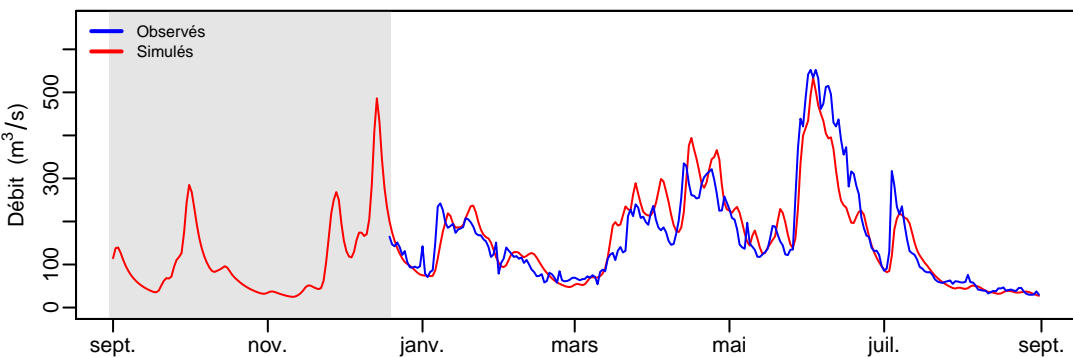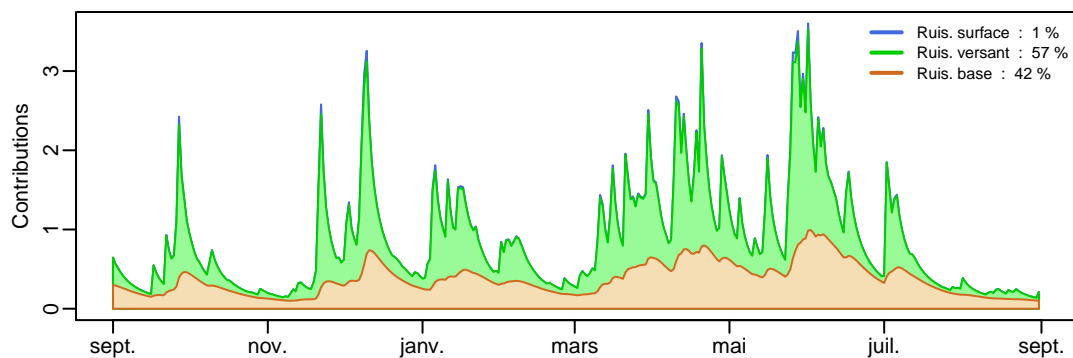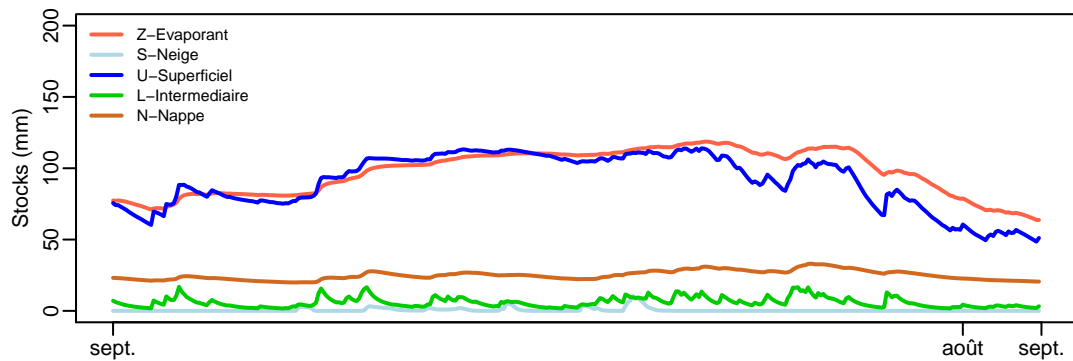

# k3650810 (14349.71 km<sup>2</sup>) – année 2008–2009

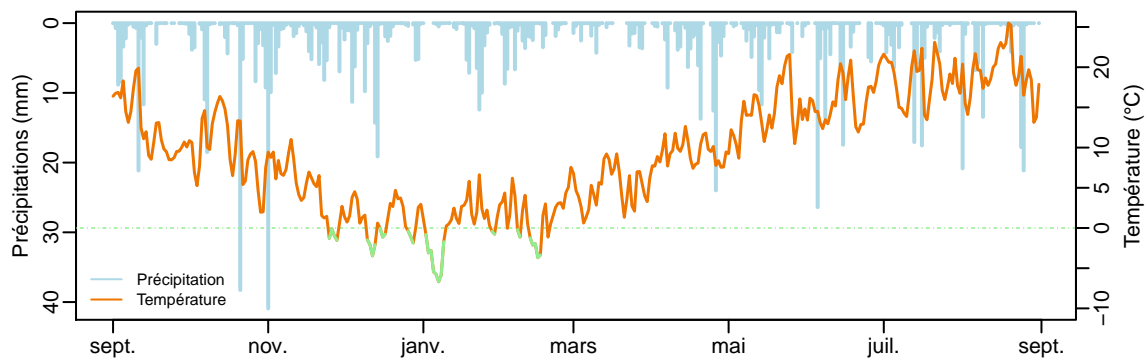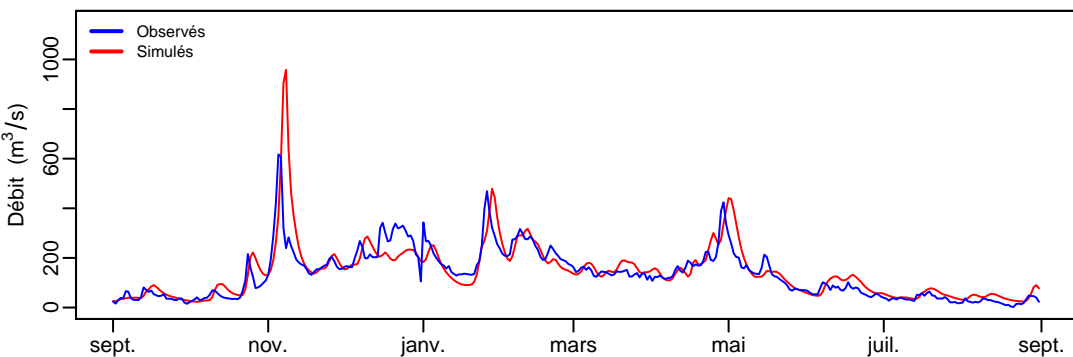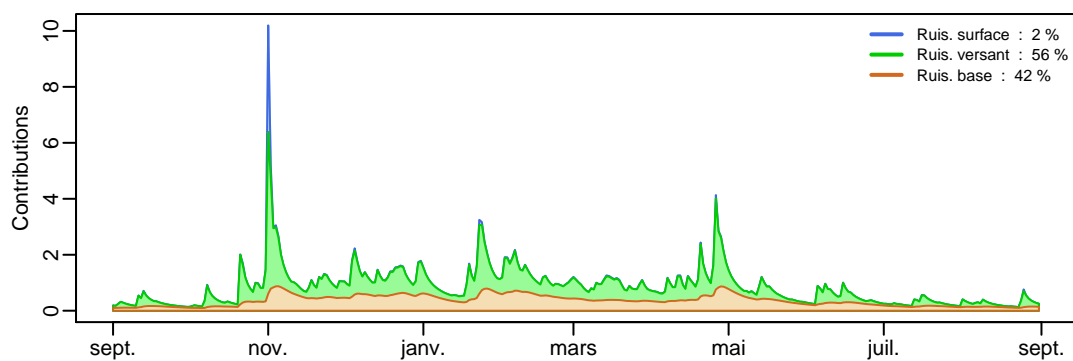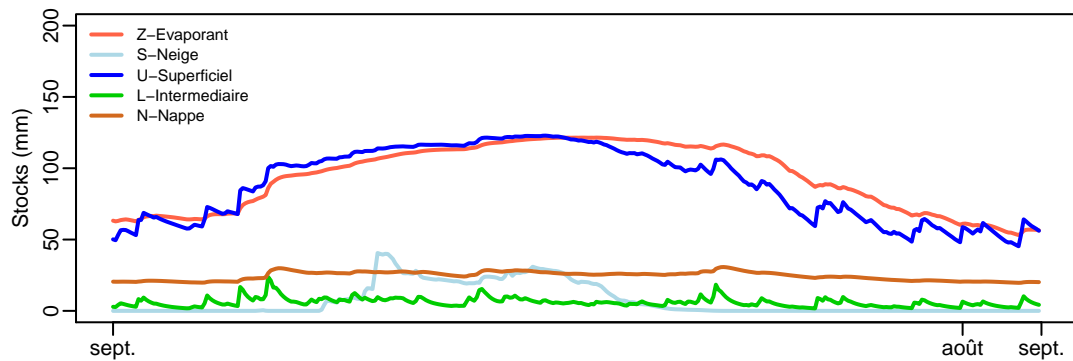

# k3650810 (14349.71 km<sup>2</sup>) – année 2009–2010

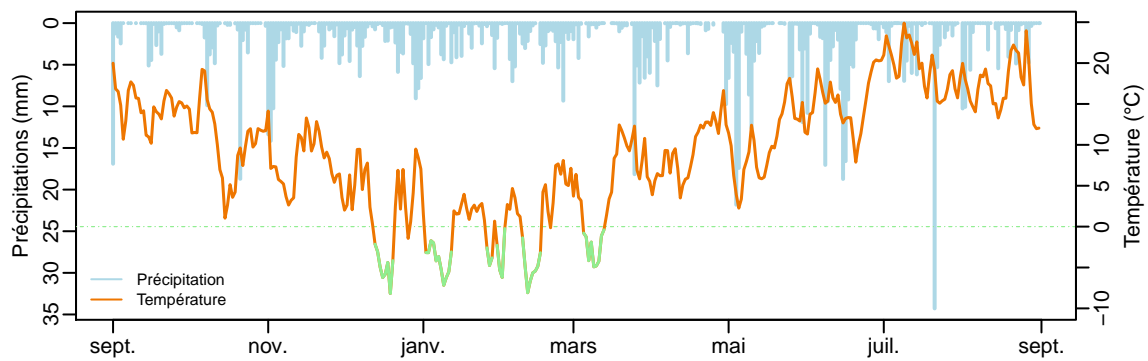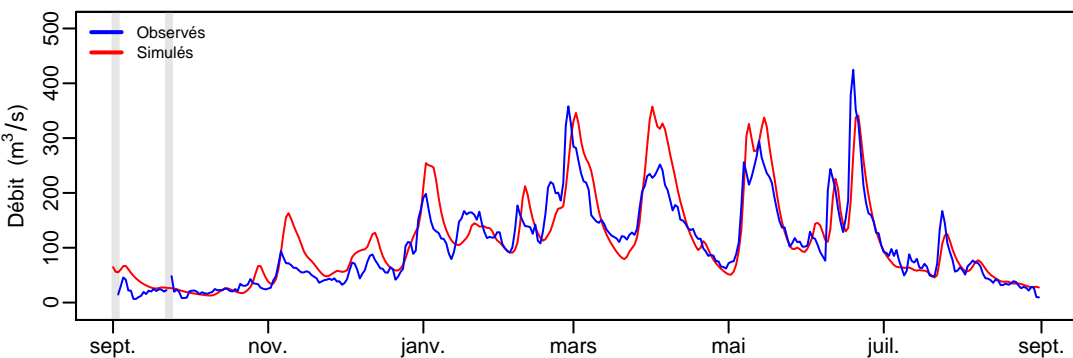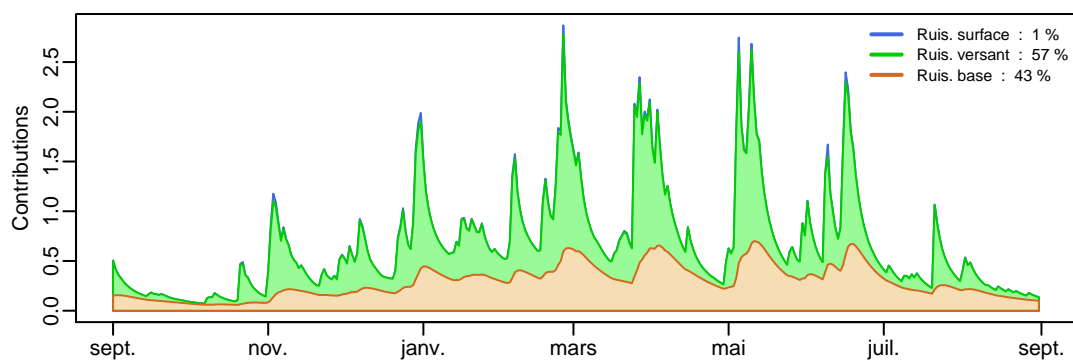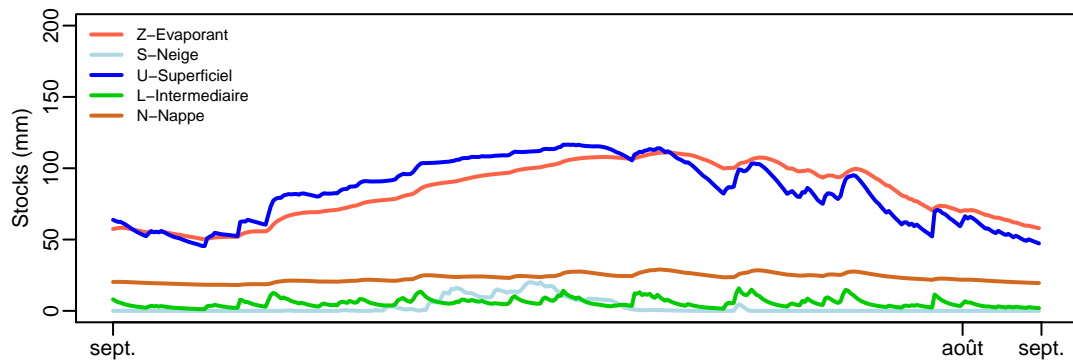

# k3650810 (14349.71 km<sup>2</sup>) – année 2010–2011

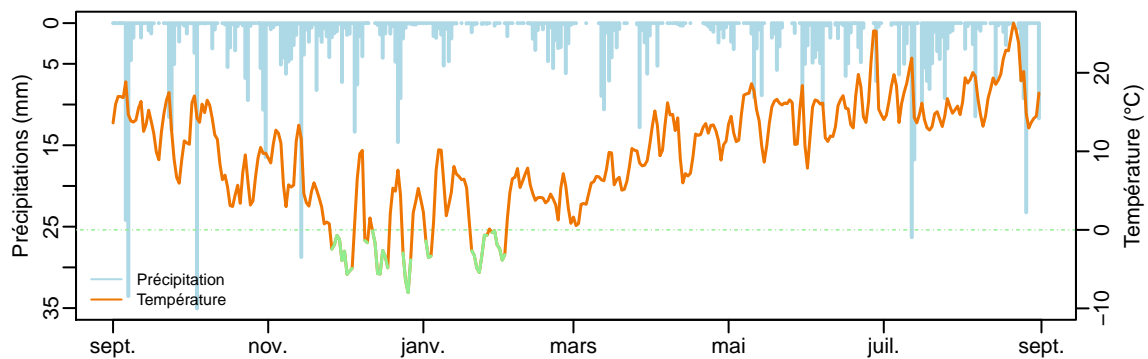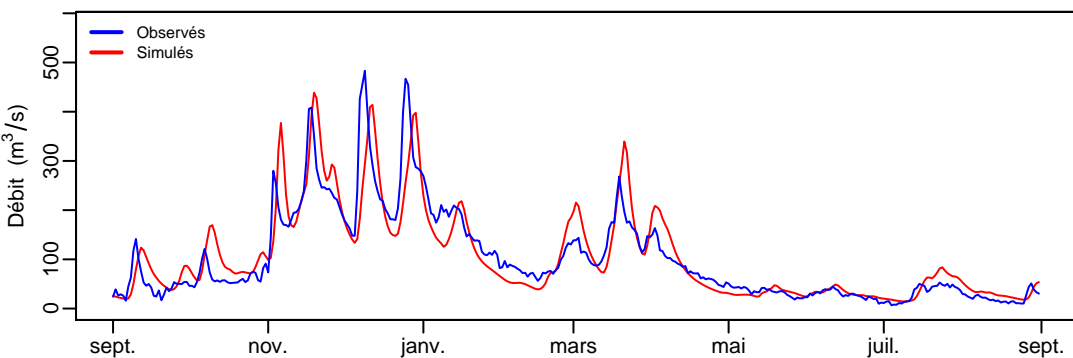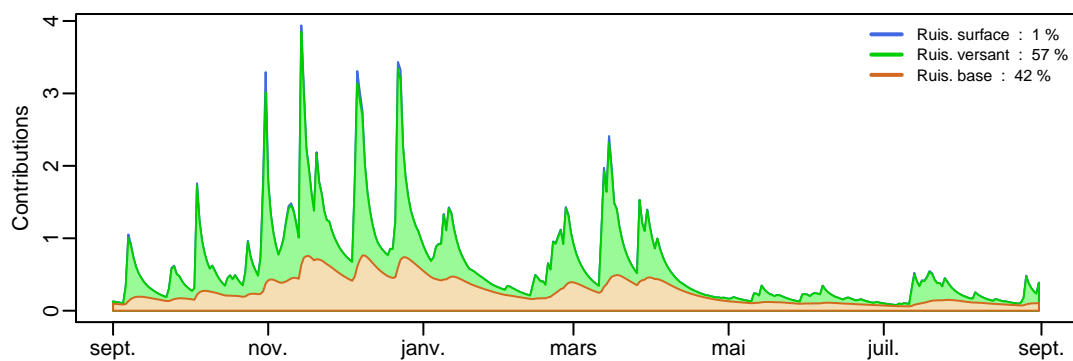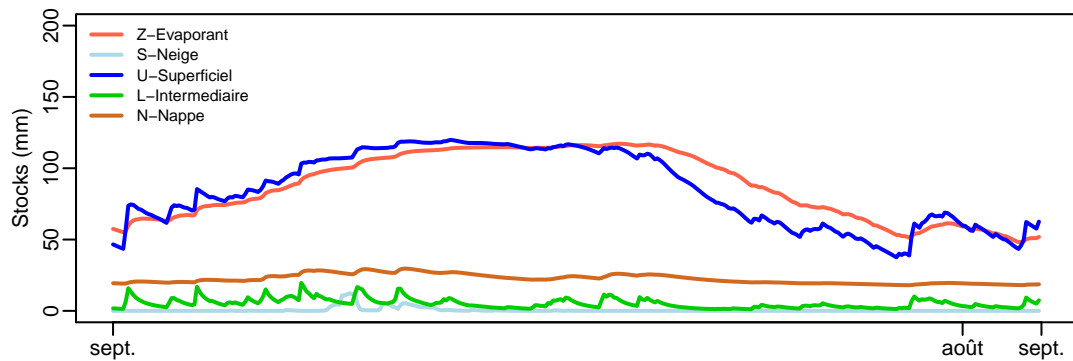

# k3650810 (14349.71 km<sup>2</sup>) – année 2011–2012

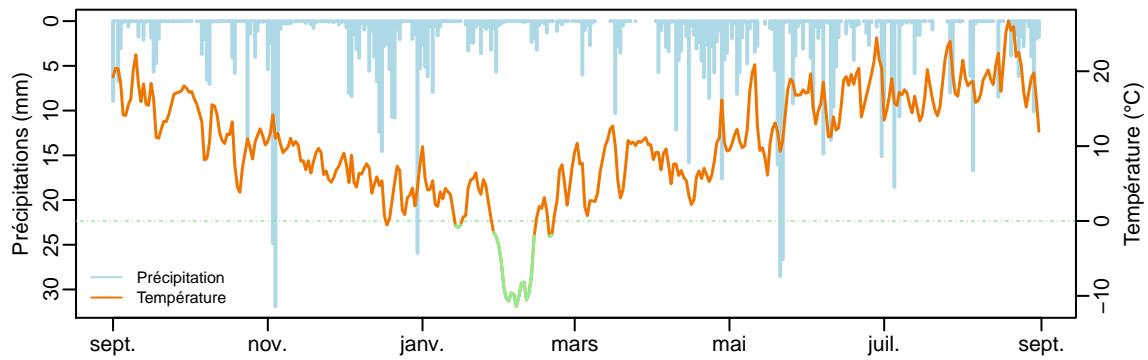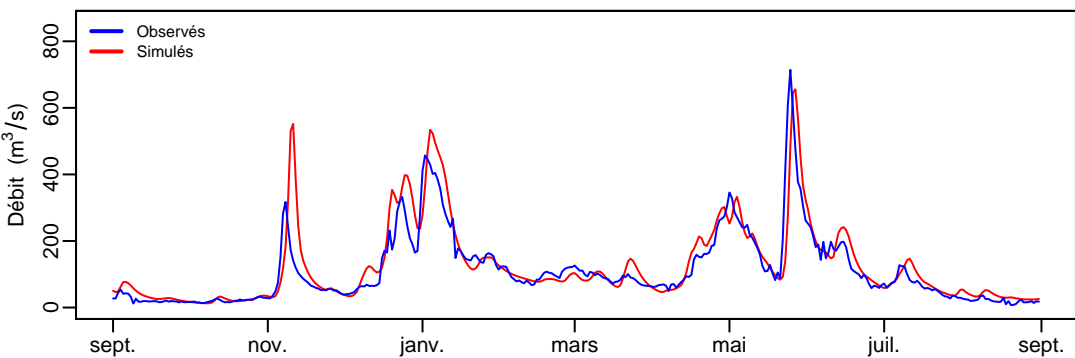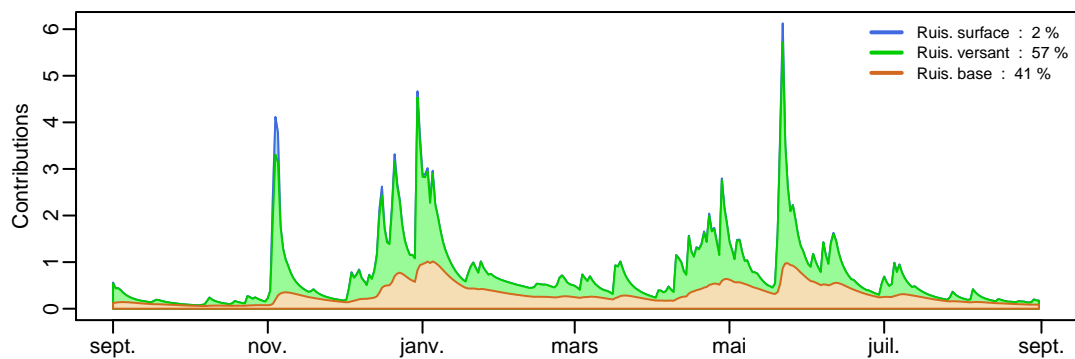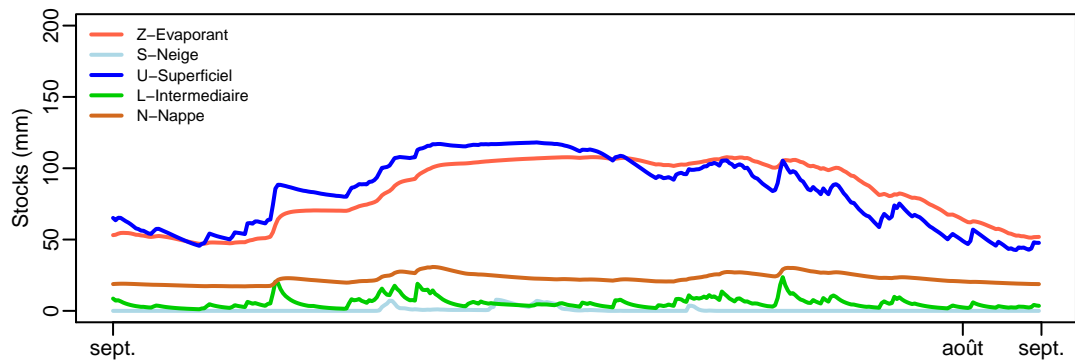



# k4000010 (32719.22 km<sup>2</sup>) – année 1982–1983

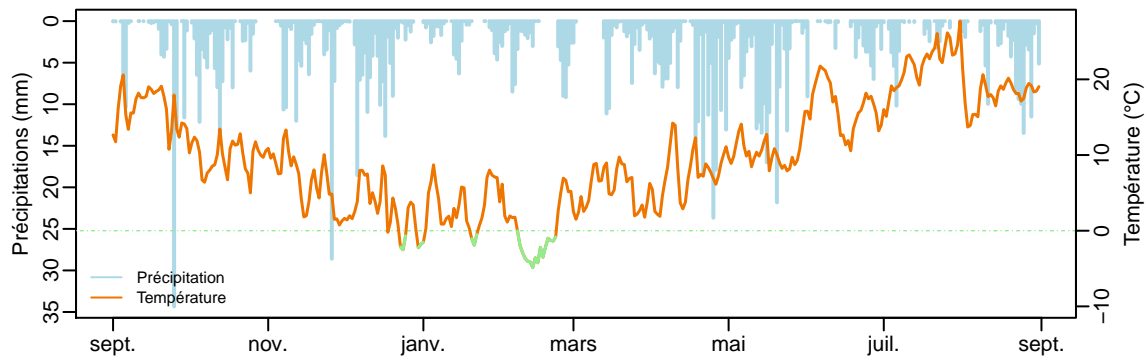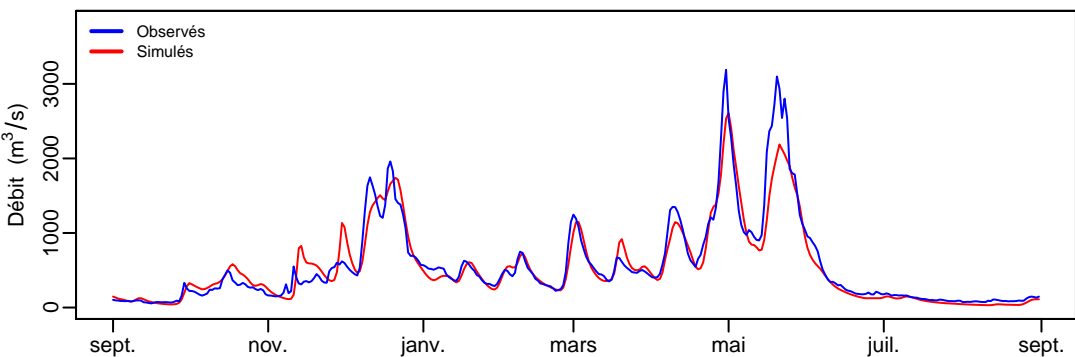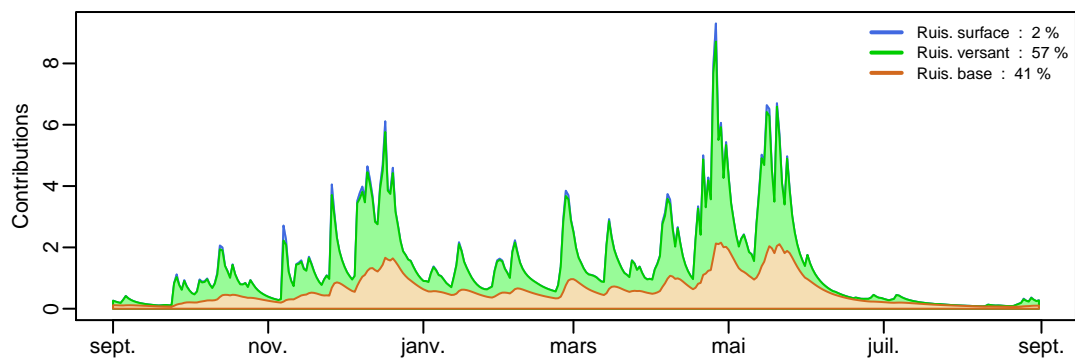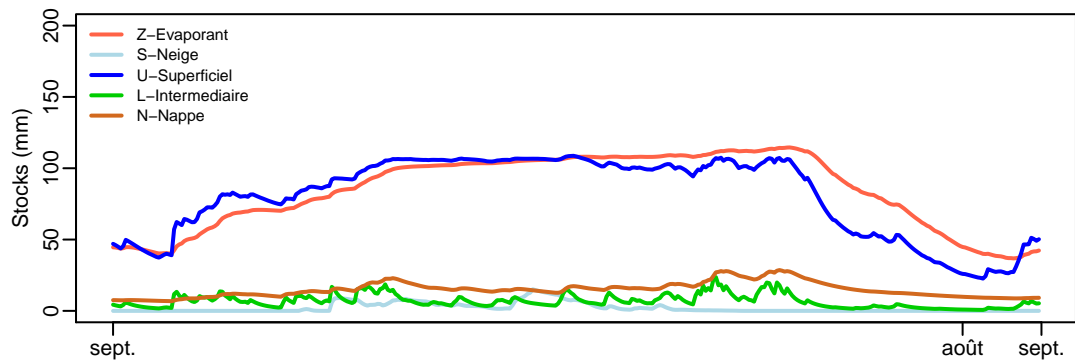

# k4000010 (32719.22 km<sup>2</sup>) – année 1983–1984

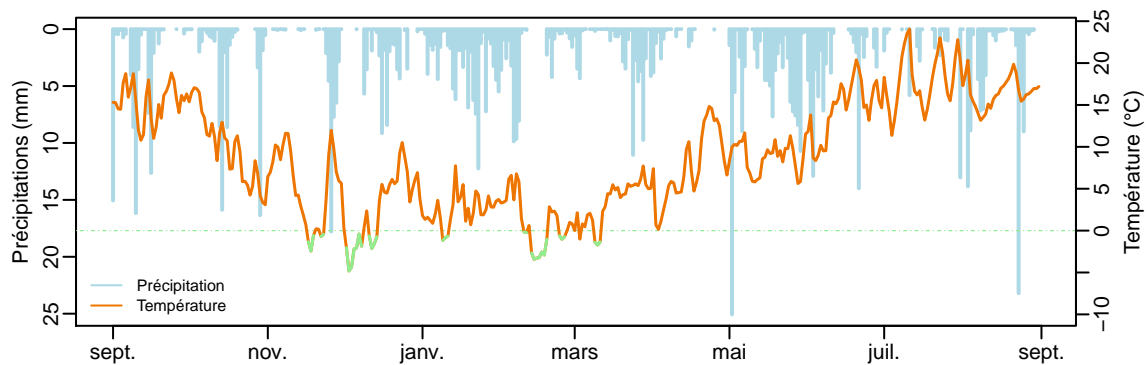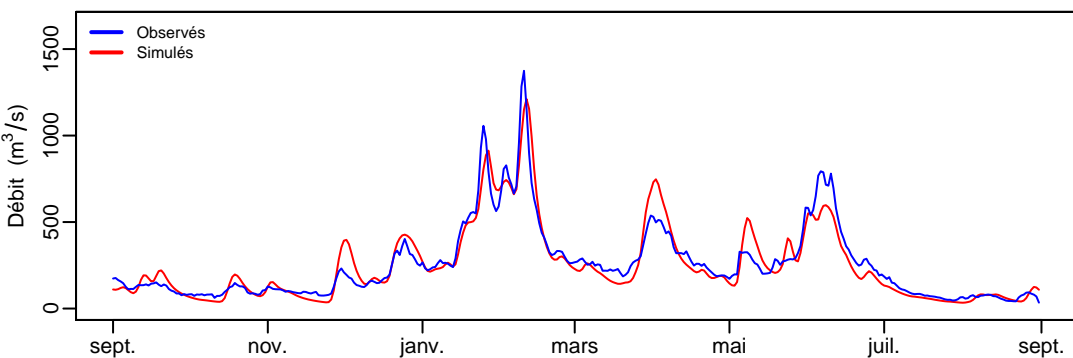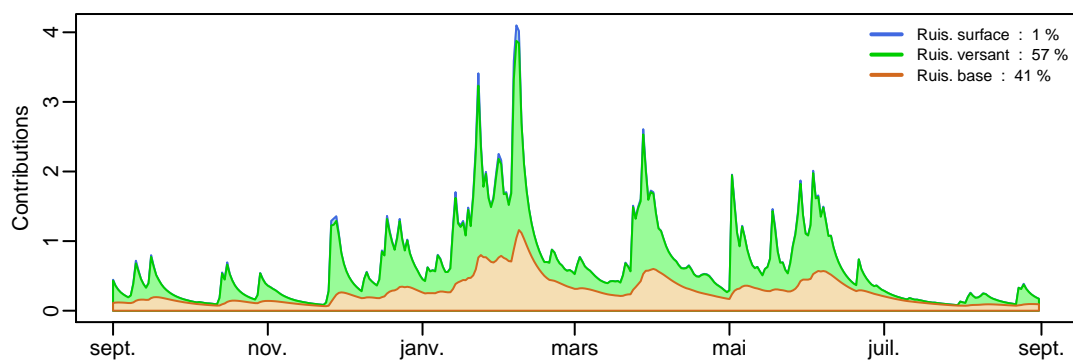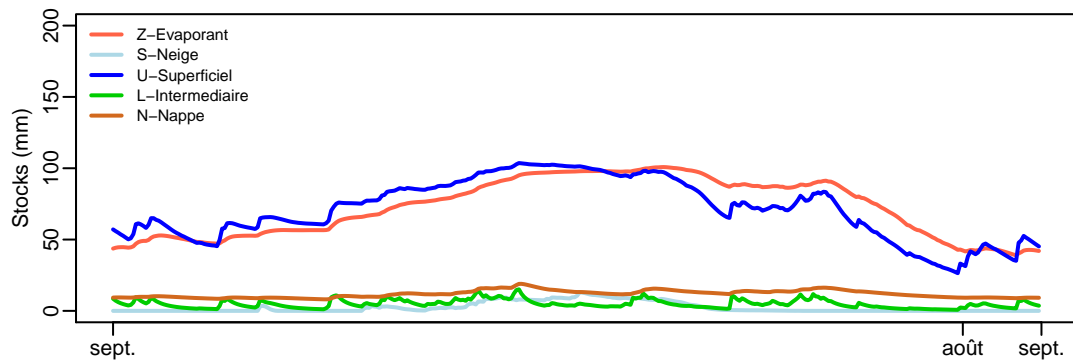

# k4000010 (32719.22 km<sup>2</sup>) – année 1984–1985

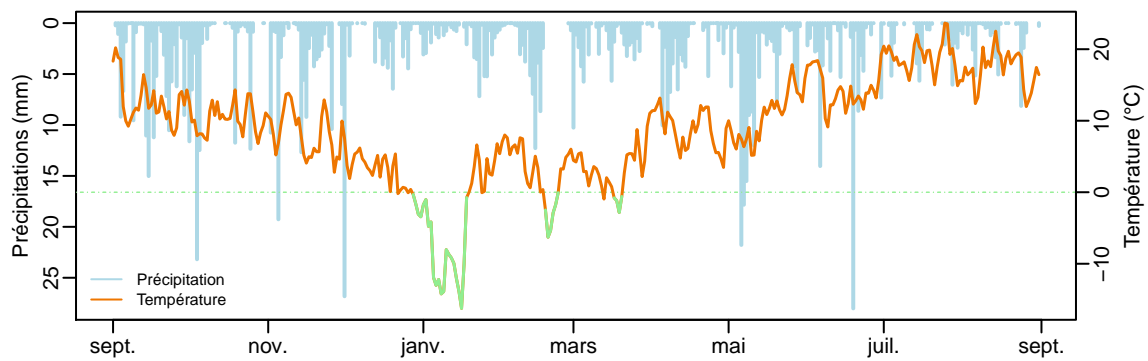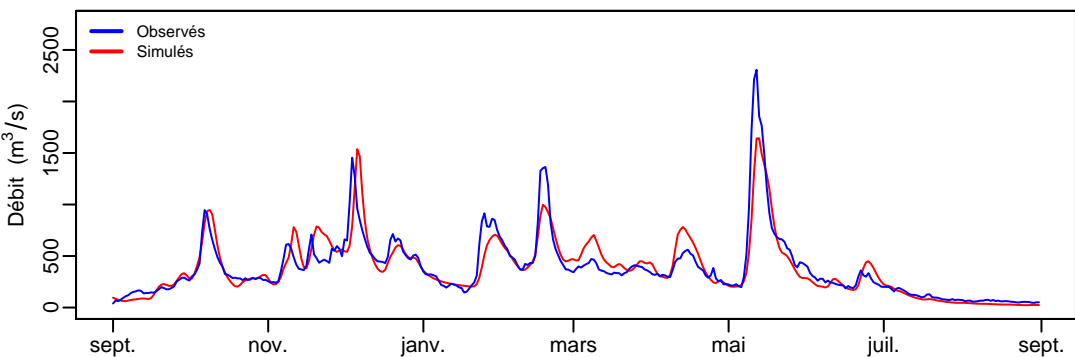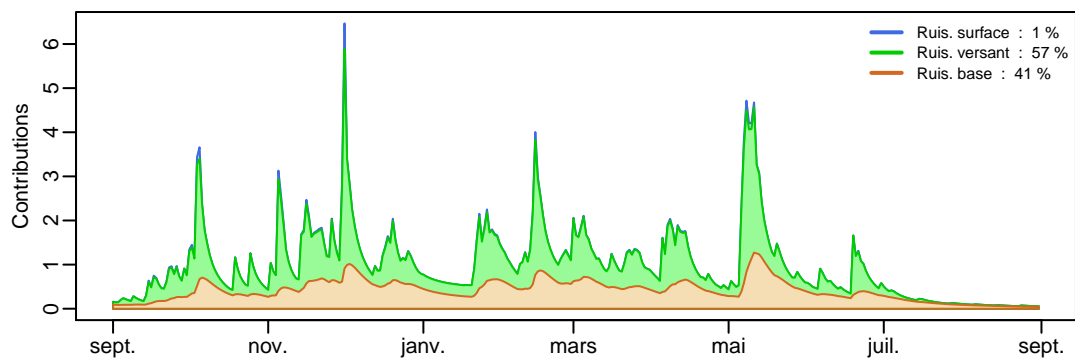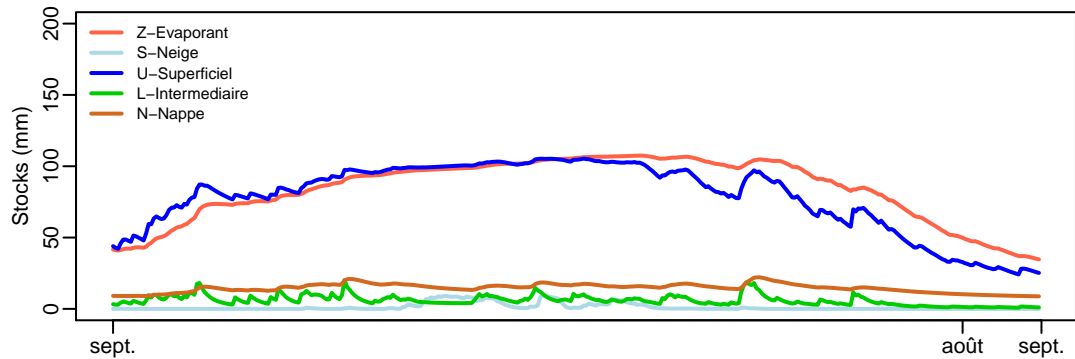

# k4000010 (32719.22 km<sup>2</sup>) – année 1985–1986

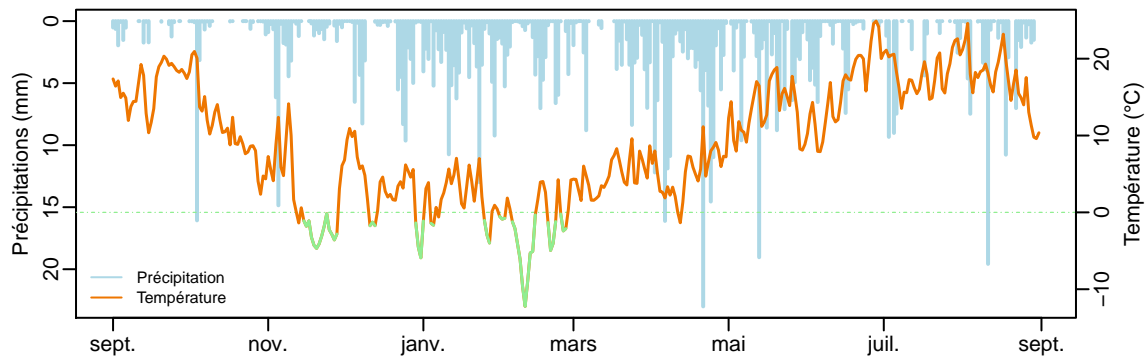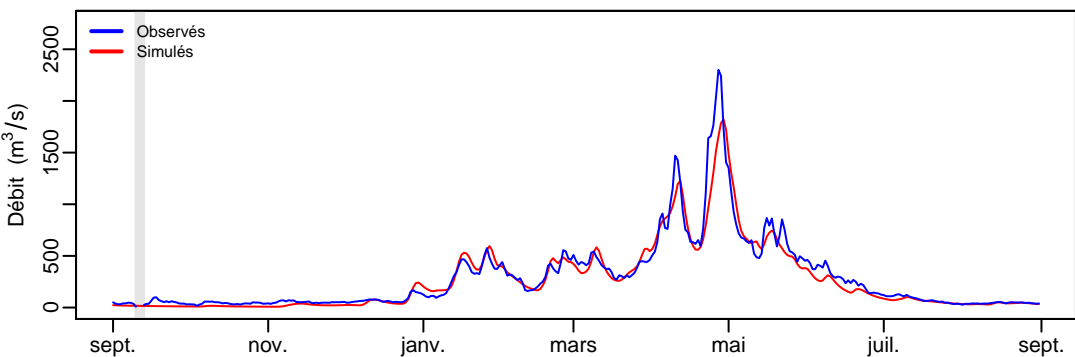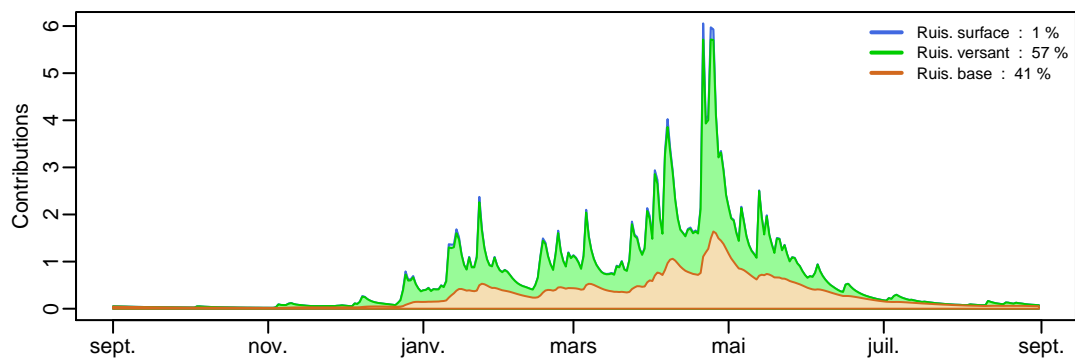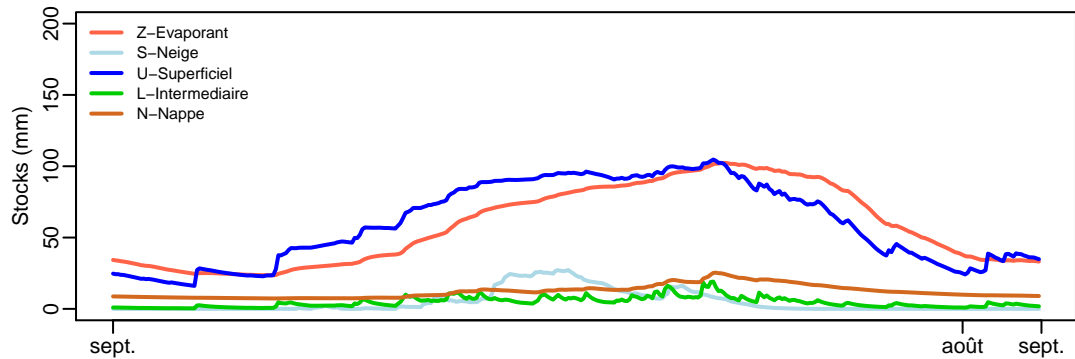

# k4000010 (32719.22 km<sup>2</sup>) – année 1986–1987

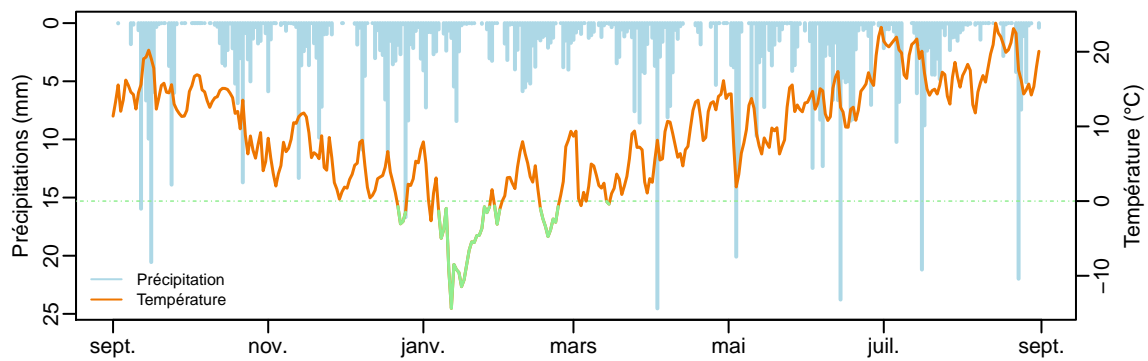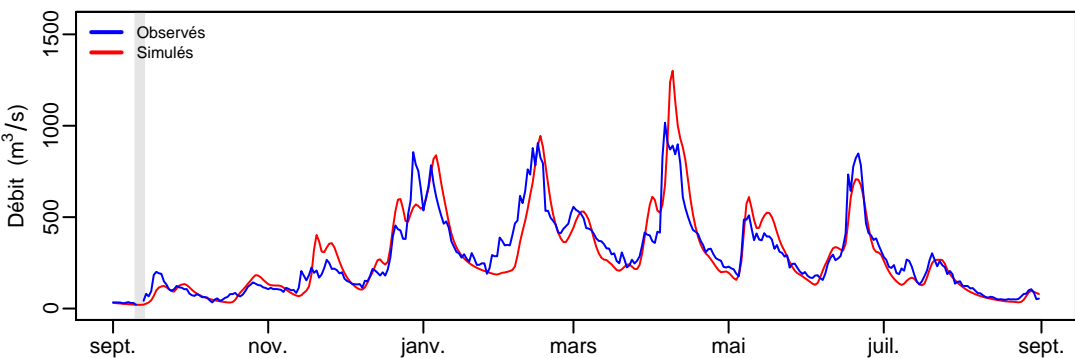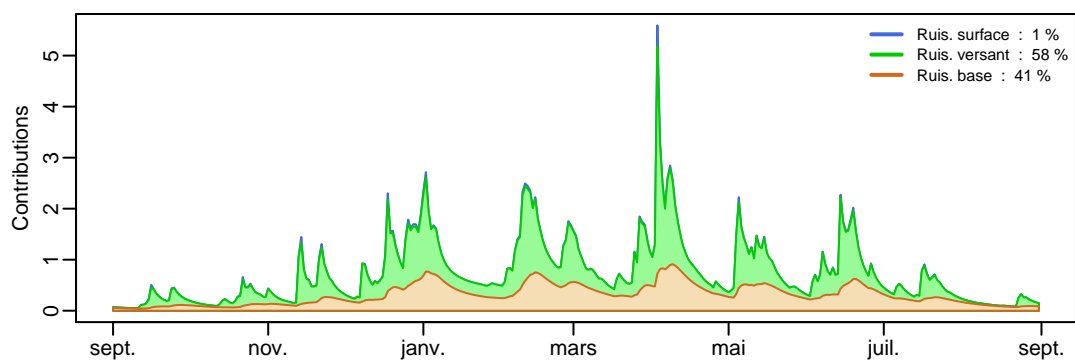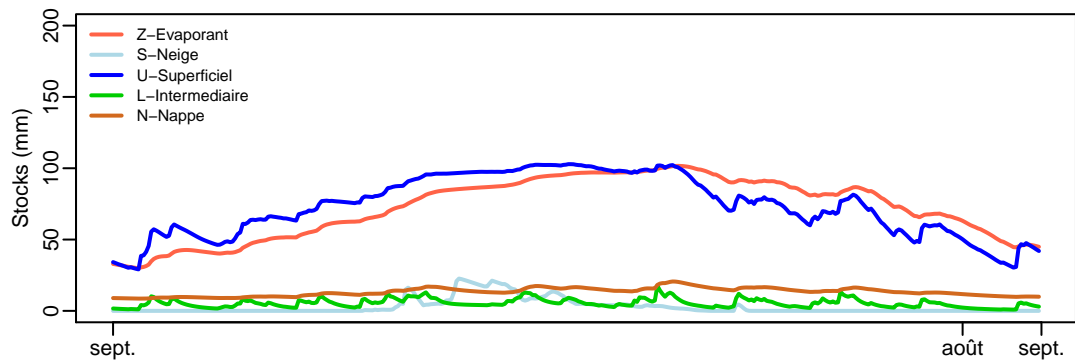

# k4000010 (32719.22 km<sup>2</sup>) – année 1987–1988

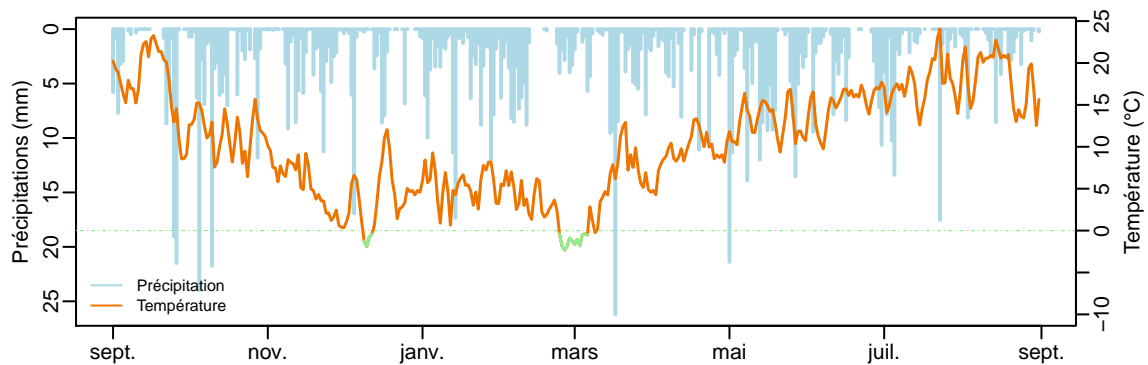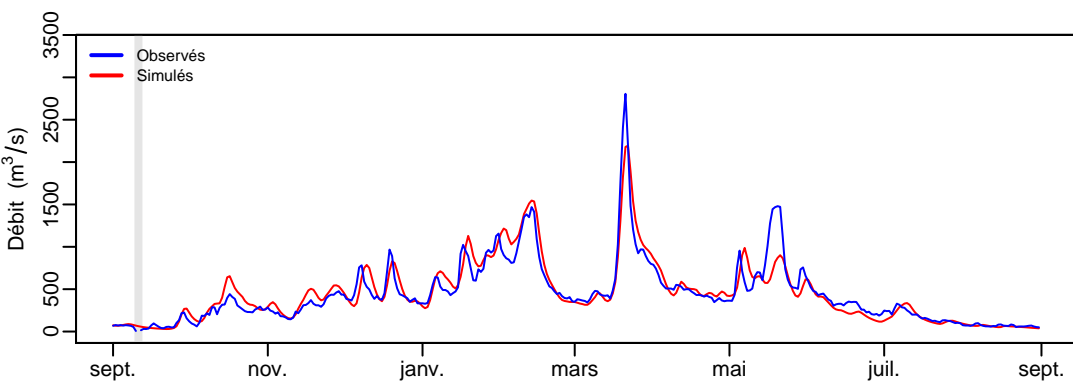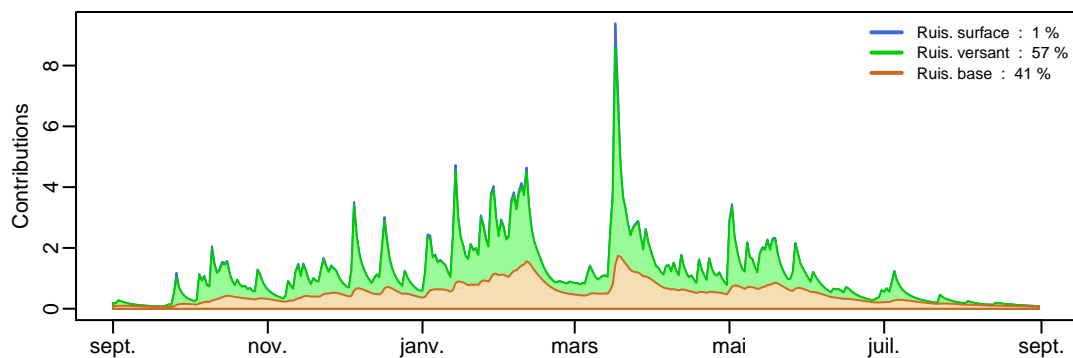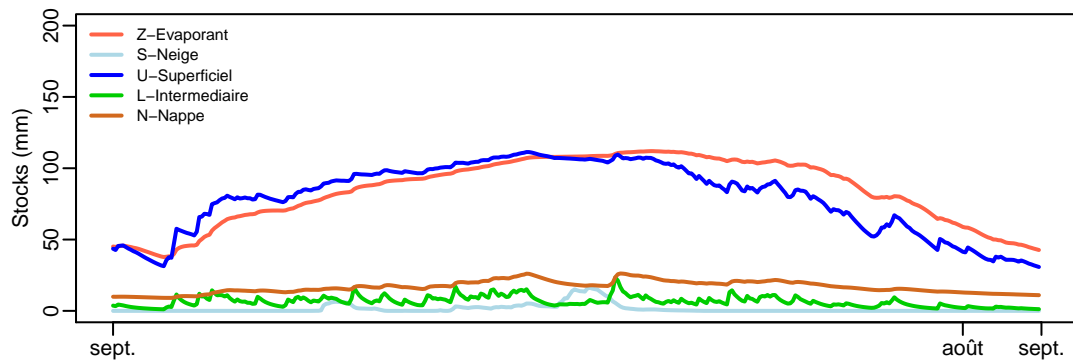

# k4000010 (32719.22 km<sup>2</sup>) – année 1988–1989

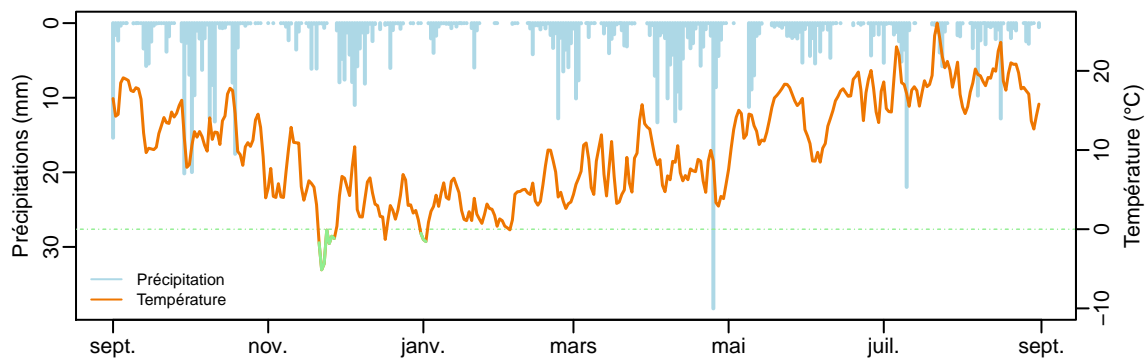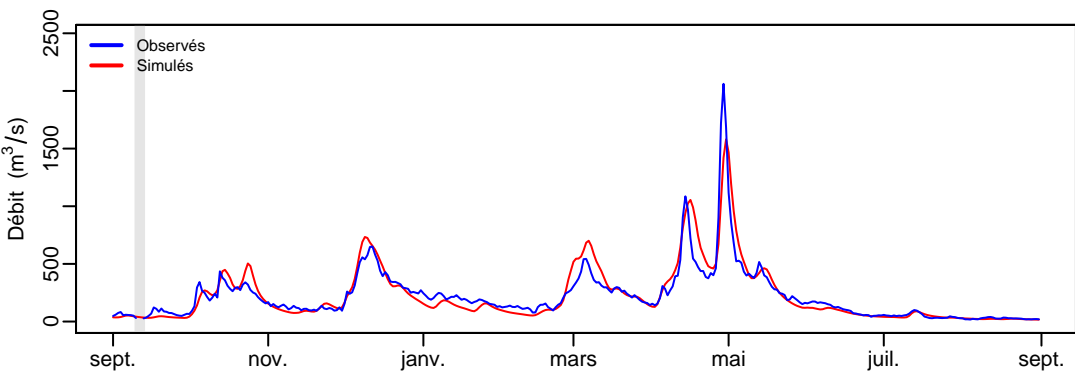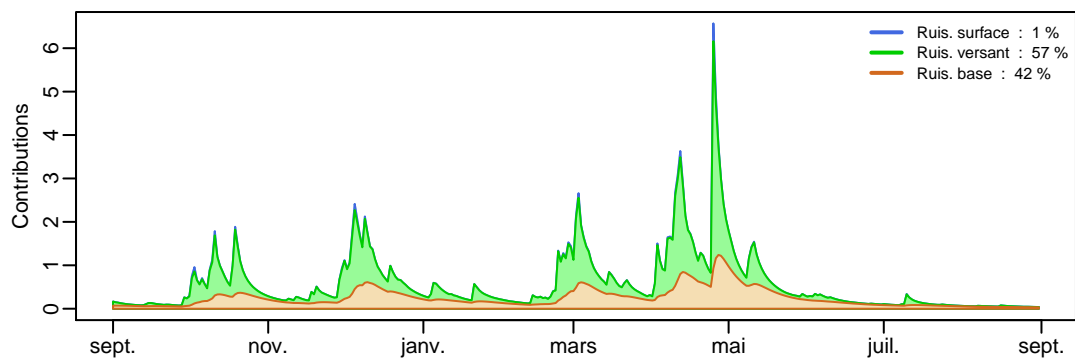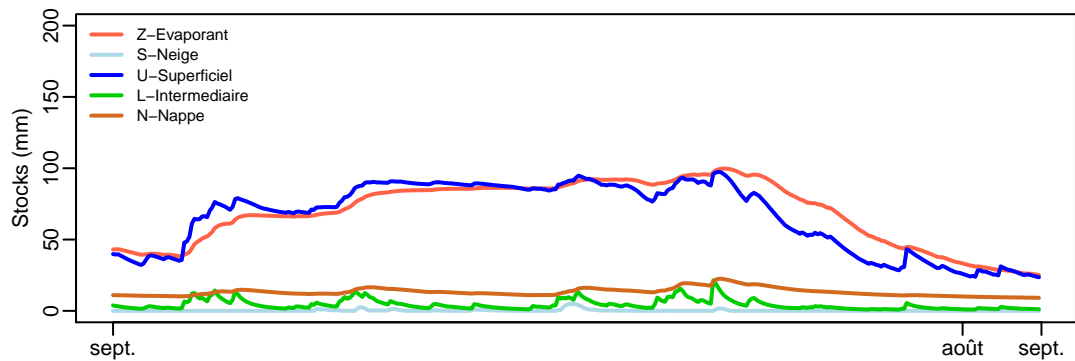

# k4000010 (32719.22 km<sup>2</sup>) – année 1989–1990

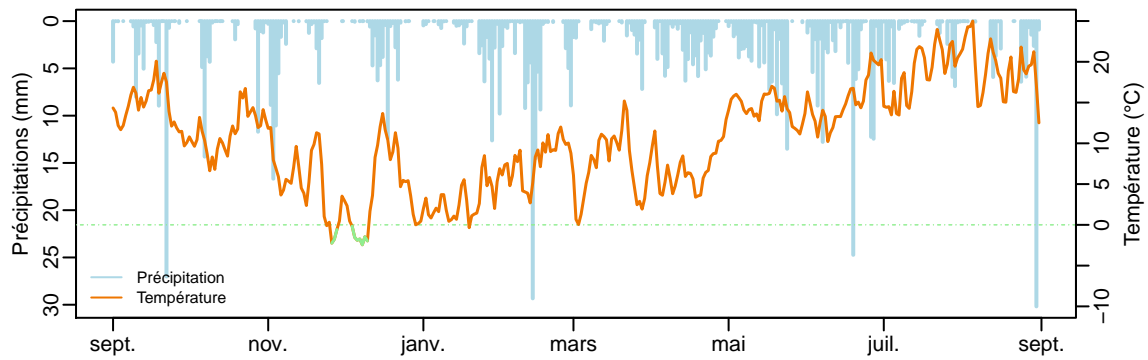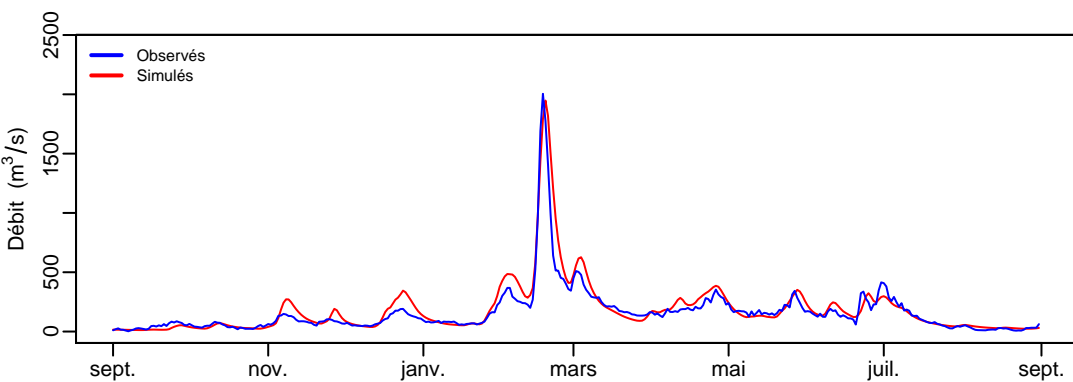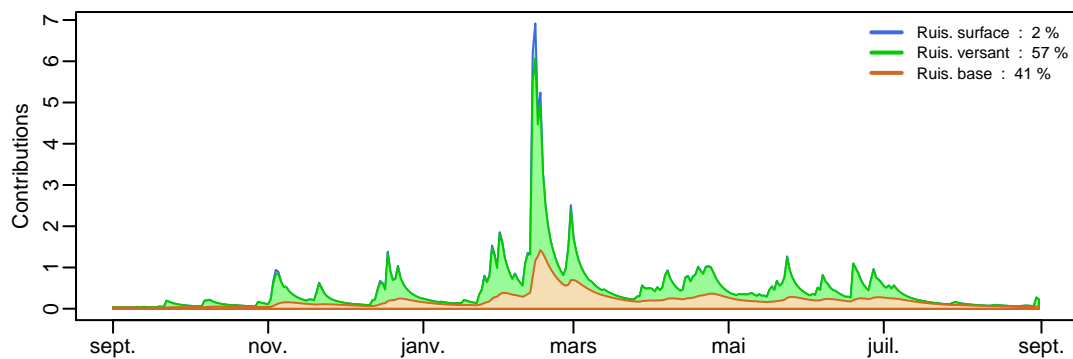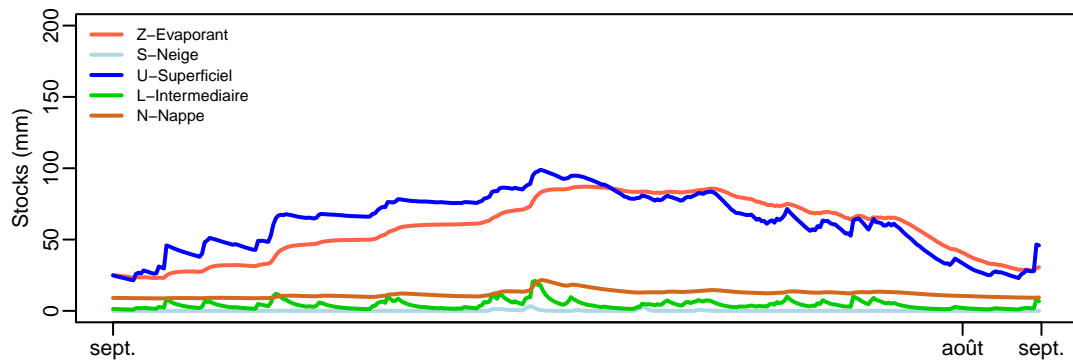



# k4000010 (32719.22 km<sup>2</sup>) – année 1990–1991

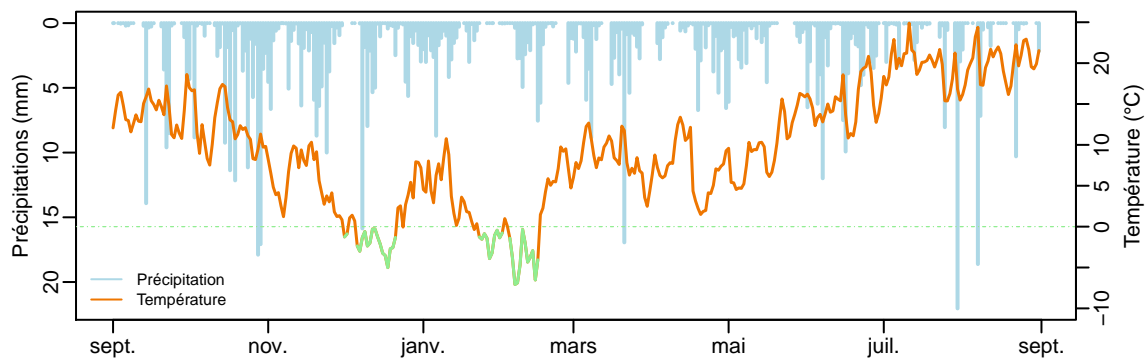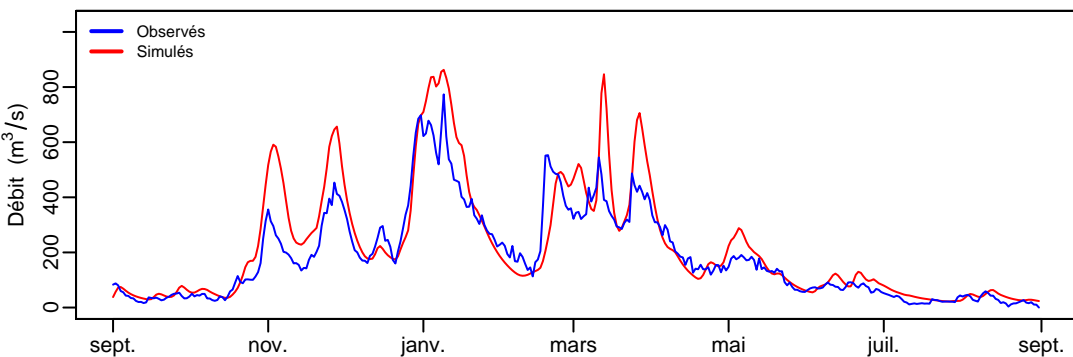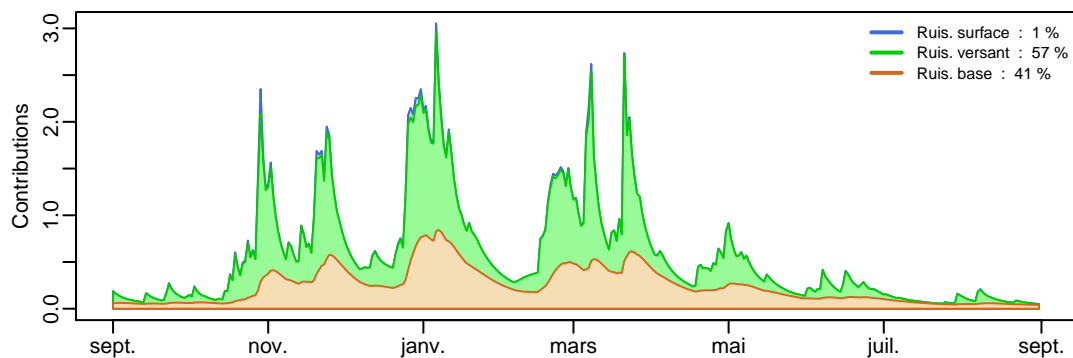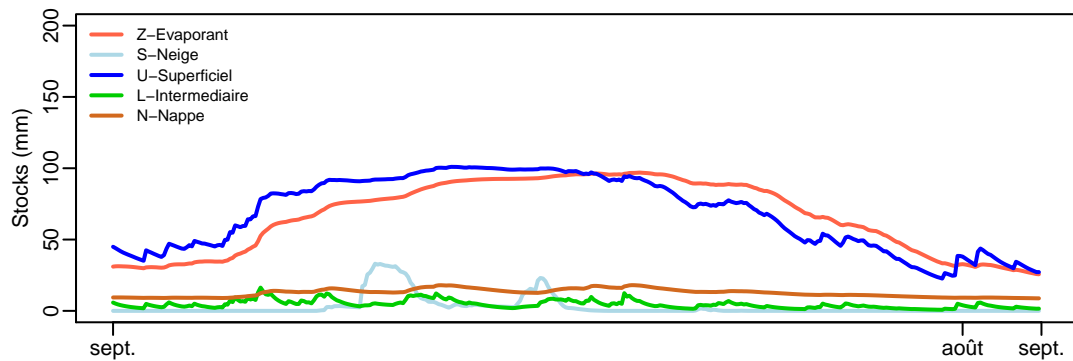

# k4000010 (32719.22 km<sup>2</sup>) – année 1991–1992

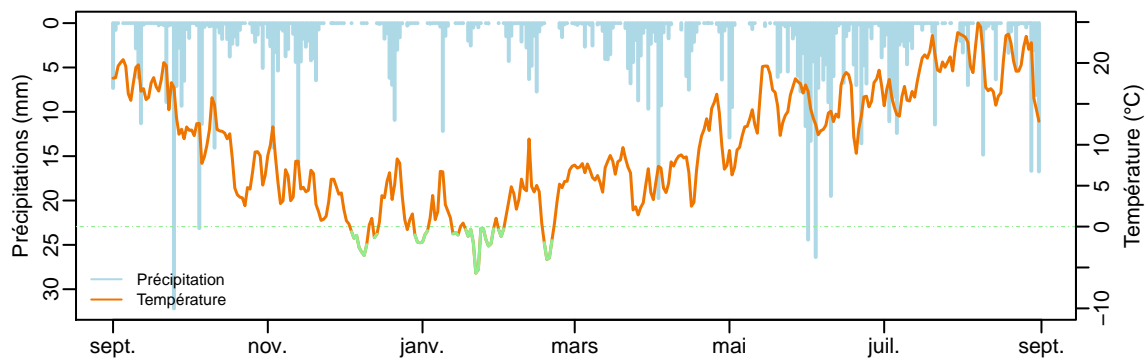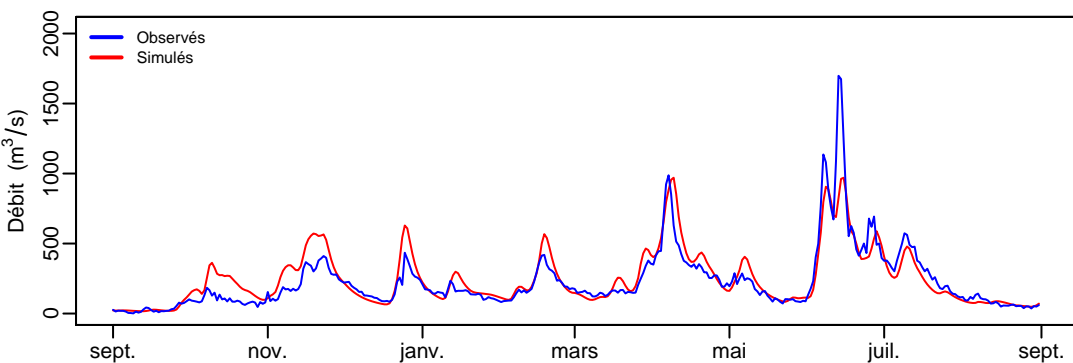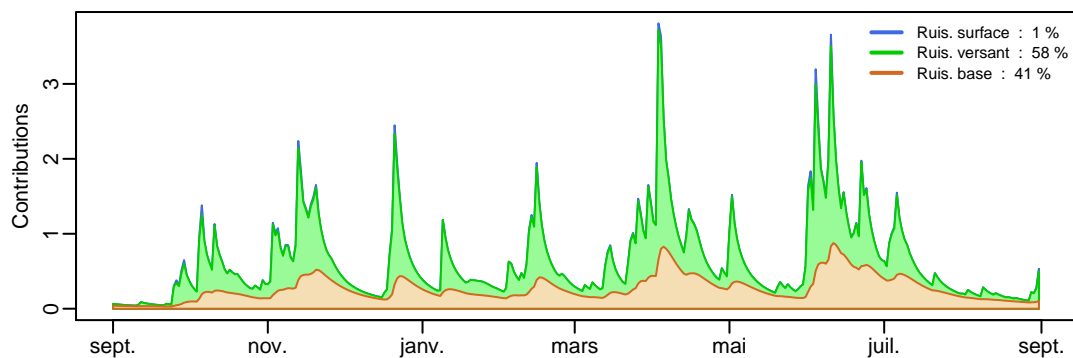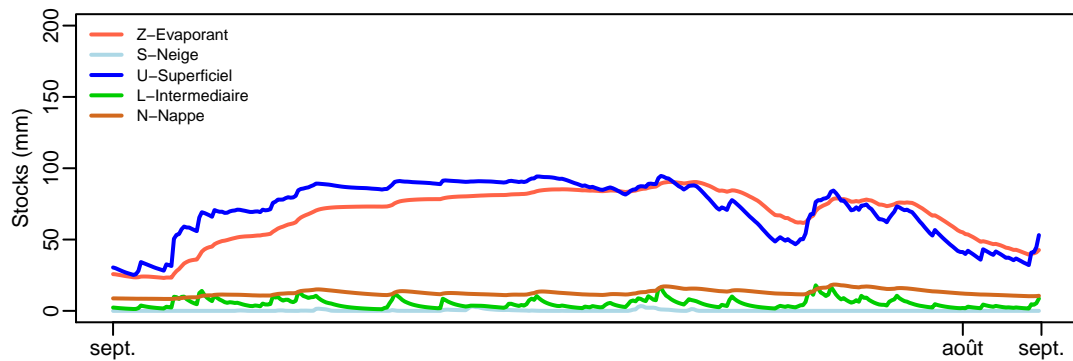

# k4000010 (32719.22 km<sup>2</sup>) – année 1992–1993

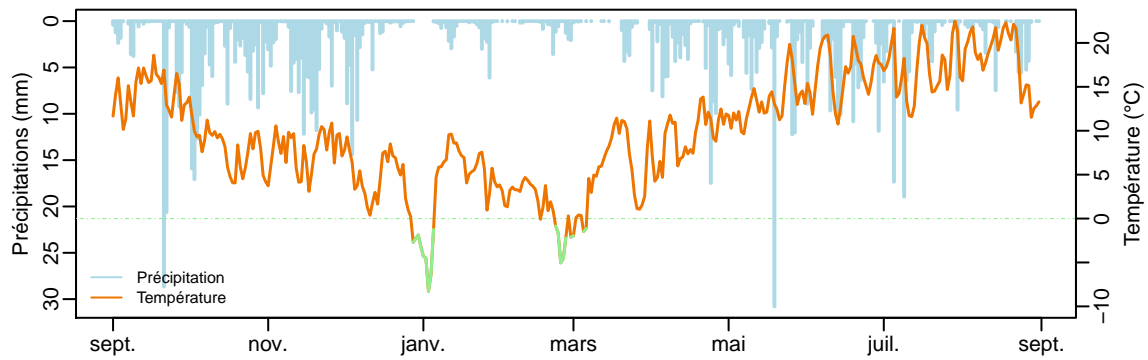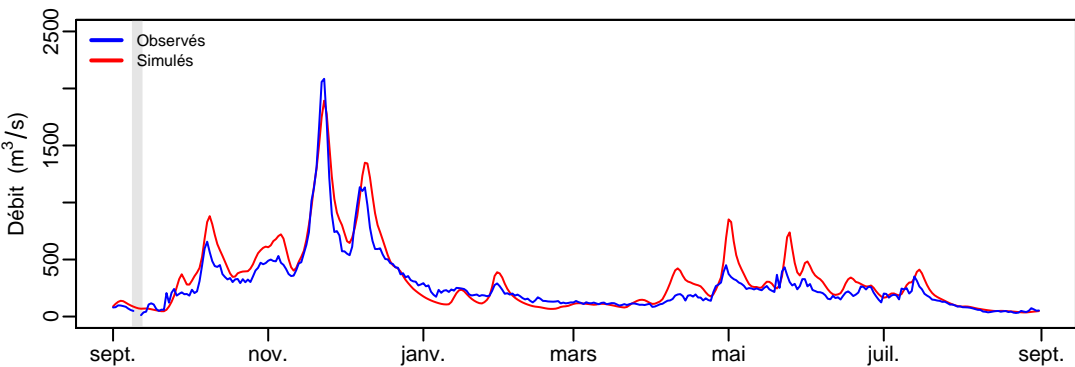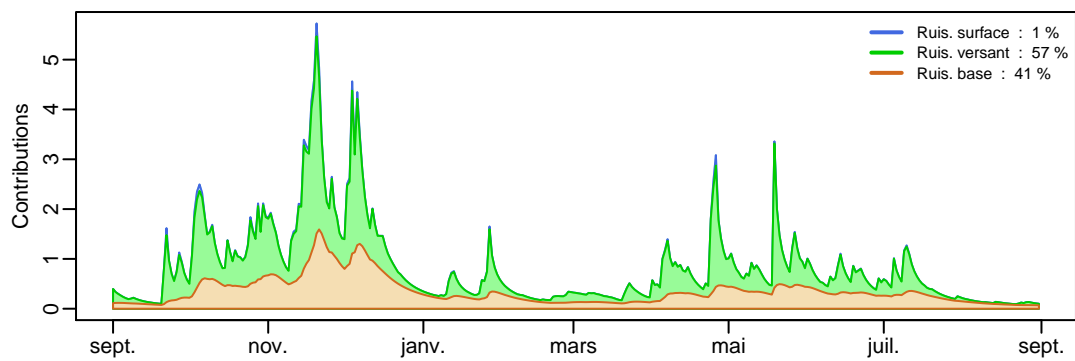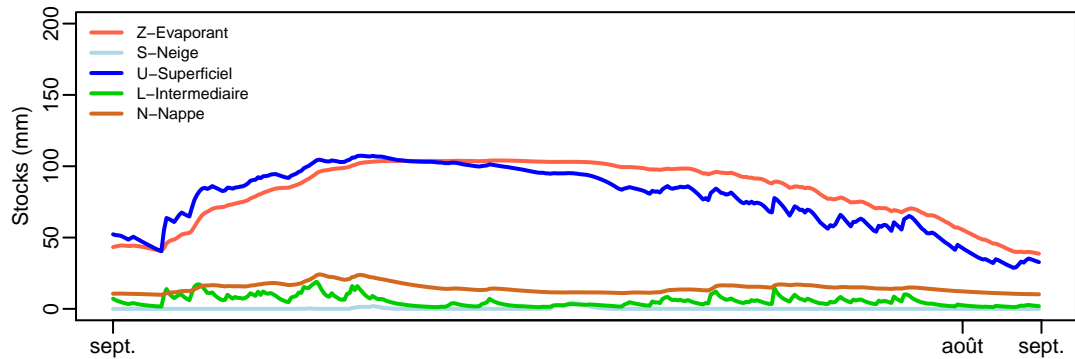

# k4000010 (32719.22 km<sup>2</sup>) – année 1993–1994

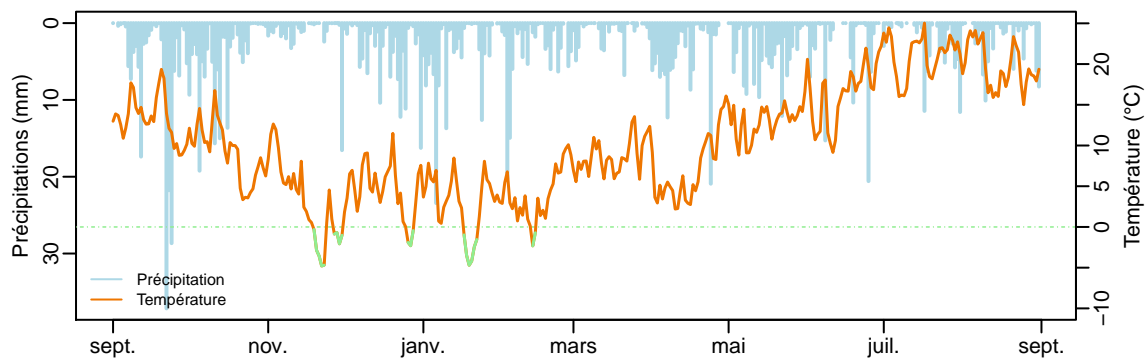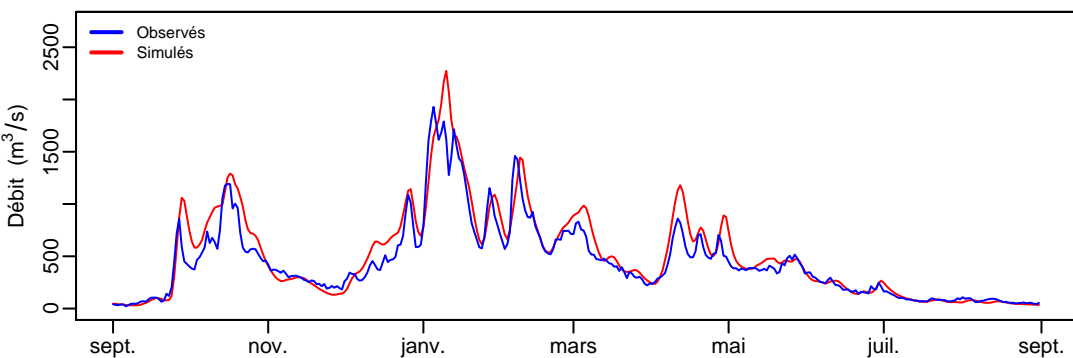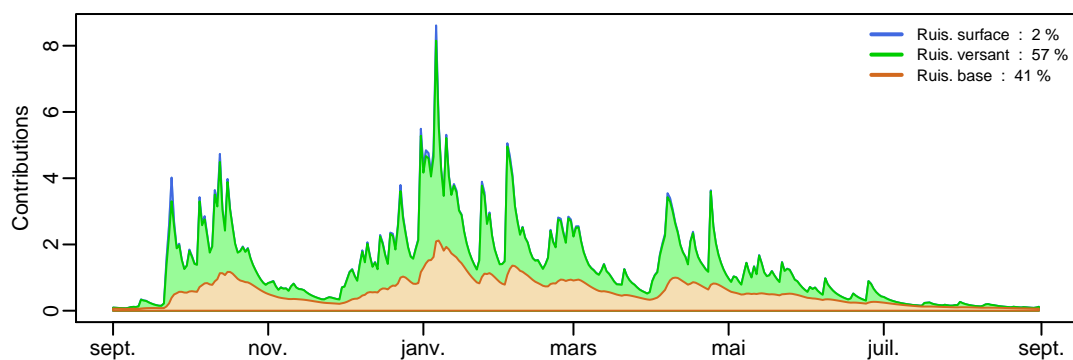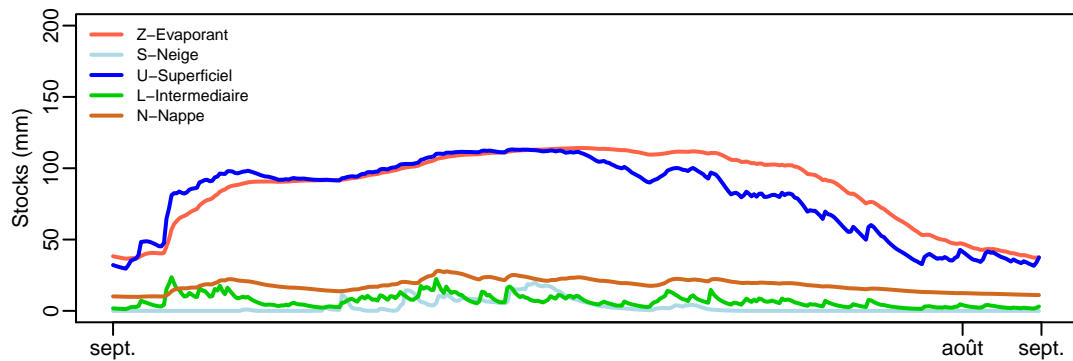

# k4000010 (32719.22 km<sup>2</sup>) – année 1994–1995

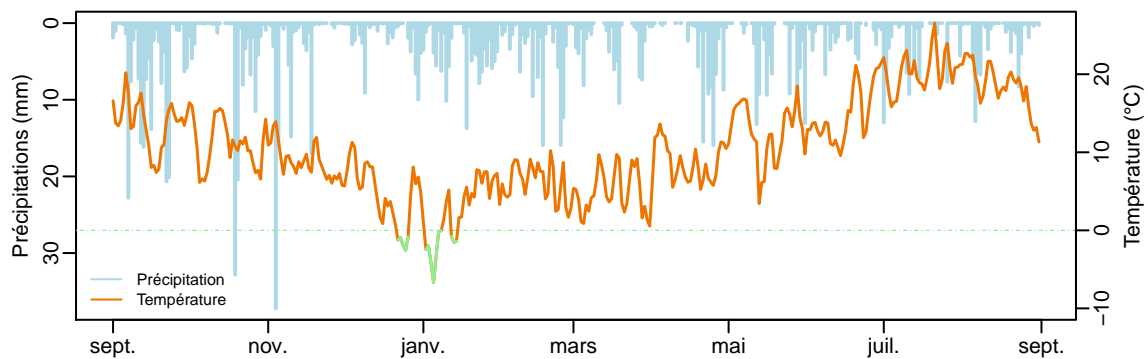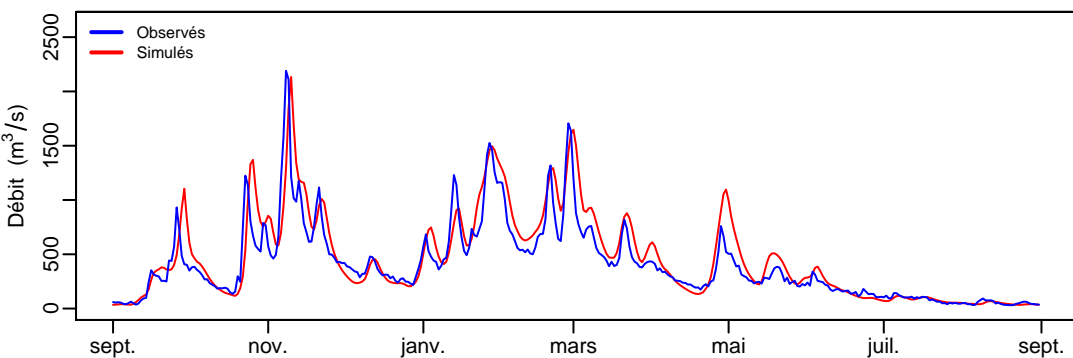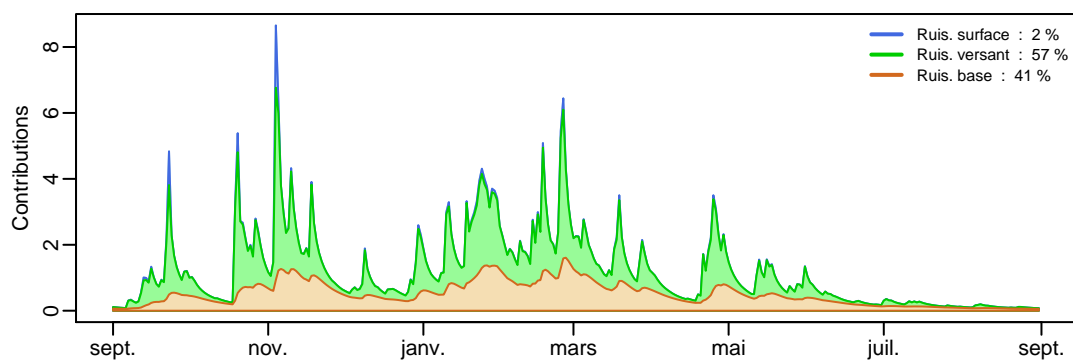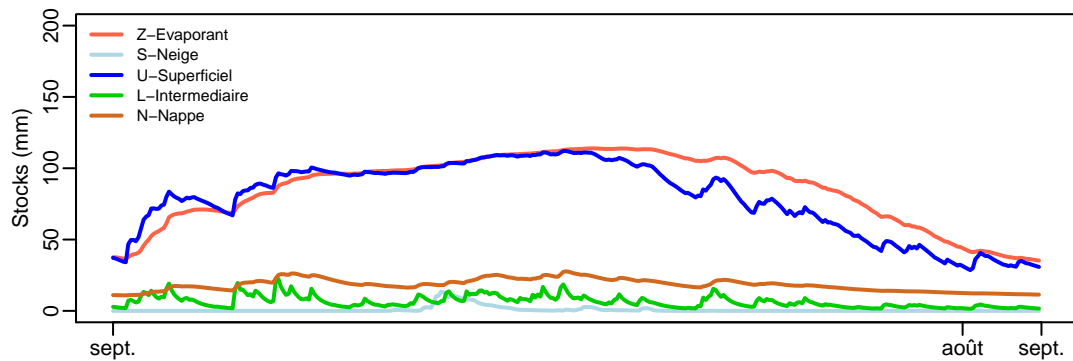

# k4000010 (32719.22 km<sup>2</sup>) – année 1995–1996

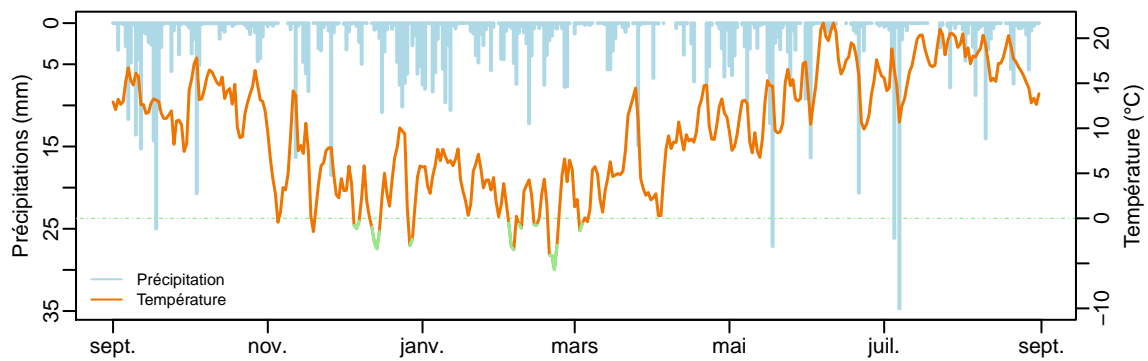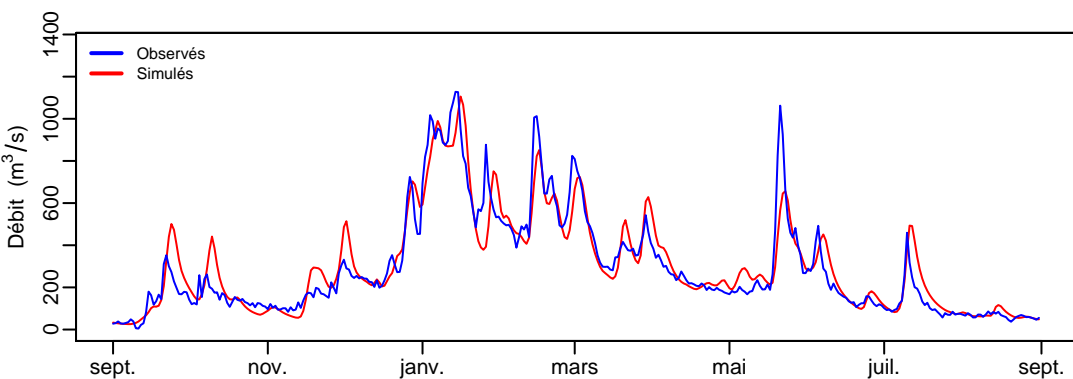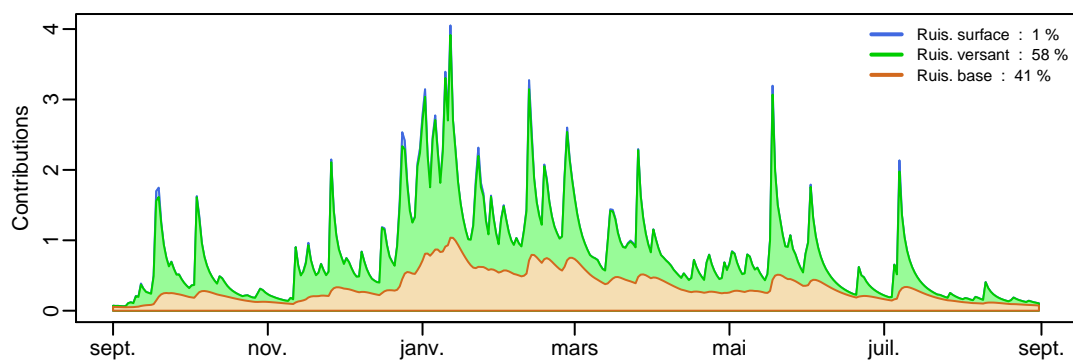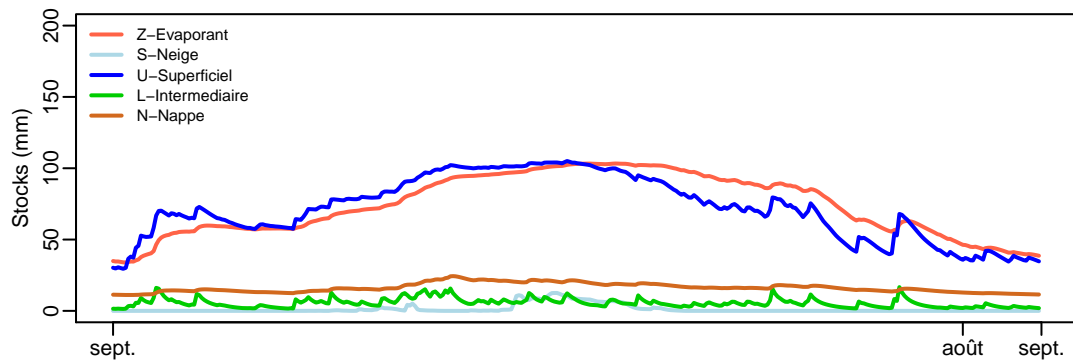

# k4000010 (32719.22 km<sup>2</sup>) – année 1996–1997

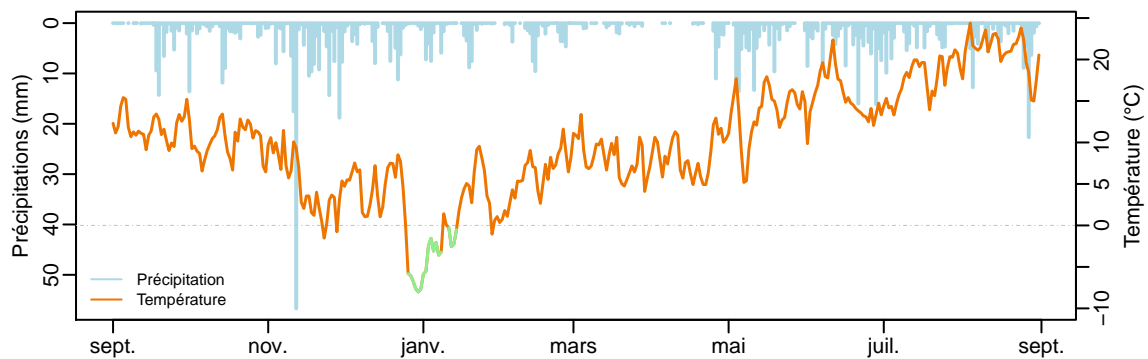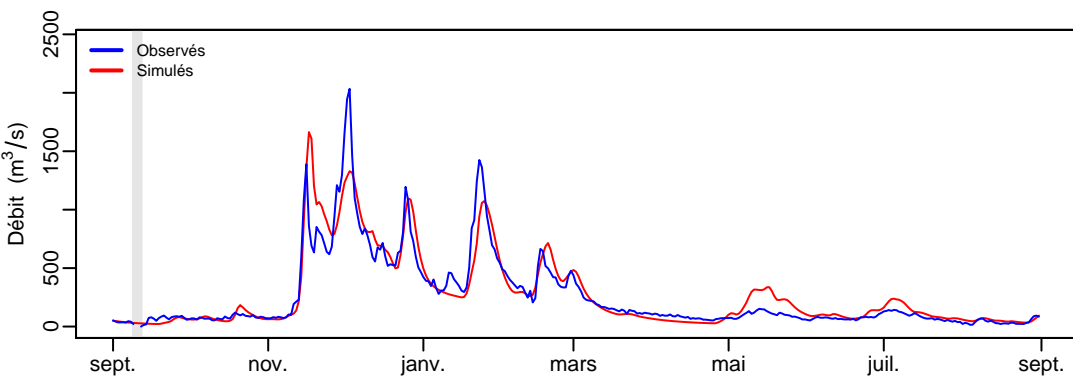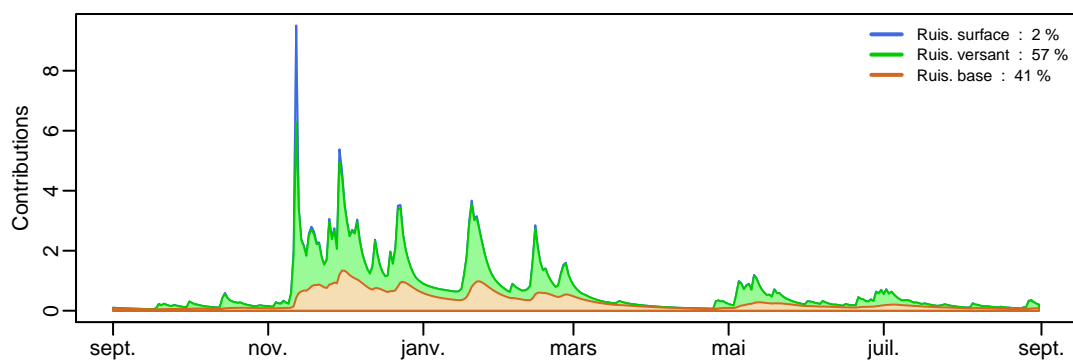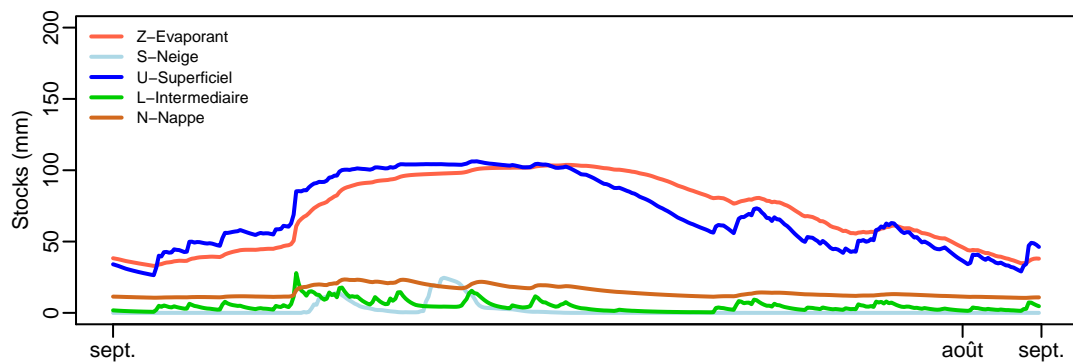

# k4000010 (32719.22 km<sup>2</sup>) – année 1997–1998

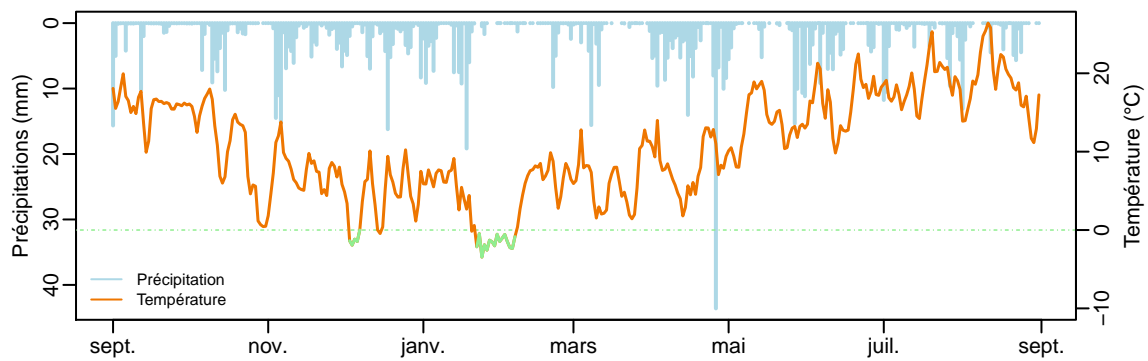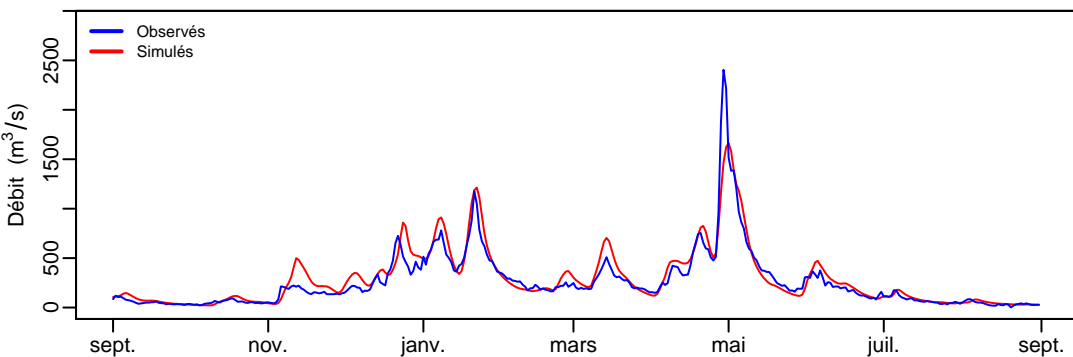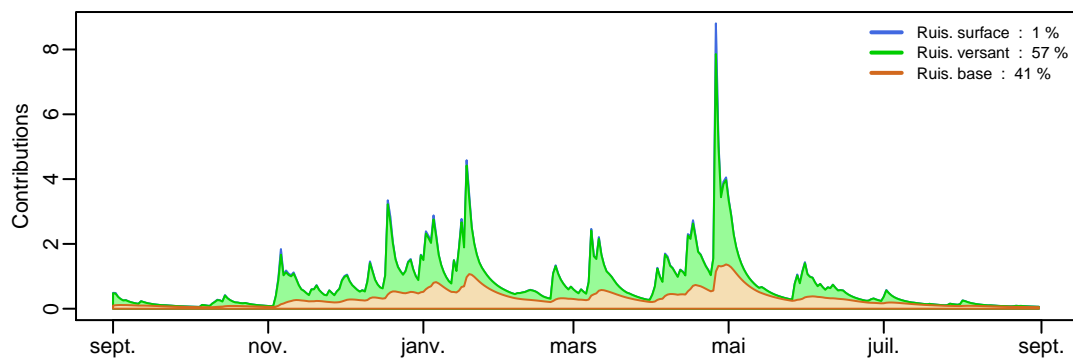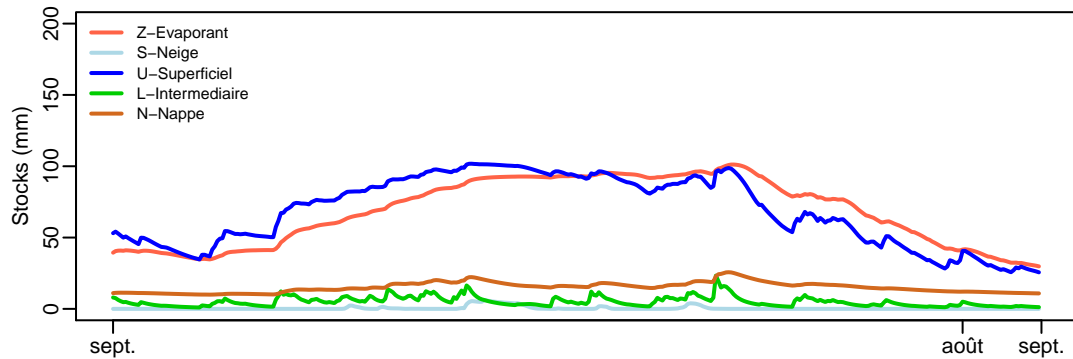



# k4000010 (32719.22 km<sup>2</sup>) – année 1998–1999

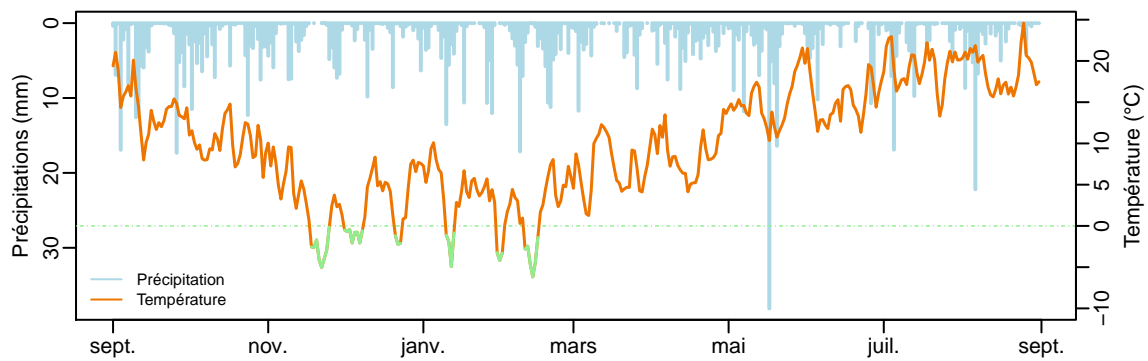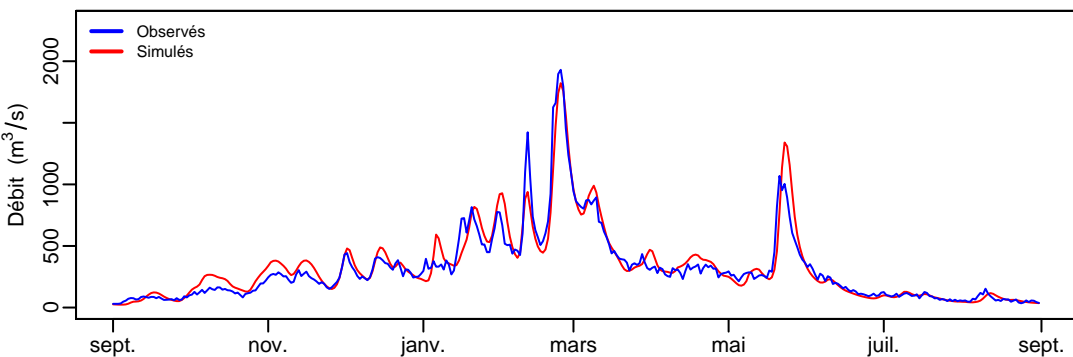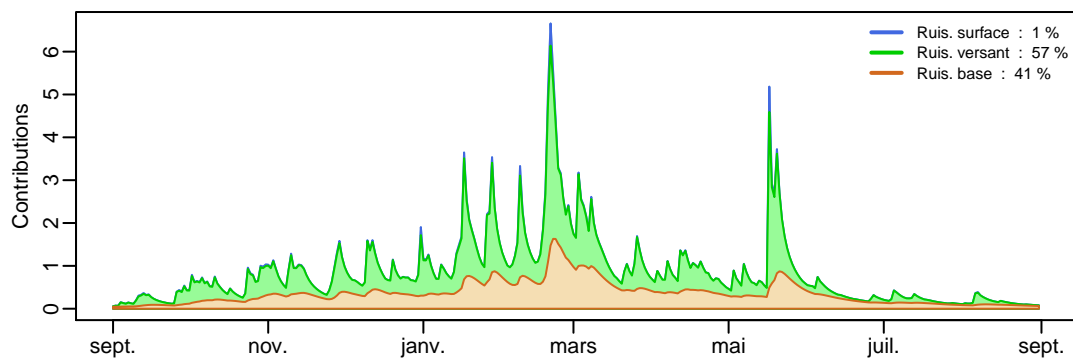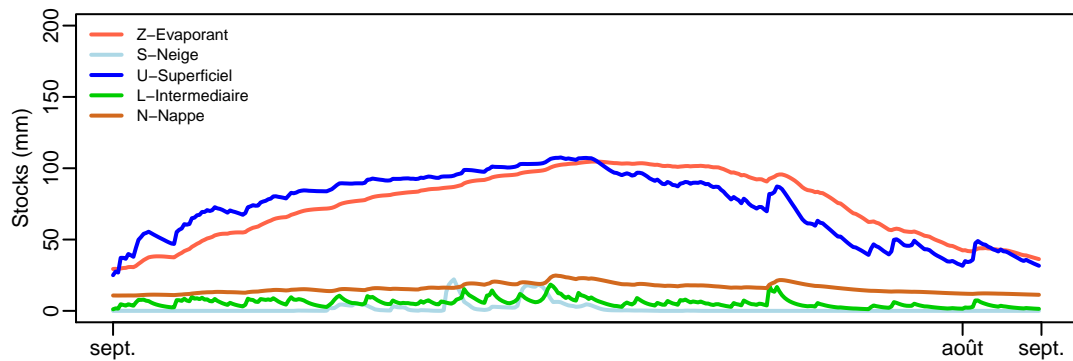

# k4000010 (32719.22 km<sup>2</sup>) – année 1999–2000

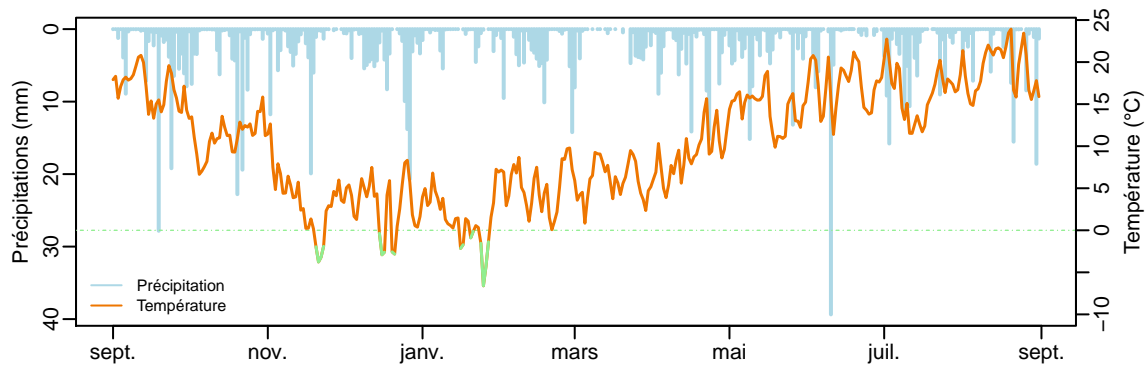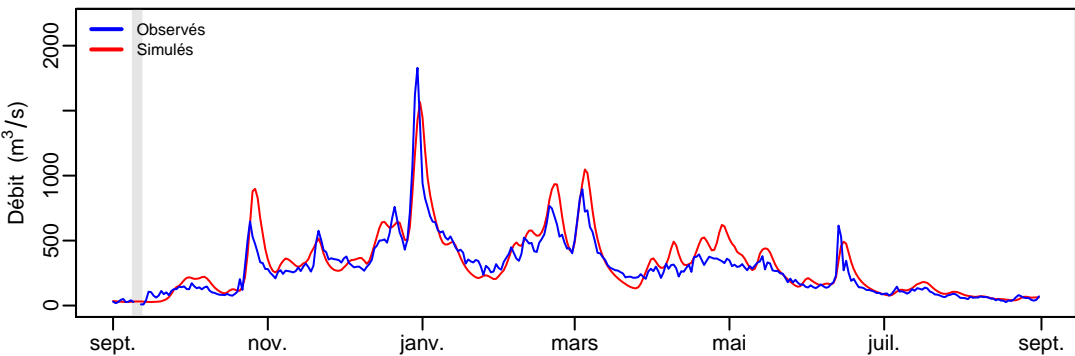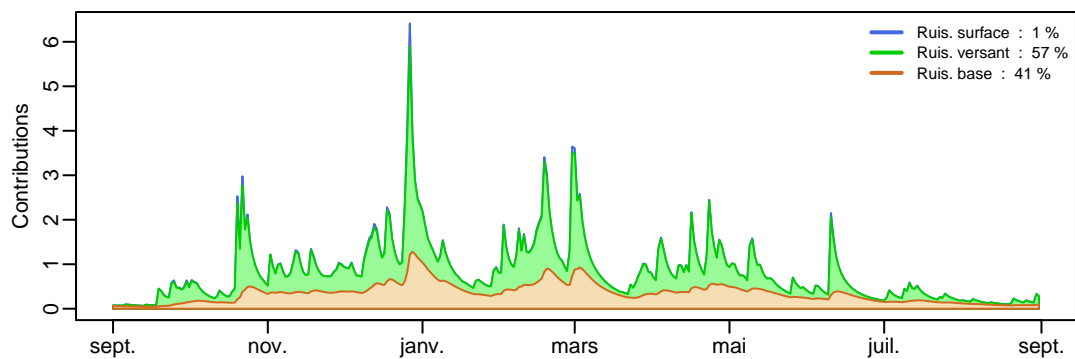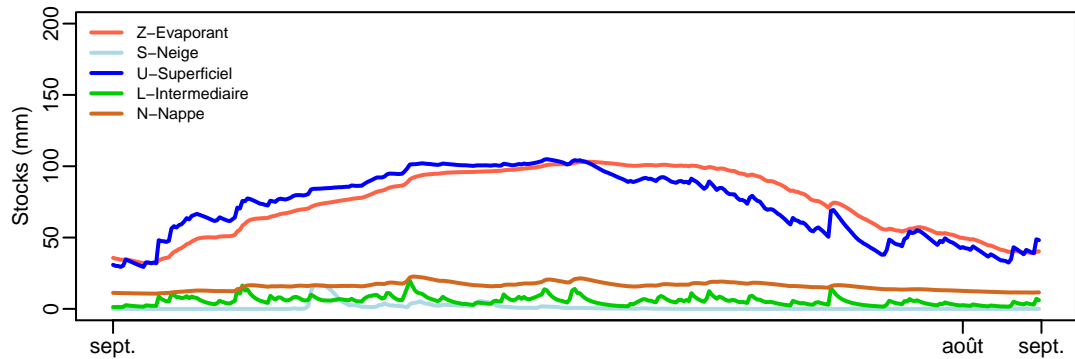

# k4000010 (32719.22 km<sup>2</sup>) – année 2000–2001

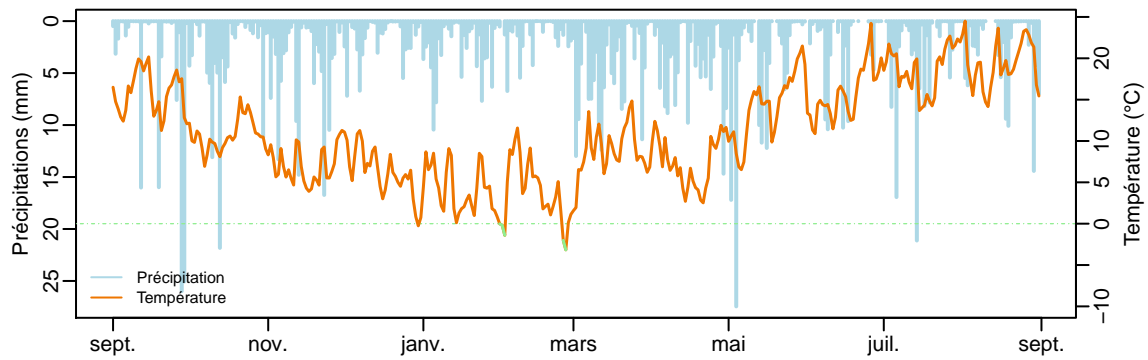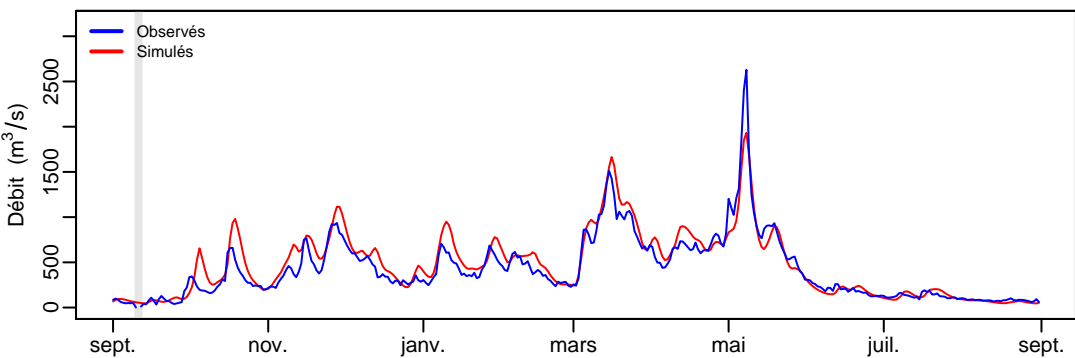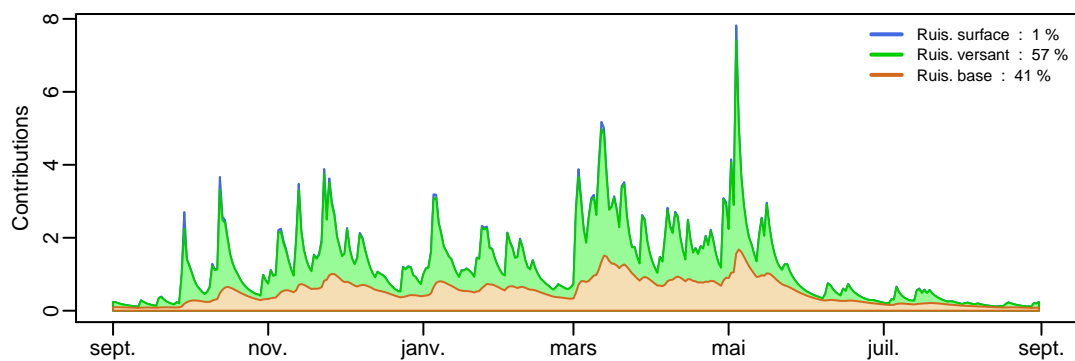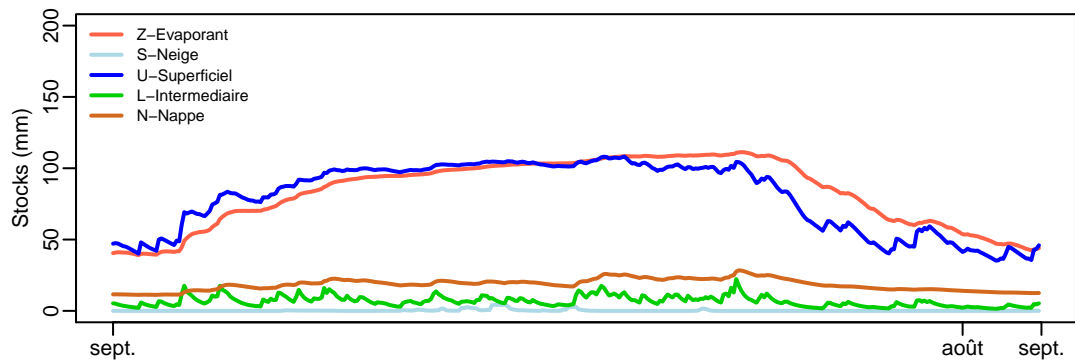

# k4000010 (32719.22 km<sup>2</sup>) – année 2001–2002

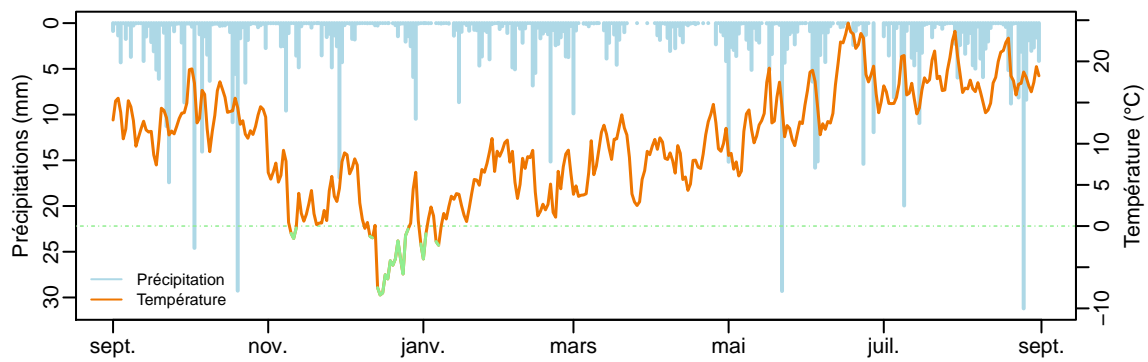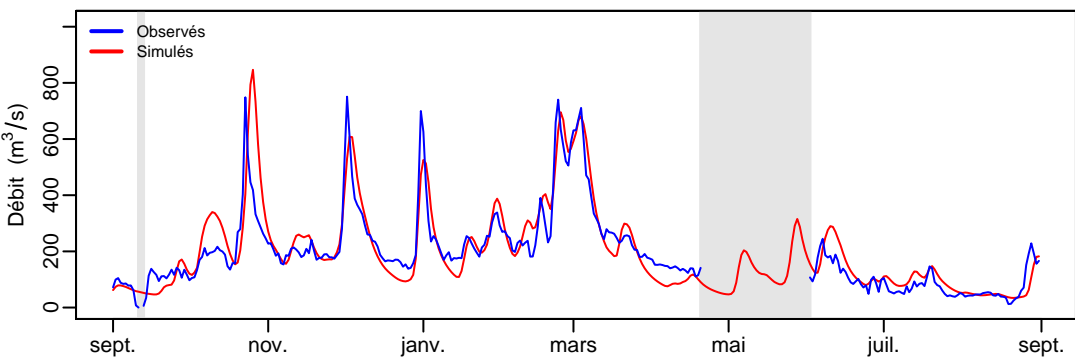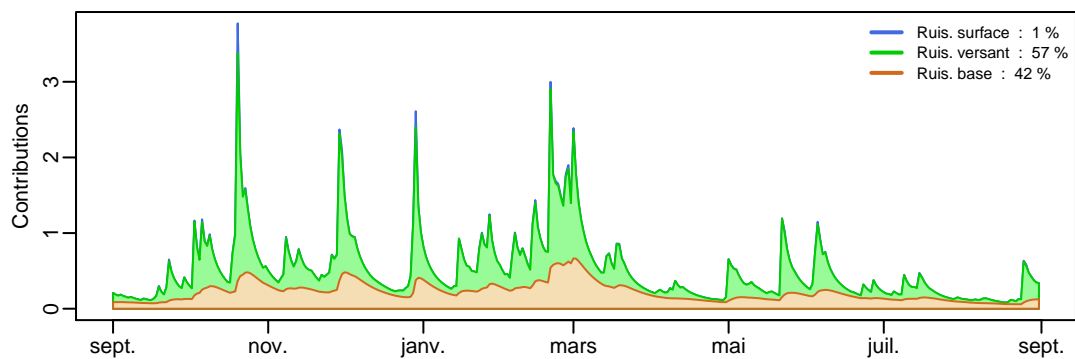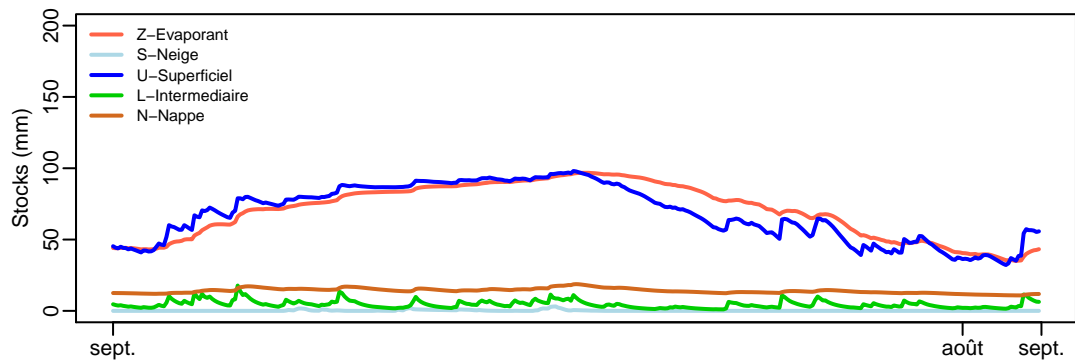

# k4000010 (32719.22 km<sup>2</sup>) – année 2002–2003

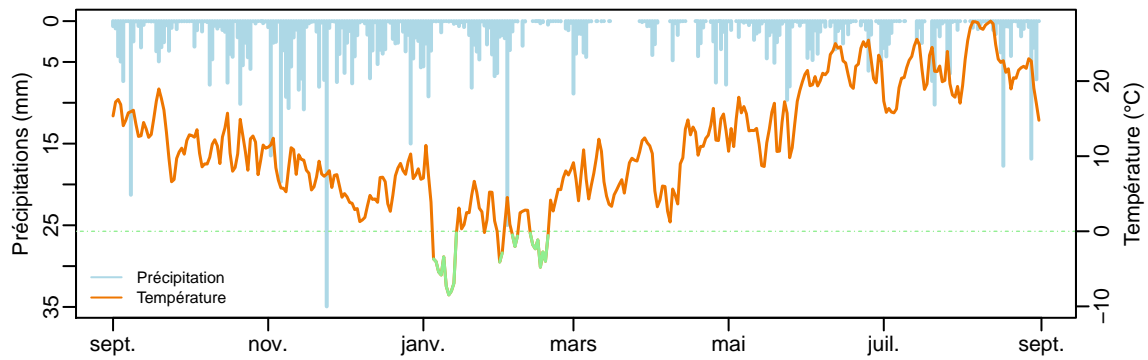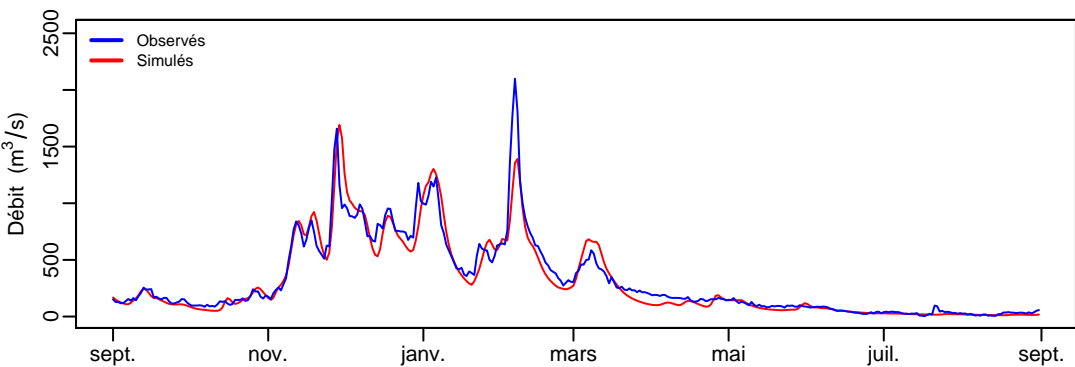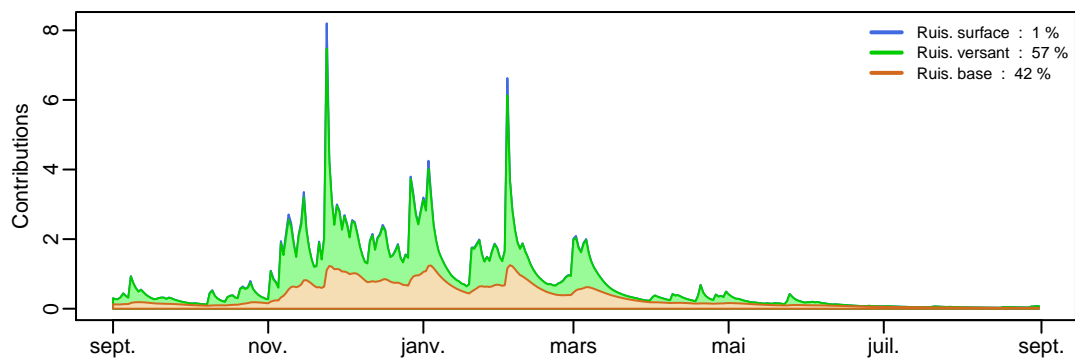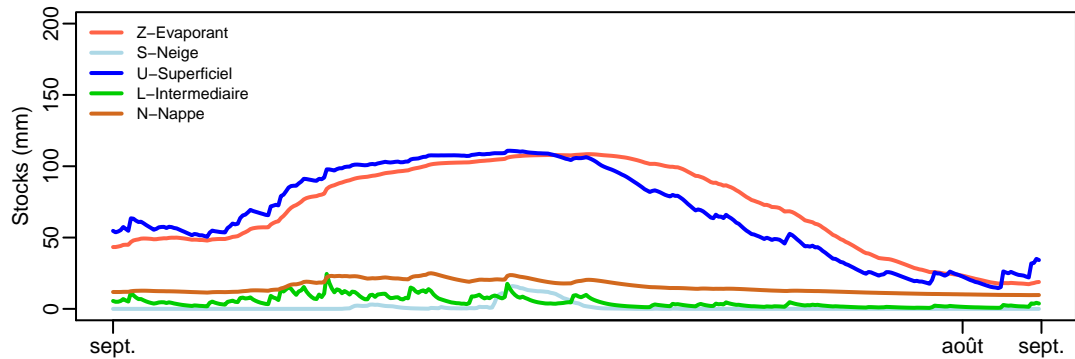

# k4000010 (32719.22 km<sup>2</sup>) – année 2003–2004

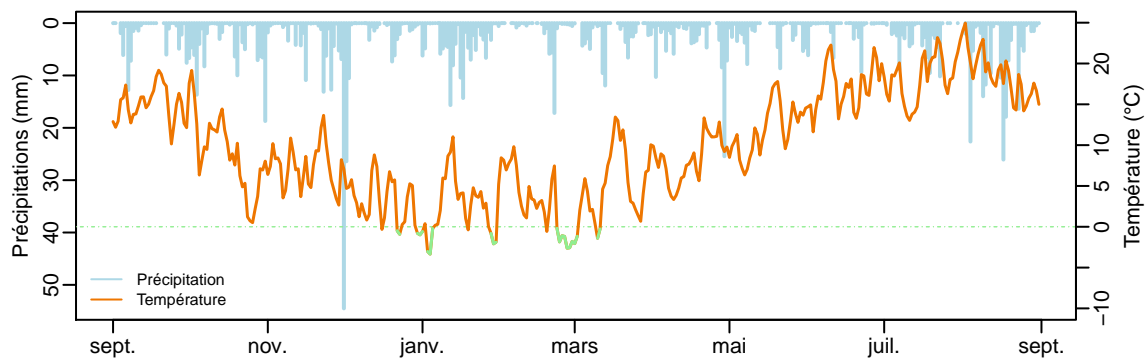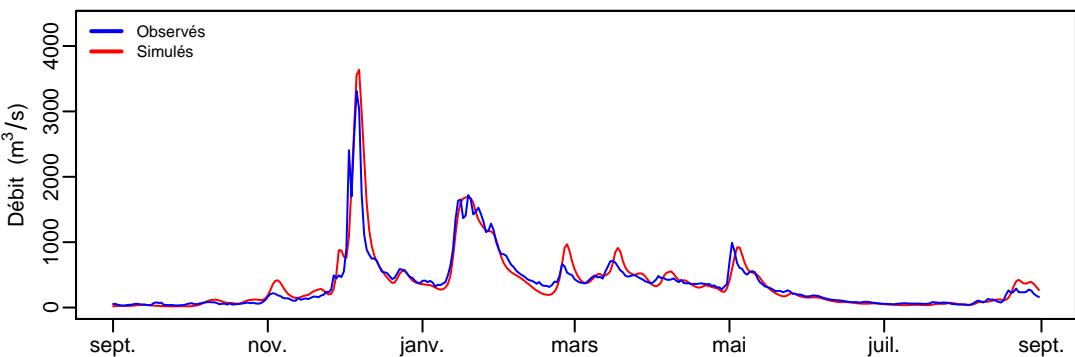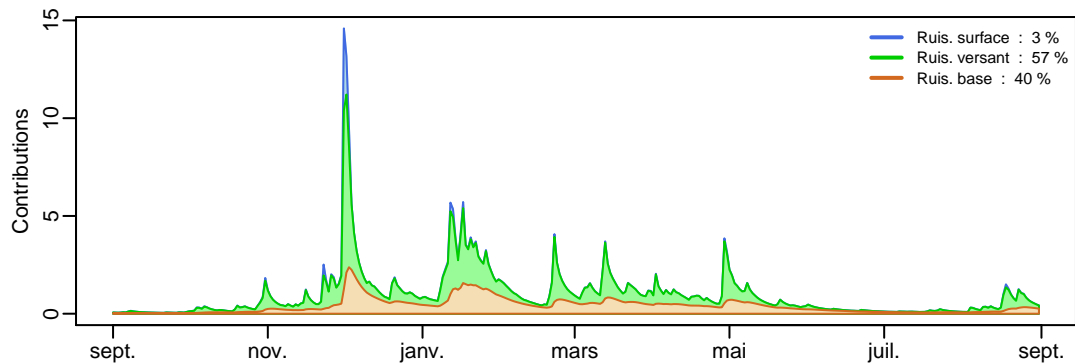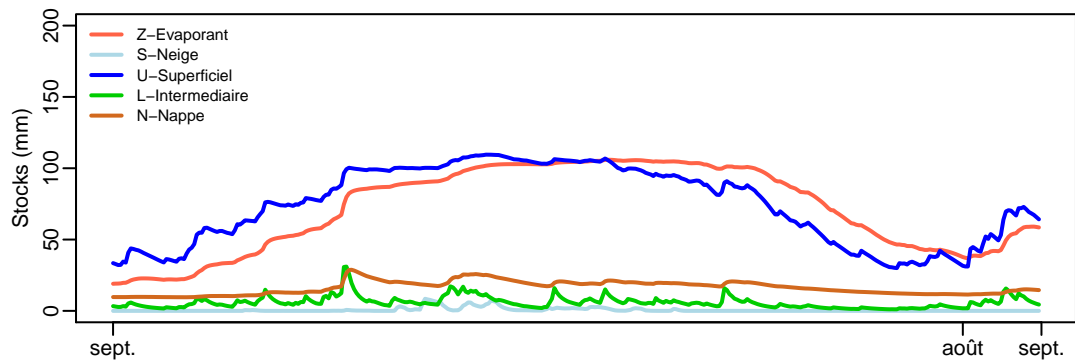

# k4000010 (32719.22 km<sup>2</sup>) – année 2004–2005

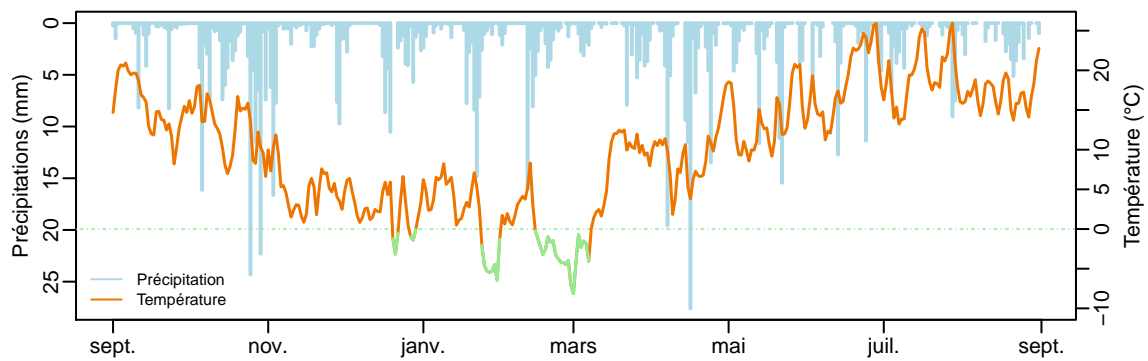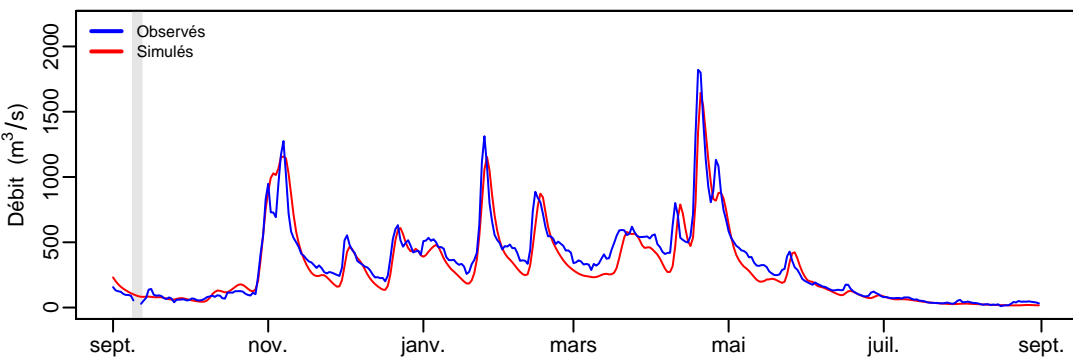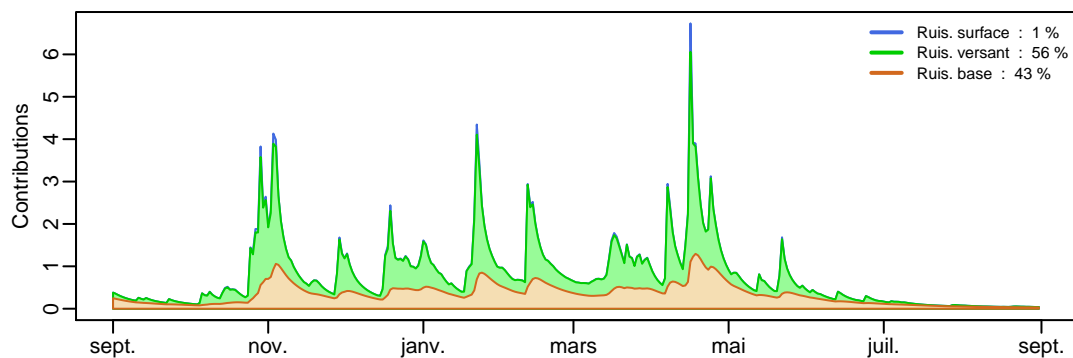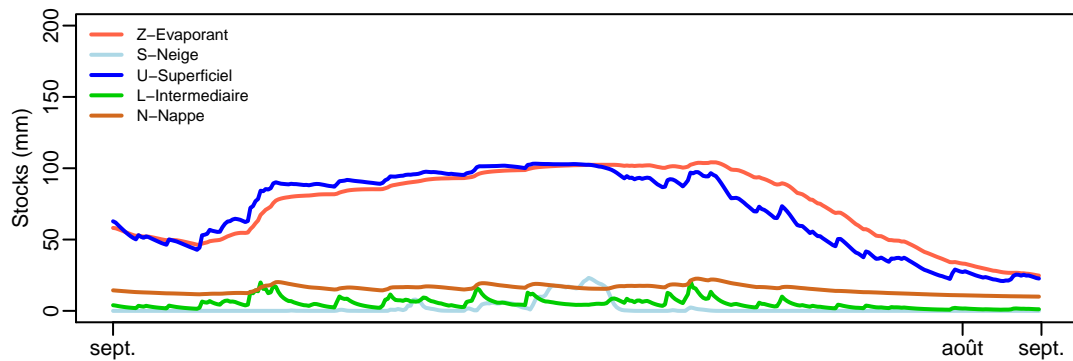

# k4000010 (32719.22 km<sup>2</sup>) – année 2005–2006

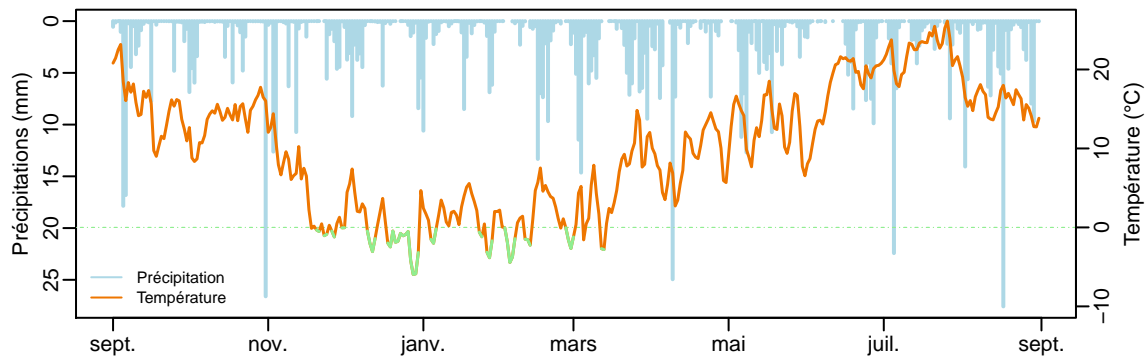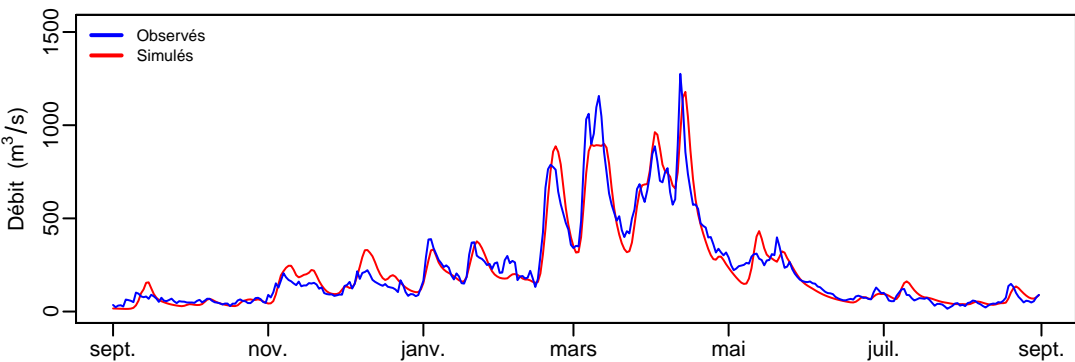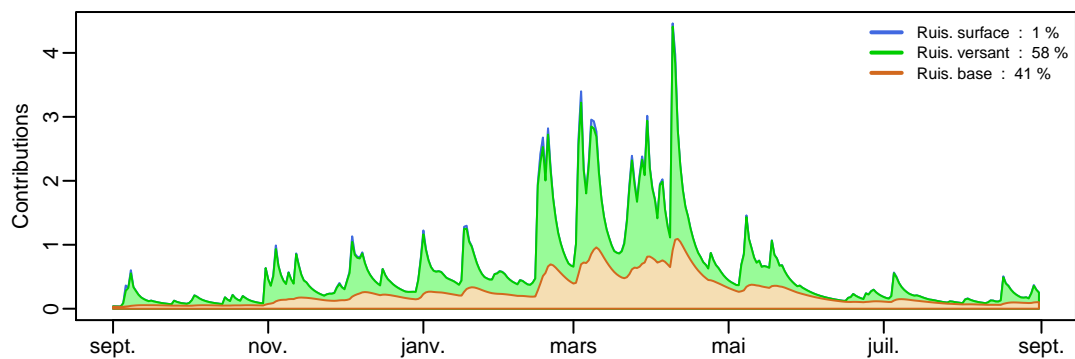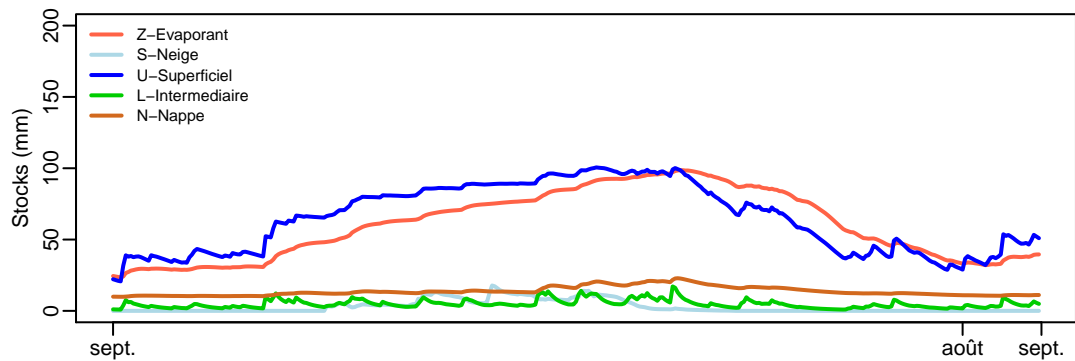



# k4000010 (32719.22 km<sup>2</sup>) – année 2006–2007

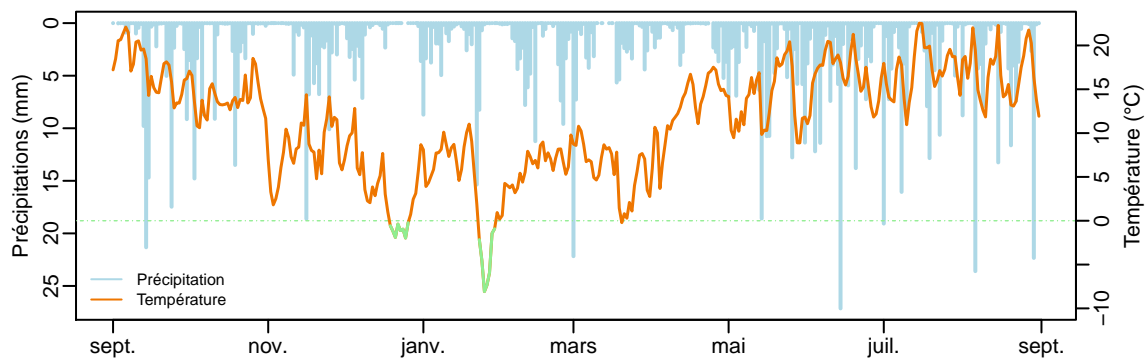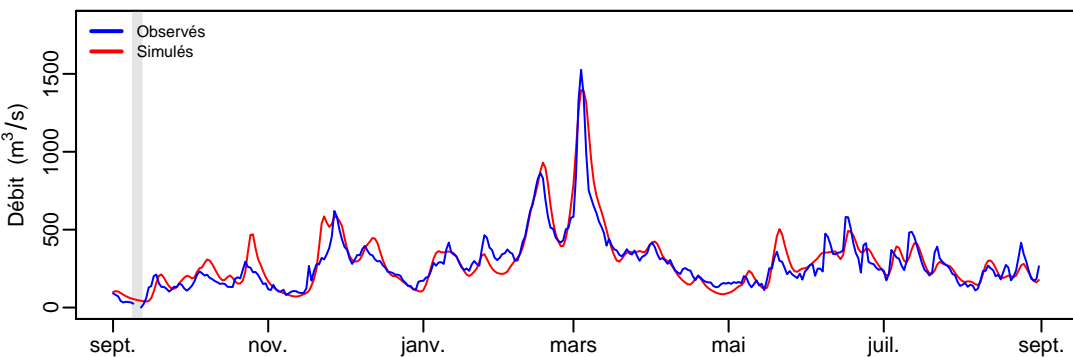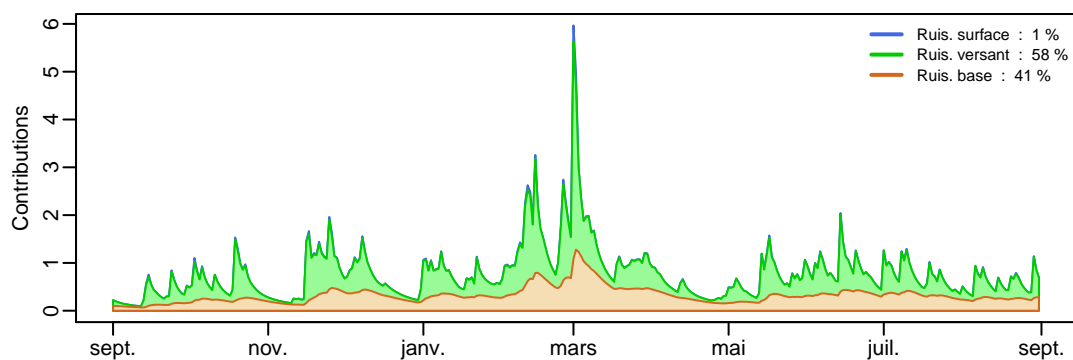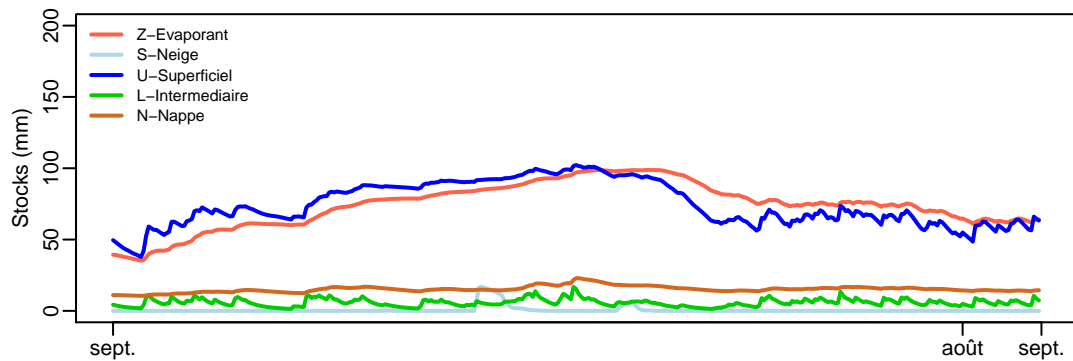

# k4000010 (32719.22 km<sup>2</sup>) – année 2007–2008

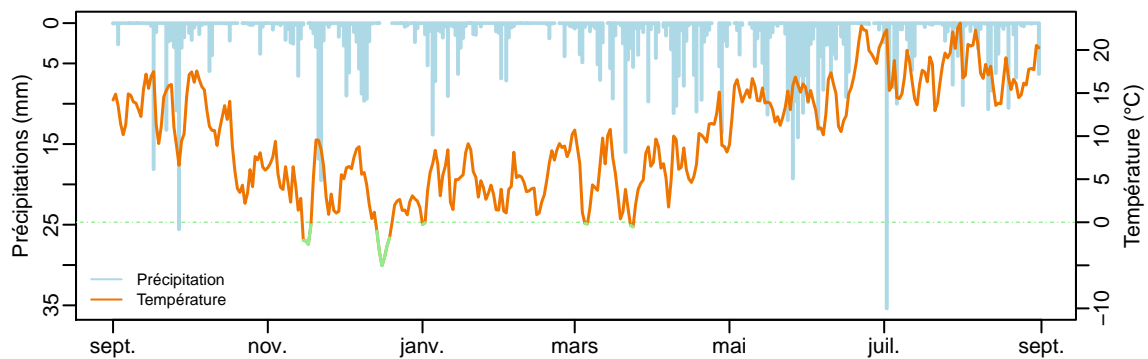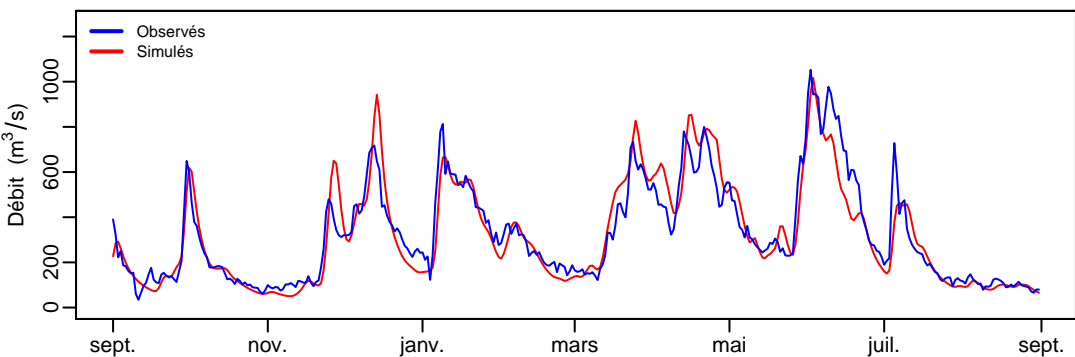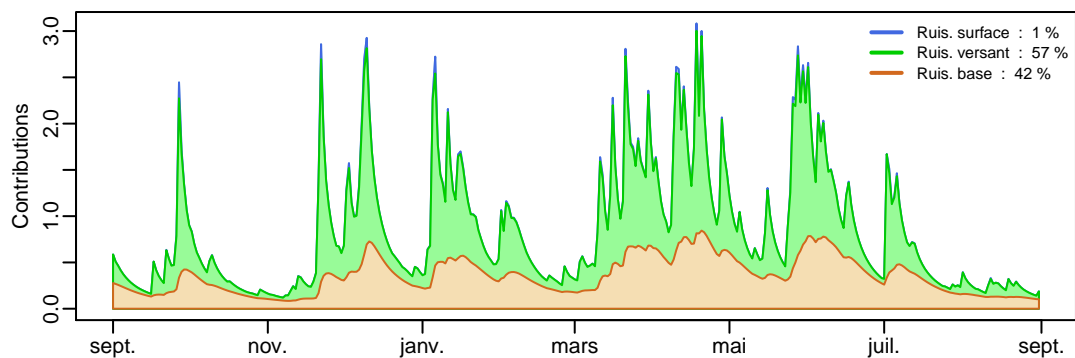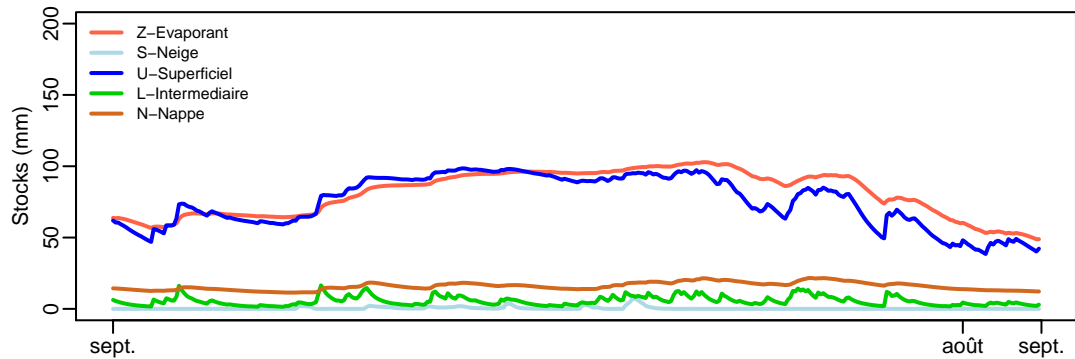

# k4000010 (32719.22 km<sup>2</sup>) – année 2008–2009

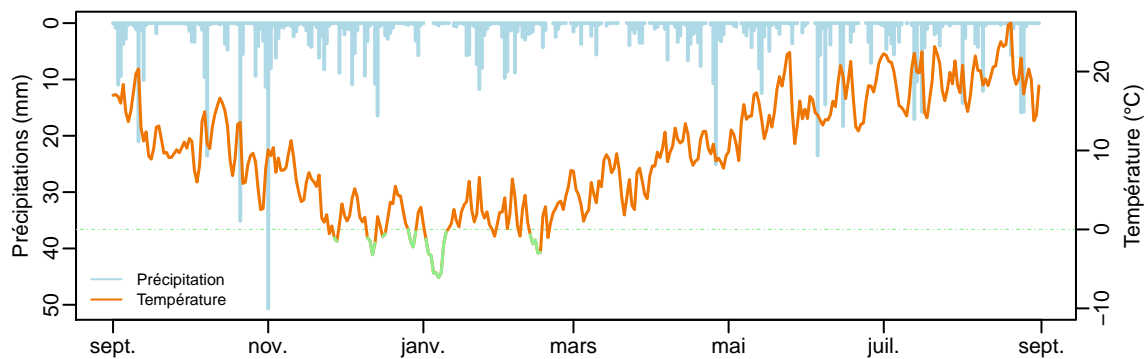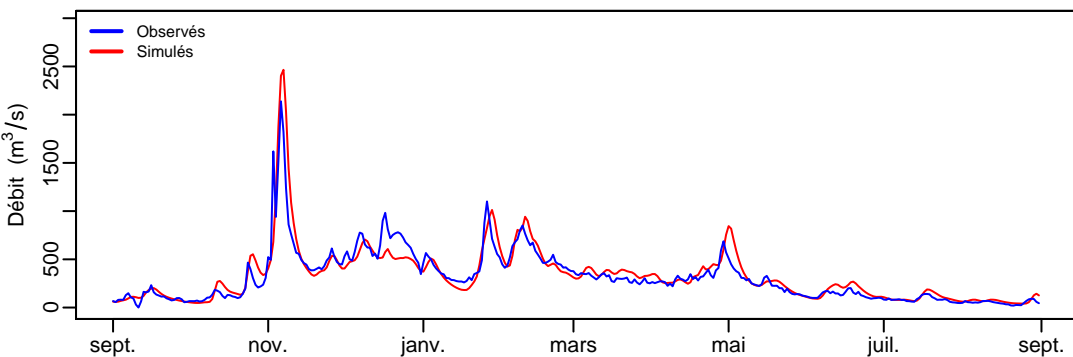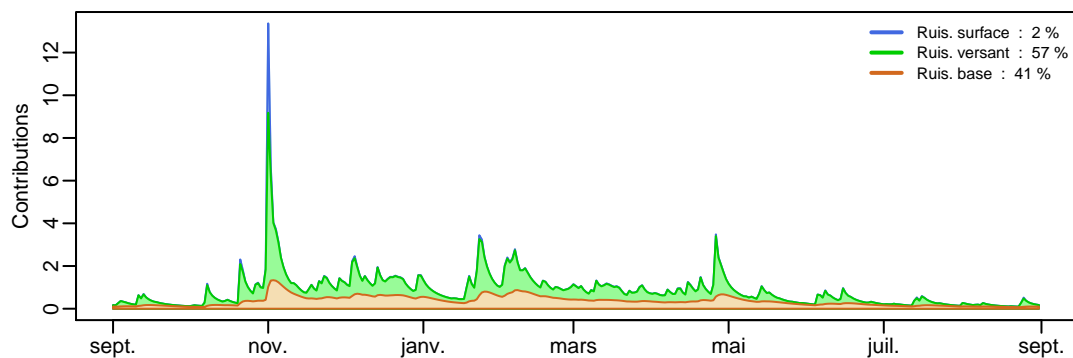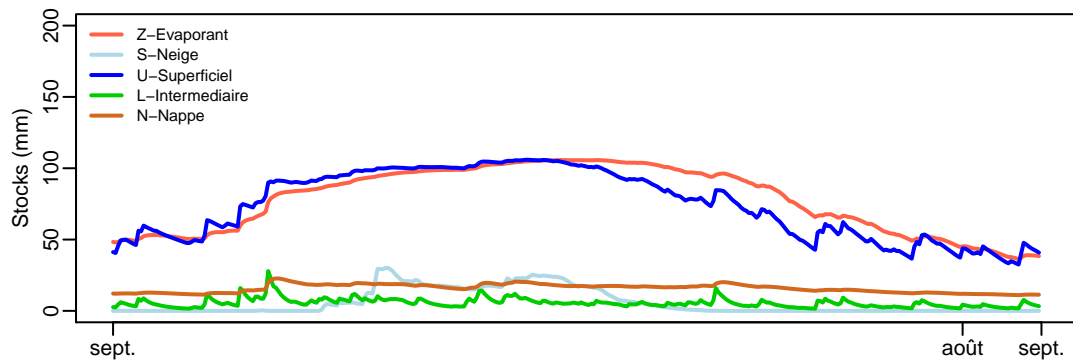

# k4000010 (32719.22 km<sup>2</sup>) – année 2009–2010

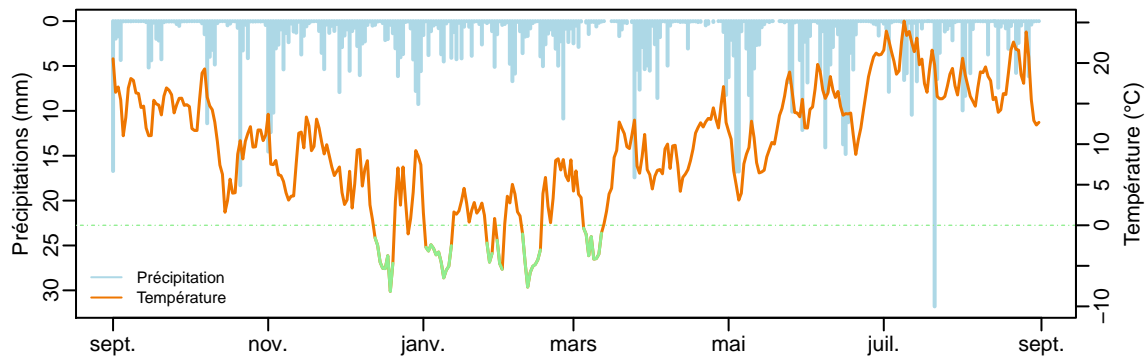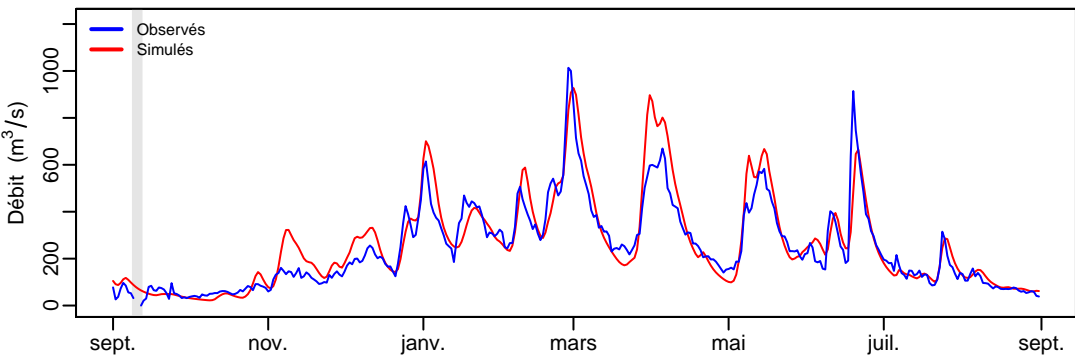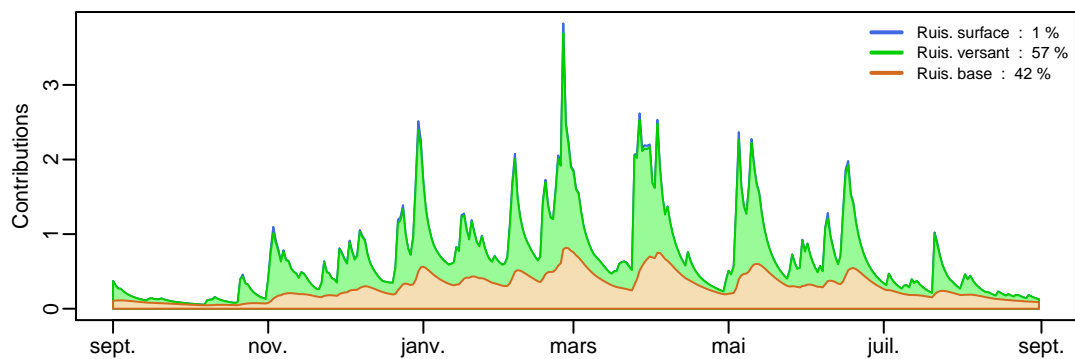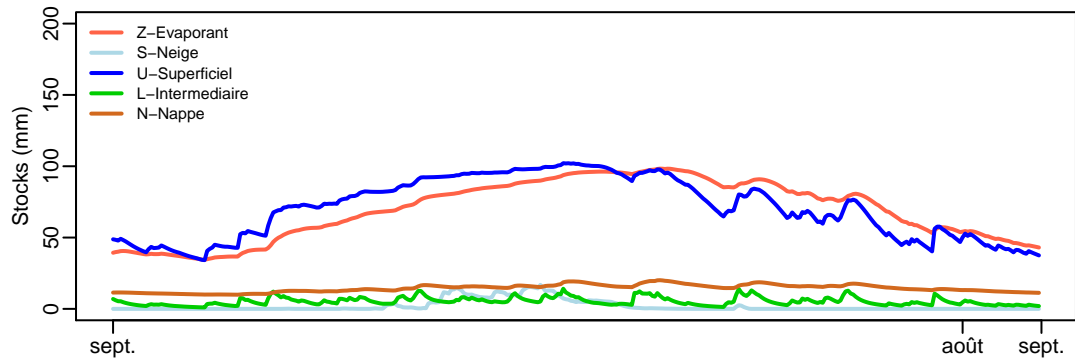

# k4000010 (32719.22 km<sup>2</sup>) – année 2010–2011

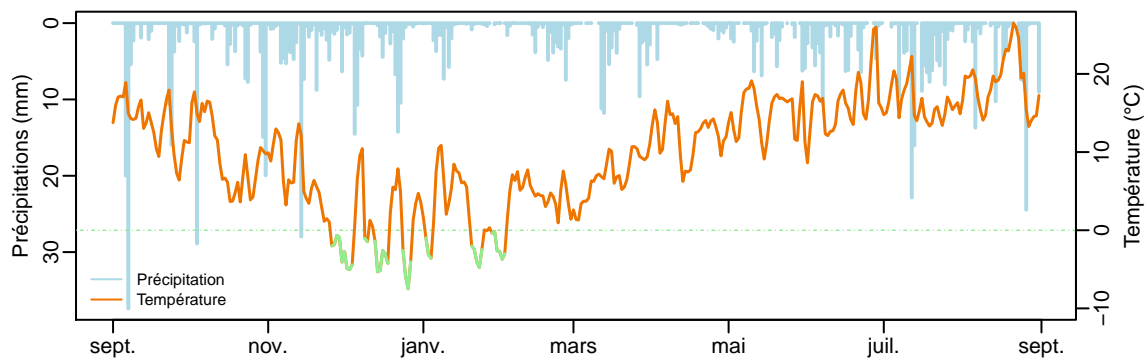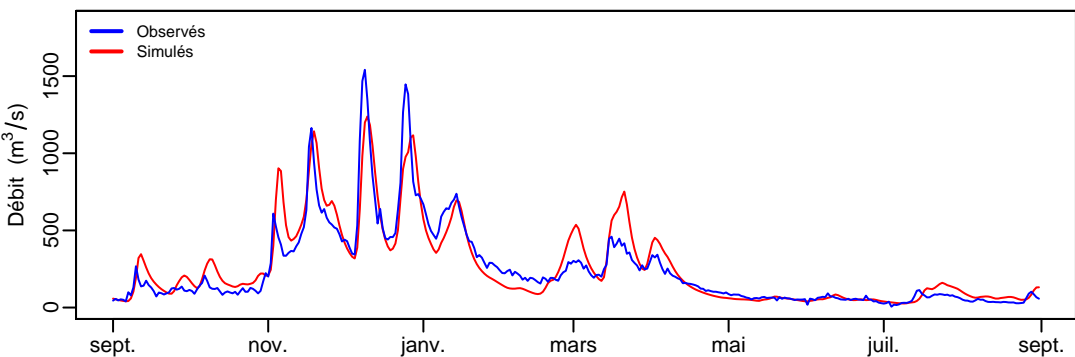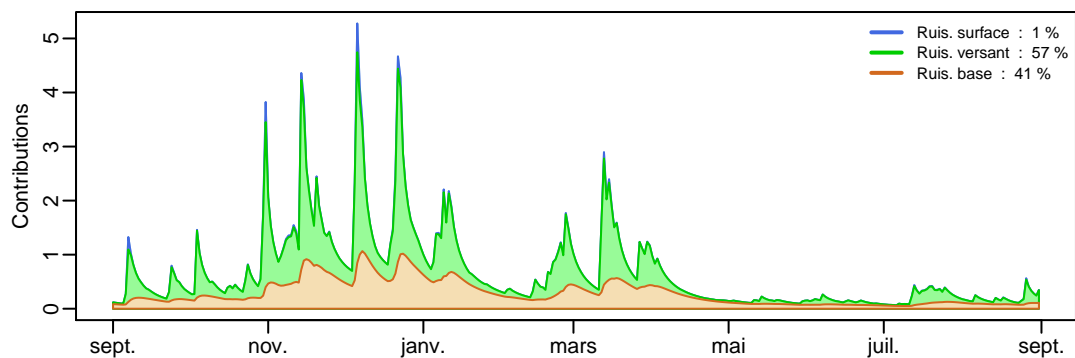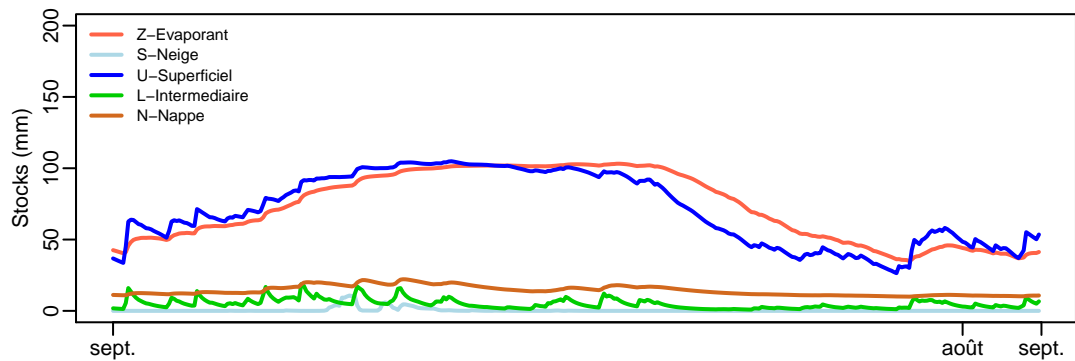

# k4000010 (32719.22 km<sup>2</sup>) – année 2011–2012

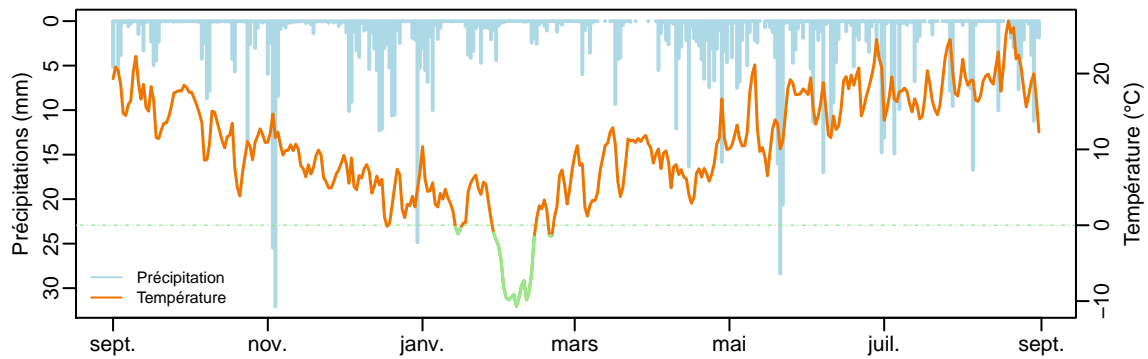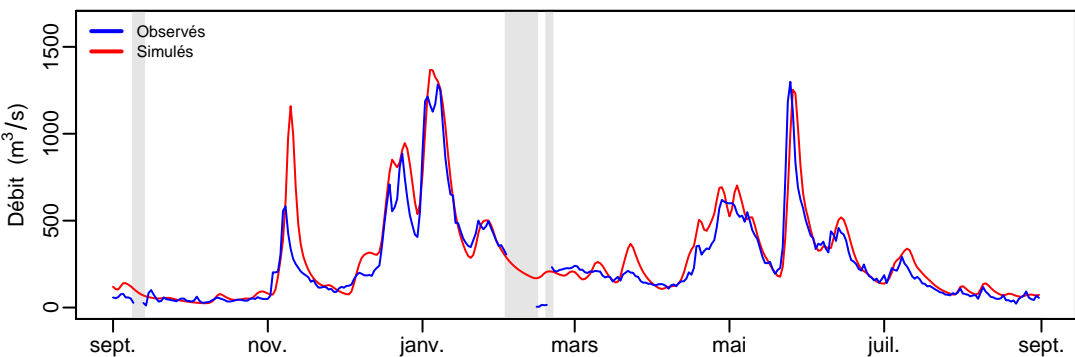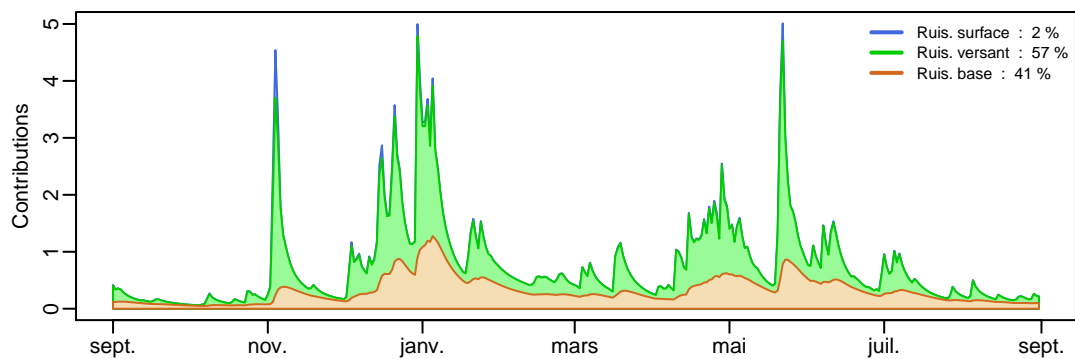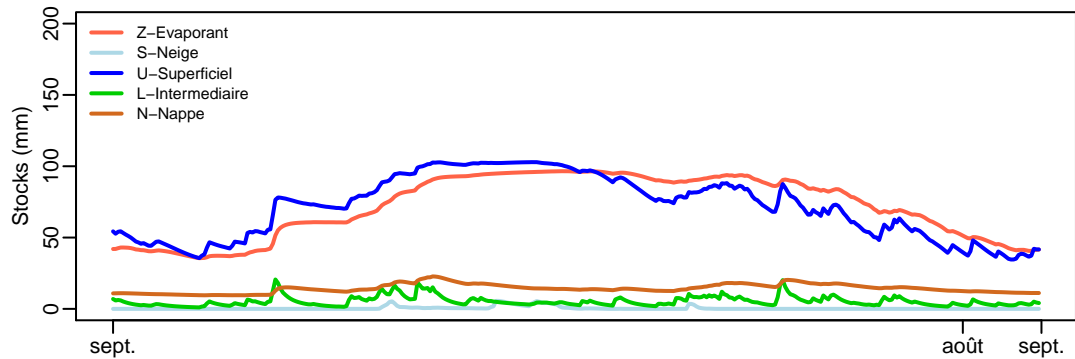

# k4013010 (135.56 km<sup>2</sup>) – année 1996–1997

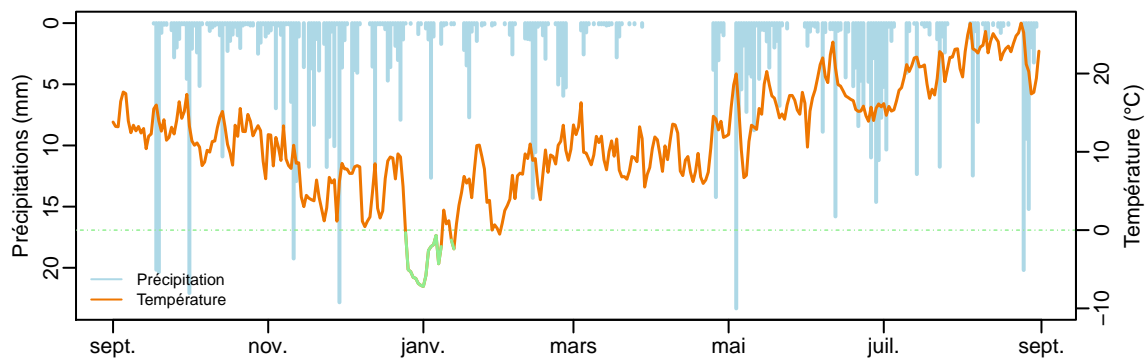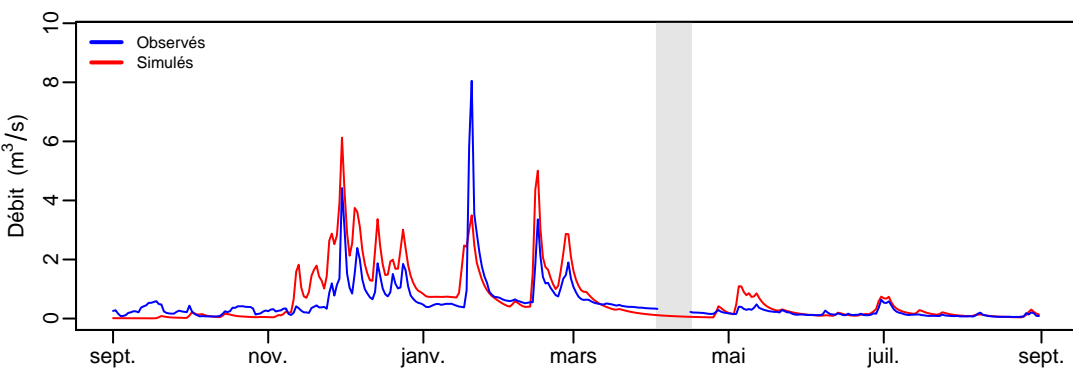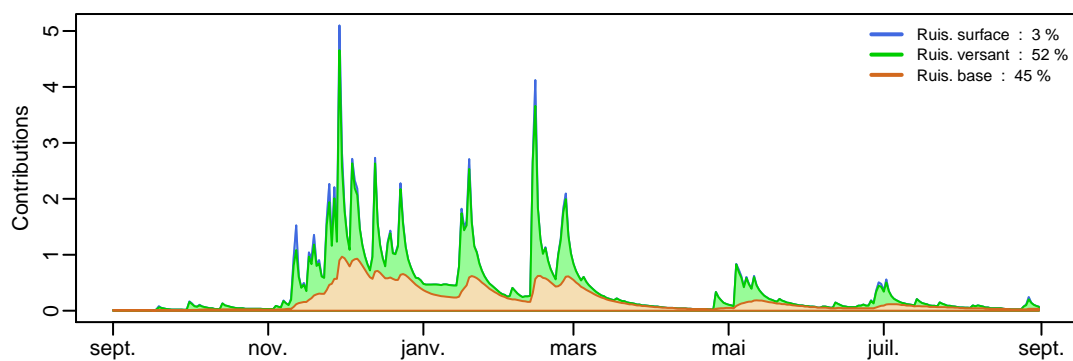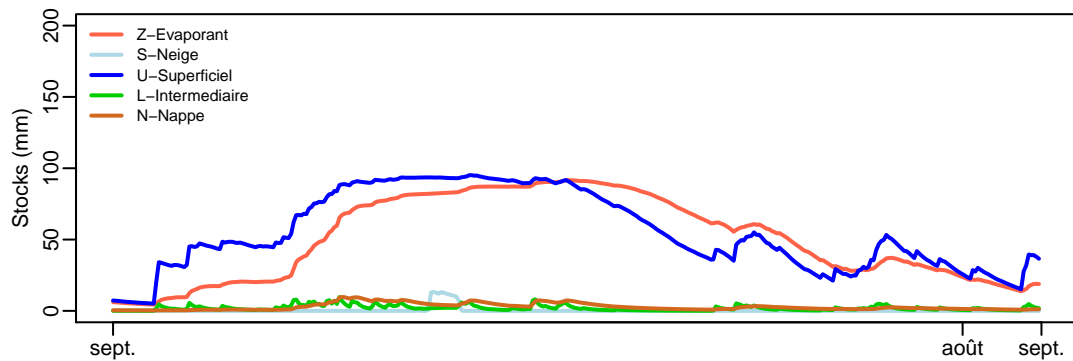

# k4013010 (135.56 km<sup>2</sup>) – année 1997–1998

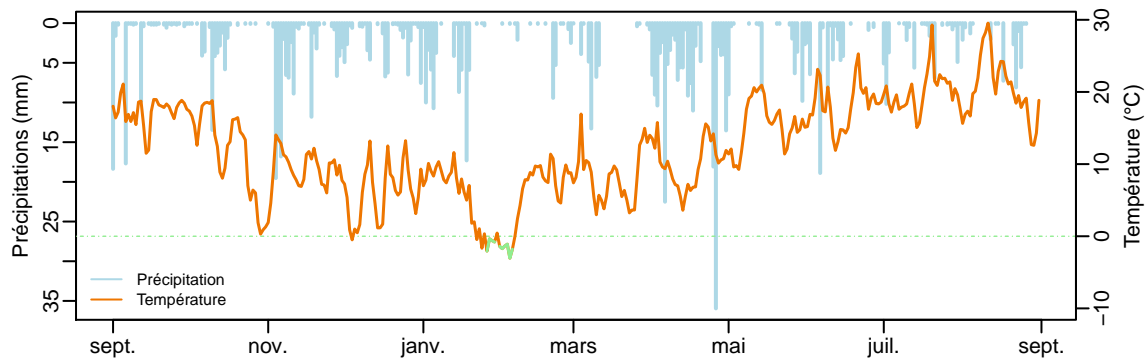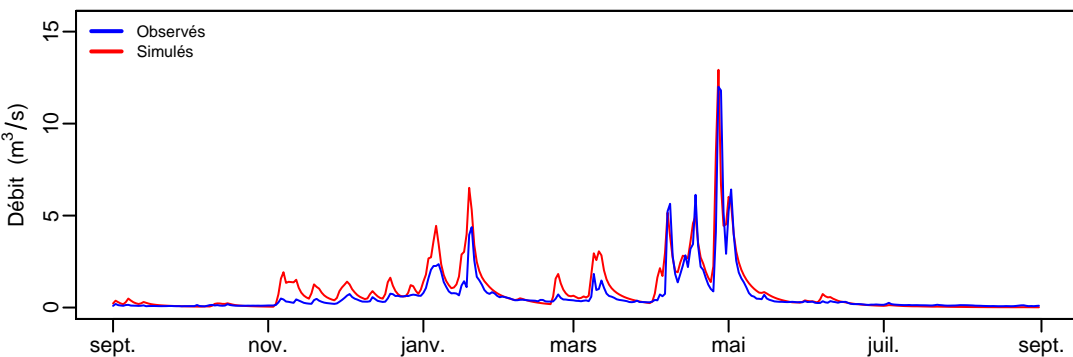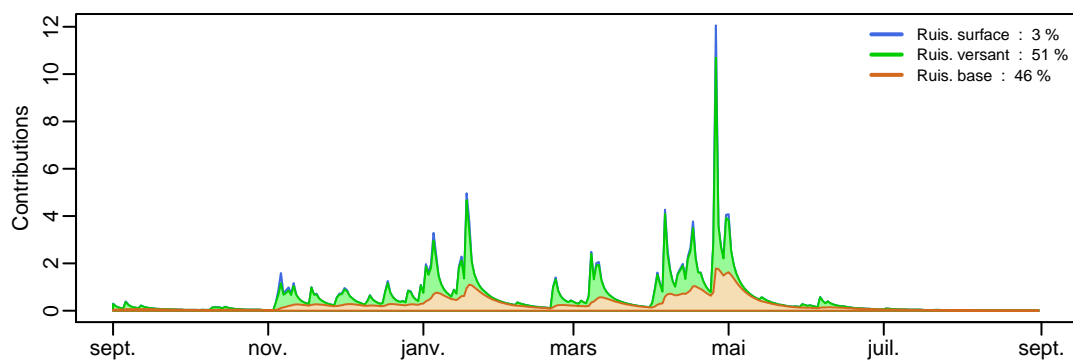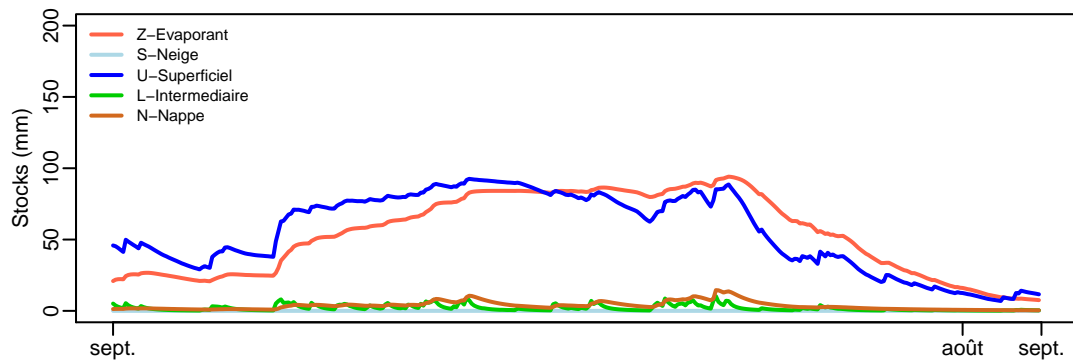



# k4013010 (135.56 km<sup>2</sup>) – année 1998–1999

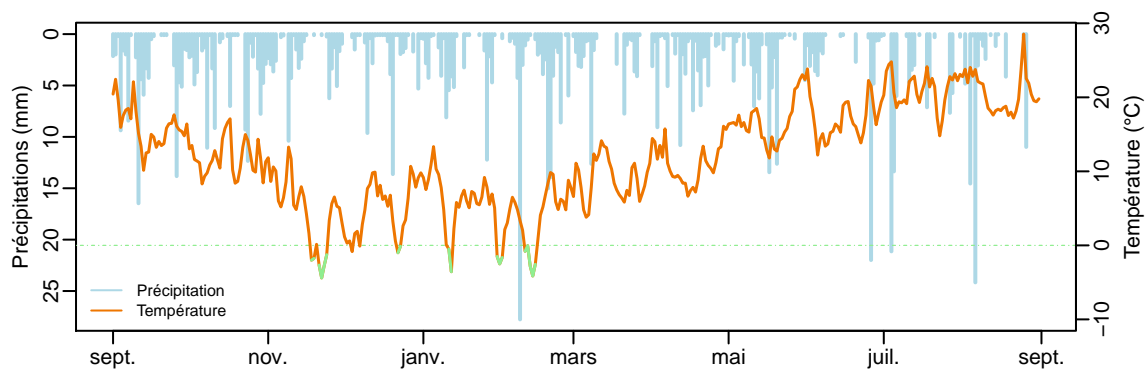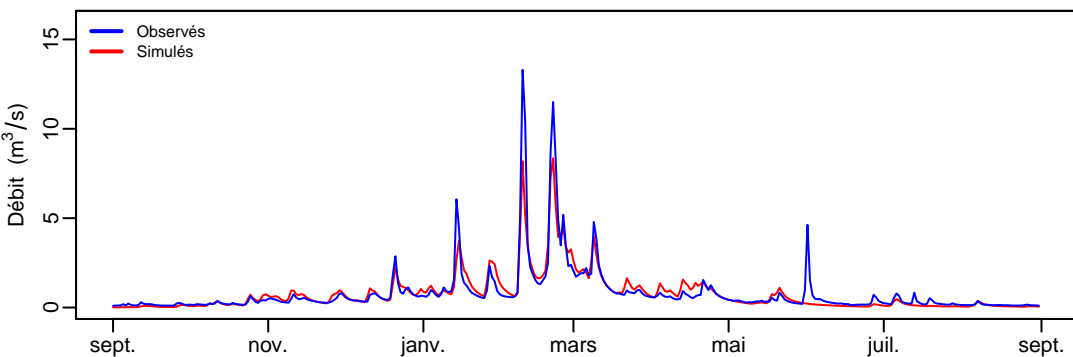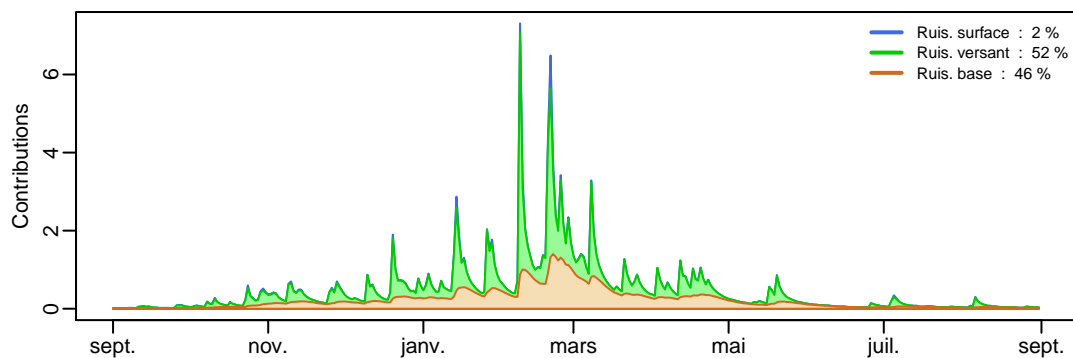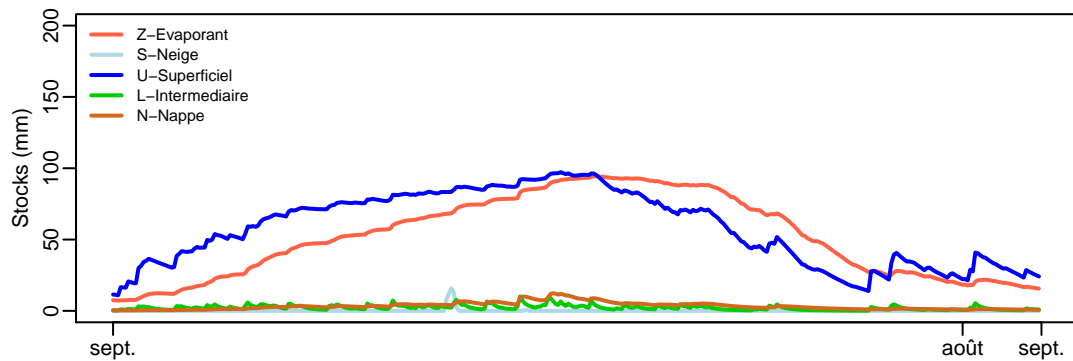

# k4013010 (135.56 km<sup>2</sup>) – année 1999–2000

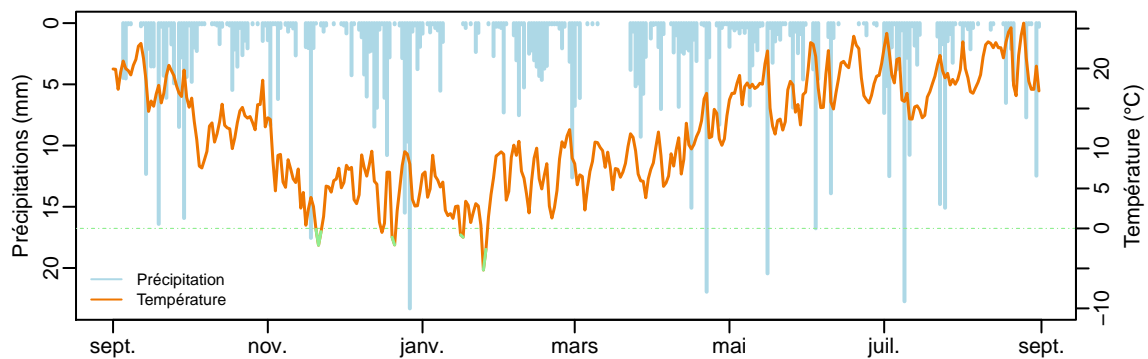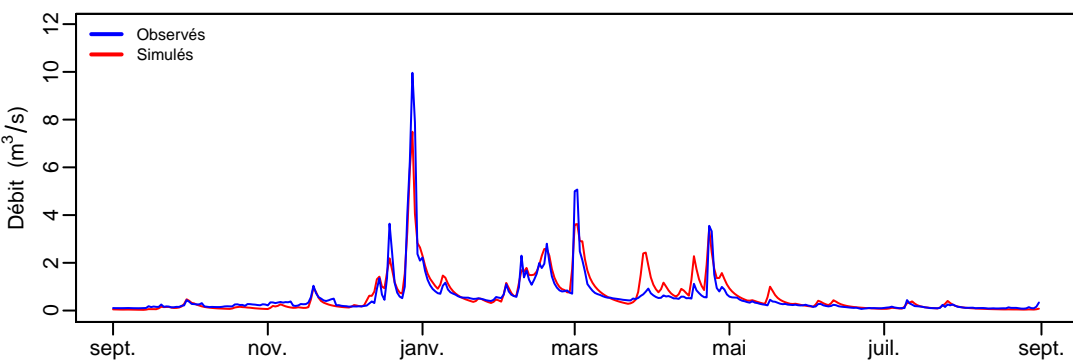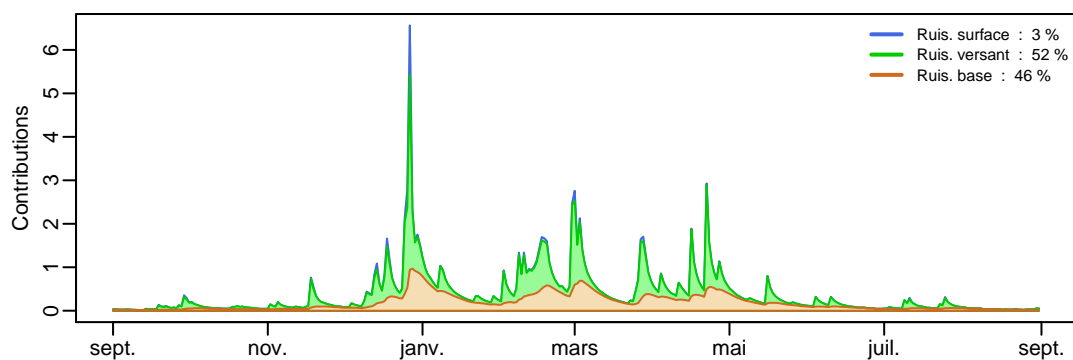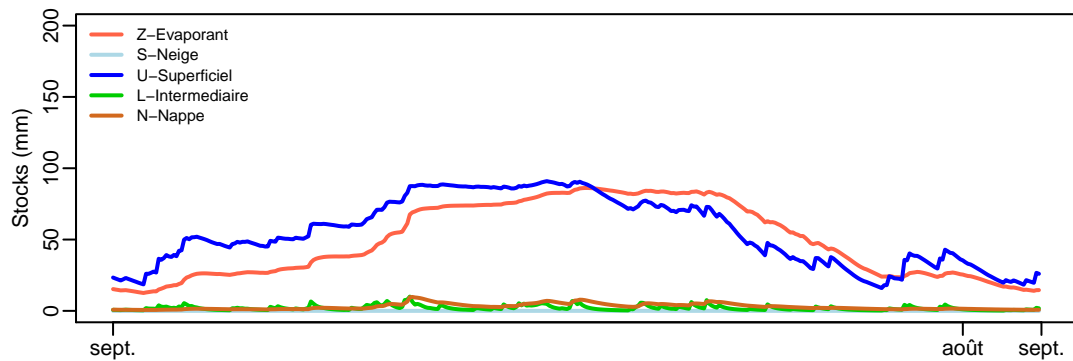

# k4013010 (135.56 km<sup>2</sup>) – année 2000–2001

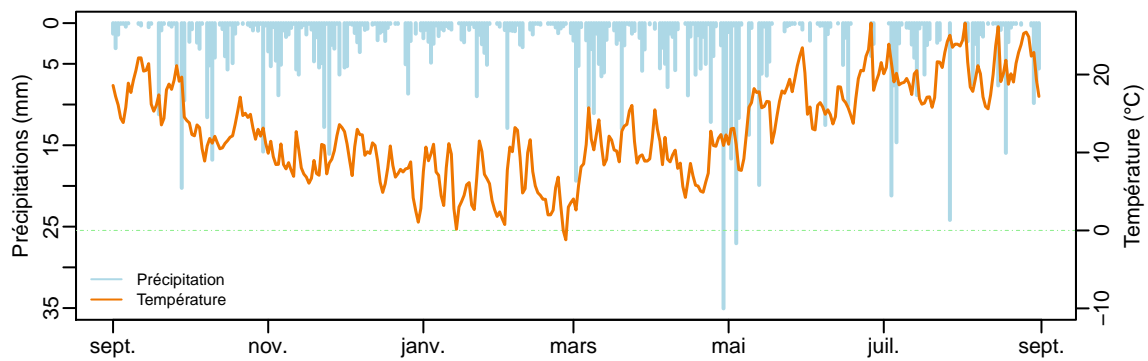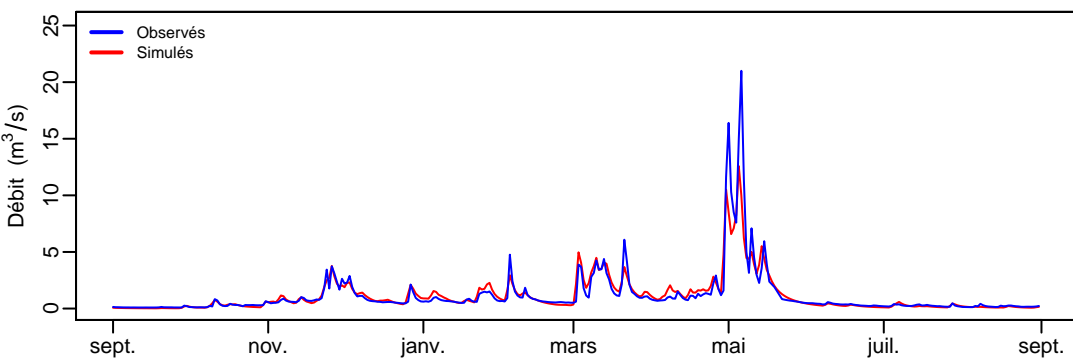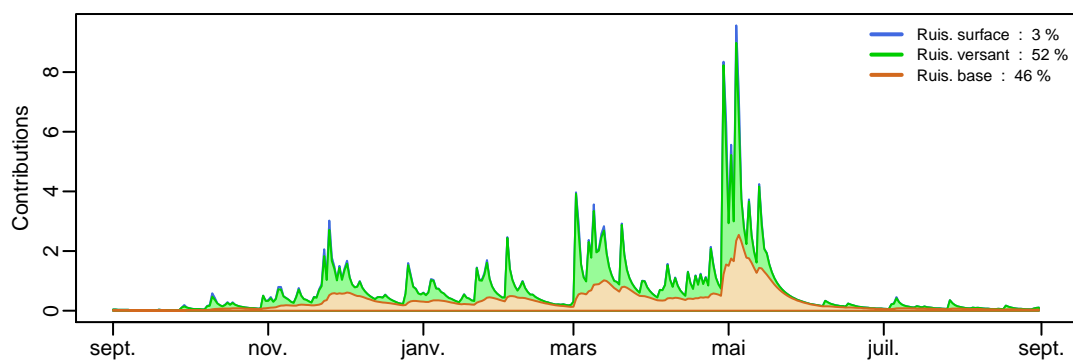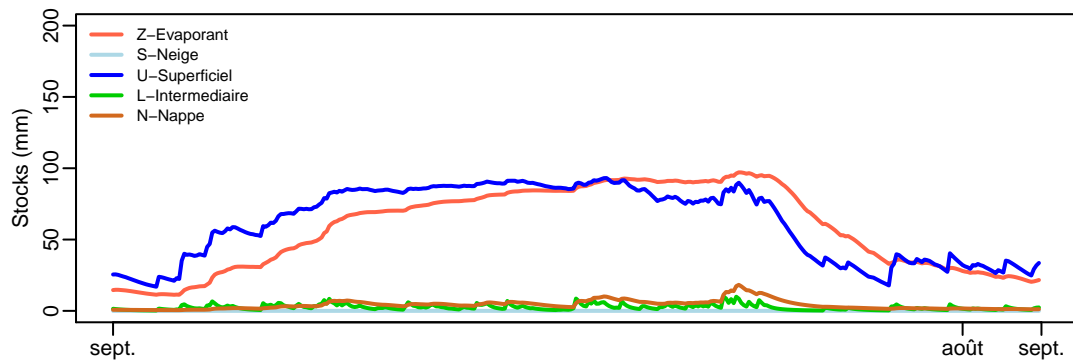

# k4013010 (135.56 km²) – année 2001–2002

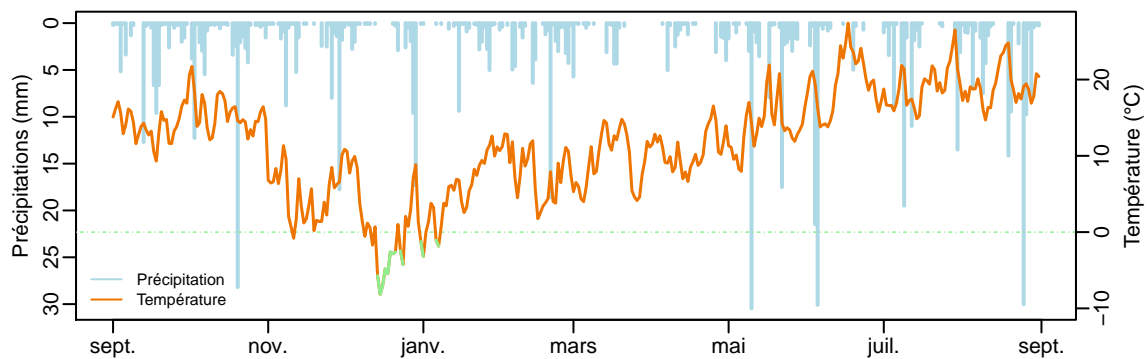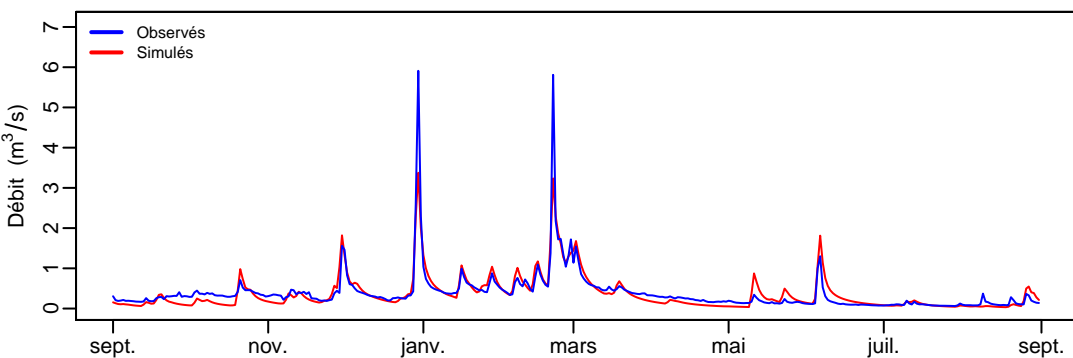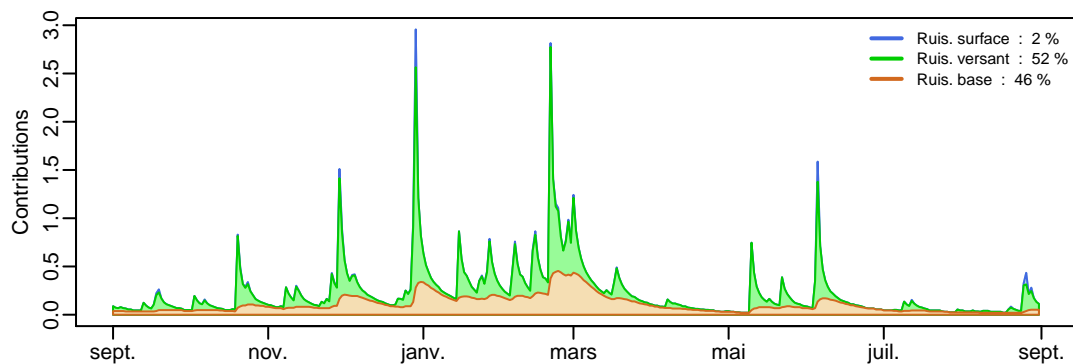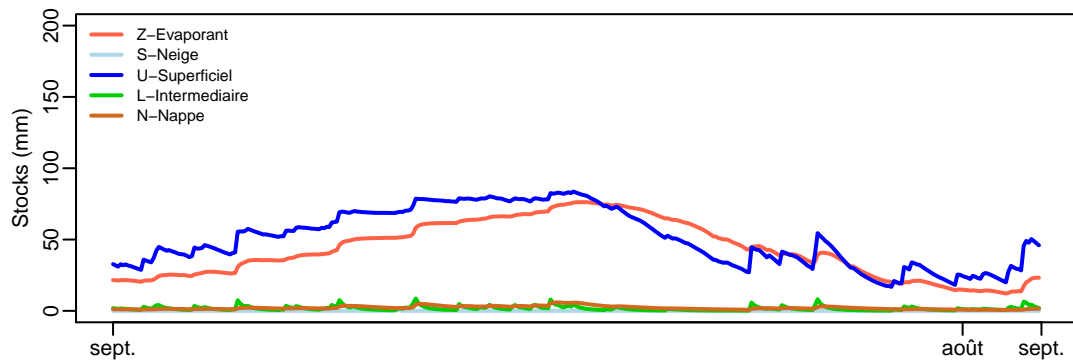

# k4013010 (135.56 km<sup>2</sup>) – année 2002–2003

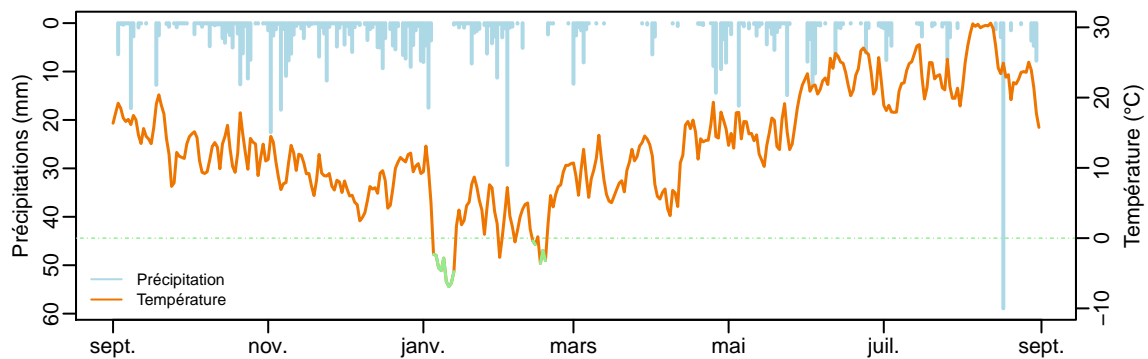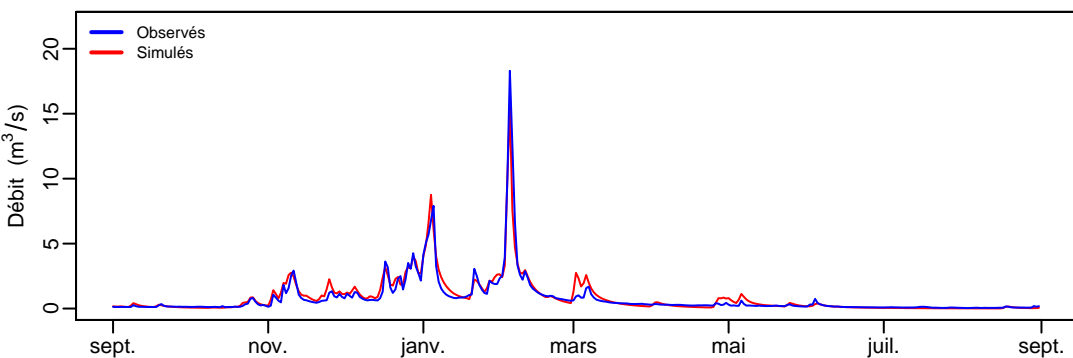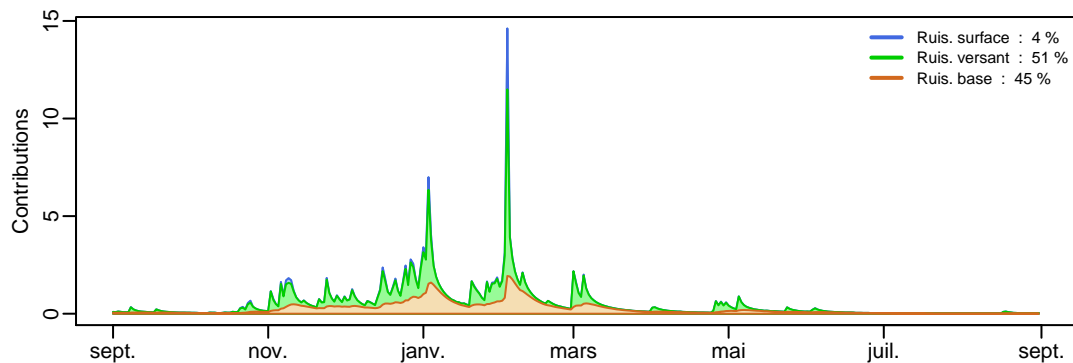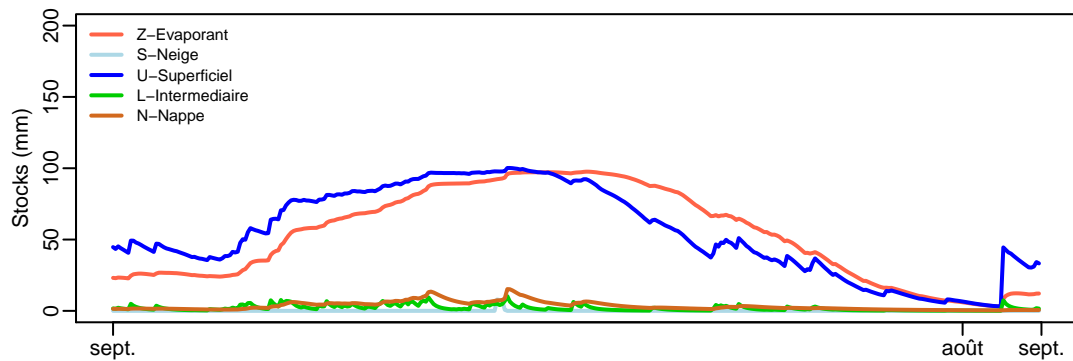

# k4013010 (135.56 km<sup>2</sup>) – année 2003–2004

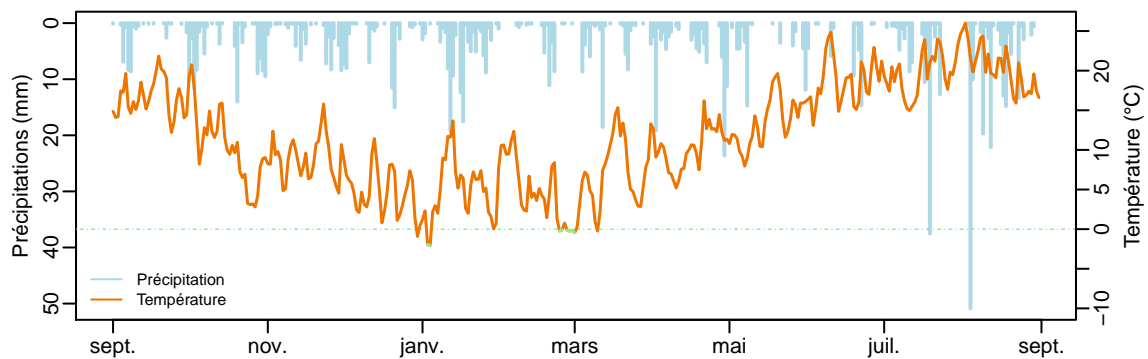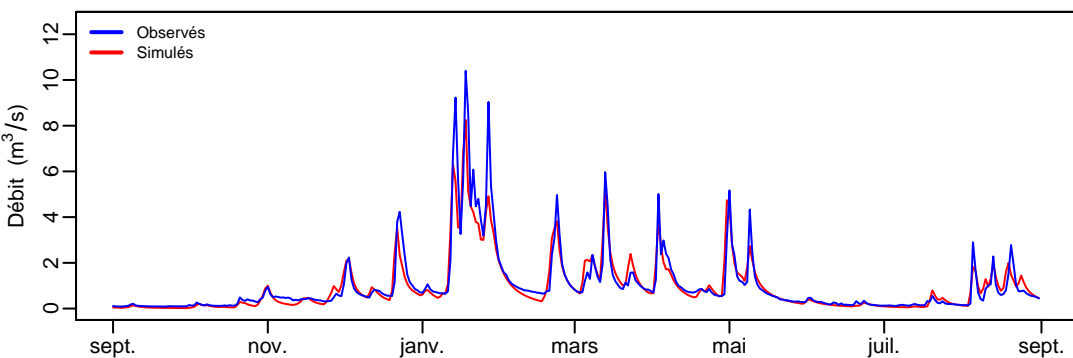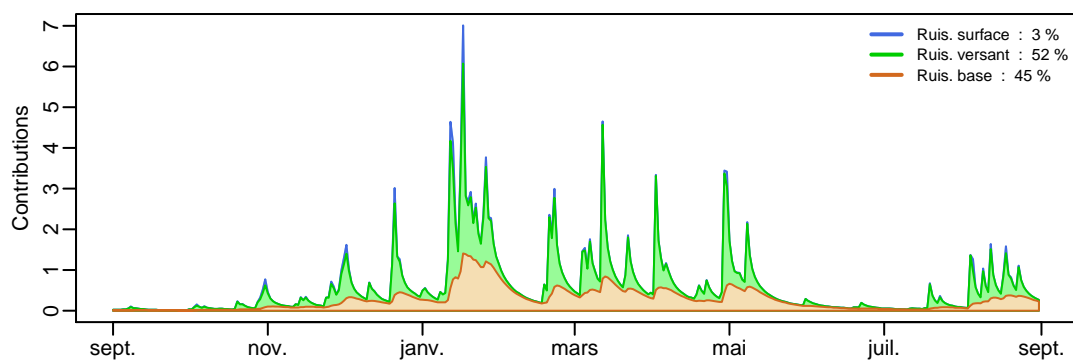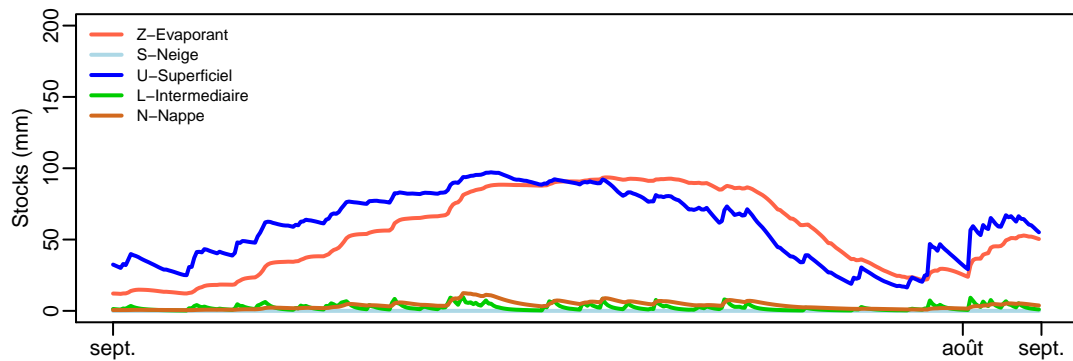

# k4013010 (135.56 km<sup>2</sup>) – année 2004–2005

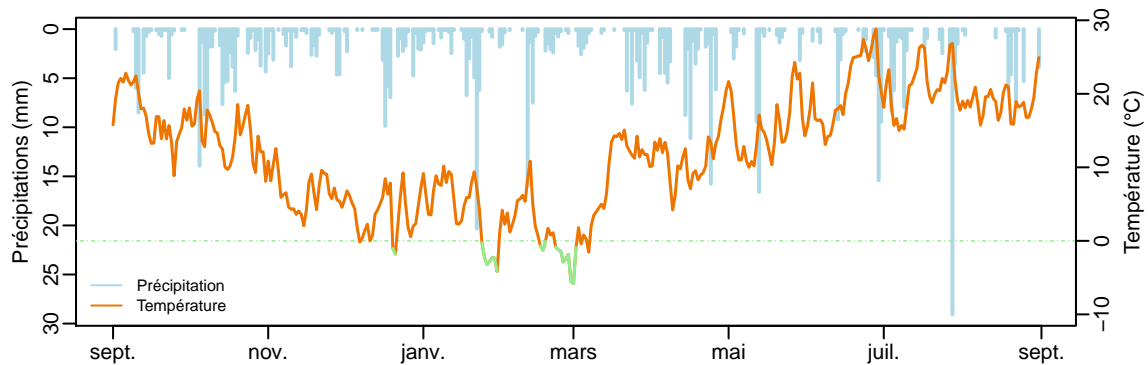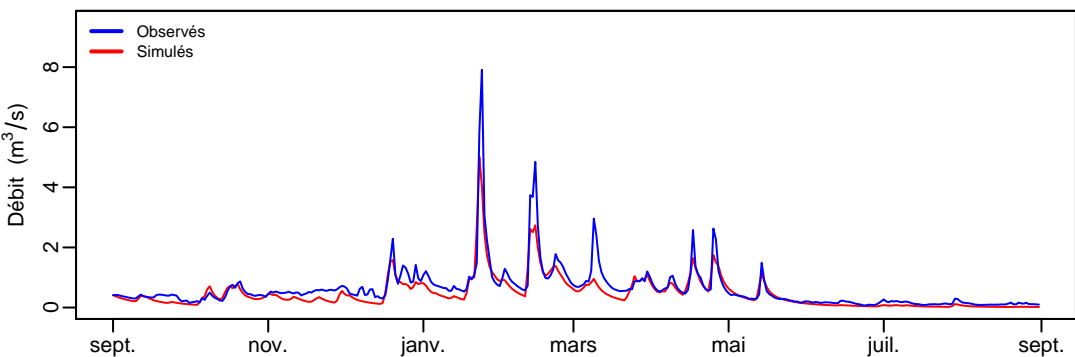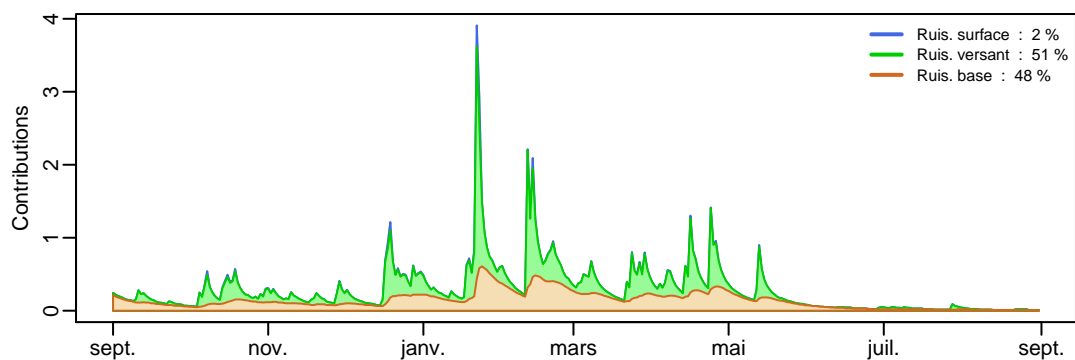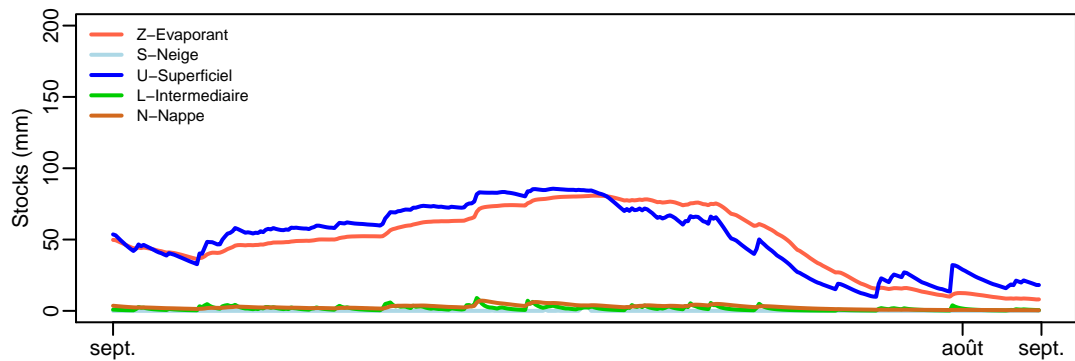

# k4013010 (135.56 km²) – année 2005–2006

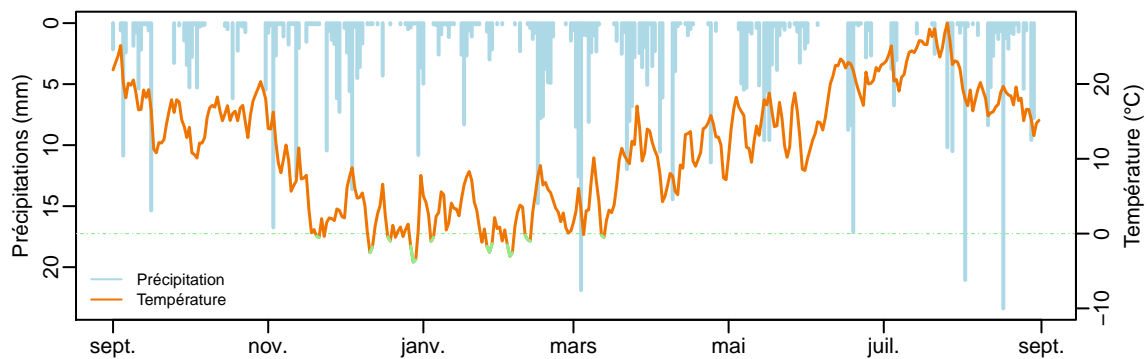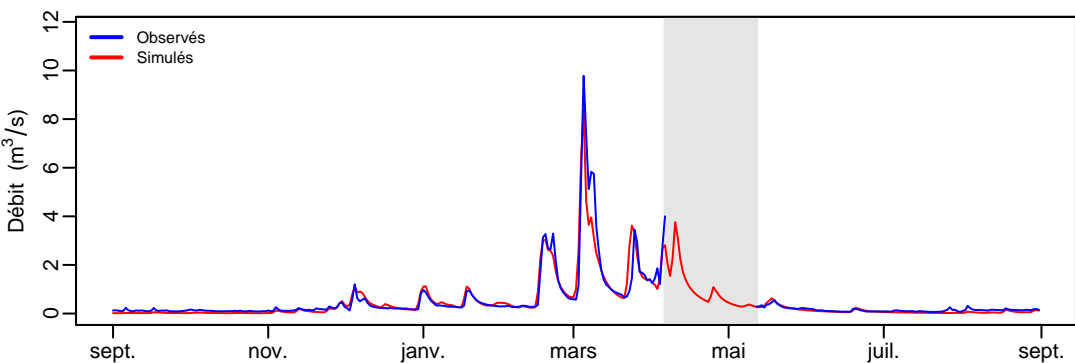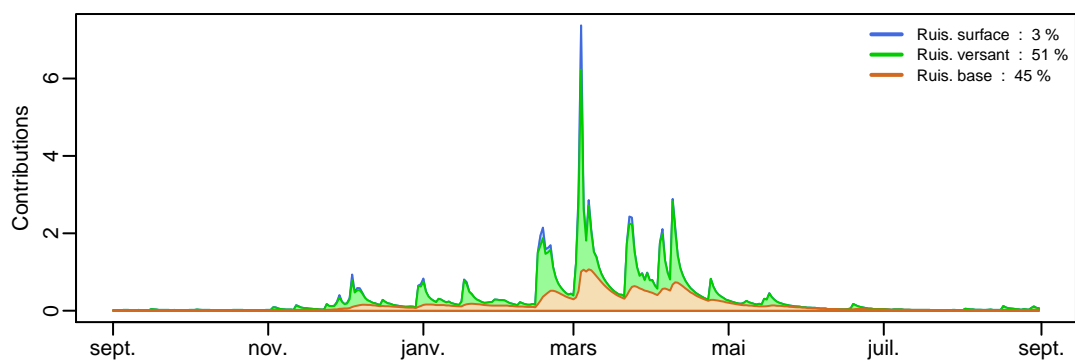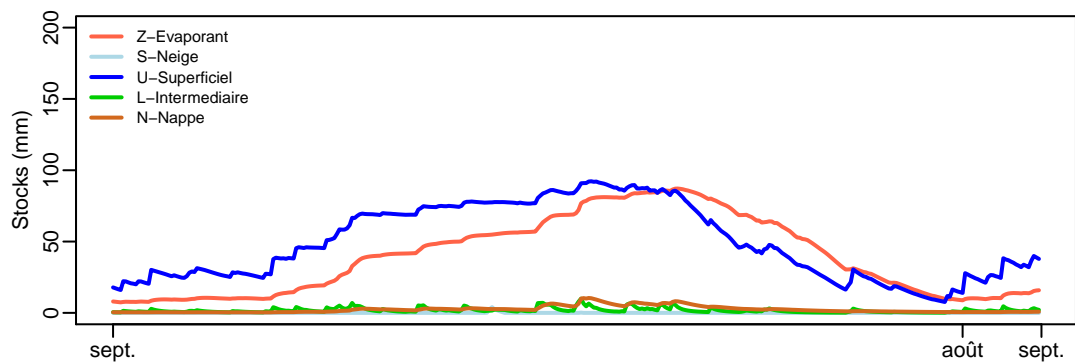



# k4013010 (135.56 km²) – année 2006–2007

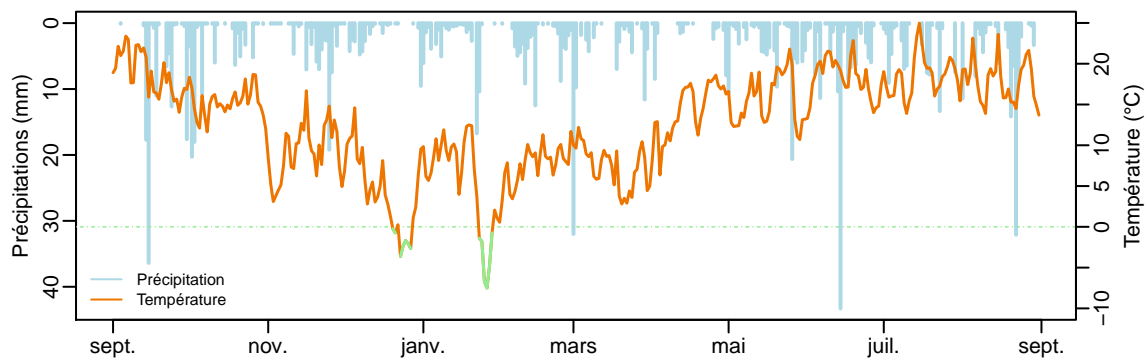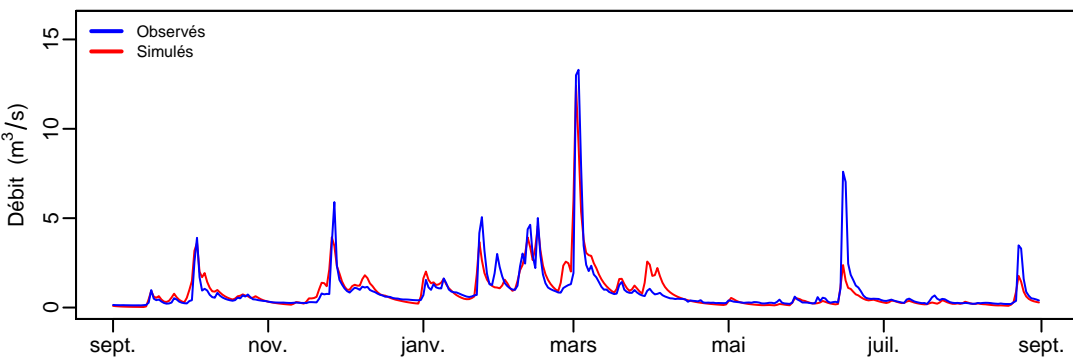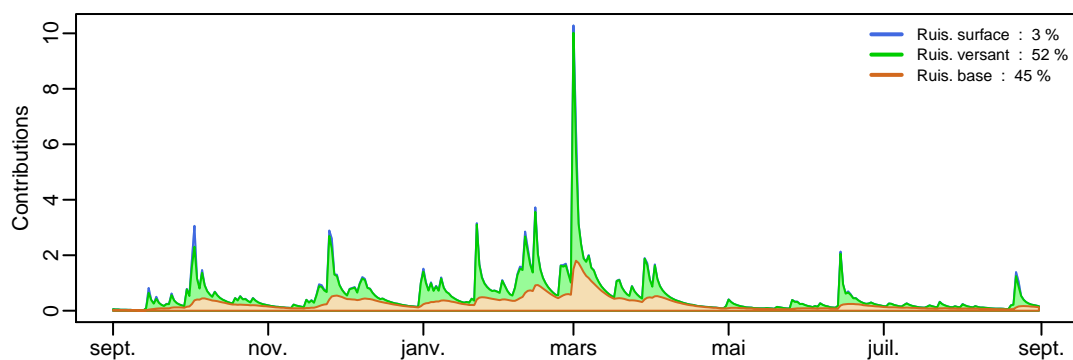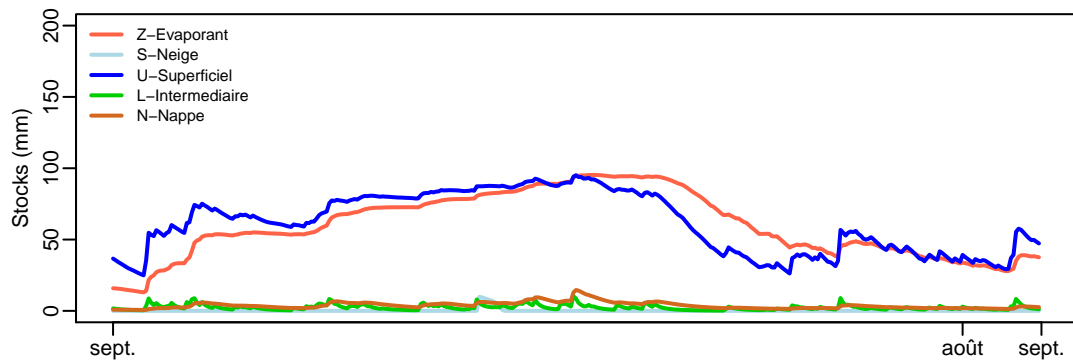

# k4013010 (135.56 km<sup>2</sup>) – année 2007–2008

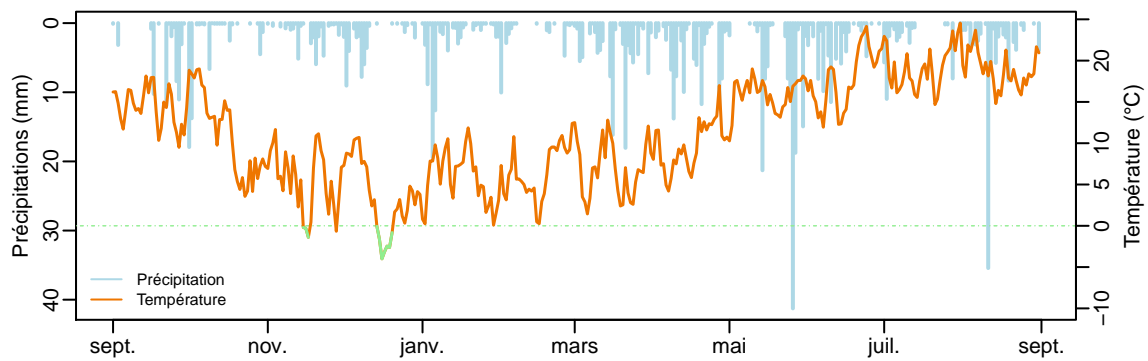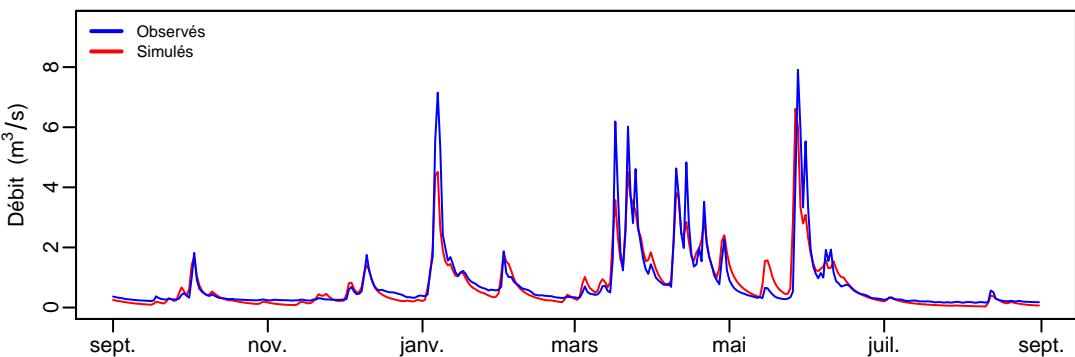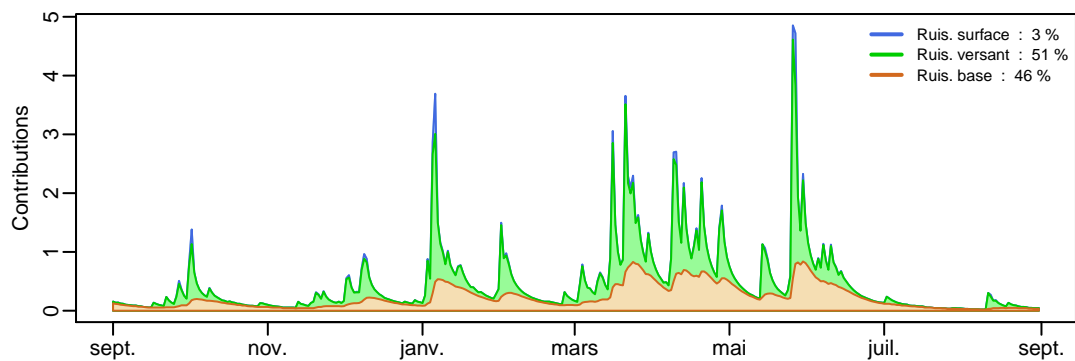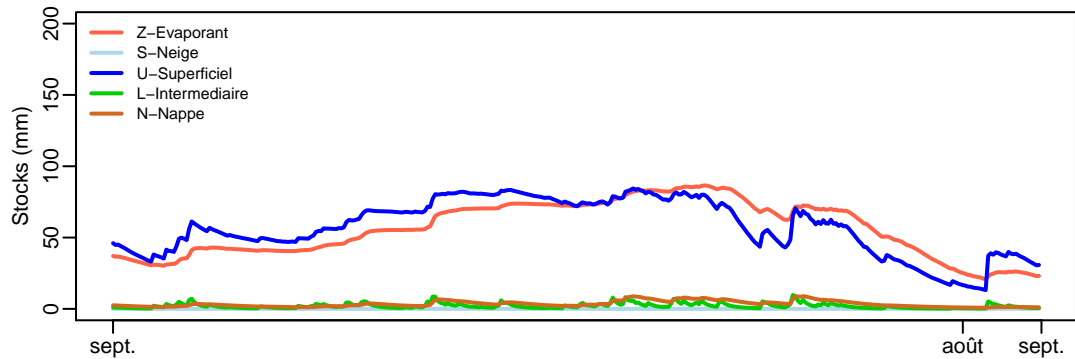

# k4013010 (135.56 km<sup>2</sup>) – année 2008–2009

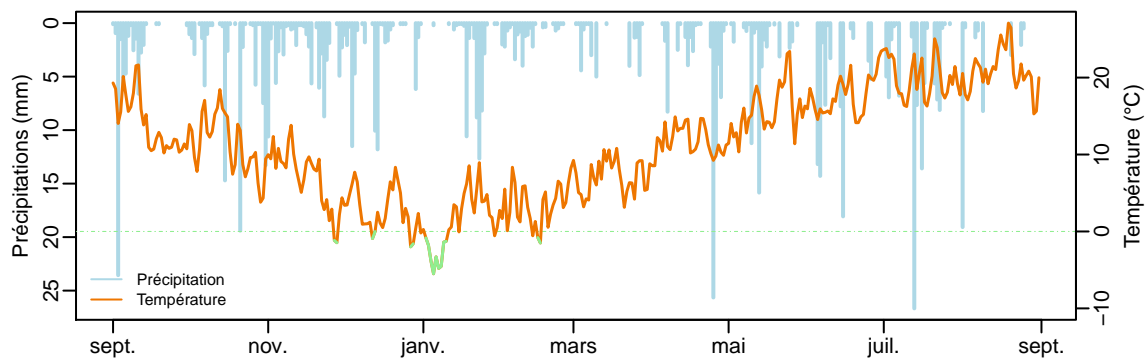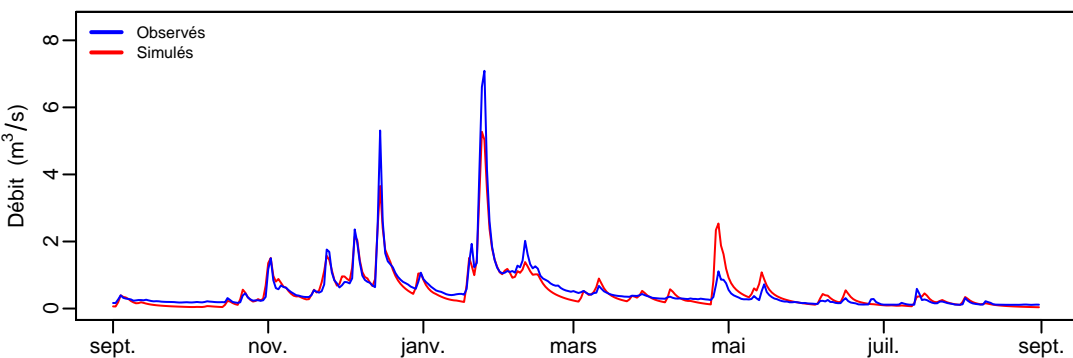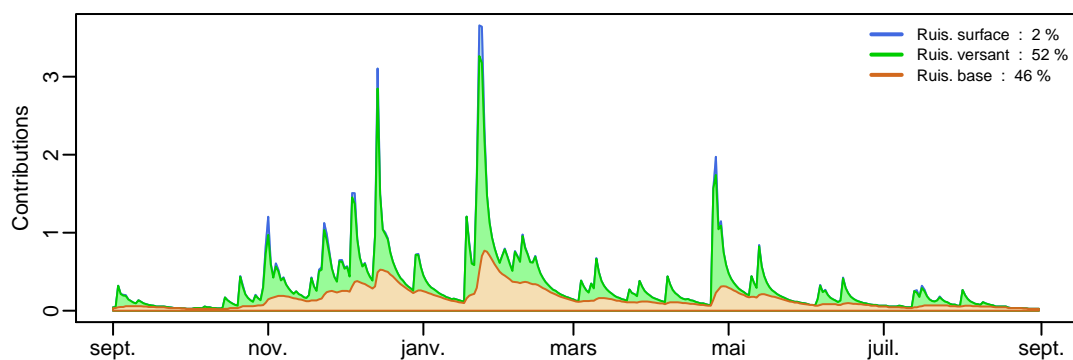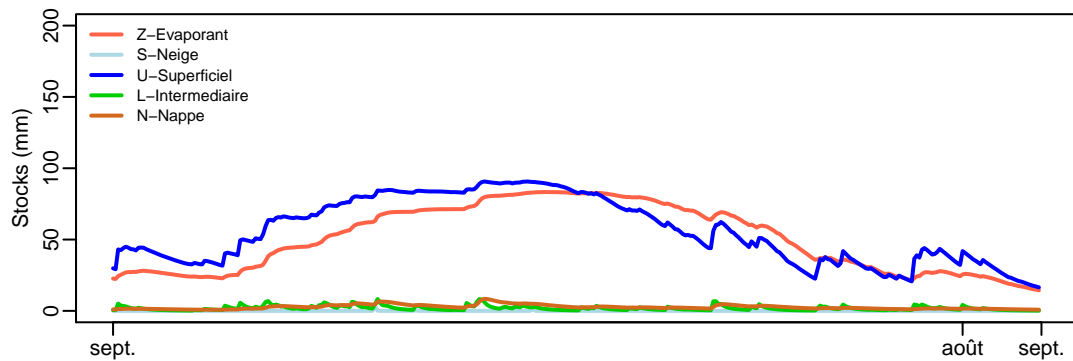

# k4013010 (135.56 km<sup>2</sup>) – année 2009–2010

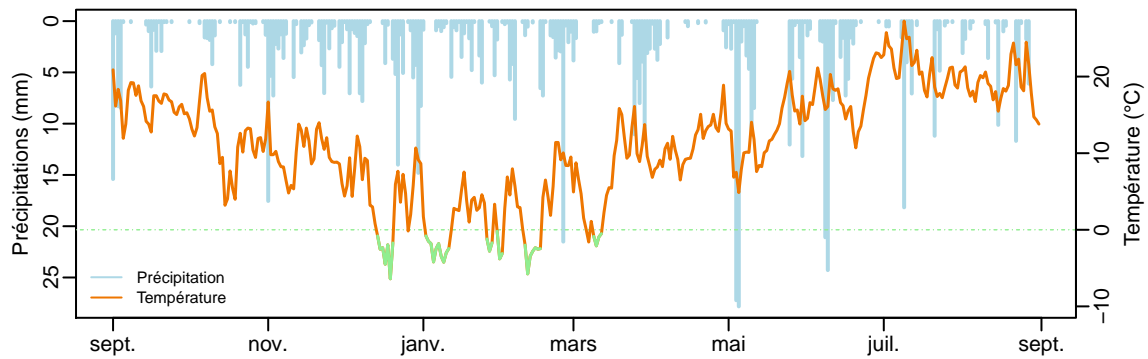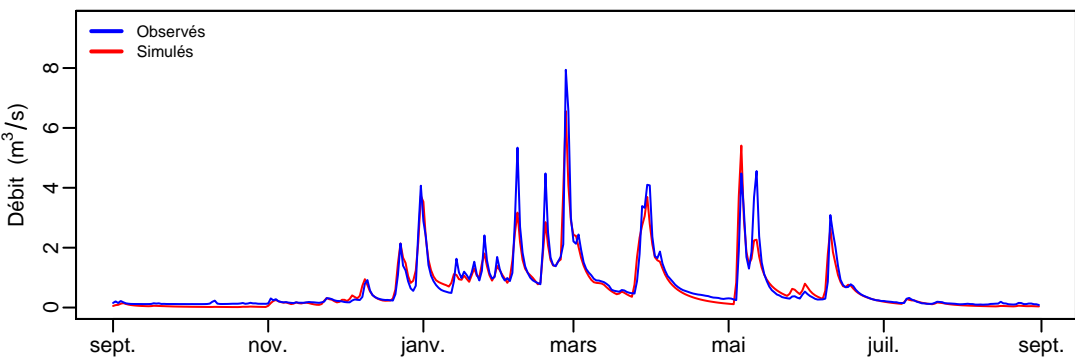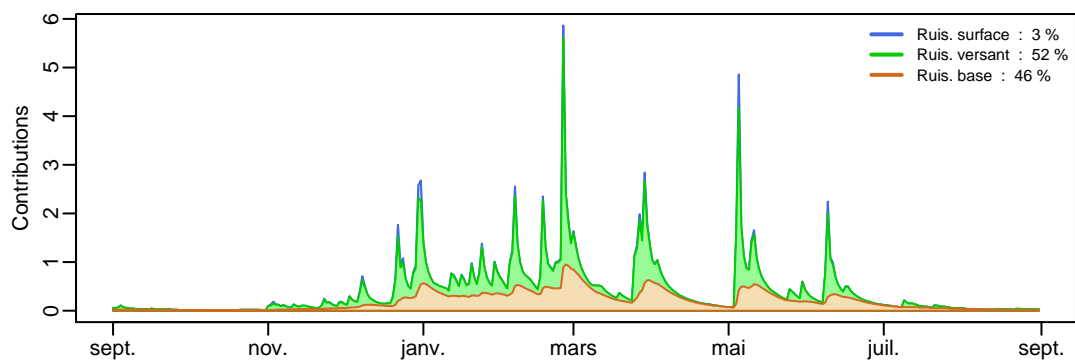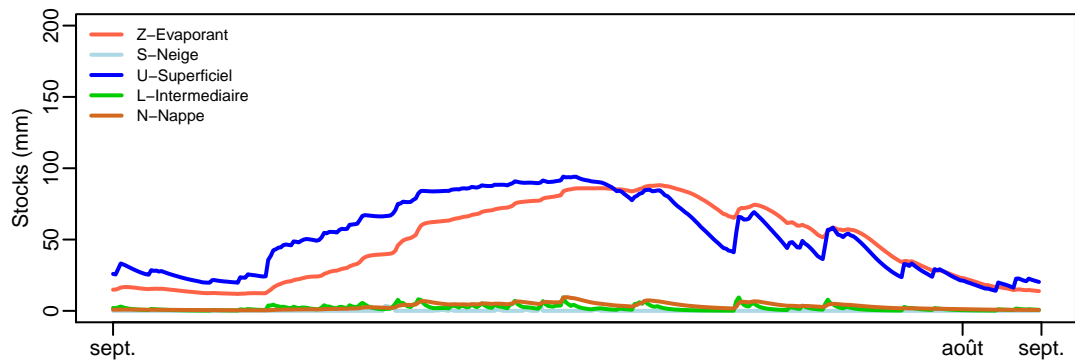

# k4013010 (135.56 km<sup>2</sup>) – année 2010–2011

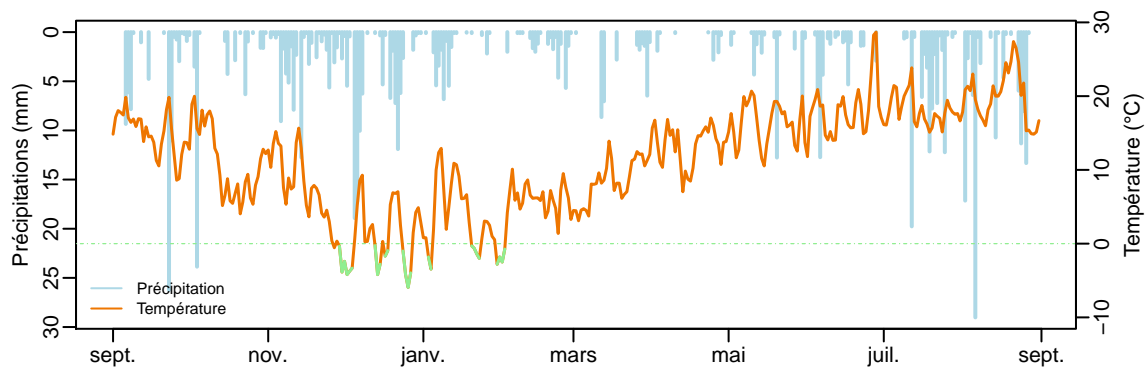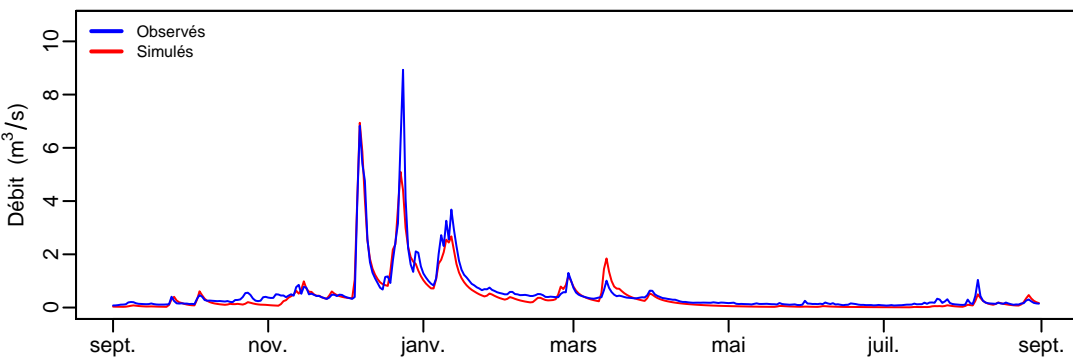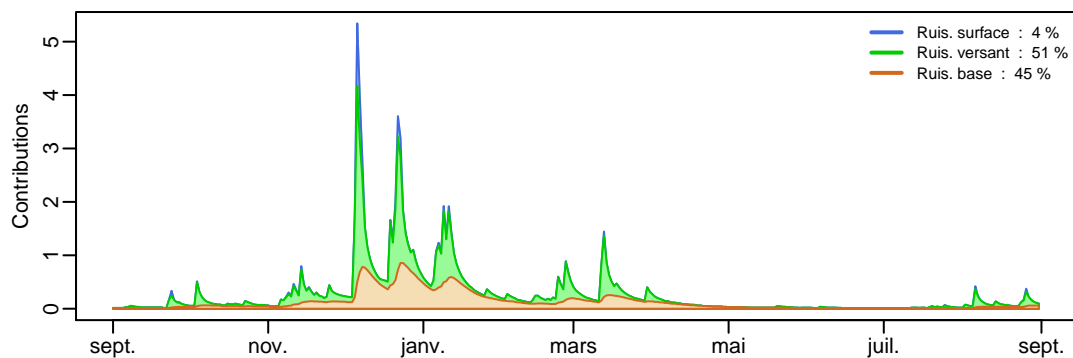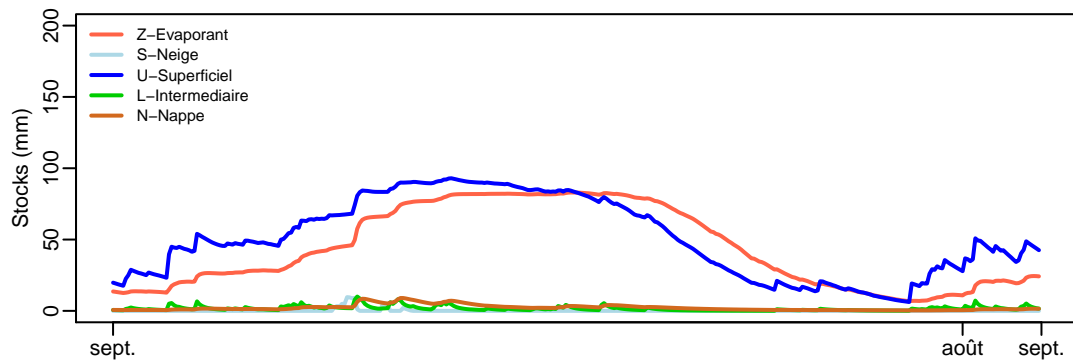

# k4013010 (135.56 km<sup>2</sup>) – année 2011–2012

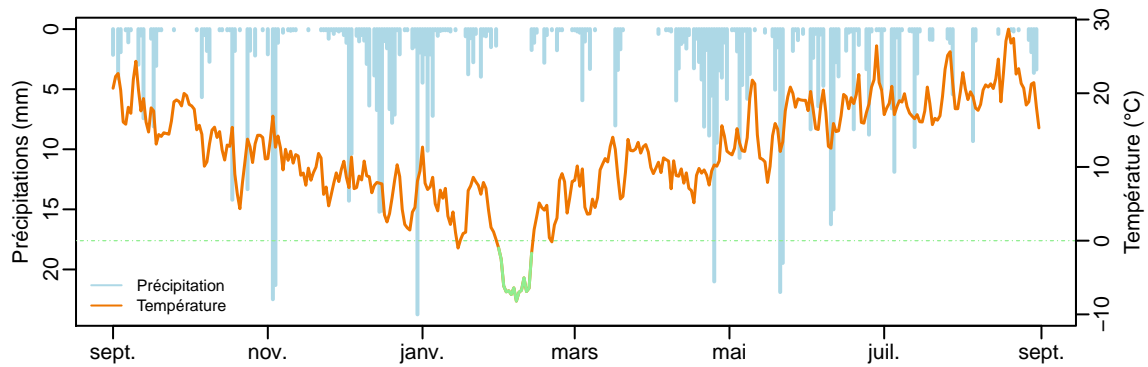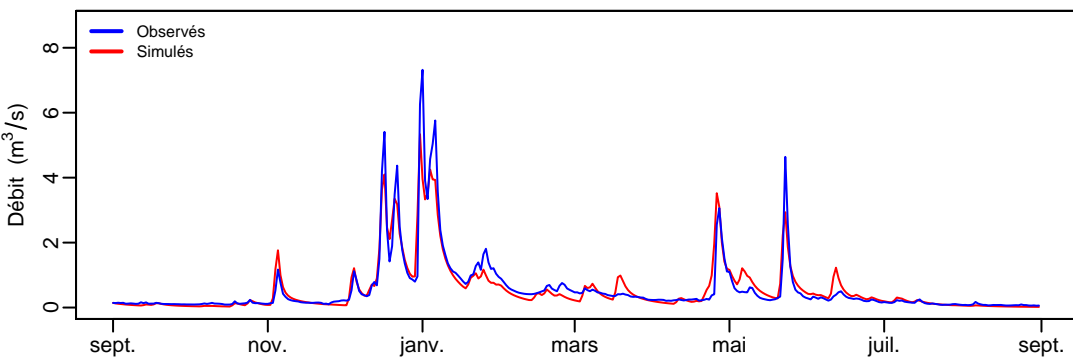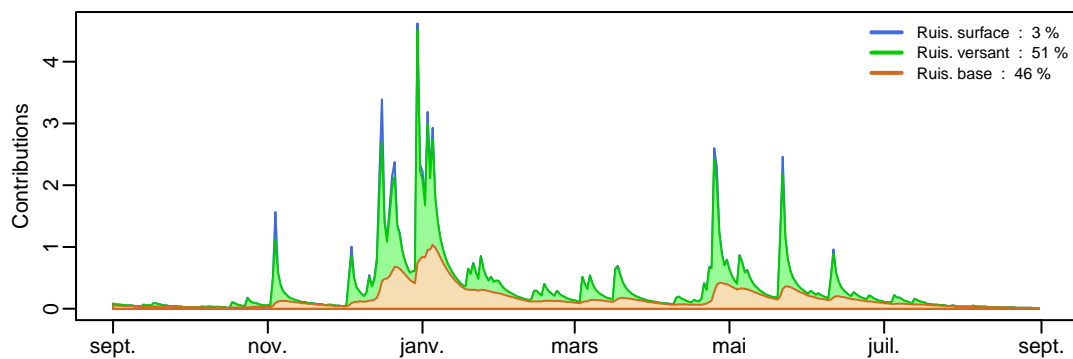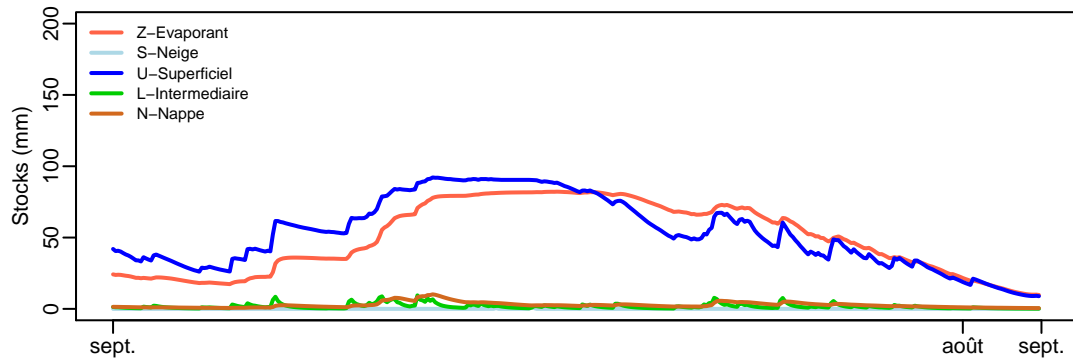

# k4073110 (389 km<sup>2</sup>) – année 1998–1999

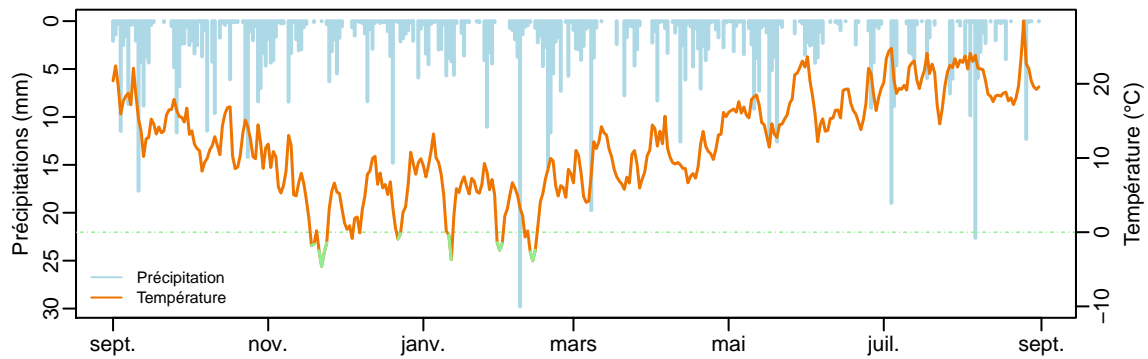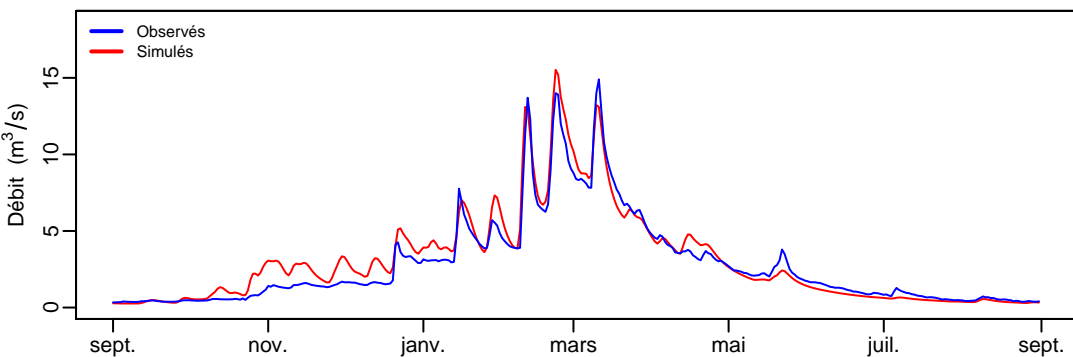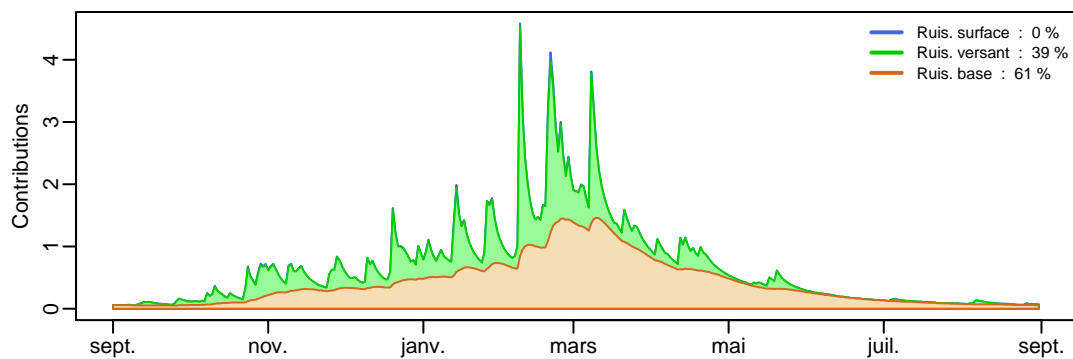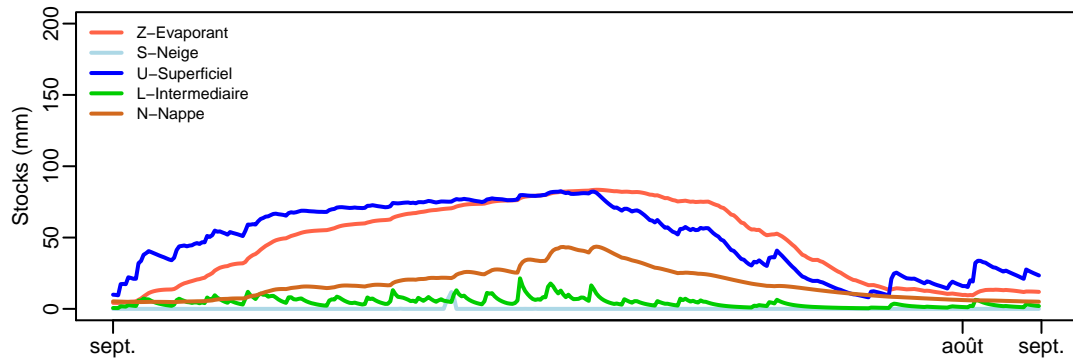

# k4073110 (389 km²) – année 1999–2000

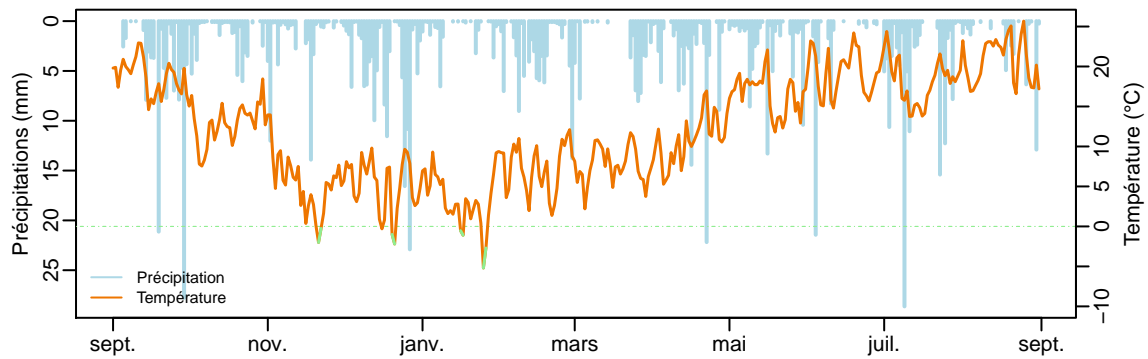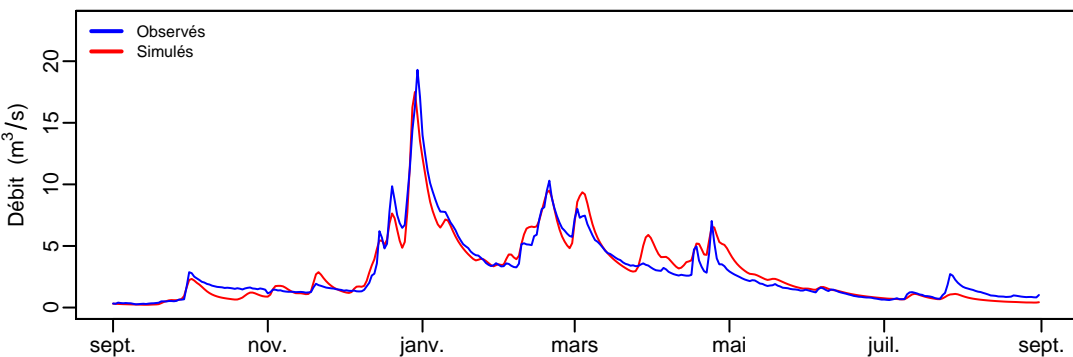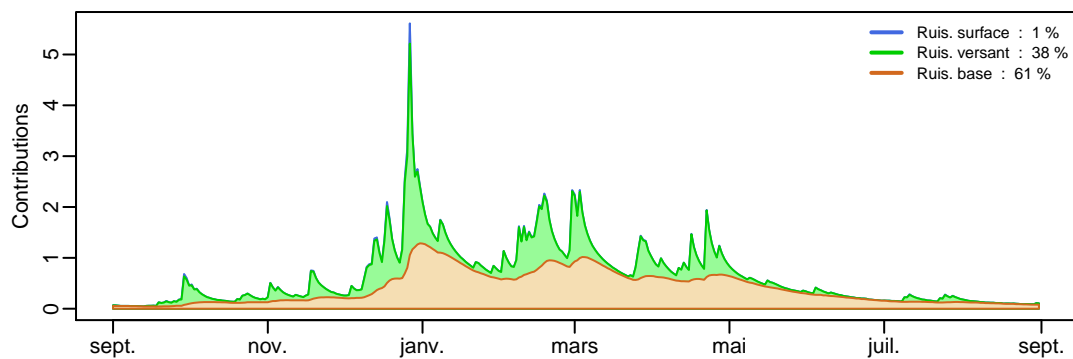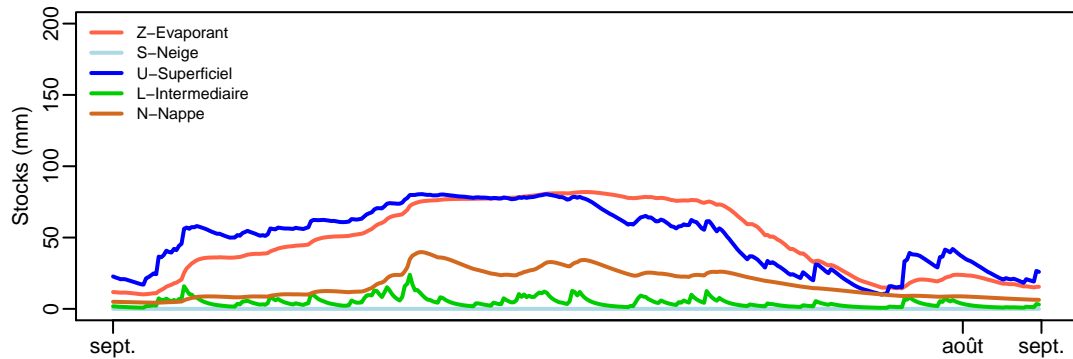



# k4073110 (389 km<sup>2</sup>) – année 2000–2001

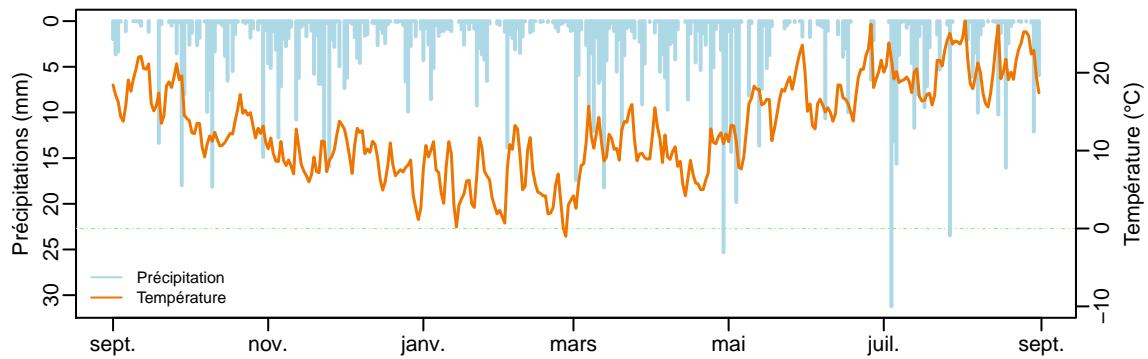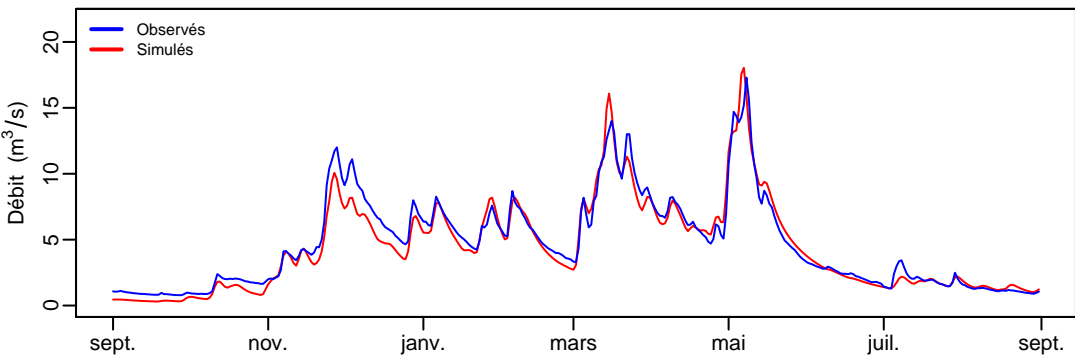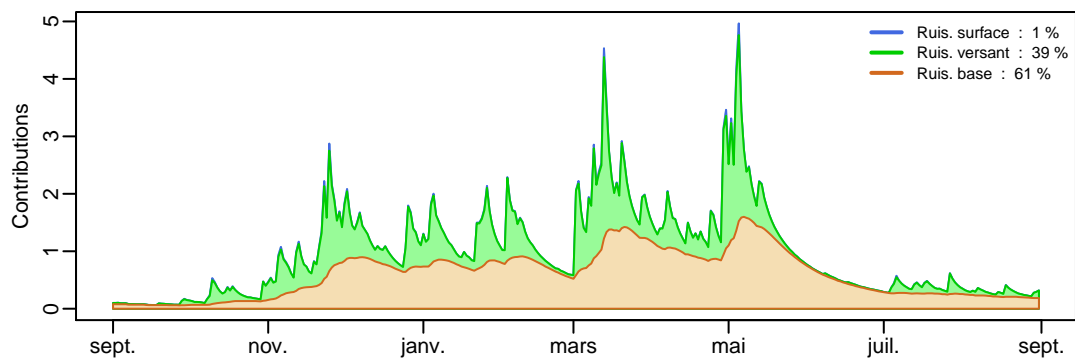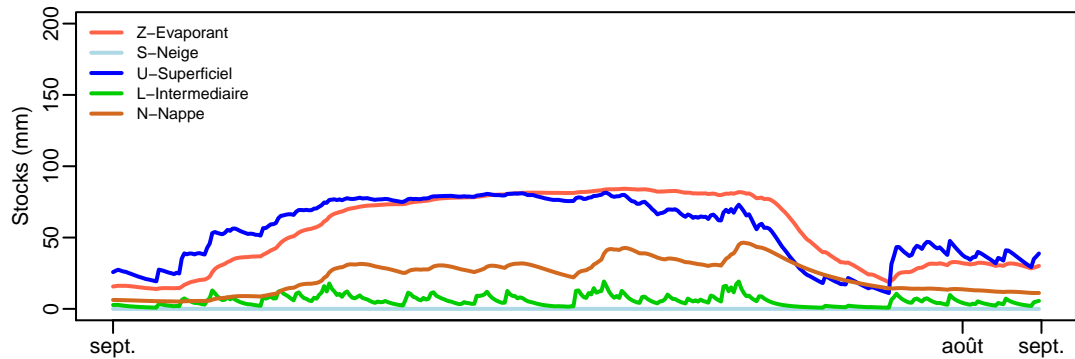

# k4073110 (389 km<sup>2</sup>) – année 2001–2002

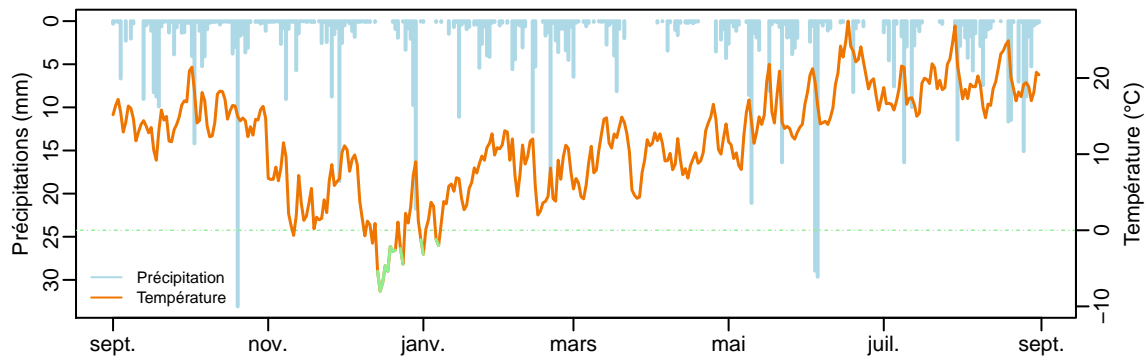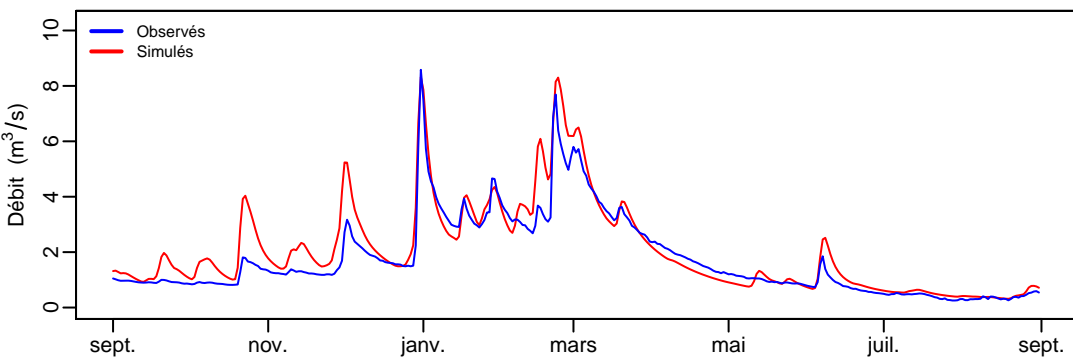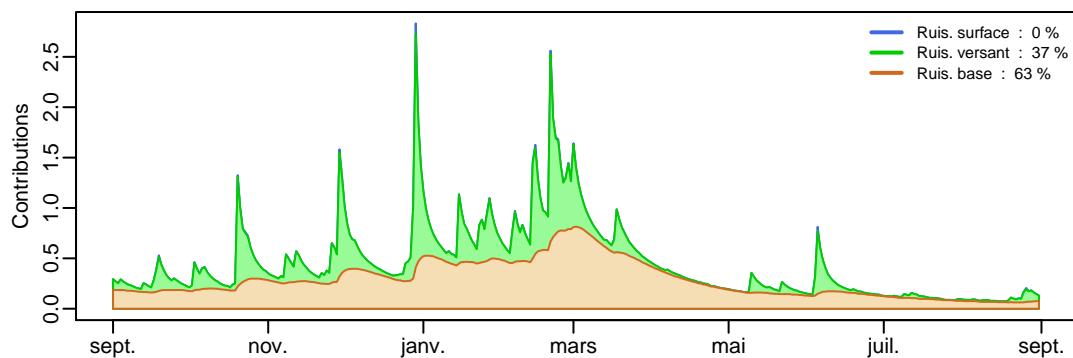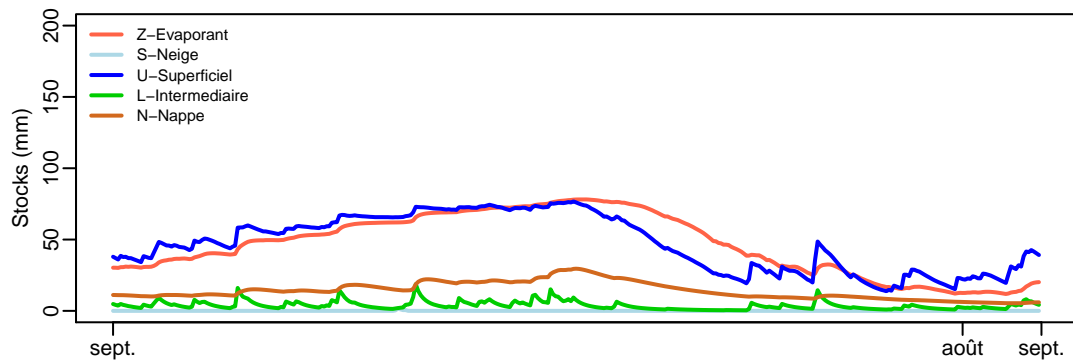

# k4073110 (389 km²) – année 2002–2003

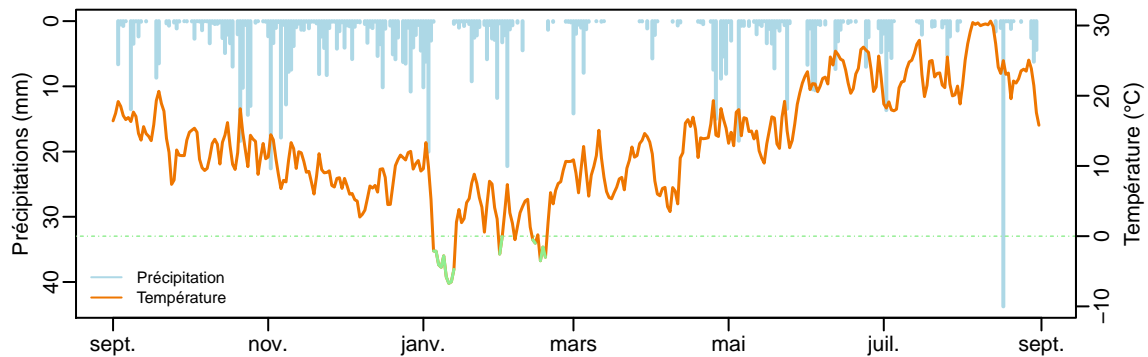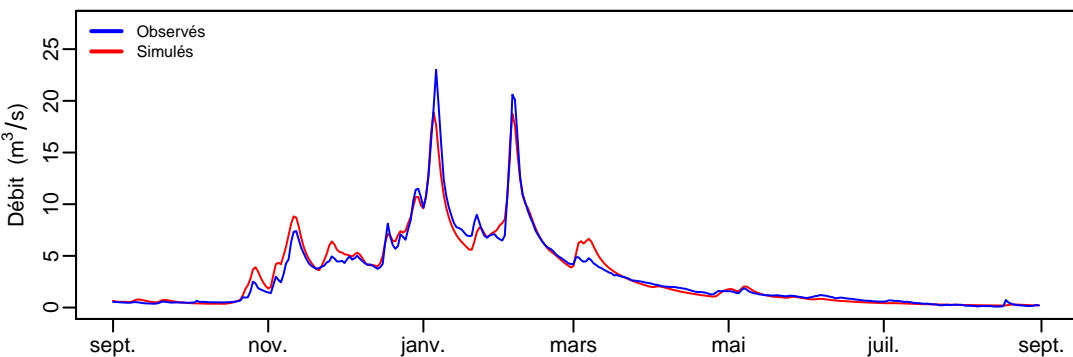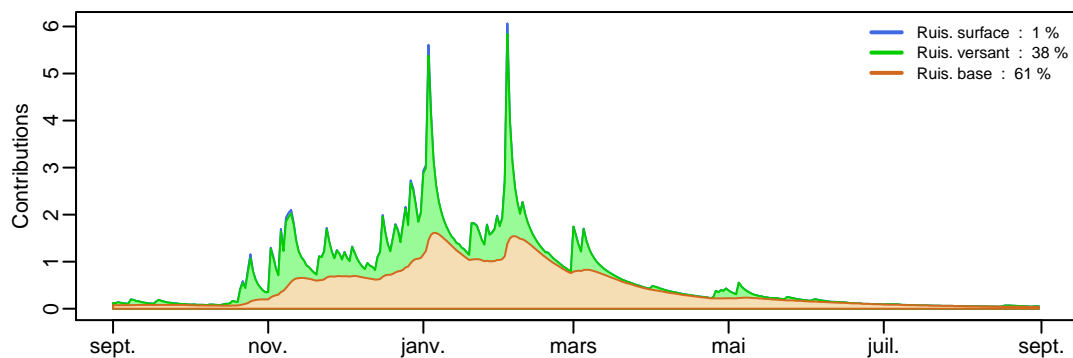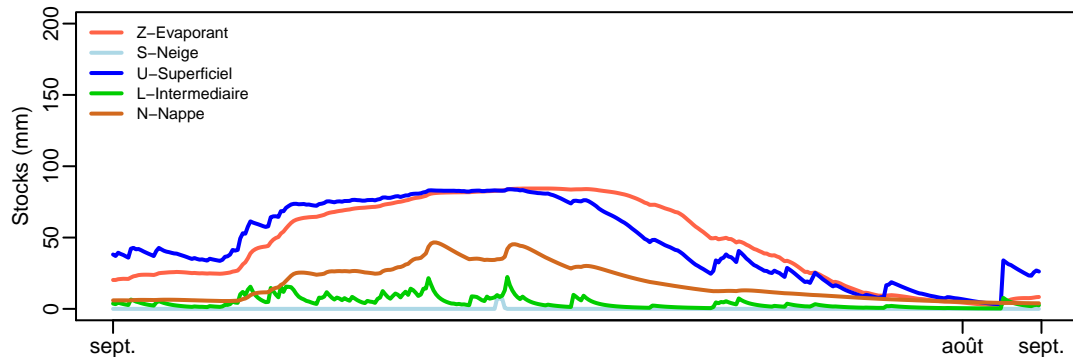

# k4073110 (389 km²) – année 2003–2004

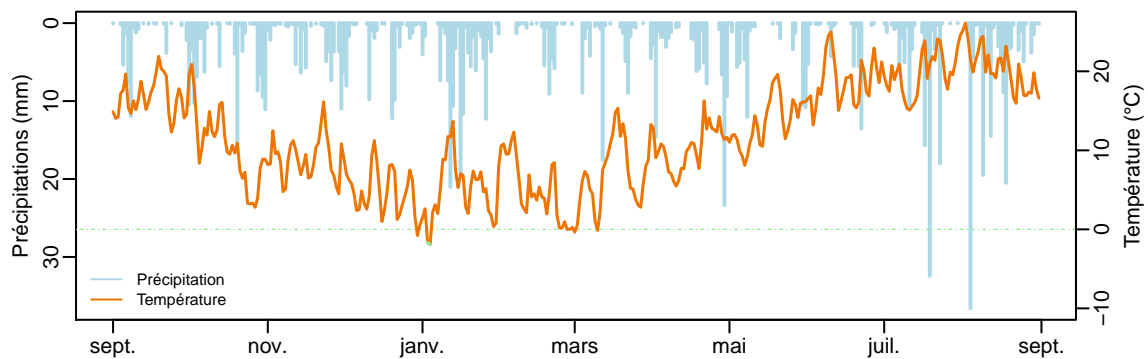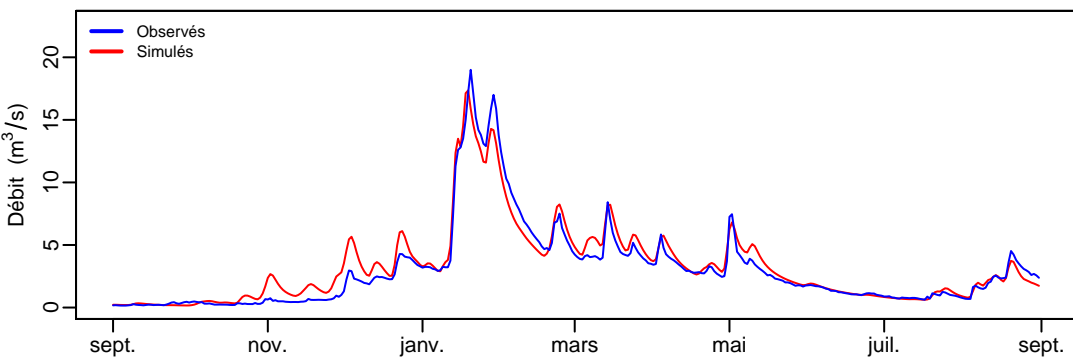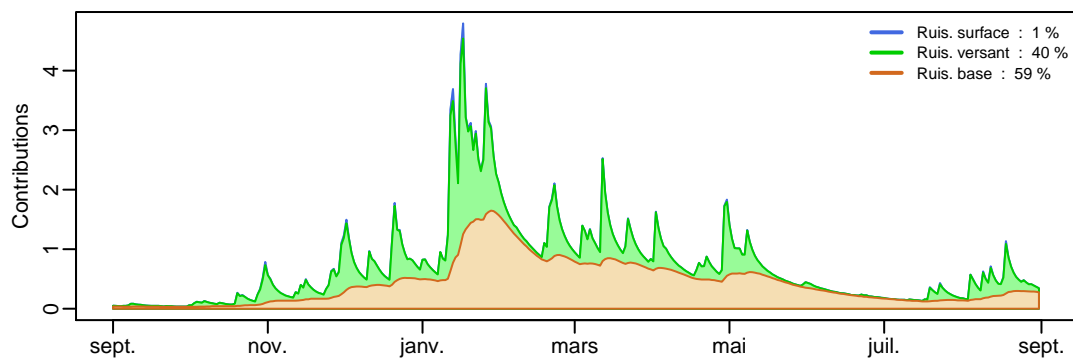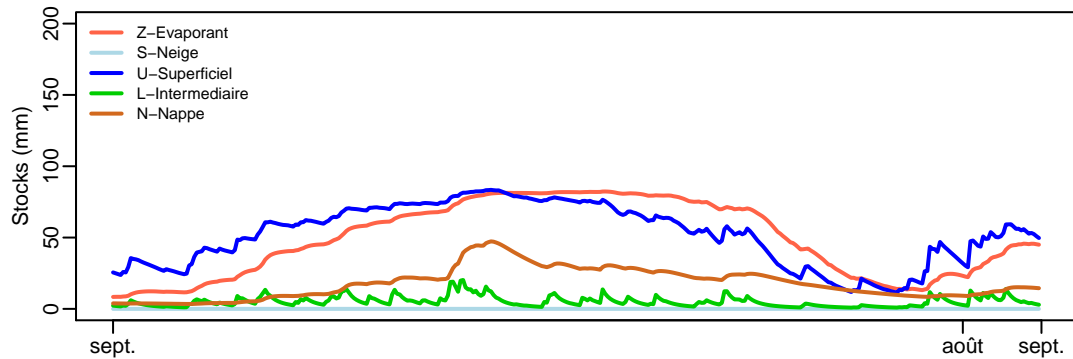

# k4073110 (389 km²) – année 2004–2005

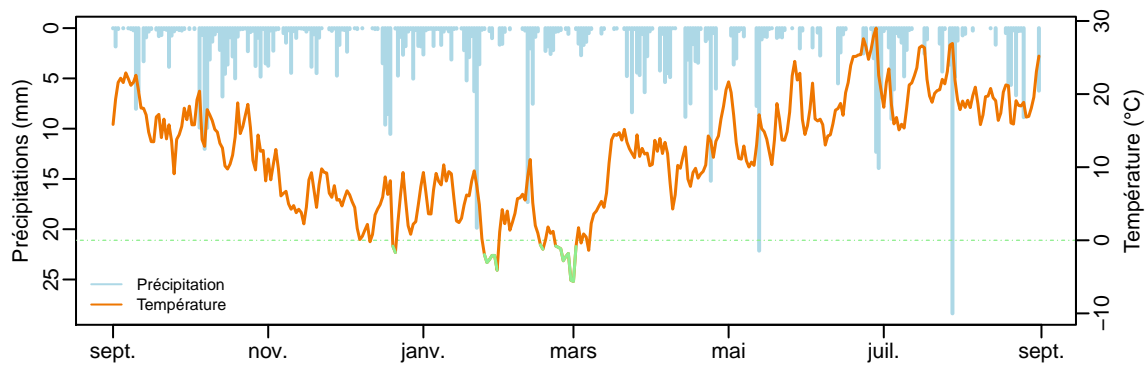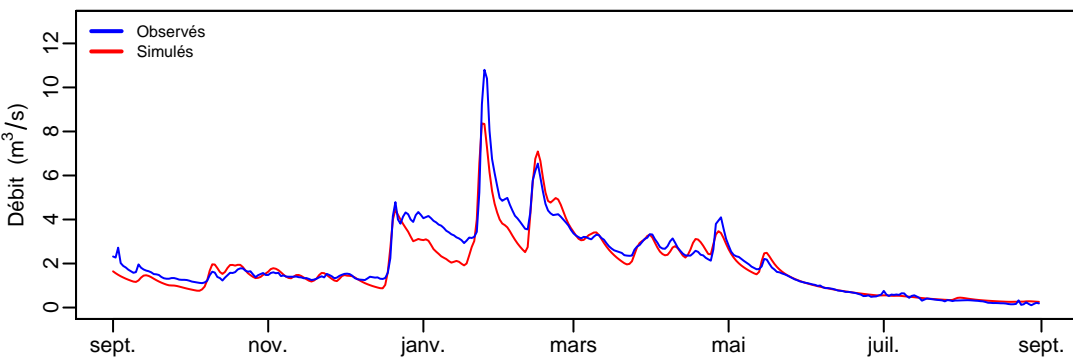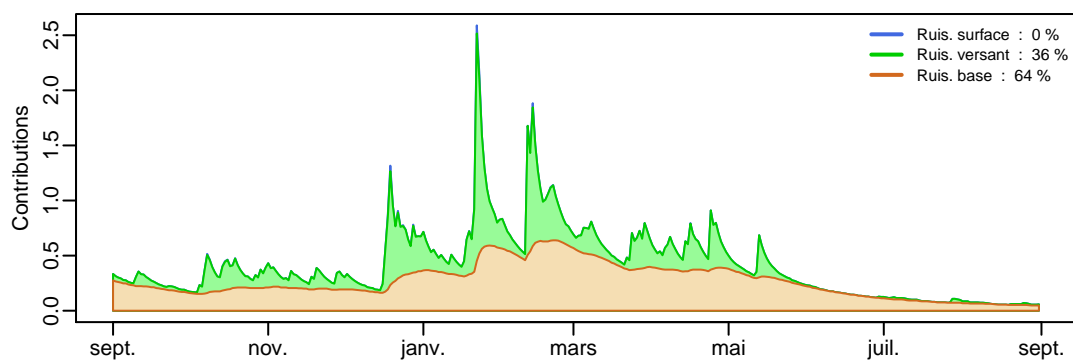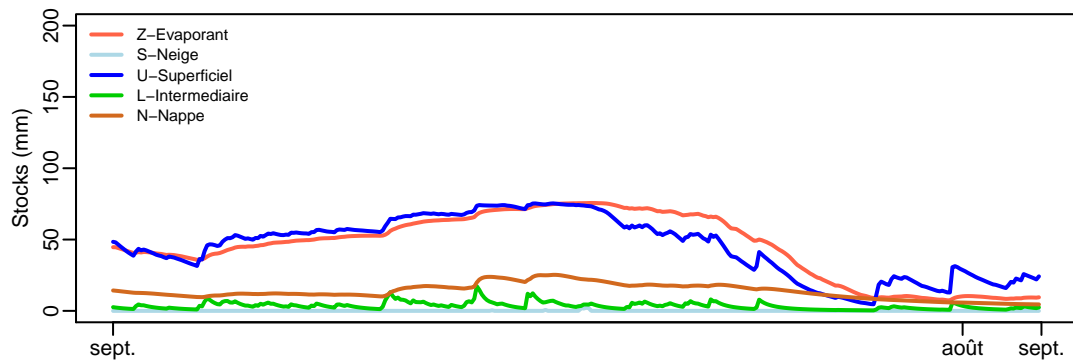

# k4073110 (389 km<sup>2</sup>) – année 2005–2006

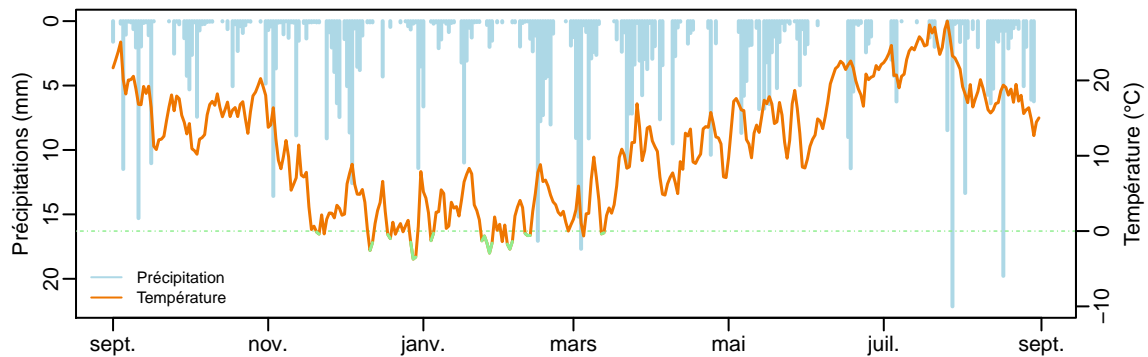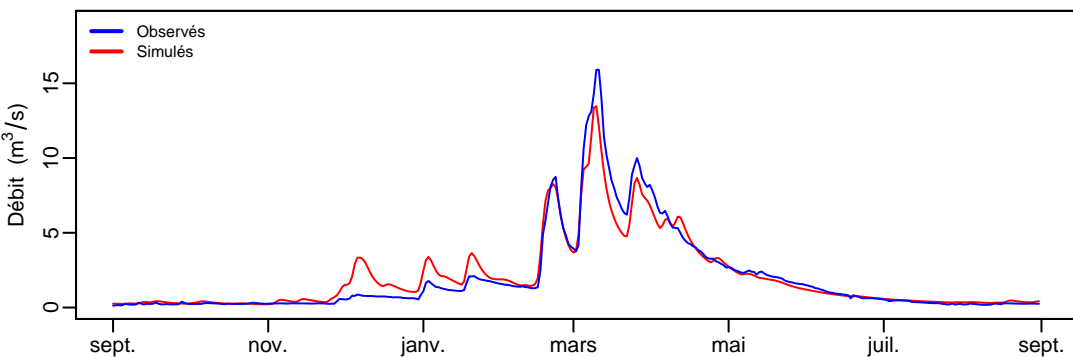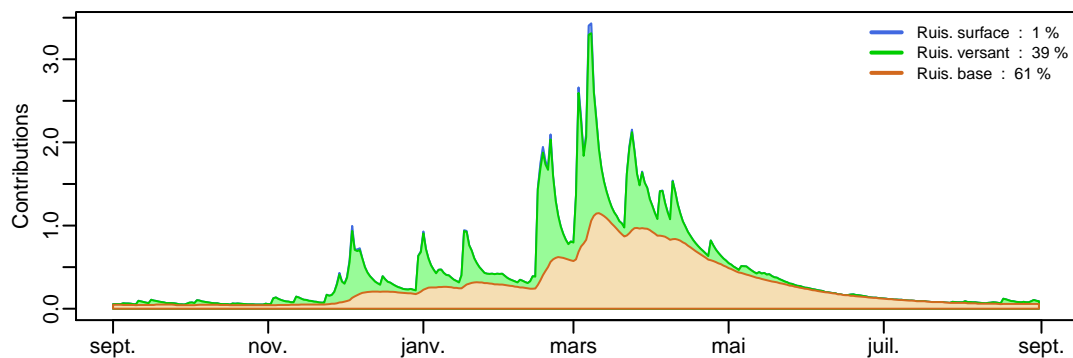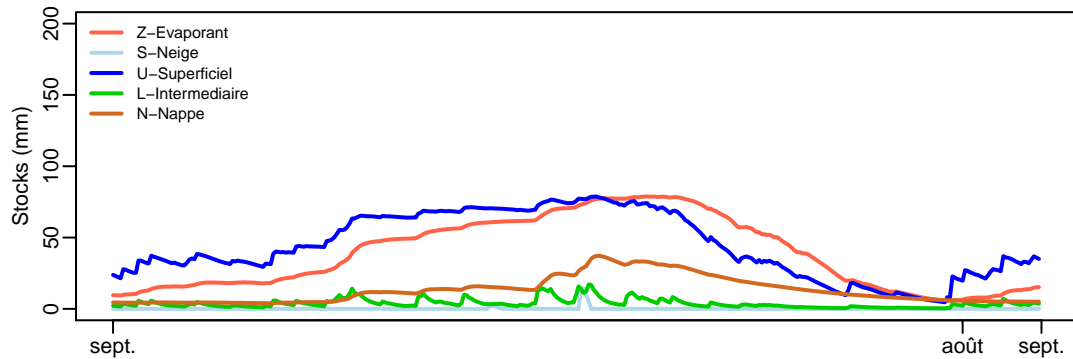

# k4073110 (389 km<sup>2</sup>) – année 2006–2007

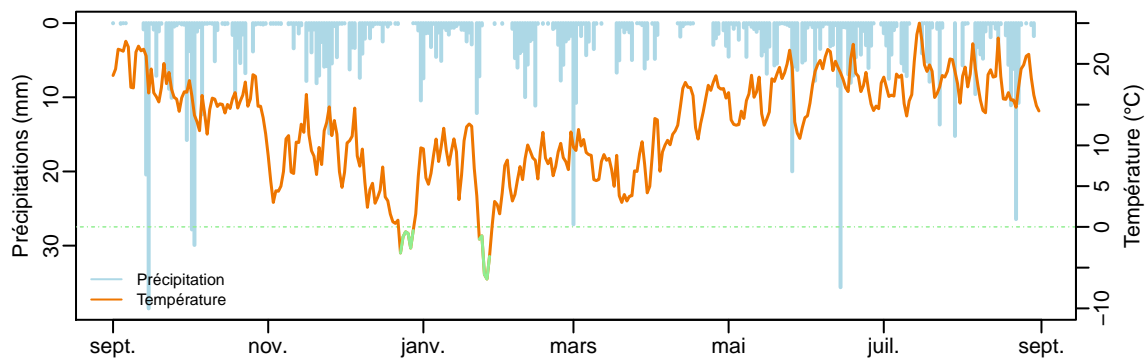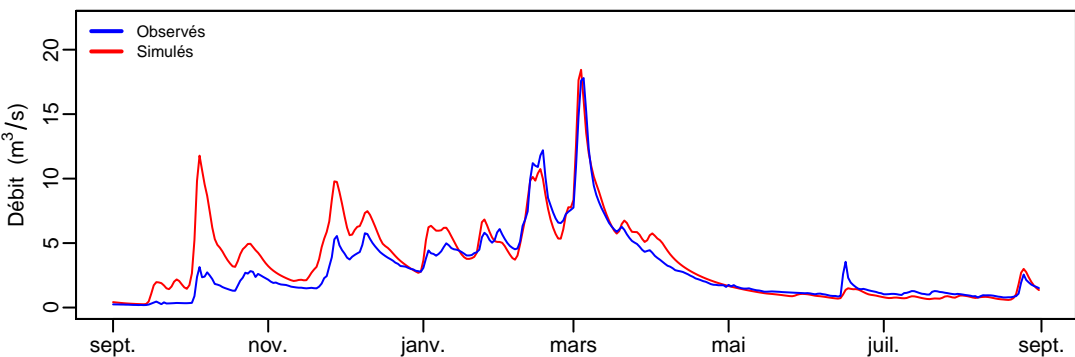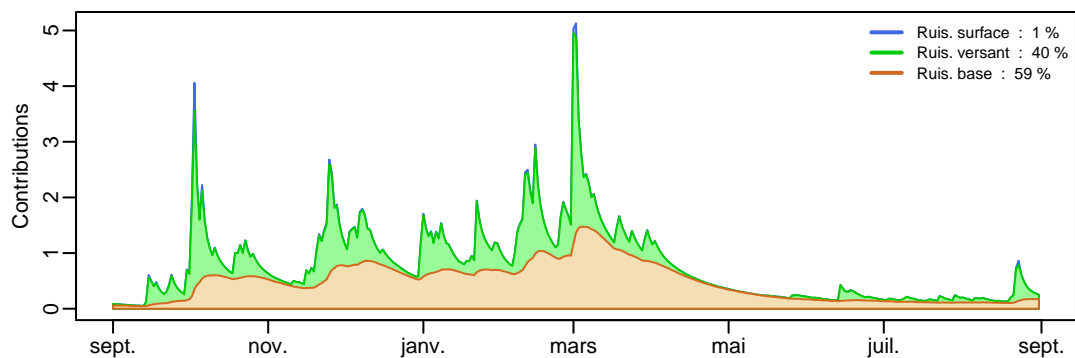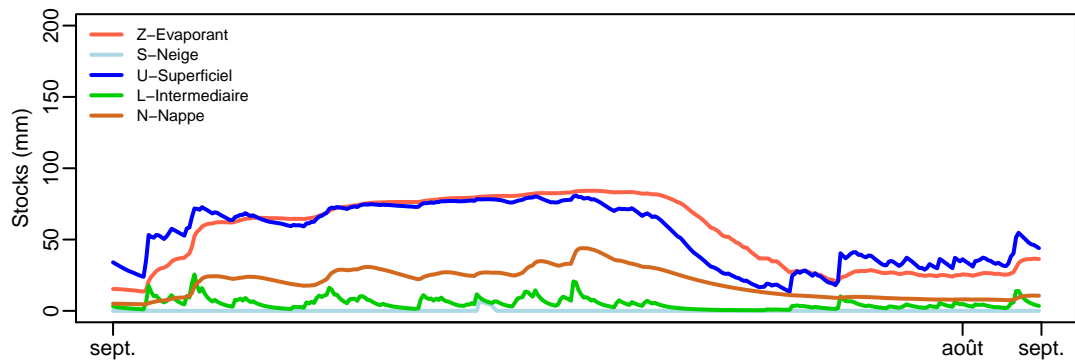

# k4073110 (389 km²) – année 2007–2008

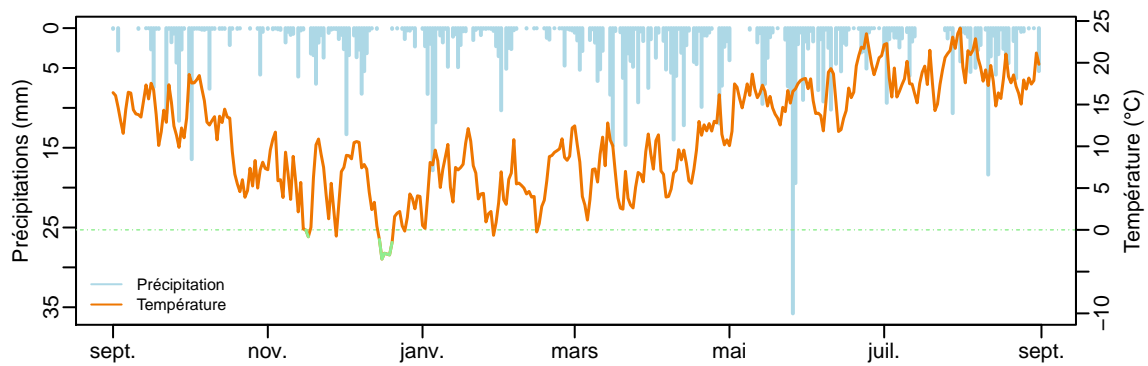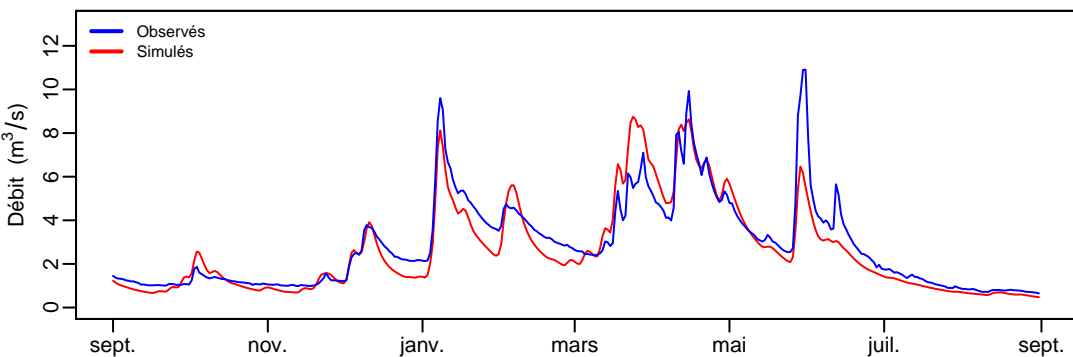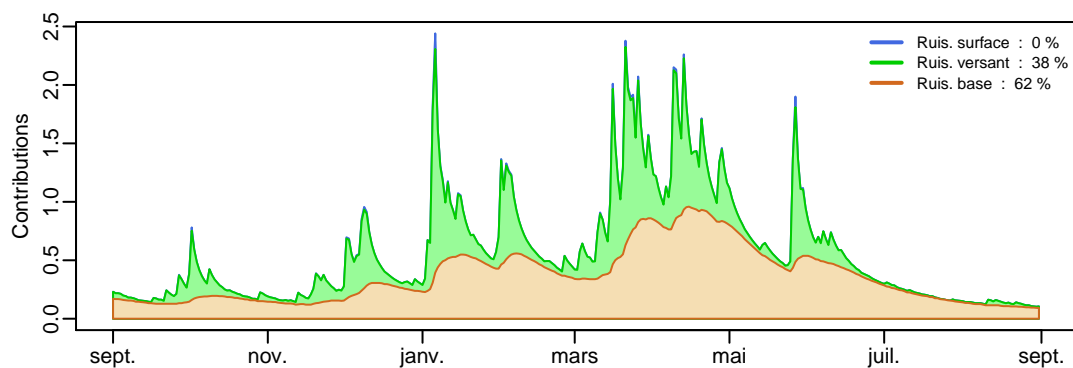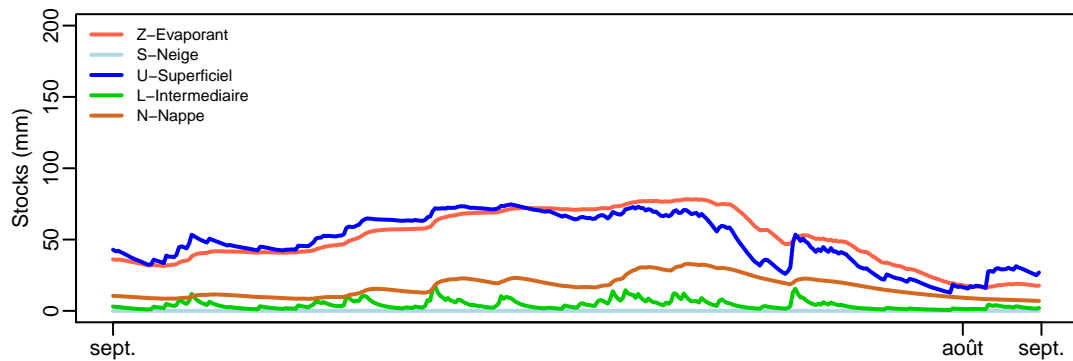



# k4073110 (389 km²) – année 2008–2009

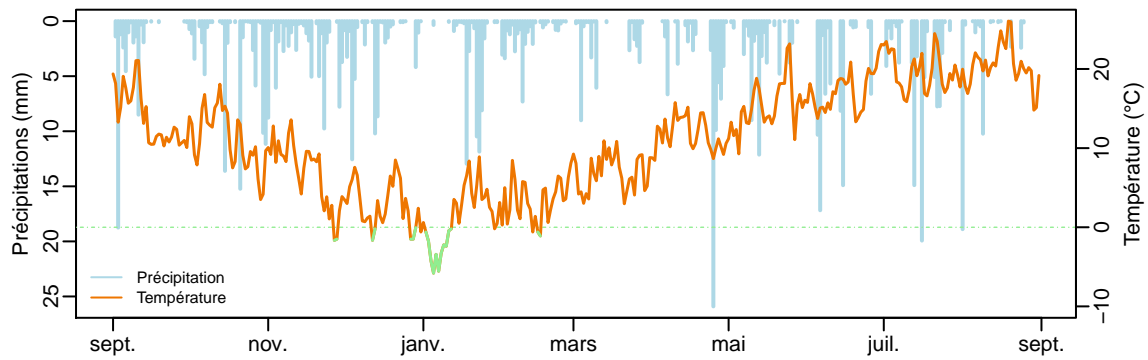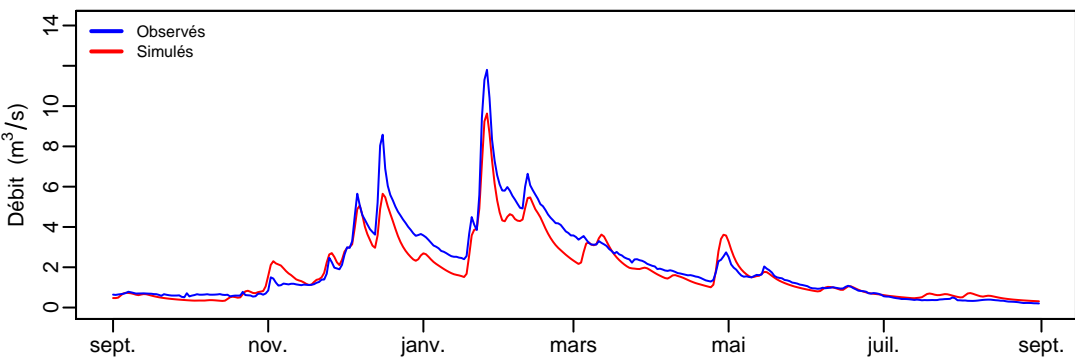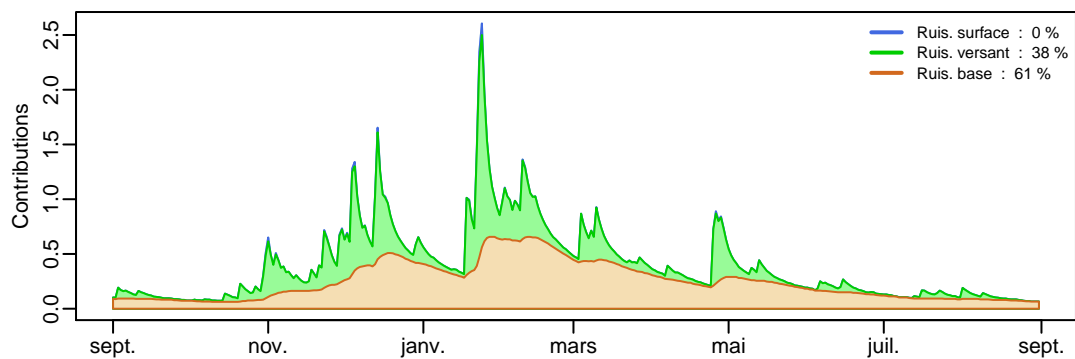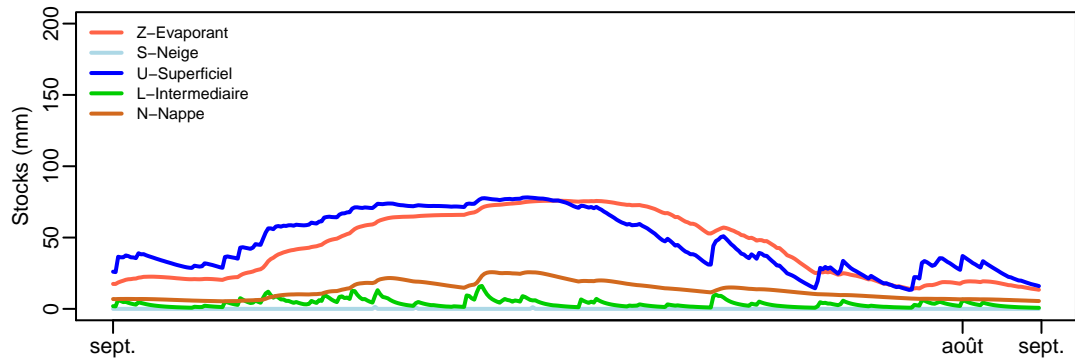

# k4073110 (389 km<sup>2</sup>) – année 2009–2010

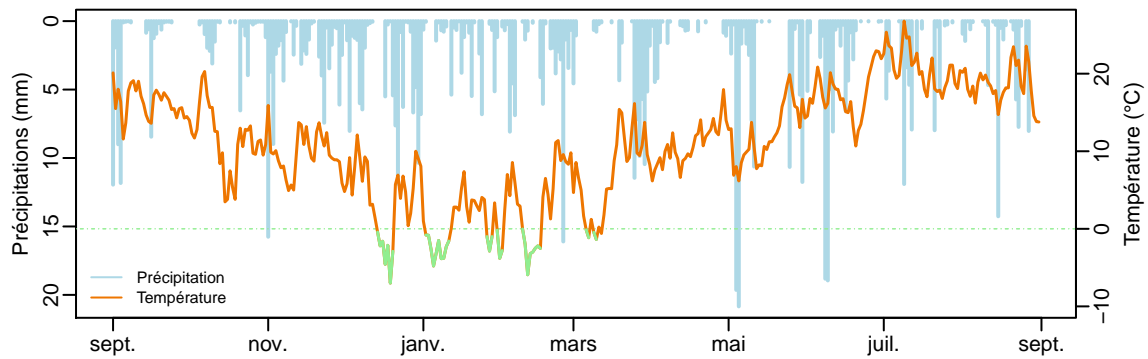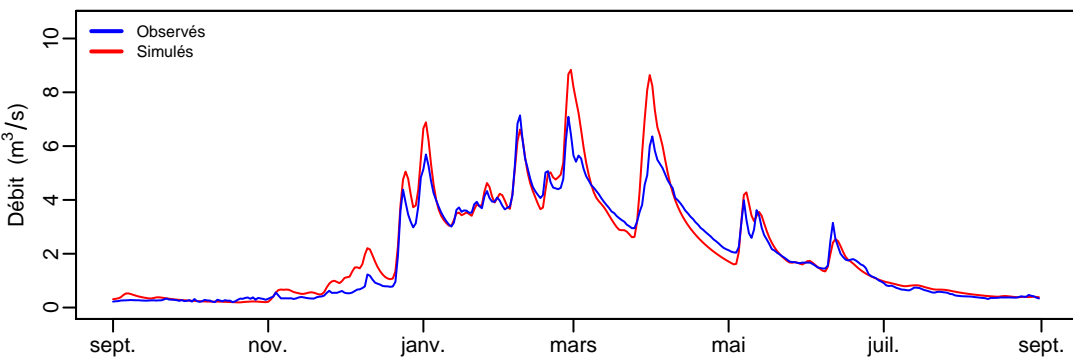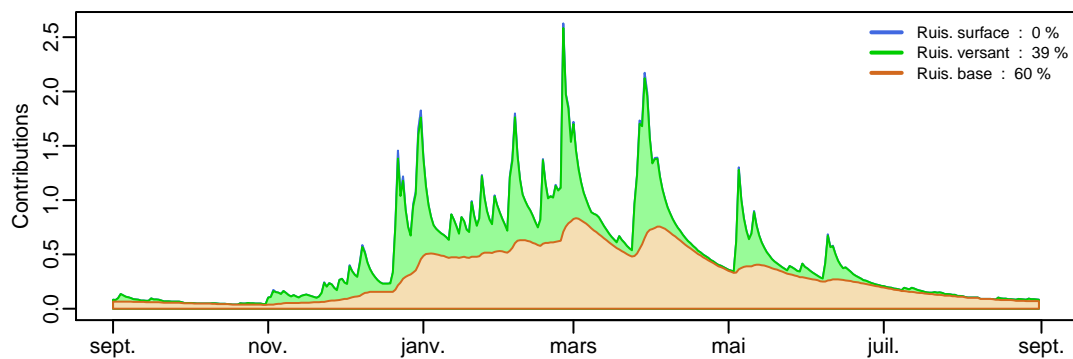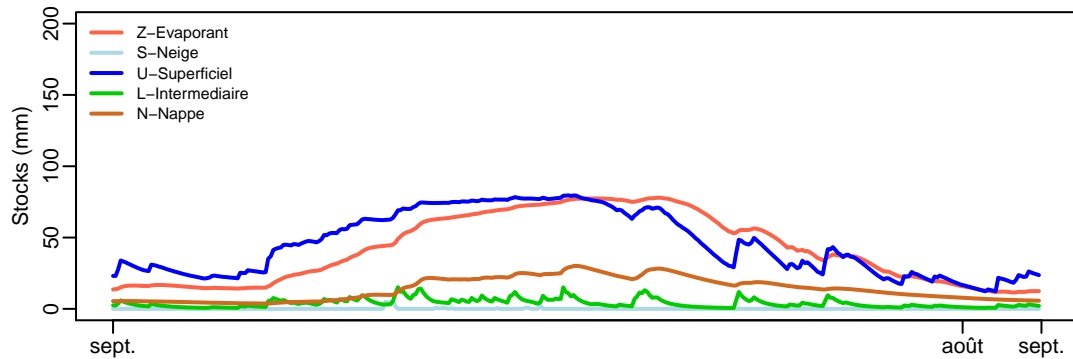

# k4073110 (389 km²) – année 2010–2011

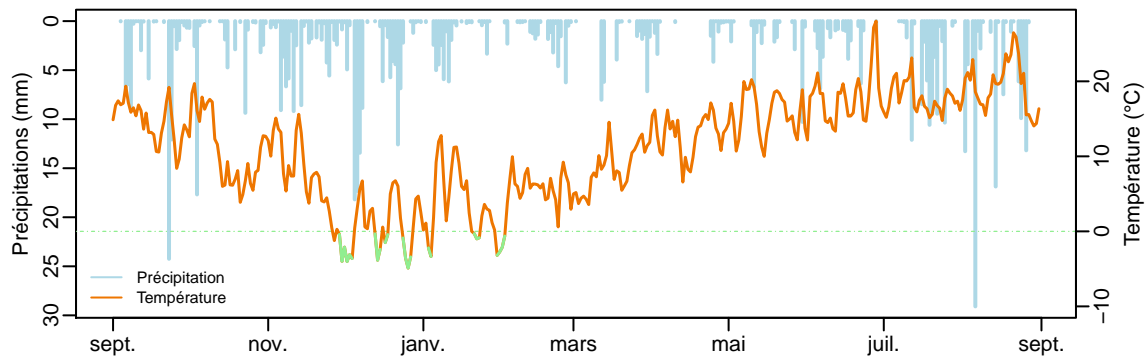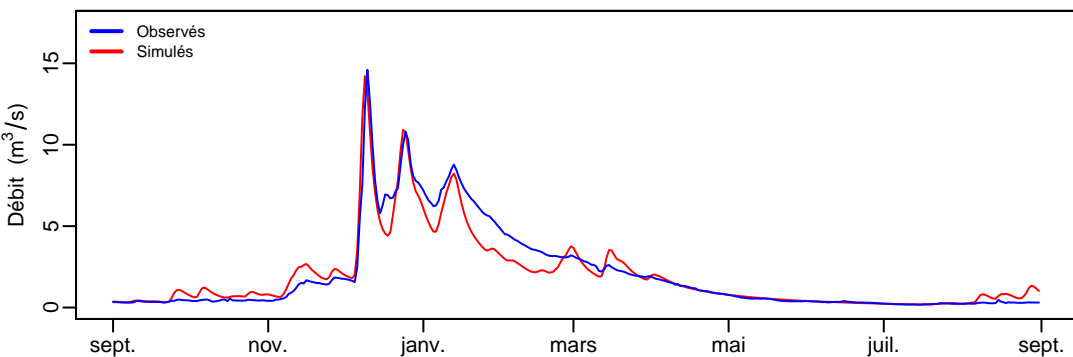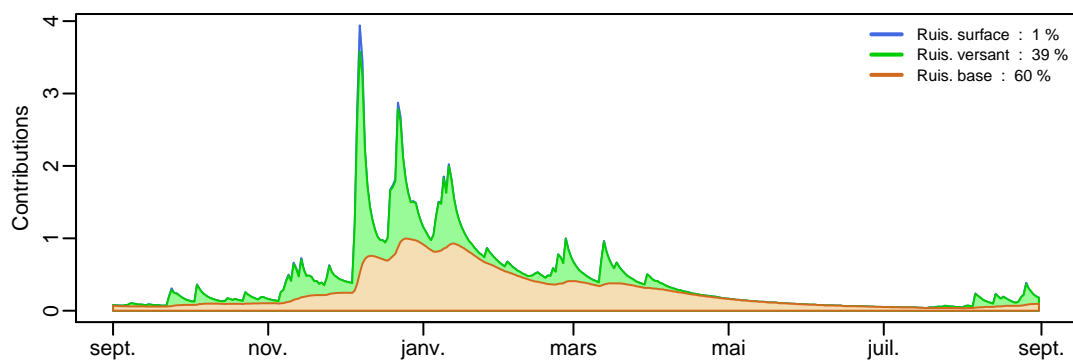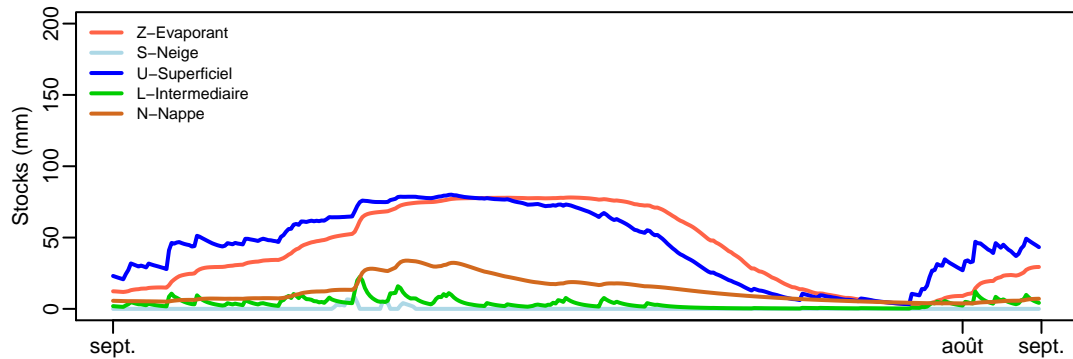

# k4073110 (389 km²) – année 2011–2012

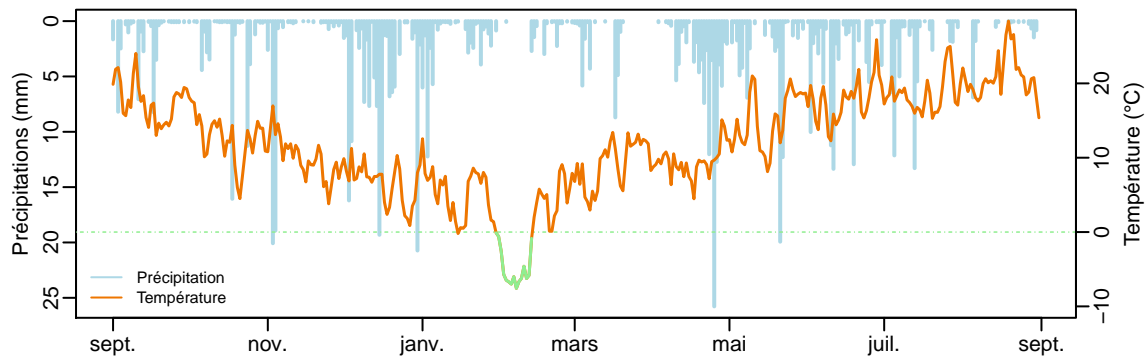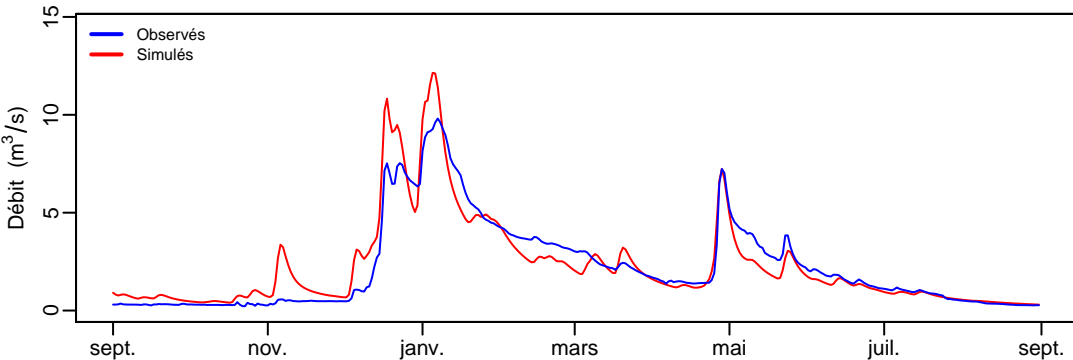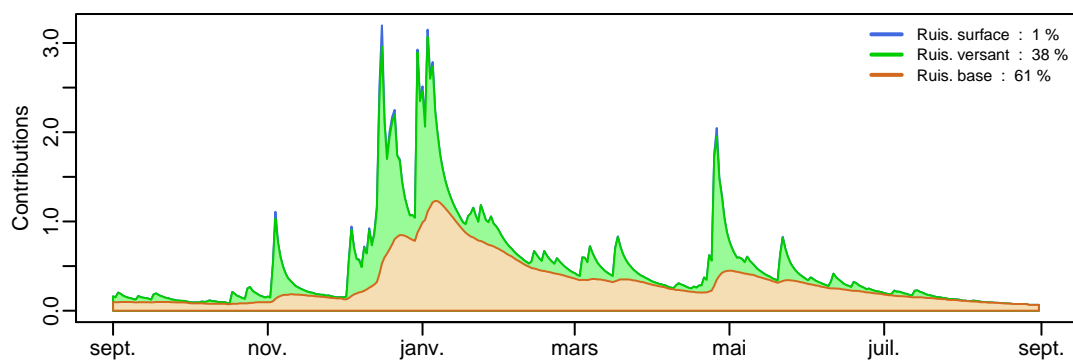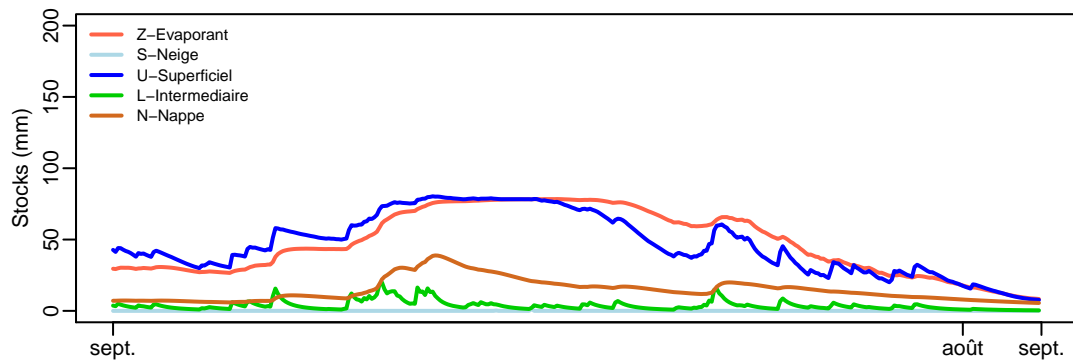

# k4080010 (34136.37 km<sup>2</sup>) – année 2000–2001

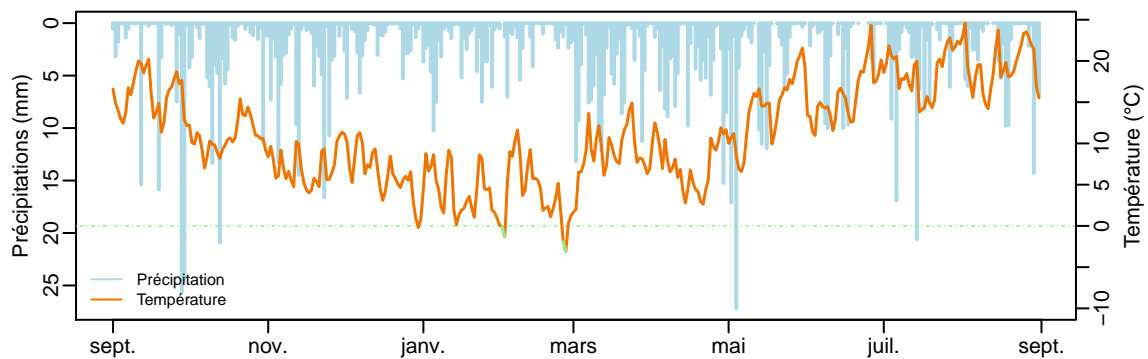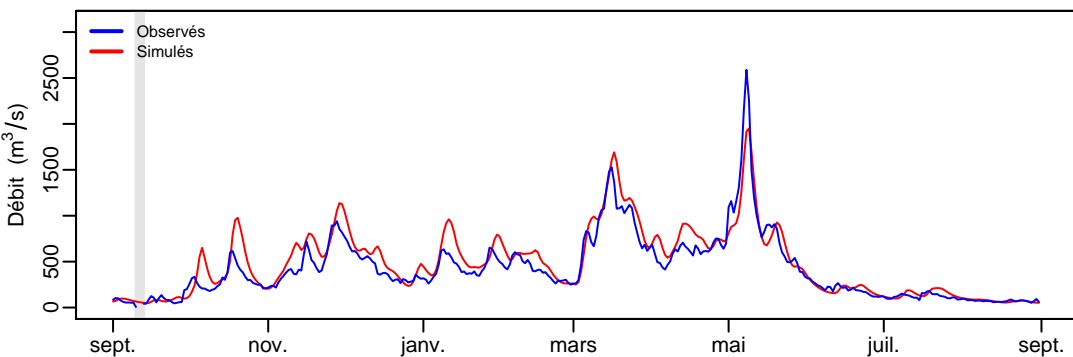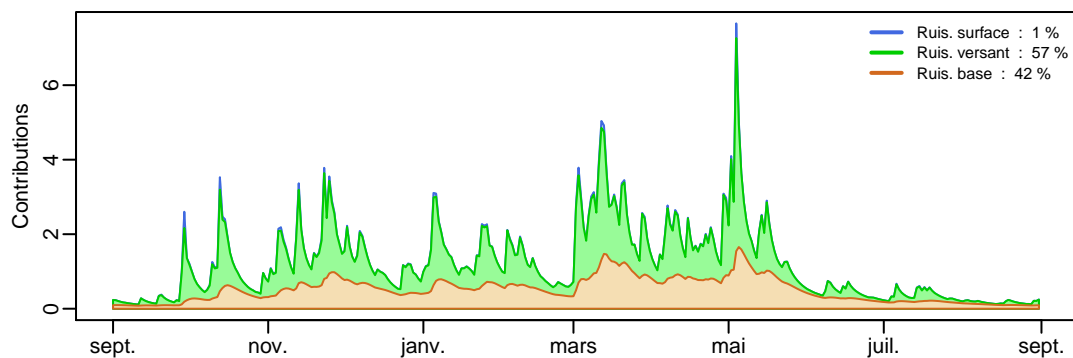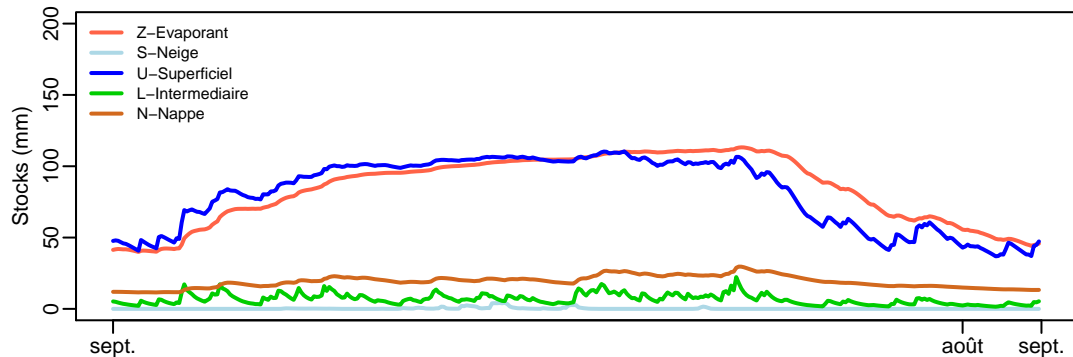

# k4080010 (34136.37 km<sup>2</sup>) – année 2001–2002

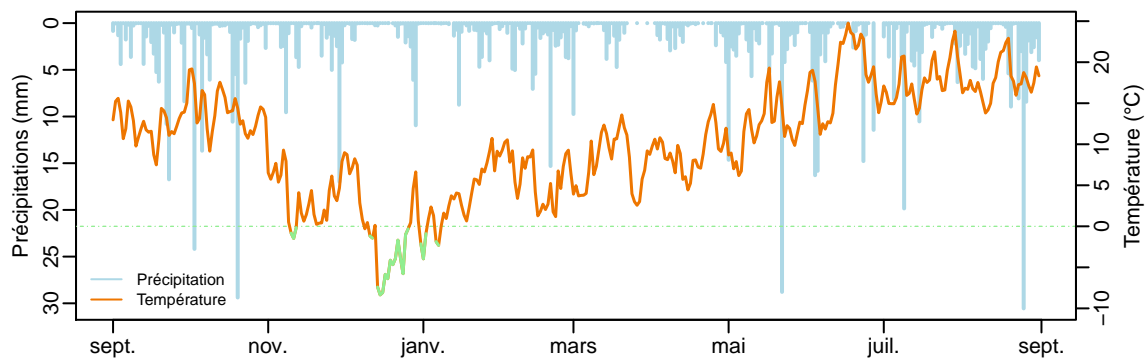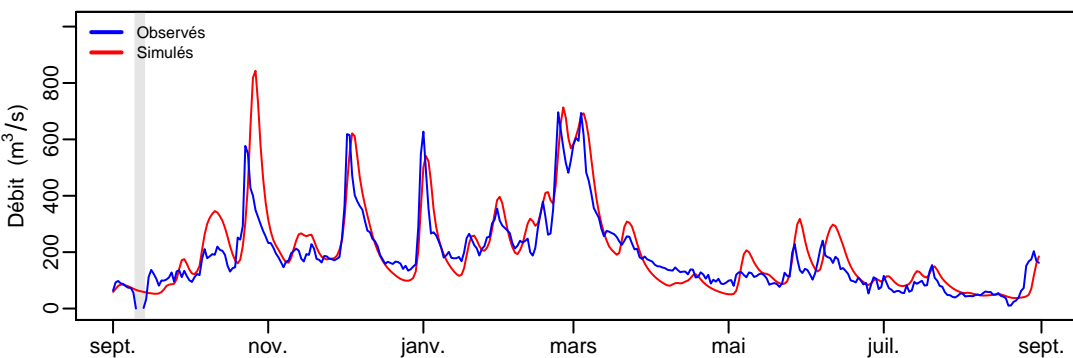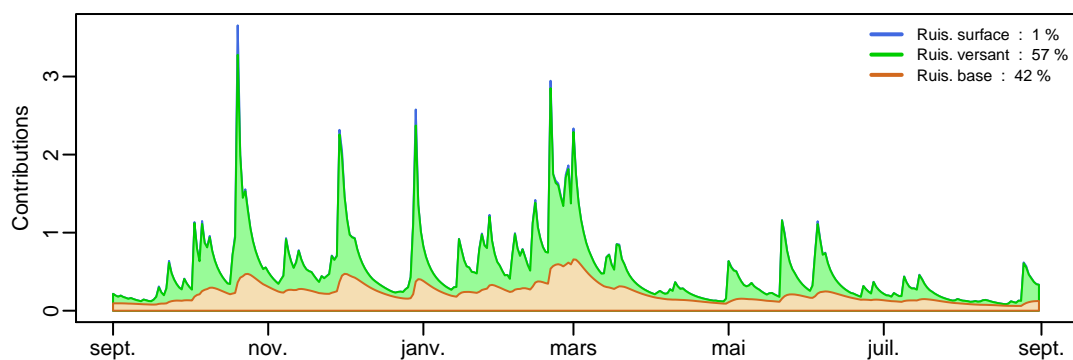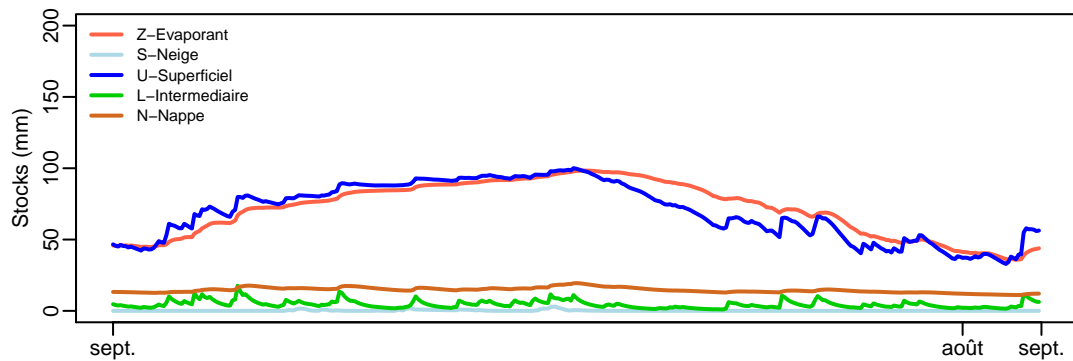

# k4080010 (34136.37 km<sup>2</sup>) – année 2002–2003

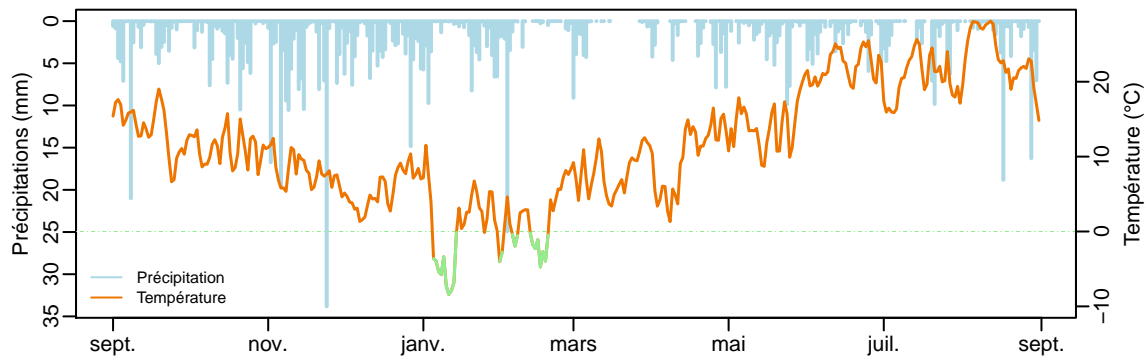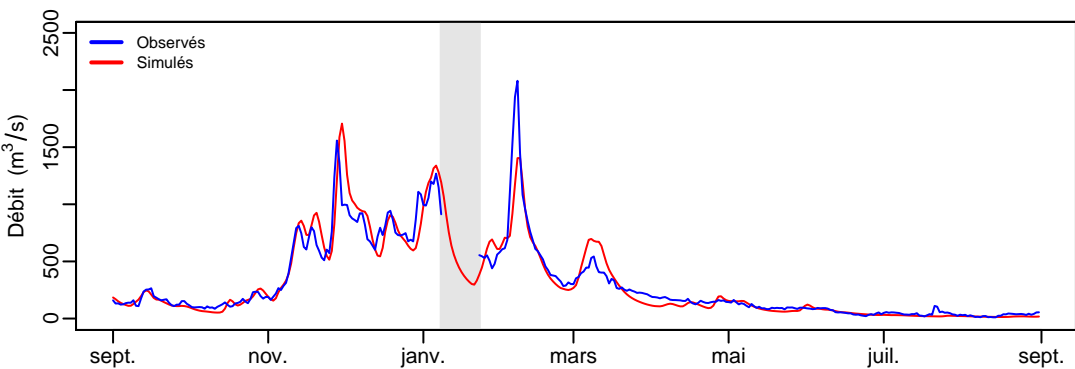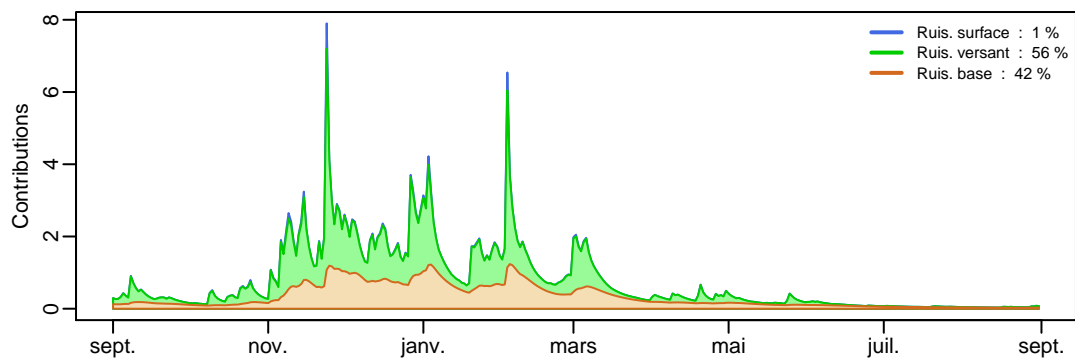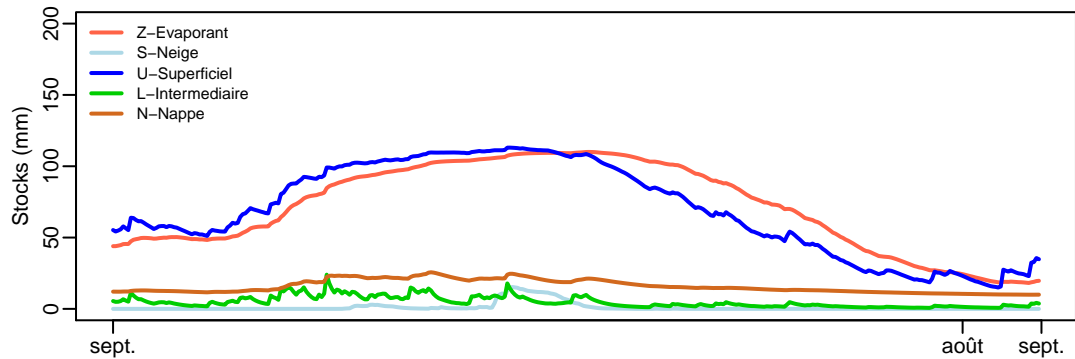

# k4080010 (34136.37 km<sup>2</sup>) – année 2003–2004

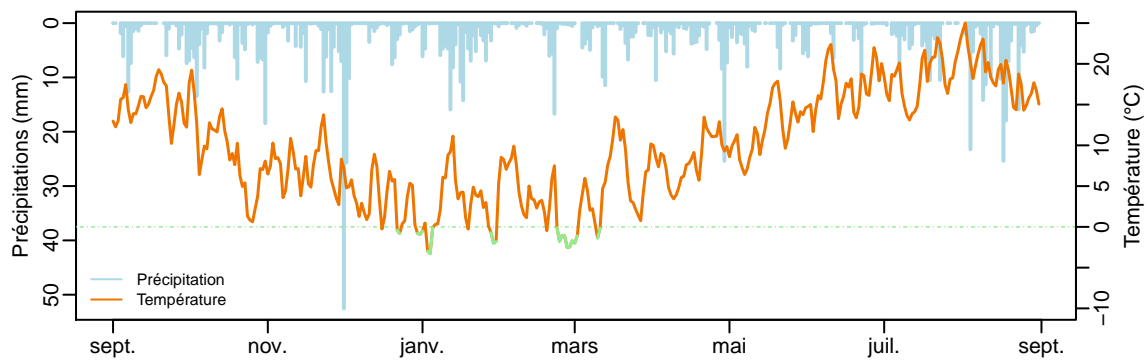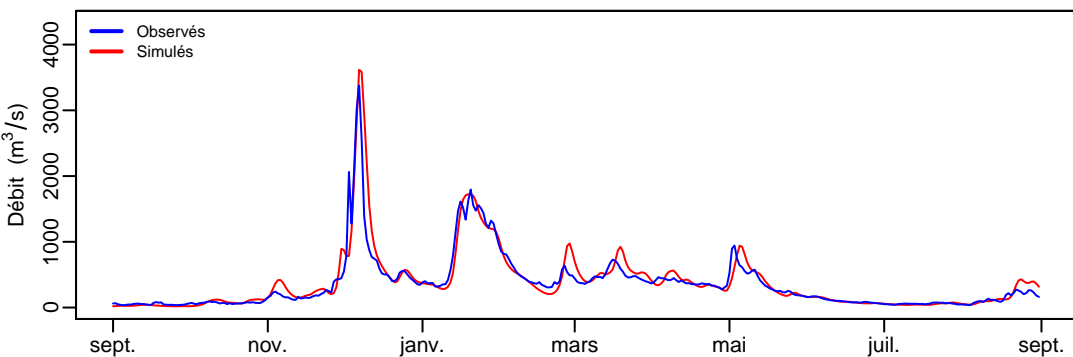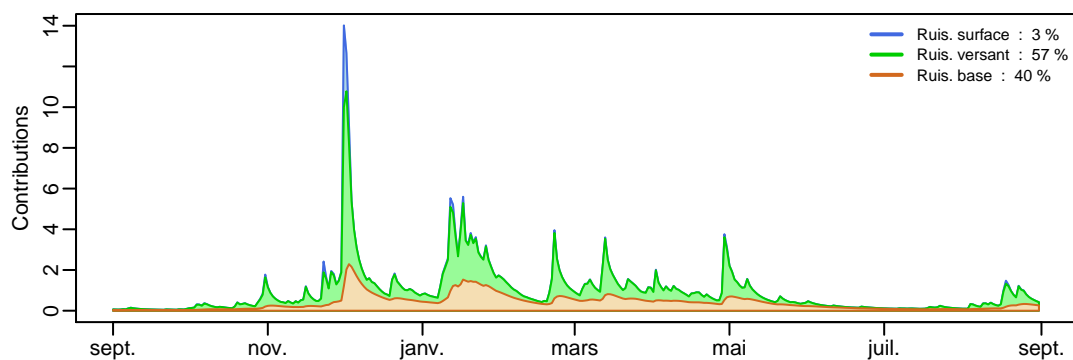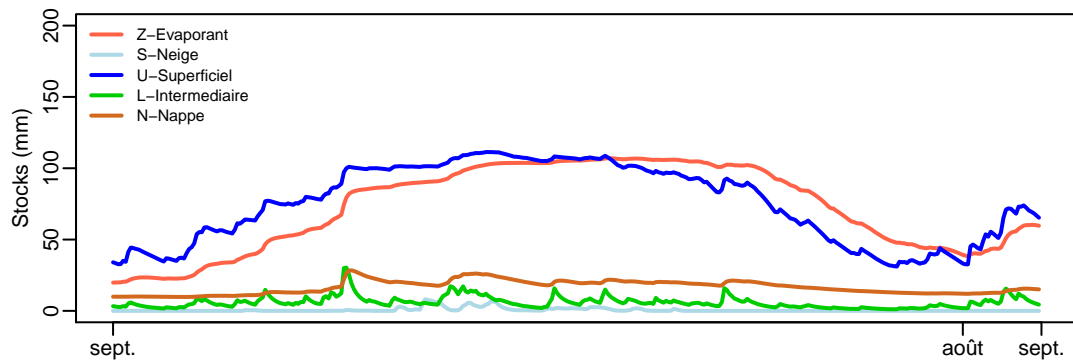



# k4080010 (34136.37 km<sup>2</sup>) – année 2004–2005

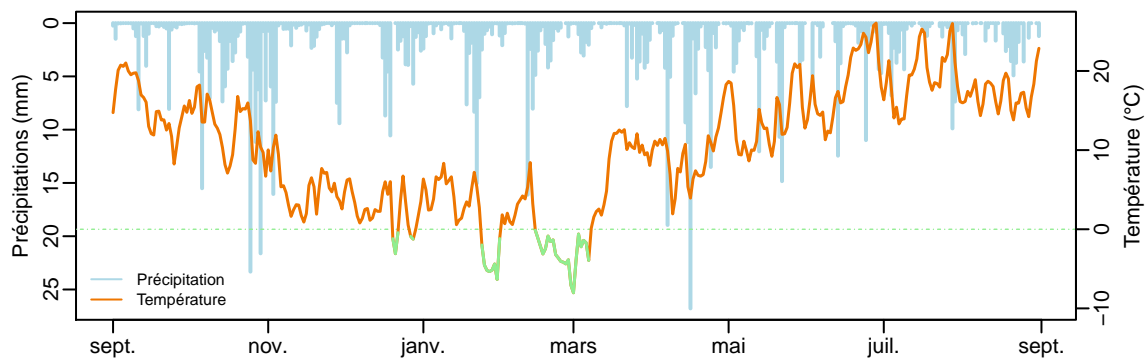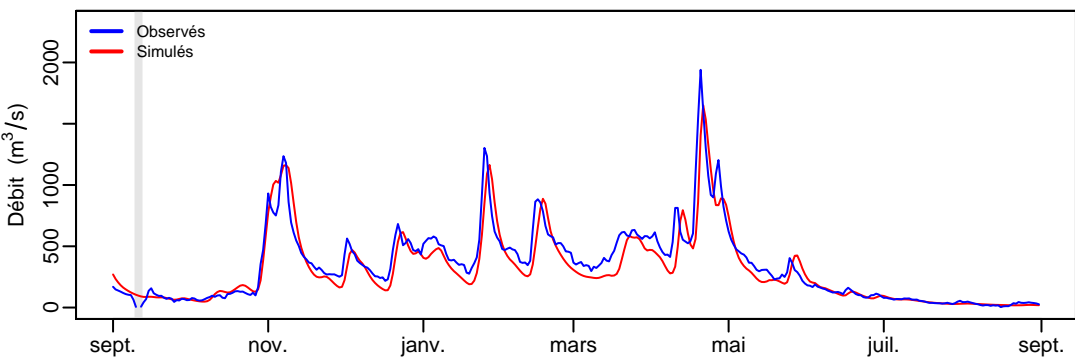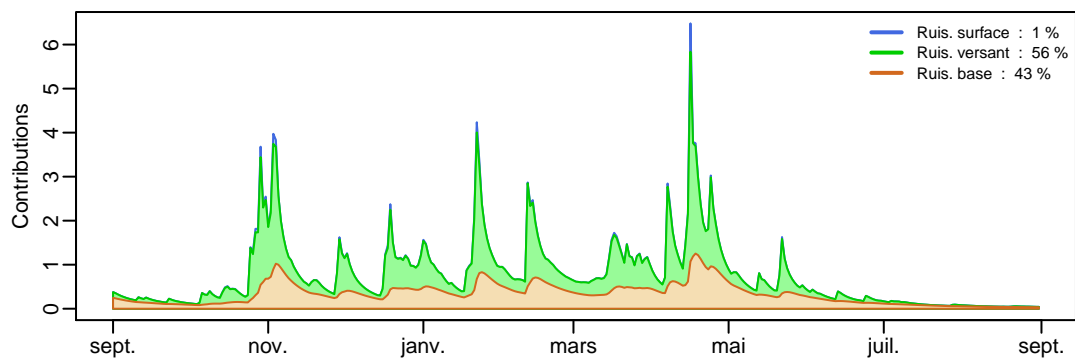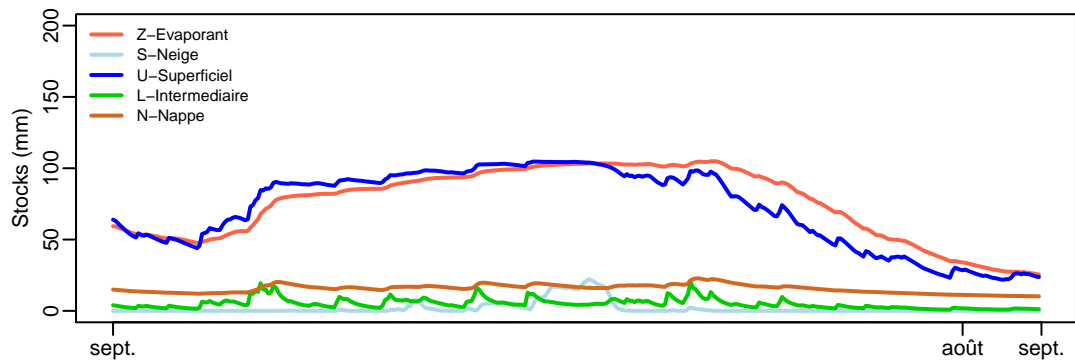

# k4080010 (34136.37 km<sup>2</sup>) – année 2005–2006

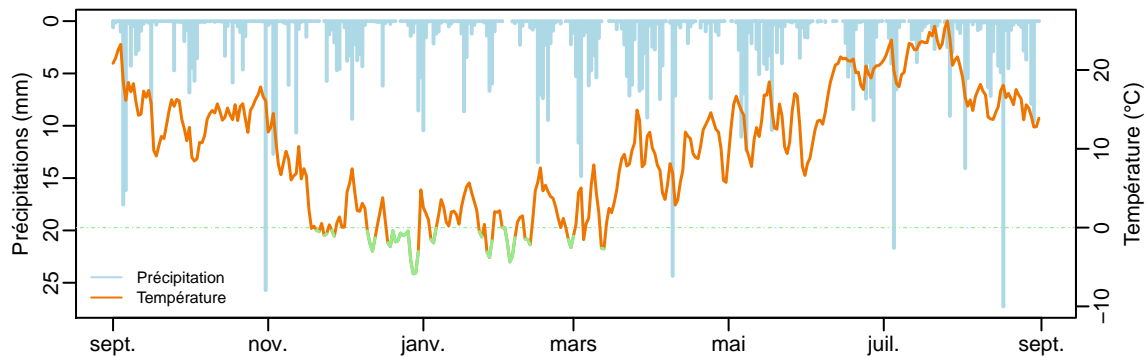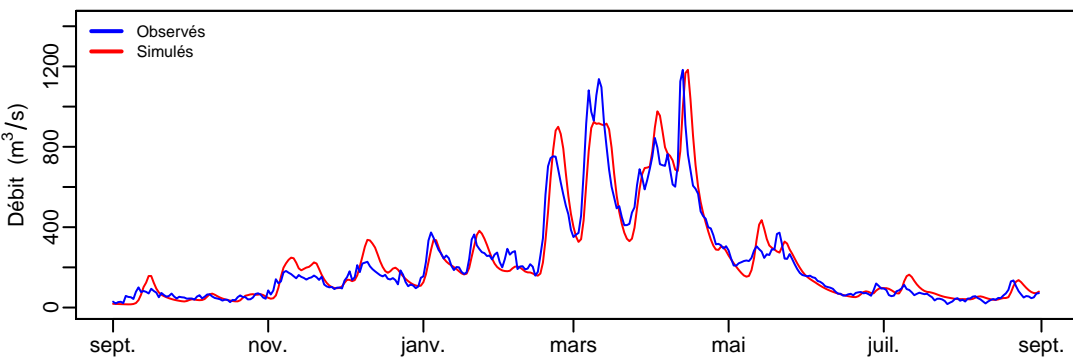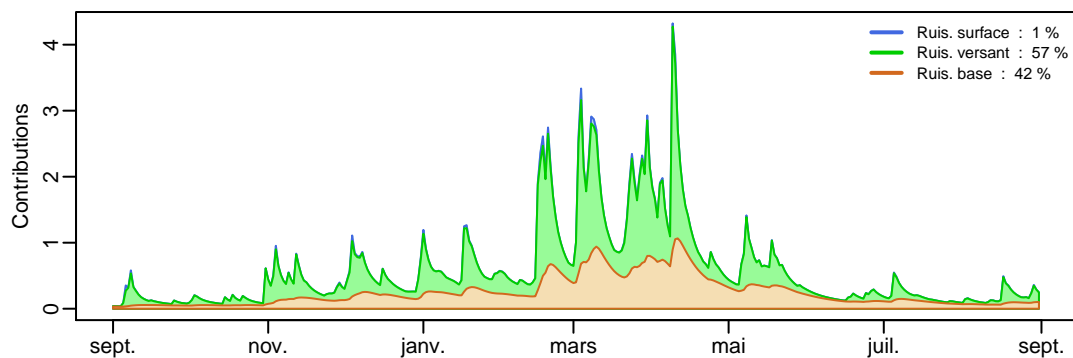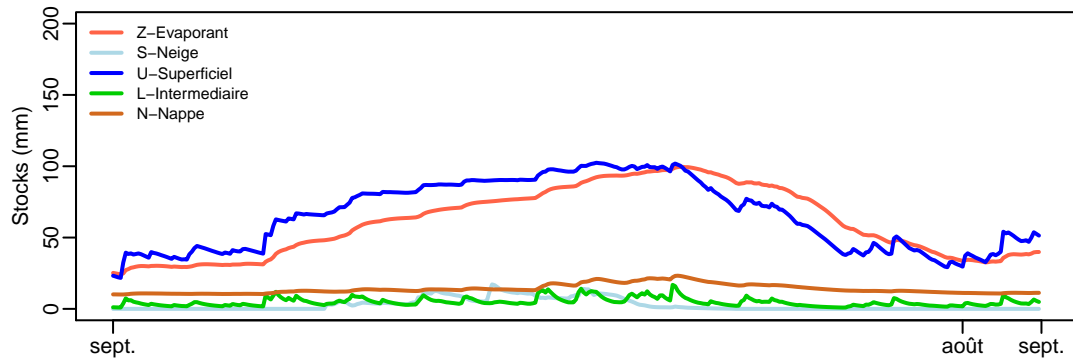

# k4080010 (34136.37 km<sup>2</sup>) – année 2006–2007

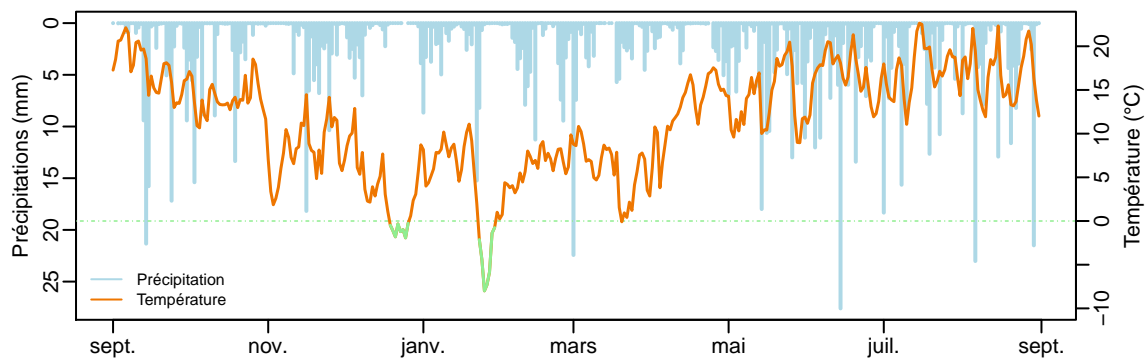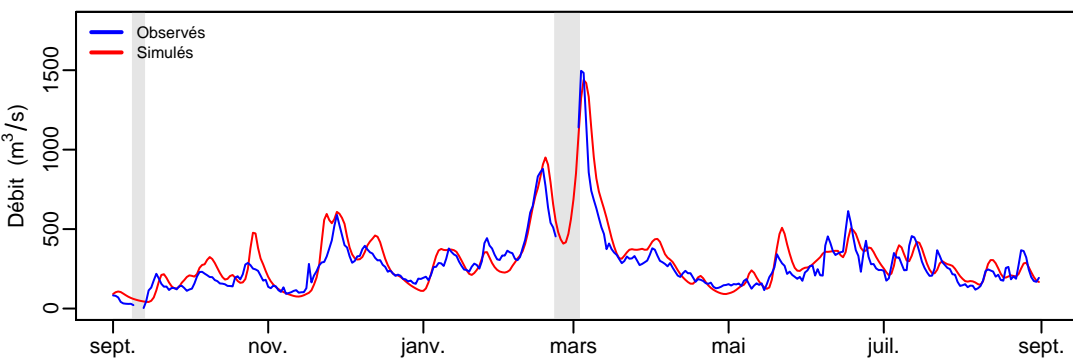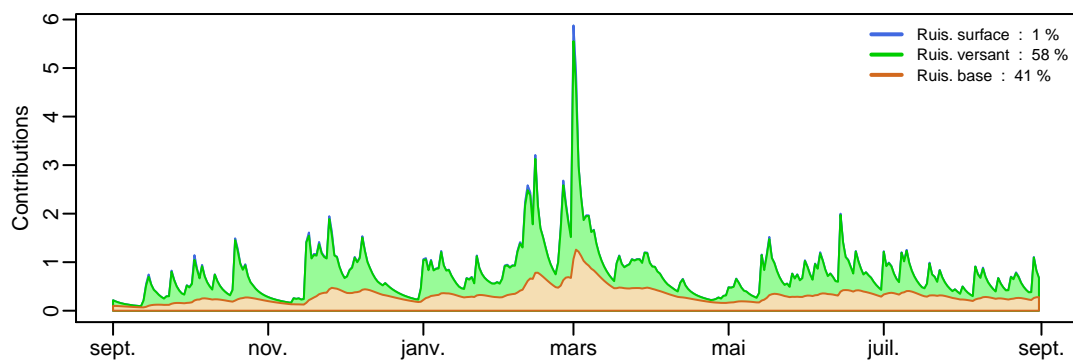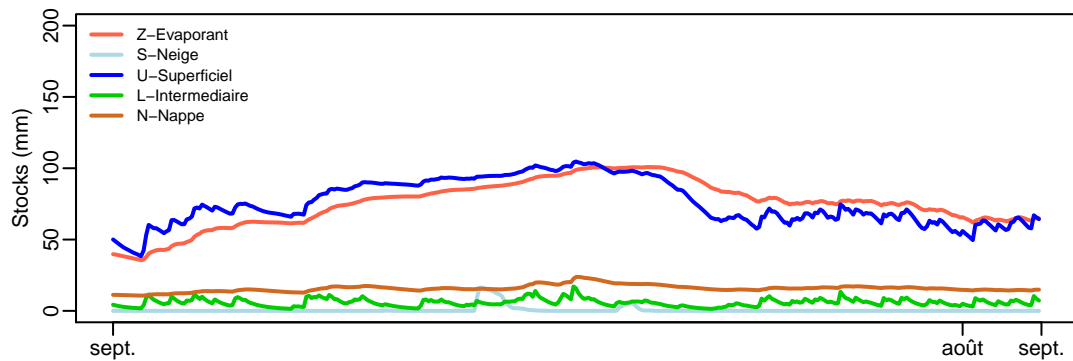

# k4080010 (34136.37 km<sup>2</sup>) – année 2007–2008

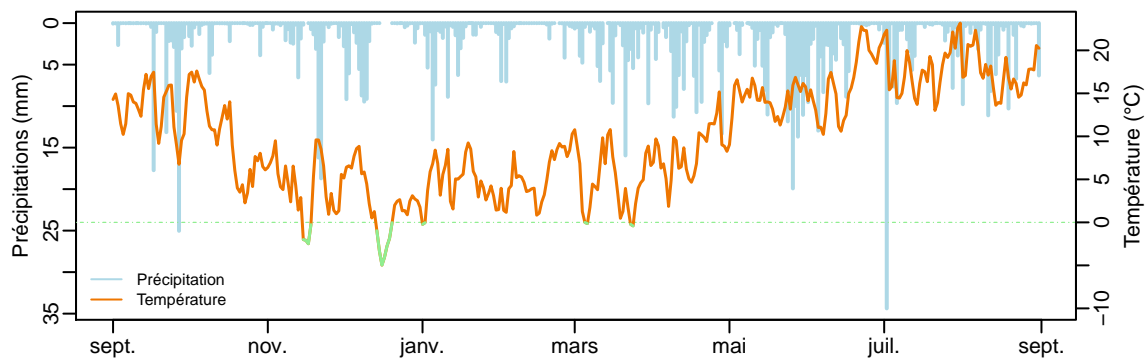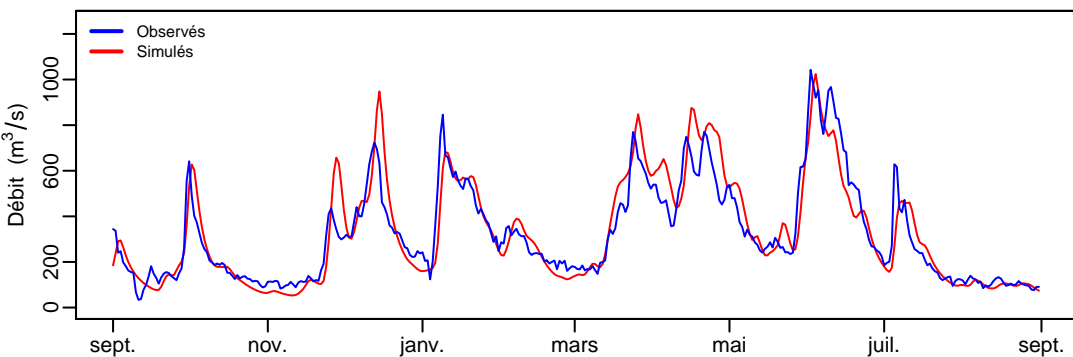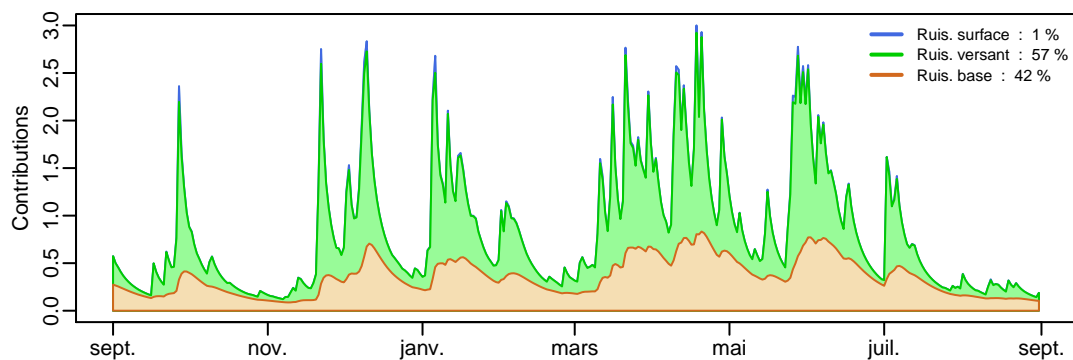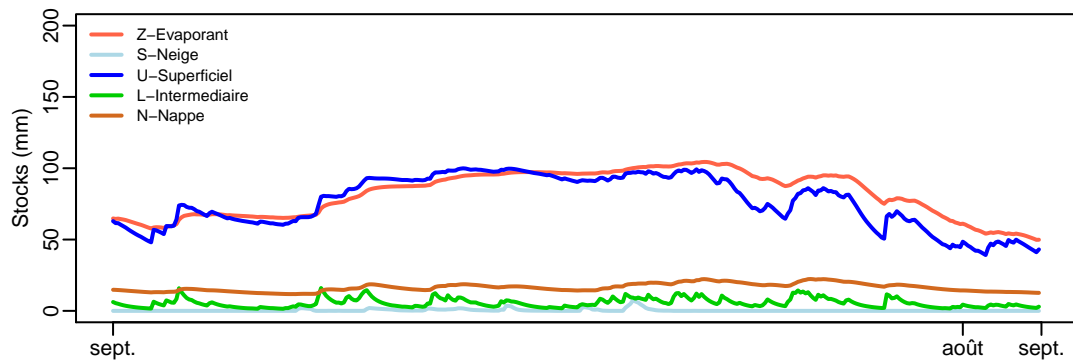

# k4080010 (34136.37 km<sup>2</sup>) – année 2008–2009

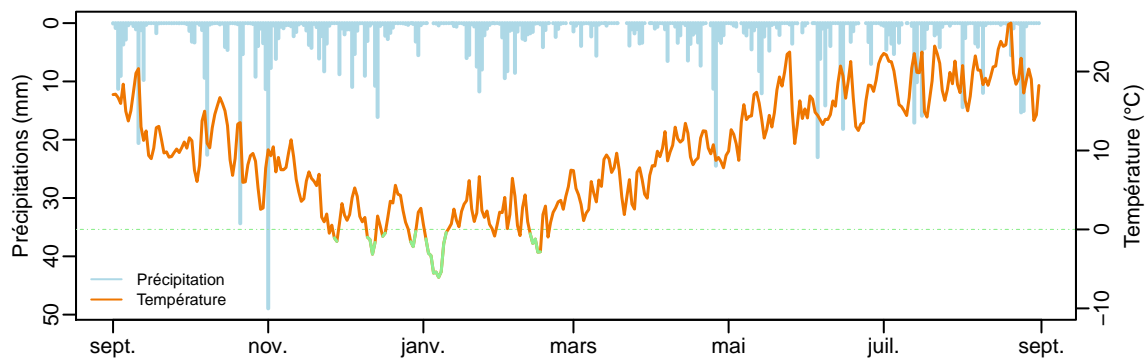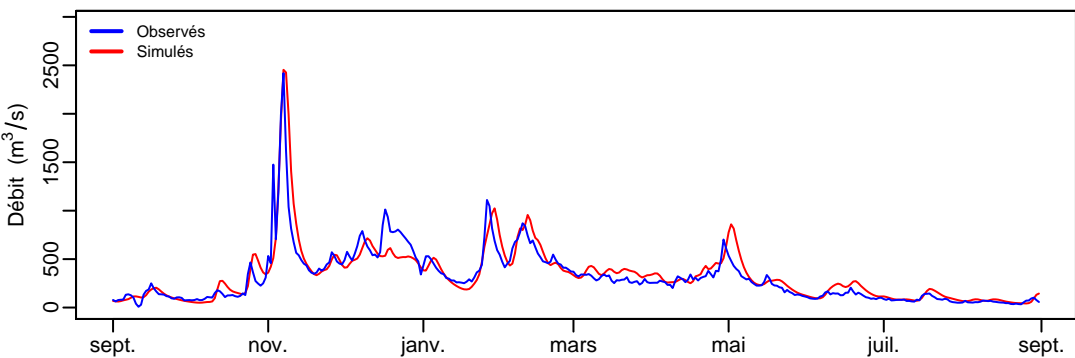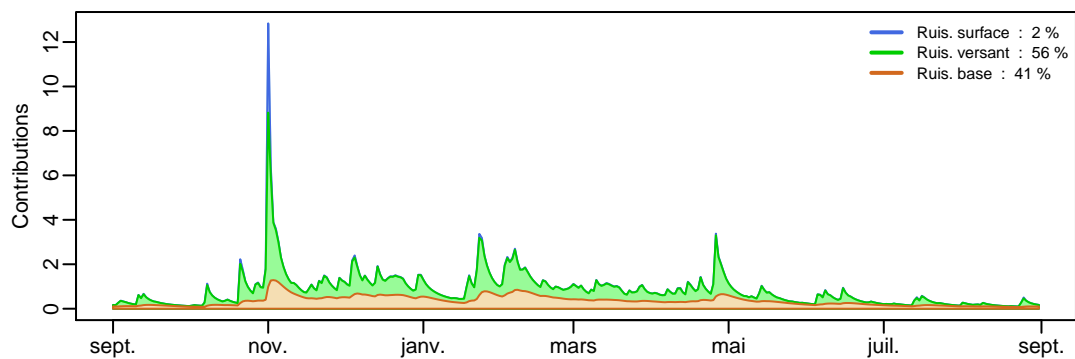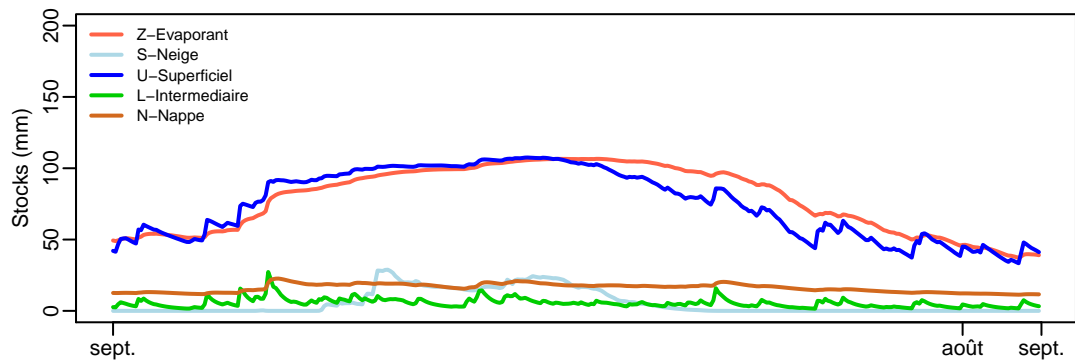

# k4080010 (34136.37 km²) – année 2009–2010

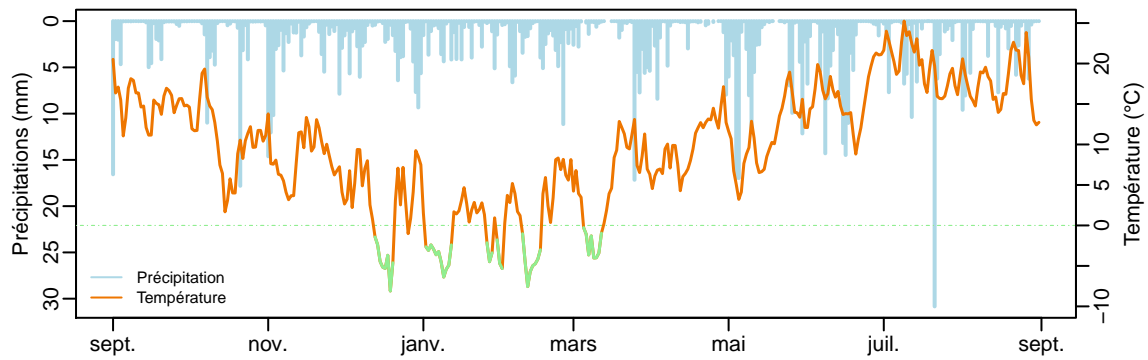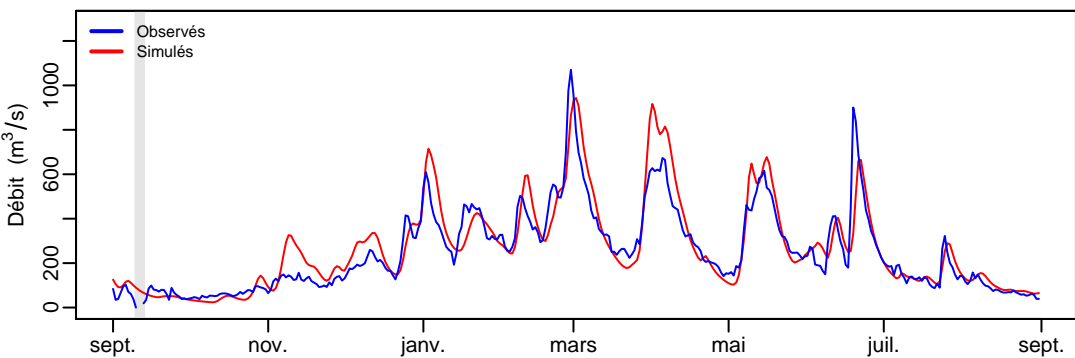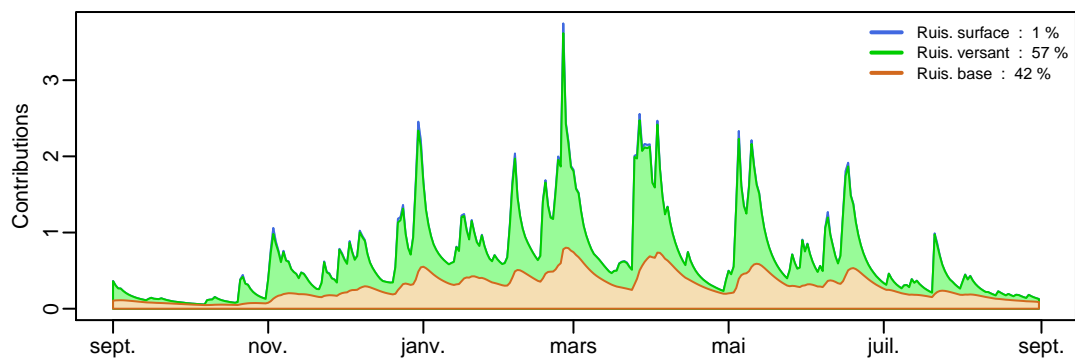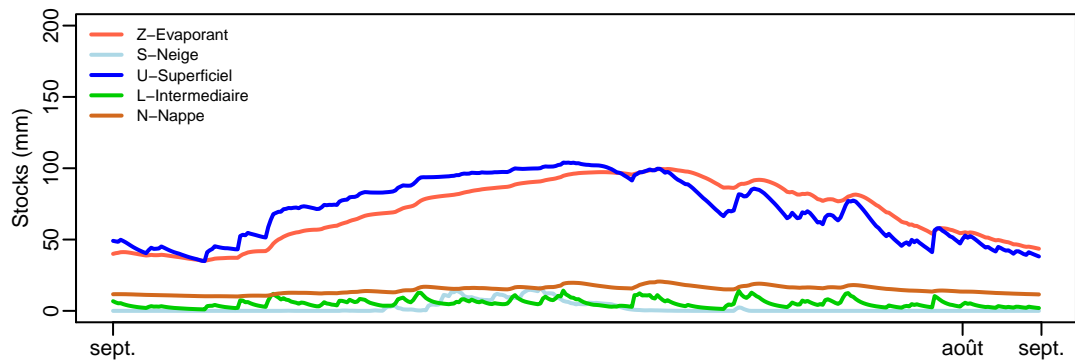

# k4080010 (34136.37 km<sup>2</sup>) – année 2010–2011

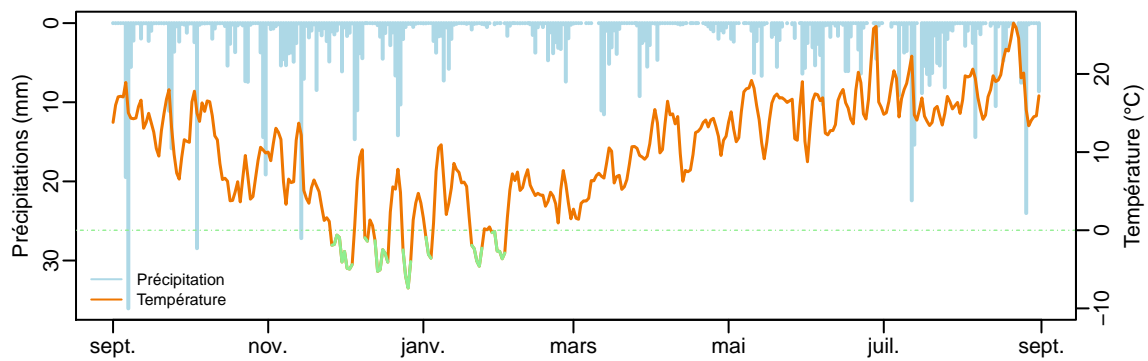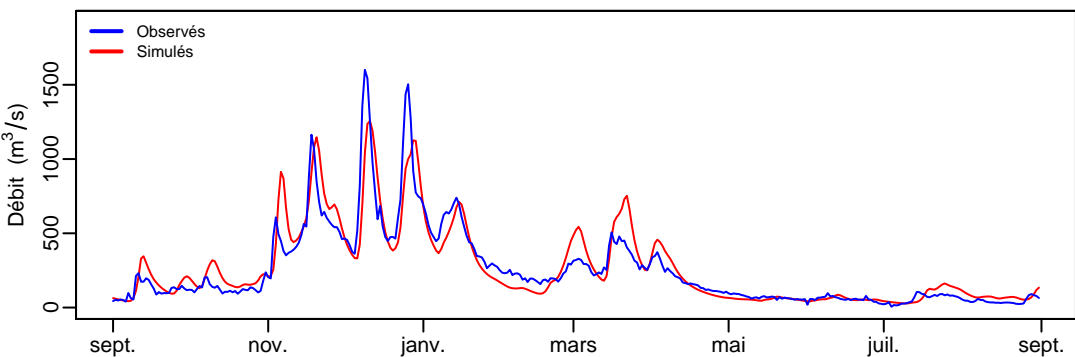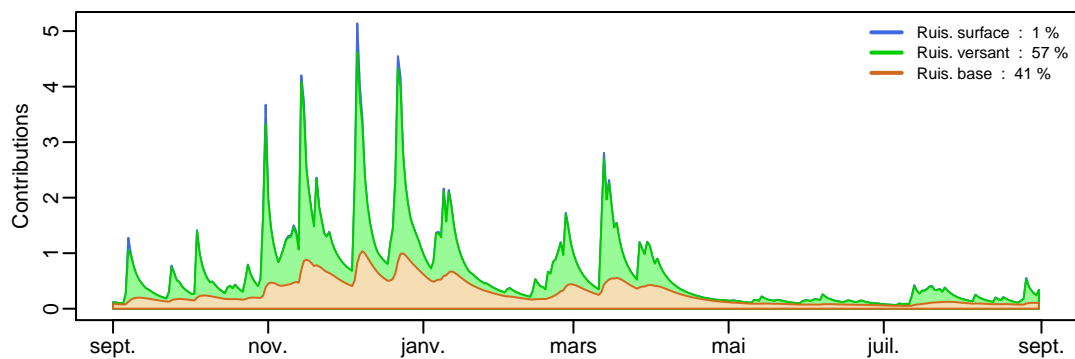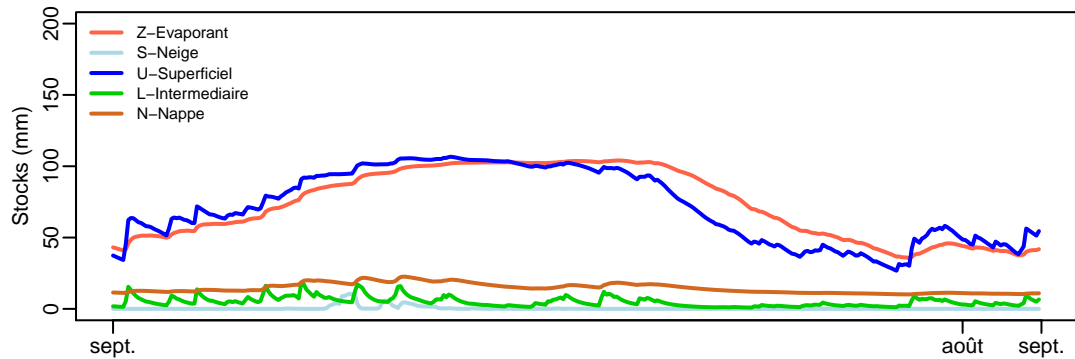

# k4080010 (34136.37 km<sup>2</sup>) – année 2011–2012

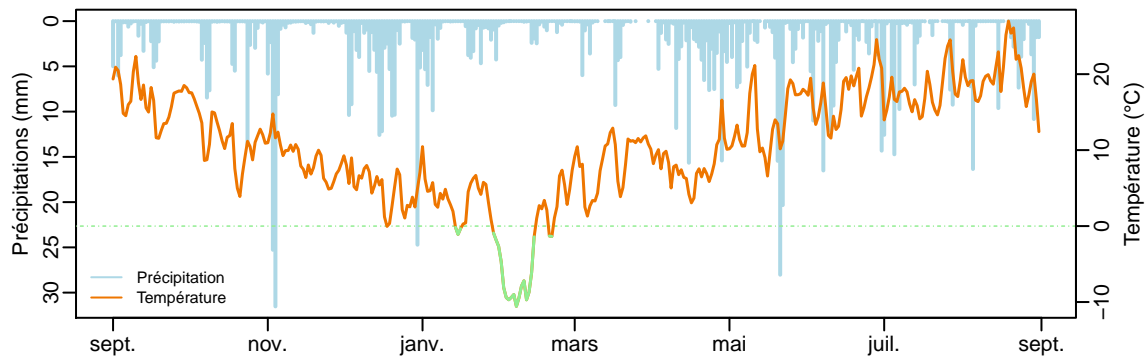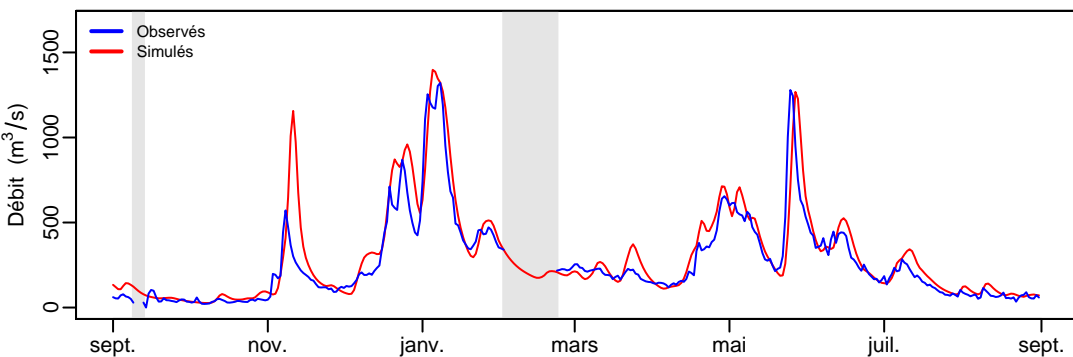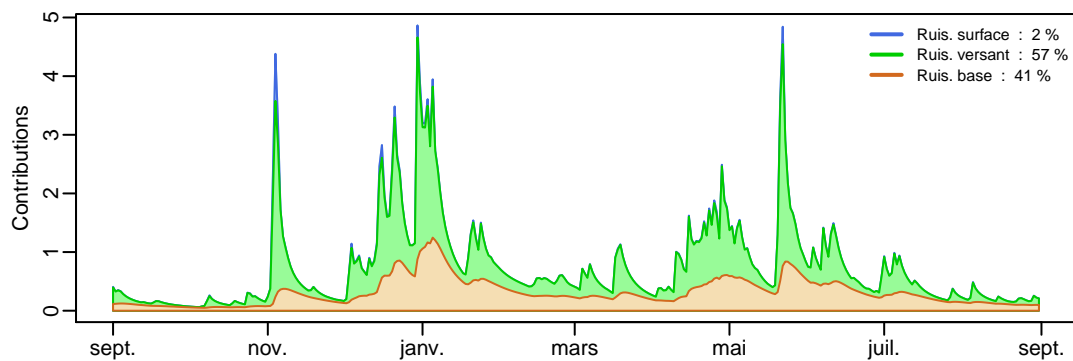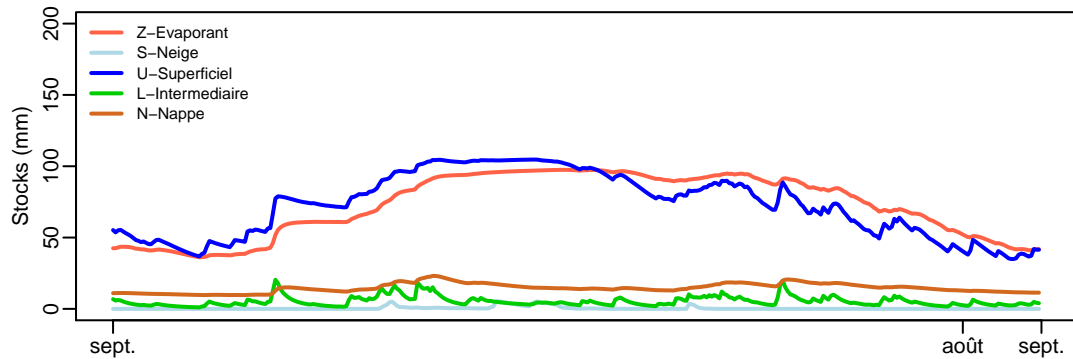



# k4094010 (477.96 km<sup>2</sup>) – année 1992–1993

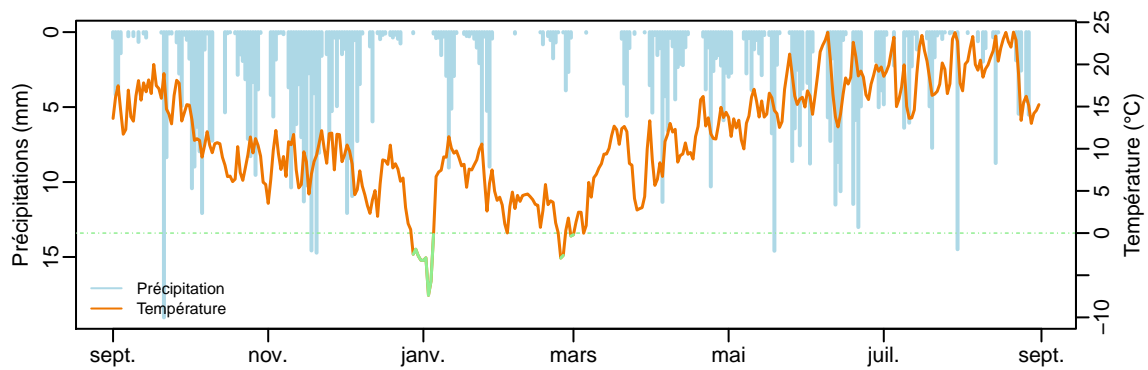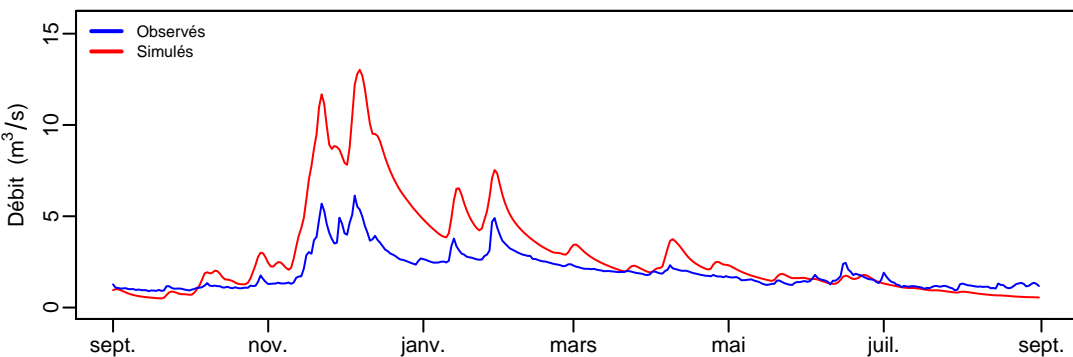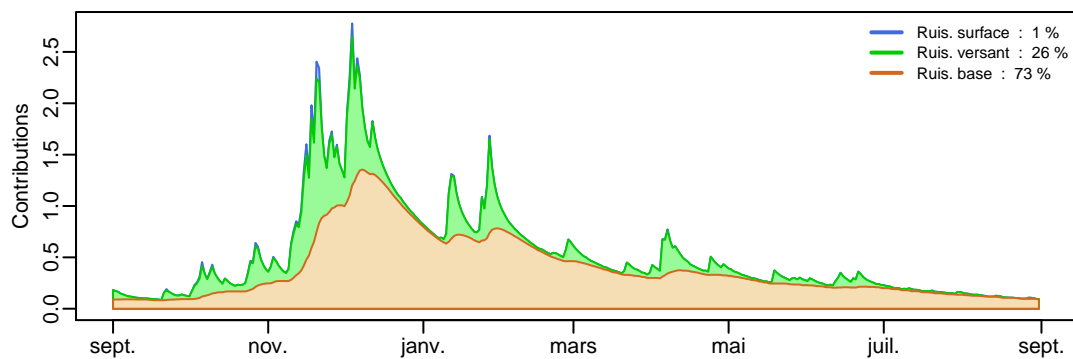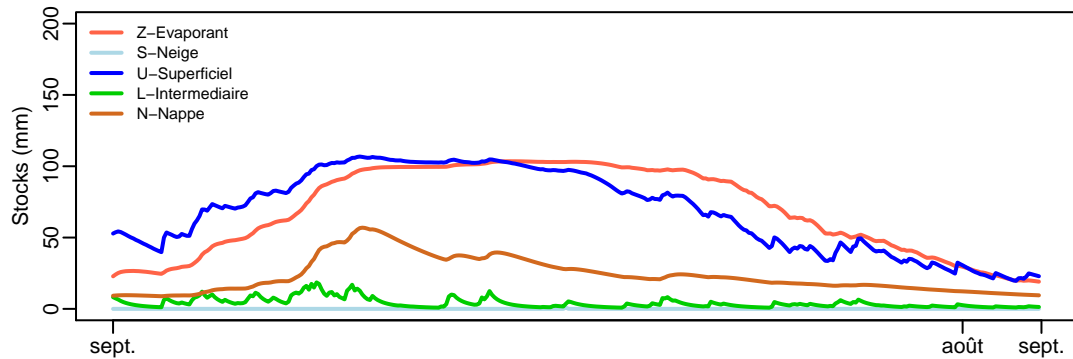

# k4094010 (477.96 km<sup>2</sup>) – année 1993–1994

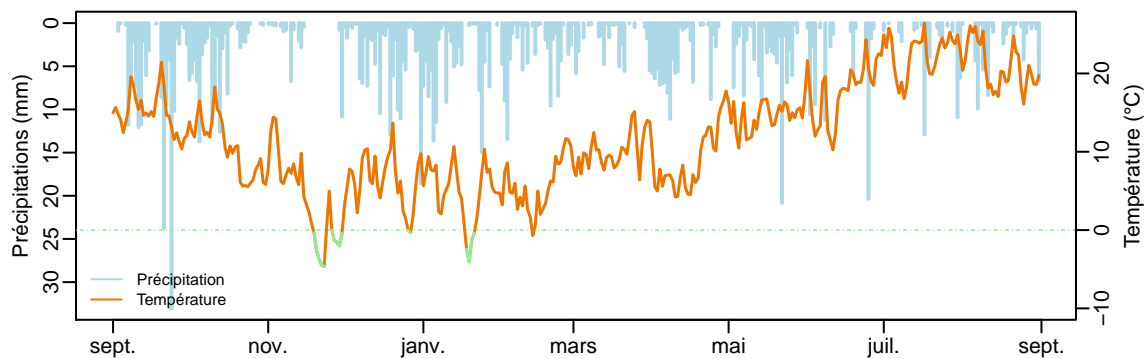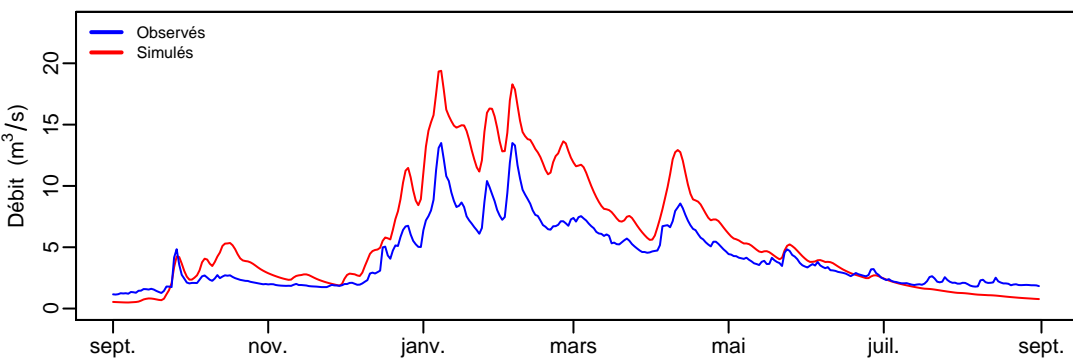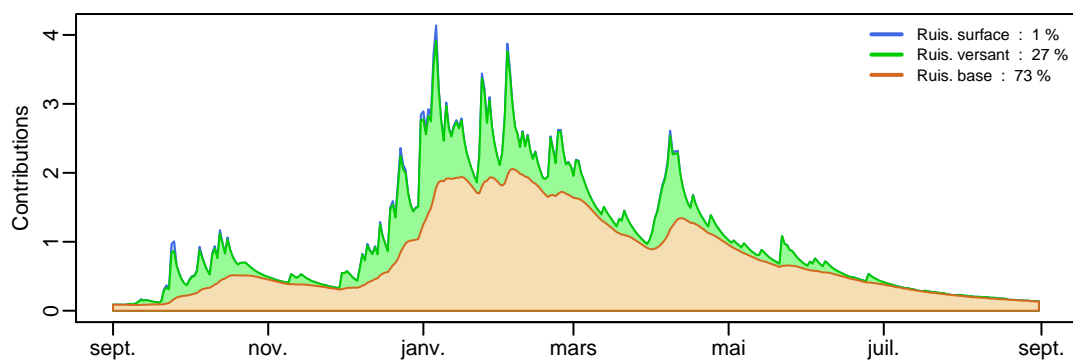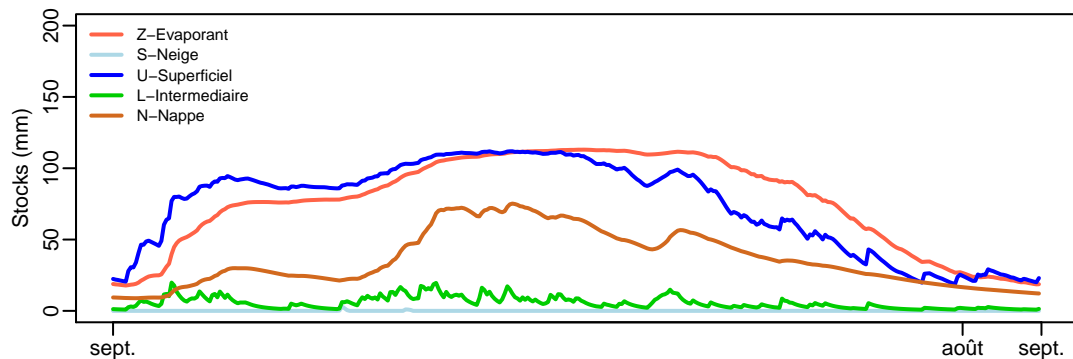

# k4094010 (477.96 km<sup>2</sup>) – année 1994–1995

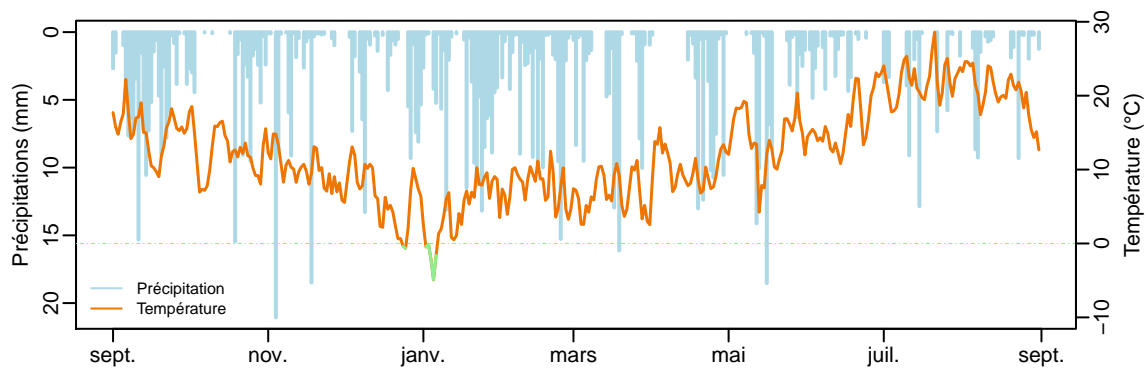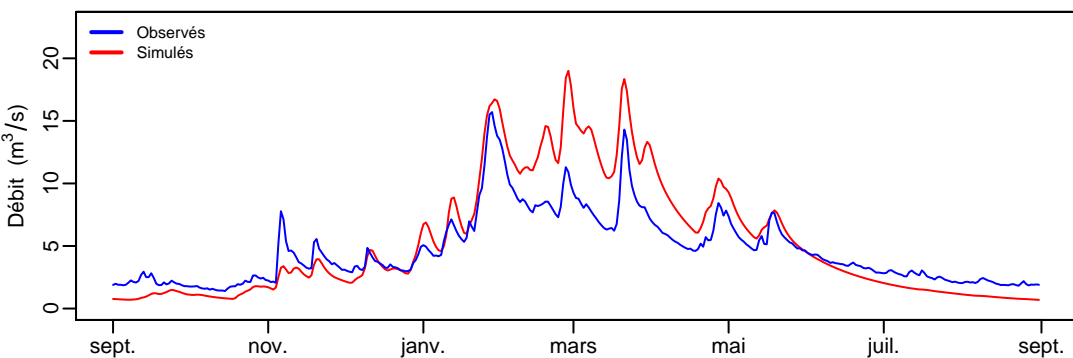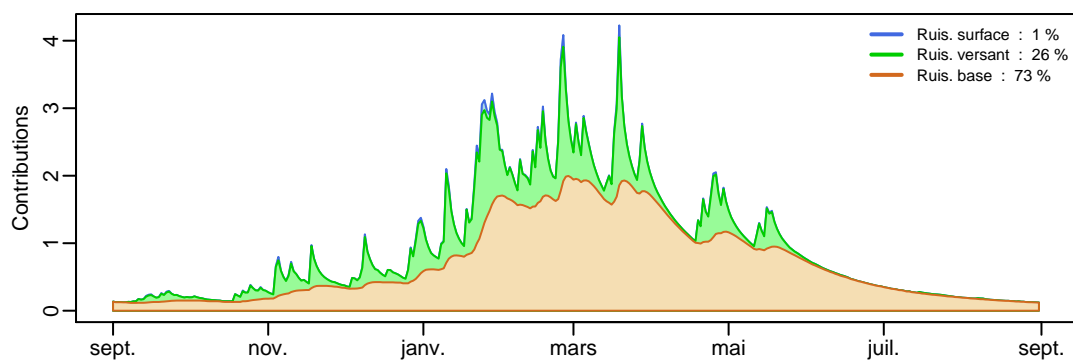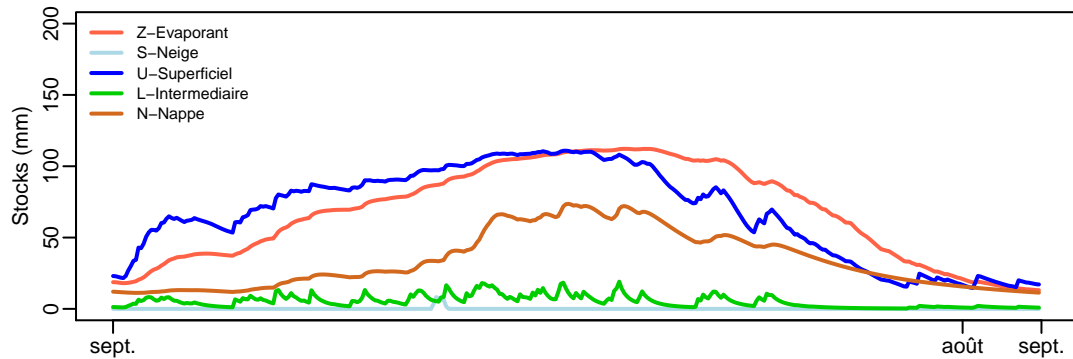

# k4094010 (477.96 km<sup>2</sup>) – année 1995–1996

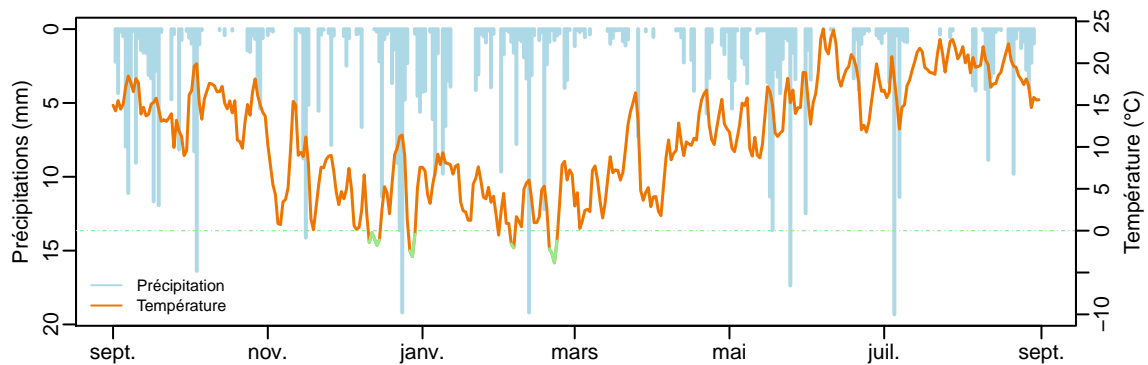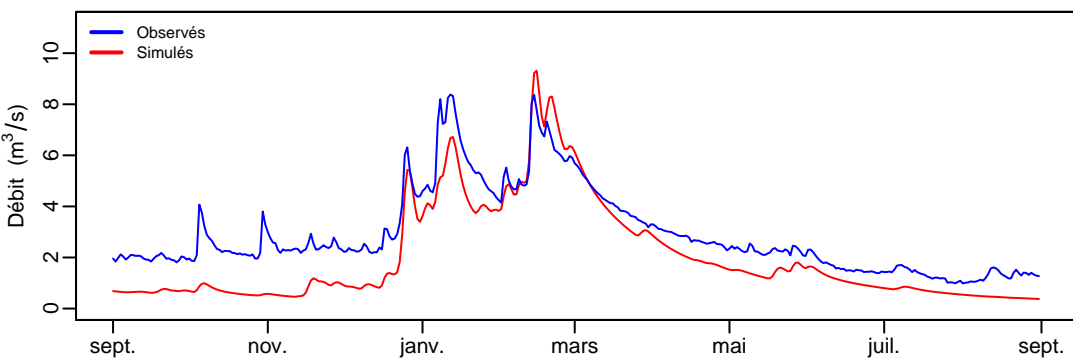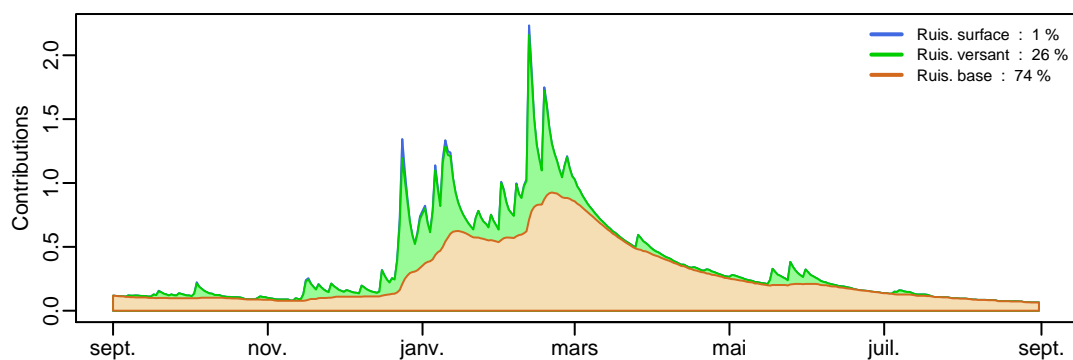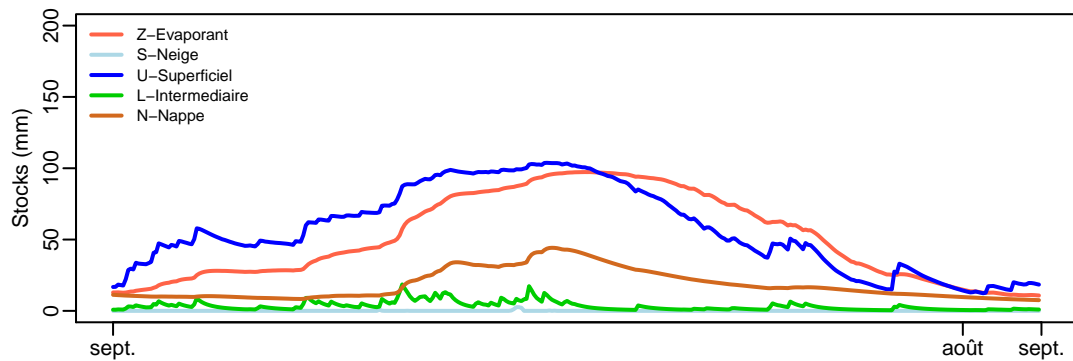

# k4094010 (477.96 km<sup>2</sup>) – année 1996–1997

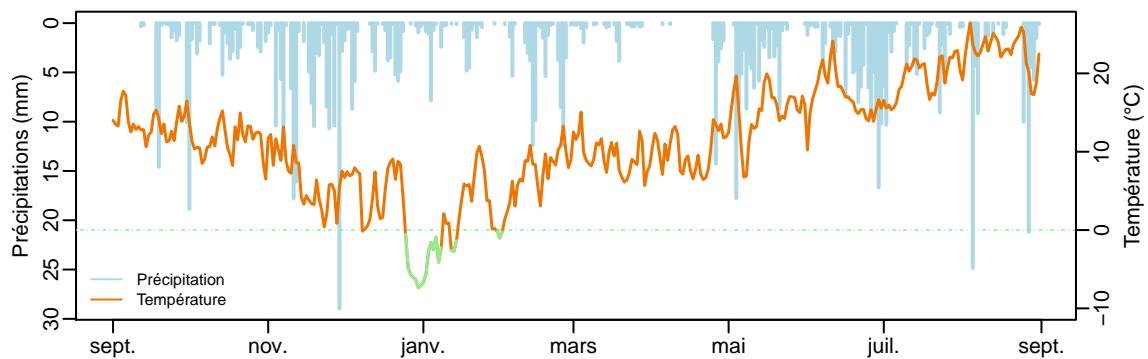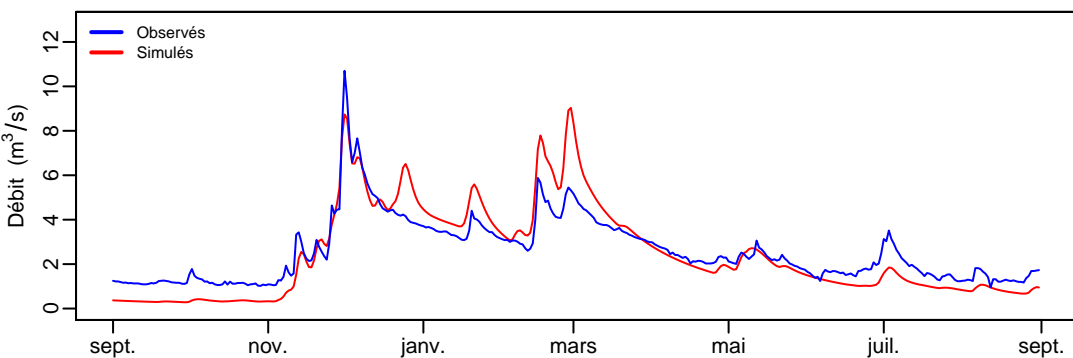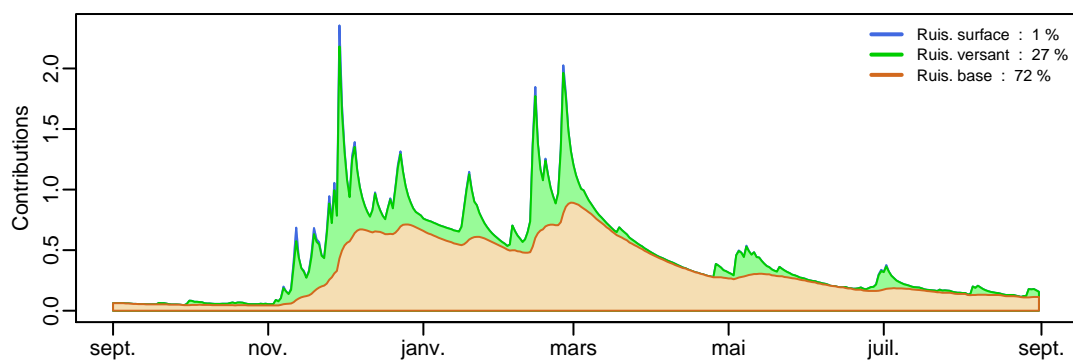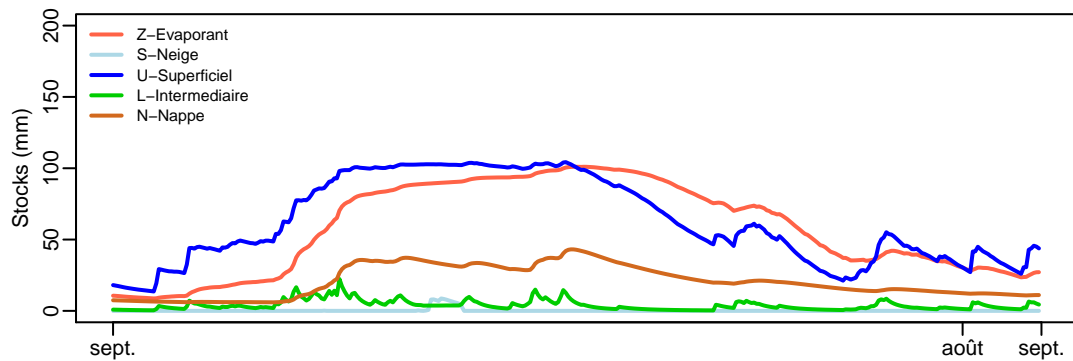

# k4094010 (477.96 km<sup>2</sup>) – année 1997–1998

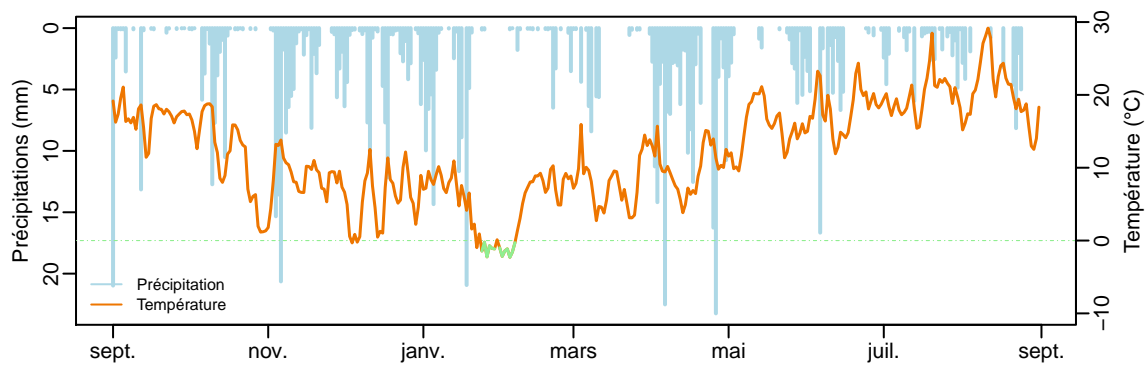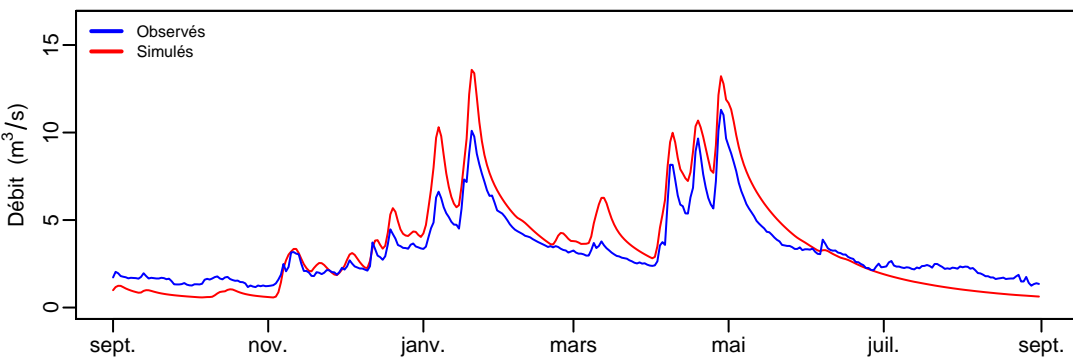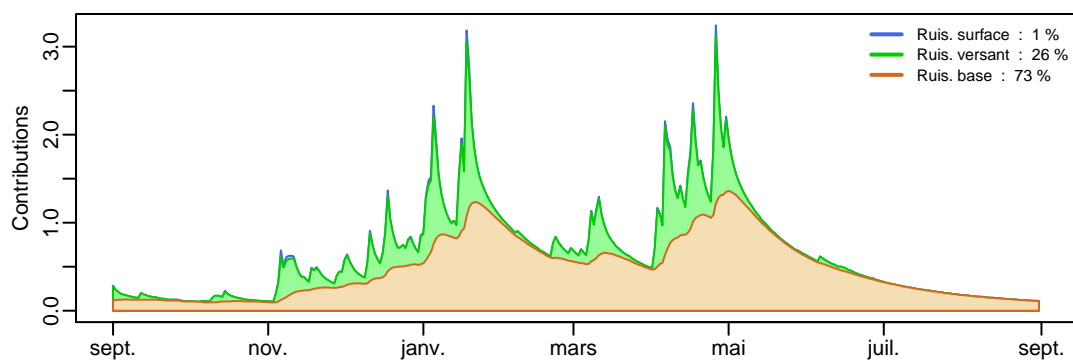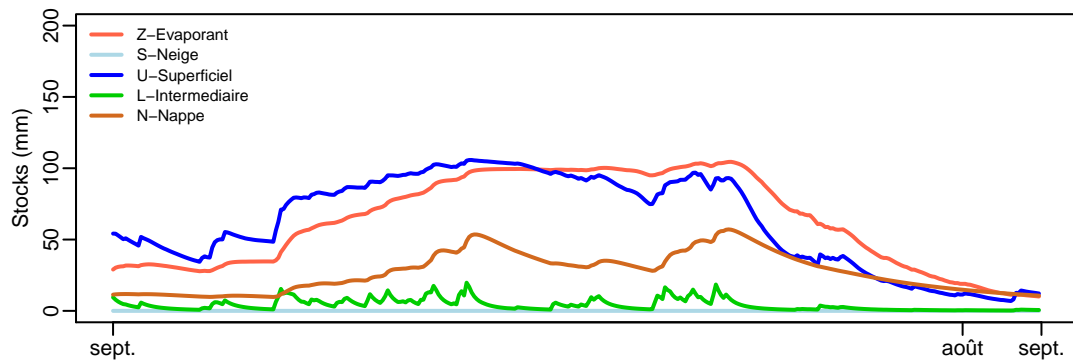

# k4094010 (477.96 km<sup>2</sup>) – année 1998–1999

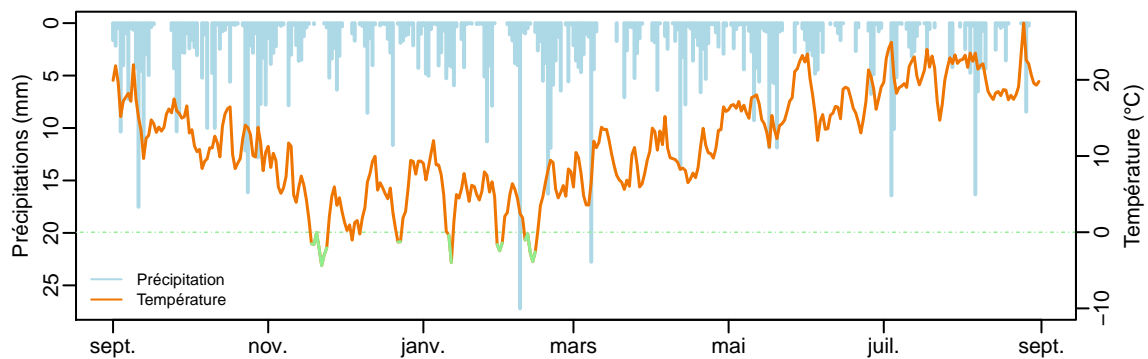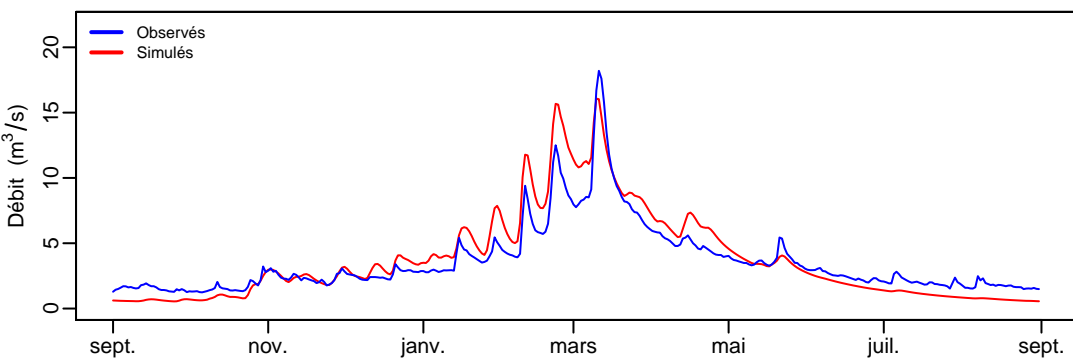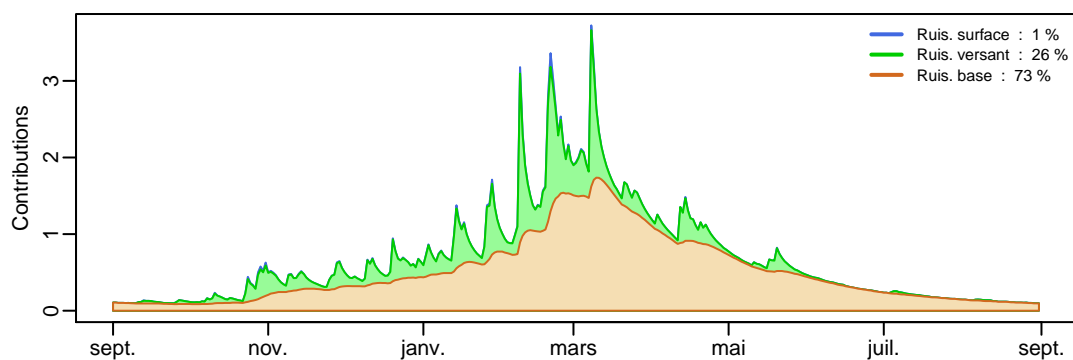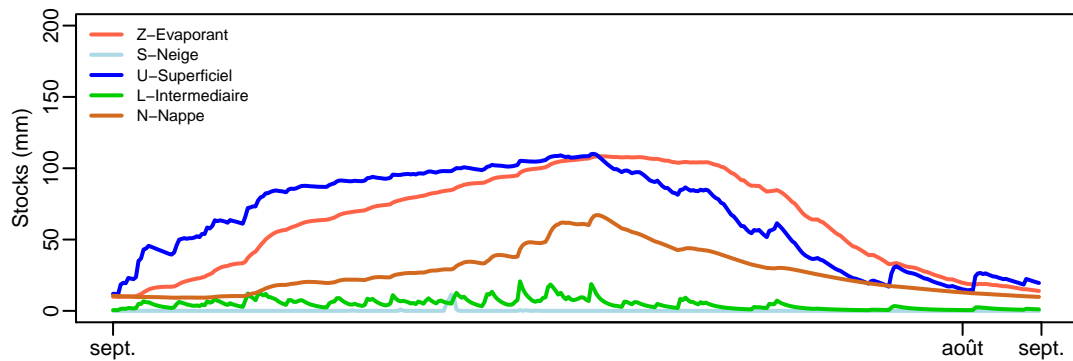

# k4094010 (477.96 km<sup>2</sup>) – année 1999–2000

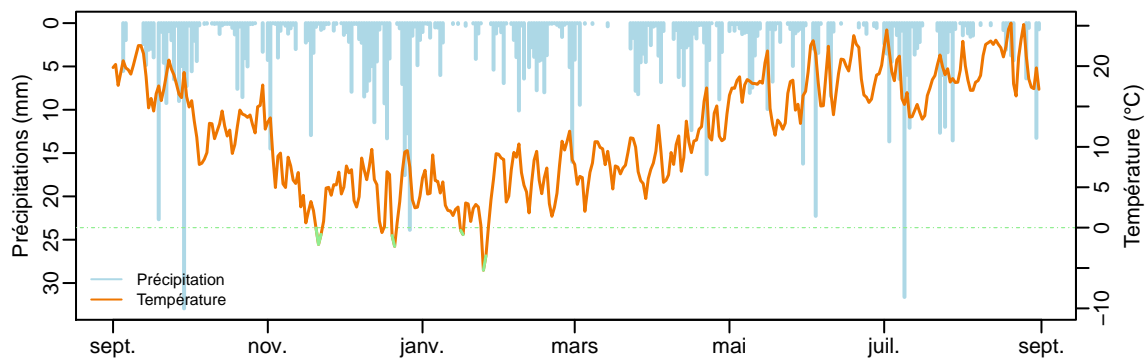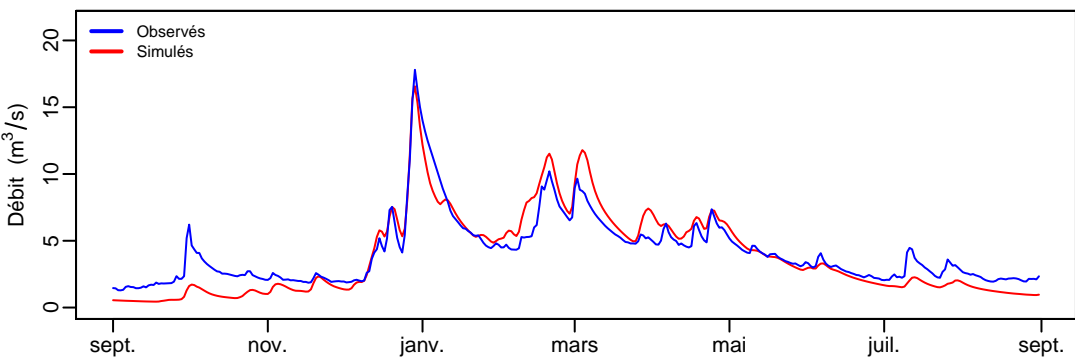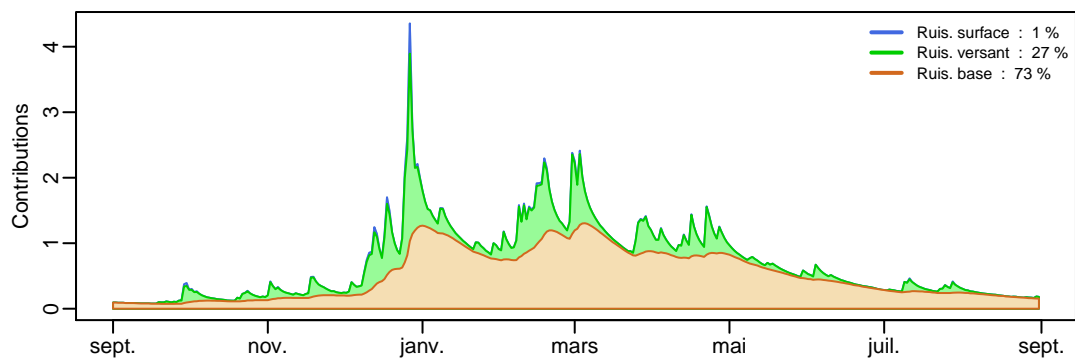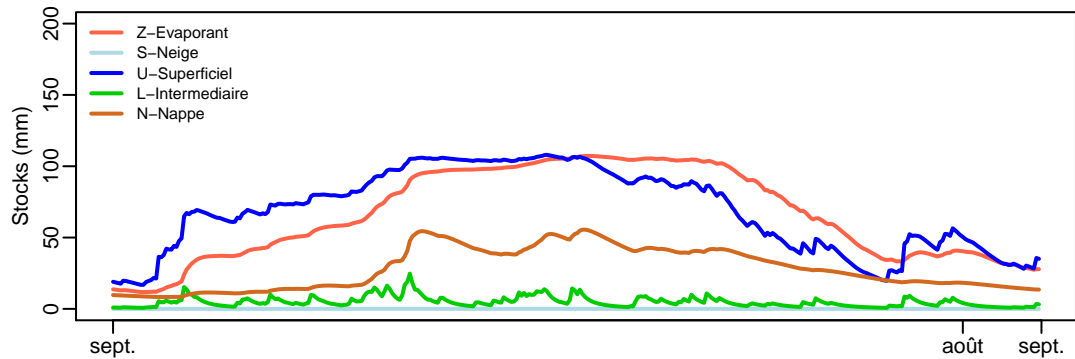



# k4094010 (477.96 km<sup>2</sup>) – année 2000–2001

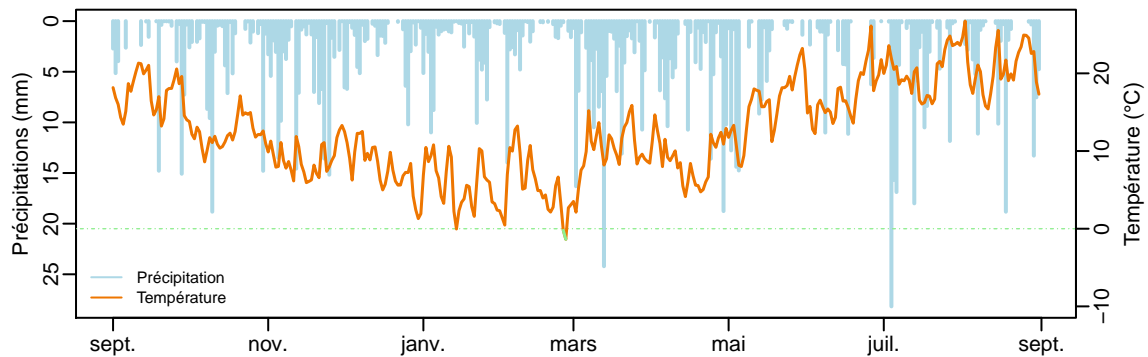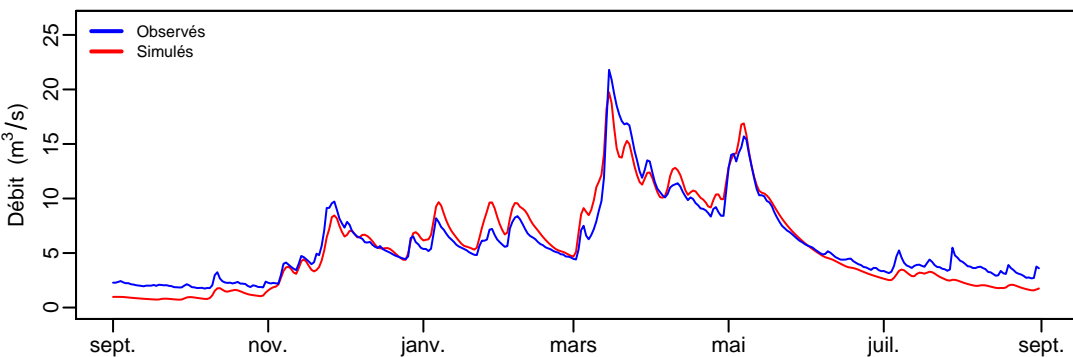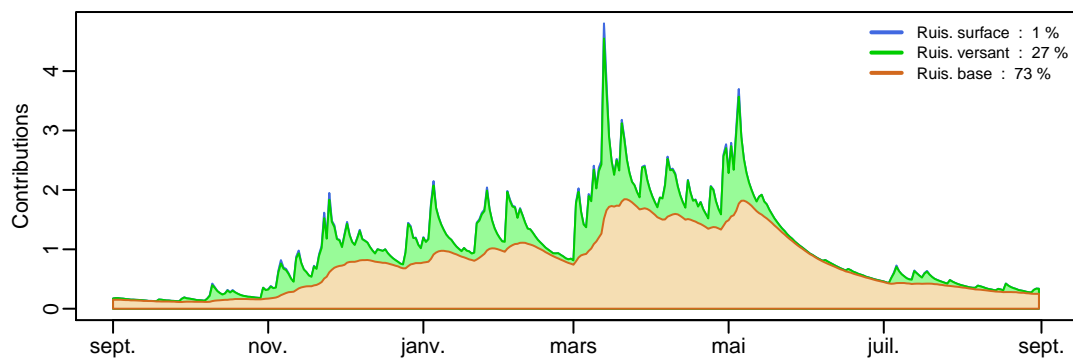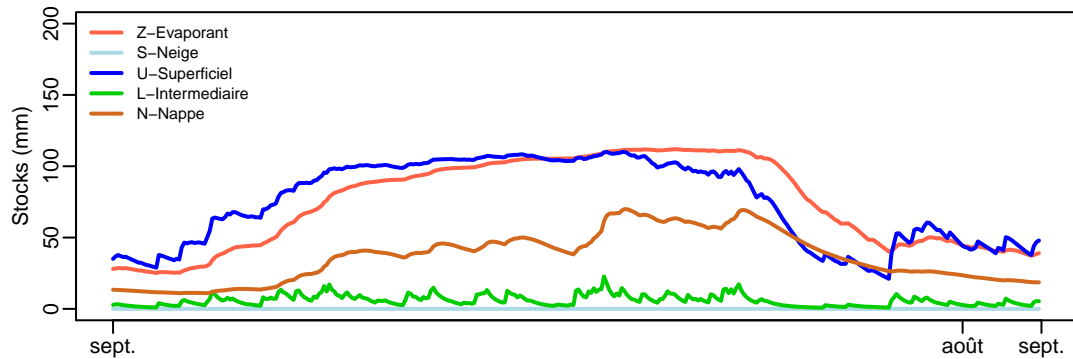

# k4094010 (477.96 km²) – année 2001–2002

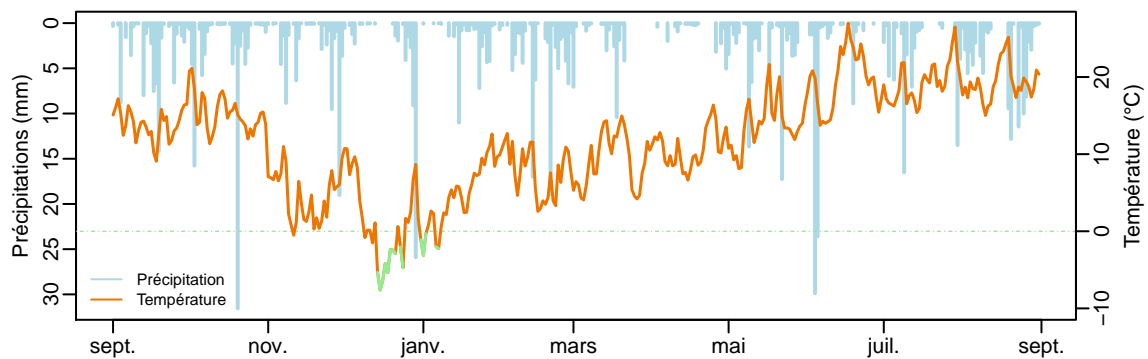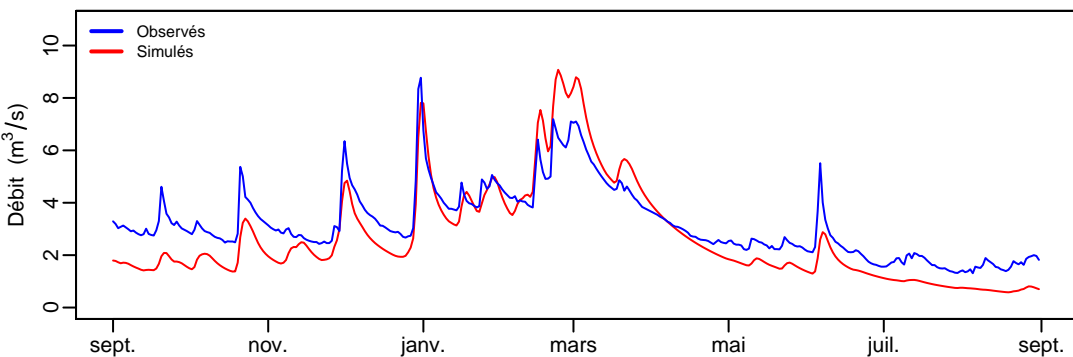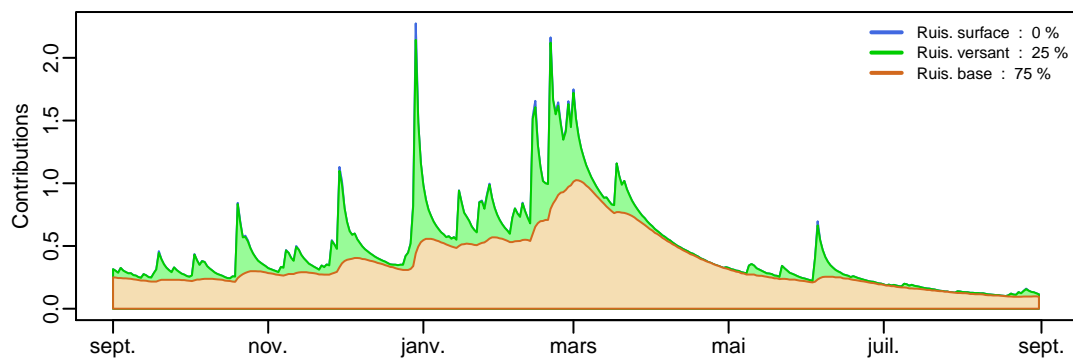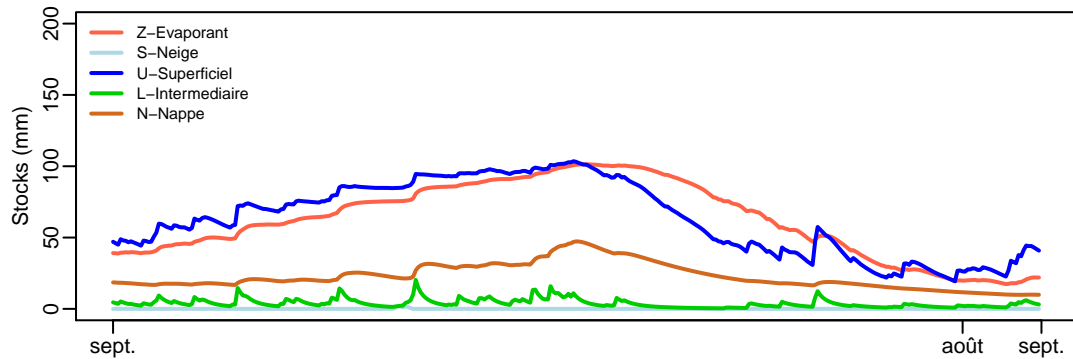

# k4094010 (477.96 km<sup>2</sup>) – année 2002–2003

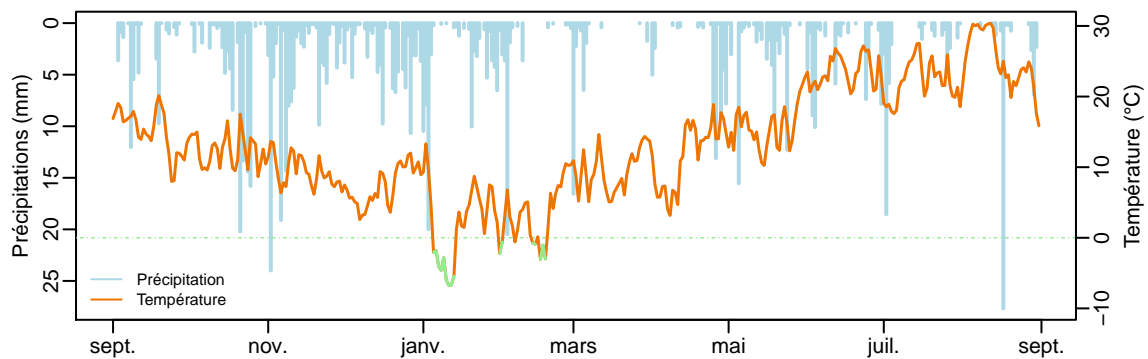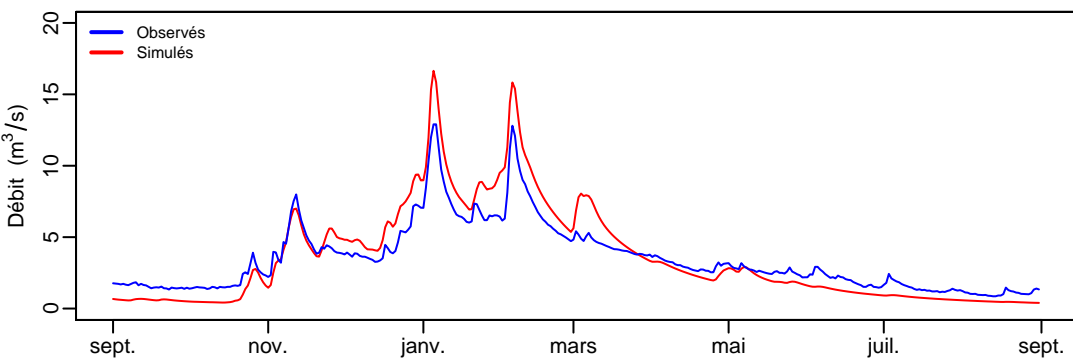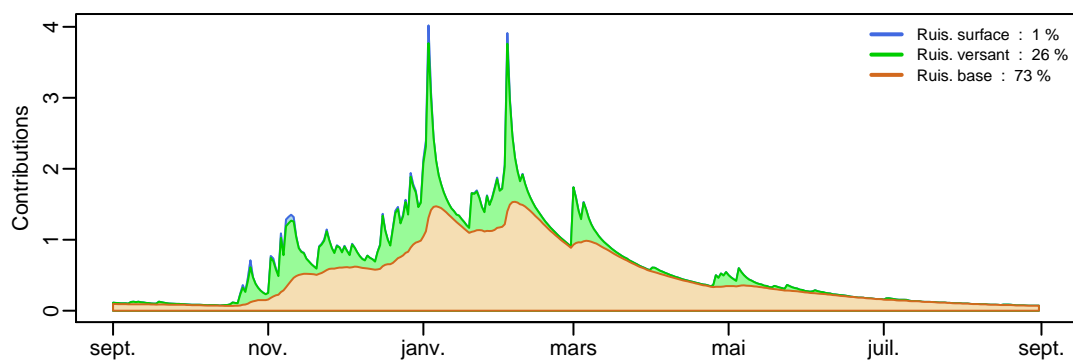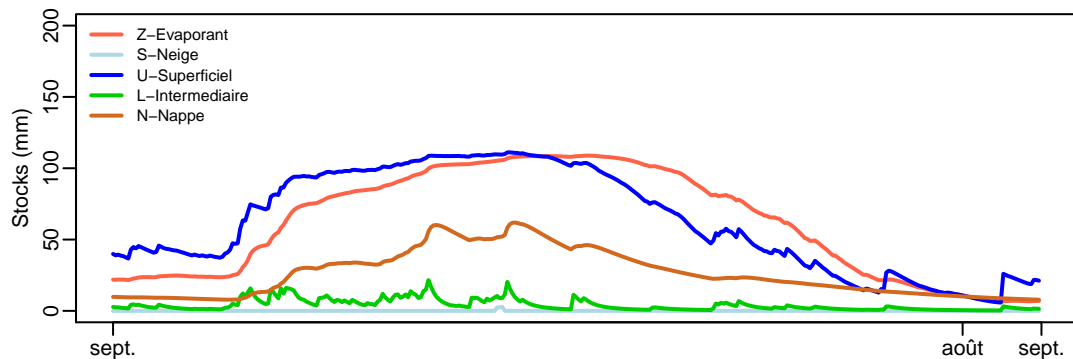

# k4094010 (477.96 km<sup>2</sup>) – année 2003–2004

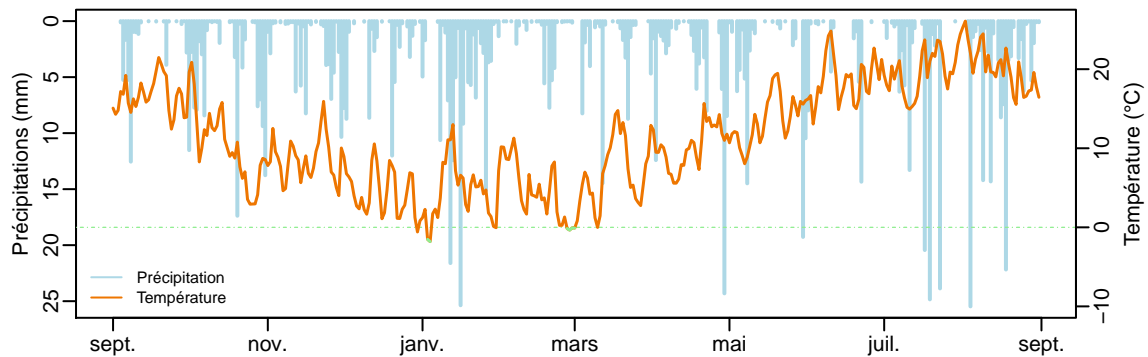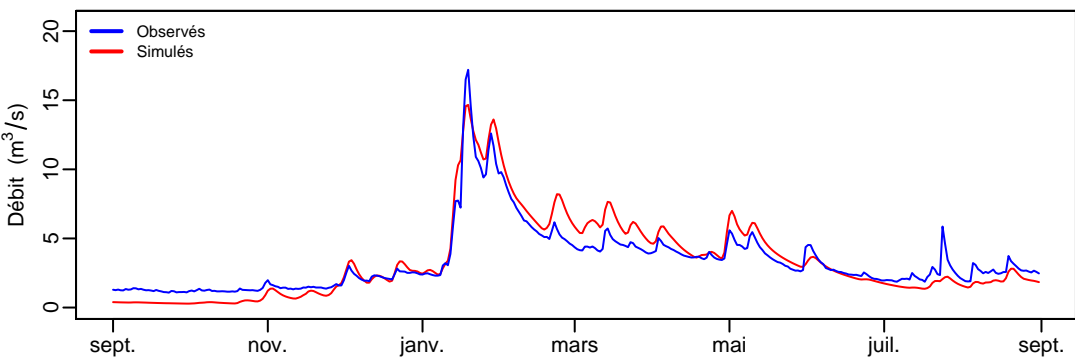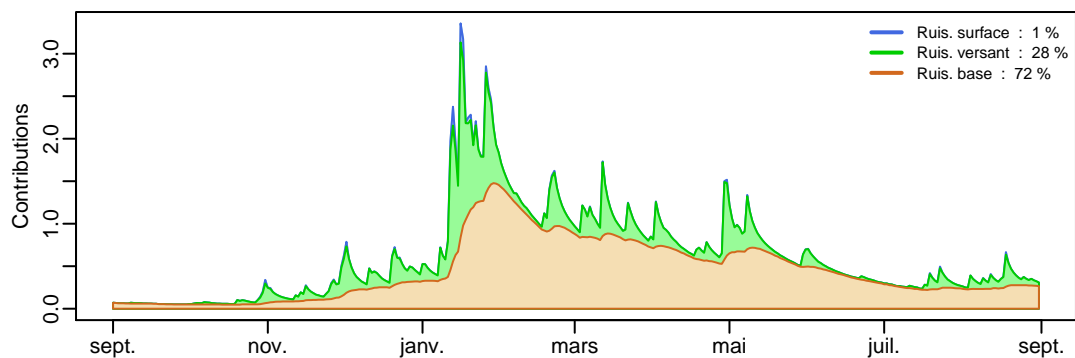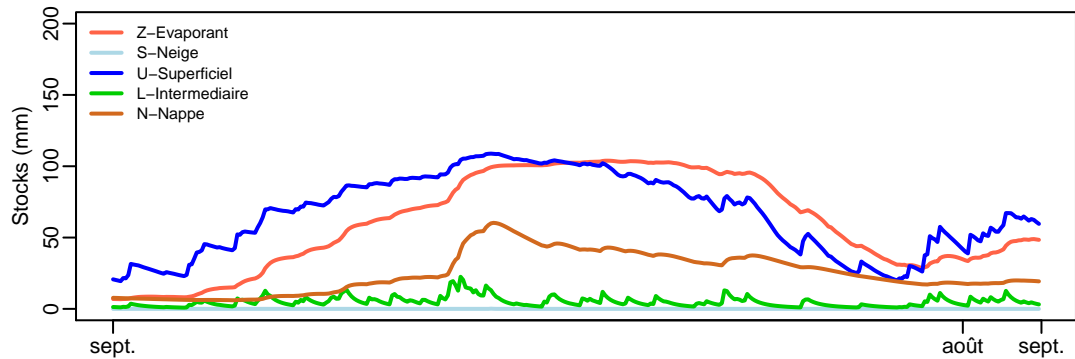

# k4094010 (477.96 km²) – année 2004–2005

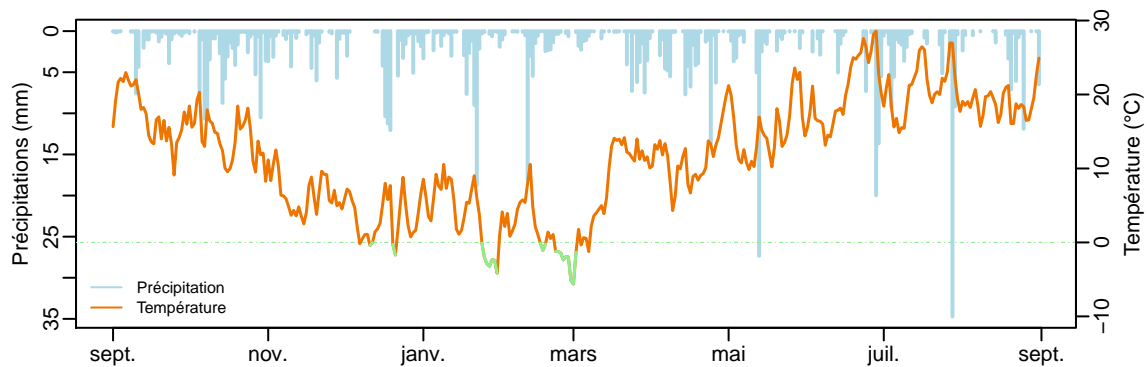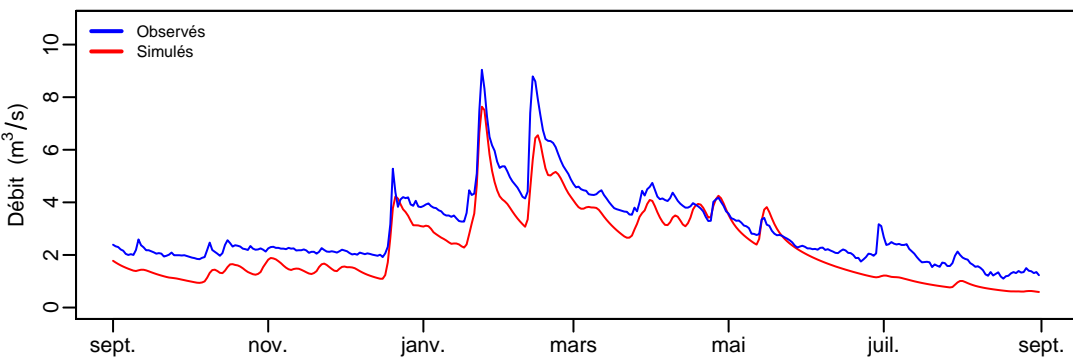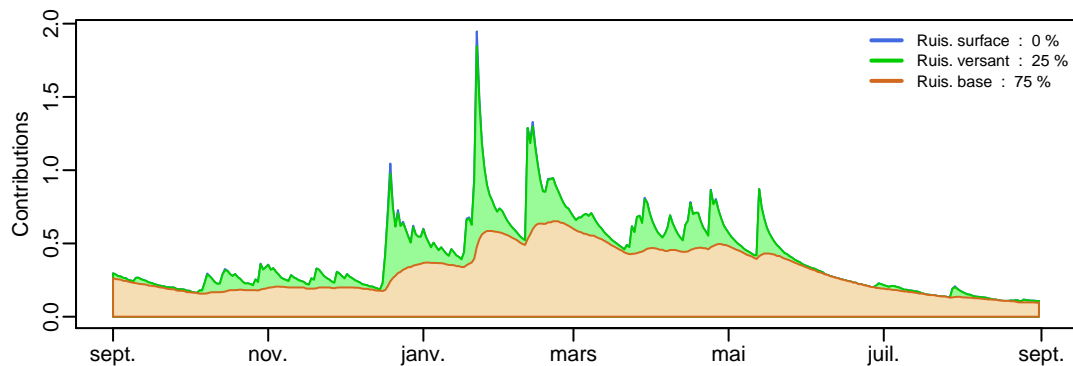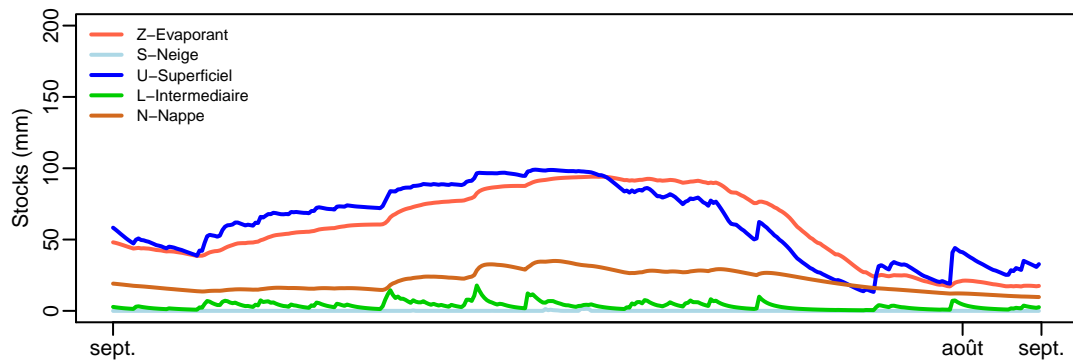

# k4094010 (477.96 km²) – année 2005–2006

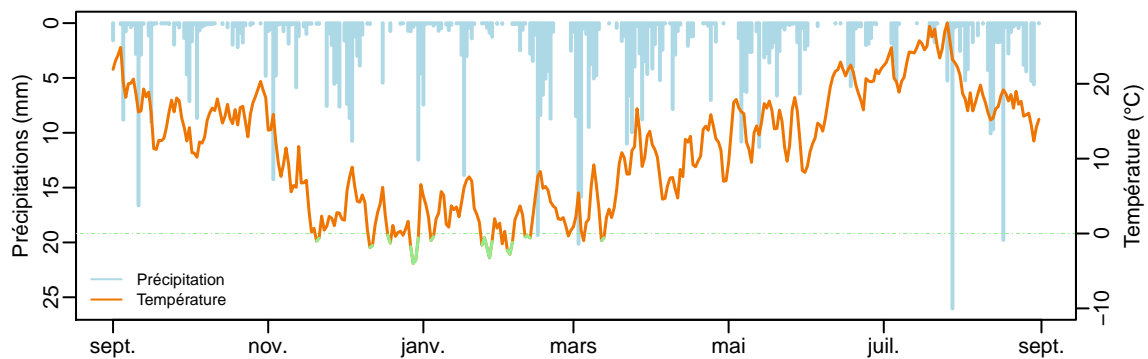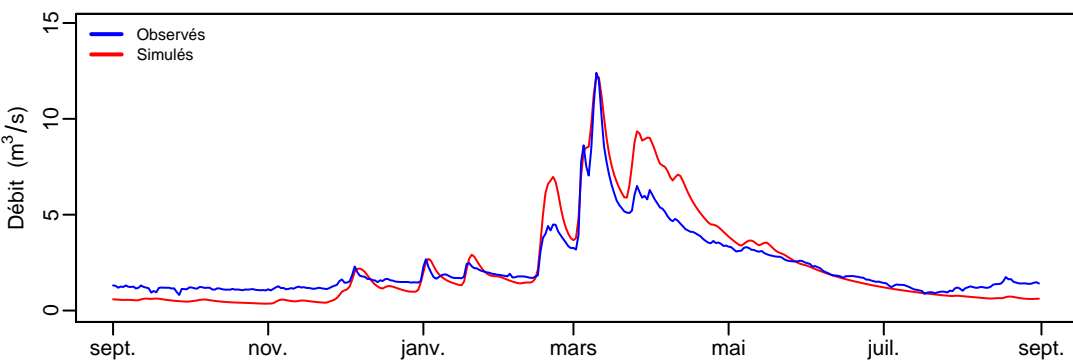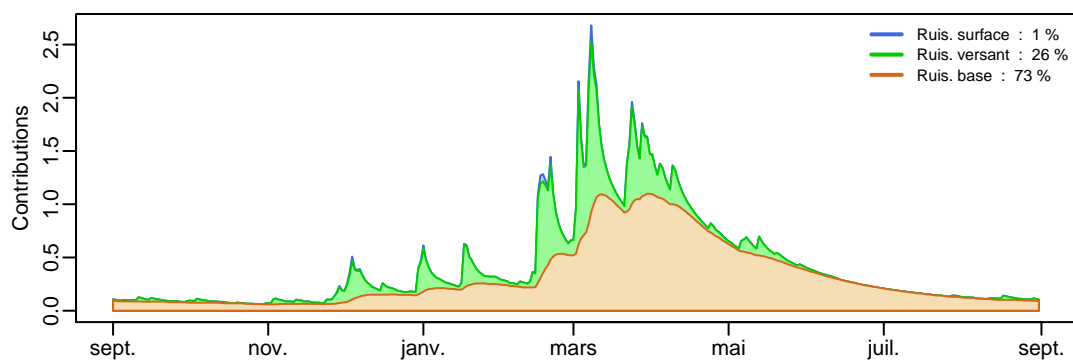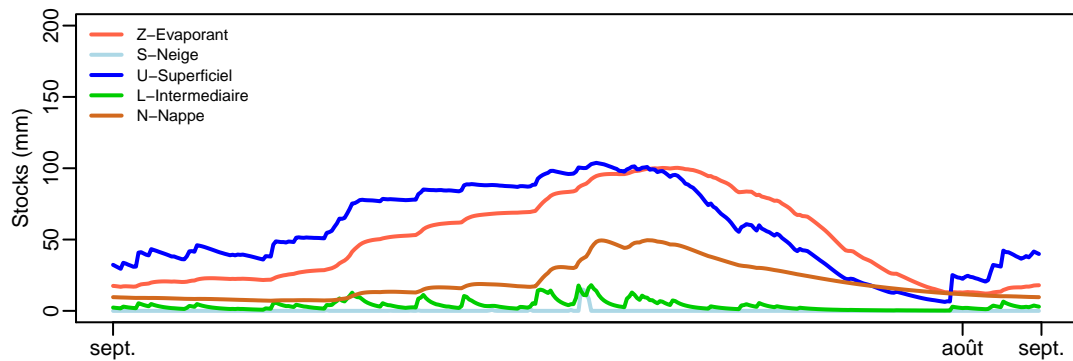

# k4094010 (477.96 km<sup>2</sup>) – année 2006–2007

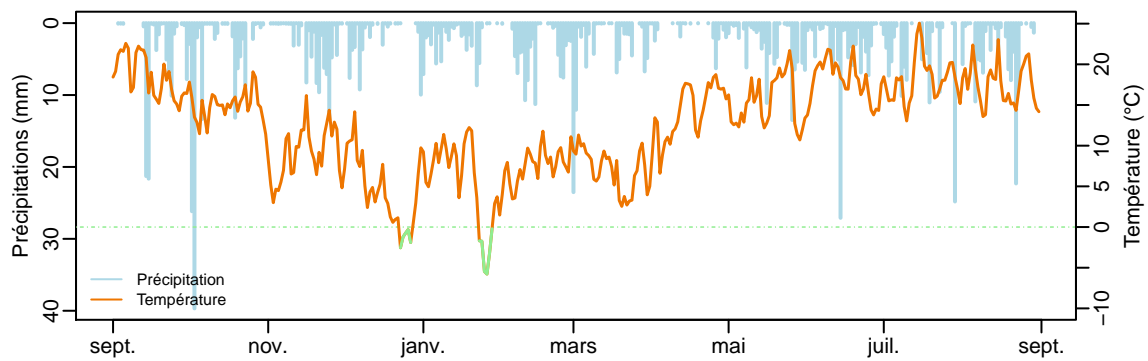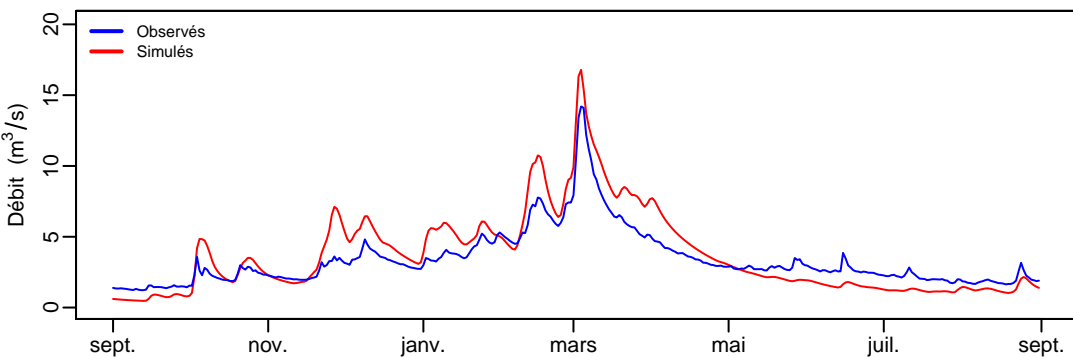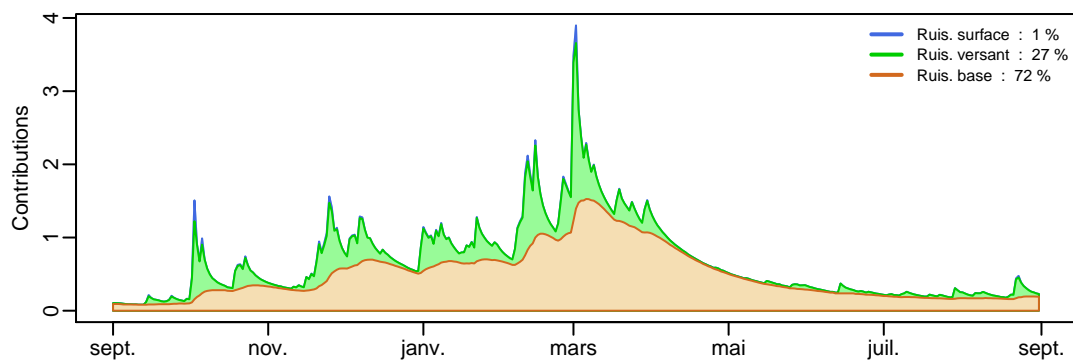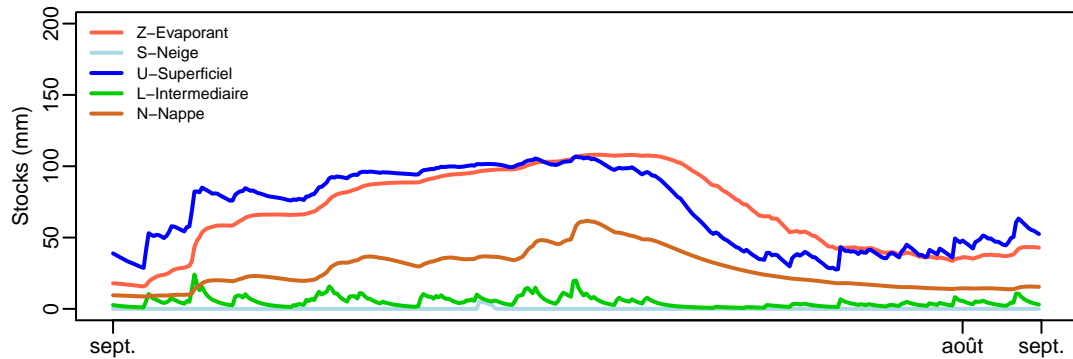

# k4094010 (477.96 km<sup>2</sup>) – année 2007–2008

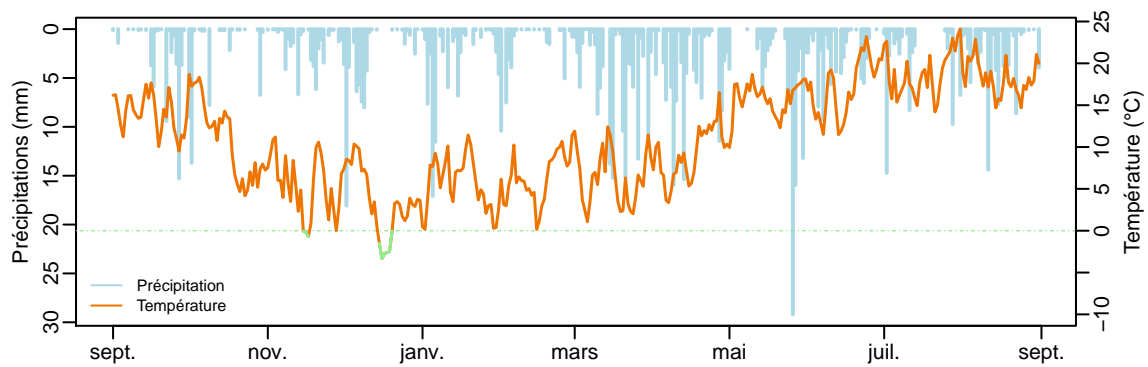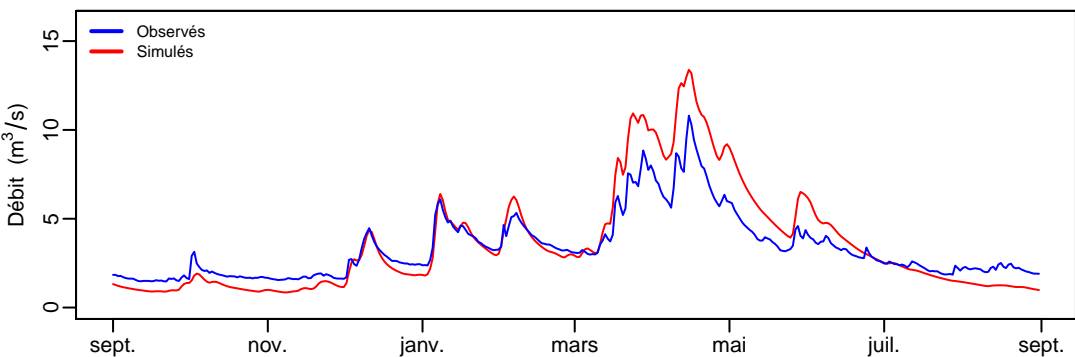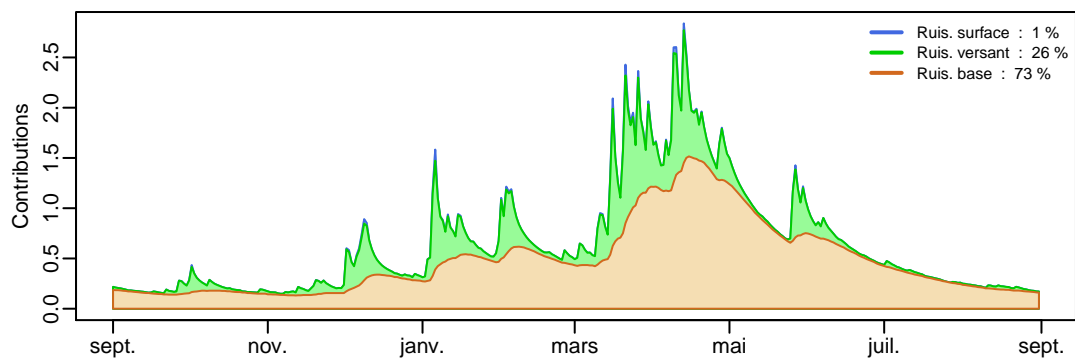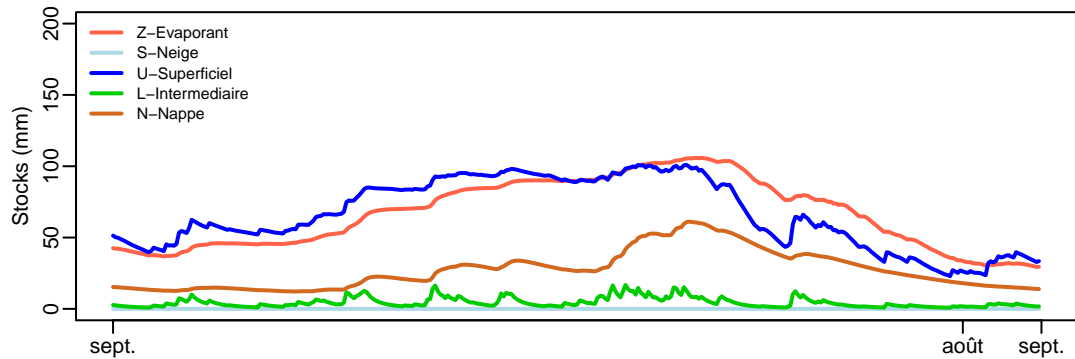



# k4094010 (477.96 km<sup>2</sup>) – année 2008–2009

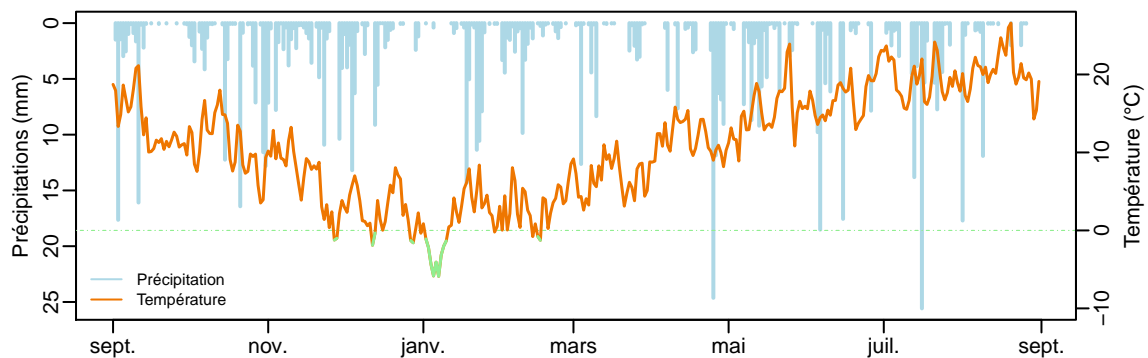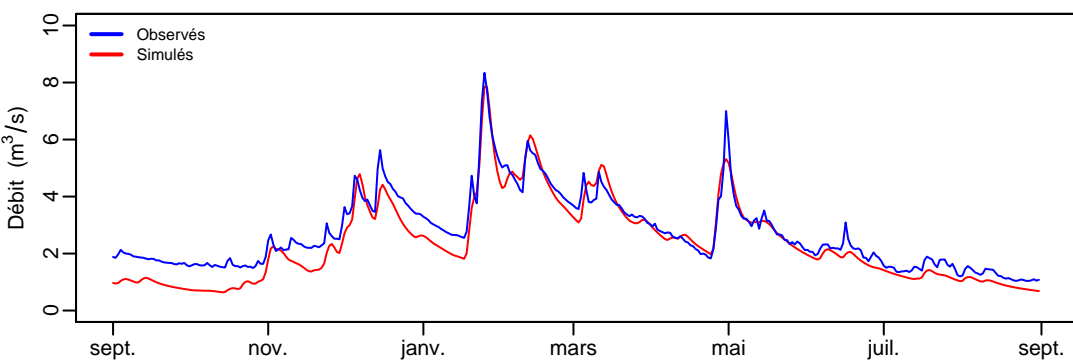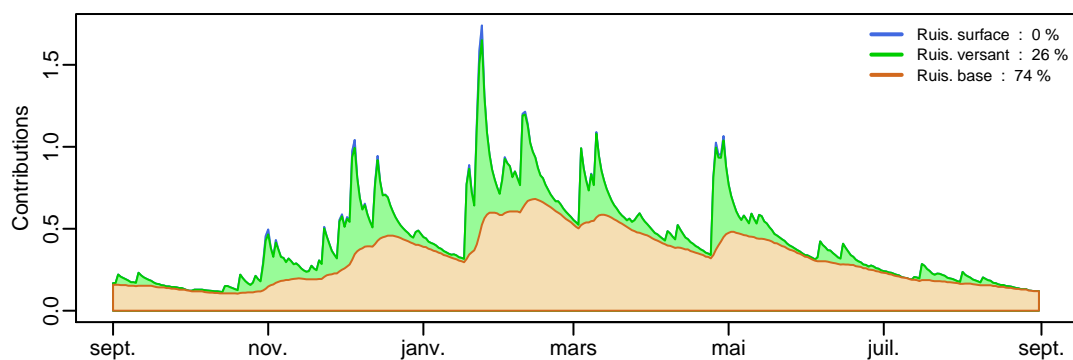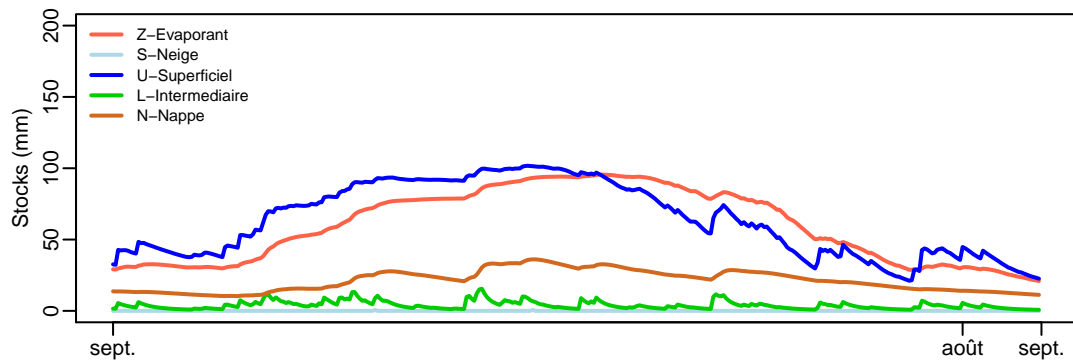

# k4094010 (477.96 km<sup>2</sup>) – année 2009–2010

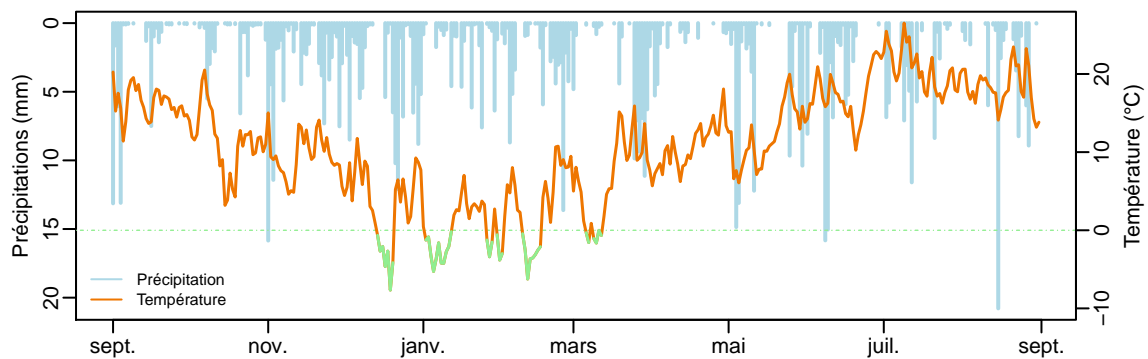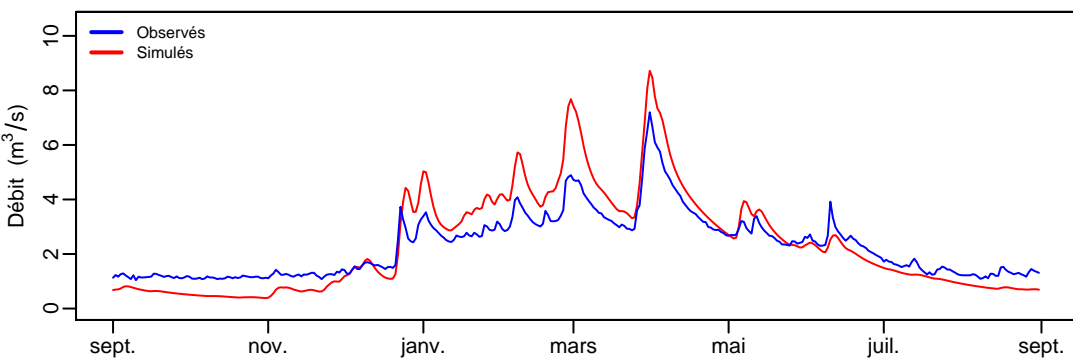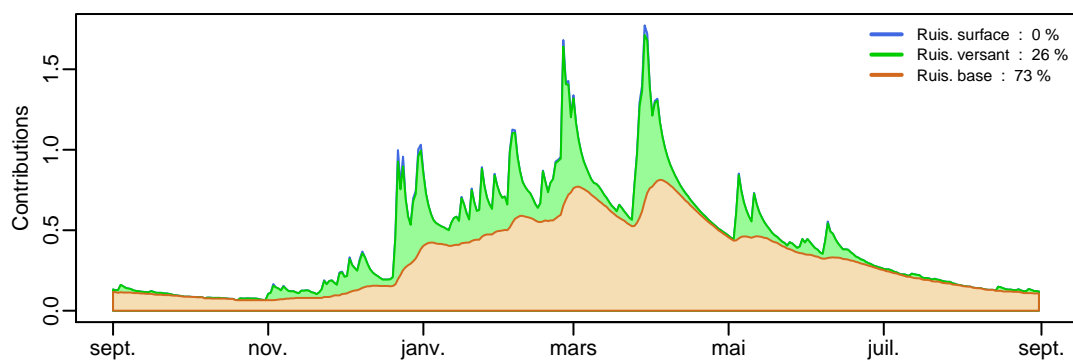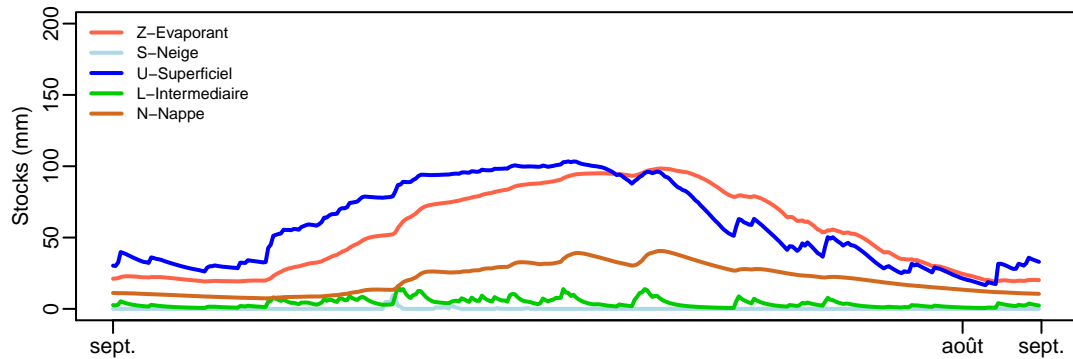

# k4094010 (477.96 km<sup>2</sup>) – année 2010–2011

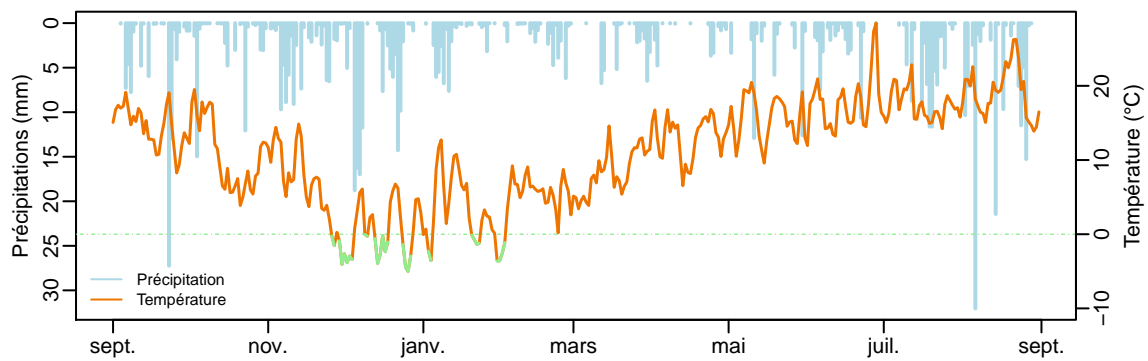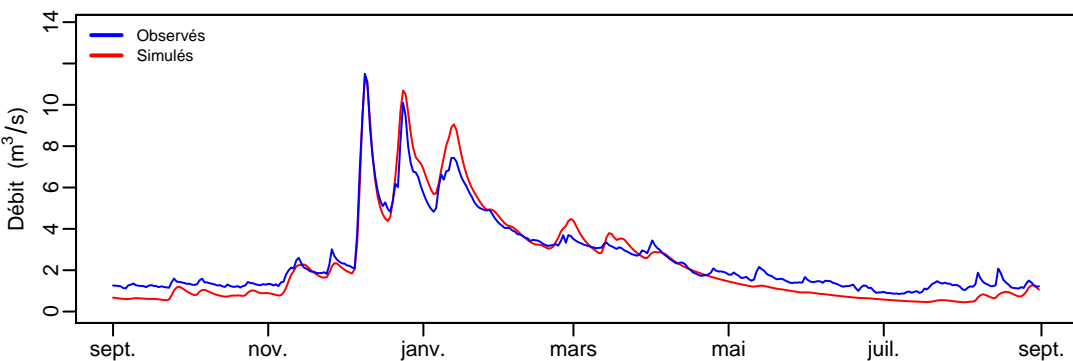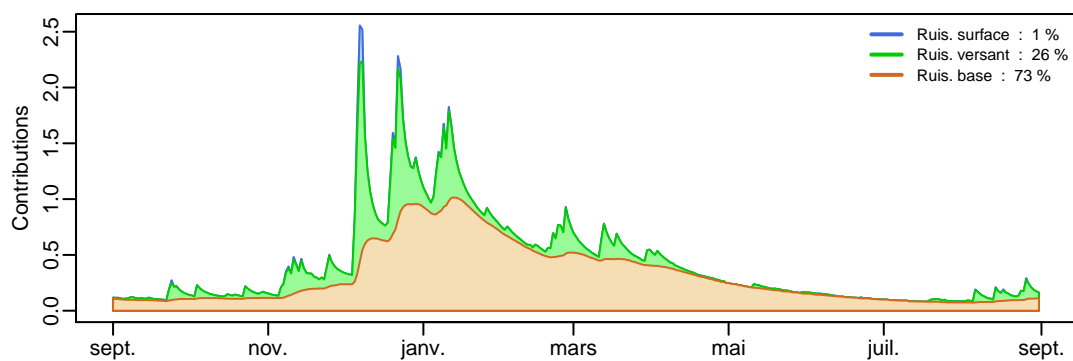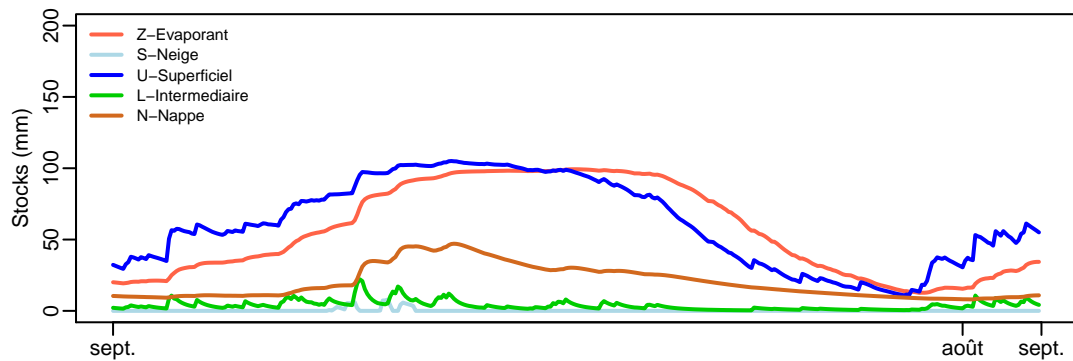

# k4094010 (477.96 km<sup>2</sup>) – année 2011–2012

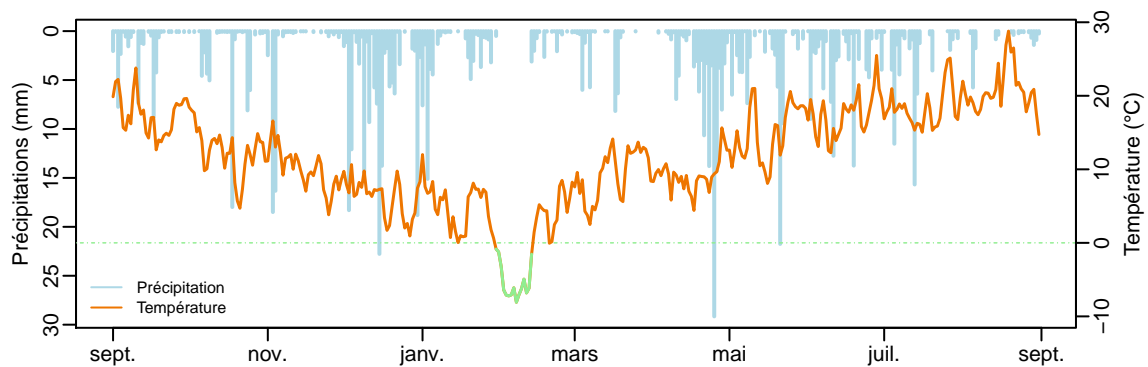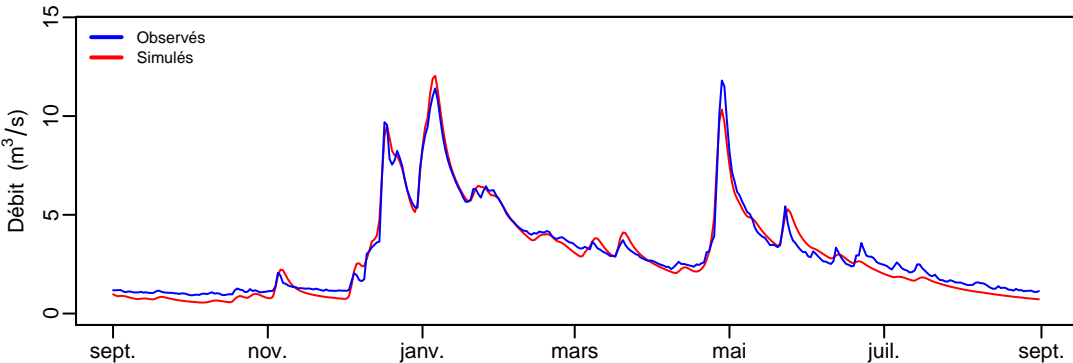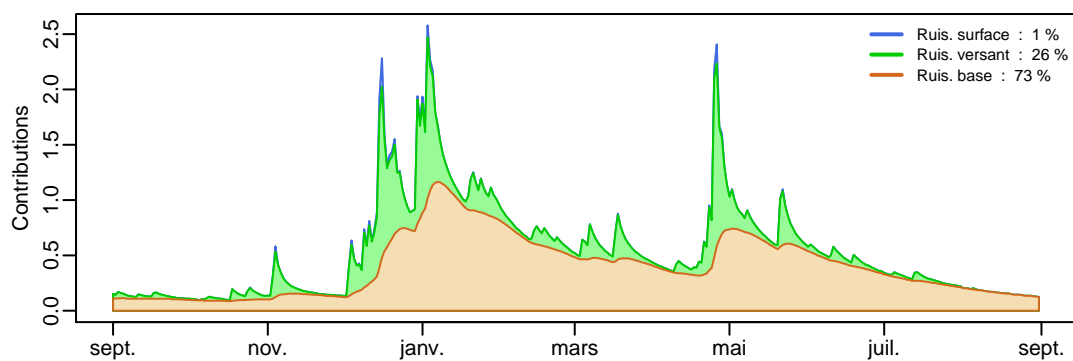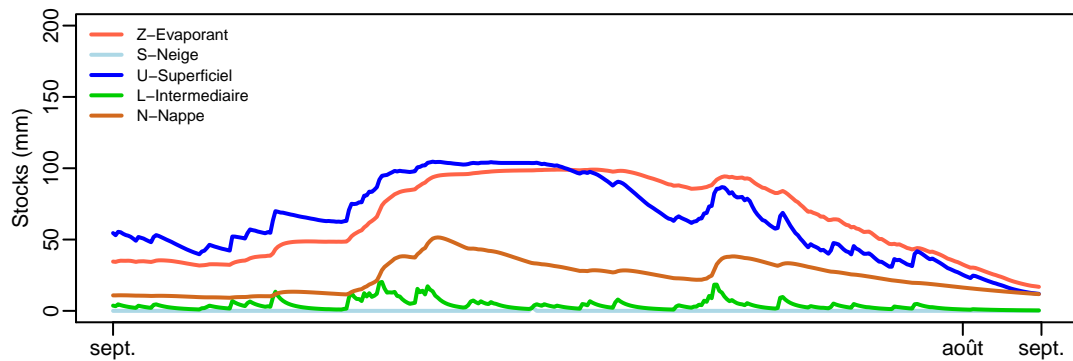

# k4180010 (35707.23 km<sup>2</sup>) – année 1984–1985

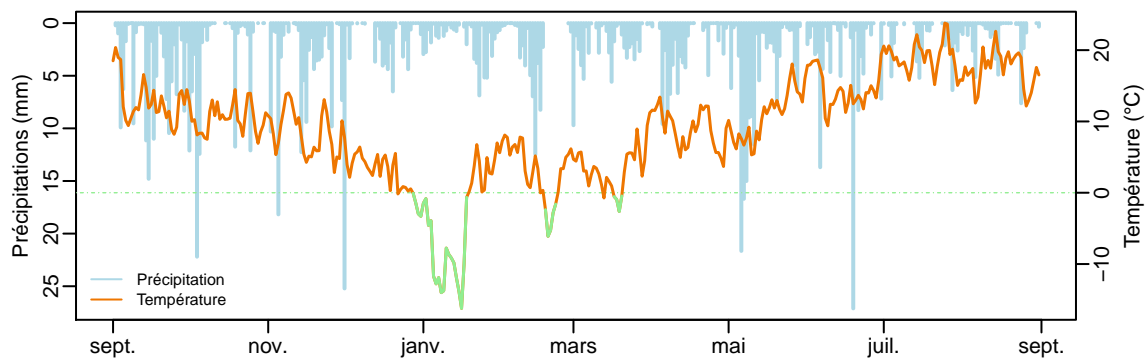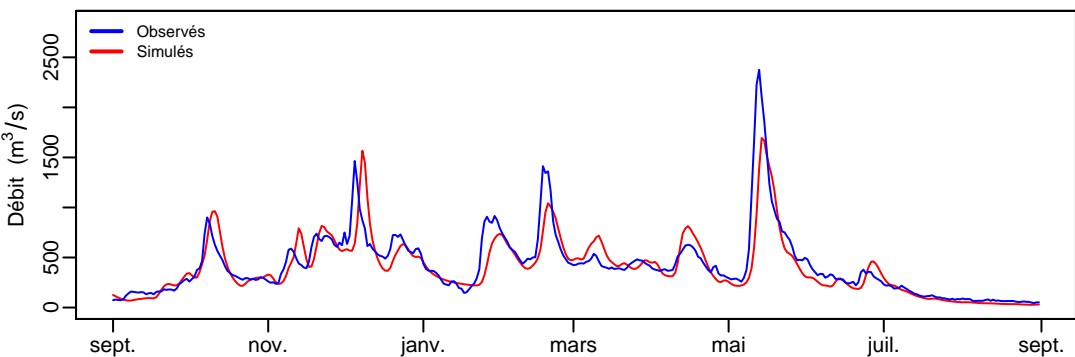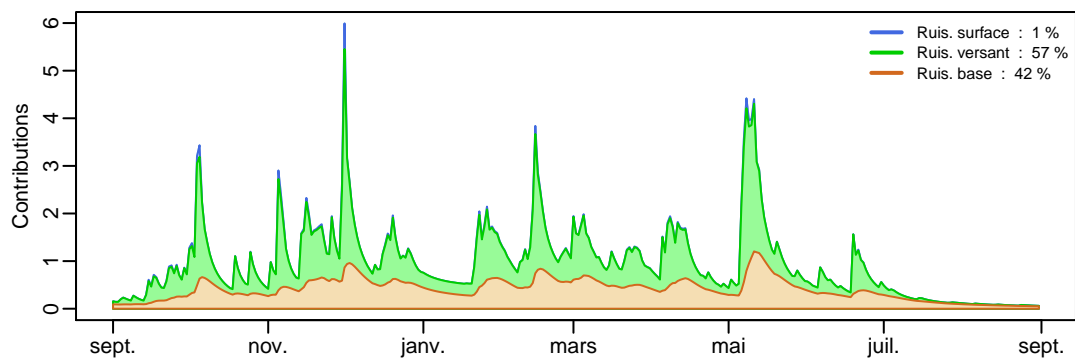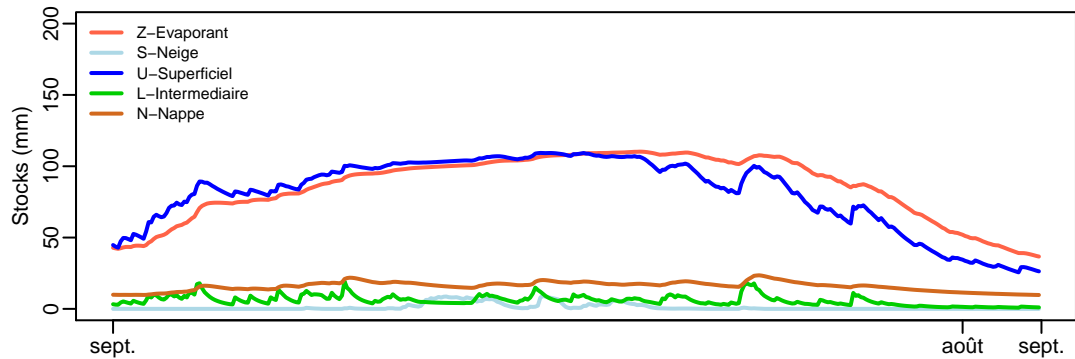

# k4180010 (35707.23 km<sup>2</sup>) – année 1985–1986

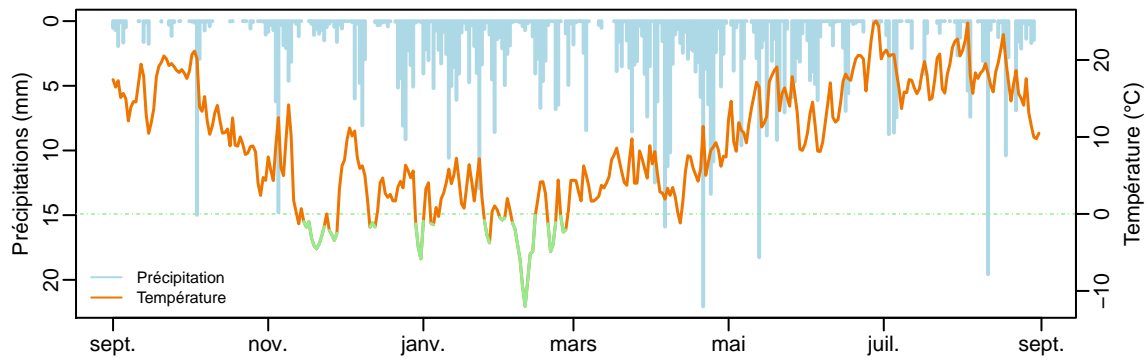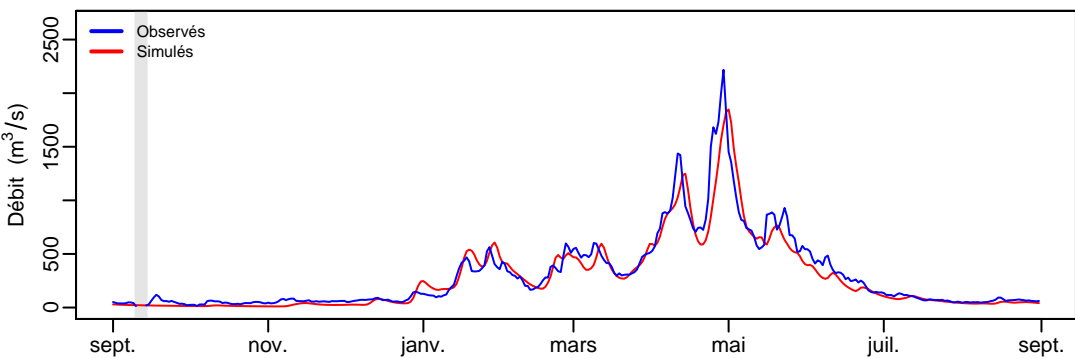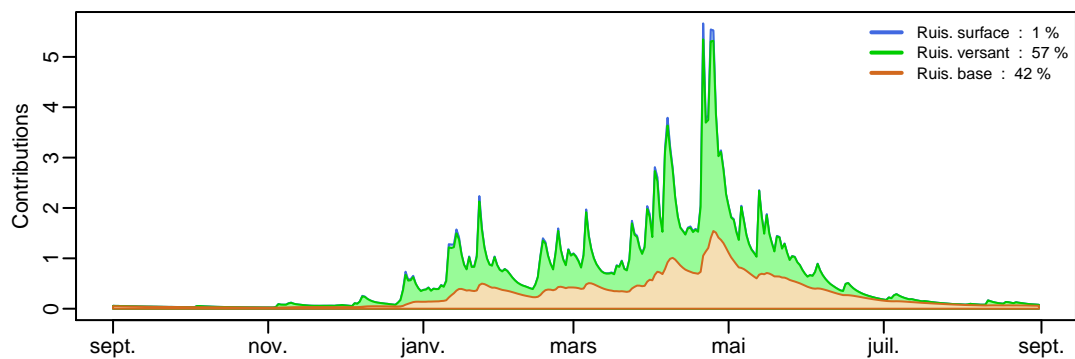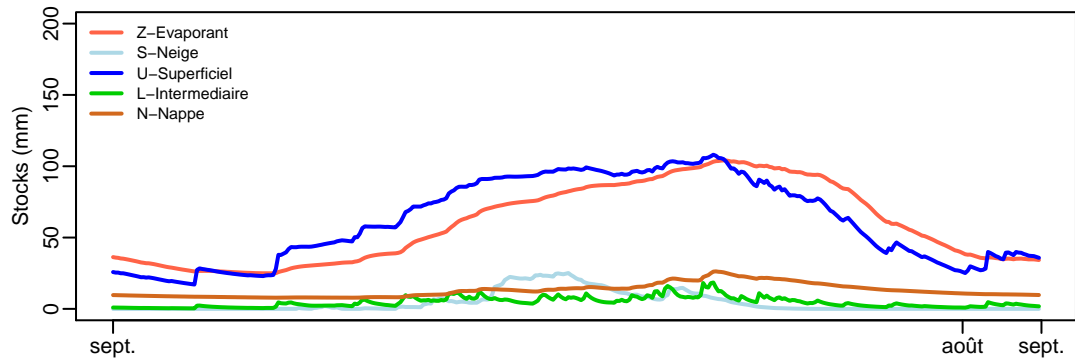

# k4180010 (35707.23 km<sup>2</sup>) – année 1986–1987

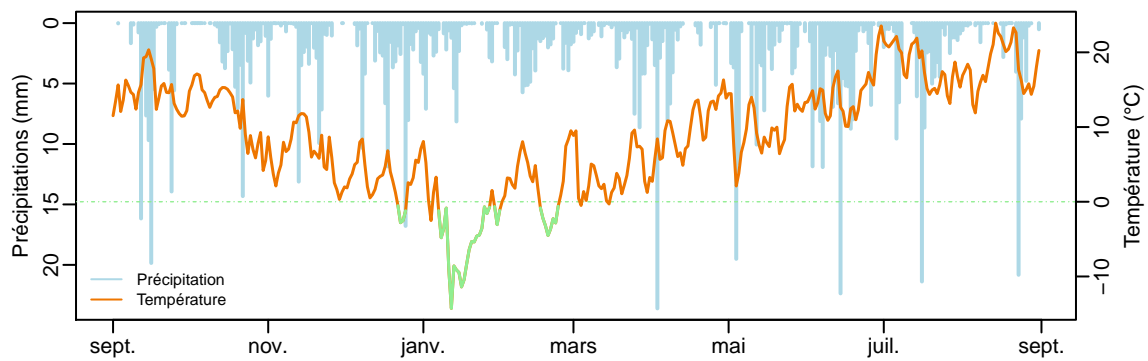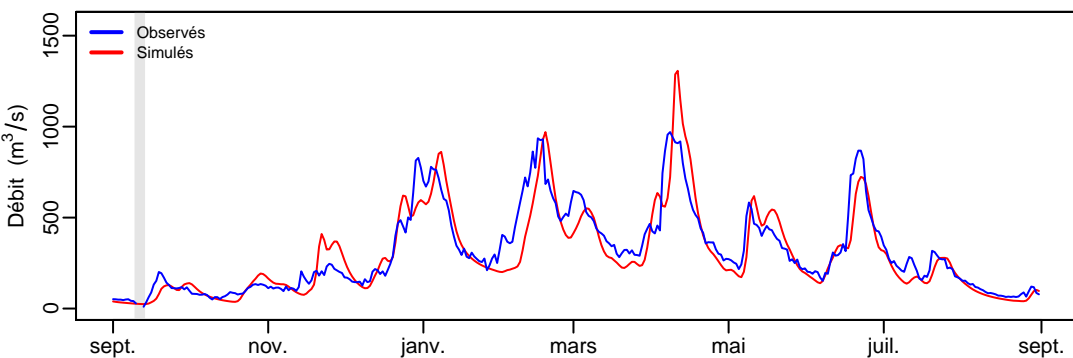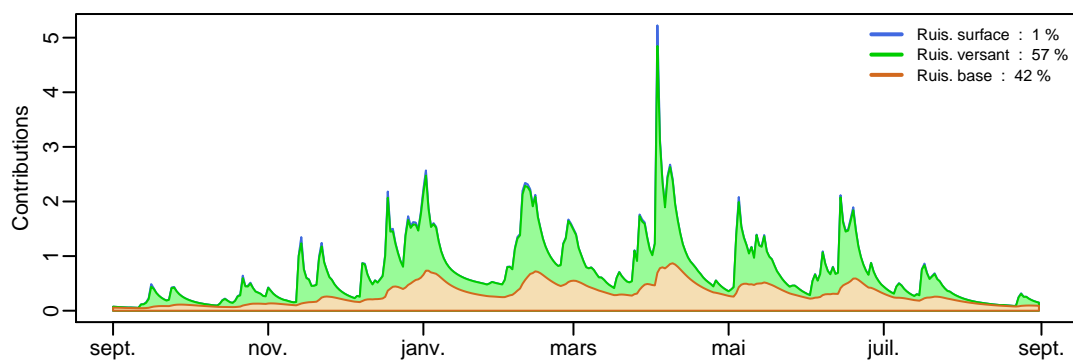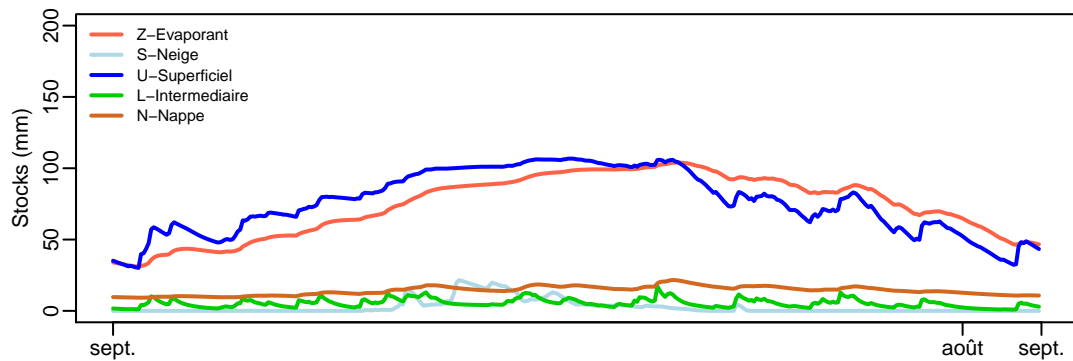

# k4180010 (35707.23 km<sup>2</sup>) – année 1987–1988

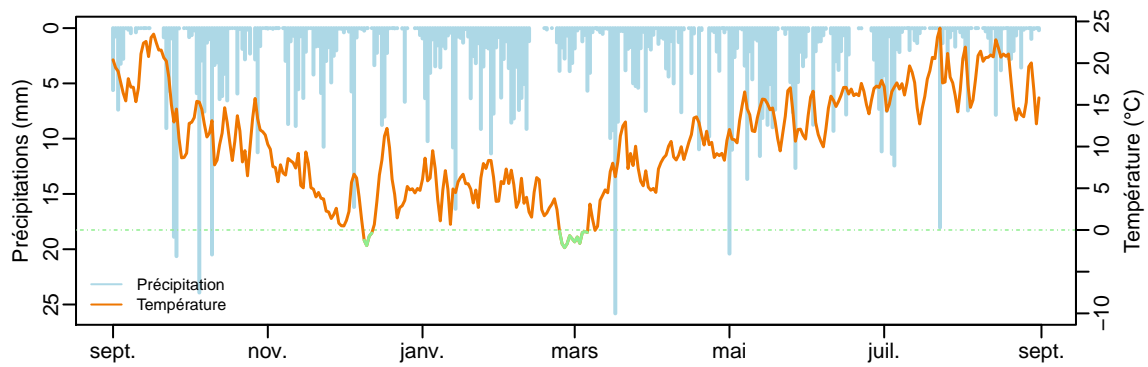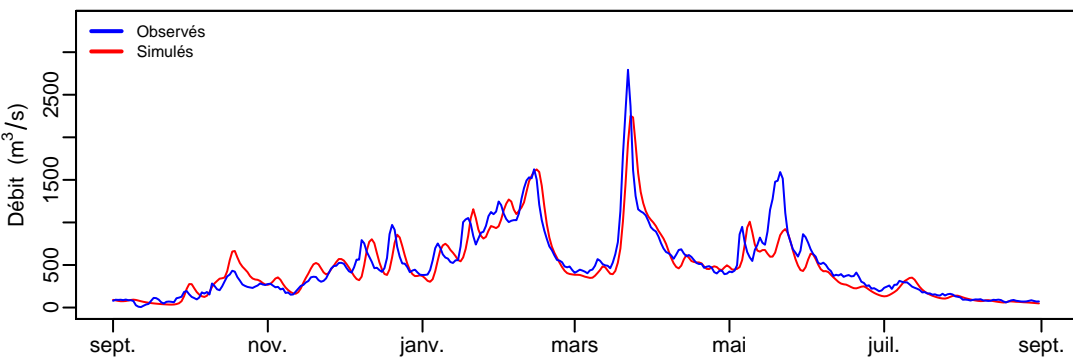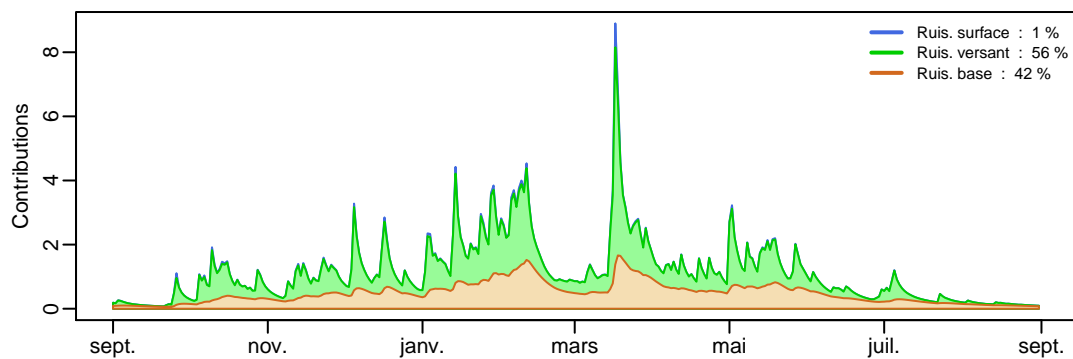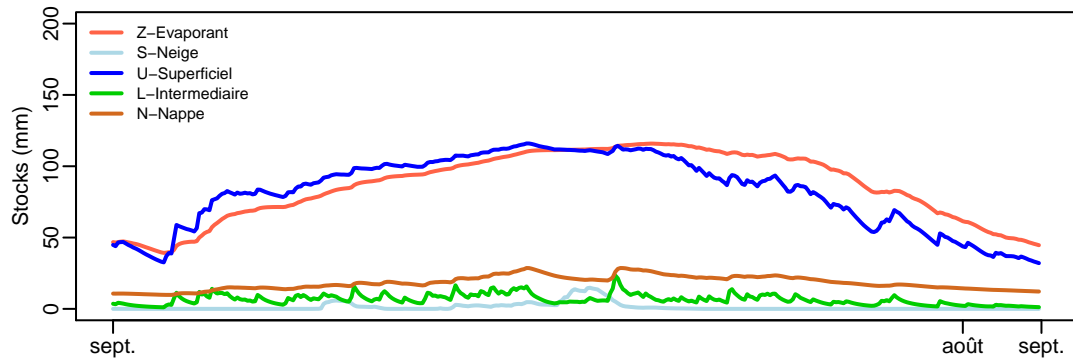



# k4180010 (35707.23 km<sup>2</sup>) – année 1988–1989

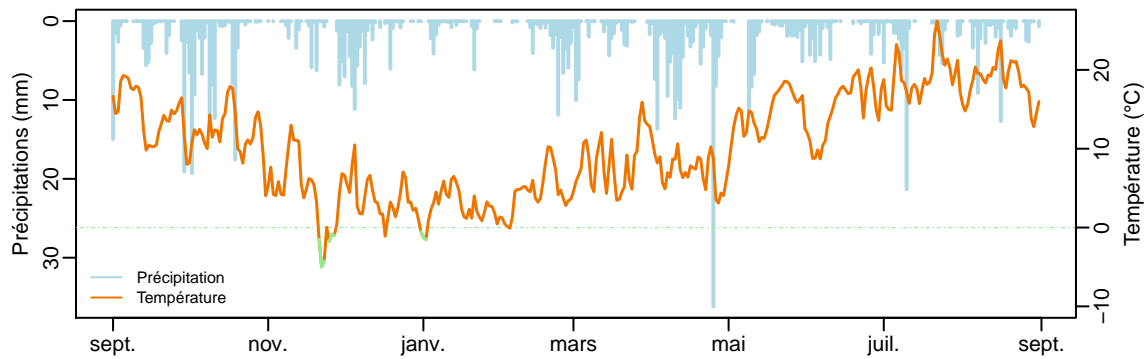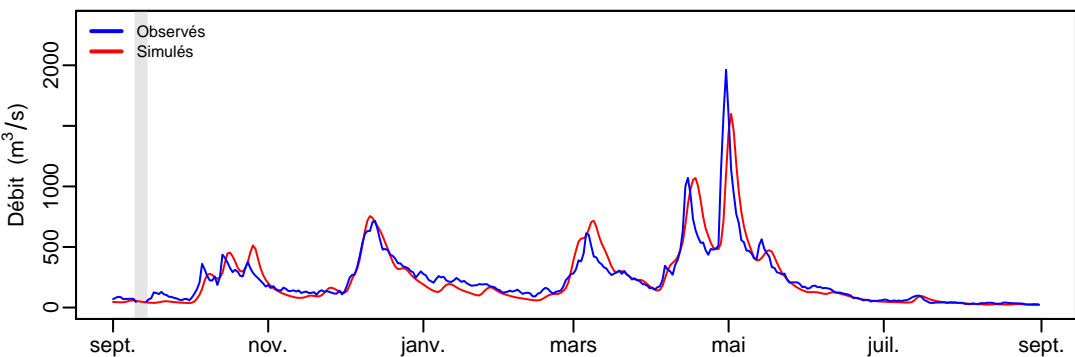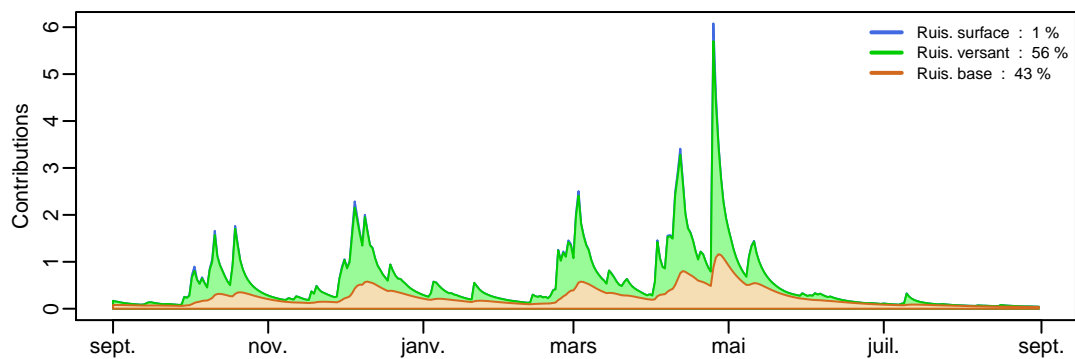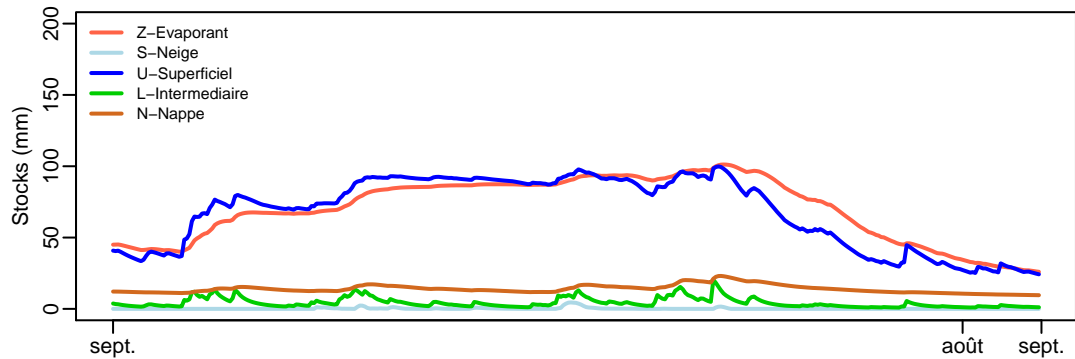

# k4180010 (35707.23 km<sup>2</sup>) – année 1989–1990

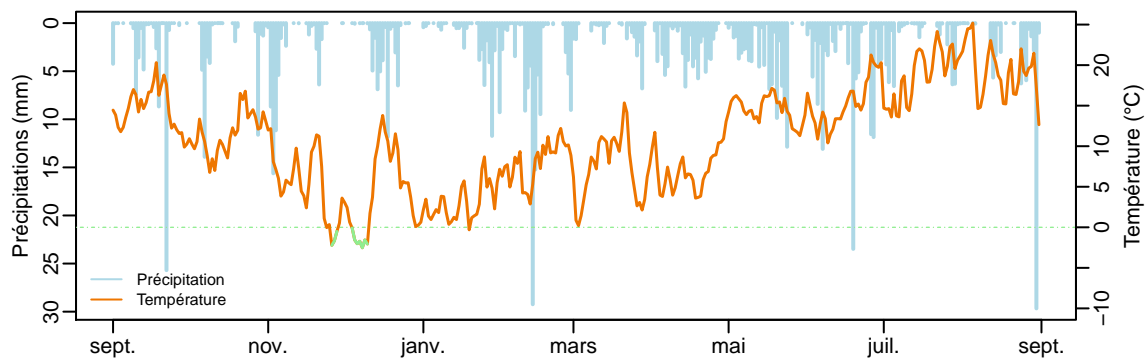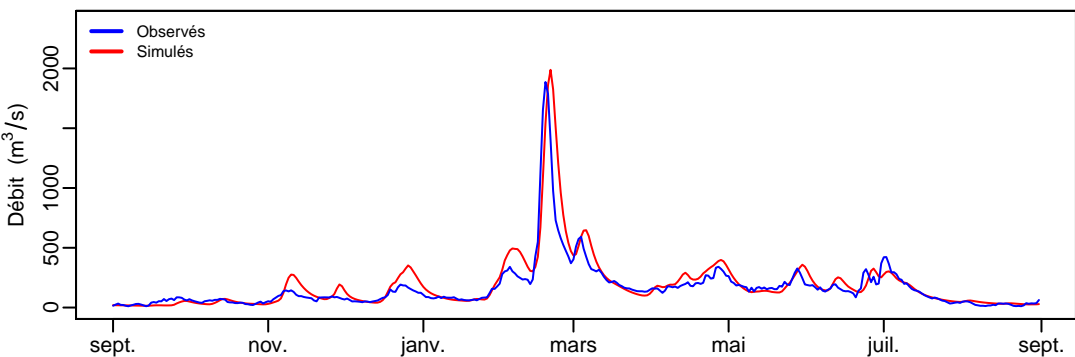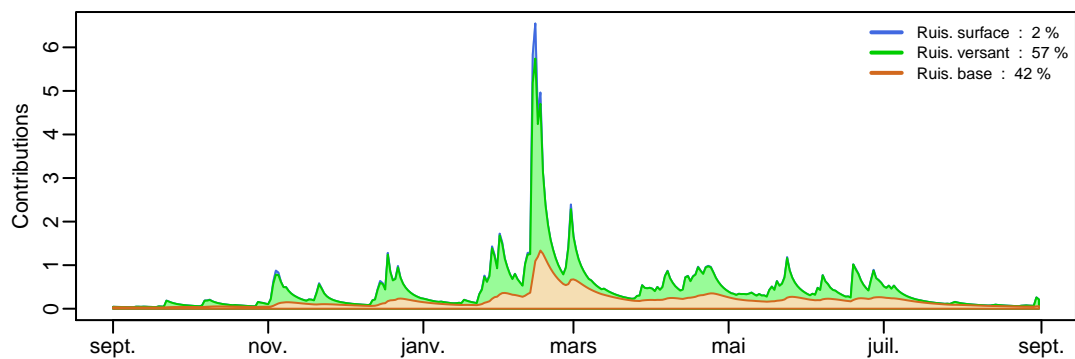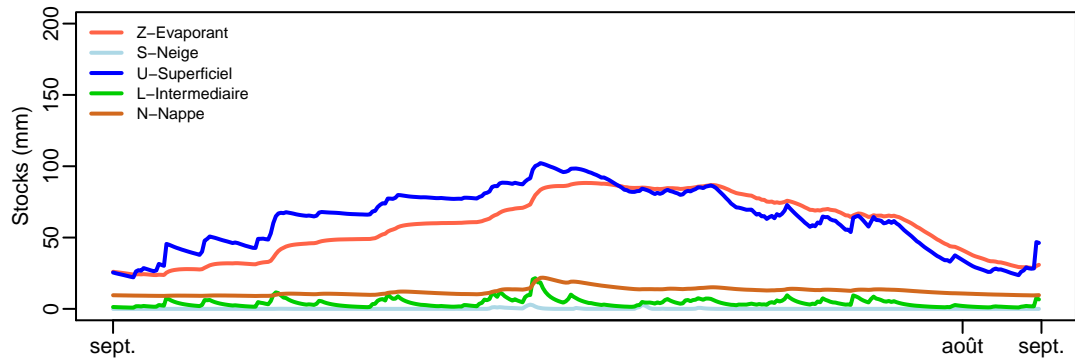

# k4180010 (35707.23 km<sup>2</sup>) – année 1990–1991

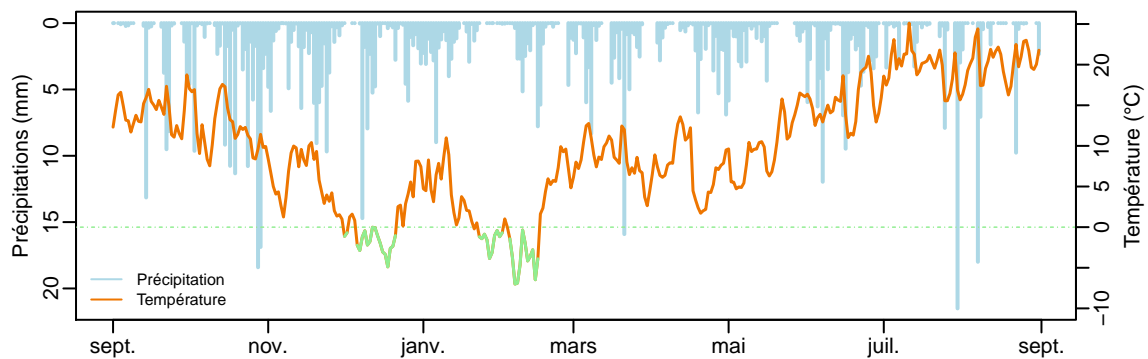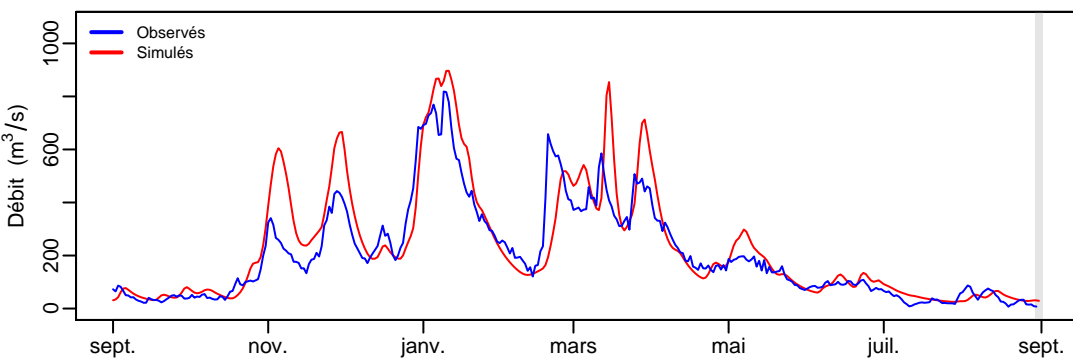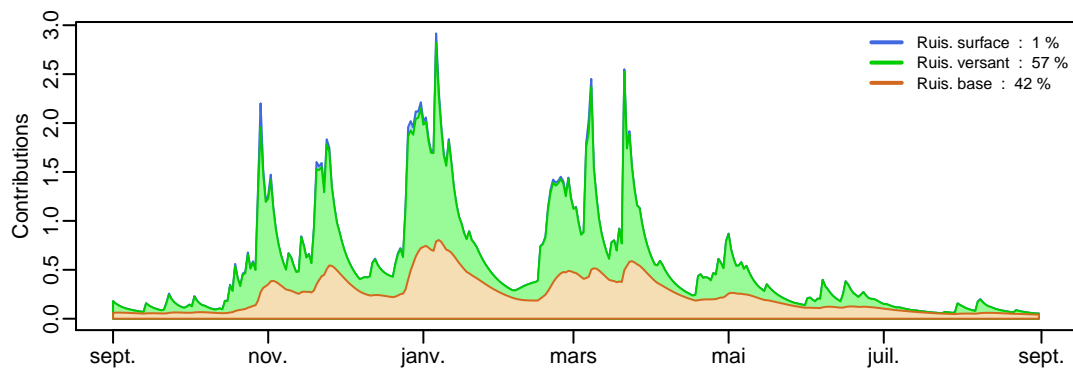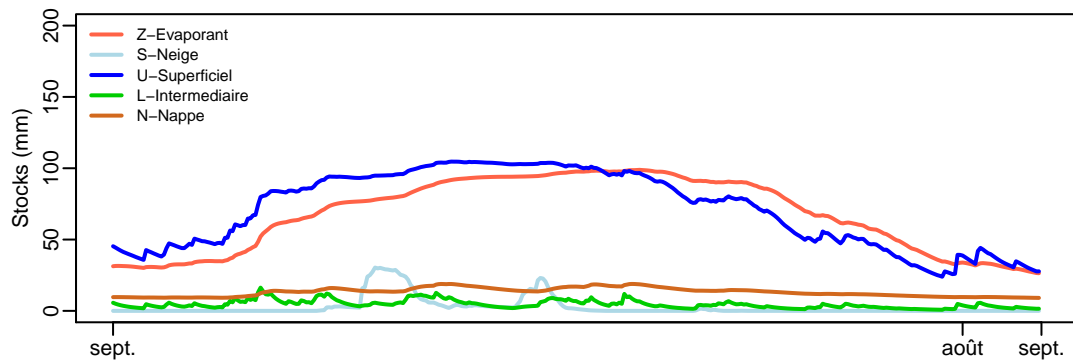

# k4180010 (35707.23 km<sup>2</sup>) – année 1991–1992

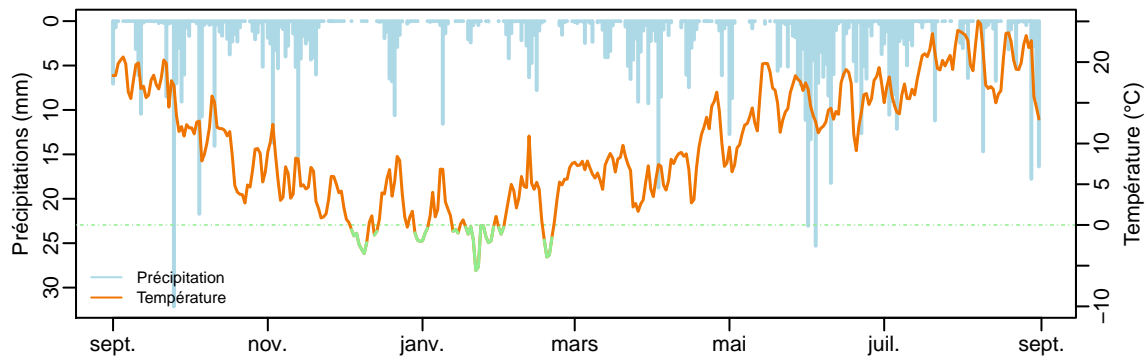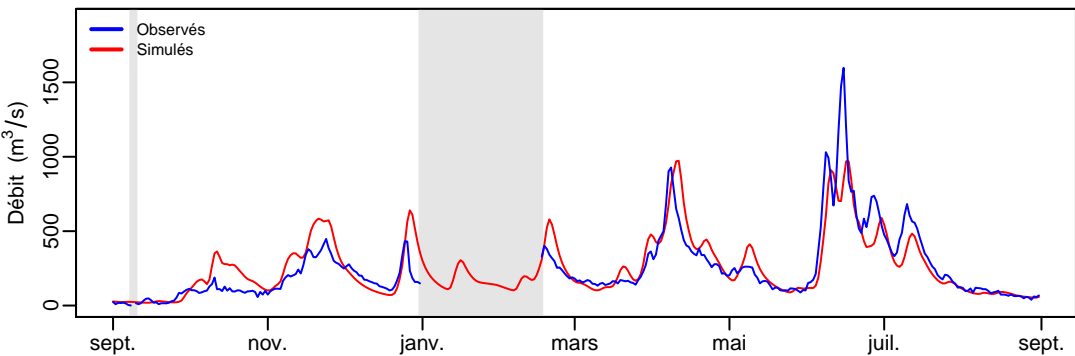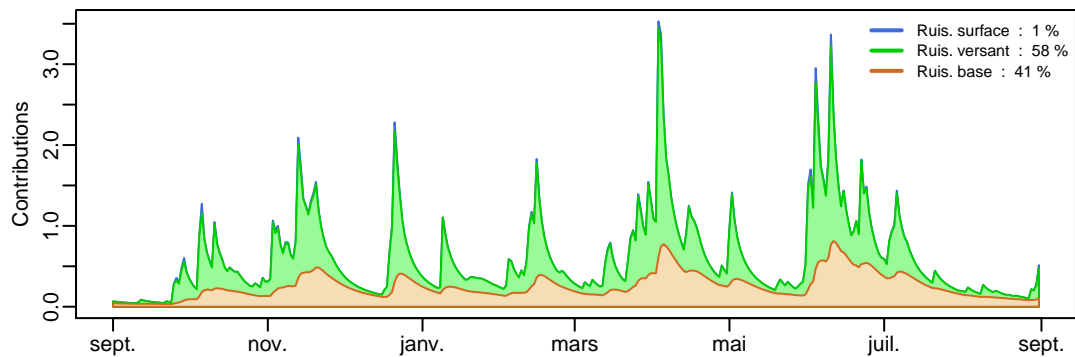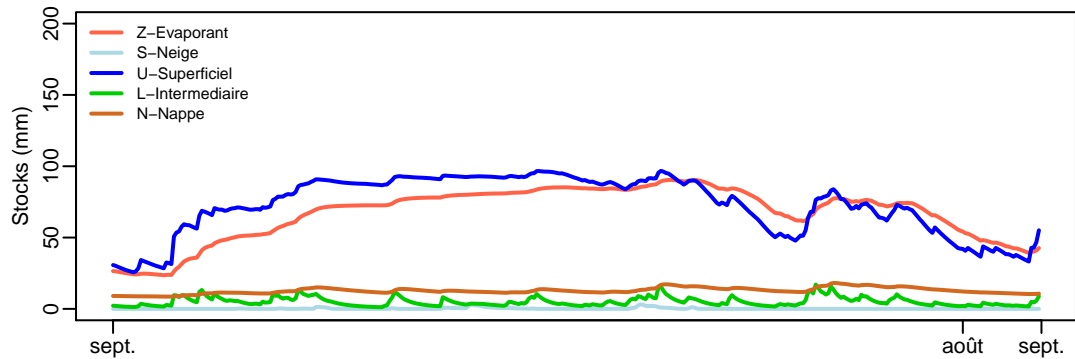

# k4180010 (35707.23 km<sup>2</sup>) – année 1992–1993

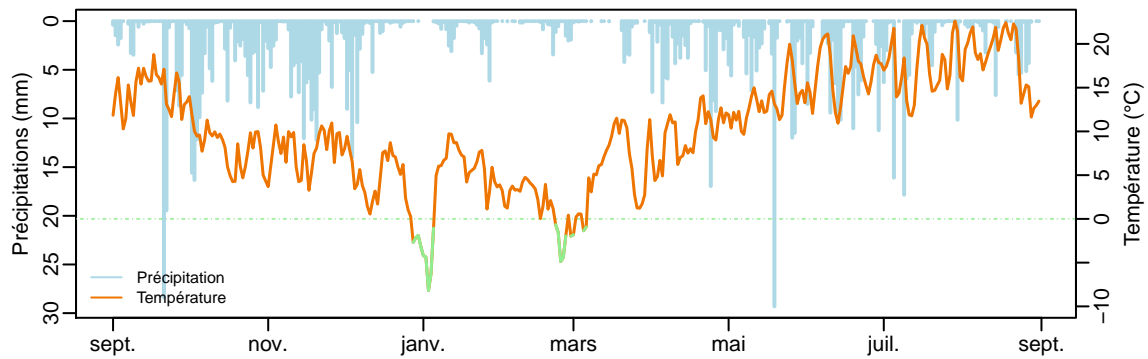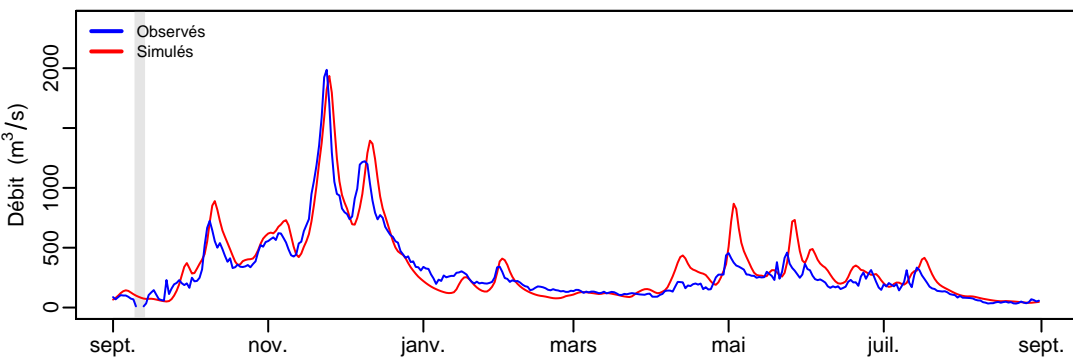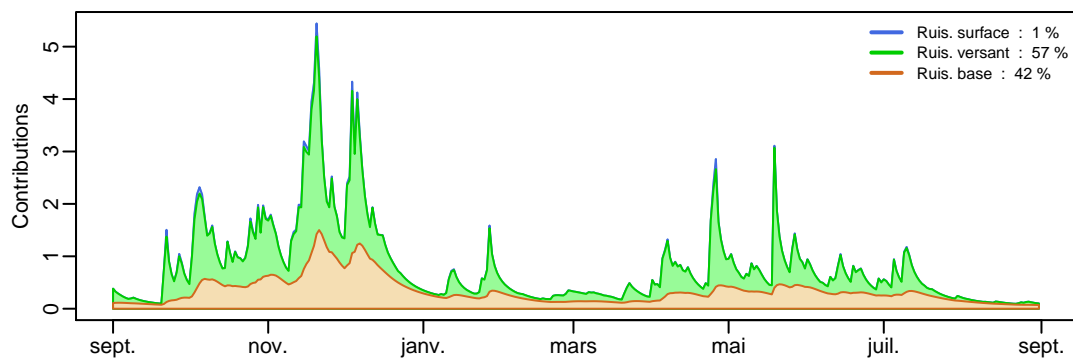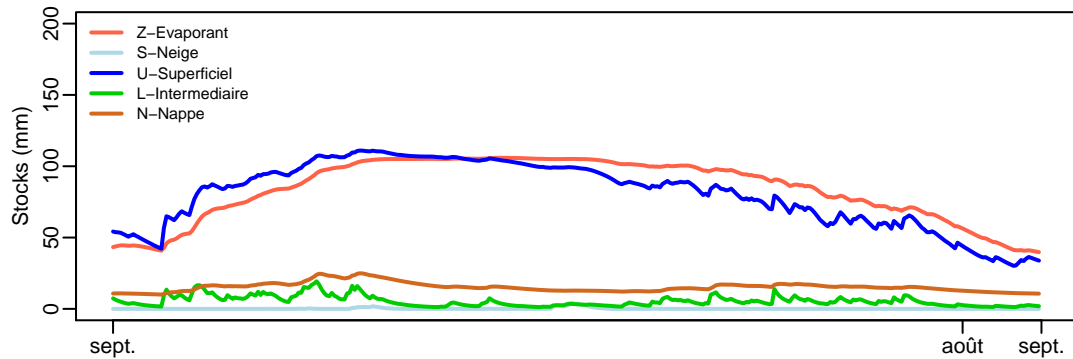

# k4180010 (35707.23 km<sup>2</sup>) – année 1993–1994

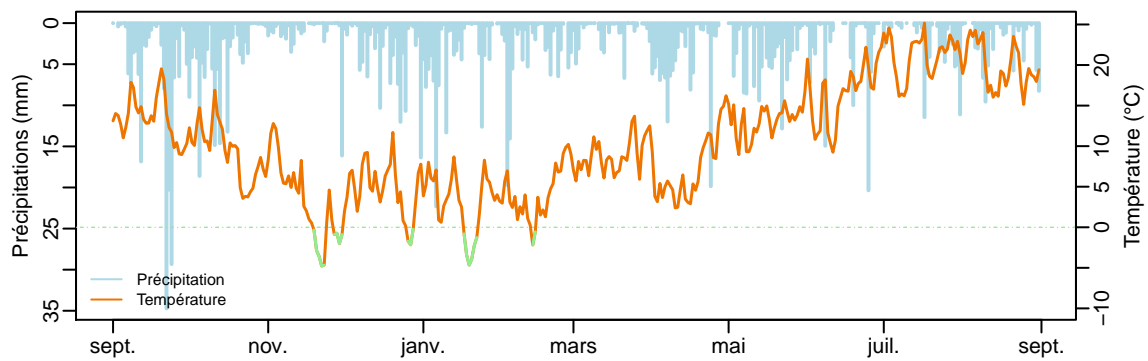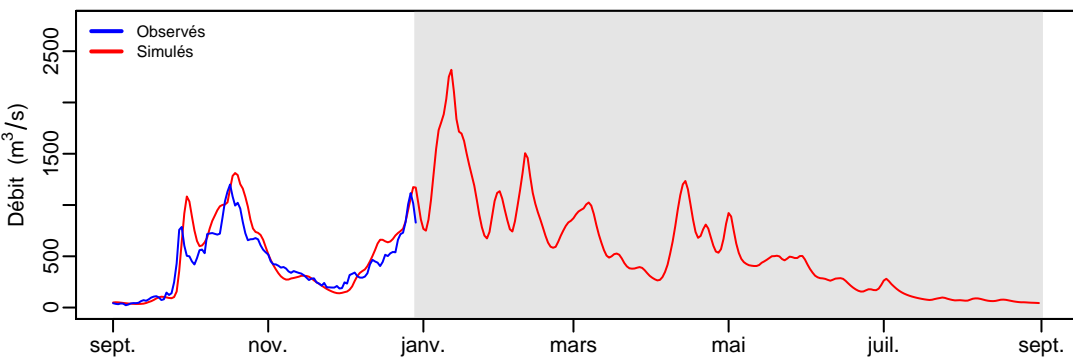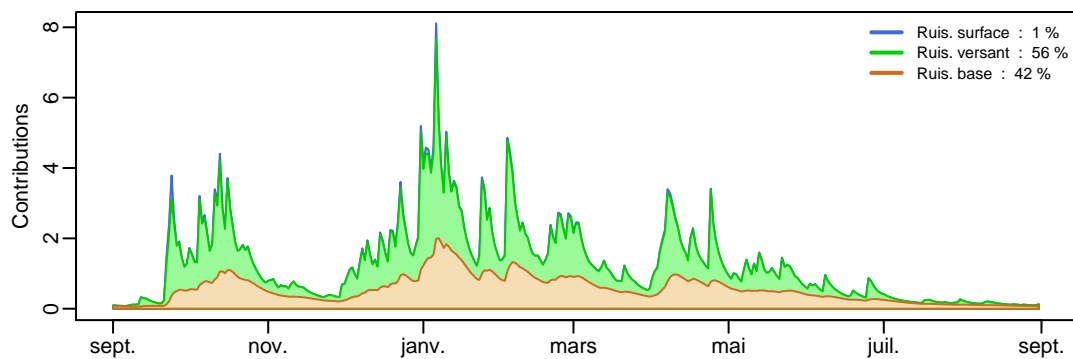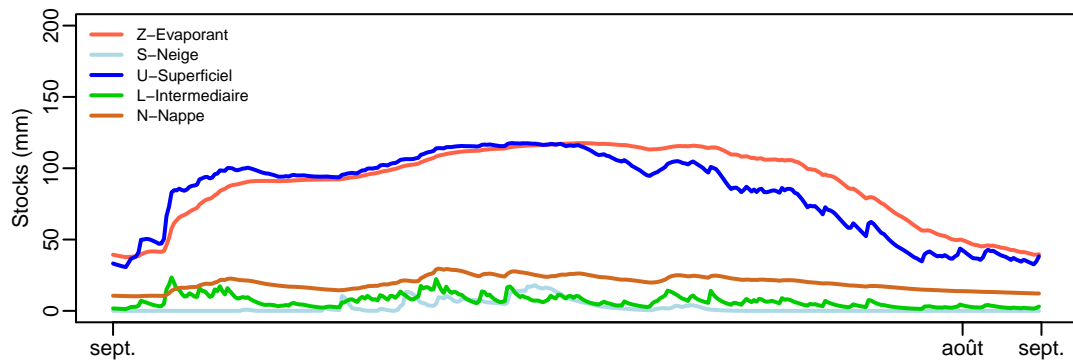

# k4180010 (35707.23 km<sup>2</sup>) – année 1994–1995

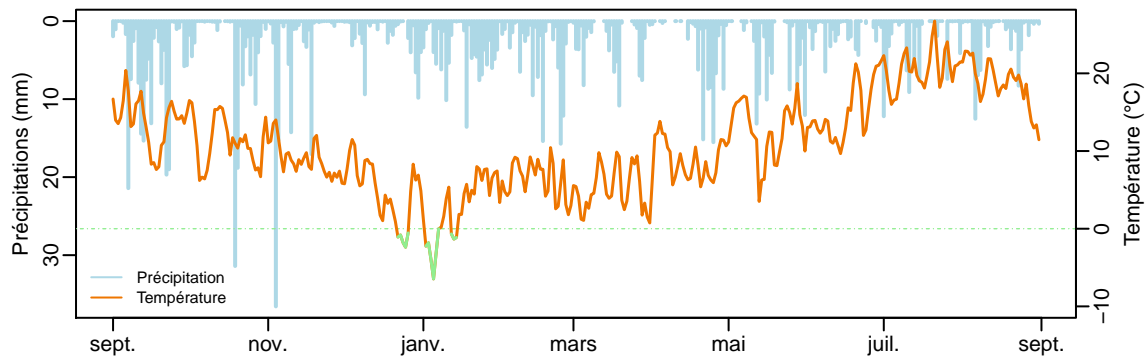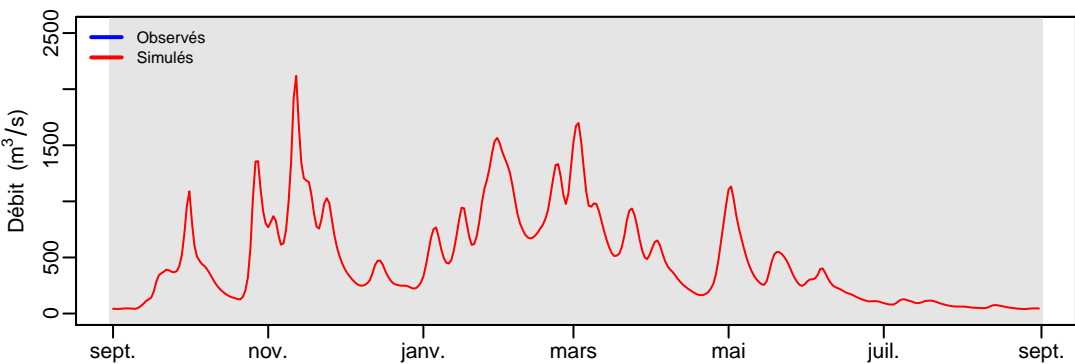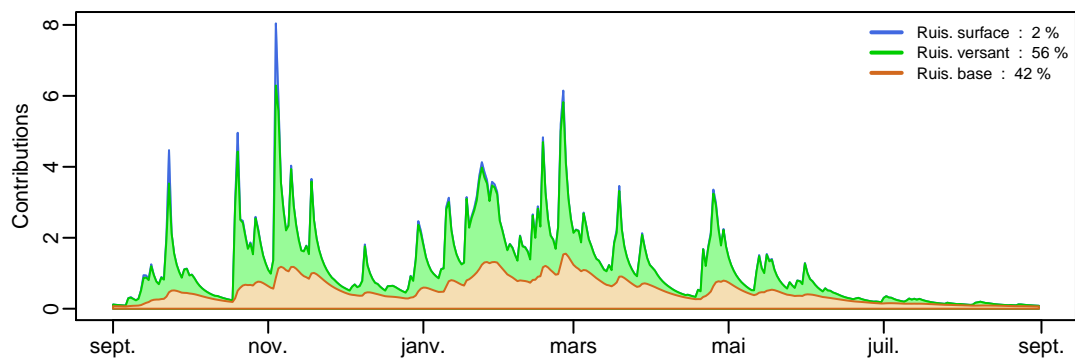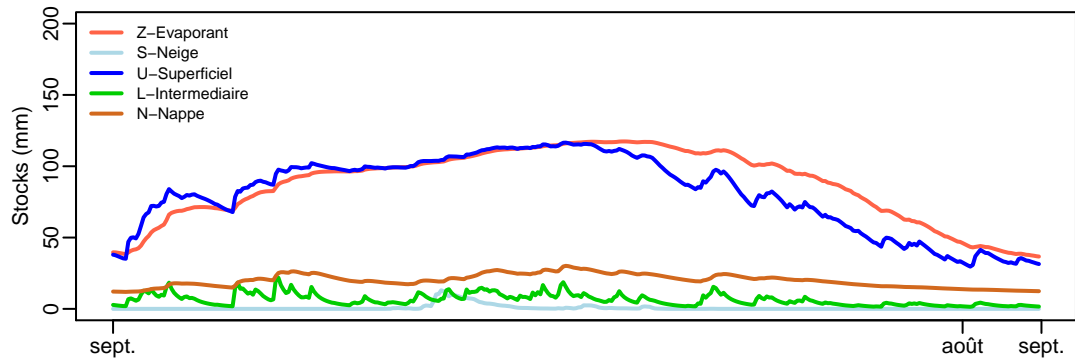

# k4180010 (35707.23 km<sup>2</sup>) – année 1995–1996

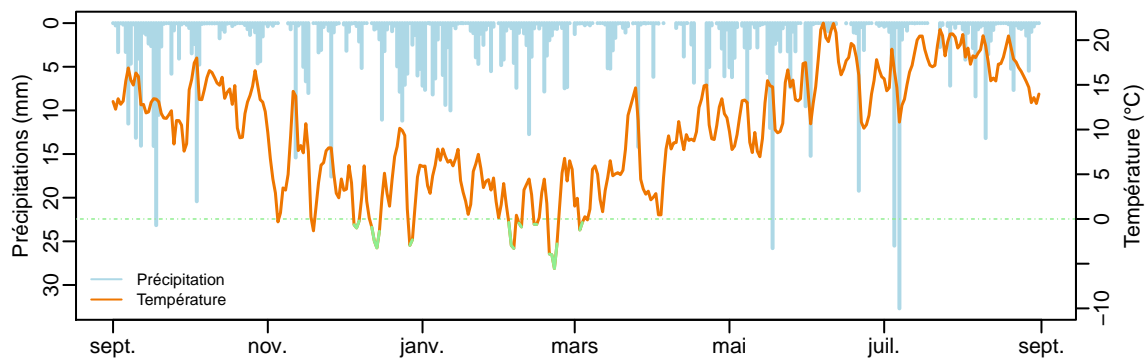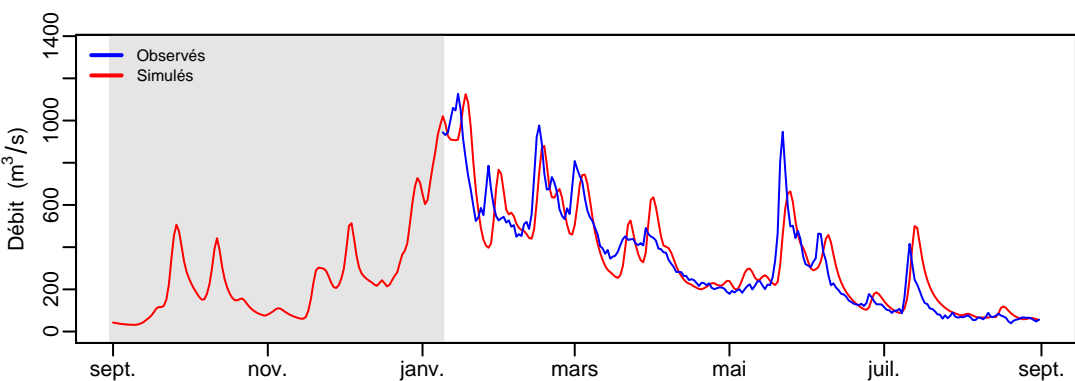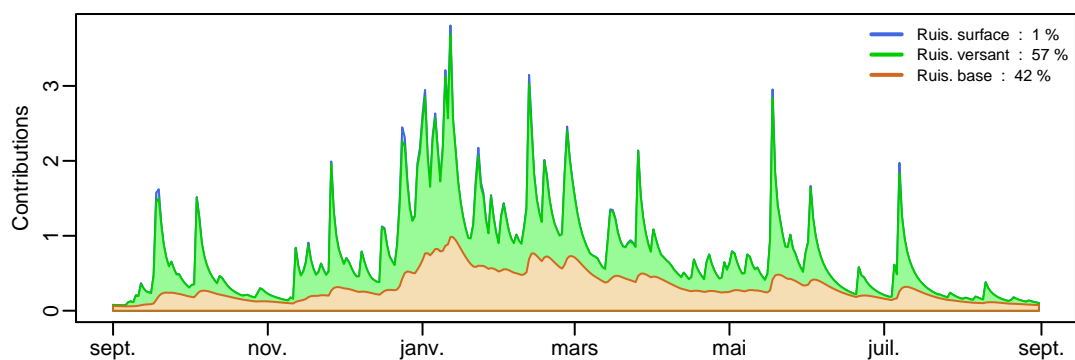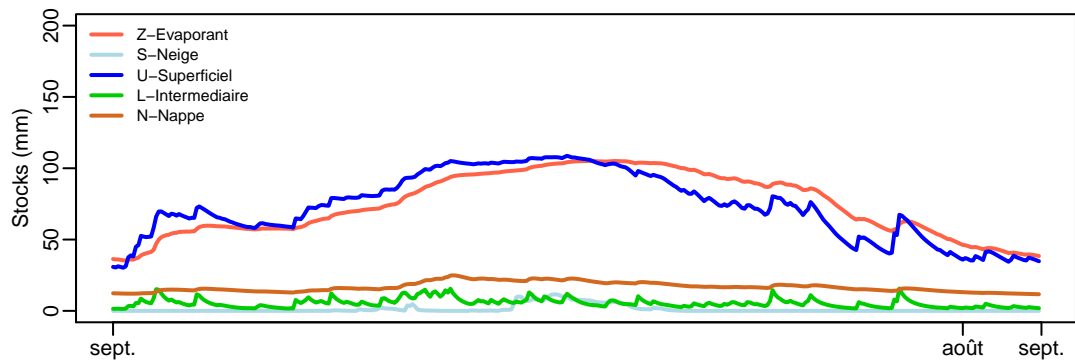



# k4180010 (35707.23 km<sup>2</sup>) – année 1996–1997

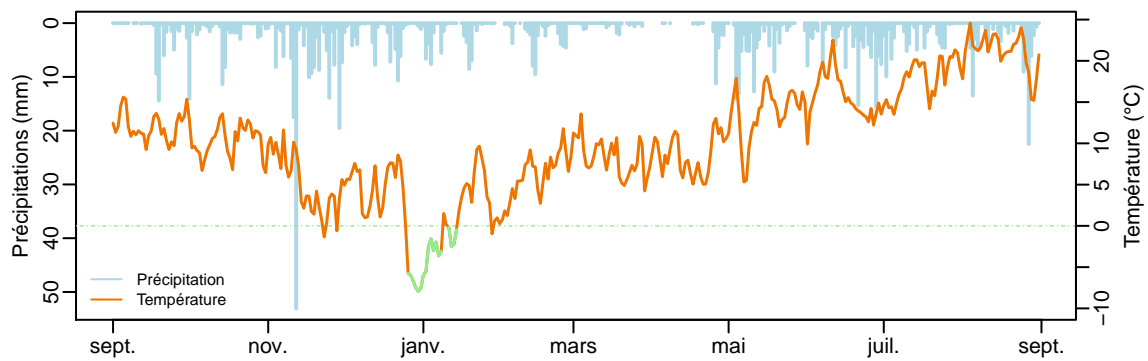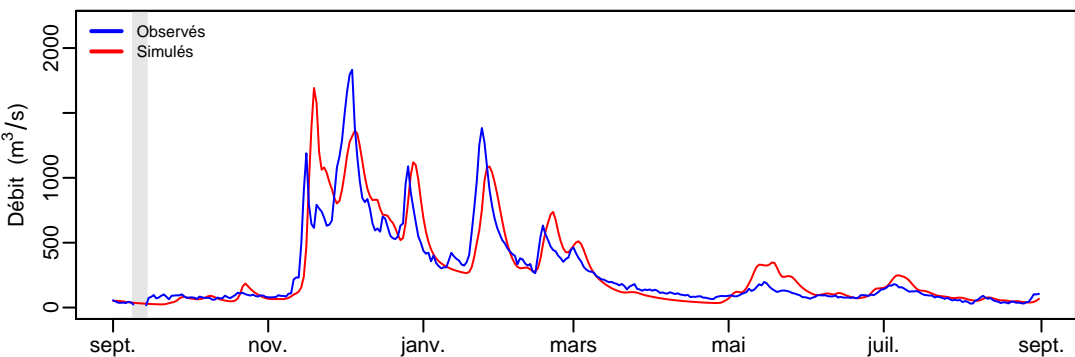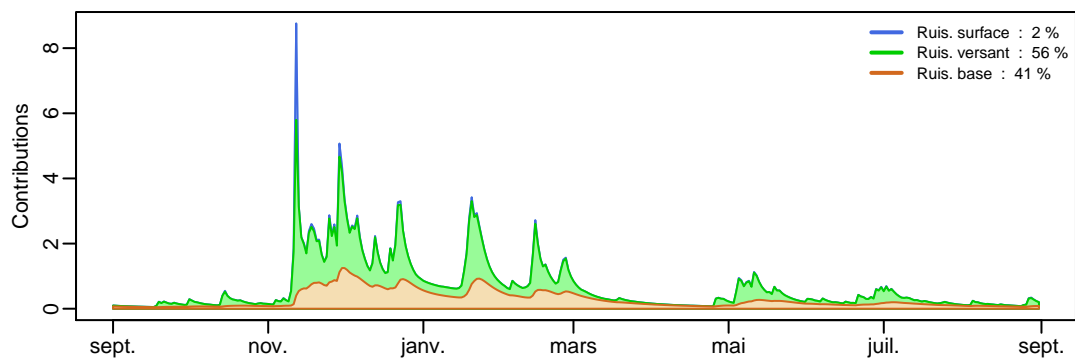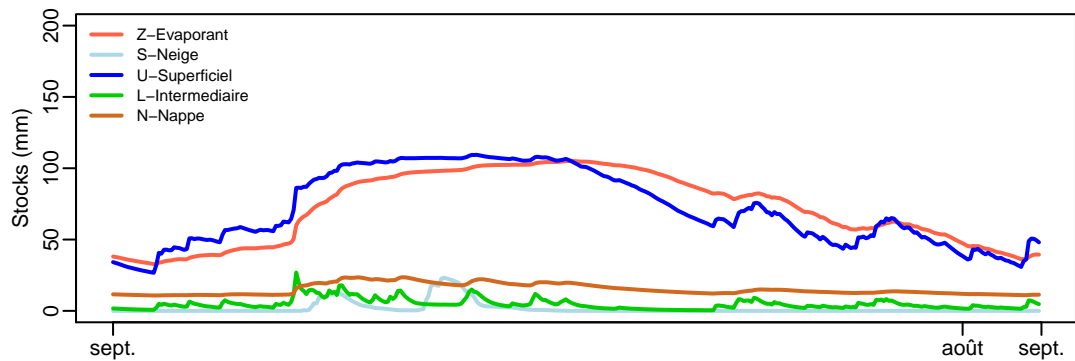

# k4180010 (35707.23 km<sup>2</sup>) – année 1997–1998

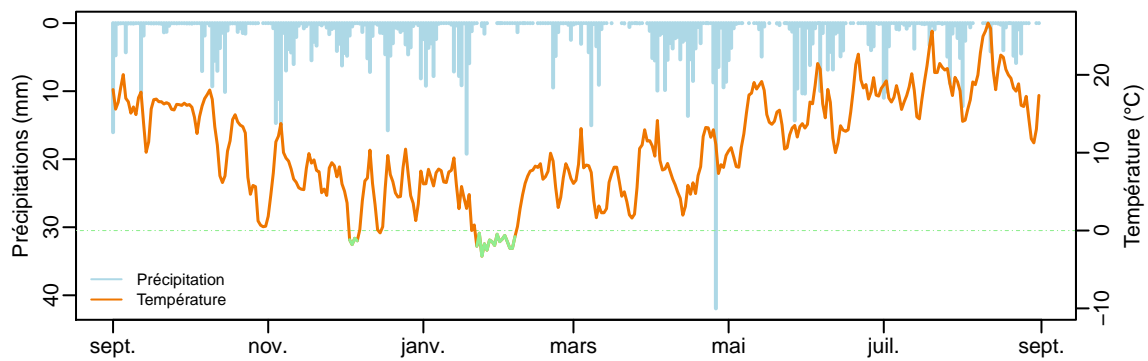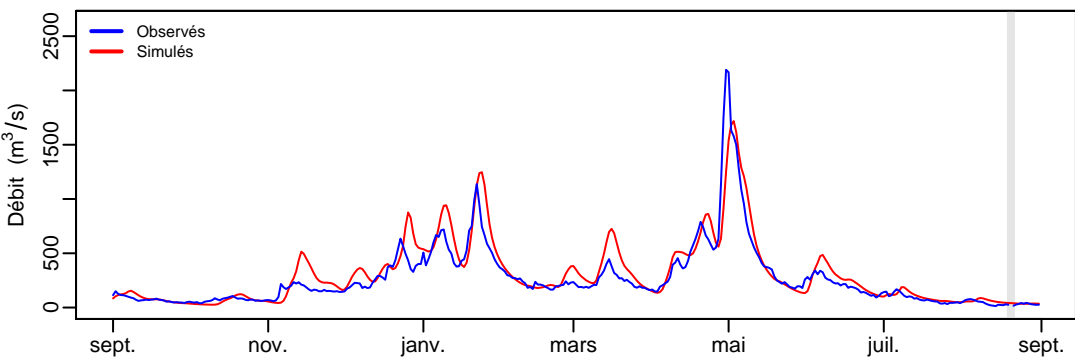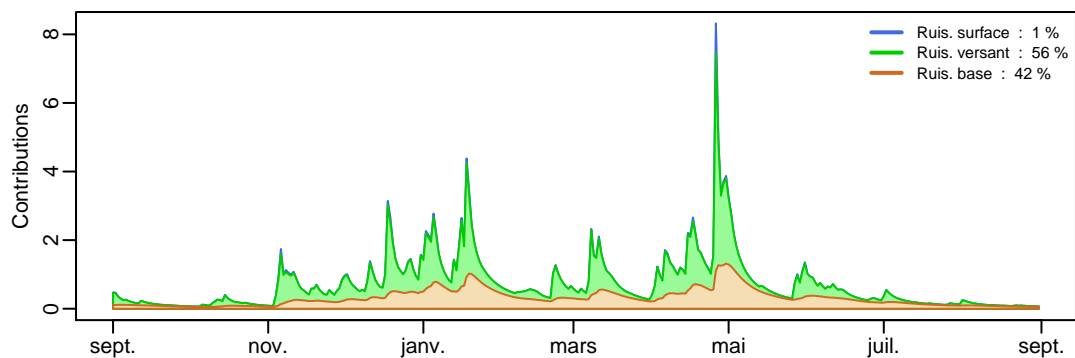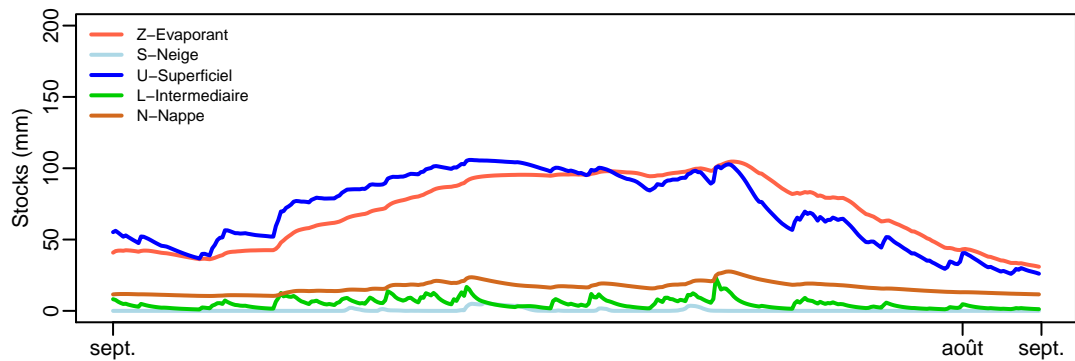

# k4180010 (35707.23 km<sup>2</sup>) – année 1998–1999

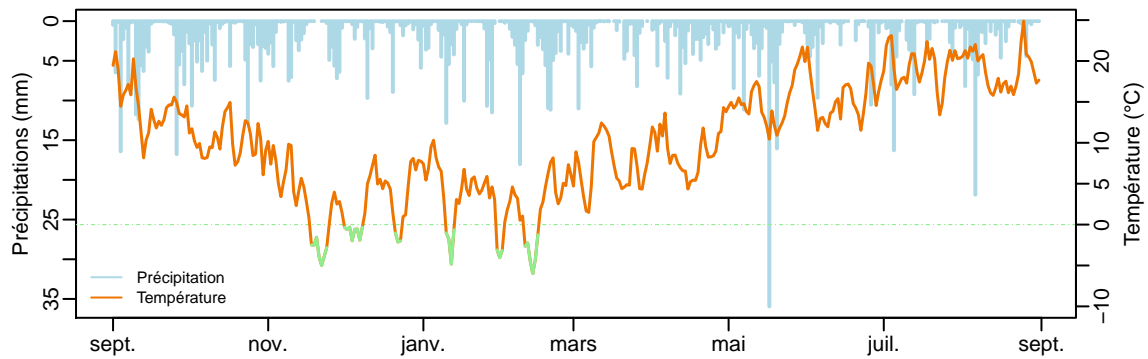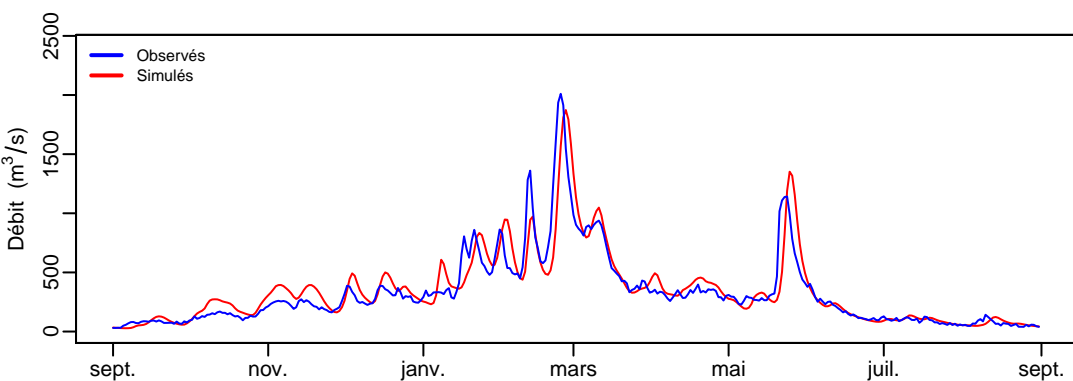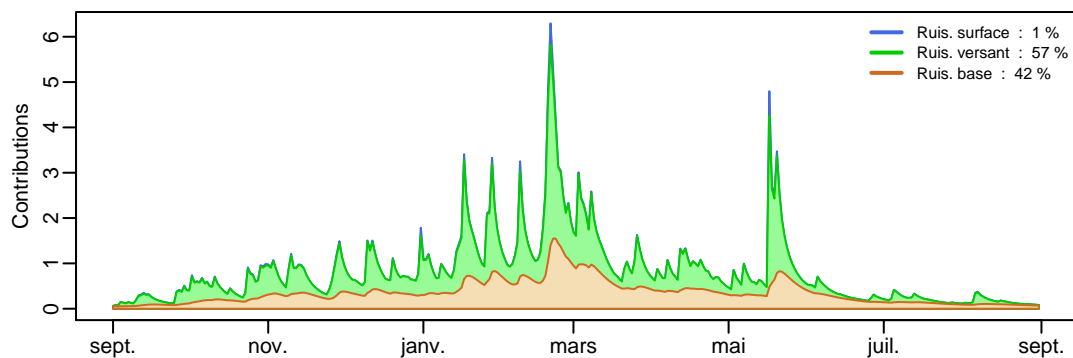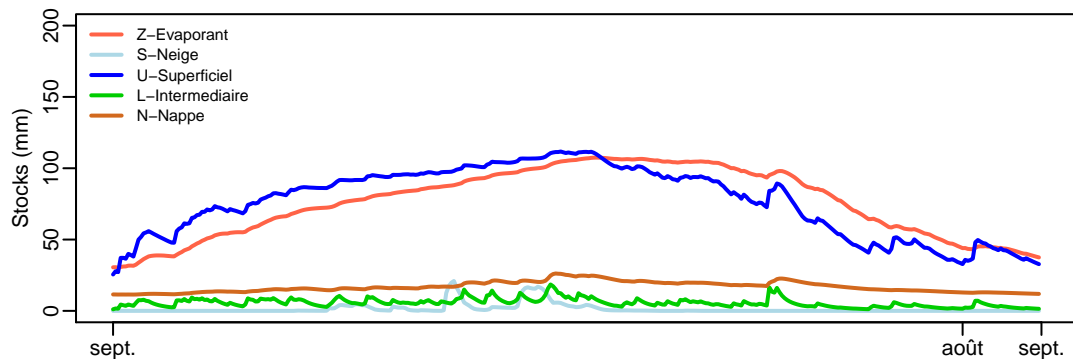

# k4180010 (35707.23 km<sup>2</sup>) – année 1999–2000

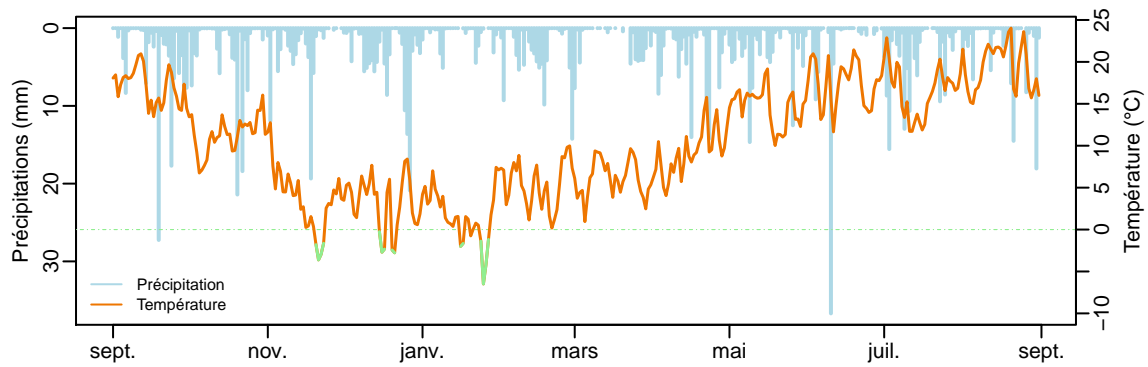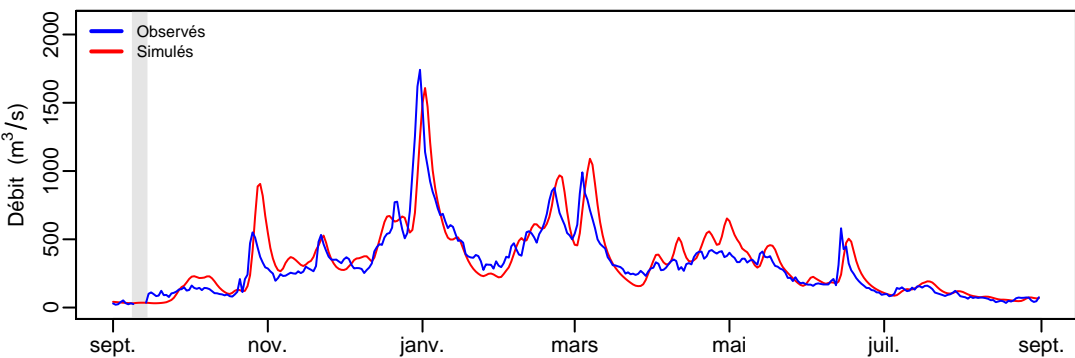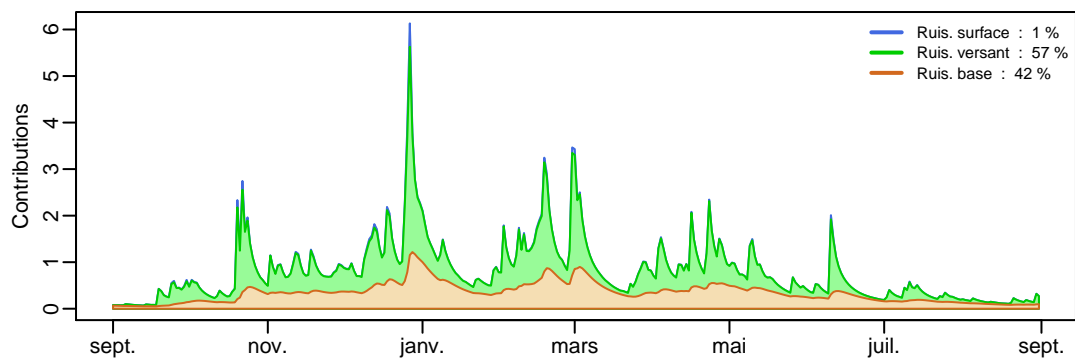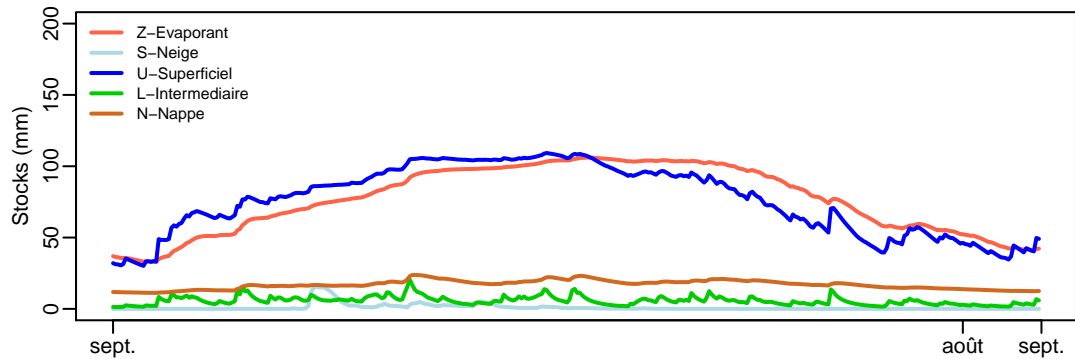

# k4180010 (35707.23 km<sup>2</sup>) – année 2000–2001

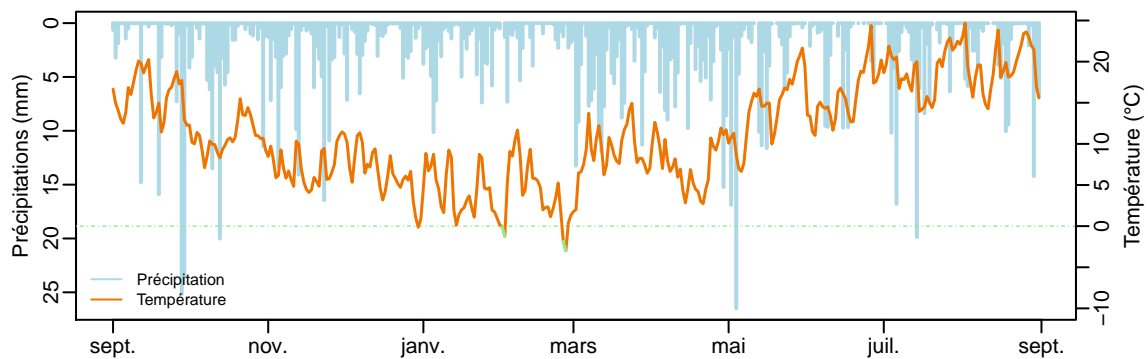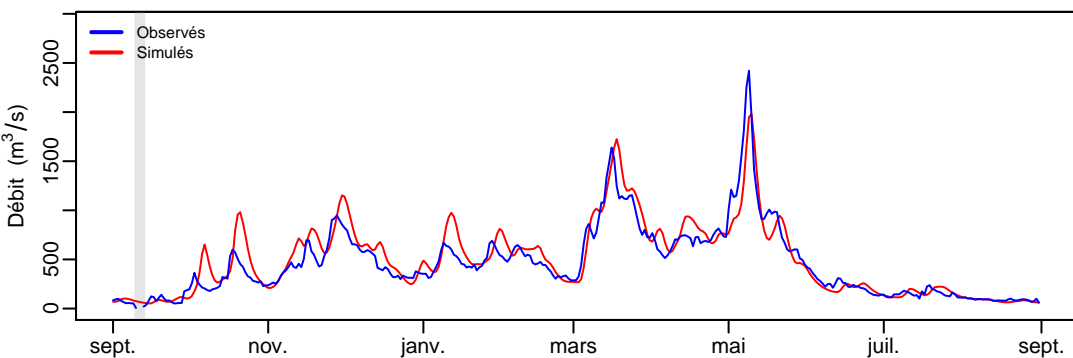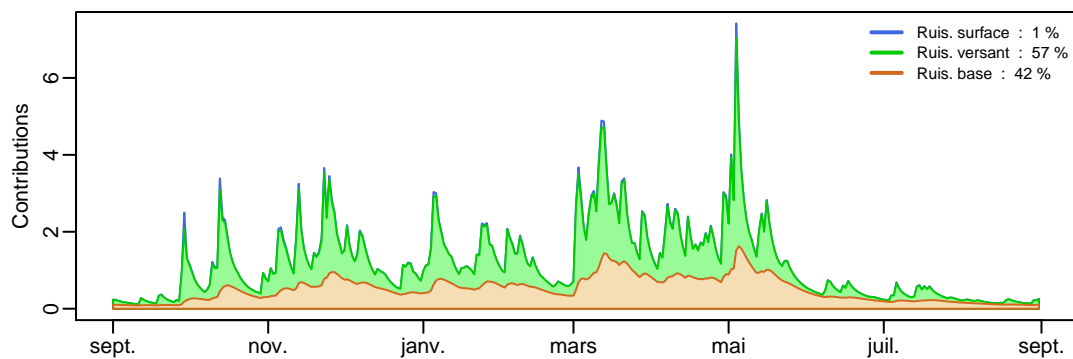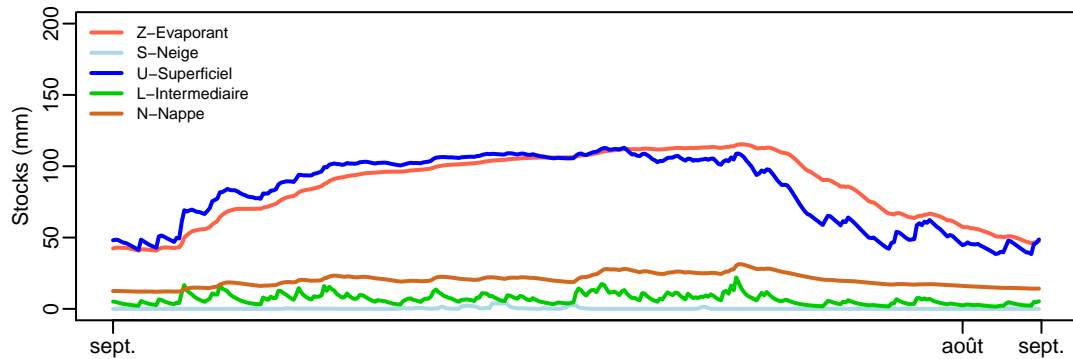

# k4180010 (35707.23 km<sup>2</sup>) – année 2001–2002

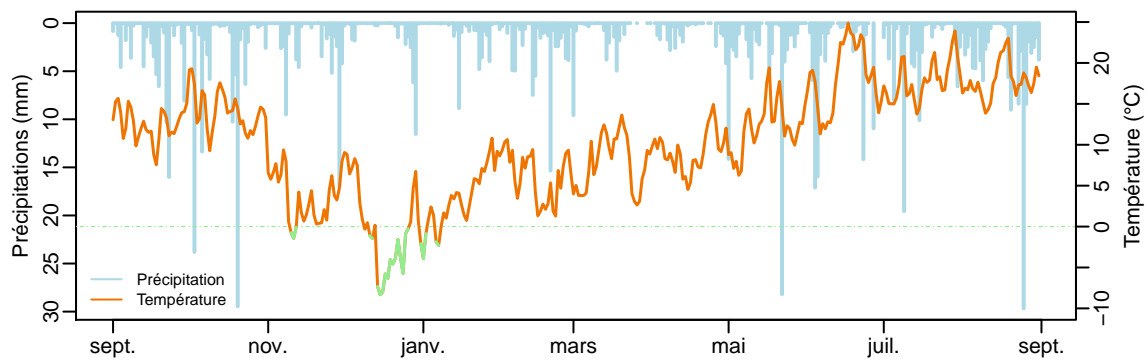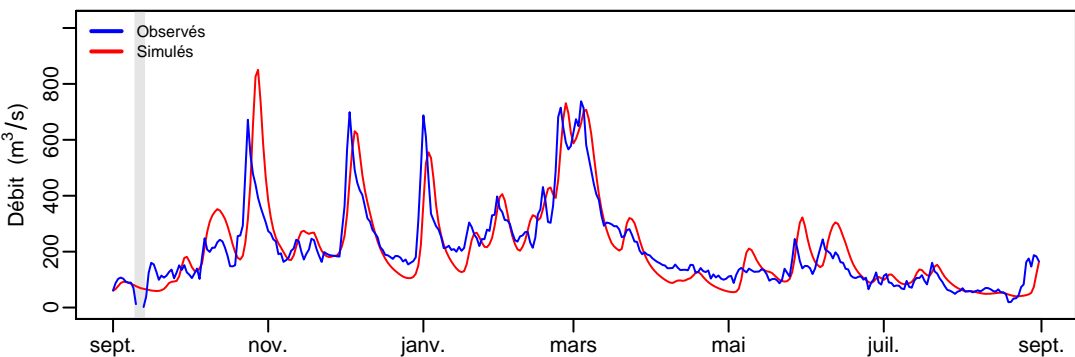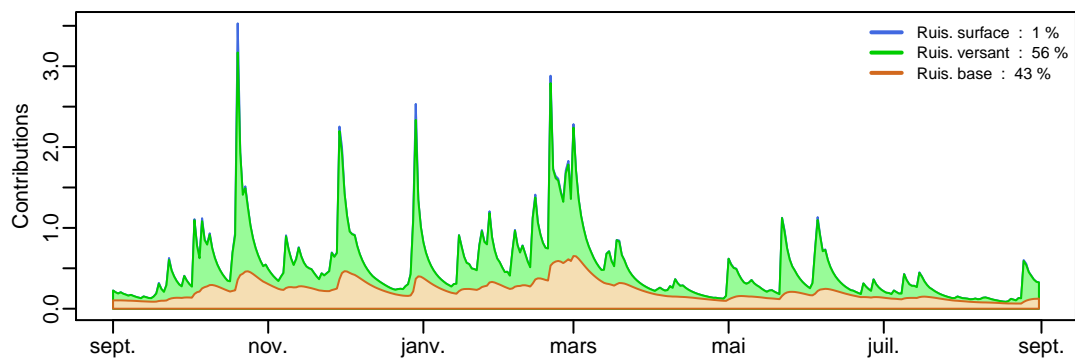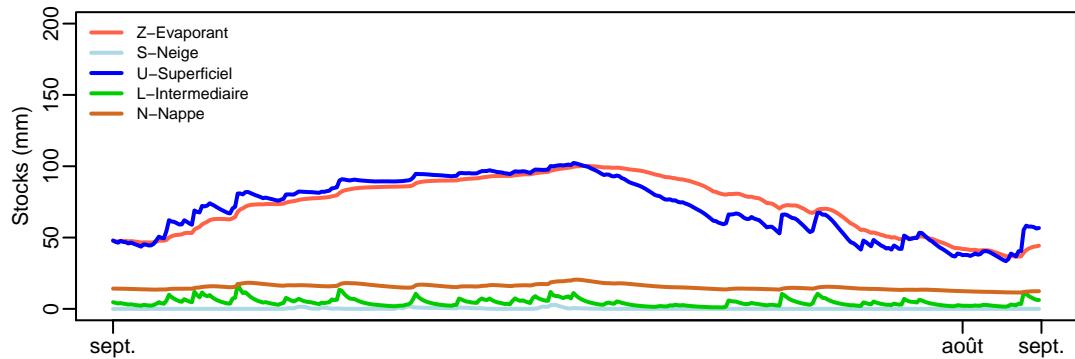

# k4180010 (35707.23 km<sup>2</sup>) – année 2002–2003

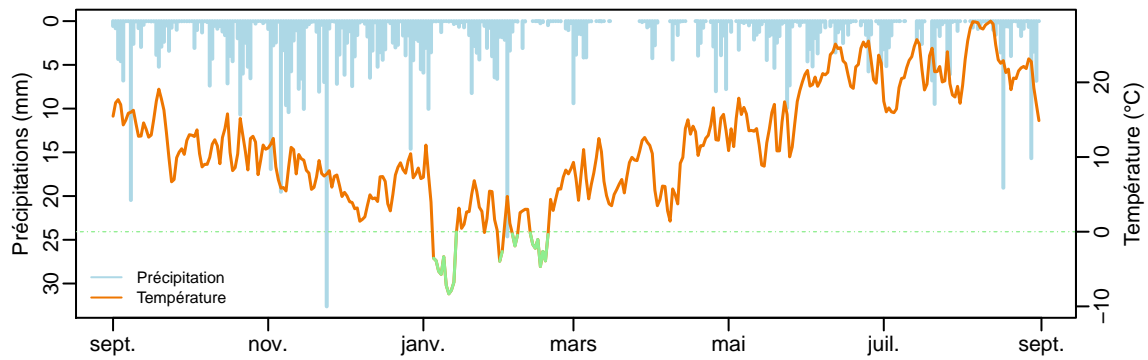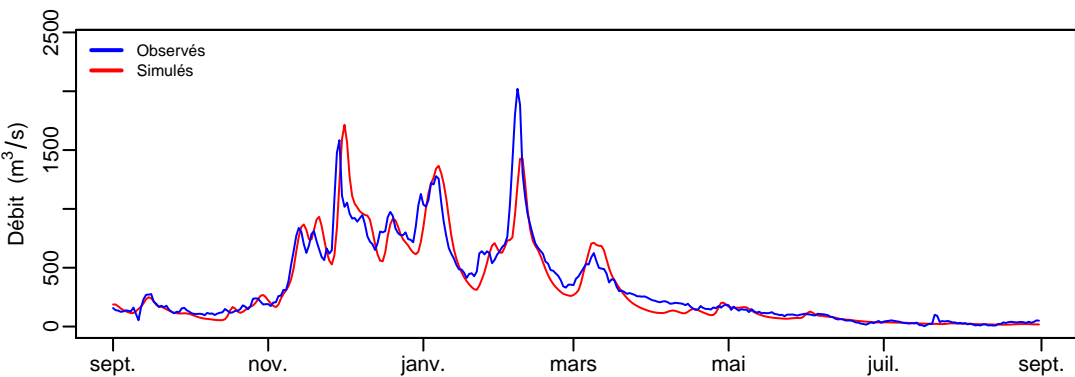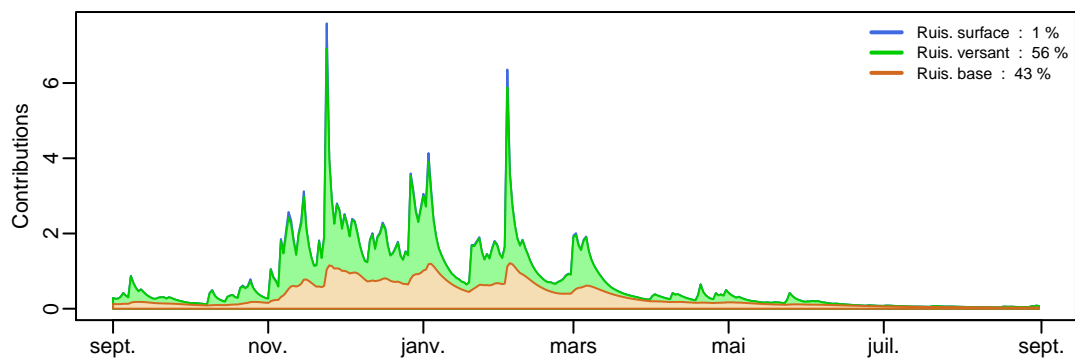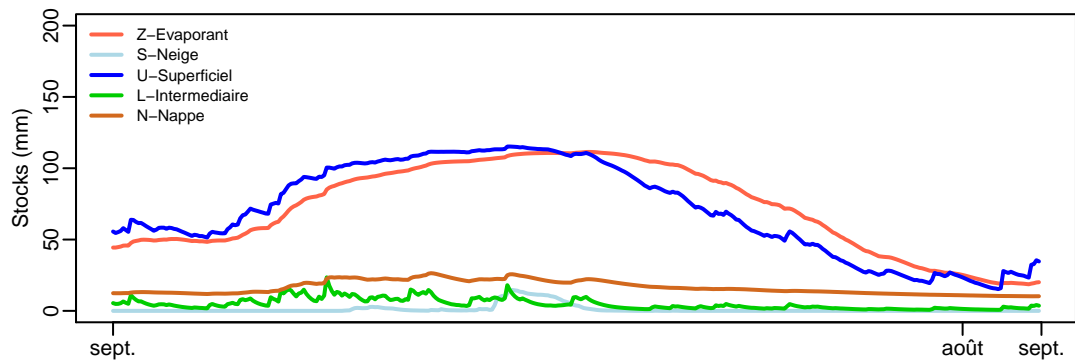

# k4180010 (35707.23 km<sup>2</sup>) – année 2003–2004

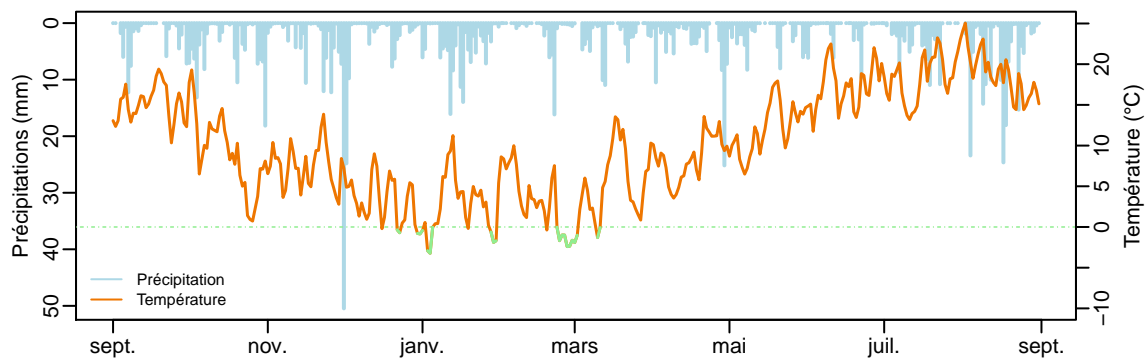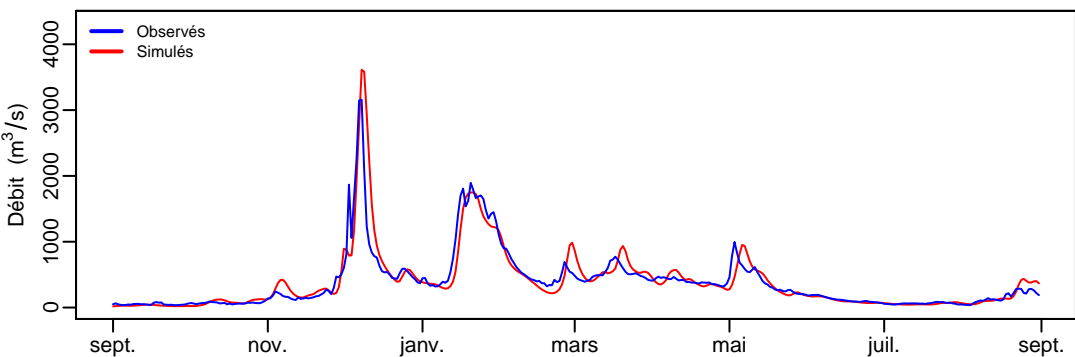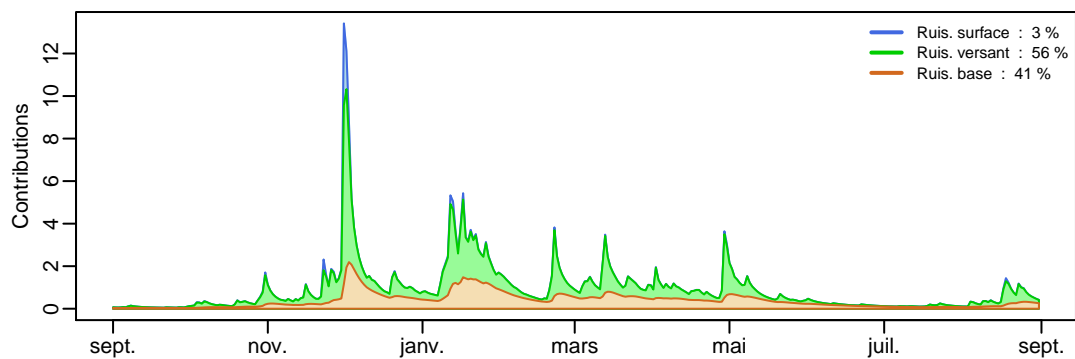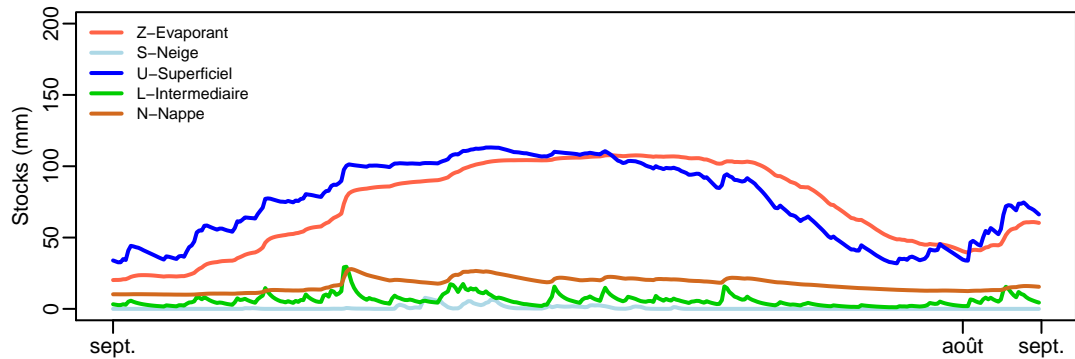



# k4180010 (35707.23 km<sup>2</sup>) – année 2004–2005

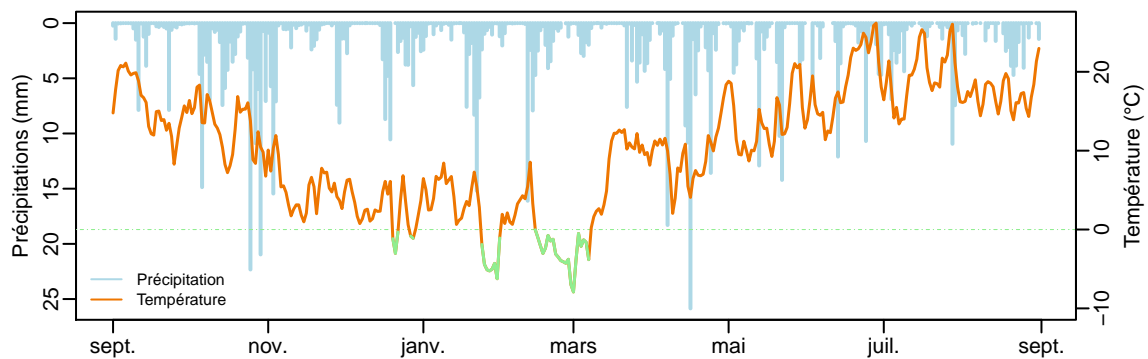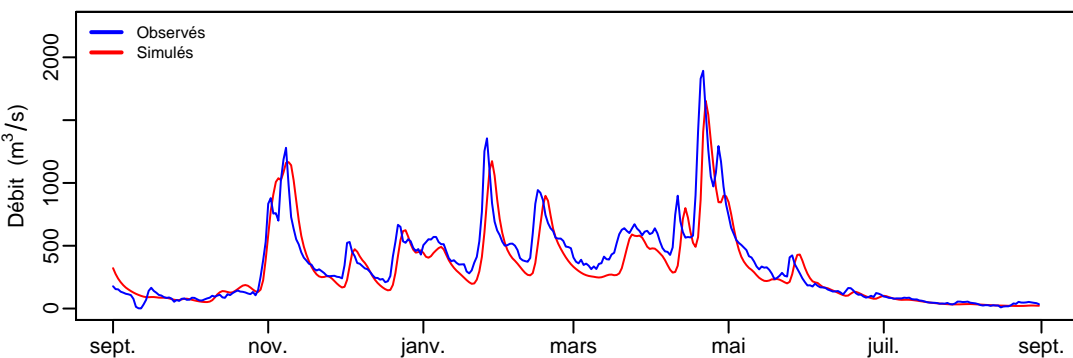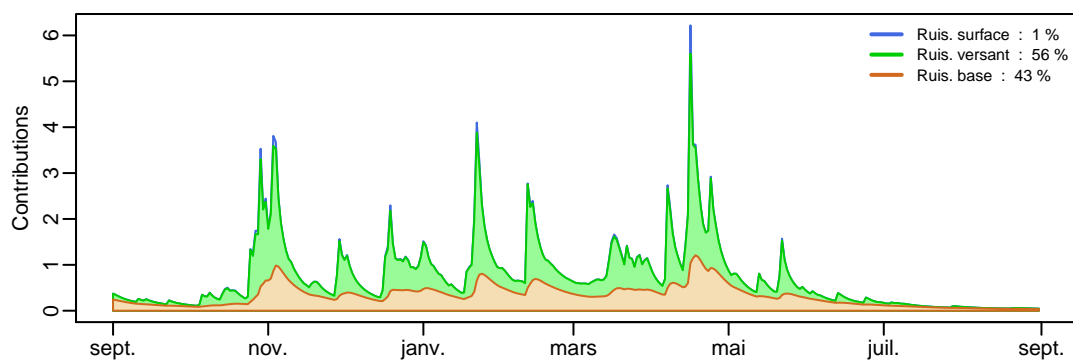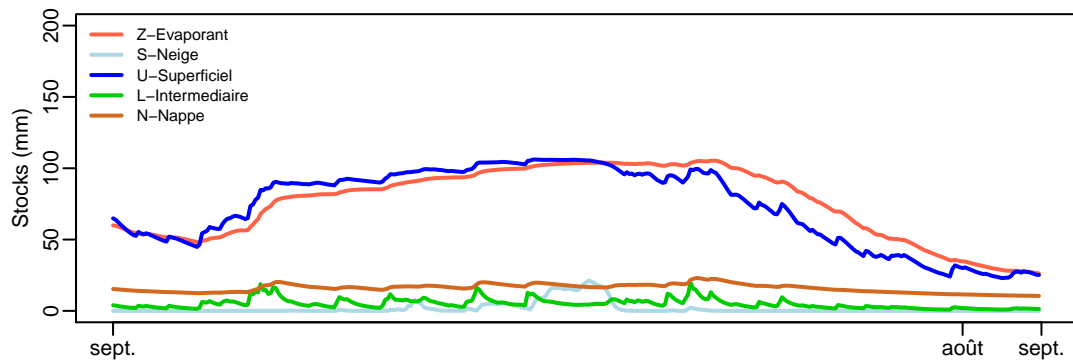

# k4180010 (35707.23 km<sup>2</sup>) – année 2005–2006

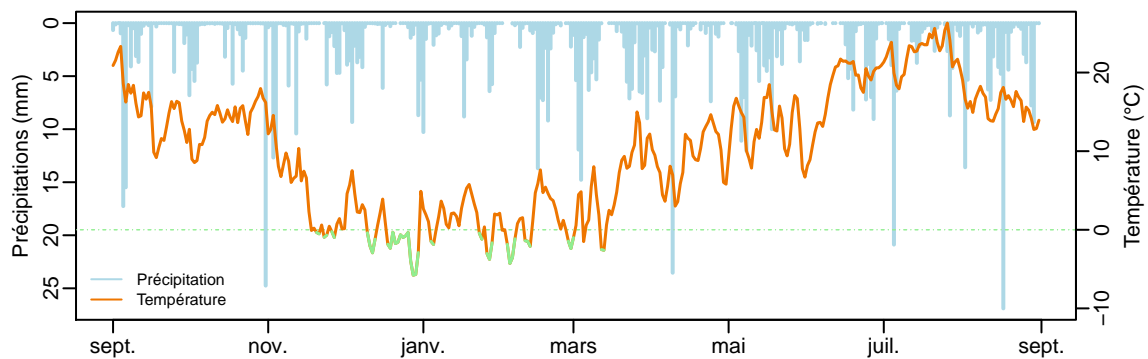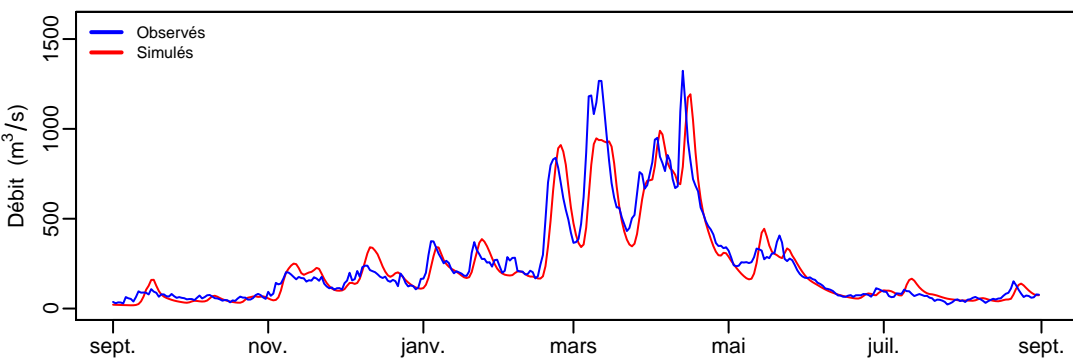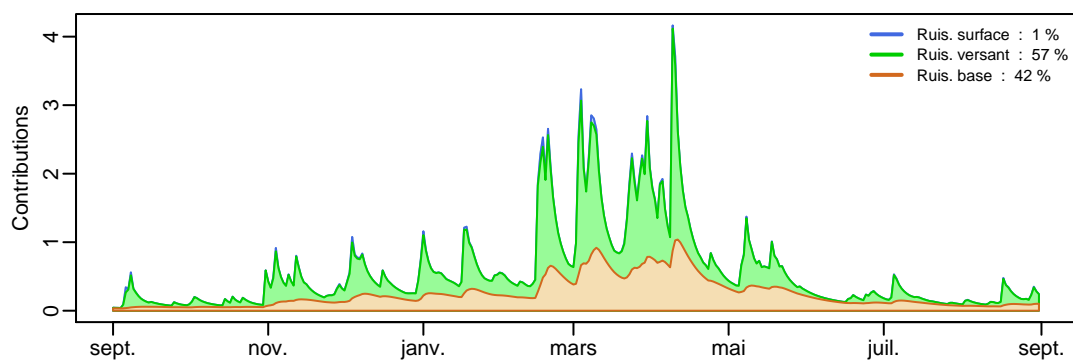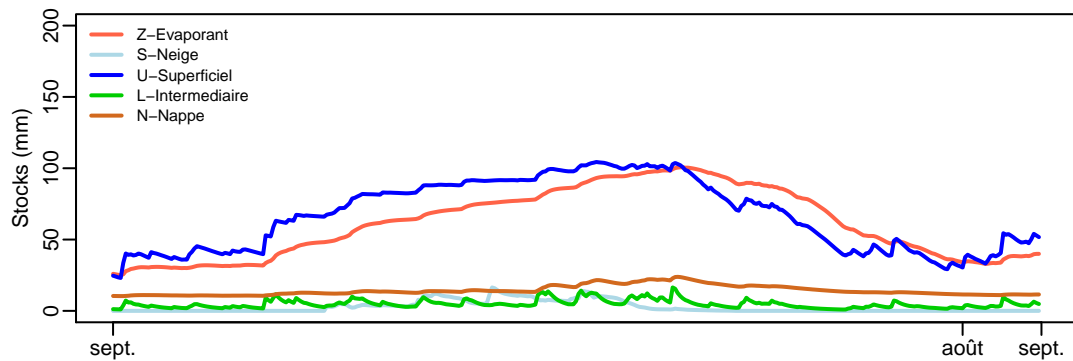

# k4180010 (35707.23 km<sup>2</sup>) – année 2006–2007

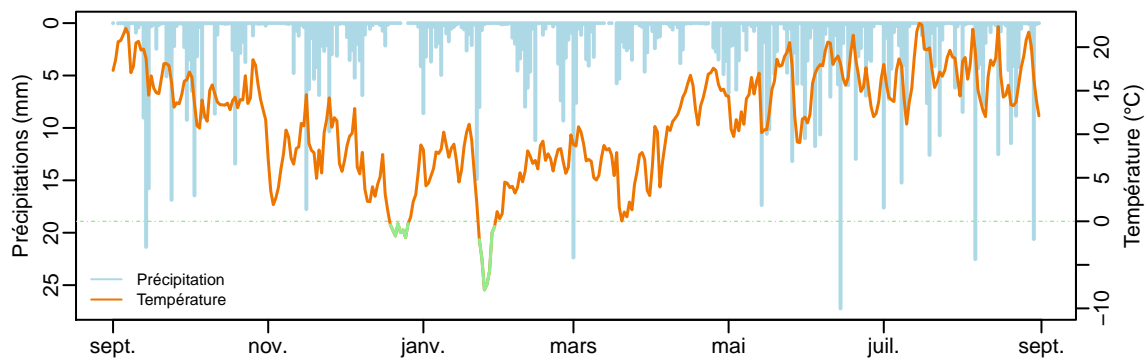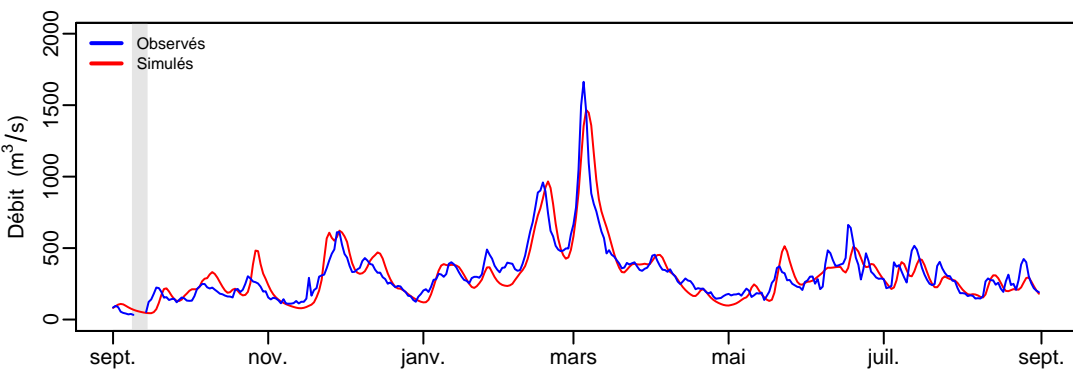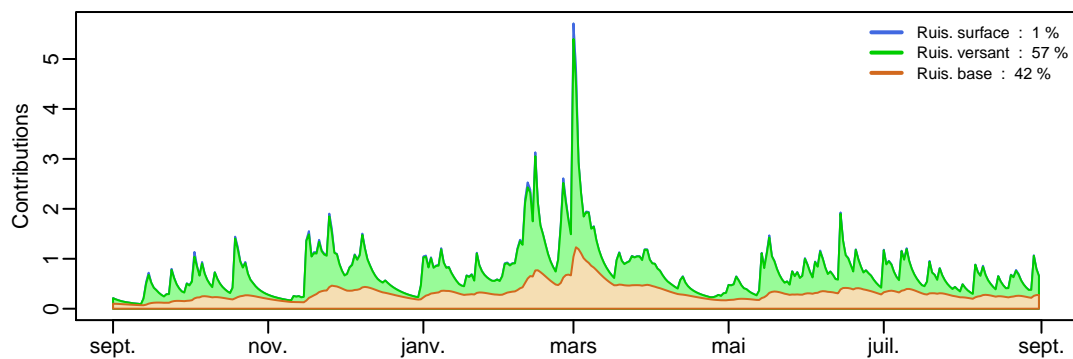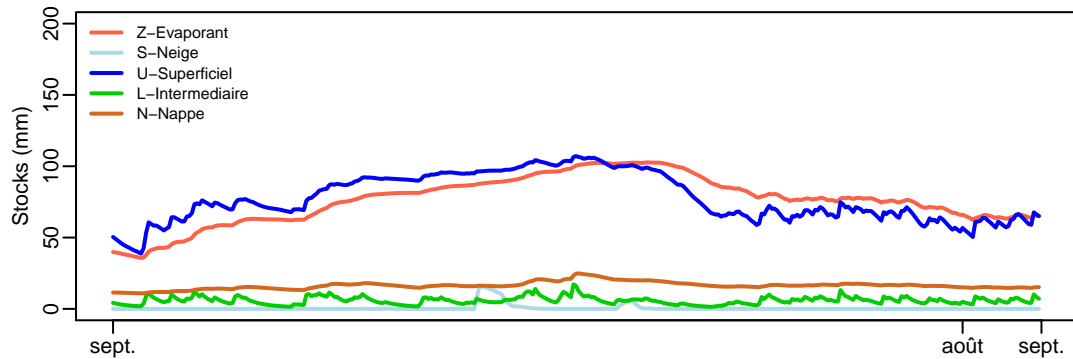

# k4180010 (35707.23 km<sup>2</sup>) – année 2007–2008

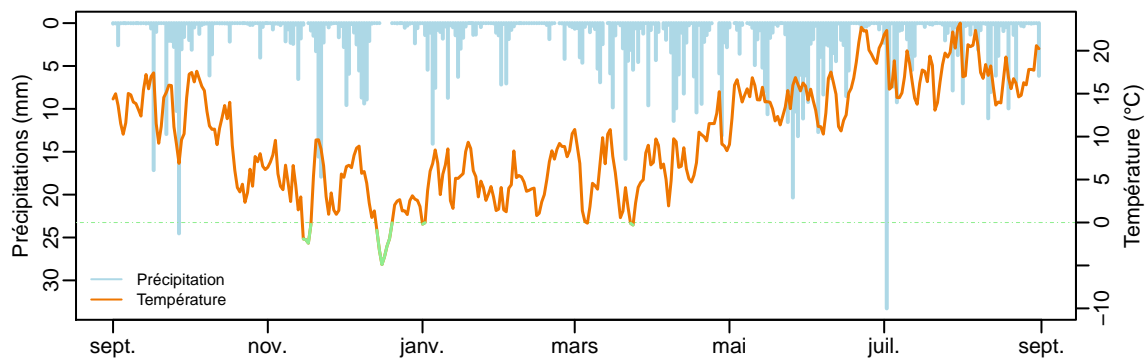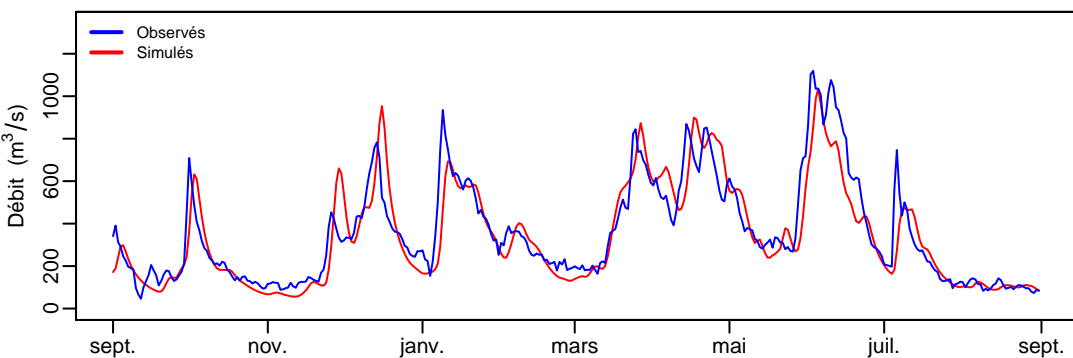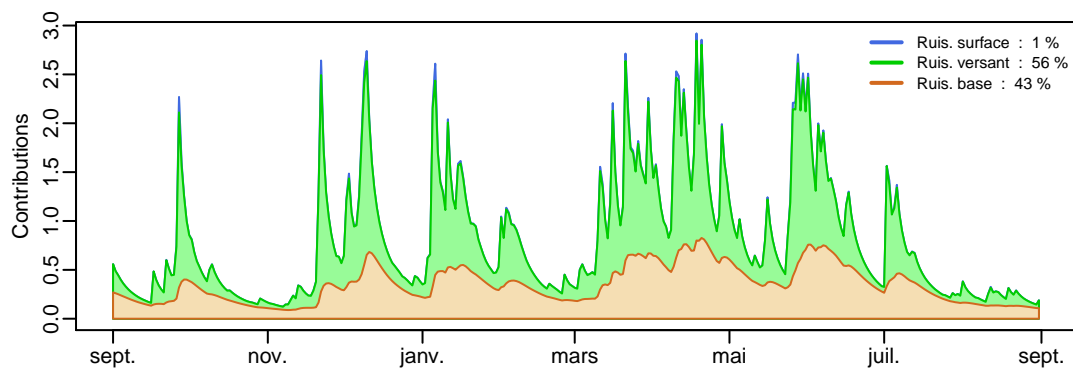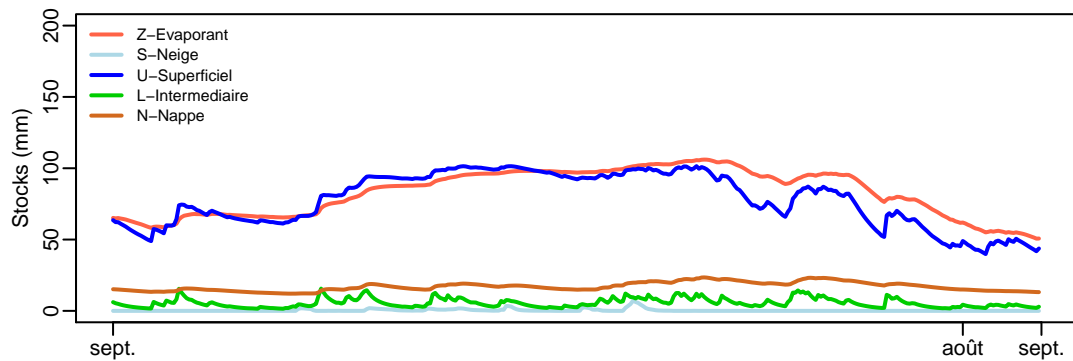

# k4180010 (35707.23 km<sup>2</sup>) – année 2008–2009

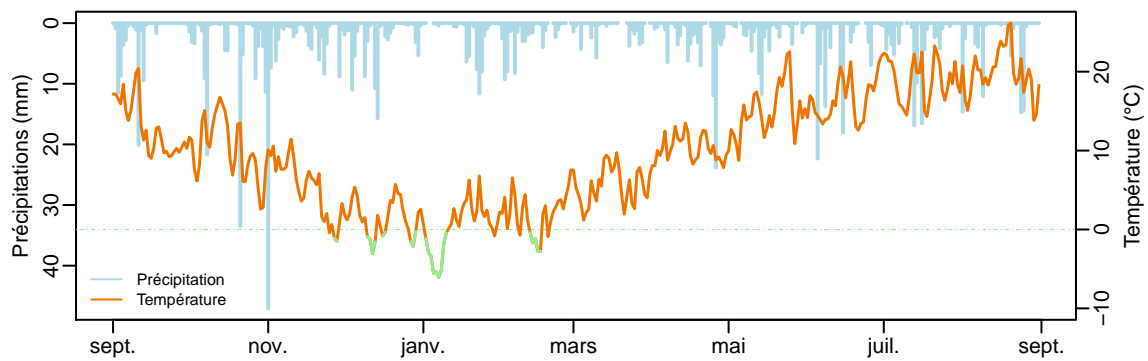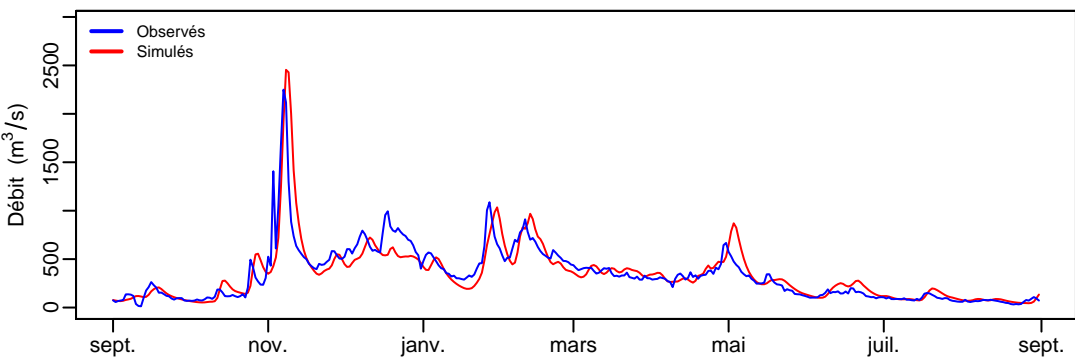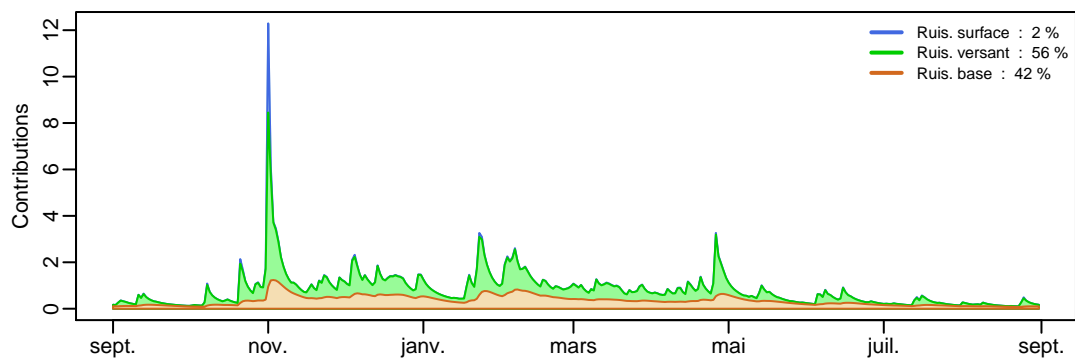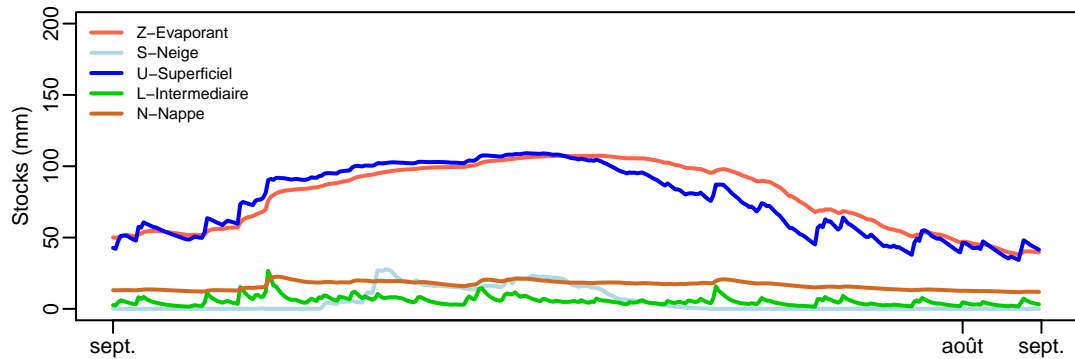

# k4180010 (35707.23 km²) – année 2009–2010

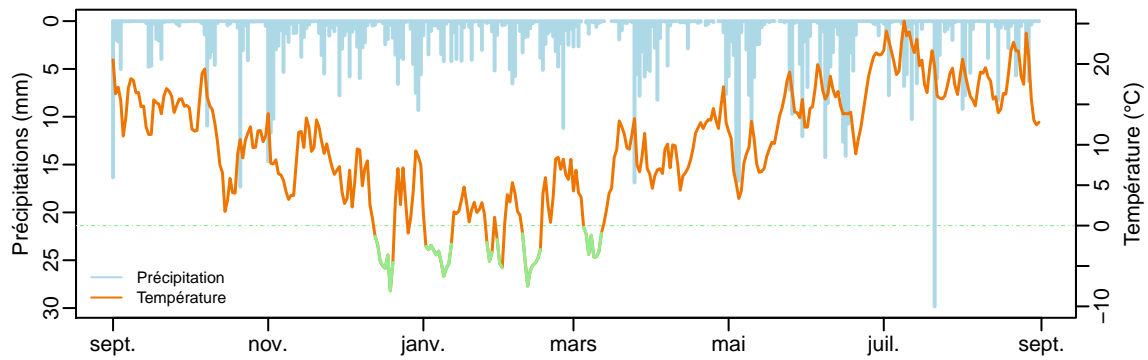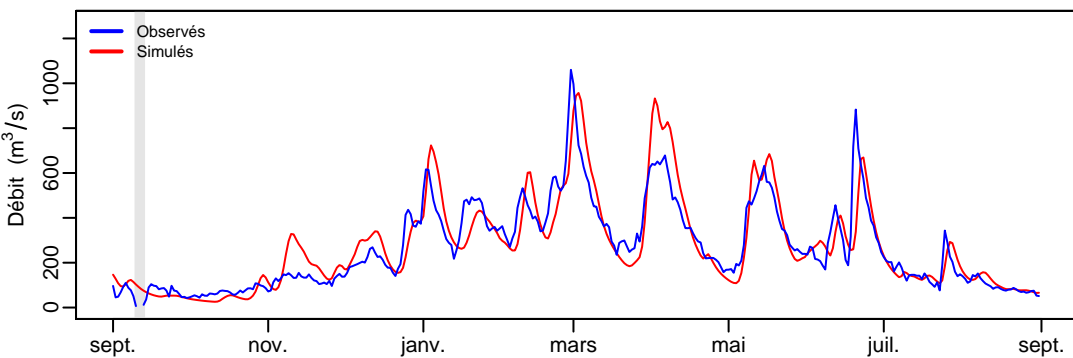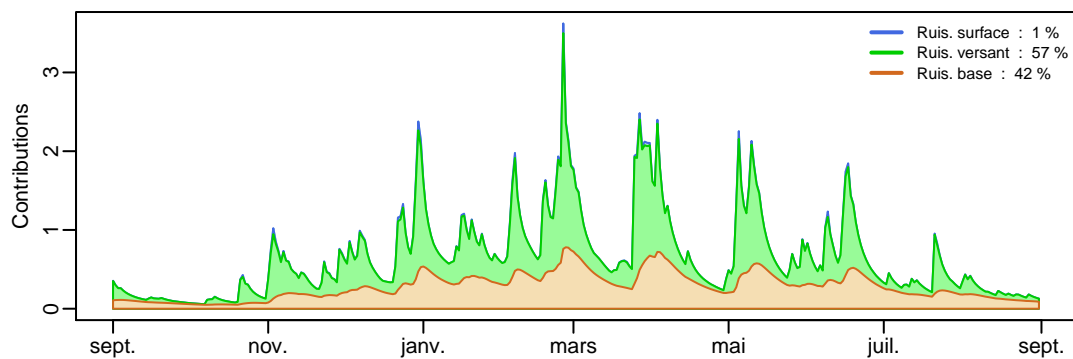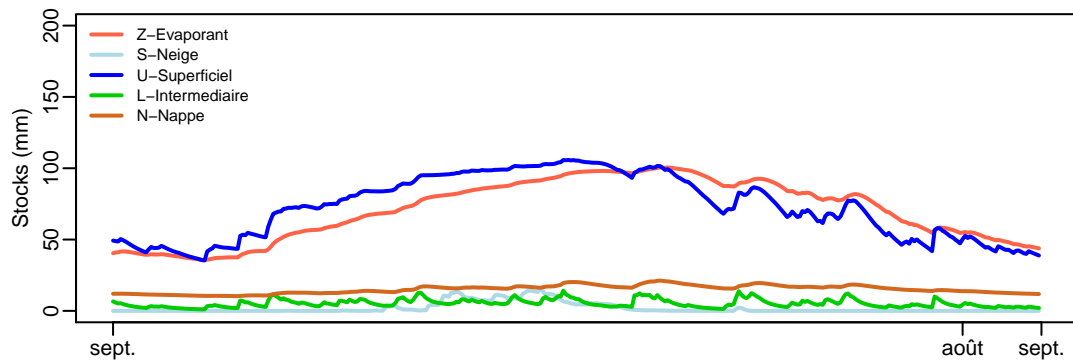

# k4180010 (35707.23 km<sup>2</sup>) – année 2010–2011

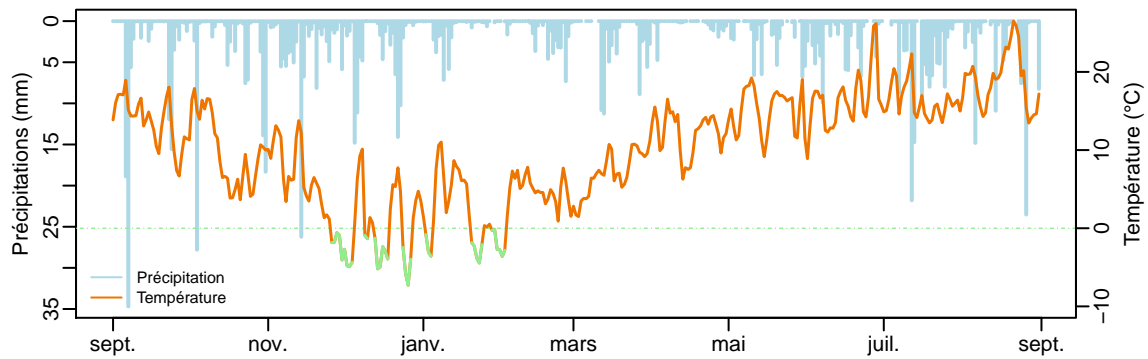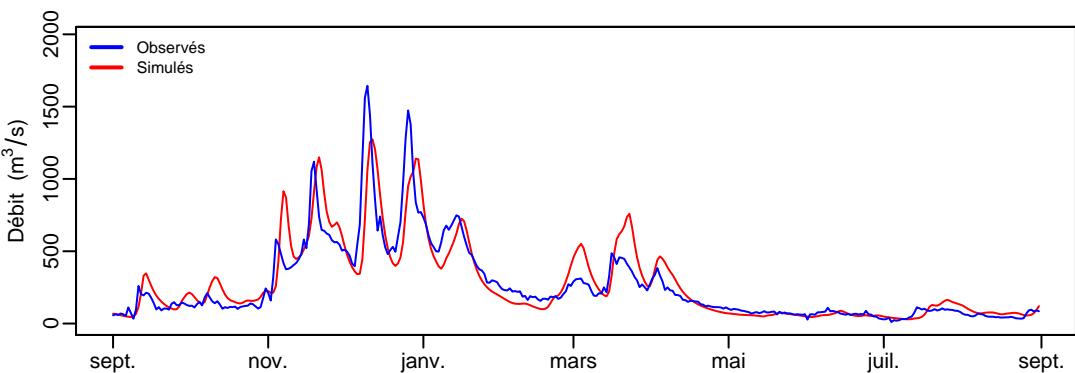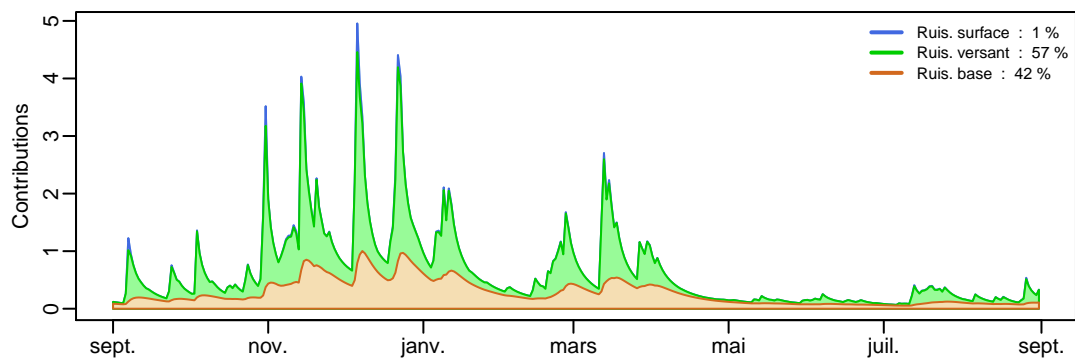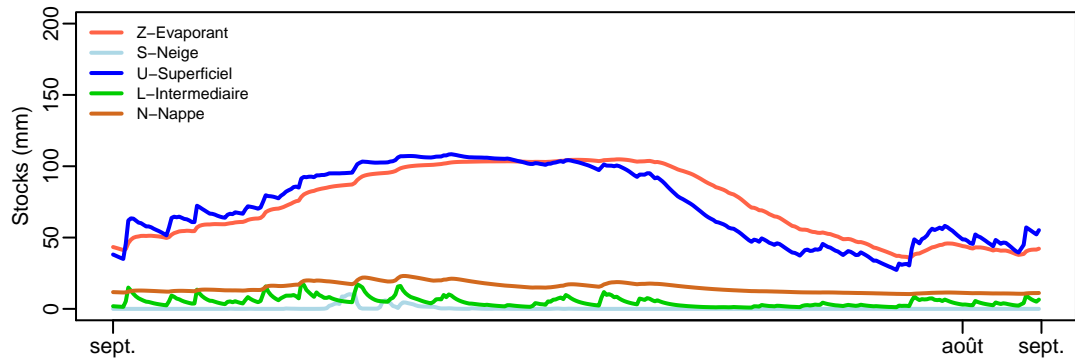

# k4180010 (35707.23 km<sup>2</sup>) – année 2011–2012

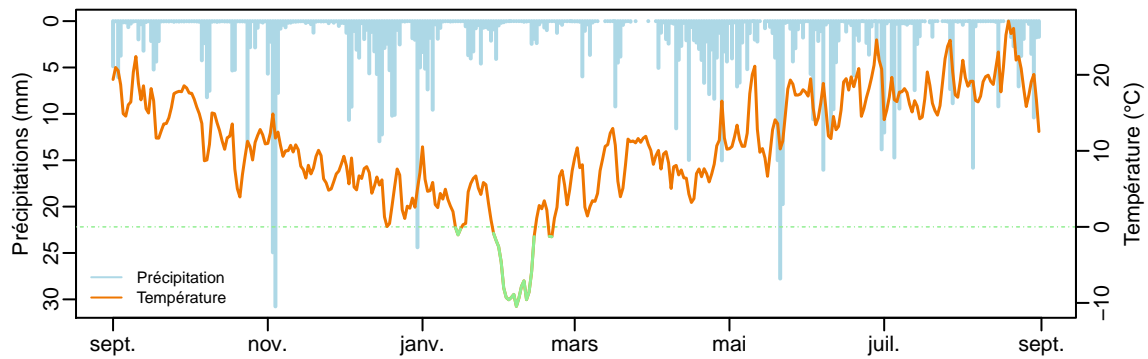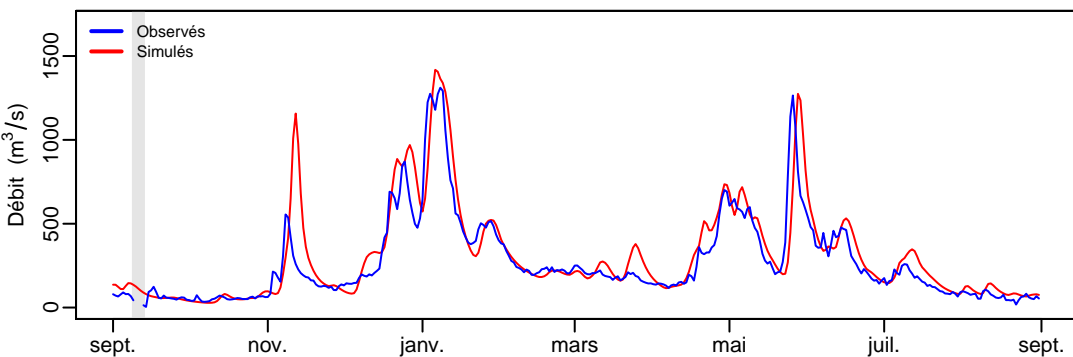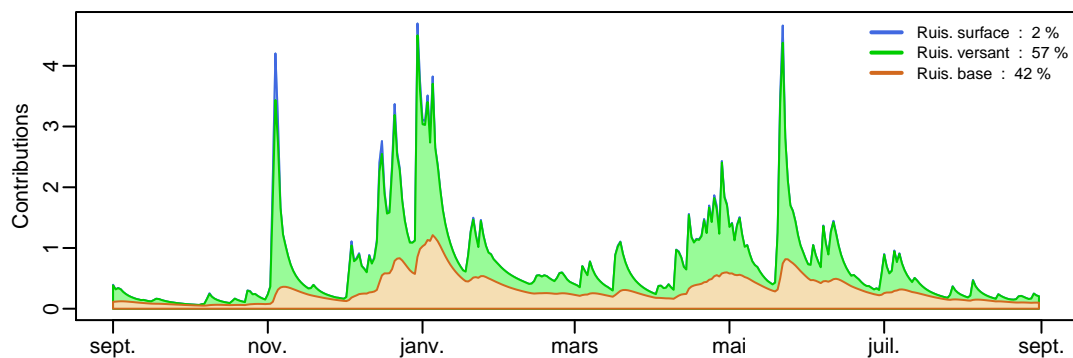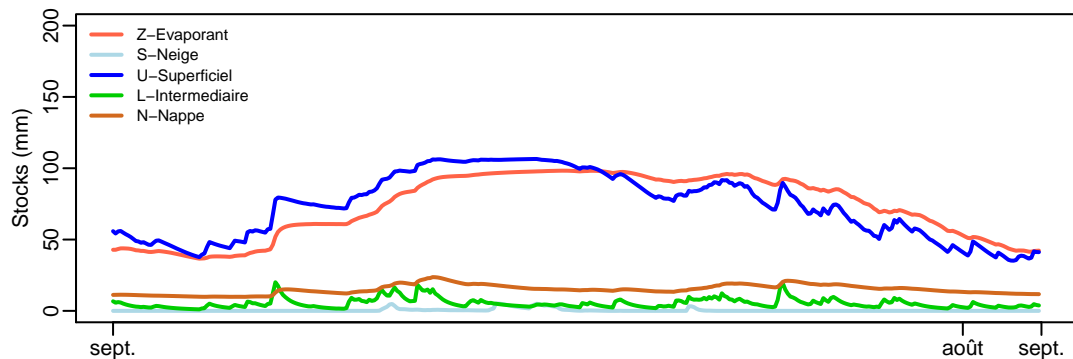



# m\_allhal (1074.14 km<sup>2</sup>) – année 1981–1982

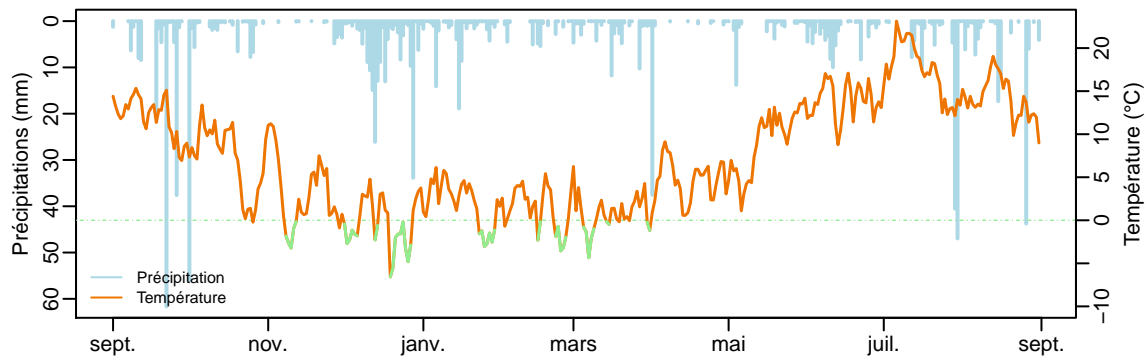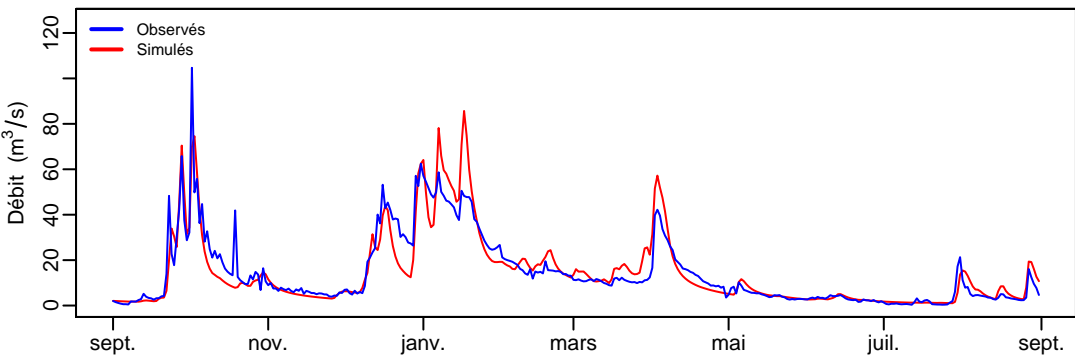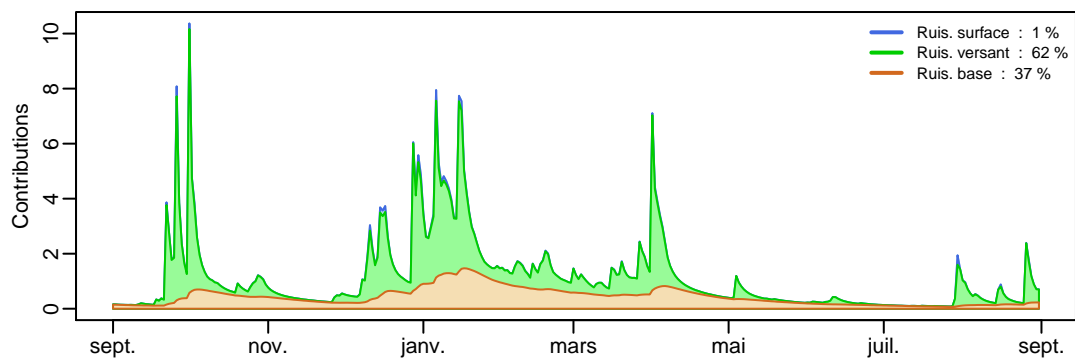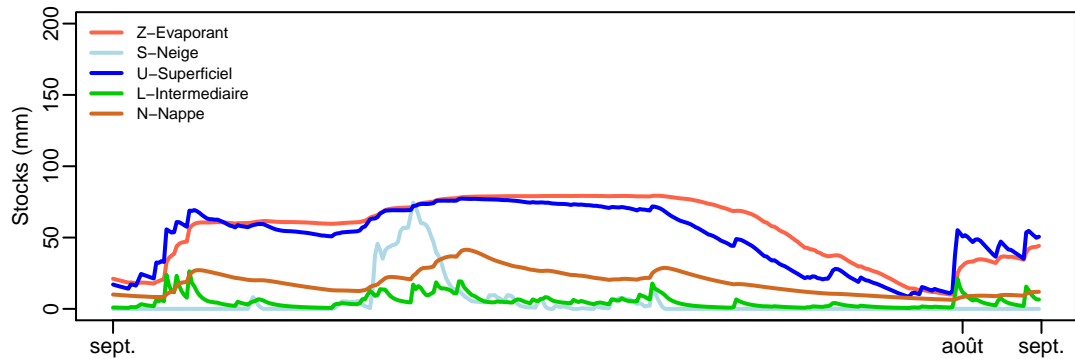

# m\_allhal (1074.14 km<sup>2</sup>) – année 1982–1983

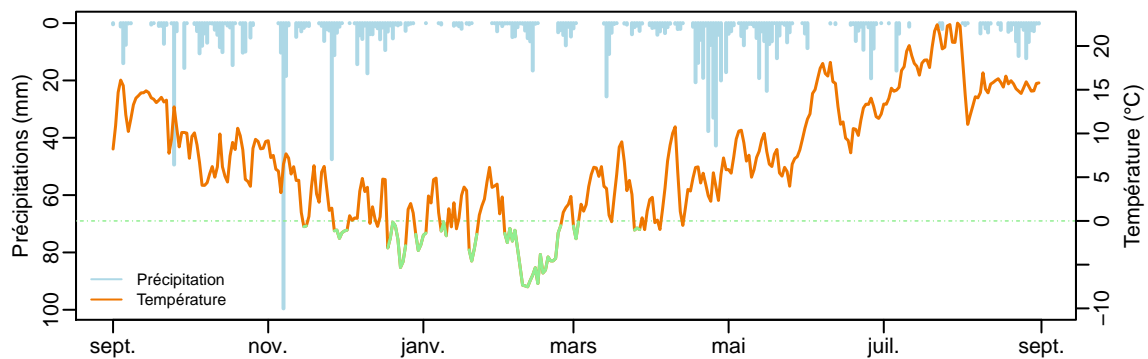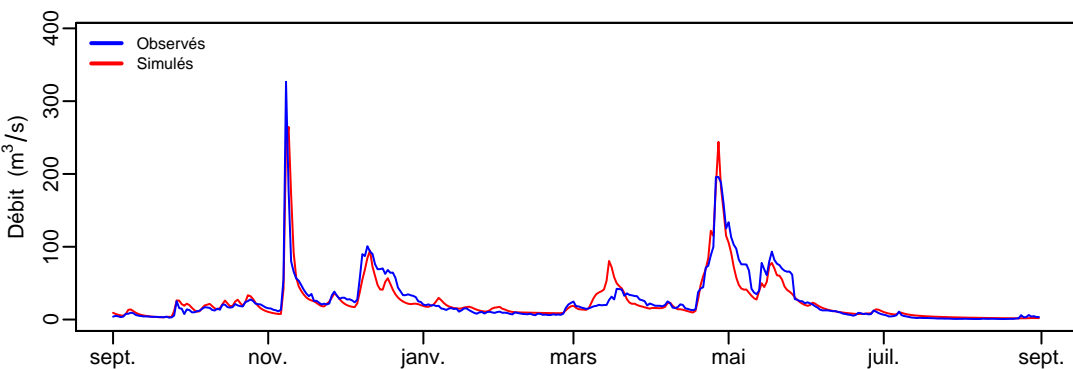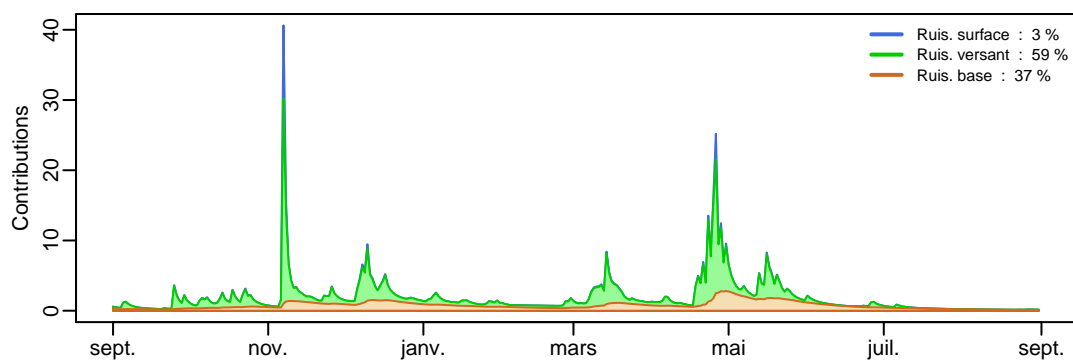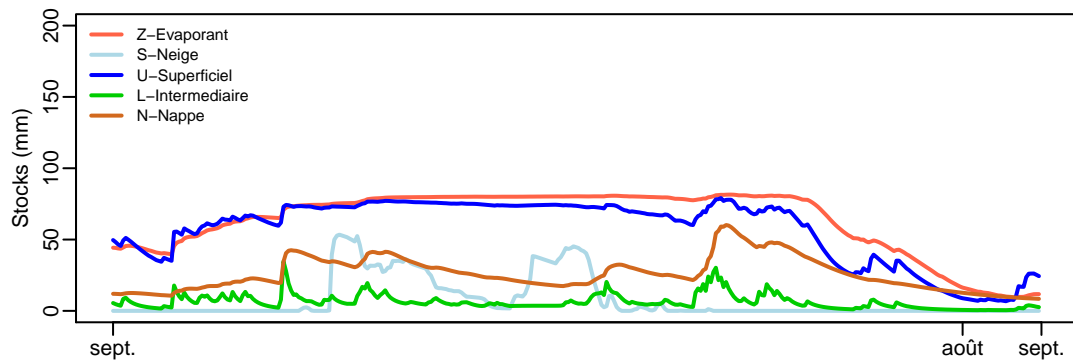

# m\_allhal (1074.14 km<sup>2</sup>) – année 1983–1984

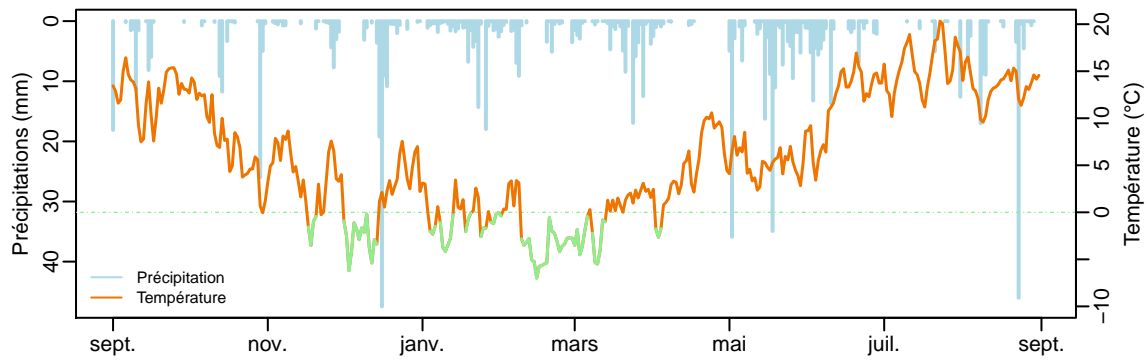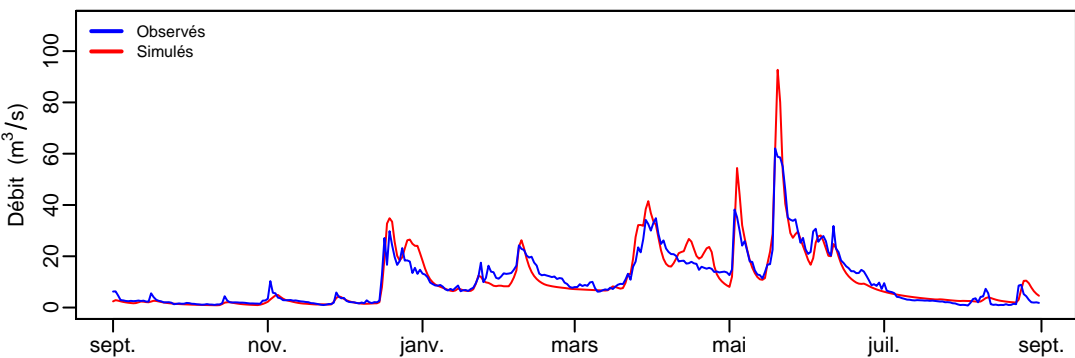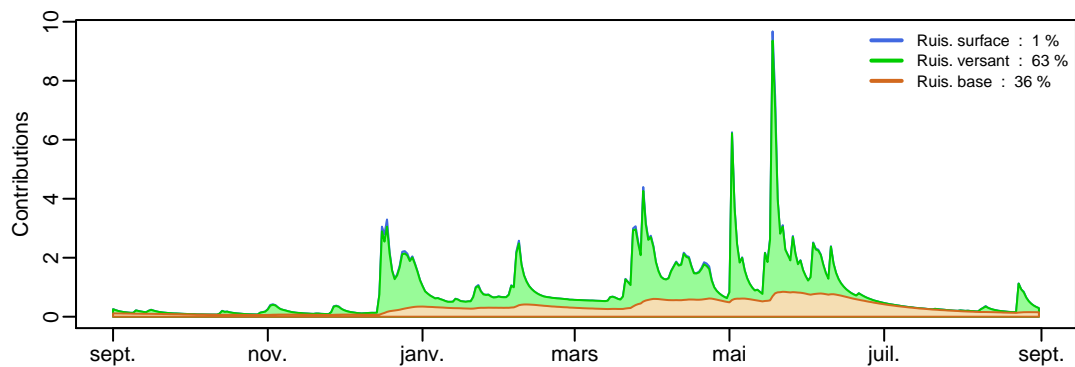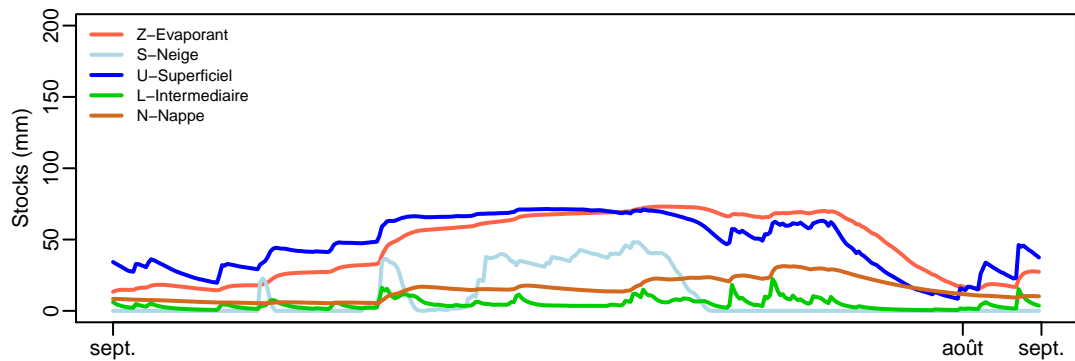

# m\_allhal (1074.14 km<sup>2</sup>) – année 1984–1985

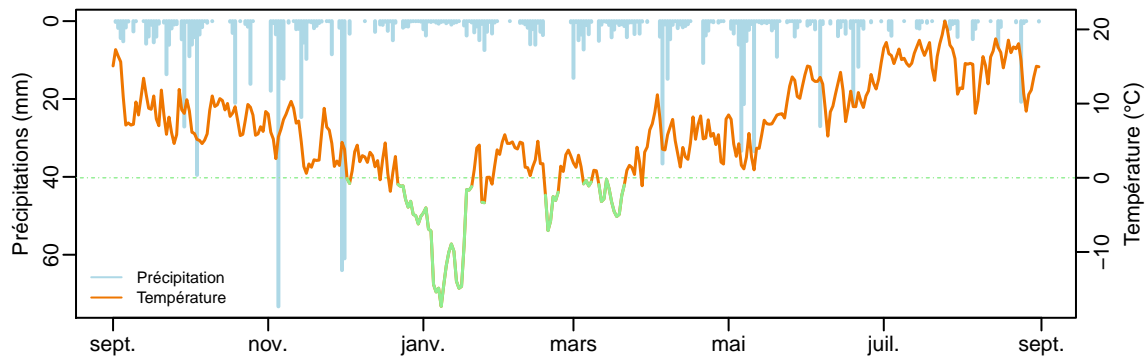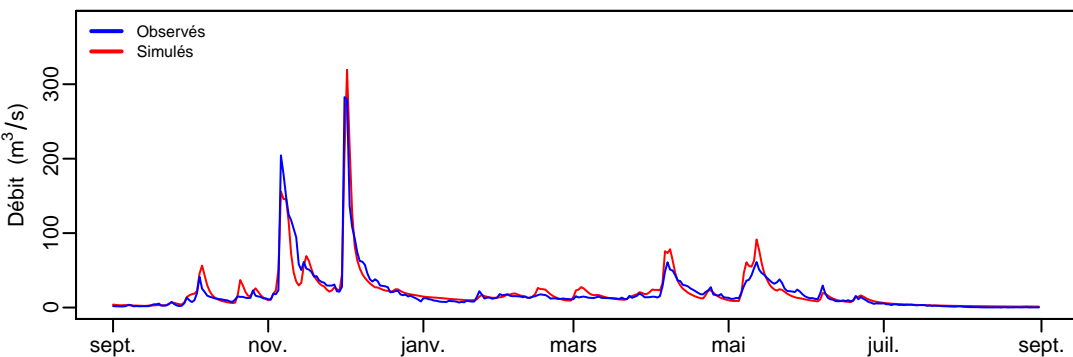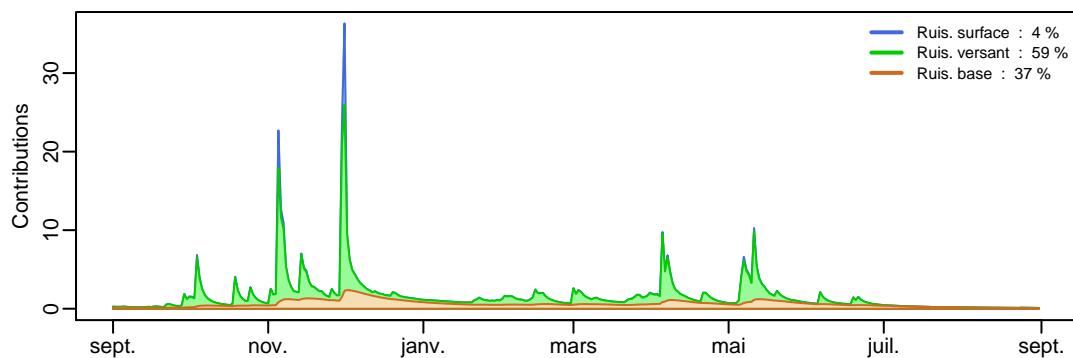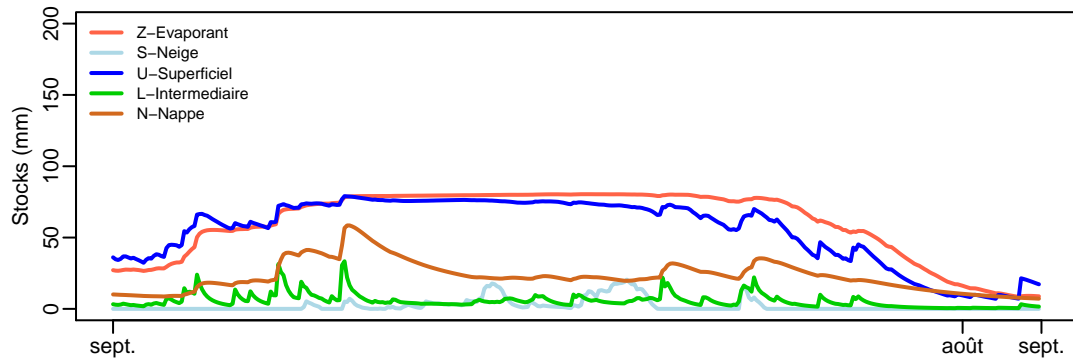

# m\_allhal (1074.14 km<sup>2</sup>) – année 1985–1986

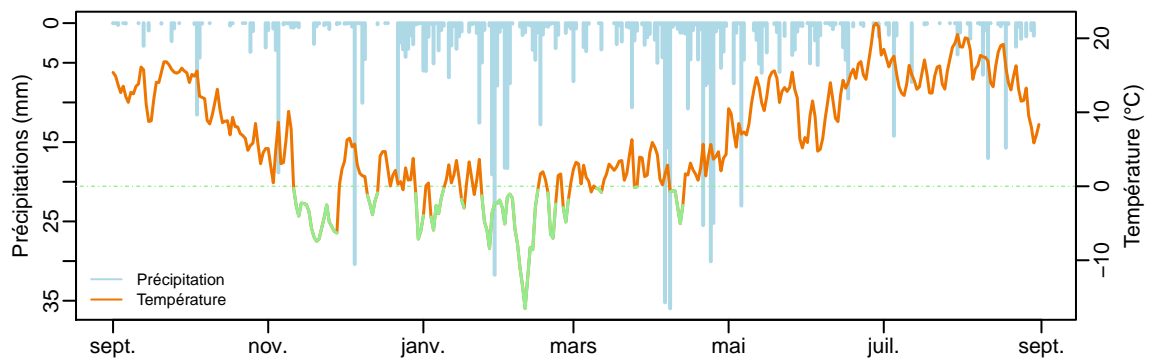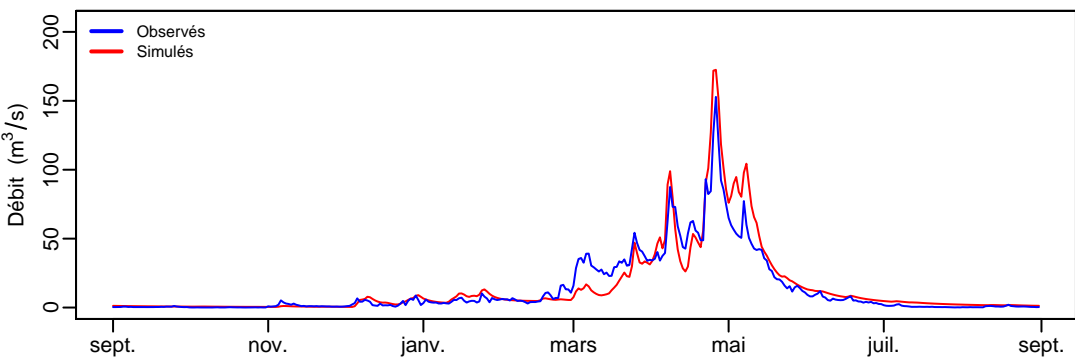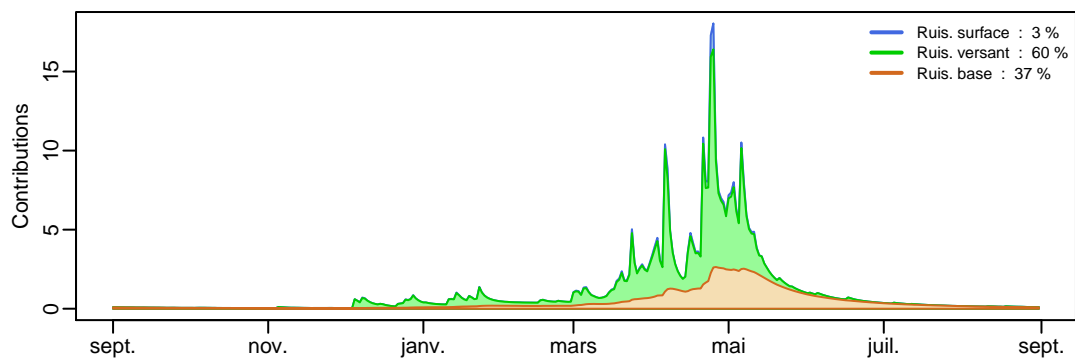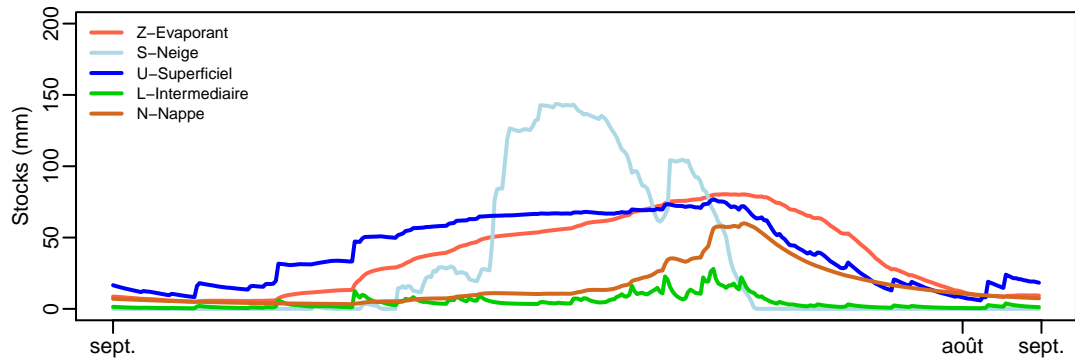

# m\_allhal (1074.14 km<sup>2</sup>) – année 1986–1987

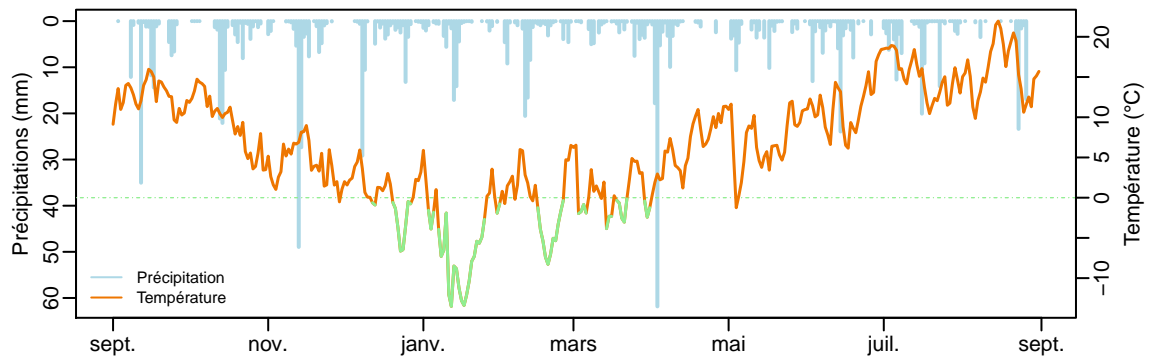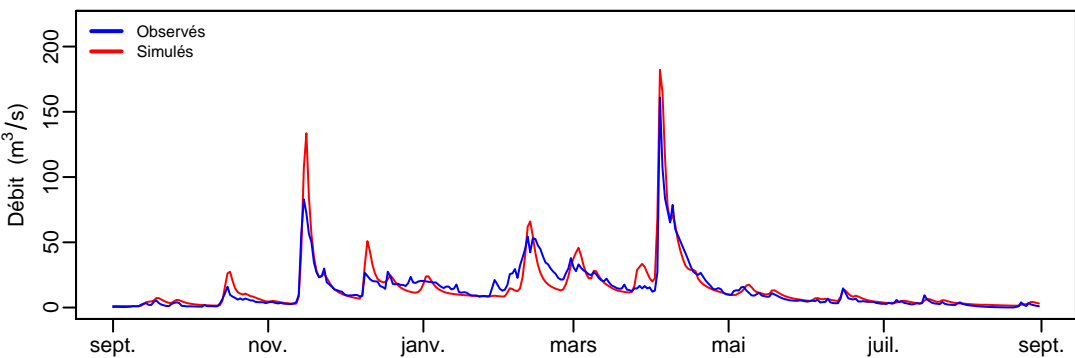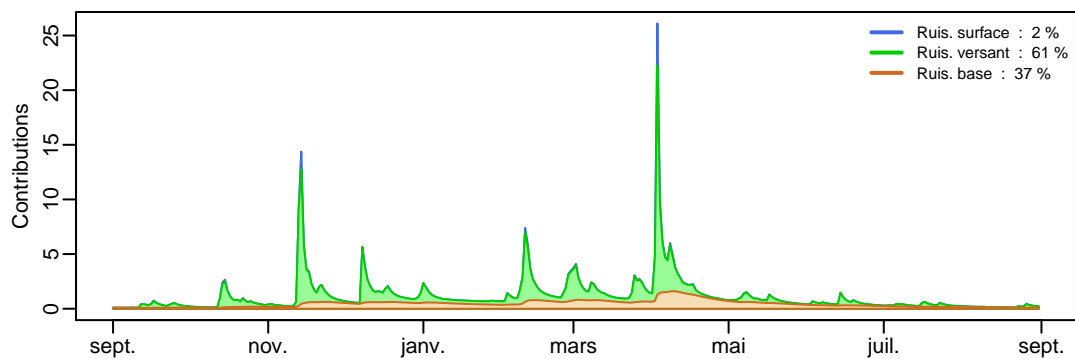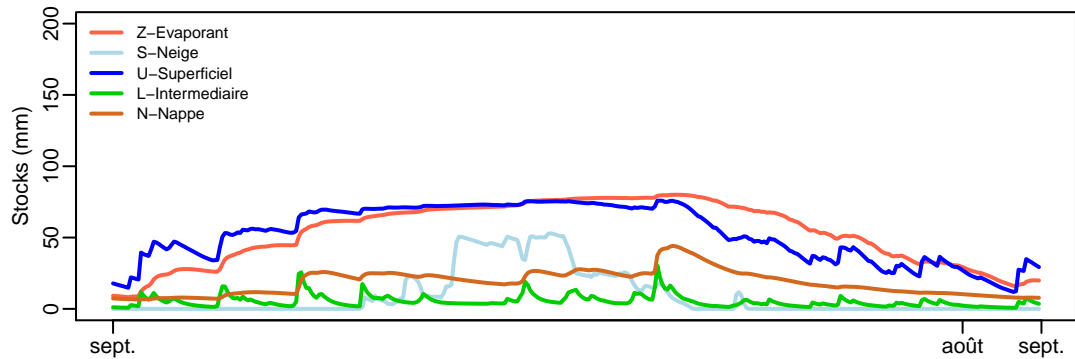

# m\_allhal (1074.14 km<sup>2</sup>) – année 1987–1988

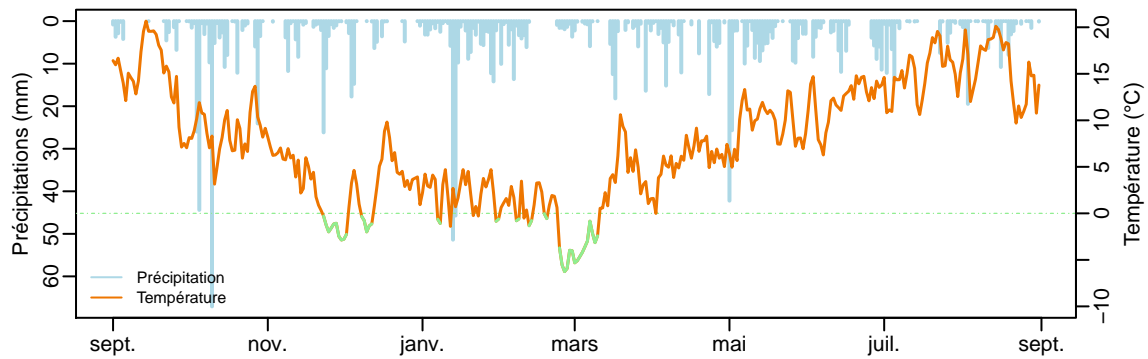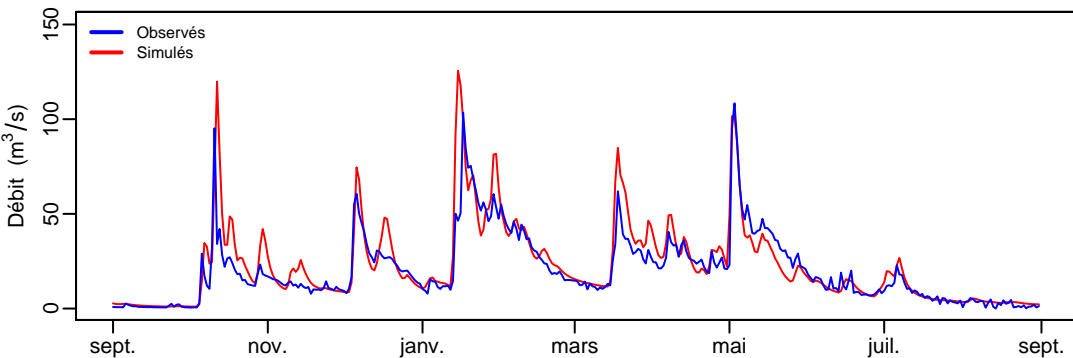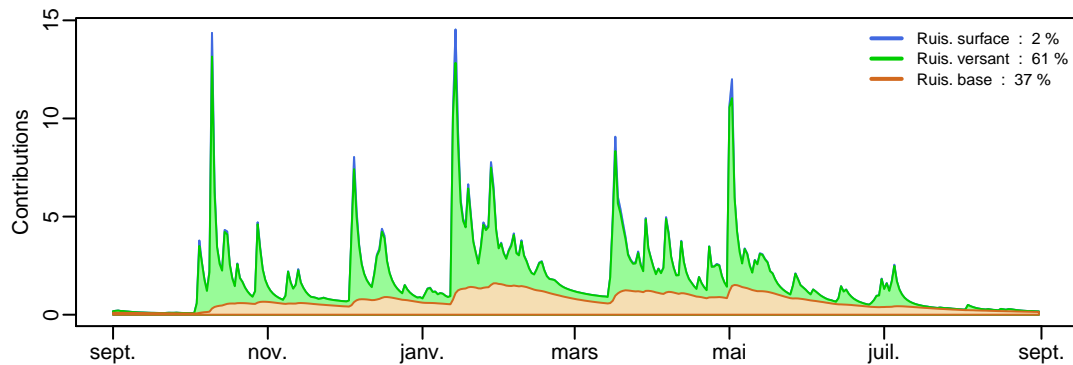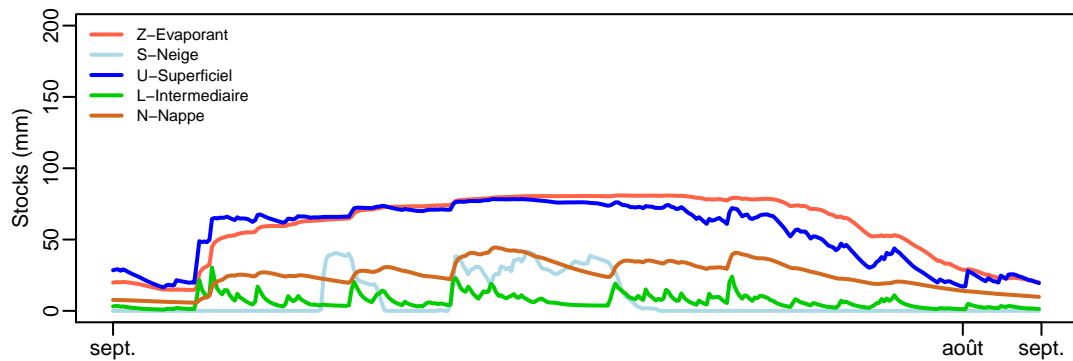

# m\_allhal (1074.14 km<sup>2</sup>) – année 1988–1989

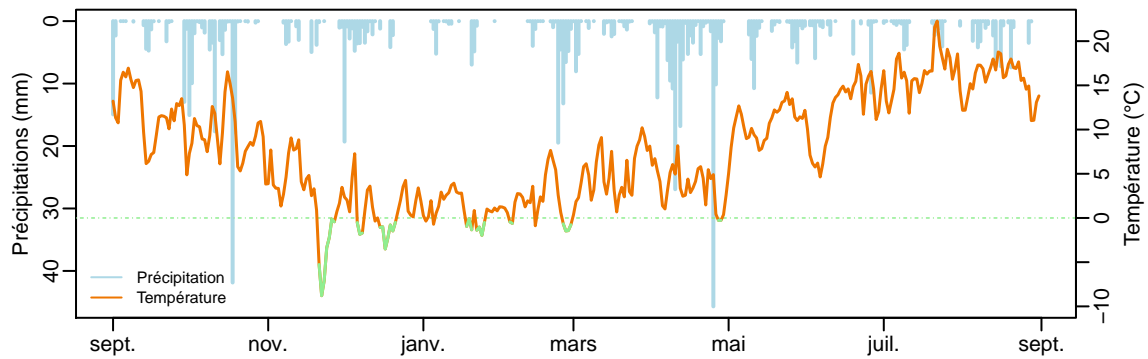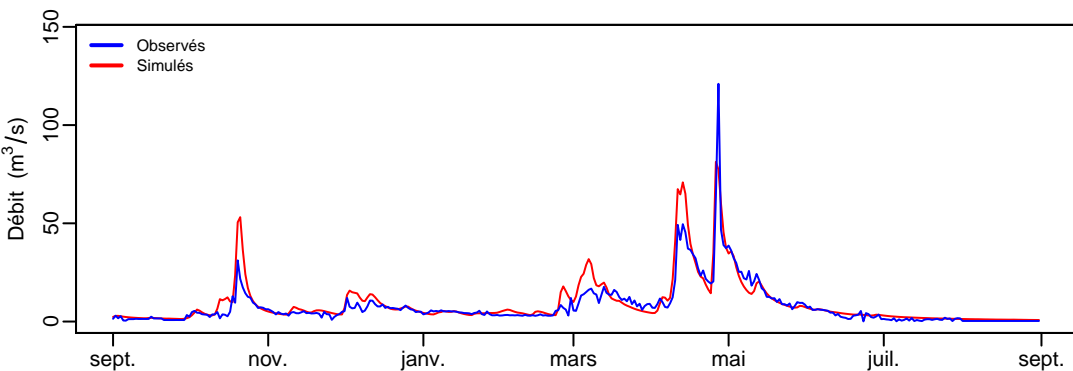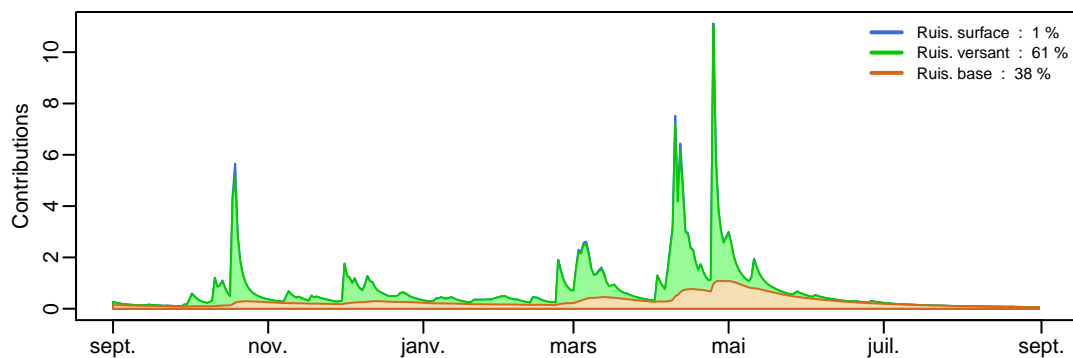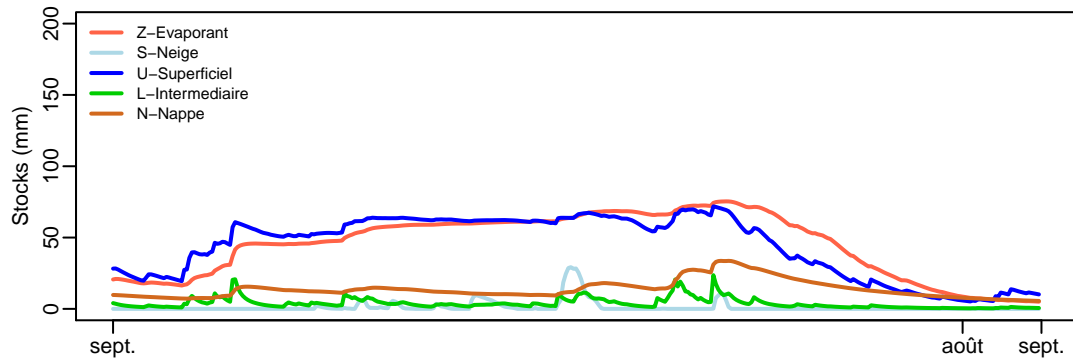



# m\_allhal (1074.14 km²) – année 1989–1990

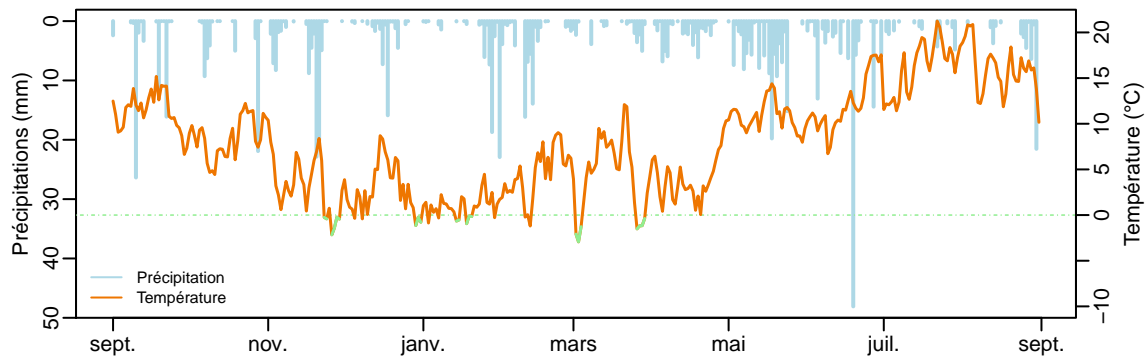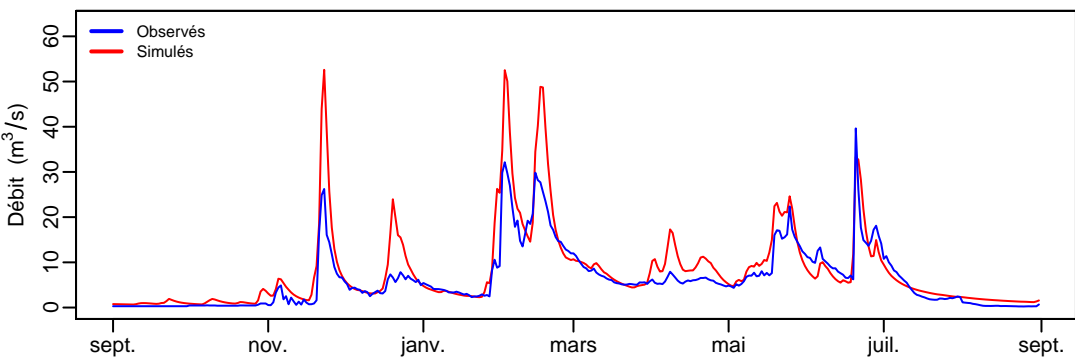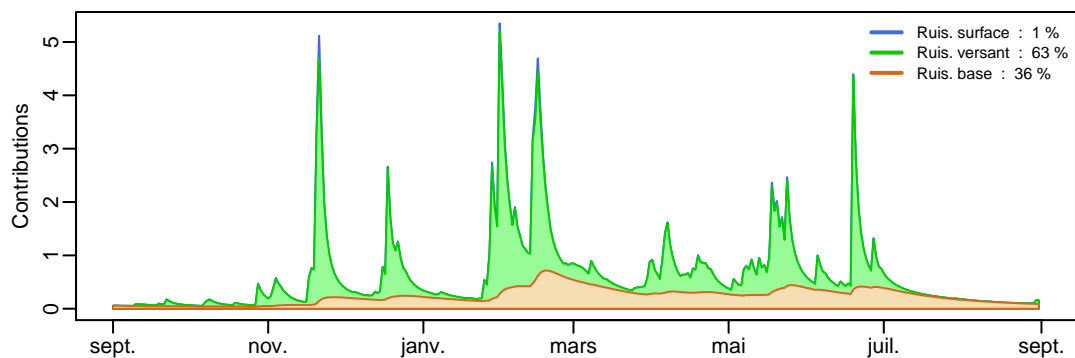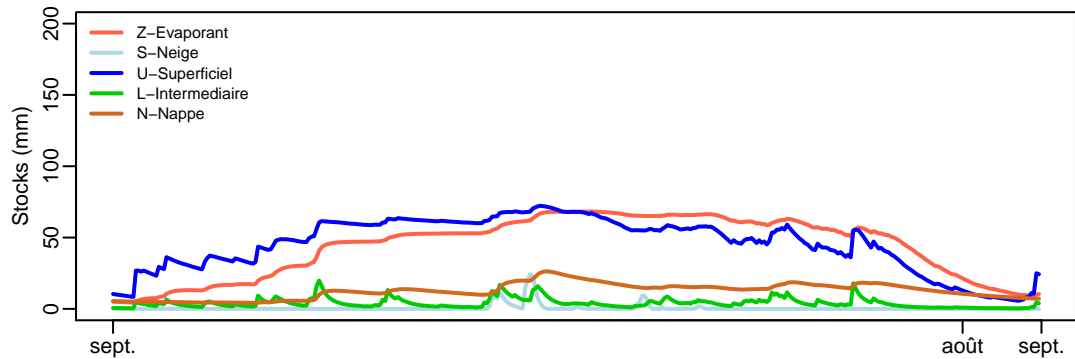

# m\_allhal (1074.14 km²) – année 1990–1991

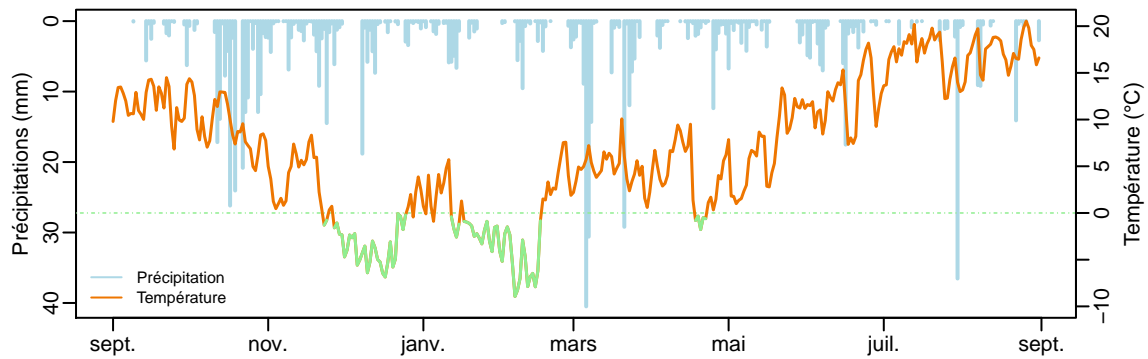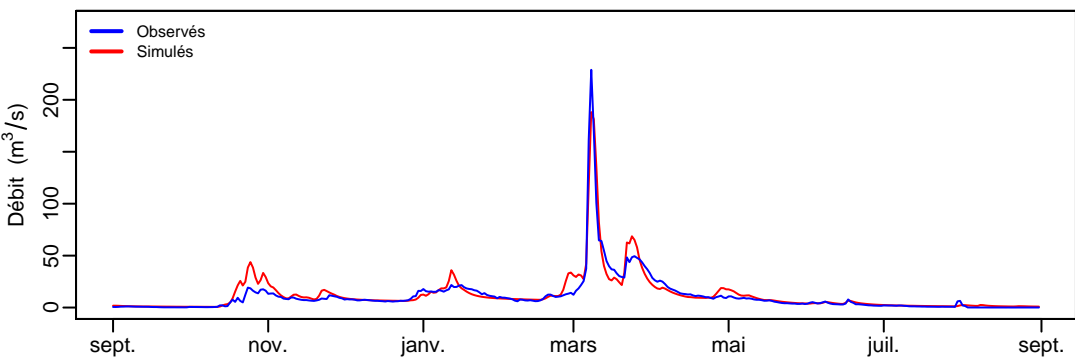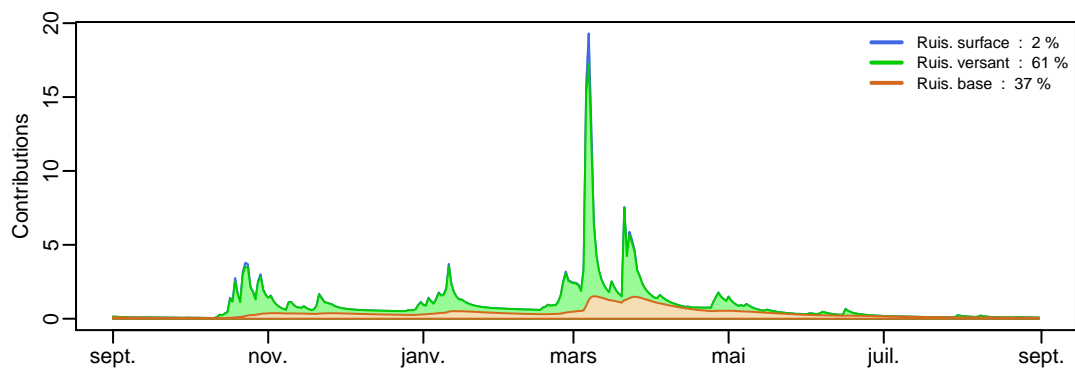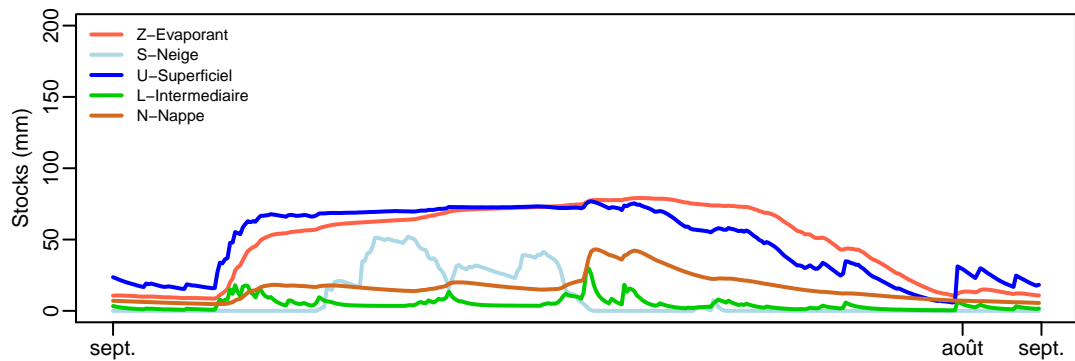

# m\_allhal (1074.14 km<sup>2</sup>) – année 1991–1992

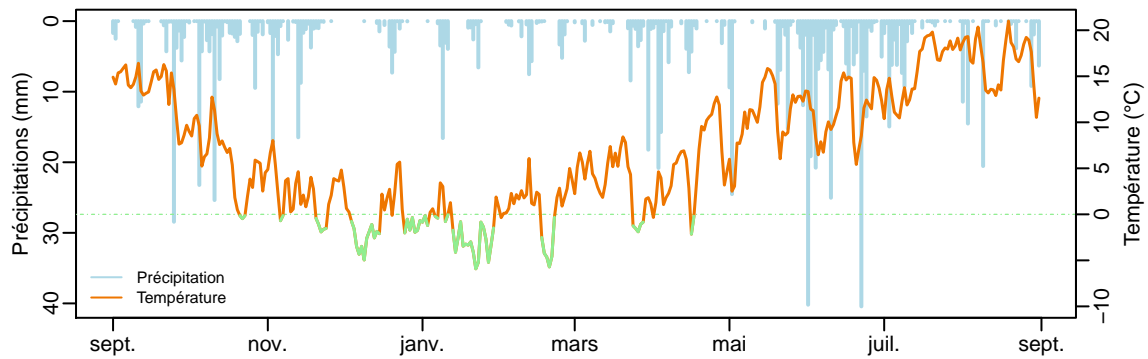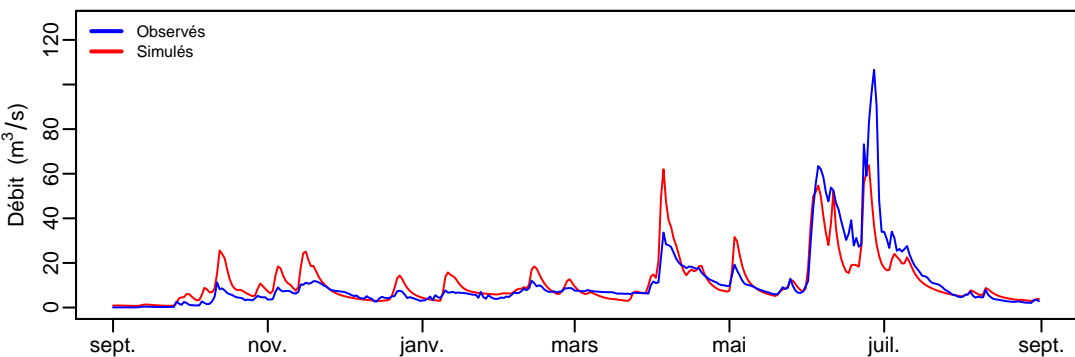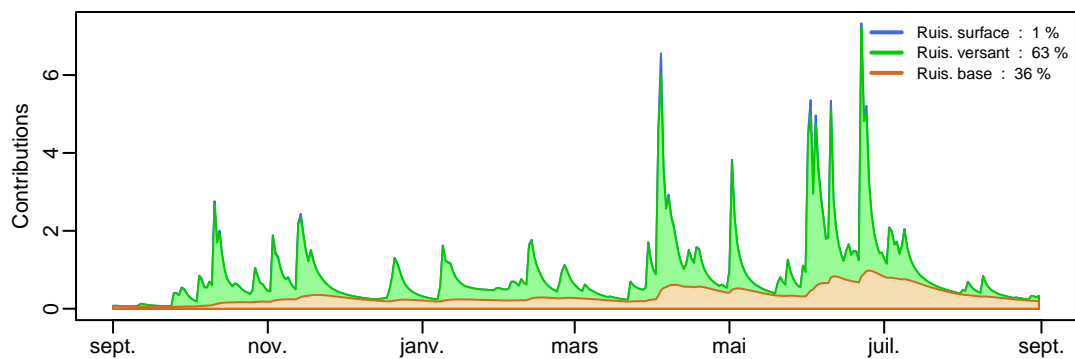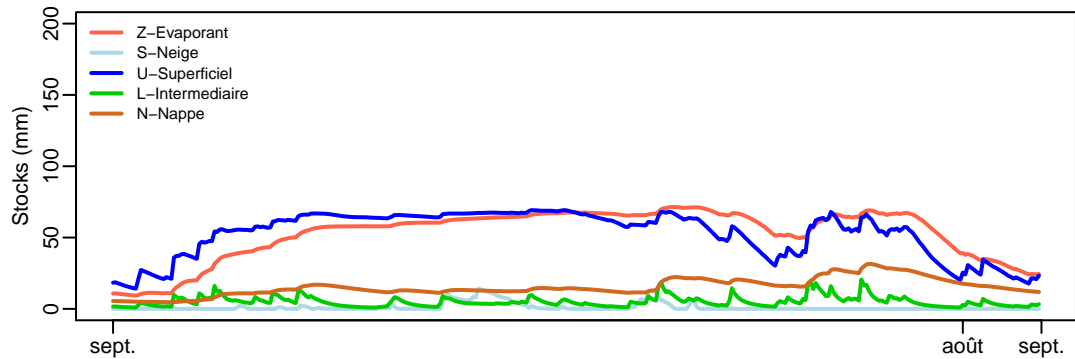

# m\_allhal (1074.14 km<sup>2</sup>) – année 1992–1993

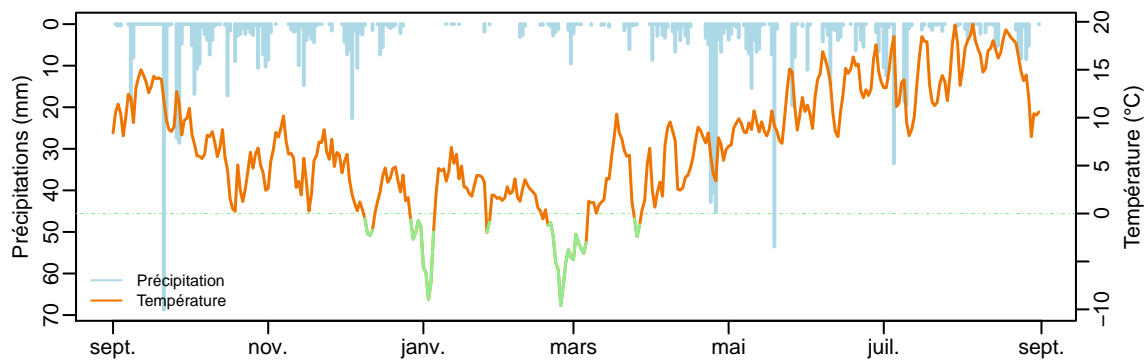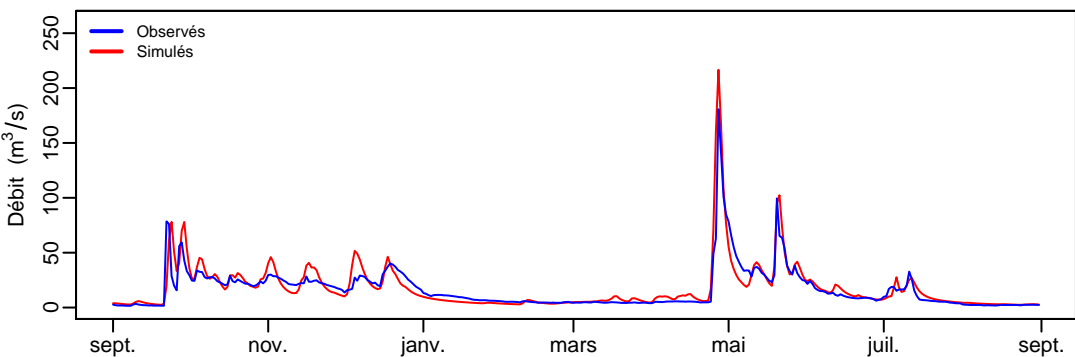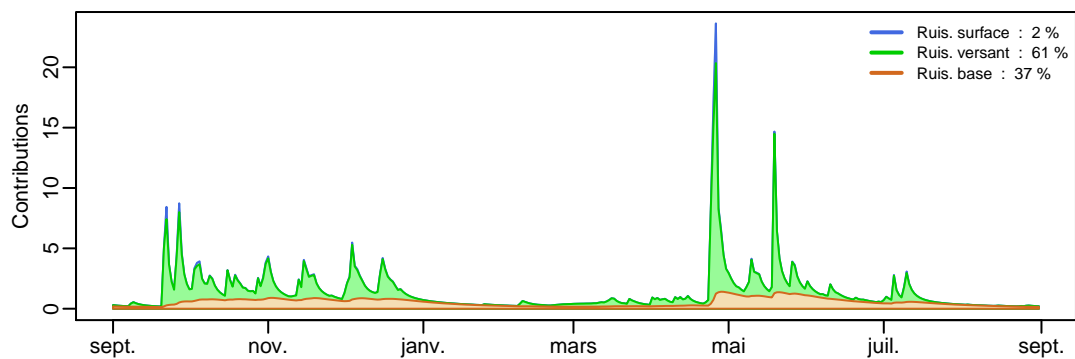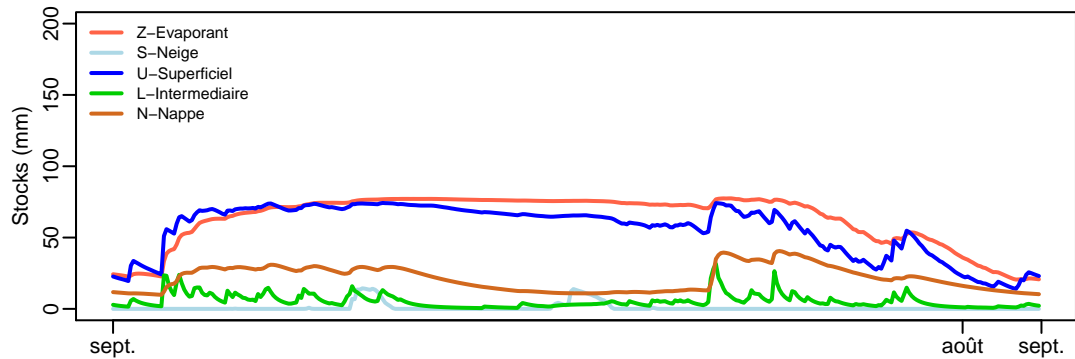

# m\_allhal (1074.14 km<sup>2</sup>) – année 1993–1994

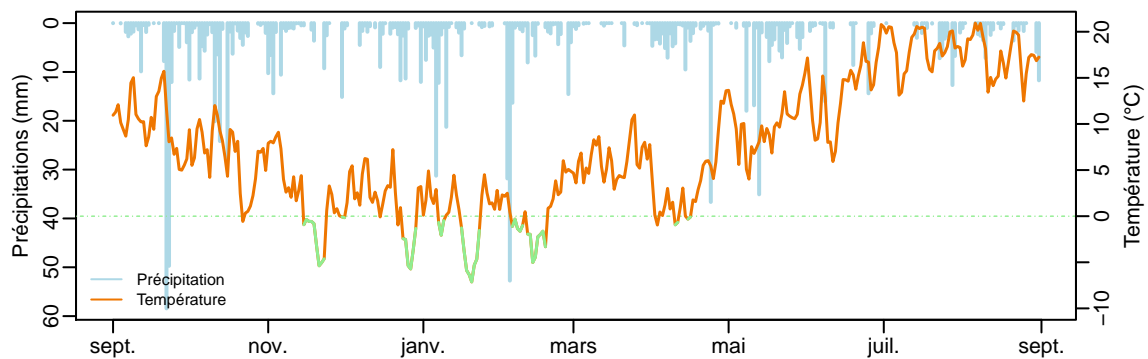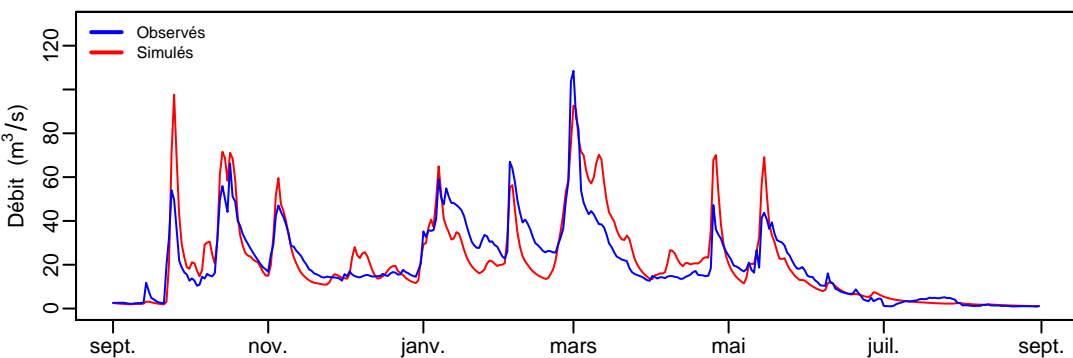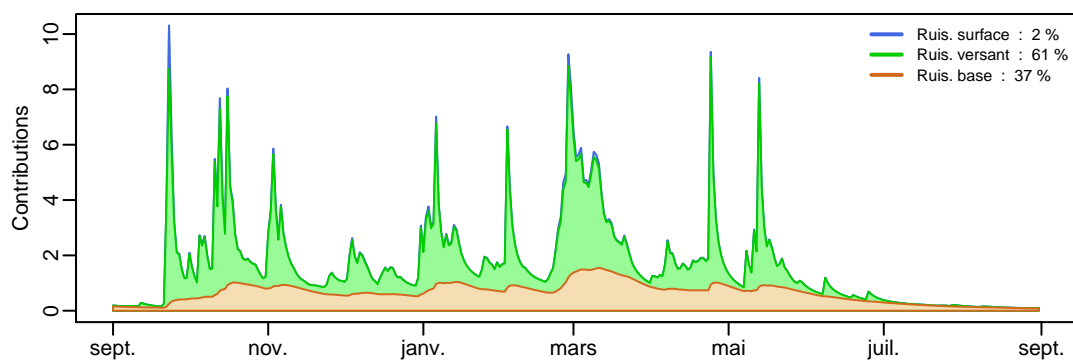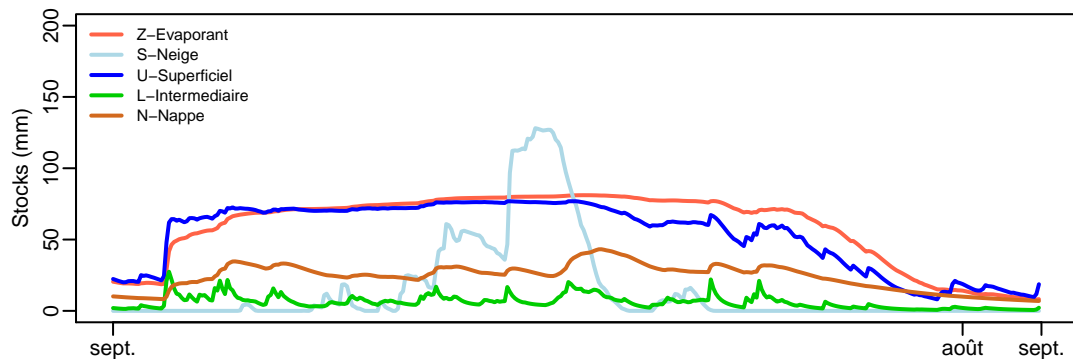

# m\_allhal (1074.14 km<sup>2</sup>) – année 1994–1995

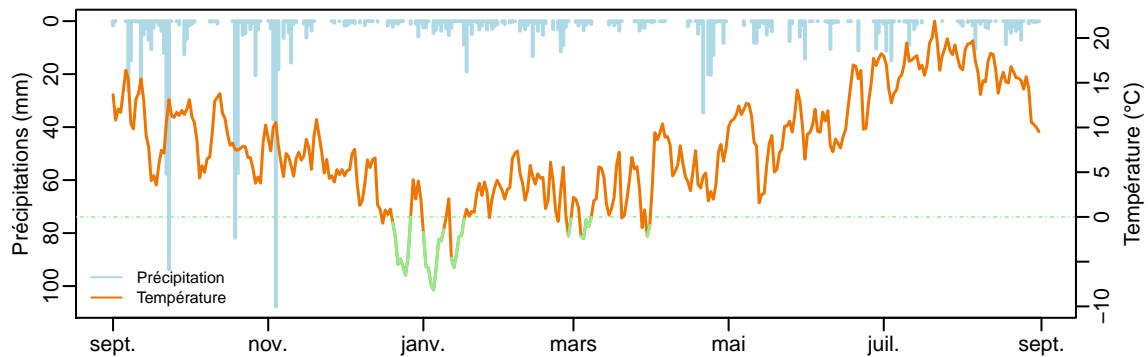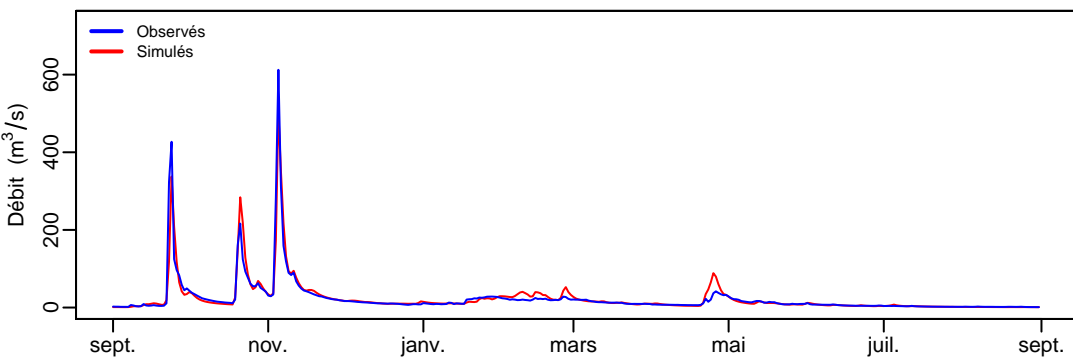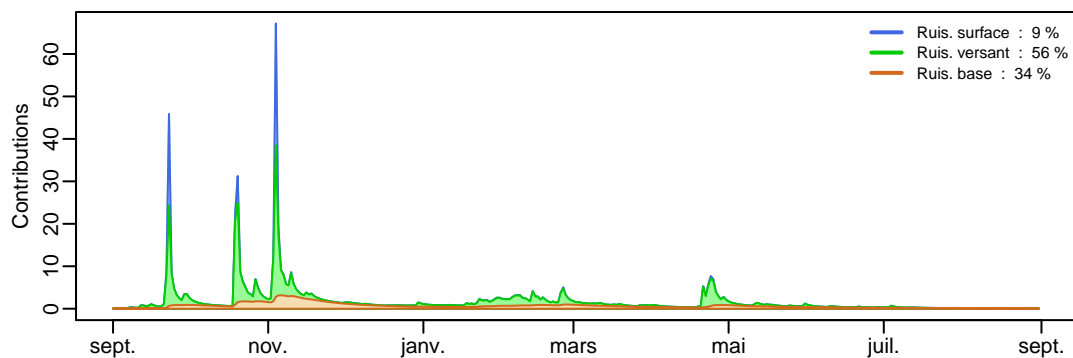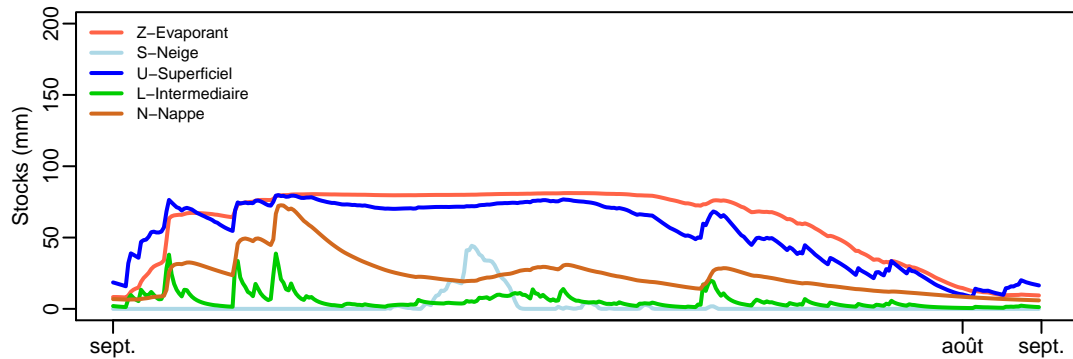

# m\_allhal (1074.14 km<sup>2</sup>) – année 1995–1996

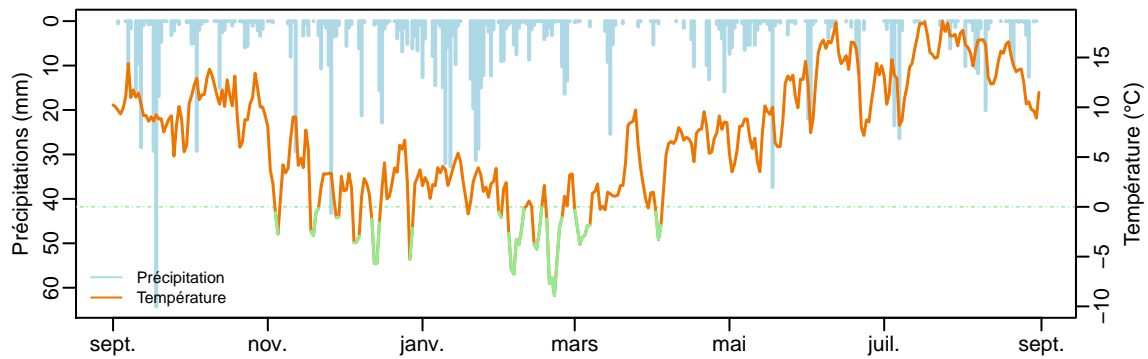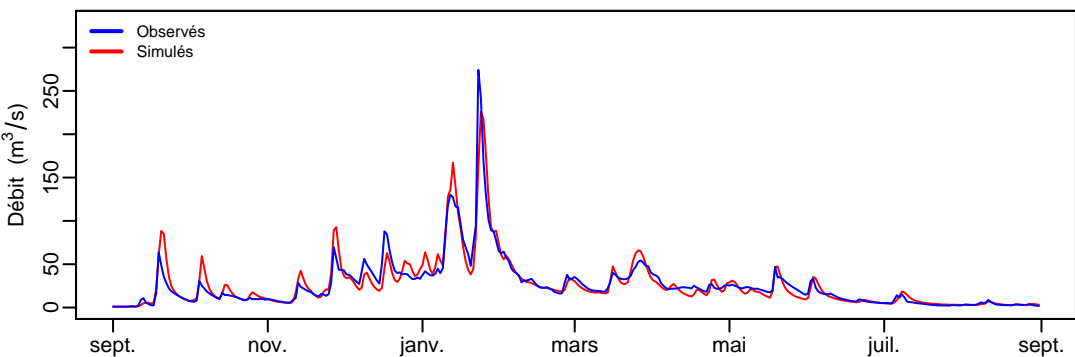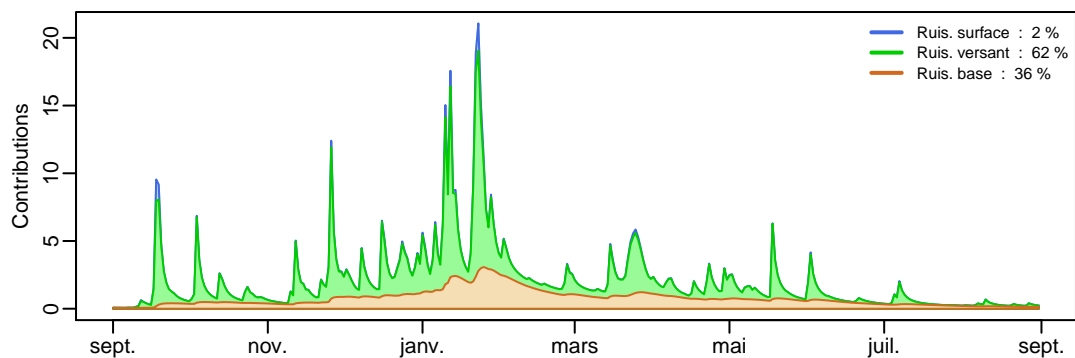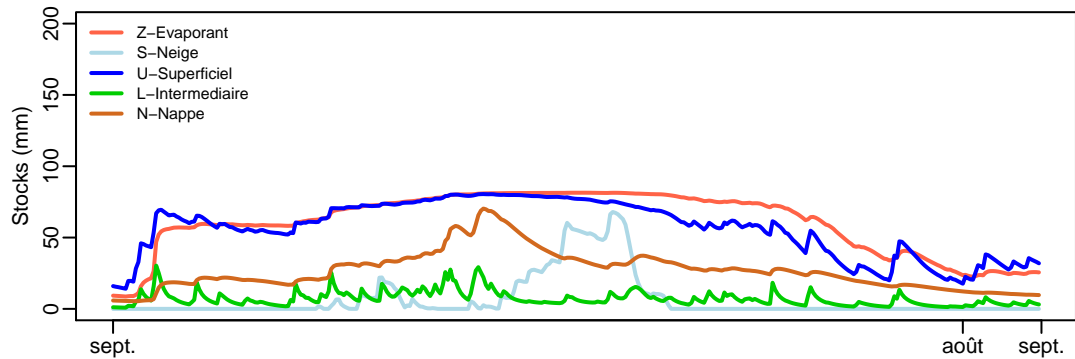

# m\_allhal (1074.14 km<sup>2</sup>) – année 1996–1997

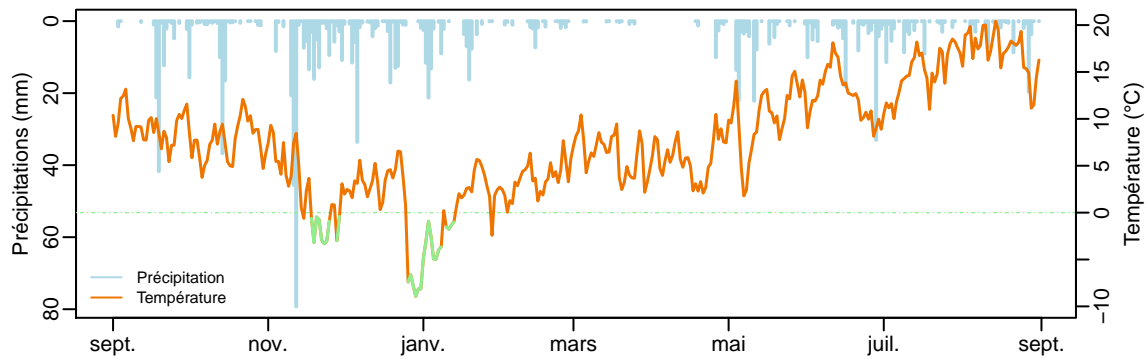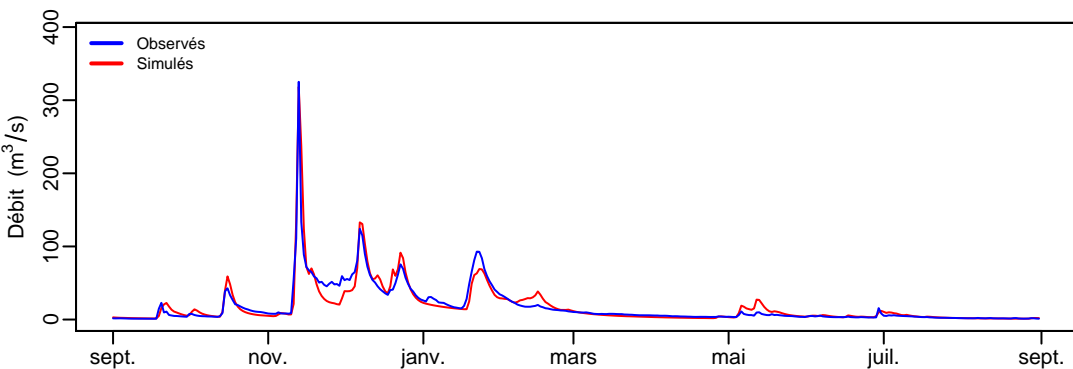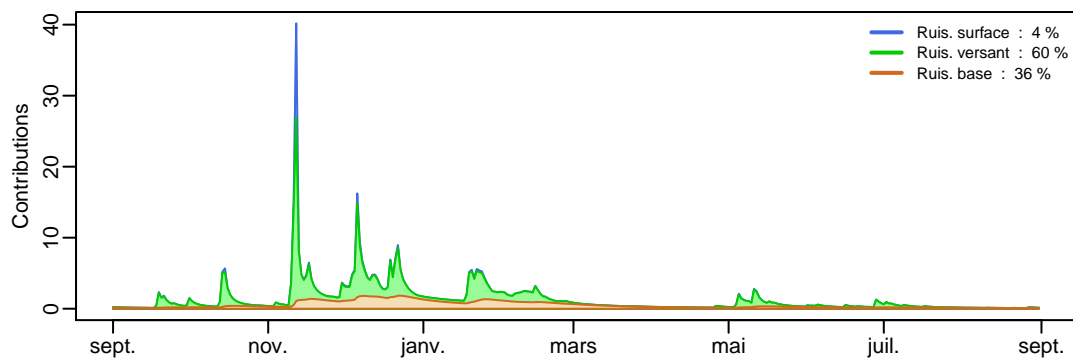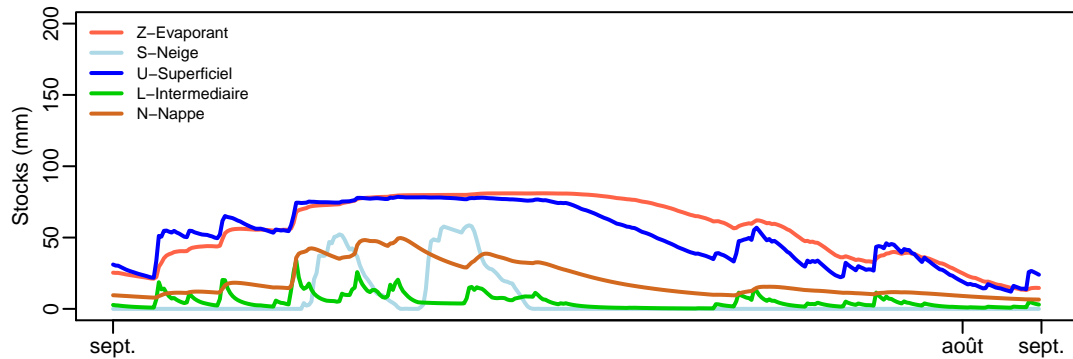



# m\_allhal (1074.14 km<sup>2</sup>) – année 1997–1998

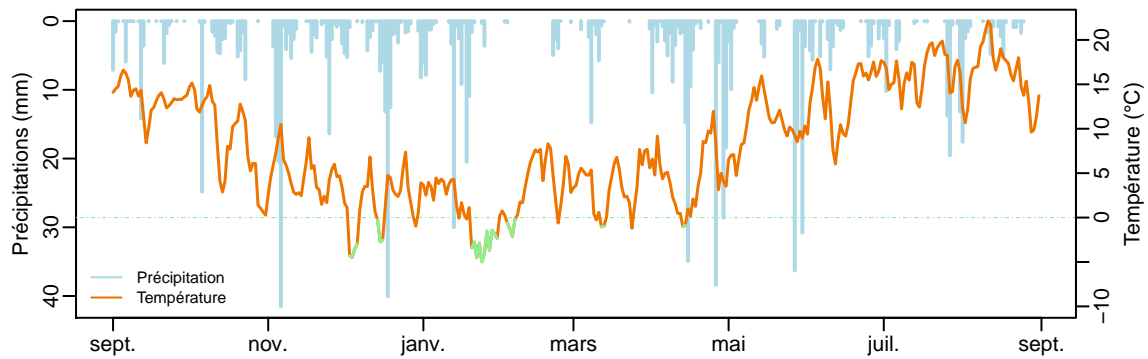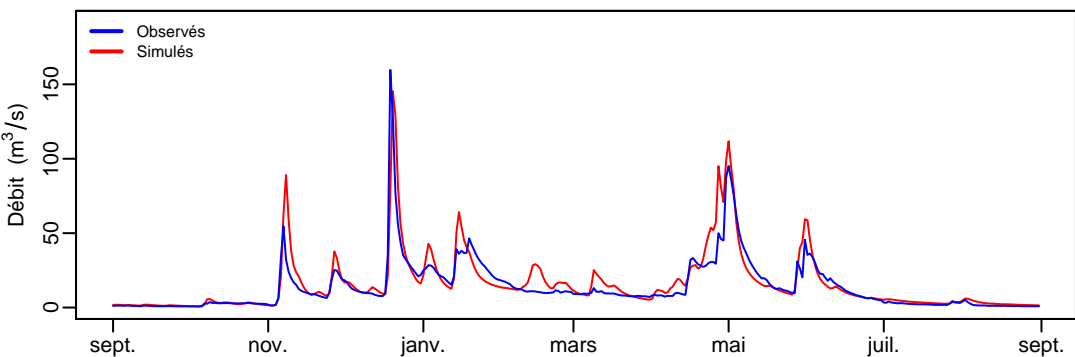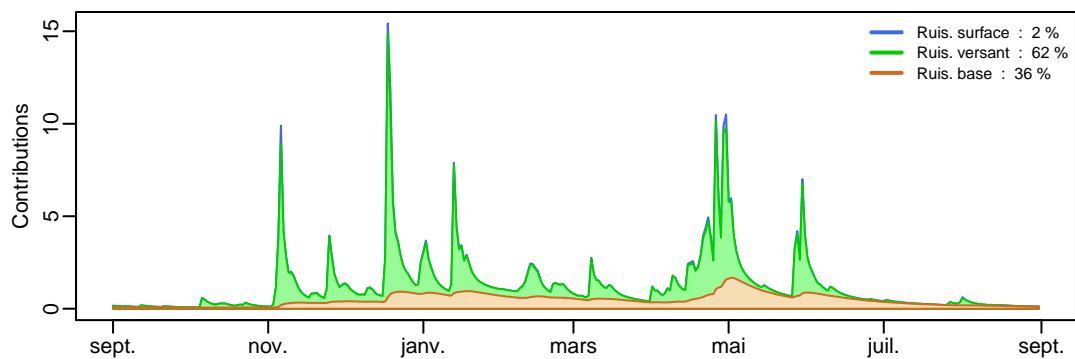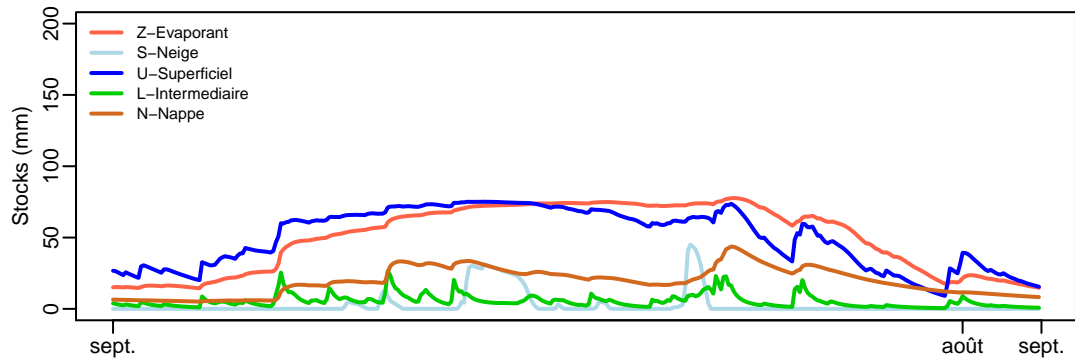

# m\_allhal (1074.14 km<sup>2</sup>) – année 1998–1999

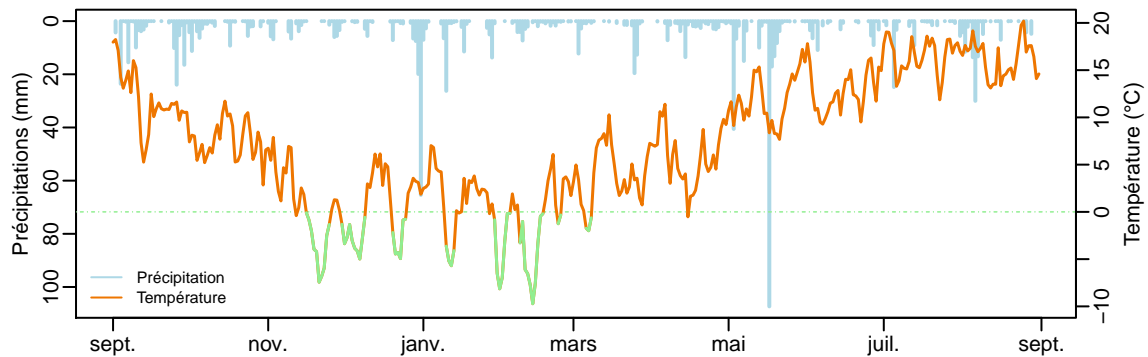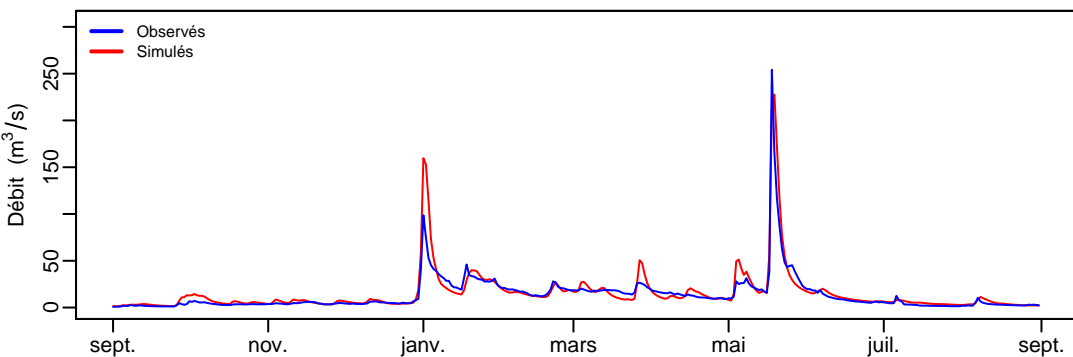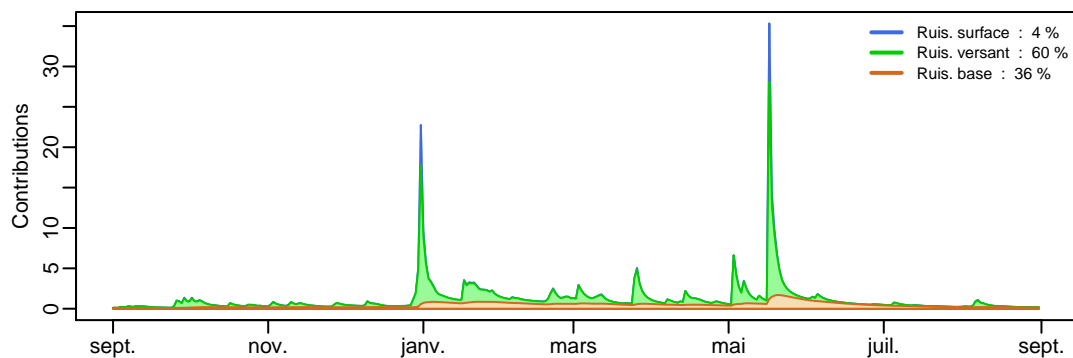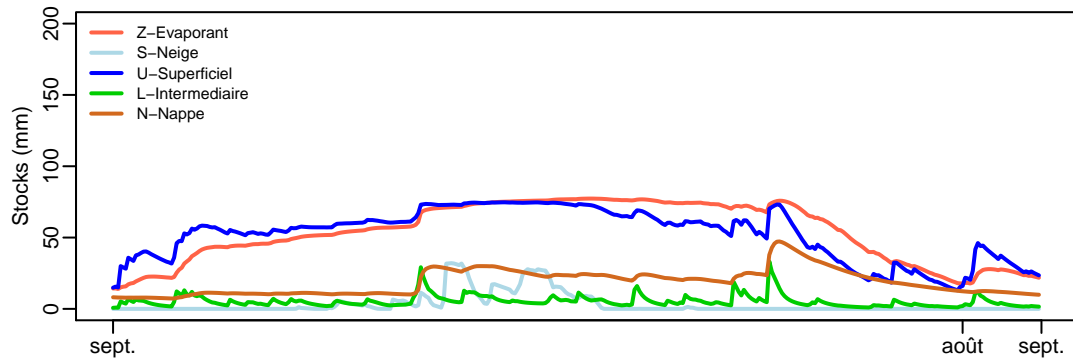

# m\_allhal (1074.14 km<sup>2</sup>) – année 1999–2000

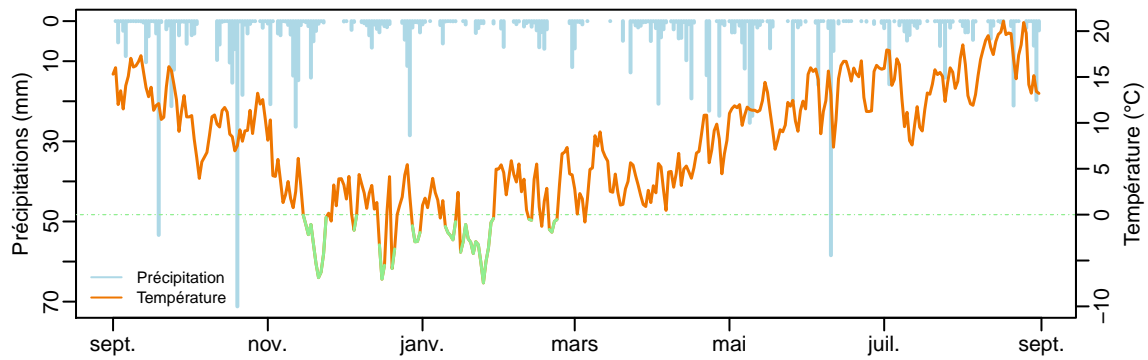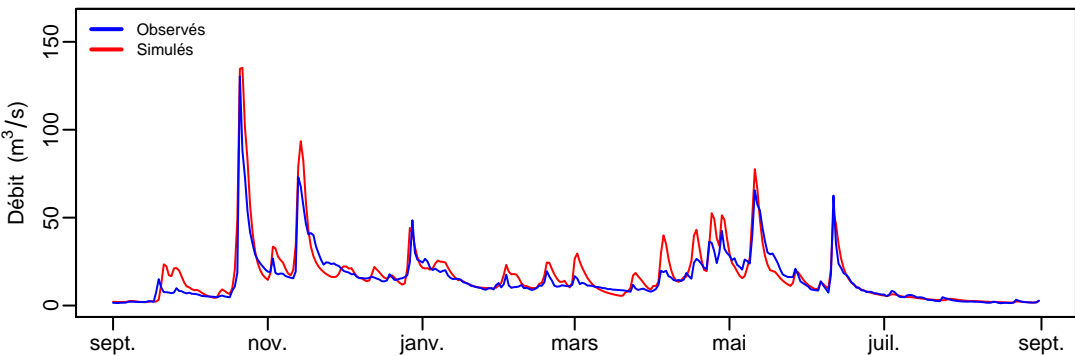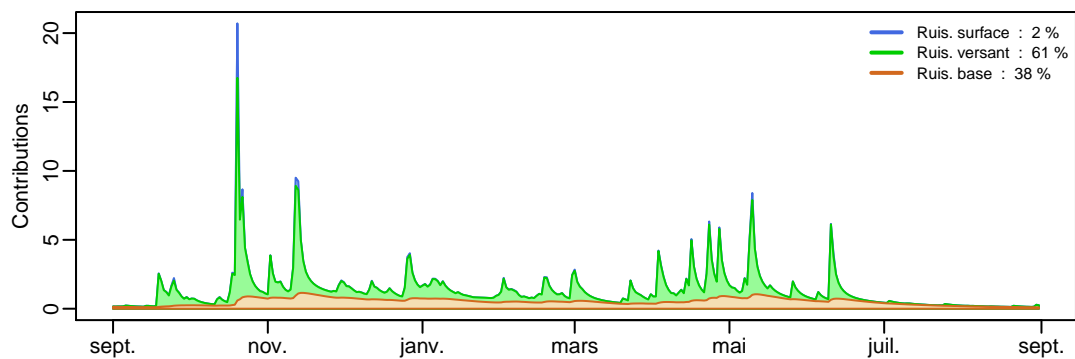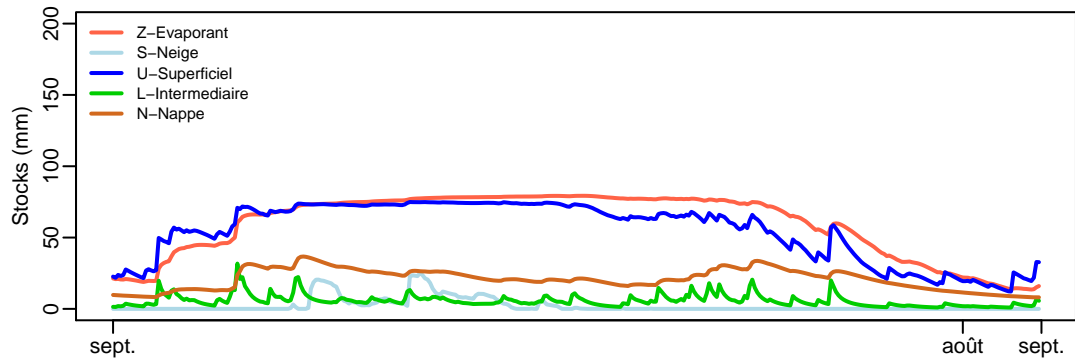

# m\_allhal (1074.14 km<sup>2</sup>) – année 2000–2001

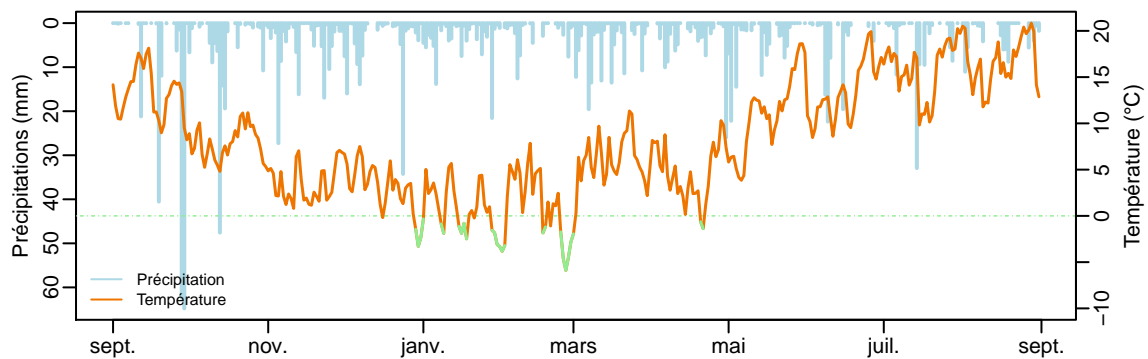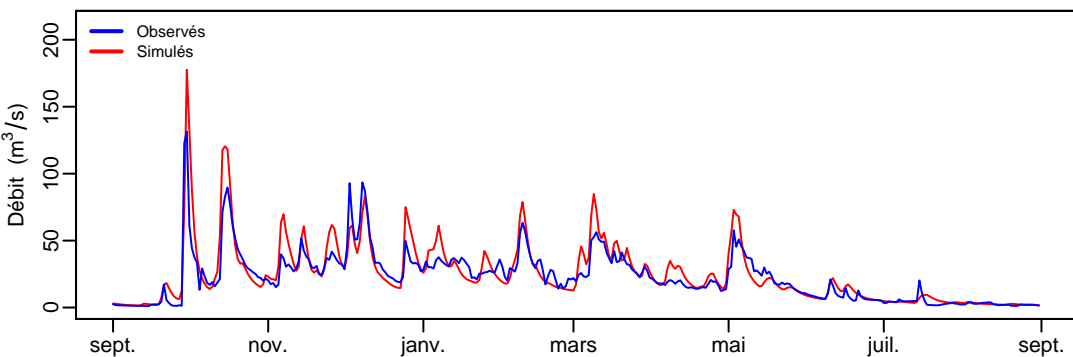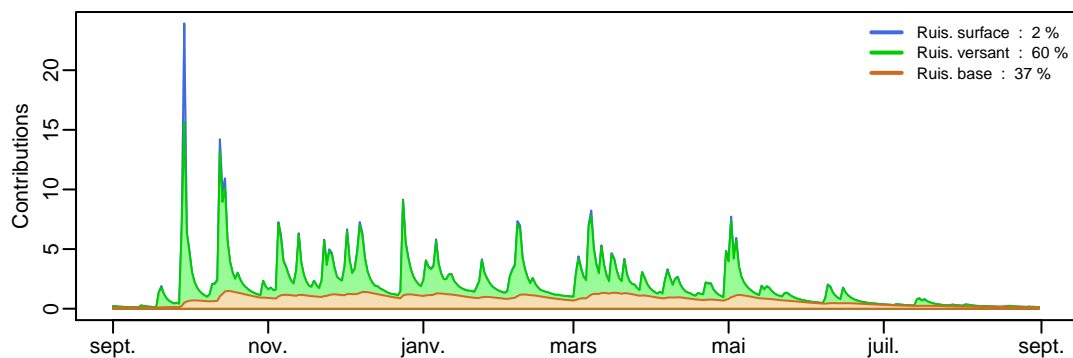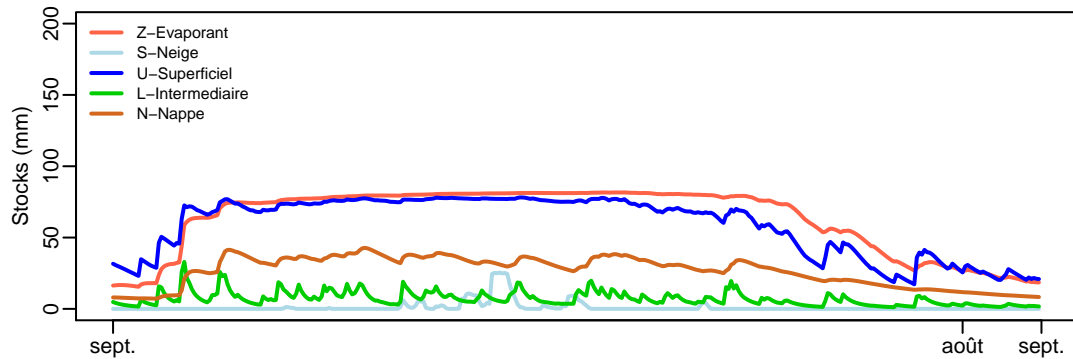

# m\_allhal (1074.14 km<sup>2</sup>) – année 2001–2002

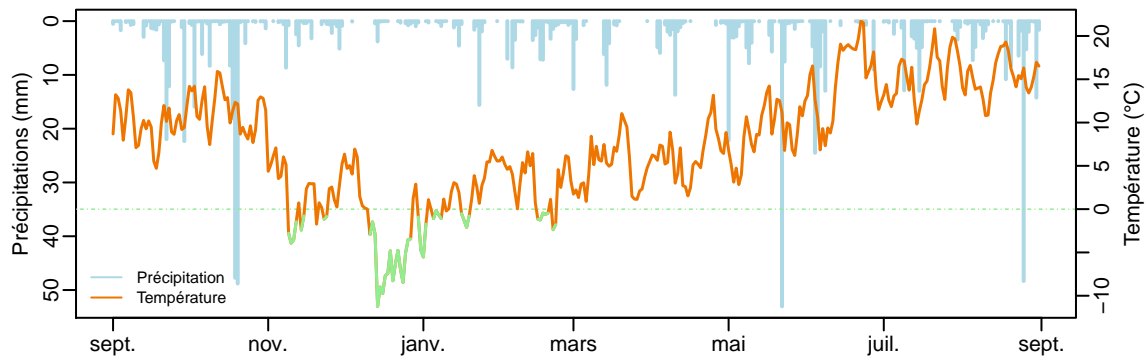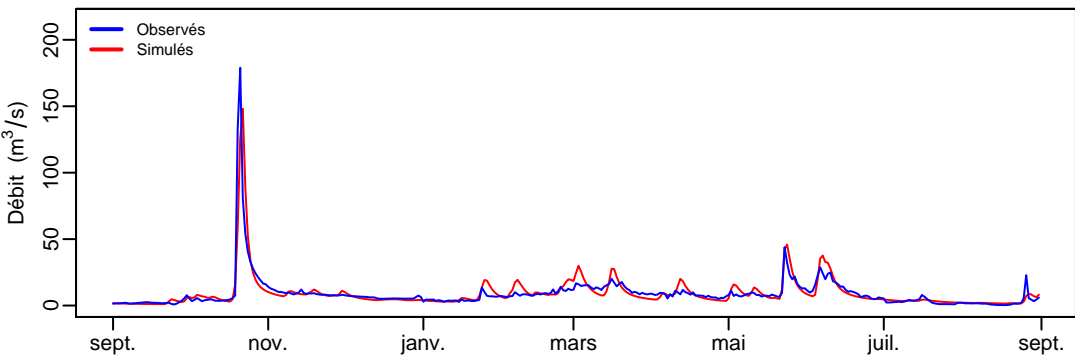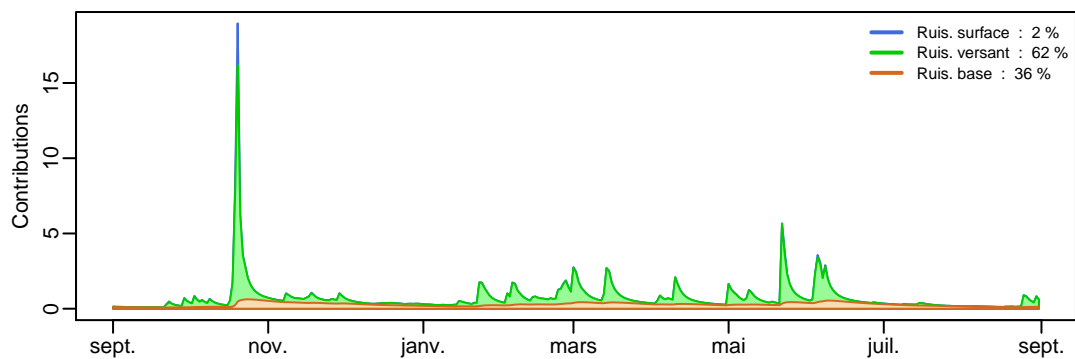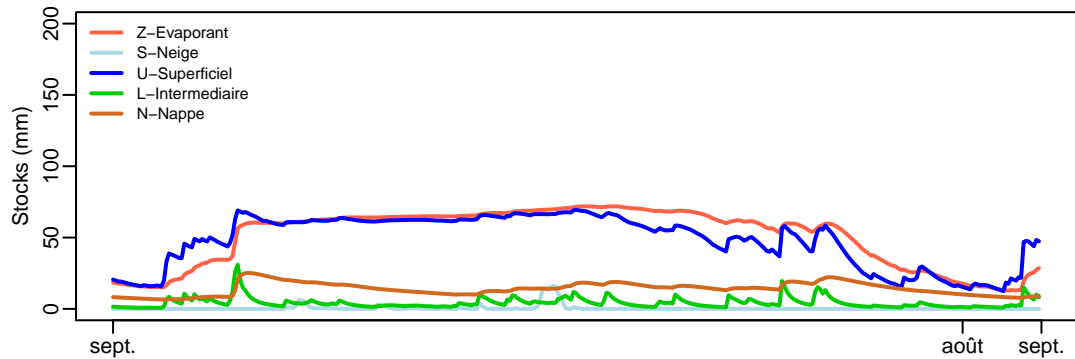

# m\_allhal (1074.14 km<sup>2</sup>) – année 2002–2003

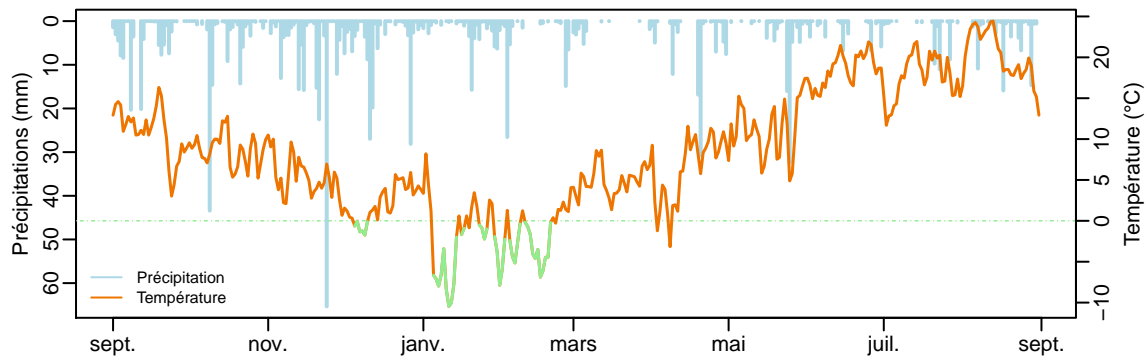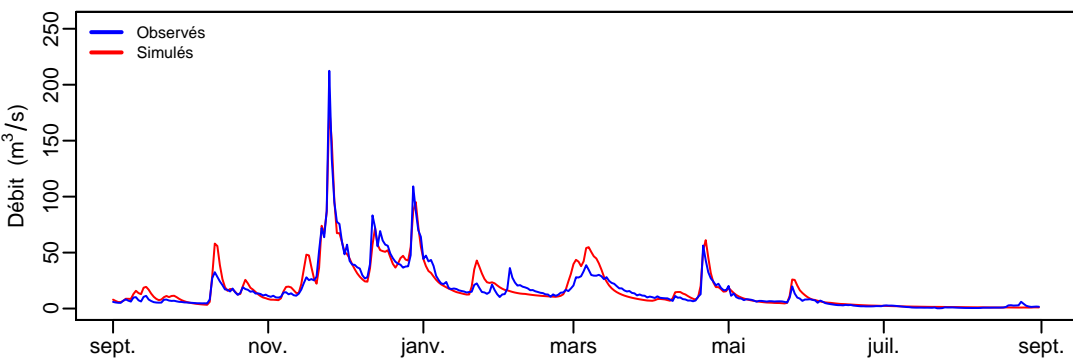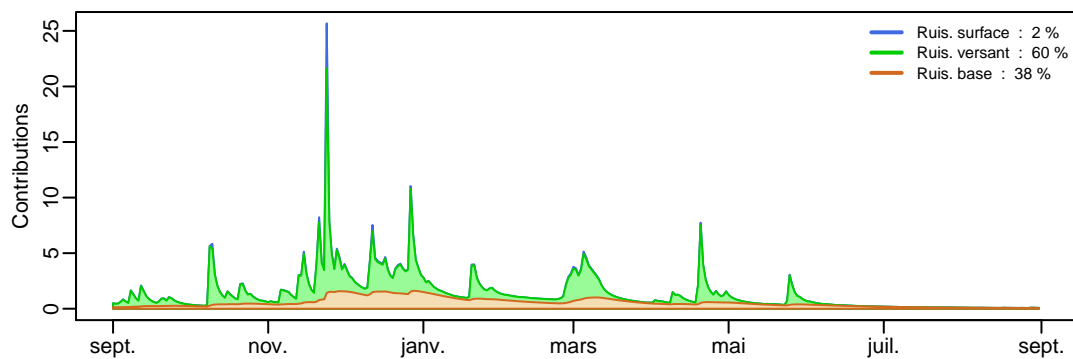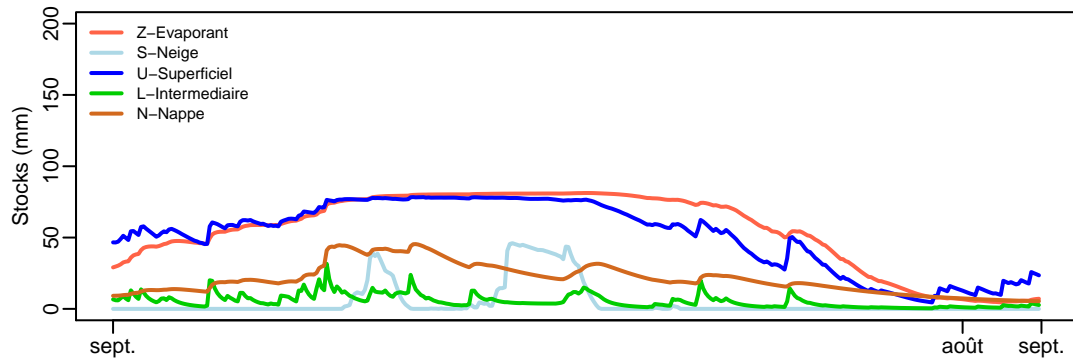

# m\_allhal (1074.14 km<sup>2</sup>) – année 2003–2004

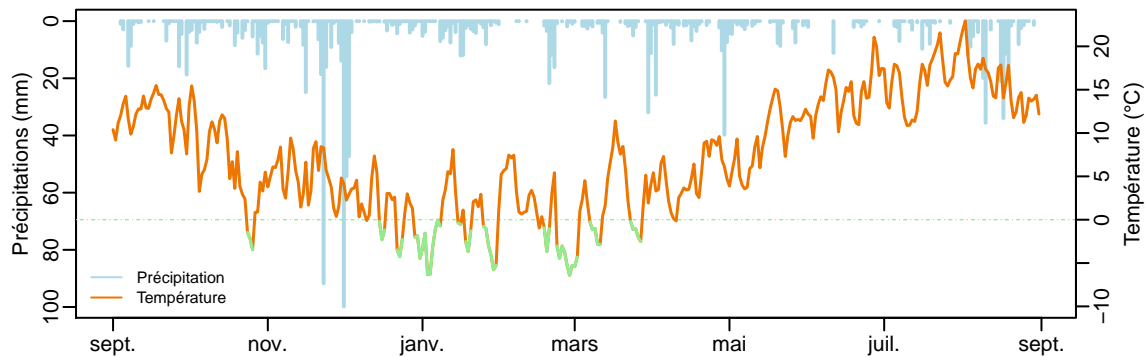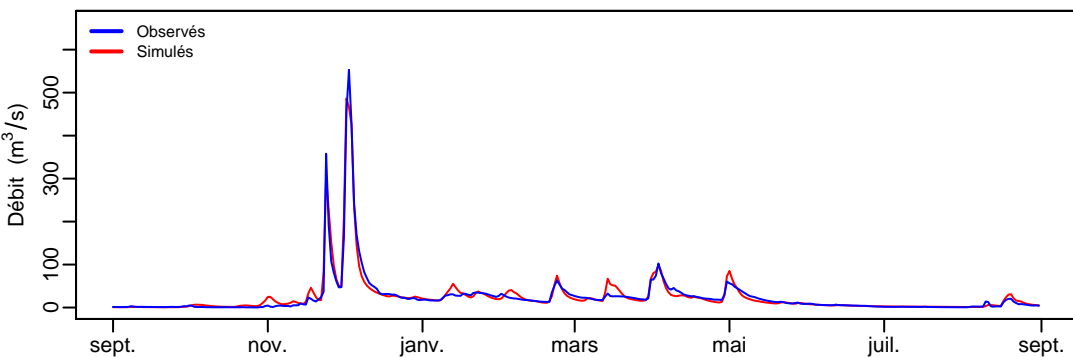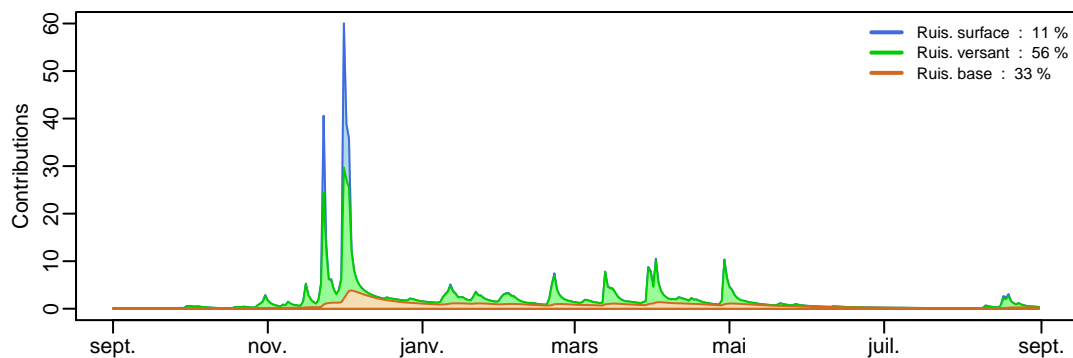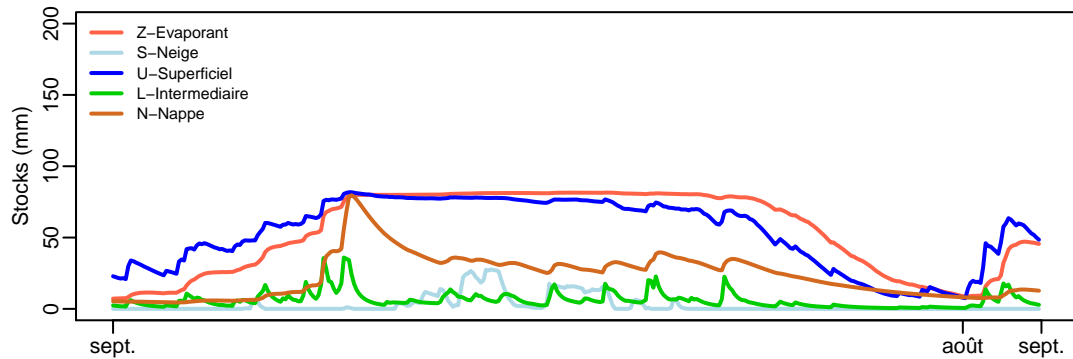

# m\_allhal (1074.14 km<sup>2</sup>) – année 2004–2005

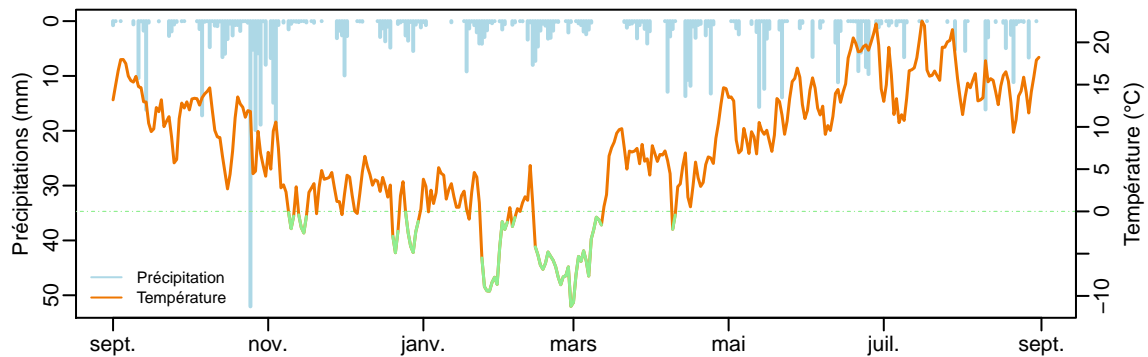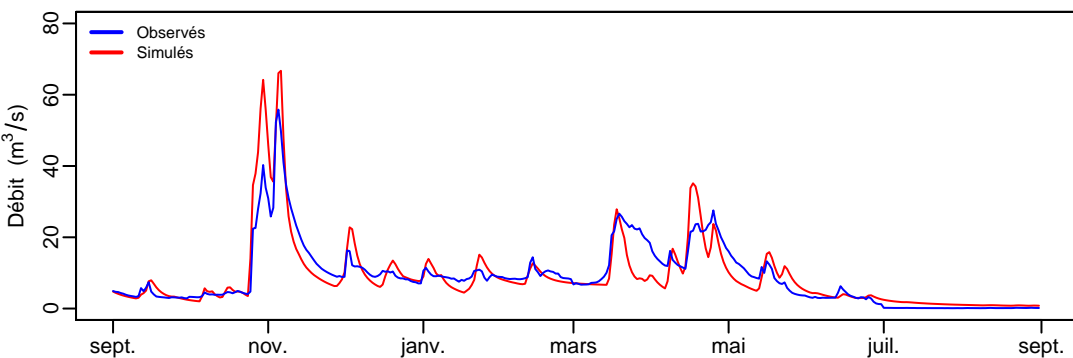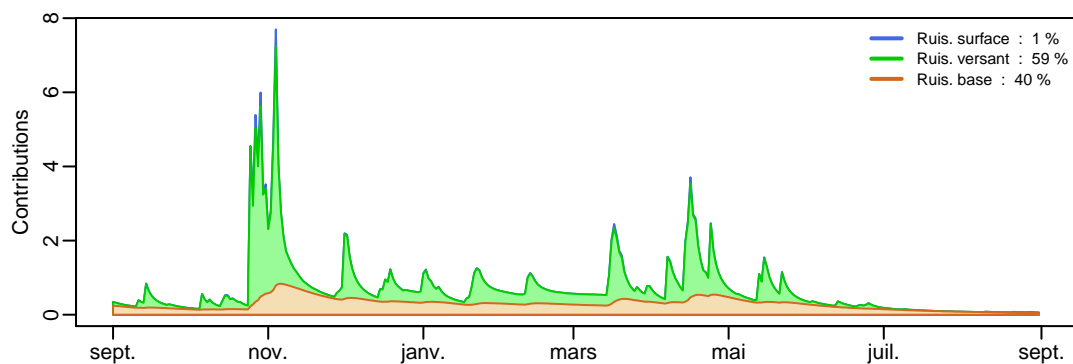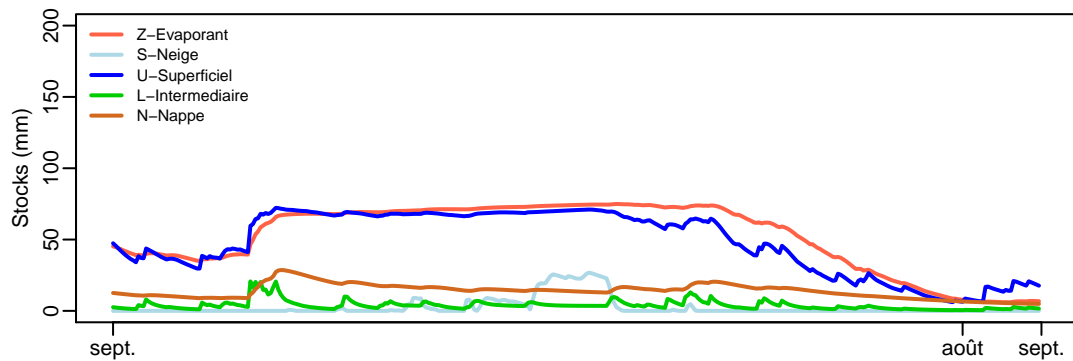



# m\_allhal (1074.14 km²) – année 2005–2006

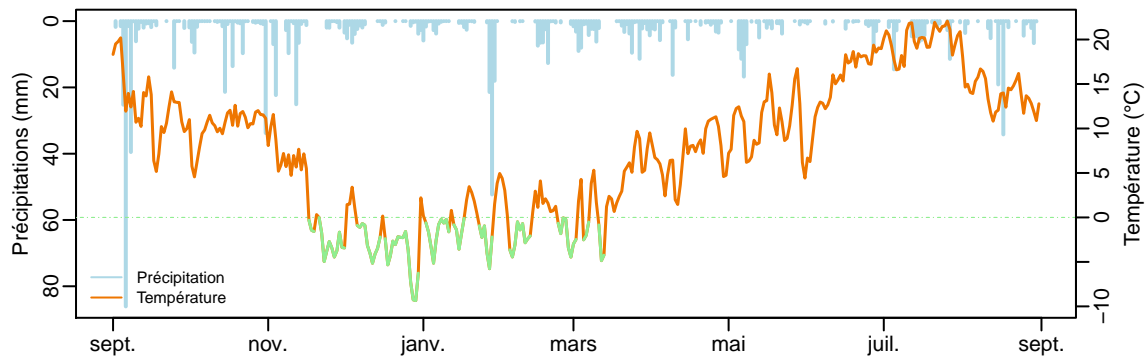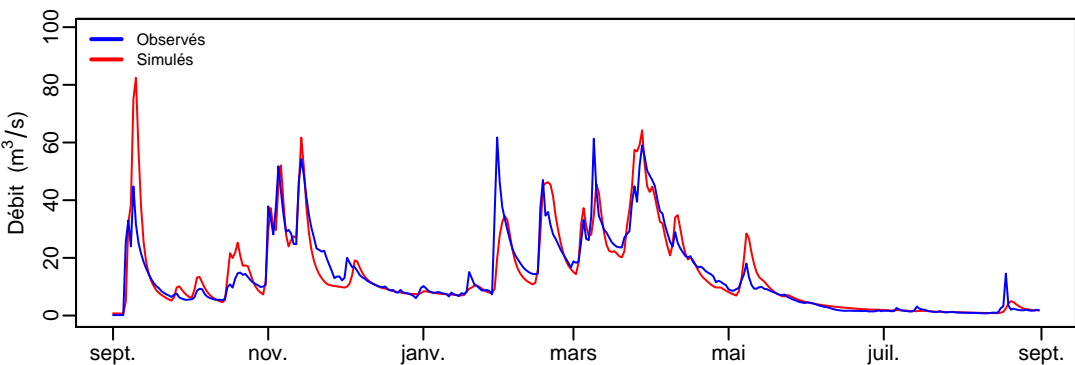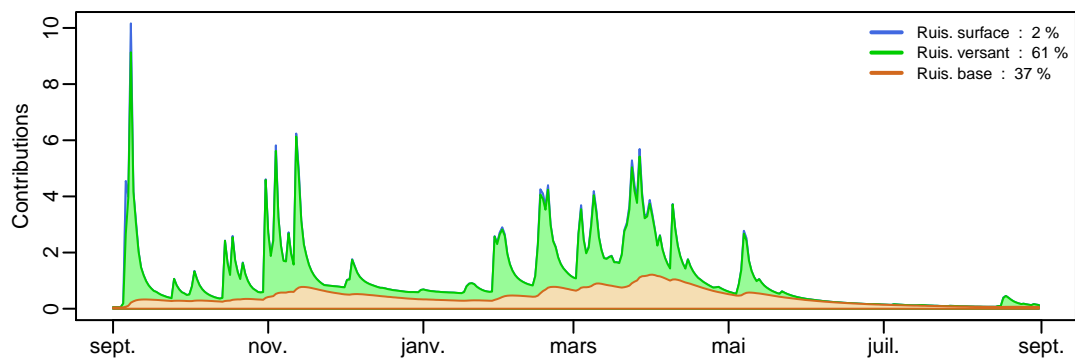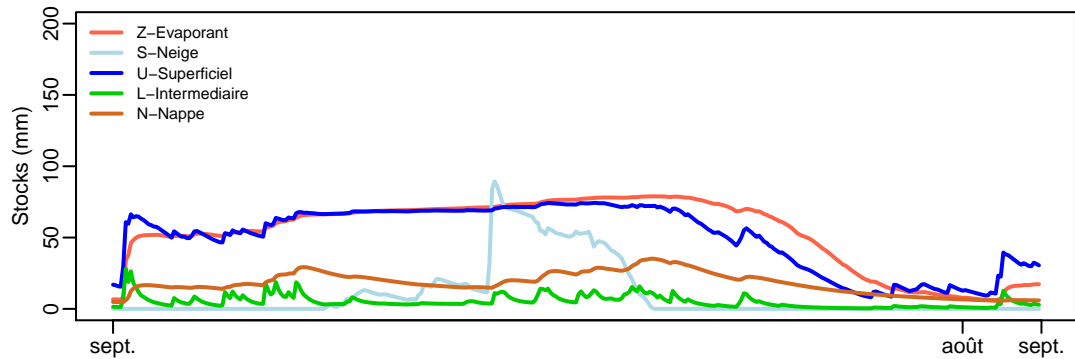

# m\_allhal (1074.14 km<sup>2</sup>) – année 2006–2007

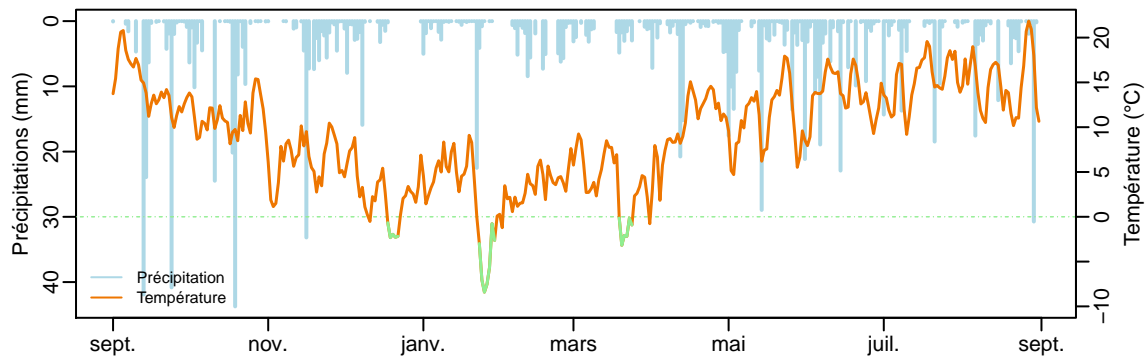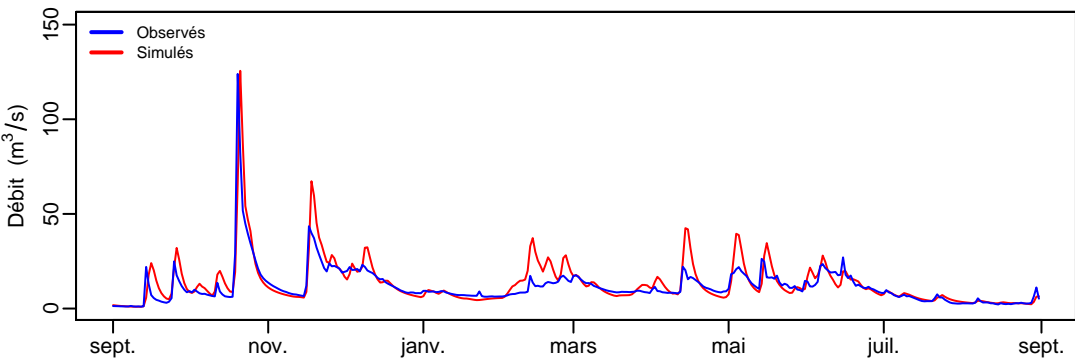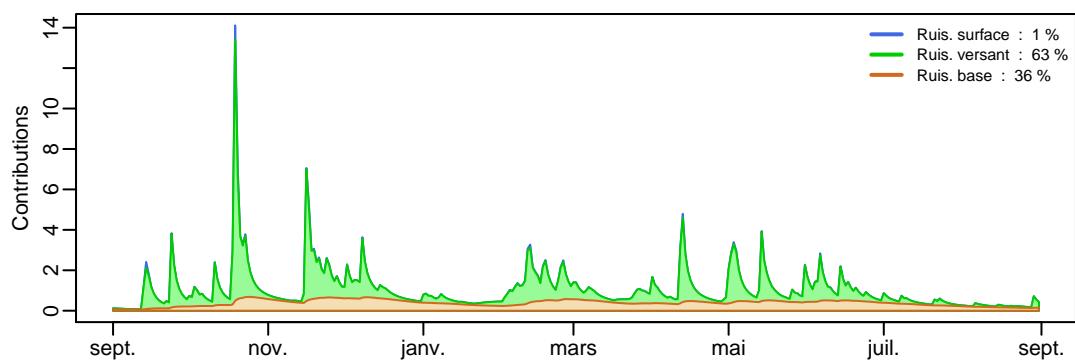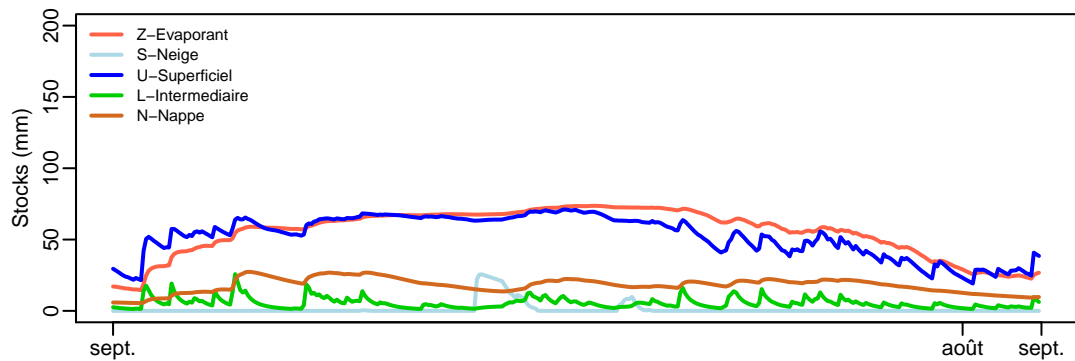

# m\_allhal (1074.14 km<sup>2</sup>) – année 2007–2008

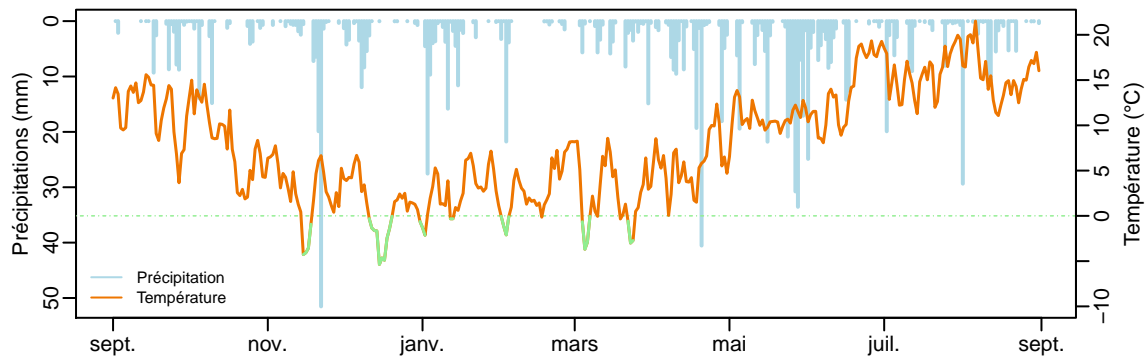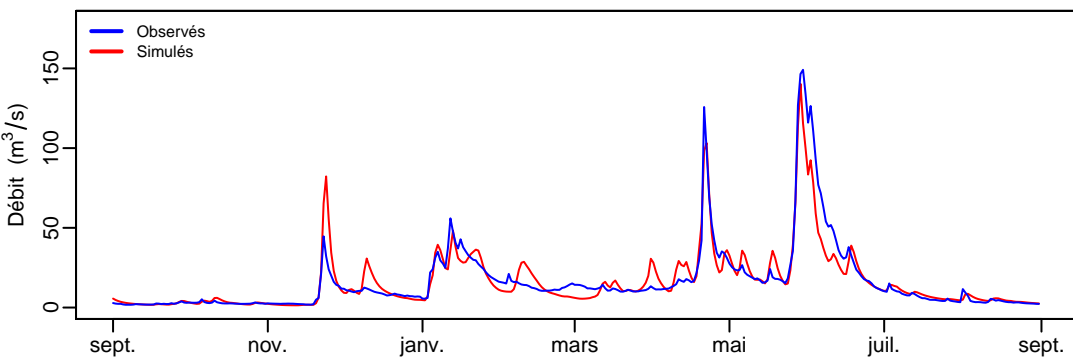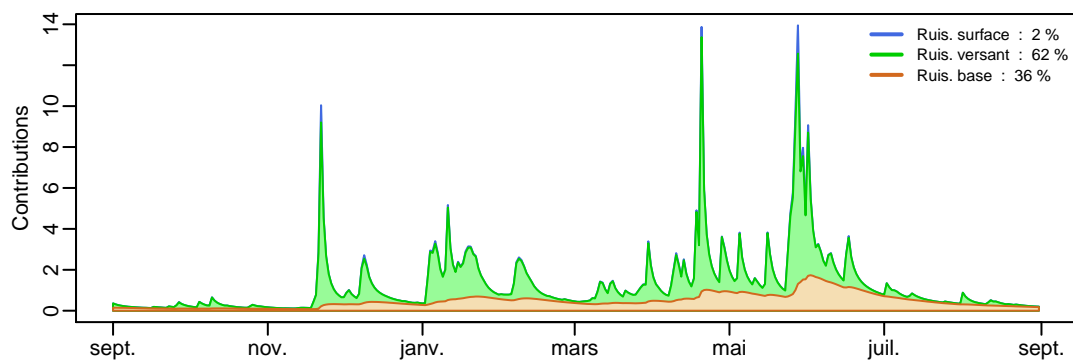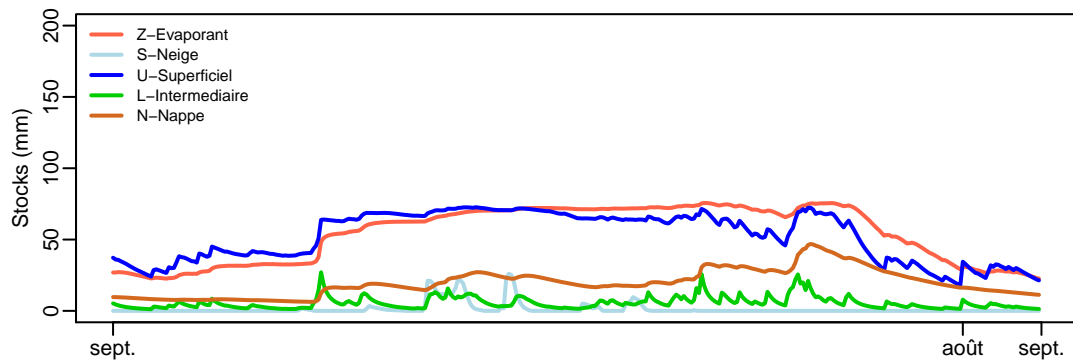

# m\_allhal (1074.14 km<sup>2</sup>) – année 2008–2009

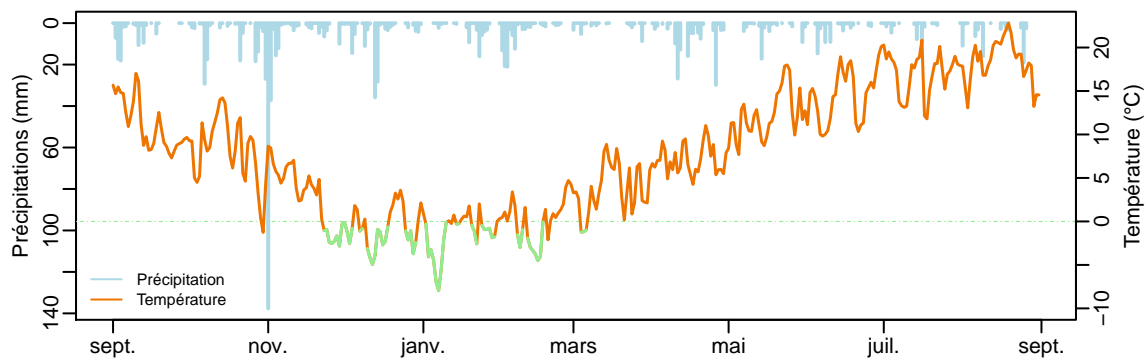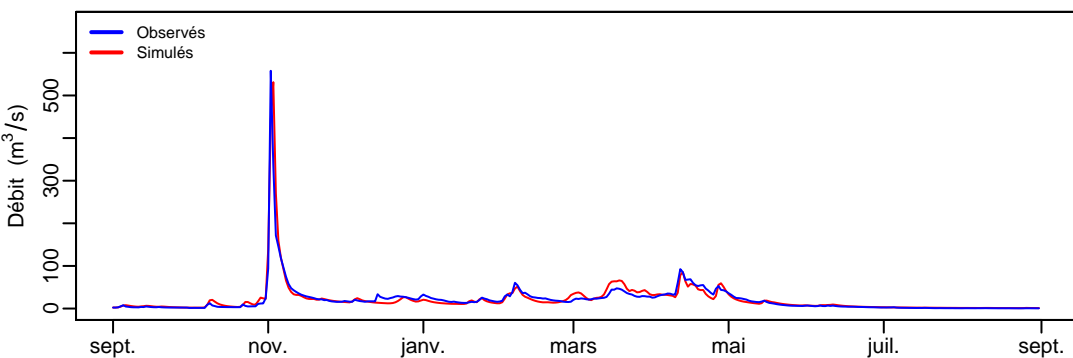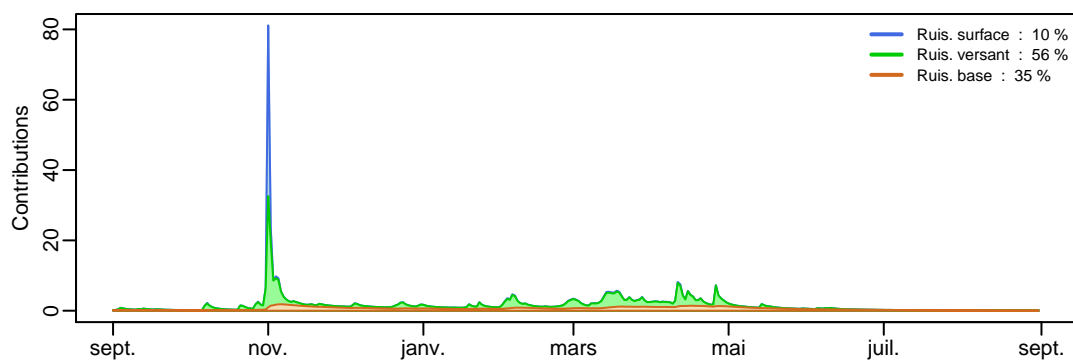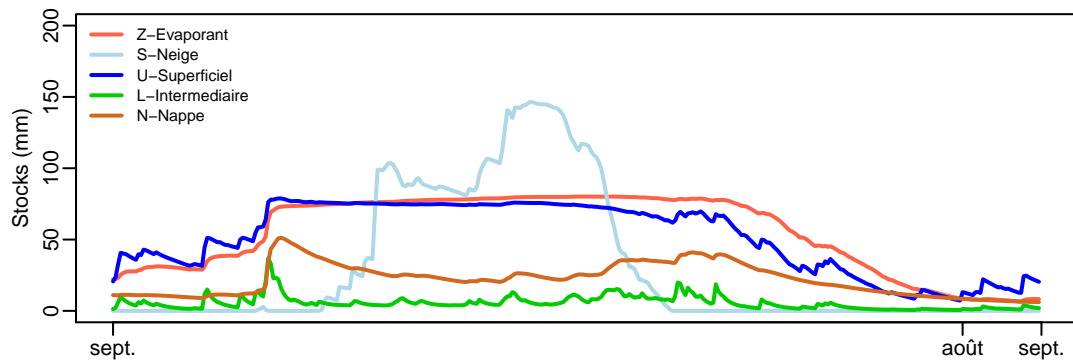

# m\_allhal (1074.14 km<sup>2</sup>) – année 2009–2010

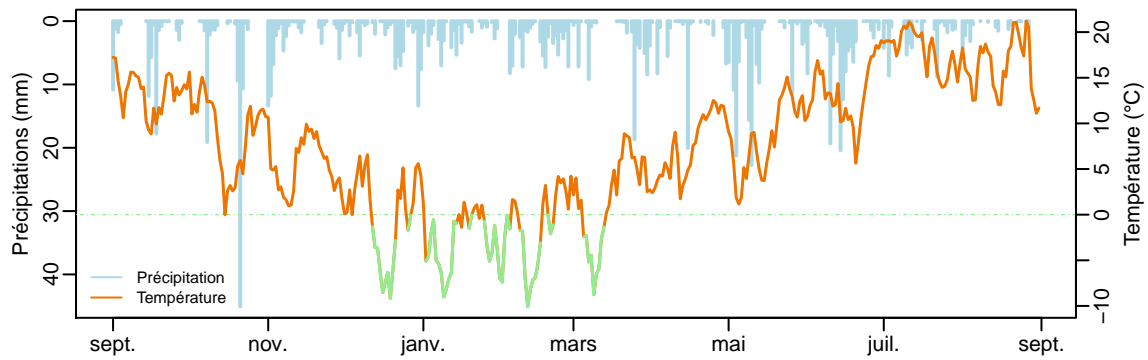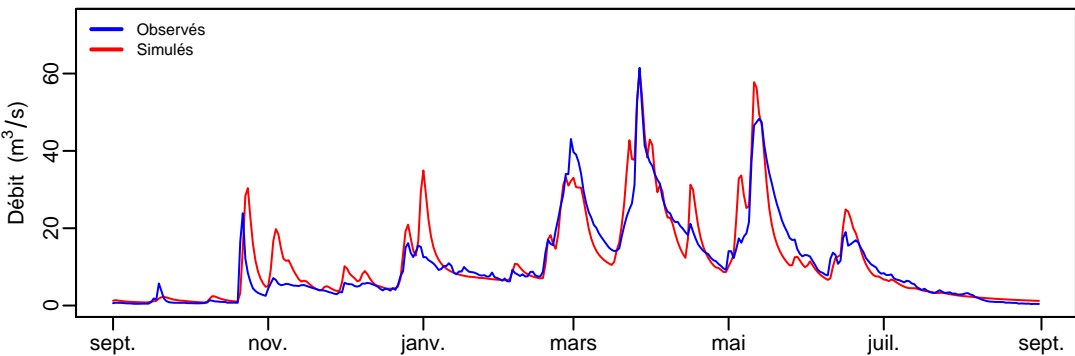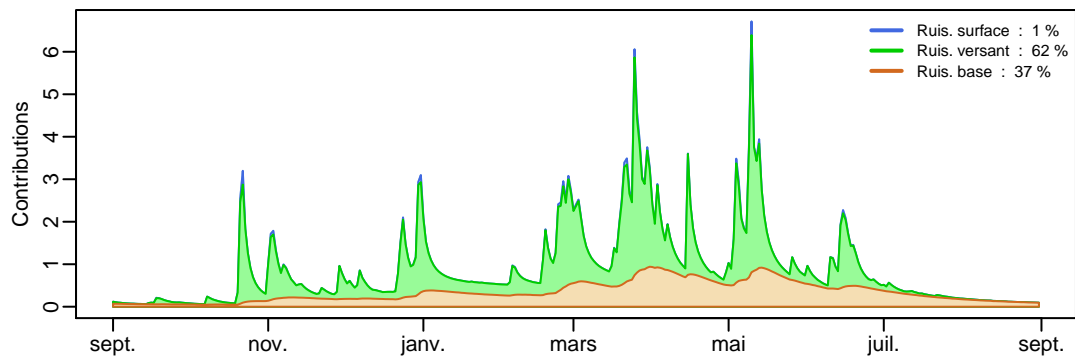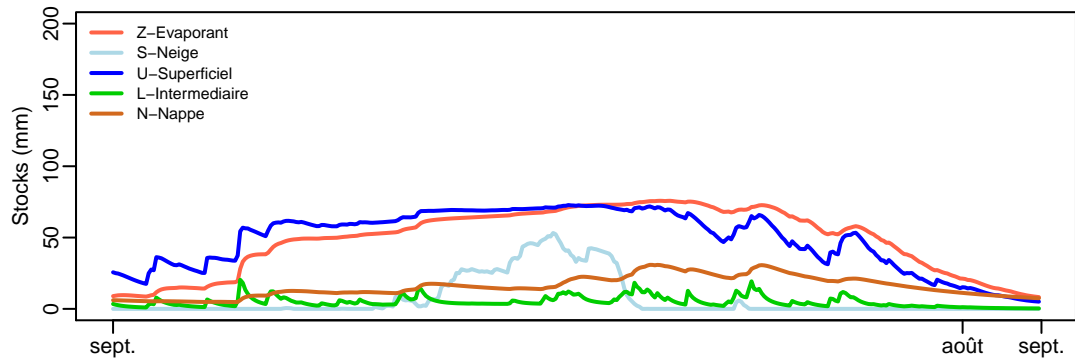

# m\_allhal (1074.14 km<sup>2</sup>) – année 2010–2011

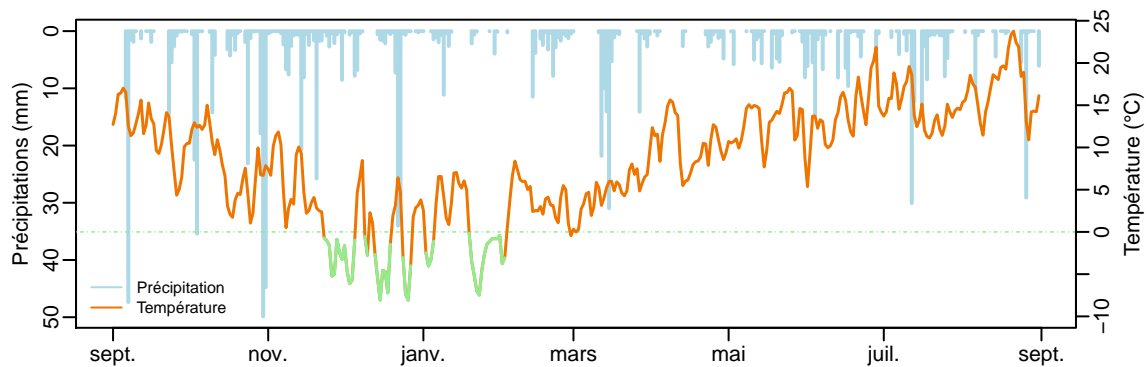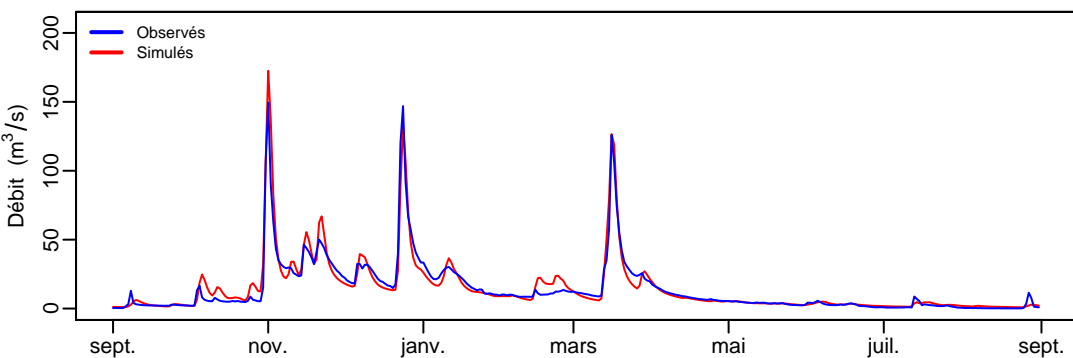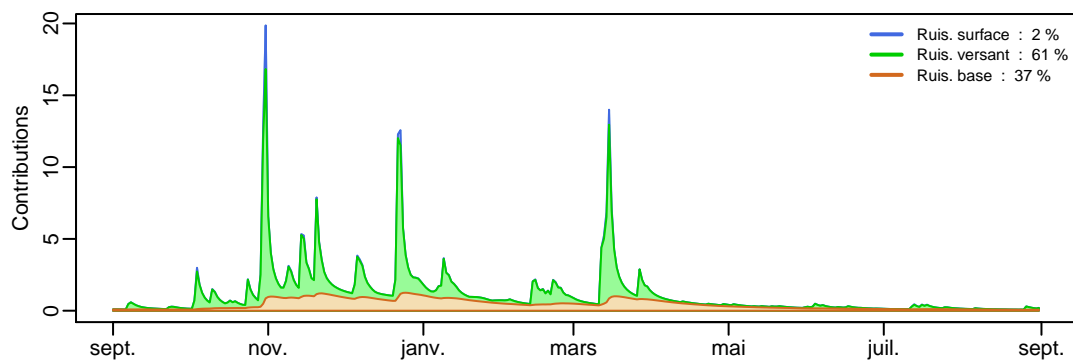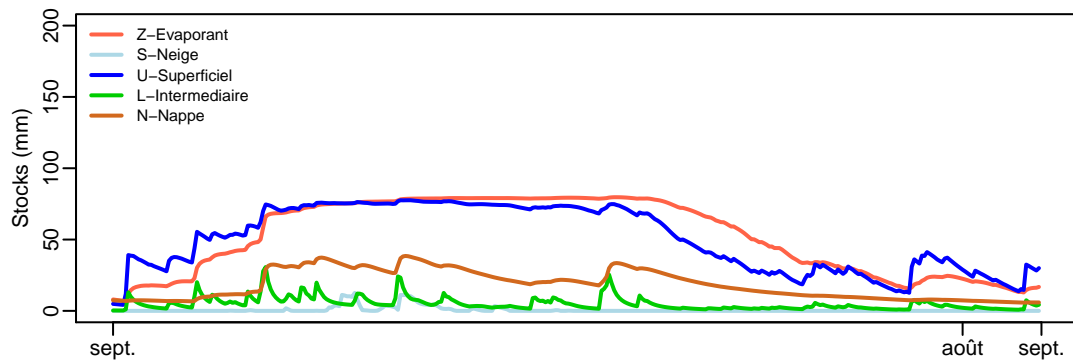

# m\_allhal (1074.14 km<sup>2</sup>) – année 2011–2012

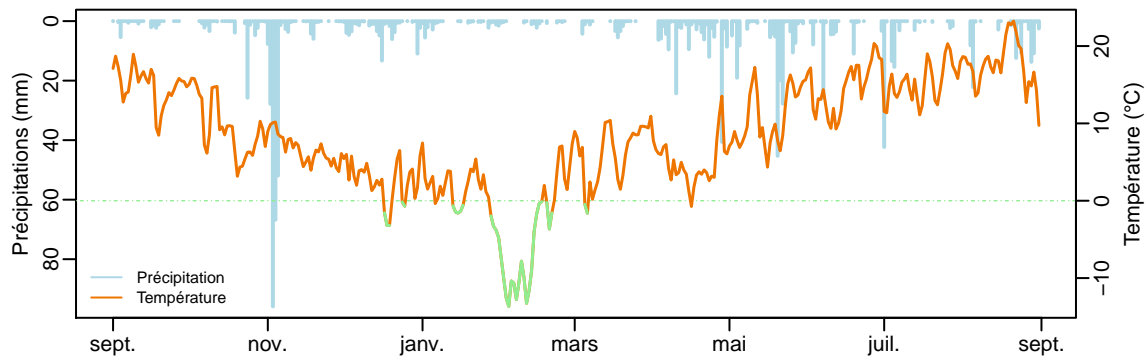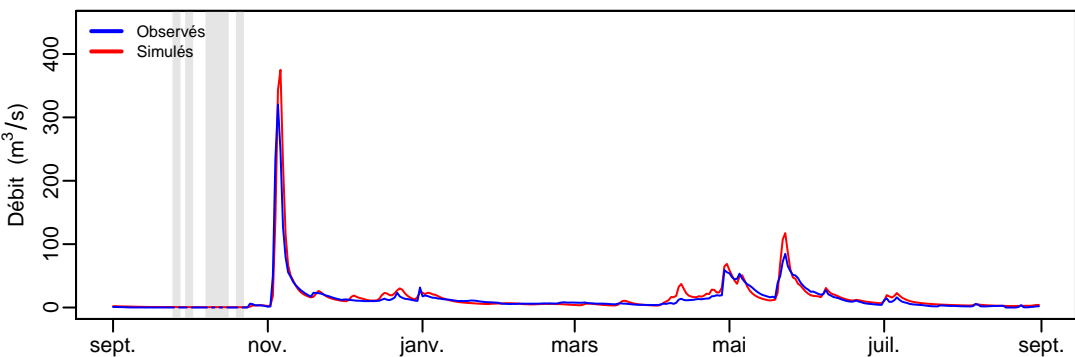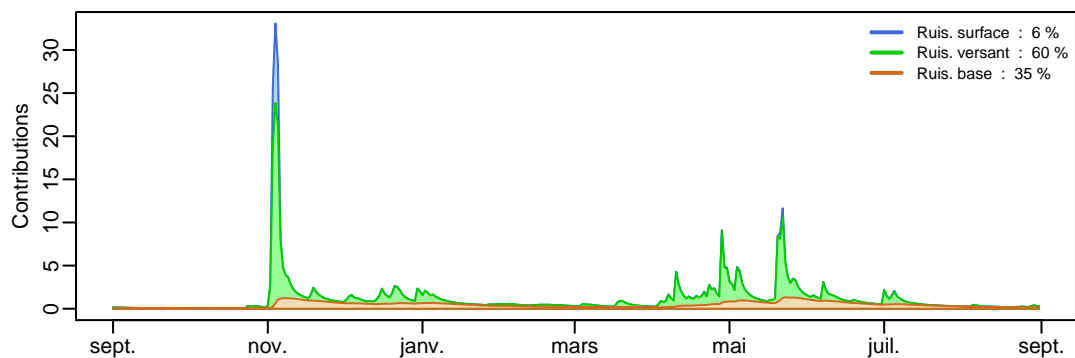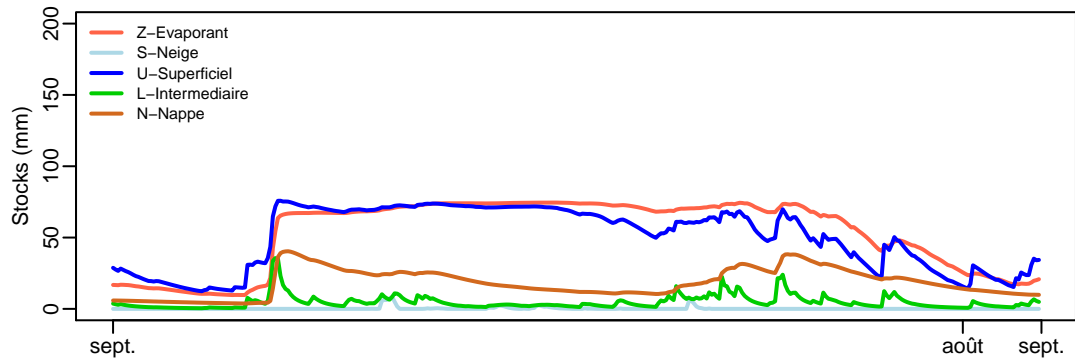

# m\_allhas (228.73 km<sup>2</sup>) – année 1981–1982

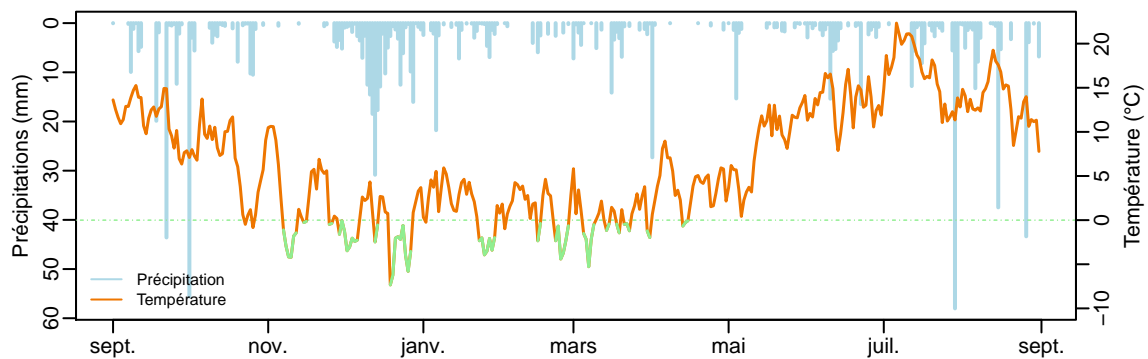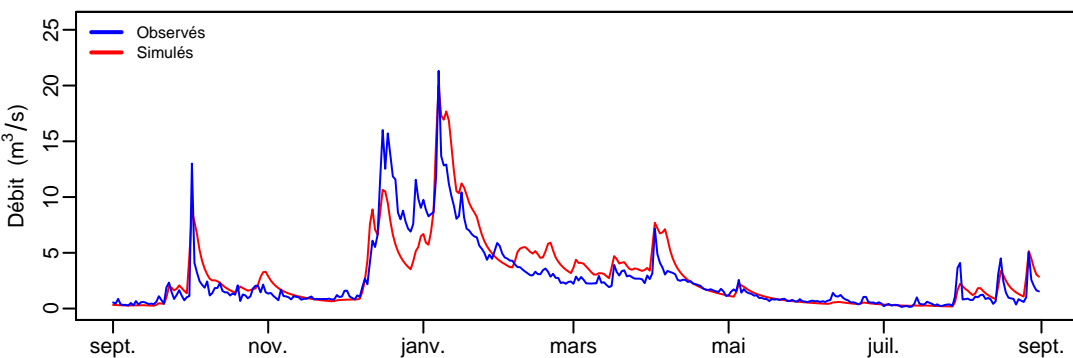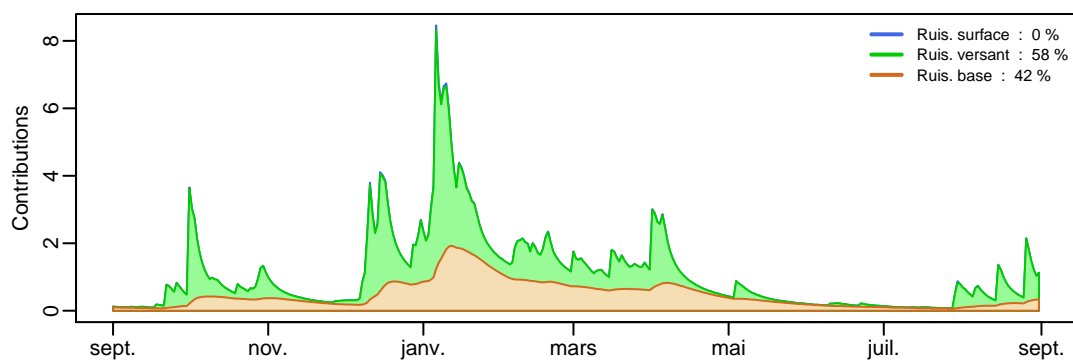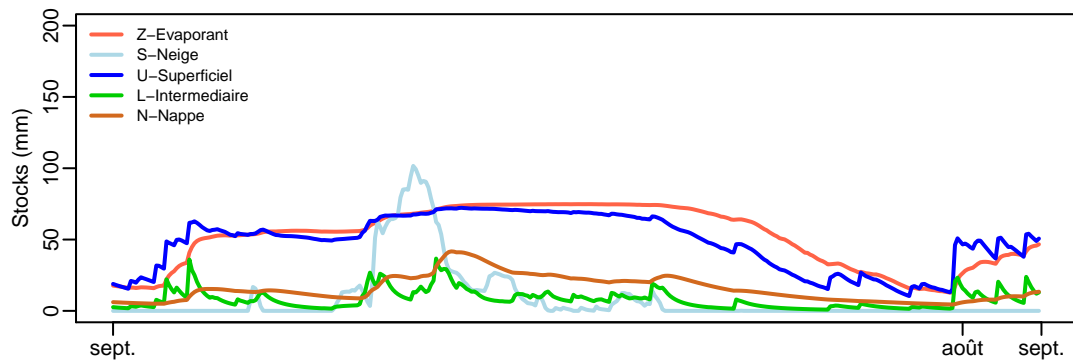



# m\_allhas (228.73 km<sup>2</sup>) – année 1982–1983

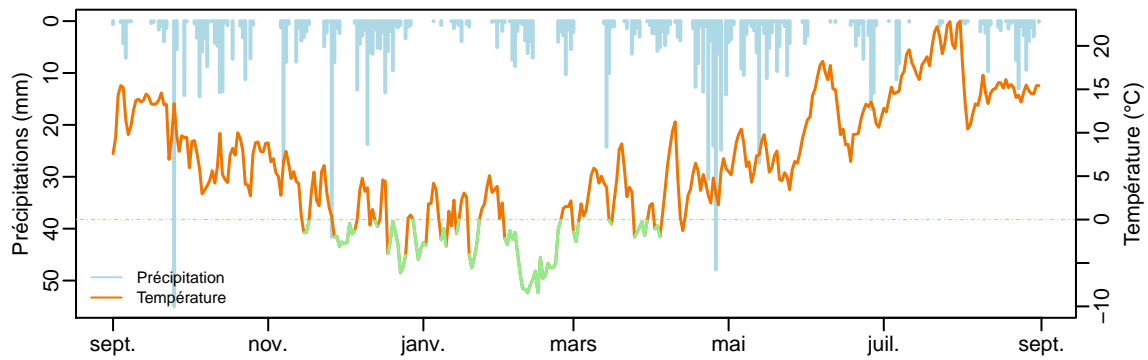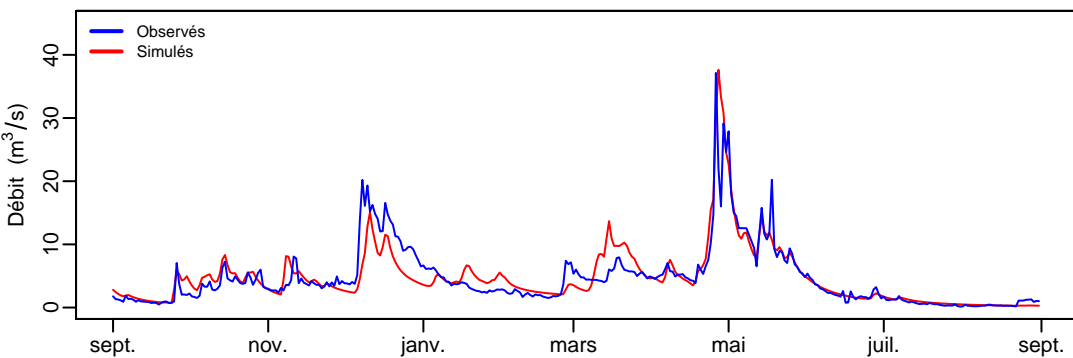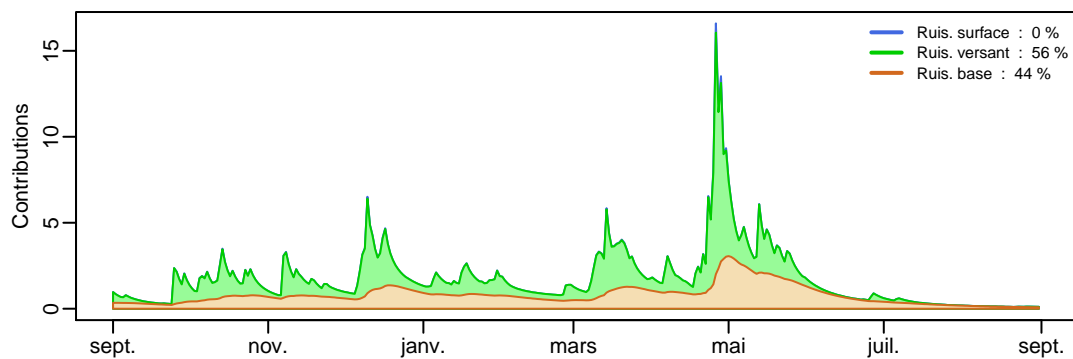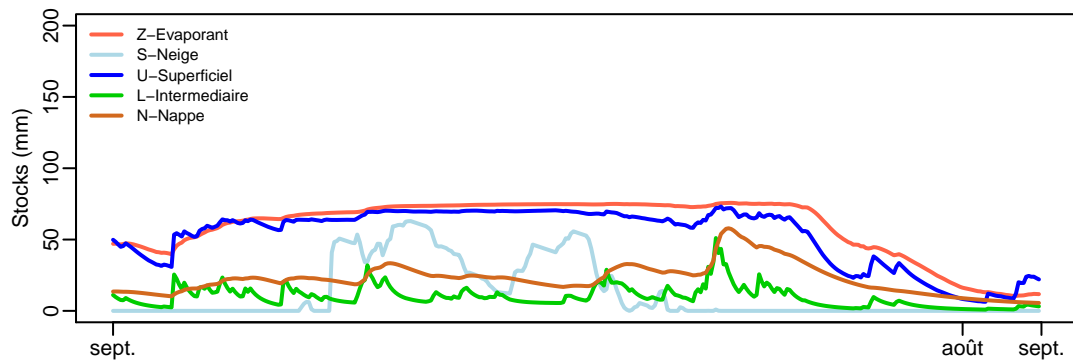

# m\_allhas (228.73 km<sup>2</sup>) – année 1983–1984

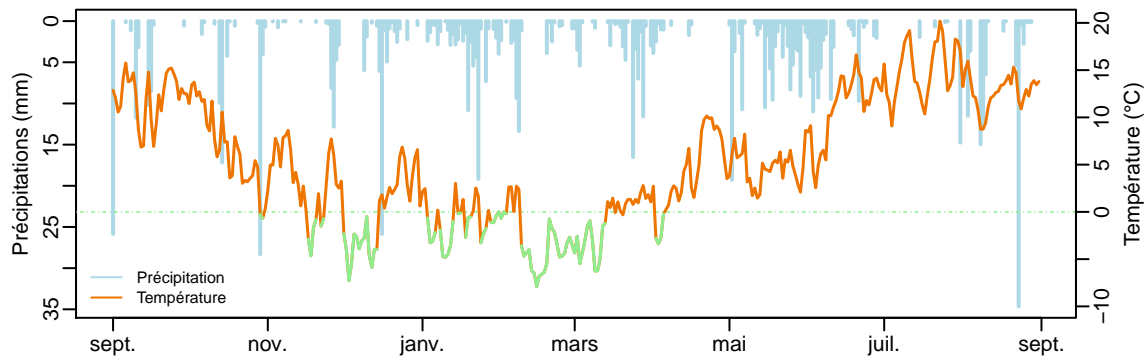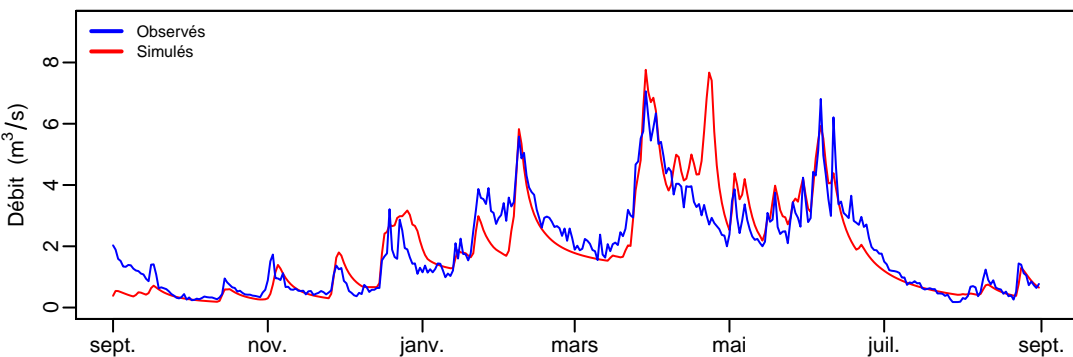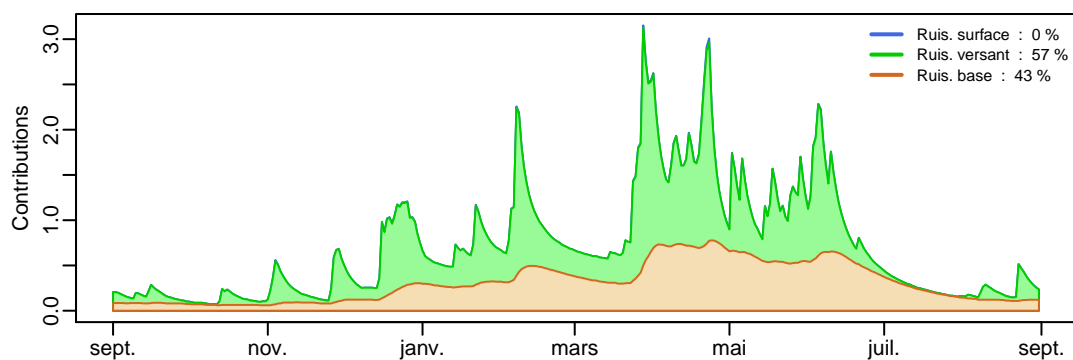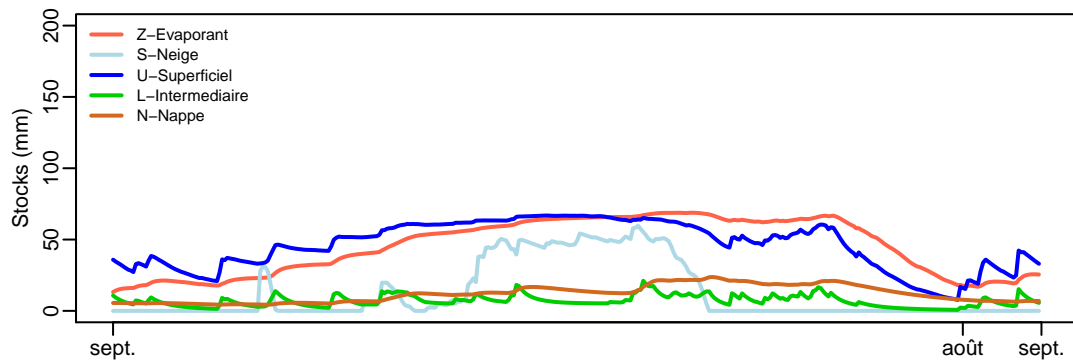

# m\_allhas (228.73 km<sup>2</sup>) – année 1984–1985

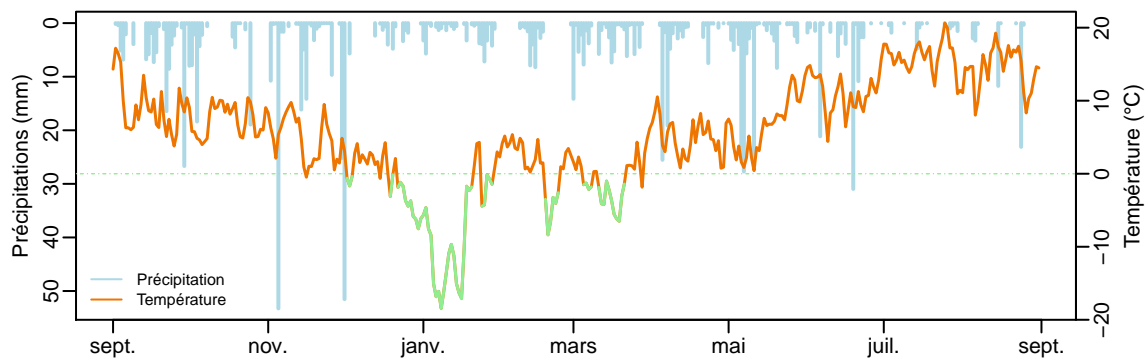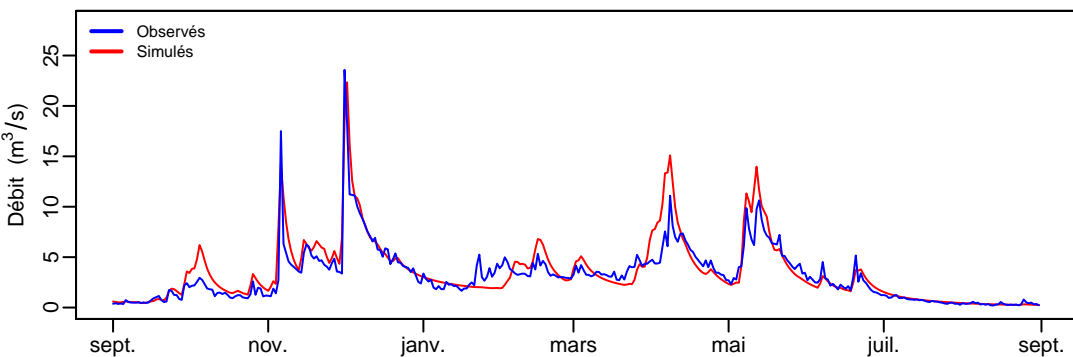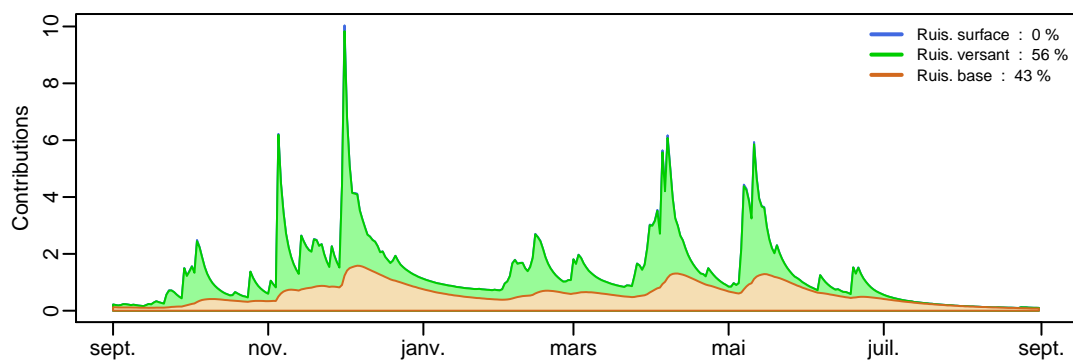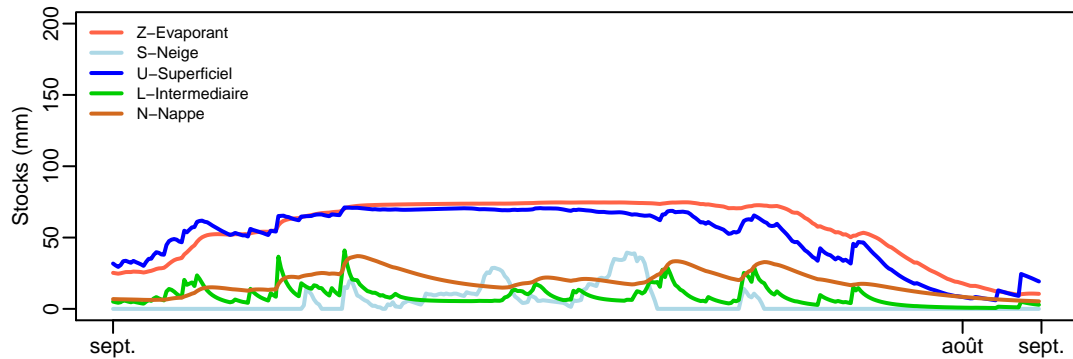

# m\_allhas (228.73 km<sup>2</sup>) – année 1985–1986

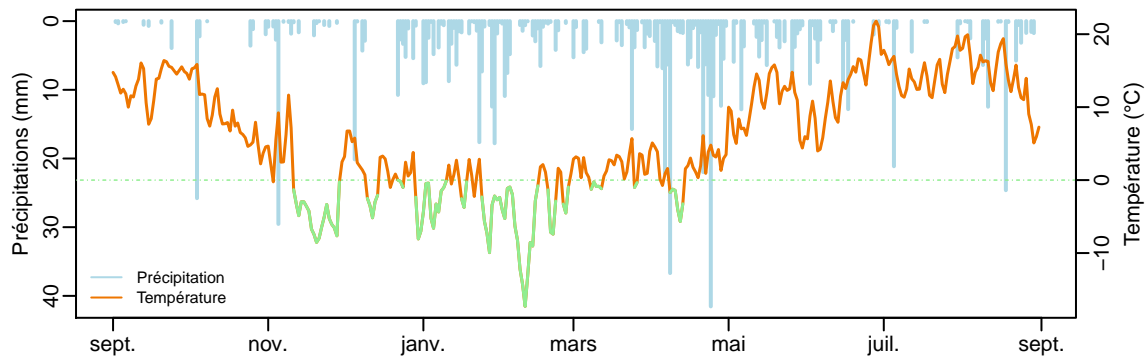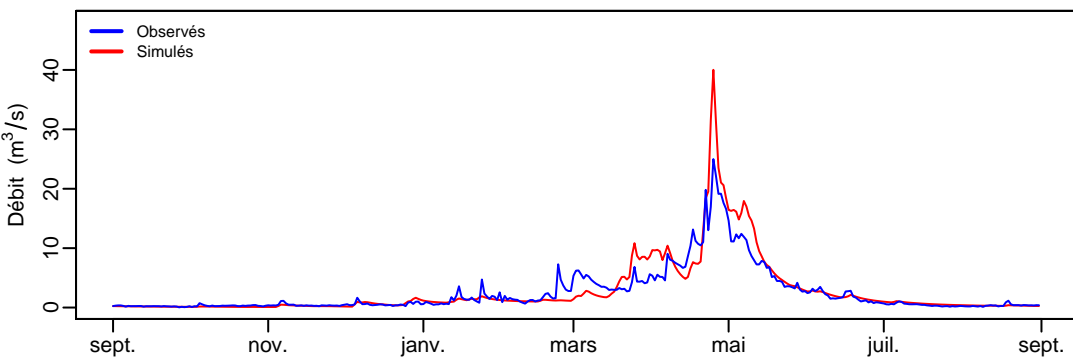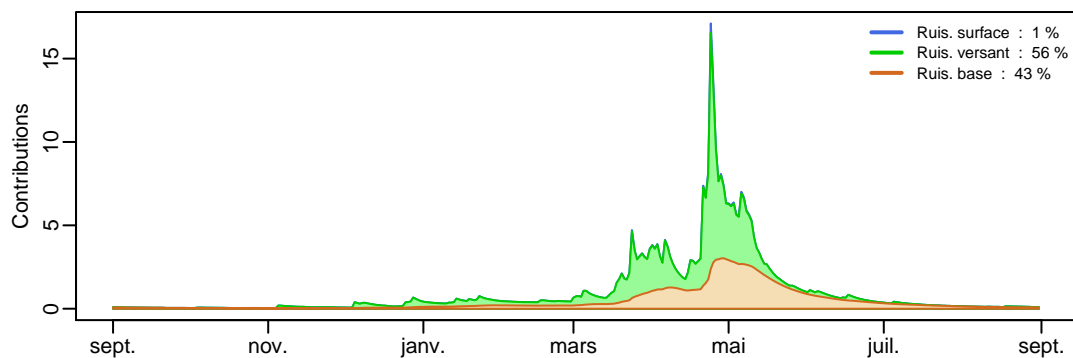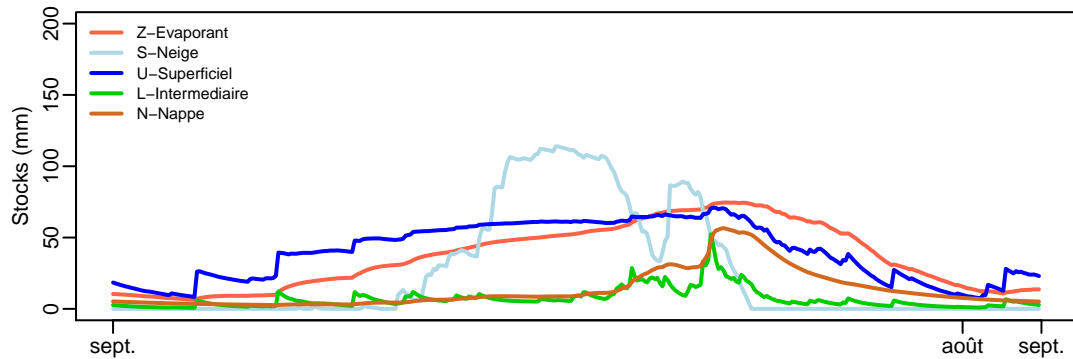

# m\_allhas (228.73 km<sup>2</sup>) – année 1986–1987

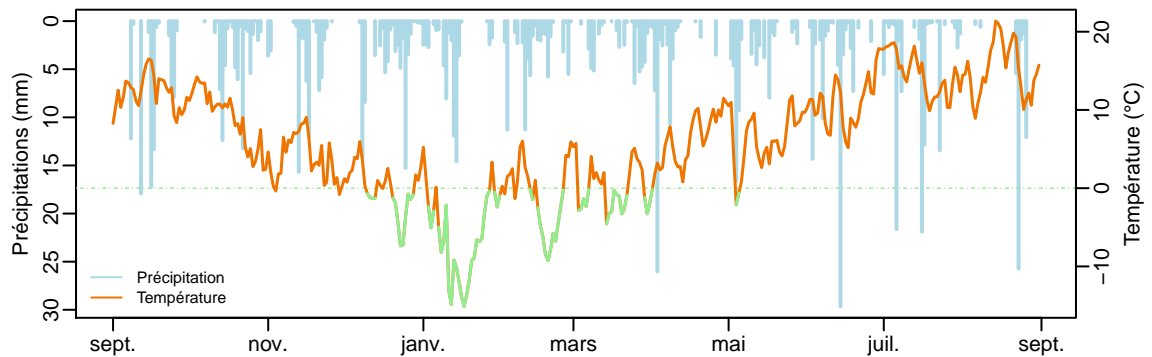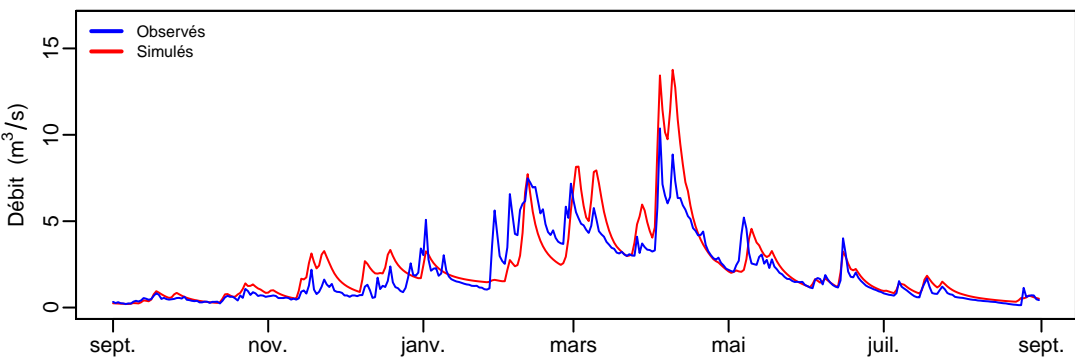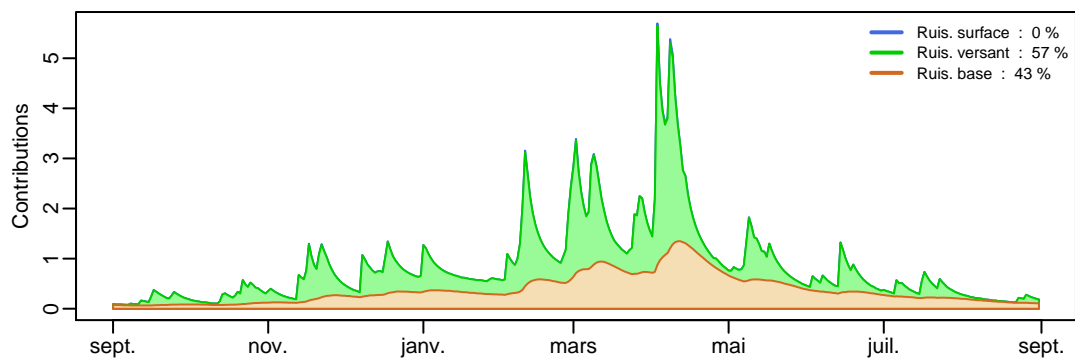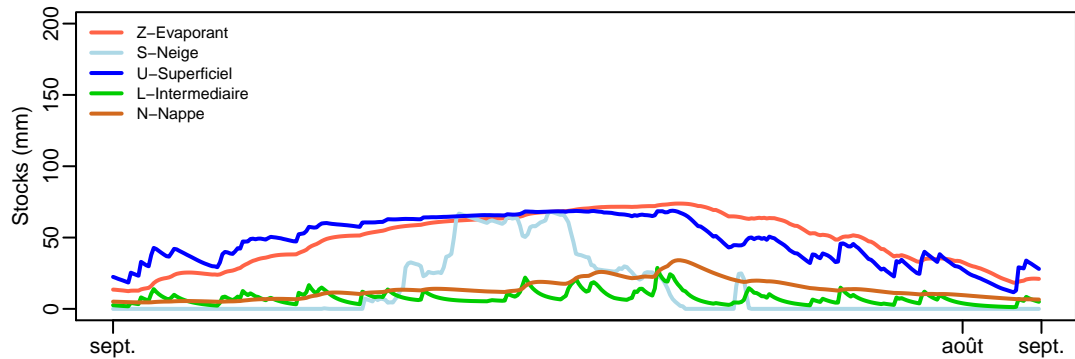

# m\_allhas (228.73 km<sup>2</sup>) – année 1987–1988

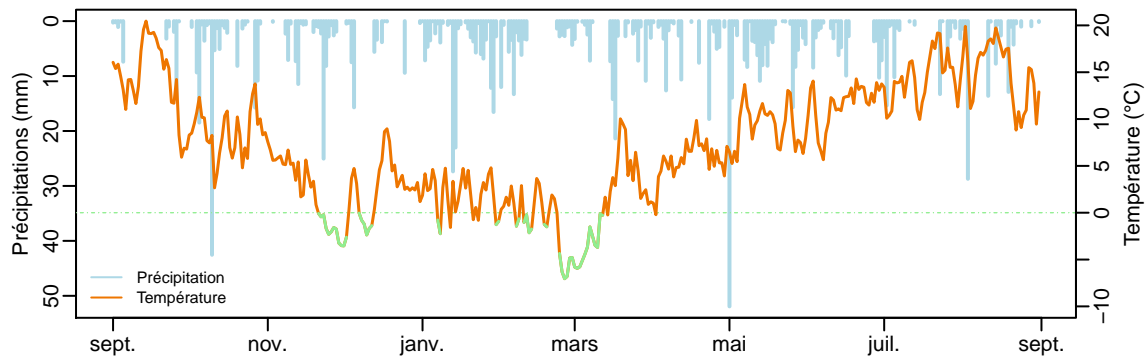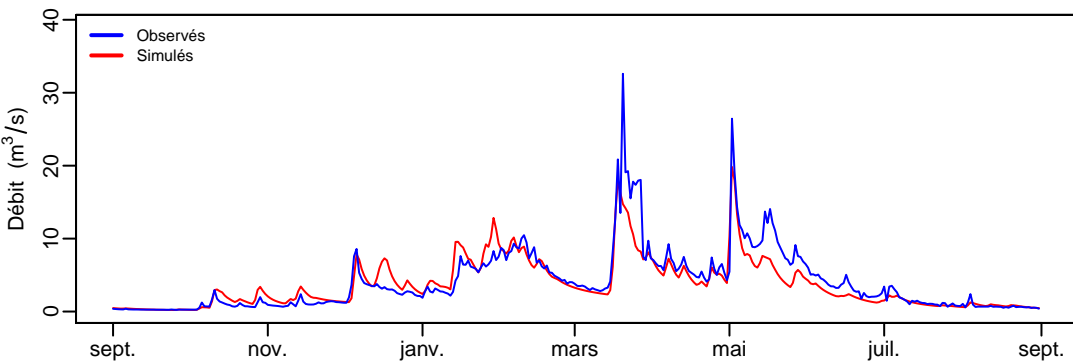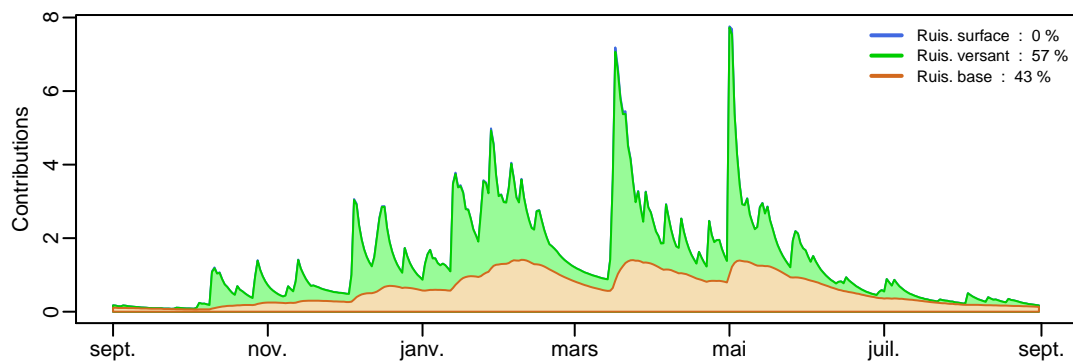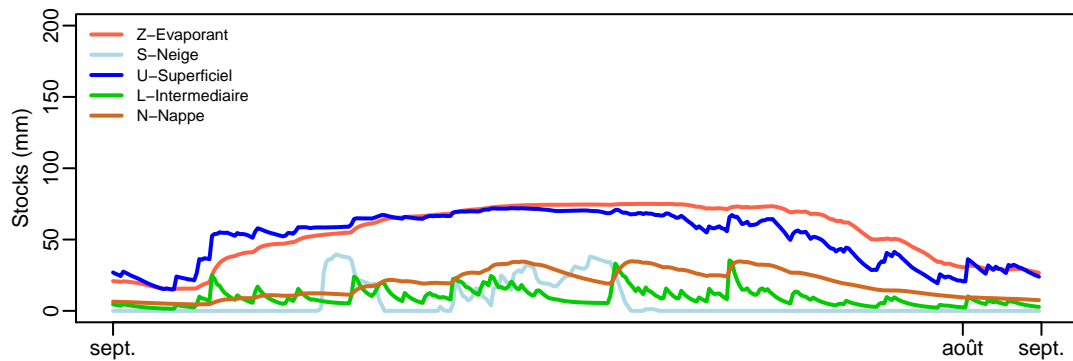

# m\_allhas (228.73 km<sup>2</sup>) – année 1988–1989

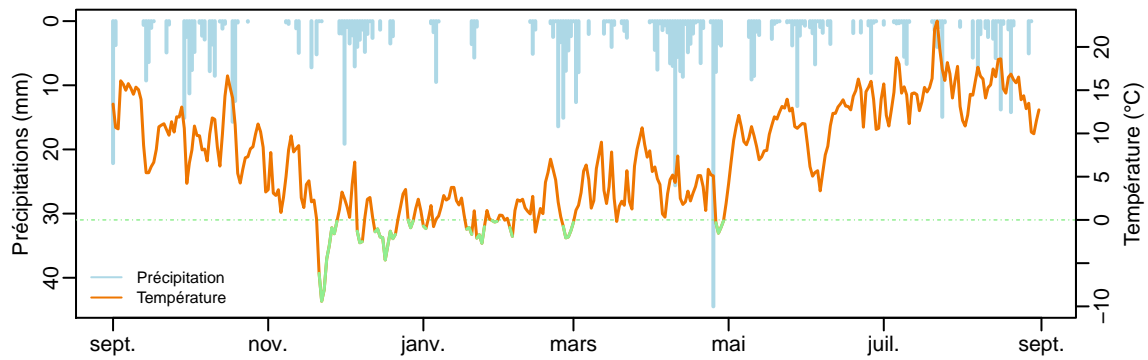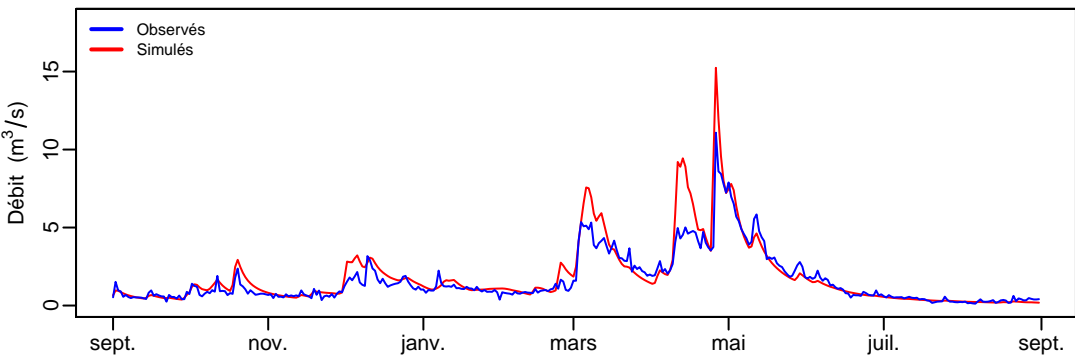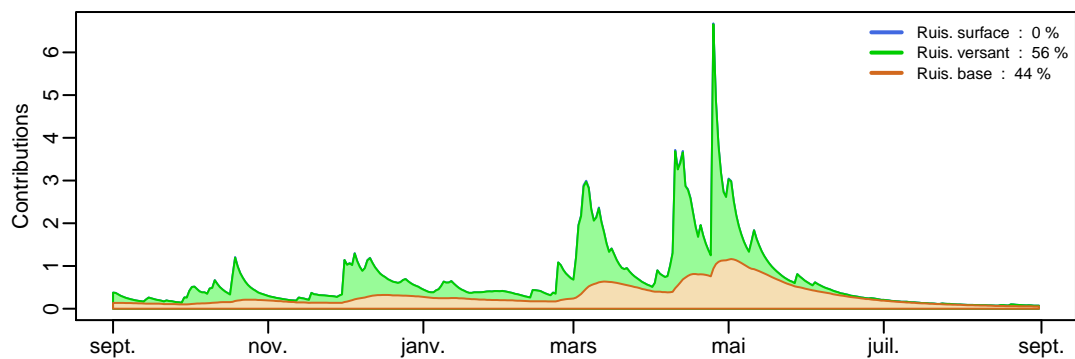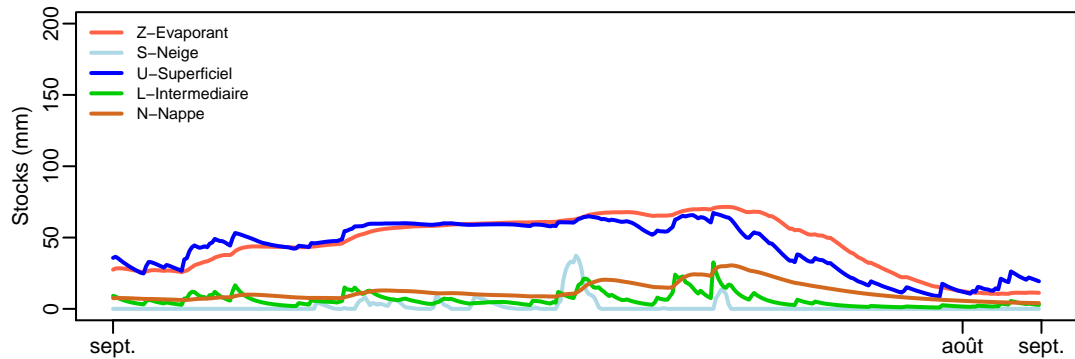

# m\_allhas (228.73 km<sup>2</sup>) – année 1989–1990

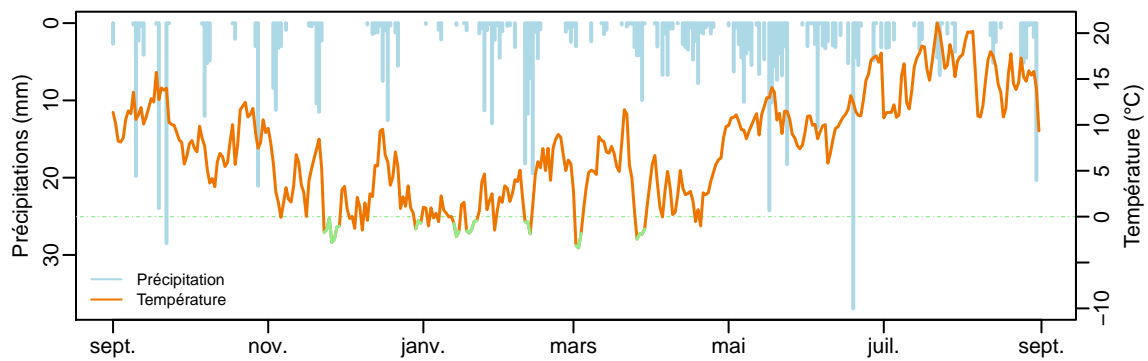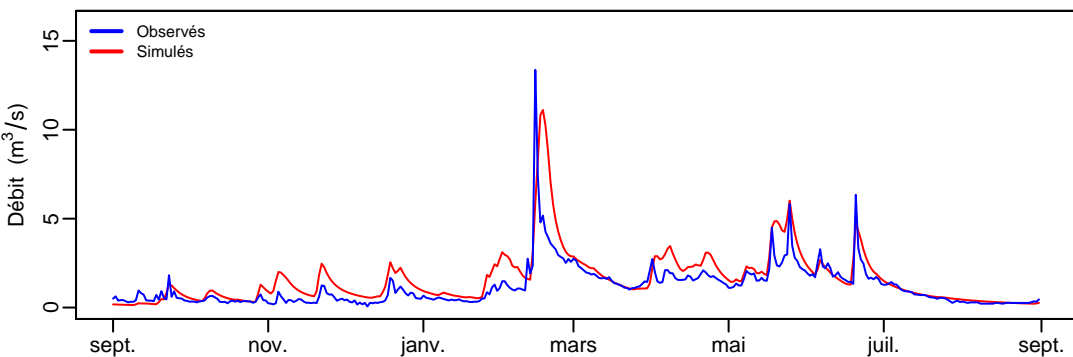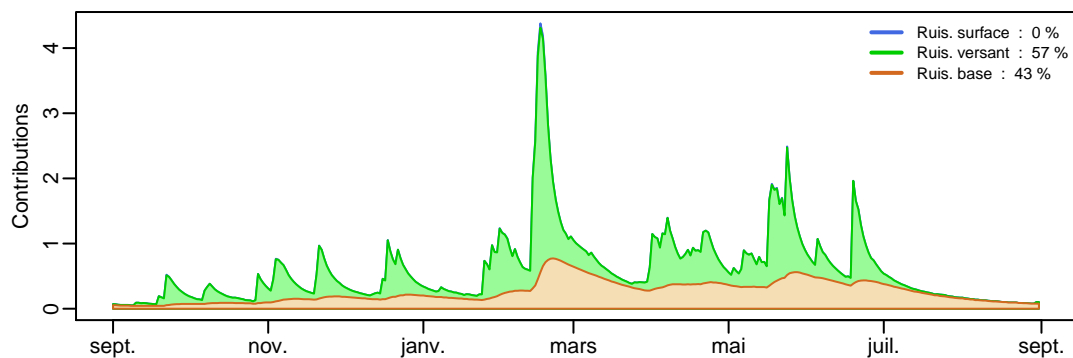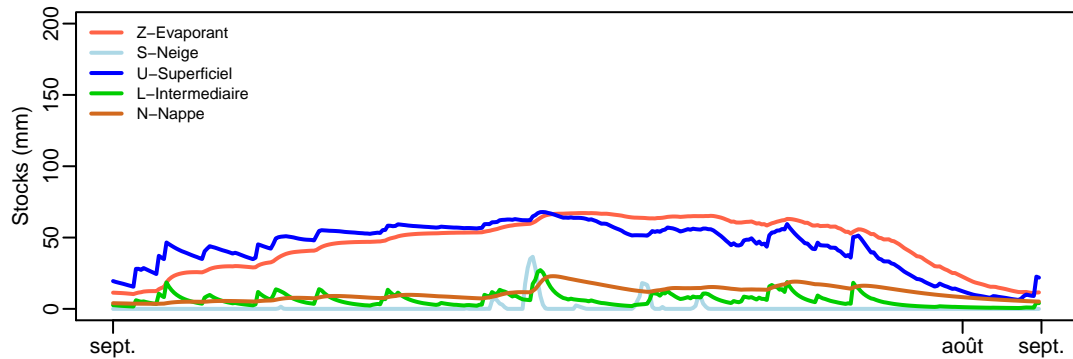



# m\_allhas (228.73 km<sup>2</sup>) – année 1990–1991

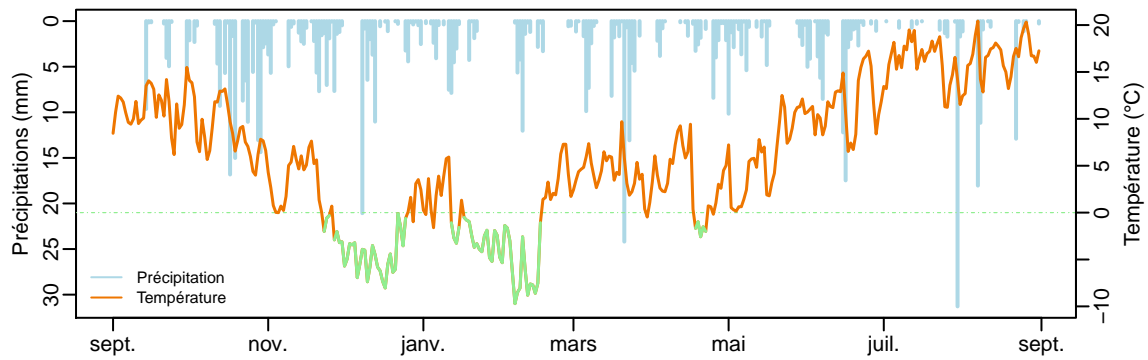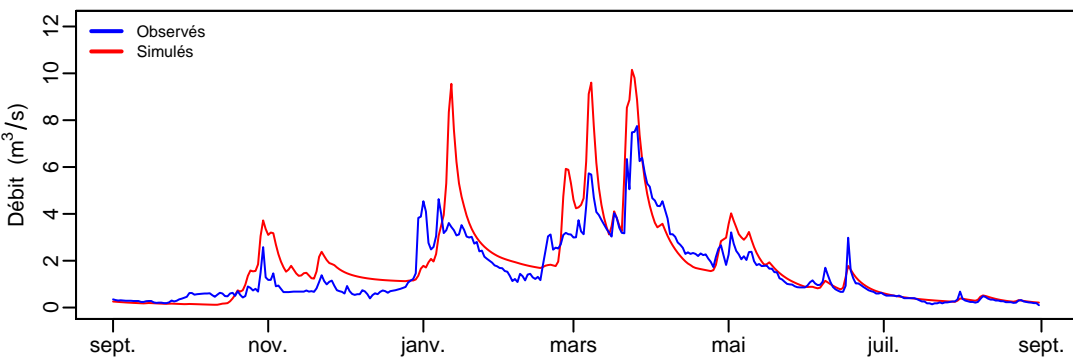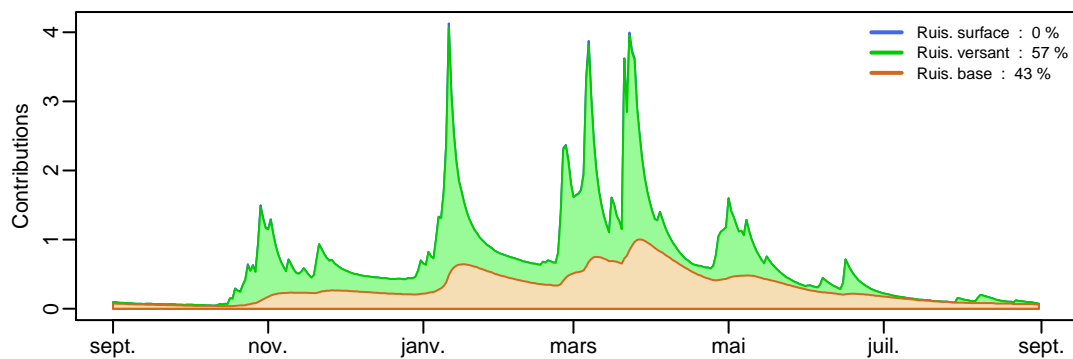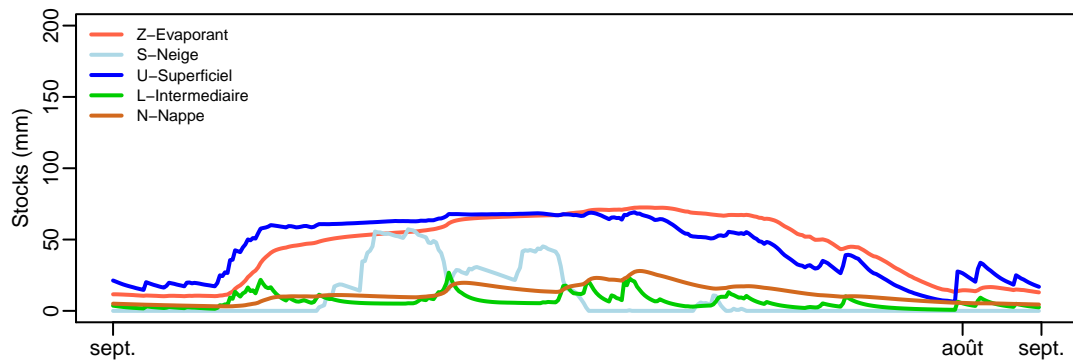

# m\_allhas (228.73 km²) – année 1991–1992

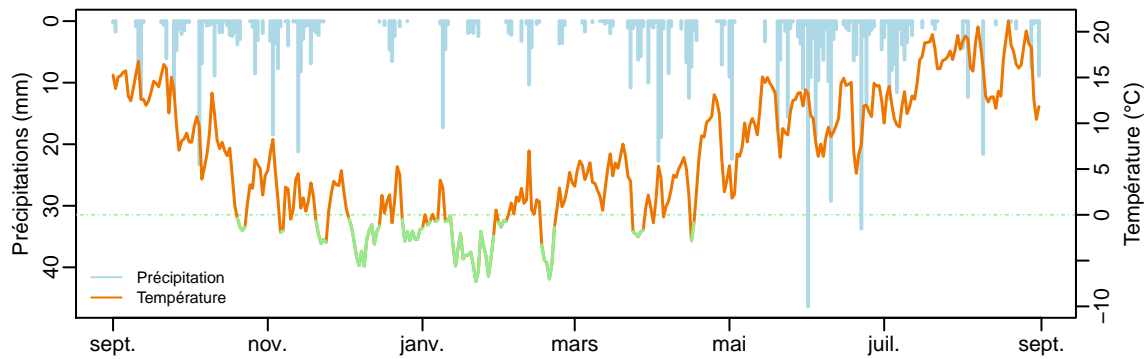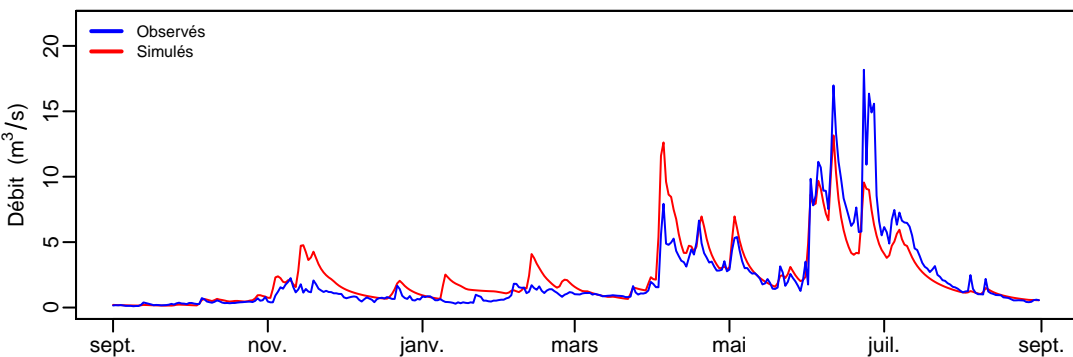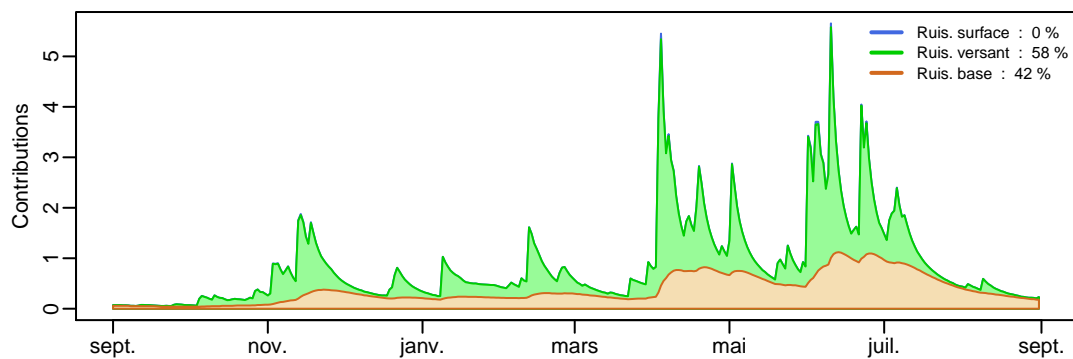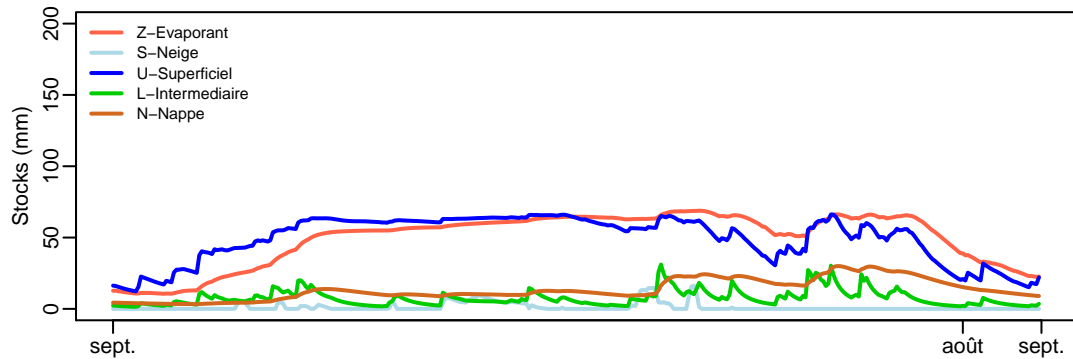

# m\_allhas (228.73 km<sup>2</sup>) – année 1992–1993

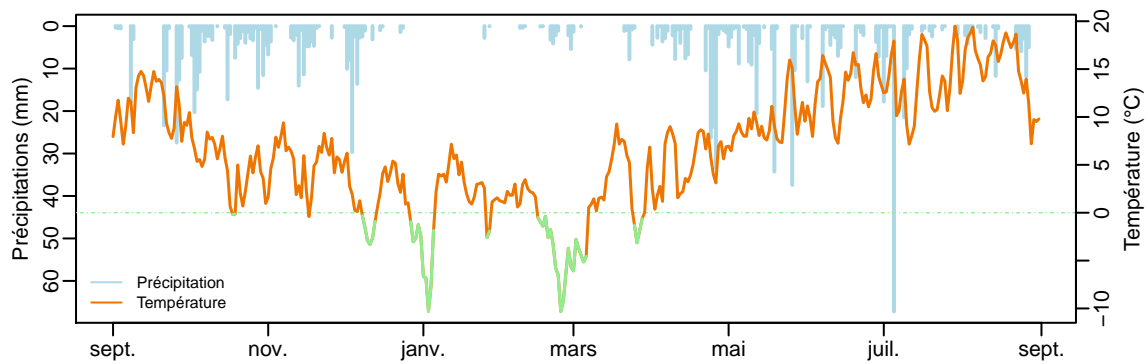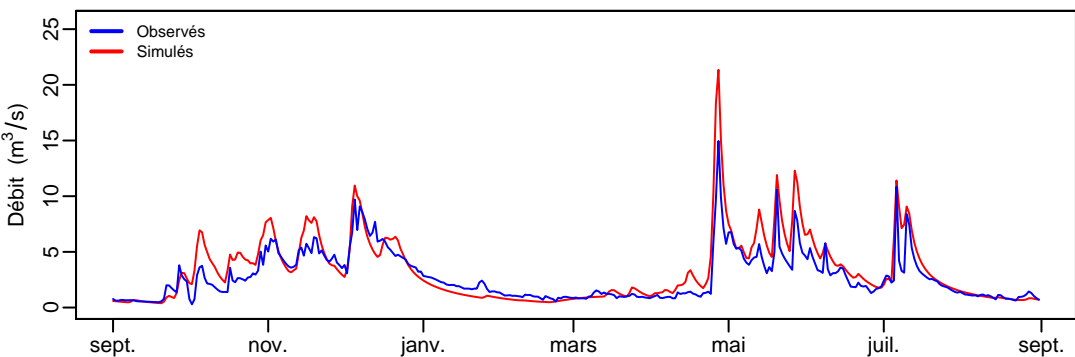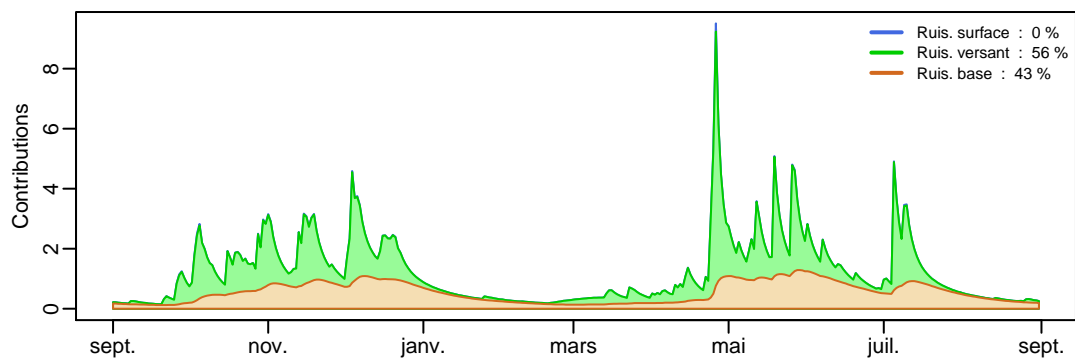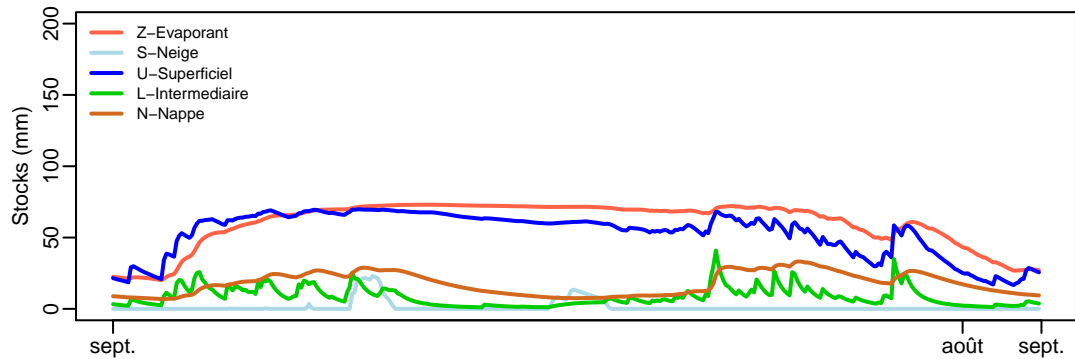

# m\_allhas (228.73 km<sup>2</sup>) – année 1993–1994

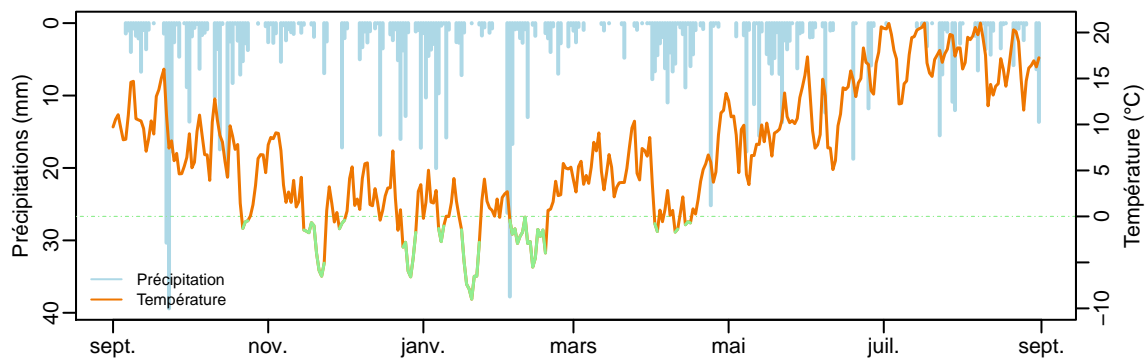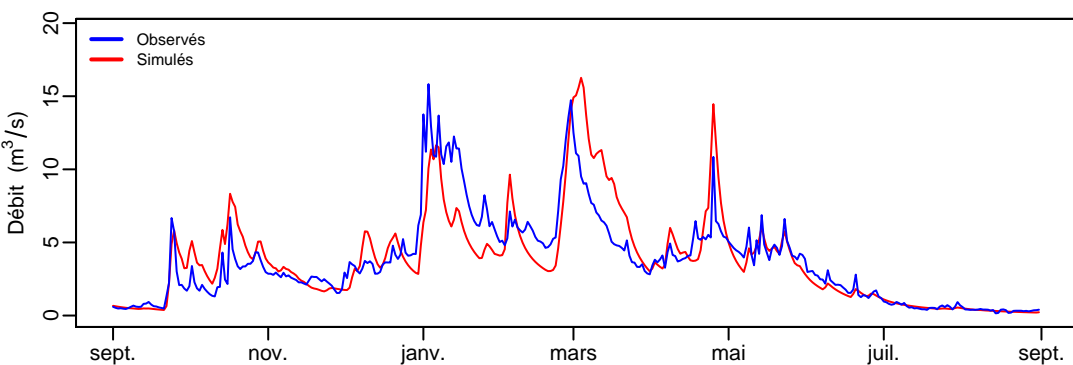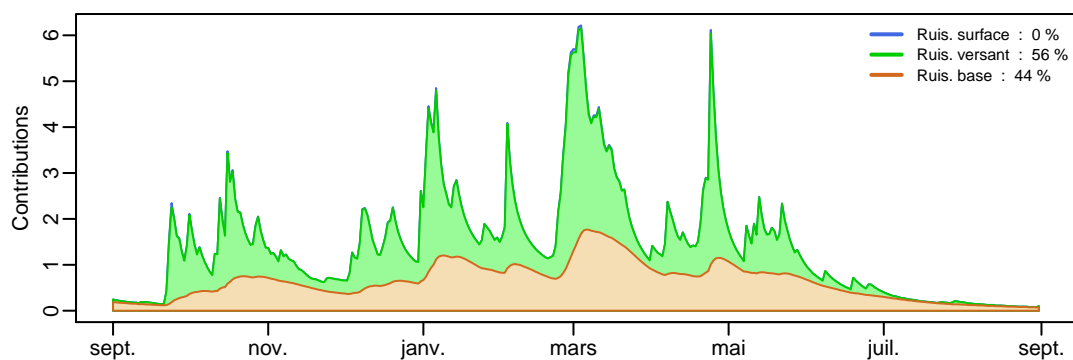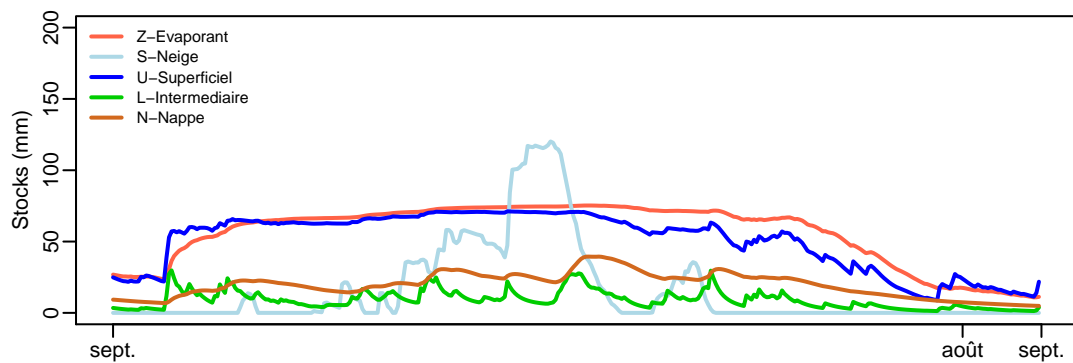

# m\_allhas (228.73 km<sup>2</sup>) – année 1994–1995

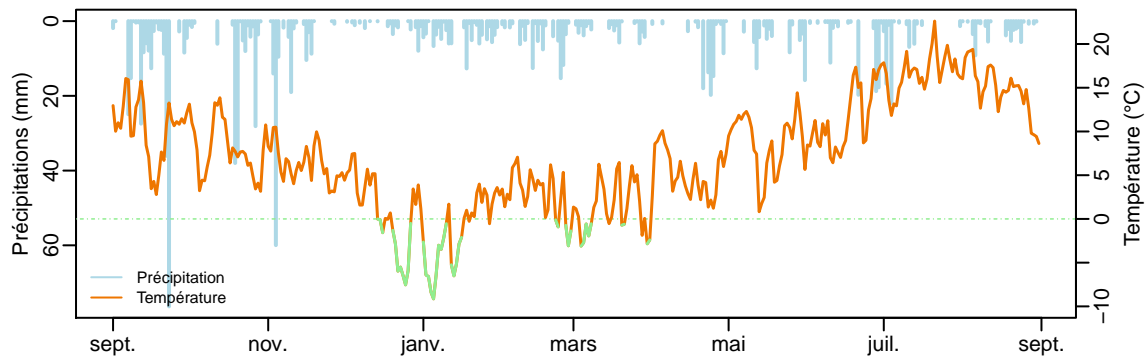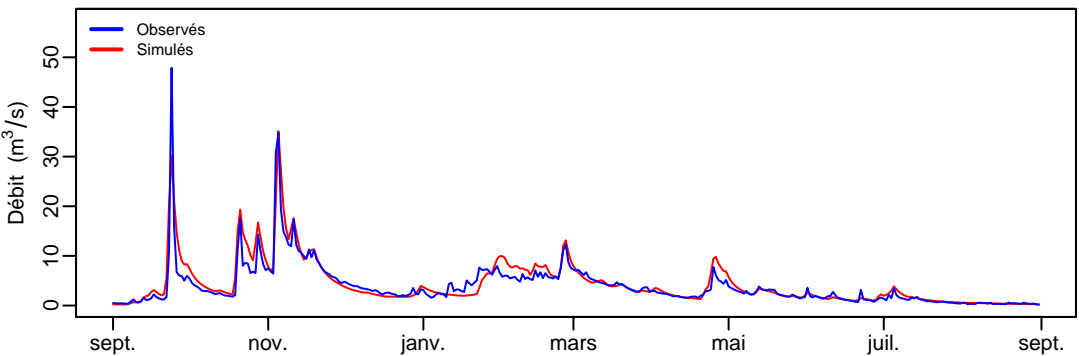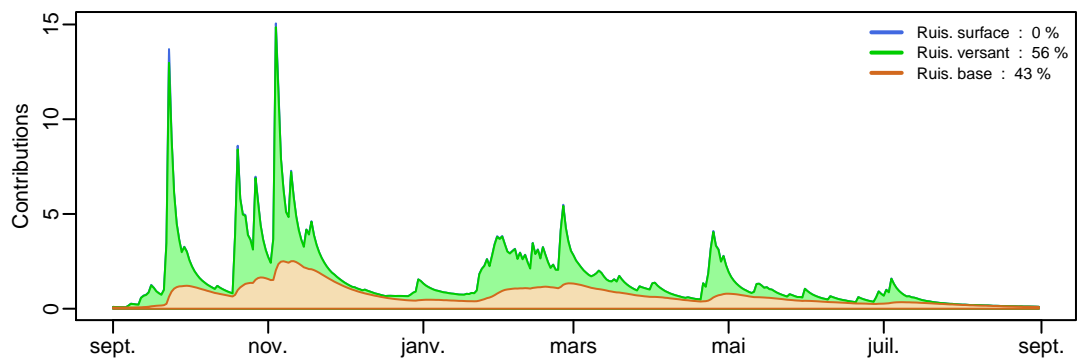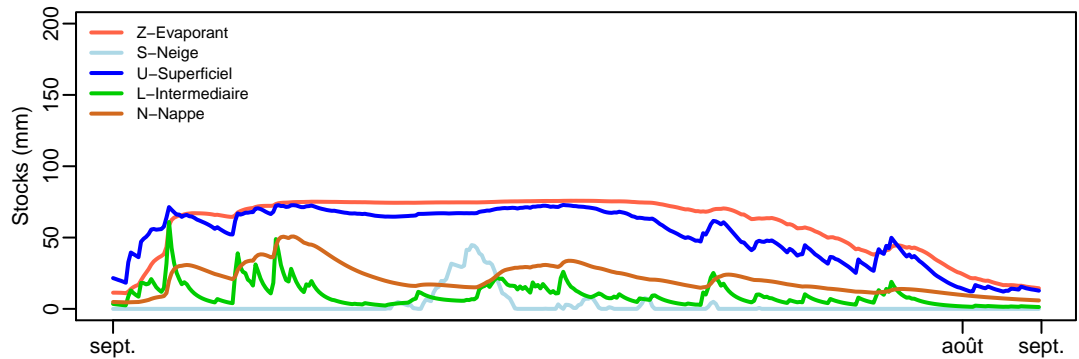

# m\_allhas (228.73 km<sup>2</sup>) – année 1995–1996

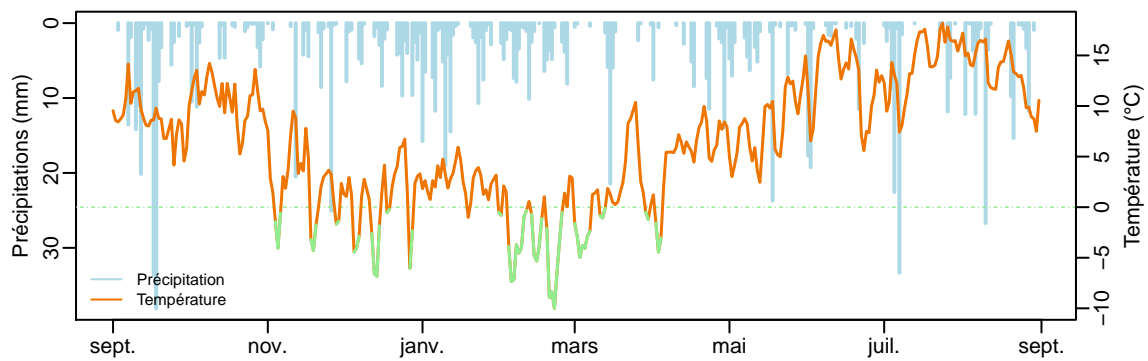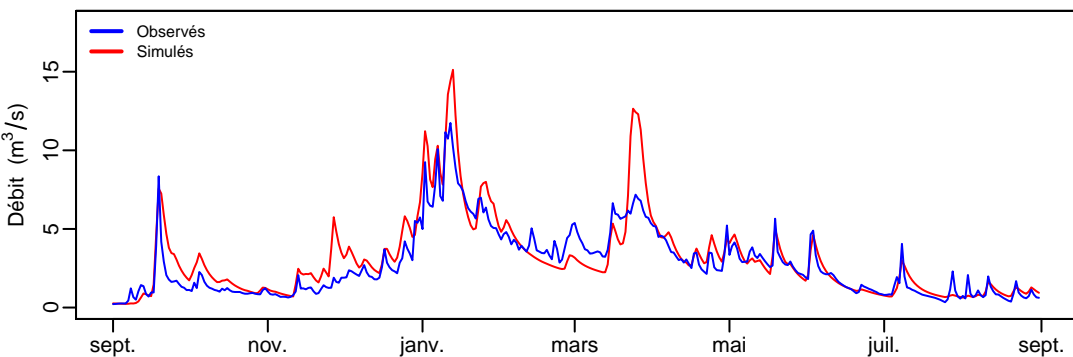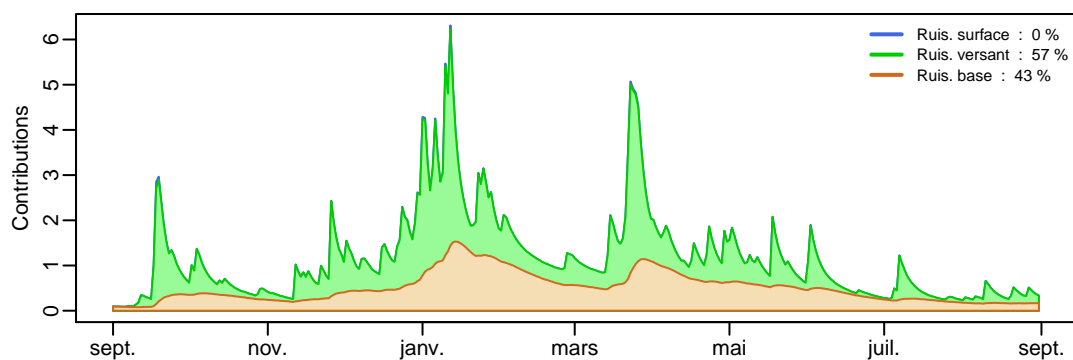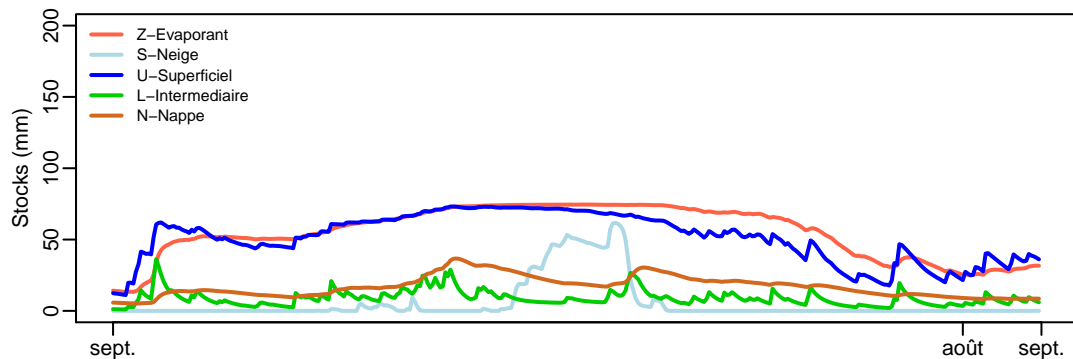

# m\_allhas (228.73 km<sup>2</sup>) – année 1996–1997

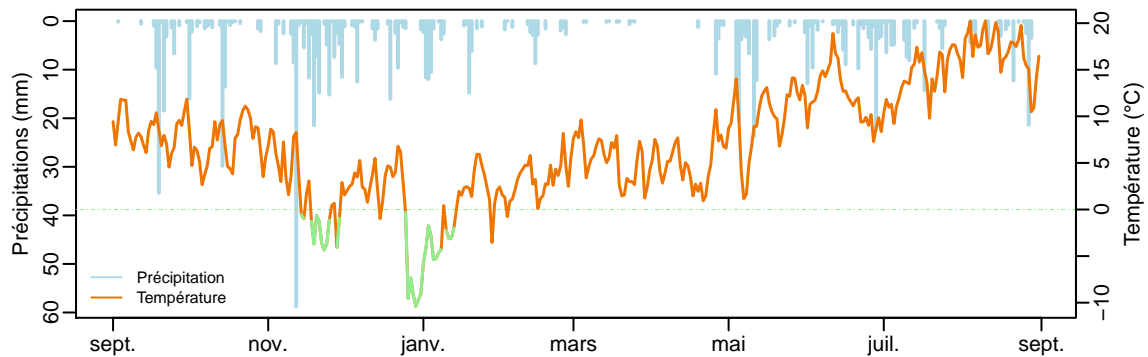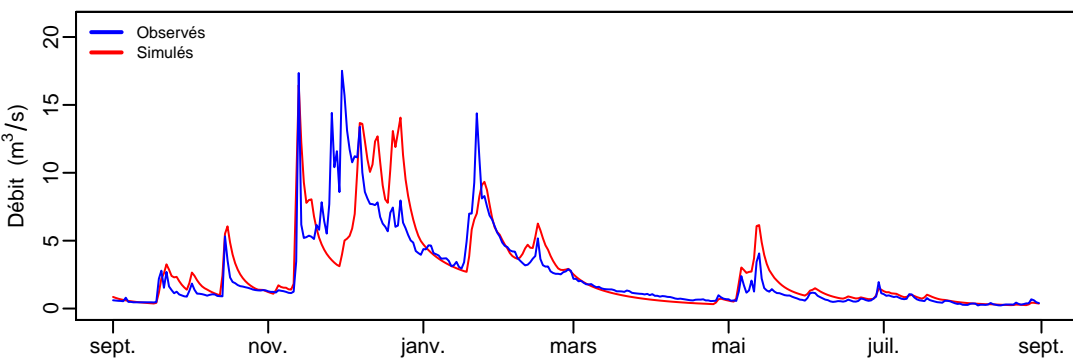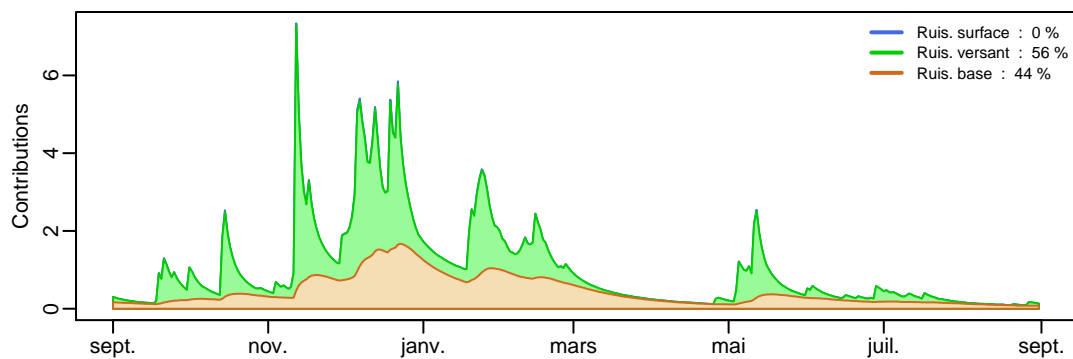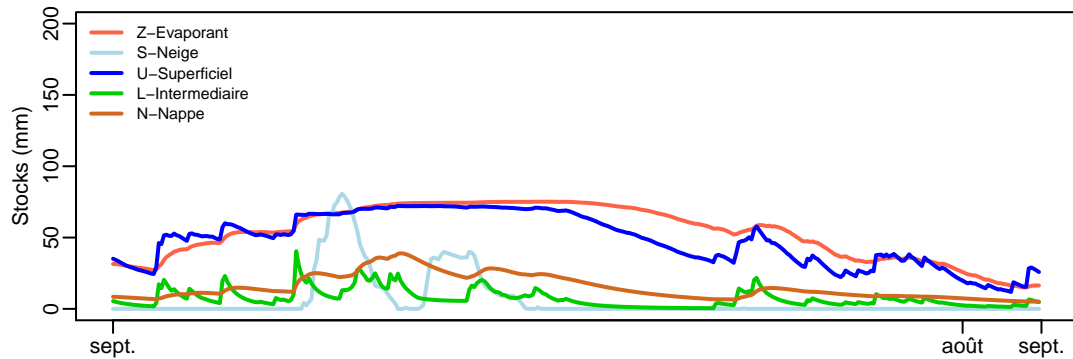

# m\_allhas (228.73 km<sup>2</sup>) – année 1997–1998

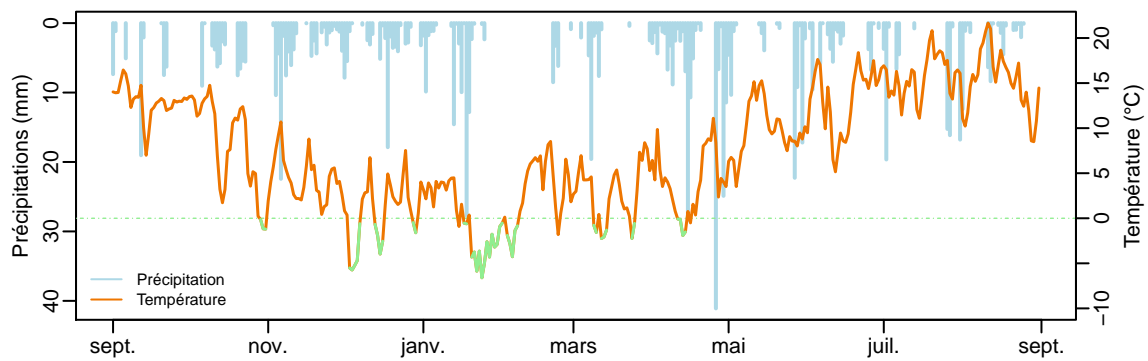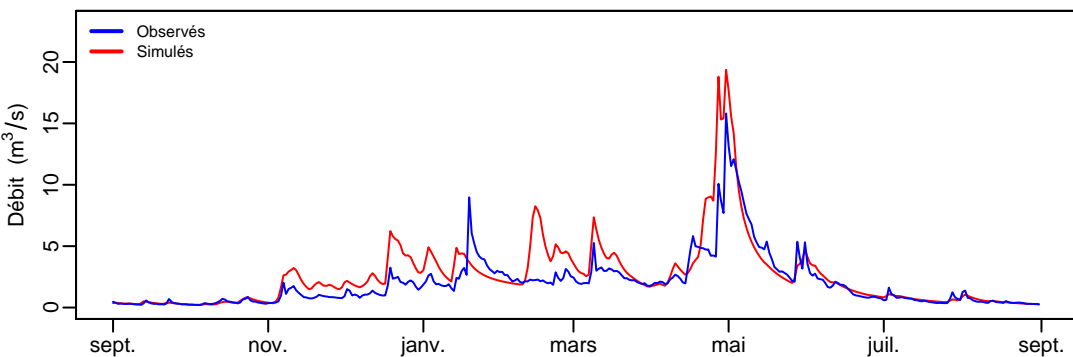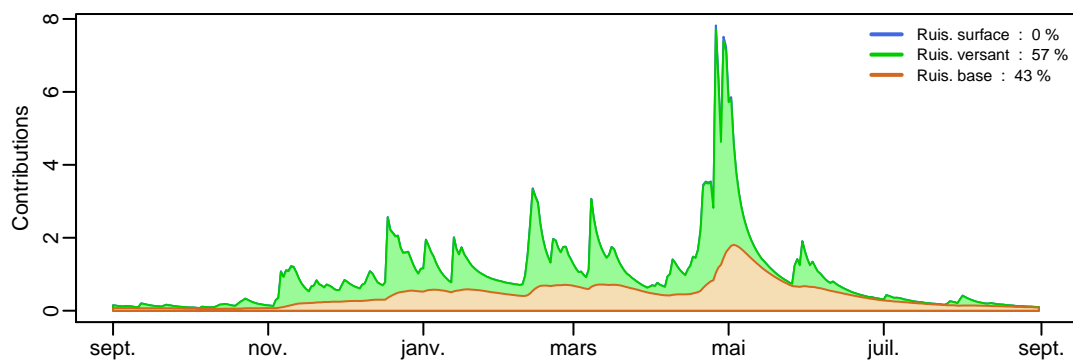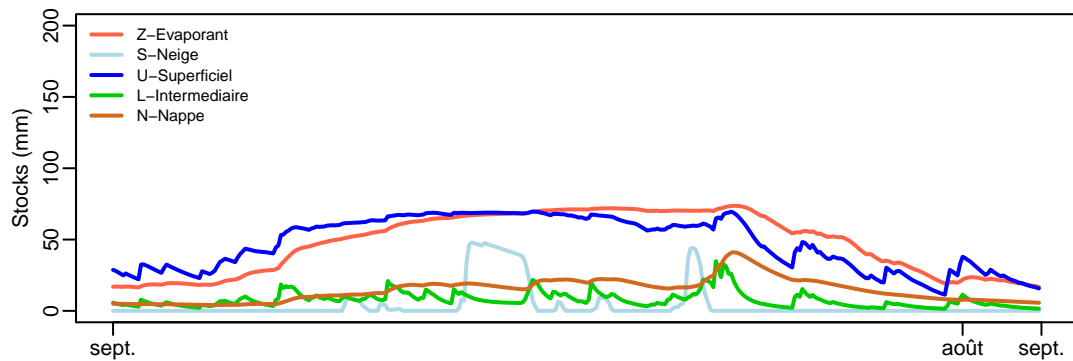



# m\_allhas (228.73 km²) – année 1998–1999

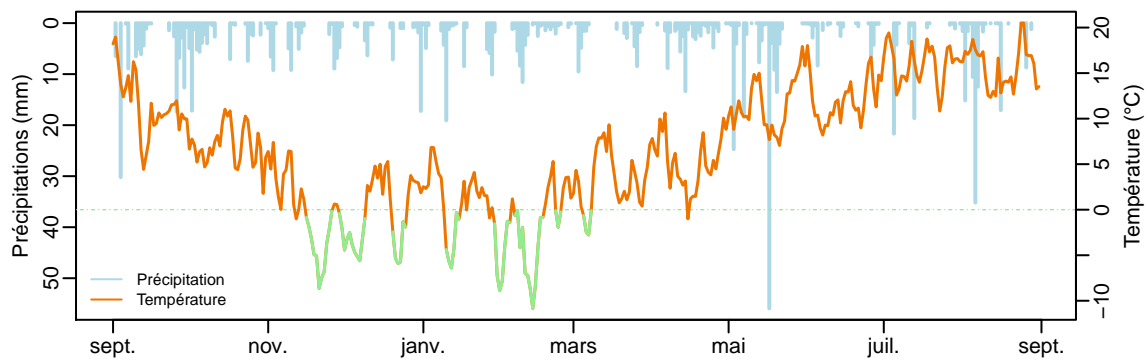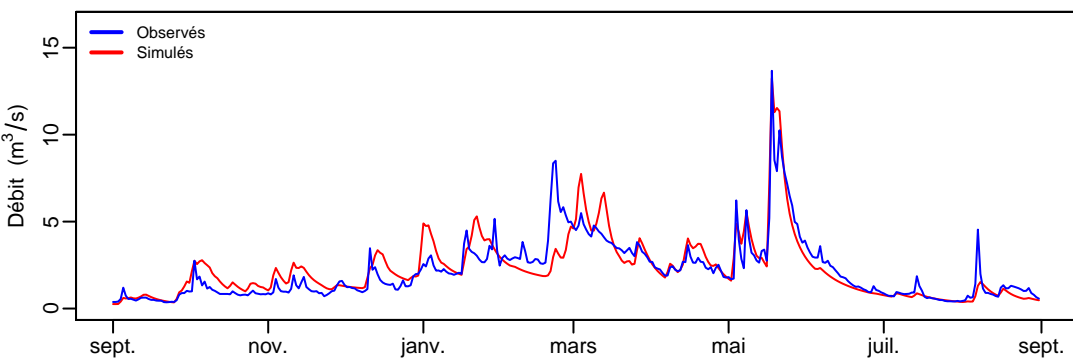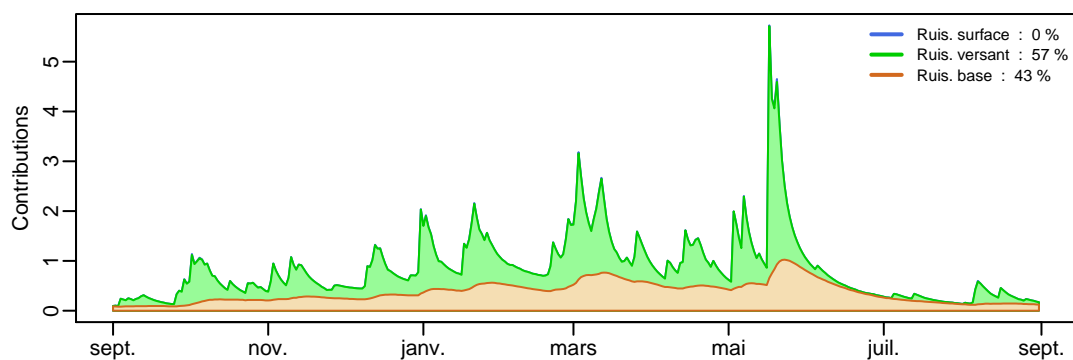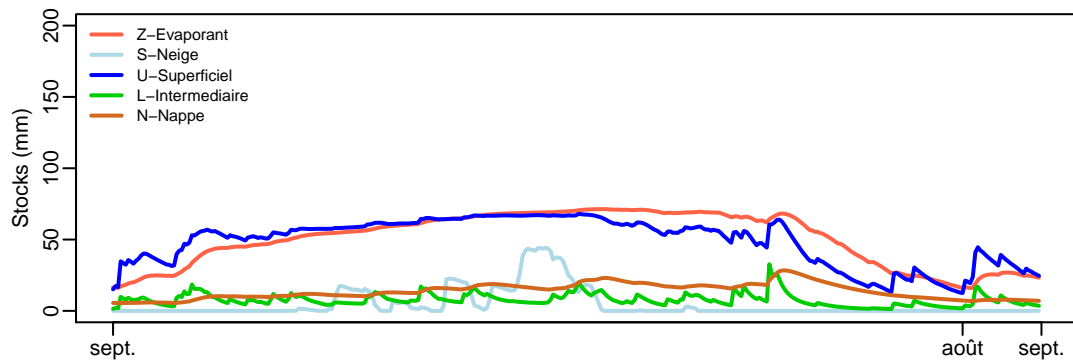

# m\_allhas (228.73 km<sup>2</sup>) – année 1999–2000

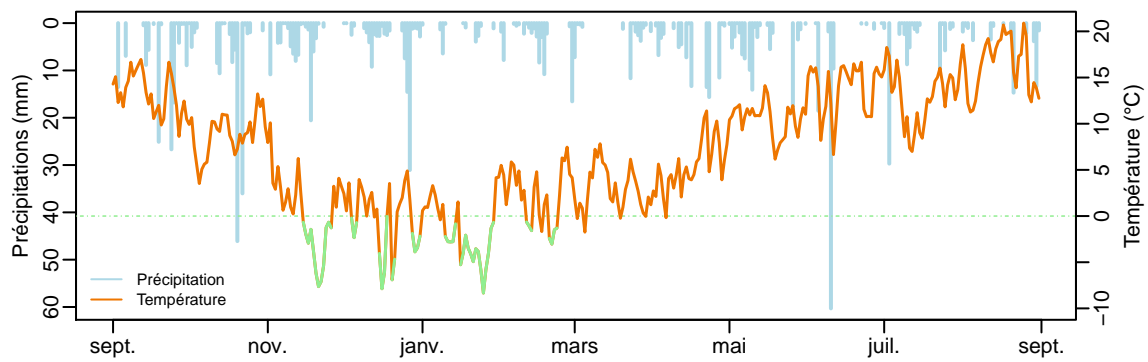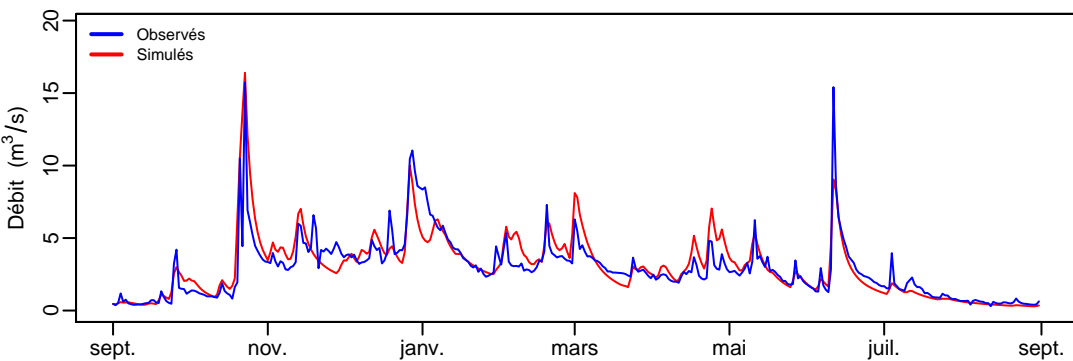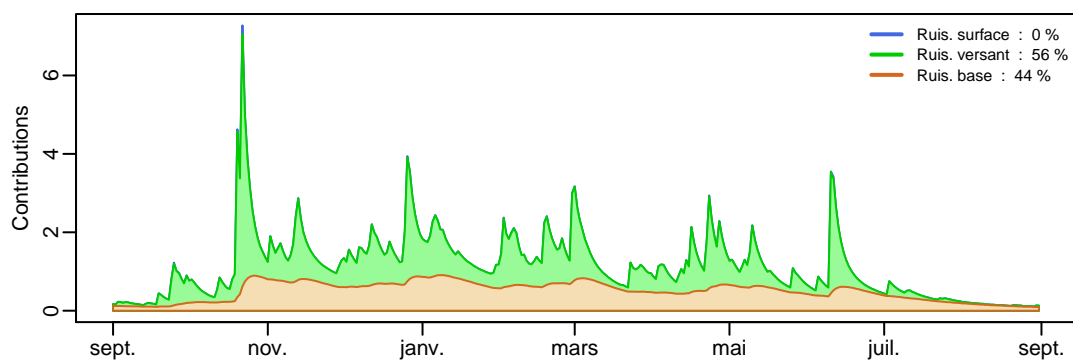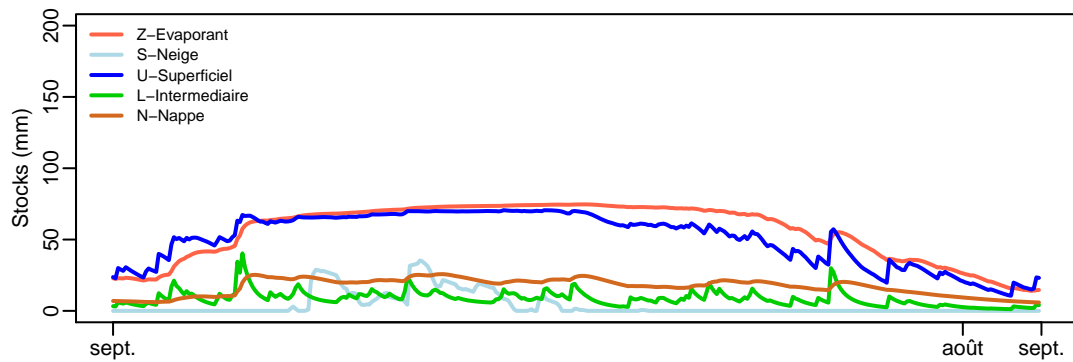

# m\_allhas (228.73 km<sup>2</sup>) – année 2000–2001

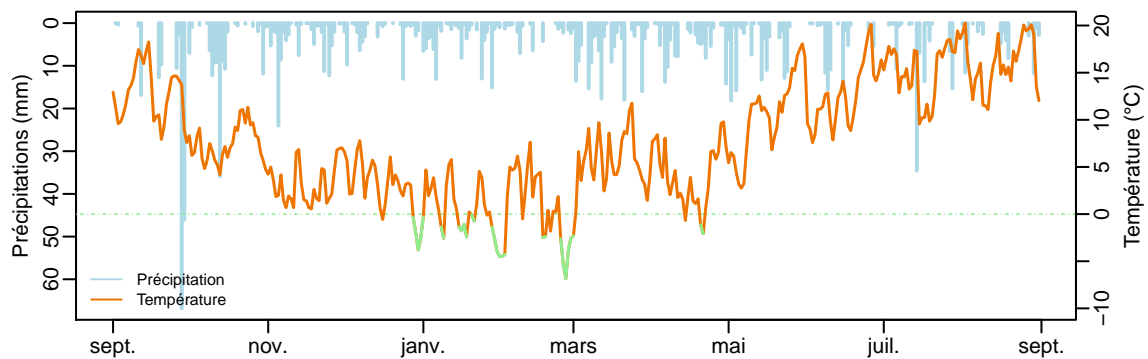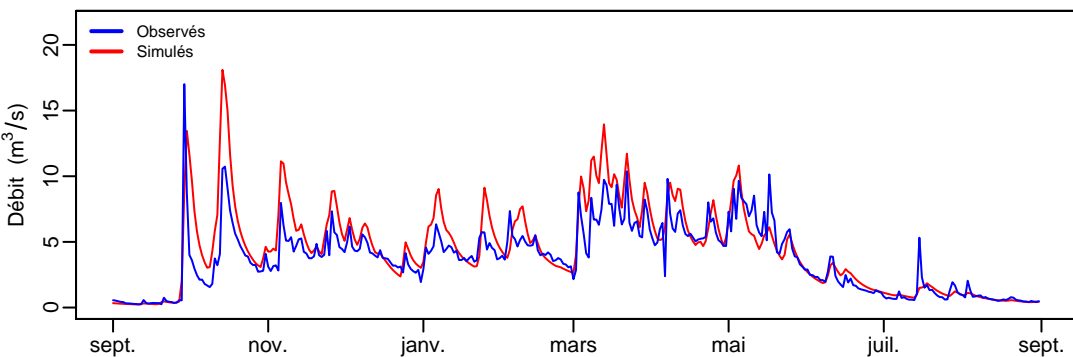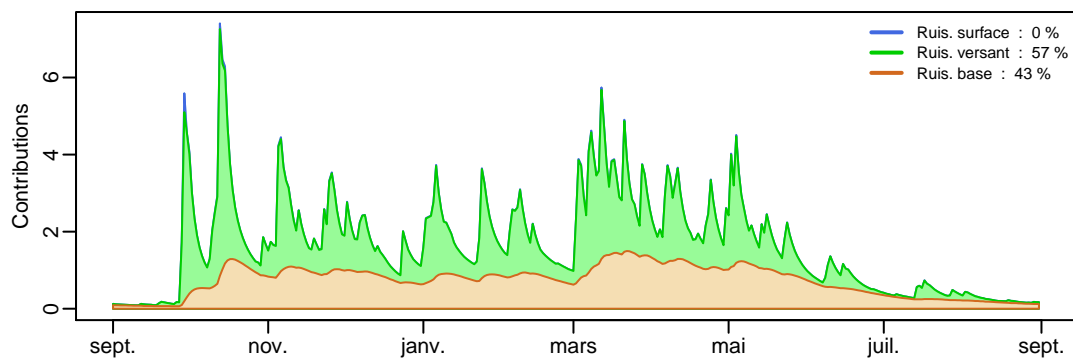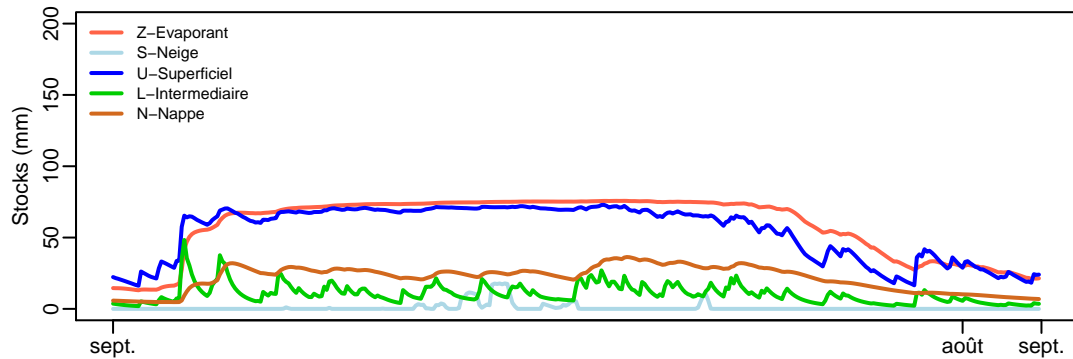

# m\_allhas (228.73 km<sup>2</sup>) – année 2001–2002

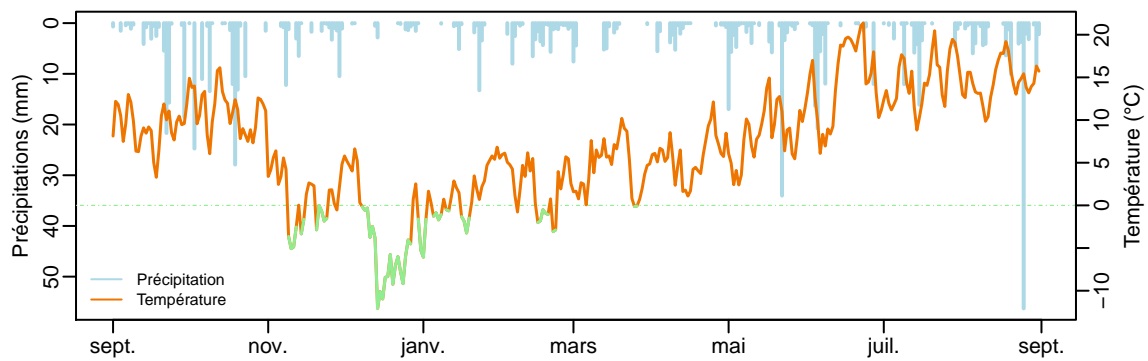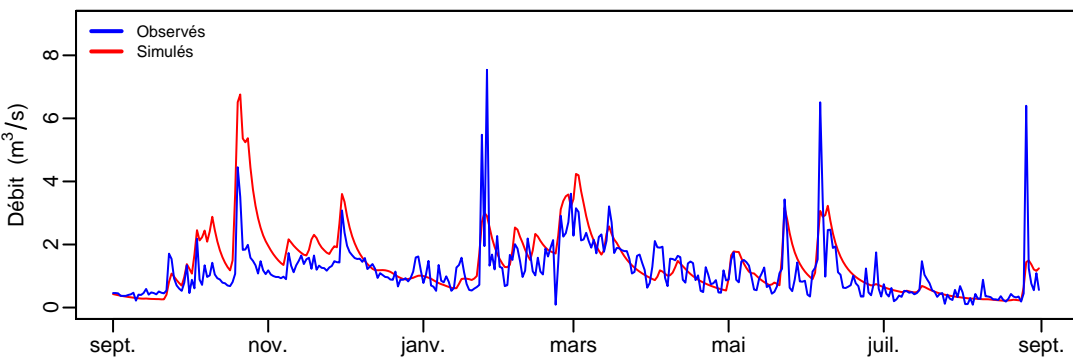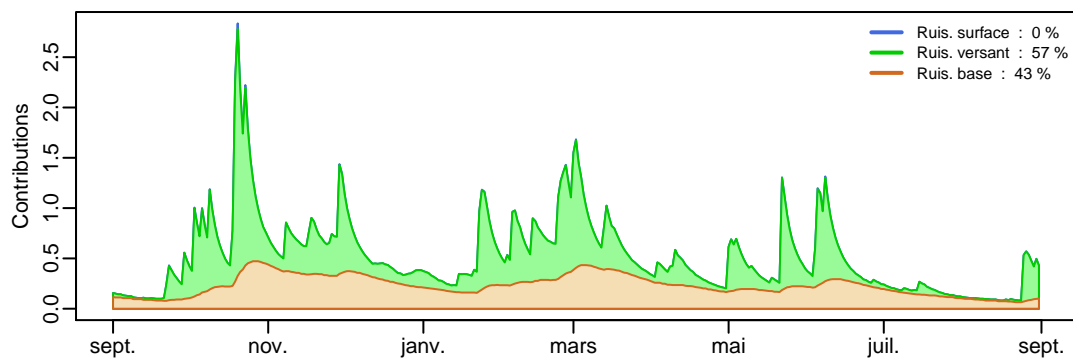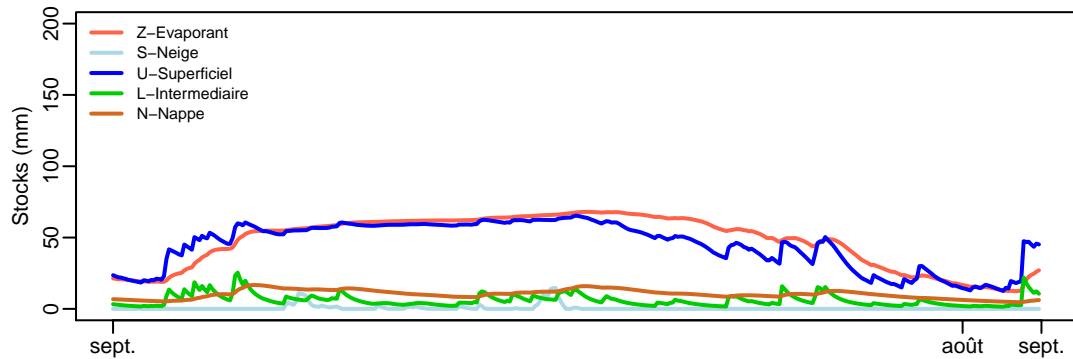

# m\_allhas (228.73 km<sup>2</sup>) – année 2002–2003

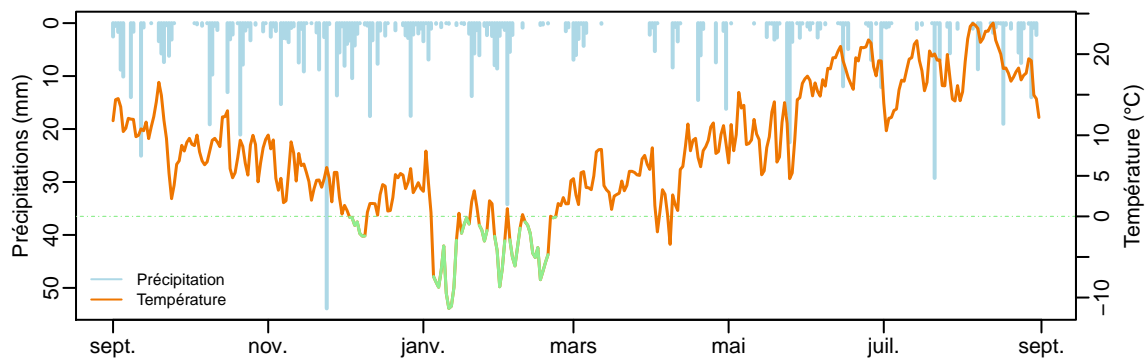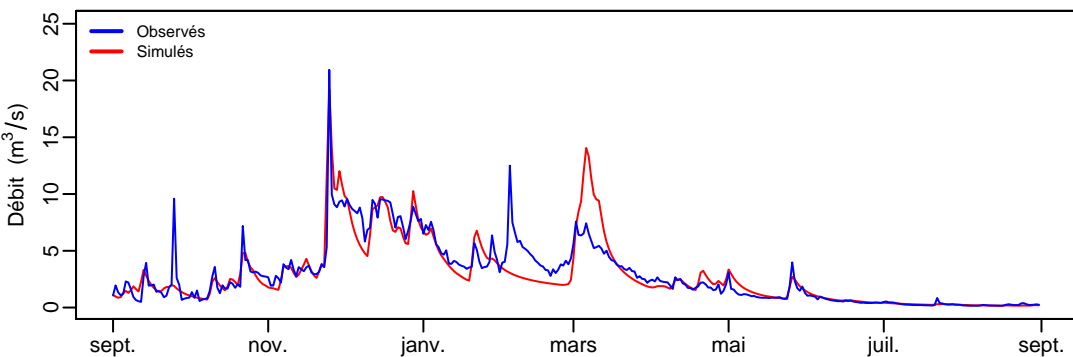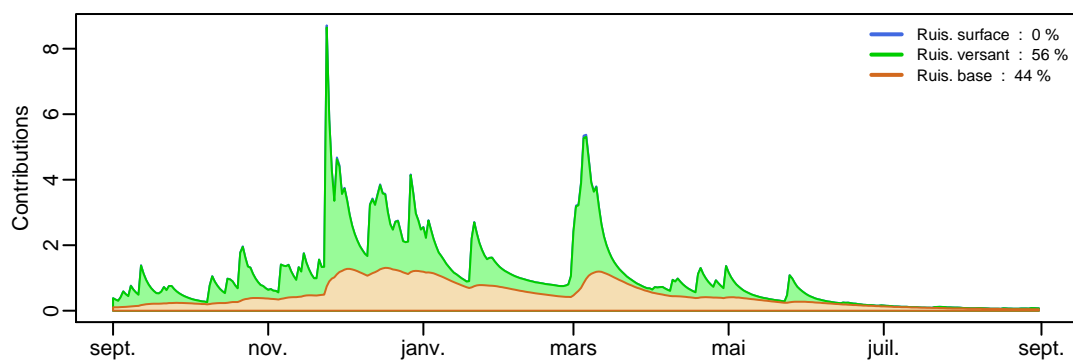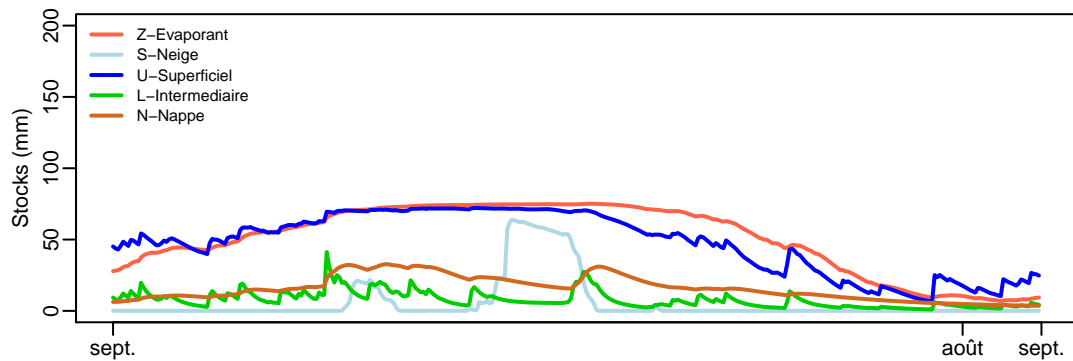

# m\_allhas (228.73 km<sup>2</sup>) – année 2003–2004

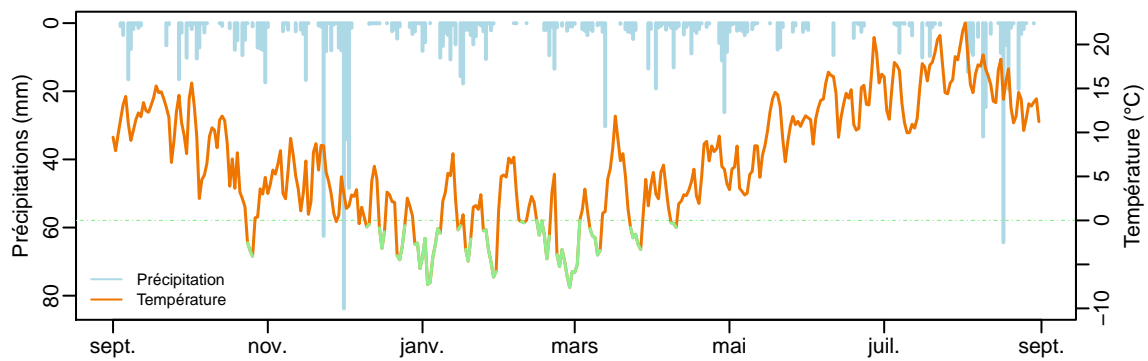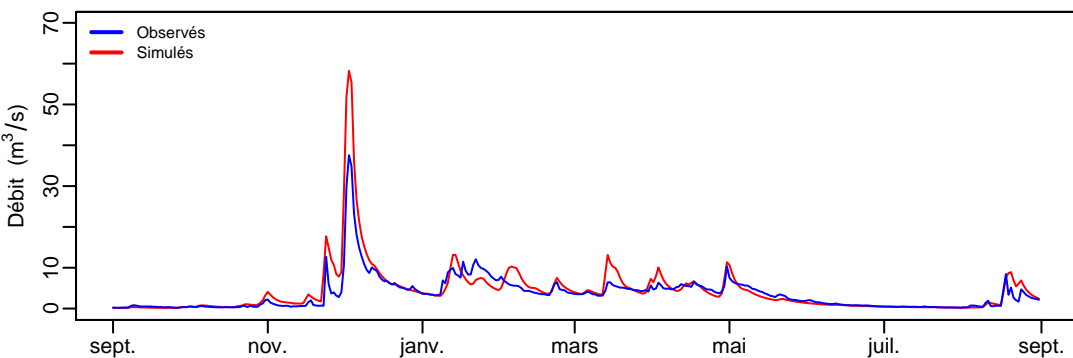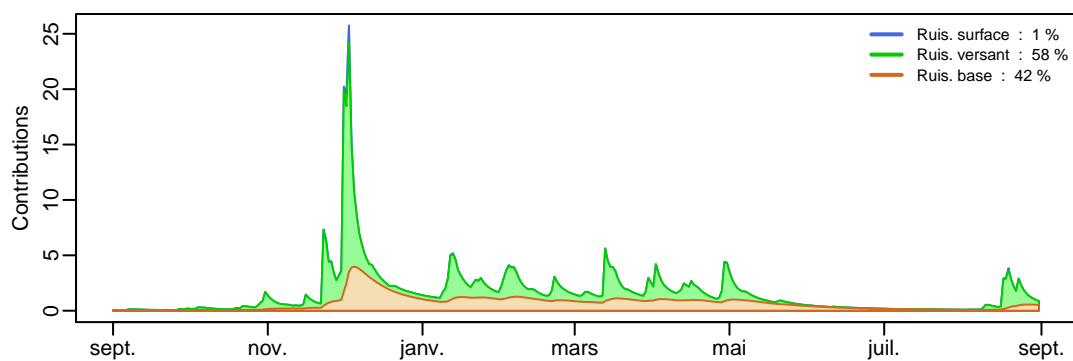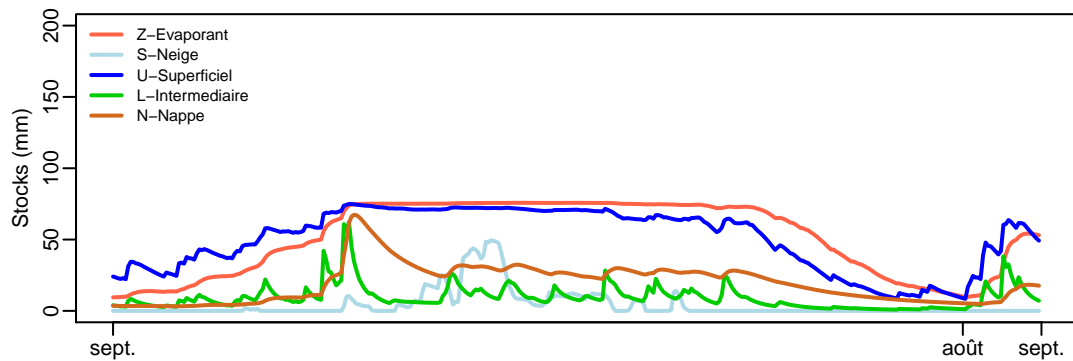

# m\_allhas (228.73 km<sup>2</sup>) – année 2004–2005

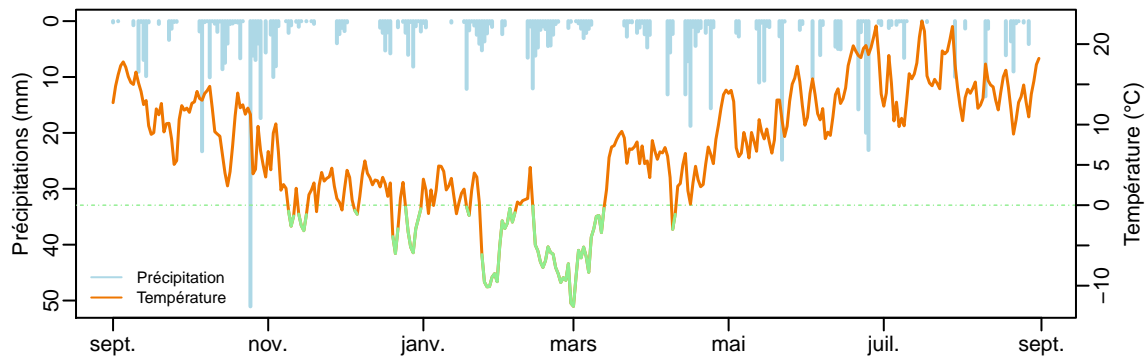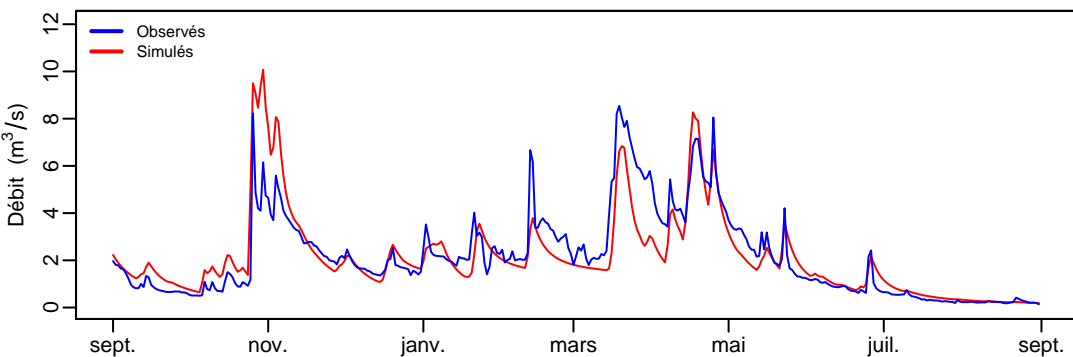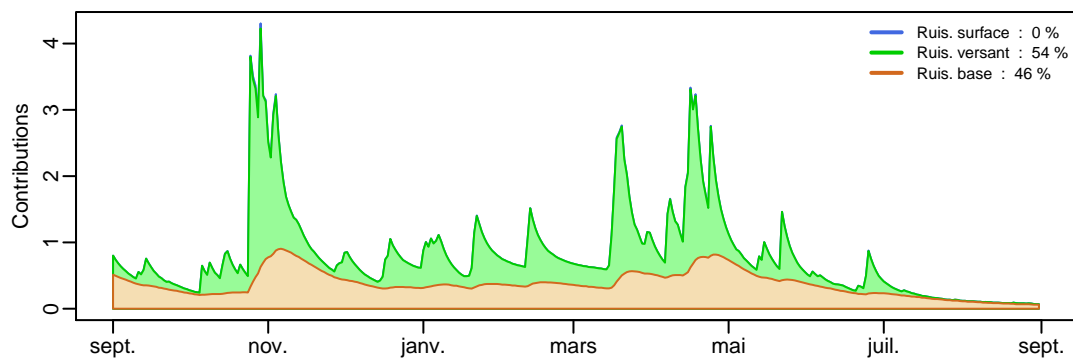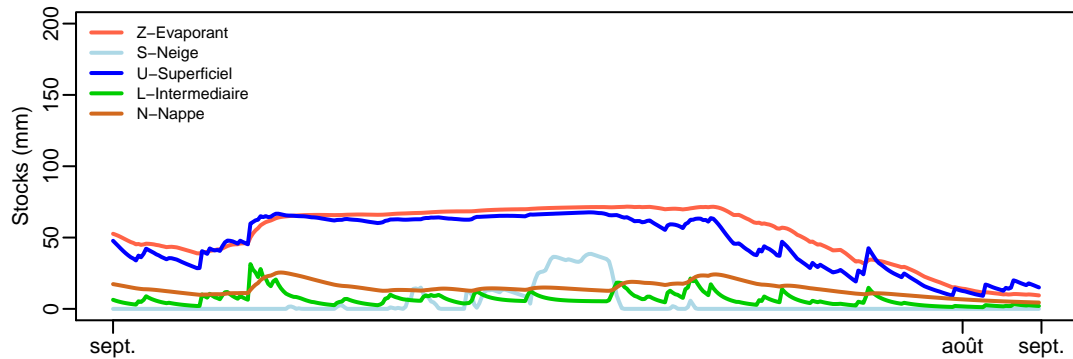

# m\_allhas (228.73 km<sup>2</sup>) – année 2005–2006

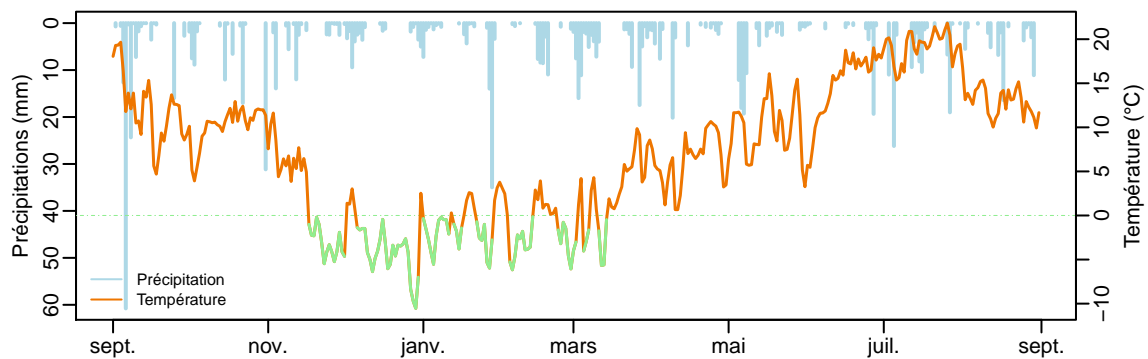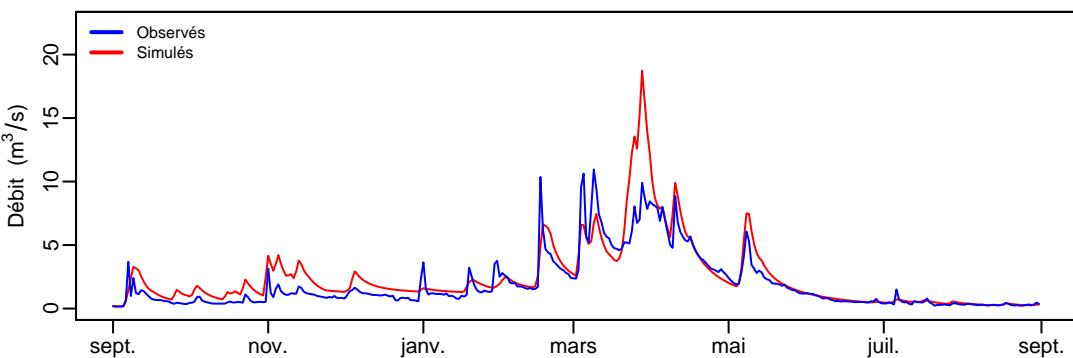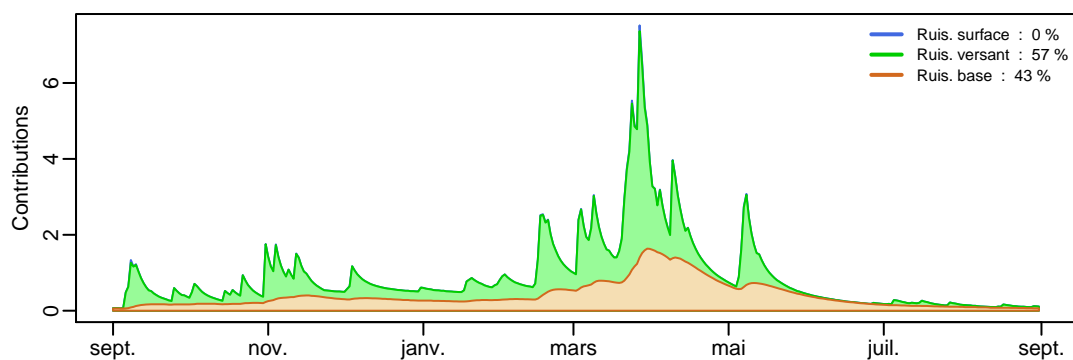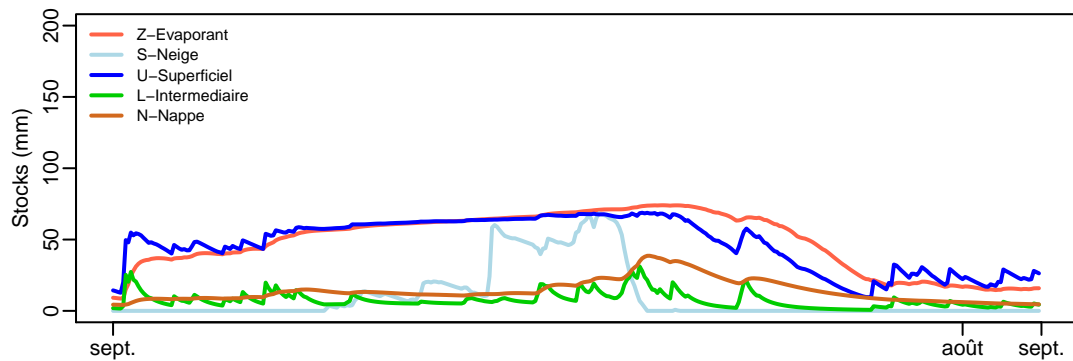



# m\_allhas (228.73 km<sup>2</sup>) – année 2006–2007

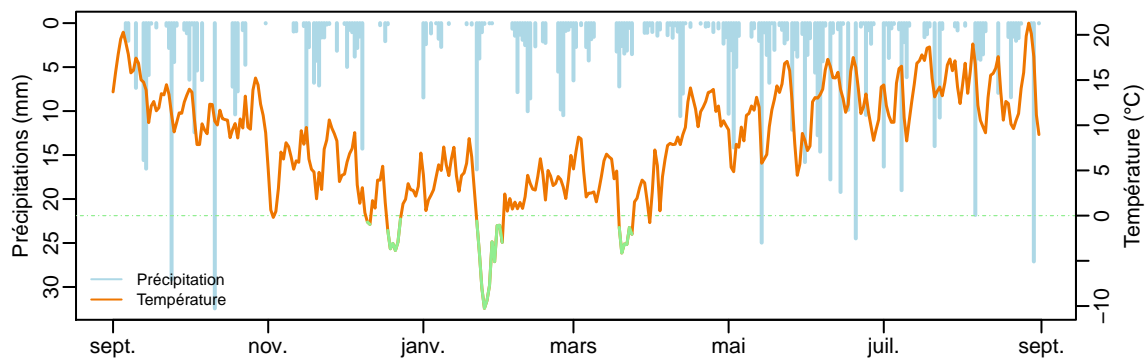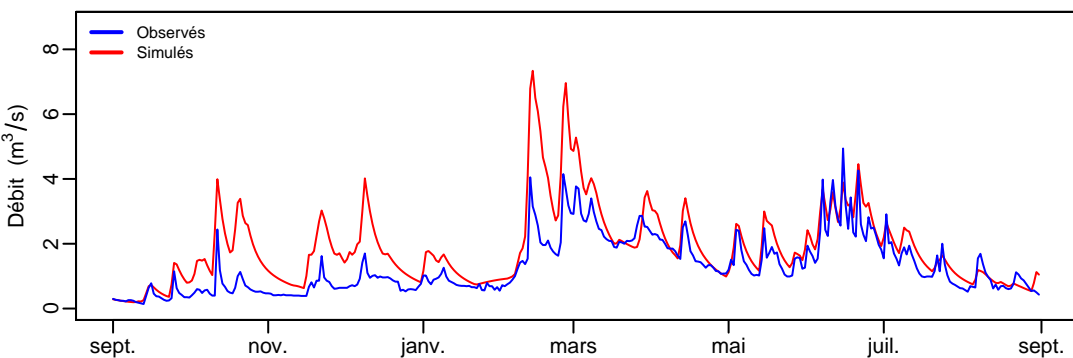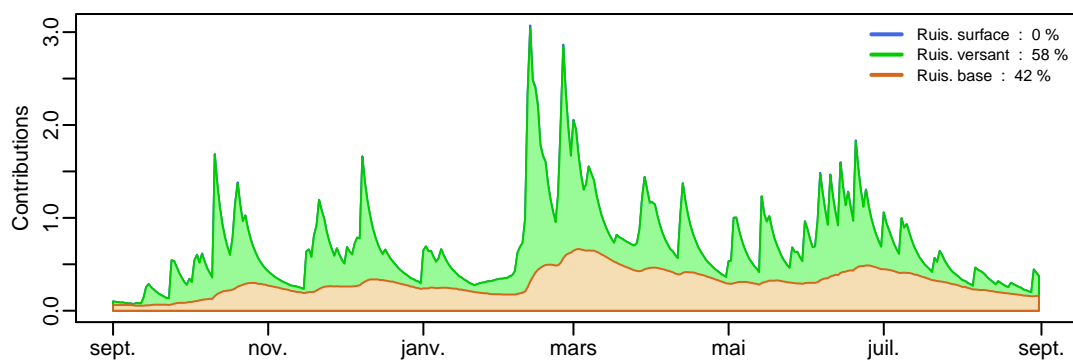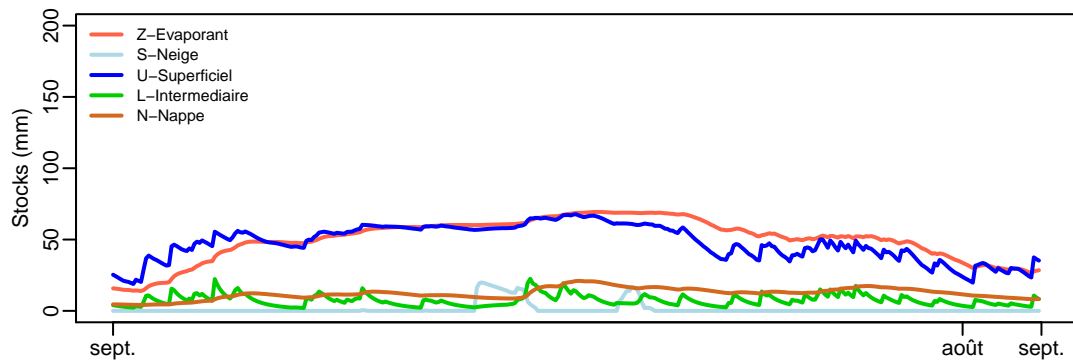

# m\_allhas (228.73 km<sup>2</sup>) – année 2007–2008

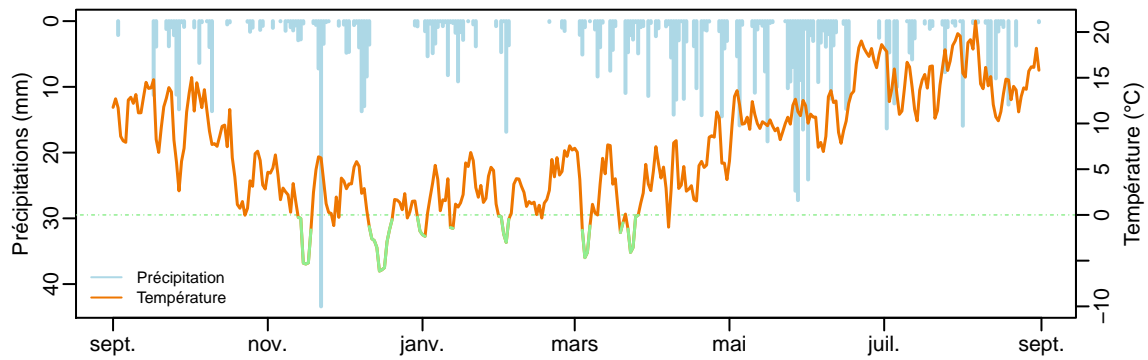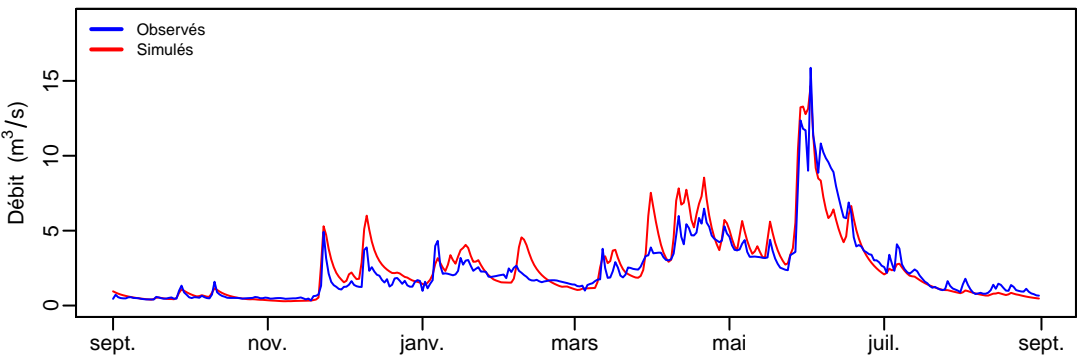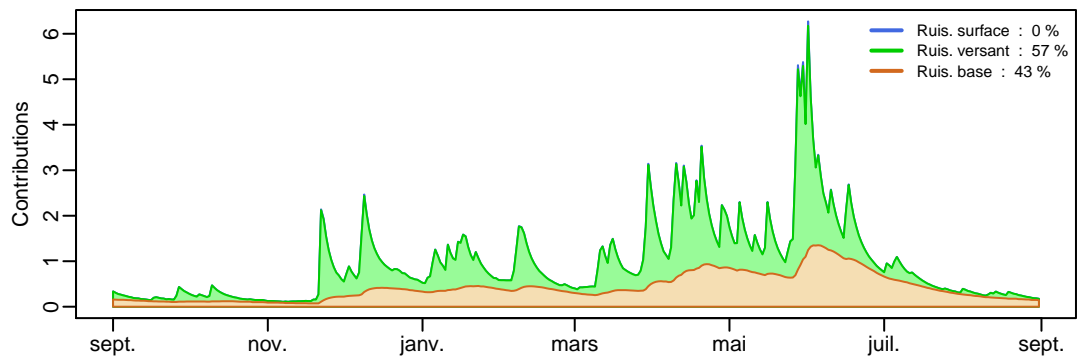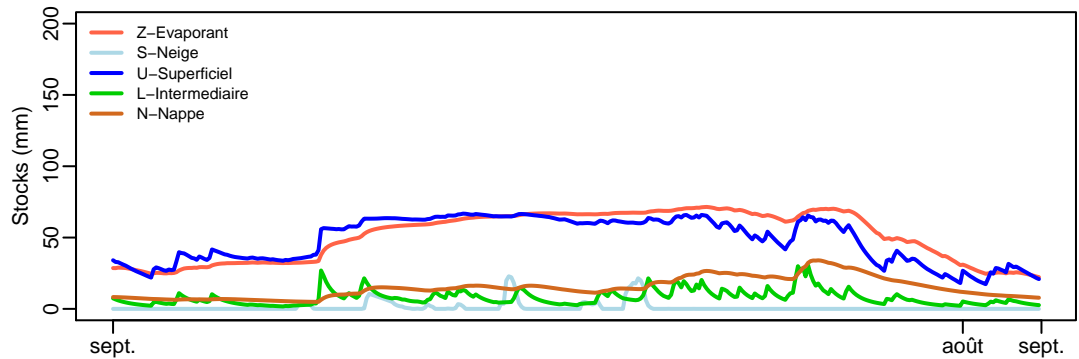

# m\_allhas (228.73 km<sup>2</sup>) – année 2008–2009

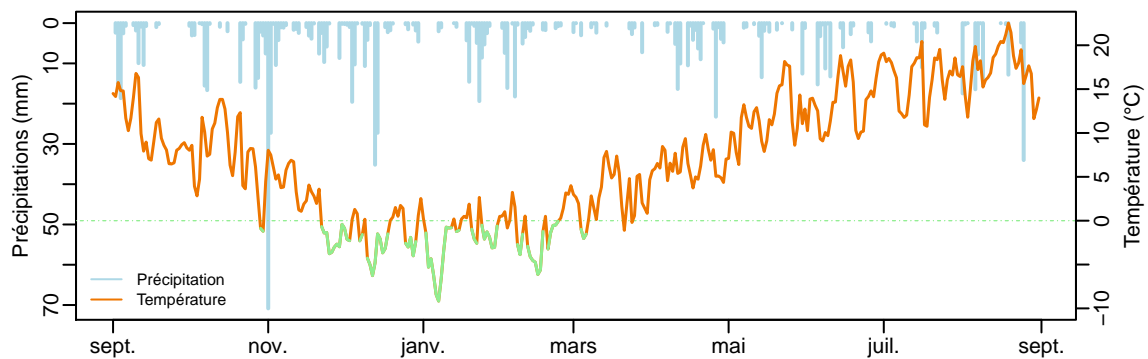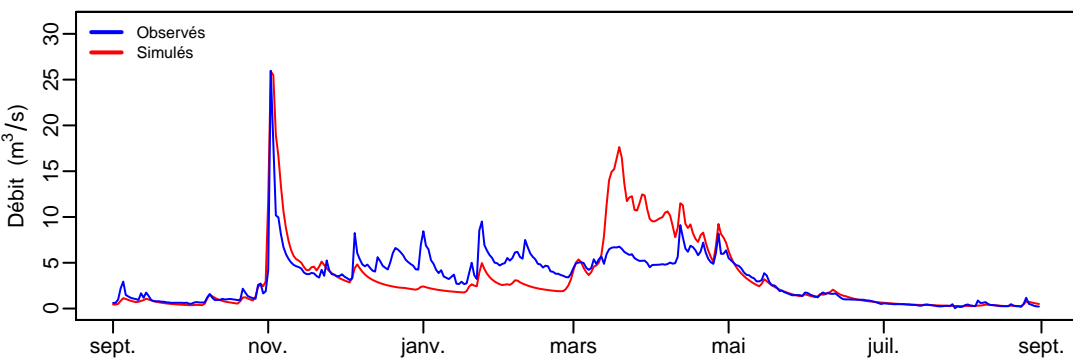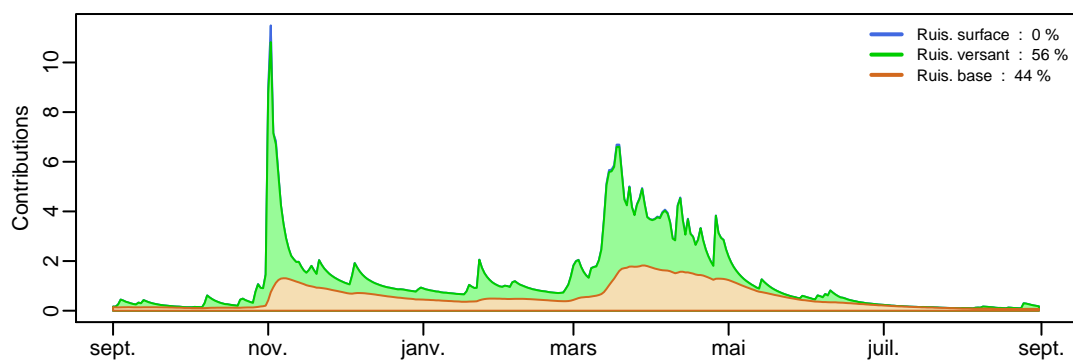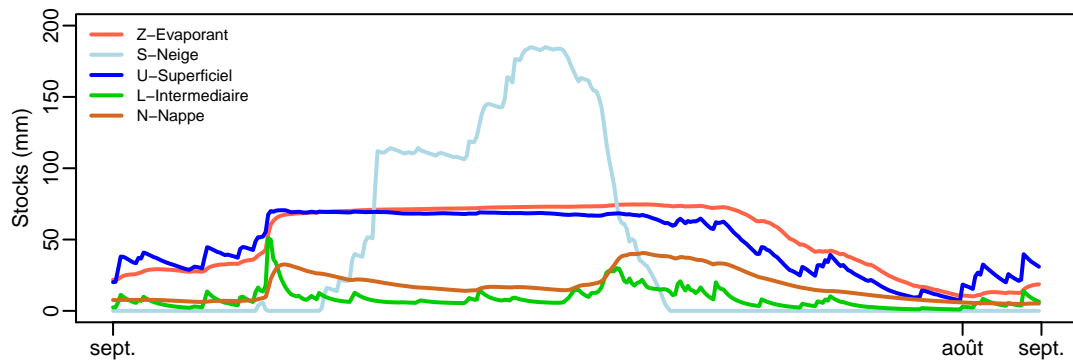

# m\_allhas (228.73 km<sup>2</sup>) – année 2009–2010

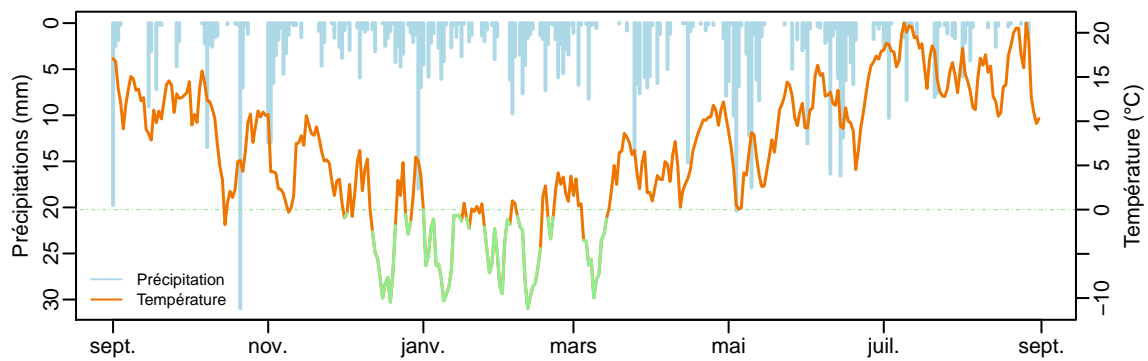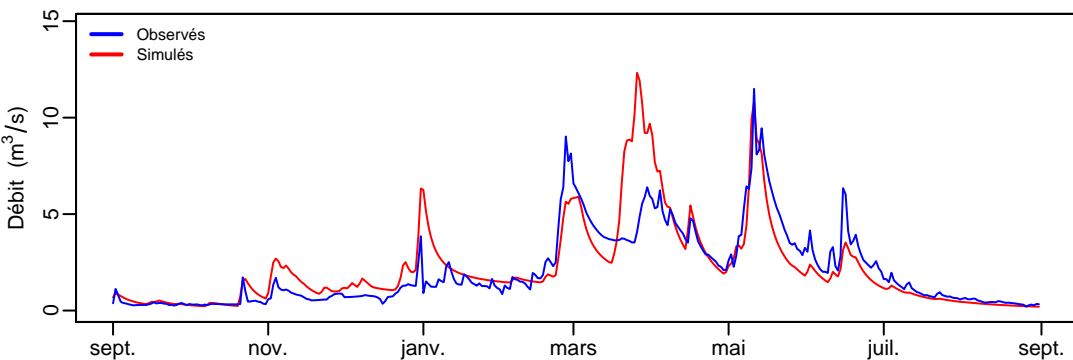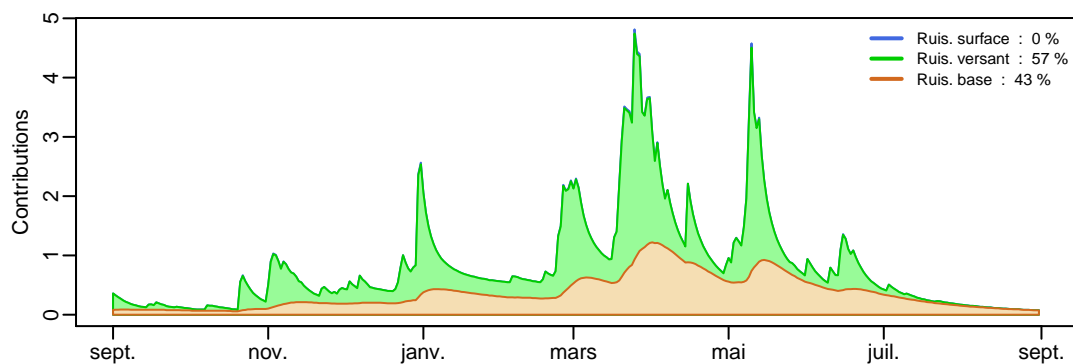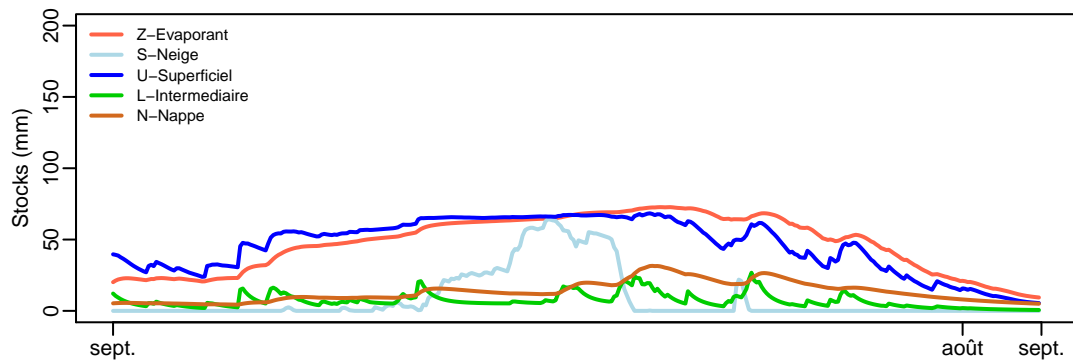

# m\_allhas (228.73 km<sup>2</sup>) – année 2010–2011

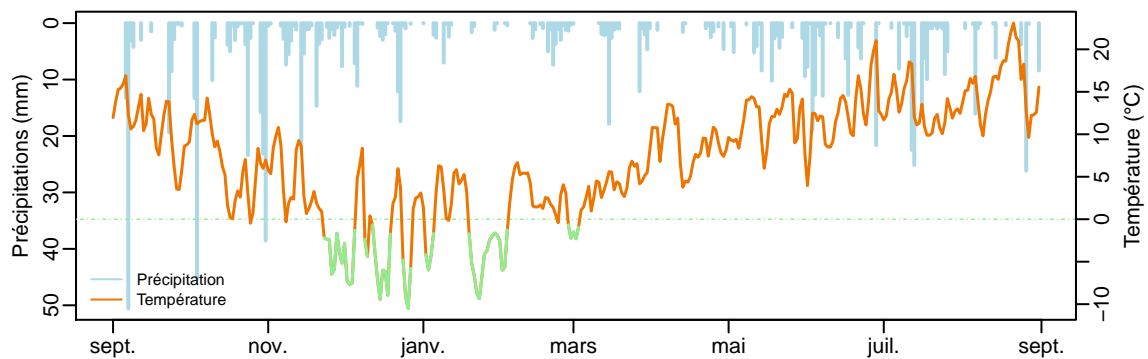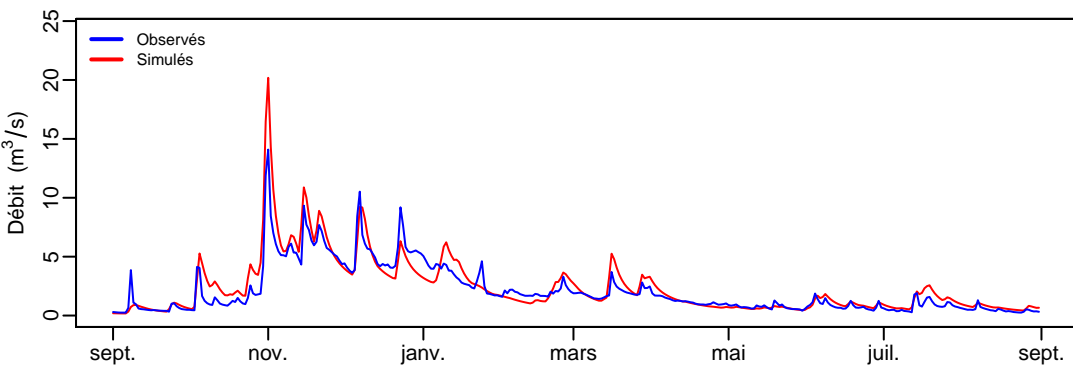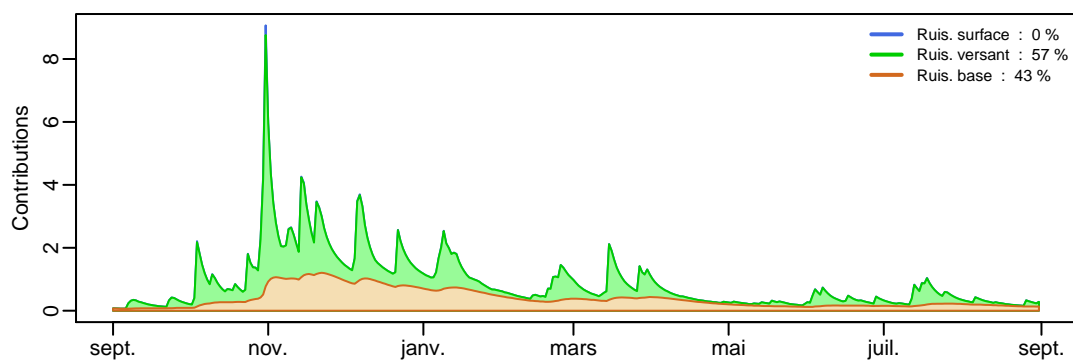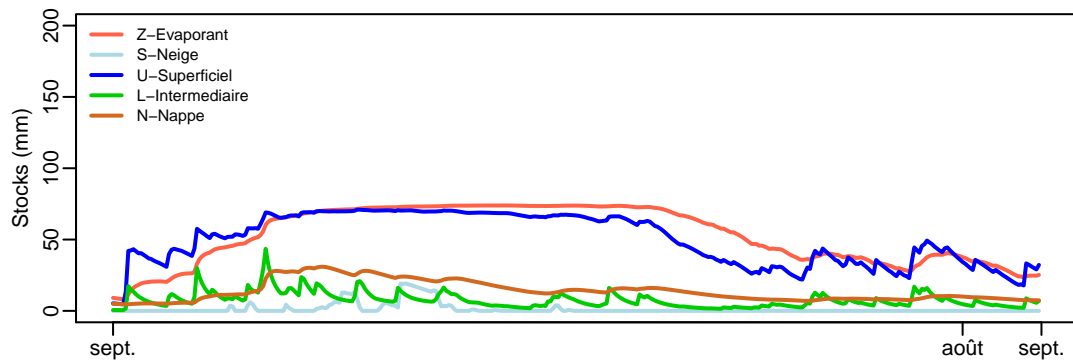

# m\_allhas (228.73 km<sup>2</sup>) – année 2011–2012

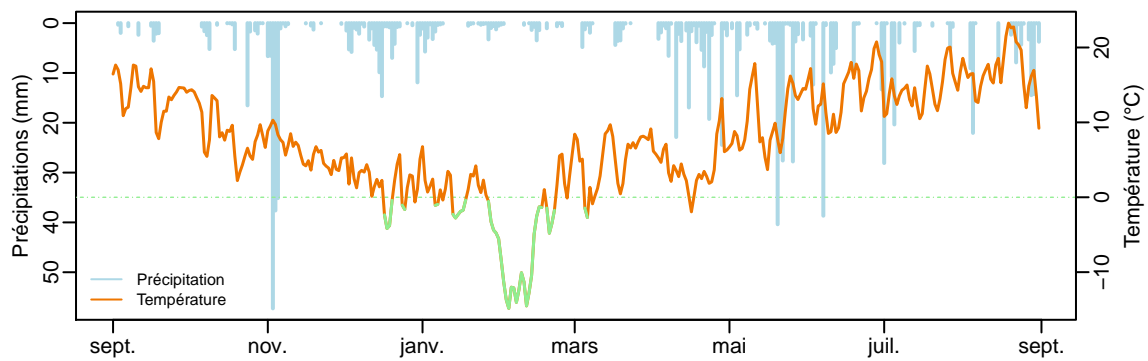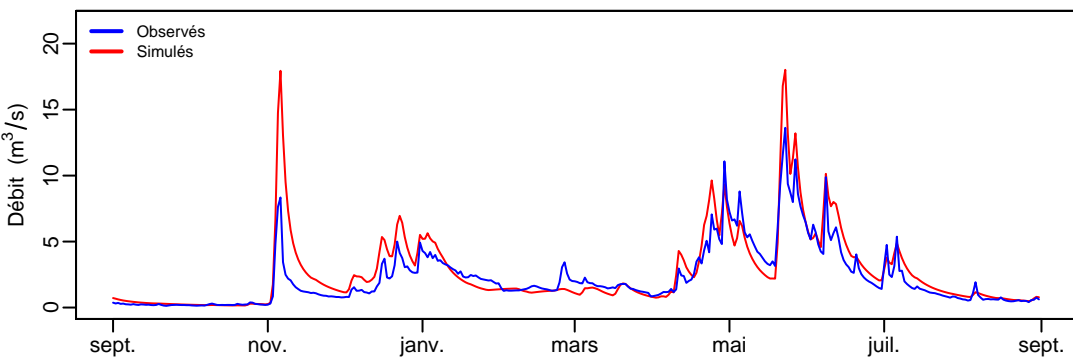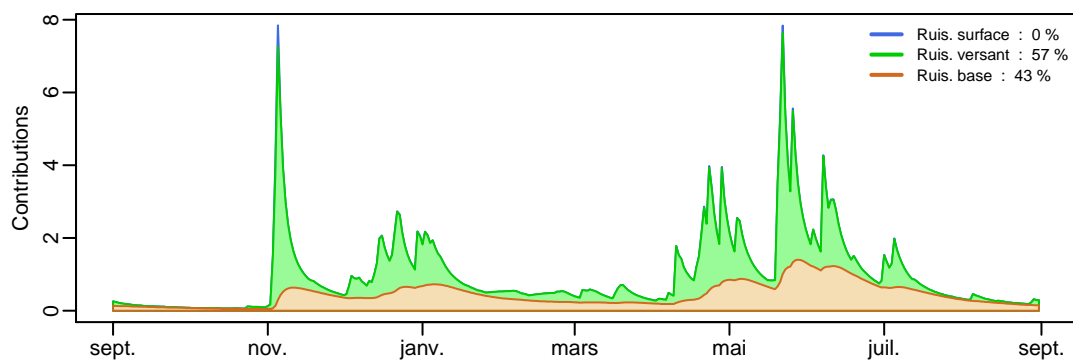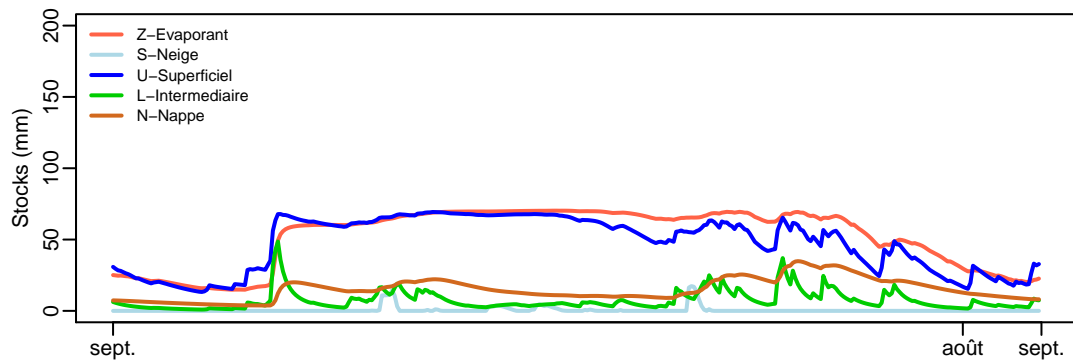

# q2815 (228.36 km<sup>2</sup>) – année 1981–1982

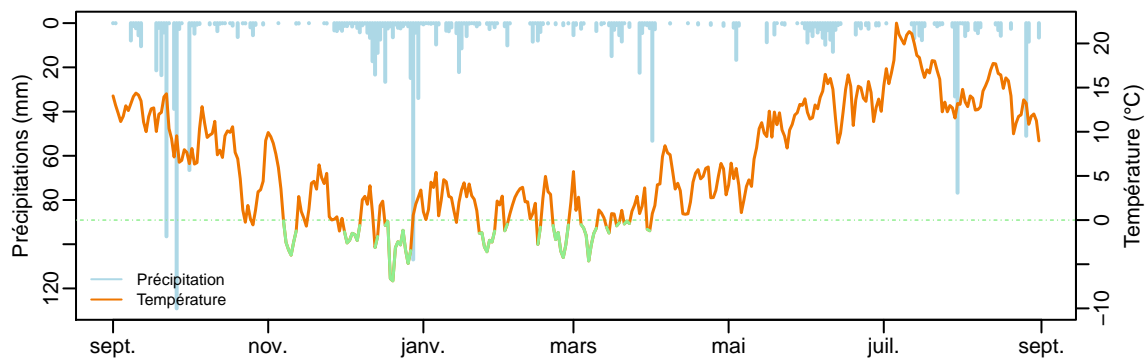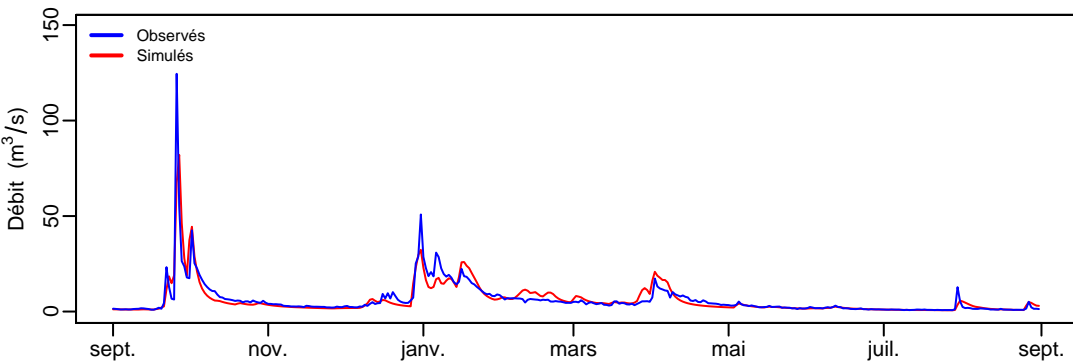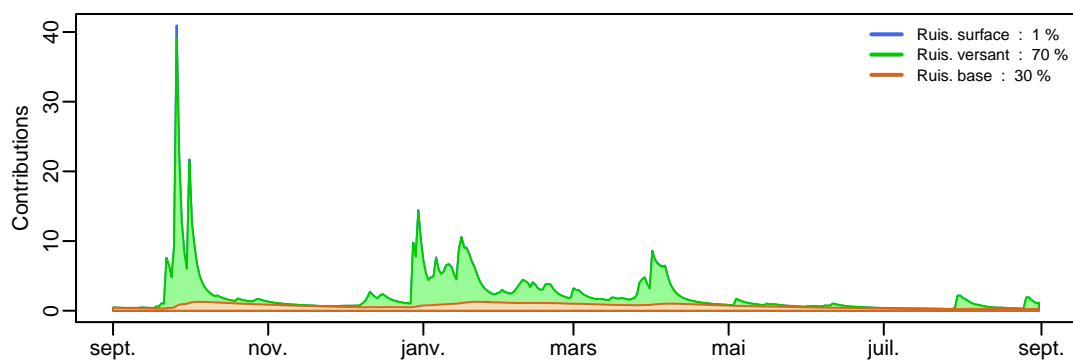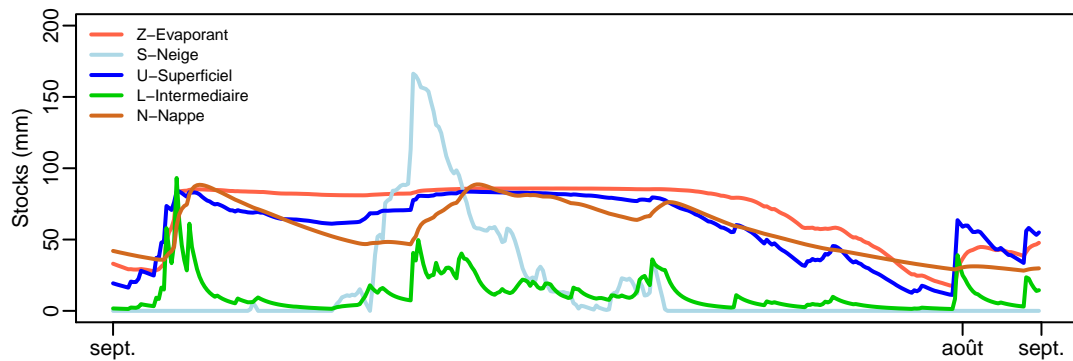

# q2815 (228.36 km²) – année 1982–1983

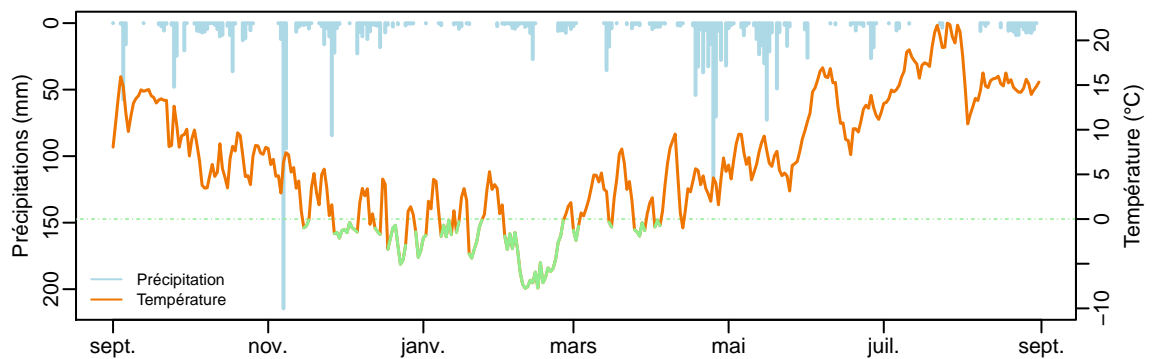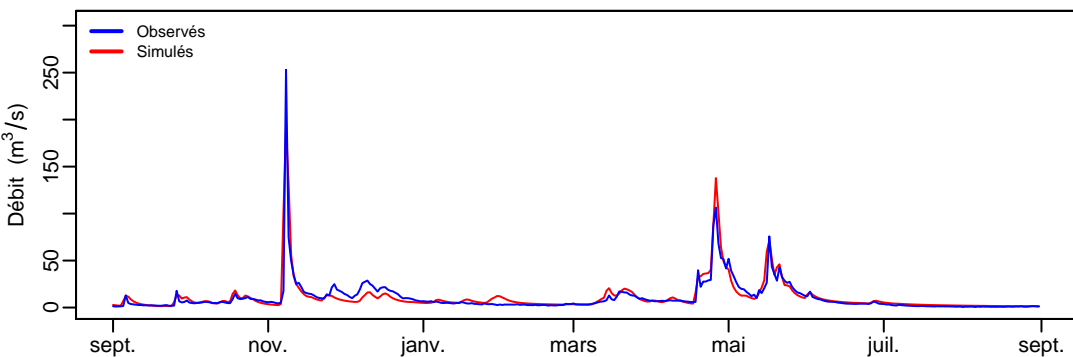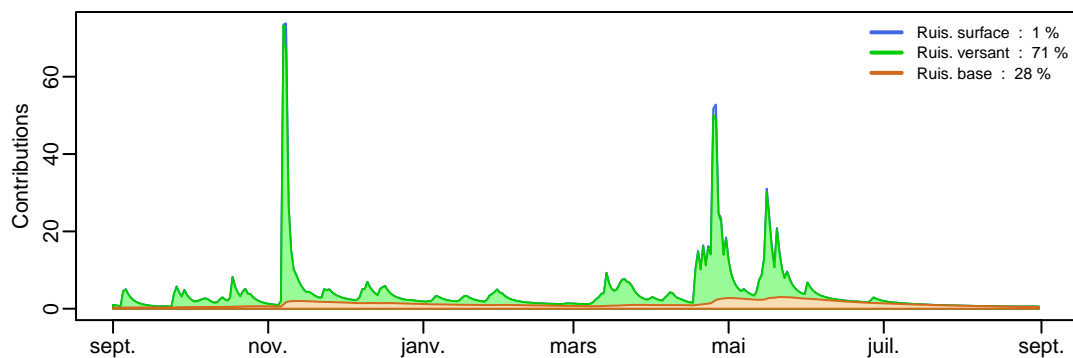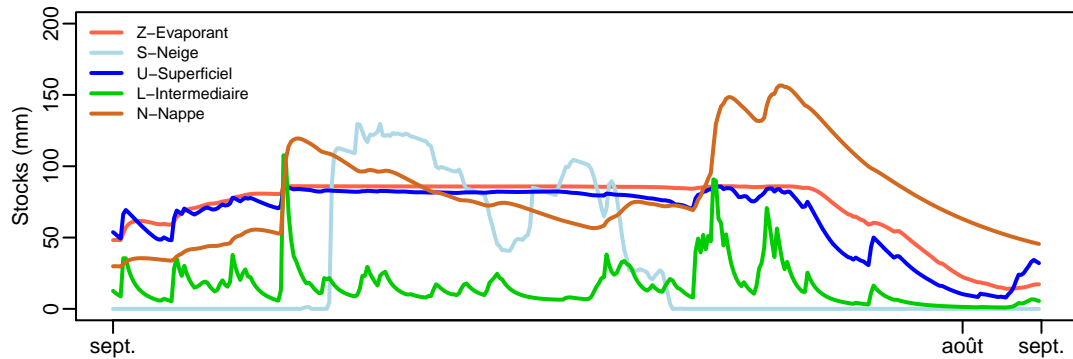



# q2815 (228.36 km<sup>2</sup>) – année 1983–1984

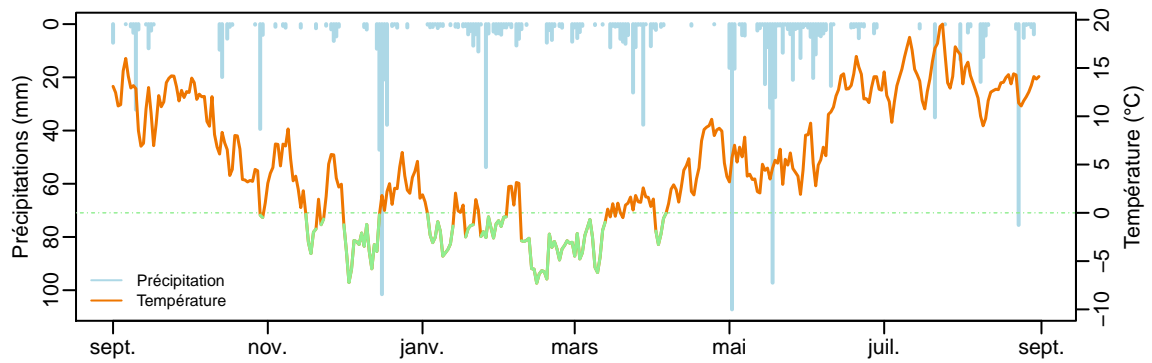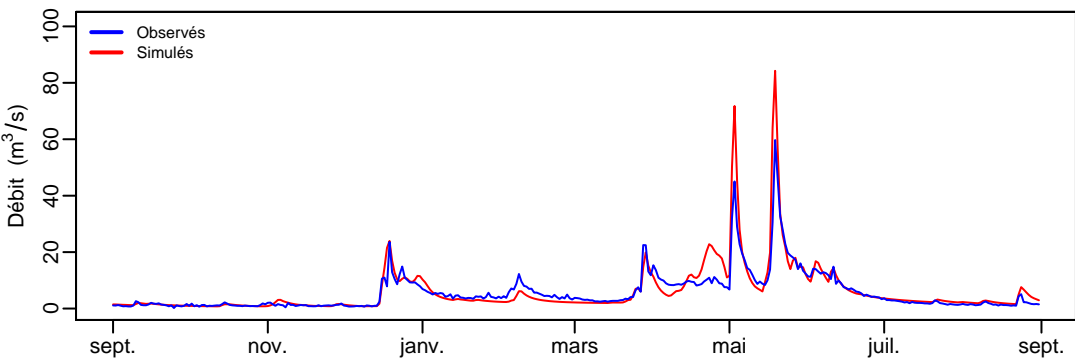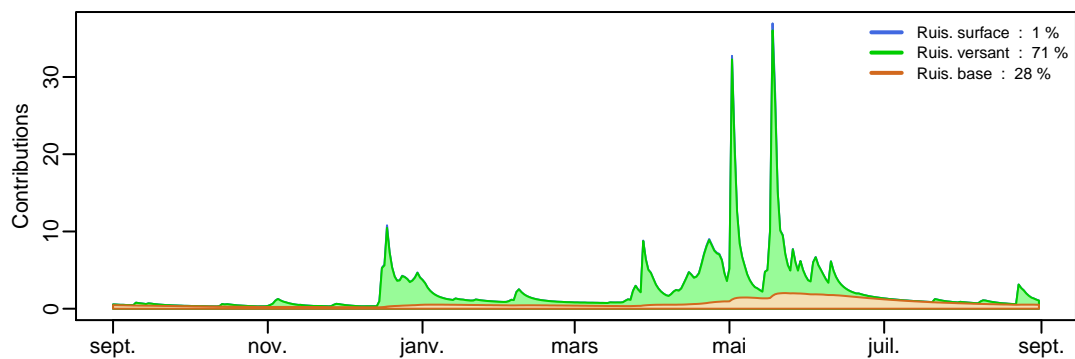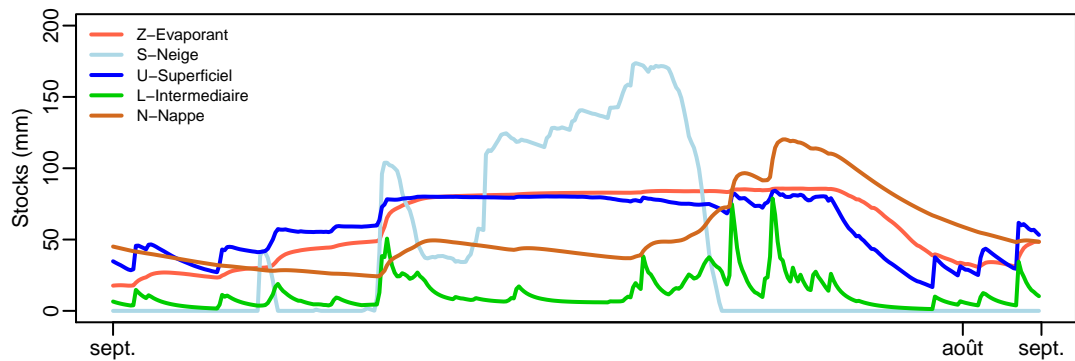

# q2815 (228.36 km<sup>2</sup>) – année 1984–1985

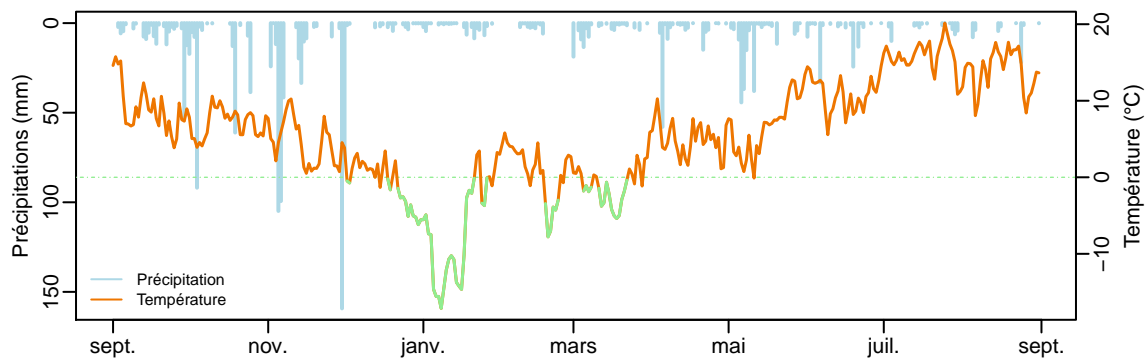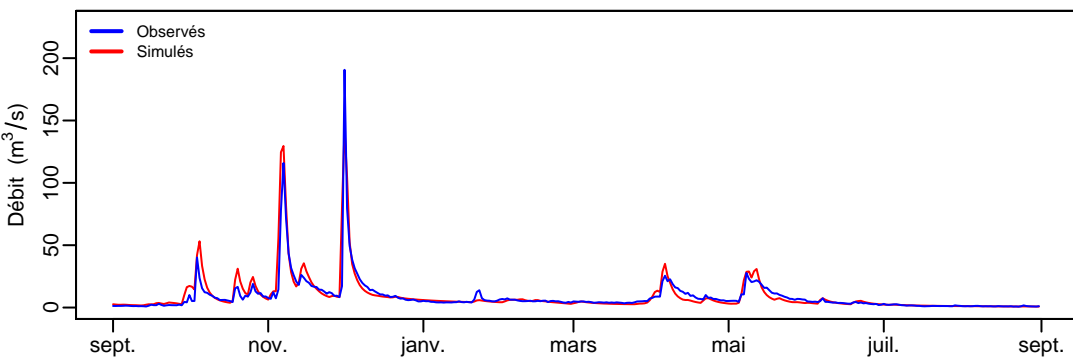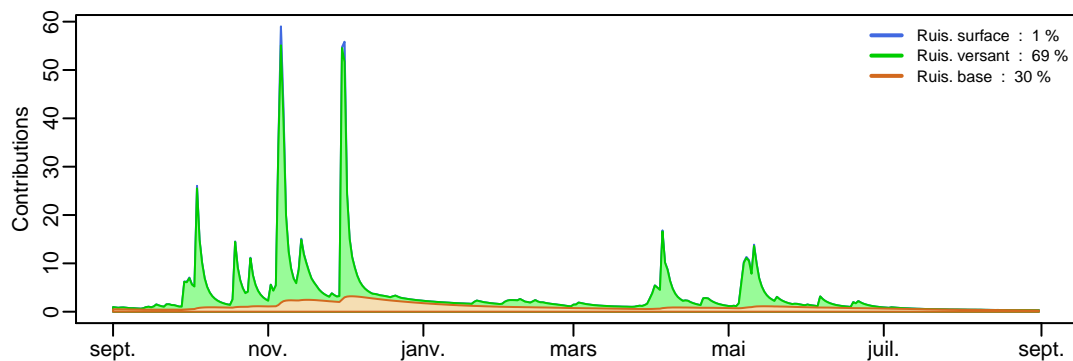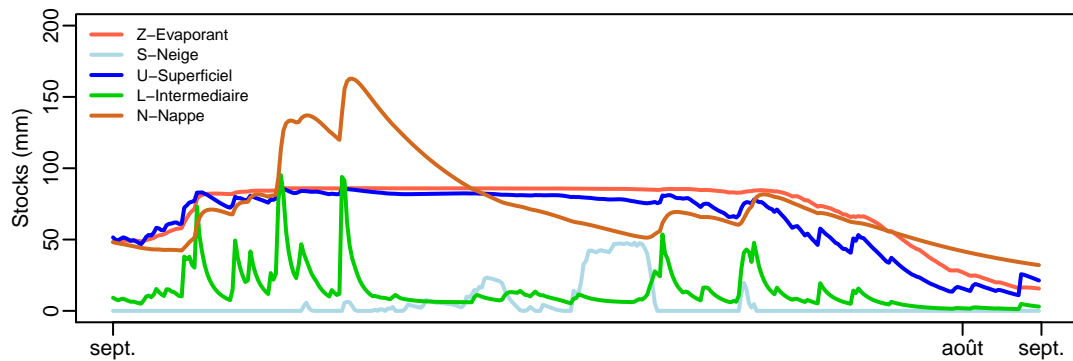

# q2815 (228.36 km²) – année 1985–1986

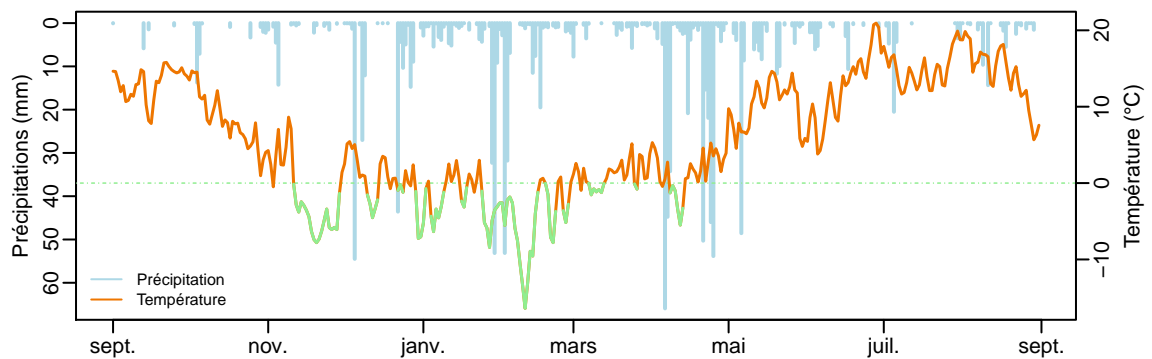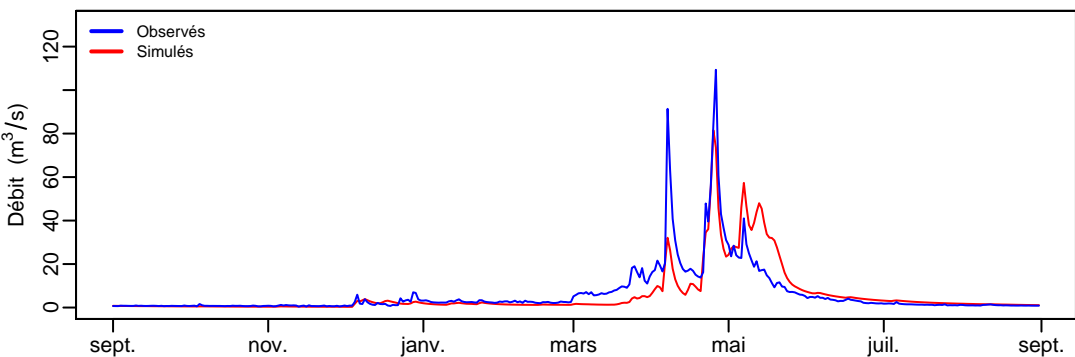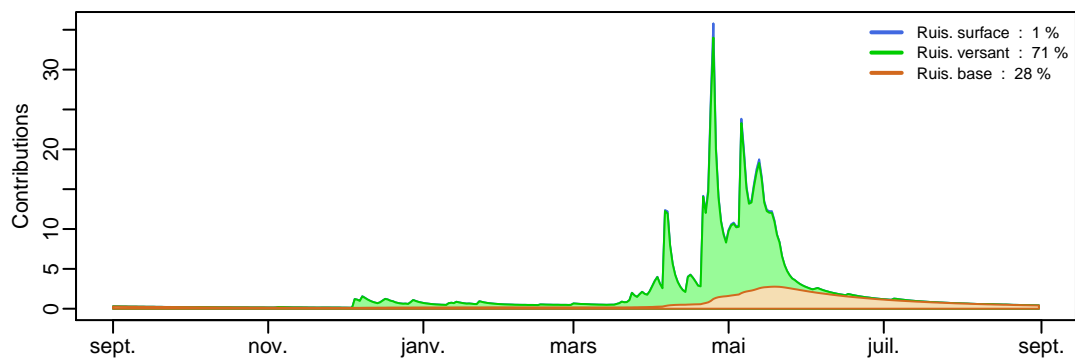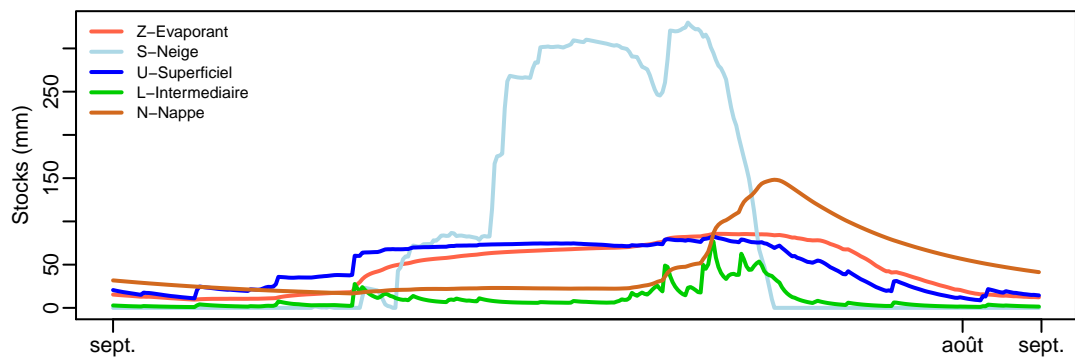

# q2815 (228.36 km²) – année 1986–1987

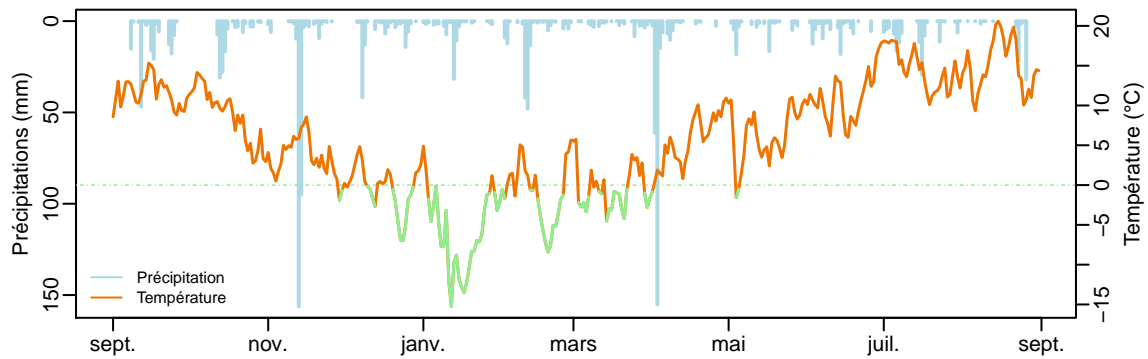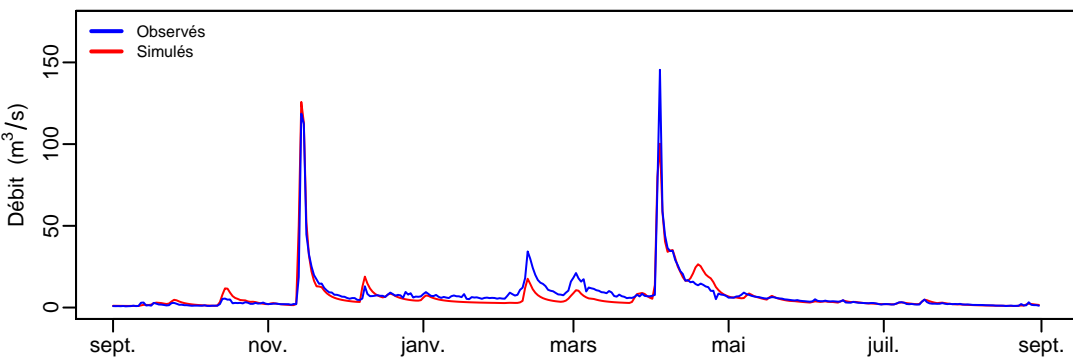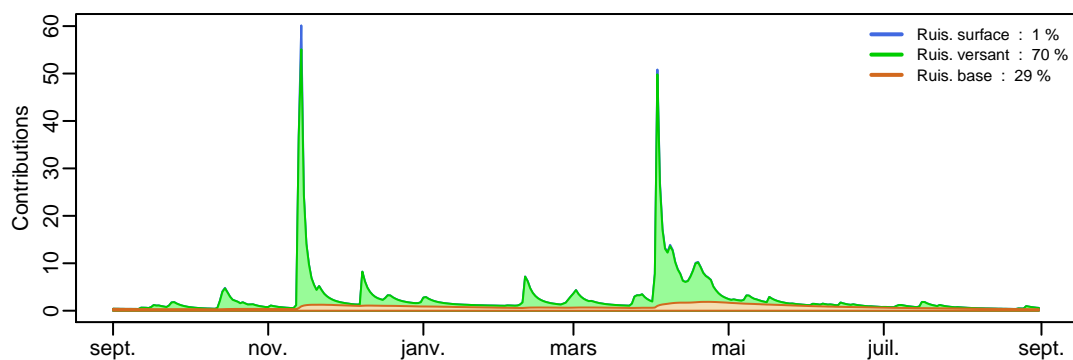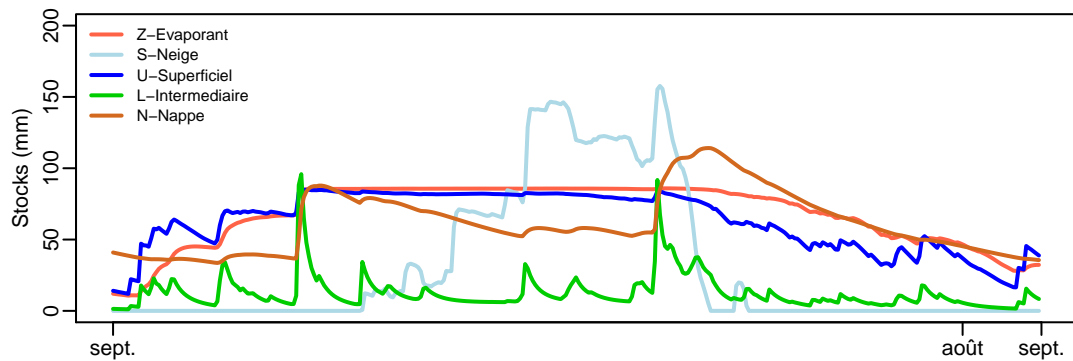

# q2815 (228.36 km<sup>2</sup>) – année 1987–1988

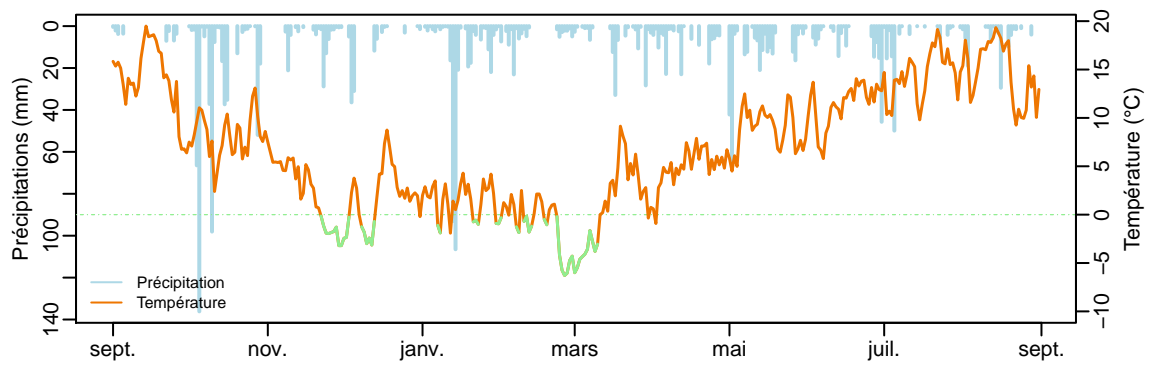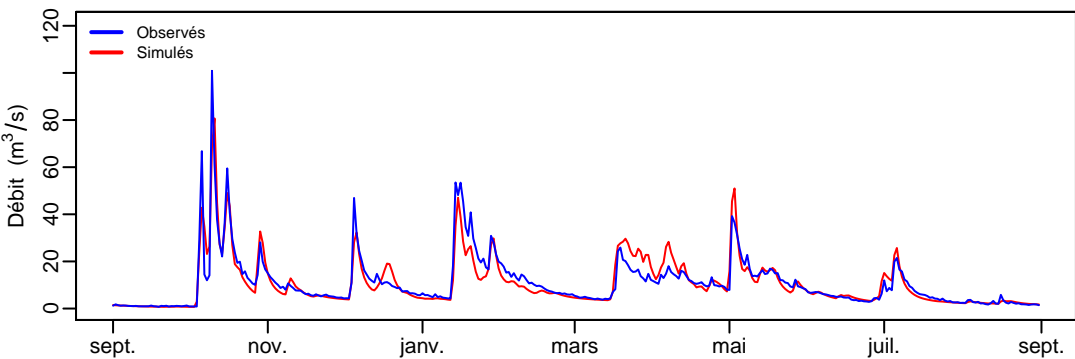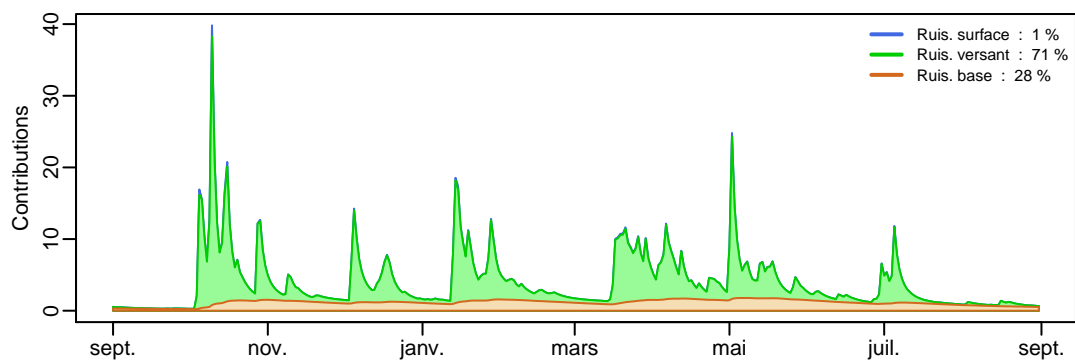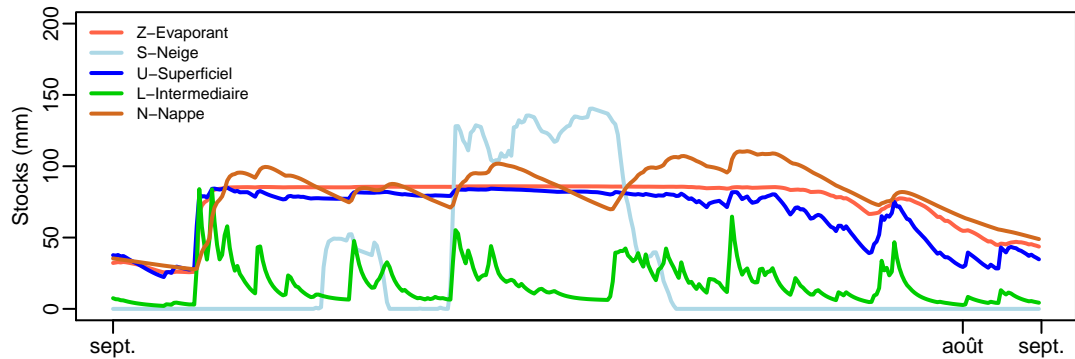

# q2815 (228.36 km<sup>2</sup>) – année 1988–1989

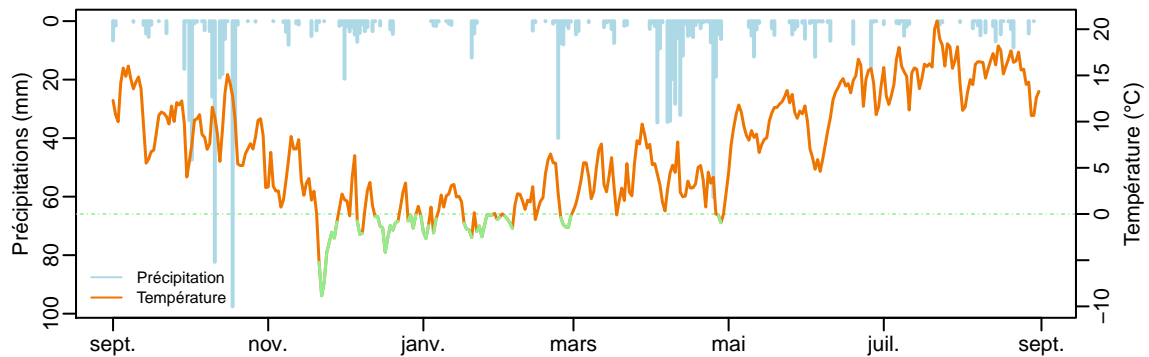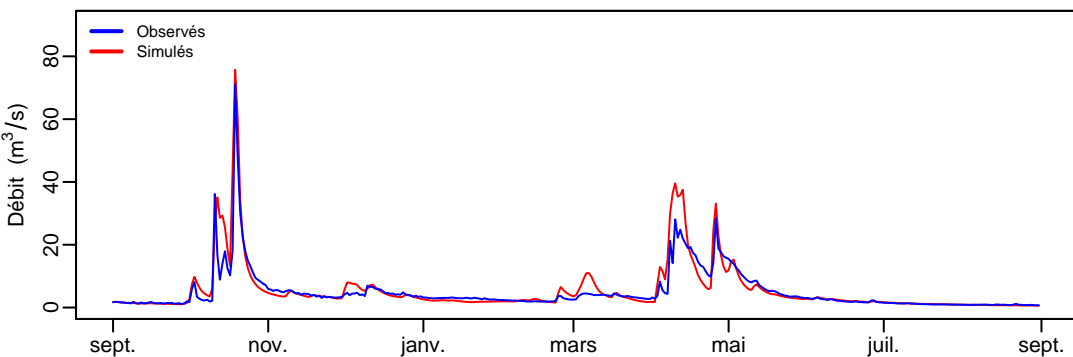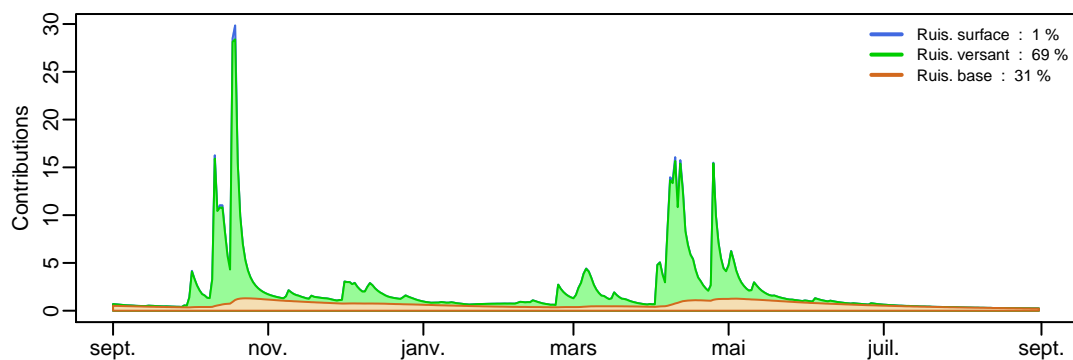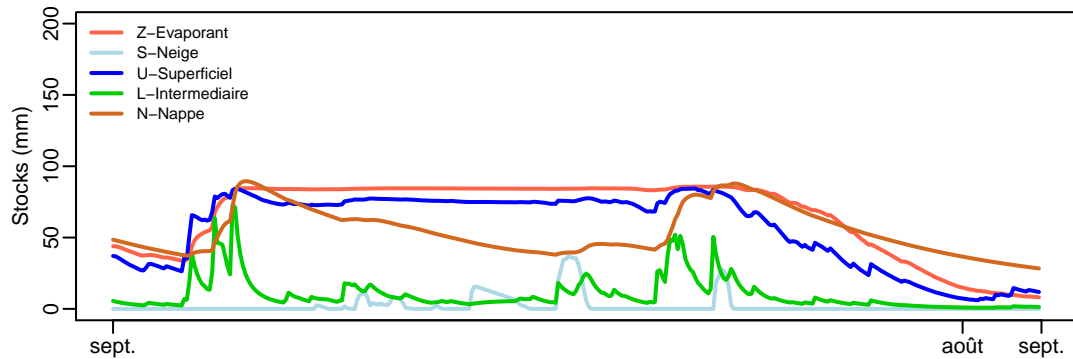

# q2815 (228.36 km²) – année 1989–1990

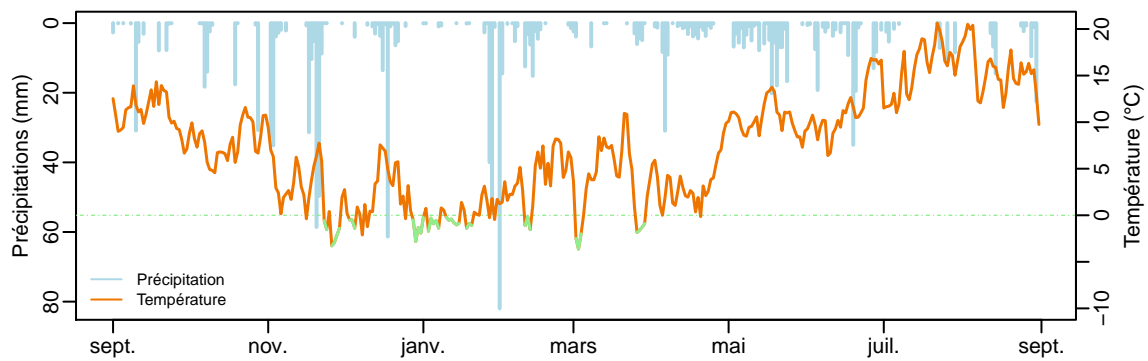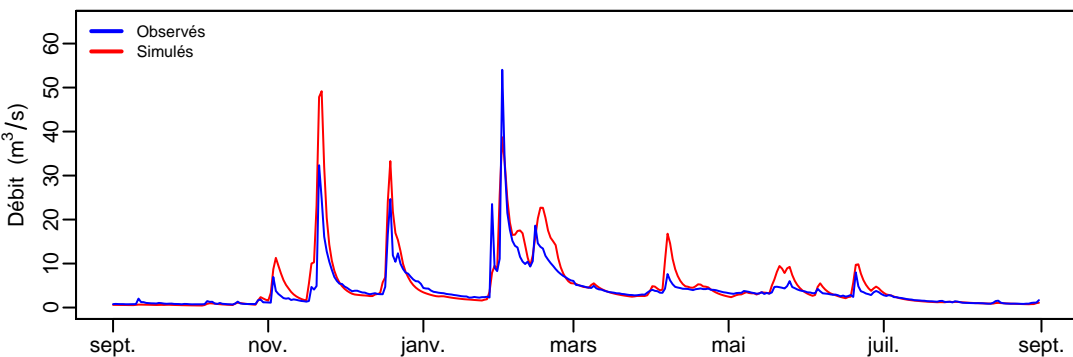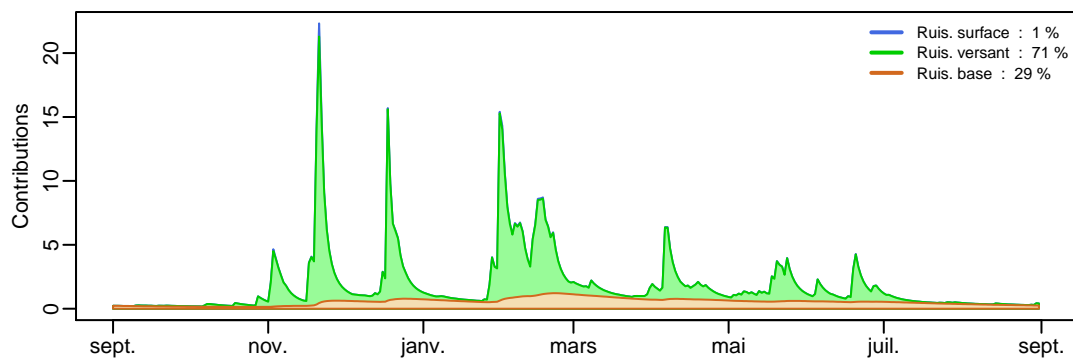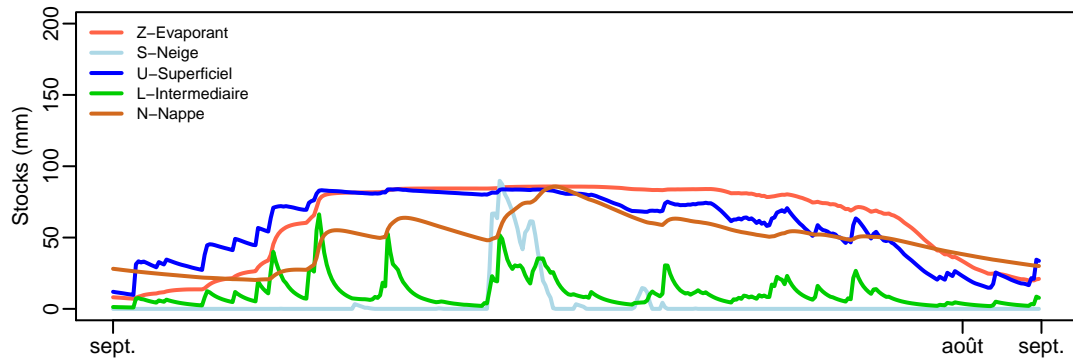

# q2815 (228.36 km<sup>2</sup>) – année 1990–1991

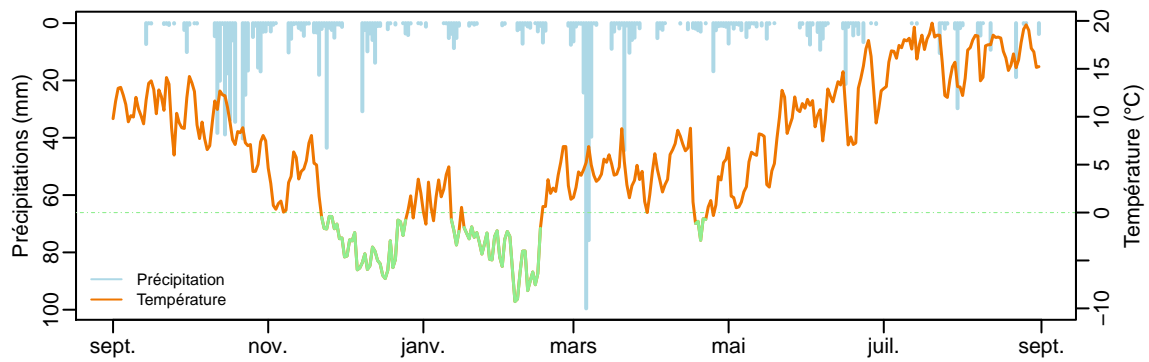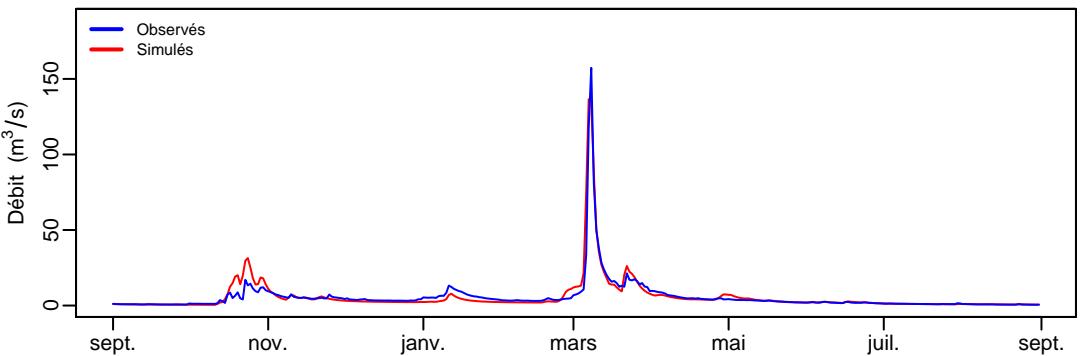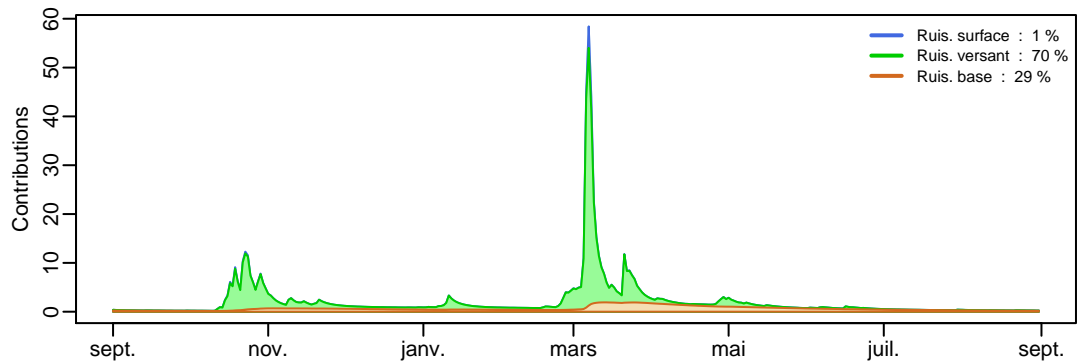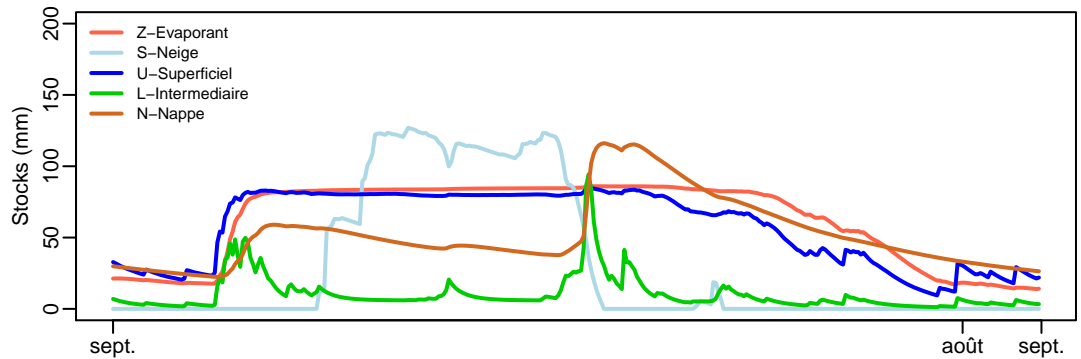



# q2815 (228.36 km<sup>2</sup>) – année 1991–1992

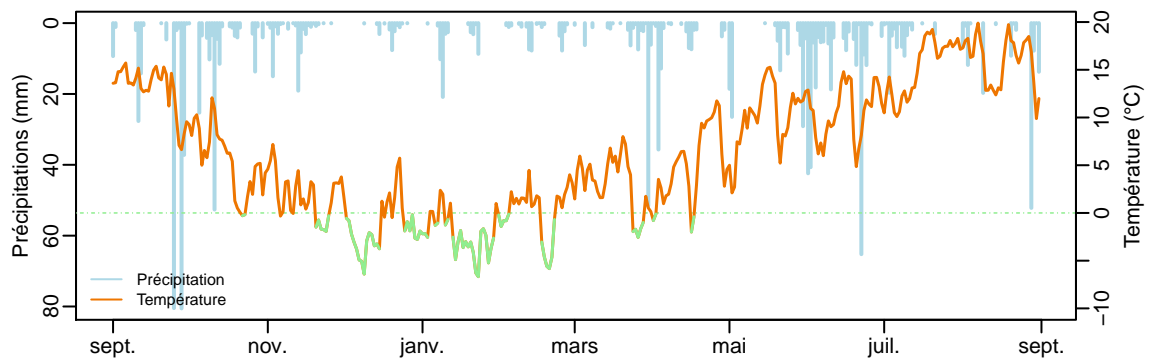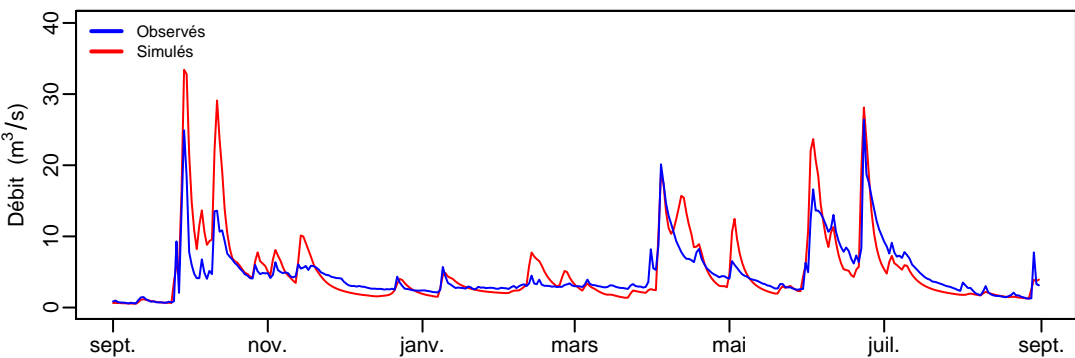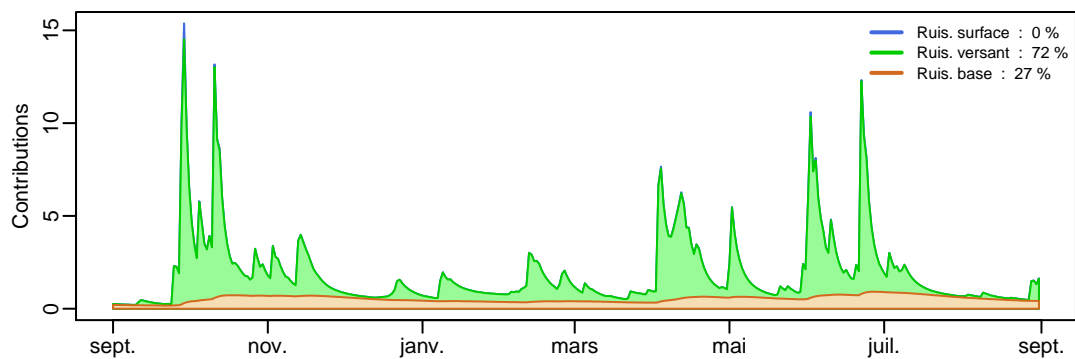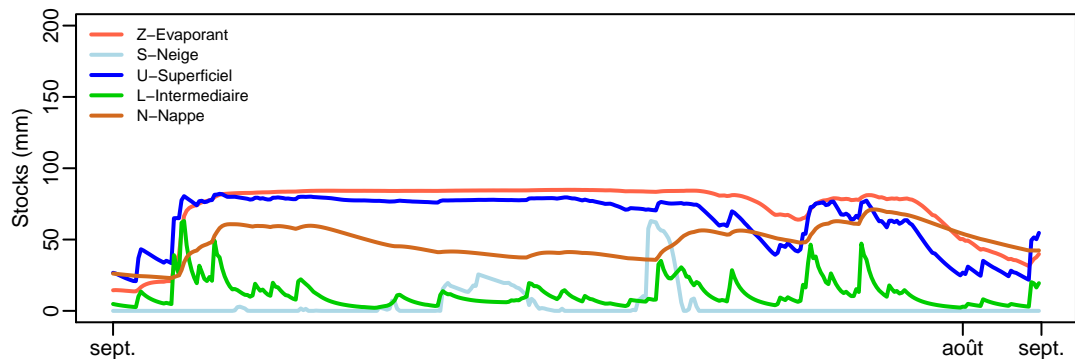

# q2815 (228.36 km²) – année 1992–1993

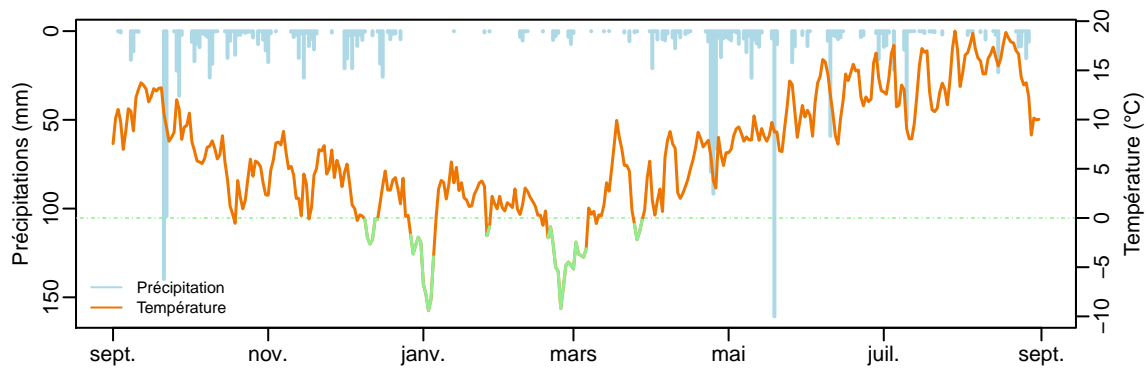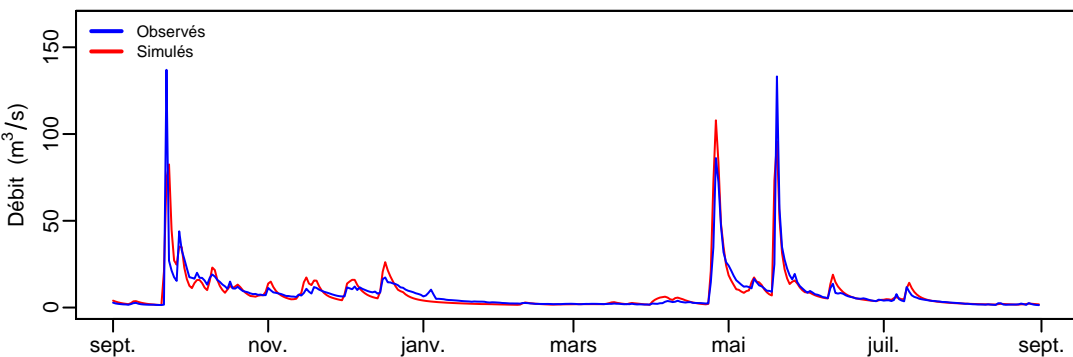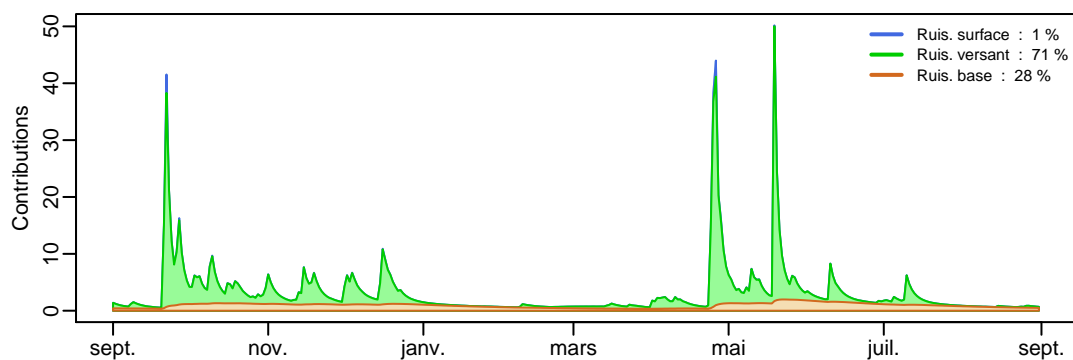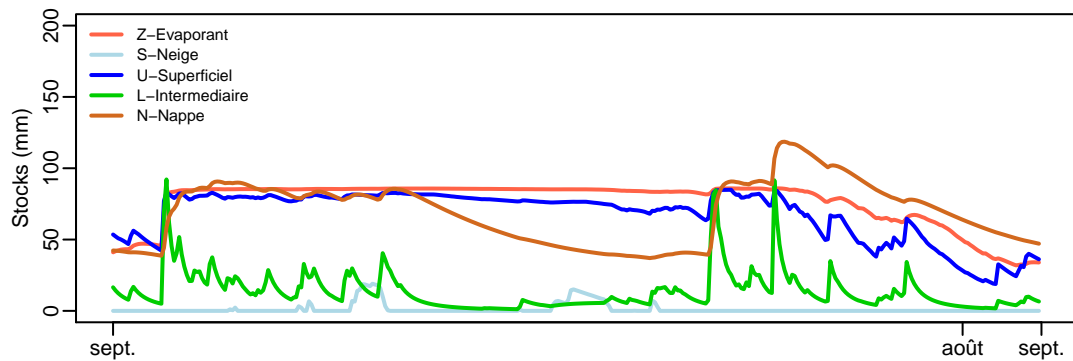

# q2815 (228.36 km²) – année 1993–1994

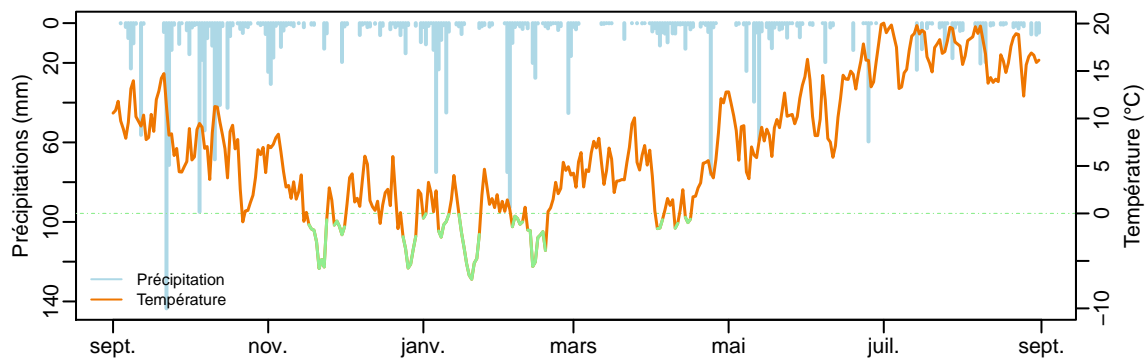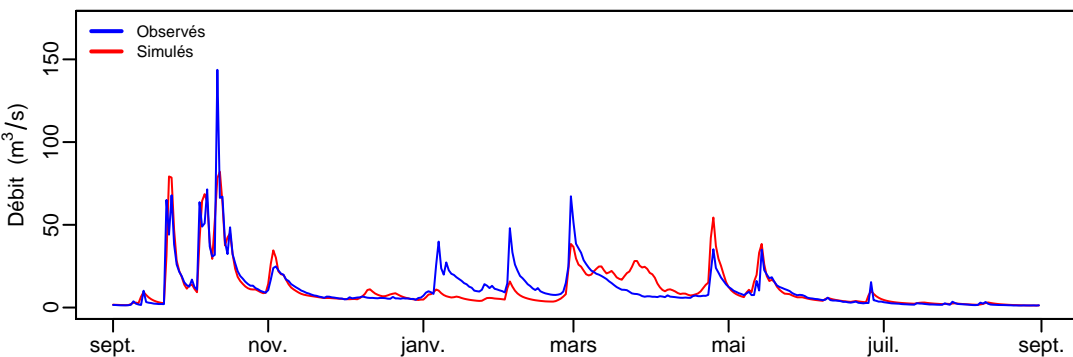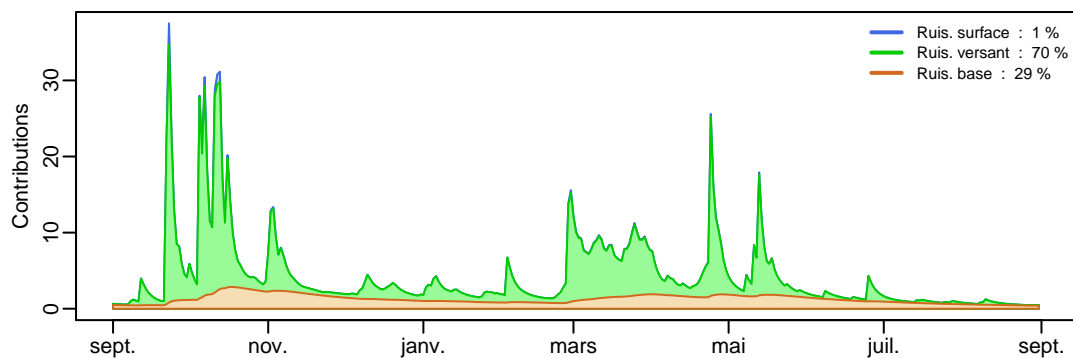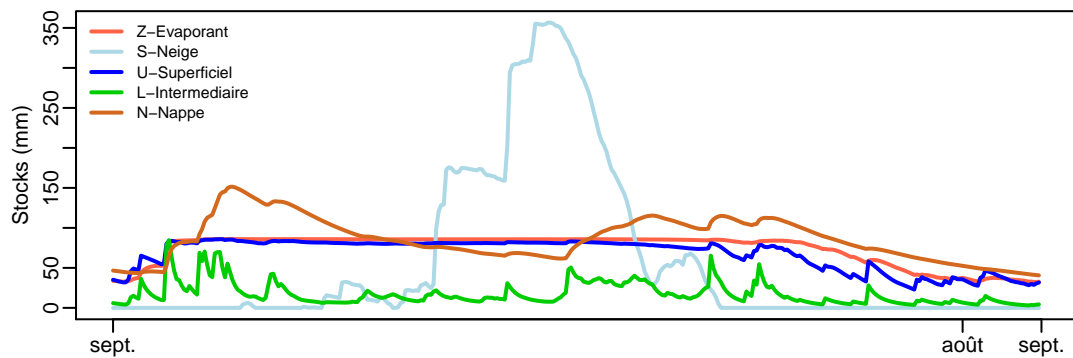

# q2815 (228.36 km²) – année 1994–1995

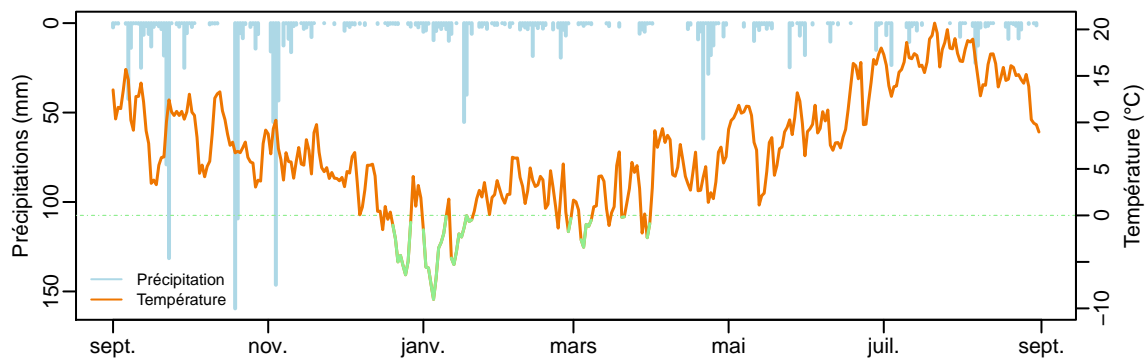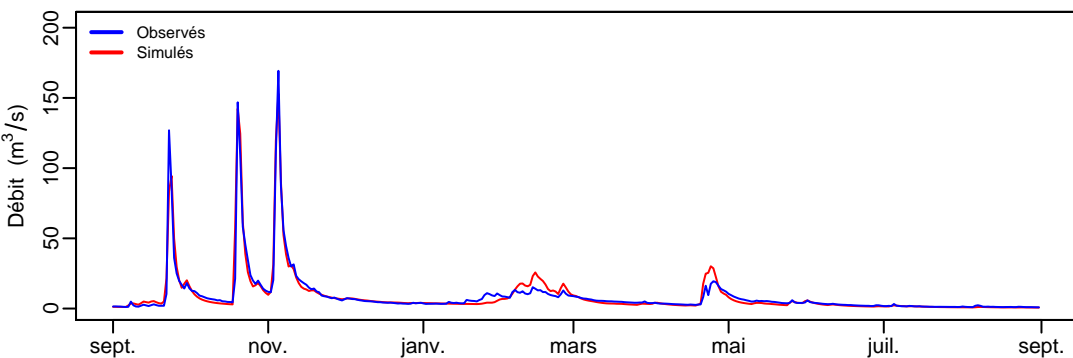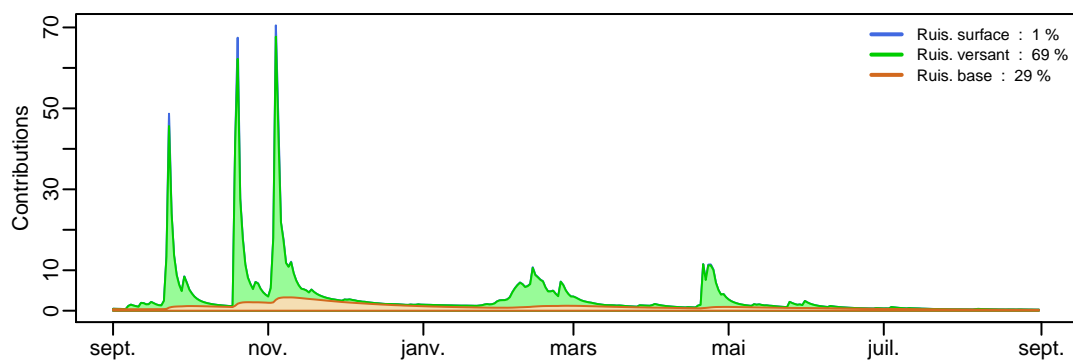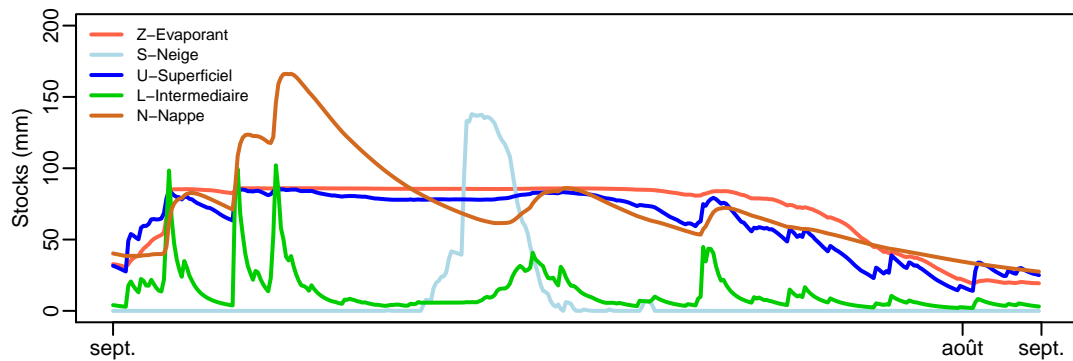

# q2815 (228.36 km²) – année 1995–1996

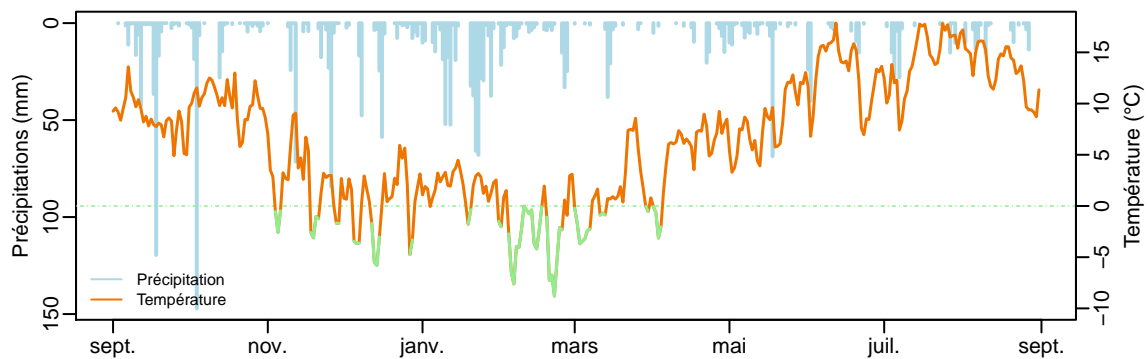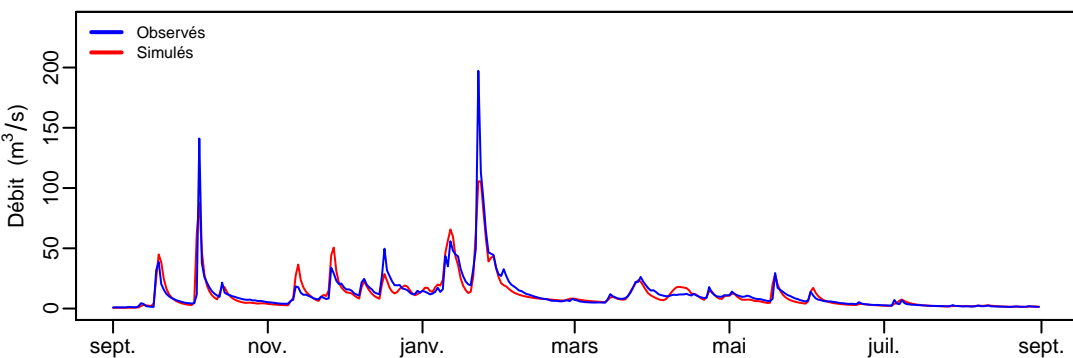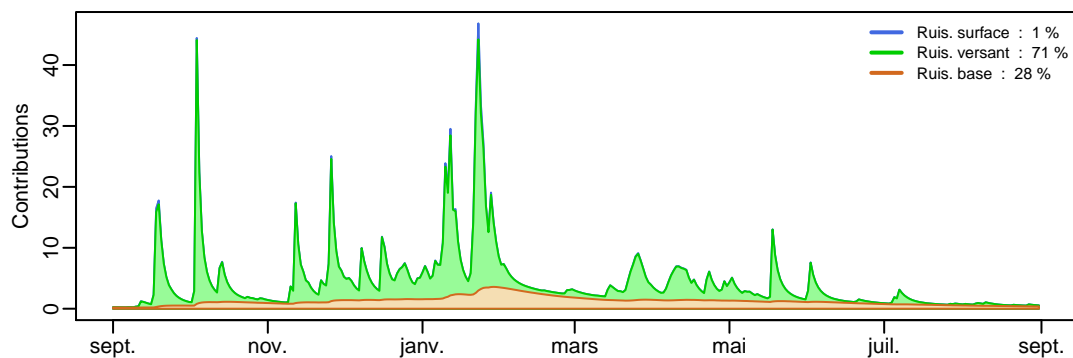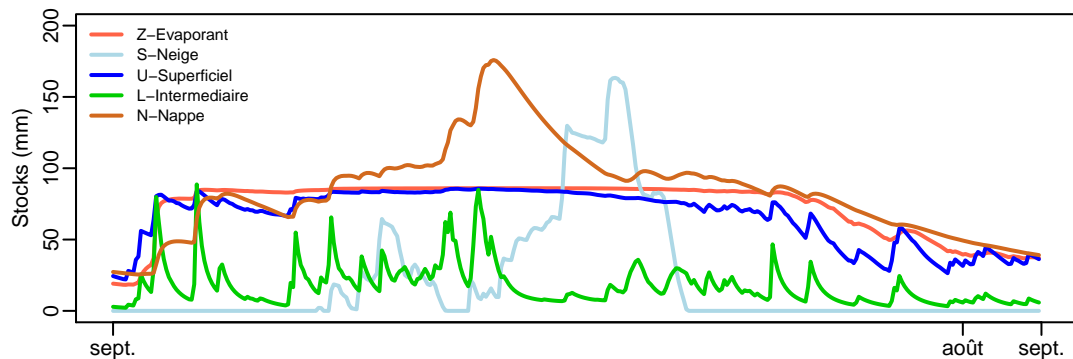

# q2815 (228.36 km²) – année 1996–1997

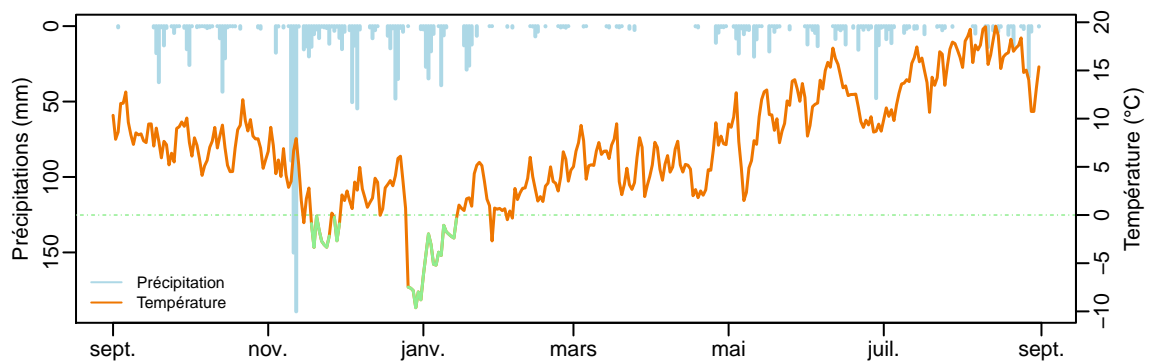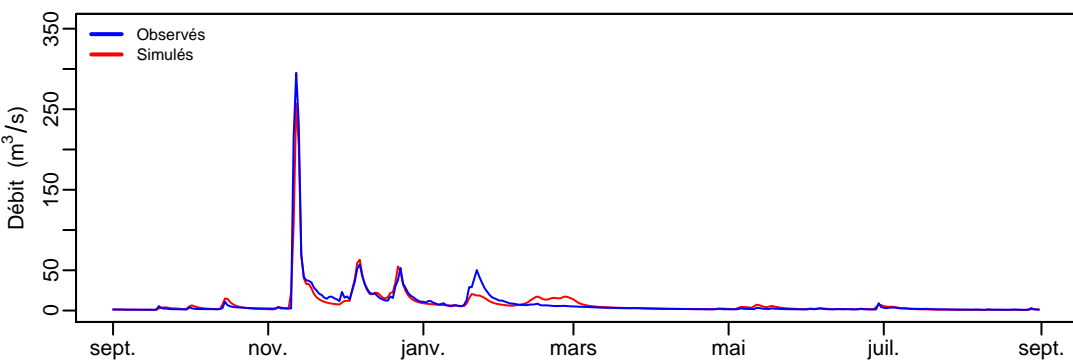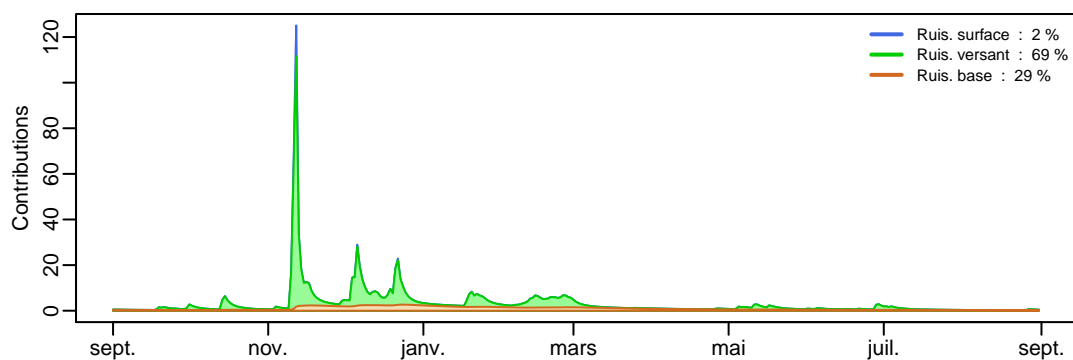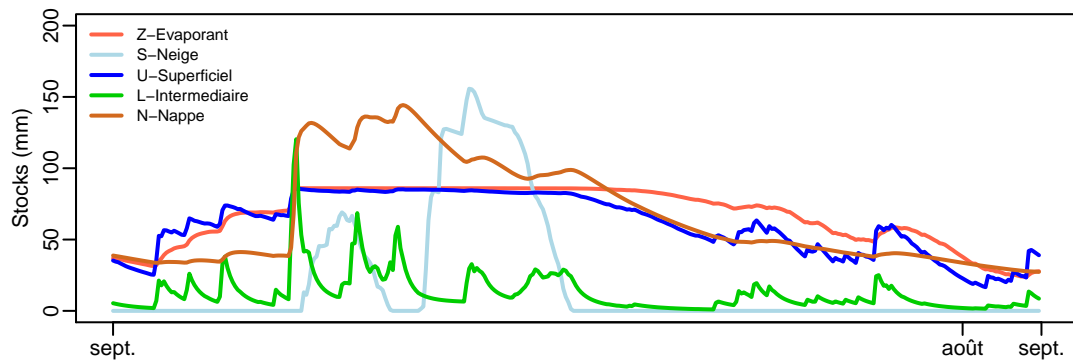

# q2815 (228.36 km²) – année 1997–1998

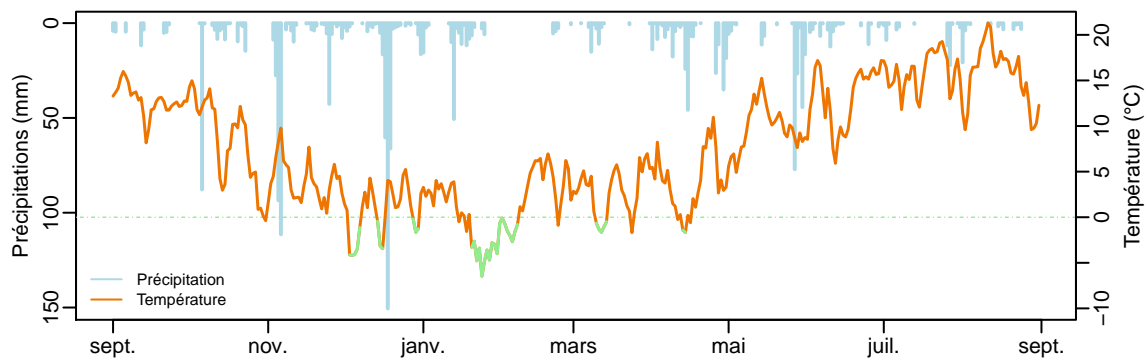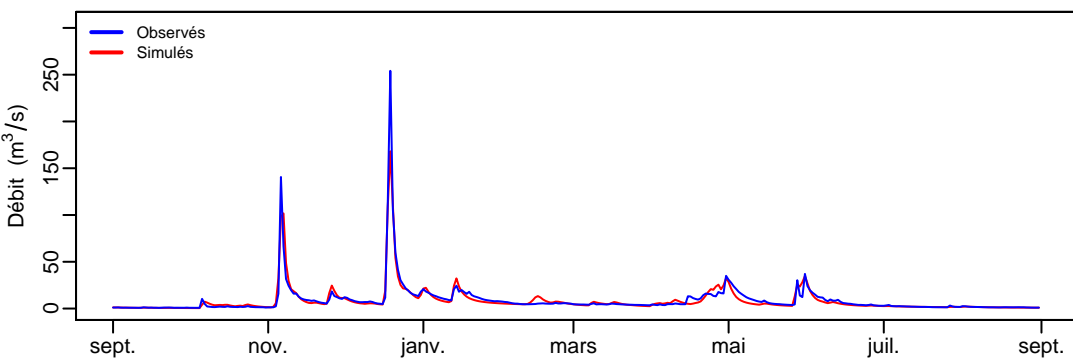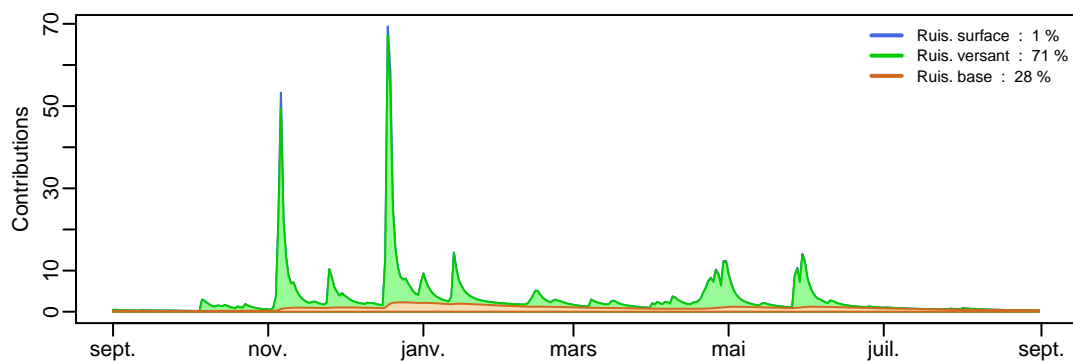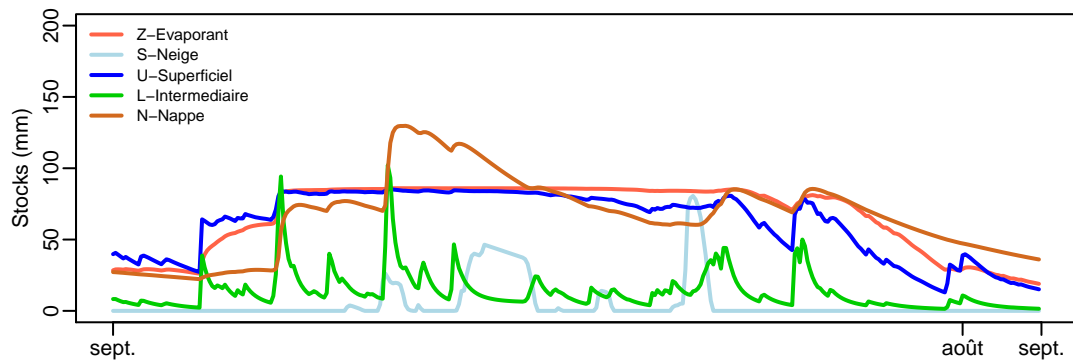

# q2815 (228.36 km<sup>2</sup>) – année 1998–1999

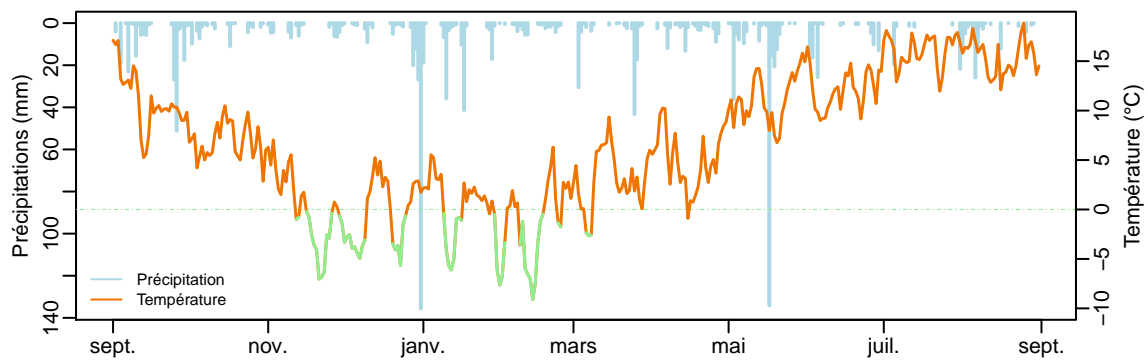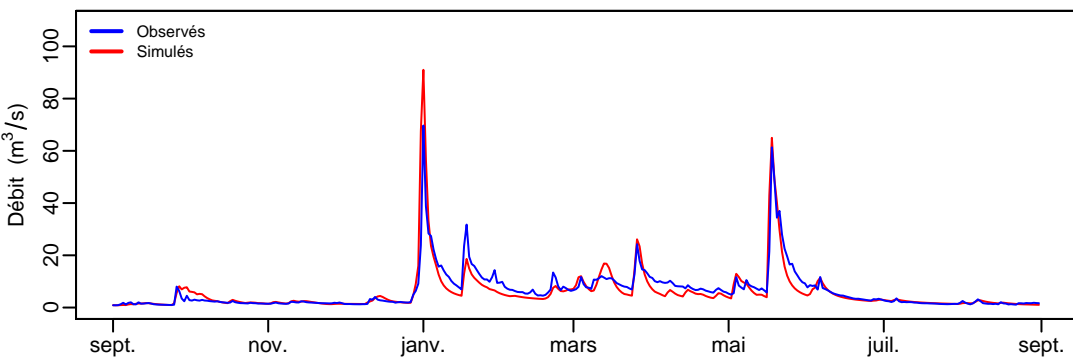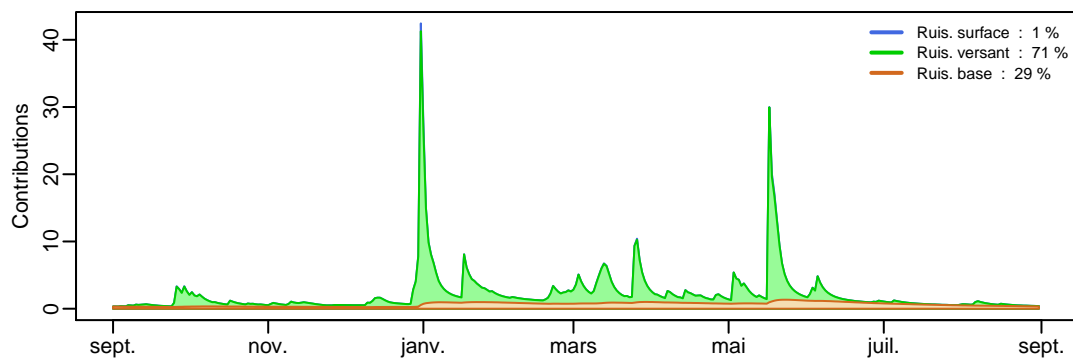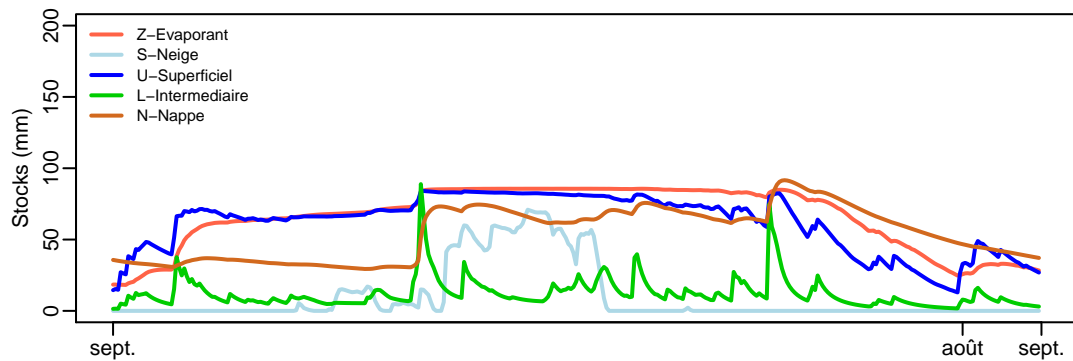



# q2815 (228.36 km²) – année 1999–2000

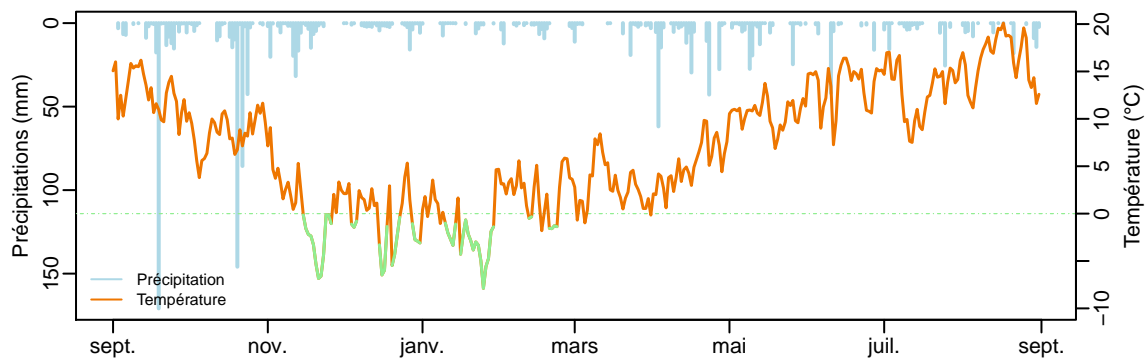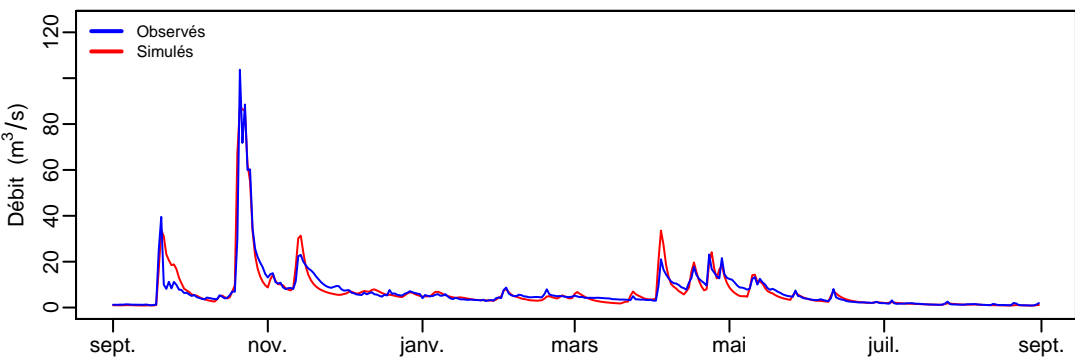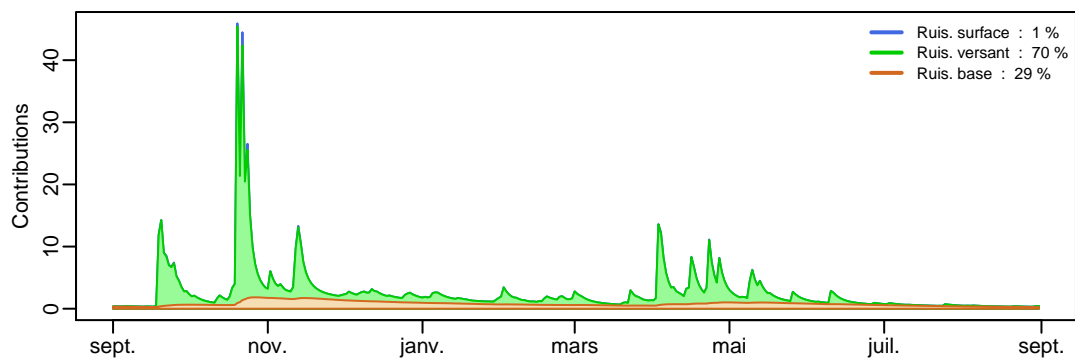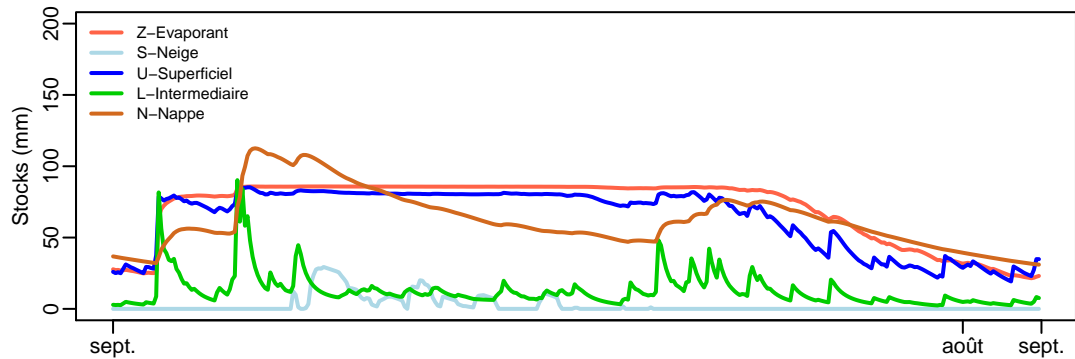

# q2815 (228.36 km<sup>2</sup>) – année 2000–2001

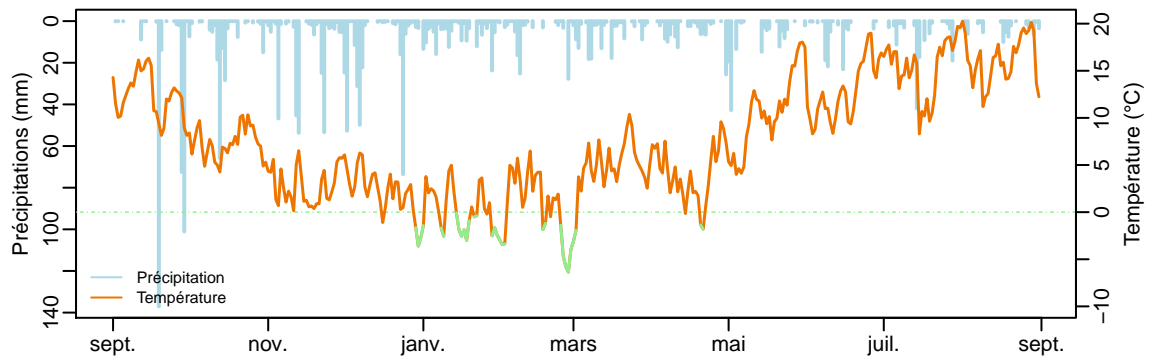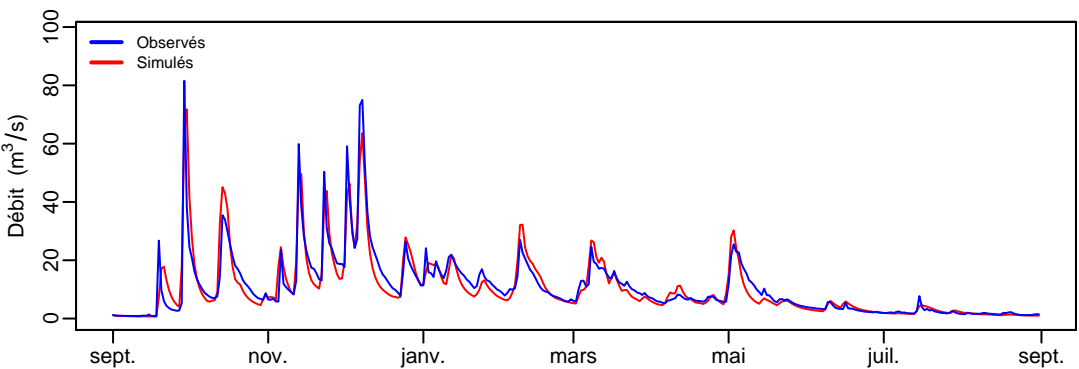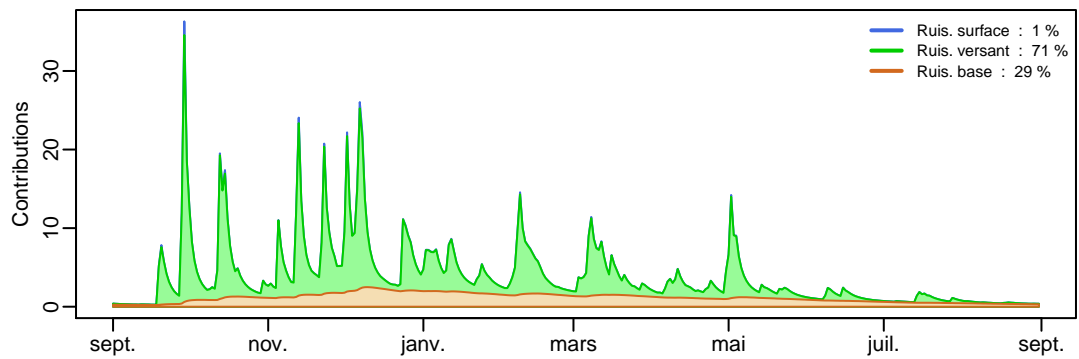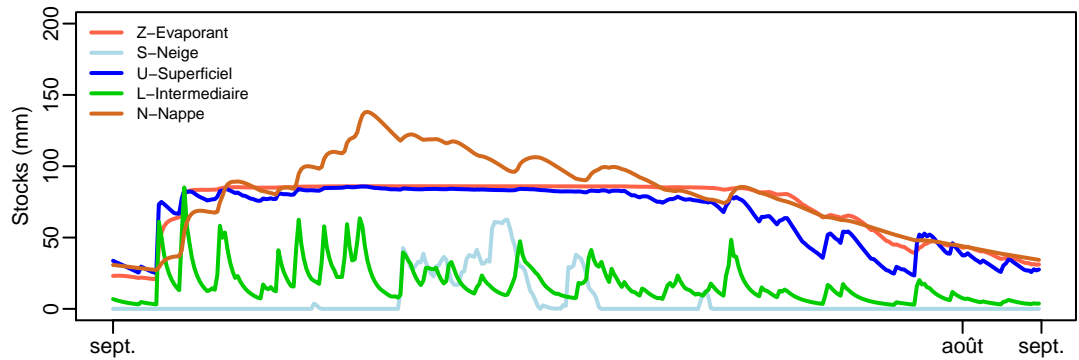

# q2815 (228.36 km²) – année 2001–2002

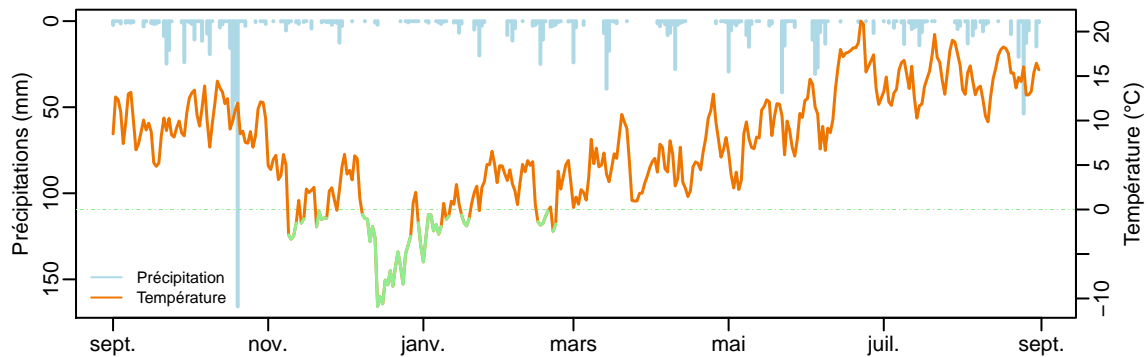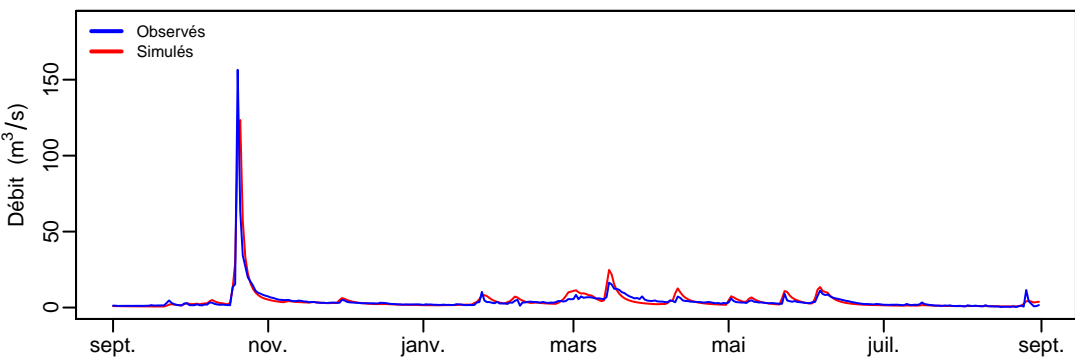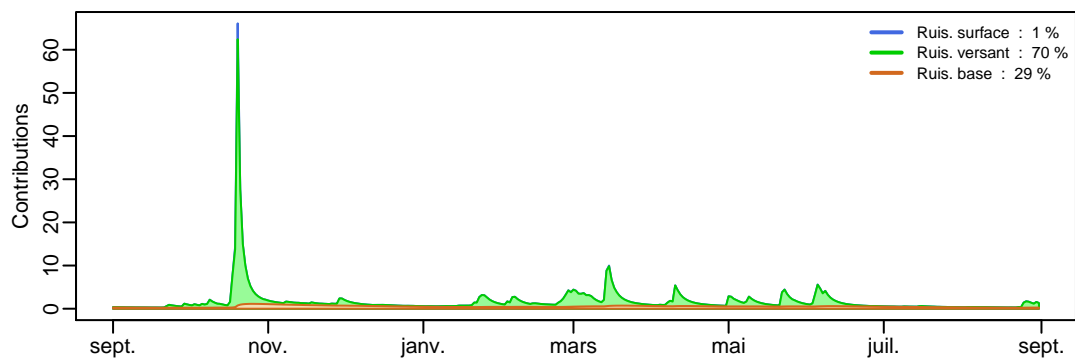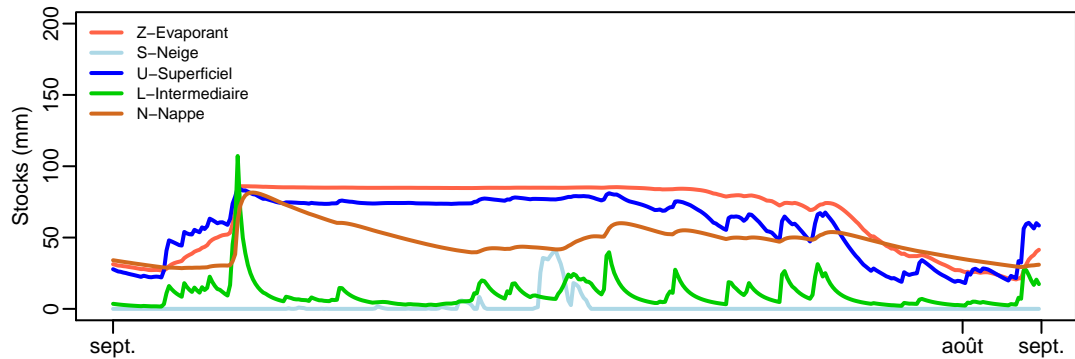

# q2815 (228.36 km<sup>2</sup>) – année 2002–2003

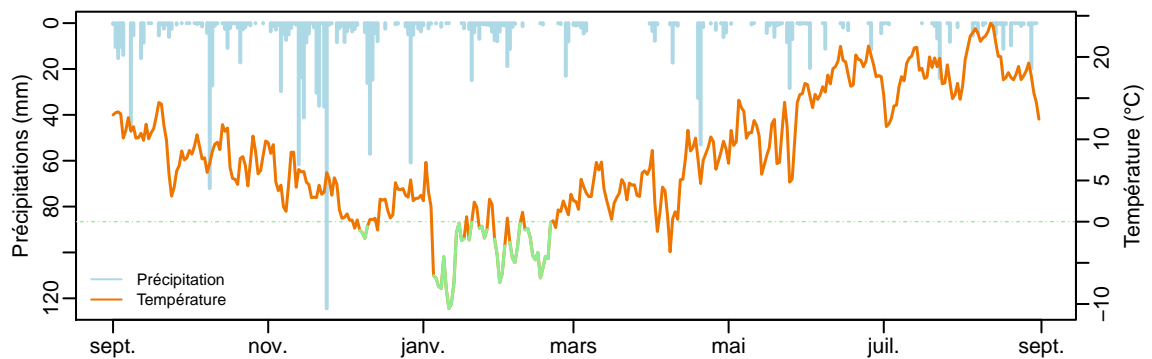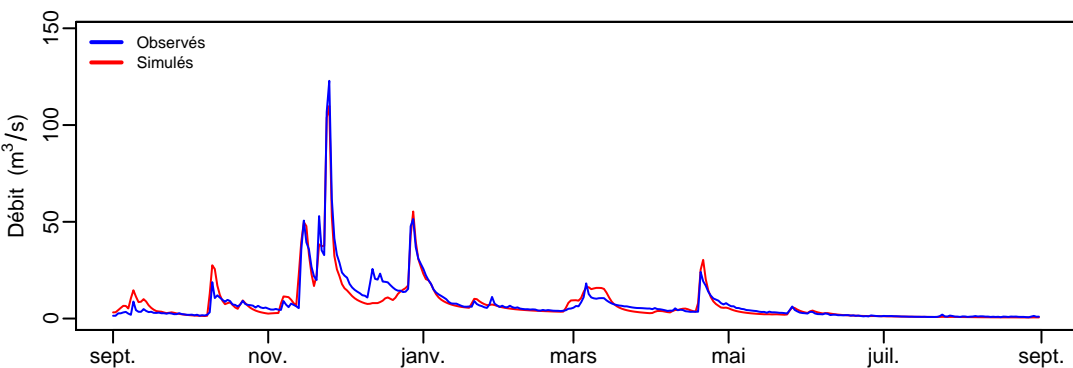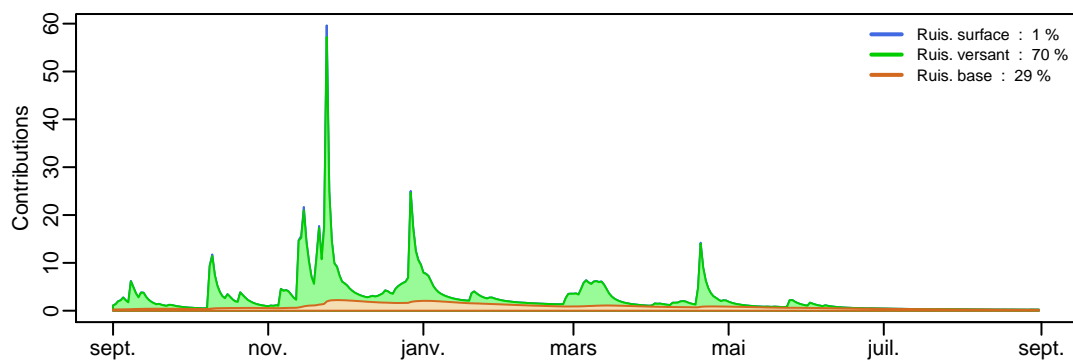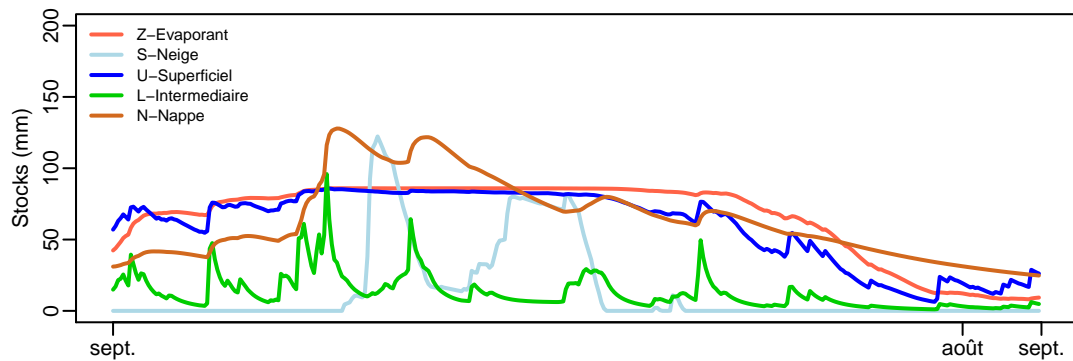

# q2815 (228.36 km<sup>2</sup>) – année 2003–2004

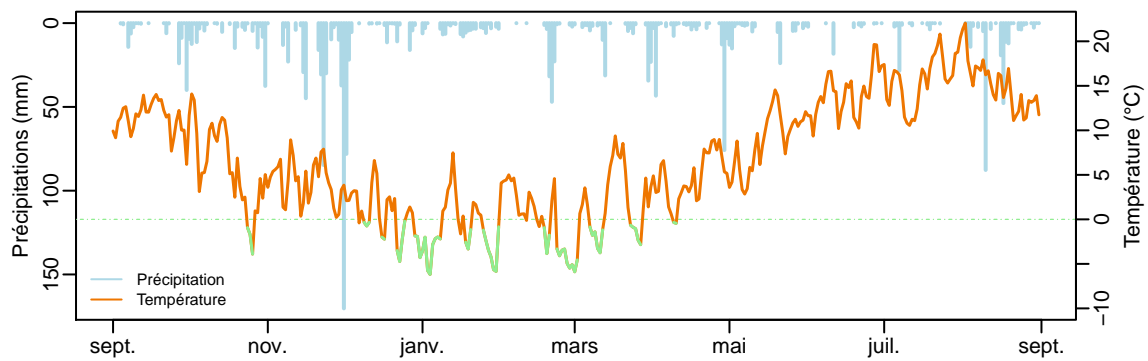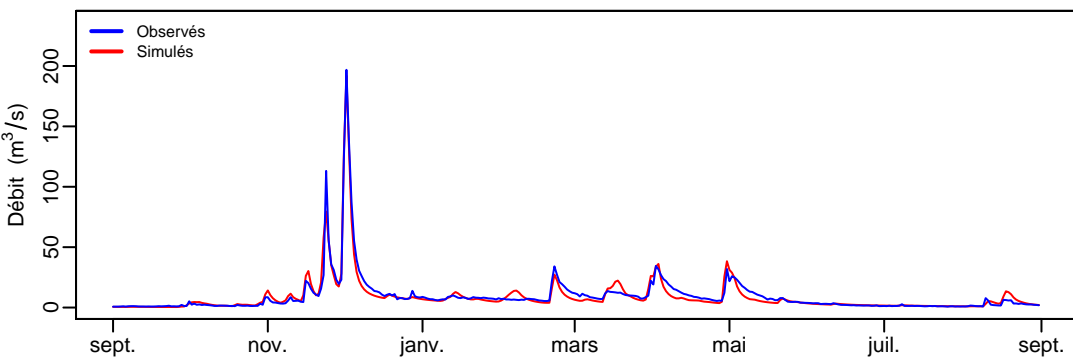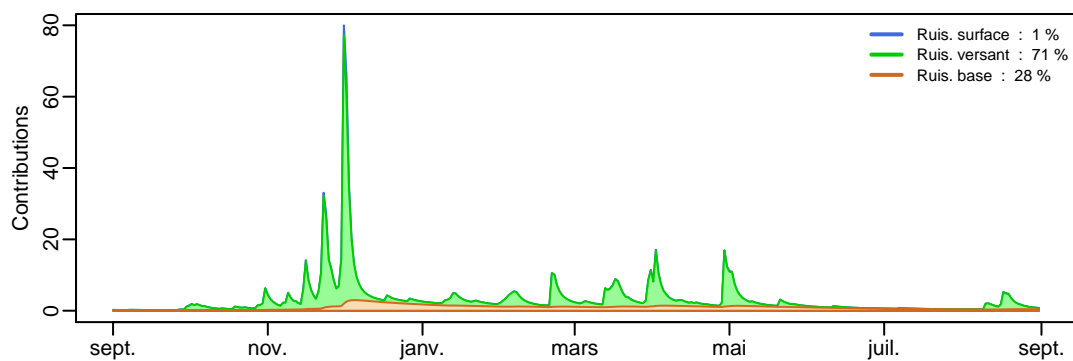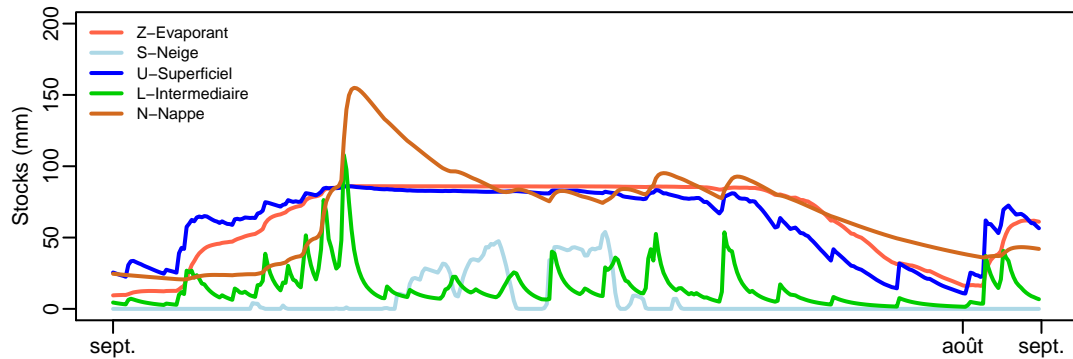

# q2815 (228.36 km<sup>2</sup>) – année 2004–2005

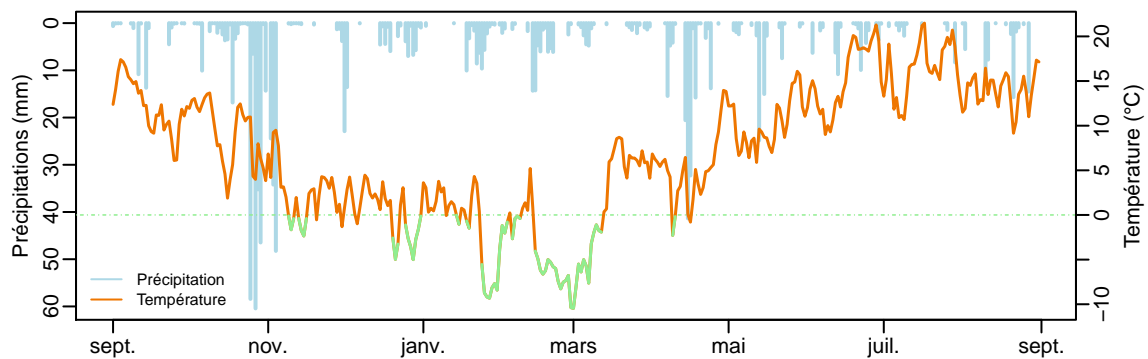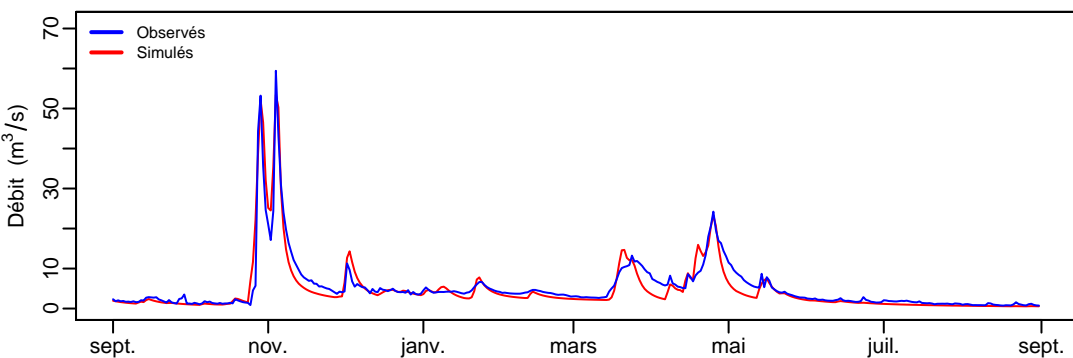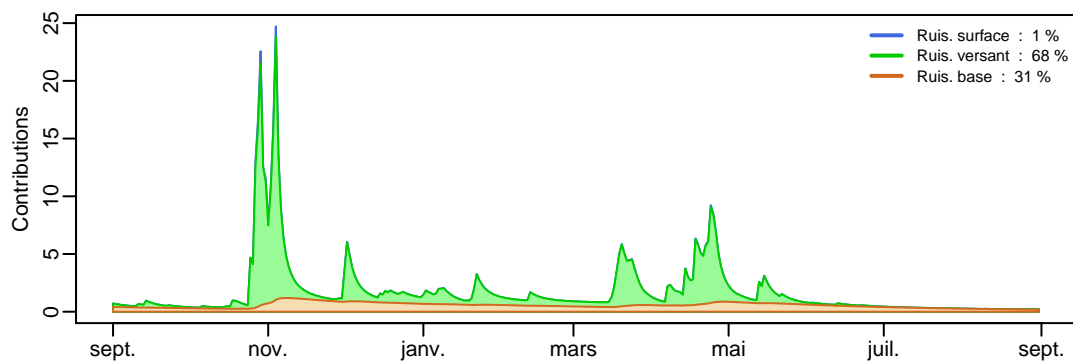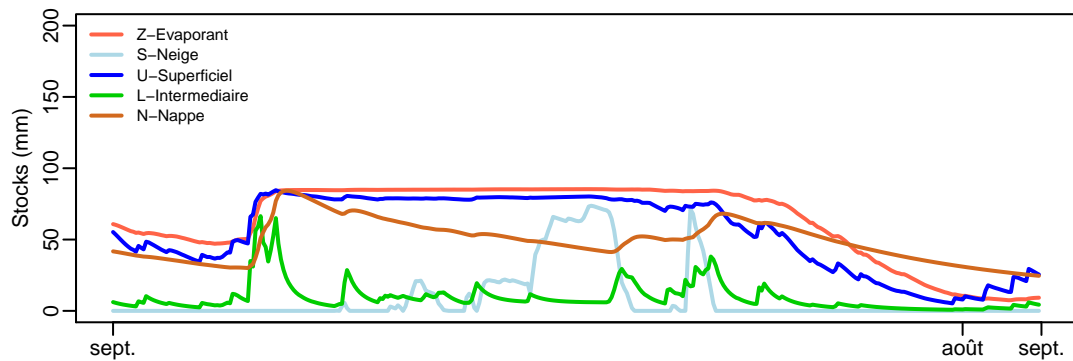

# q2815 (228.36 km<sup>2</sup>) – année 2005–2006

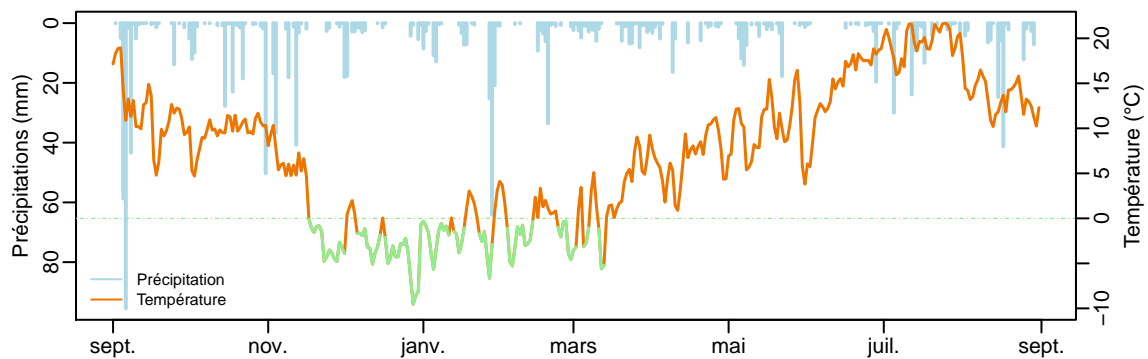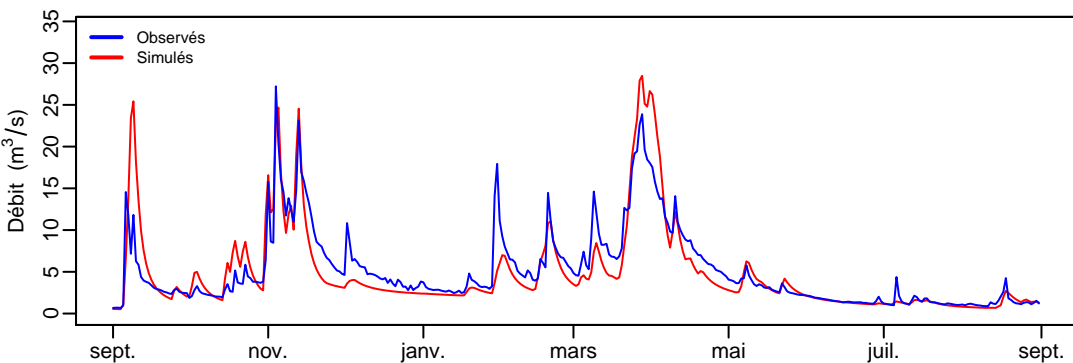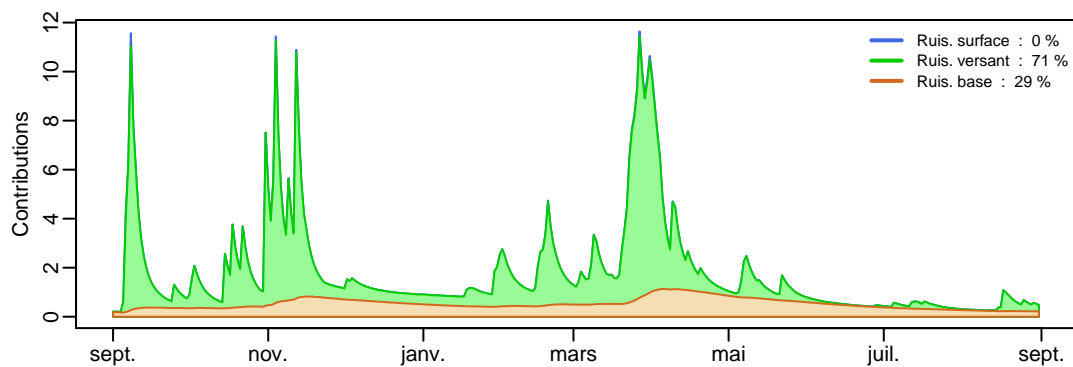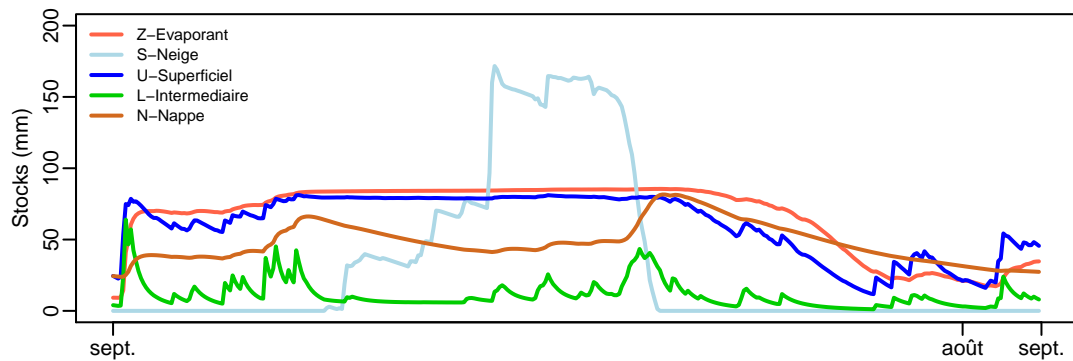

# q2815 (228.36 km²) – année 2006–2007

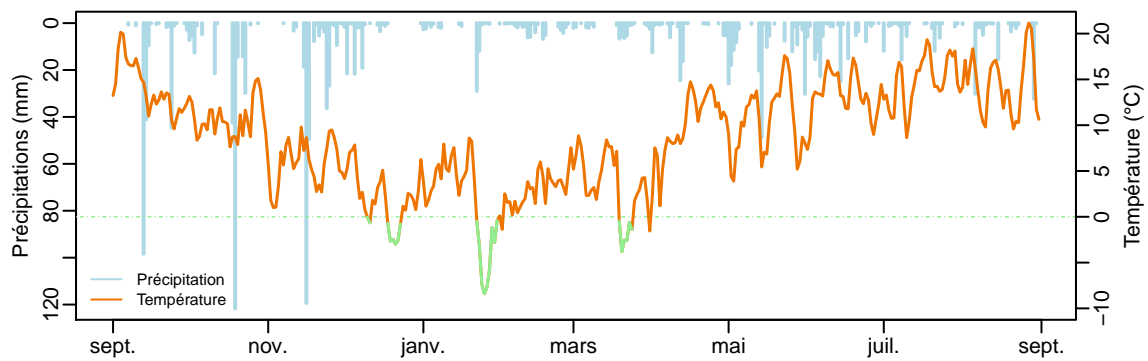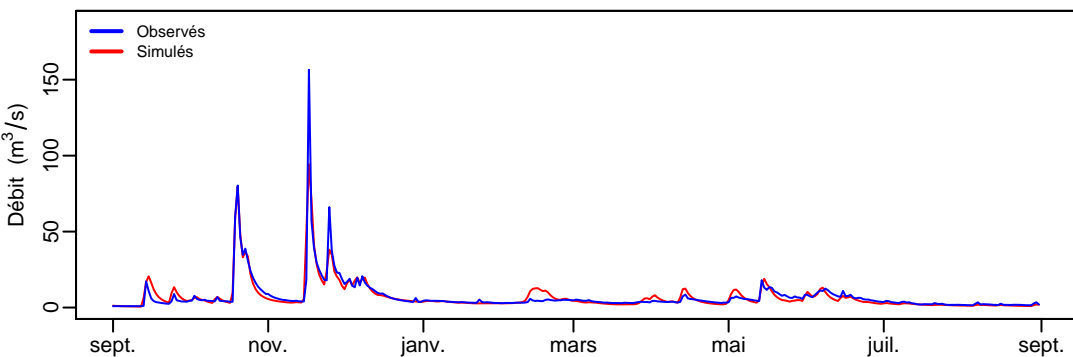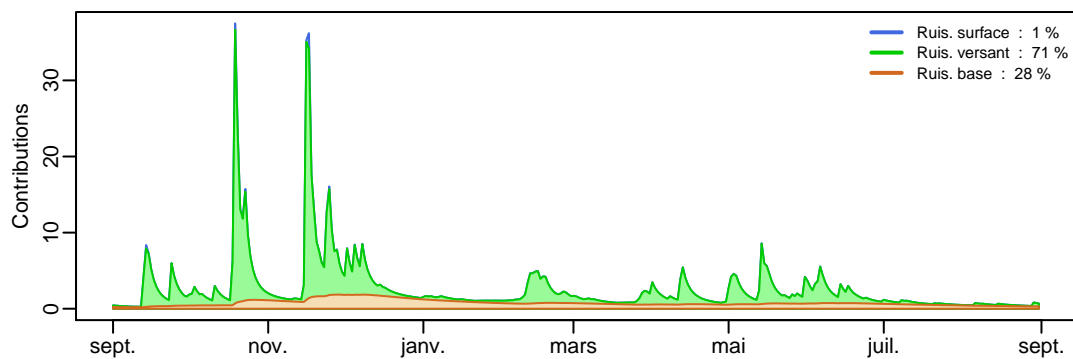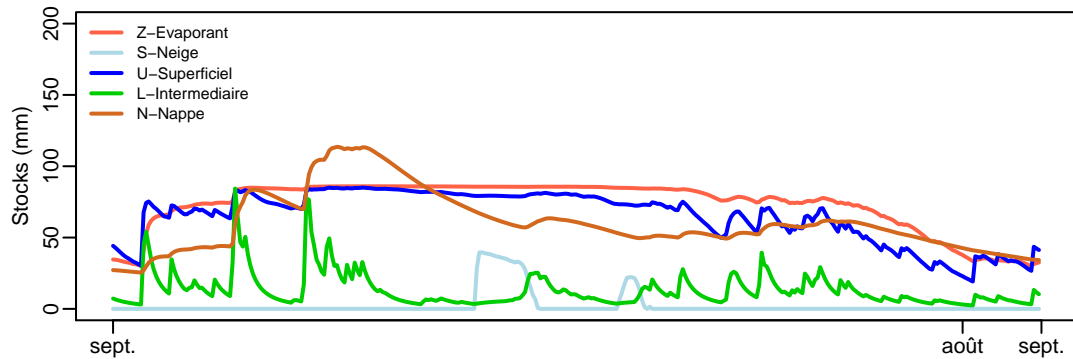



# q2815 (228.36 km<sup>2</sup>) – année 2007–2008

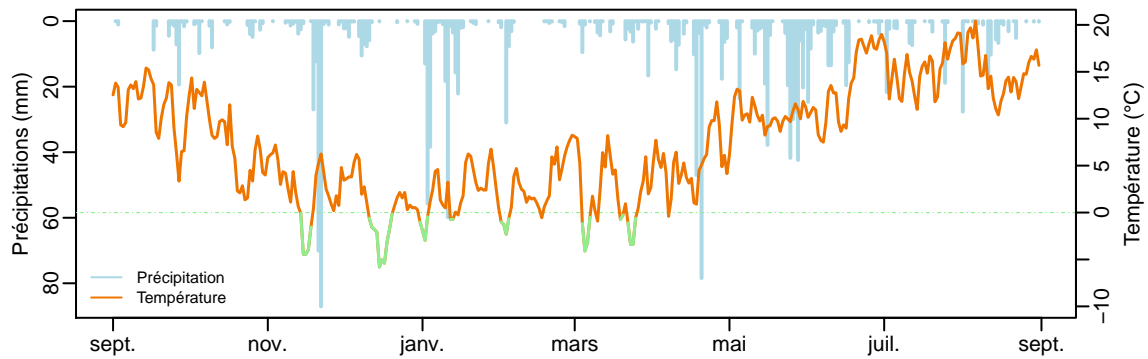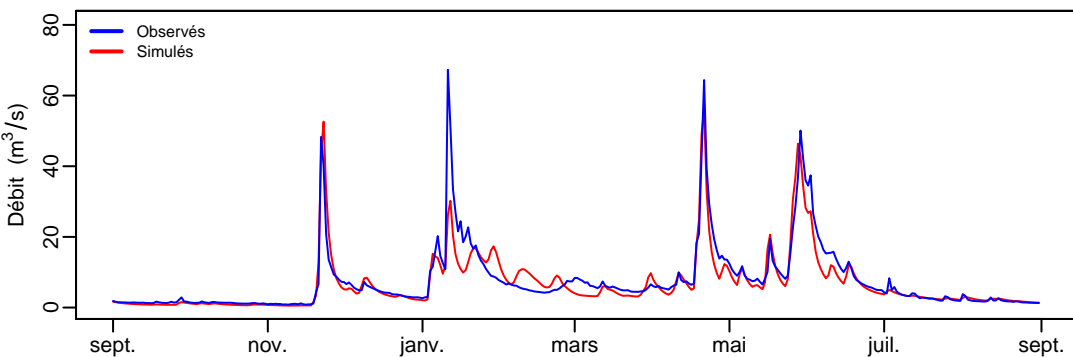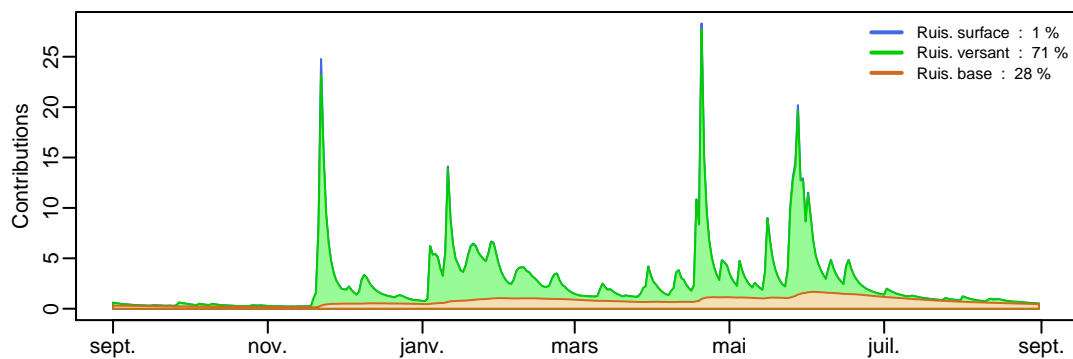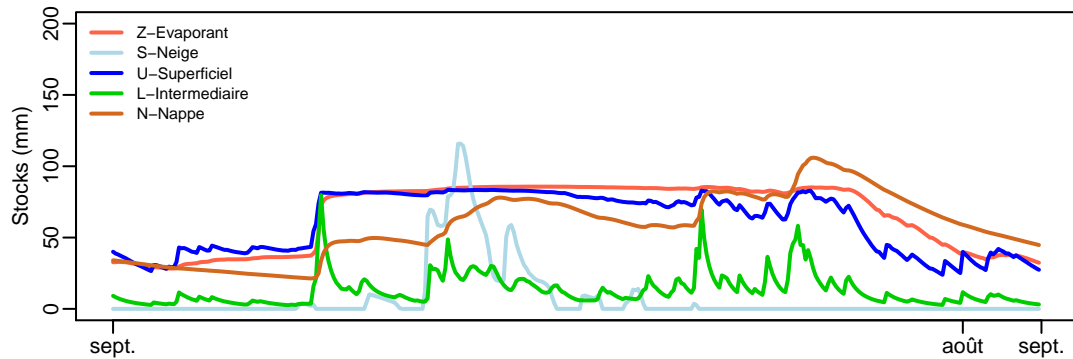

# q2815 (228.36 km²) – année 2008–2009

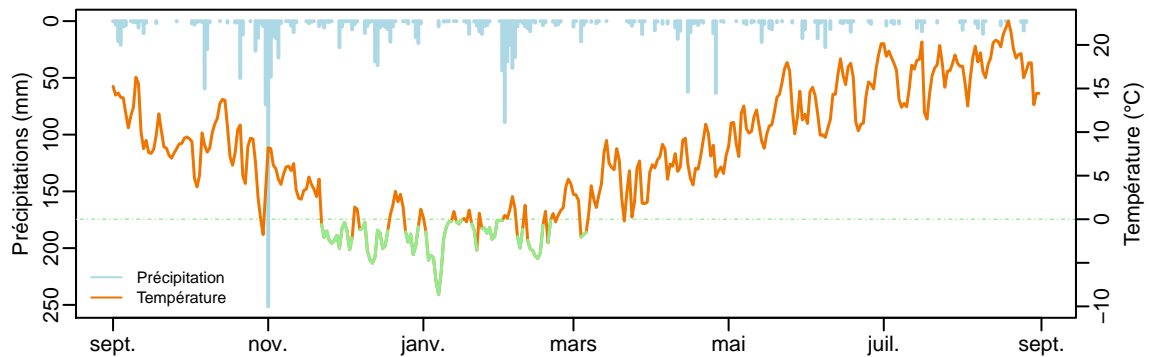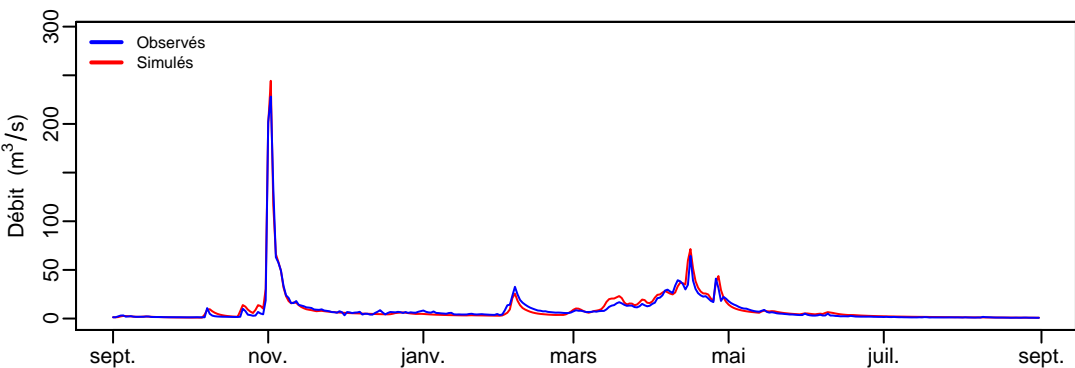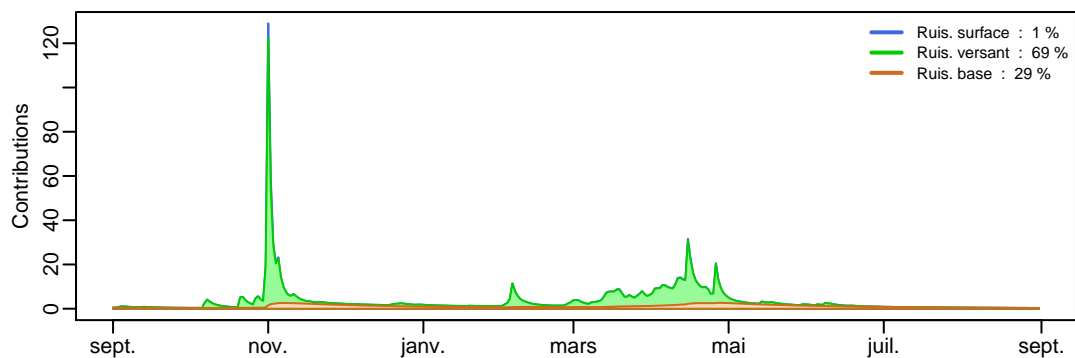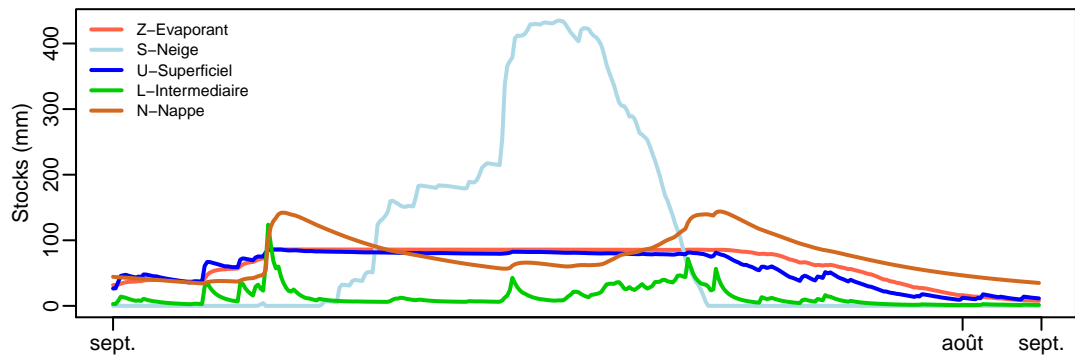

# q2815 (228.36 km²) – année 2009–2010

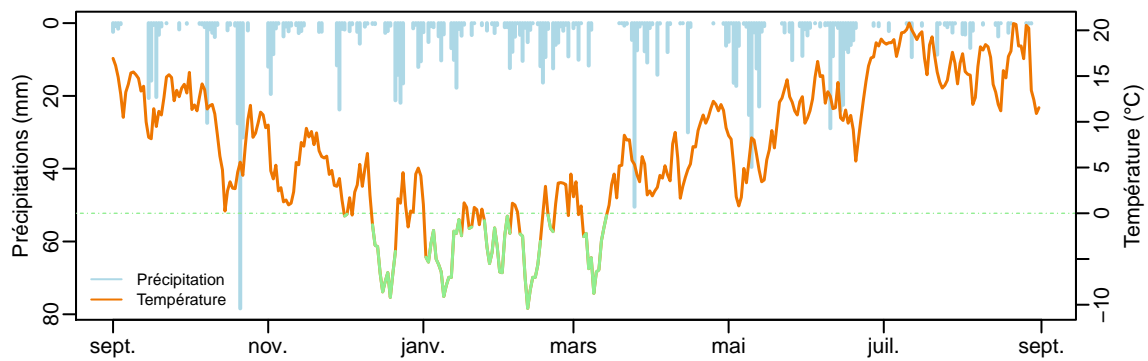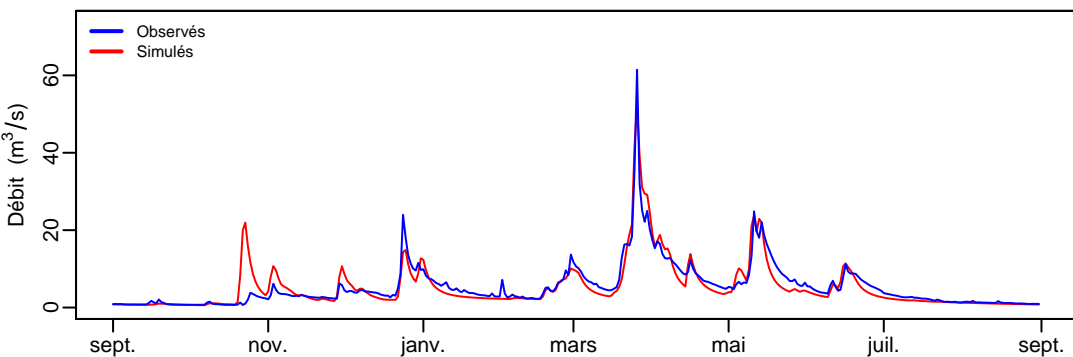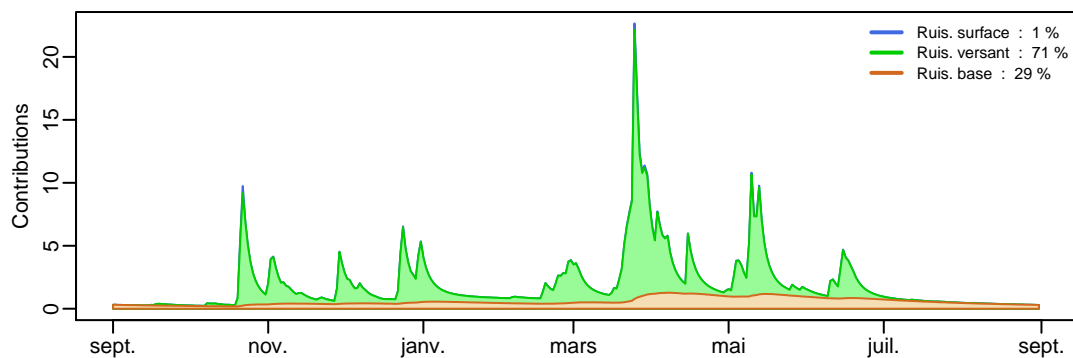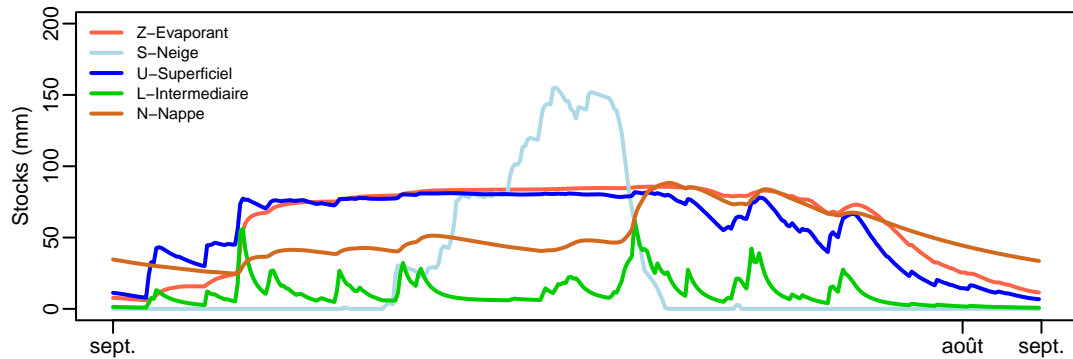

# q2815 (228.36 km²) – année 2010–2011

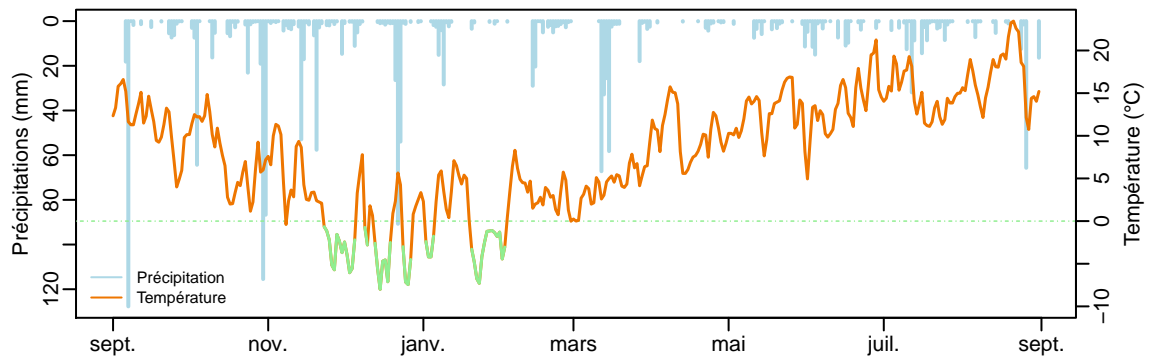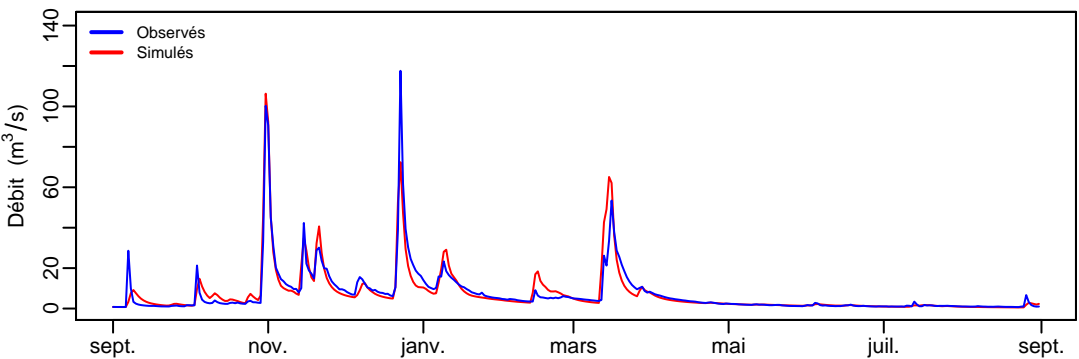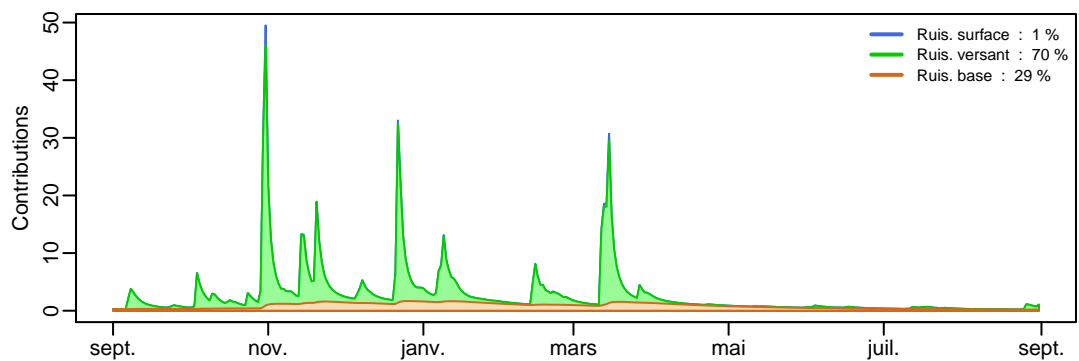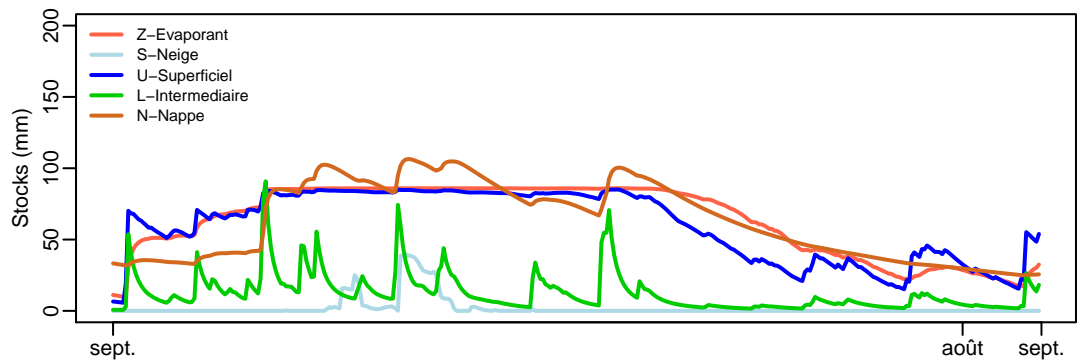

# q2861 (346.85 km²) – année 1990–1991

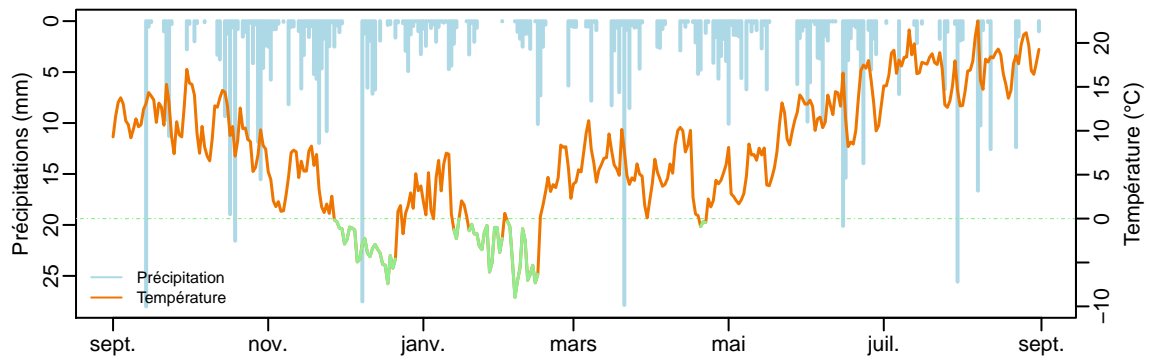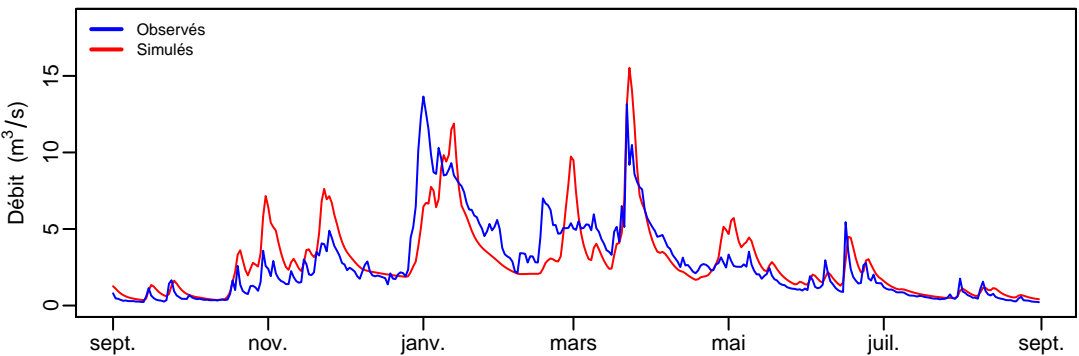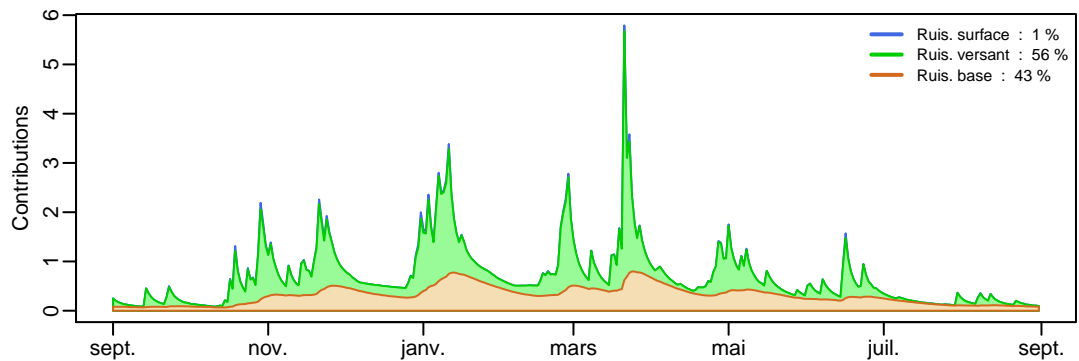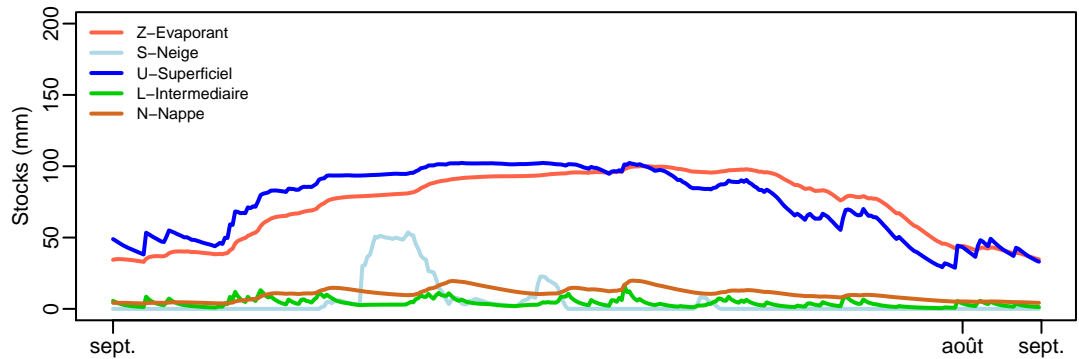

# q2861 (346.85 km<sup>2</sup>) – année 1991–1992

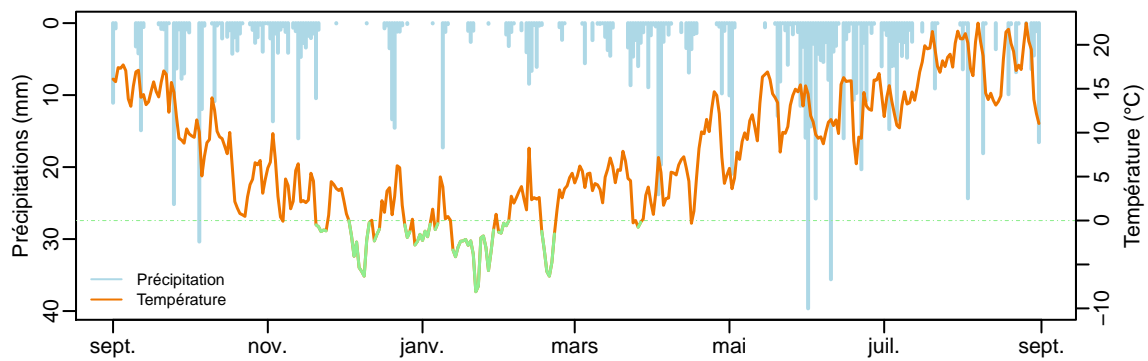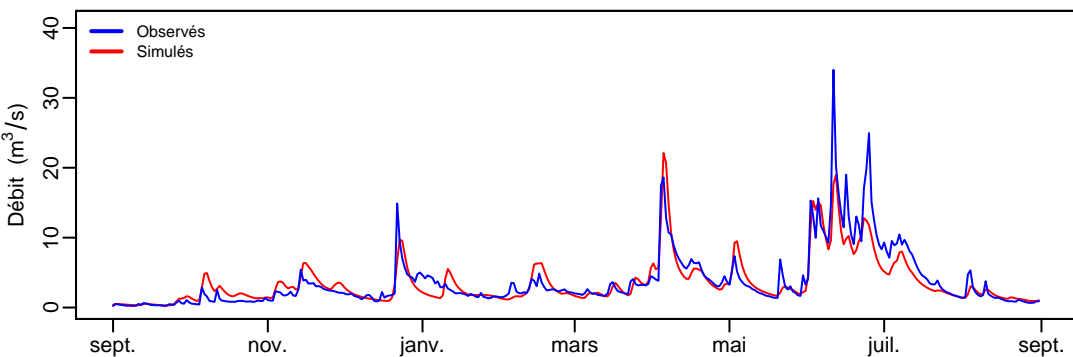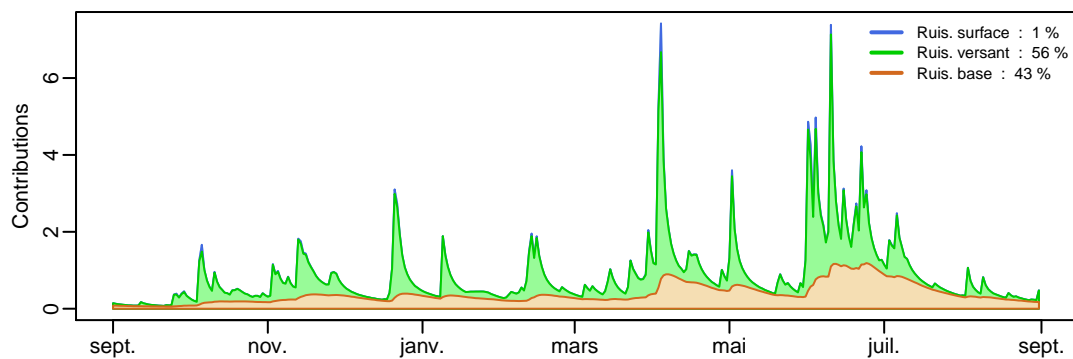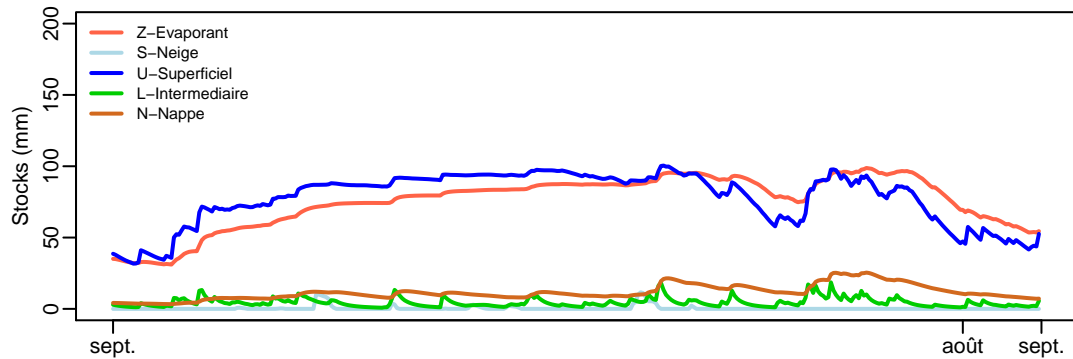

# q2861 (346.85 km²) – année 1992–1993

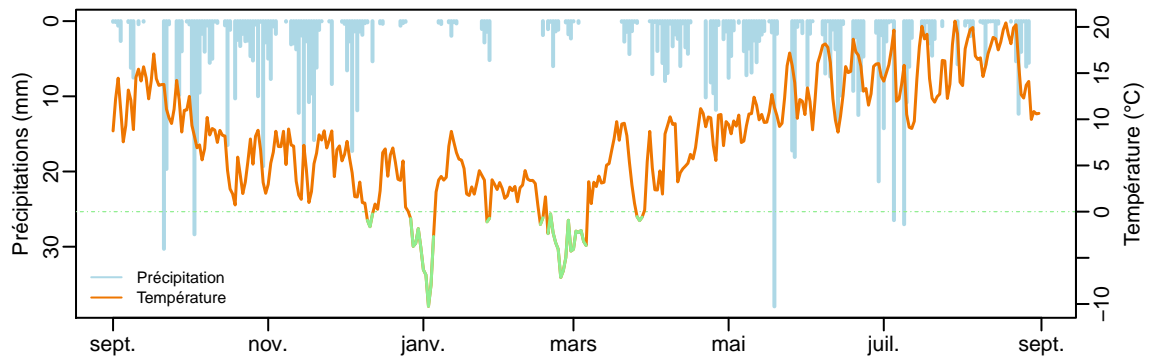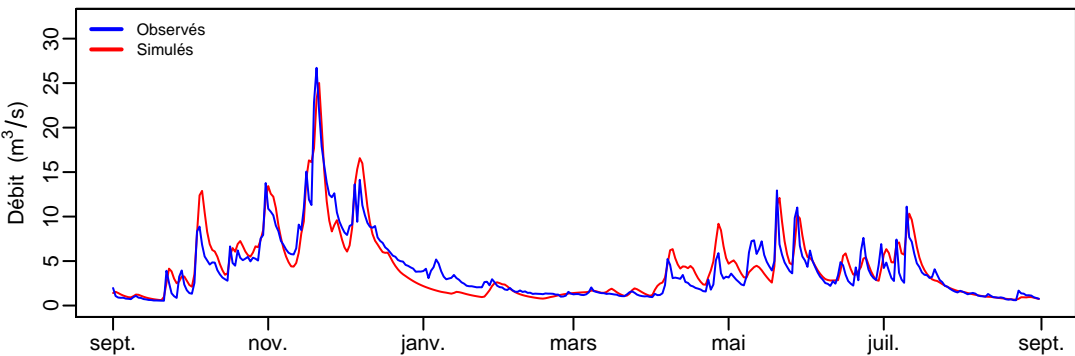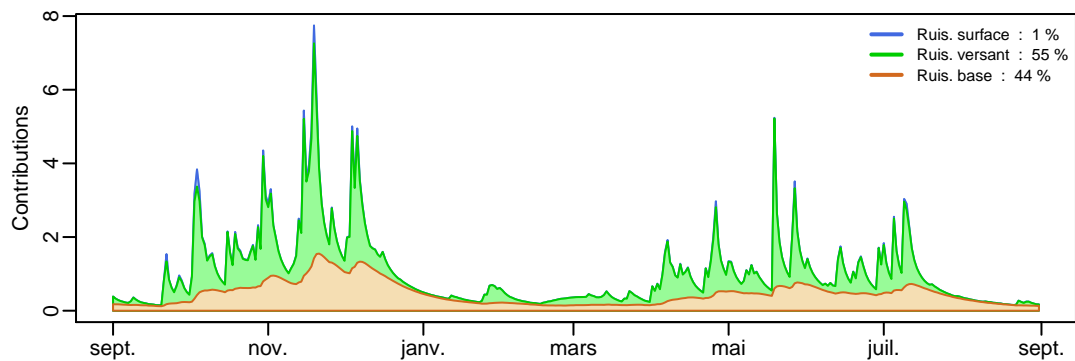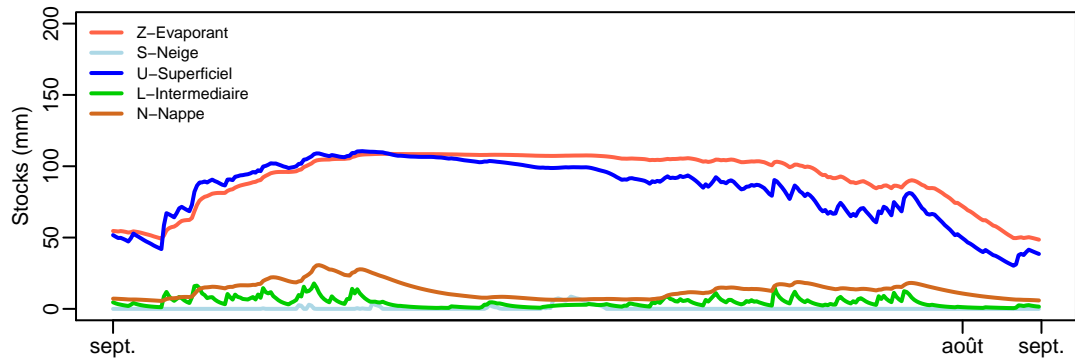

# q2861 (346.85 km²) – année 1993–1994

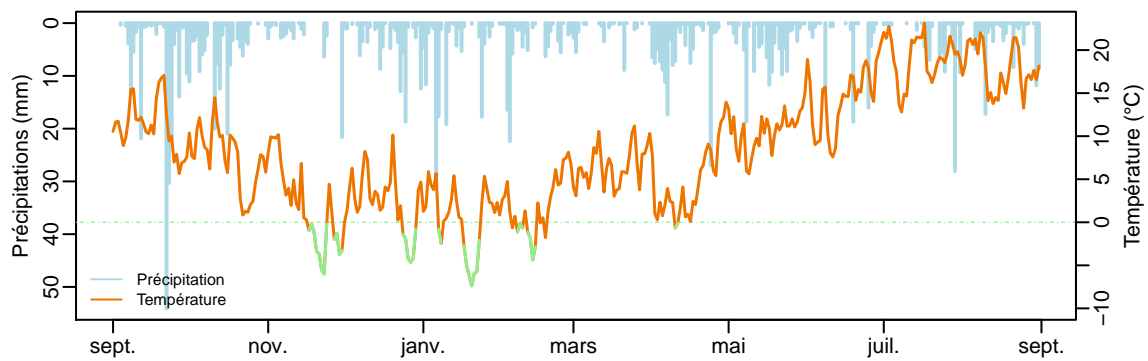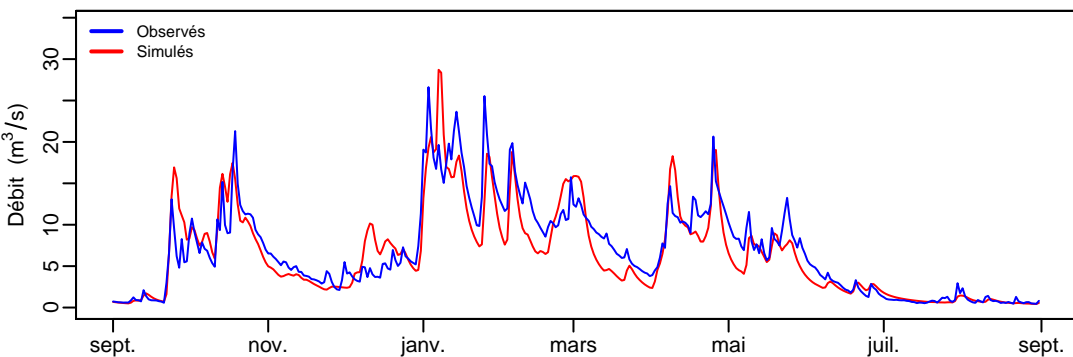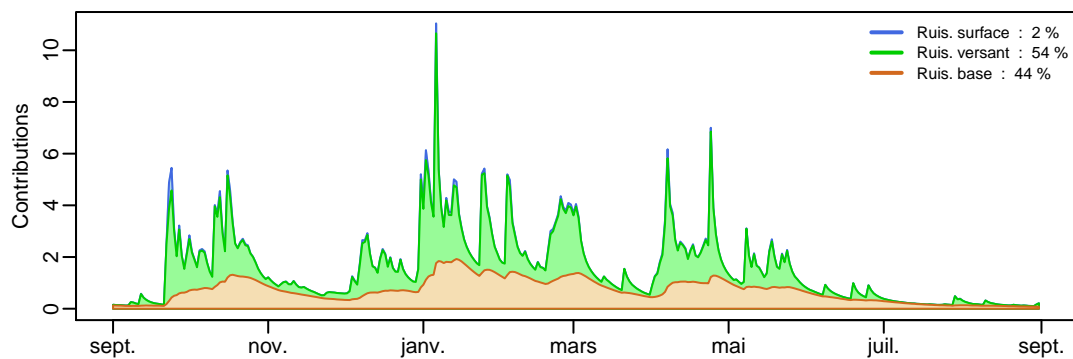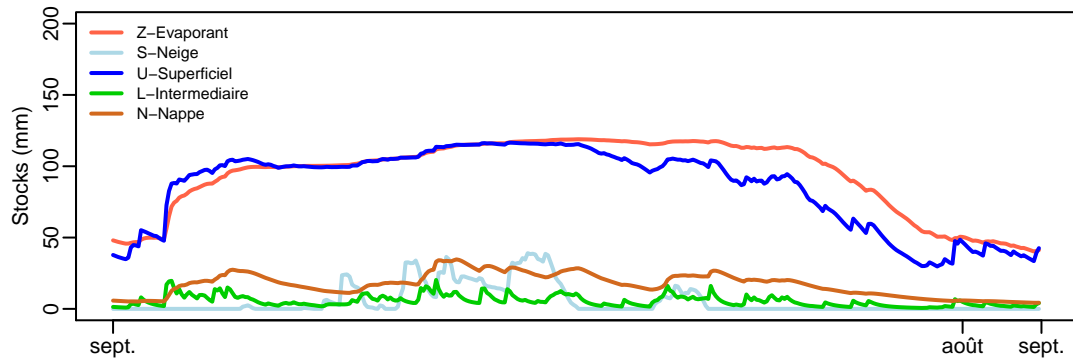



# q2861 (346.85 km<sup>2</sup>) – année 1994–1995

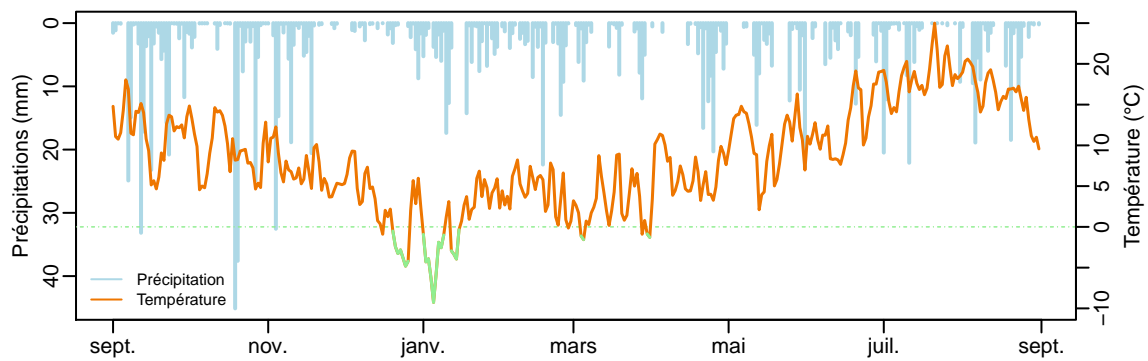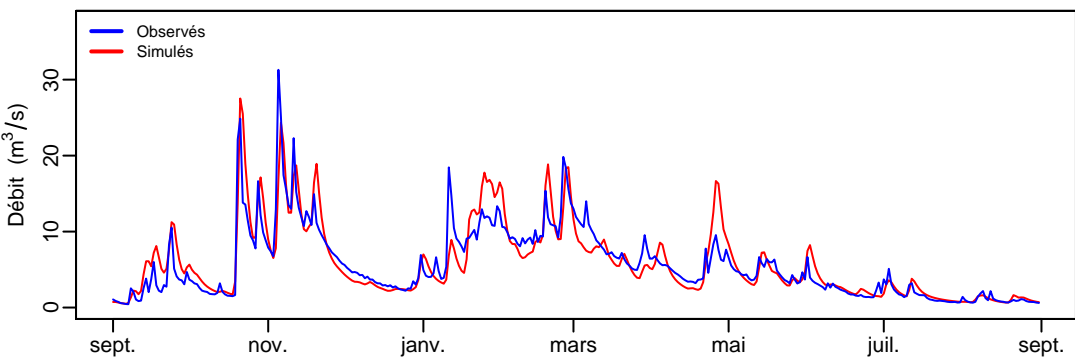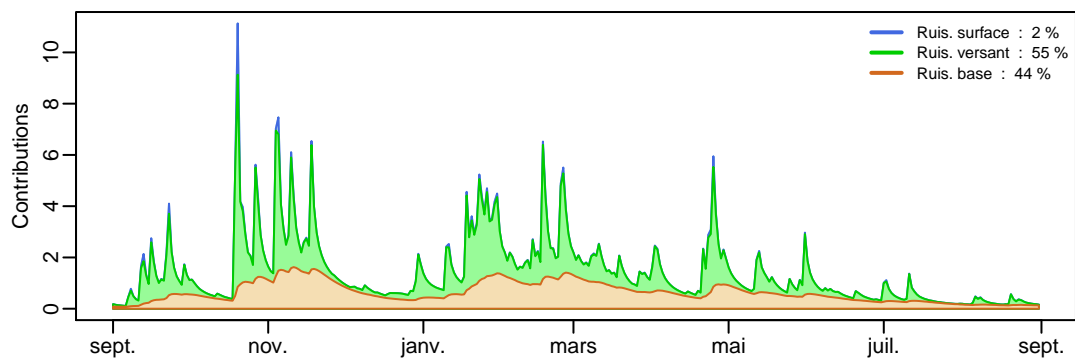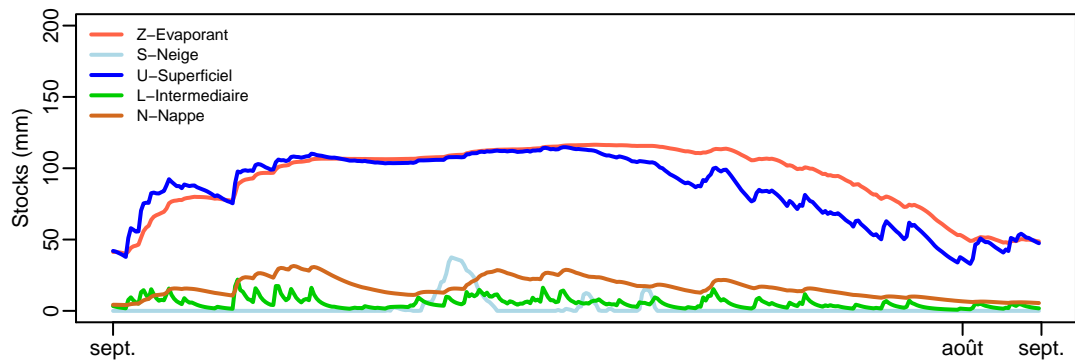

# q2861 (346.85 km<sup>2</sup>) – année 1995–1996

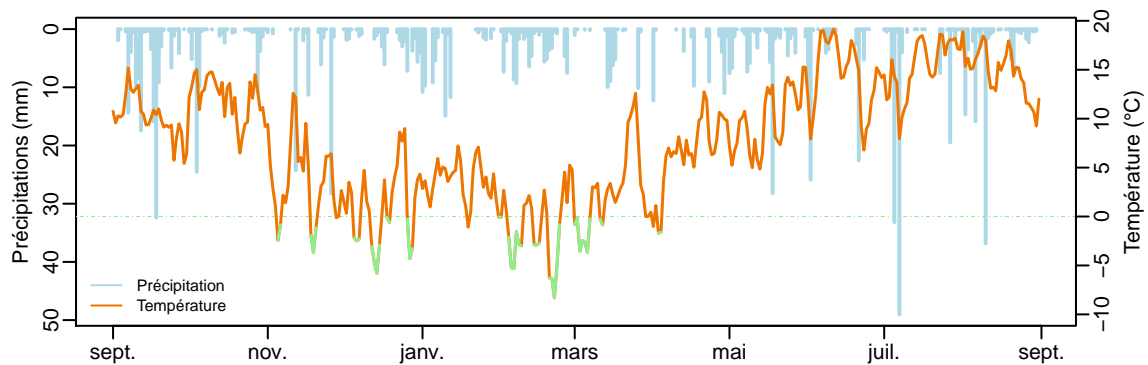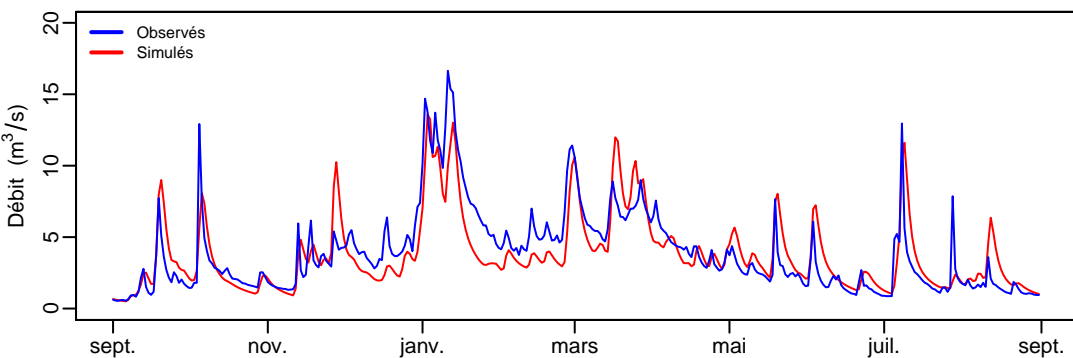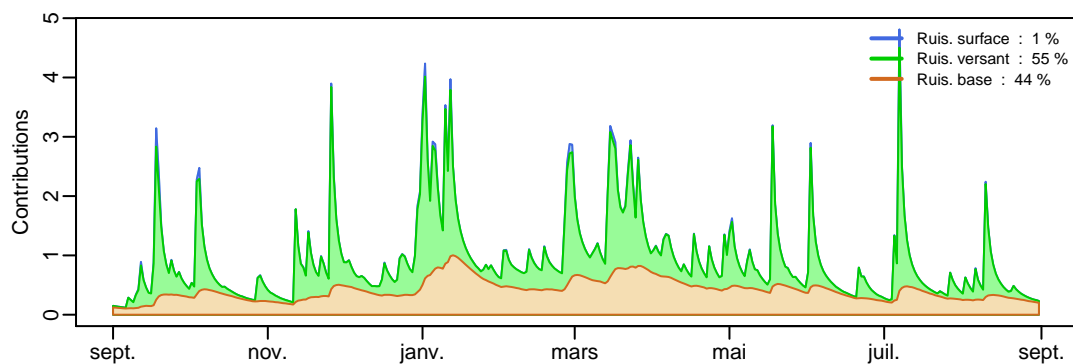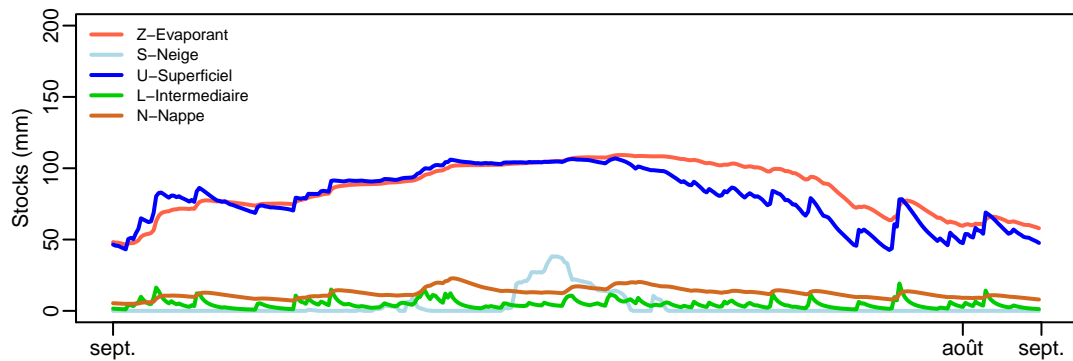

# q2861 (346.85 km²) – année 1996–1997

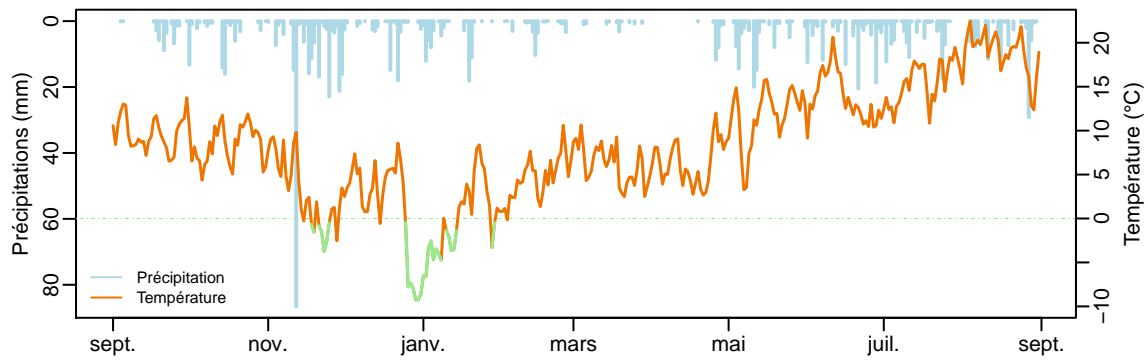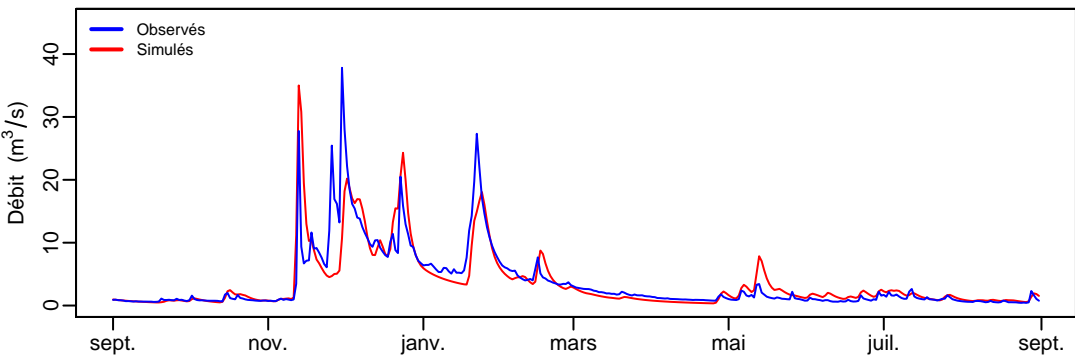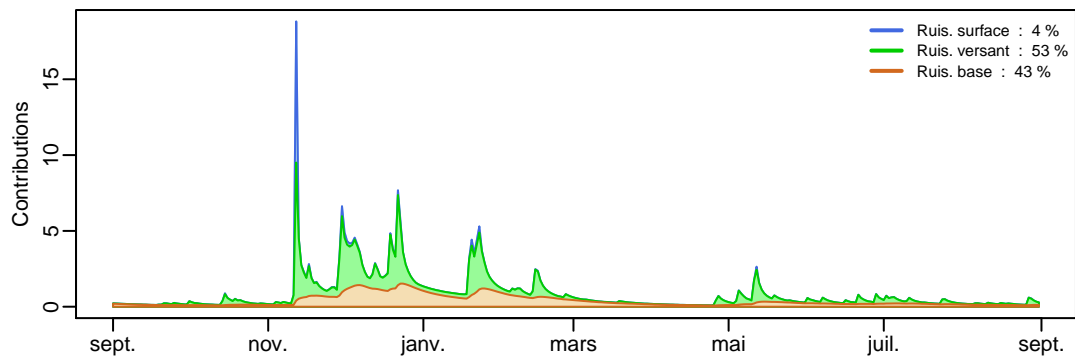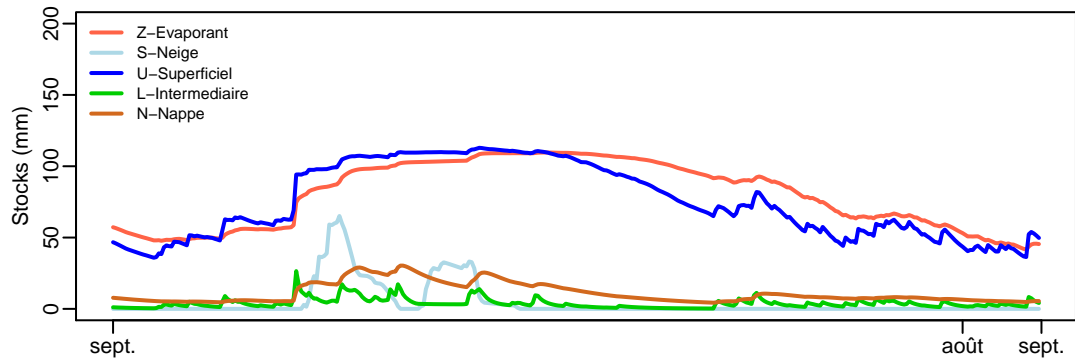

# q2861 (346.85 km<sup>2</sup>) – année 1997–1998

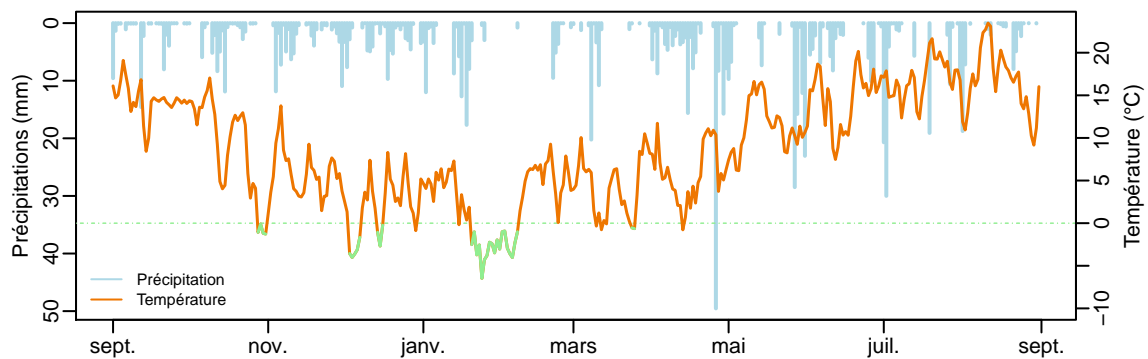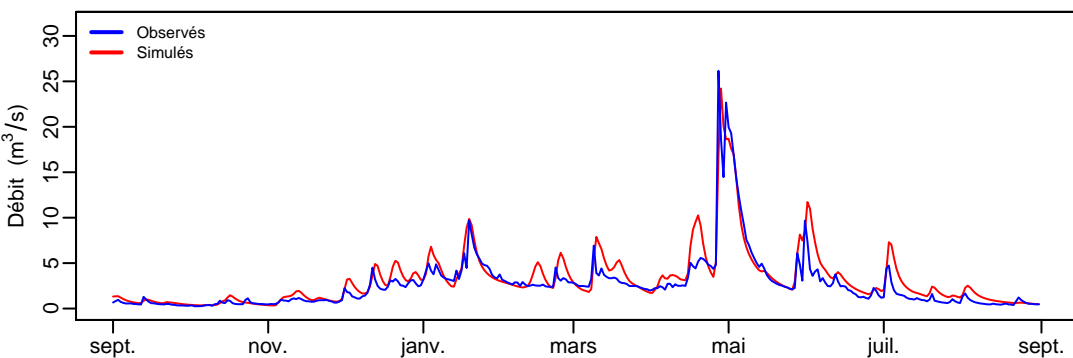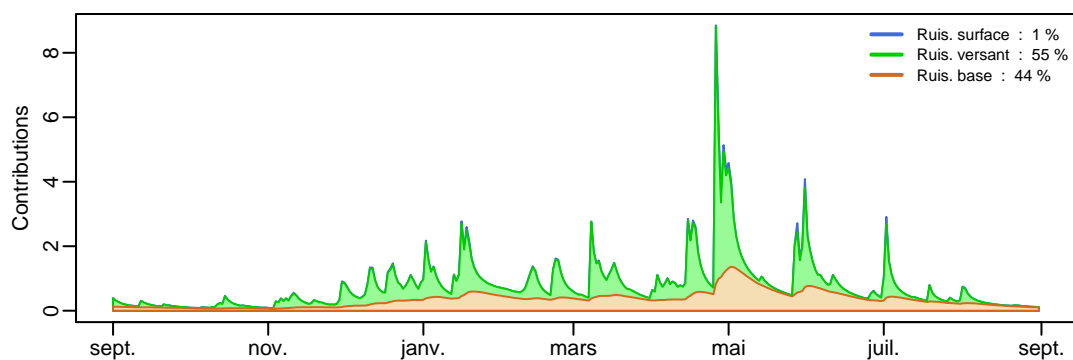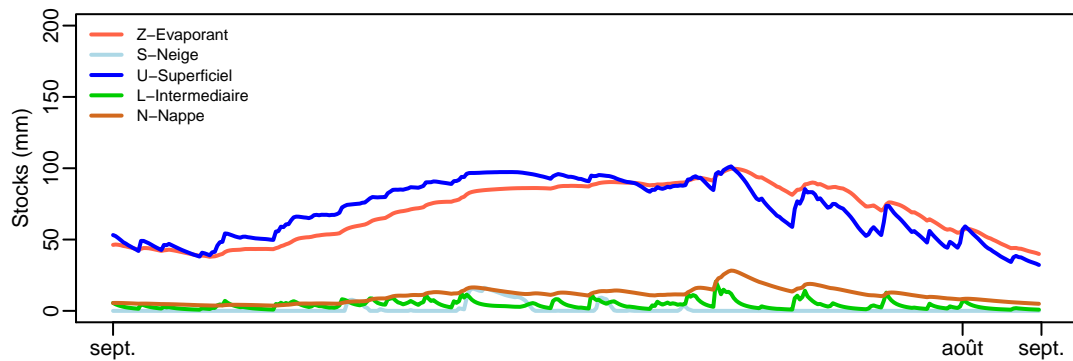

# q2861 (346.85 km²) – année 1998–1999

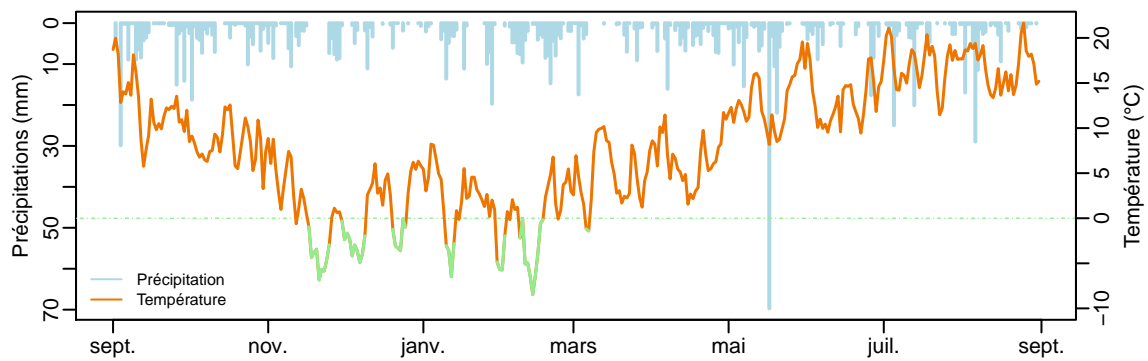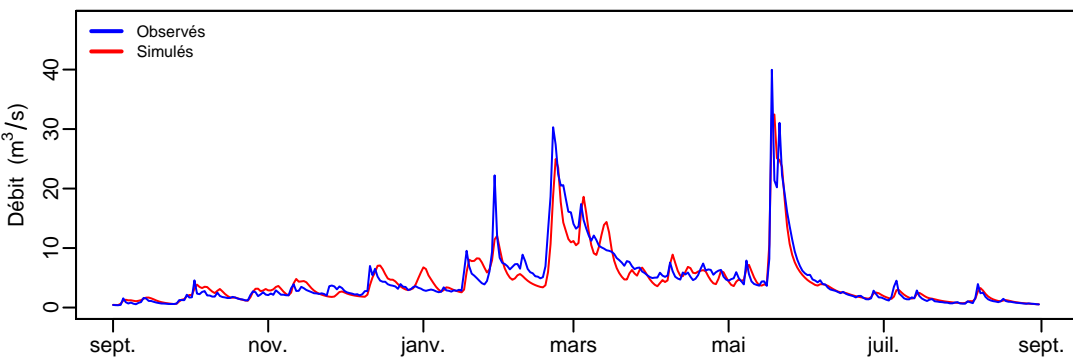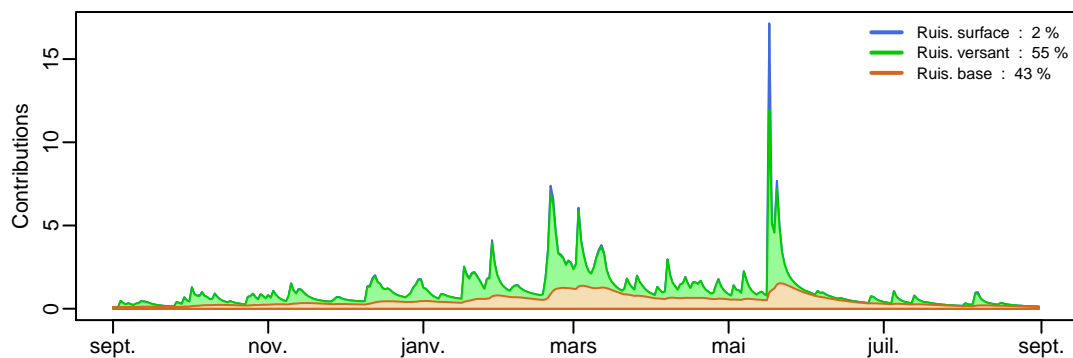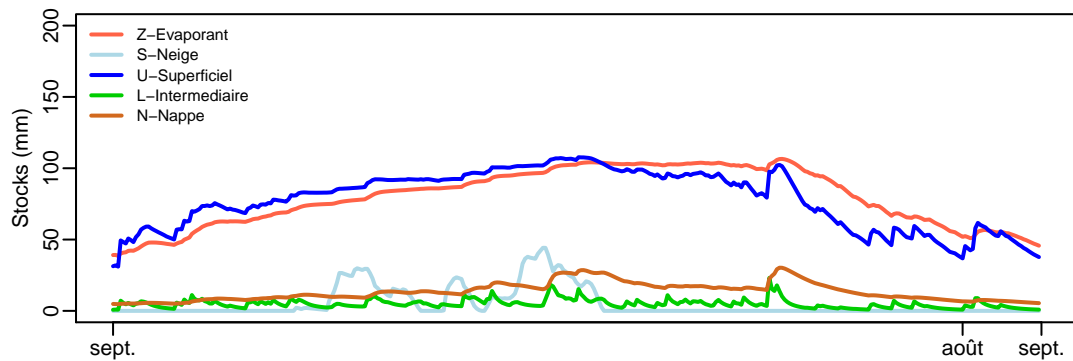

# q2861 (346.85 km²) – année 1999–2000

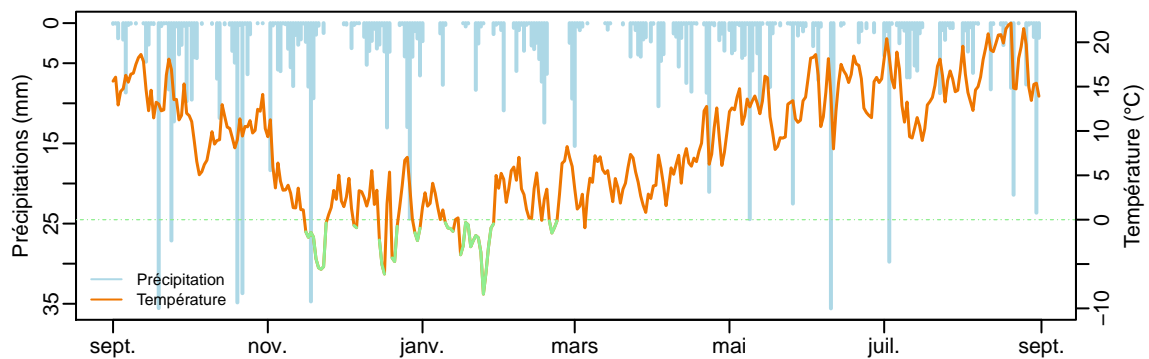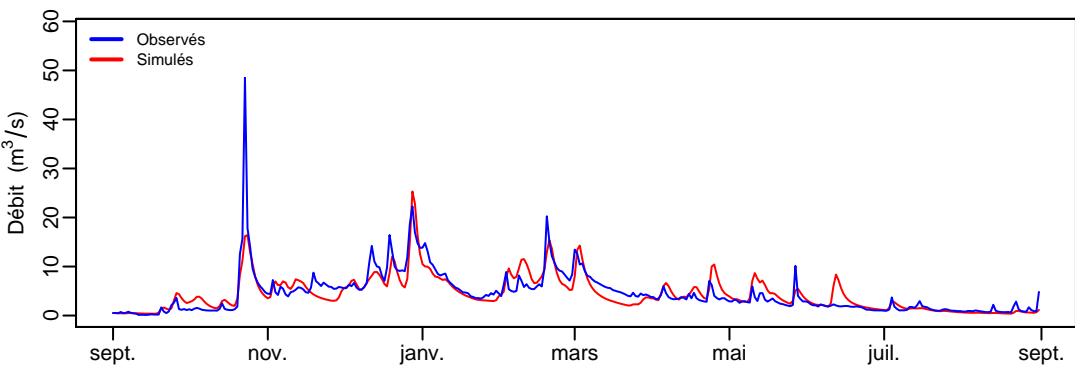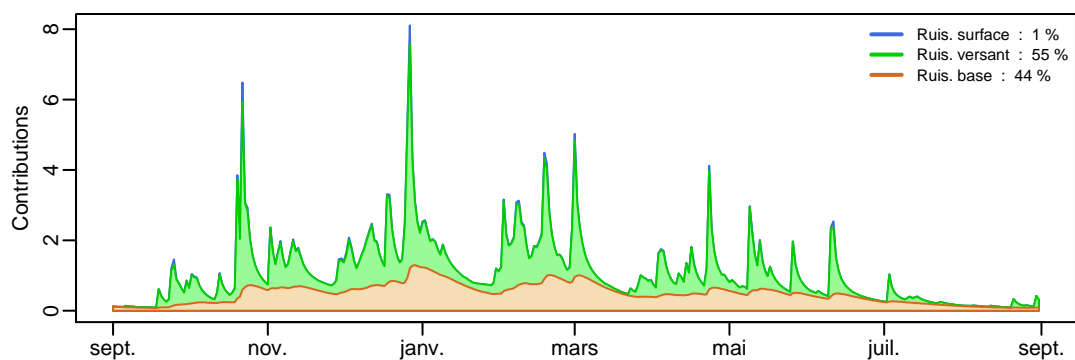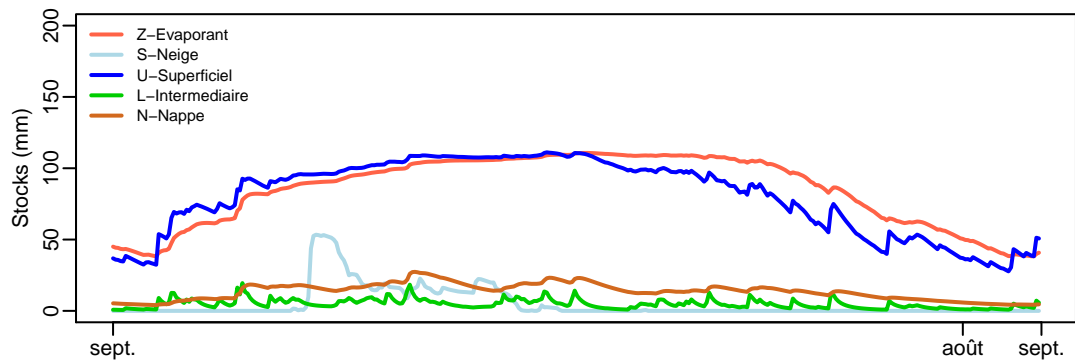

# q2861 (346.85 km²) – année 2000–2001

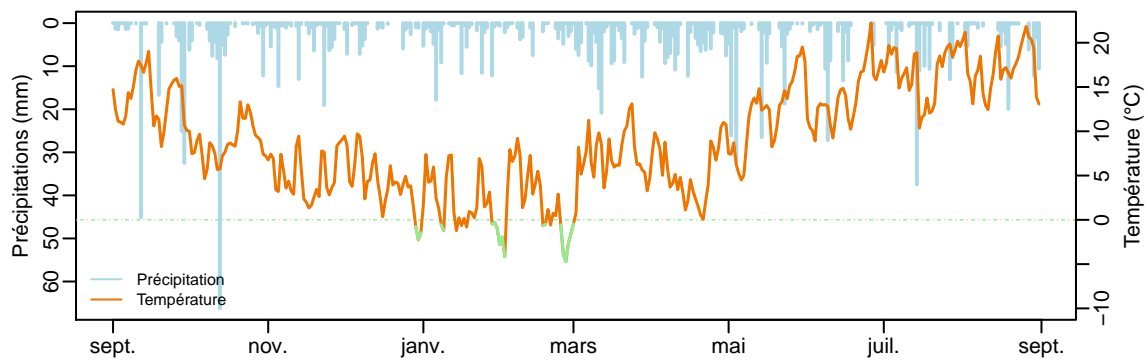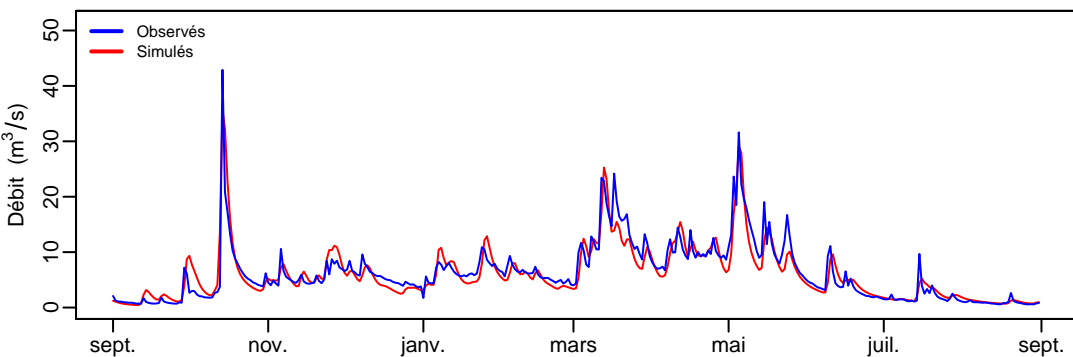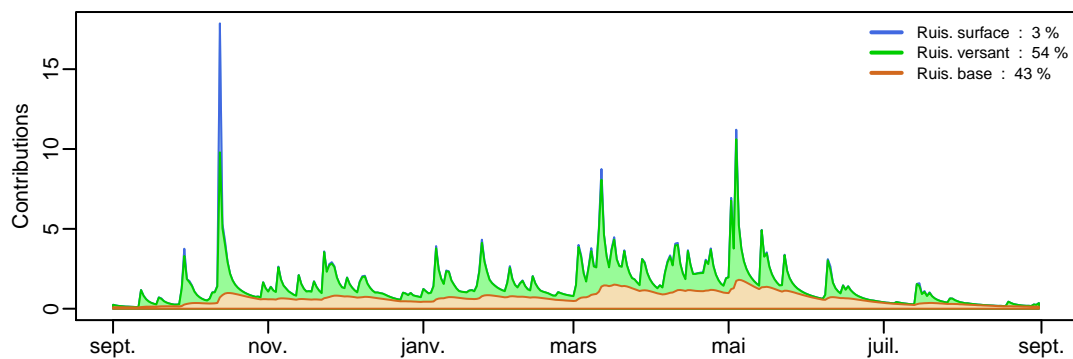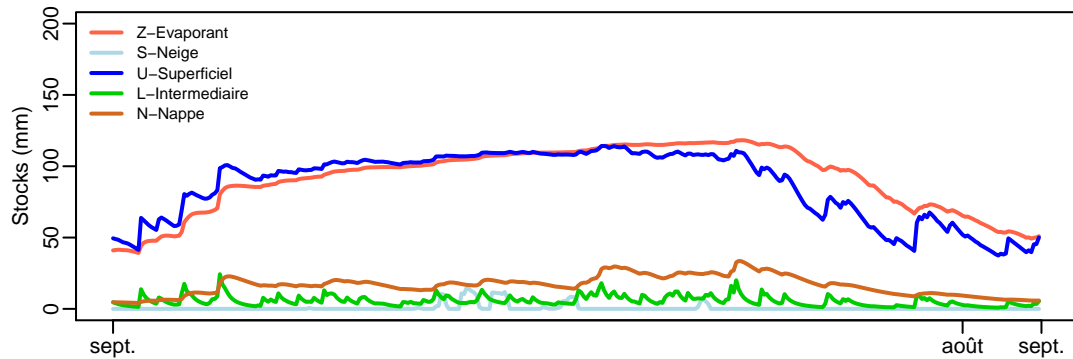

# q2861 (346.85 km<sup>2</sup>) – année 2001–2002

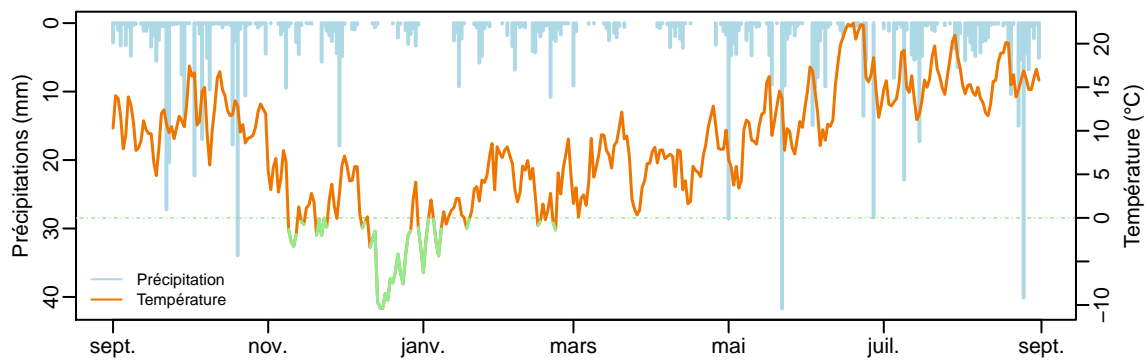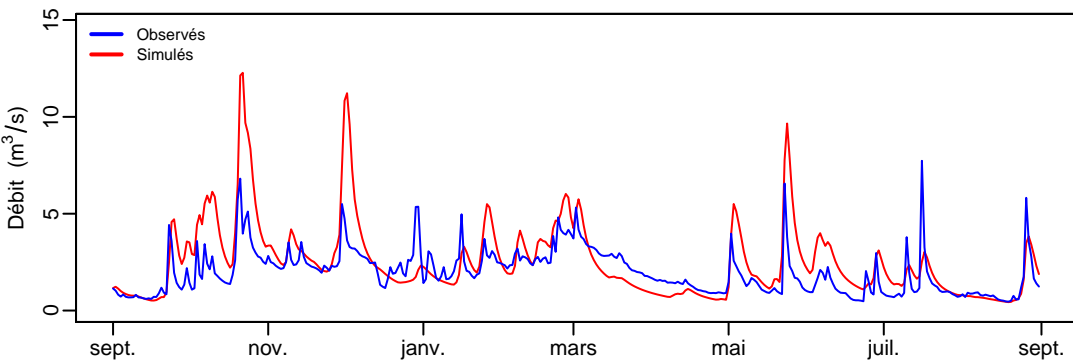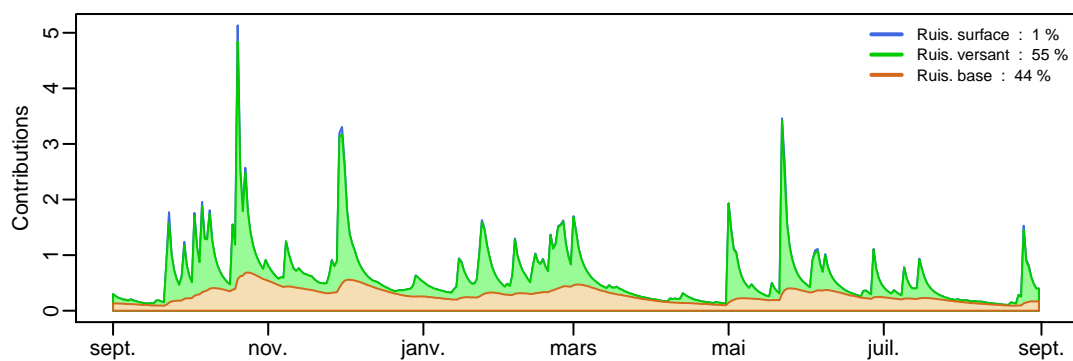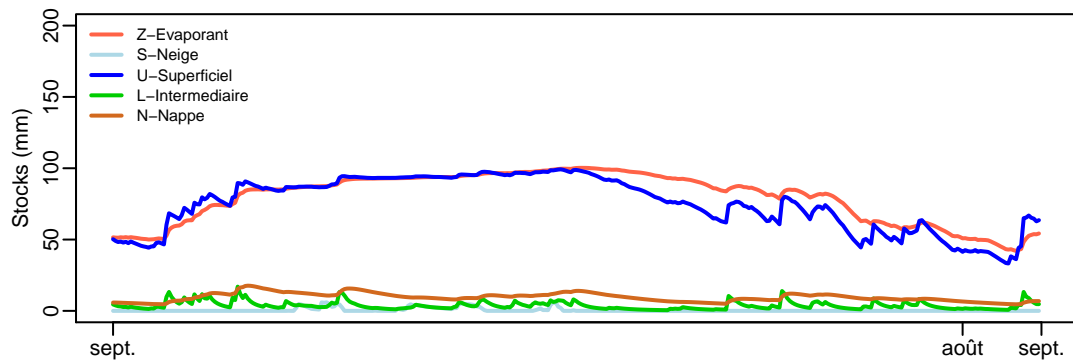



# q2861 (346.85 km²) – année 2002–2003

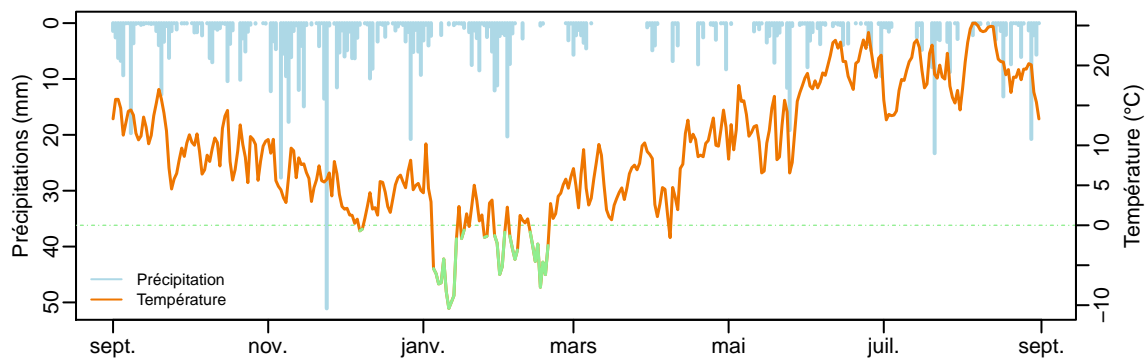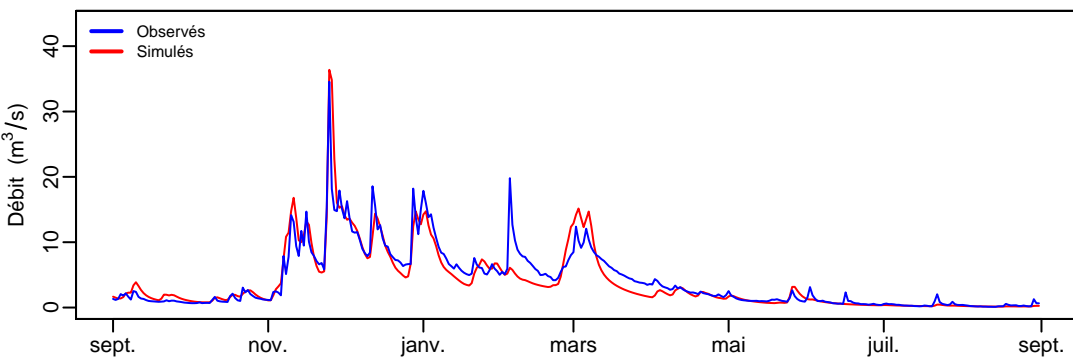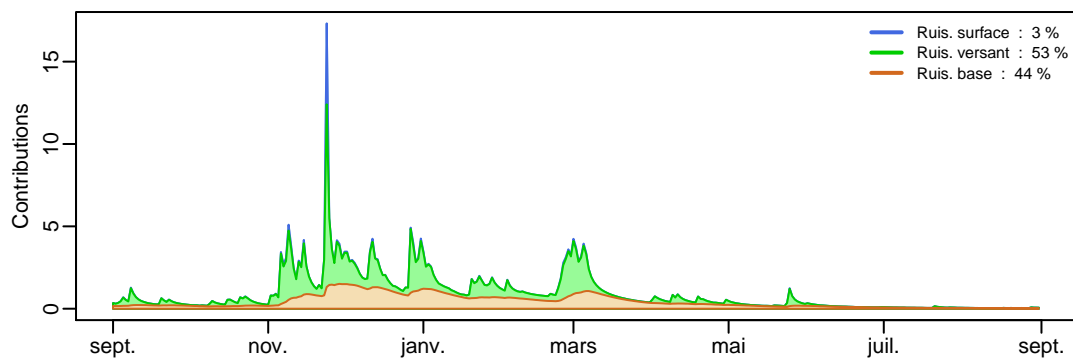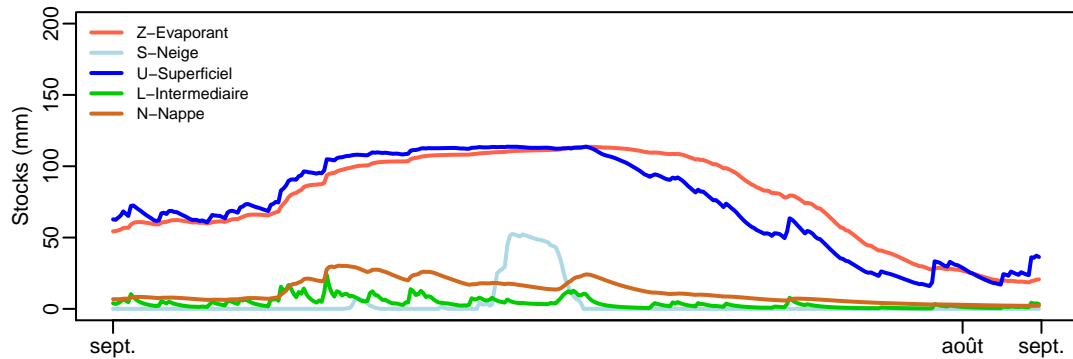

# q2861 (346.85 km²) – année 2003–2004

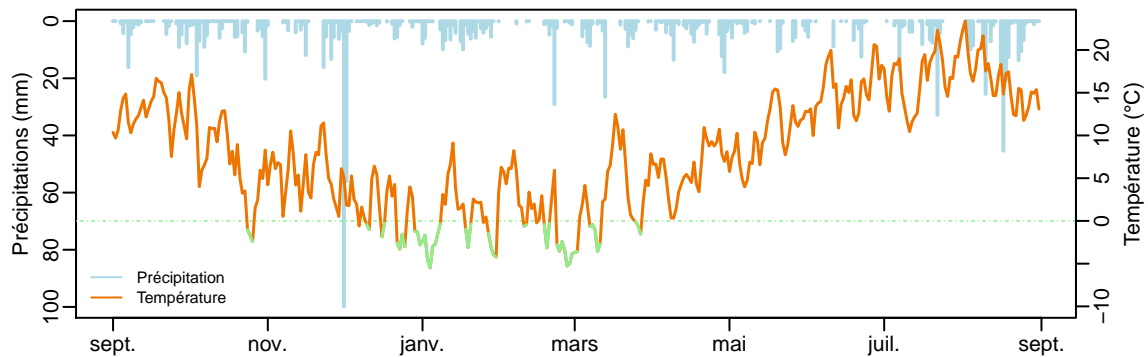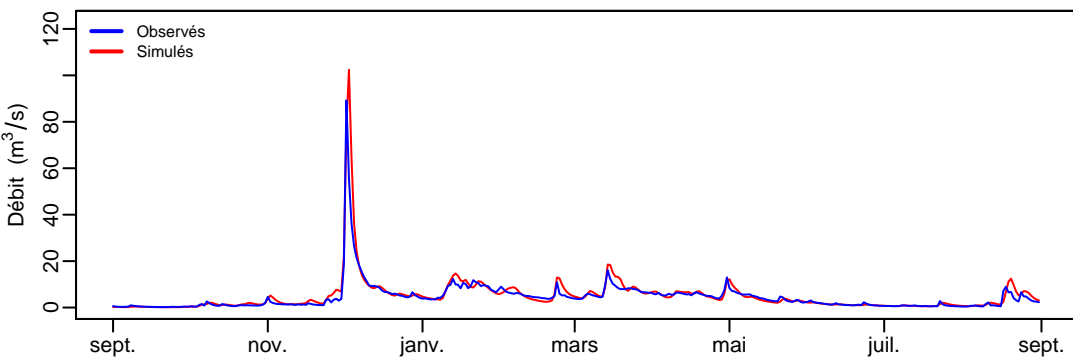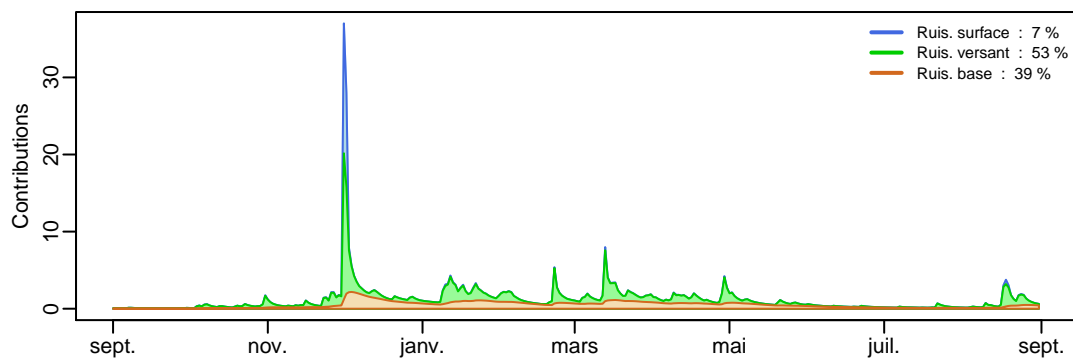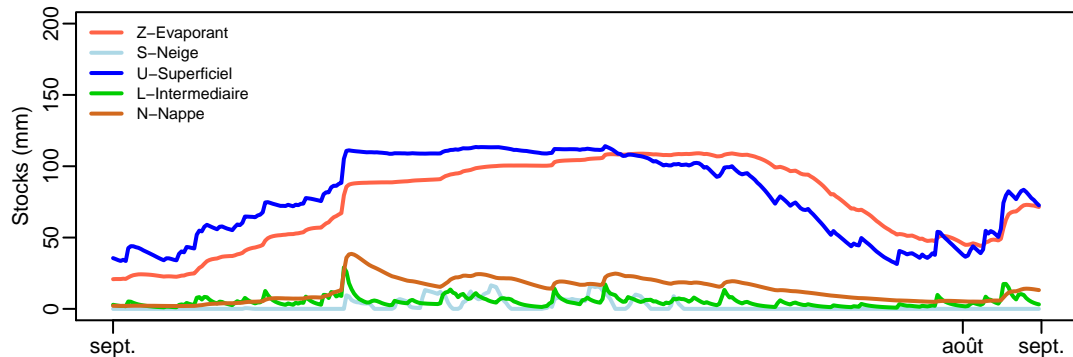

# q2861 (346.85 km²) – année 2004–2005

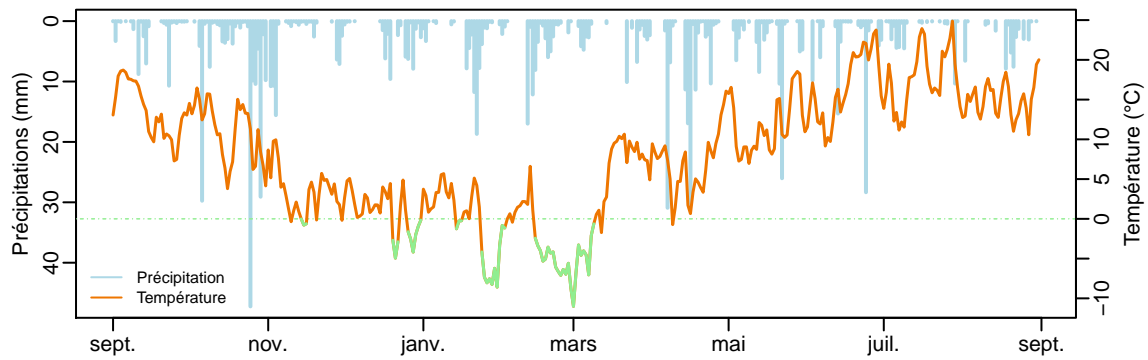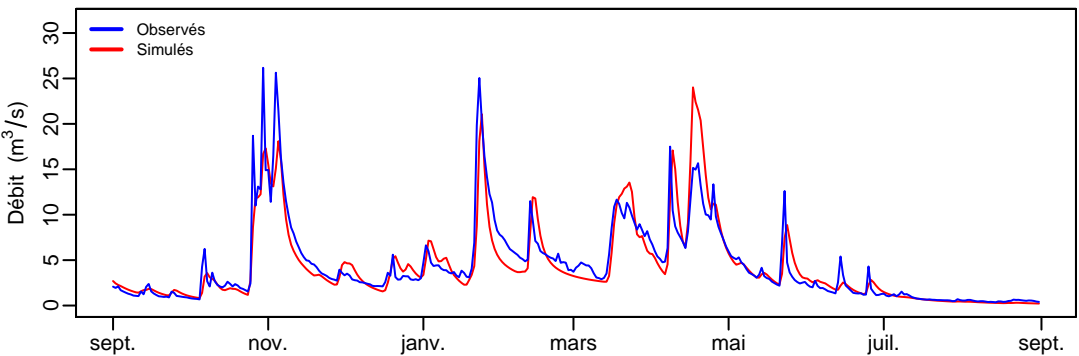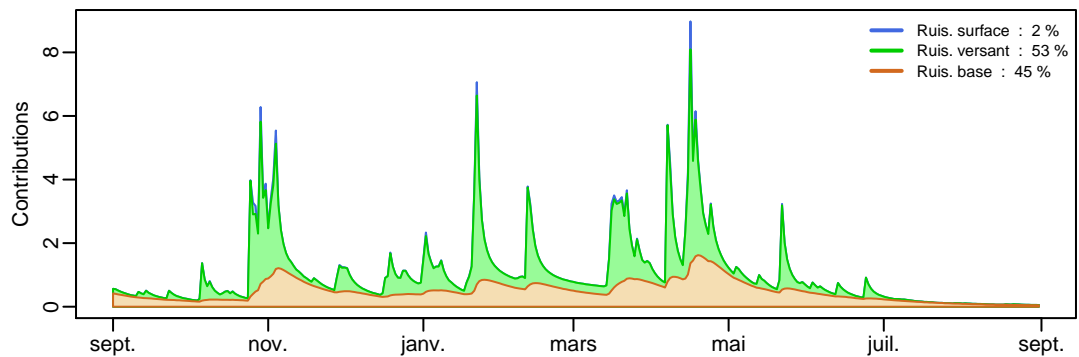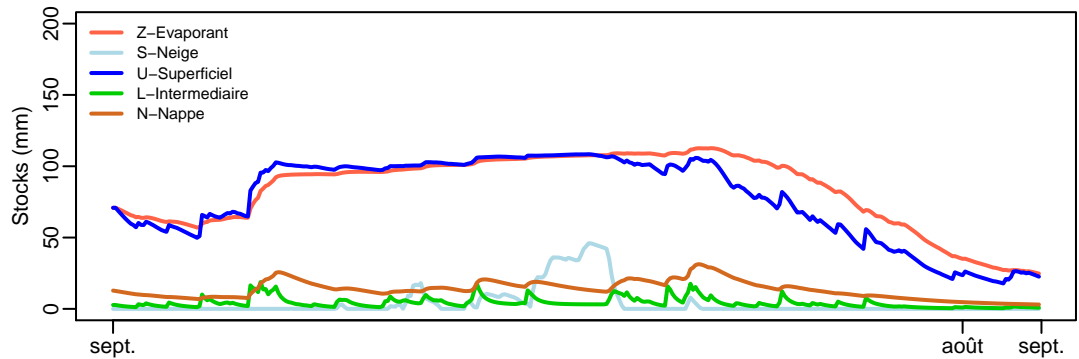

# q2861 (346.85 km²) – année 2005–2006

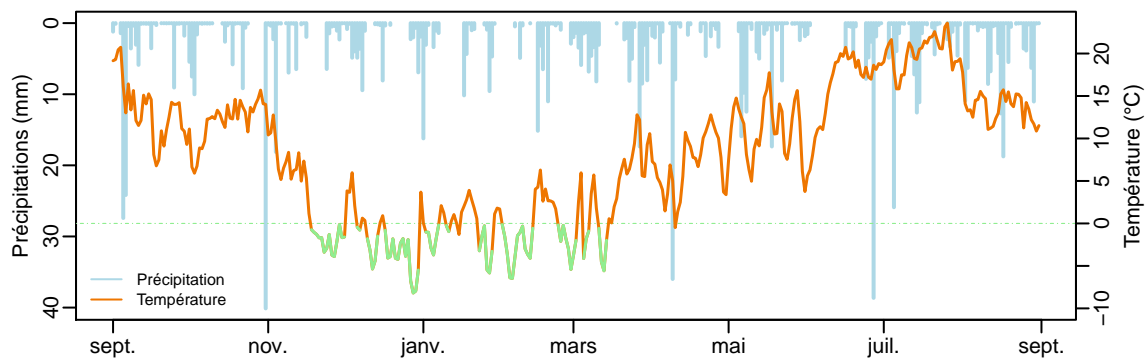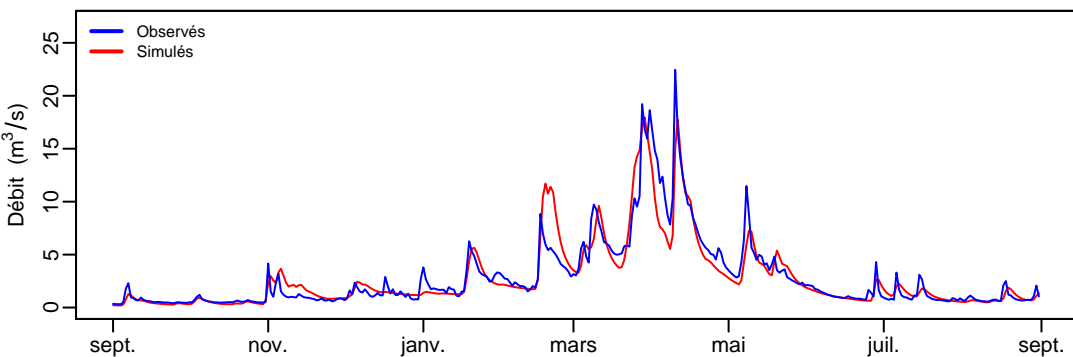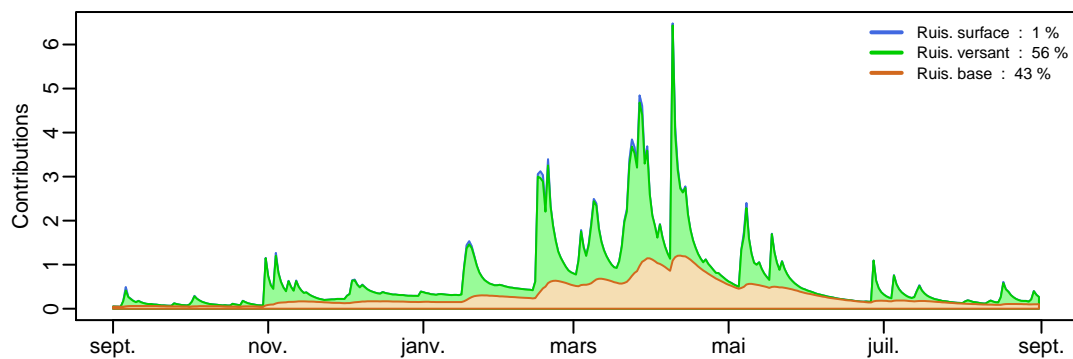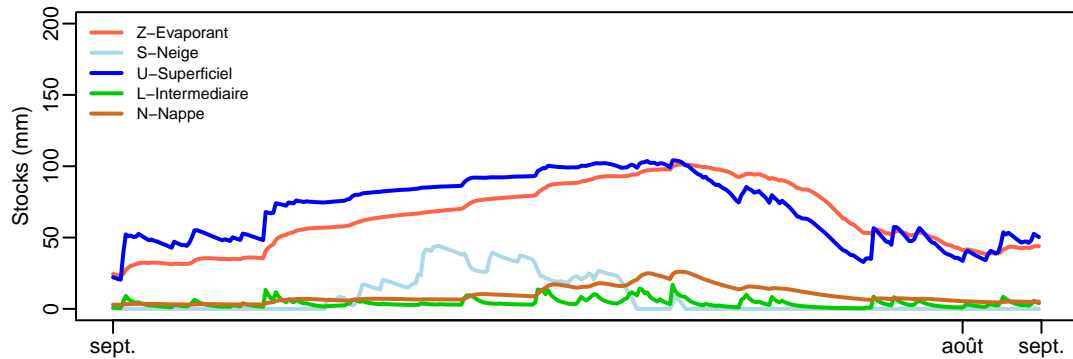

# q2861 (346.85 km²) – année 2006–2007

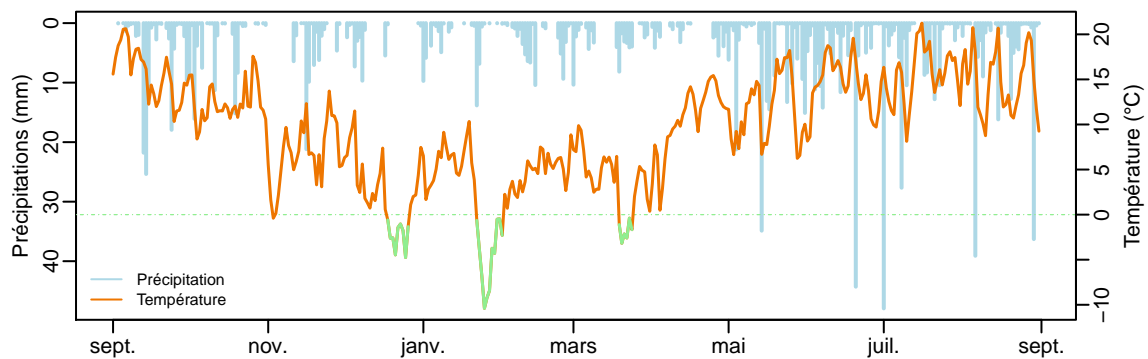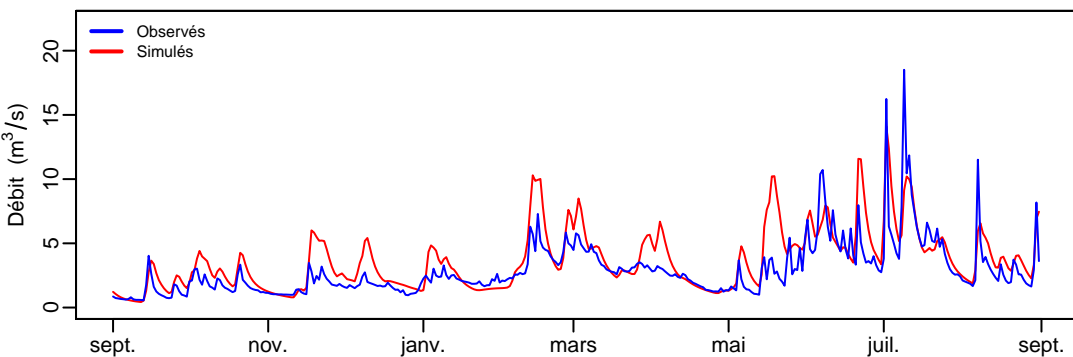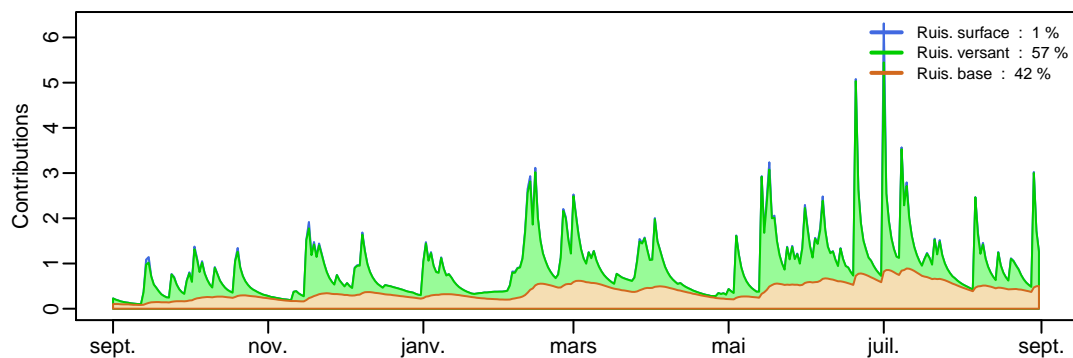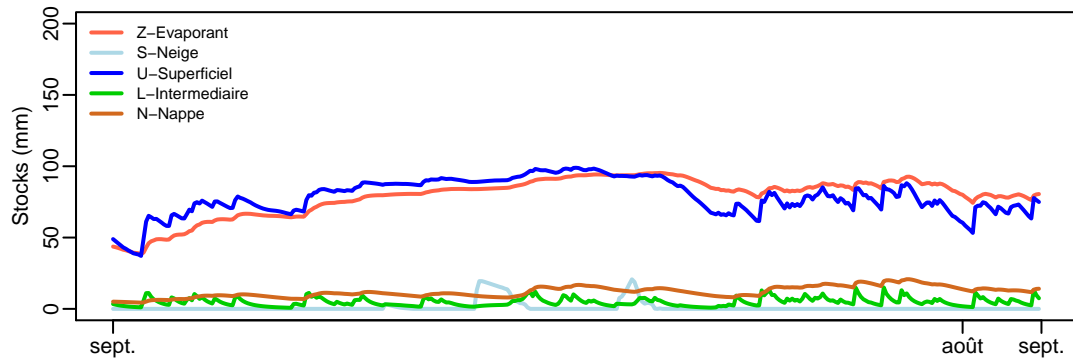

# q2861 (346.85 km<sup>2</sup>) – année 2007–2008

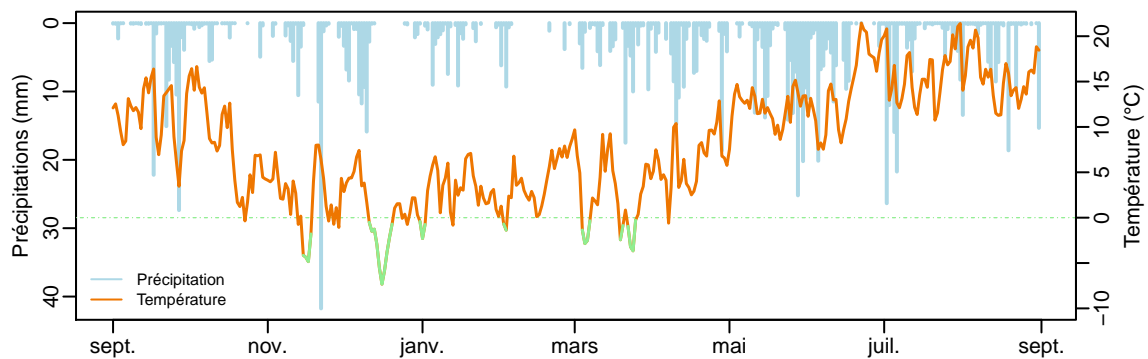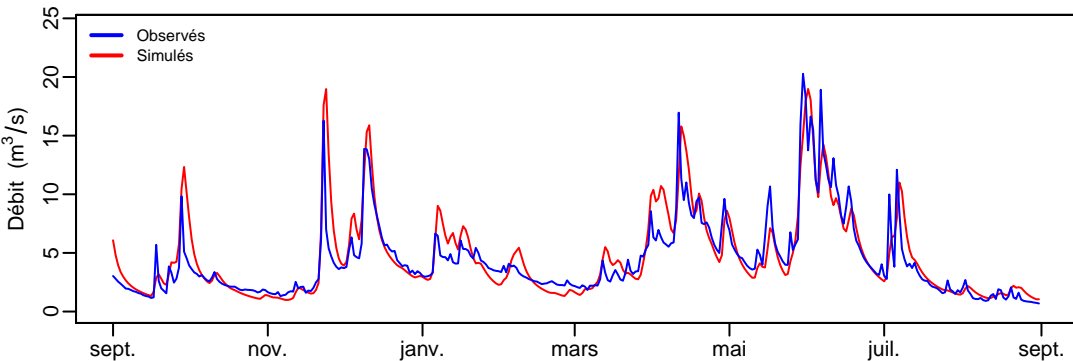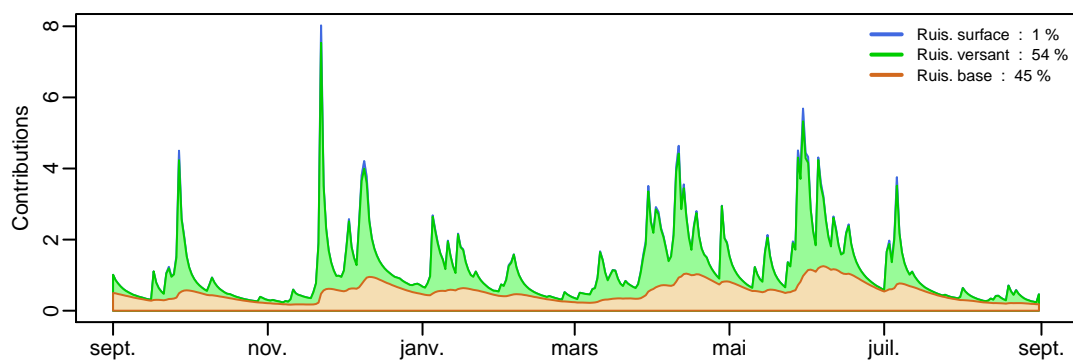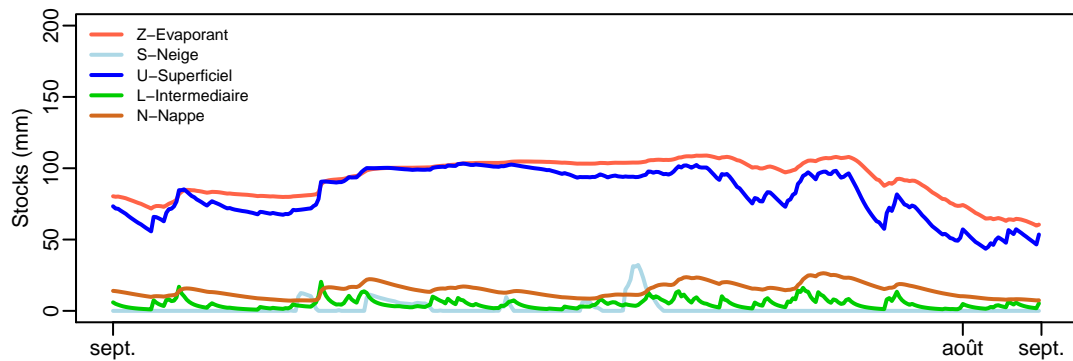

# q2861 (346.85 km<sup>2</sup>) – année 2008–2009

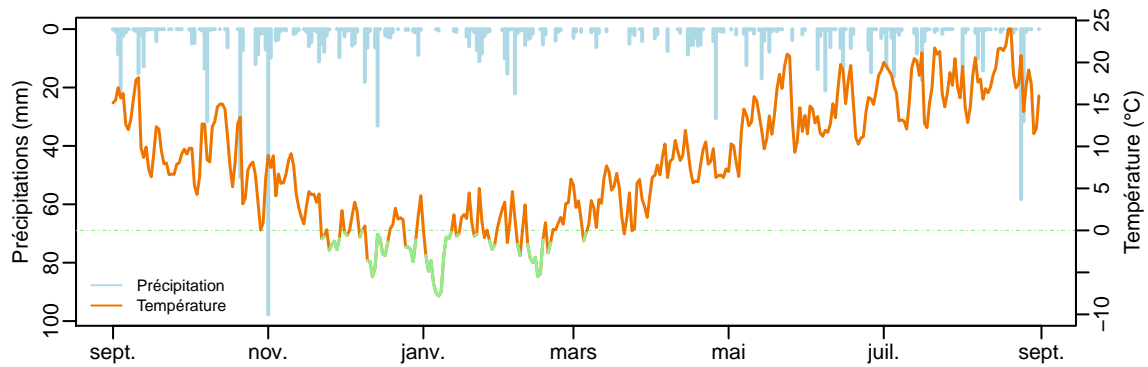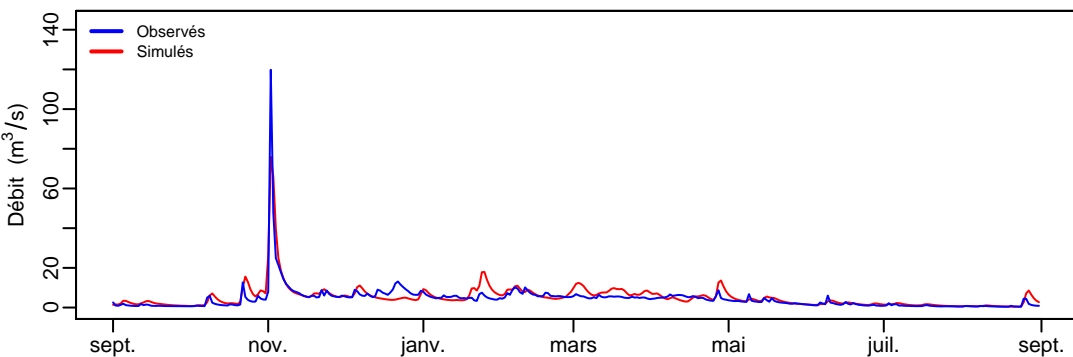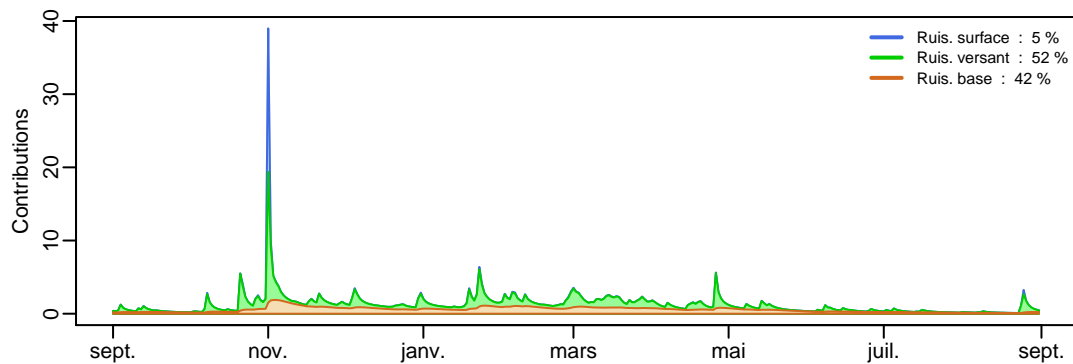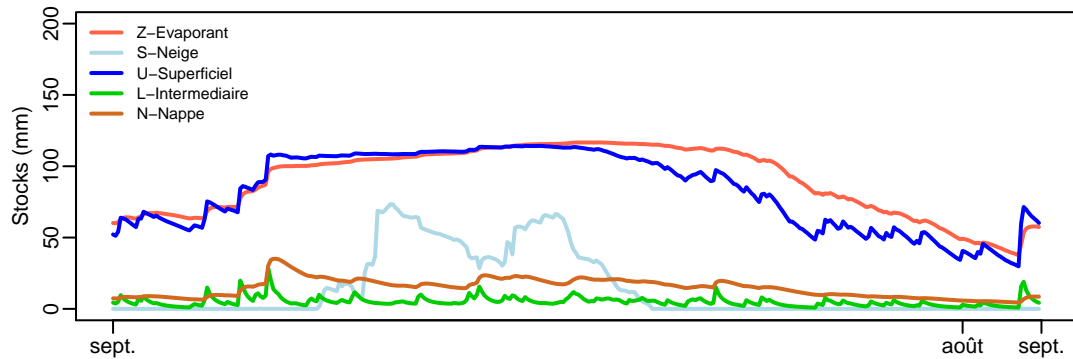

# q2861 (346.85 km<sup>2</sup>) – année 2009–2010

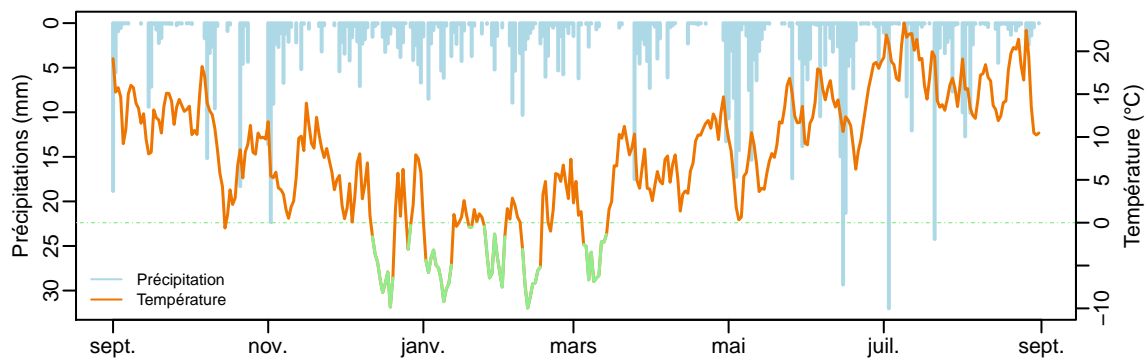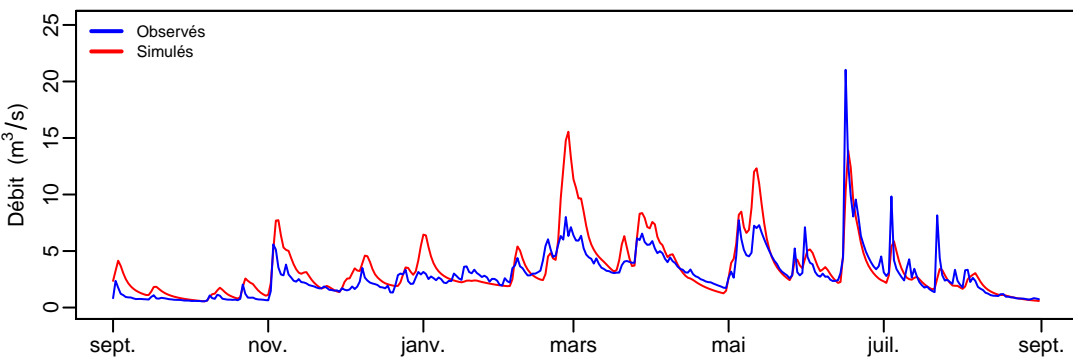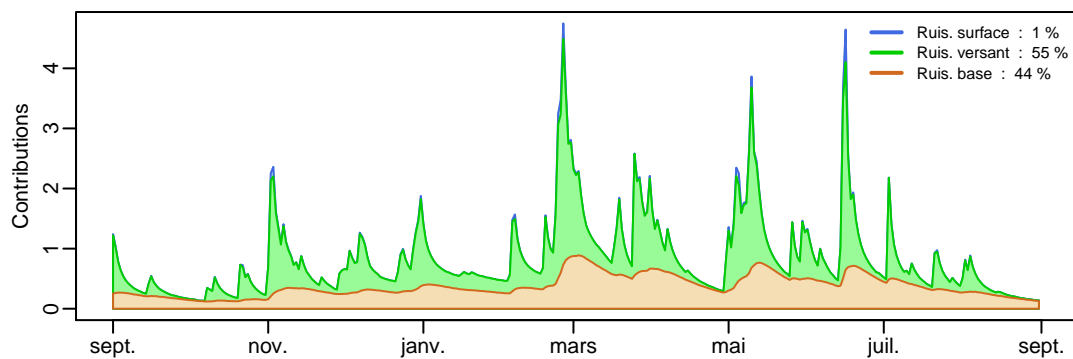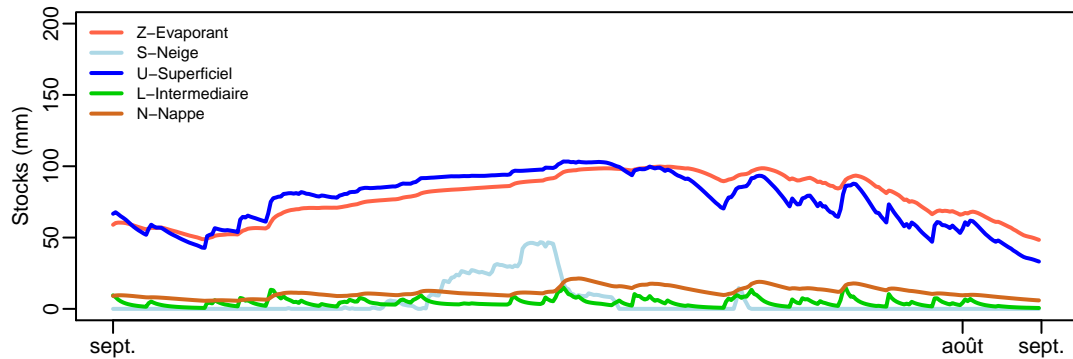



# q2861 (346.85 km²) – année 2010–2011

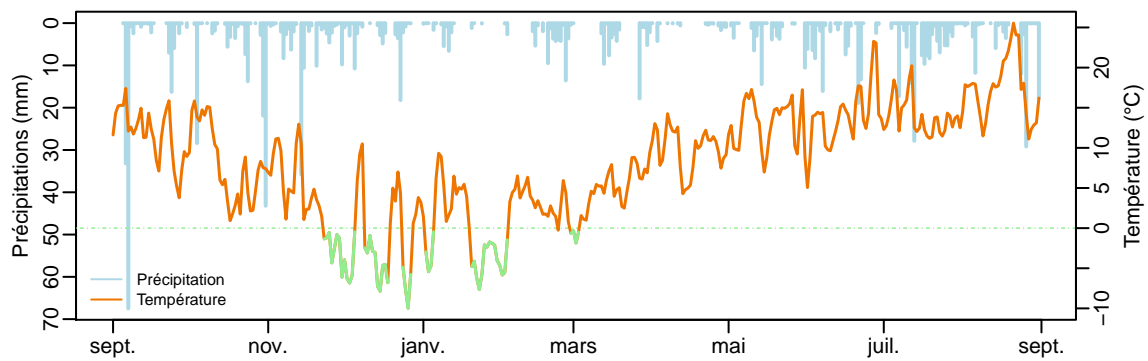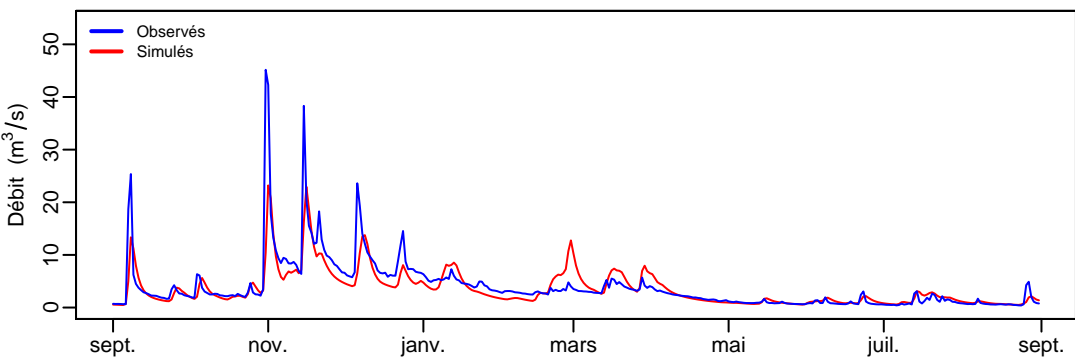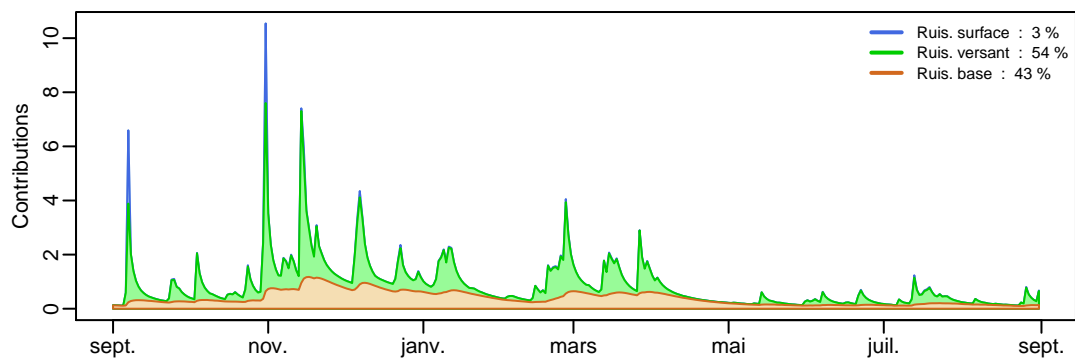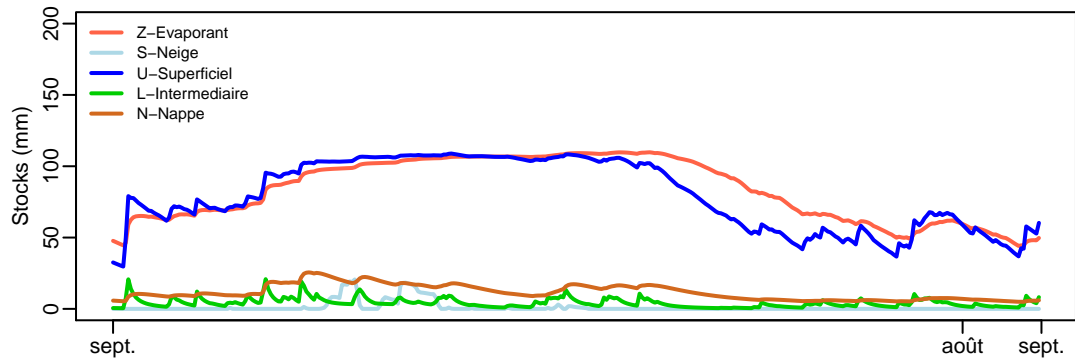

# q2861 (346.85 km<sup>2</sup>) – année 2011–2012

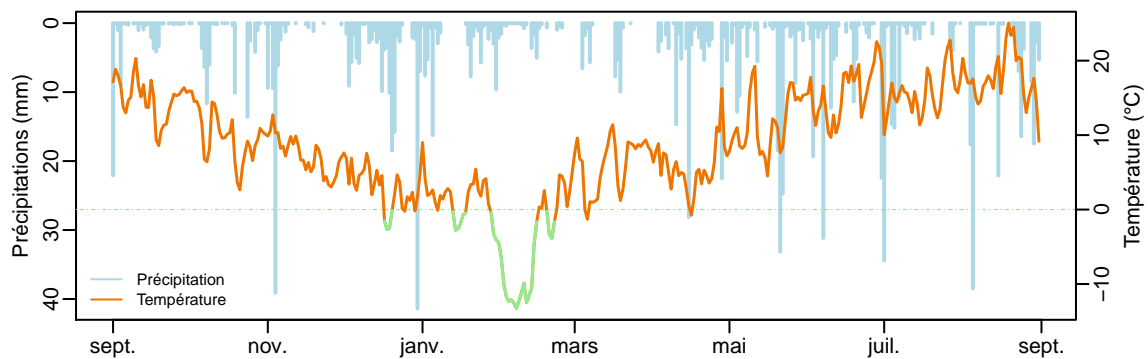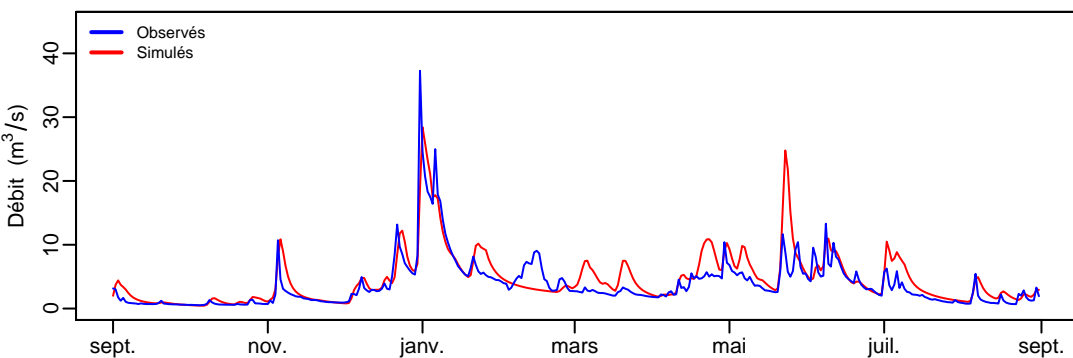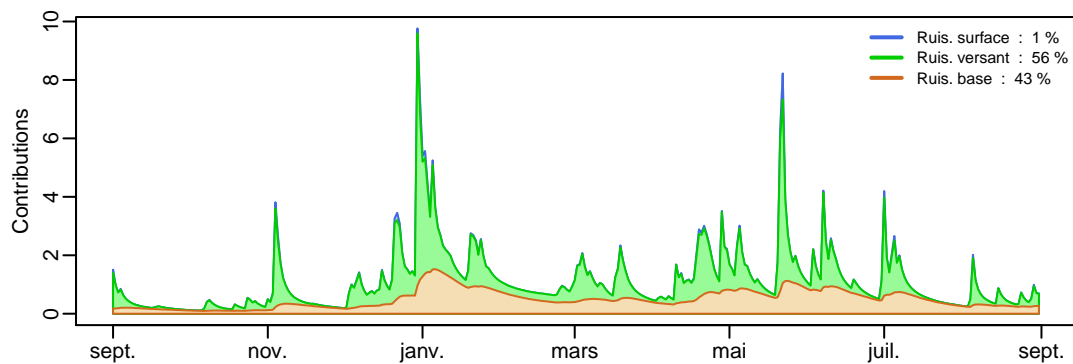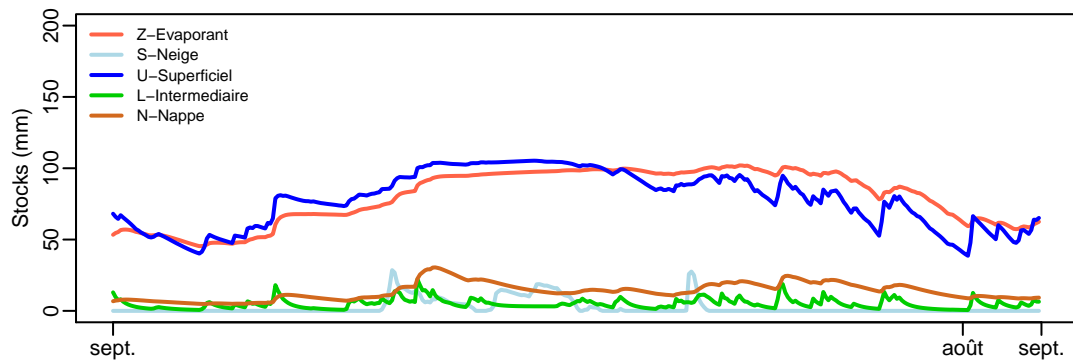

# rory\_h (116.56 km<sup>2</sup>) – année 1990–1991

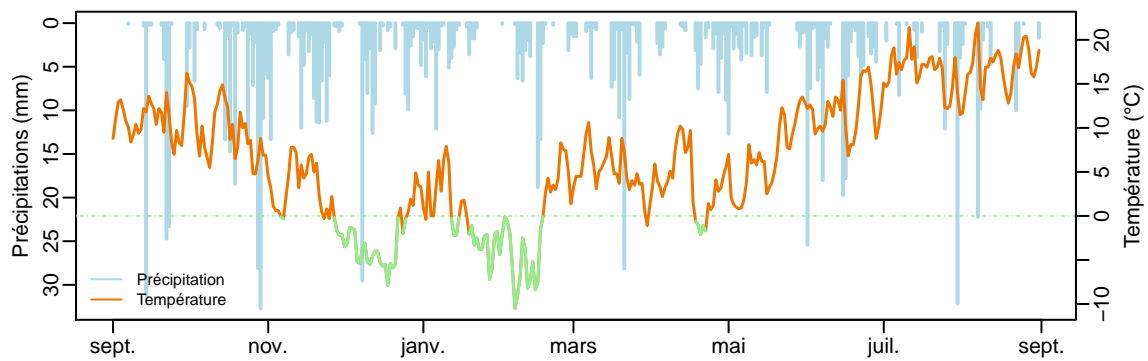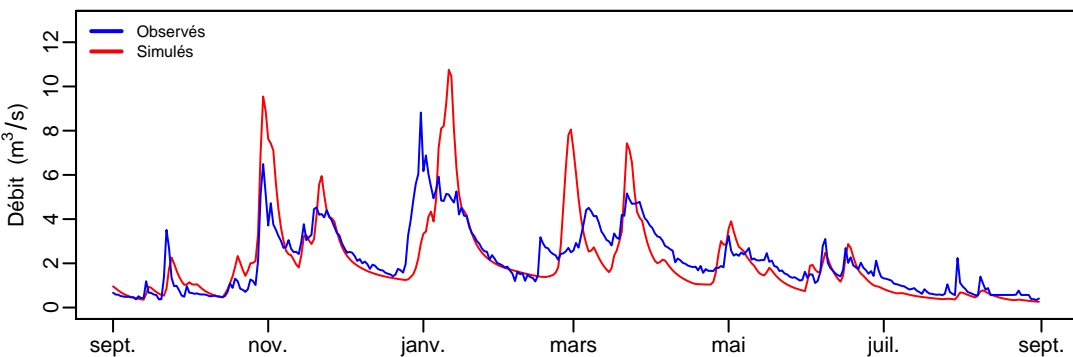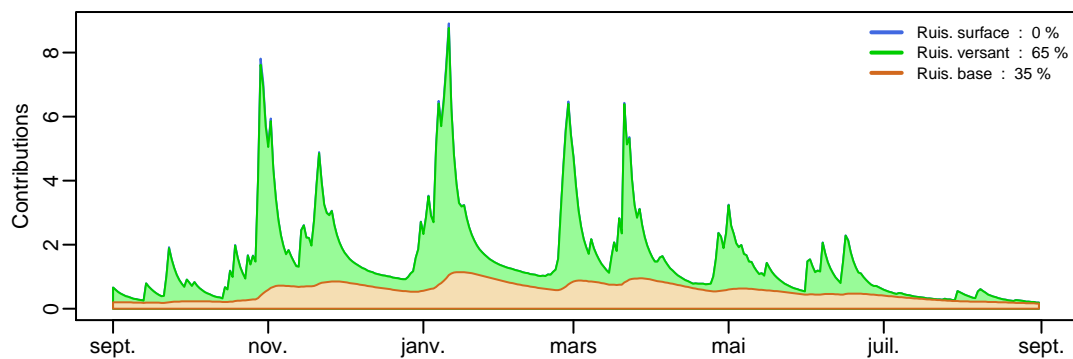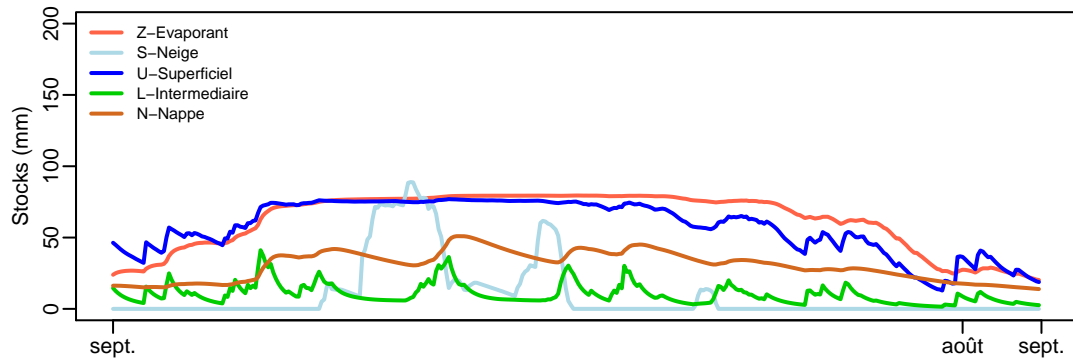

# rory\_h (116.56 km<sup>2</sup>) – année 1991–1992

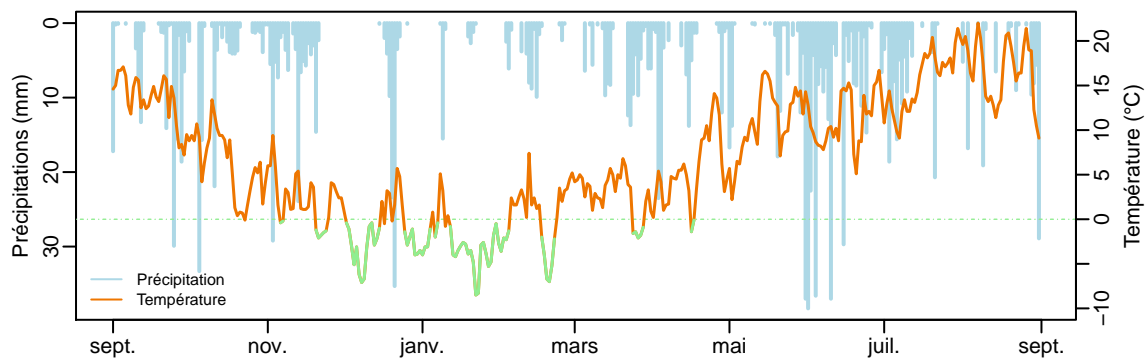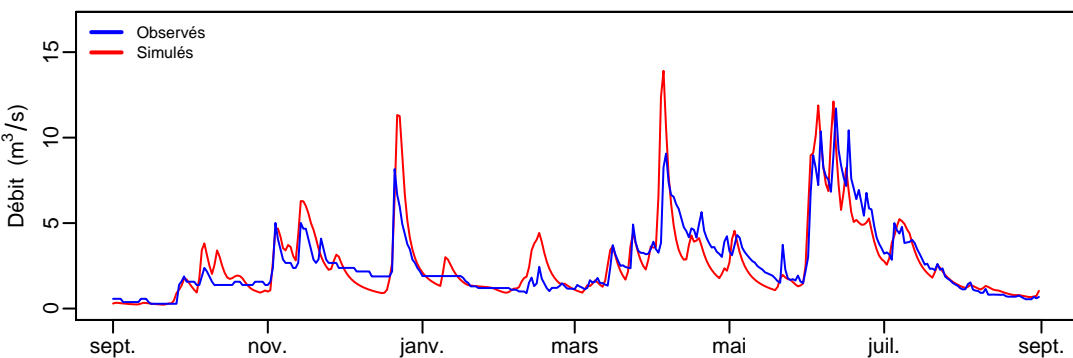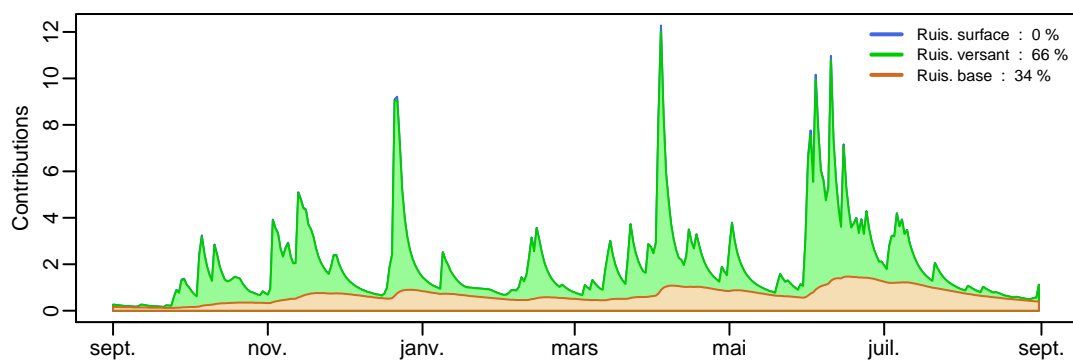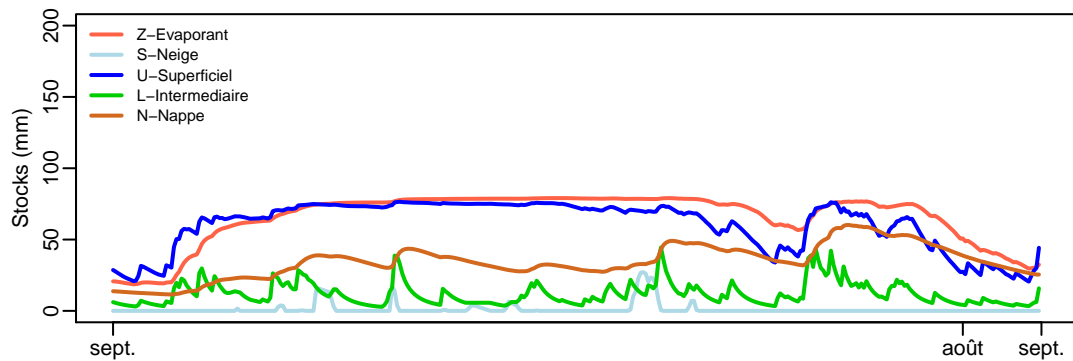

# rory\_h (116.56 km<sup>2</sup>) – année 1992–1993

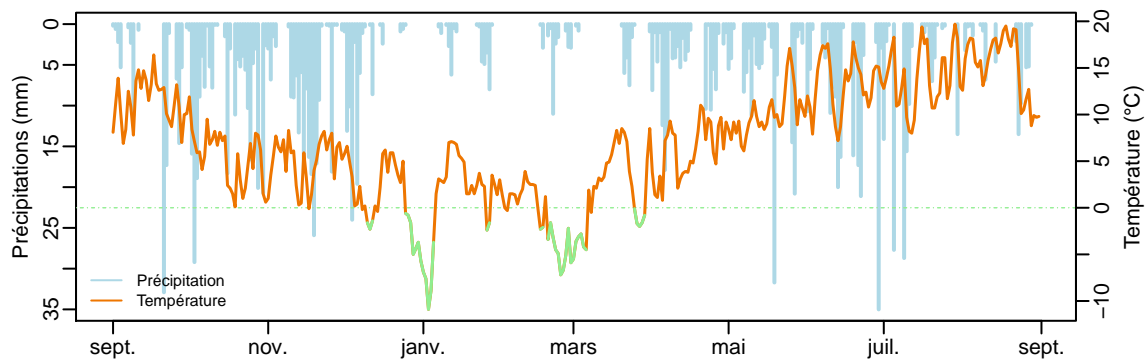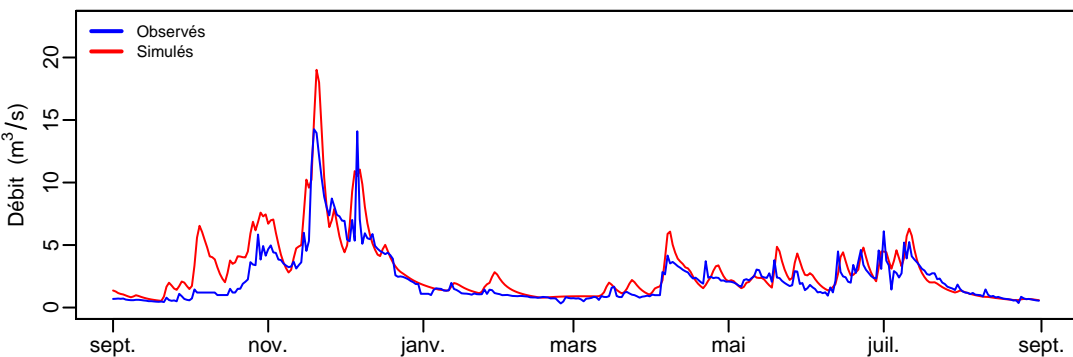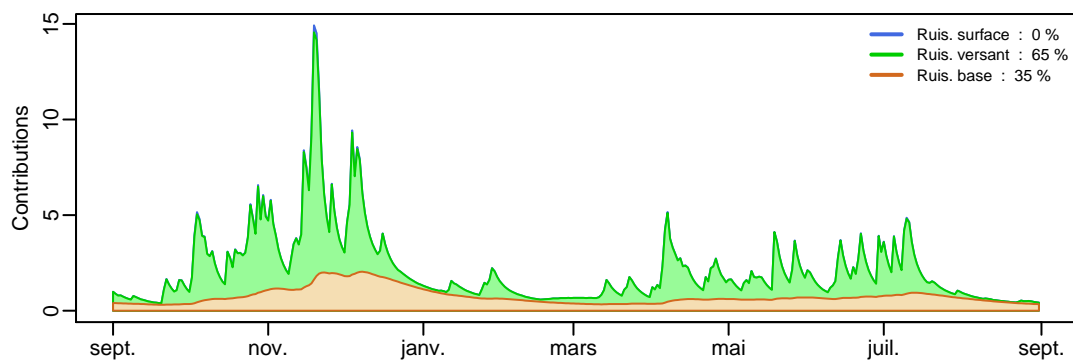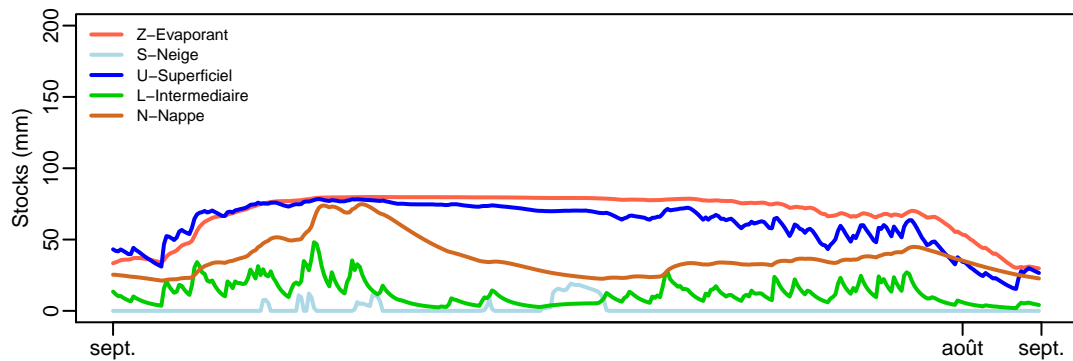

# rory\_h (116.56 km<sup>2</sup>) – année 1993–1994

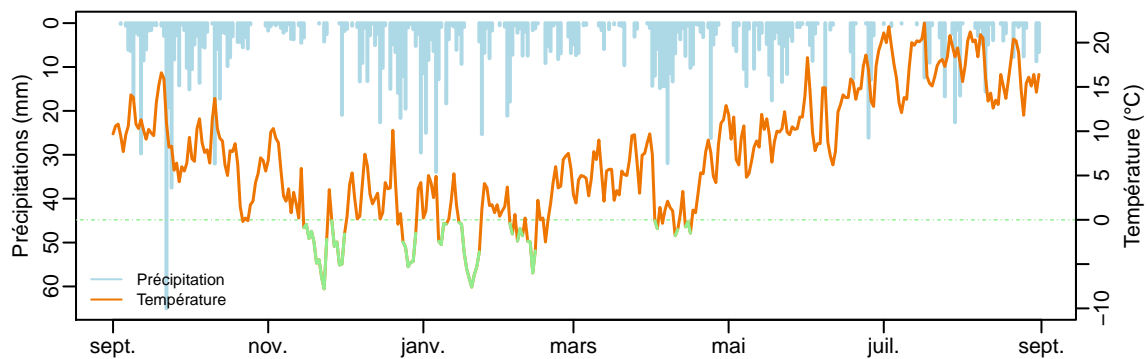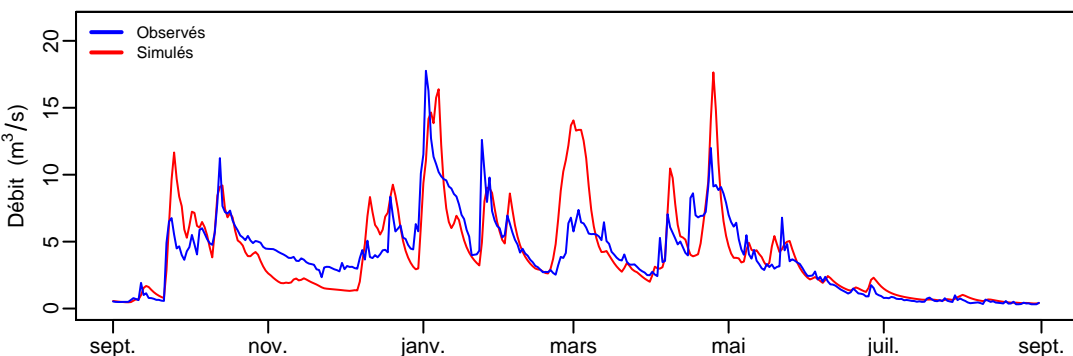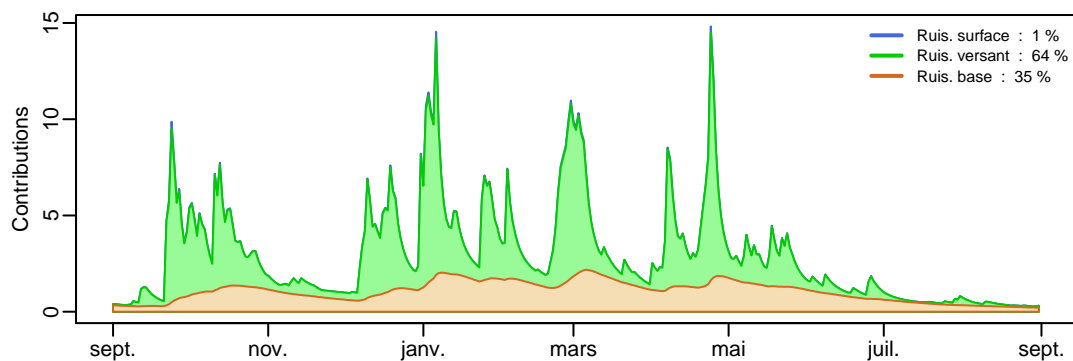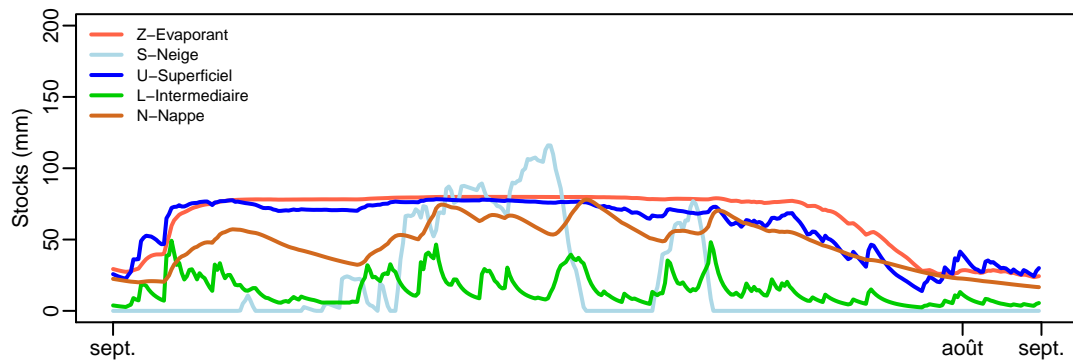

# rory\_h (116.56 km<sup>2</sup>) – année 1994–1995

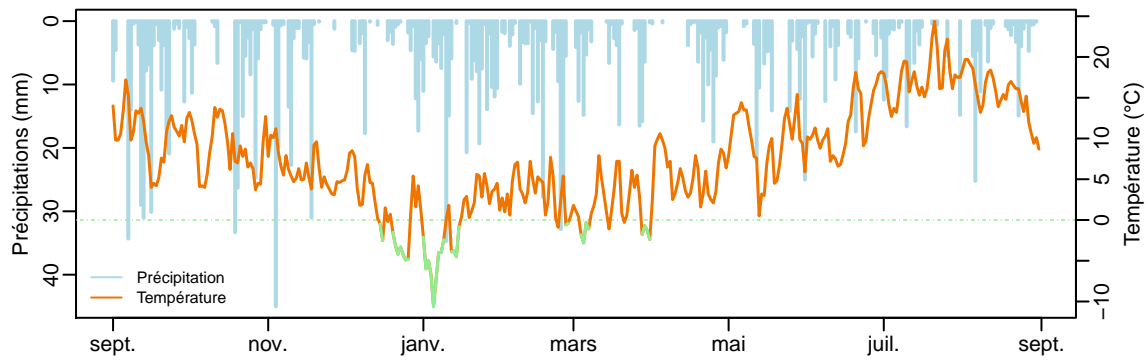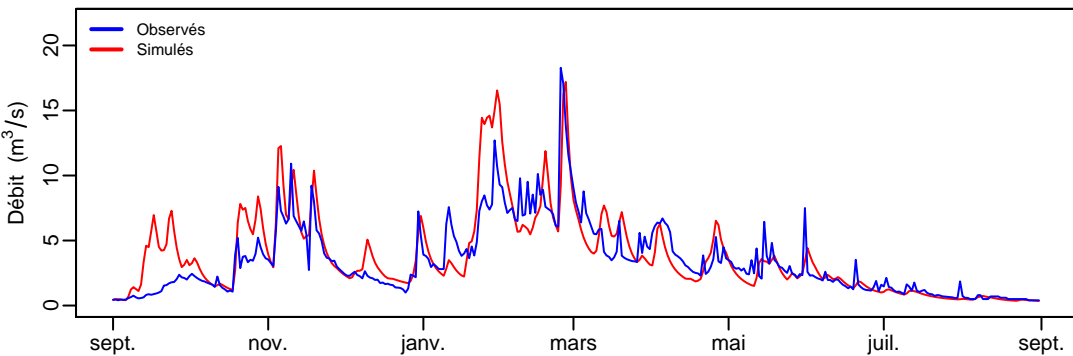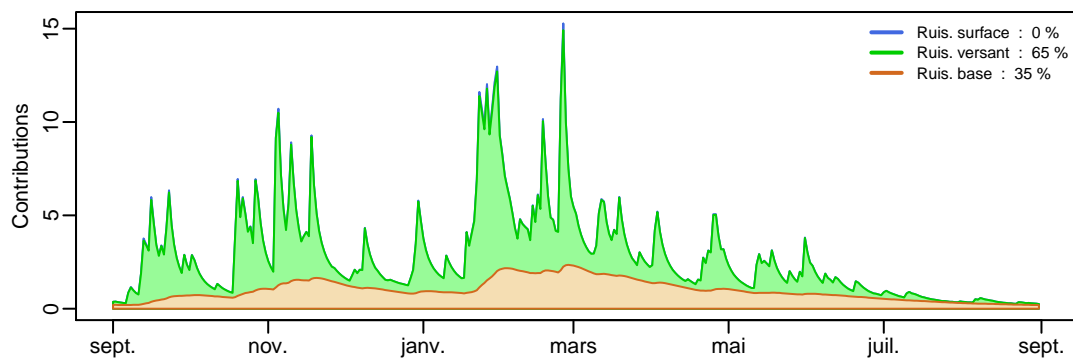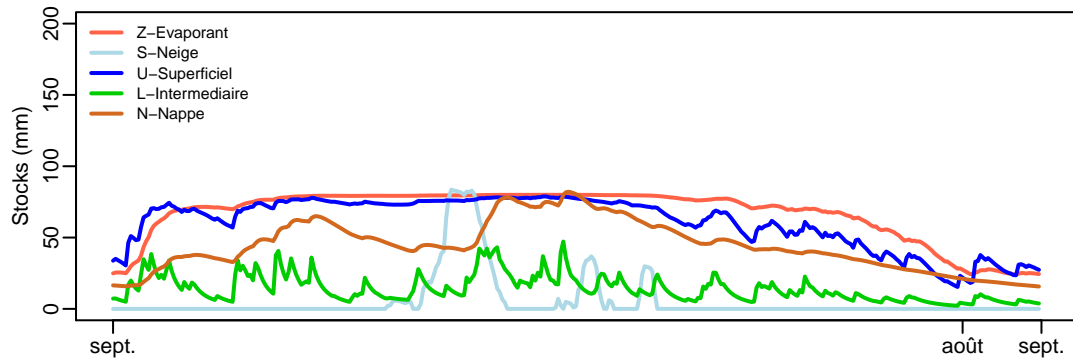

# rory\_h (116.56 km<sup>2</sup>) – année 1995–1996

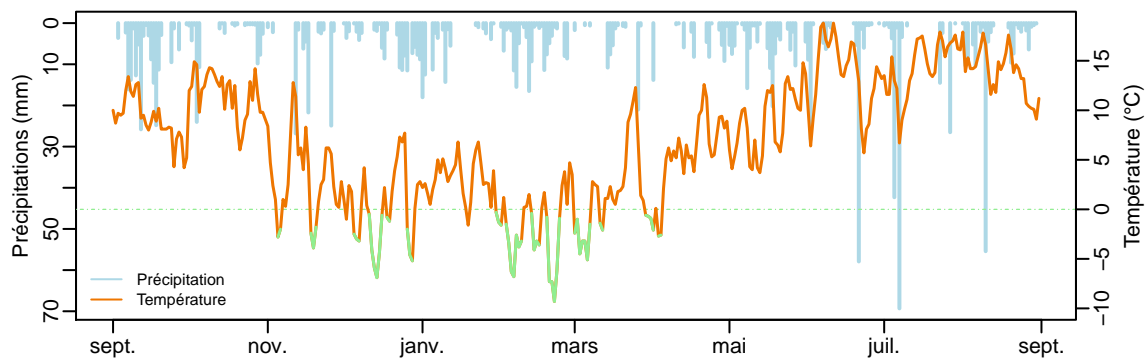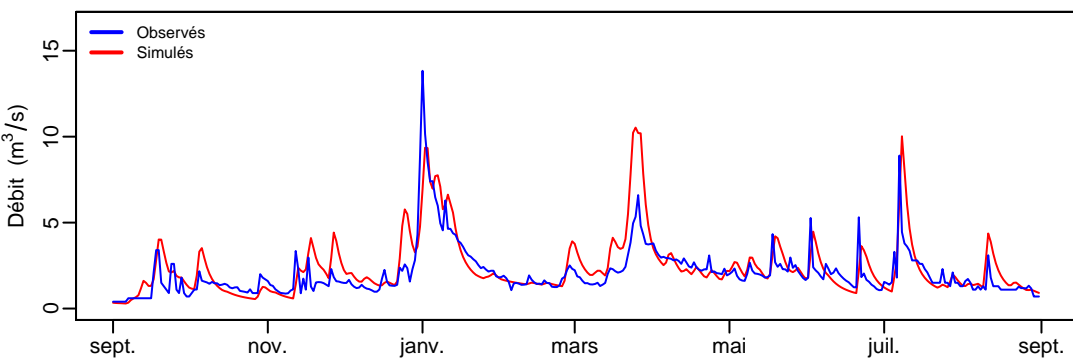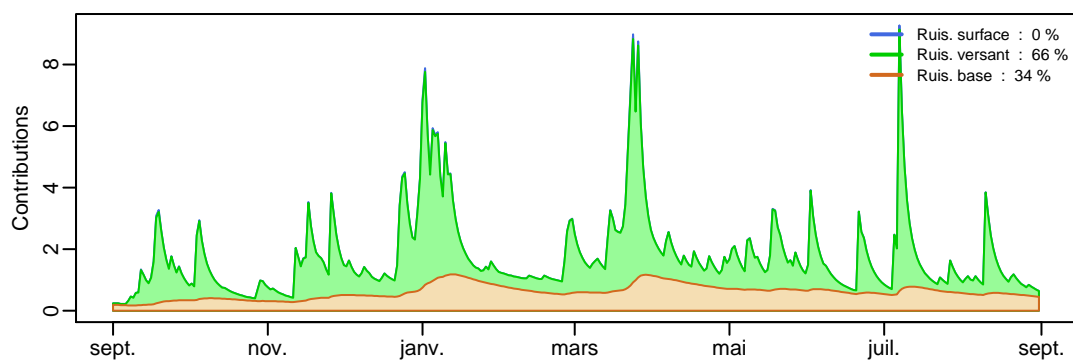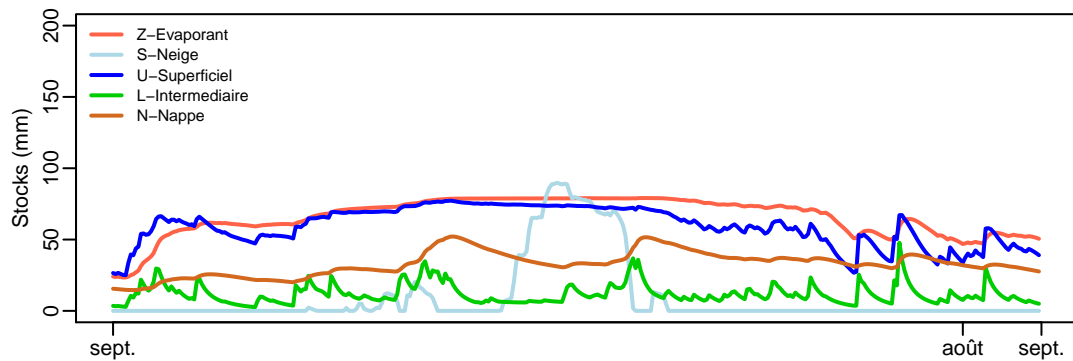



# rory\_h (116.56 km<sup>2</sup>) – année 1996–1997

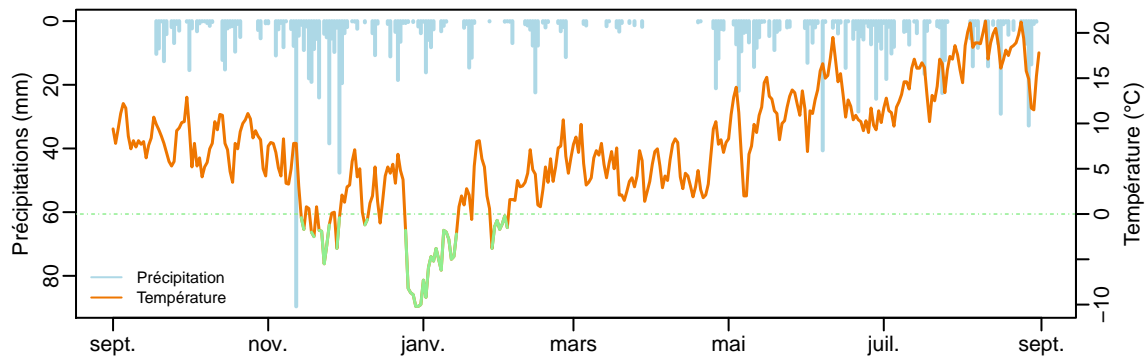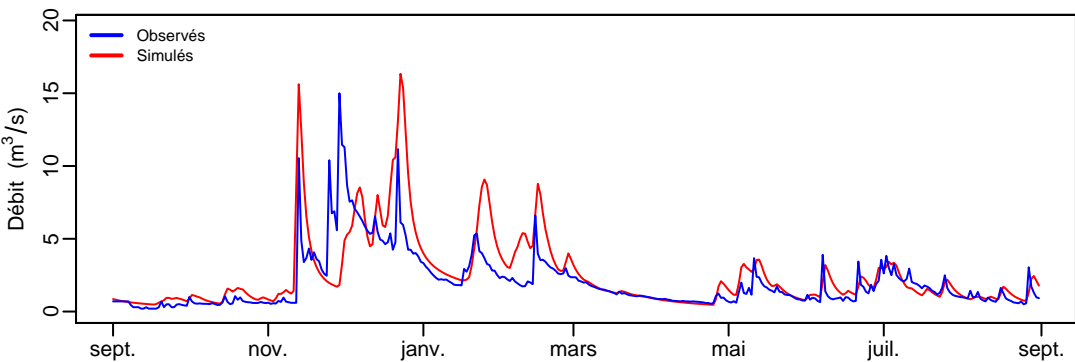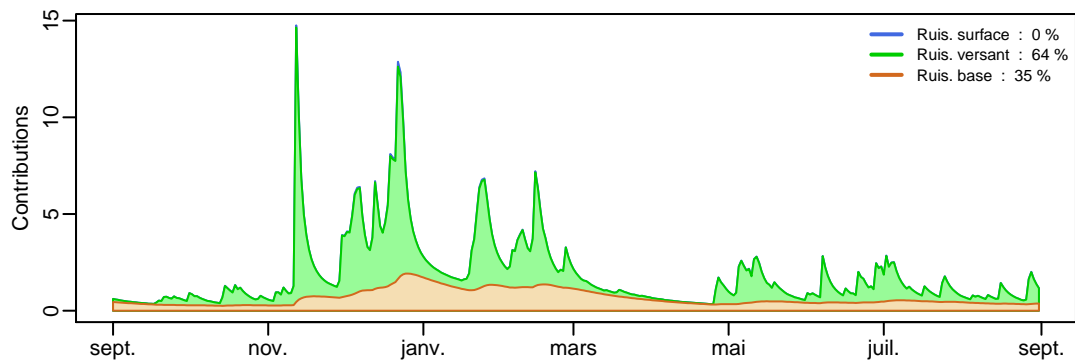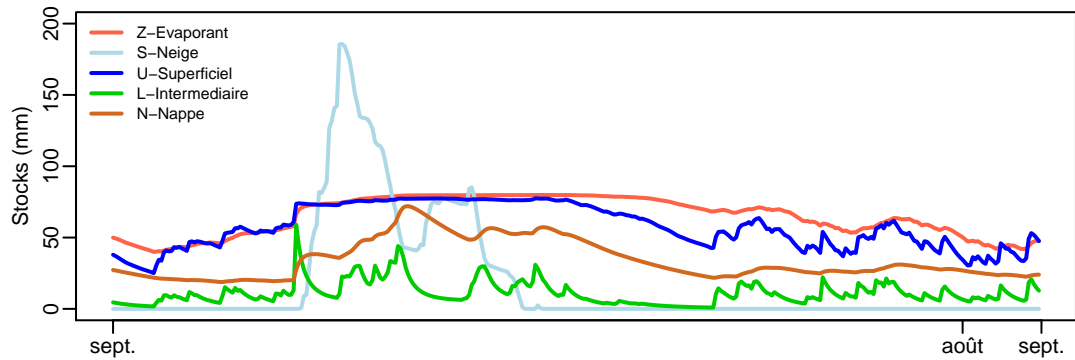

# rory\_h (116.56 km²) – année 1997–1998

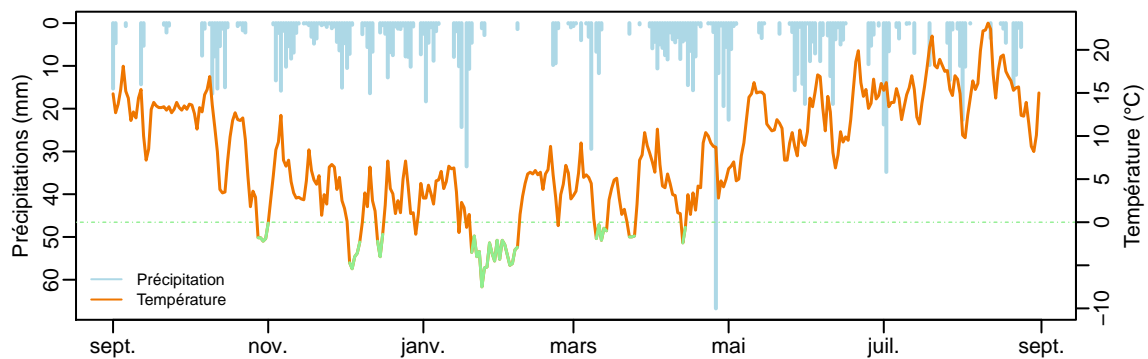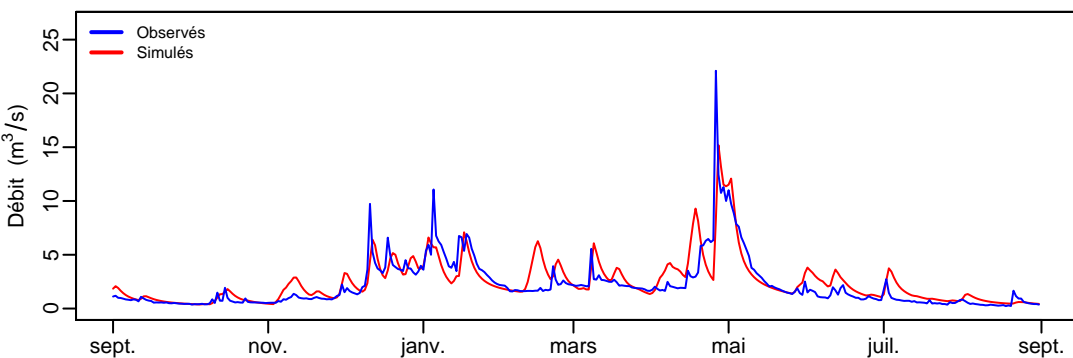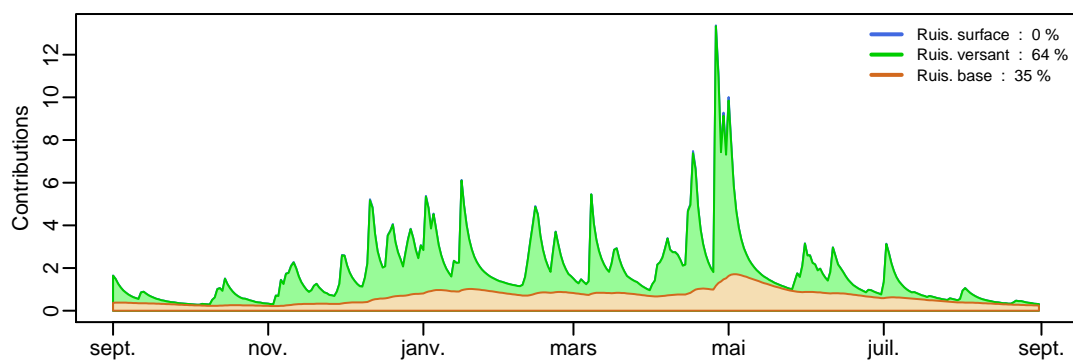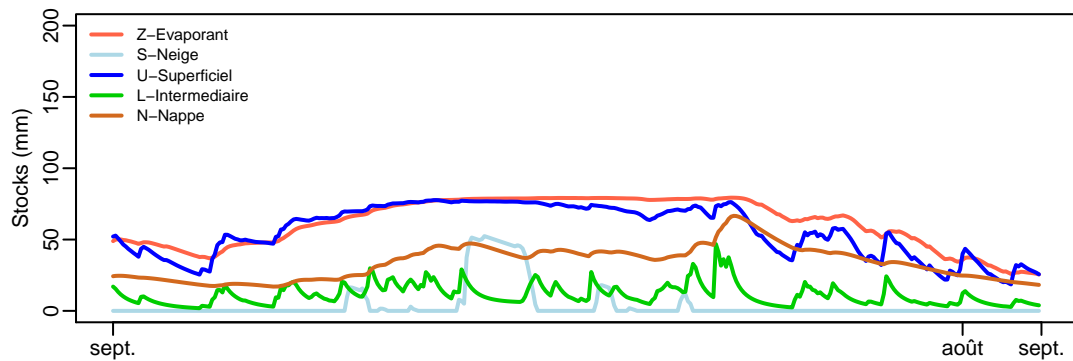

# rory\_h (116.56 km<sup>2</sup>) – année 1998–1999

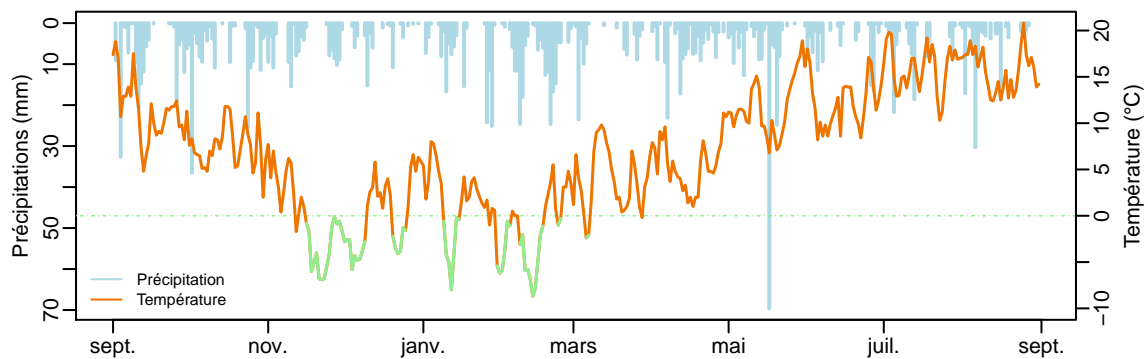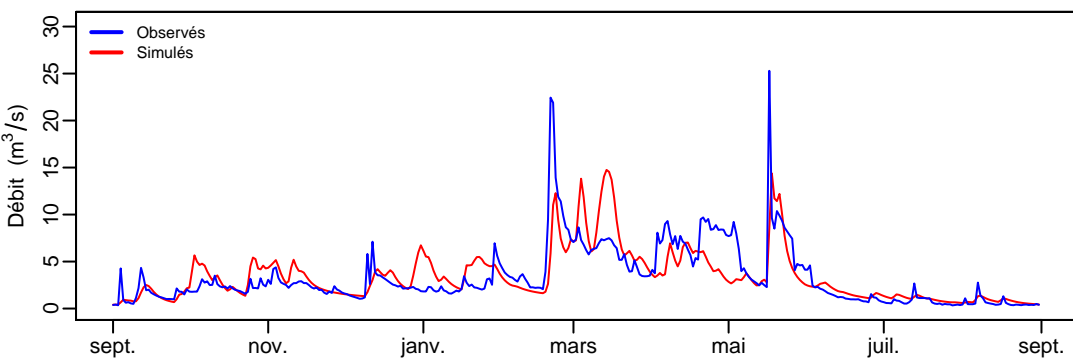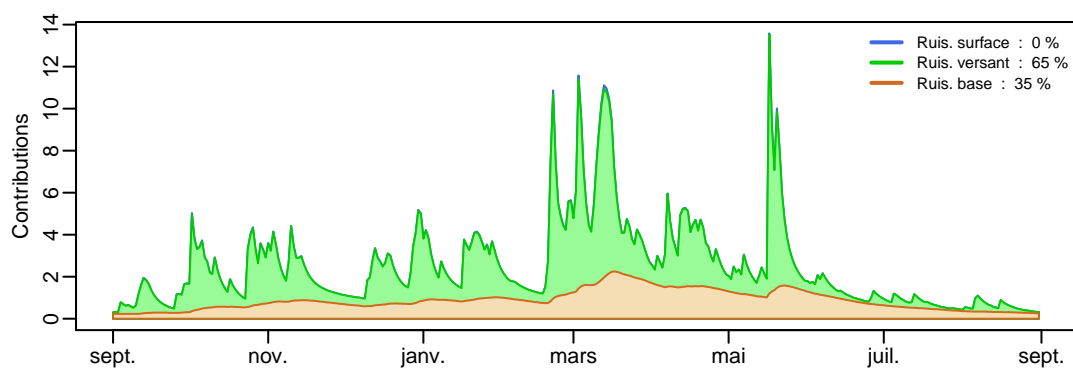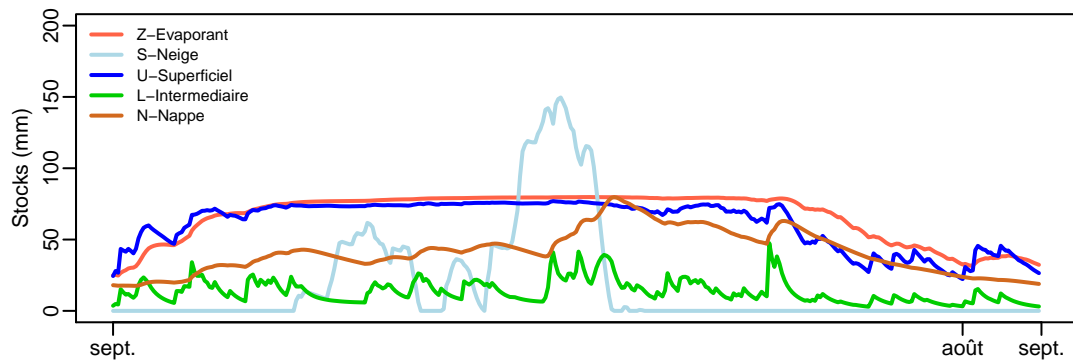

# rory\_h (116.56 km<sup>2</sup>) – année 1999–2000

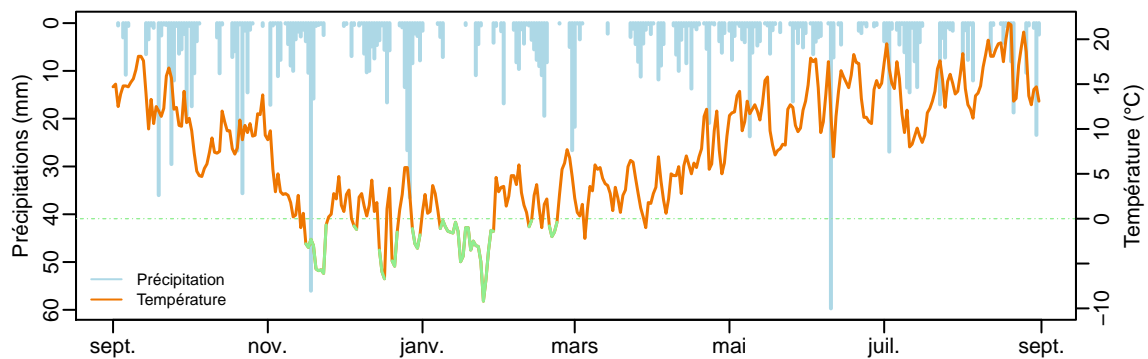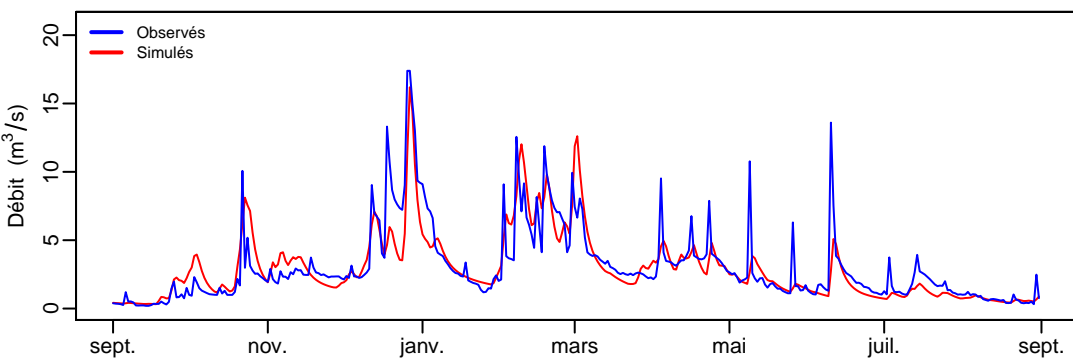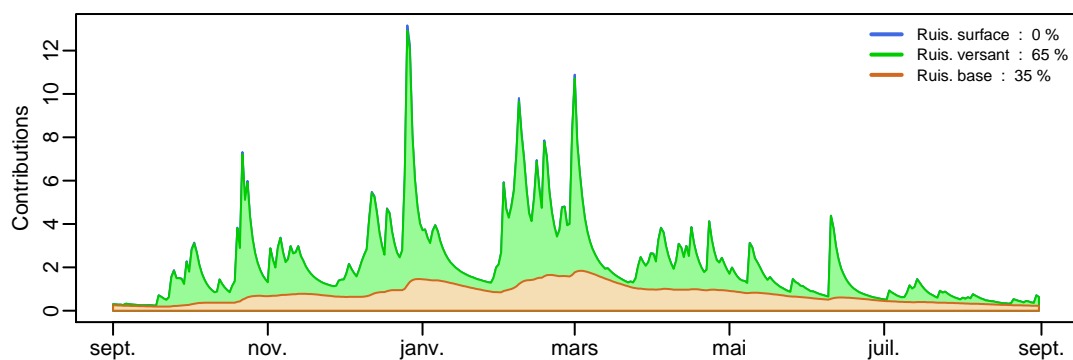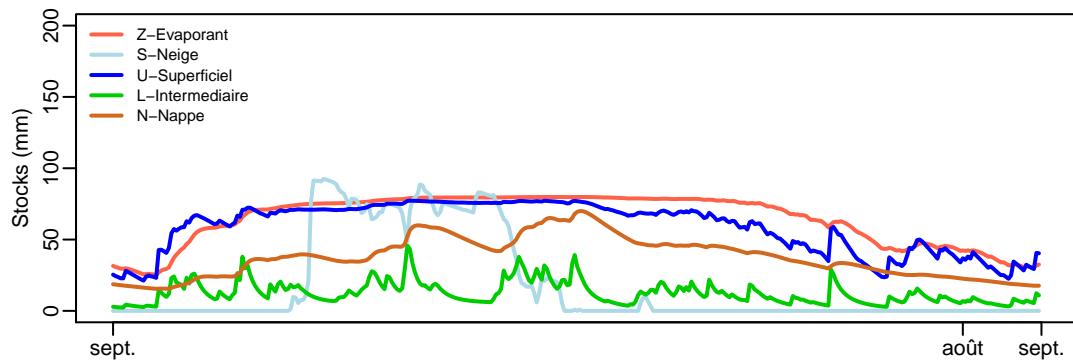

# rory\_h (116.56 km<sup>2</sup>) – année 2000–2001

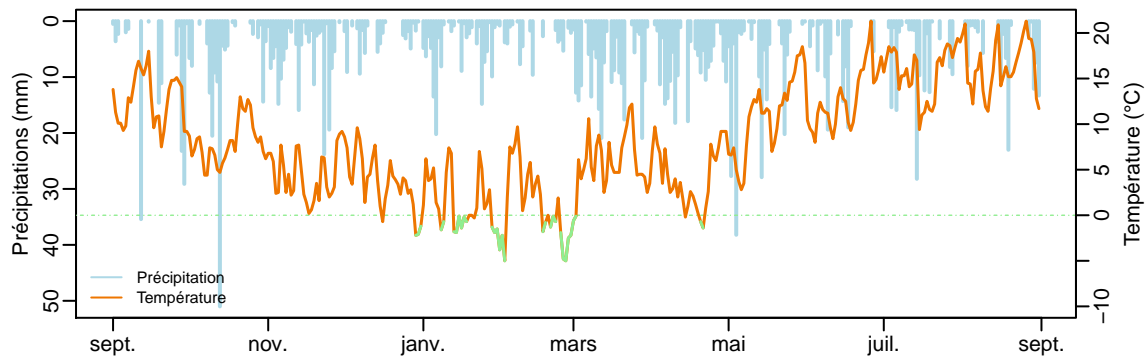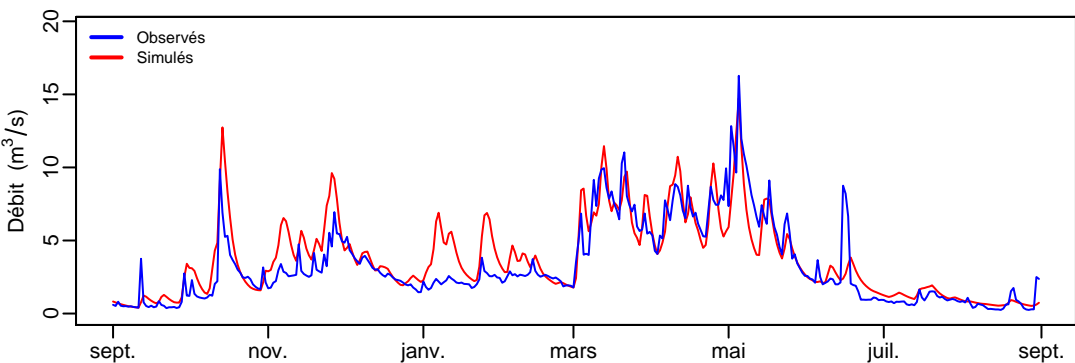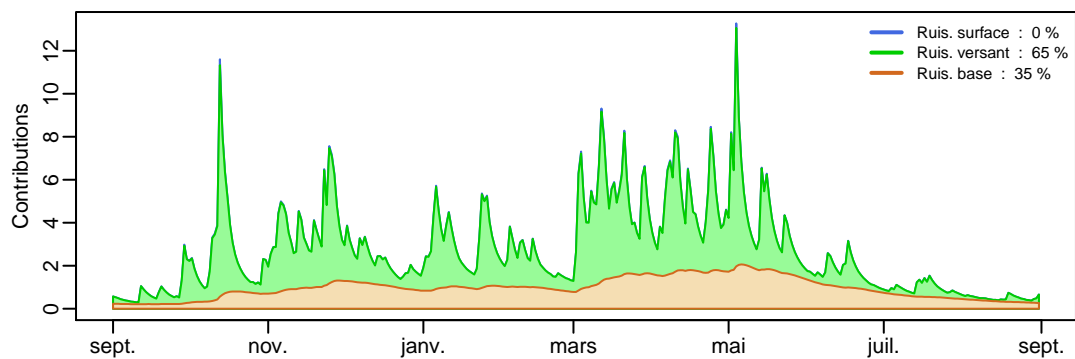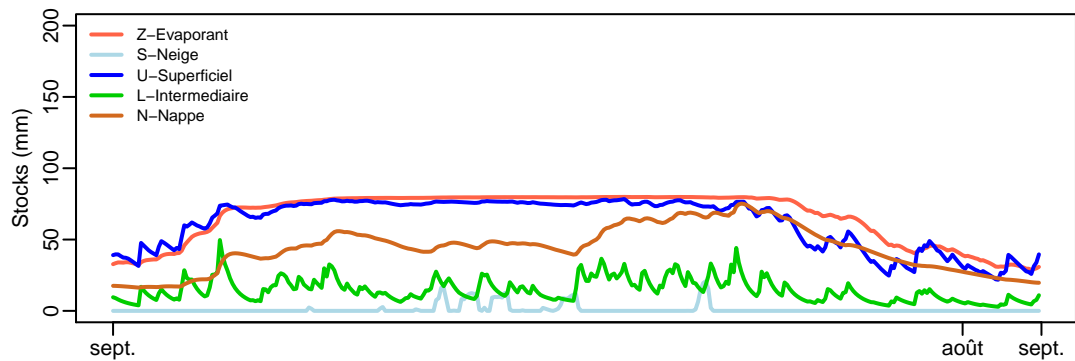

# rory\_h (116.56 km<sup>2</sup>) – année 2001–2002

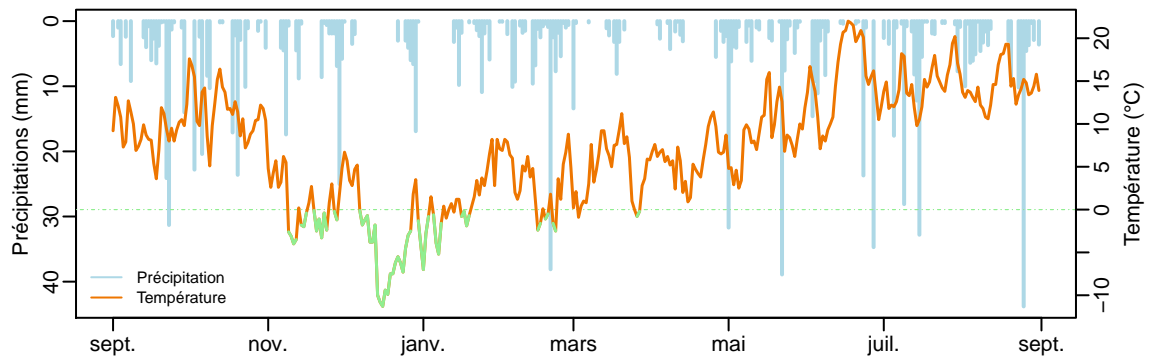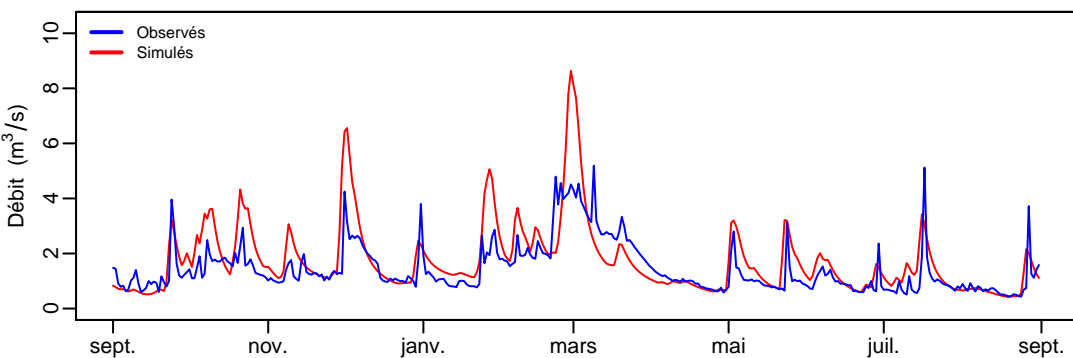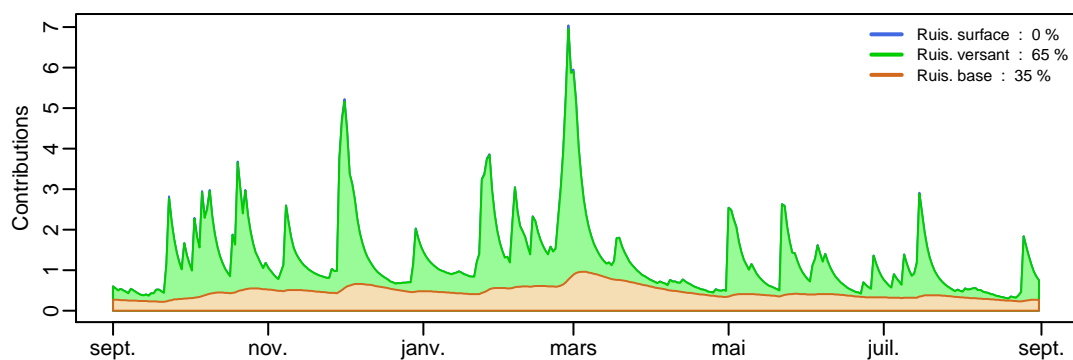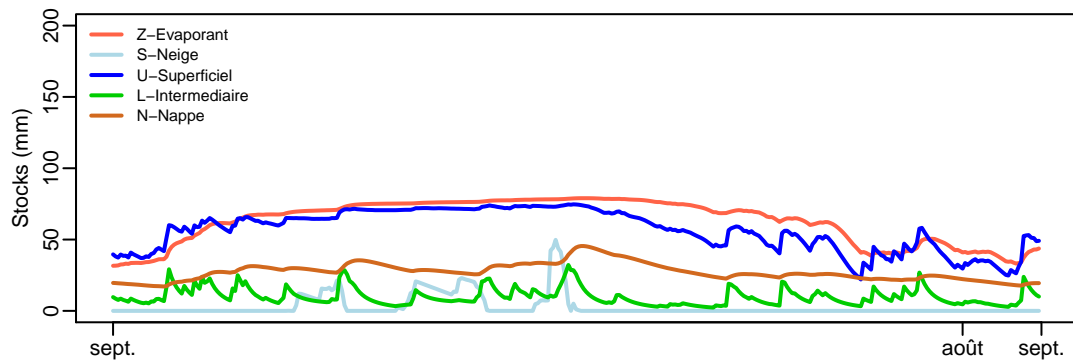

# rory\_h (116.56 km<sup>2</sup>) – année 2002–2003

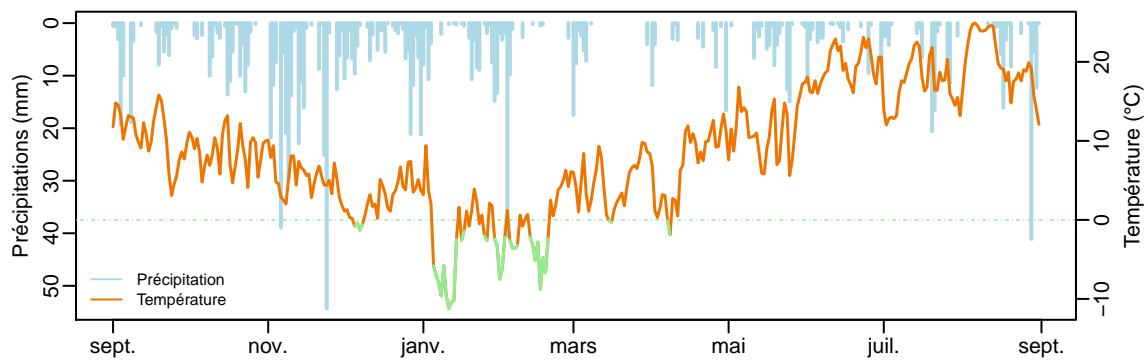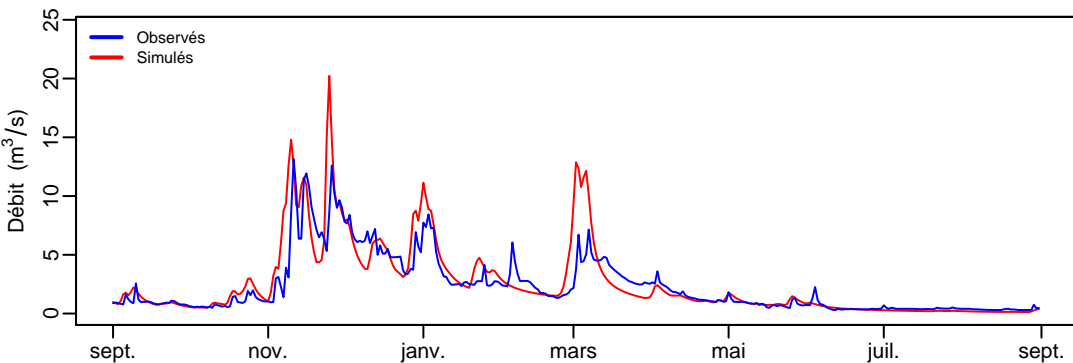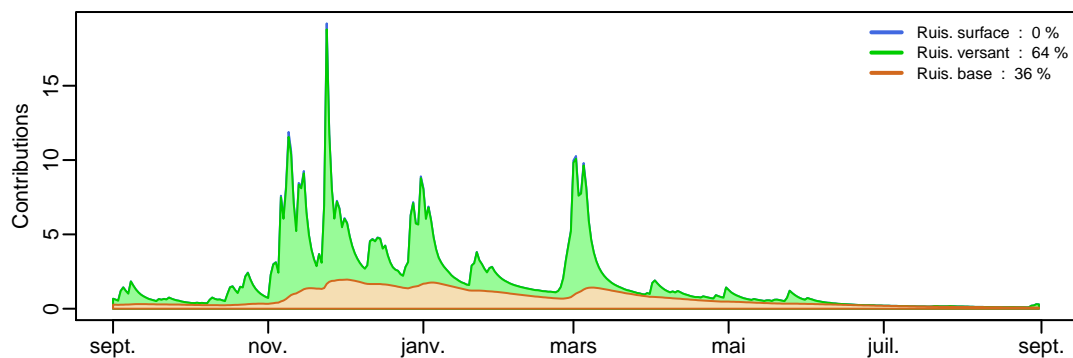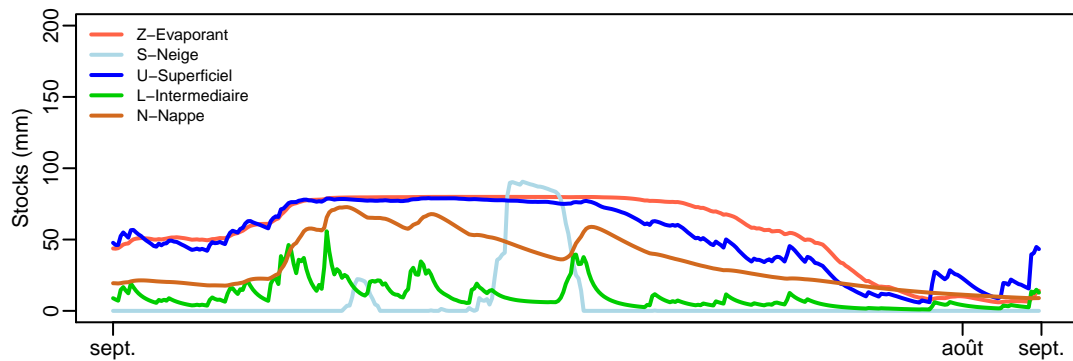

# rory\_h (116.56 km<sup>2</sup>) – année 2003–2004

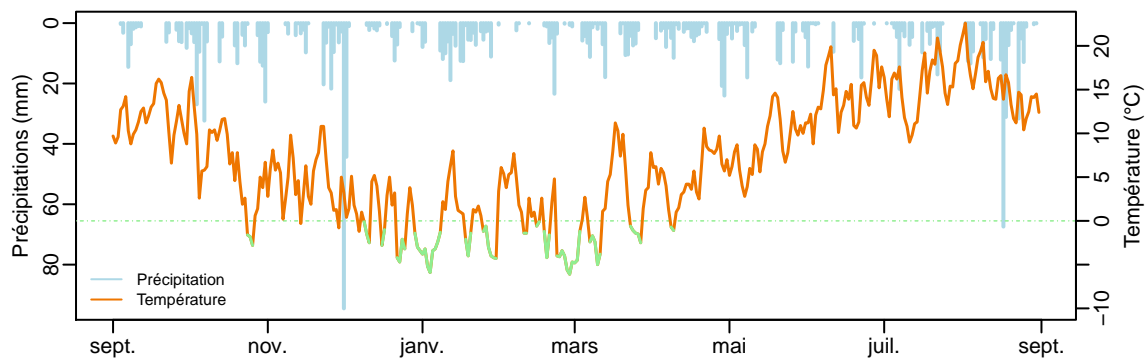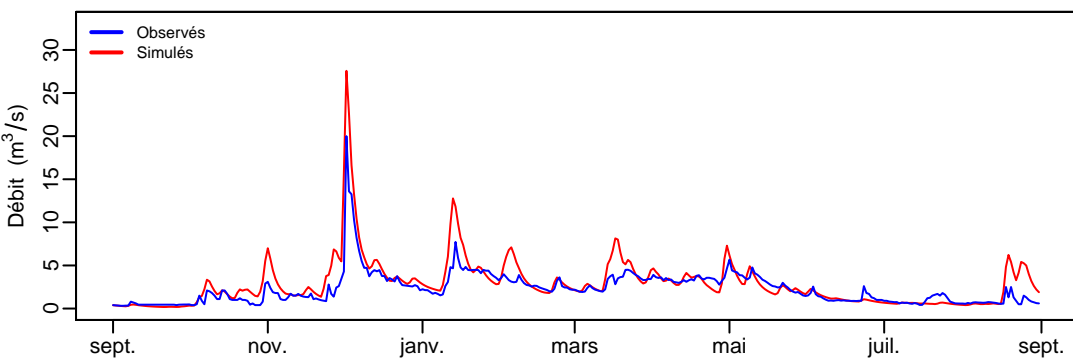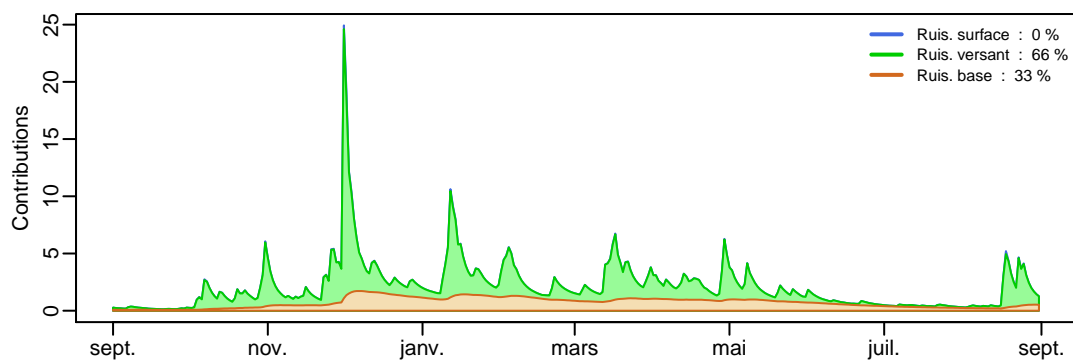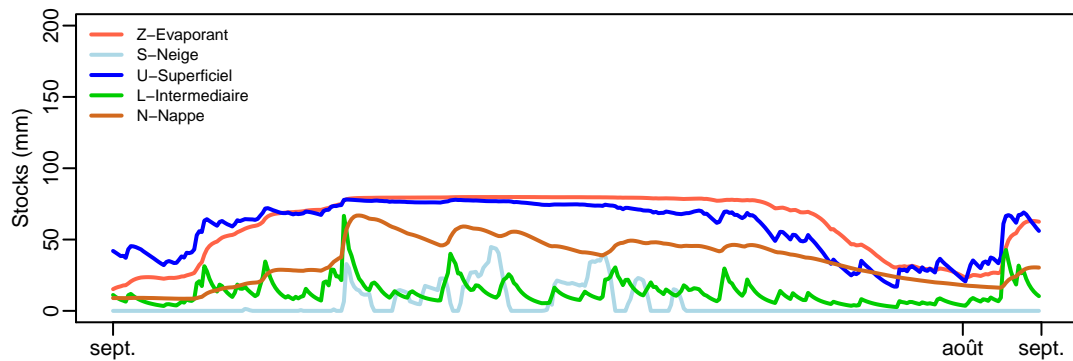



# rory\_h (116.56 km<sup>2</sup>) – année 2004–2005

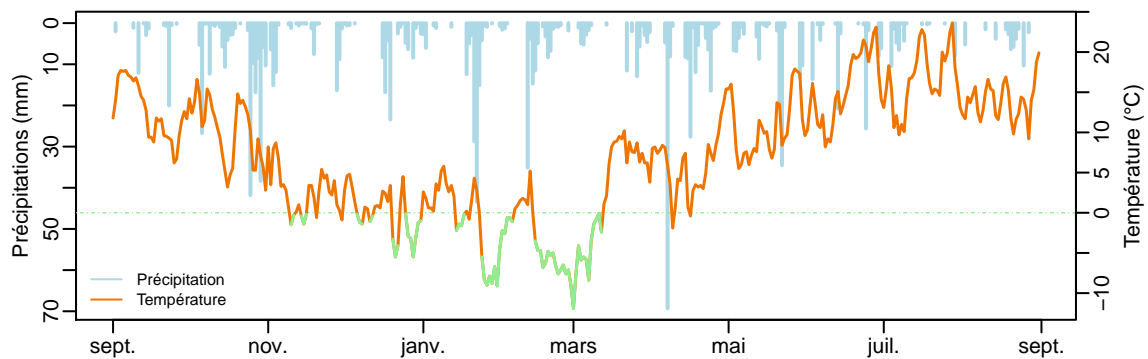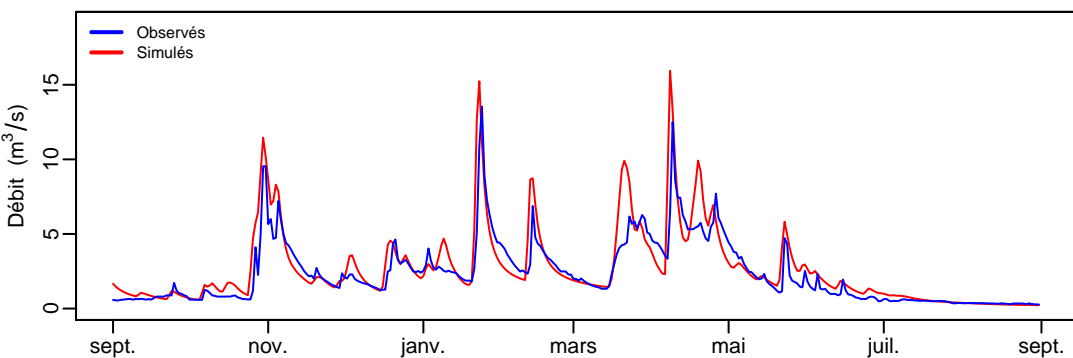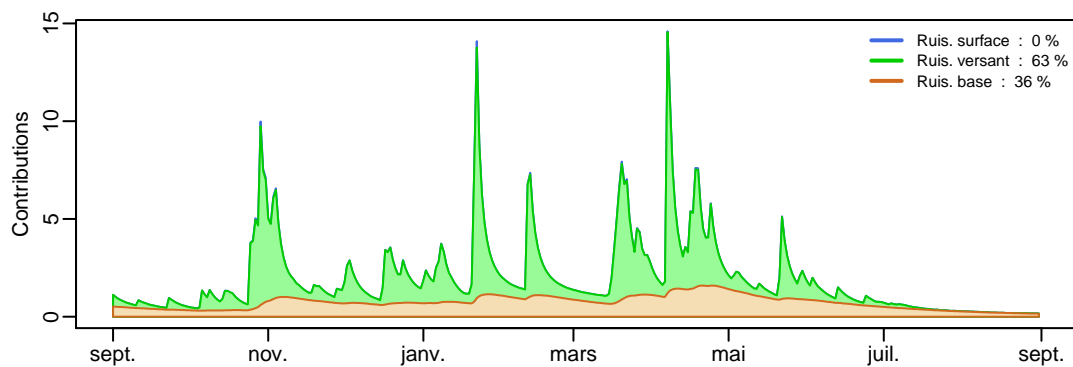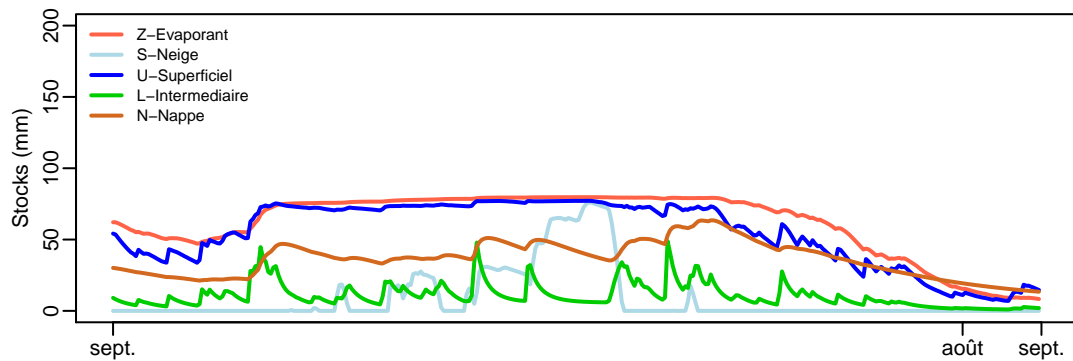

# rory\_h (116.56 km<sup>2</sup>) – année 2005–2006

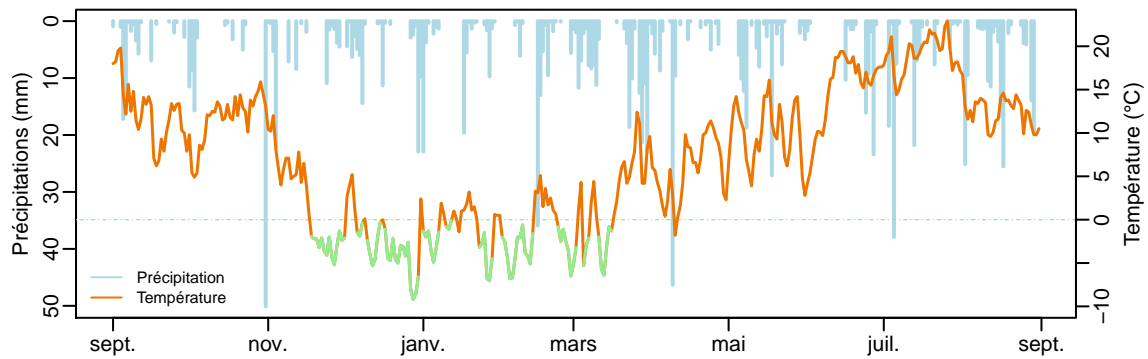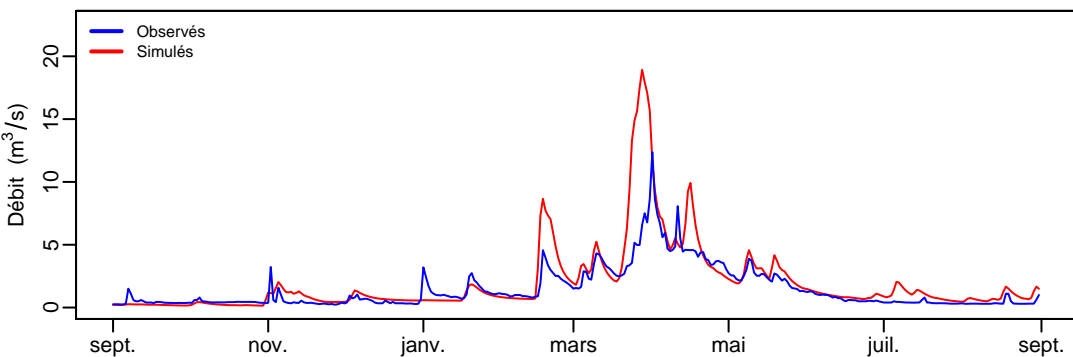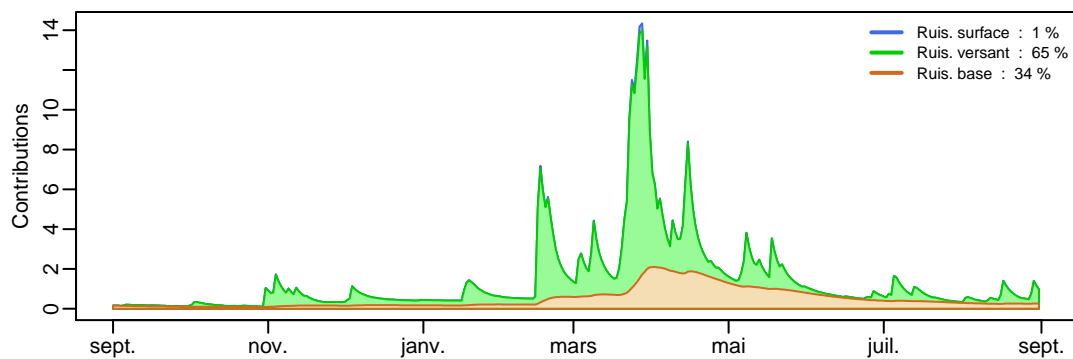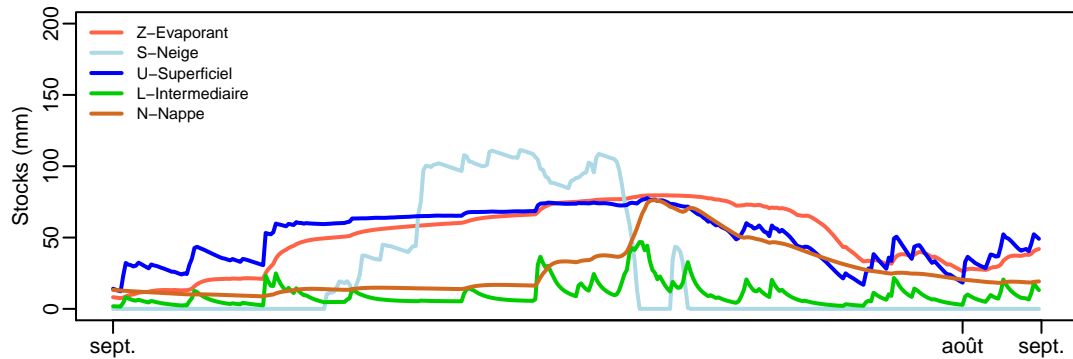

# rory\_h (116.56 km<sup>2</sup>) – année 2006–2007

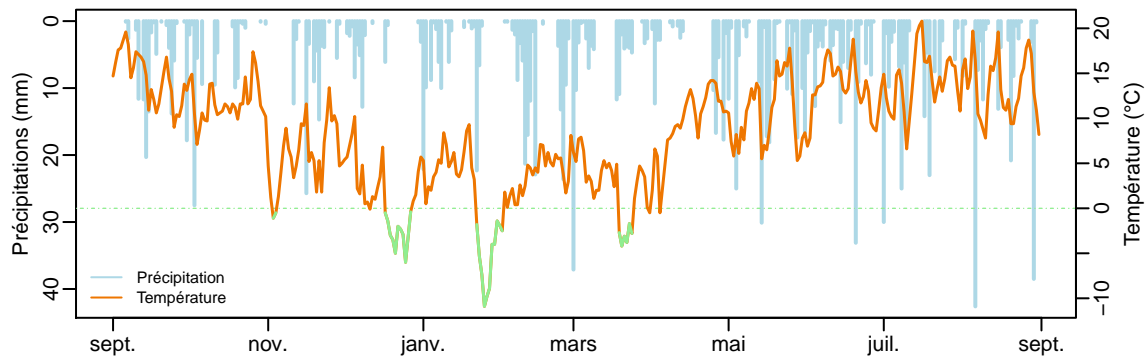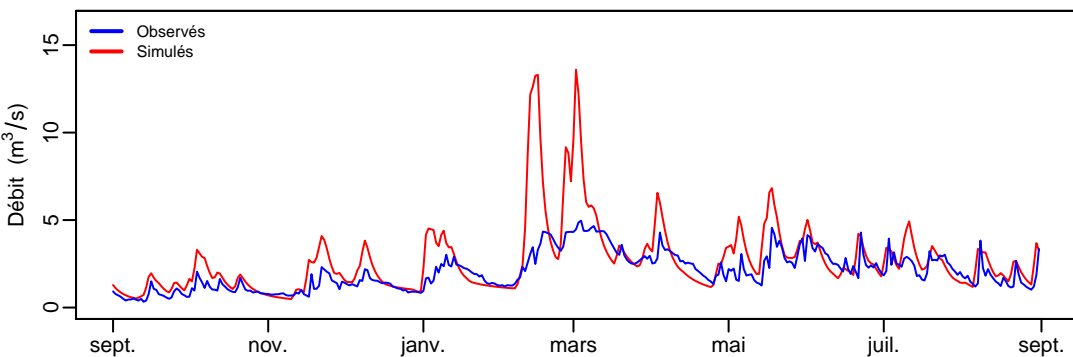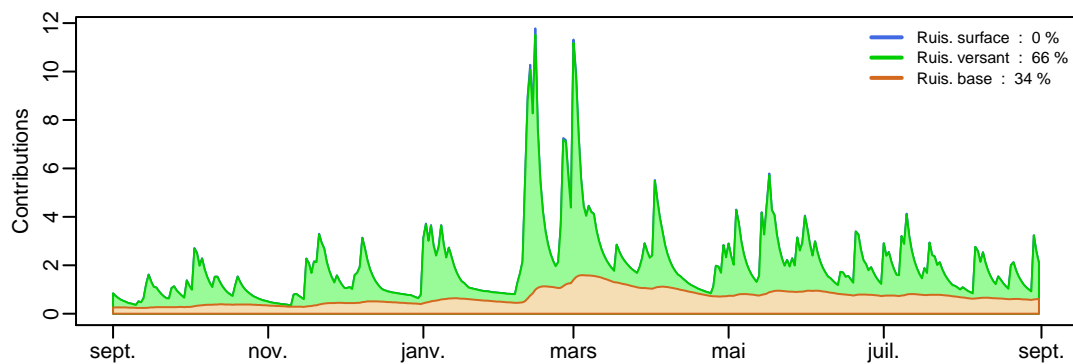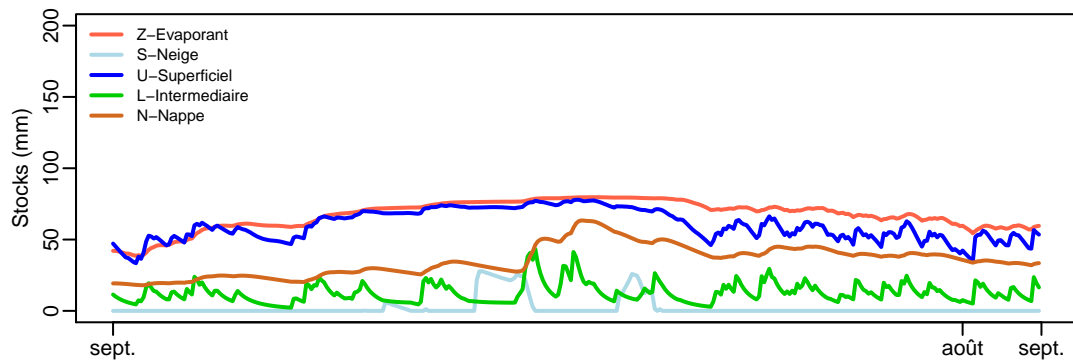

# rory\_h (116.56 km<sup>2</sup>) – année 2007–2008

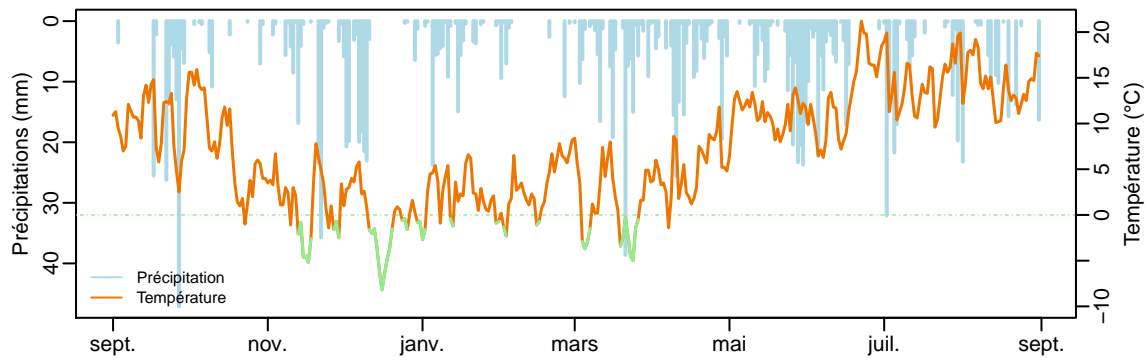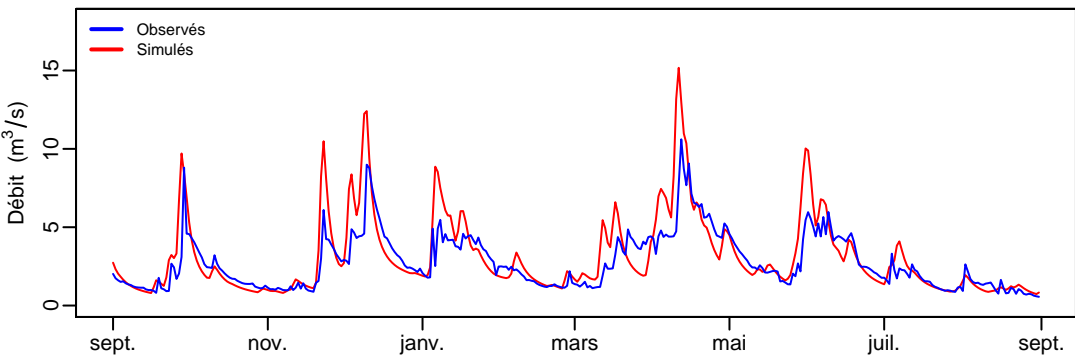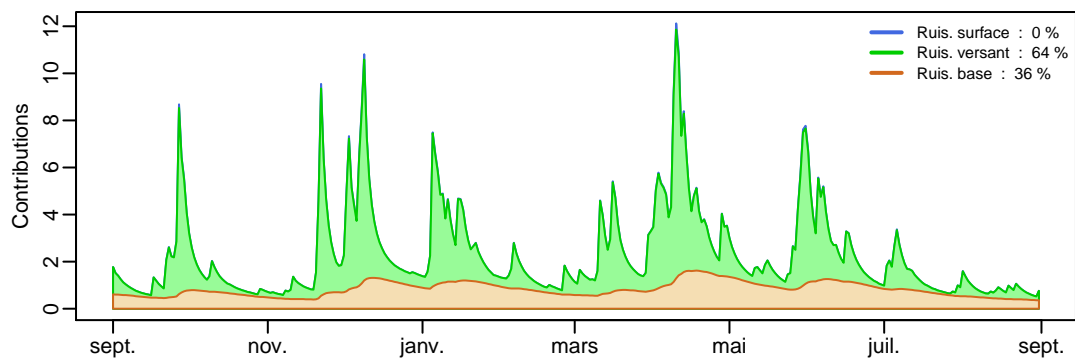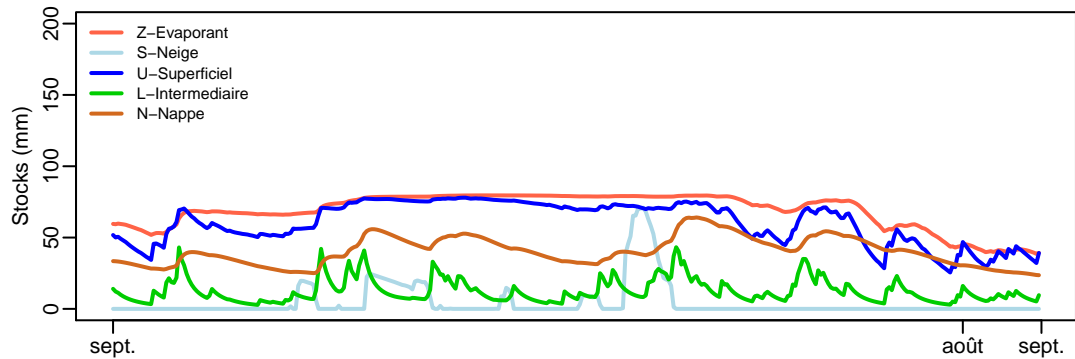

# rory\_h (116.56 km²) – année 2008–2009

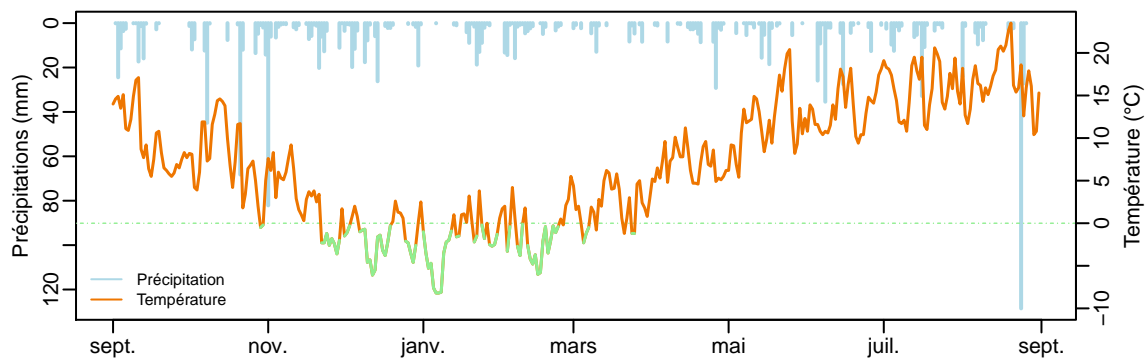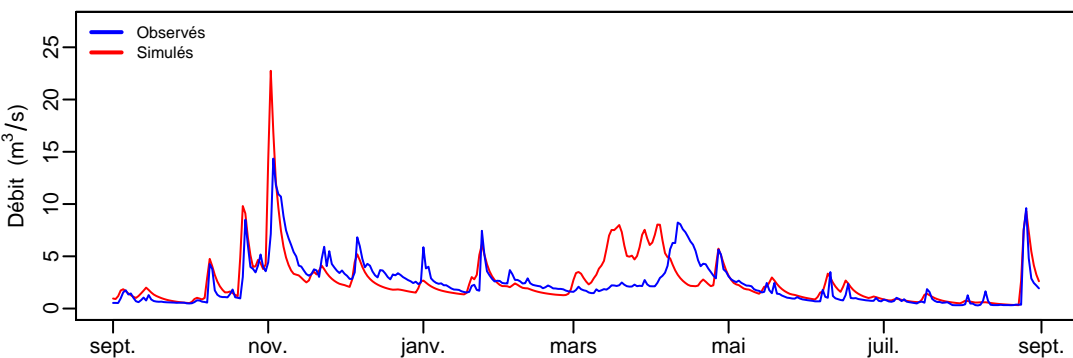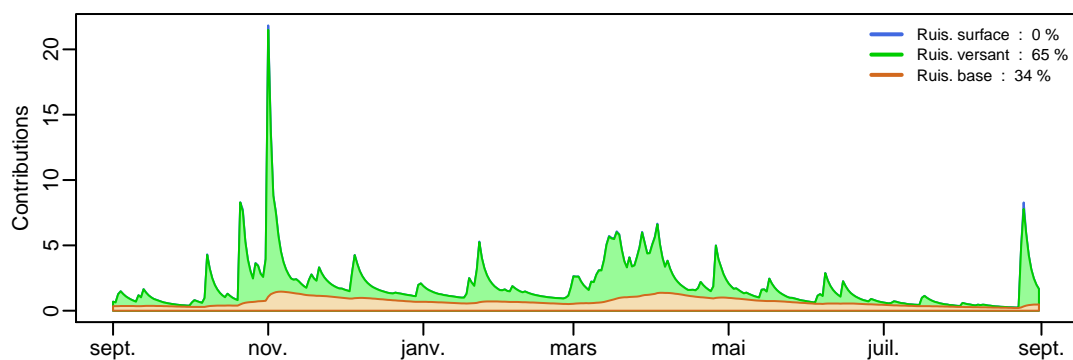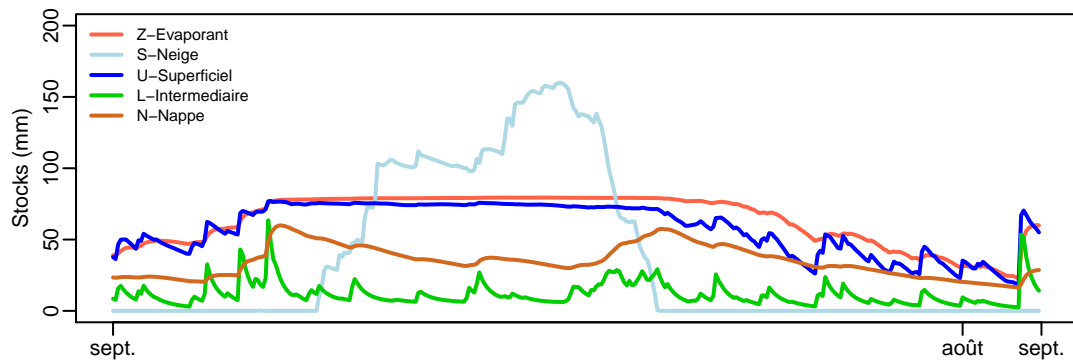

# rory\_h (116.56 km<sup>2</sup>) – année 2009–2010

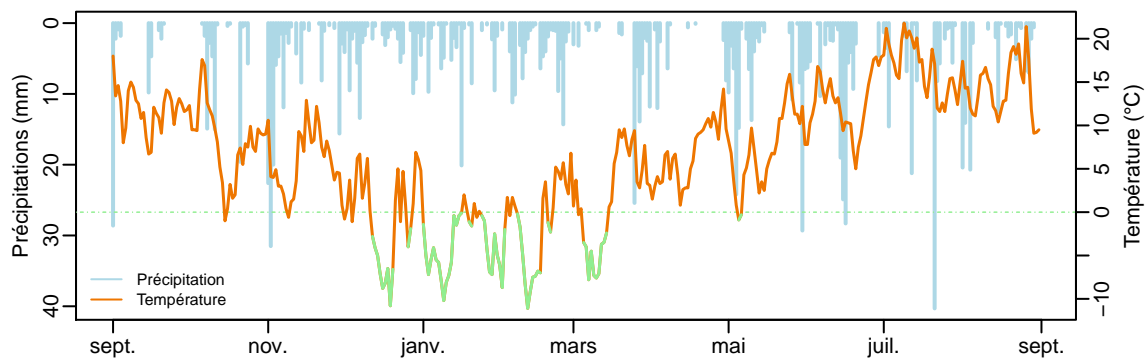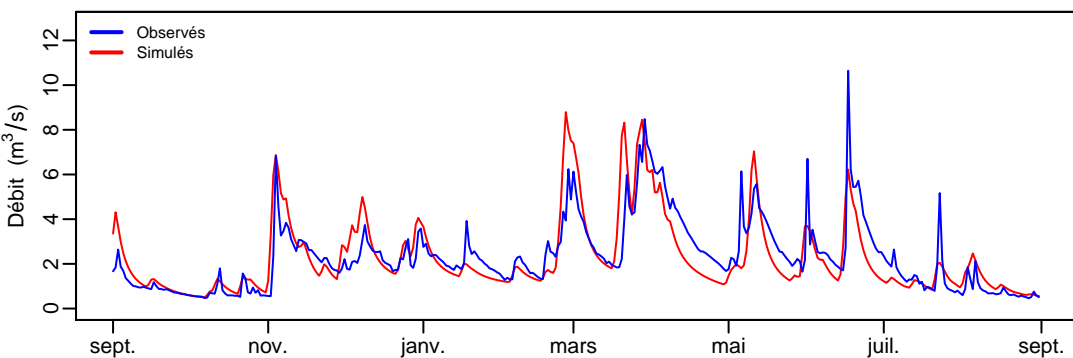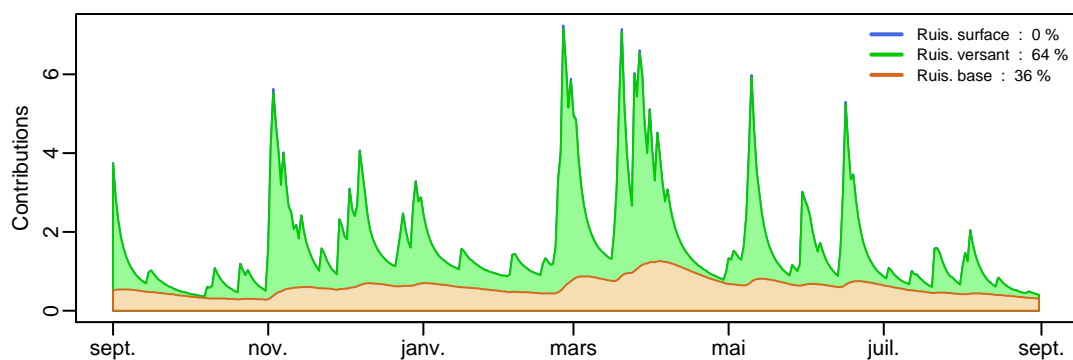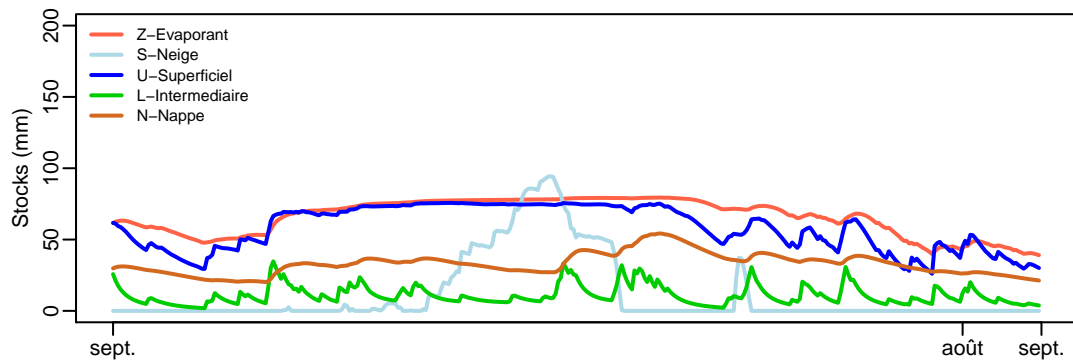

# rory\_h (116.56 km²) – année 2010–2011

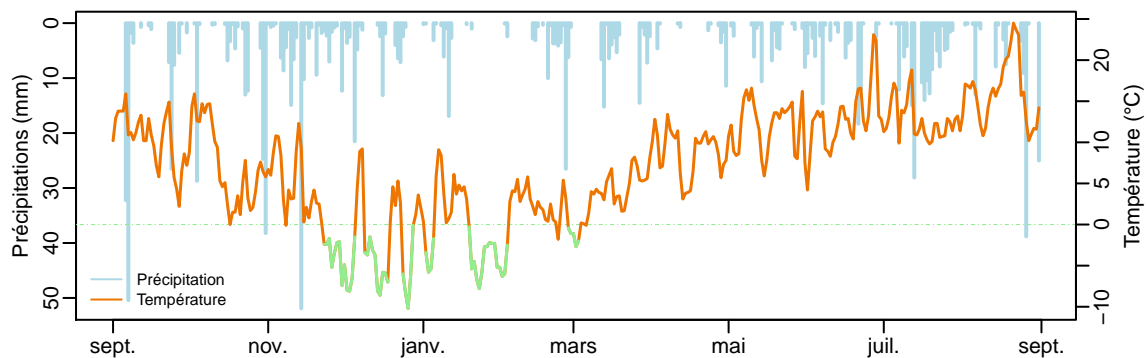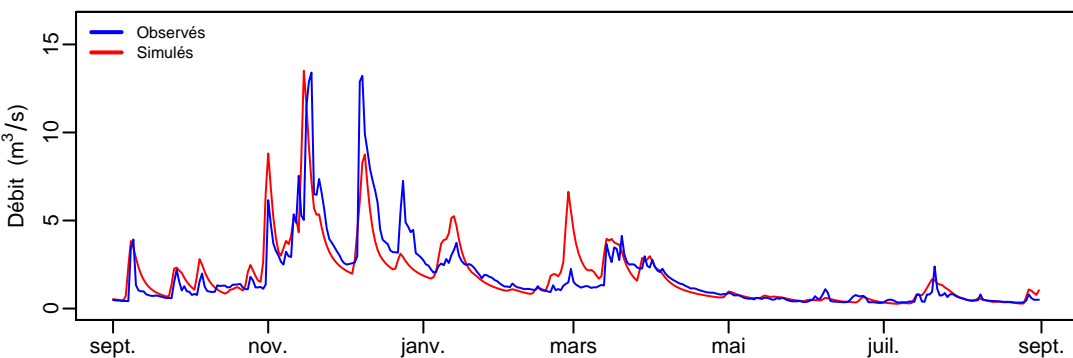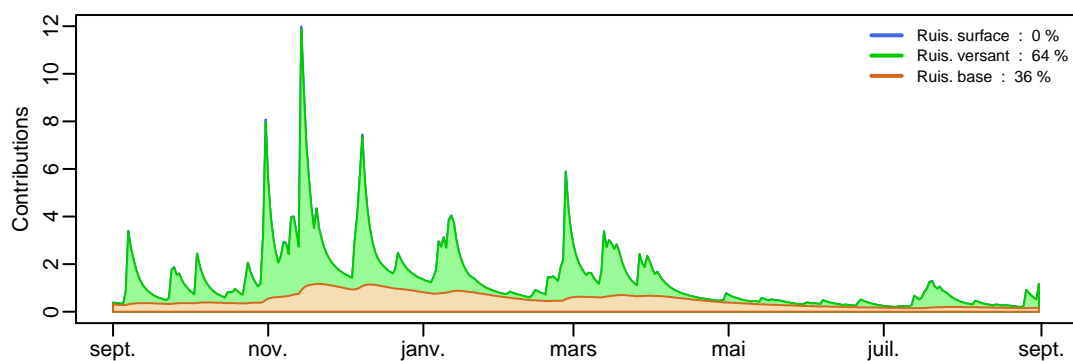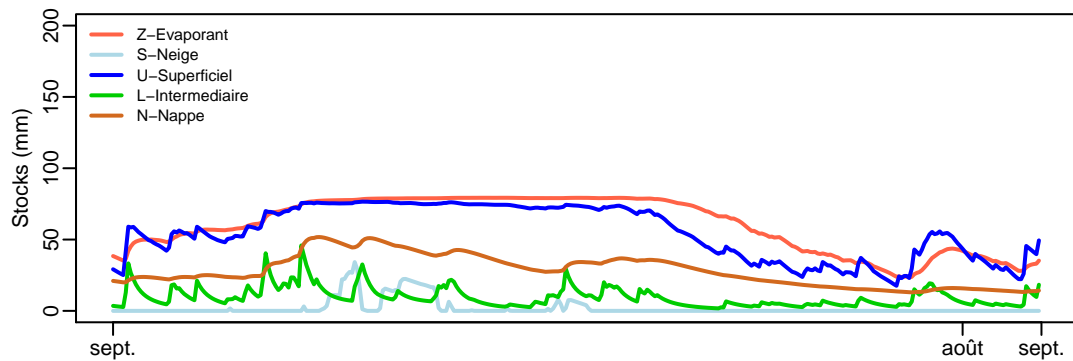

# rory\_h (116.56 km<sup>2</sup>) – année 2011–2012

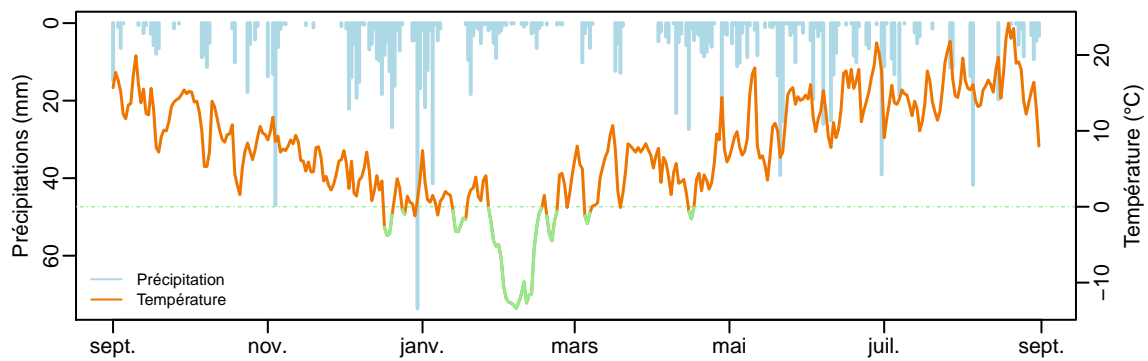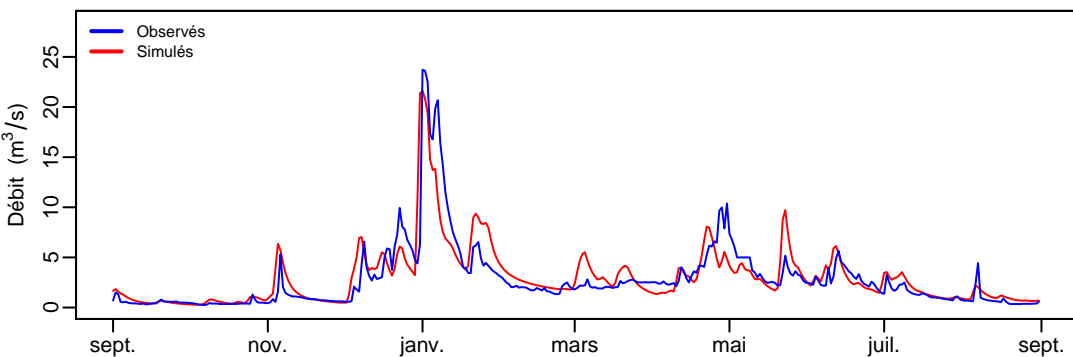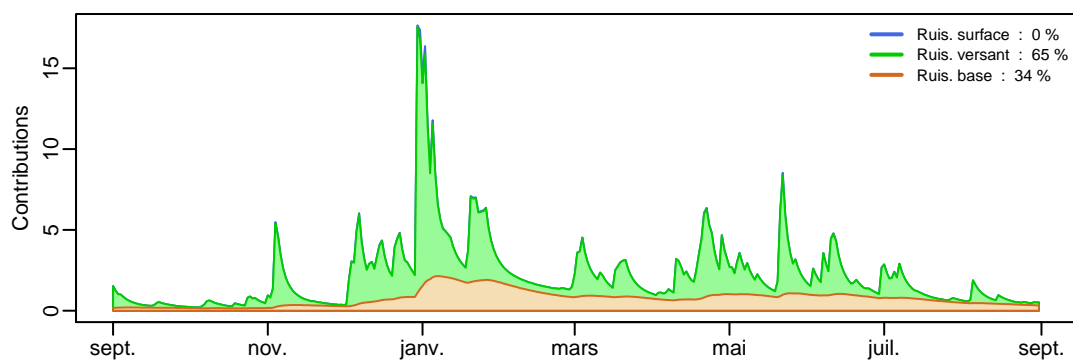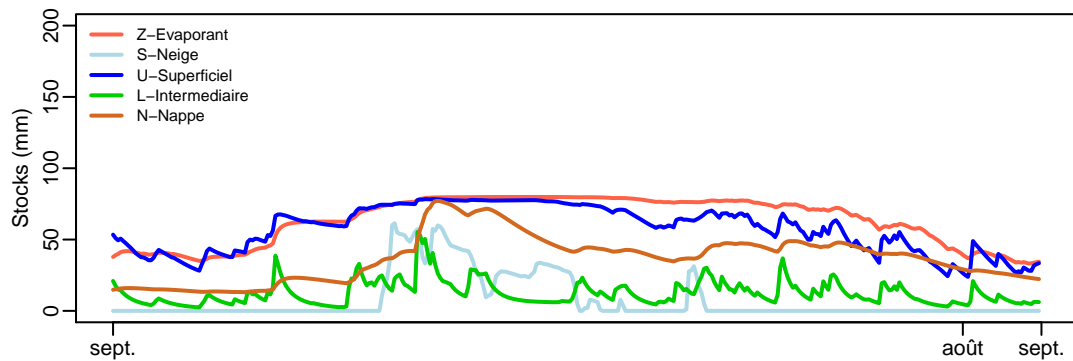



# versih (355.12 km²) – année 1995–1996

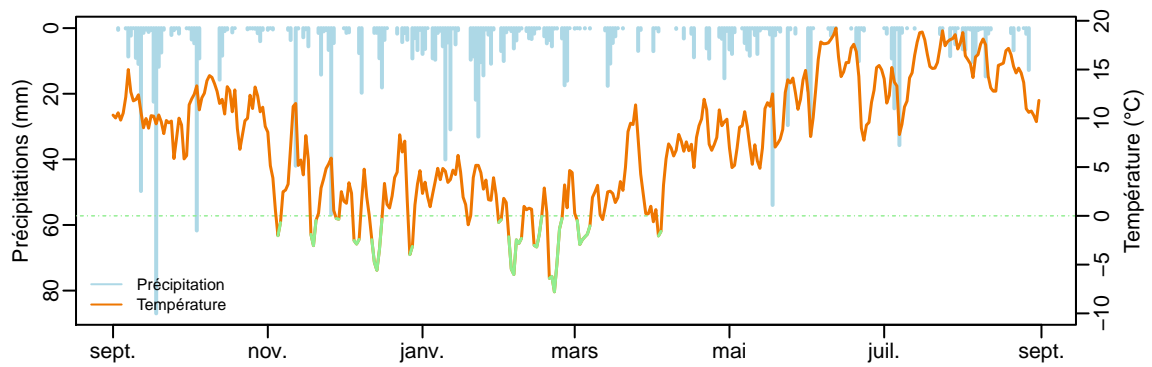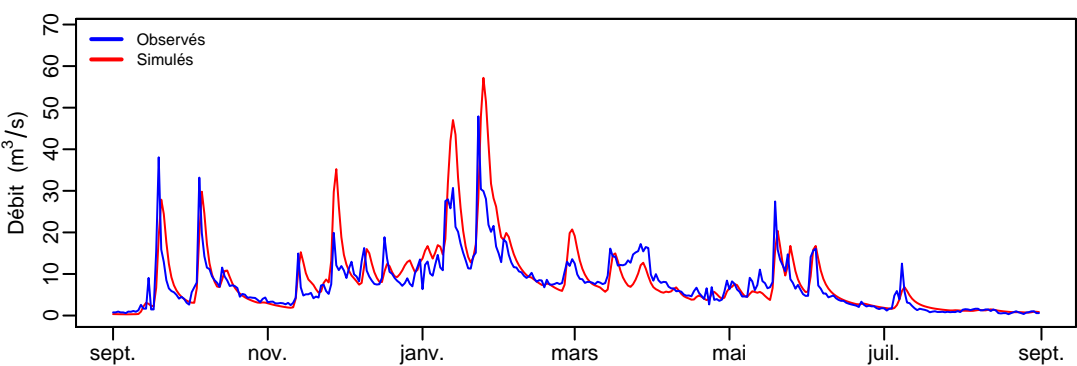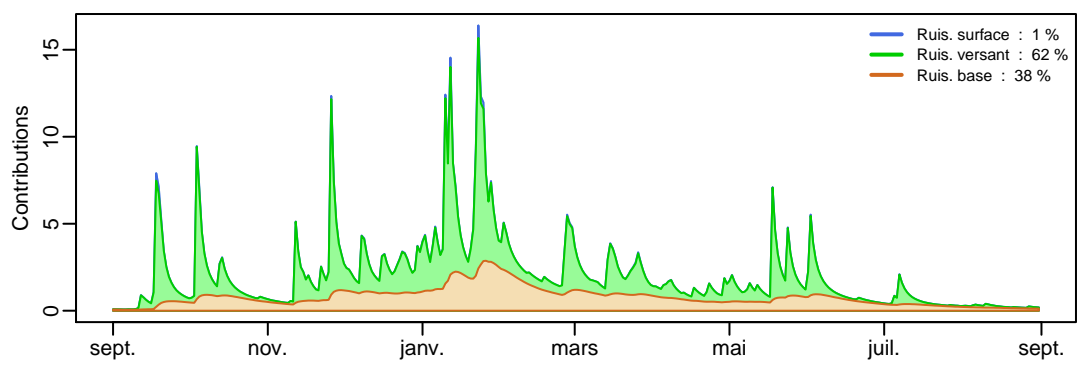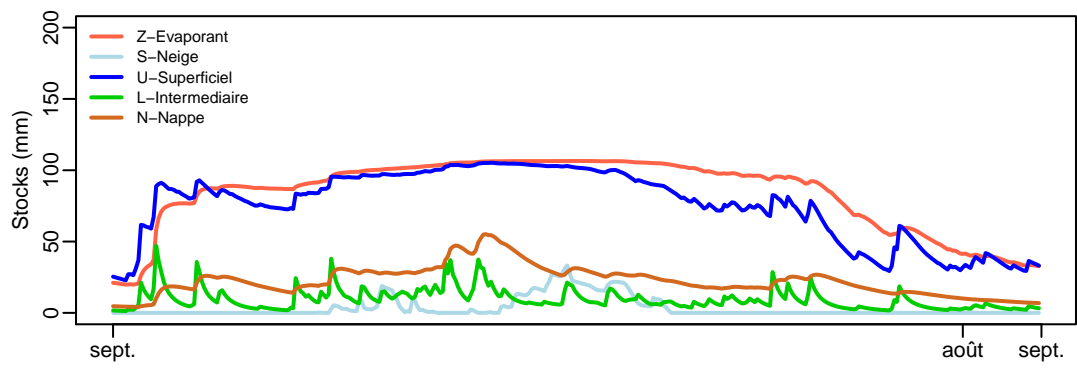

# versih (355.12 km<sup>2</sup>) – année 1996–1997

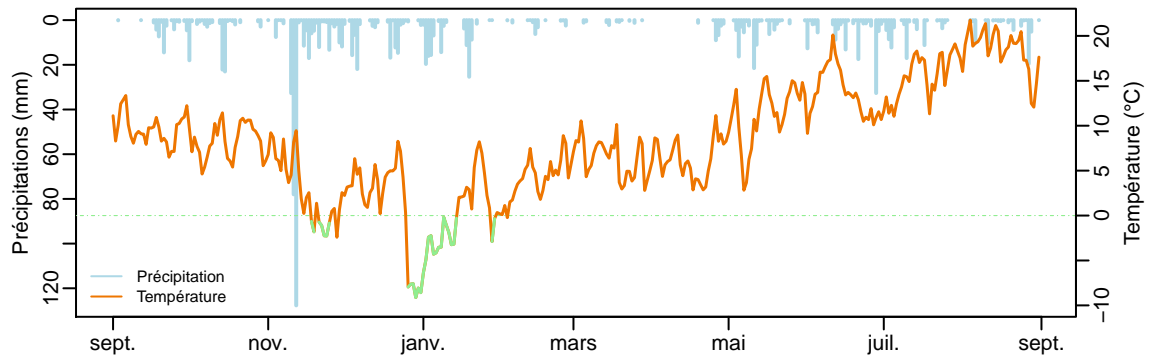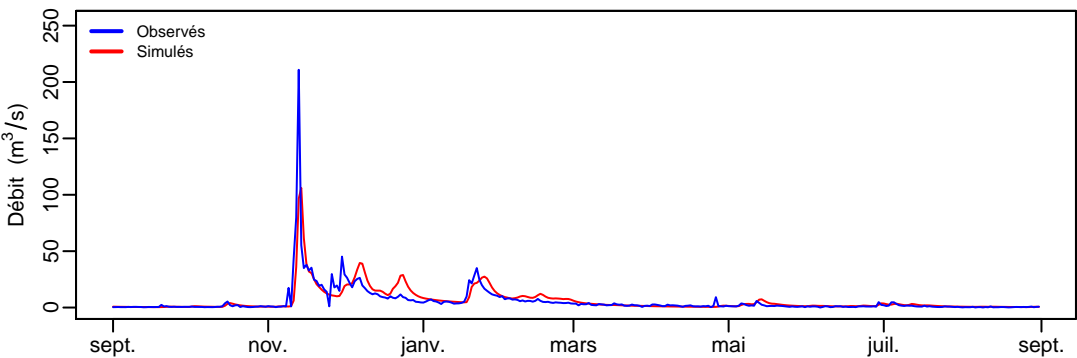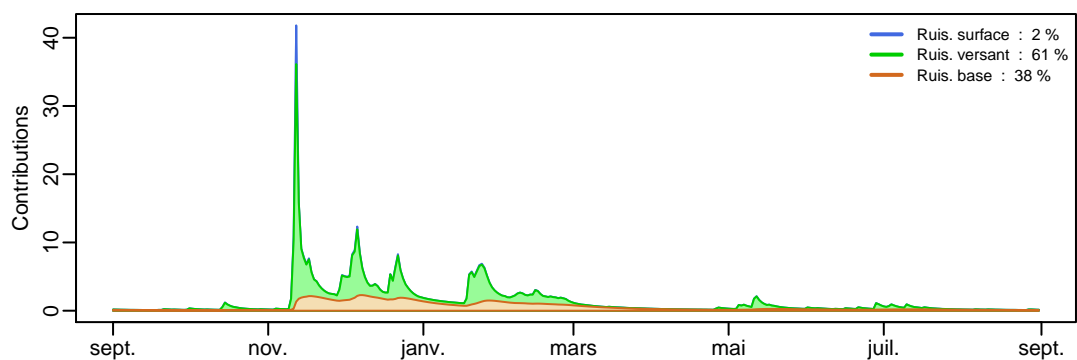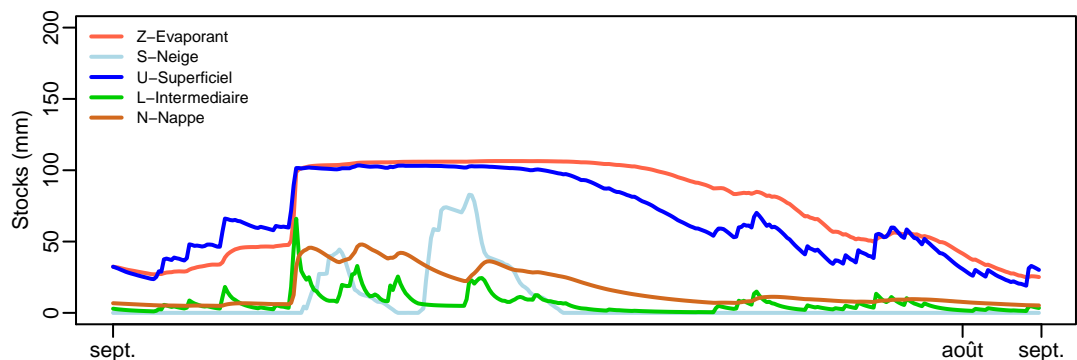

# versih (355.12 km²) – année 1997–1998

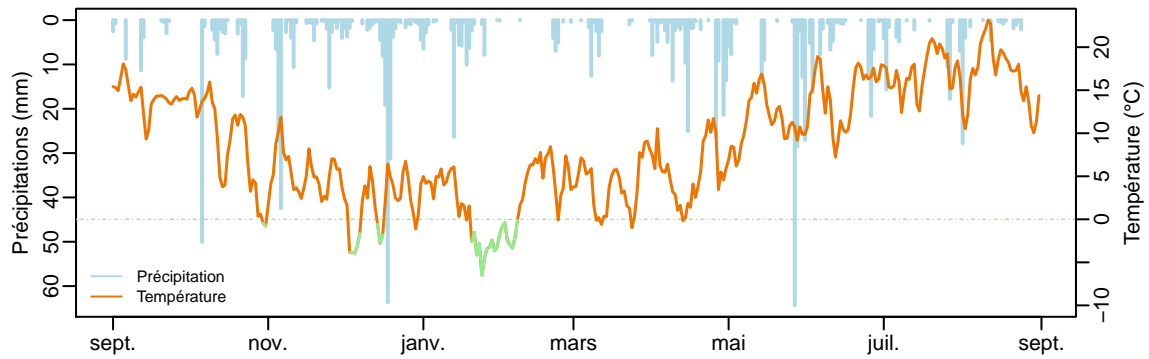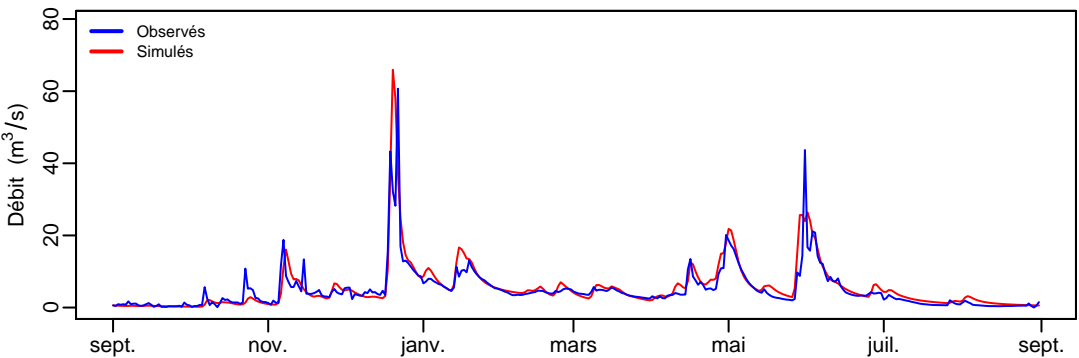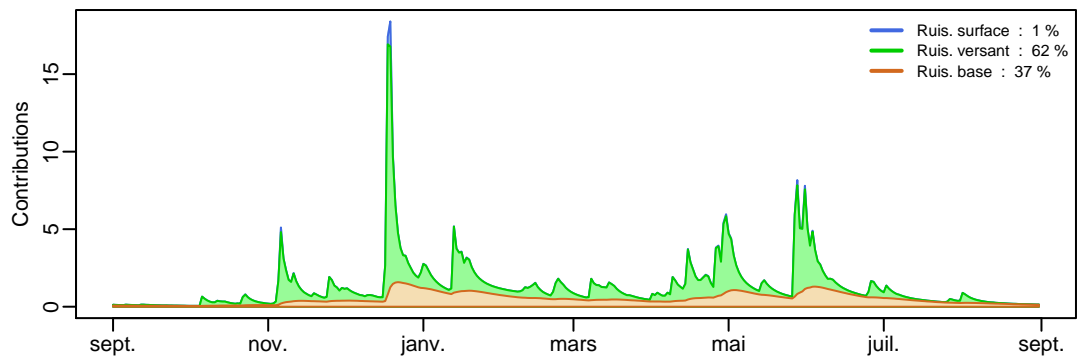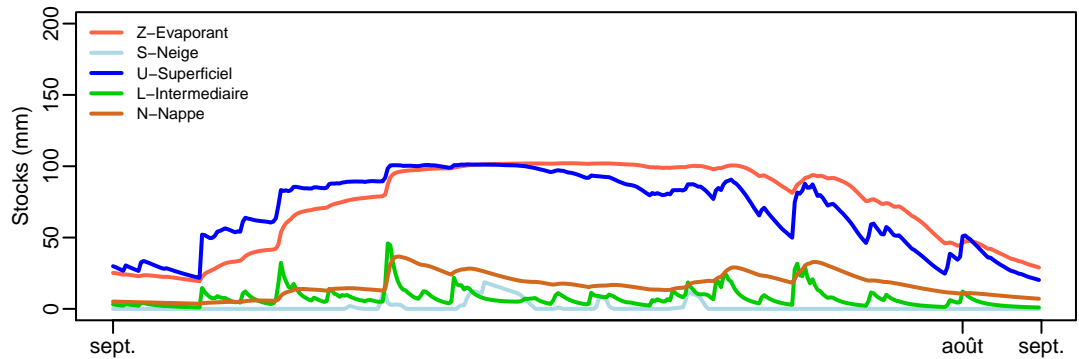

# versih (355.12 km²) – année 1998–1999

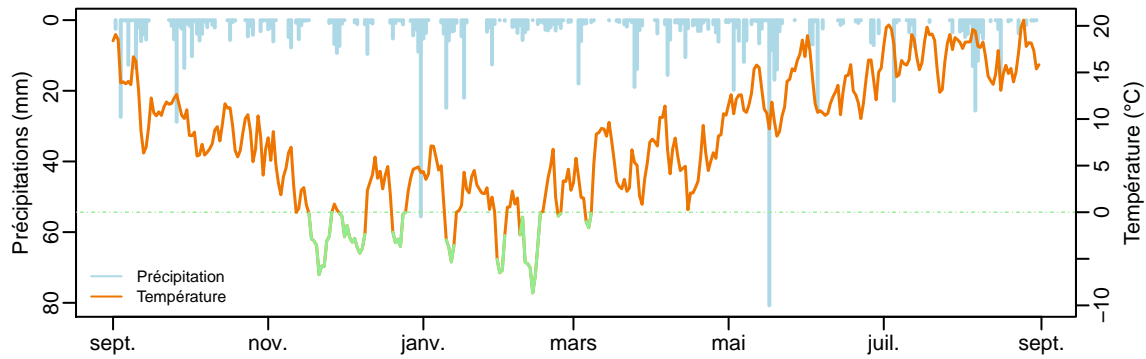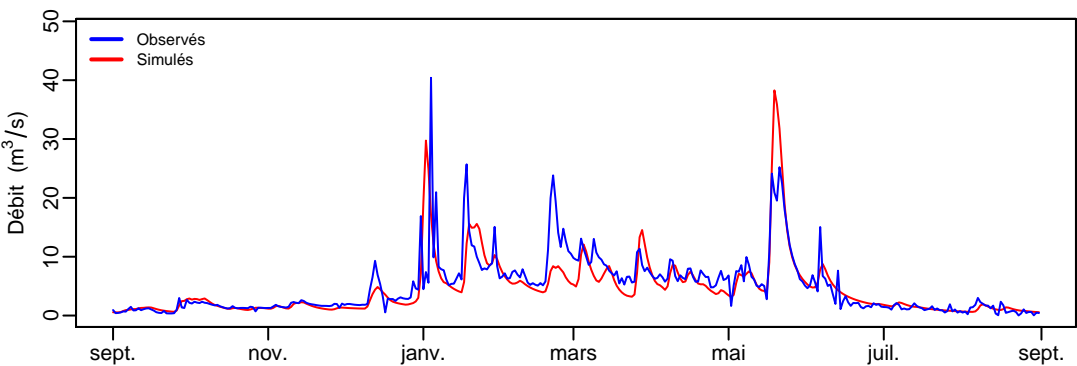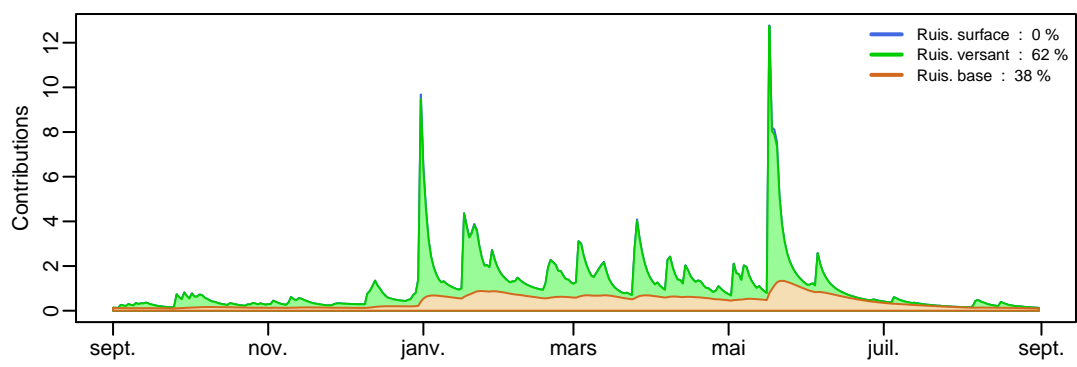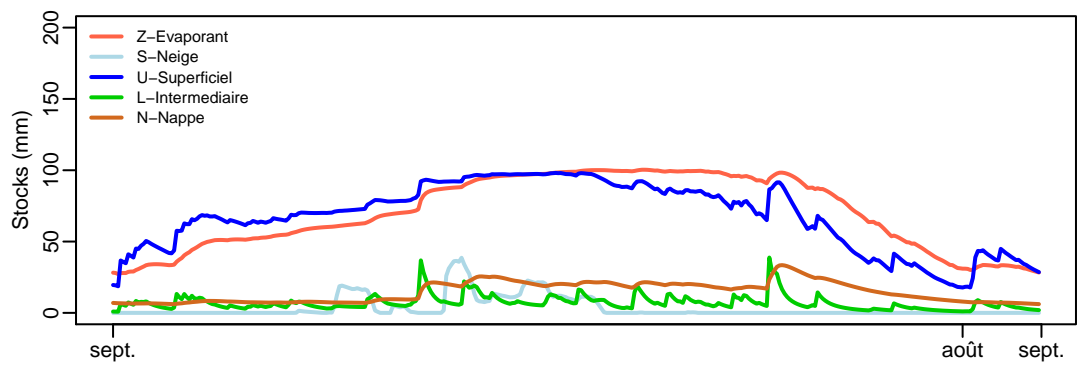

# versih (355.12 km²) – année 1999–2000

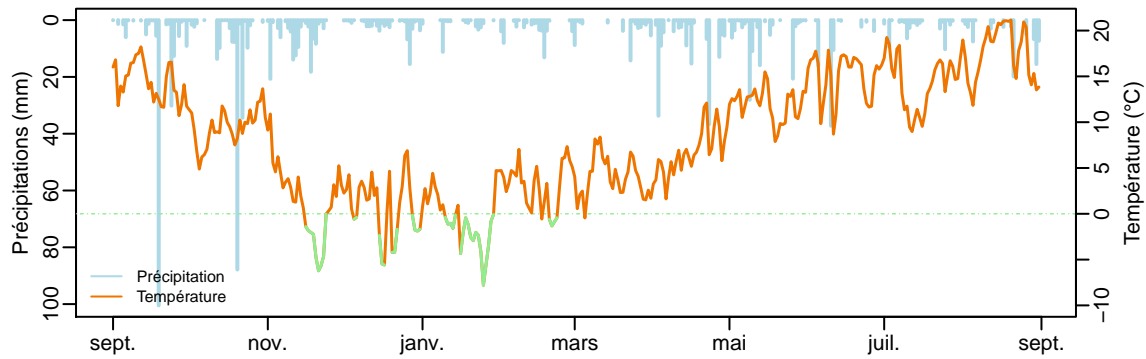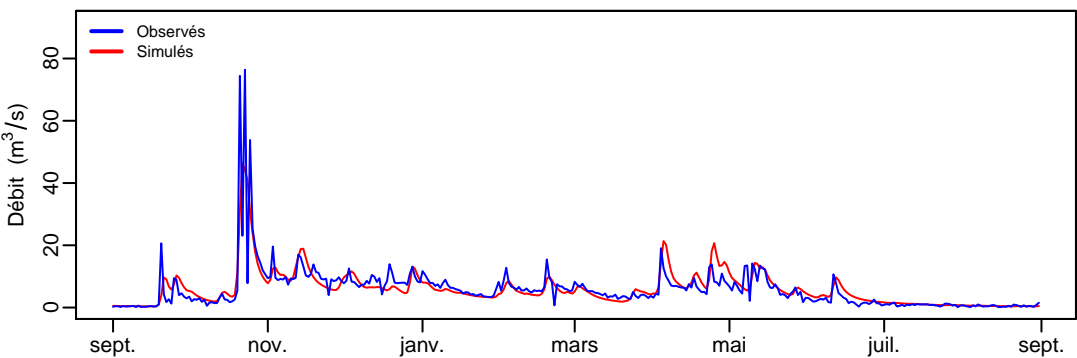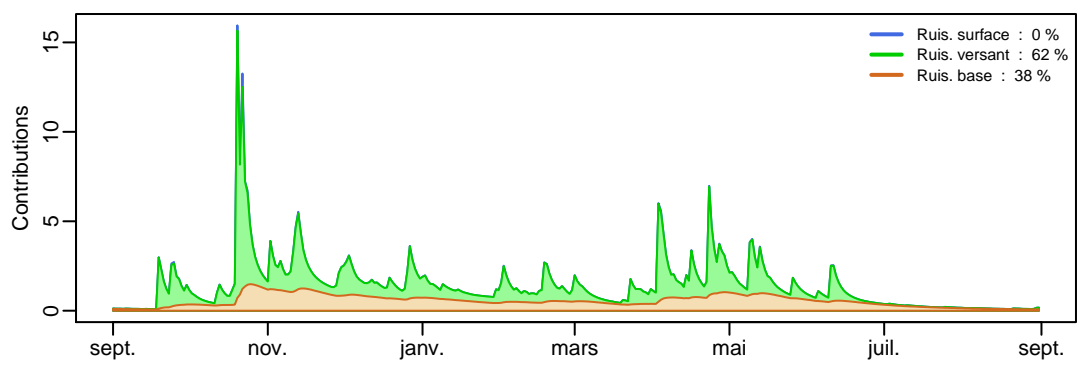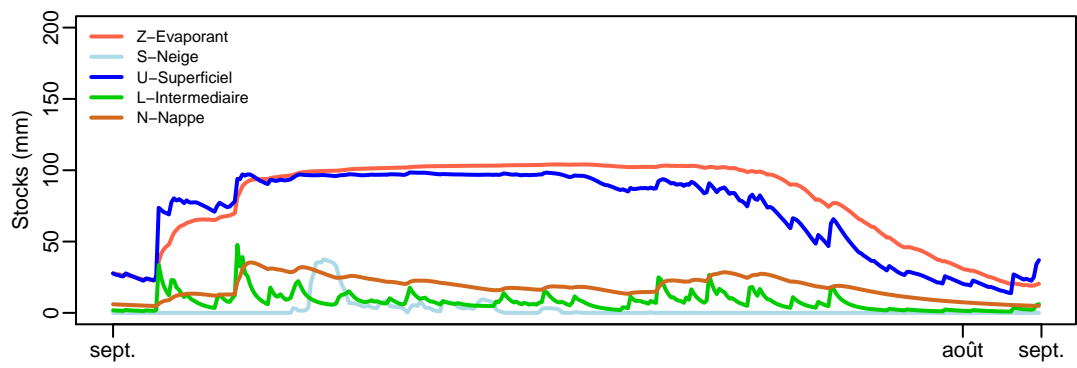

# versih (355.12 km<sup>2</sup>) – année 2000–2001

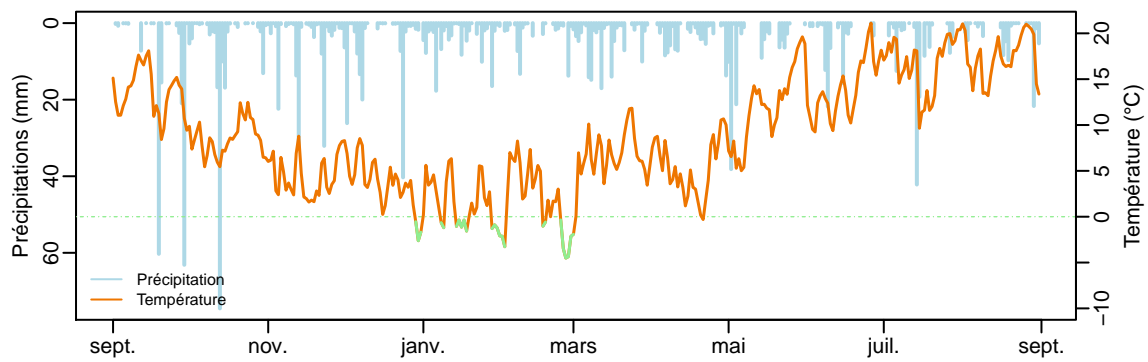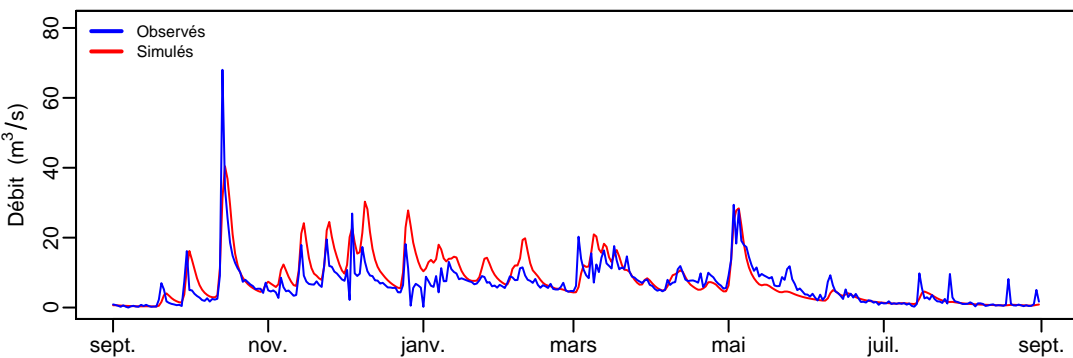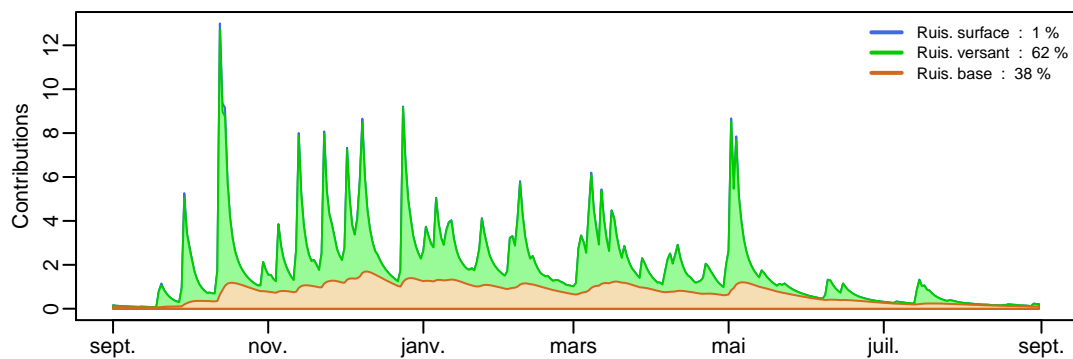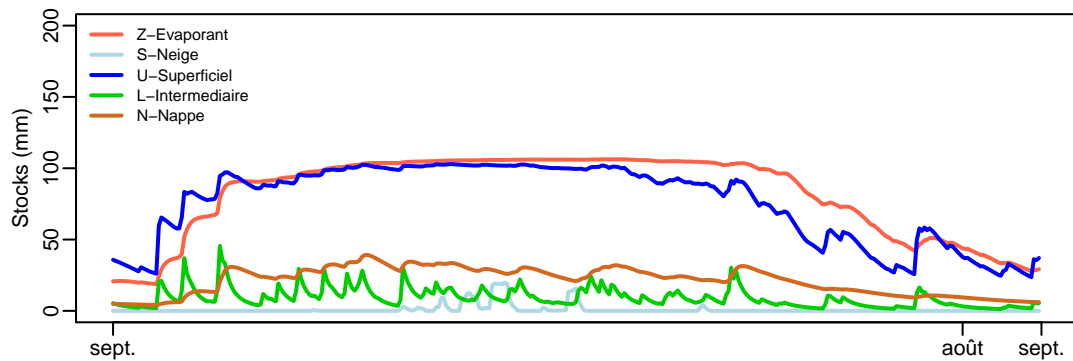

# versih (355.12 km<sup>2</sup>) – année 2001–2002

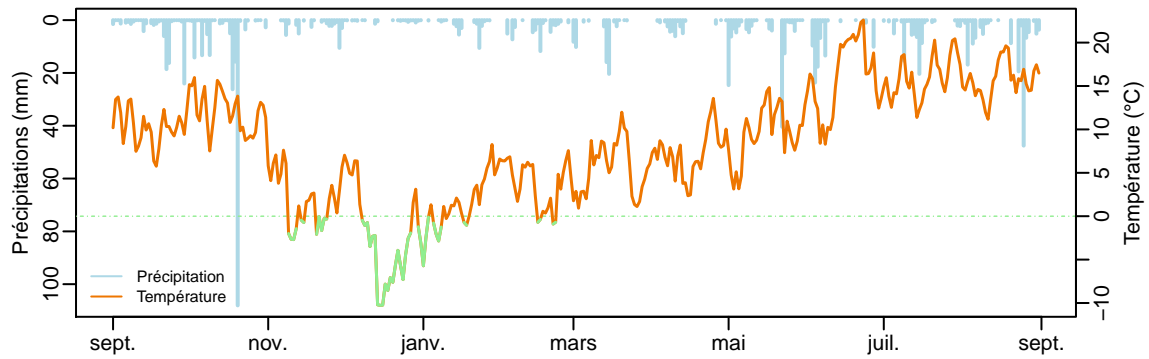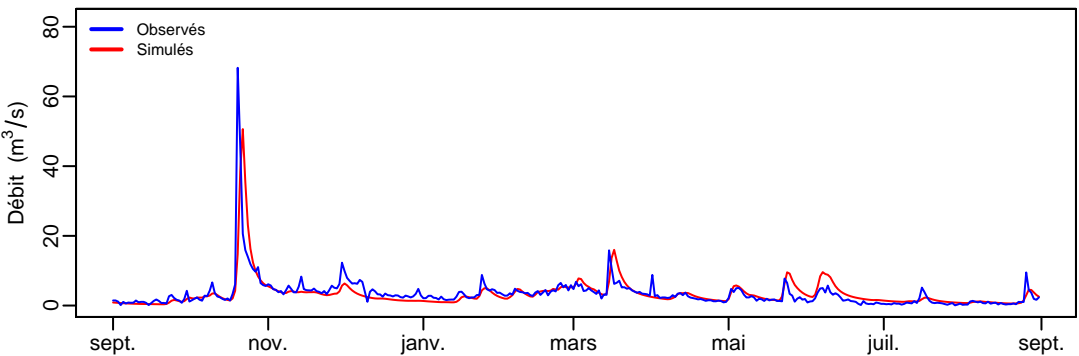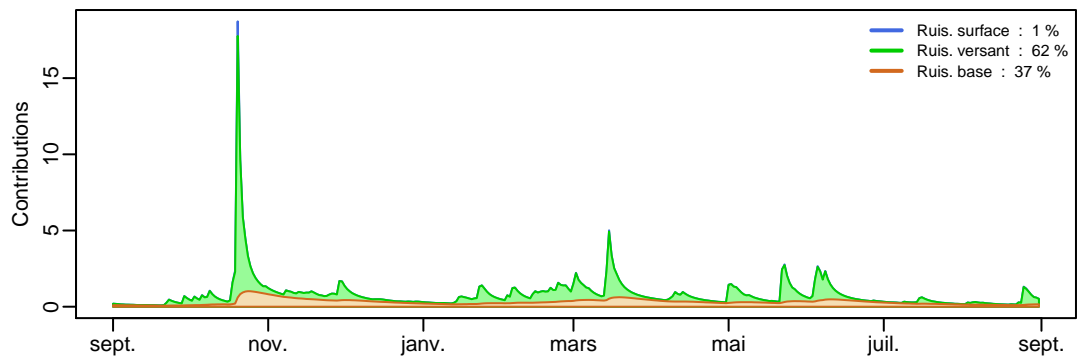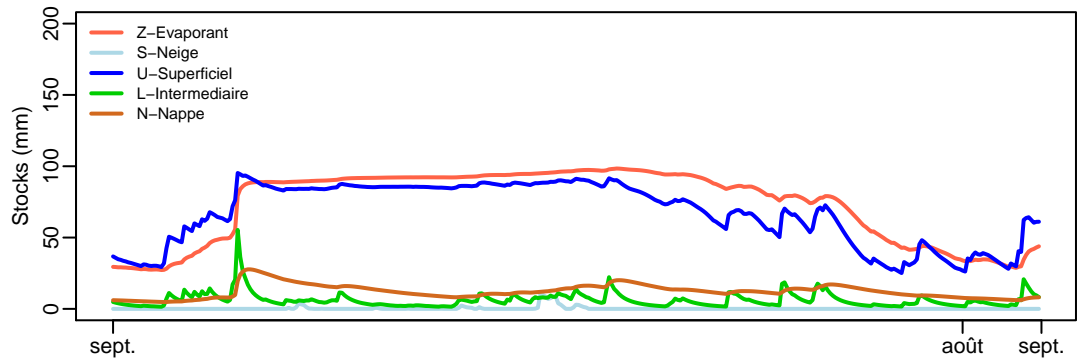

# versih (355.12 km²) – année 2002–2003

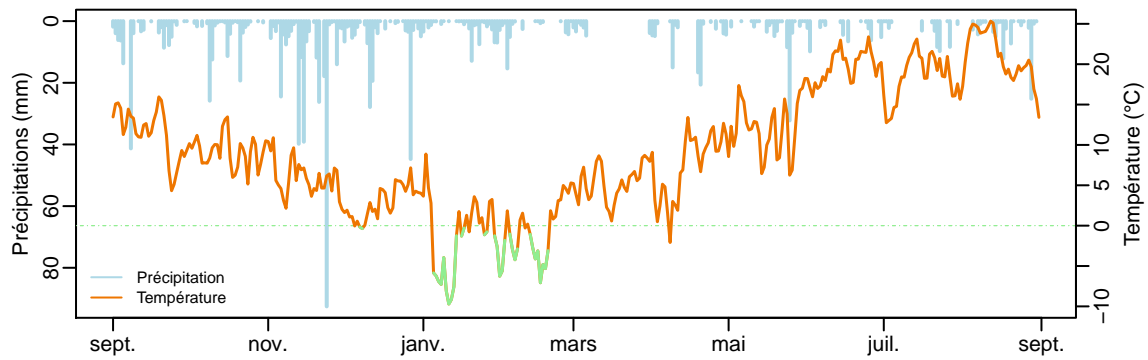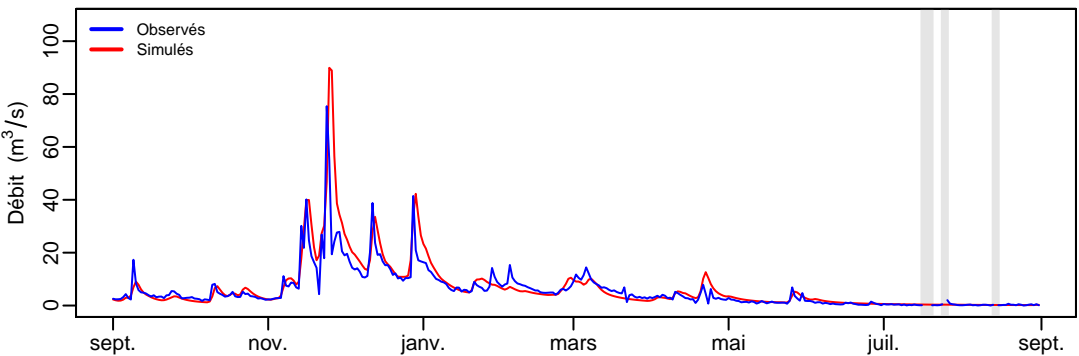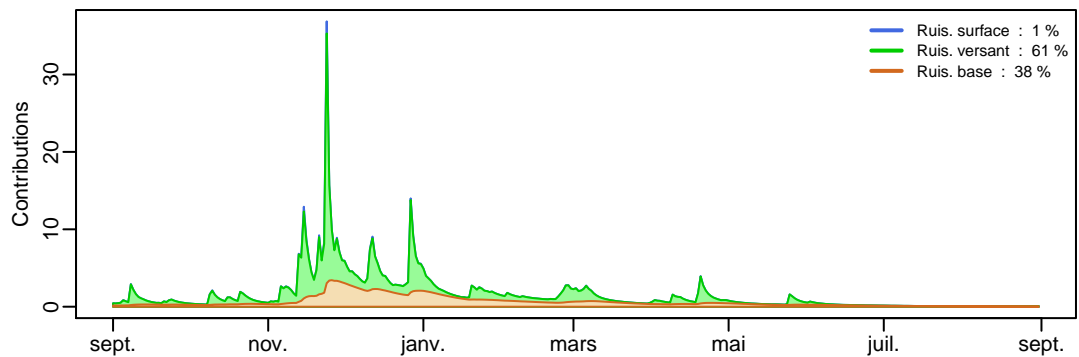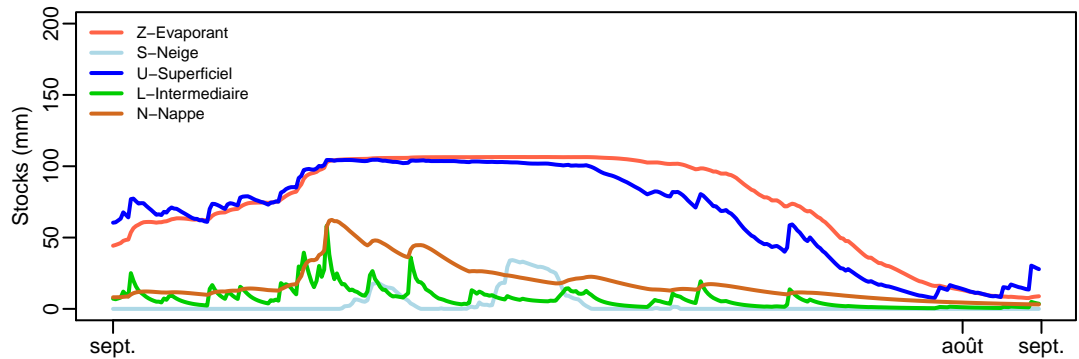



# versih (355.12 km²) – année 2003–2004

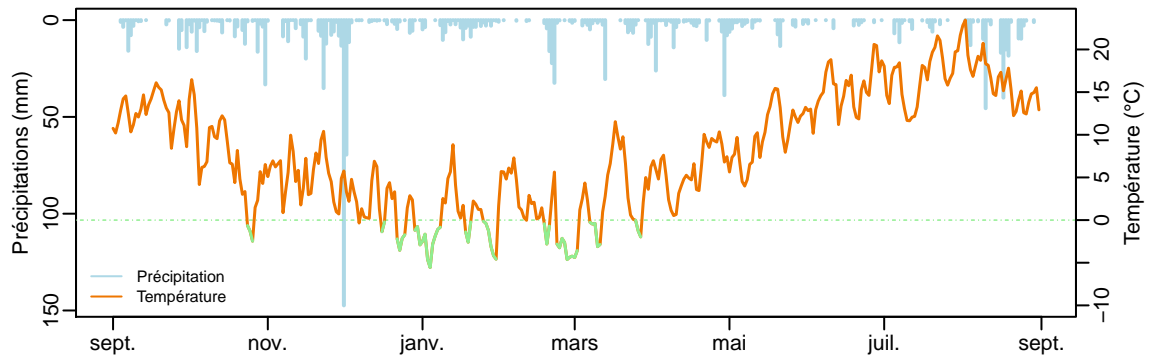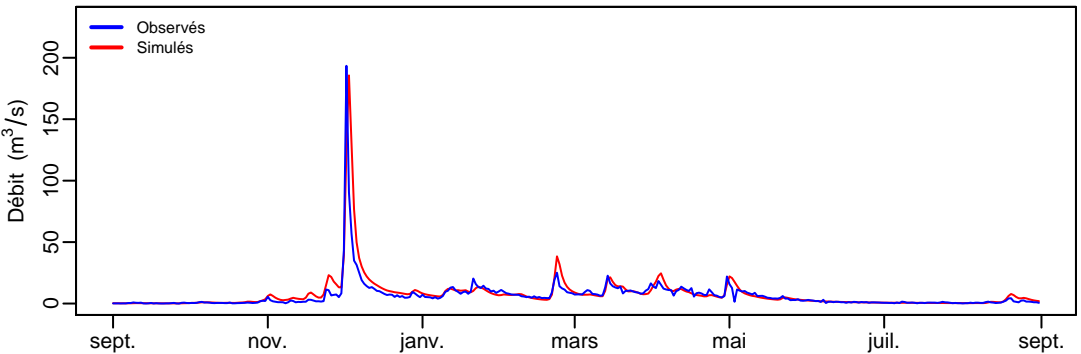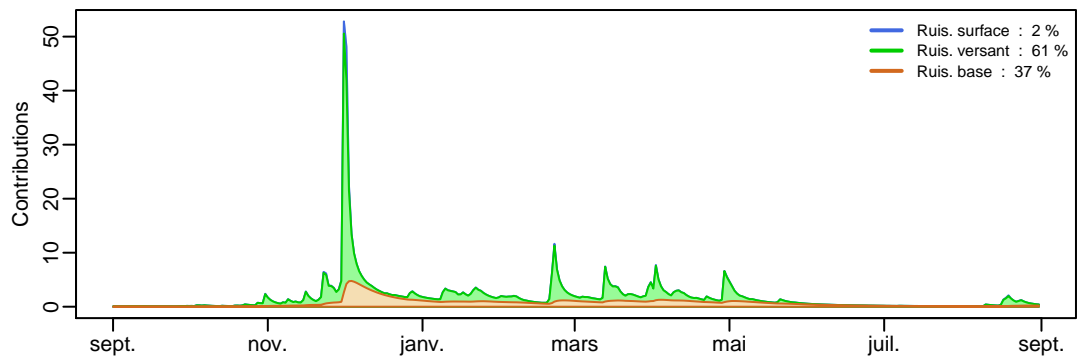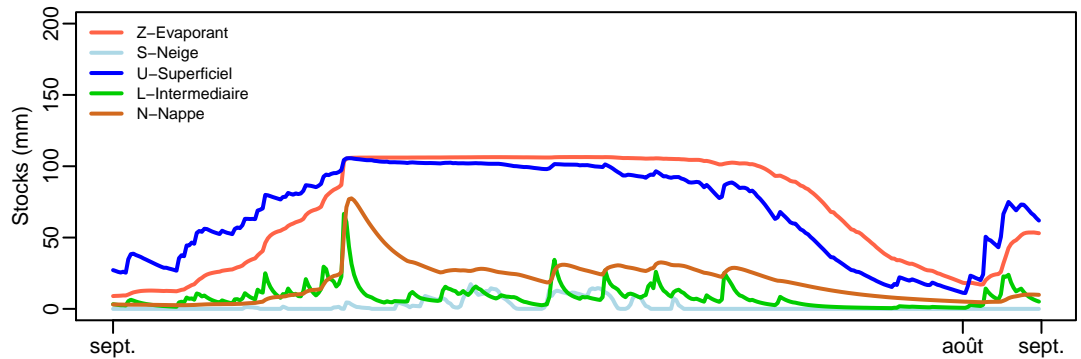

# versih (355.12 km²) – année 2004–2005

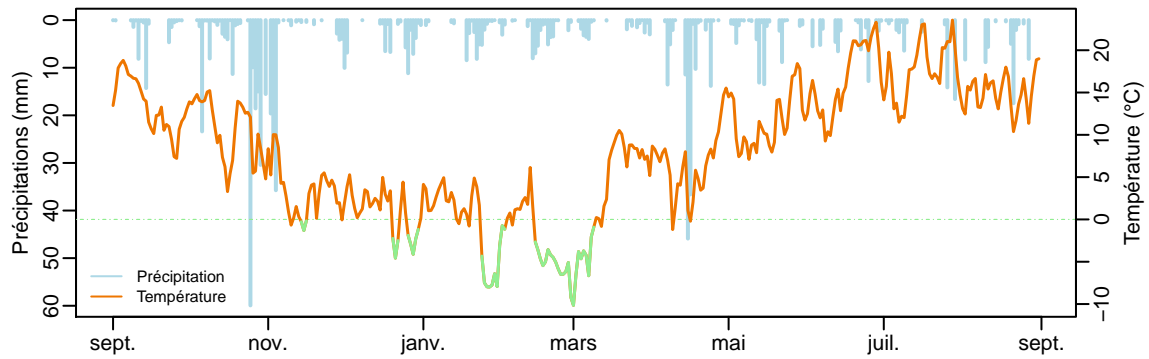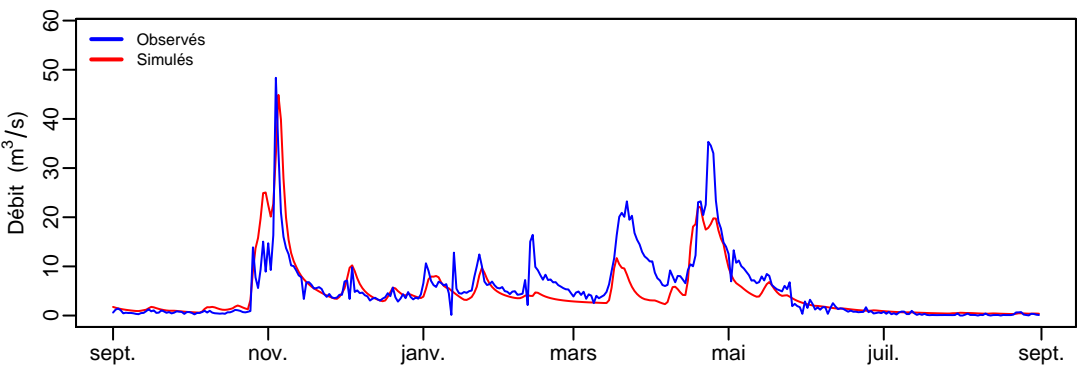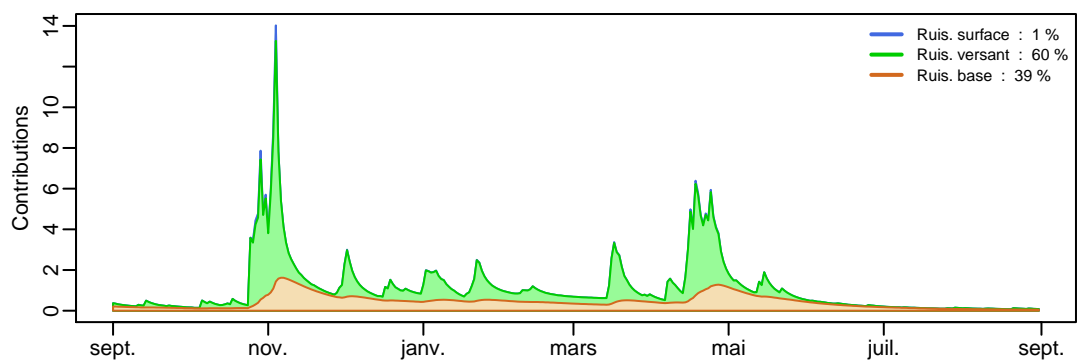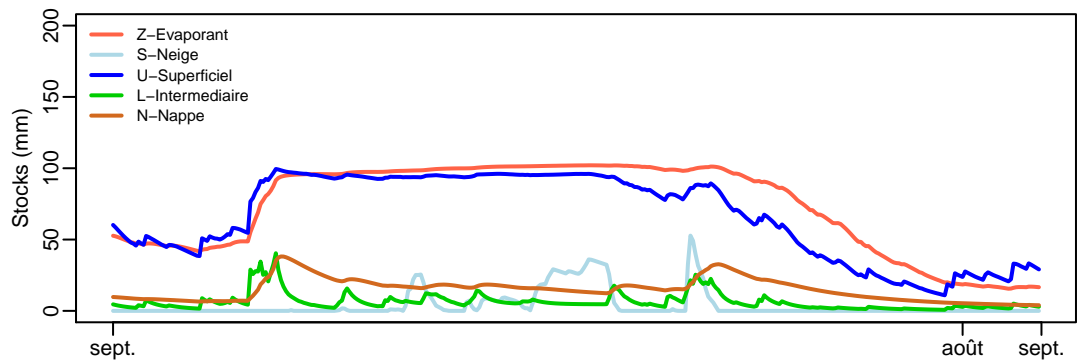

# versih (355.12 km²) – année 2005–2006

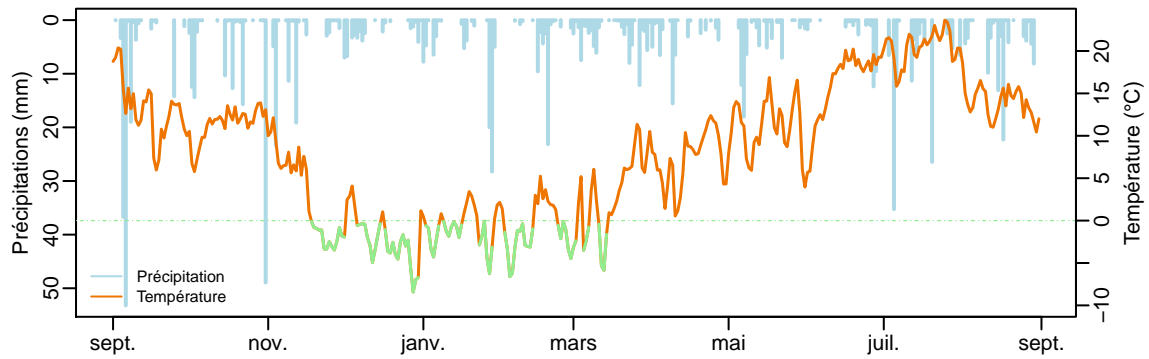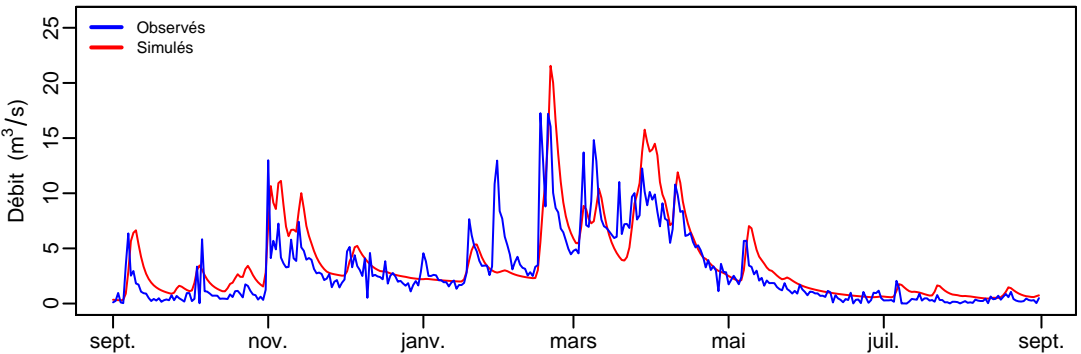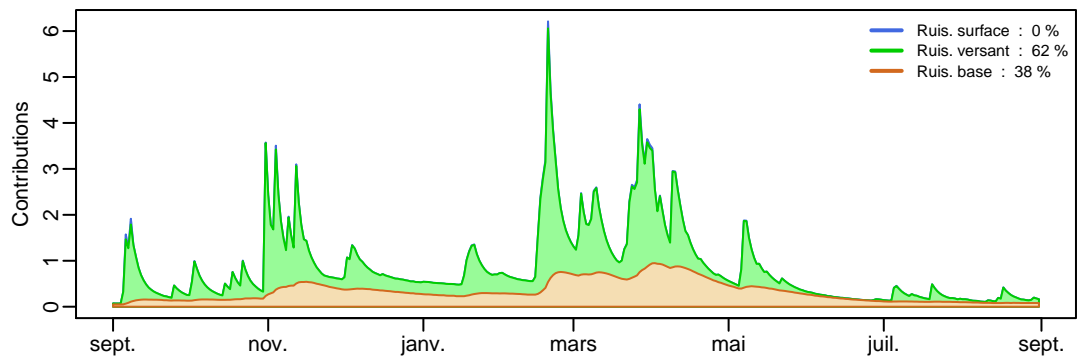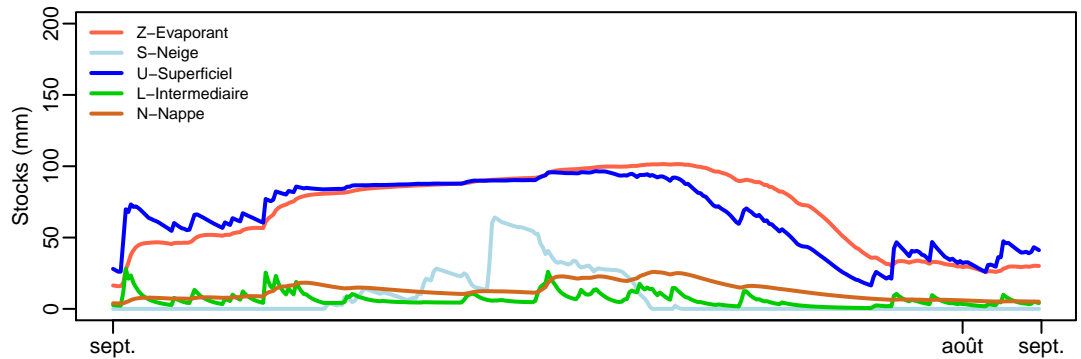

# versih (355.12 km²) – année 2006–2007

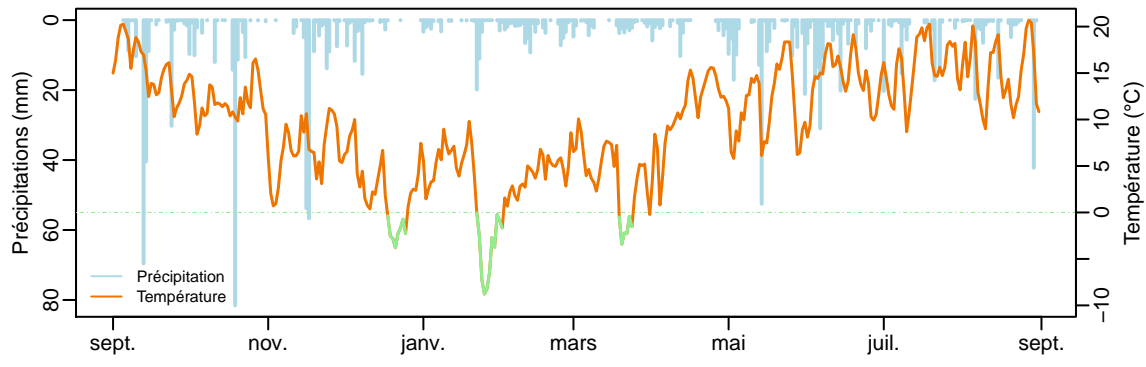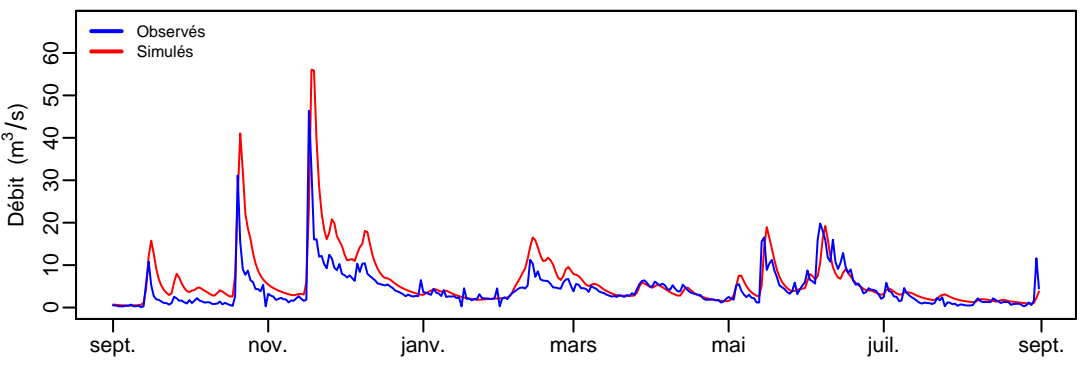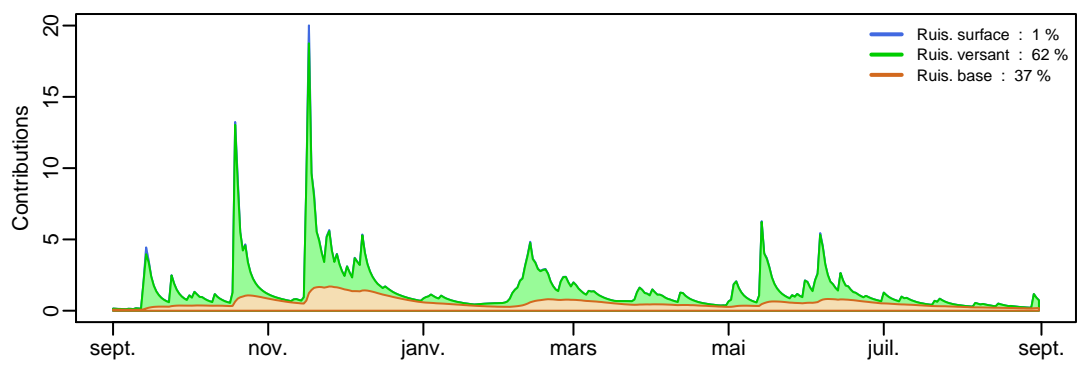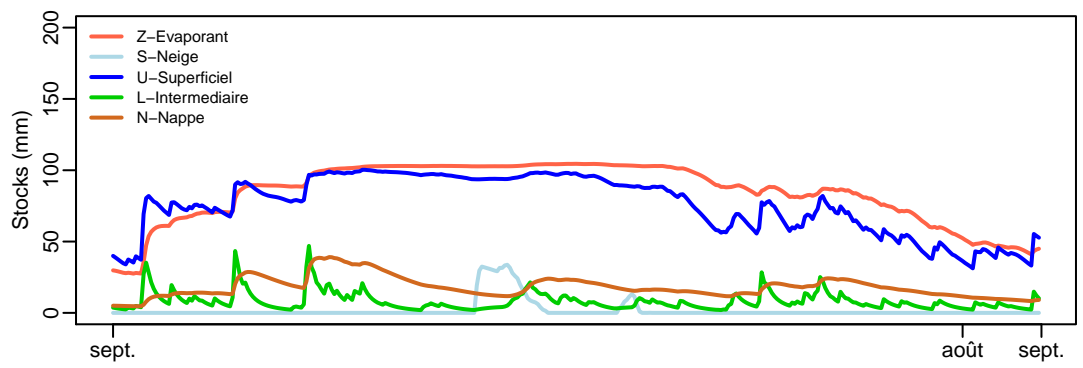

# versih (355.12 km²) – année 2007–2008

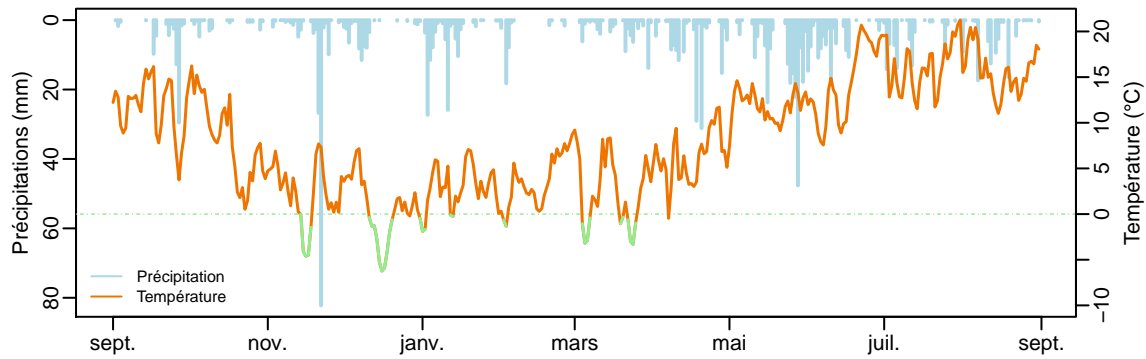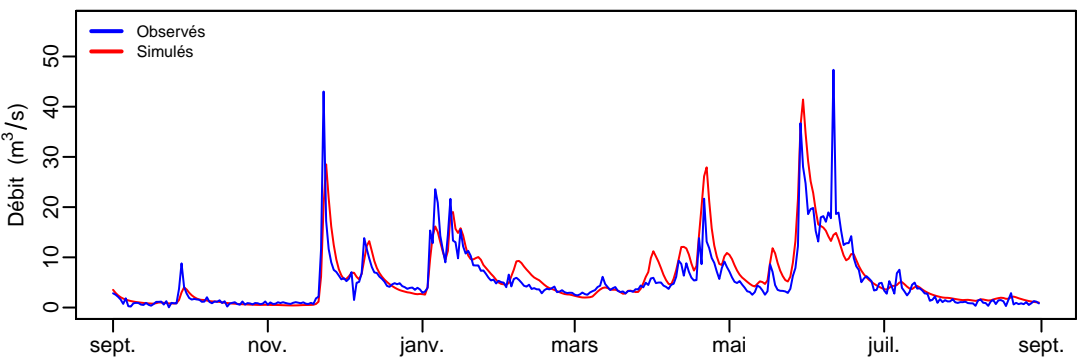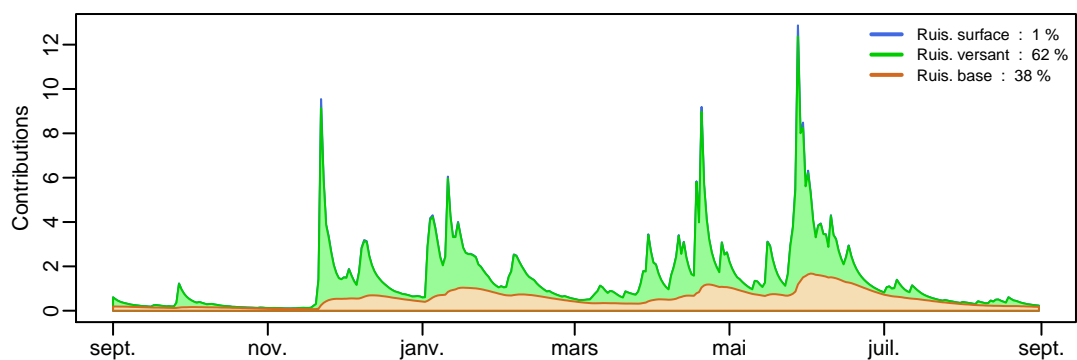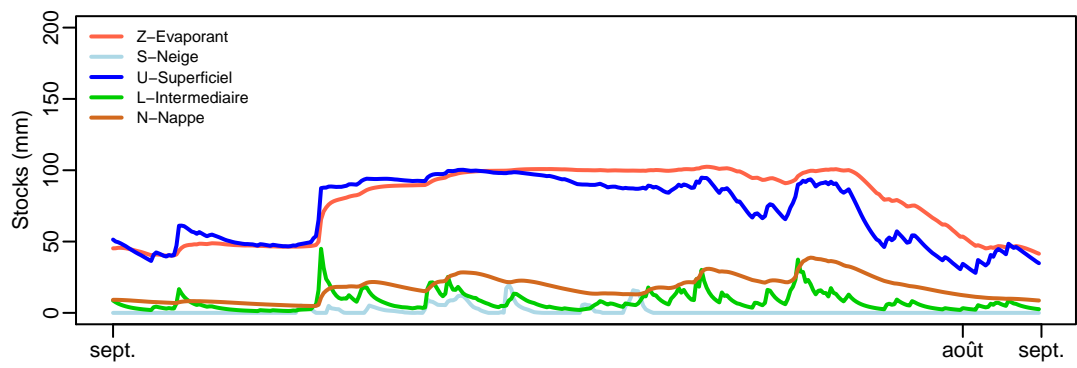

# versih (355.12 km<sup>2</sup>) – année 2008–2009

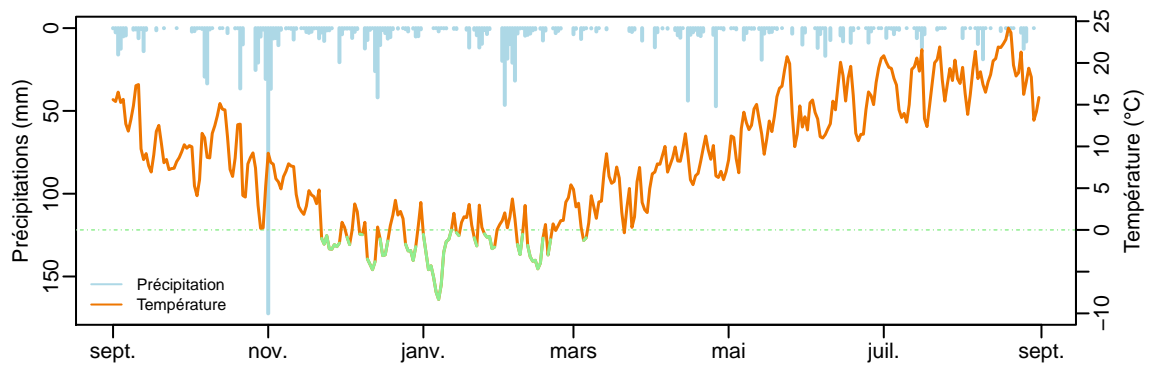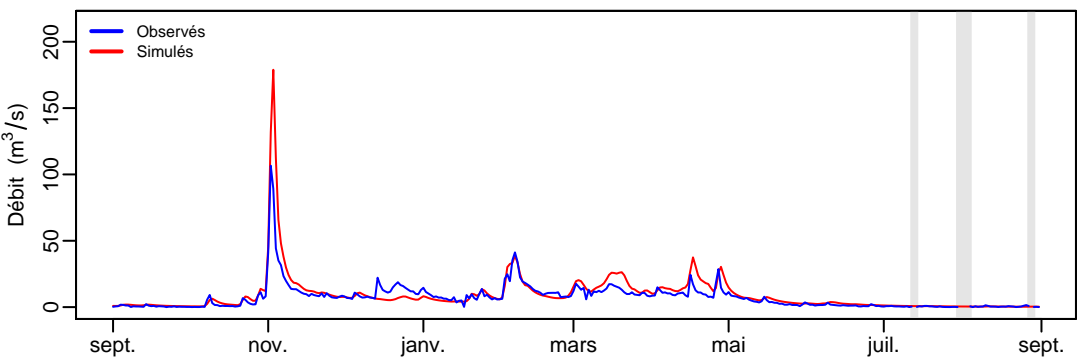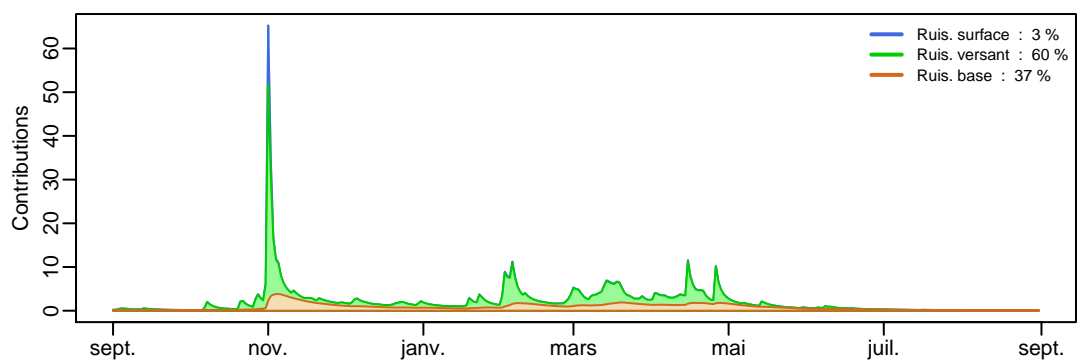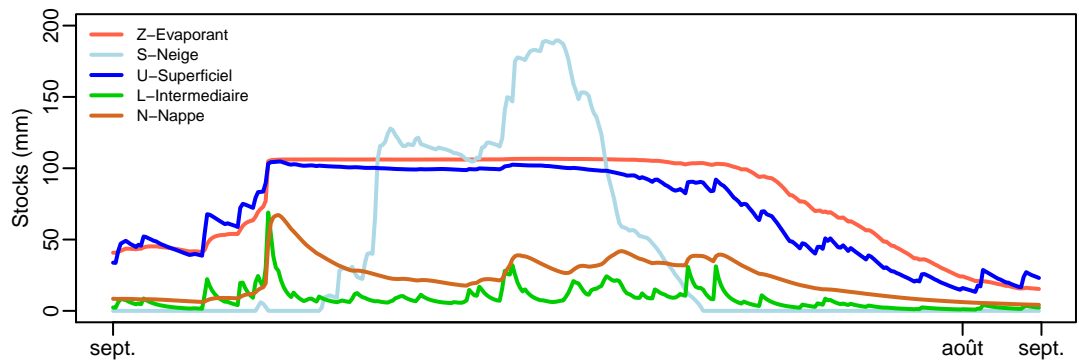

# versih (355.12 km²) – année 2009–2010

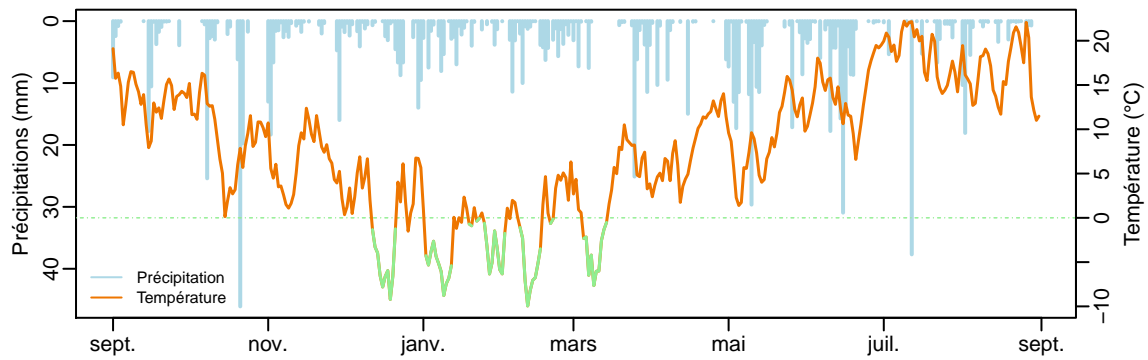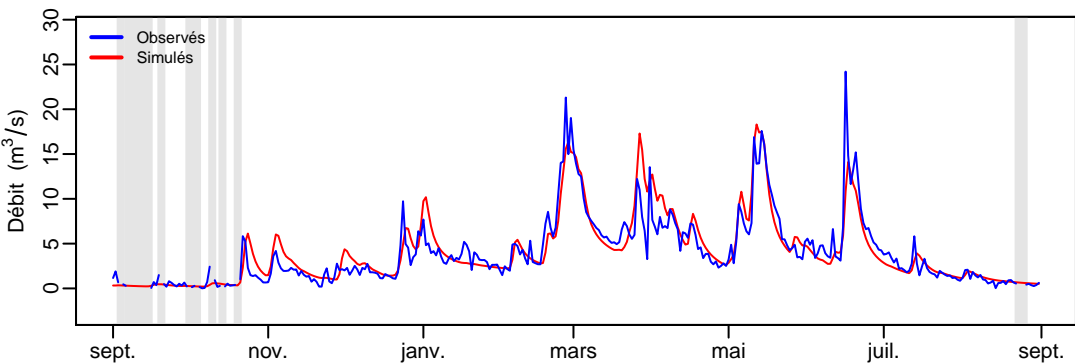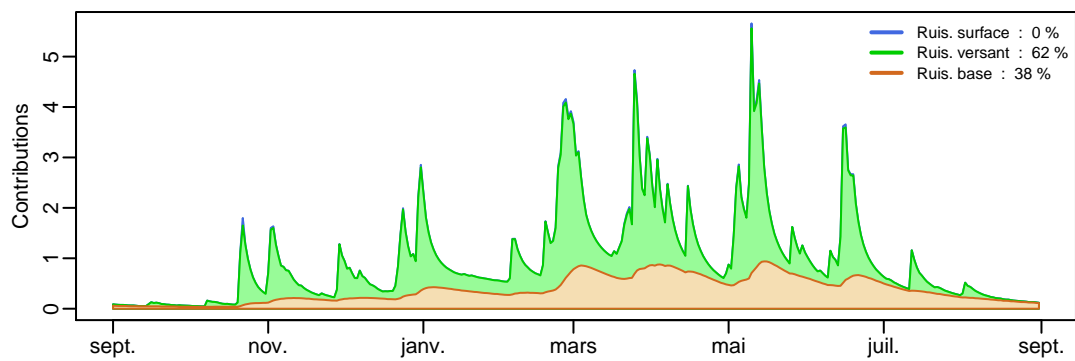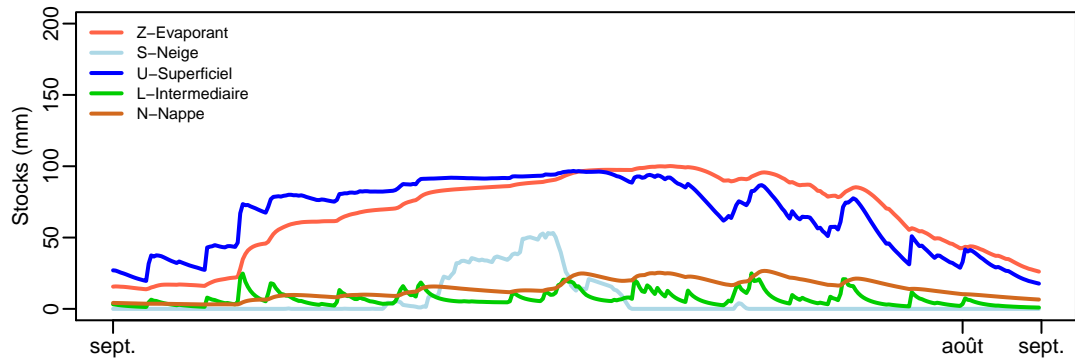

# versih (355.12 km<sup>2</sup>) – année 2010–2011

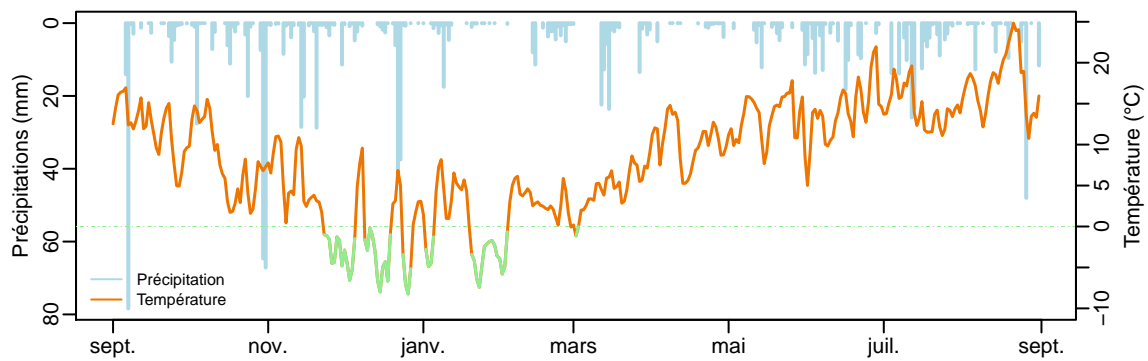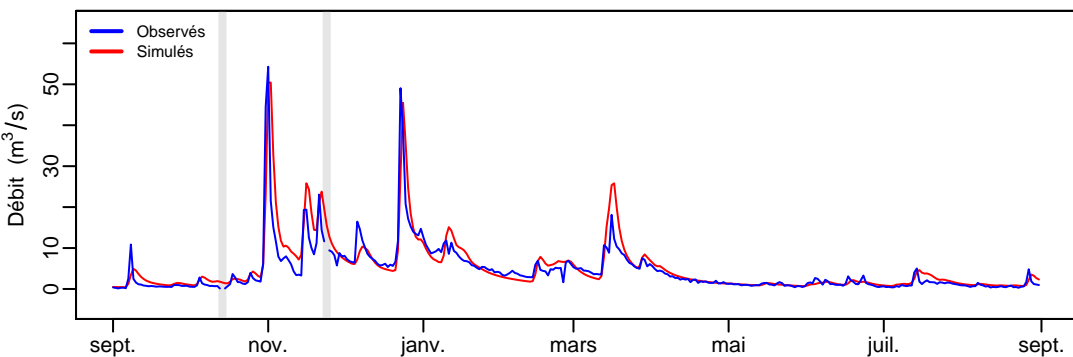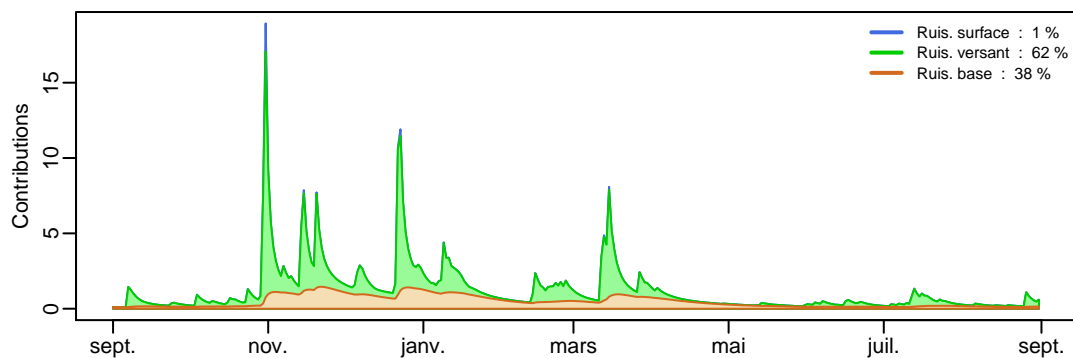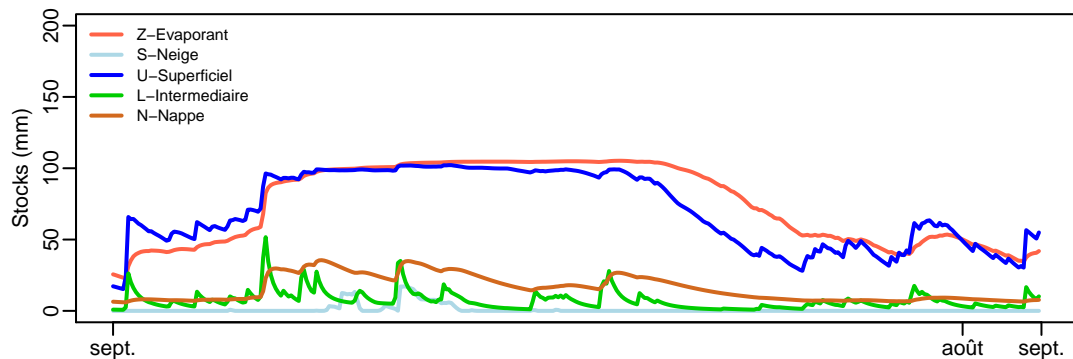



# versih (355.12 km²) – année 2011–2012

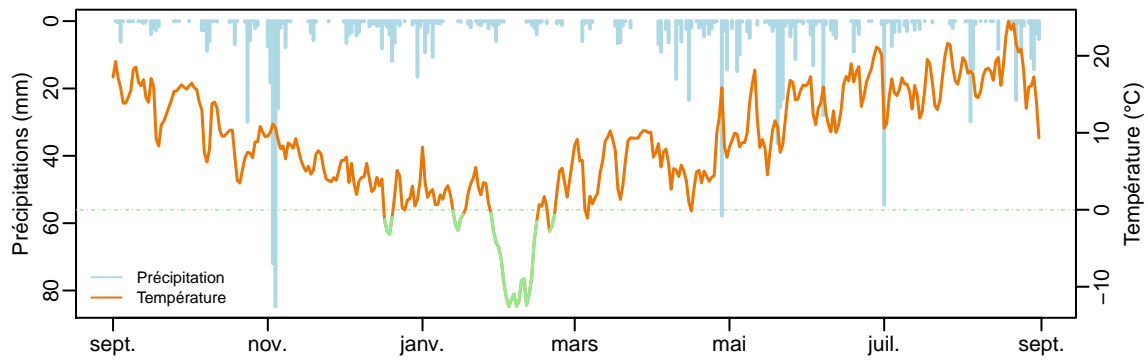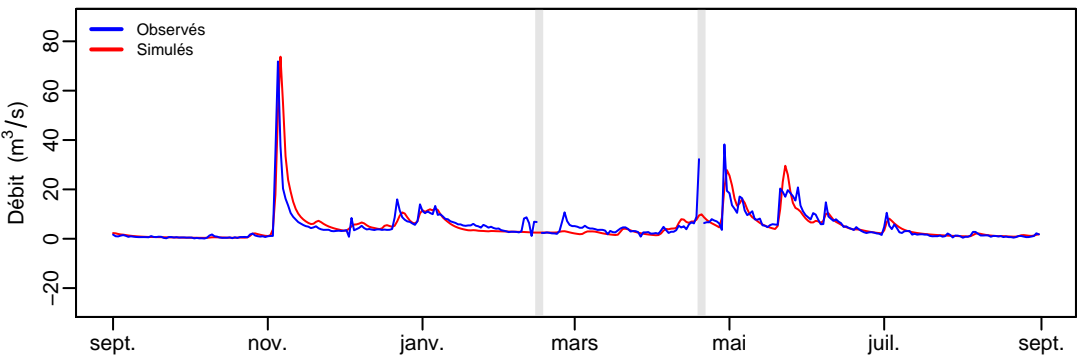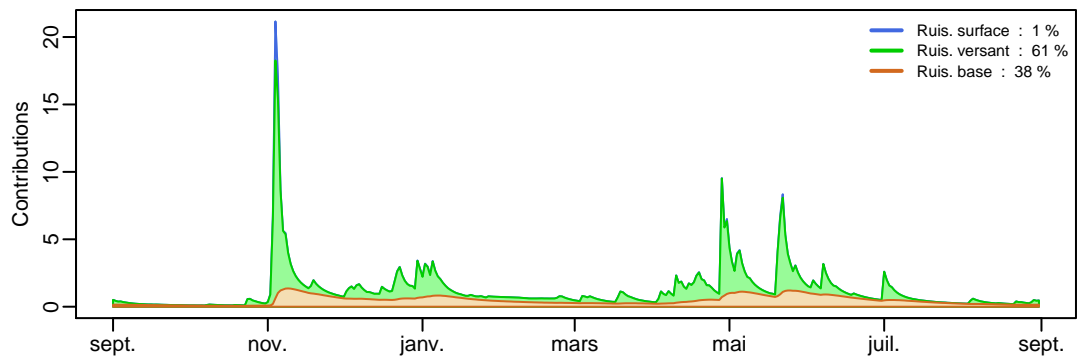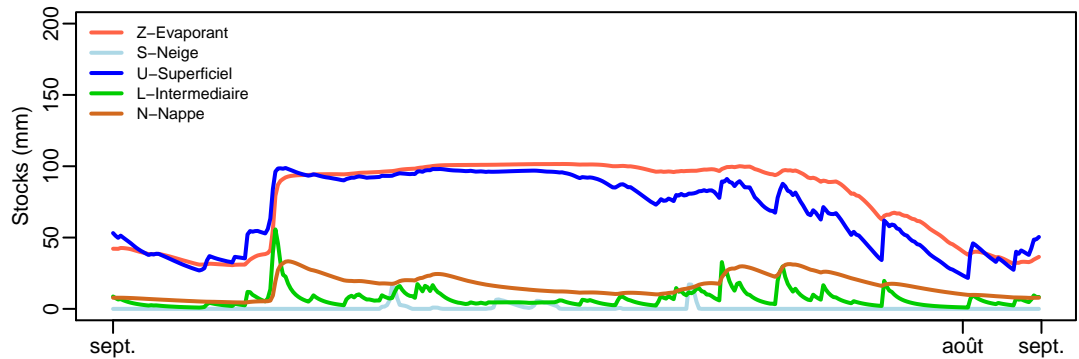

Supplement: Supplementary file 2 [file Suppl_Loire_Exp2.pdf › Suppl_Loire_Exp2.pdf]
