# Supplementary material for: Tailor-made spatial patterns for hydrological model parameters combining regionalisation methods
Source: Copernicus journal article supplement (doi:10.5194/hess-2018-342), 2018-06-29

# castih (656.22 km<sup>2</sup>) – année 1981–1982

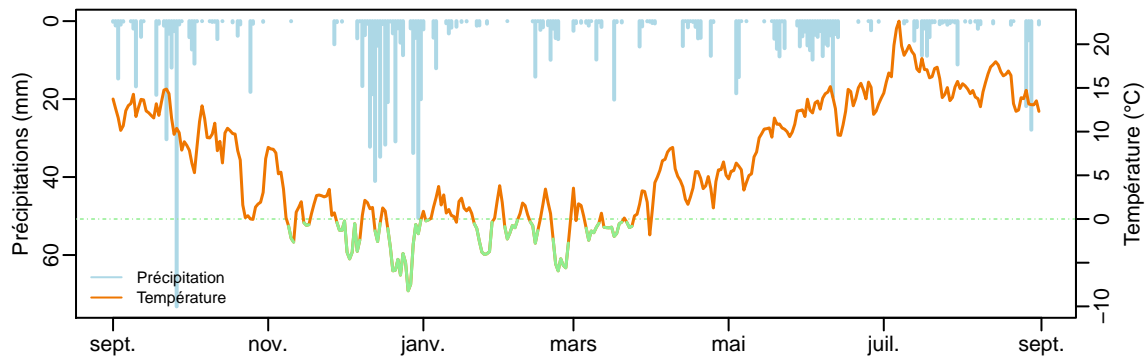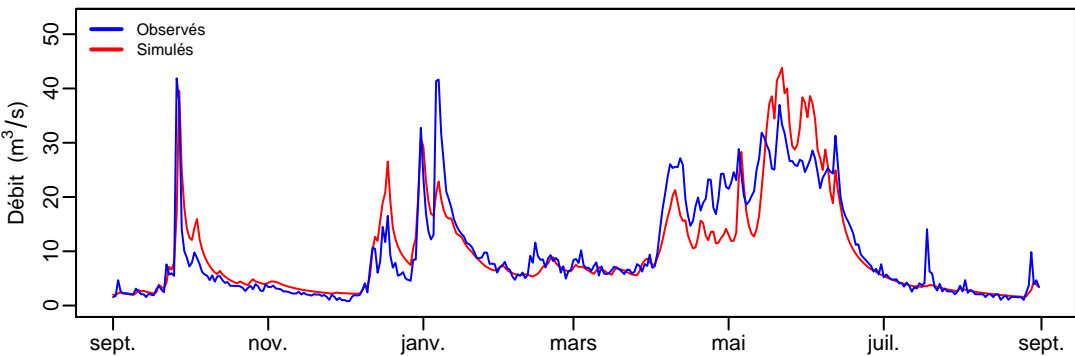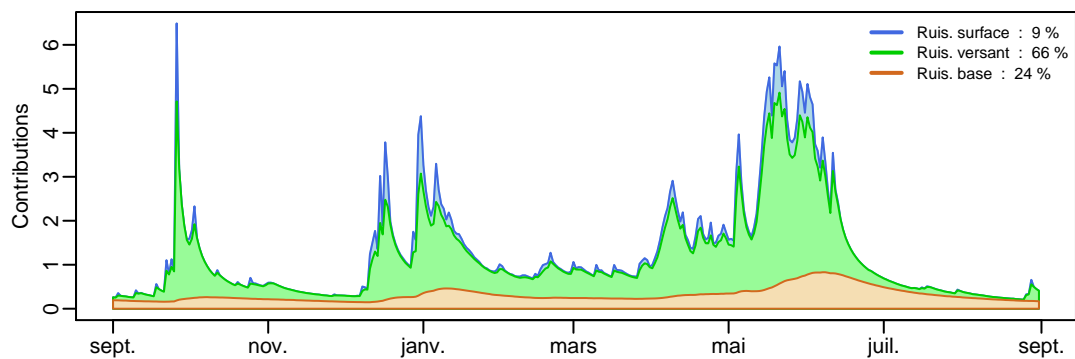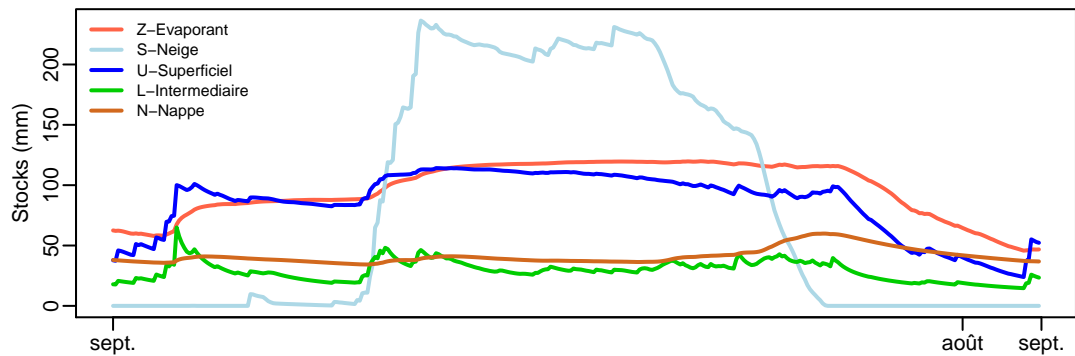

# castih (656.22 km²) – année 1982–1983

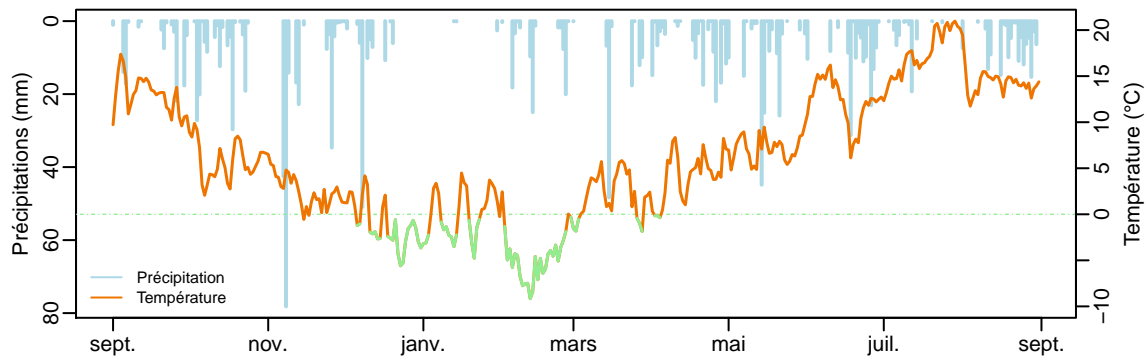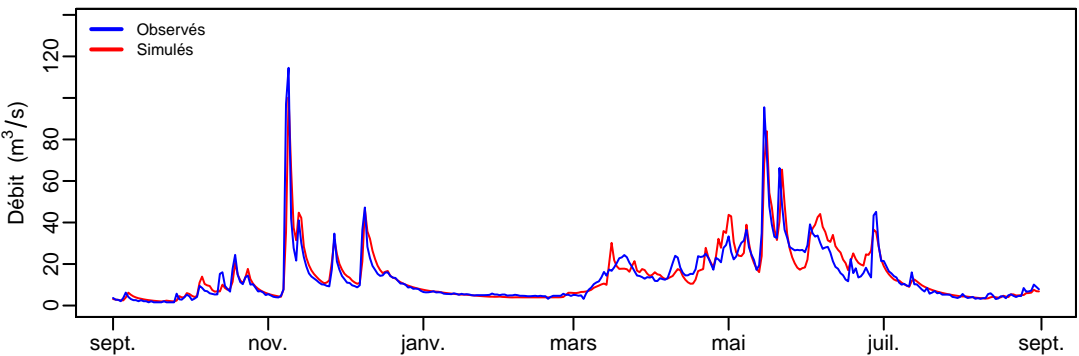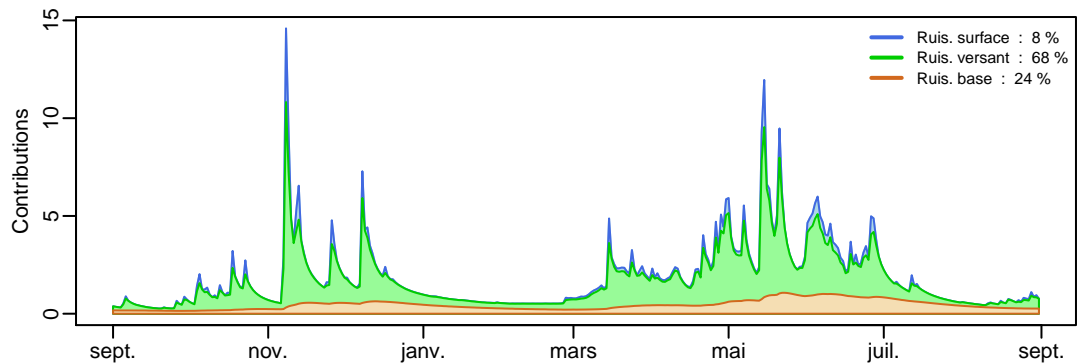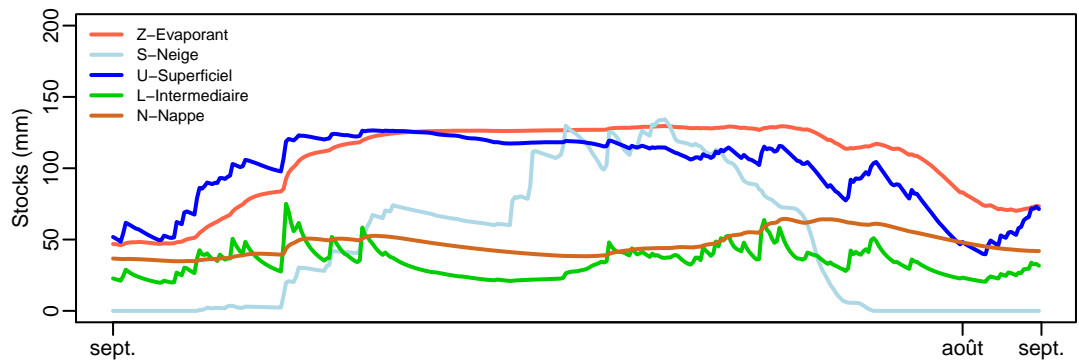

castih (656.22 km<sup>2</sup>) – année 1983–1984

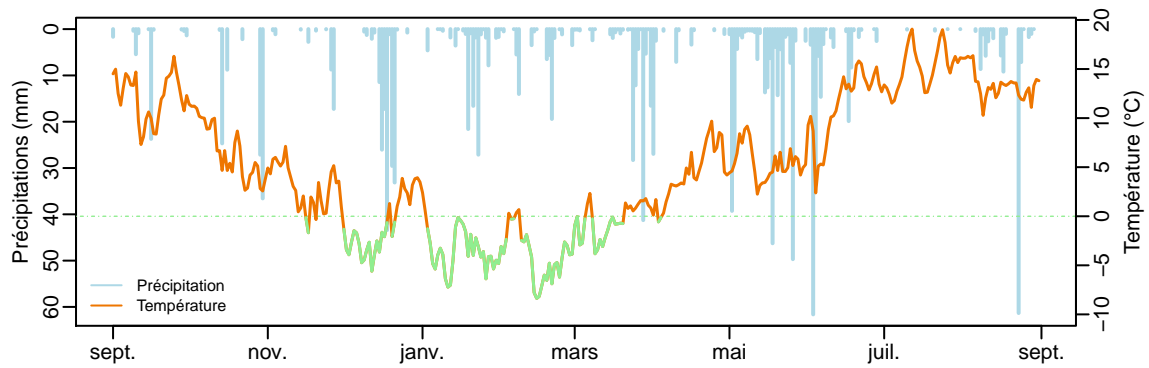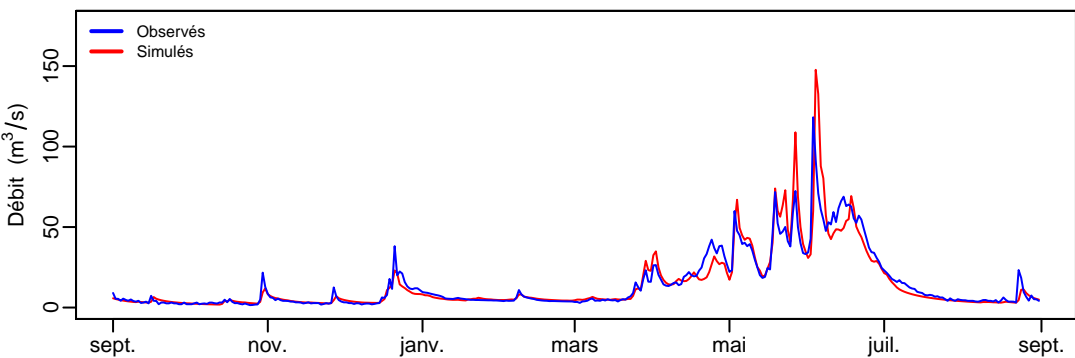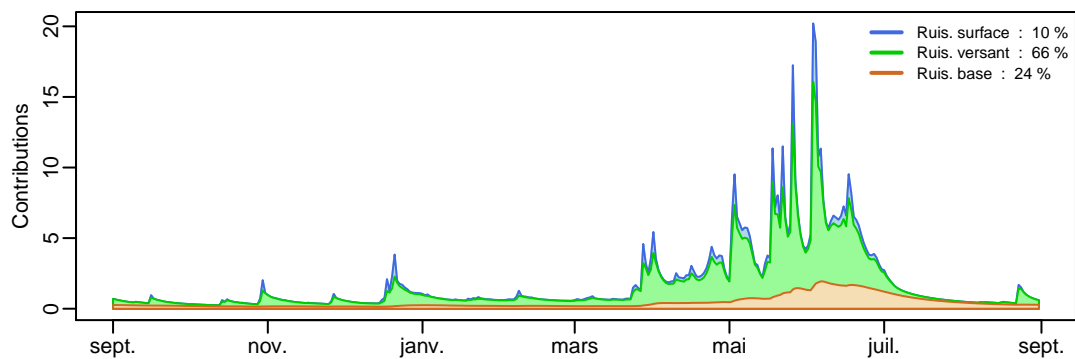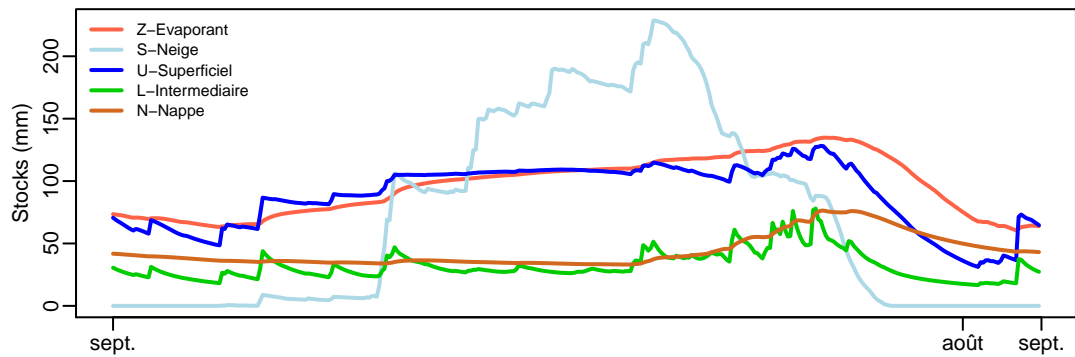

# castih (656.22 km²) – année 1984–1985

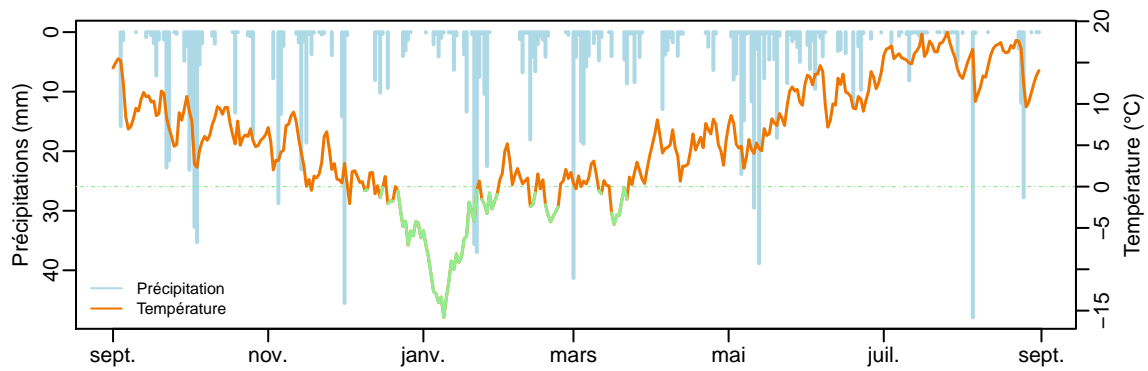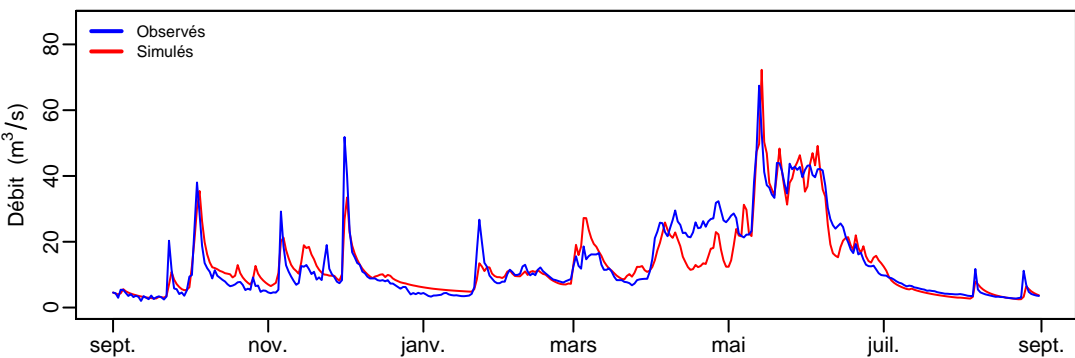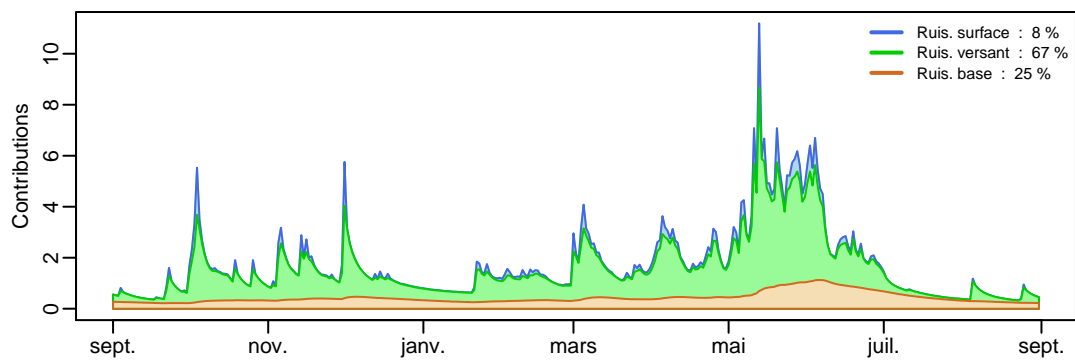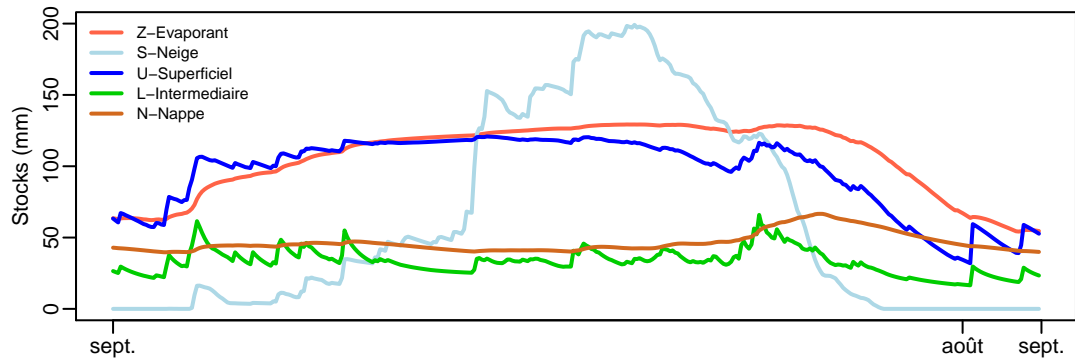



# castih (656.22 km²) – année 1985–1986

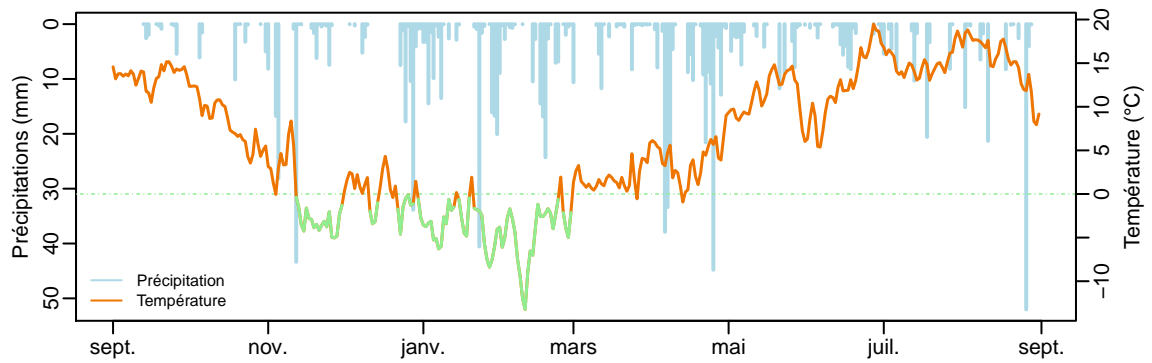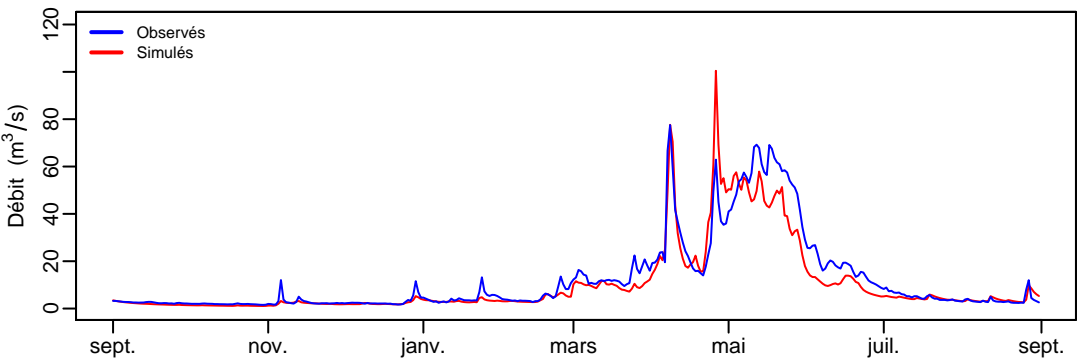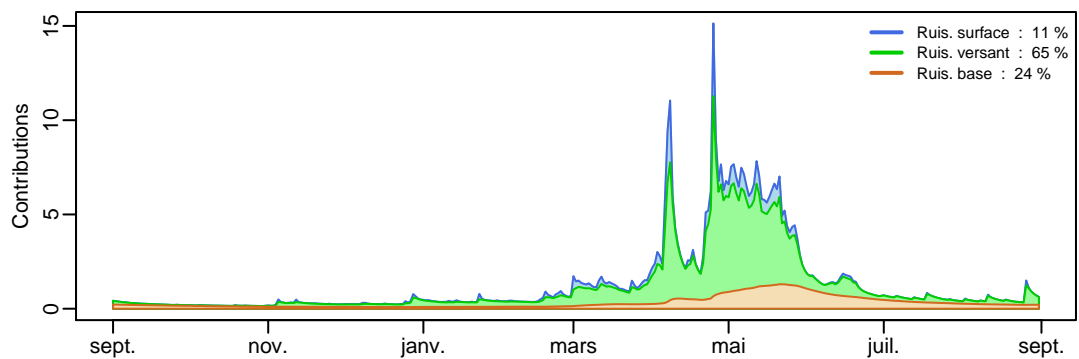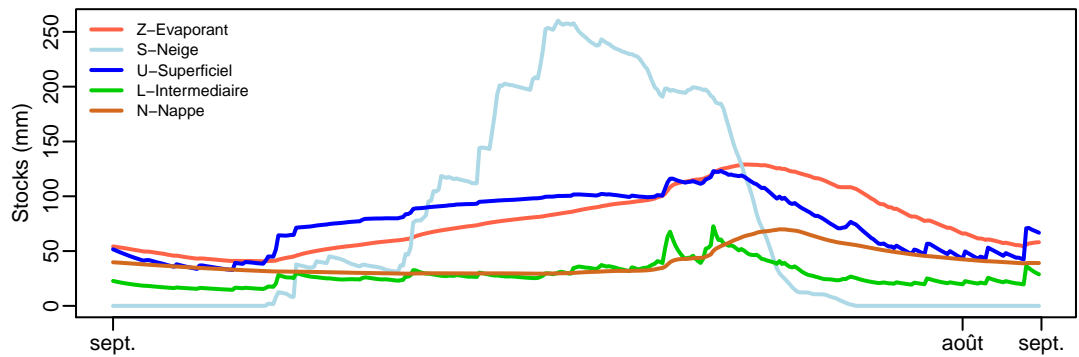

castih (656.22 km²) – année 1986–1987

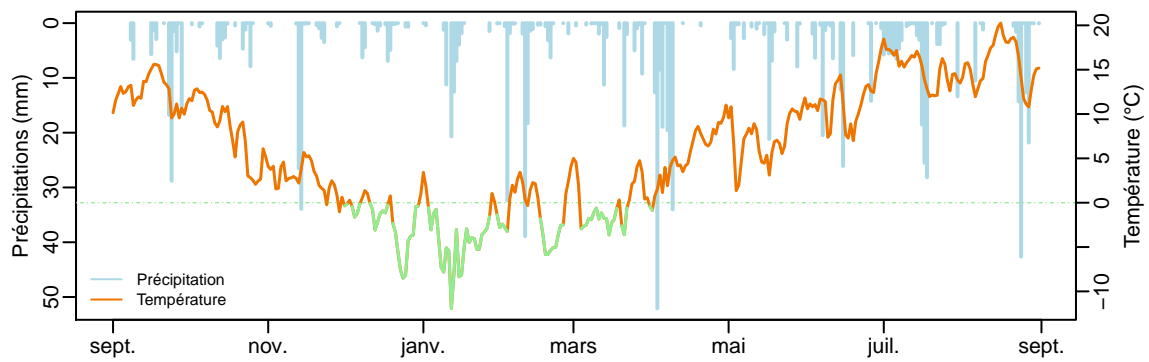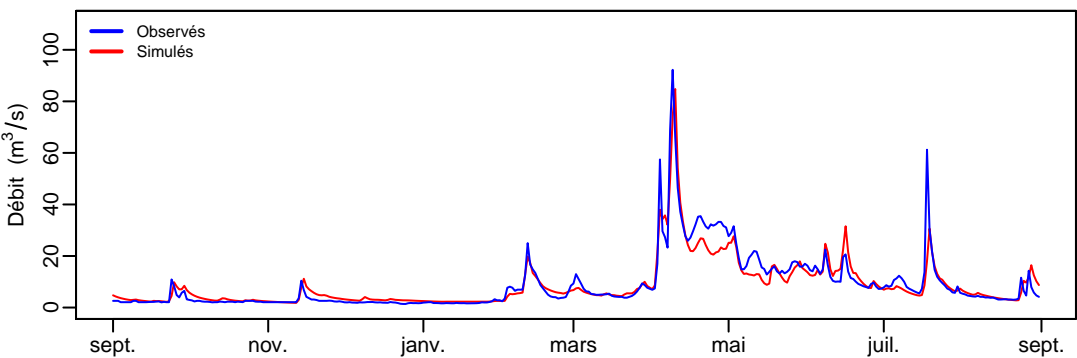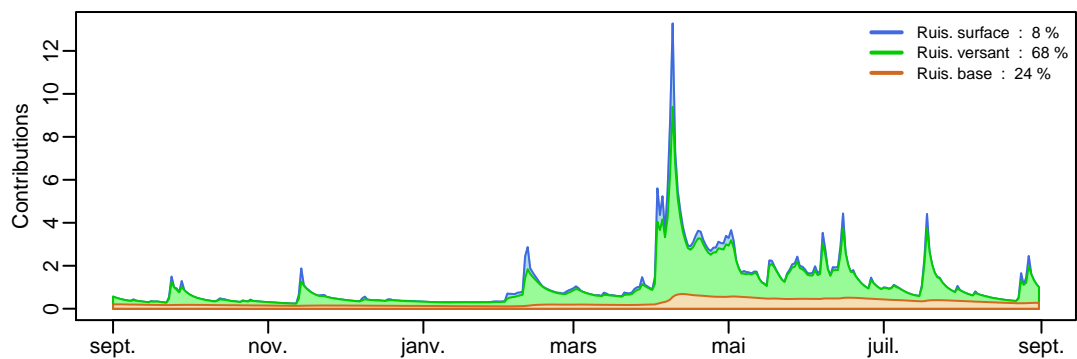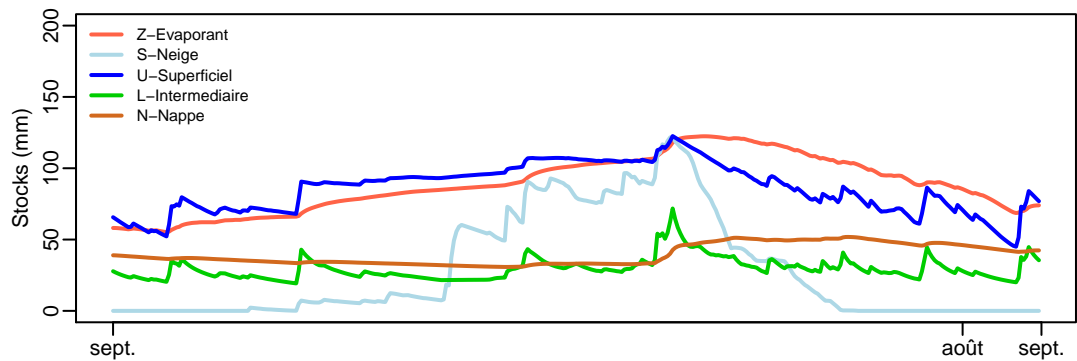

# castih (656.22 km<sup>2</sup>) – année 1987–1988

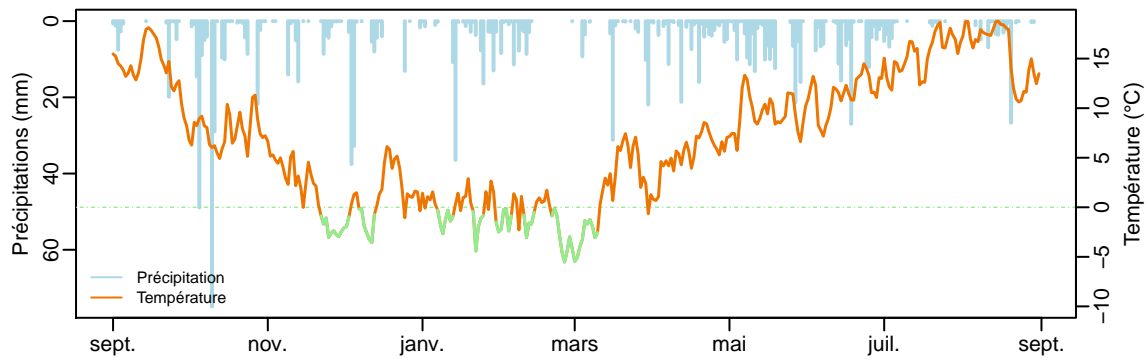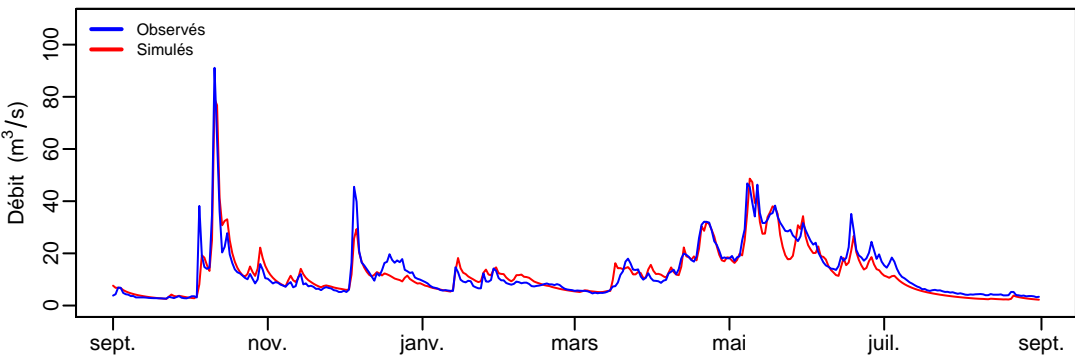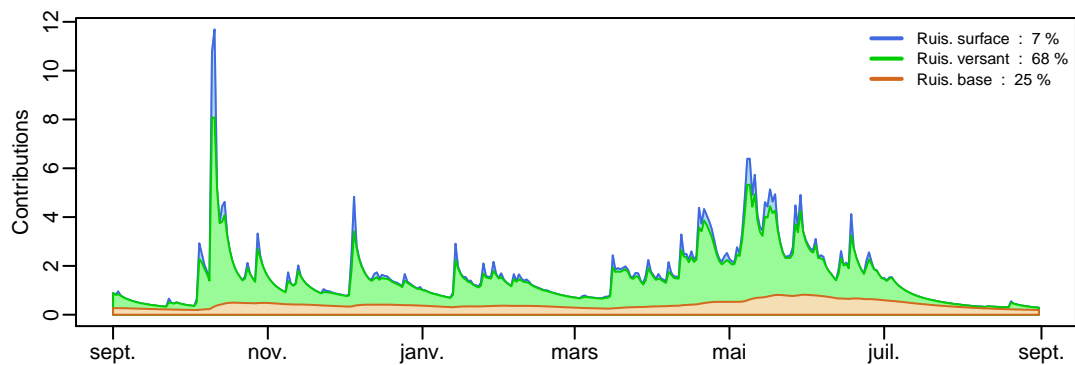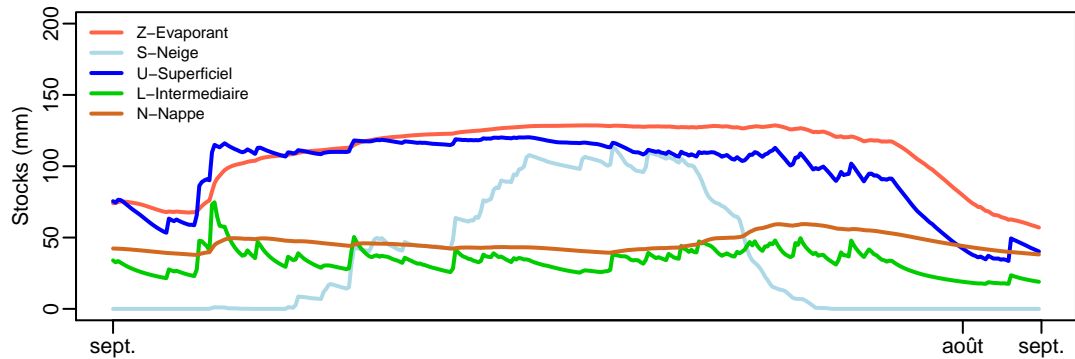

castih (656.22 km<sup>2</sup>) – année 1988–1989

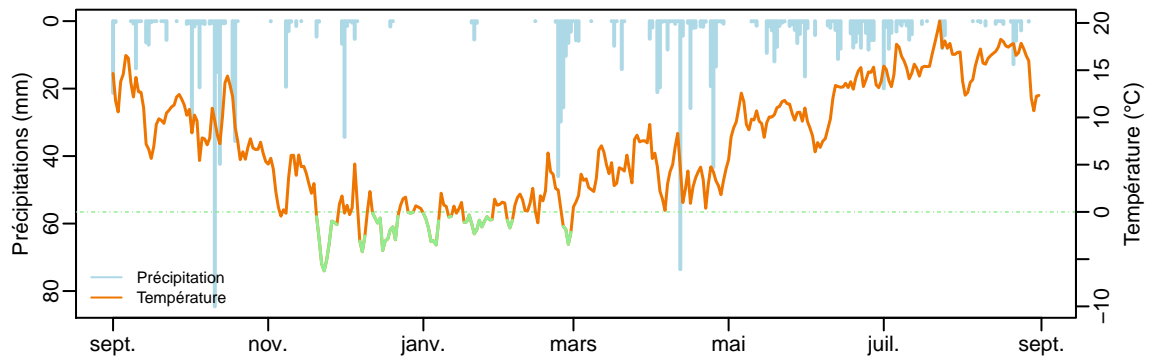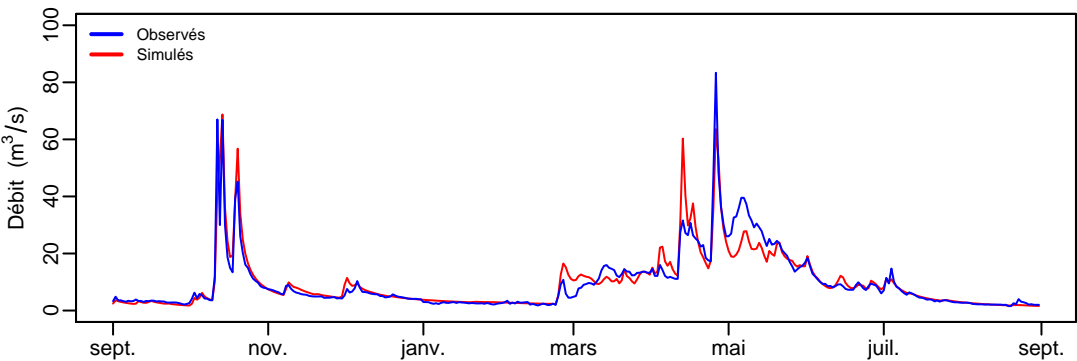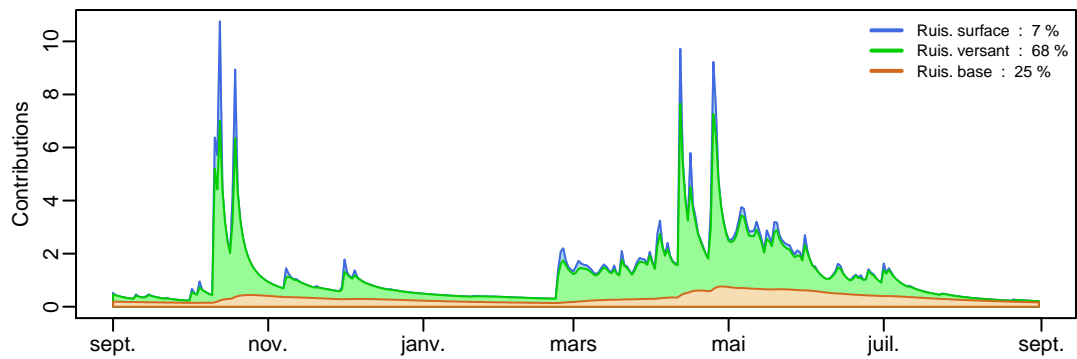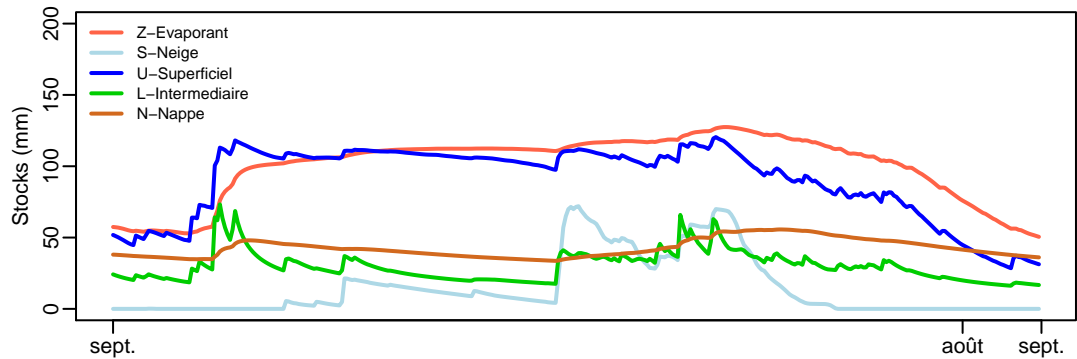

# castih (656.22 km²) – année 1989–1990

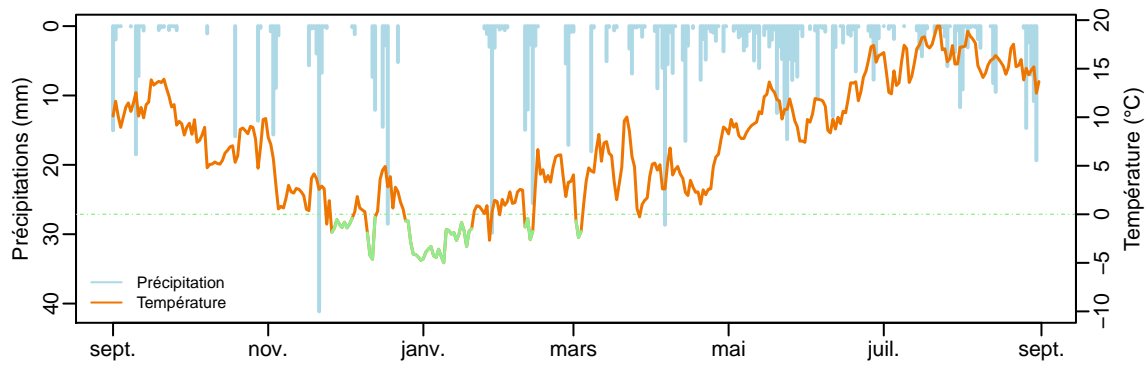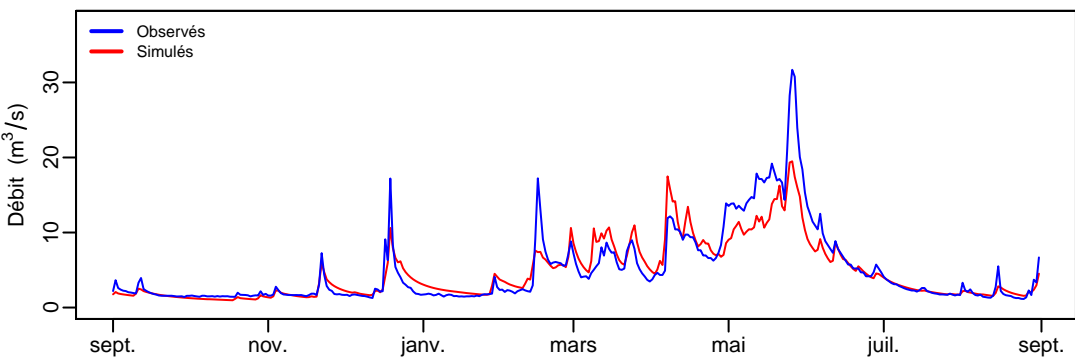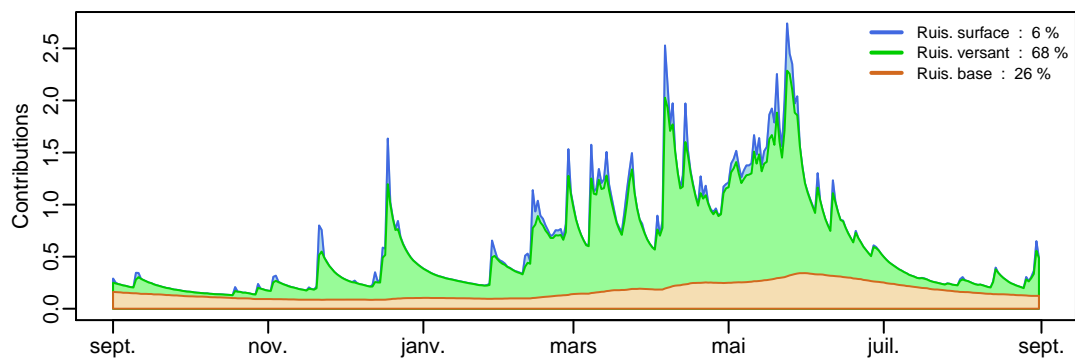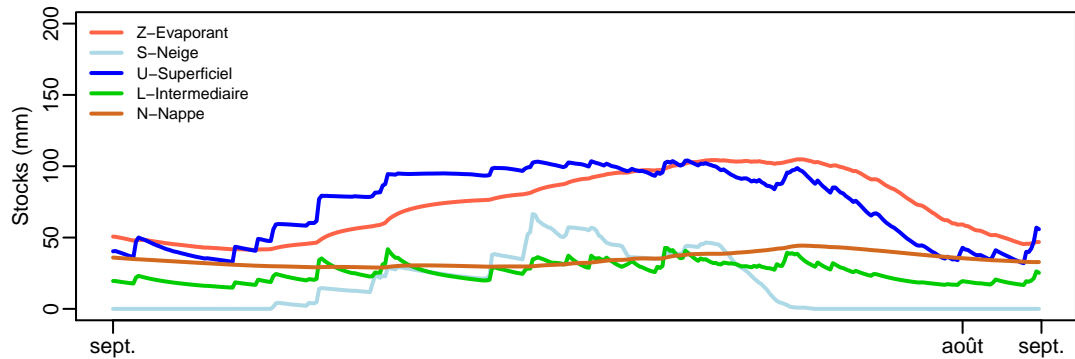

# castih (656.22 km²) – année 1990–1991

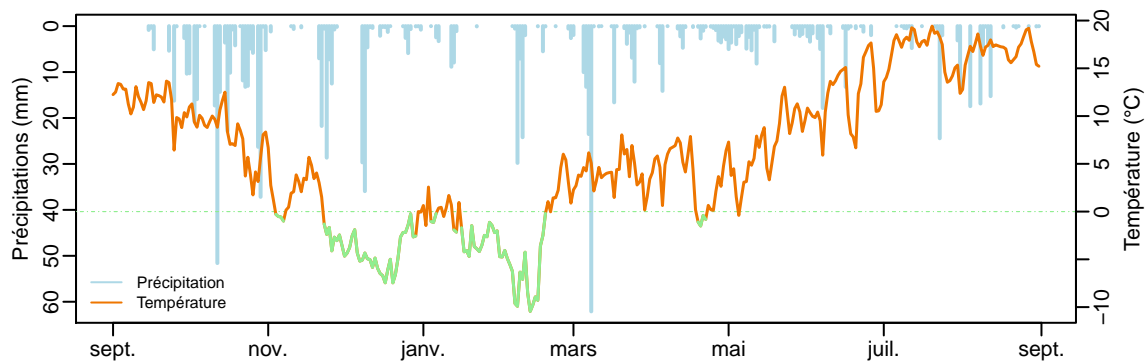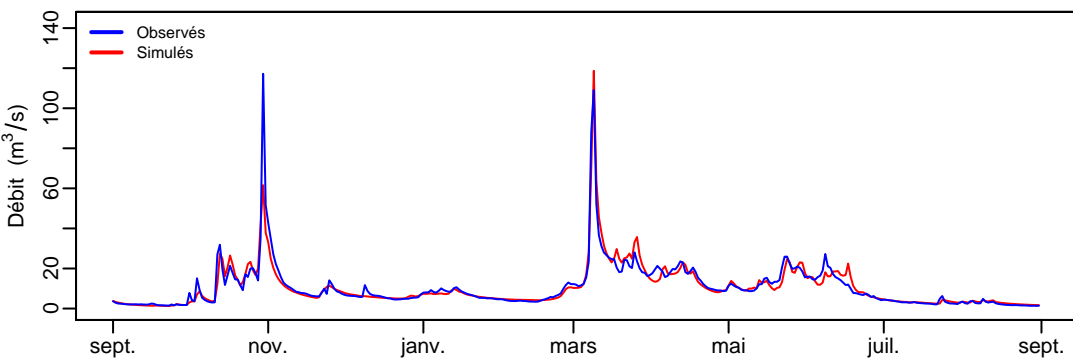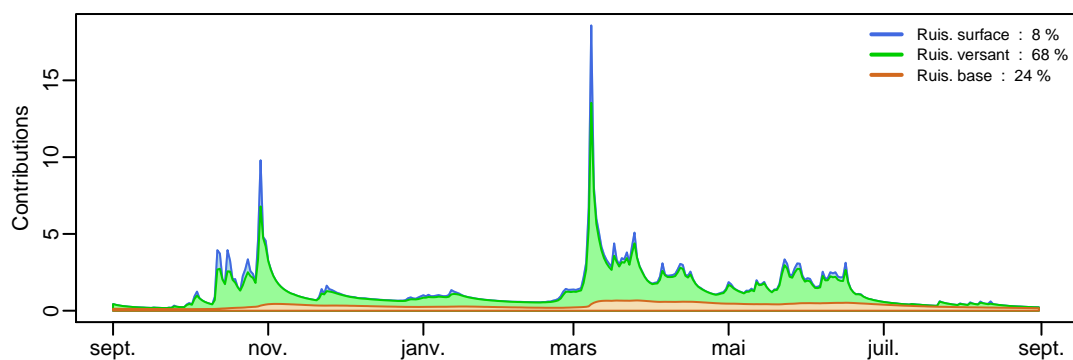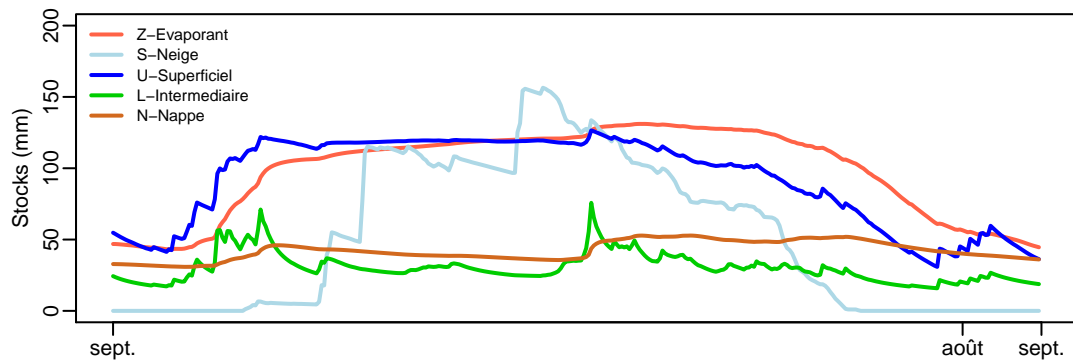

# castih (656.22 km²) – année 1991–1992

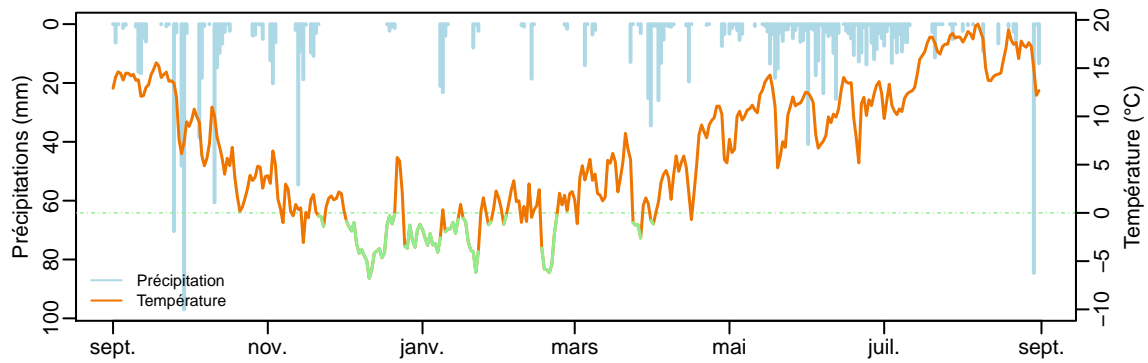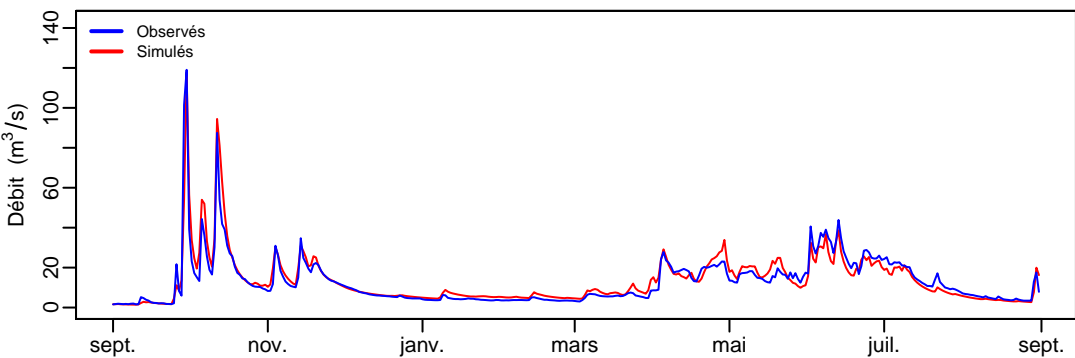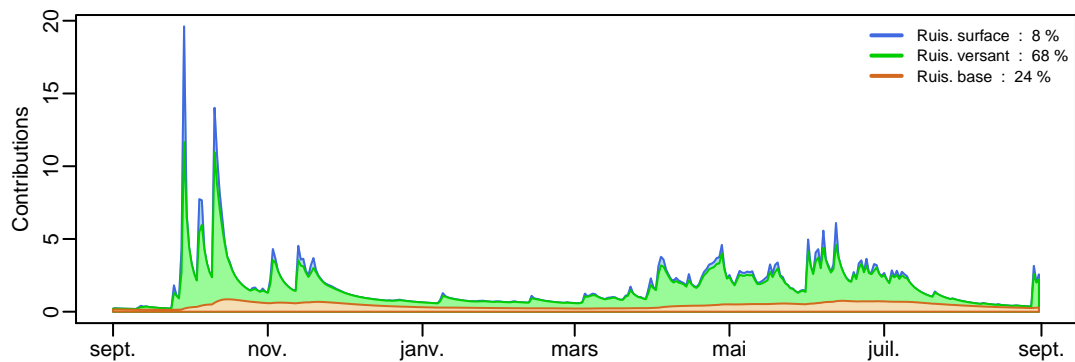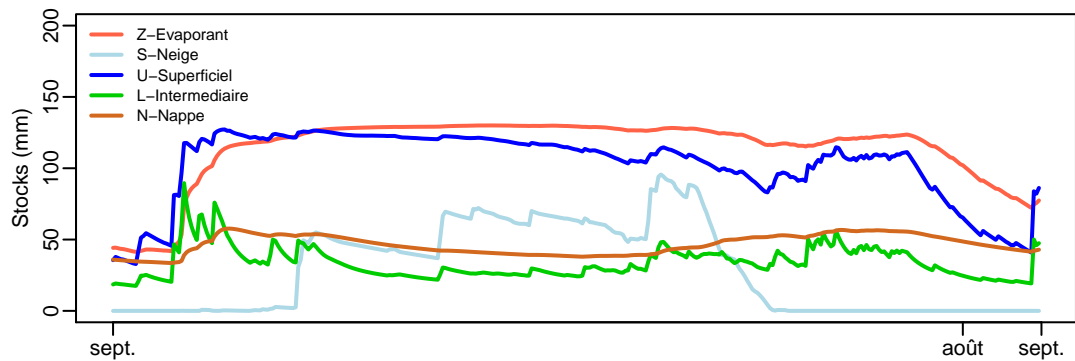

# castih (656.22 km²) – année 1992–1993

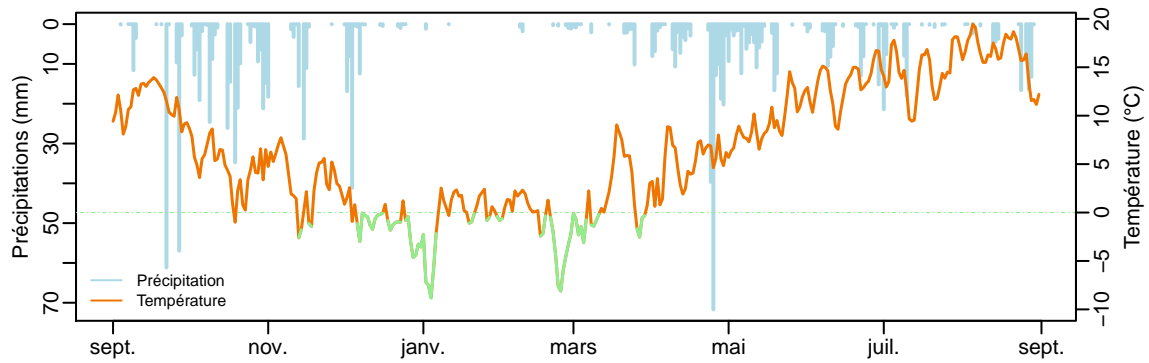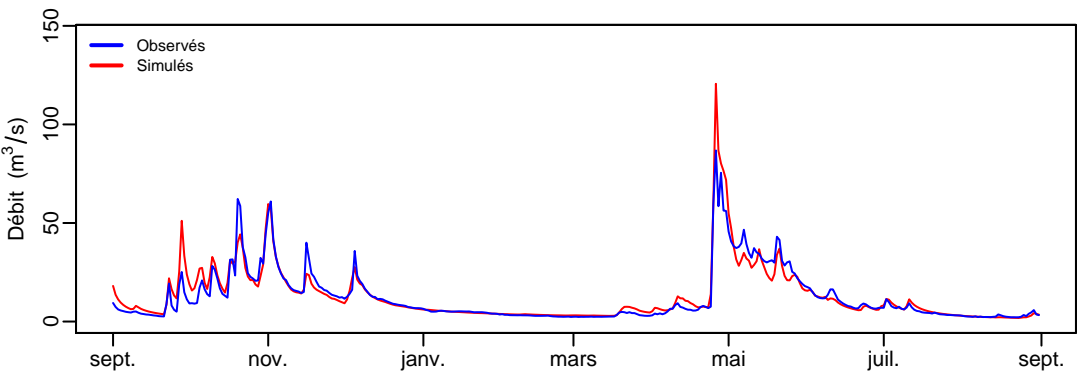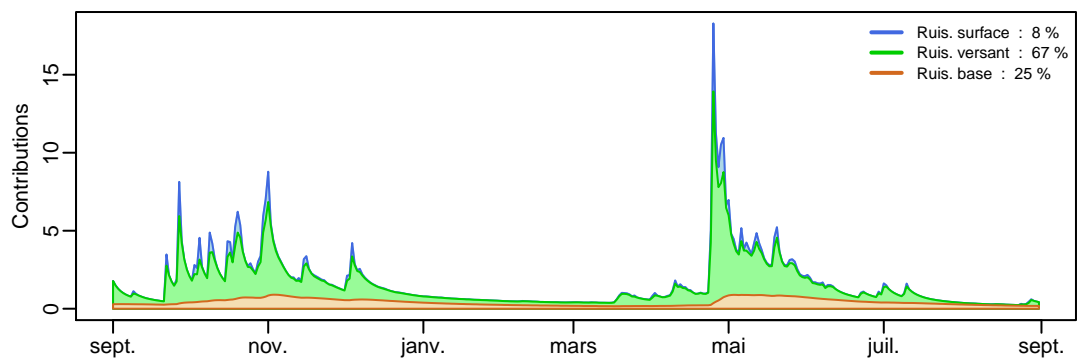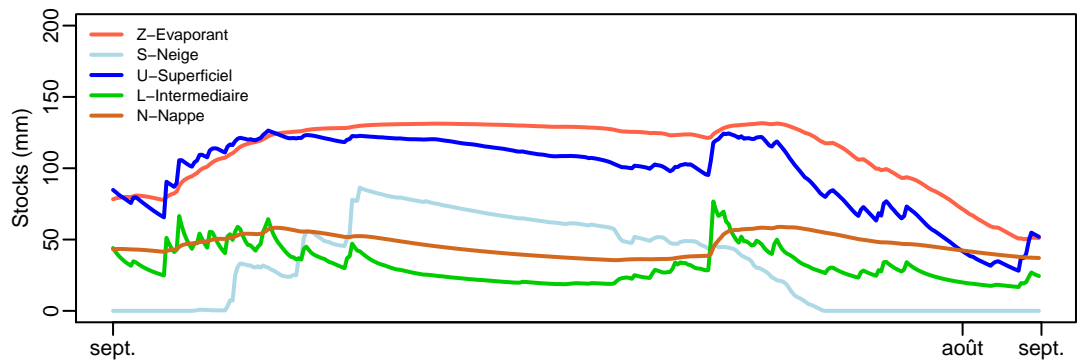



castih (656.22 km²) – année 1993–1994

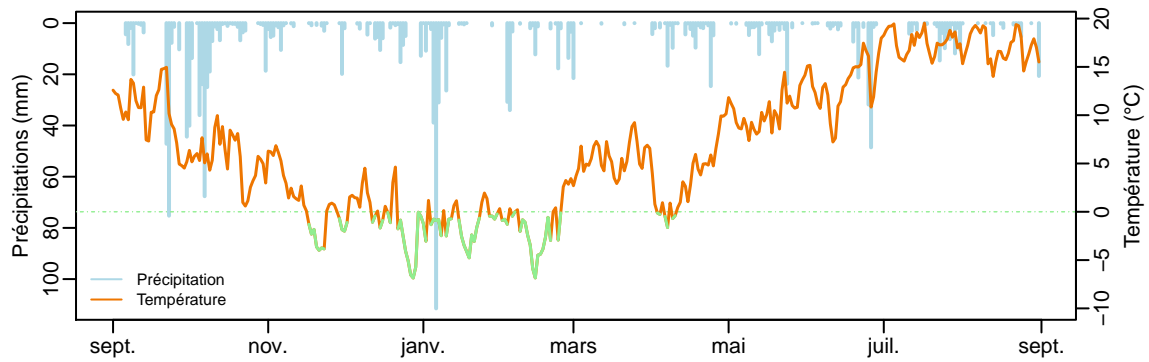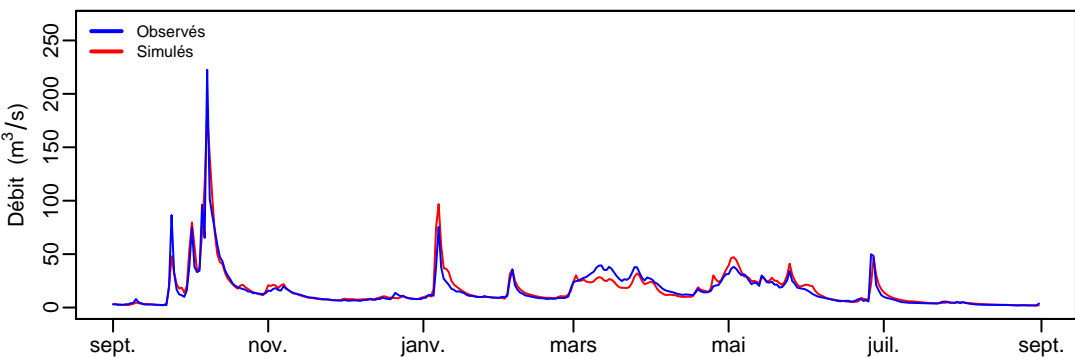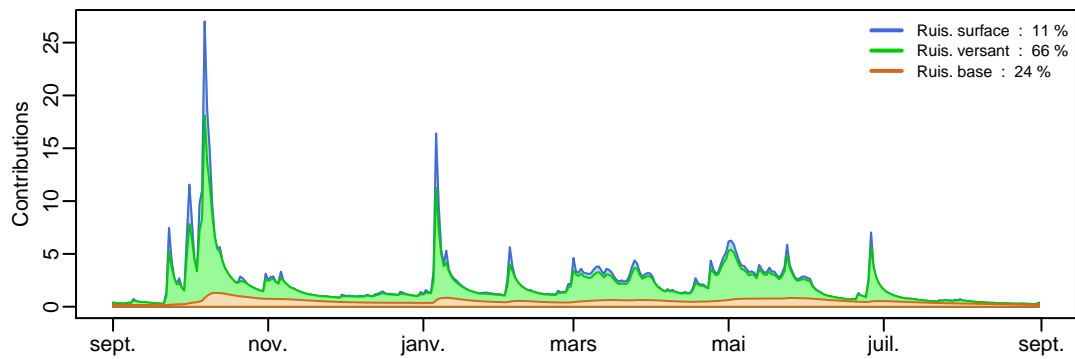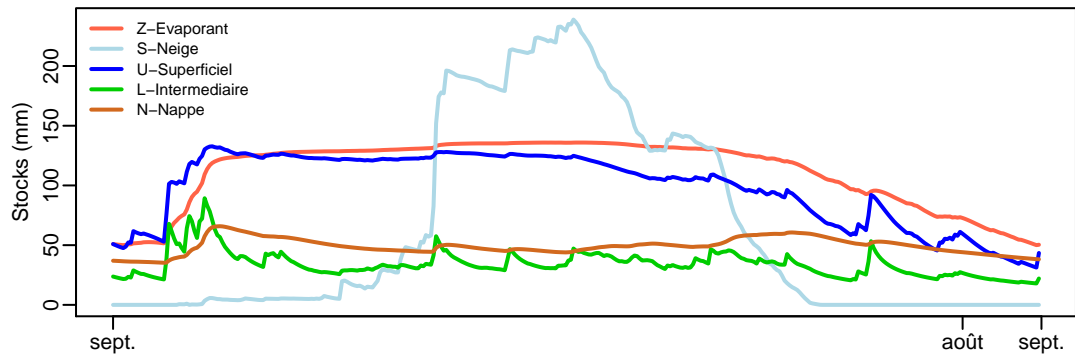

# castih (656.22 km<sup>2</sup>) – année 1994–1995

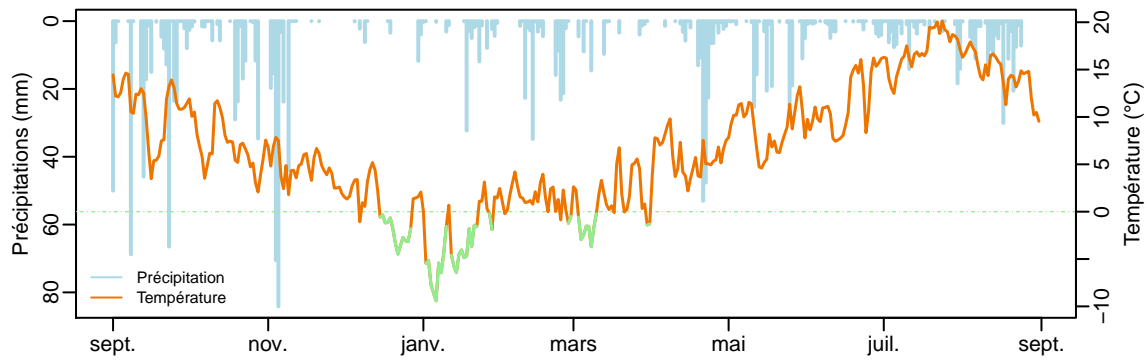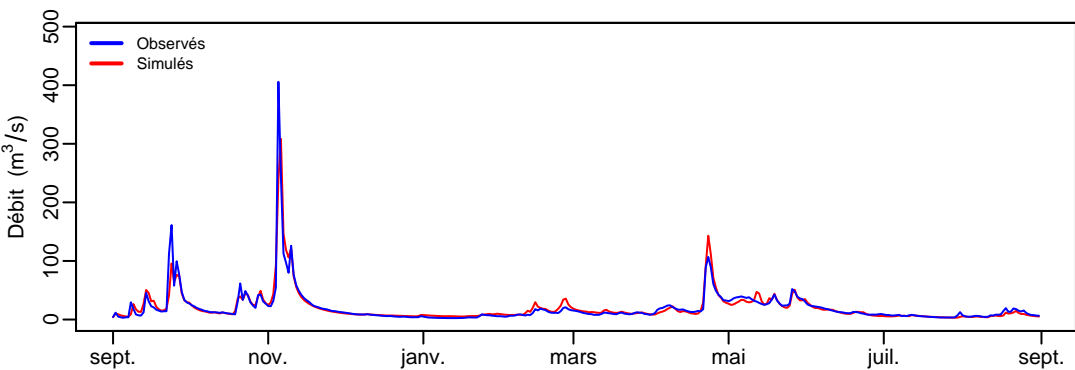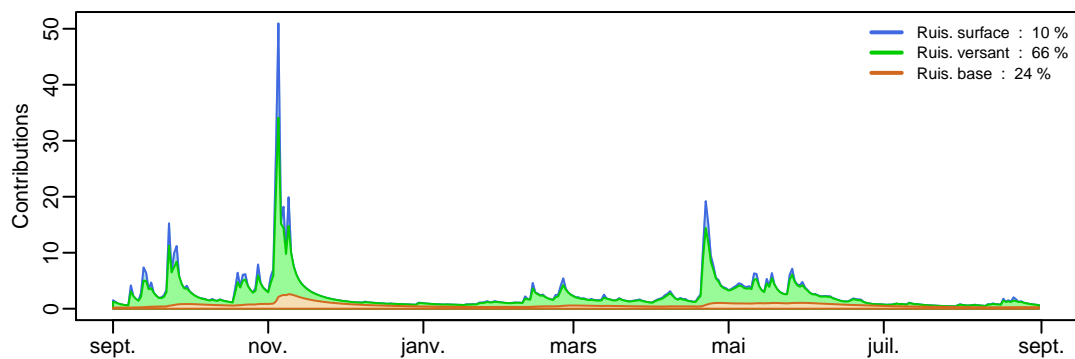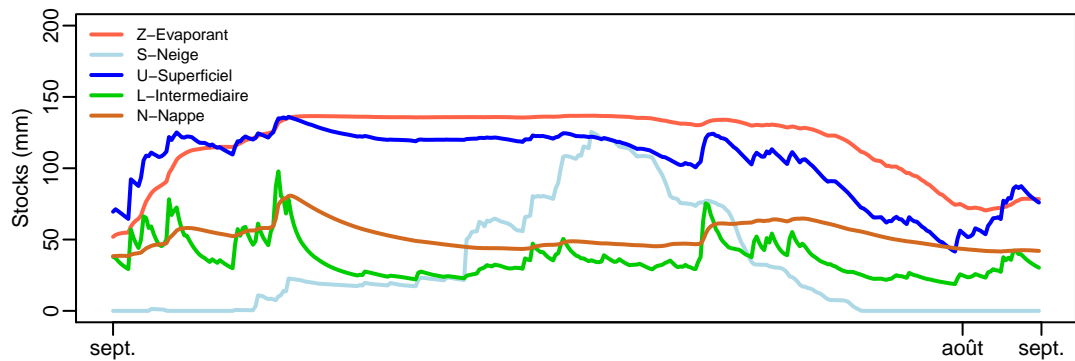

# castih (656.22 km²) – année 1995–1996

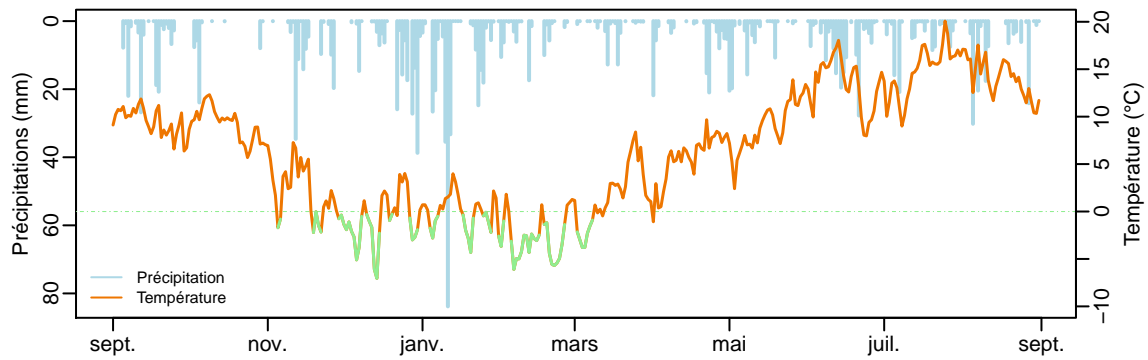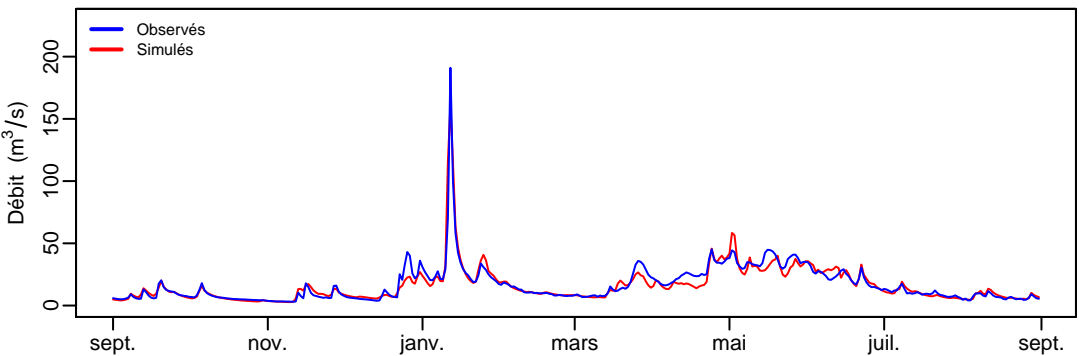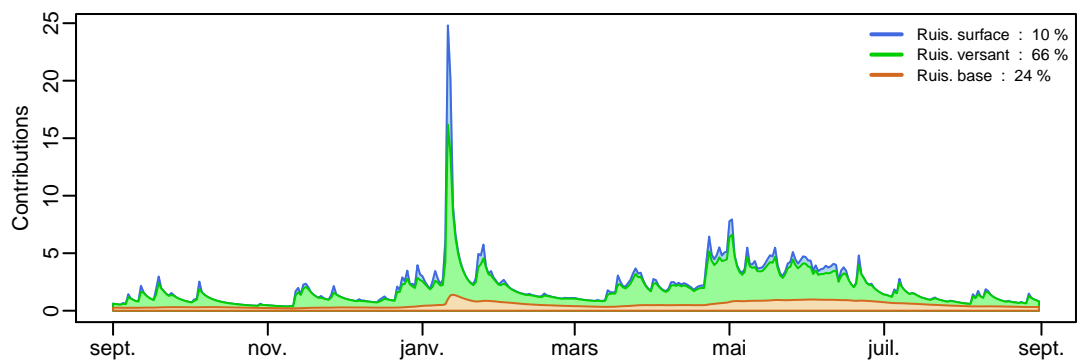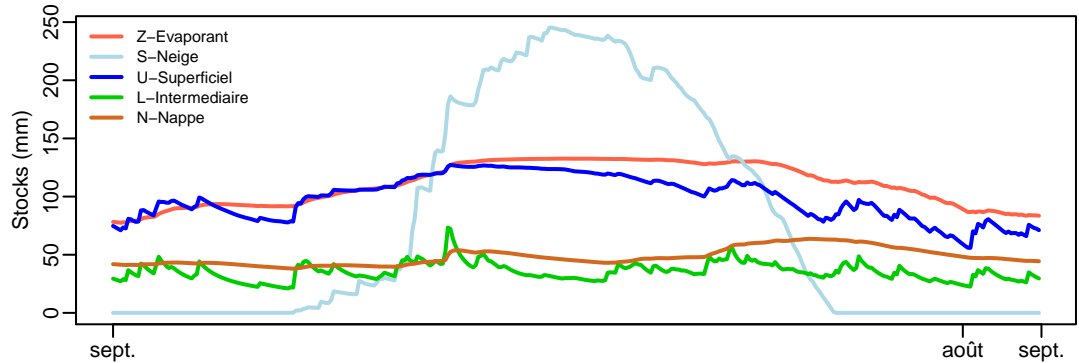

# castih (656.22 km²) – année 1996–1997

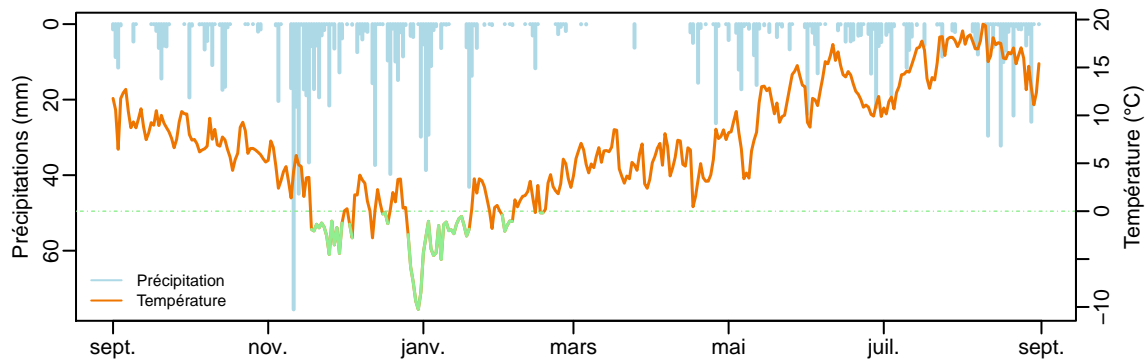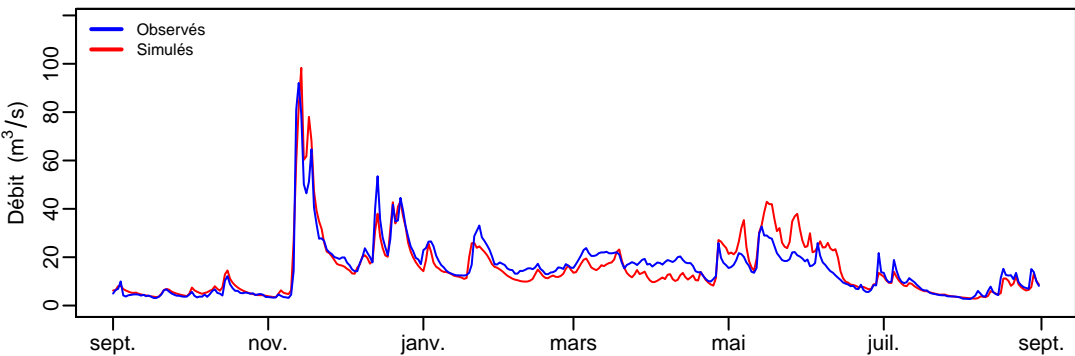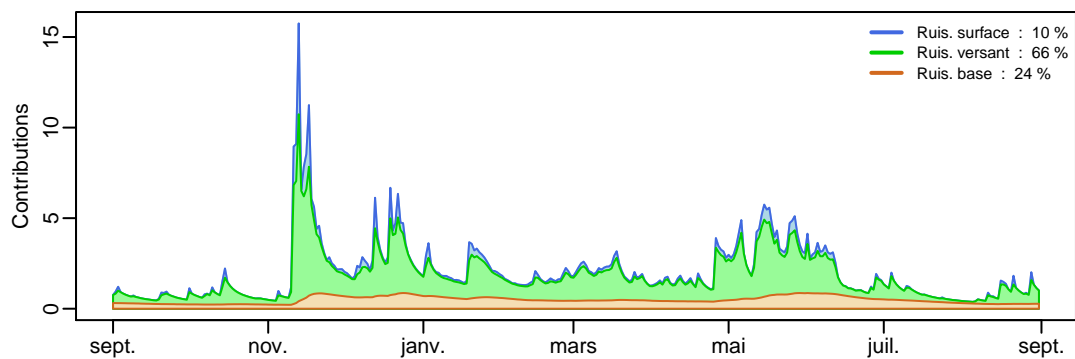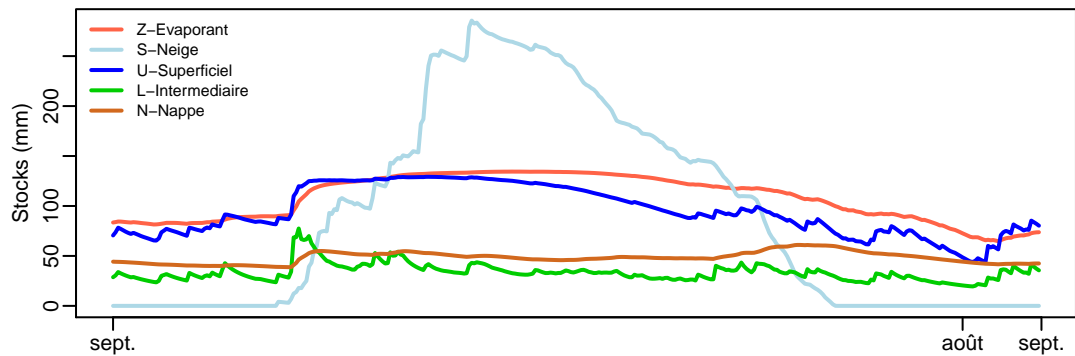

# castih (656.22 km<sup>2</sup>) – année 1997–1998

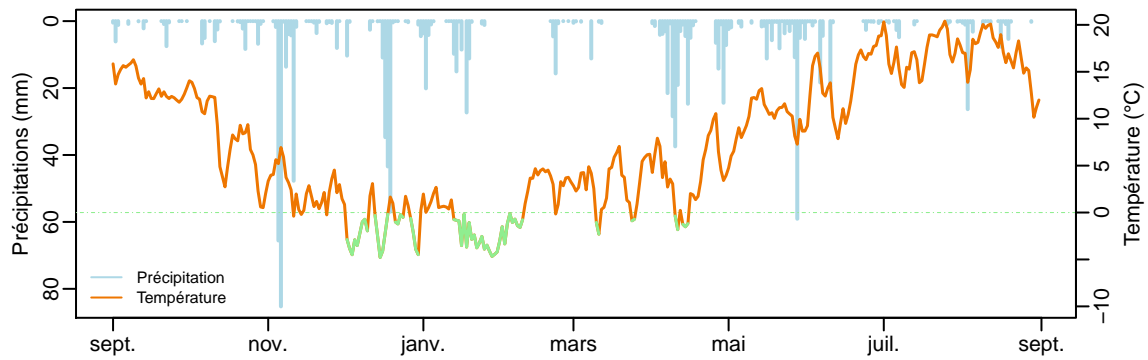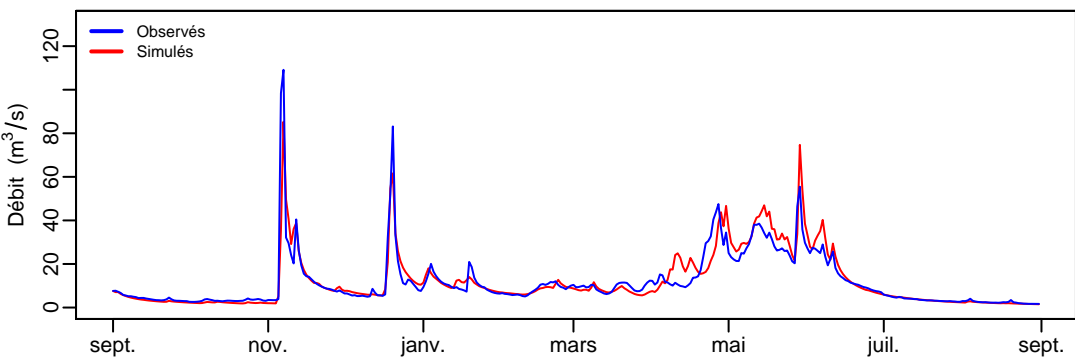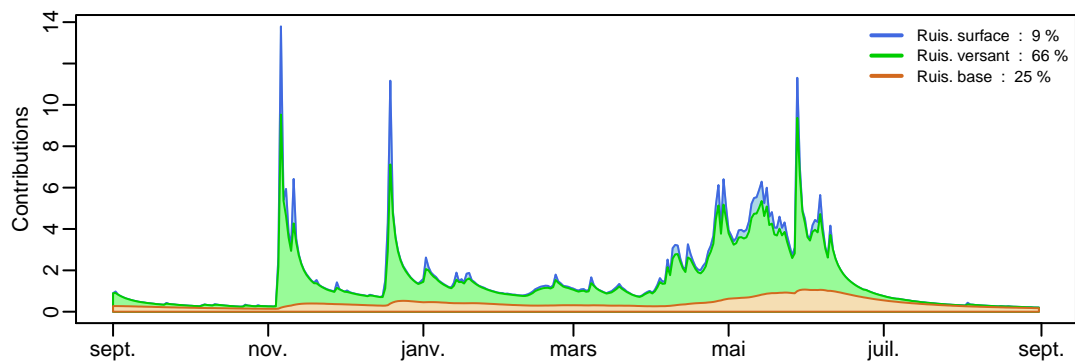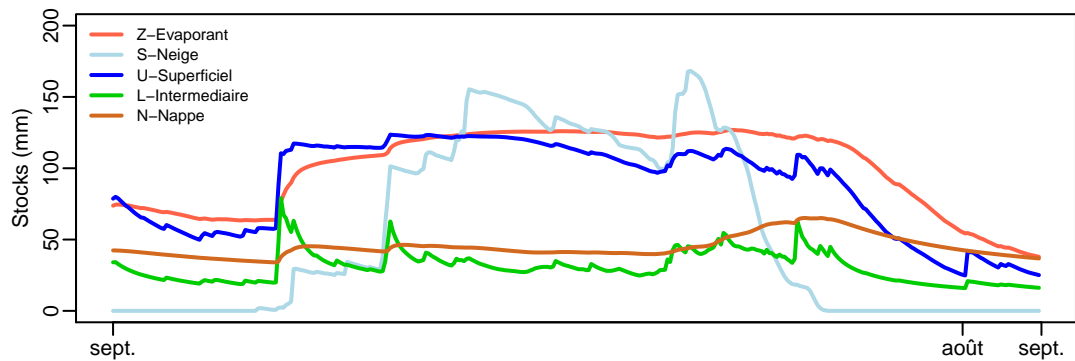

# castih (656.22 km²) – année 1998–1999

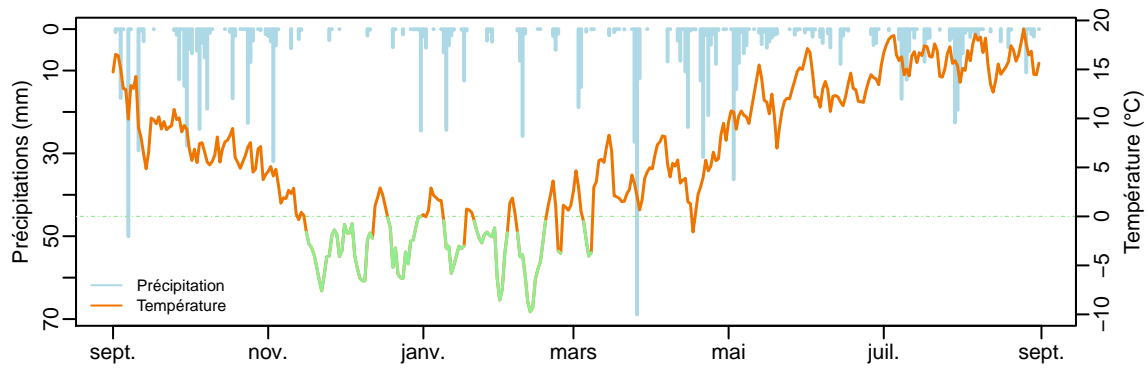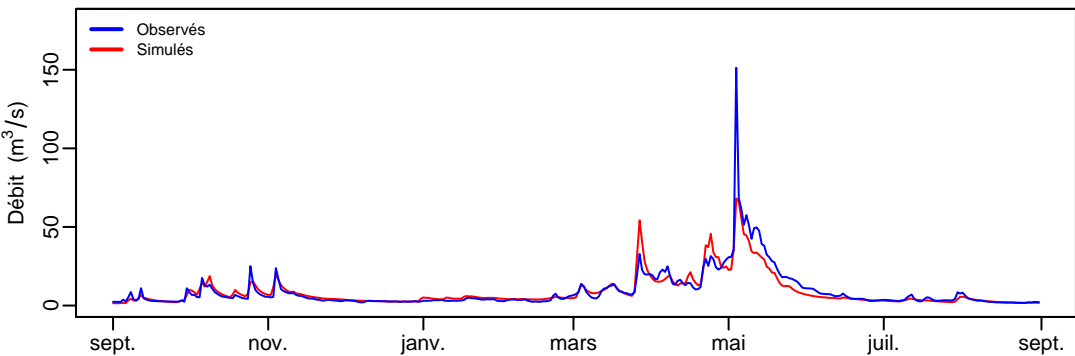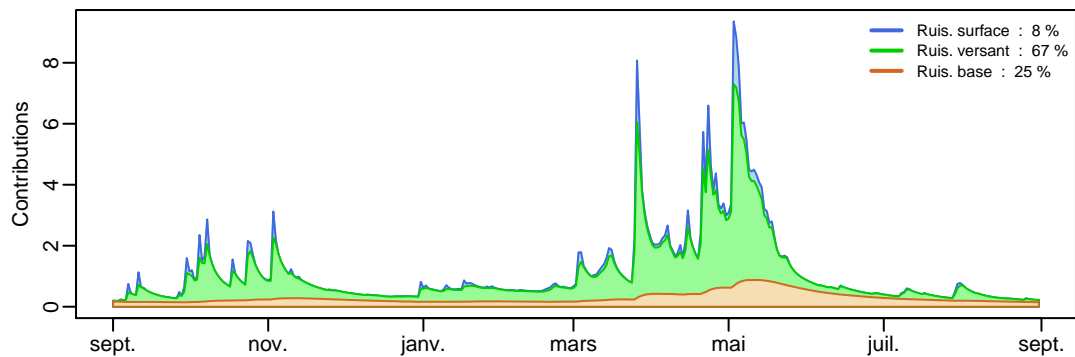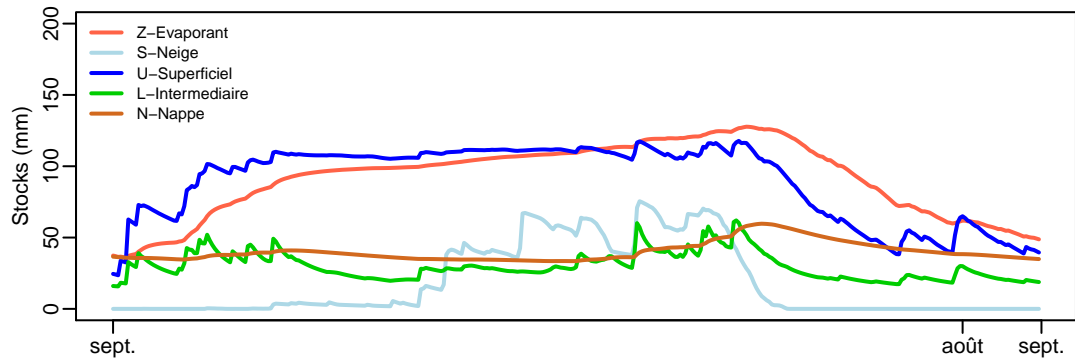

castih (656.22 km<sup>2</sup>) – année 1999–2000

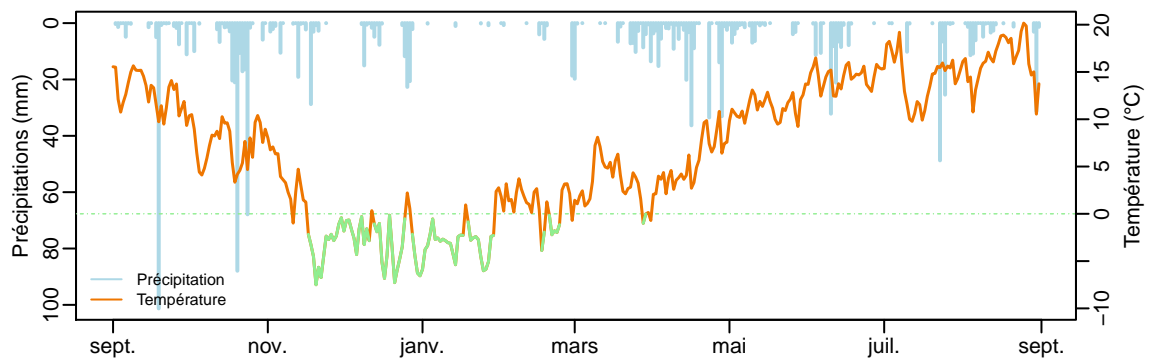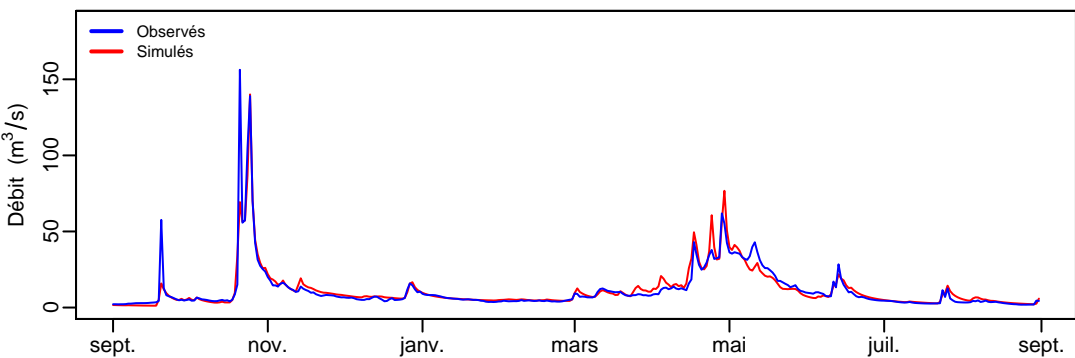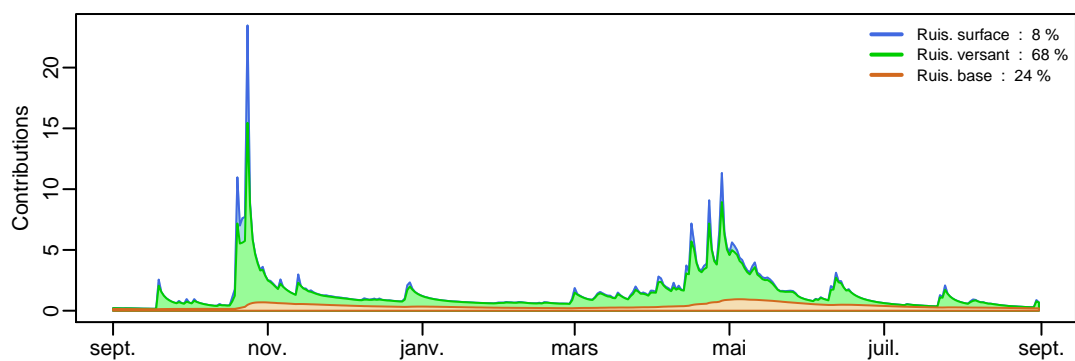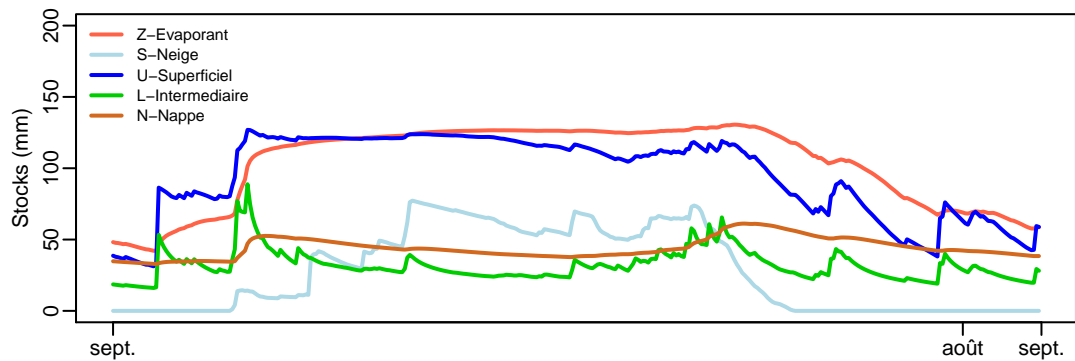

# castih (656.22 km²) – année 2000–2001

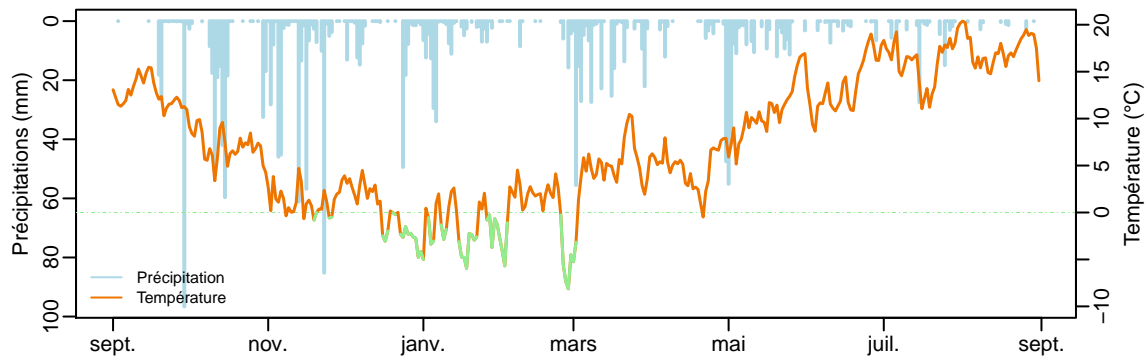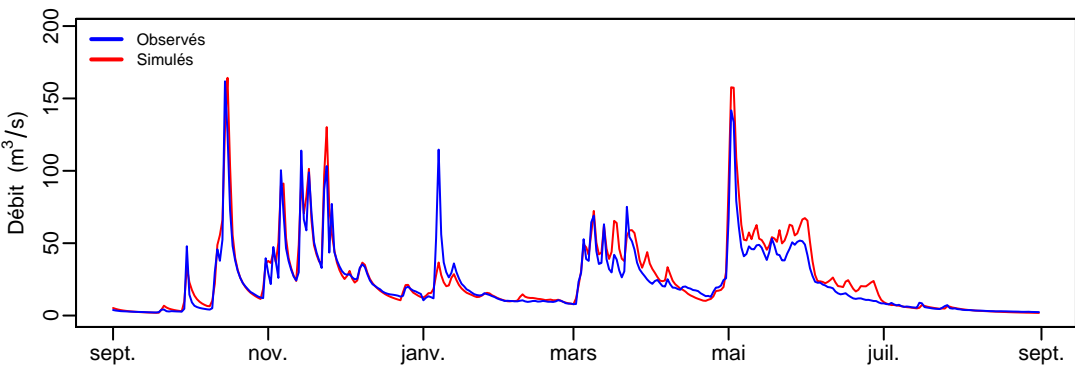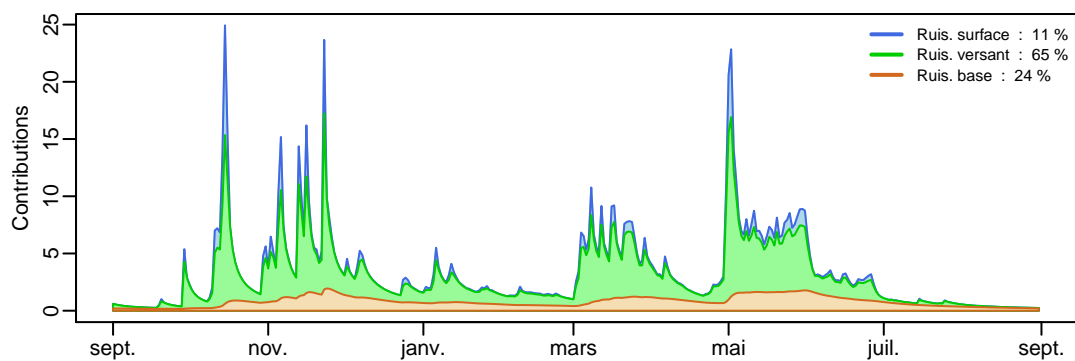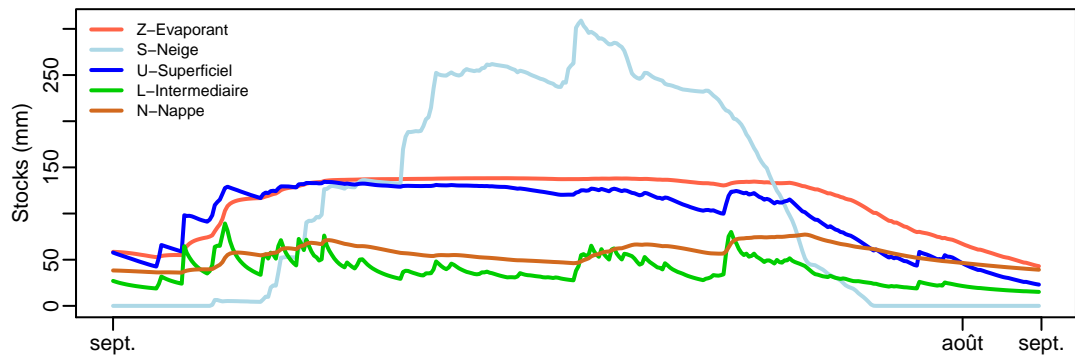



# castih (656.22 km²) – année 2001–2002

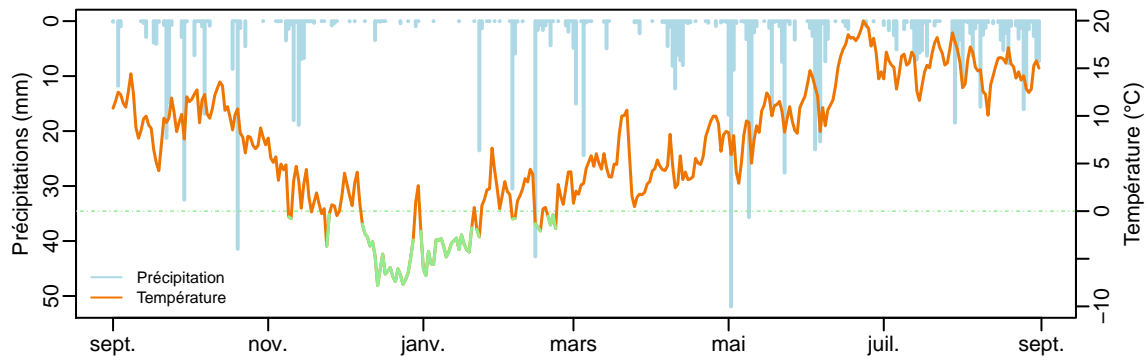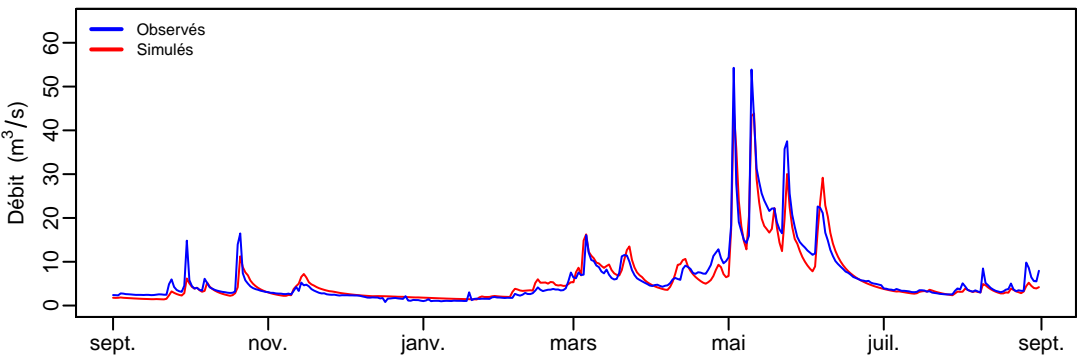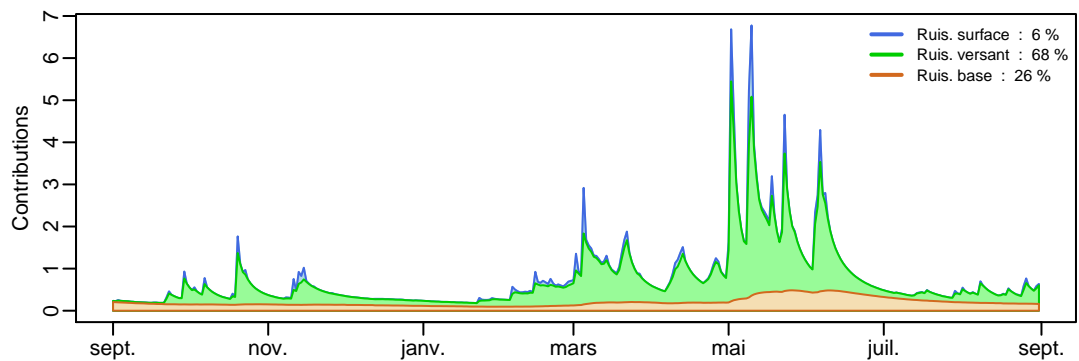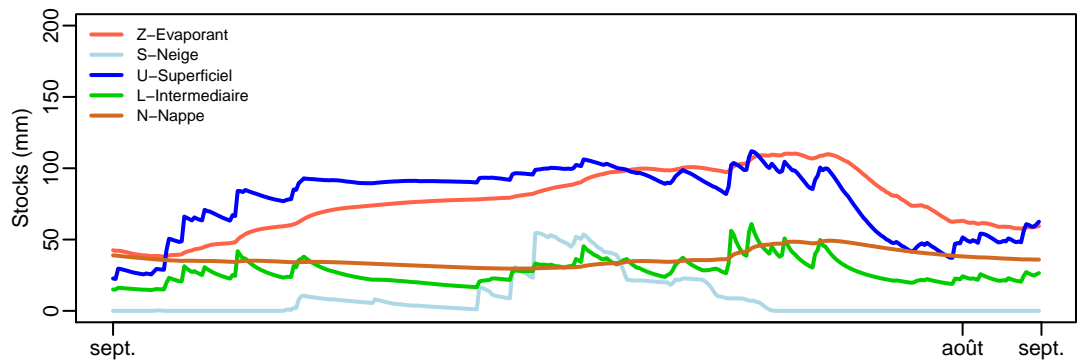

# castih (656.22 km<sup>2</sup>) – année 2002–2003

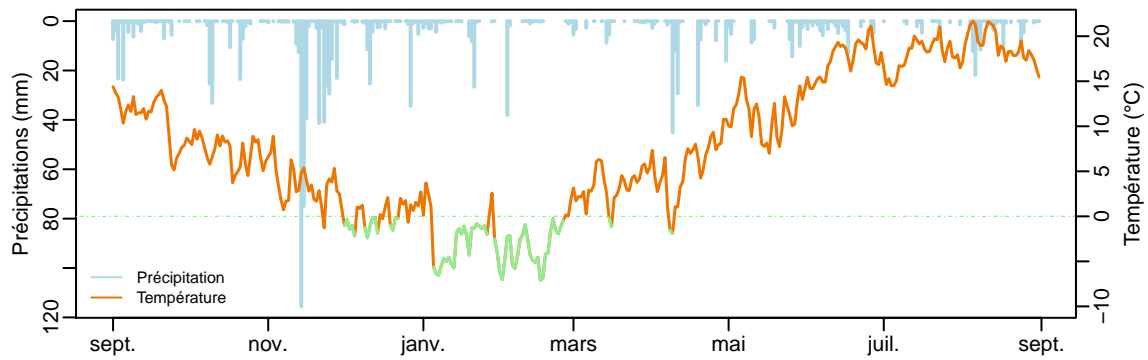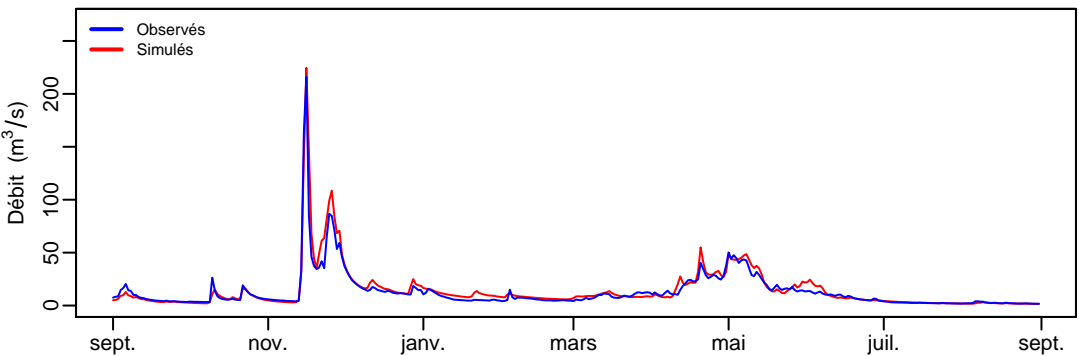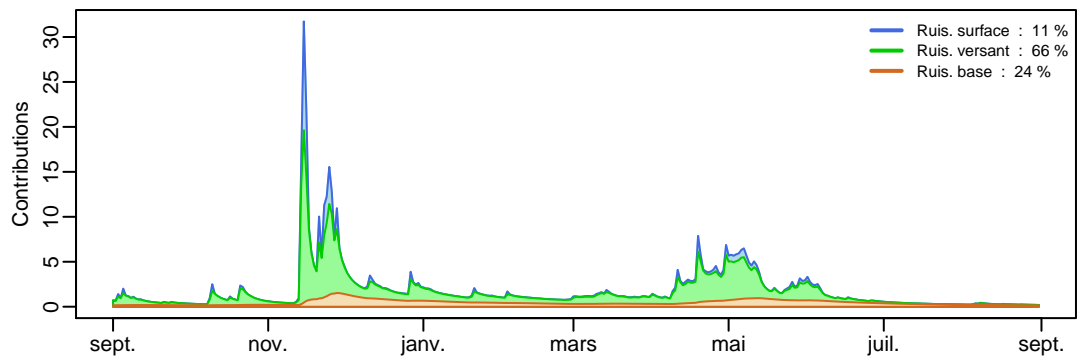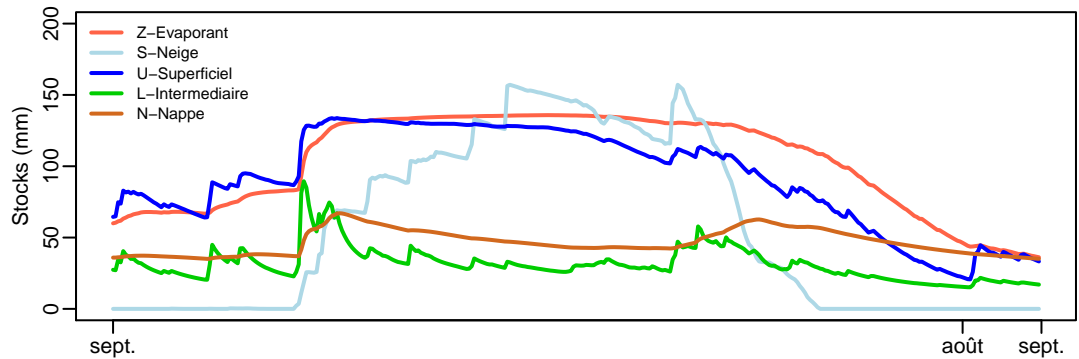

# castih (656.22 km²) – année 2003–2004

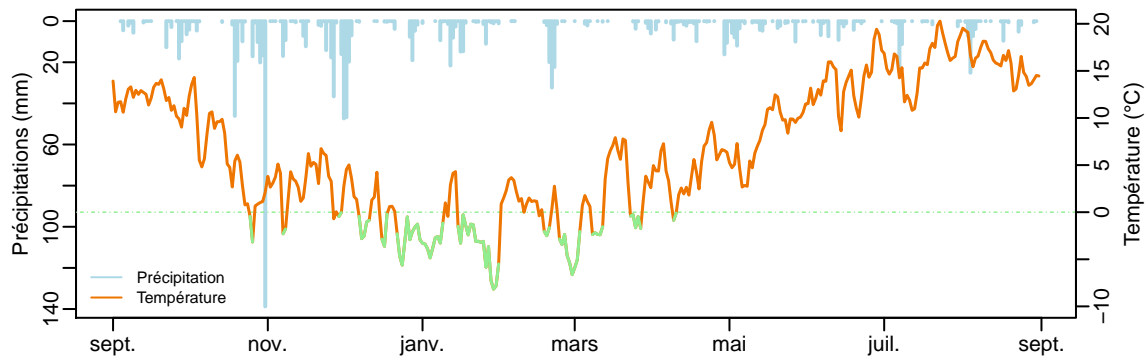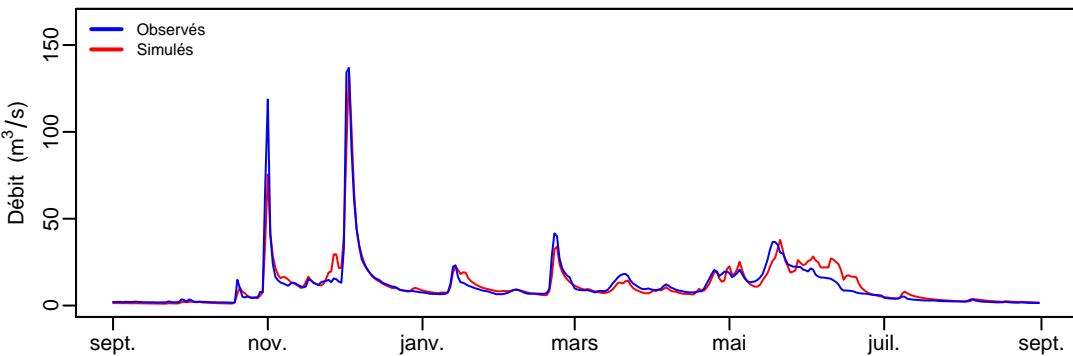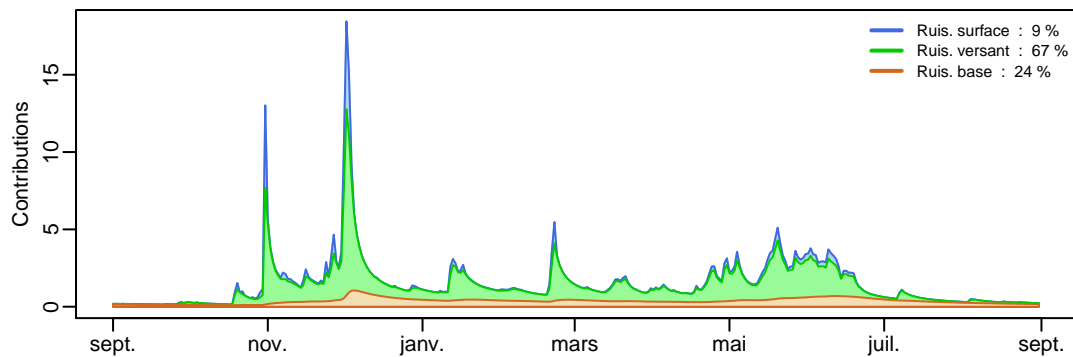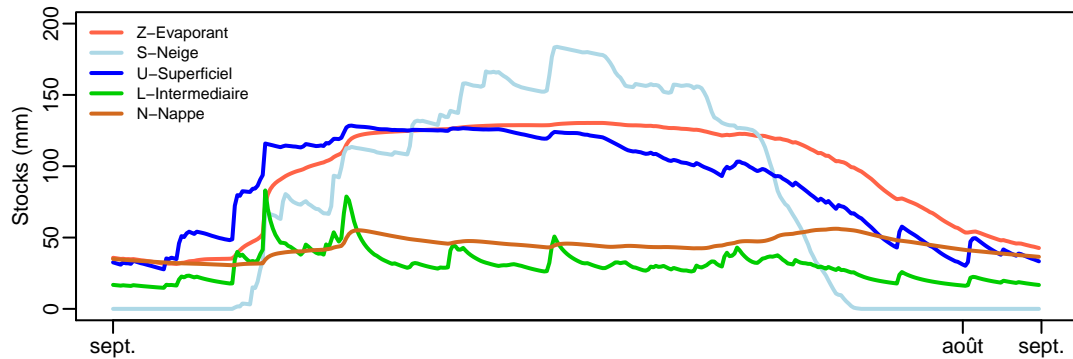

# castih (656.22 km²) – année 2004–2005

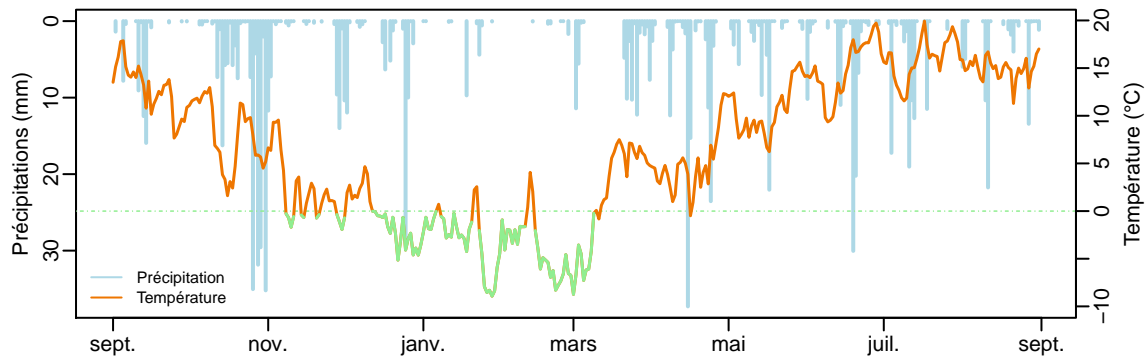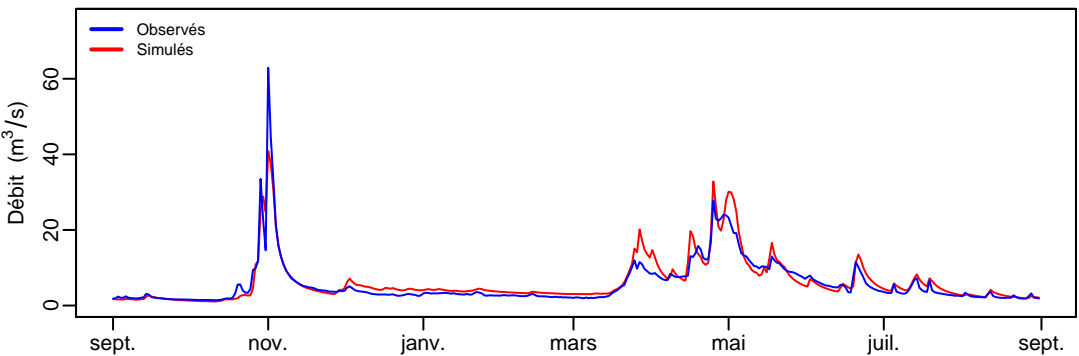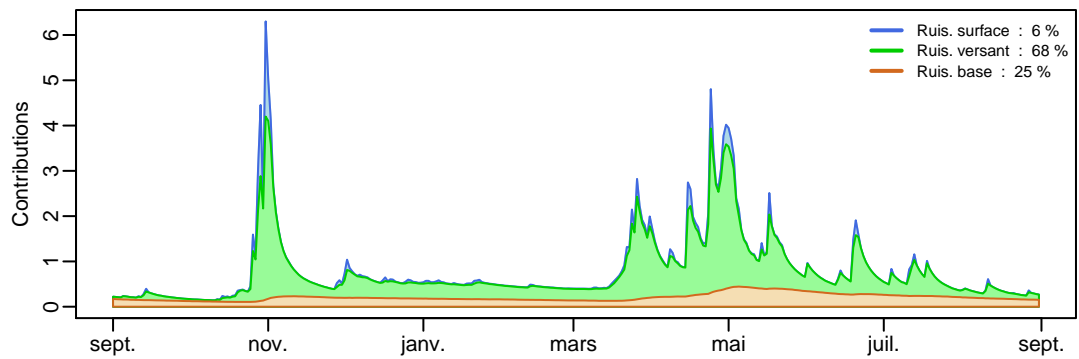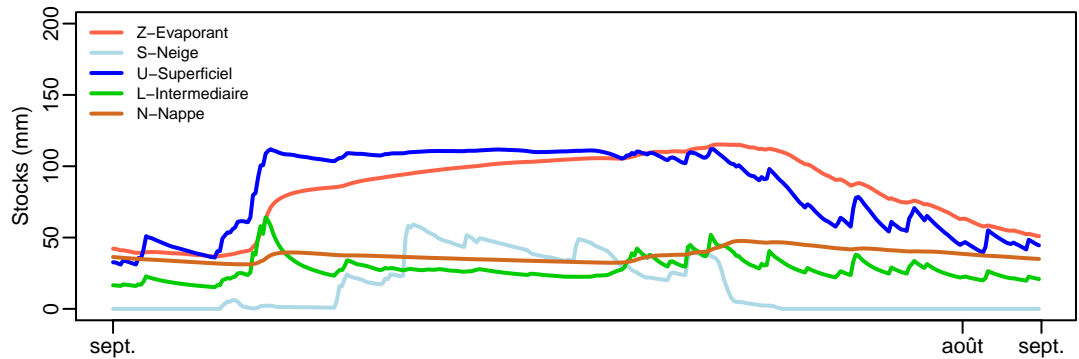

# castih (656.22 km²) – année 2005–2006

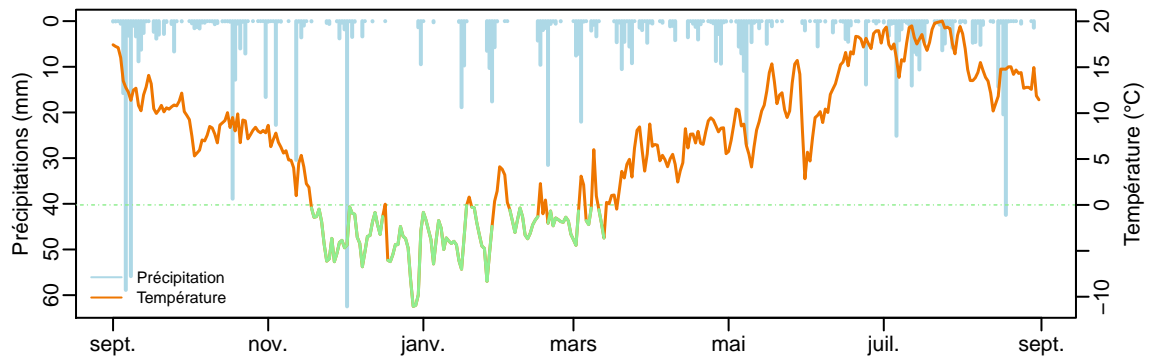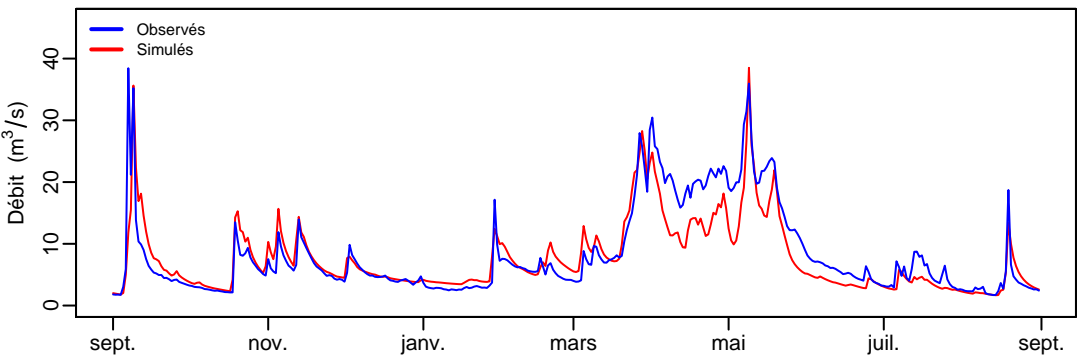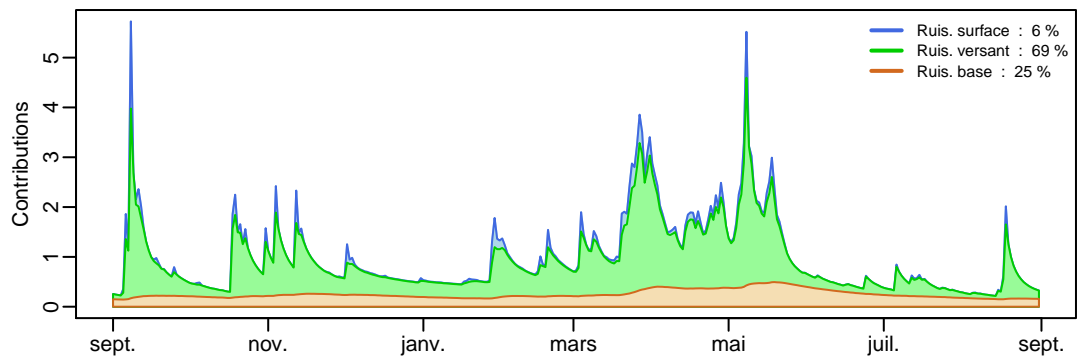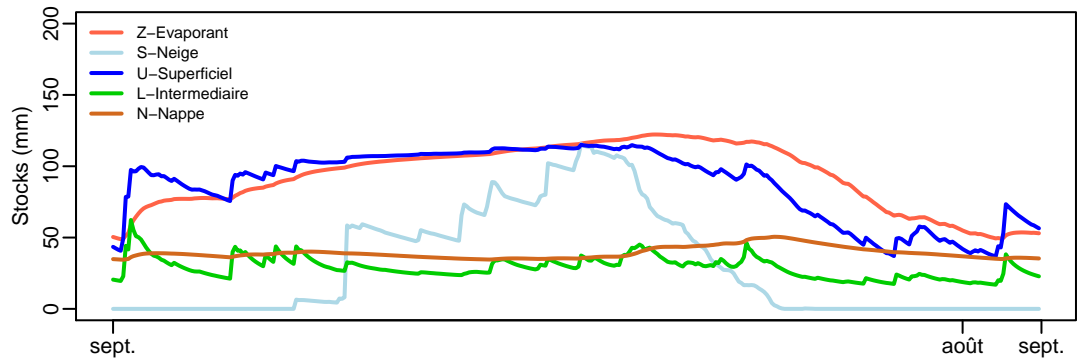

# castih (656.22 km²) – année 2006–2007

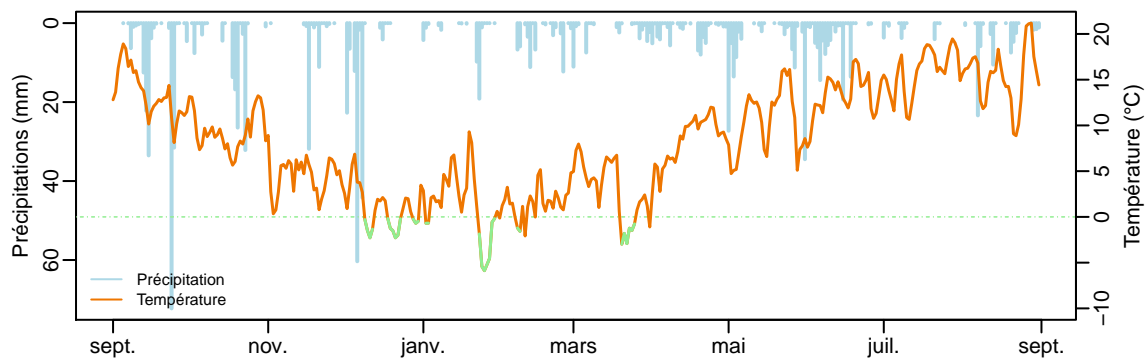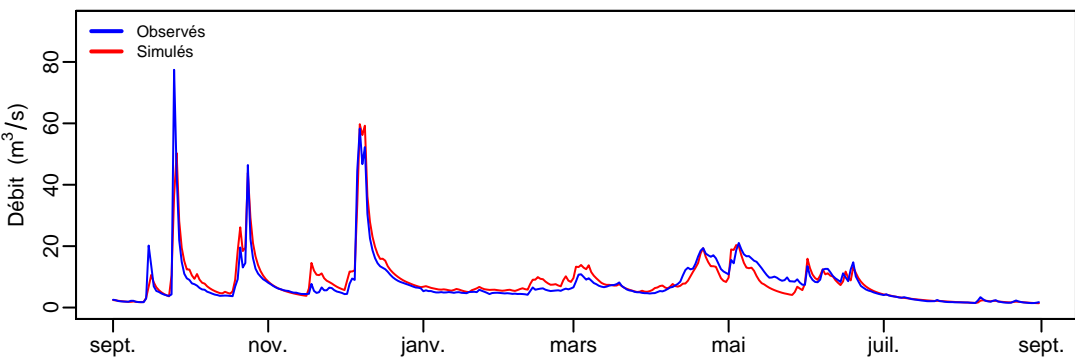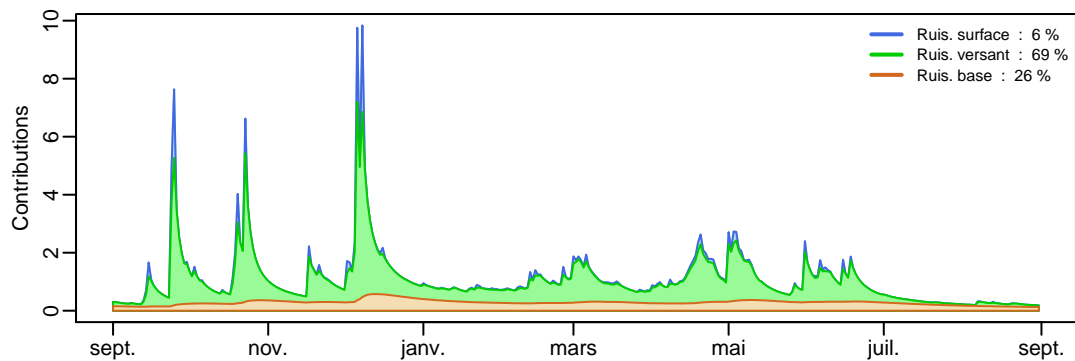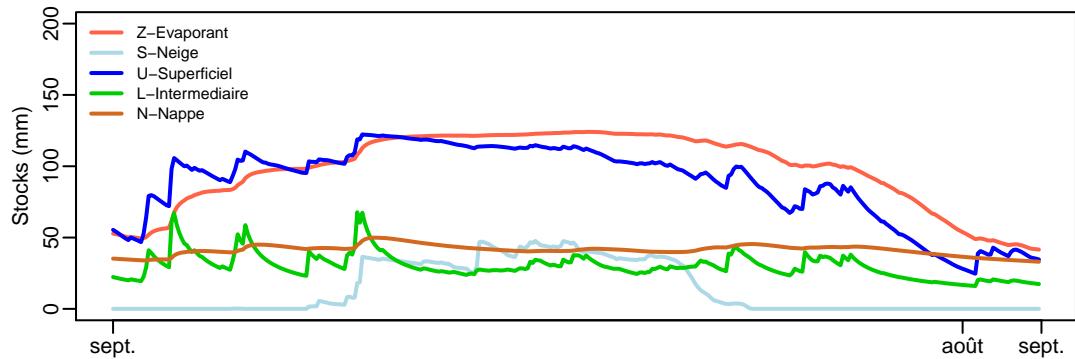

# castih (656.22 km²) – année 2007–2008

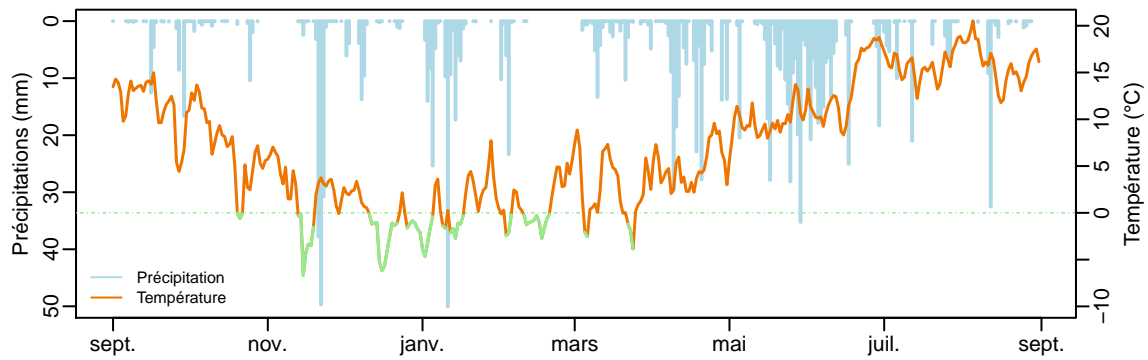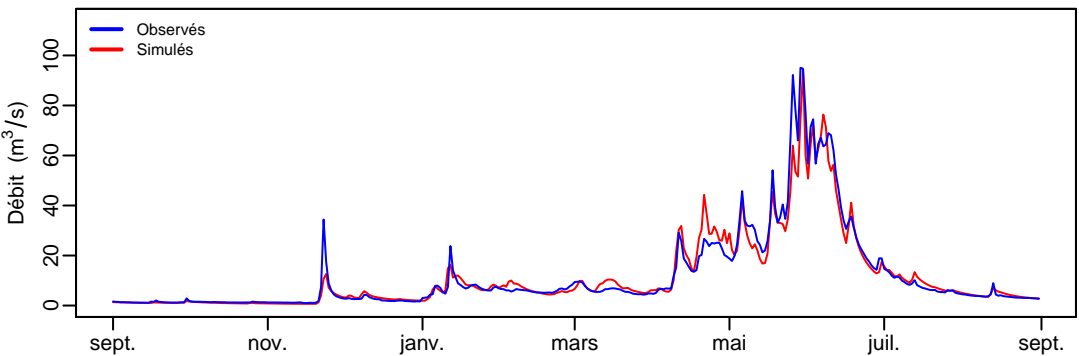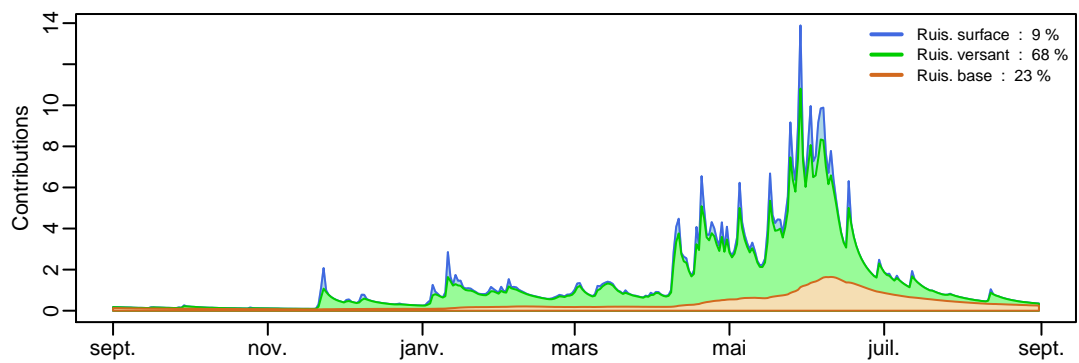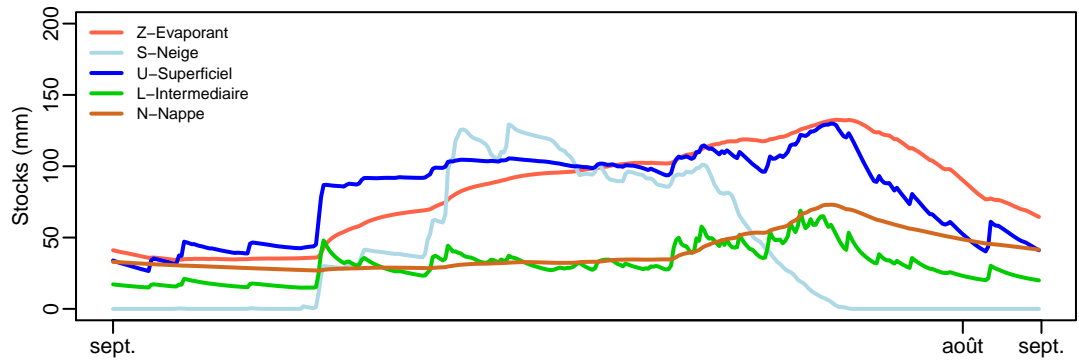

# castih (656.22 km²) – année 2008–2009

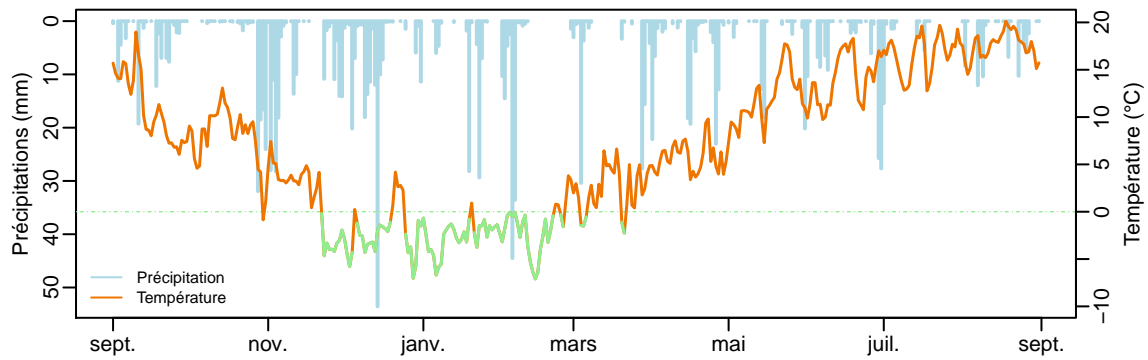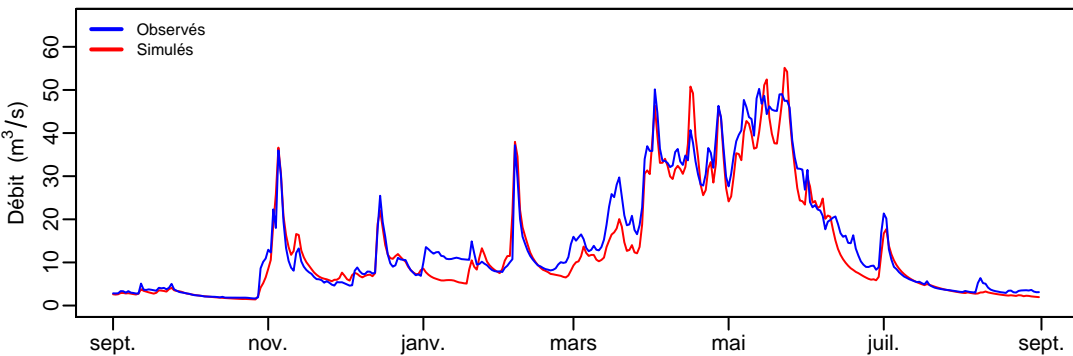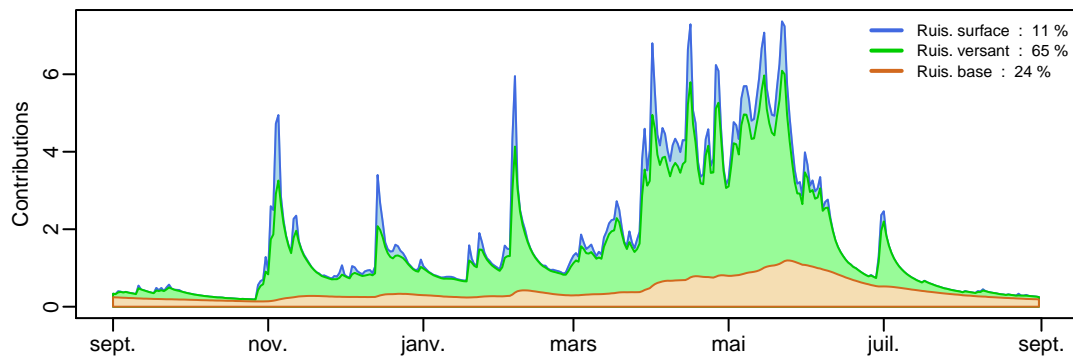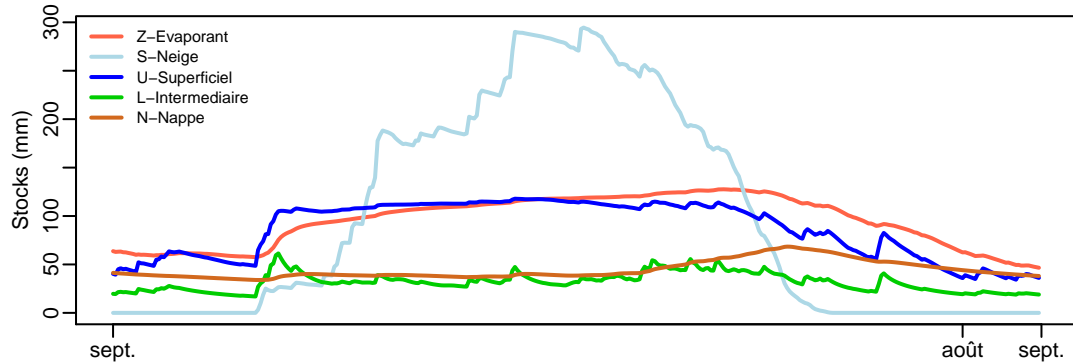



# castih (656.22 km²) – année 2009–2010

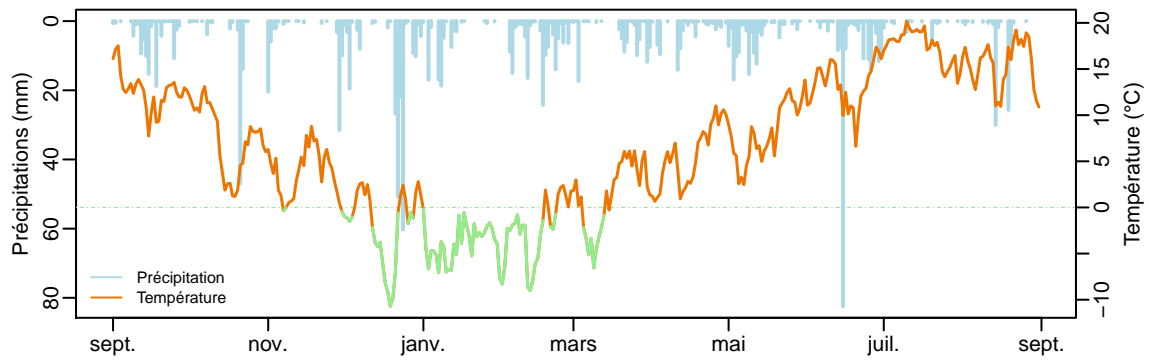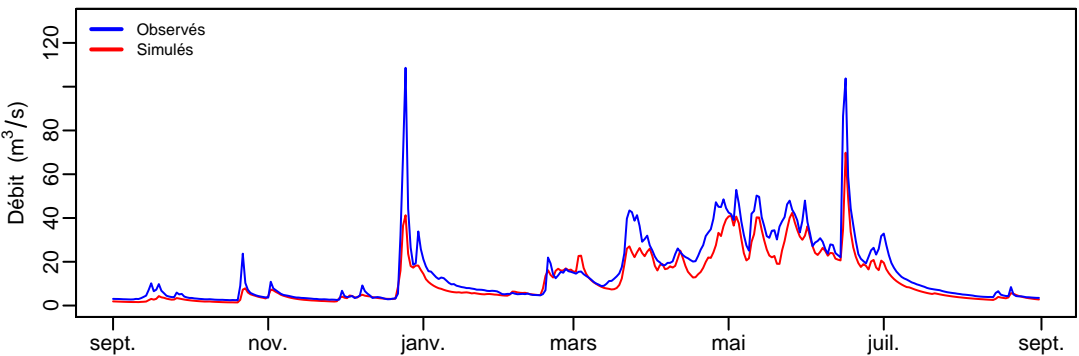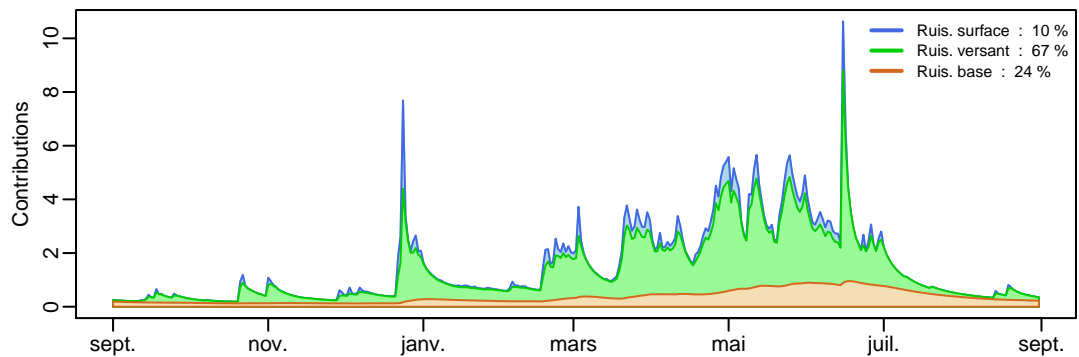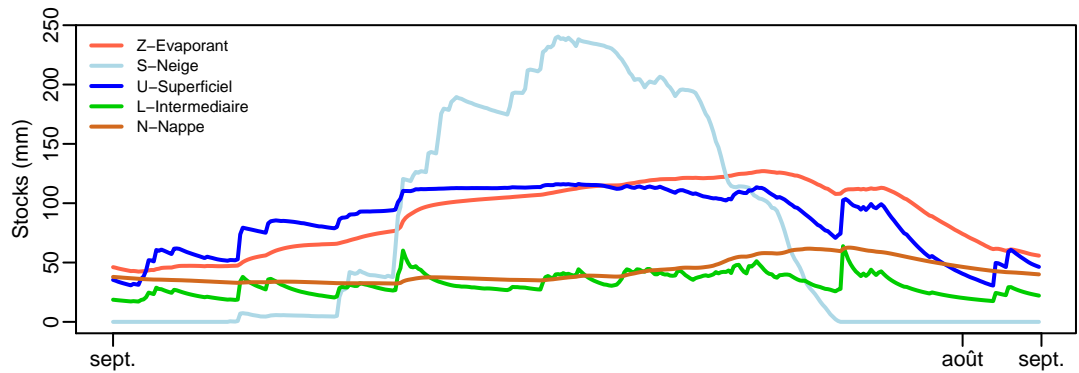

# castih (656.22 km<sup>2</sup>) – année 2010–2011

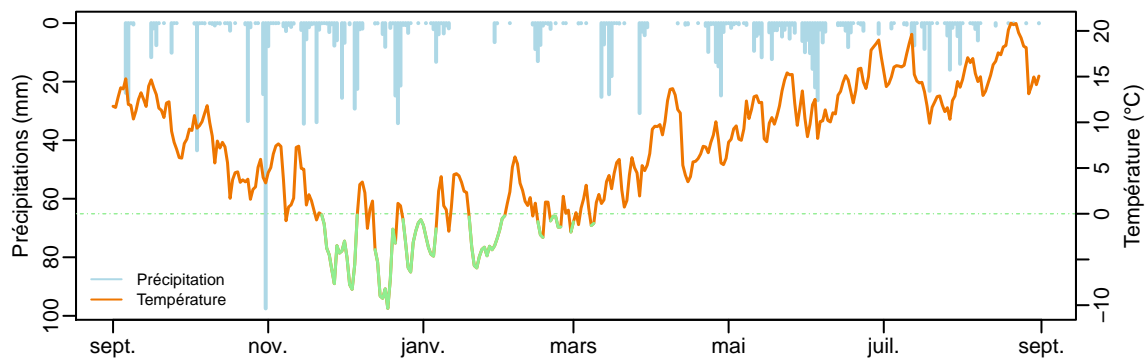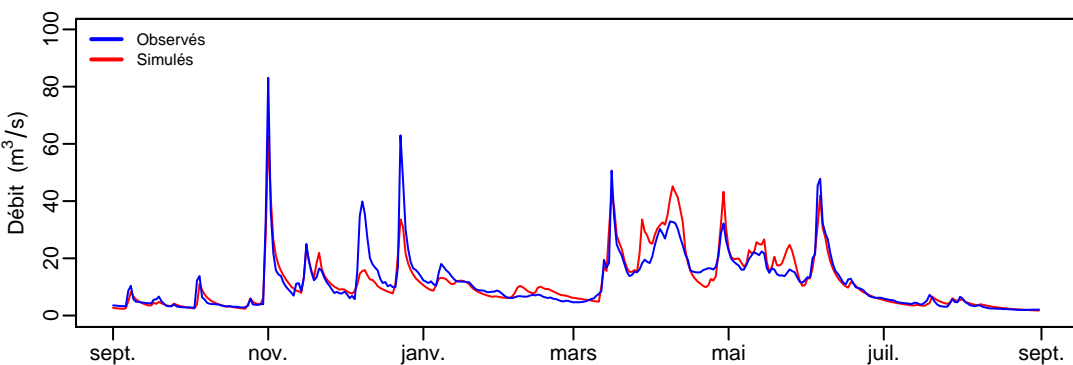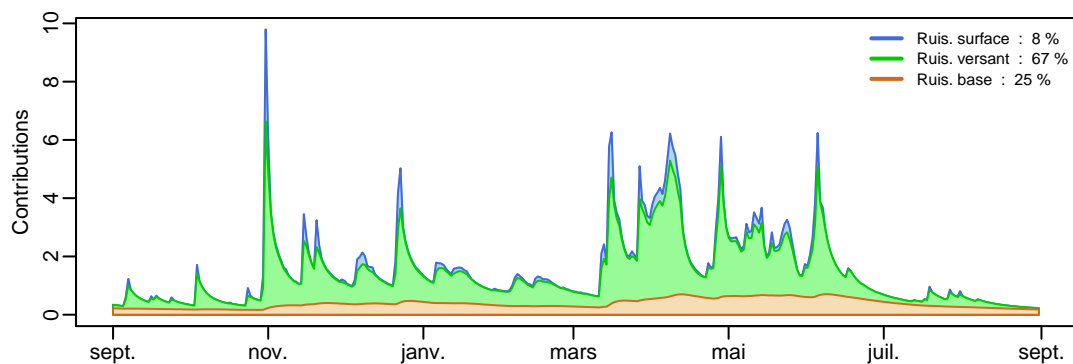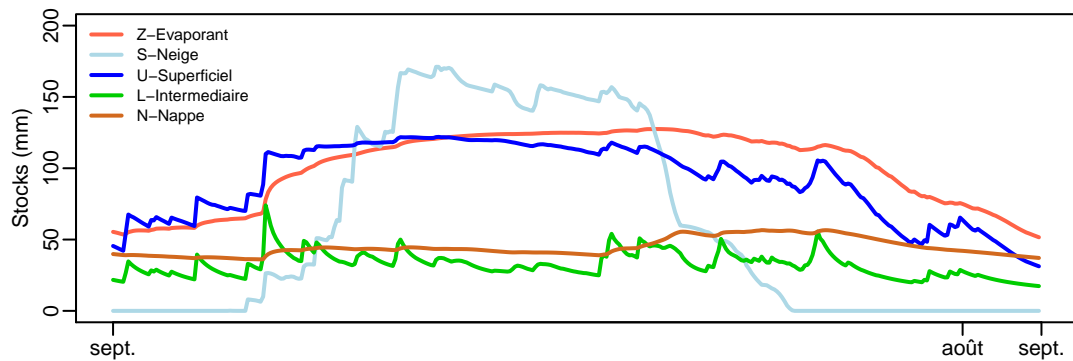

castih (656.22 km<sup>2</sup>) – année 2011–2012

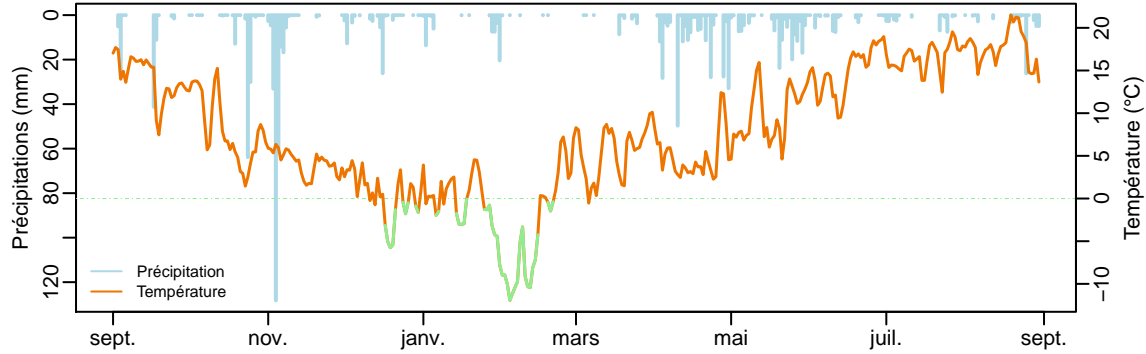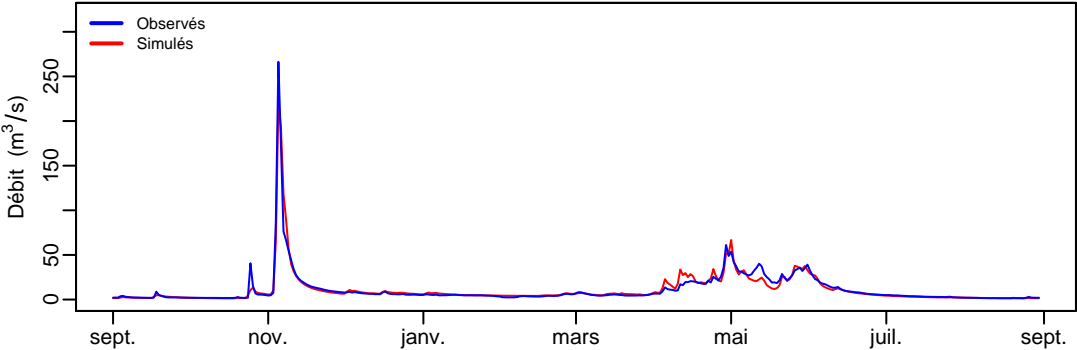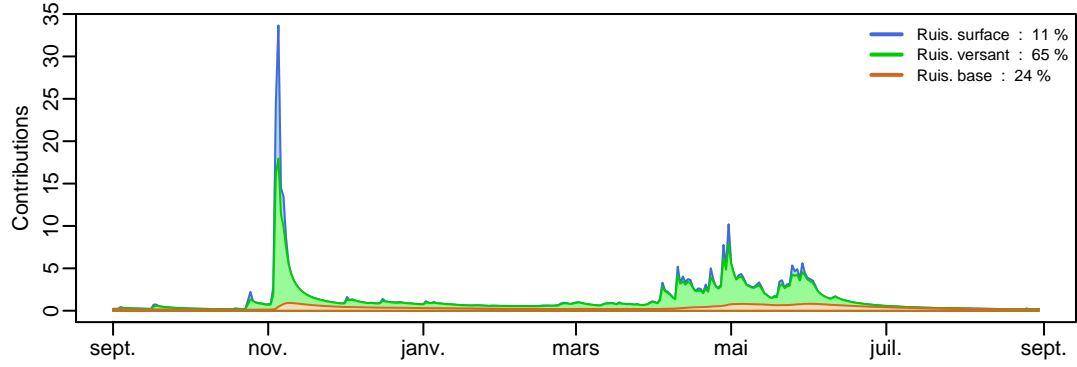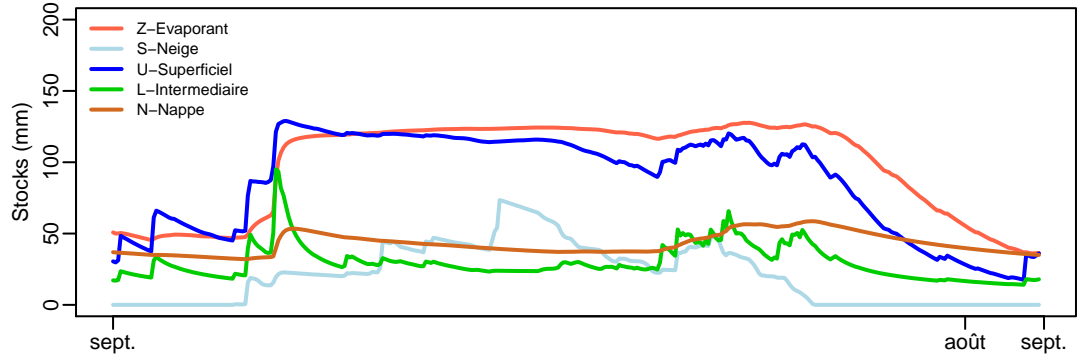

# jouquh (11364.0093 km²) – année 1981–1982

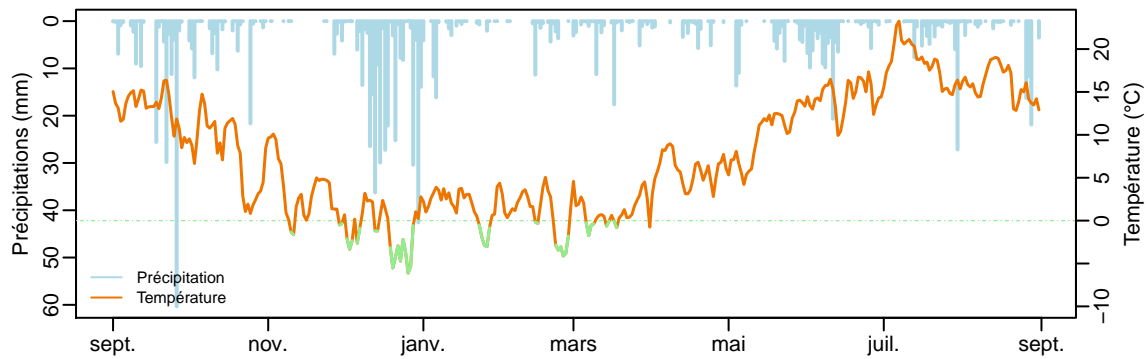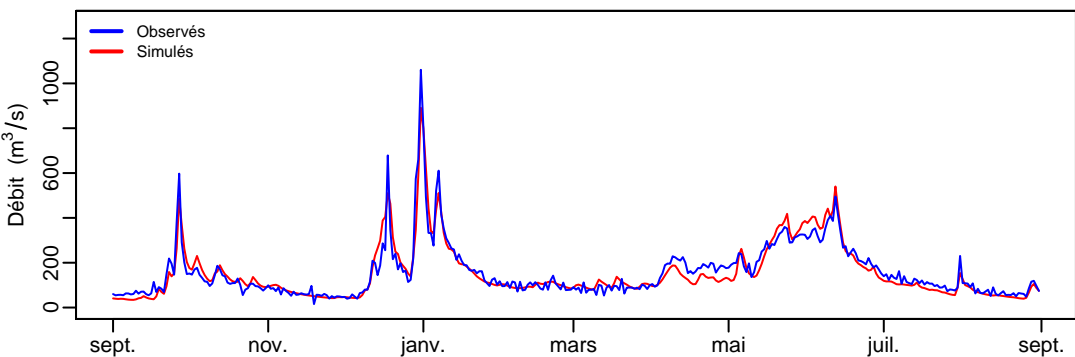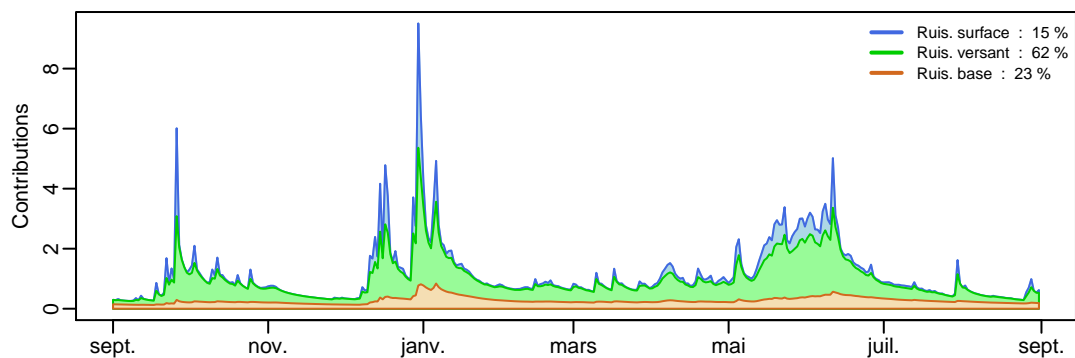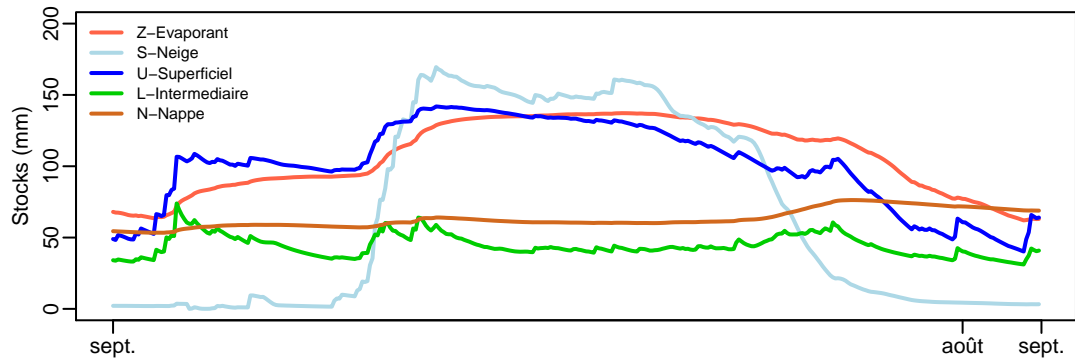

# jouquh (11364.0093 km<sup>2</sup>) – année 1982–1983

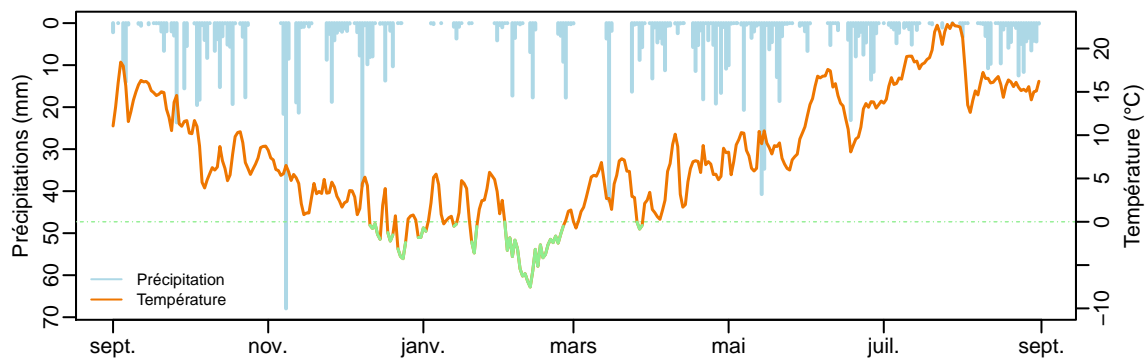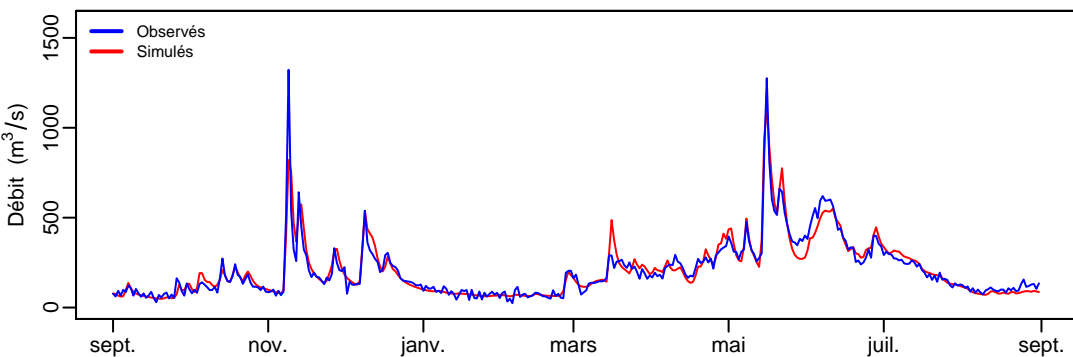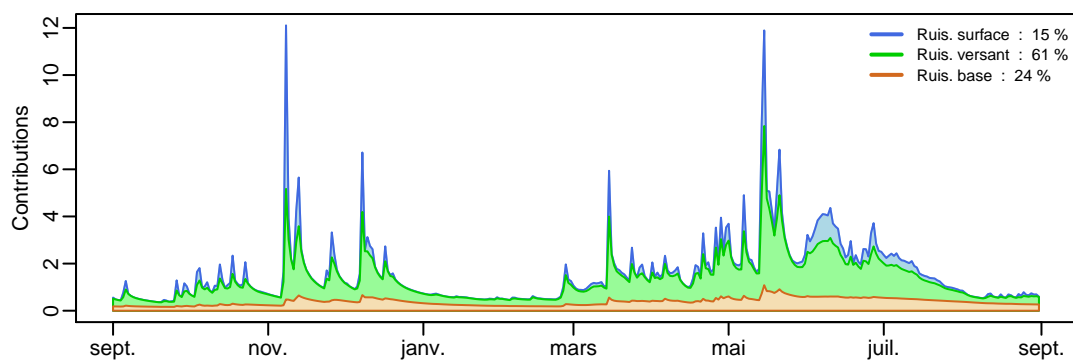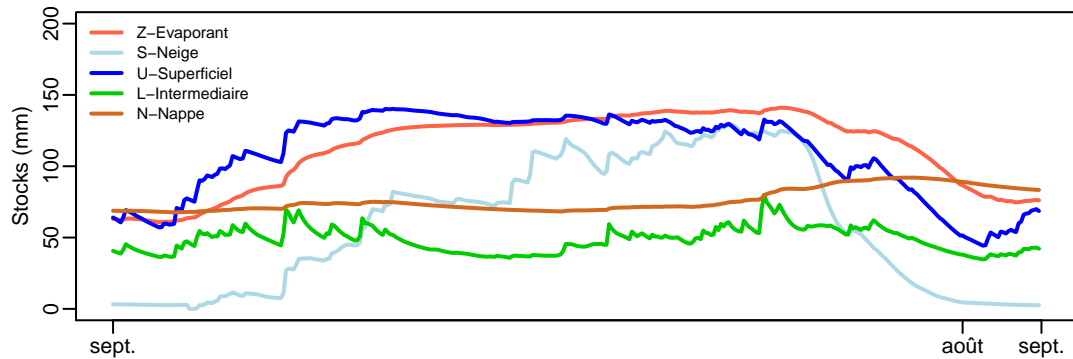

# jouquh (11364.0093 km²) – année 1983–1984

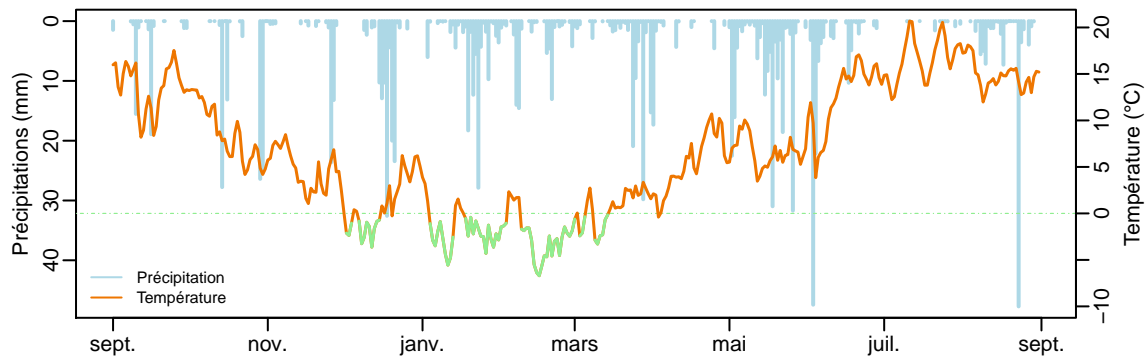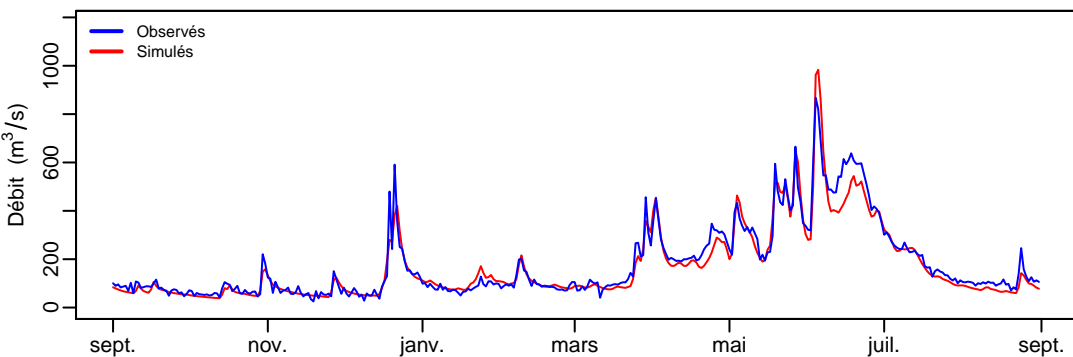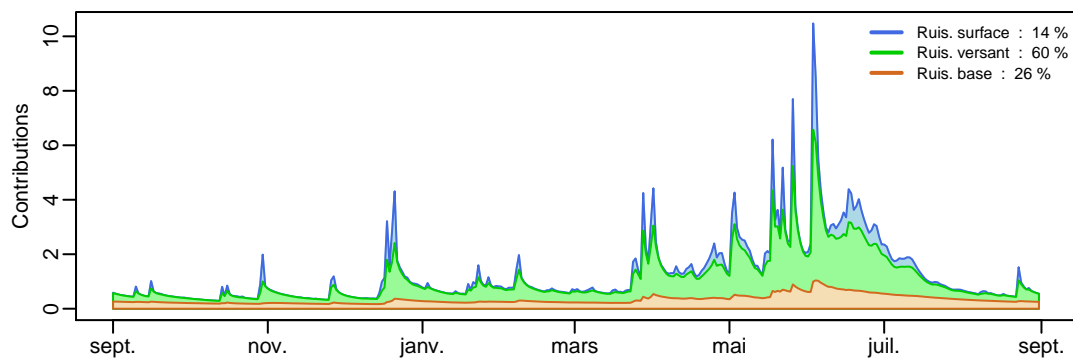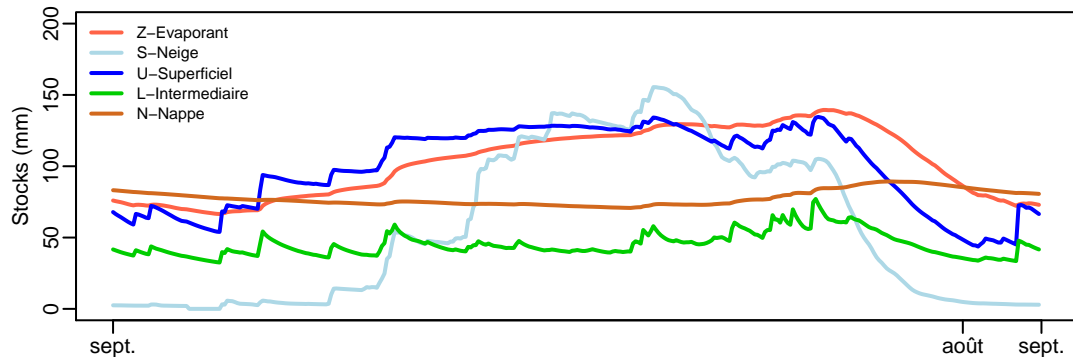

# jouquh (11364.0093 km<sup>2</sup>) – année 1984–1985

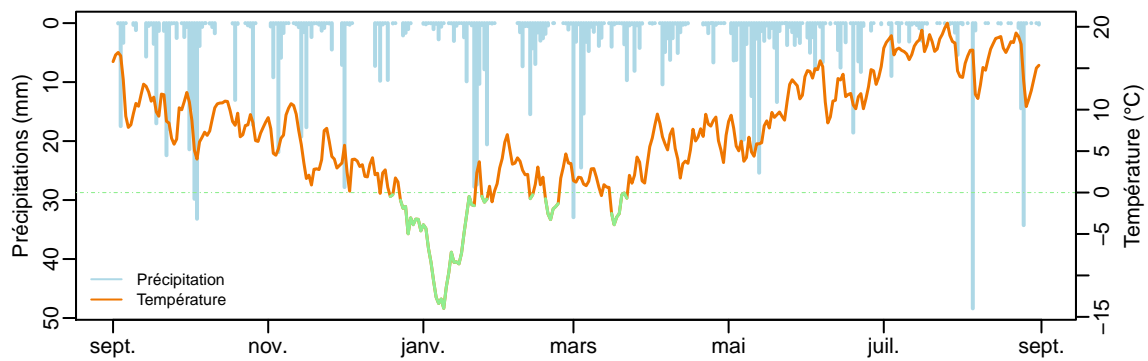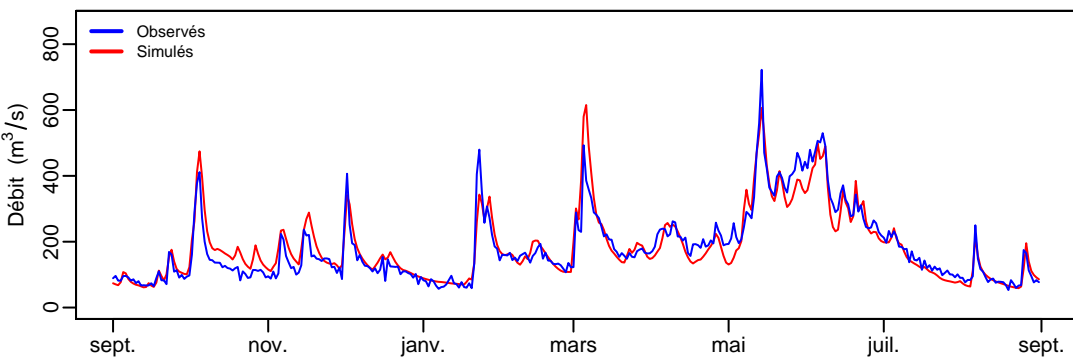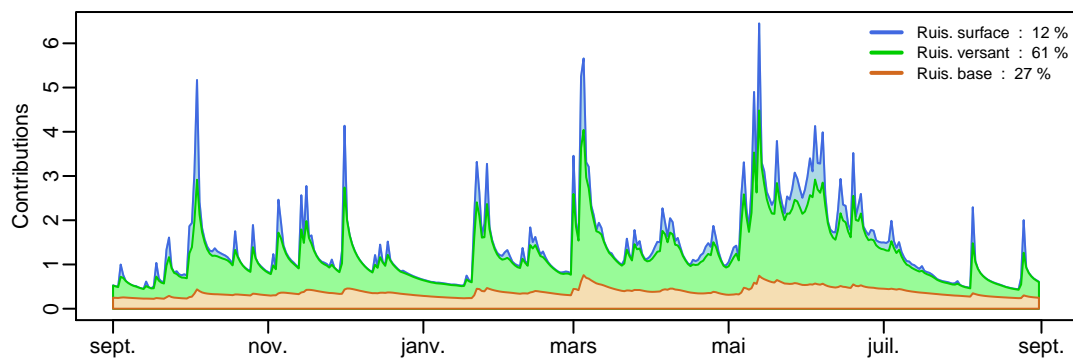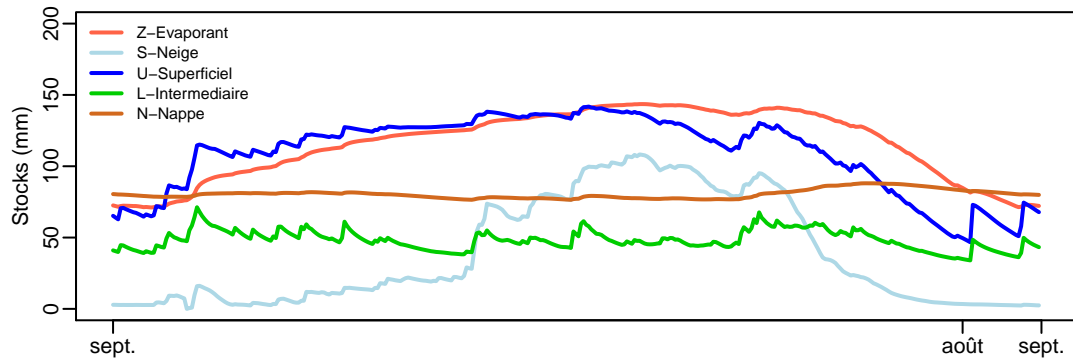

# jouquh (11364.0093 km<sup>2</sup>) – année 1985–1986

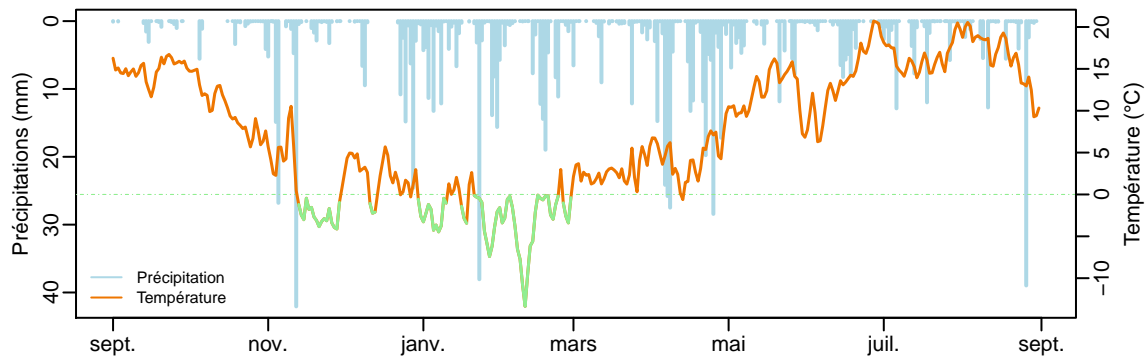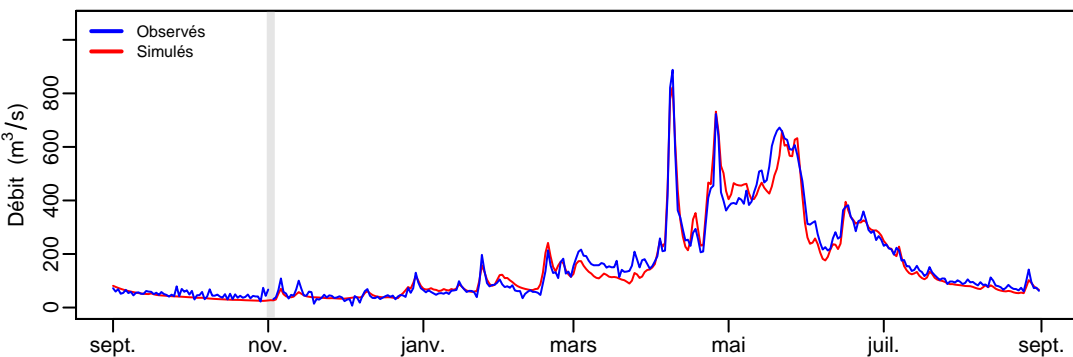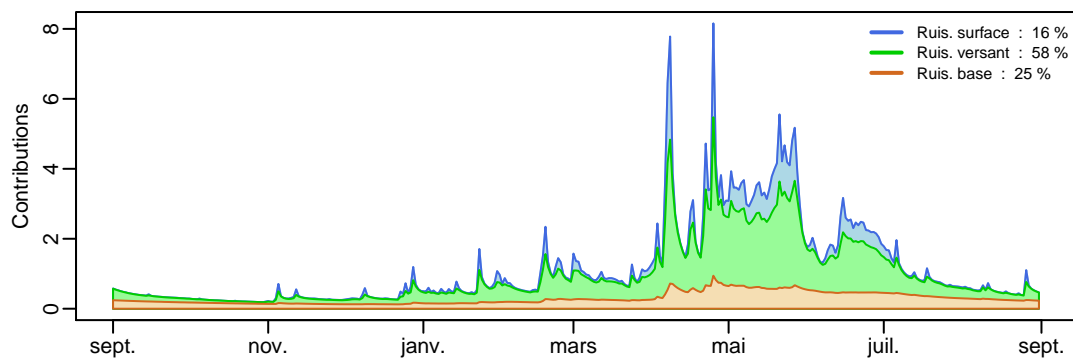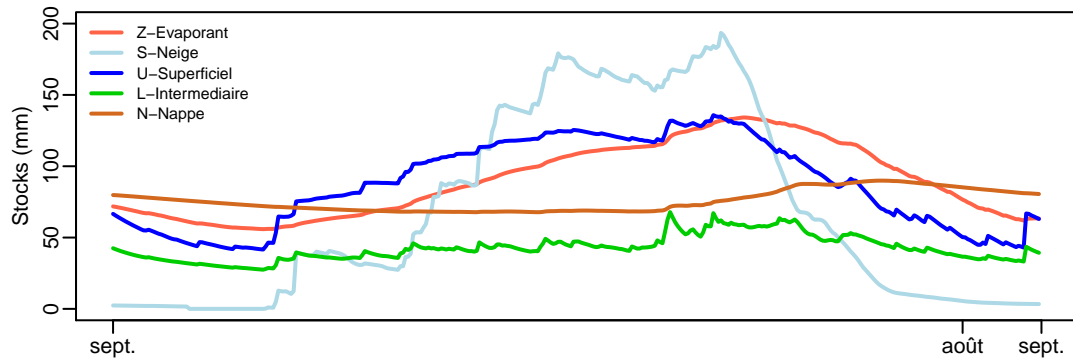



# jouquh (11364.0093 km²) – année 1986–1987

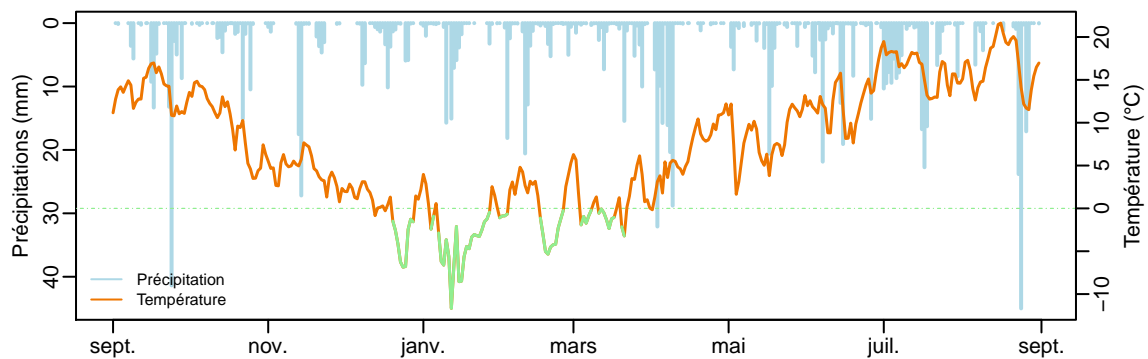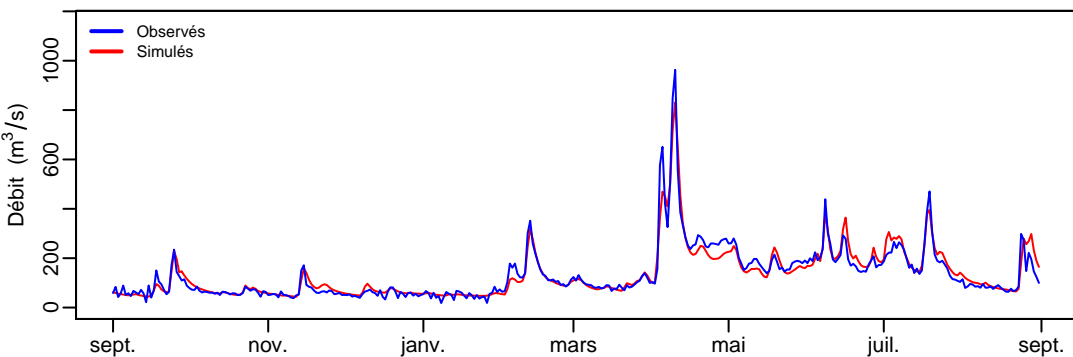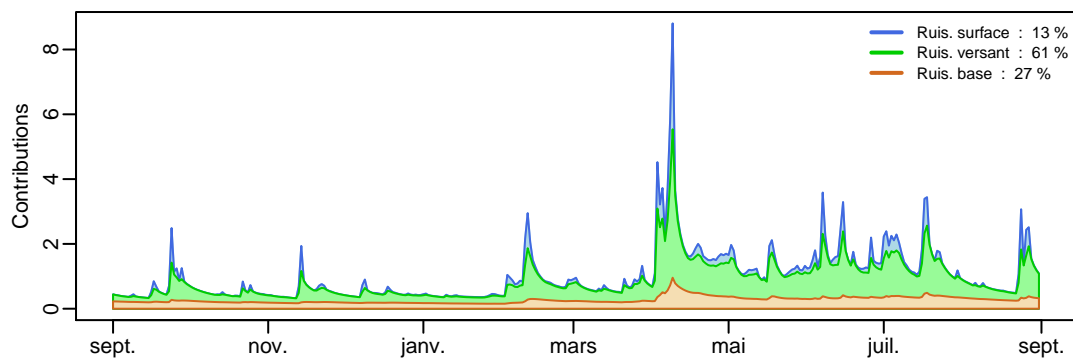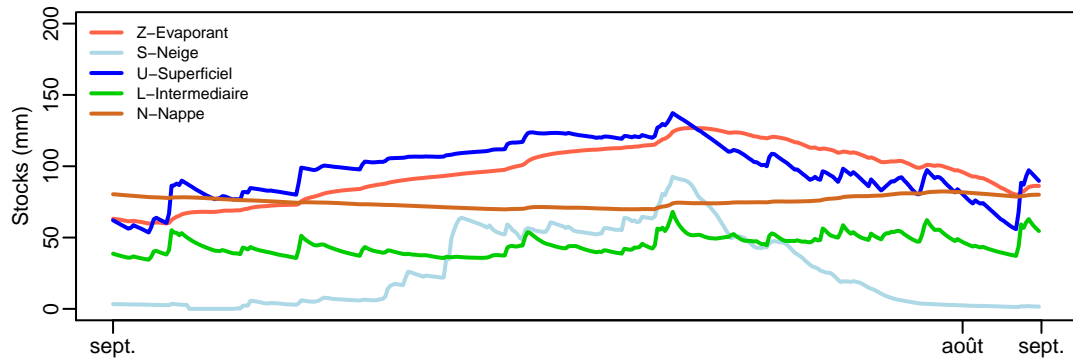

# jouqh (11364.0093 km<sup>2</sup>) – année 1987–1988

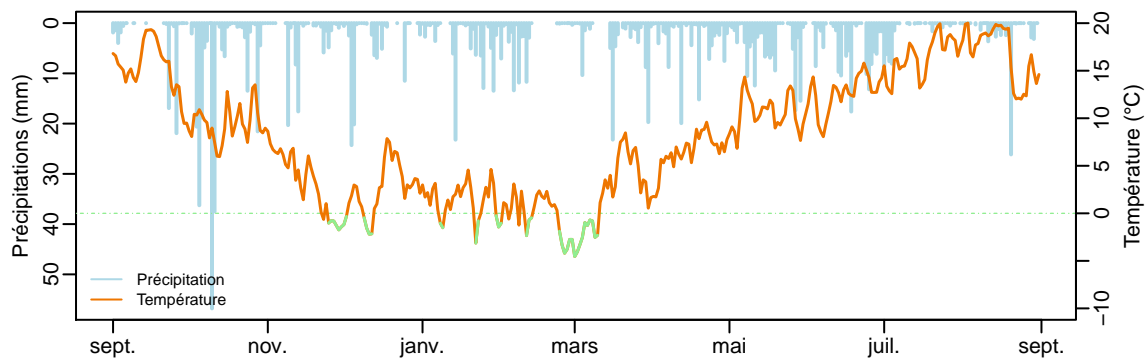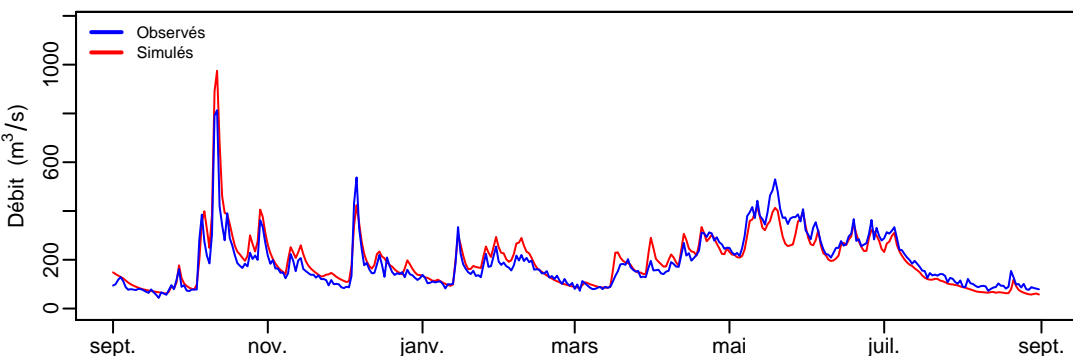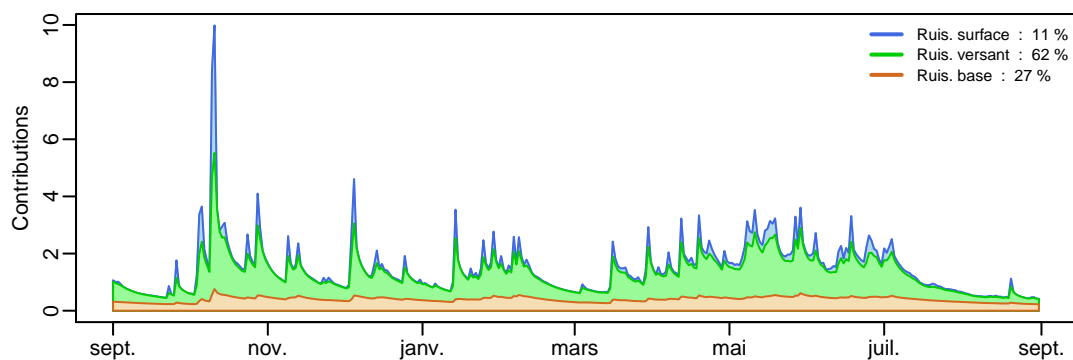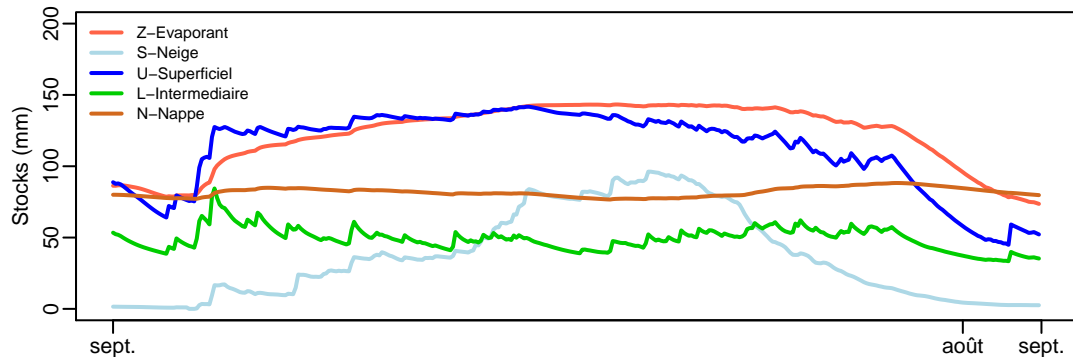

# jouquh (11364.0093 km<sup>2</sup>) – année 1988–1989

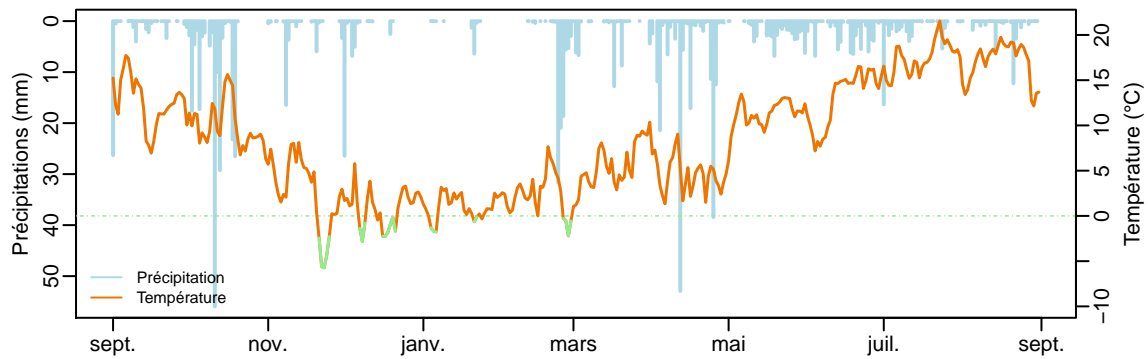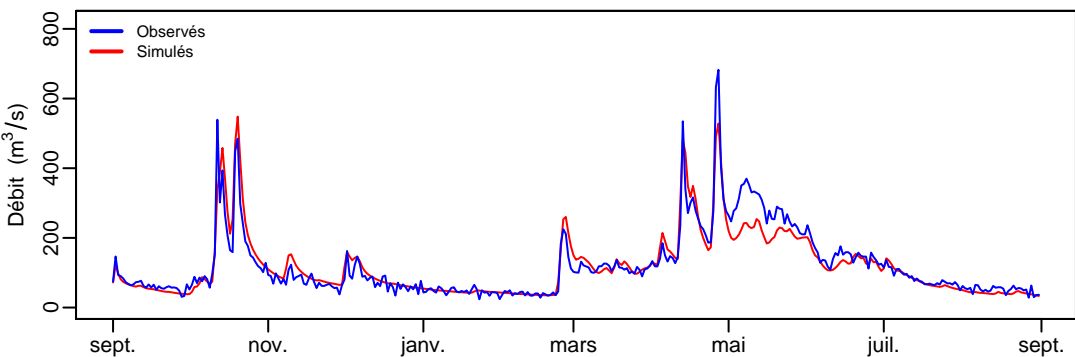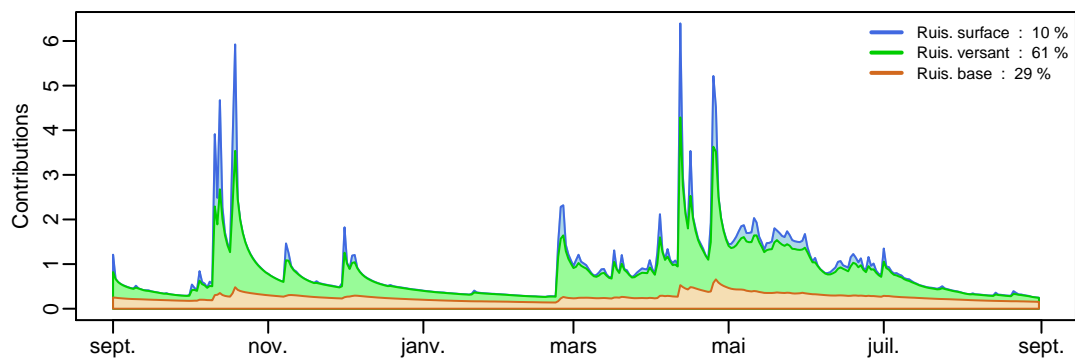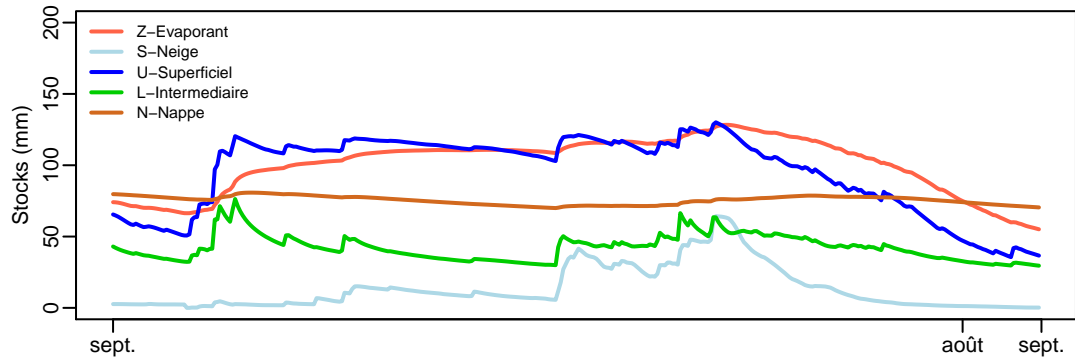

# jouquh (11364.0093 km²) – année 1989–1990

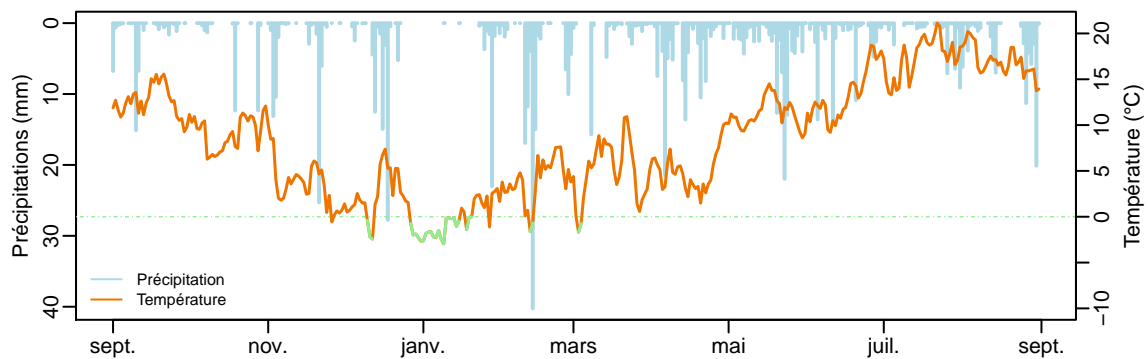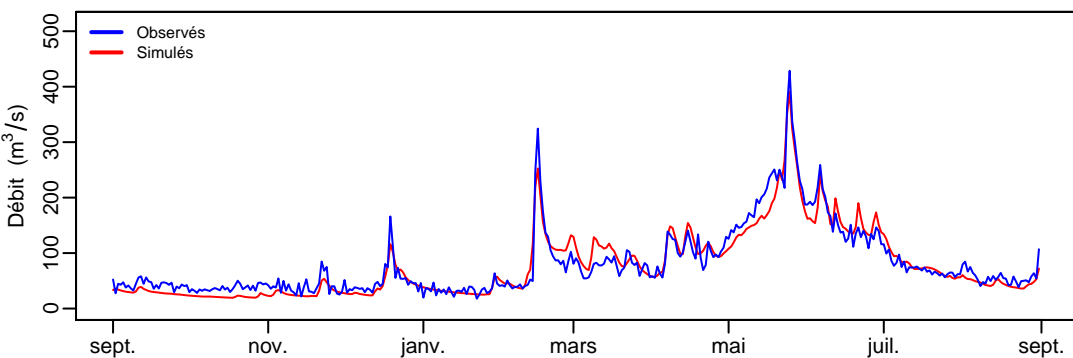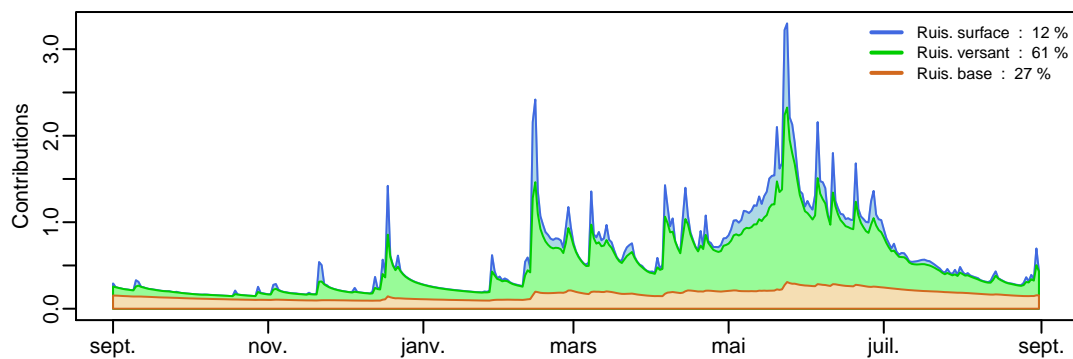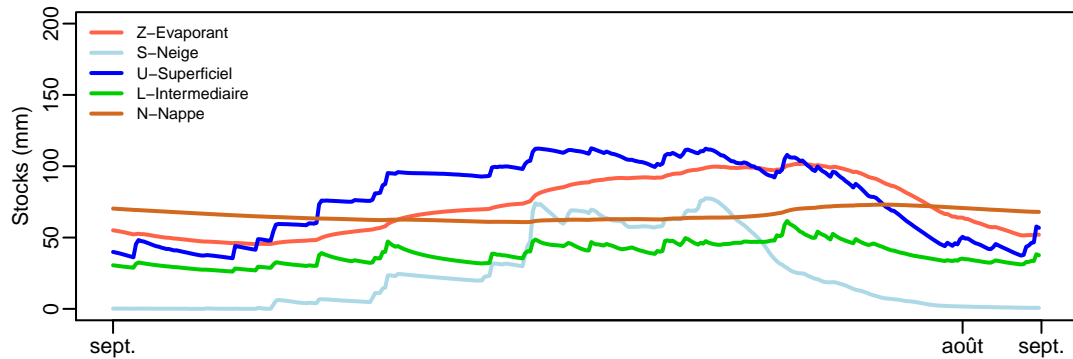

# jouqh (11364.0093 km²) – année 1990–1991

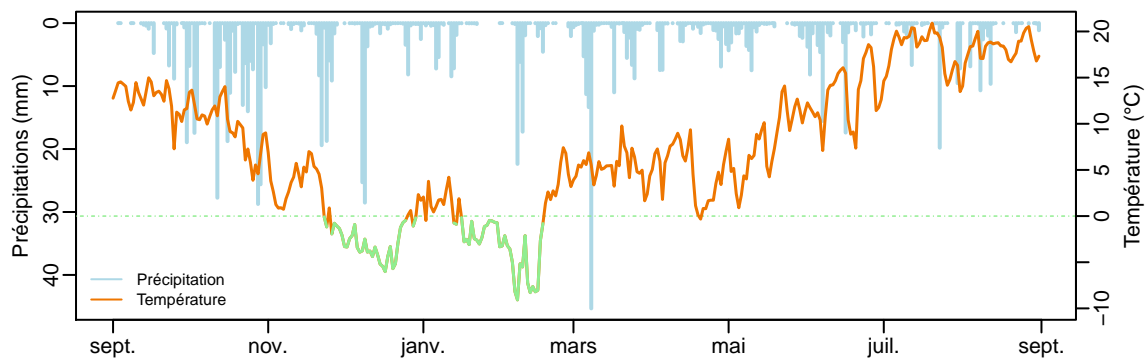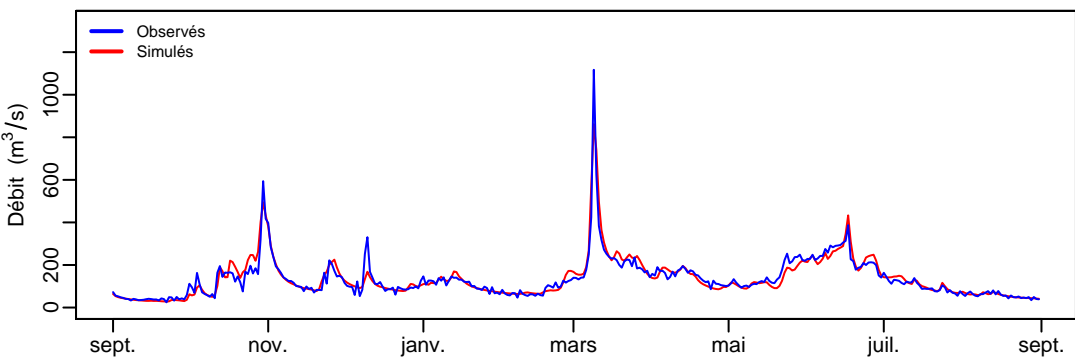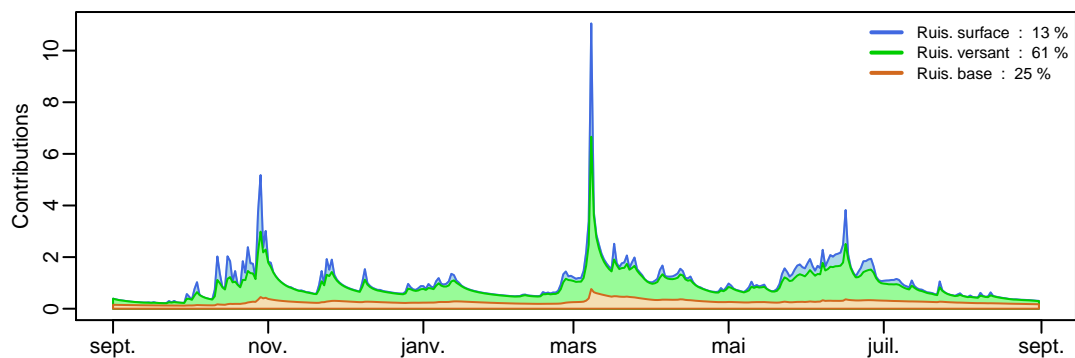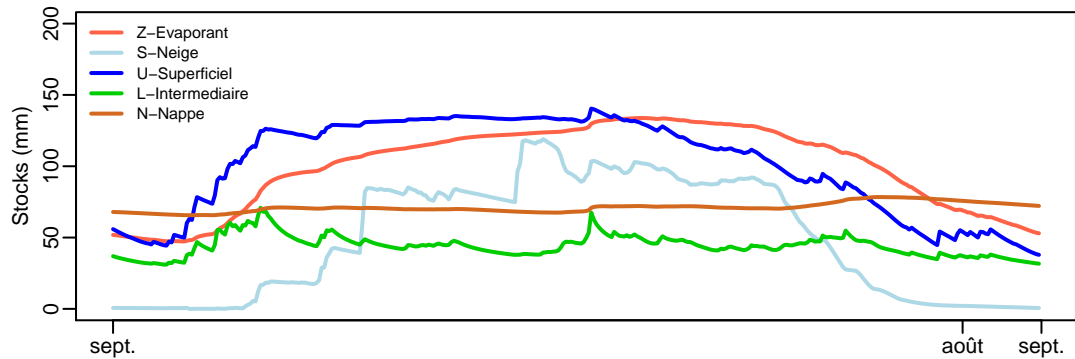

# jouquh (11364.0093 km²) – année 1991–1992

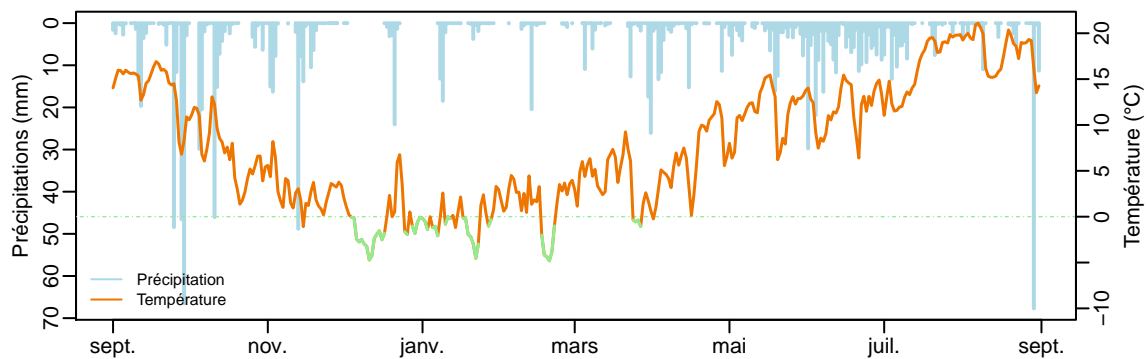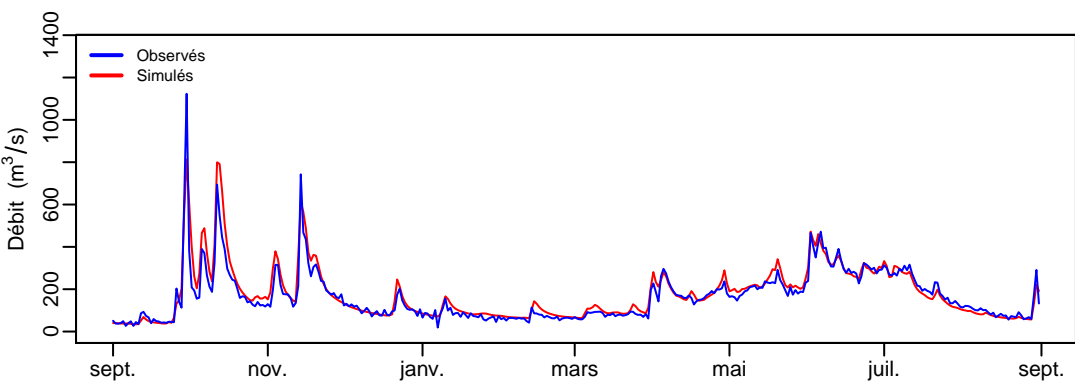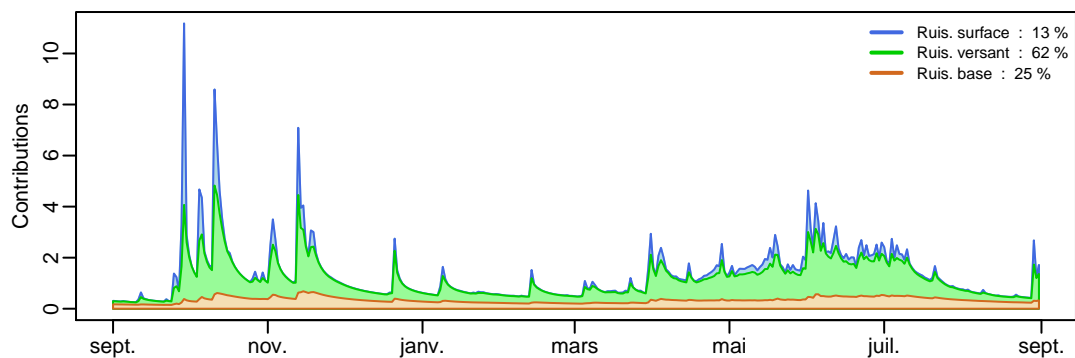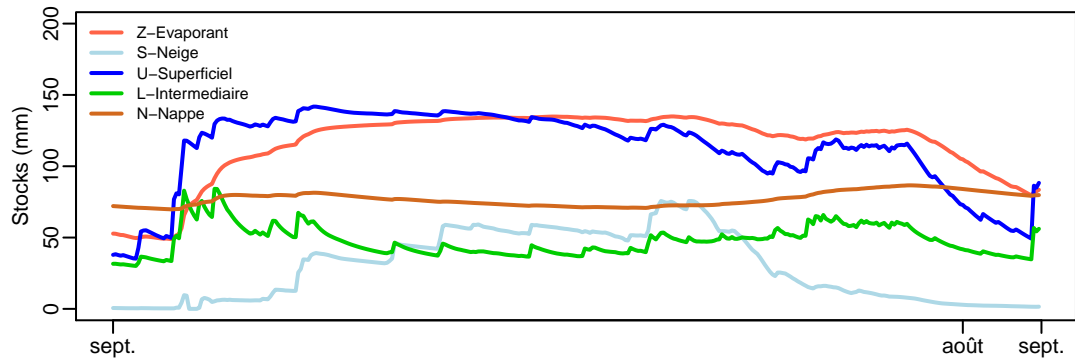

# jouquh (11364.0093 km²) – année 1992–1993

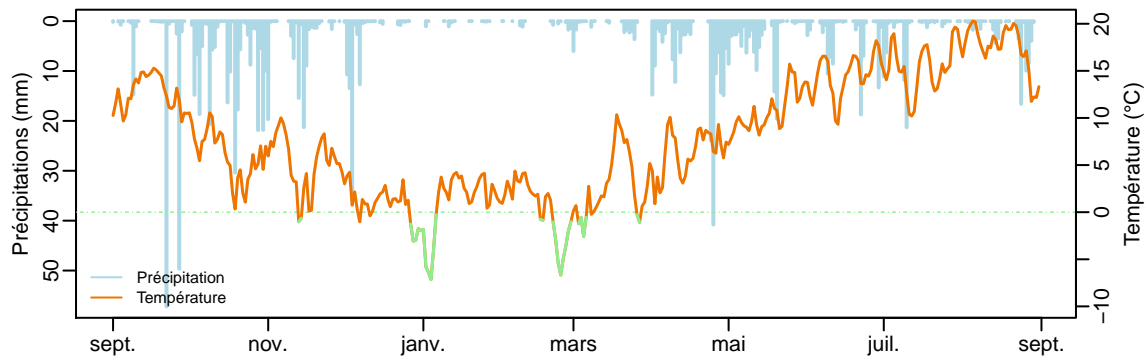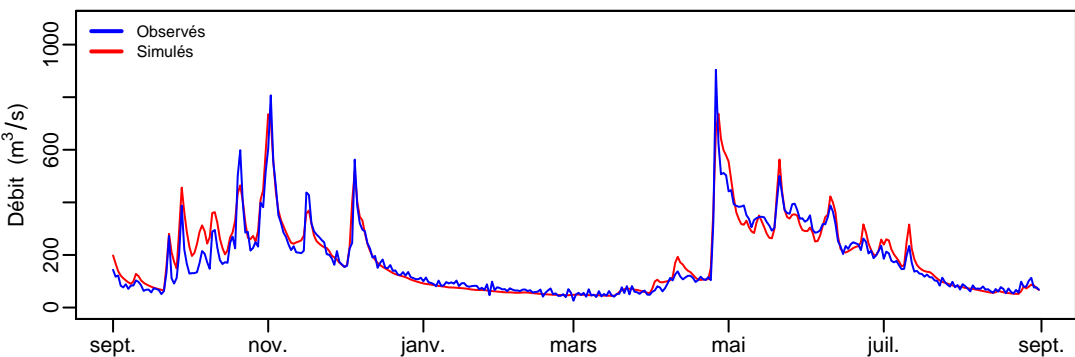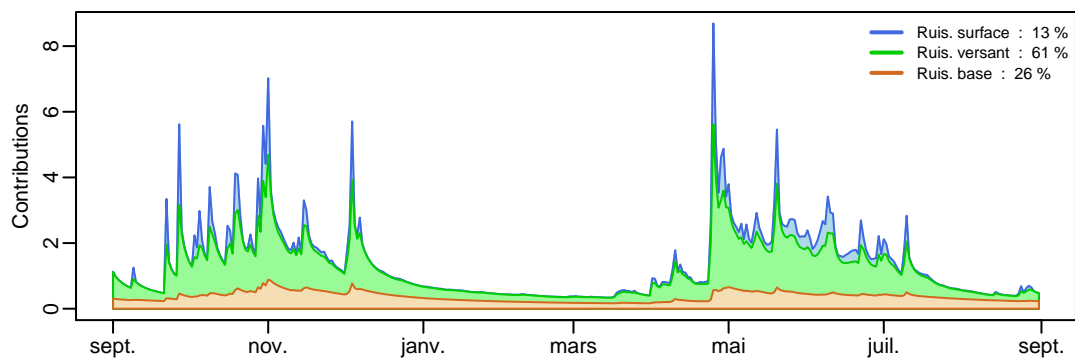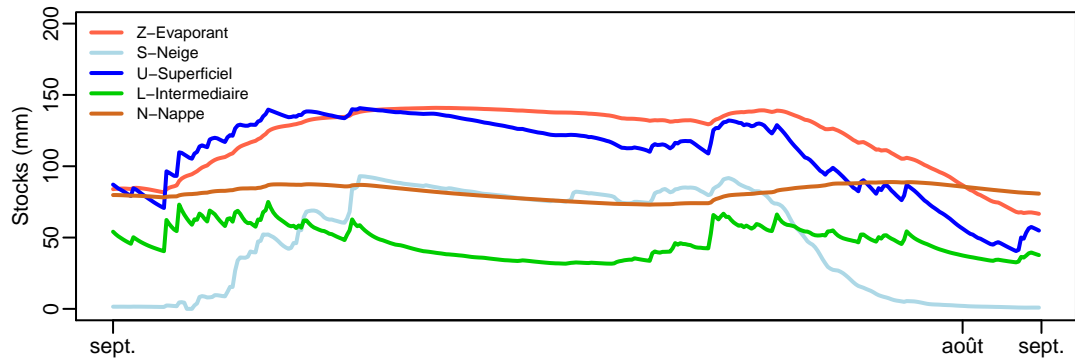

# jouquh (11364.0093 km<sup>2</sup>) – année 1993–1994

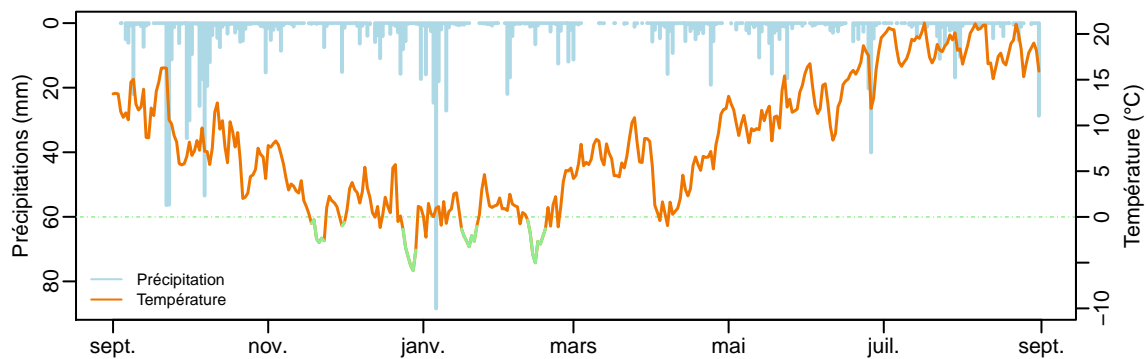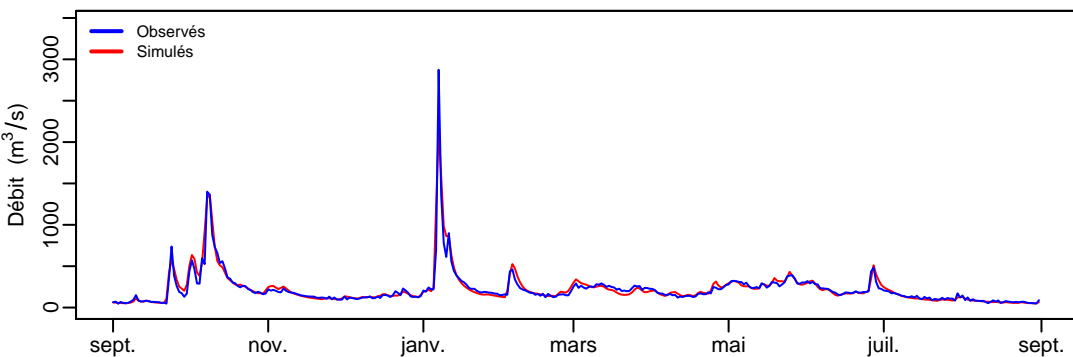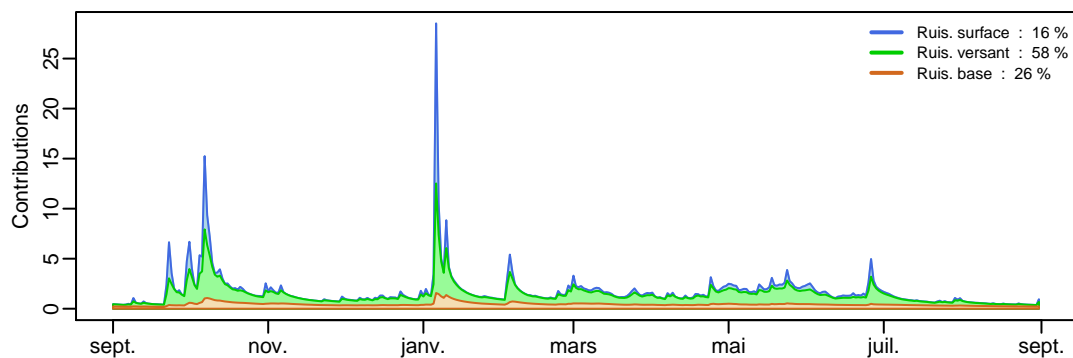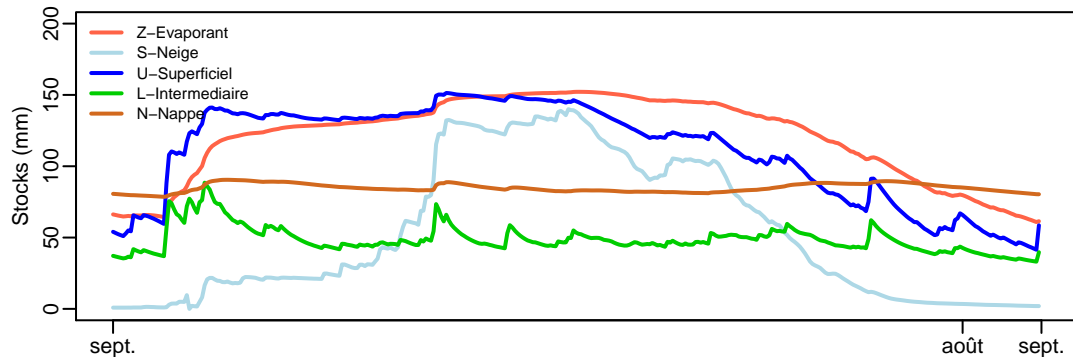



# jouqh (11364.0093 km<sup>2</sup>) – année 1994–1995

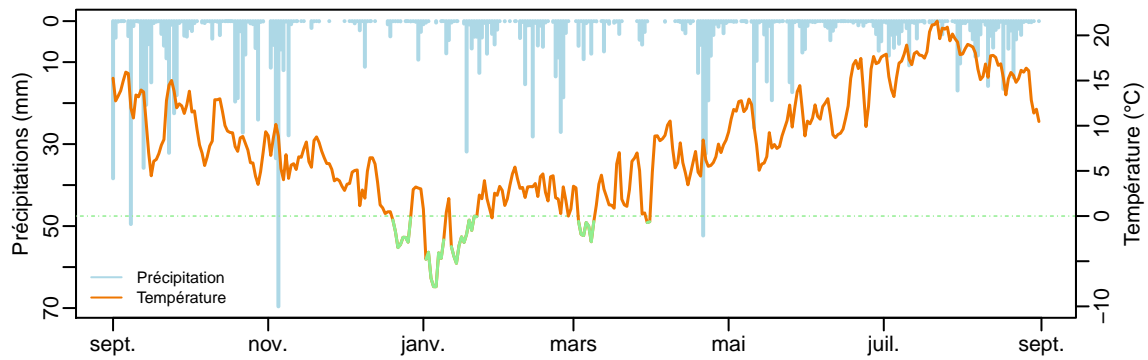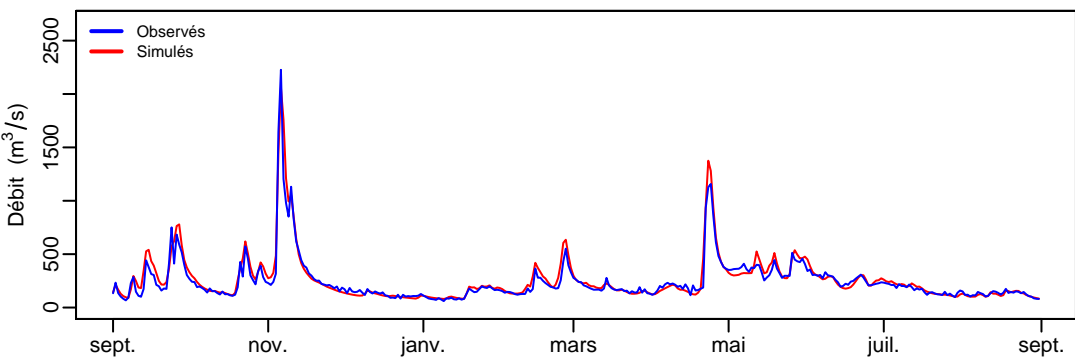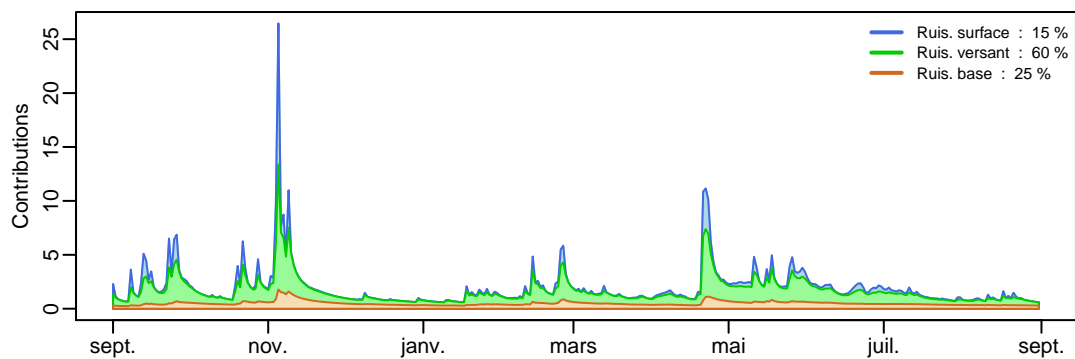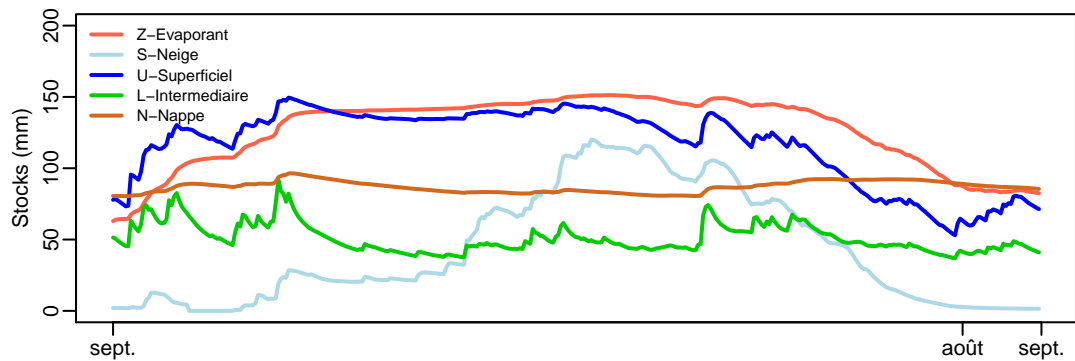

# jouquh (11364.0093 km²) – année 1995–1996

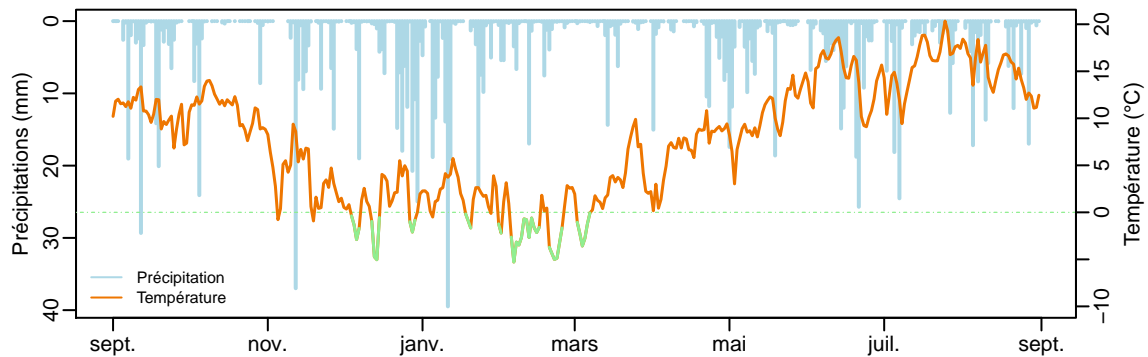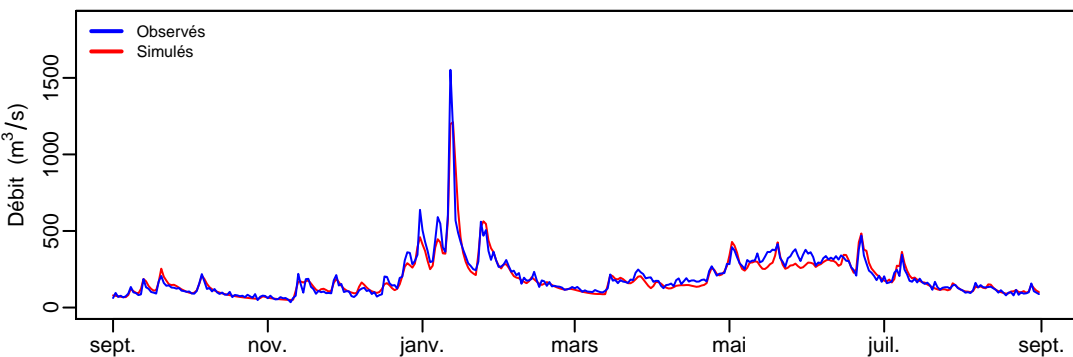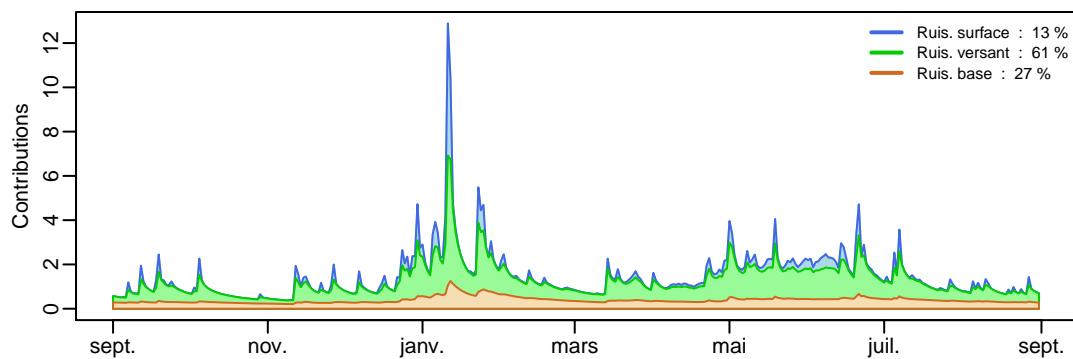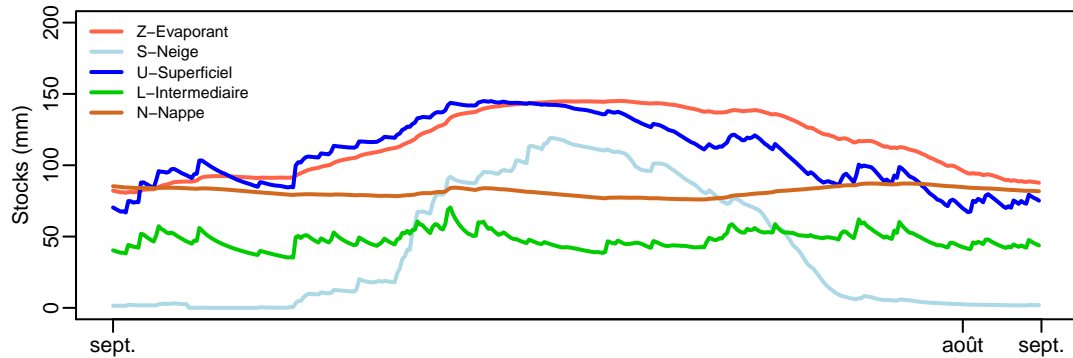

# jouquh (11364.0093 km²) – année 1996–1997

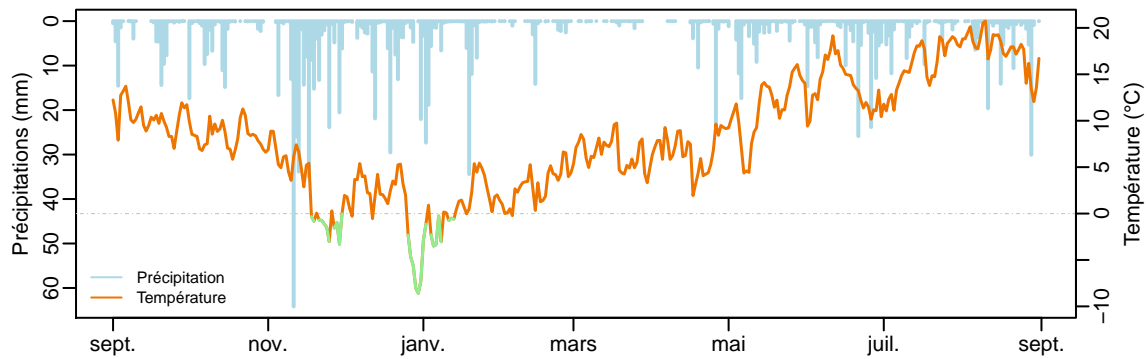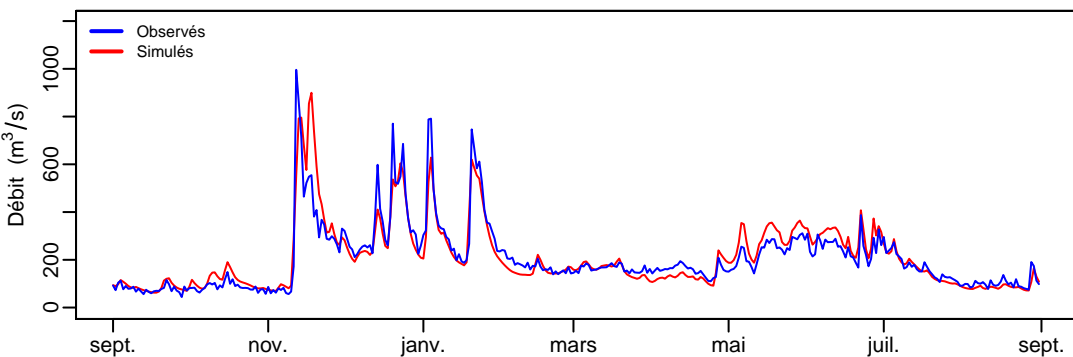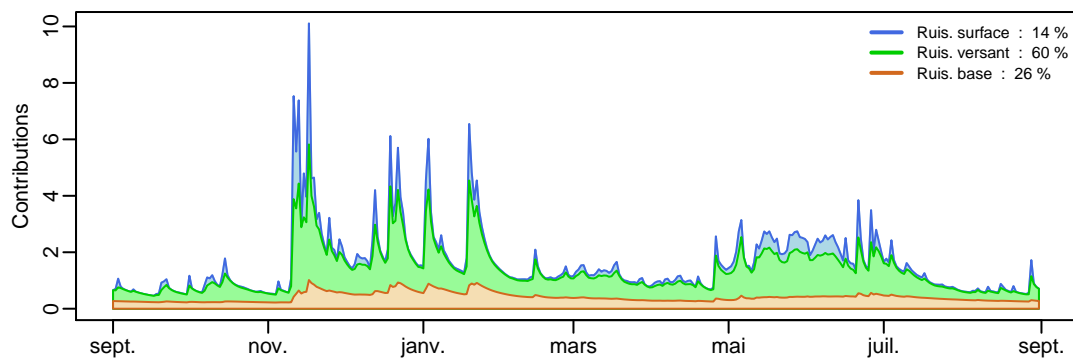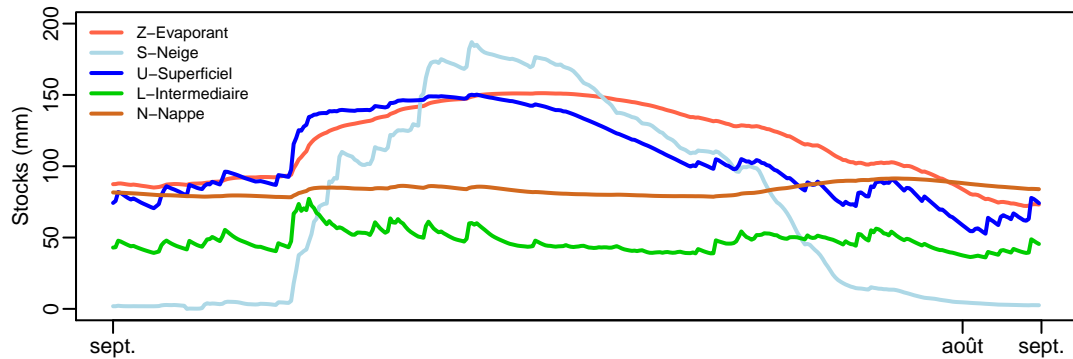

# jouquh (11364.0093 km<sup>2</sup>) – année 1997–1998

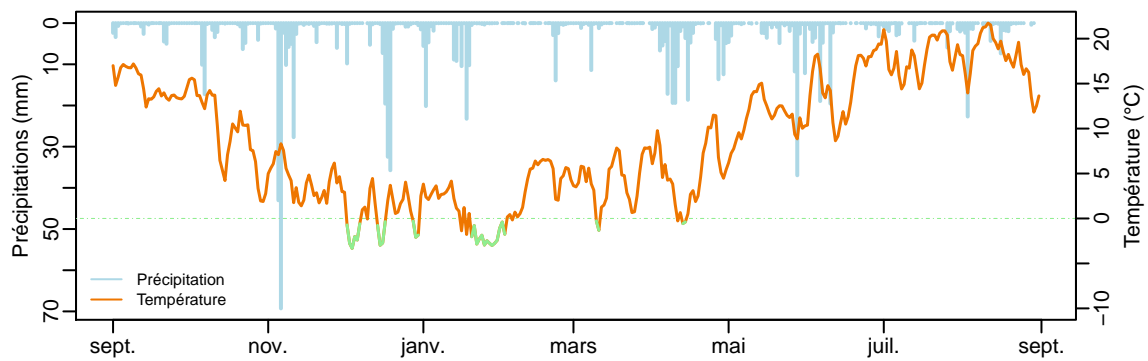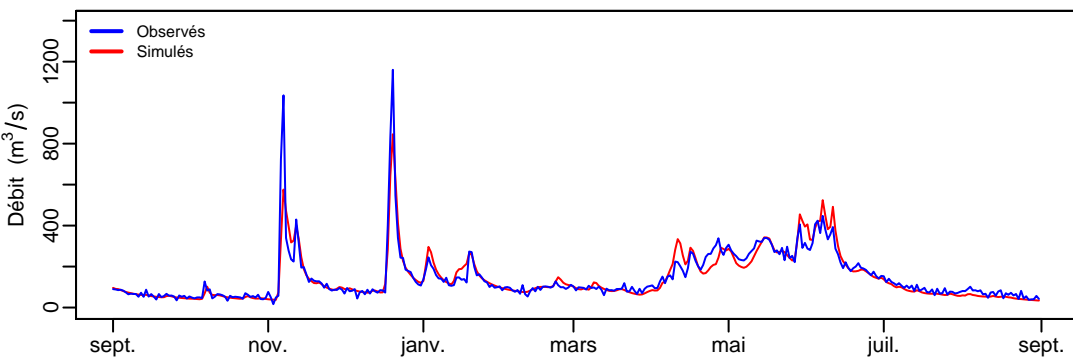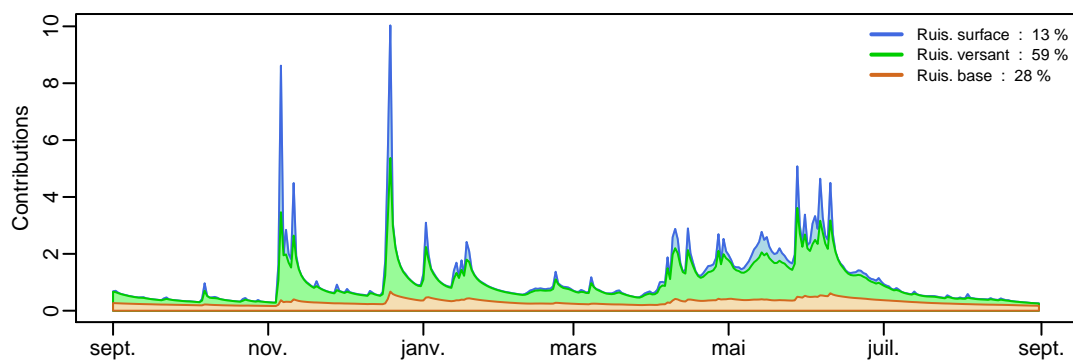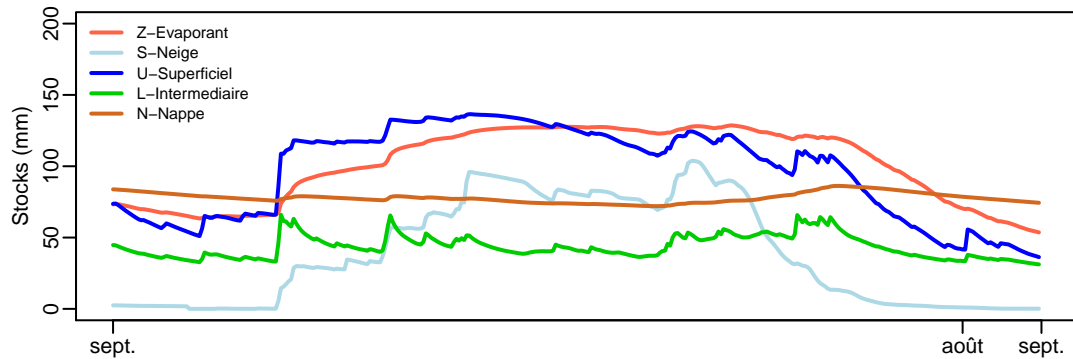

# jouqh (11364.0093 km²) – année 1998–1999

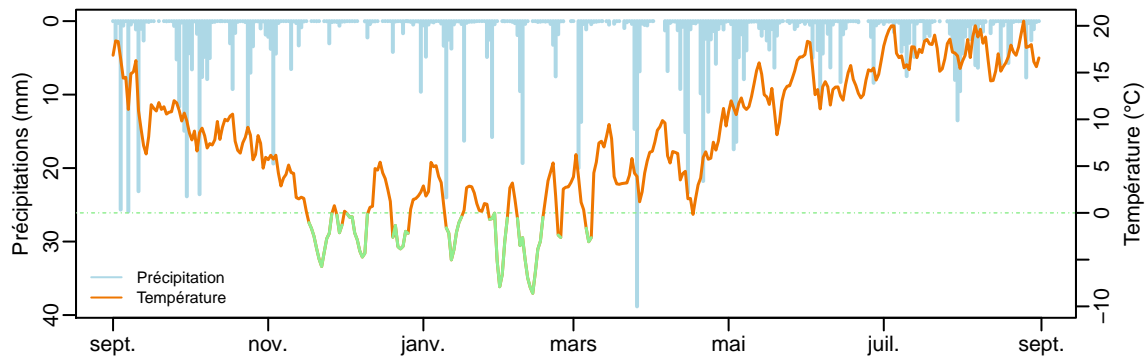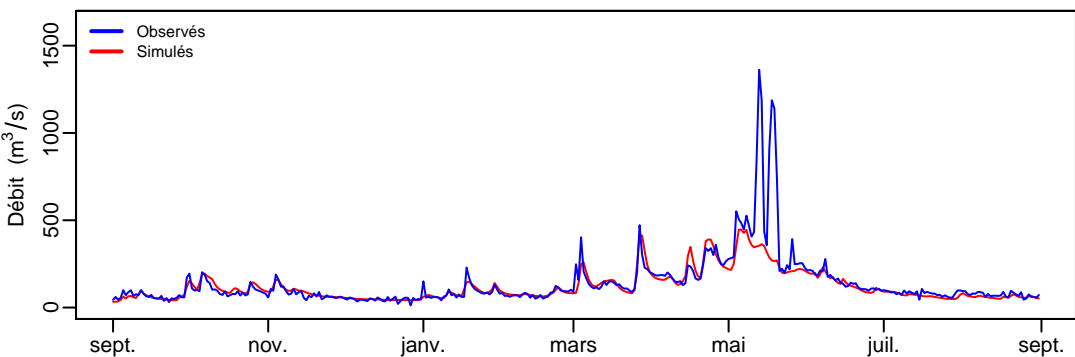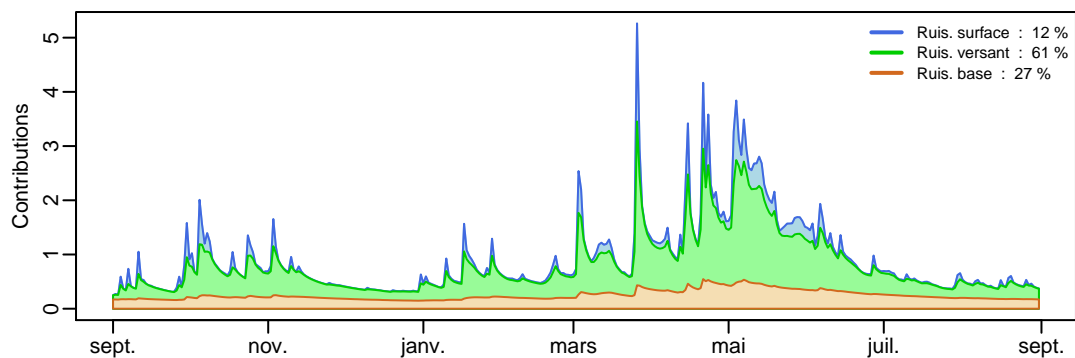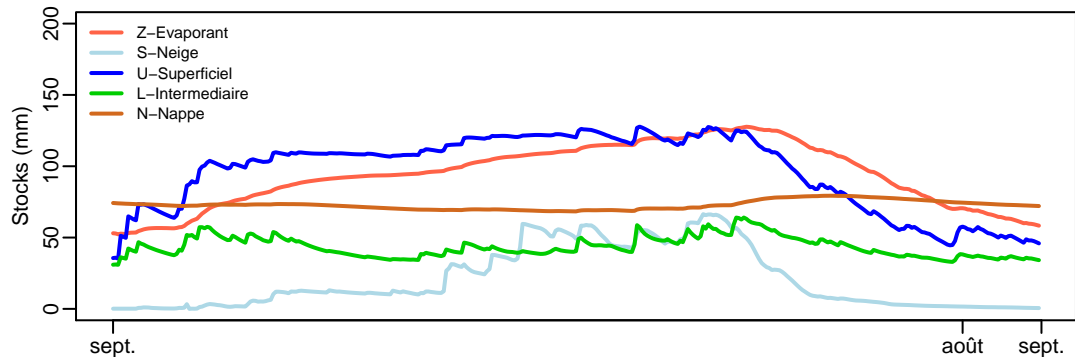

# jouquh (11364.0093 km<sup>2</sup>) – année 1999–2000

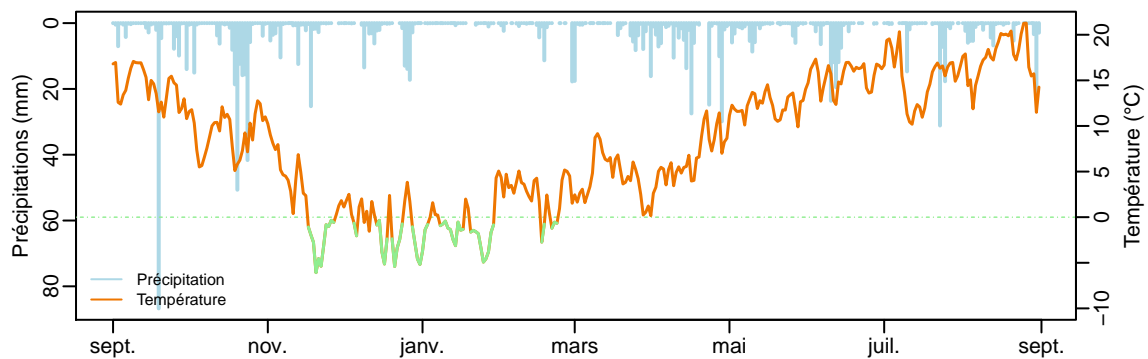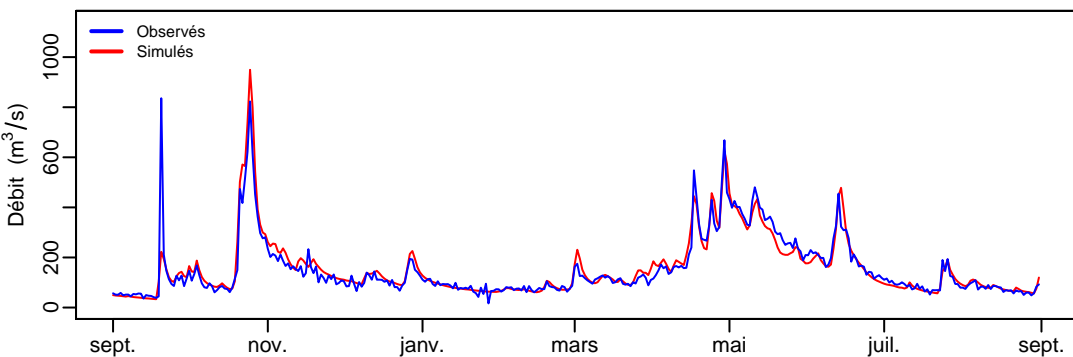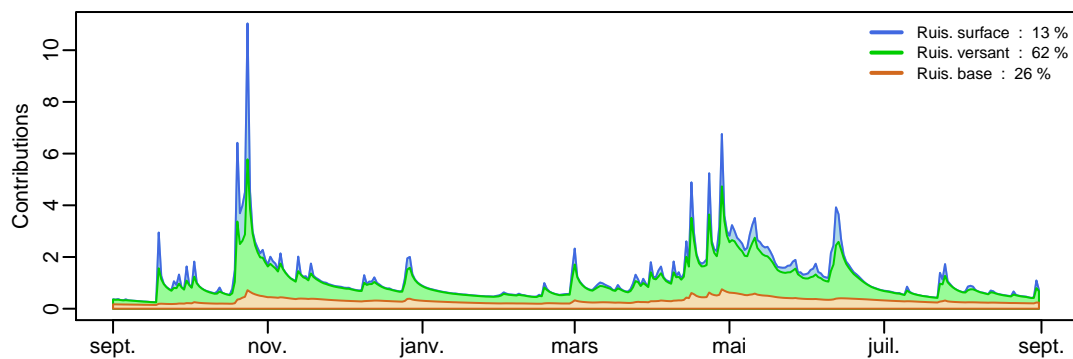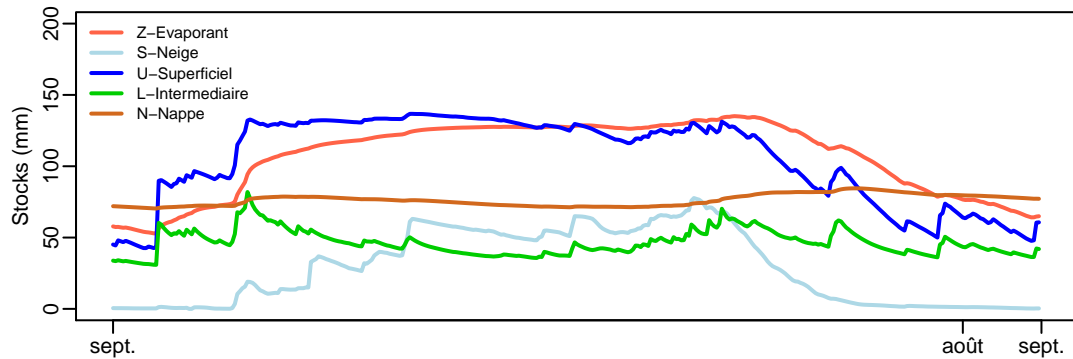

# jouquh (11364.0093 km<sup>2</sup>) – année 2000–2001

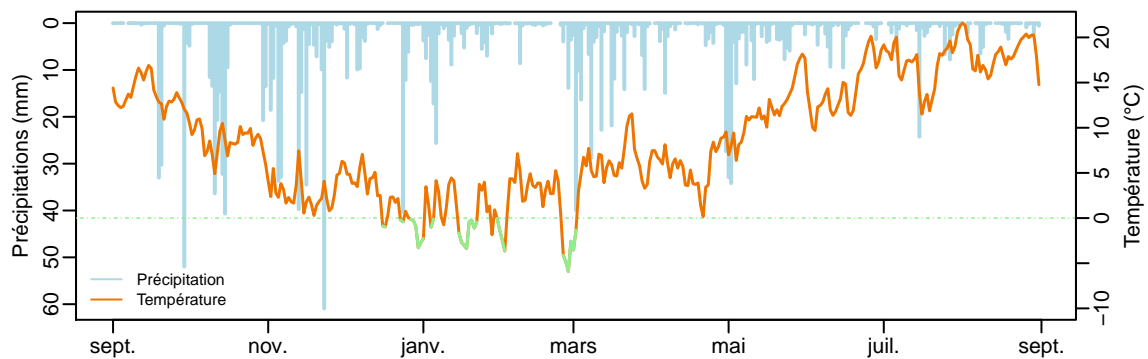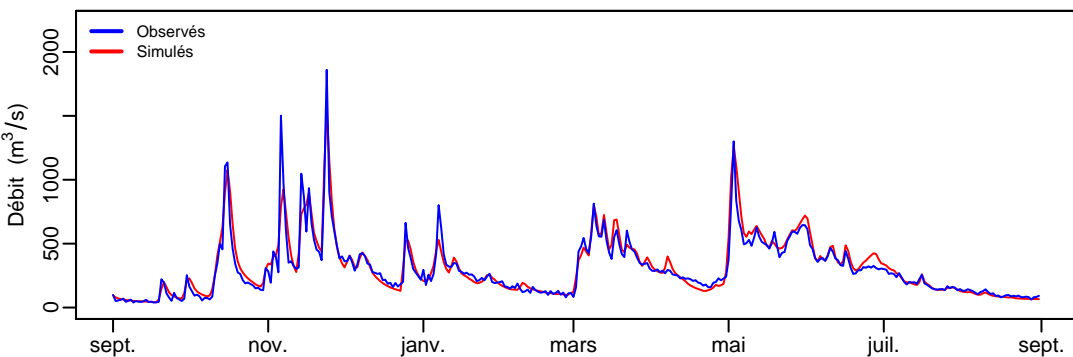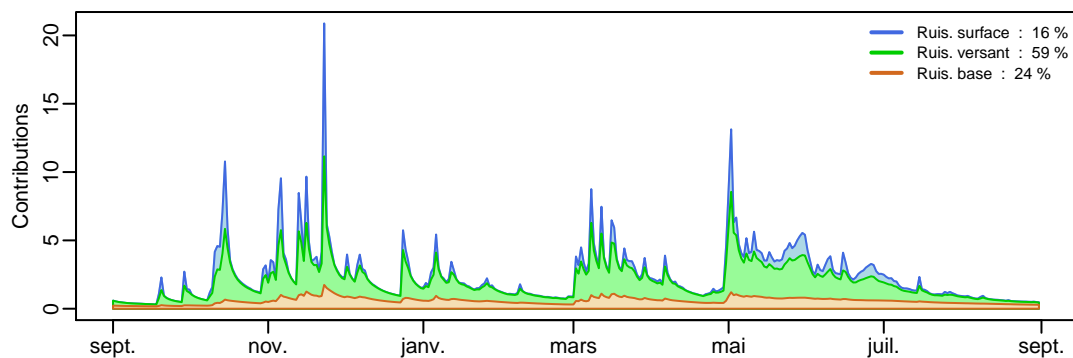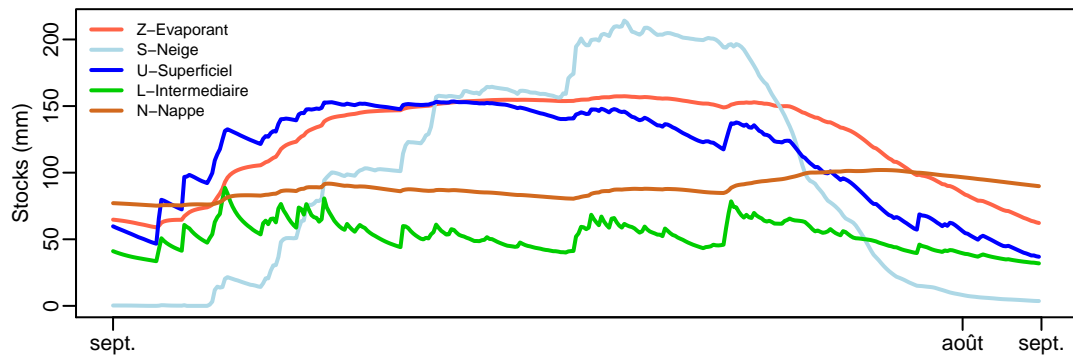

# jouquh (11364.0093 km<sup>2</sup>) – année 2001–2002

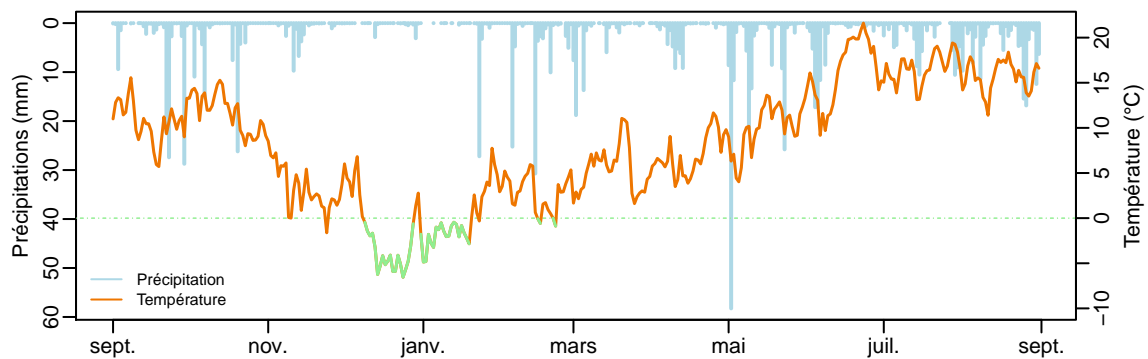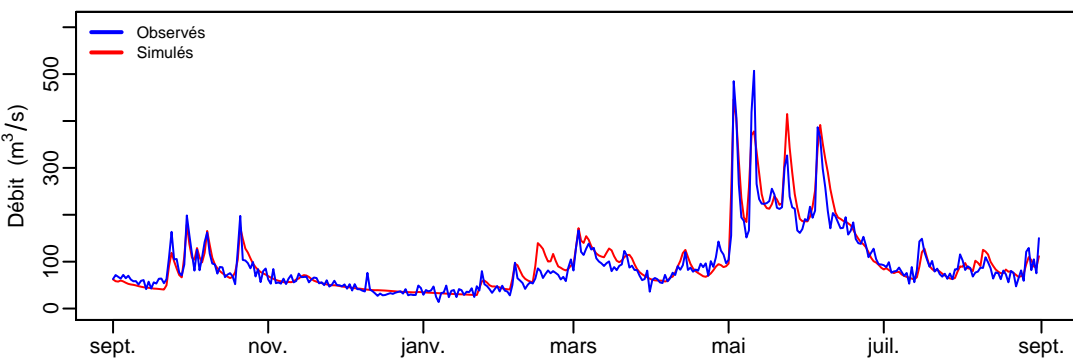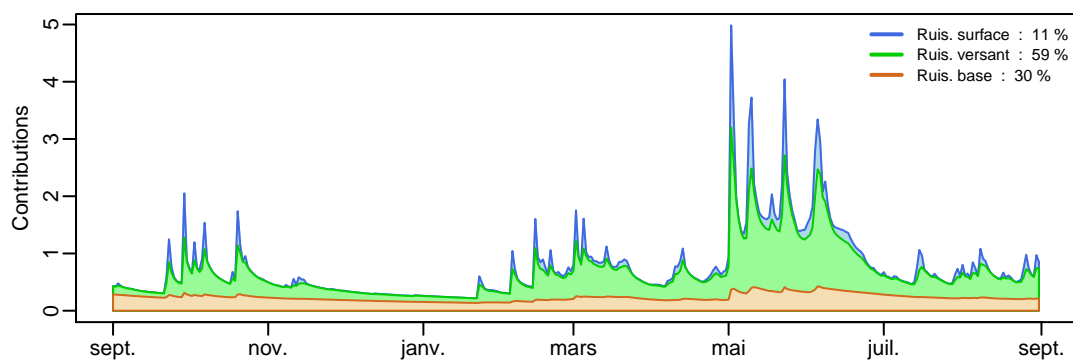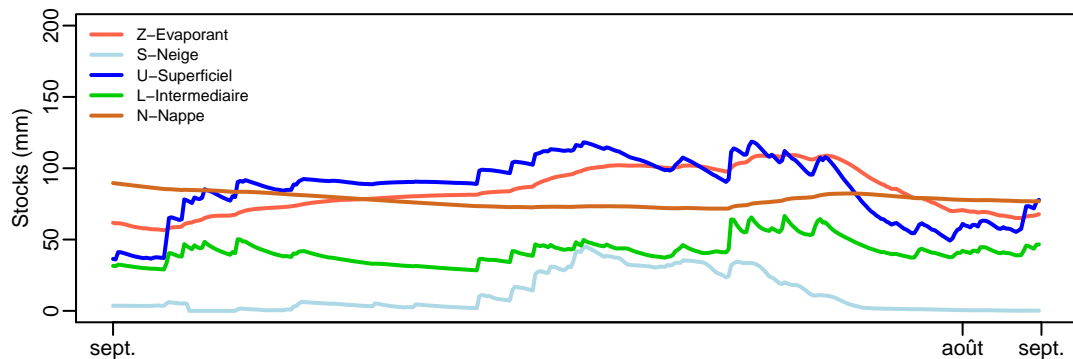



# jouquh (11364.0093 km²) – année 2002–2003

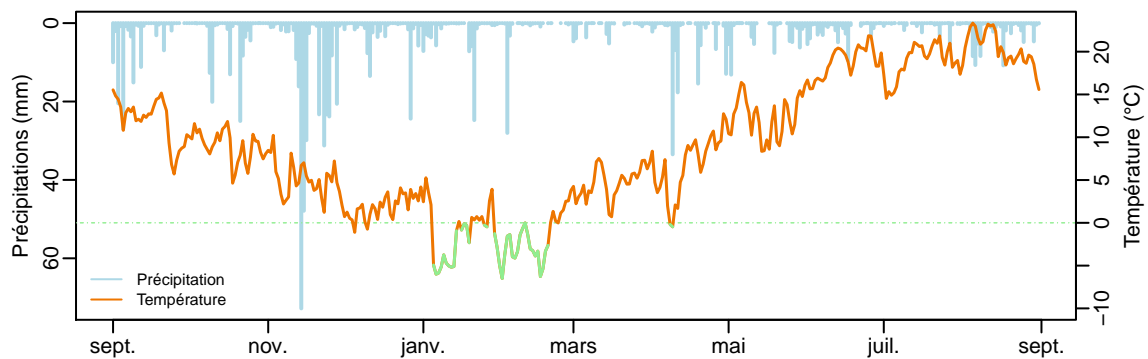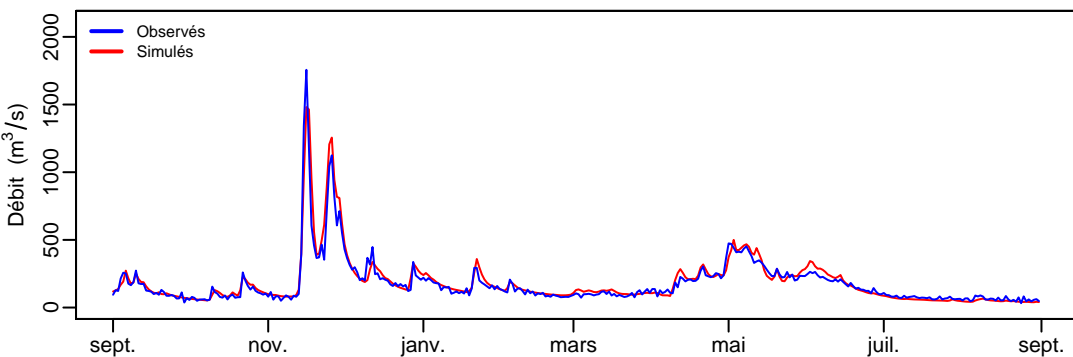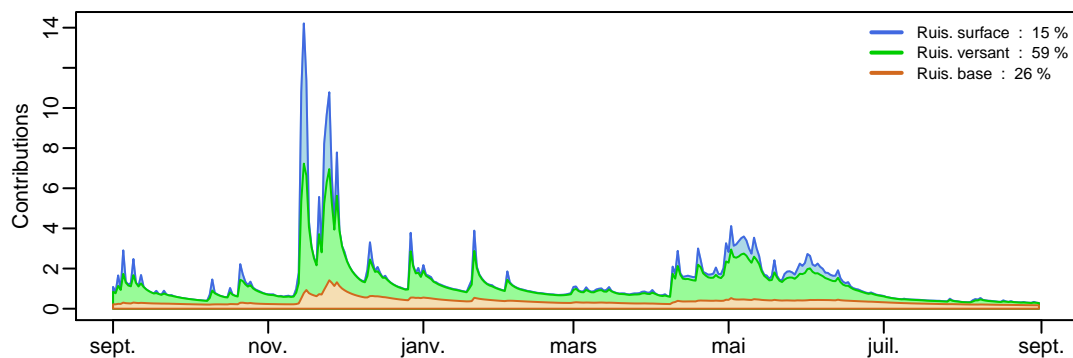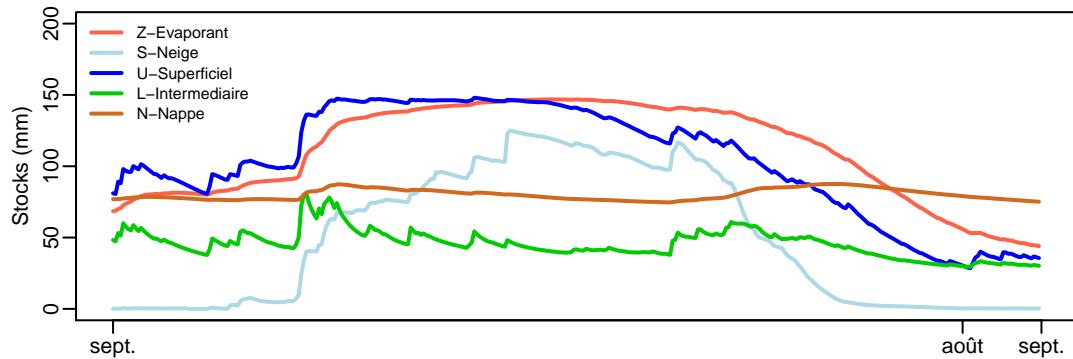

# jouquh (11364.0093 km²) – année 2003–2004

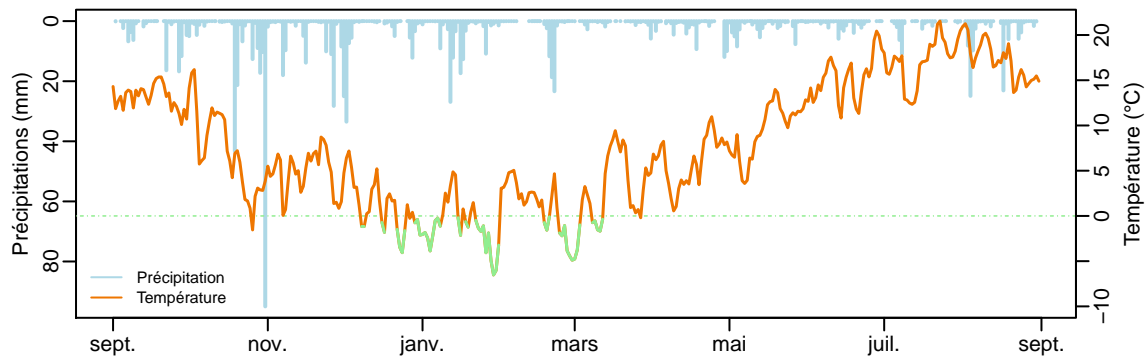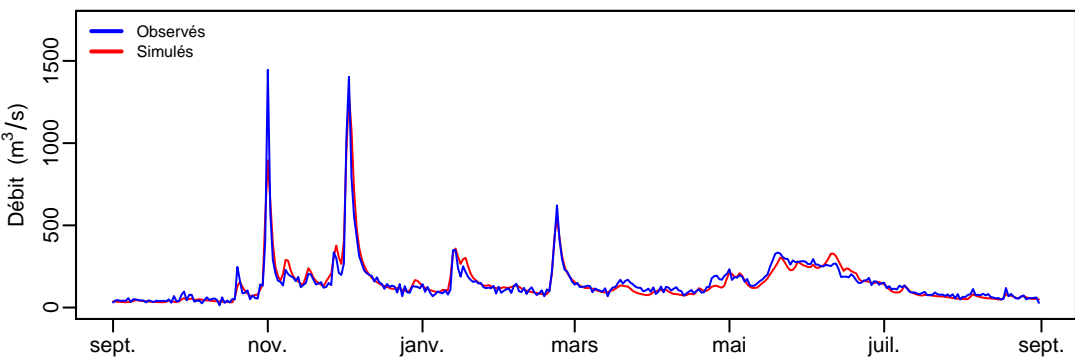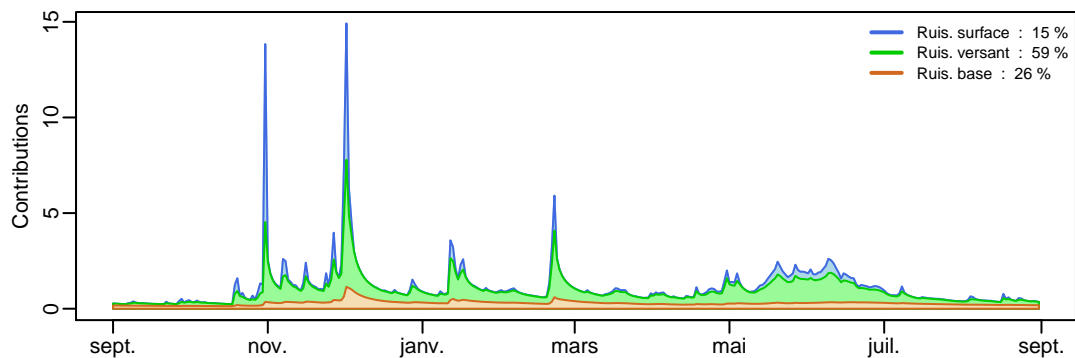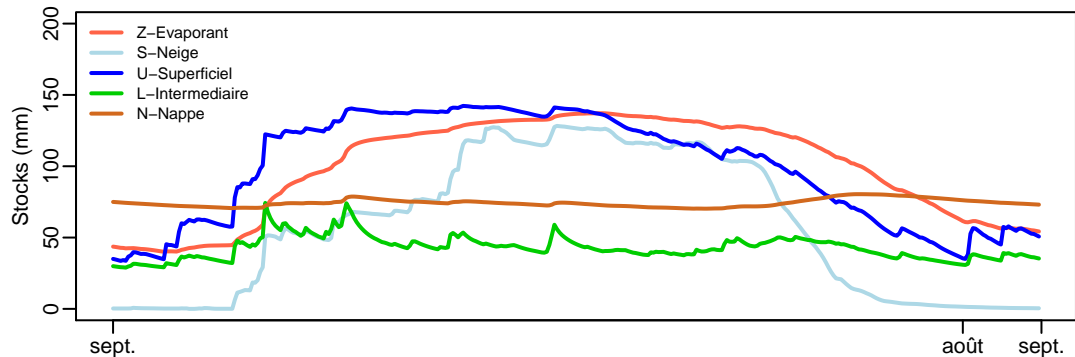

# jouquh (11364.0093 km²) – année 2004–2005

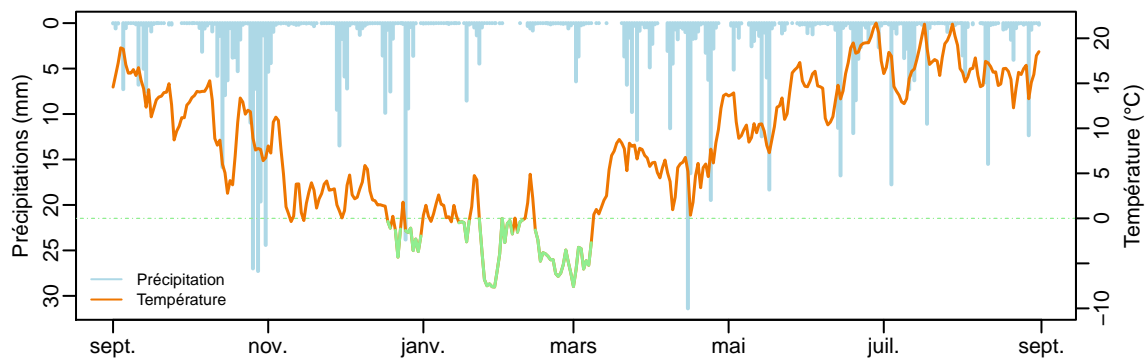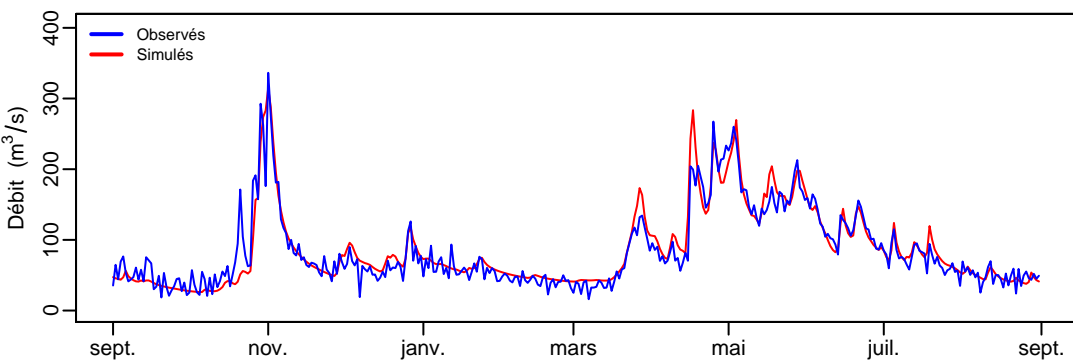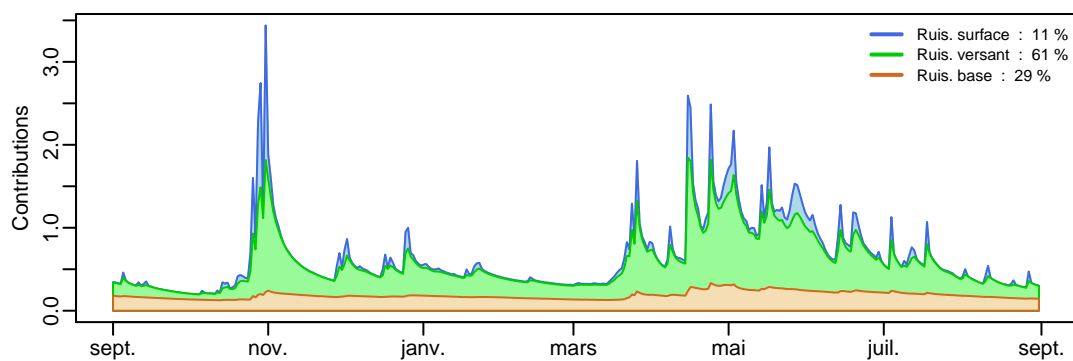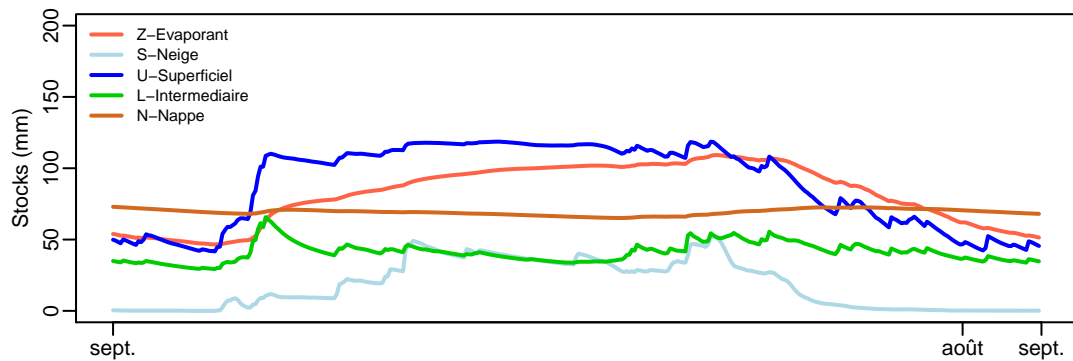

# jouhuh (11364.0093 km<sup>2</sup>) – année 2005–2006

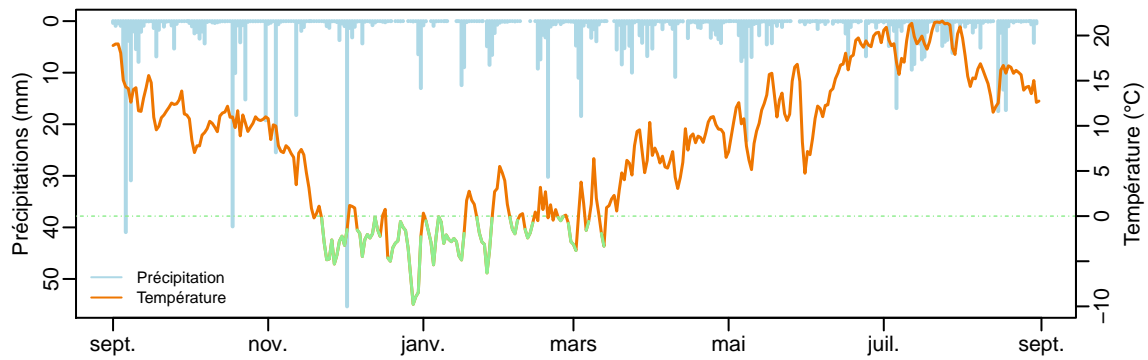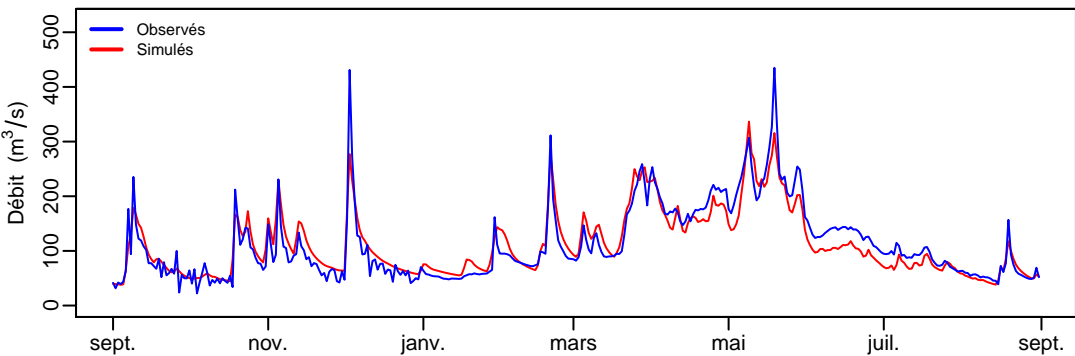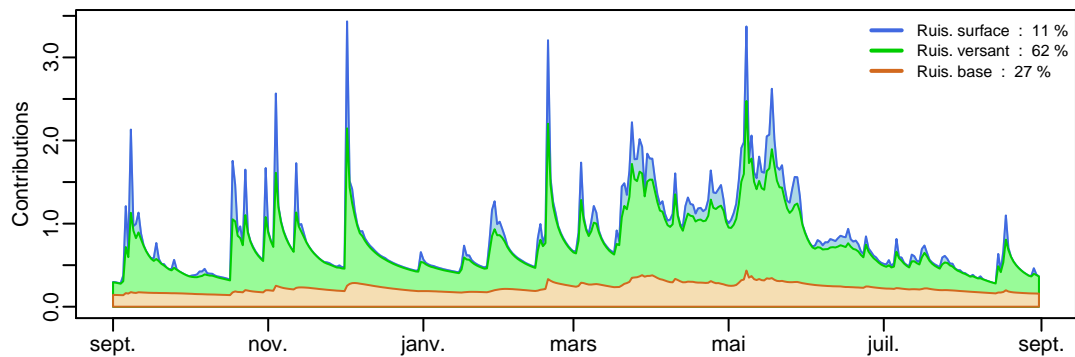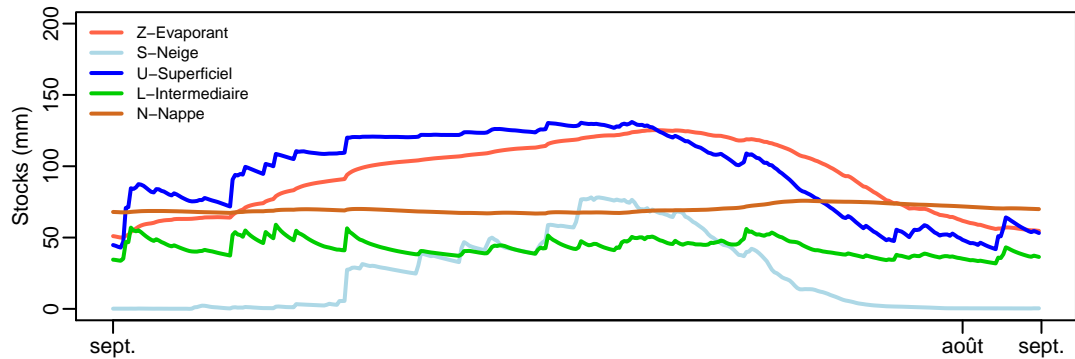

# jouqh (11364.0093 km<sup>2</sup>) – année 2006–2007

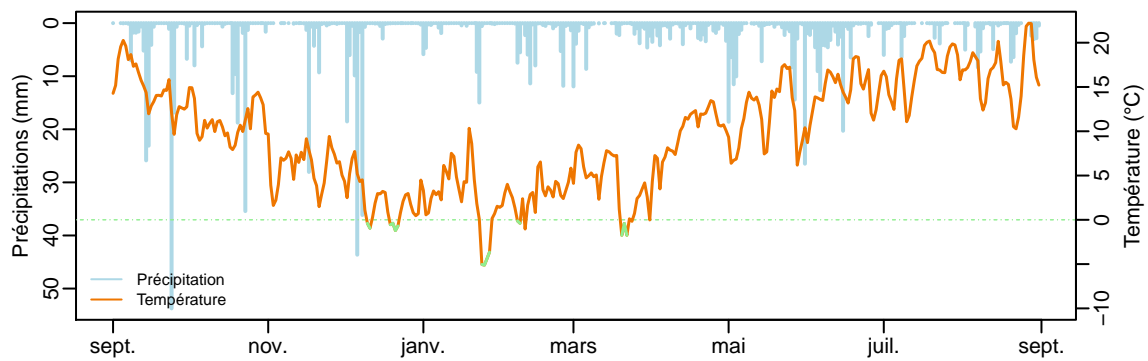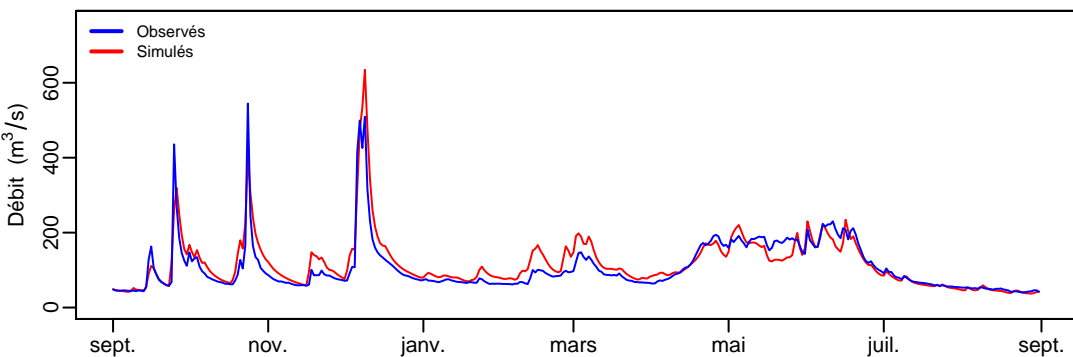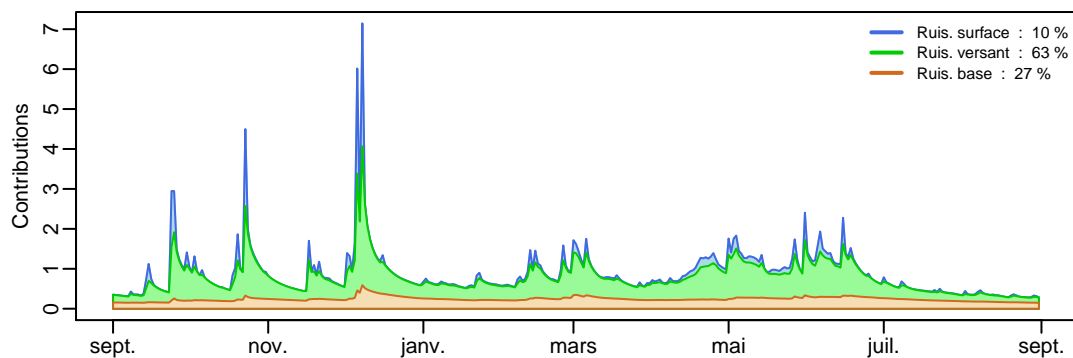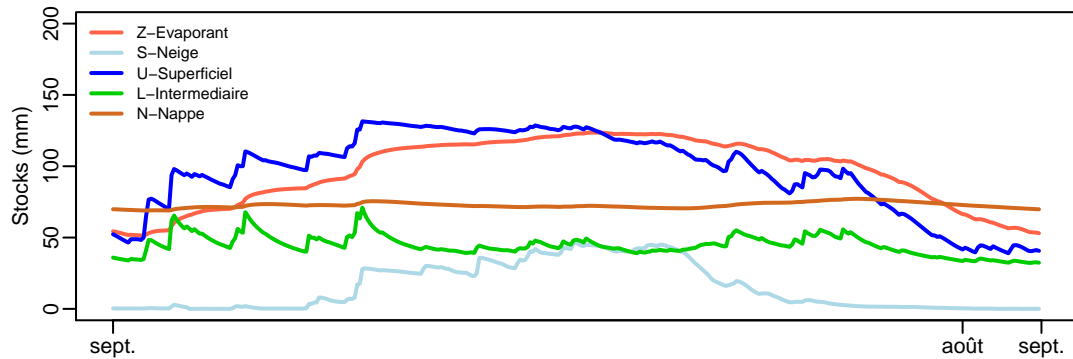

# jouquh (11364.0093 km²) – année 2007–2008

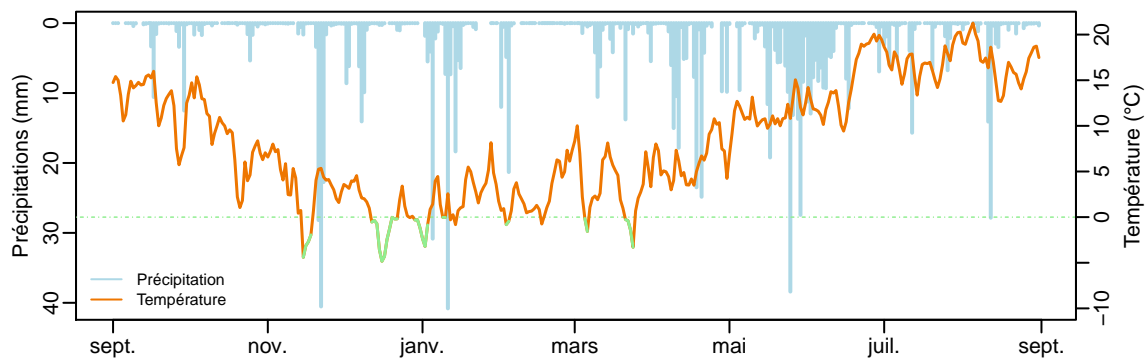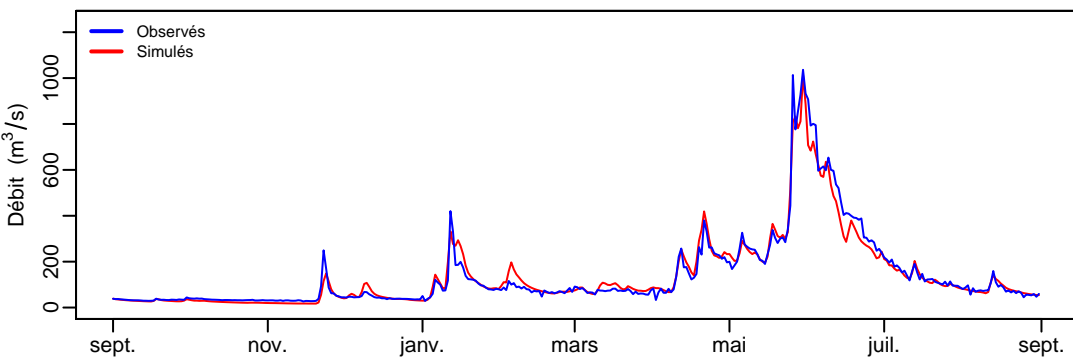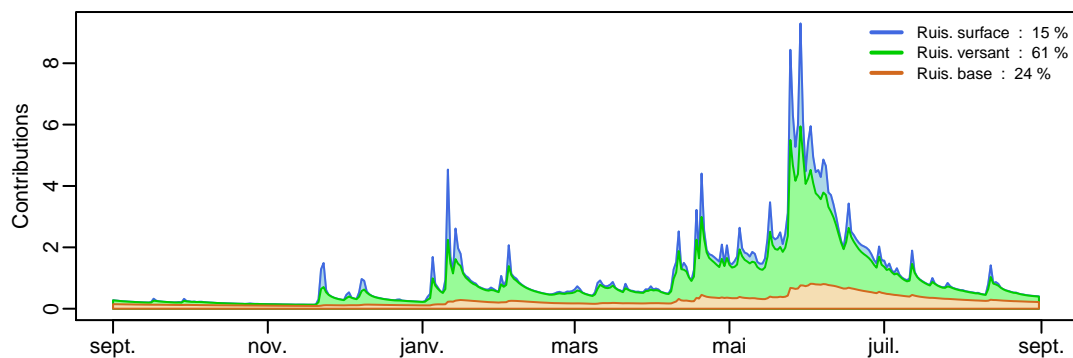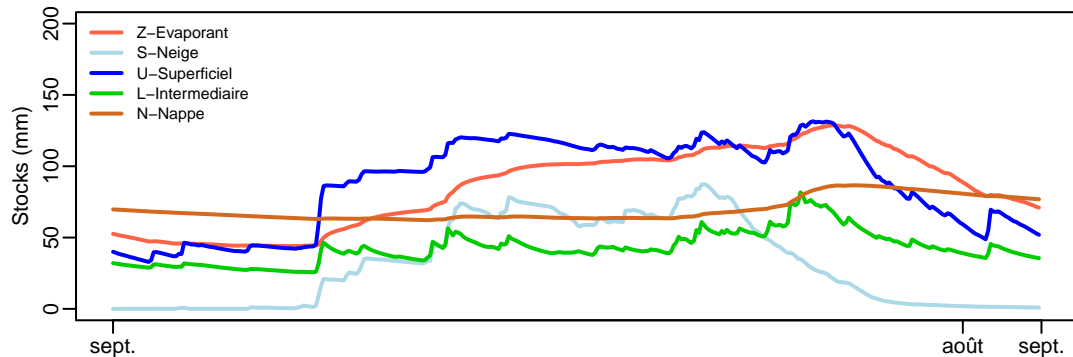

# jouqh (11364.0093 km<sup>2</sup>) – année 2008–2009

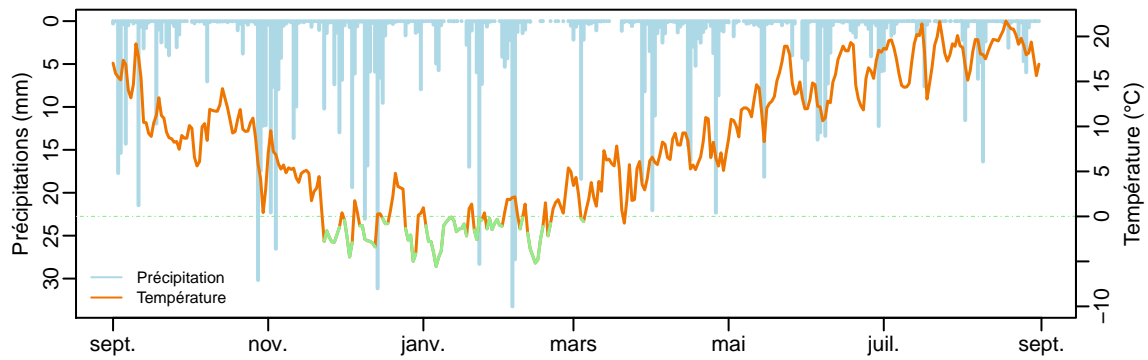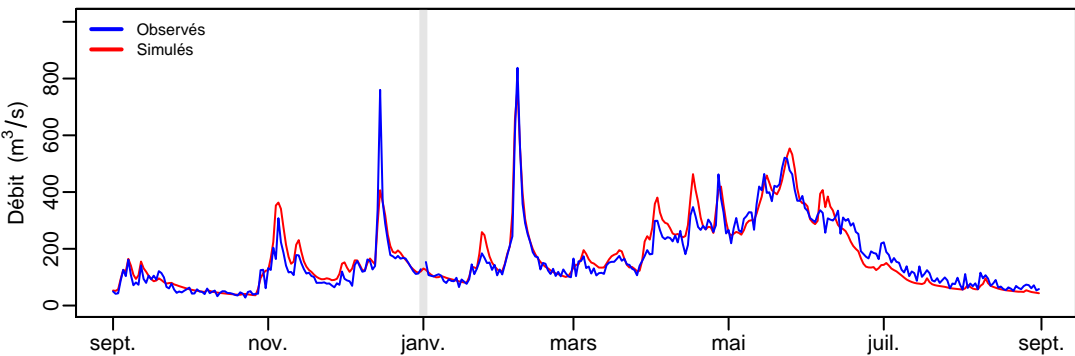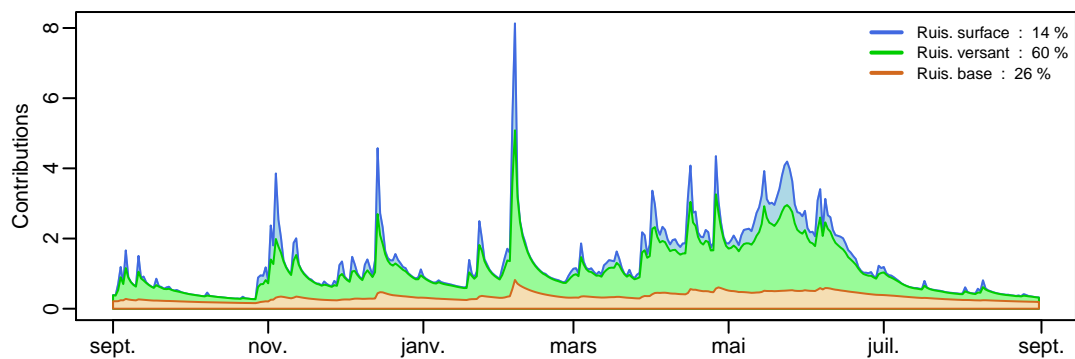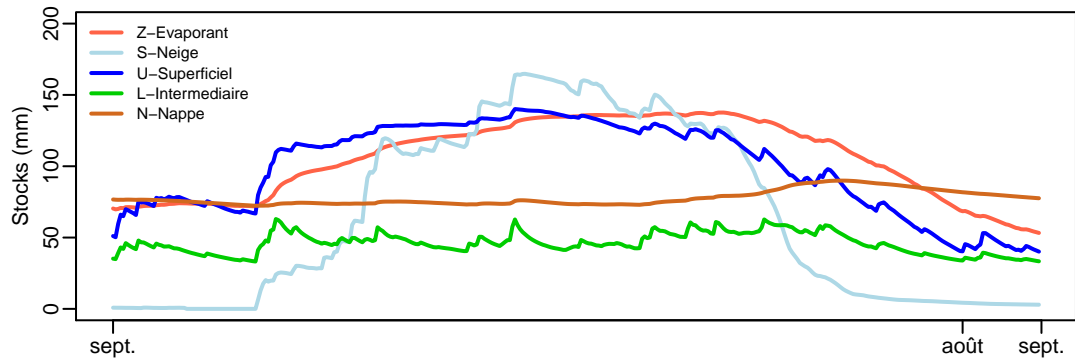

# jouquh (11364.0093 km²) – année 2009–2010

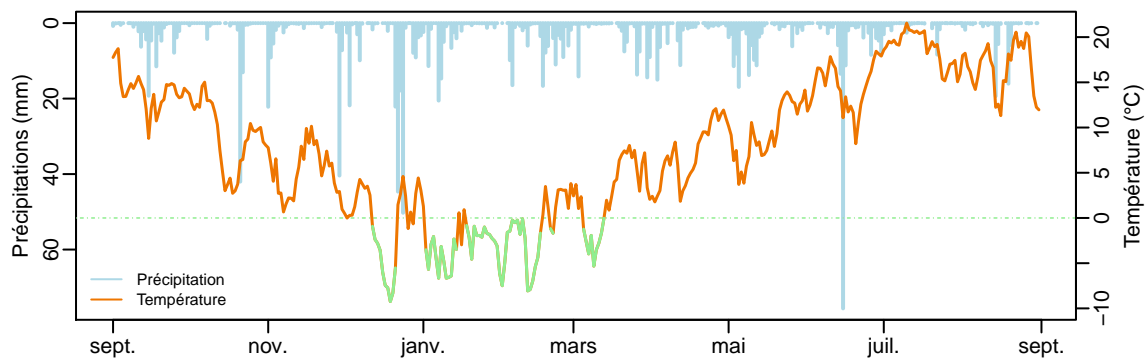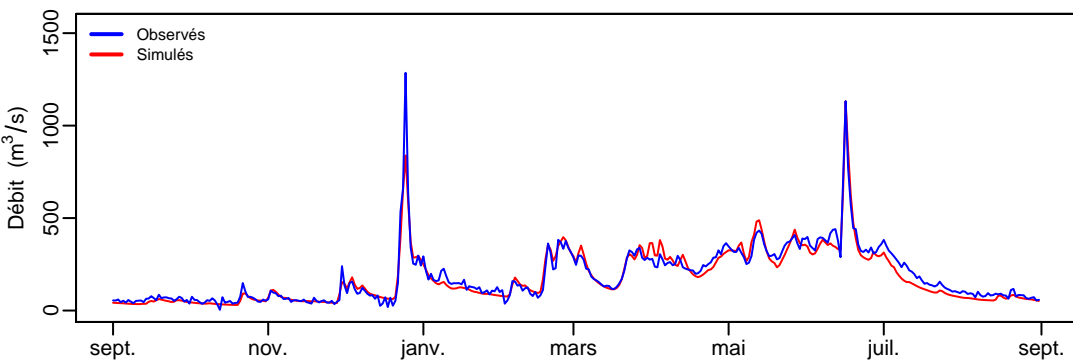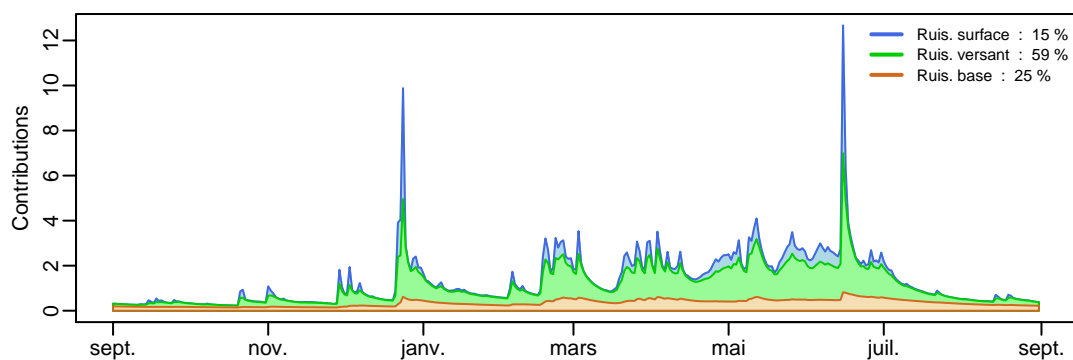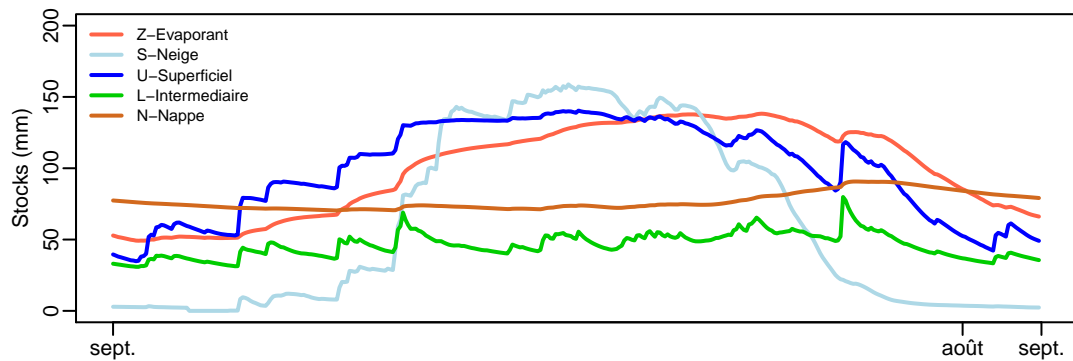



# jouquh (11364.0093 km²) – année 2010–2011

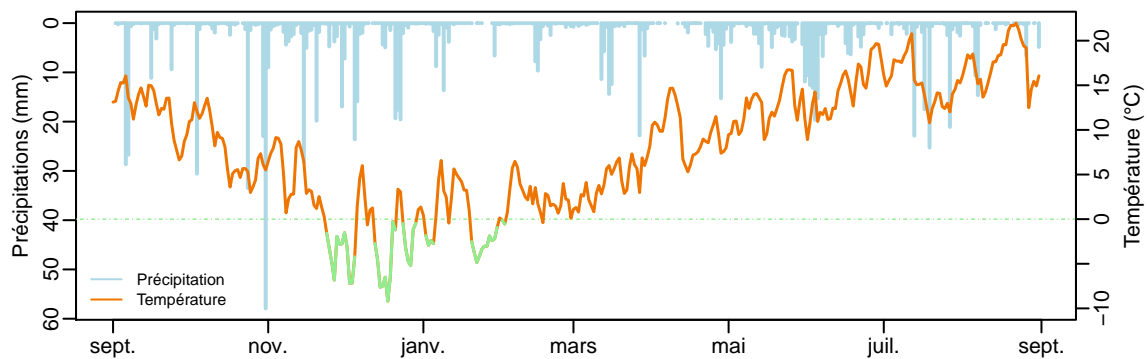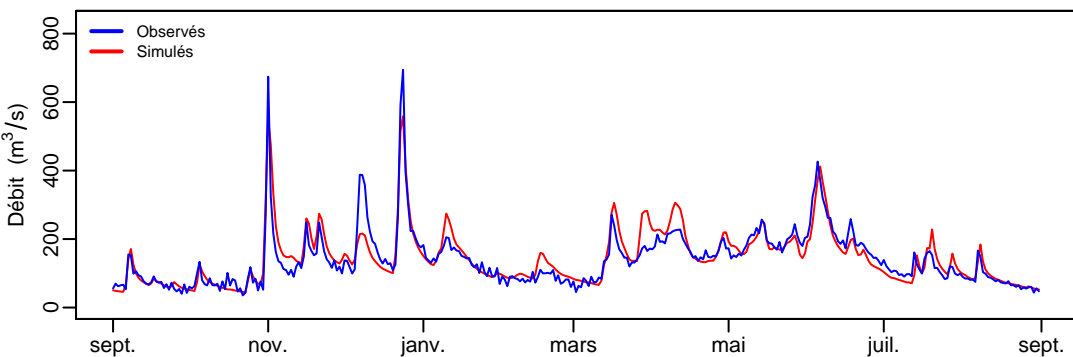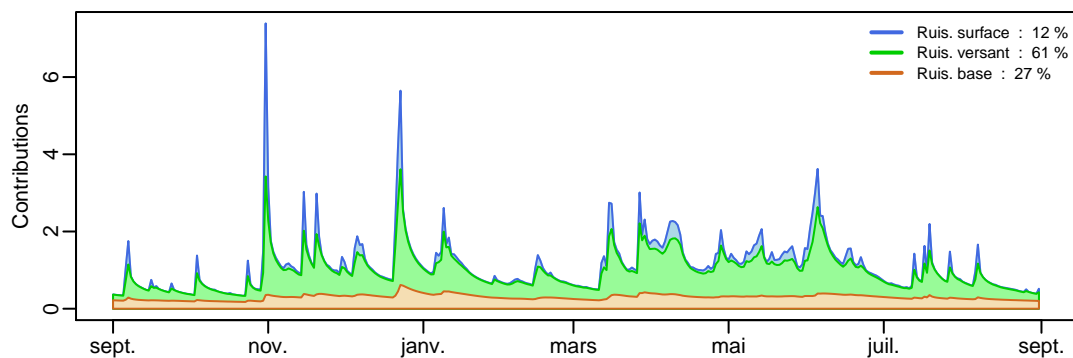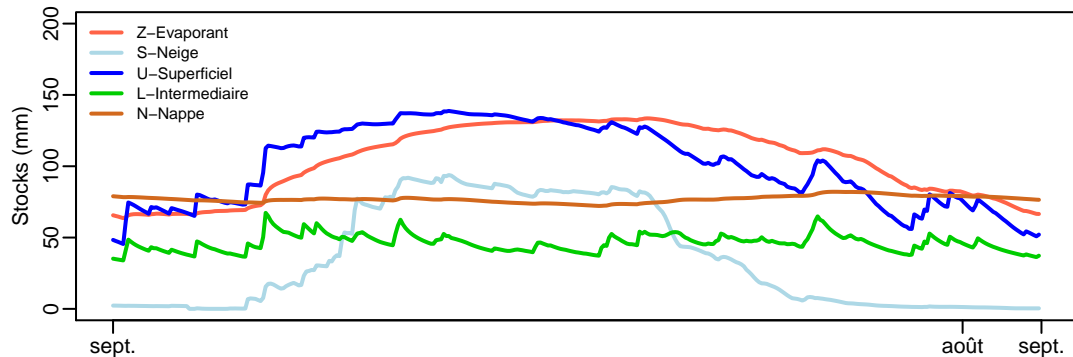

# jouquh (11364.0093 km<sup>2</sup>) – année 2011–2012

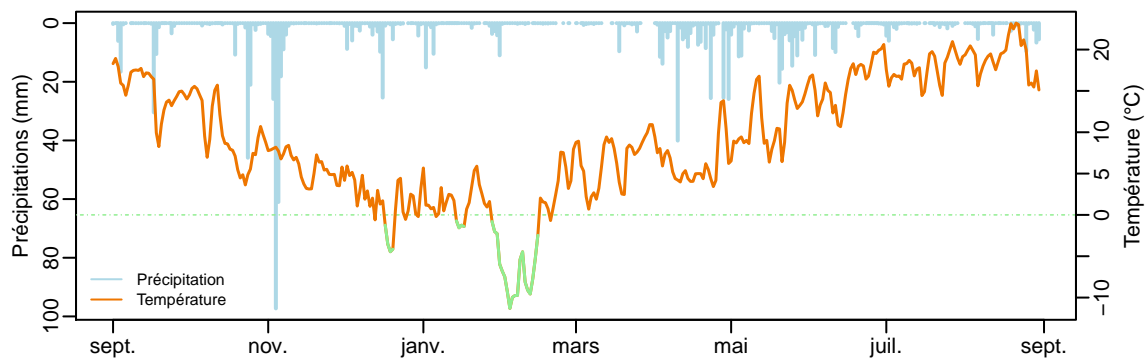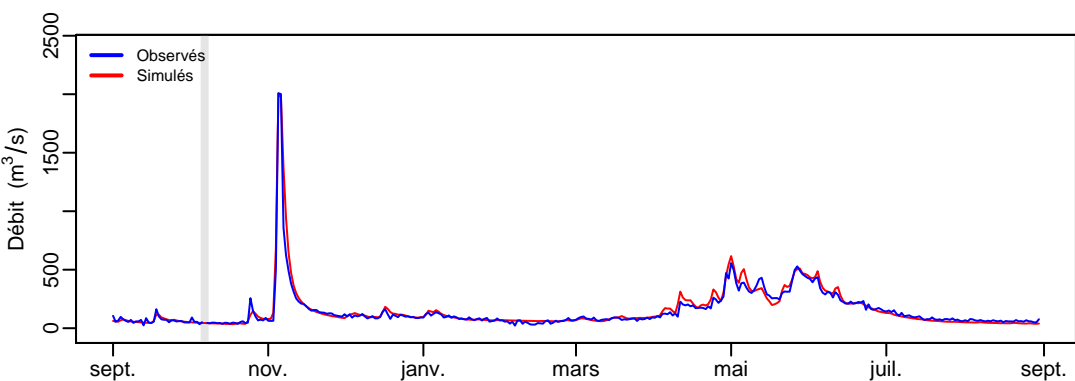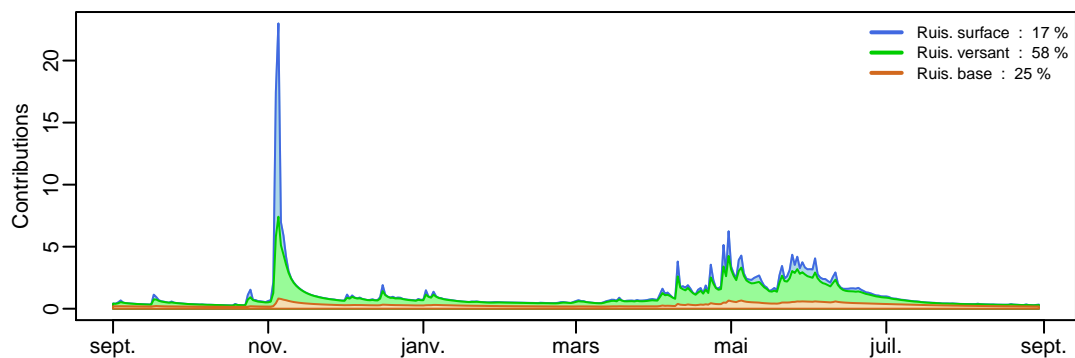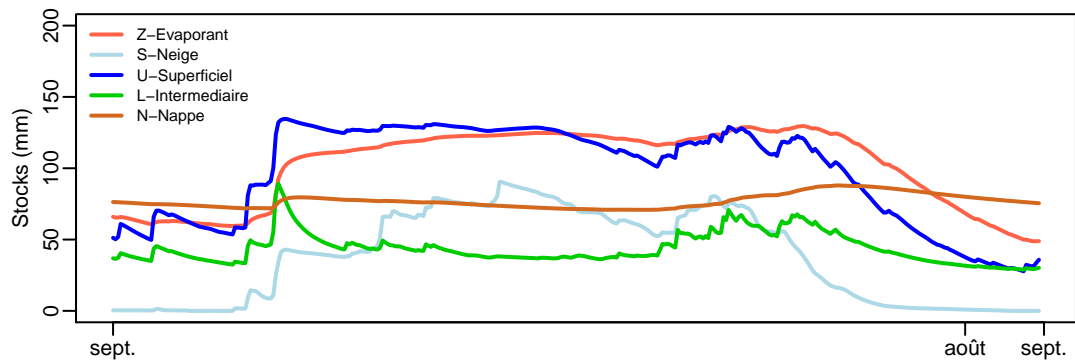

# oraish (6724.6394 km<sup>2</sup>) – année 1981–1982

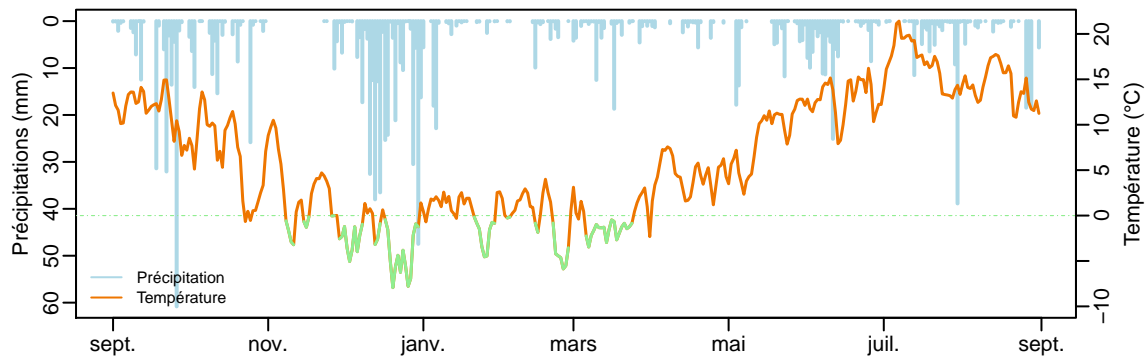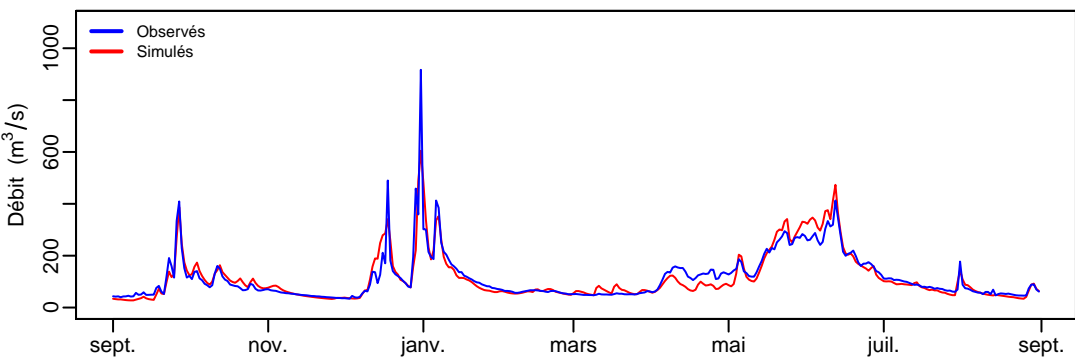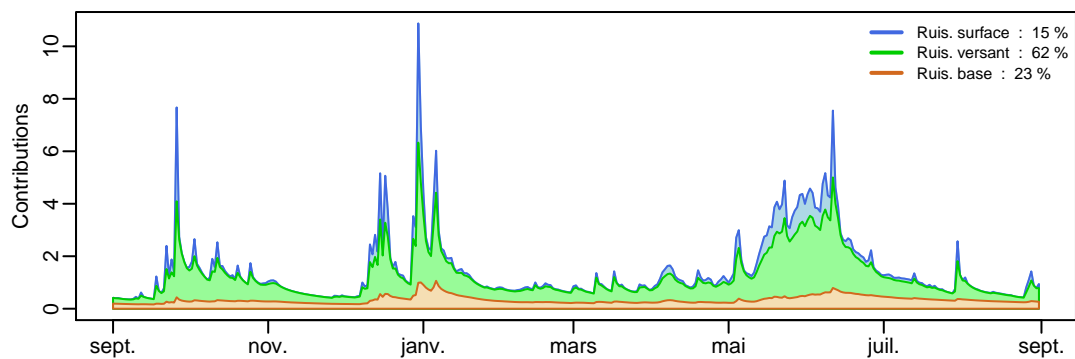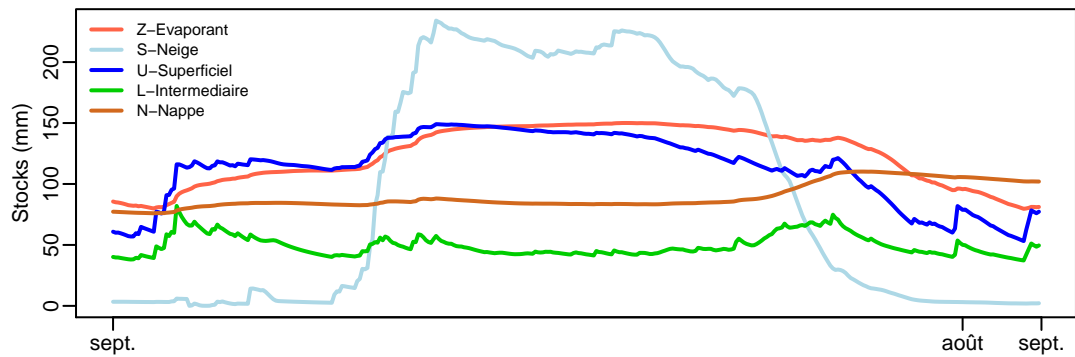

# oraish (6724.6394 km<sup>2</sup>) – année 1982–1983

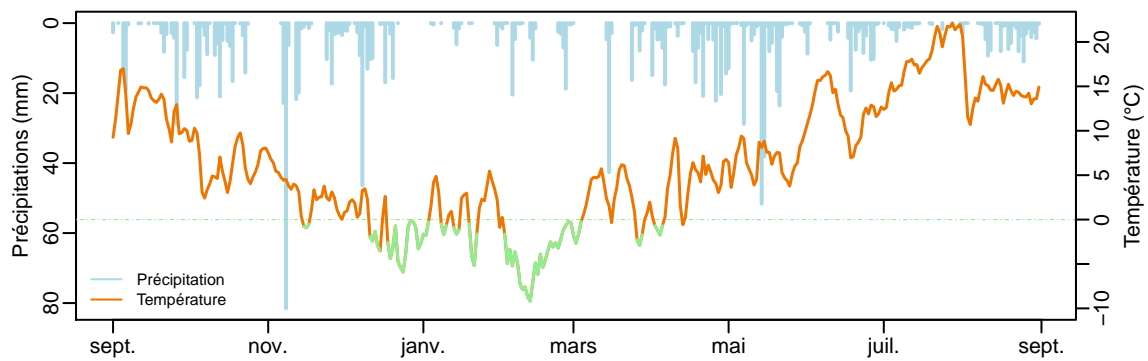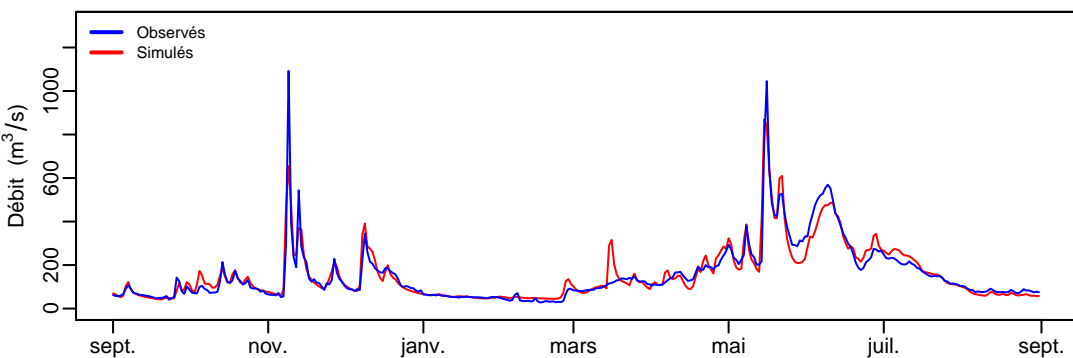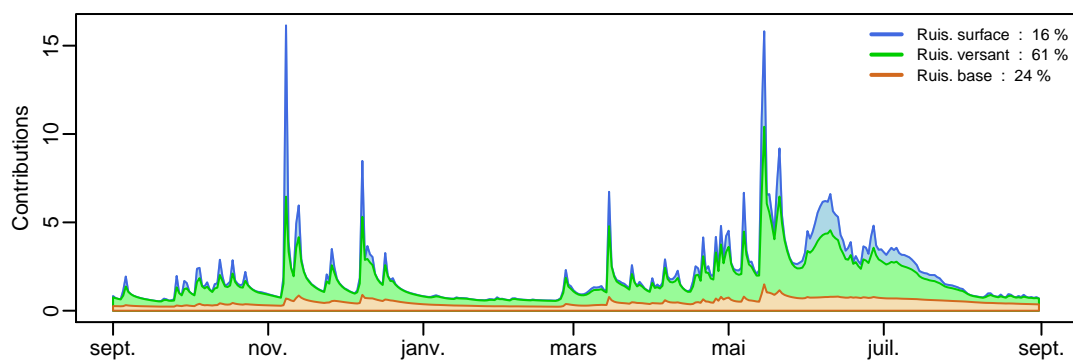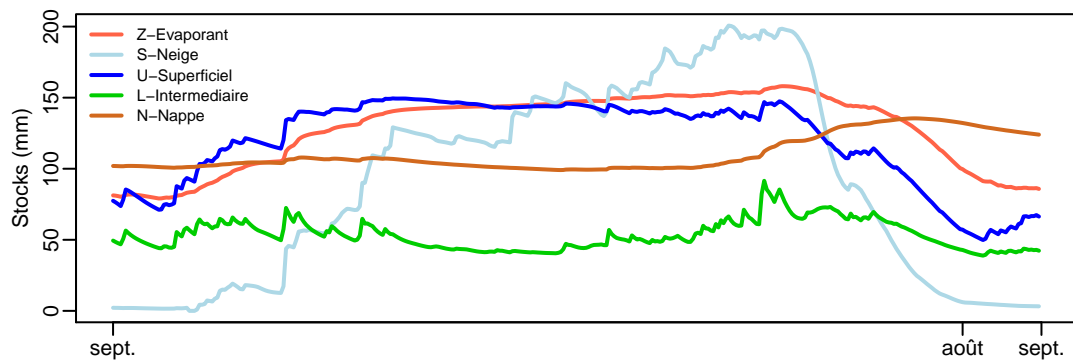

# oraish (6724.6394 km<sup>2</sup>) – année 1983–1984

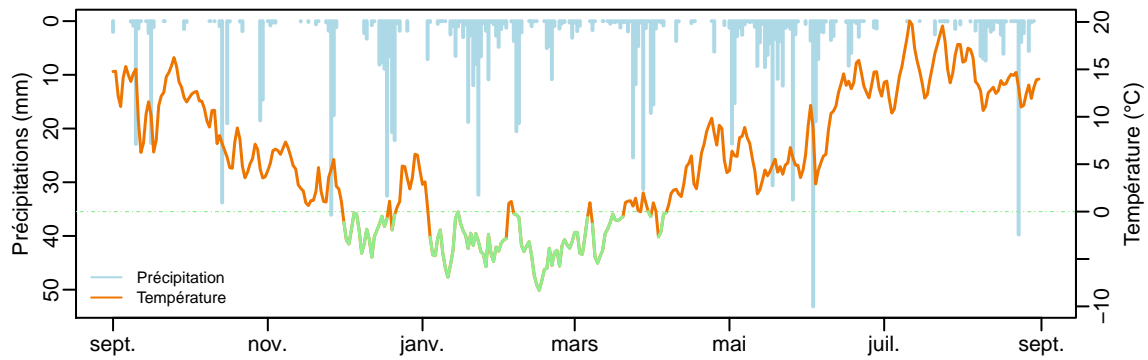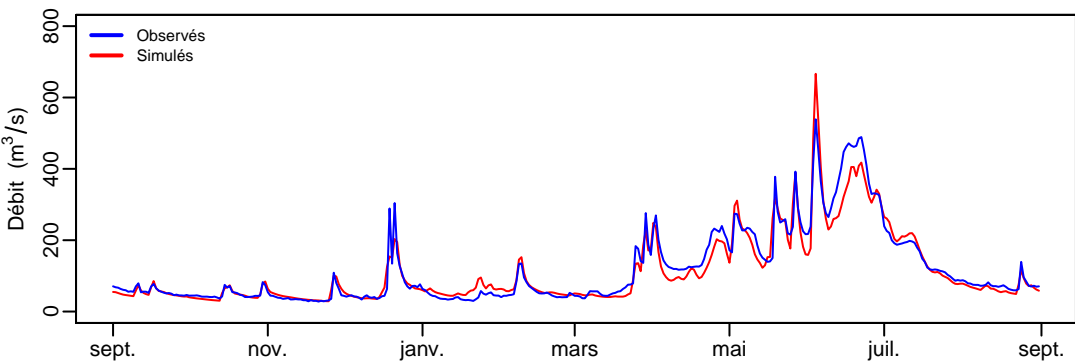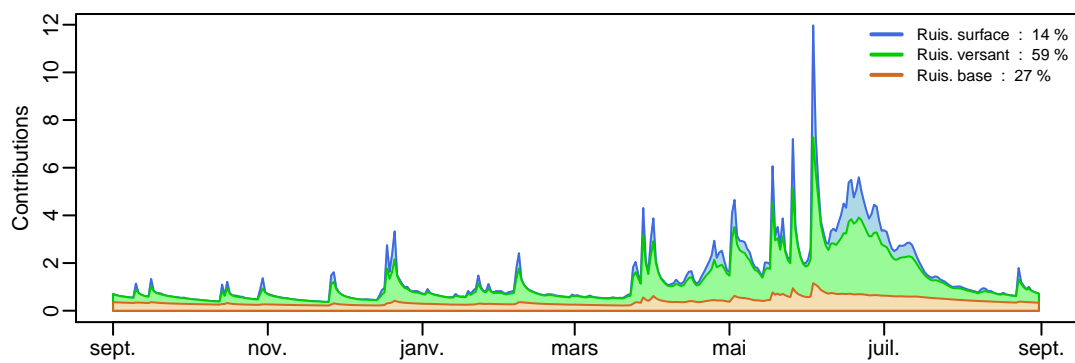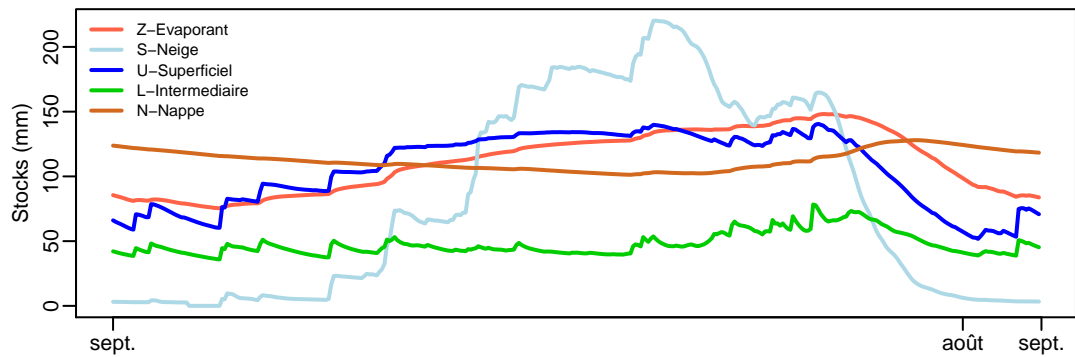

# oraish (6724.6394 km<sup>2</sup>) – année 1984–1985

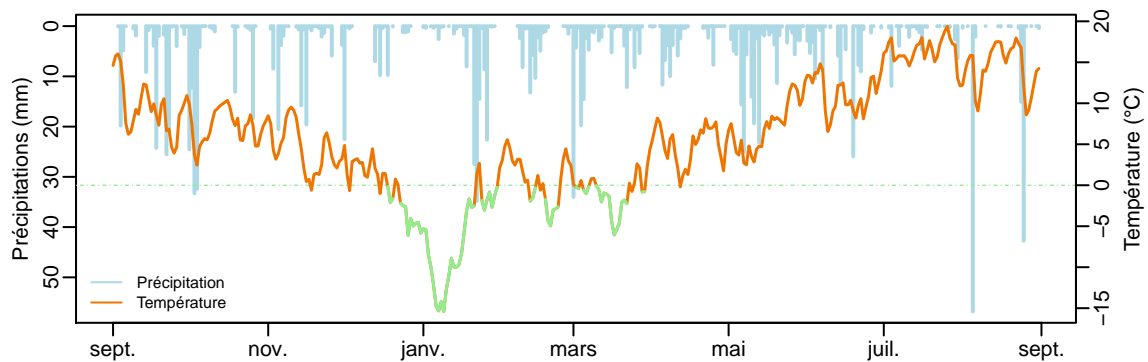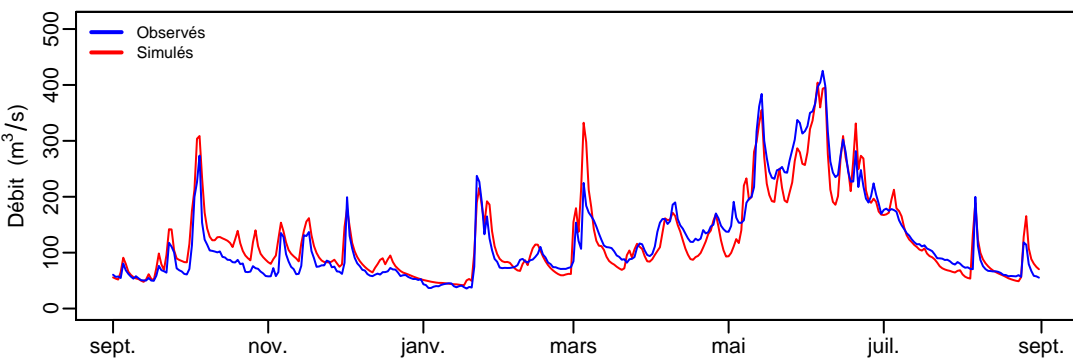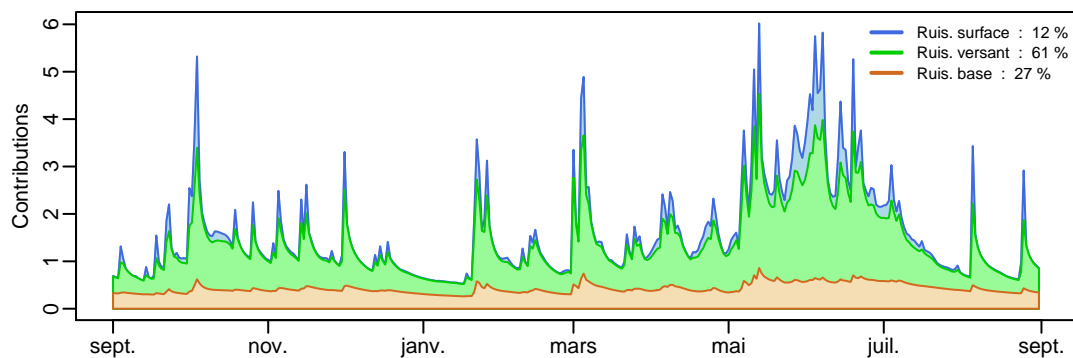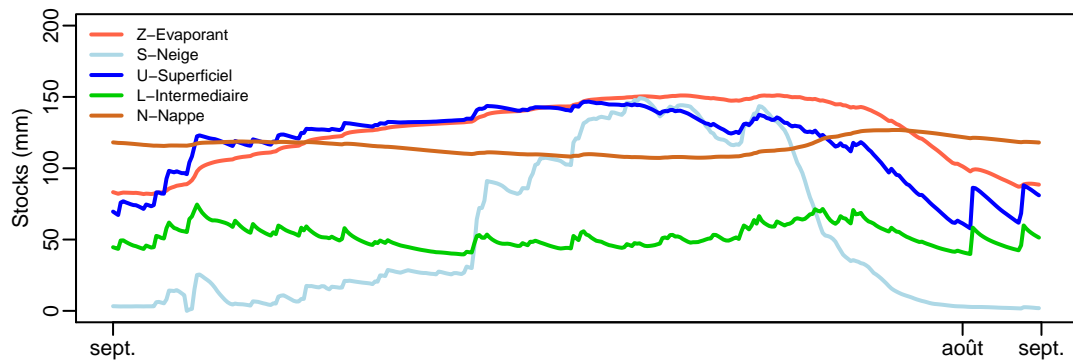

# oraish (6724.6394 km<sup>2</sup>) – année 1985–1986

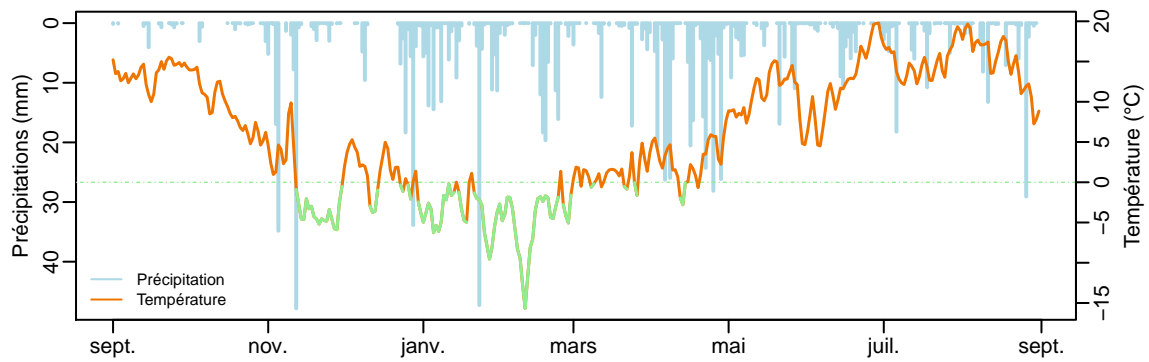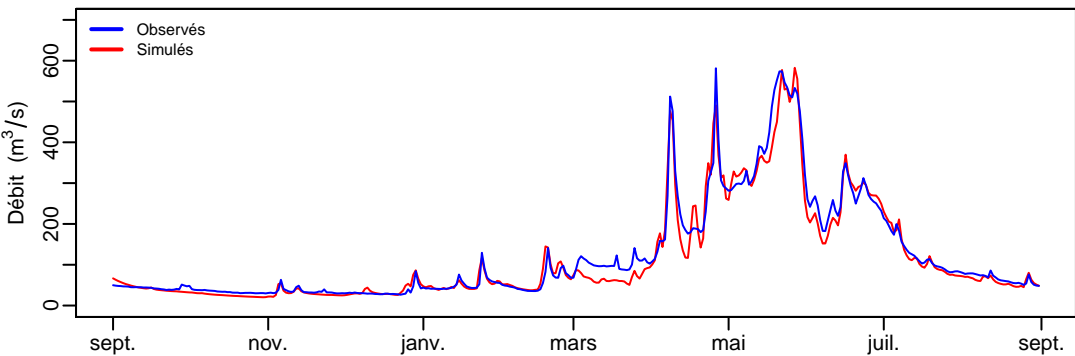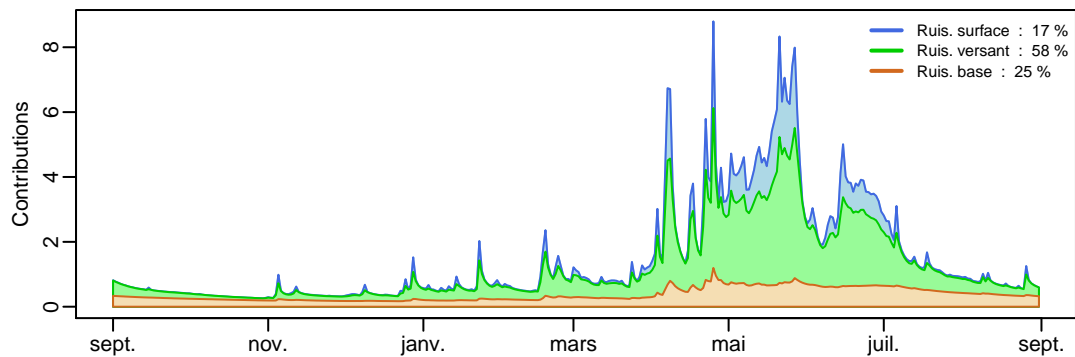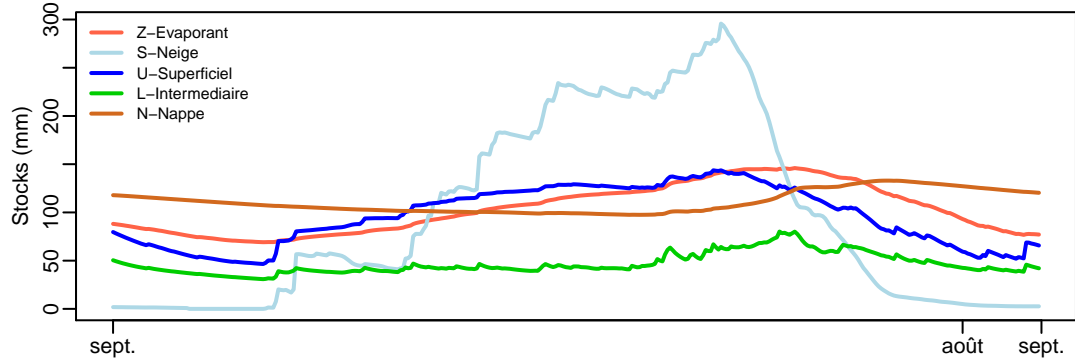

# oraish (6724.6394 km<sup>2</sup>) – année 1986–1987

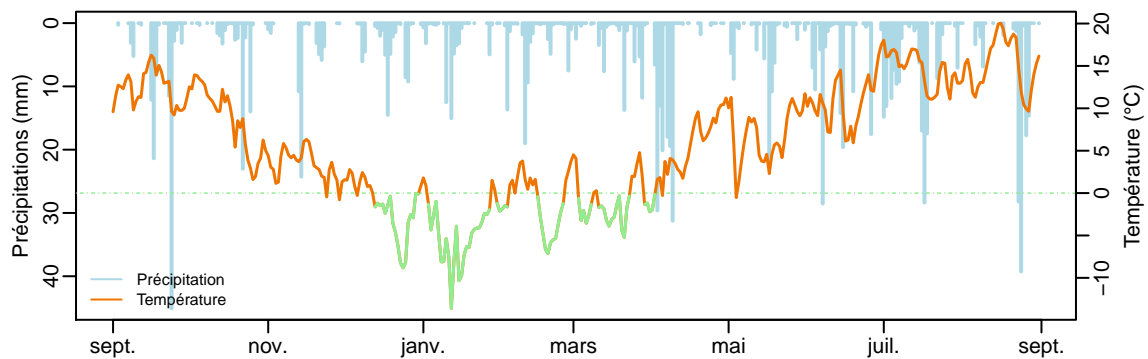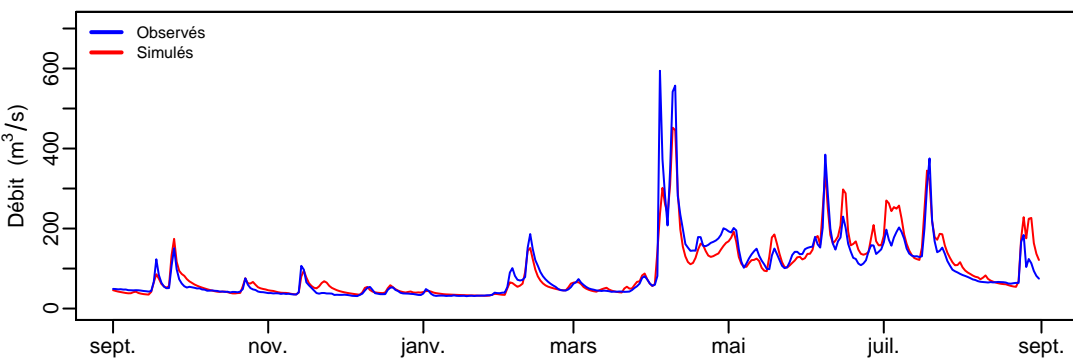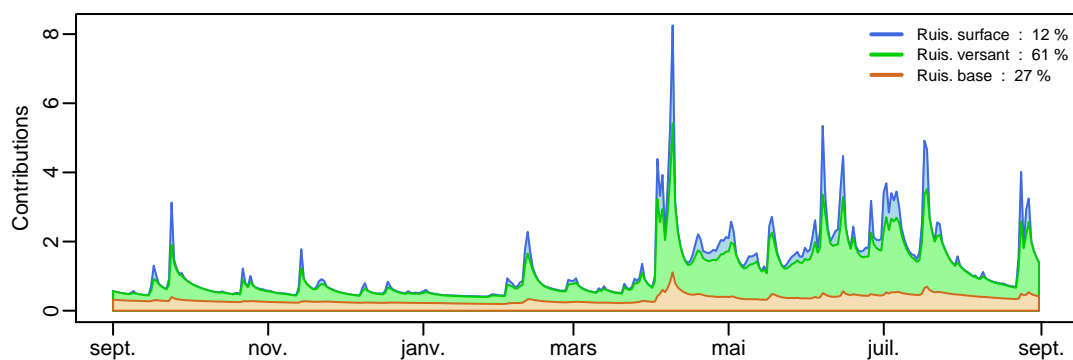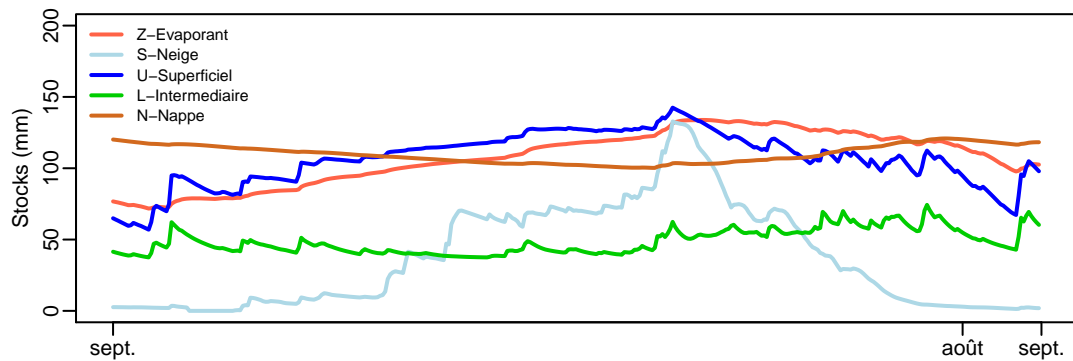



# oraish (6724.6394 km<sup>2</sup>) – année 1987–1988

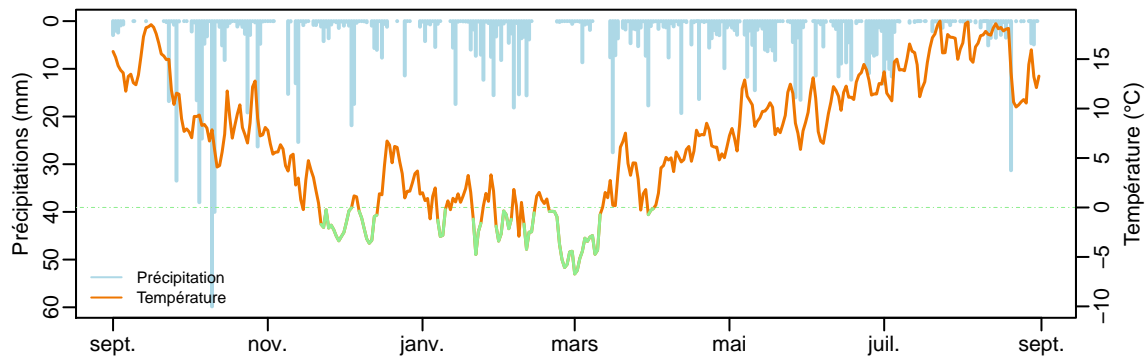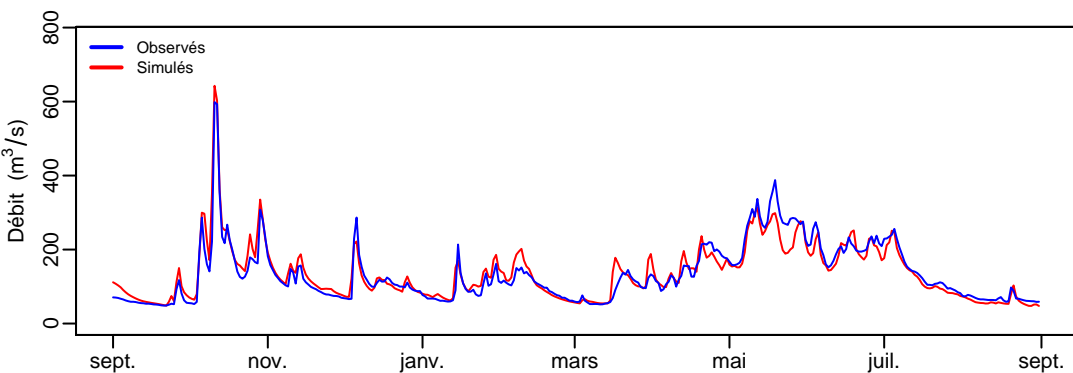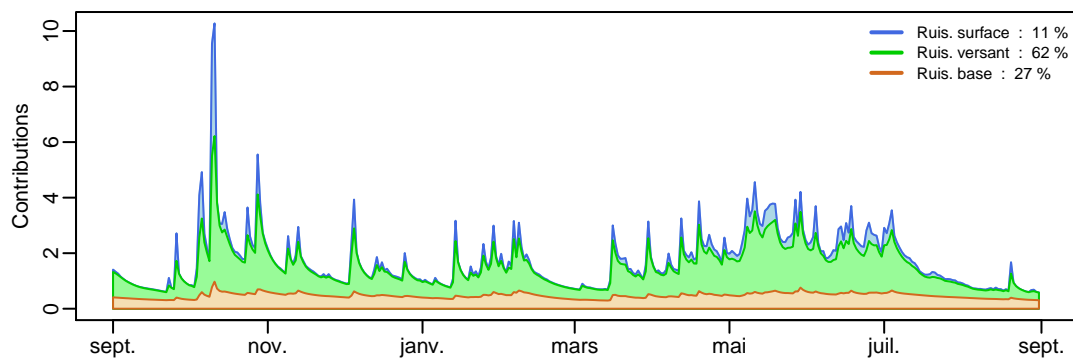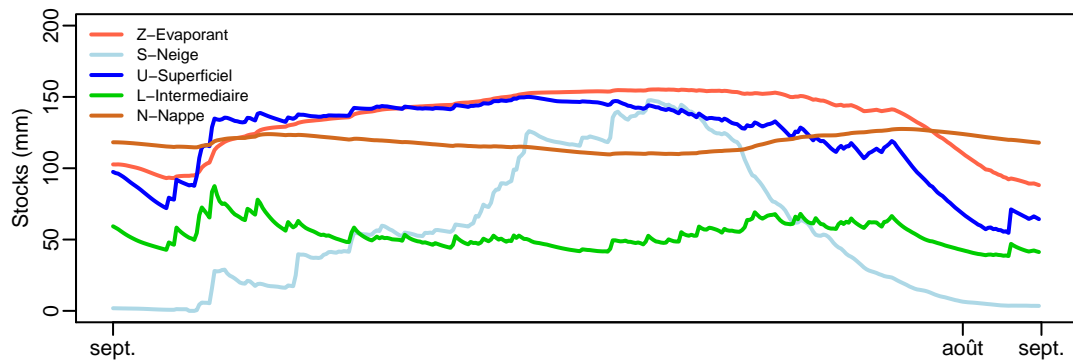

# oraish (6724.6394 km<sup>2</sup>) – année 1988–1989

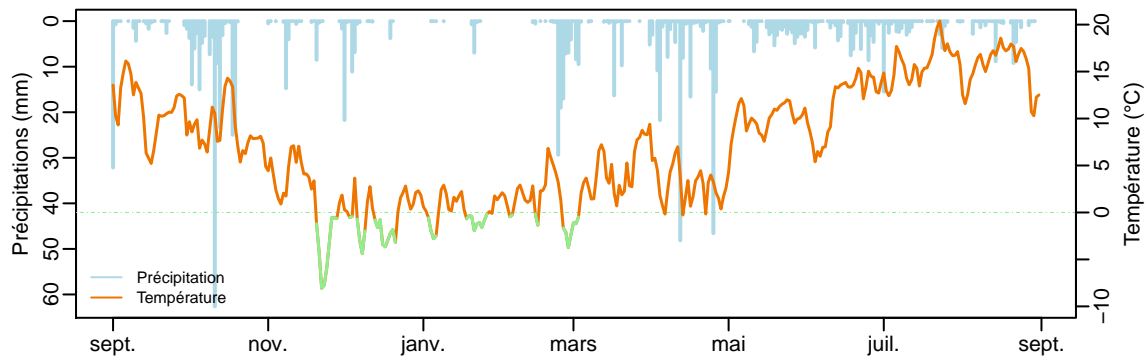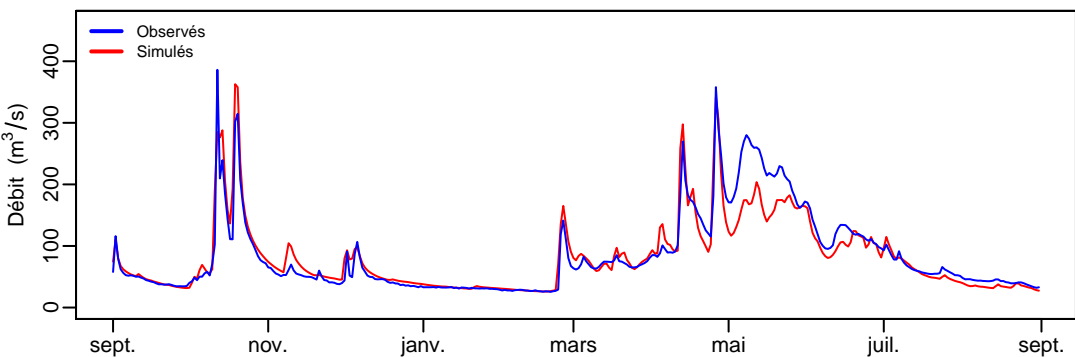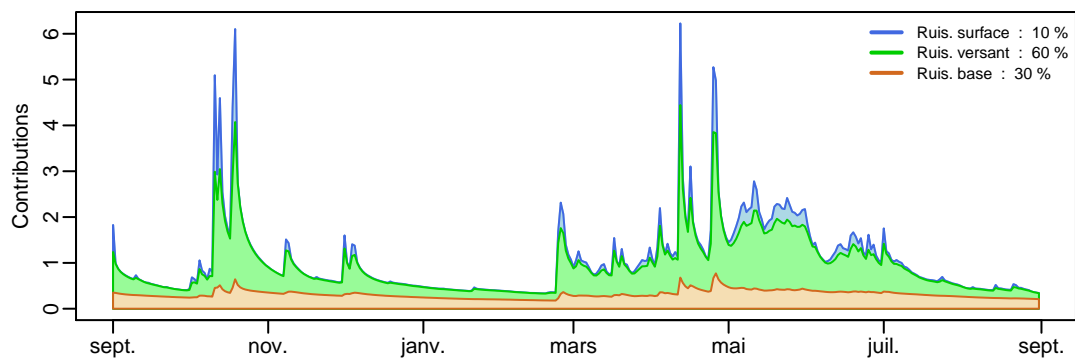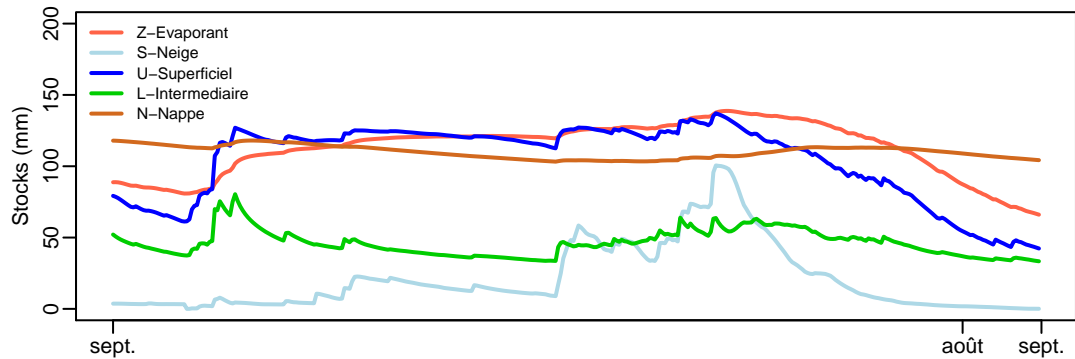

# oraish (6724.6394 km<sup>2</sup>) – année 1989–1990

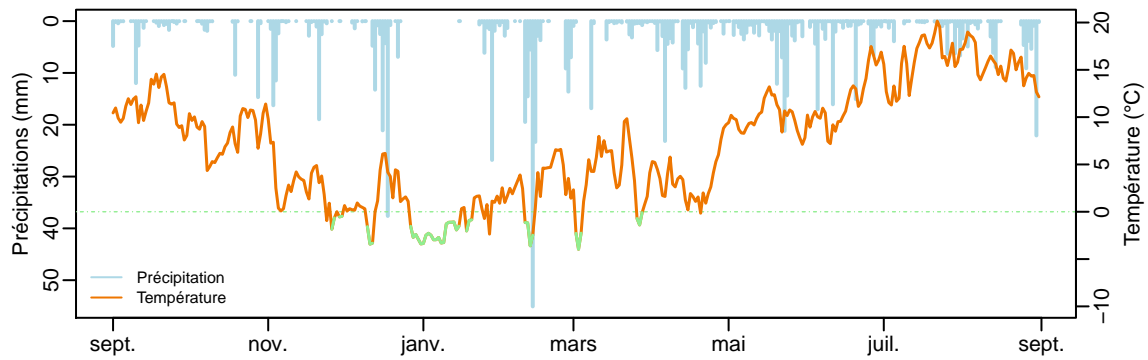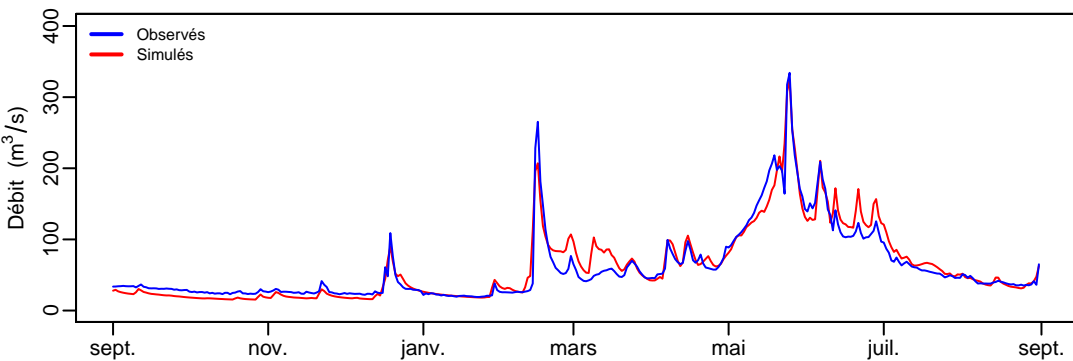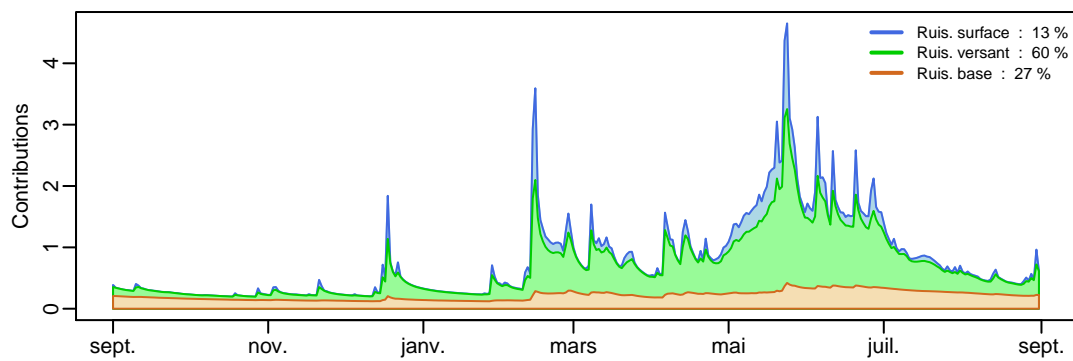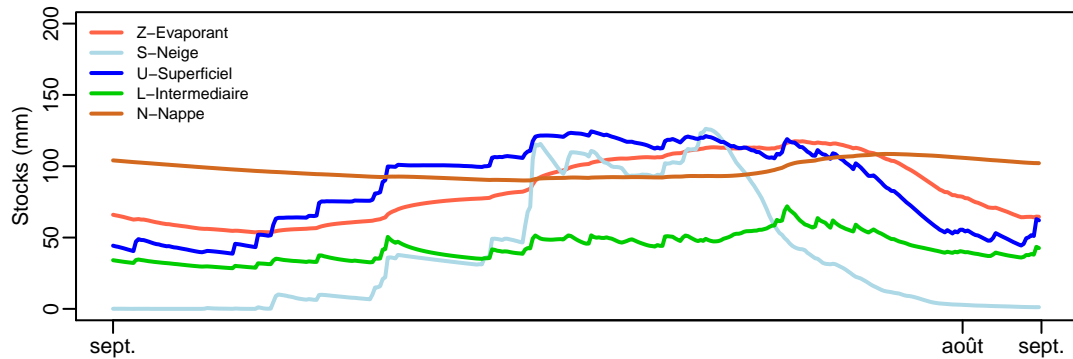

# oraish (6724.6394 km<sup>2</sup>) – année 1990–1991

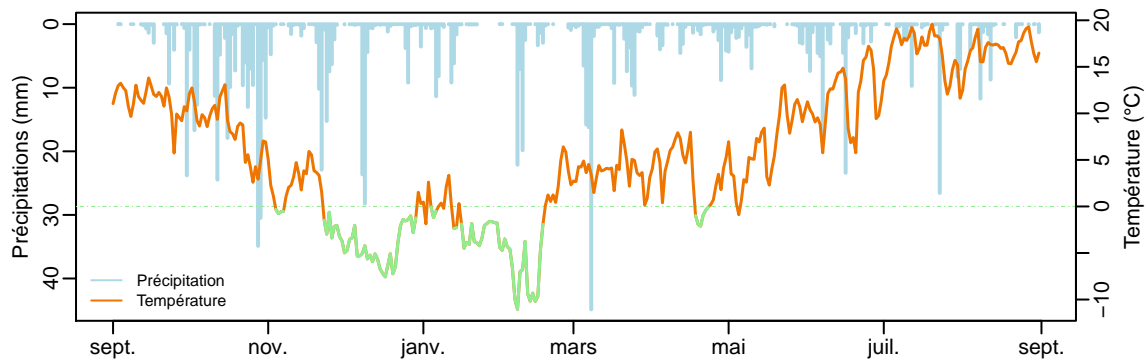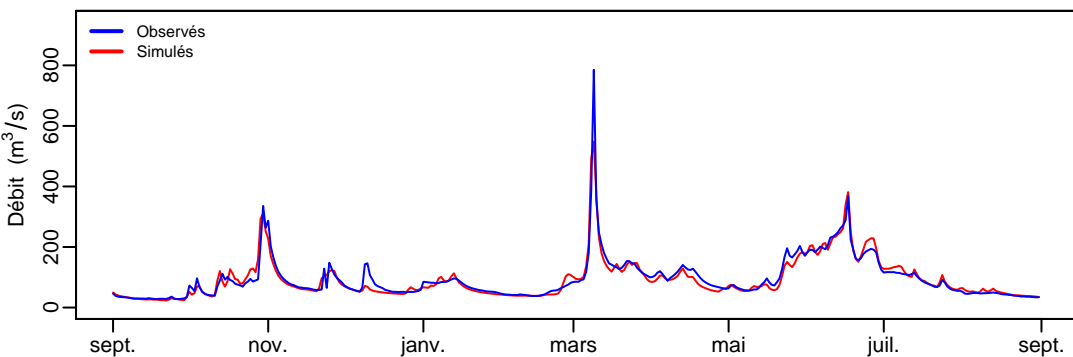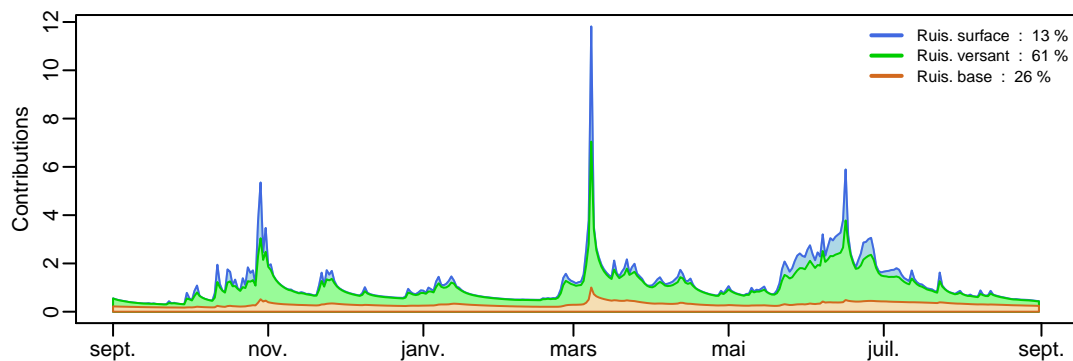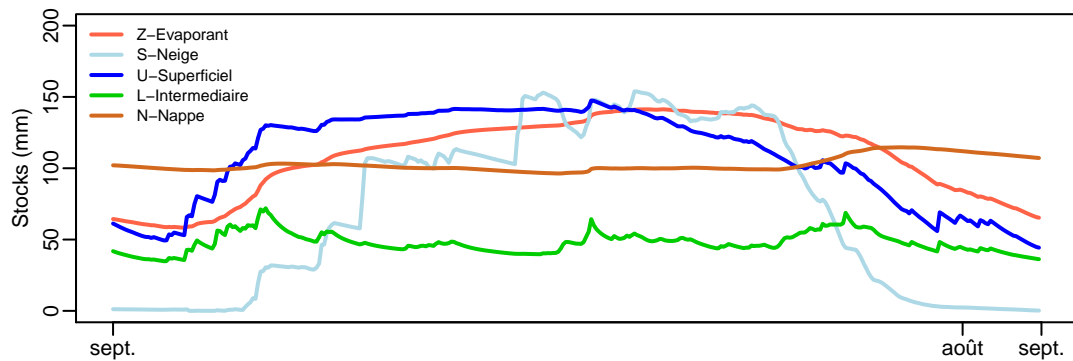

# oraish (6724.6394 km<sup>2</sup>) – année 1991–1992

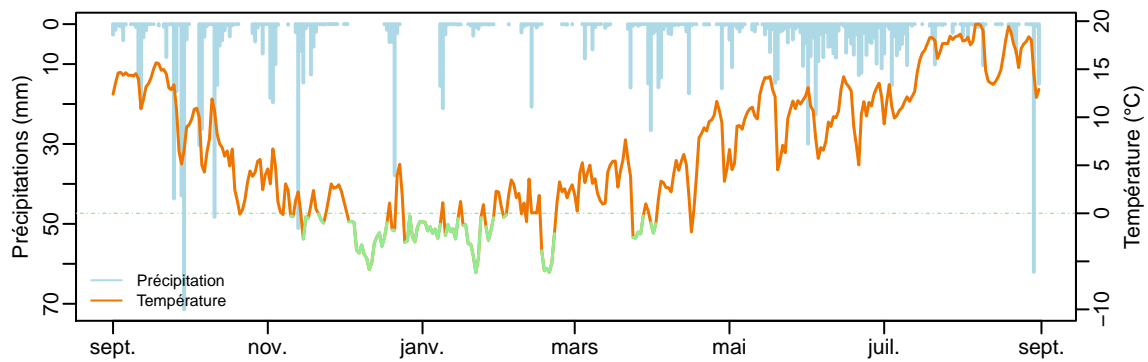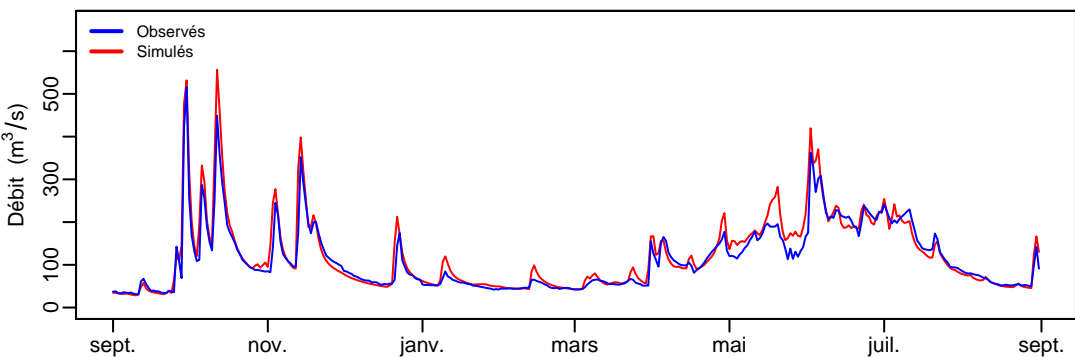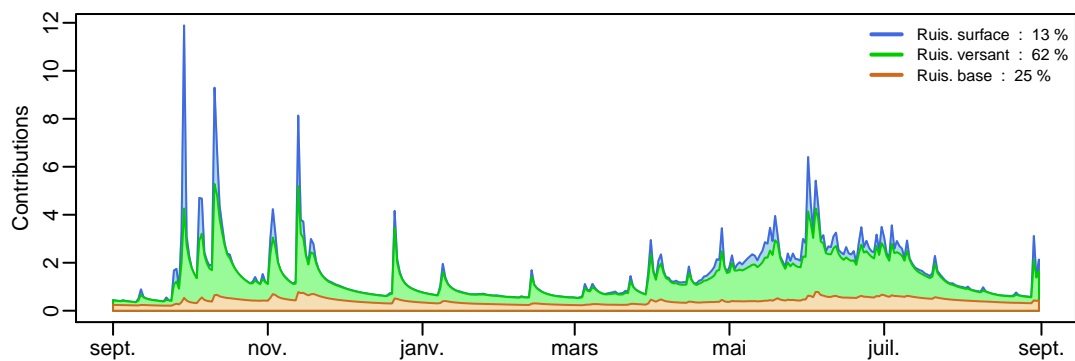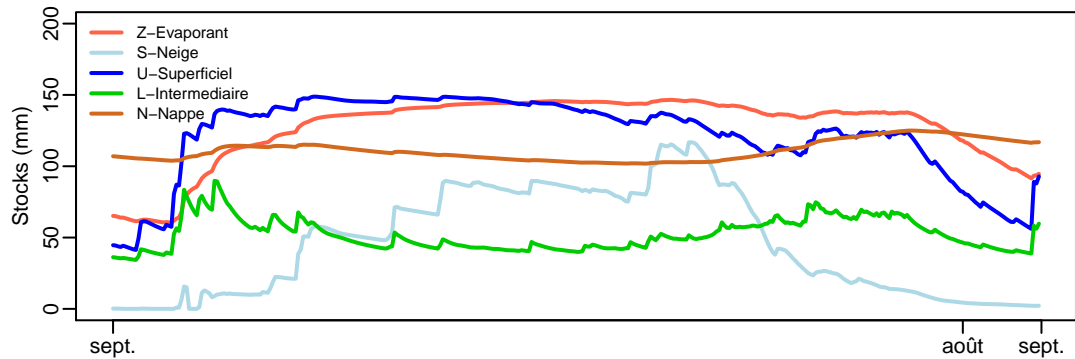

# oraish (6724.6394 km<sup>2</sup>) – année 1992–1993

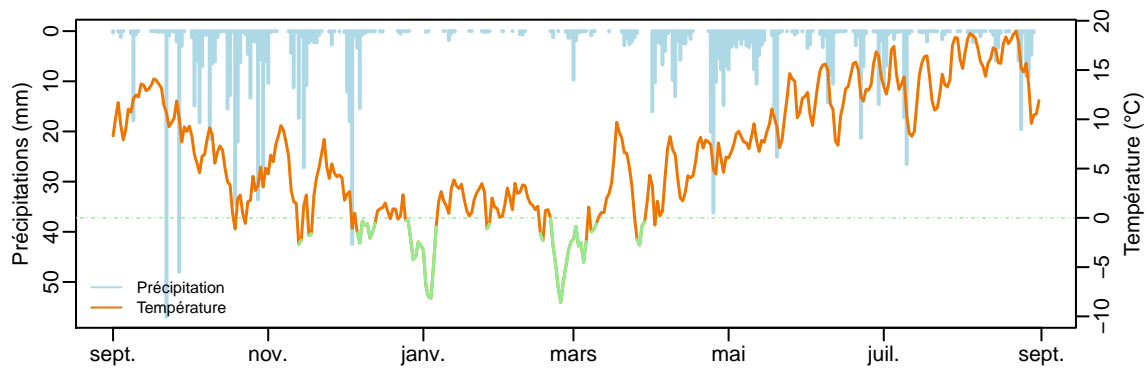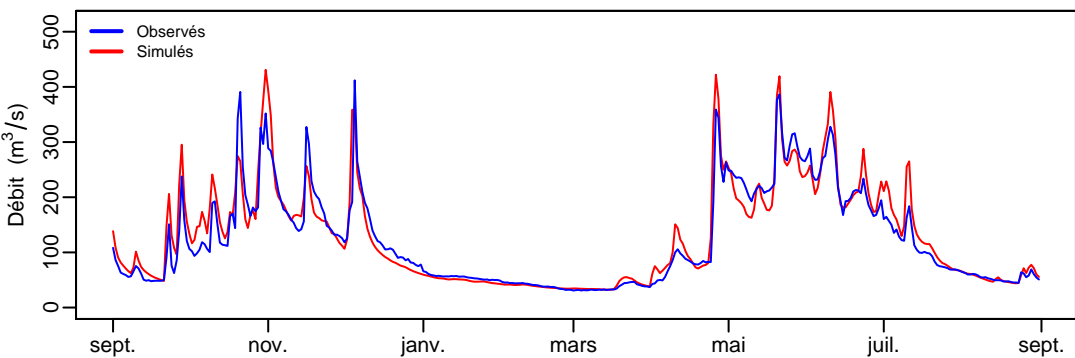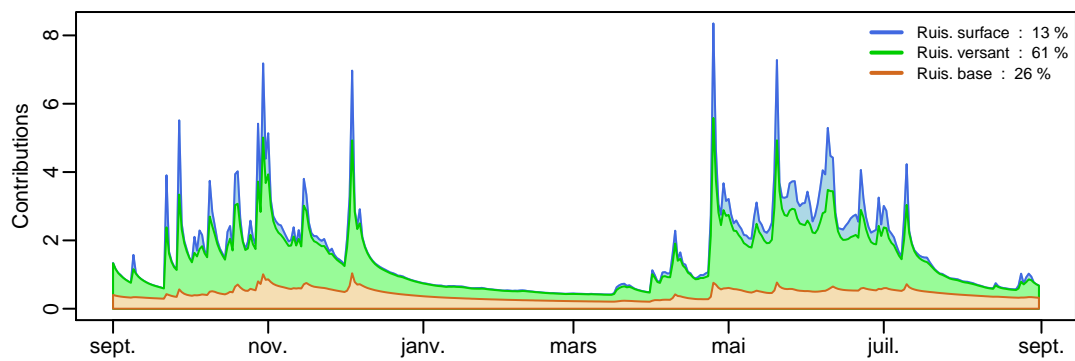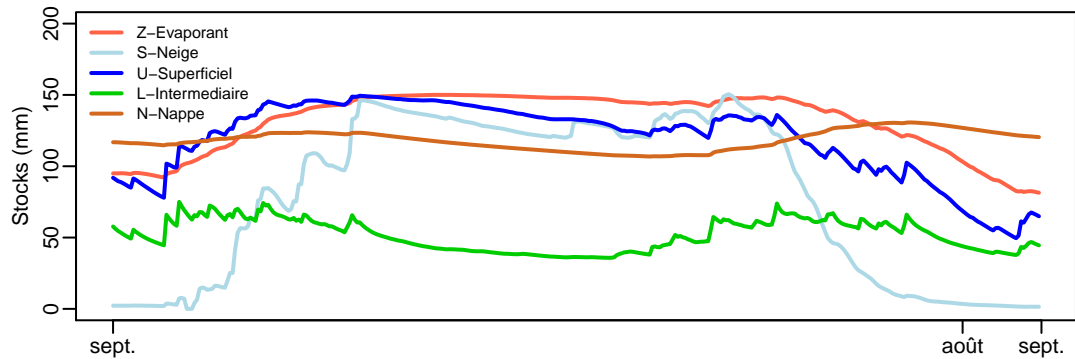

# oraish (6724.6394 km<sup>2</sup>) – année 1993–1994

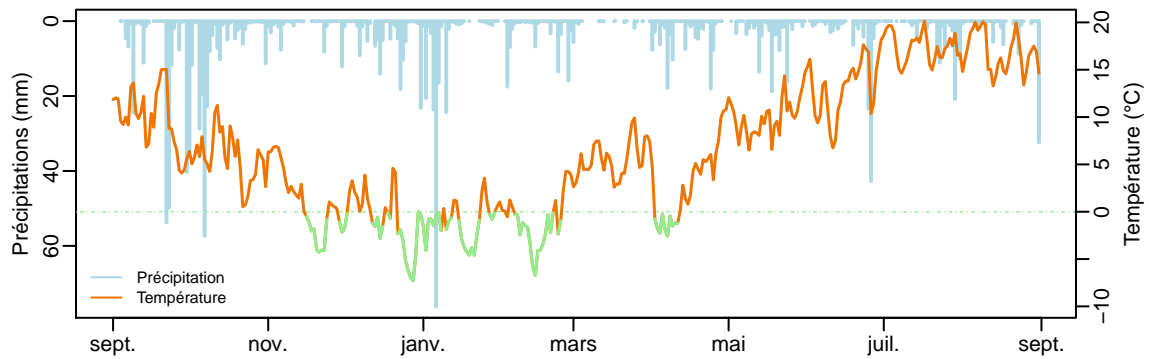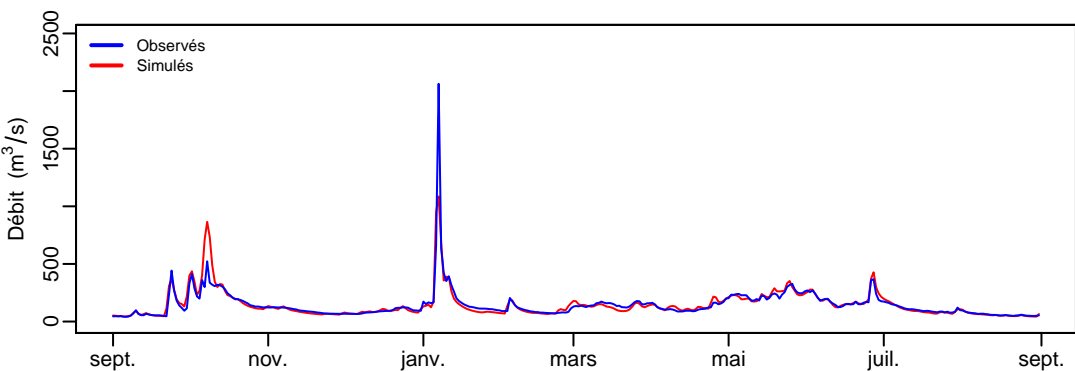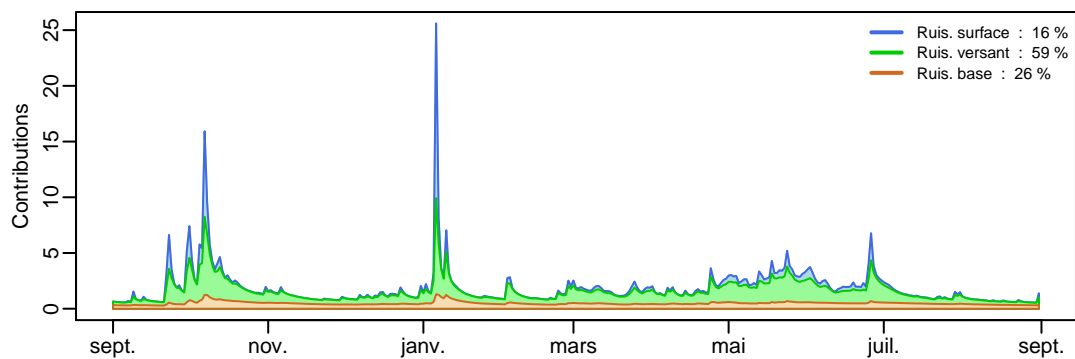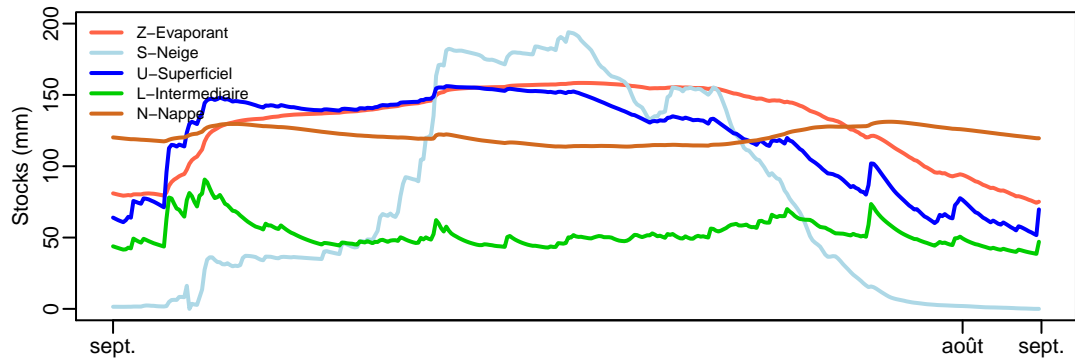

# oraish (6724.6394 km<sup>2</sup>) – année 1994–1995

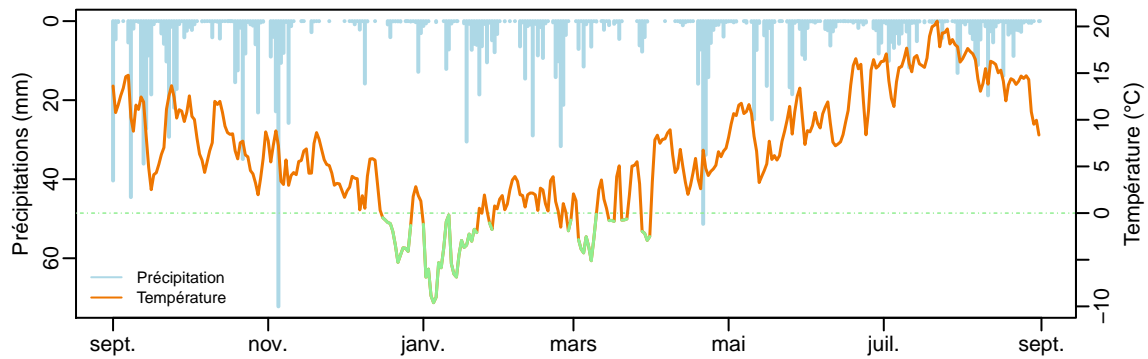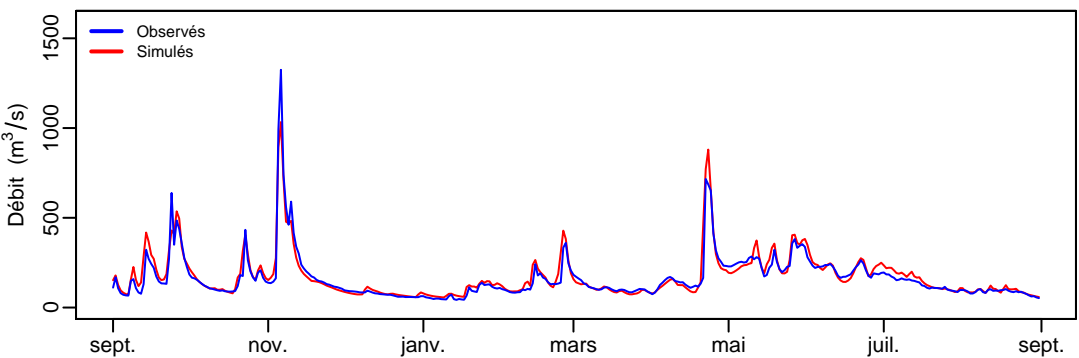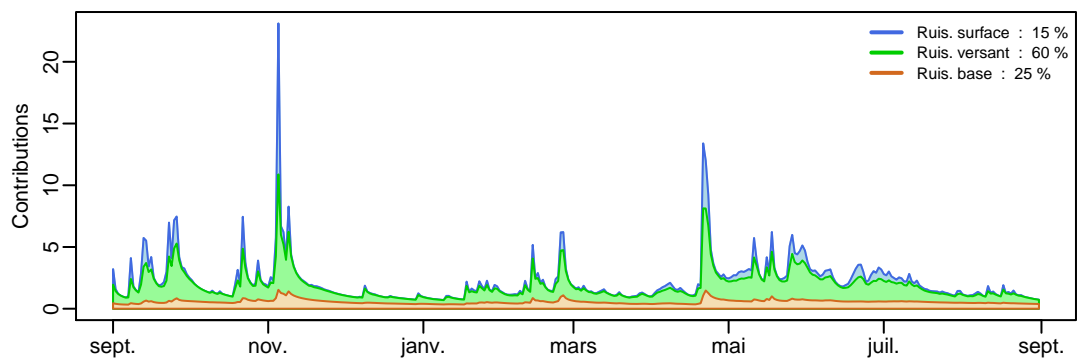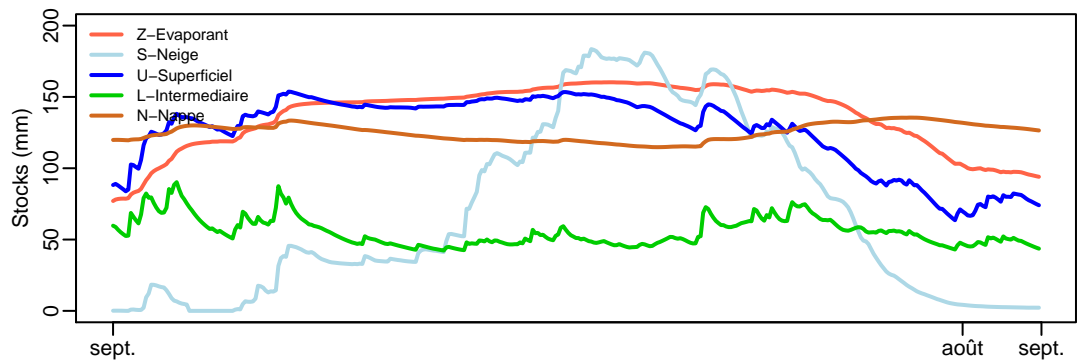



# oraish (6724.6394 km<sup>2</sup>) – année 1995–1996

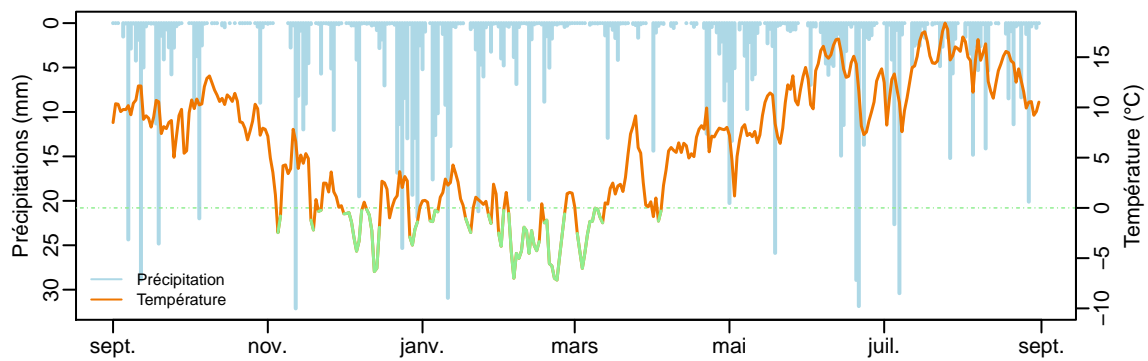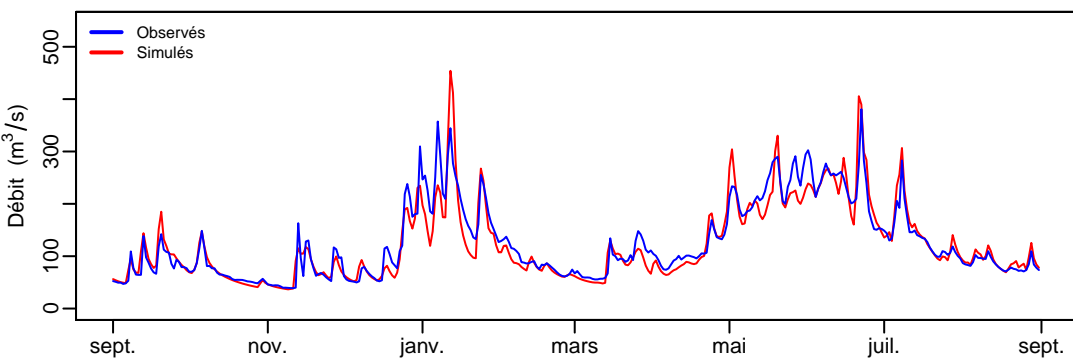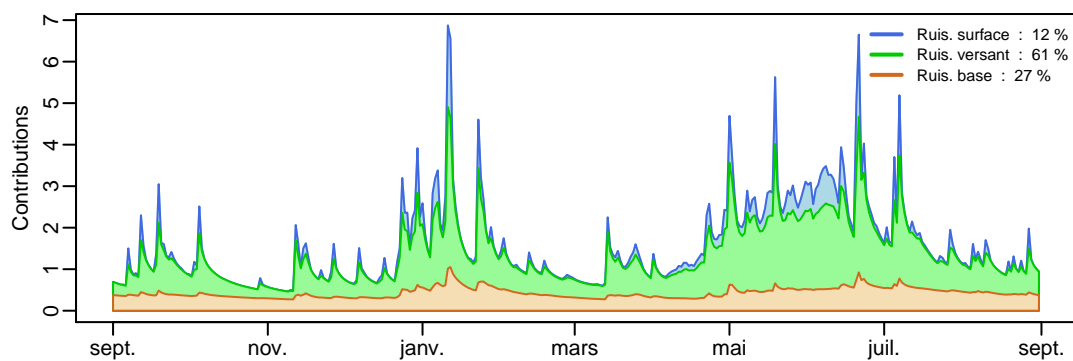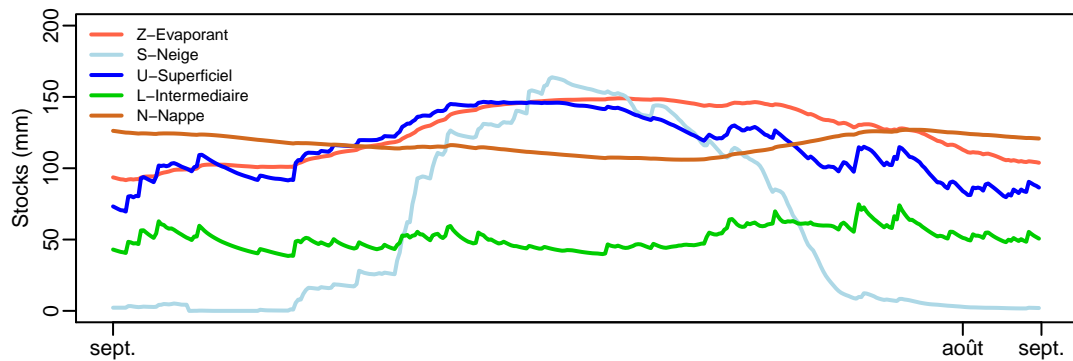

# oraish (6724.6394 km<sup>2</sup>) – année 1996–1997

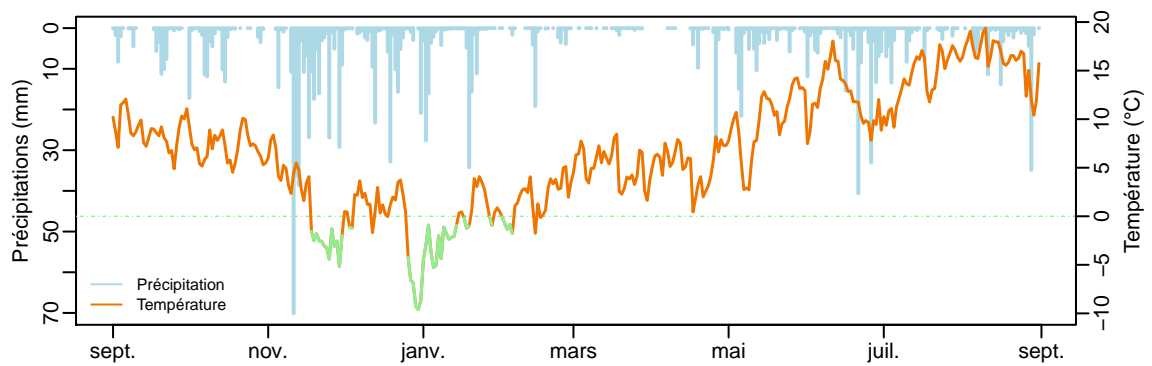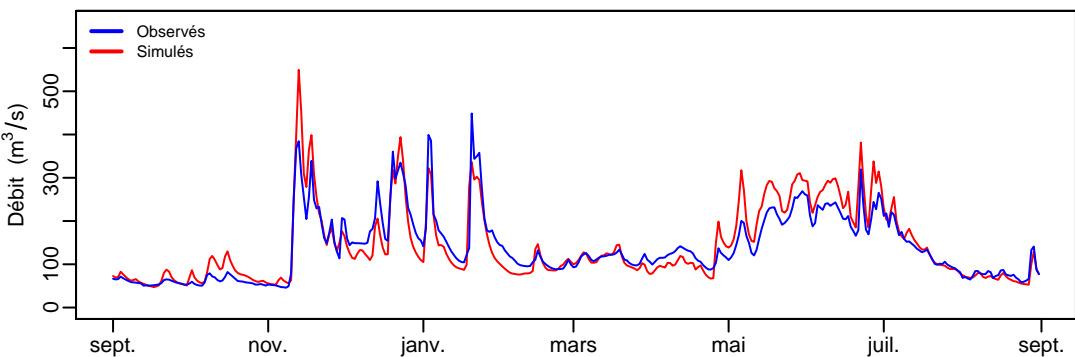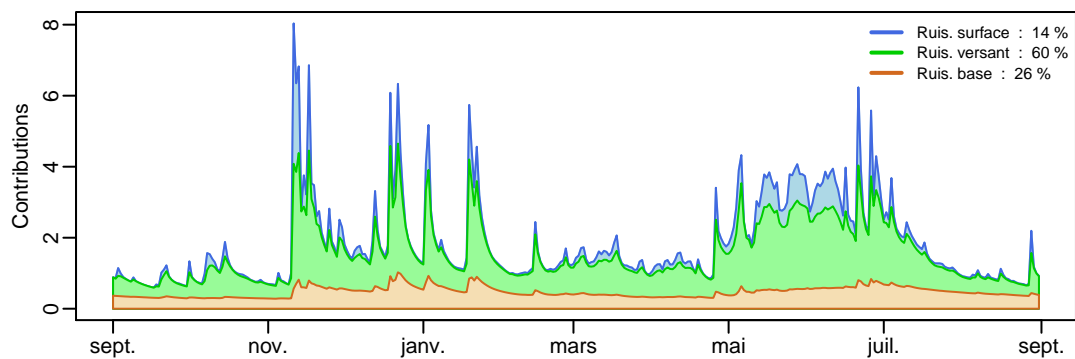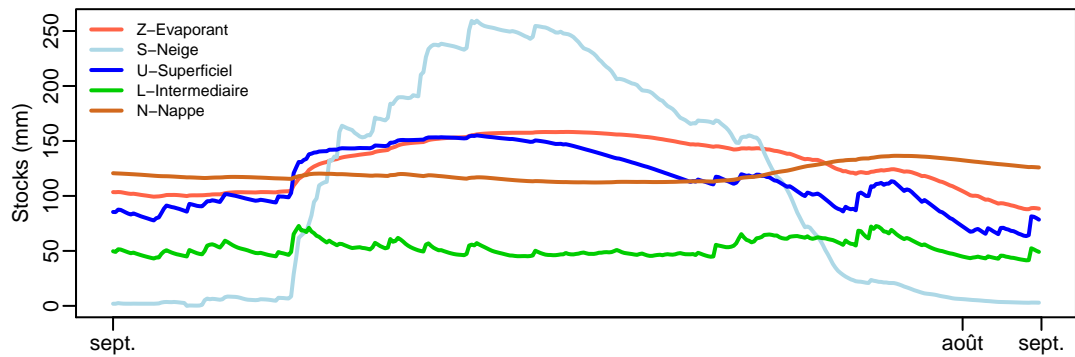

# oraish (6724.6394 km<sup>2</sup>) – année 1997–1998

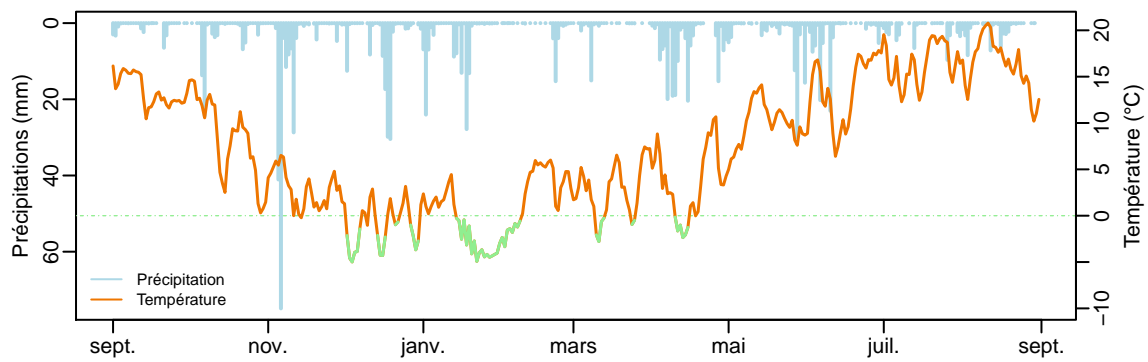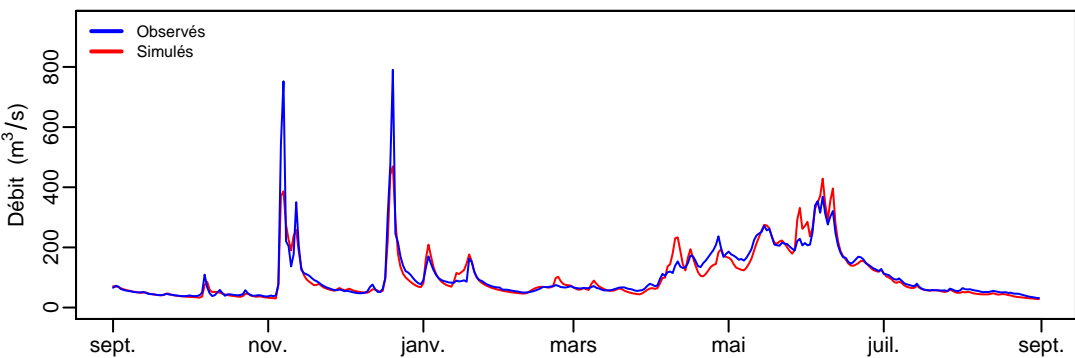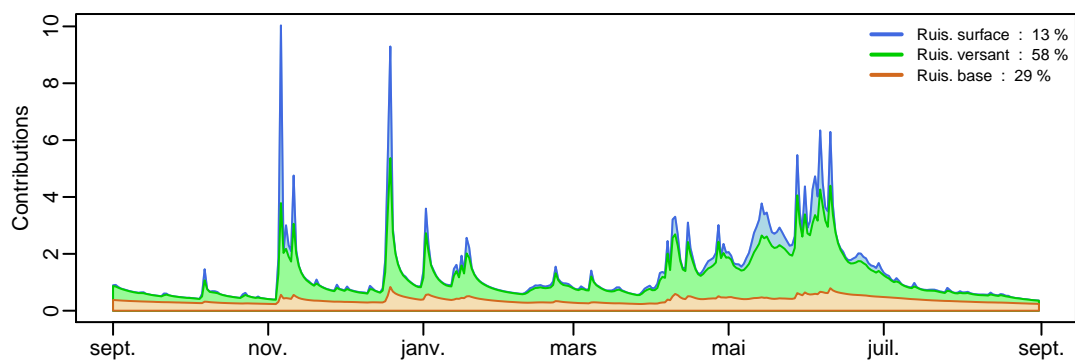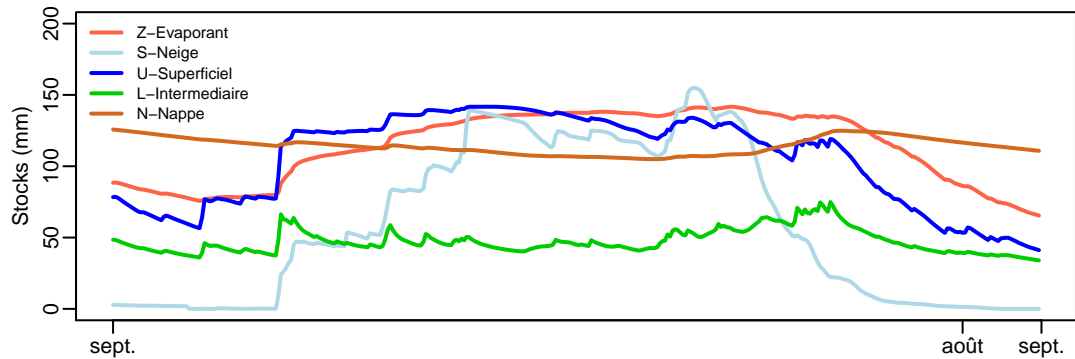

# oraish (6724.6394 km<sup>2</sup>) – année 1998–1999

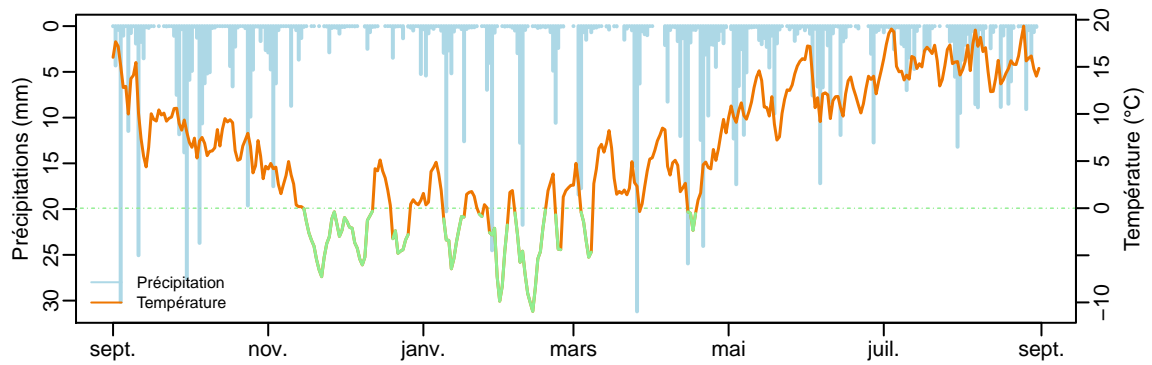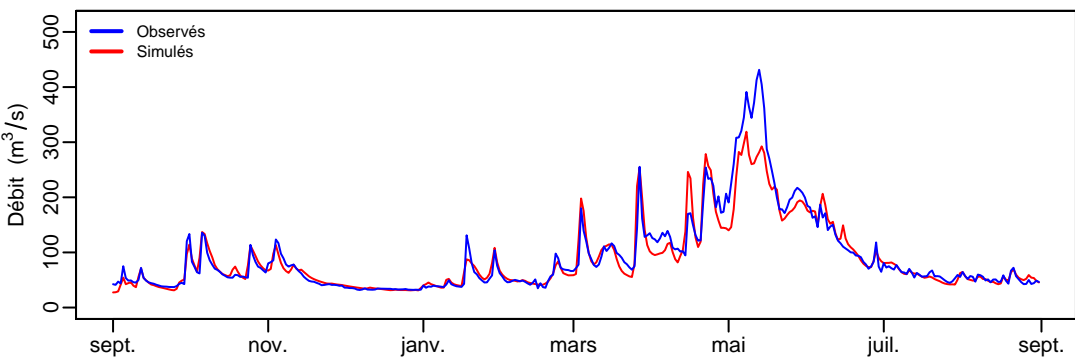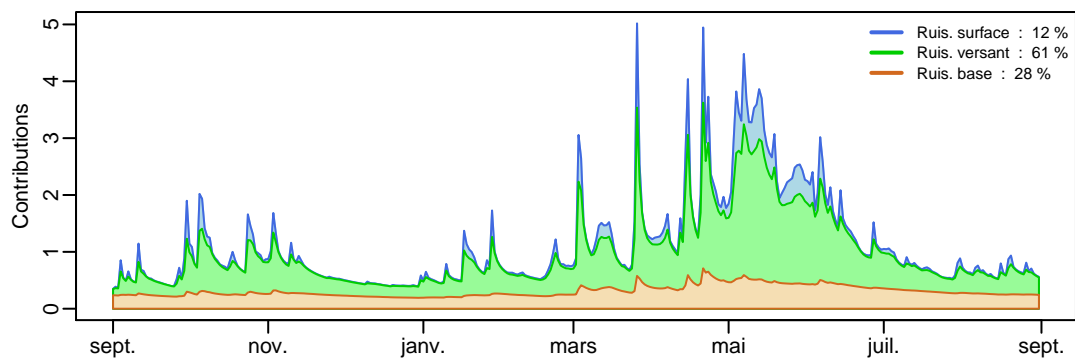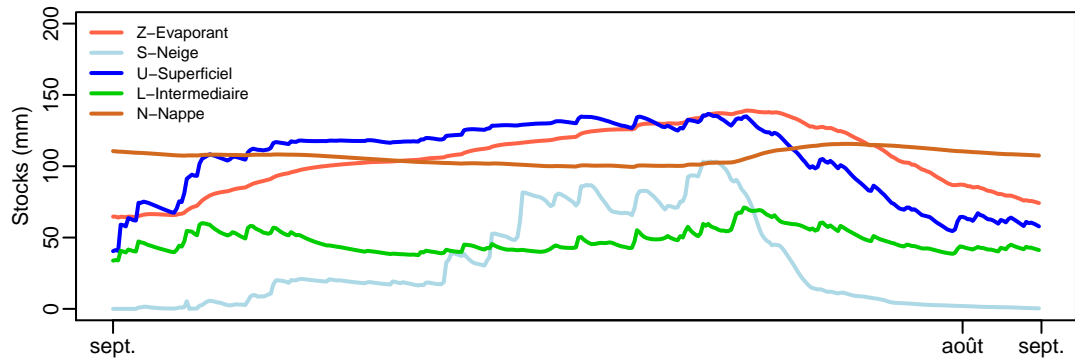

# oraish (6724.6394 km<sup>2</sup>) – année 1999–2000

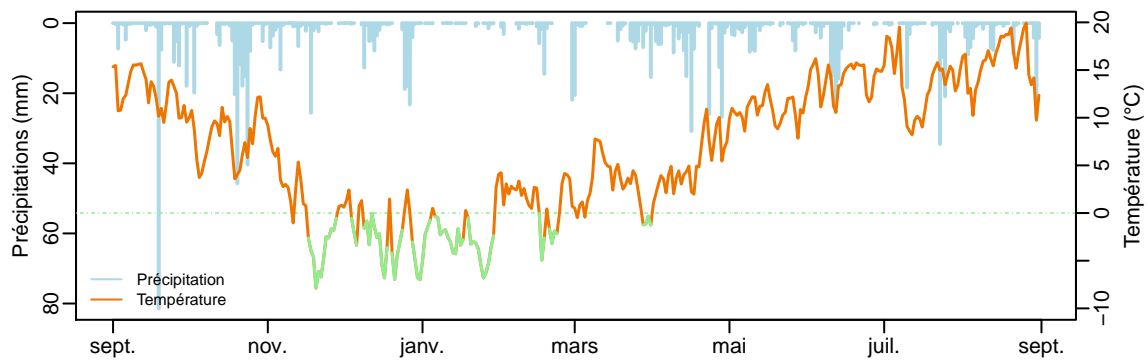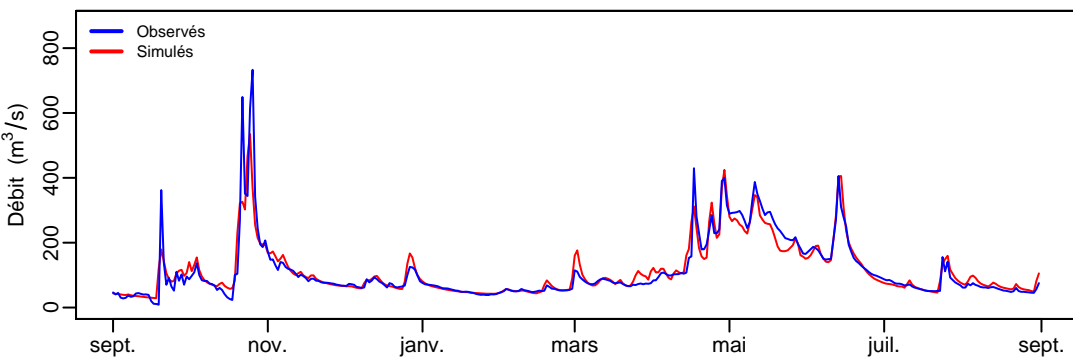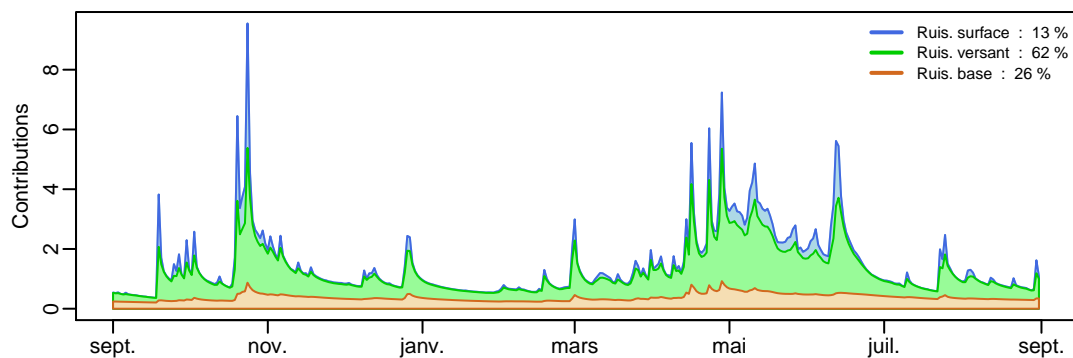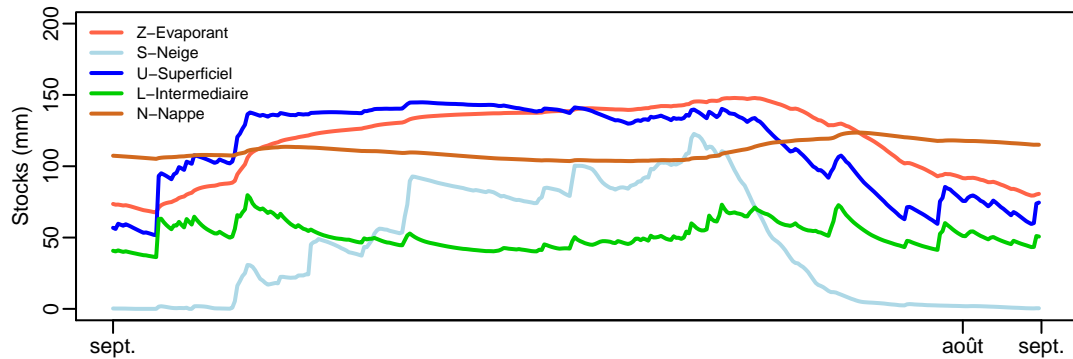

# oraish (6724.6394 km<sup>2</sup>) – année 2000–2001

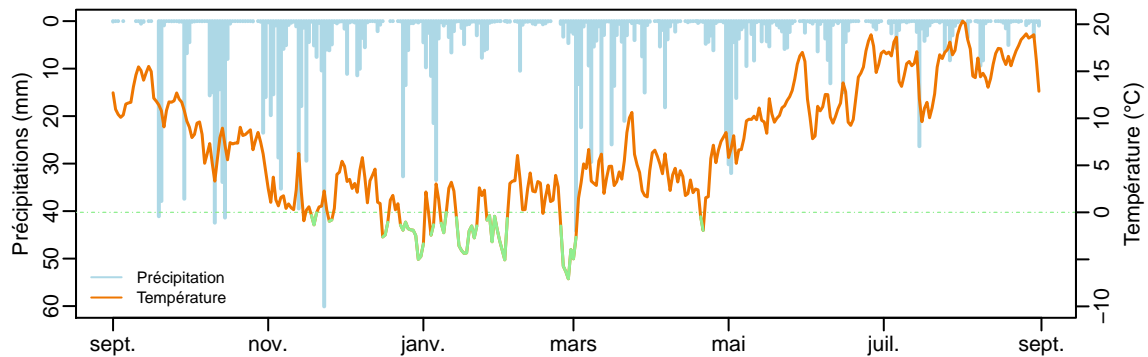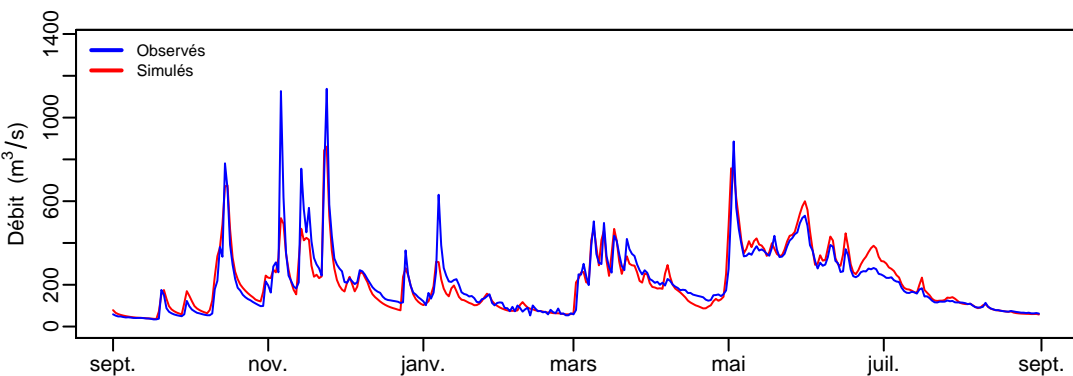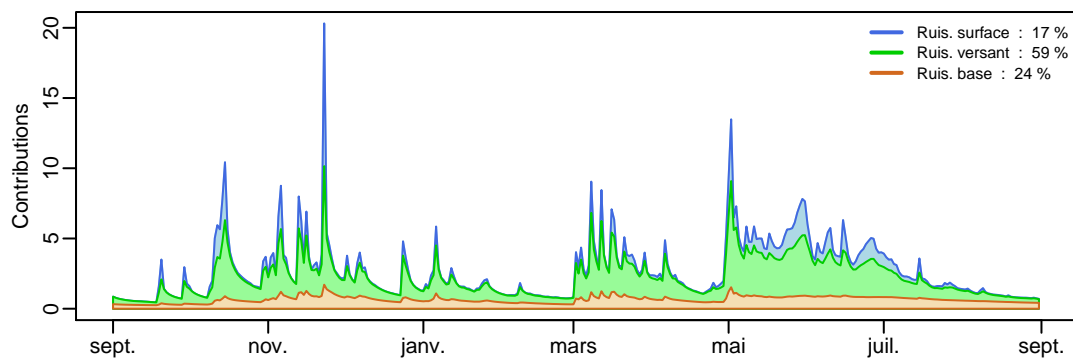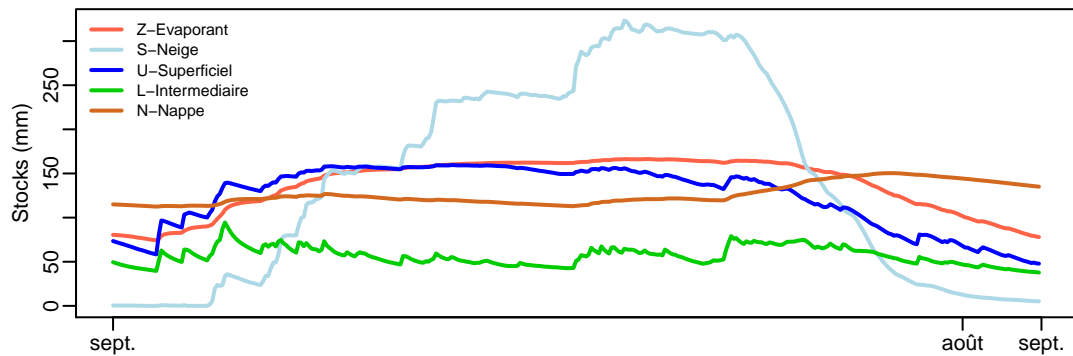

# oraish (6724.6394 km<sup>2</sup>) – année 2001–2002

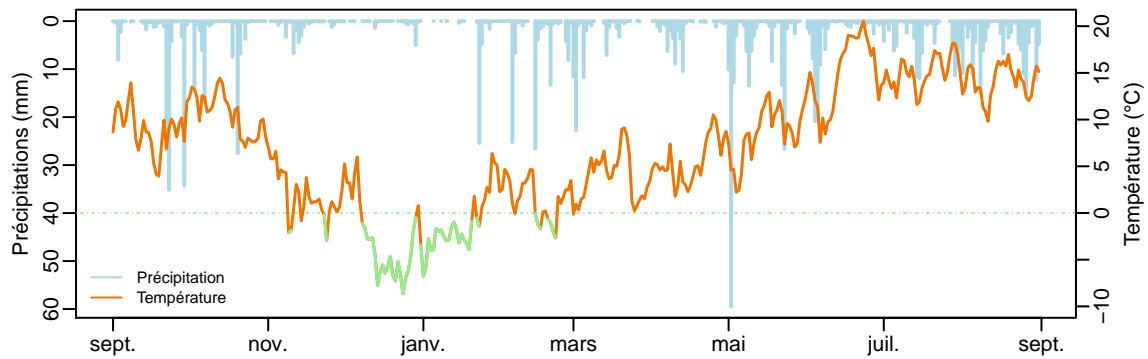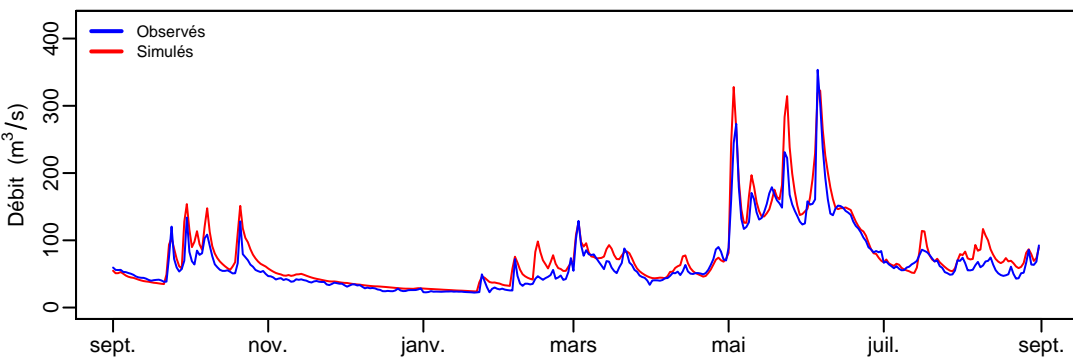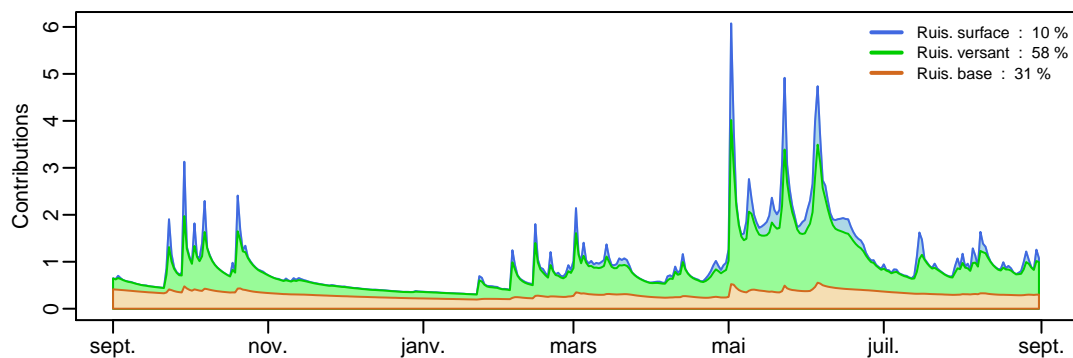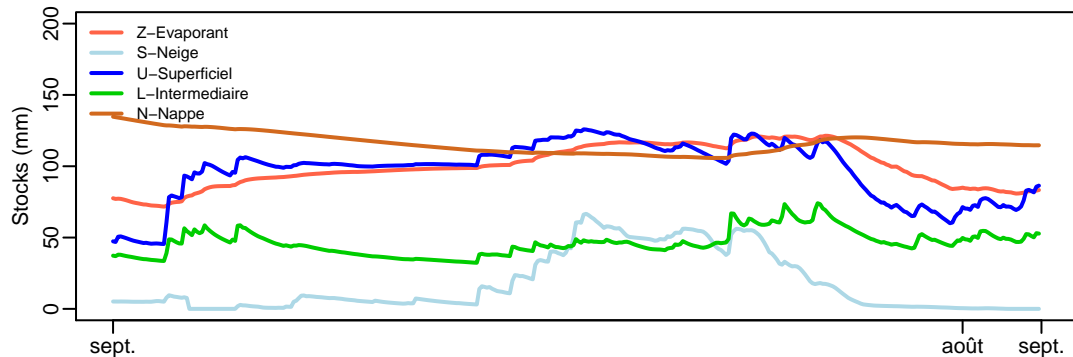

# oraish (6724.6394 km<sup>2</sup>) – année 2002–2003

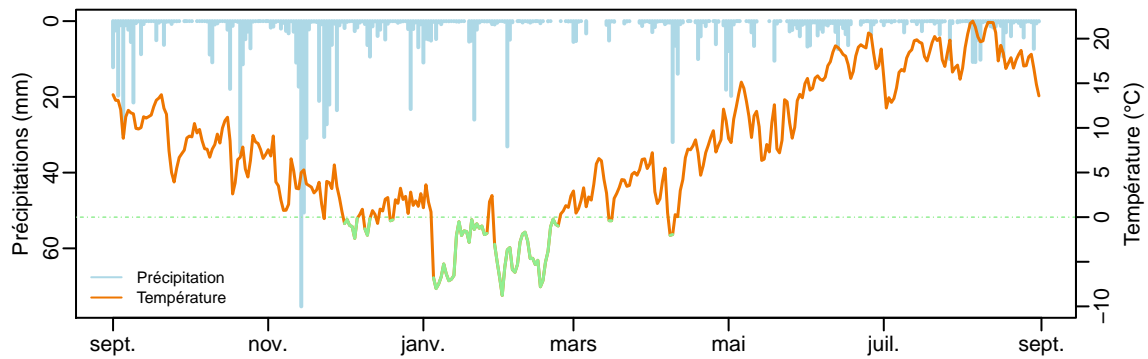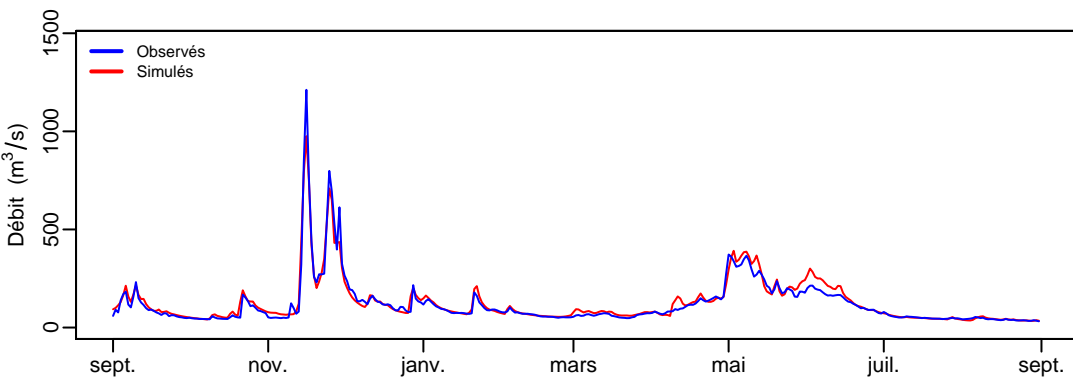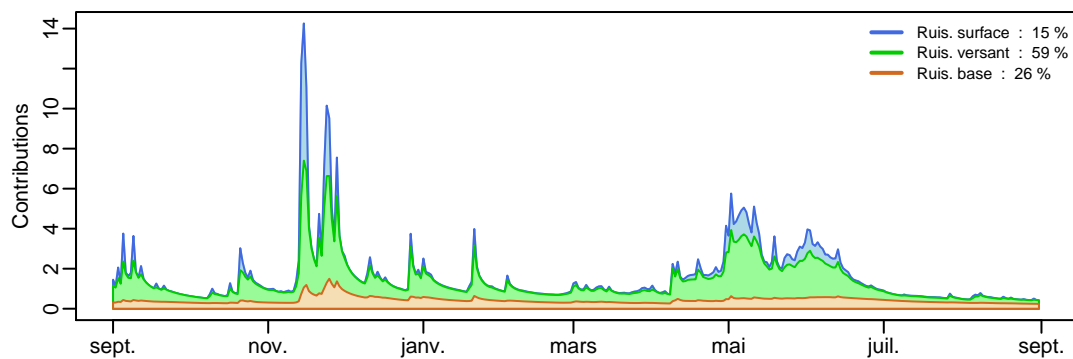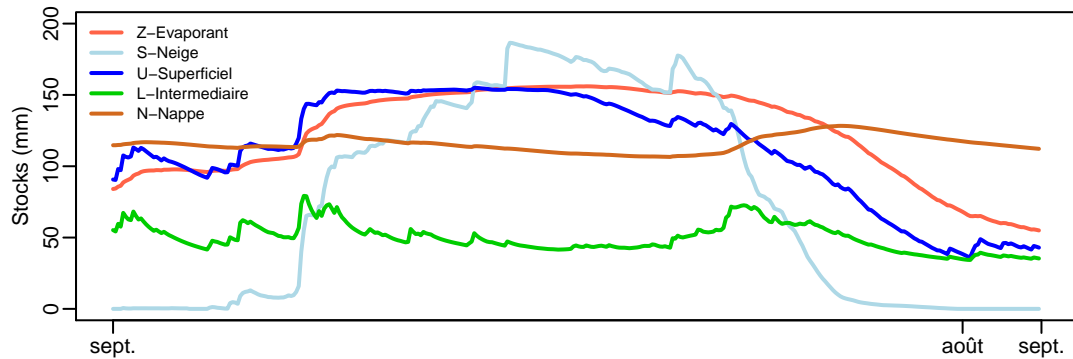



# oraish (6724.6394 km<sup>2</sup>) – année 2003–2004

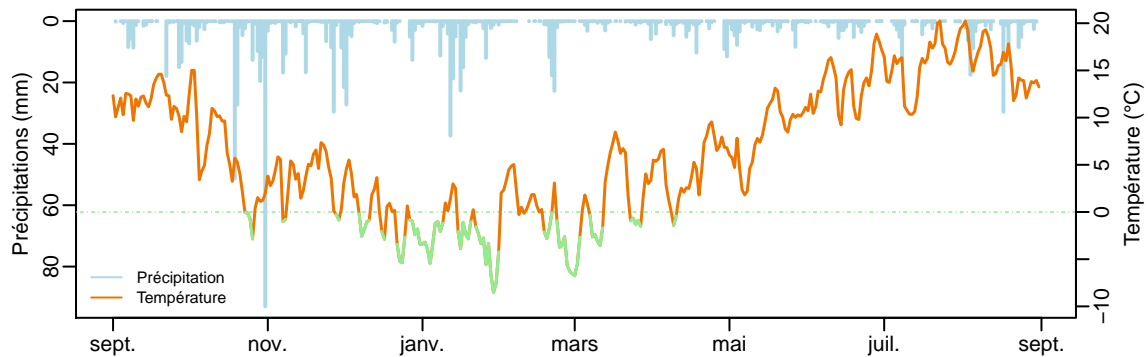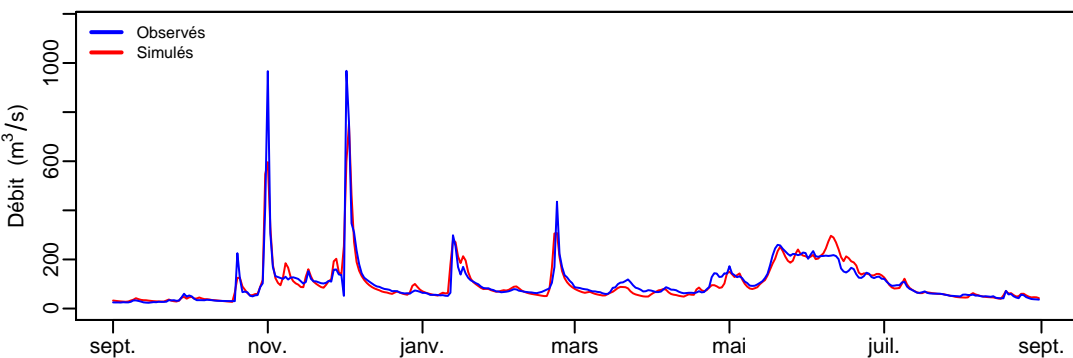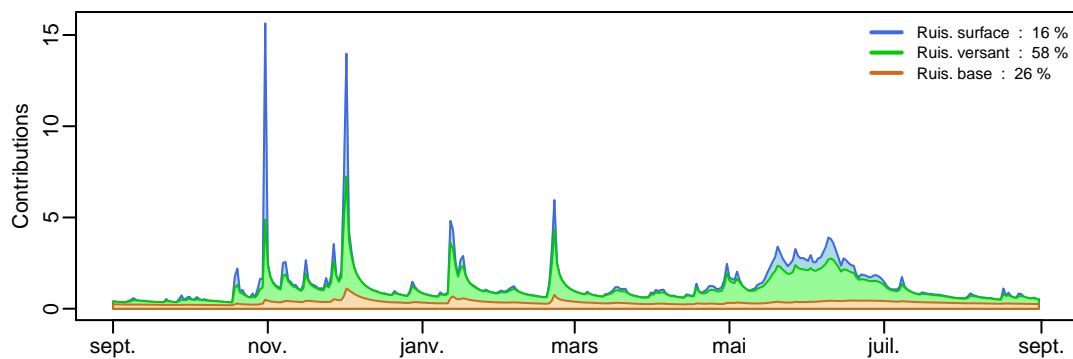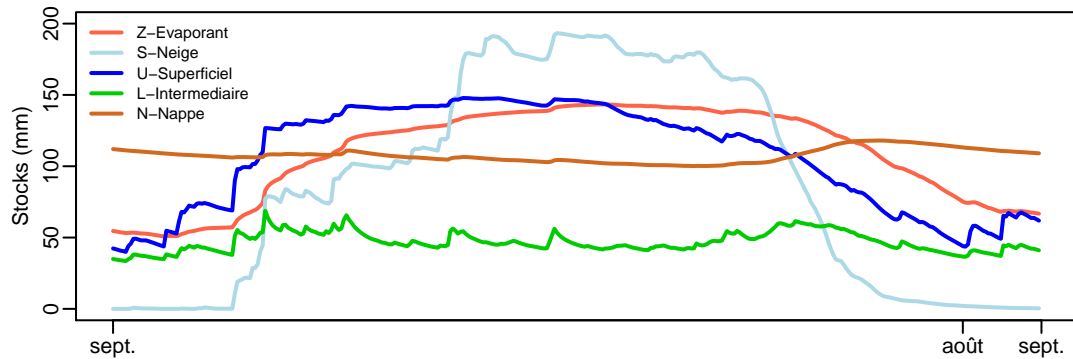

# oraish (6724.6394 km<sup>2</sup>) – année 2004–2005

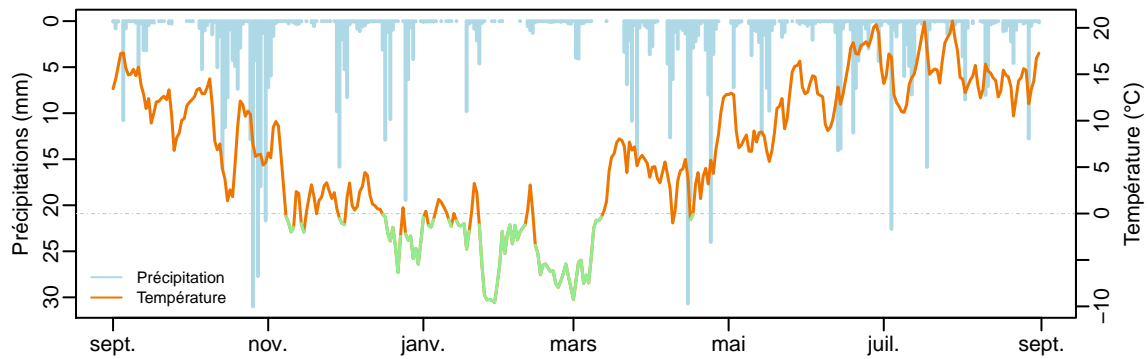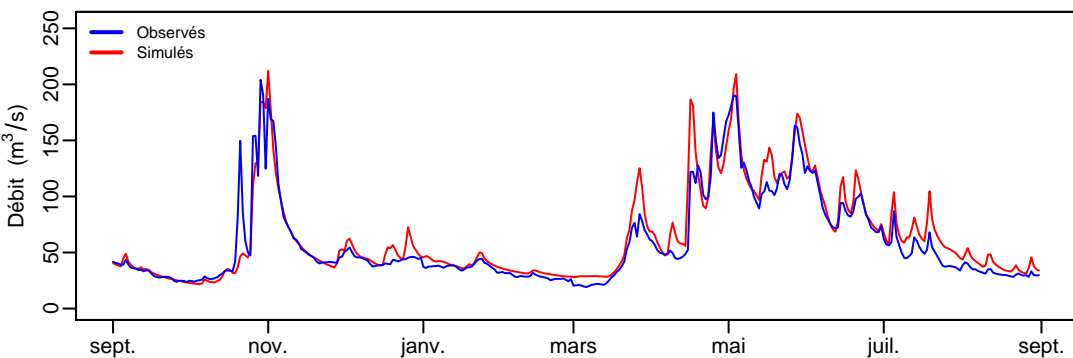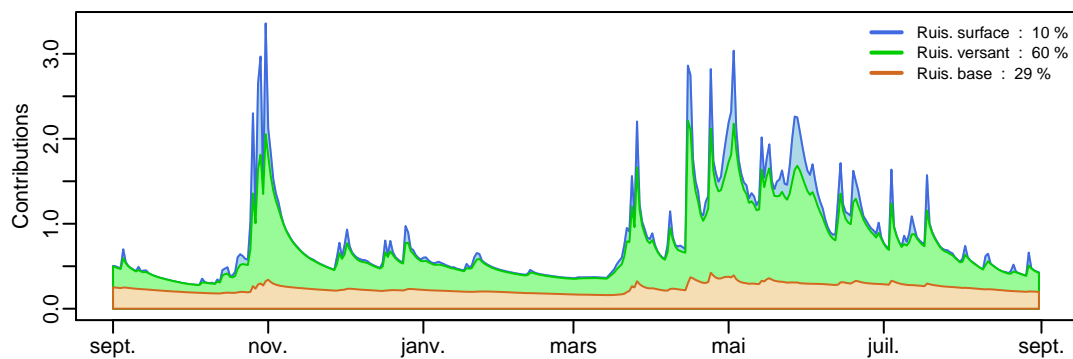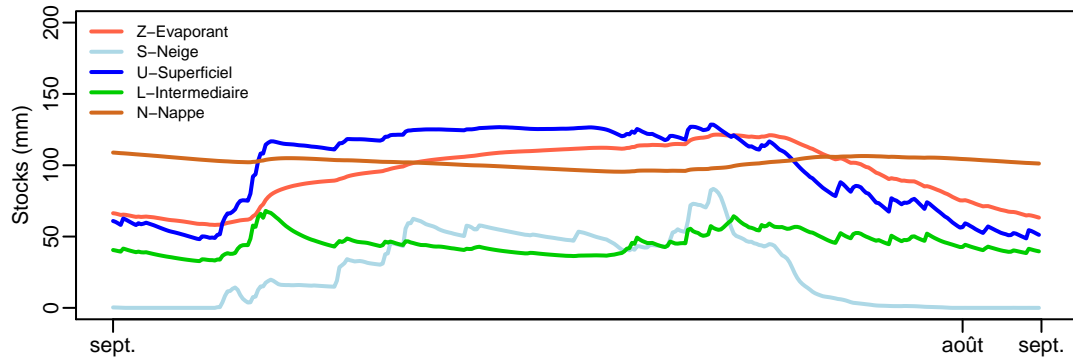

# oraish (6724.6394 km<sup>2</sup>) – année 2005–2006

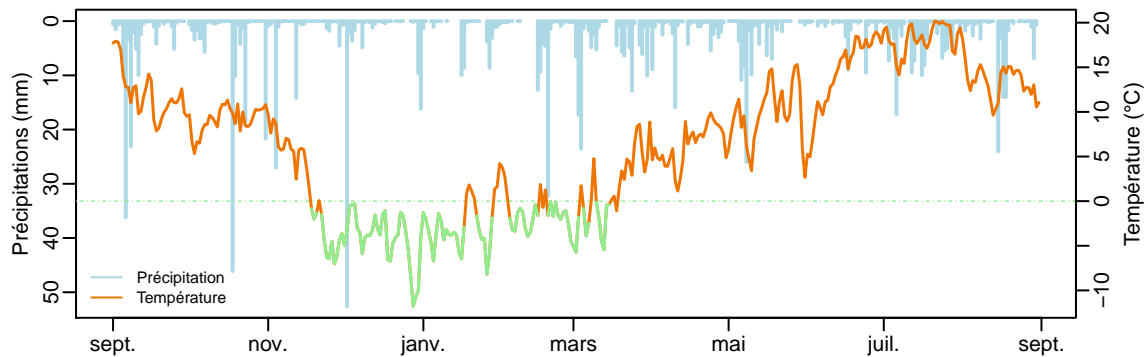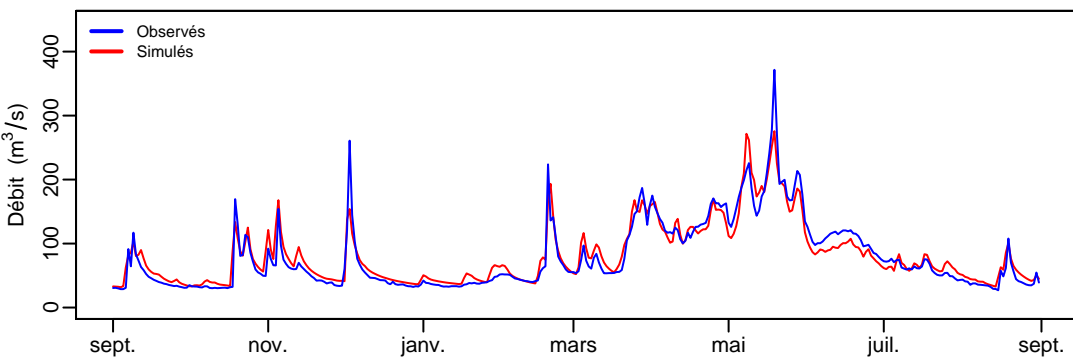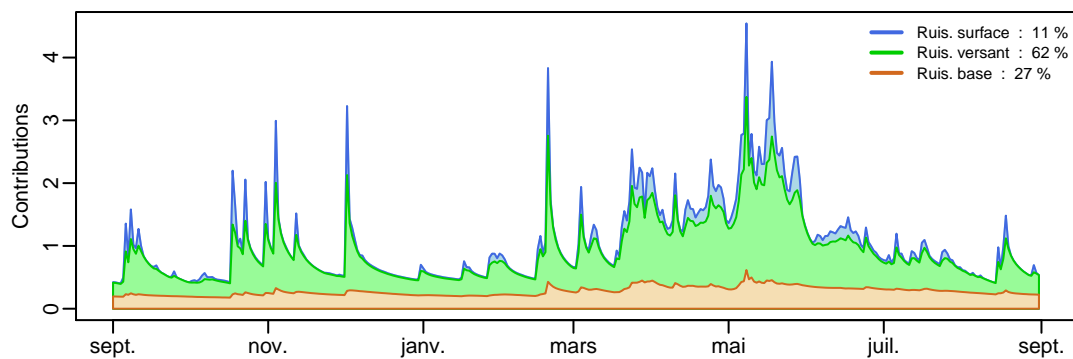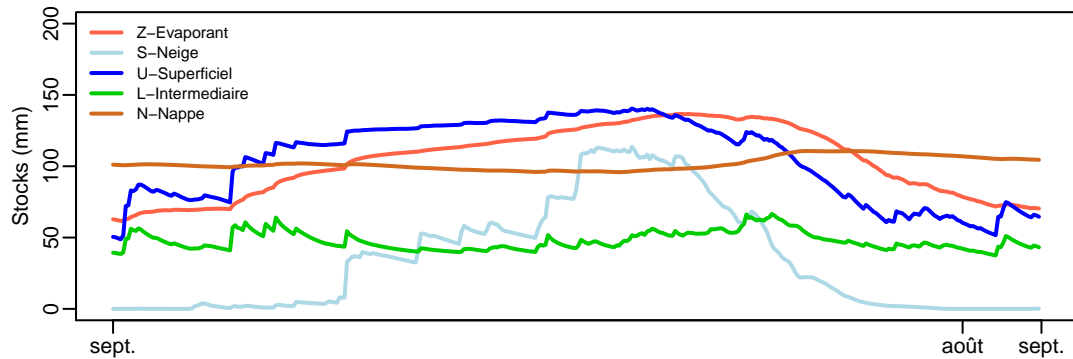

# oraish (6724.6394 km<sup>2</sup>) – année 2006–2007

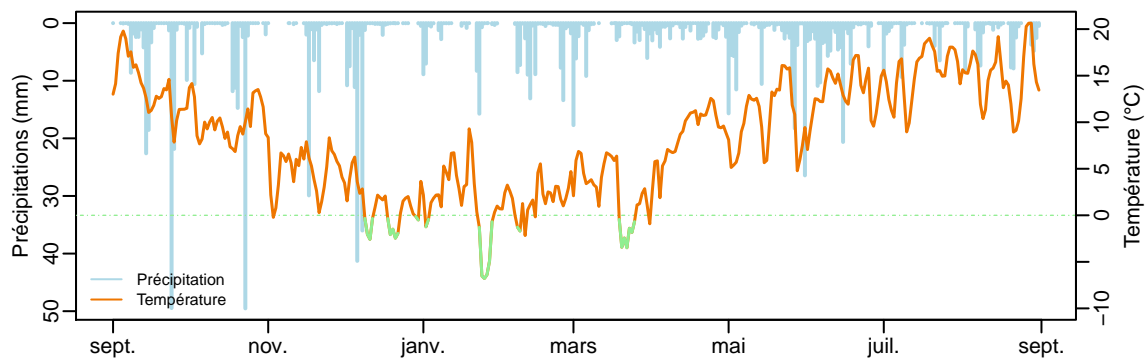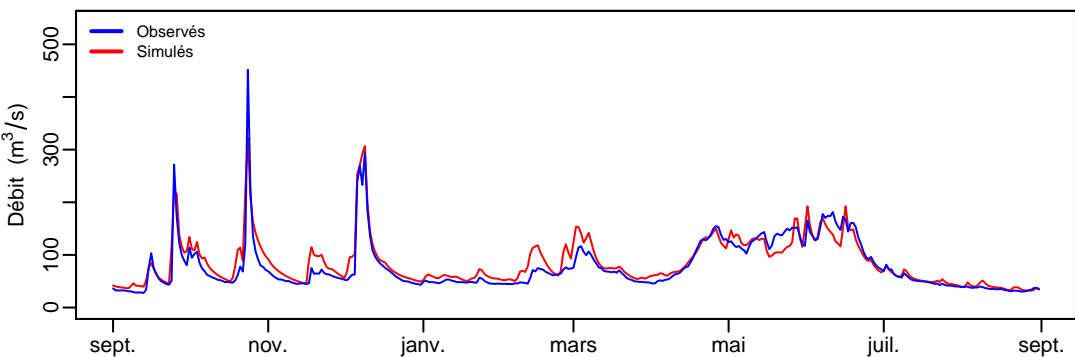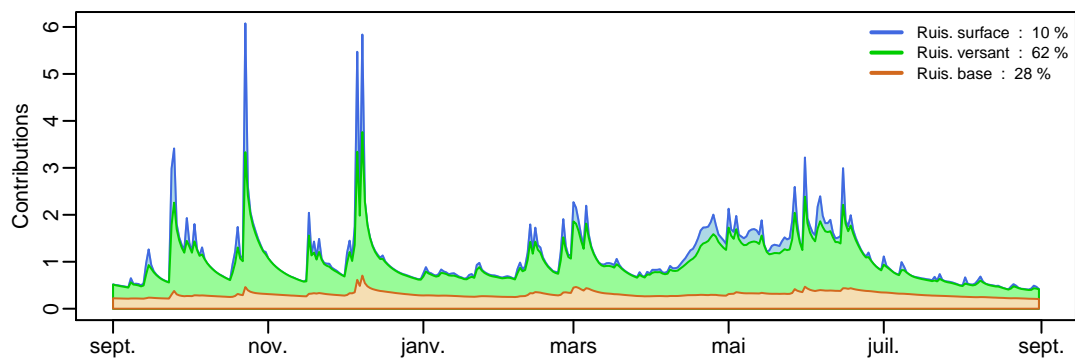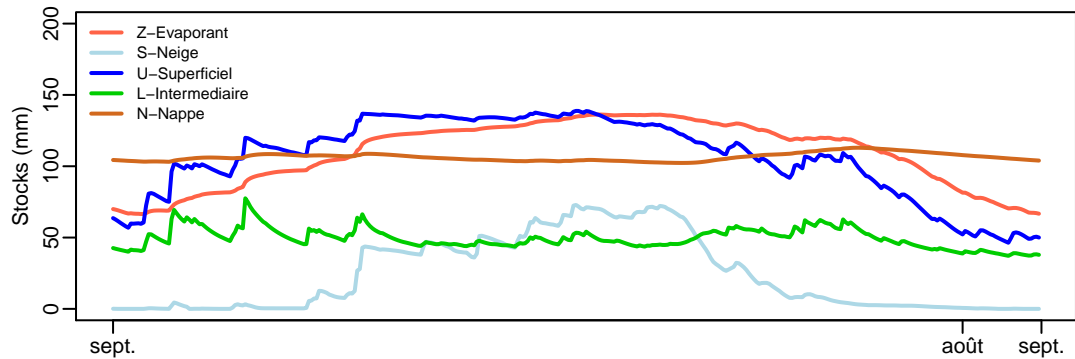

# oraish (6724.6394 km<sup>2</sup>) – année 2007–2008

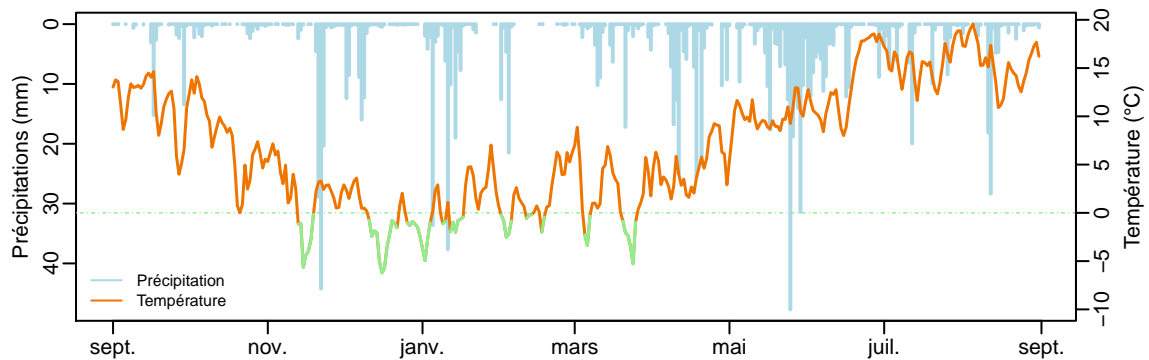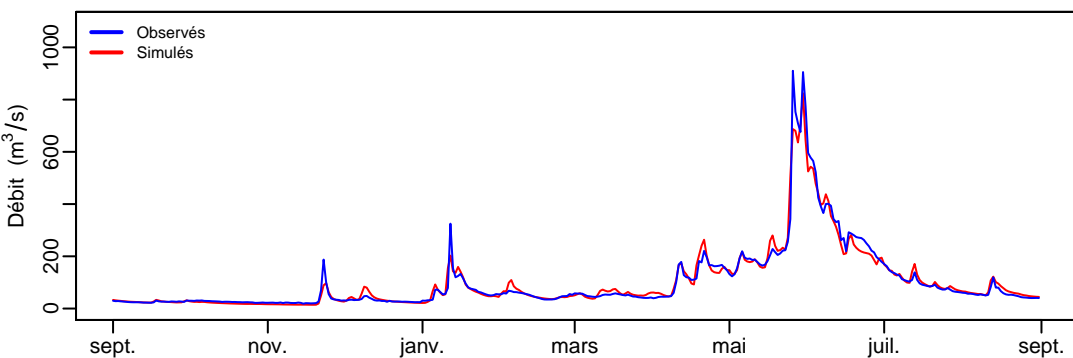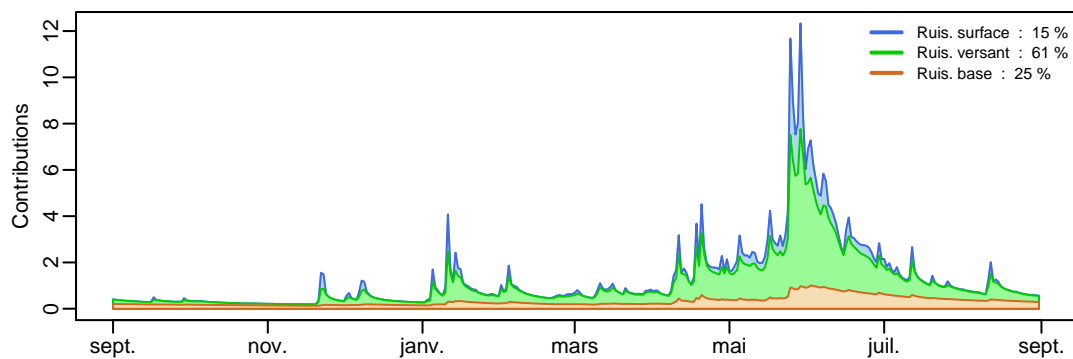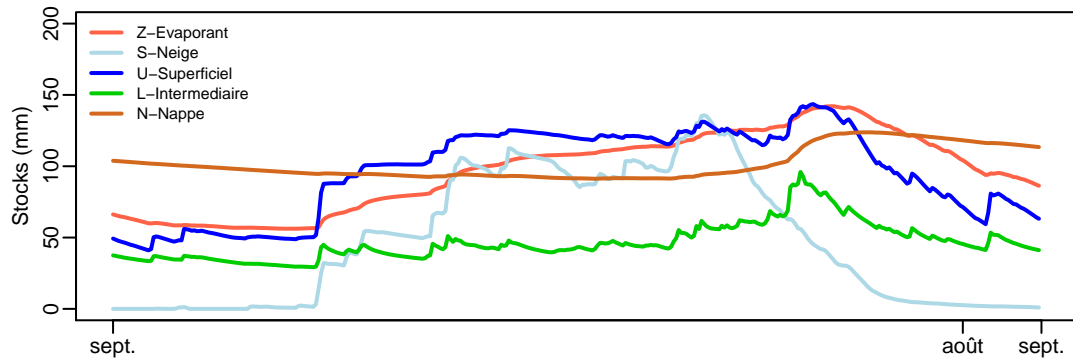

# oraish (6724.6394 km<sup>2</sup>) – année 2008–2009

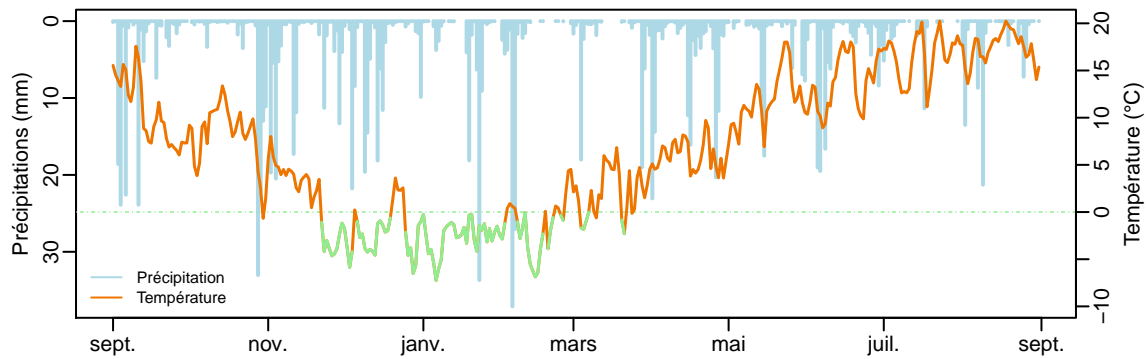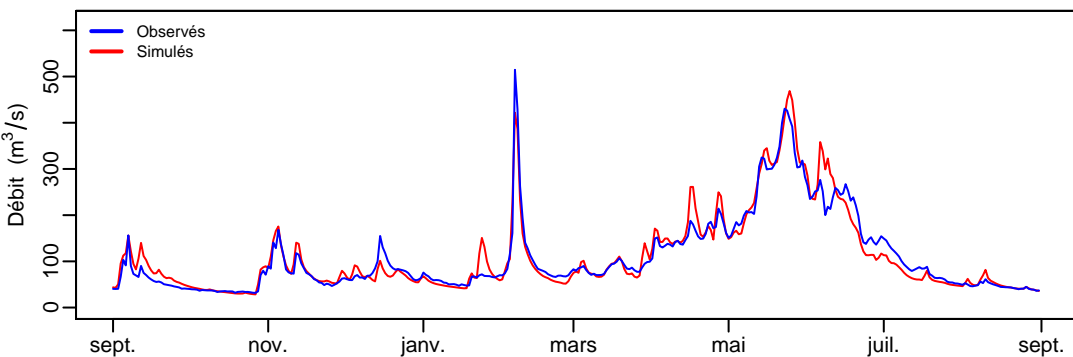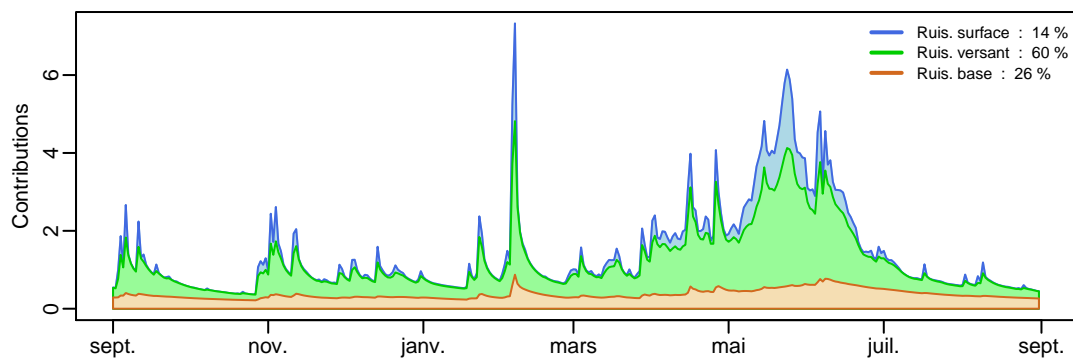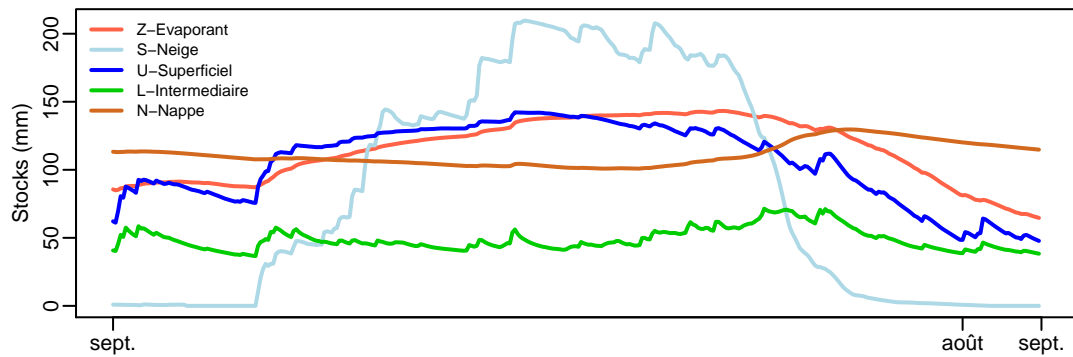

# oraish (6724.6394 km<sup>2</sup>) – année 2009–2010

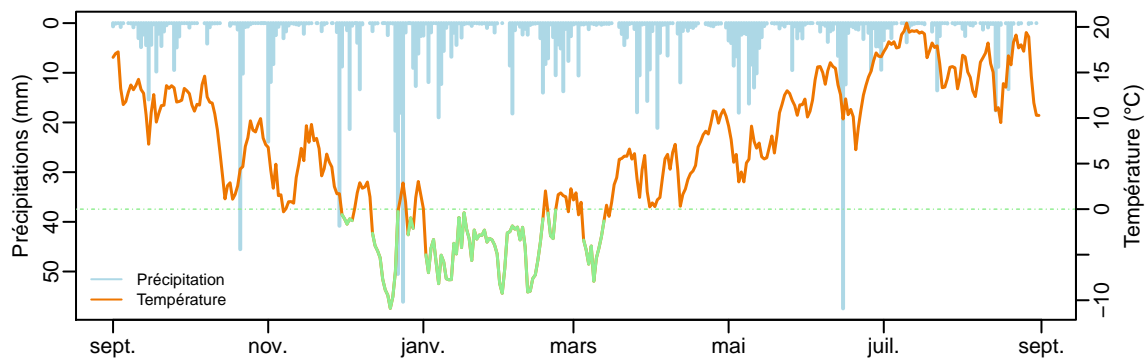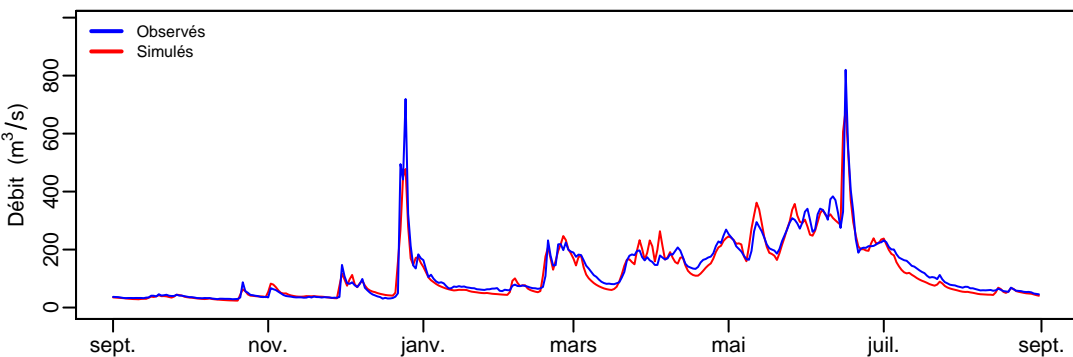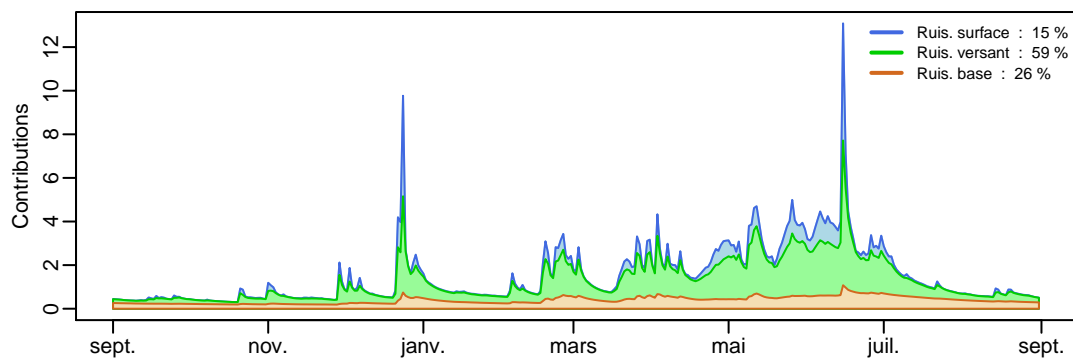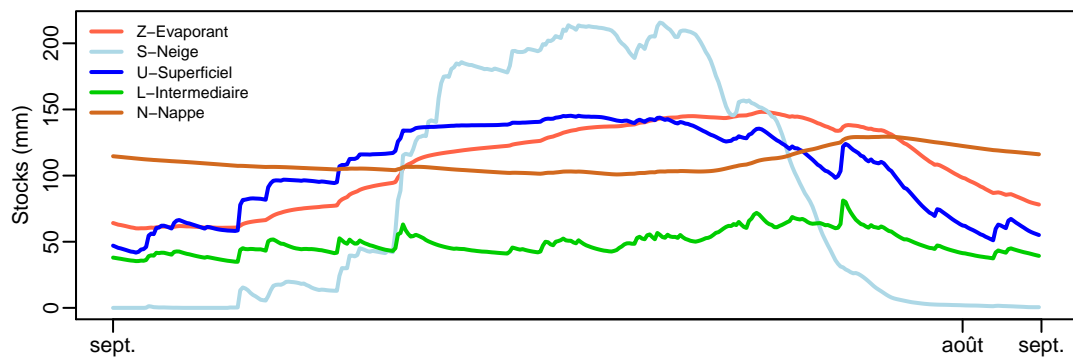

# oraish (6724.6394 km<sup>2</sup>) – année 2010–2011

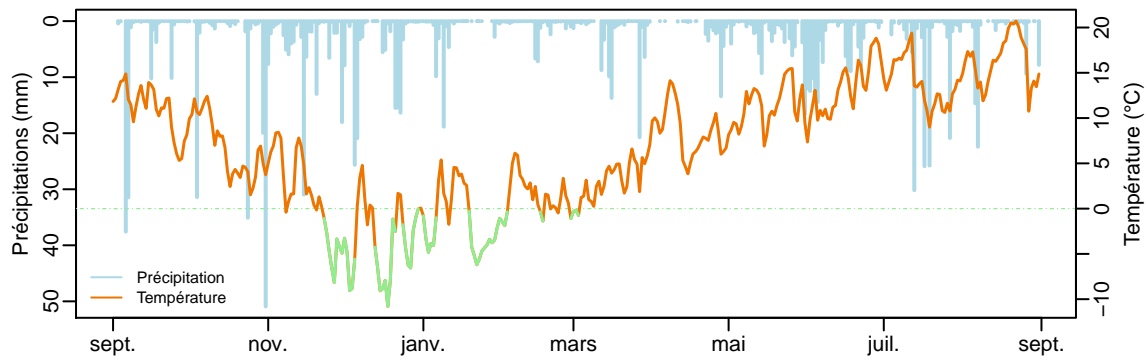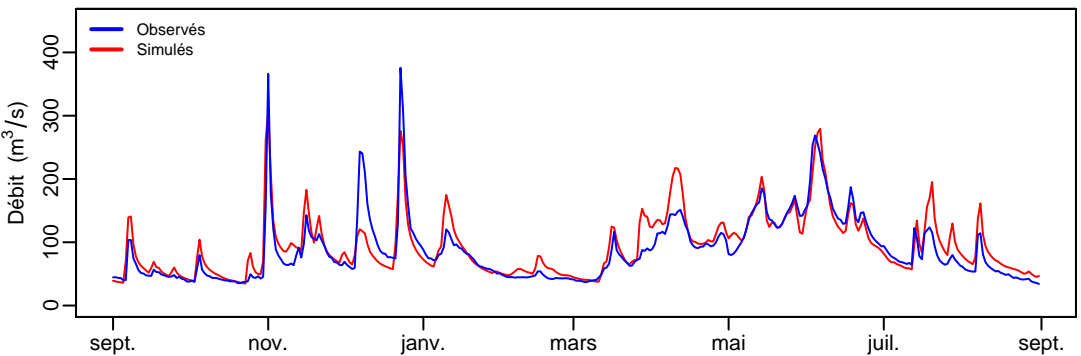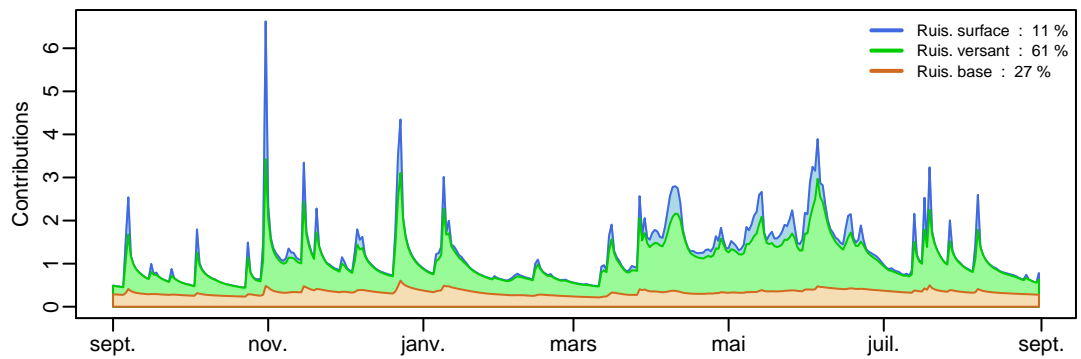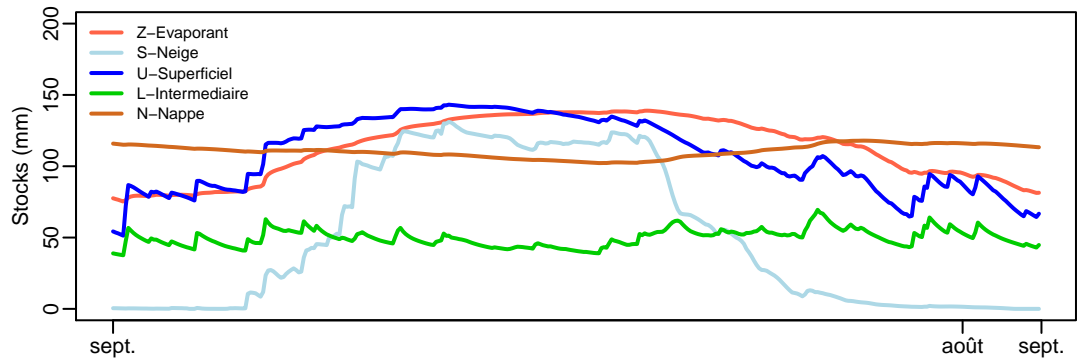



# oraish (6724.6394 km<sup>2</sup>) – année 2011–2012

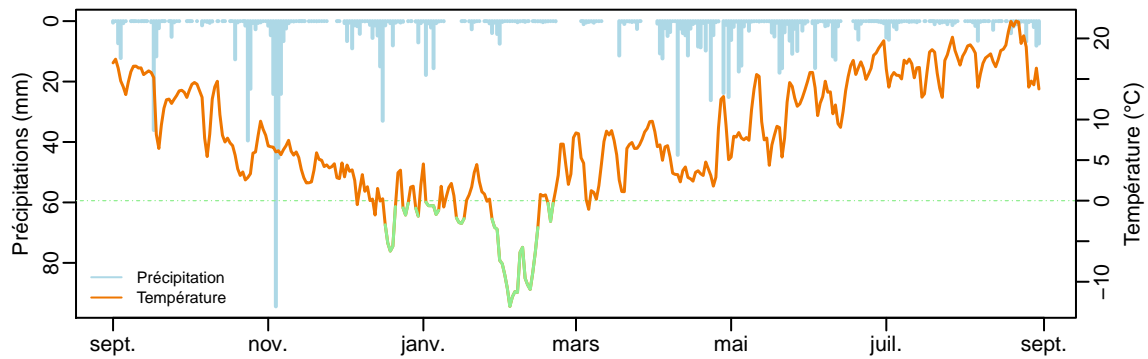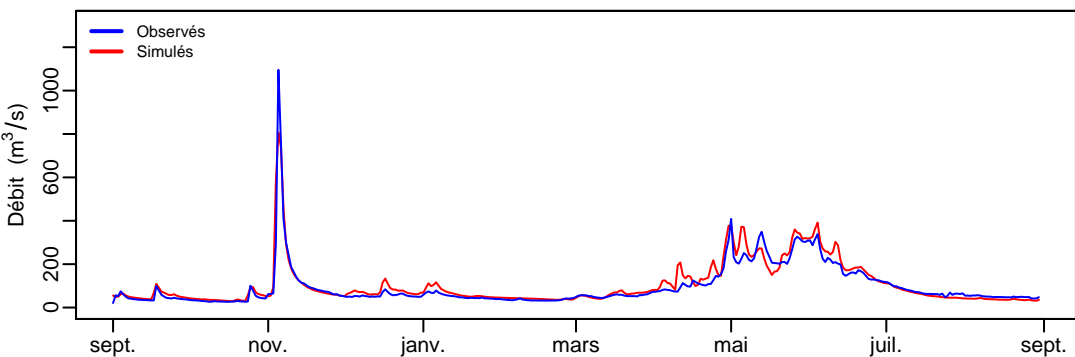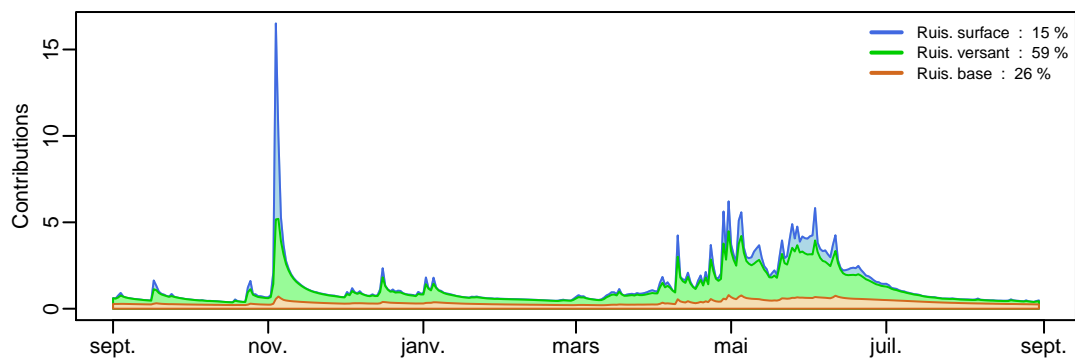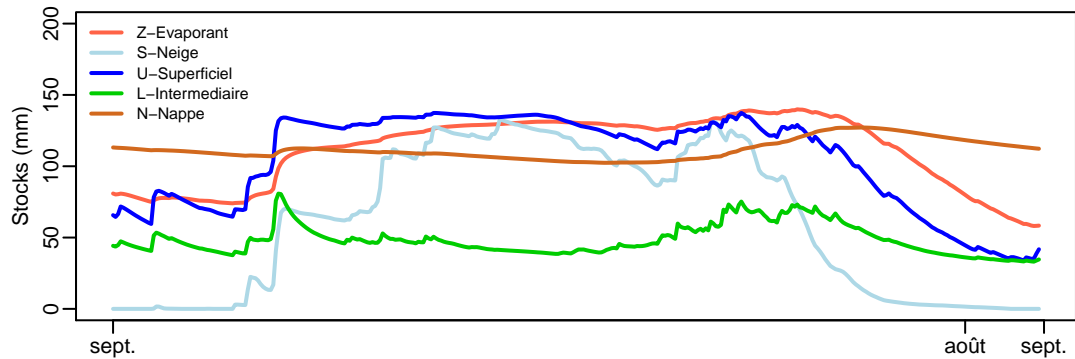

# q0157 (2179.64 km<sup>2</sup>) – année 1981–1982

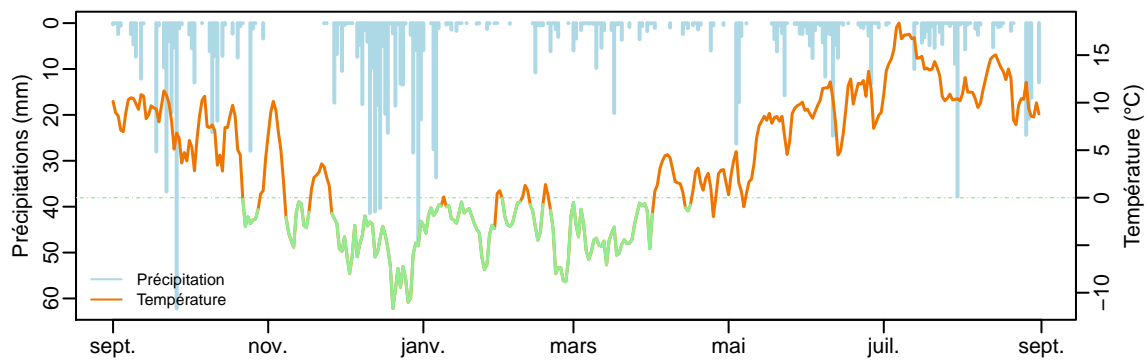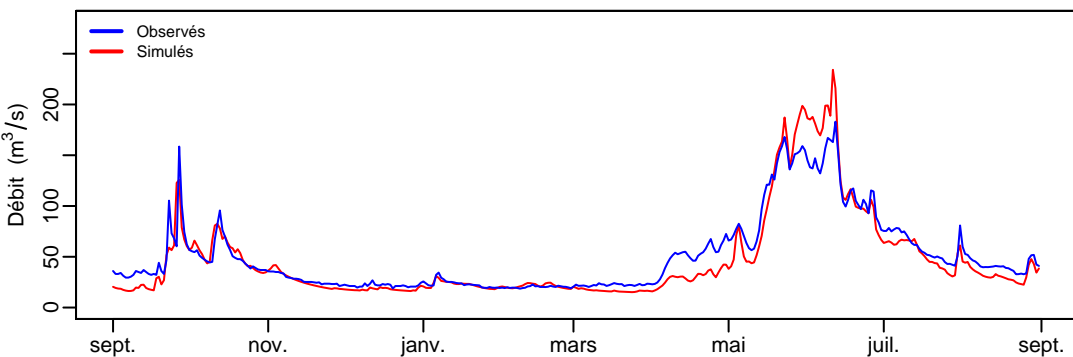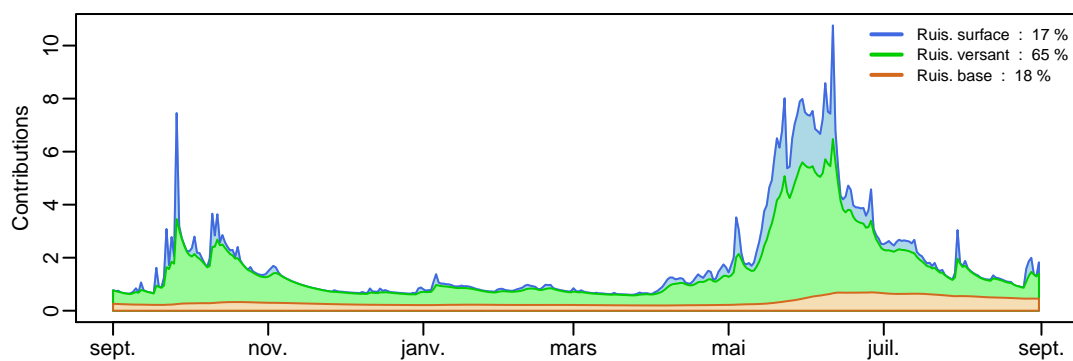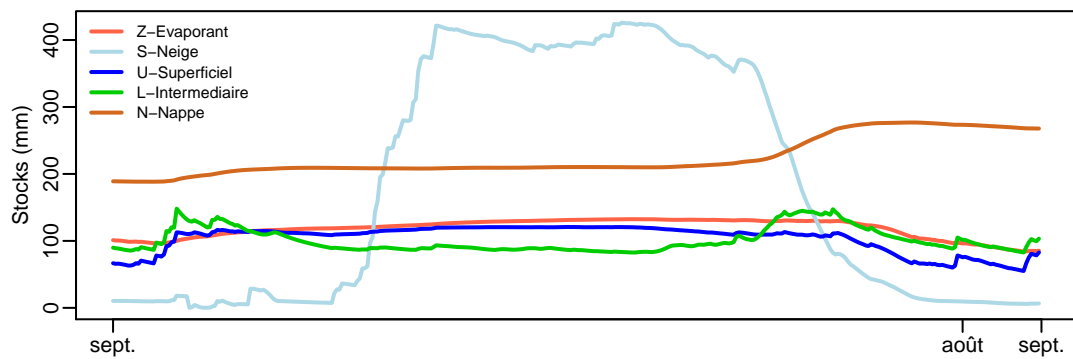

# q0157 (2179.64 km²) – année 1982–1983

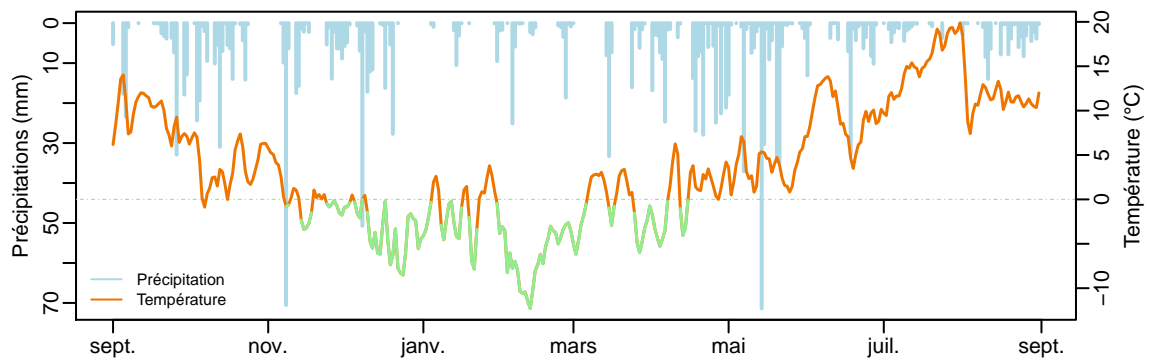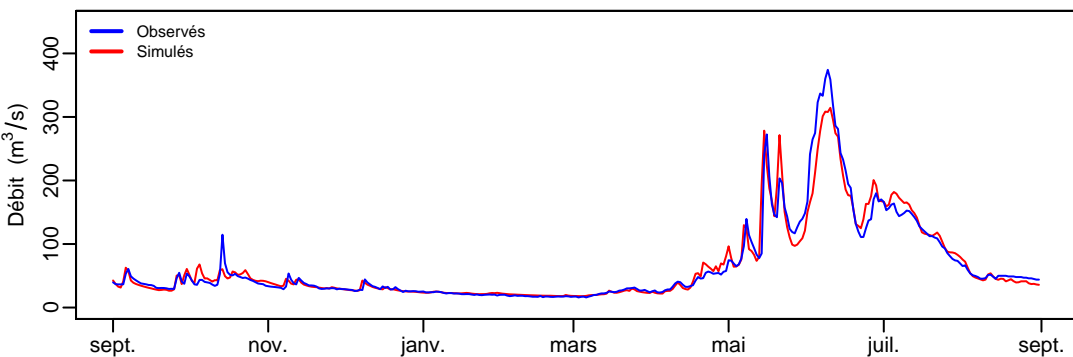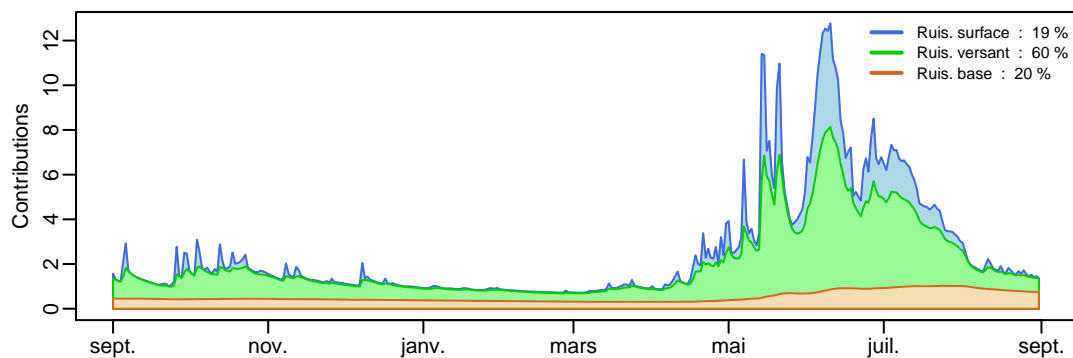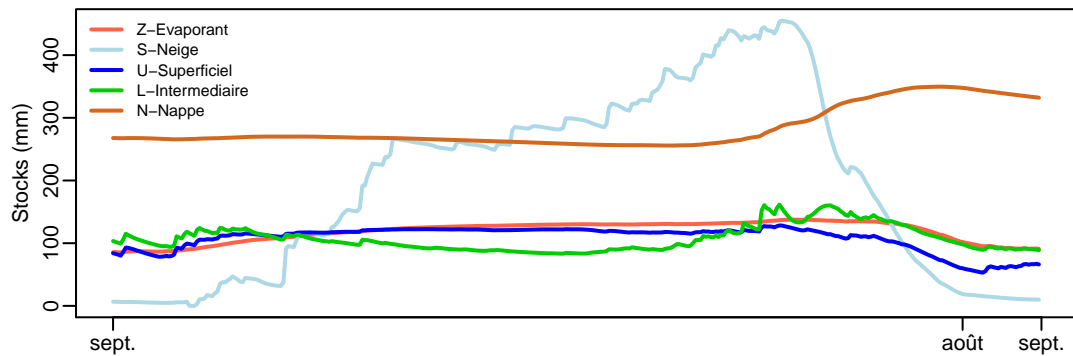

# q0157 (2179.64 km<sup>2</sup>) – année 1983–1984

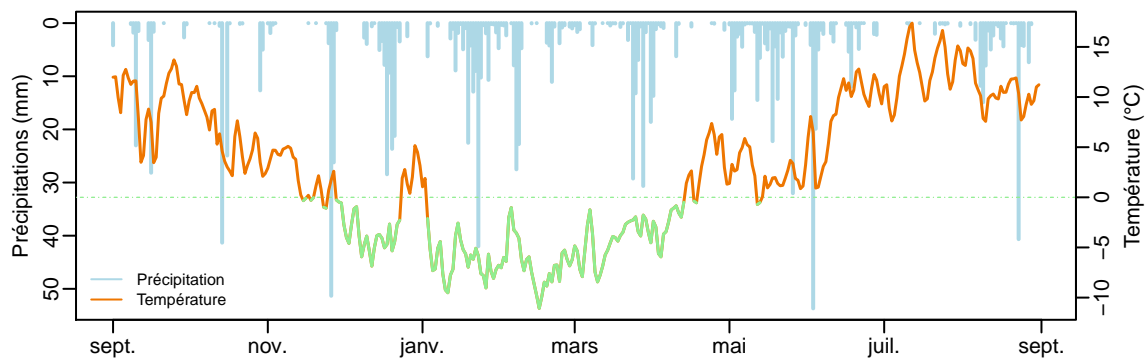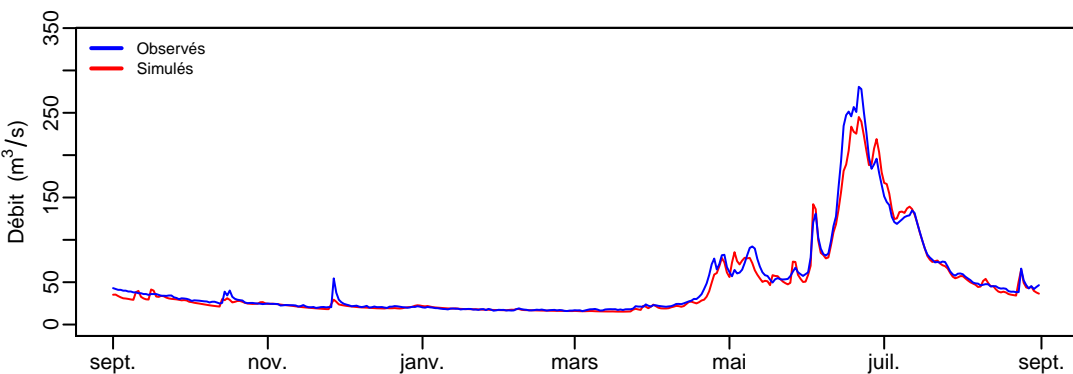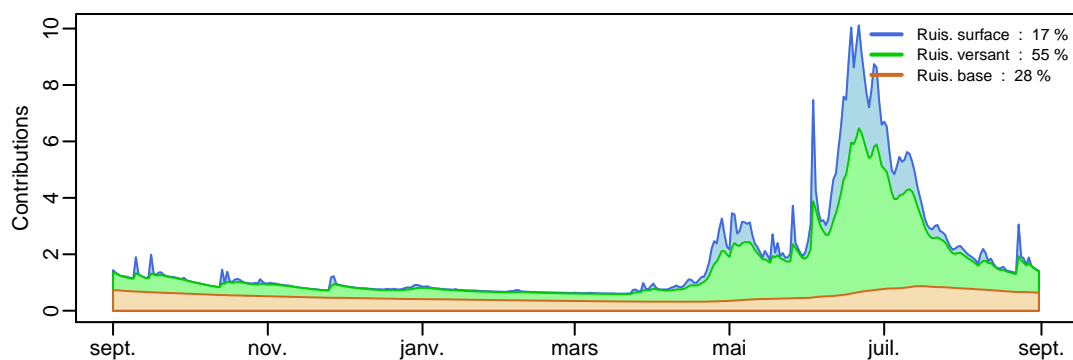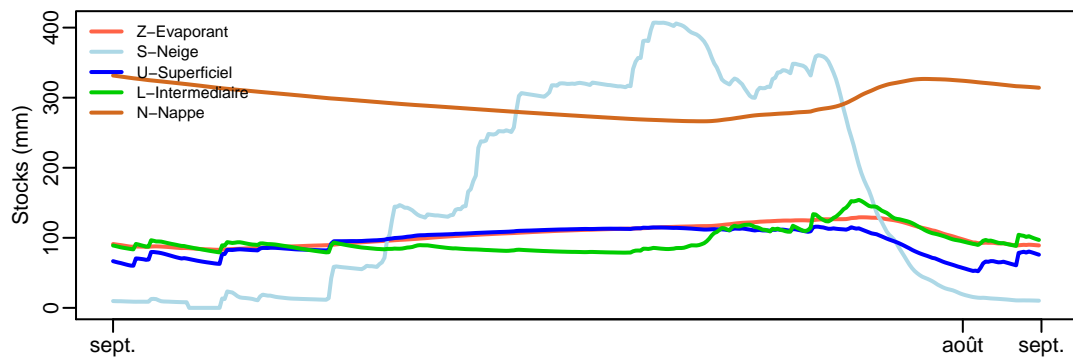

# q0157 (2179.64 km<sup>2</sup>) – année 1984–1985

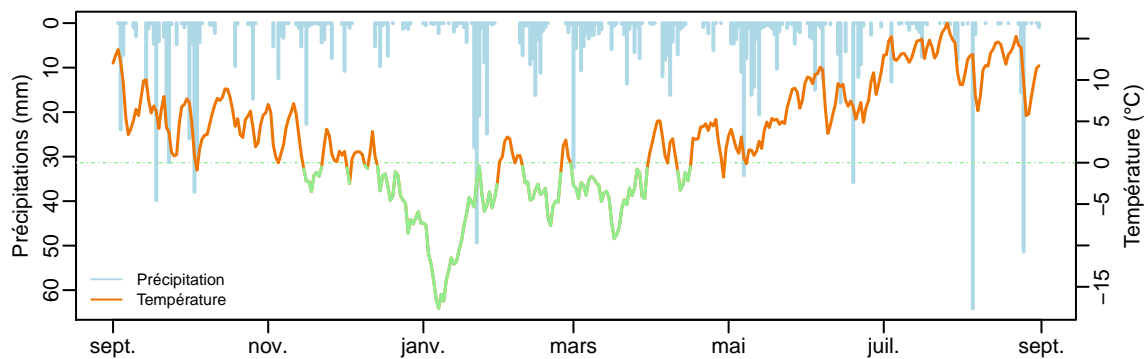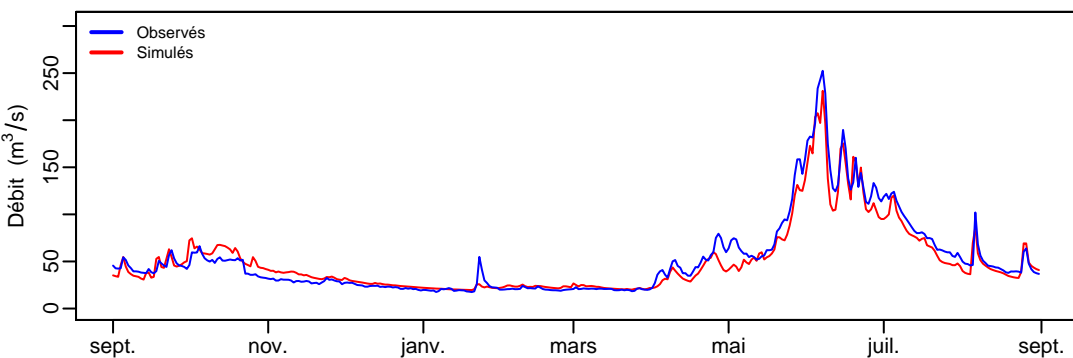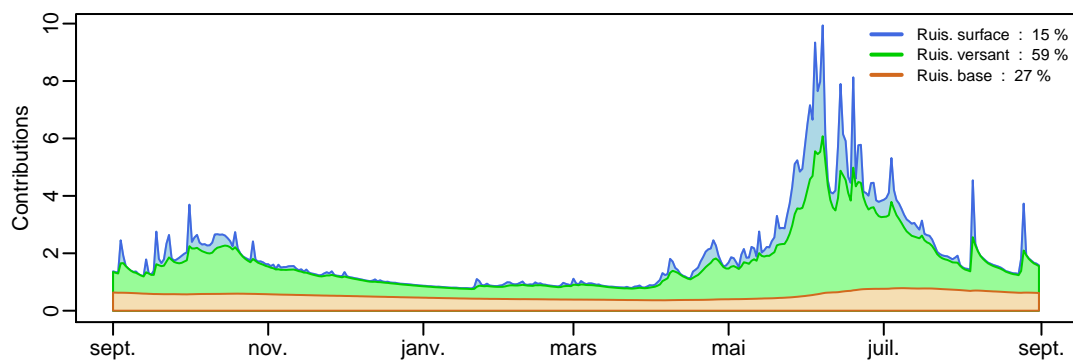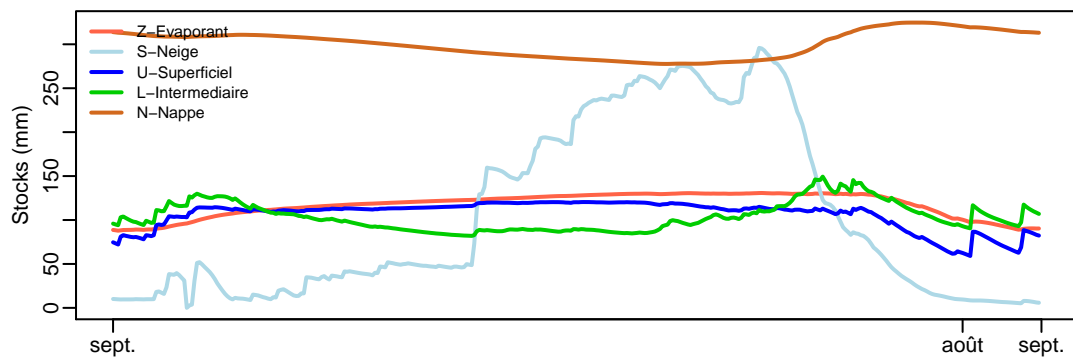

# q0157 (2179.64 km<sup>2</sup>) – année 1985–1986

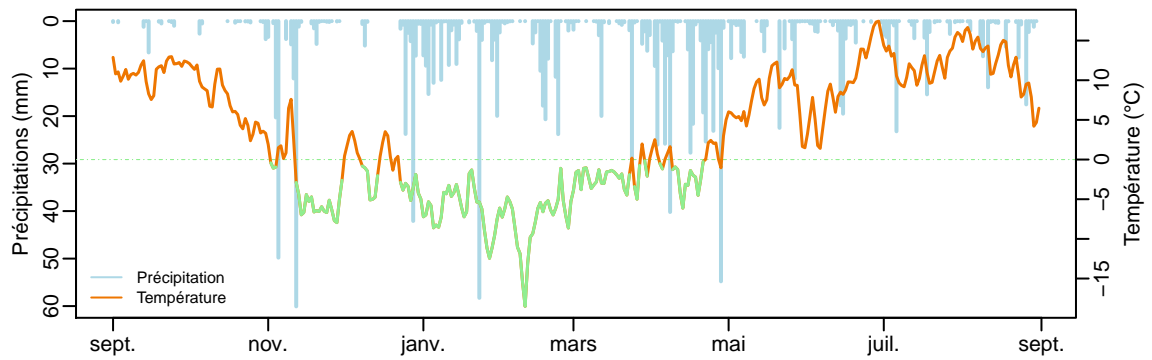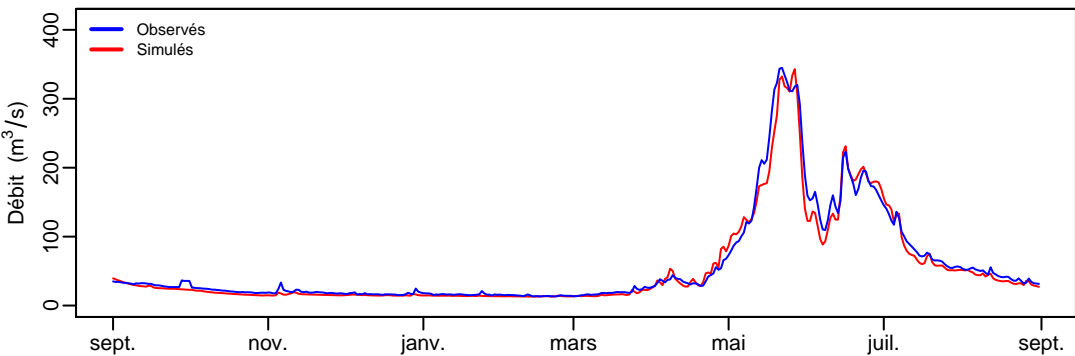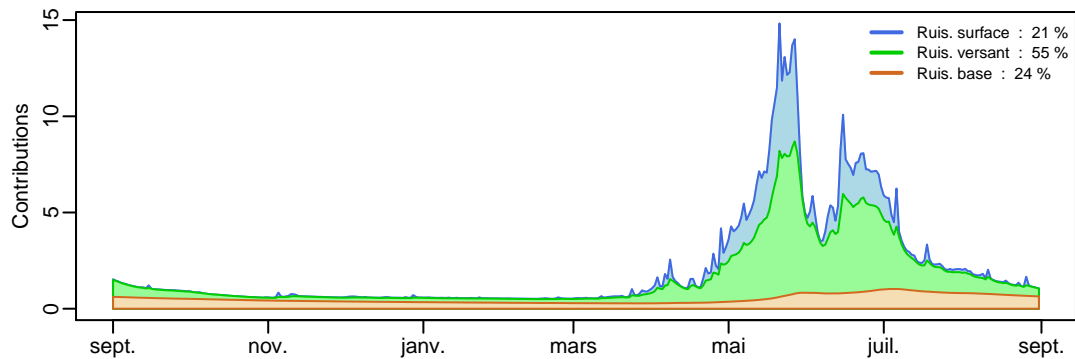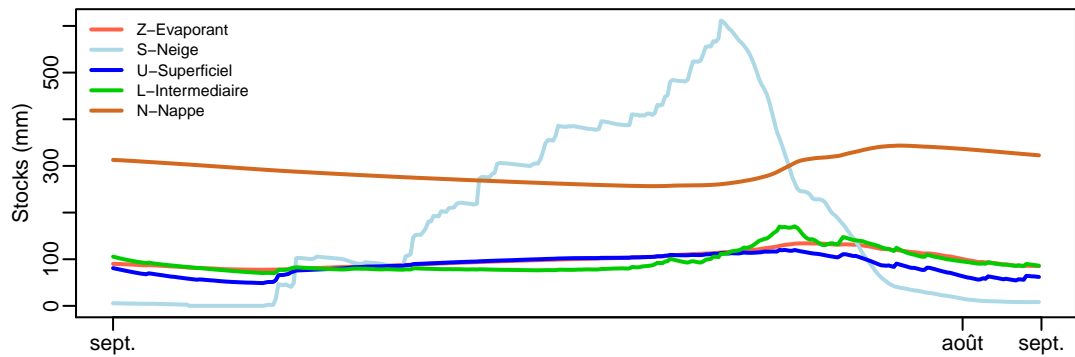

# q0157 (2179.64 km<sup>2</sup>) – année 1986–1987

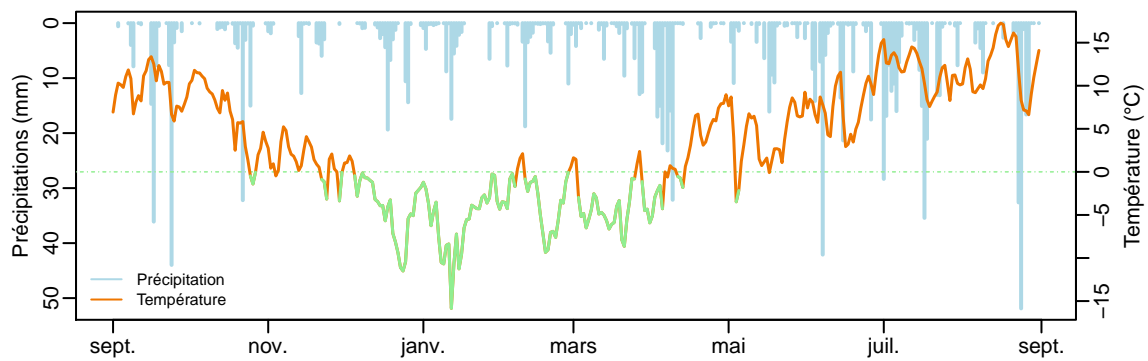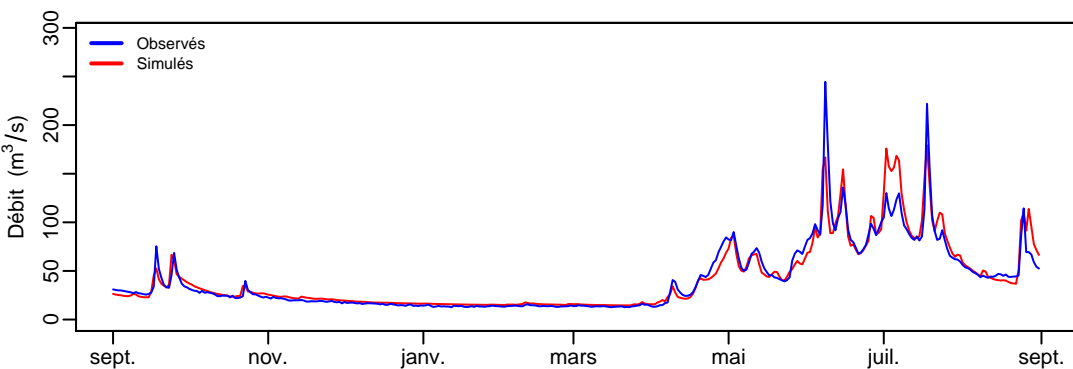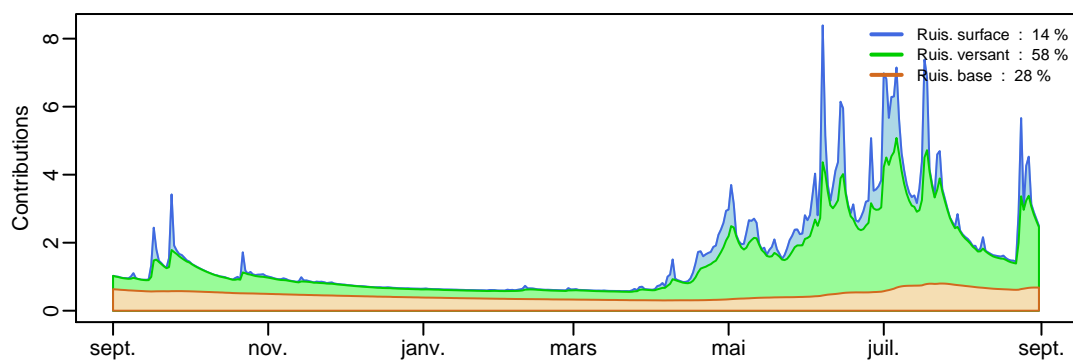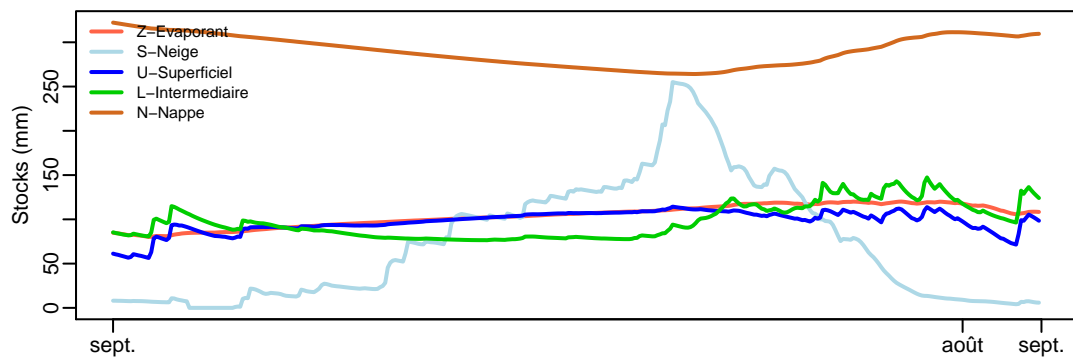

# q0157 (2179.64 km<sup>2</sup>) – année 1987–1988

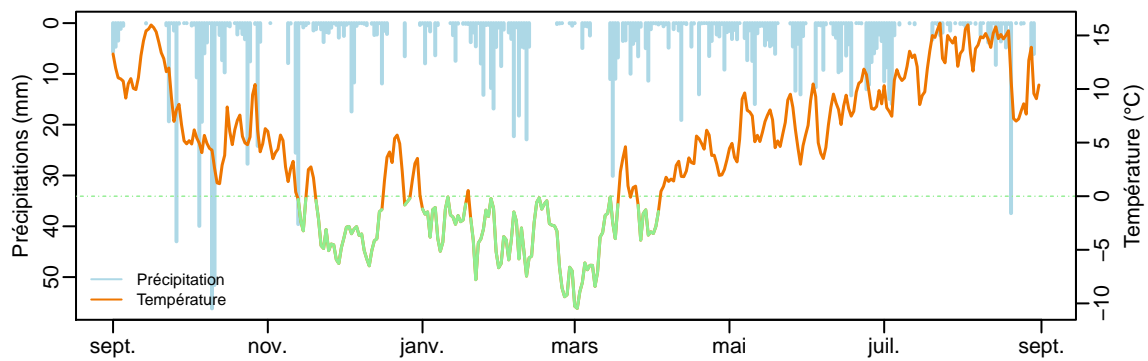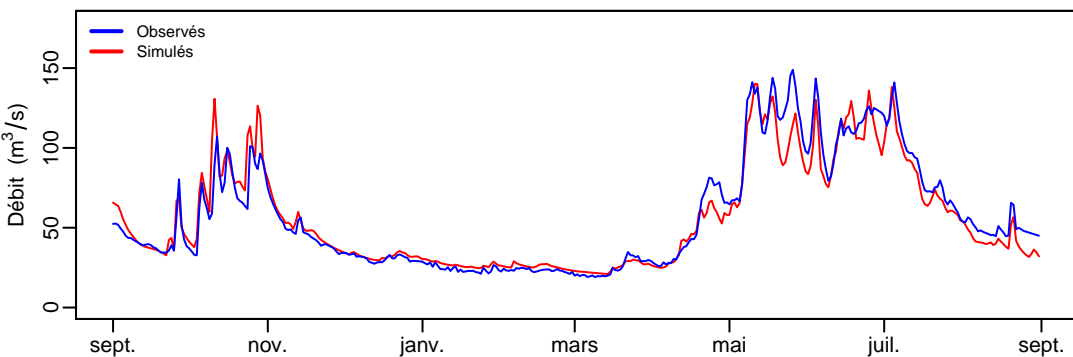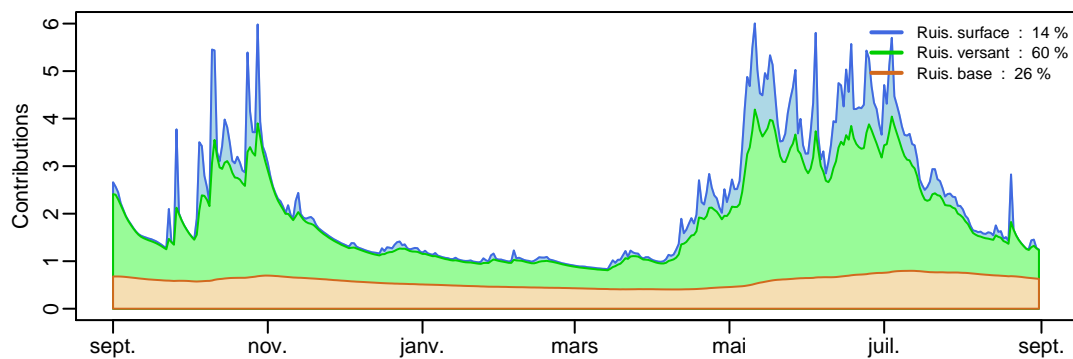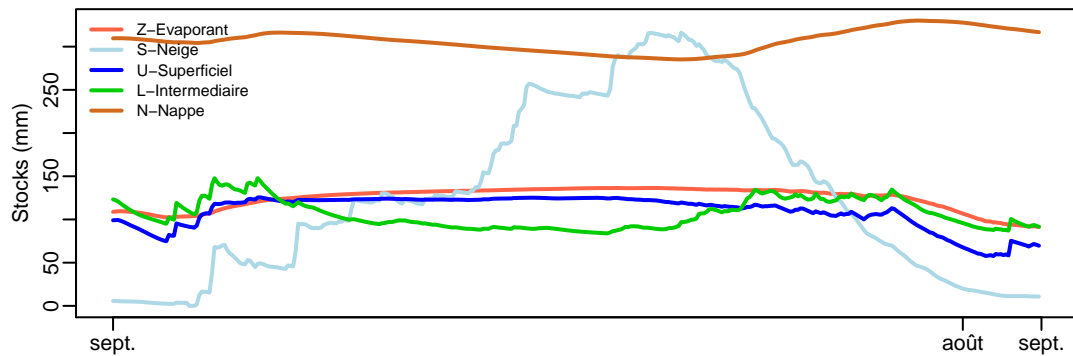



# q0157 (2179.64 km<sup>2</sup>) – année 1988–1989

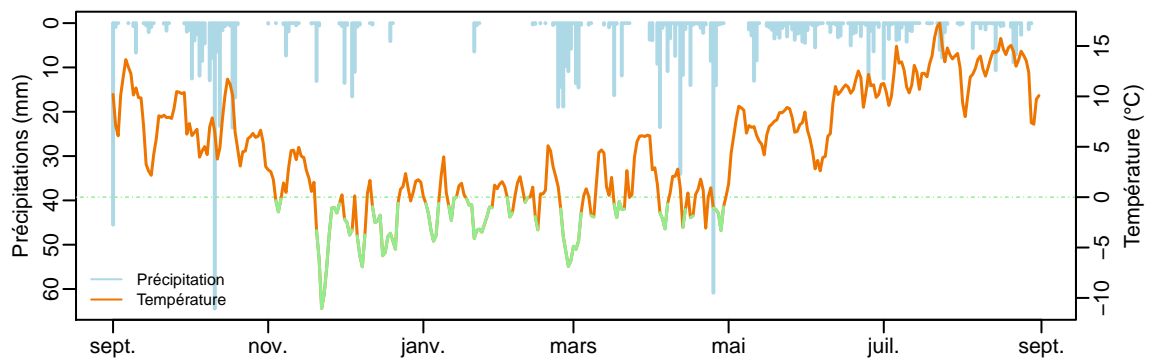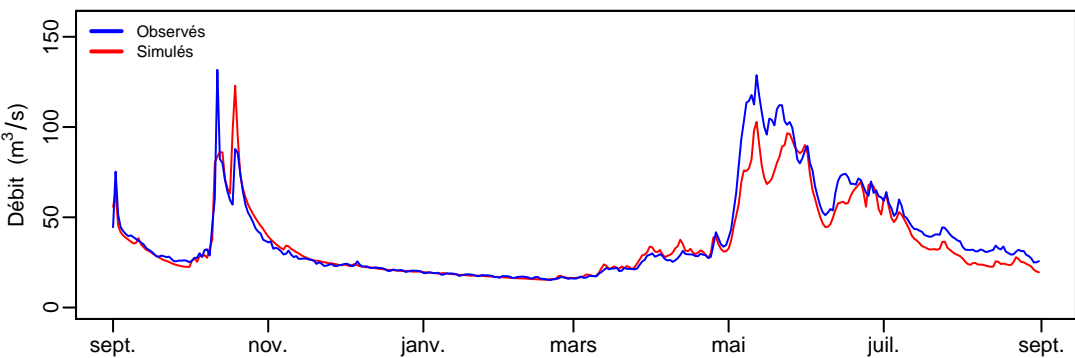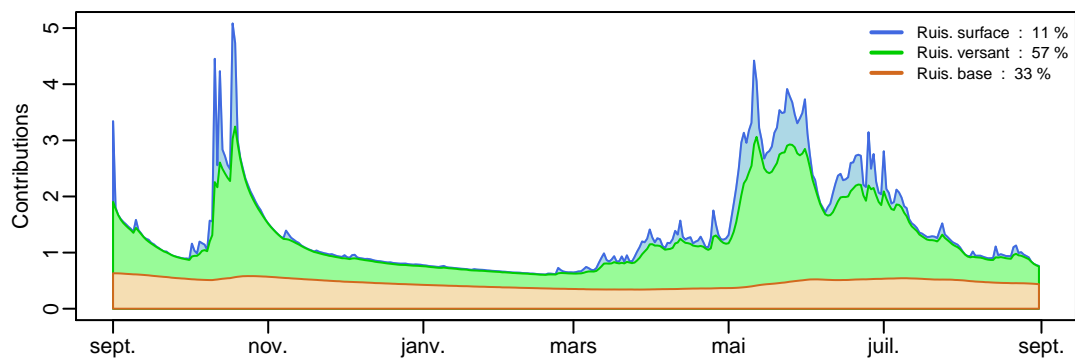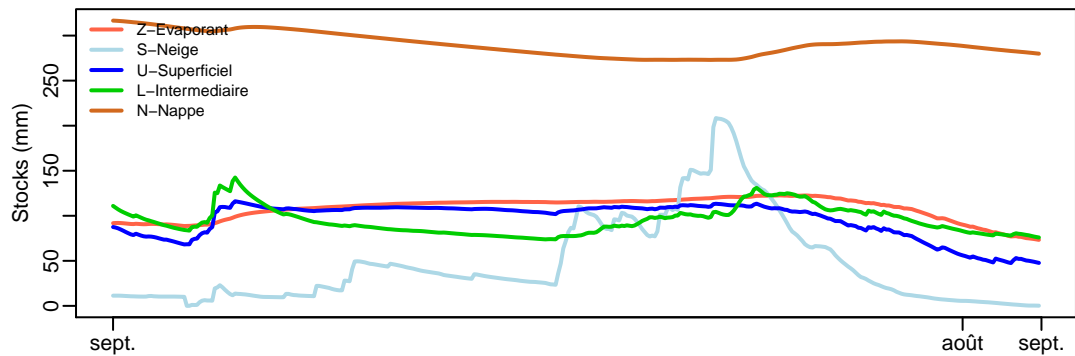

# q0157 (2179.64 km<sup>2</sup>) – année 1989–1990

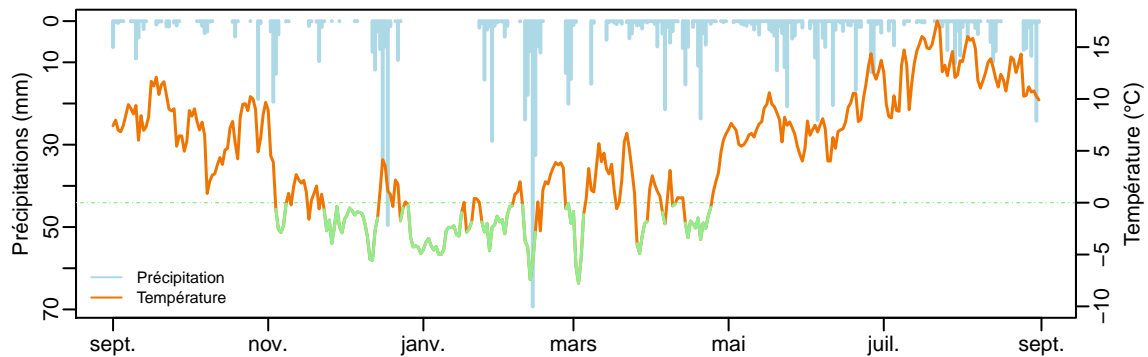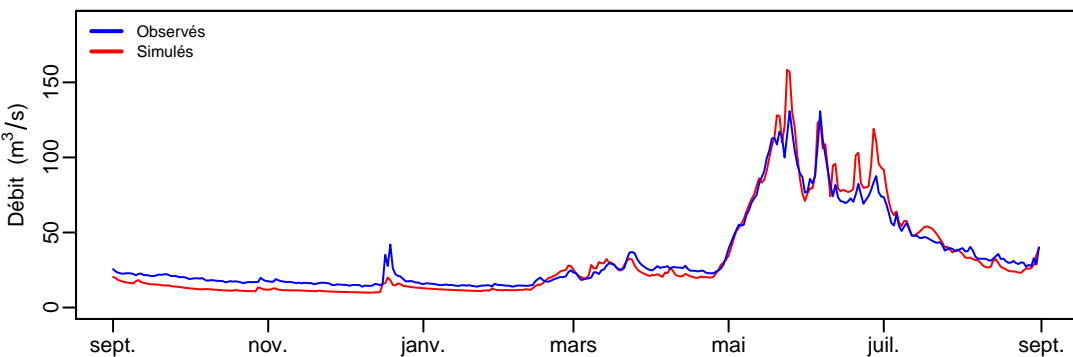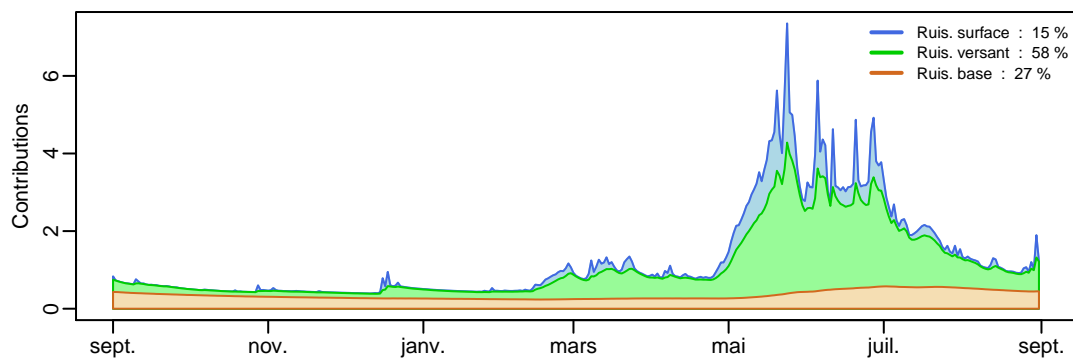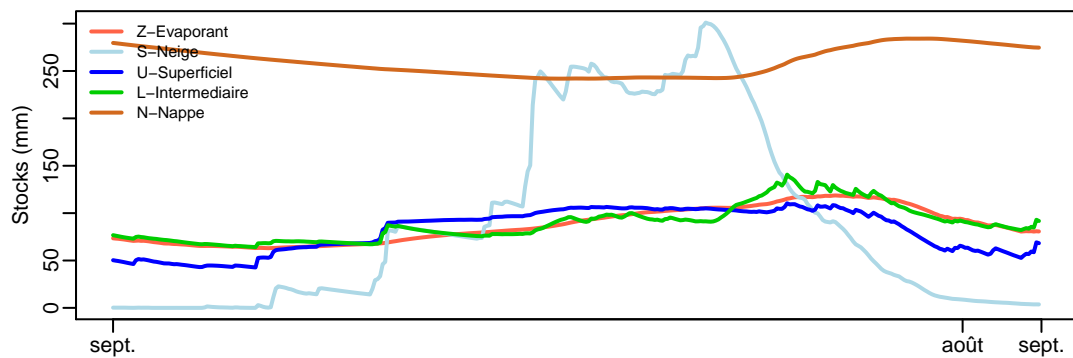

# q0157 (2179.64 km<sup>2</sup>) – année 1990–1991

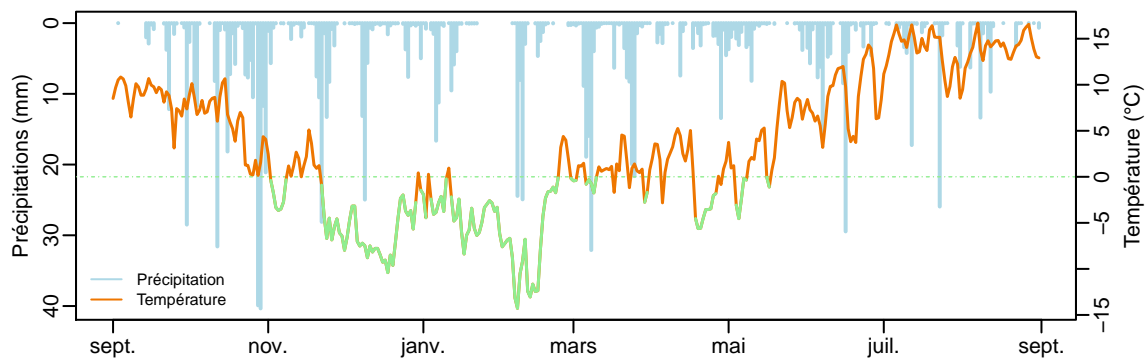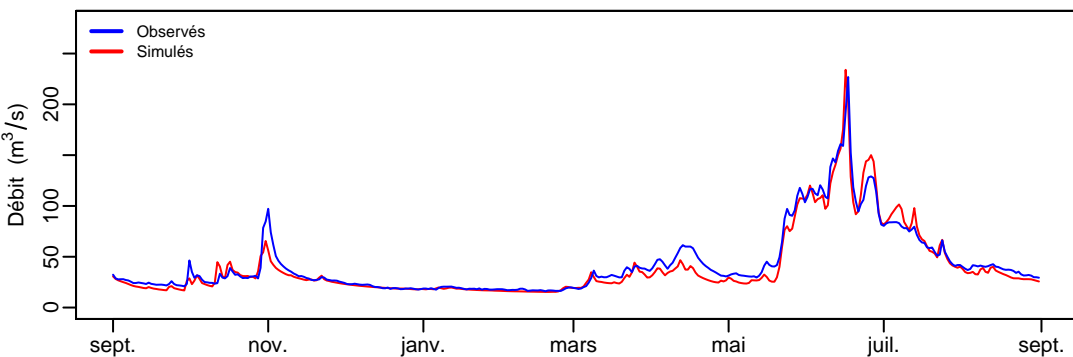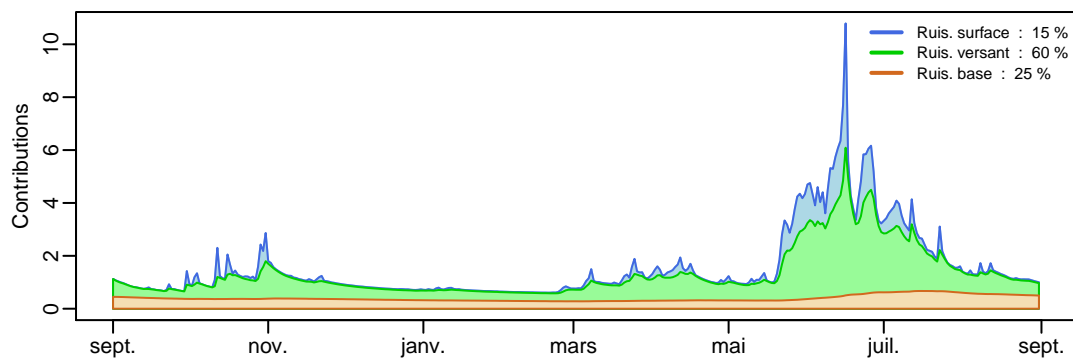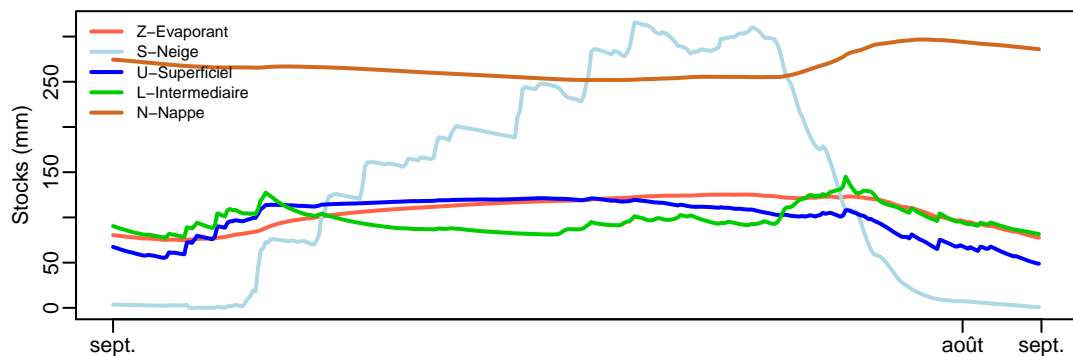

# q0157 (2179.64 km²) – année 1991–1992

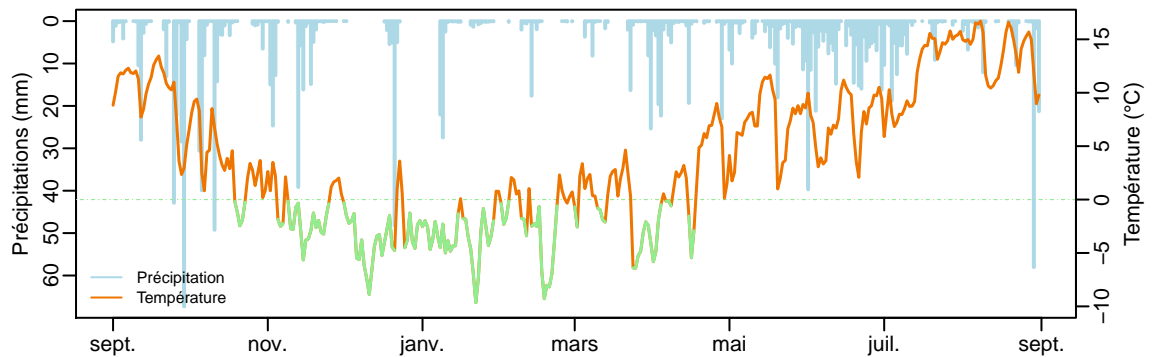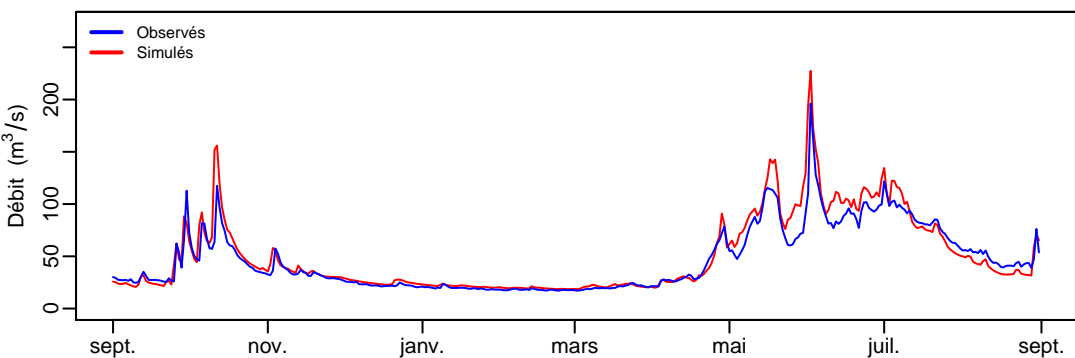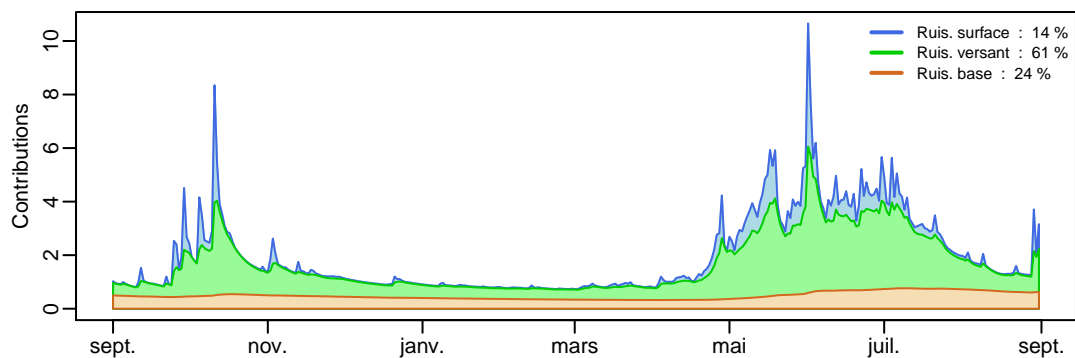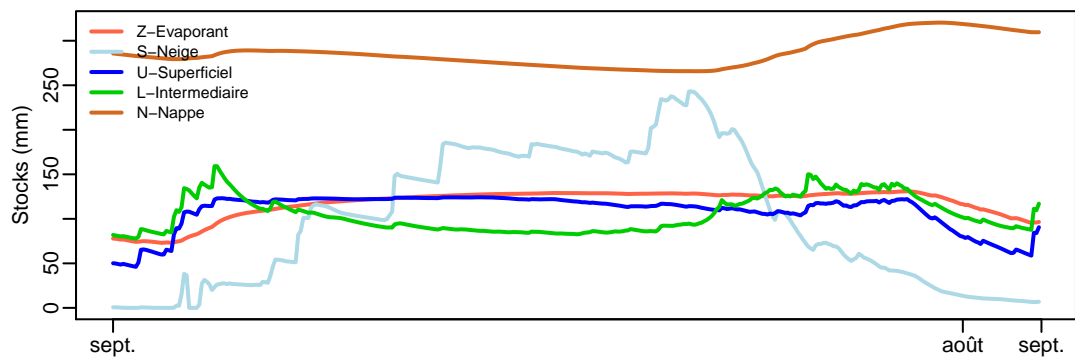

# q0157 (2179.64 km²) – année 1992–1993

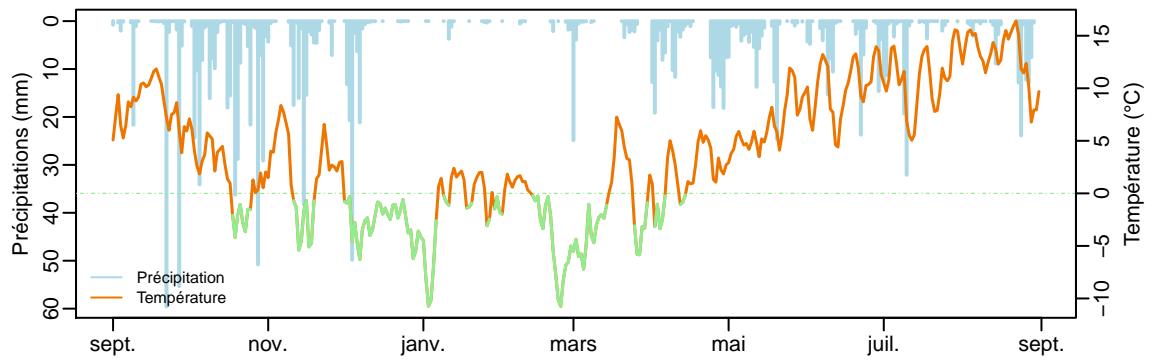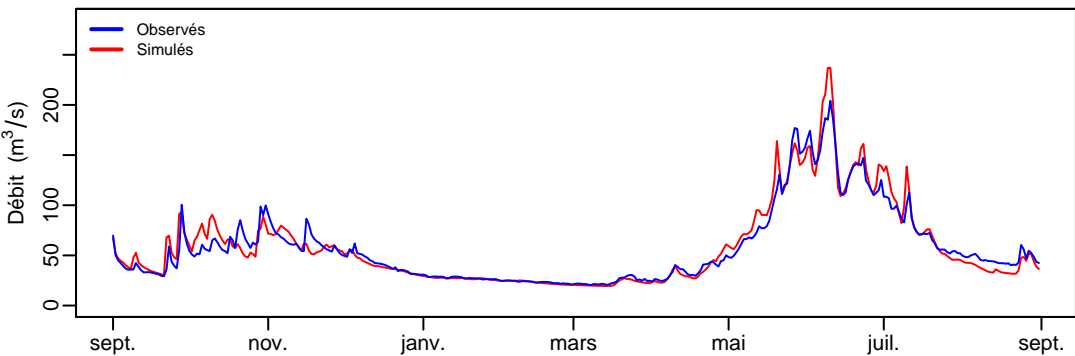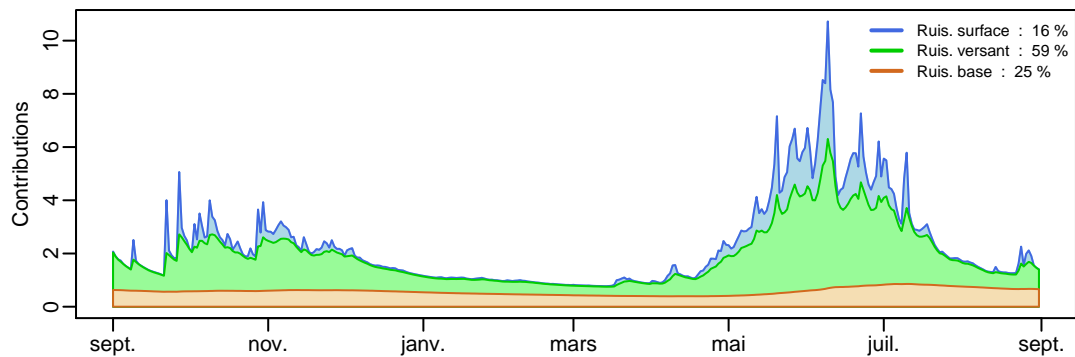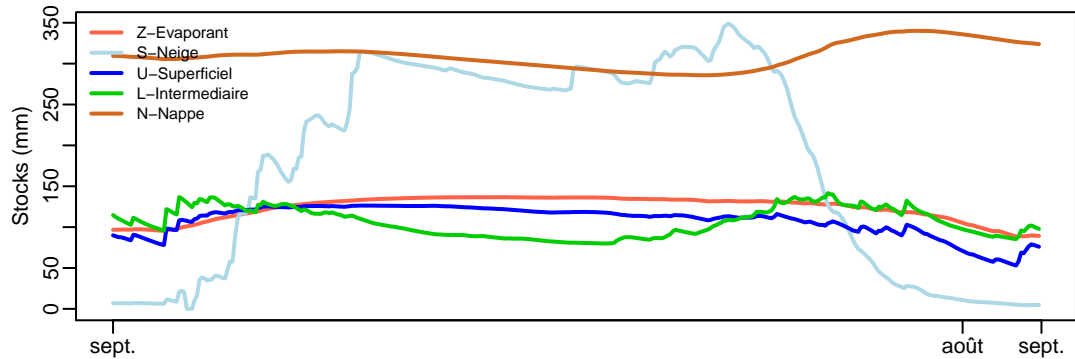

# q0157 (2179.64 km²) – année 1993–1994

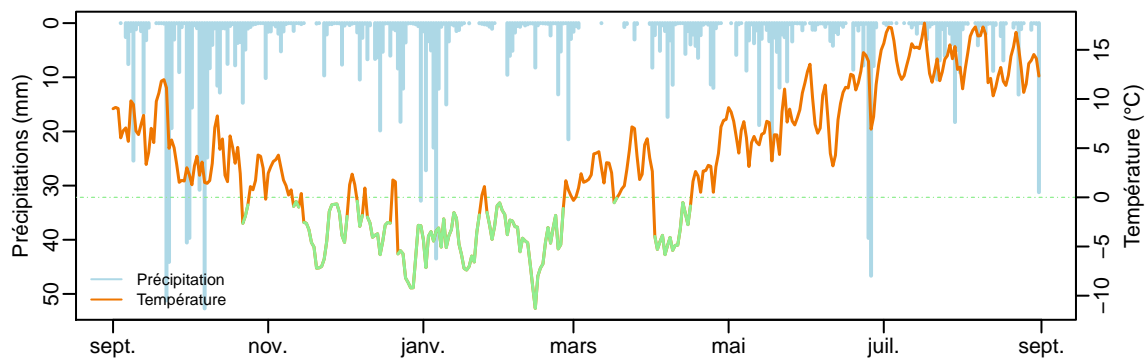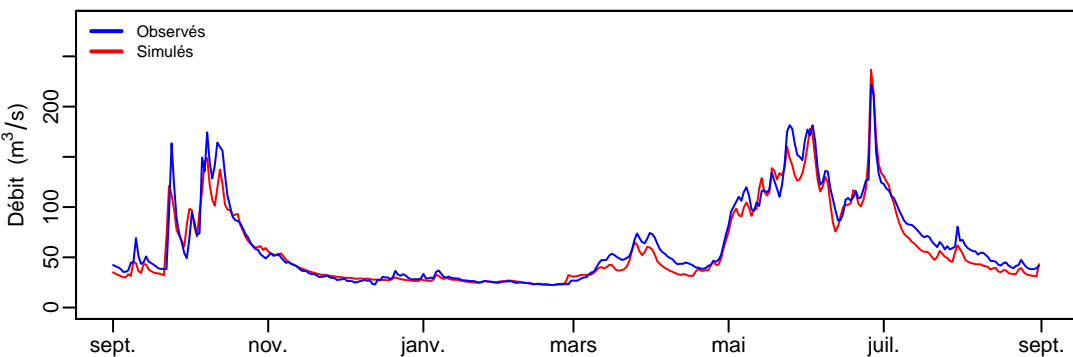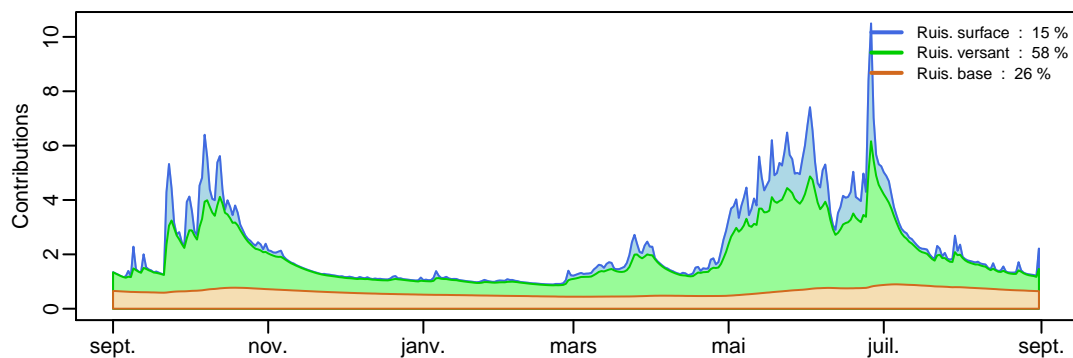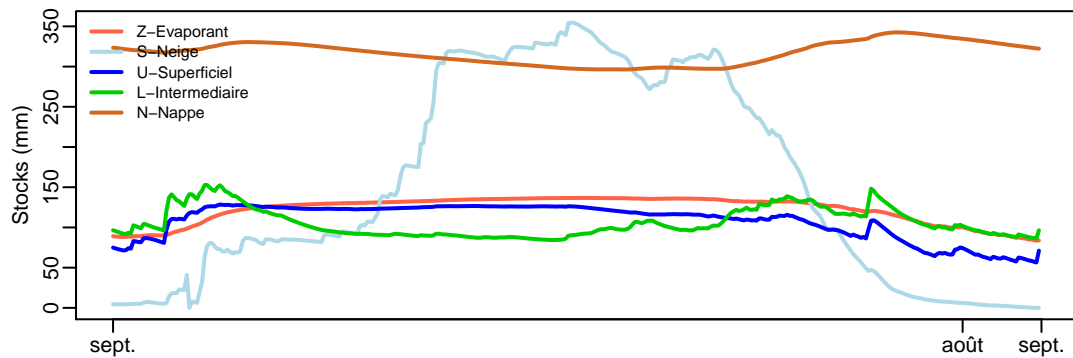

# q0157 (2179.64 km<sup>2</sup>) – année 1994–1995

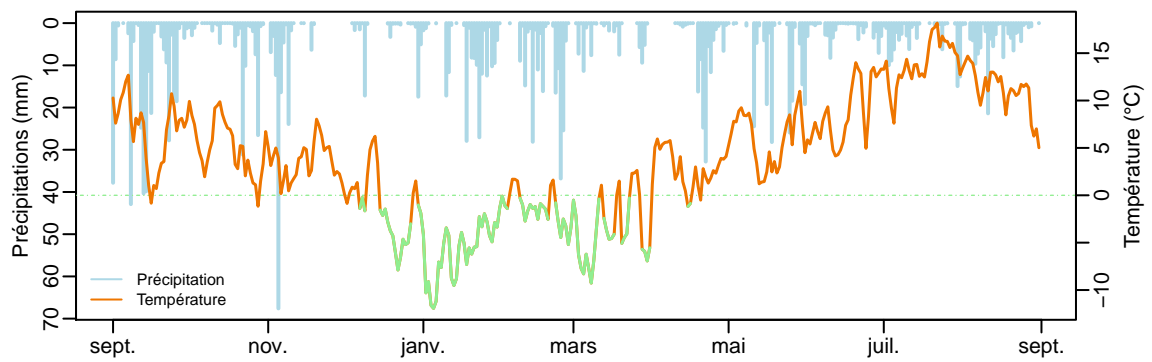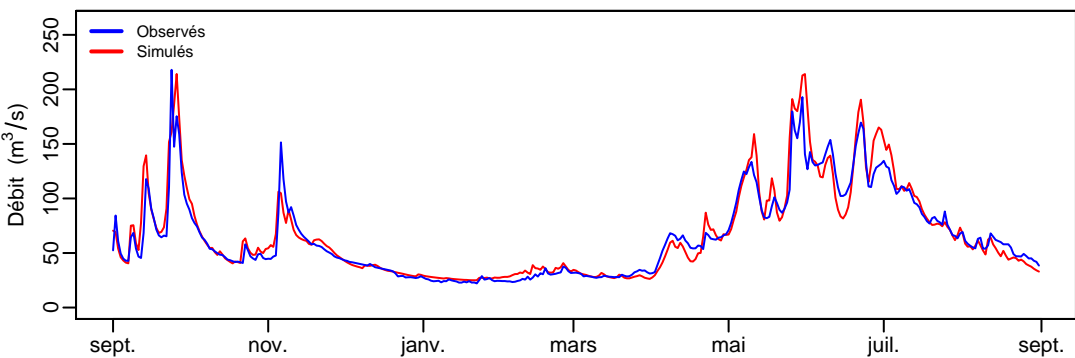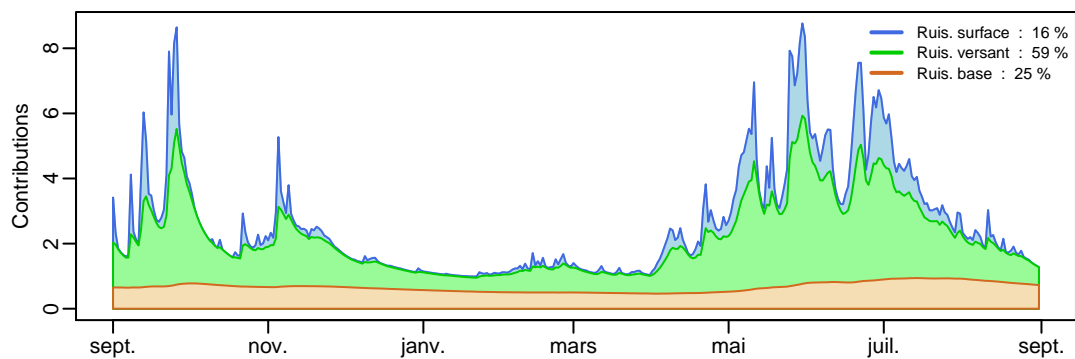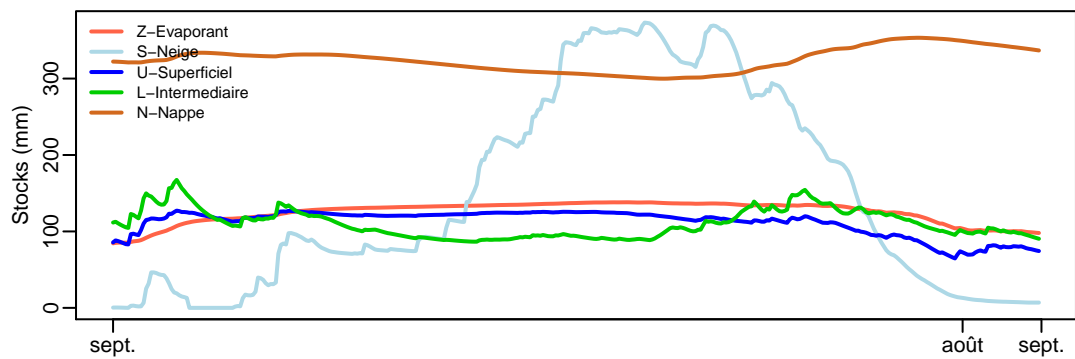

# q0157 (2179.64 km²) – année 1995–1996

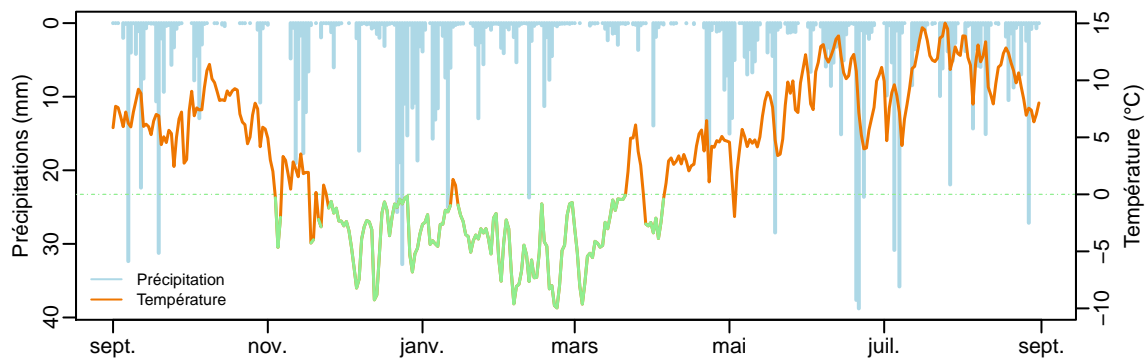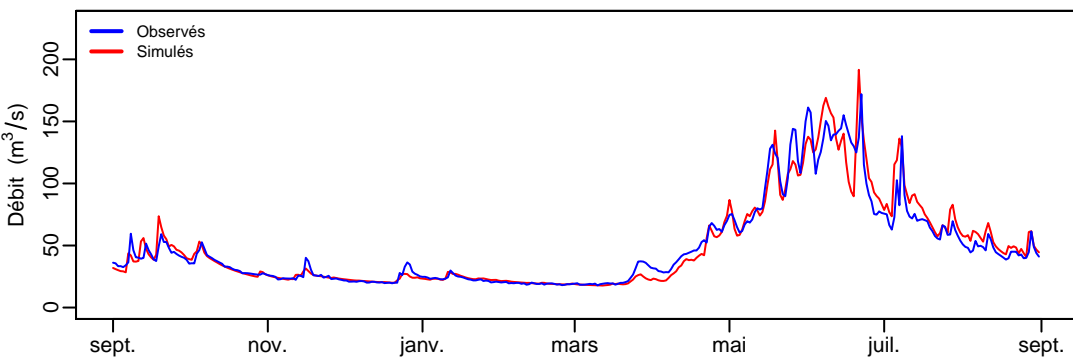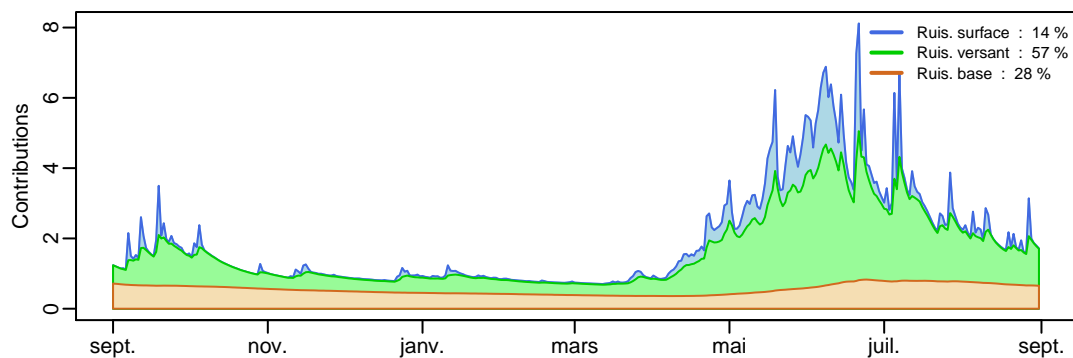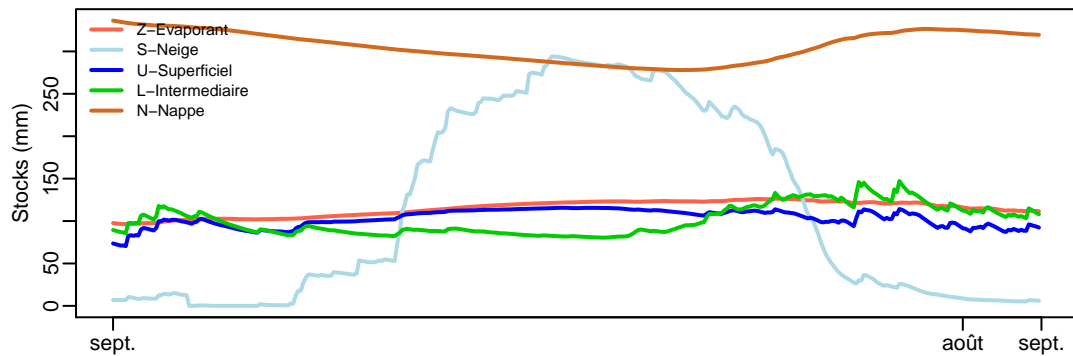



# q0157 (2179.64 km²) – année 1996–1997

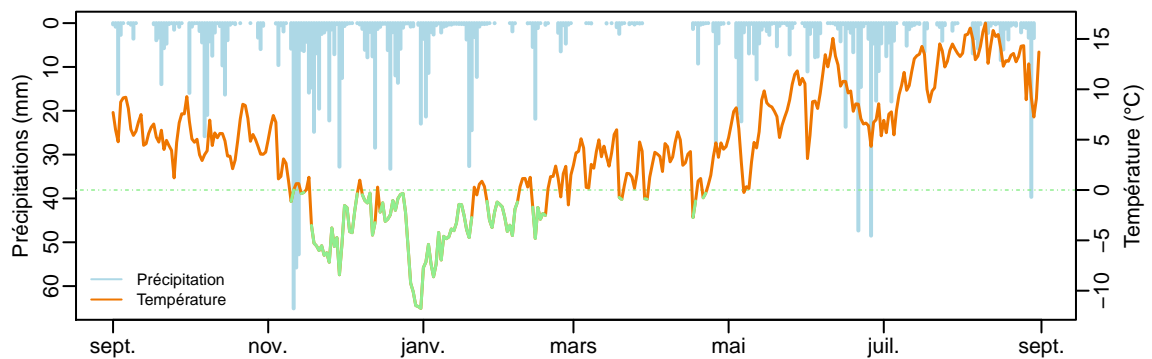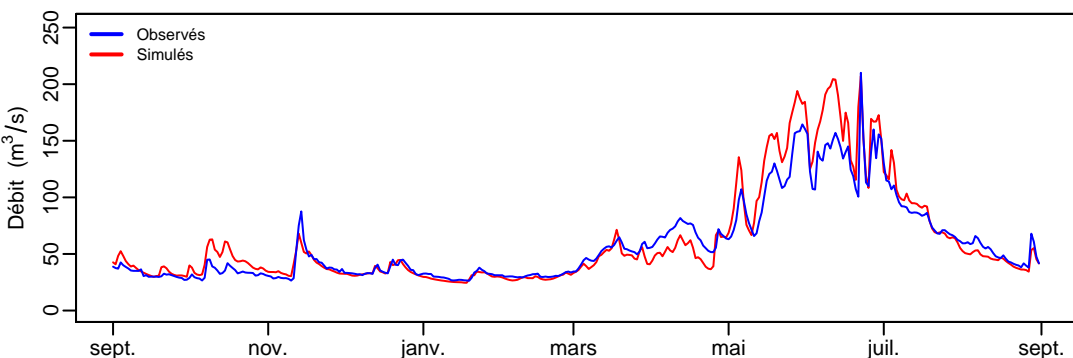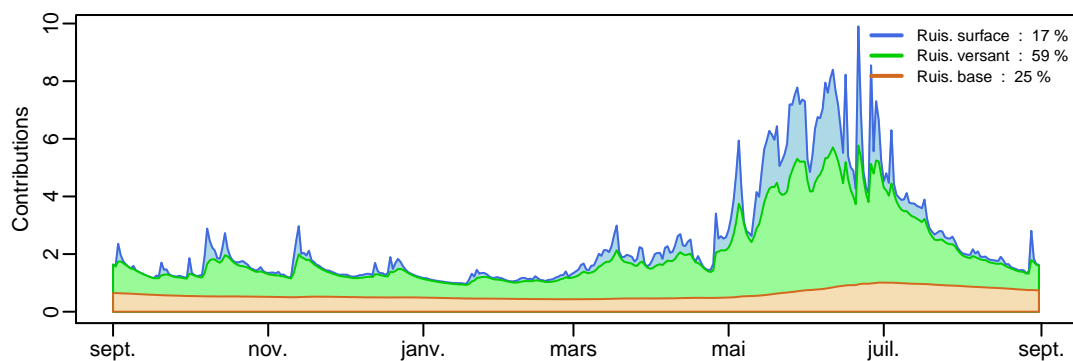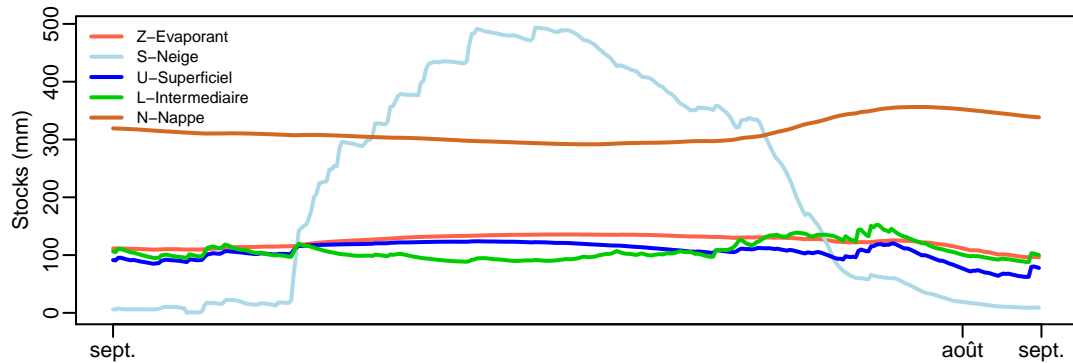

# q0157 (2179.64 km²) – année 1997–1998

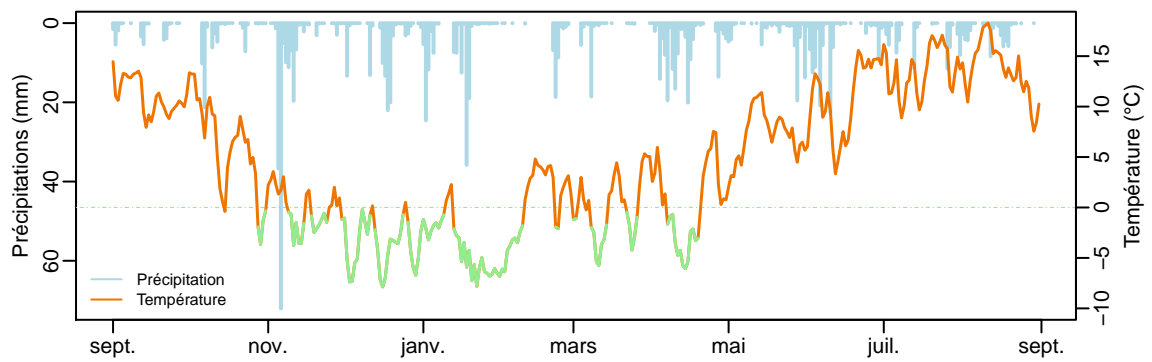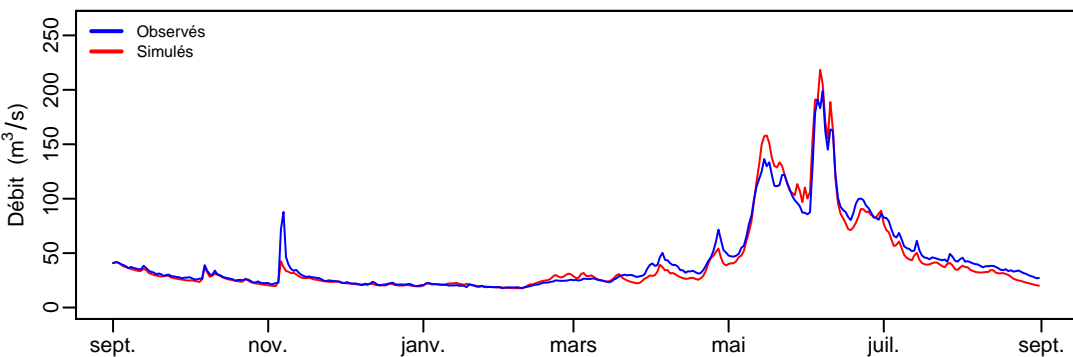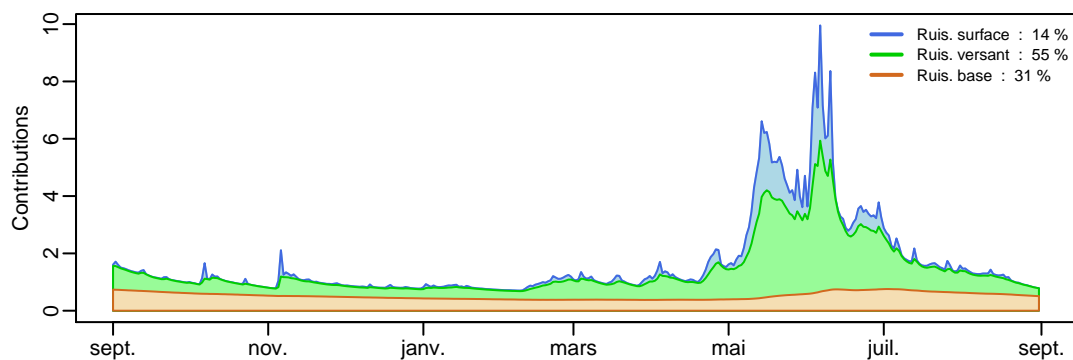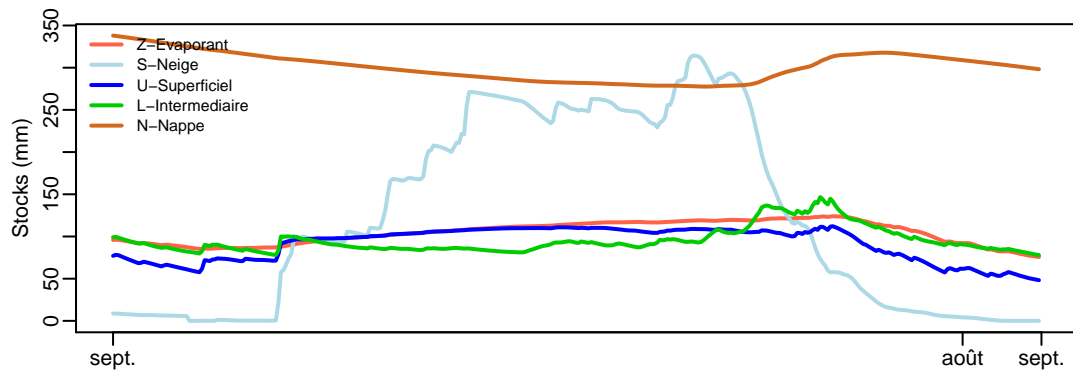

# q0157 (2179.64 km<sup>2</sup>) – année 1998–1999

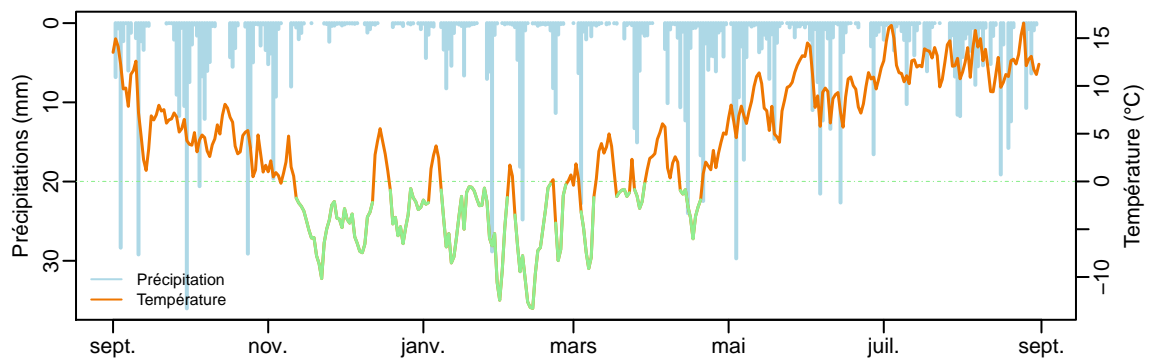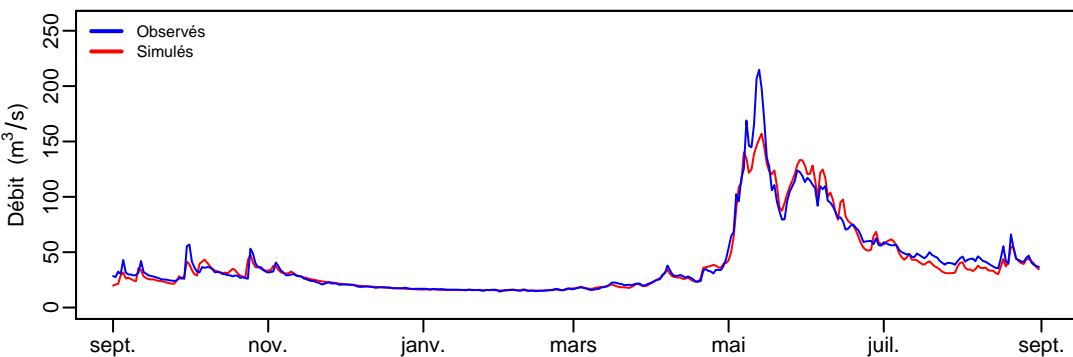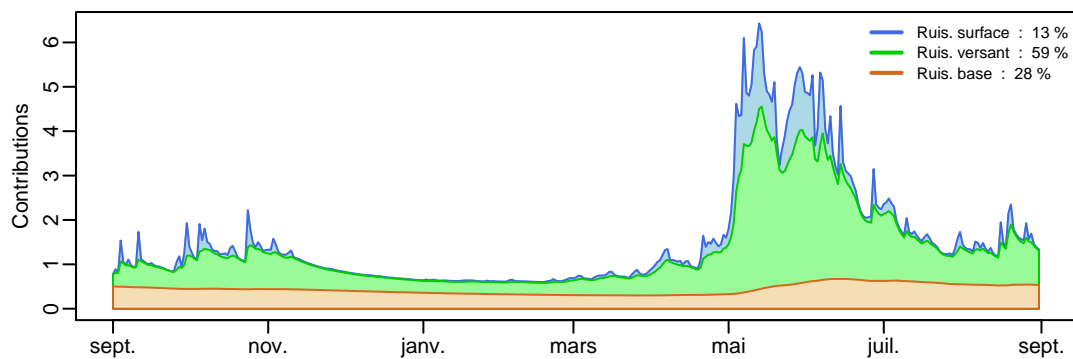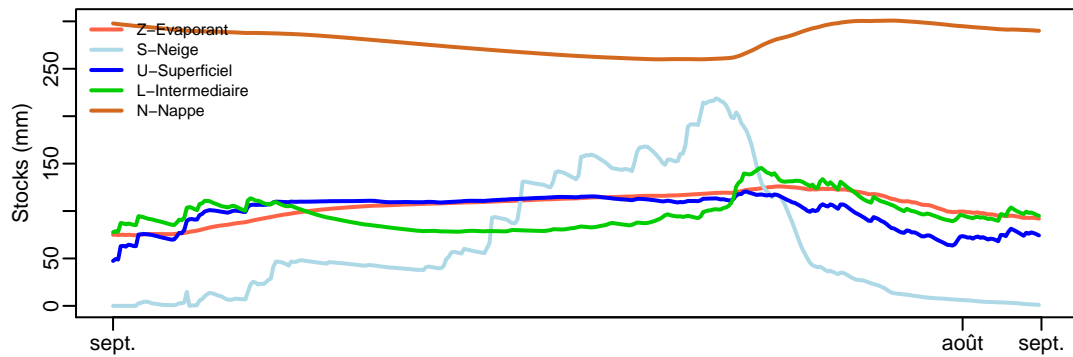

# q0157 (2179.64 km²) – année 1999–2000

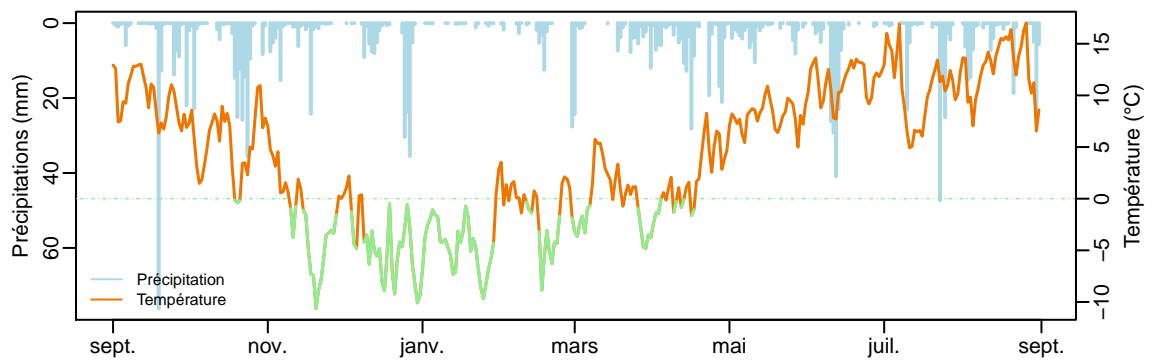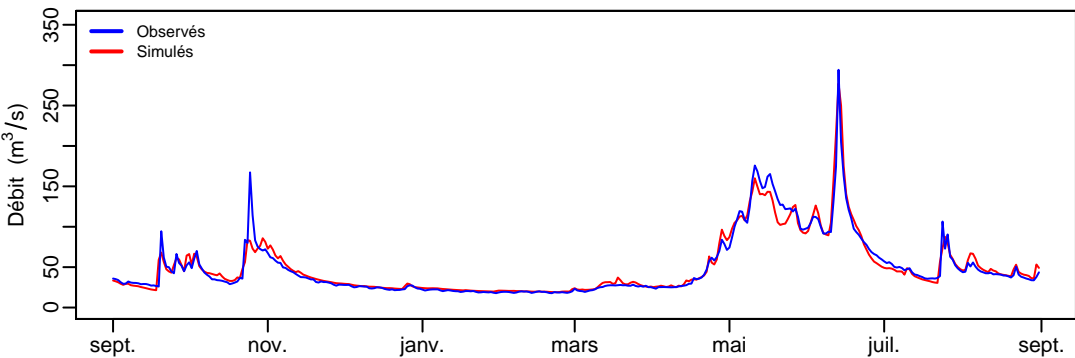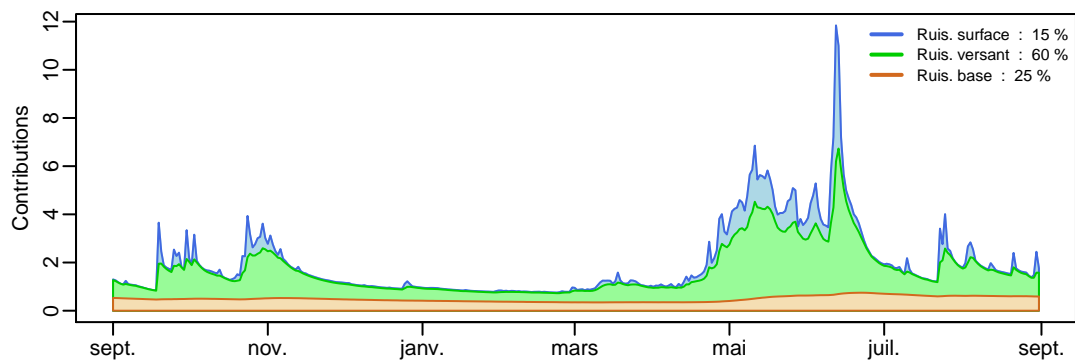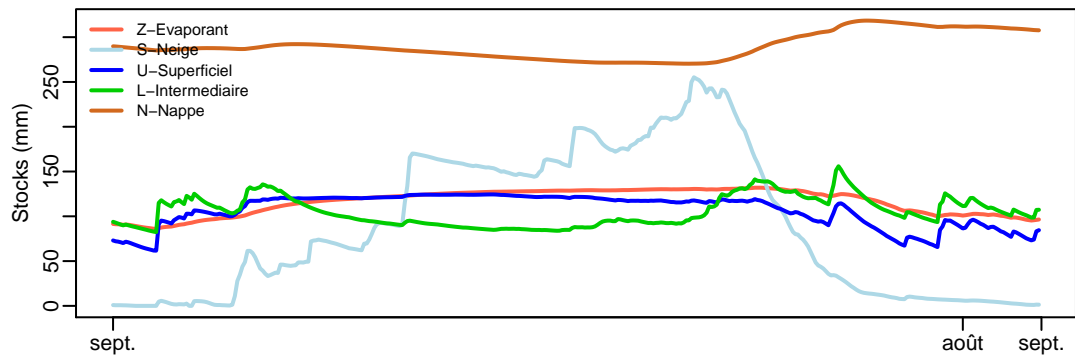

# q0157 (2179.64 km<sup>2</sup>) – année 2000–2001

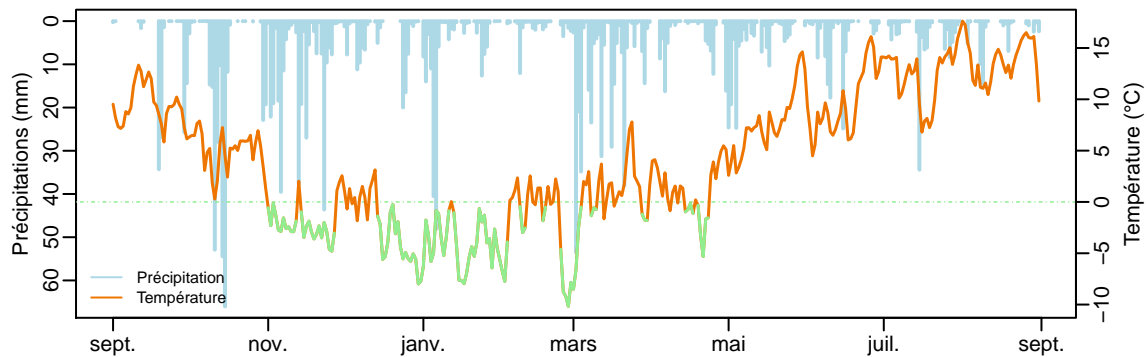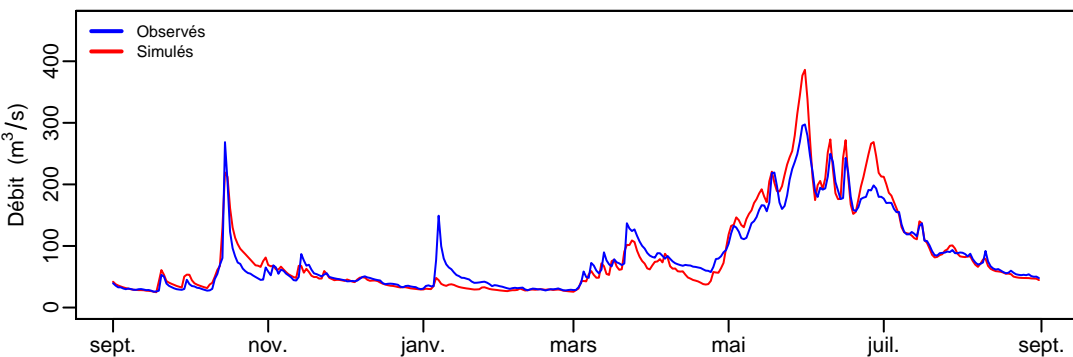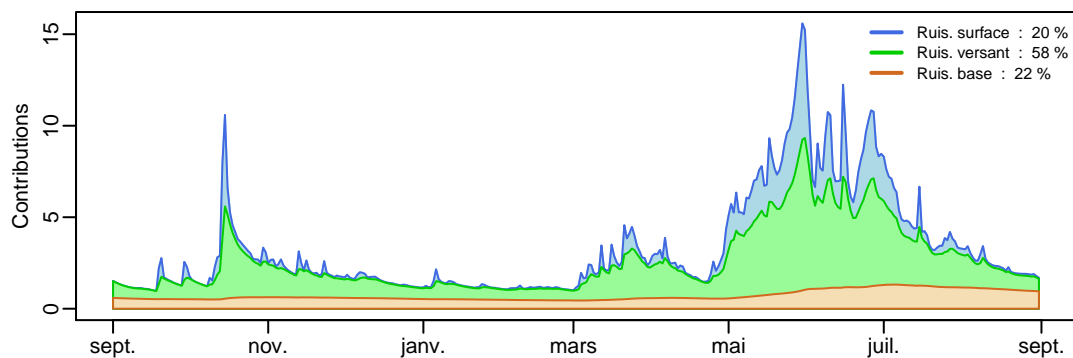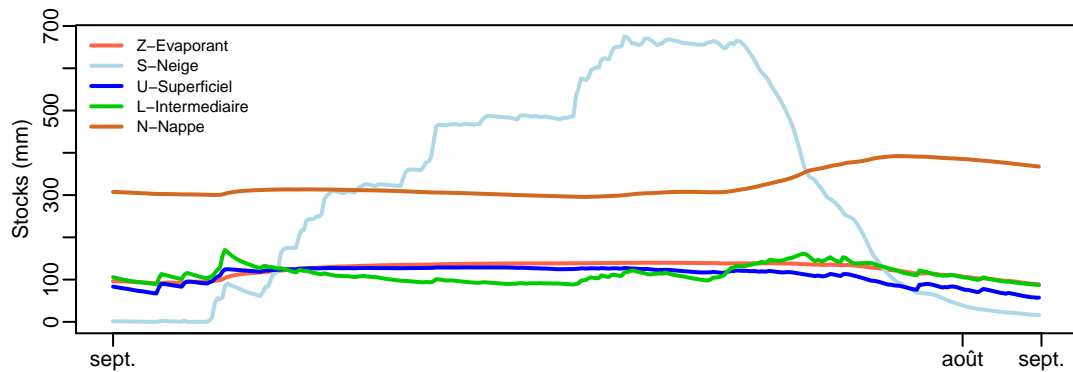

# q0157 (2179.64 km²) – année 2001–2002

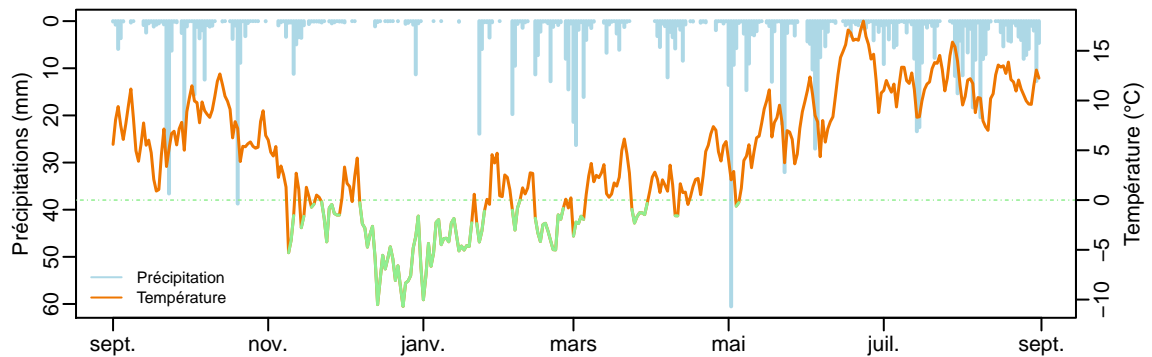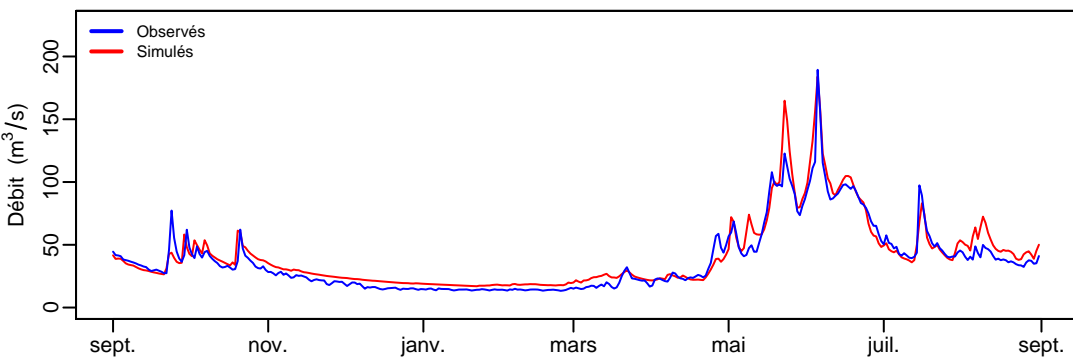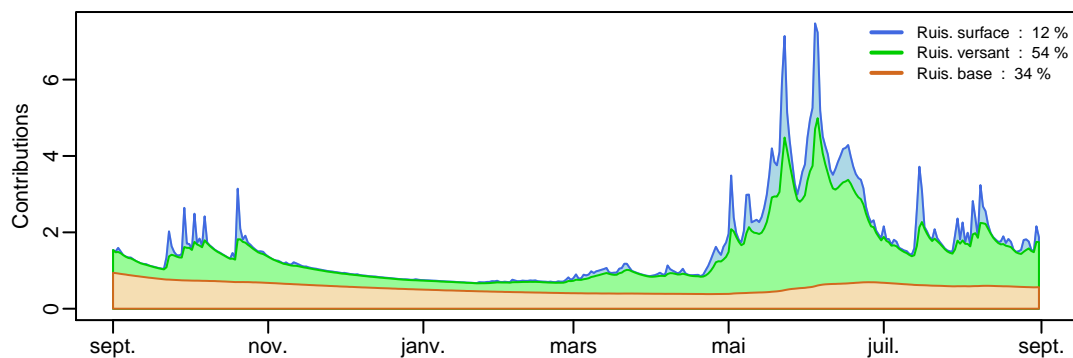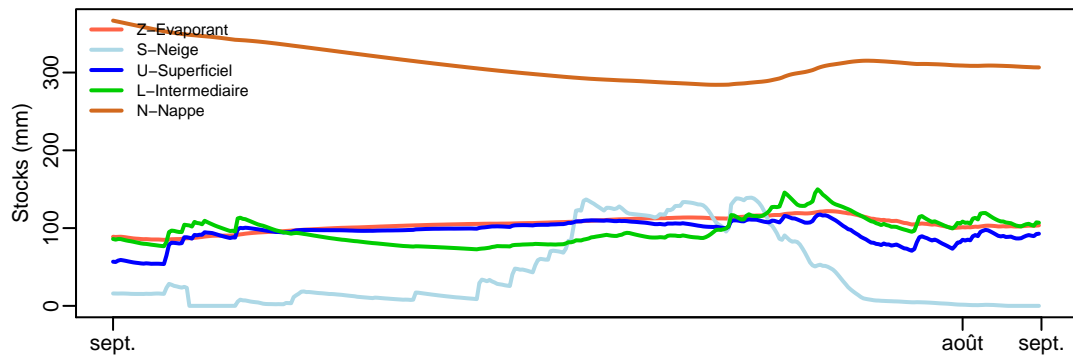

# q0157 (2179.64 km<sup>2</sup>) – année 2002–2003

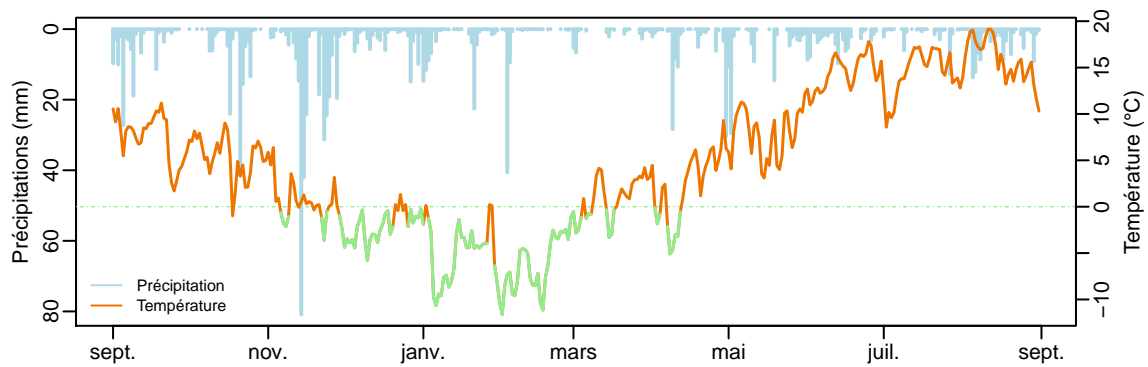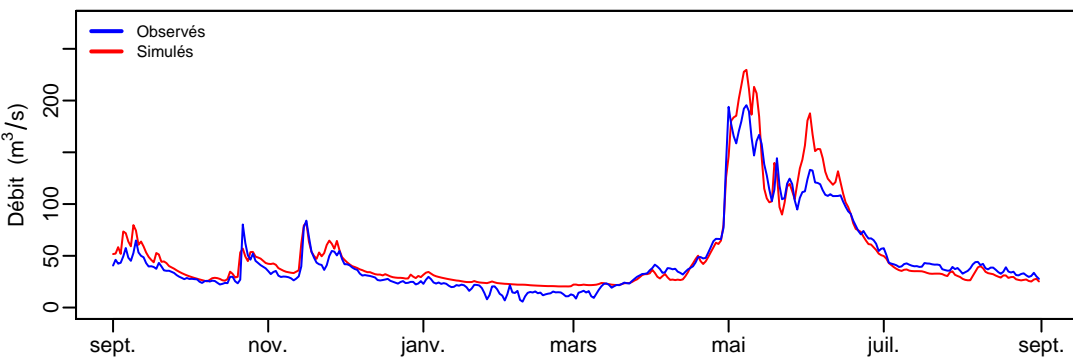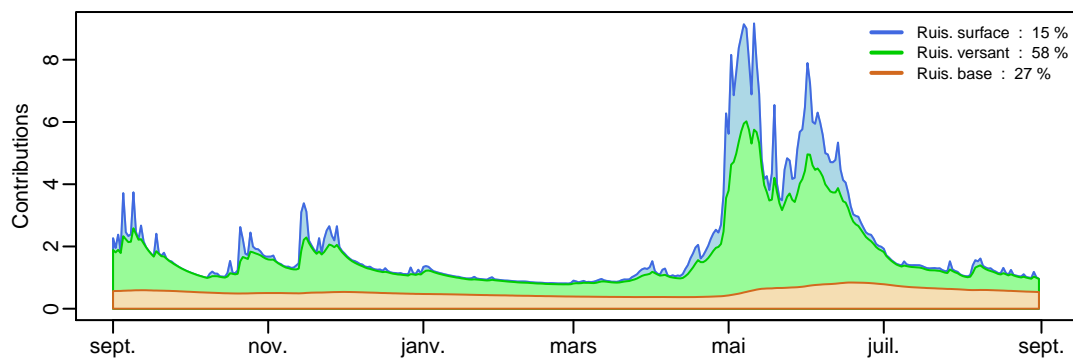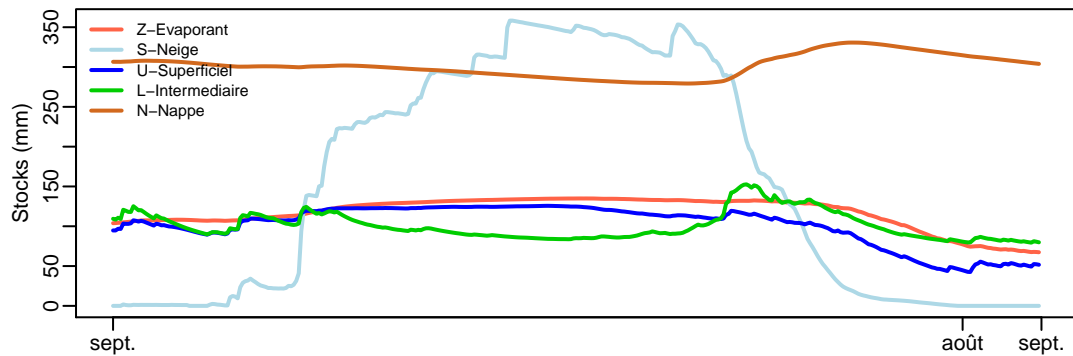

# q0157 (2179.64 km²) – année 2003–2004

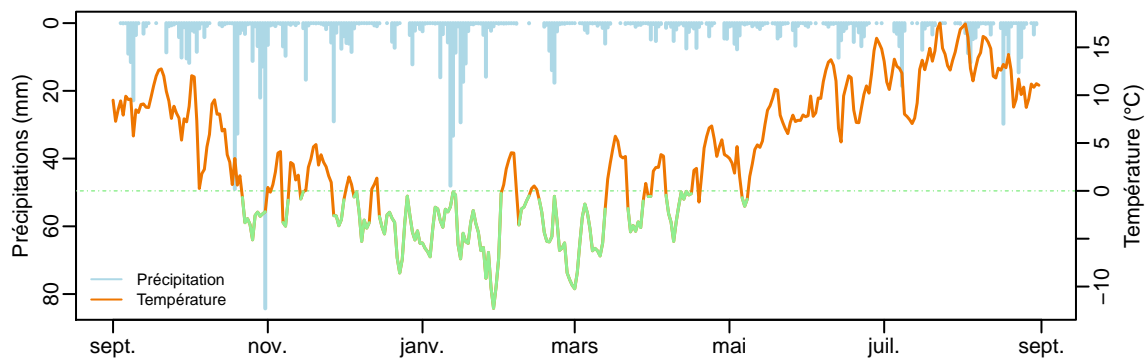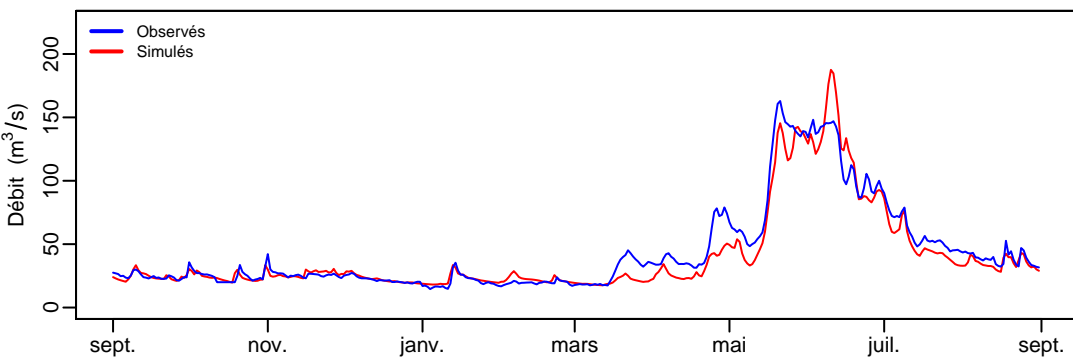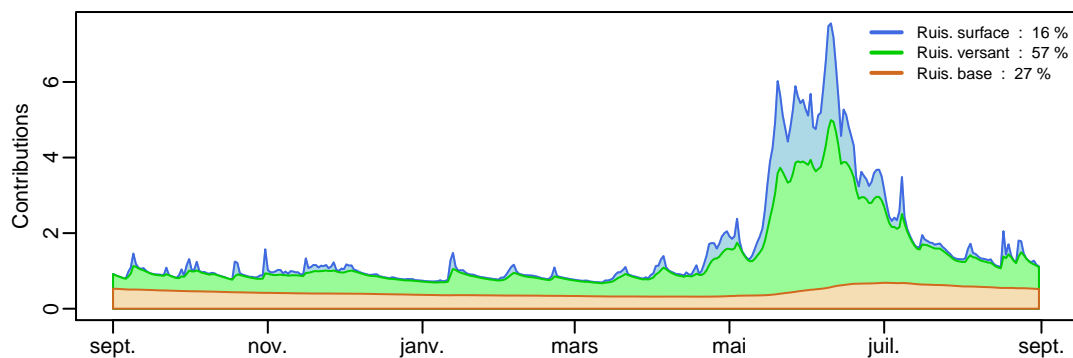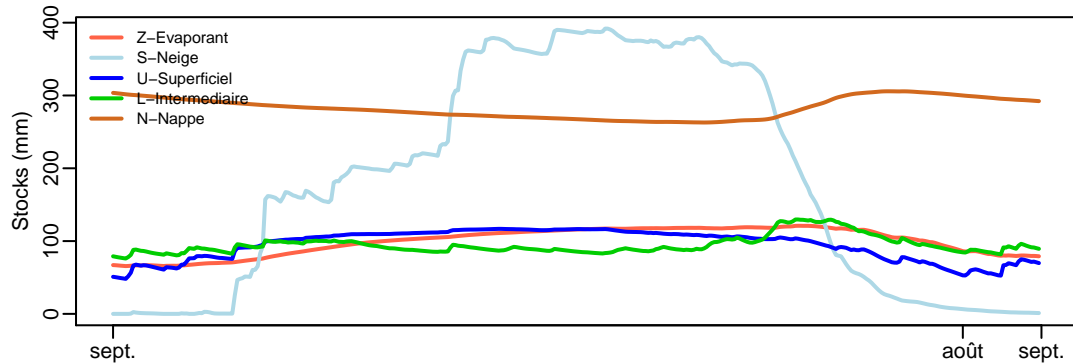



# q0157 (2179.64 km<sup>2</sup>) – année 2004–2005

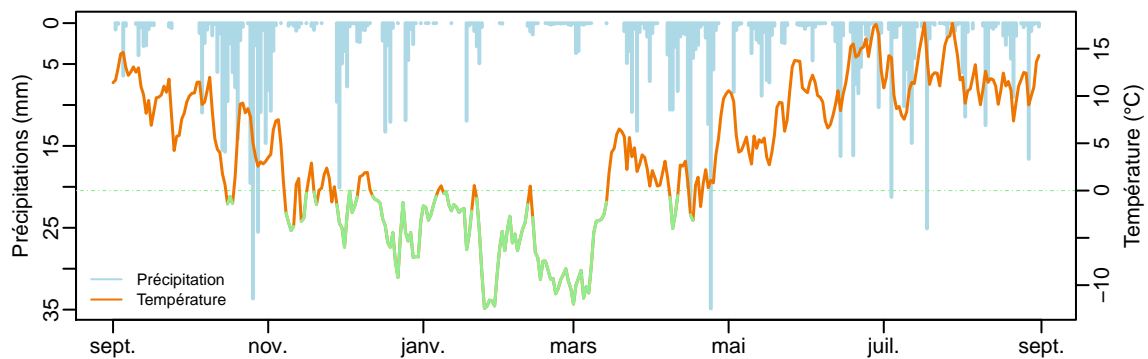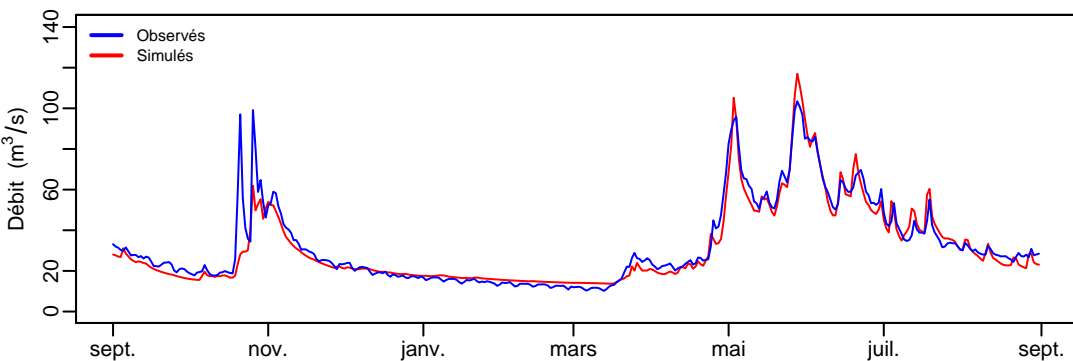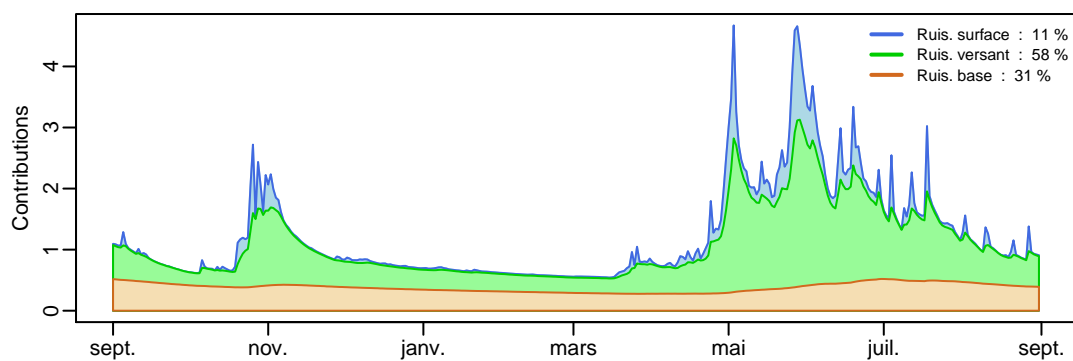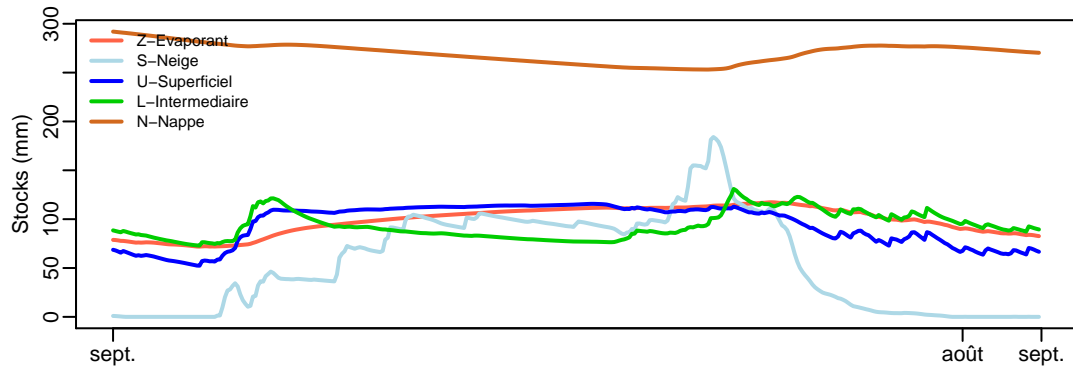

# q0157 (2179.64 km²) – année 2005–2006

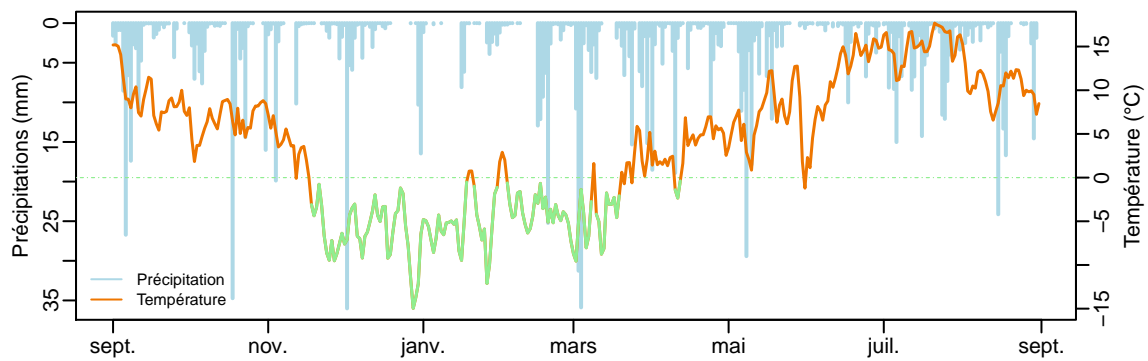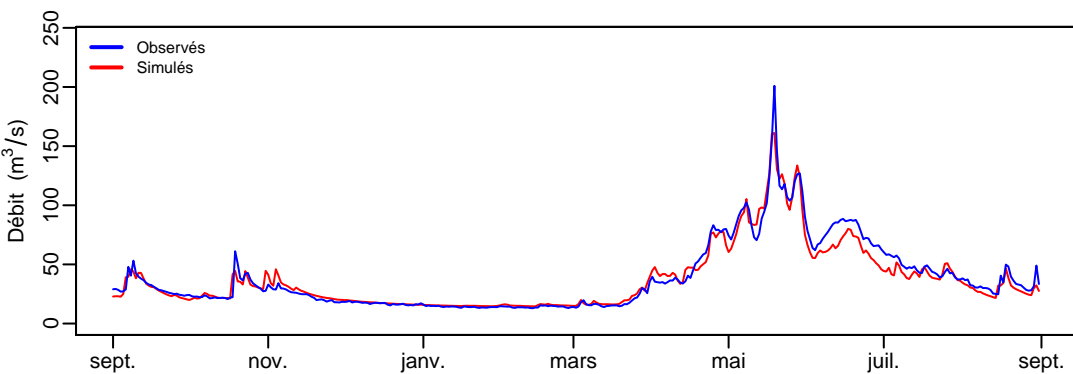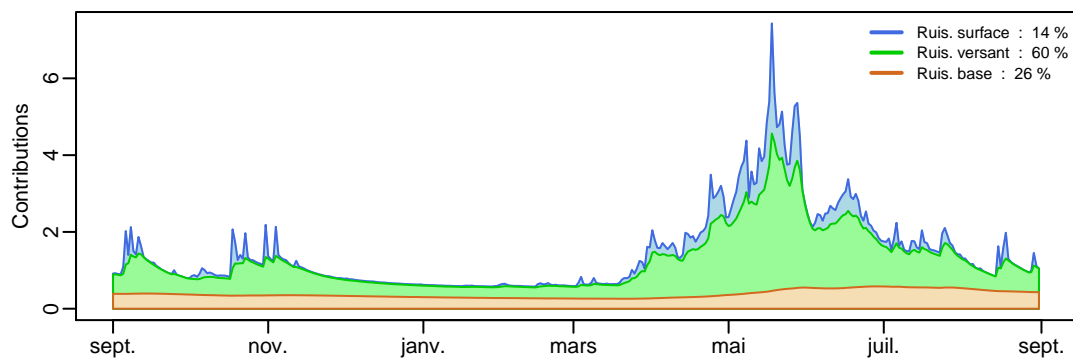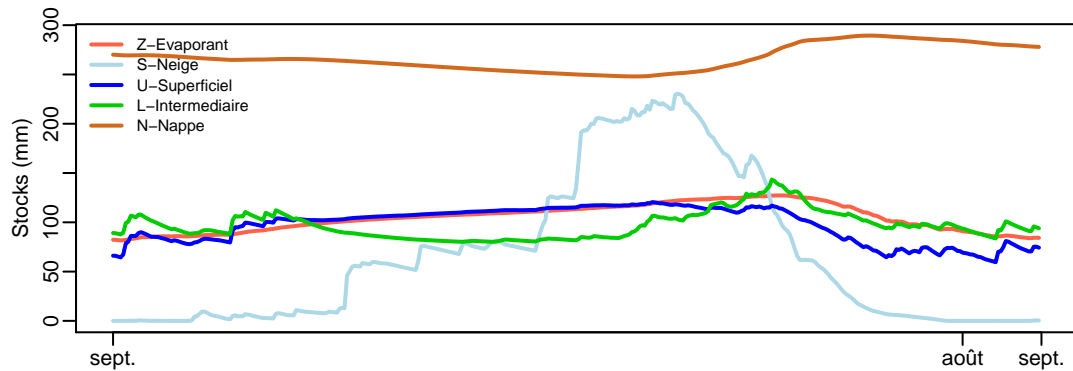

# q0157 (2179.64 km²) – année 2006–2007

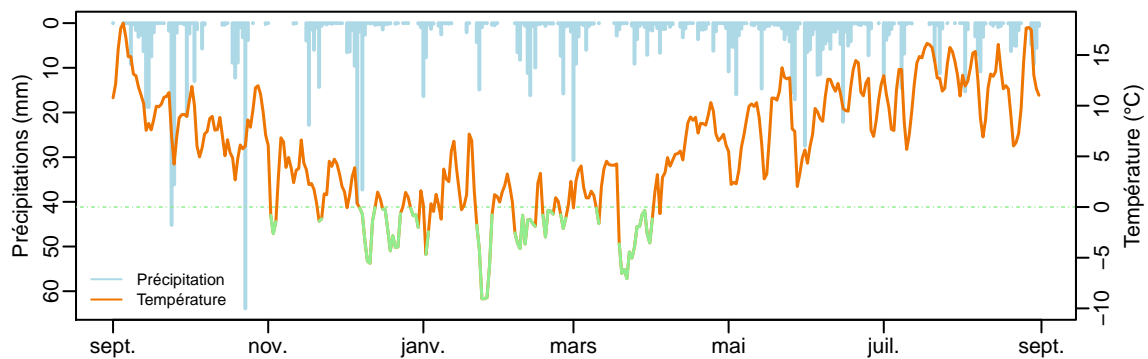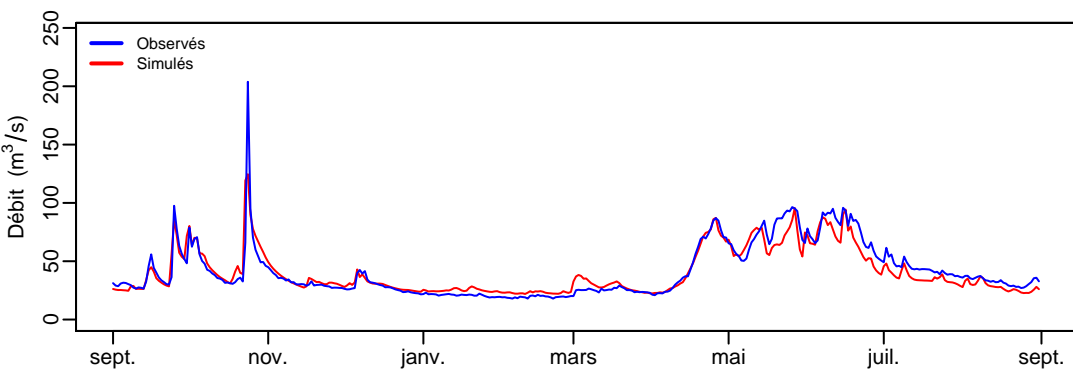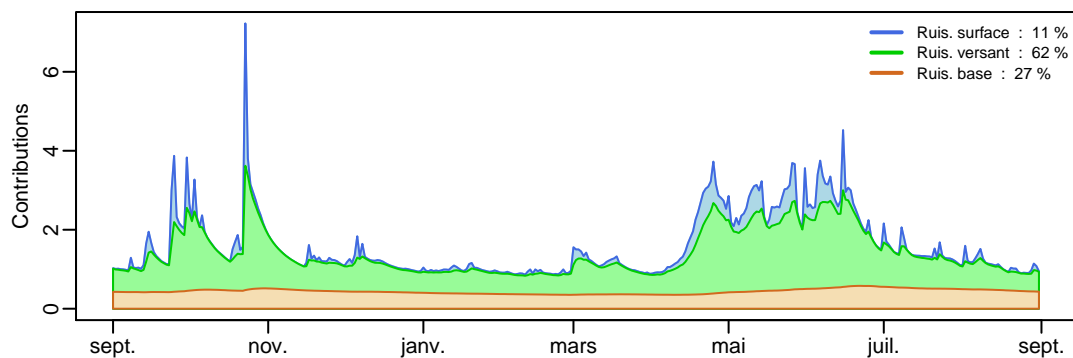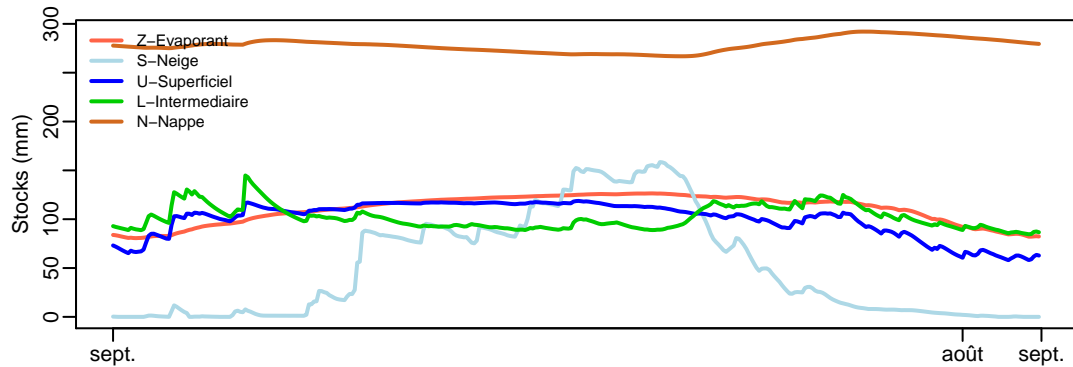

# q0157 (2179.64 km<sup>2</sup>) – année 2007–2008

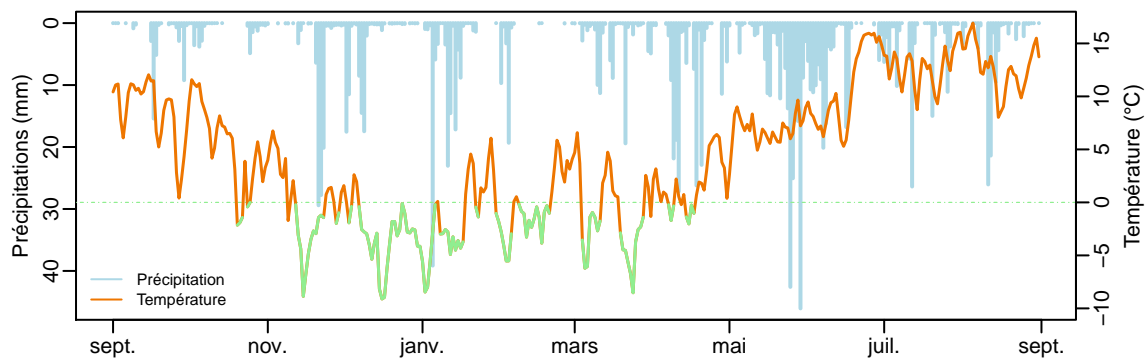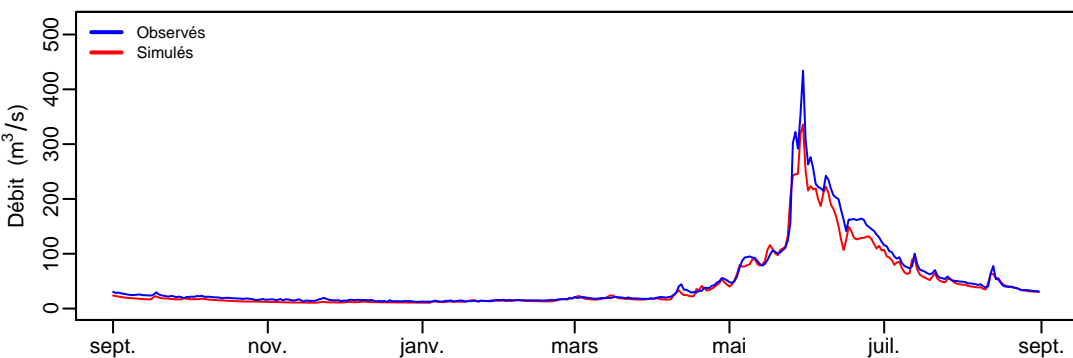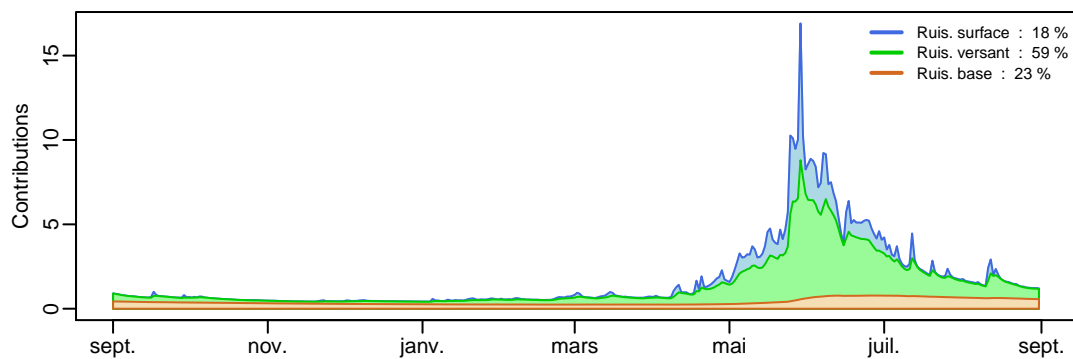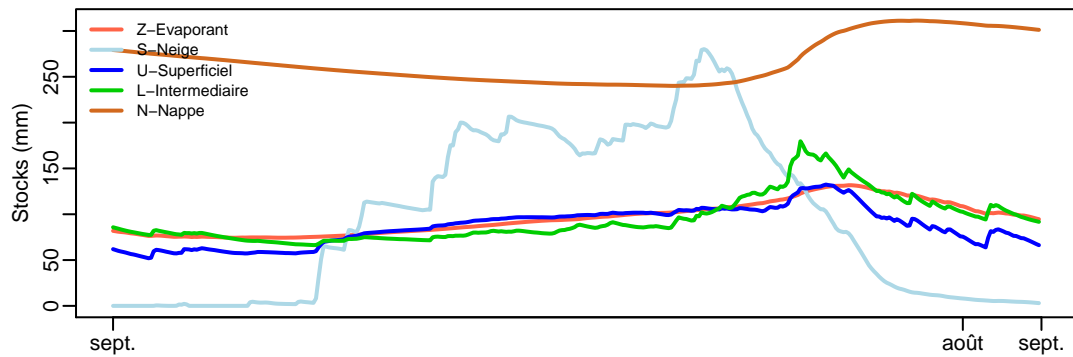

# q0157 (2179.64 km<sup>2</sup>) – année 2008–2009

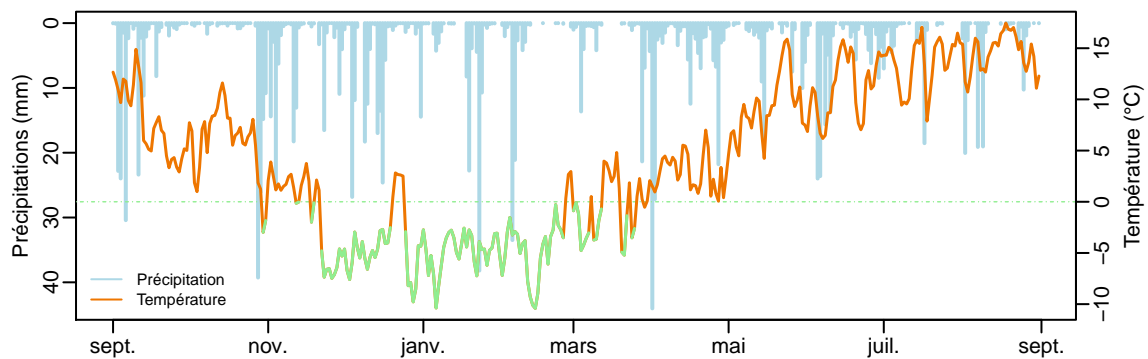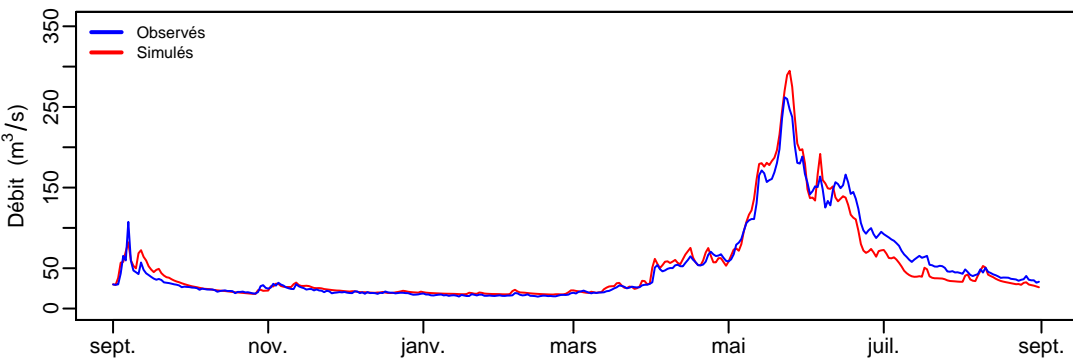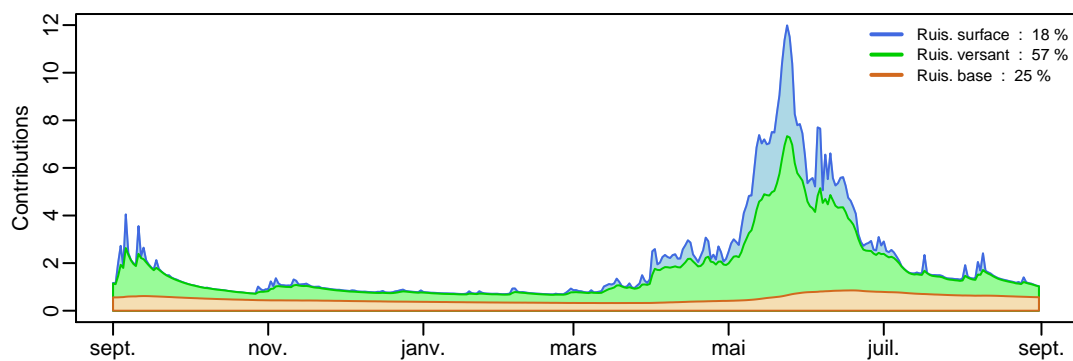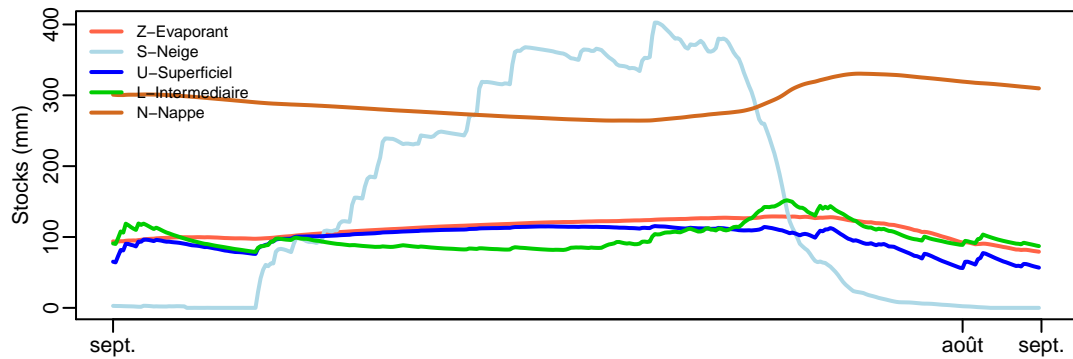

# q0157 (2179.64 km²) – année 2009–2010

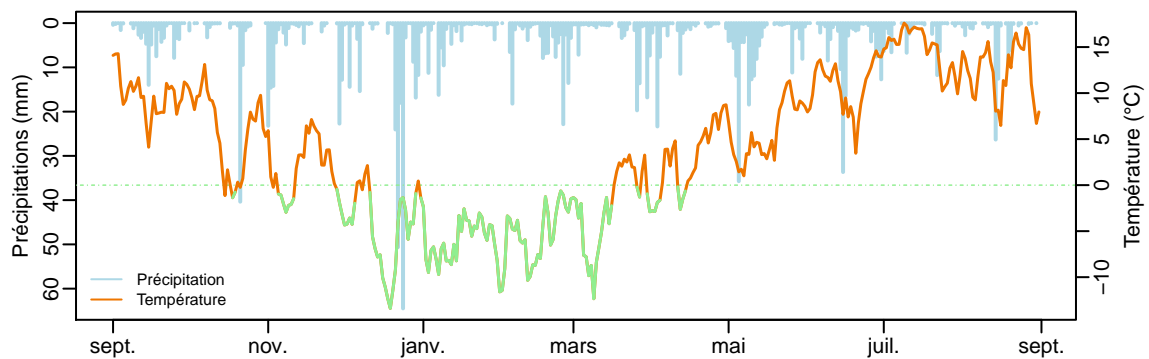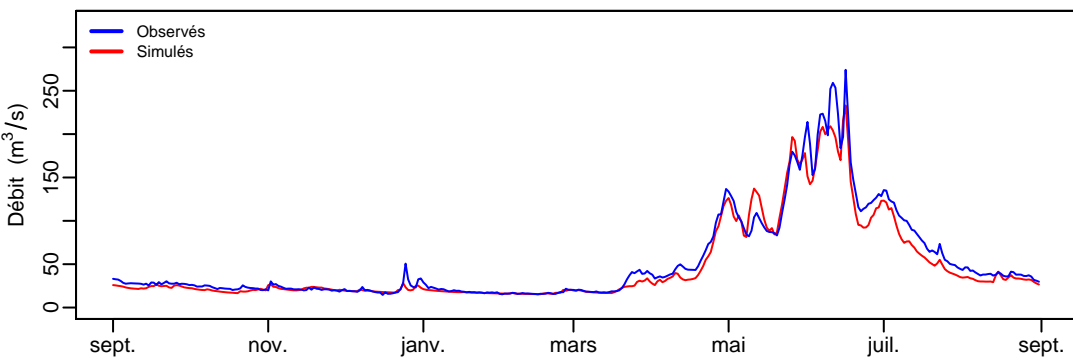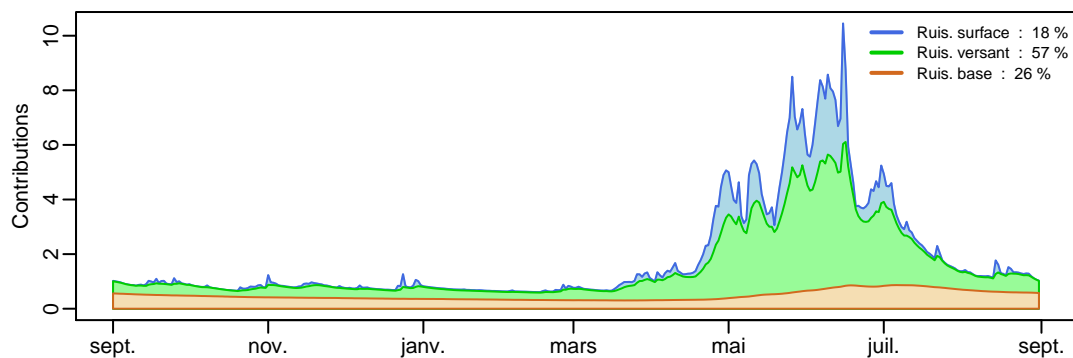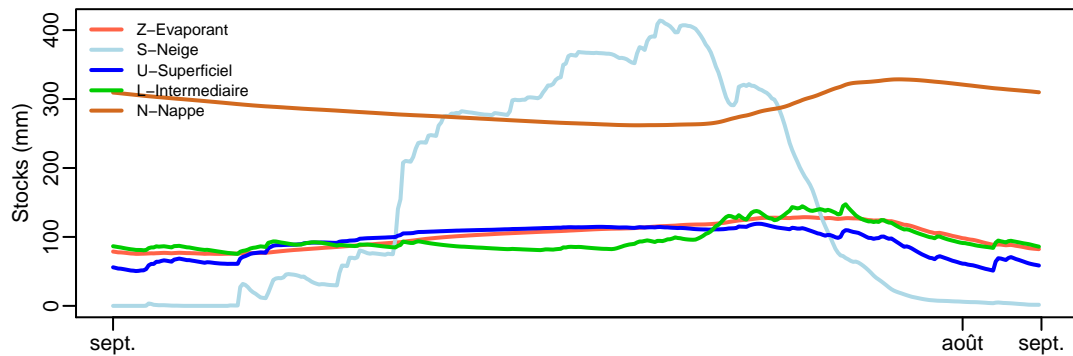

# q0157 (2179.64 km<sup>2</sup>) – année 2010–2011

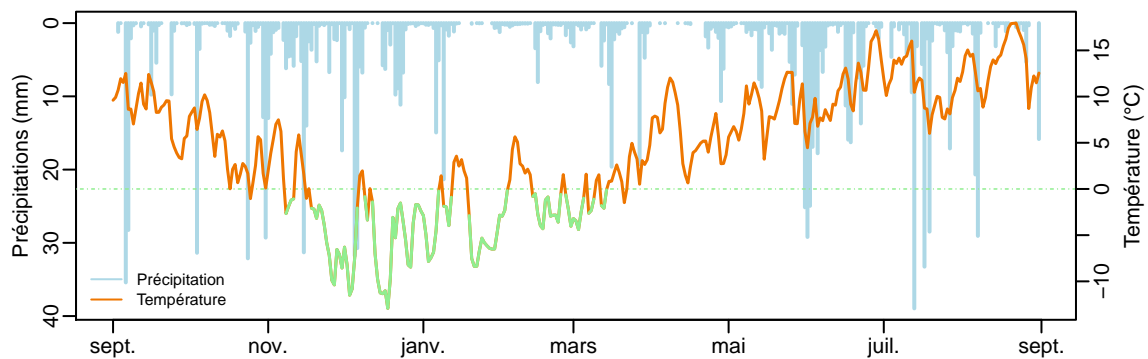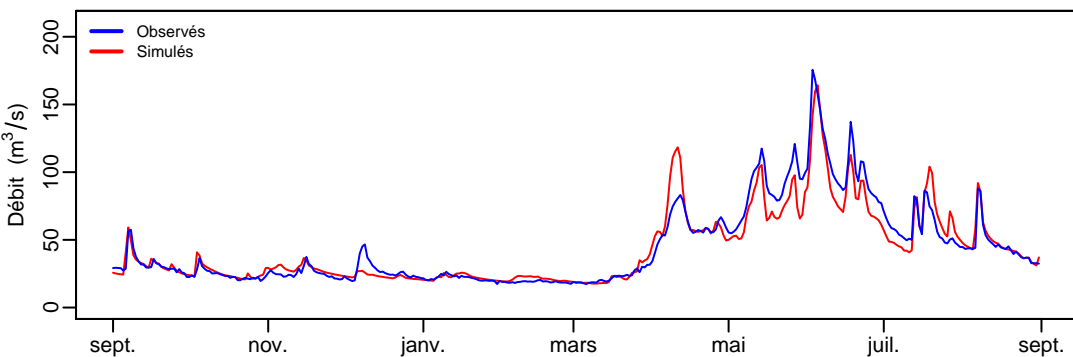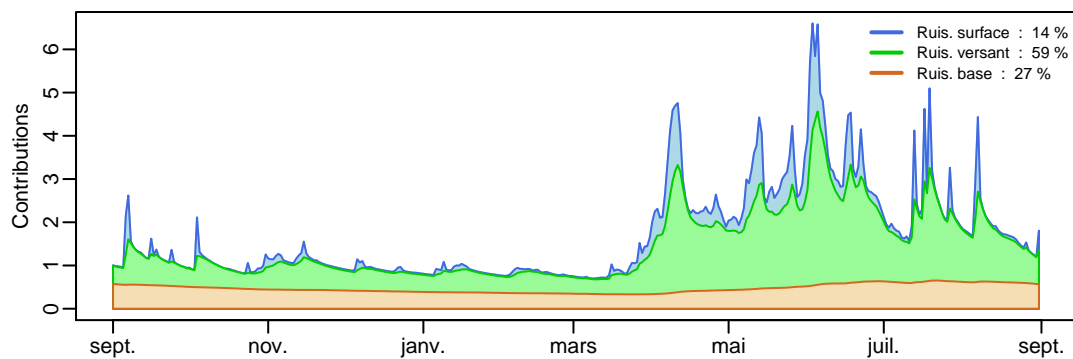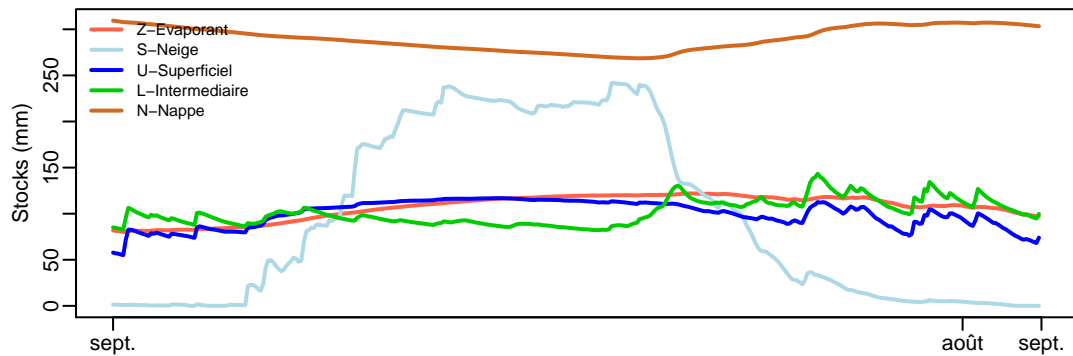

# q0157 (2179.64 km²) – année 2011–2012

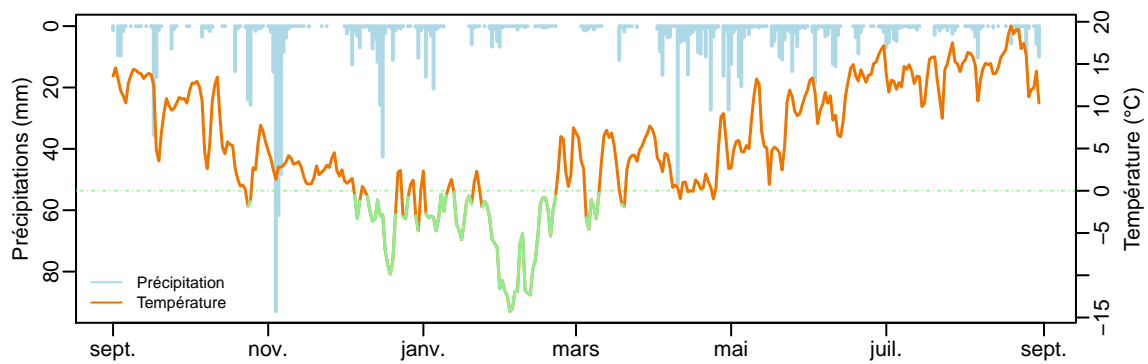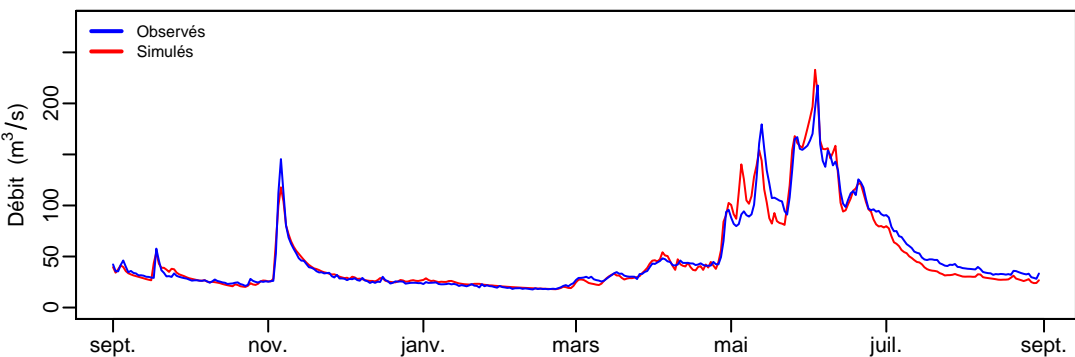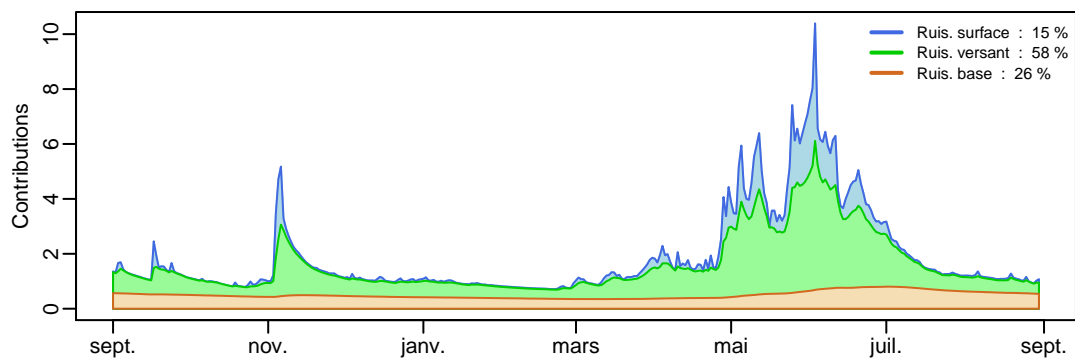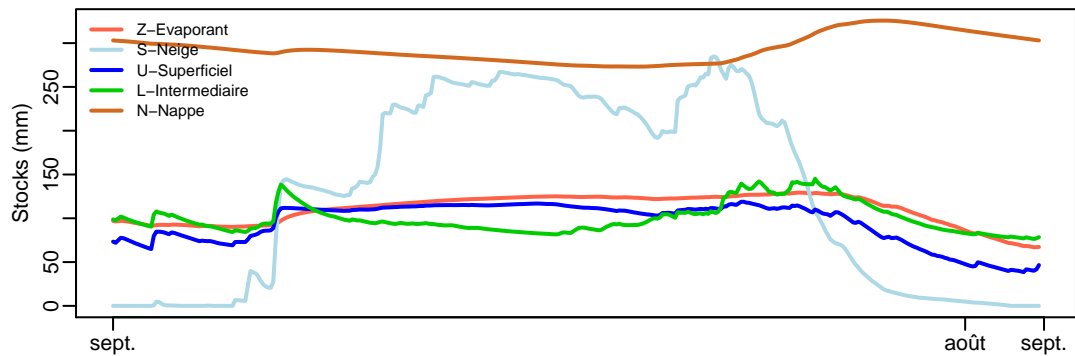



# q0159 (943.51 km<sup>2</sup>) – année 1981–1982

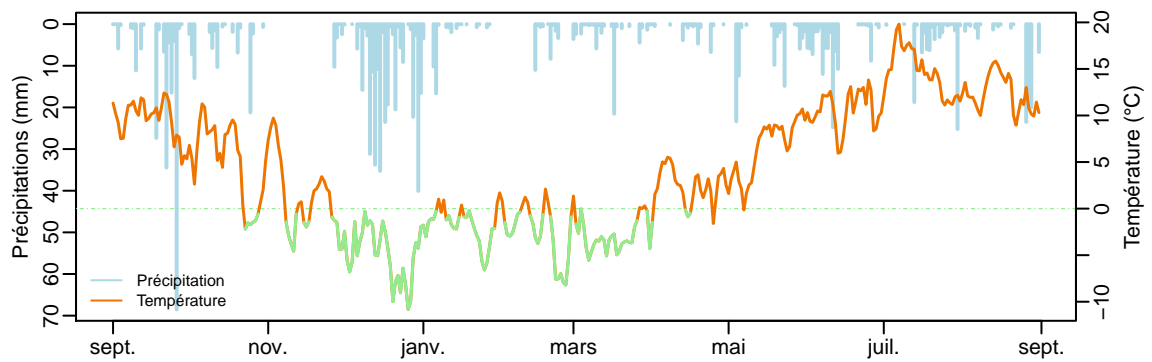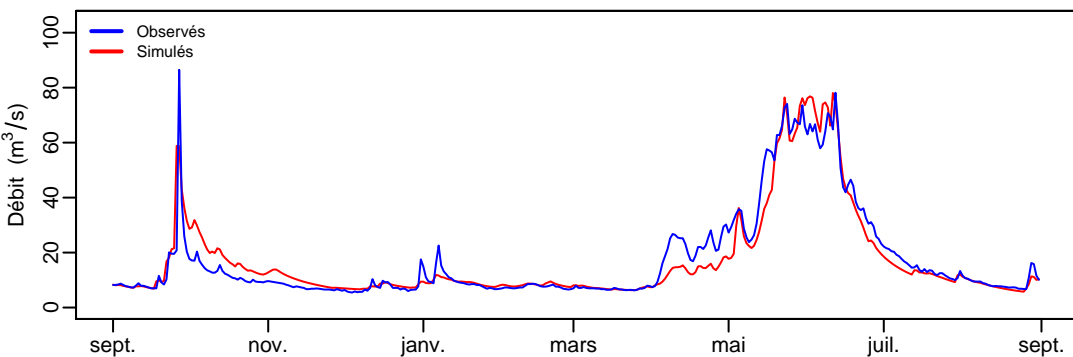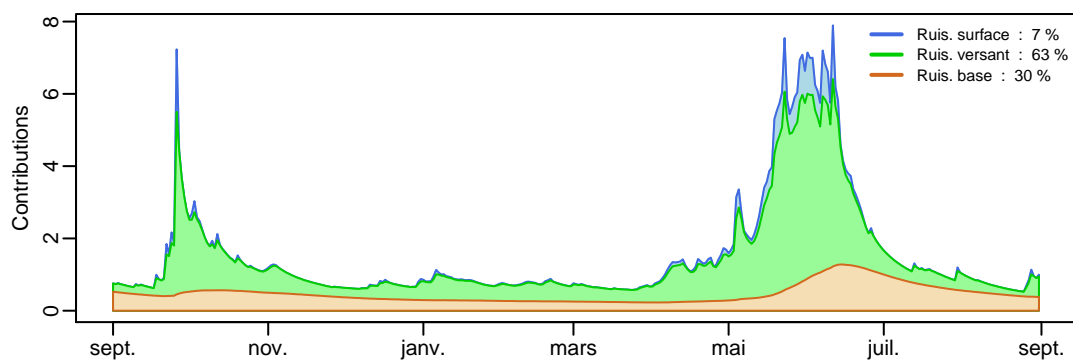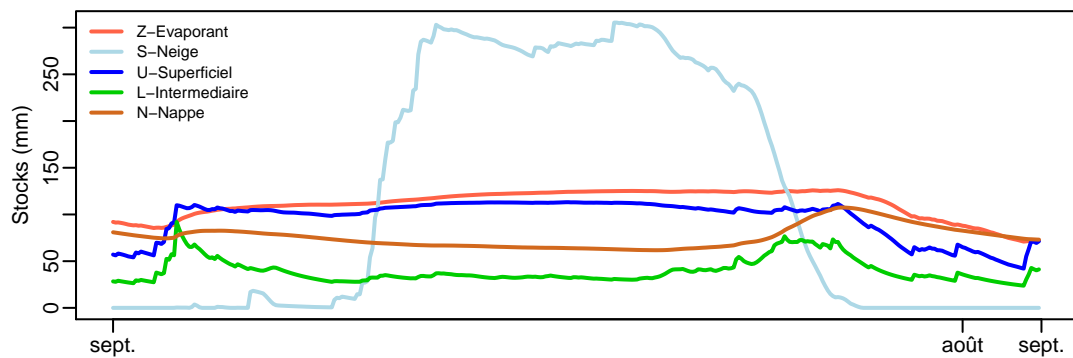

# q0159 (943.51 km²) – année 1982–1983

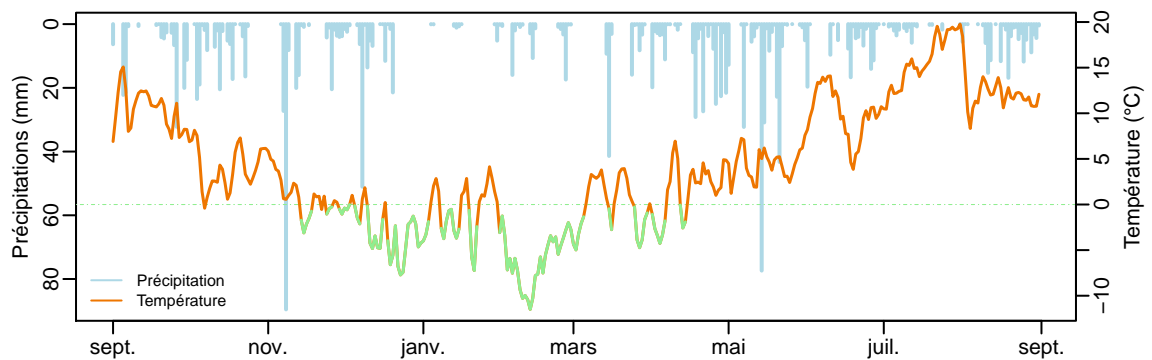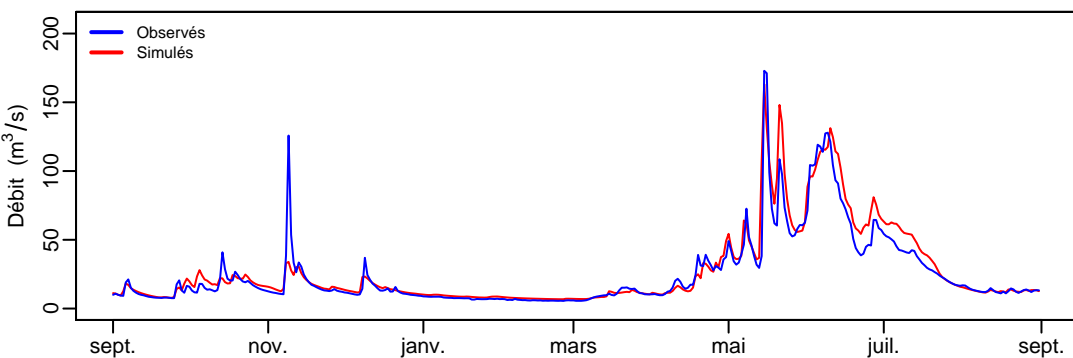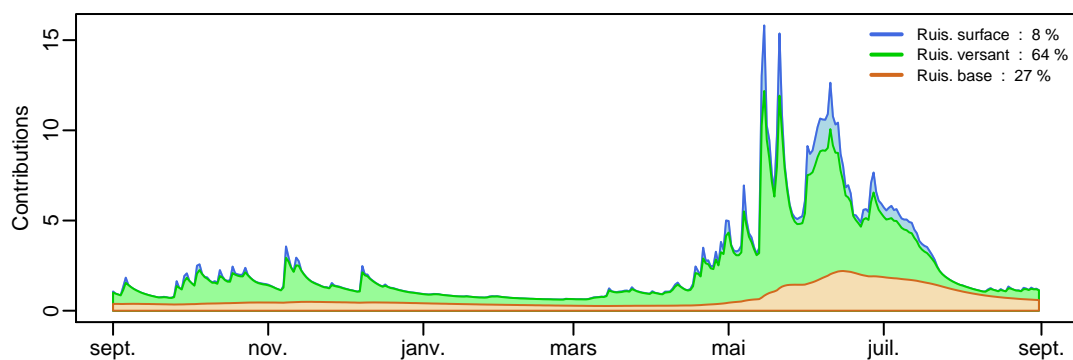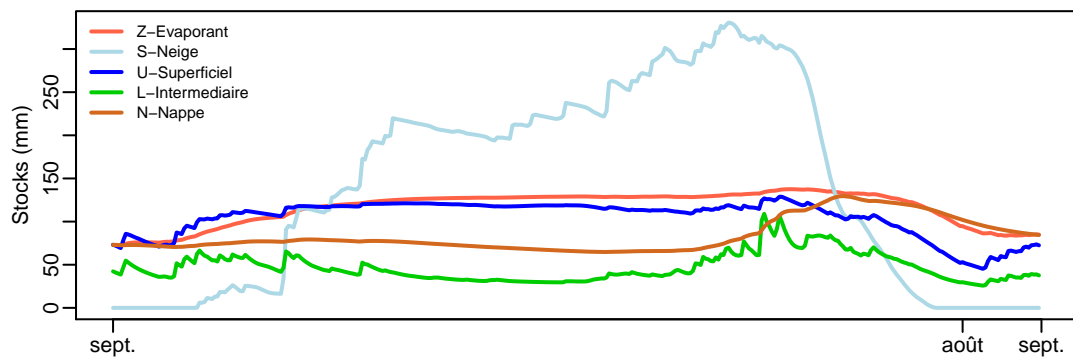

# q0159 (943.51 km<sup>2</sup>) – année 1983–1984

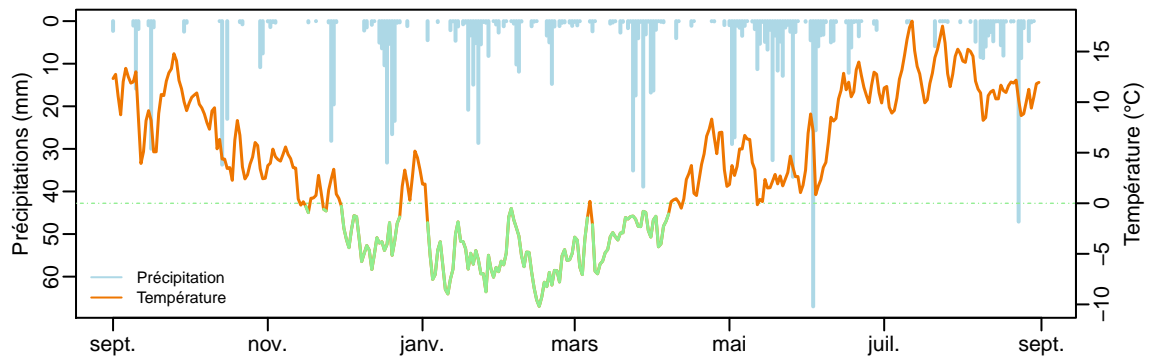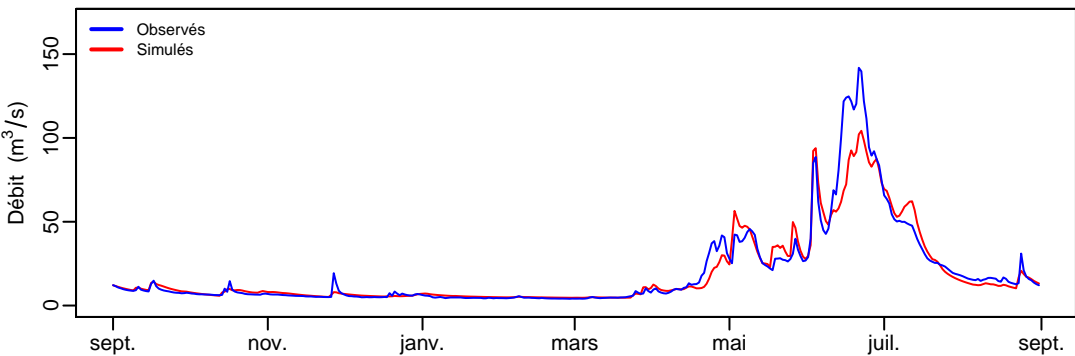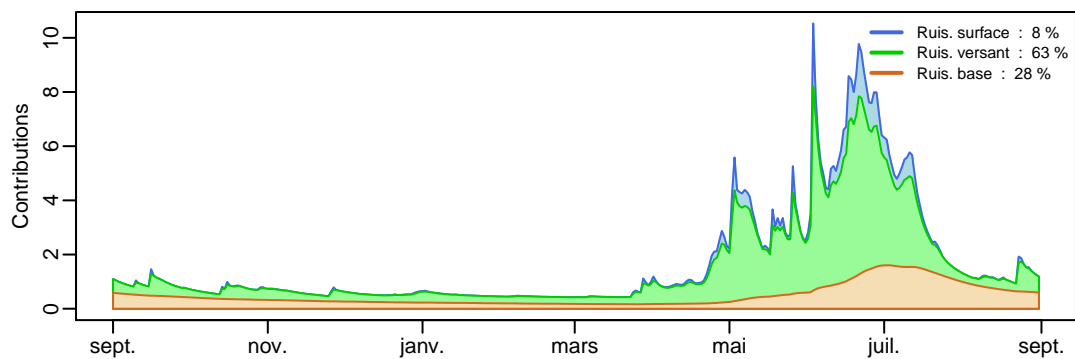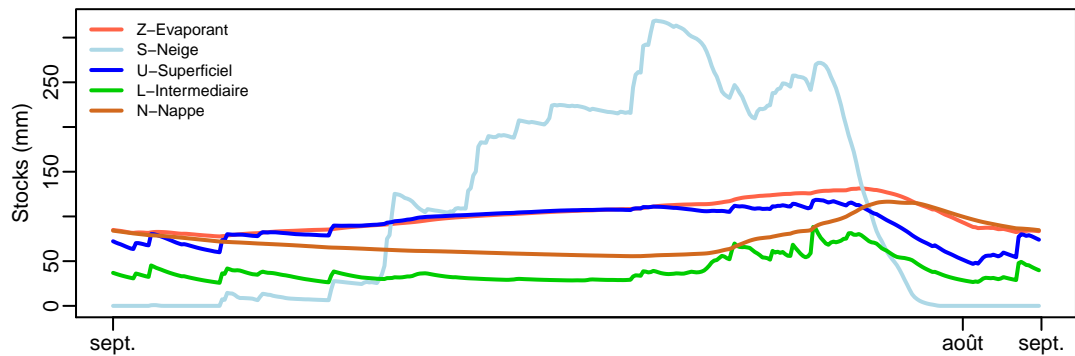

# q0159 (943.51 km<sup>2</sup>) – année 1984–1985

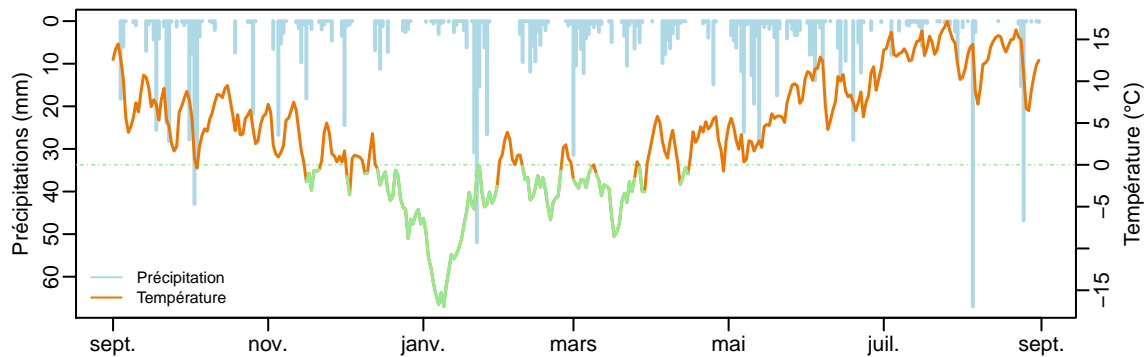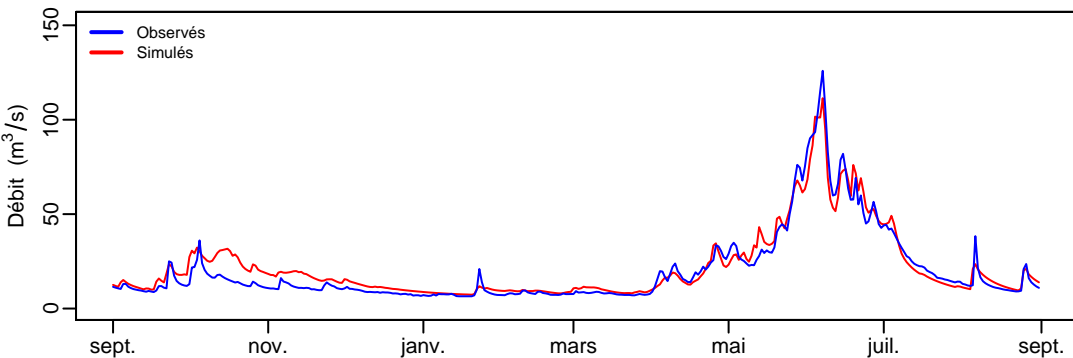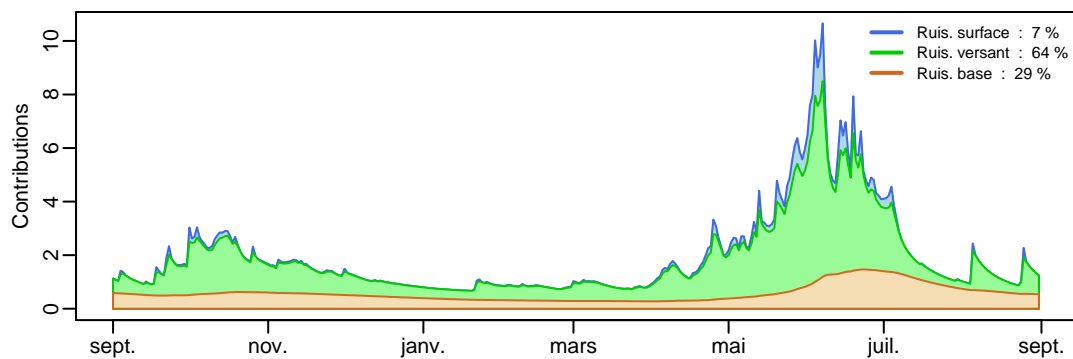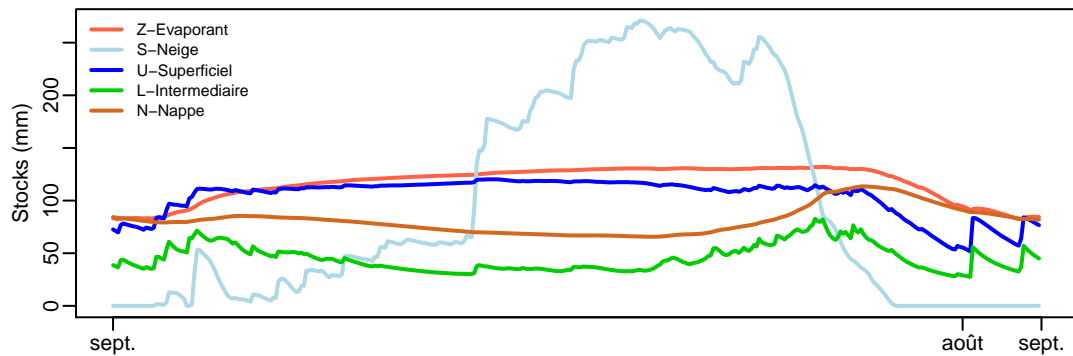

# q0159 (943.51 km²) – année 1985–1986

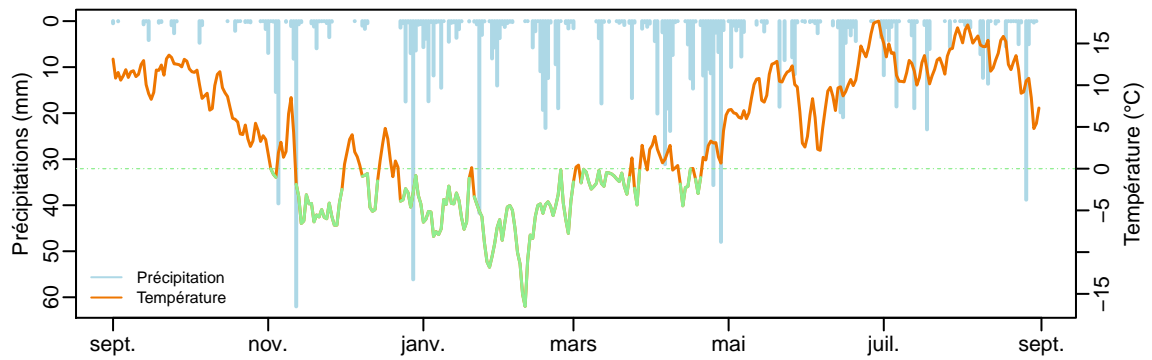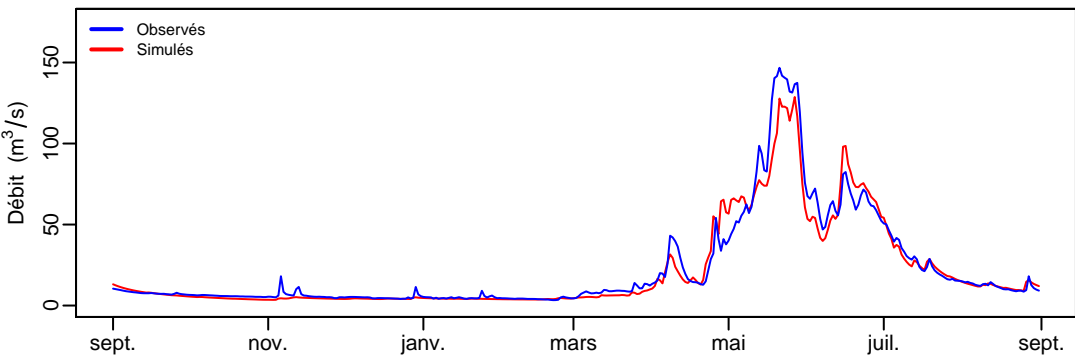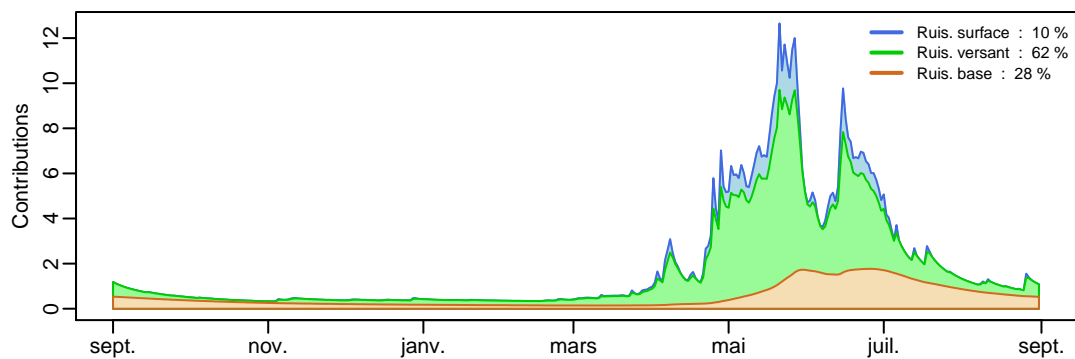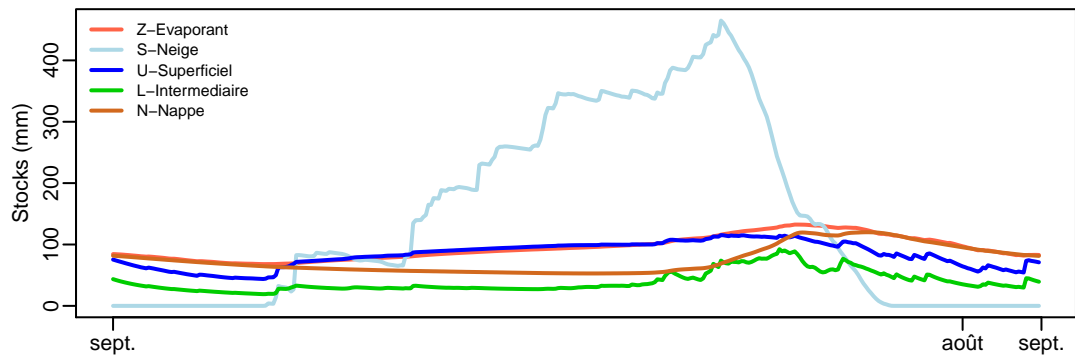

# q0159 (943.51 km<sup>2</sup>) – année 1986–1987

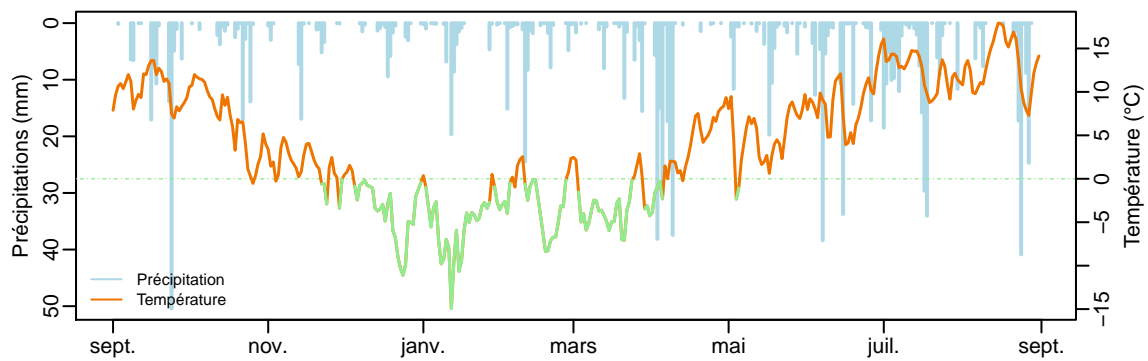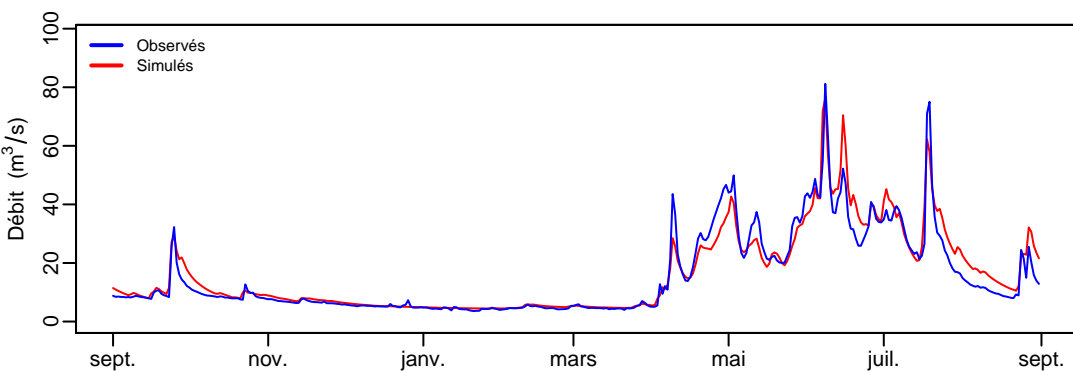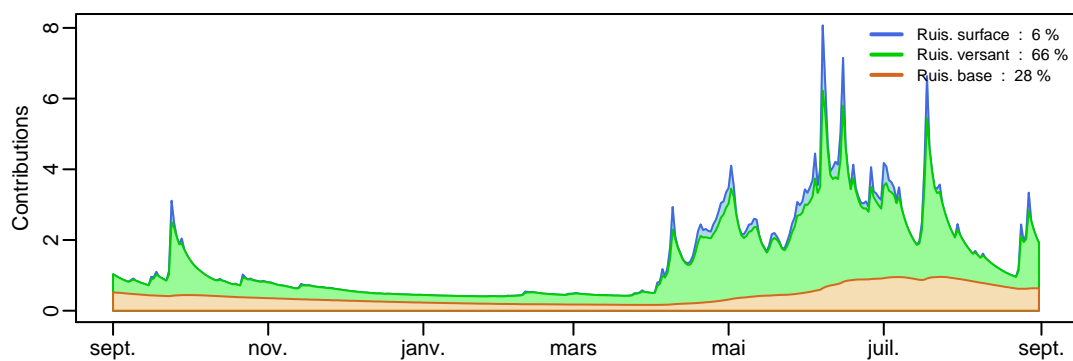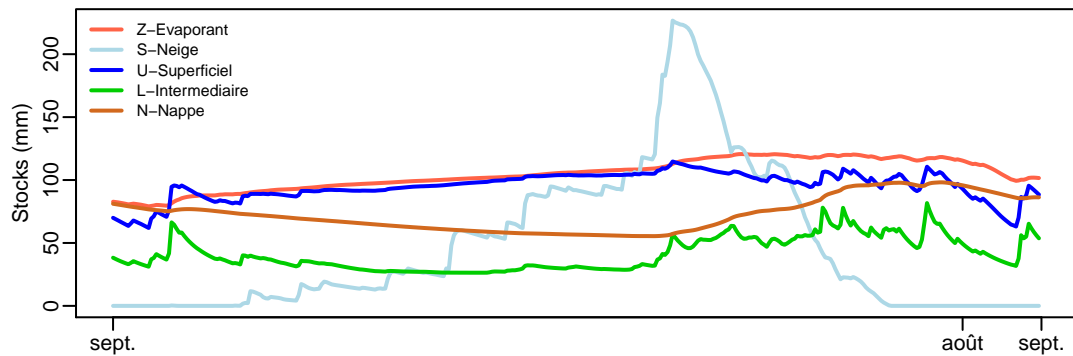

# q0159 (943.51 km<sup>2</sup>) – année 1987–1988

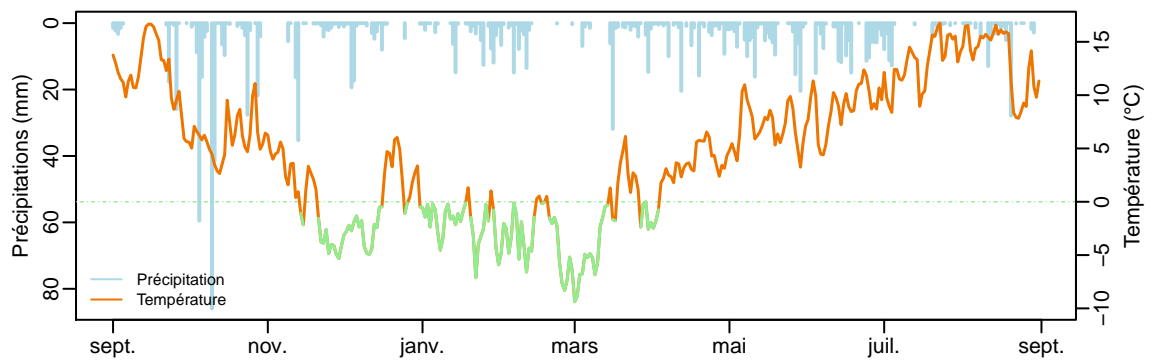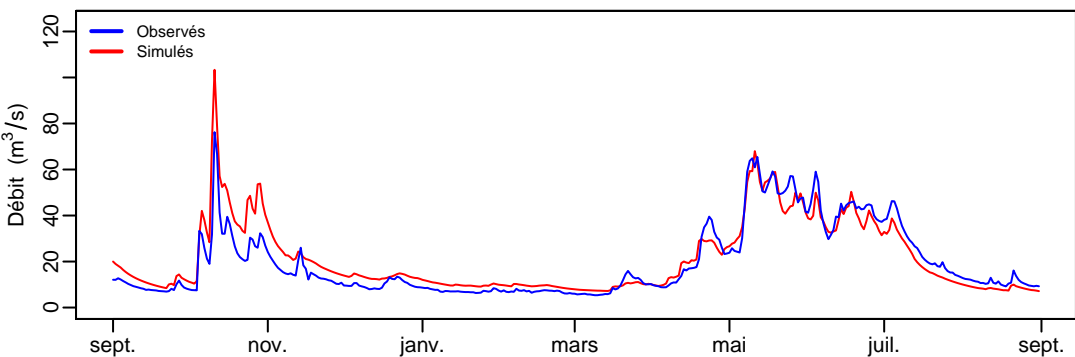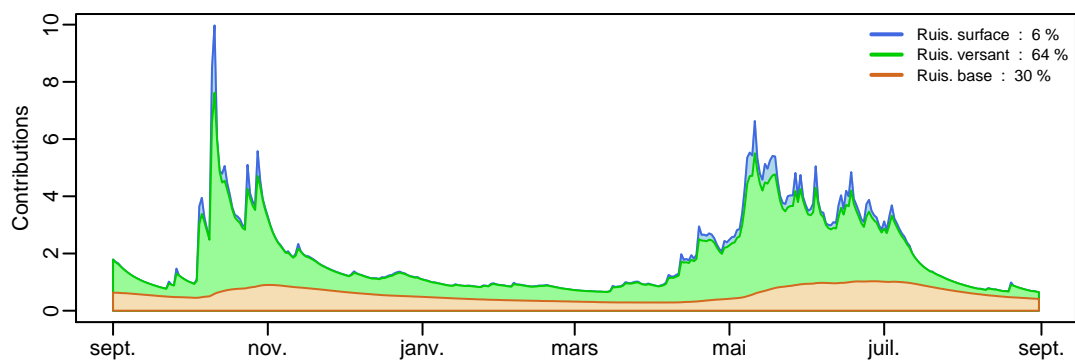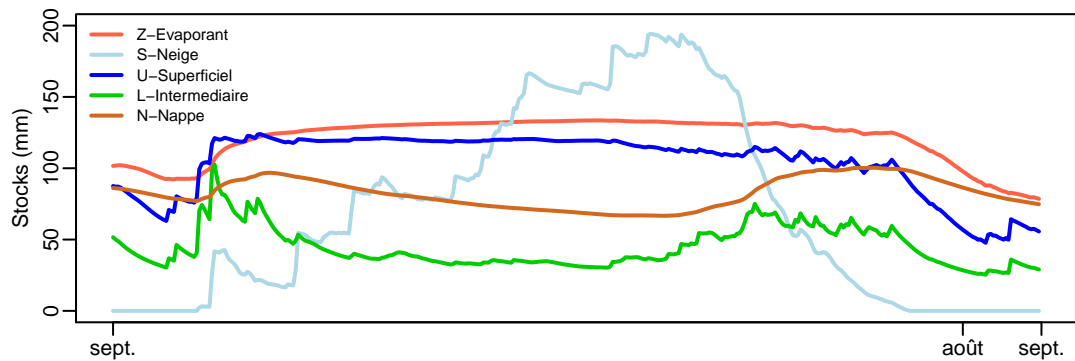

# q0159 (943.51 km²) – année 1988–1989

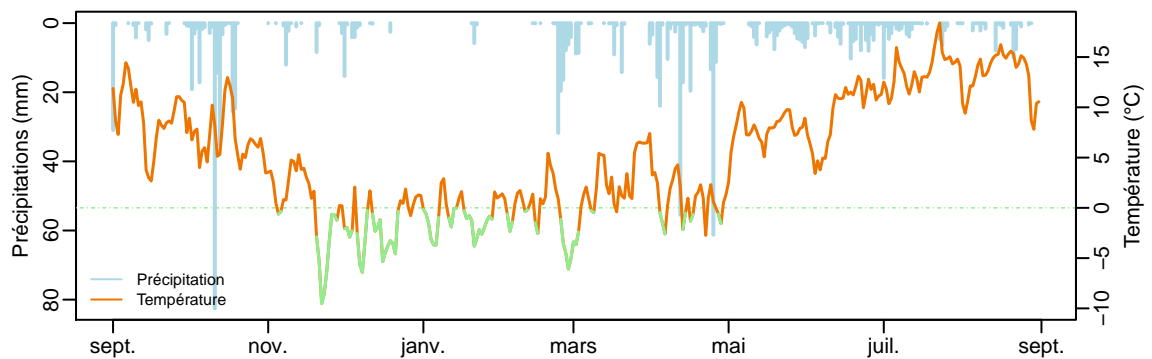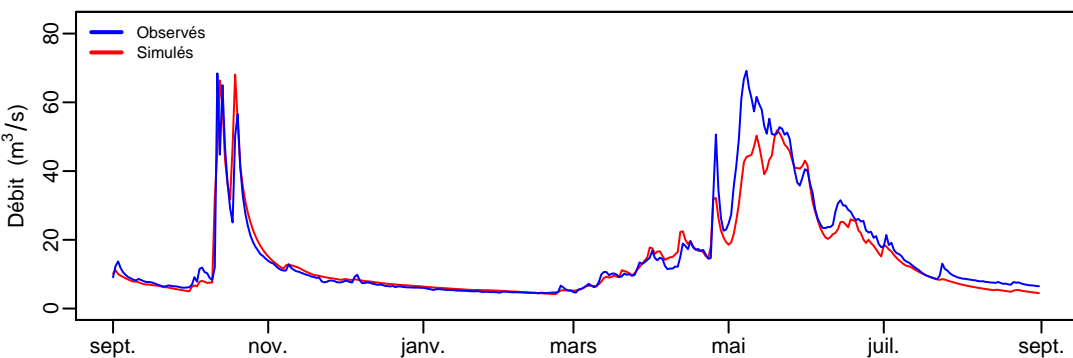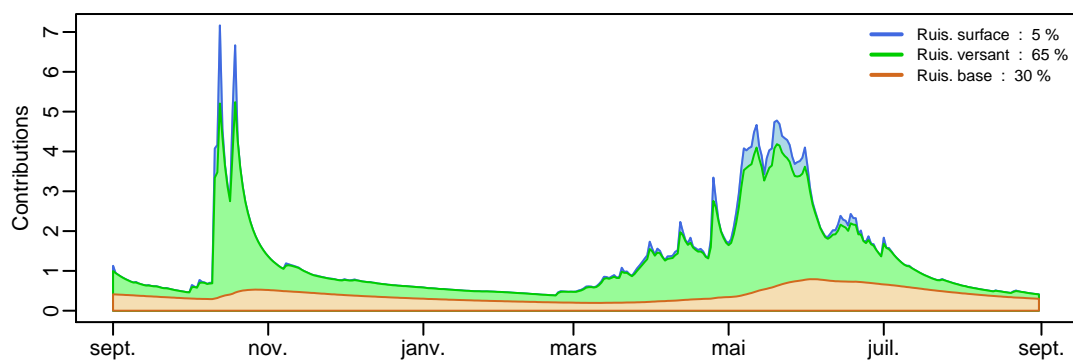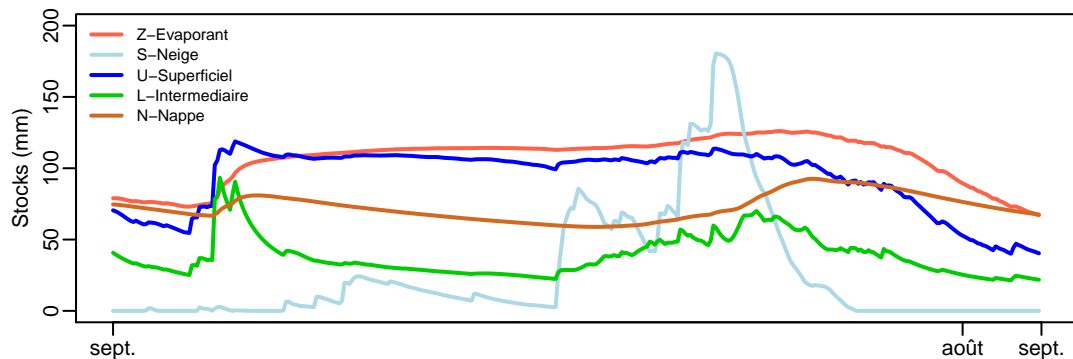



# q0159 (943.51 km<sup>2</sup>) – année 1989–1990

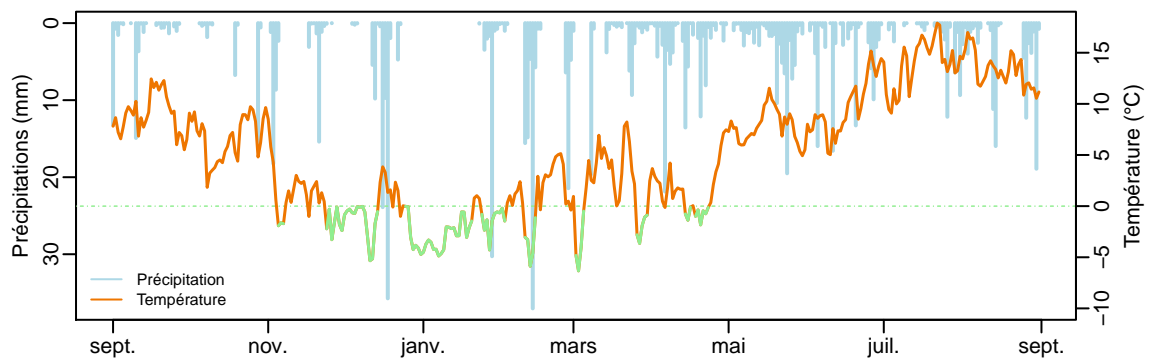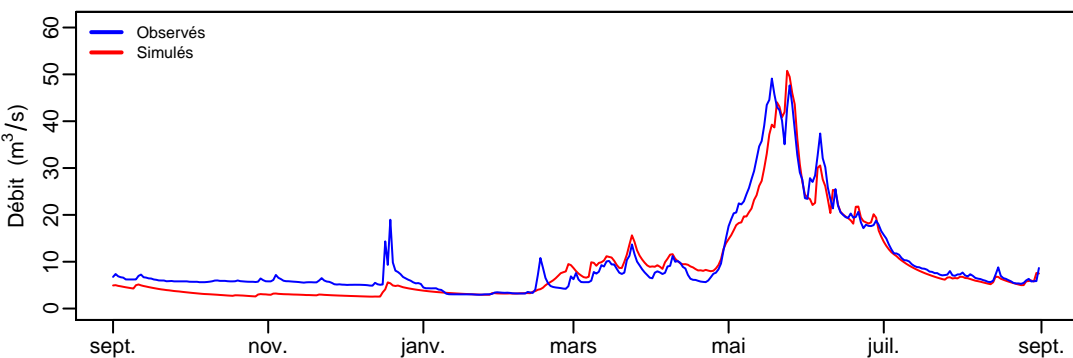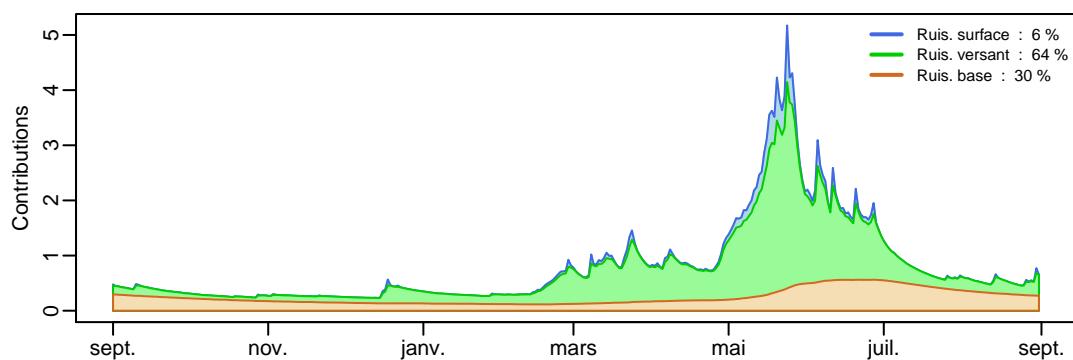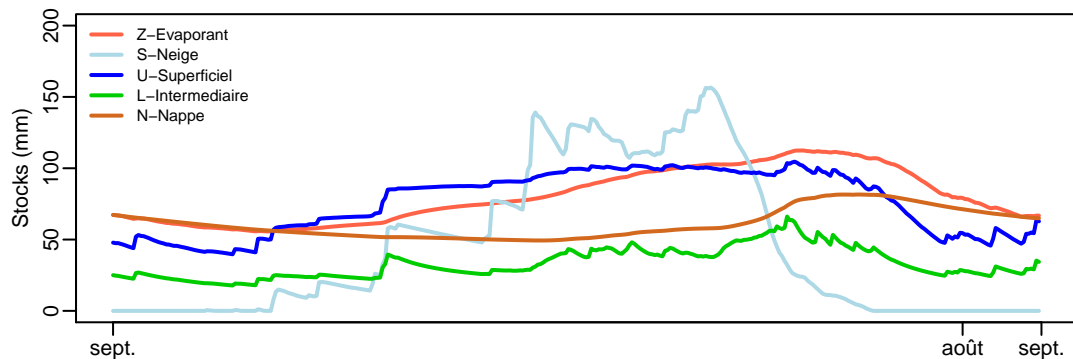

# q0159 (943.51 km²) – année 1990–1991

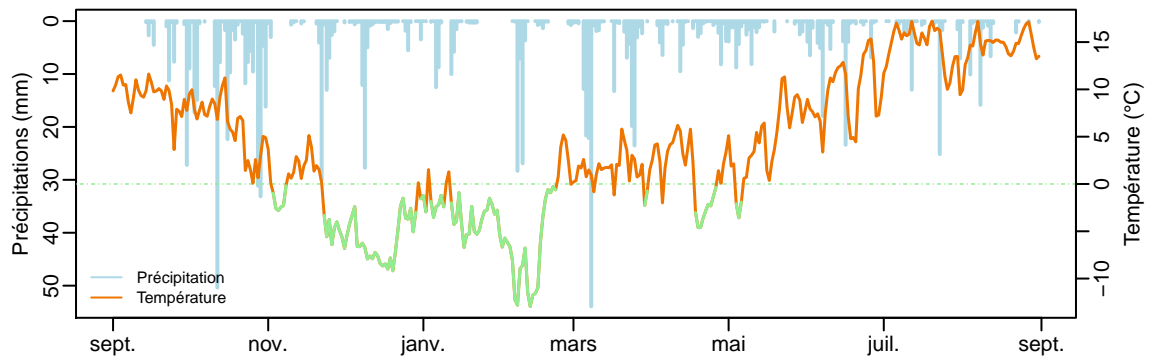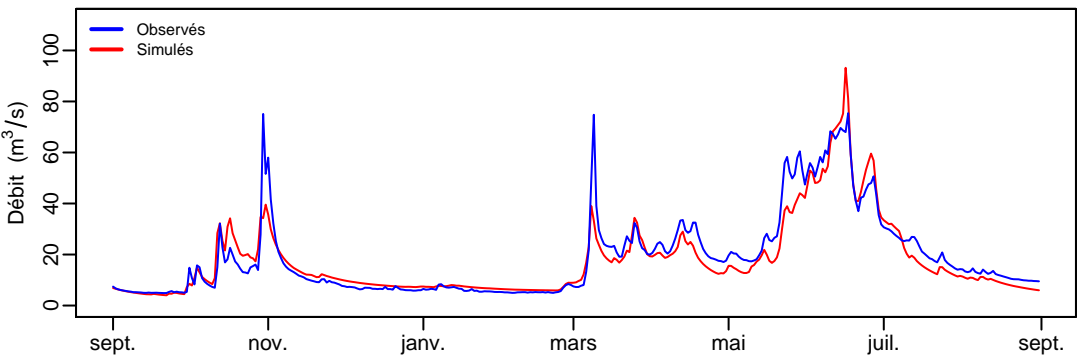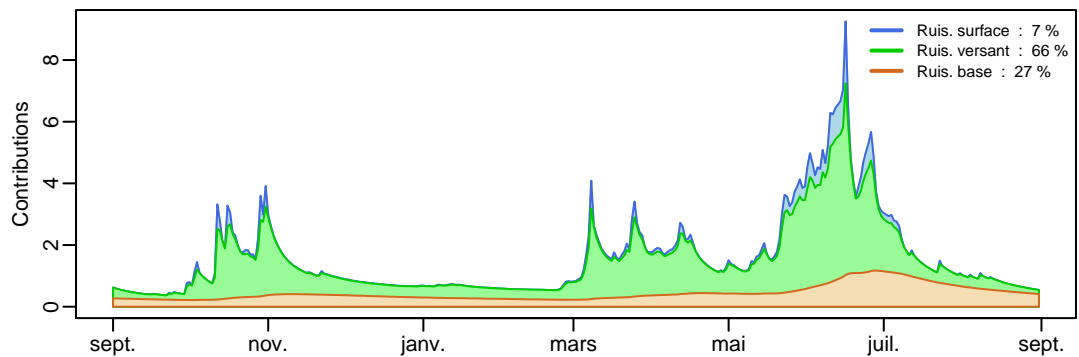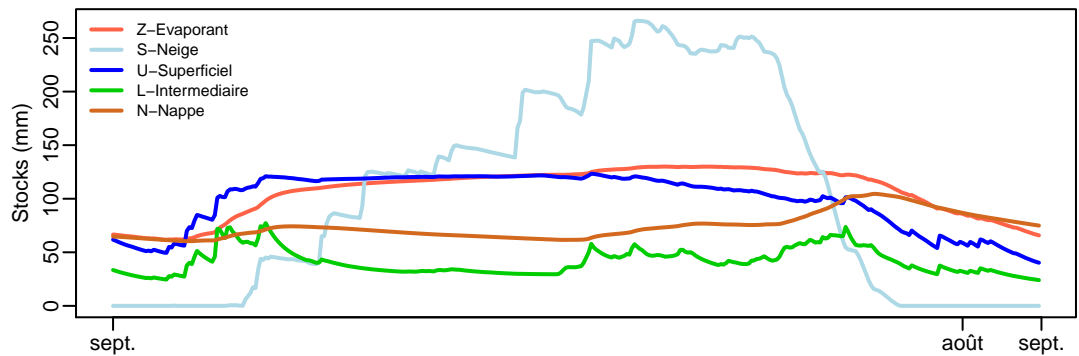

# q0159 (943.51 km²) – année 1991–1992

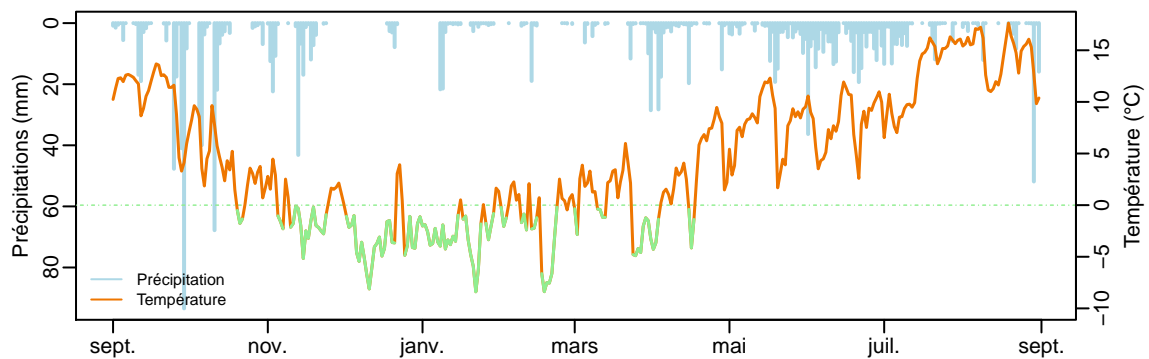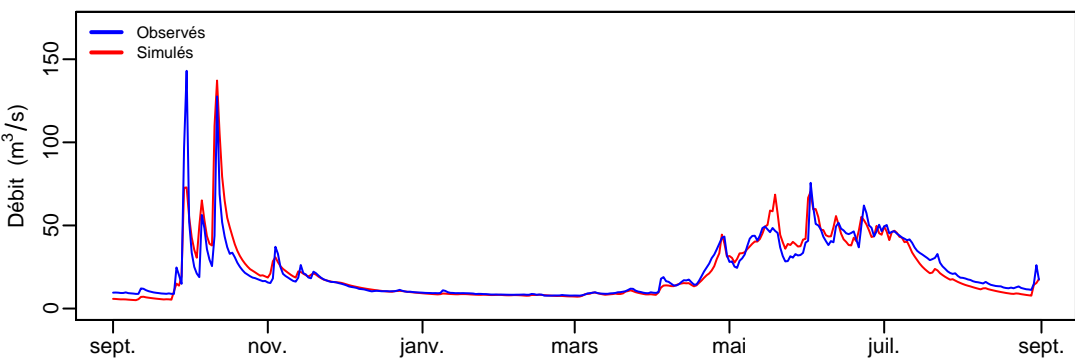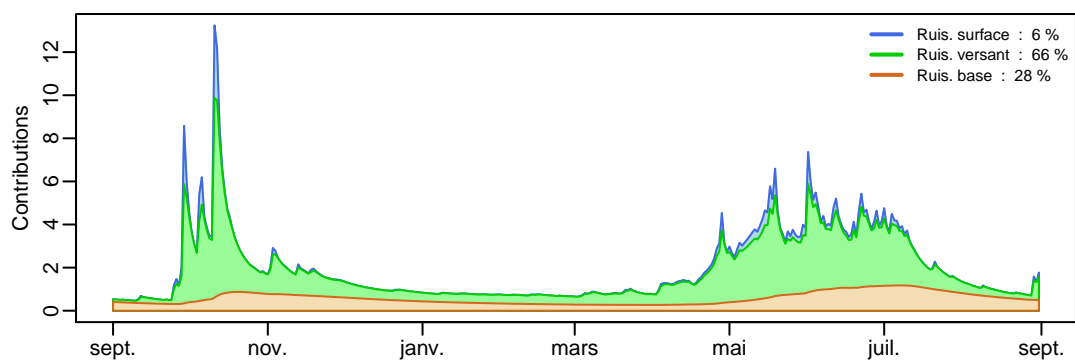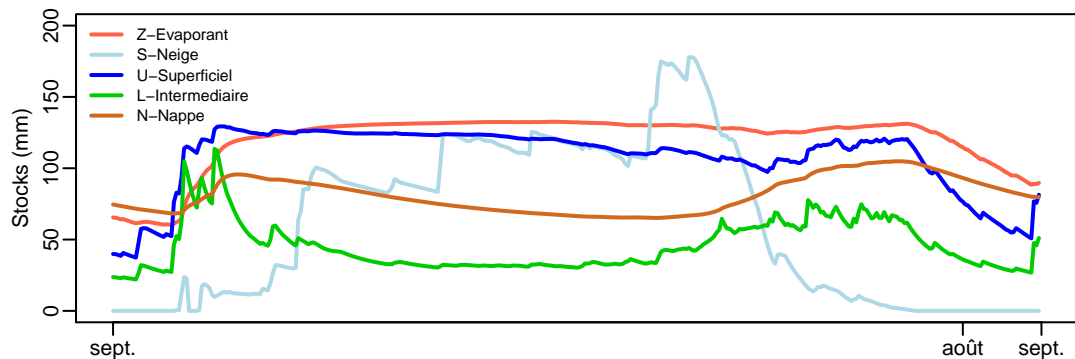

# q0159 (943.51 km²) – année 1992–1993

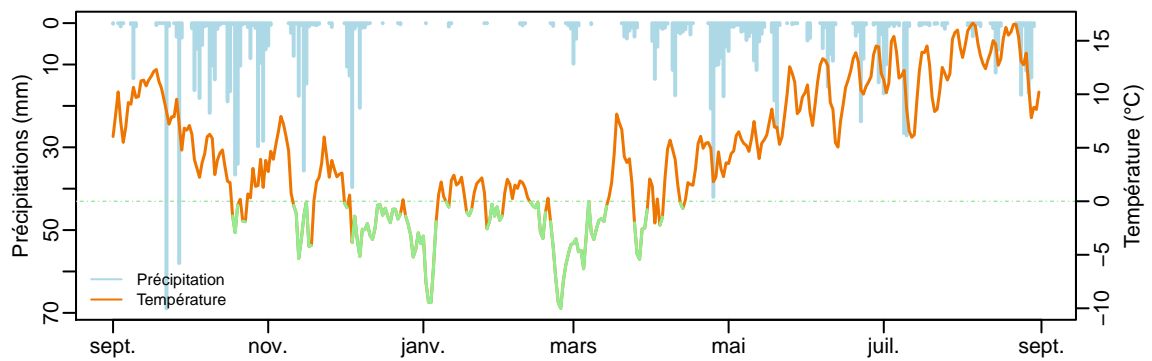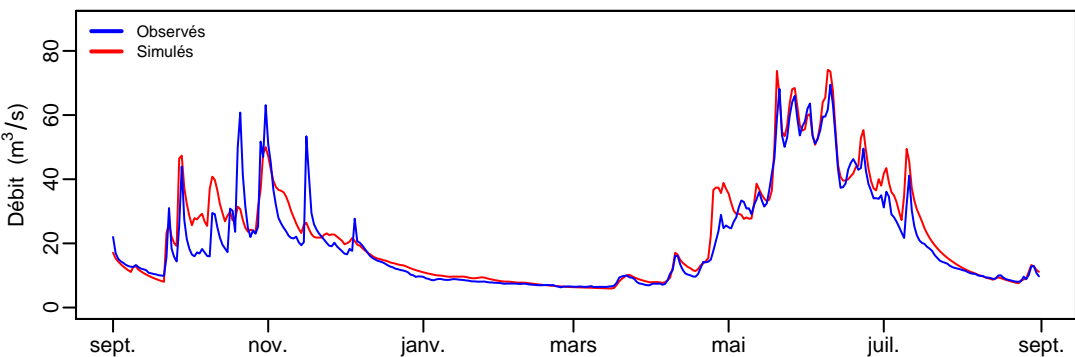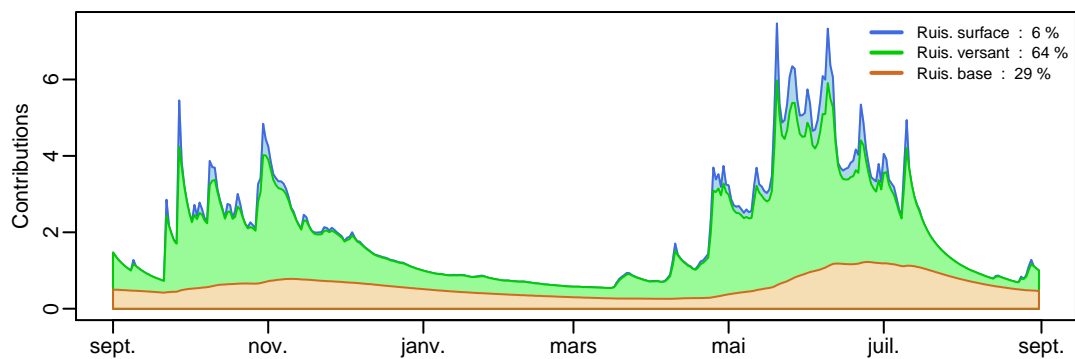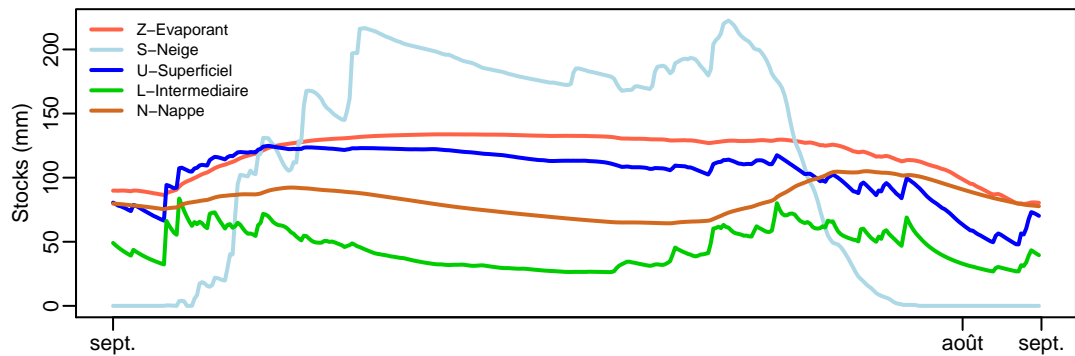

# q0159 (943.51 km²) – année 1993–1994

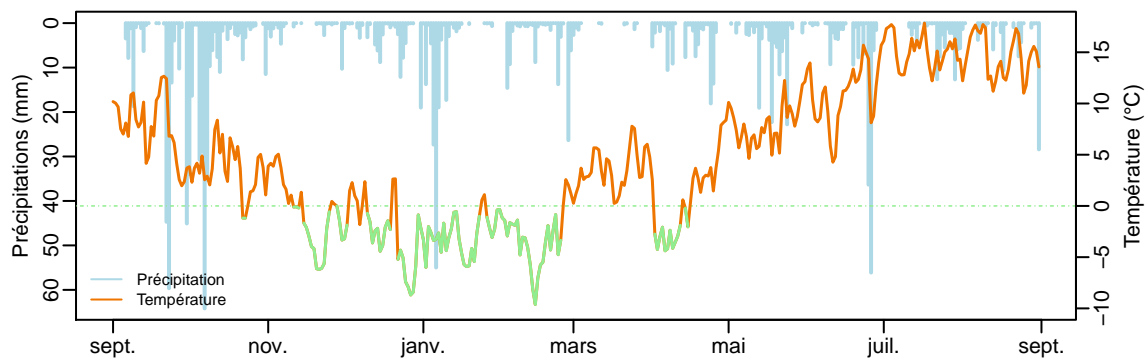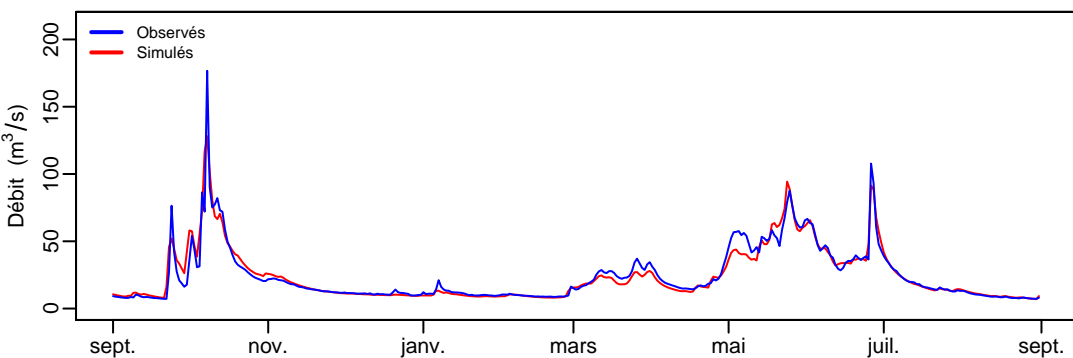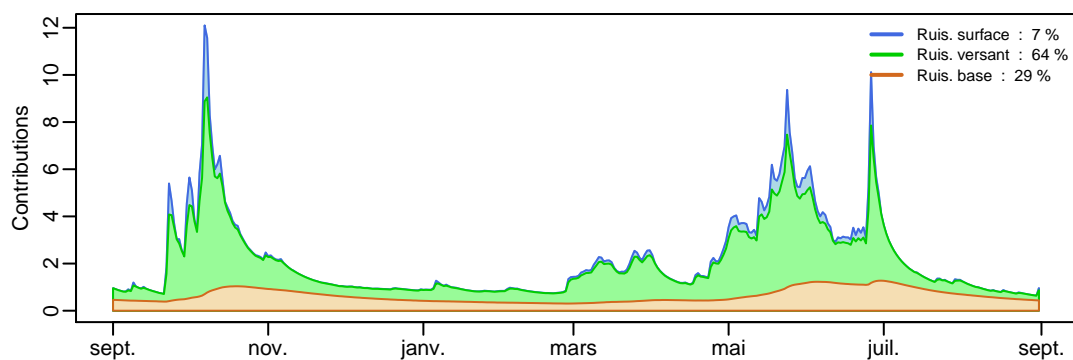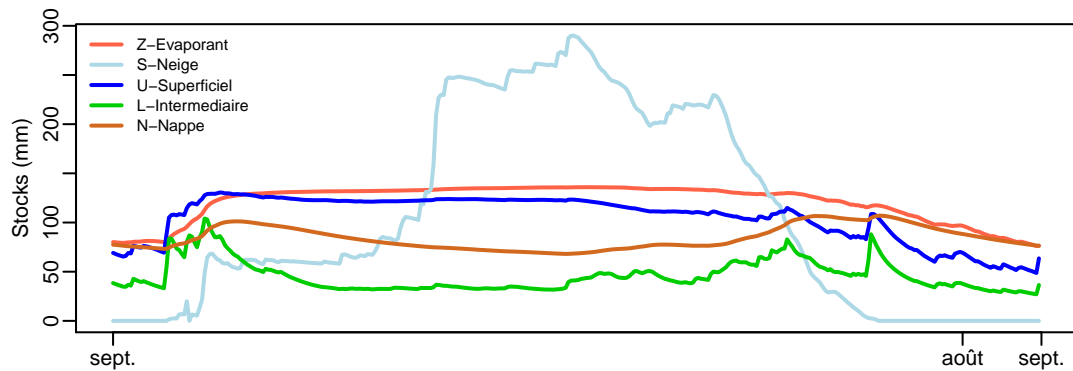

# q0159 (943.51 km<sup>2</sup>) – année 1994–1995

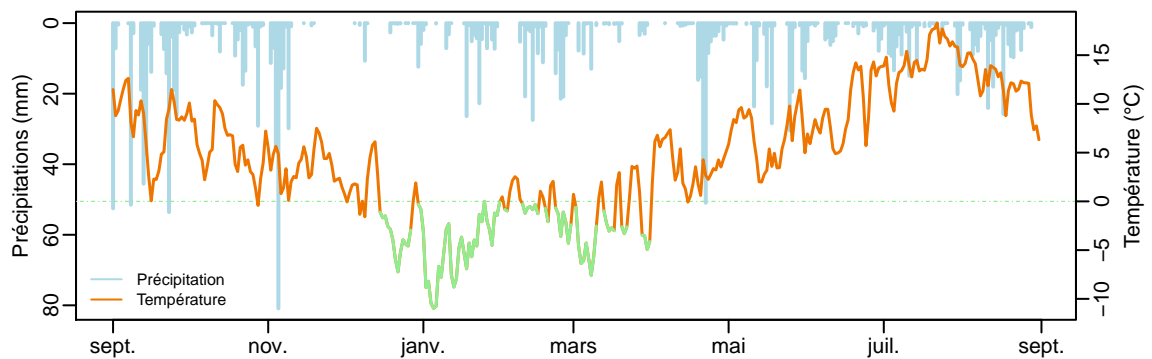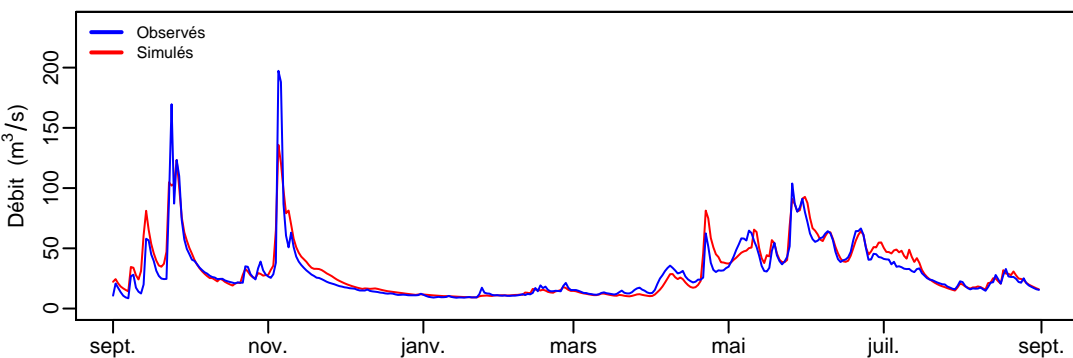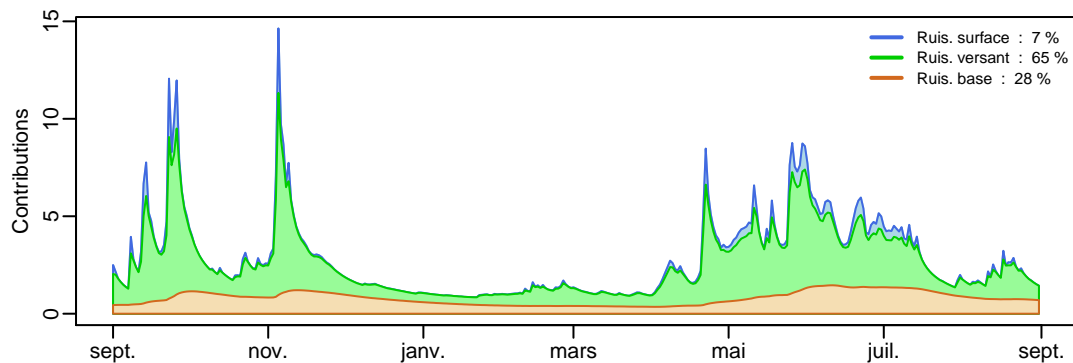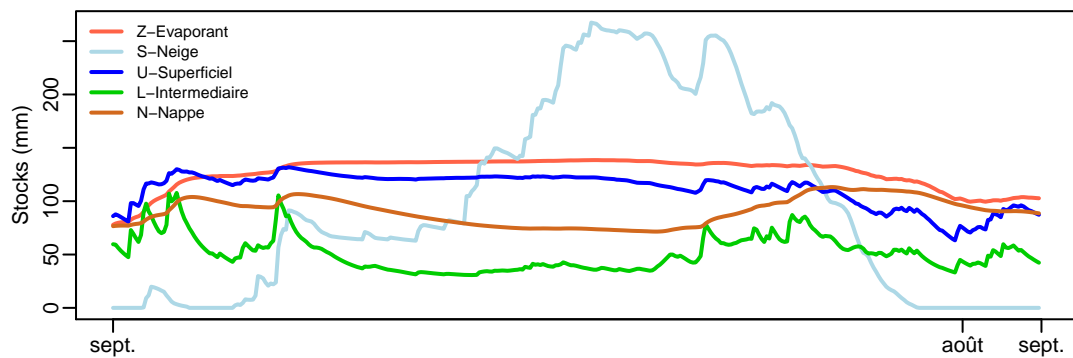

# q0159 (943.51 km<sup>2</sup>) – année 1995–1996

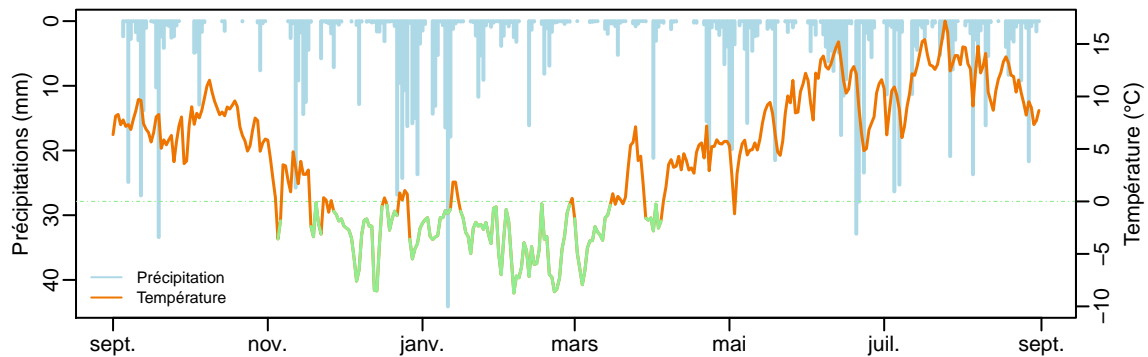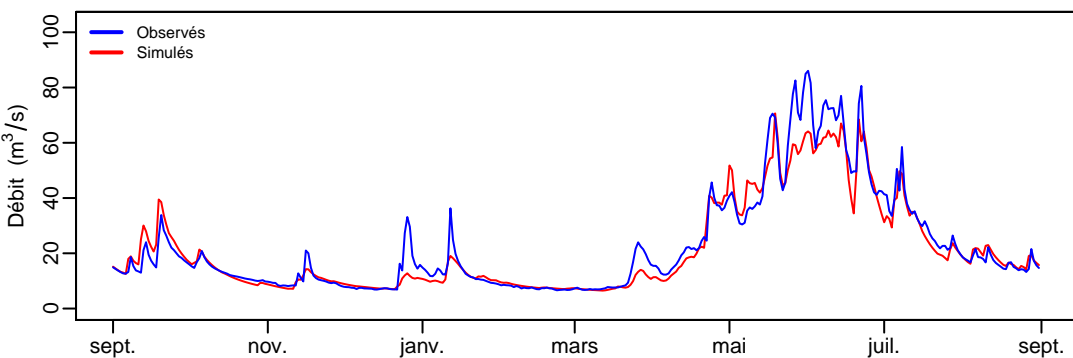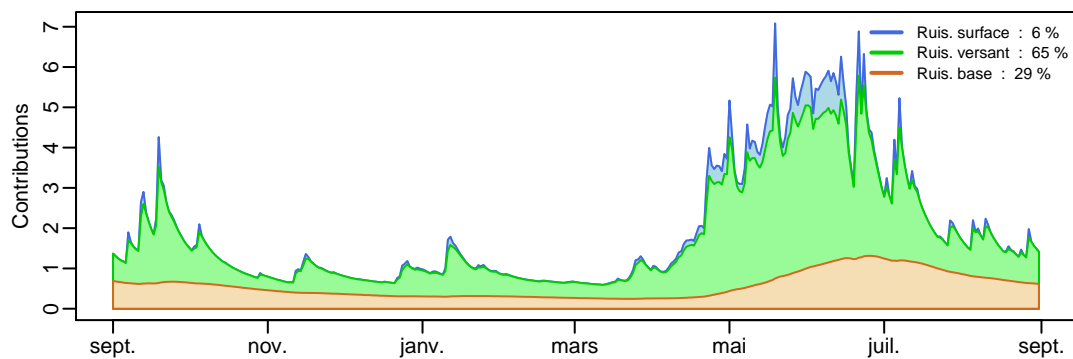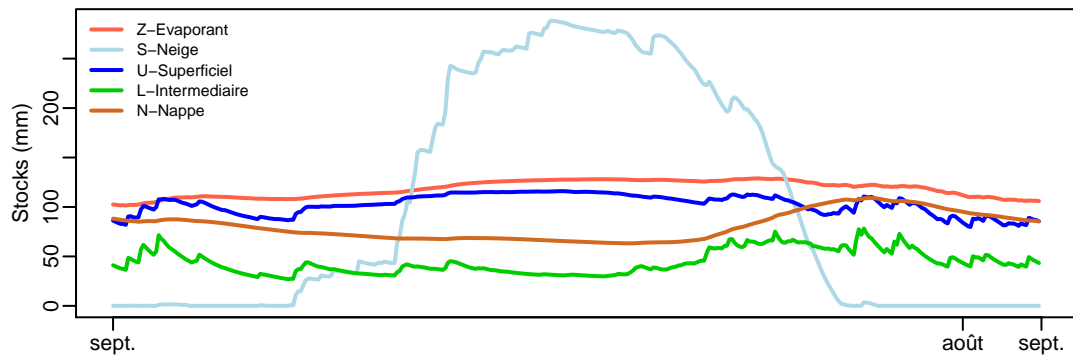

# q0159 (943.51 km²) – année 1996–1997

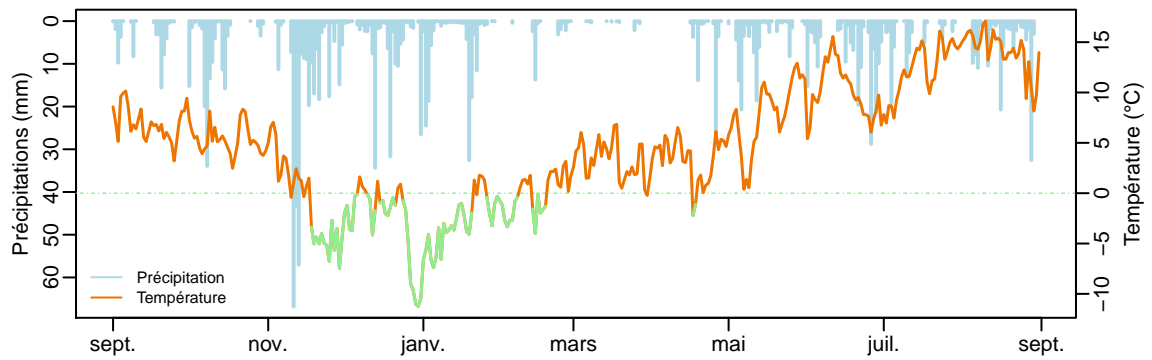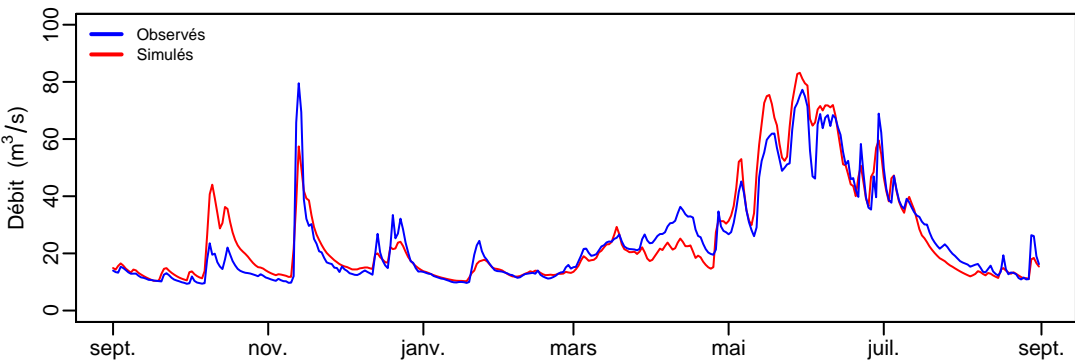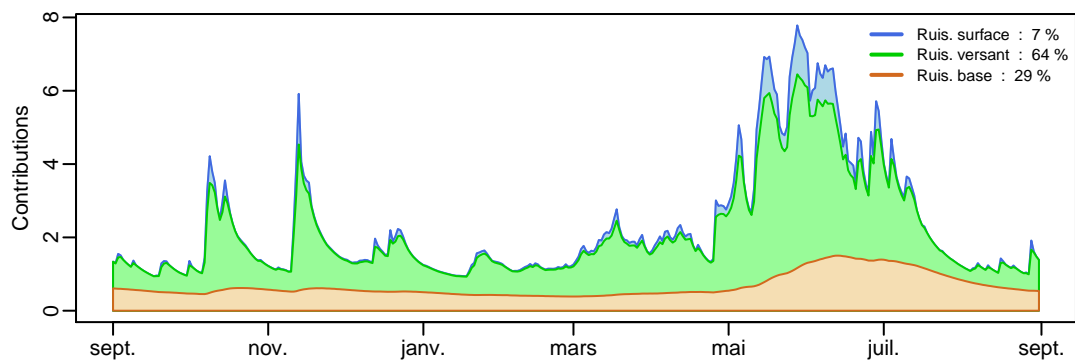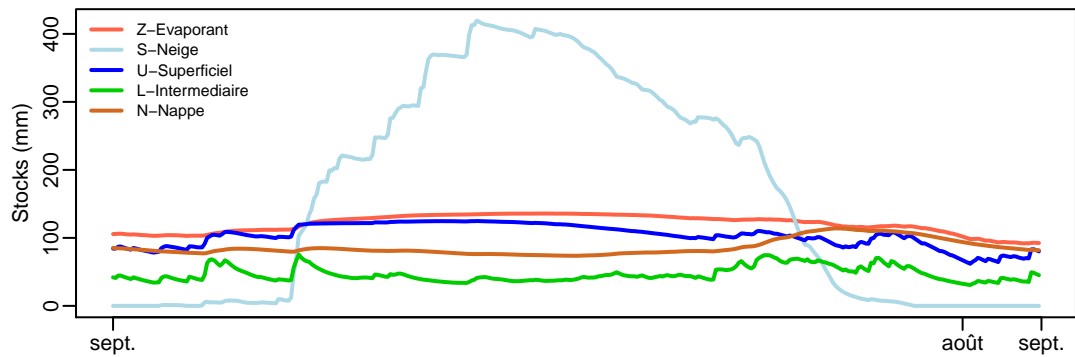



# q0159 (943.51 km²) – année 1997–1998

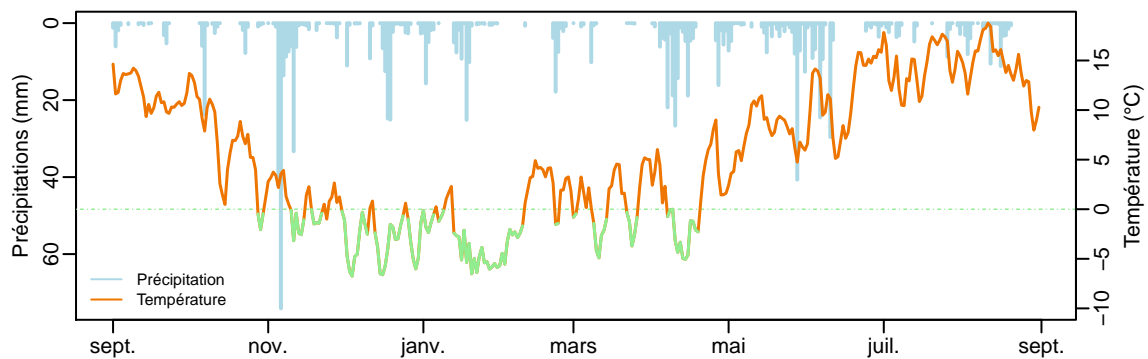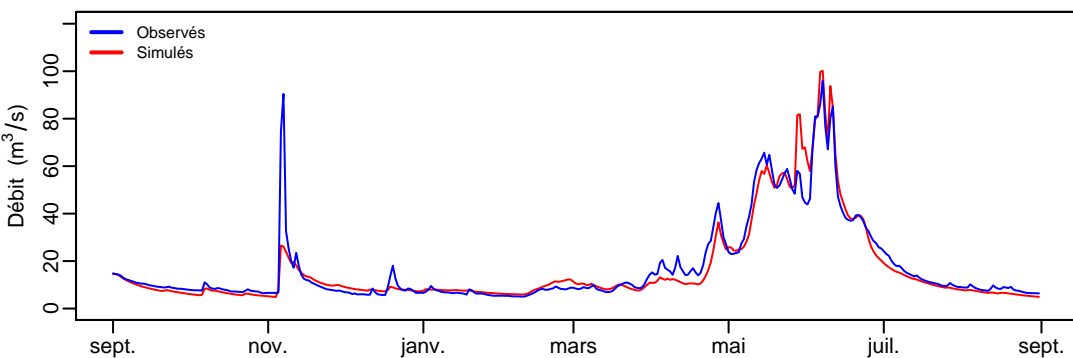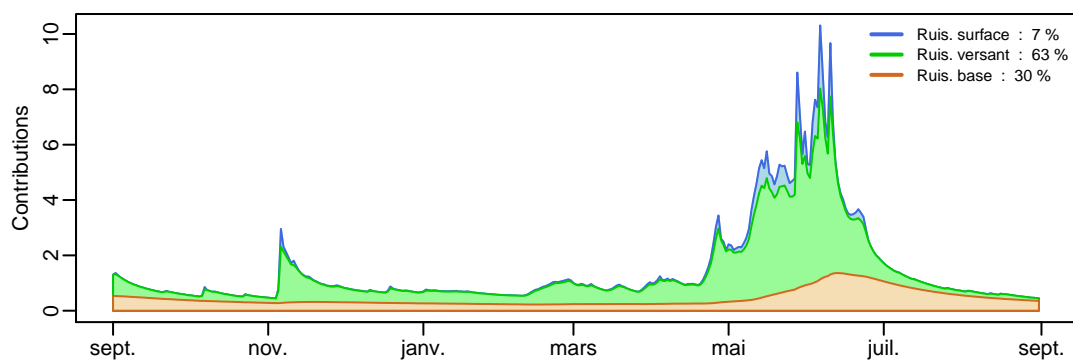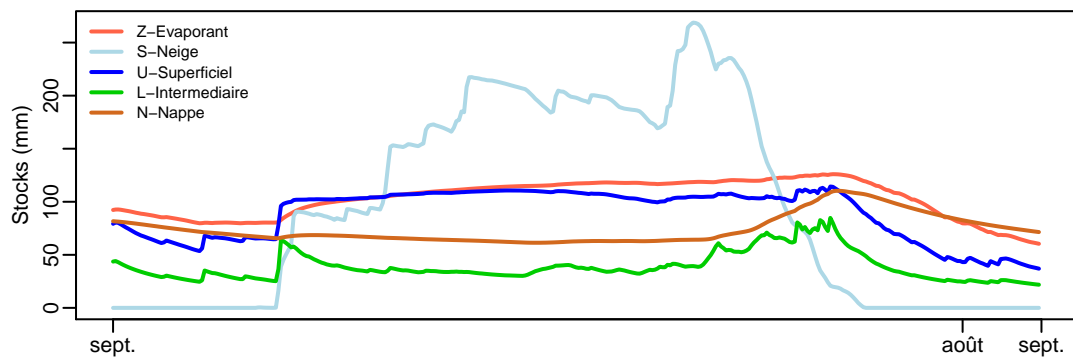

# q0159 (943.51 km<sup>2</sup>) – année 1998–1999

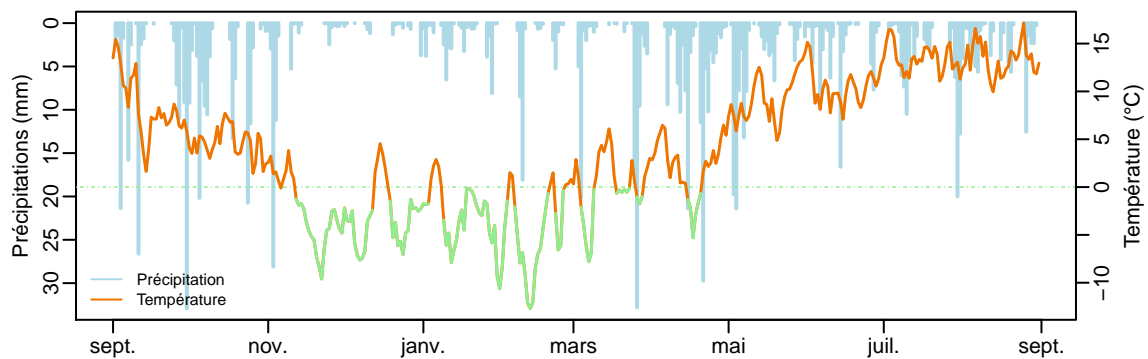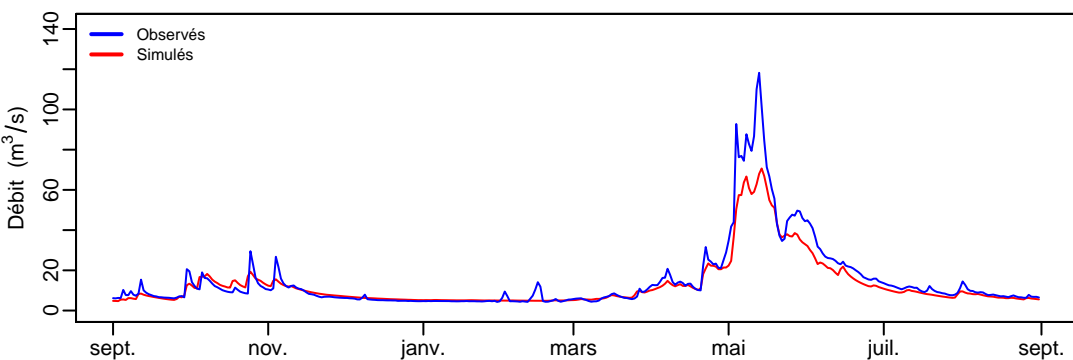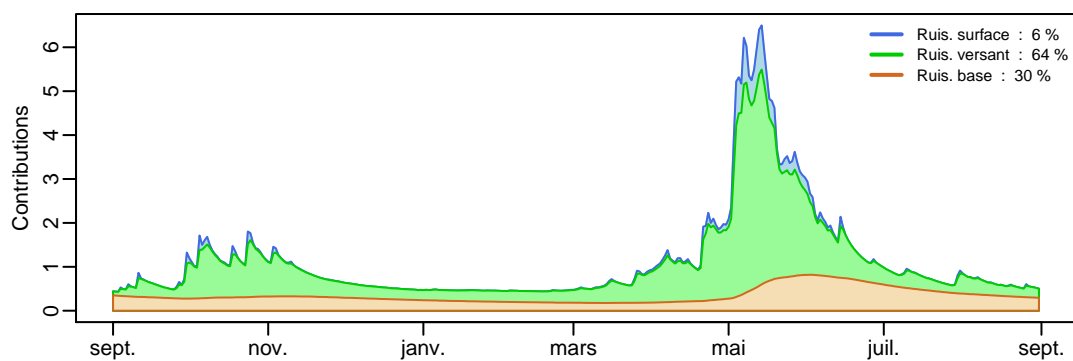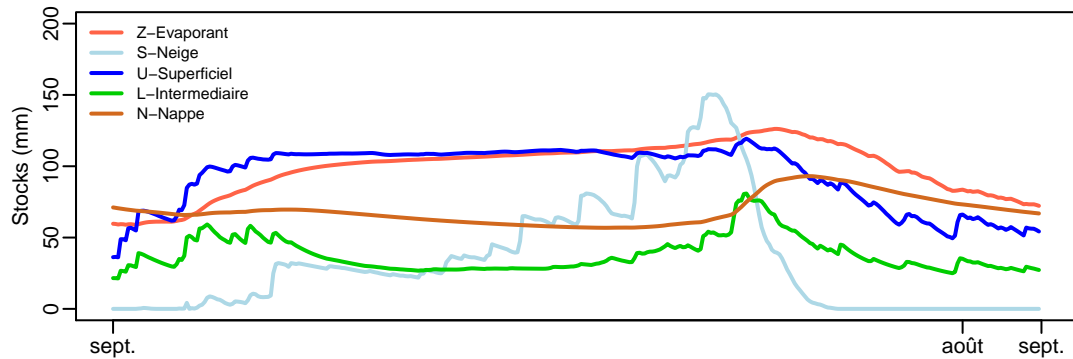

# q0159 (943.51 km<sup>2</sup>) – année 1999–2000

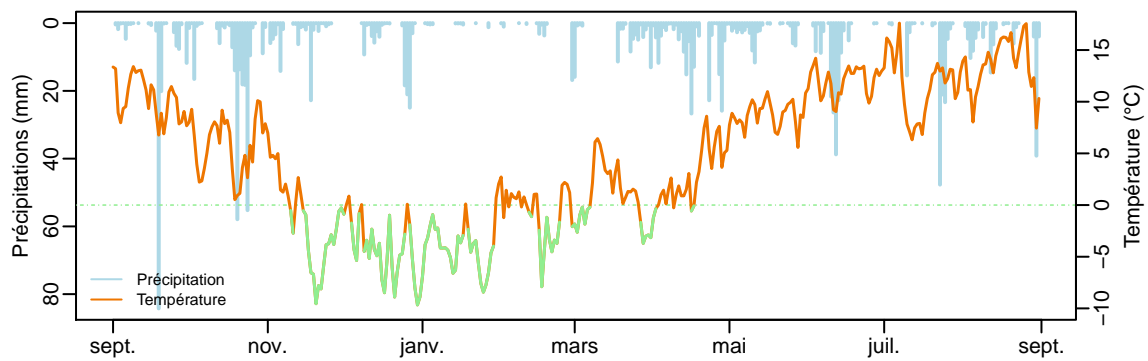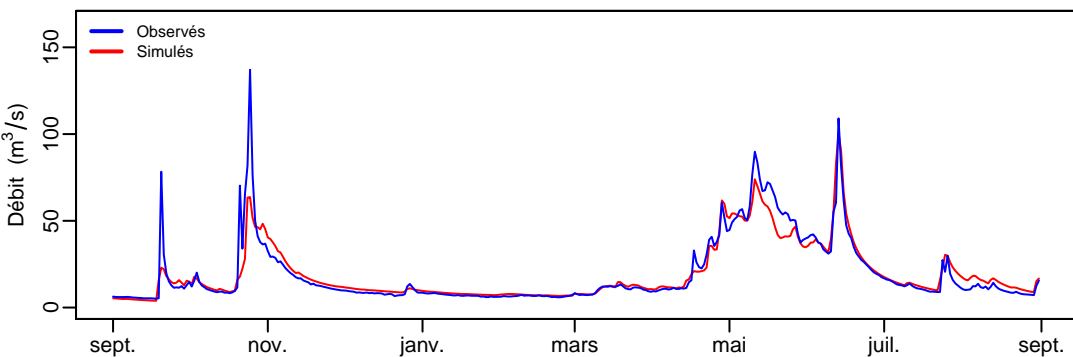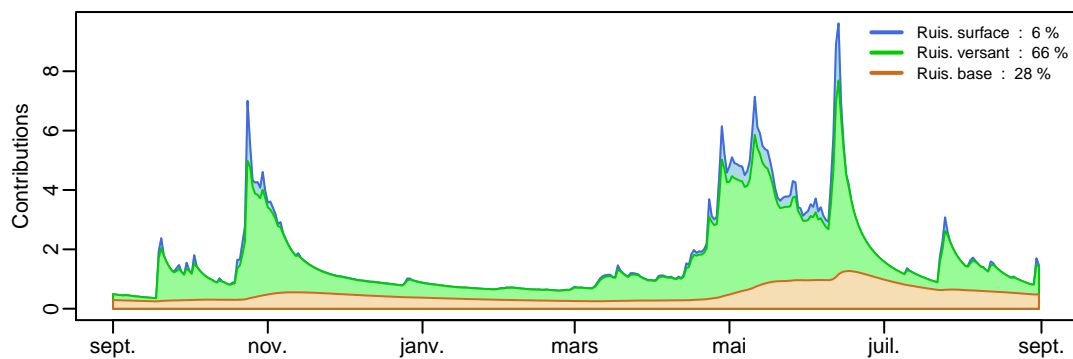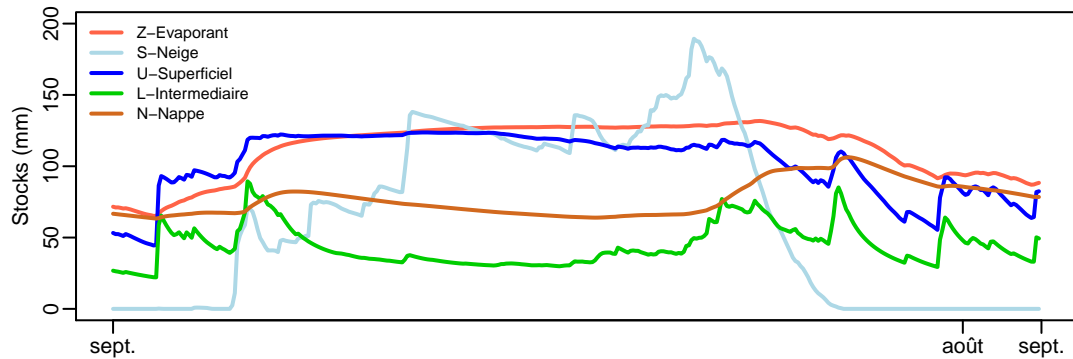

# q0159 (943.51 km<sup>2</sup>) – année 2000–2001

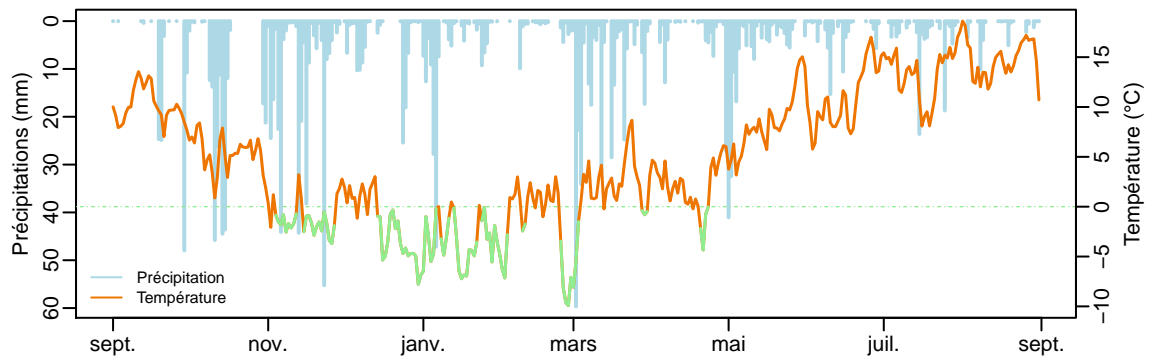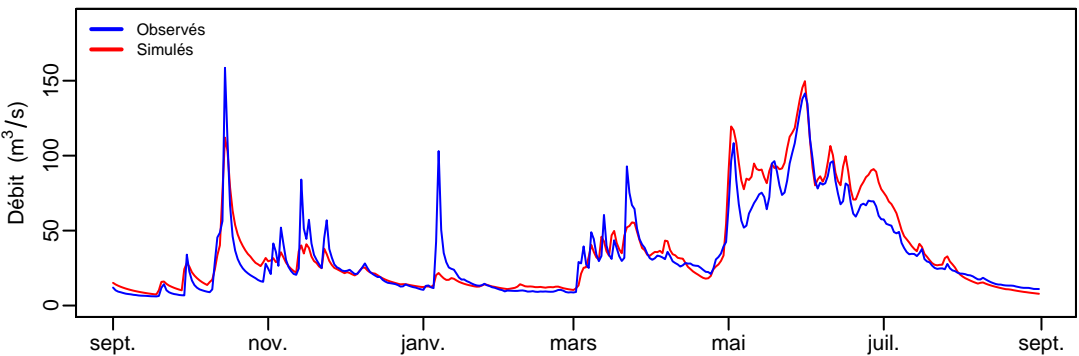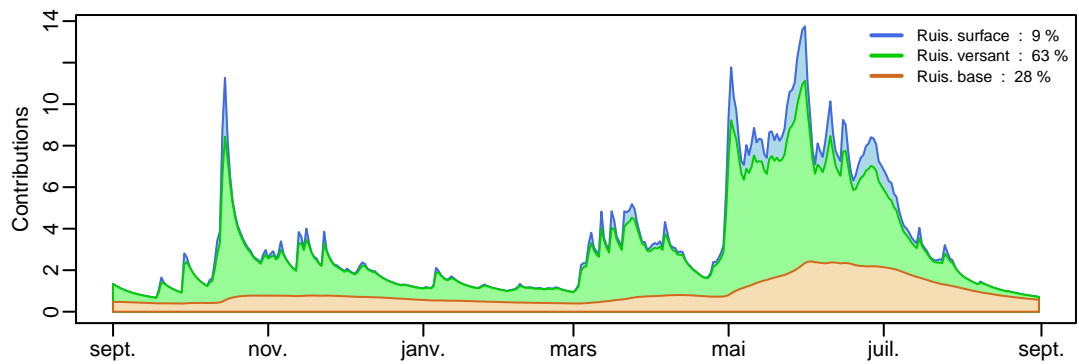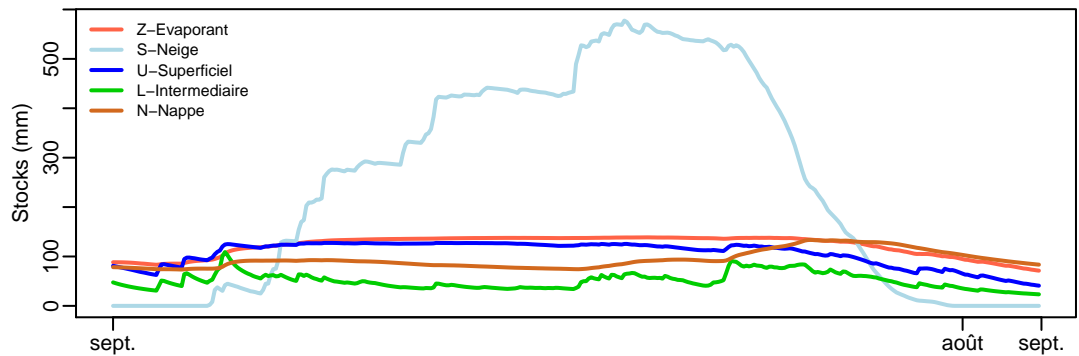

# q0159 (943.51 km²) – année 2001–2002

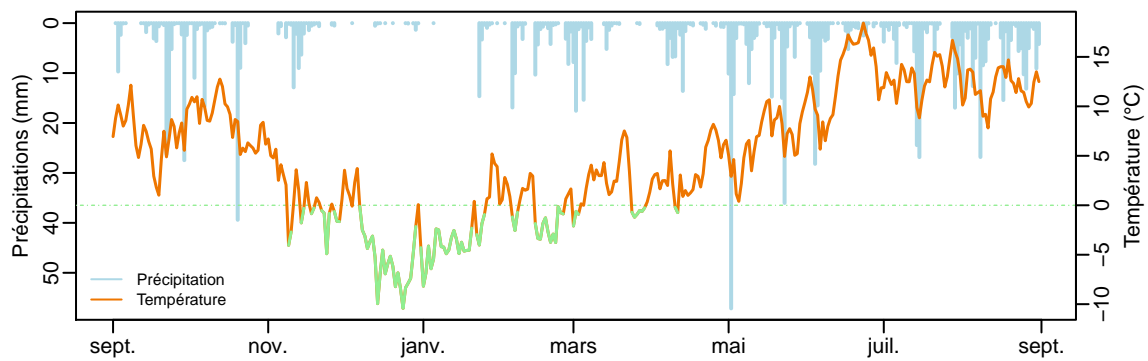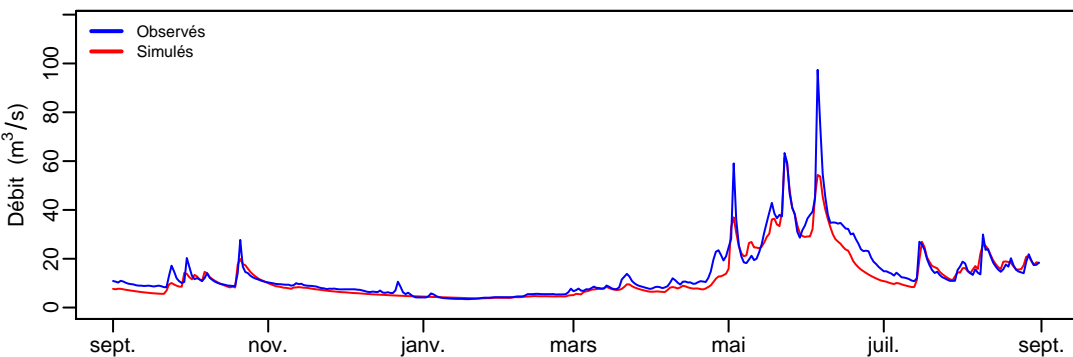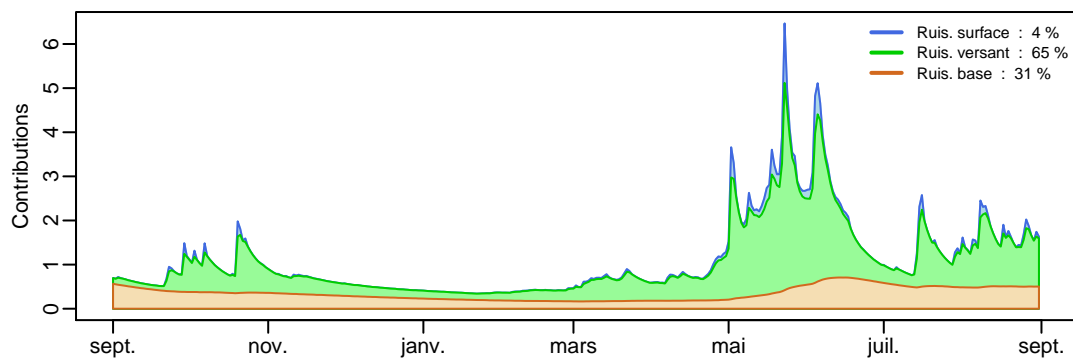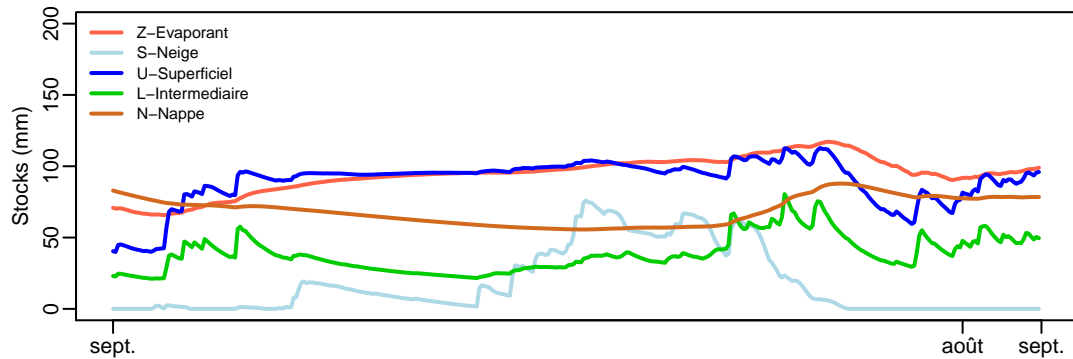

# q0159 (943.51 km²) – année 2002–2003

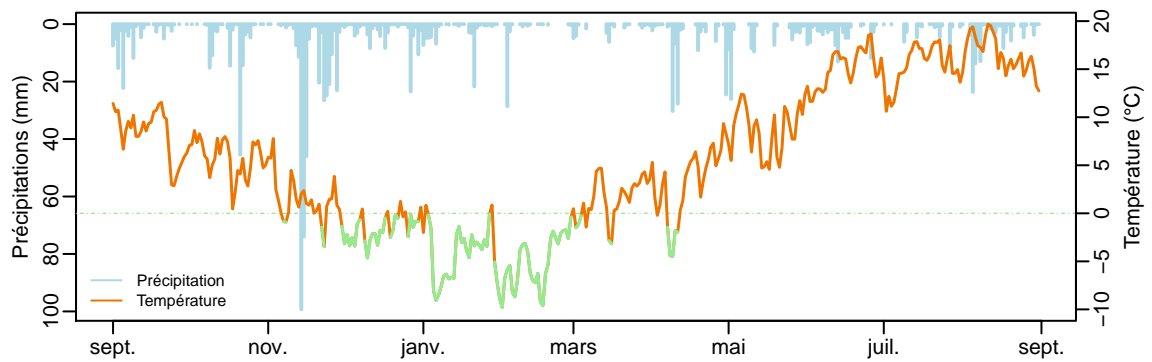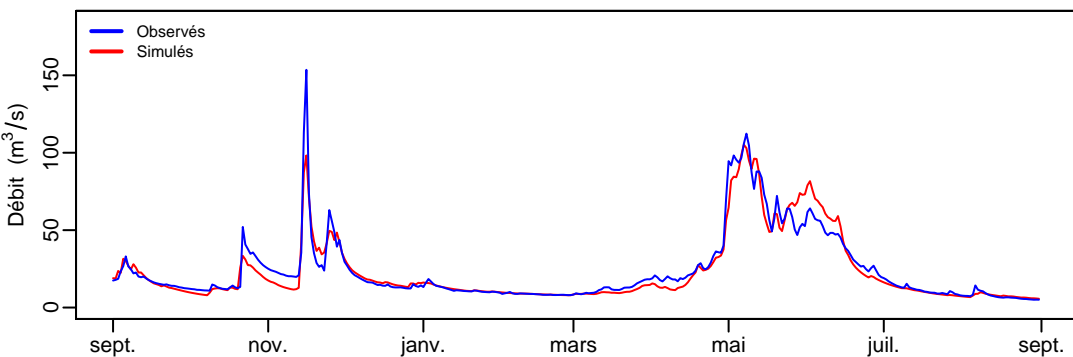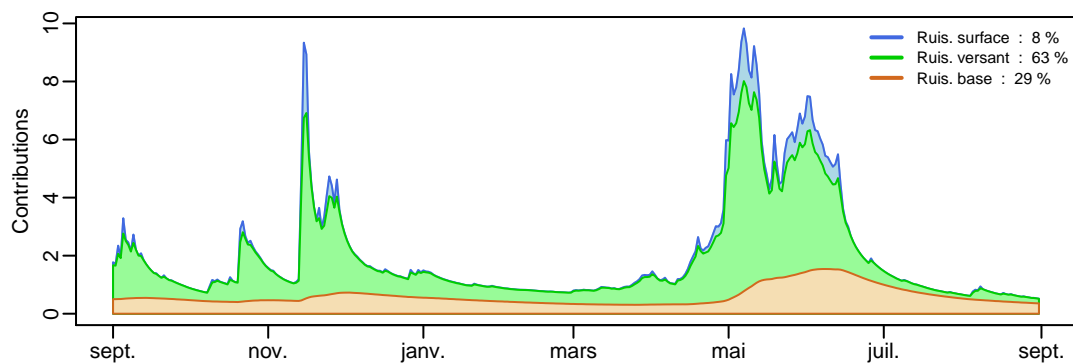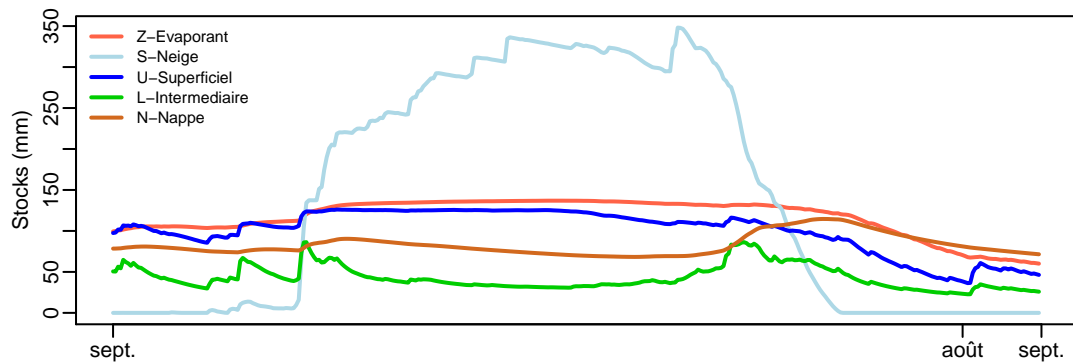

# q0159 (943.51 km<sup>2</sup>) – année 2003–2004

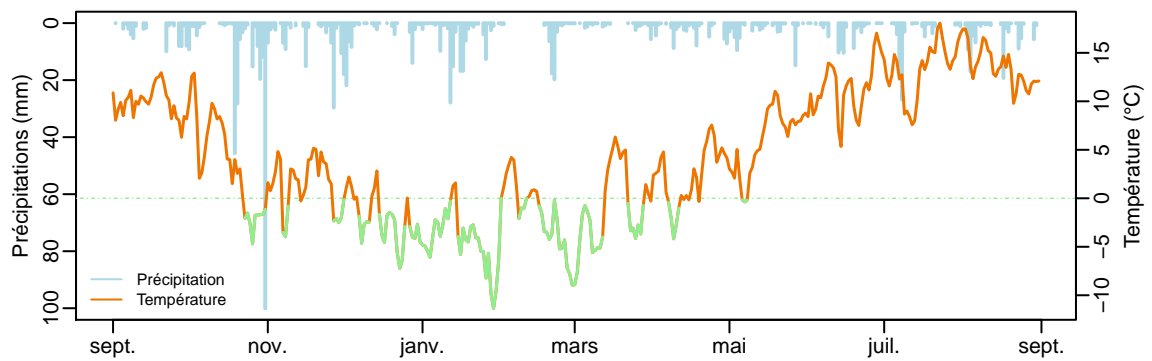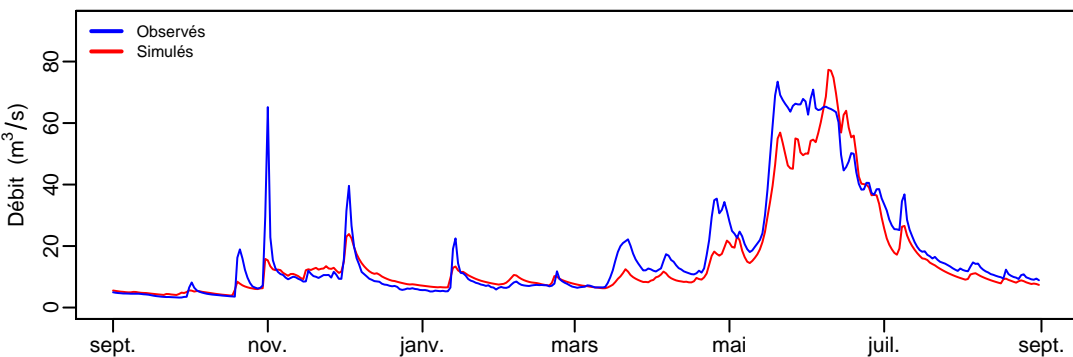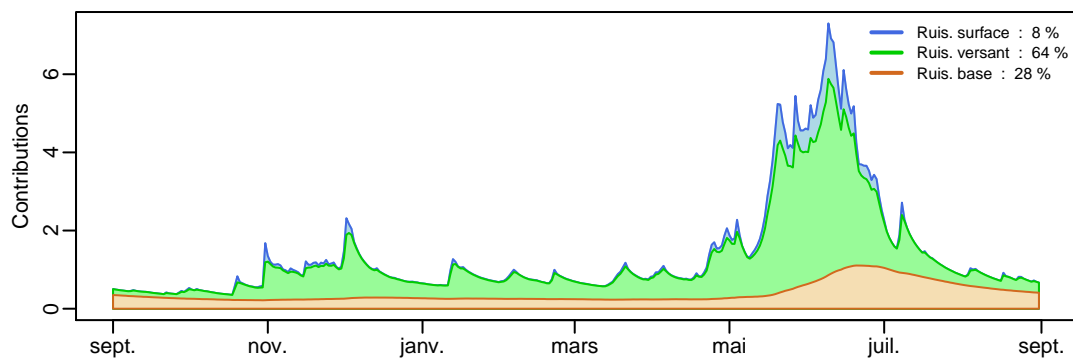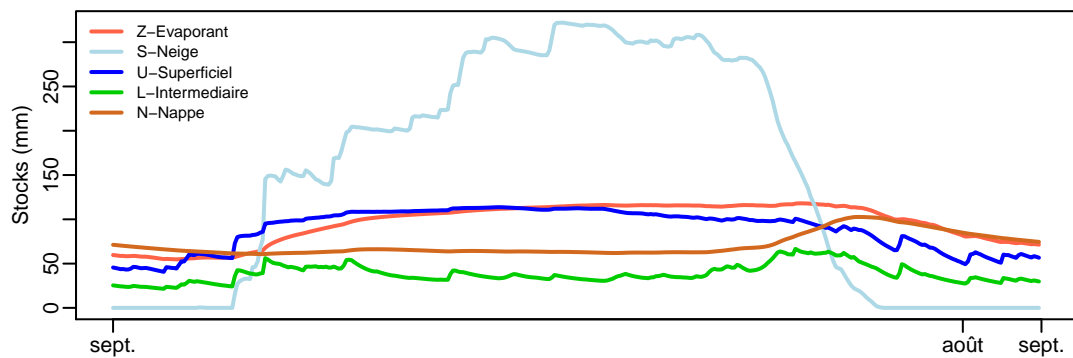

# q0159 (943.51 km²) – année 2004–2005

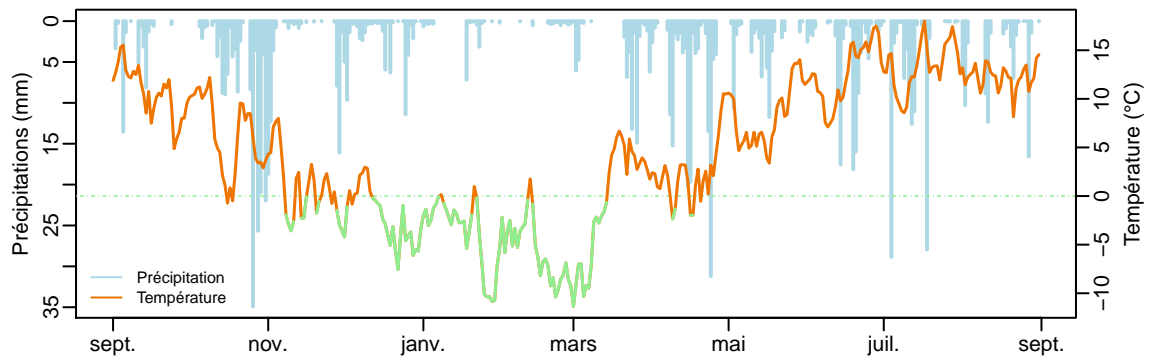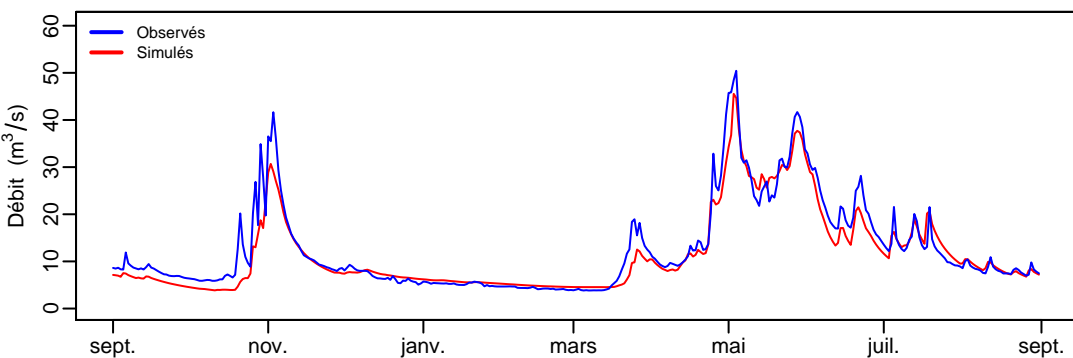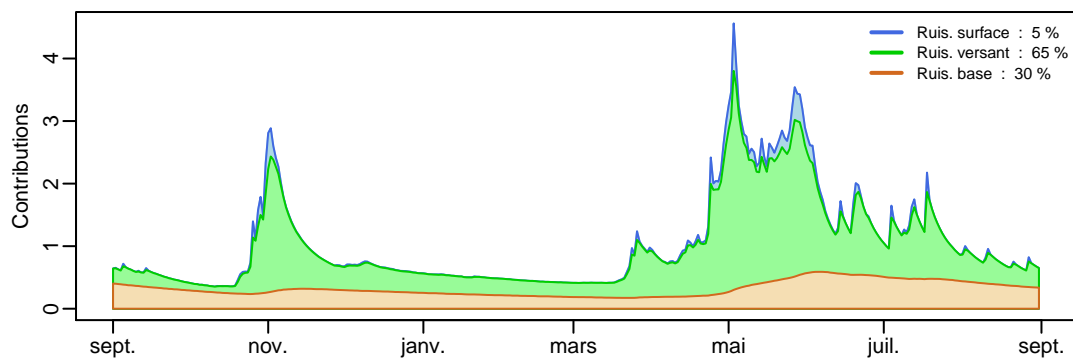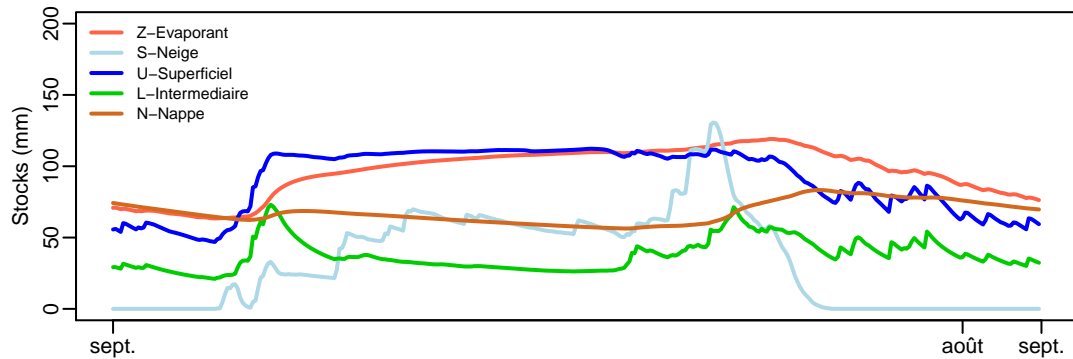



# q0159 (943.51 km<sup>2</sup>) – année 2005–2006

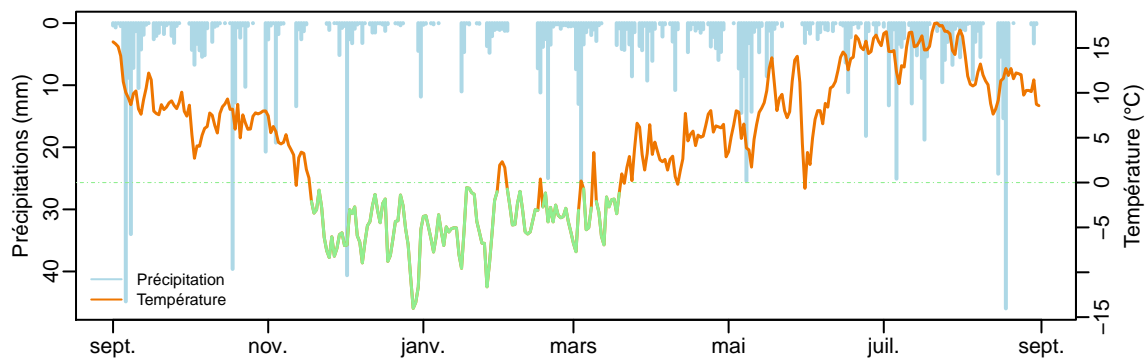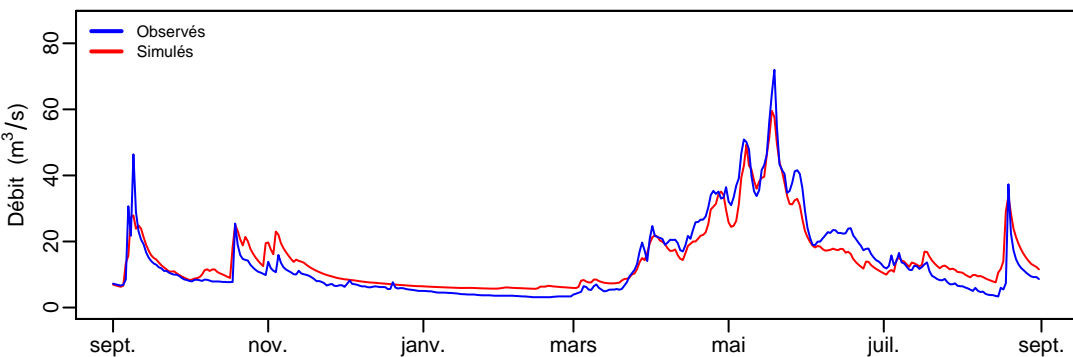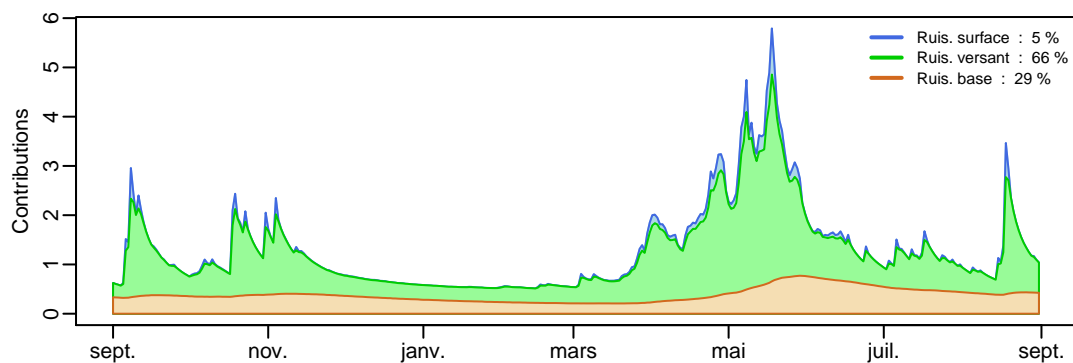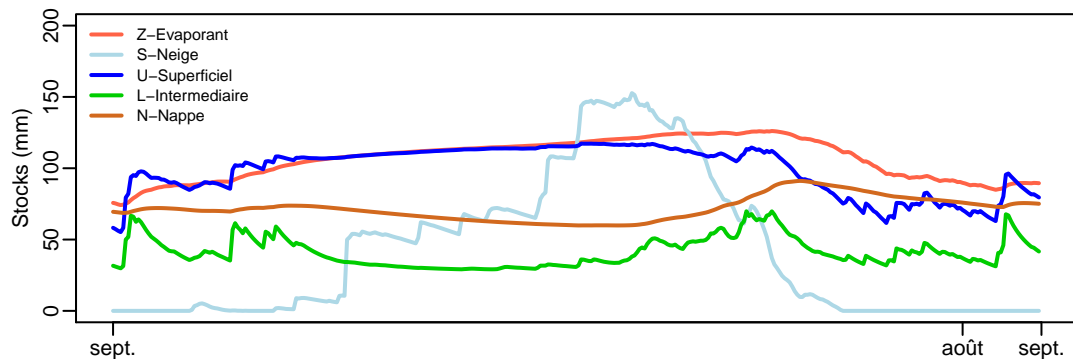

# q0159 (943.51 km<sup>2</sup>) – année 2006–2007

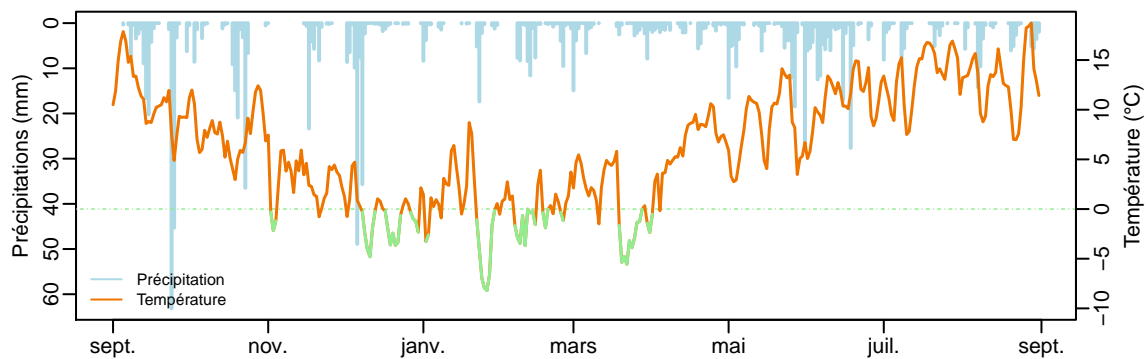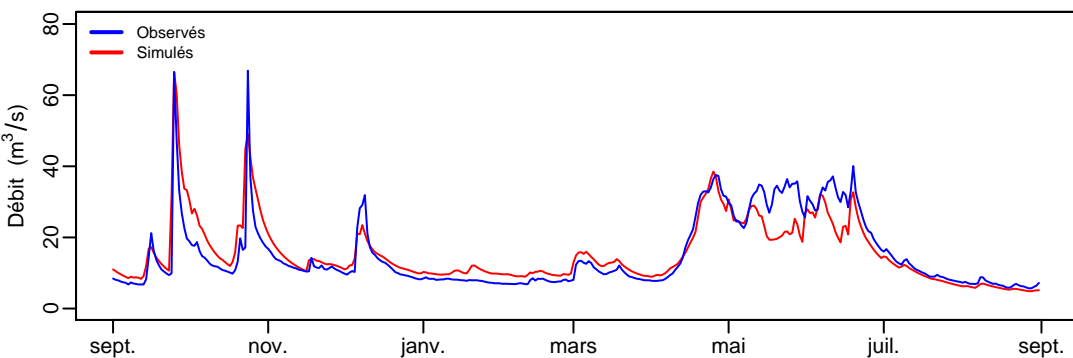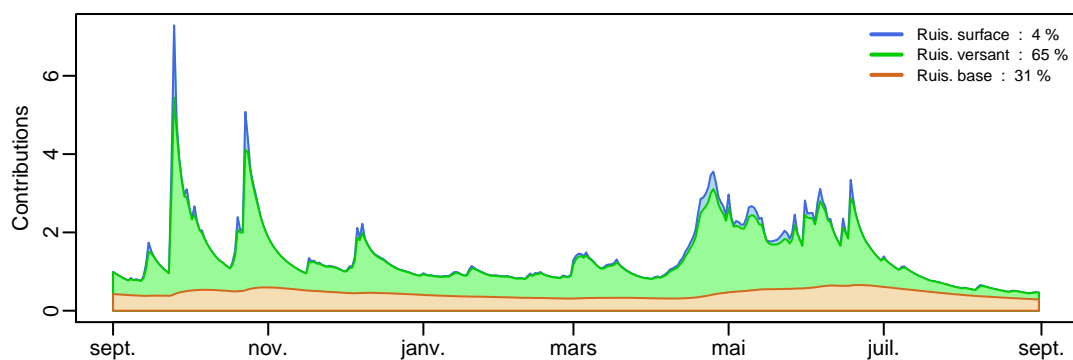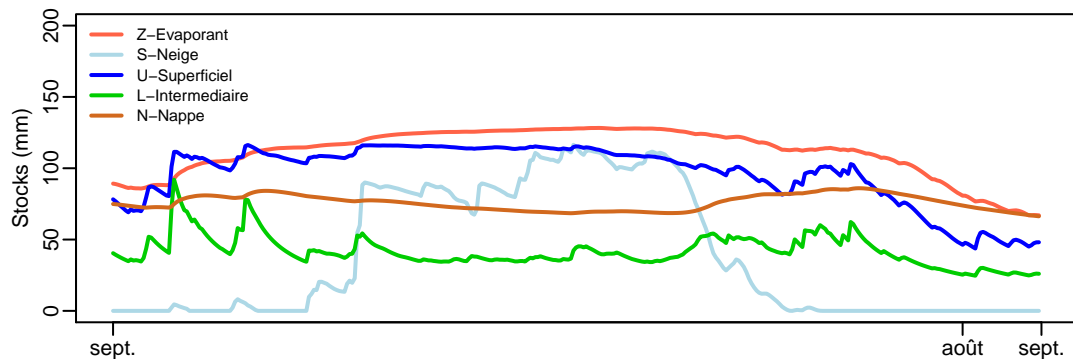

# q0159 (943.51 km<sup>2</sup>) – année 2007–2008

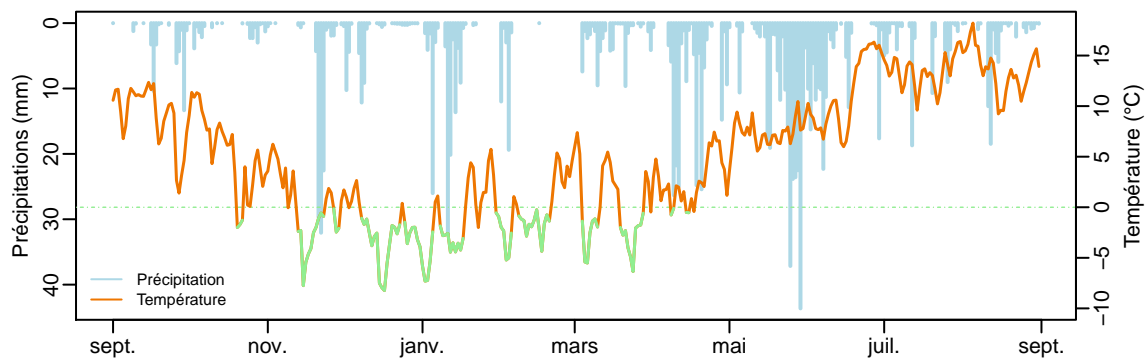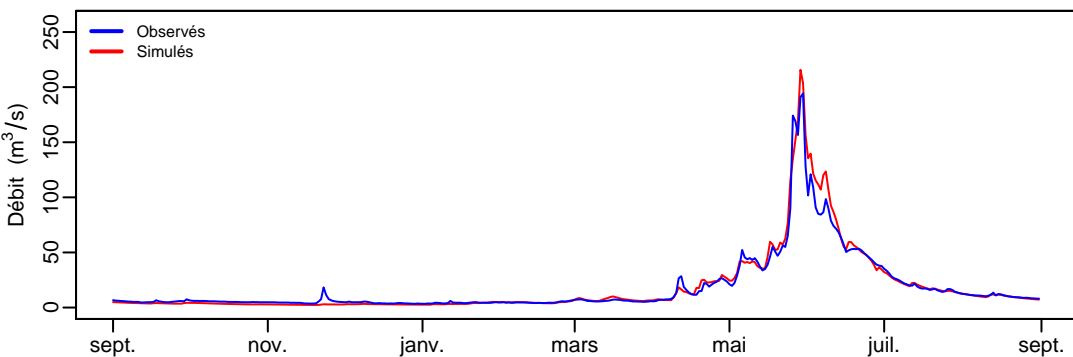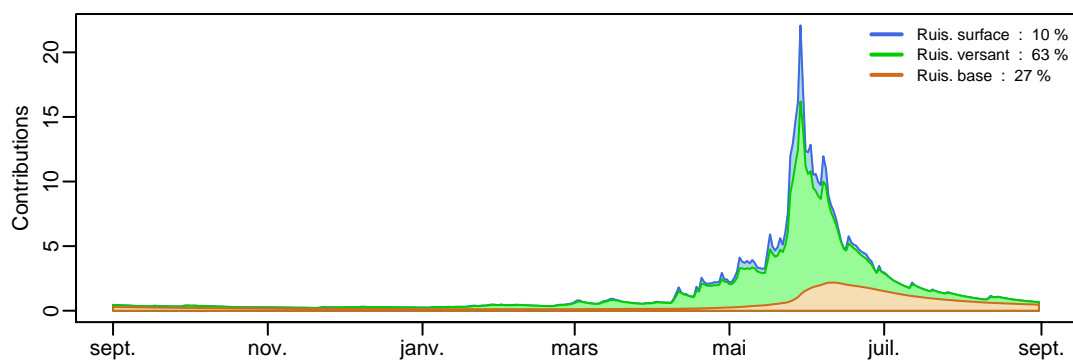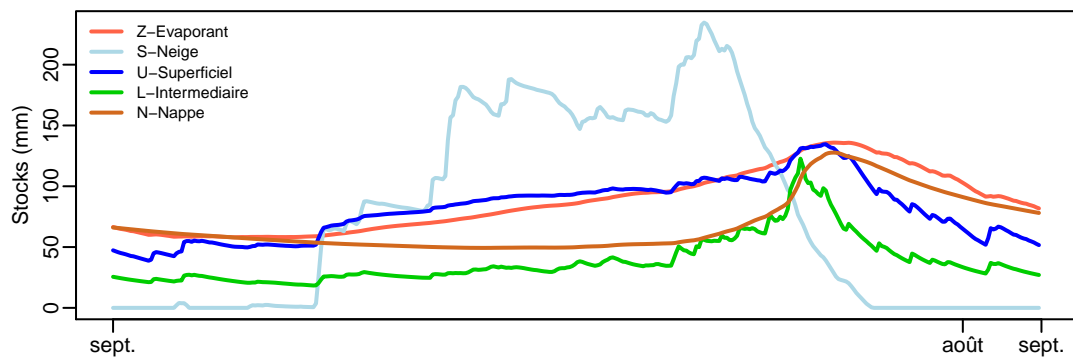

# q0159 (943.51 km²) – année 2008–2009

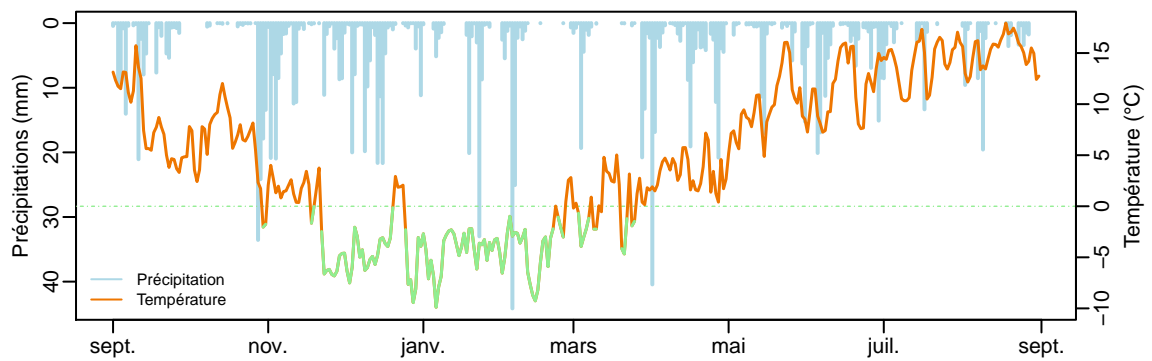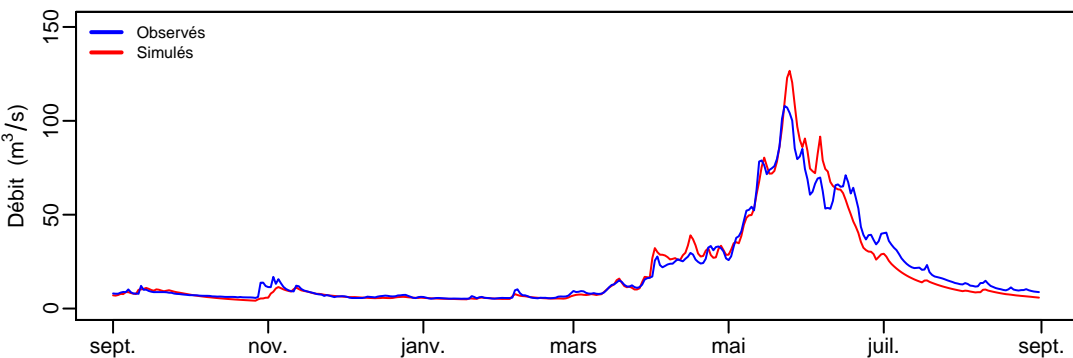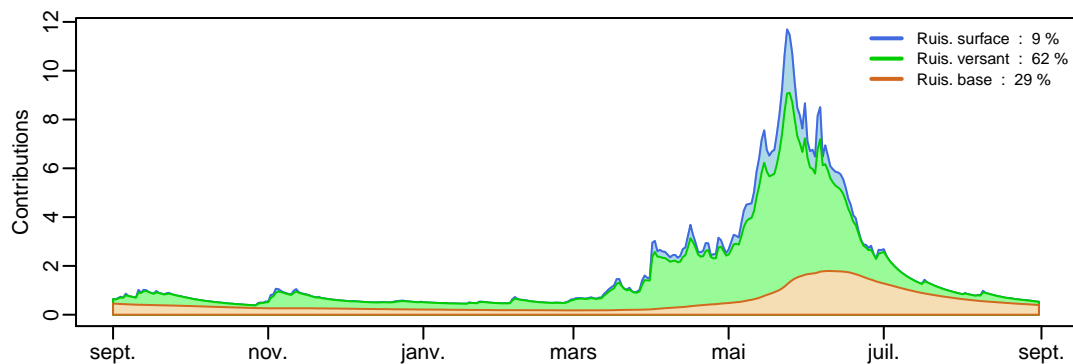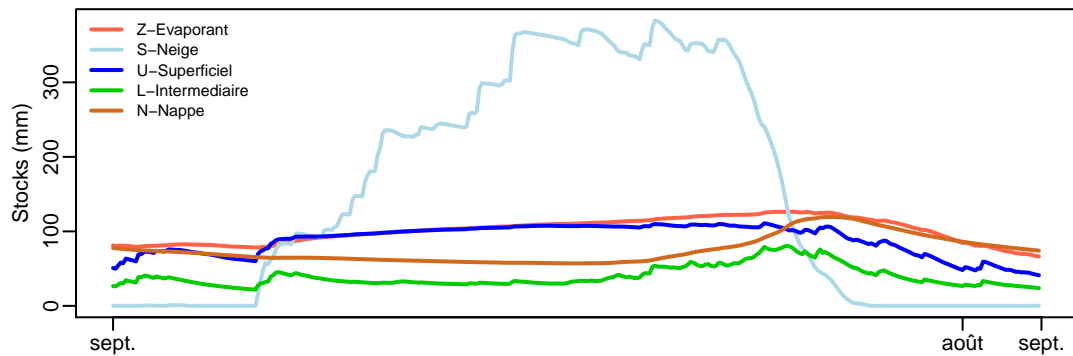

# q0159 (943.51 km²) – année 2009–2010

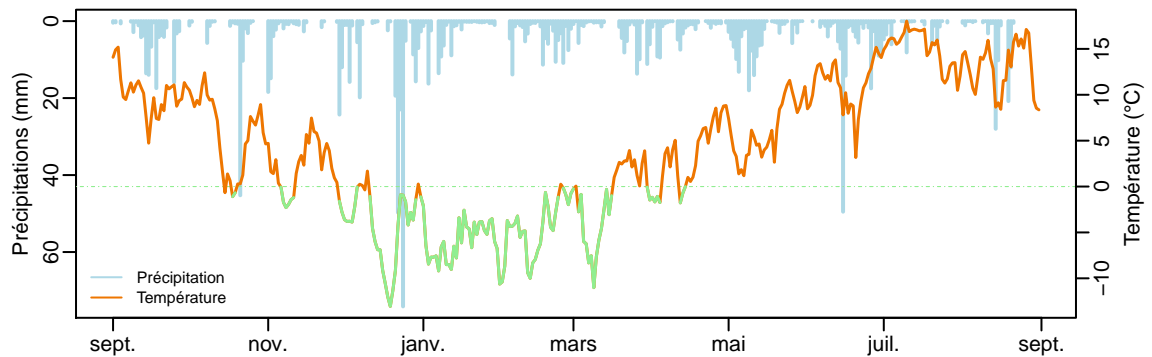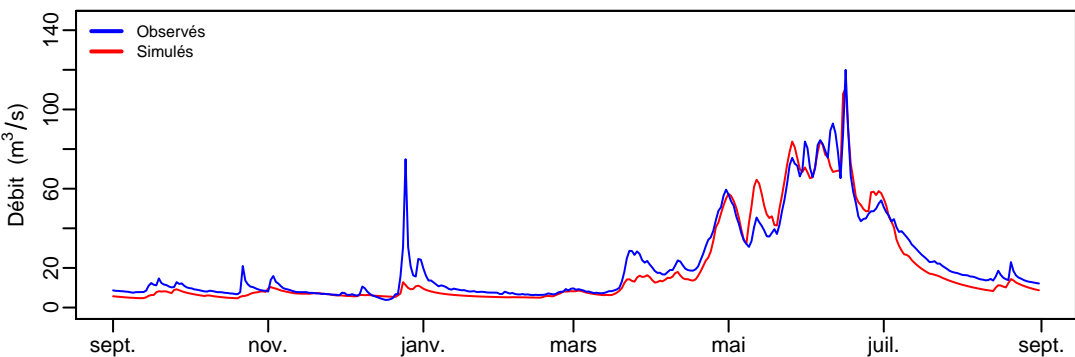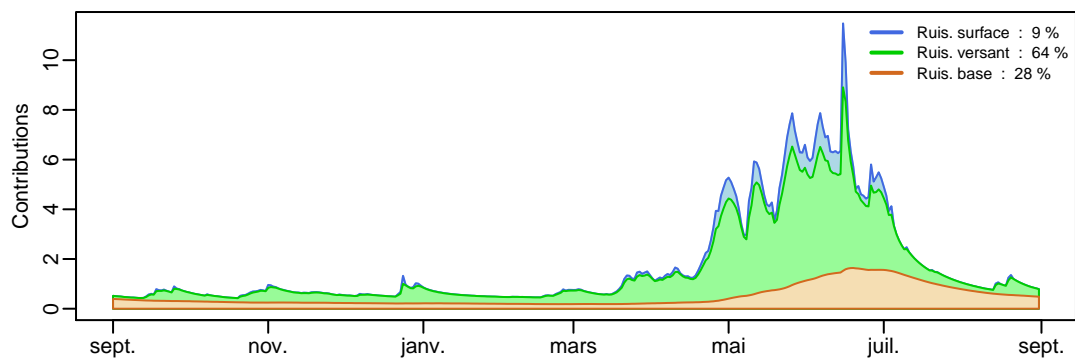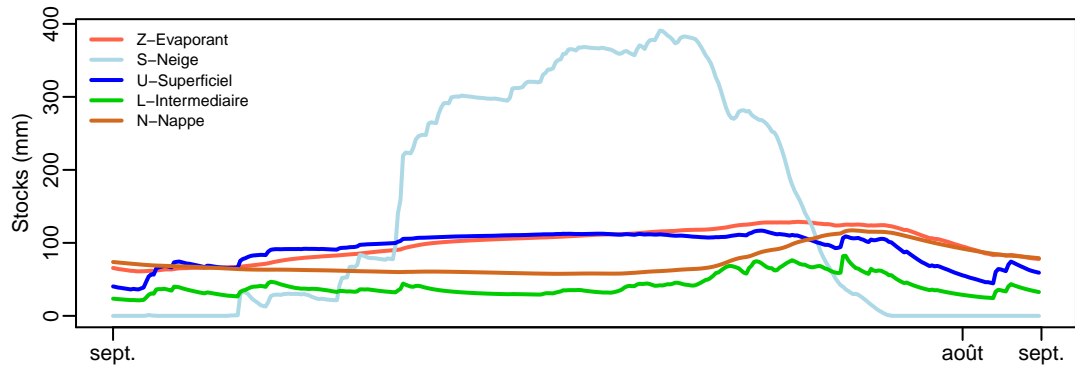

# q0159 (943.51 km²) – année 2010–2011

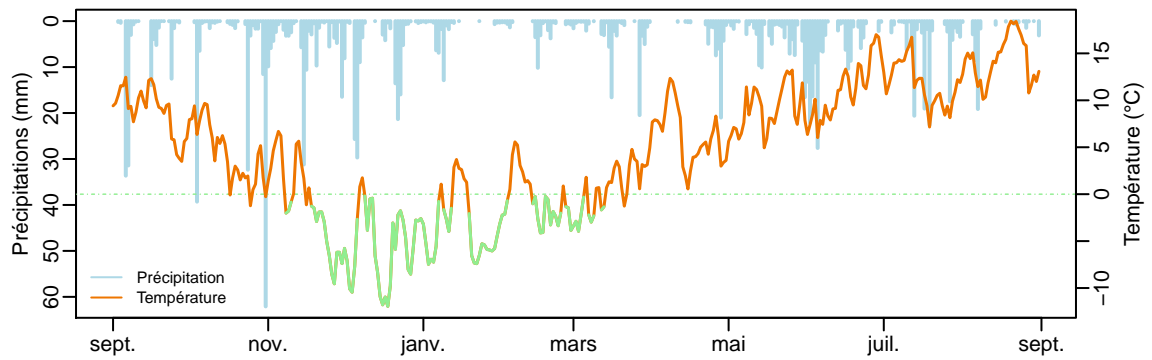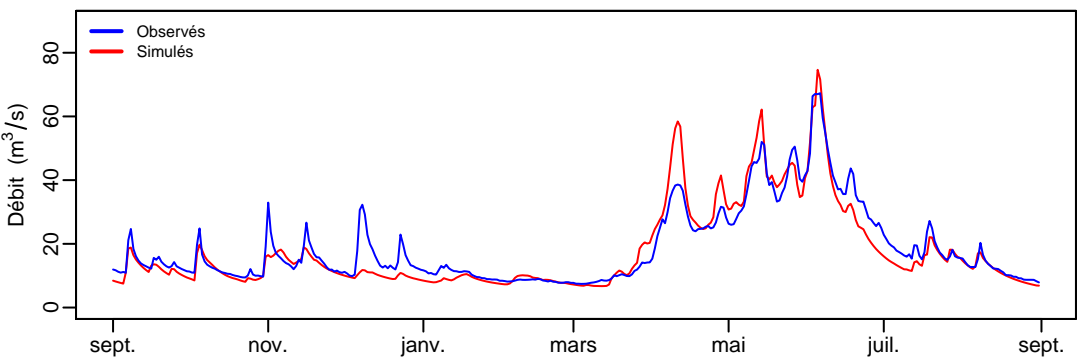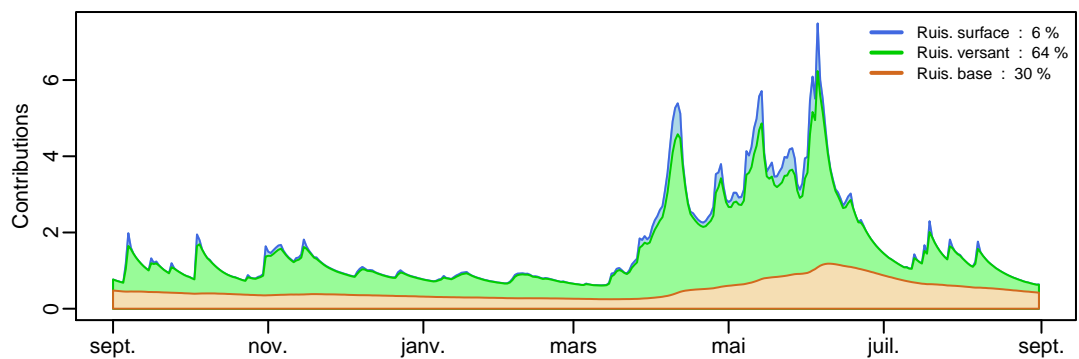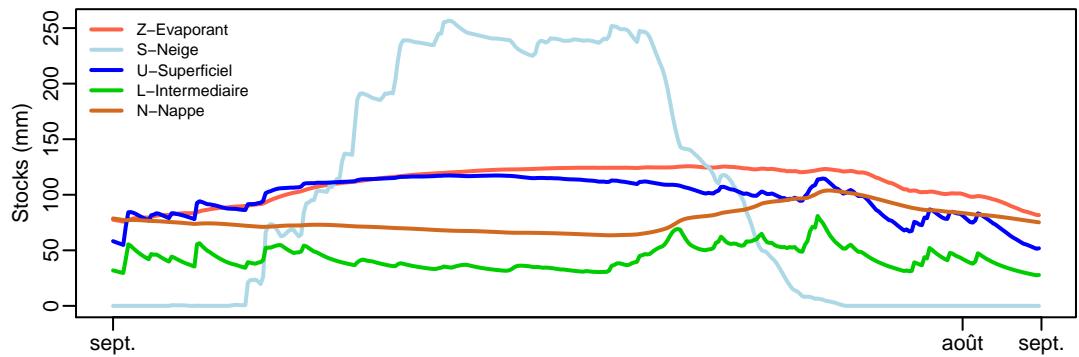

# q0159 (943.51 km²) – année 2011–2012

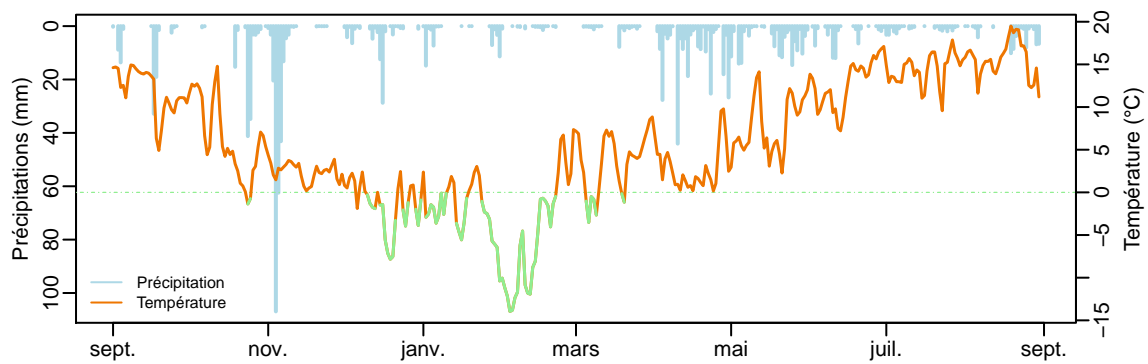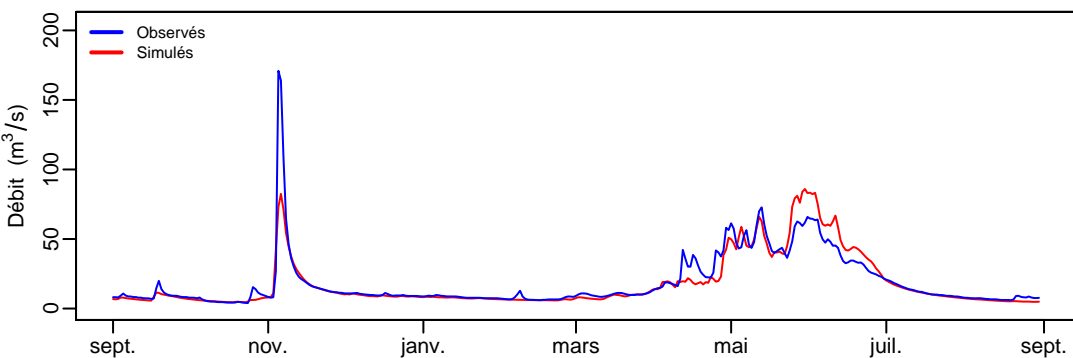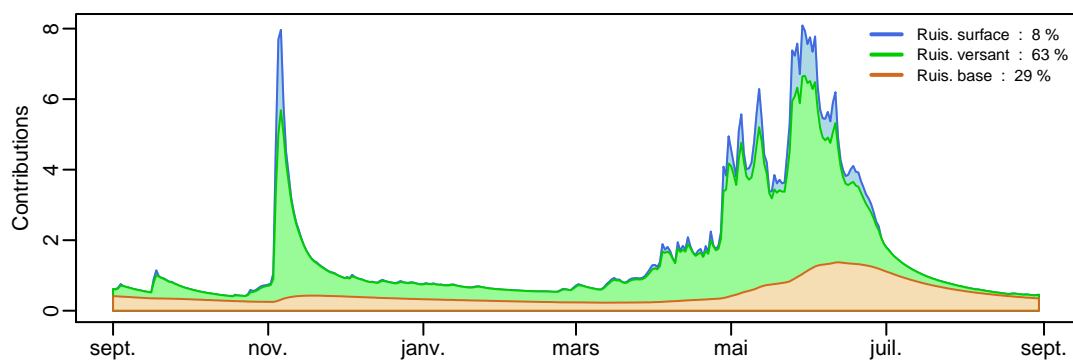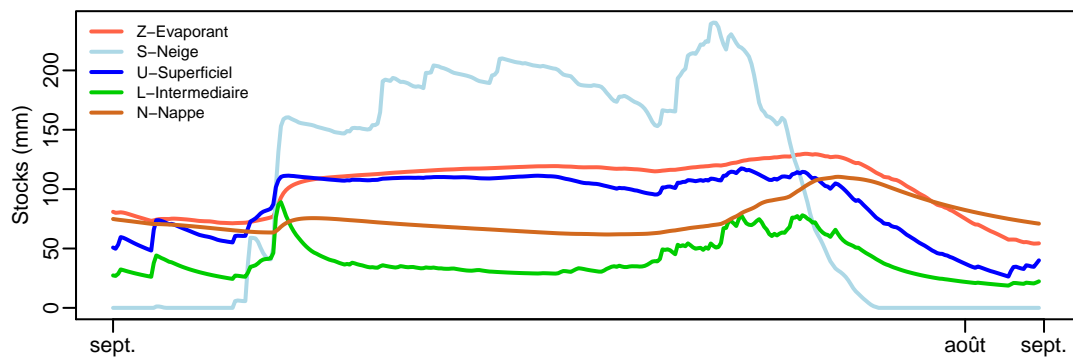

# q0168 (548.1 km<sup>2</sup>) – année 1981–1982

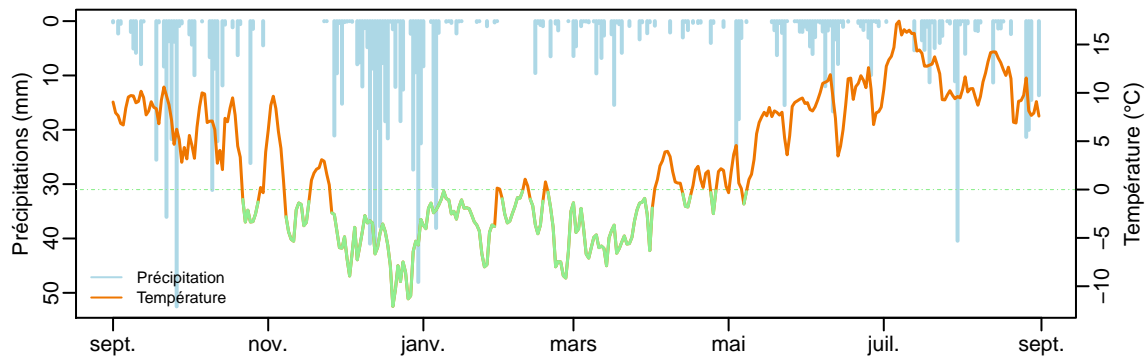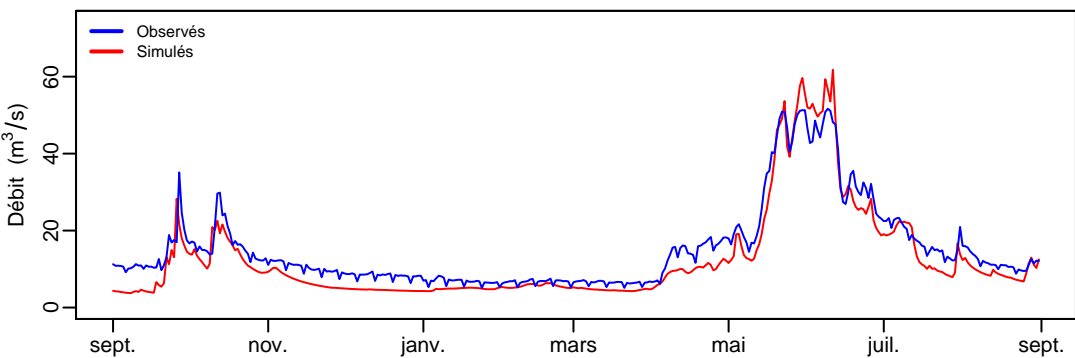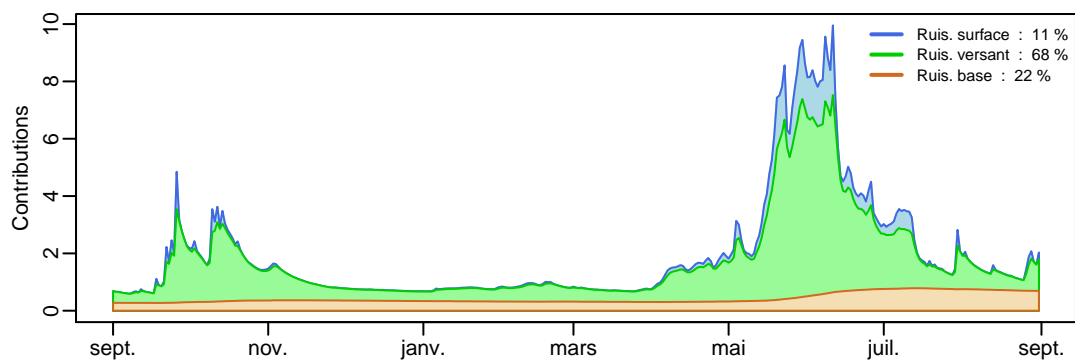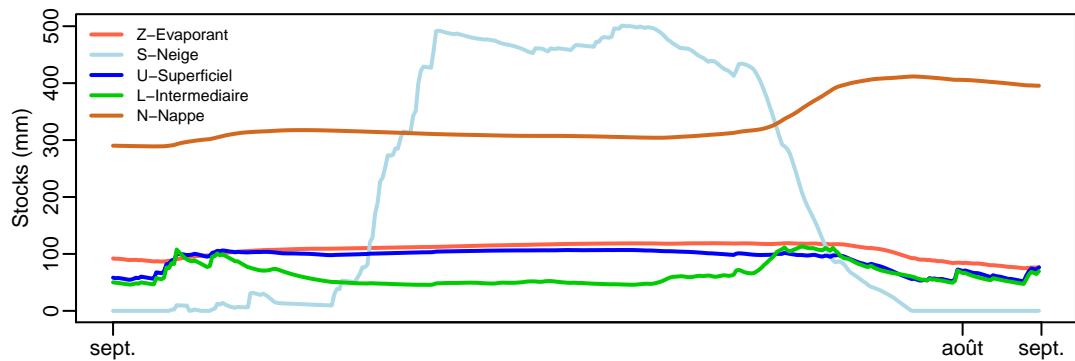



# q0168 (548.1 km²) – année 1982–1983

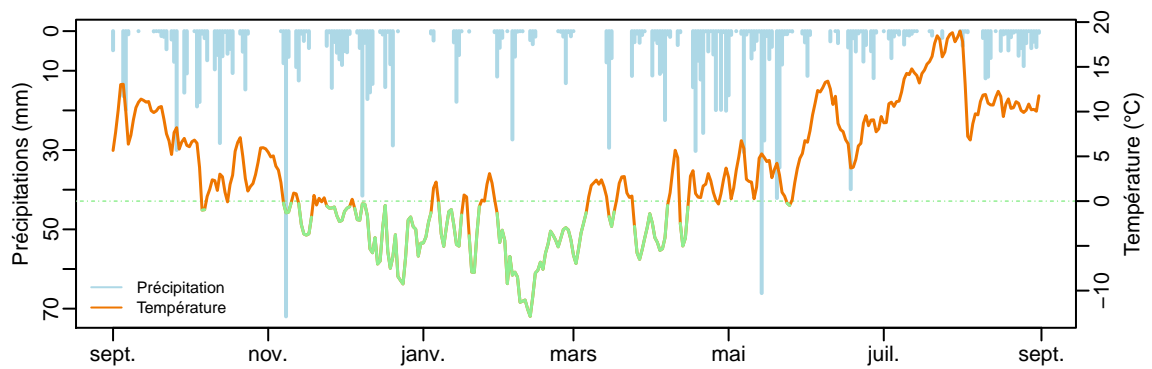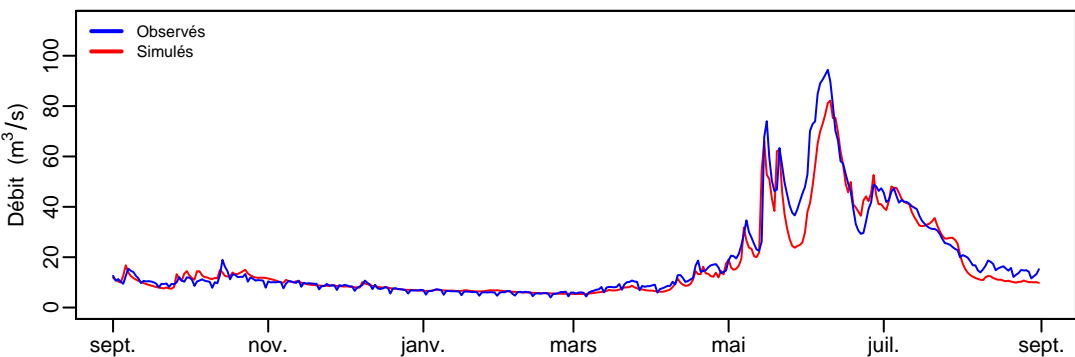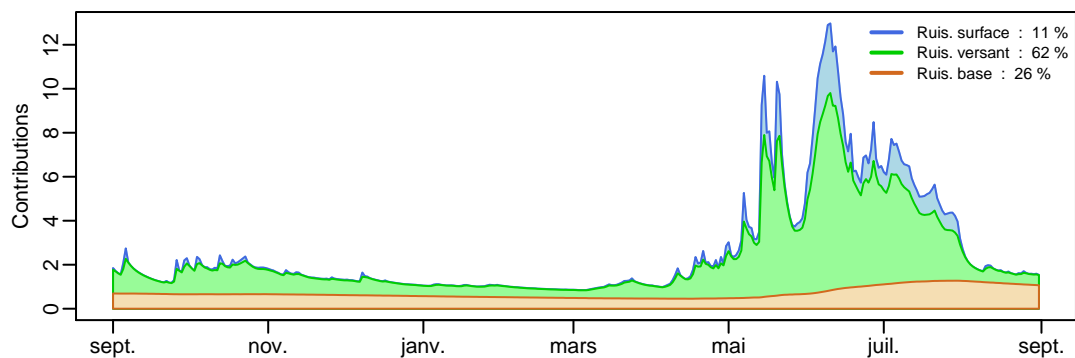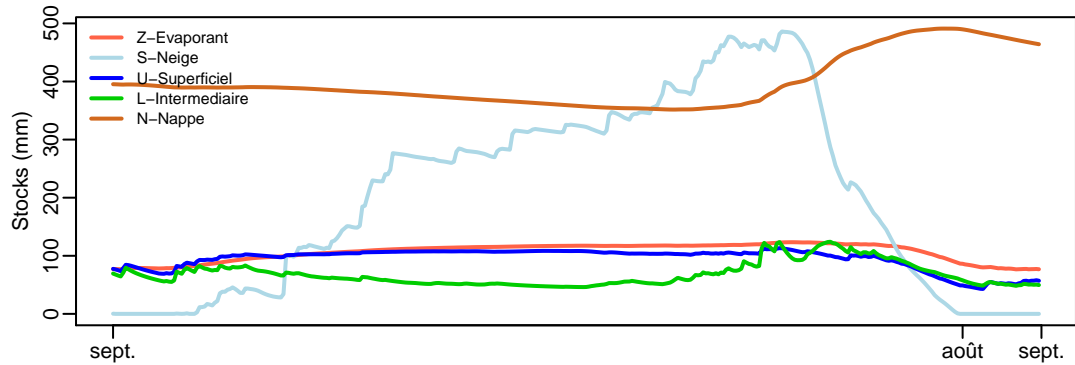

# q0168 (548.1 km<sup>2</sup>) – année 1983–1984

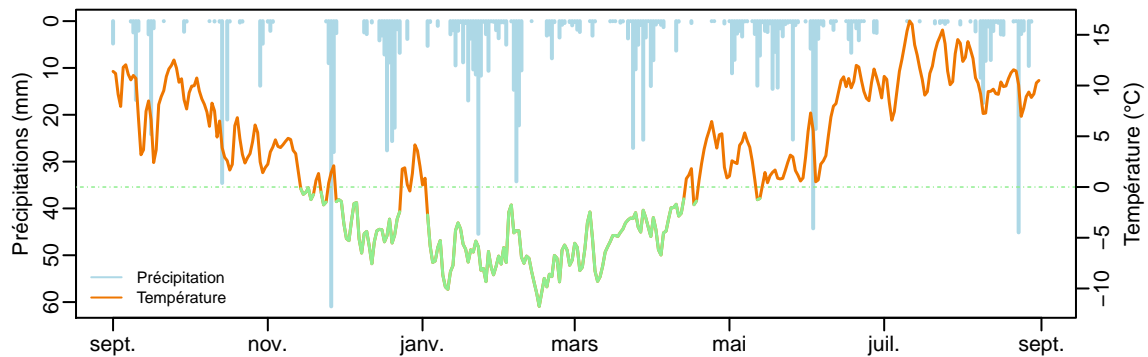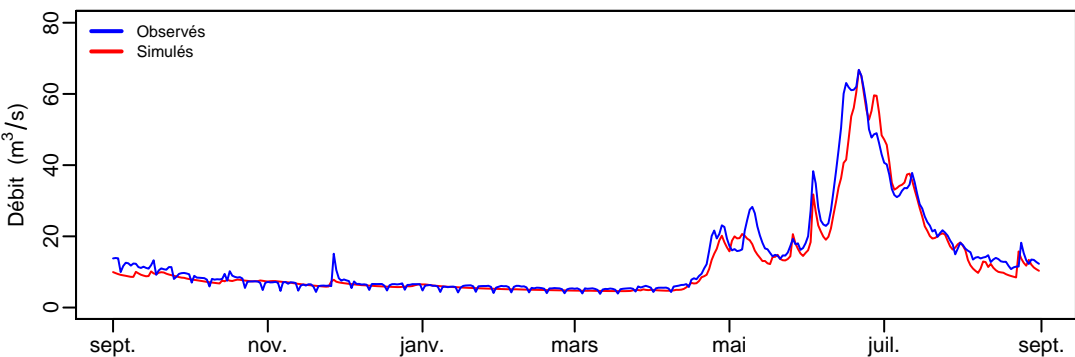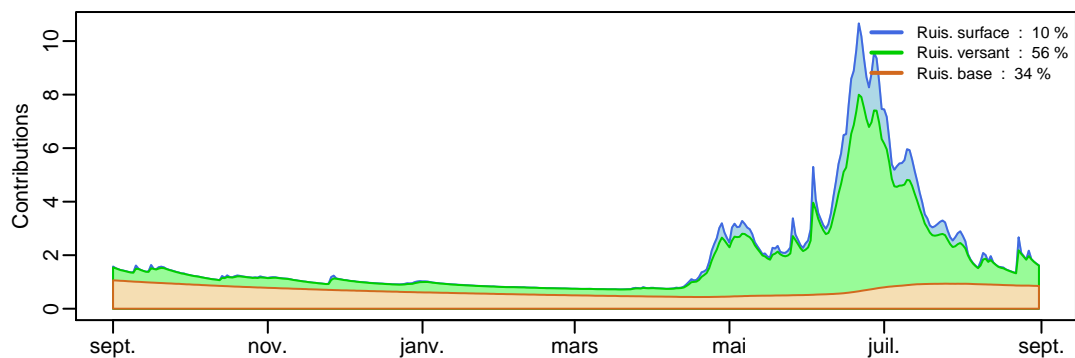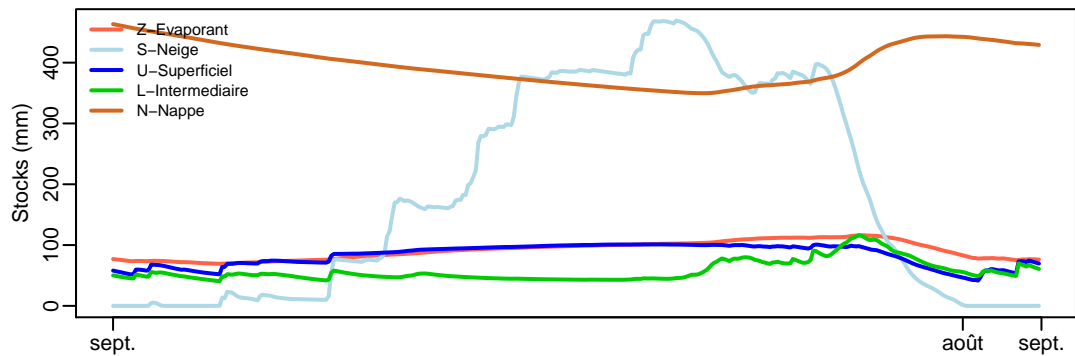

# q0168 (548.1 km<sup>2</sup>) – année 1984–1985

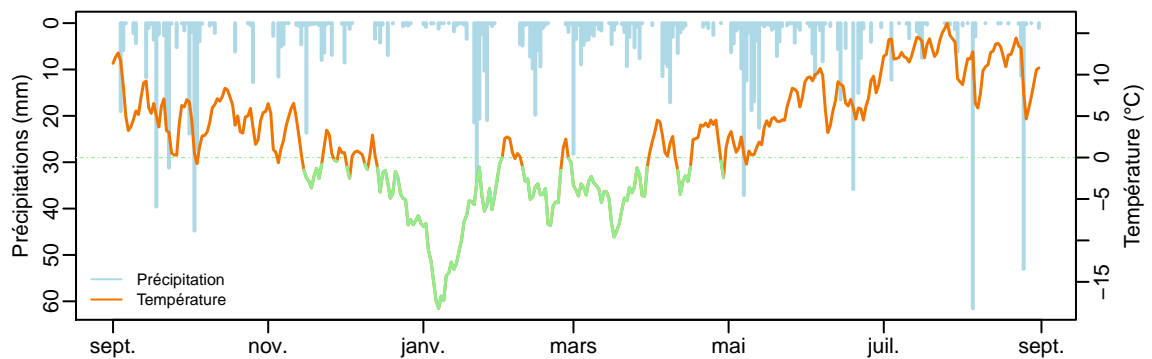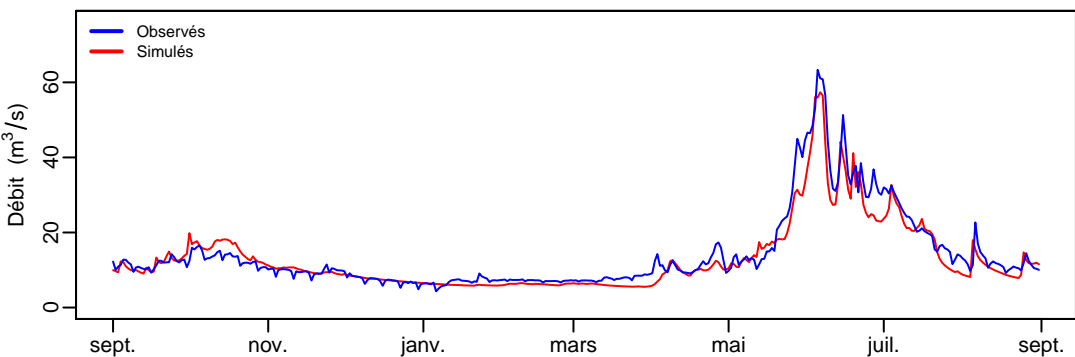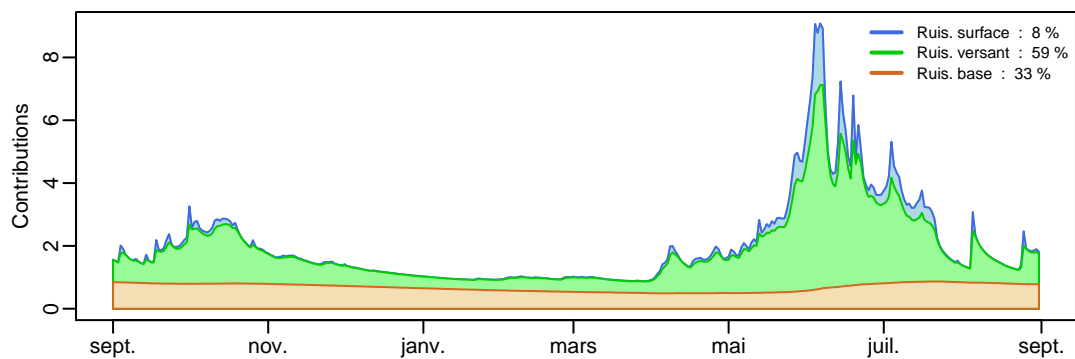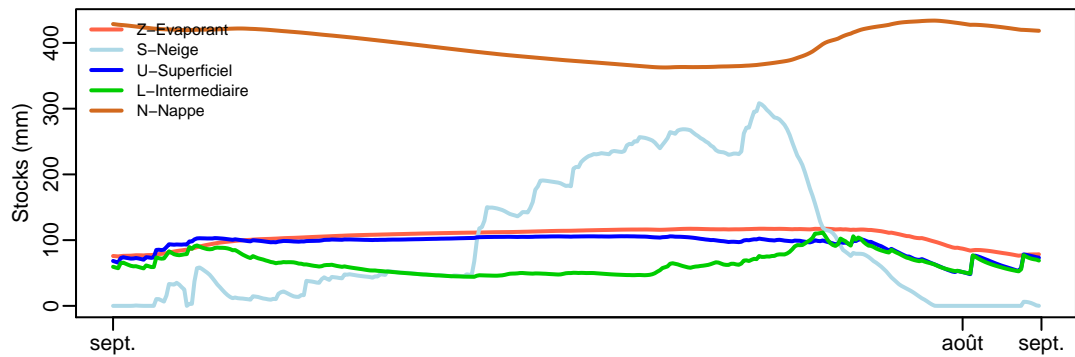

# q0168 (548.1 km²) – année 1985–1986

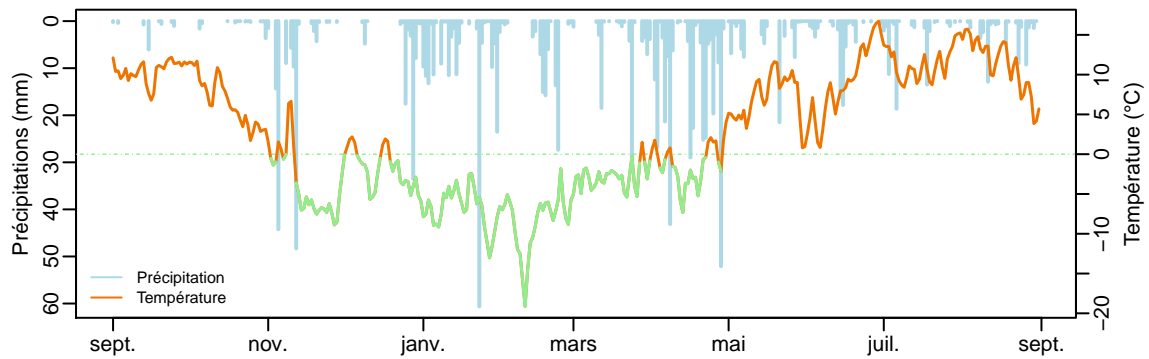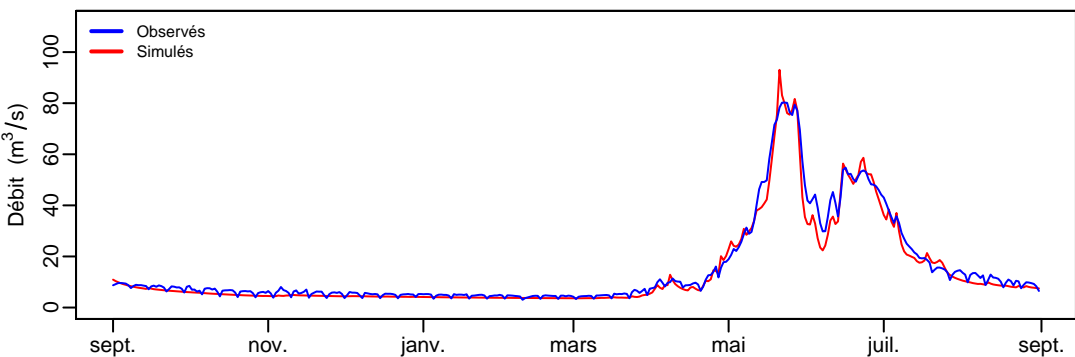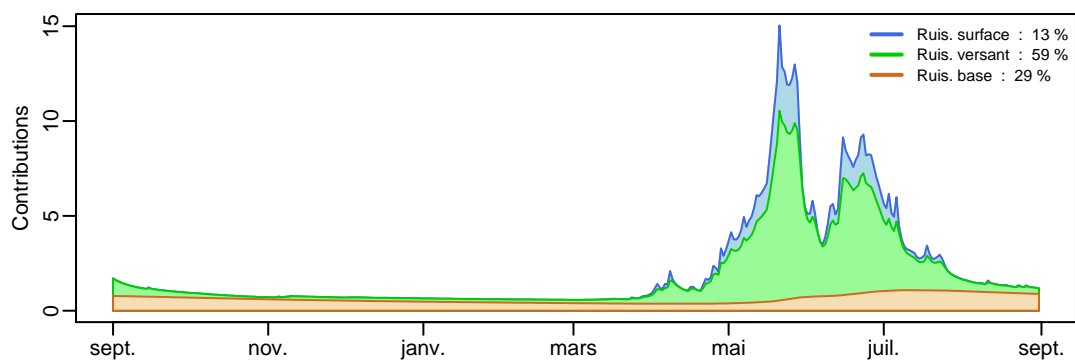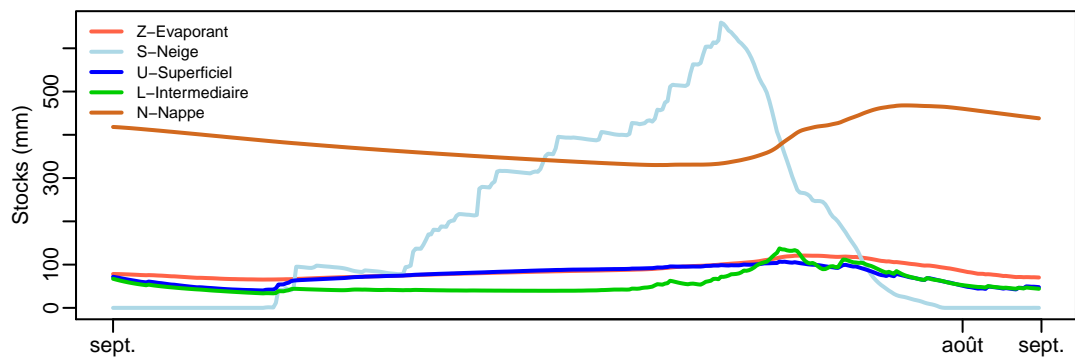

# q0168 (548.1 km²) – année 1986–1987

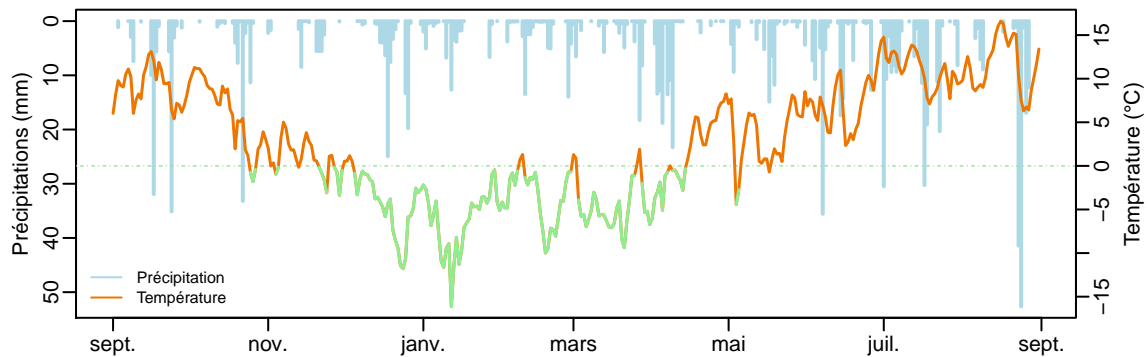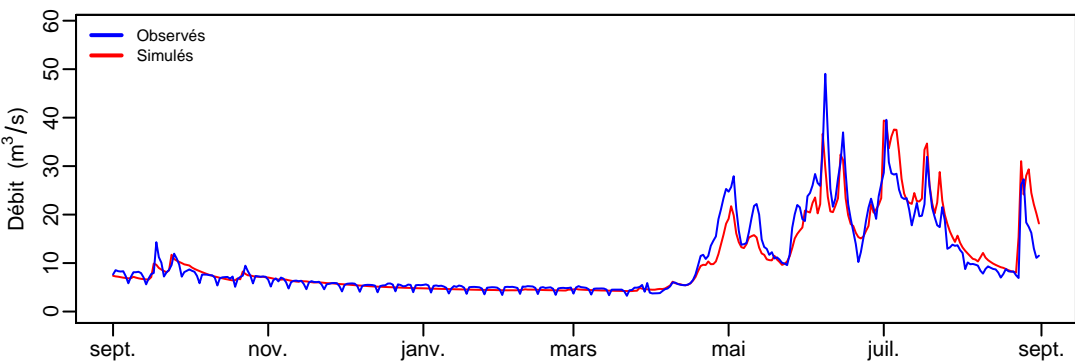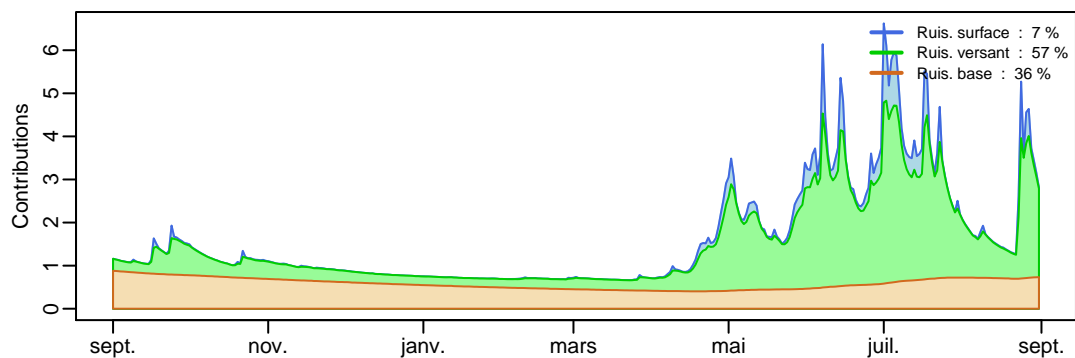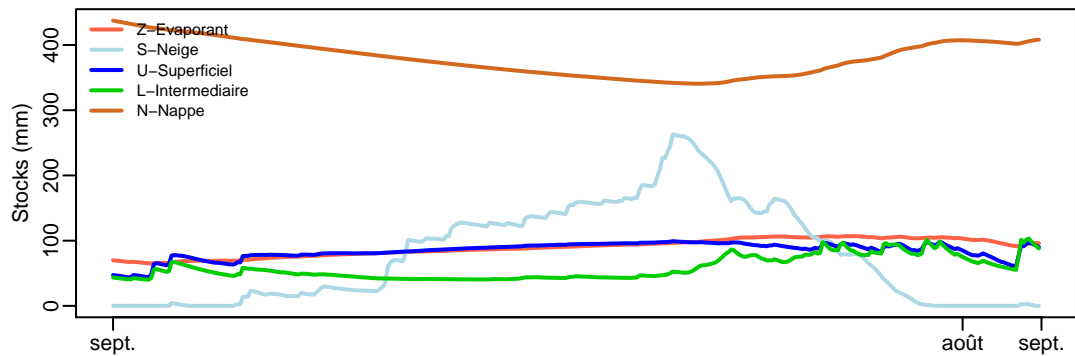

# q0168 (548.1 km<sup>2</sup>) – année 1987–1988

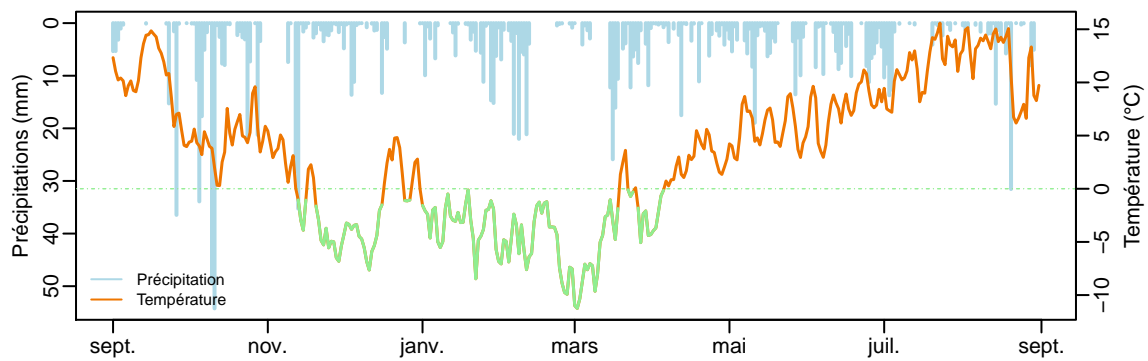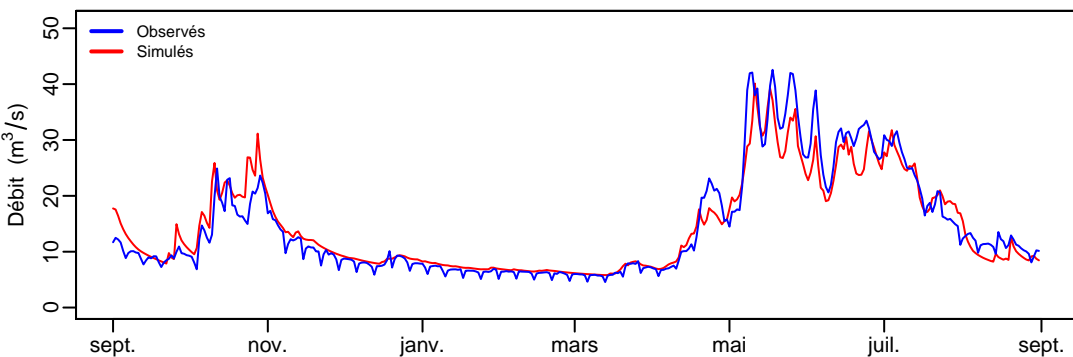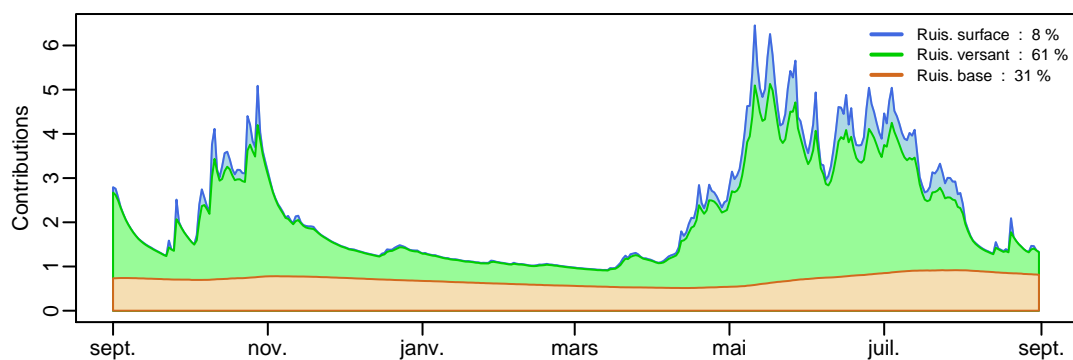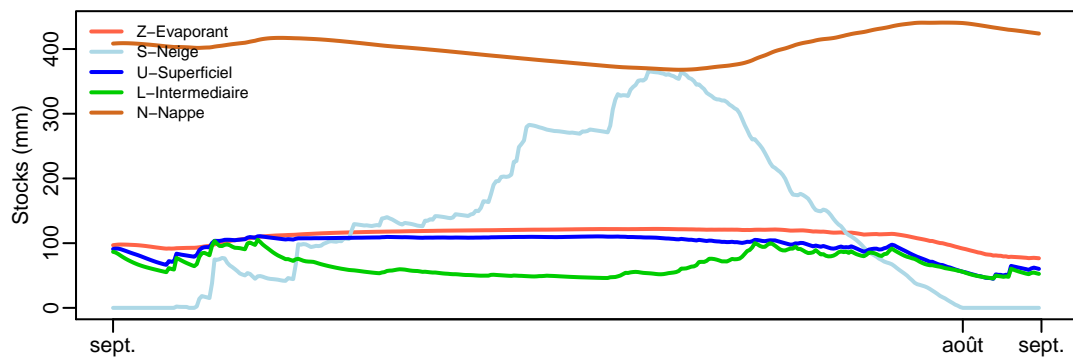

# q0168 (548.1 km²) – année 1988–1989

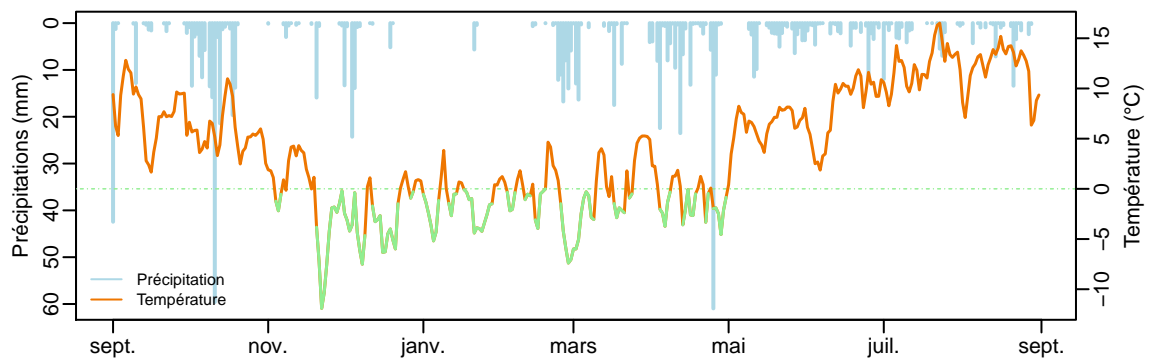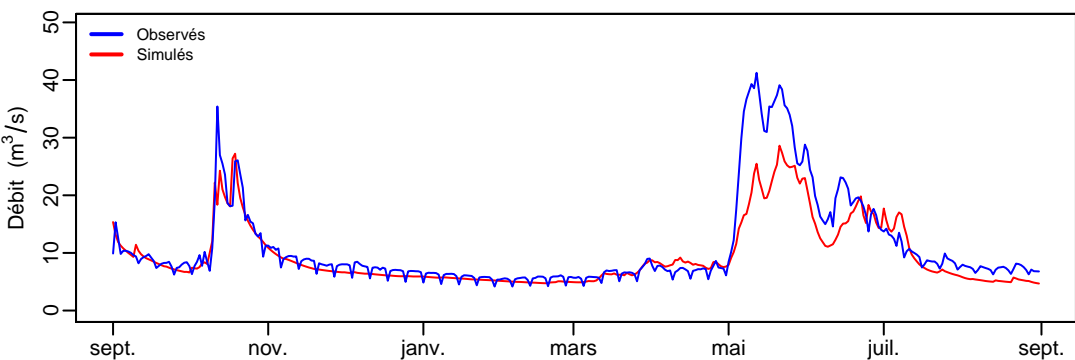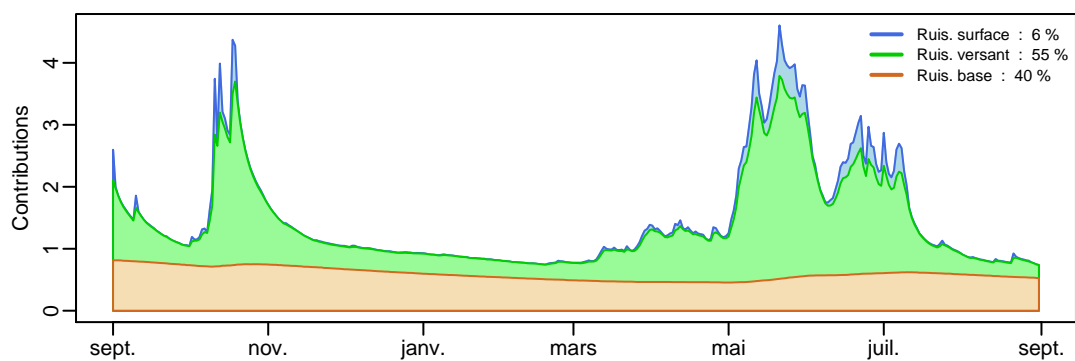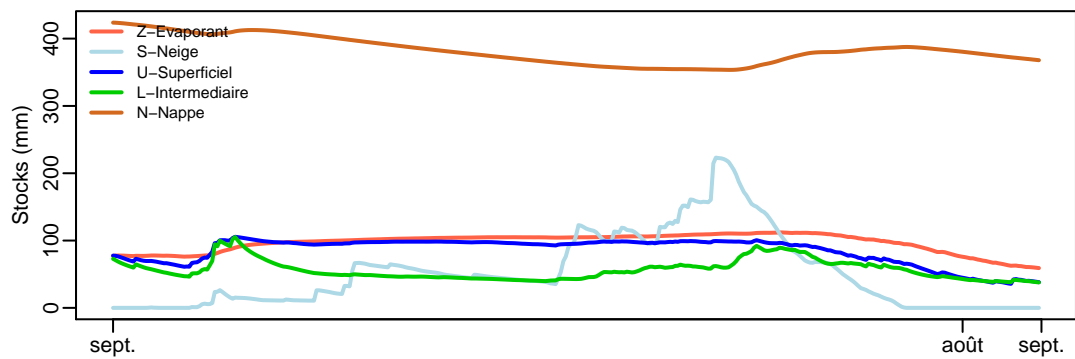

# q0168 (548.1 km<sup>2</sup>) – année 1989–1990

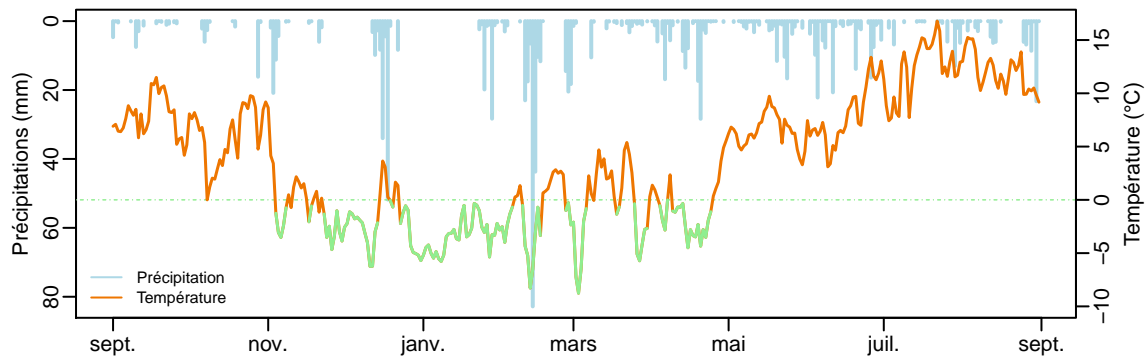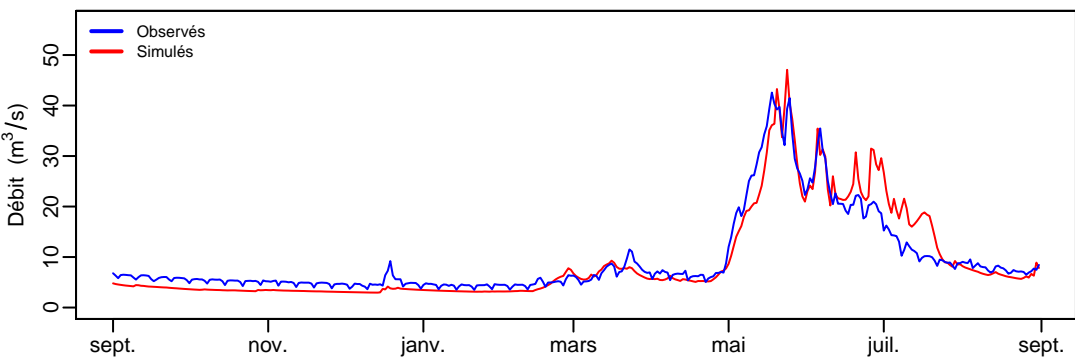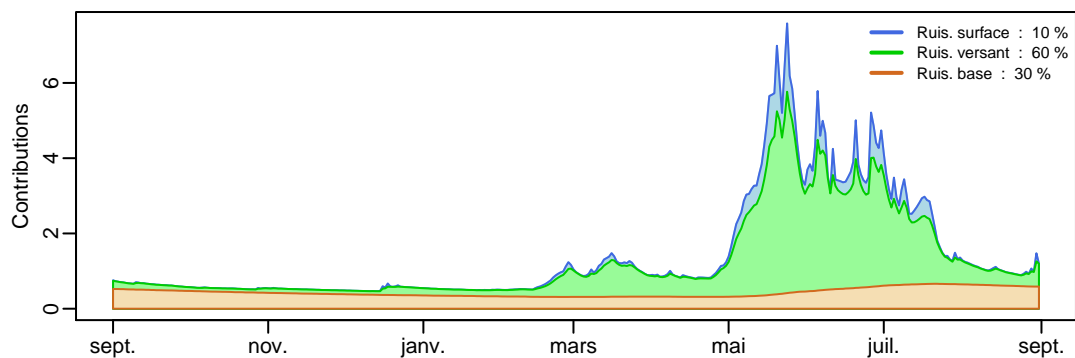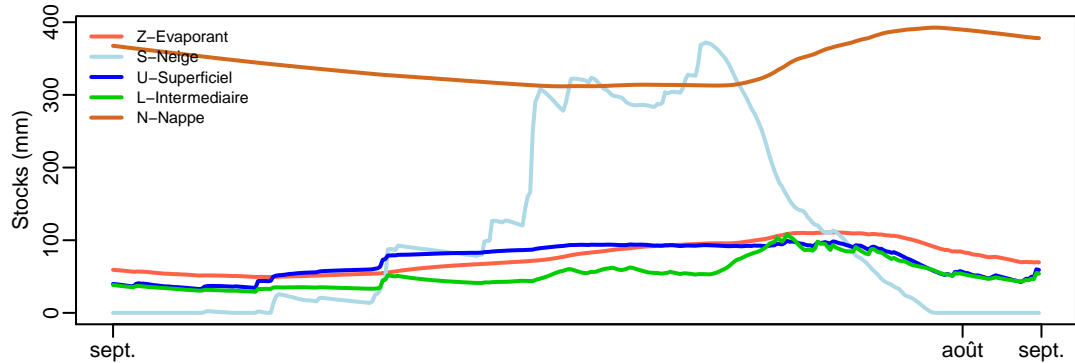



# q0168 (548.1 km²) – année 1990–1991

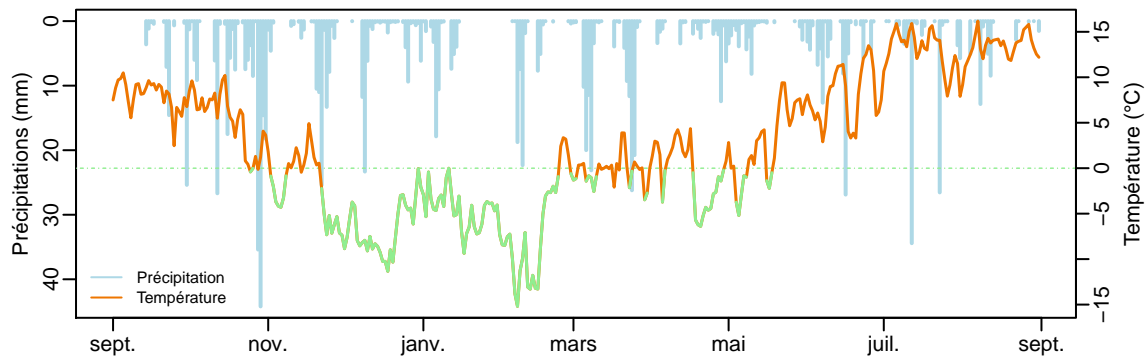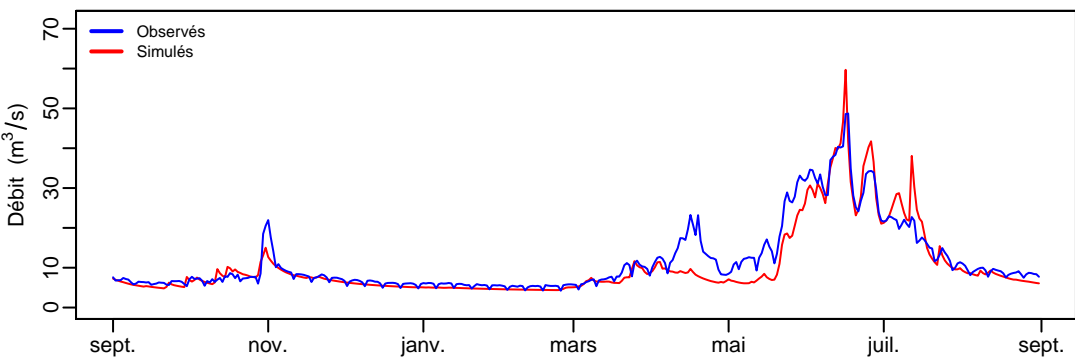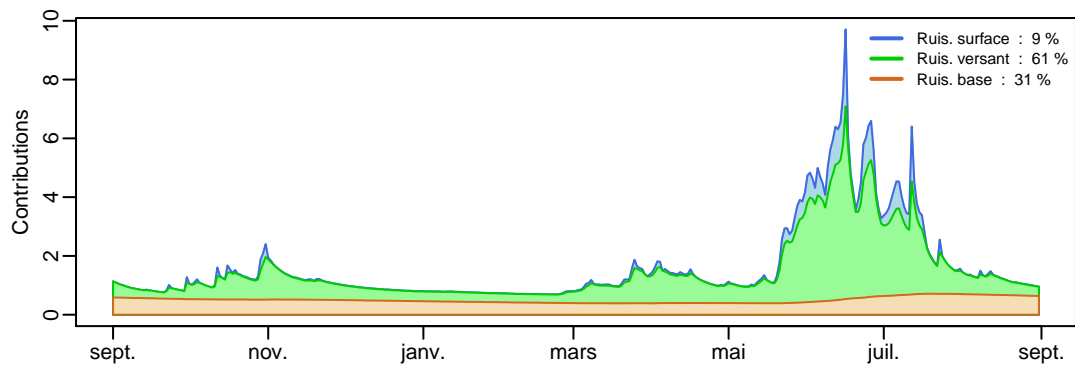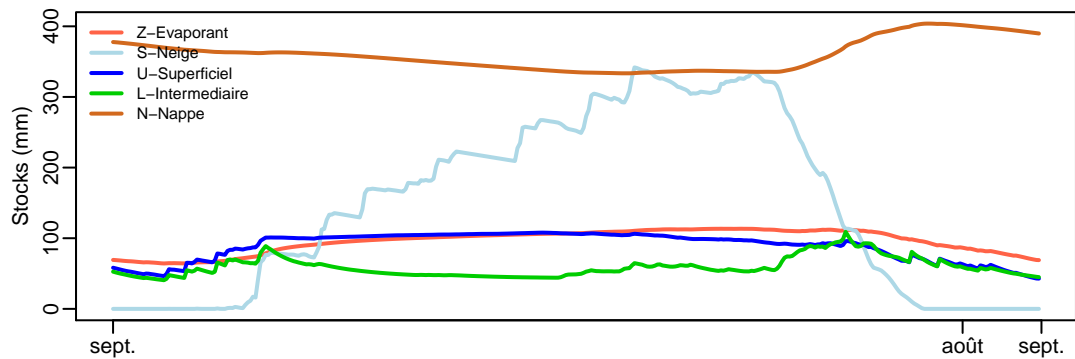

# q0168 (548.1 km<sup>2</sup>) – année 1991–1992

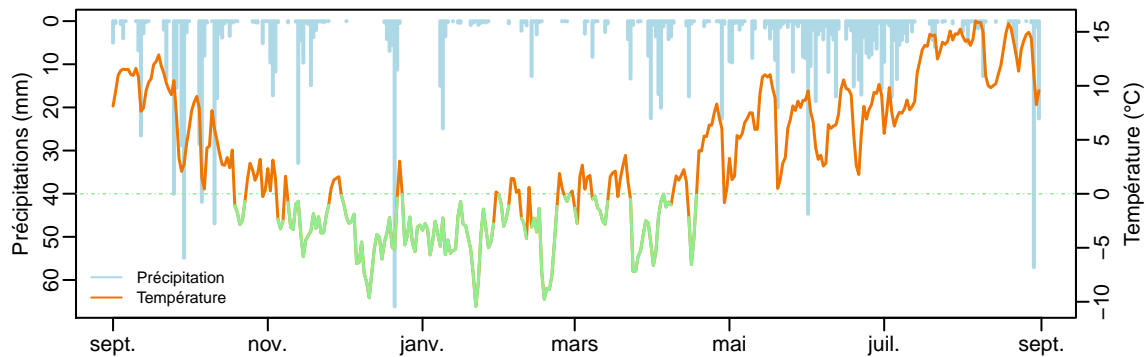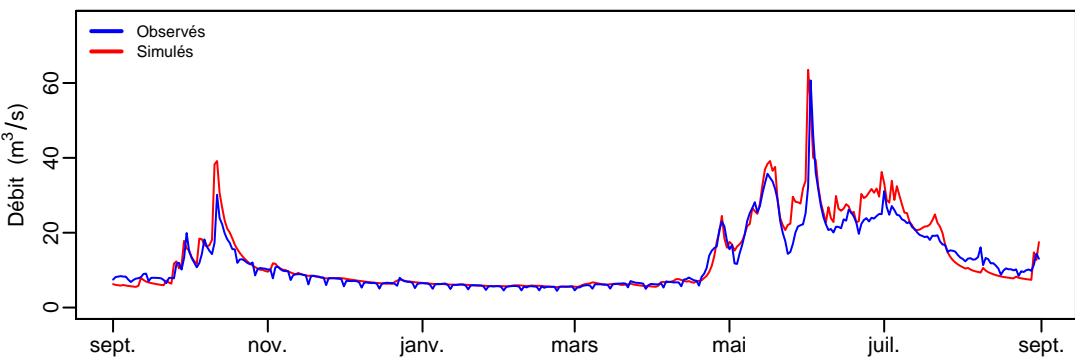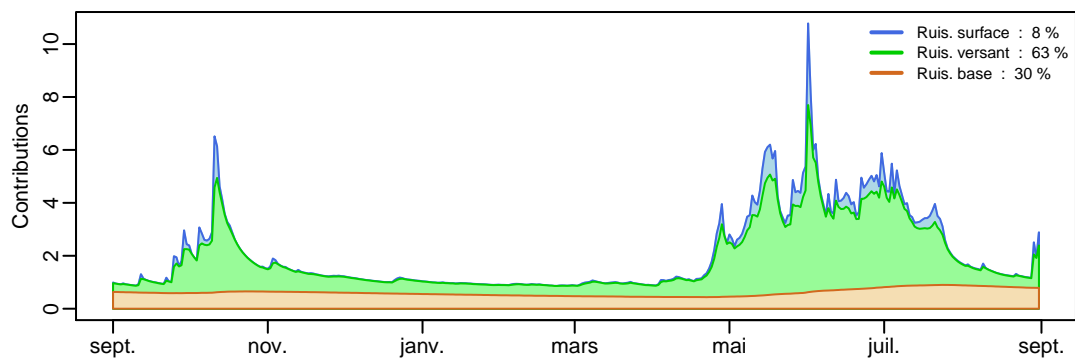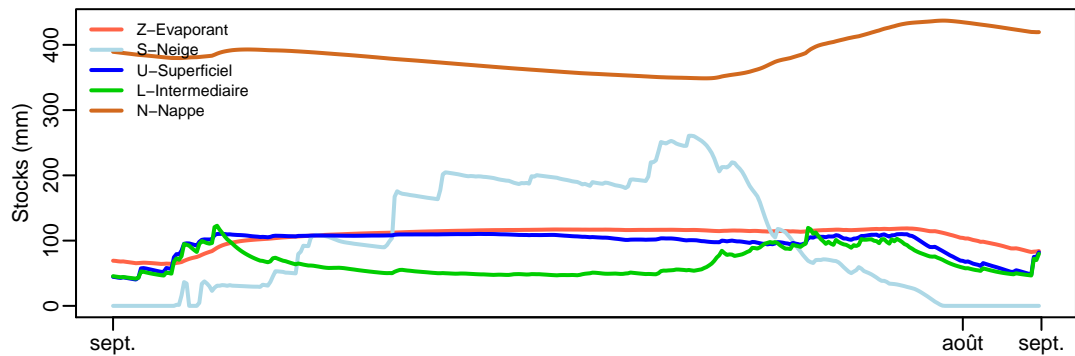

# q0168 (548.1 km<sup>2</sup>) – année 1992–1993

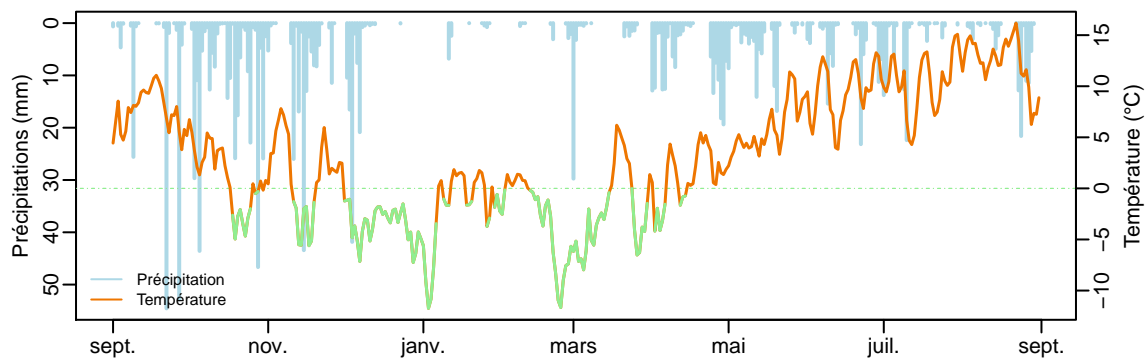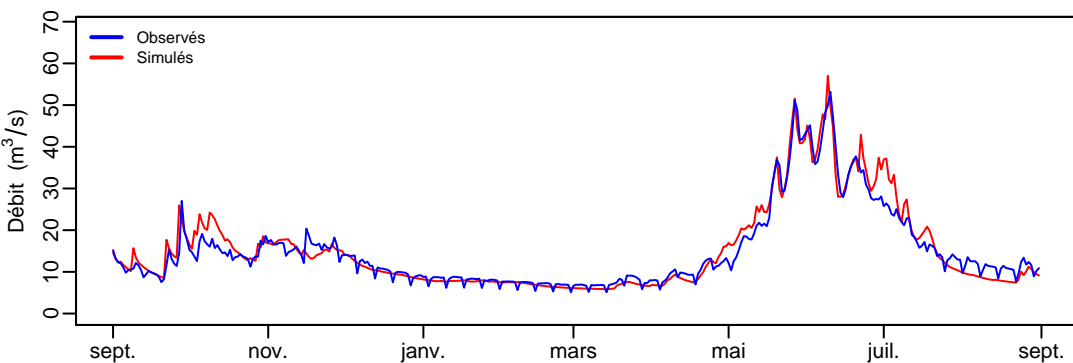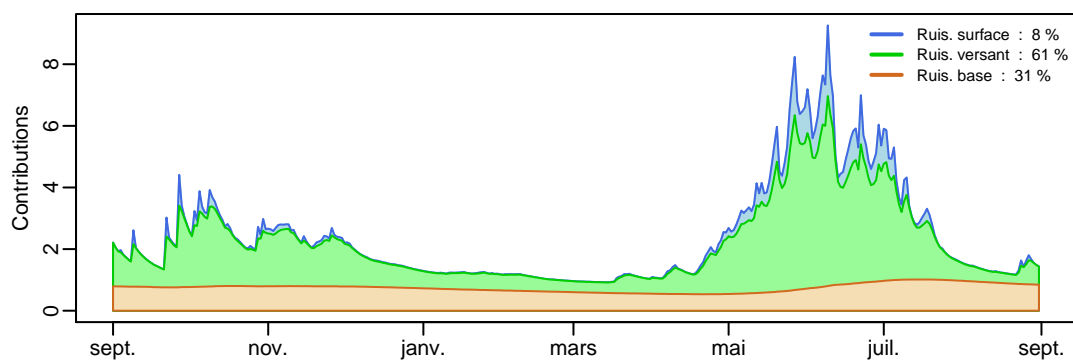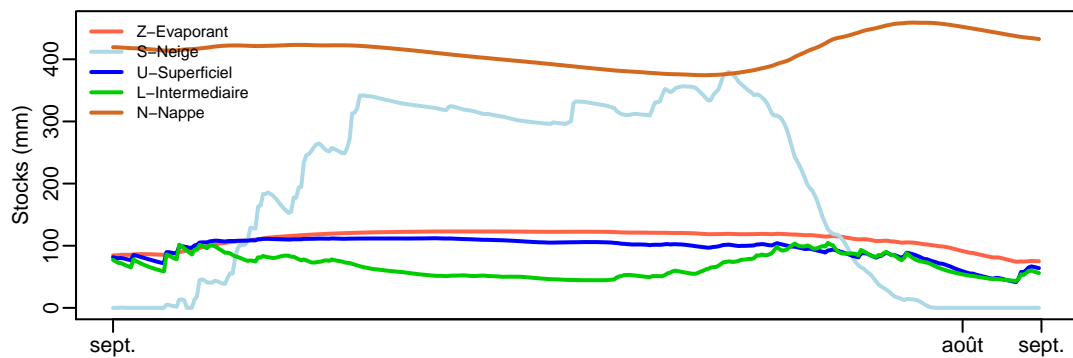

# q0168 (548.1 km²) – année 1993–1994

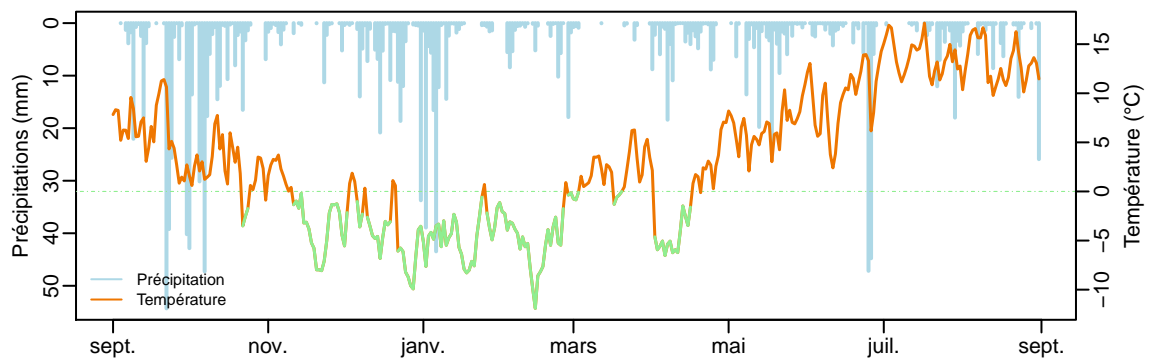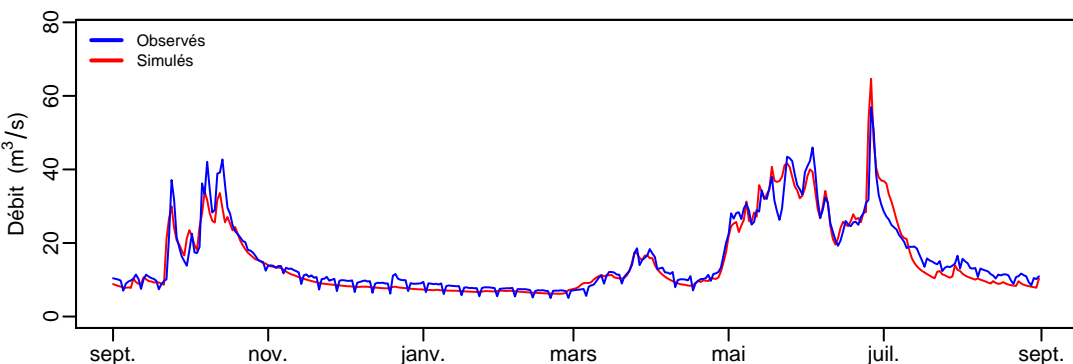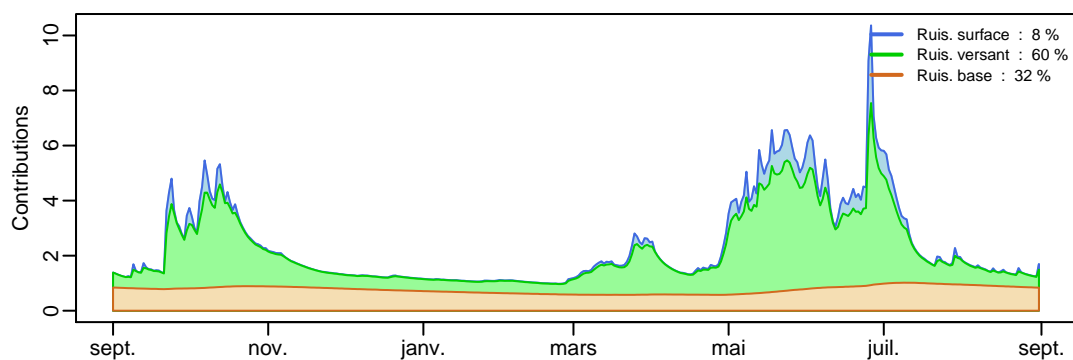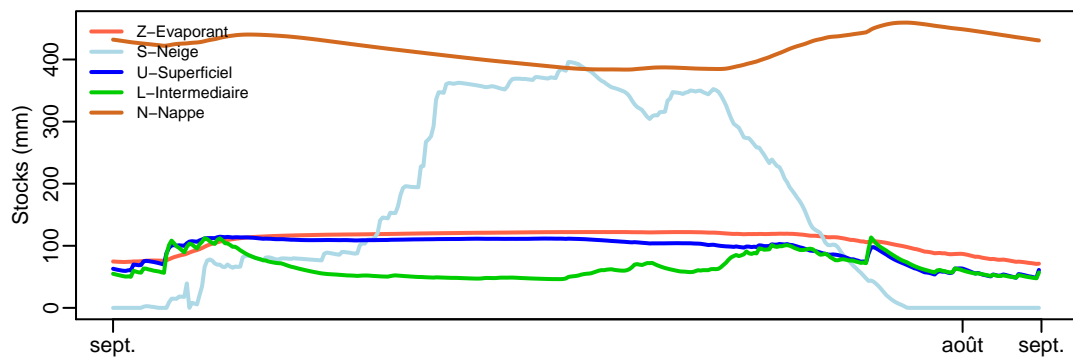

# q0168 (548.1 km<sup>2</sup>) – année 1994–1995

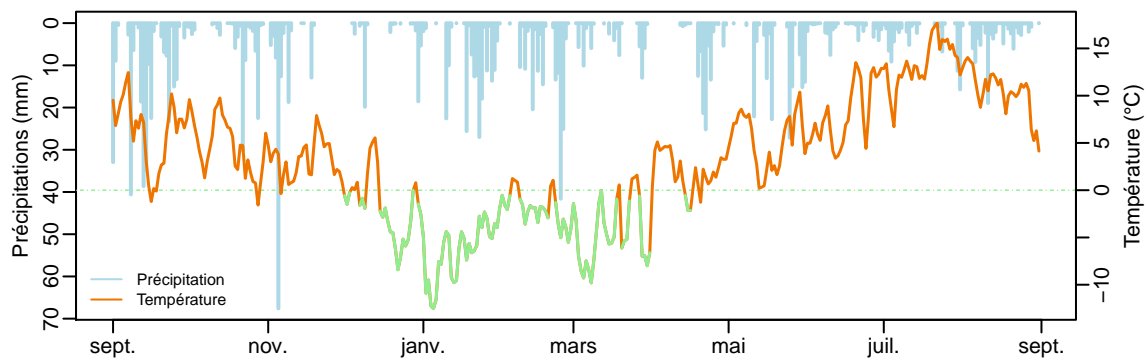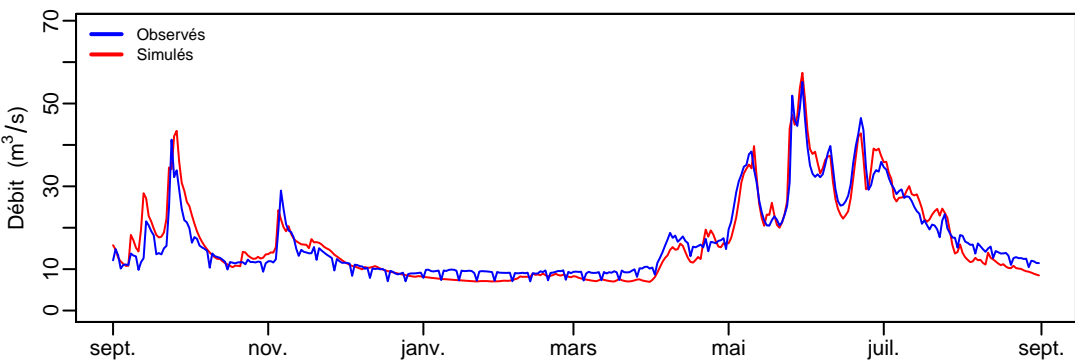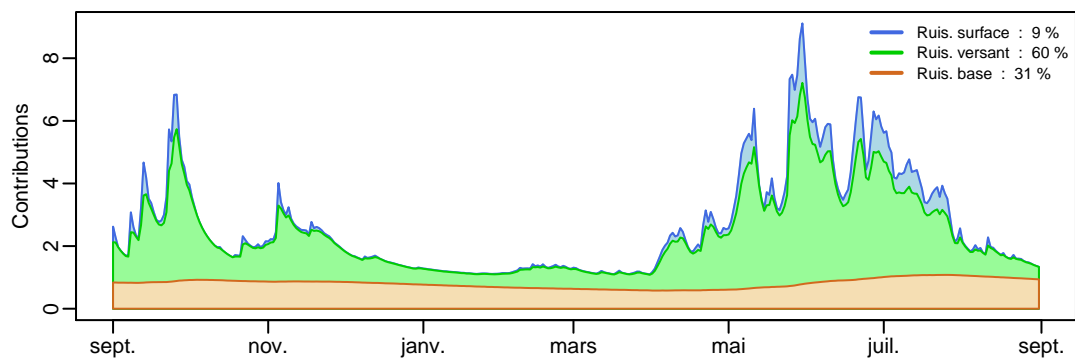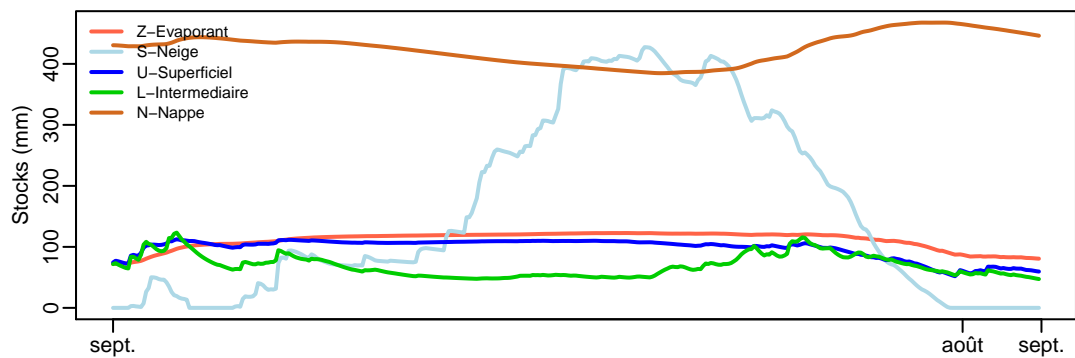

# q0168 (548.1 km²) – année 1995–1996

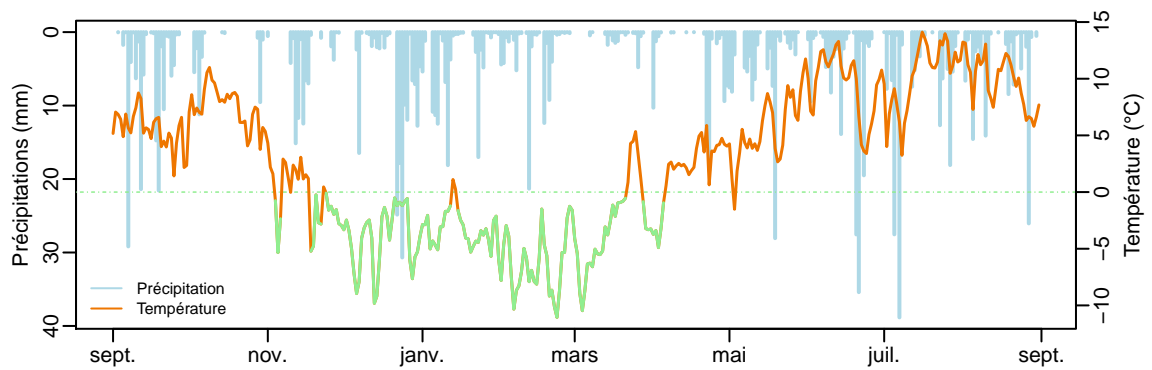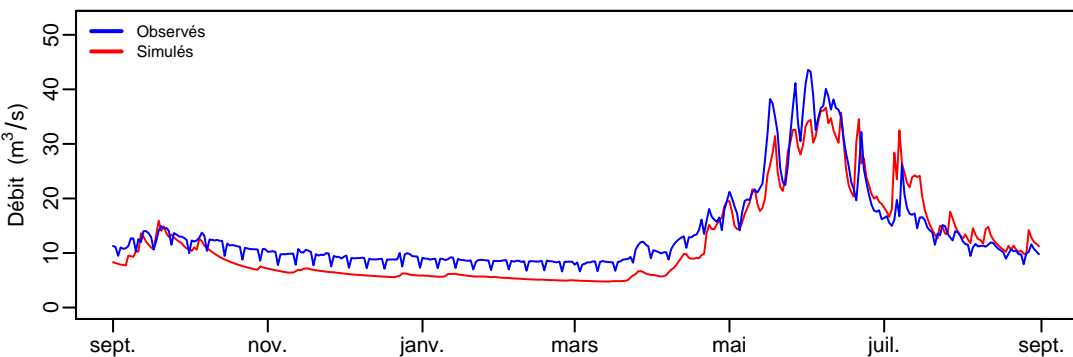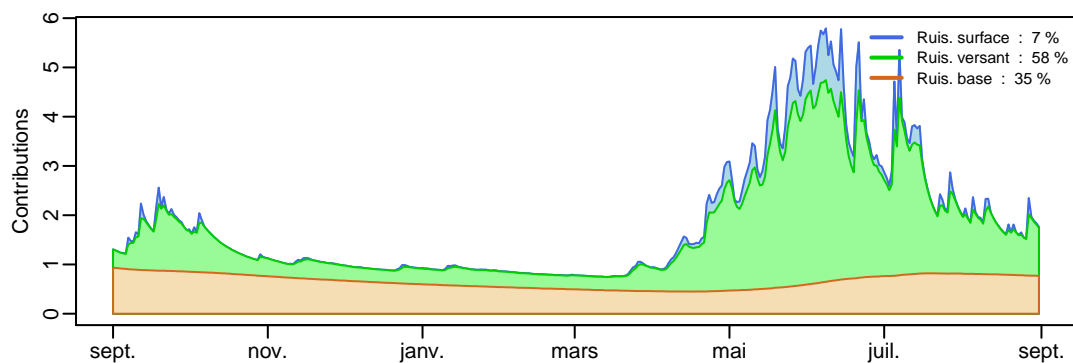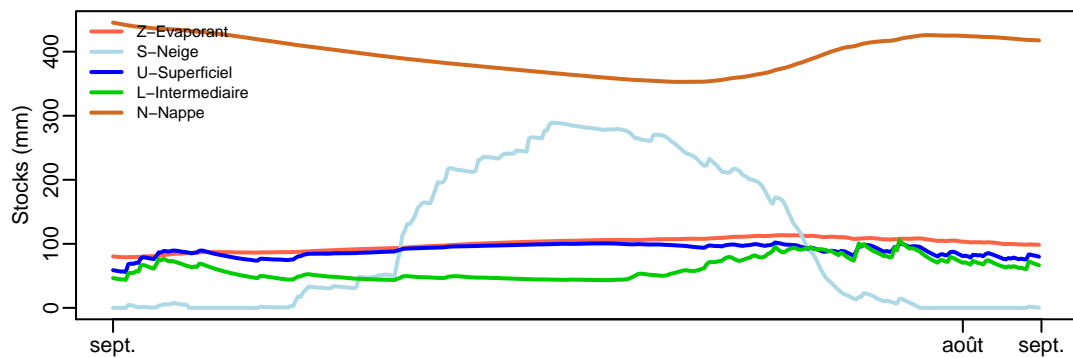

# q0168 (548.1 km<sup>2</sup>) – année 1996–1997

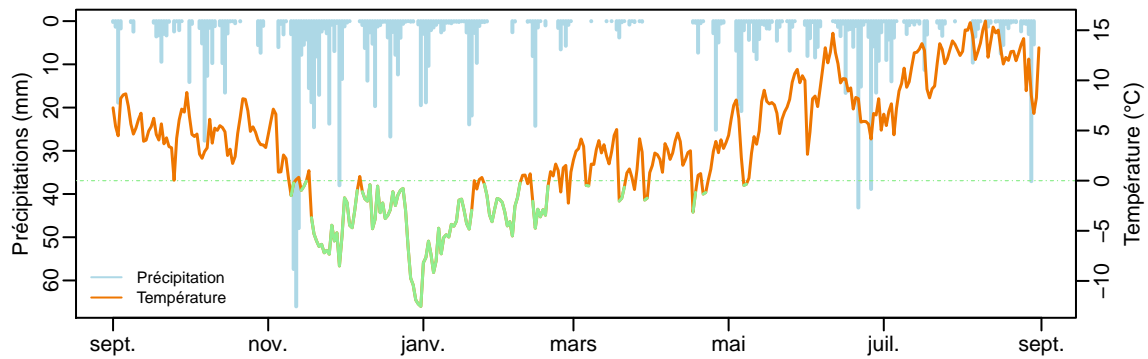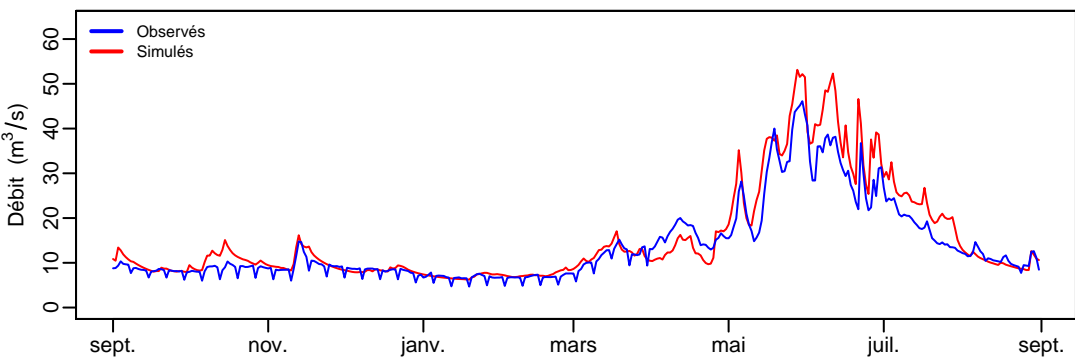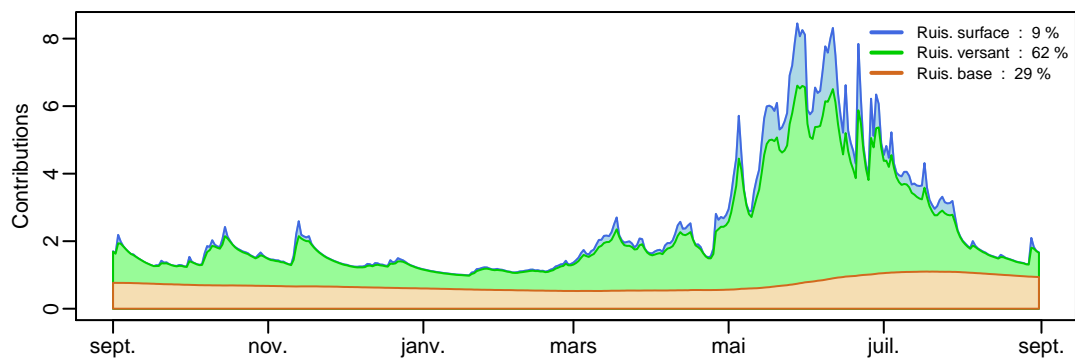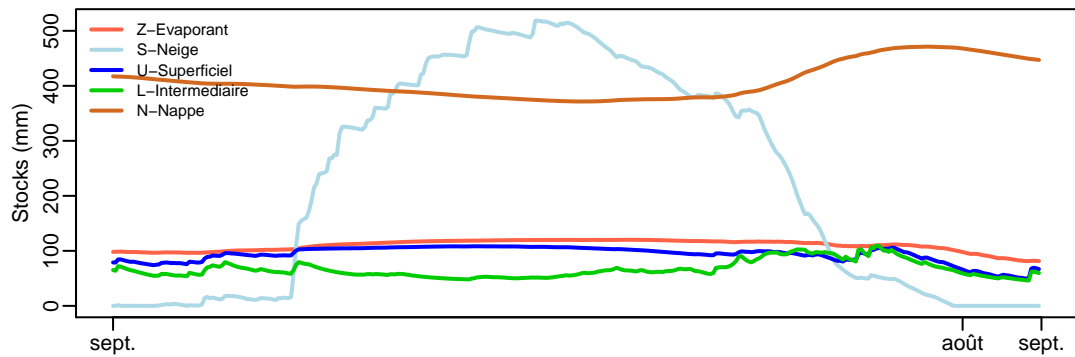

# q0168 (548.1 km²) – année 1997–1998

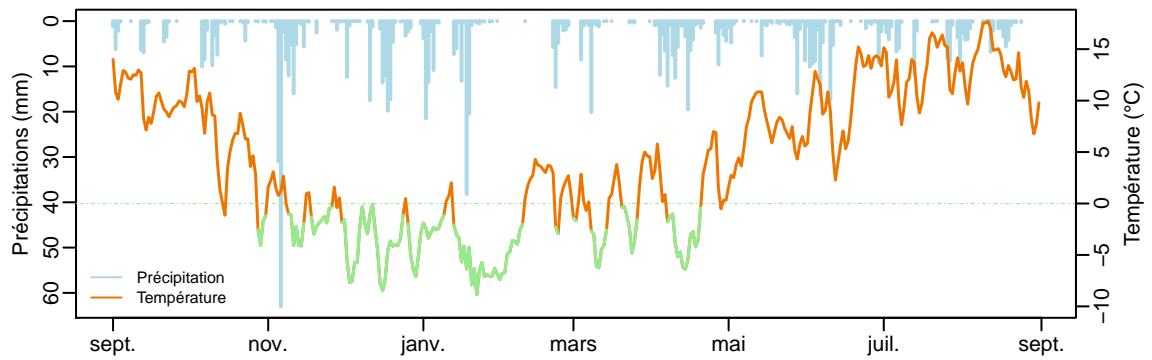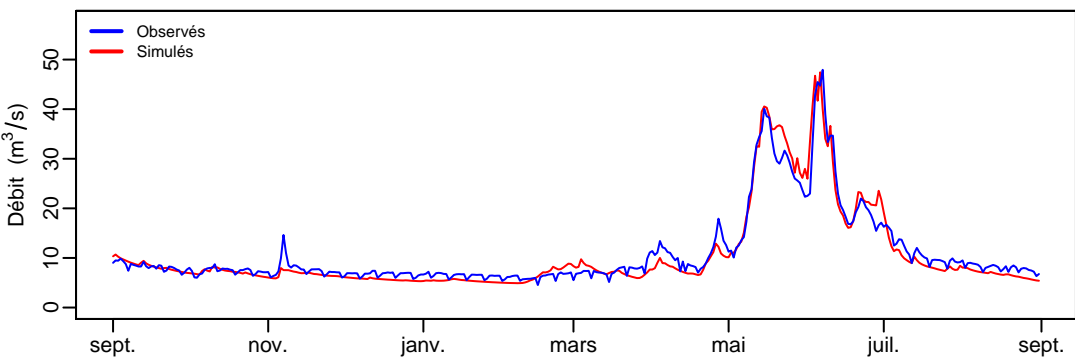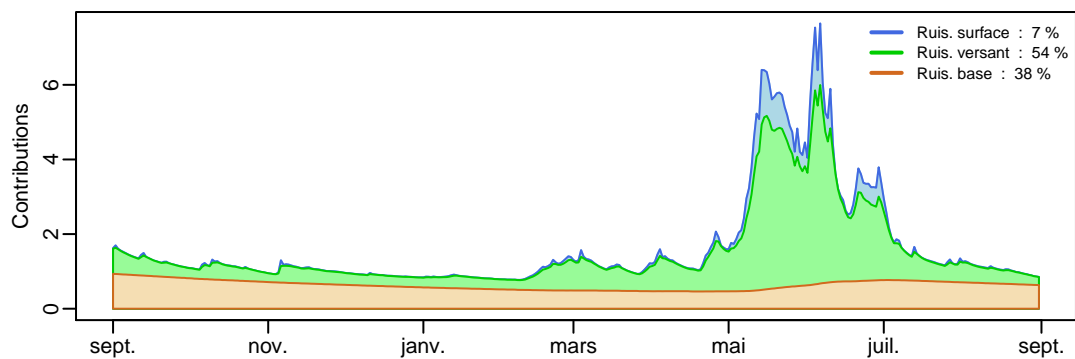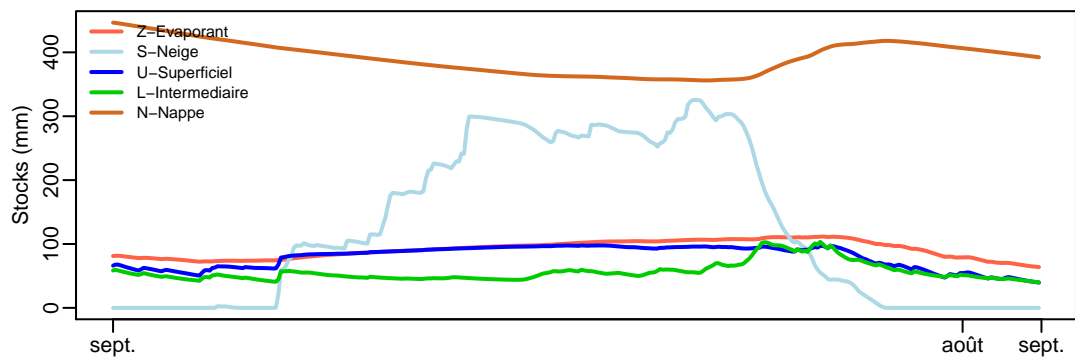



# q0168 (548.1 km<sup>2</sup>) – année 1998–1999

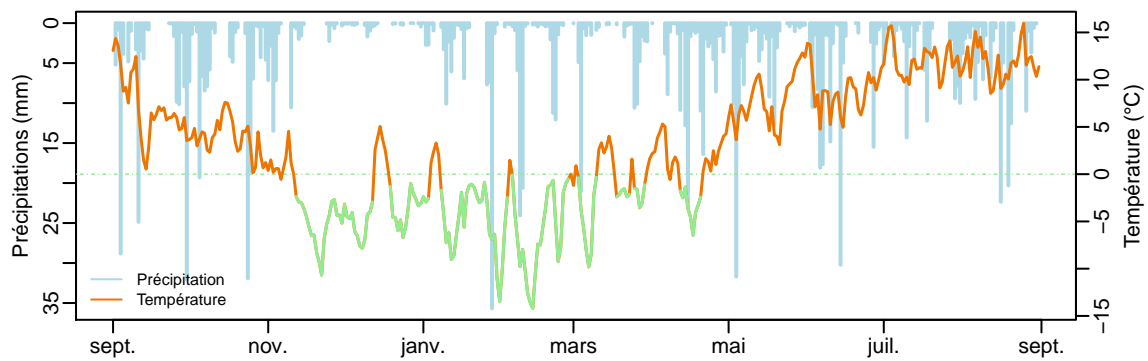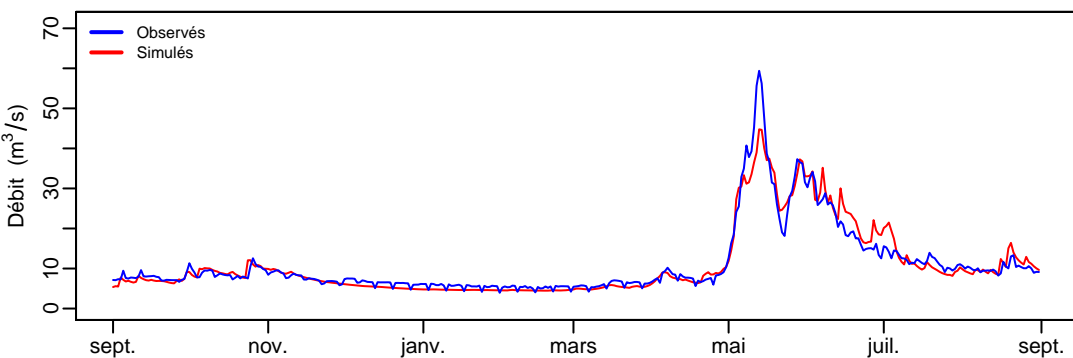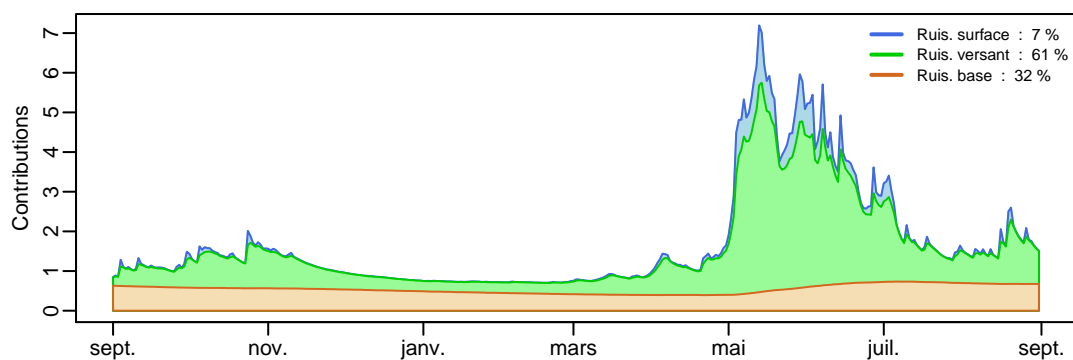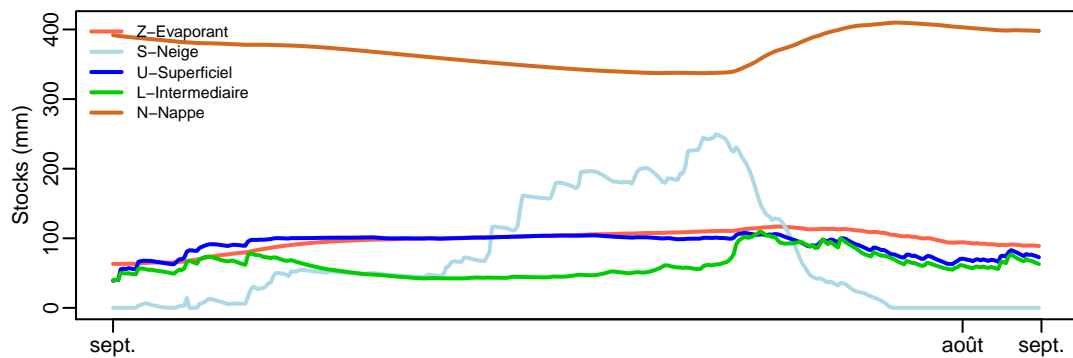

# q0168 (548.1 km<sup>2</sup>) – année 1999–2000

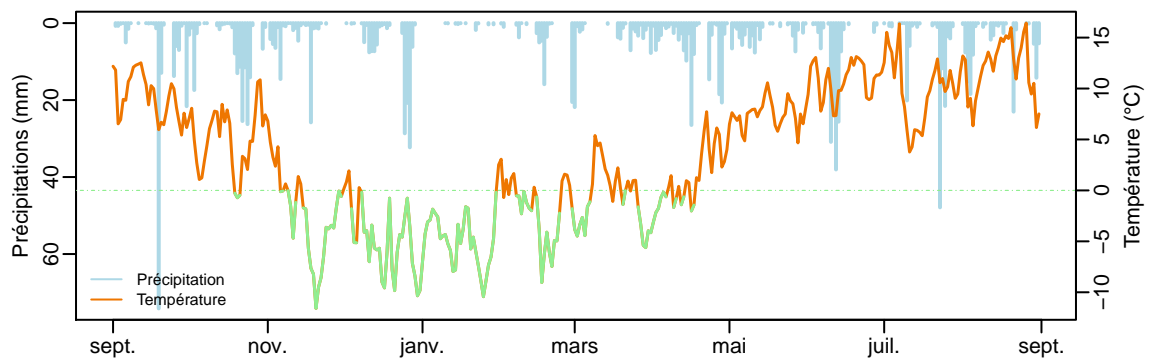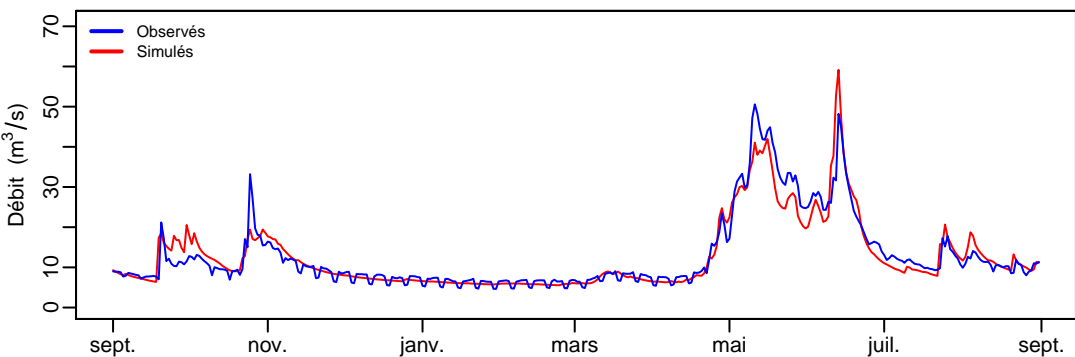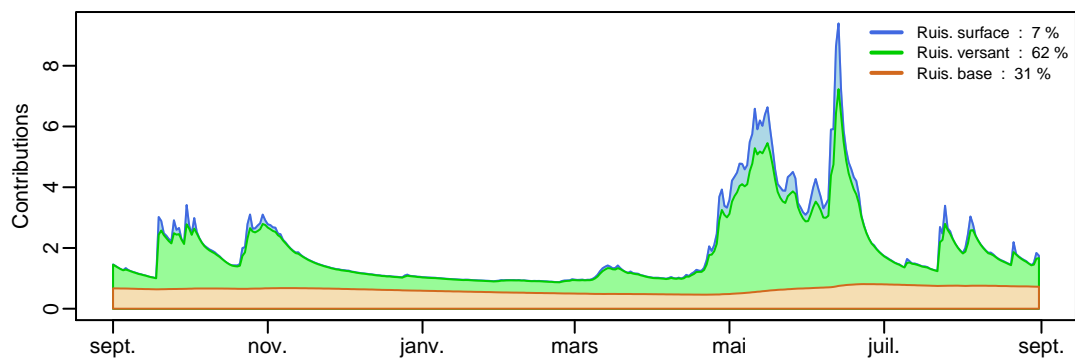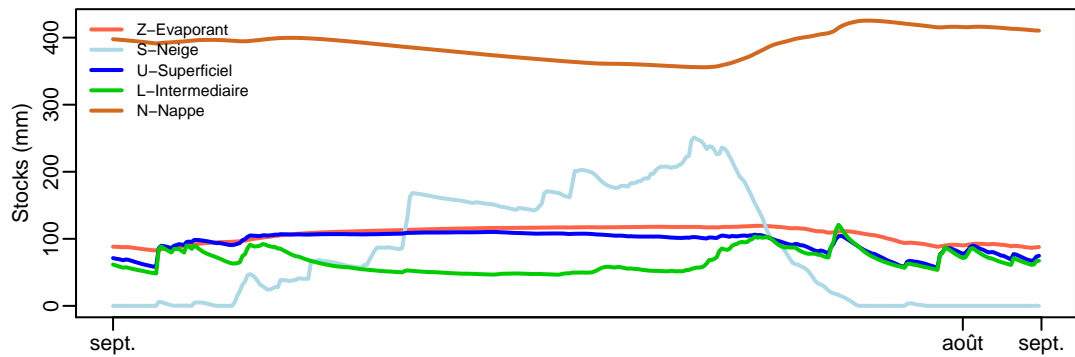

# q0168 (548.1 km²) – année 2000–2001

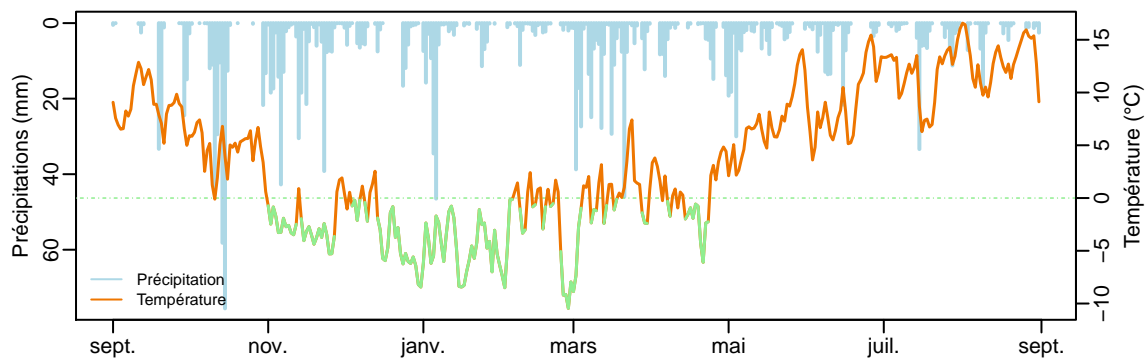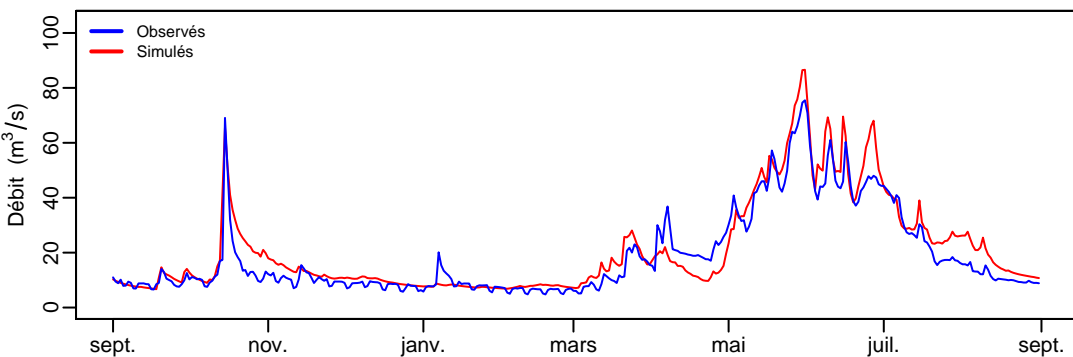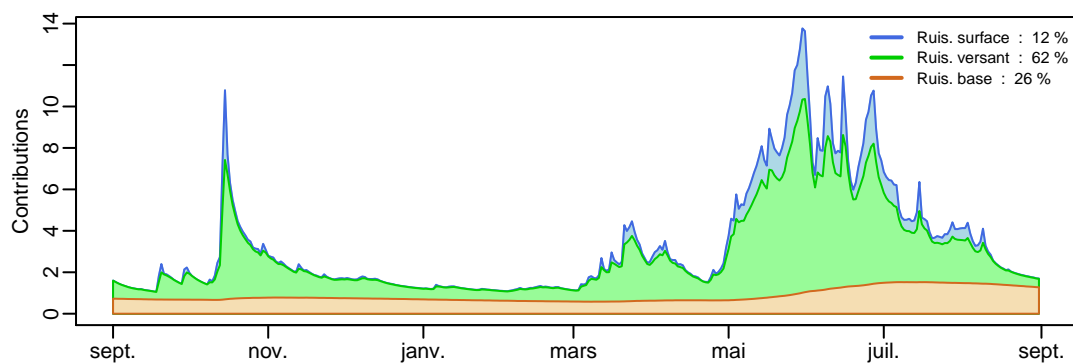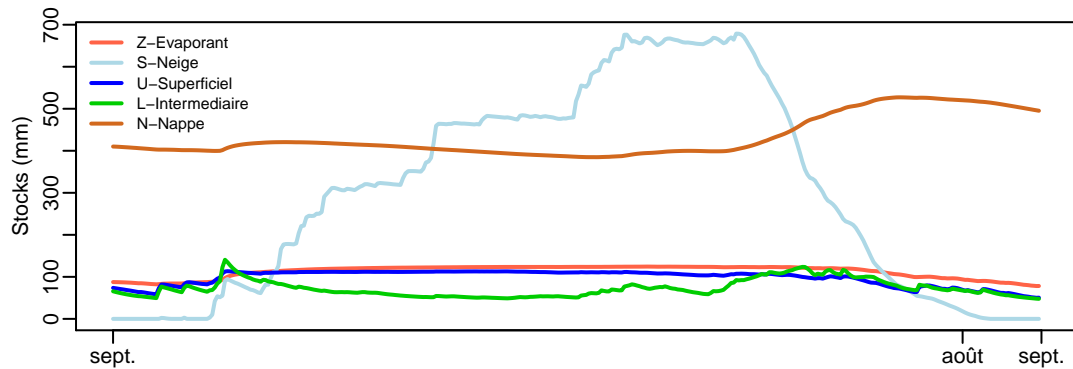

# q0168 (548.1 km<sup>2</sup>) – année 2001–2002

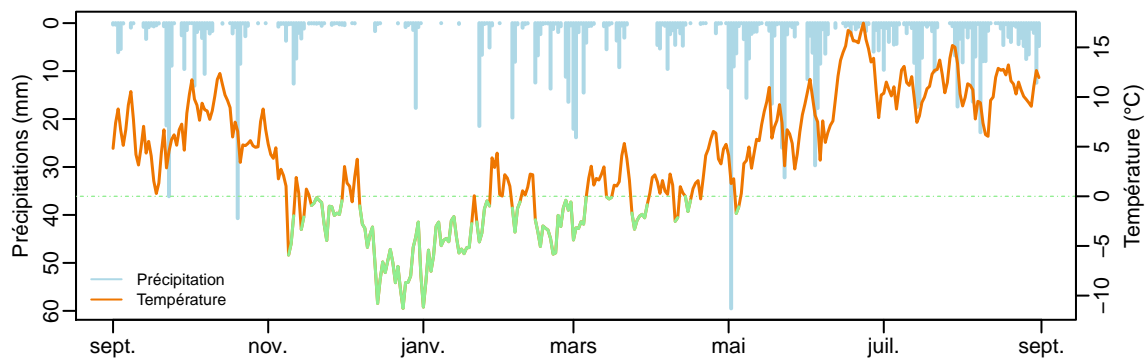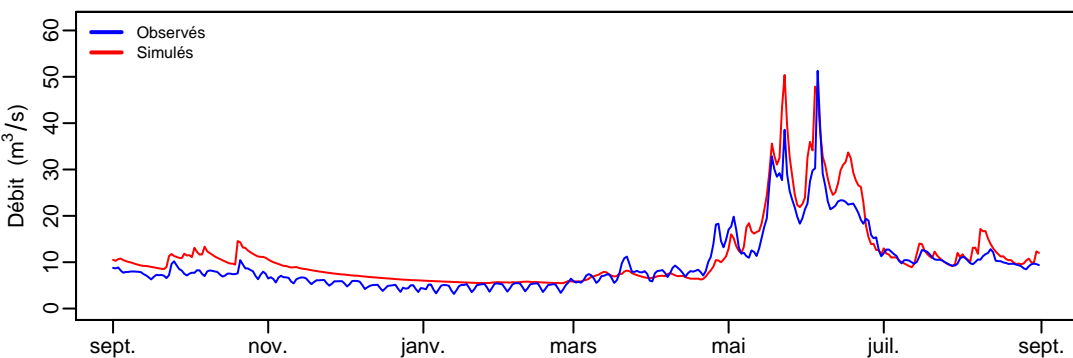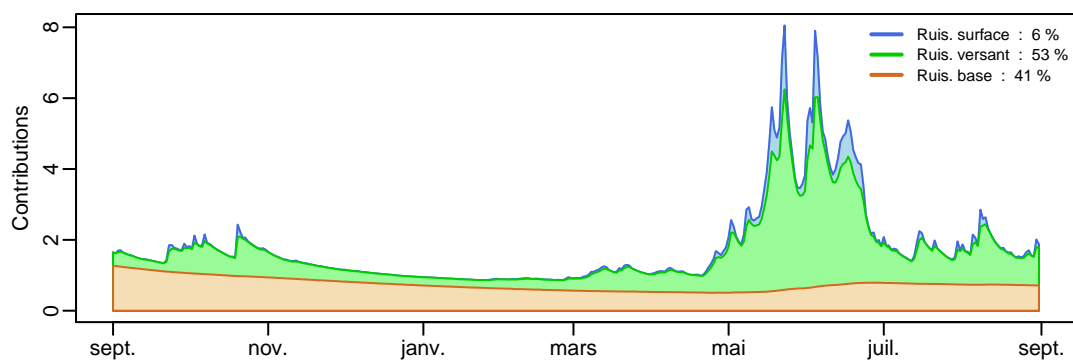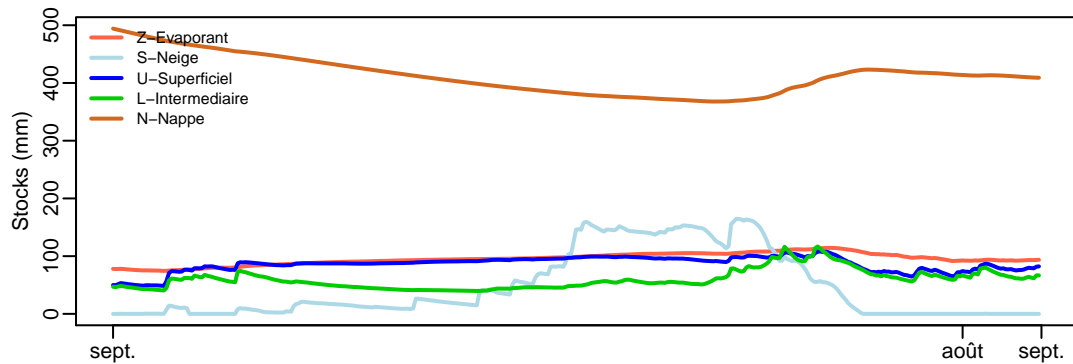

# q0168 (548.1 km²) – année 2002–2003

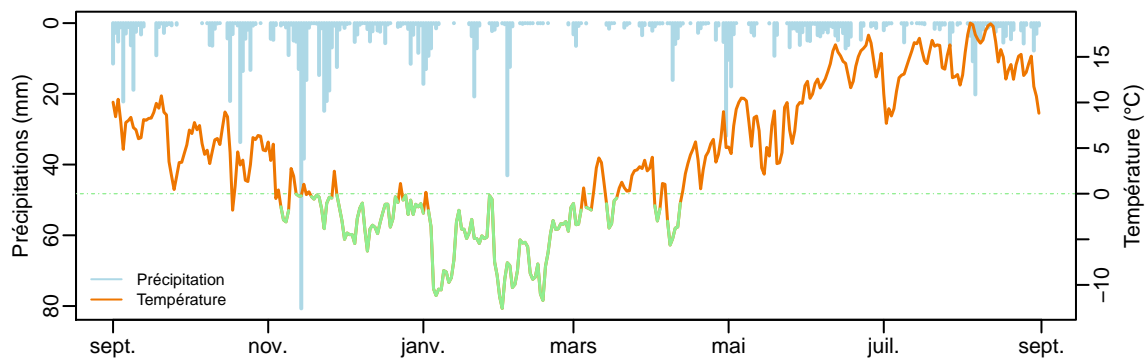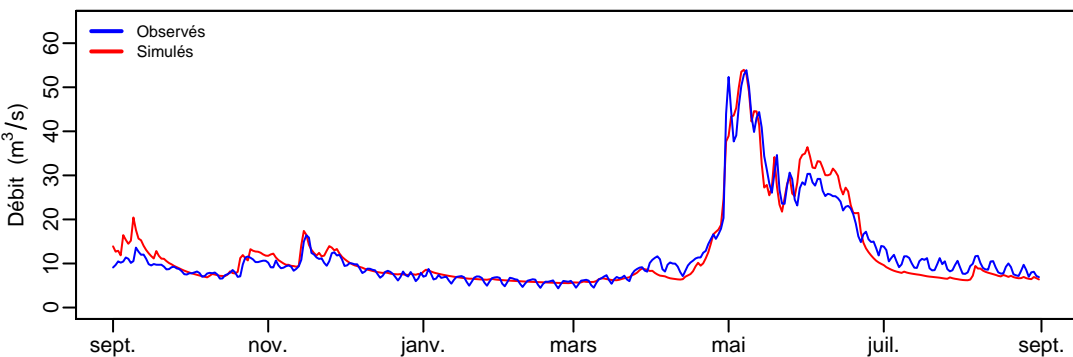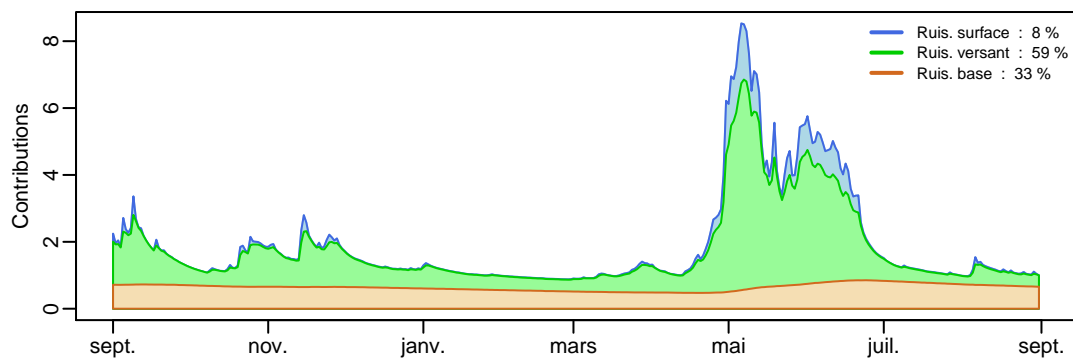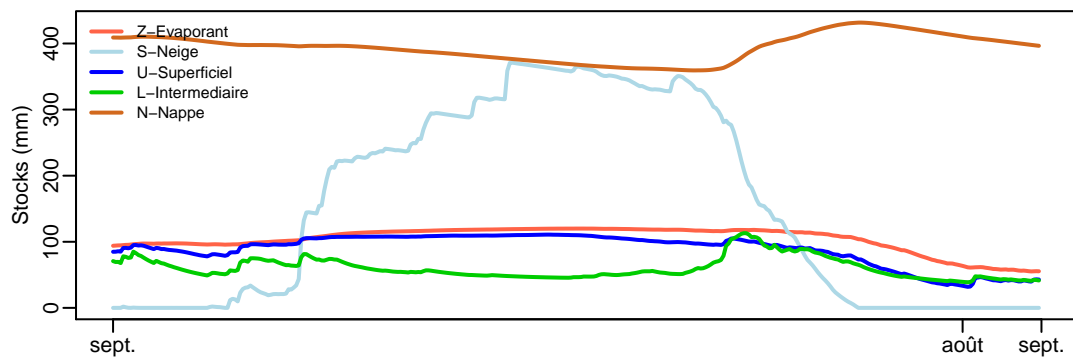

# q0168 (548.1 km<sup>2</sup>) – année 2003–2004

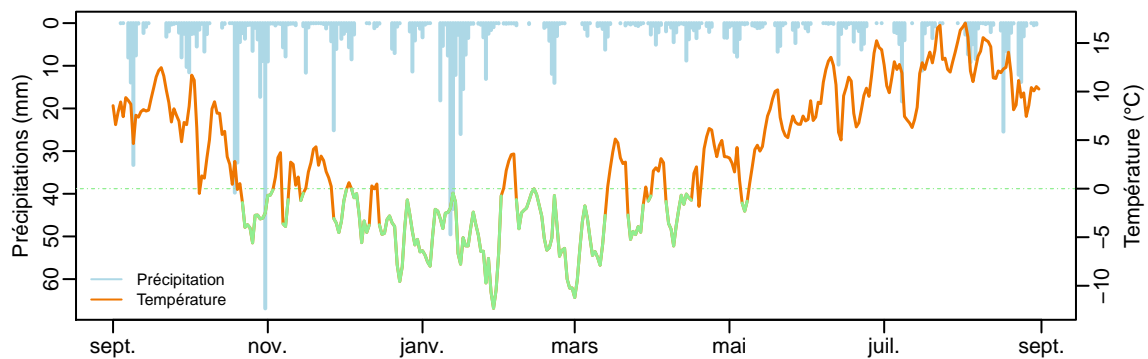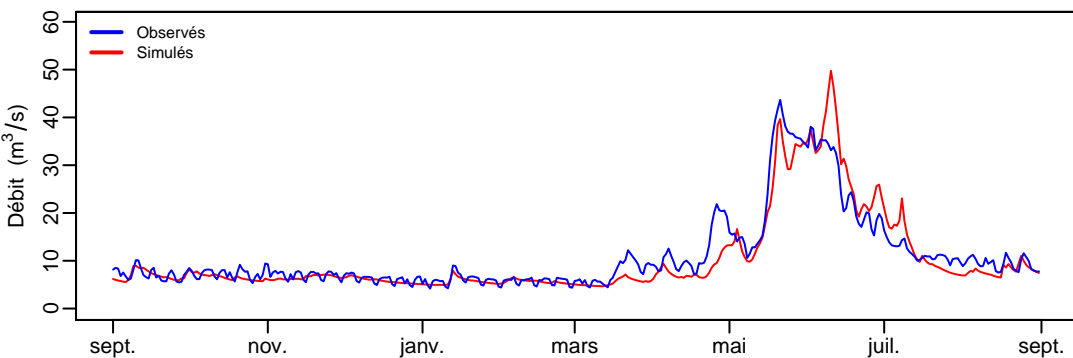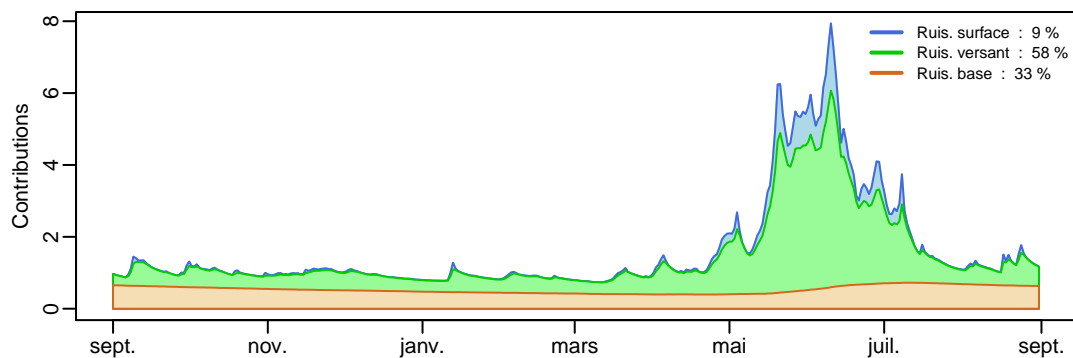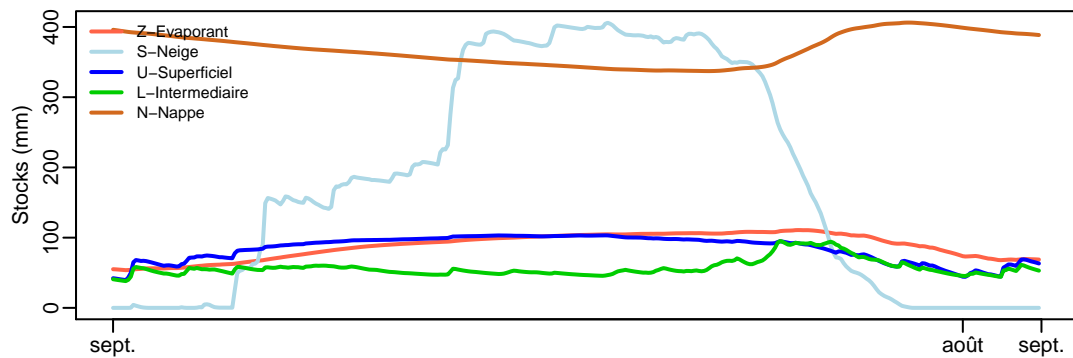

# q0168 (548.1 km<sup>2</sup>) – année 2004–2005

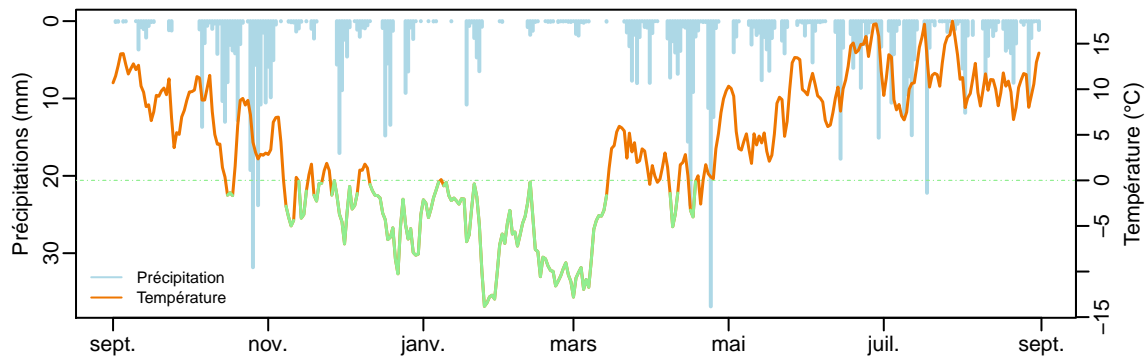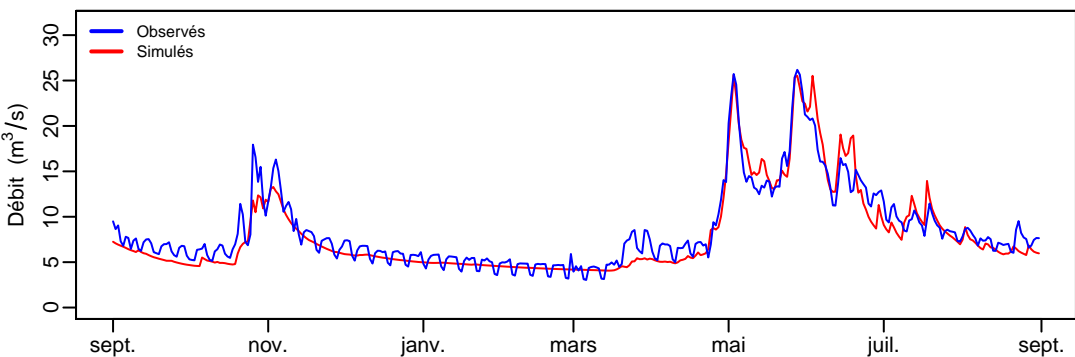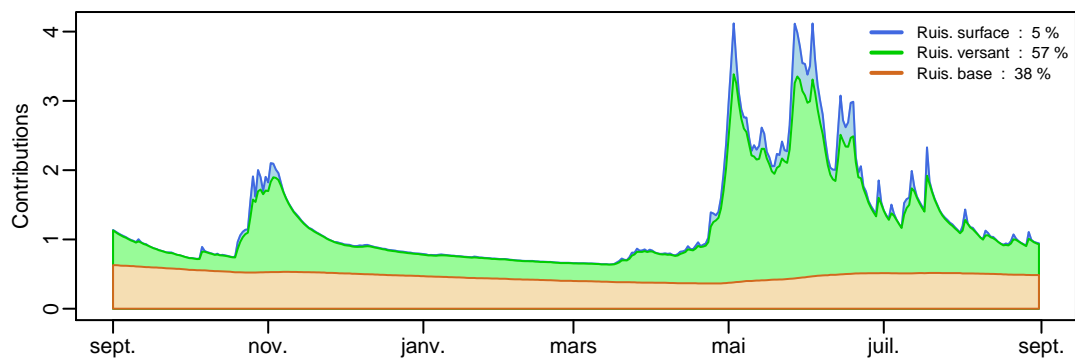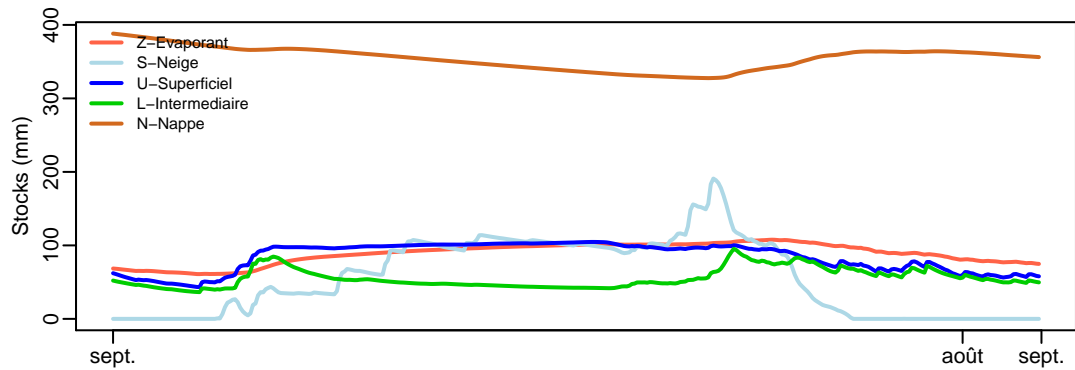

# q0168 (548.1 km<sup>2</sup>) – année 2005–2006

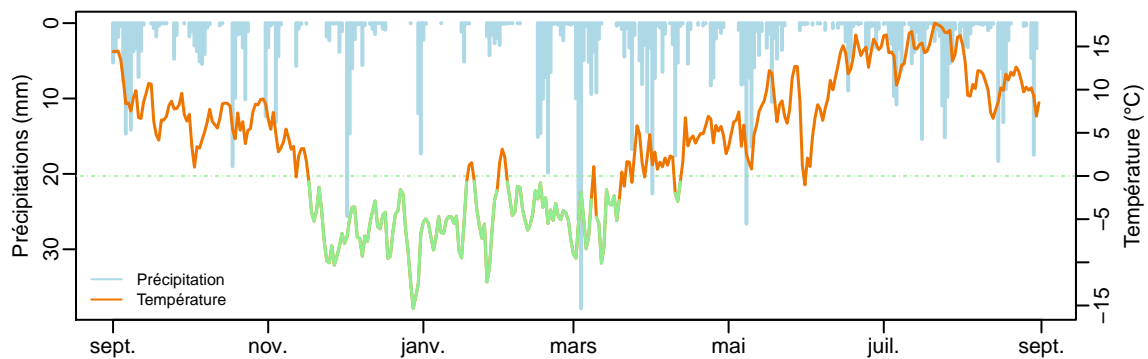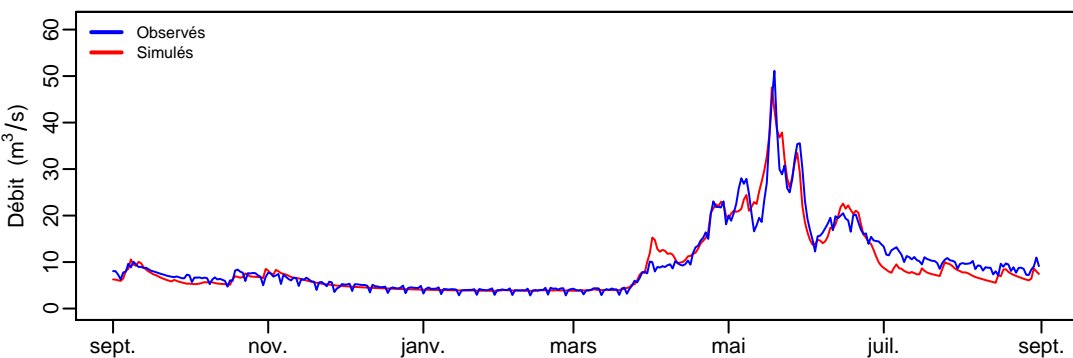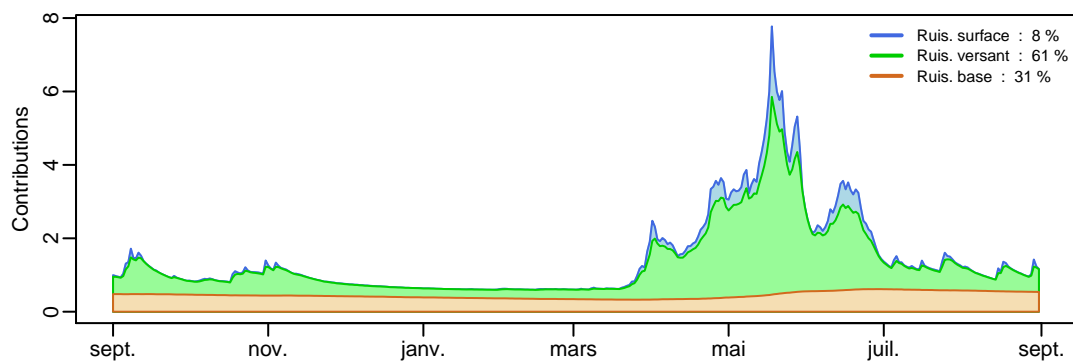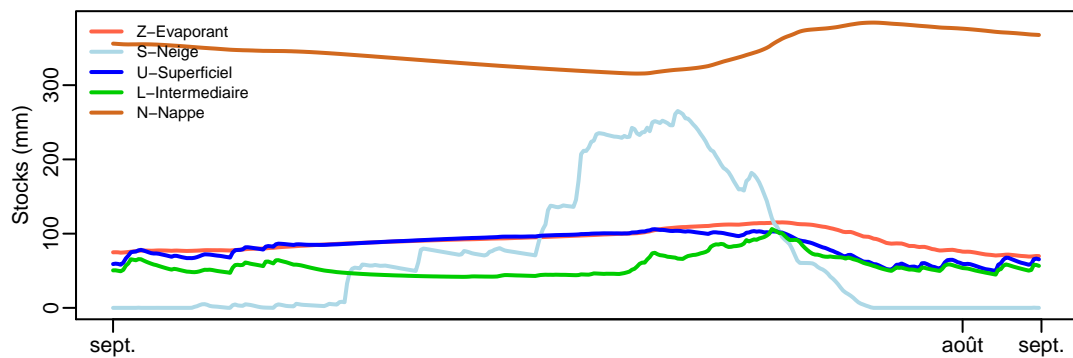



# q0168 (548.1 km²) – année 2006–2007

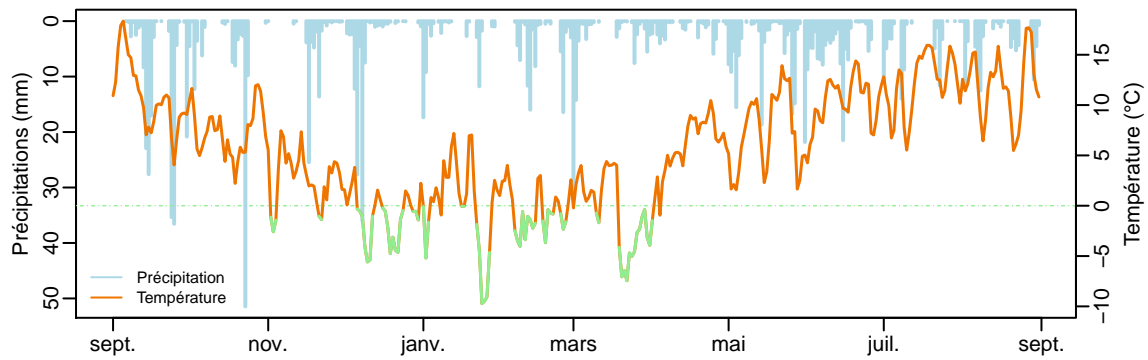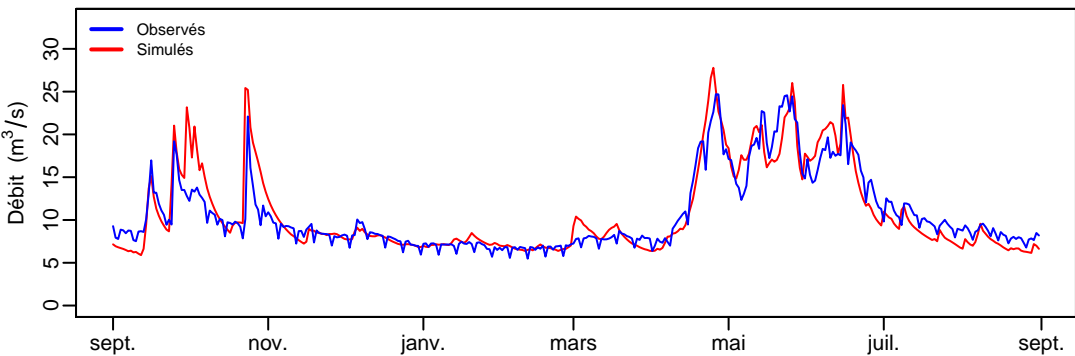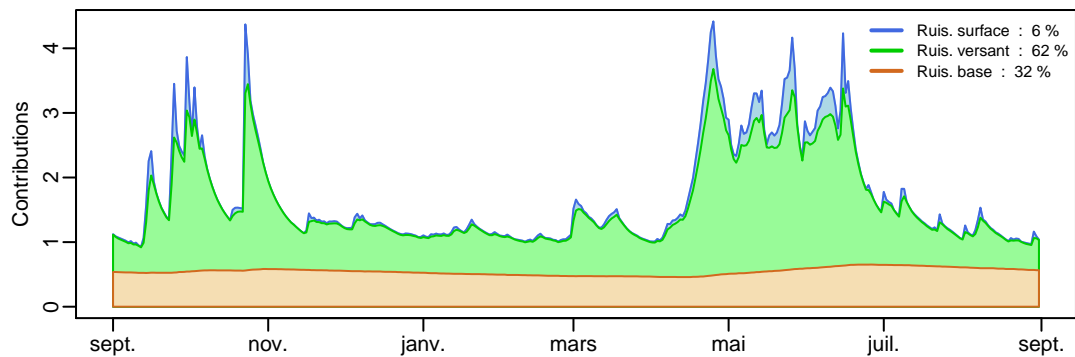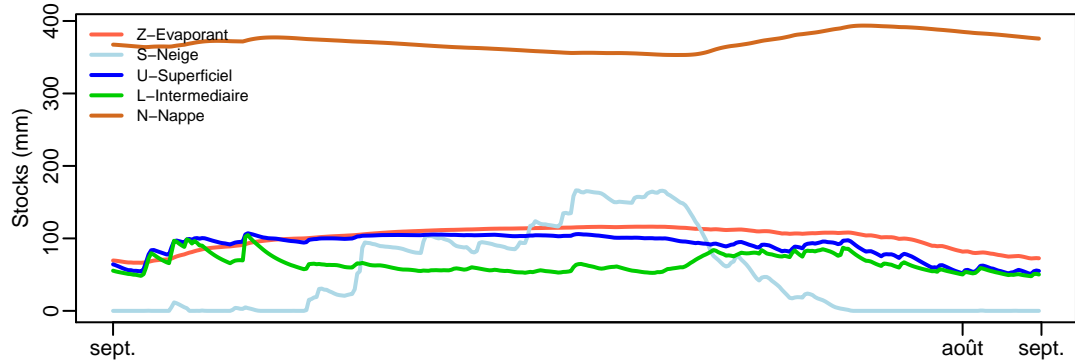

# q0168 (548.1 km<sup>2</sup>) – année 2007–2008

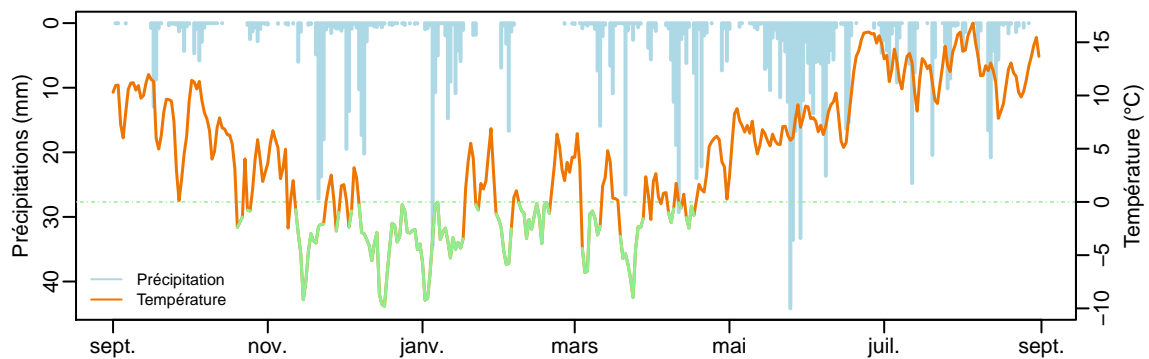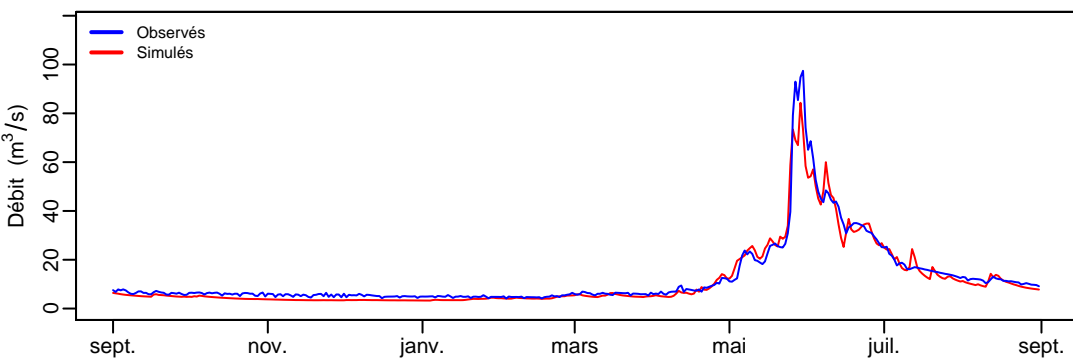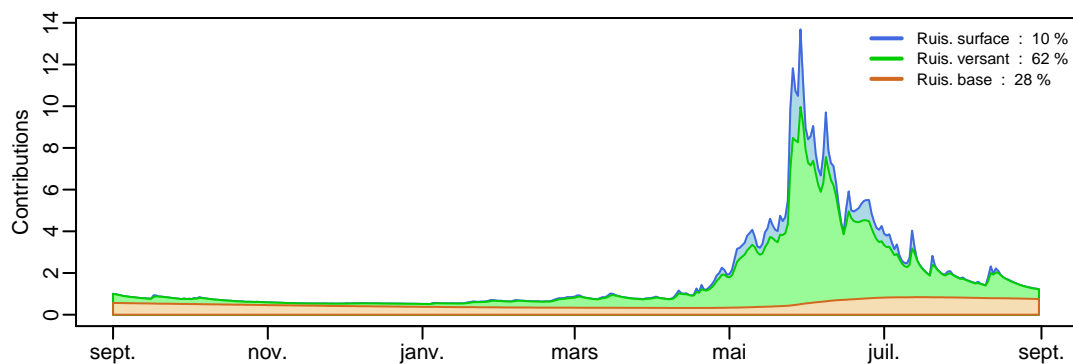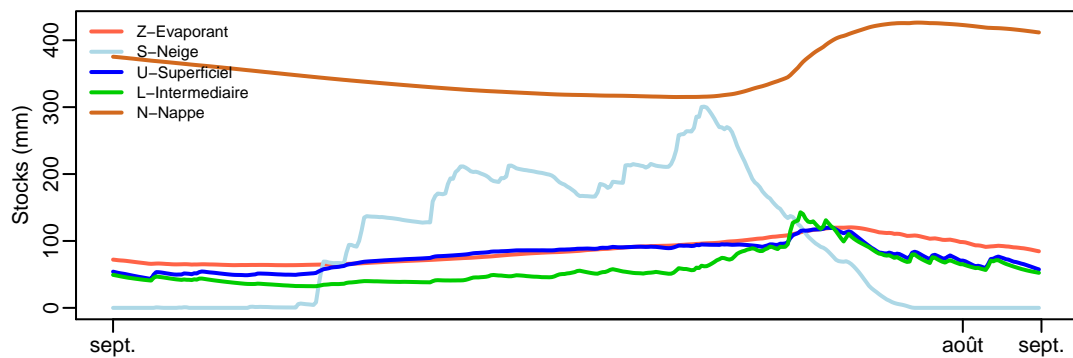

# q0168 (548.1 km<sup>2</sup>) – année 2008–2009

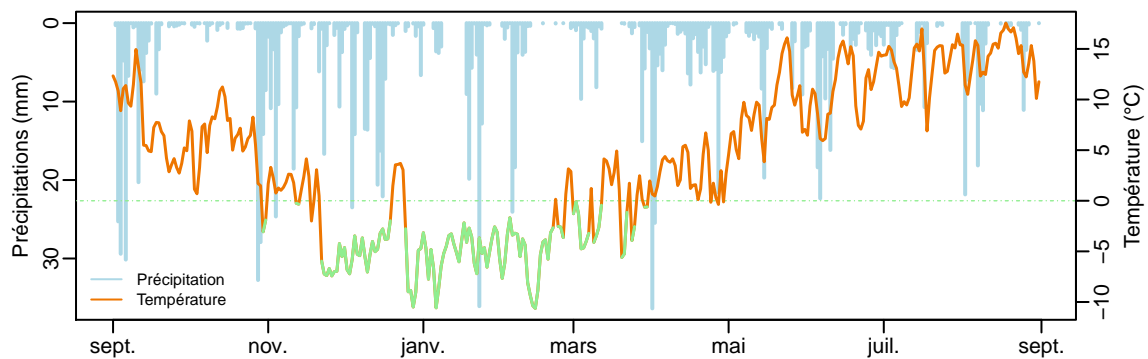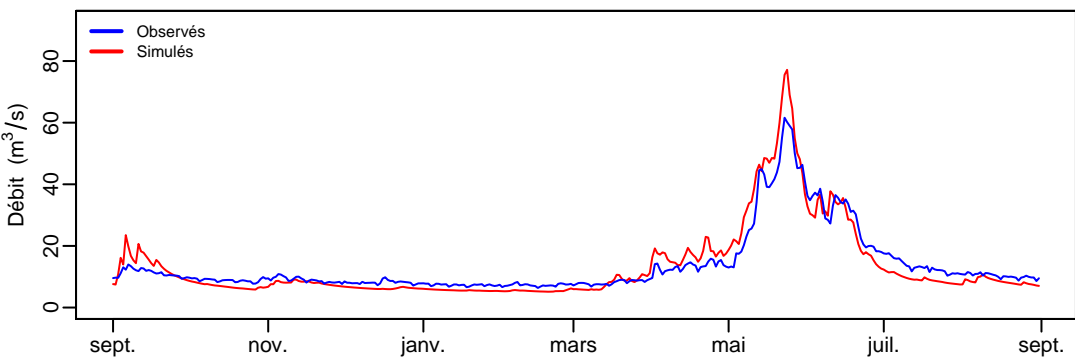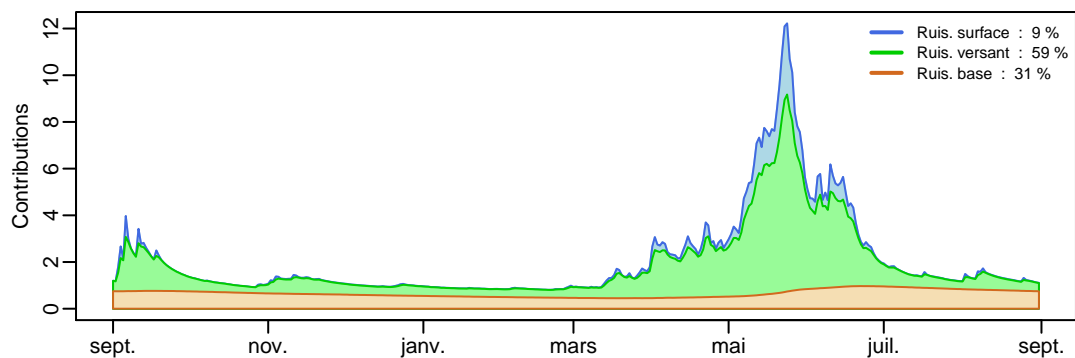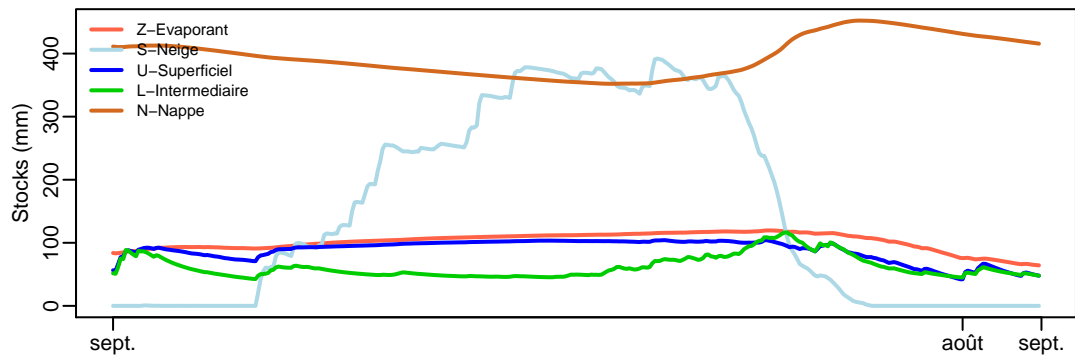

# q0168 (548.1 km²) – année 2009–2010

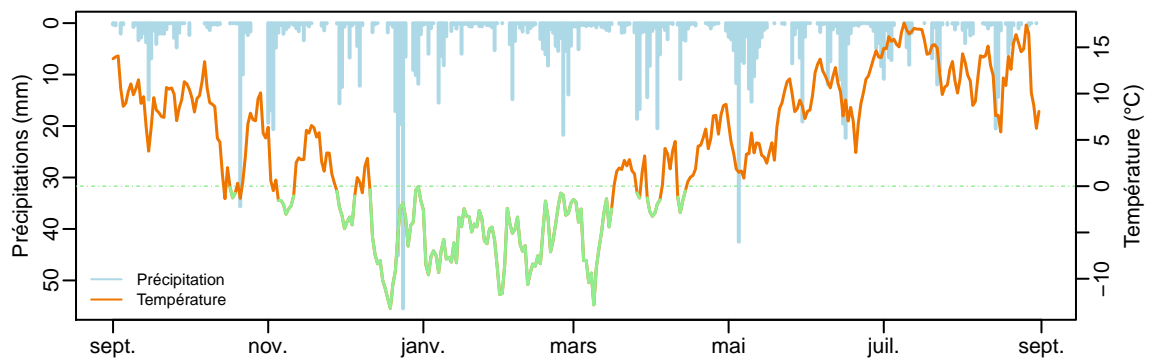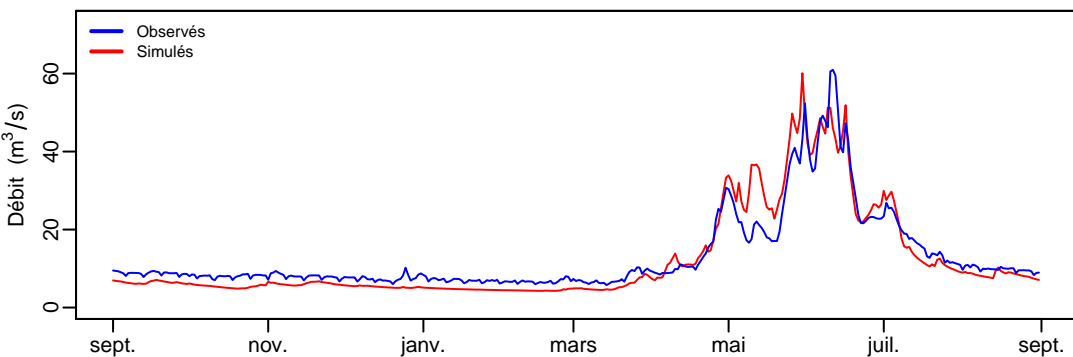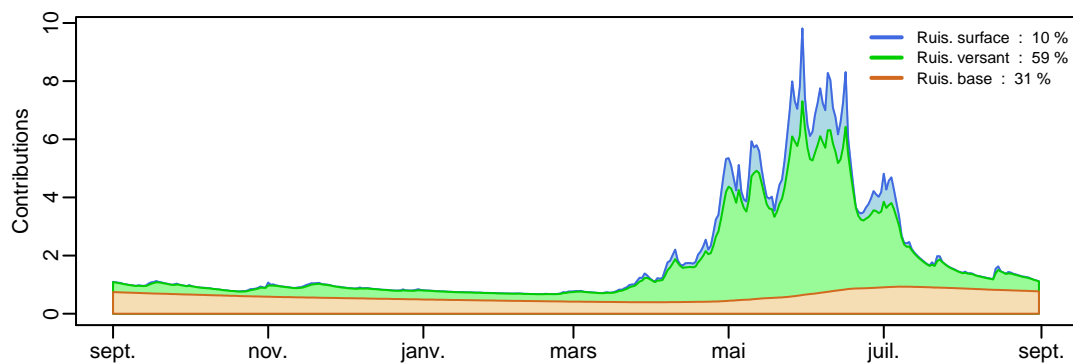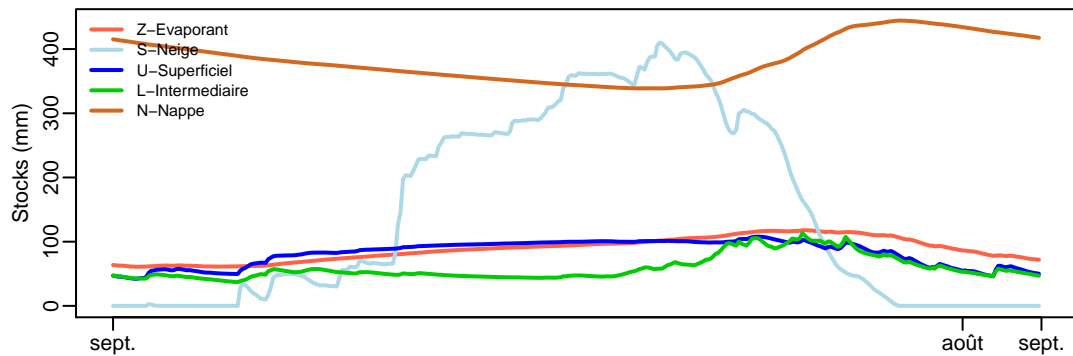

# q0168 (548.1 km²) – année 2010–2011

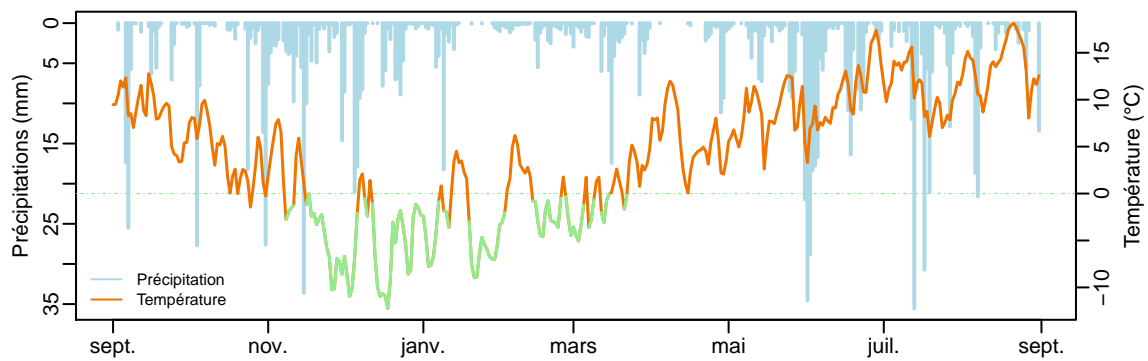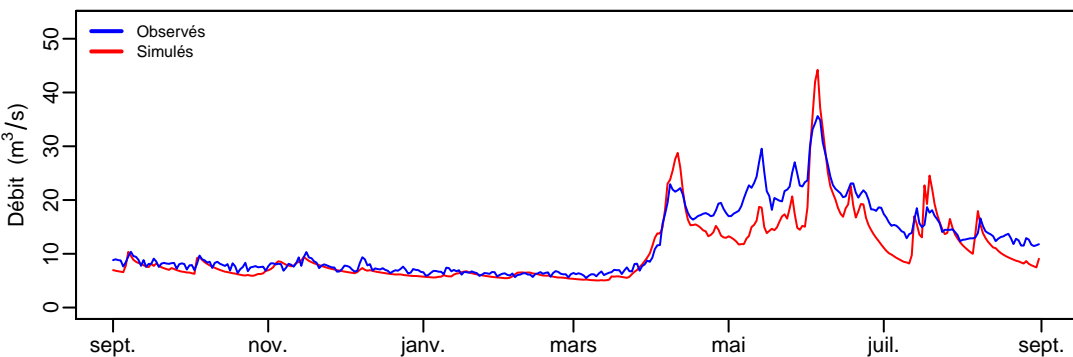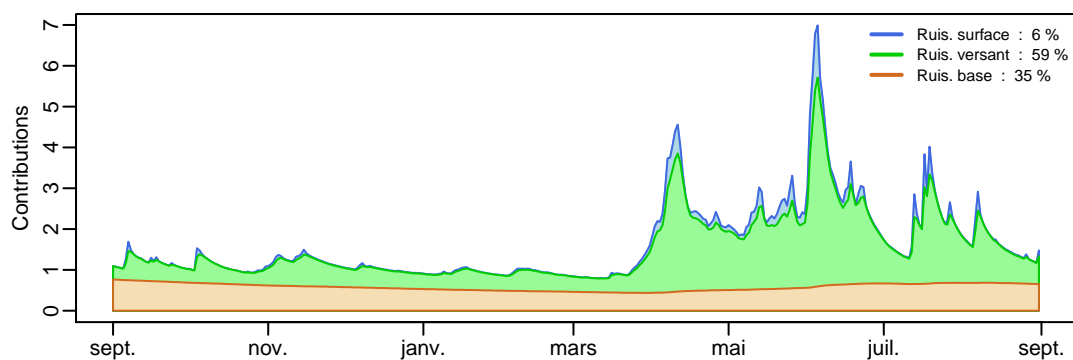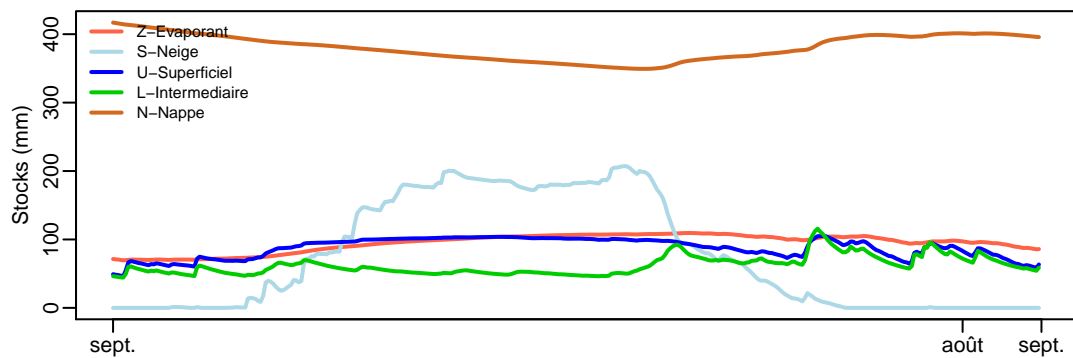

# q0168 (548.1 km²) – année 2011–2012

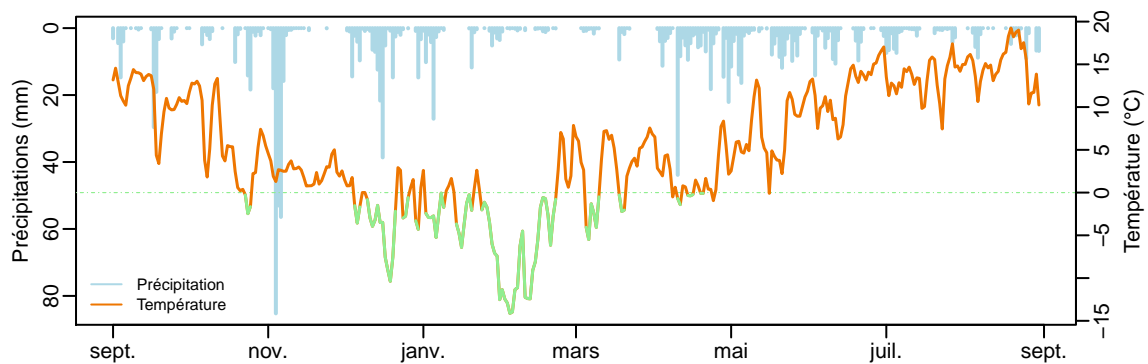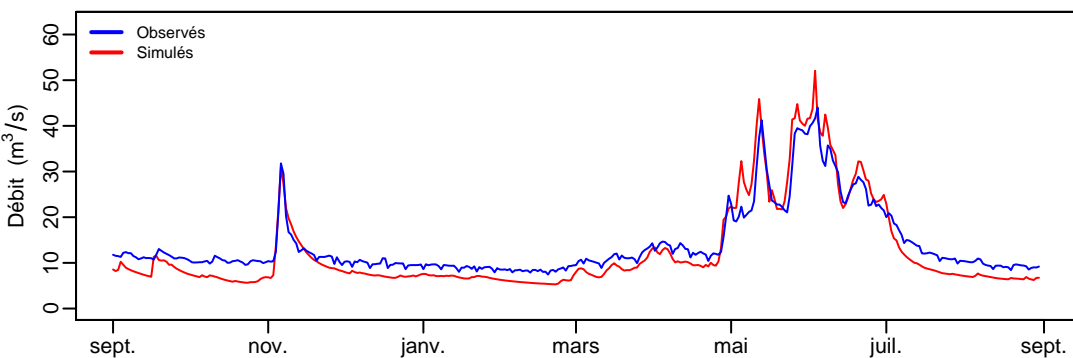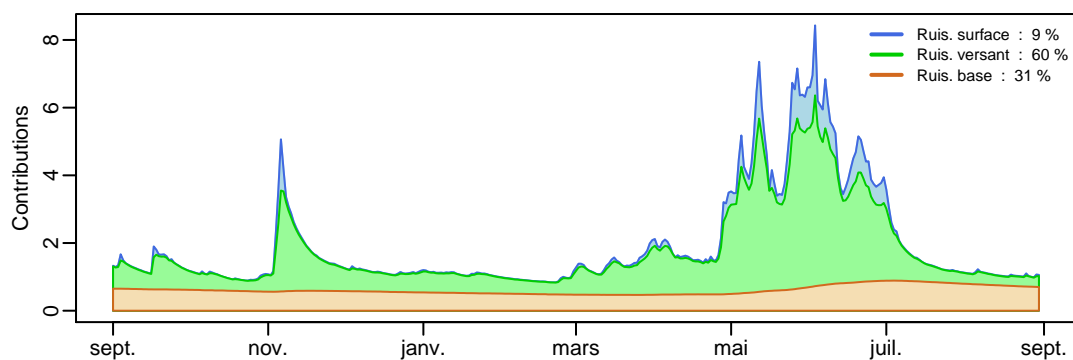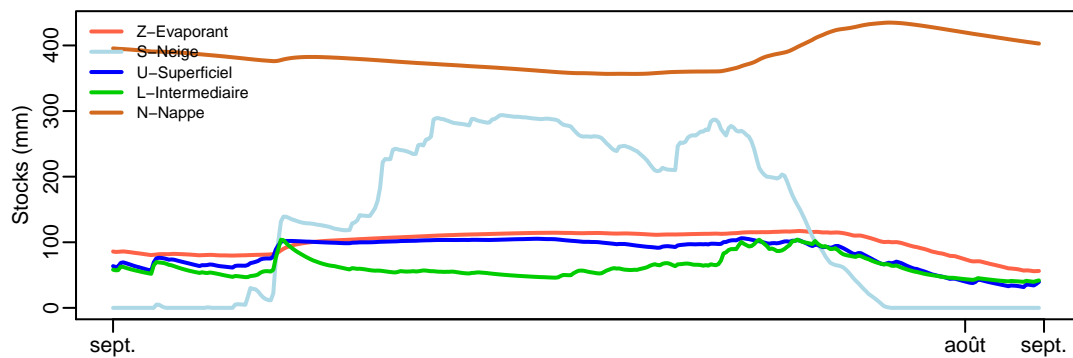

# q0171 (723.02 km²) – année 1982–1983

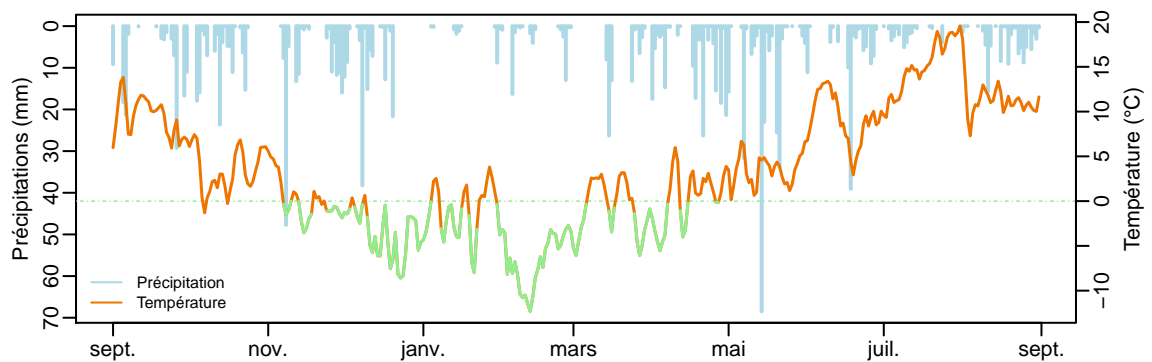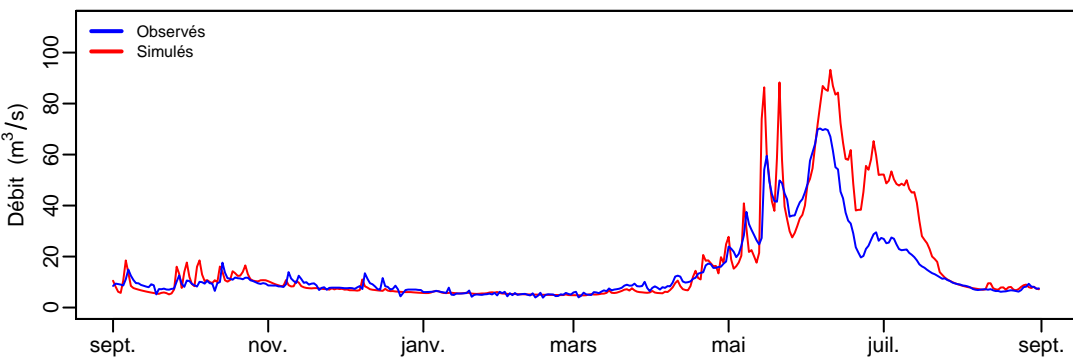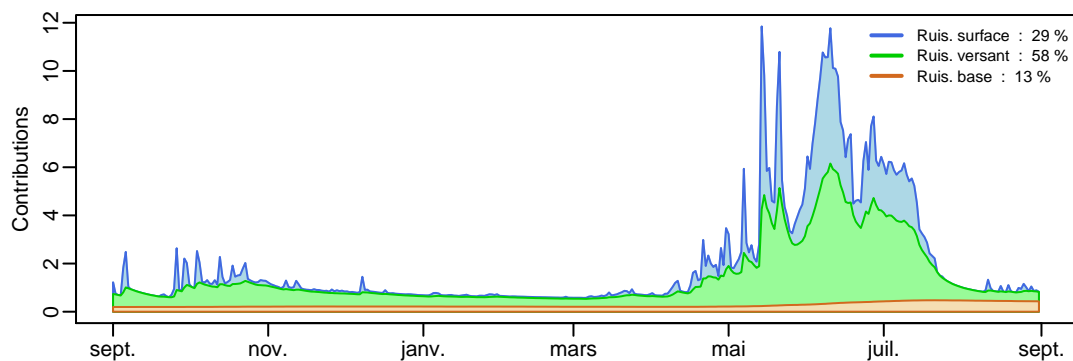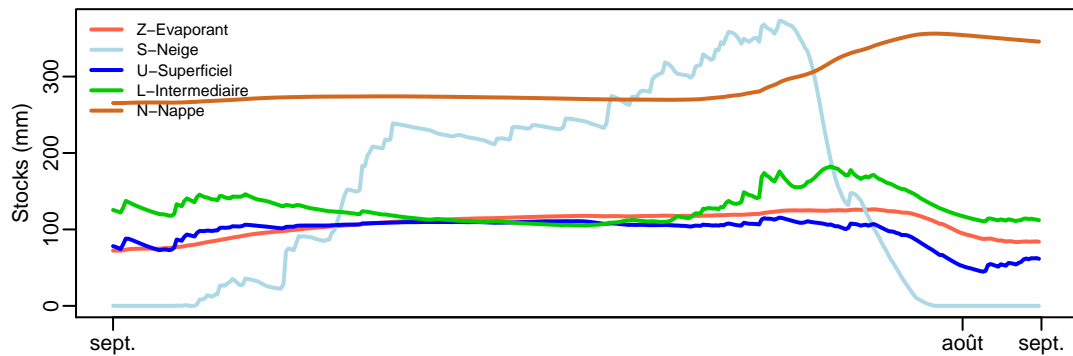

# q0171 (723.02 km²) – année 1983–1984

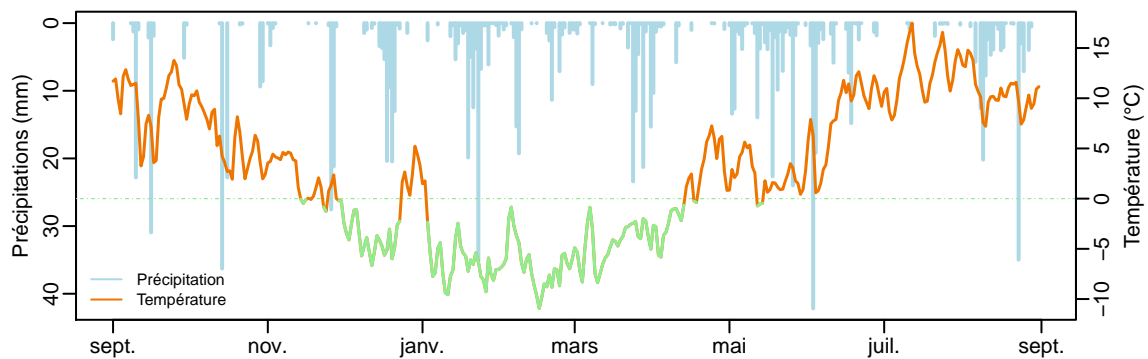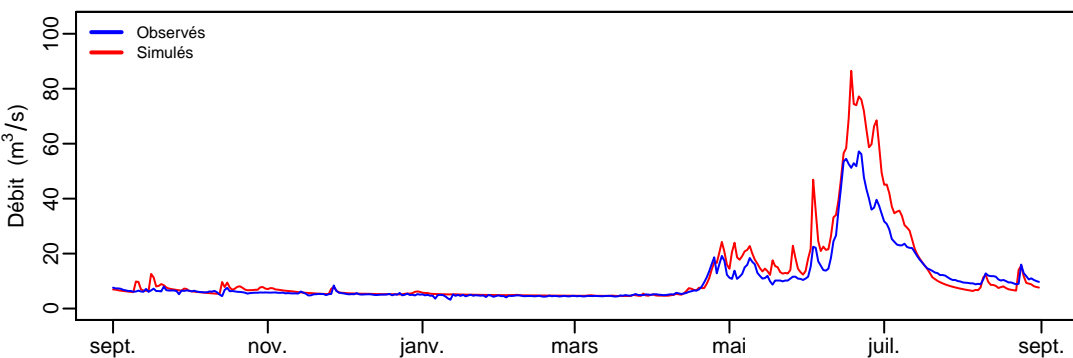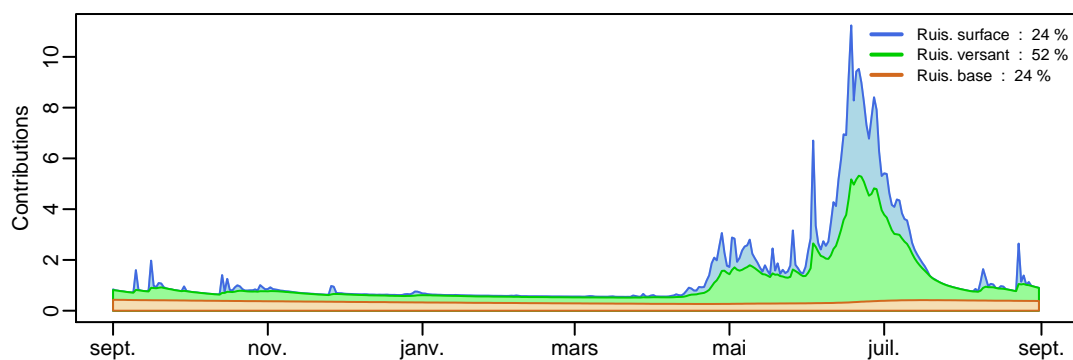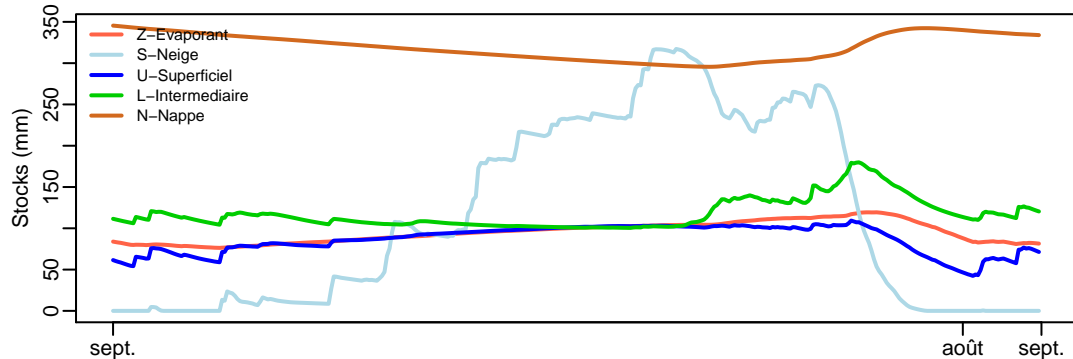



# q0171 (723.02 km<sup>2</sup>) – année 1984–1985

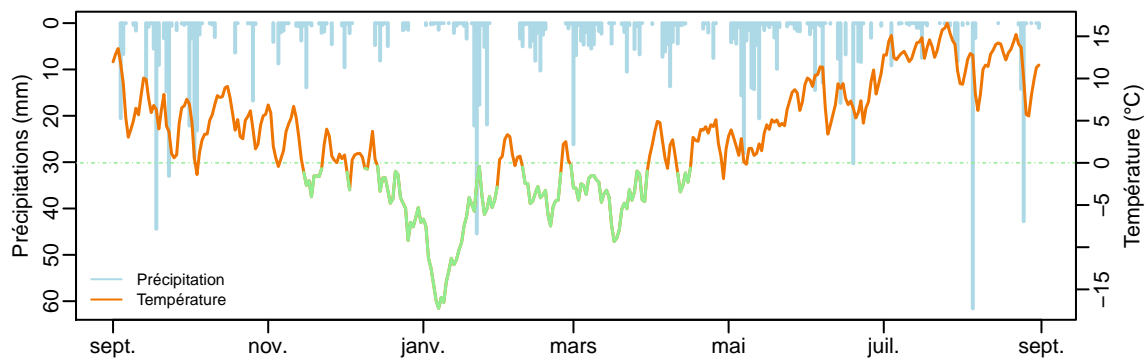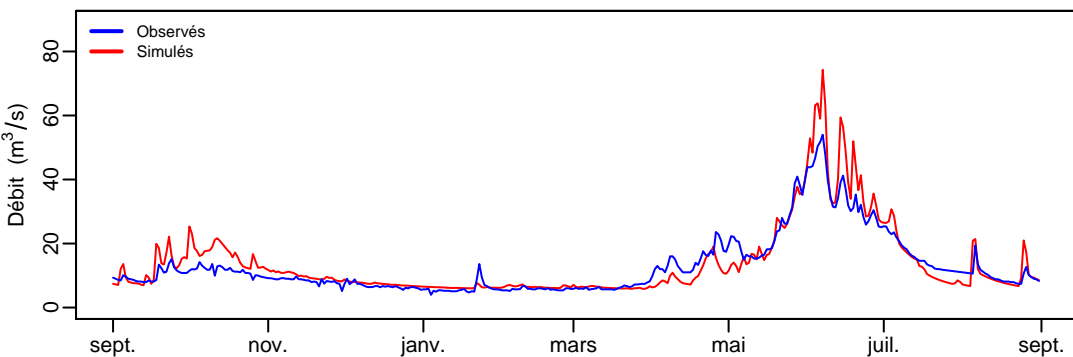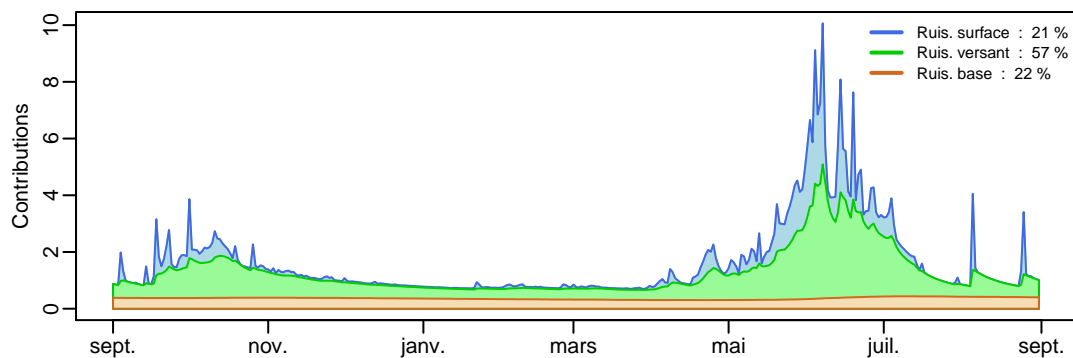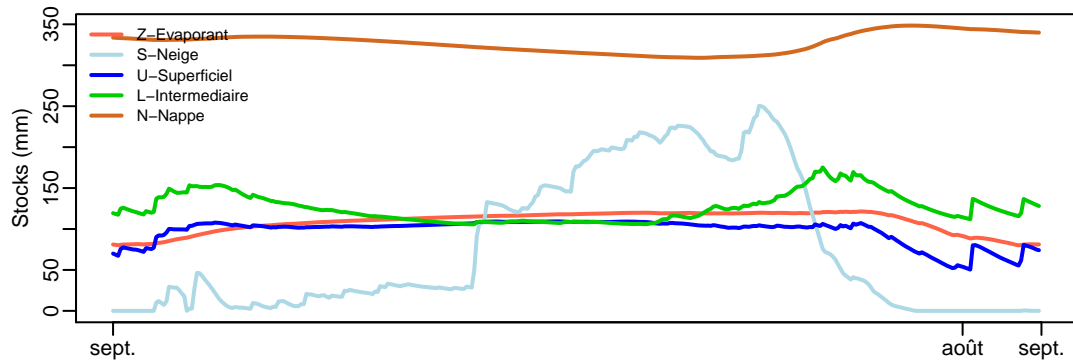

# q0171 (723.02 km<sup>2</sup>) – année 1985–1986

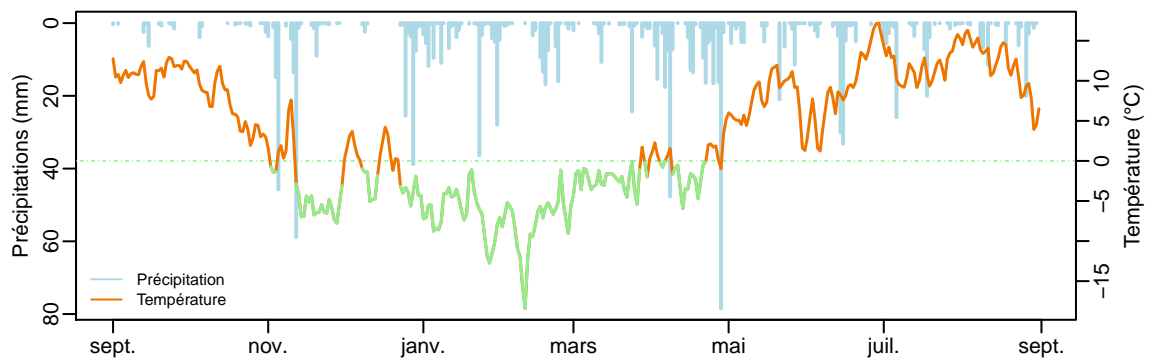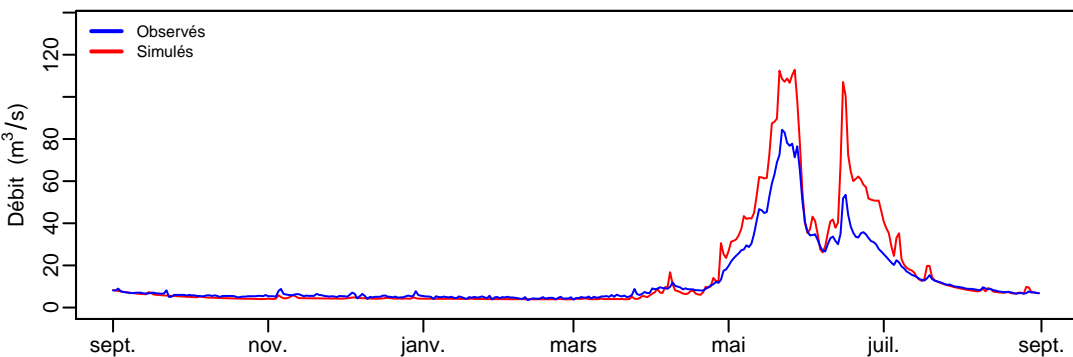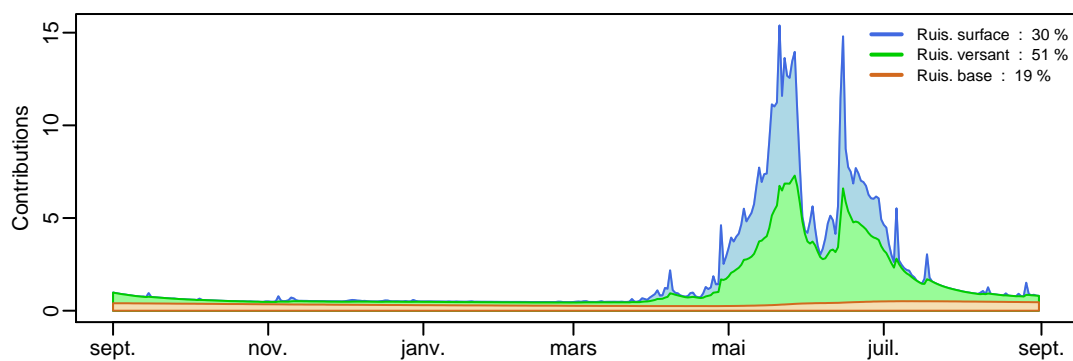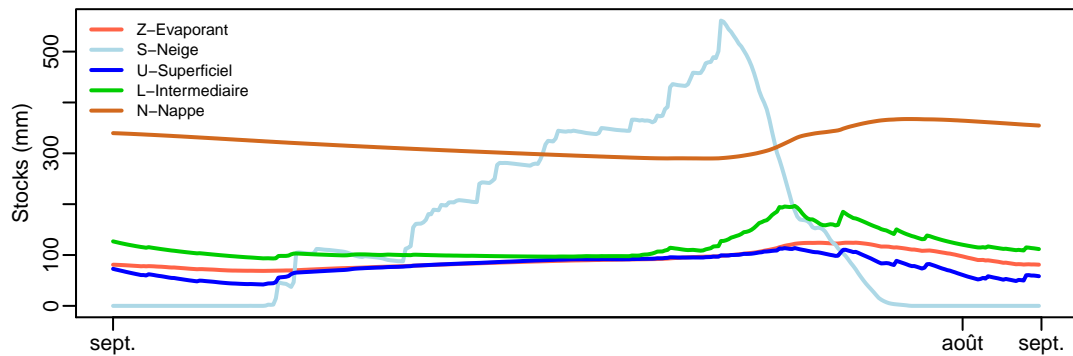

# q0171 (723.02 km<sup>2</sup>) – année 1986–1987

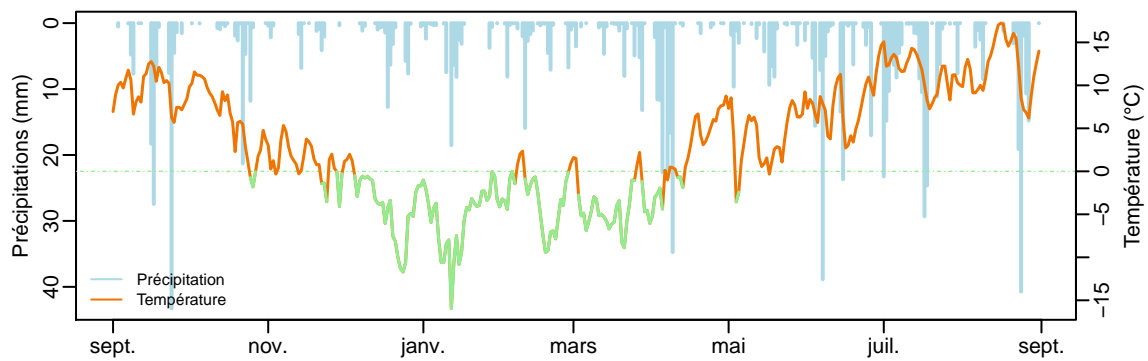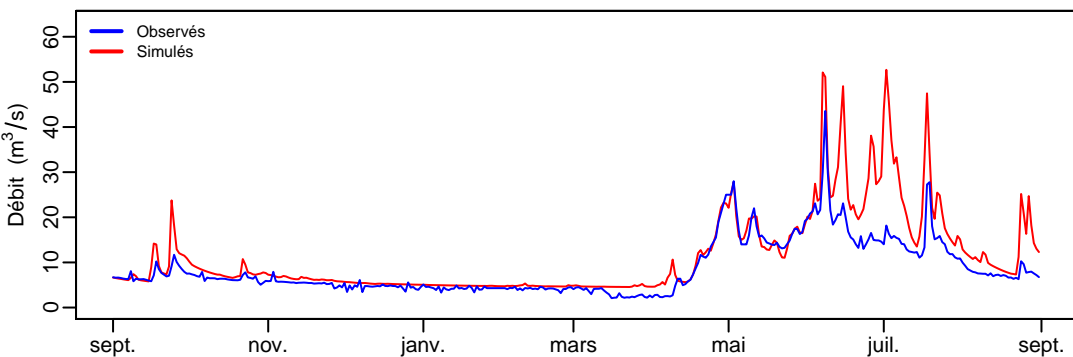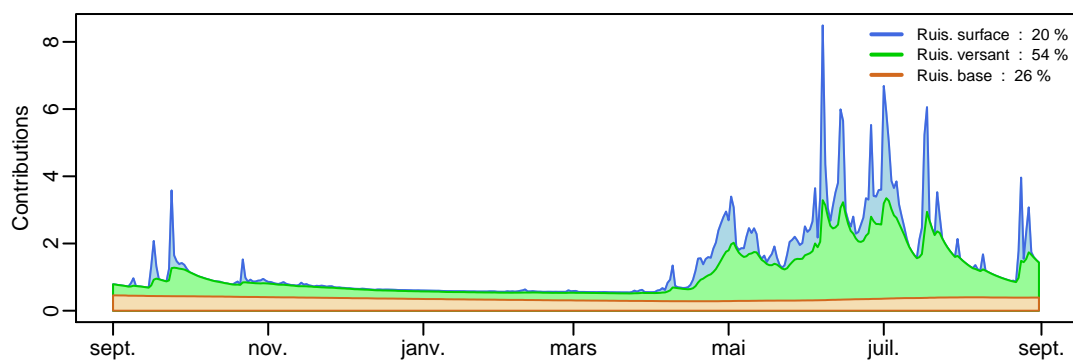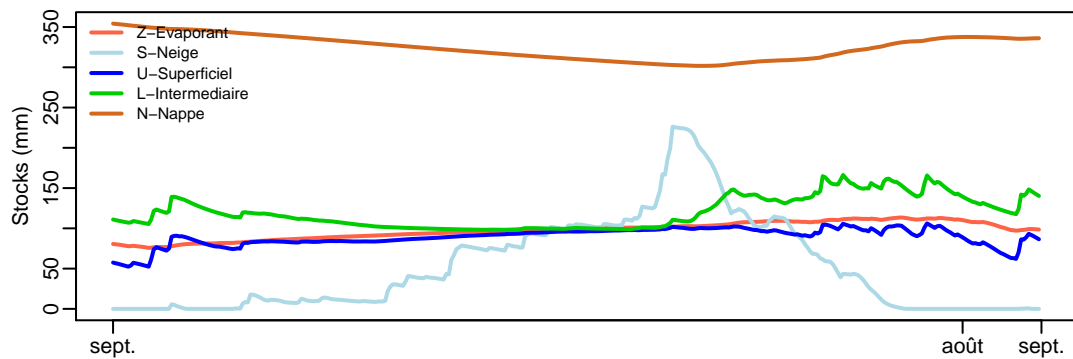

# q0171 (723.02 km<sup>2</sup>) – année 1987–1988

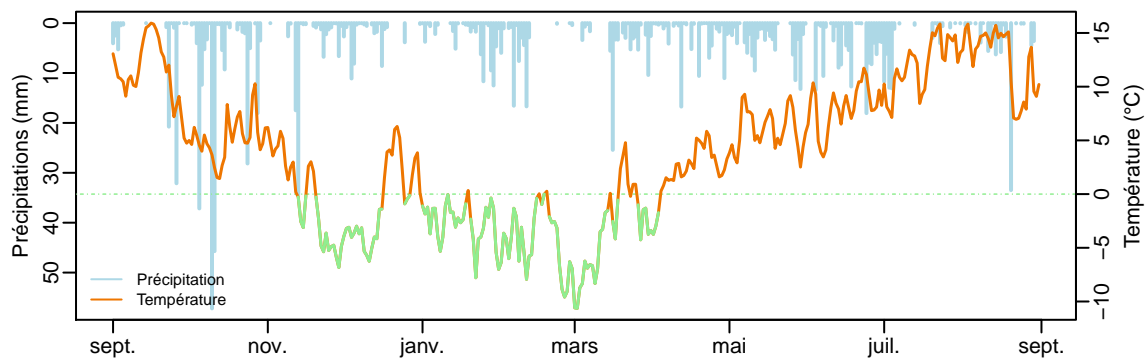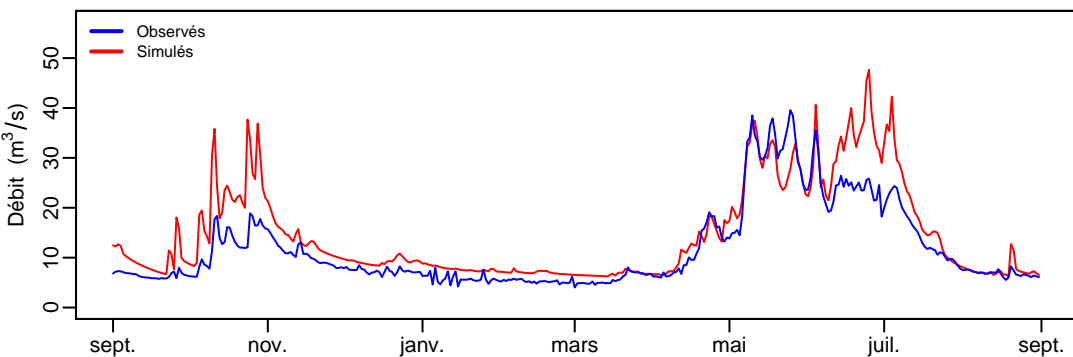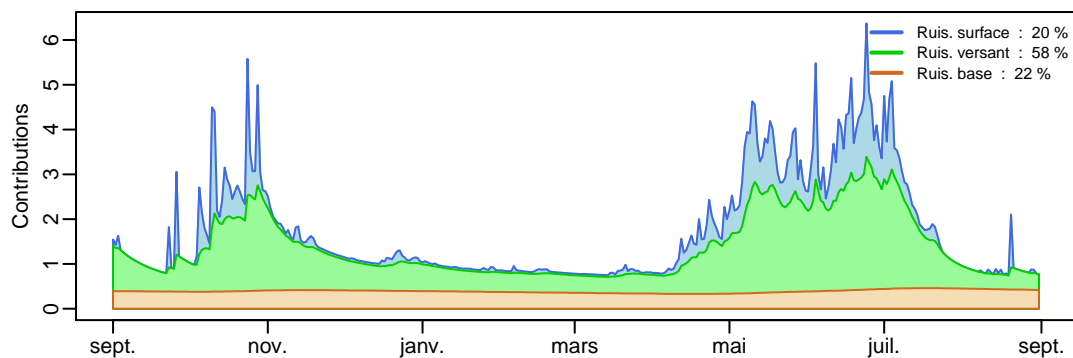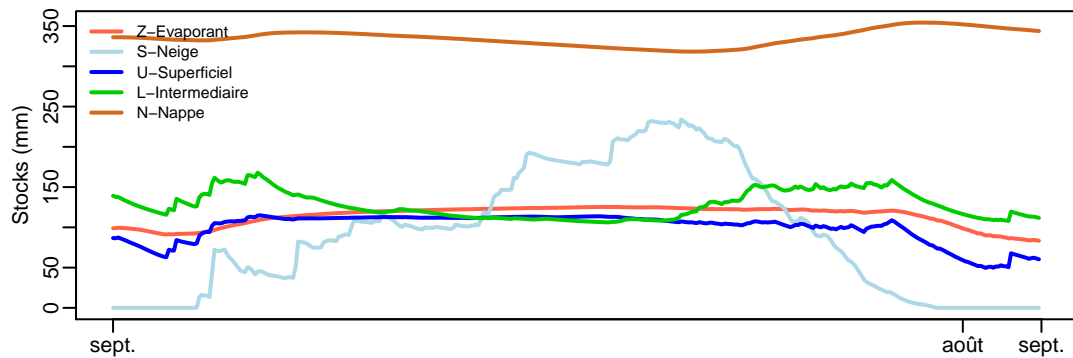

# q0171 (723.02 km²) – année 1988–1989

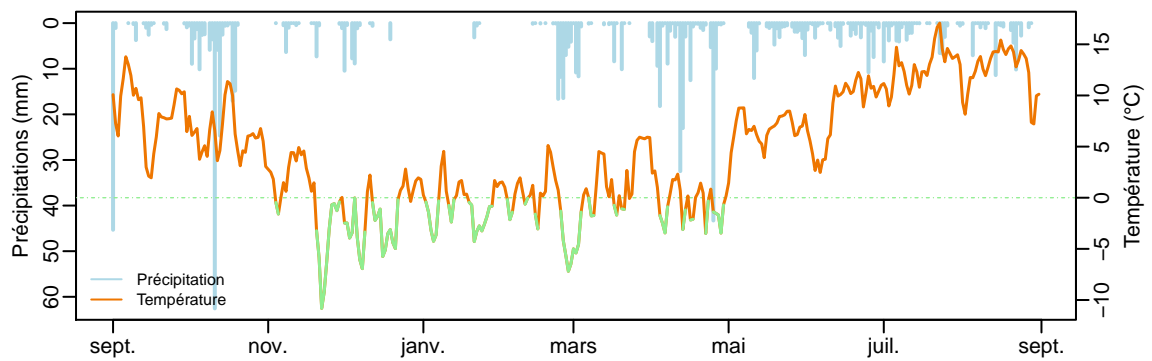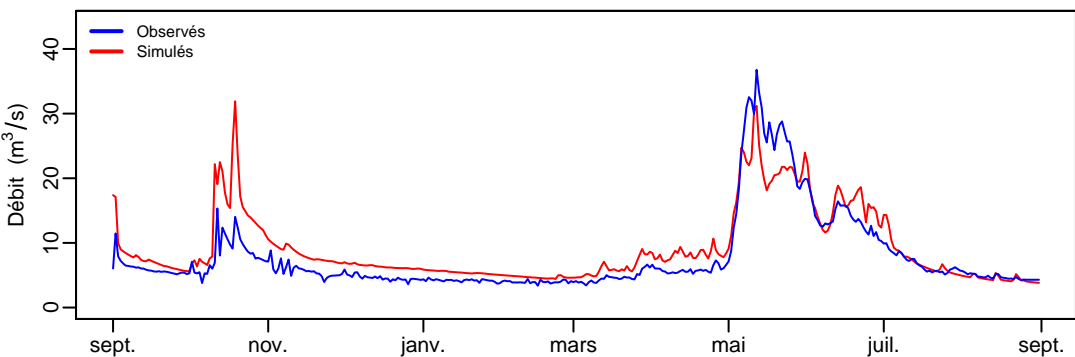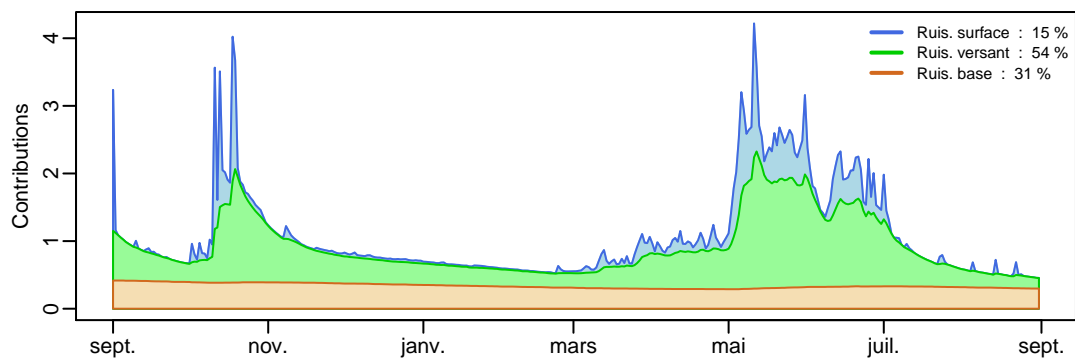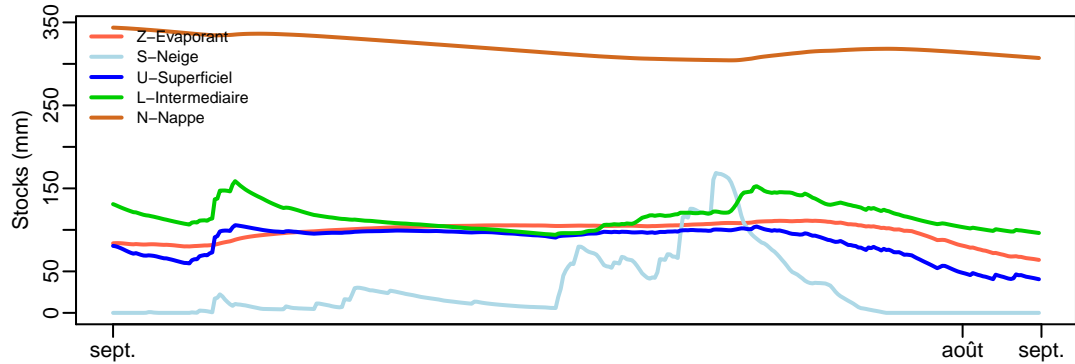

# q0171 (723.02 km<sup>2</sup>) – année 1989–1990

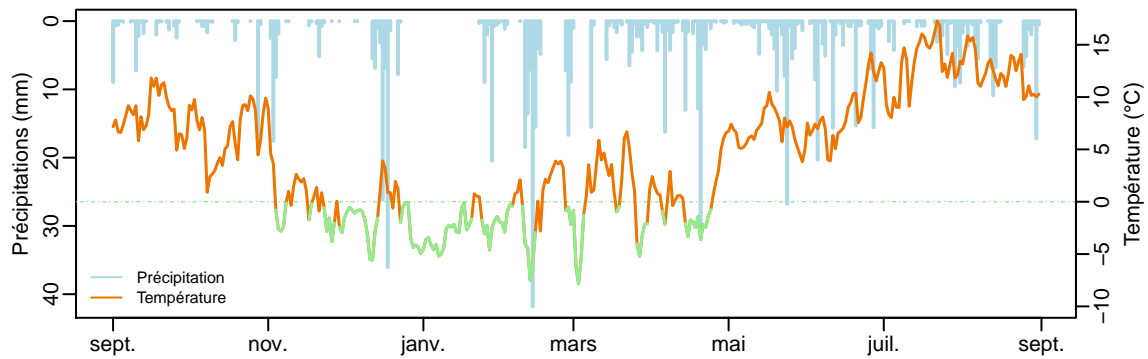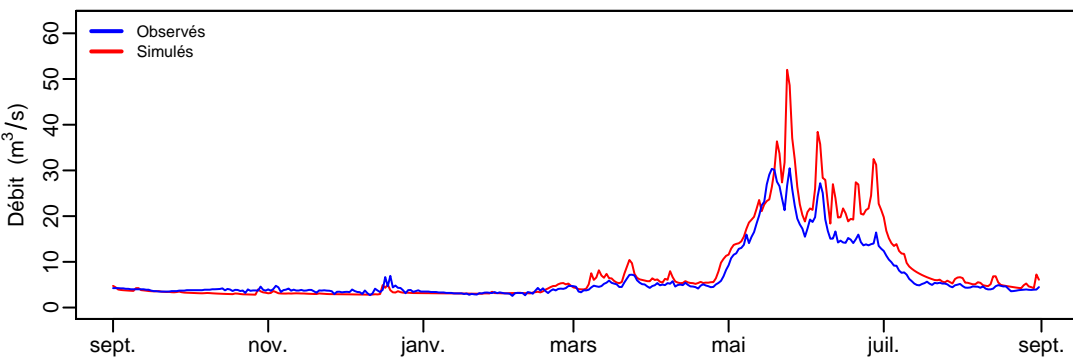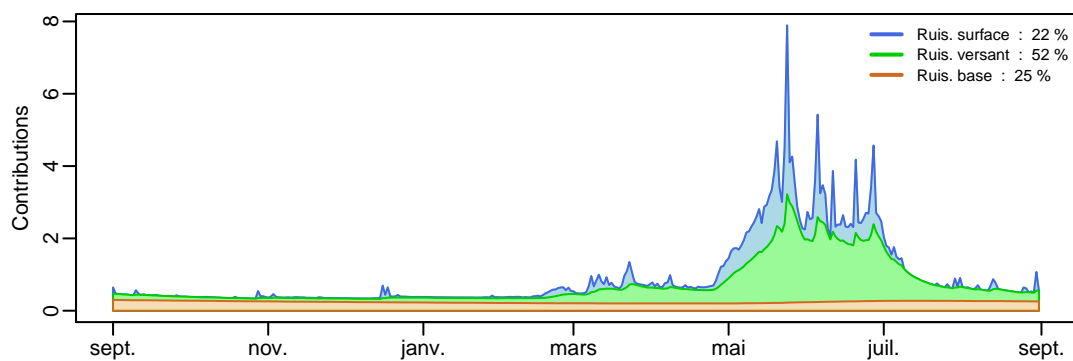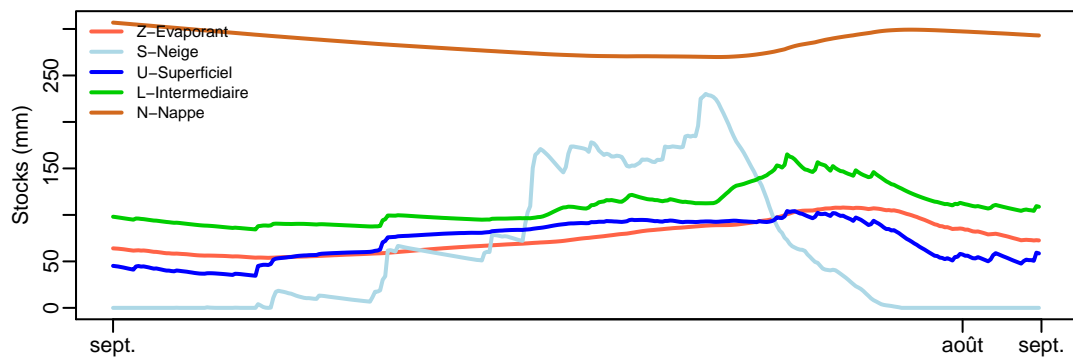

# q0171 (723.02 km<sup>2</sup>) – année 1990–1991

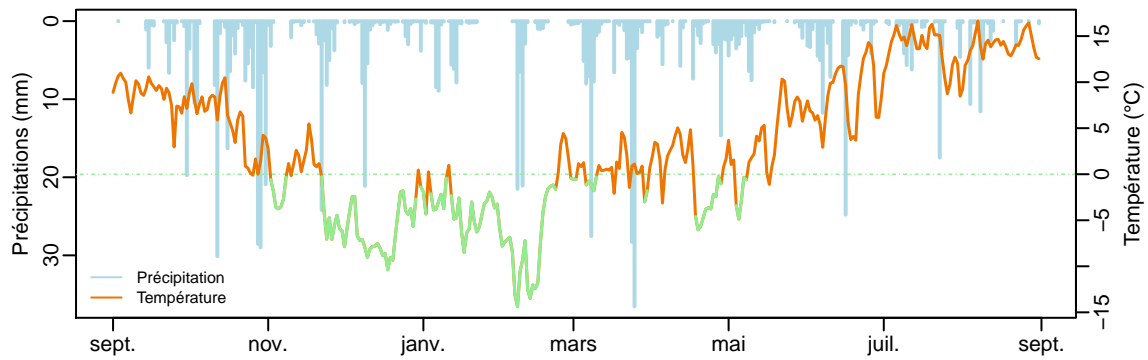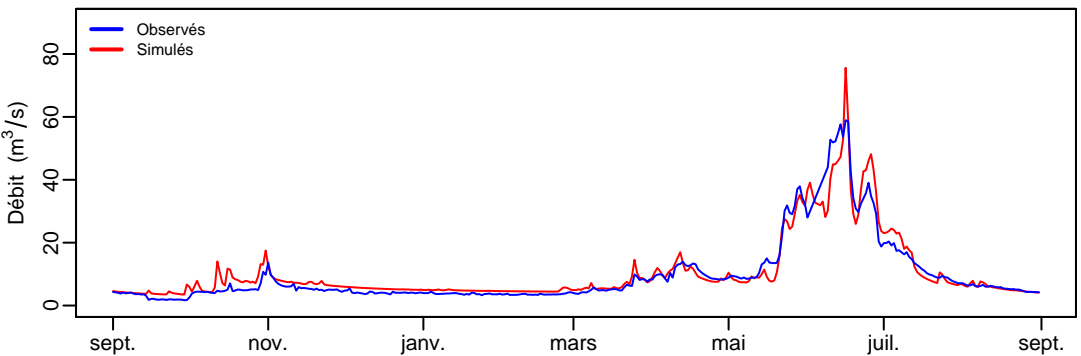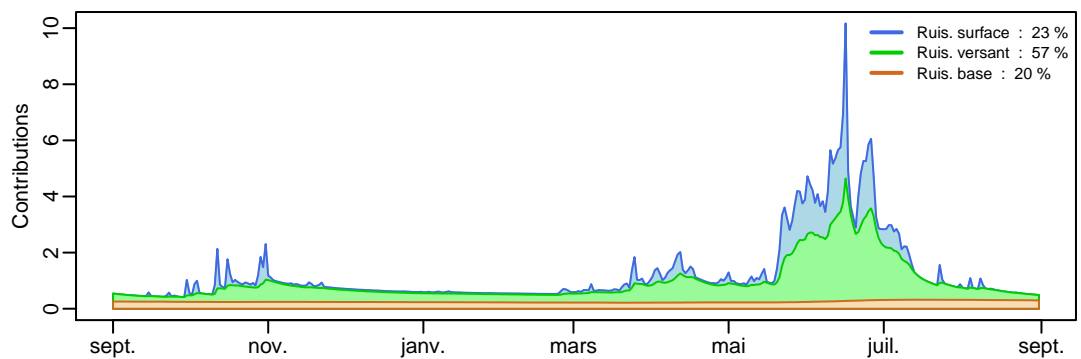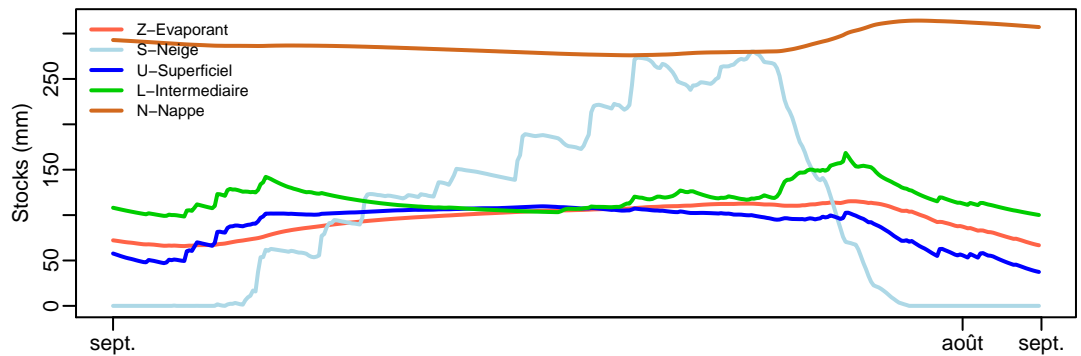

# q0171 (723.02 km²) – année 1991–1992

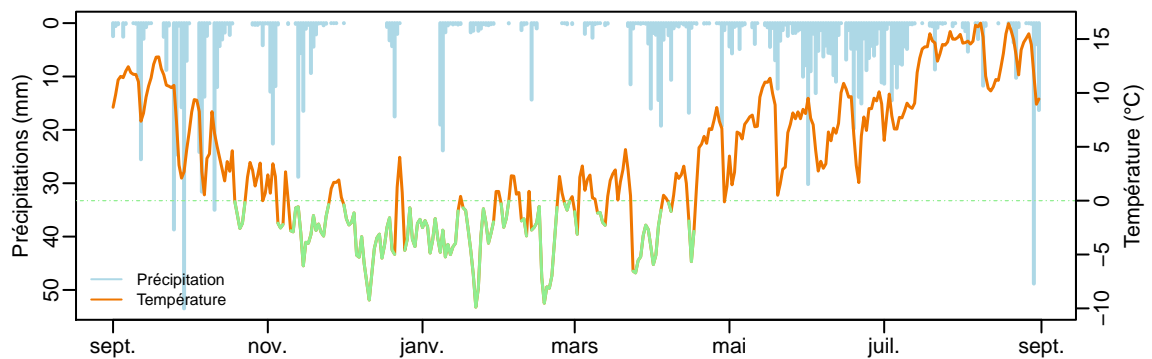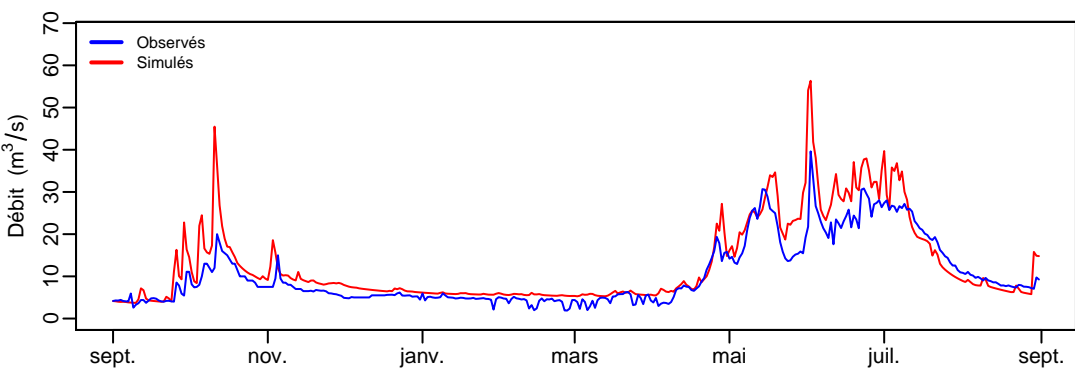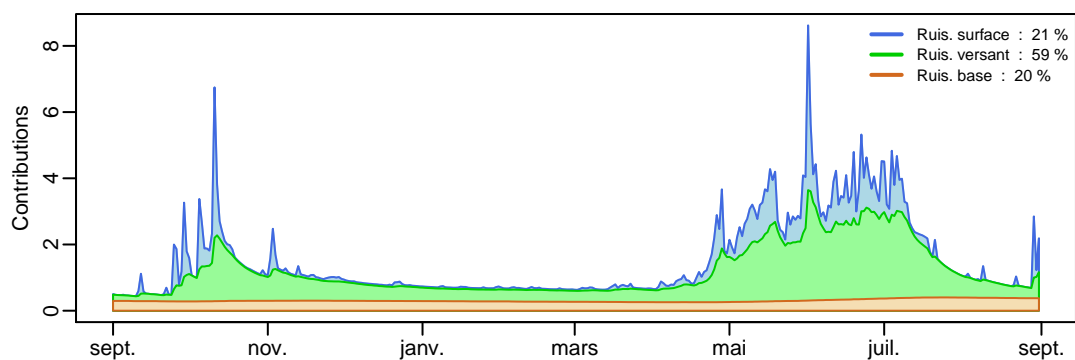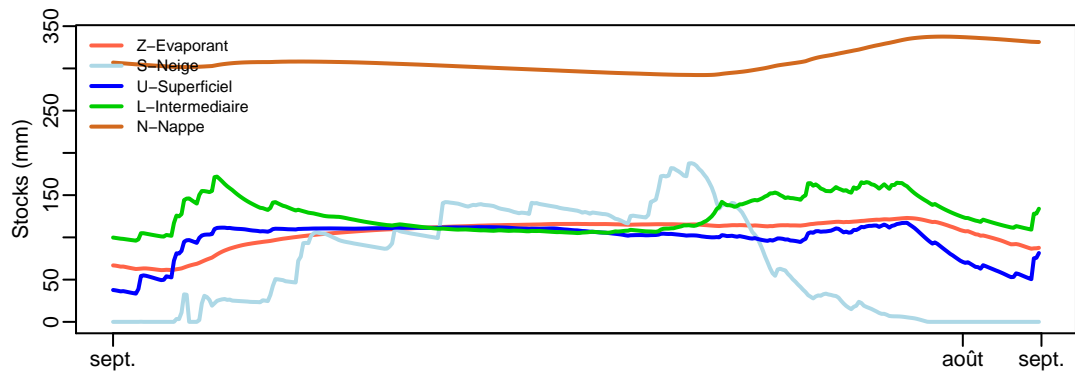



# q0171 (723.02 km²) – année 1992–1993

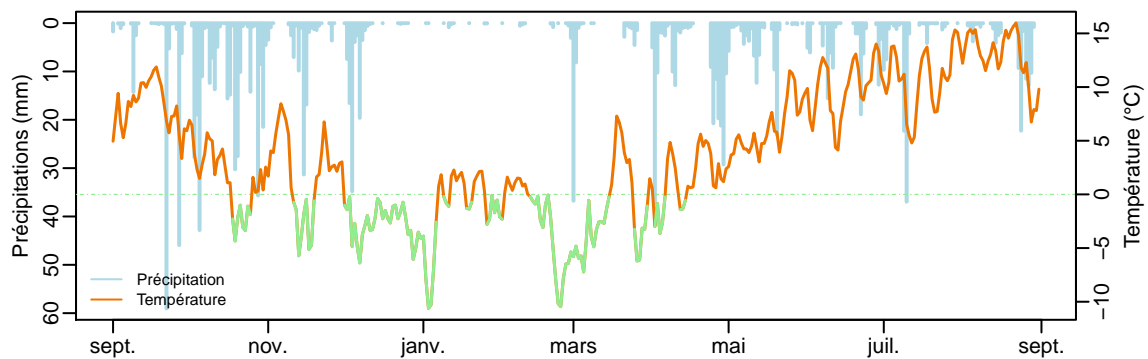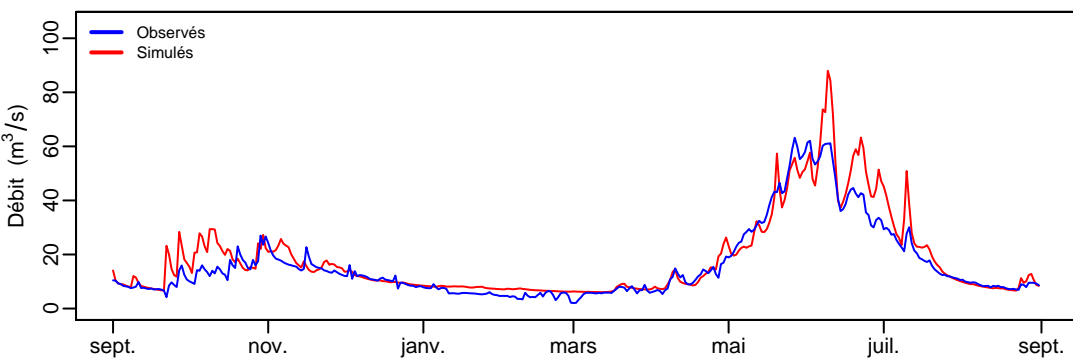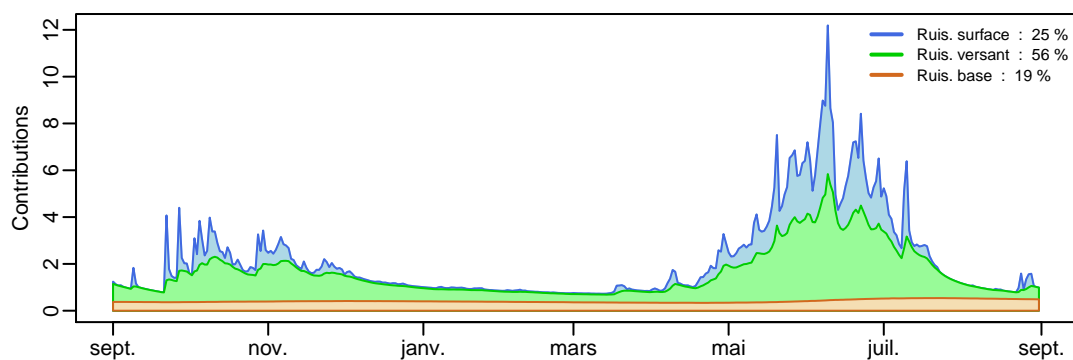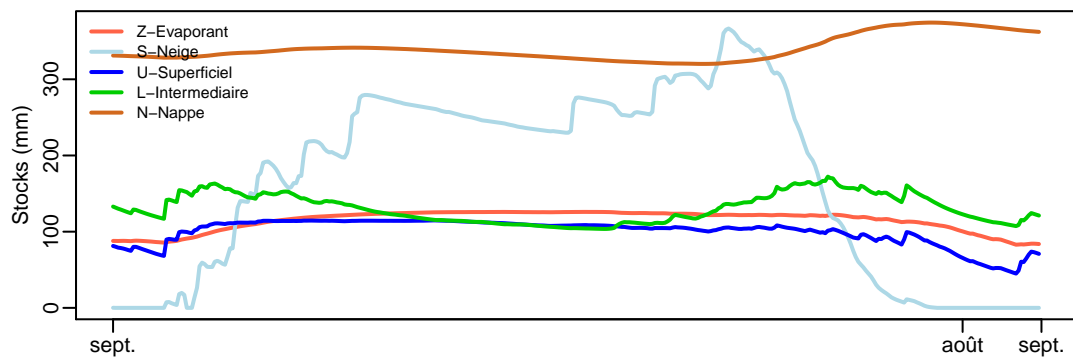

# q0171 (723.02 km<sup>2</sup>) – année 1993–1994

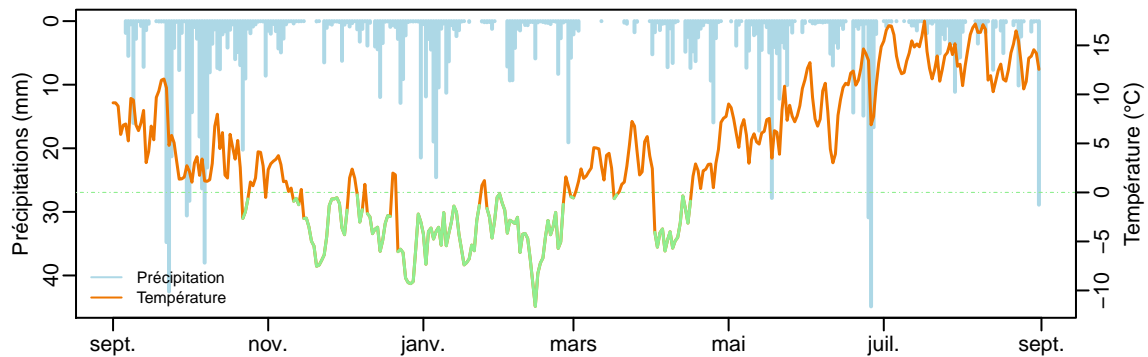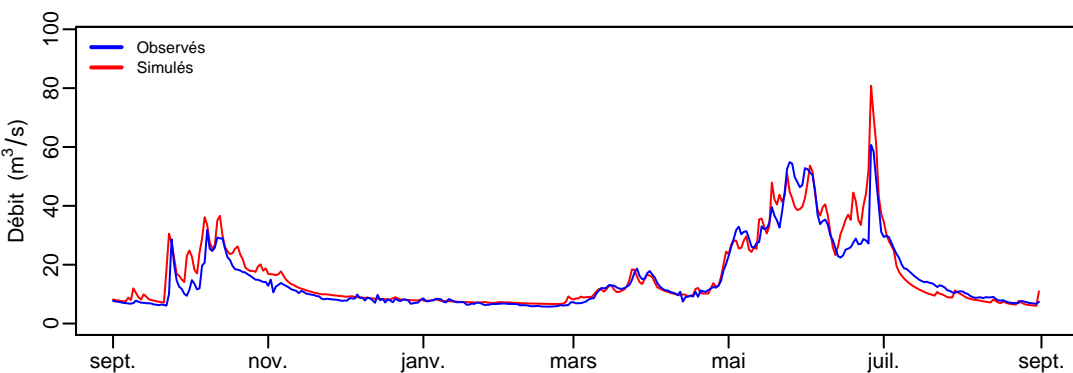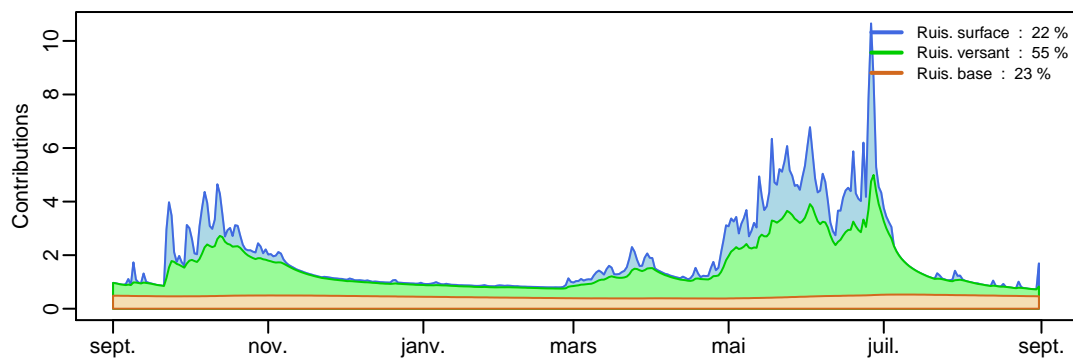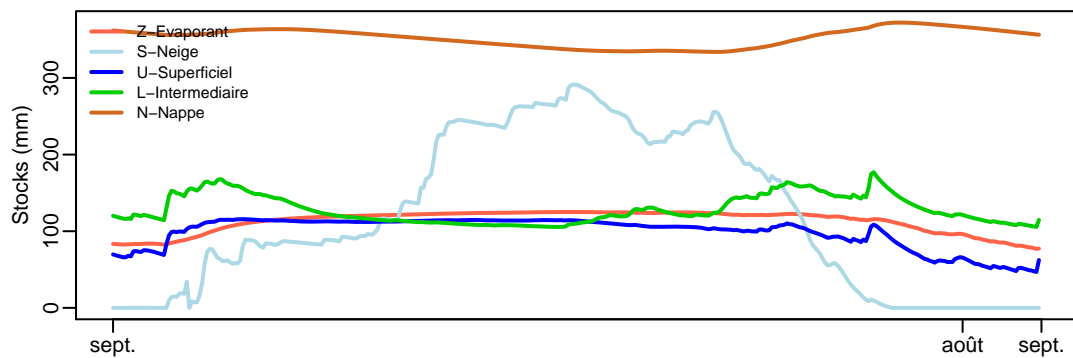

# q0171 (723.02 km<sup>2</sup>) – année 1994–1995

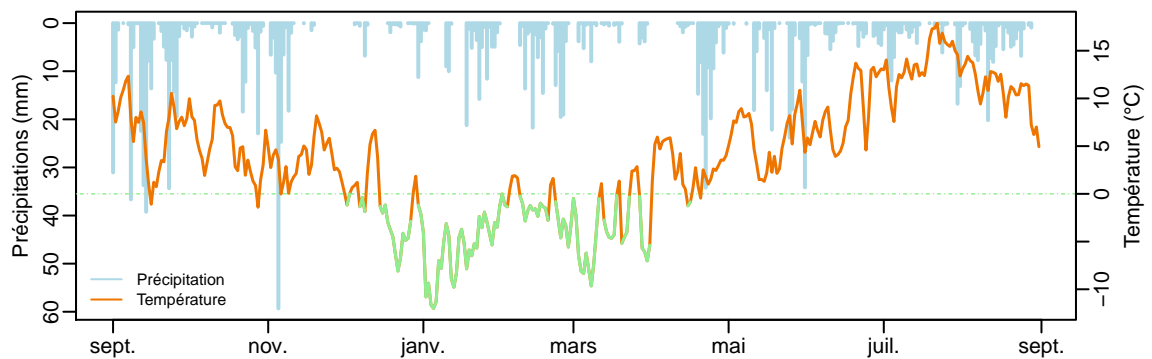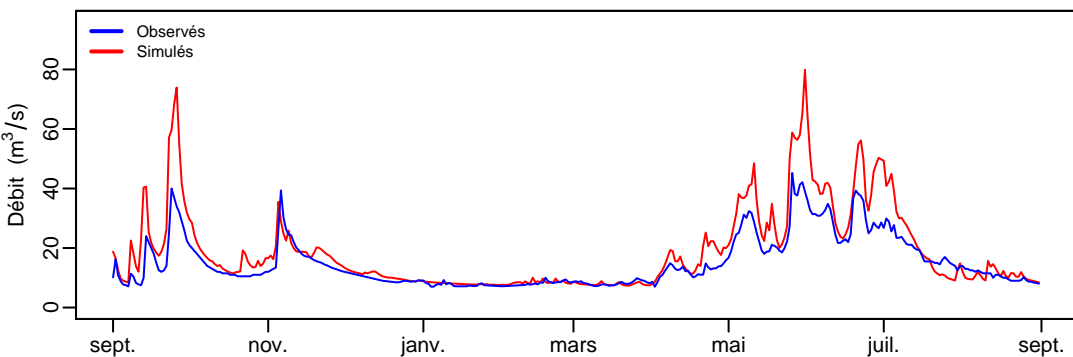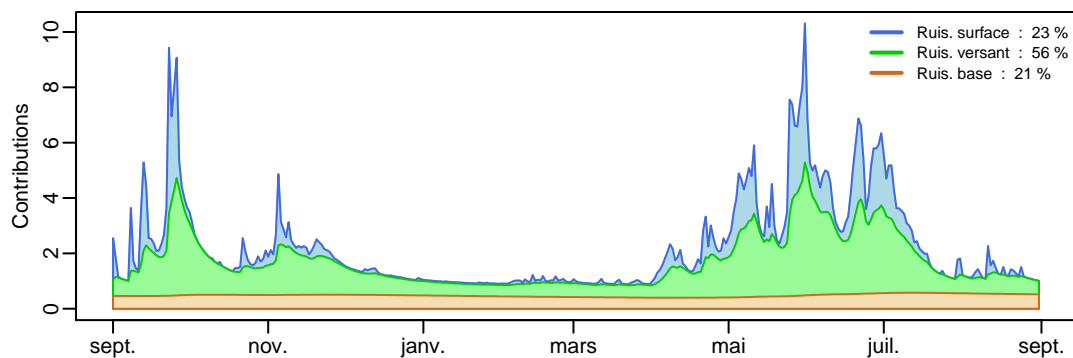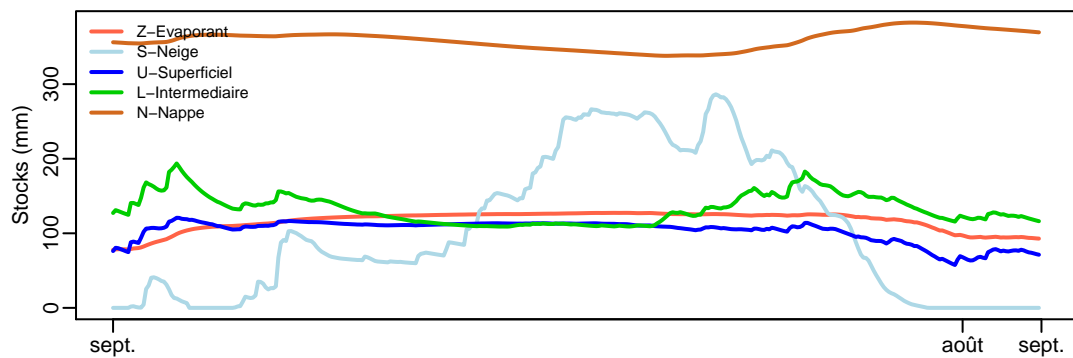

# q0171 (723.02 km<sup>2</sup>) – année 1995–1996

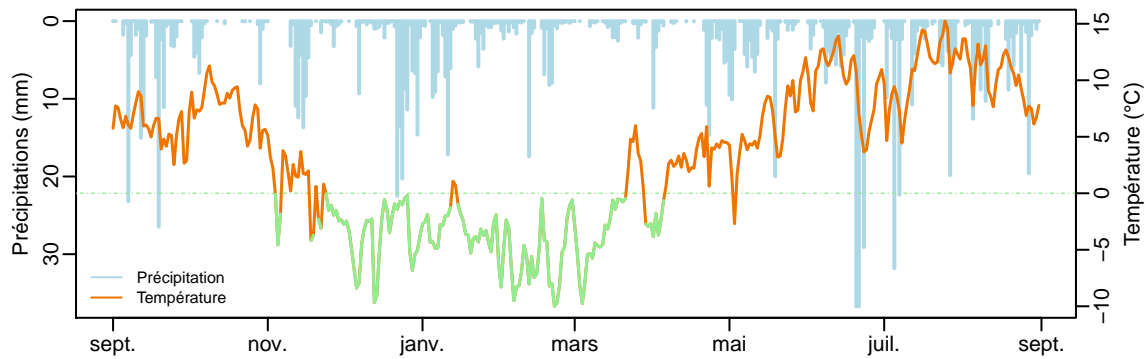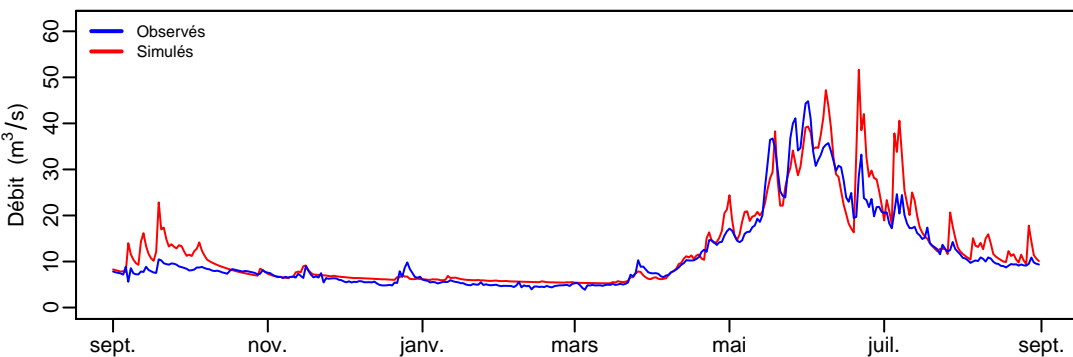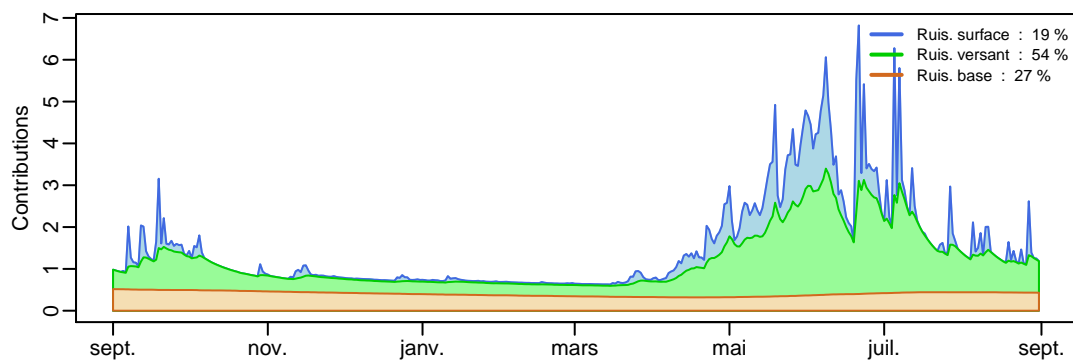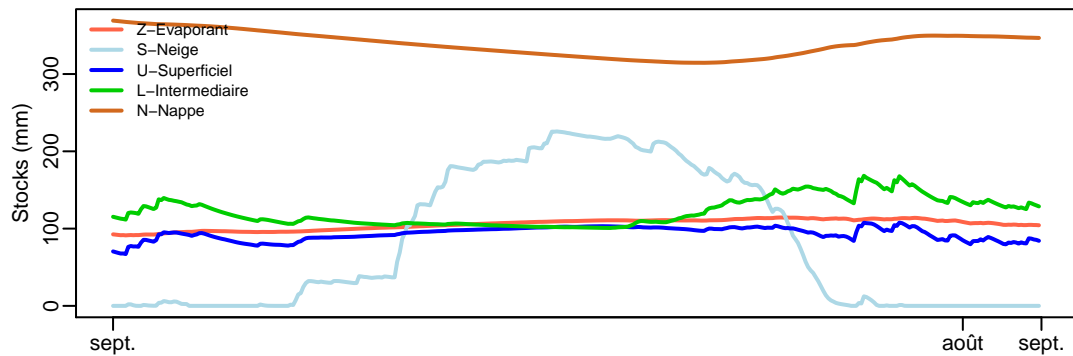

# q0171 (723.02 km²) – année 1996–1997

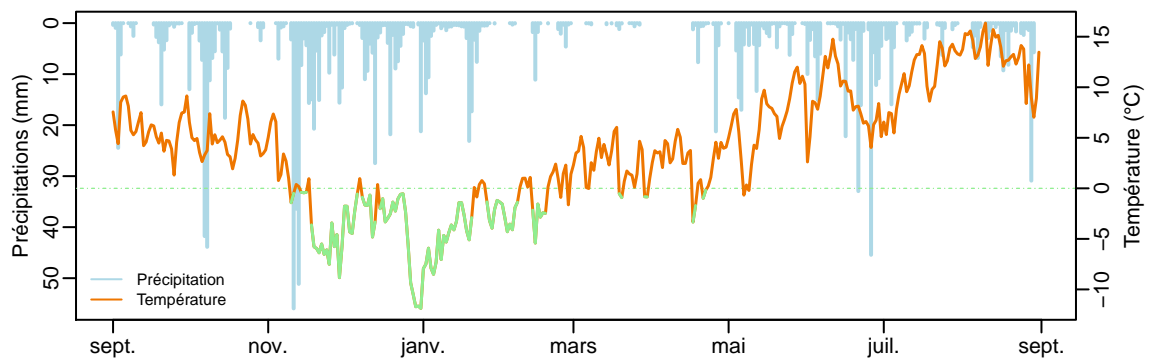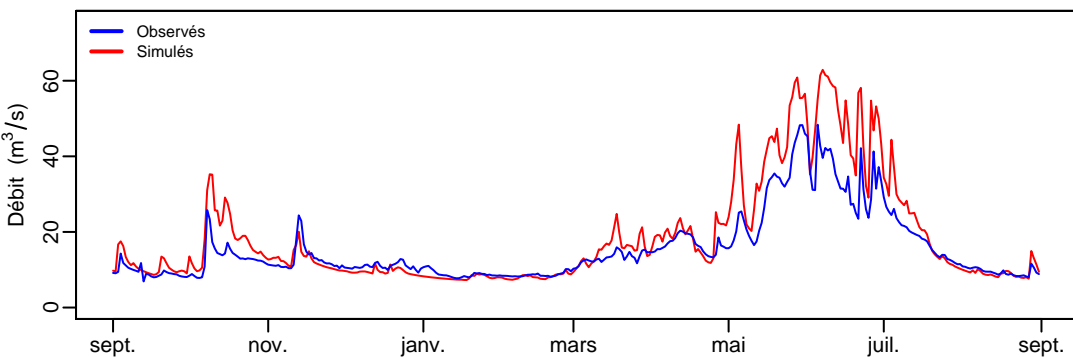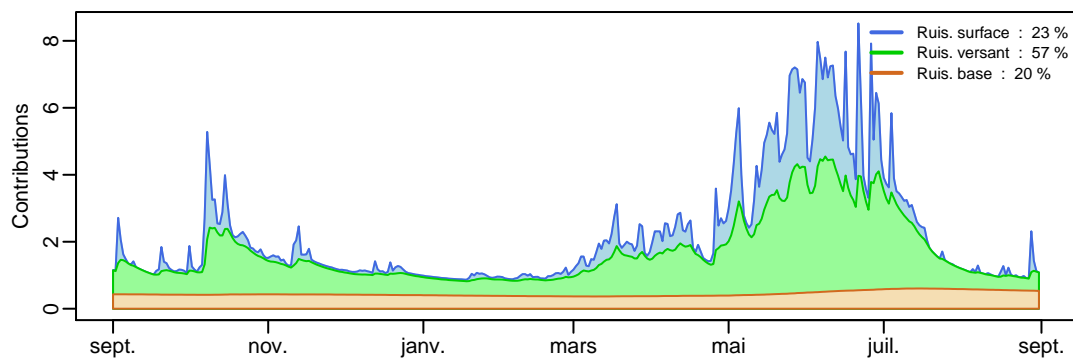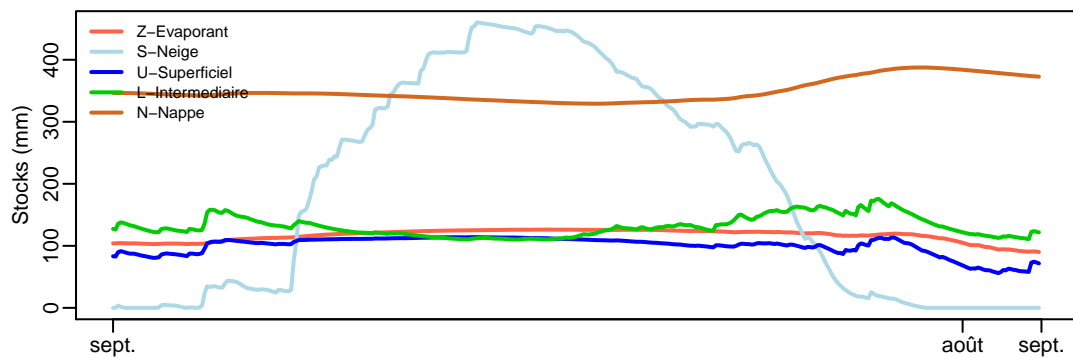

# q0171 (723.02 km²) – année 1997–1998

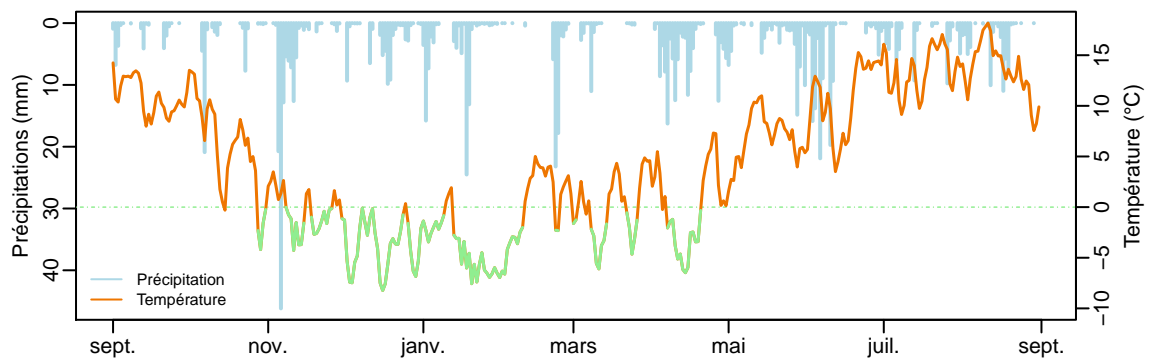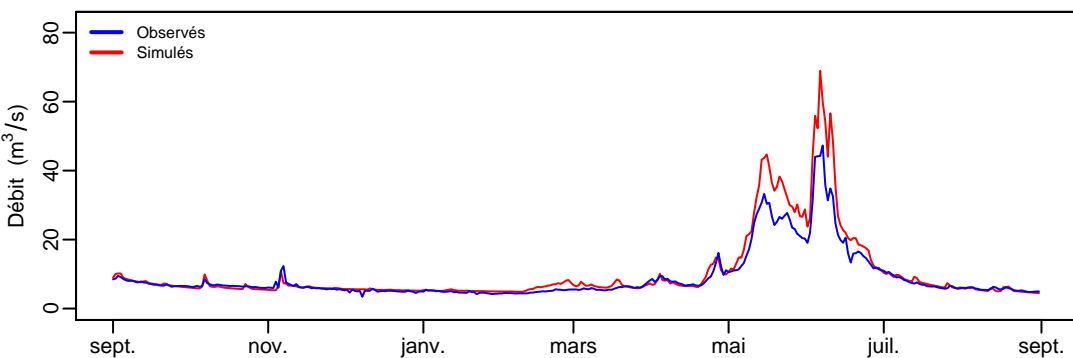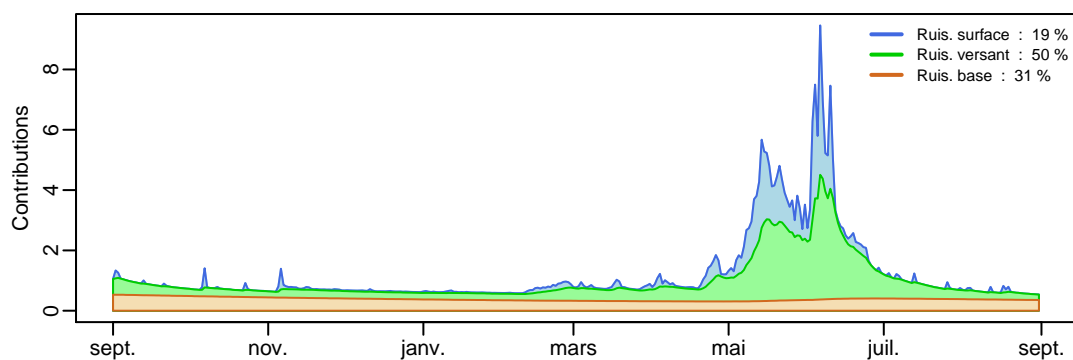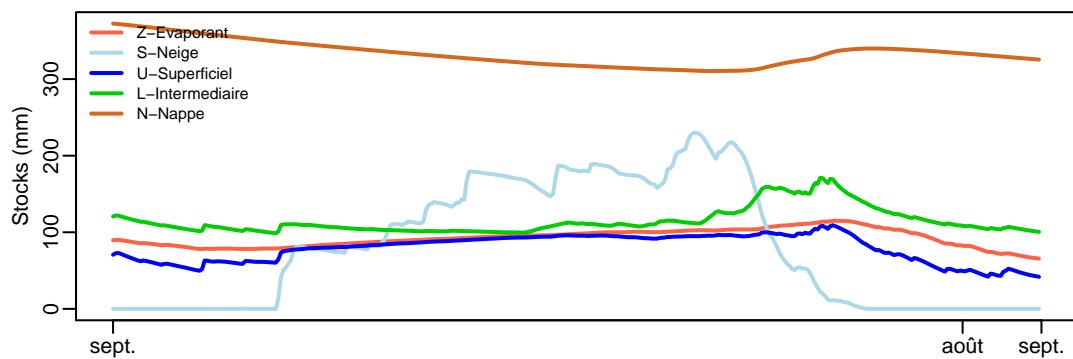

# q0171 (723.02 km²) – année 1998–1999

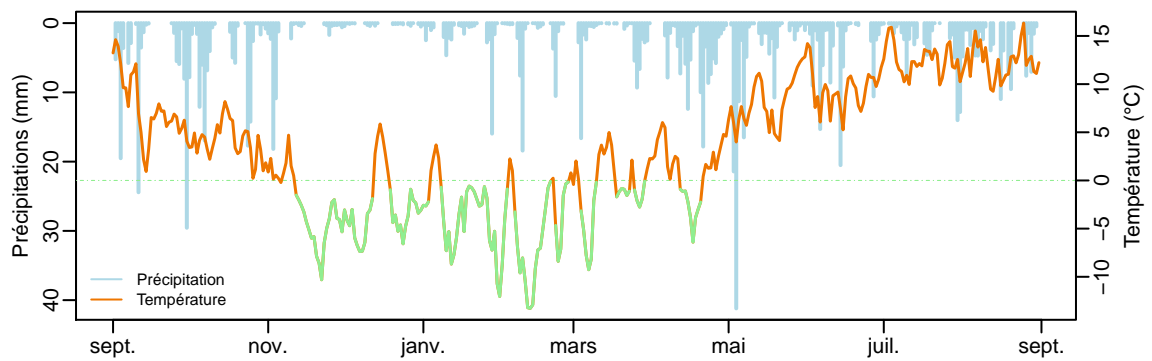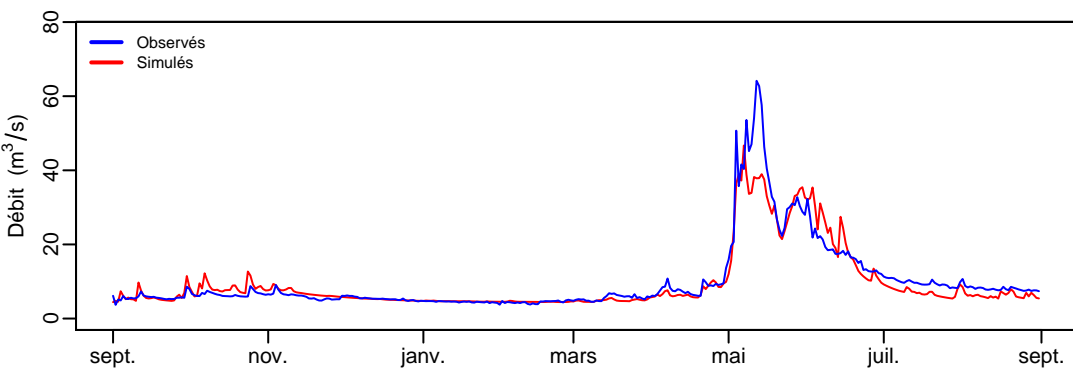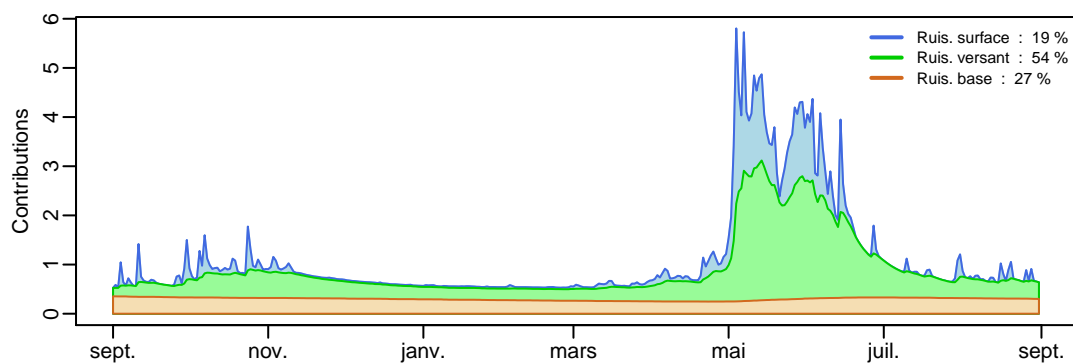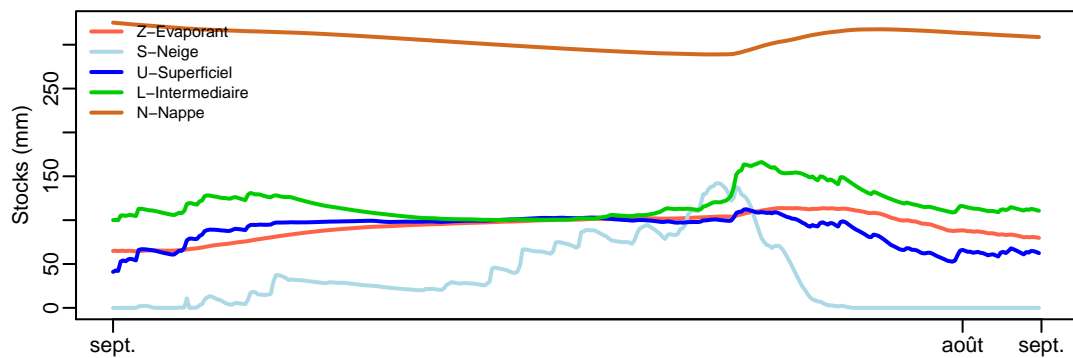

# q0171 (723.02 km<sup>2</sup>) – année 1999–2000

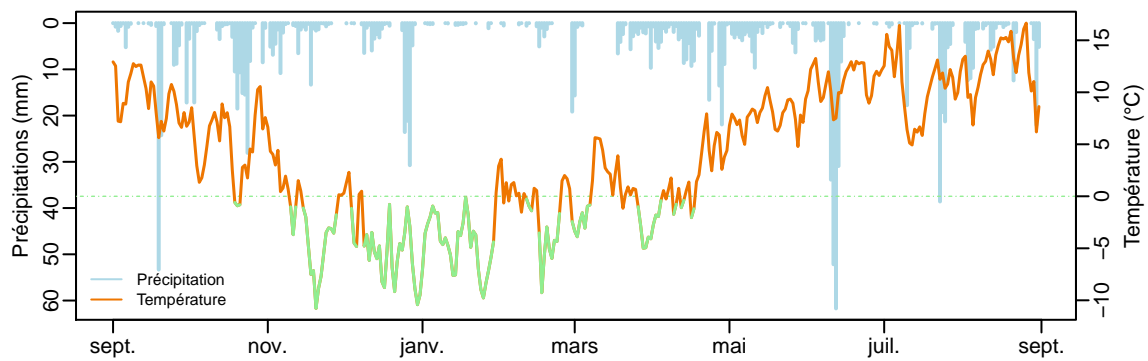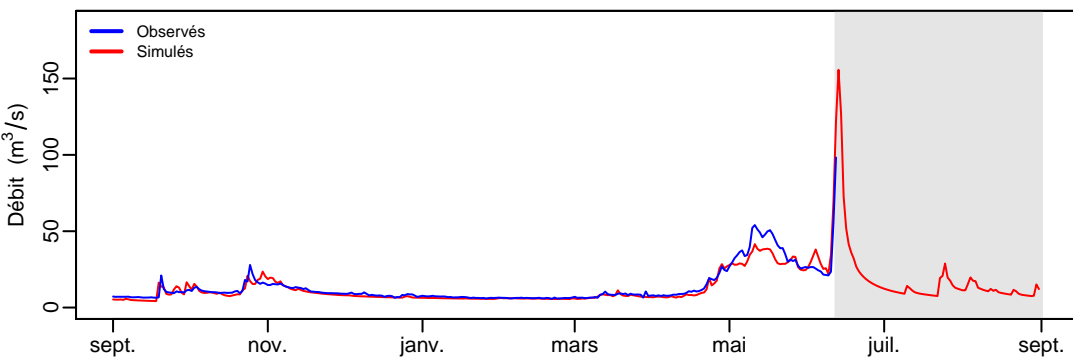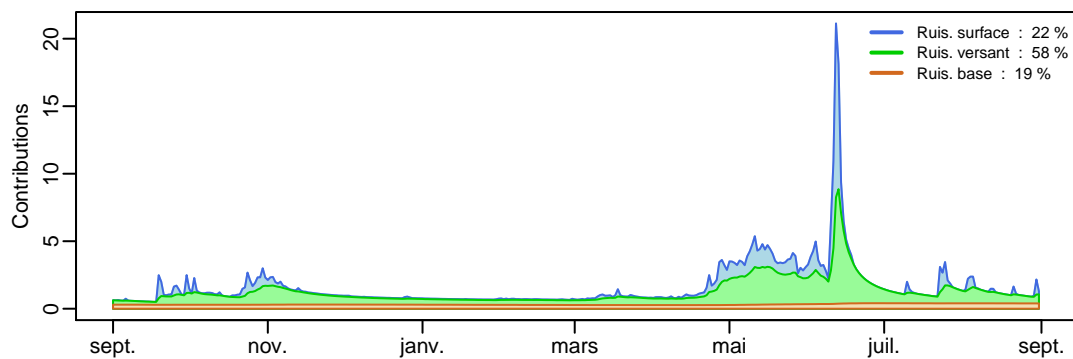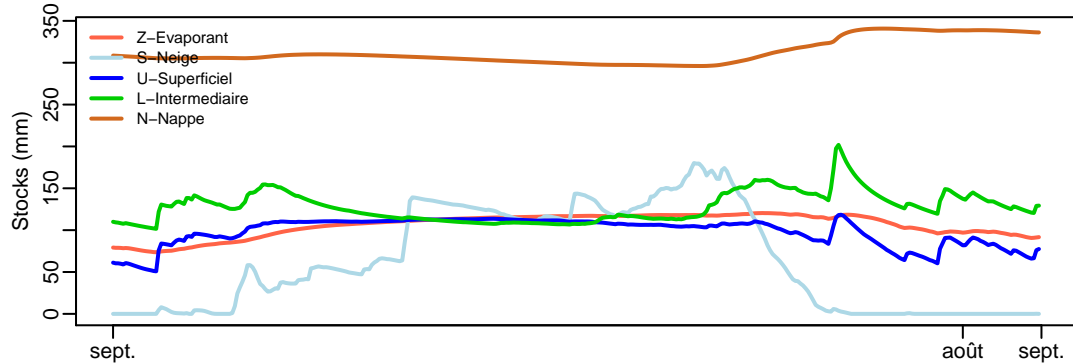



# q0171 (723.02 km<sup>2</sup>) – année 2000–2001

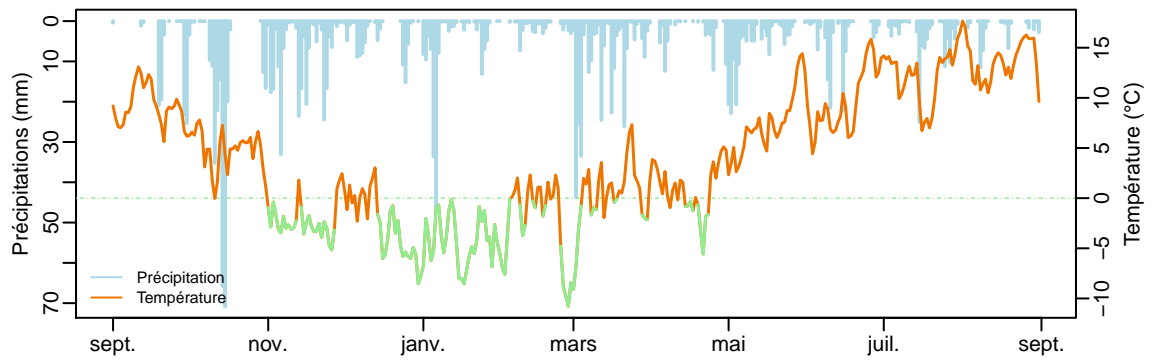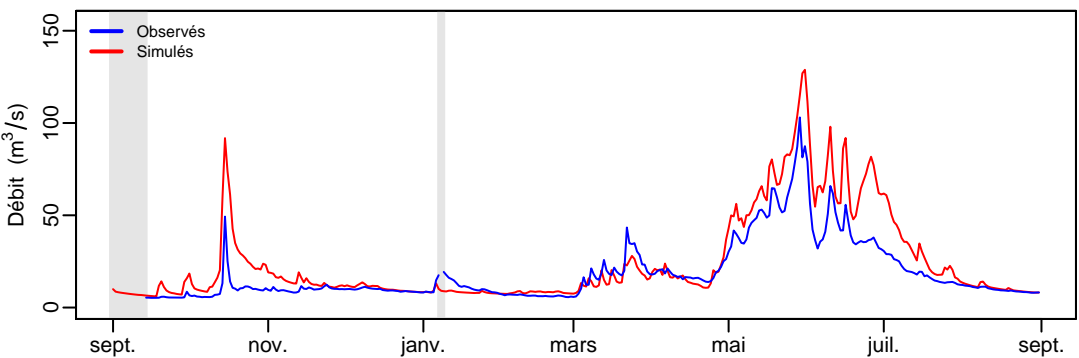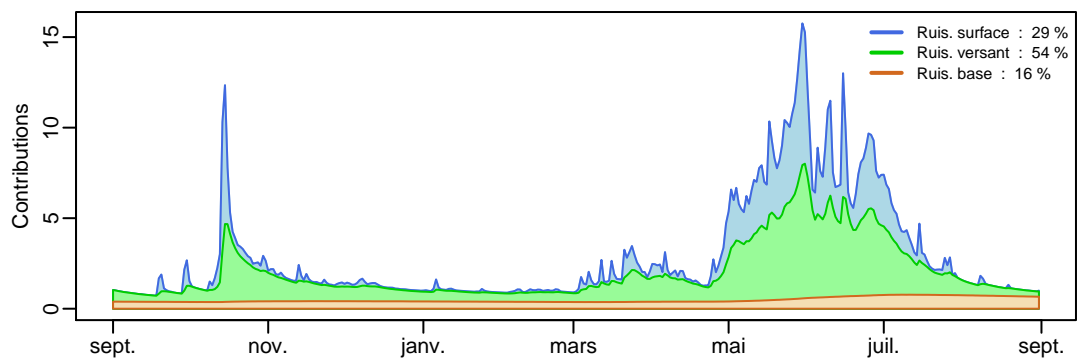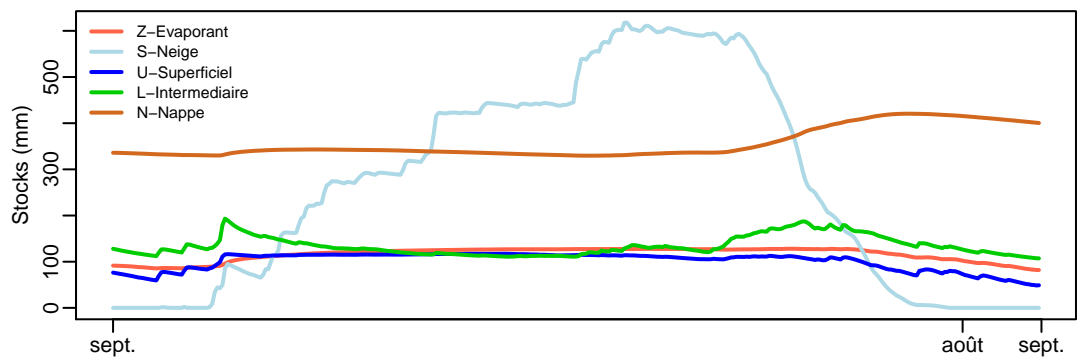

# q0171 (723.02 km<sup>2</sup>) – année 2001–2002

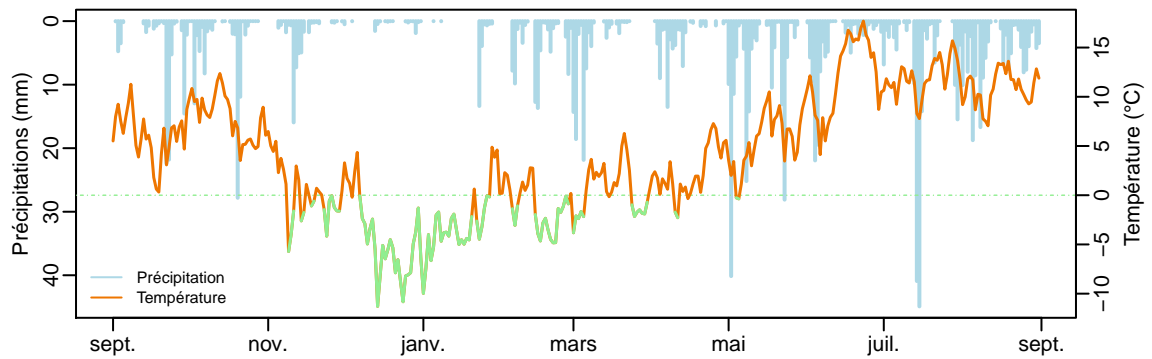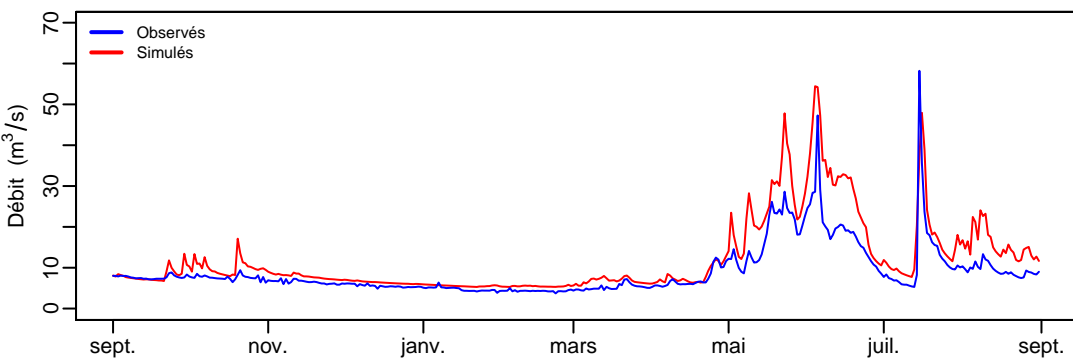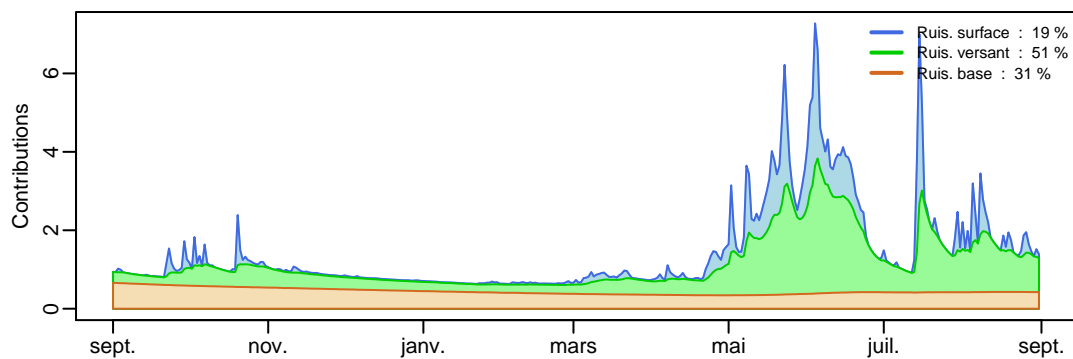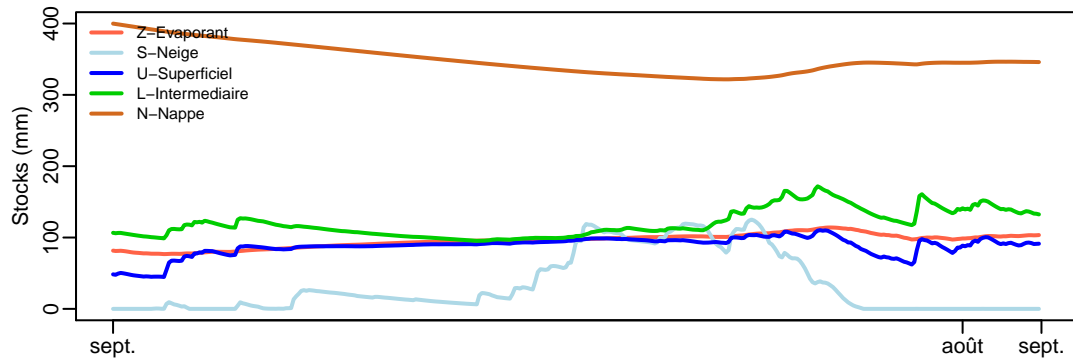

# q0171 (723.02 km²) – année 2002–2003

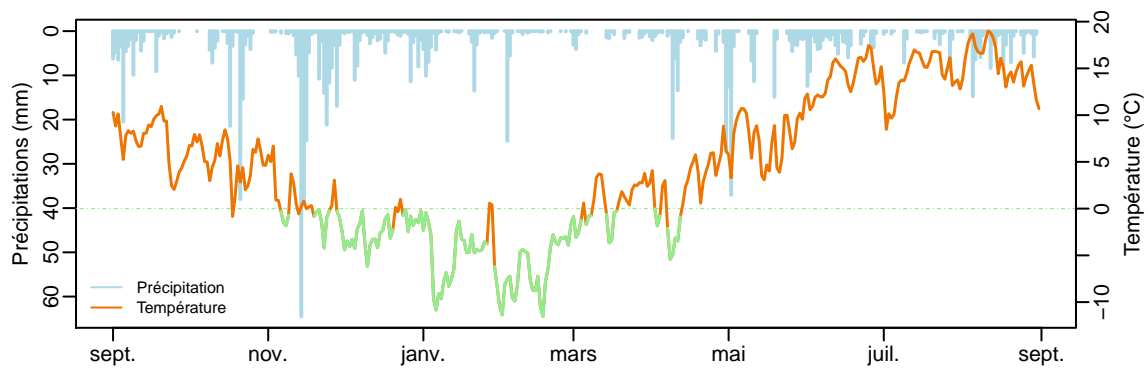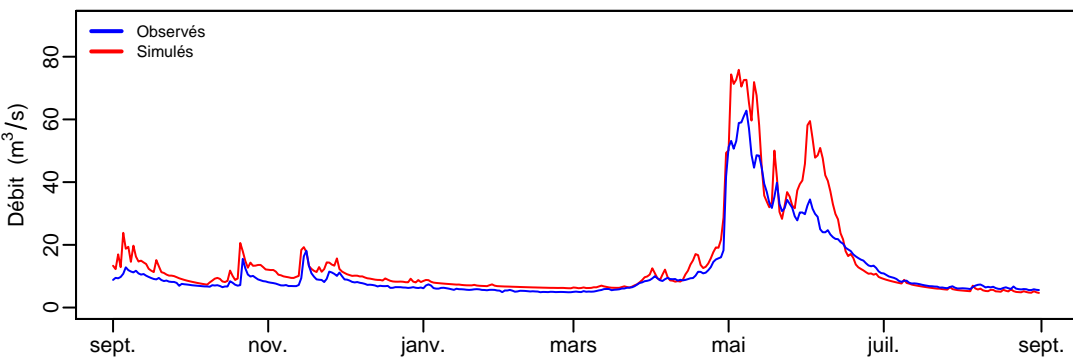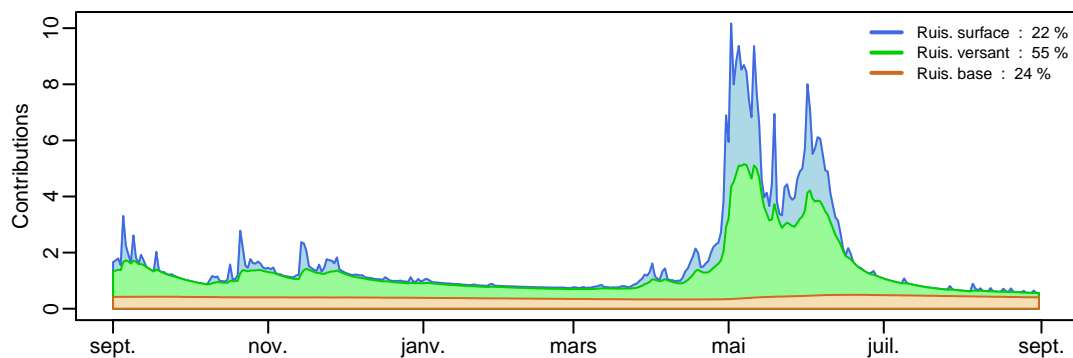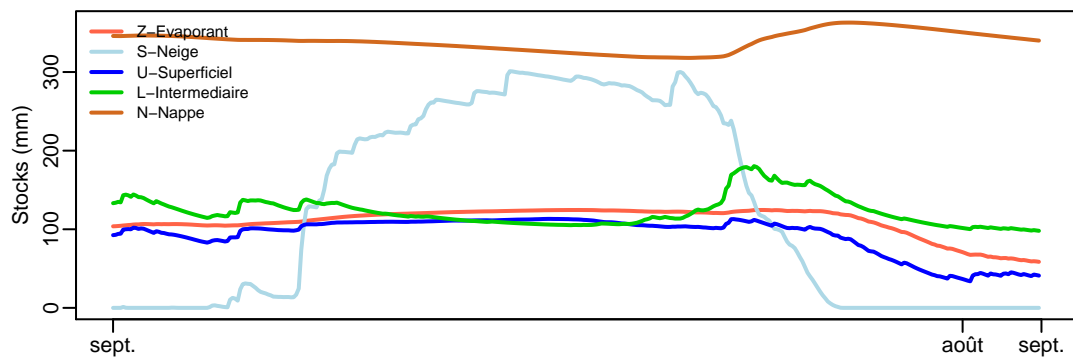

# q0171 (723.02 km<sup>2</sup>) – année 2003–2004

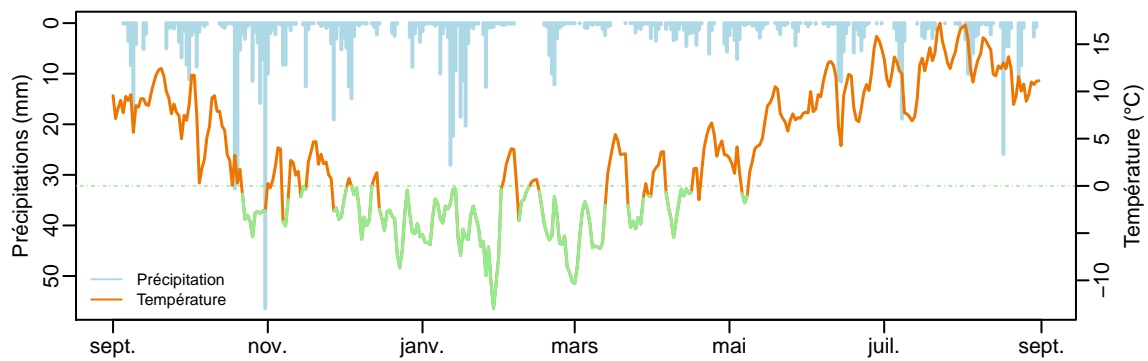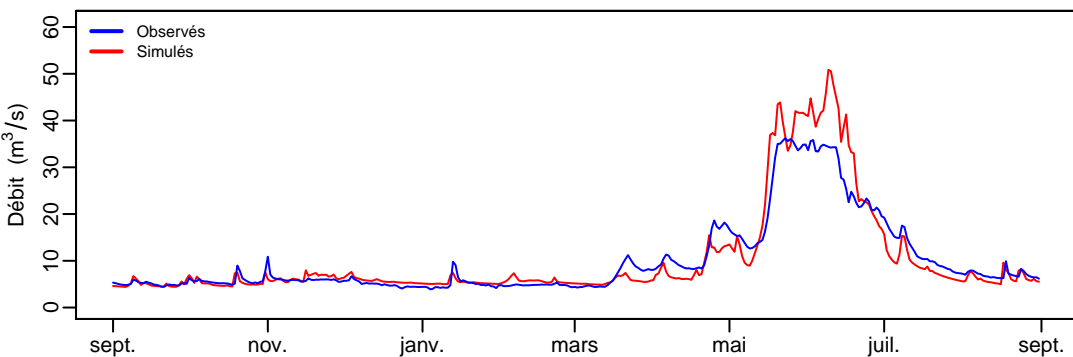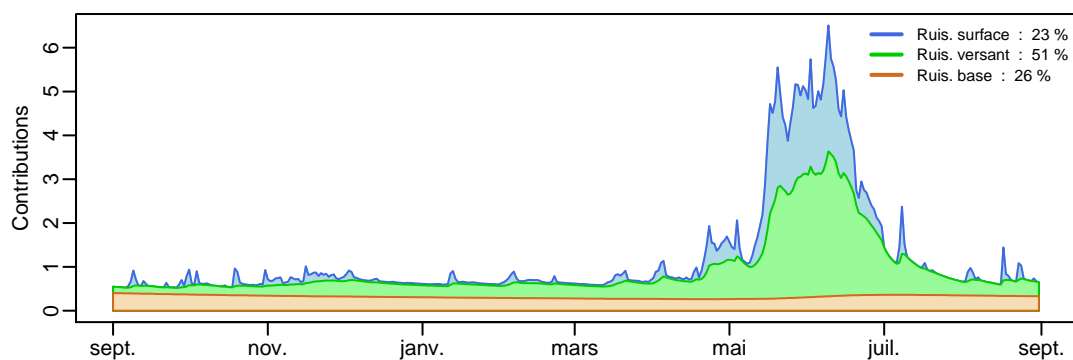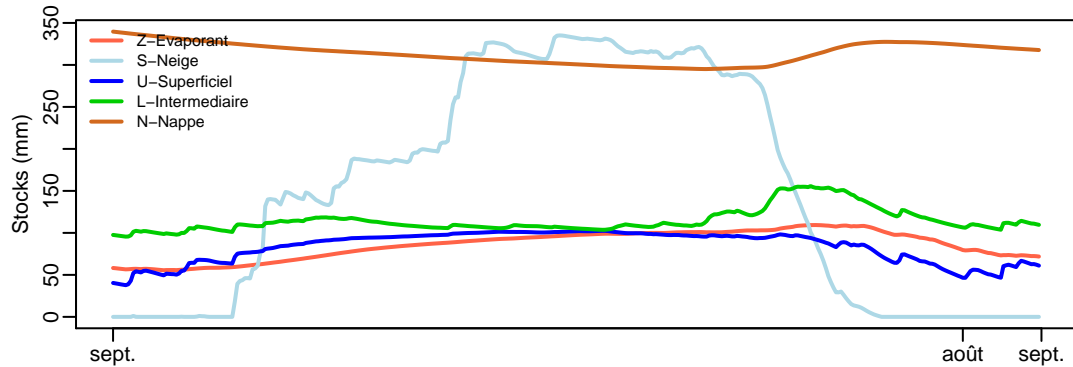

# q0171 (723.02 km²) – année 2004–2005

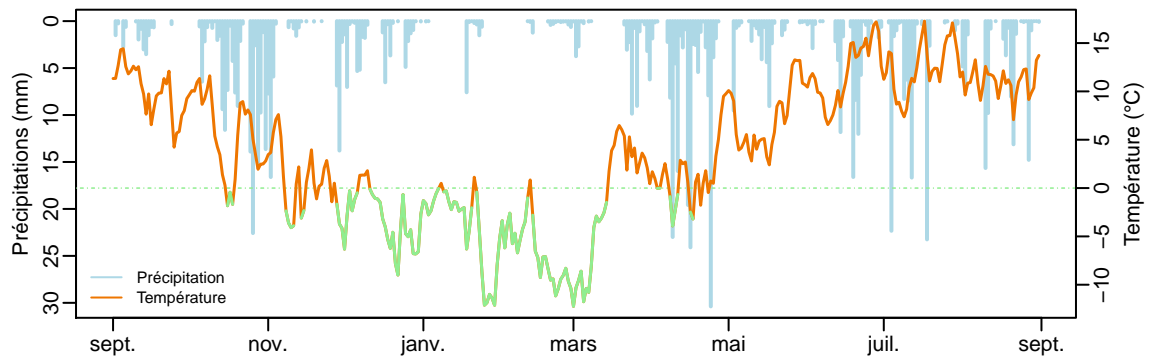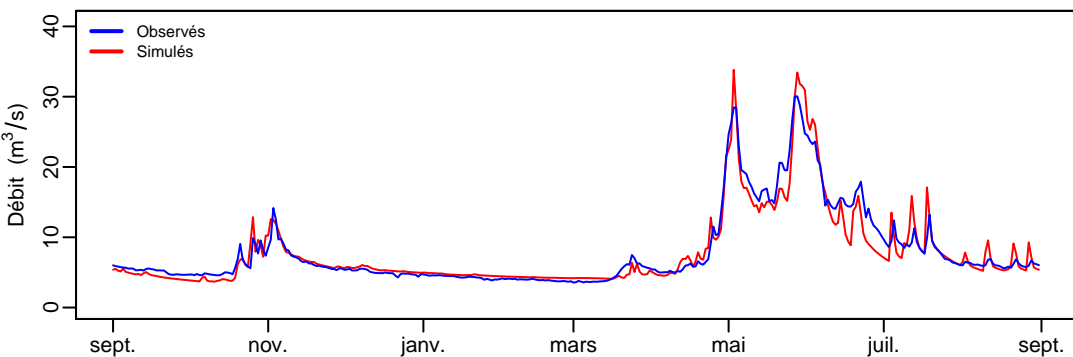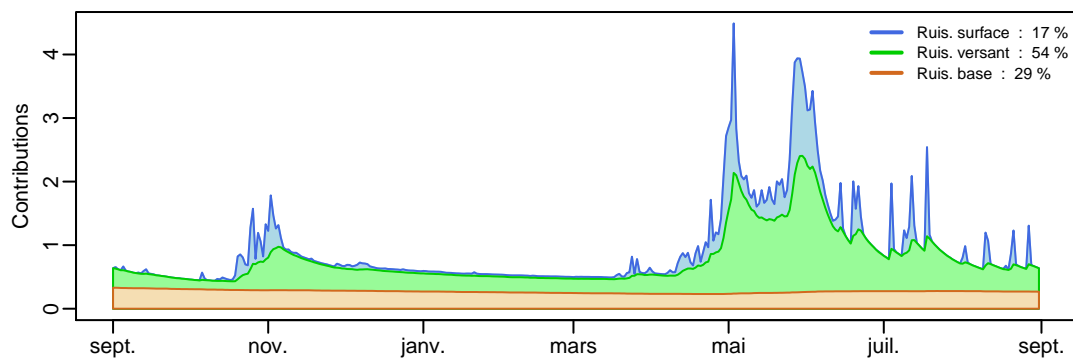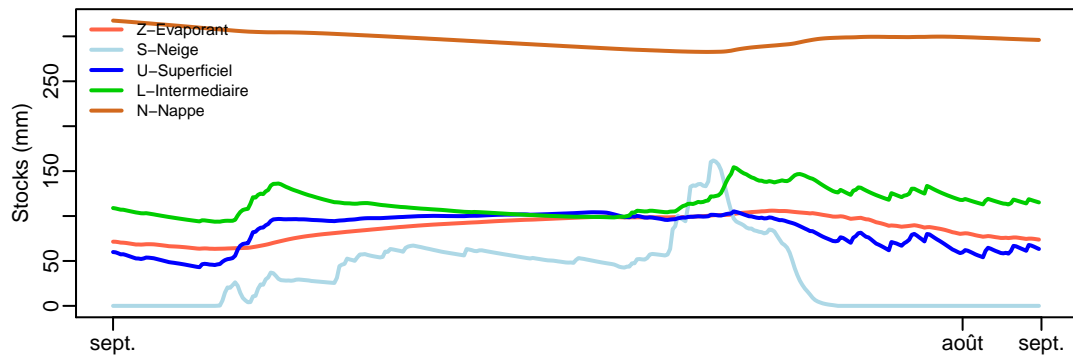

# q0171 (723.02 km<sup>2</sup>) – année 2005–2006

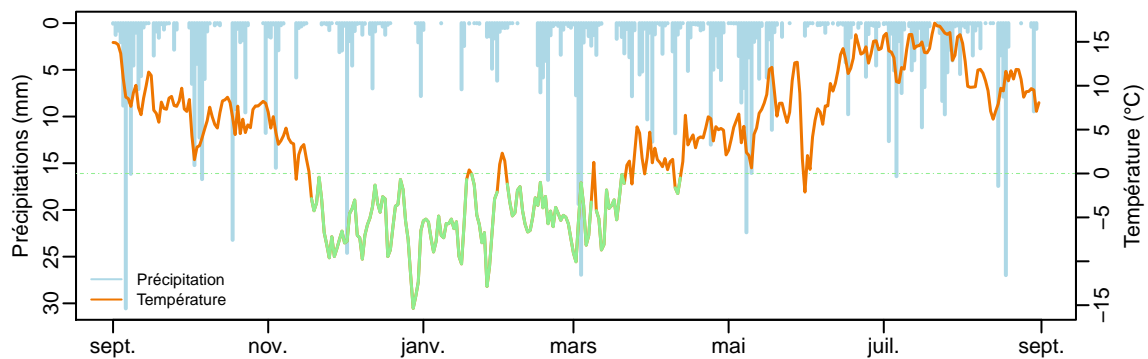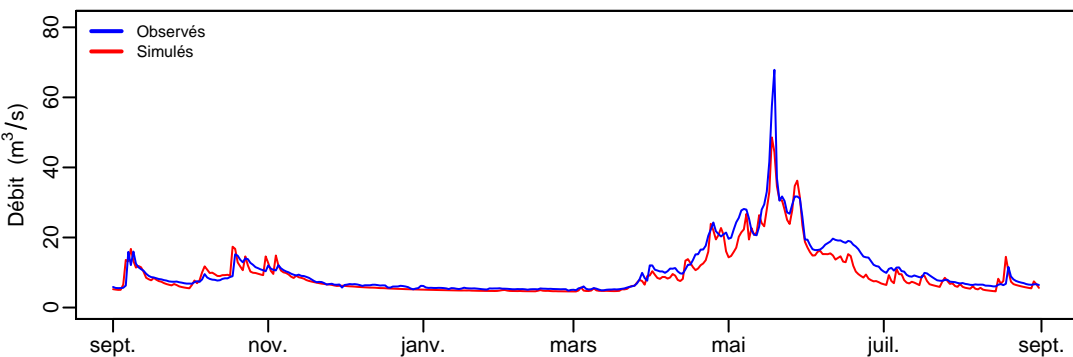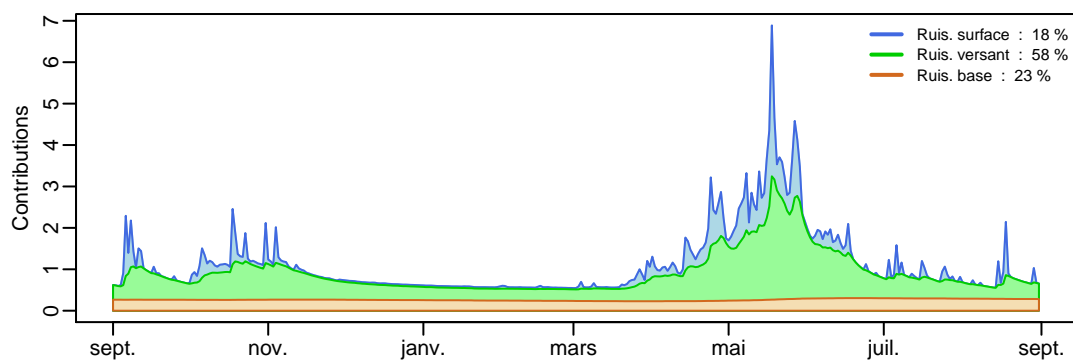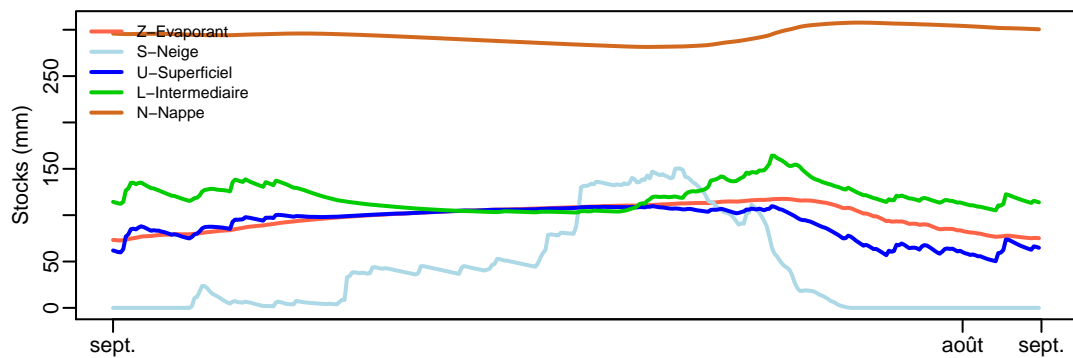

# q0174 (417.87 km²) – année 2004–2005

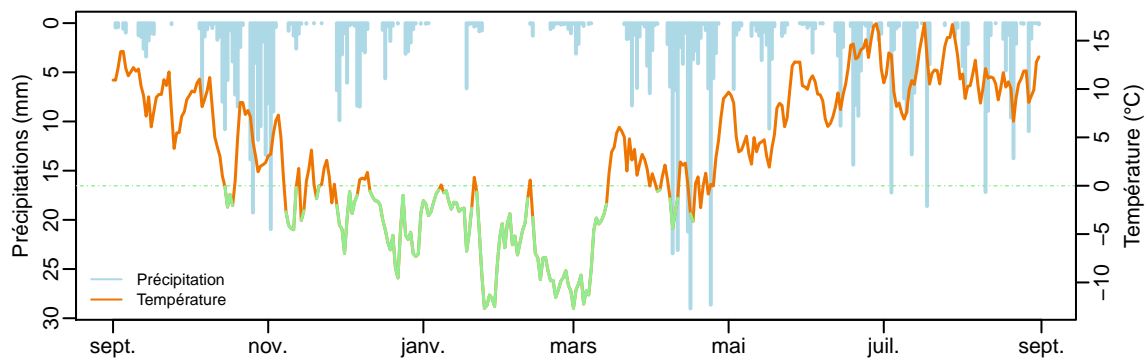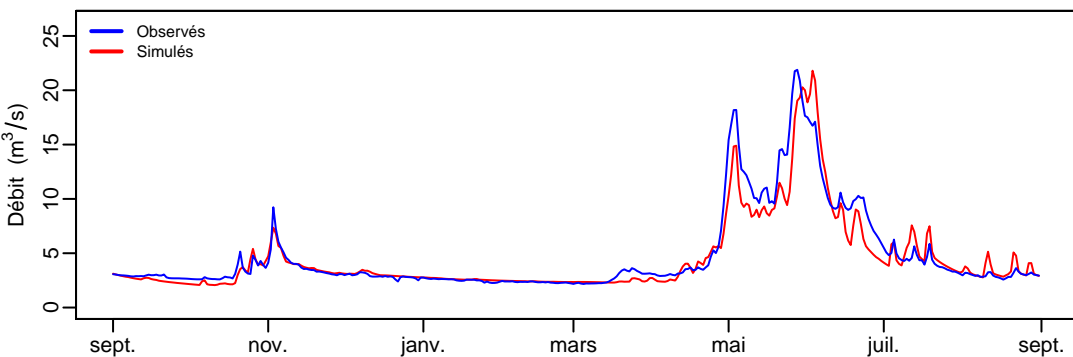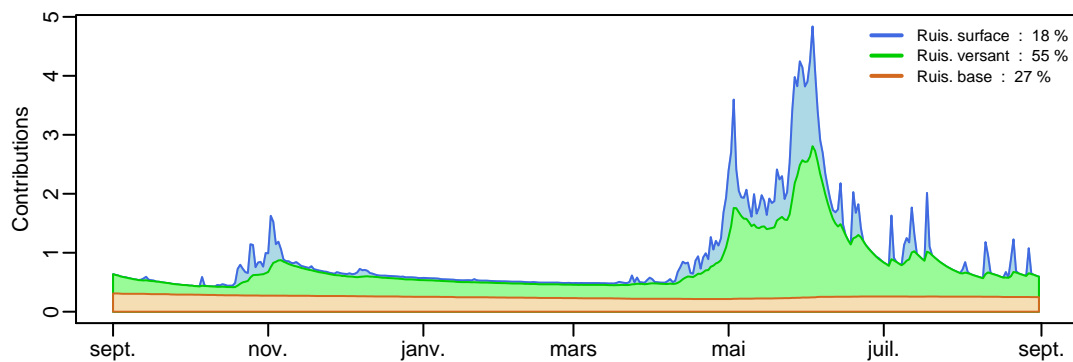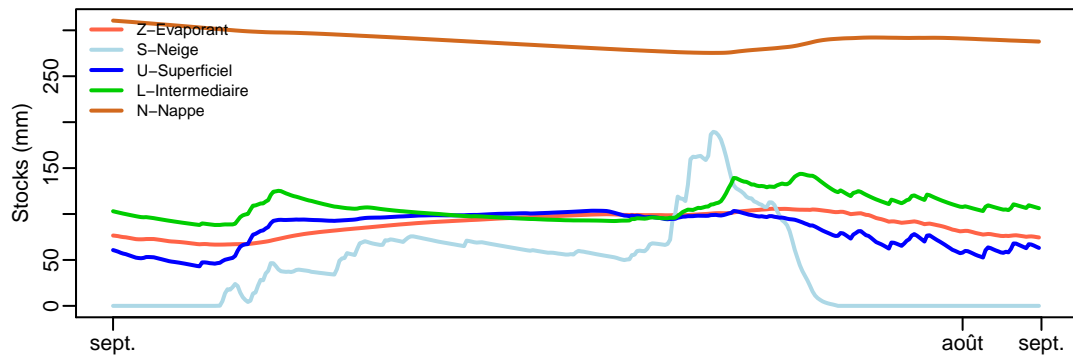

# q0174 (417.87 km<sup>2</sup>) – année 2005–2006

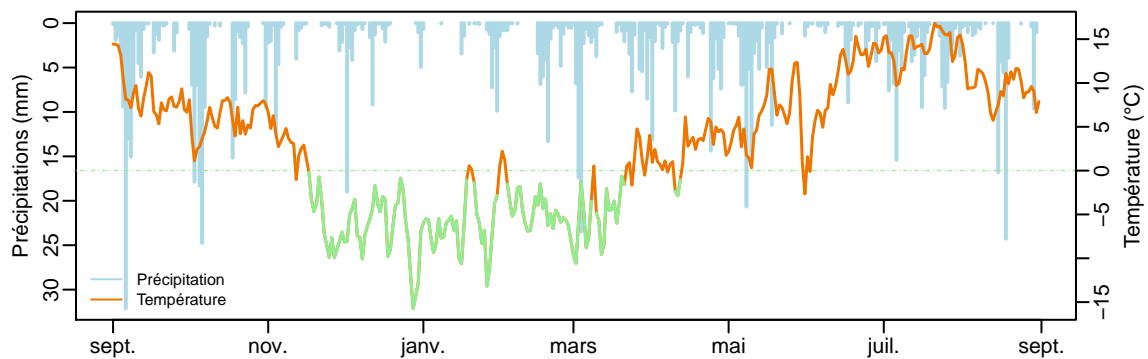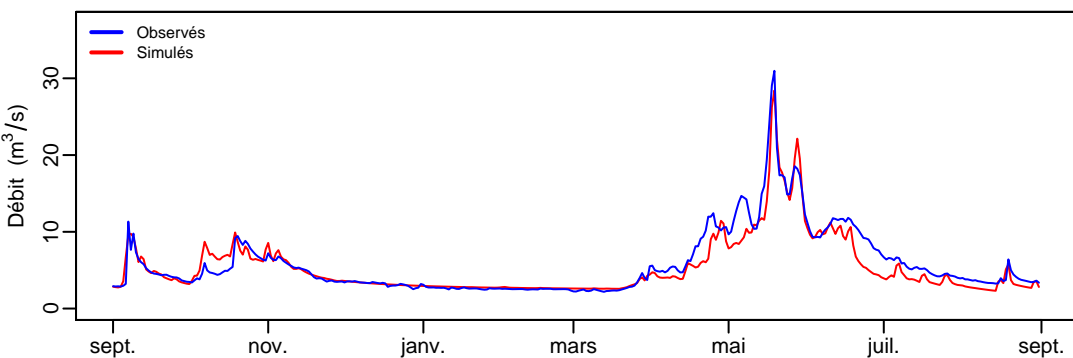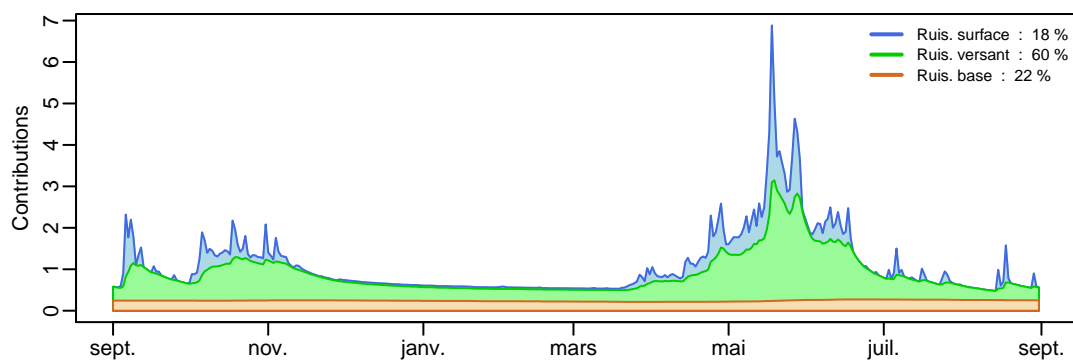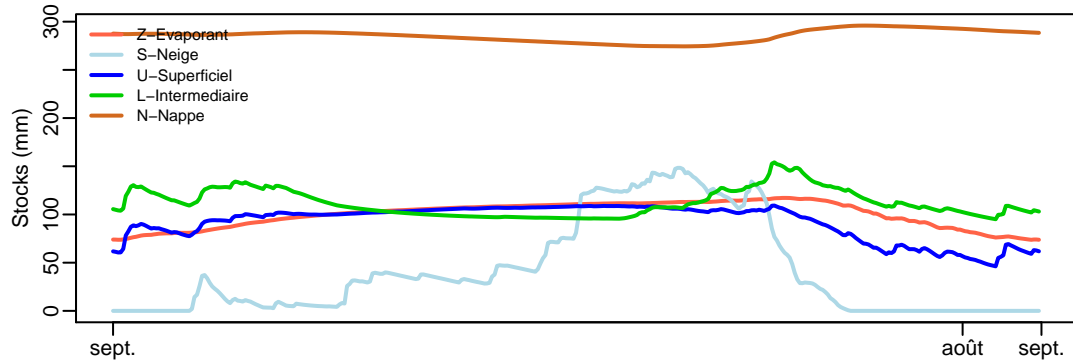



# q0174 (417.87 km²) – année 2006–2007

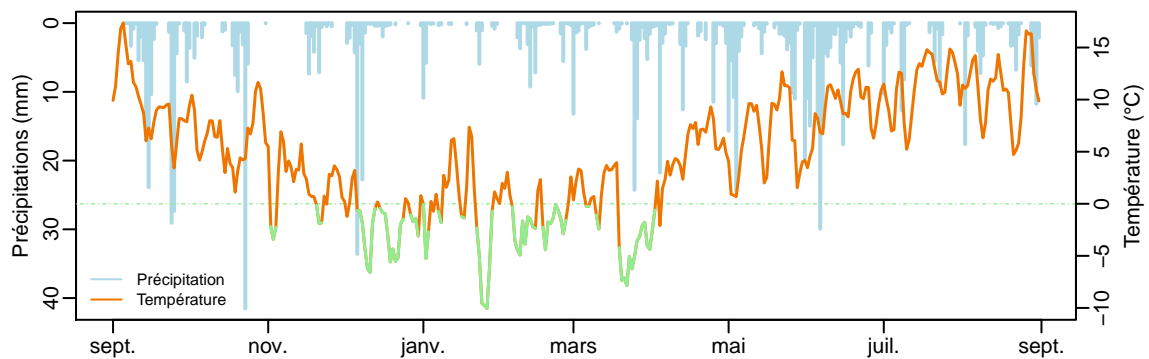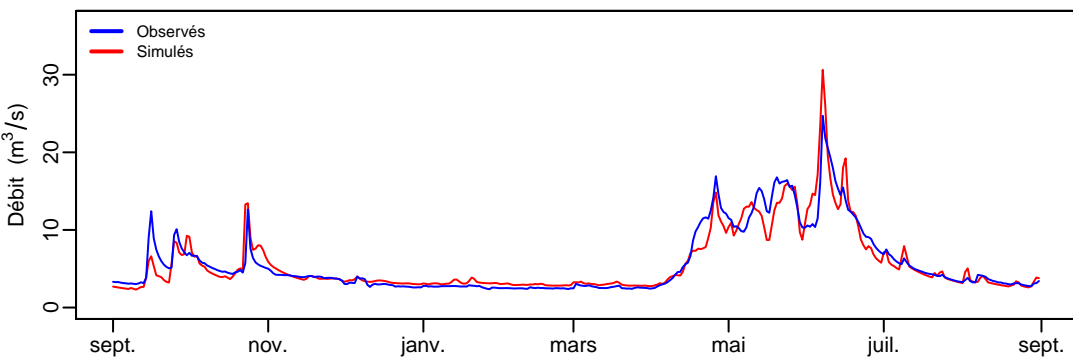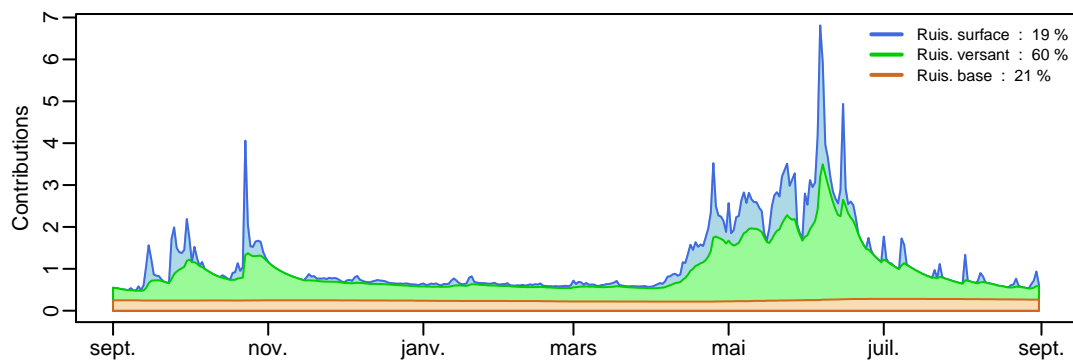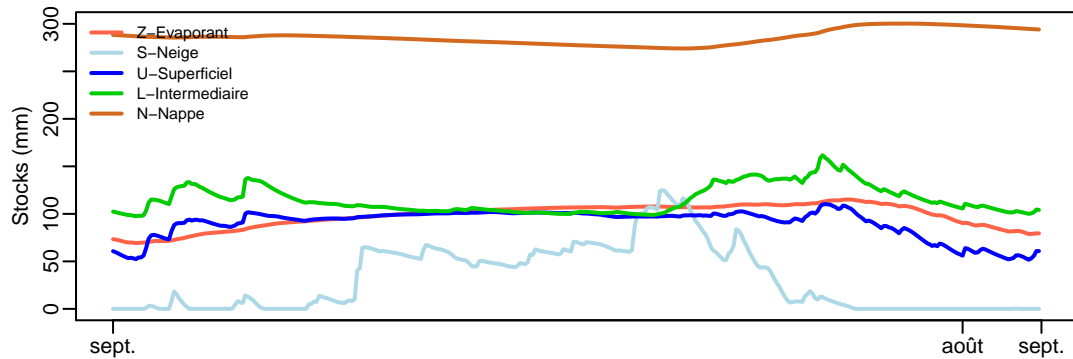

# q0174 (417.87 km<sup>2</sup>) – année 2007–2008

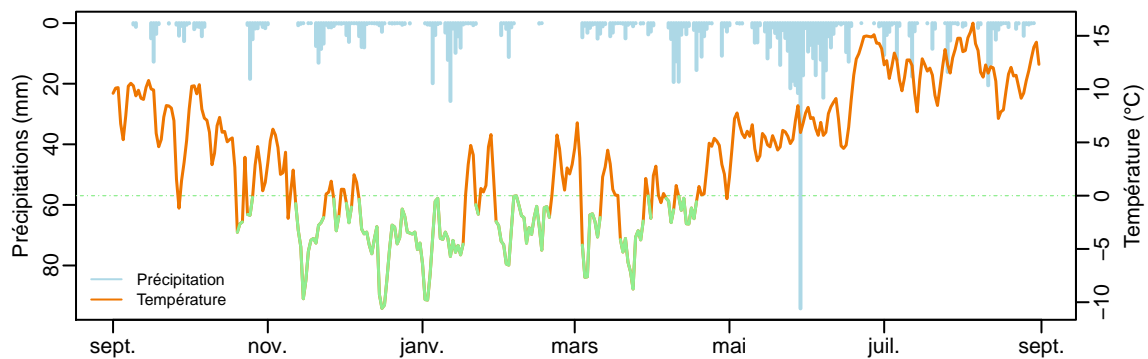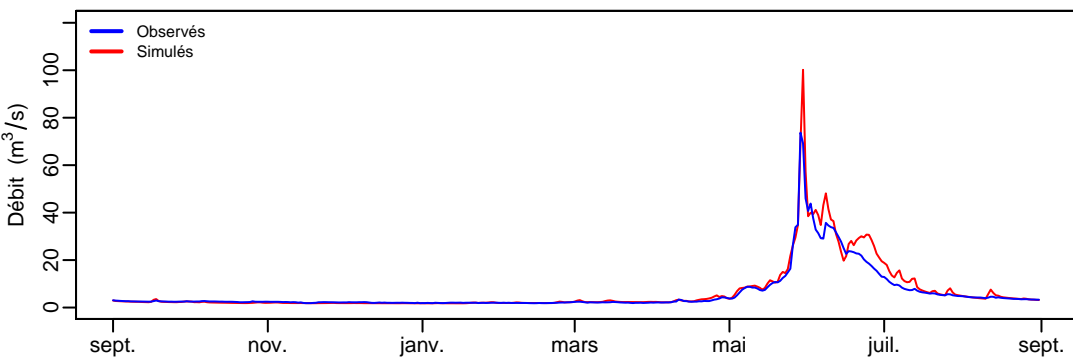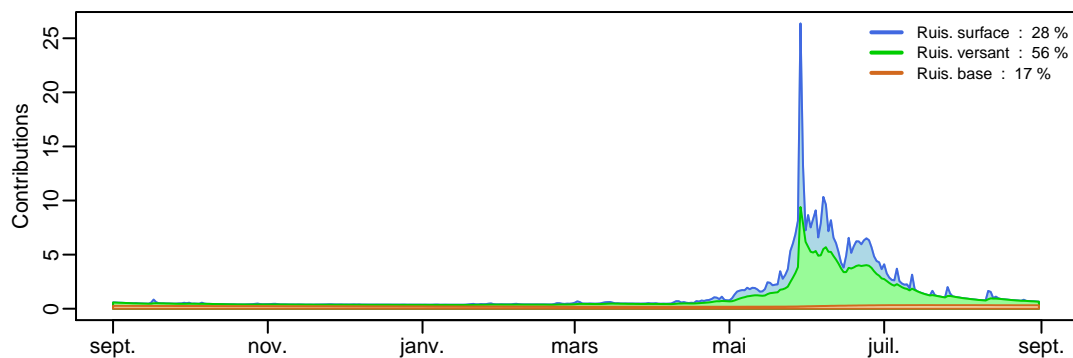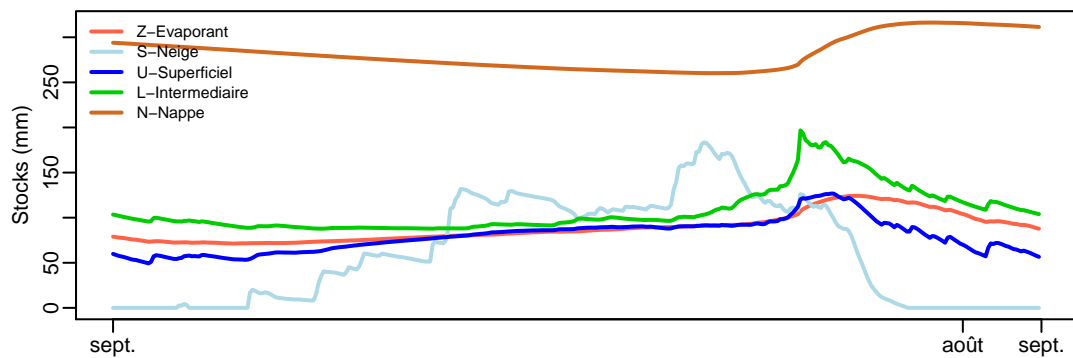

# q0174 (417.87 km<sup>2</sup>) – année 2008–2009

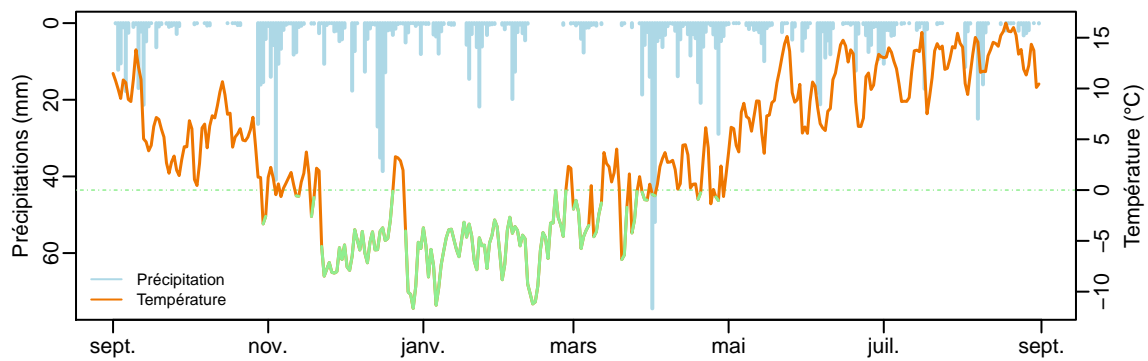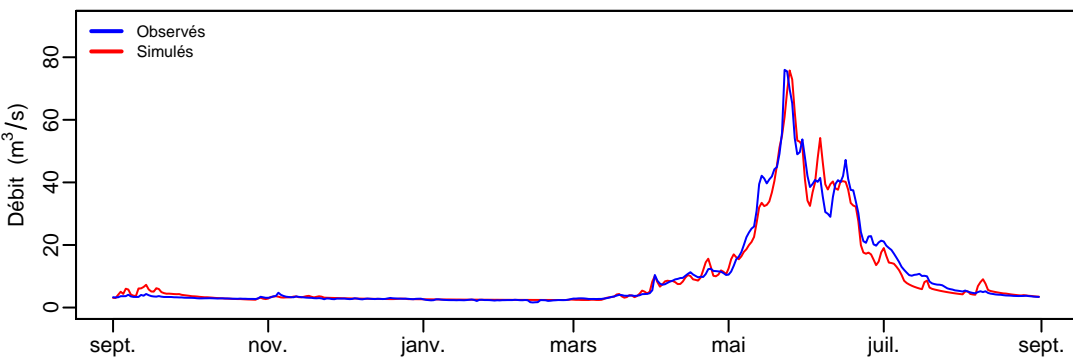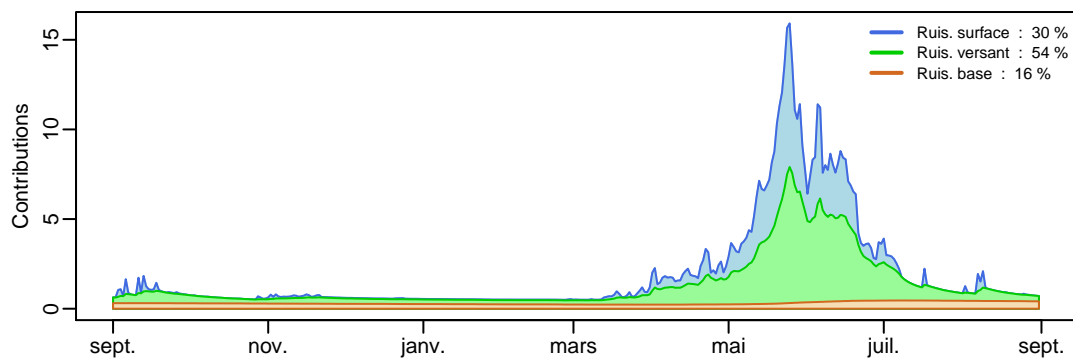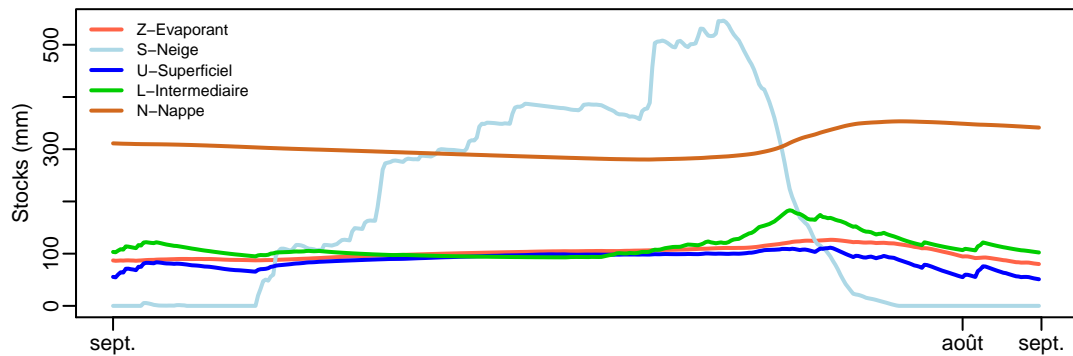

# q0174 (417.87 km<sup>2</sup>) – année 2009–2010

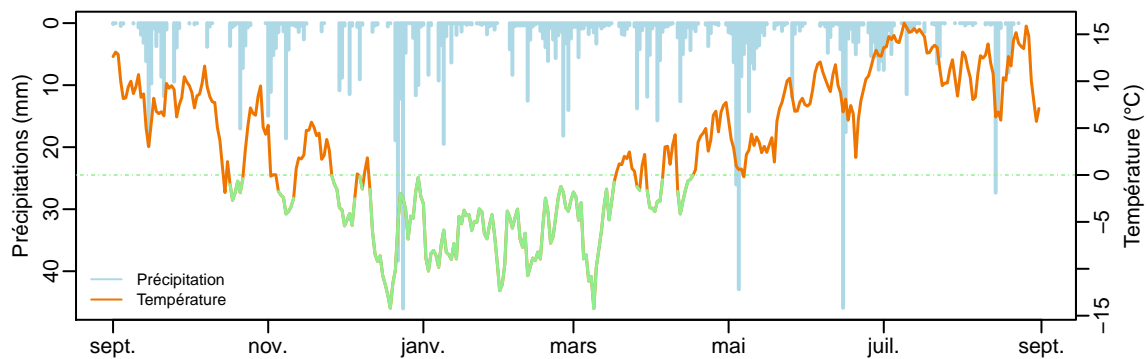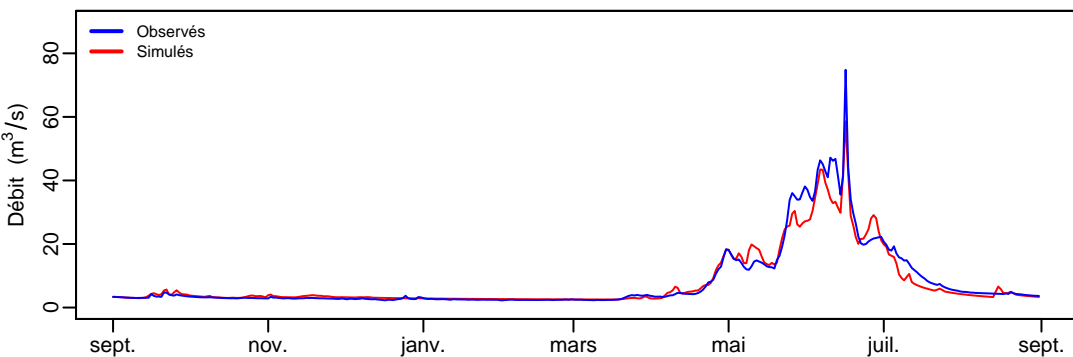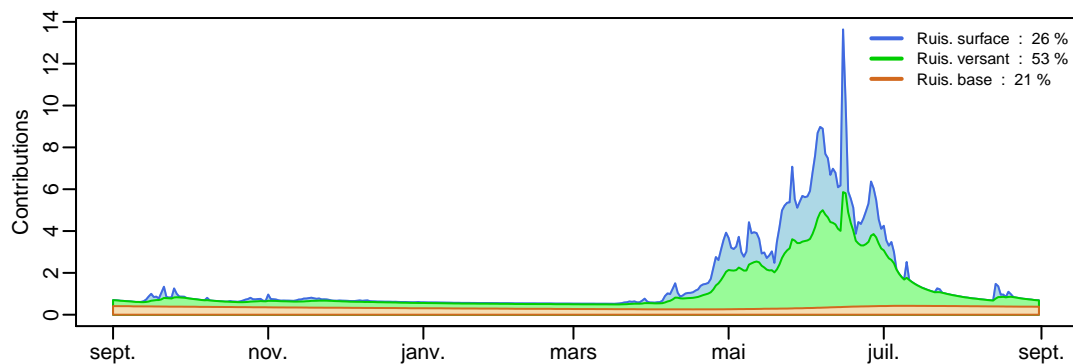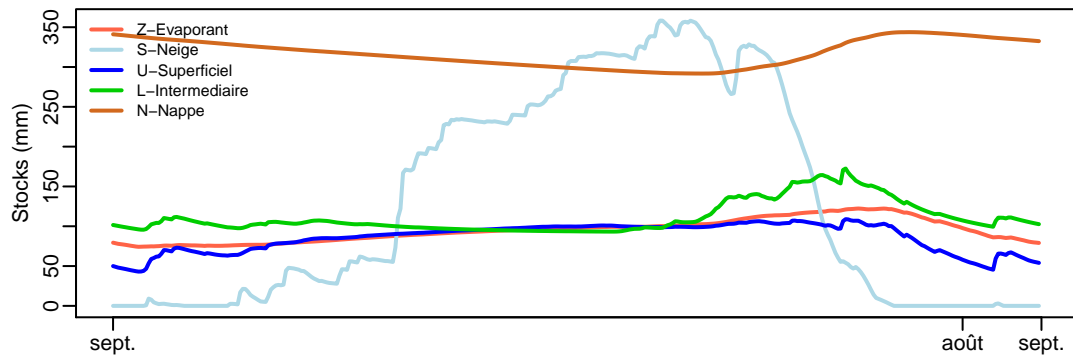

# q0174 (417.87 km<sup>2</sup>) – année 2010–2011

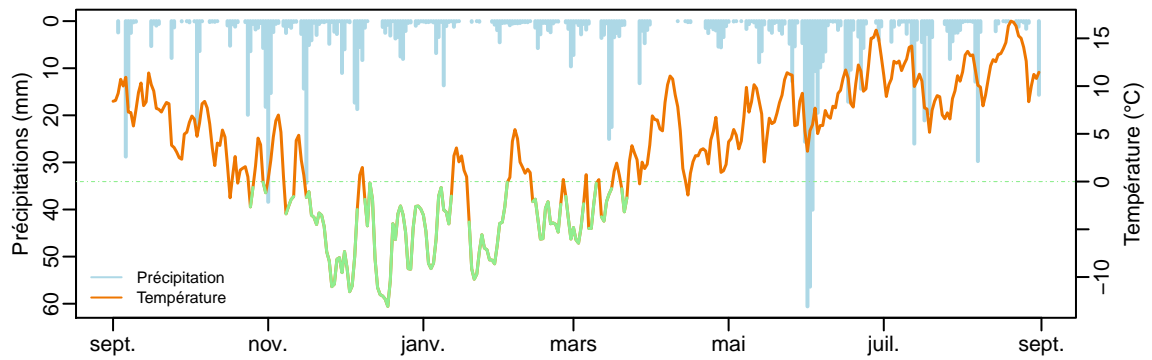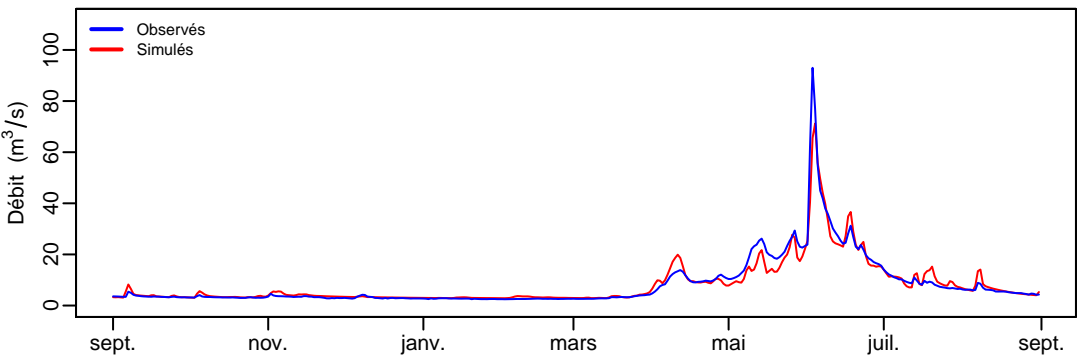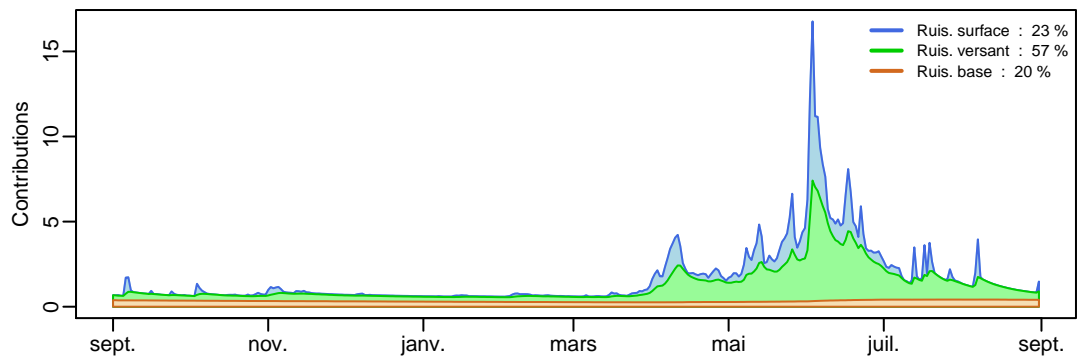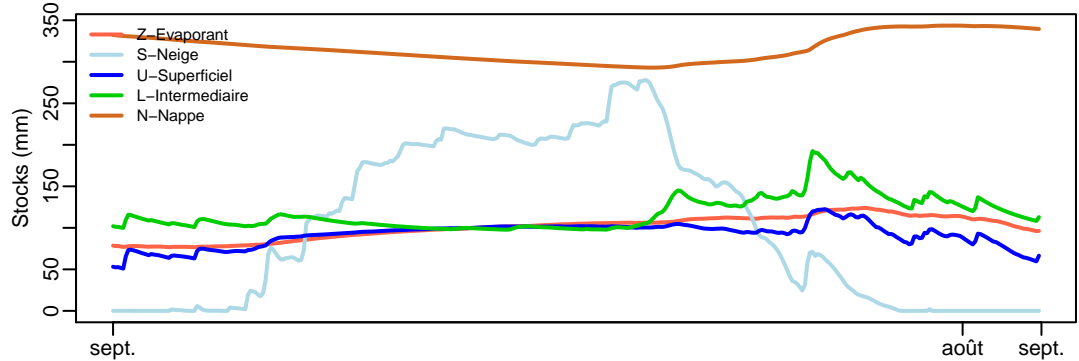

# q0174 (417.87 km<sup>2</sup>) – année 2011–2012

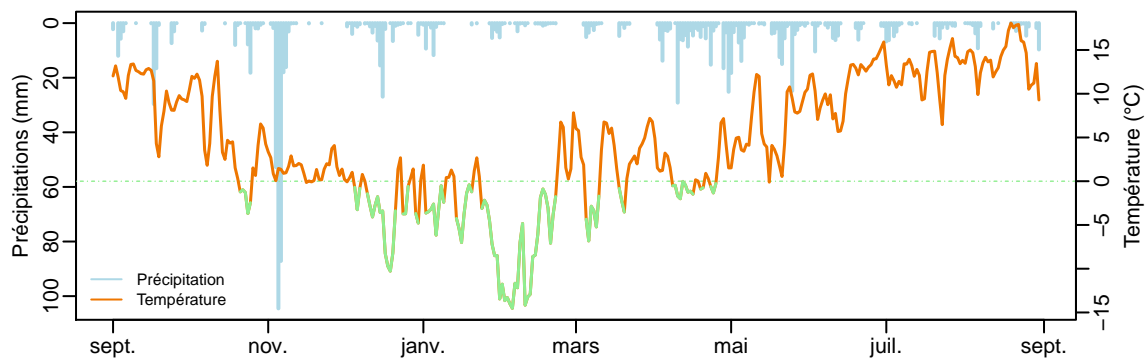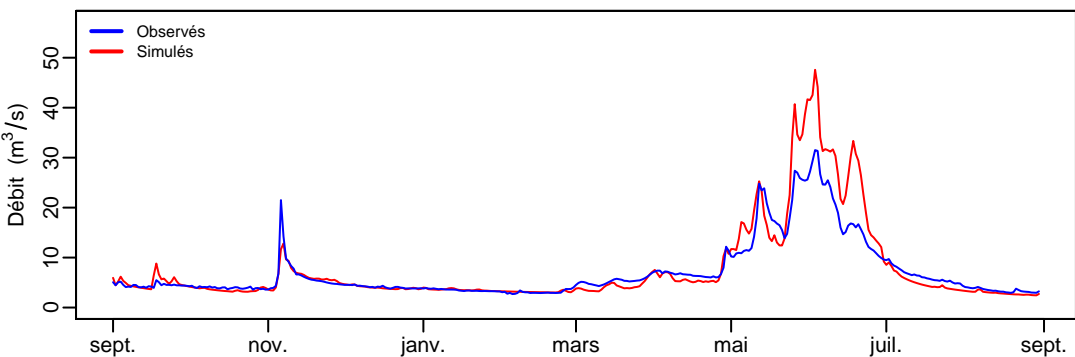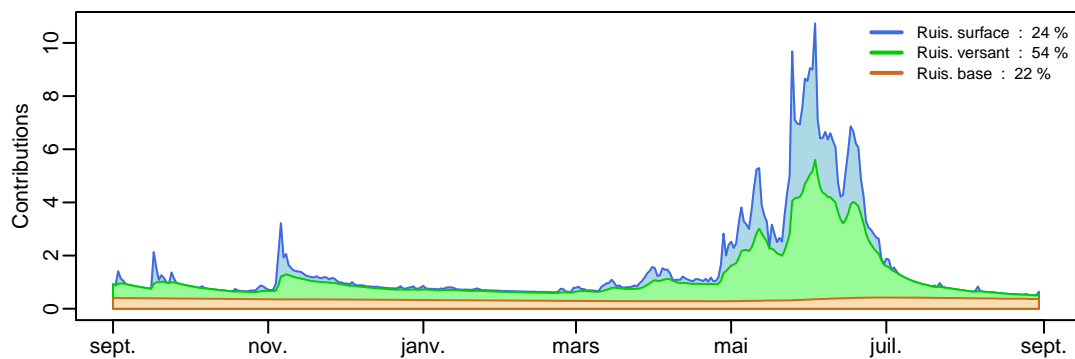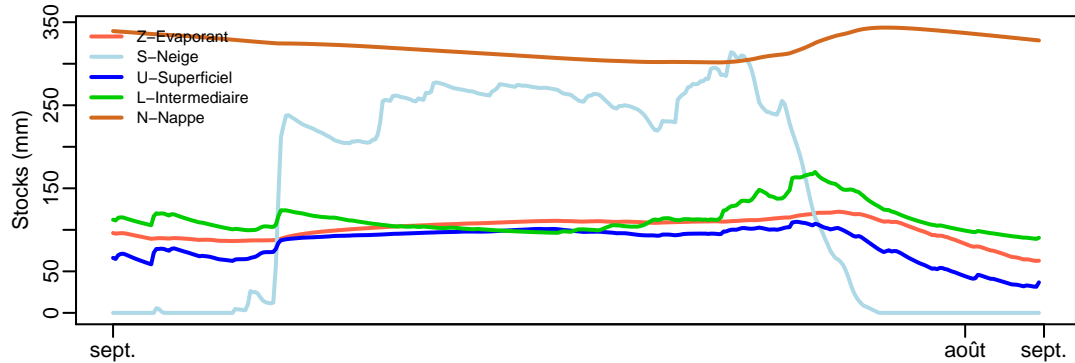

# q0204 (731.66 km²) – année 1981–1982

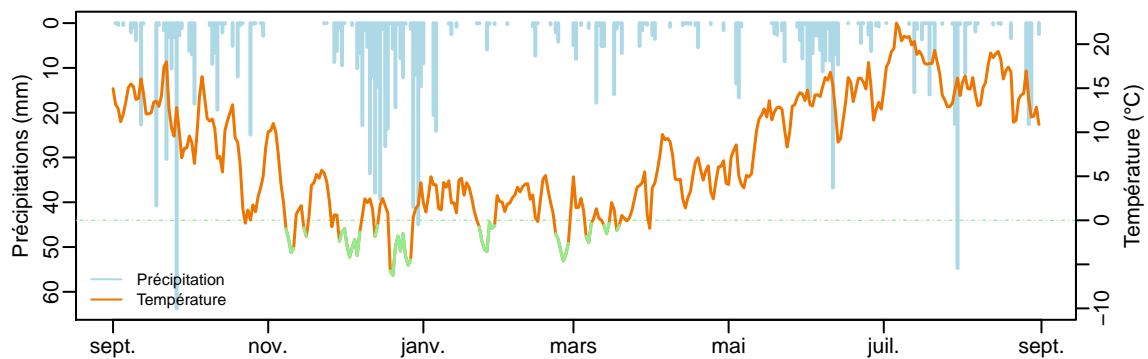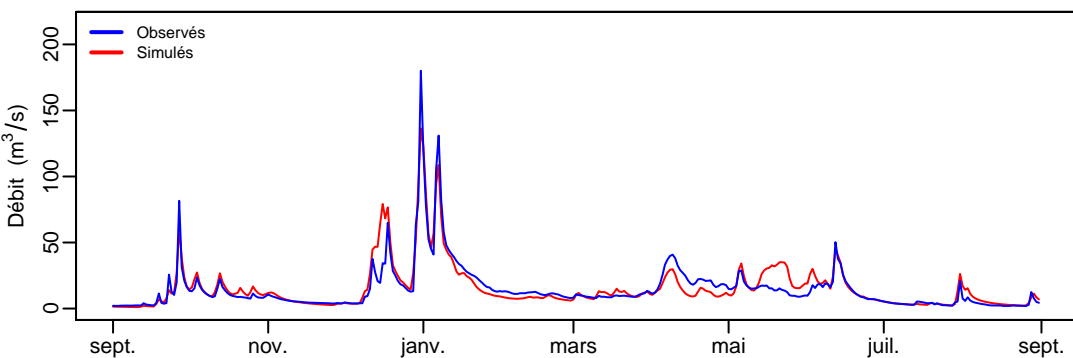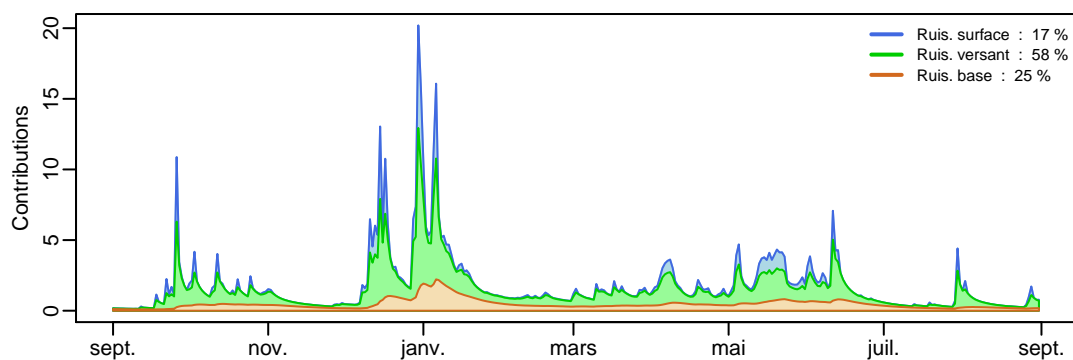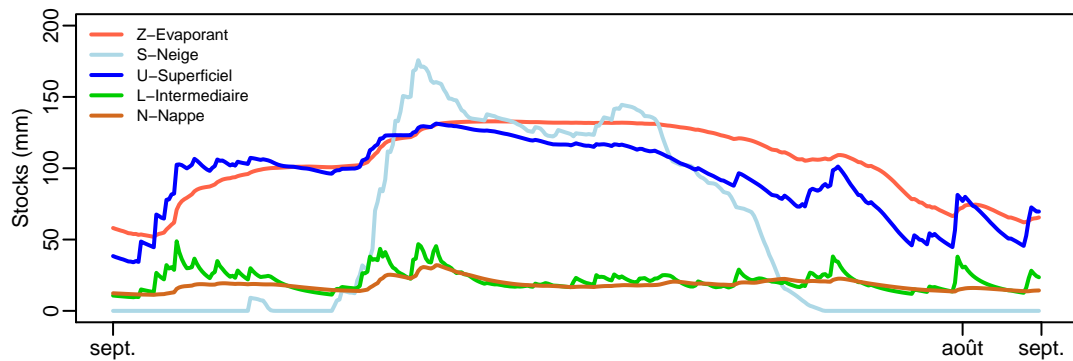

# q0204 (731.66 km²) – année 1982–1983

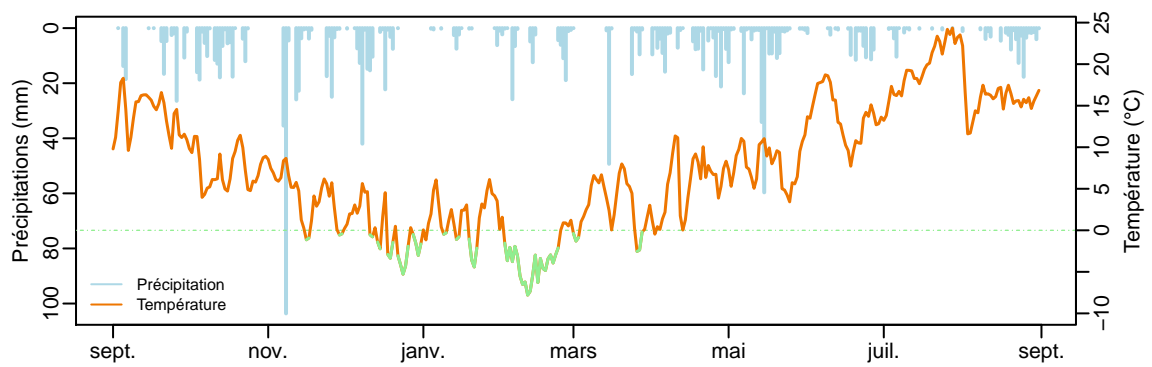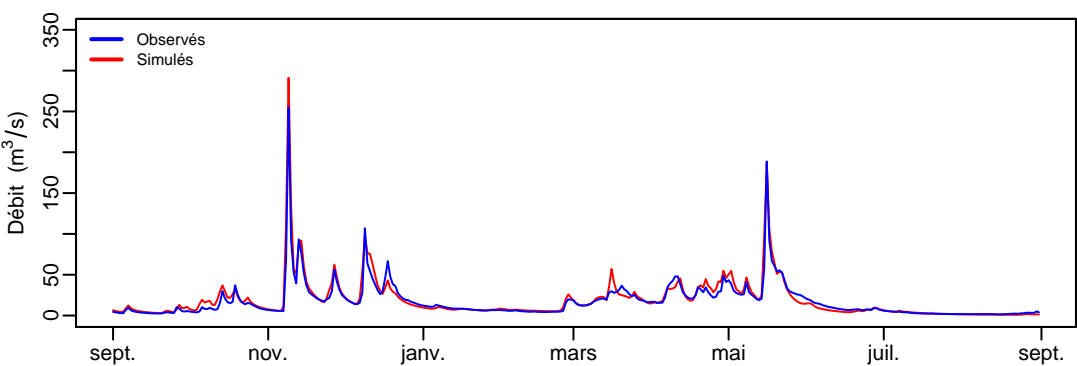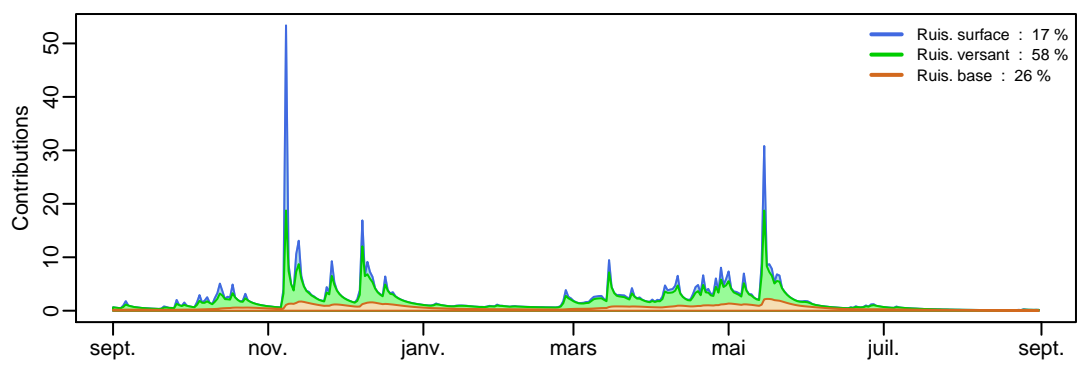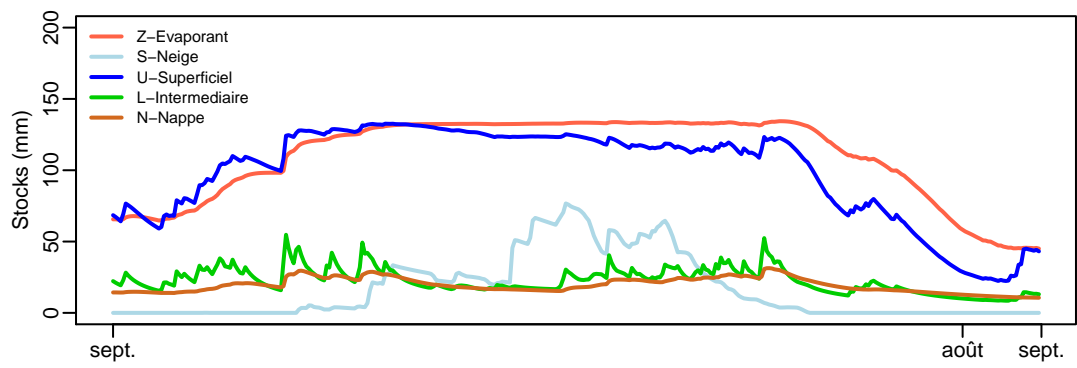



# q0204 (731.66 km²) – année 1983–1984

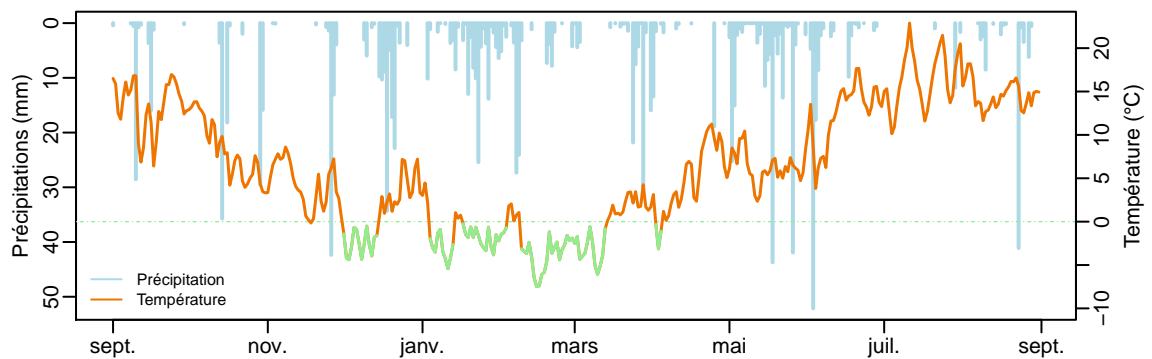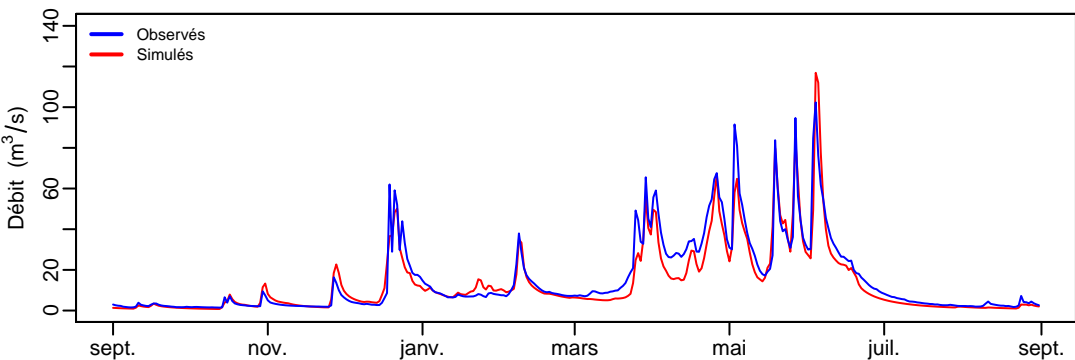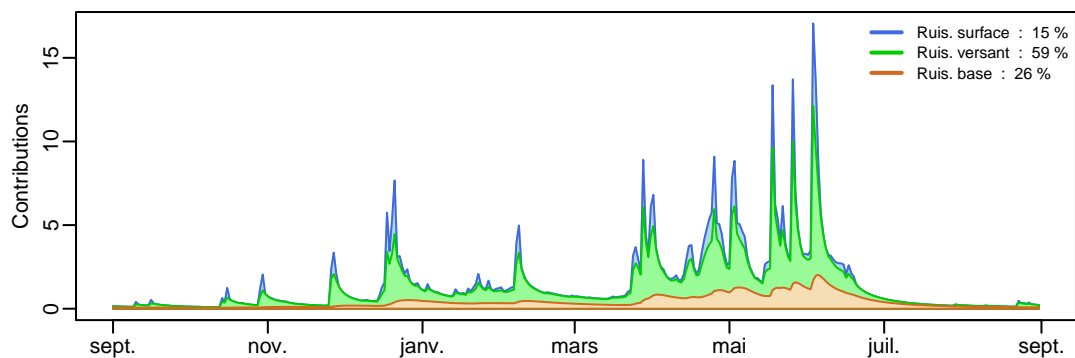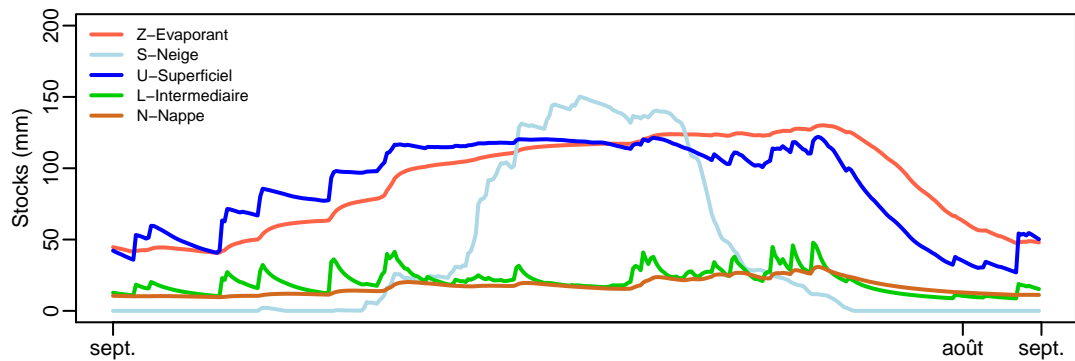

# q0204 (731.66 km<sup>2</sup>) – année 1984–1985

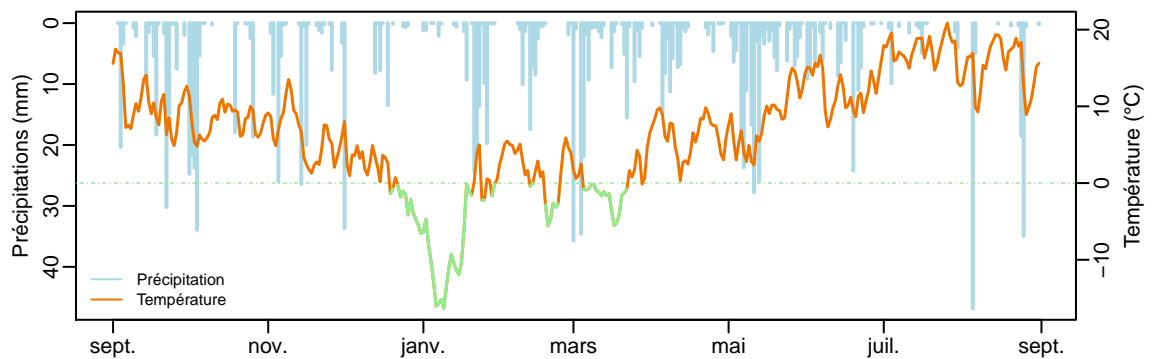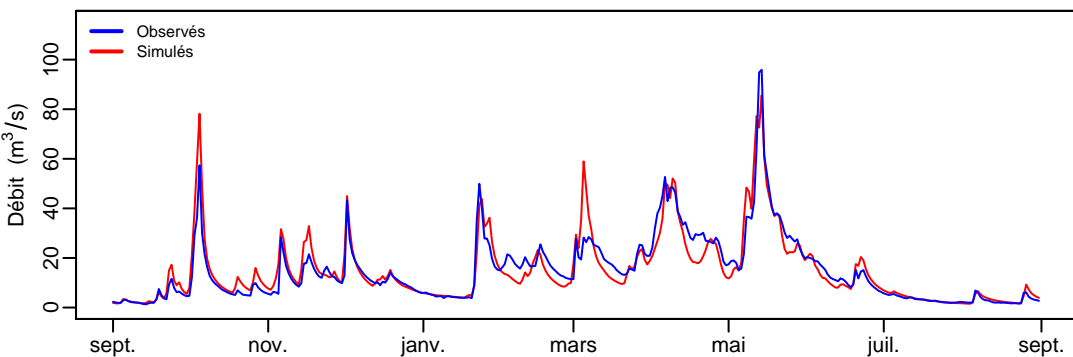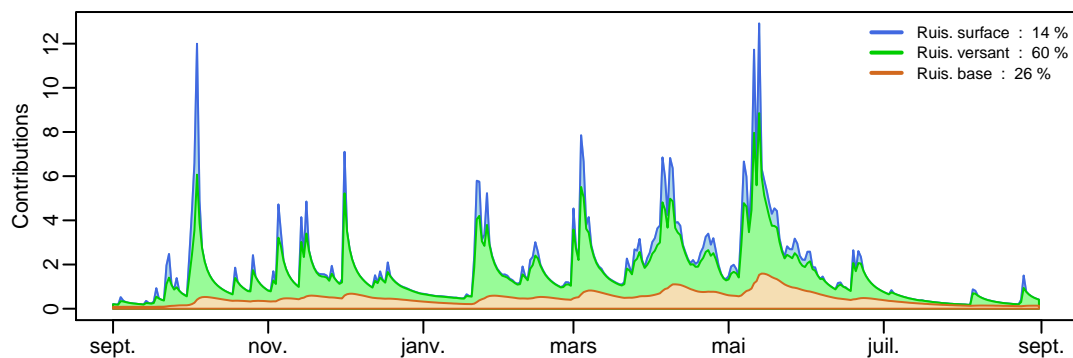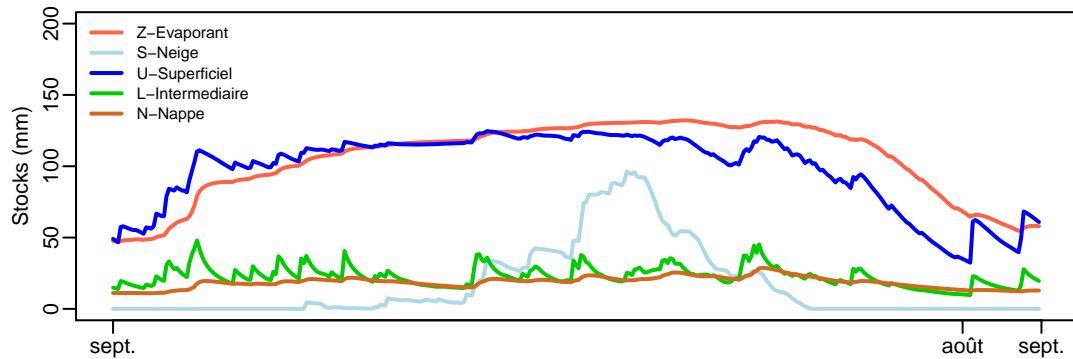

# q0204 (731.66 km<sup>2</sup>) – année 1985–1986

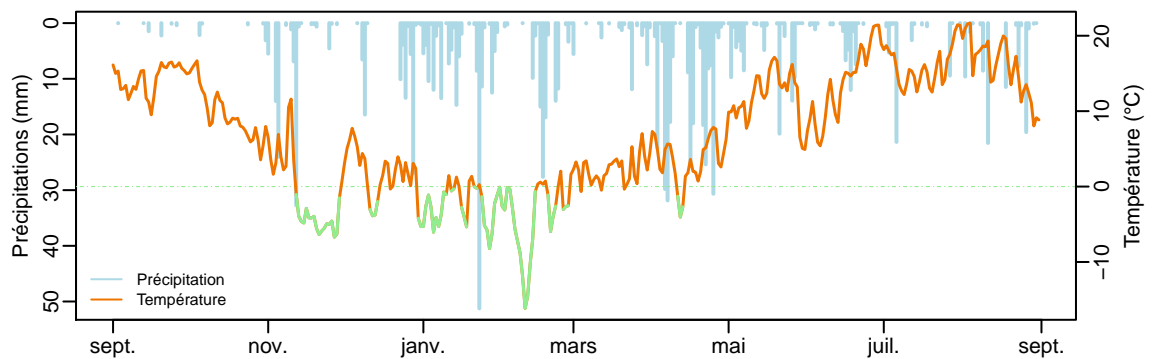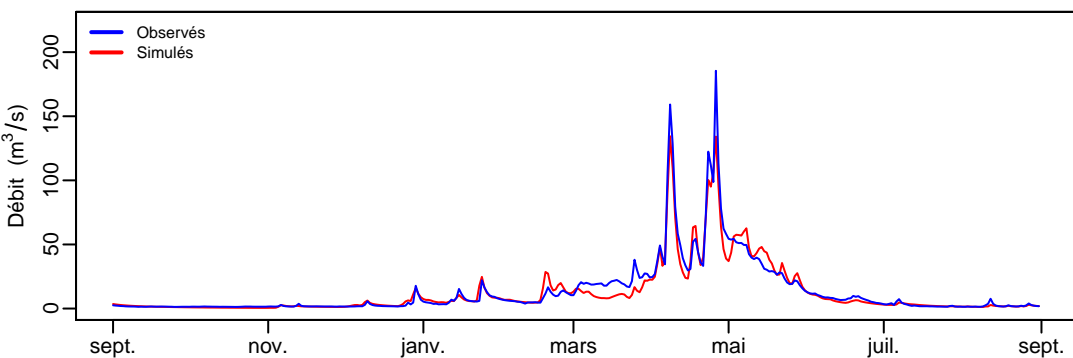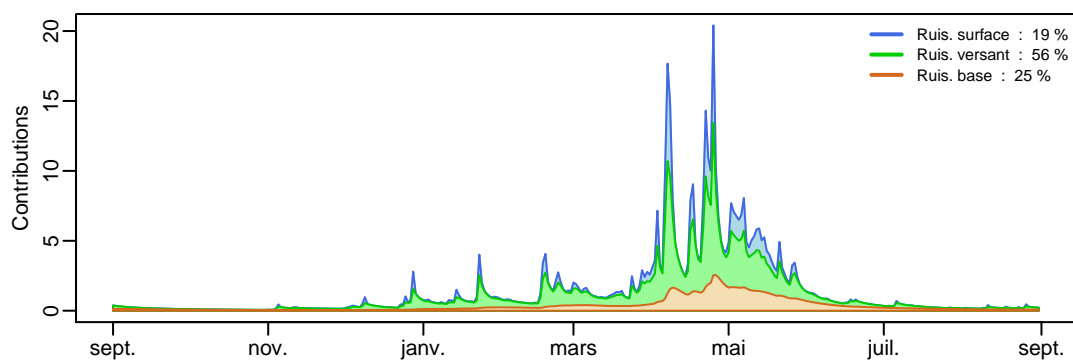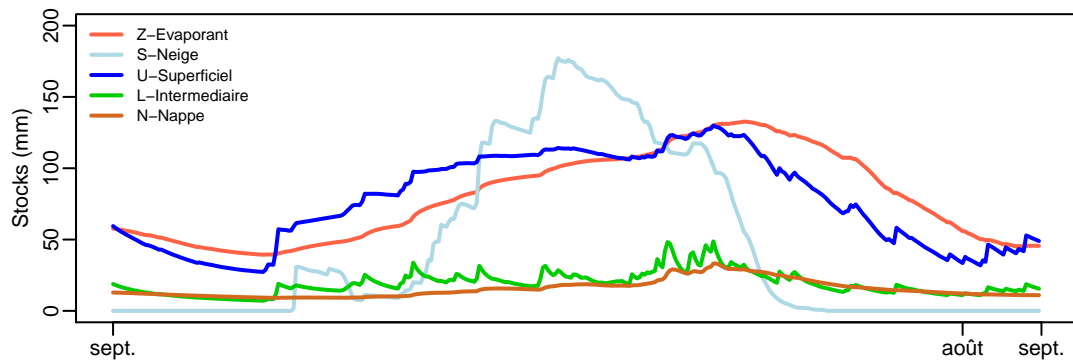

# q0204 (731.66 km²) – année 1986–1987

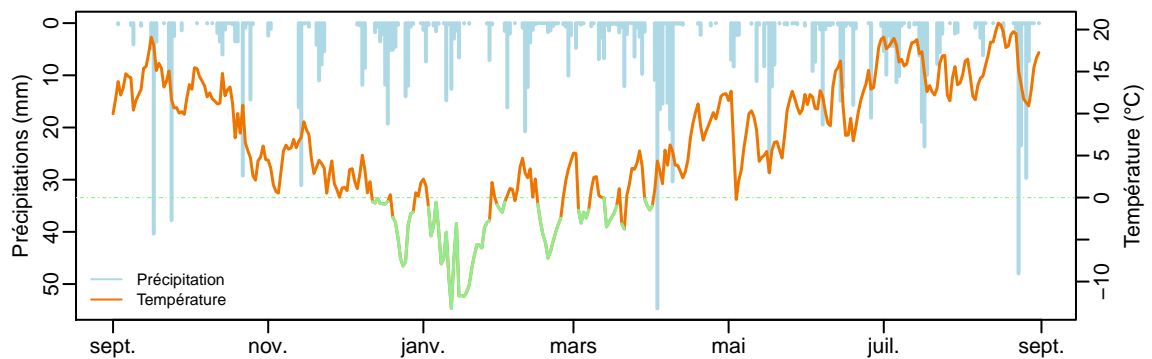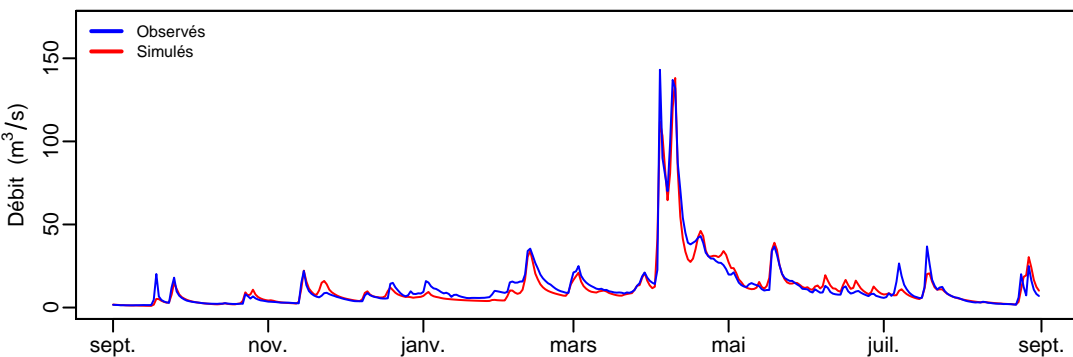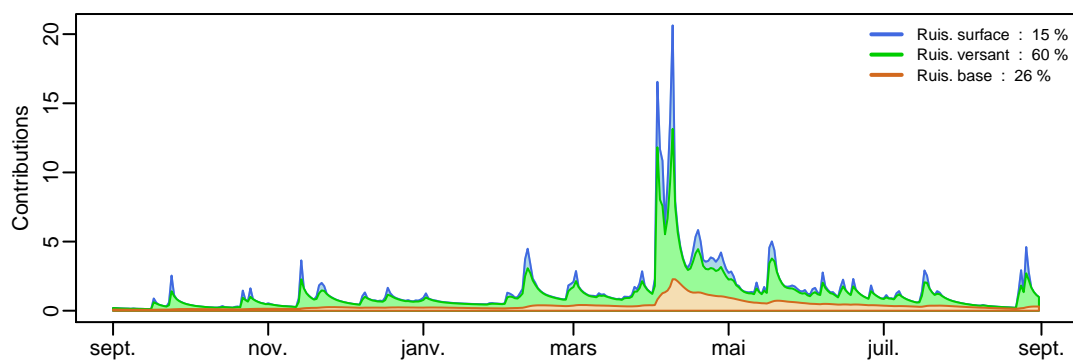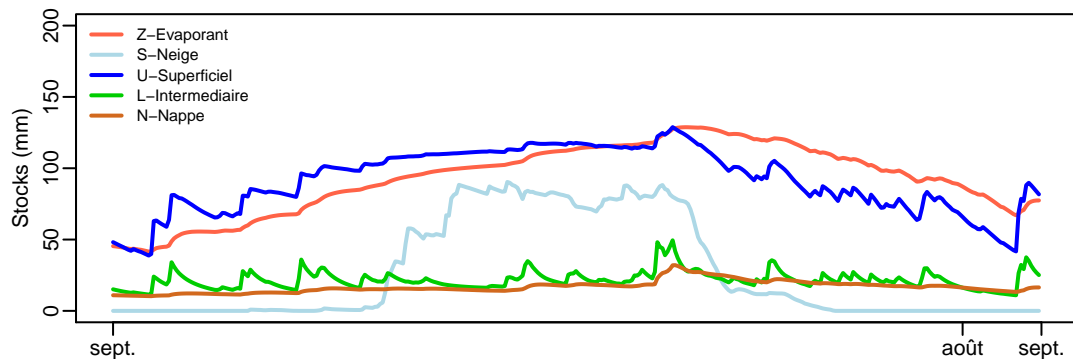

# q0204 (731.66 km²) – année 1987–1988

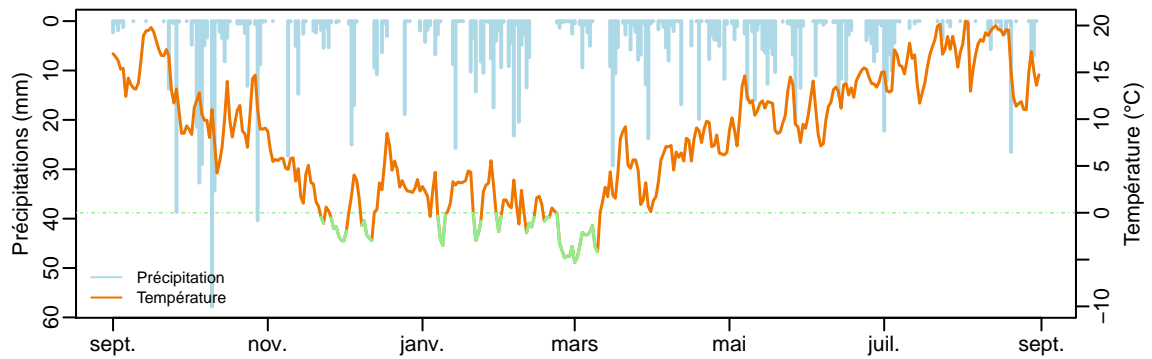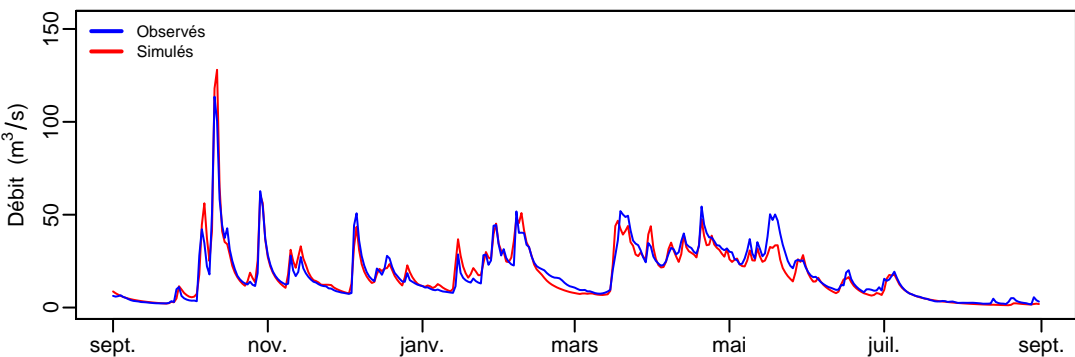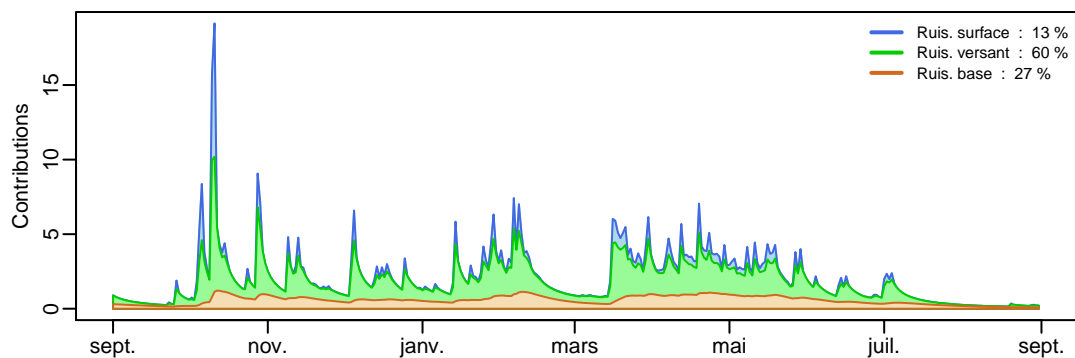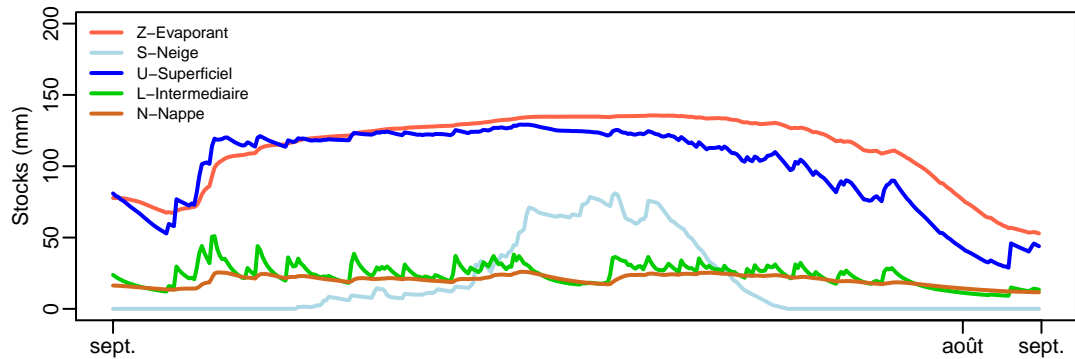

# q0204 (731.66 km²) – année 1988–1989

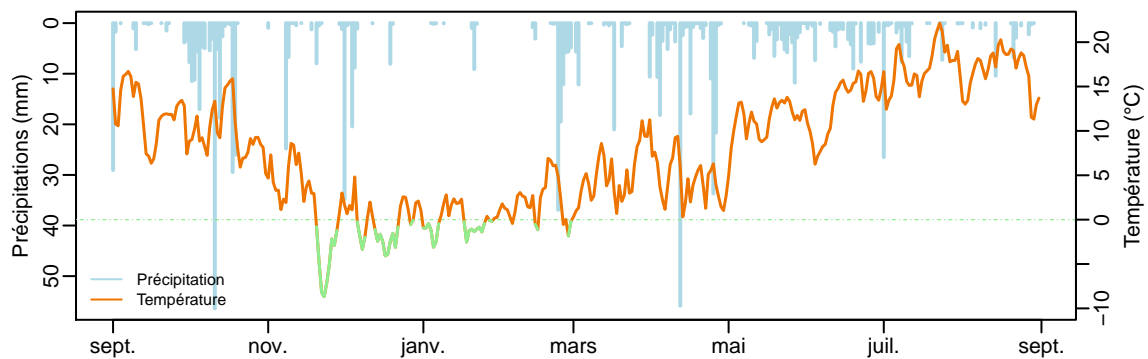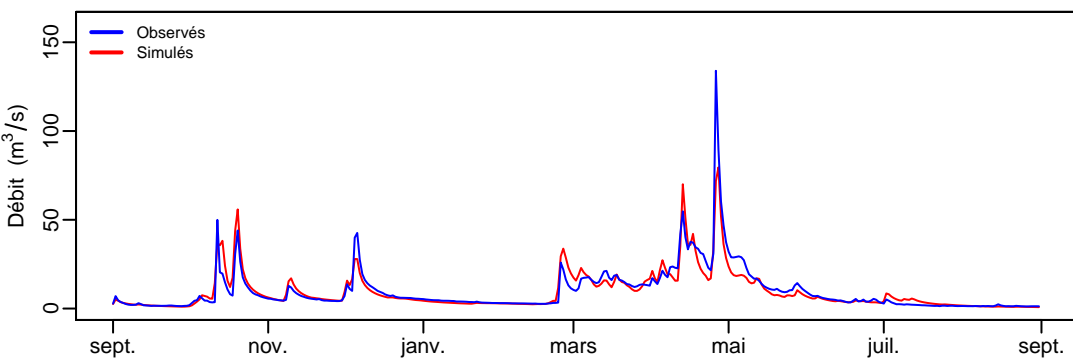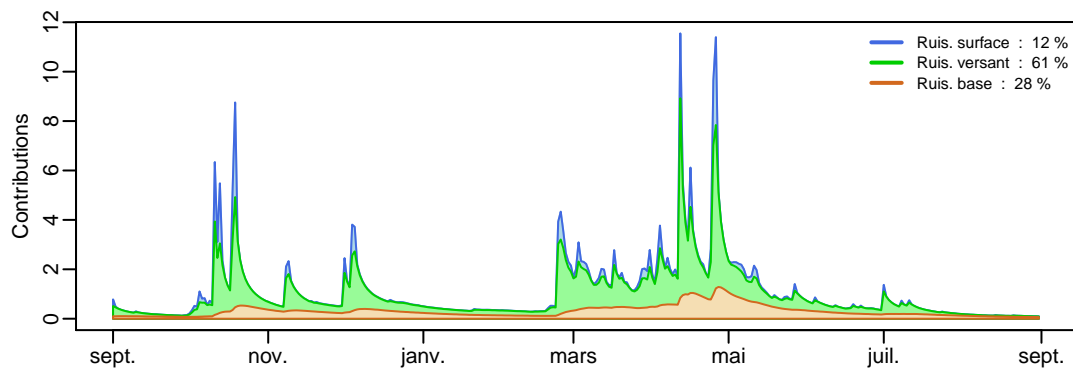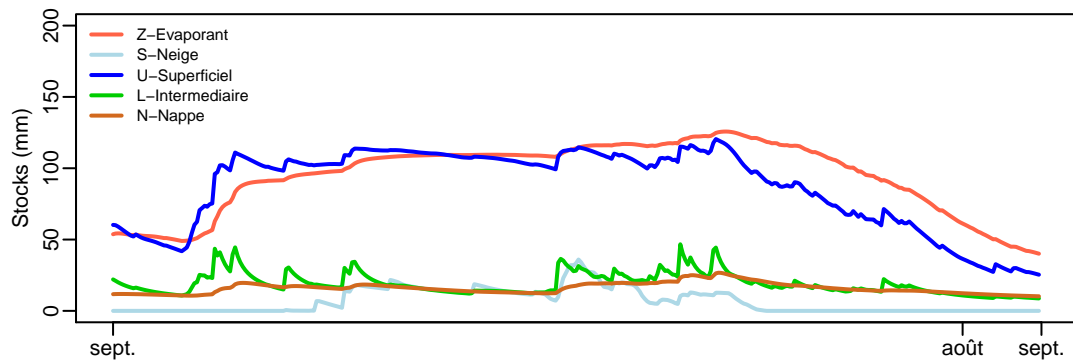

# q0204 (731.66 km<sup>2</sup>) – année 1989–1990

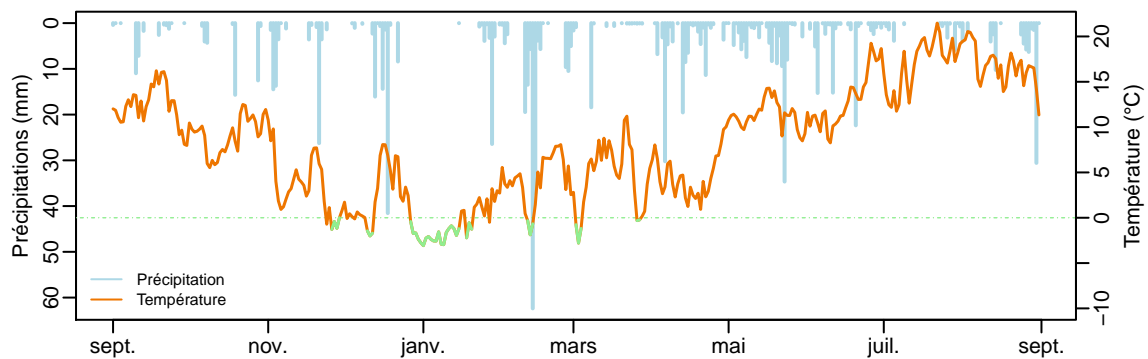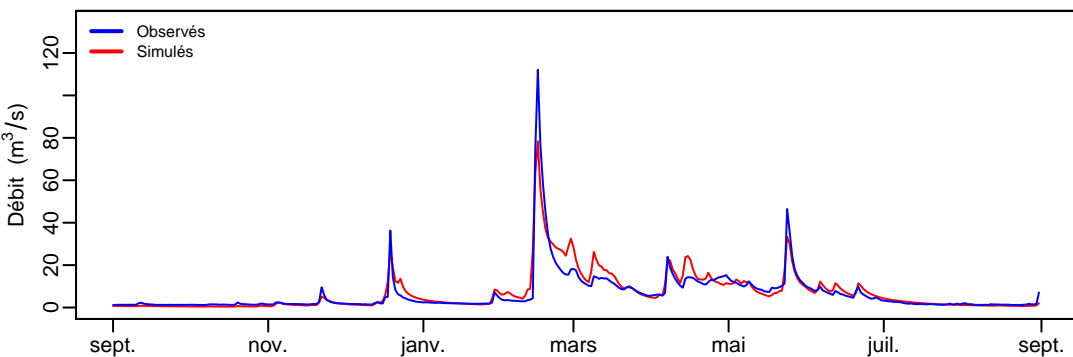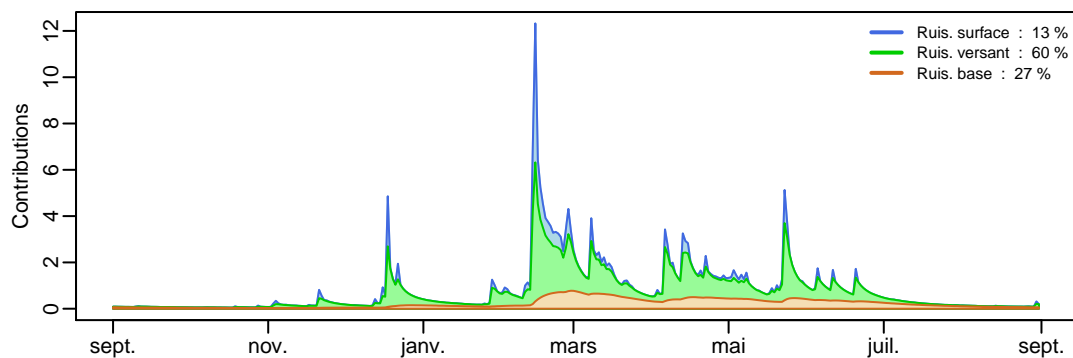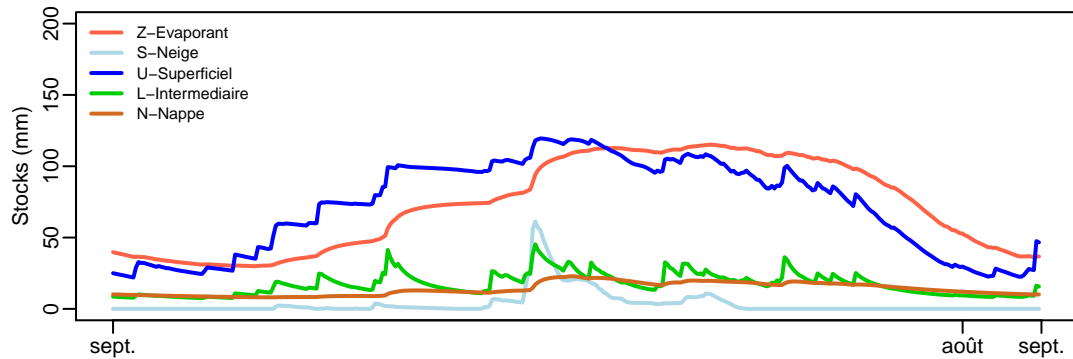

# q0204 (731.66 km<sup>2</sup>) – année 1990–1991

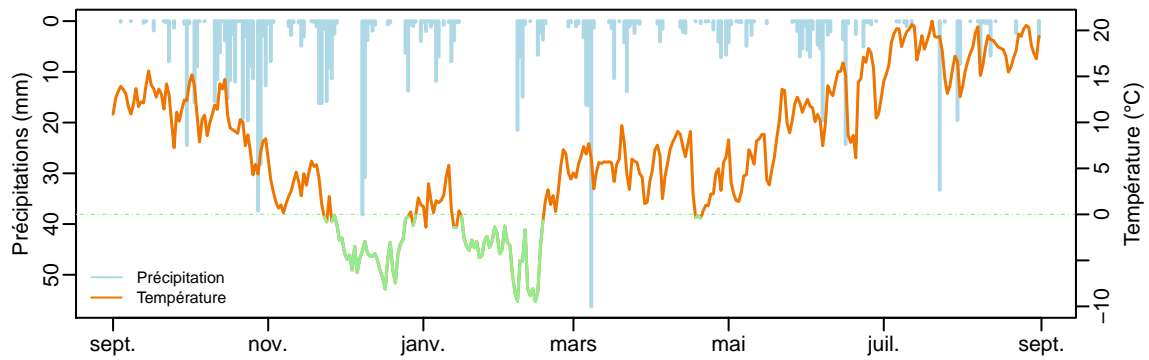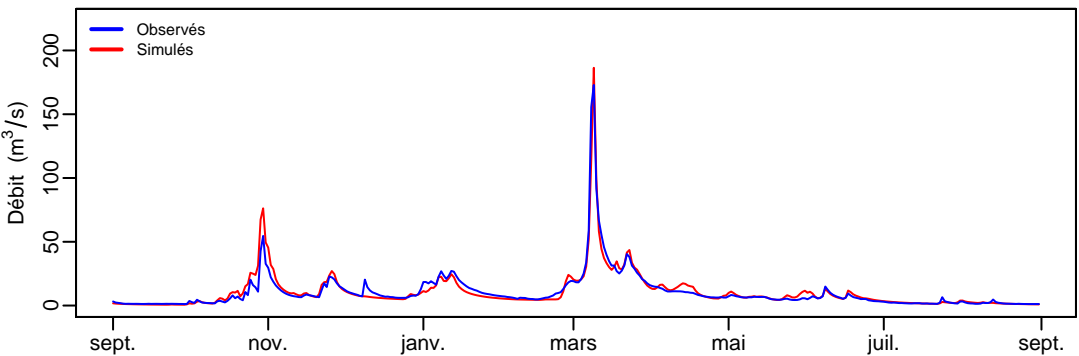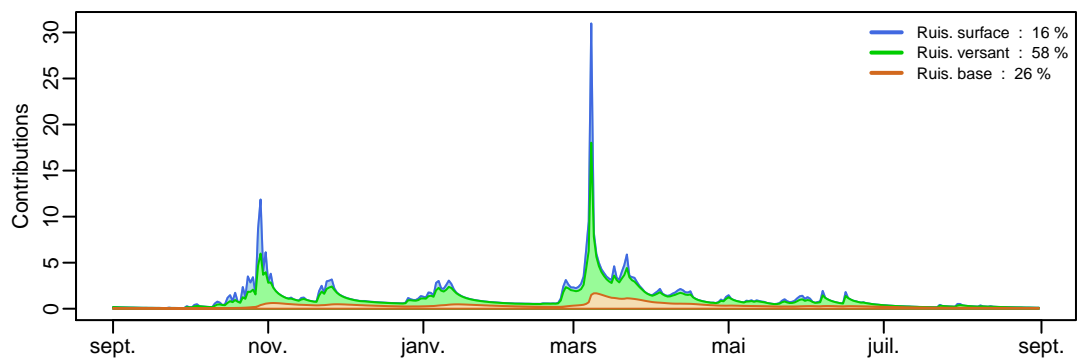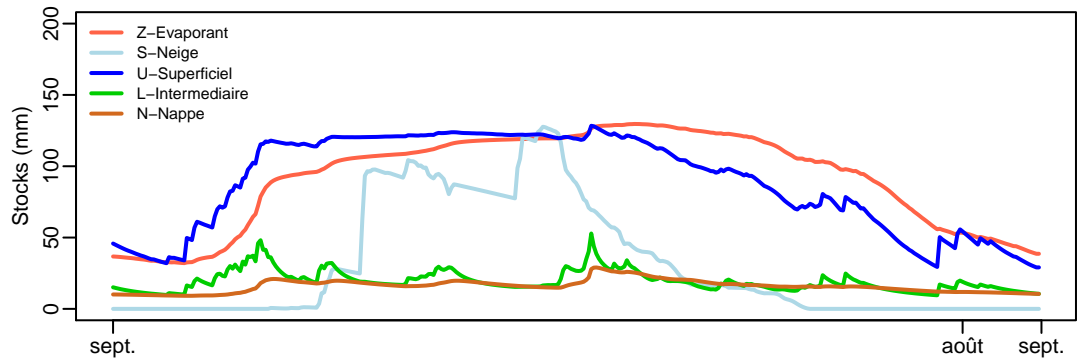



# q0204 (731.66 km<sup>2</sup>) – année 1991–1992

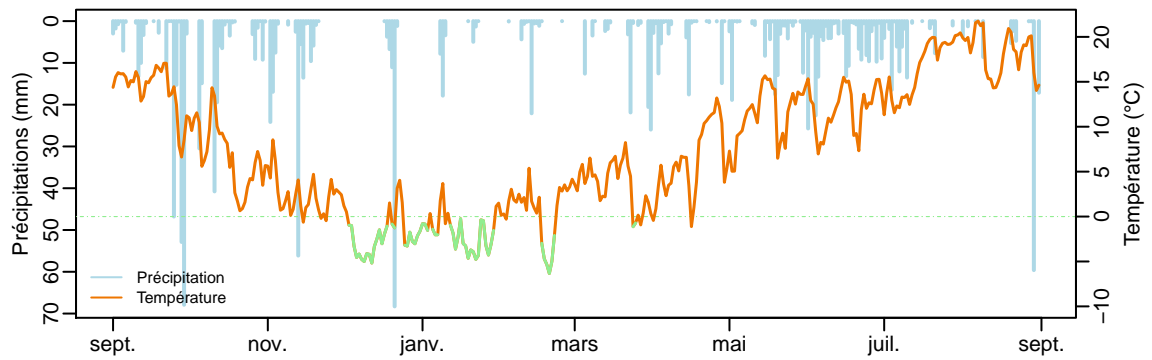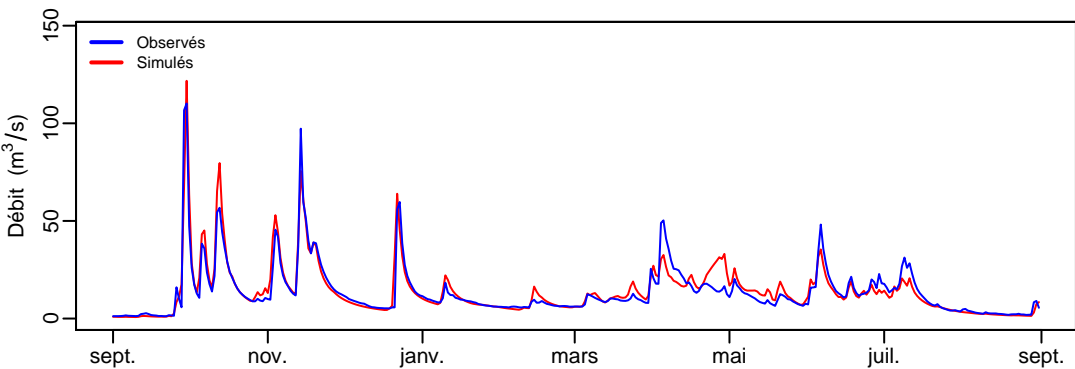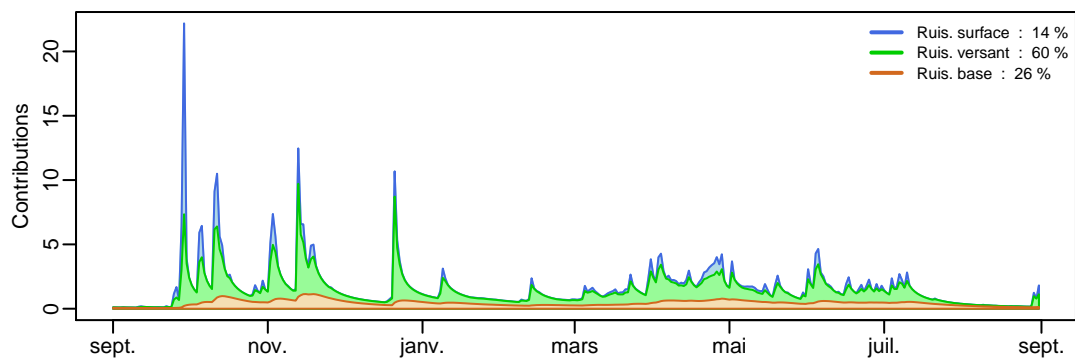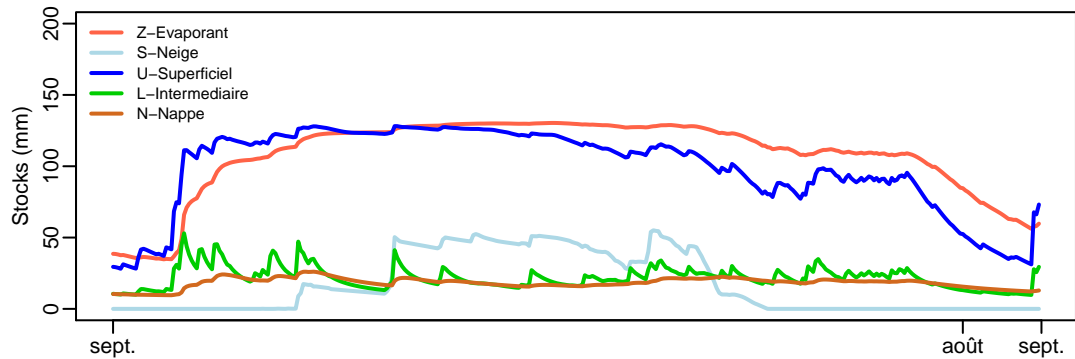

# q0204 (731.66 km²) – année 1992–1993

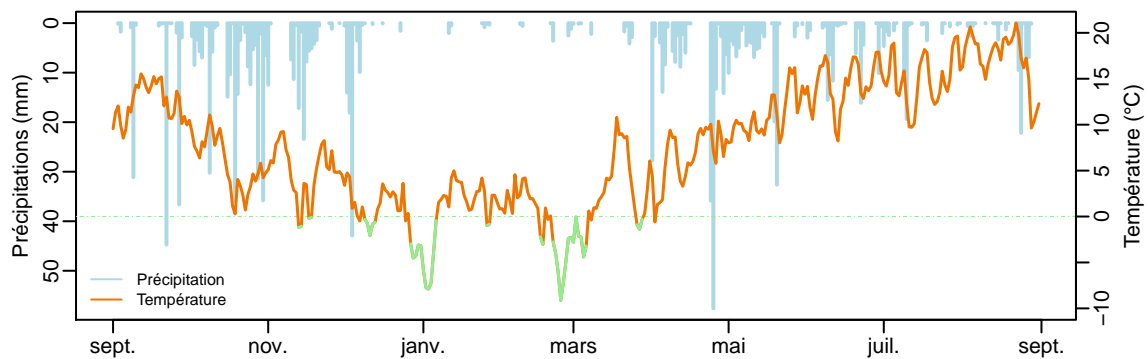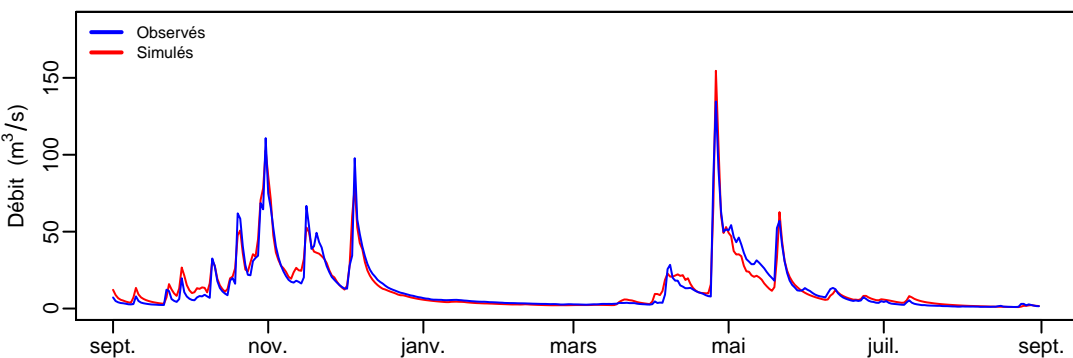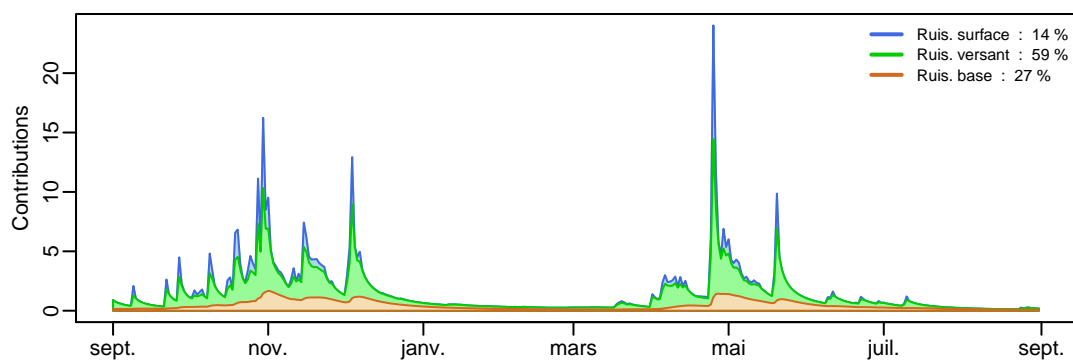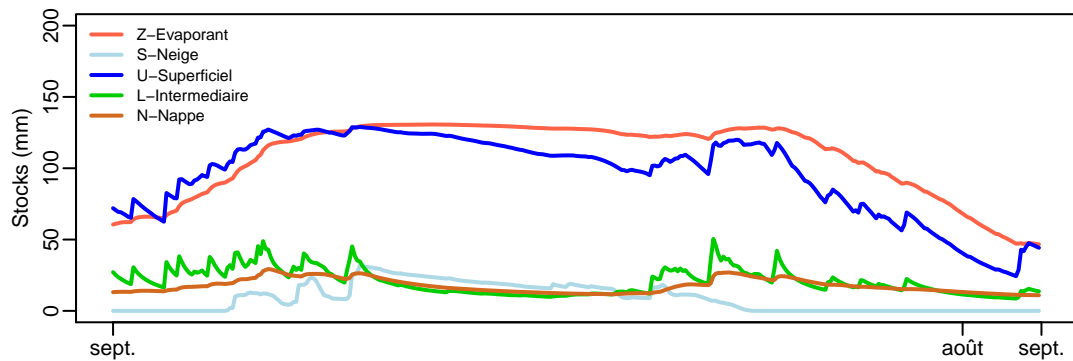

# q0204 (731.66 km<sup>2</sup>) – année 1993–1994

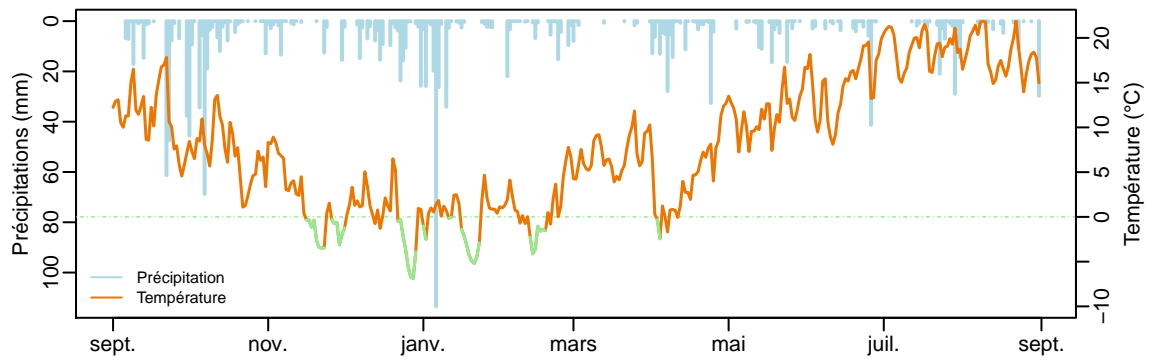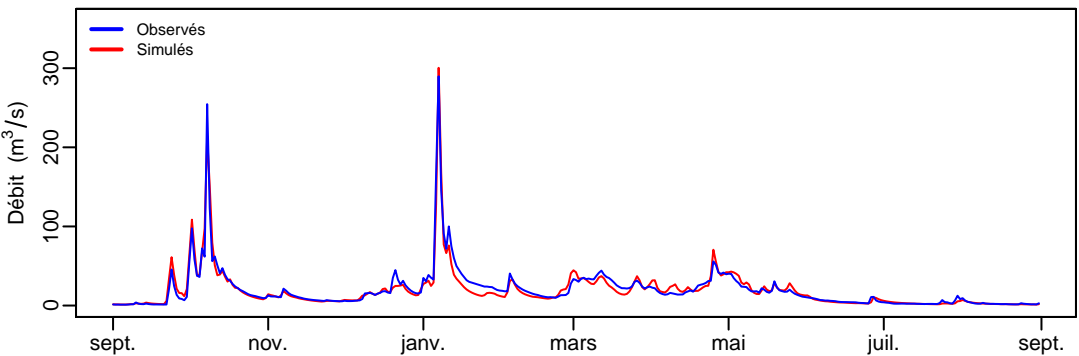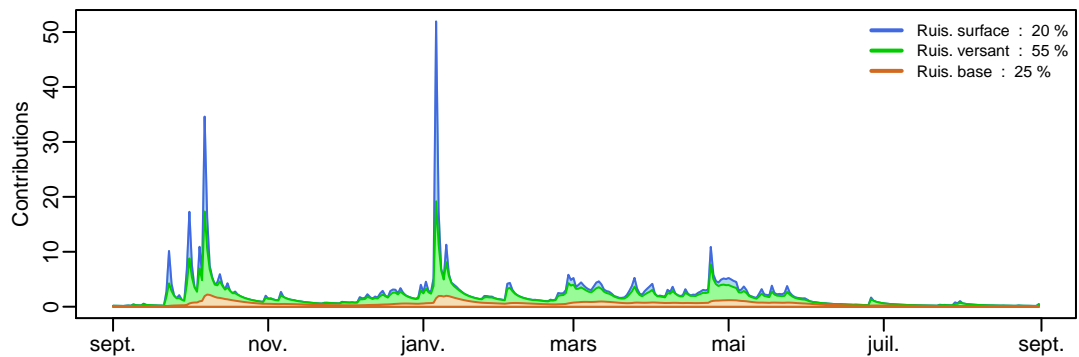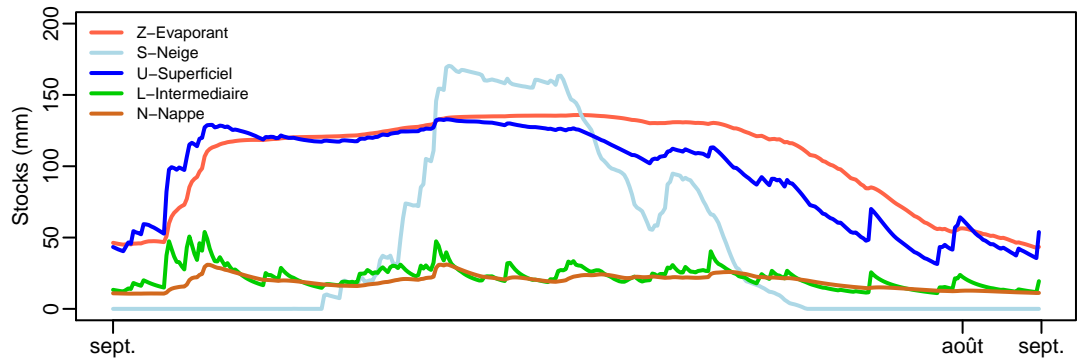

# q0204 (731.66 km<sup>2</sup>) – année 1994–1995

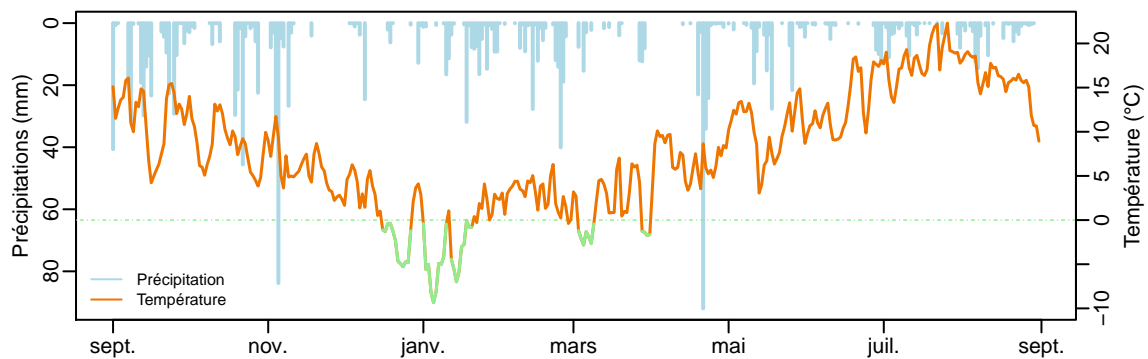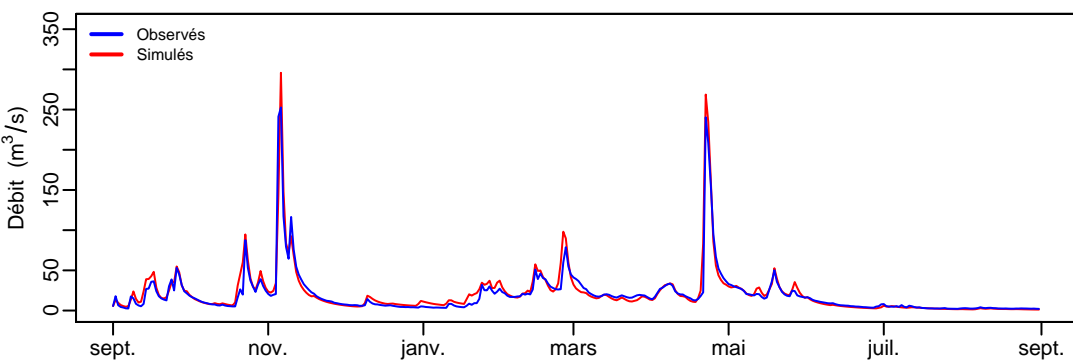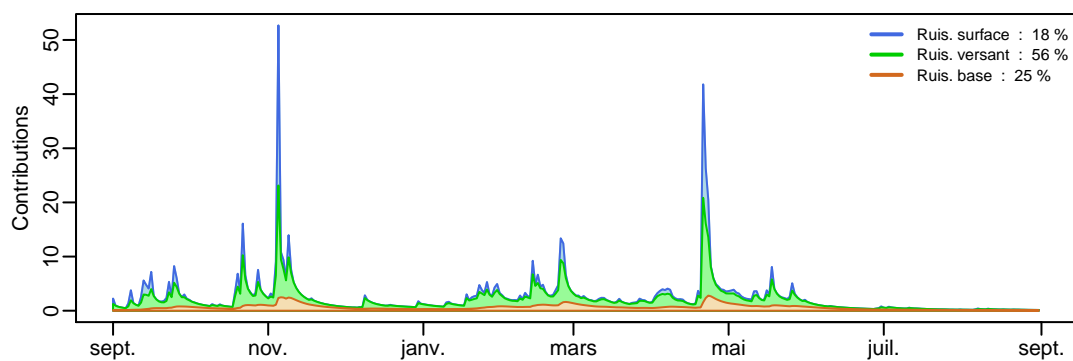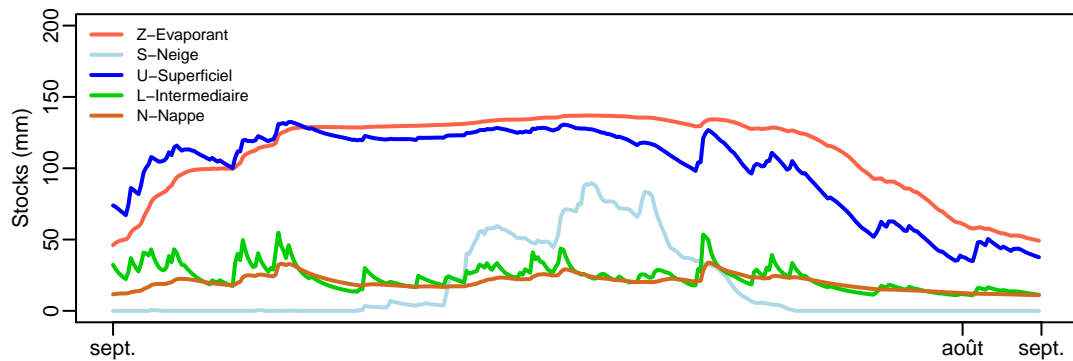

# q0204 (731.66 km<sup>2</sup>) – année 1995–1996

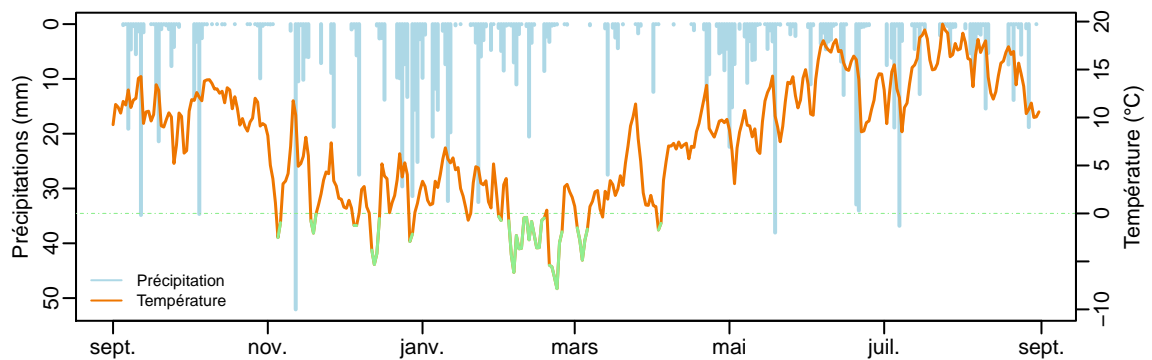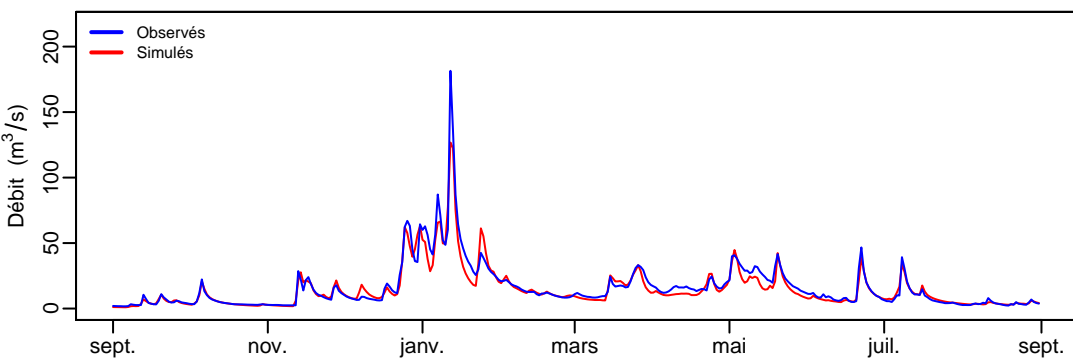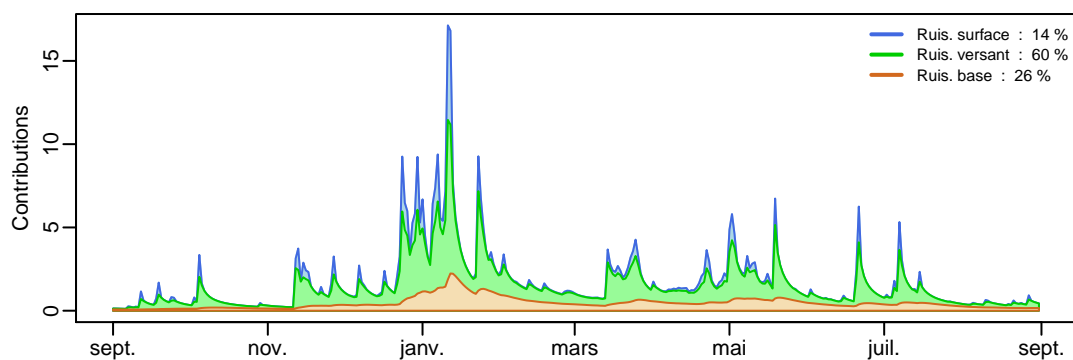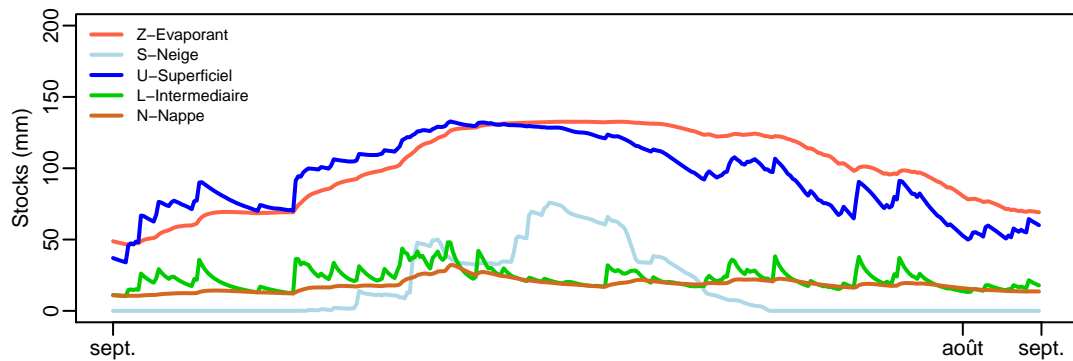

# q0204 (731.66 km<sup>2</sup>) – année 1996–1997

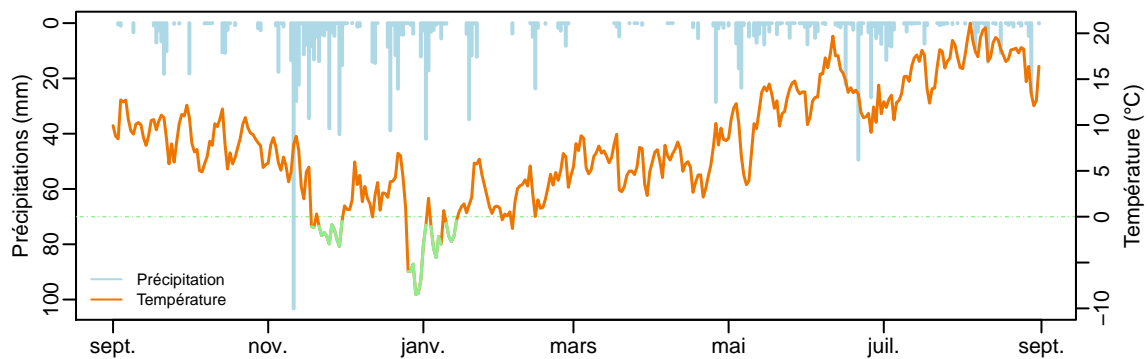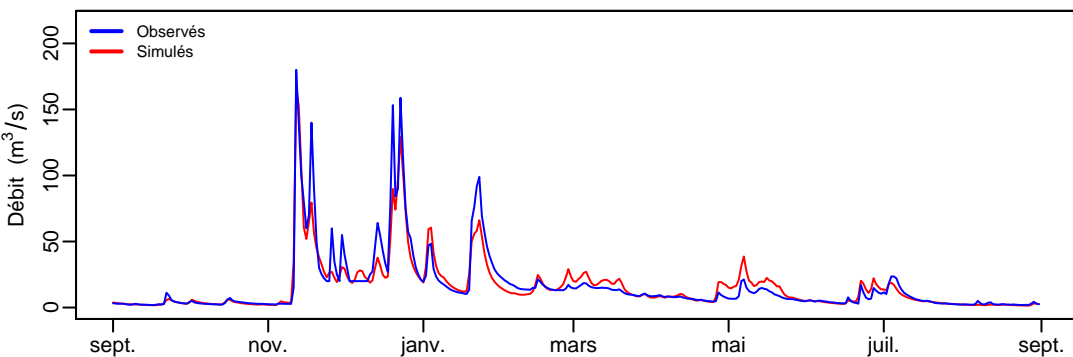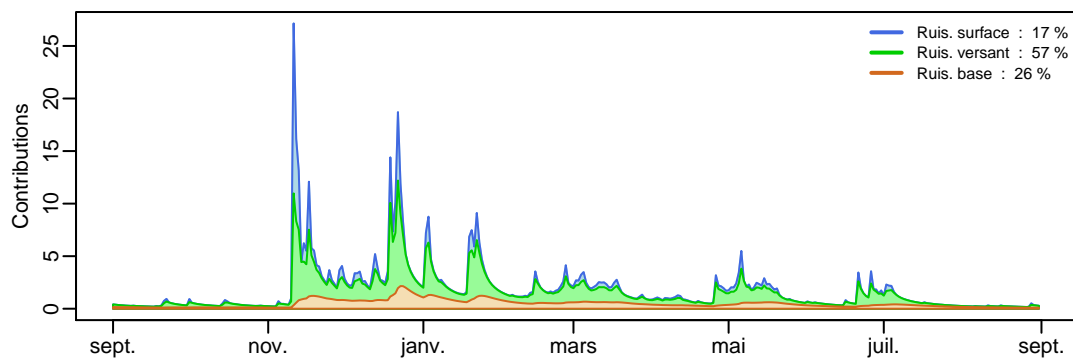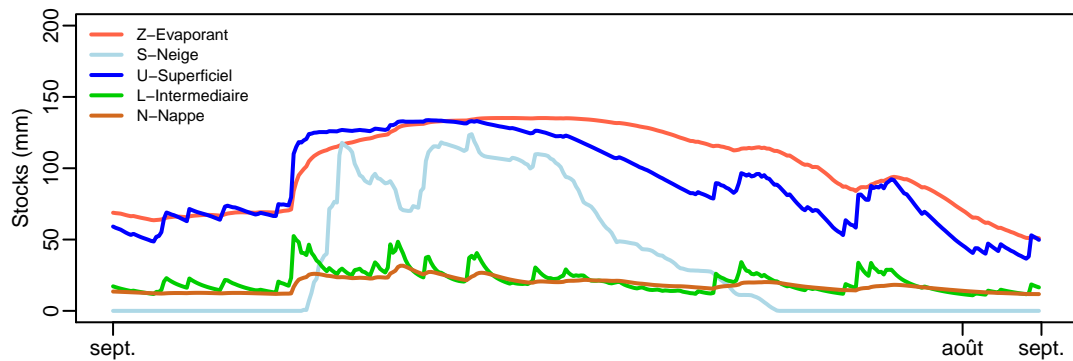

# q0204 (731.66 km<sup>2</sup>) – année 1997–1998

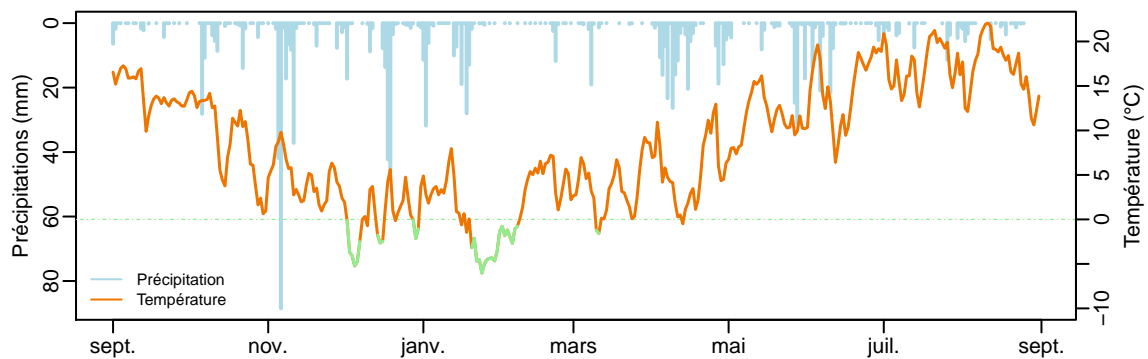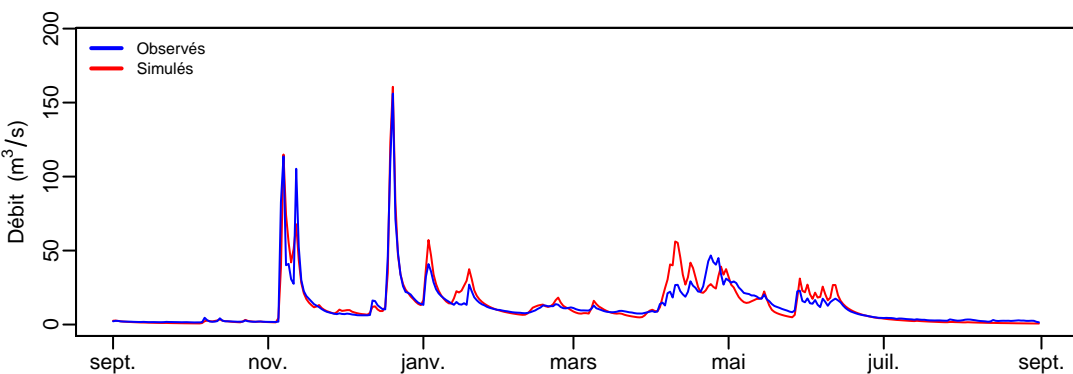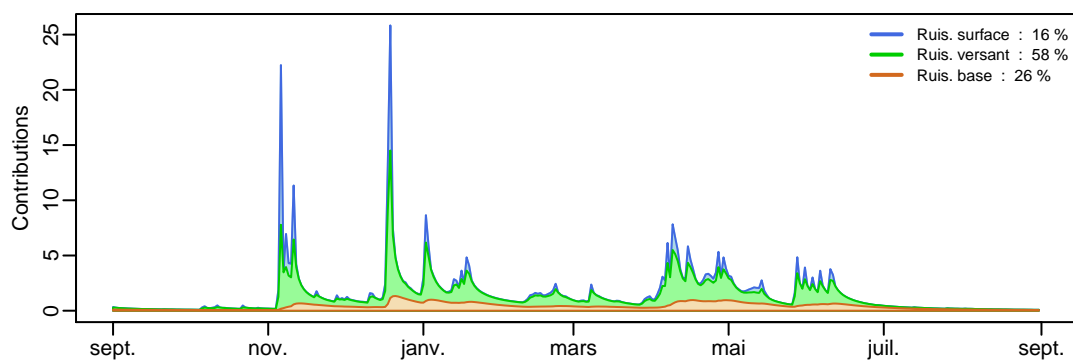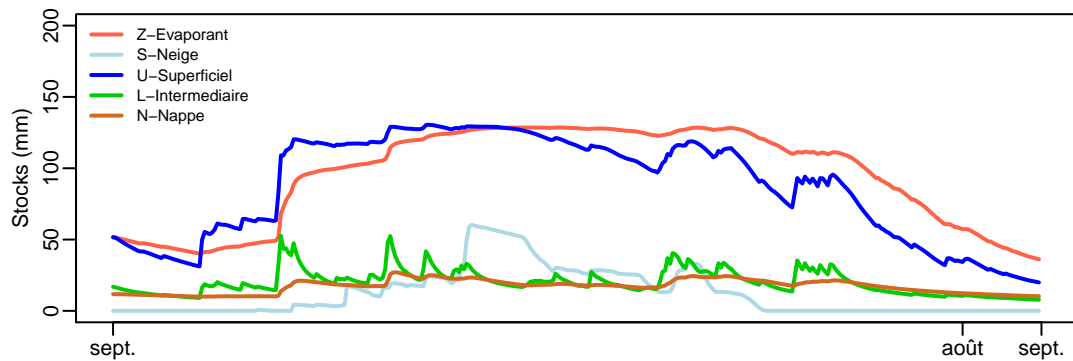

# q0204 (731.66 km<sup>2</sup>) – année 1998–1999

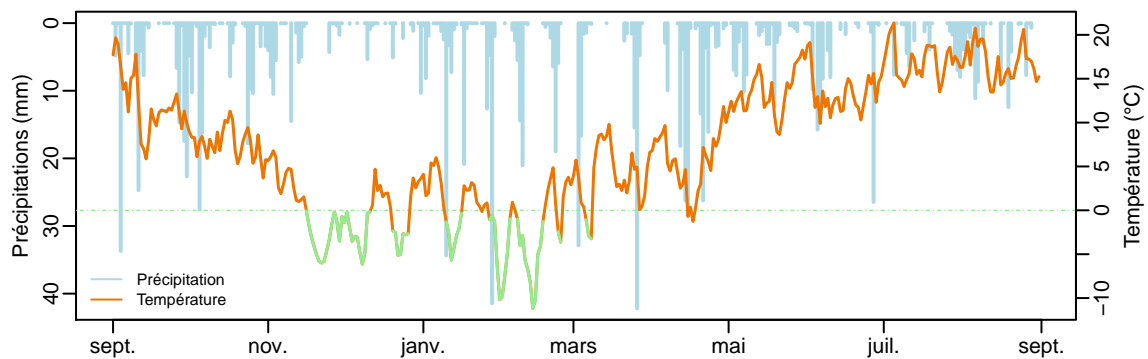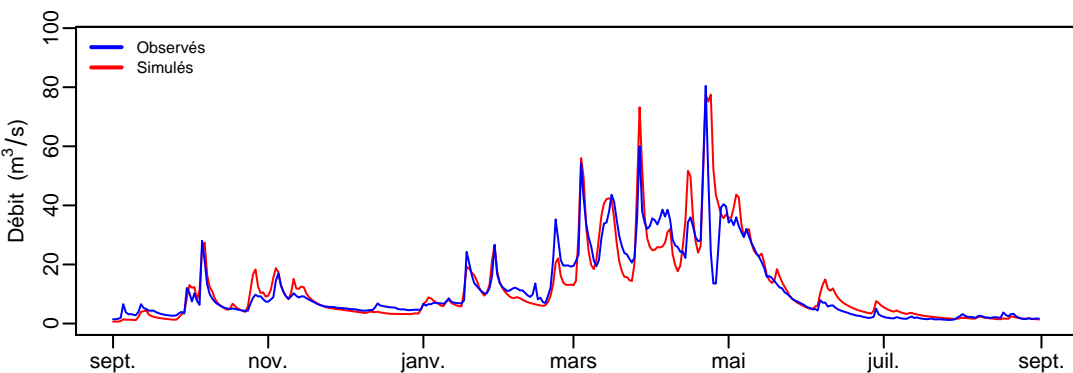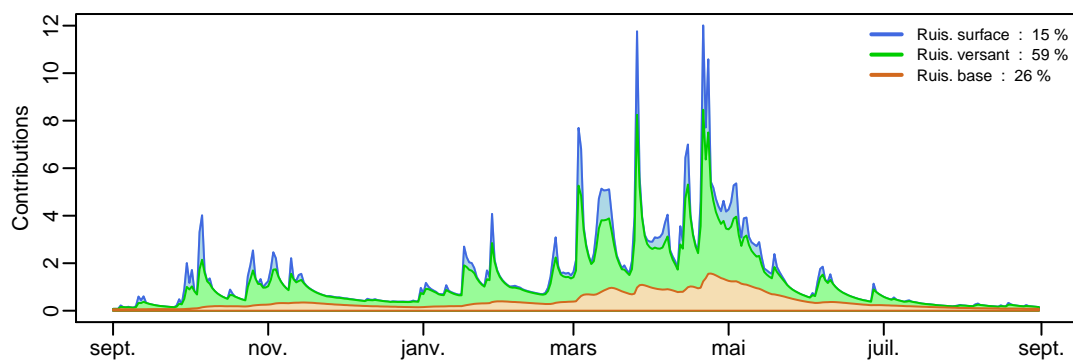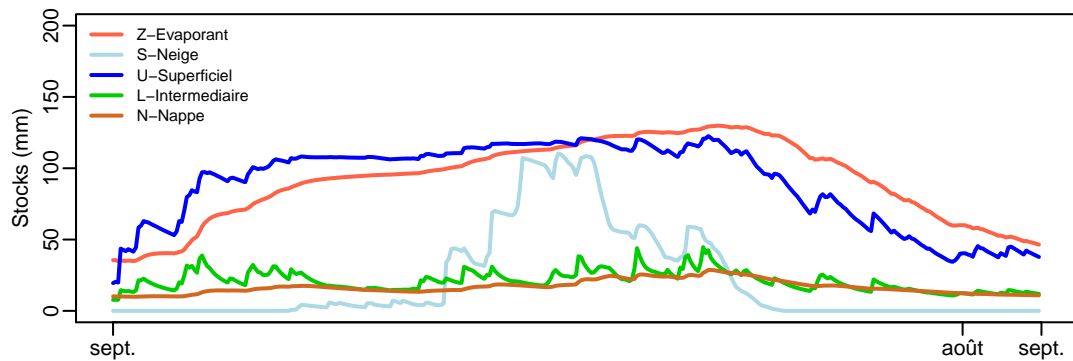



# q0204 (731.66 km<sup>2</sup>) – année 1999–2000

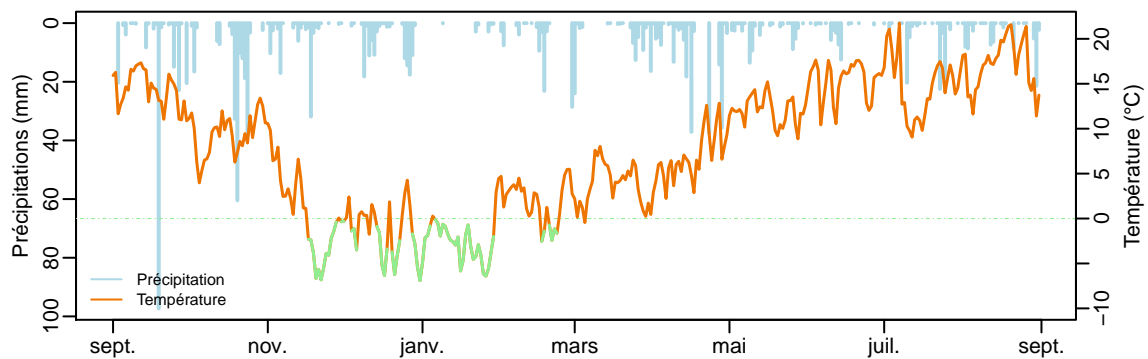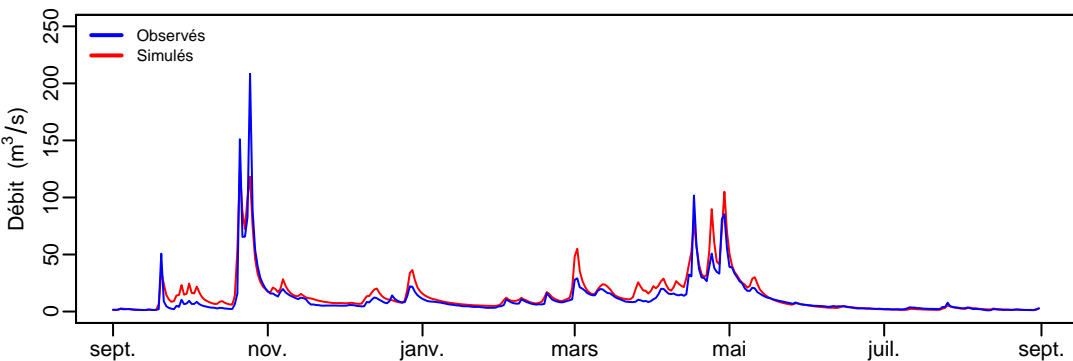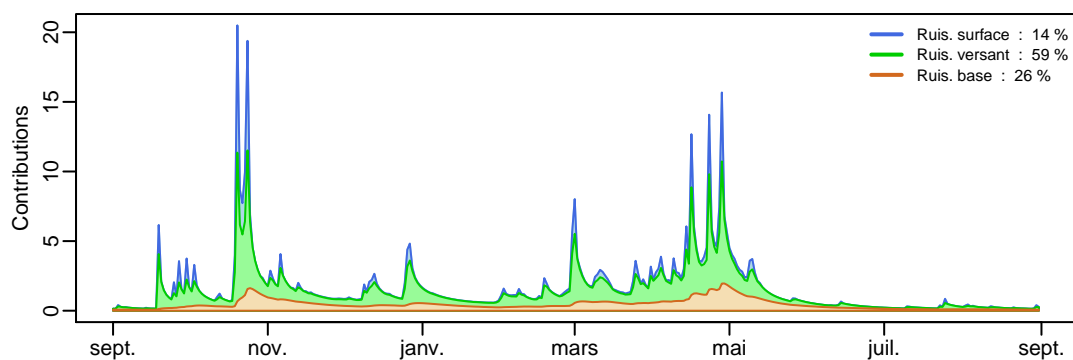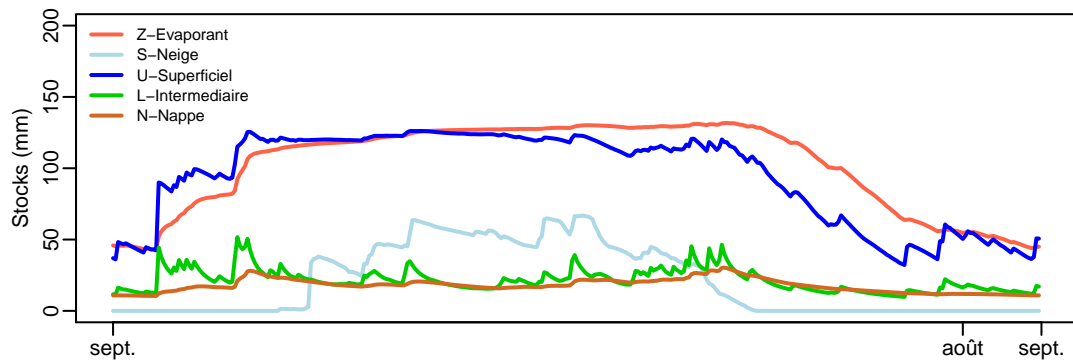

# q0204 (731.66 km²) – année 2000–2001

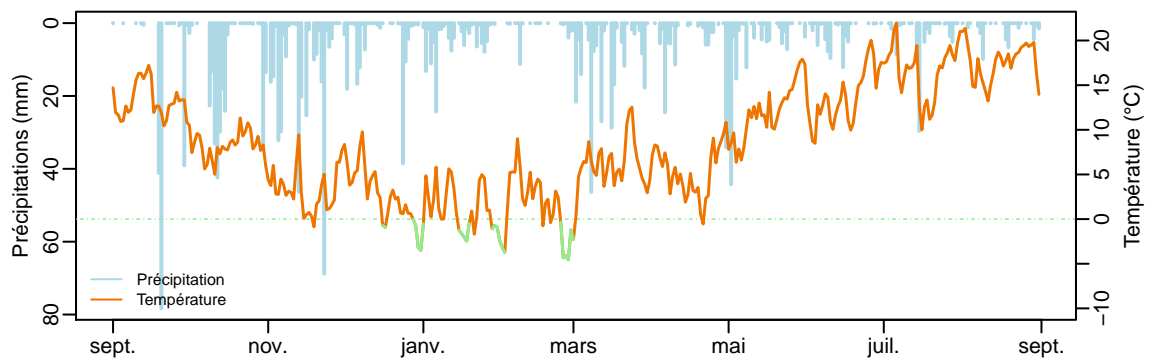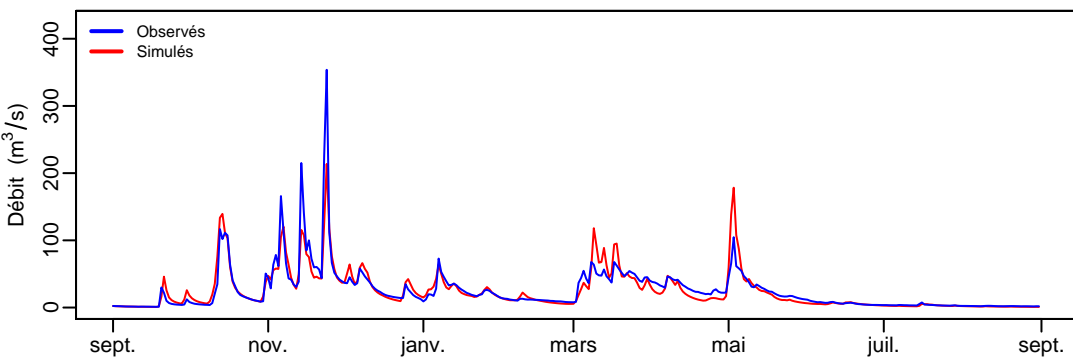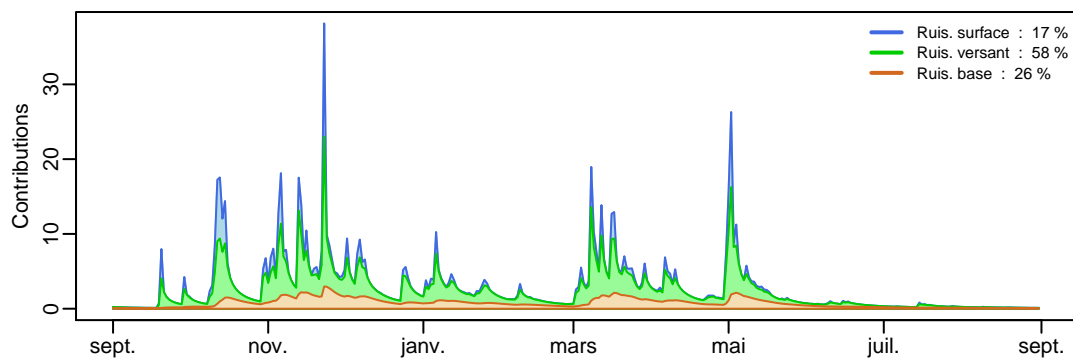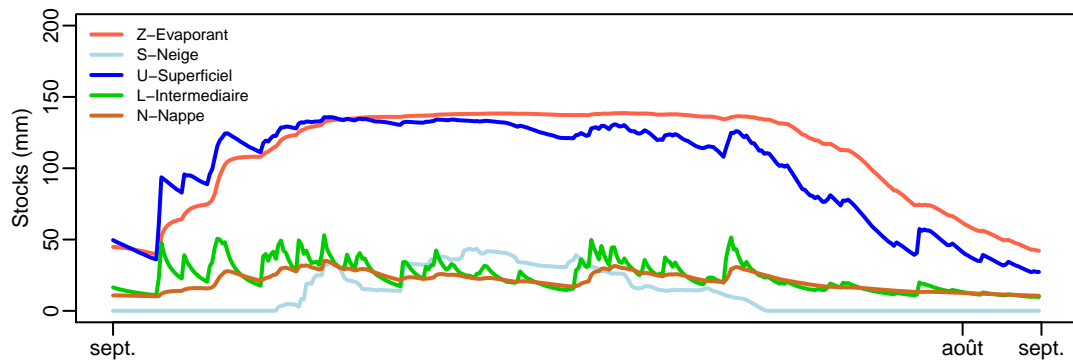

# q0204 (731.66 km<sup>2</sup>) – année 2001–2002

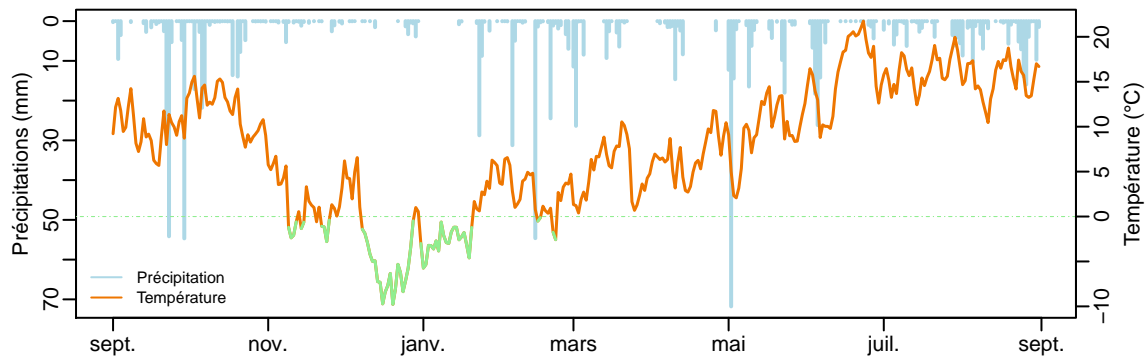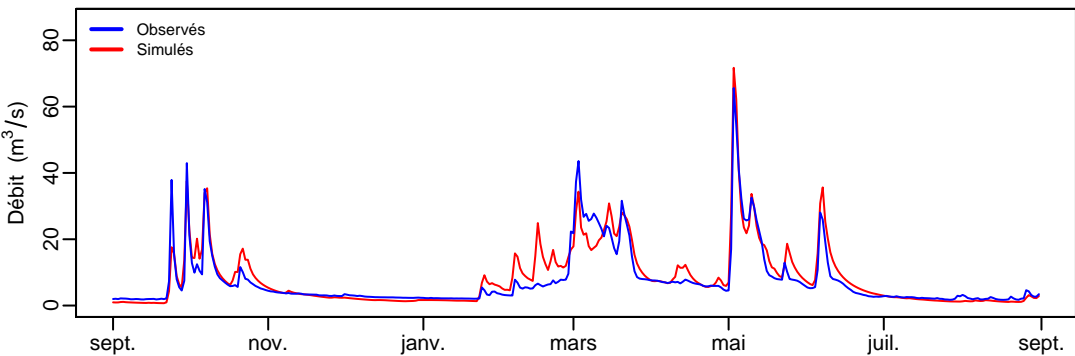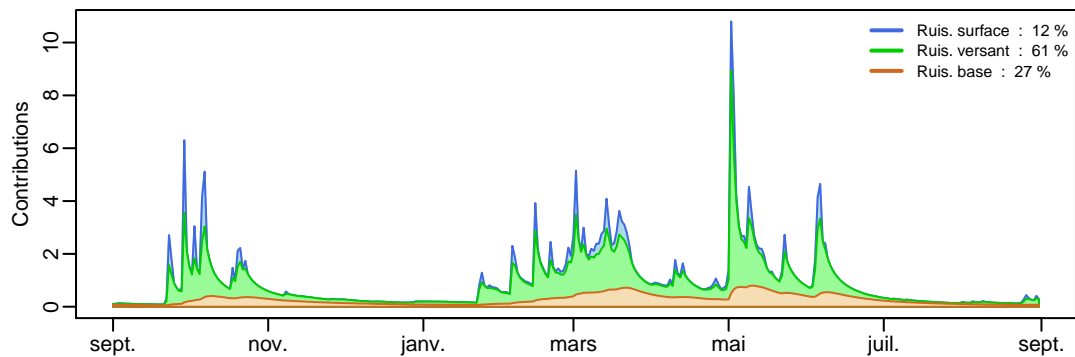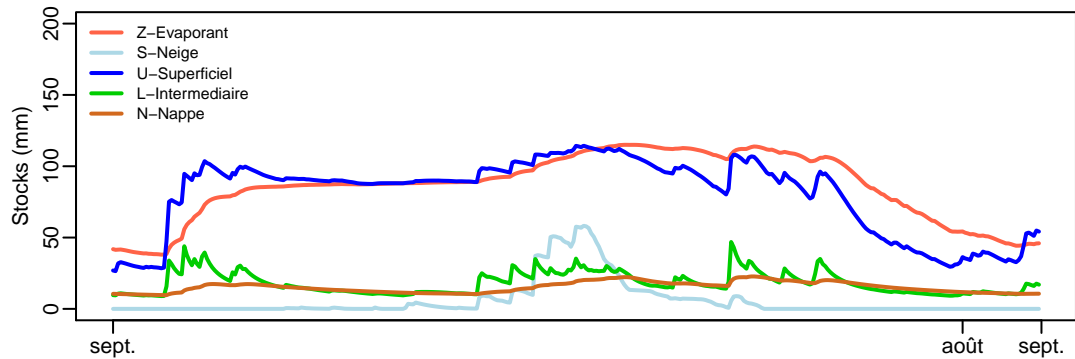

# q0204 (731.66 km<sup>2</sup>) – année 2002–2003

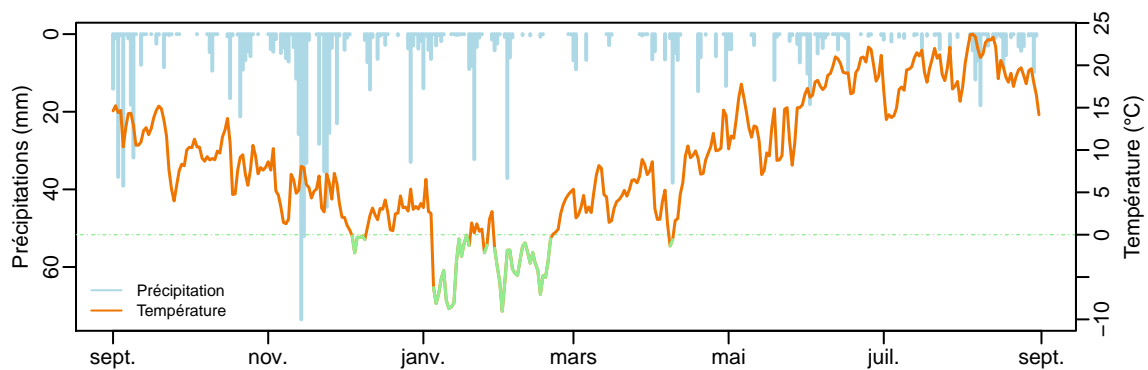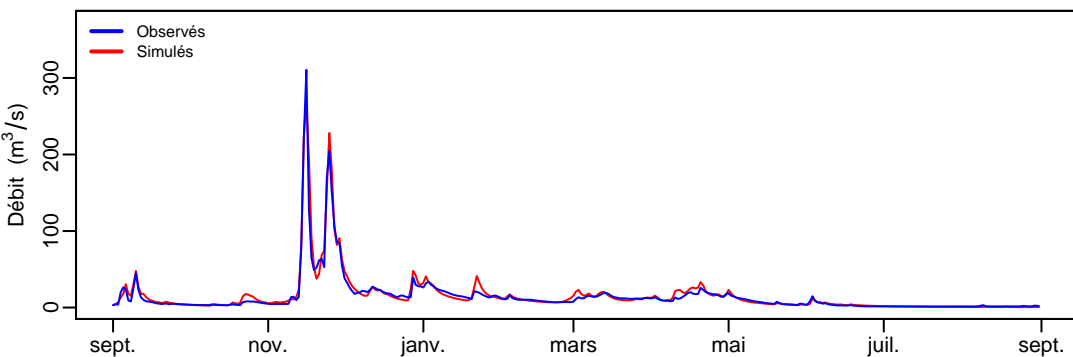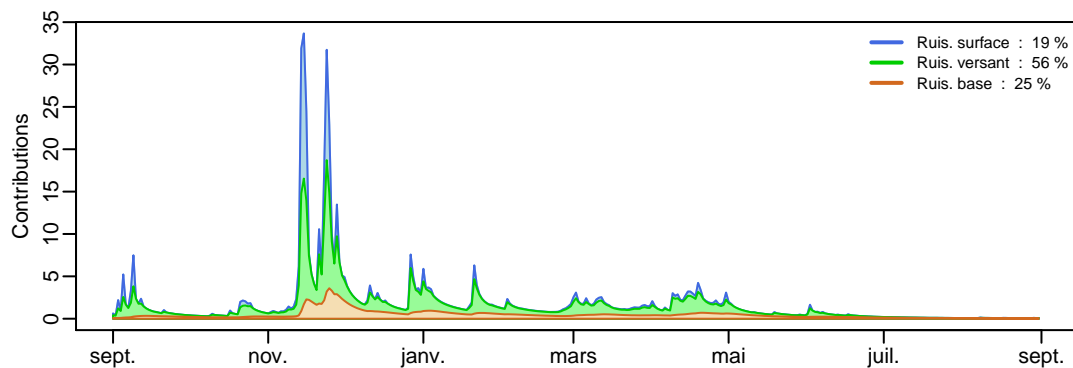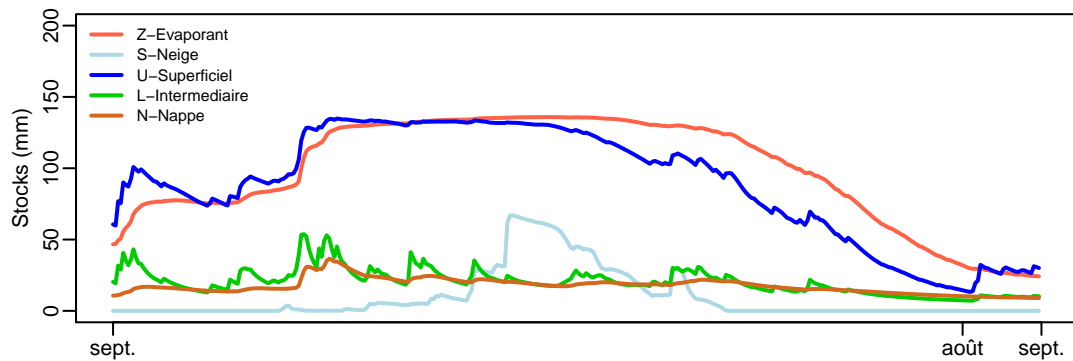

# q0204 (731.66 km<sup>2</sup>) – année 2003–2004

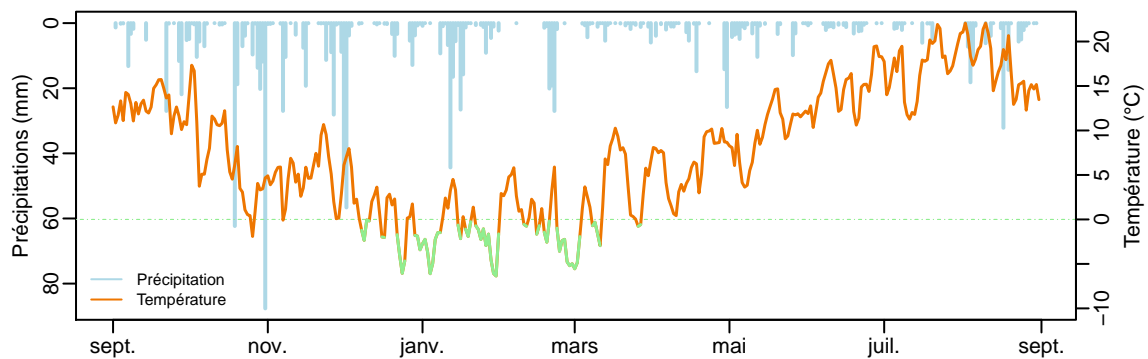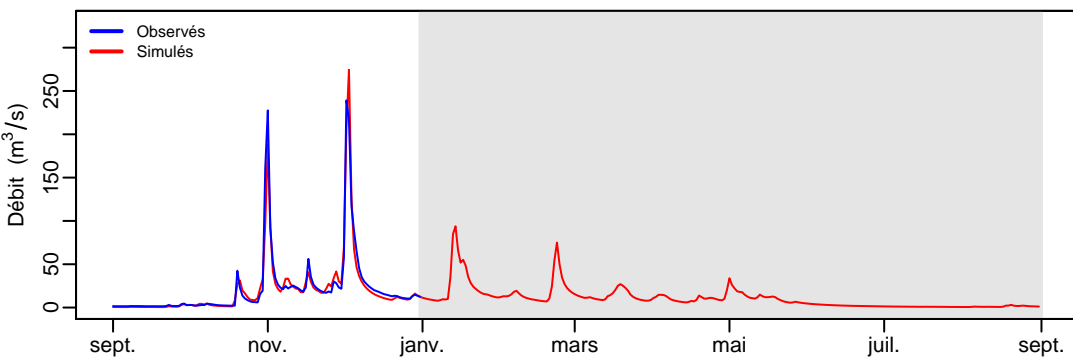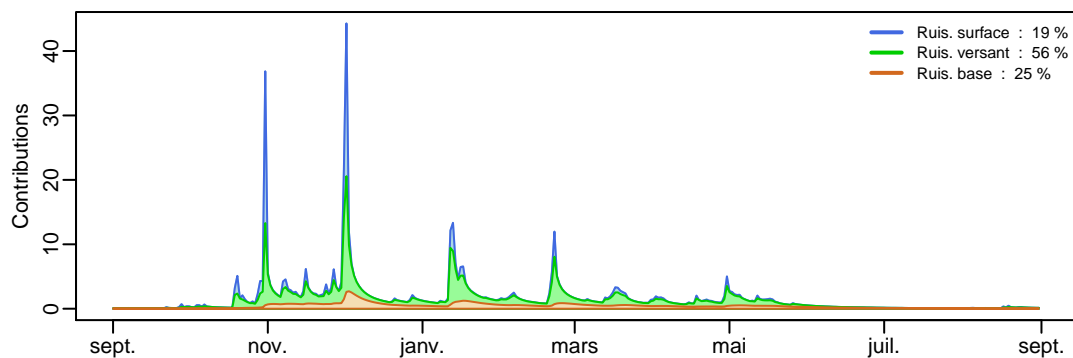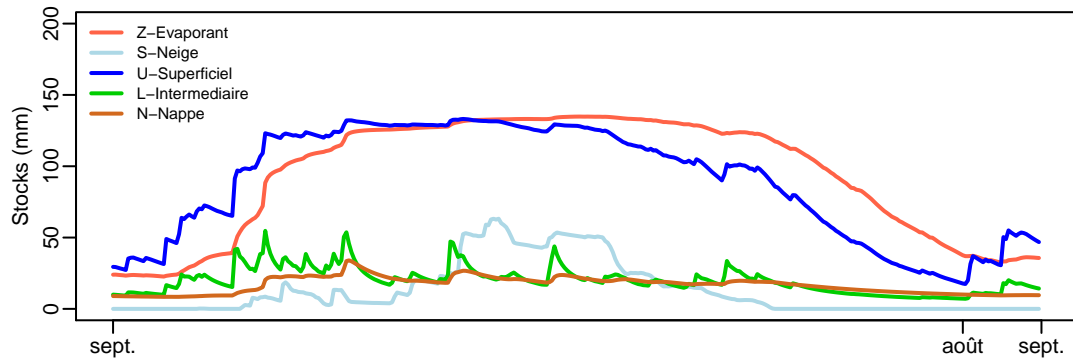

# q0204 (731.66 km²) – année 2004–2005

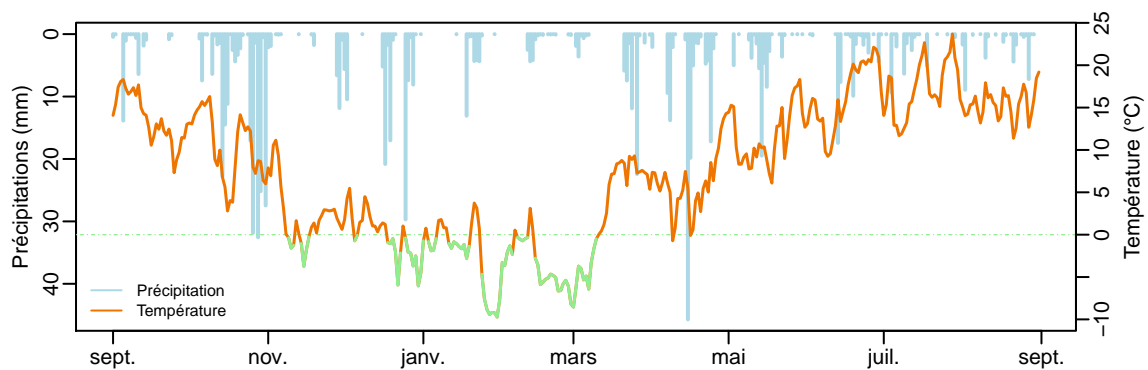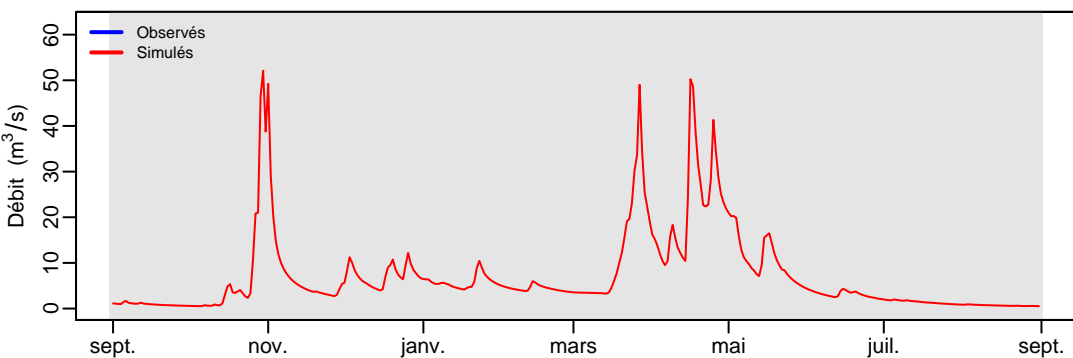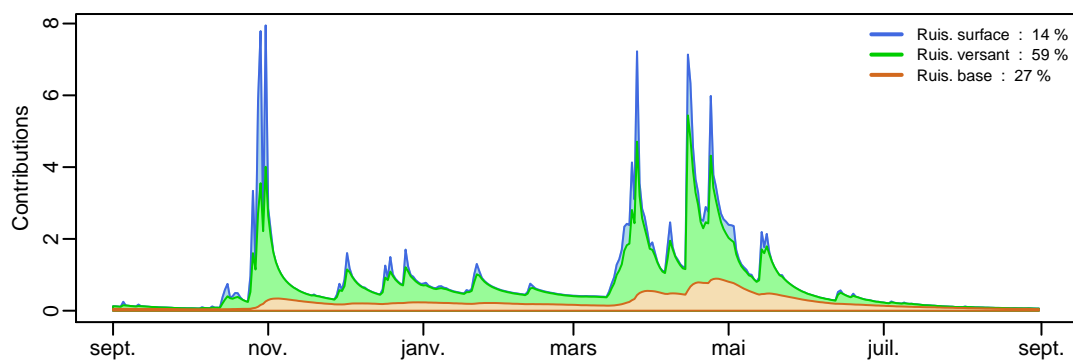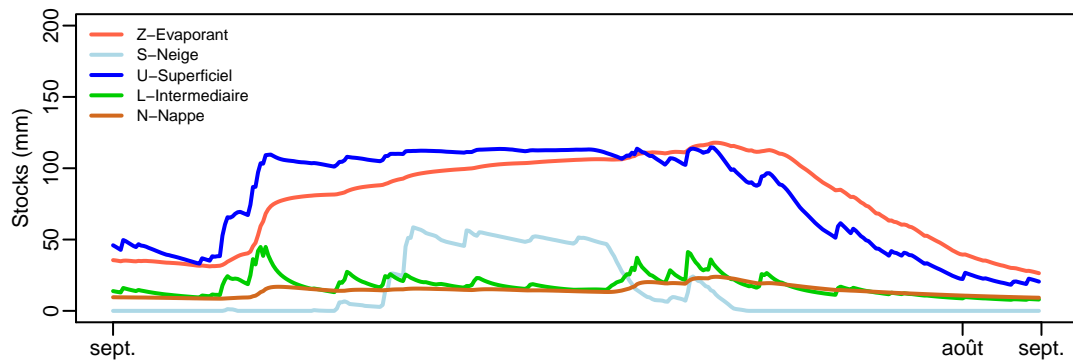

# q0204 (731.66 km<sup>2</sup>) – année 2005–2006

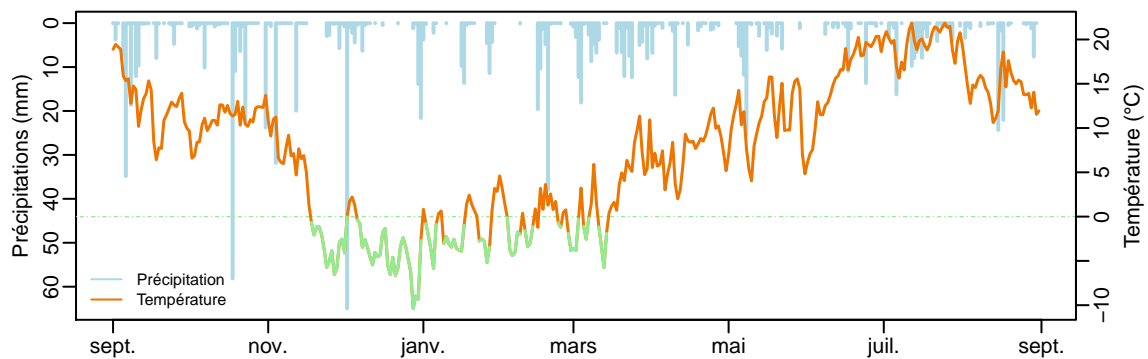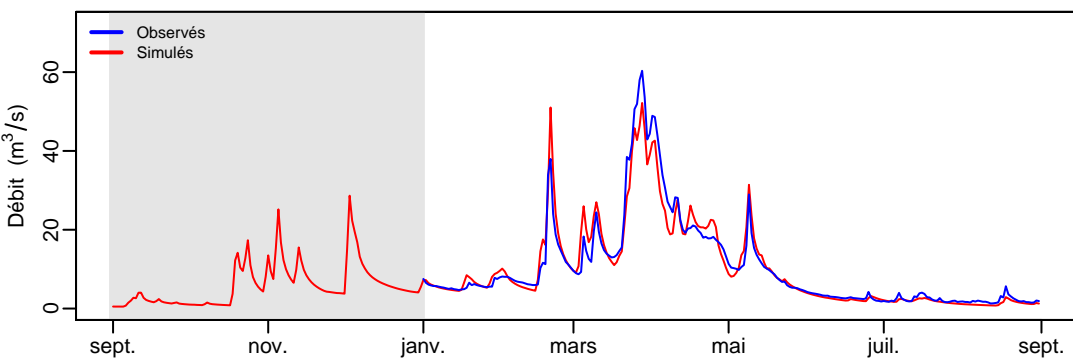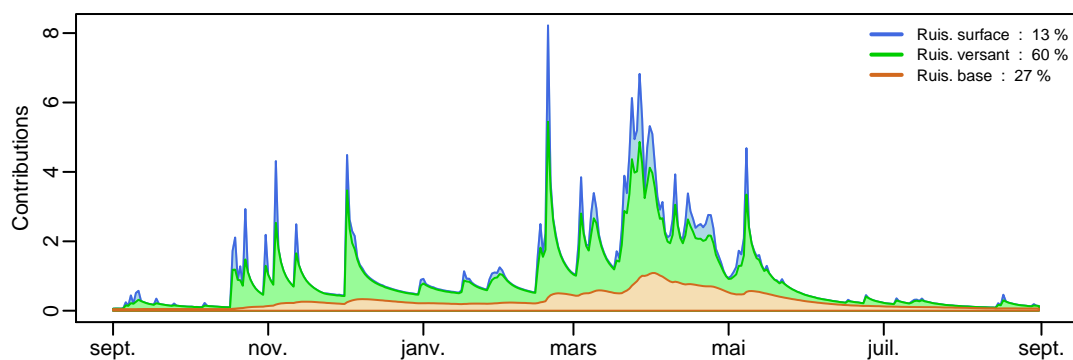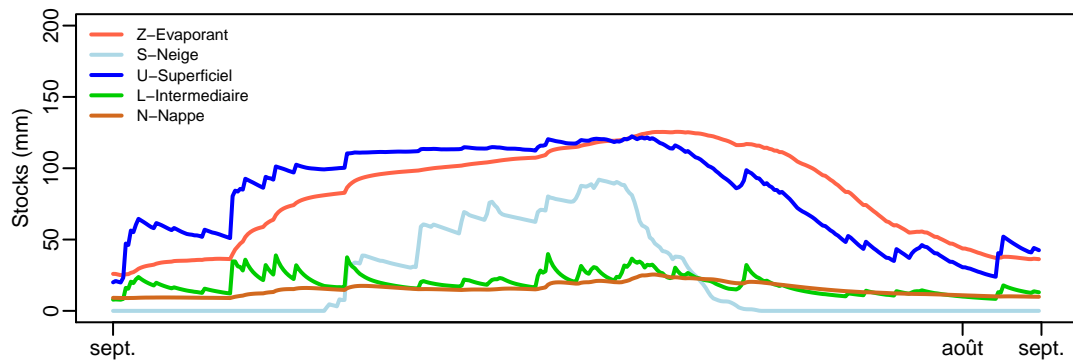

# q0204 (731.66 km<sup>2</sup>) – année 2006–2007

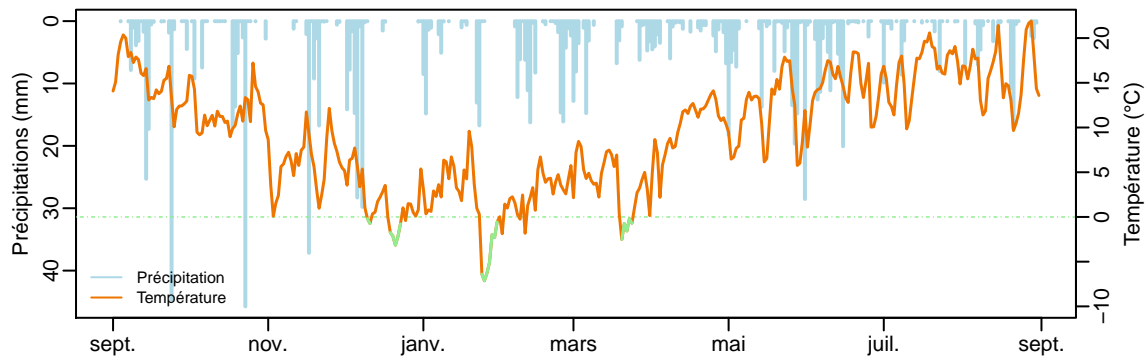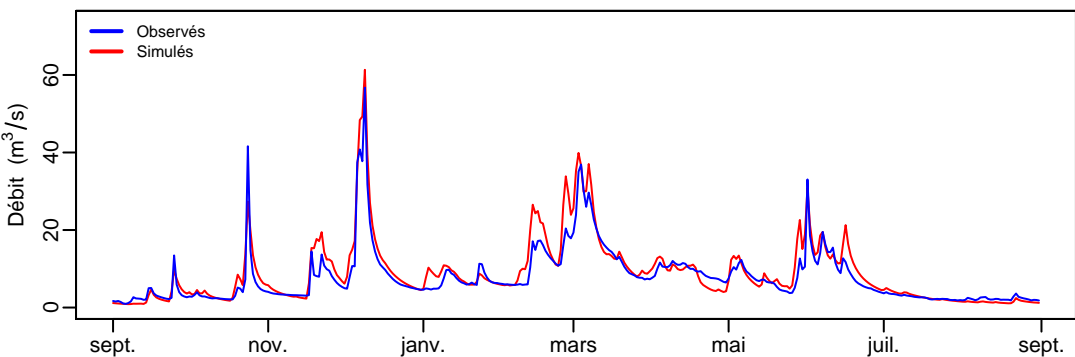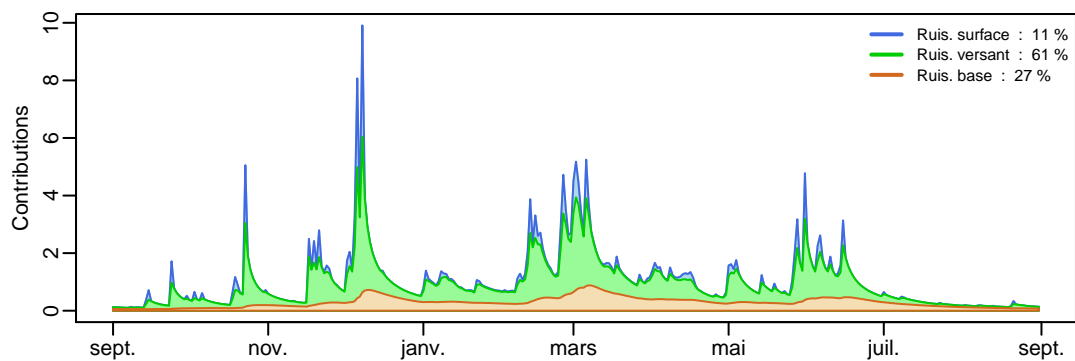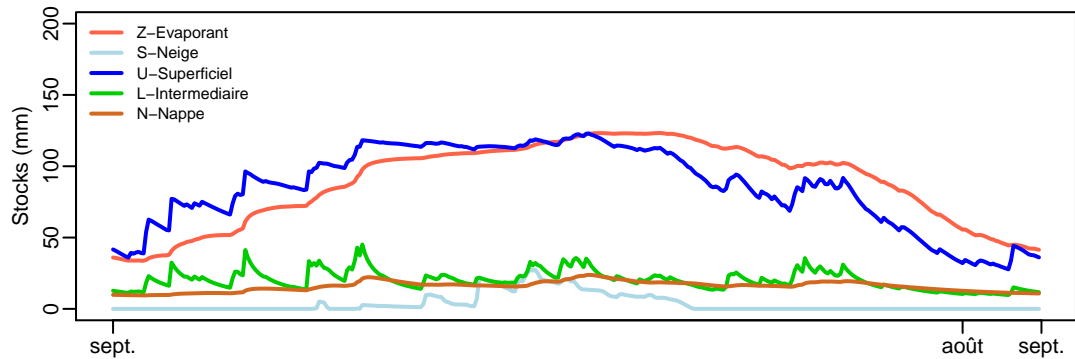



# q0204 (731.66 km²) – année 2007–2008

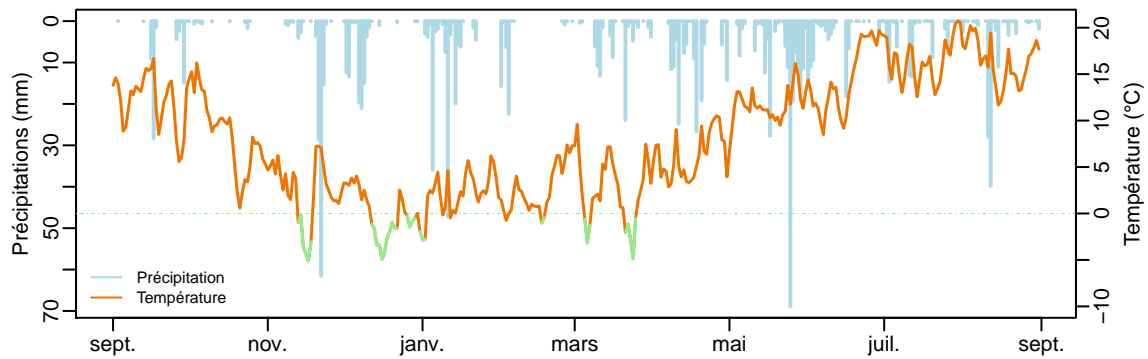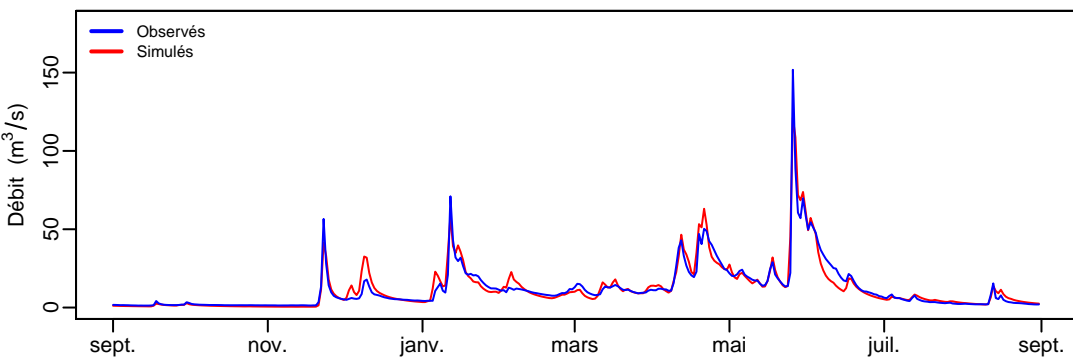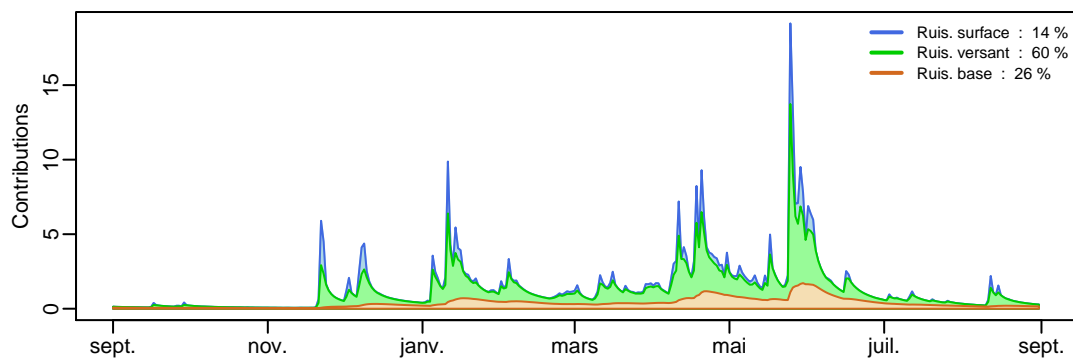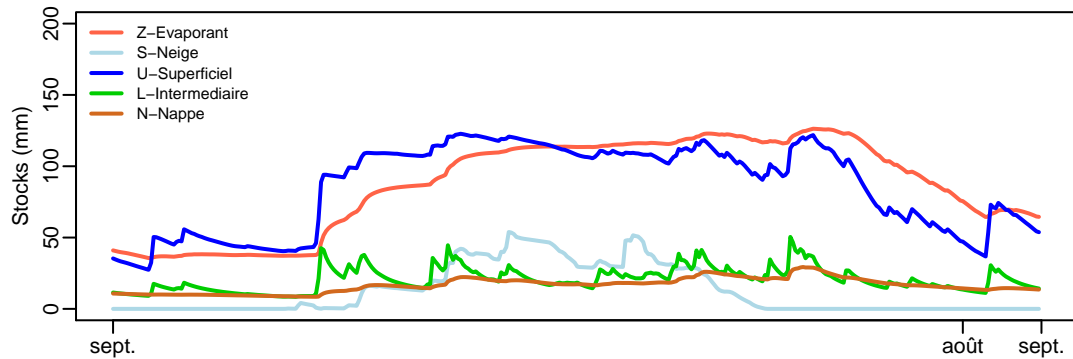

# q0204 (731.66 km<sup>2</sup>) – année 2008–2009

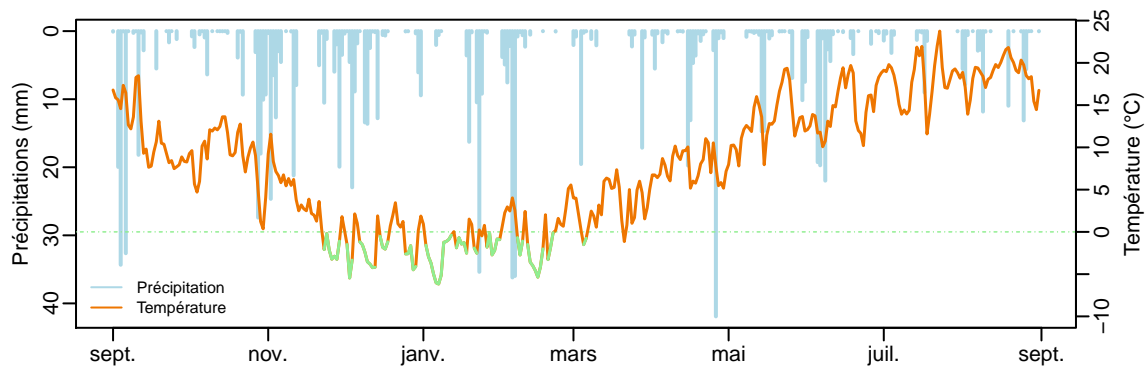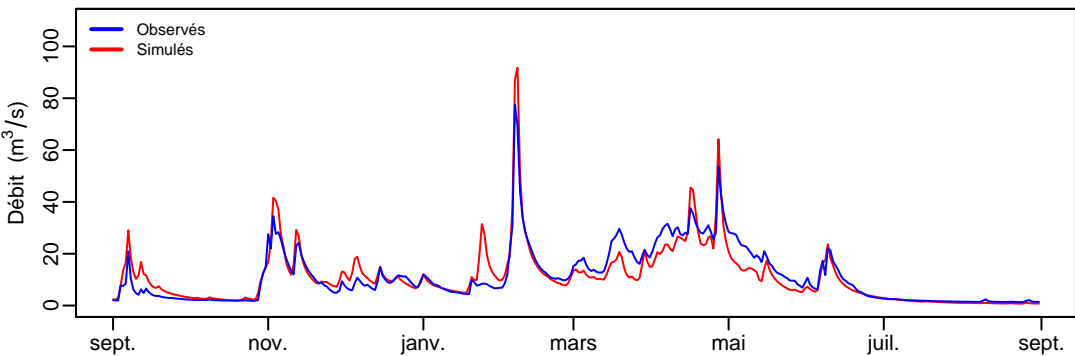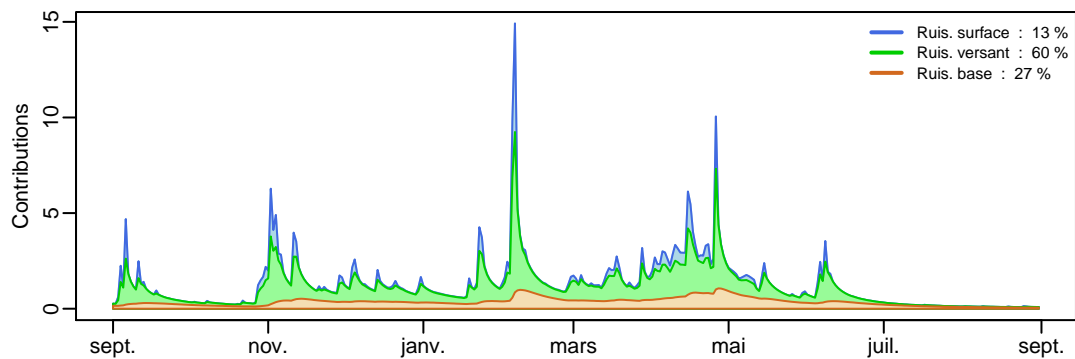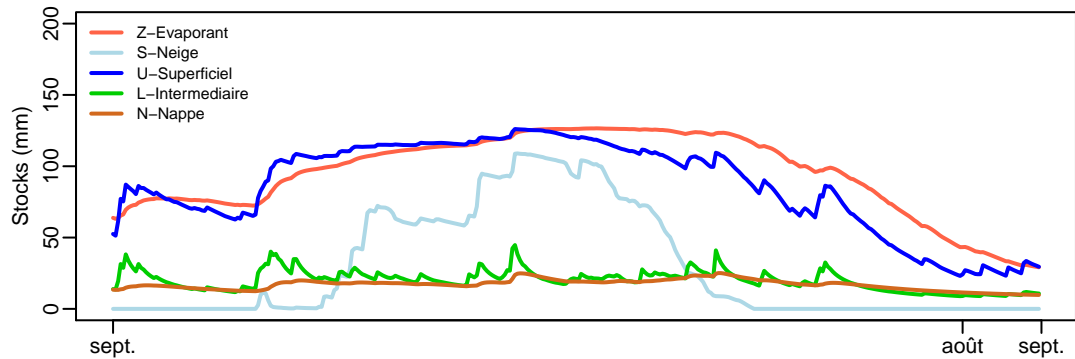

# q0204 (731.66 km²) – année 2009–2010

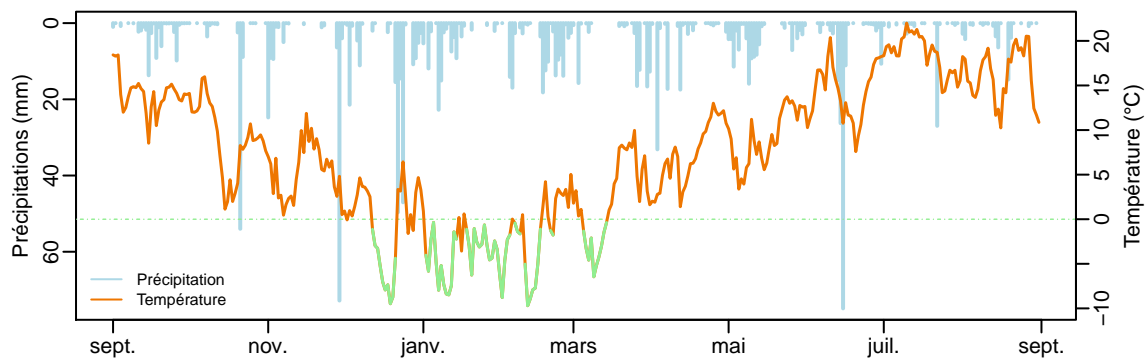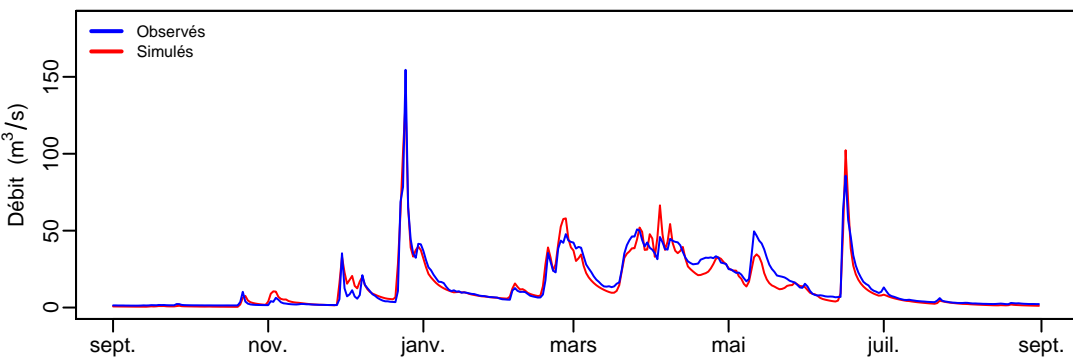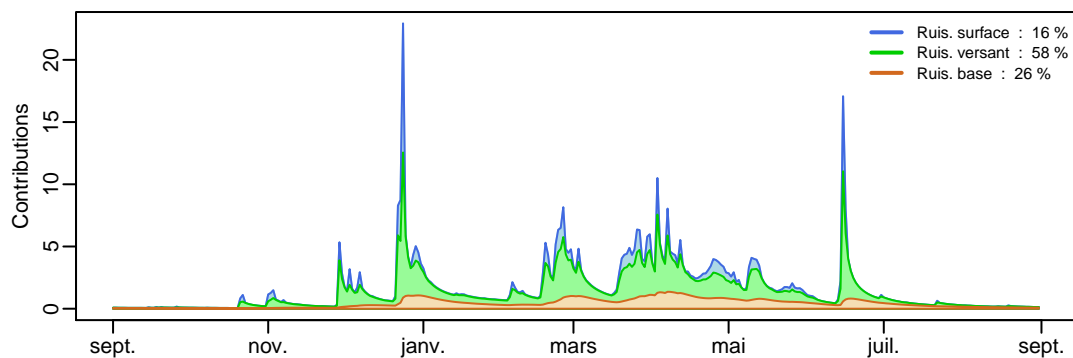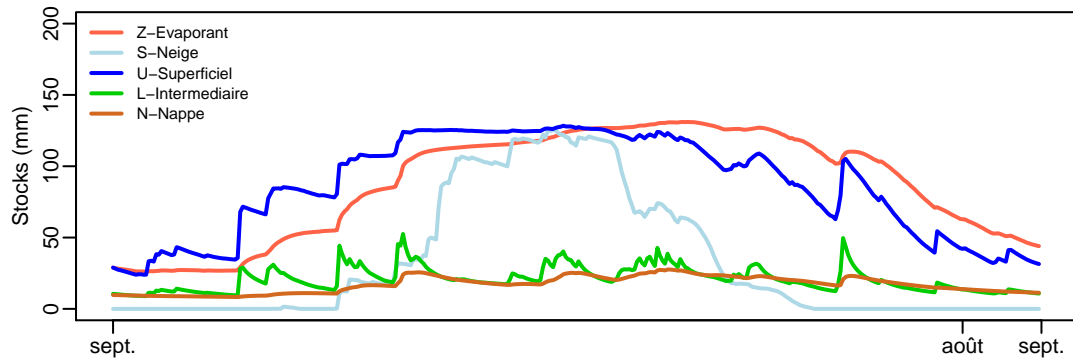

# q0204 (731.66 km²) – année 2010–2011

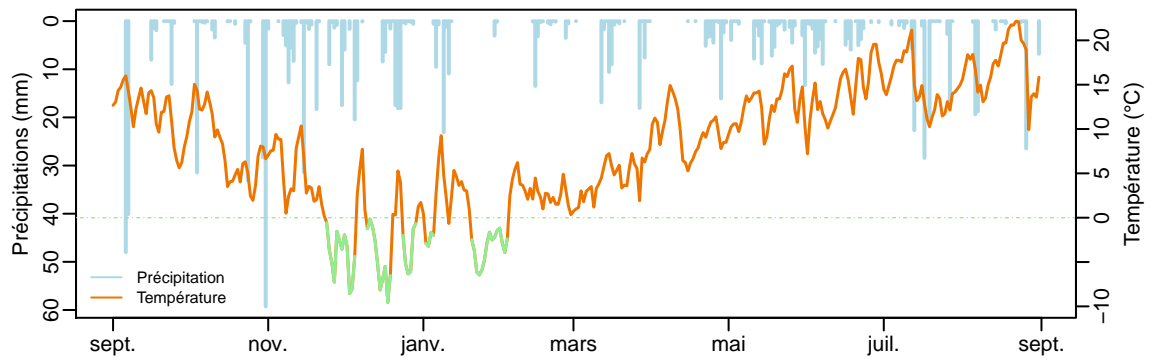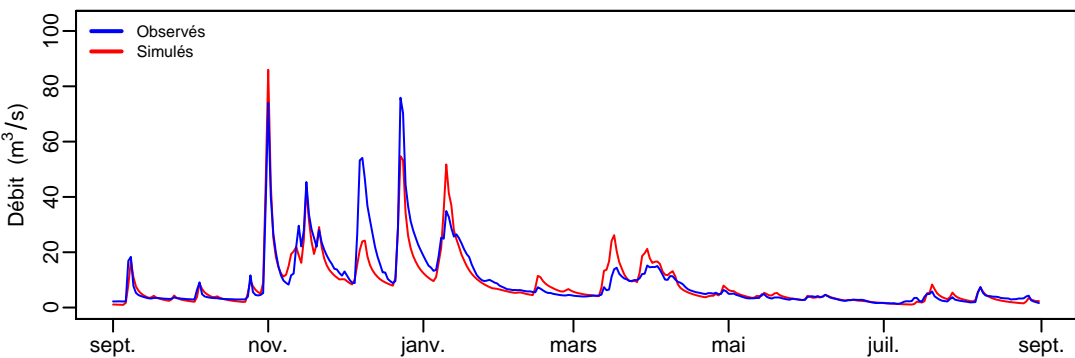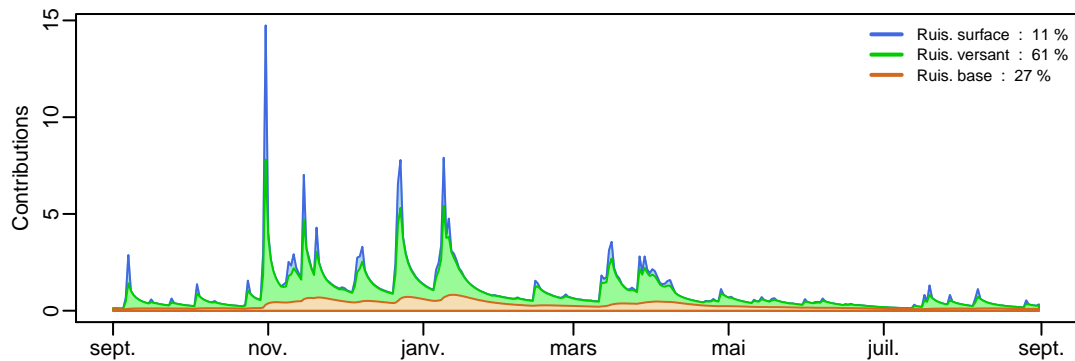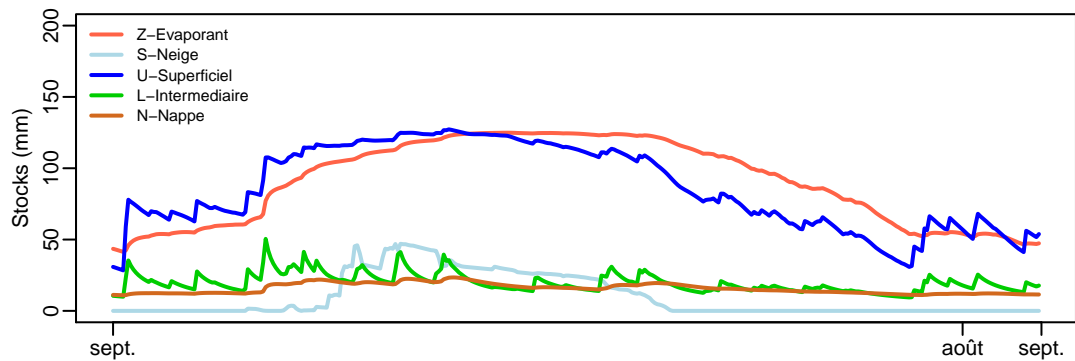

# q0204 (731.66 km²) – année 2011–2012

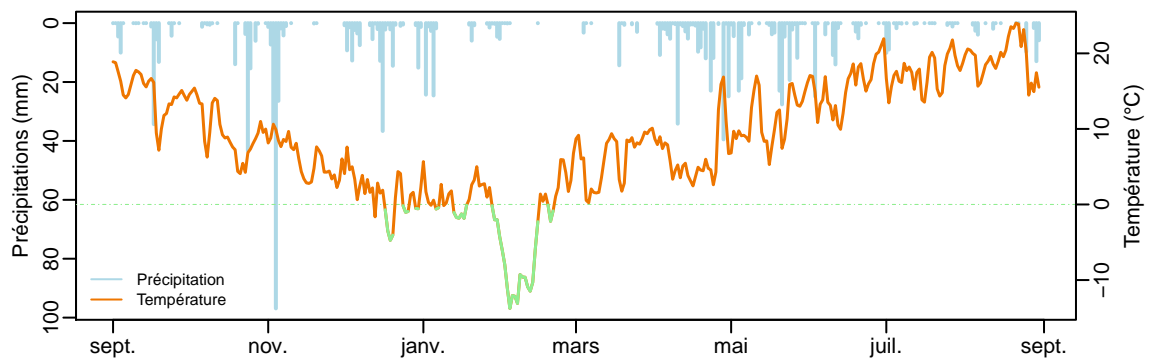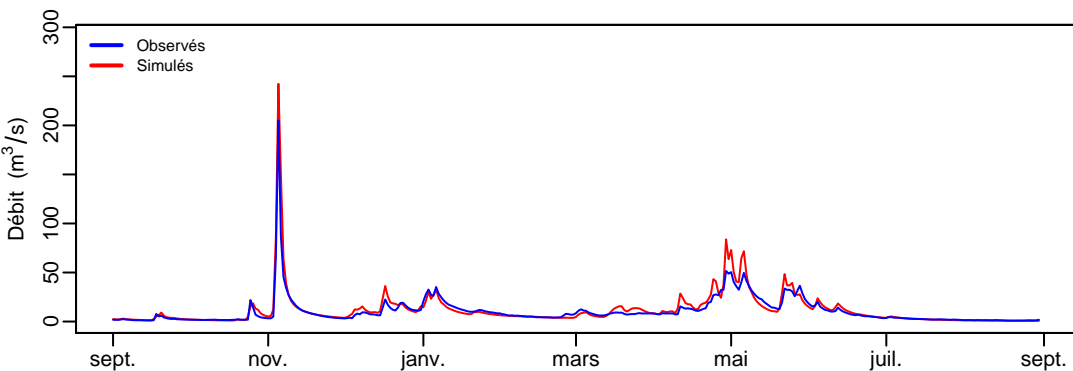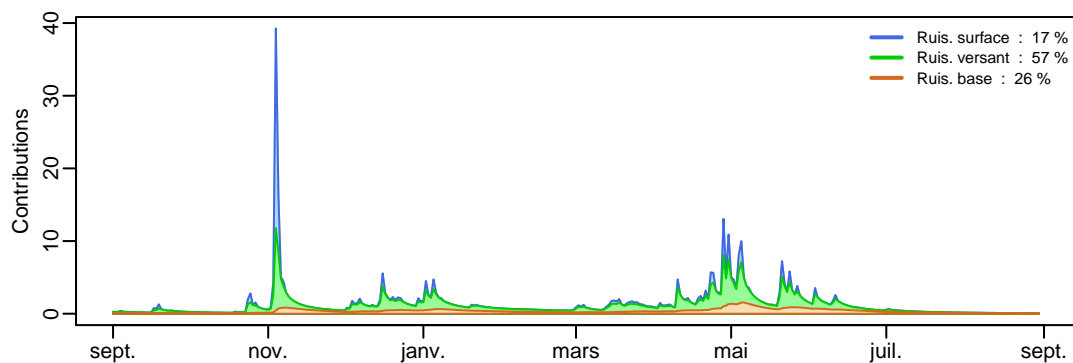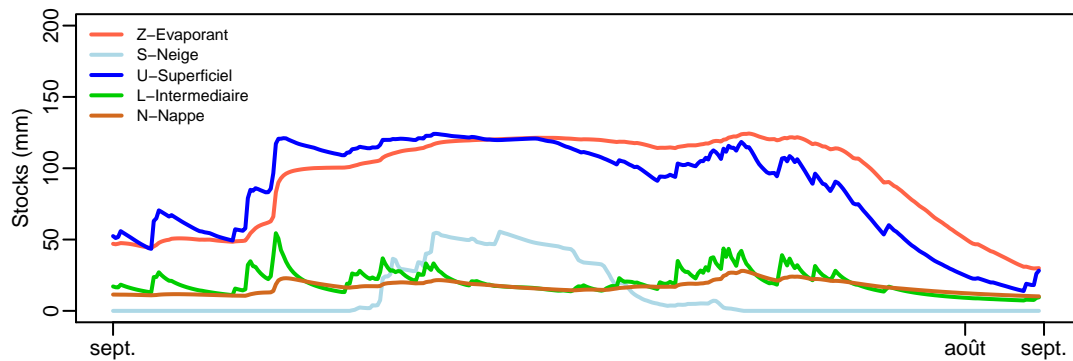

# q0207 (900.05 km<sup>2</sup>) – année 1981–1982

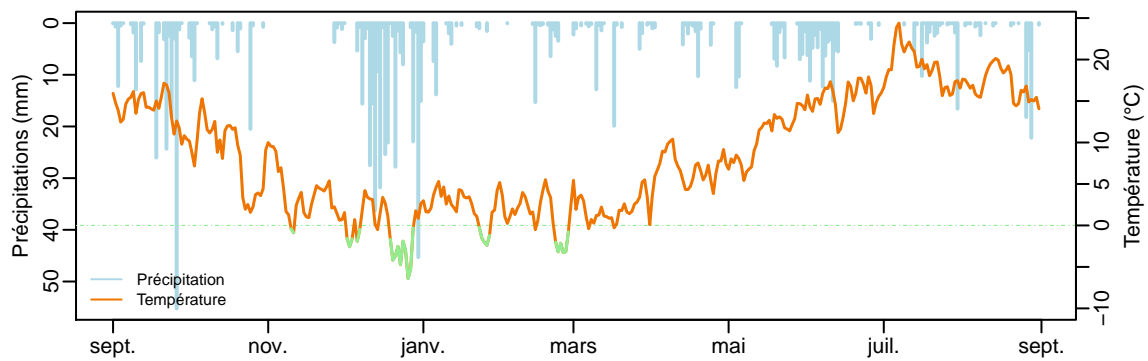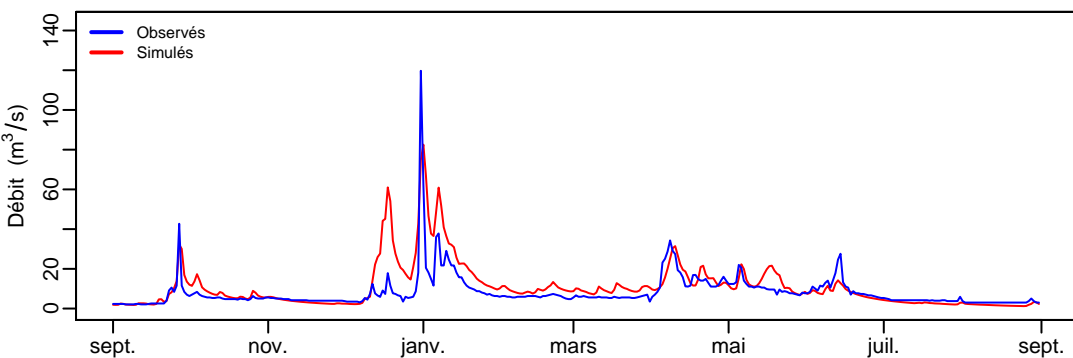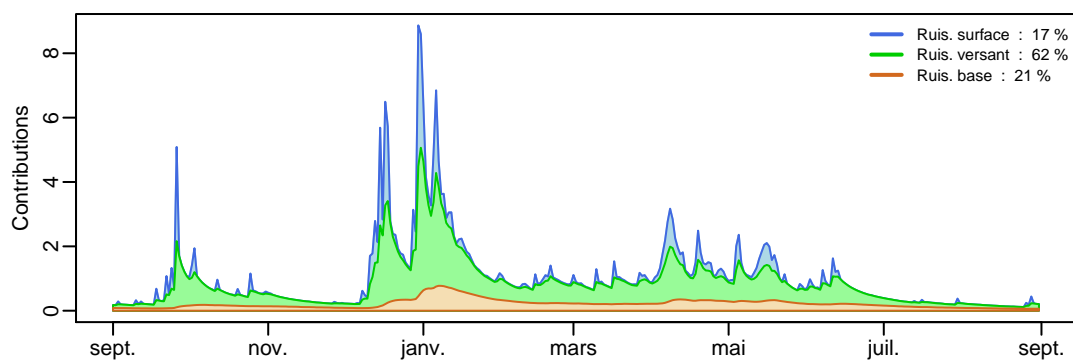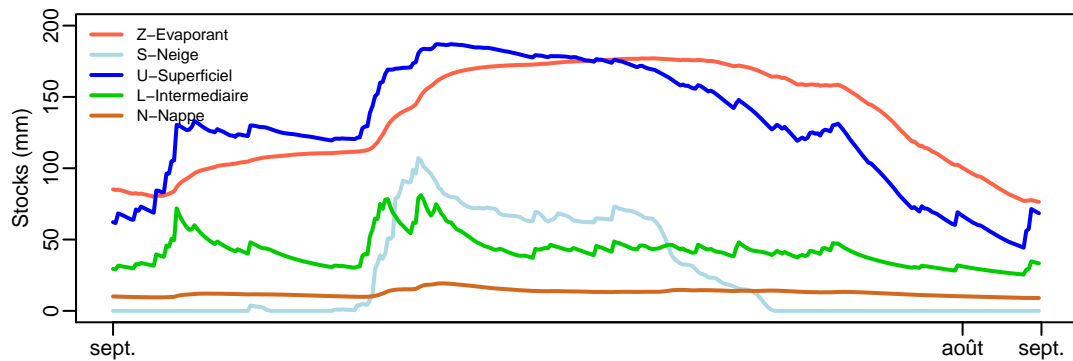

# q0207 (900.05 km²) – année 1982–1983

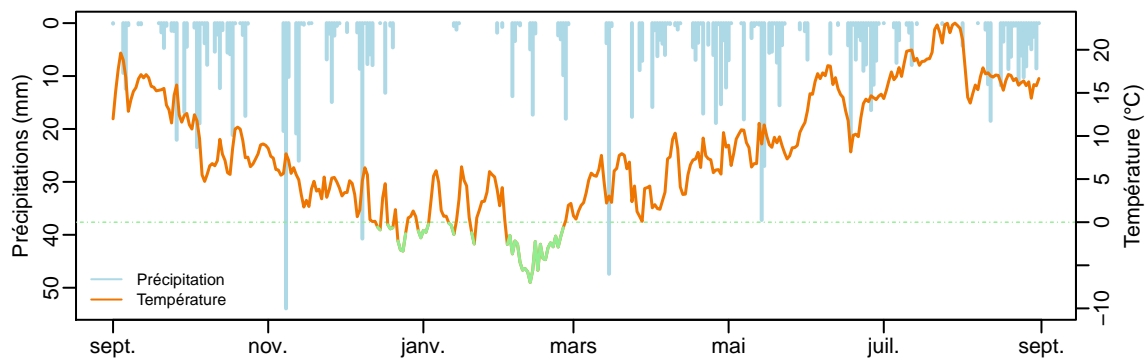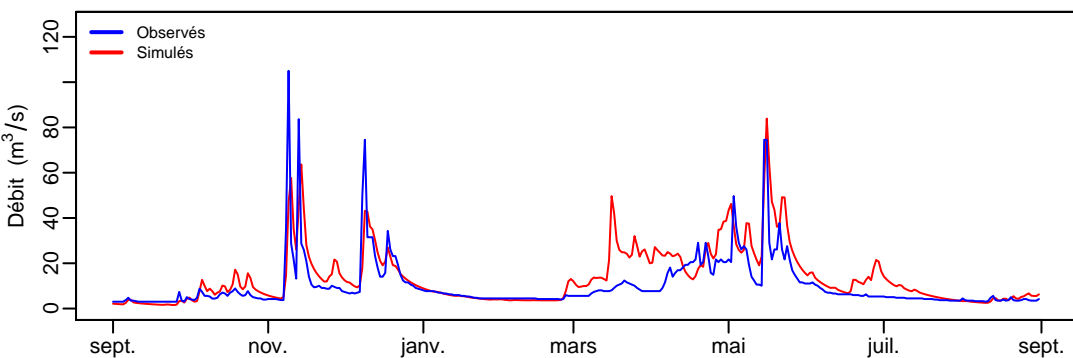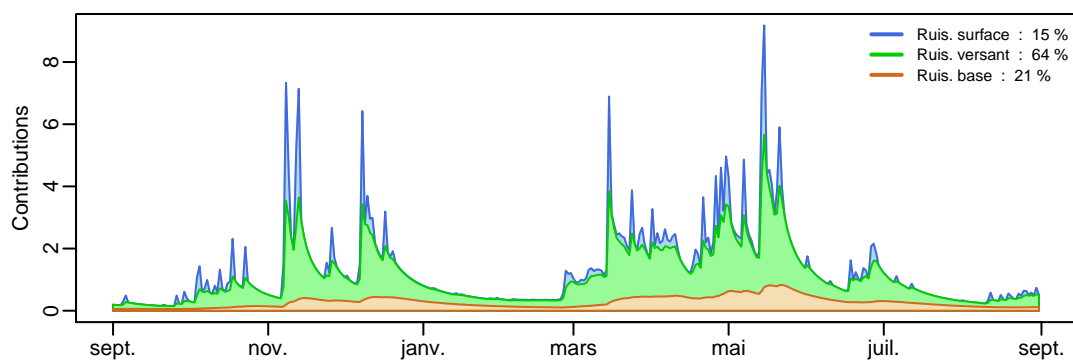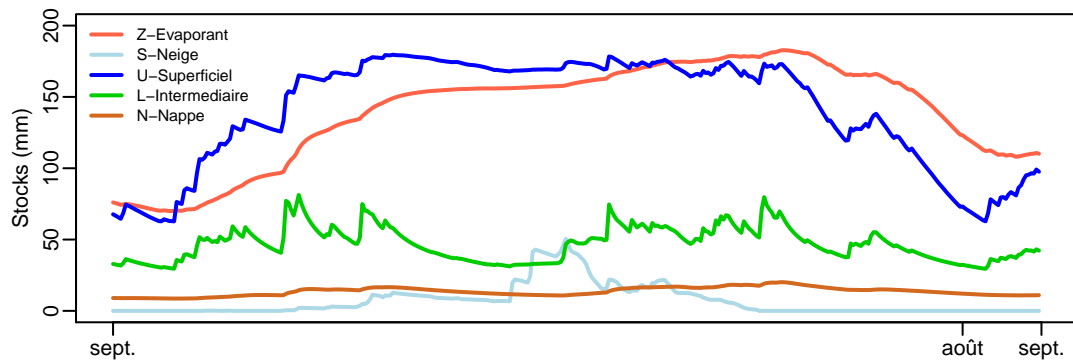

# q0207 (900.05 km<sup>2</sup>) – année 1983–1984

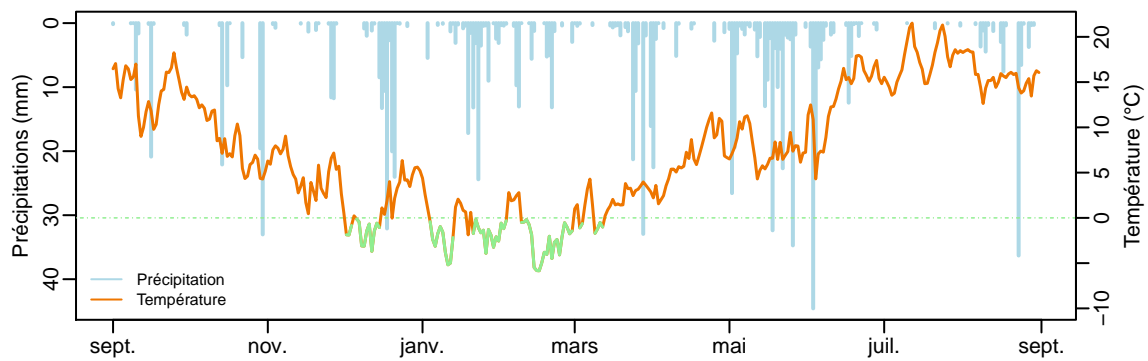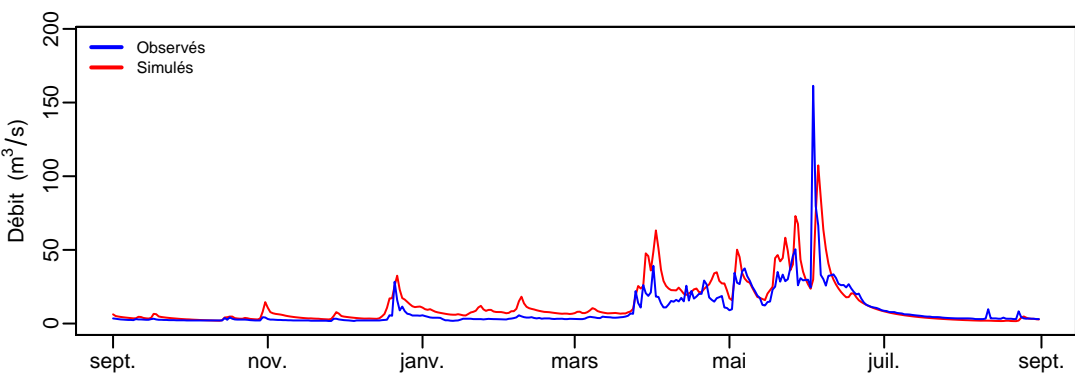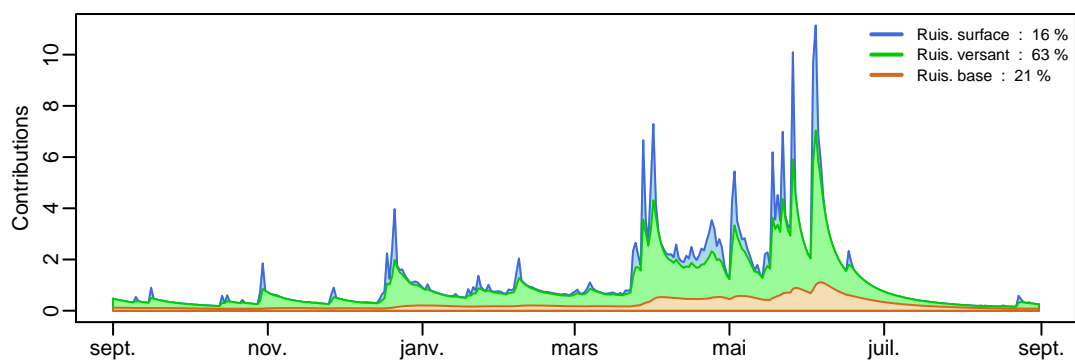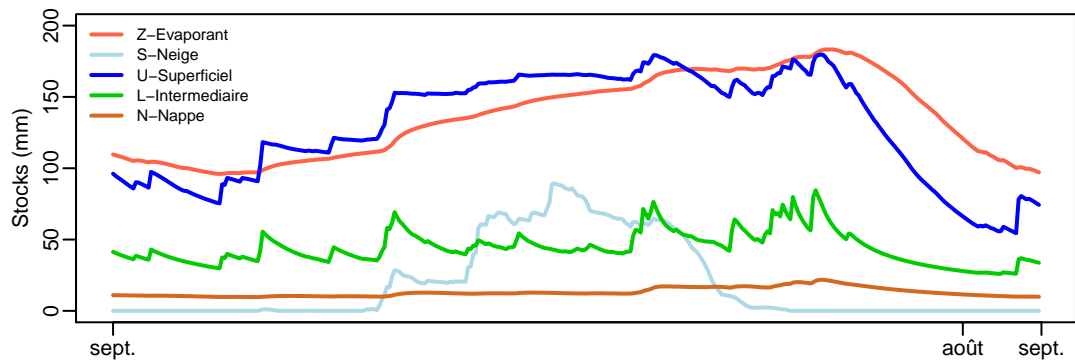



# q0207 (900.05 km²) – année 1984–1985

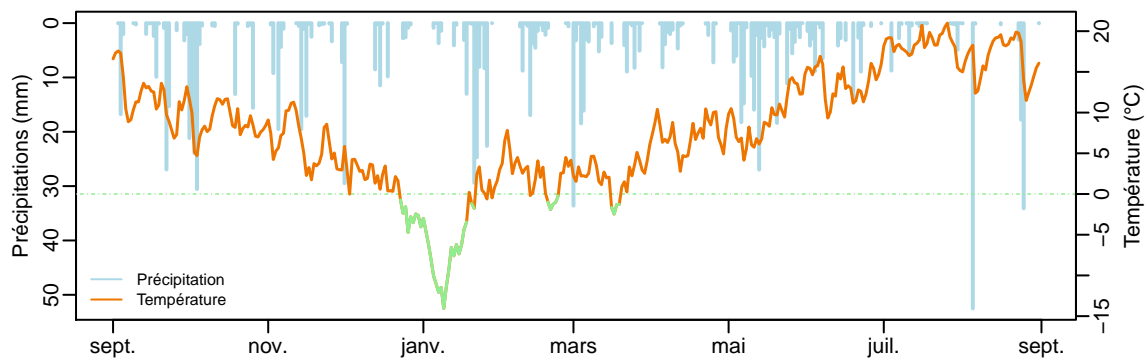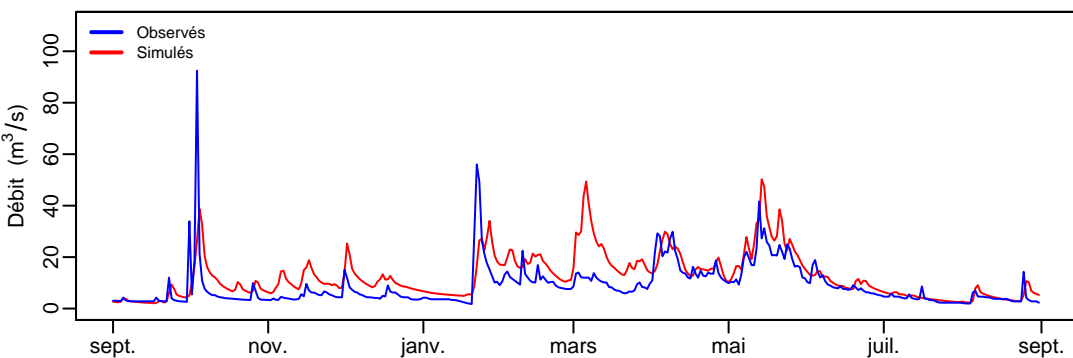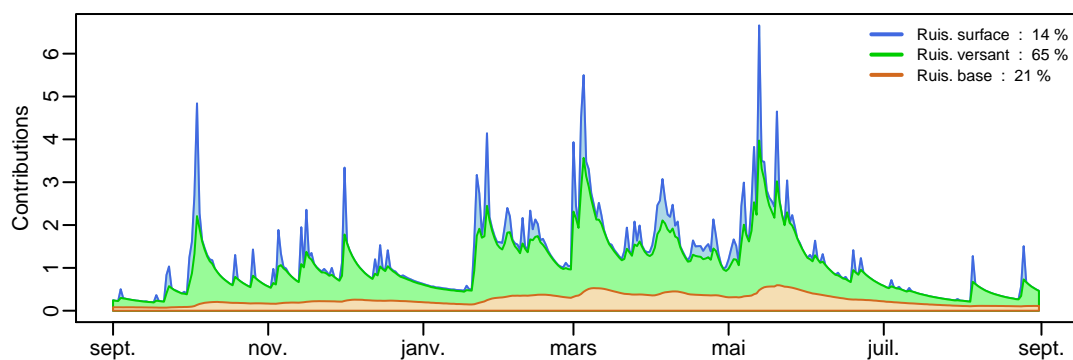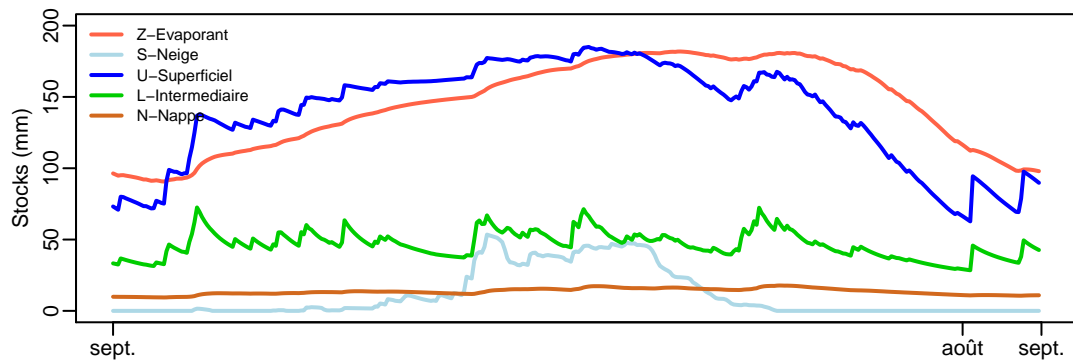

# q0207 (900.05 km²) – année 1985–1986

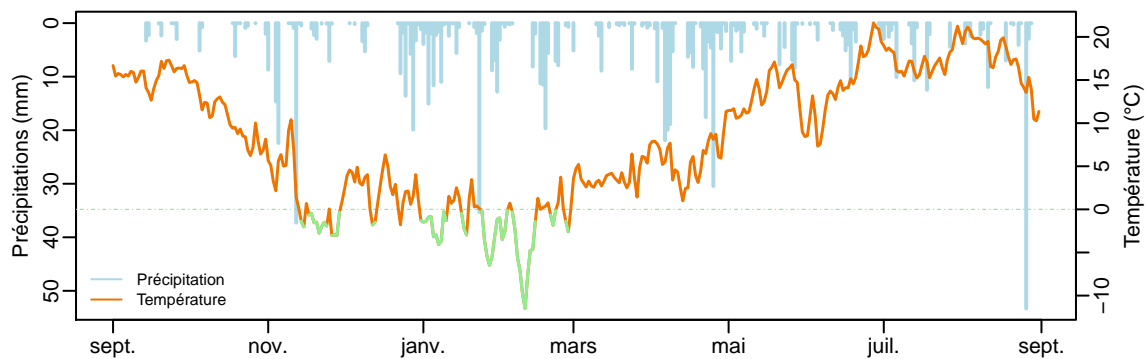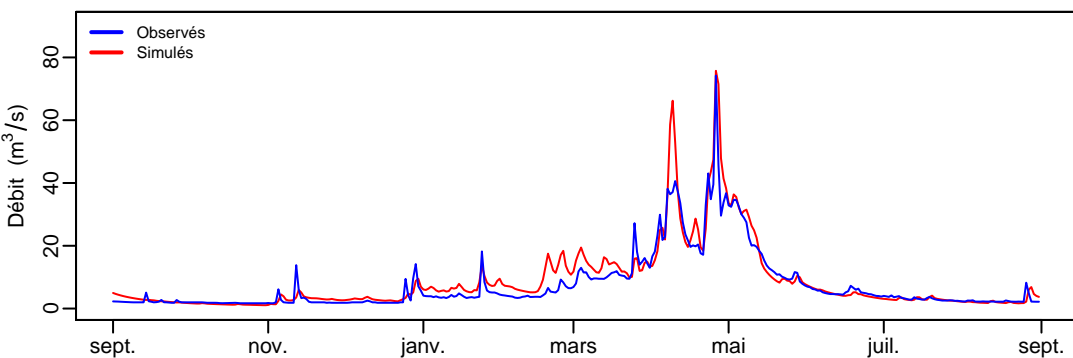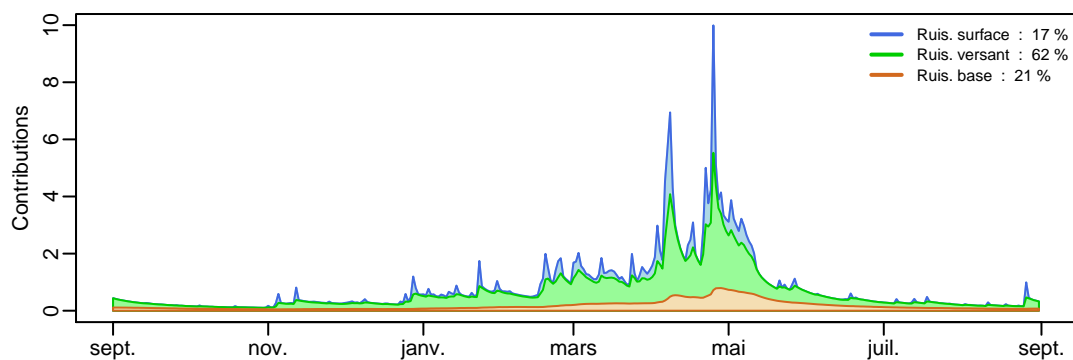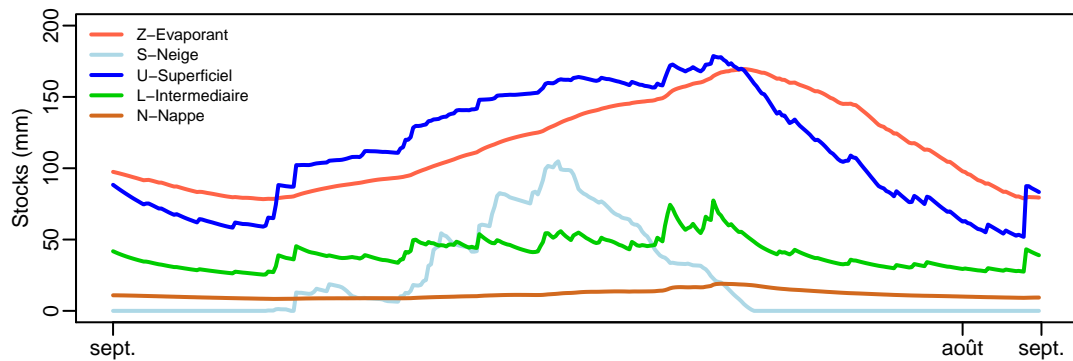

# q0207 (900.05 km²) – année 1986–1987

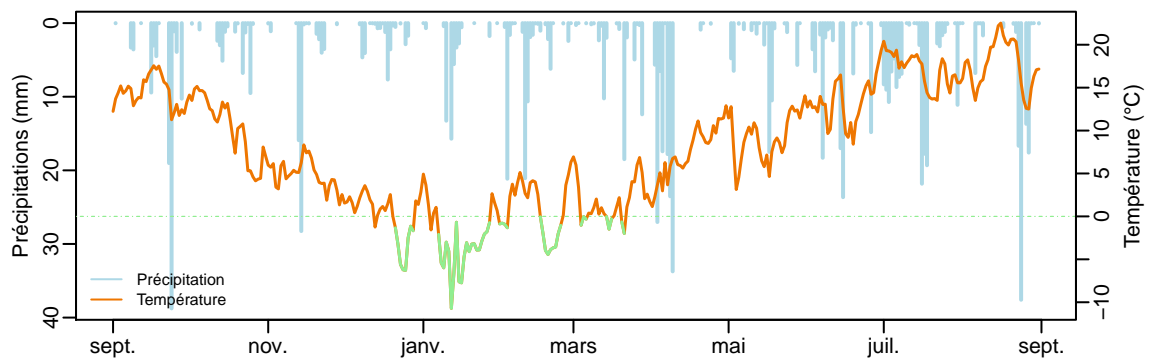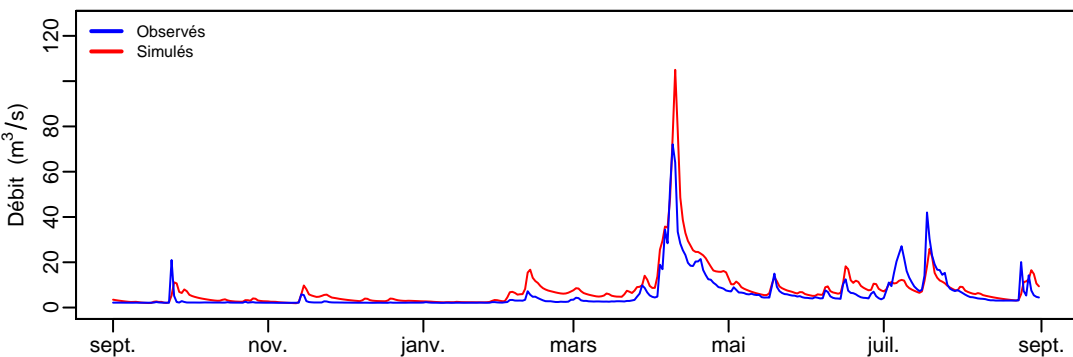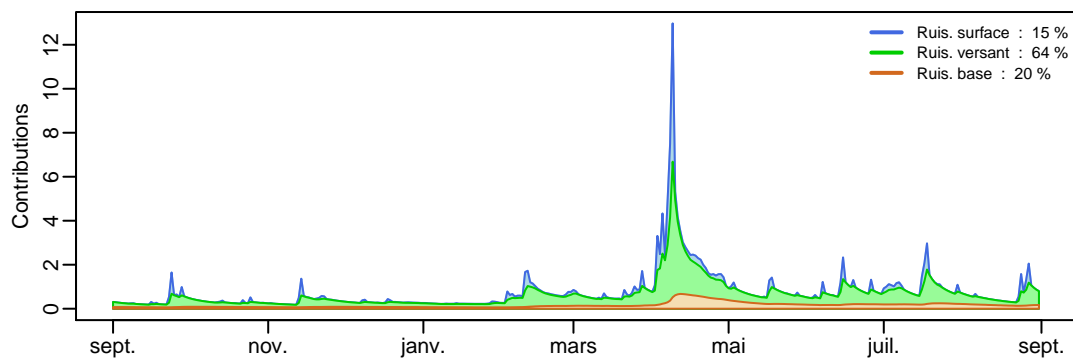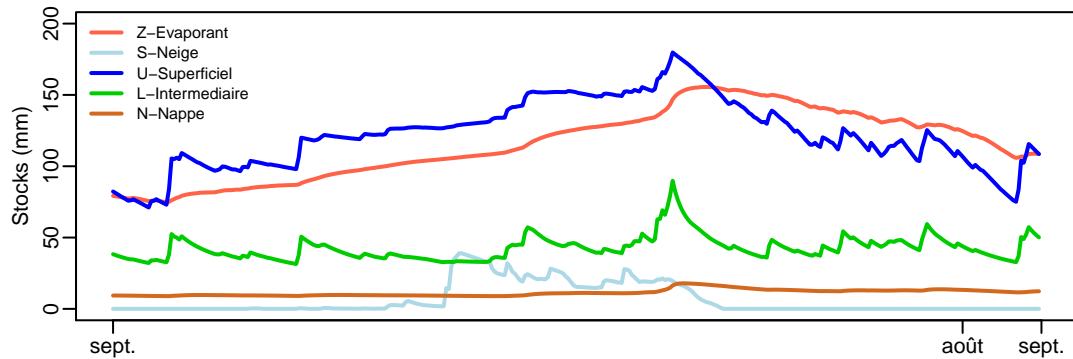

# q0207 (900.05 km²) – année 1987–1988

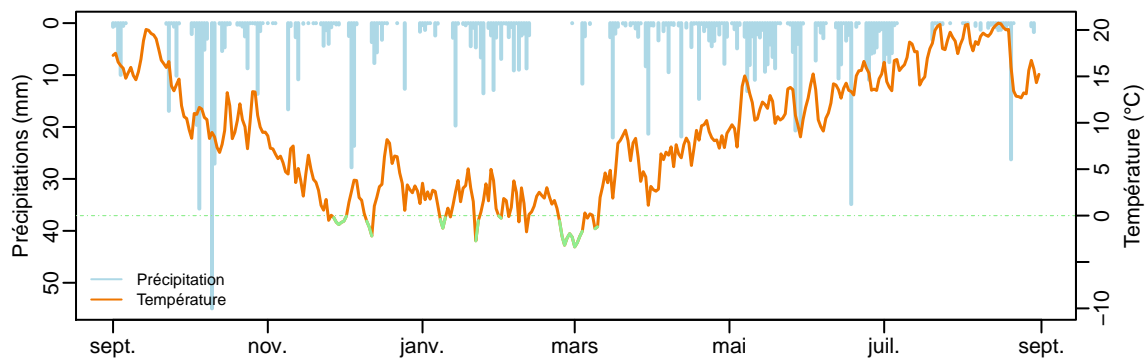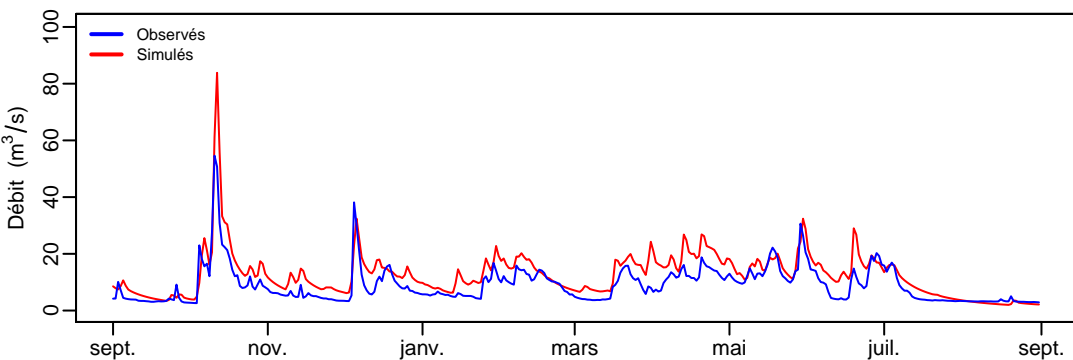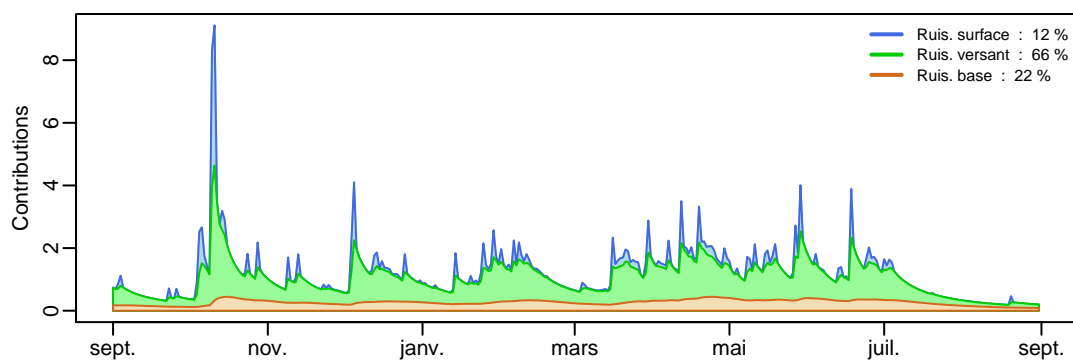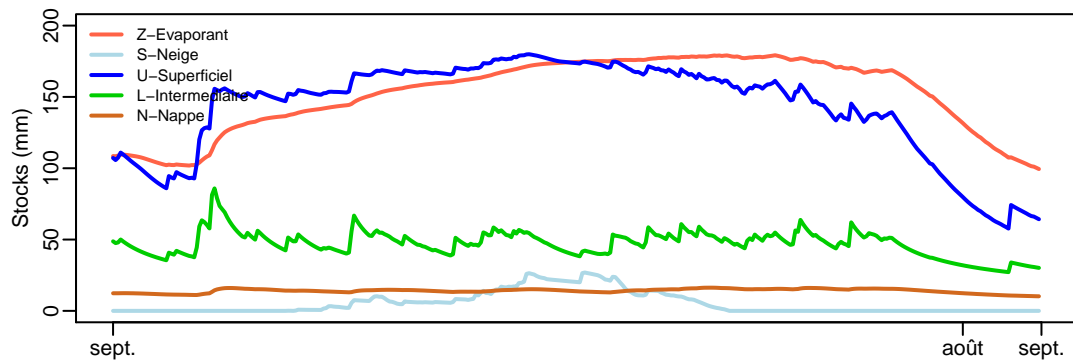

# q0207 (900.05 km<sup>2</sup>) – année 1988–1989

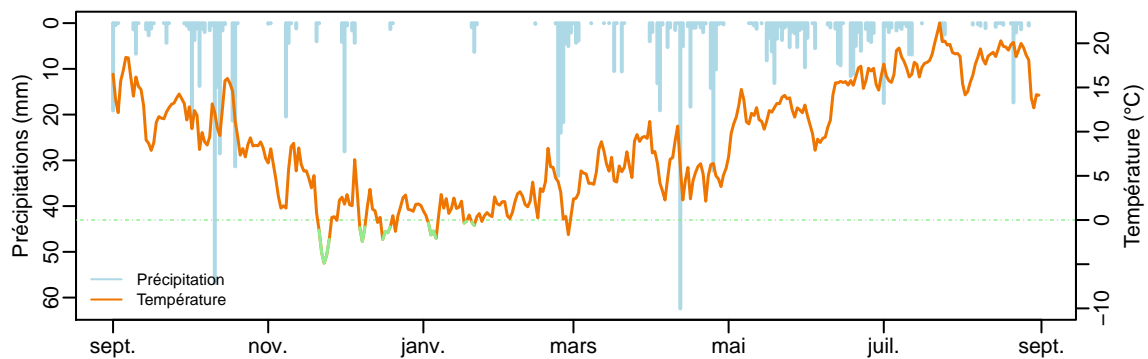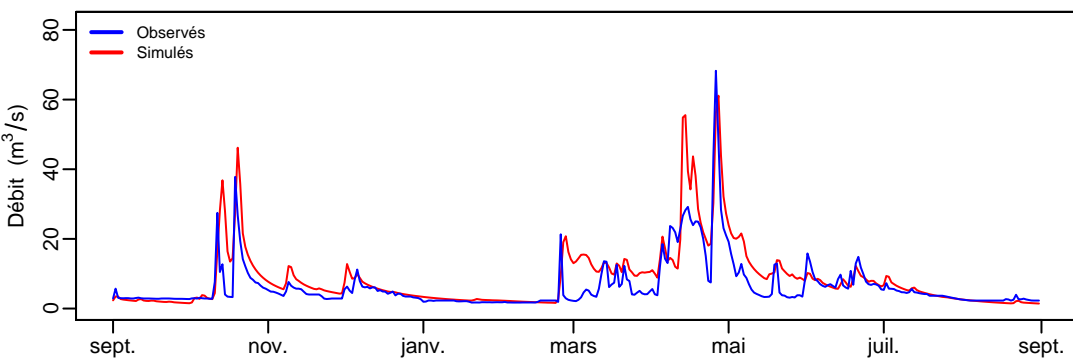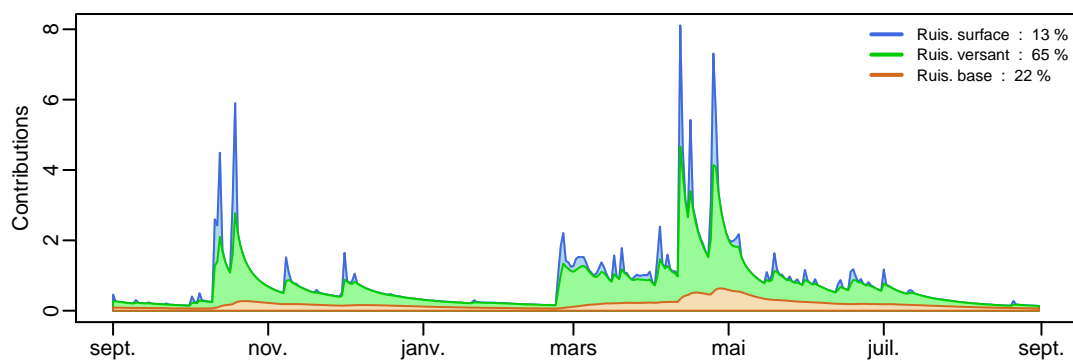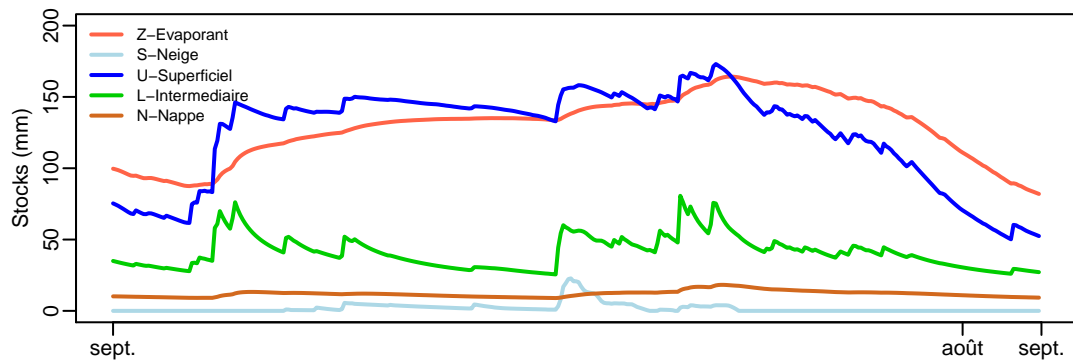

# q0207 (900.05 km²) – année 1989–1990

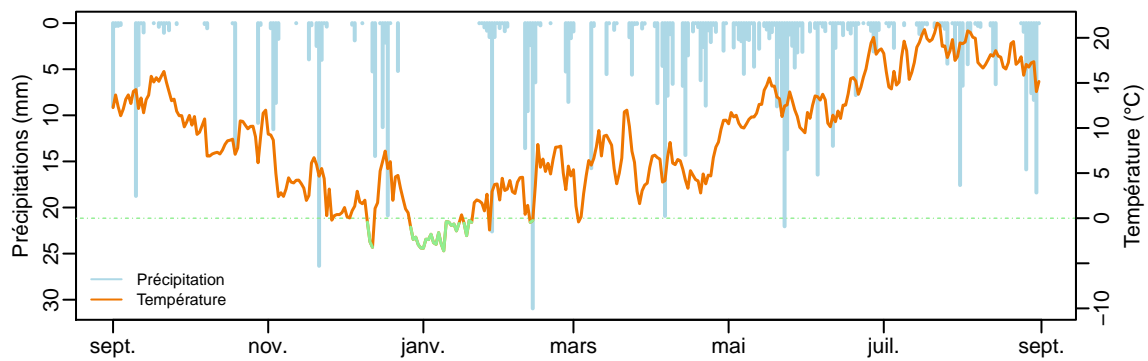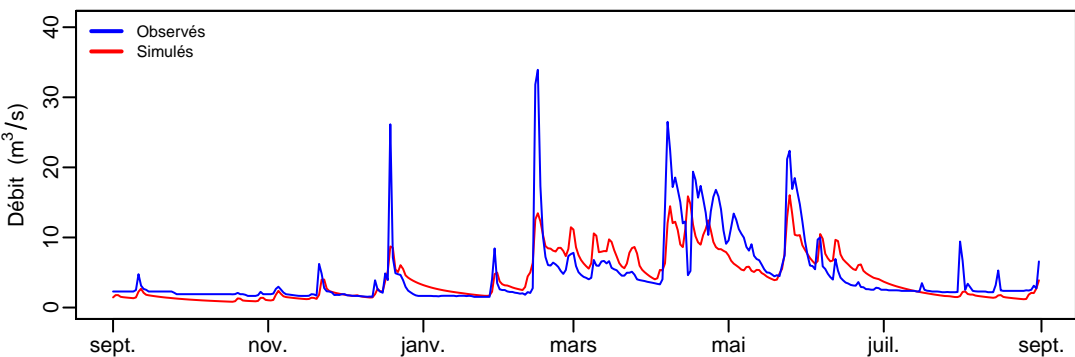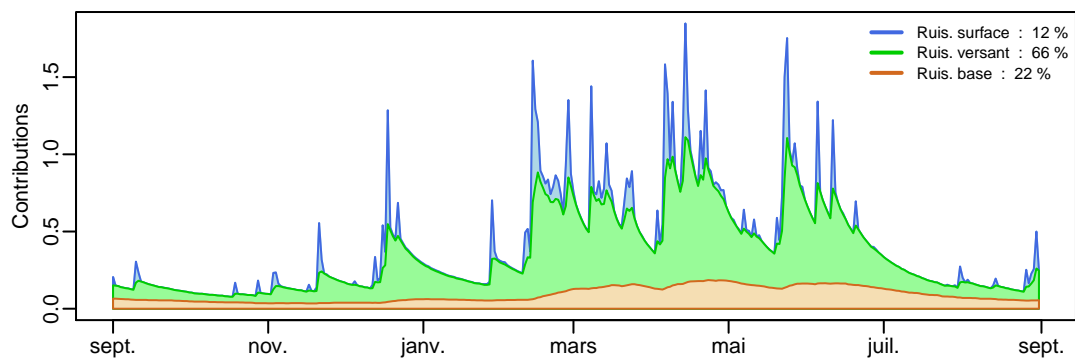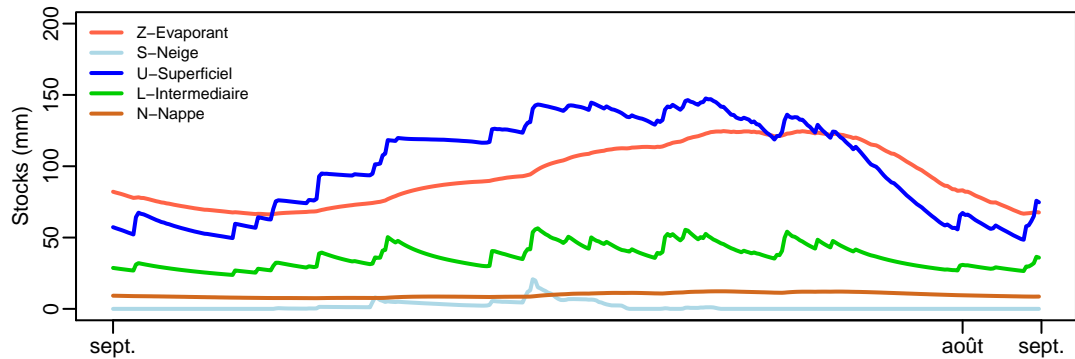

# q0207 (900.05 km<sup>2</sup>) – année 1990–1991

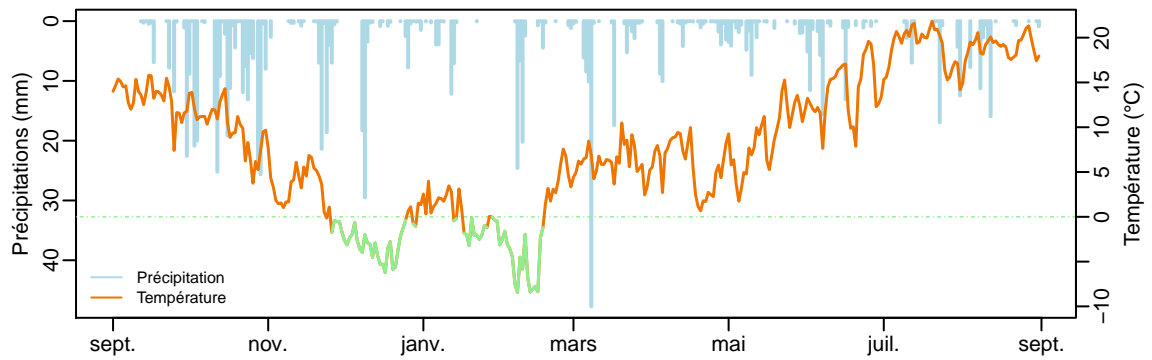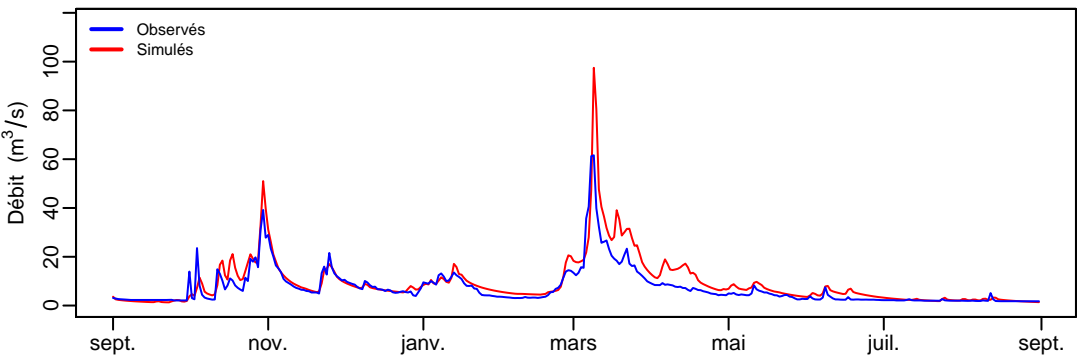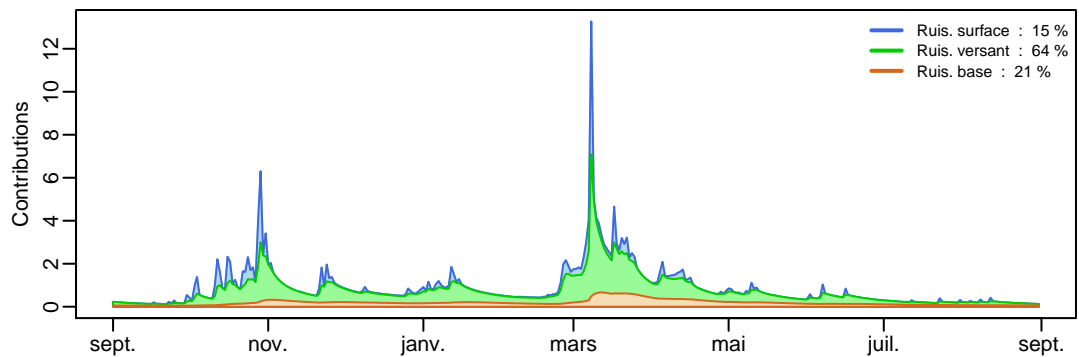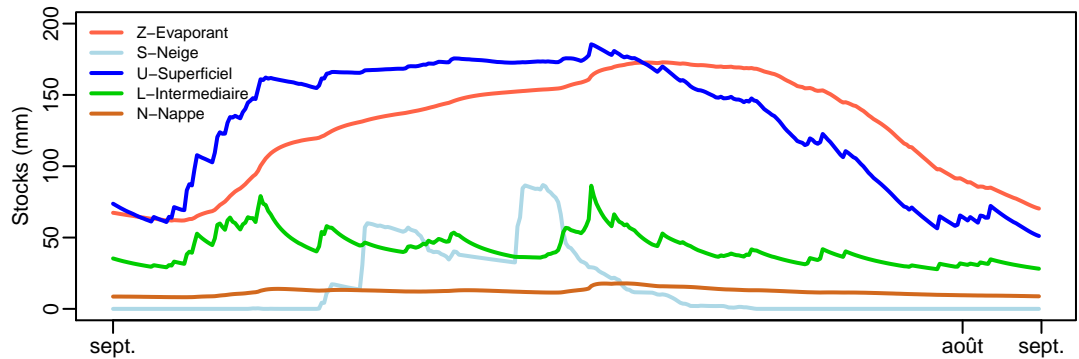

# q0207 (900.05 km²) – année 1991–1992

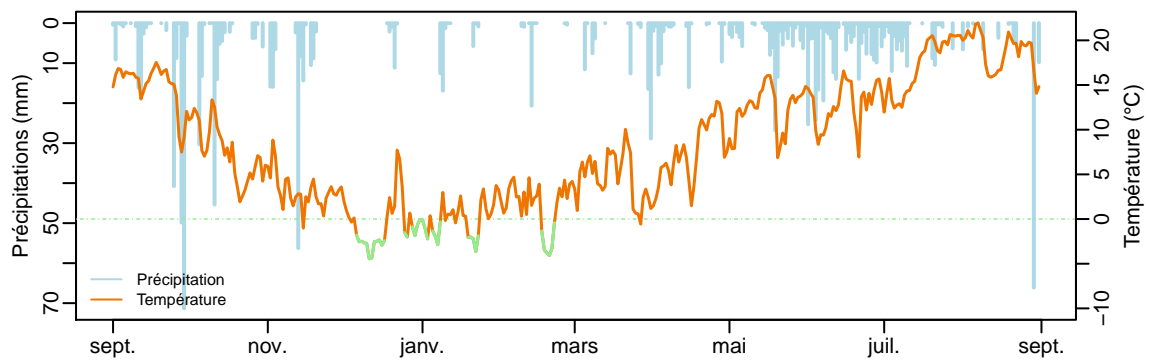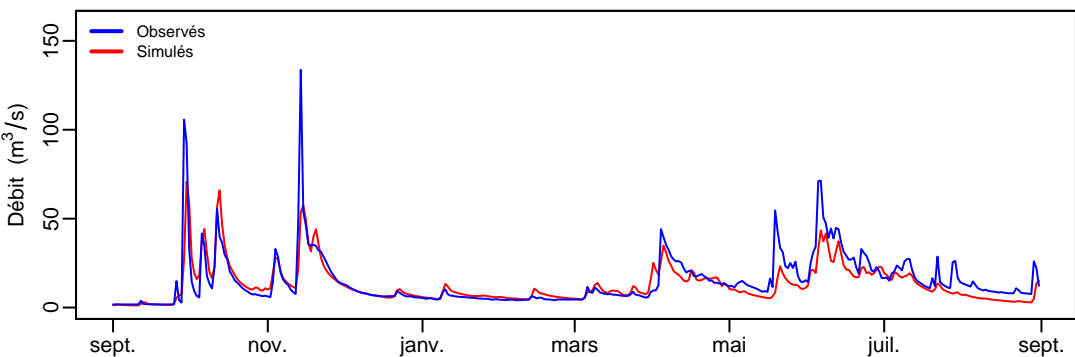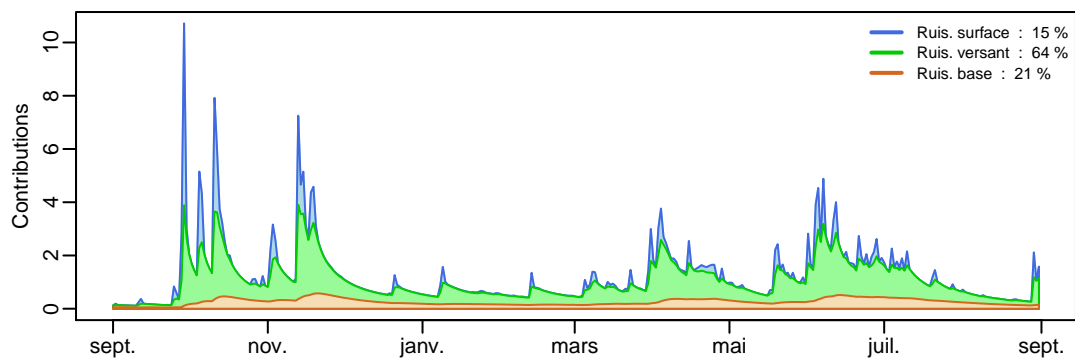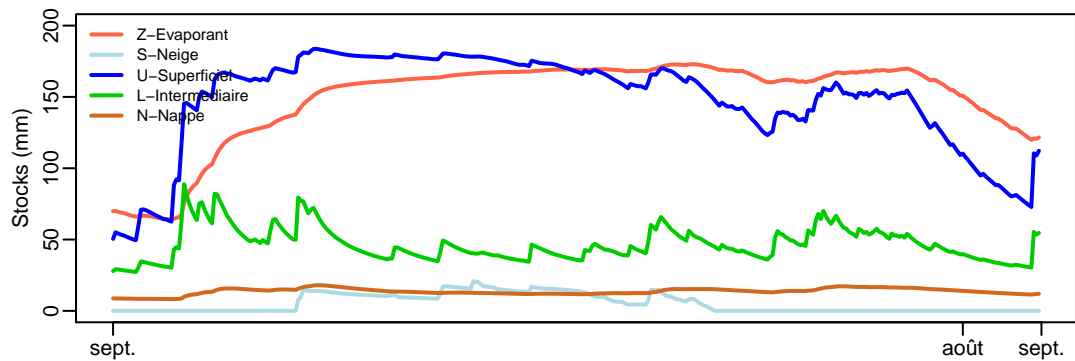



# q0207 (900.05 km²) – année 1992–1993

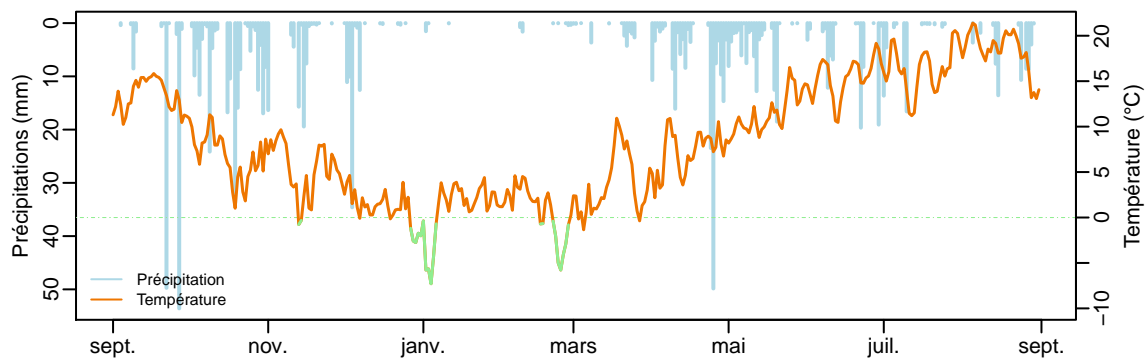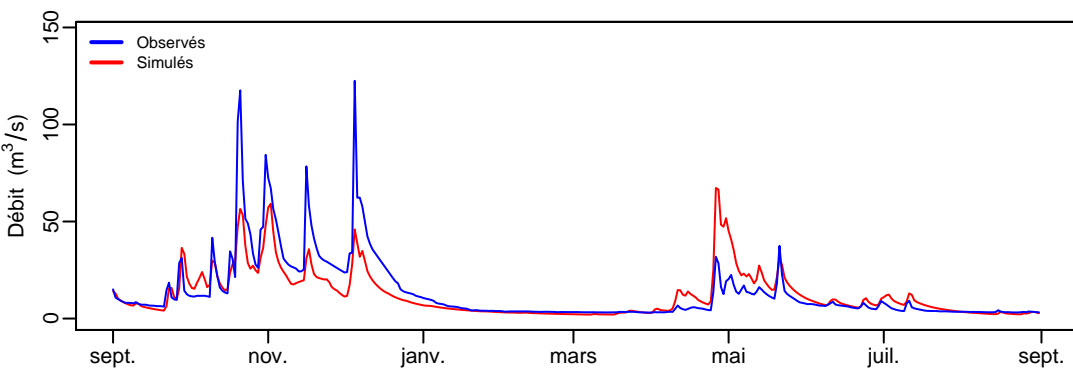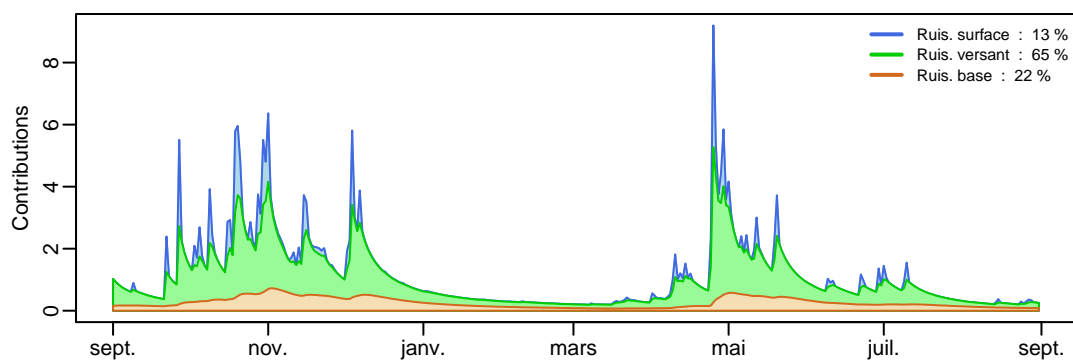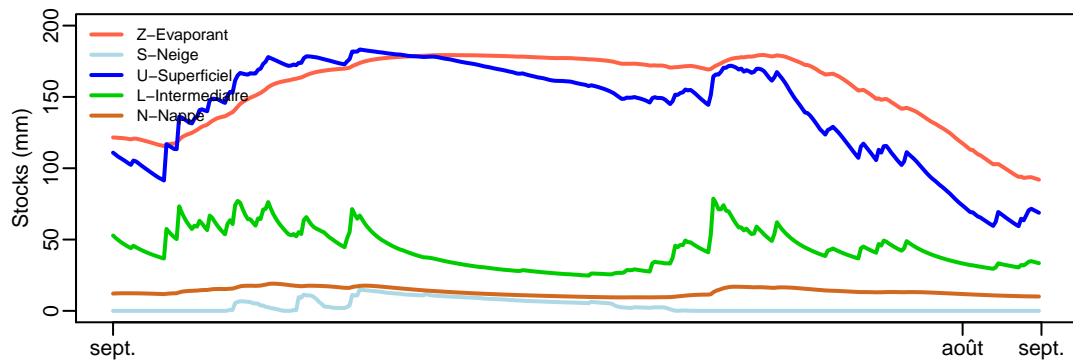

# q0207 (900.05 km<sup>2</sup>) – année 1993–1994

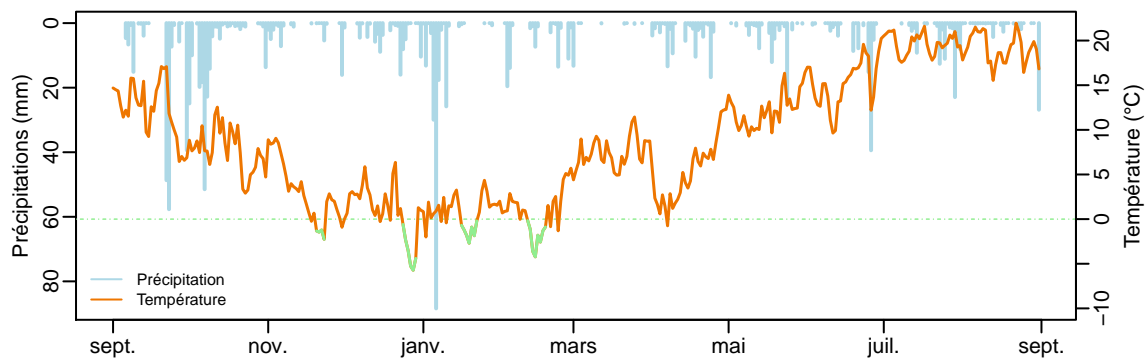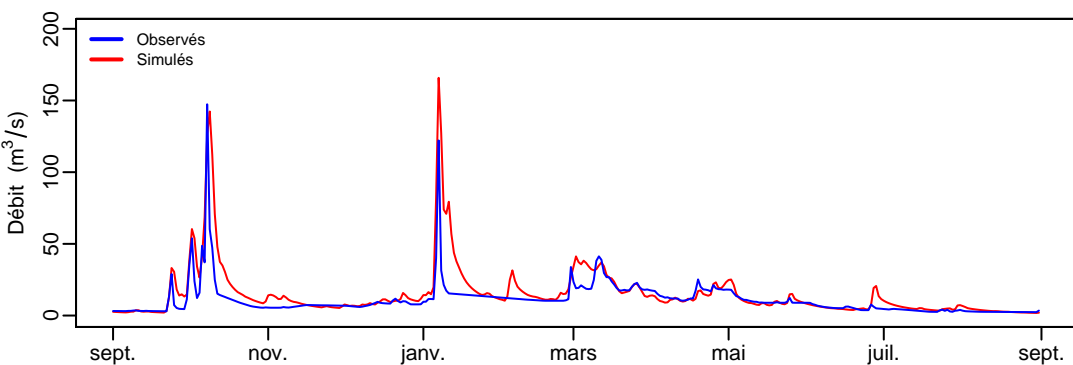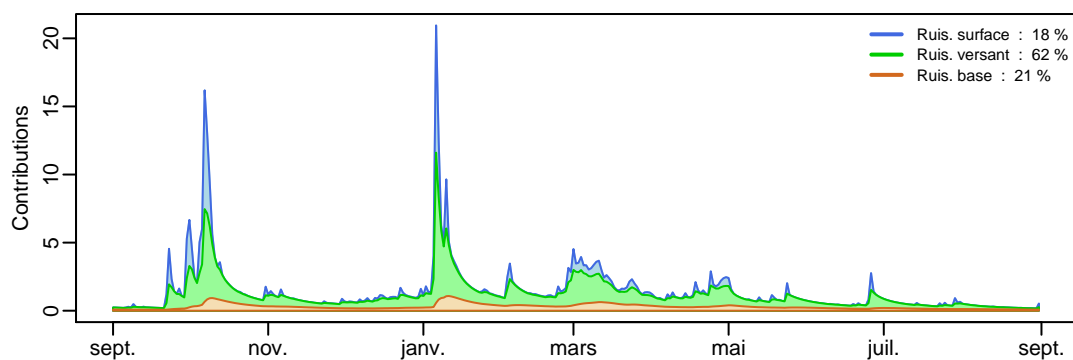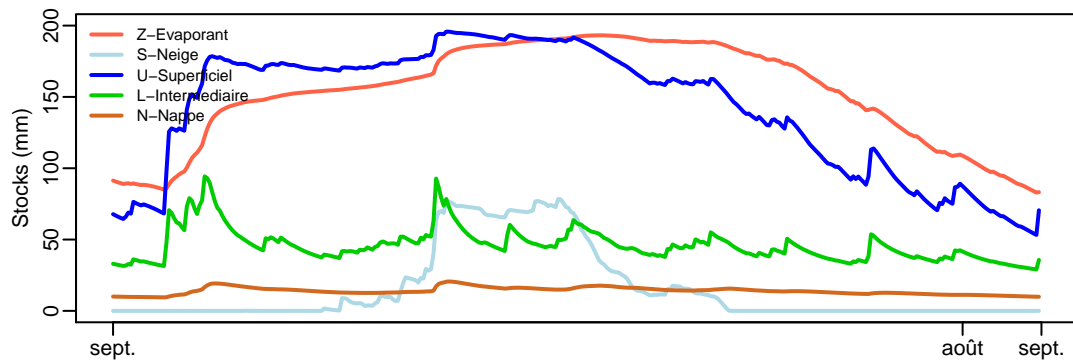

# q0207 (900.05 km<sup>2</sup>) – année 1994–1995

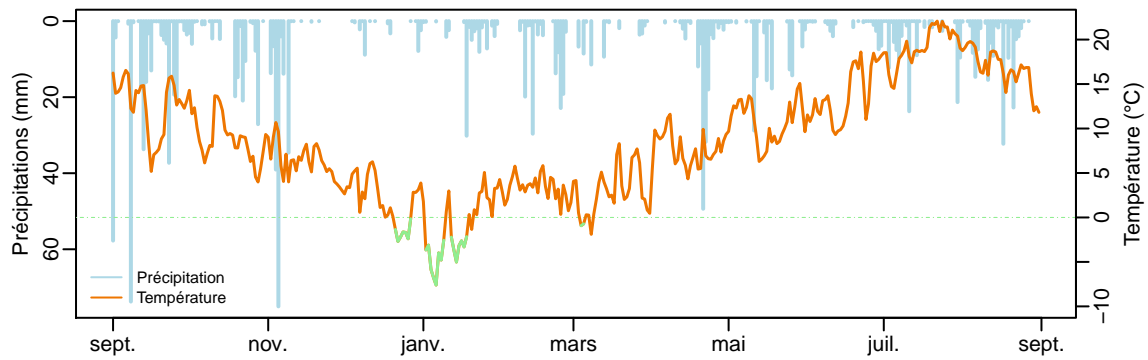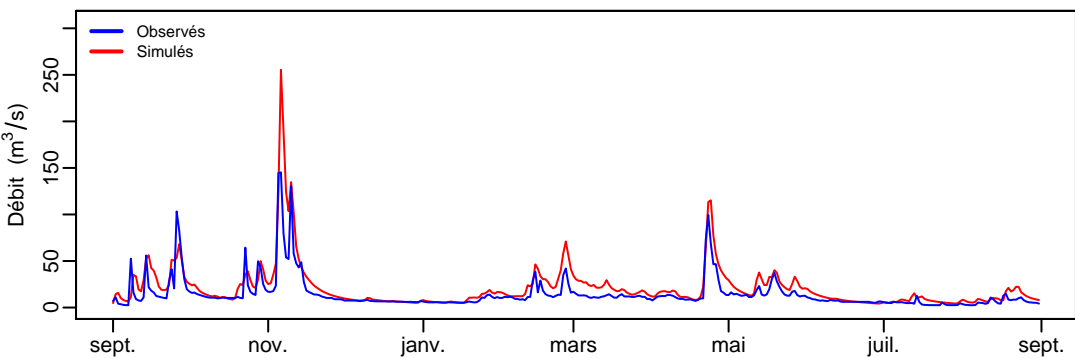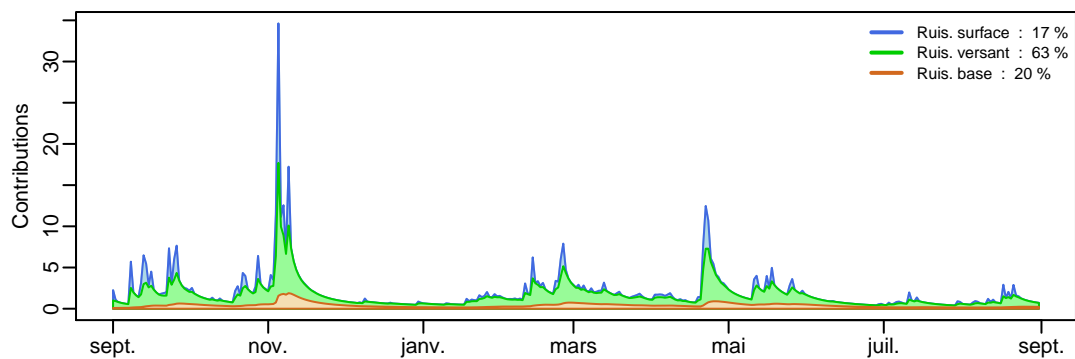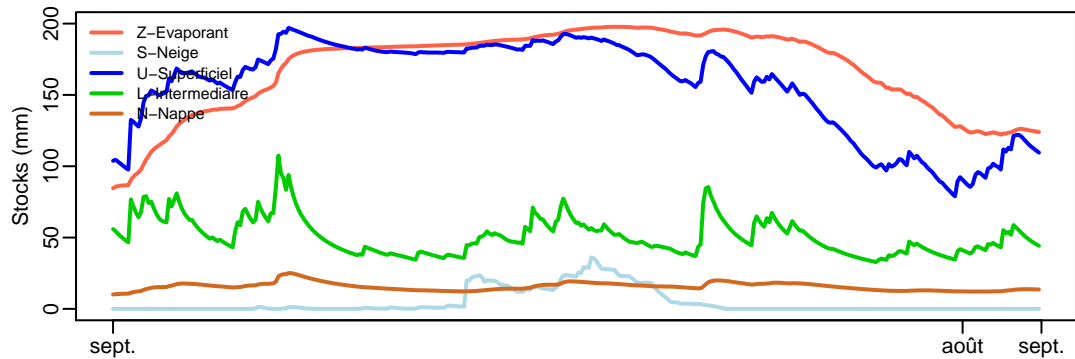

# q0207 (900.05 km<sup>2</sup>) – année 1995–1996

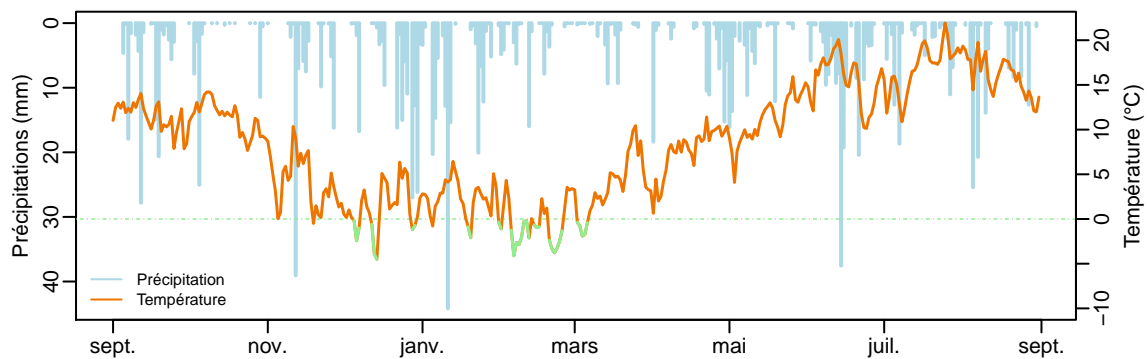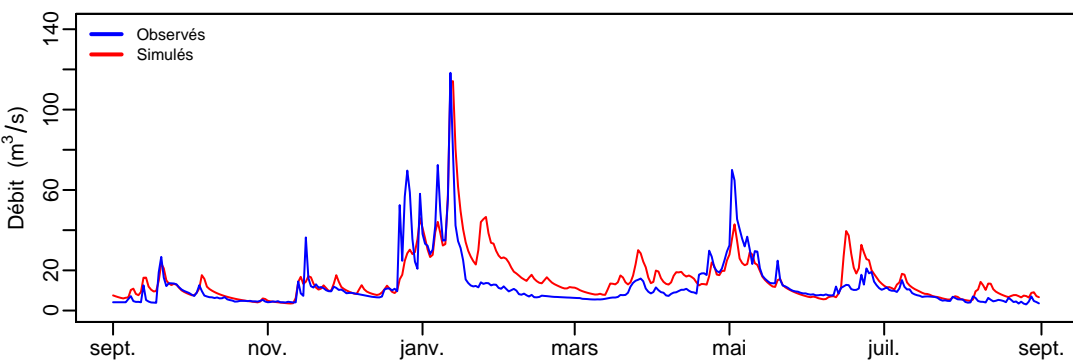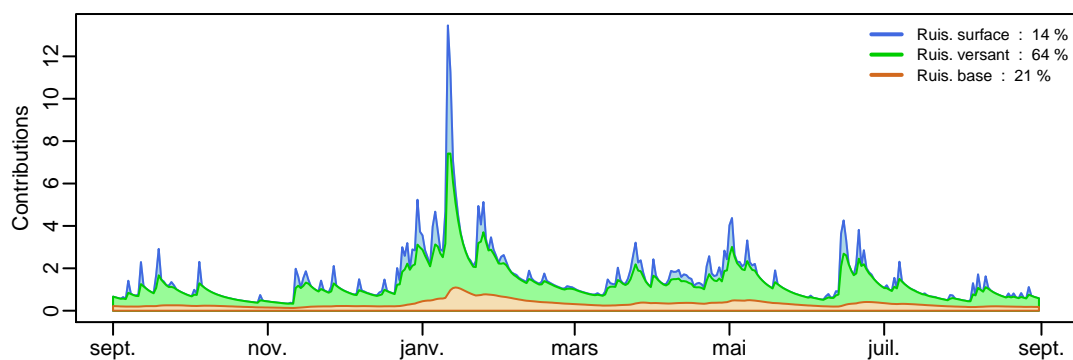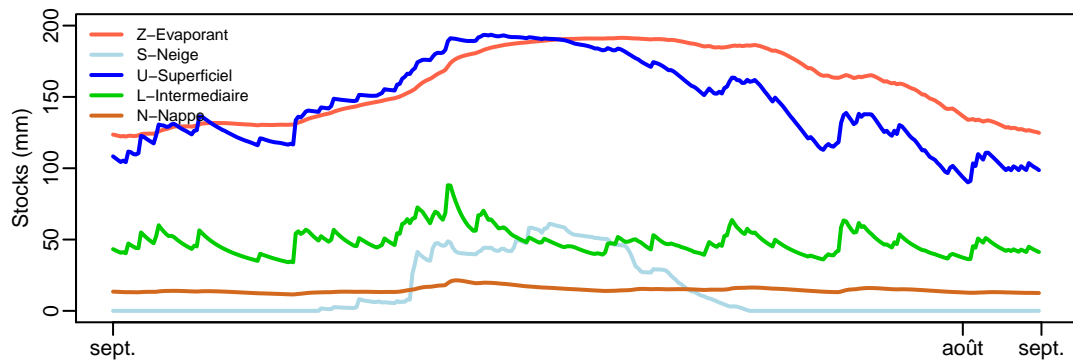

# q0207 (900.05 km²) – année 1996–1997

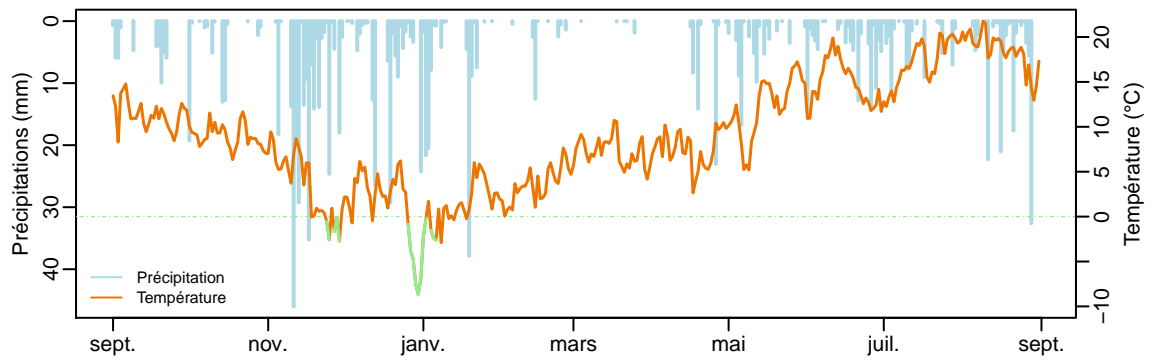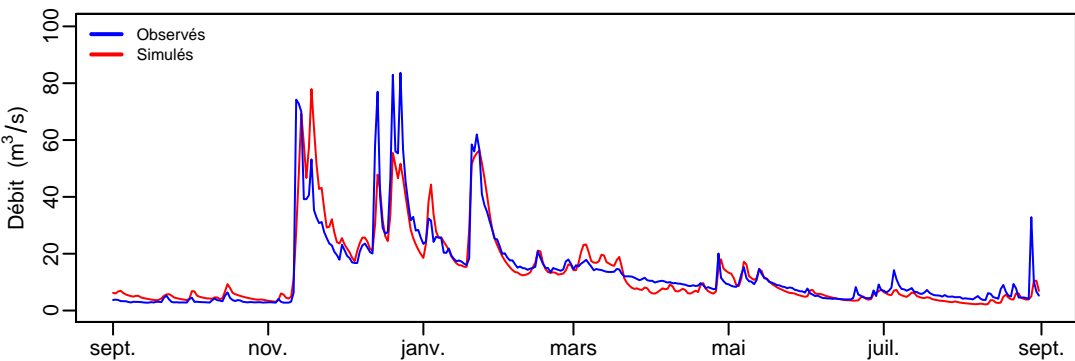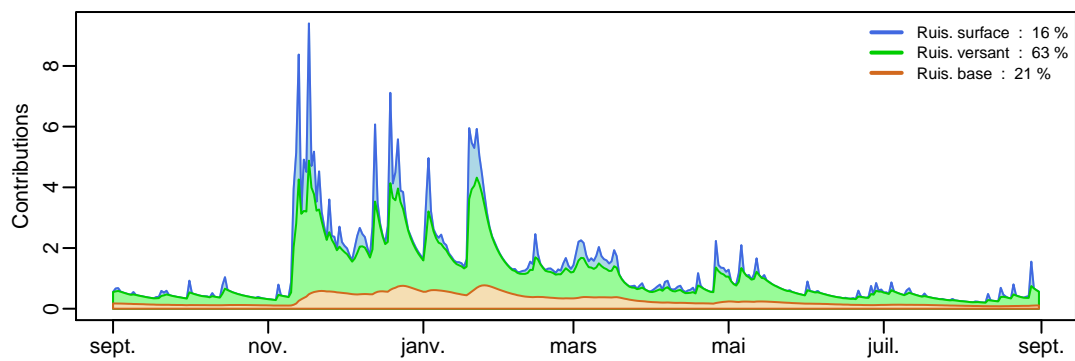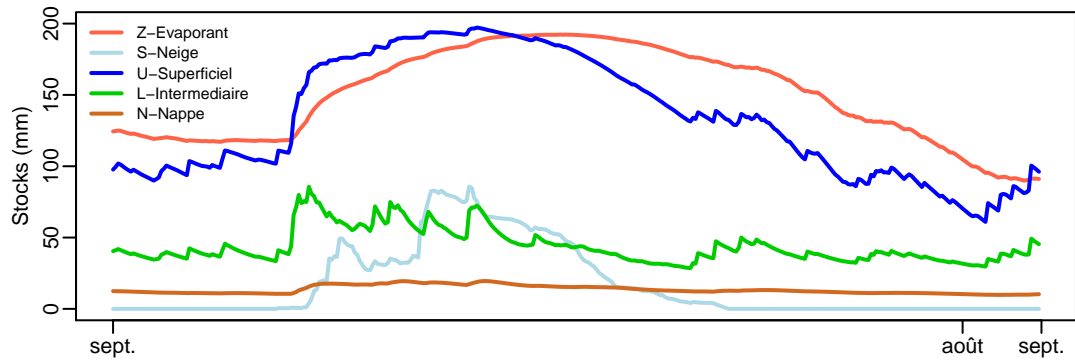

# q0207 (900.05 km²) – année 1997–1998

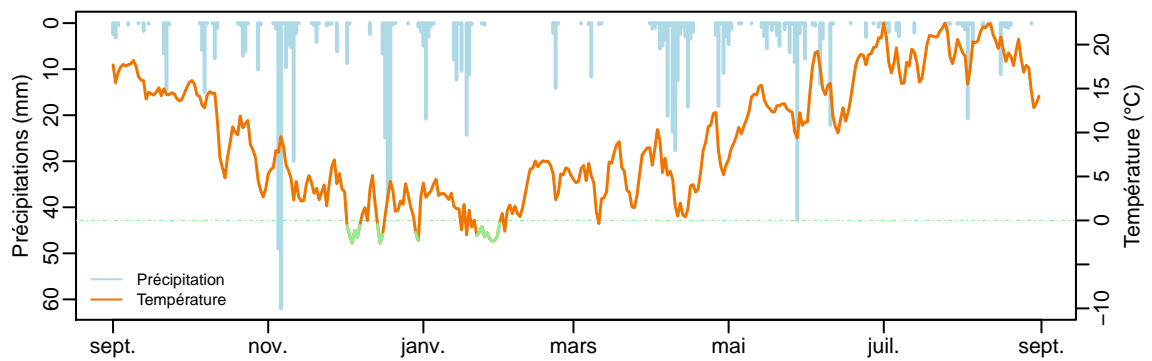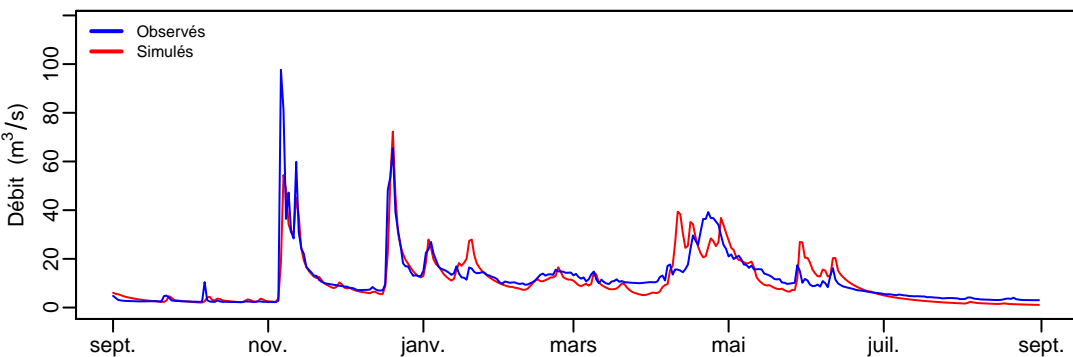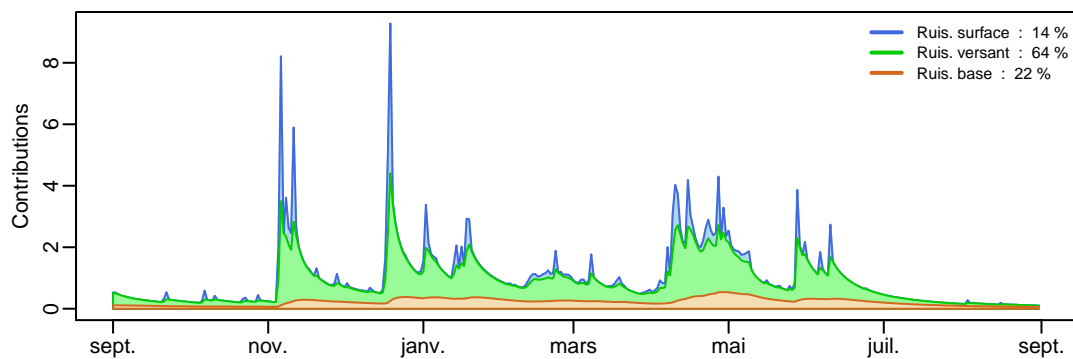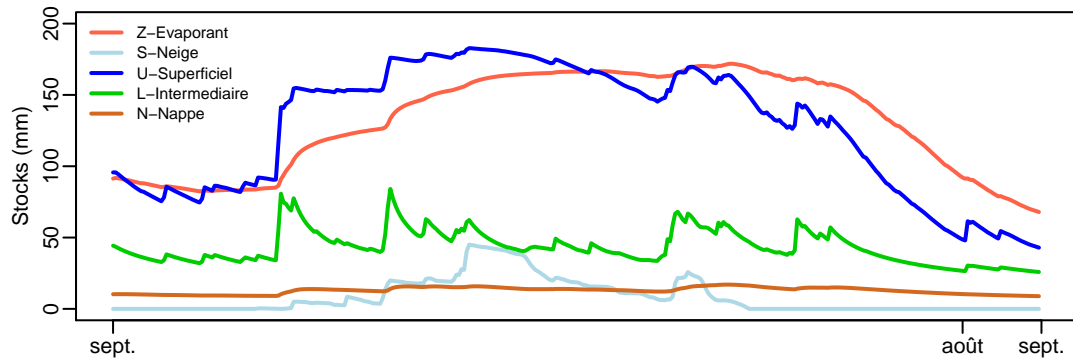

# q0207 (900.05 km²) – année 1998–1999

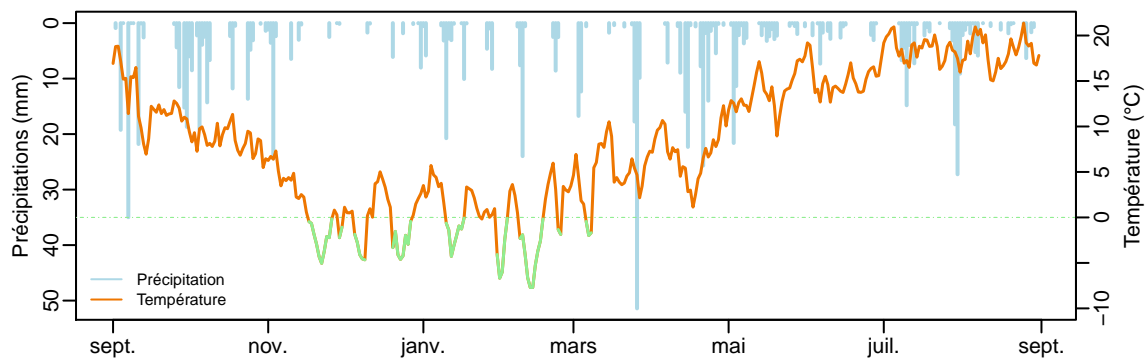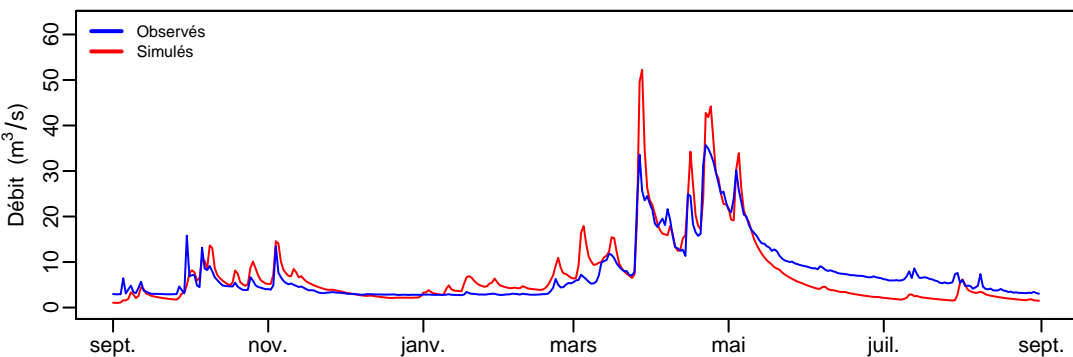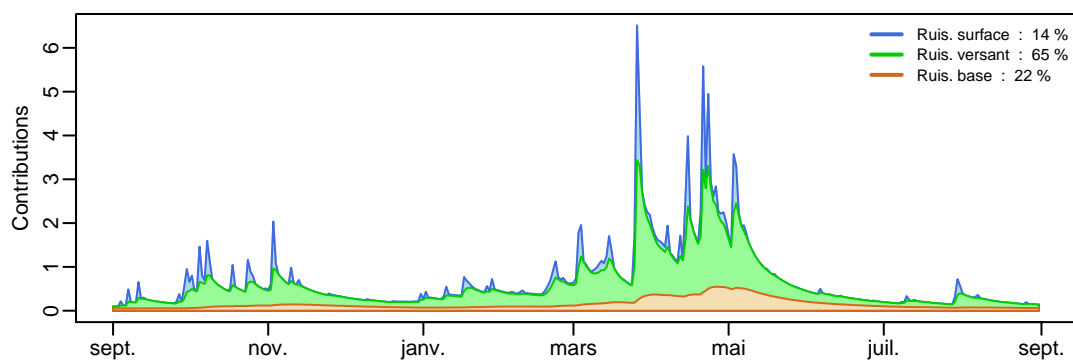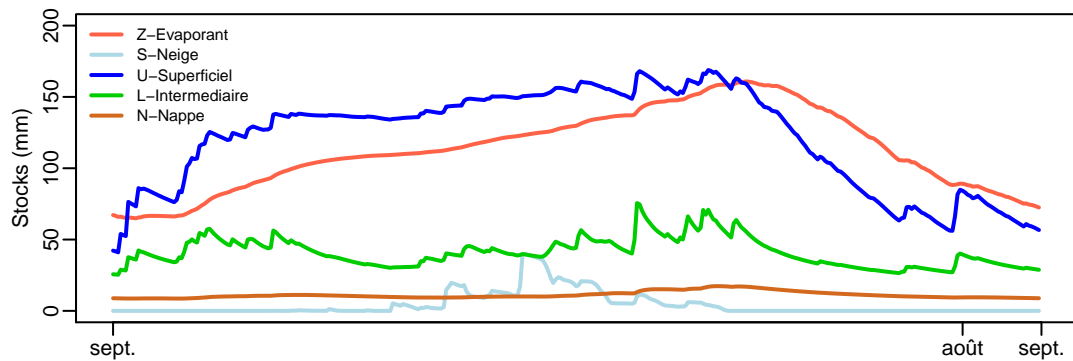

# q0207 (900.05 km²) – année 1999–2000

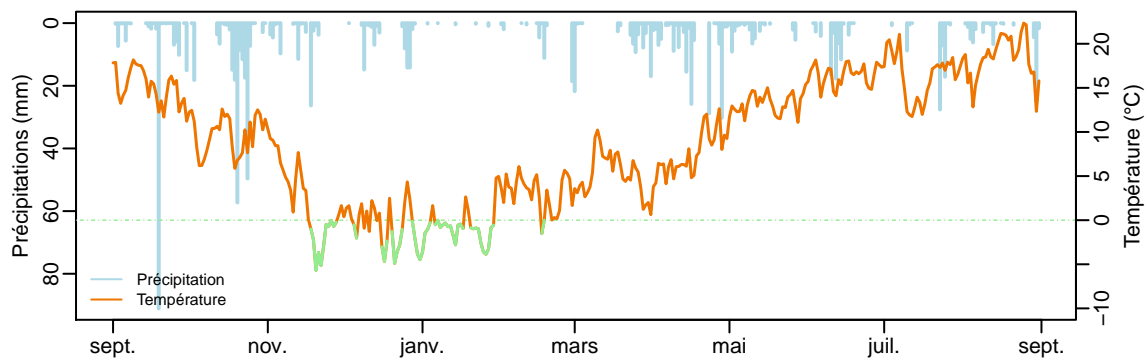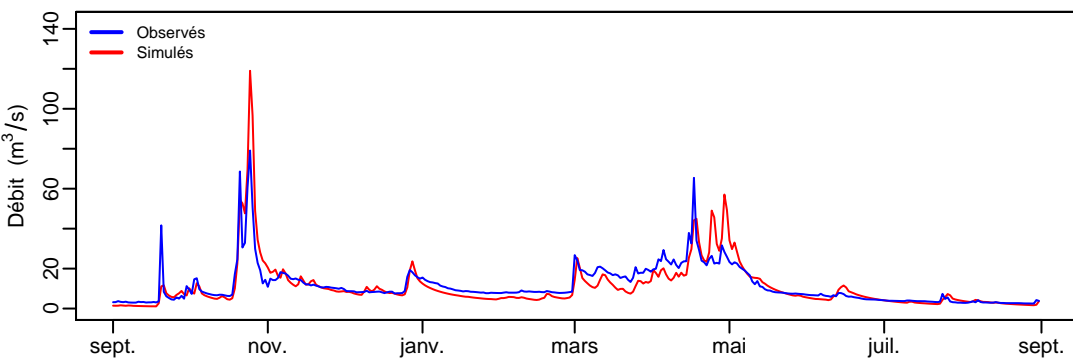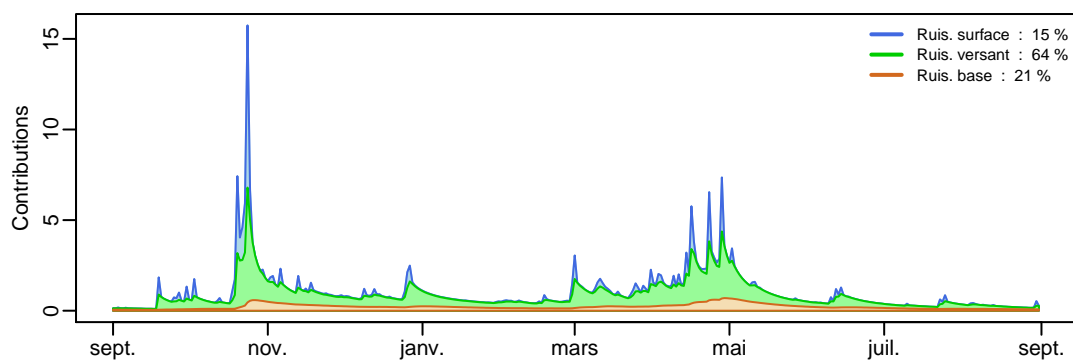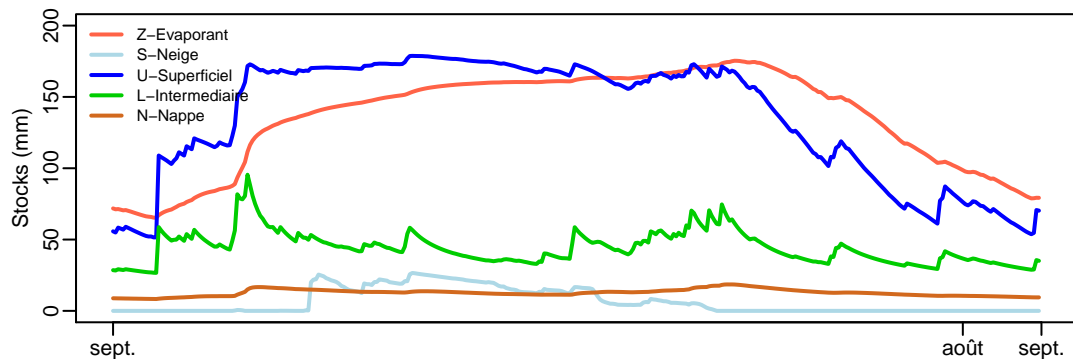



# q0207 (900.05 km<sup>2</sup>) – année 2000–2001

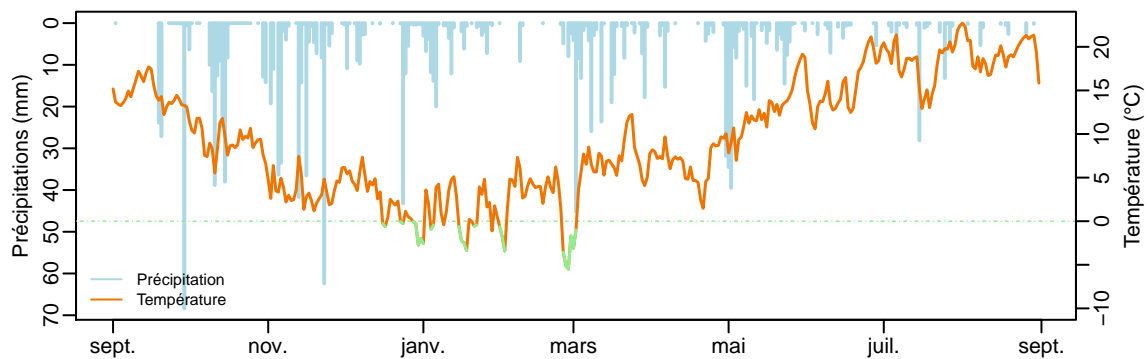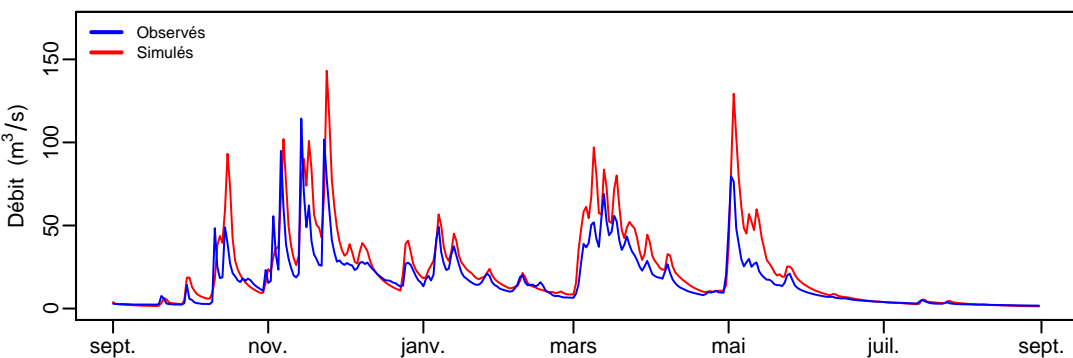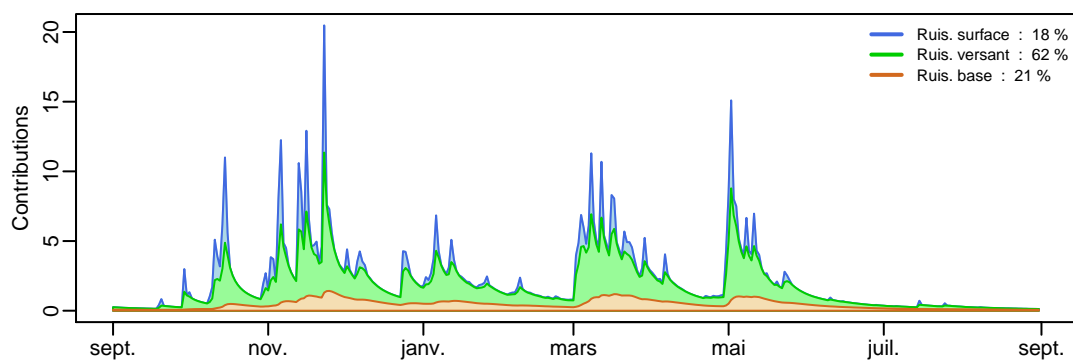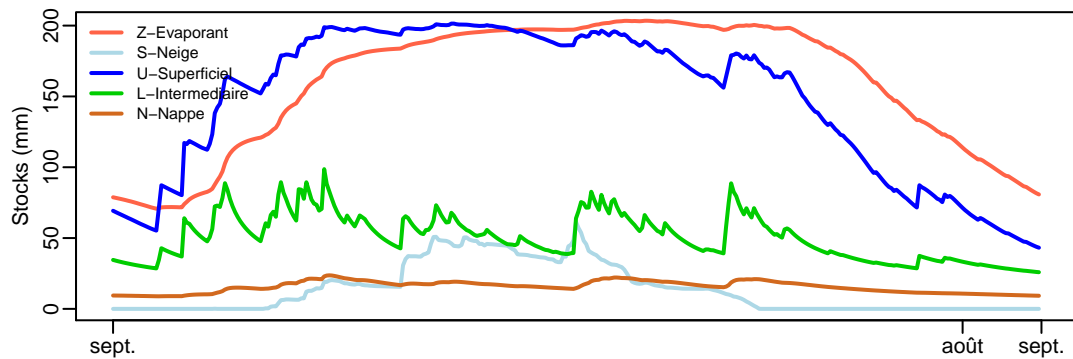

# q0207 (900.05 km²) – année 2001–2002

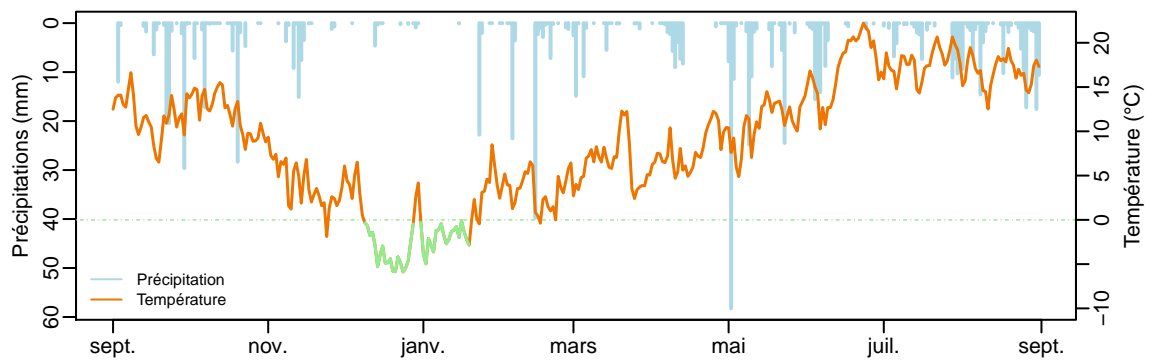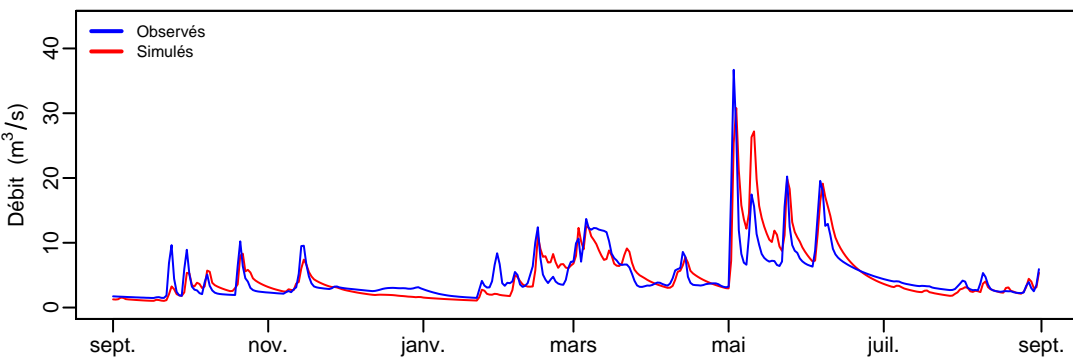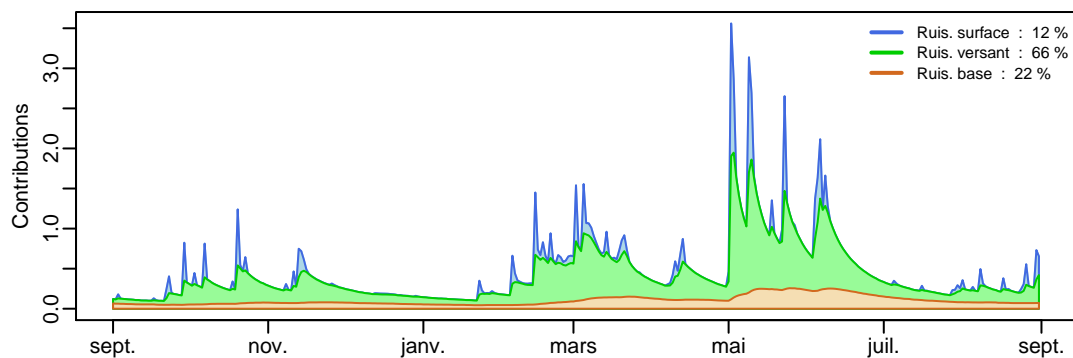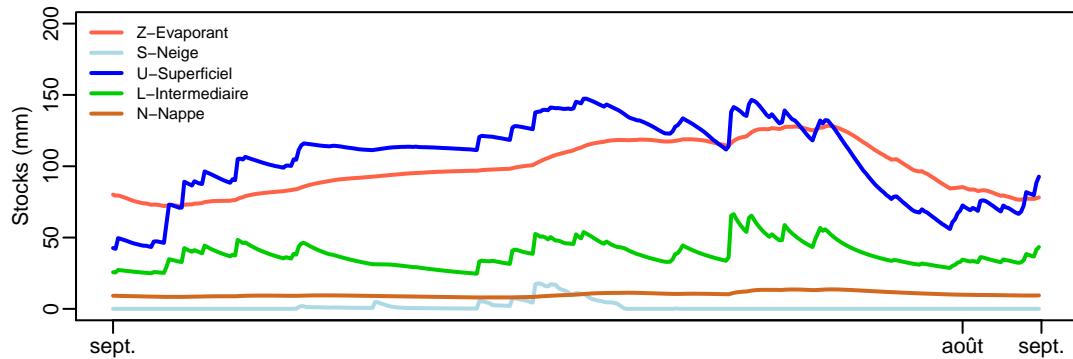

# q0207 (900.05 km<sup>2</sup>) – année 2002–2003

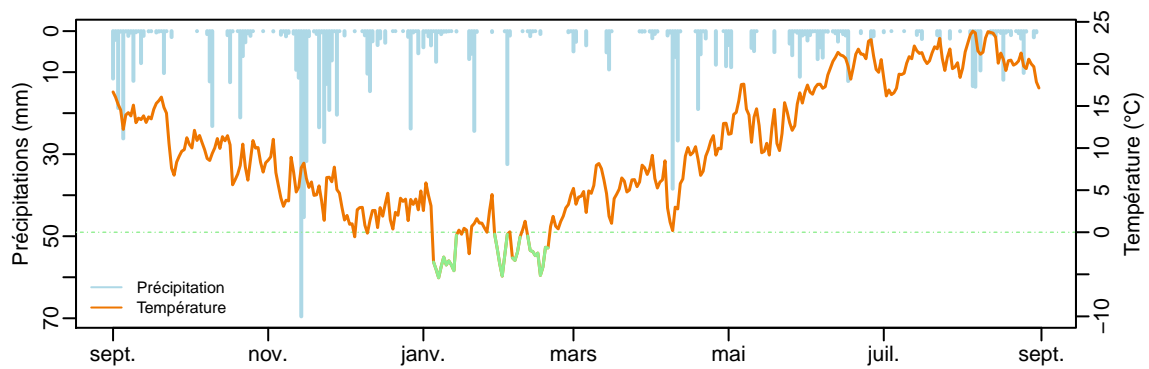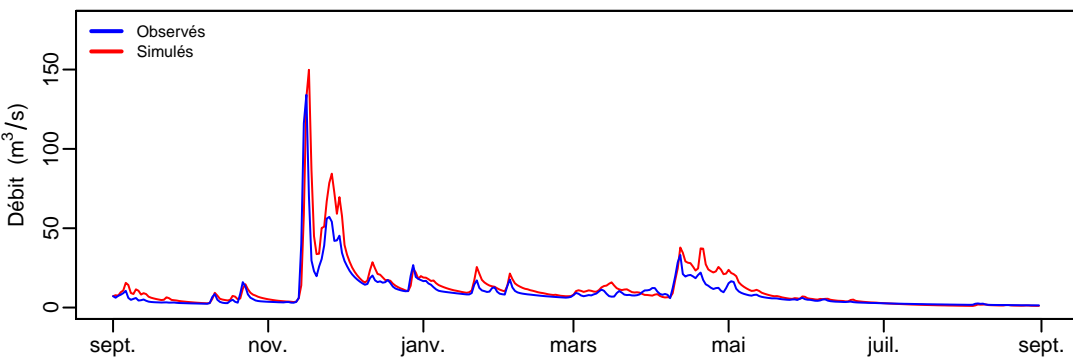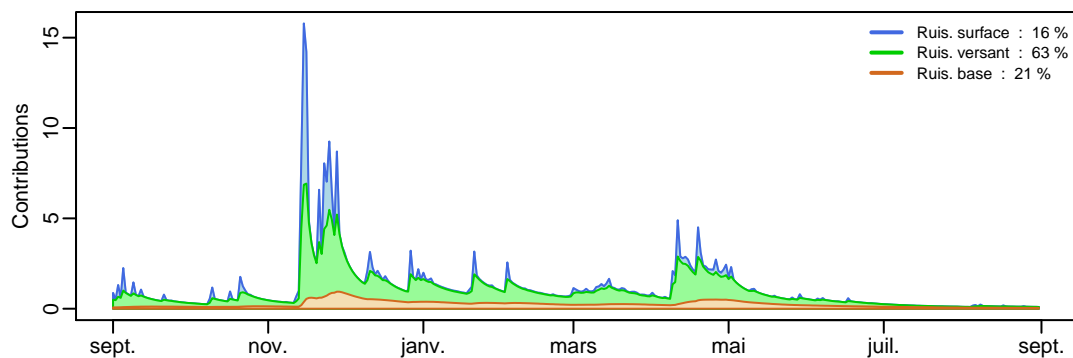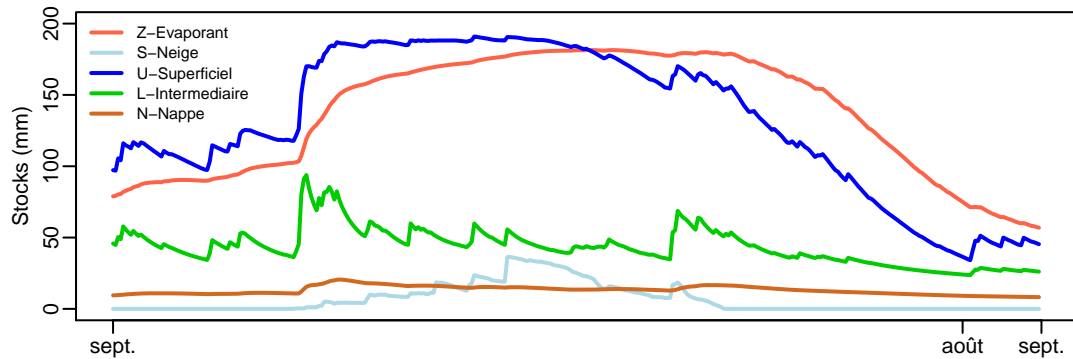

# q0230 (213.586 km²) – année 1994–1995

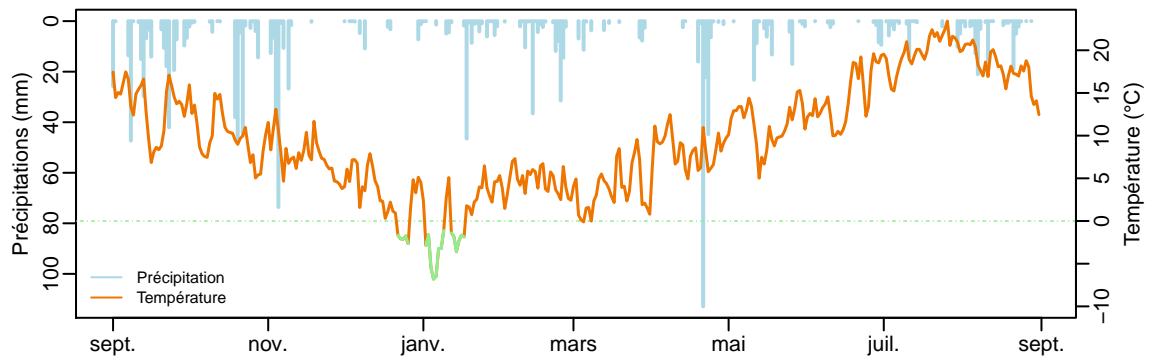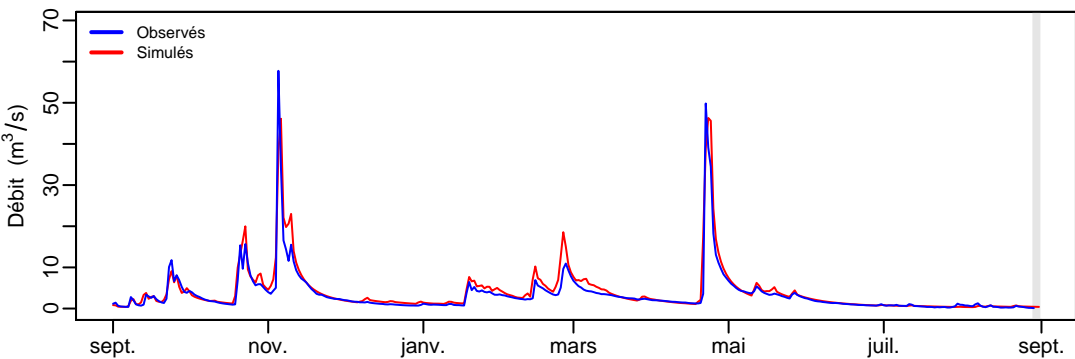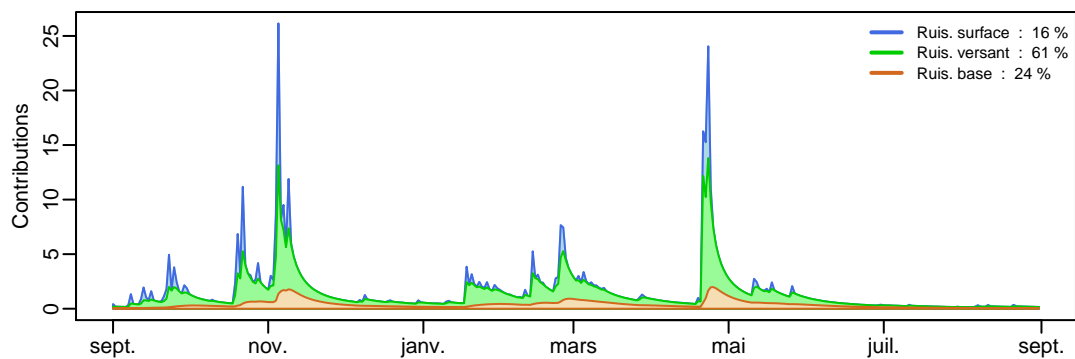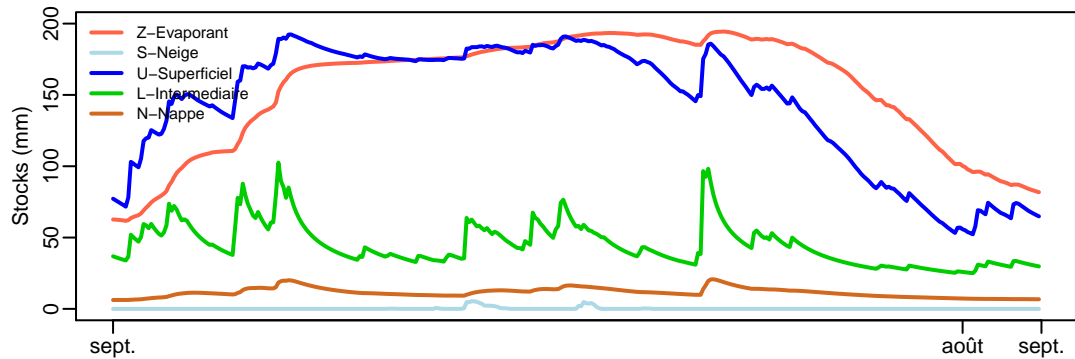

# q0230 (213.586 km<sup>2</sup>) – année 1995–1996

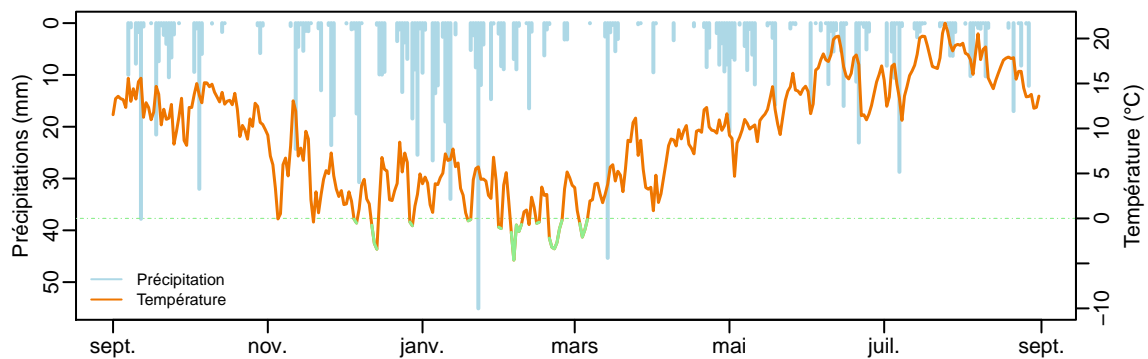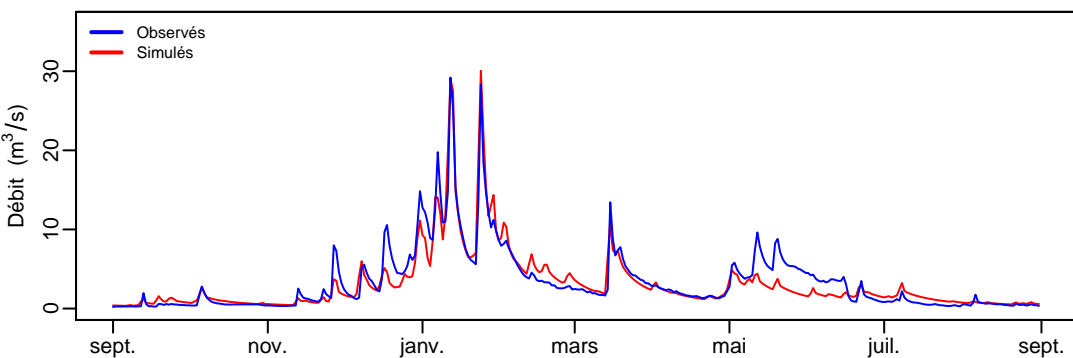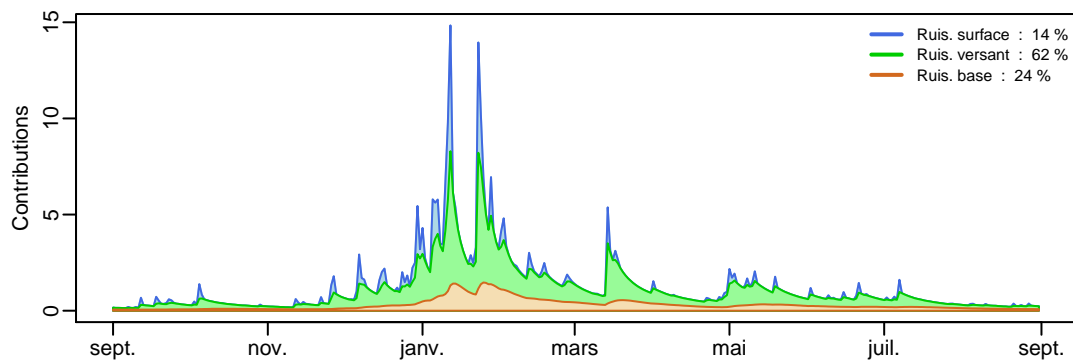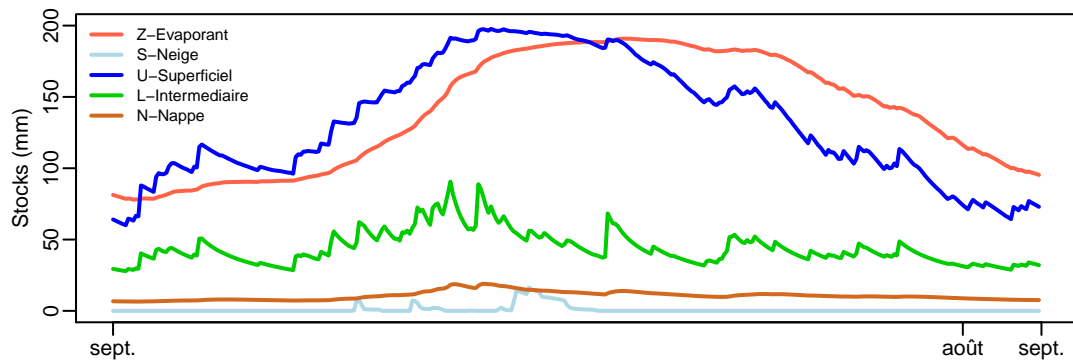

# q0230 (213.586 km<sup>2</sup>) – année 1996–1997

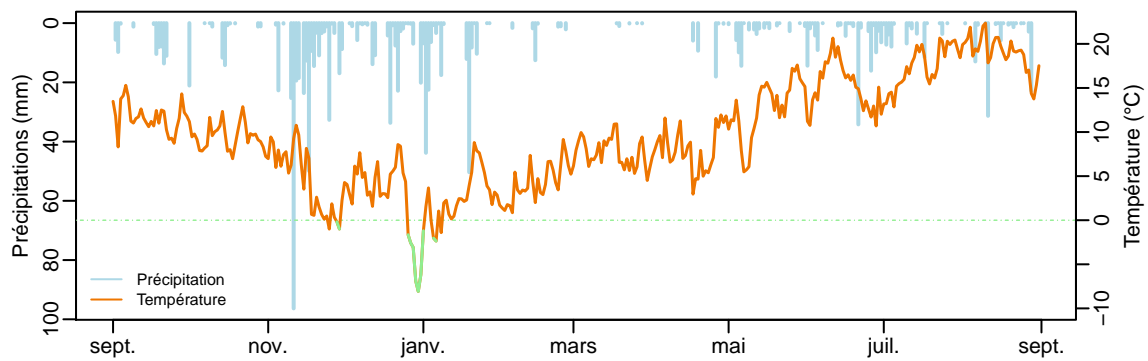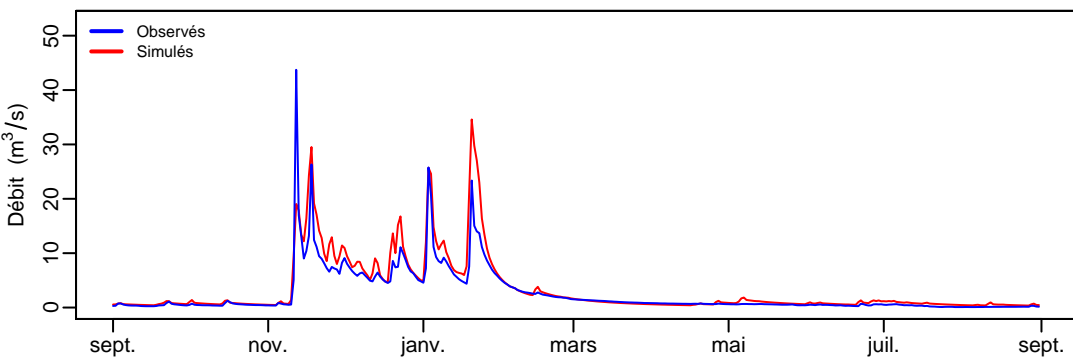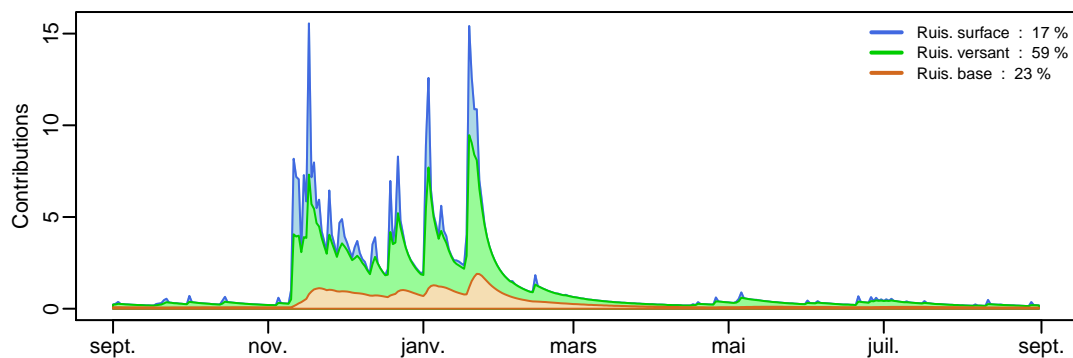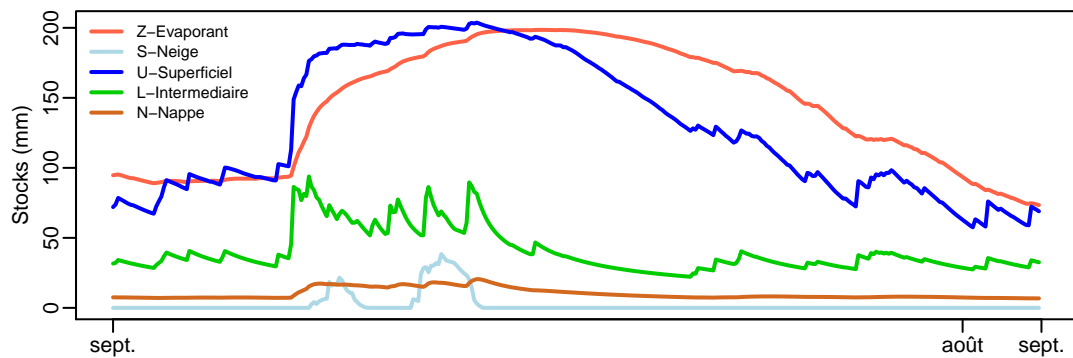

# q0230 (213.586 km²) – année 1997–1998

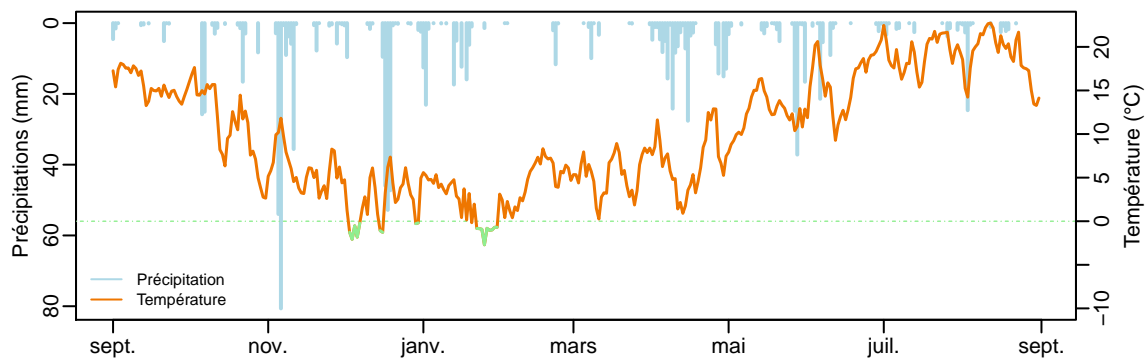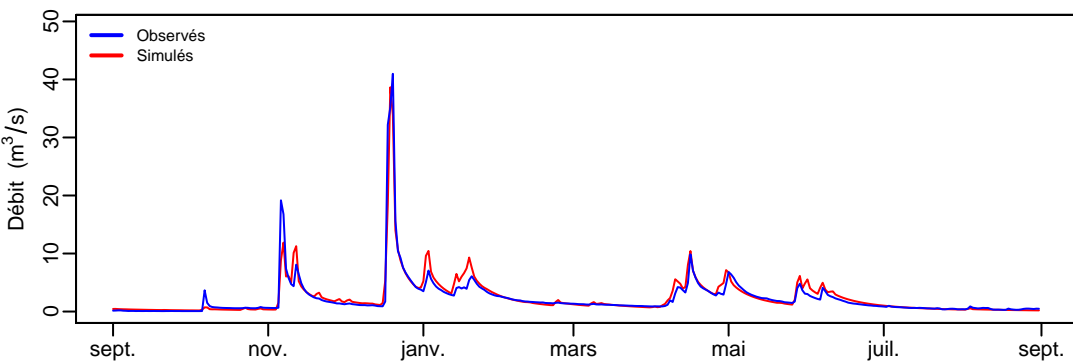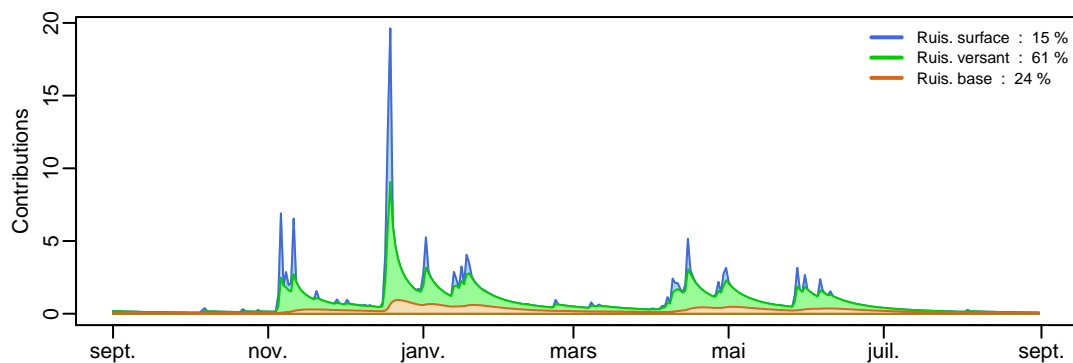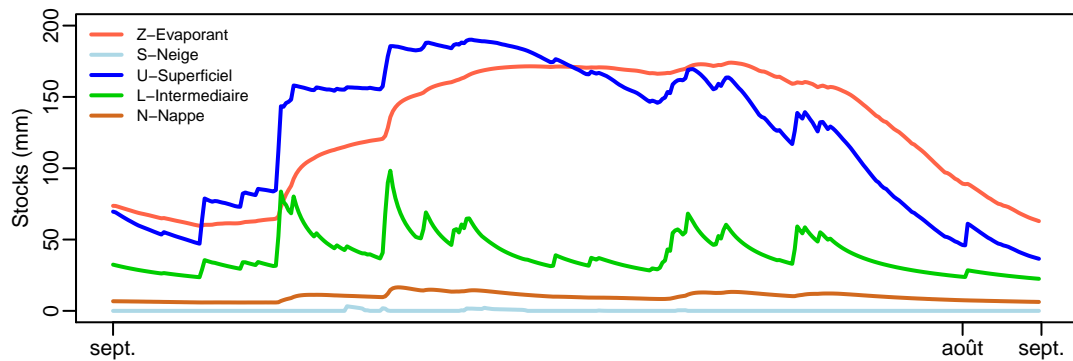

# q0230 (213.586 km<sup>2</sup>) – année 1998–1999

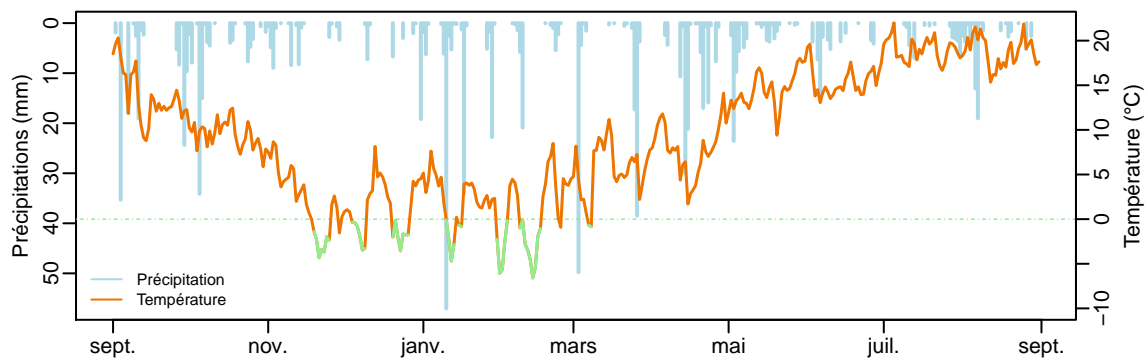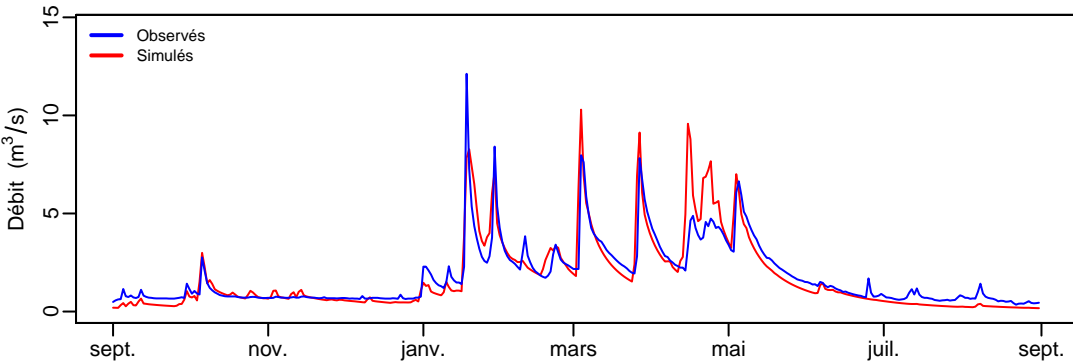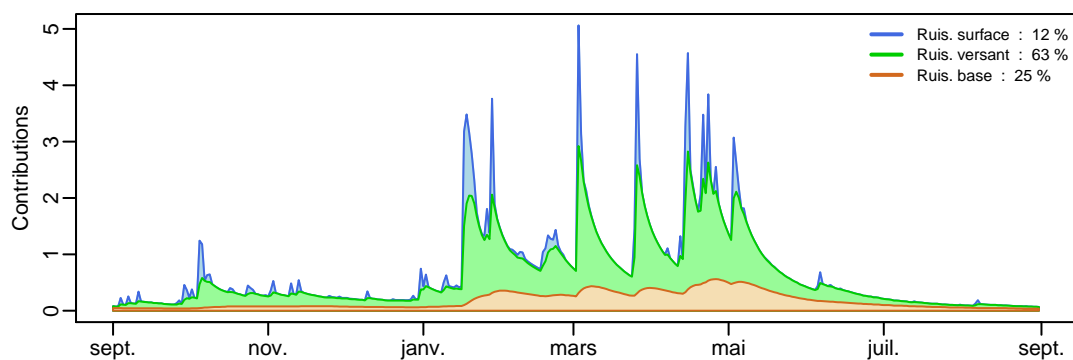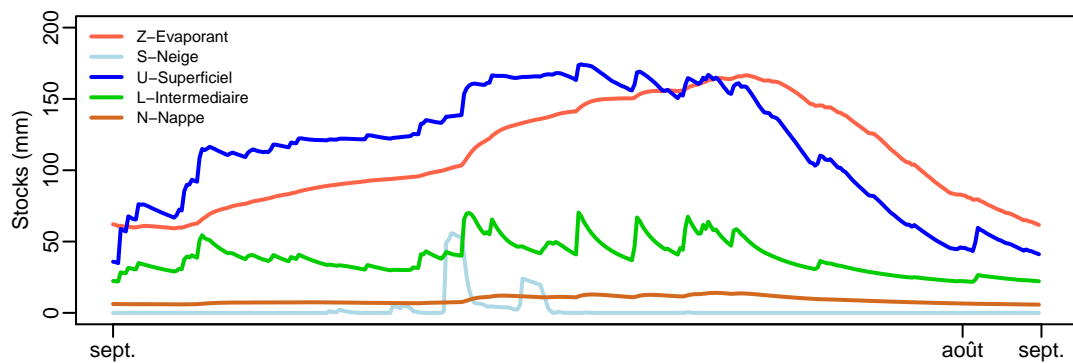



# q0230 (213.586 km²) – année 1999–2000

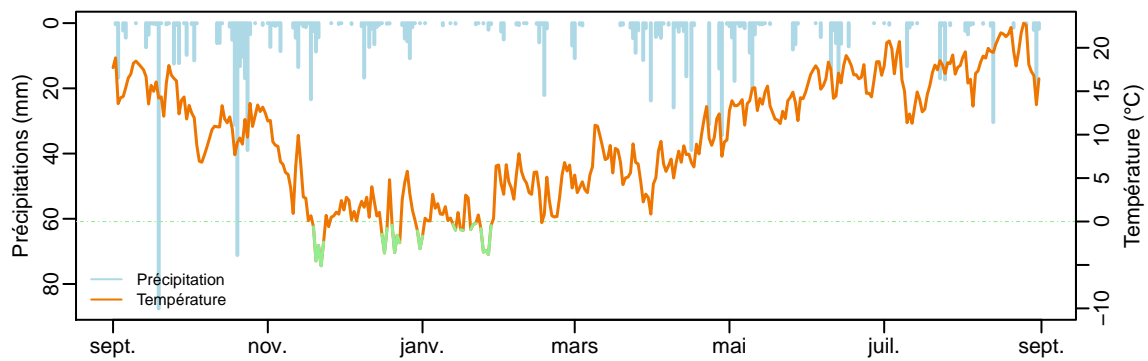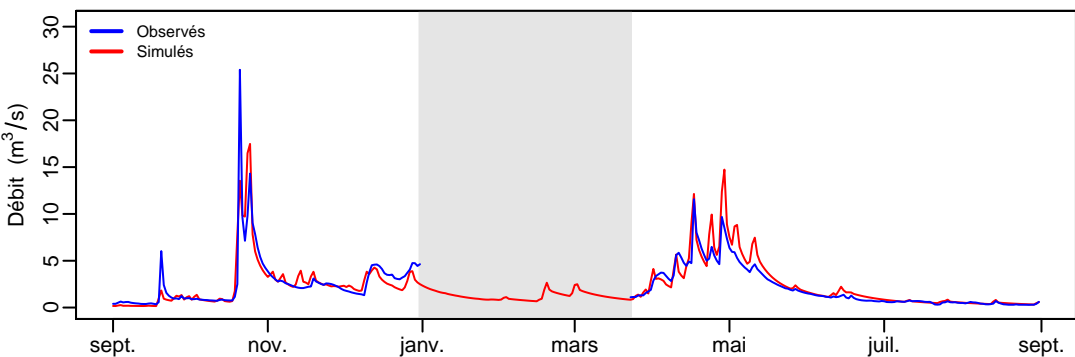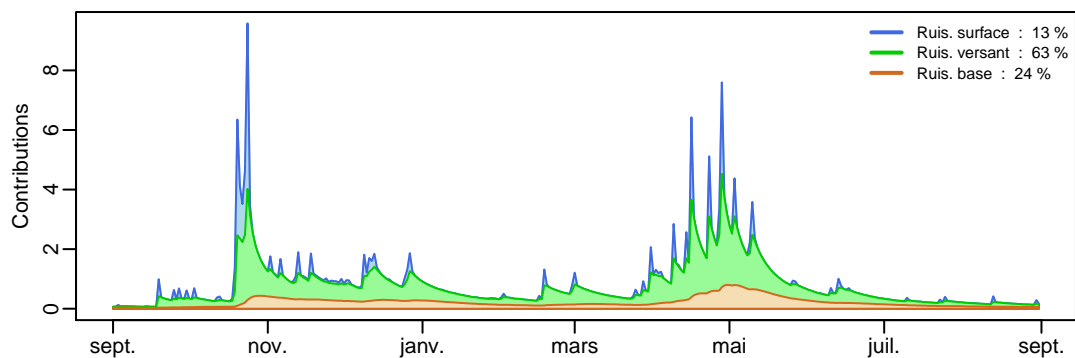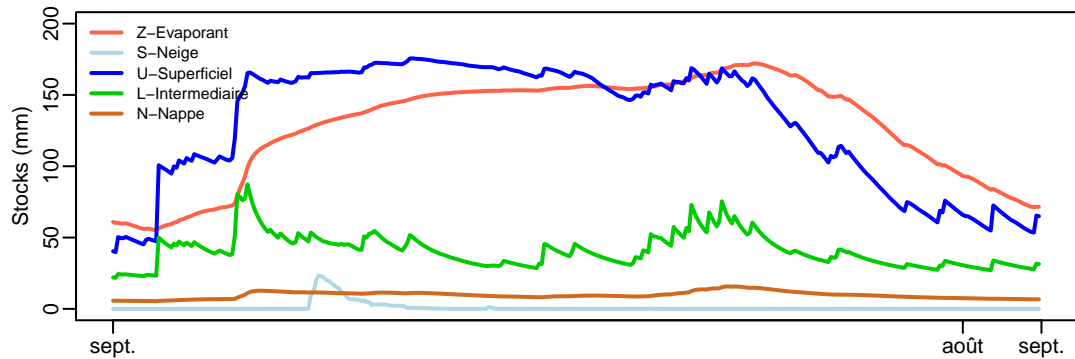

# q0230 (213.586 km<sup>2</sup>) – année 2000–2001

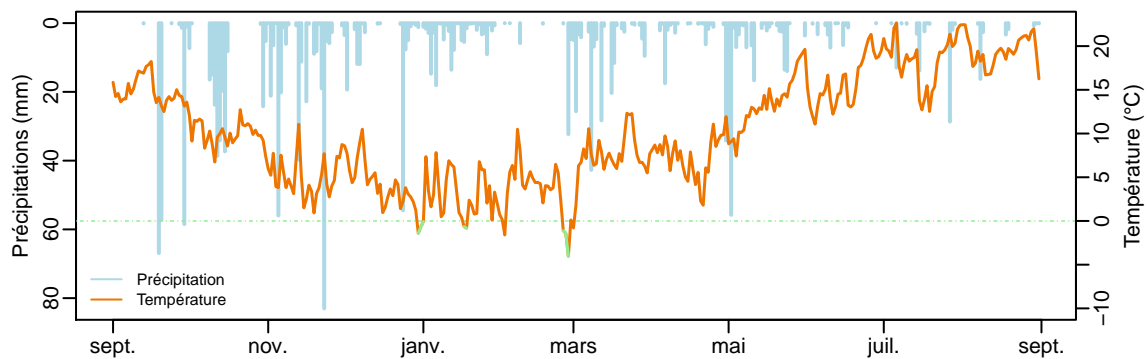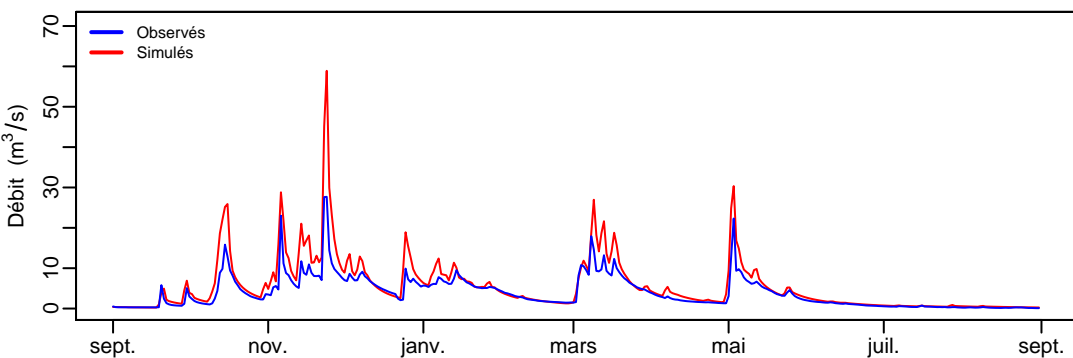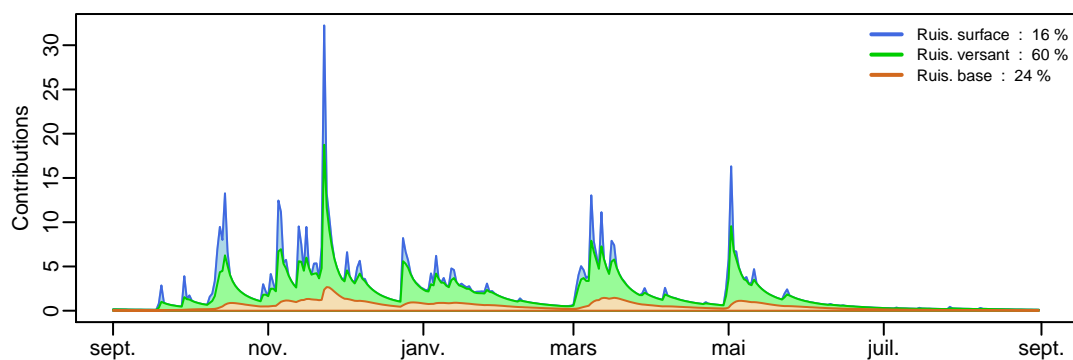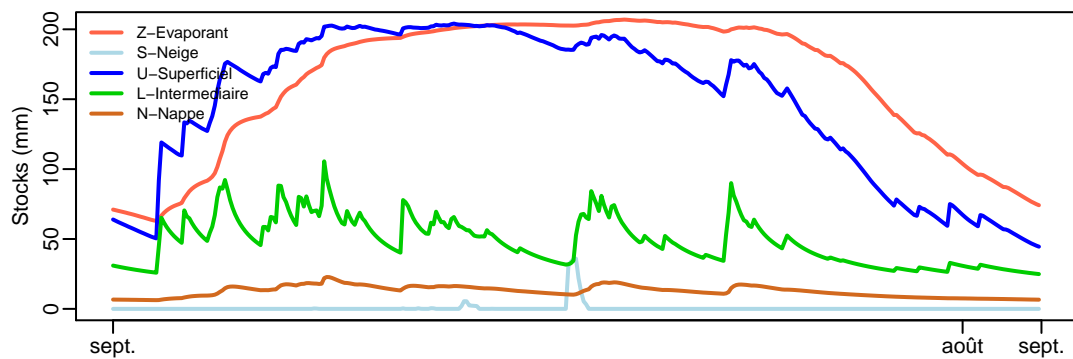

# q0230 (213.586 km<sup>2</sup>) – année 2001–2002

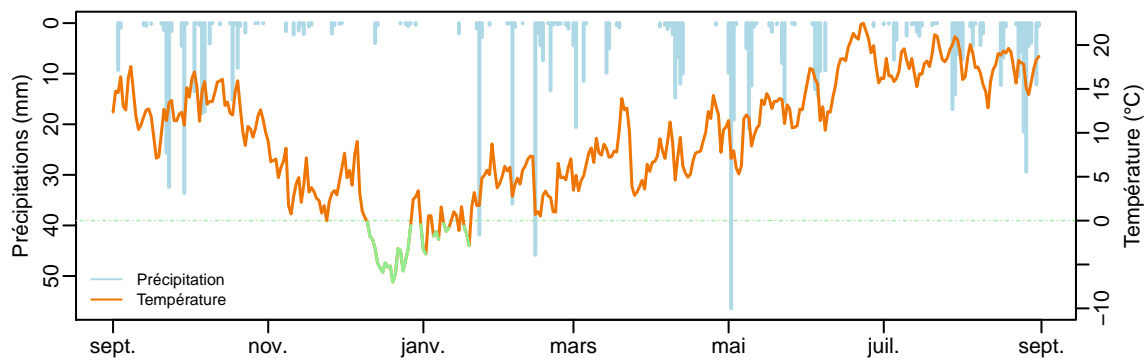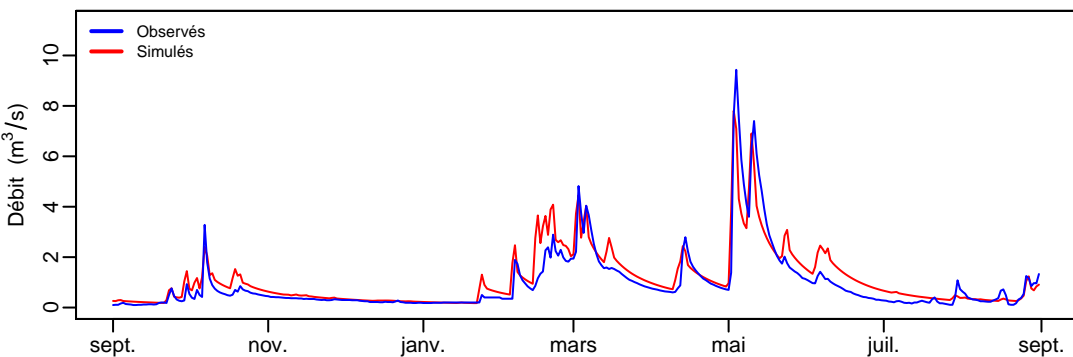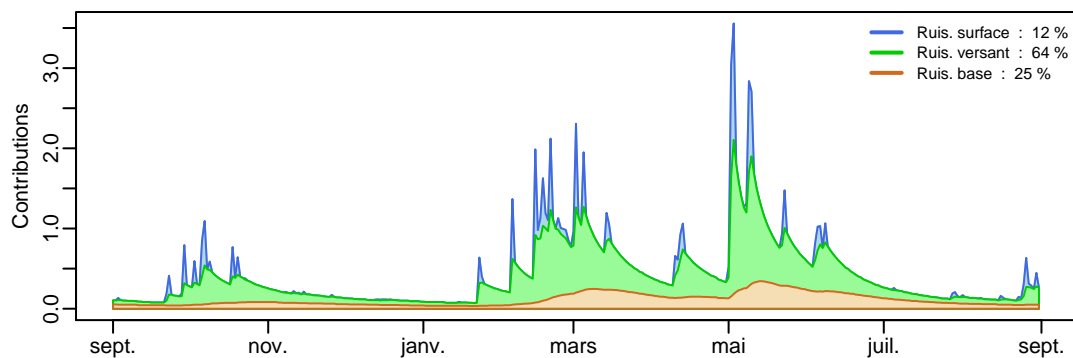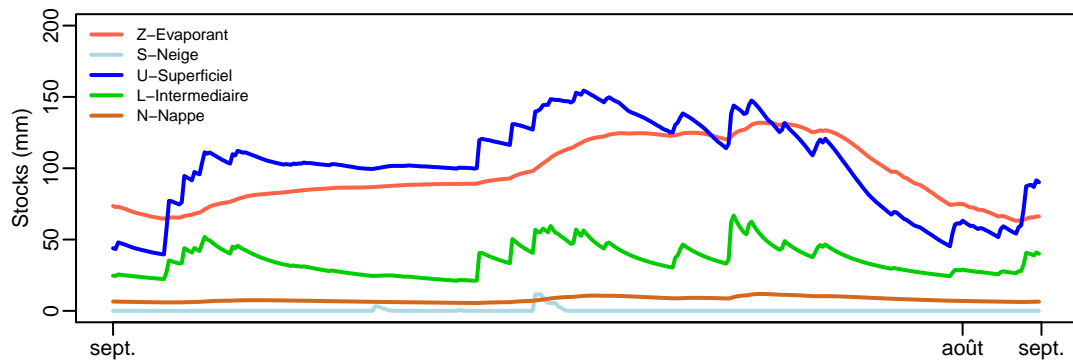

# q0230 (213.586 km²) – année 2002–2003

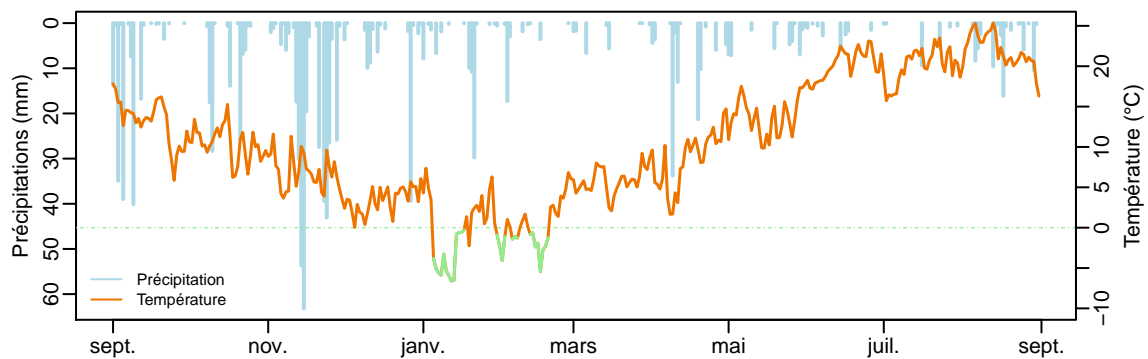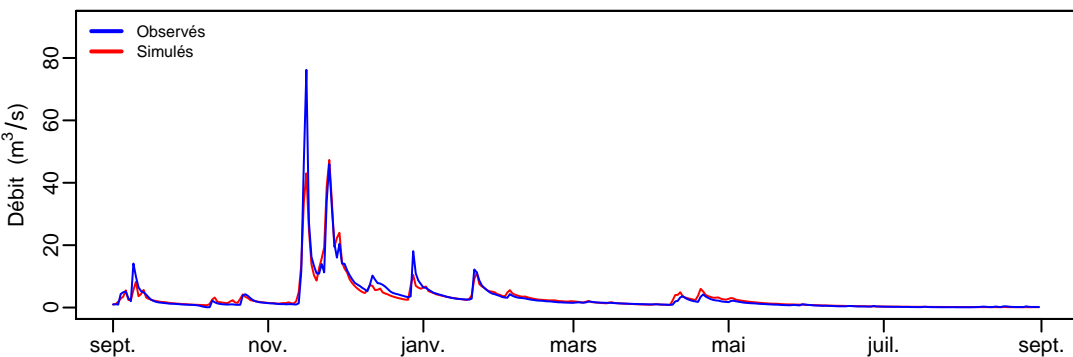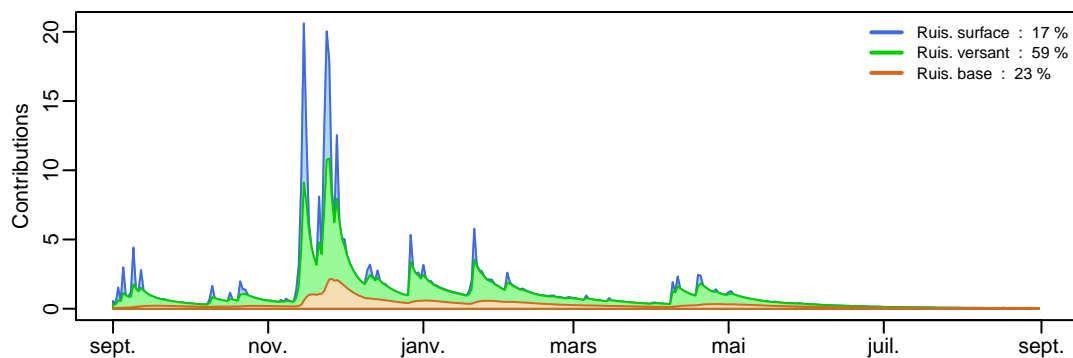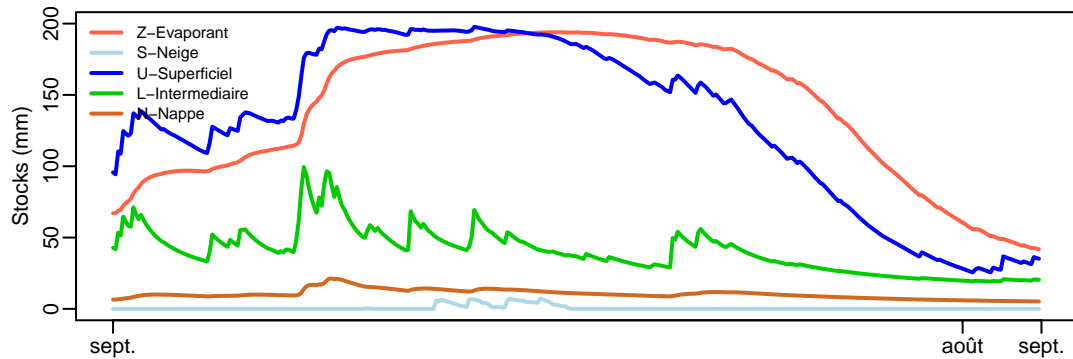

# q0230 (213.586 km²) – année 2003–2004

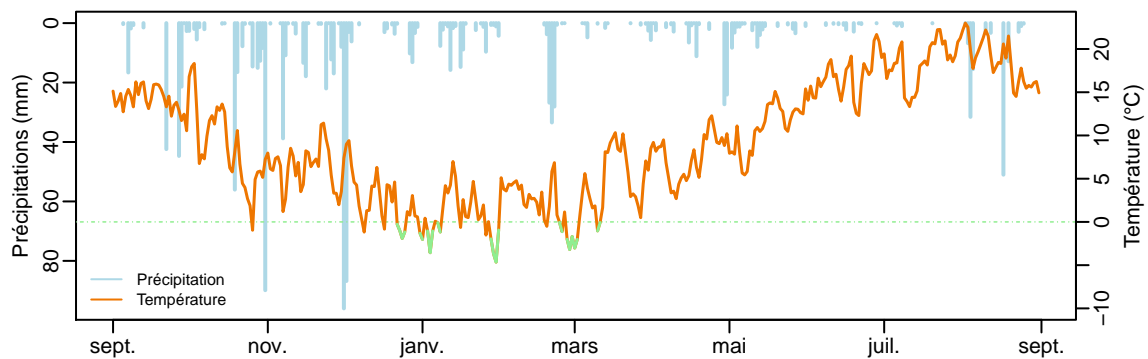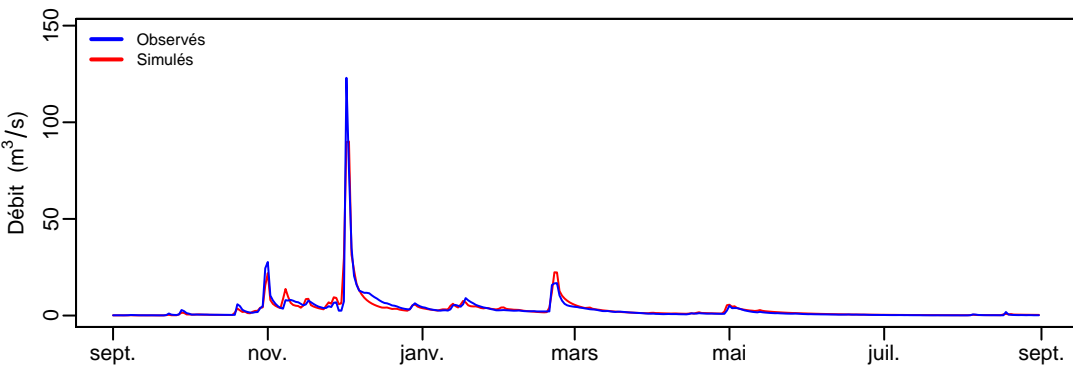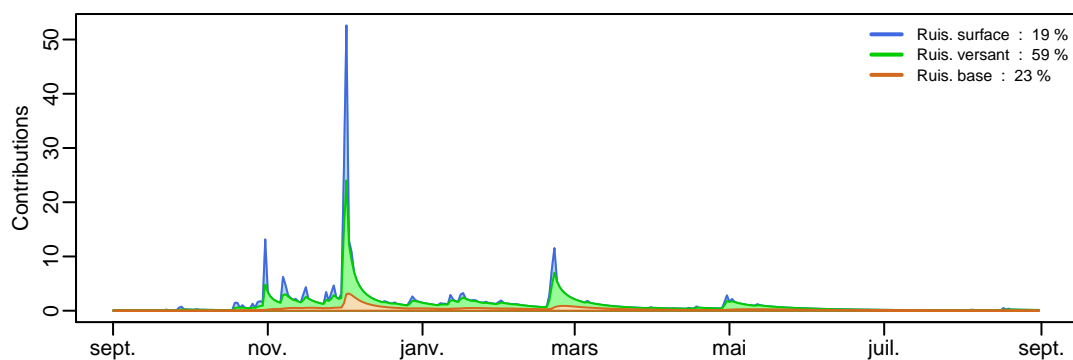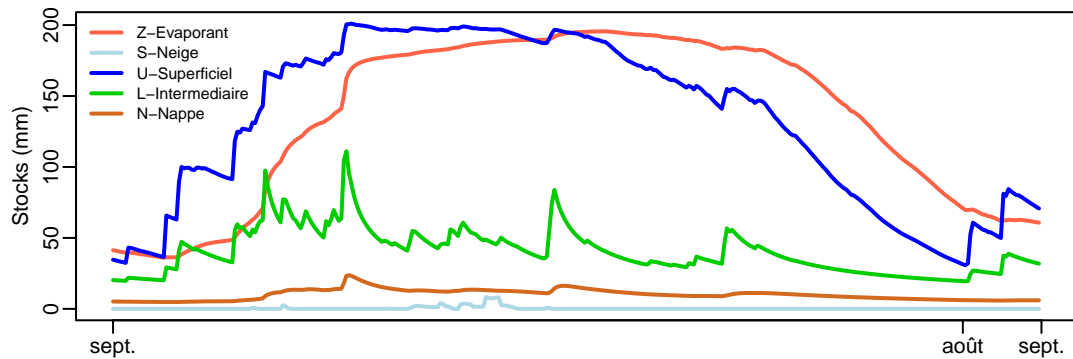

# q0230 (213.586 km<sup>2</sup>) – année 2004–2005

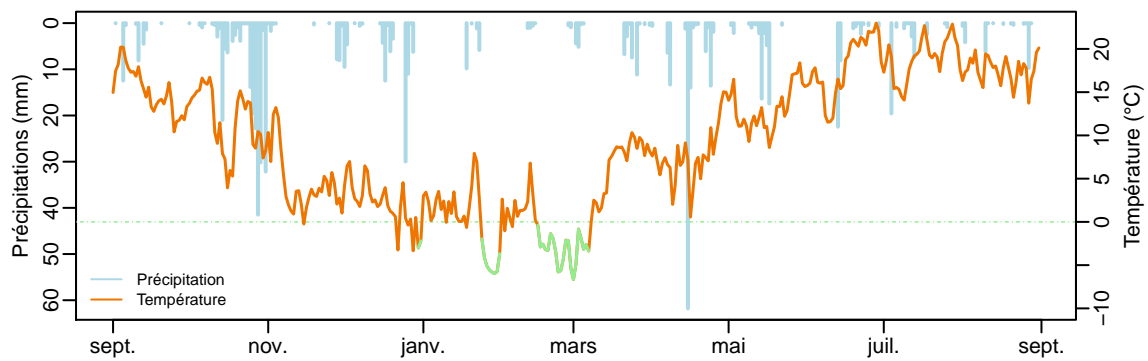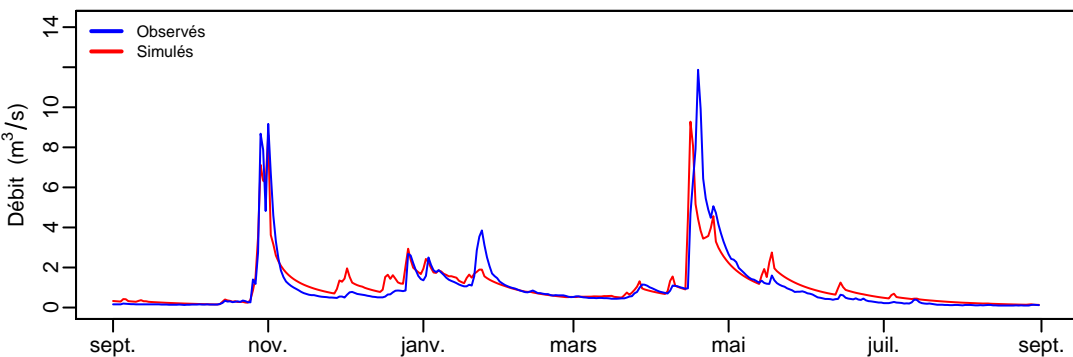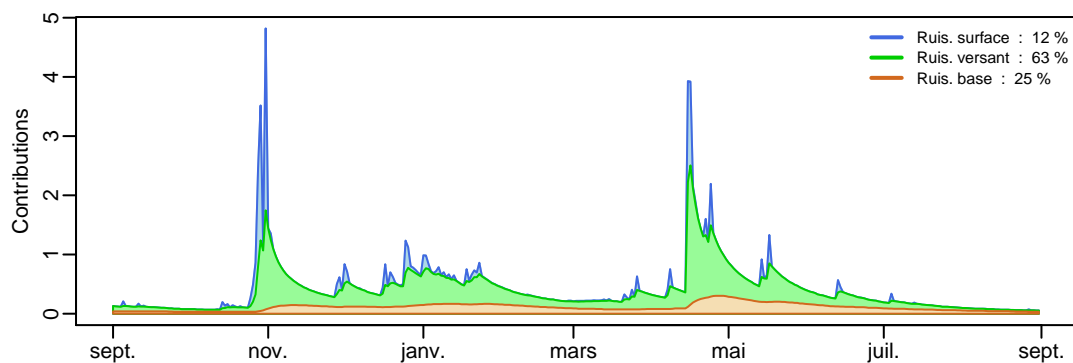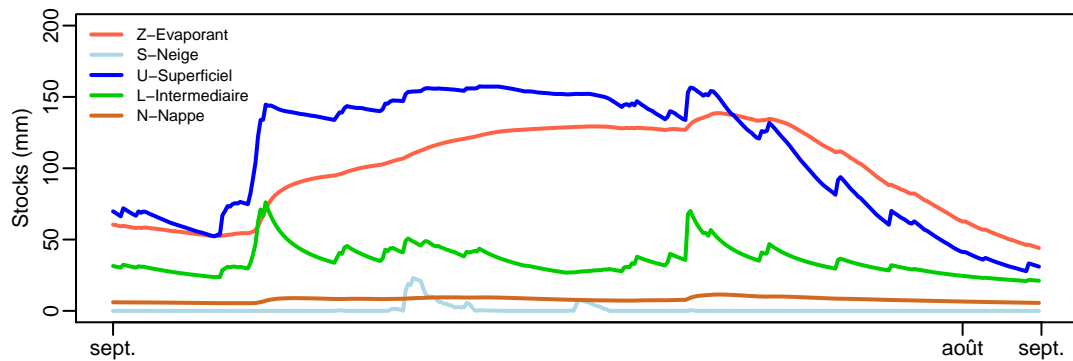

# q0230 (213.586 km²) – année 2005–2006

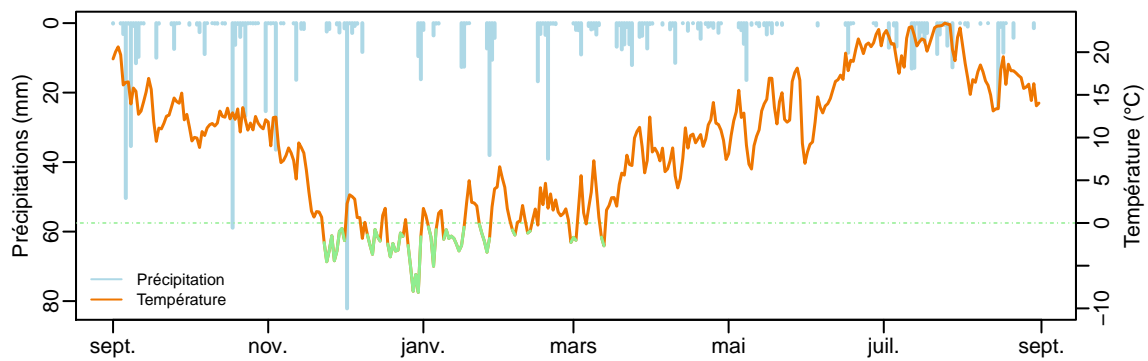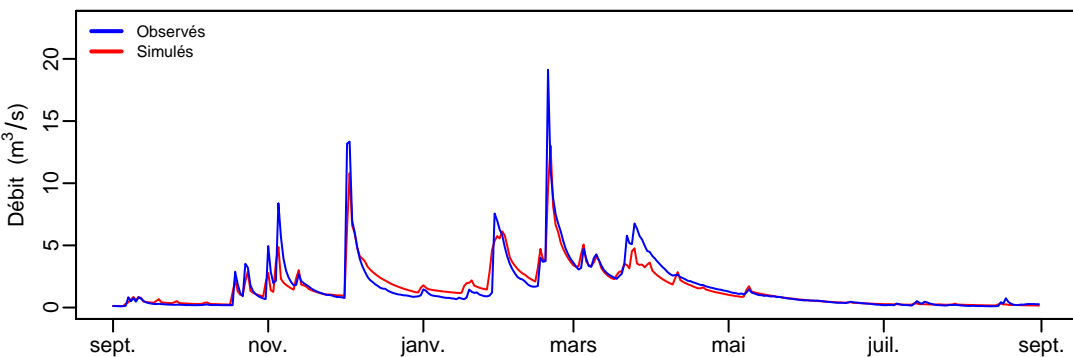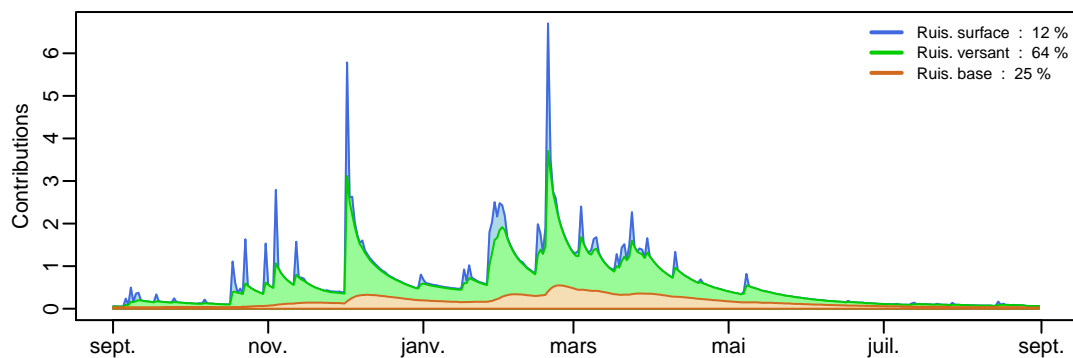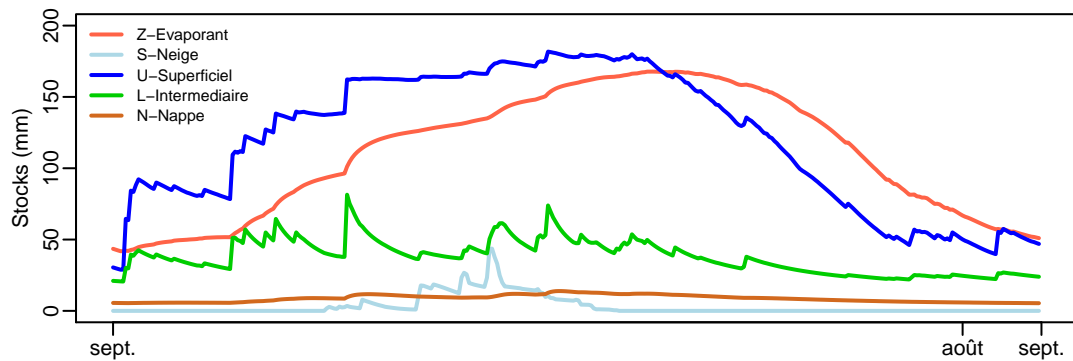

# q0230 (213.586 km<sup>2</sup>) – année 2006–2007

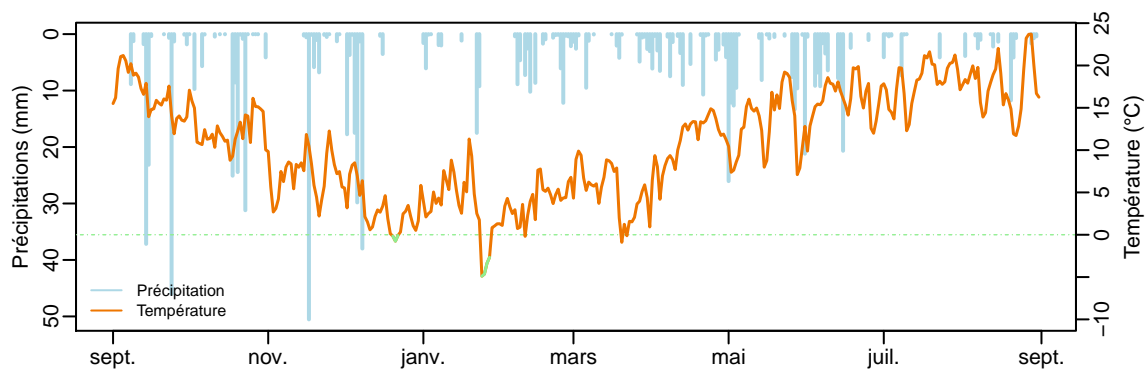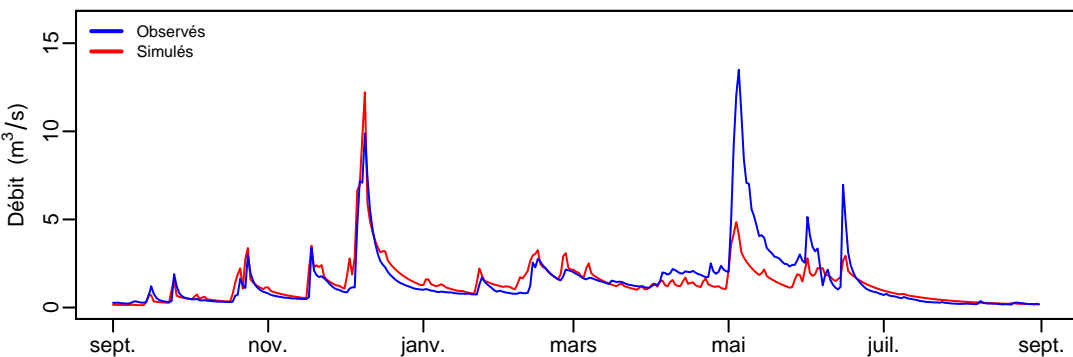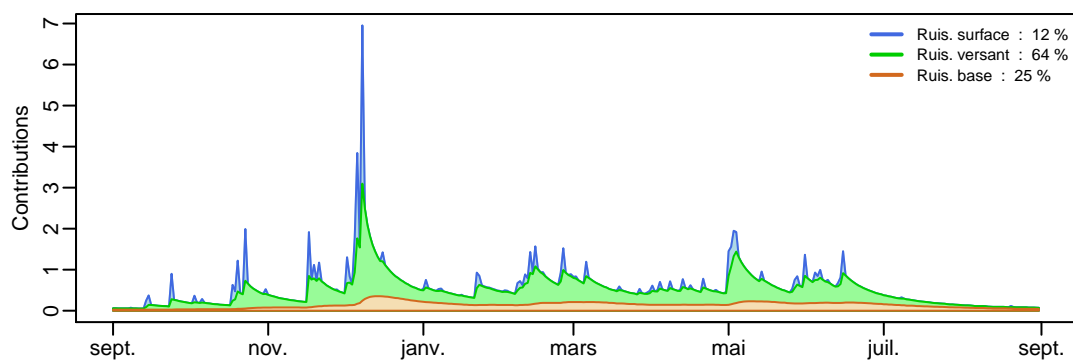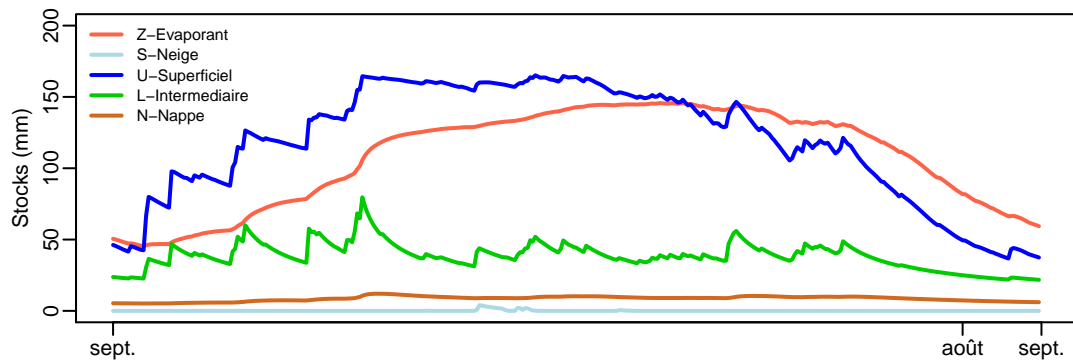



# q0230 (213.586 km²) – année 2007–2008

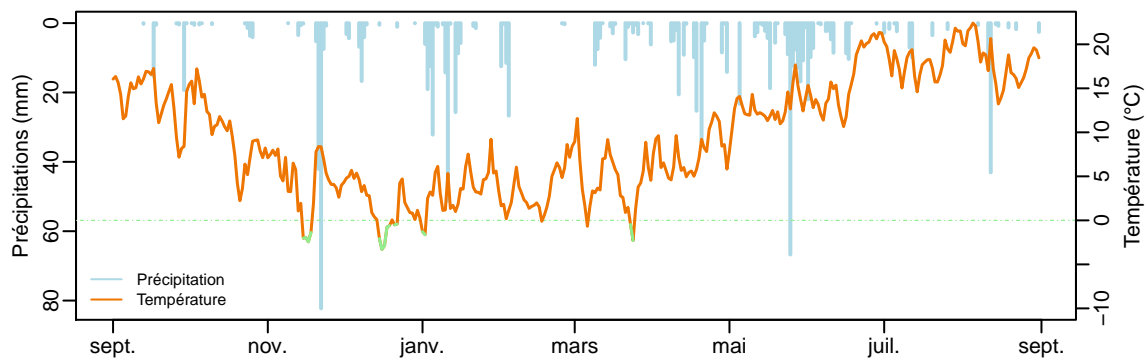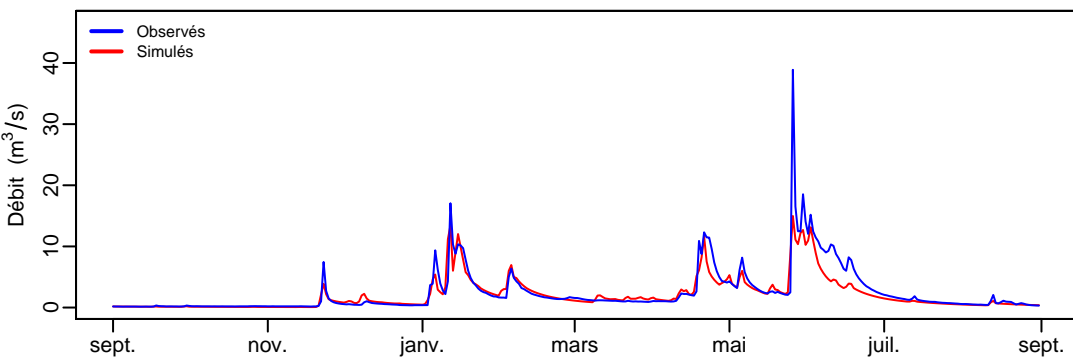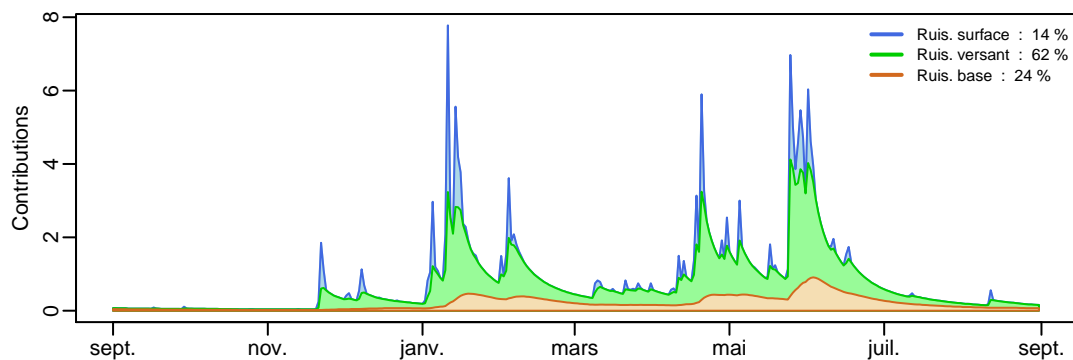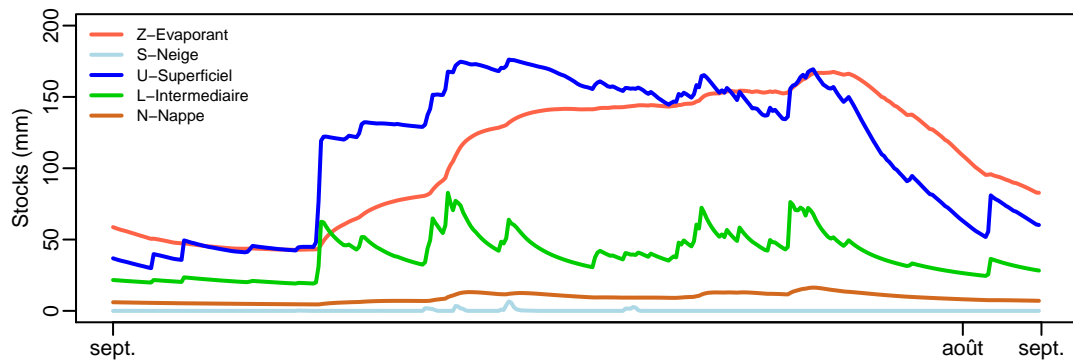

# q0230 (213.586 km<sup>2</sup>) – année 2008–2009

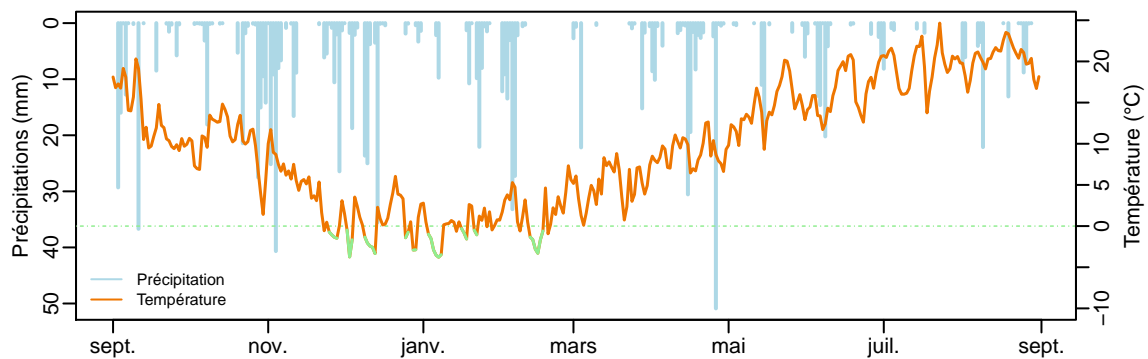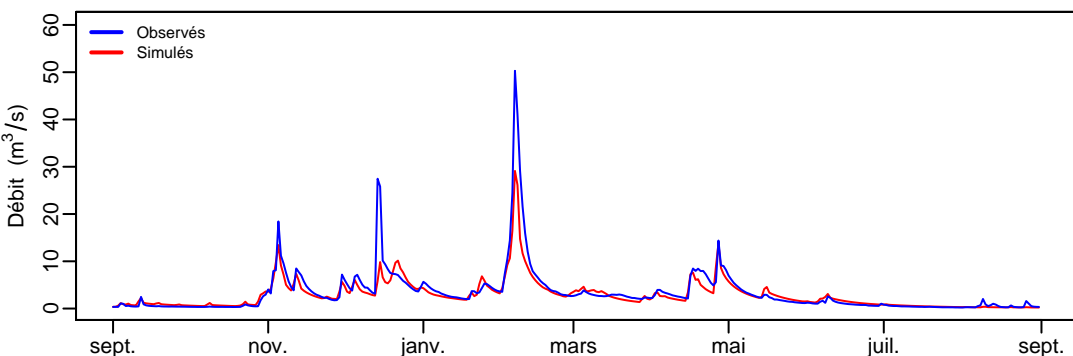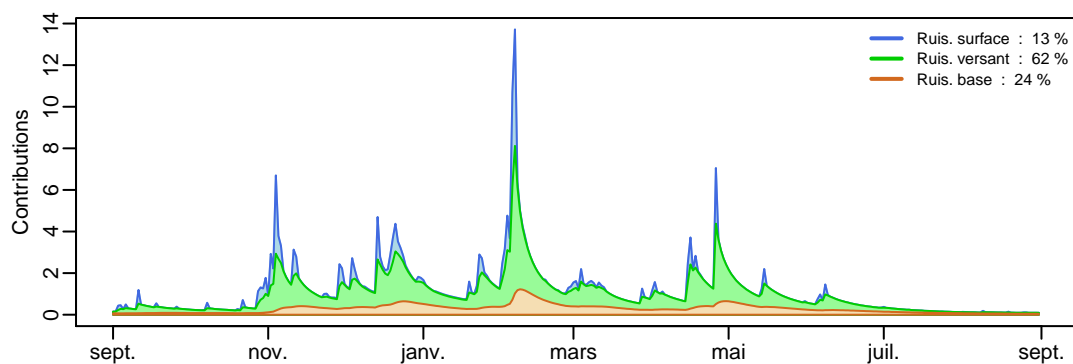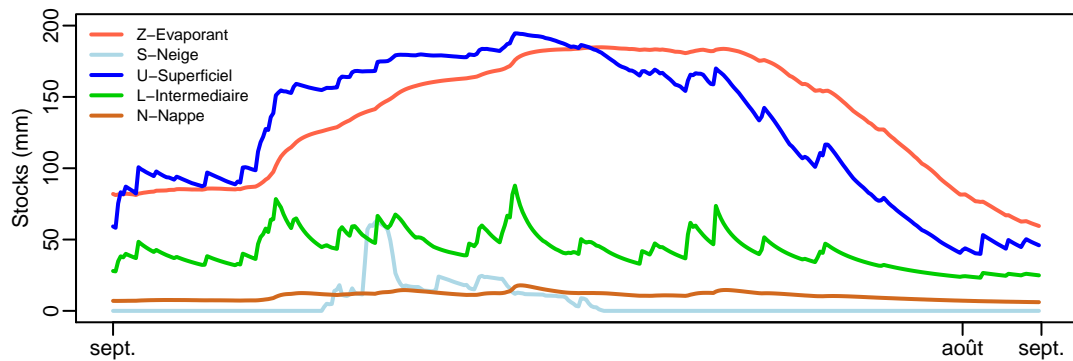

# q0230 (213.586 km<sup>2</sup>) – année 2009–2010

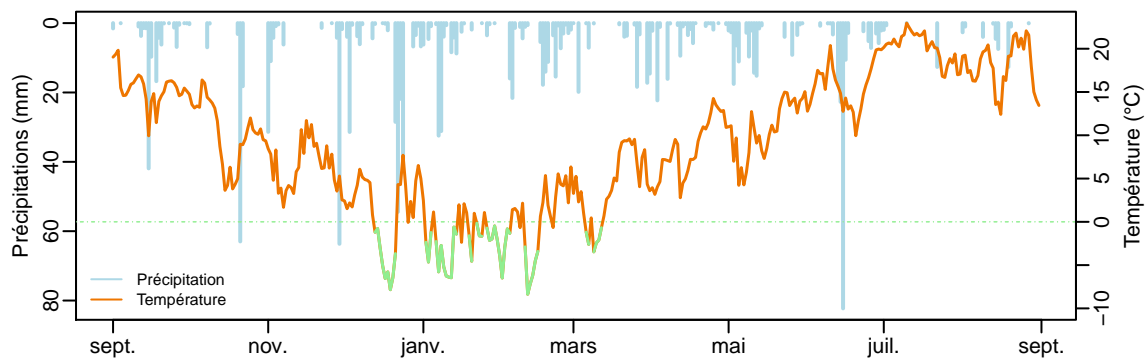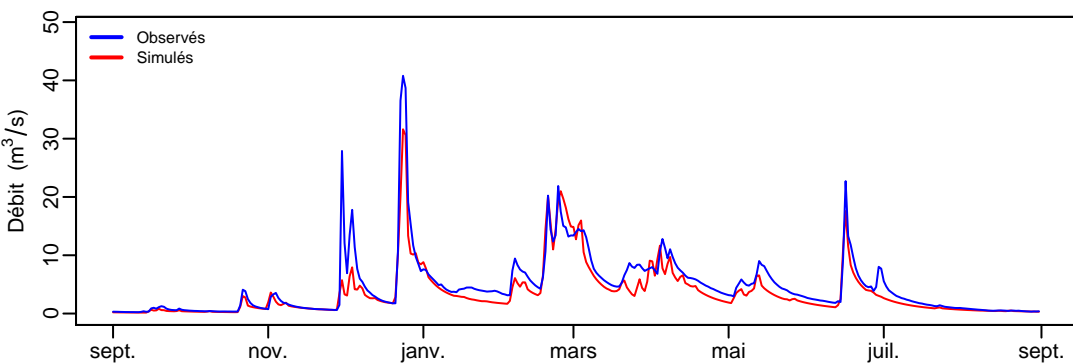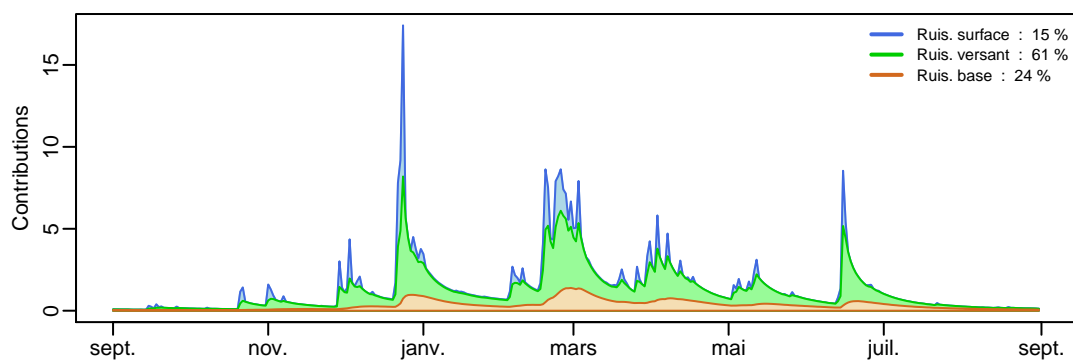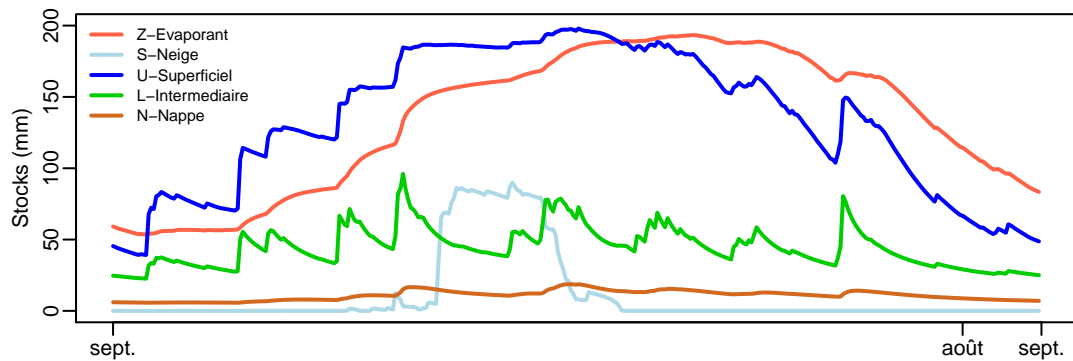

# q0230 (213.586 km²) – année 2010–2011

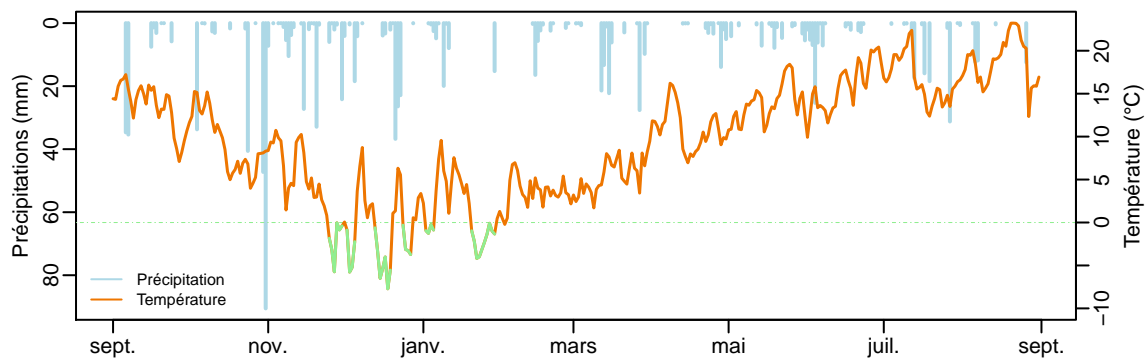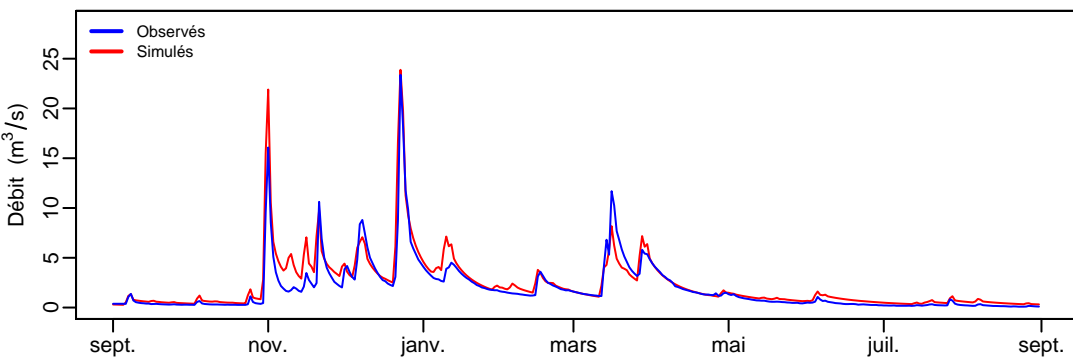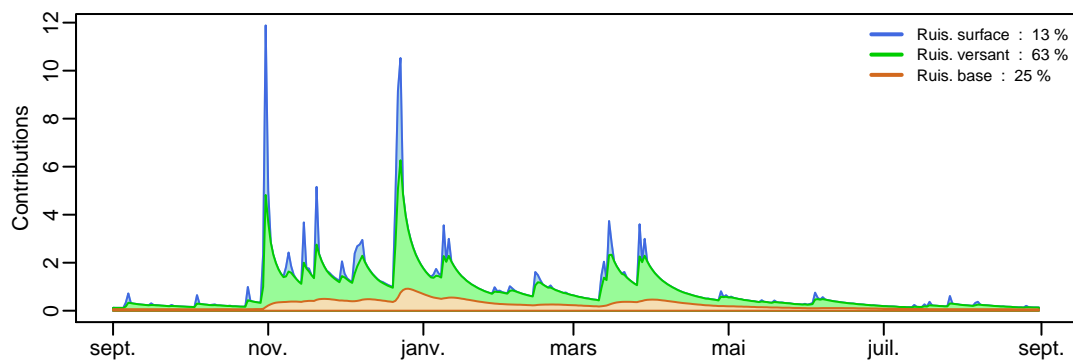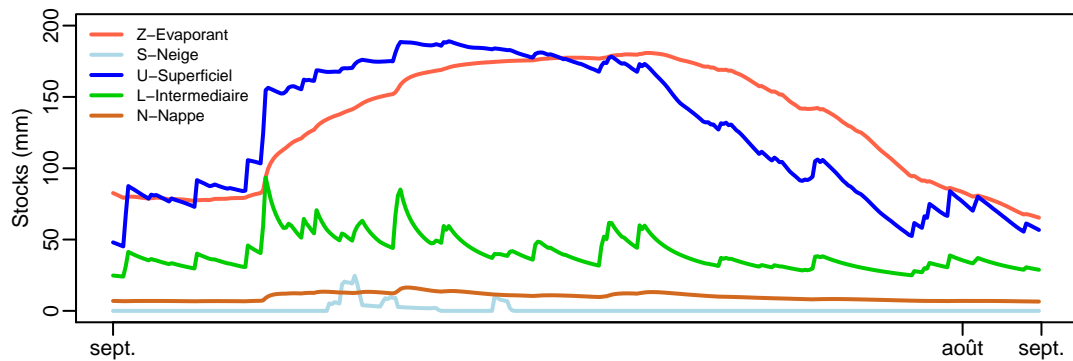

# q0230 (213.586 km<sup>2</sup>) – année 2011–2012

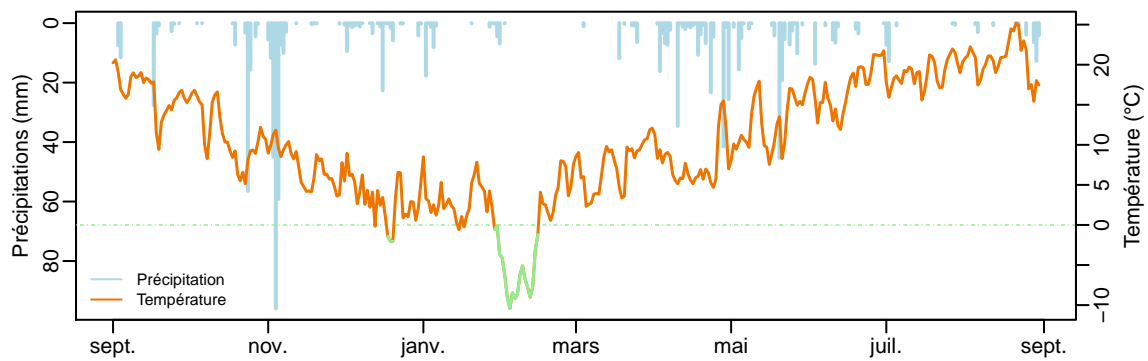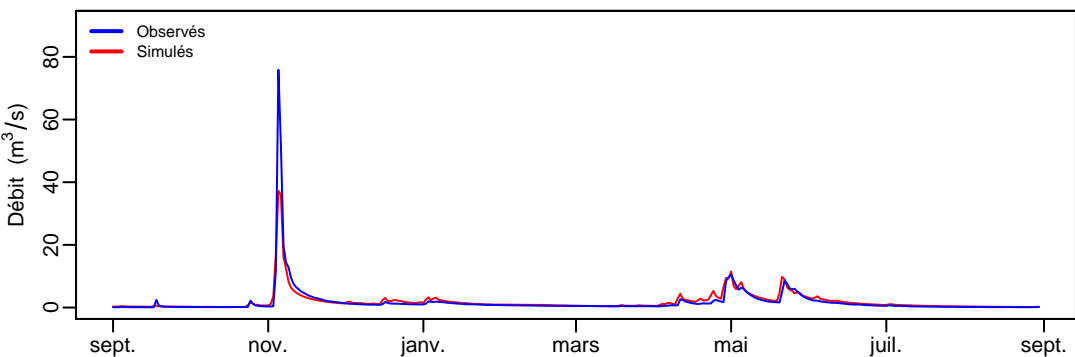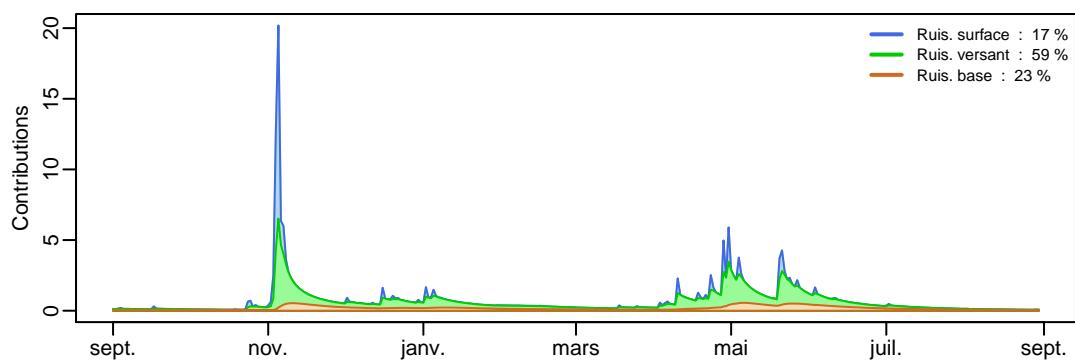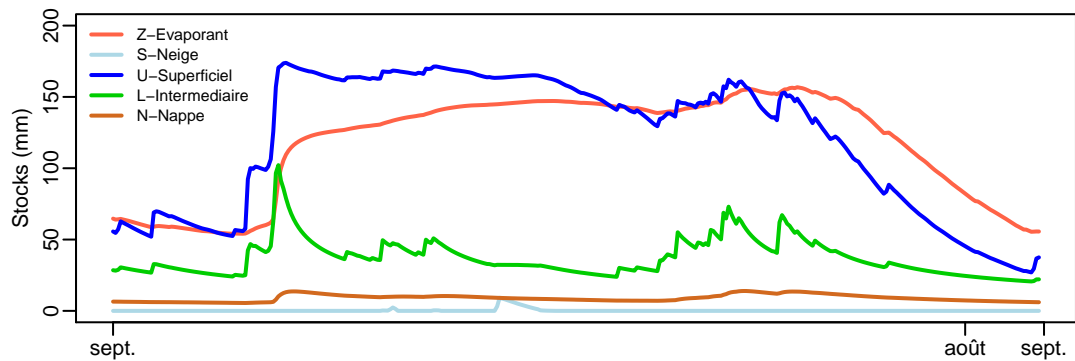

# q0235 (78.4644 km²) – année 1995–1996

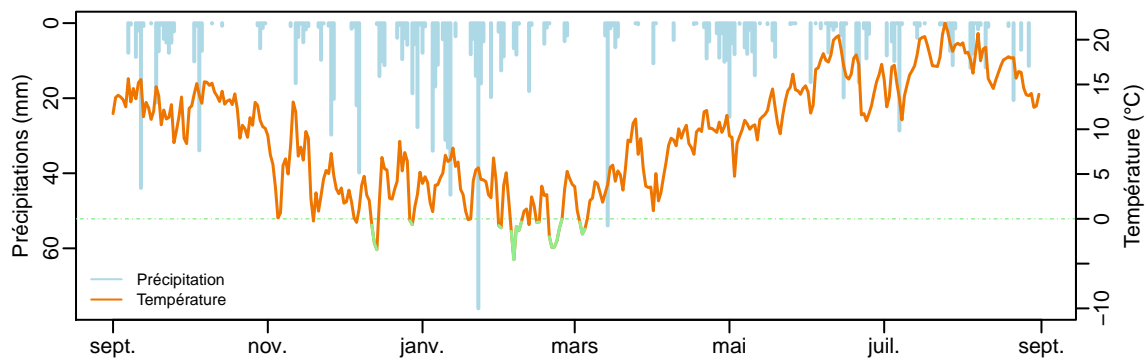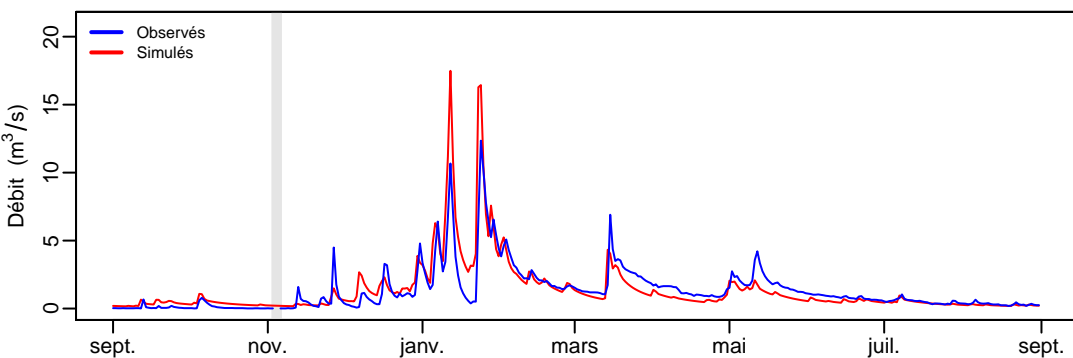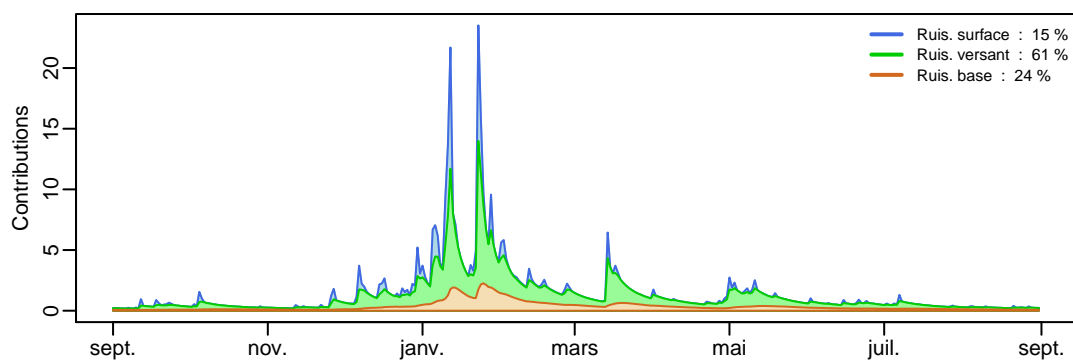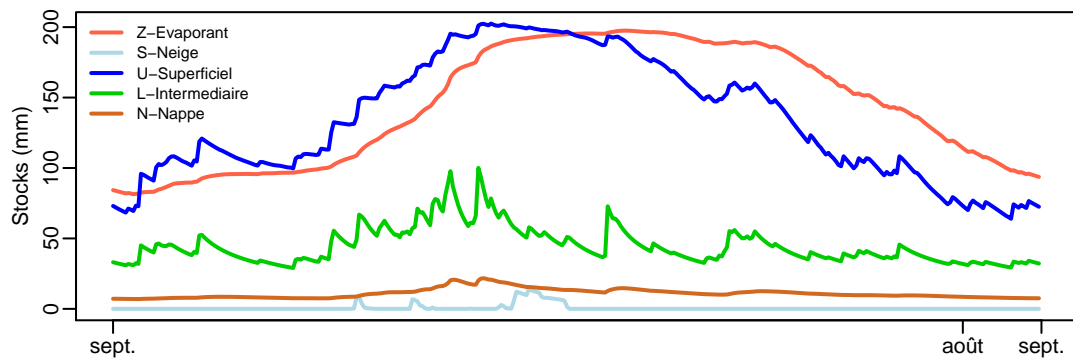

# q0235 (78.4644 km<sup>2</sup>) – année 1996–1997

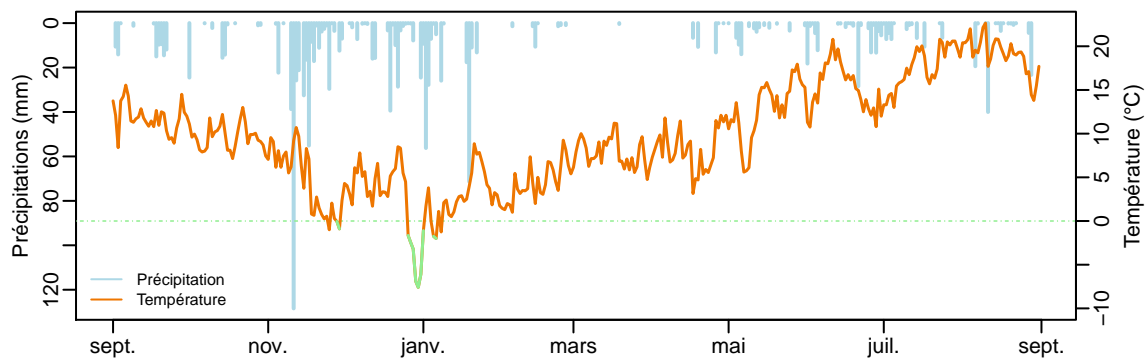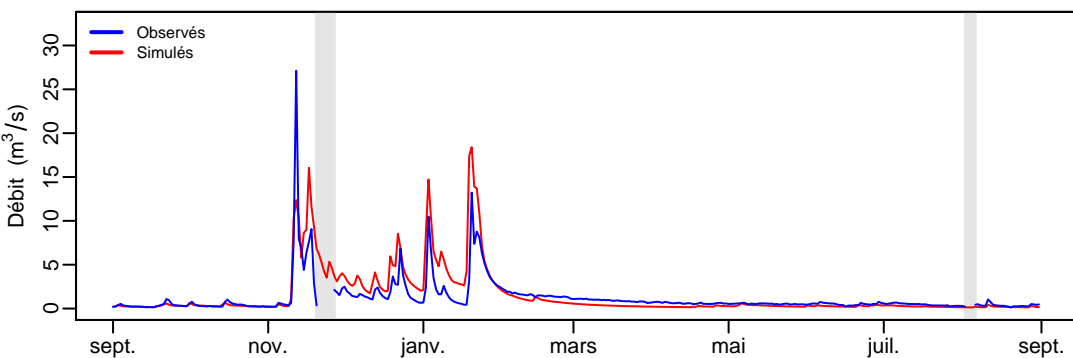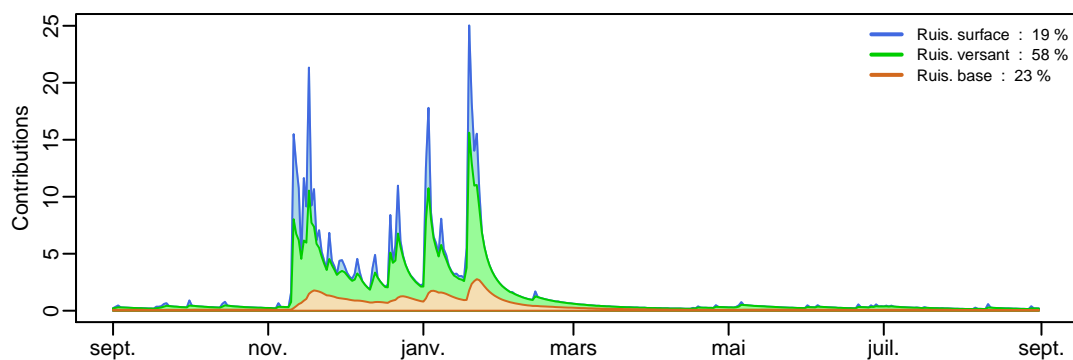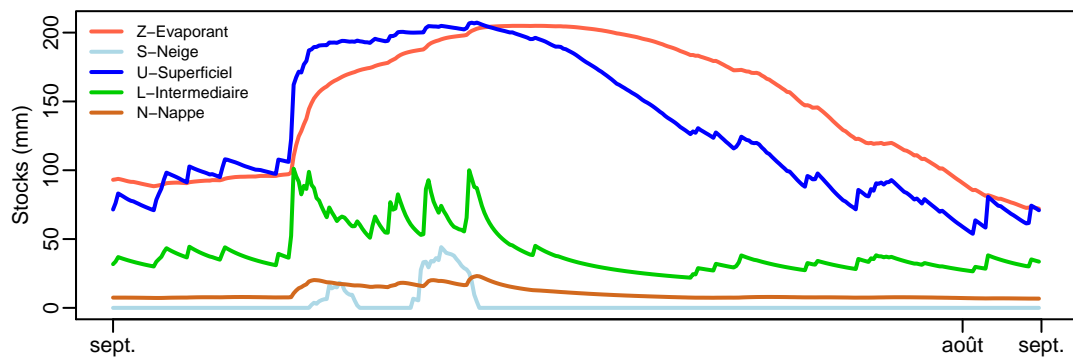

# q0235 (78.4644 km²) – année 1997–1998

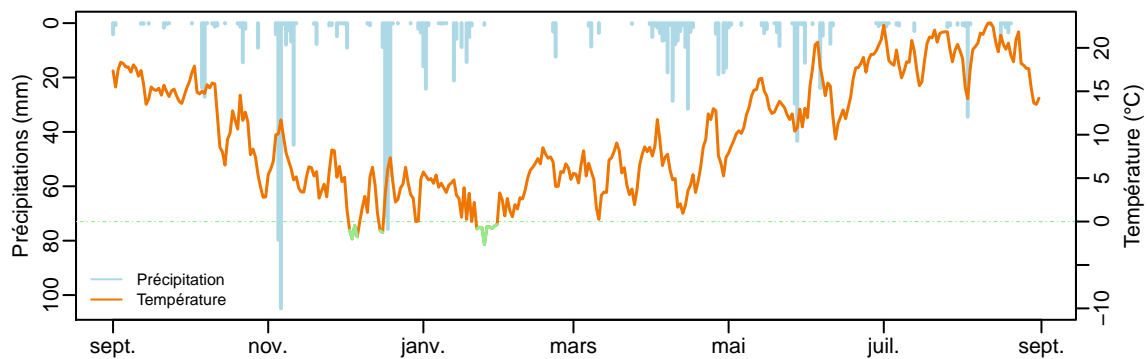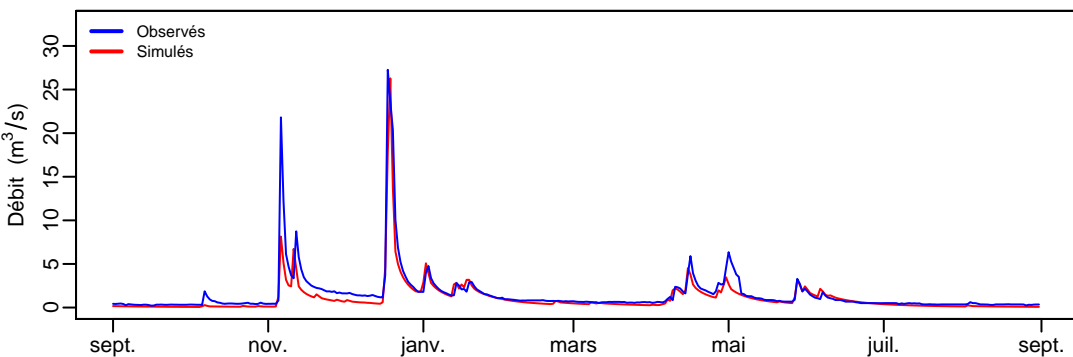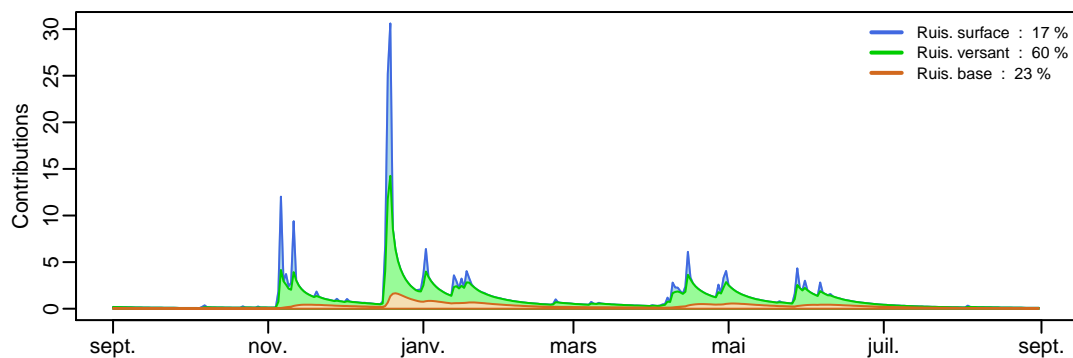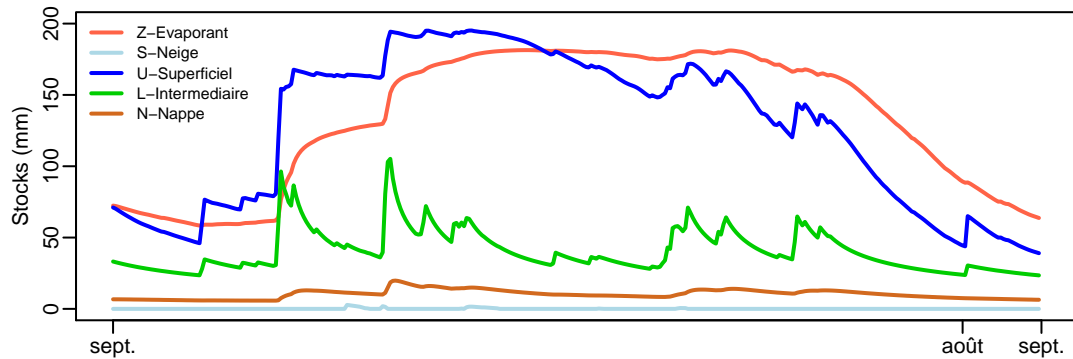



# q0235 (78.4644 km²) – année 1998–1999

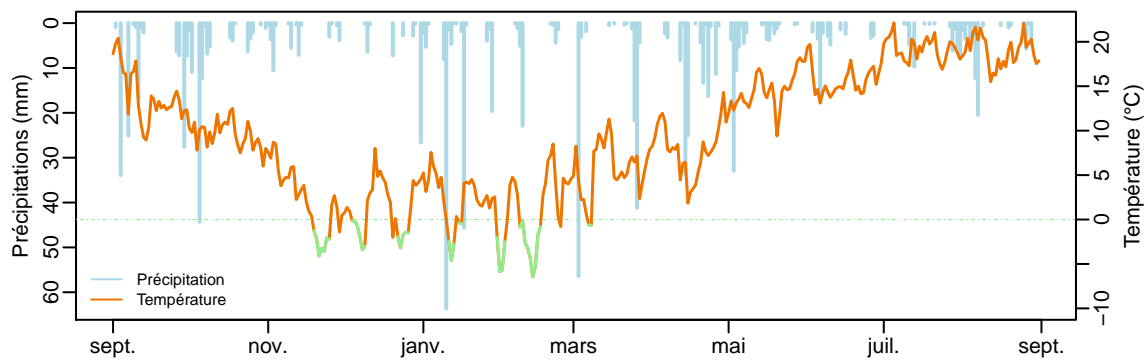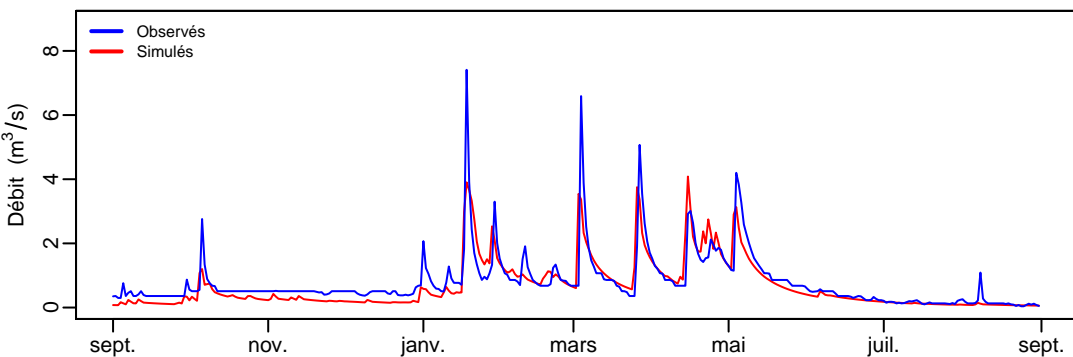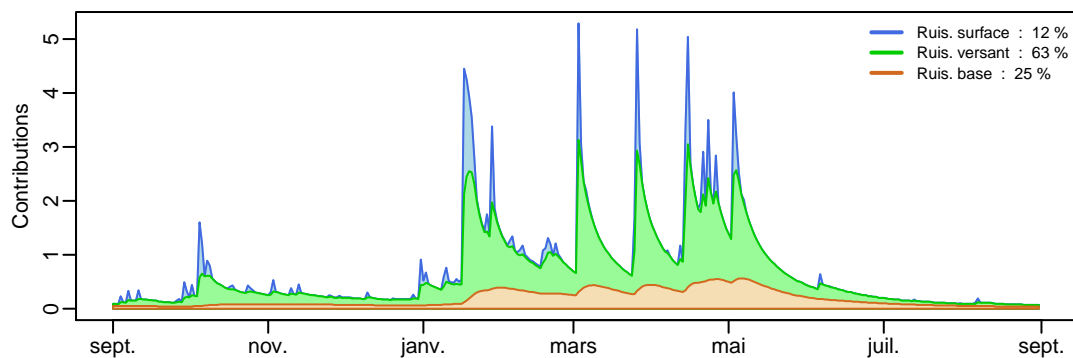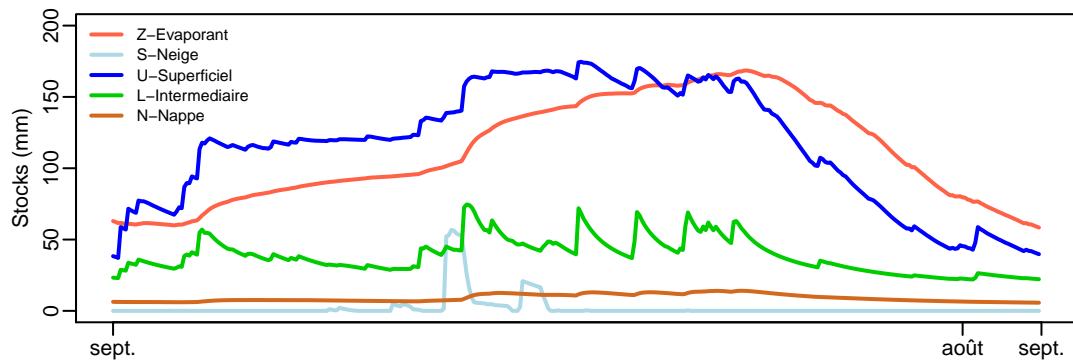

# q0235 (78.4644 km<sup>2</sup>) – année 1999–2000

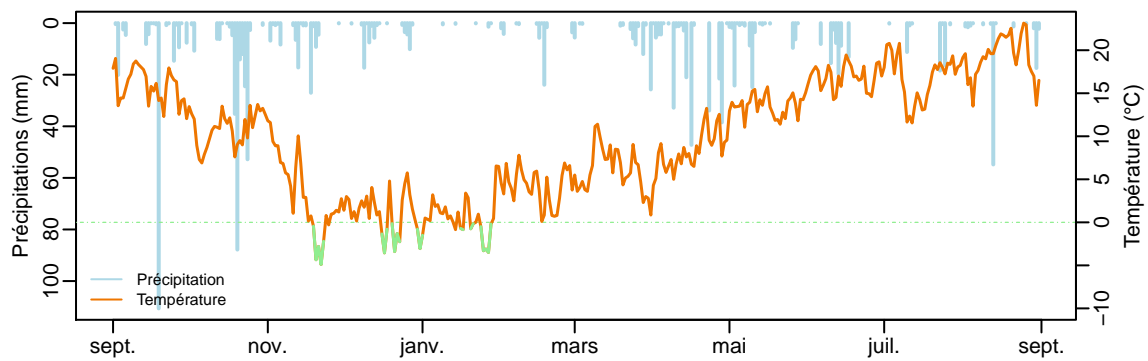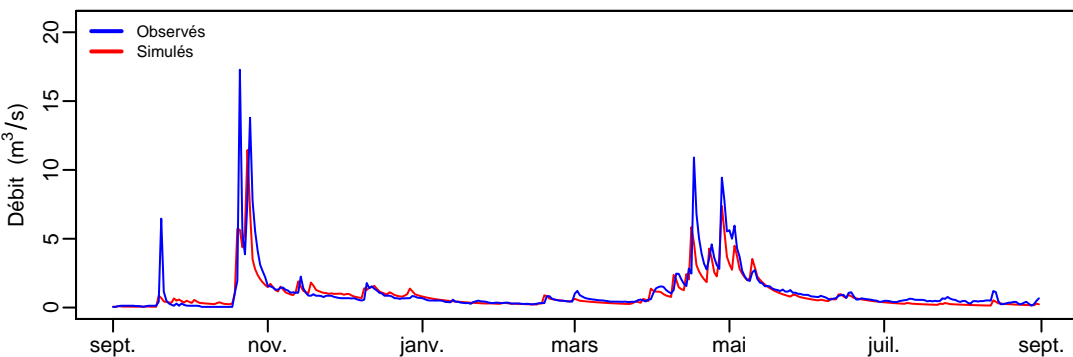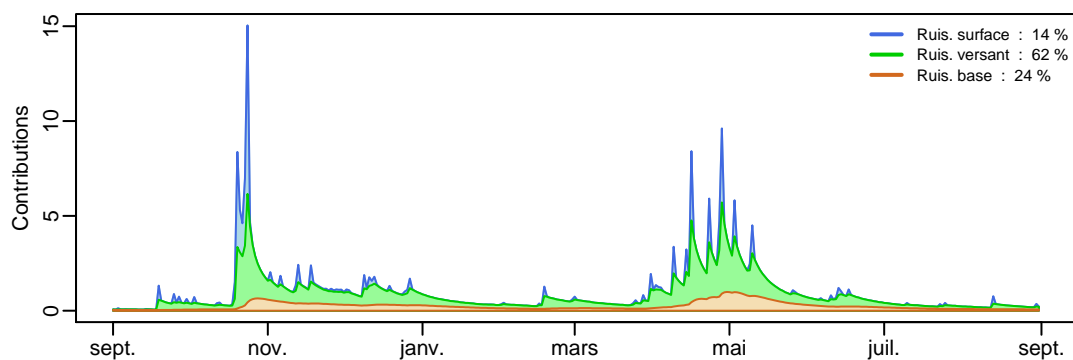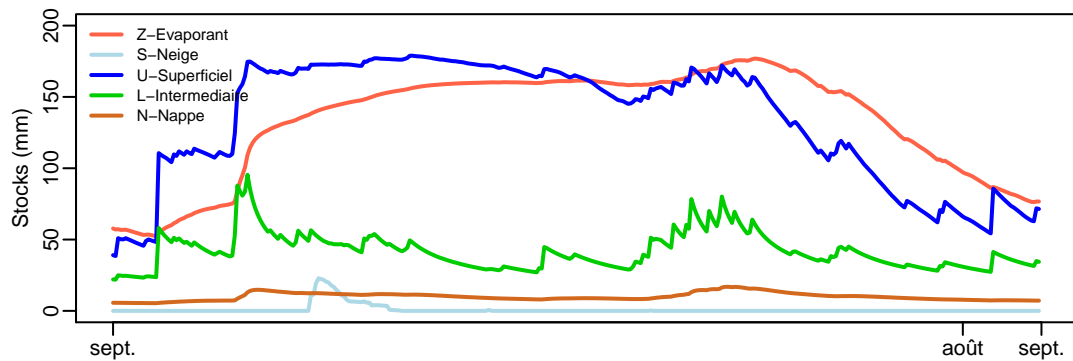

# q0235 (78.4644 km<sup>2</sup>) – année 2000–2001

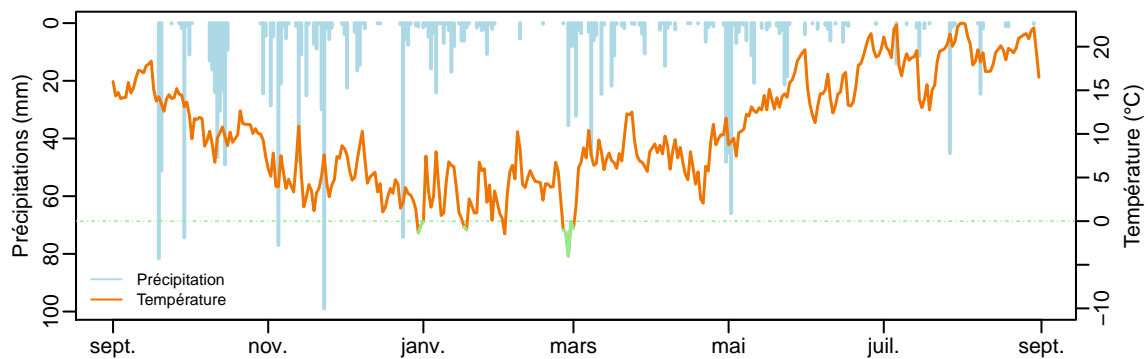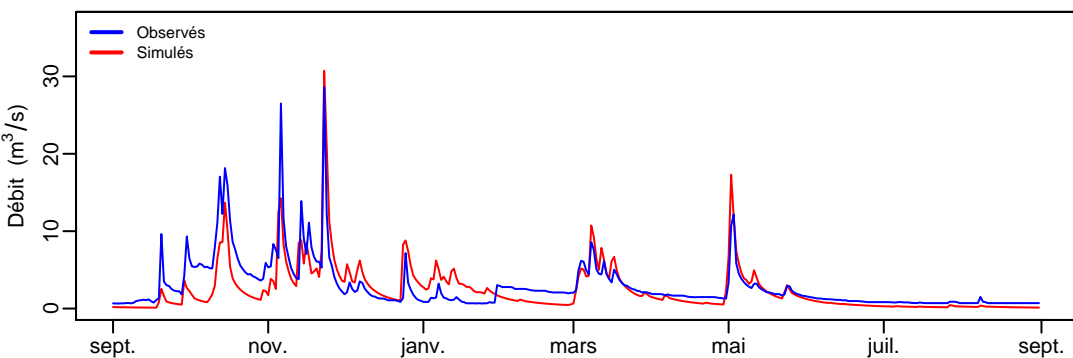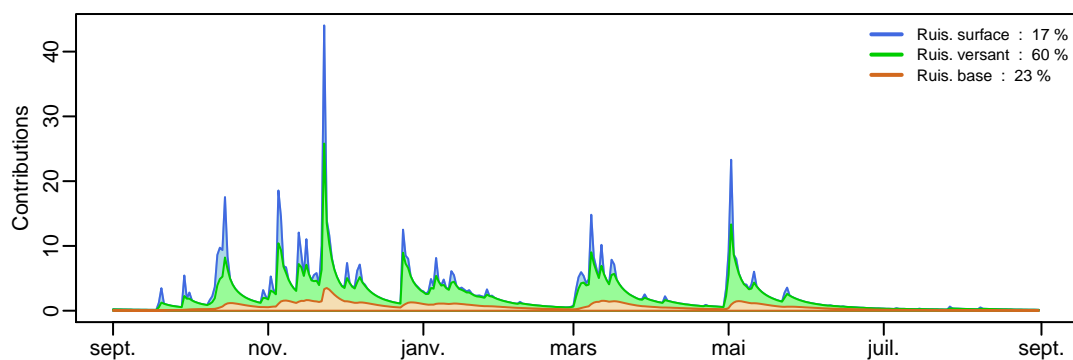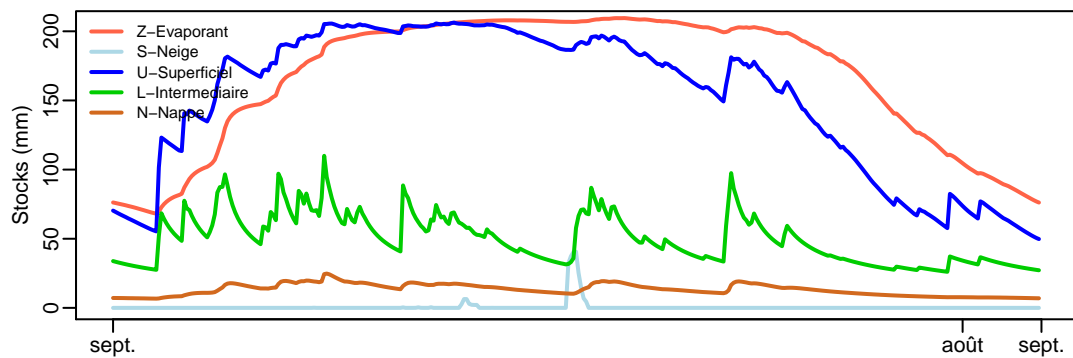

# q0235 (78.4644 km<sup>2</sup>) – année 2001–2002

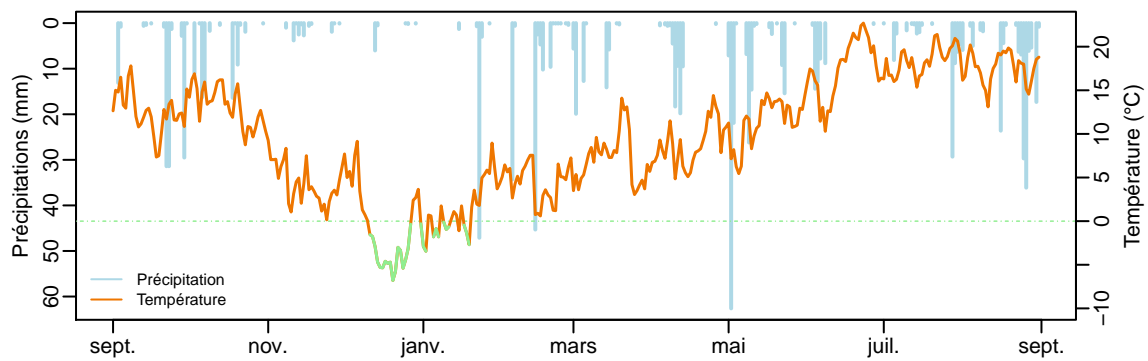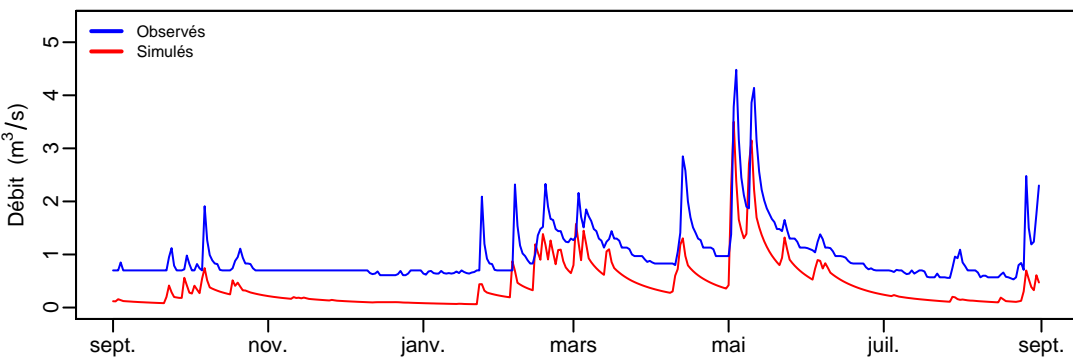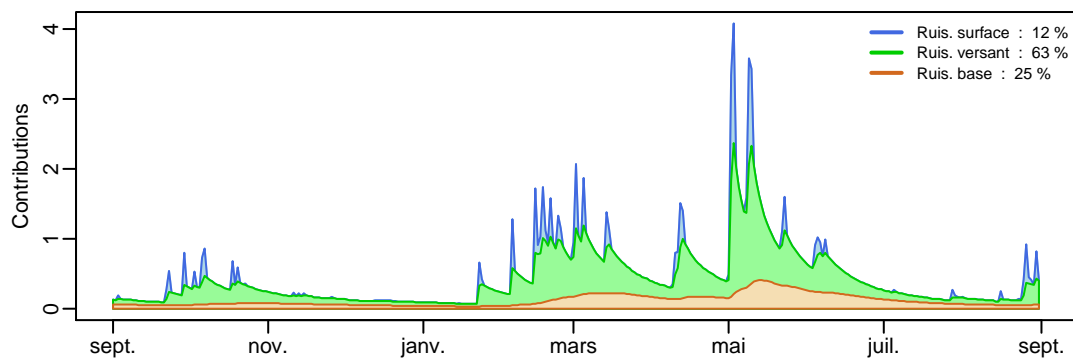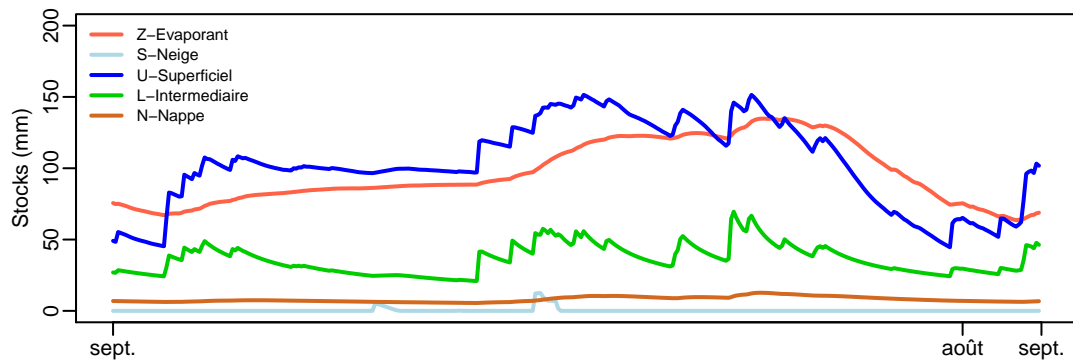

# q0235 (78.4644 km<sup>2</sup>) – année 2002–2003

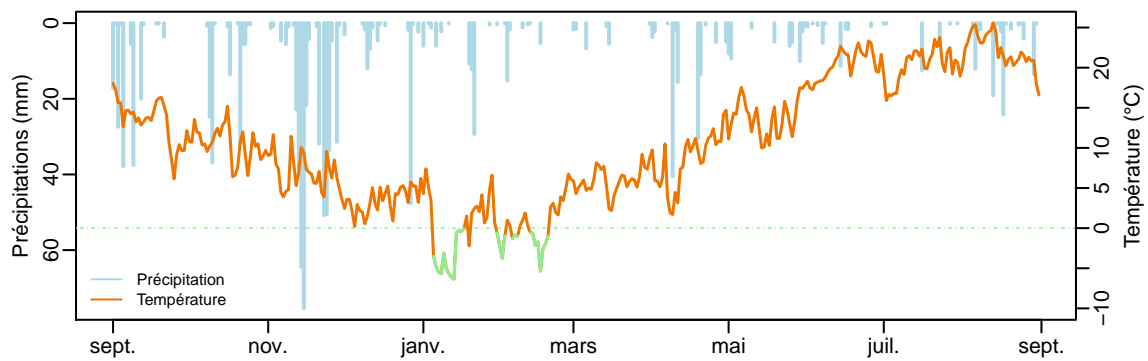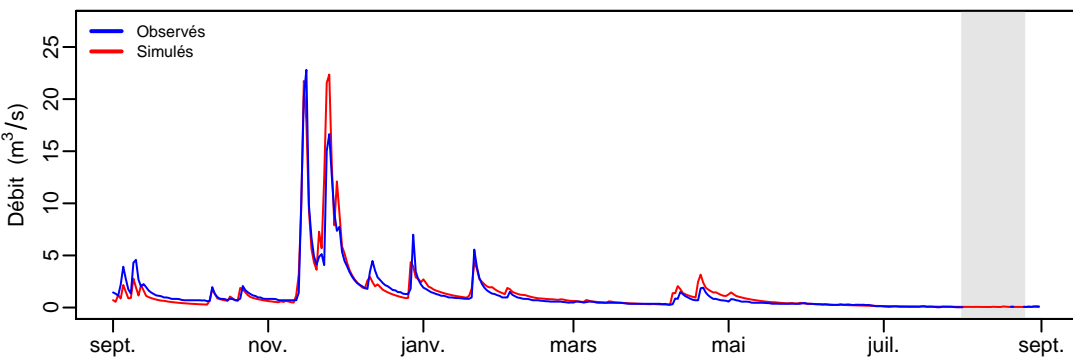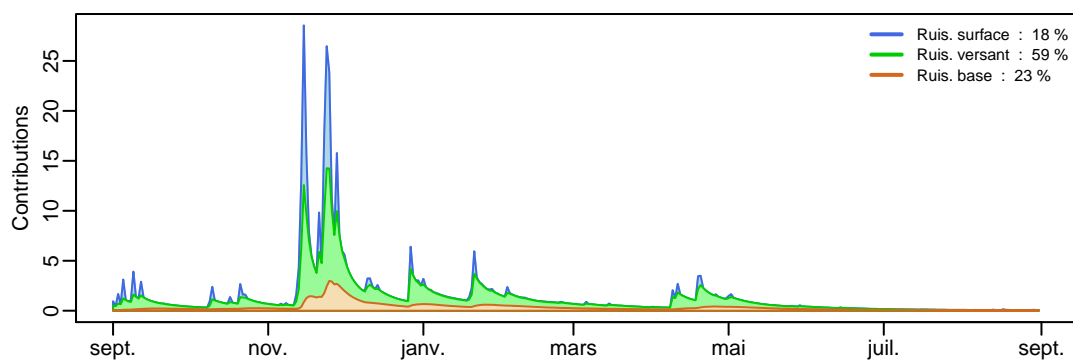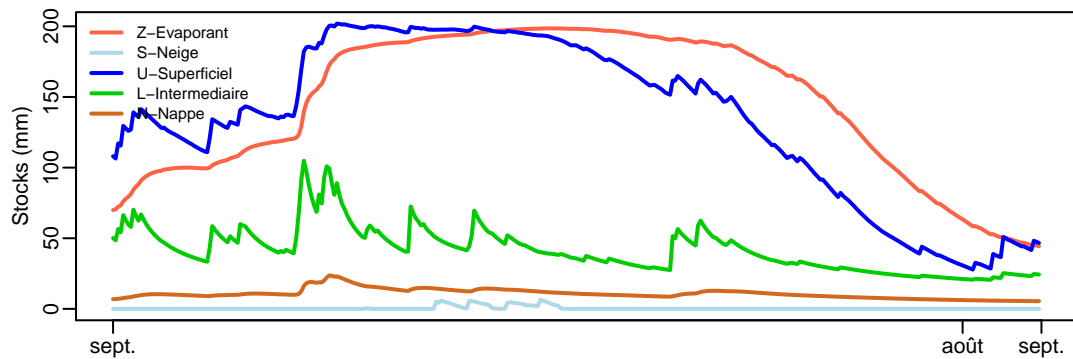

# q0235 (78.4644 km²) – année 2003–2004

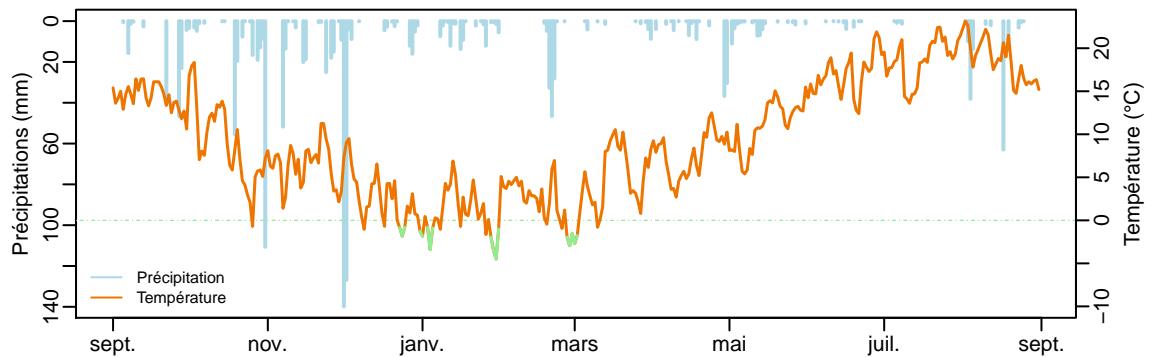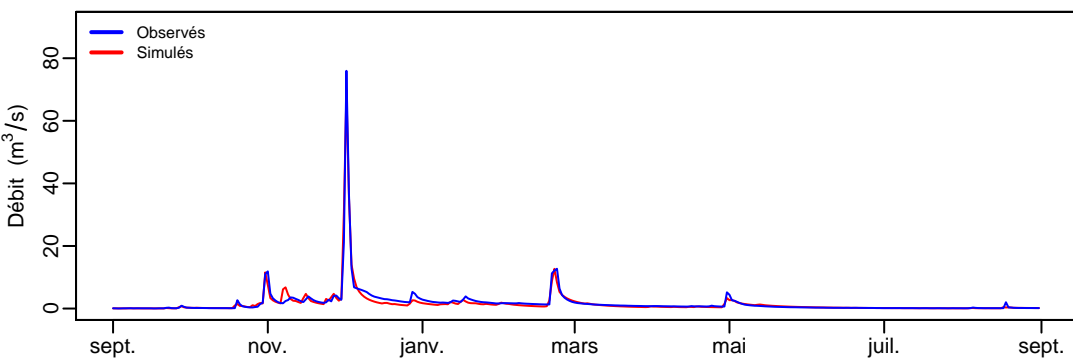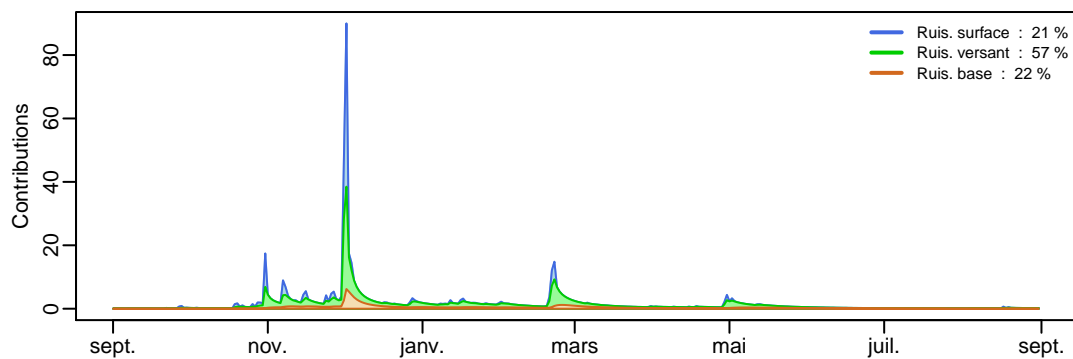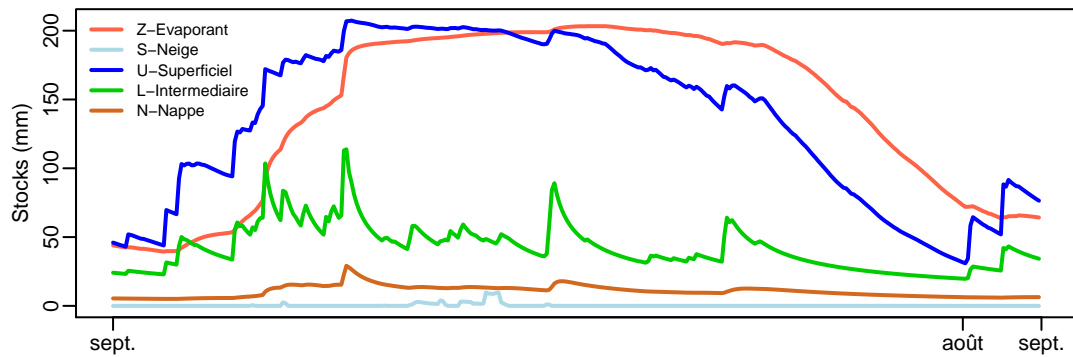

# q0235 (78.4644 km²) – année 2004–2005

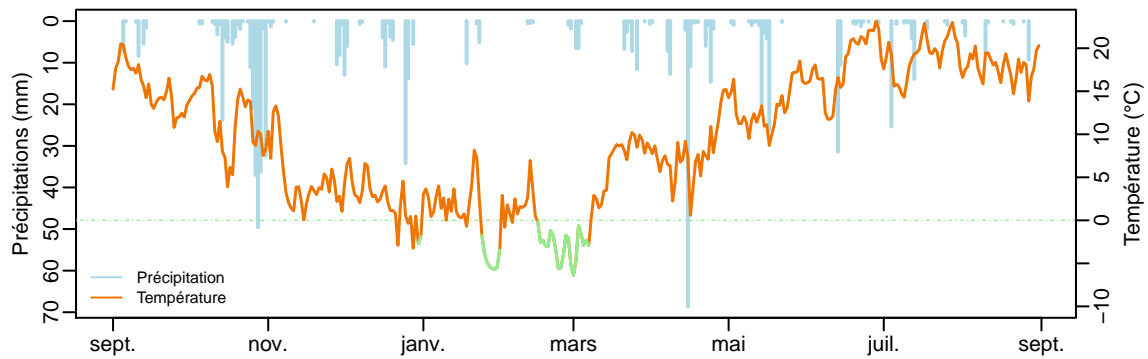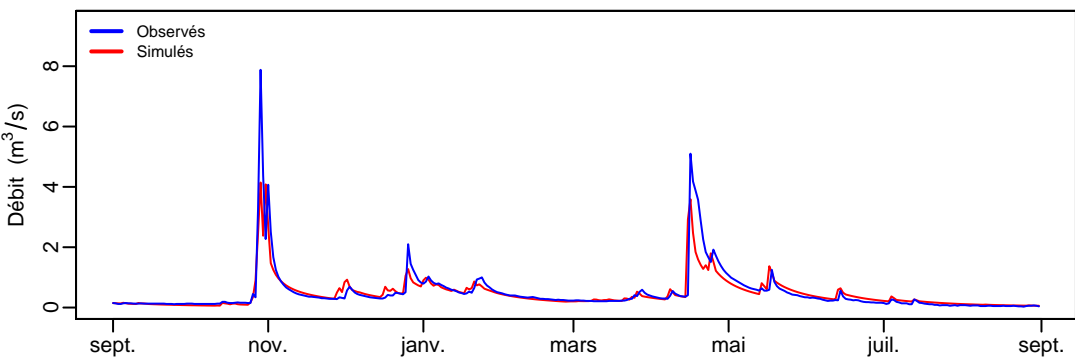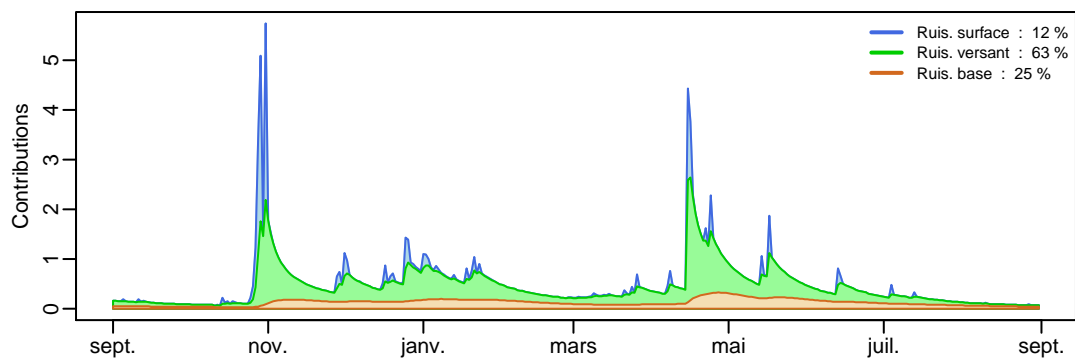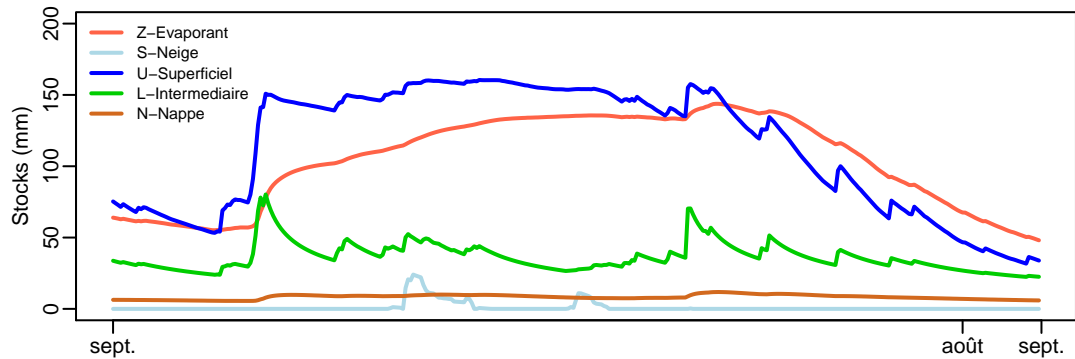

# q0235 (78.4644 km²) – année 2005–2006

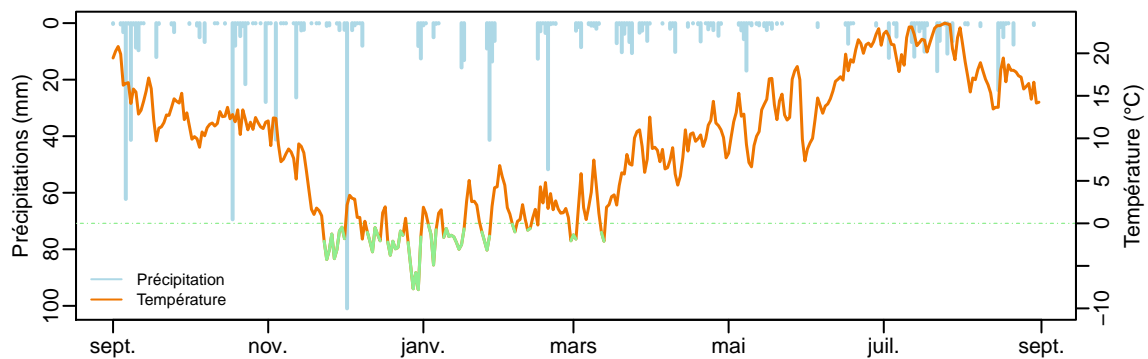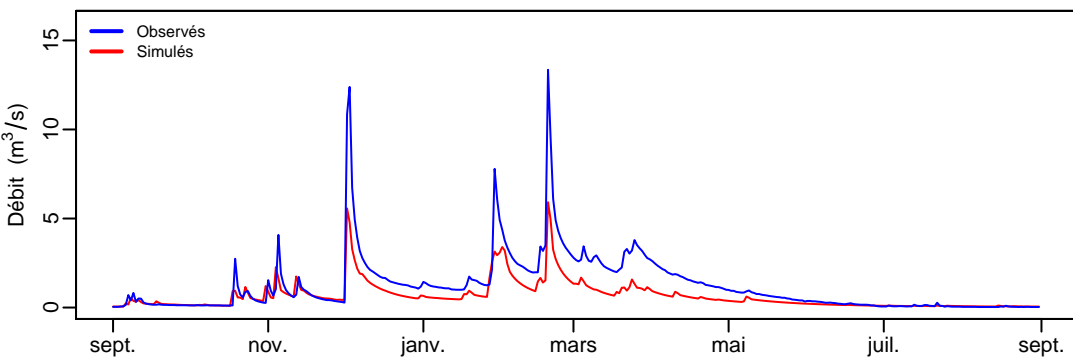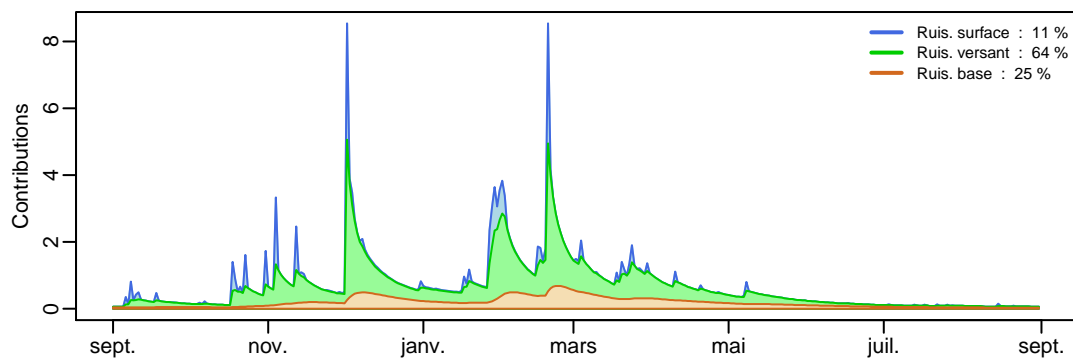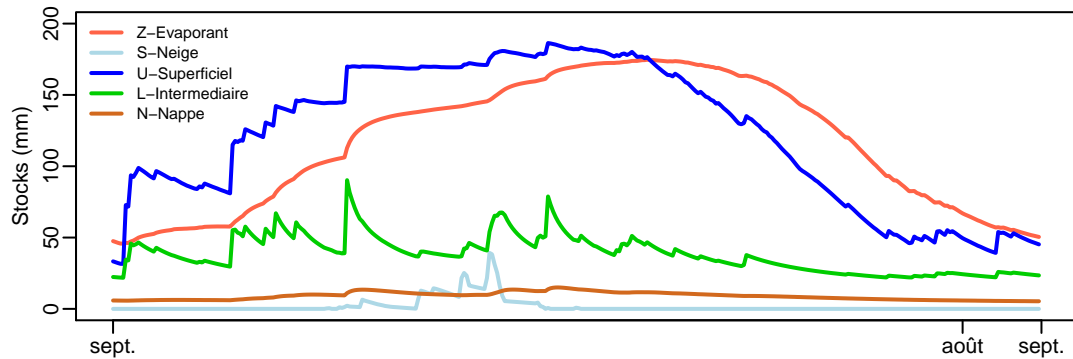



# q0235 (78.4644 km<sup>2</sup>) – année 2006–2007

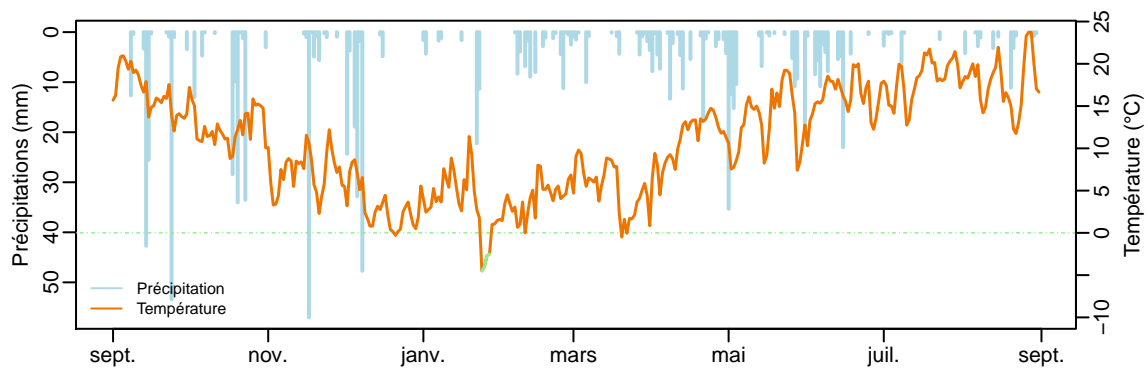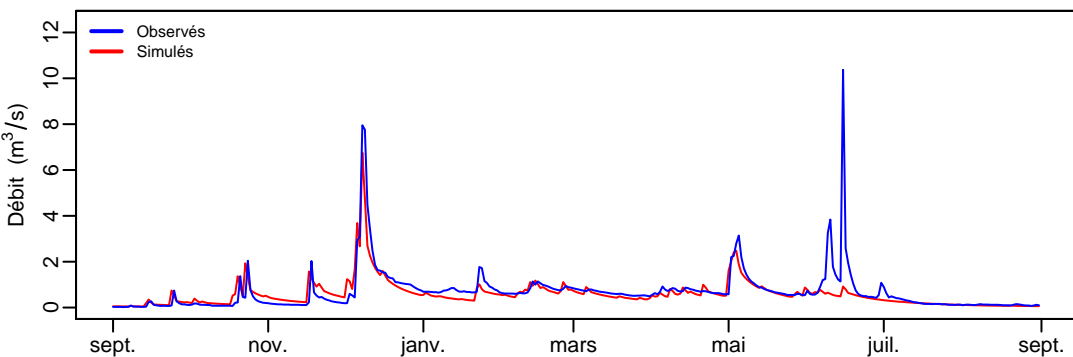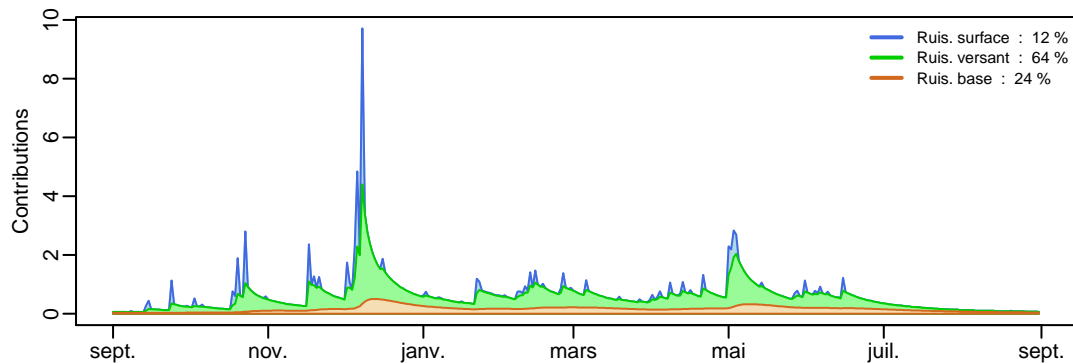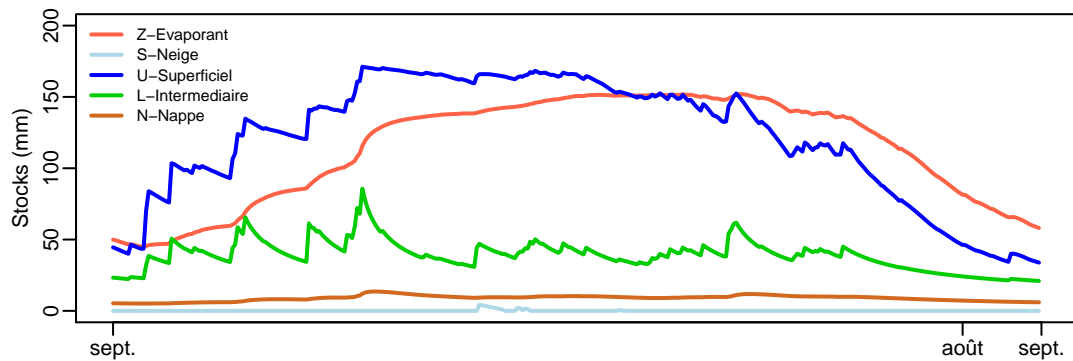

# q0235 (78.4644 km²) – année 2007–2008

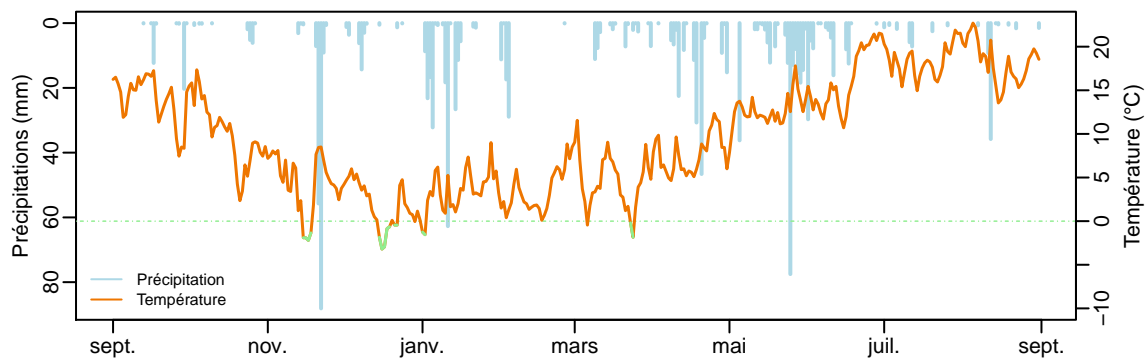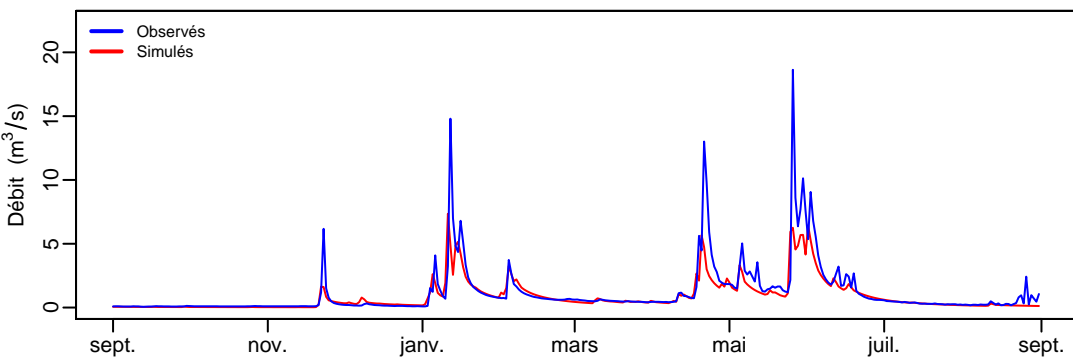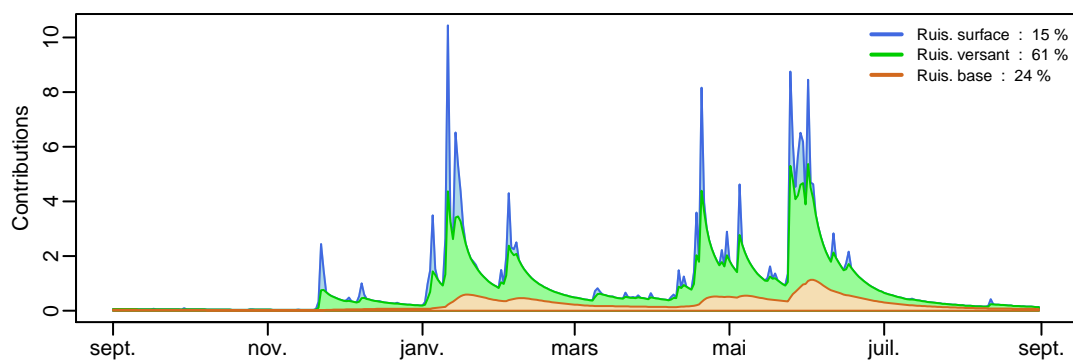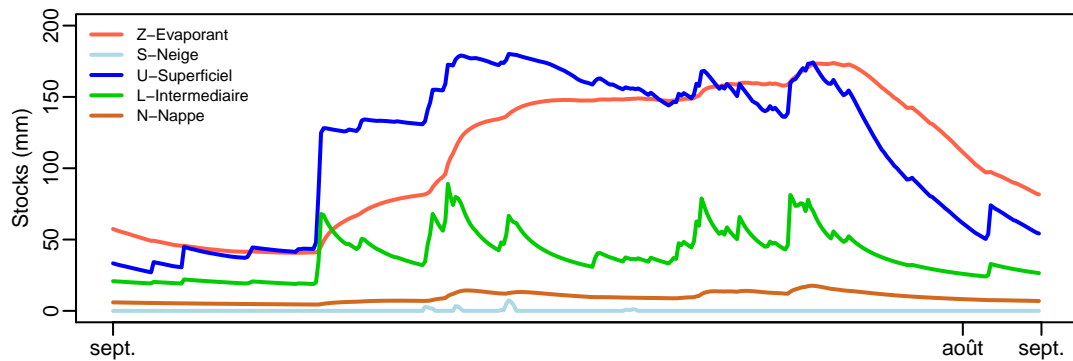

# q0235 (78.4644 km²) – année 2008–2009

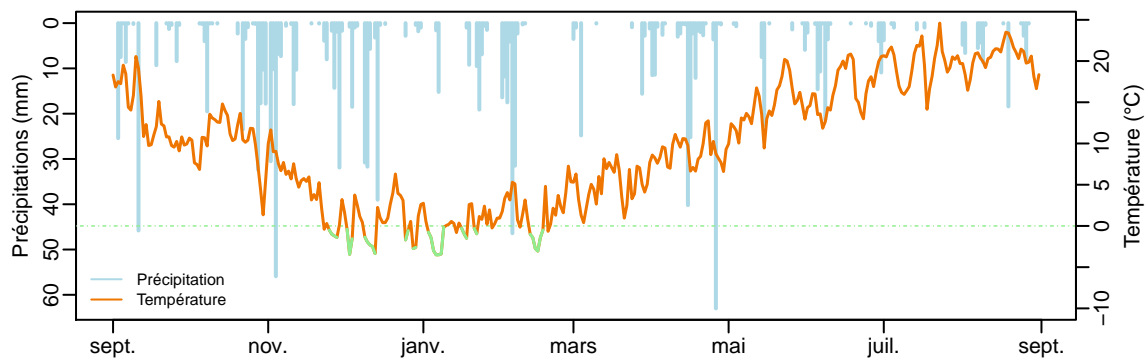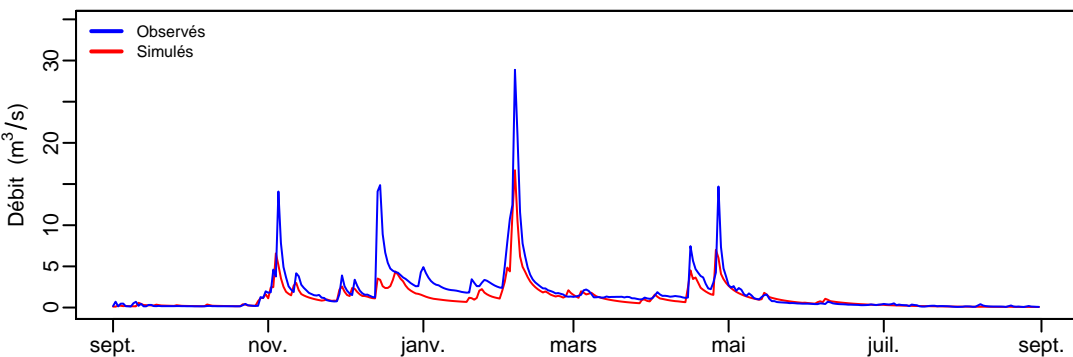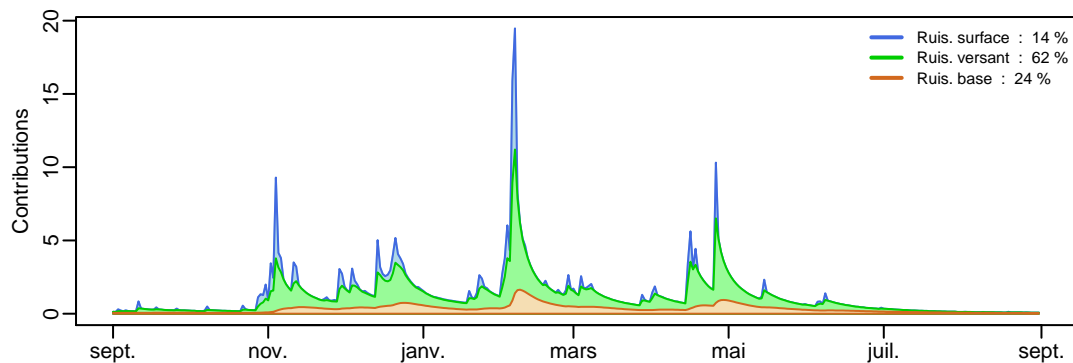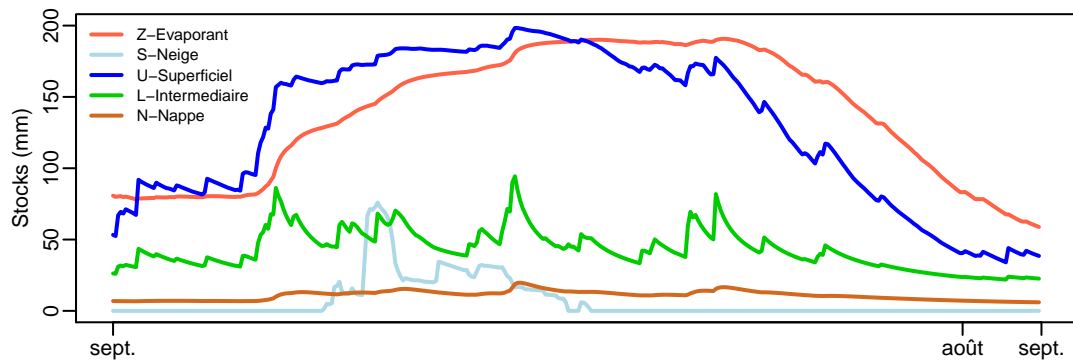

# q0235 (78.4644 km²) – année 2009–2010

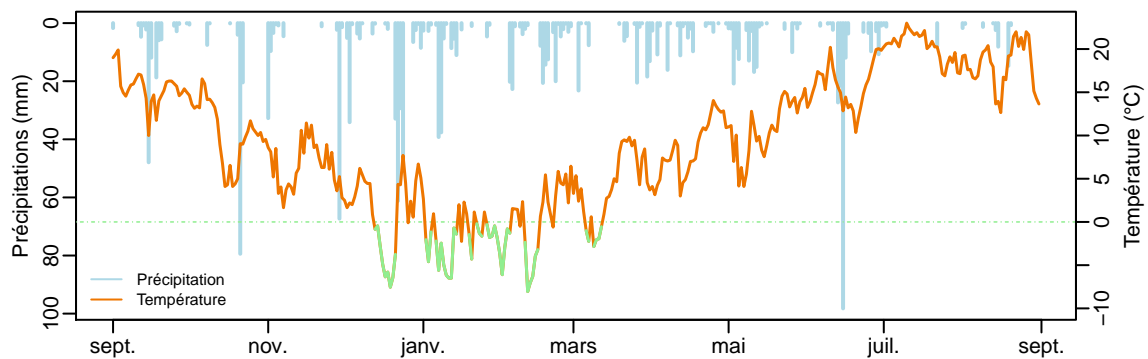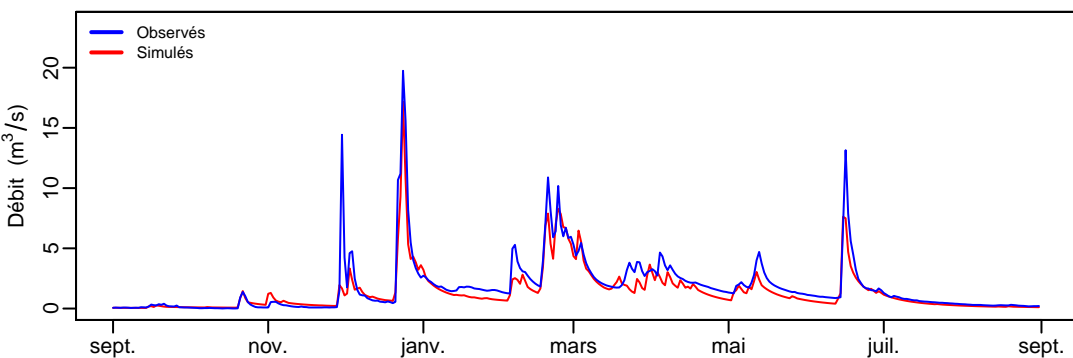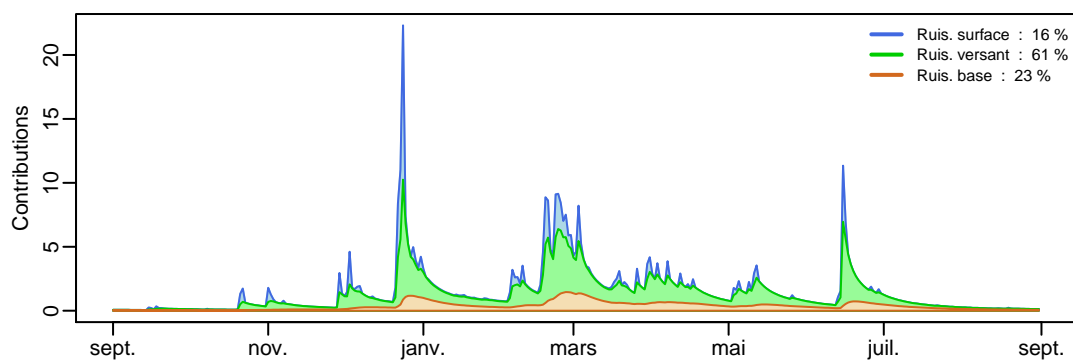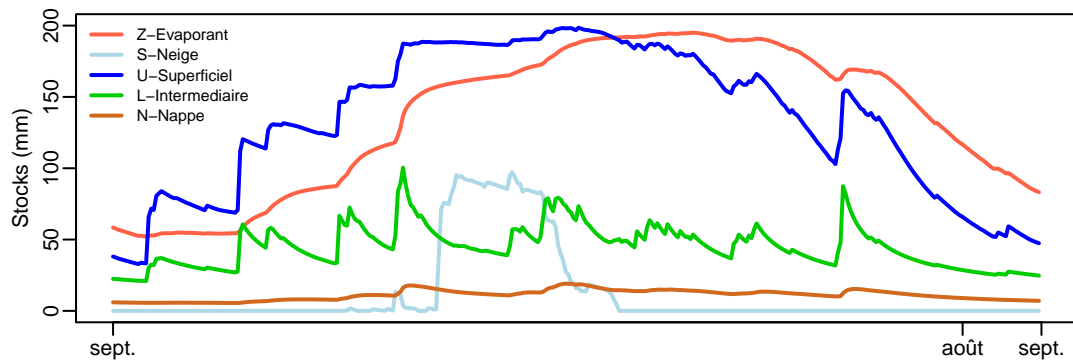

# q0235 (78.4644 km<sup>2</sup>) – année 2010–2011

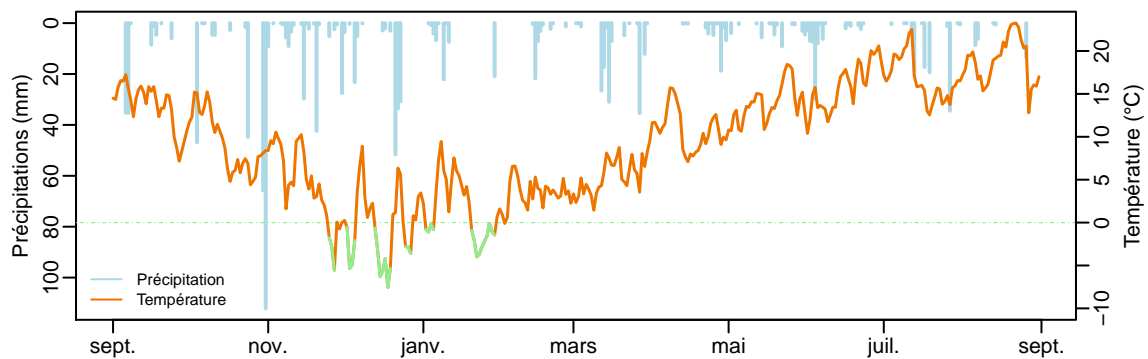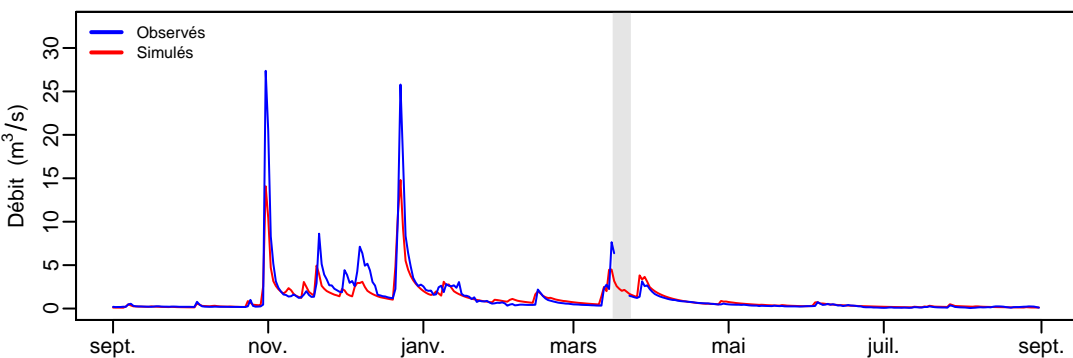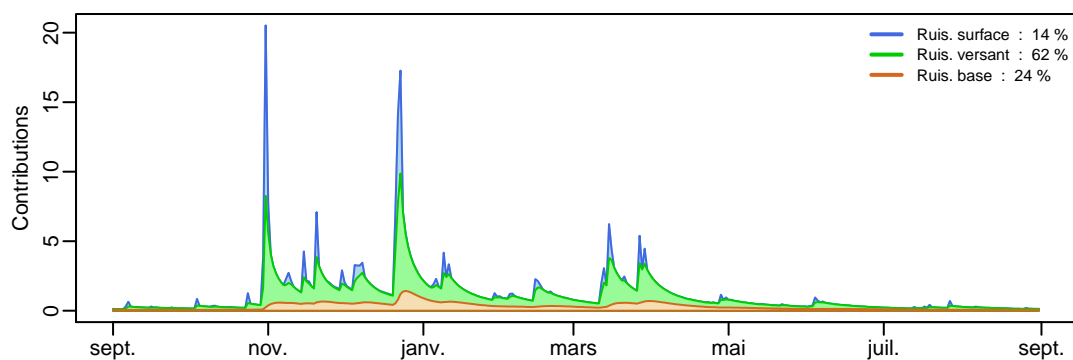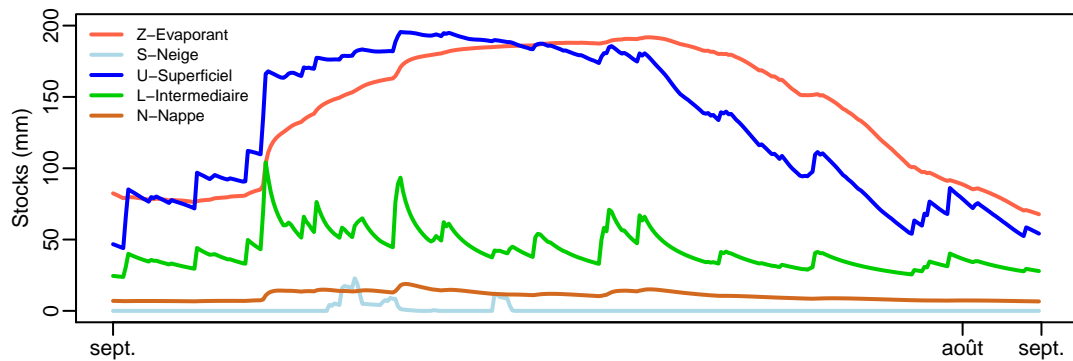

# q0235 (78.4644 km²) – année 2011–2012

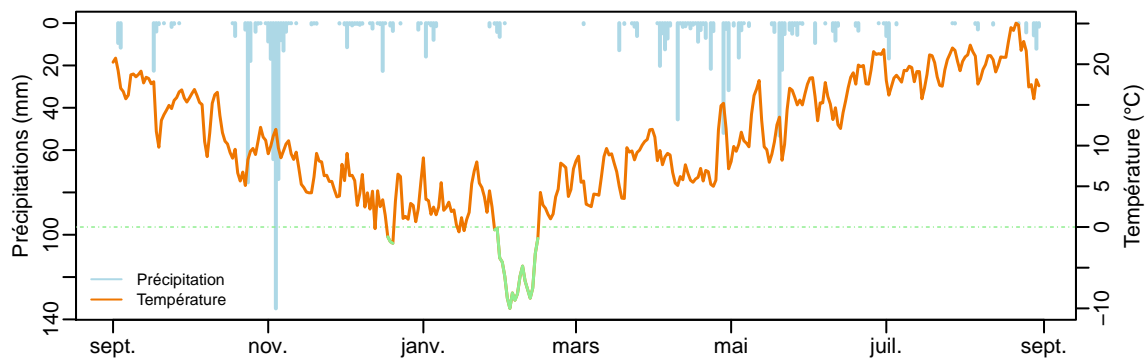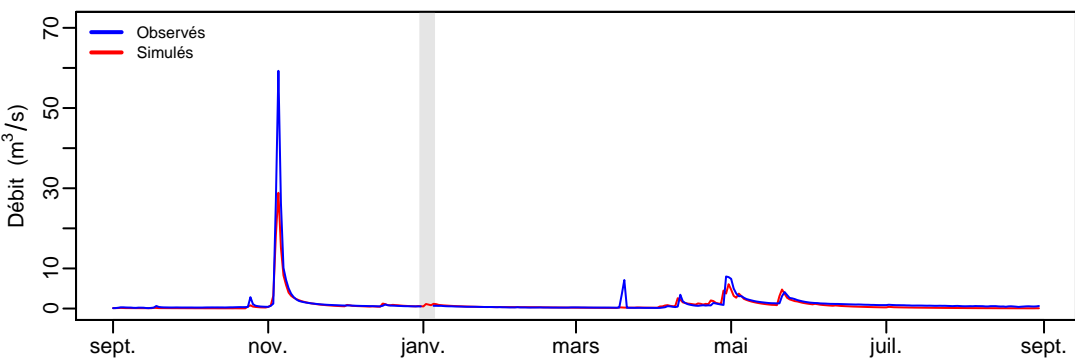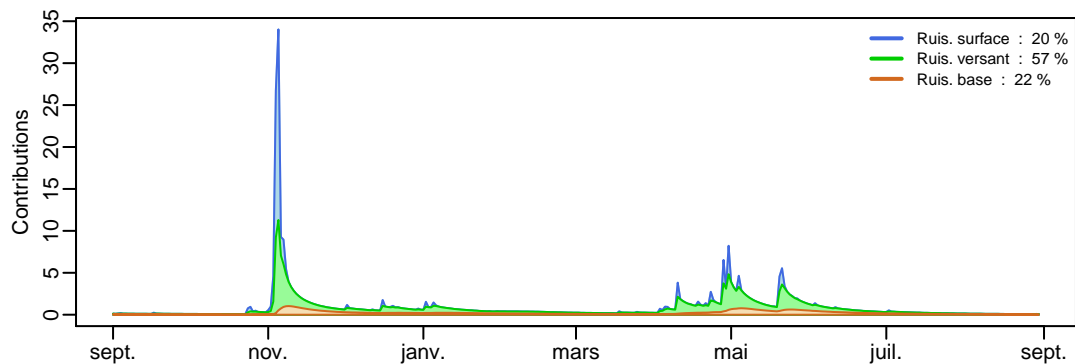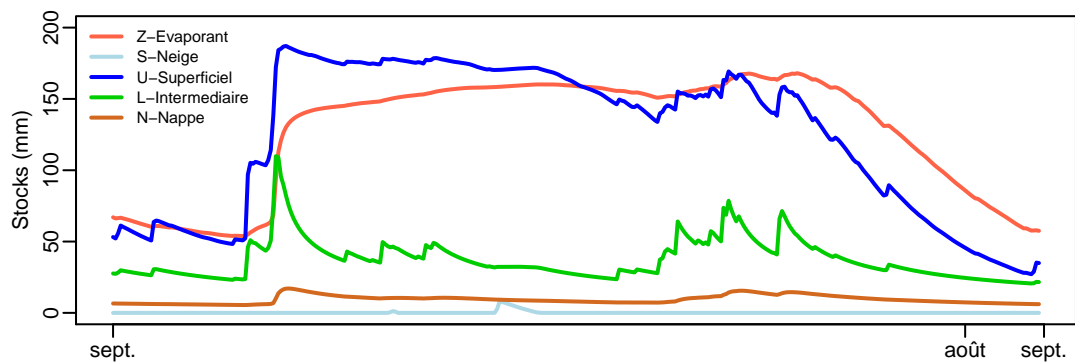

# q0251 (155.95 km<sup>2</sup>) – année 1981–1982

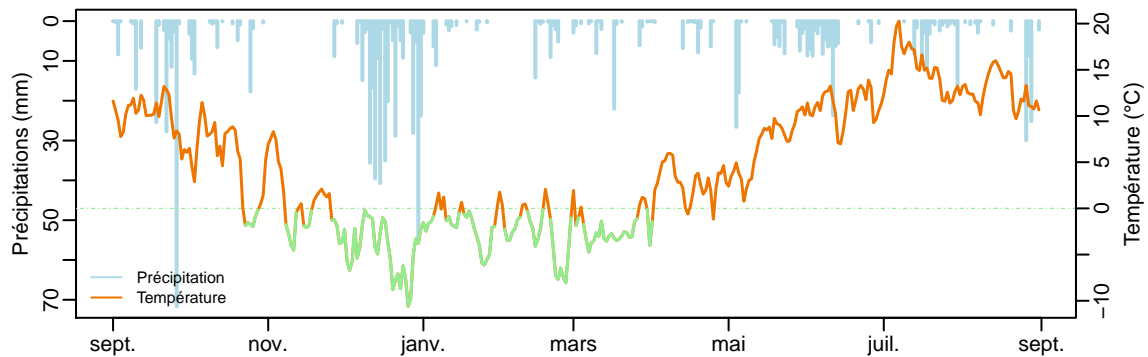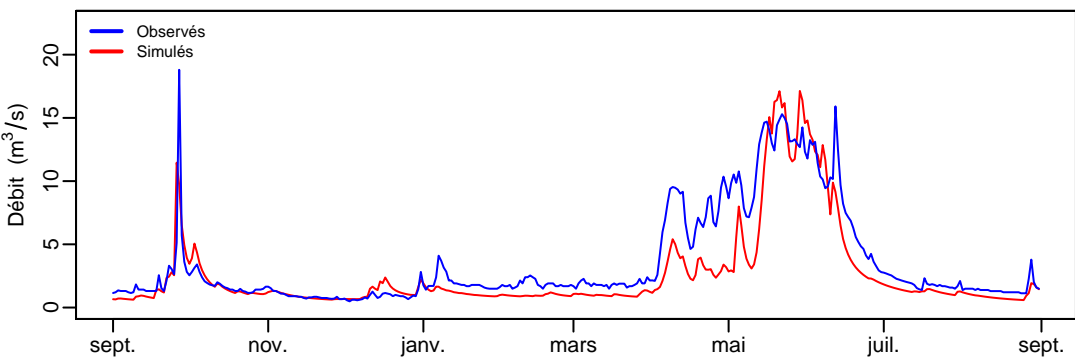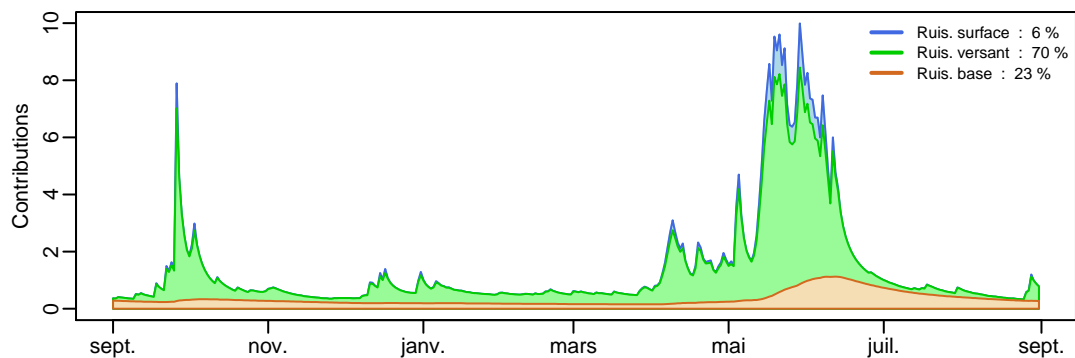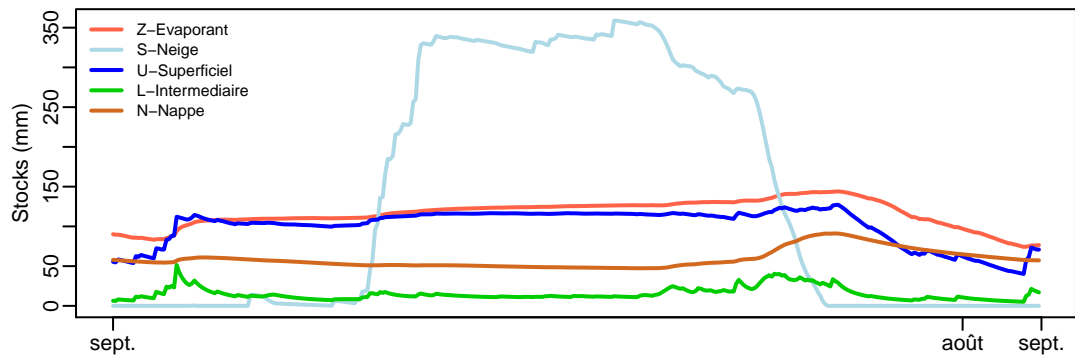

# q0251 (155.95 km²) – année 1982–1983

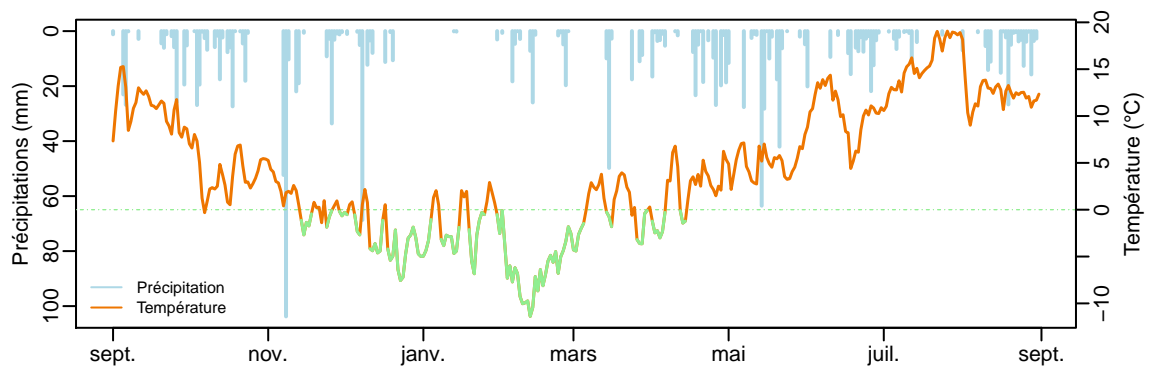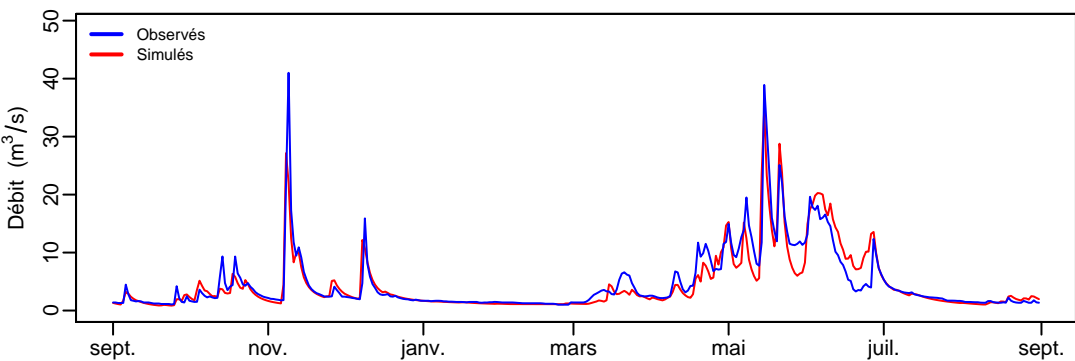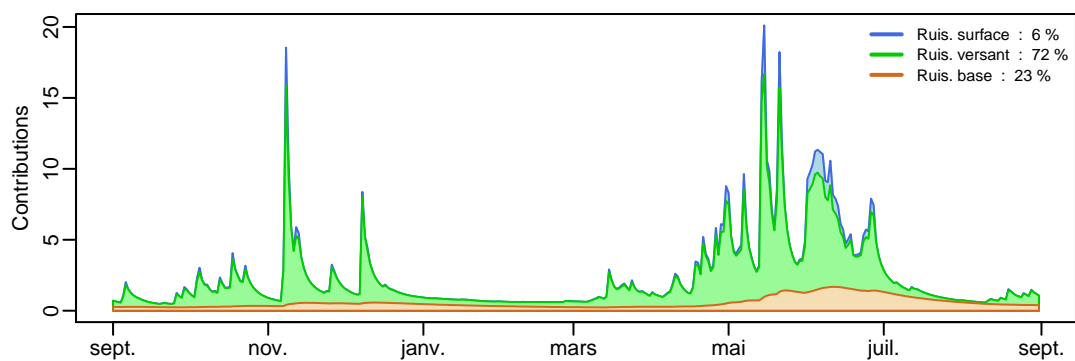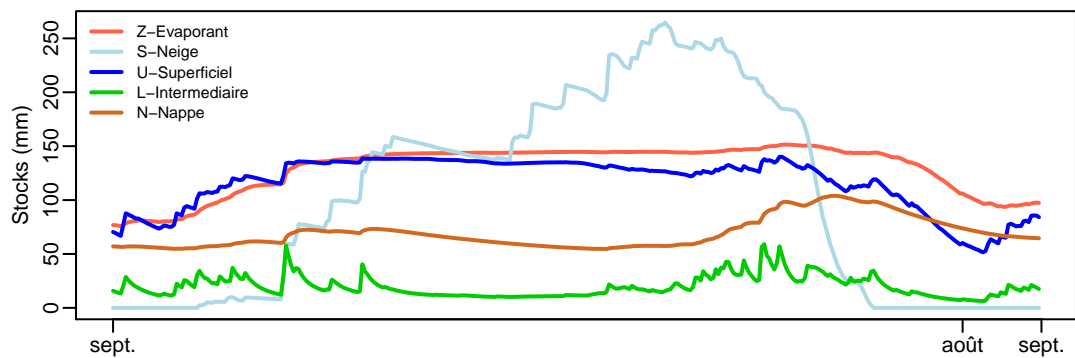



# q0251 (155.95 km<sup>2</sup>) – année 1983–1984

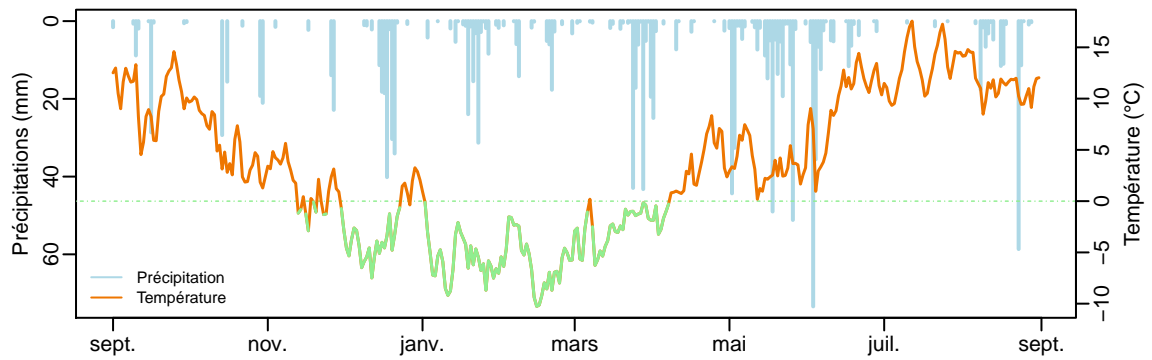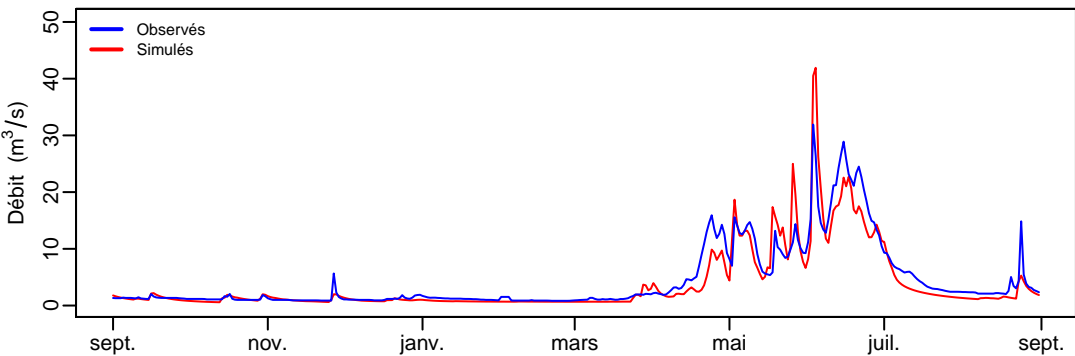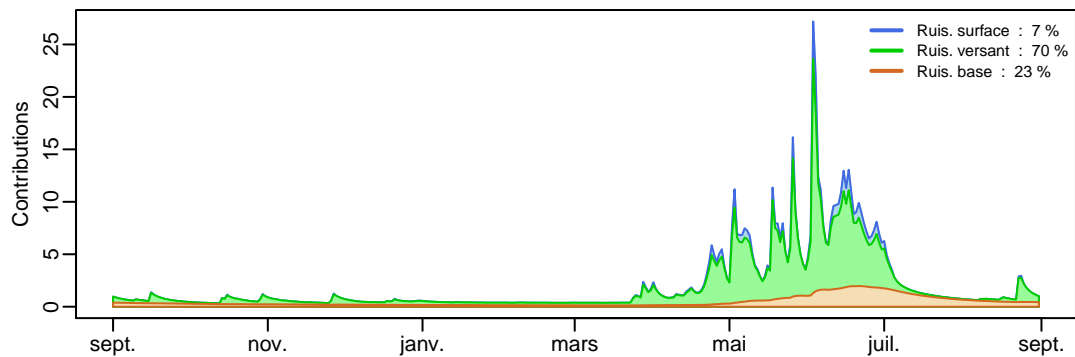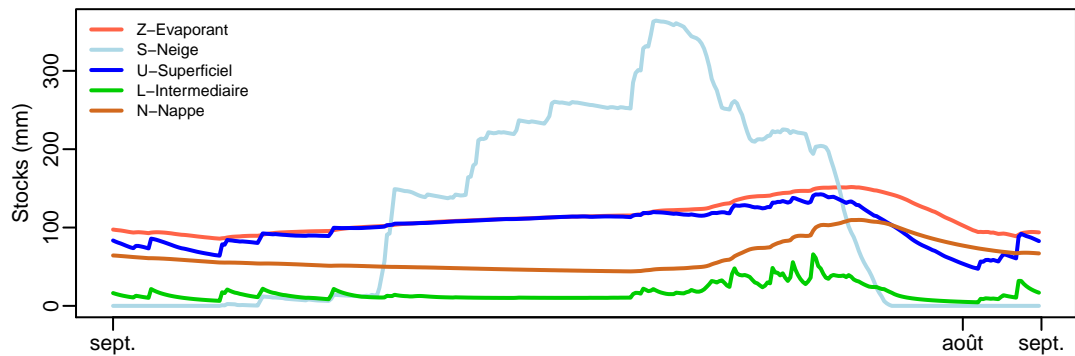

# q0251 (155.95 km²) – année 1984–1985

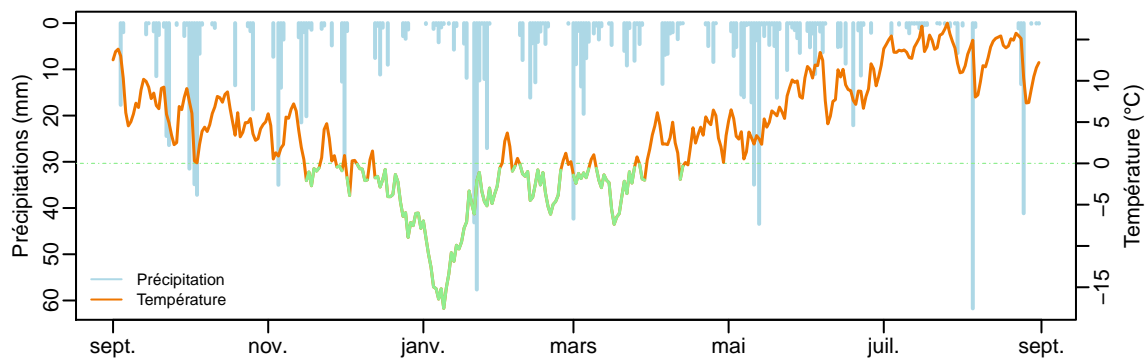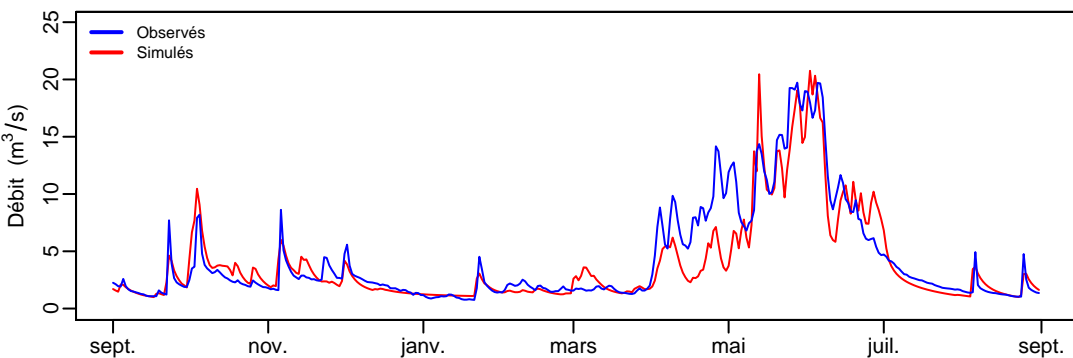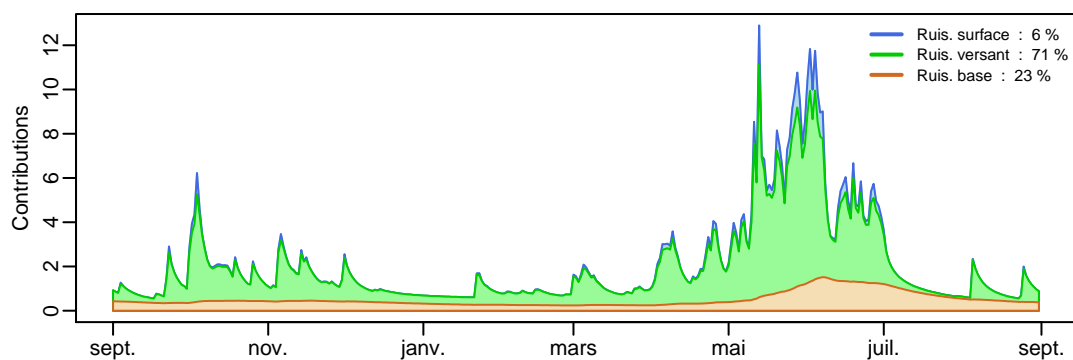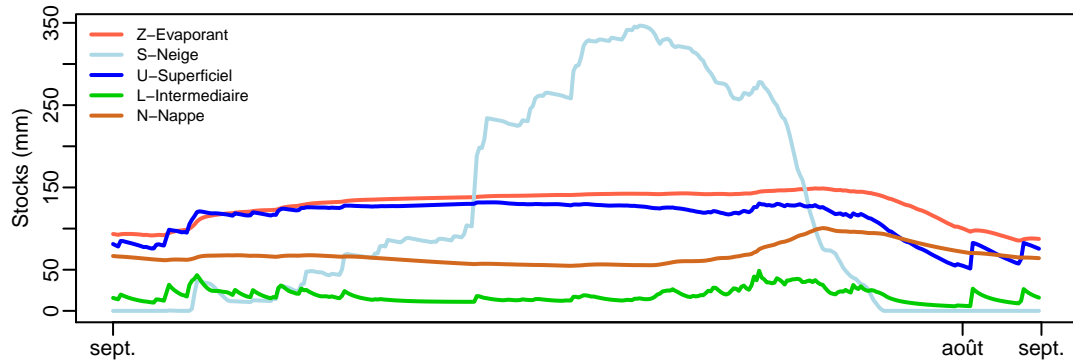

# q0251 (155.95 km<sup>2</sup>) – année 1985–1986

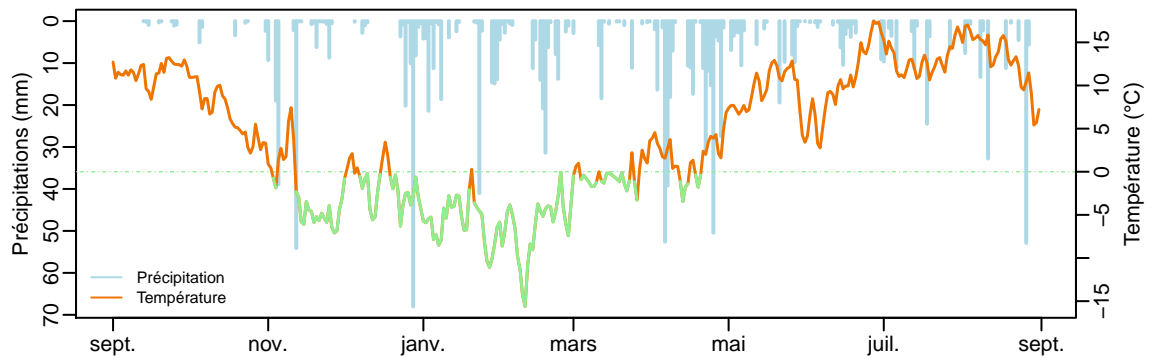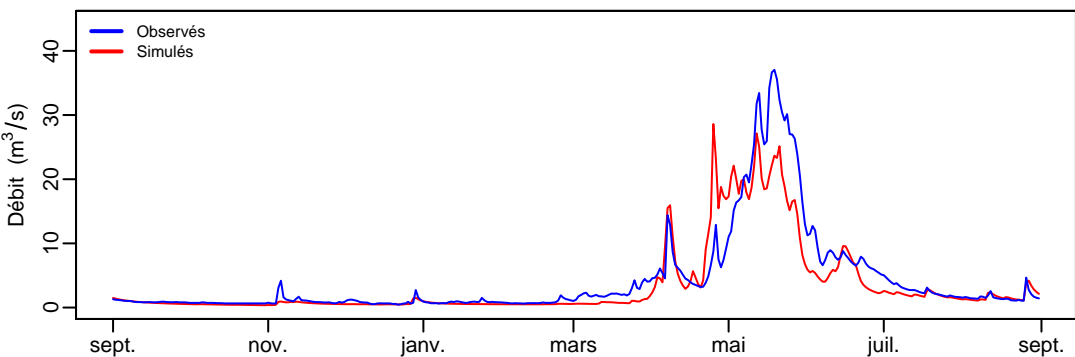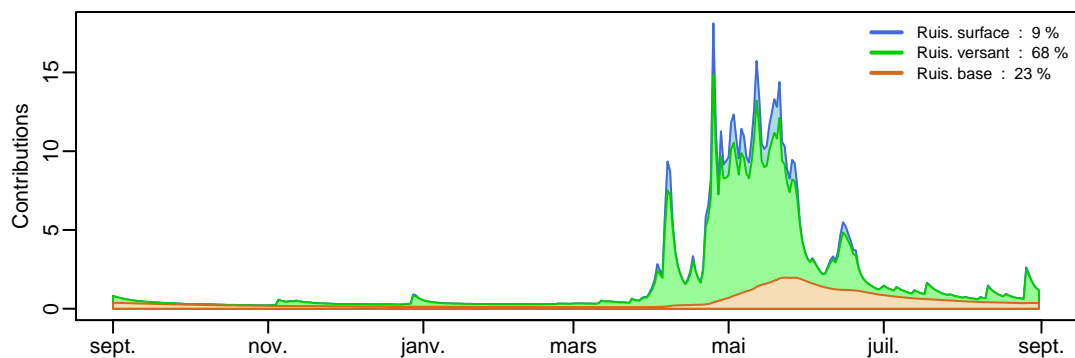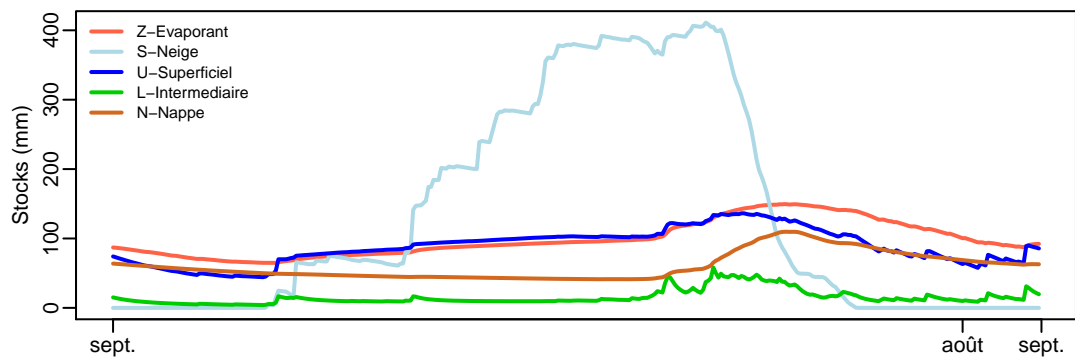

# q0251 (155.95 km²) – année 1986–1987

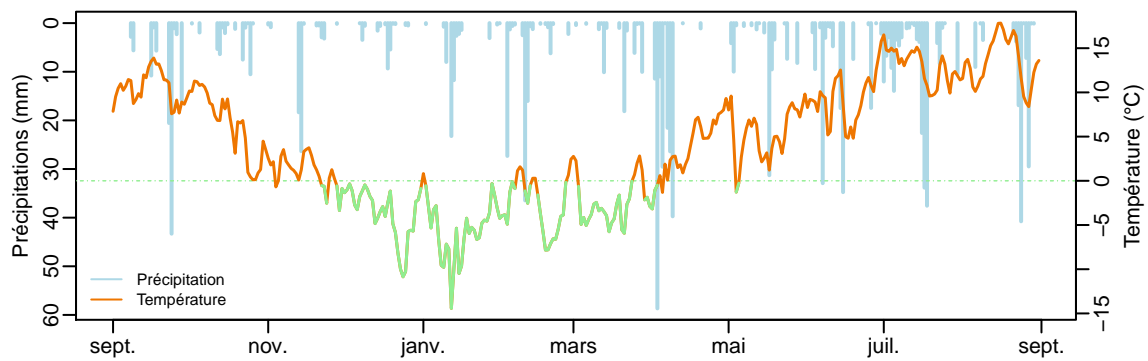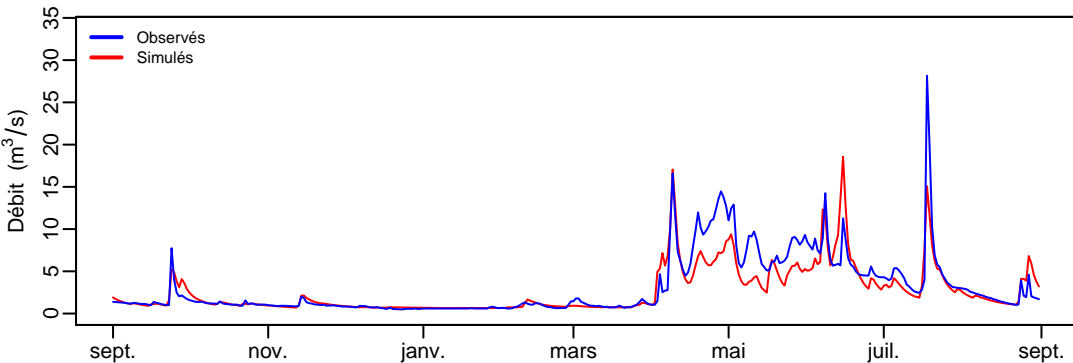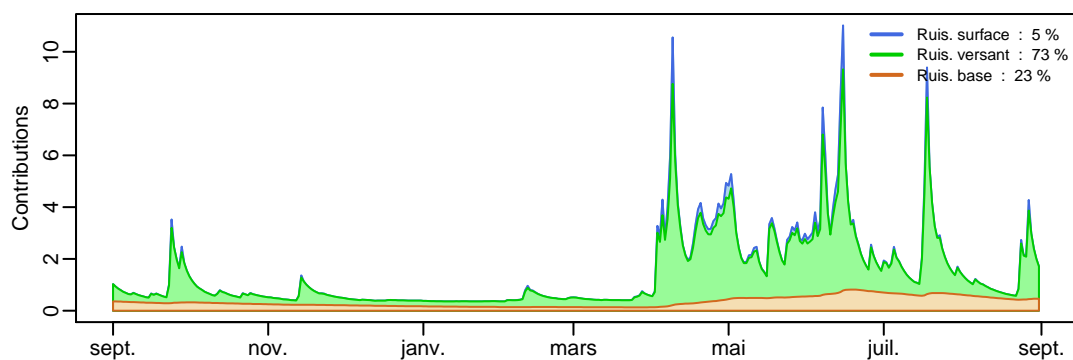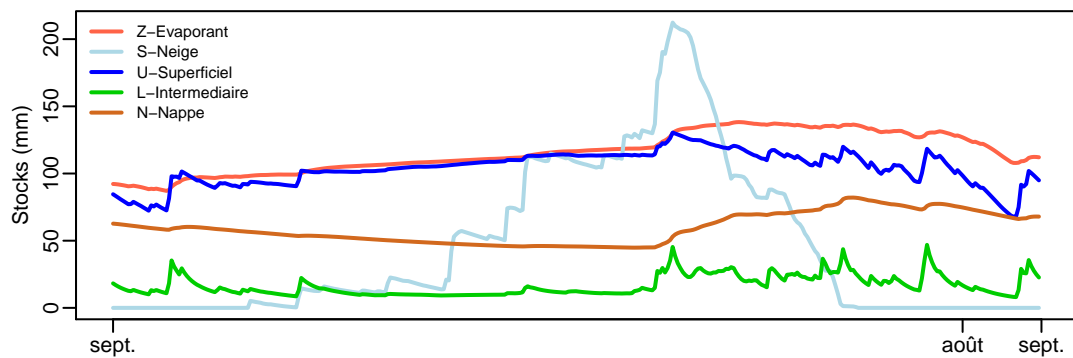

# q0251 (155.95 km<sup>2</sup>) – année 1987–1988

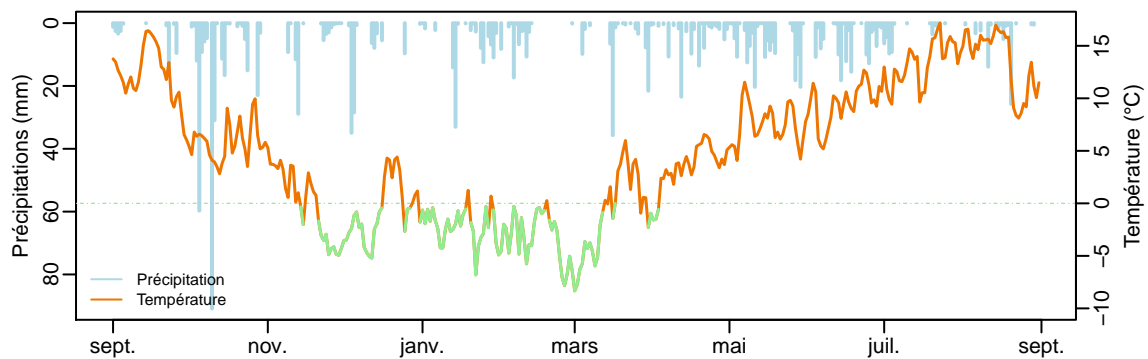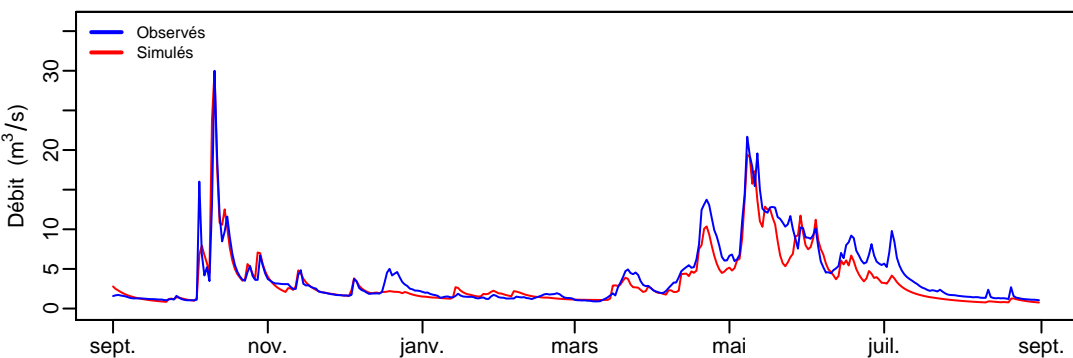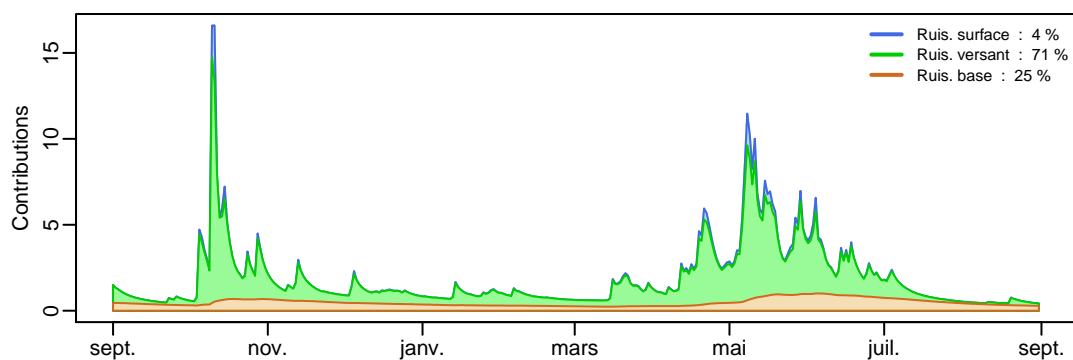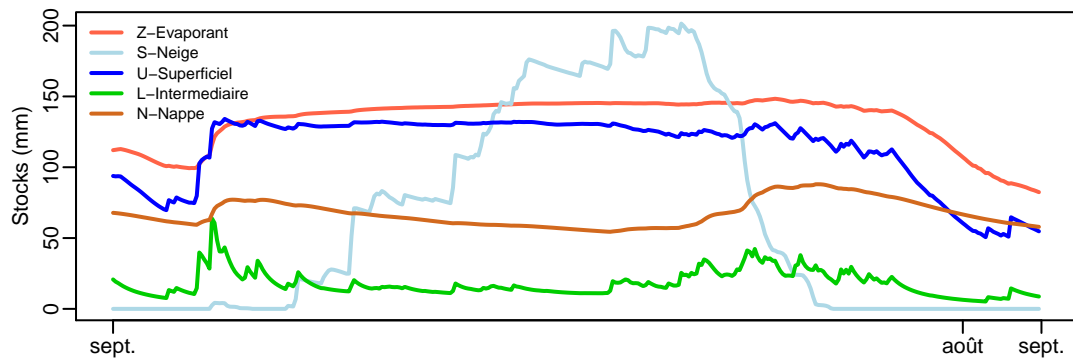

# q0251 (155.95 km<sup>2</sup>) – année 1988–1989

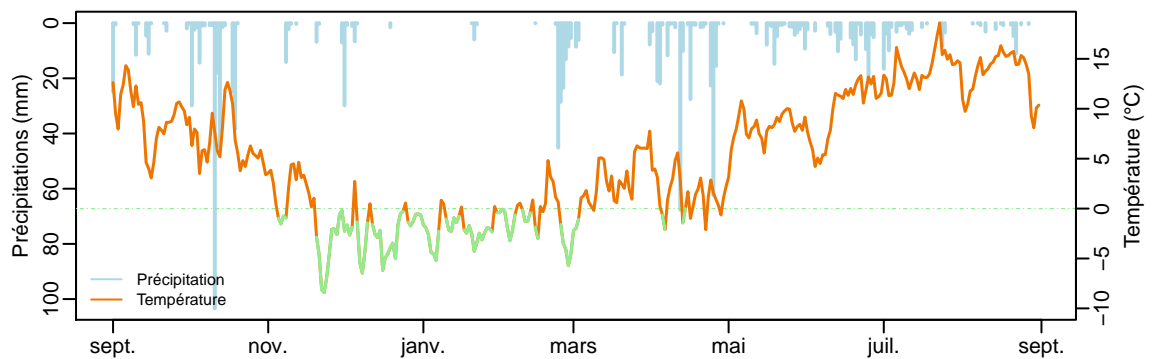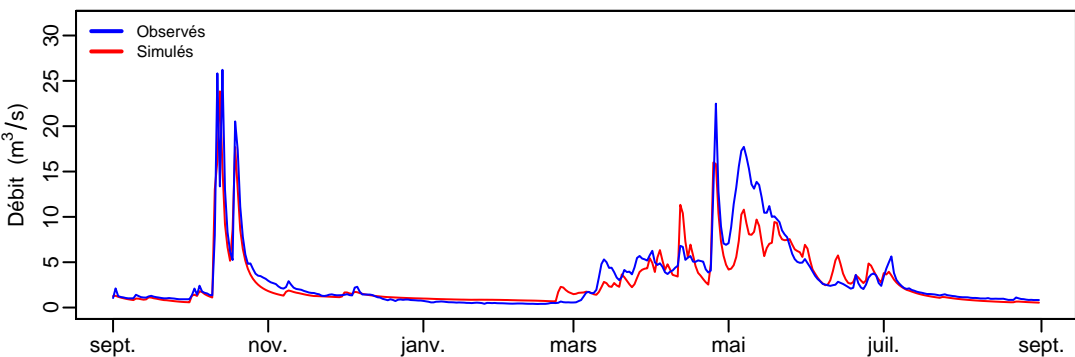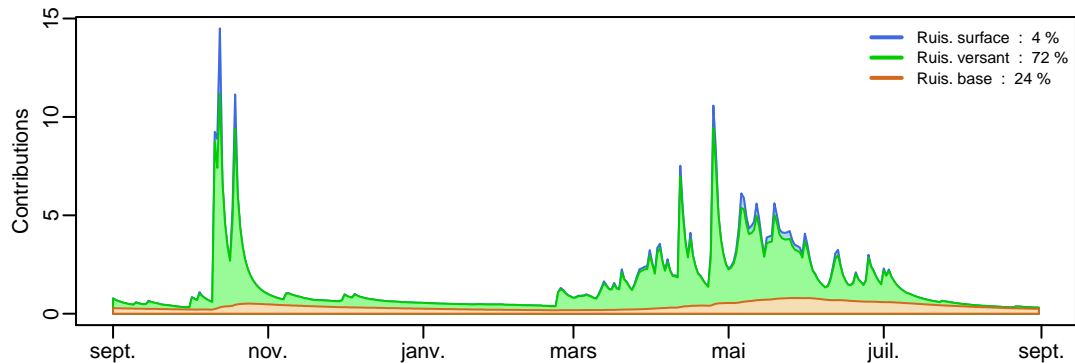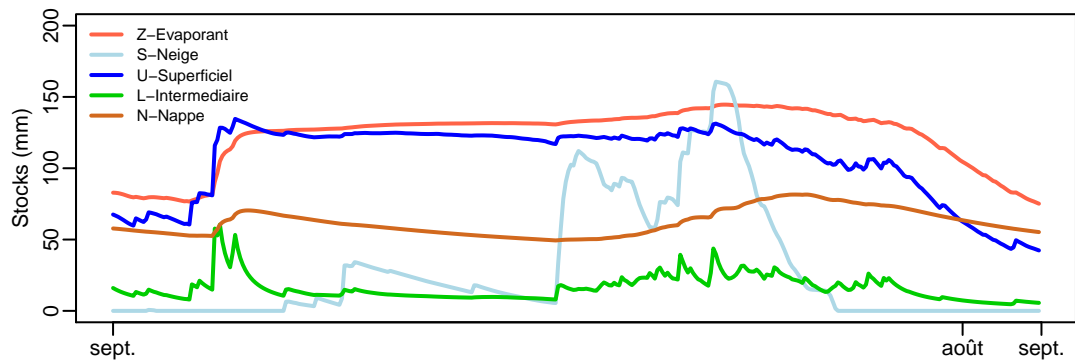

# q0251 (155.95 km²) – année 1989–1990

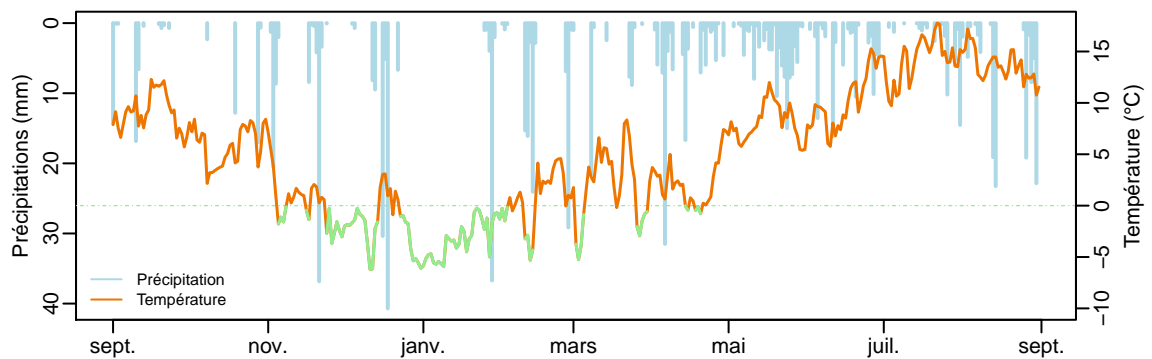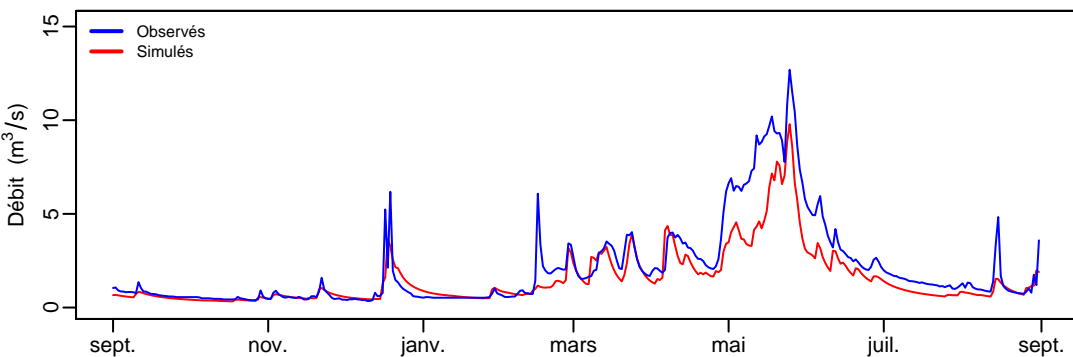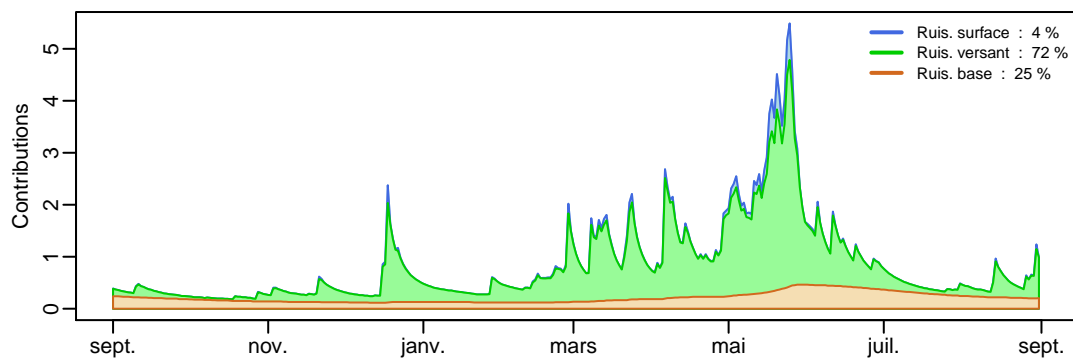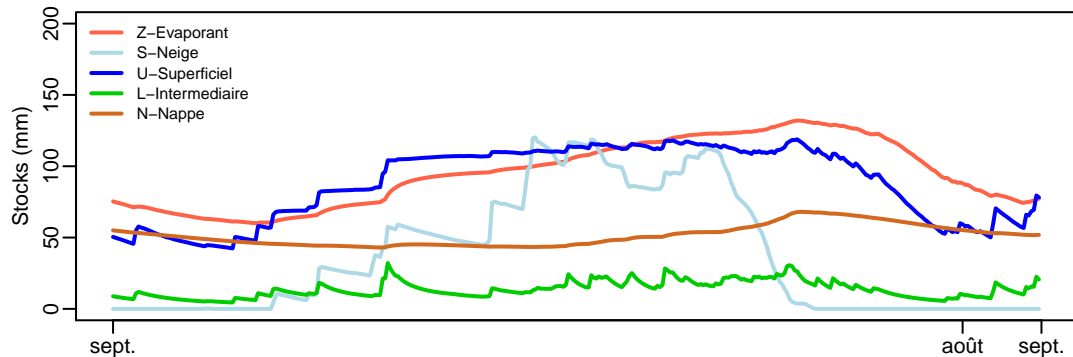

# q0251 (155.95 km²) – année 1990–1991

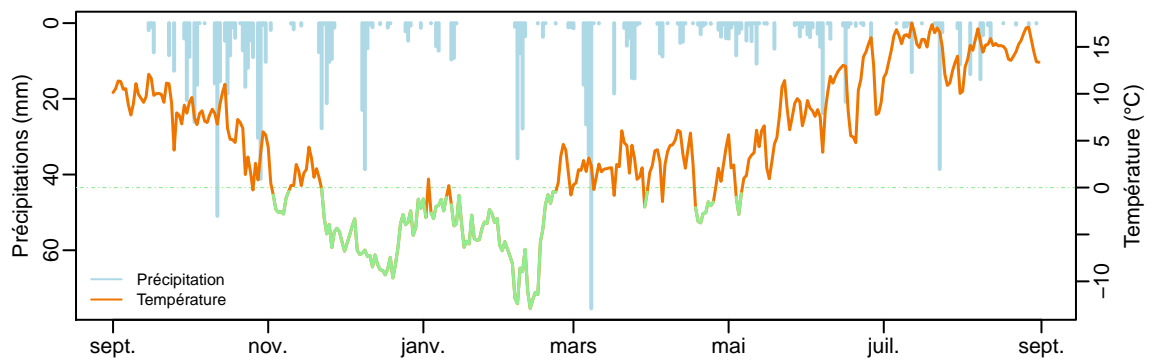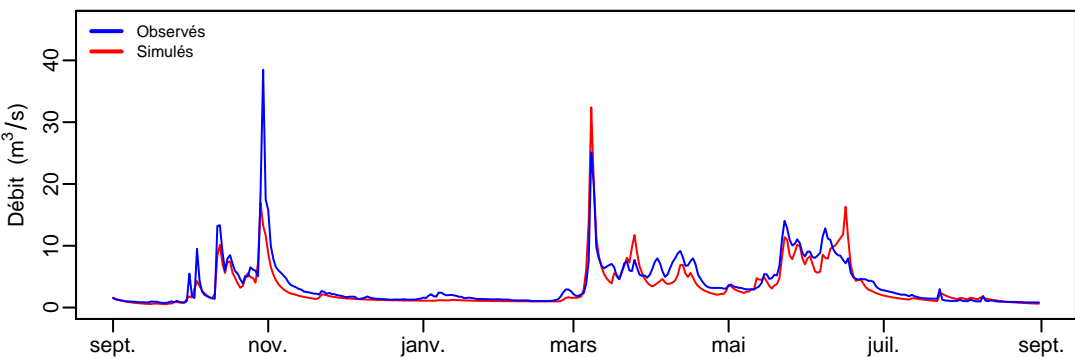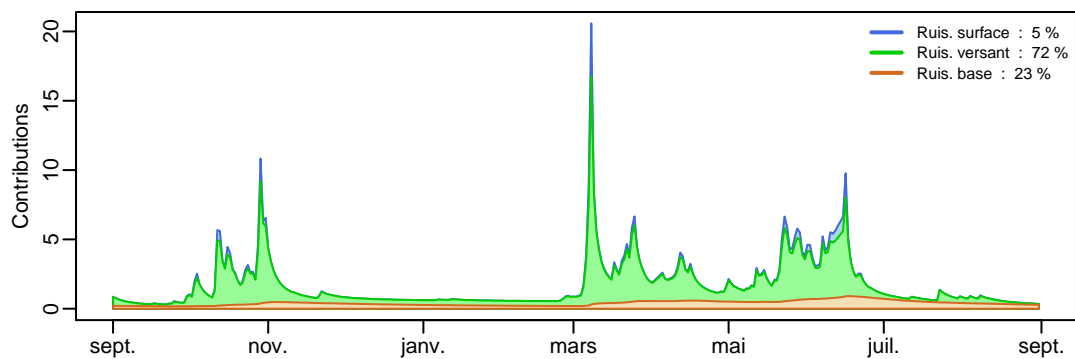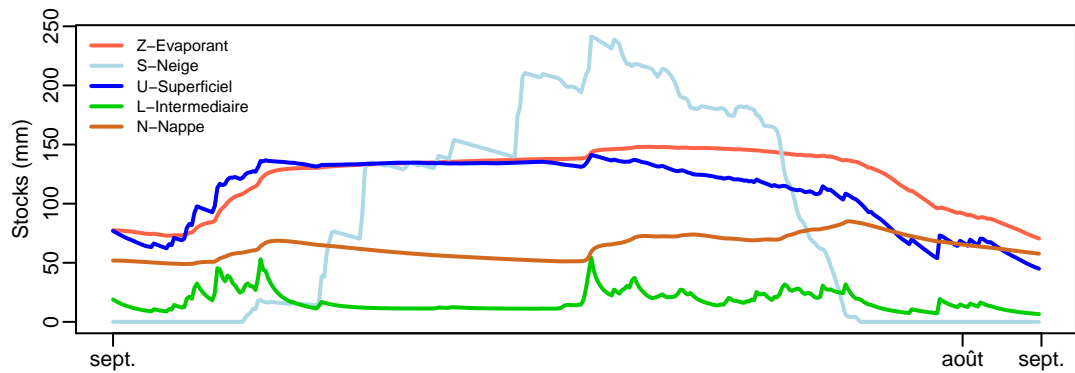



# q0251 (155.95 km²) – année 1991–1992

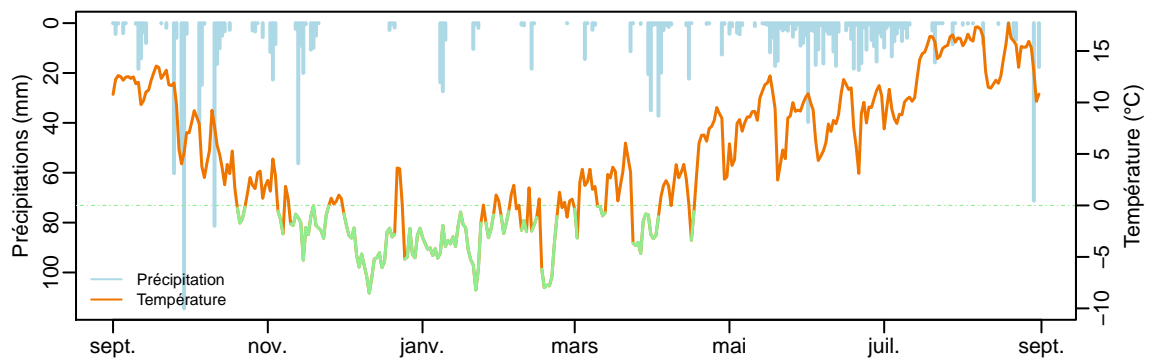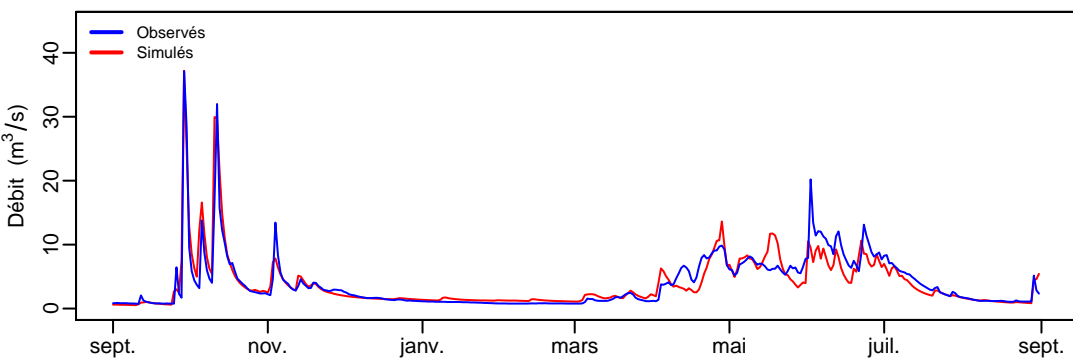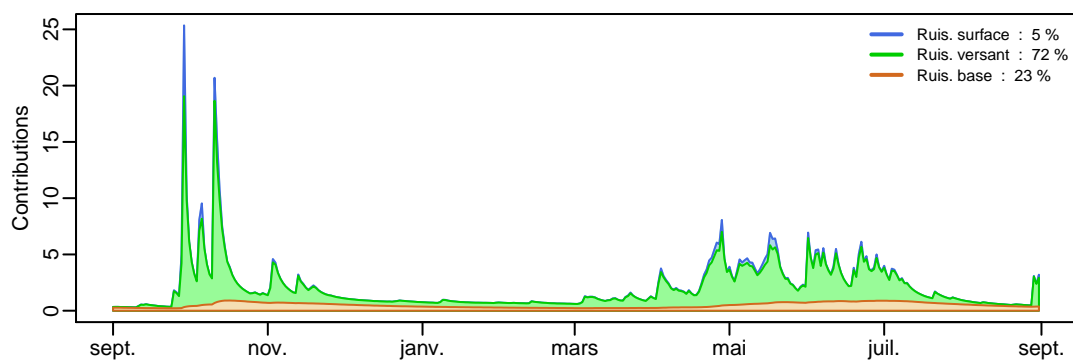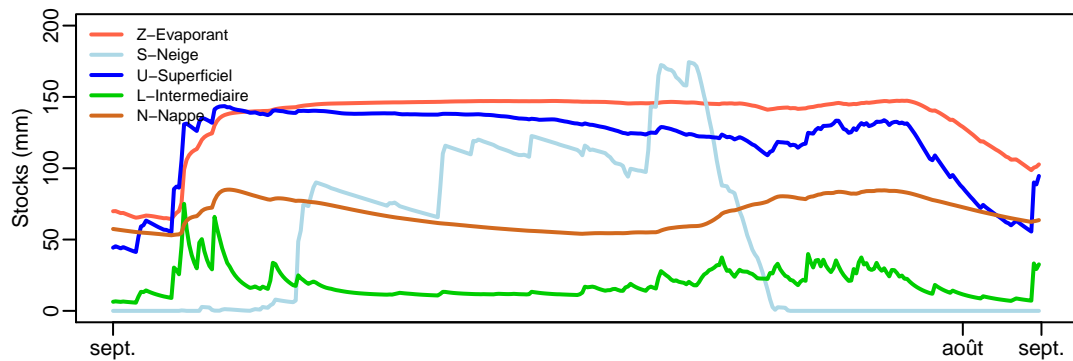

# q0251 (155.95 km²) – année 1992–1993

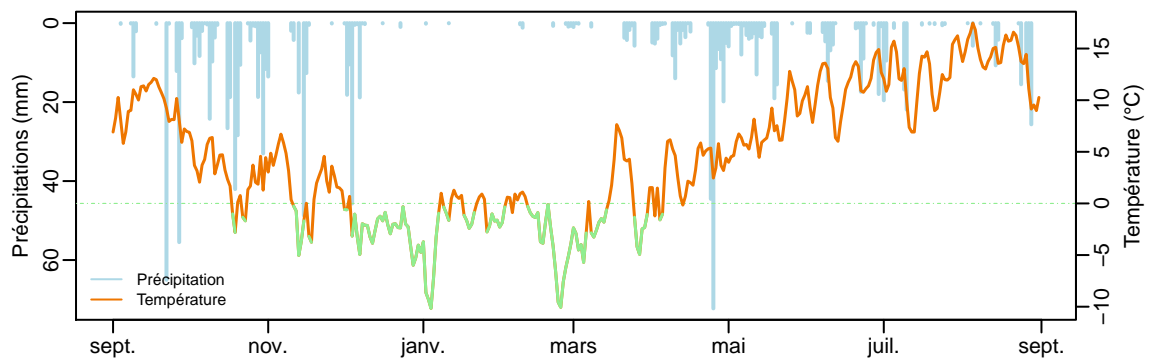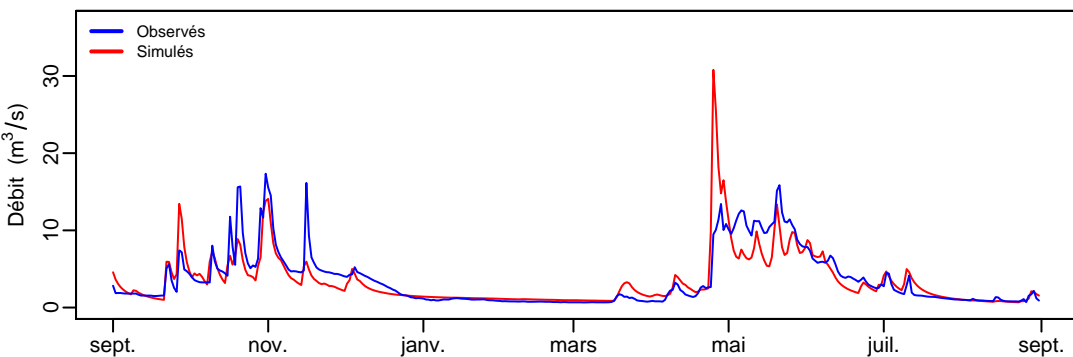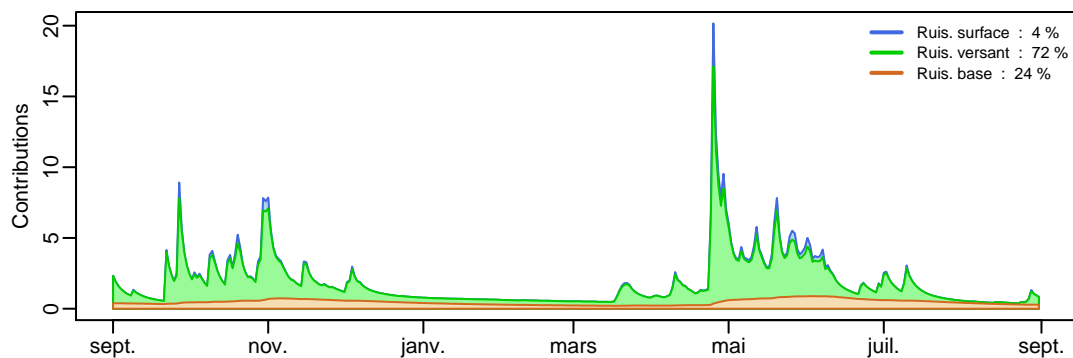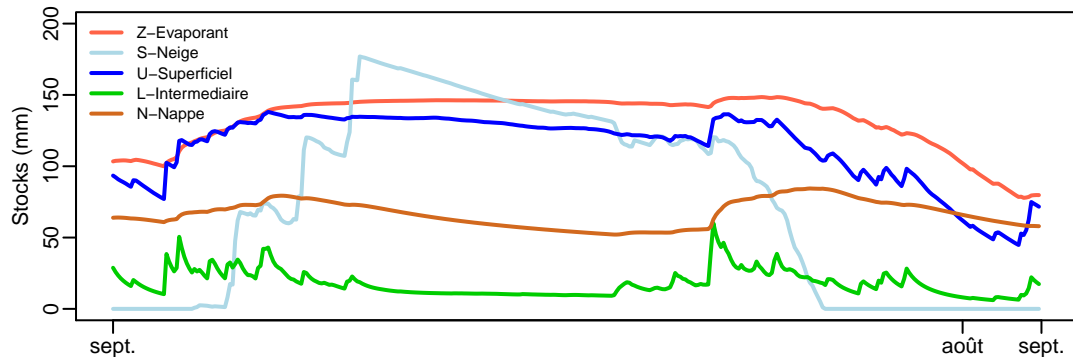

# q0251 (155.95 km²) – année 1993–1994

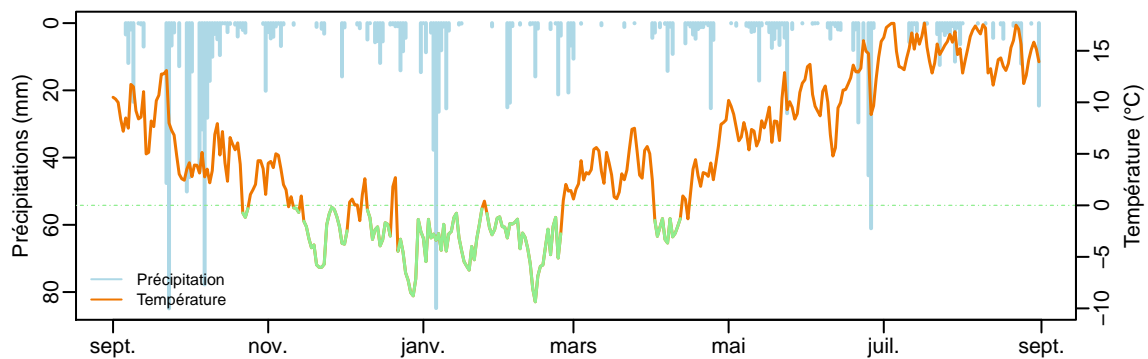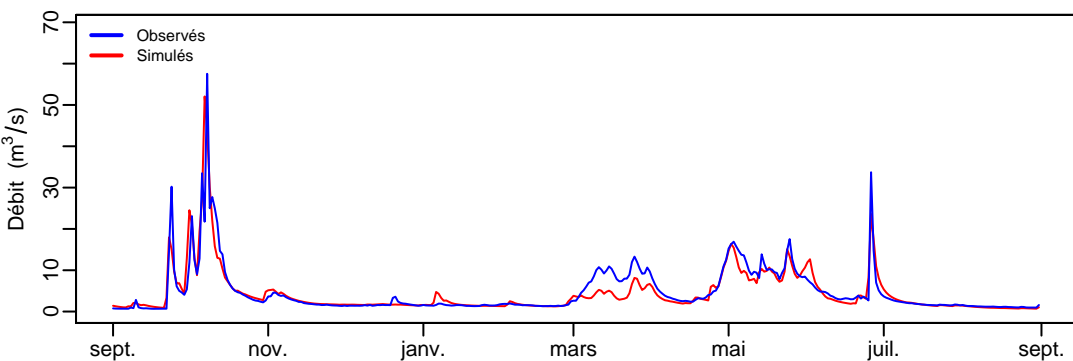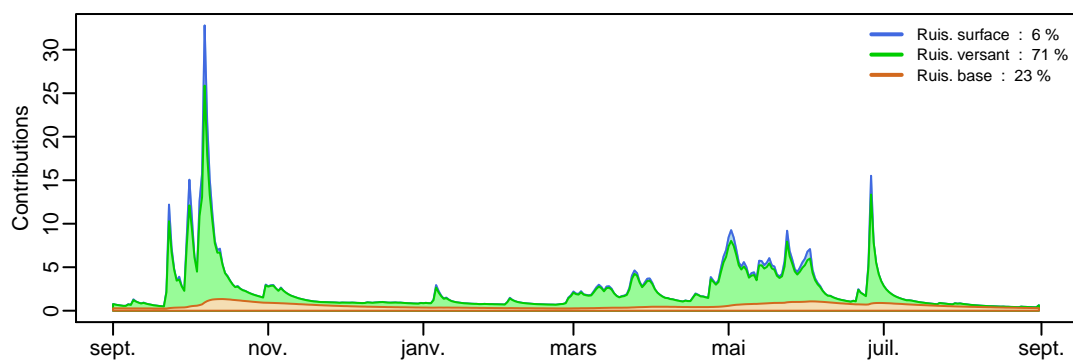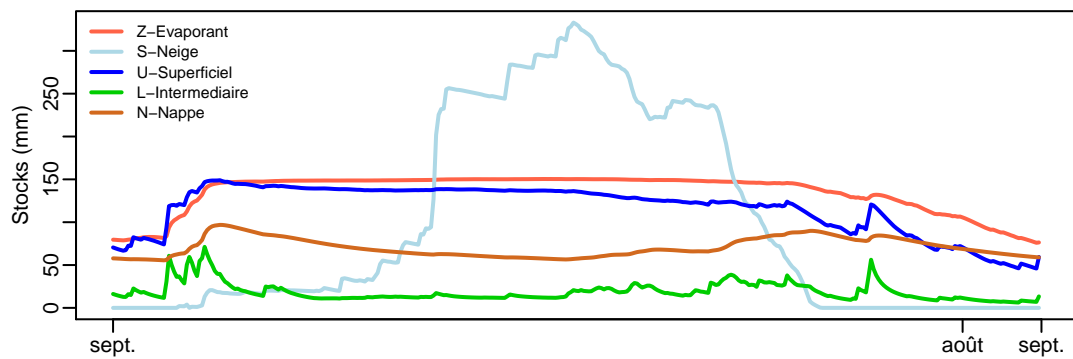

# q0251 (155.95 km²) – année 1994–1995

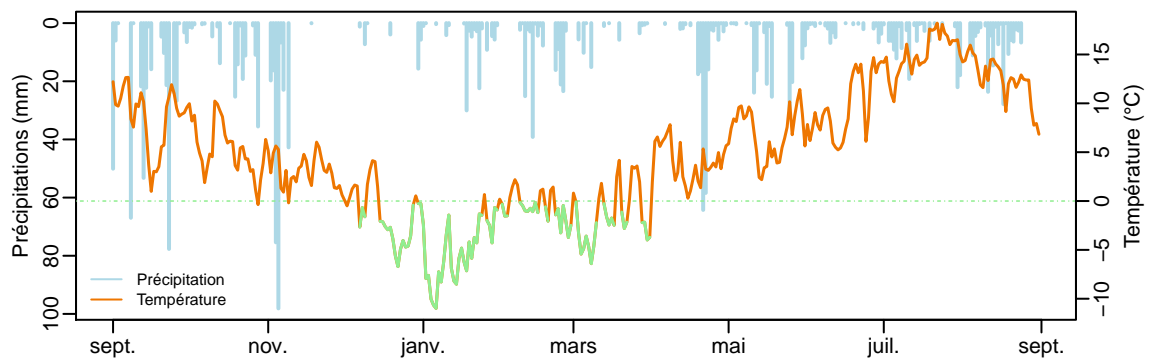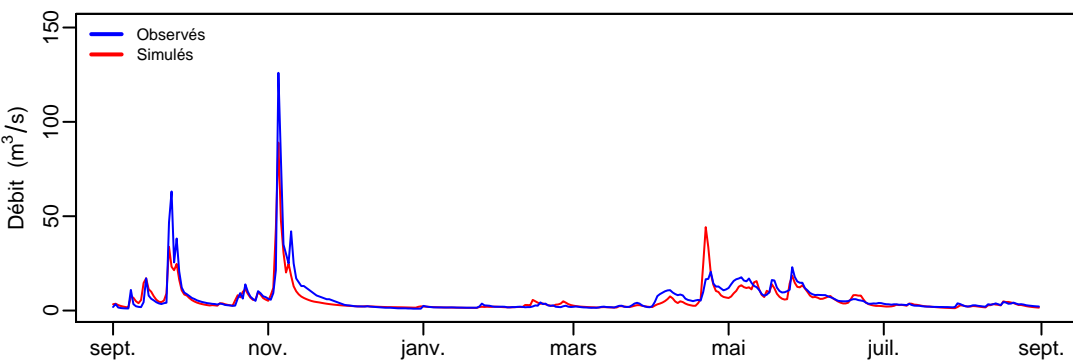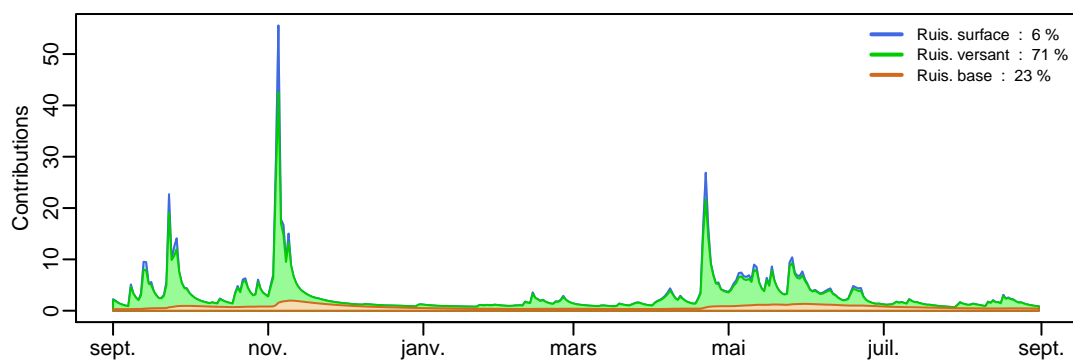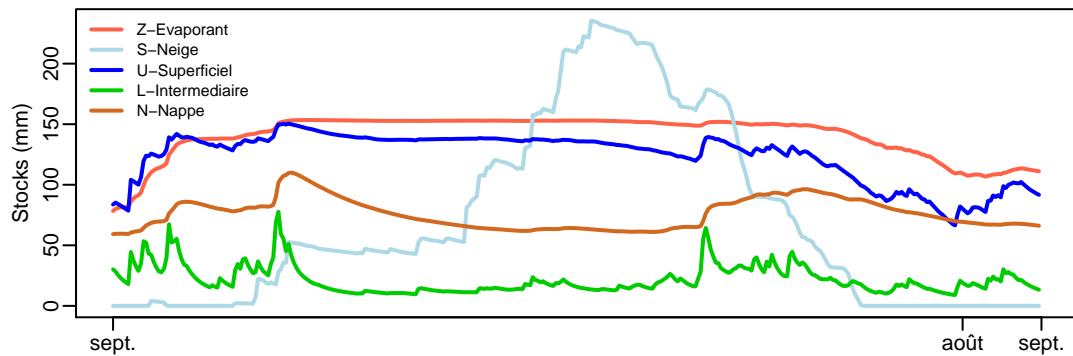

# q0251 (155.95 km<sup>2</sup>) – année 1995–1996

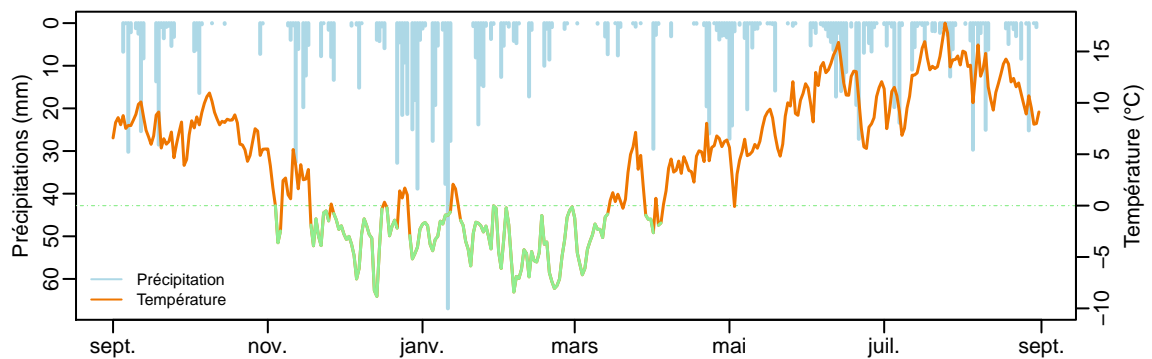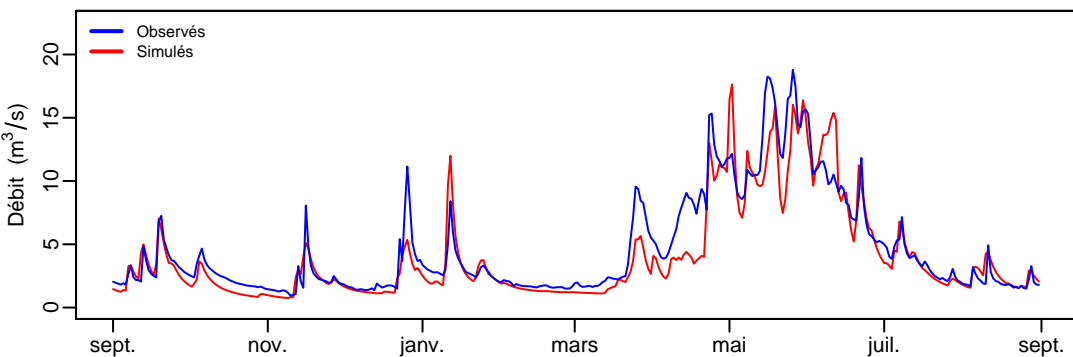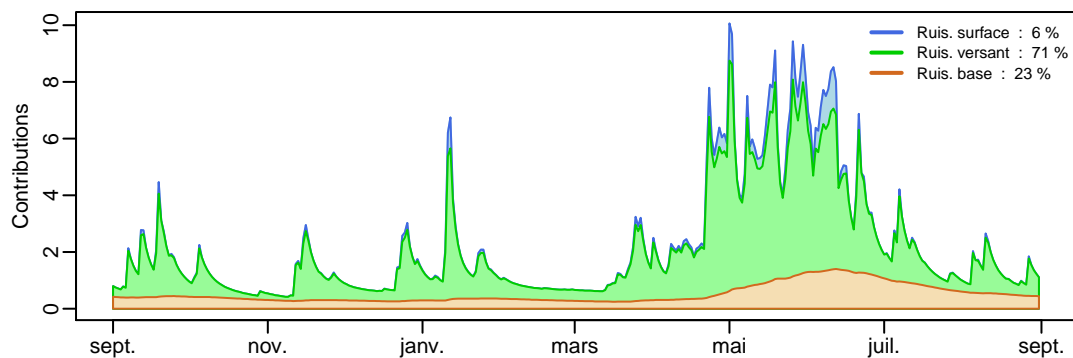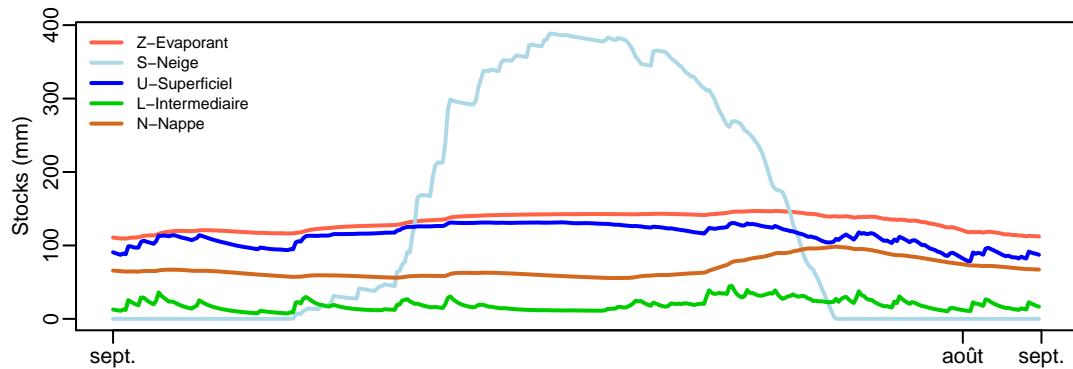

# q0251 (155.95 km²) – année 1996–1997

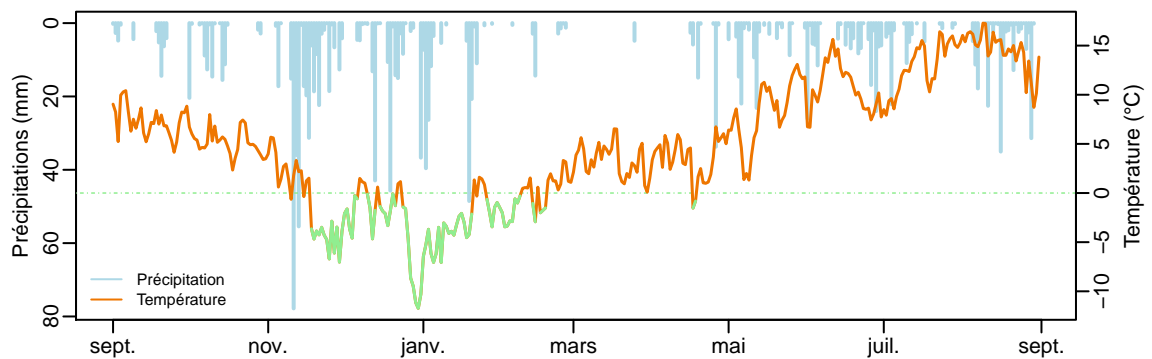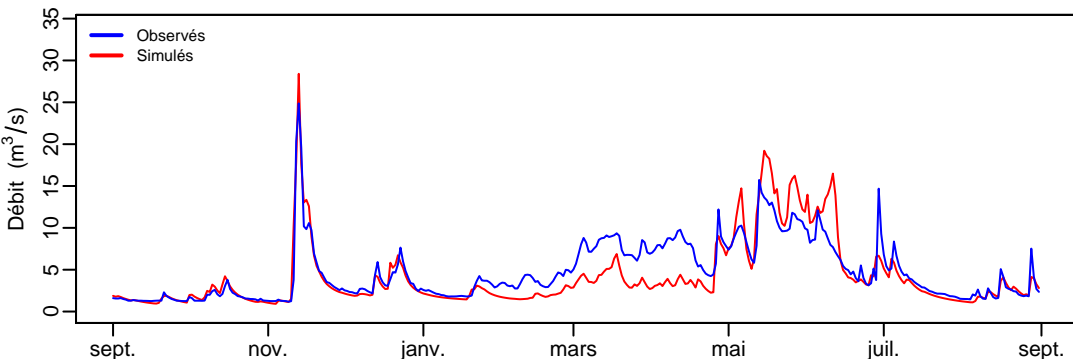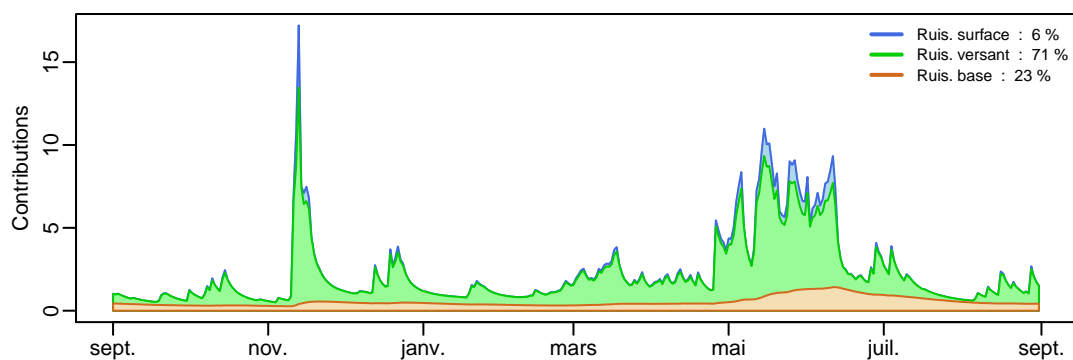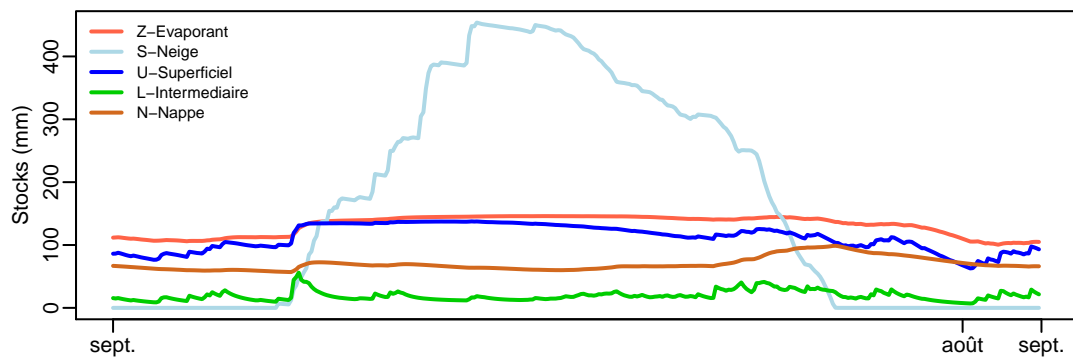

# q0251 (155.95 km²) – année 1997–1998

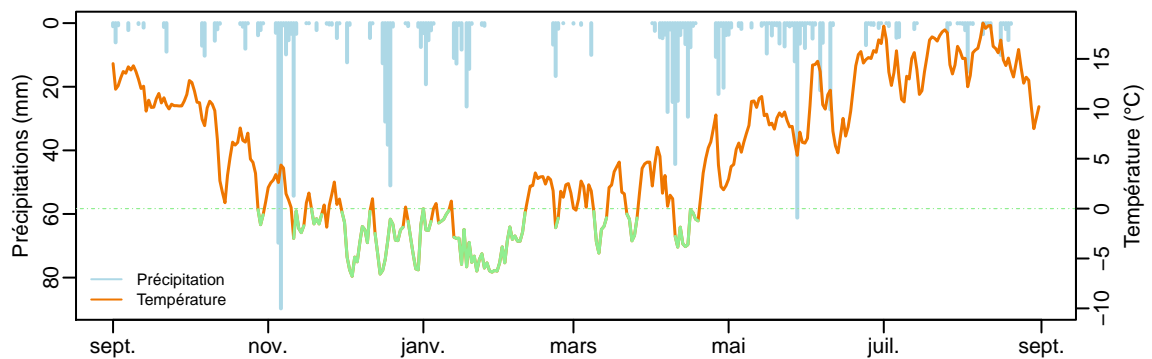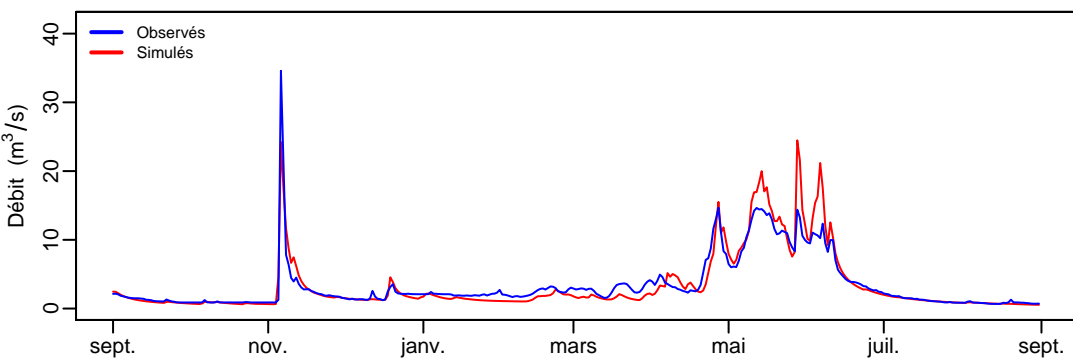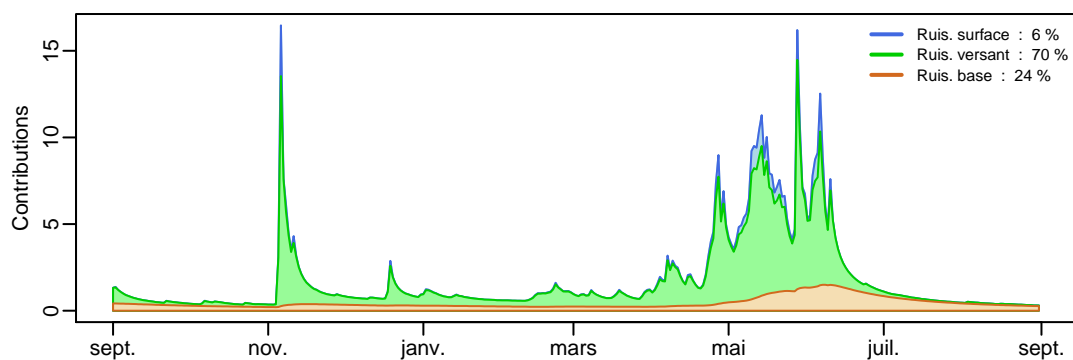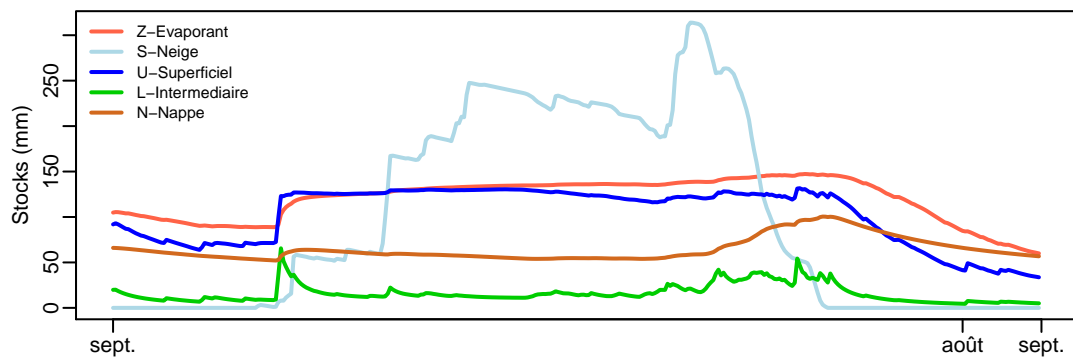

# q0251 (155.95 km²) – année 1998–1999

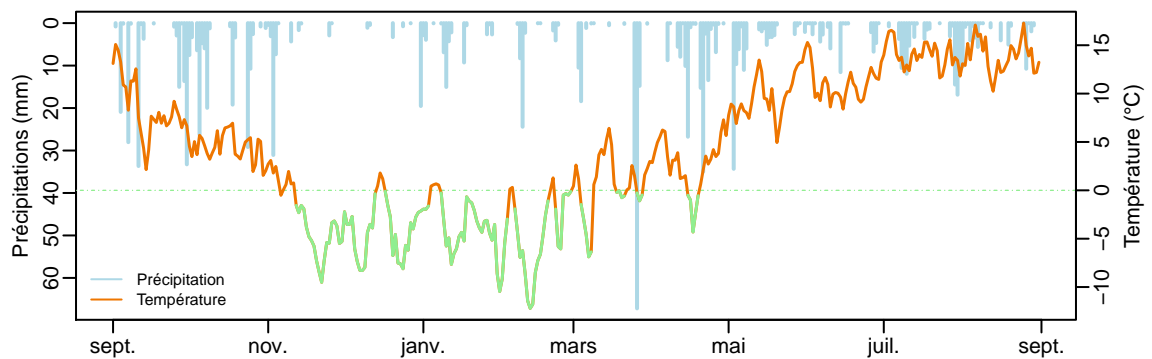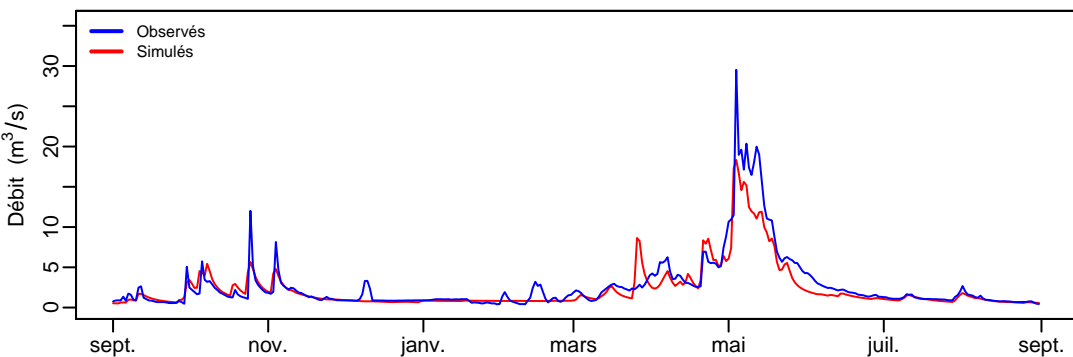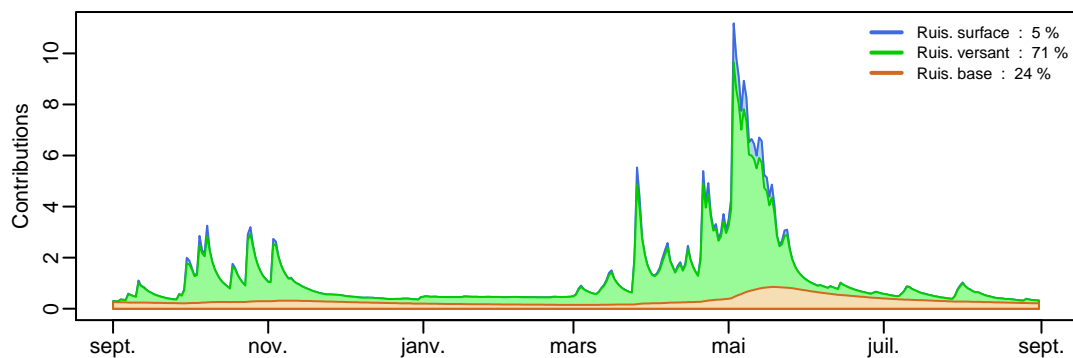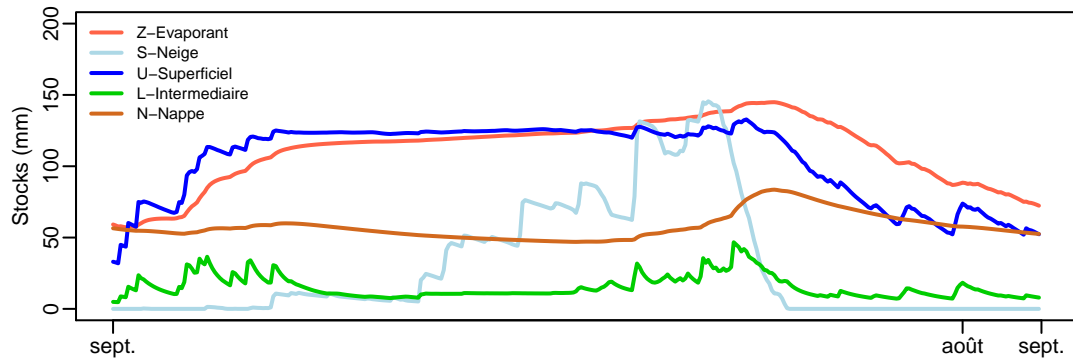



# q0251 (155.95 km²) – année 1999–2000

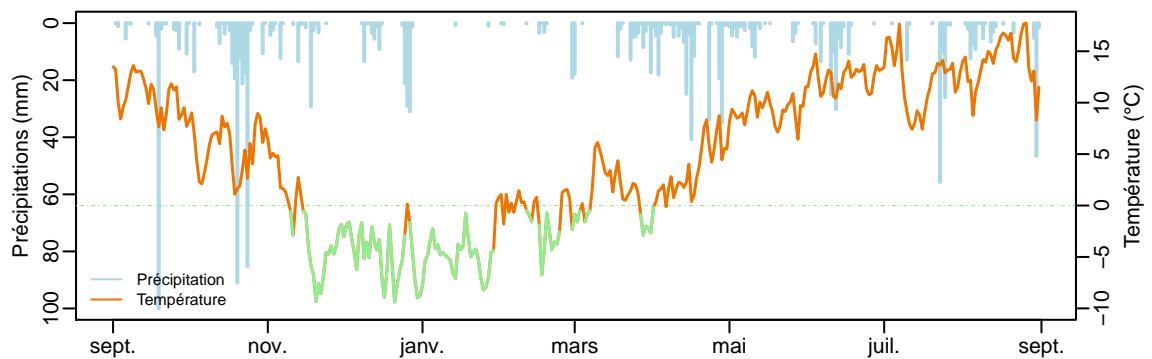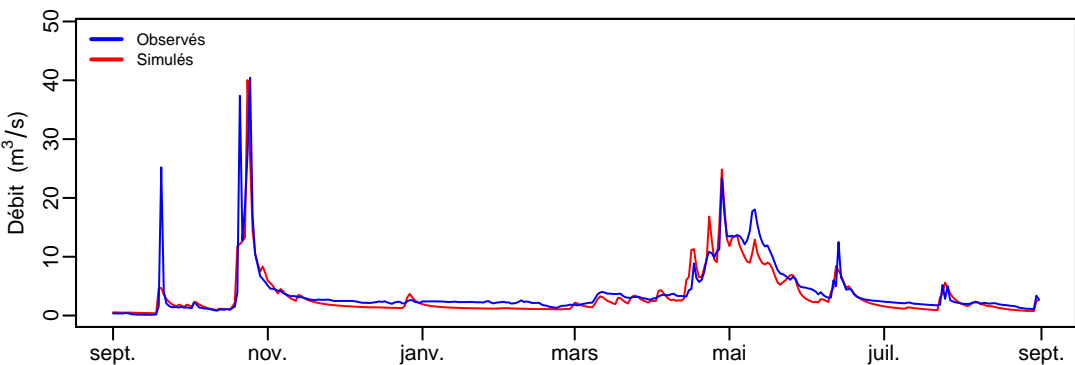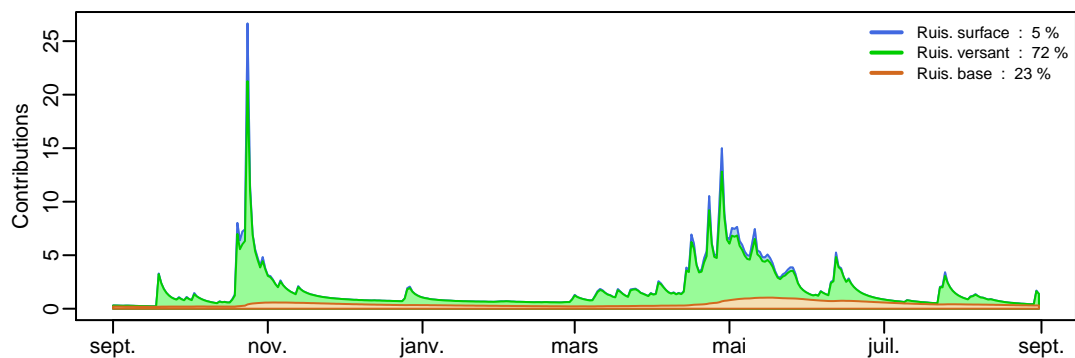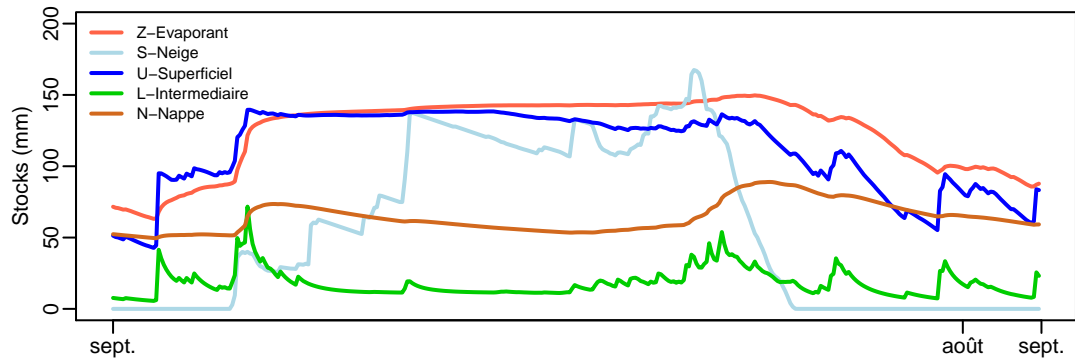

# q0251 (155.95 km²) – année 2000–2001

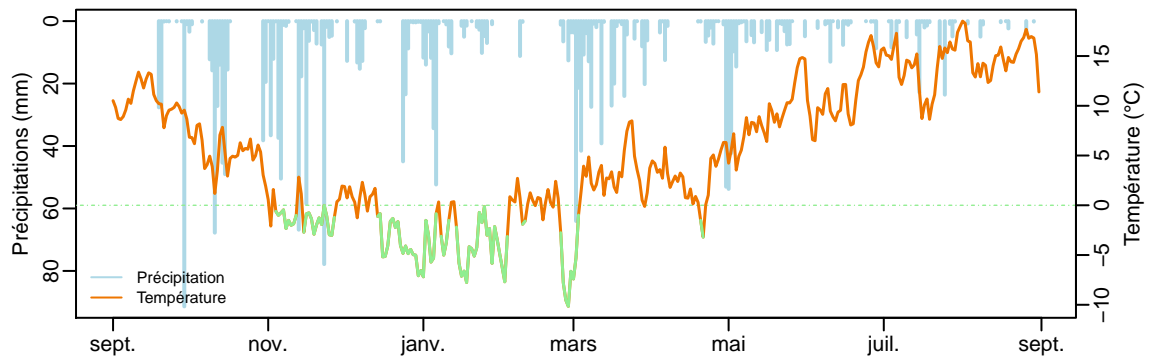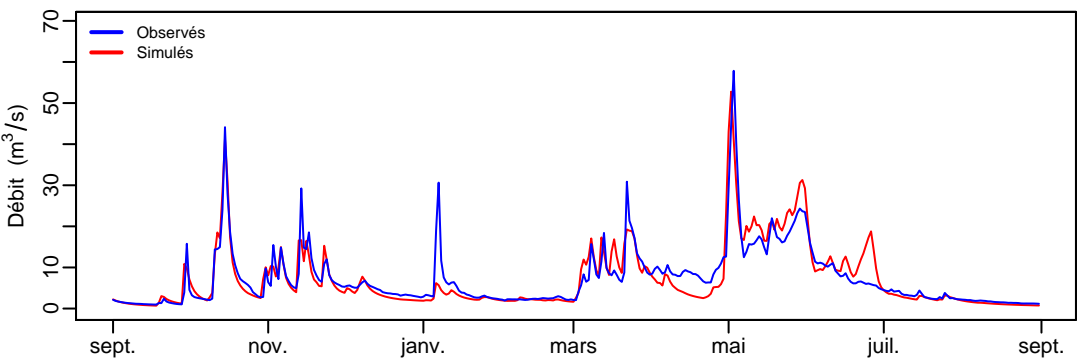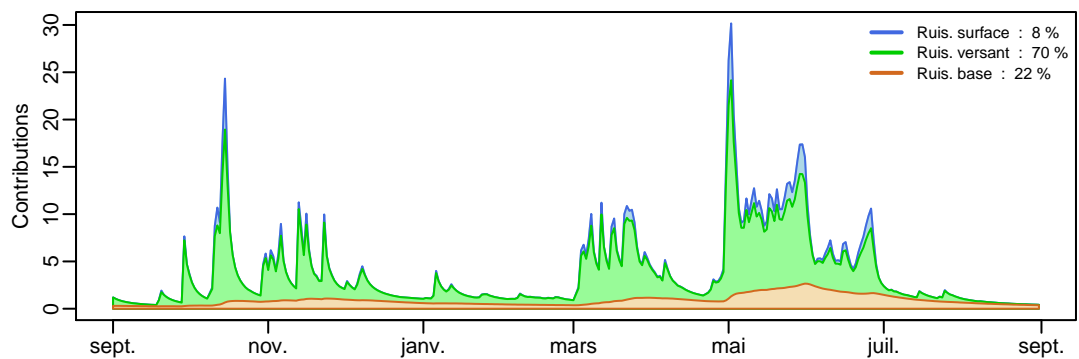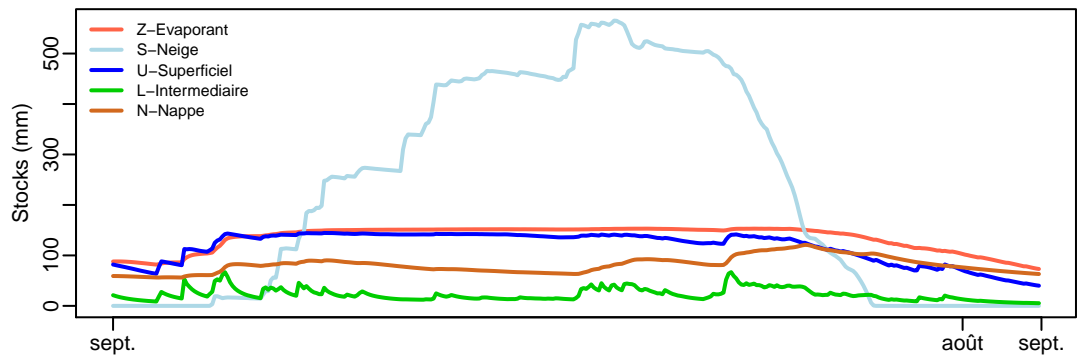

# q0251 (155.95 km²) – année 2001–2002

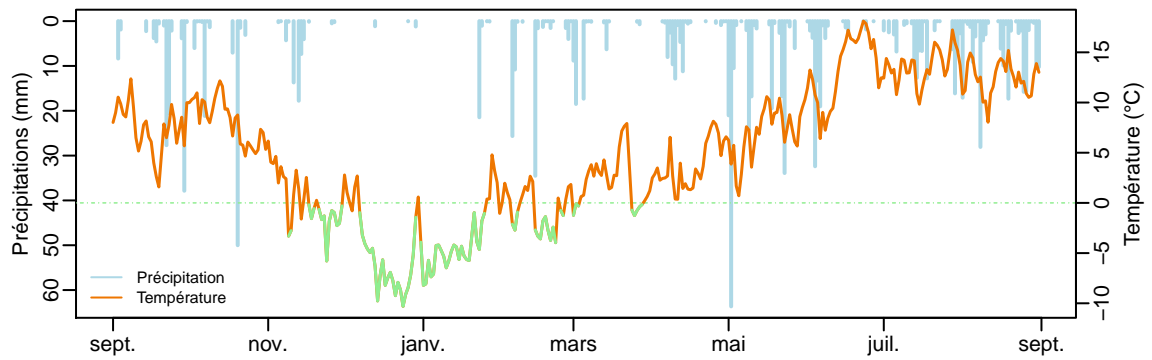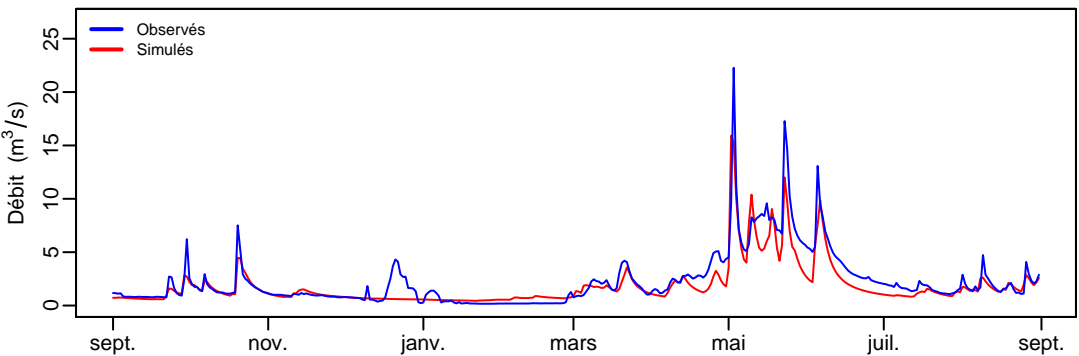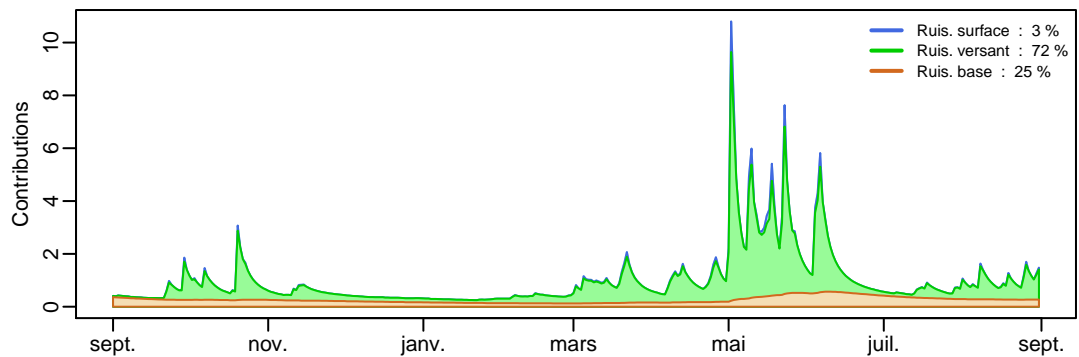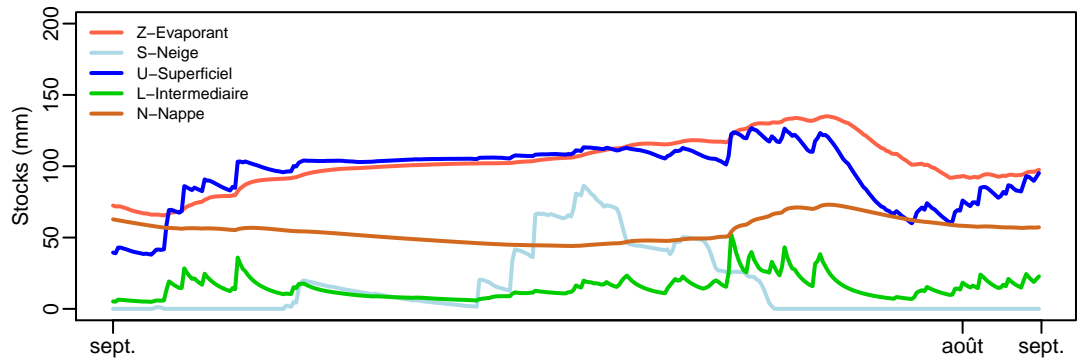

# q0251 (155.95 km<sup>2</sup>) – année 2002–2003

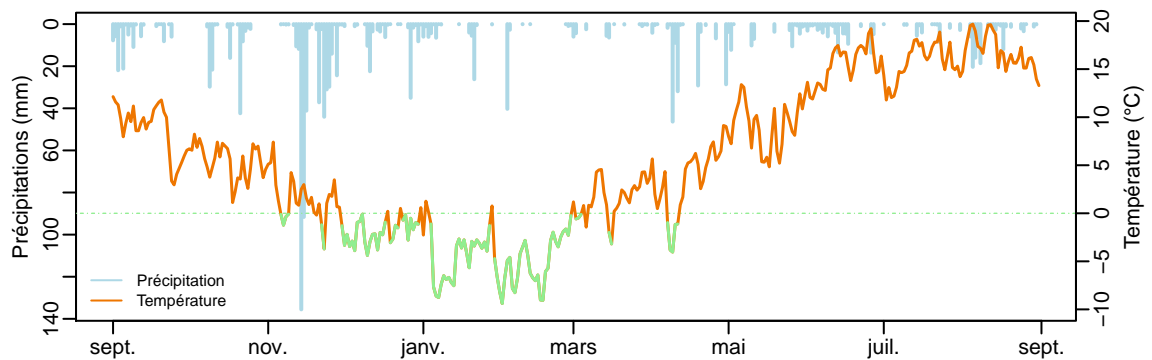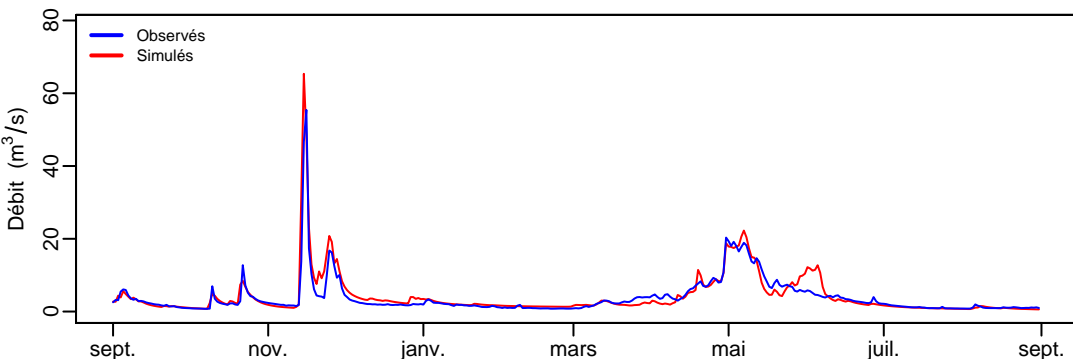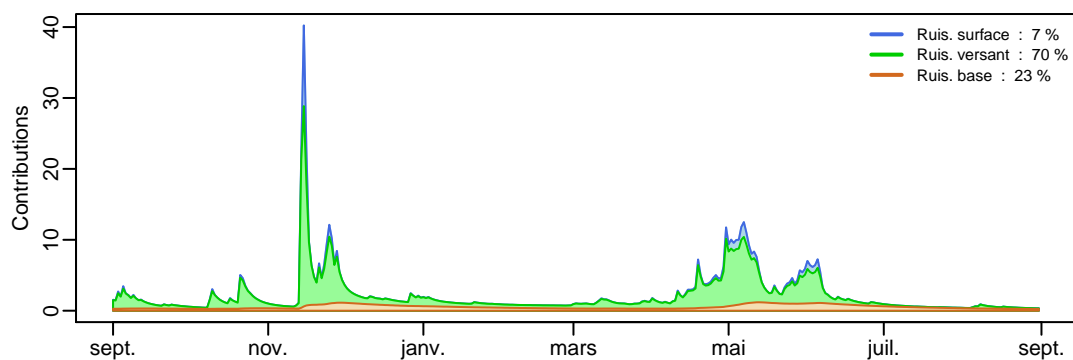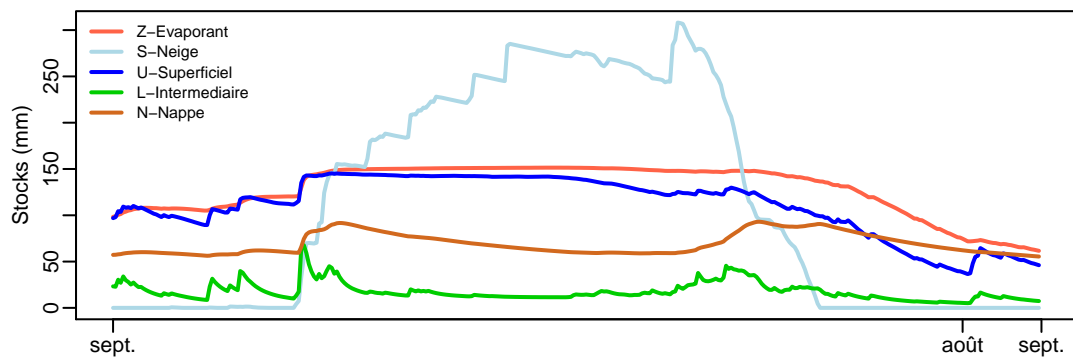

# q0251 (155.95 km<sup>2</sup>) – année 2003–2004

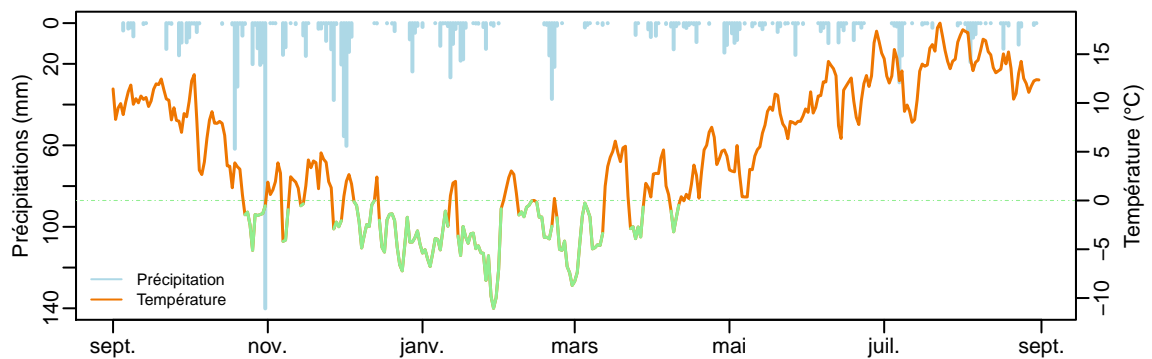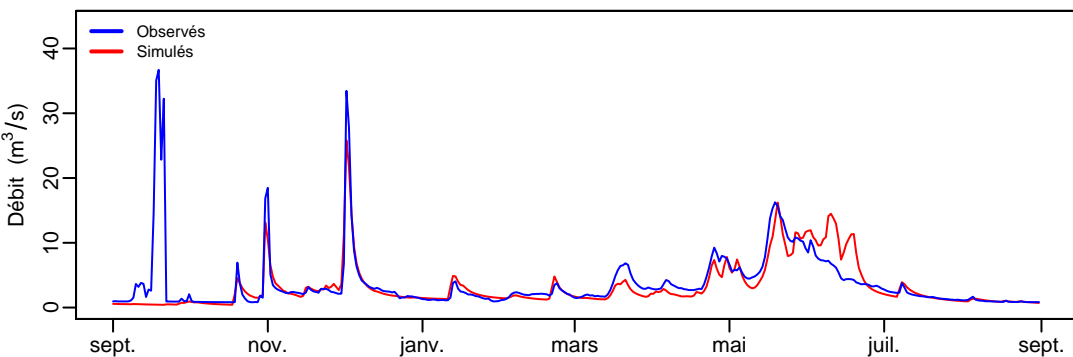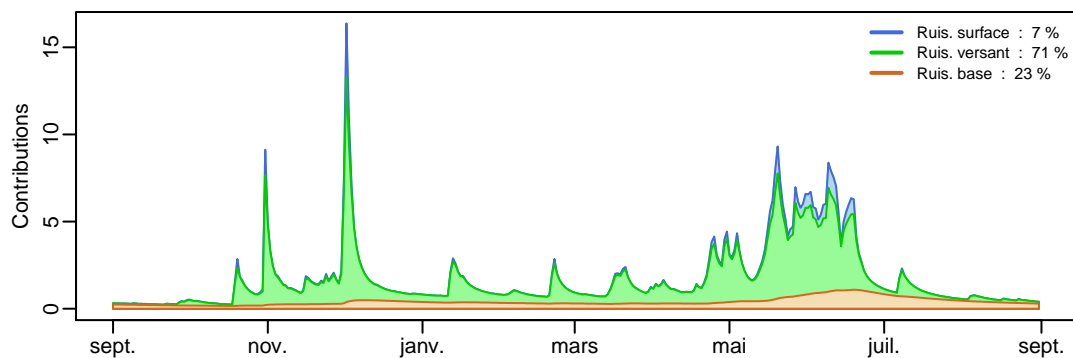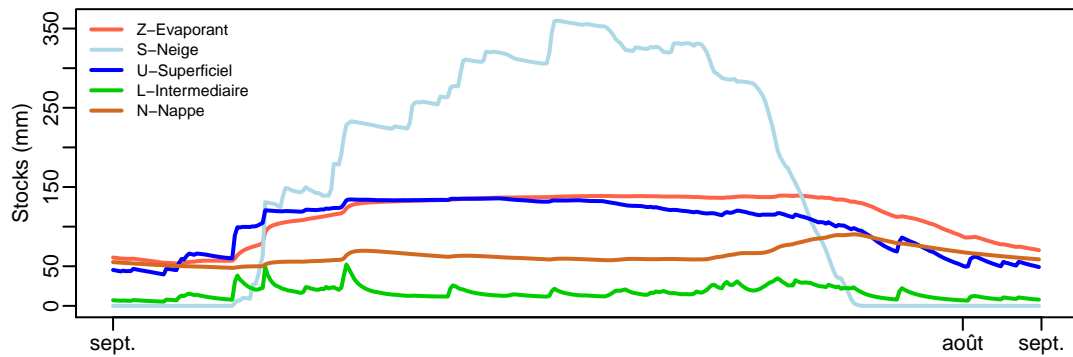

# q0251 (155.95 km²) – année 2004–2005

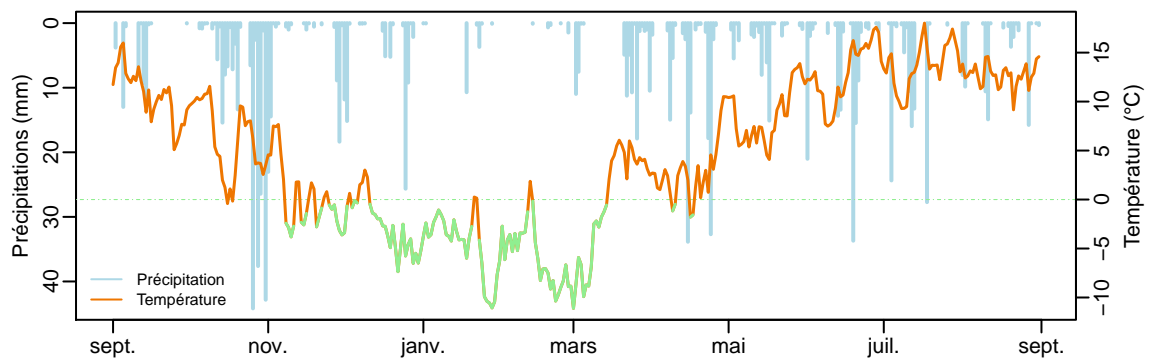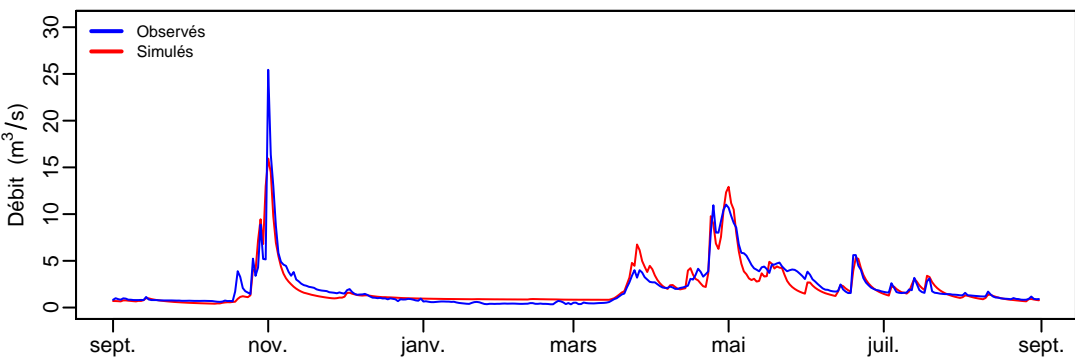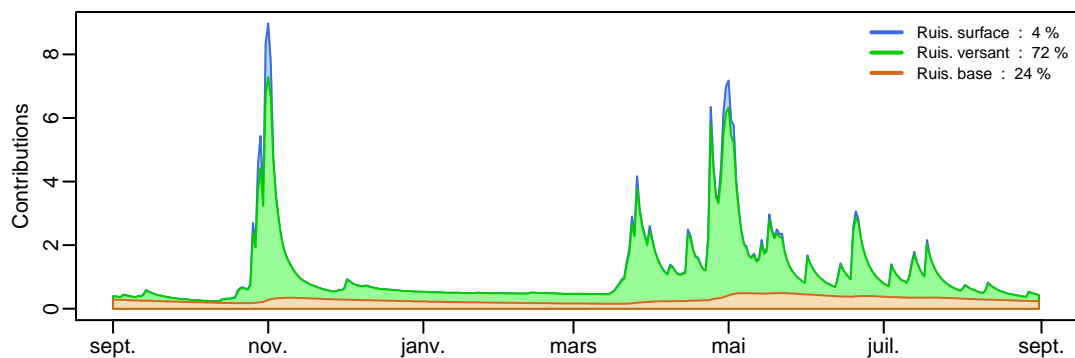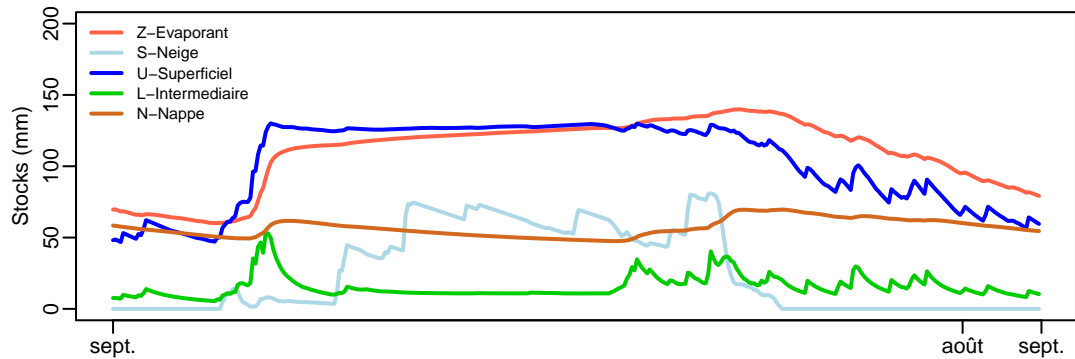

# q0251 (155.95 km<sup>2</sup>) – année 2005–2006

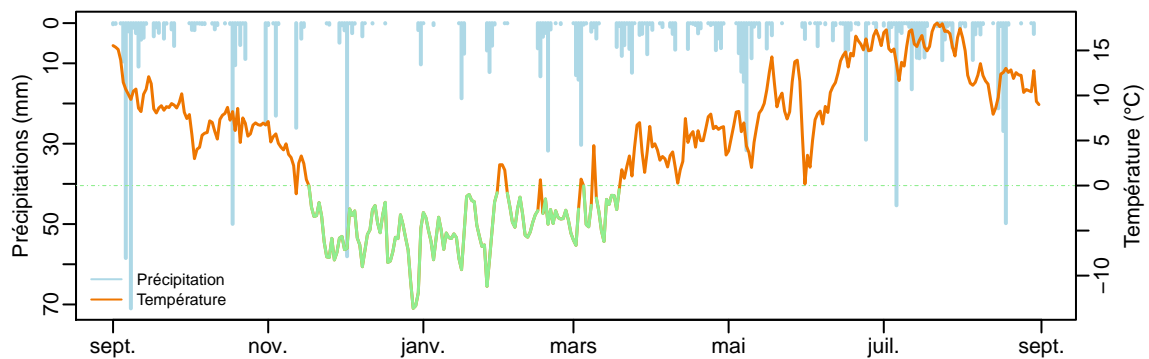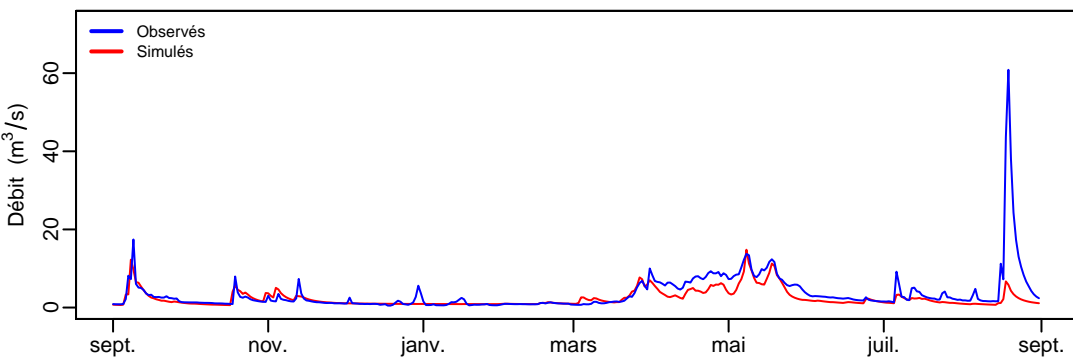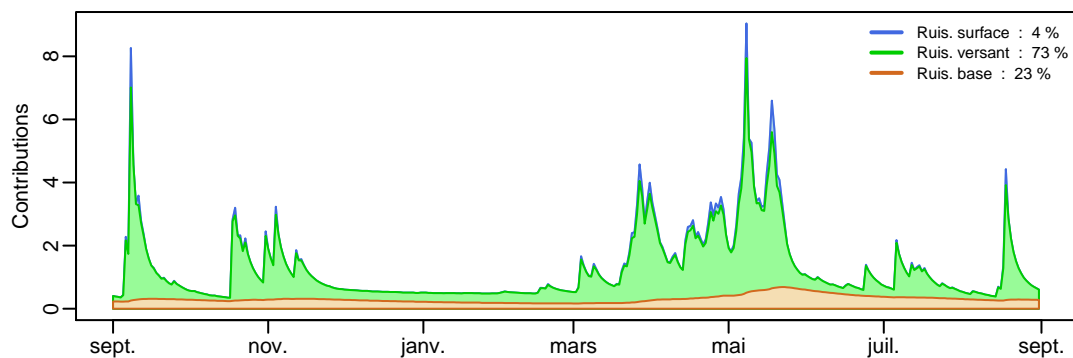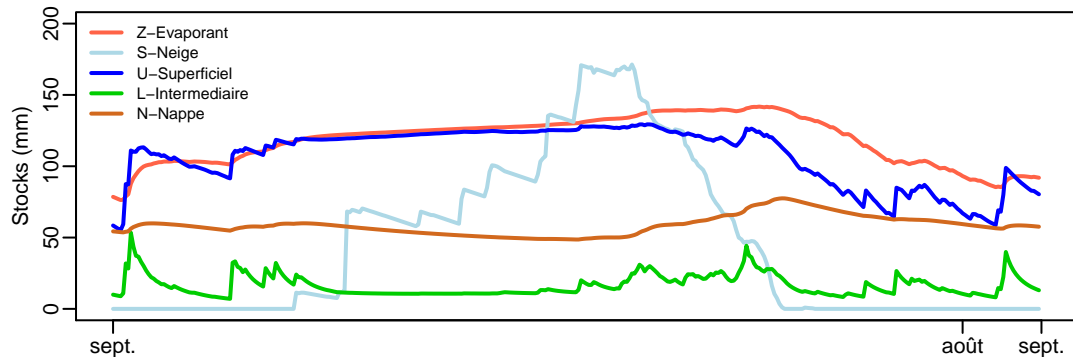

# q0251 (155.95 km²) – année 2006–2007

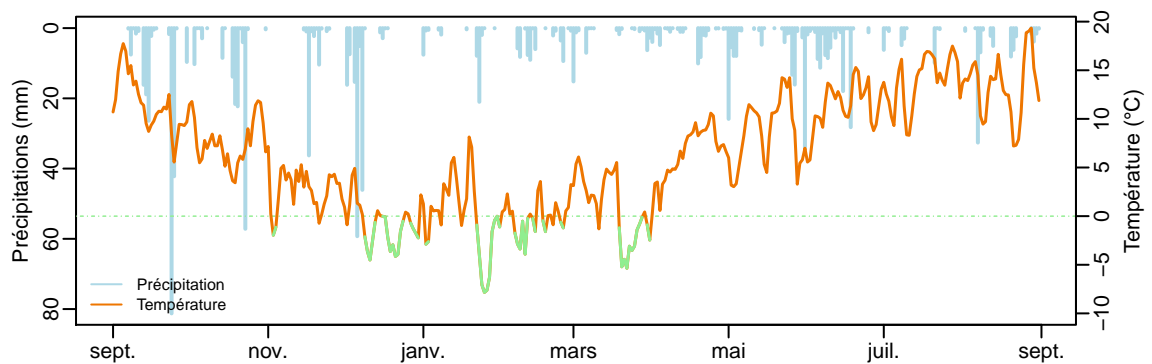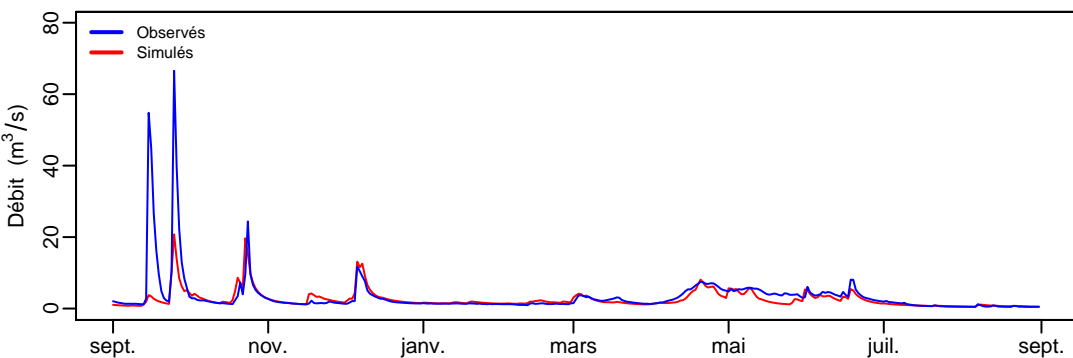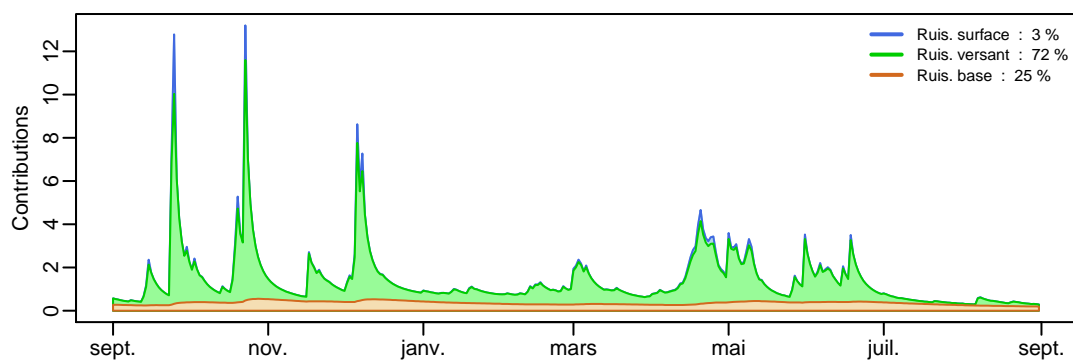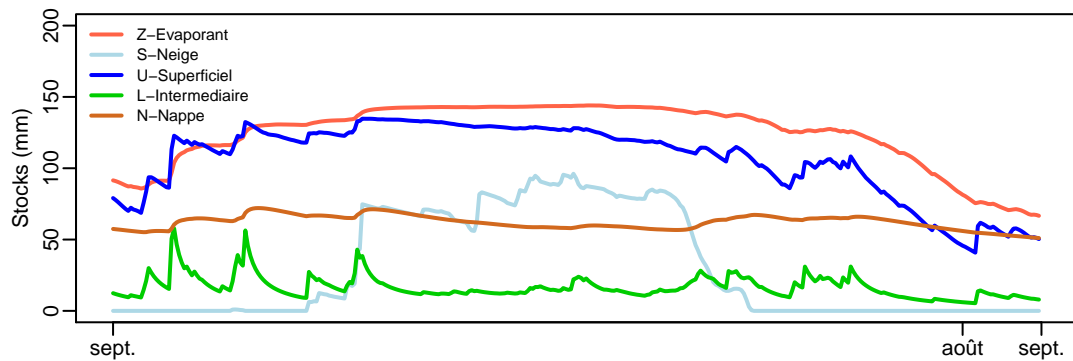



# q0251 (155.95 km<sup>2</sup>) – année 2007–2008

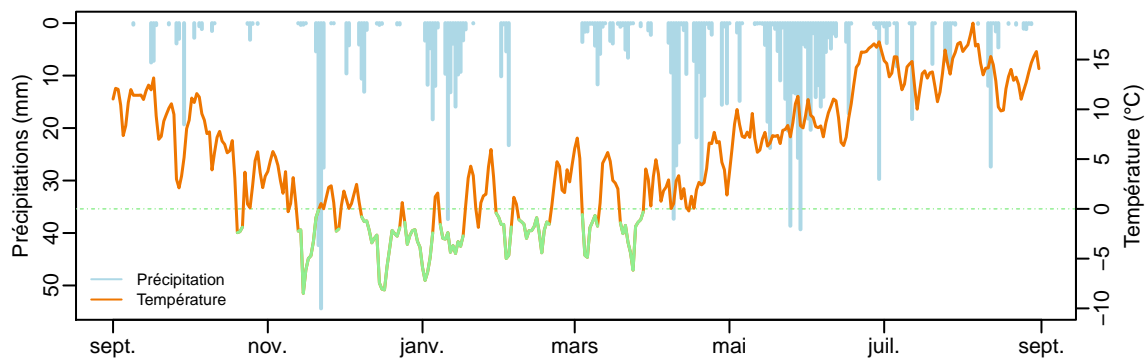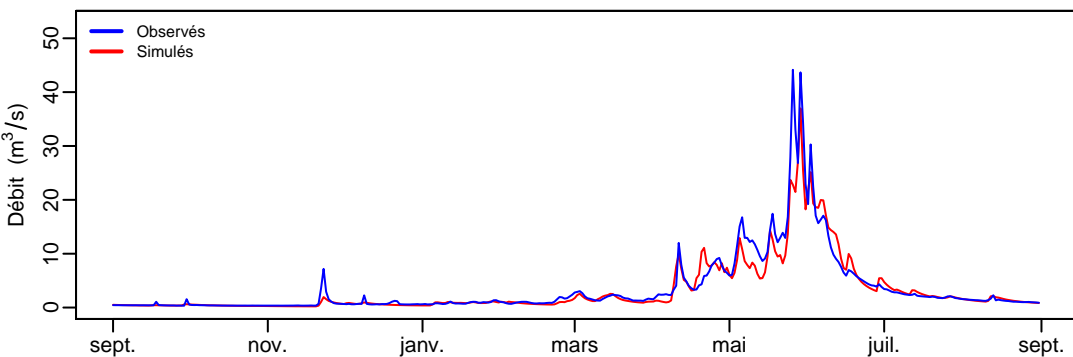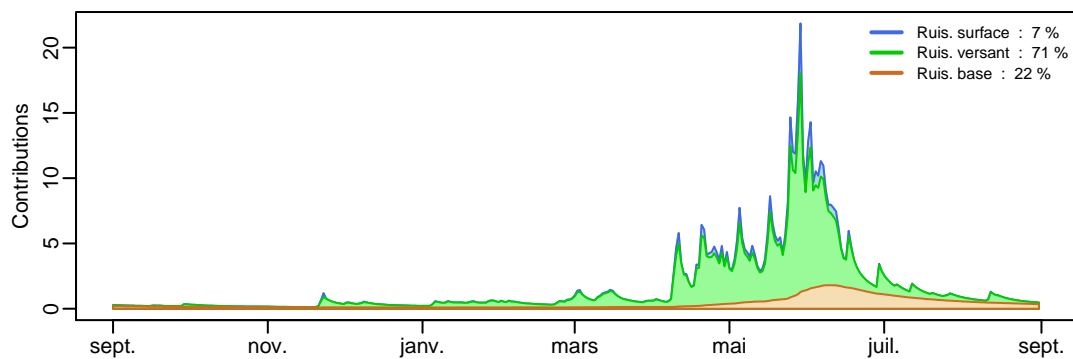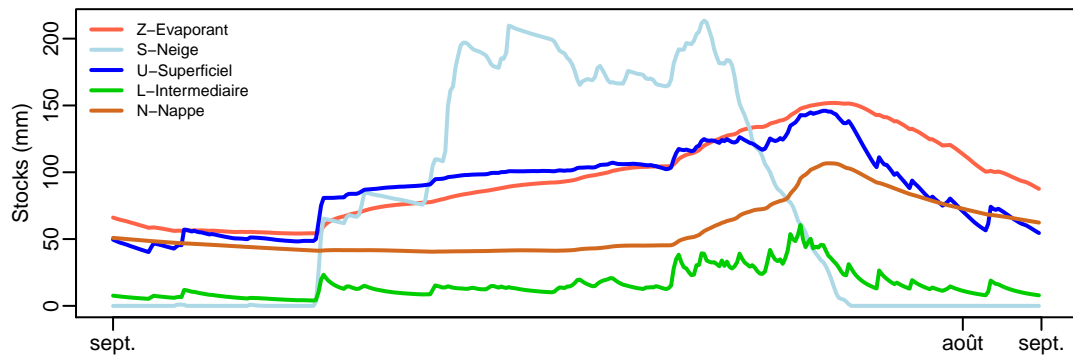

# q0251 (155.95 km<sup>2</sup>) – année 2008–2009

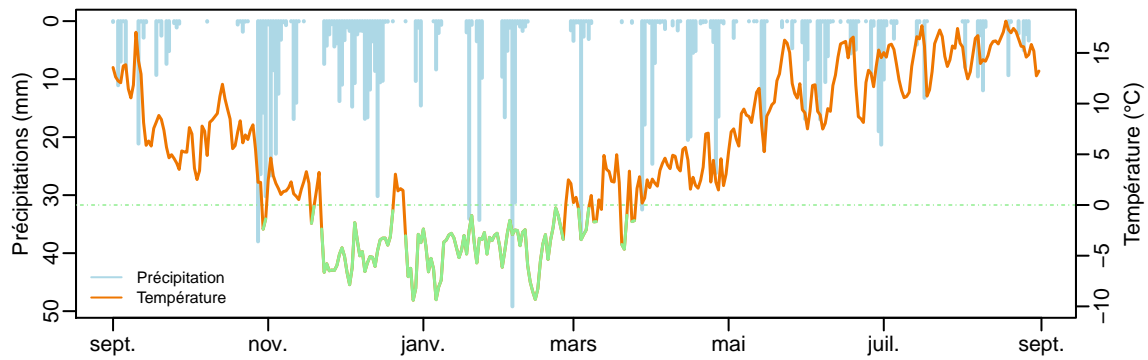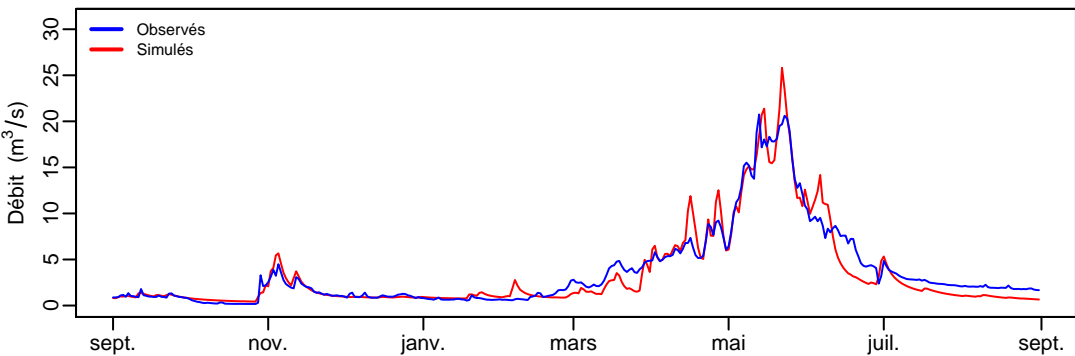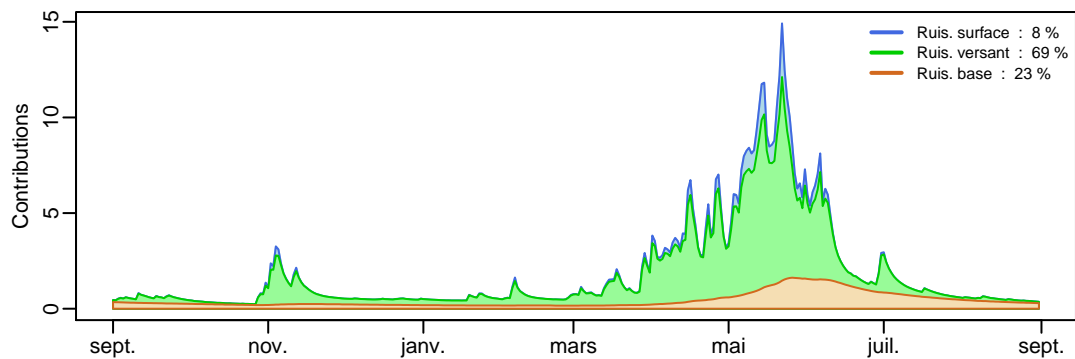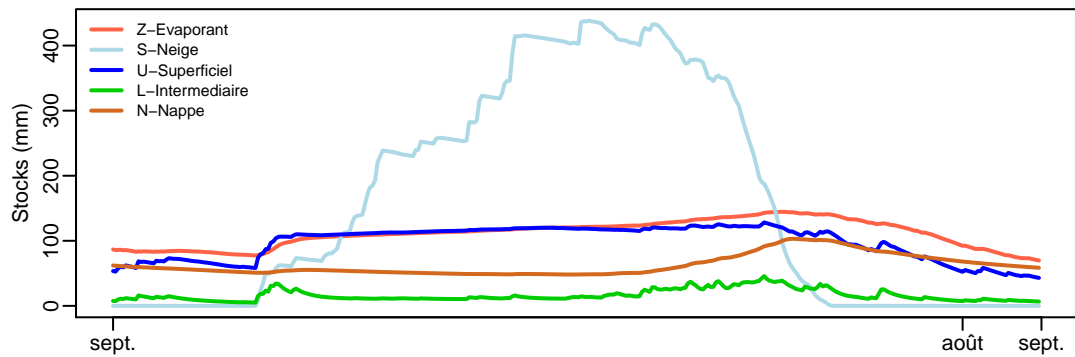

# q0251 (155.95 km<sup>2</sup>) – année 2009–2010

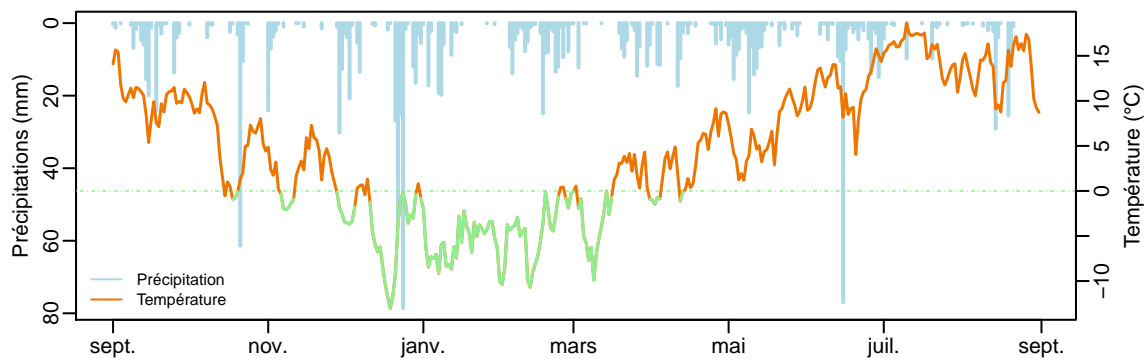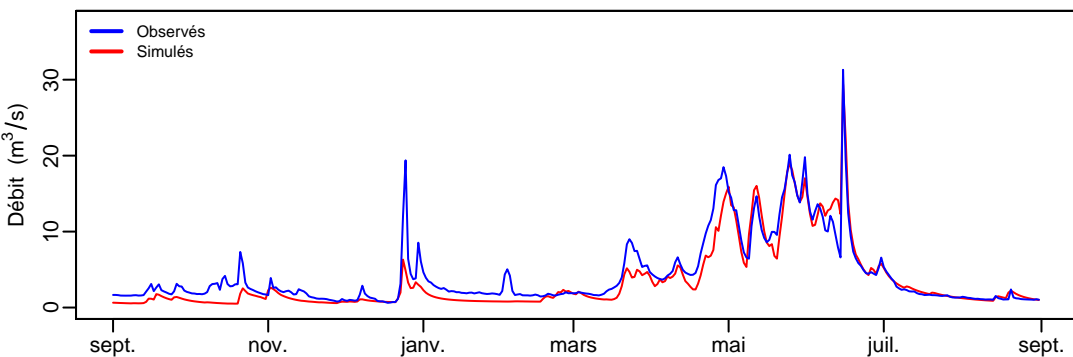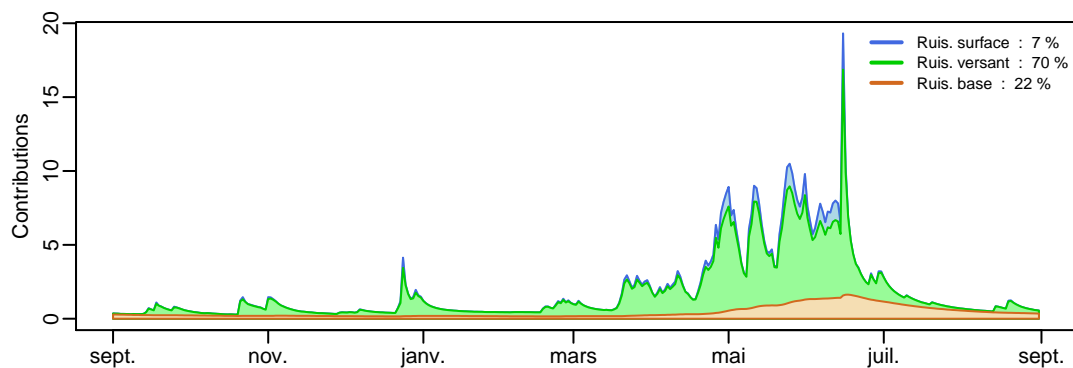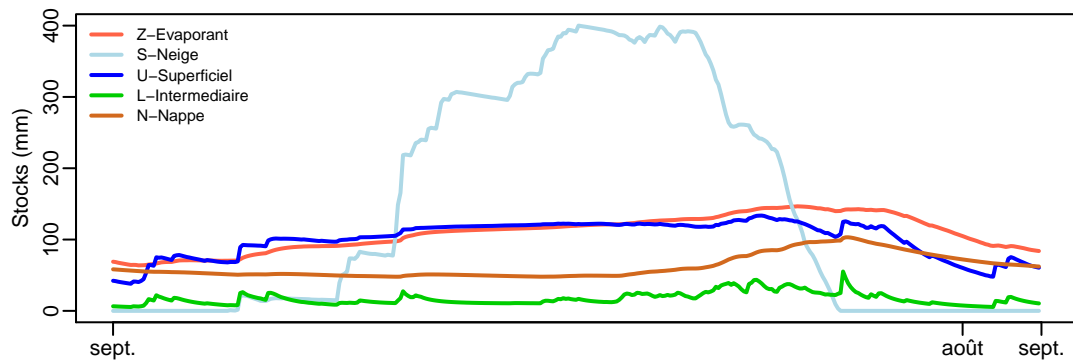

# q0251 (155.95 km²) – année 2010–2011

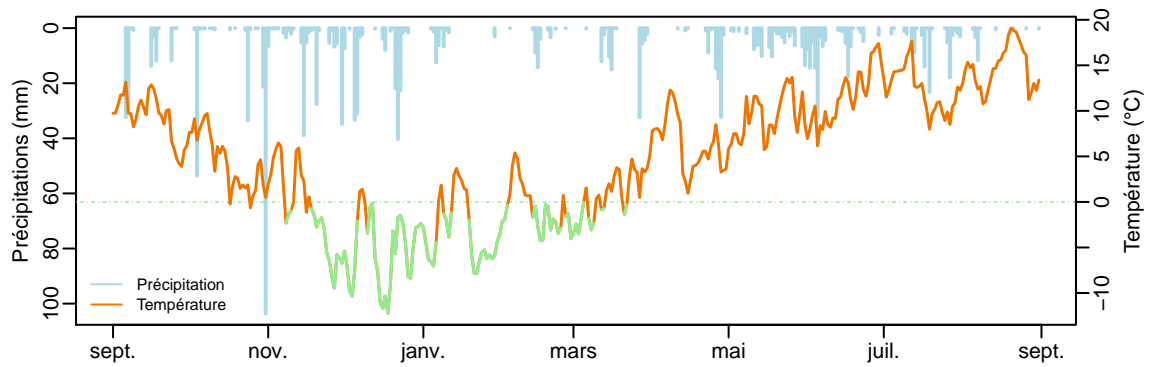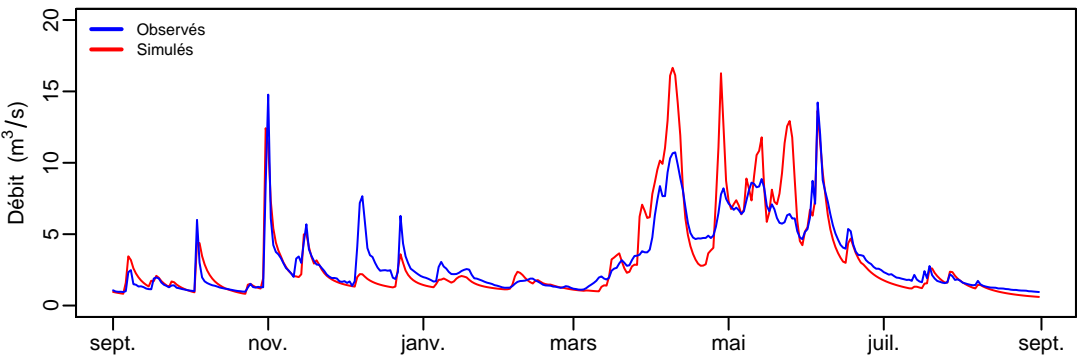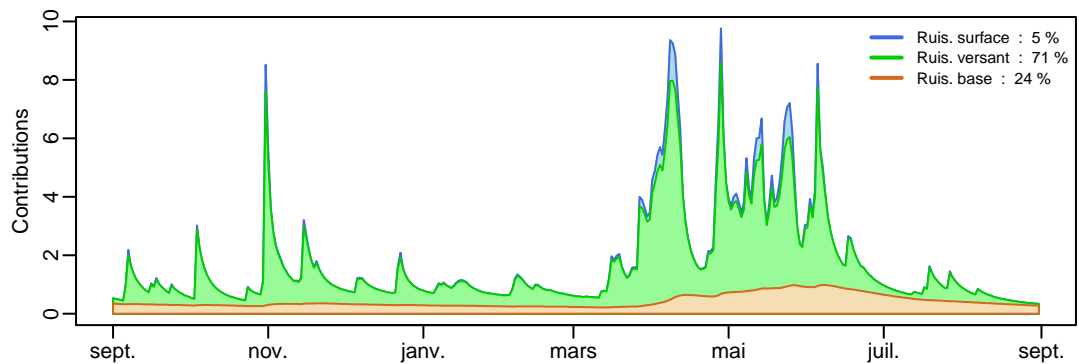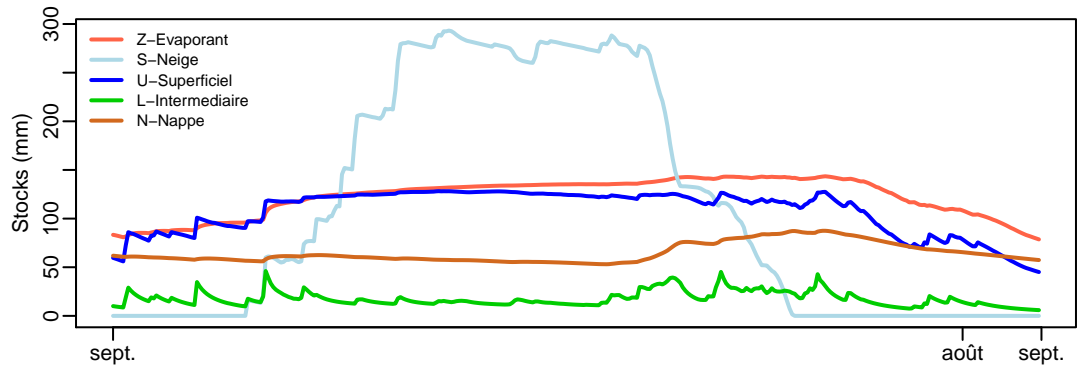

# q0251 (155.95 km²) – année 2011–2012

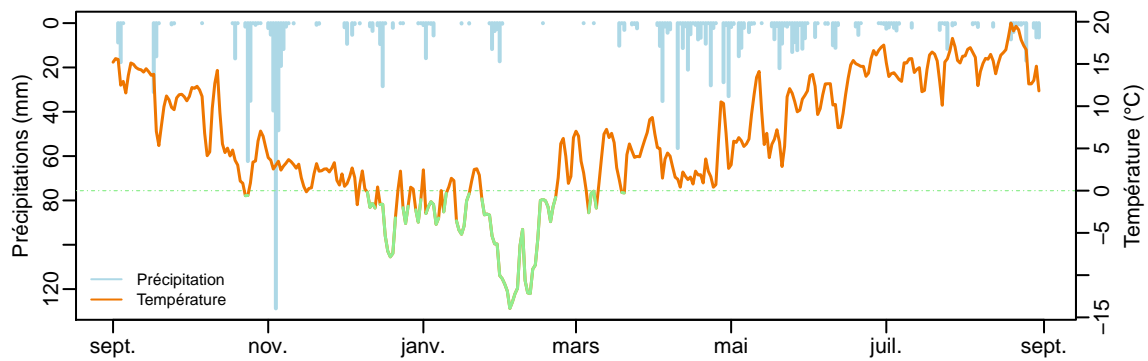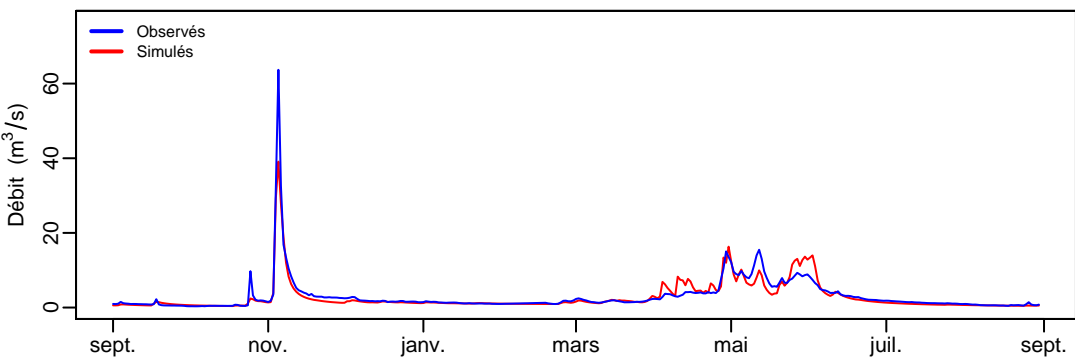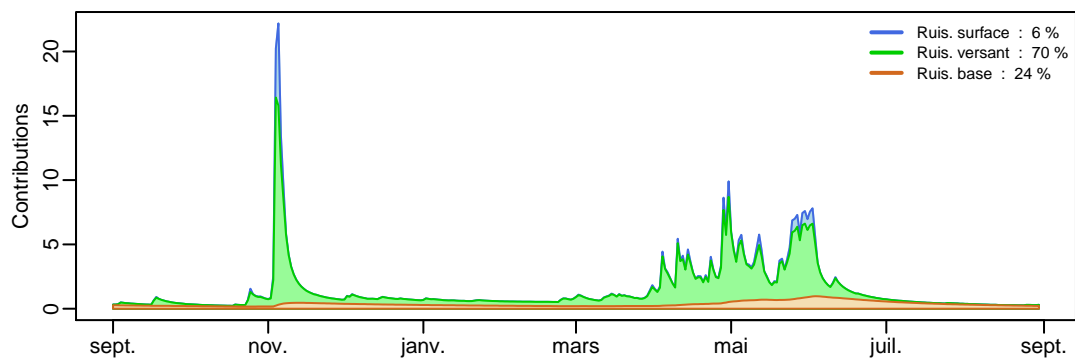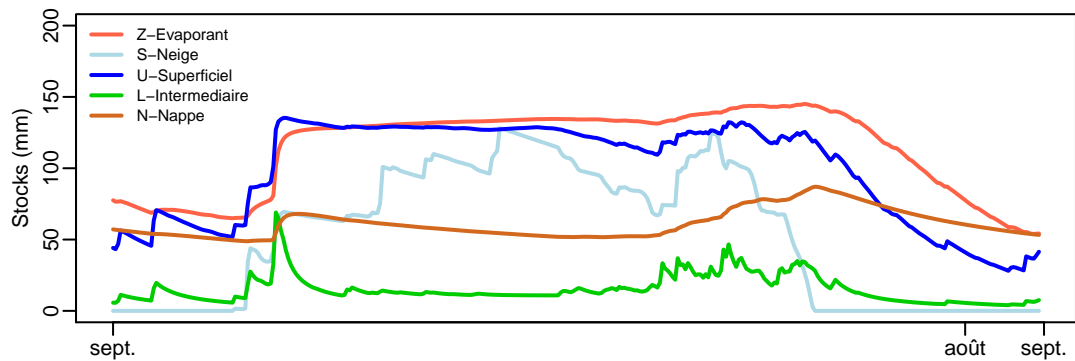

# q0252 (137.59 km²) – année 1981–1982

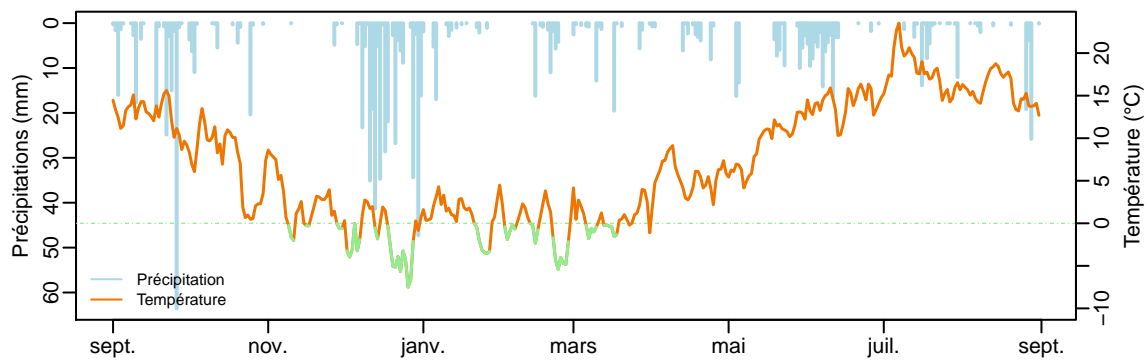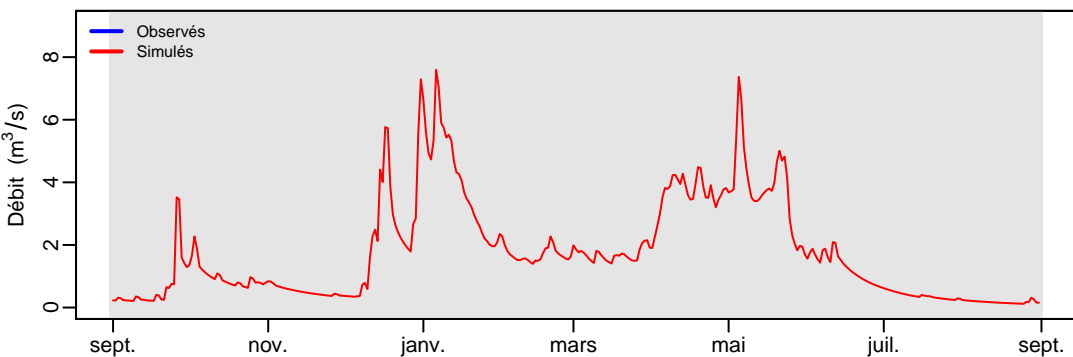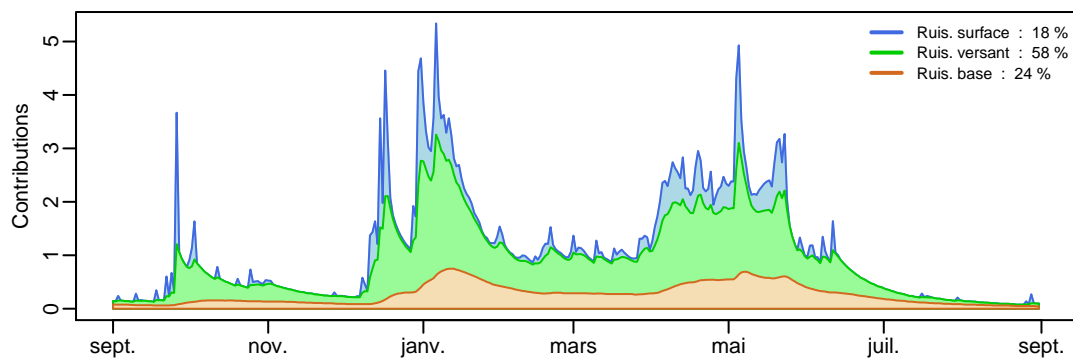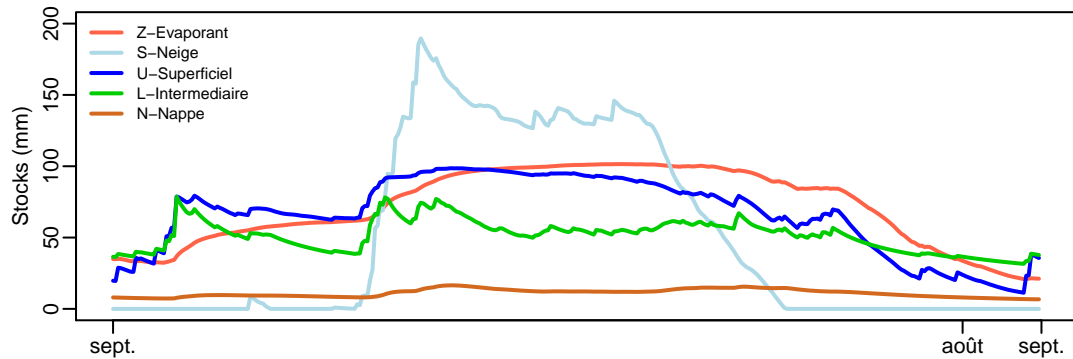

# q0252 (137.59 km²) – année 1982–1983

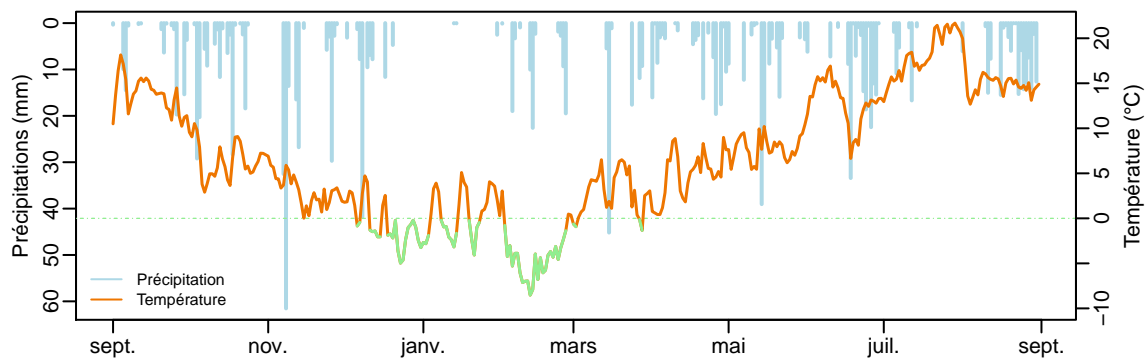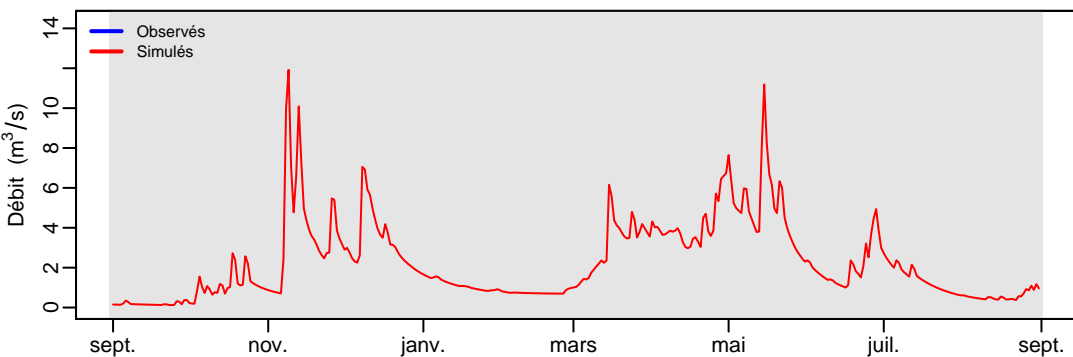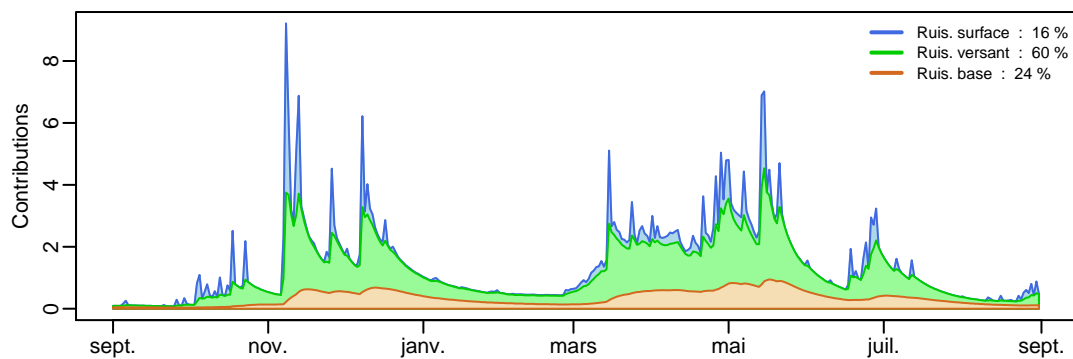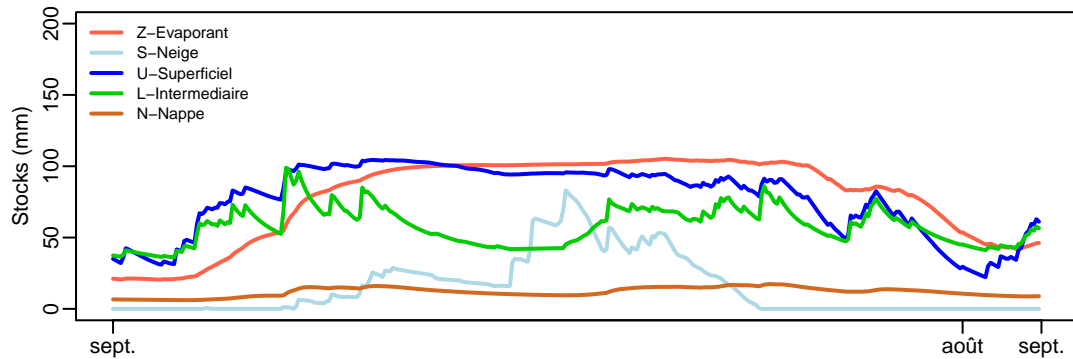

# q0252 (137.59 km²) – année 1983–1984

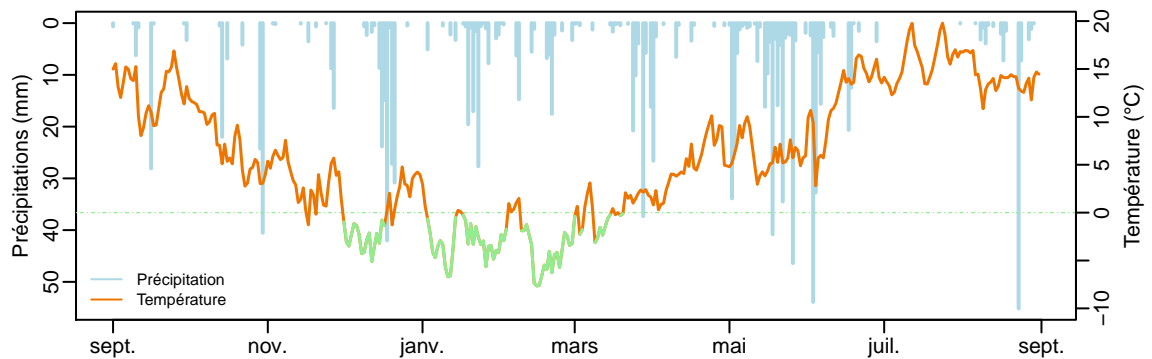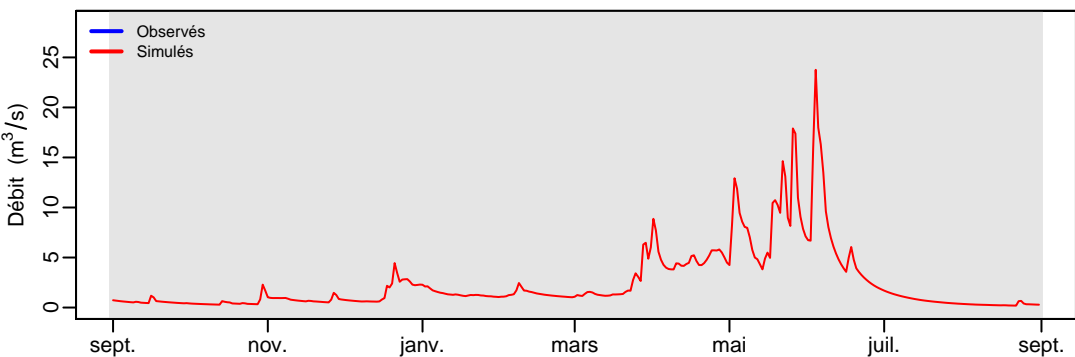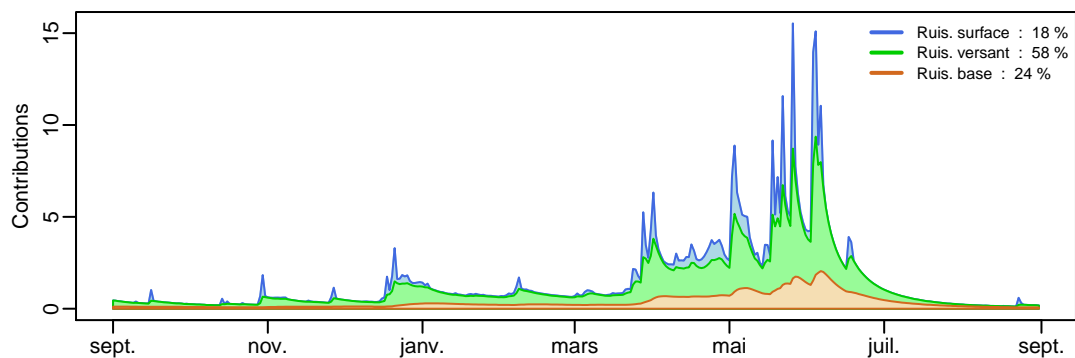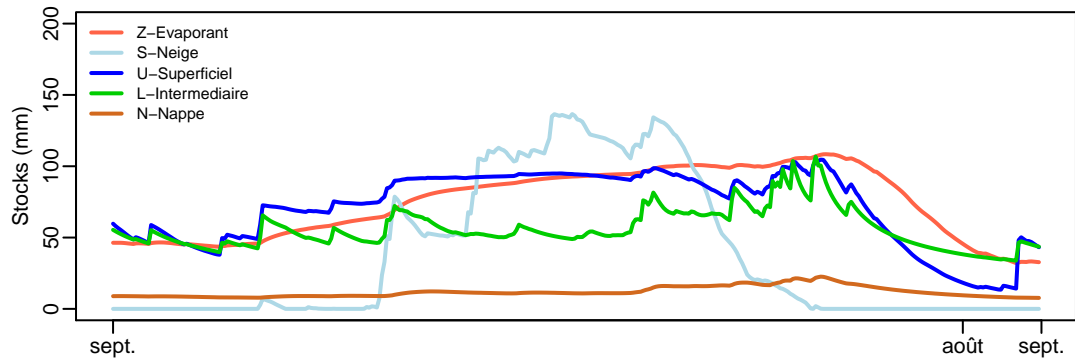



# q0252 (137.59 km²) – année 1984–1985

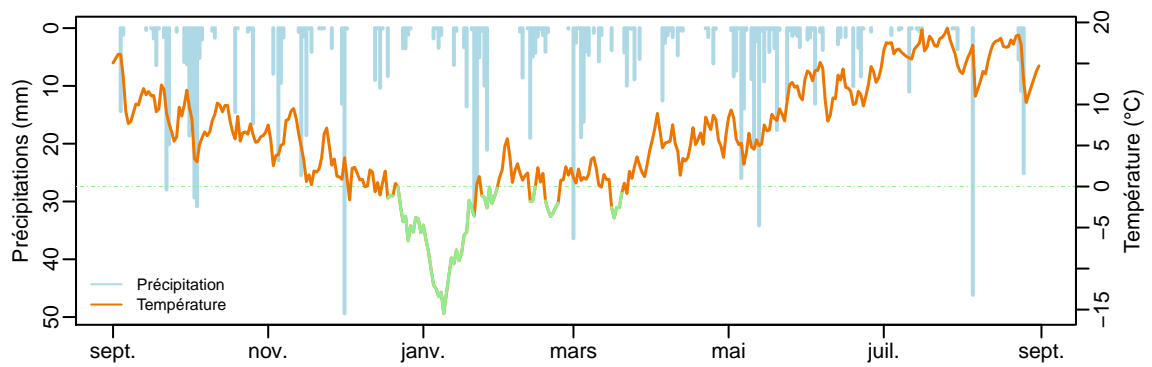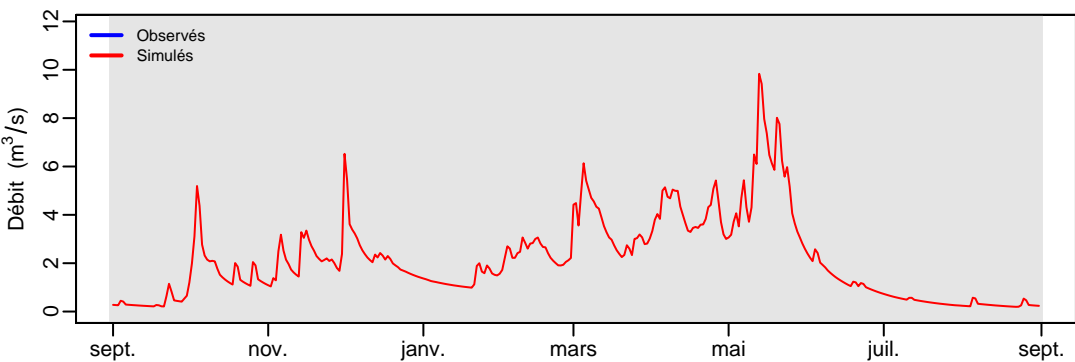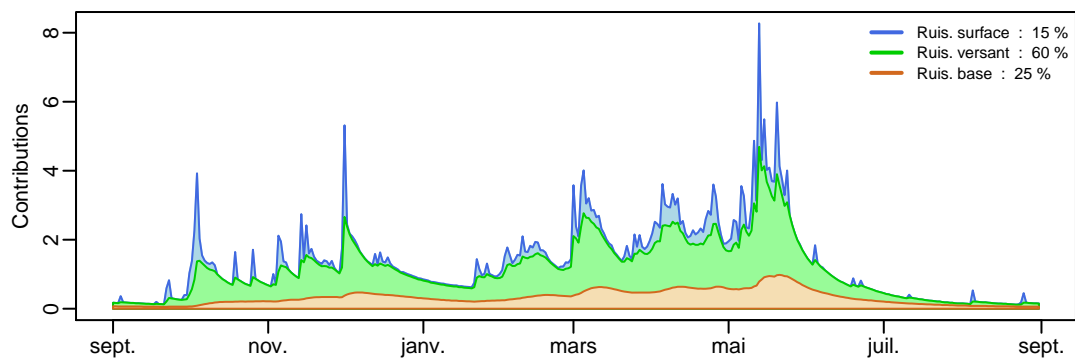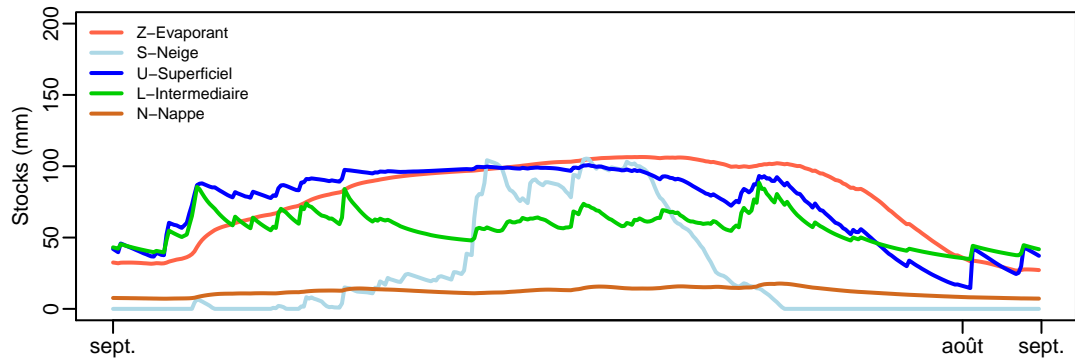

# q0252 (137.59 km²) – année 1985–1986

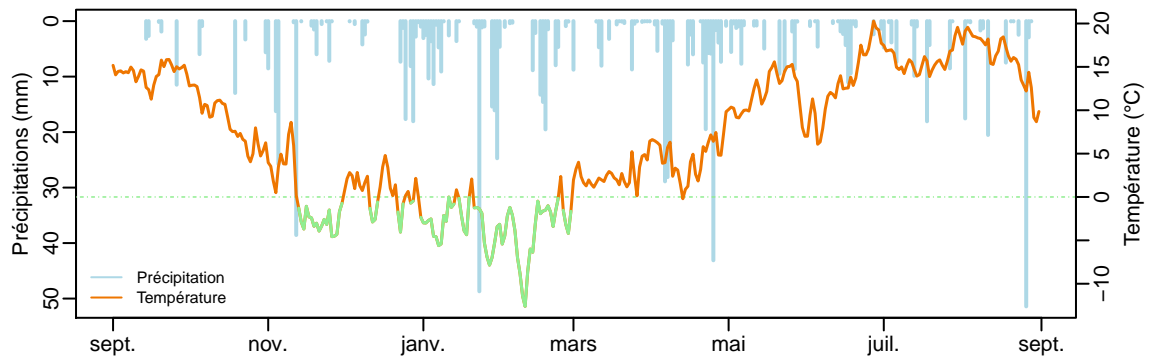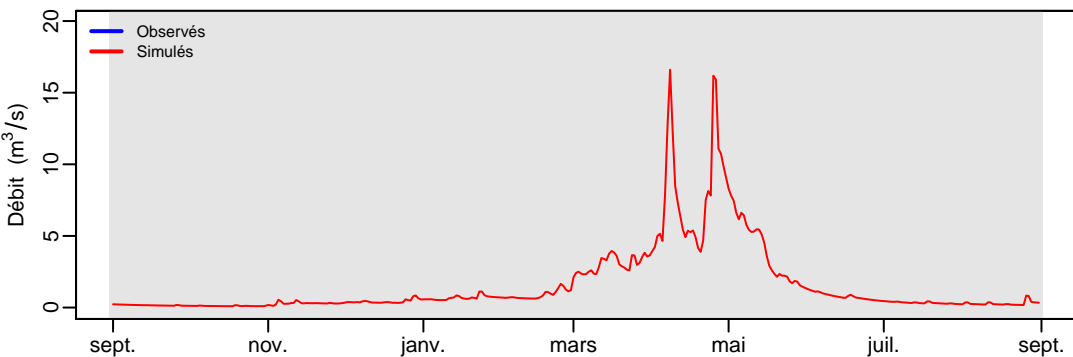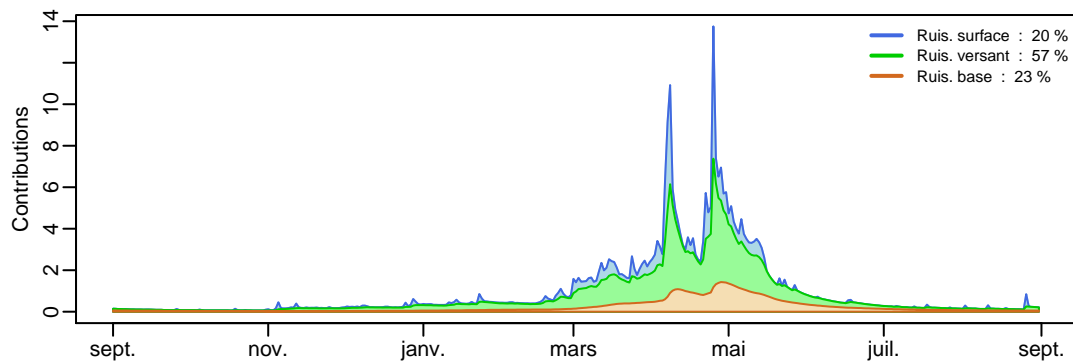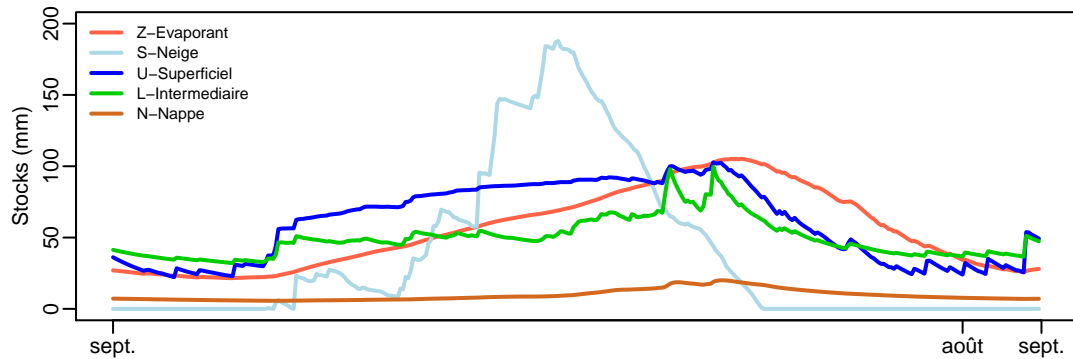

# q0252 (137.59 km²) – année 1986–1987

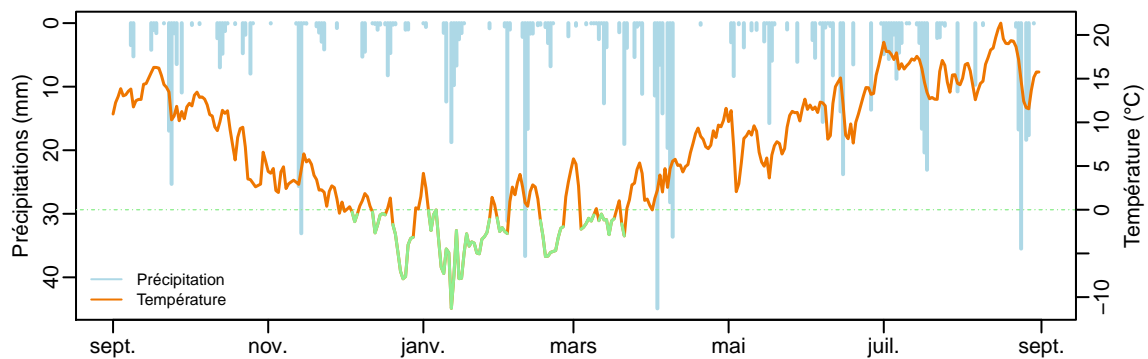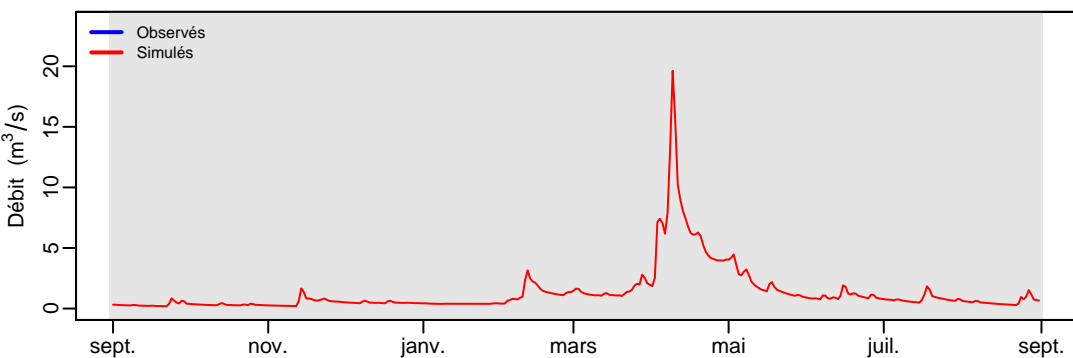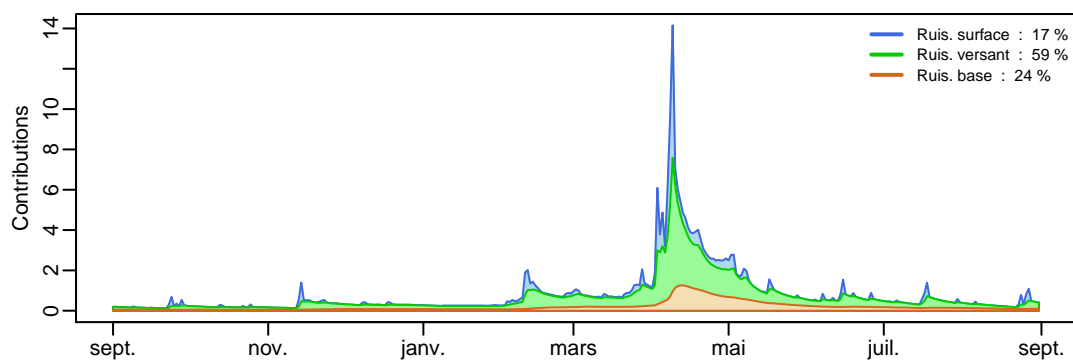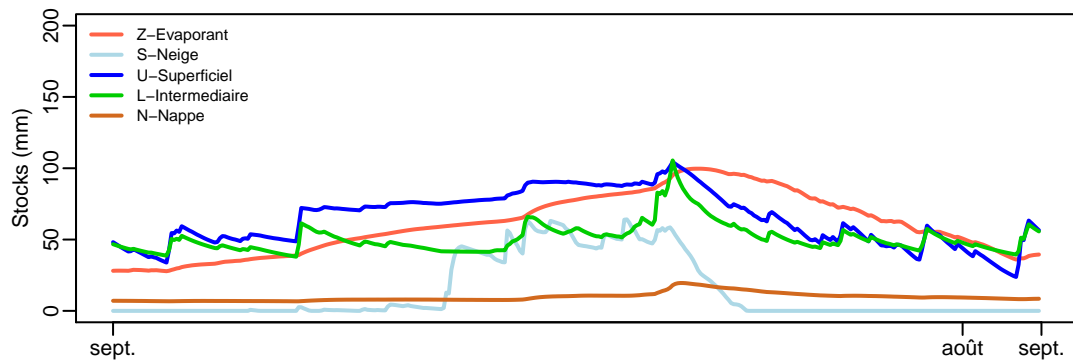

# q0252 (137.59 km²) – année 1987–1988

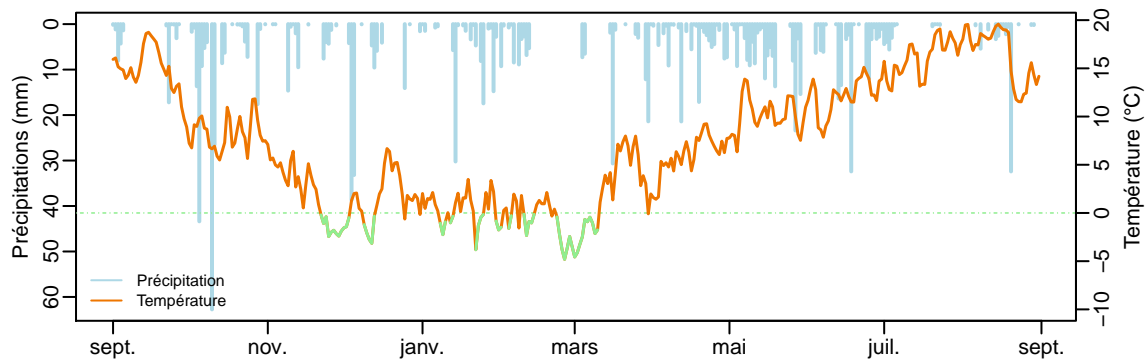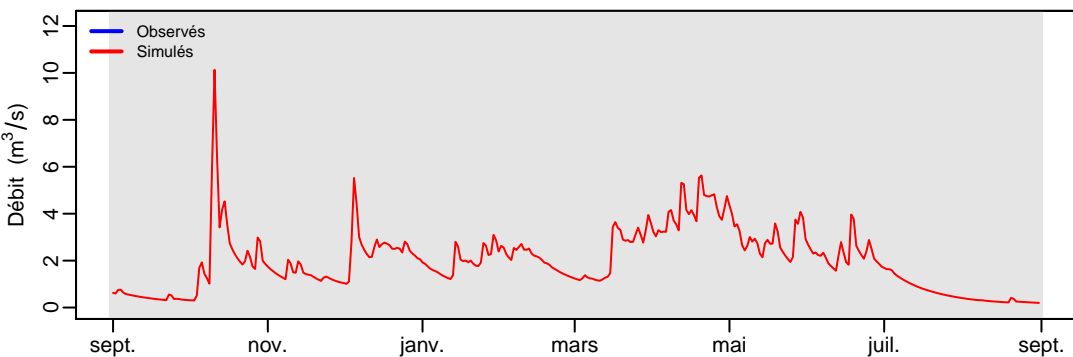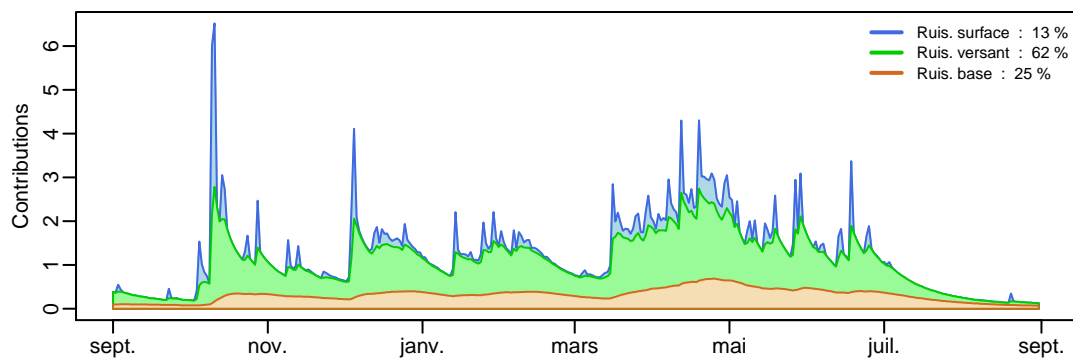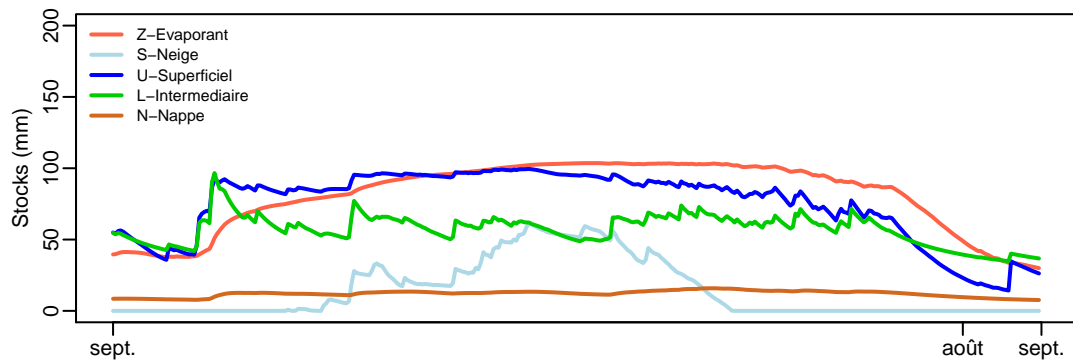

# q0252 (137.59 km²) – année 1988–1989

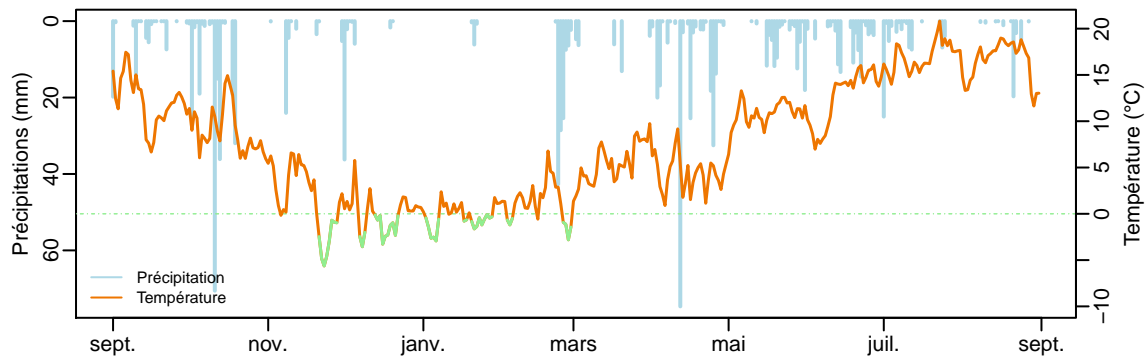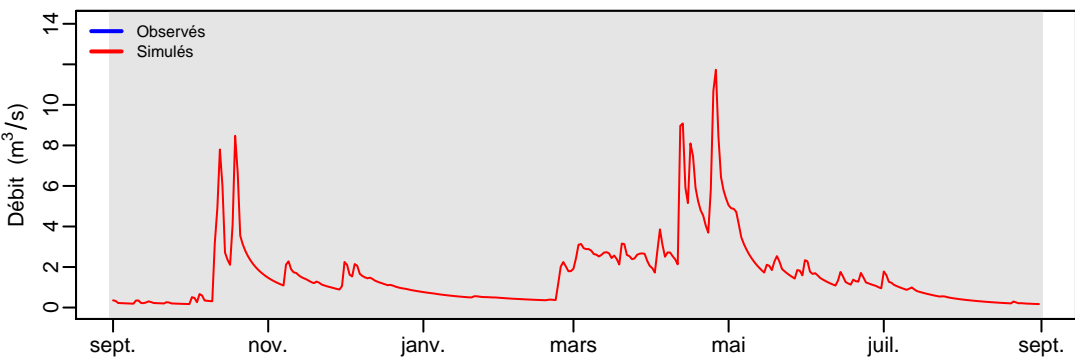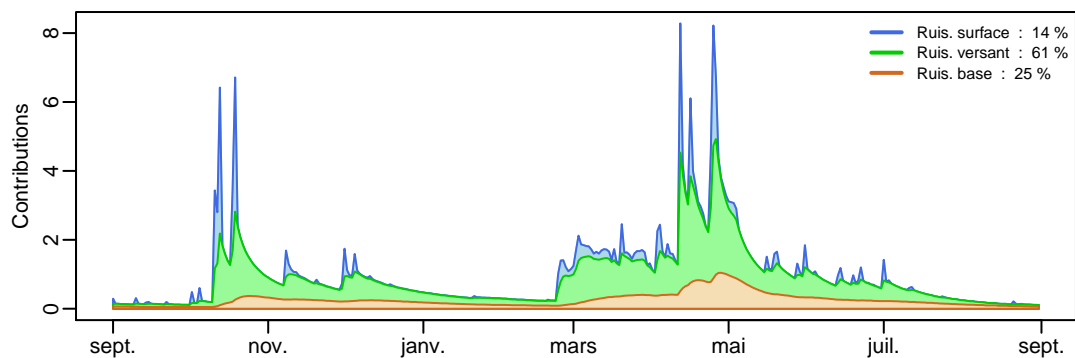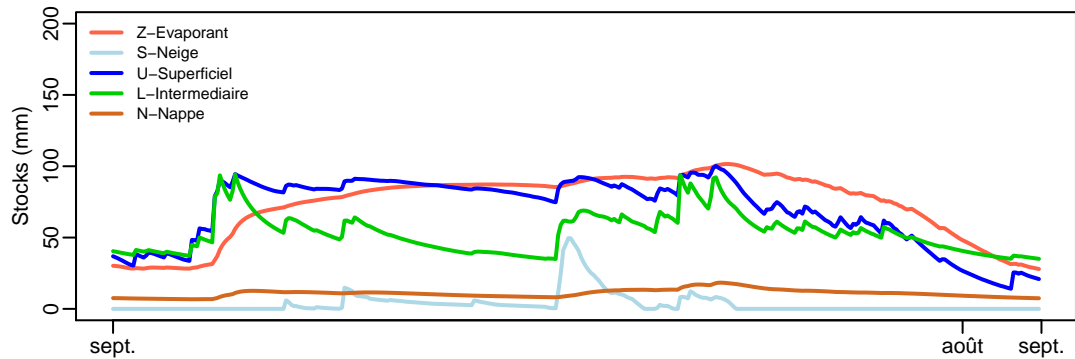

# q0252 (137.59 km²) – année 1989–1990

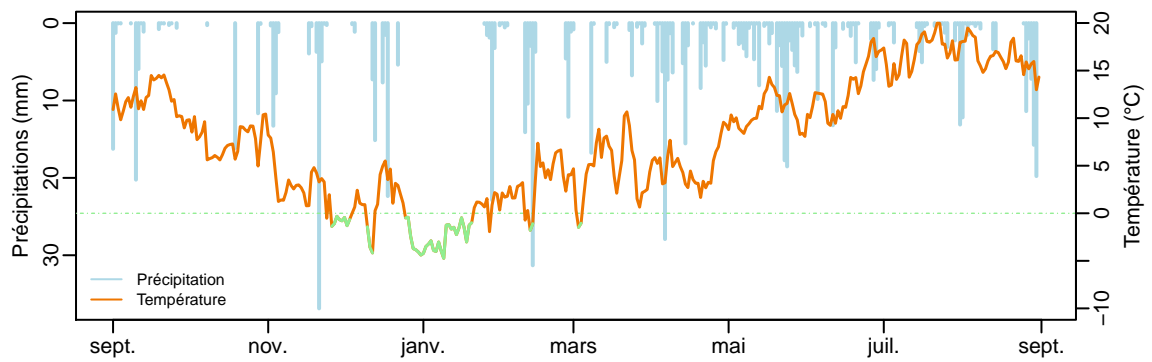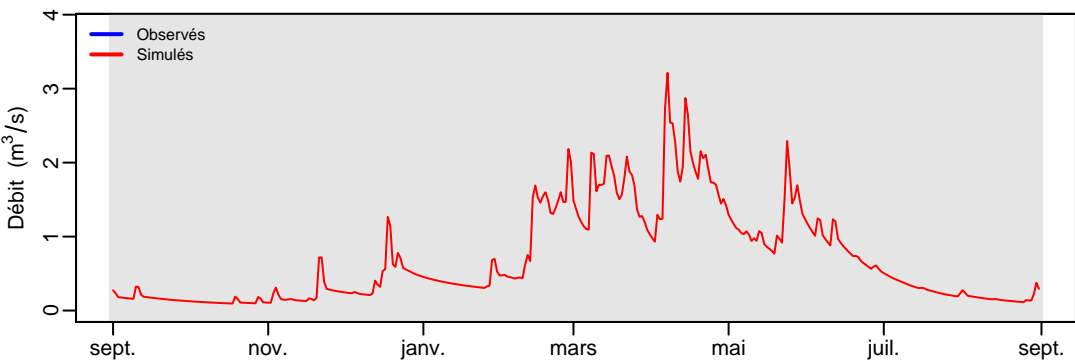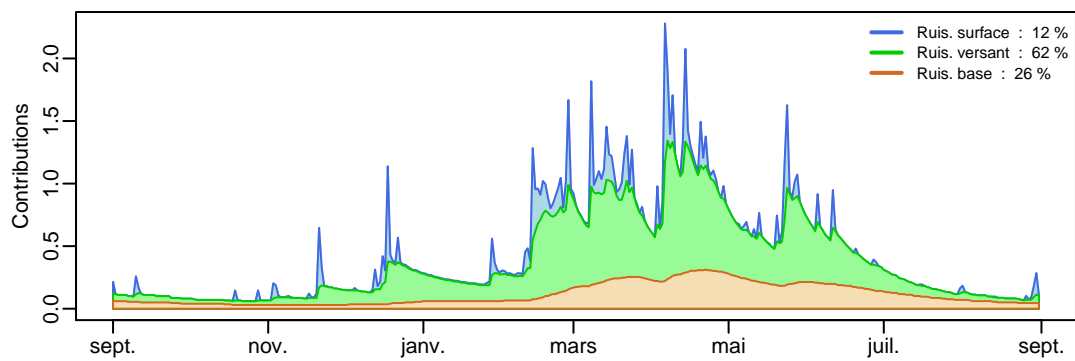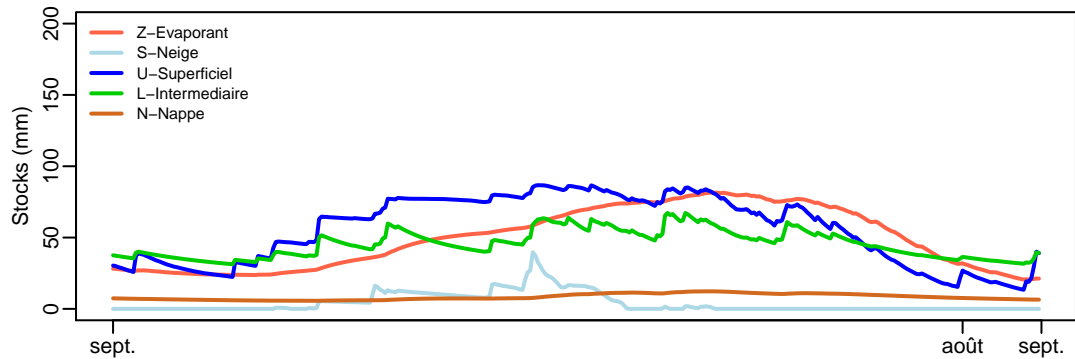

# q0252 (137.59 km<sup>2</sup>) – année 1990–1991

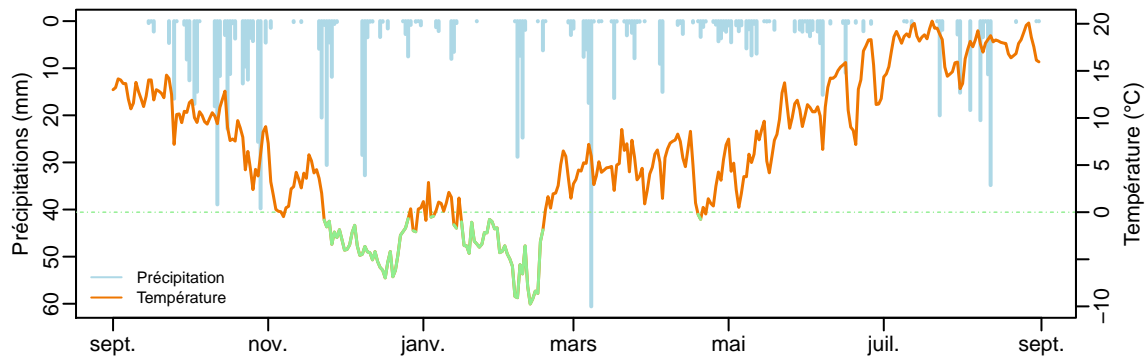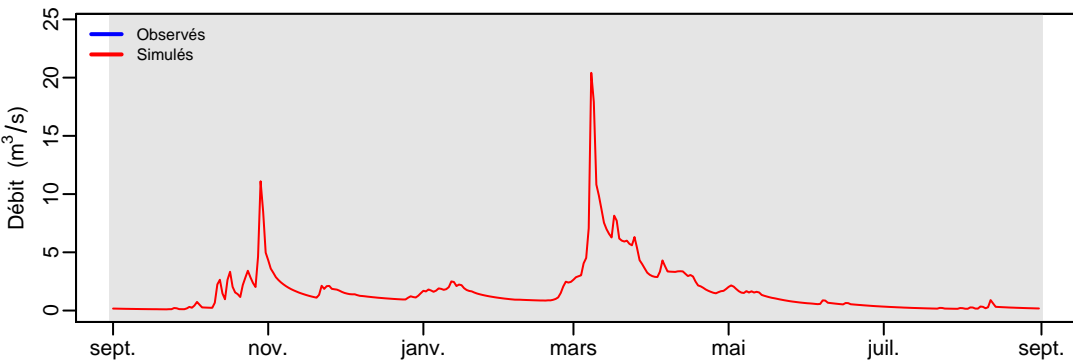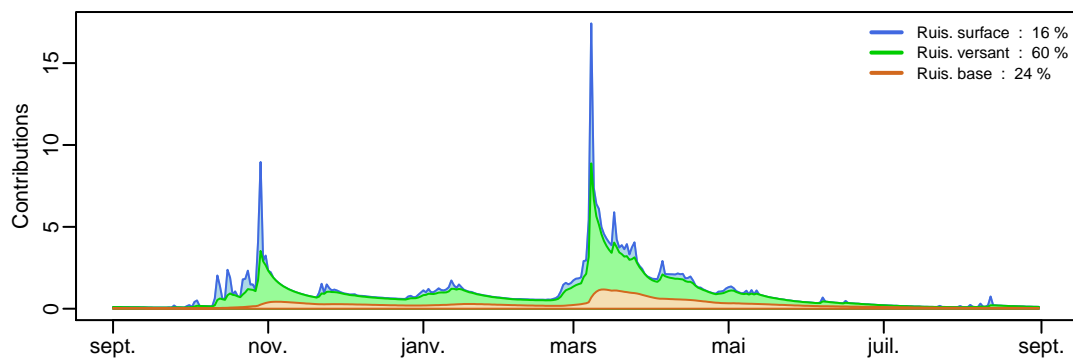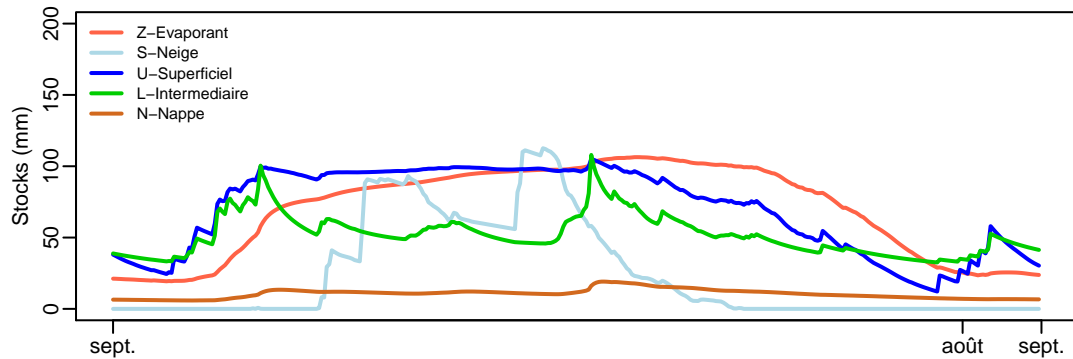

# q0252 (137.59 km²) – année 1991–1992

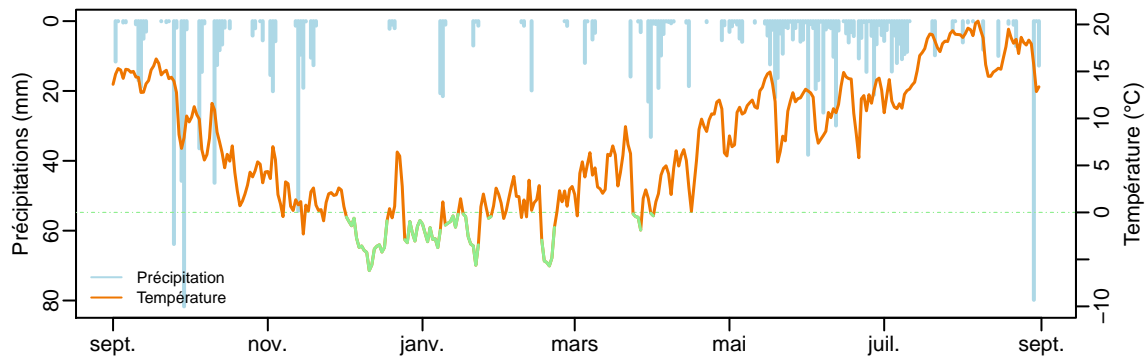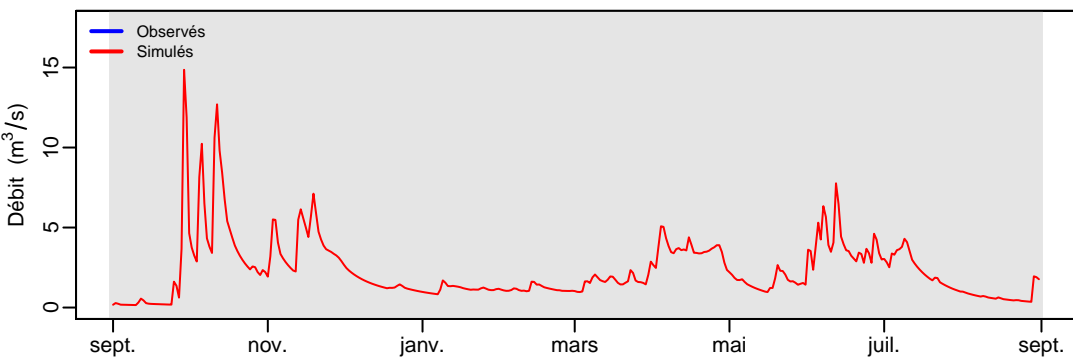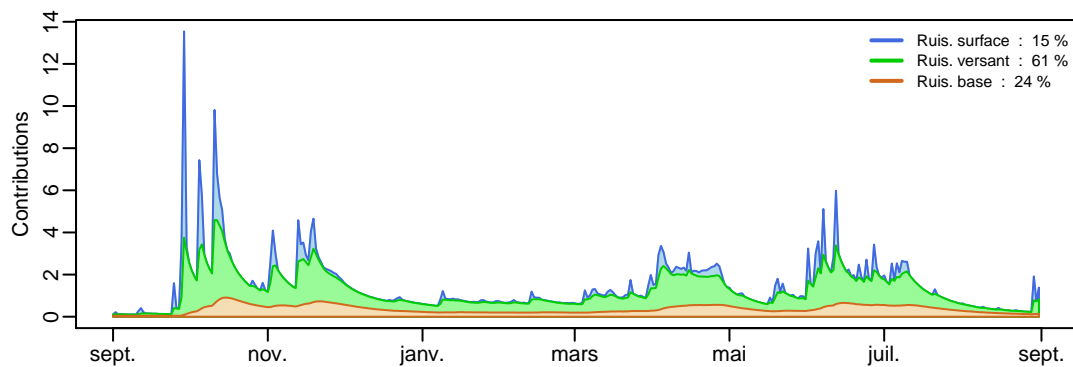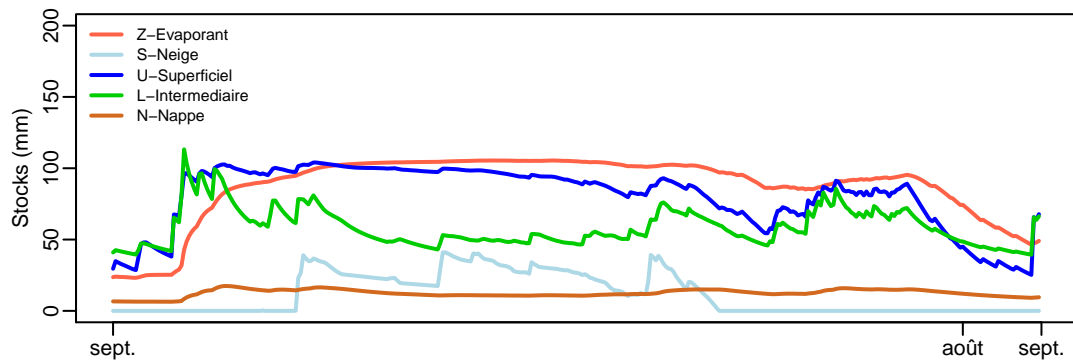



# q0252 (137.59 km²) – année 1992–1993

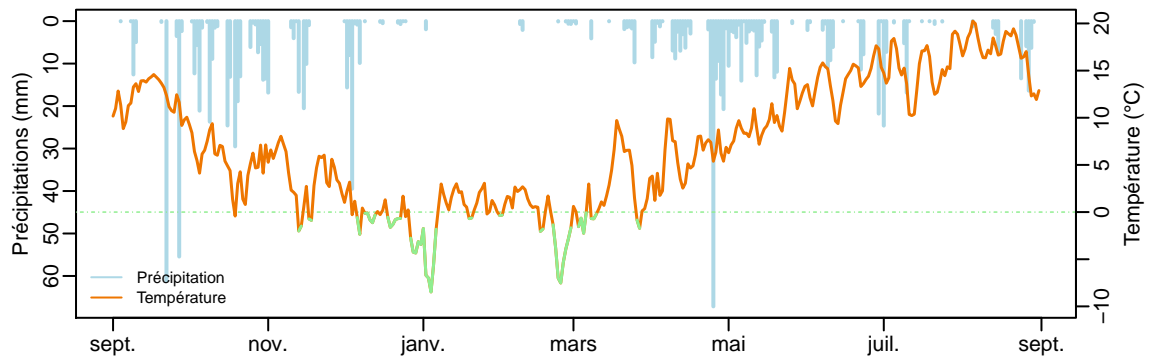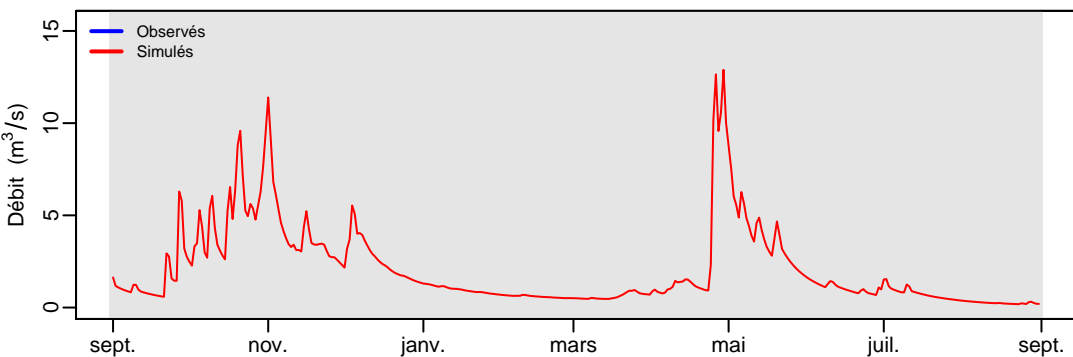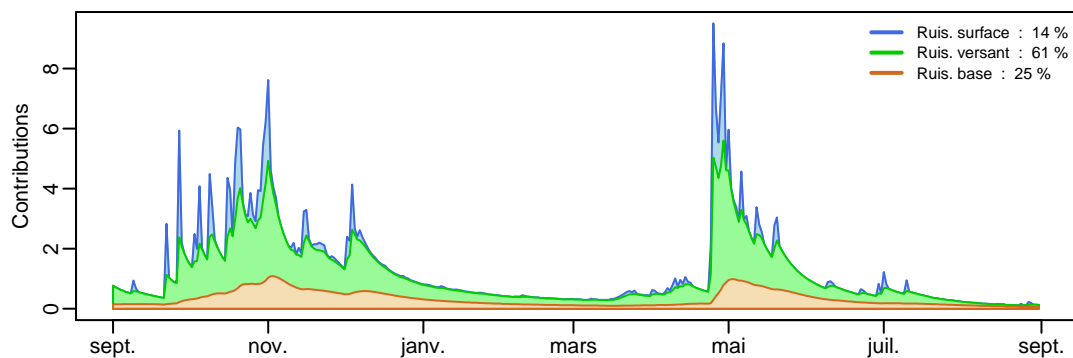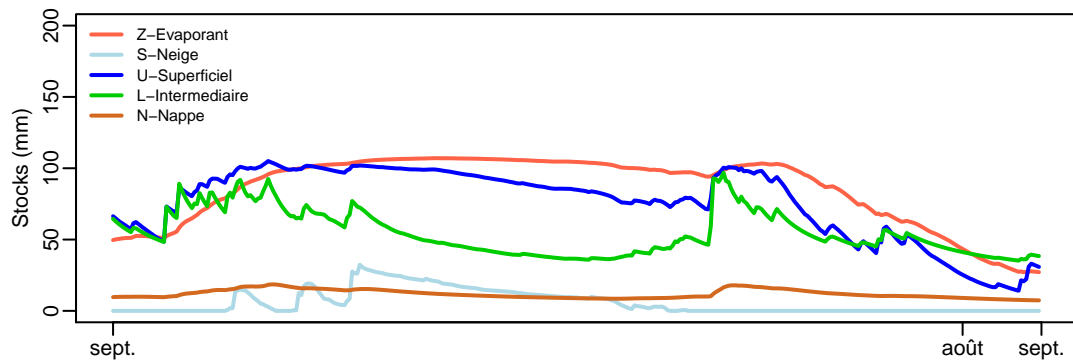

# q0252 (137.59 km²) – année 1993–1994

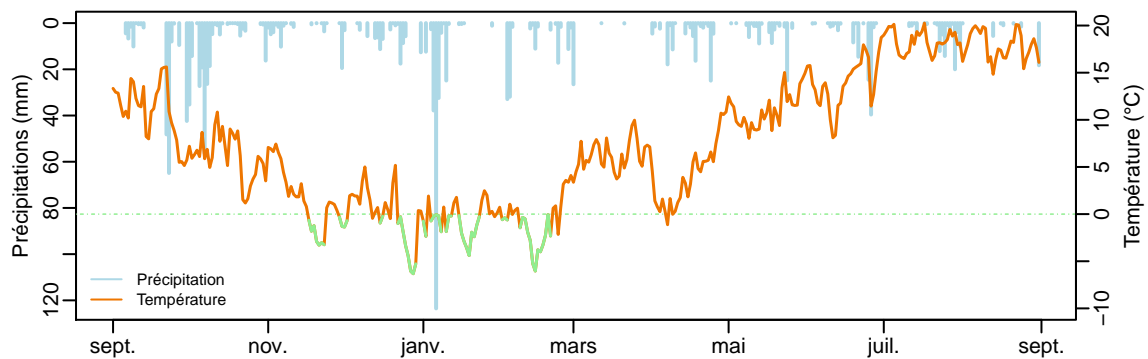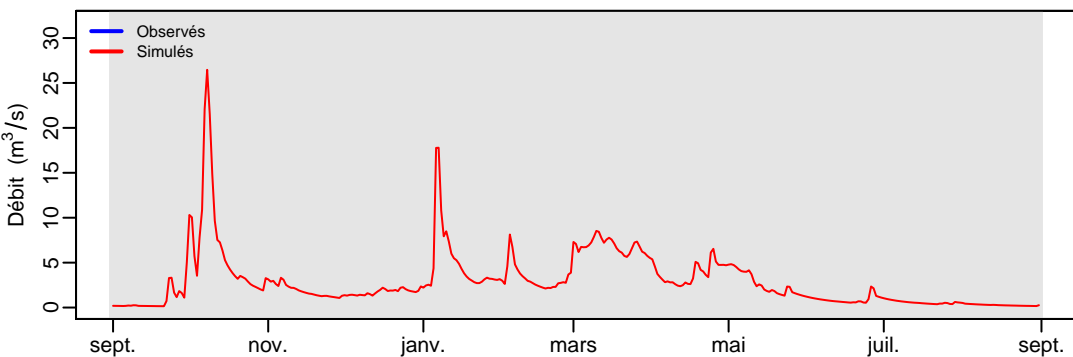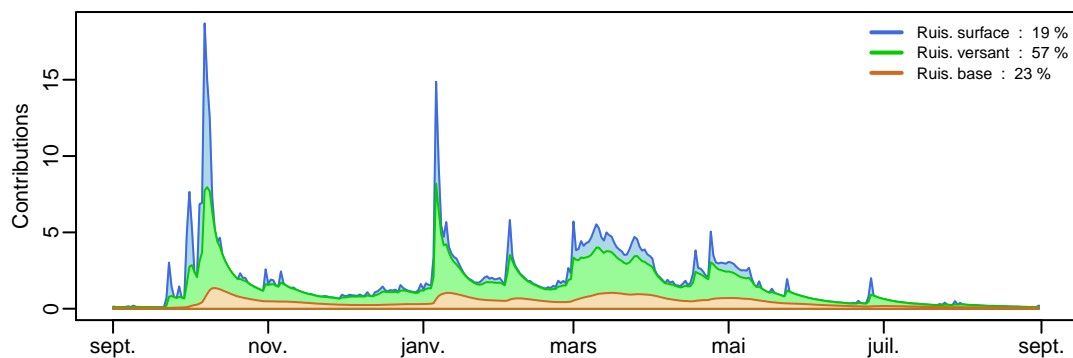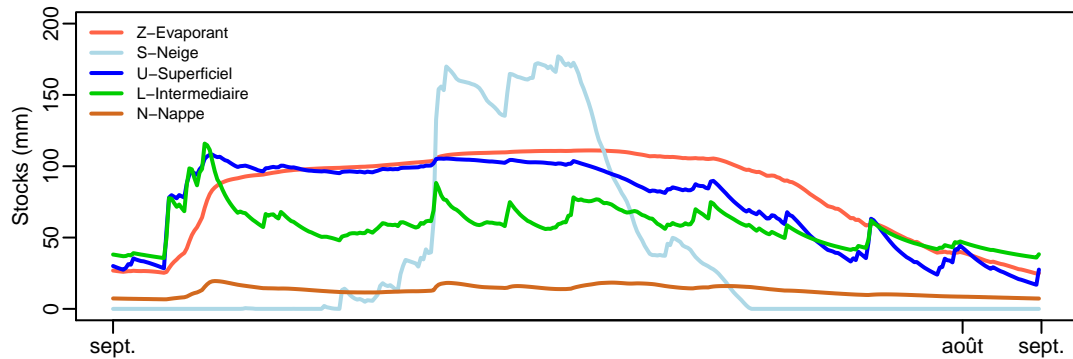

# q0252 (137.59 km²) – année 1994–1995

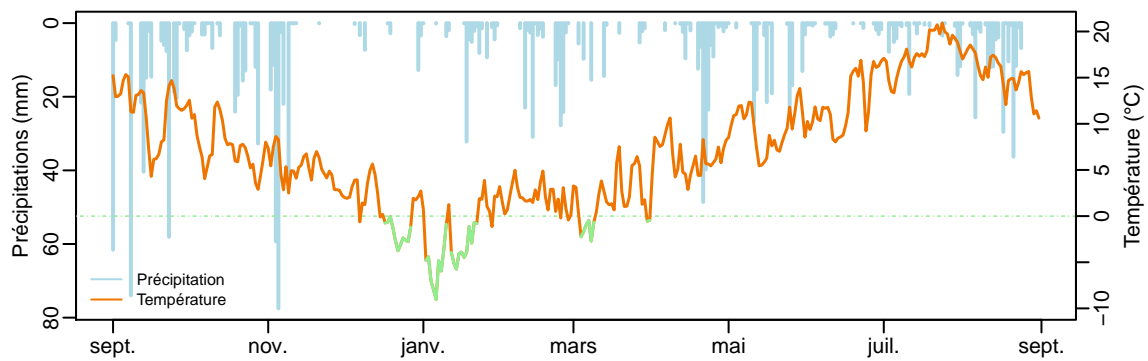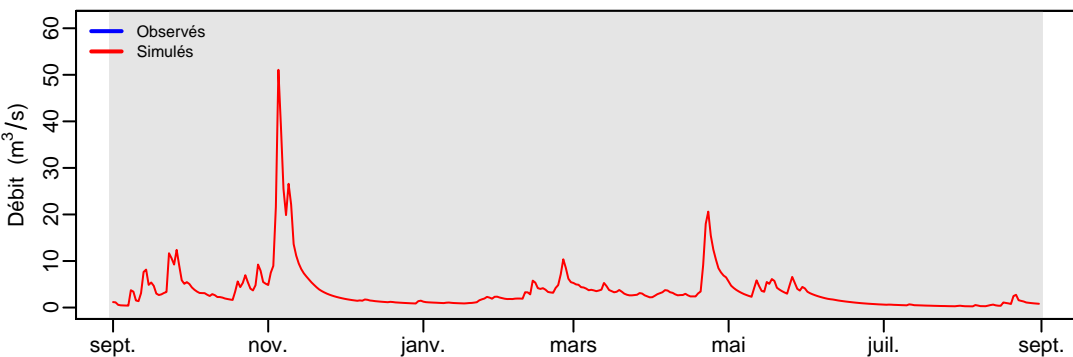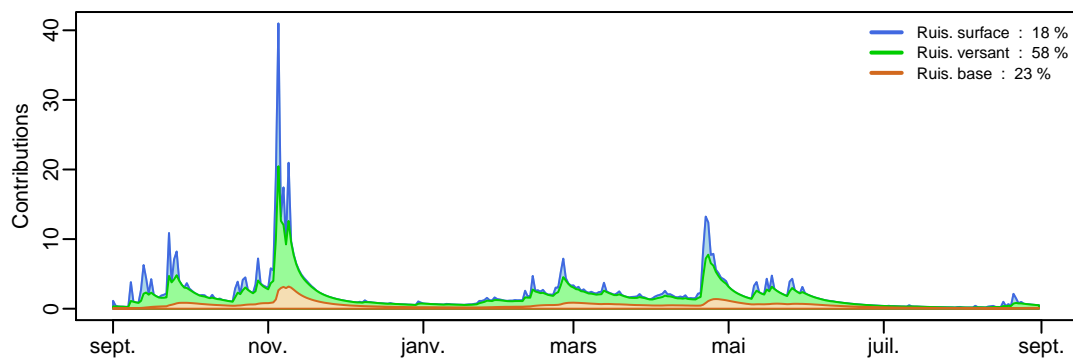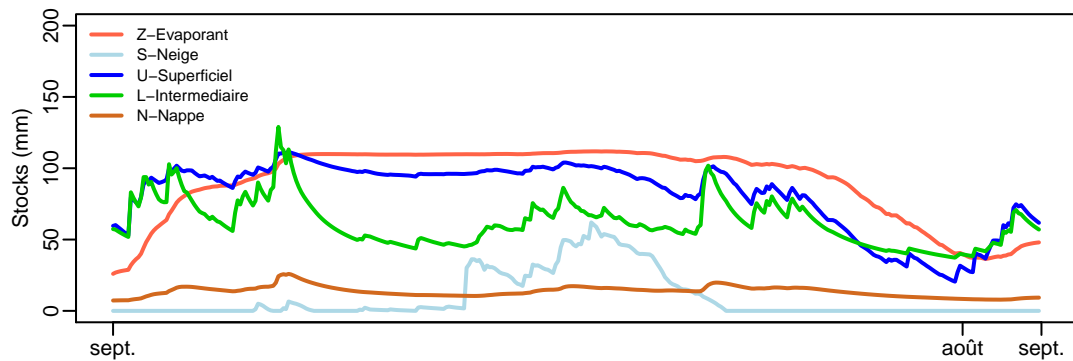

# q0252 (137.59 km²) – année 1995–1996

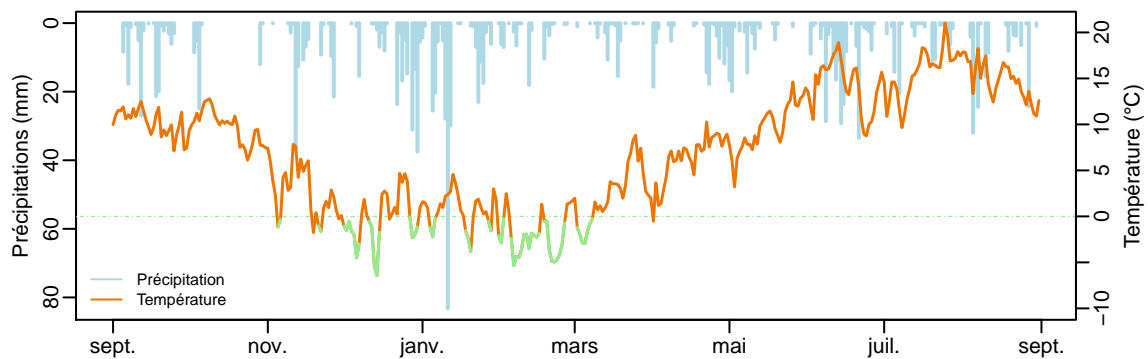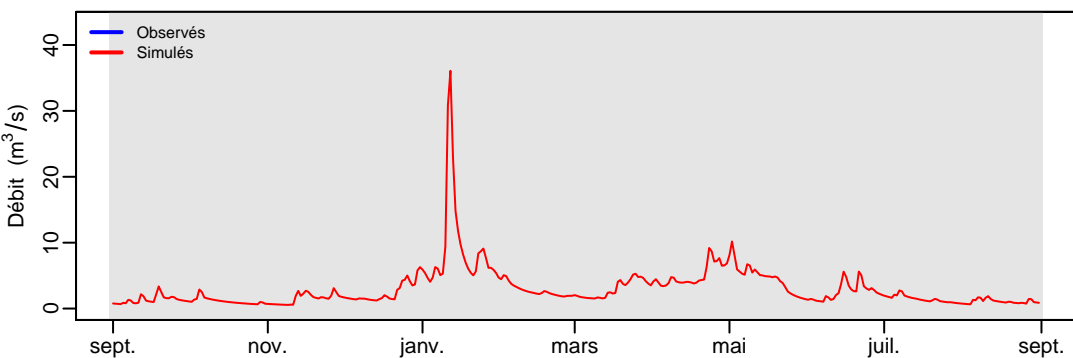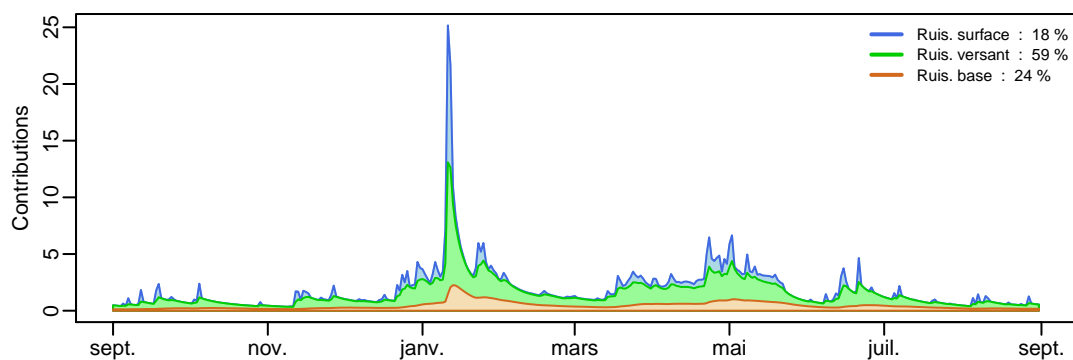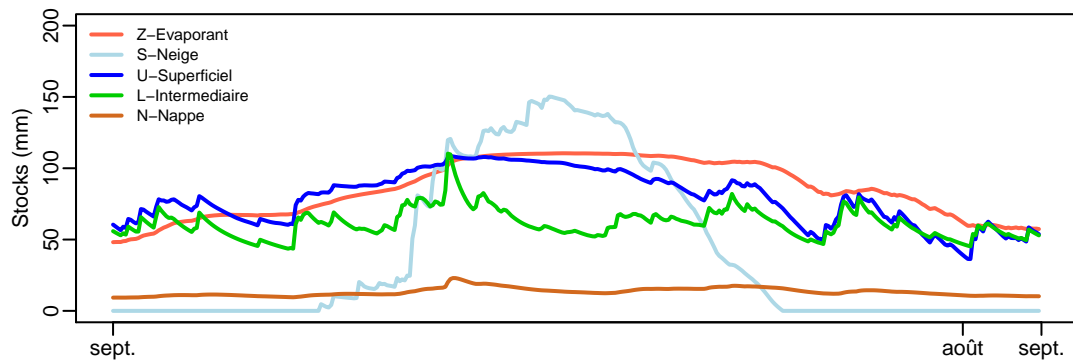

# q0252 (137.59 km²) – année 1996–1997

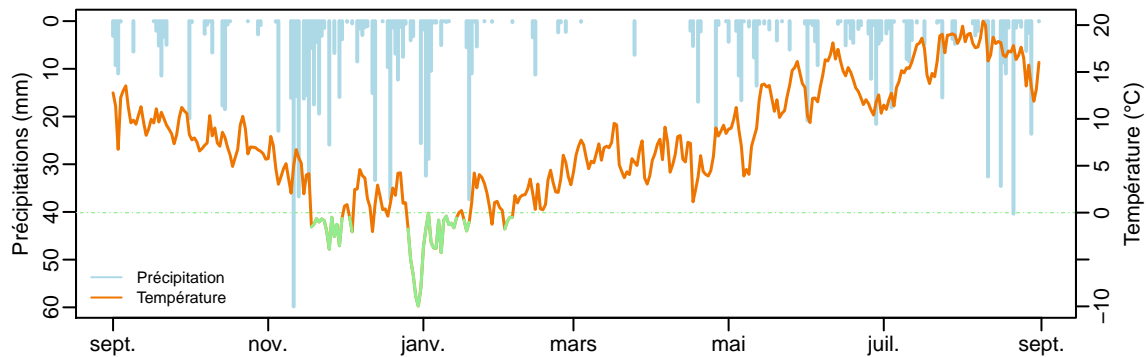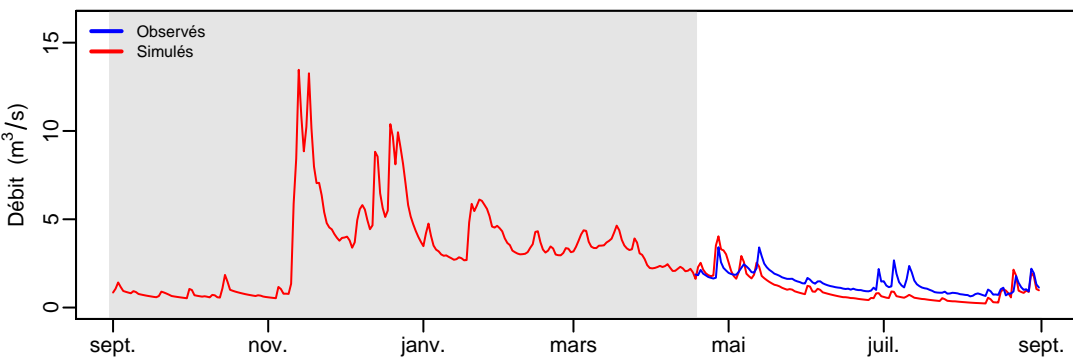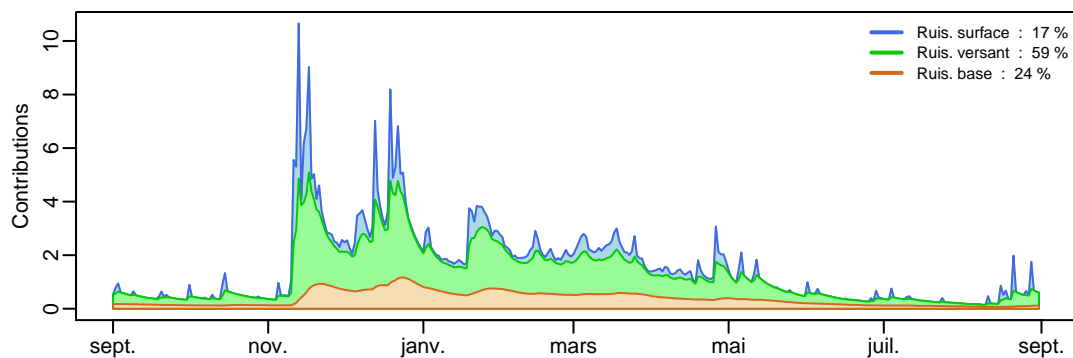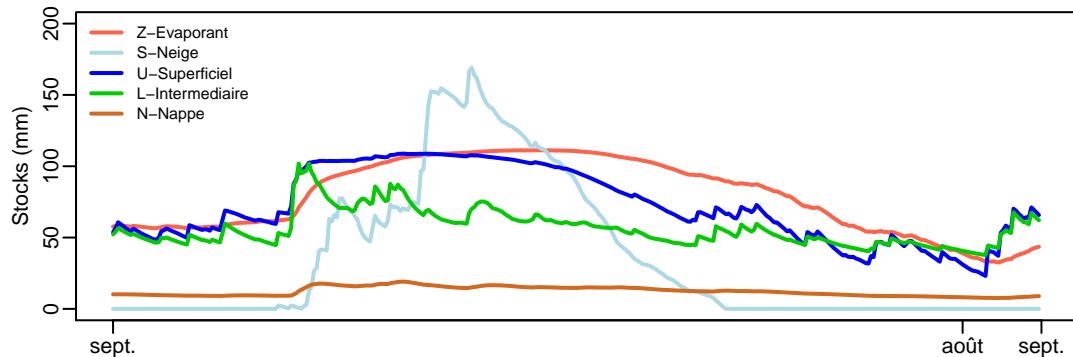

# q0252 (137.59 km²) – année 1997–1998

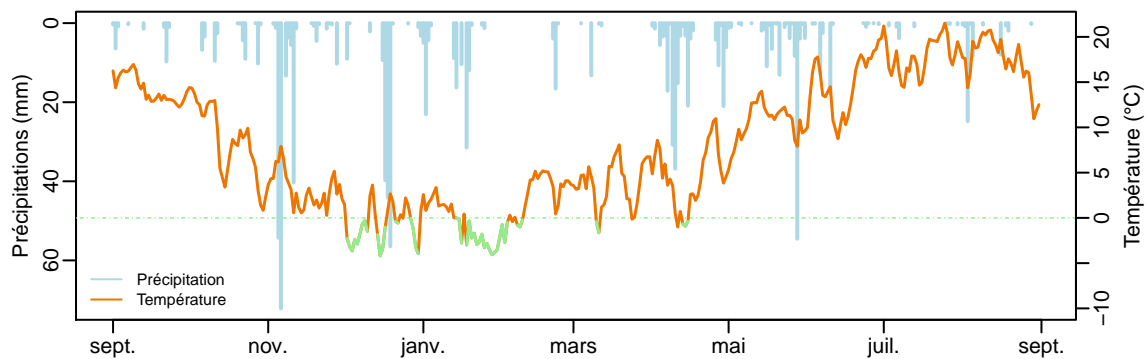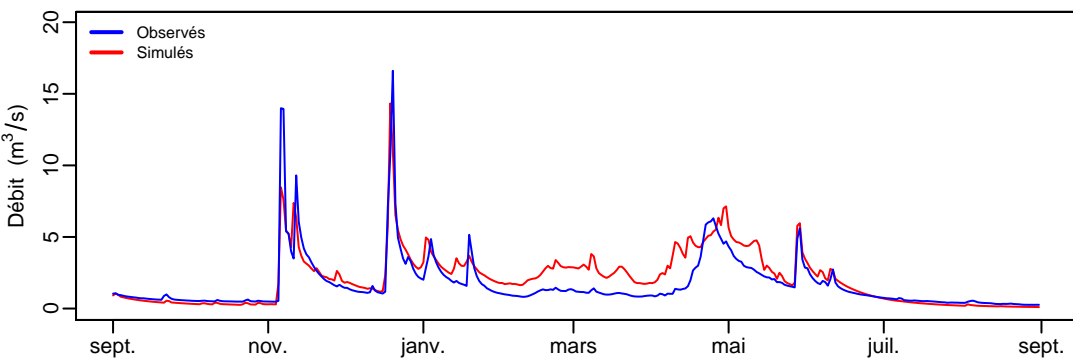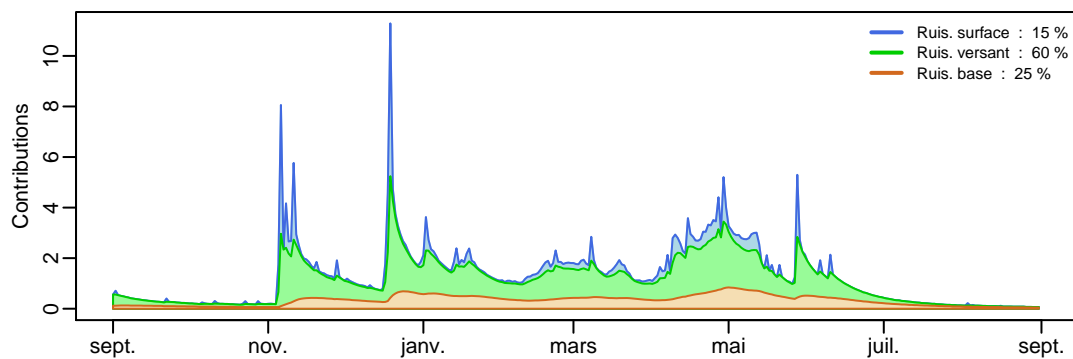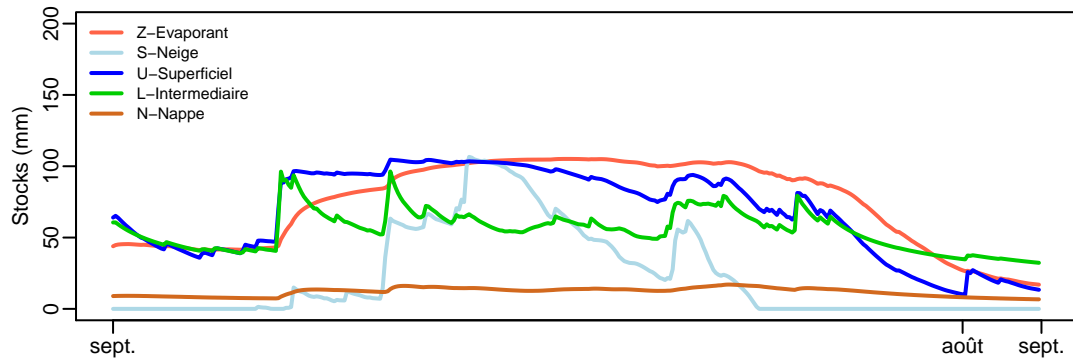

# q0252 (137.59 km²) – année 1998–1999

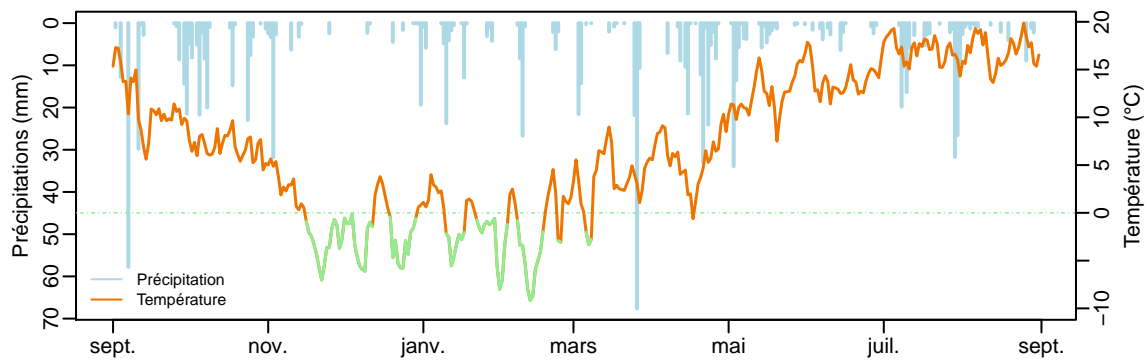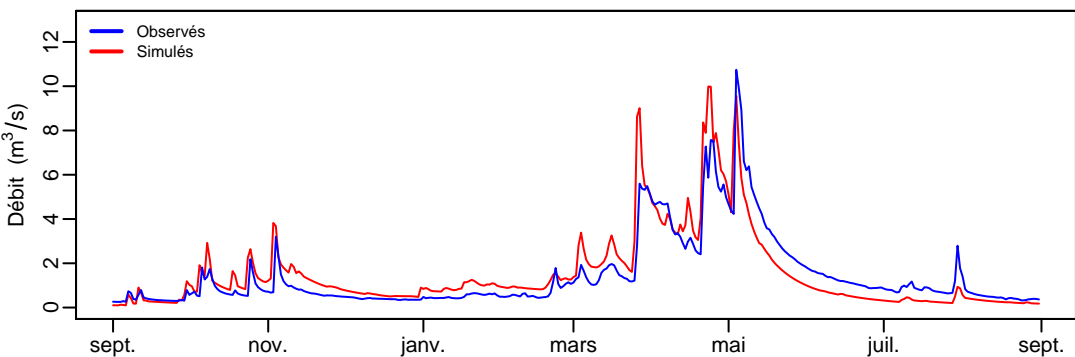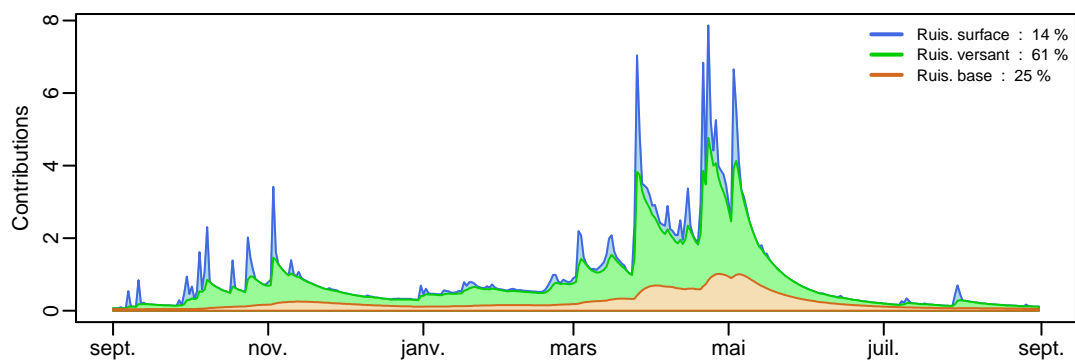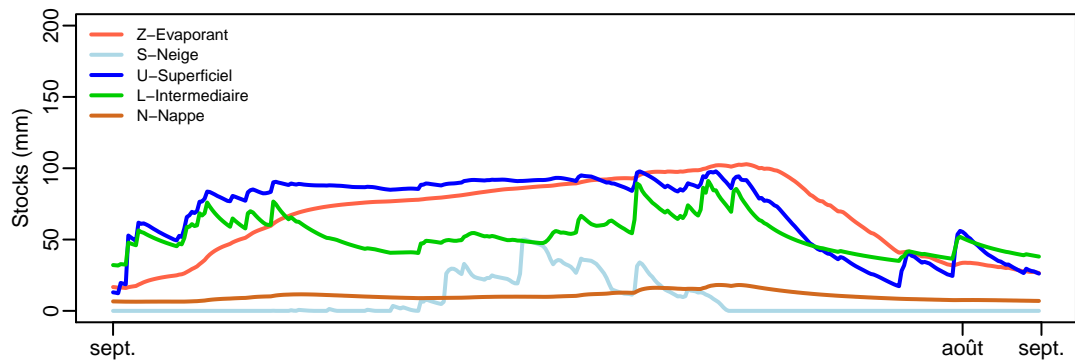

# q0252 (137.59 km²) – année 1999–2000

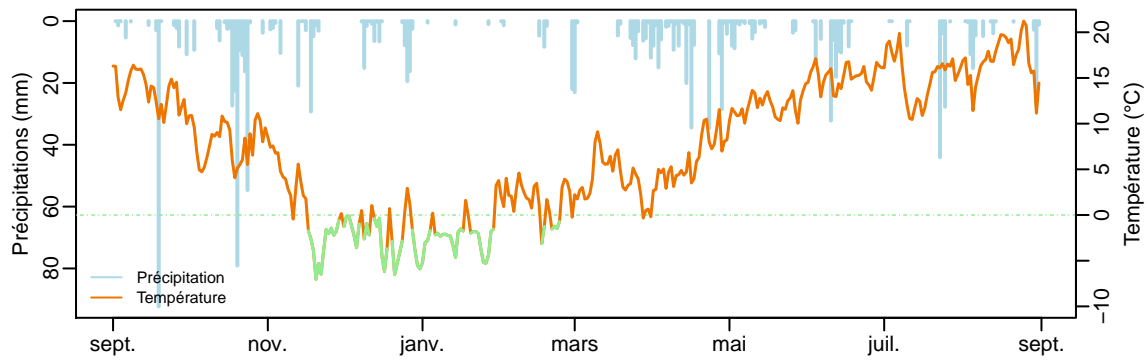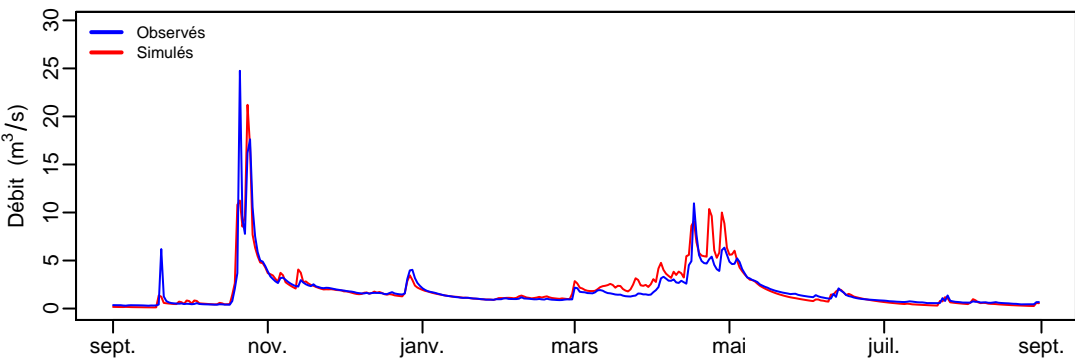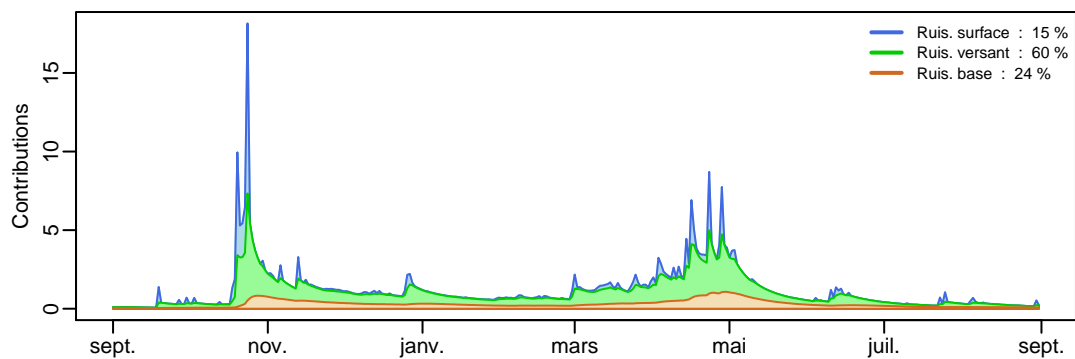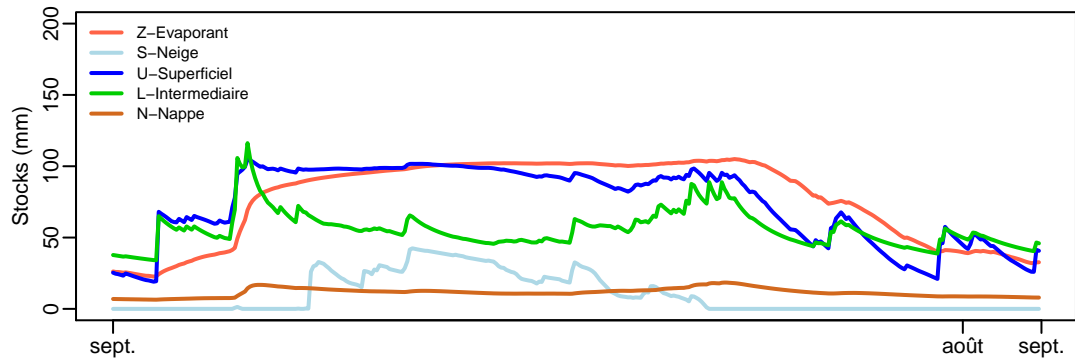



# q0252 (137.59 km²) – année 2000–2001

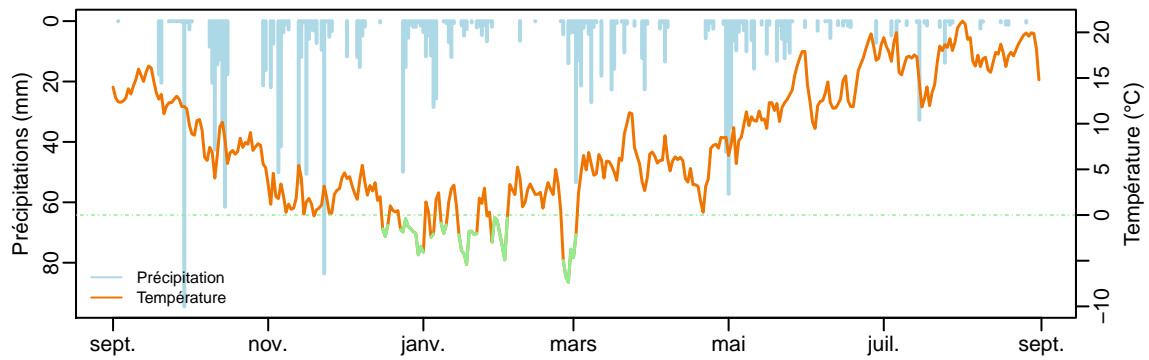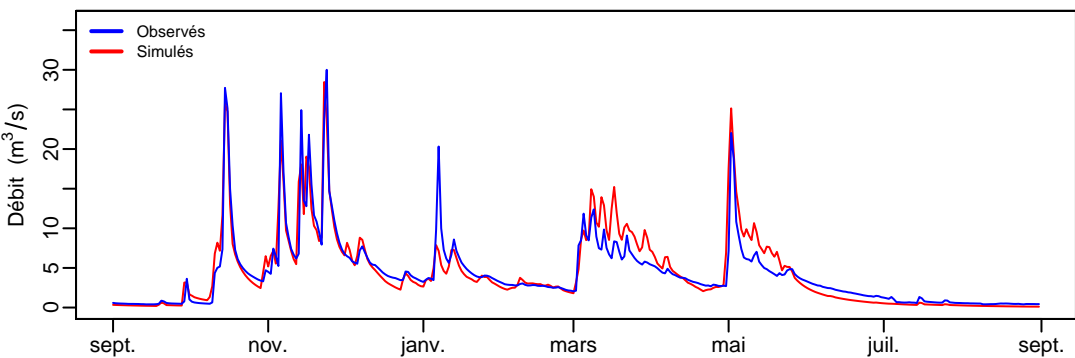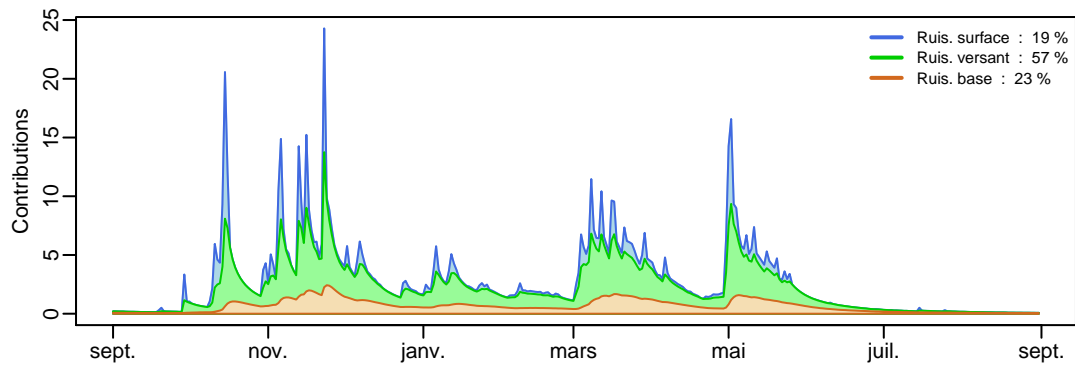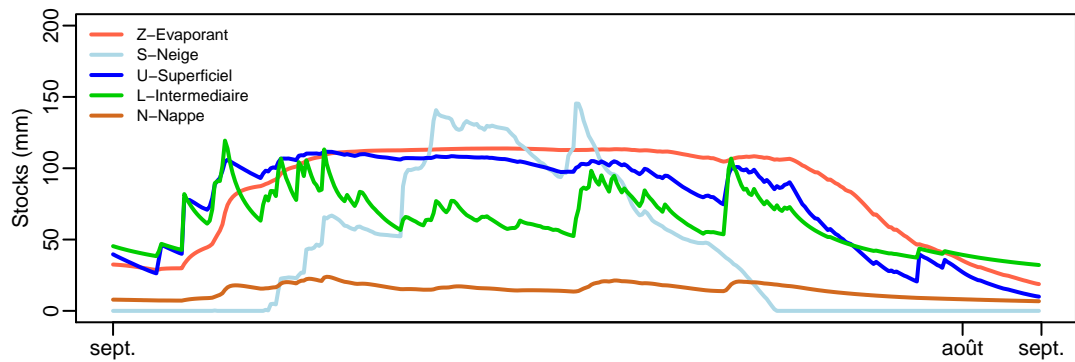

# q0252 (137.59 km²) – année 2001–2002

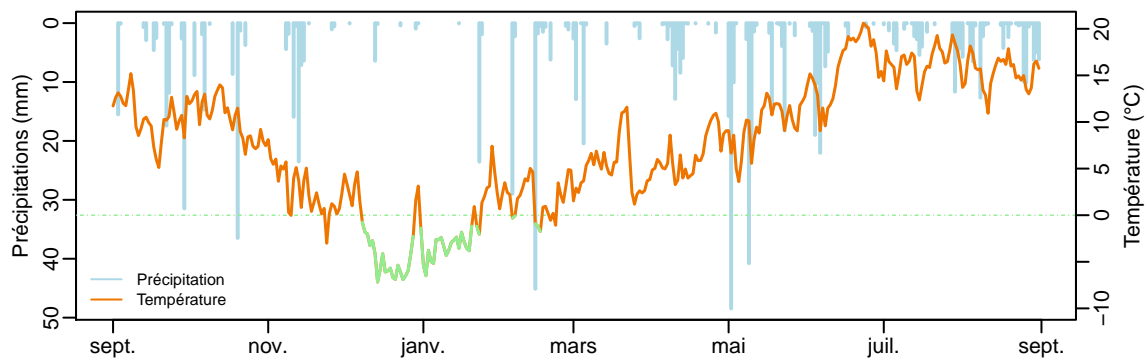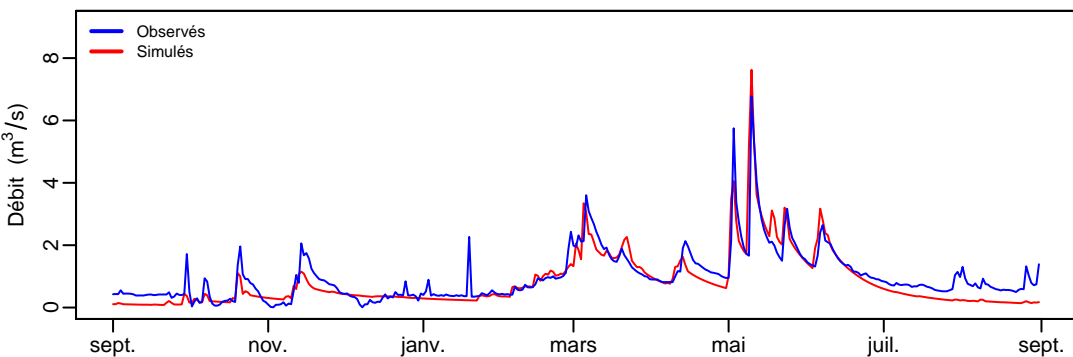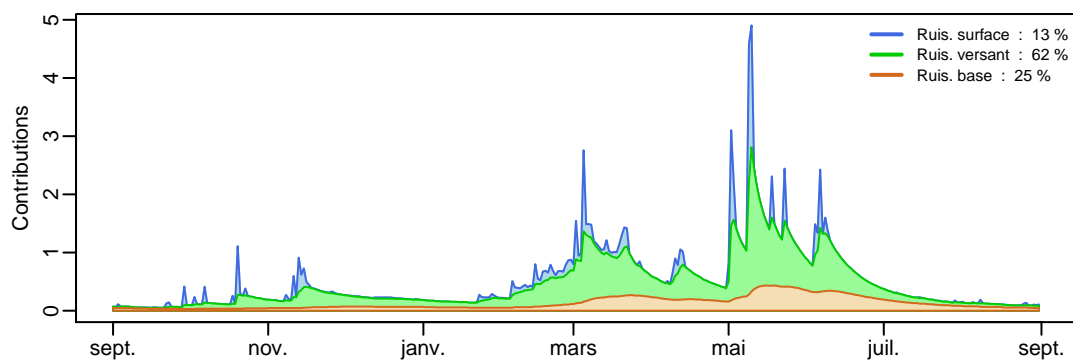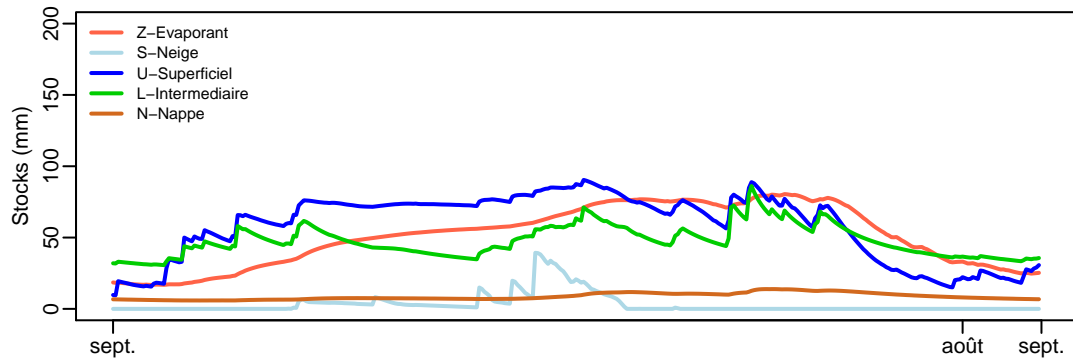

# q0252 (137.59 km²) – année 2002–2003

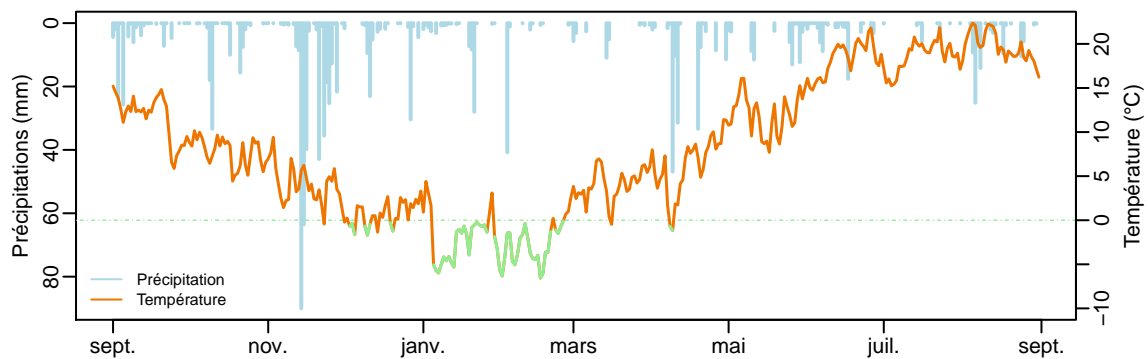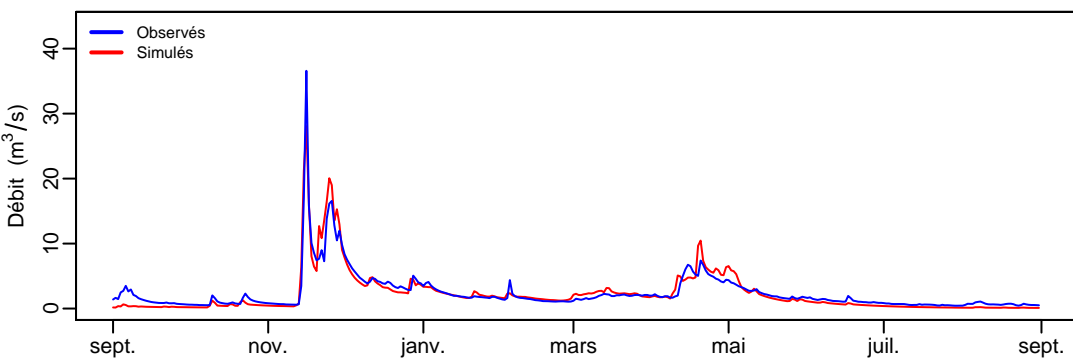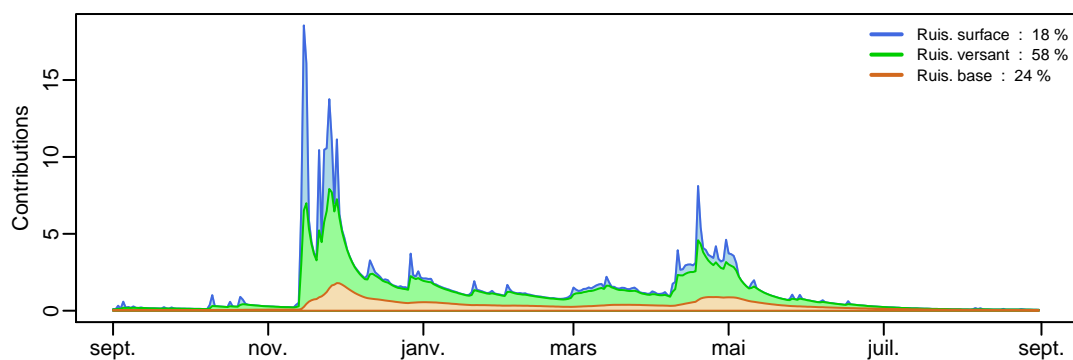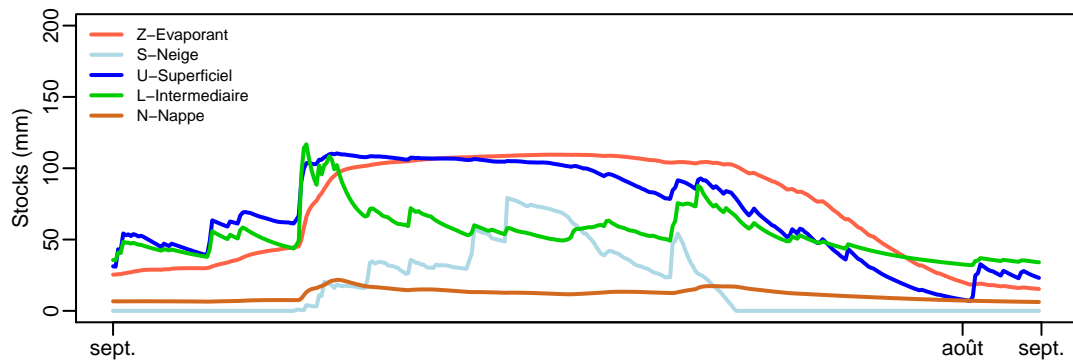

# q0252 (137.59 km²) – année 2003–2004

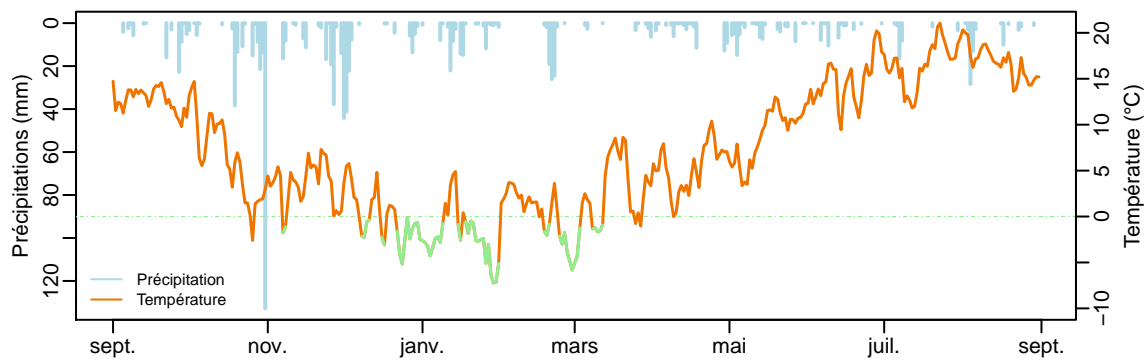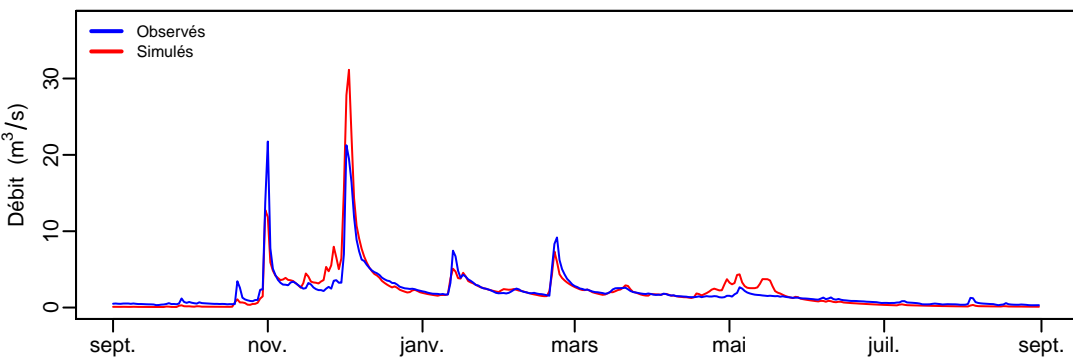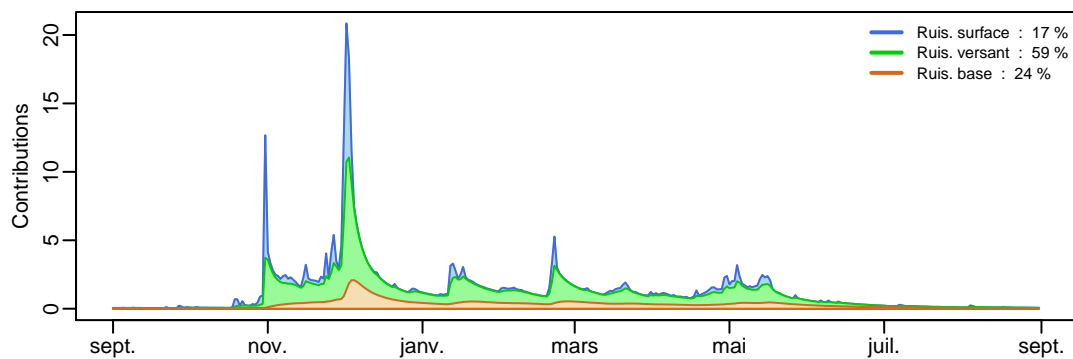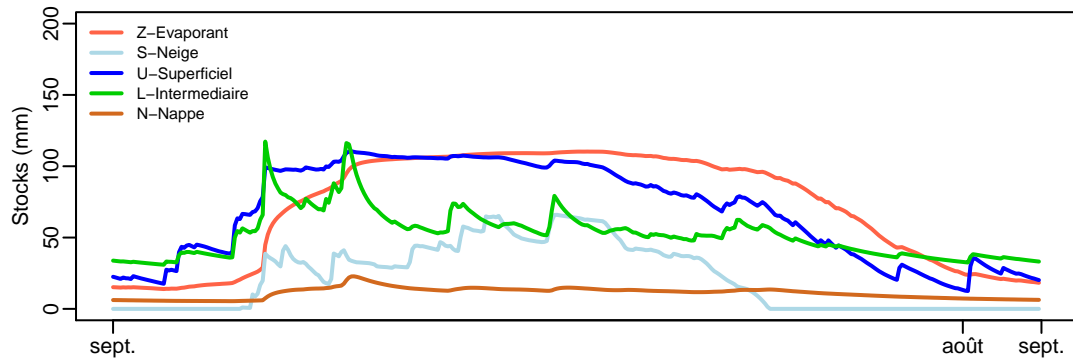

# q0252 (137.59 km²) – année 2004–2005

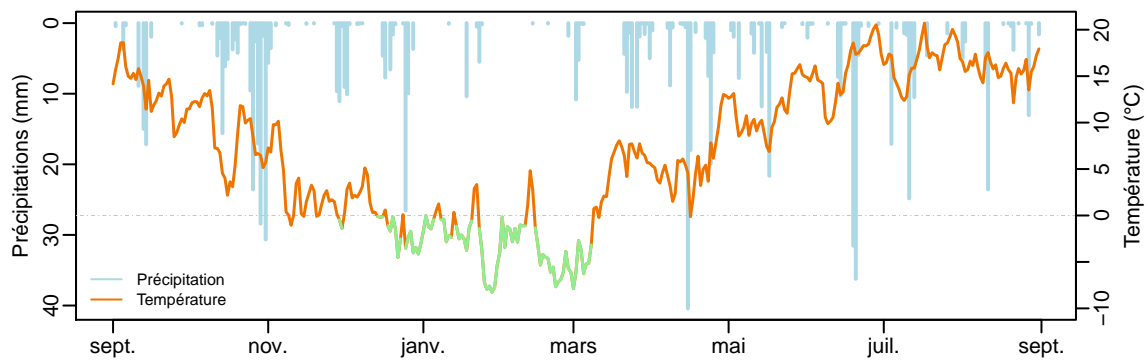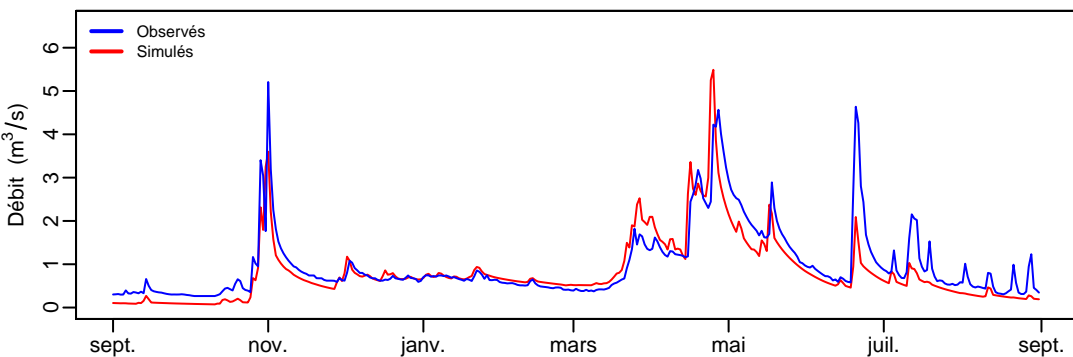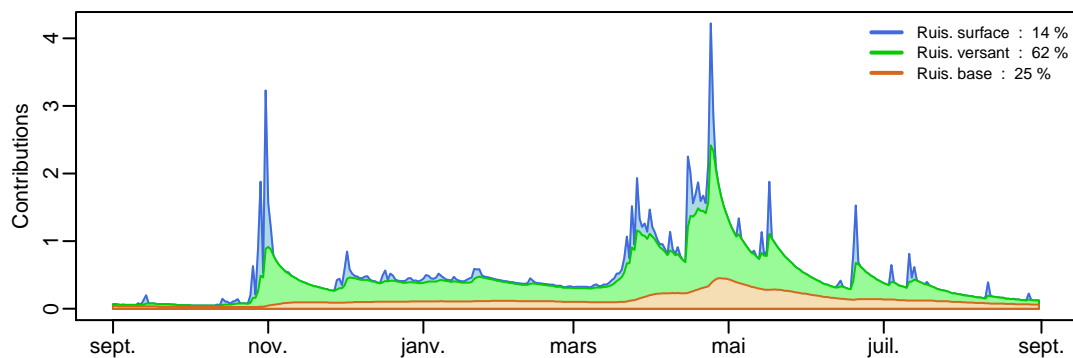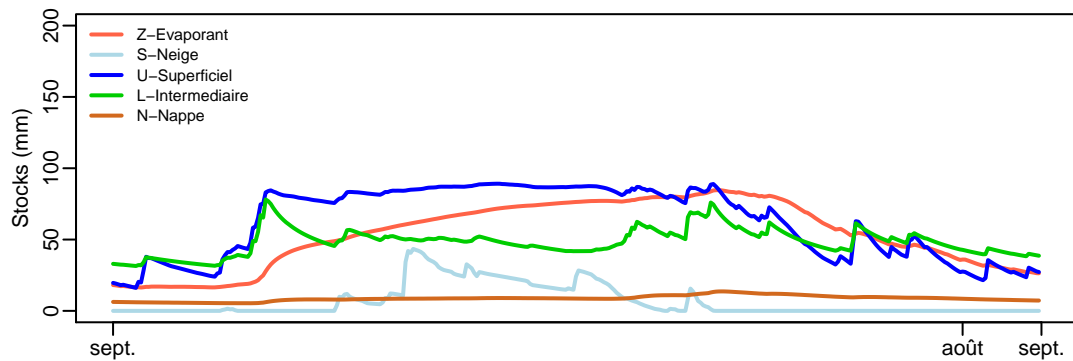

# q0252 (137.59 km<sup>2</sup>) – année 2005–2006

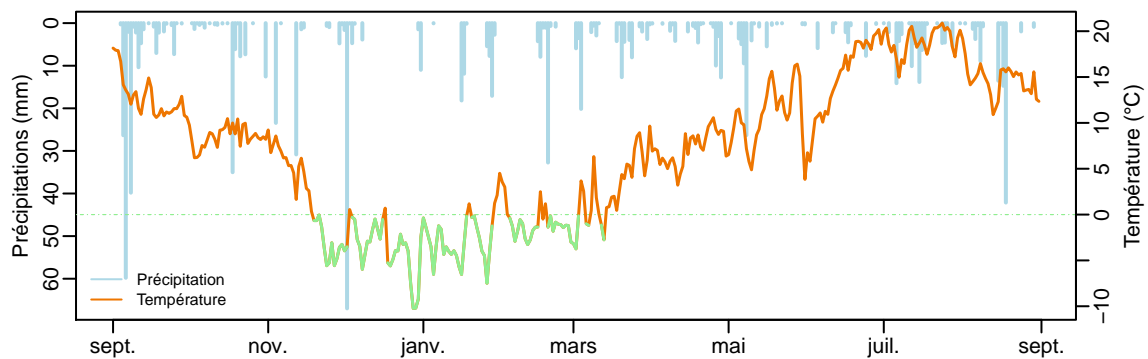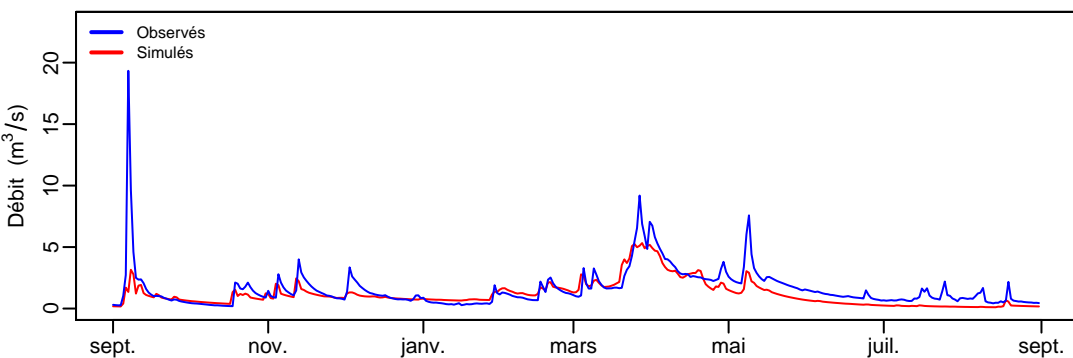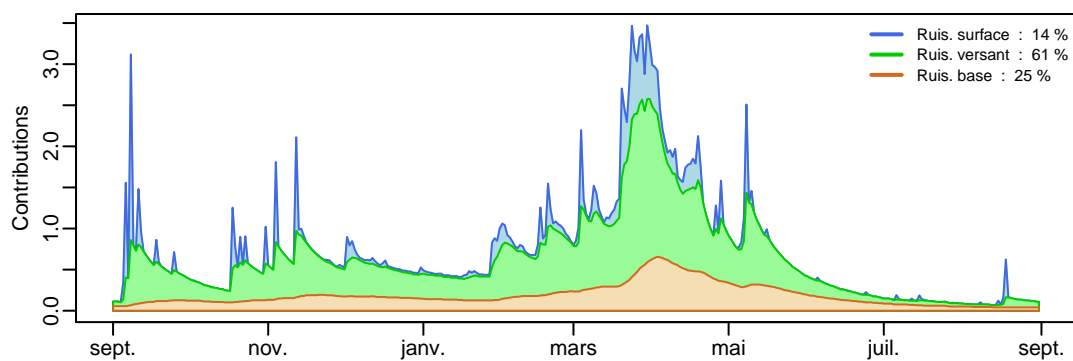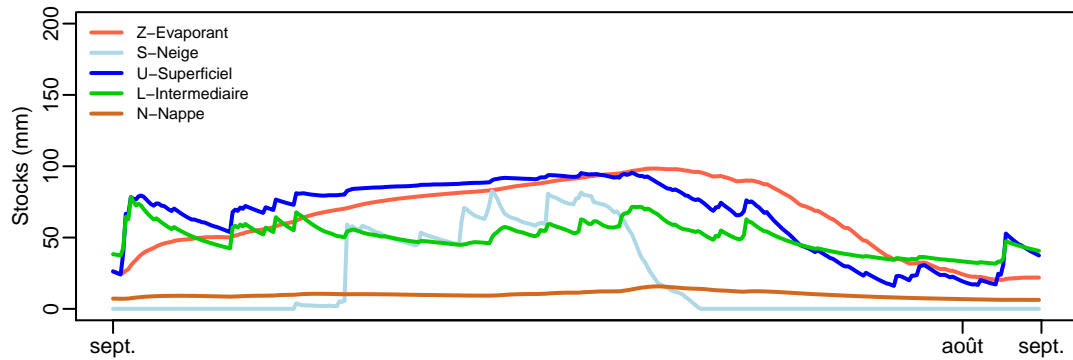

# q0252 (137.59 km<sup>2</sup>) – année 2006–2007

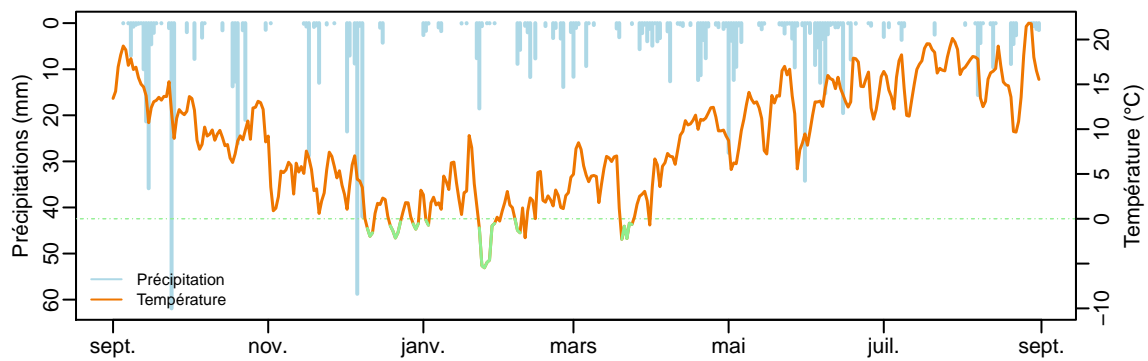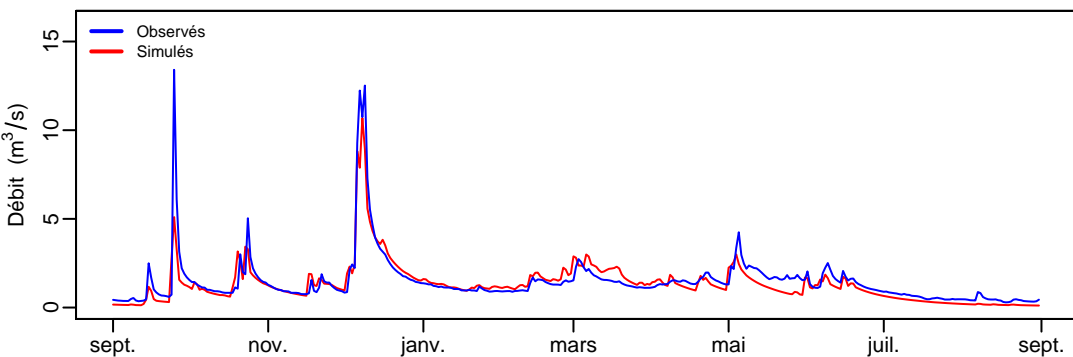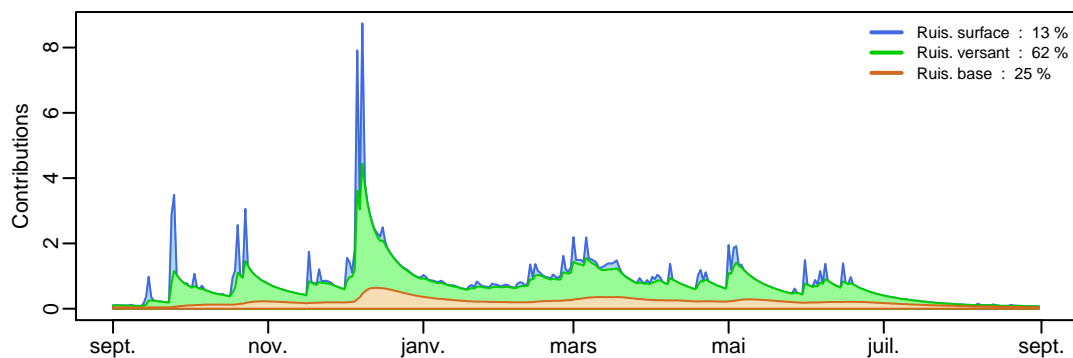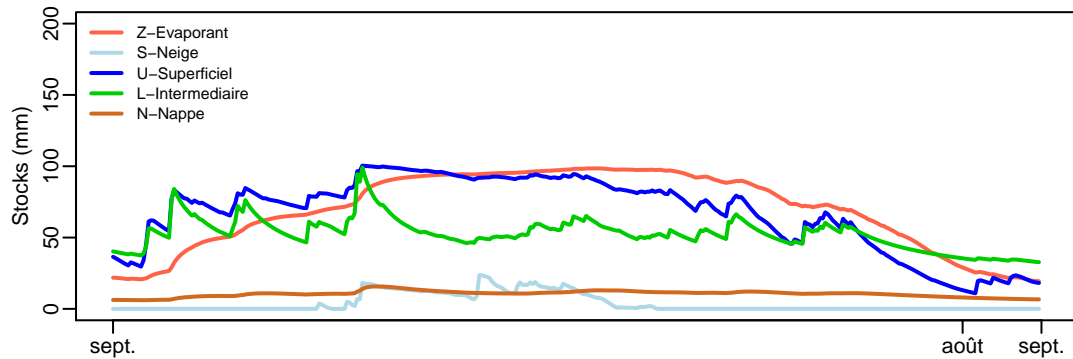

# q0252 (137.59 km²) – année 2007–2008

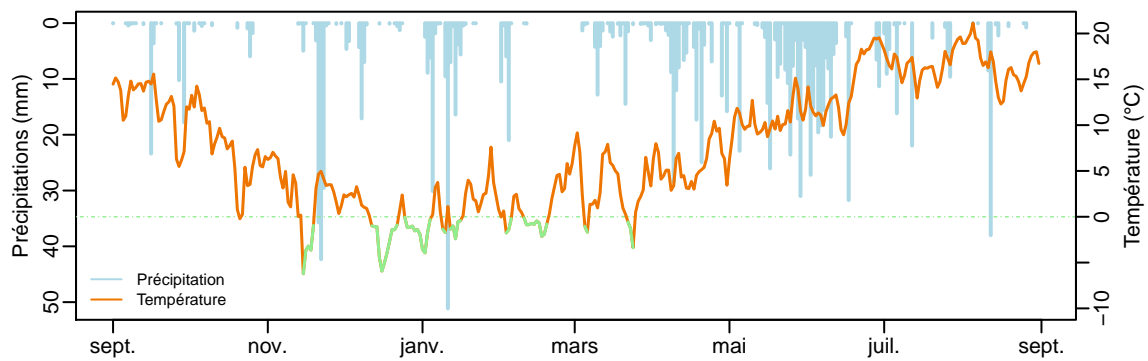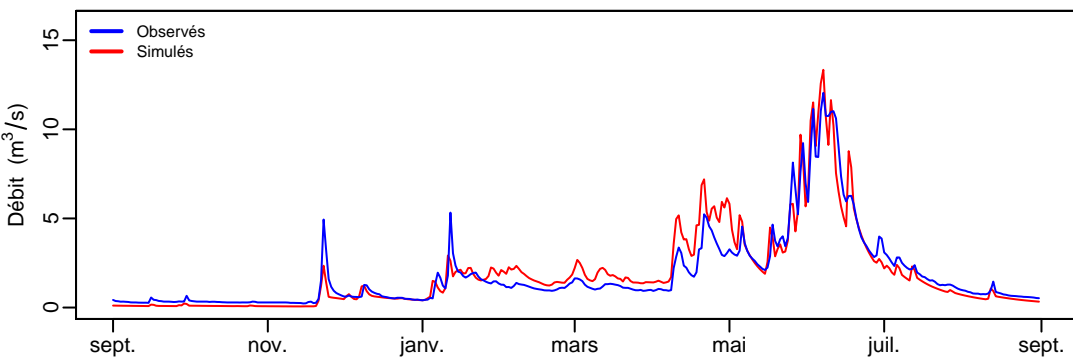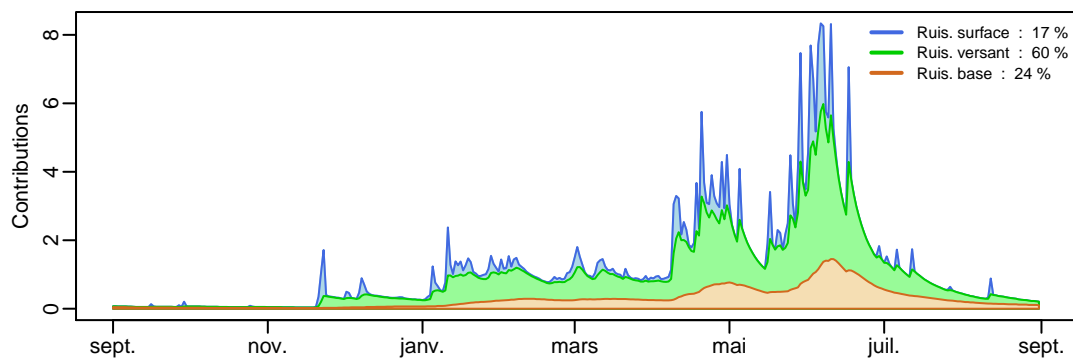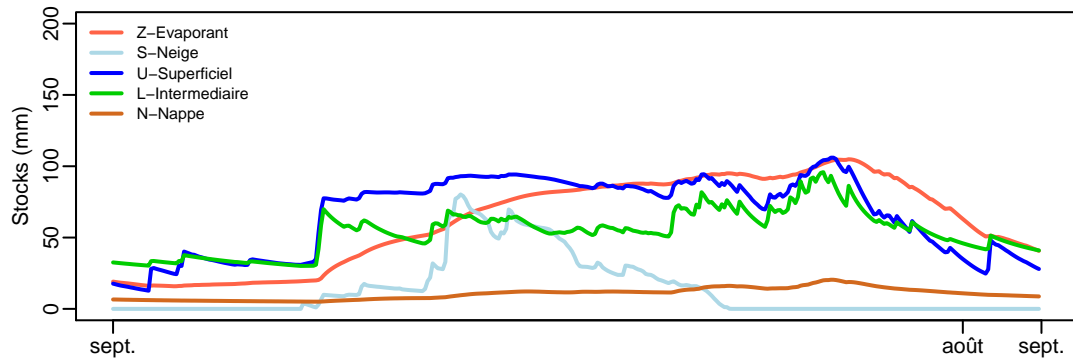



# q0252 (137.59 km²) – année 2008–2009

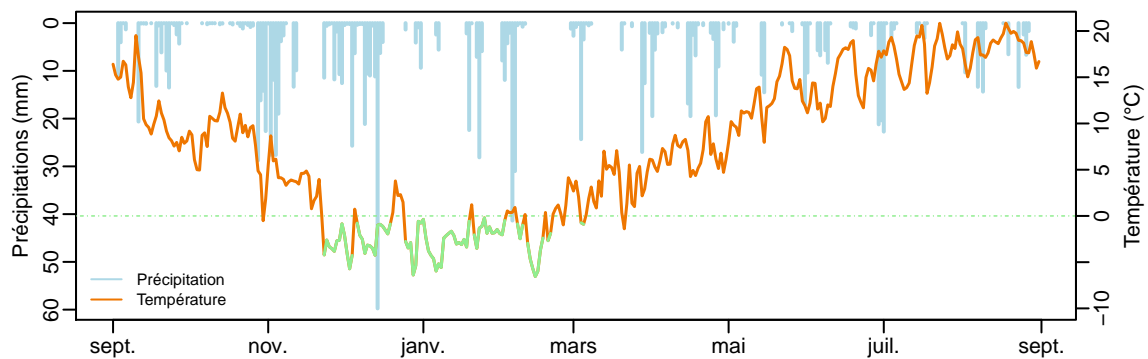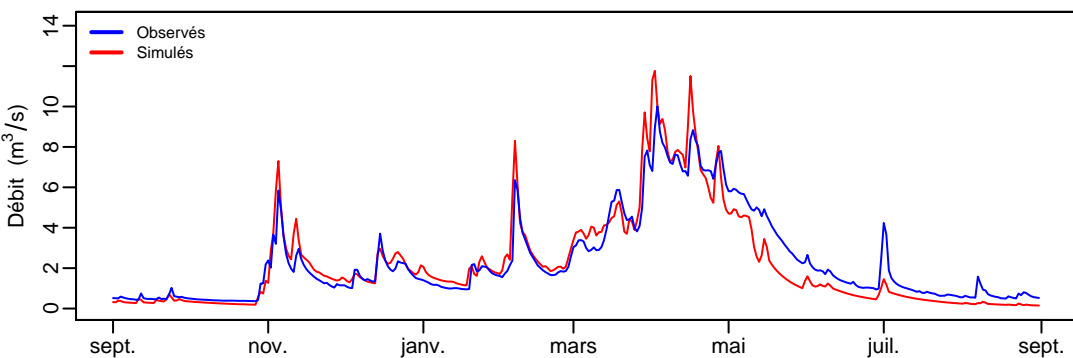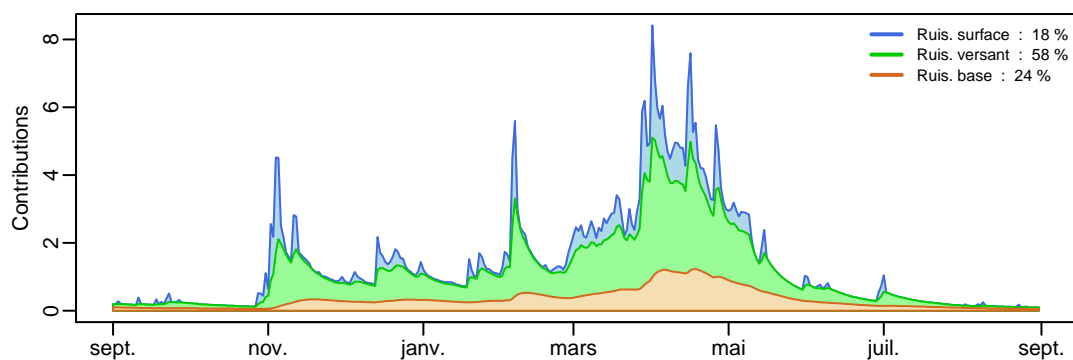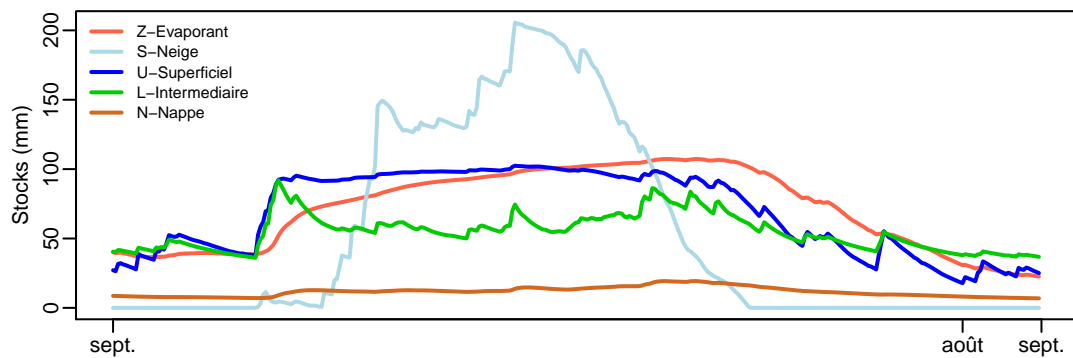

# q0252 (137.59 km<sup>2</sup>) – année 2009–2010

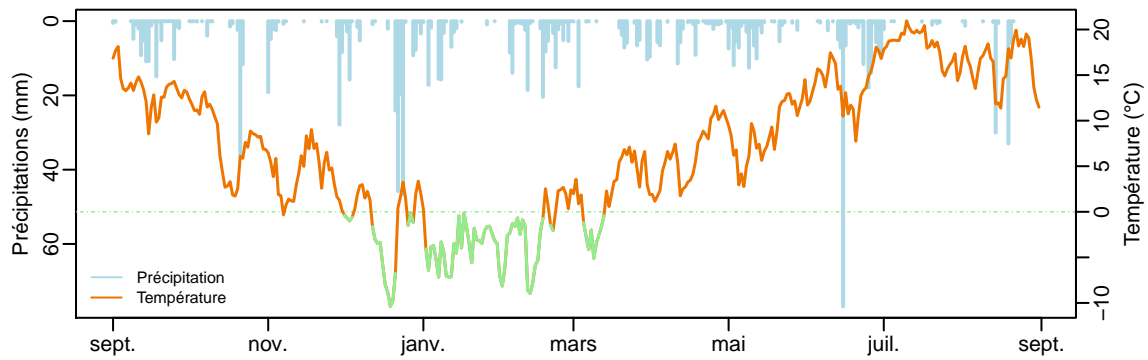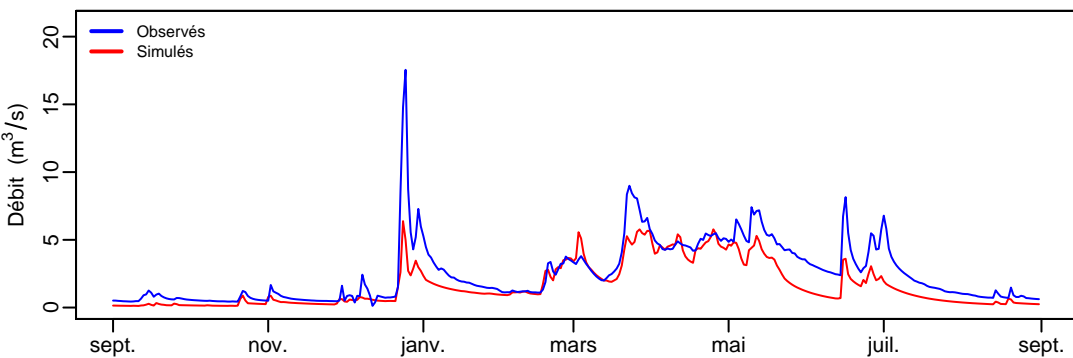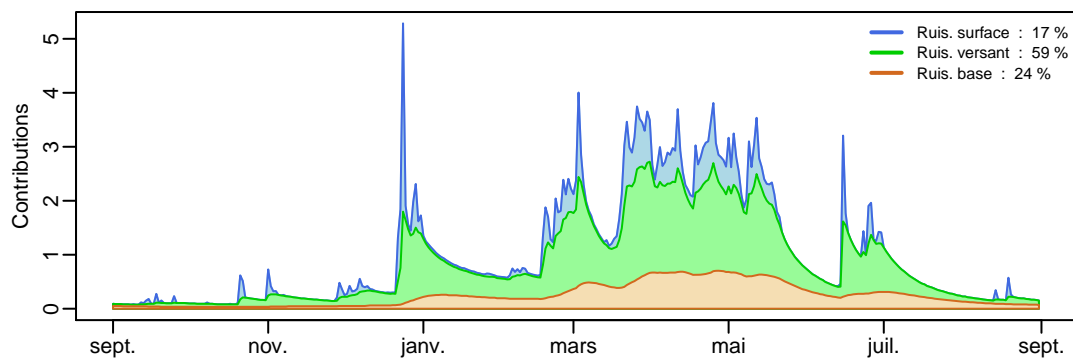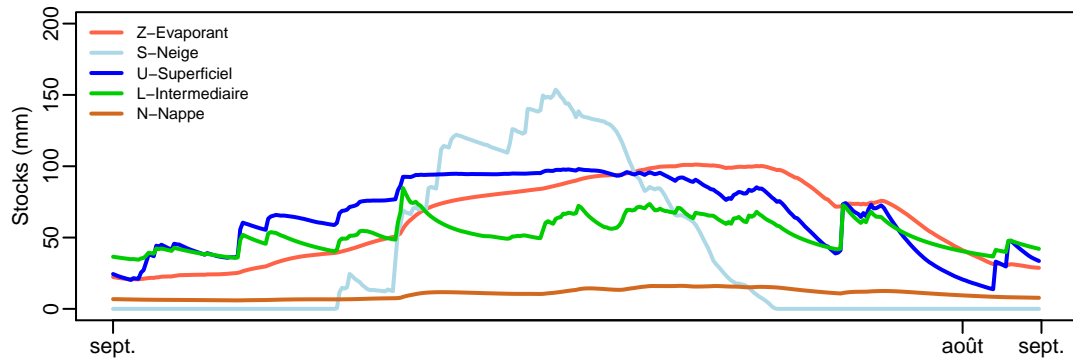

# q0252 (137.59 km²) – année 2010–2011

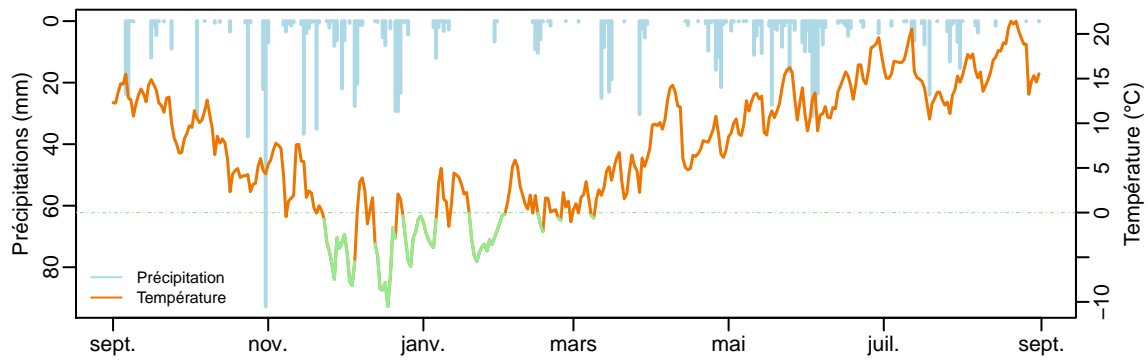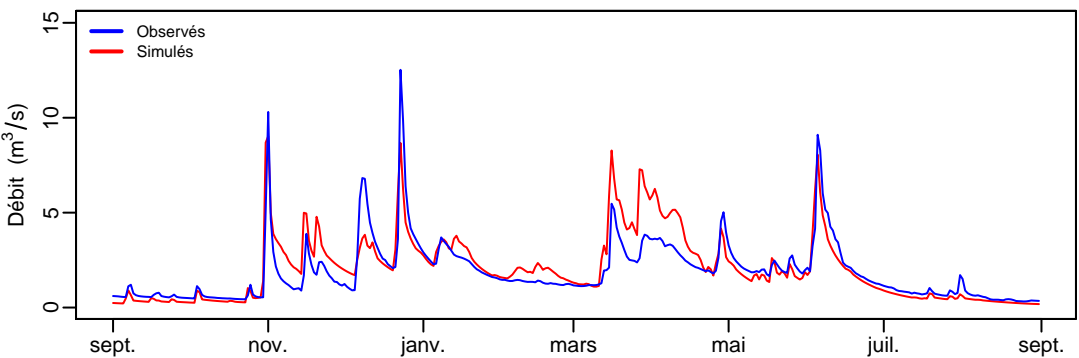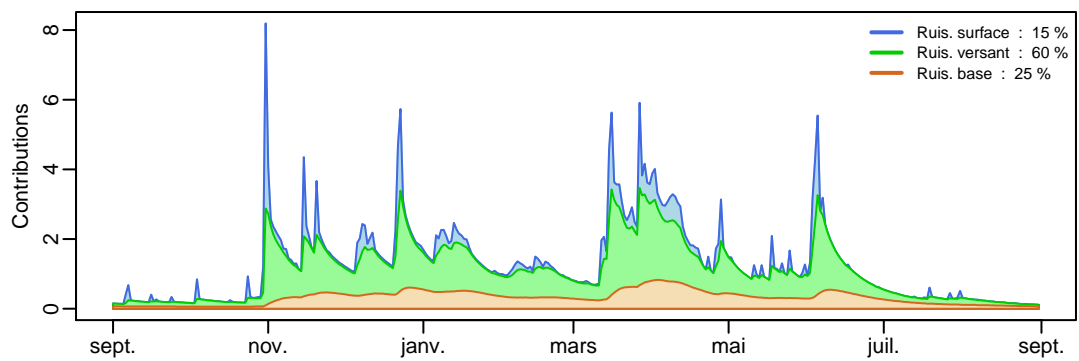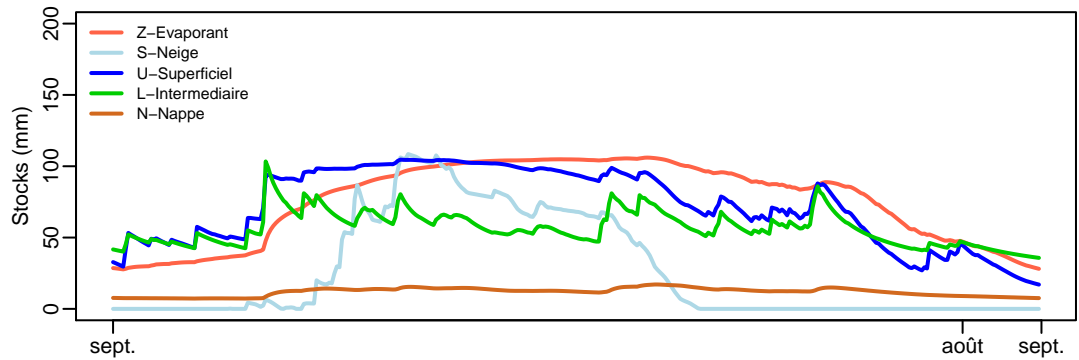

# q0252 (137.59 km²) – année 2011–2012

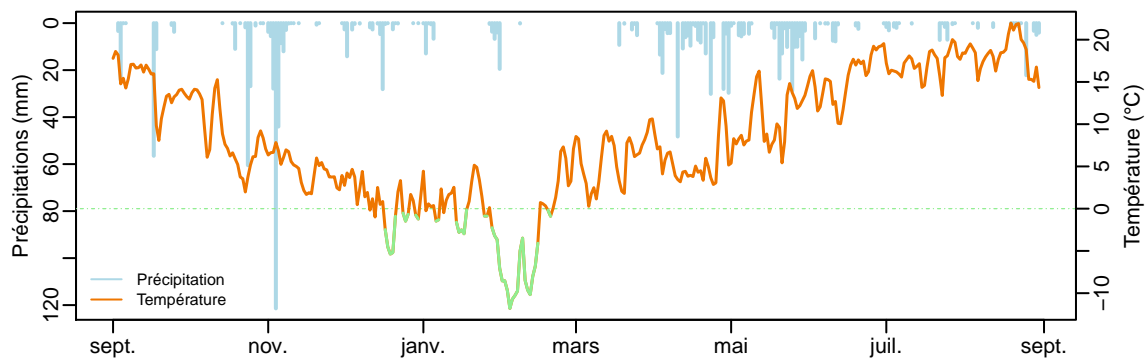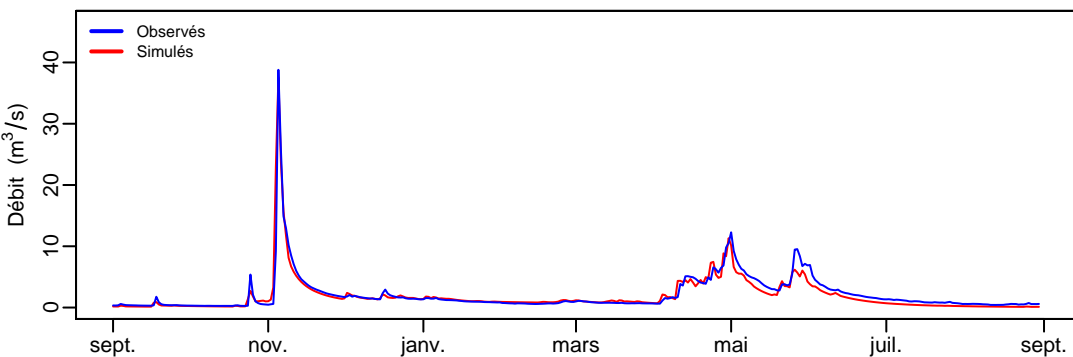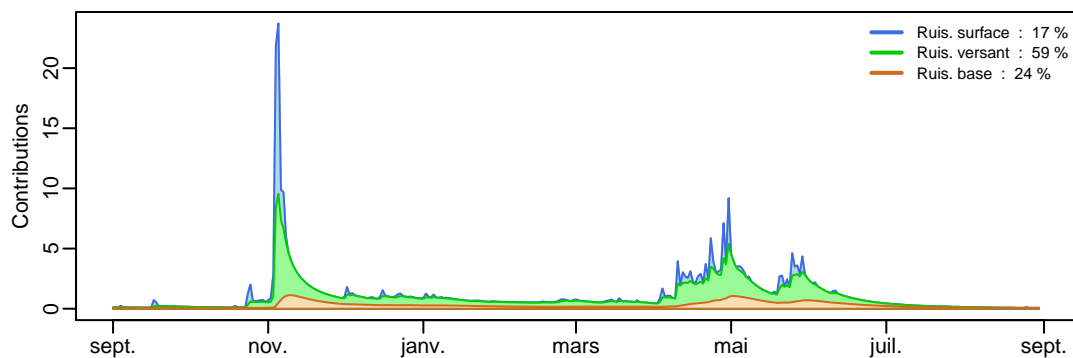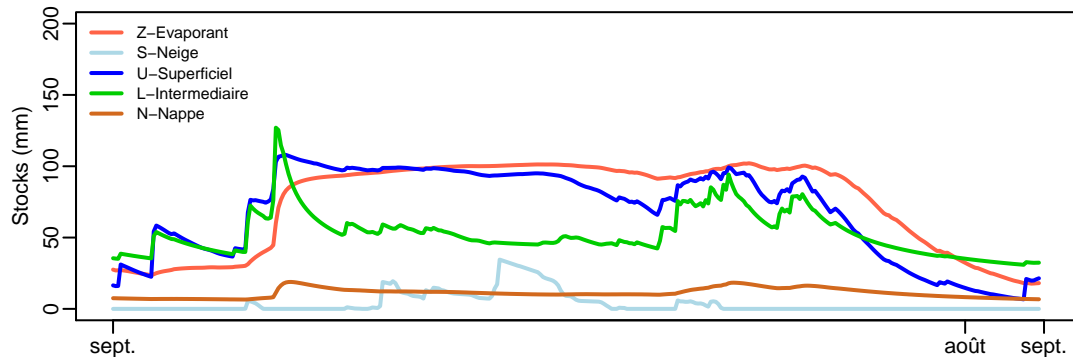

# q0258 (566.9 km<sup>2</sup>) – année 1983–1984

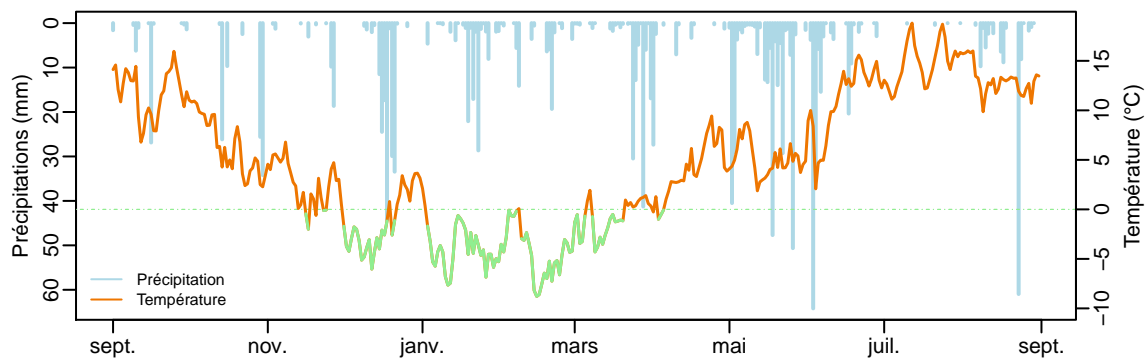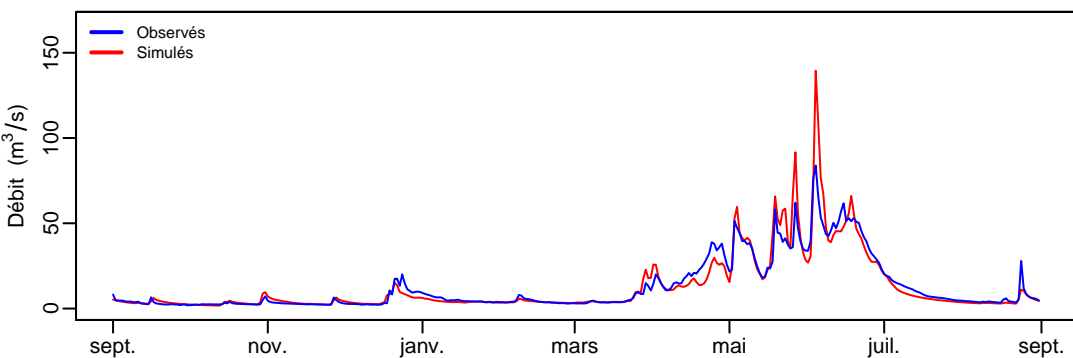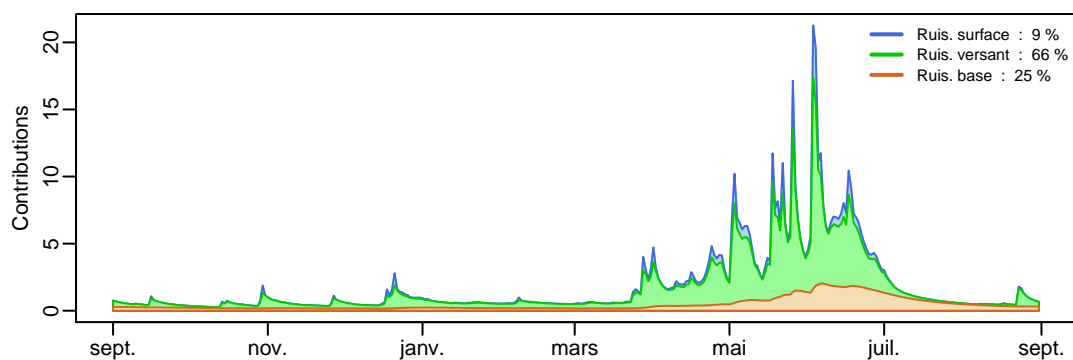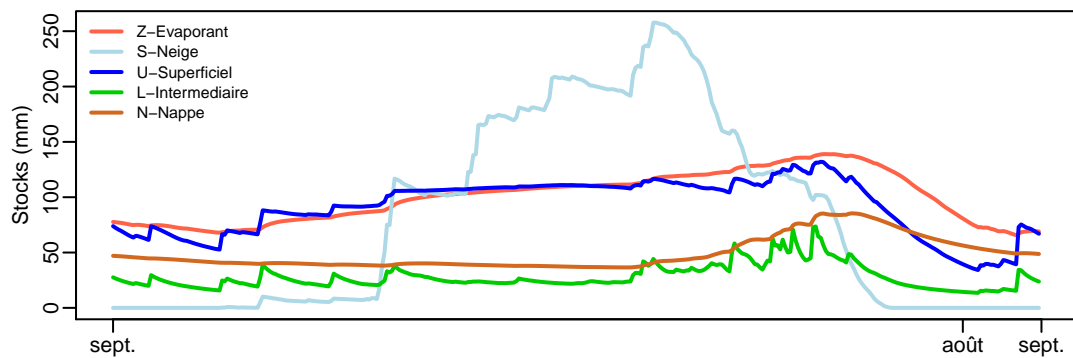

# q0258 (566.9 km<sup>2</sup>) – année 1984–1985

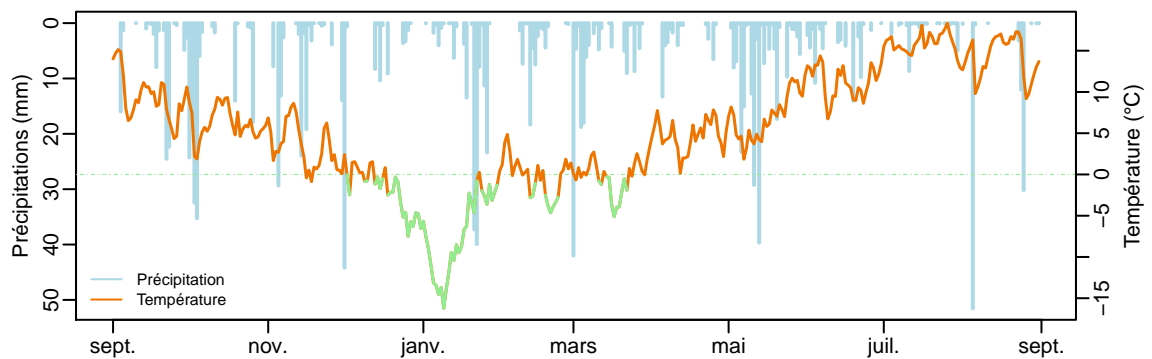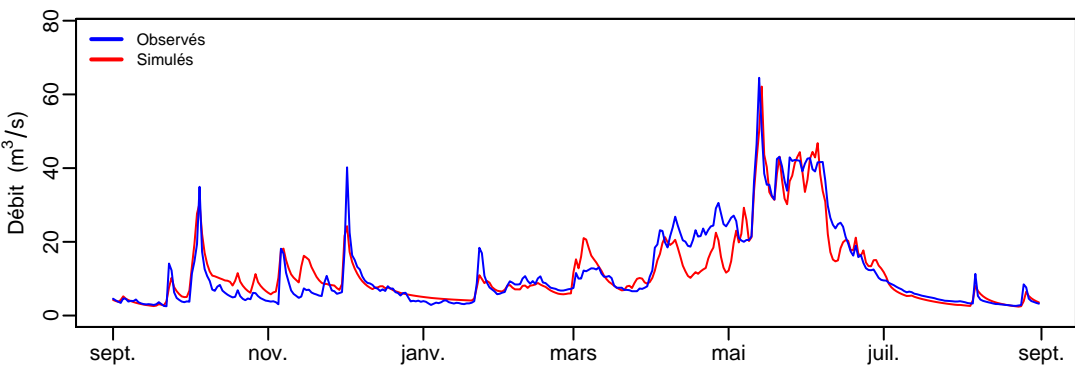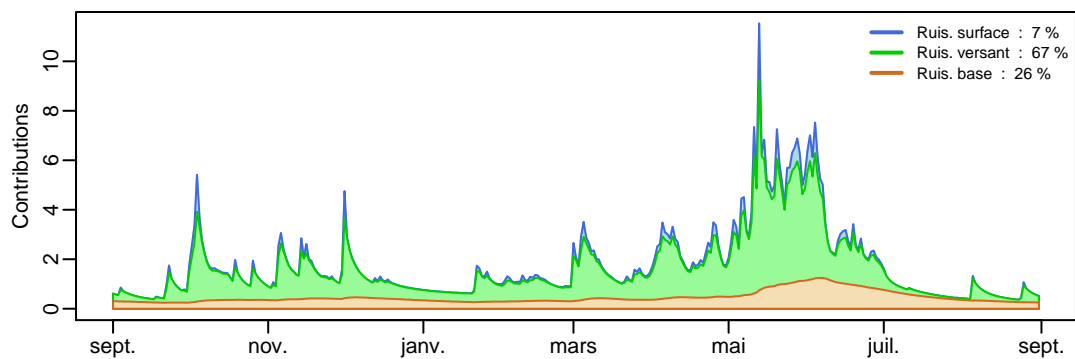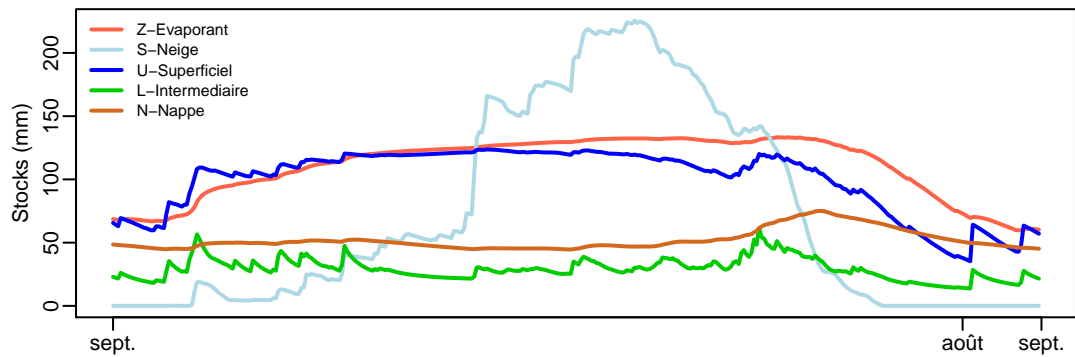

# q0258 (566.9 km²) – année 1985–1986

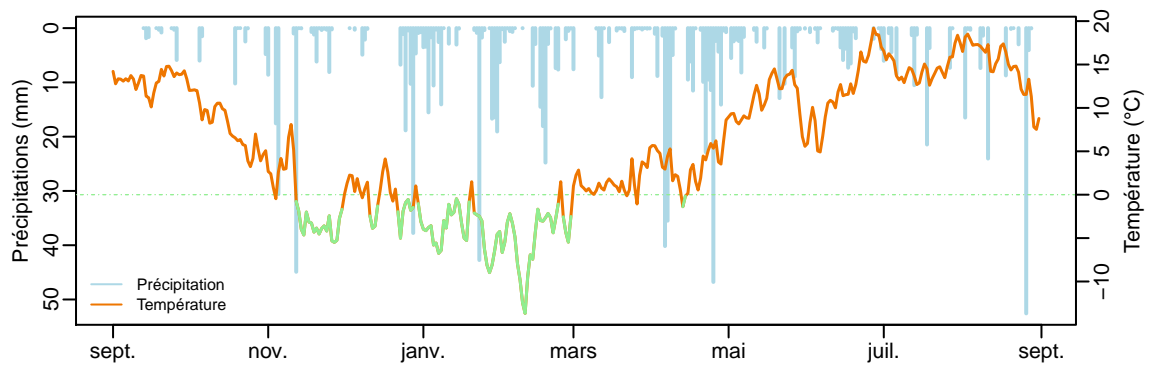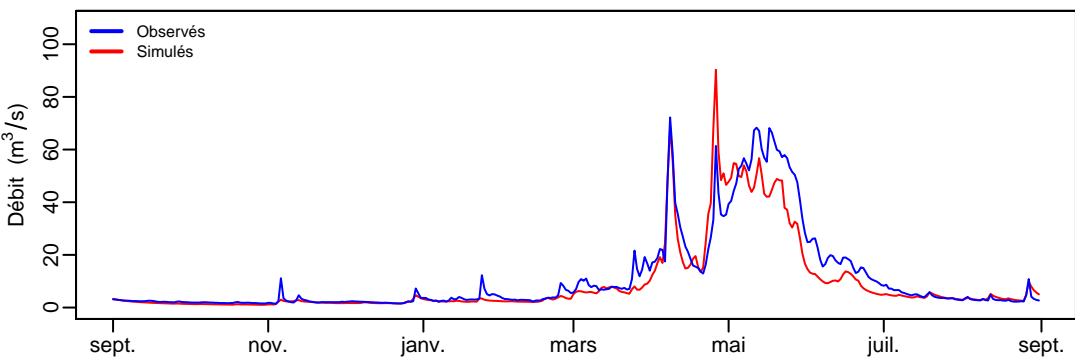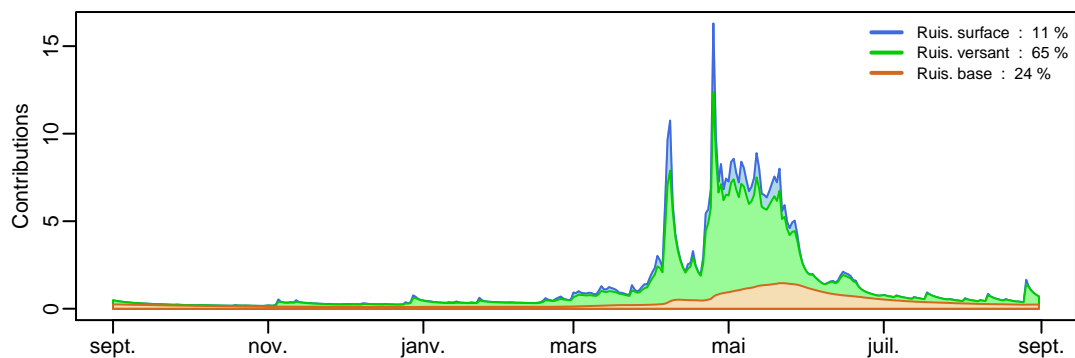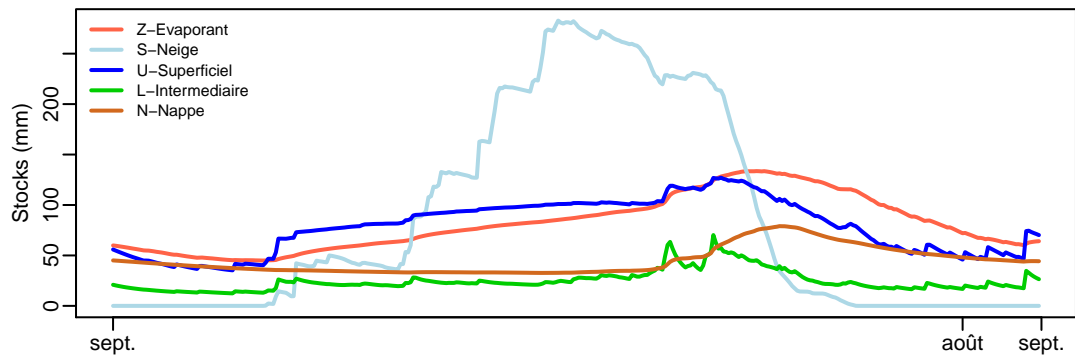

# q0258 (566.9 km²) – année 1986–1987

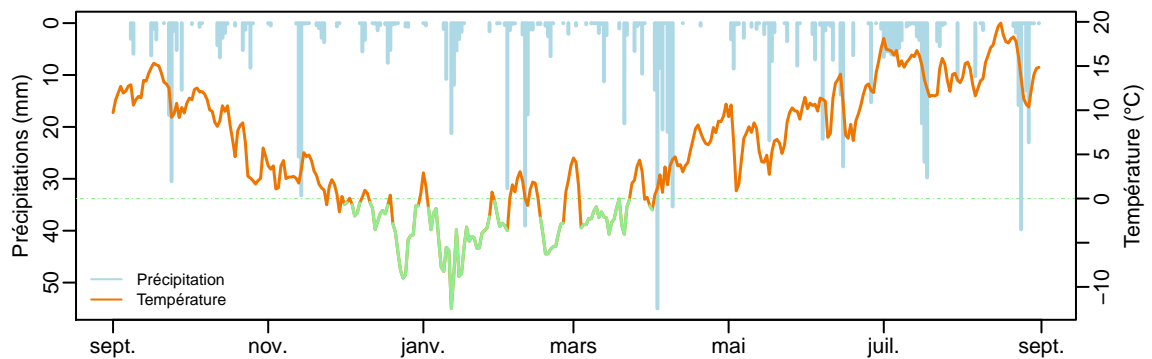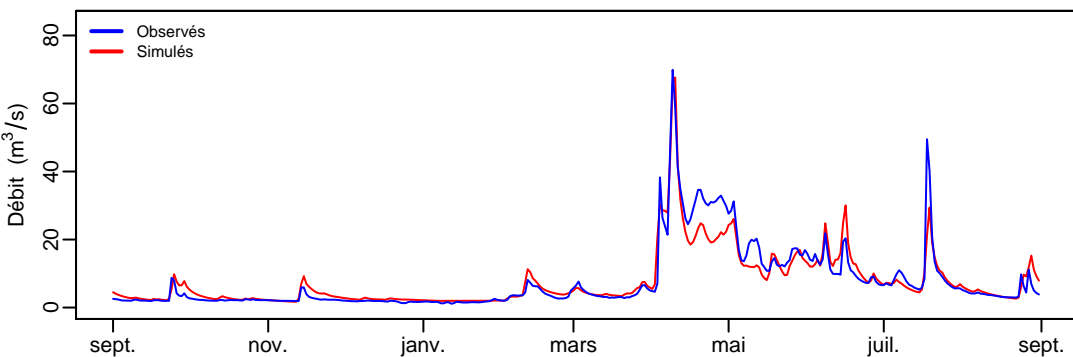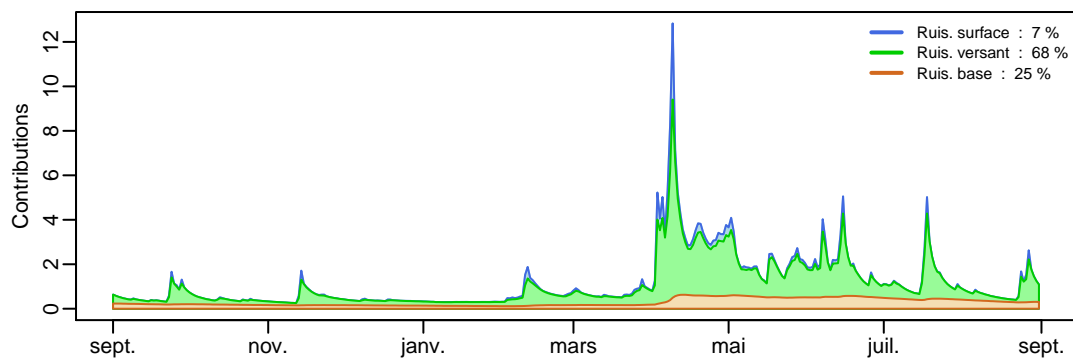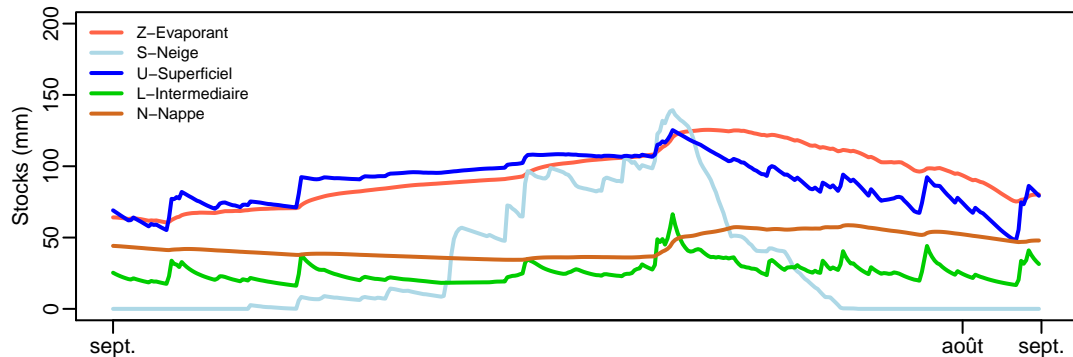



# q0258 (566.9 km²) – année 1987–1988

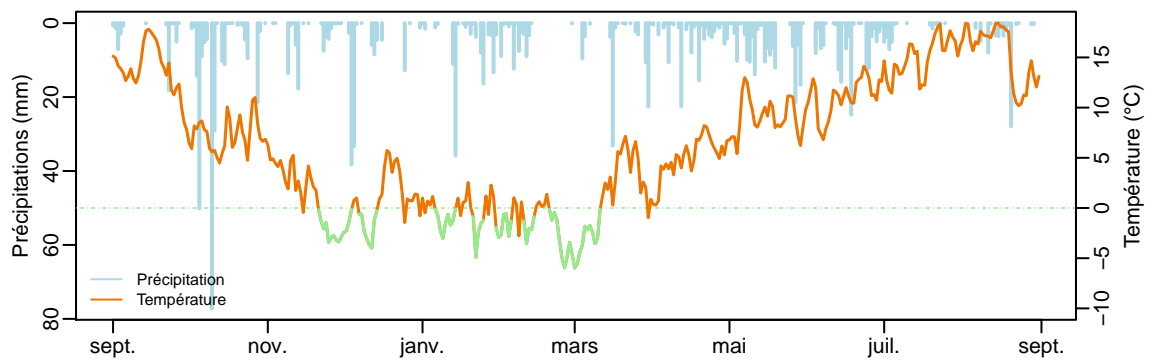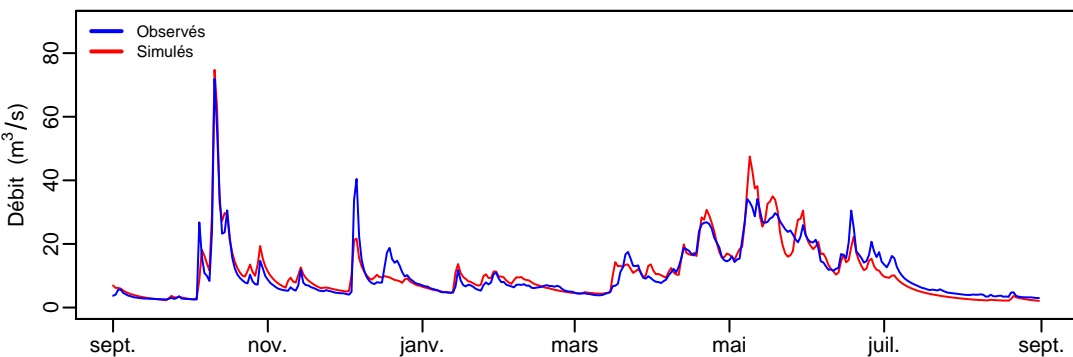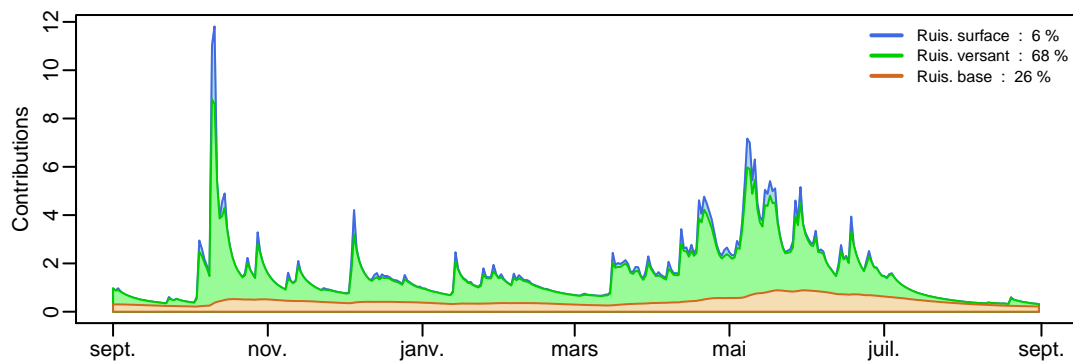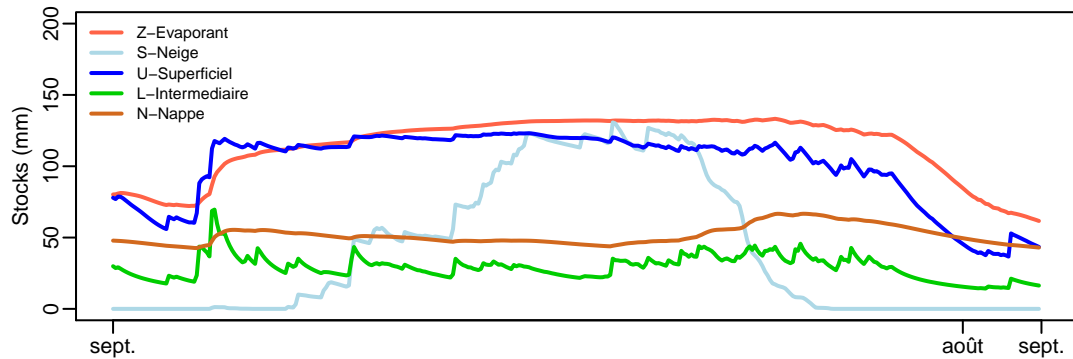

# q0258 (566.9 km<sup>2</sup>) – année 1988–1989

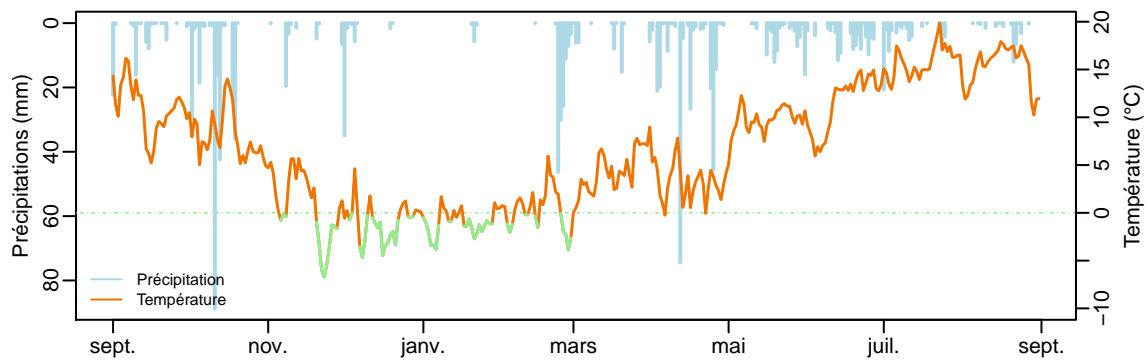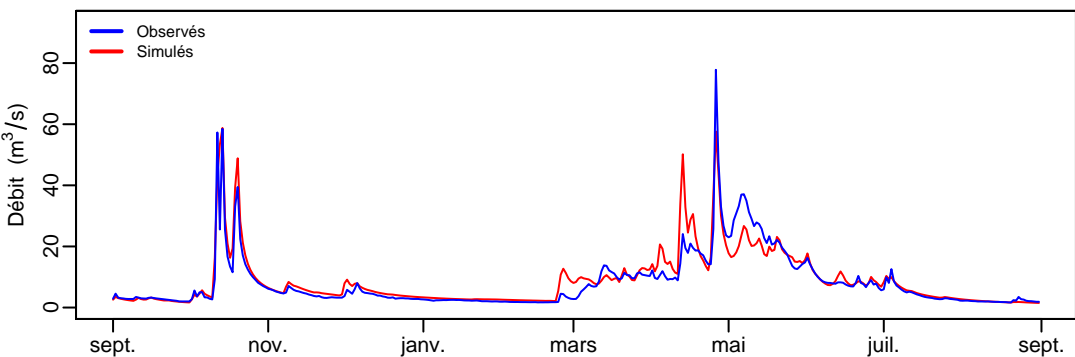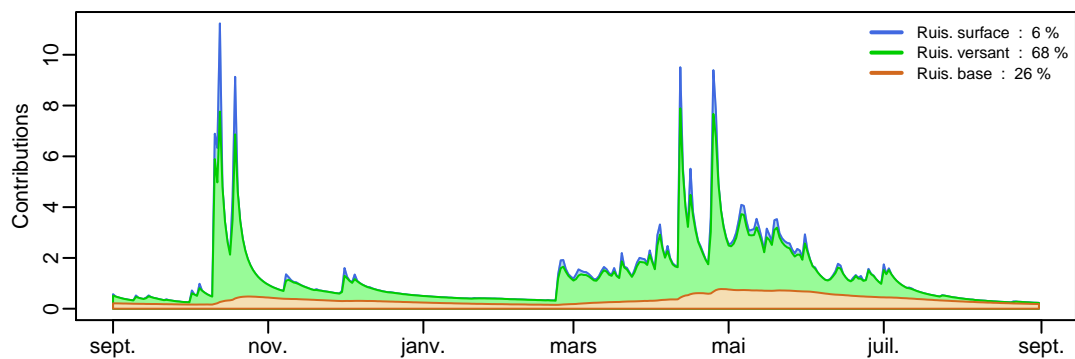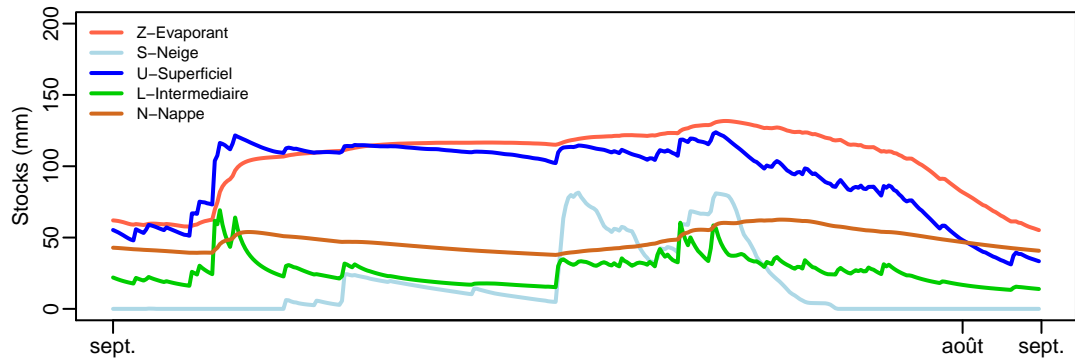

# q0258 (566.9 km²) – année 1989–1990

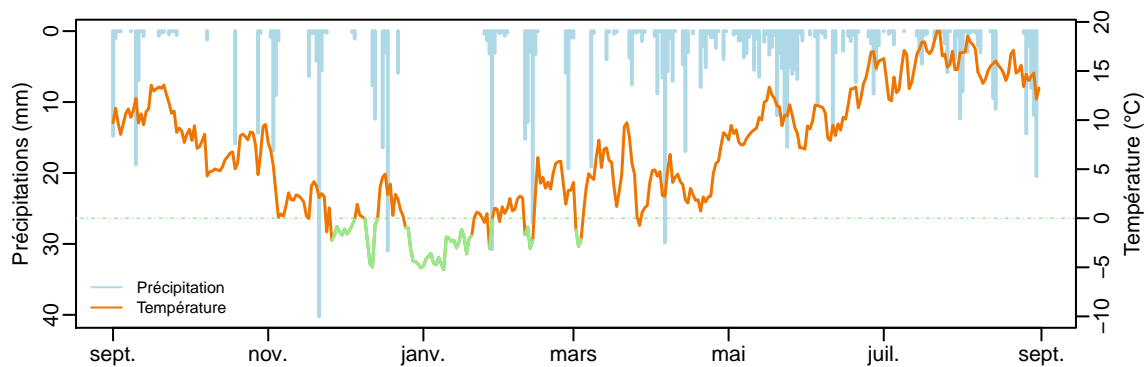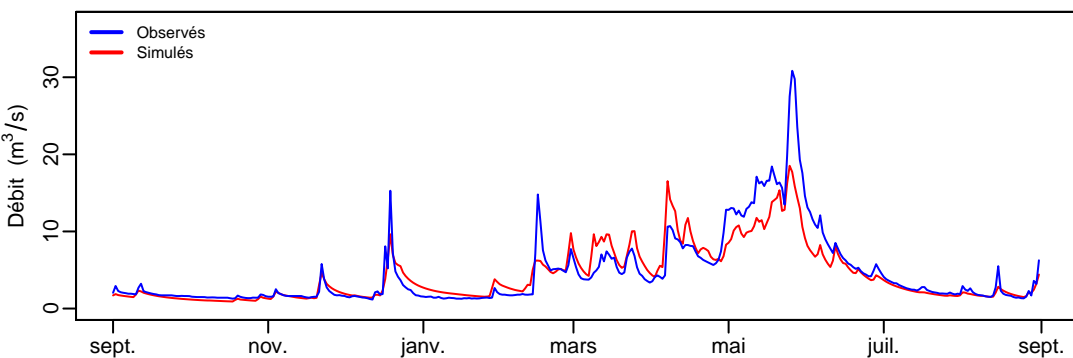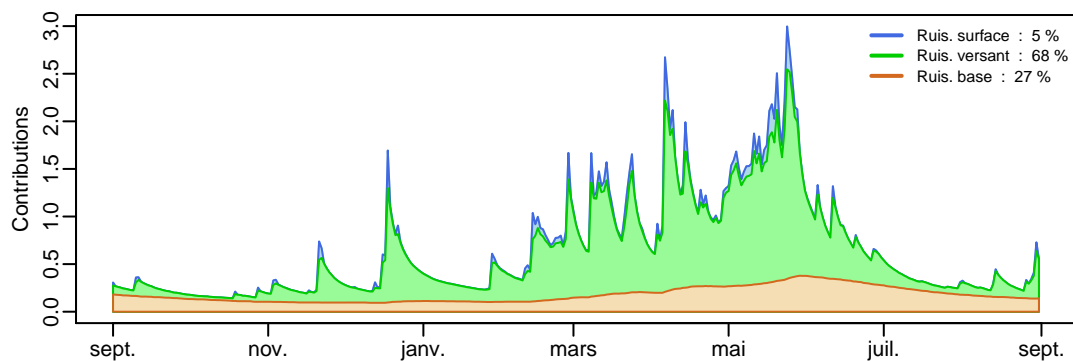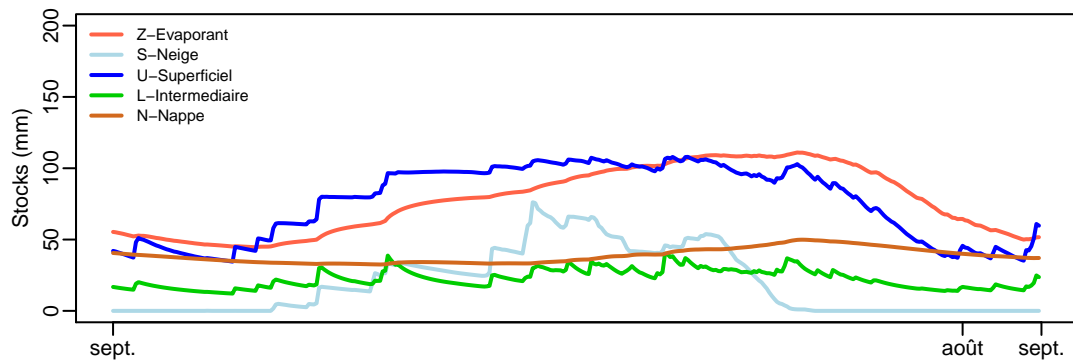

# q0258 (566.9 km<sup>2</sup>) – année 1990–1991

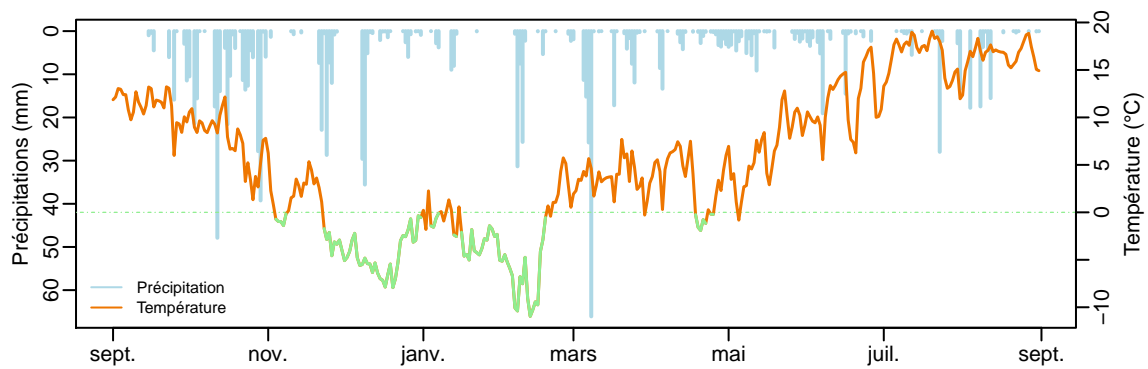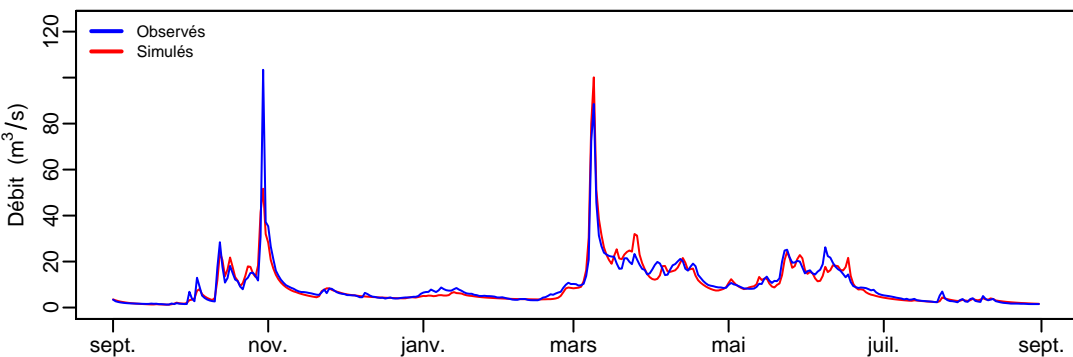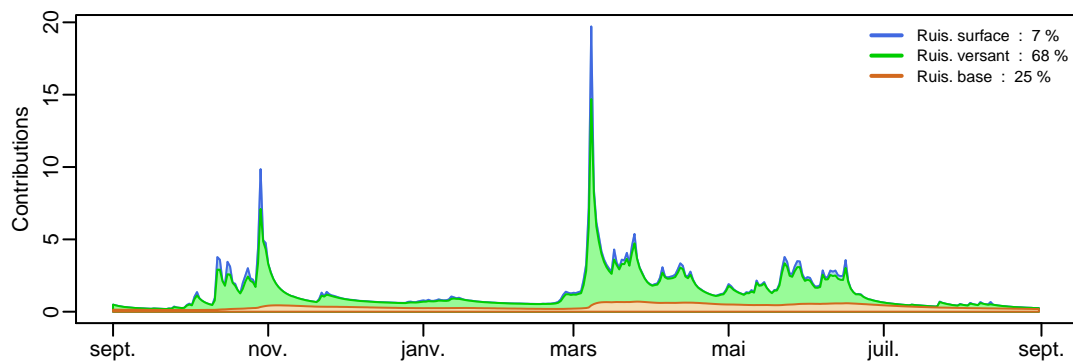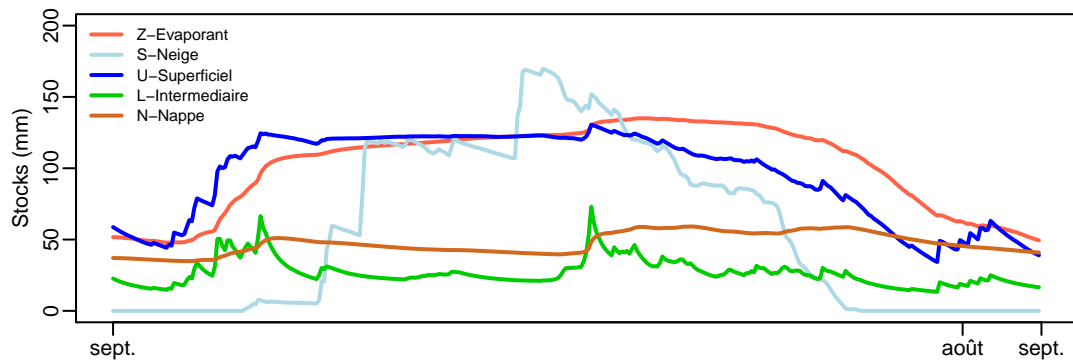

# q0258 (566.9 km²) – année 1991–1992

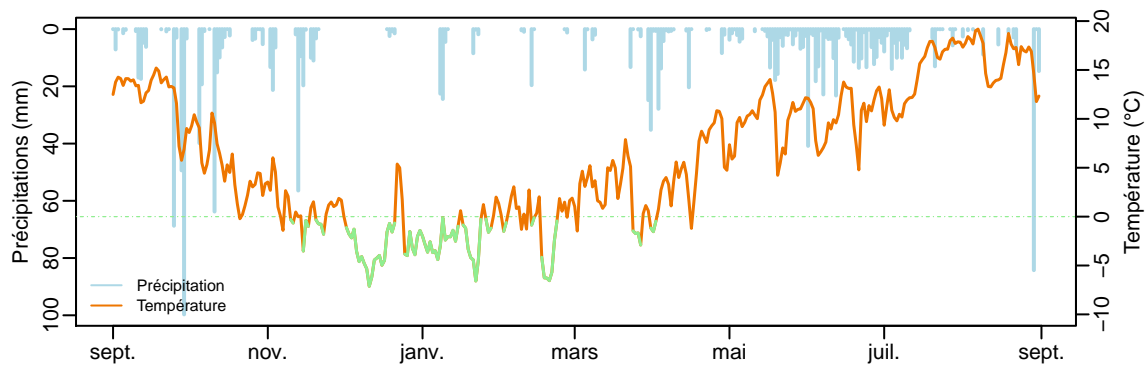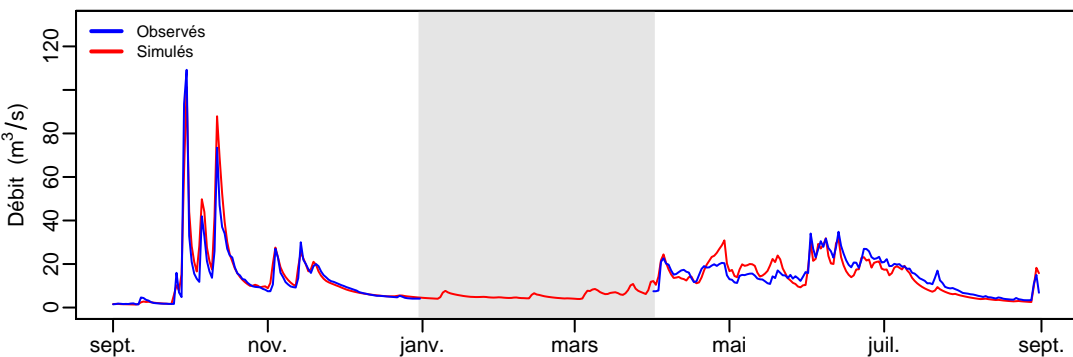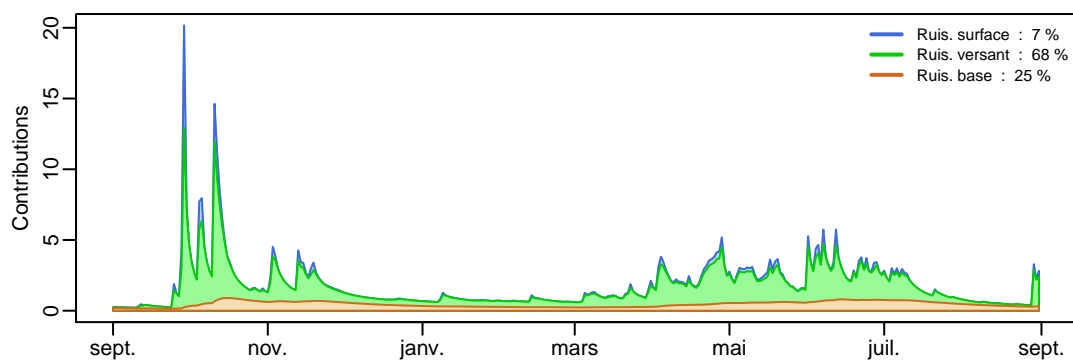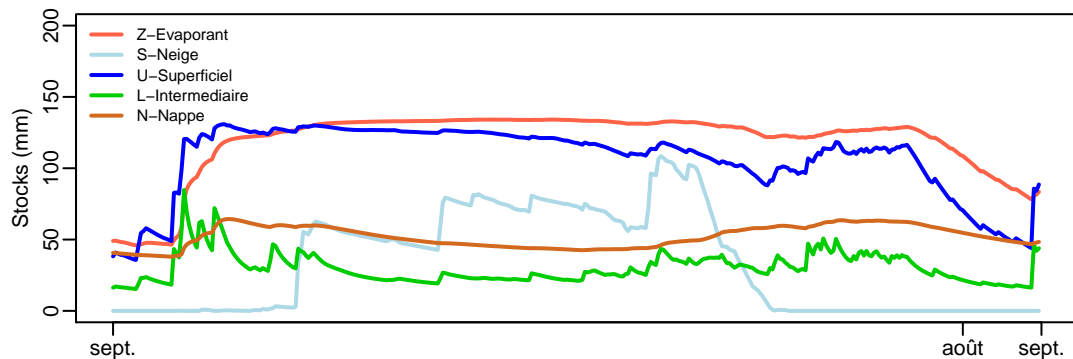

# q0258 (566.9 km<sup>2</sup>) – année 1992–1993

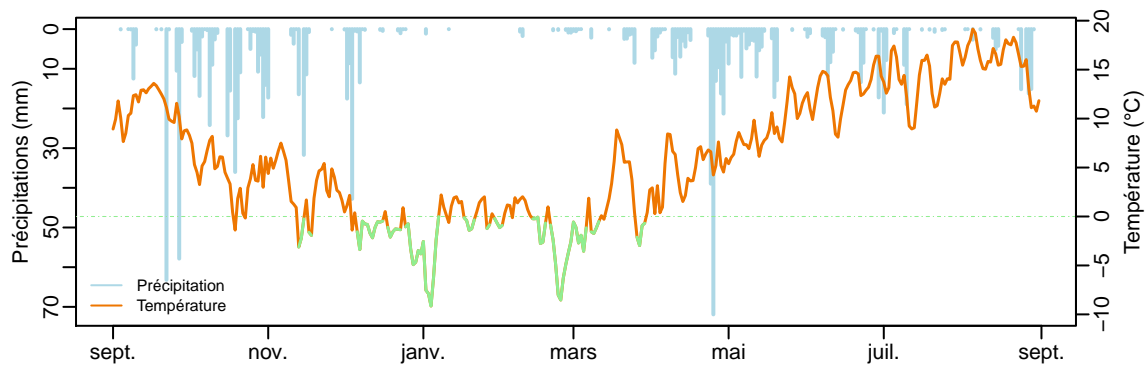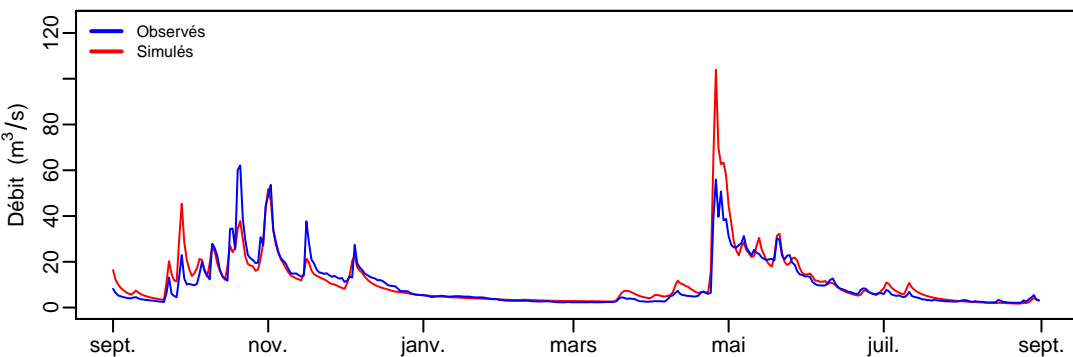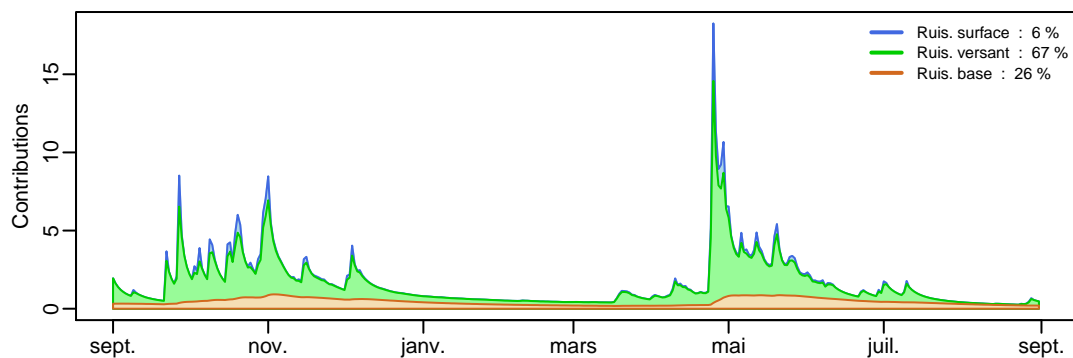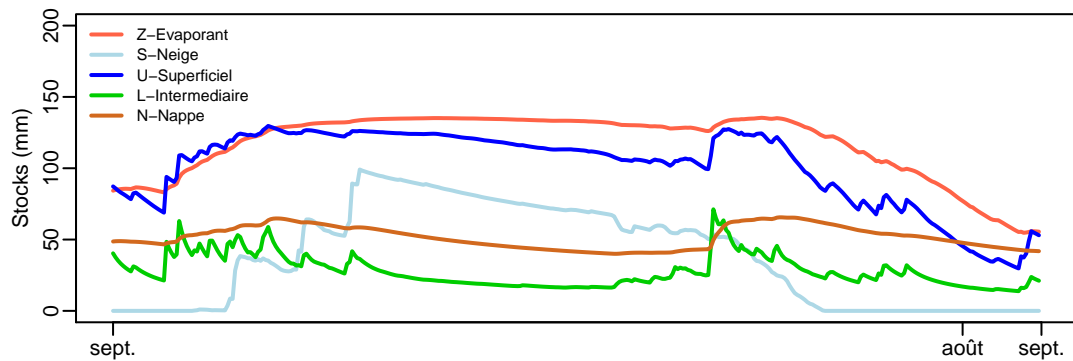

# q0258 (566.9 km²) – année 1993–1994

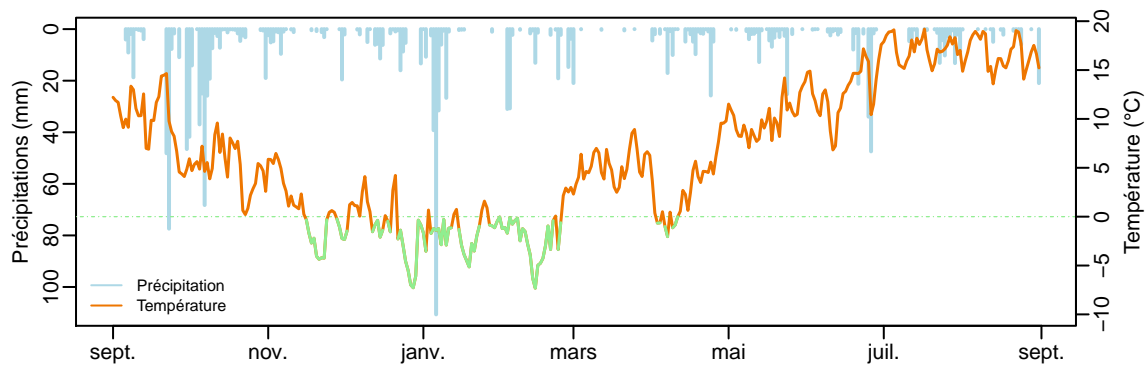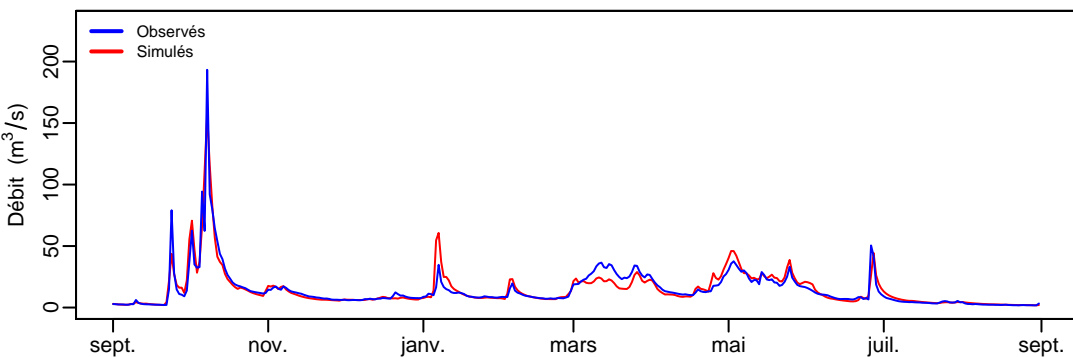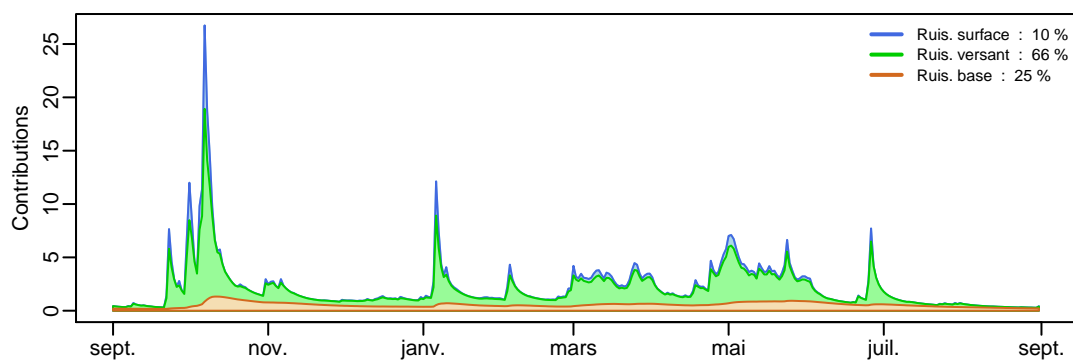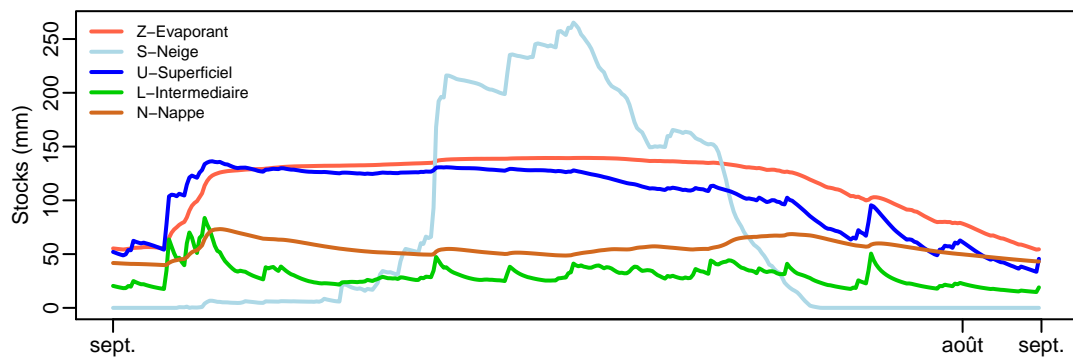

# q0277 (376.01 km²) – année 1994–1995

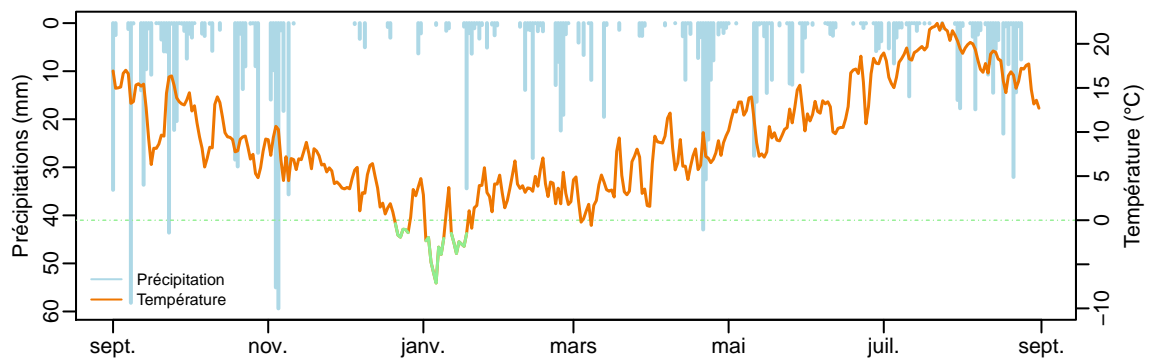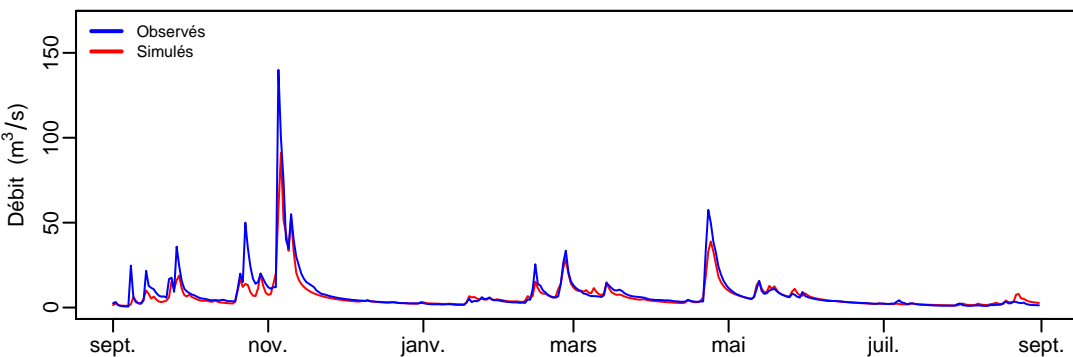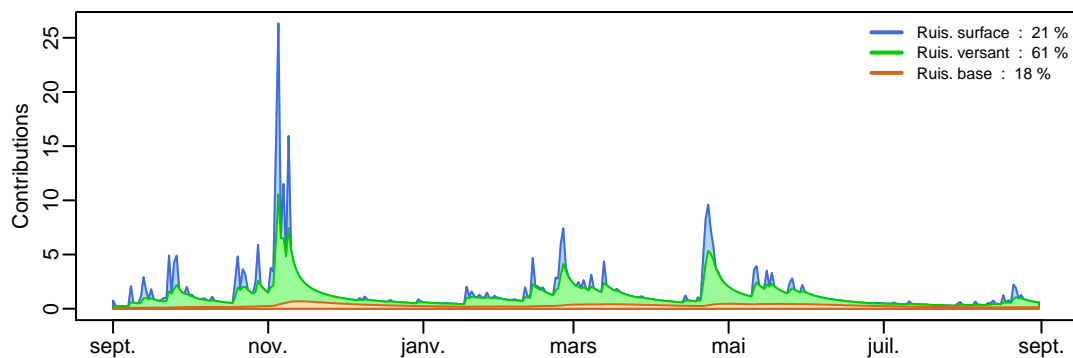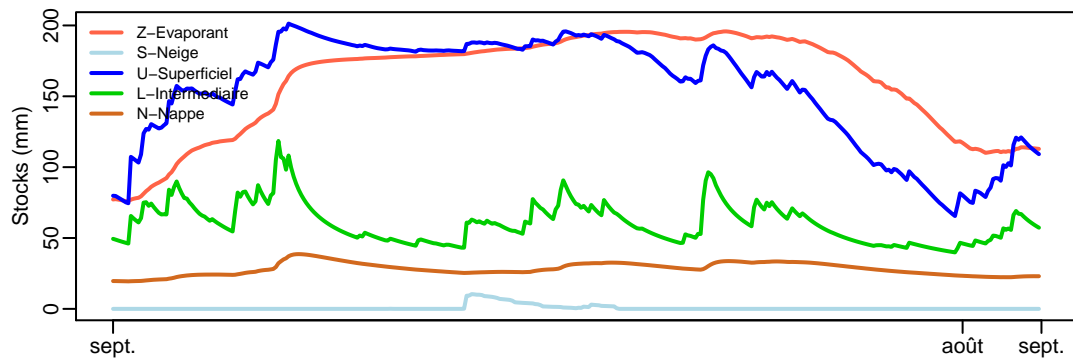



# q0277 (376.01 km²) – année 1995–1996

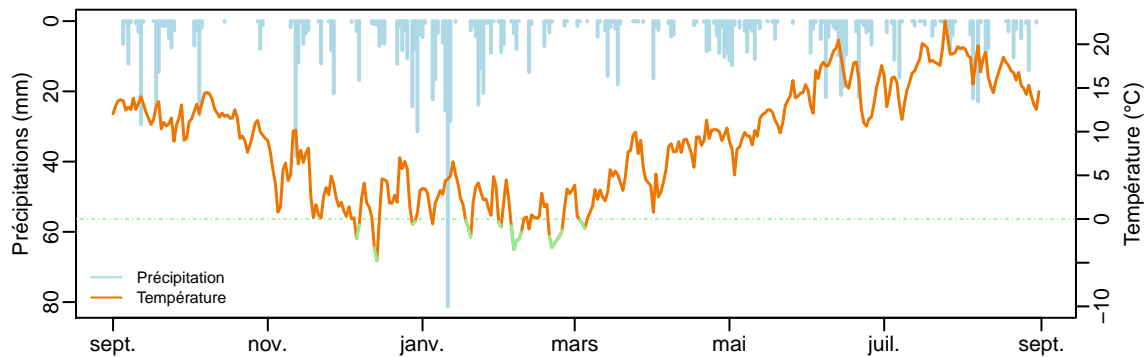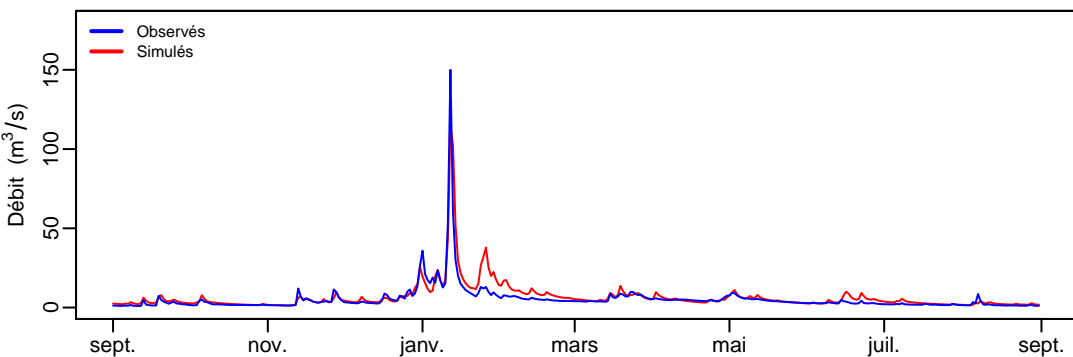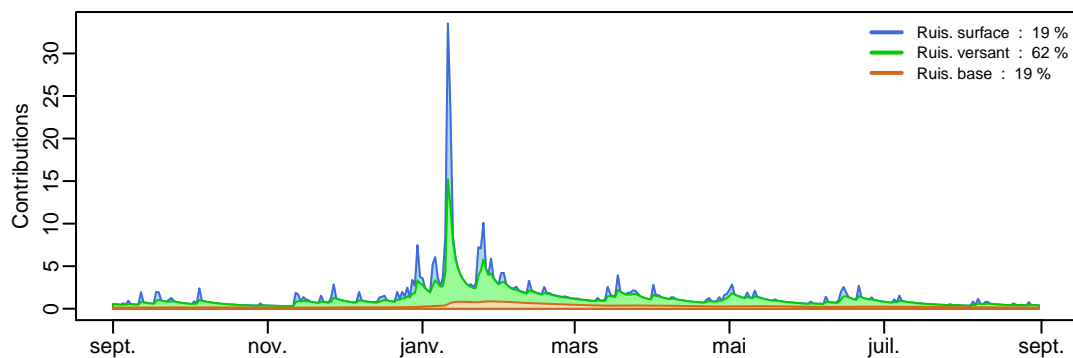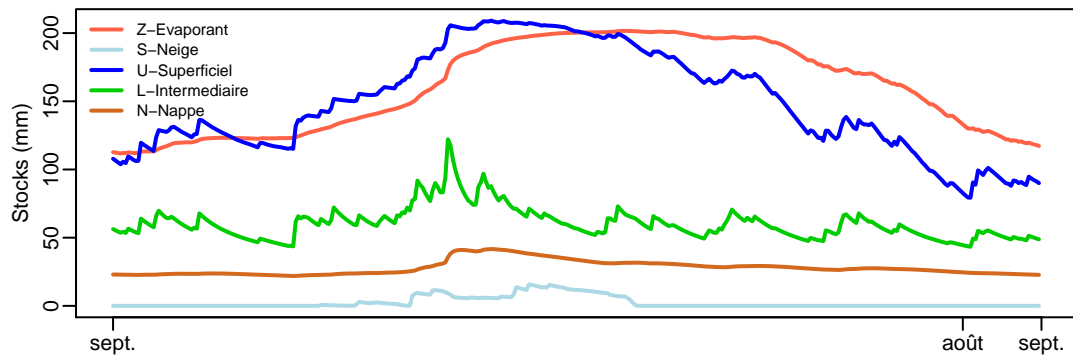

# q0277 (376.01 km<sup>2</sup>) – année 1996–1997

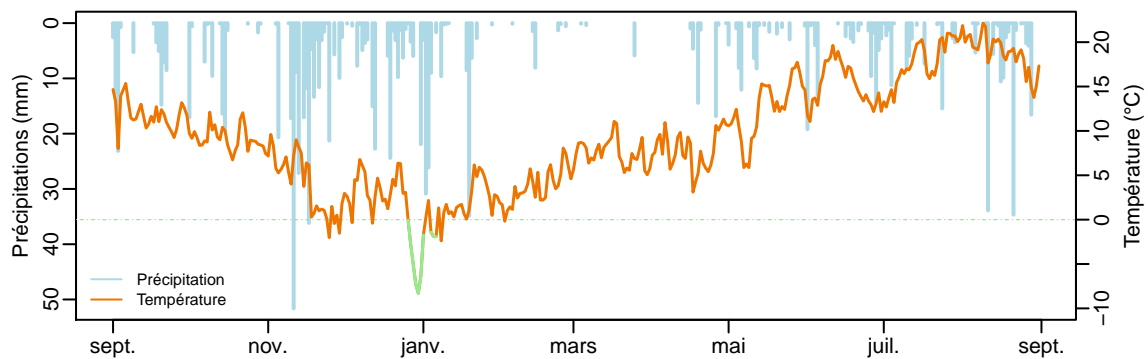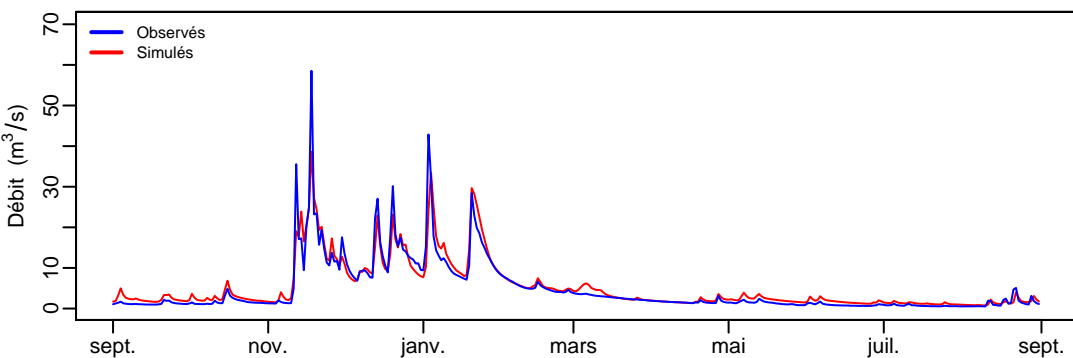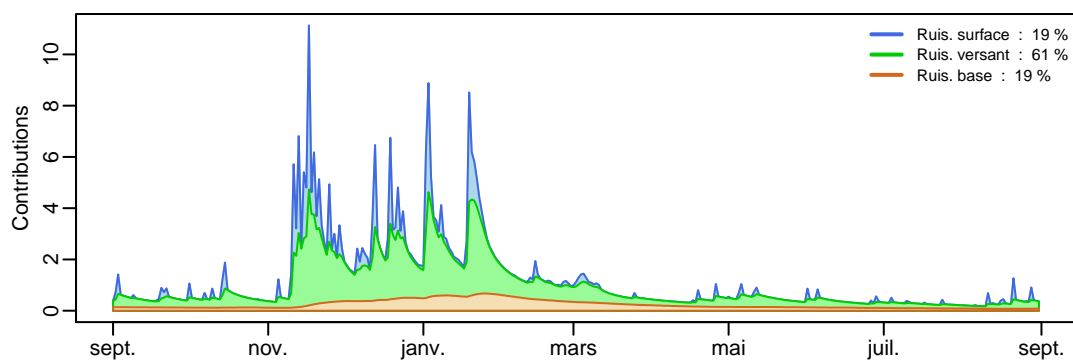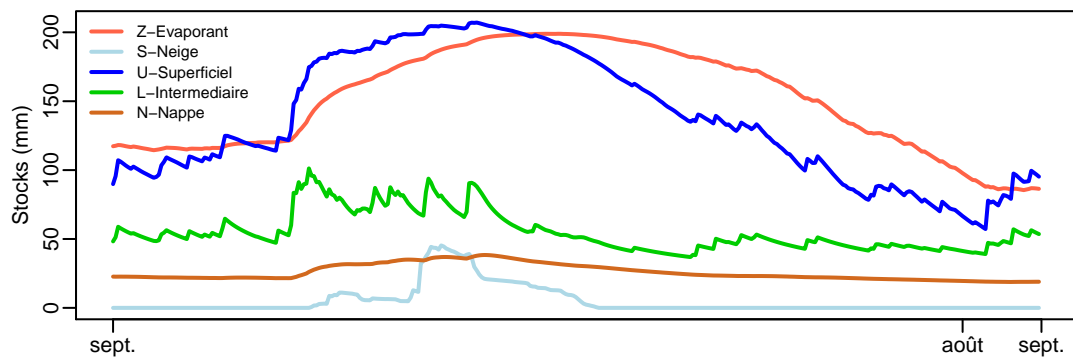

# q0277 (376.01 km²) – année 1997–1998

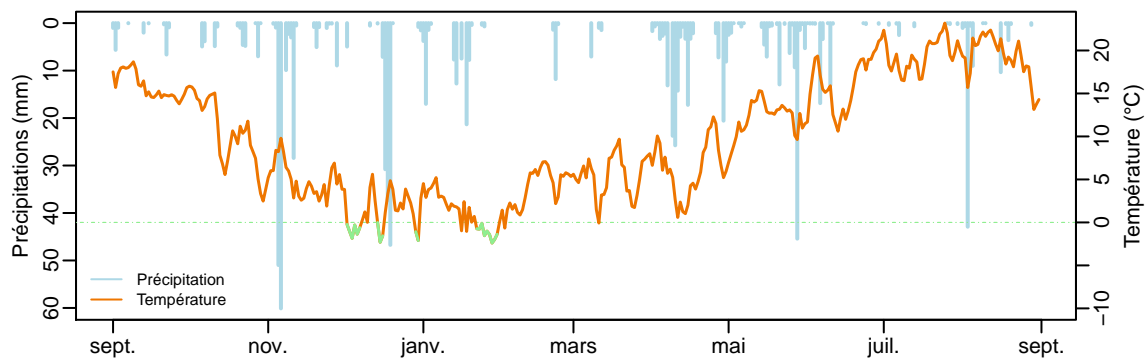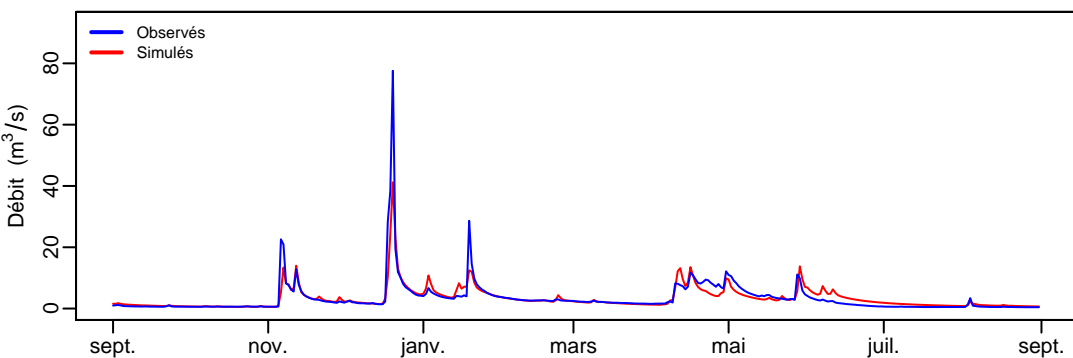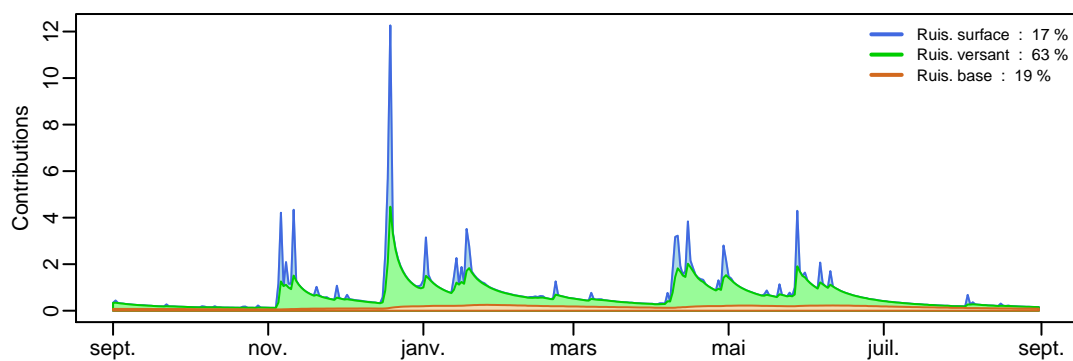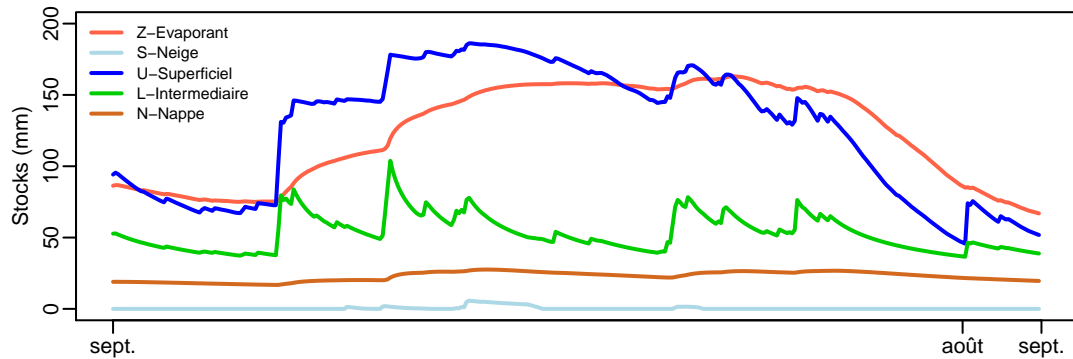

# q0277 (376.01 km<sup>2</sup>) – année 1998–1999

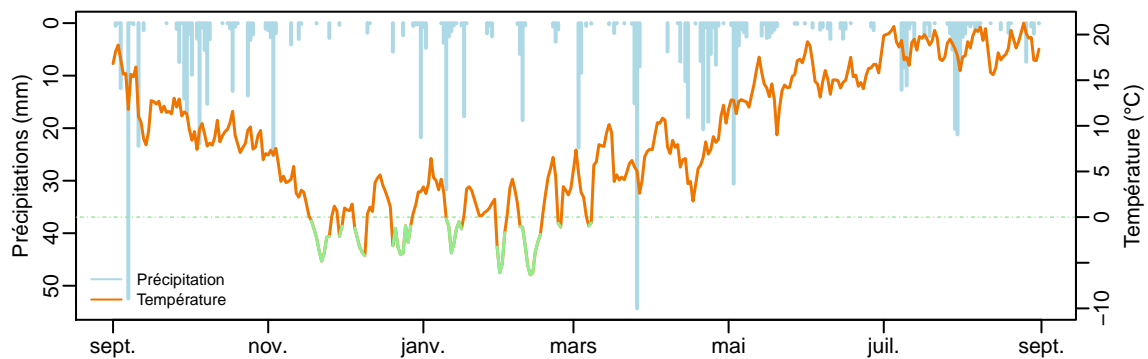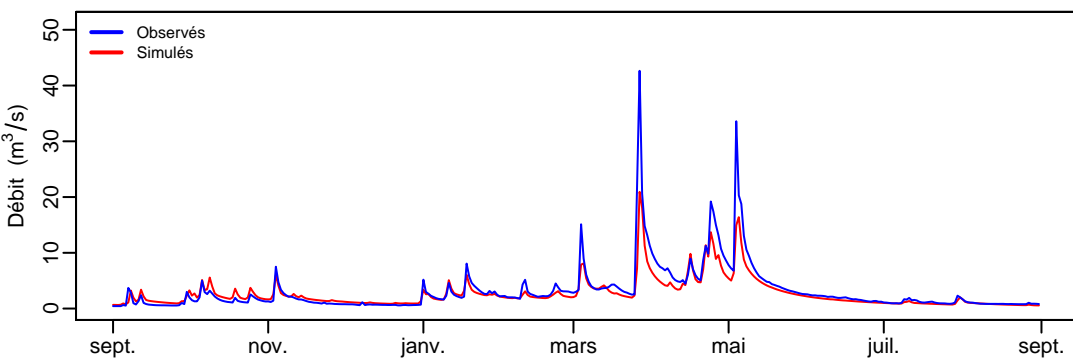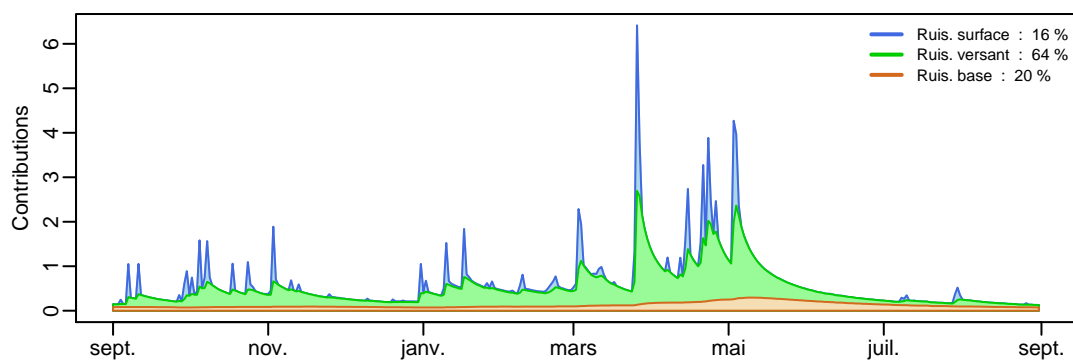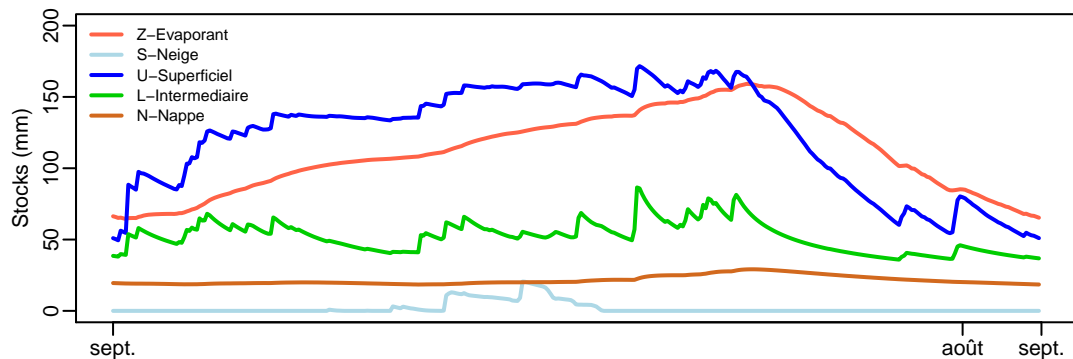

# q0277 (376.01 km²) – année 1999–2000

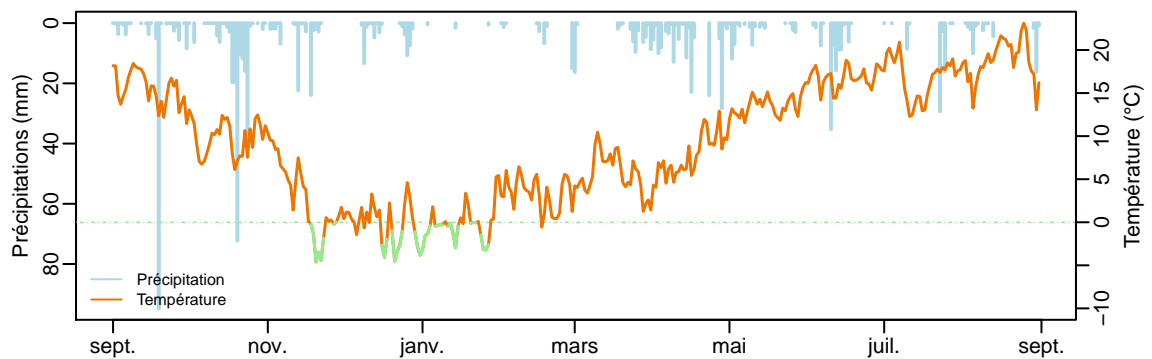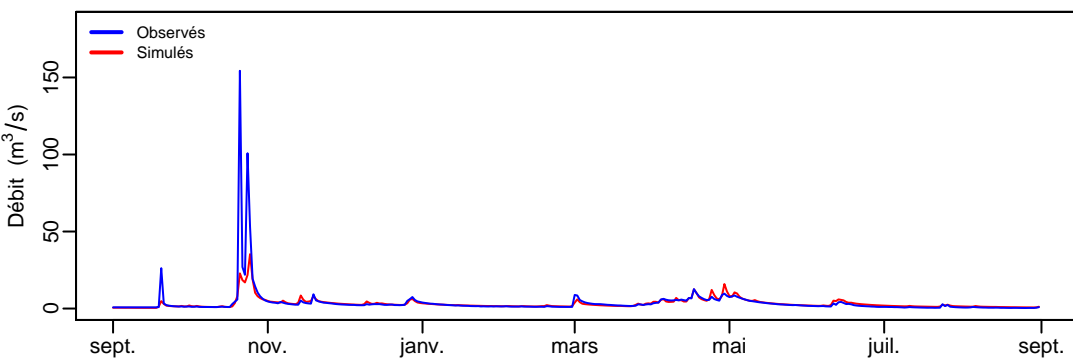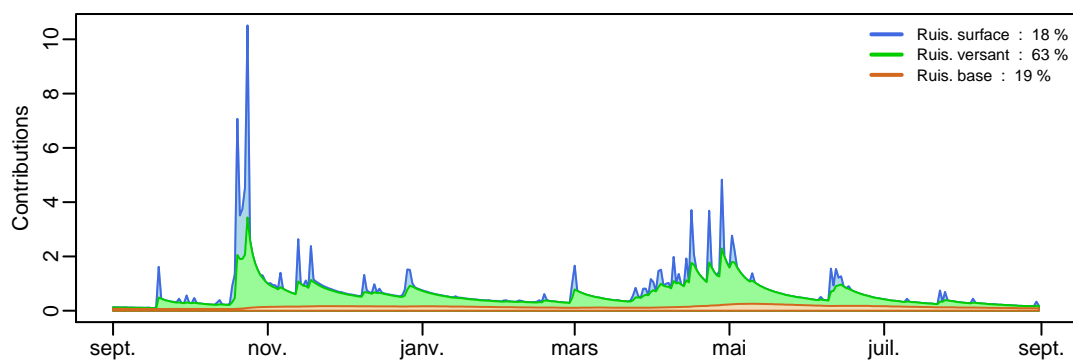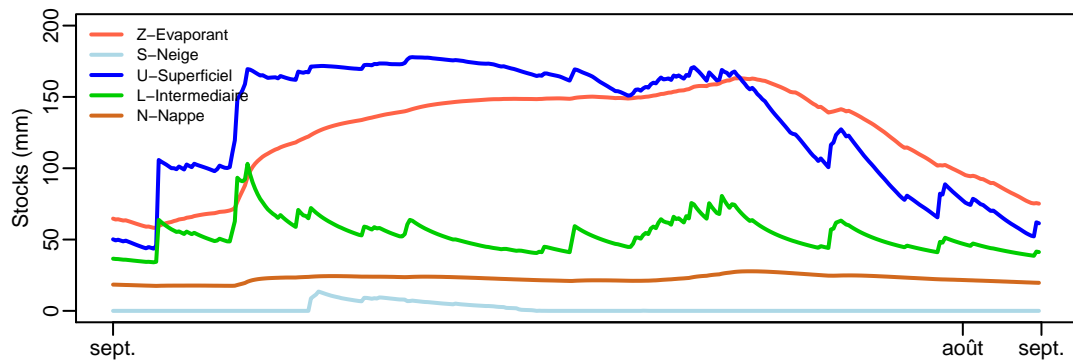

# q0277 (376.01 km²) – année 2000–2001

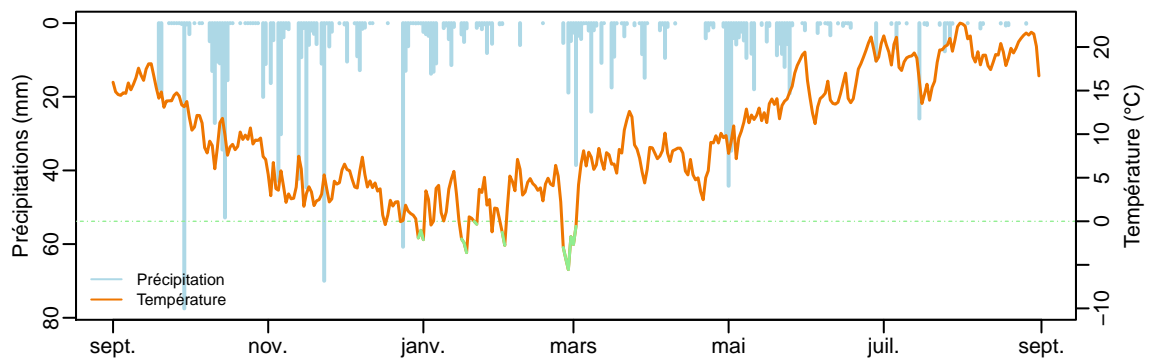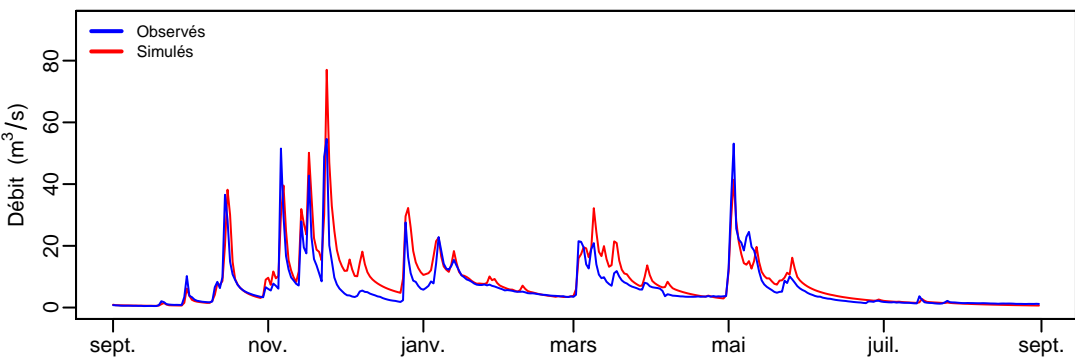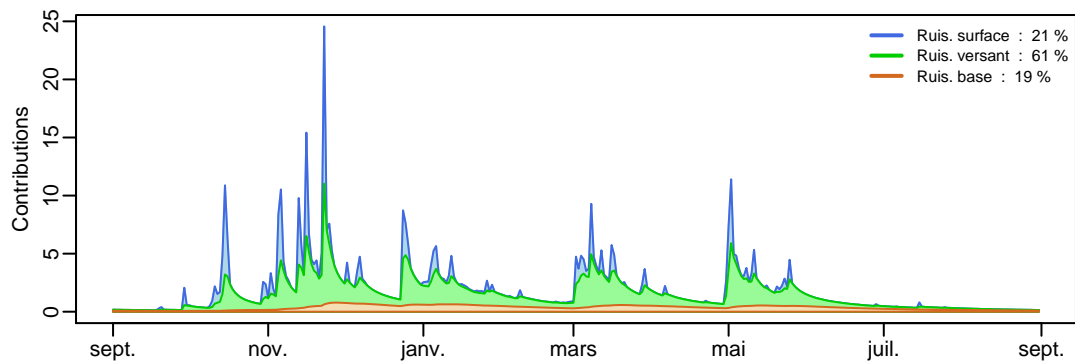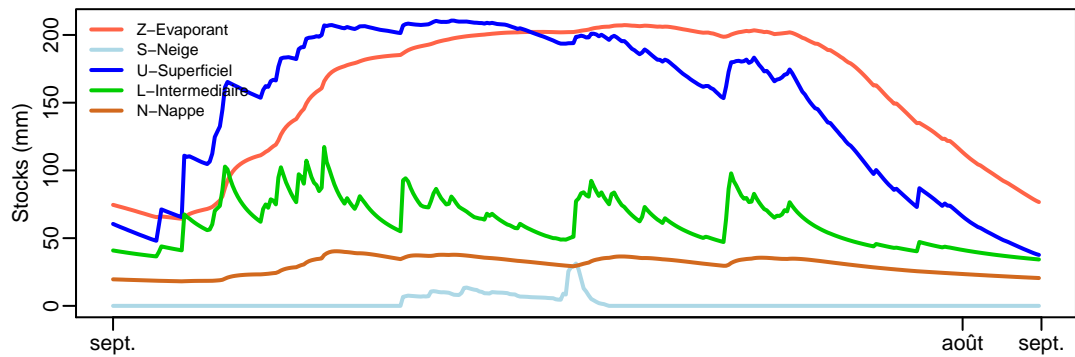

# q0277 (376.01 km<sup>2</sup>) – année 2001–2002

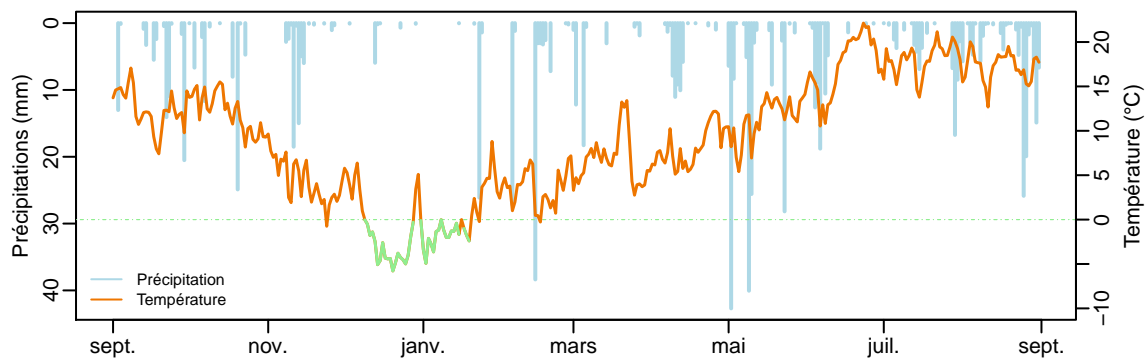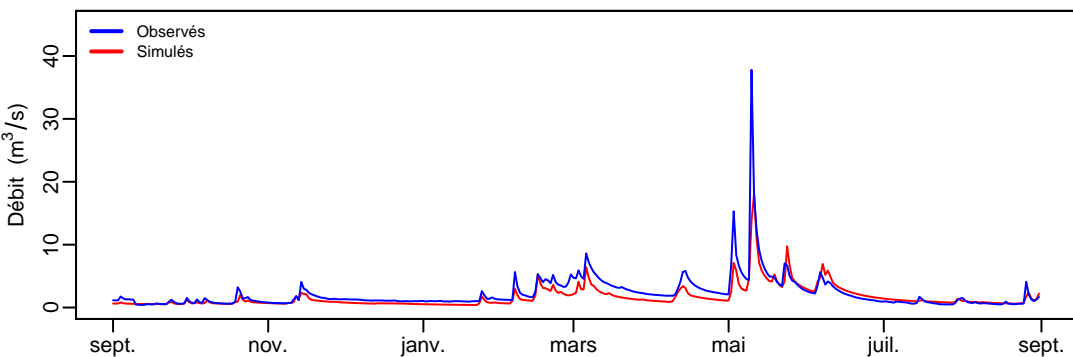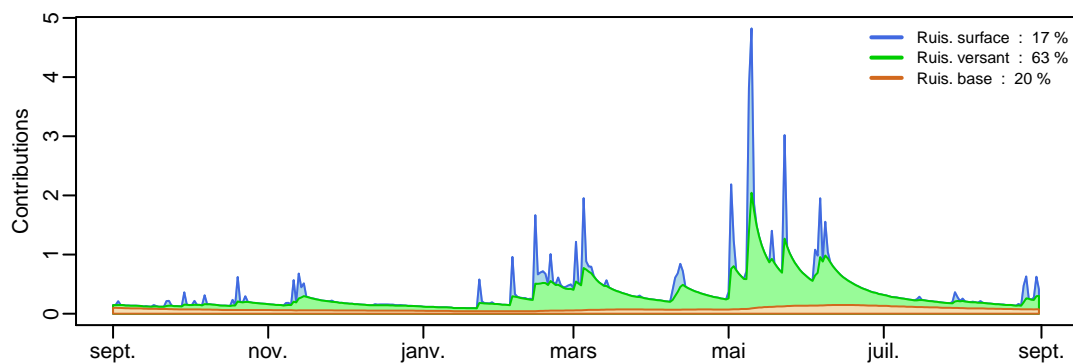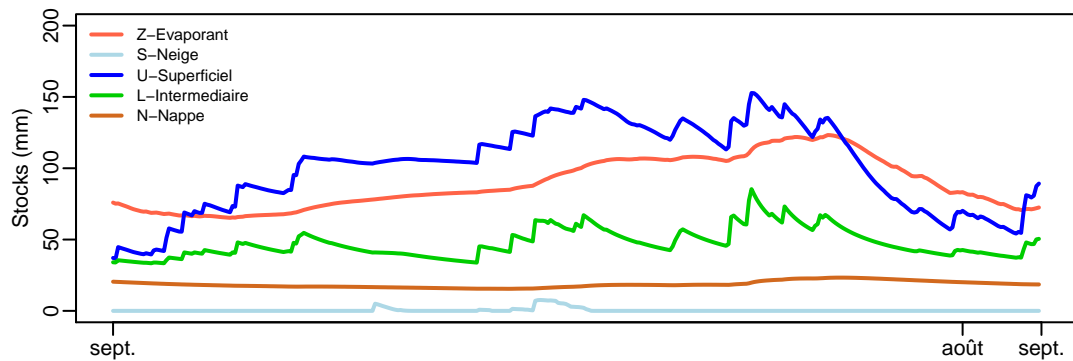

# q0277 (376.01 km²) – année 2002–2003

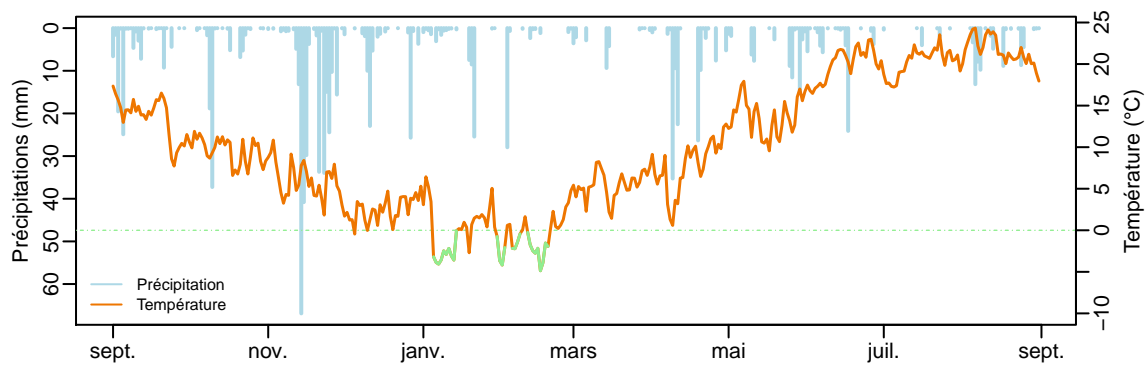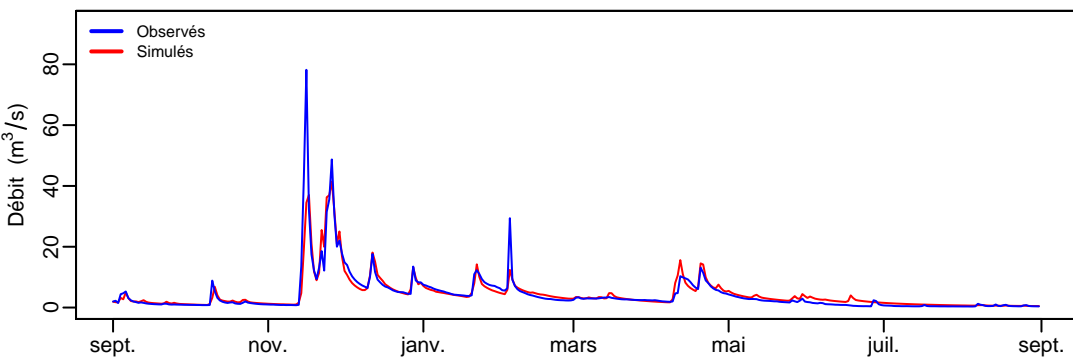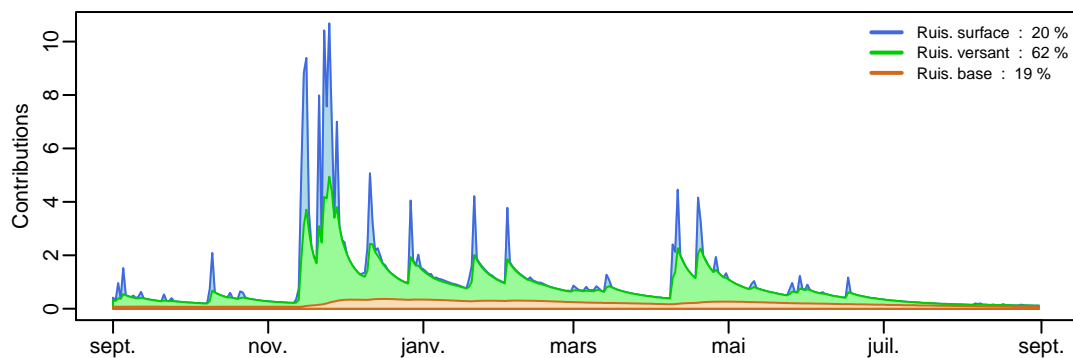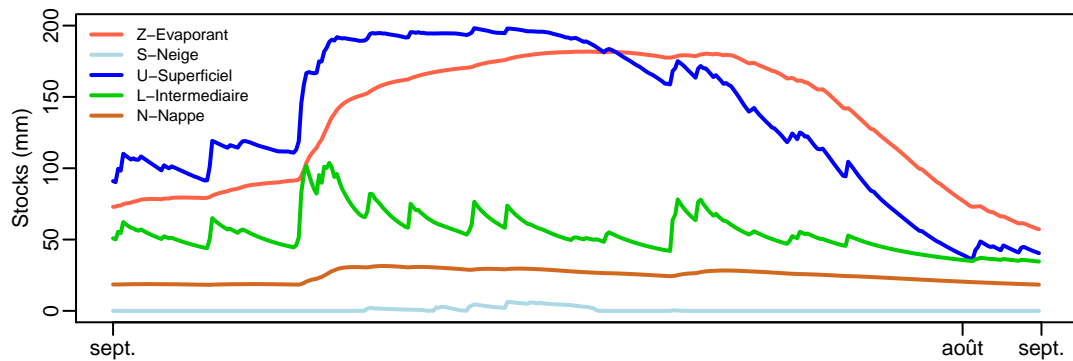



# q0277 (376.01 km²) – année 2003–2004

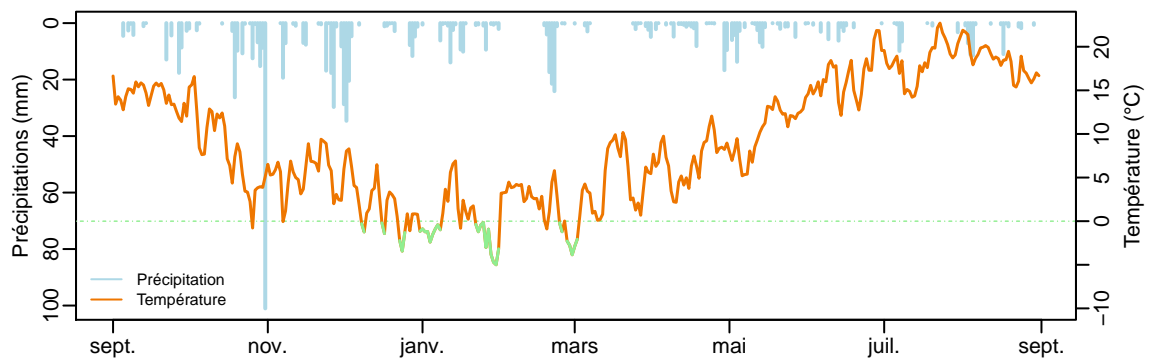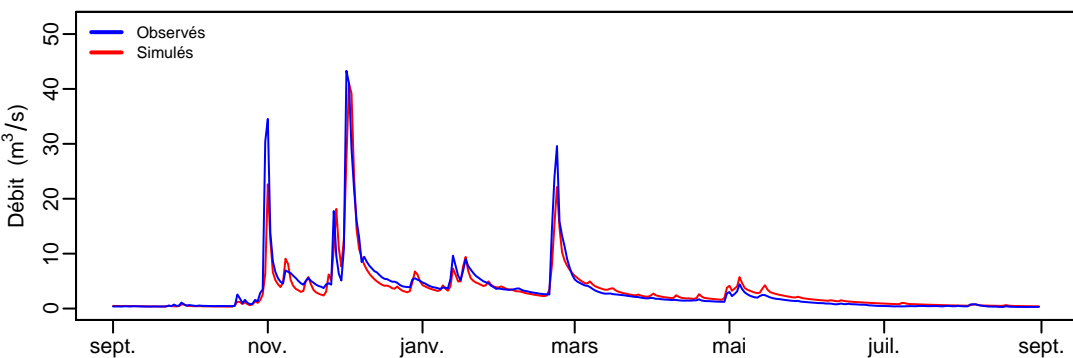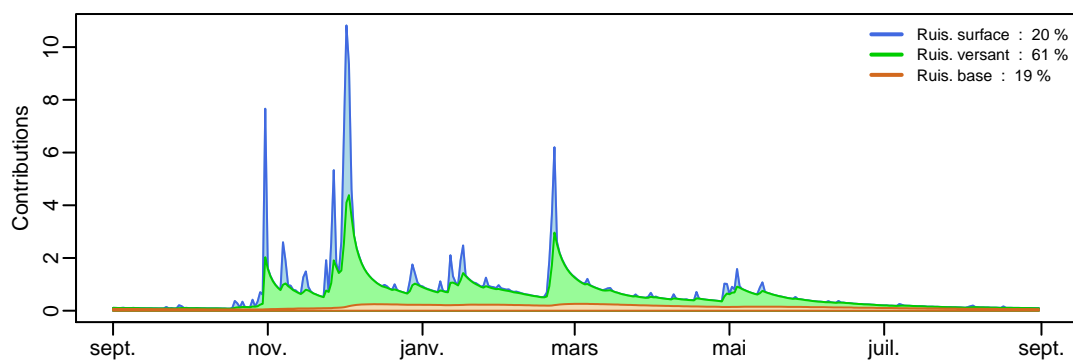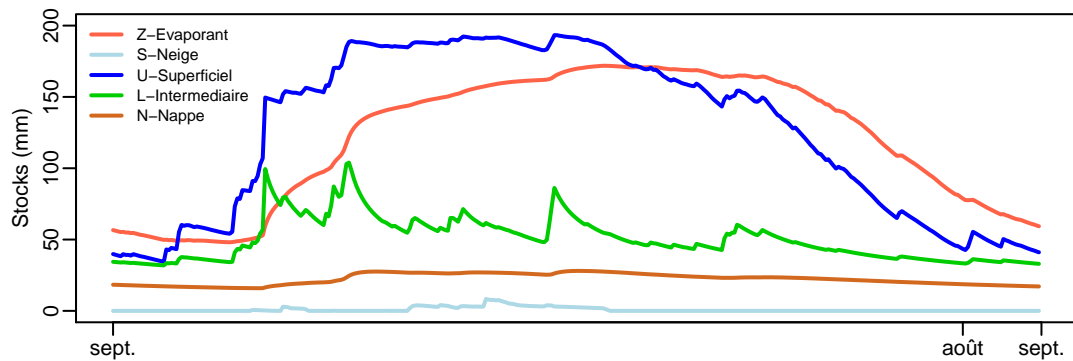

# q0277 (376.01 km<sup>2</sup>) – année 2004–2005

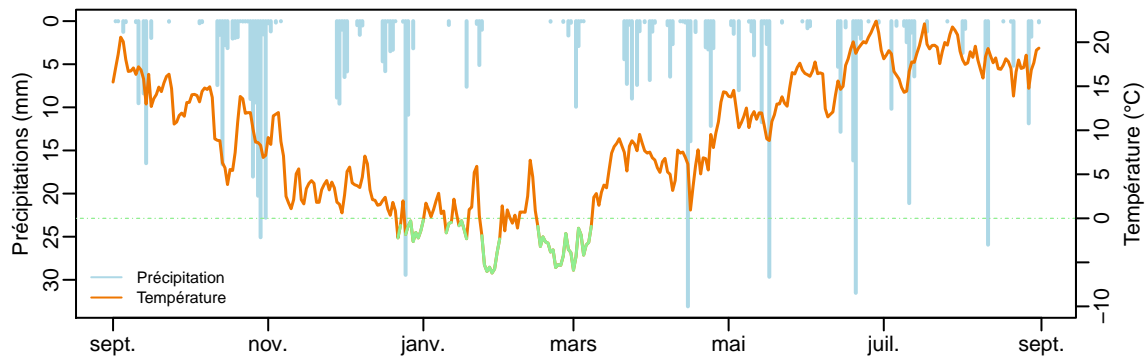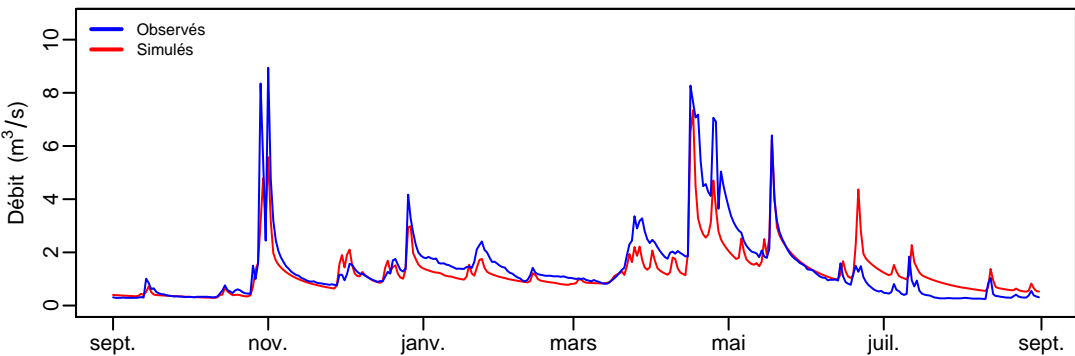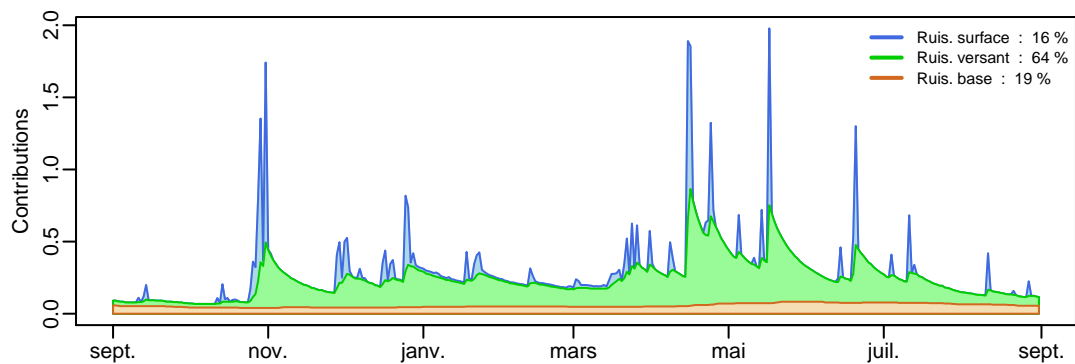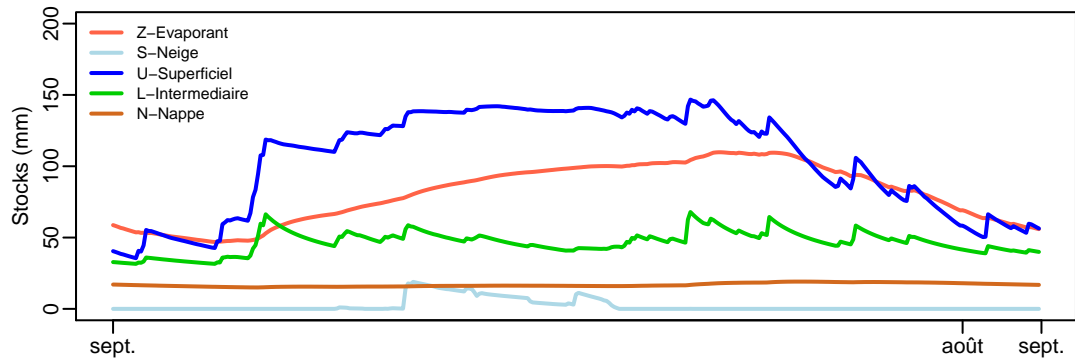

# q0277 (376.01 km²) – année 2005–2006

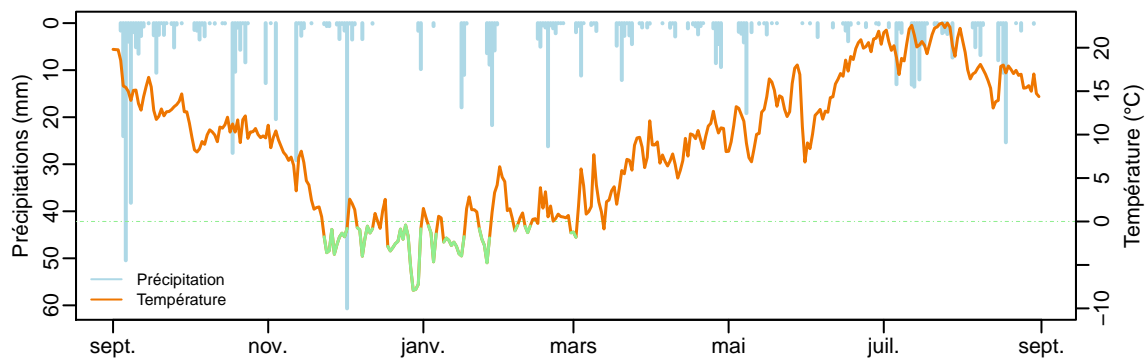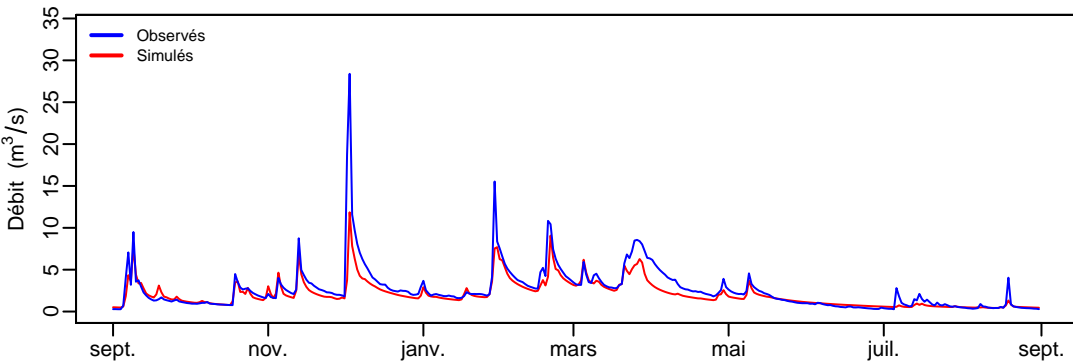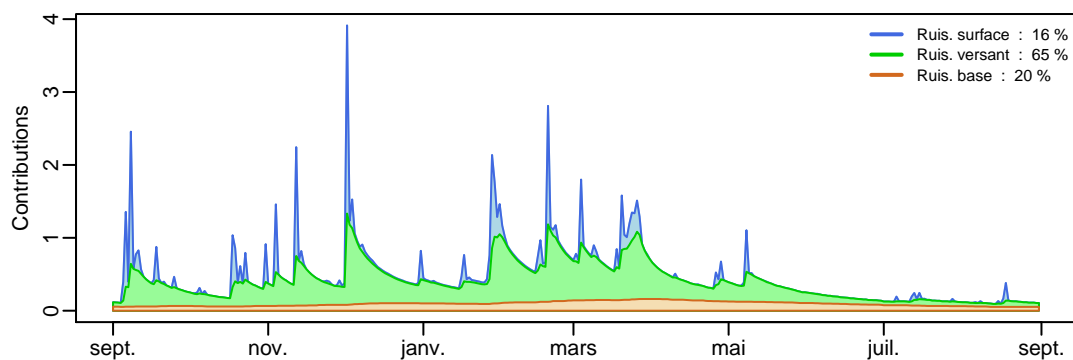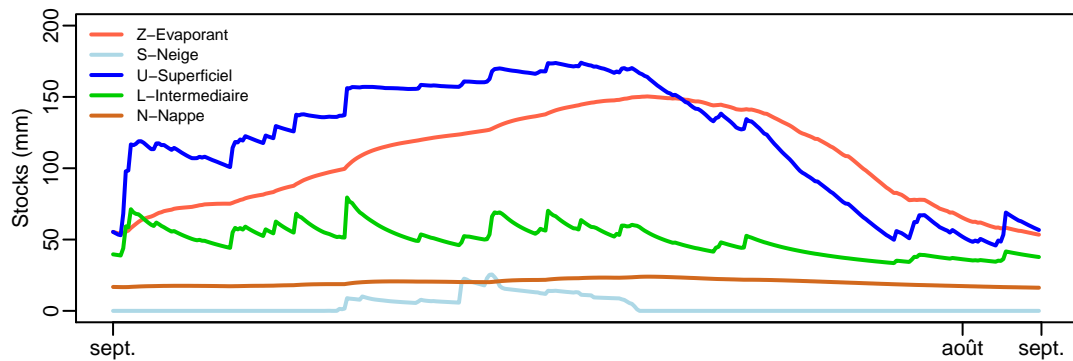

# q0277 (376.01 km<sup>2</sup>) – année 2006–2007

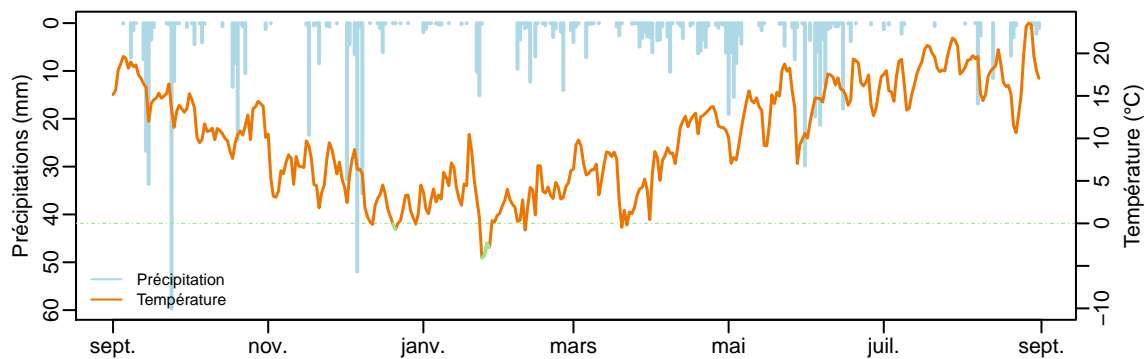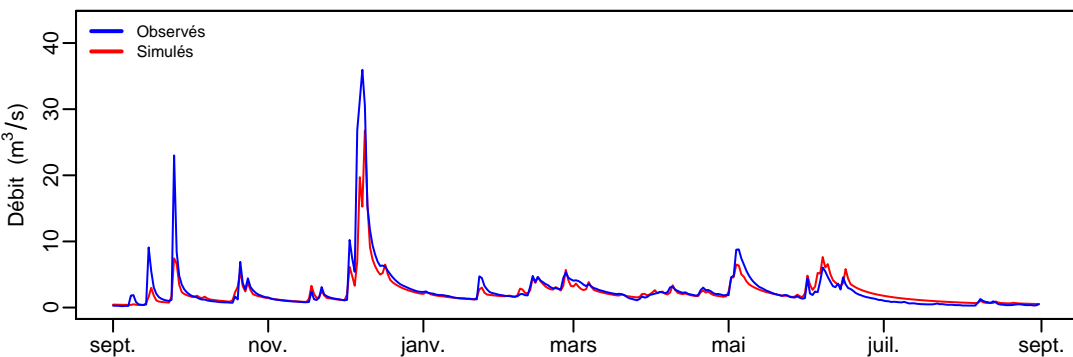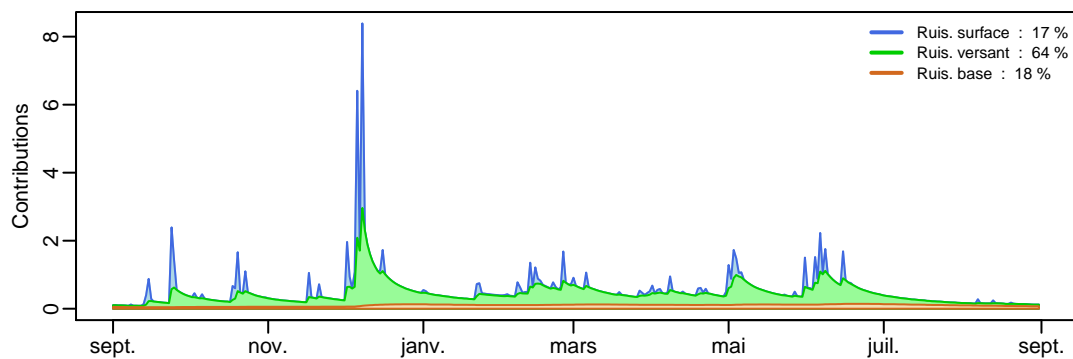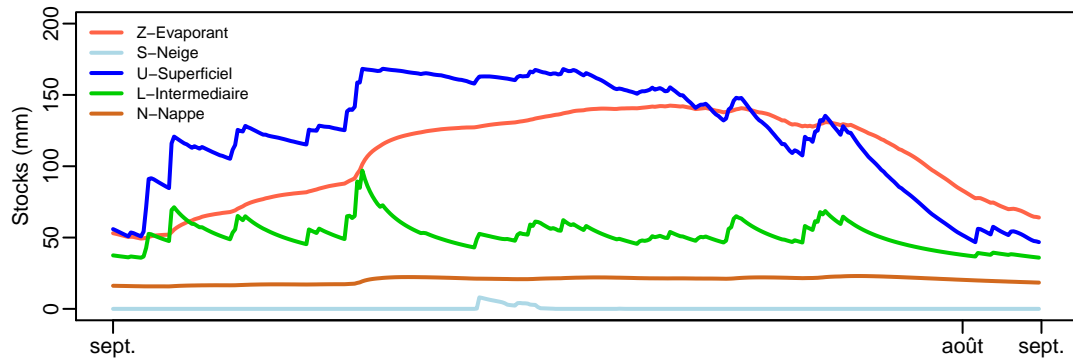

# q0277 (376.01 km²) – année 2007–2008

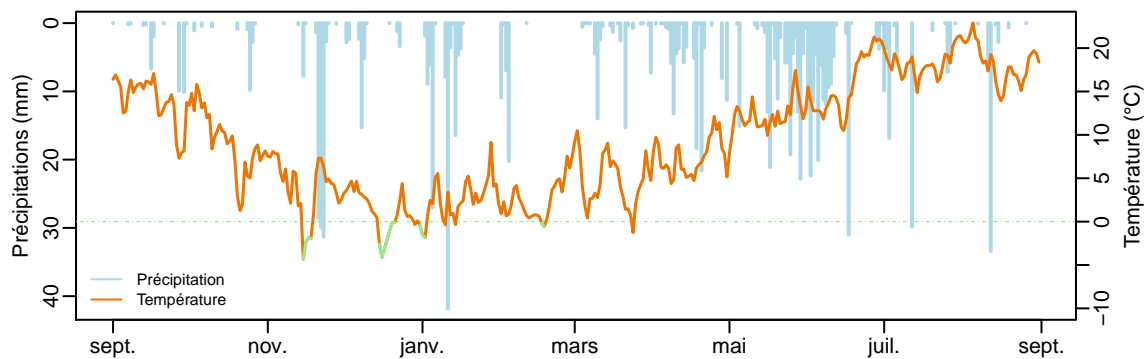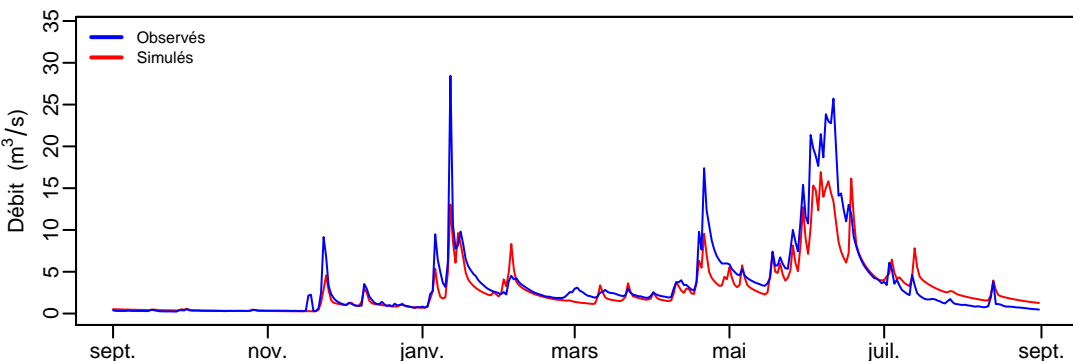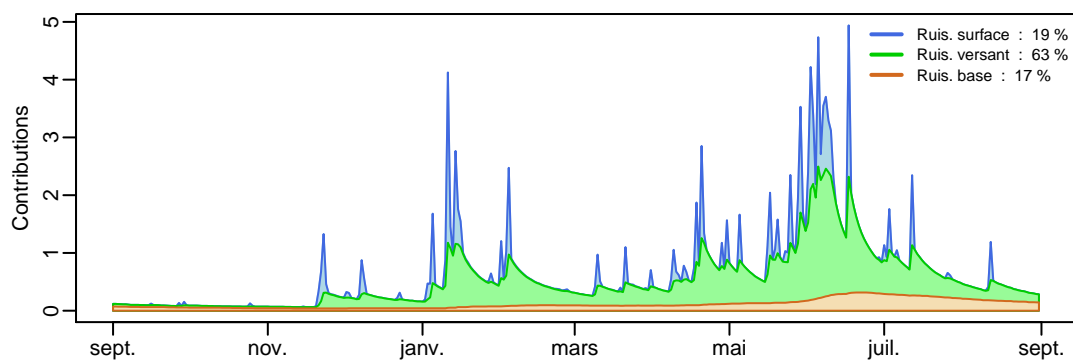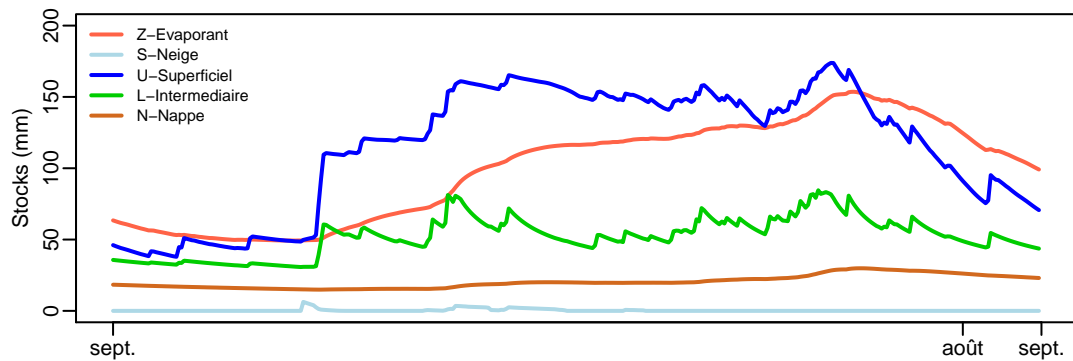

# q0277 (376.01 km²) – année 2008–2009

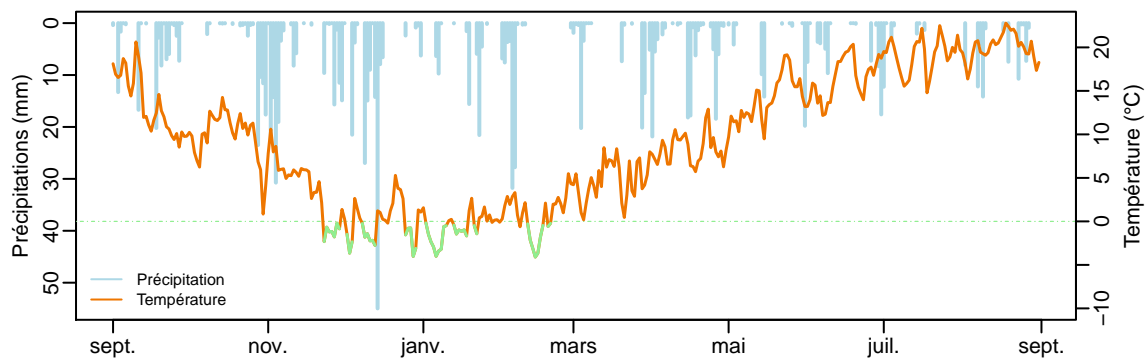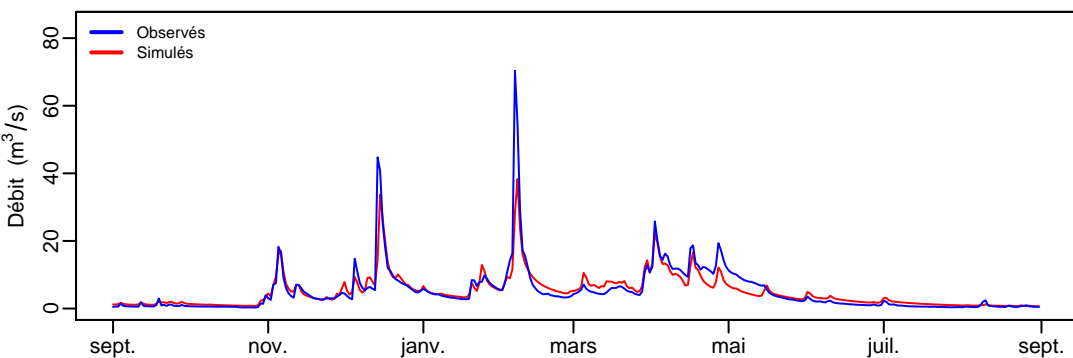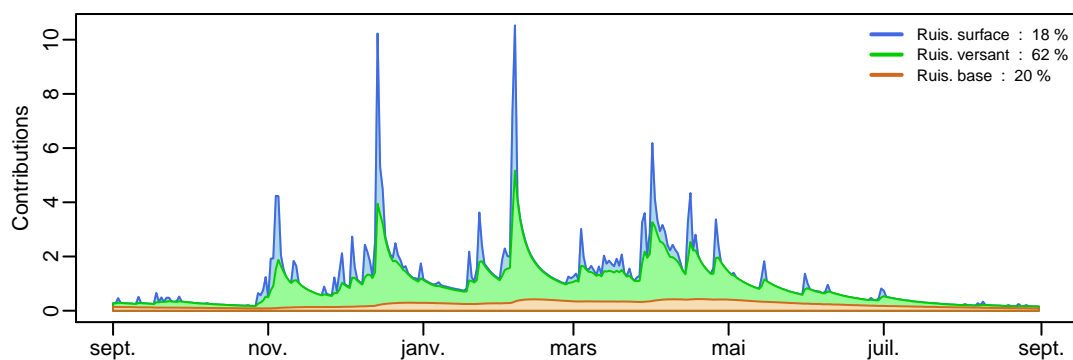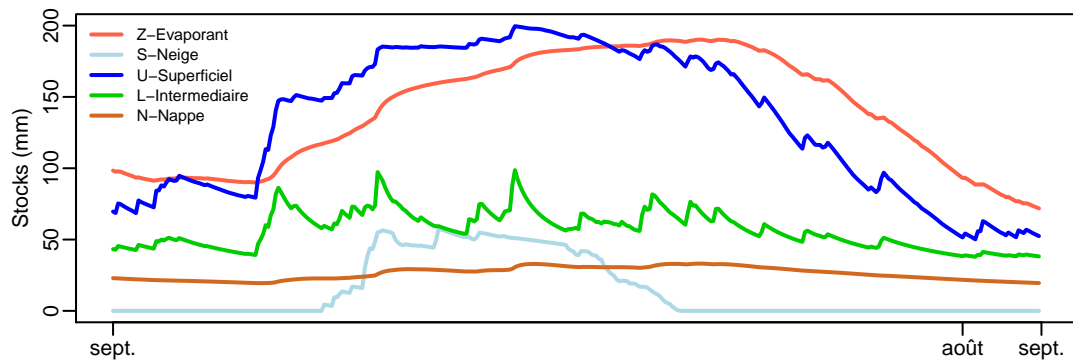

# q0277 (376.01 km<sup>2</sup>) – année 2009–2010

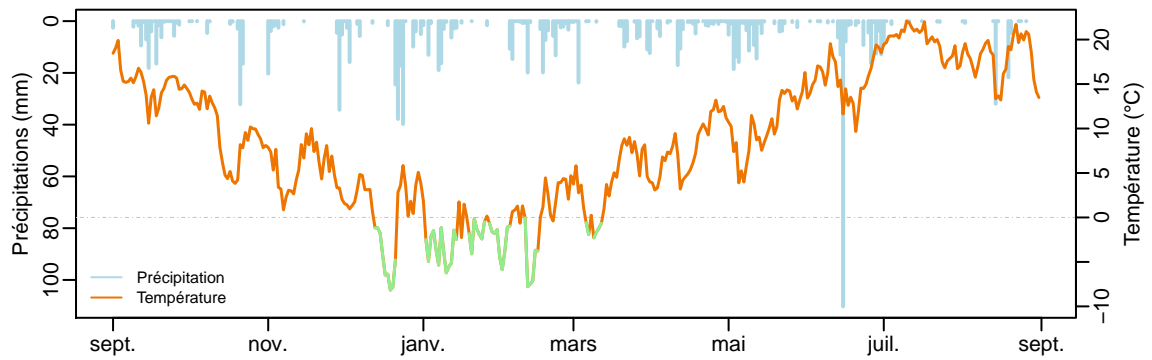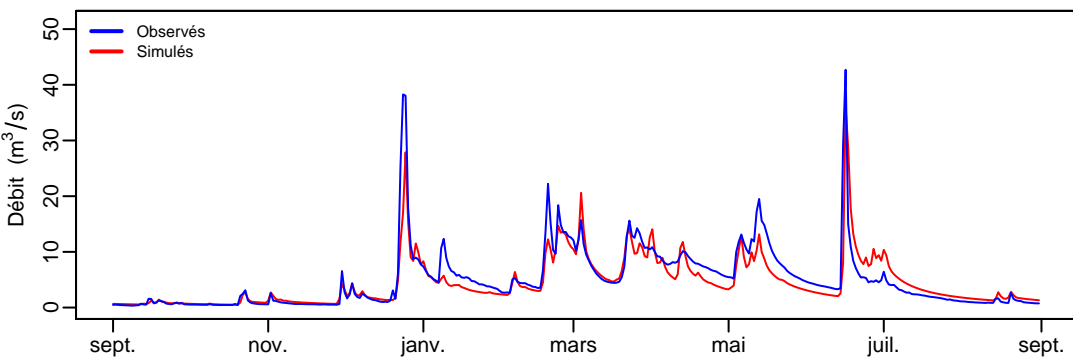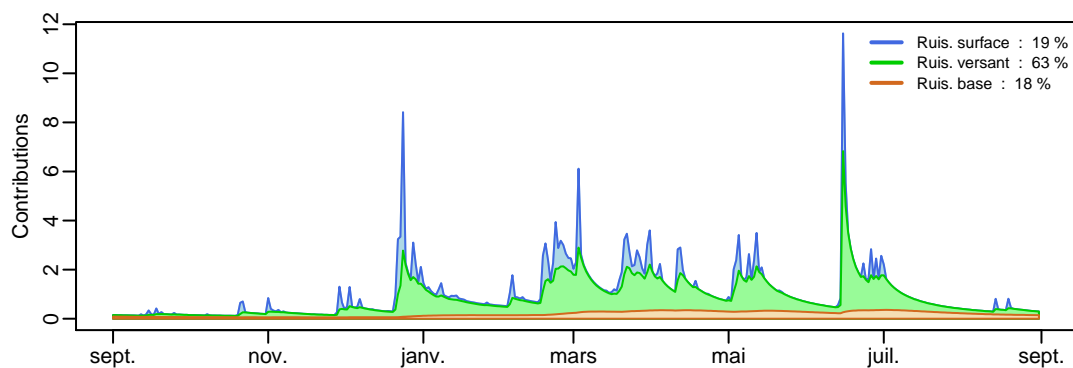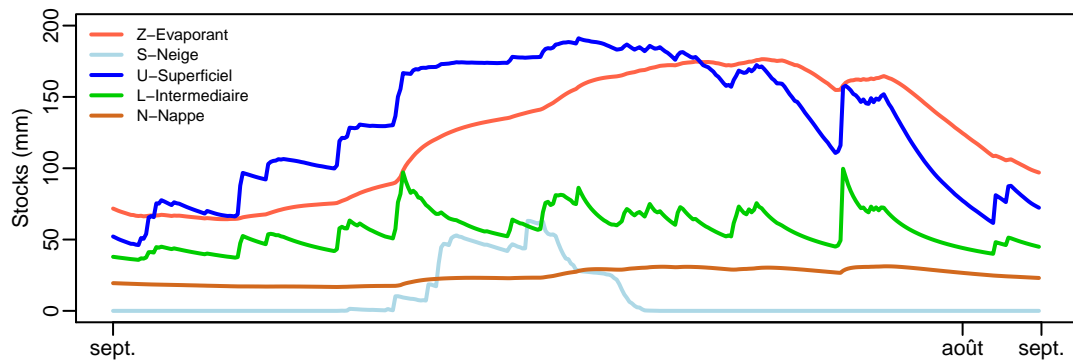

# q0277 (376.01 km<sup>2</sup>) – année 2010–2011

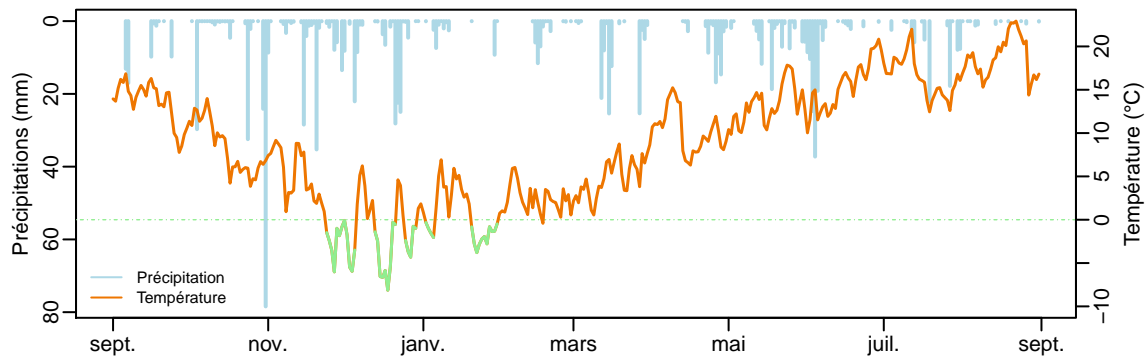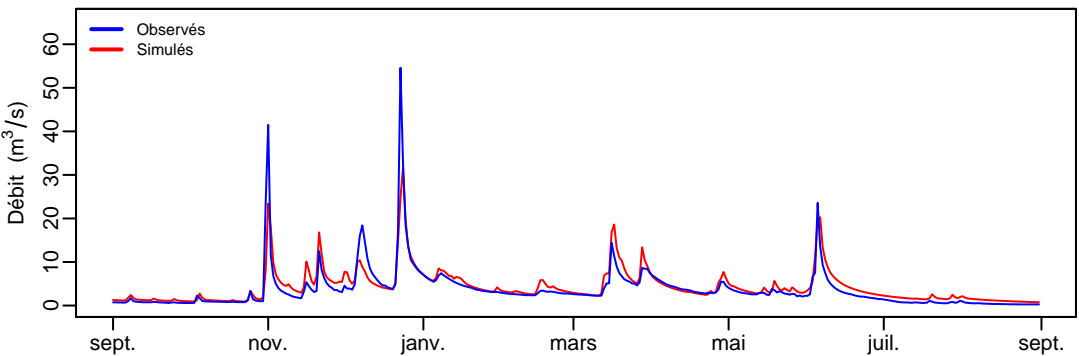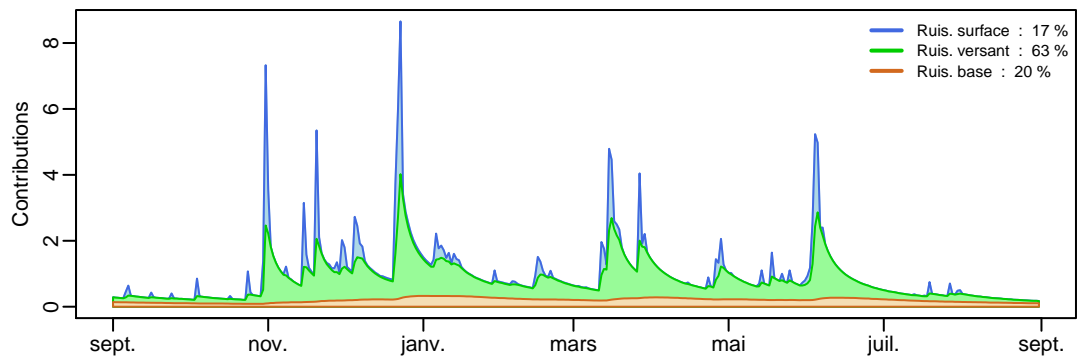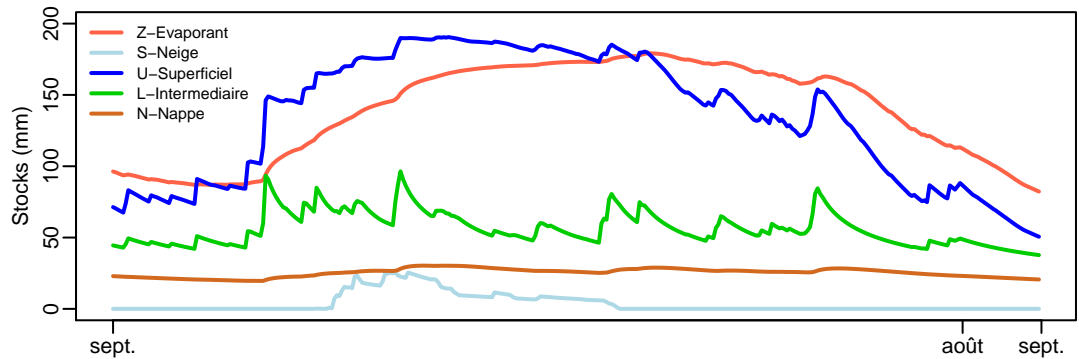



# q0277 (376.01 km²) – année 2011–2012

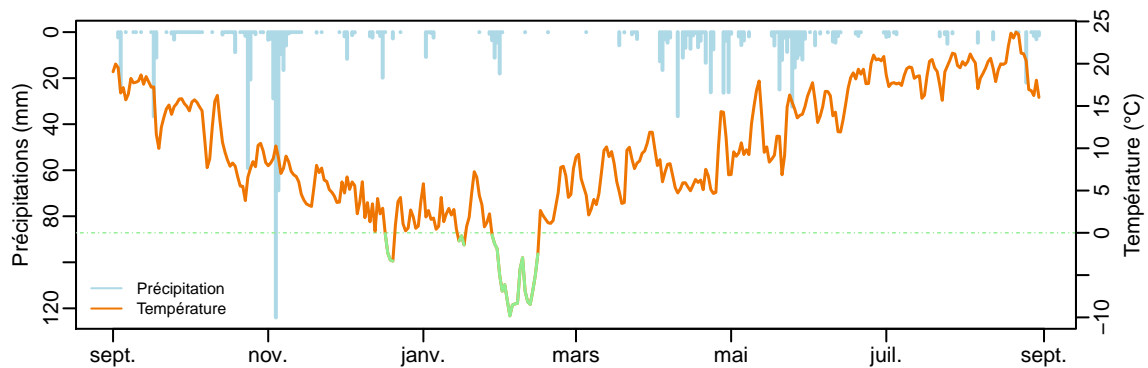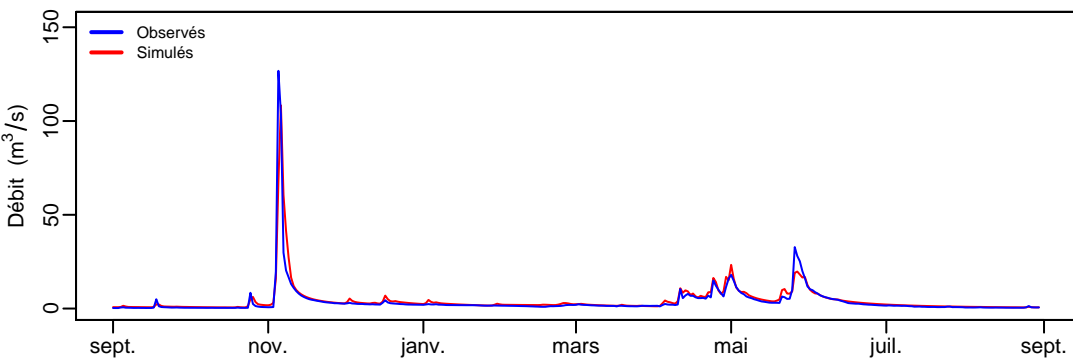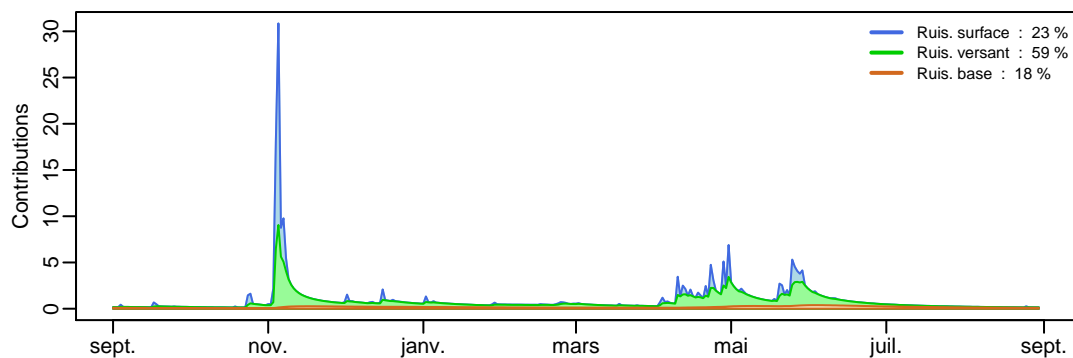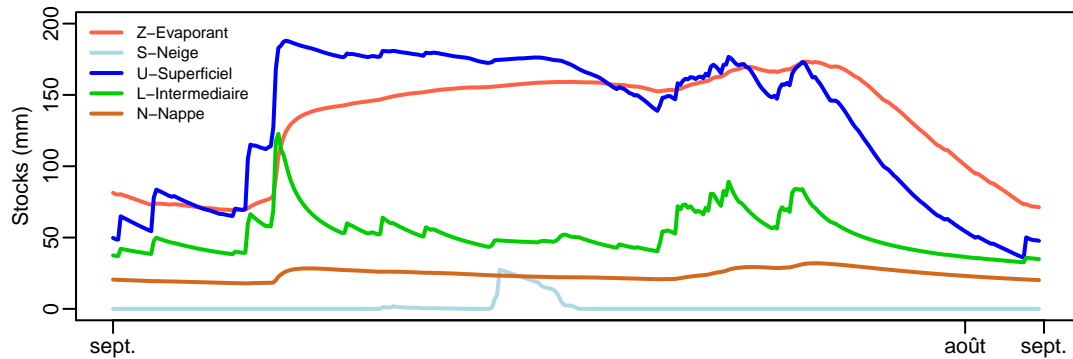

# q0278 (1186.3401 km<sup>2</sup>) – année 1996–1997

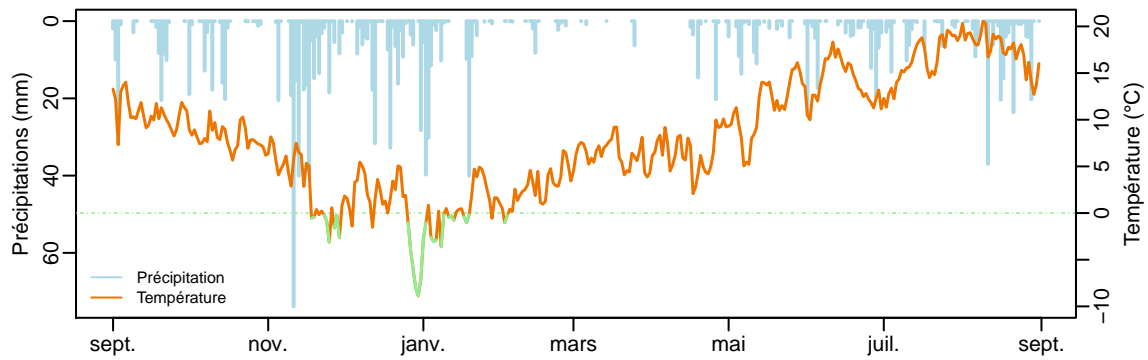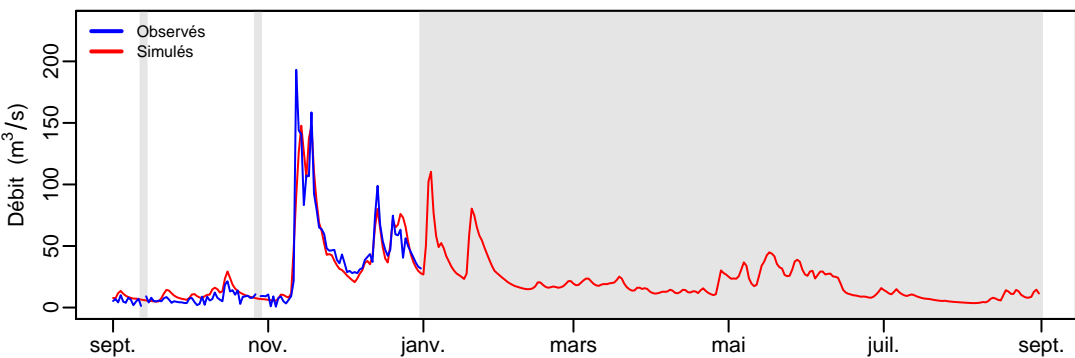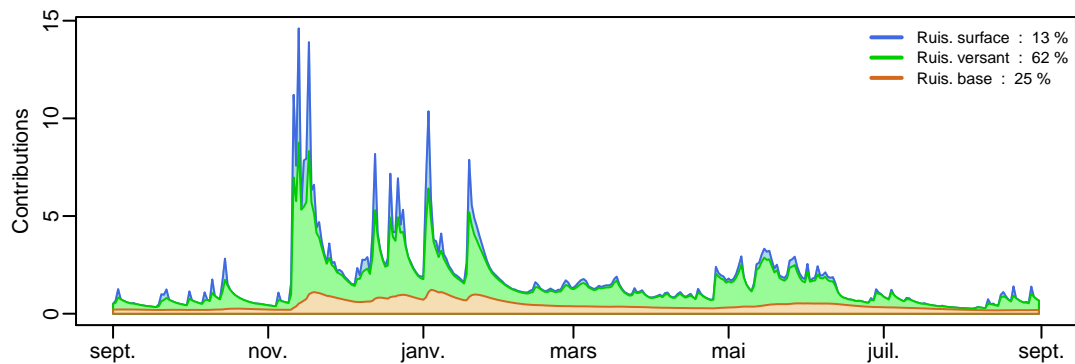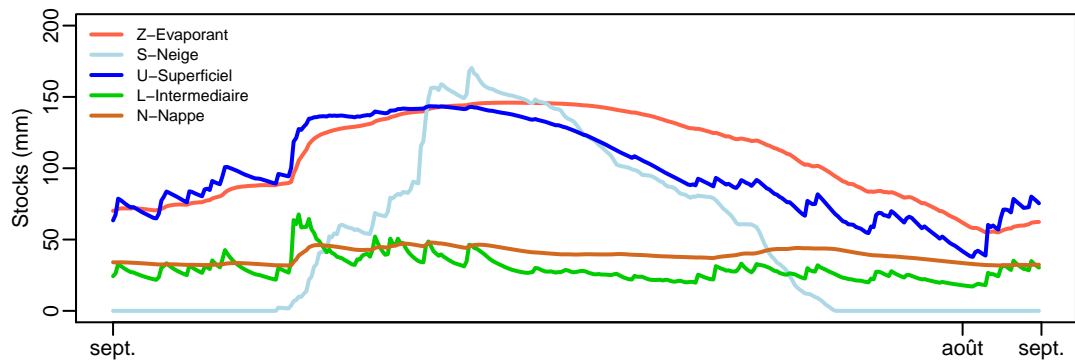

# q0278 (1186.3401 km<sup>2</sup>) – année 1997–1998

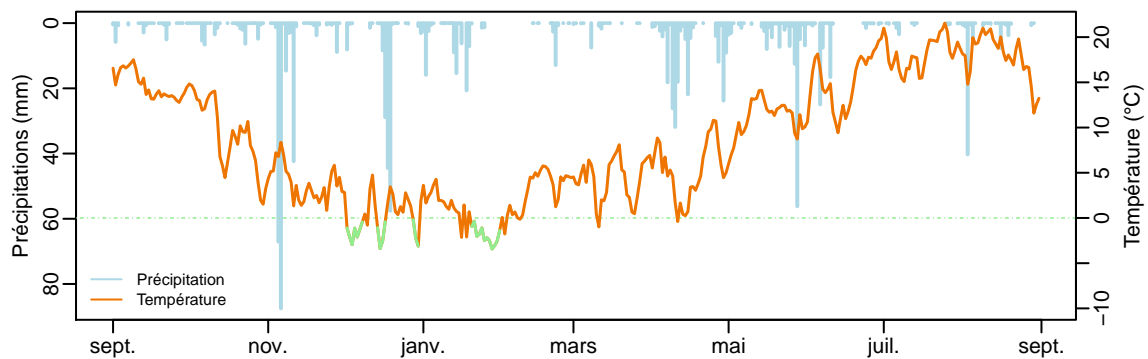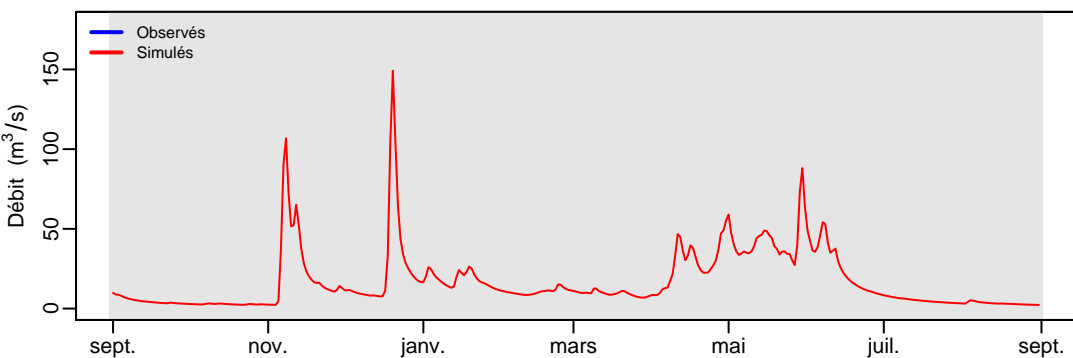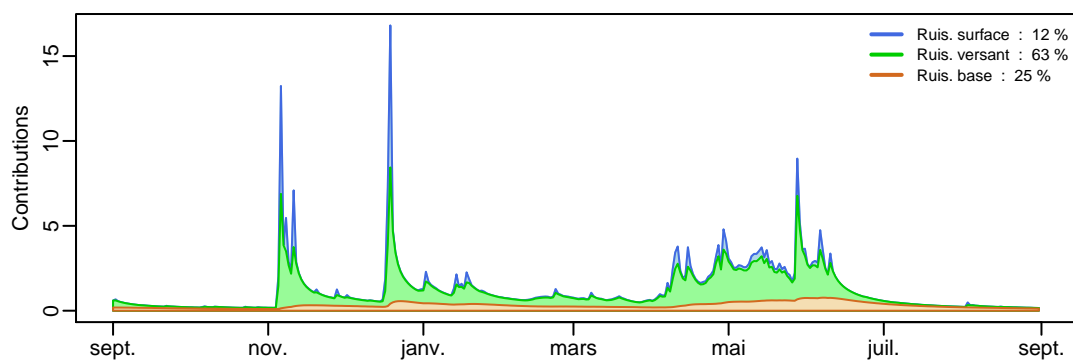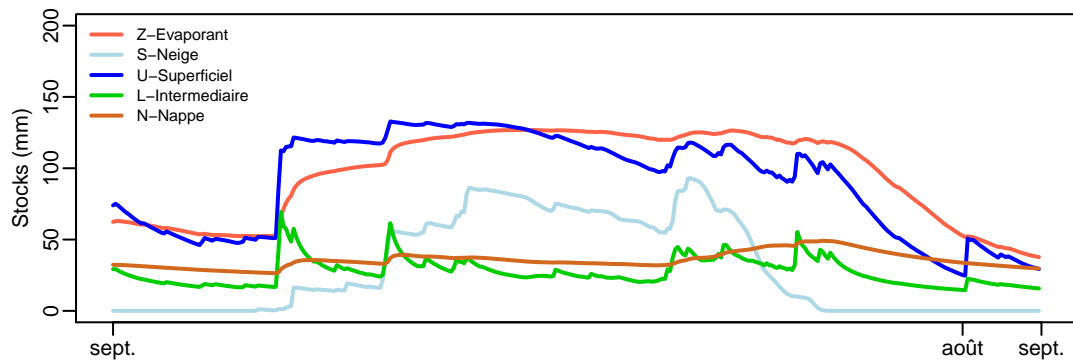

# q0278 (1186.3401 km<sup>2</sup>) – année 1998–1999

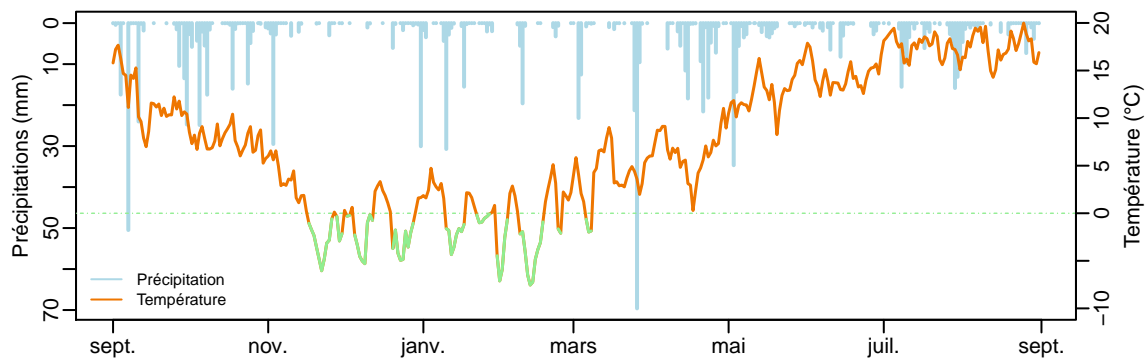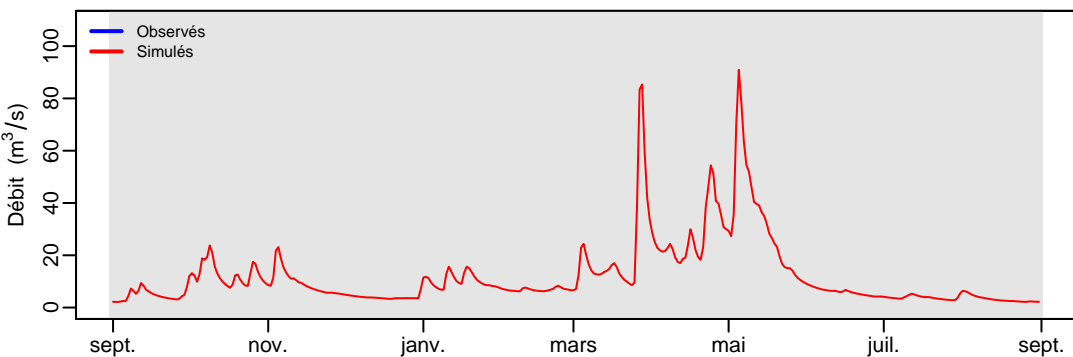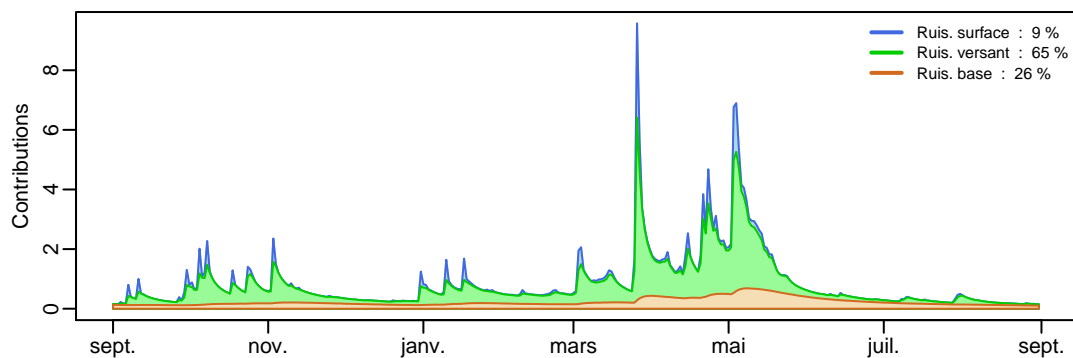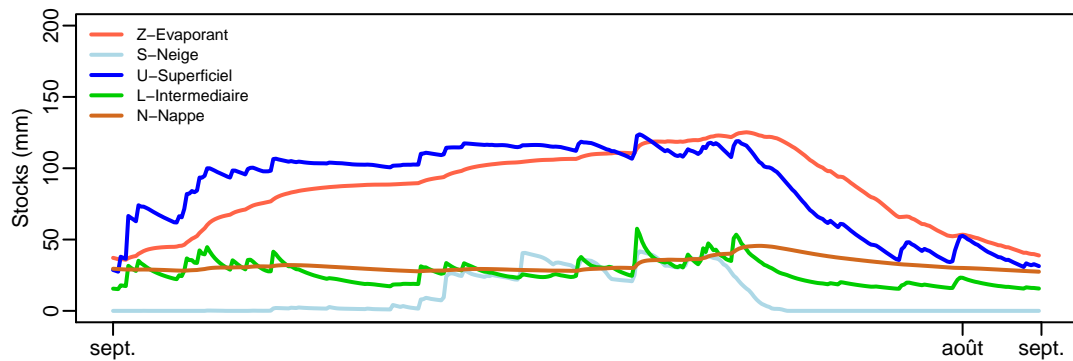

# q0278 (1186.3401 km<sup>2</sup>) – année 1999–2000

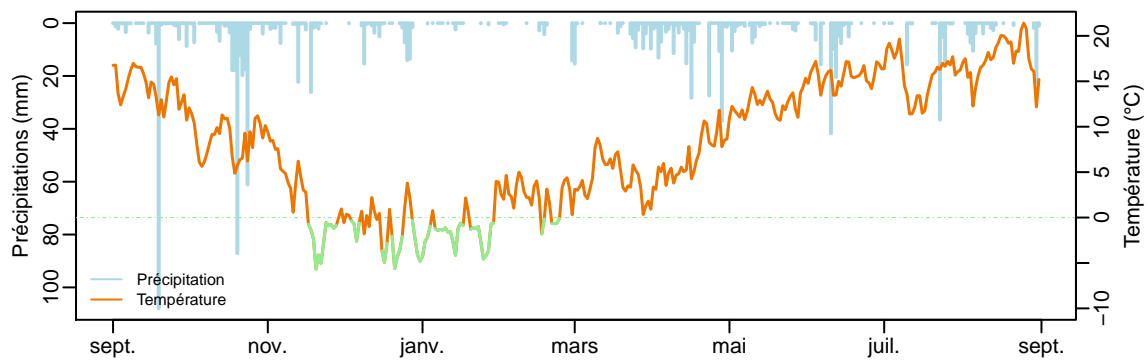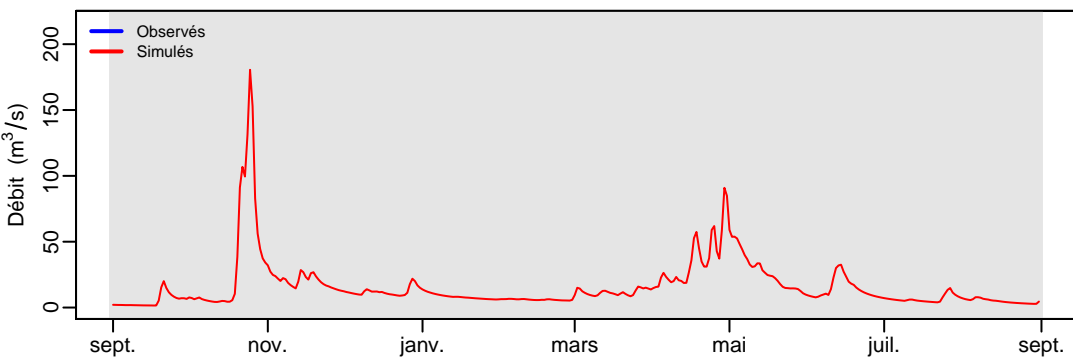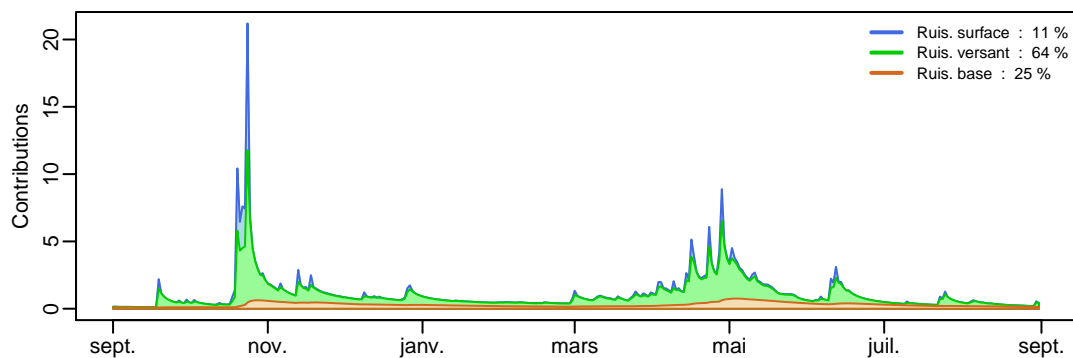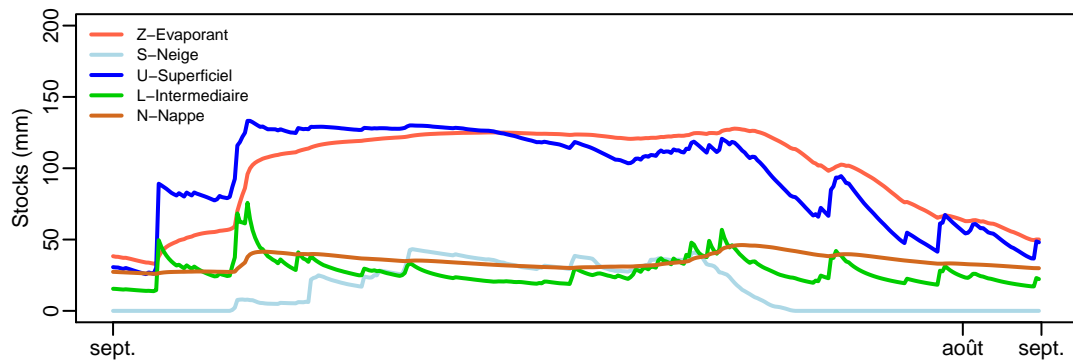

# q0278 (1186.3401 km<sup>2</sup>) – année 2000–2001

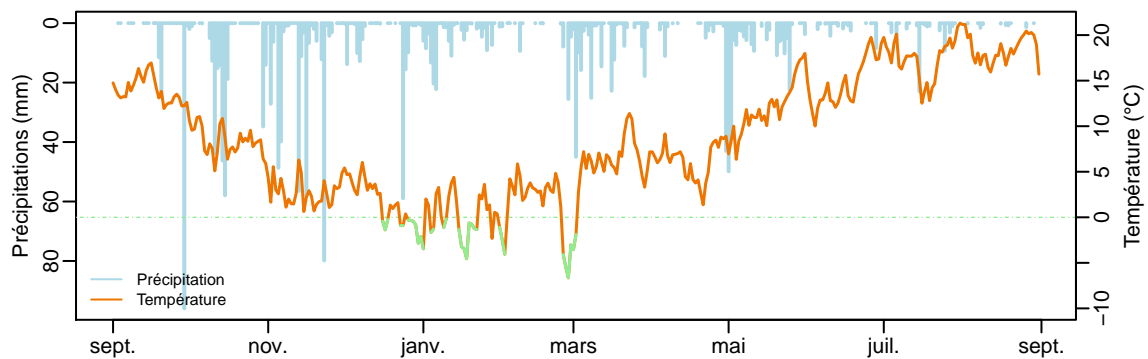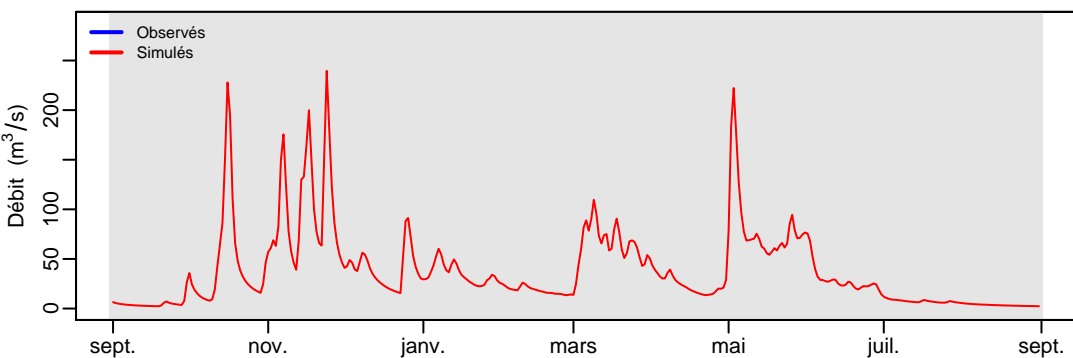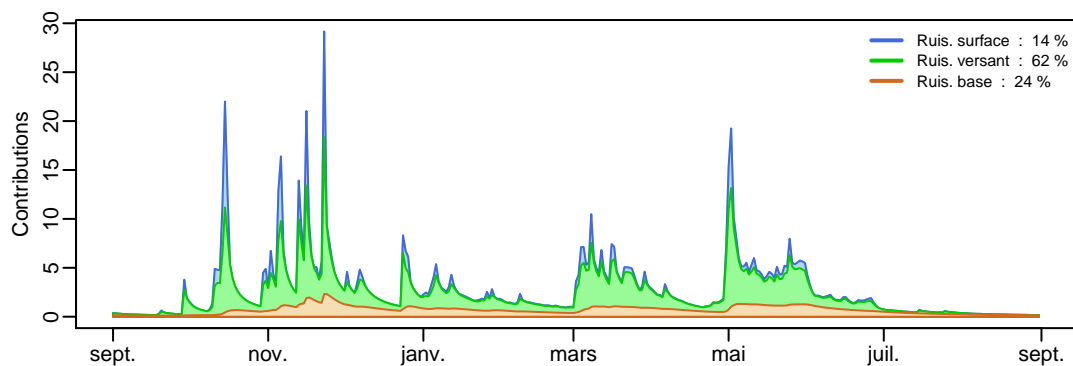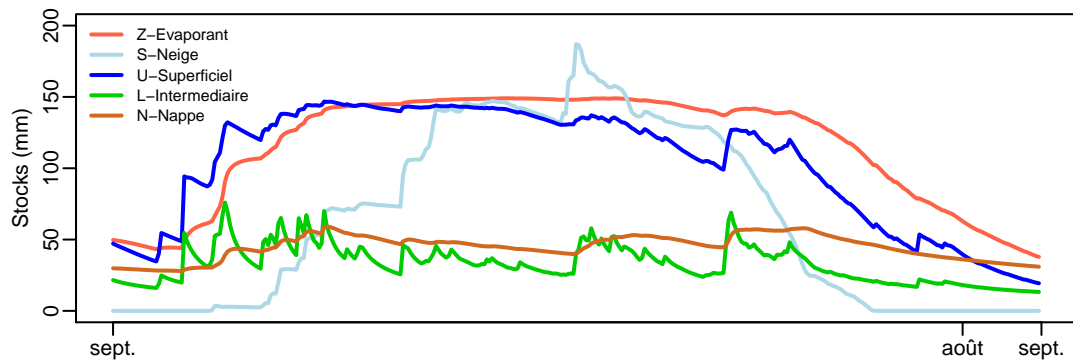

# q0278 (1186.3401 km<sup>2</sup>) – année 2001–2002

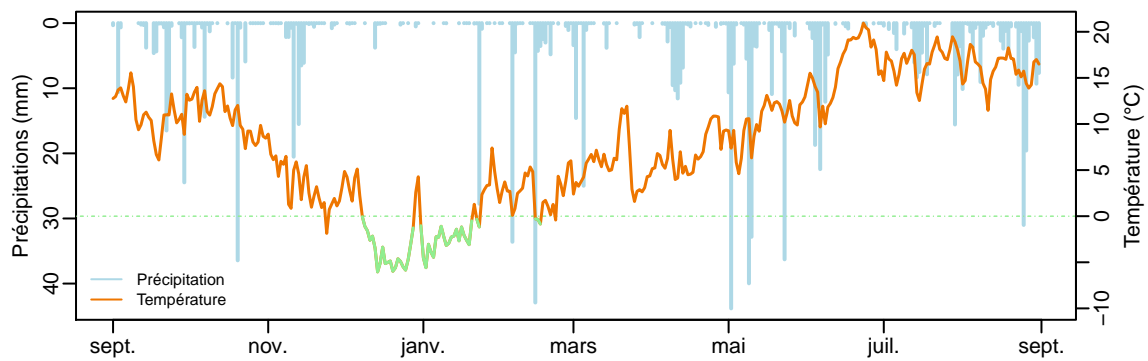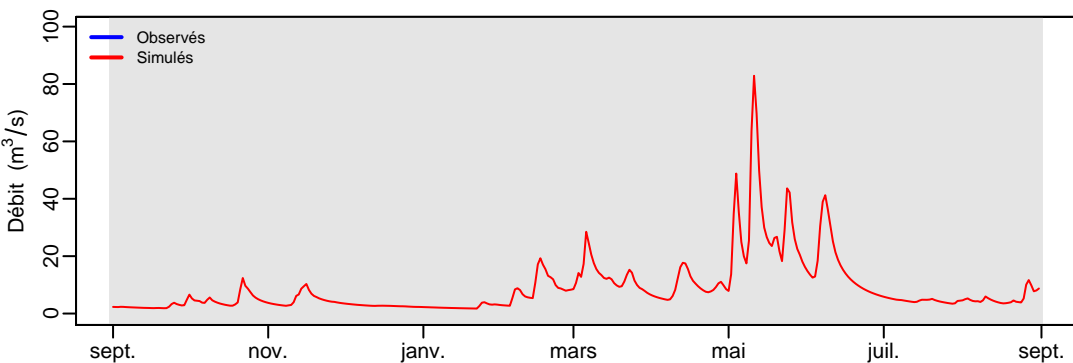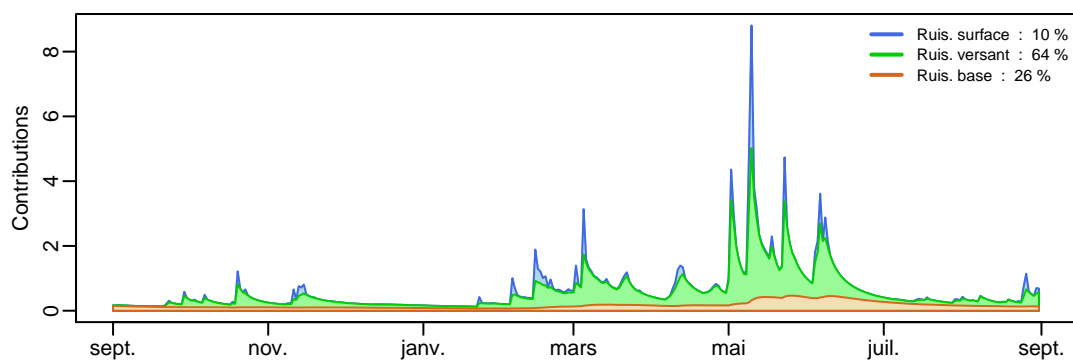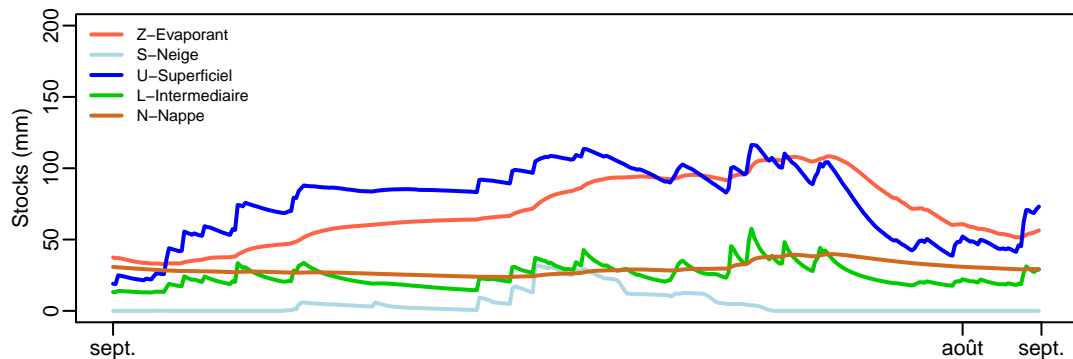

# q0278 (1186.3401 km<sup>2</sup>) – année 2002–2003

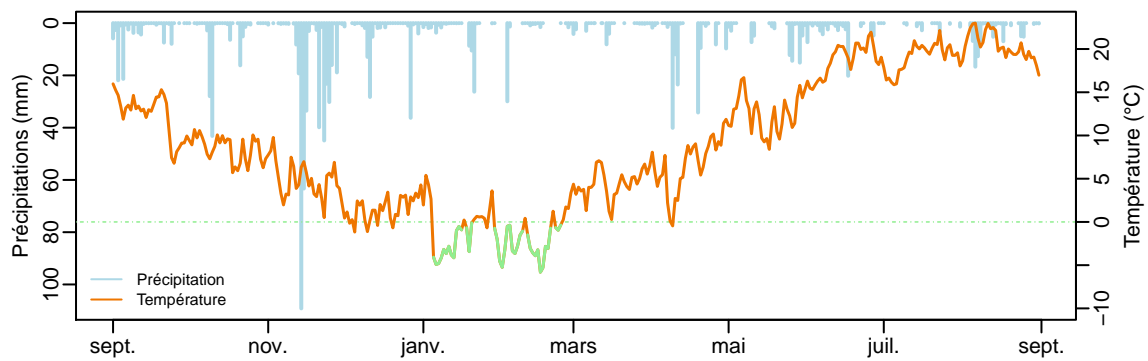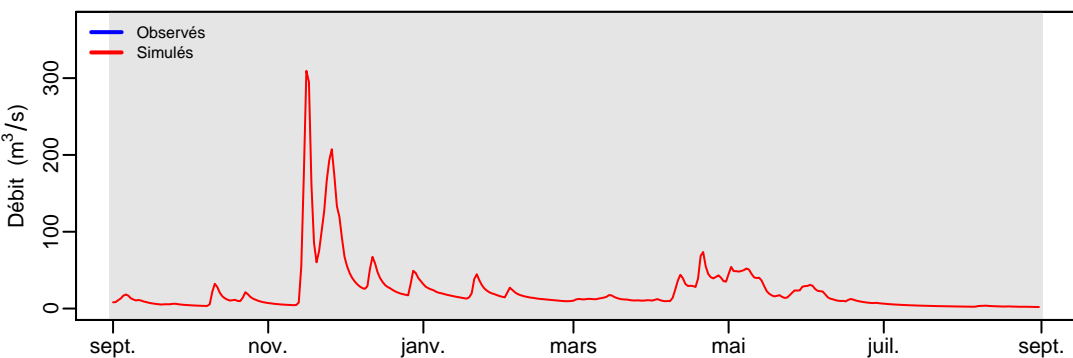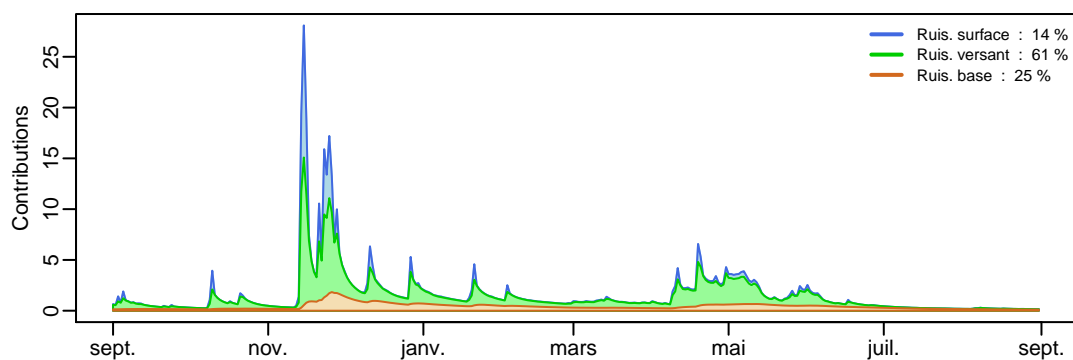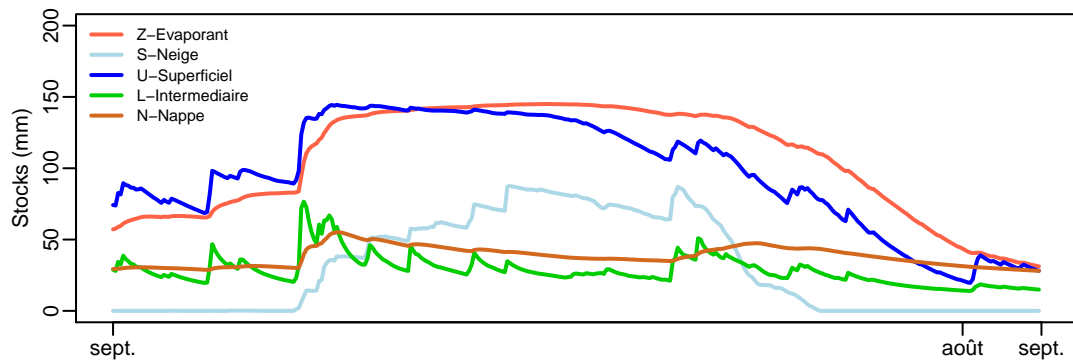



# q0278 (1186.3401 km<sup>2</sup>) – année 2003–2004

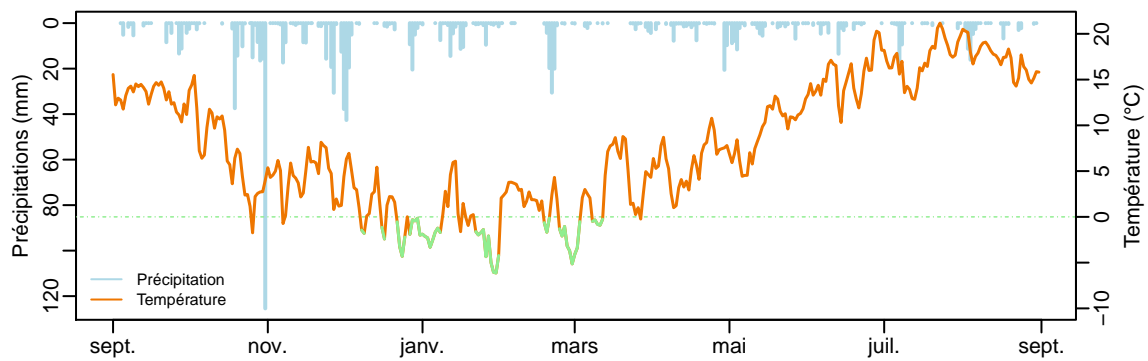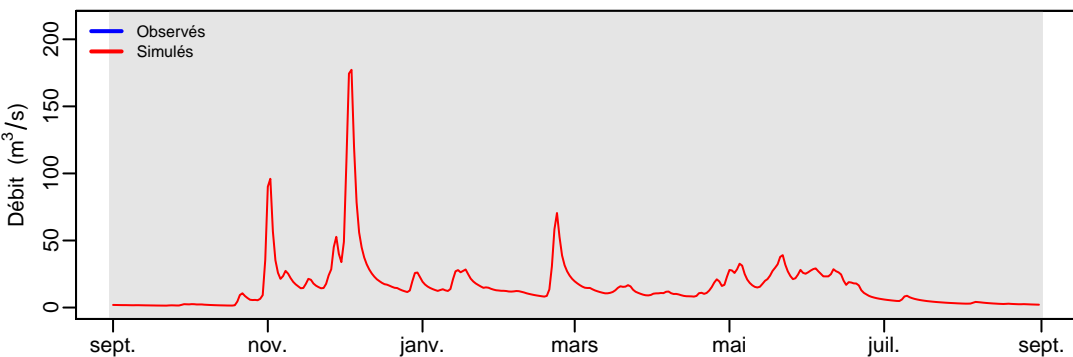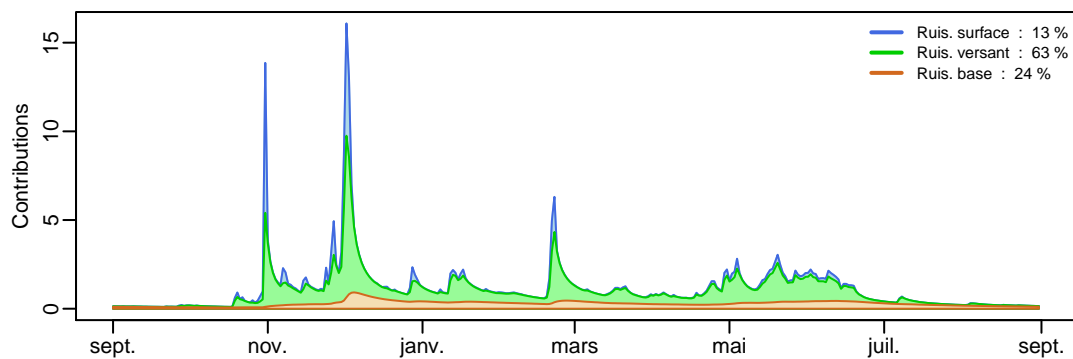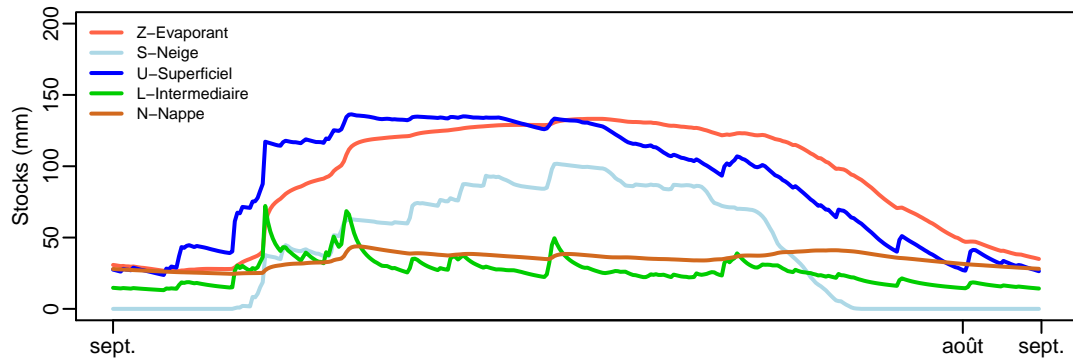

# q0278 (1186.3401 km<sup>2</sup>) – année 2004–2005

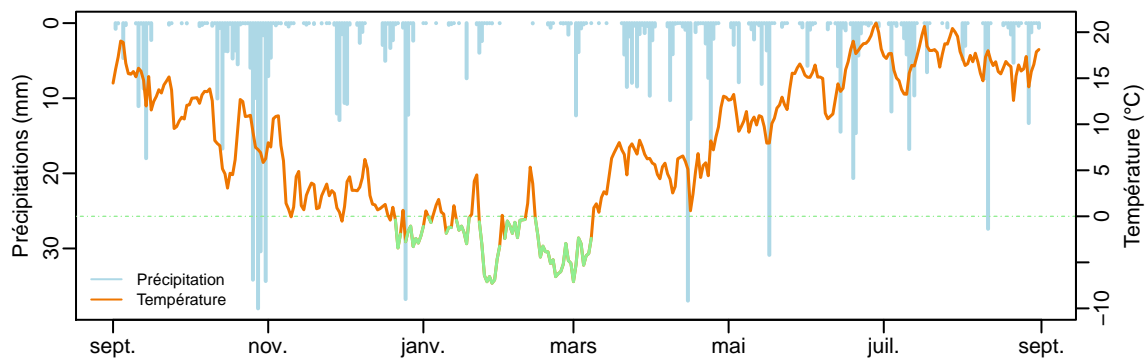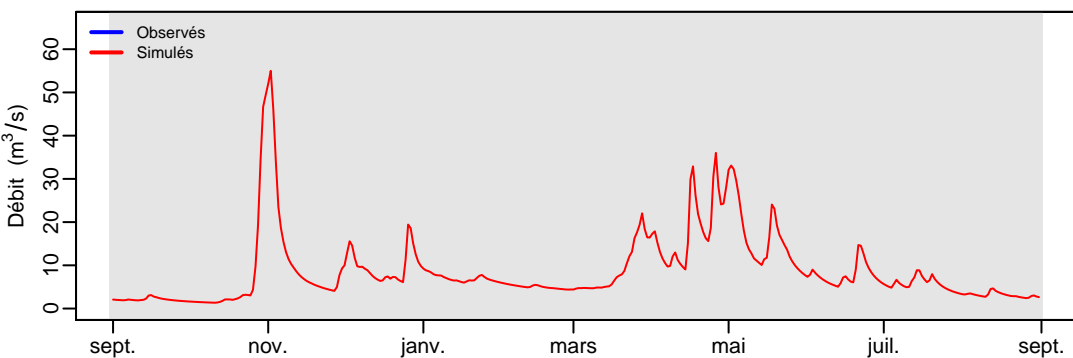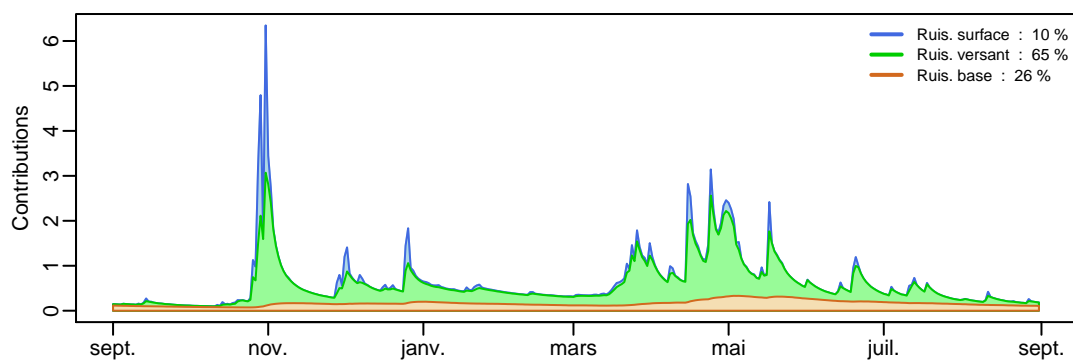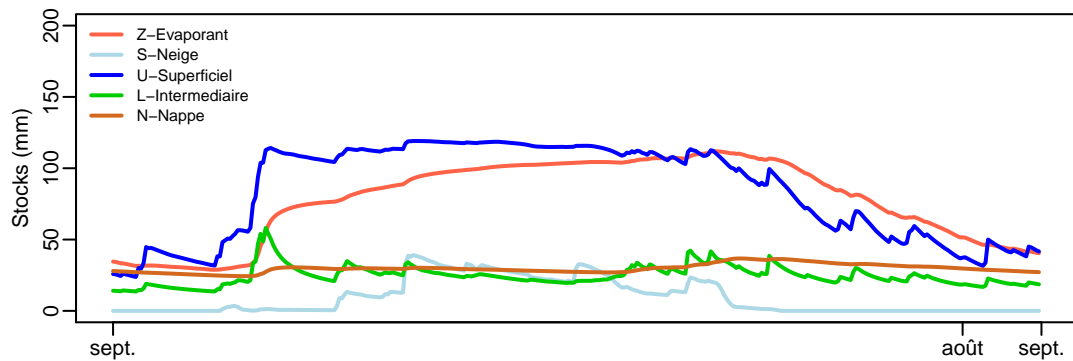

# q0278 (1186.3401 km<sup>2</sup>) – année 2005–2006

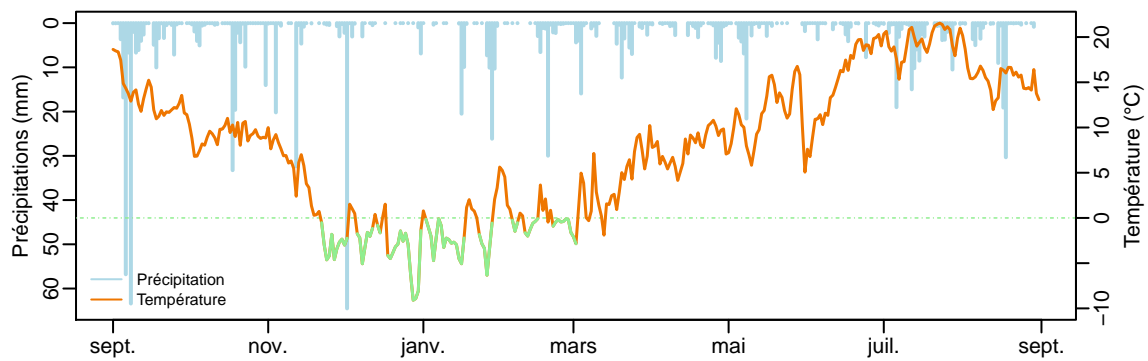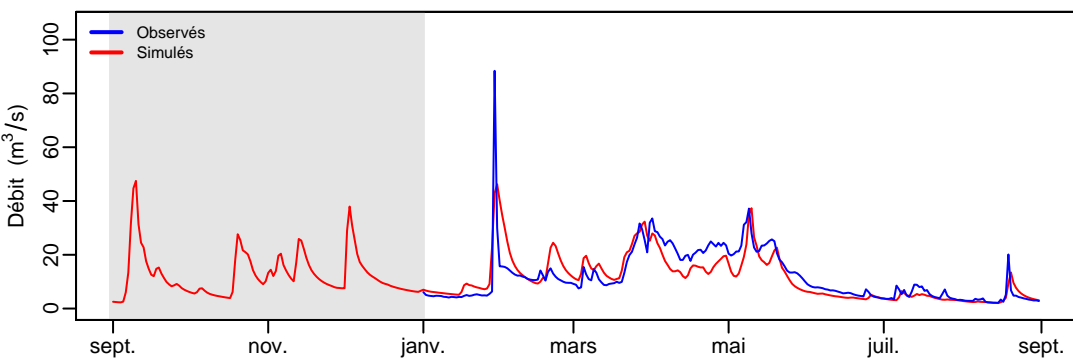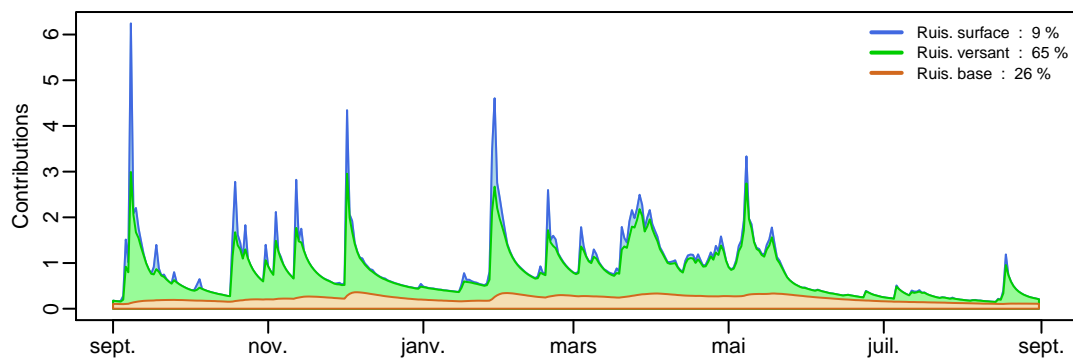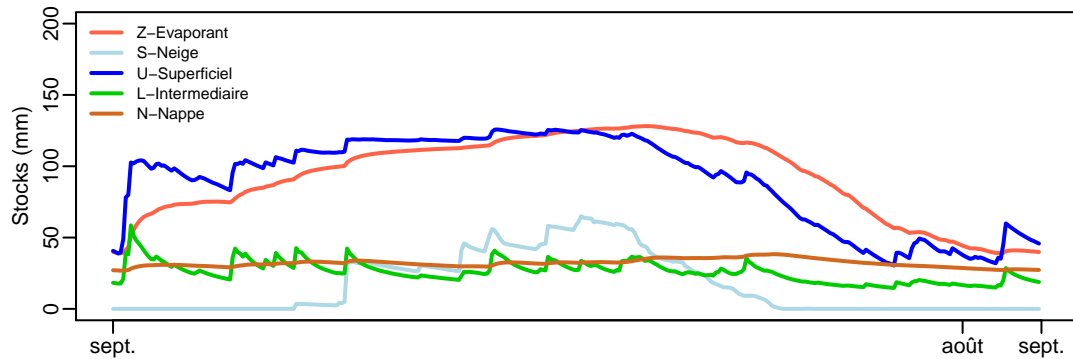

# q0278 (1186.3401 km<sup>2</sup>) – année 2006–2007

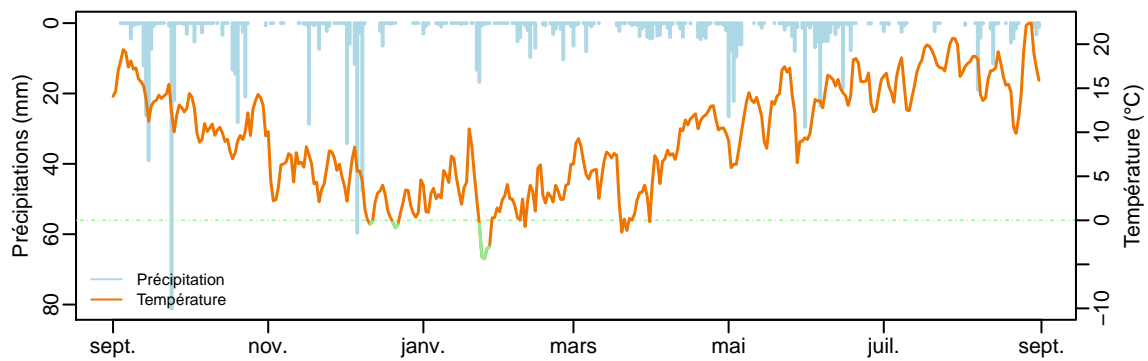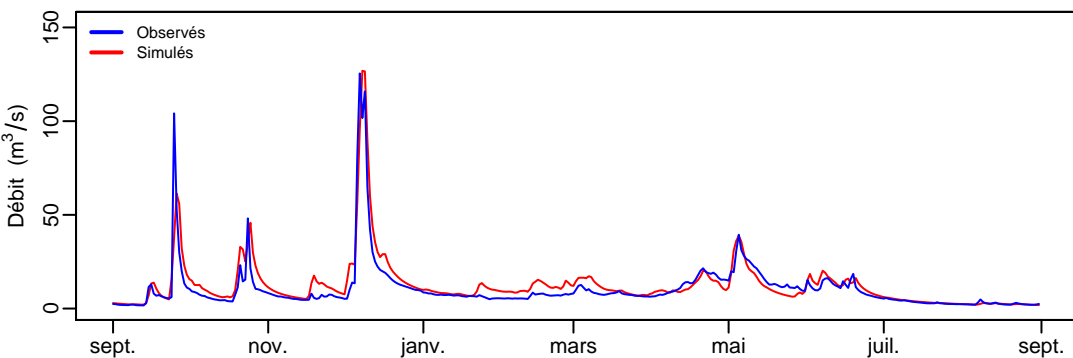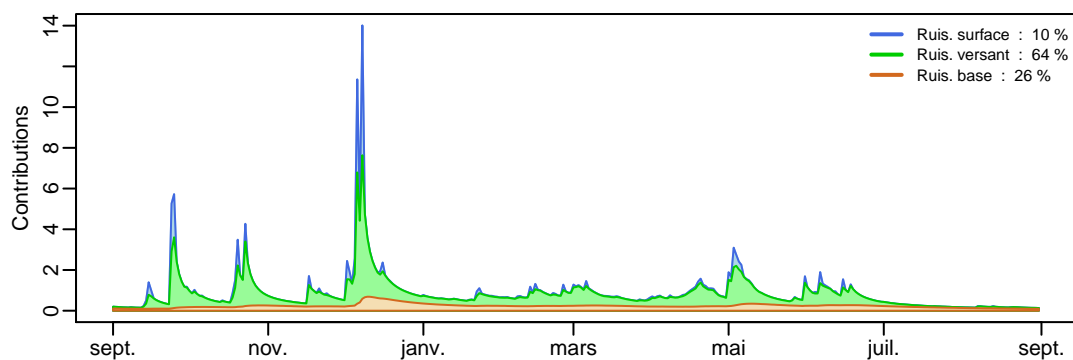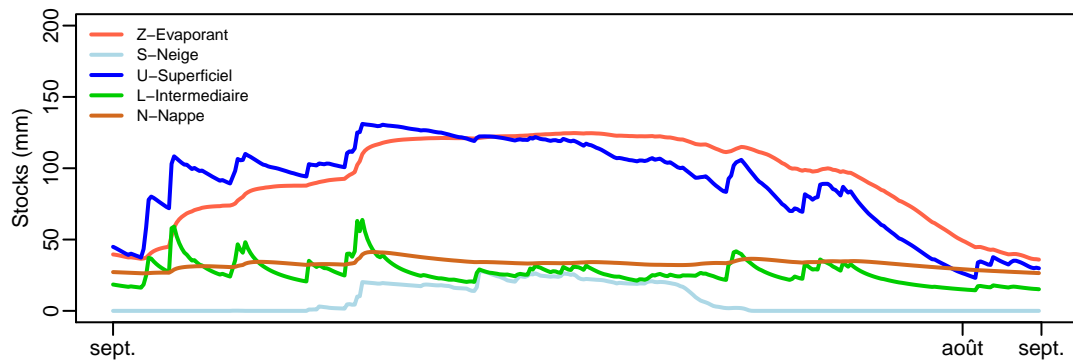

# q0278 (1186.3401 km<sup>2</sup>) – année 2007–2008

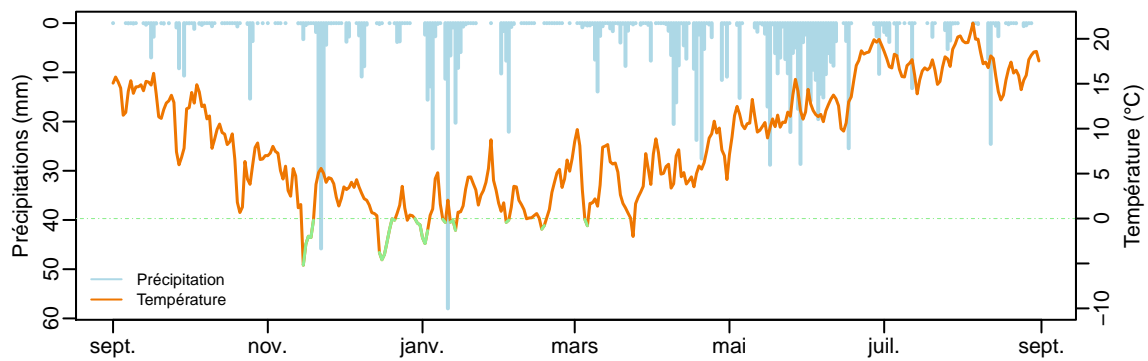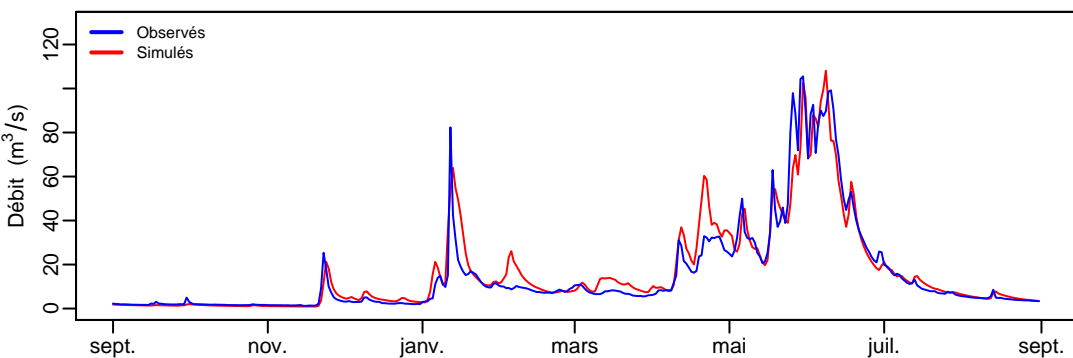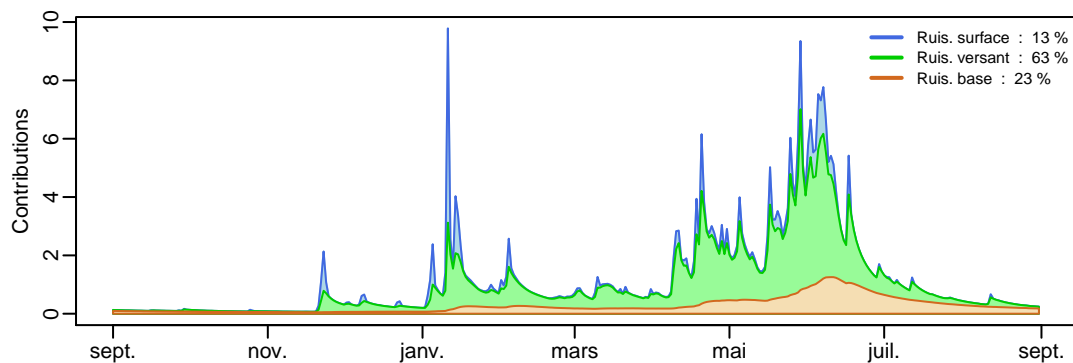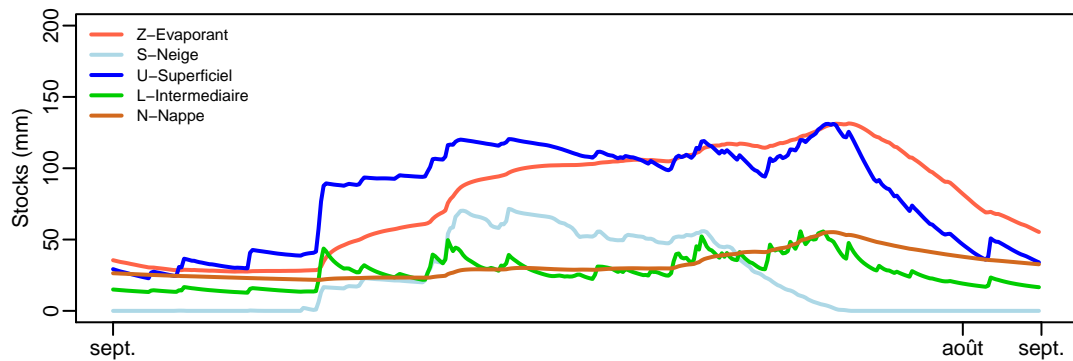

# q0278 (1186.3401 km<sup>2</sup>) – année 2008–2009

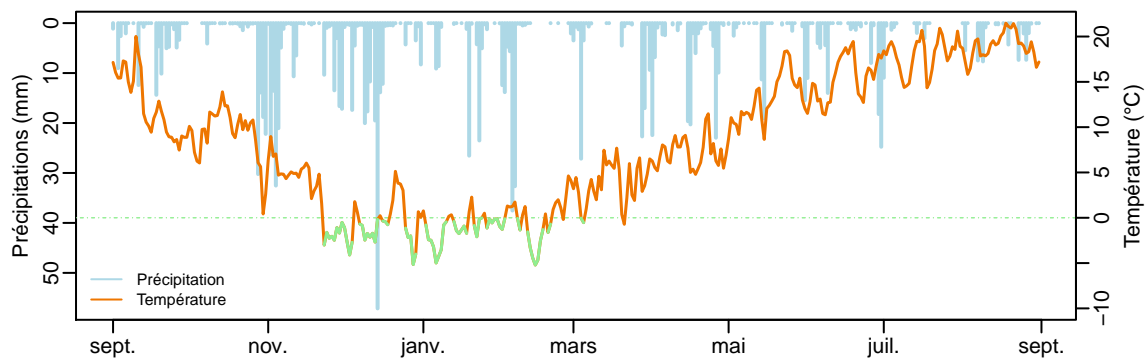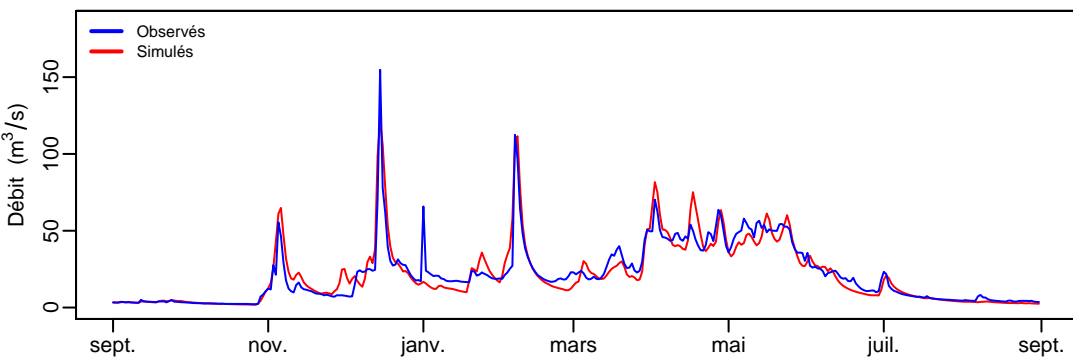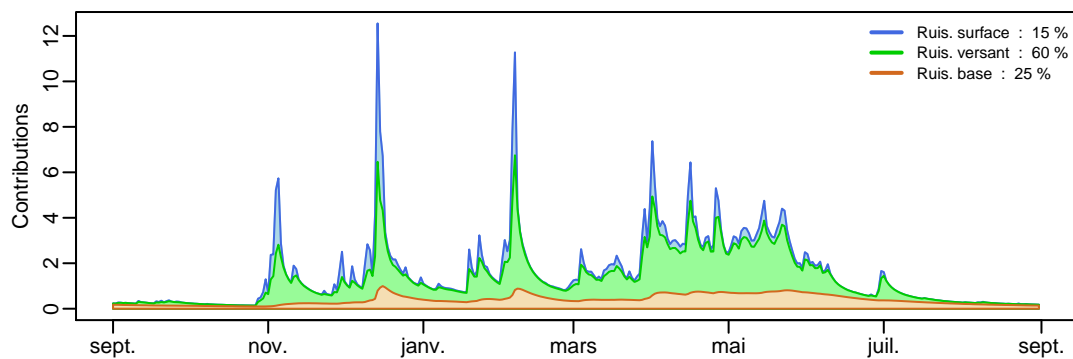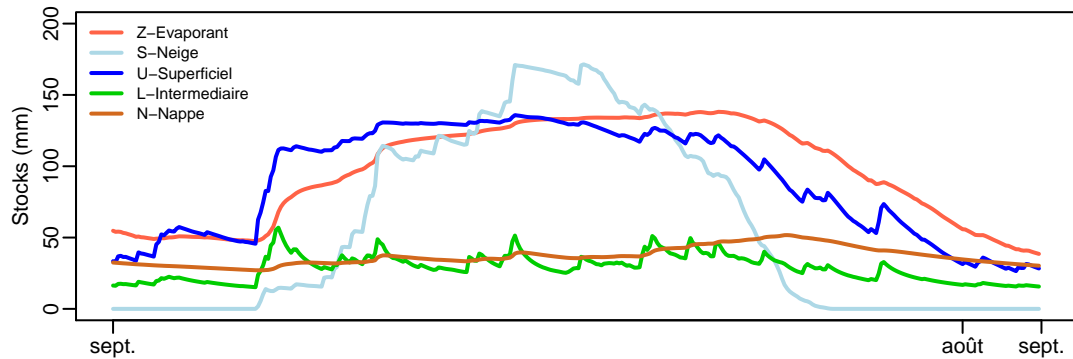

# q0278 (1186.3401 km<sup>2</sup>) – année 2009–2010

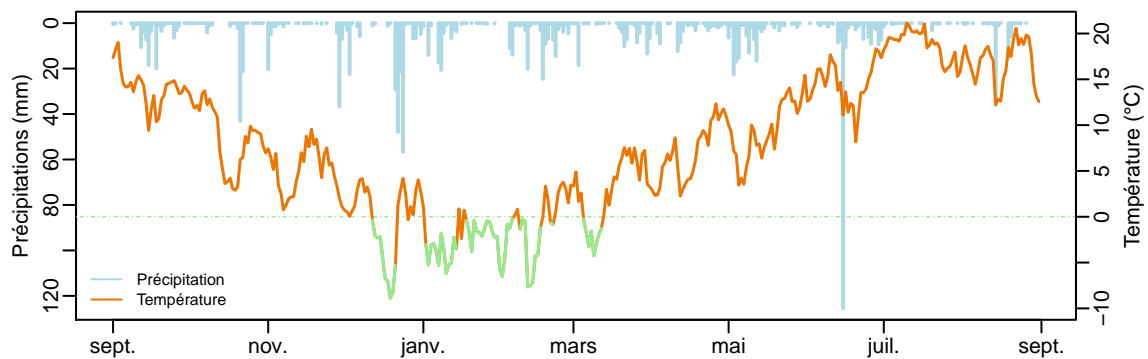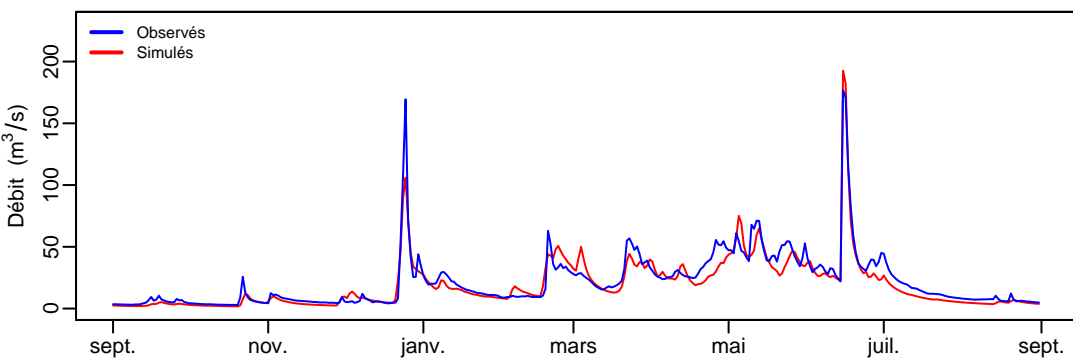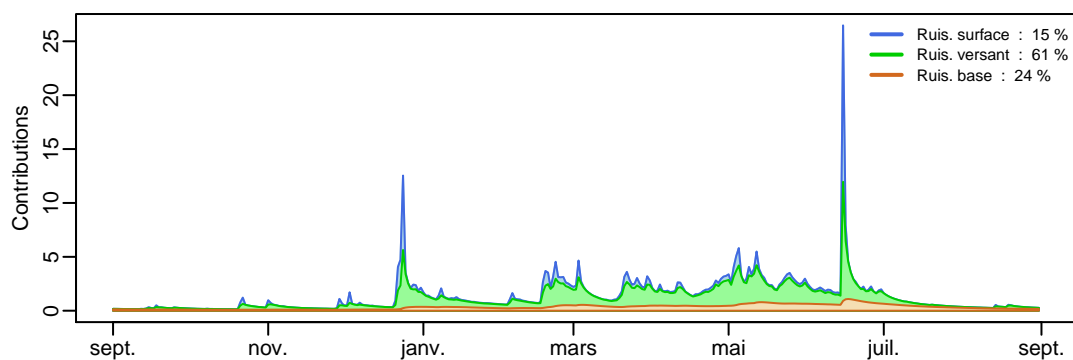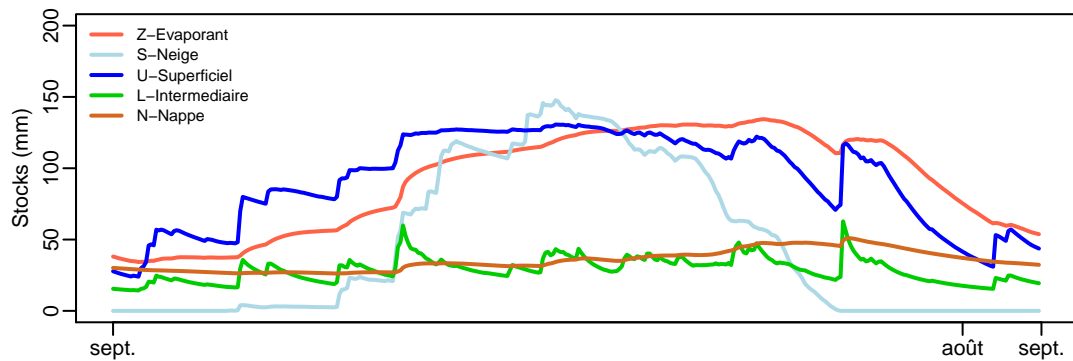

# q0278 (1186.3401 km<sup>2</sup>) – année 2010–2011

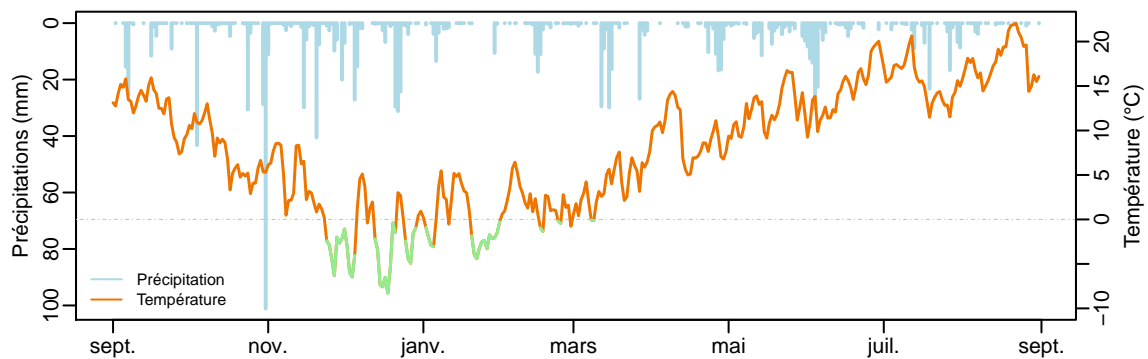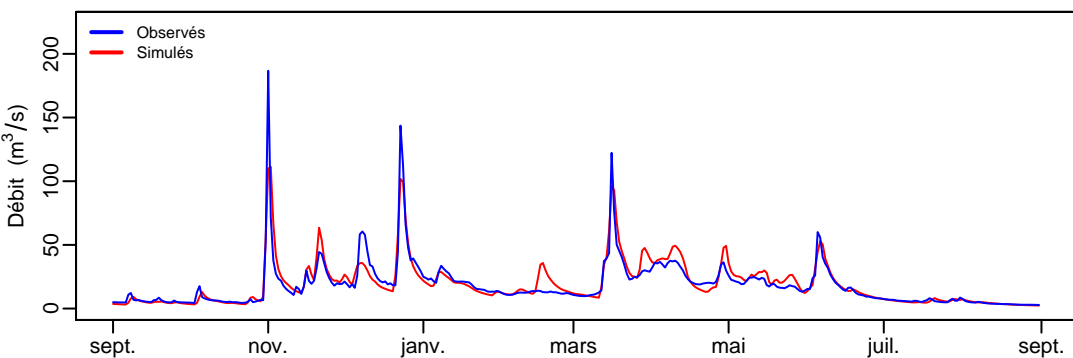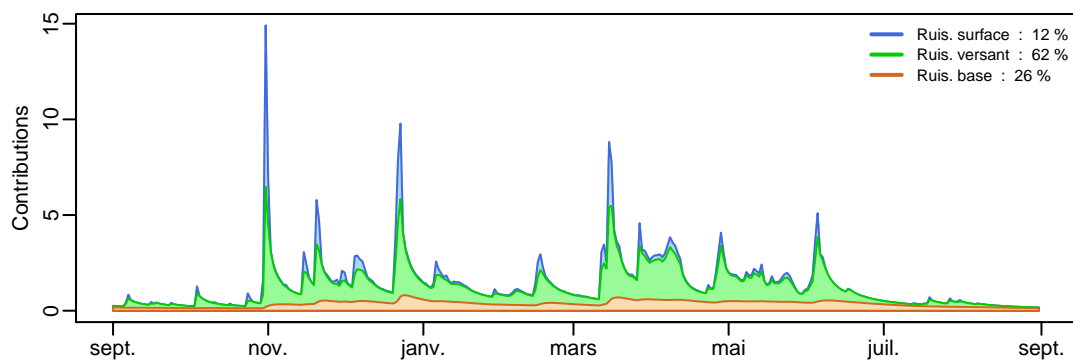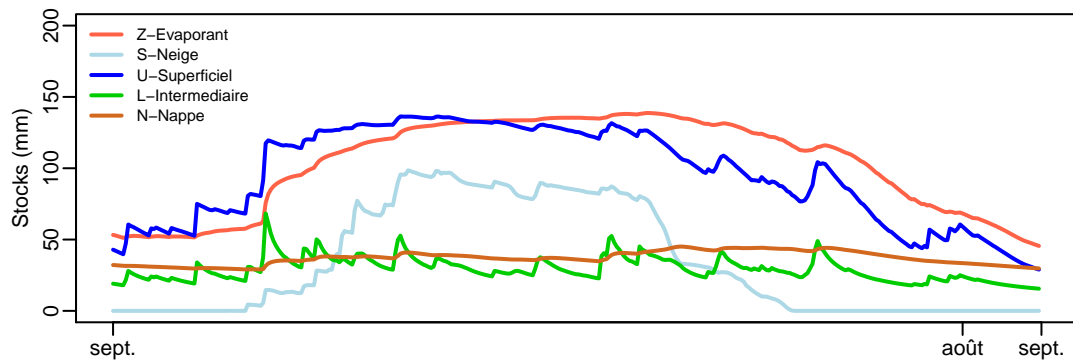



# q0278 (1186.3401 km<sup>2</sup>) – année 2011–2012

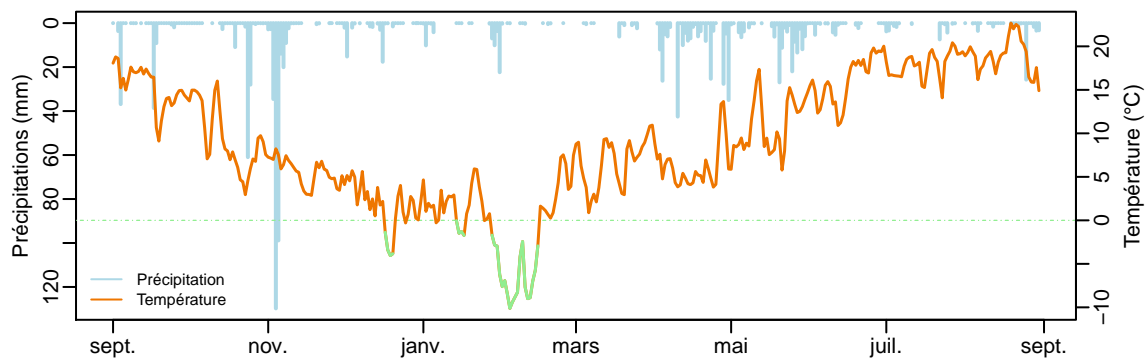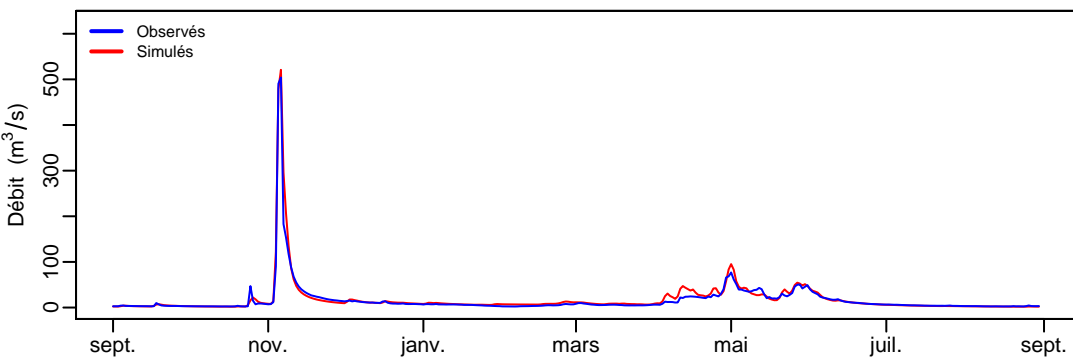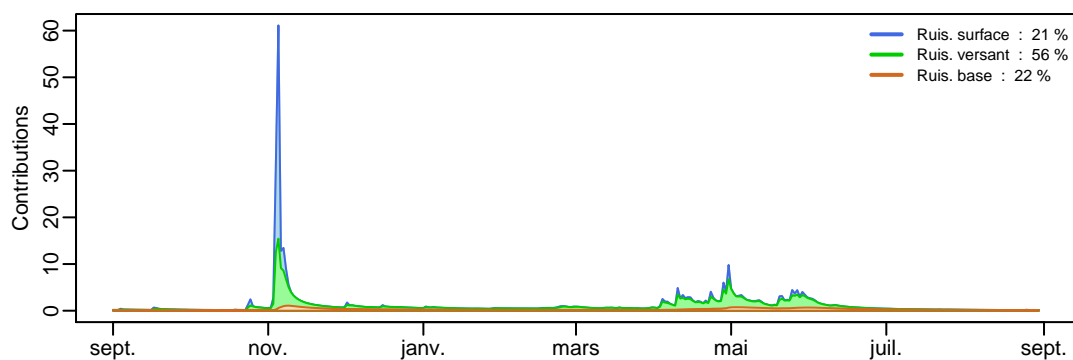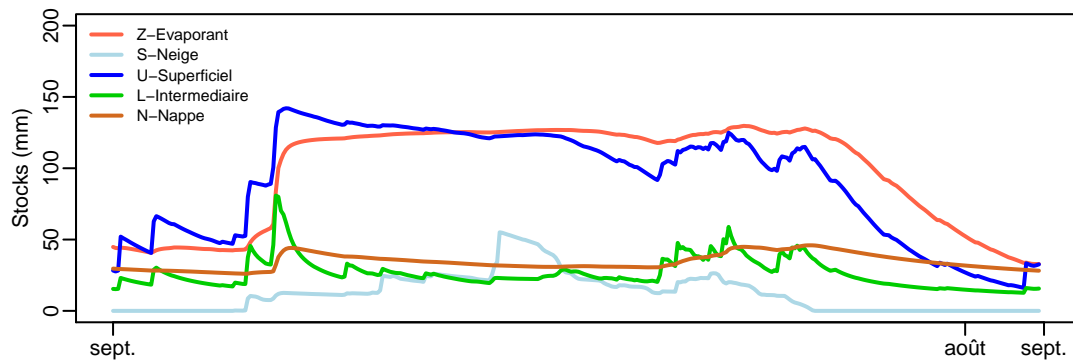

# q0296 (405.76 km<sup>2</sup>) – année 1997–1998

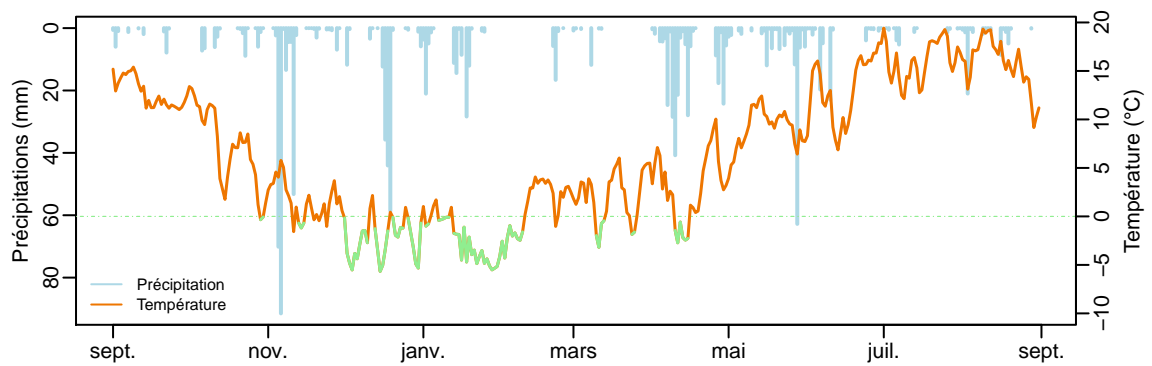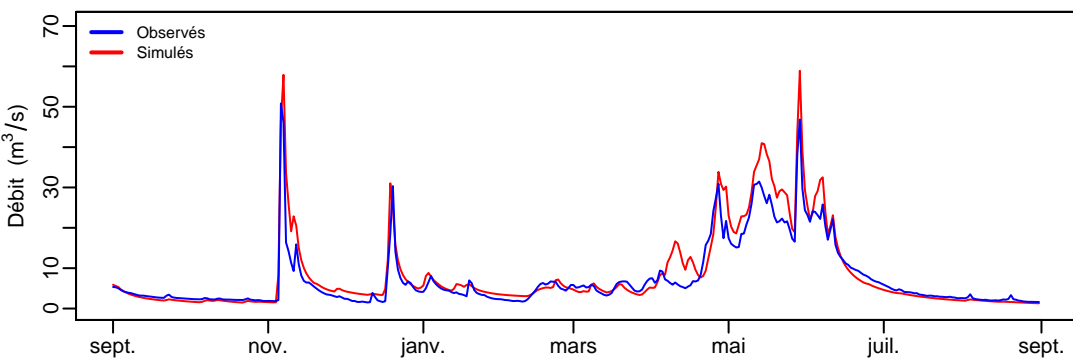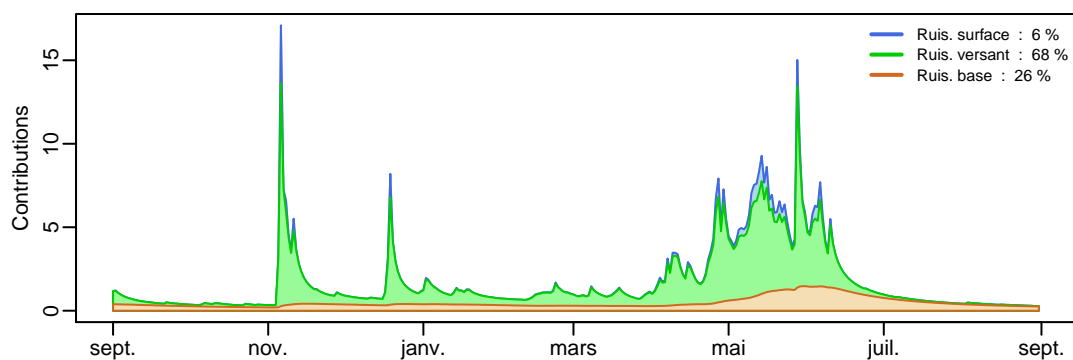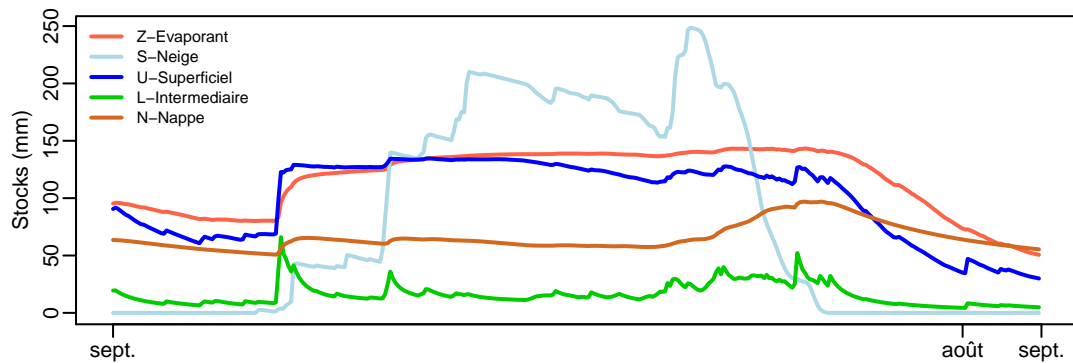

# q0296 (405.76 km<sup>2</sup>) – année 1998–1999

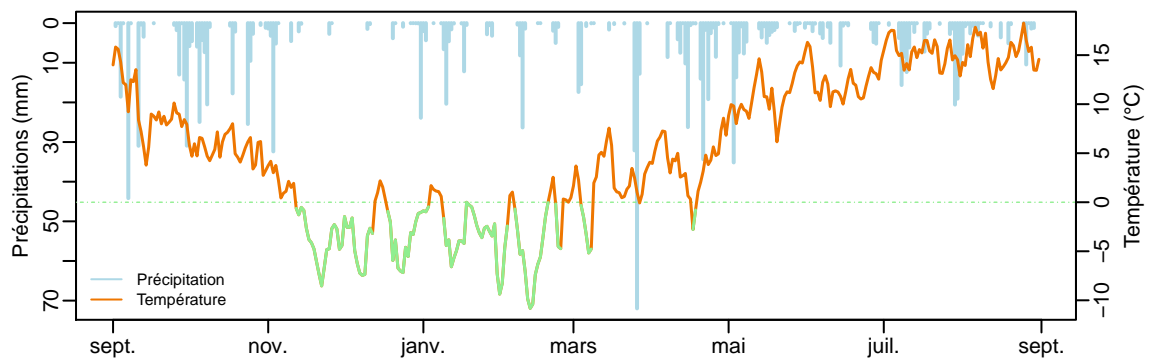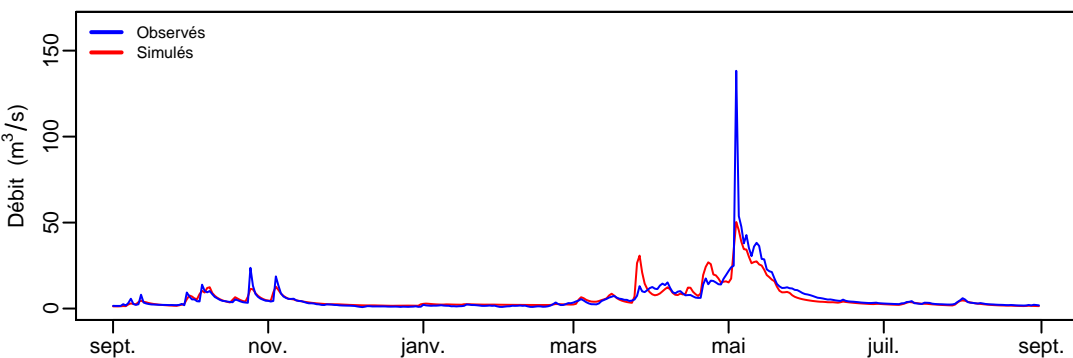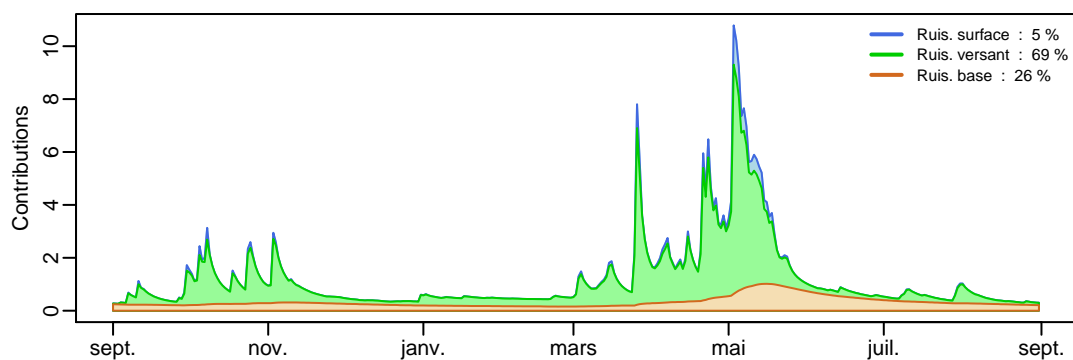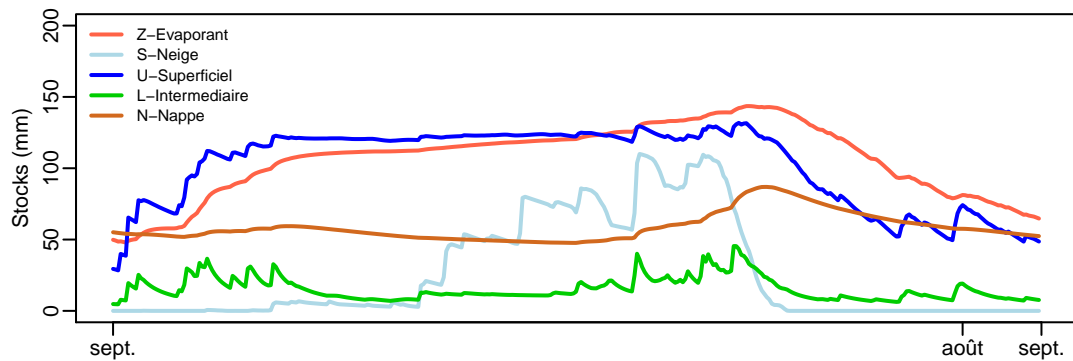

# q0296 (405.76 km<sup>2</sup>) – année 1999–2000

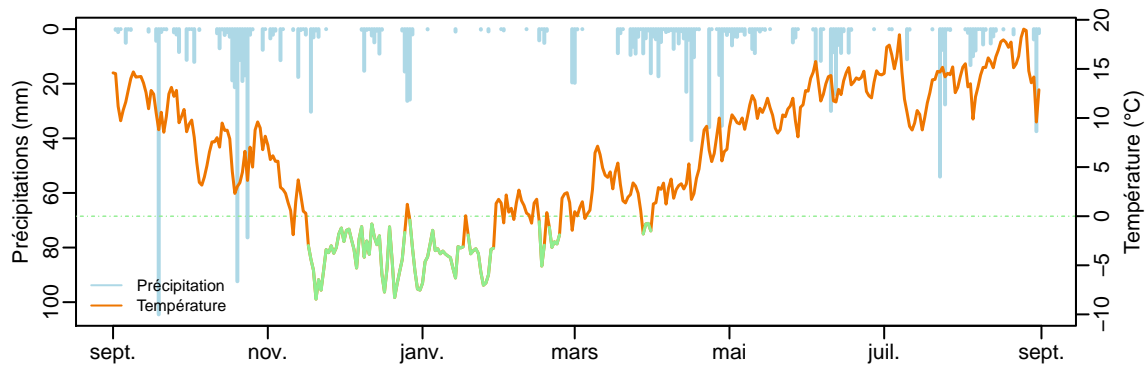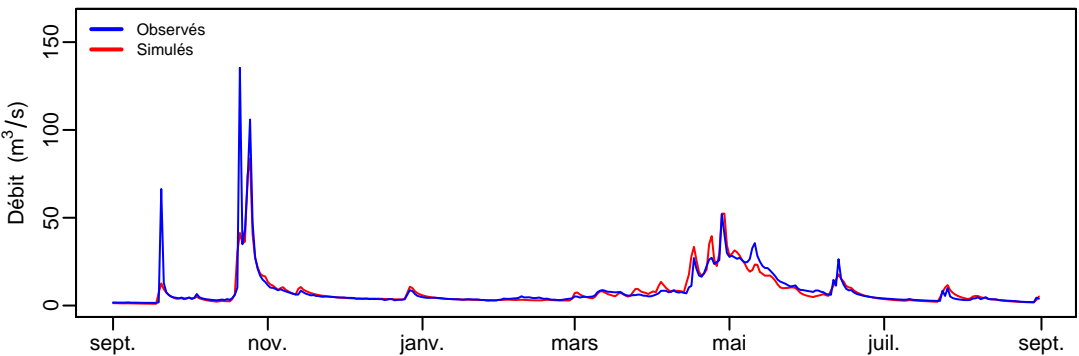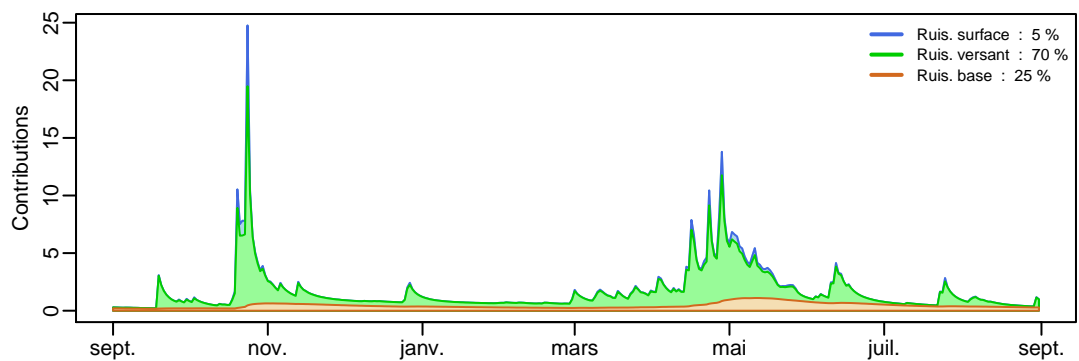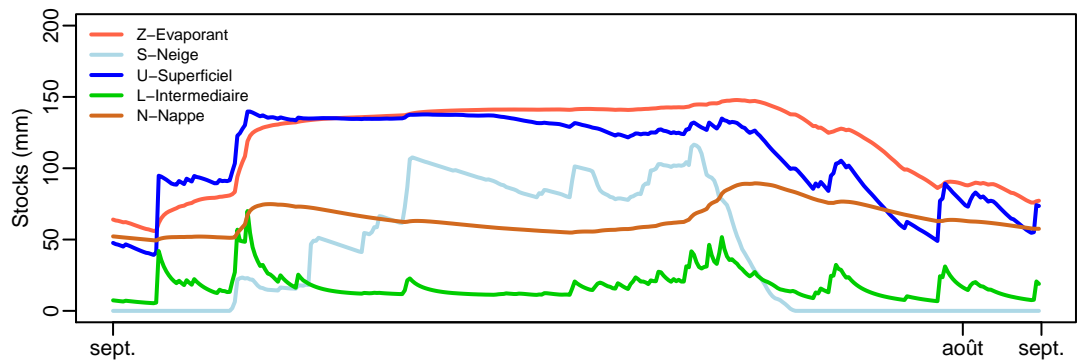

# q0296 (405.76 km²) – année 2000–2001

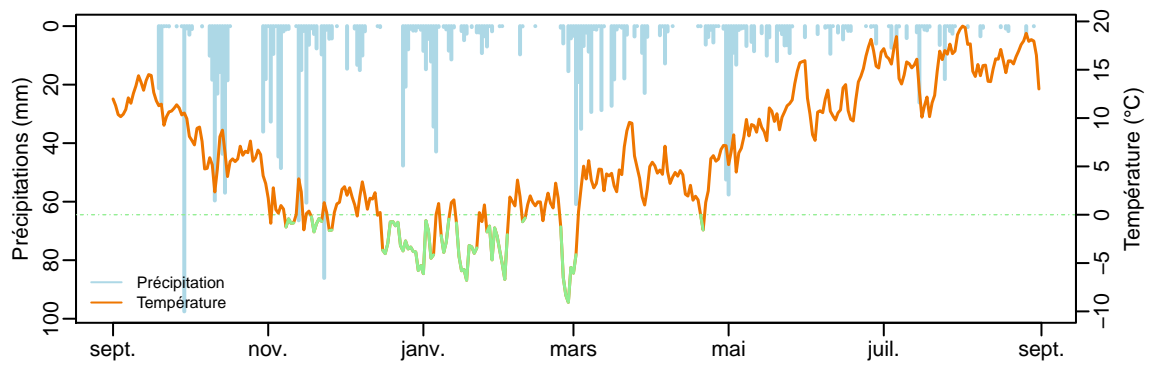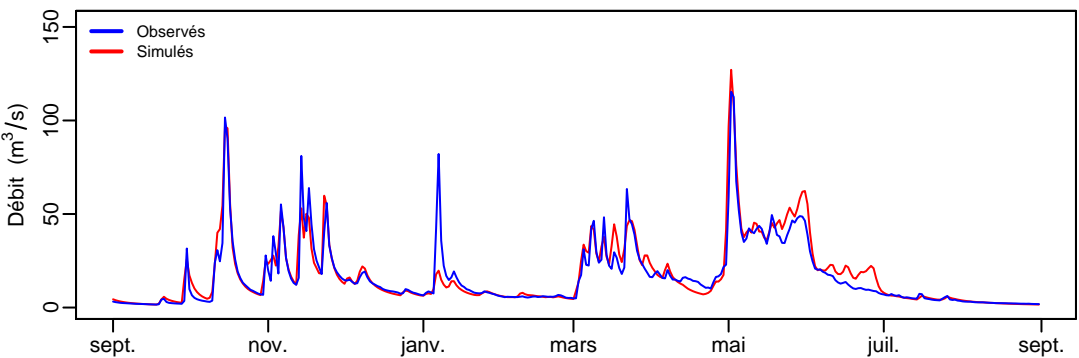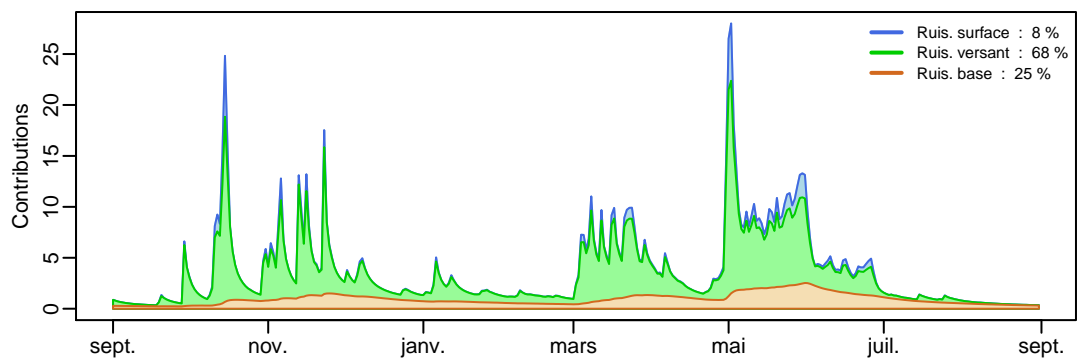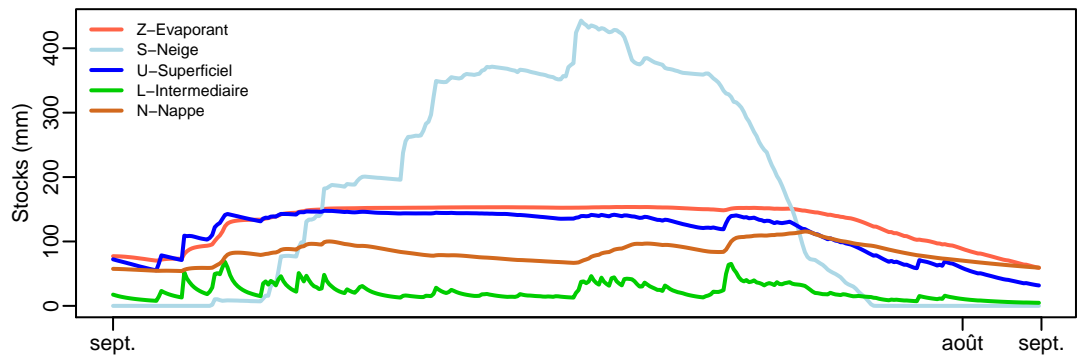

# q0296 (405.76 km<sup>2</sup>) – année 2001–2002

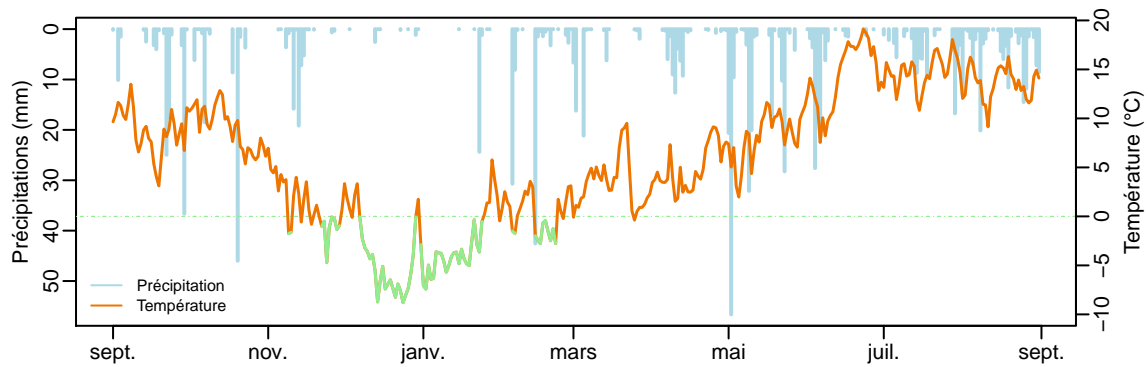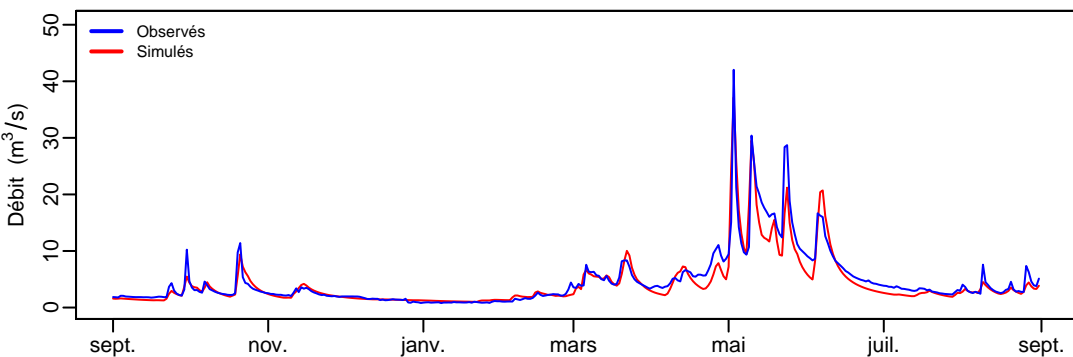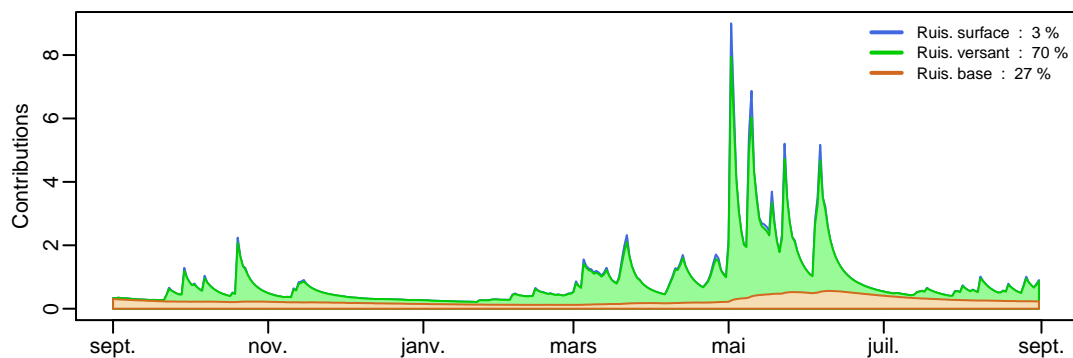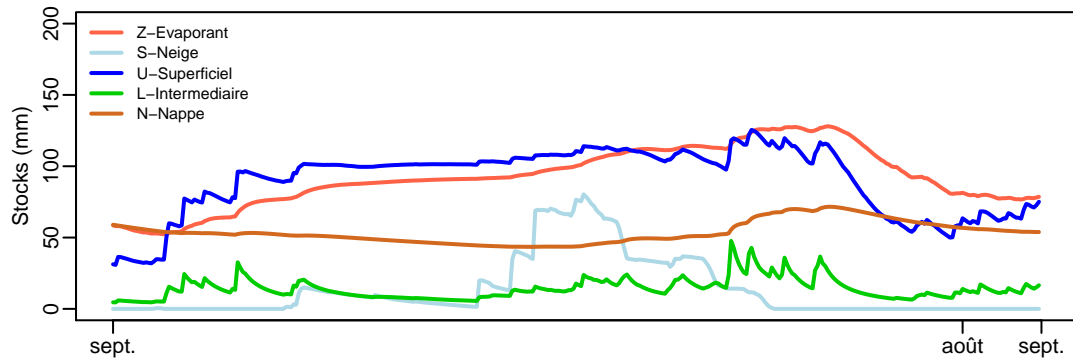

# q0296 (405.76 km²) – année 2002–2003

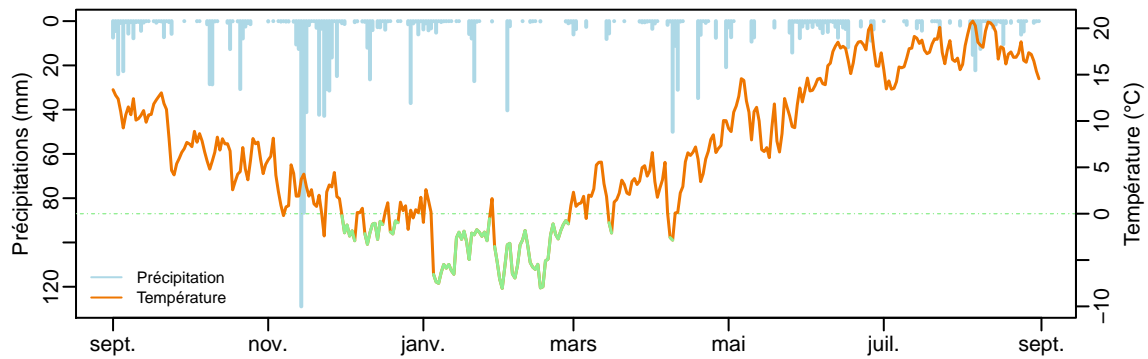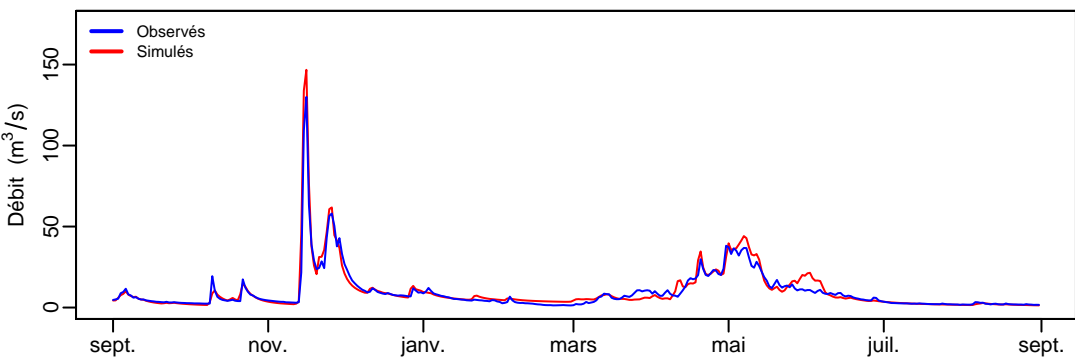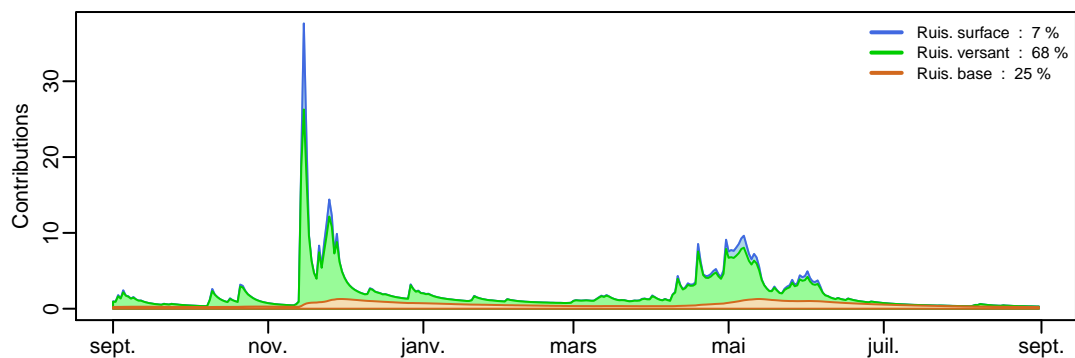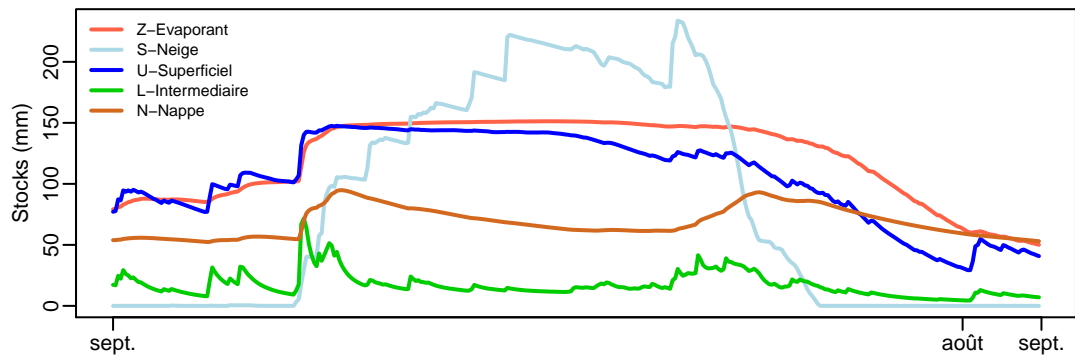

# q0296 (405.76 km<sup>2</sup>) – année 2003–2004

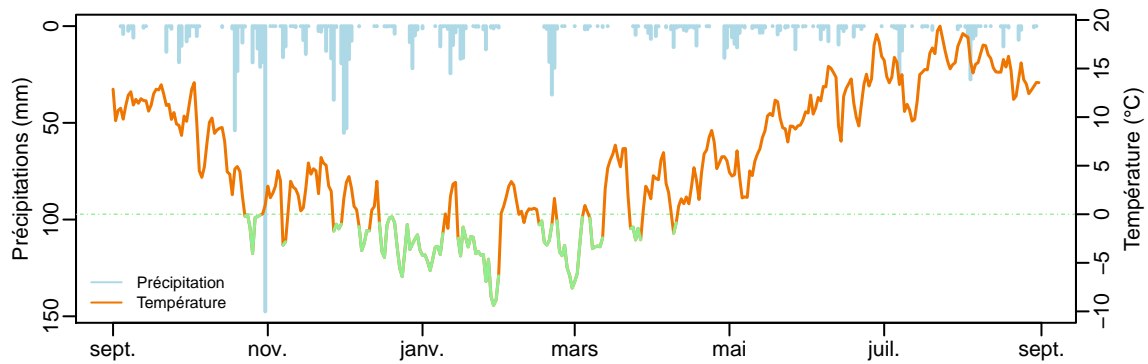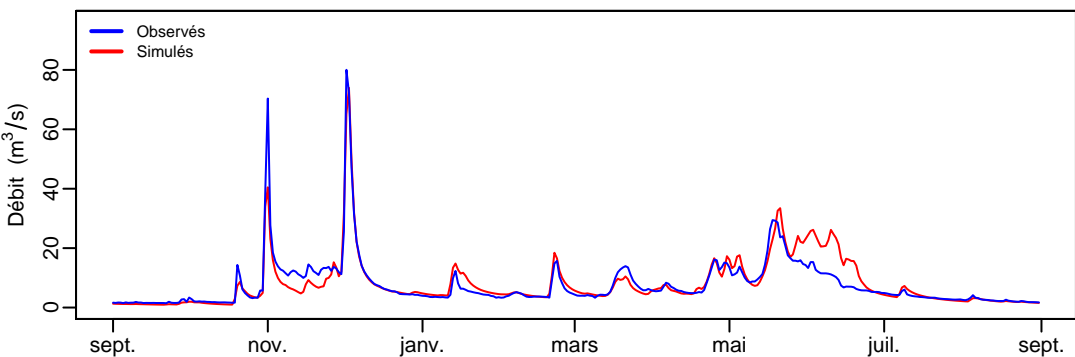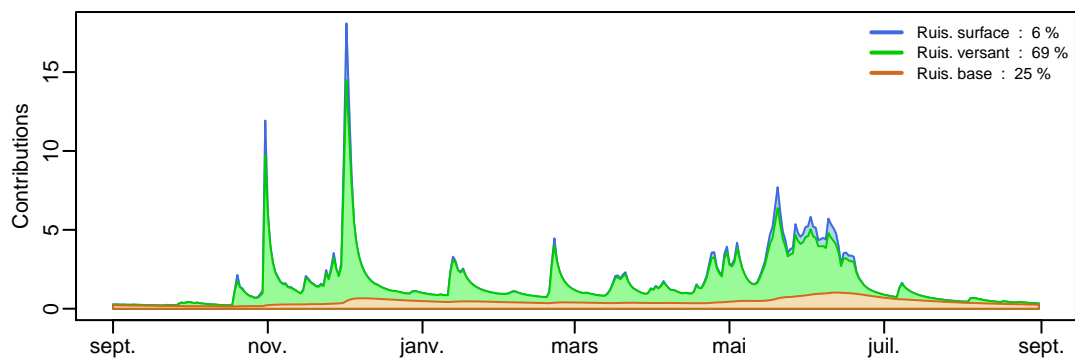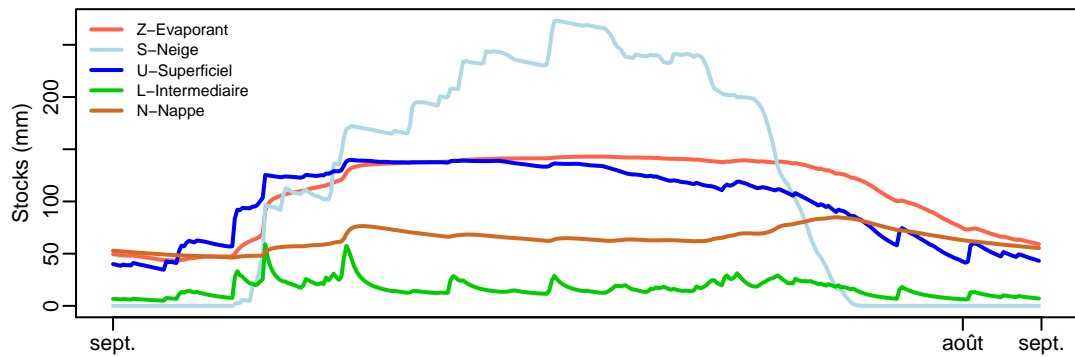



# q0296 (405.76 km²) – année 2004–2005

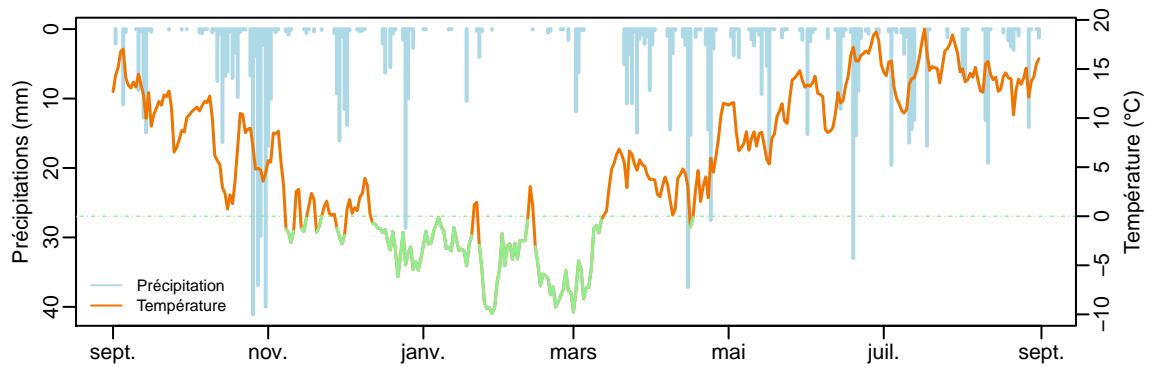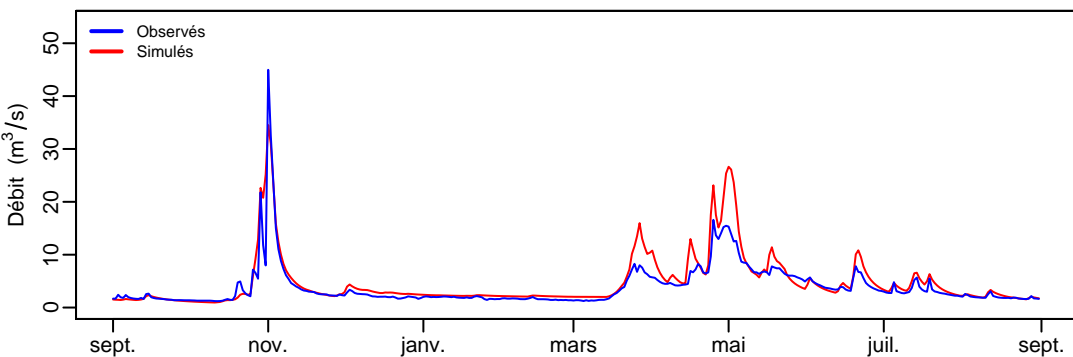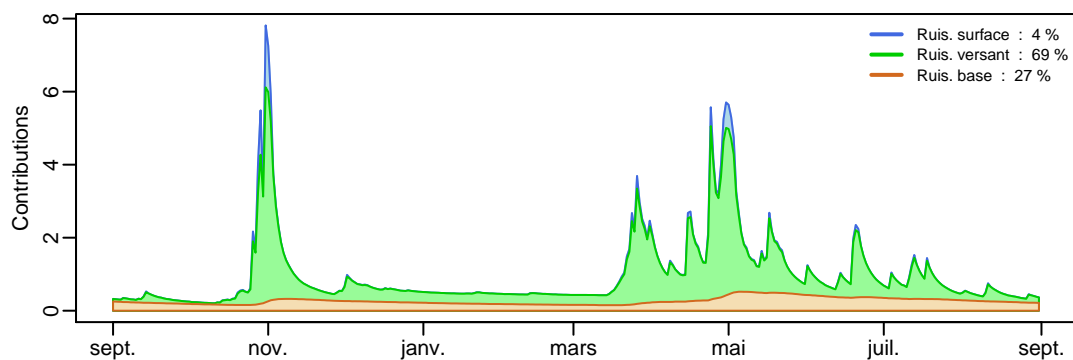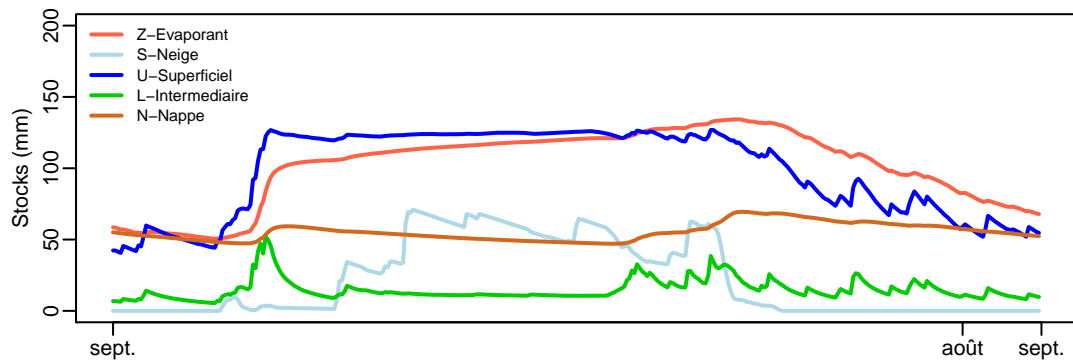

# q0296 (405.76 km<sup>2</sup>) – année 2005–2006

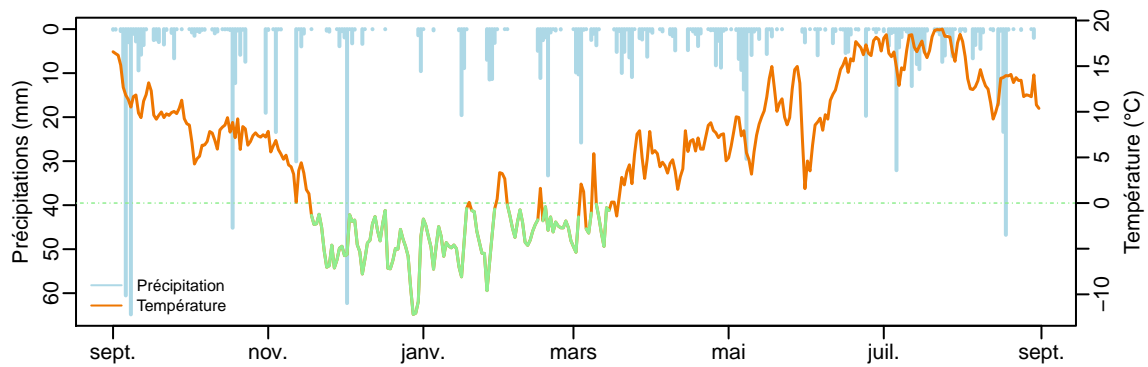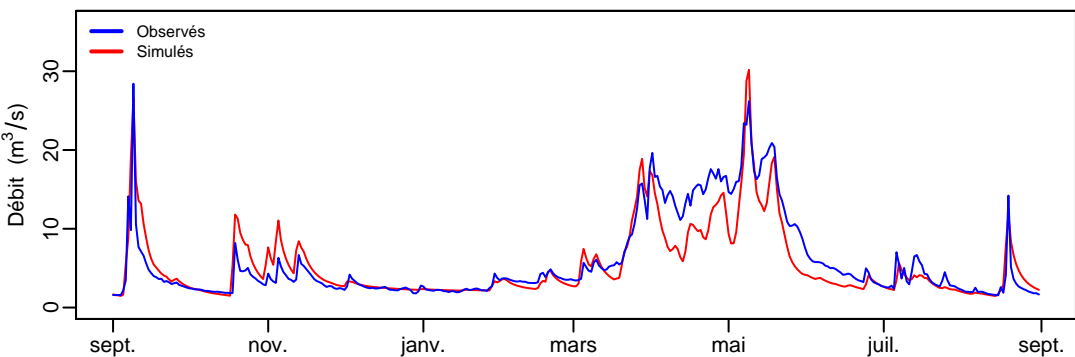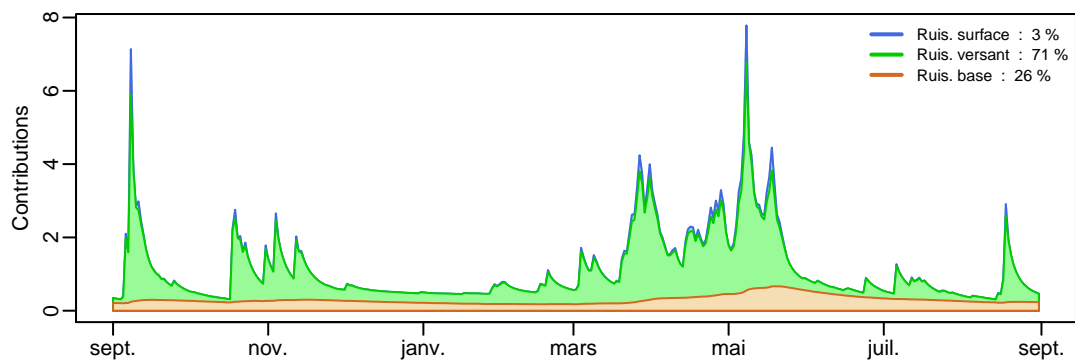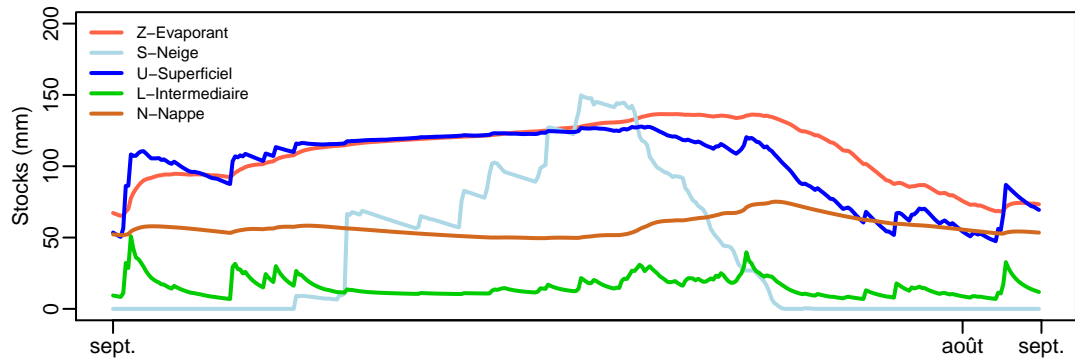

# q0296 (405.76 km<sup>2</sup>) – année 2006–2007

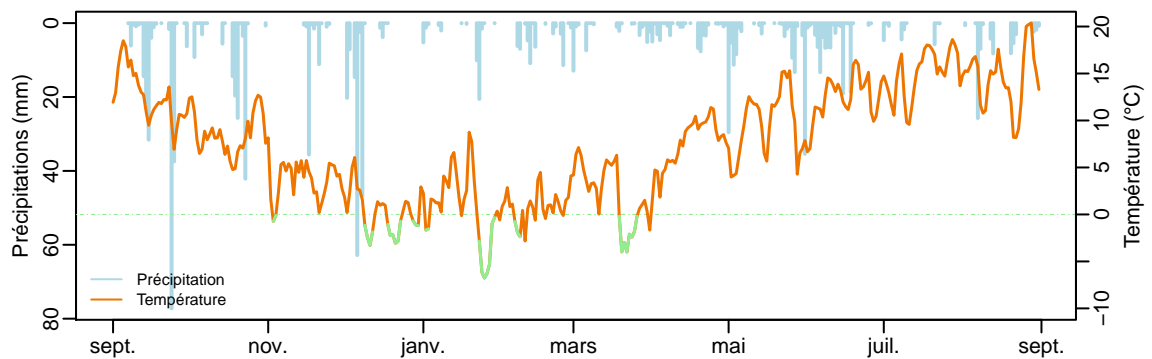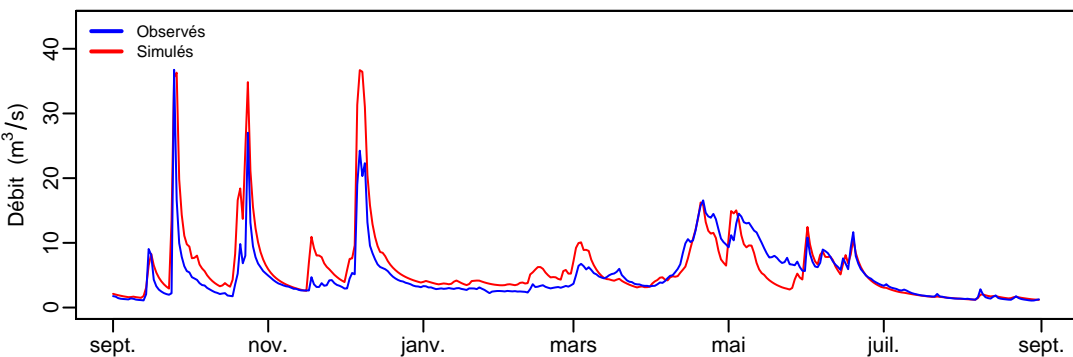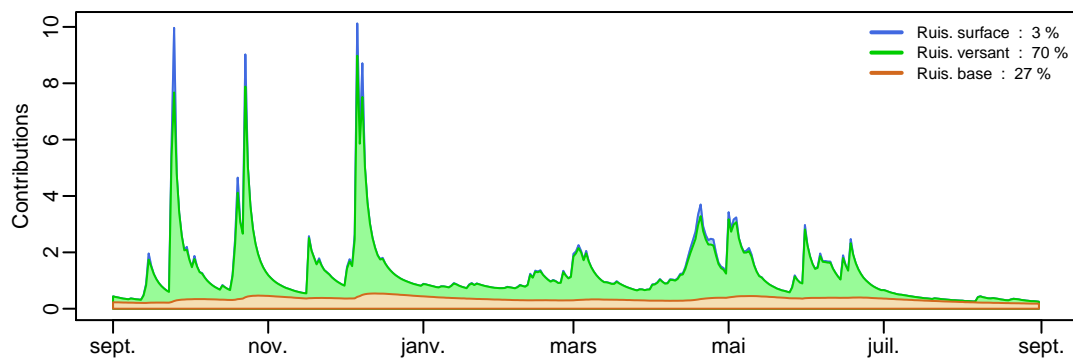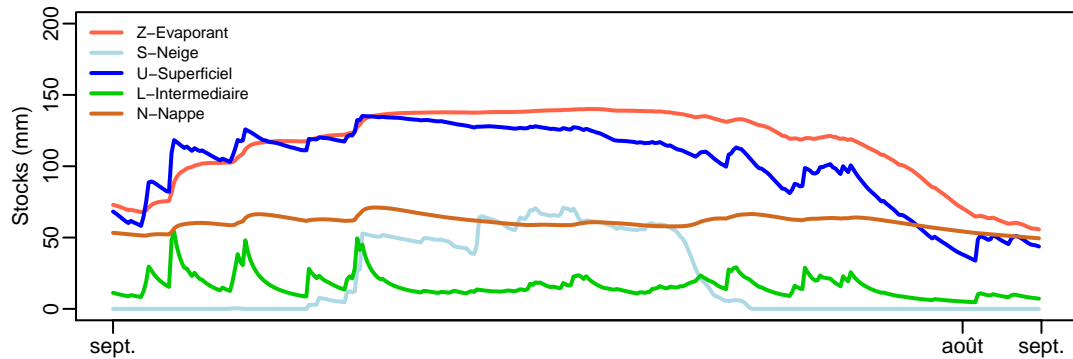

# q0296 (405.76 km<sup>2</sup>) – année 2007–2008

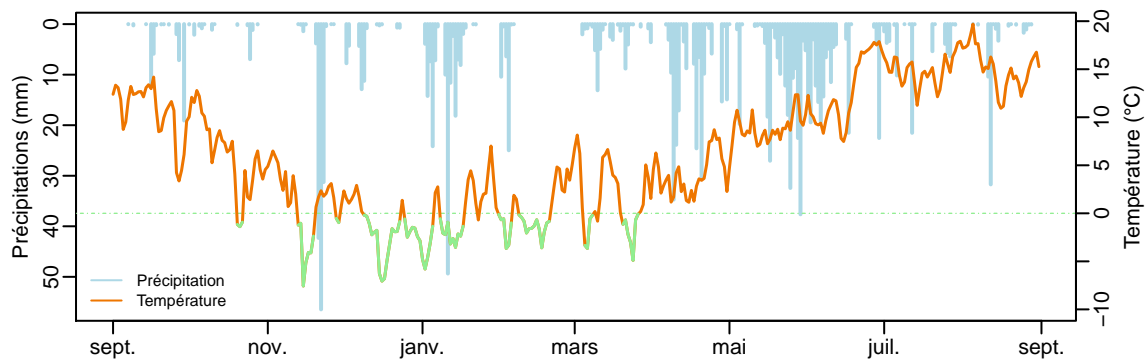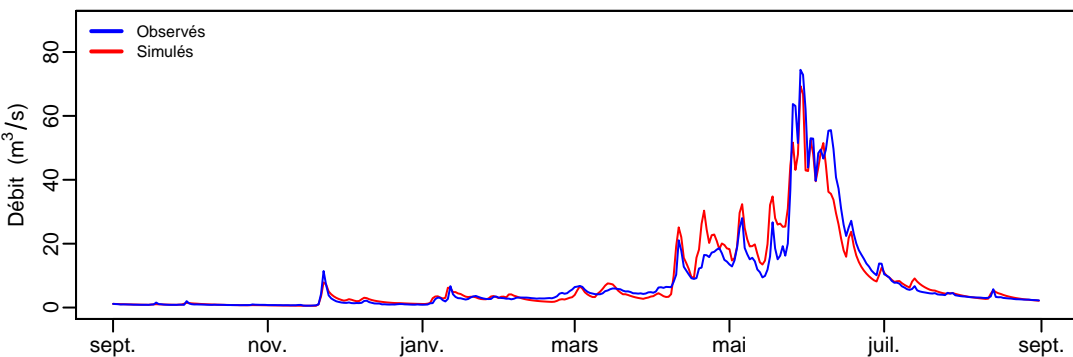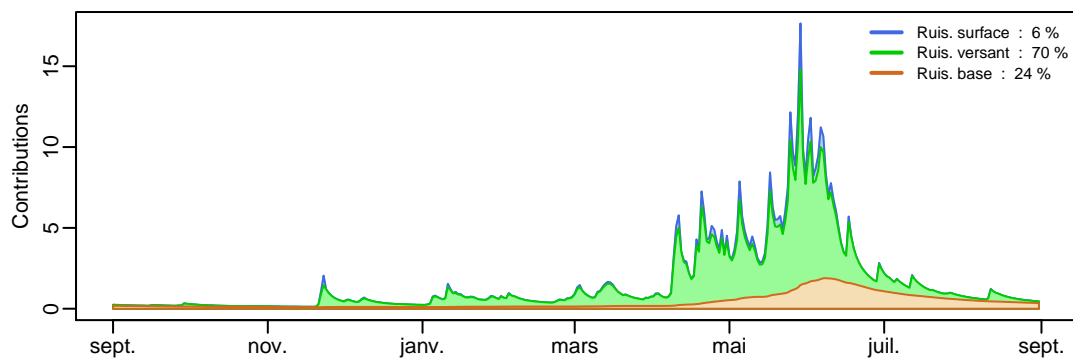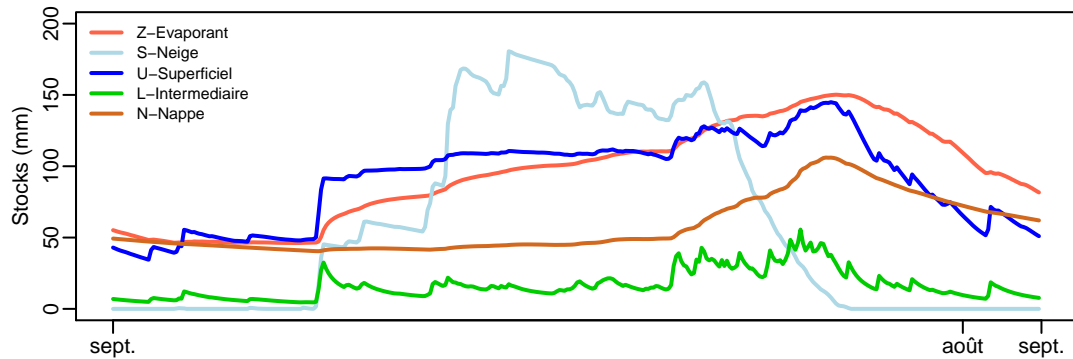

# q0296 (405.76 km<sup>2</sup>) – année 2008–2009

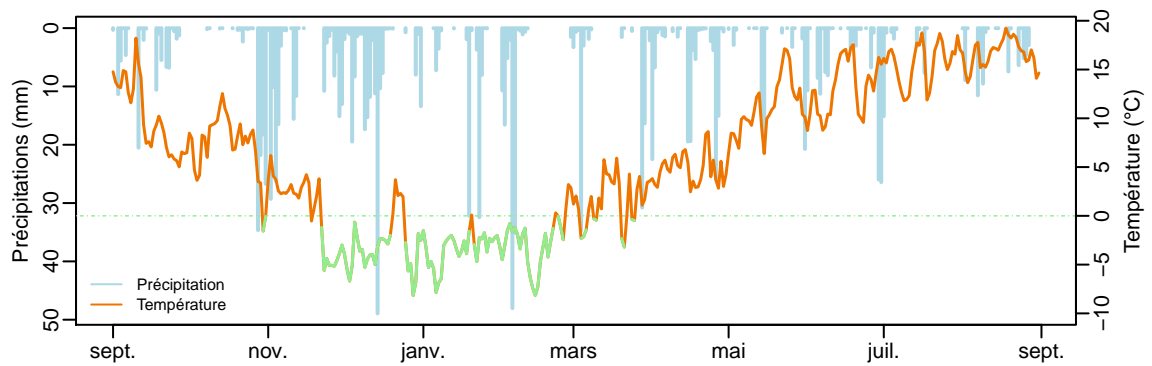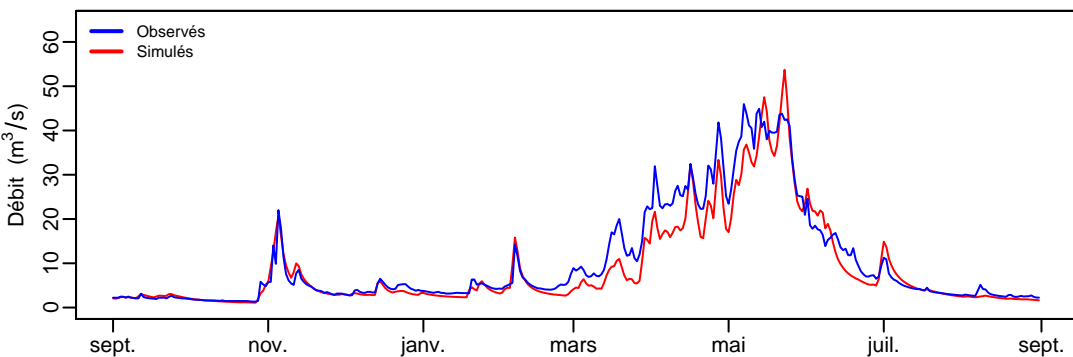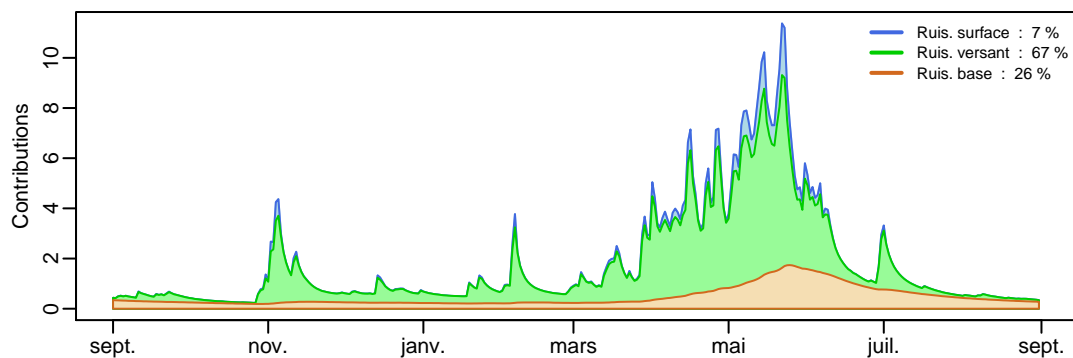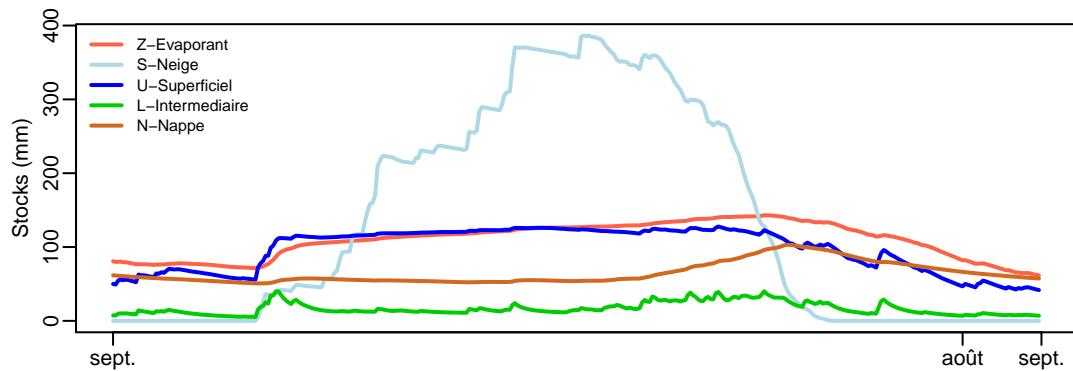

# q0296 (405.76 km²) – année 2009–2010

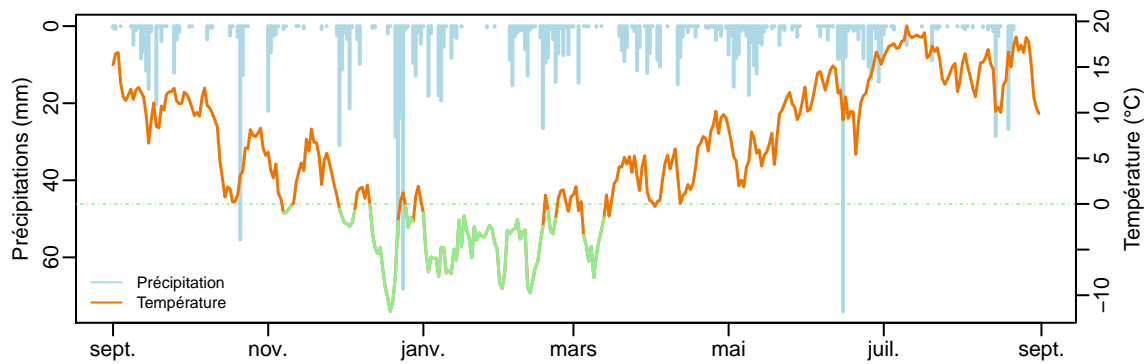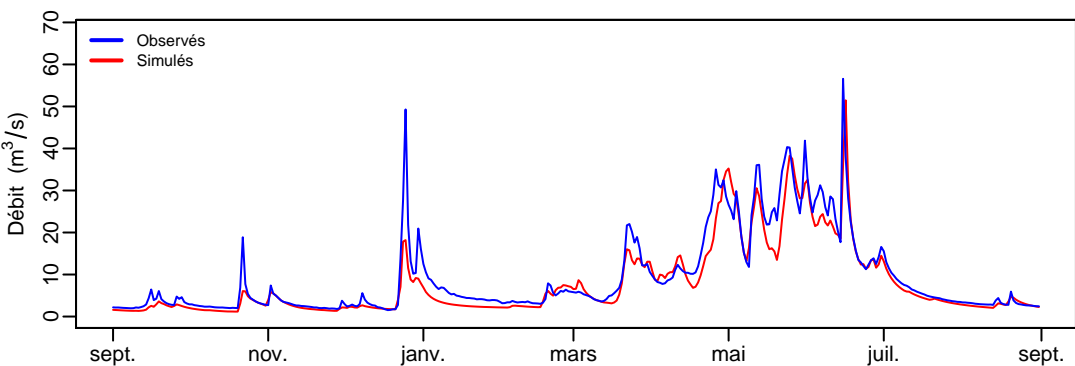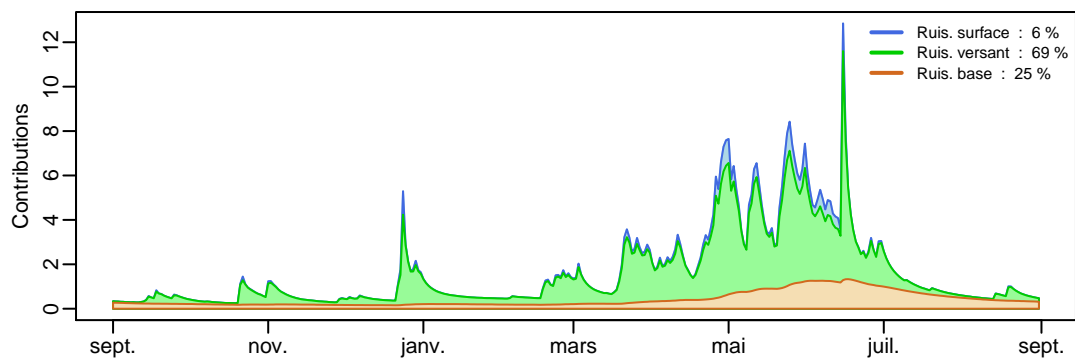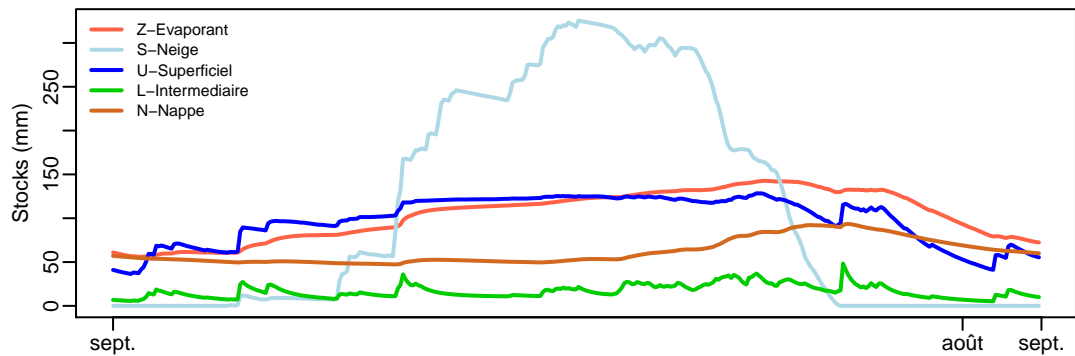

# q0296 (405.76 km<sup>2</sup>) – année 2010–2011

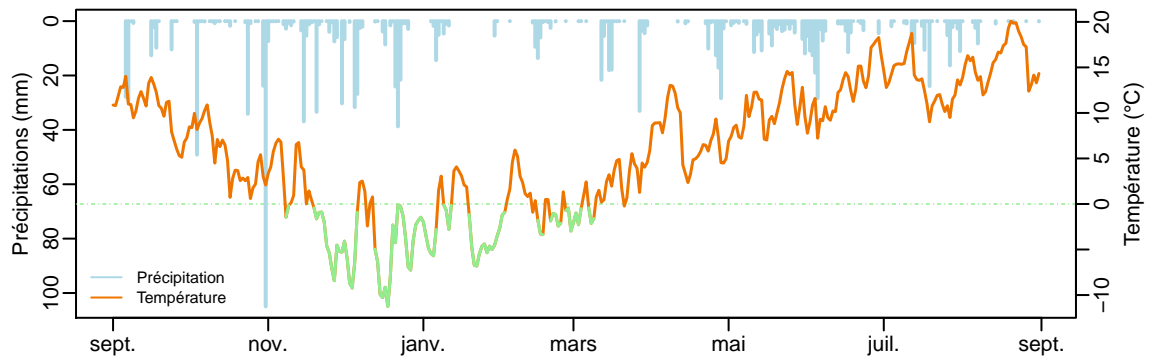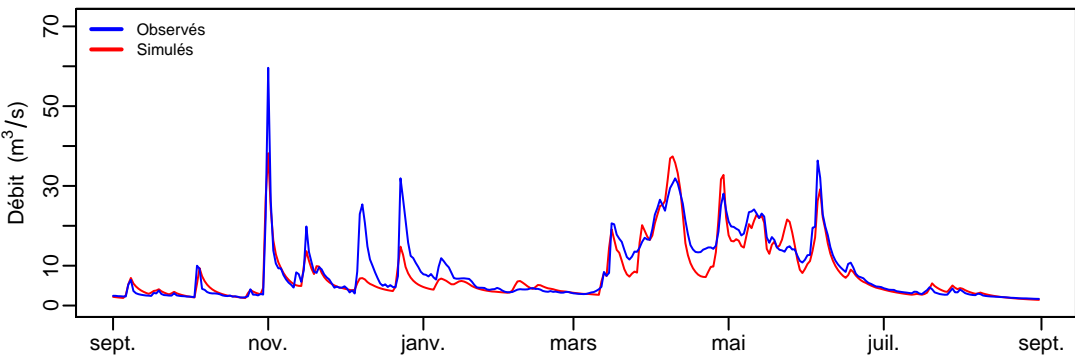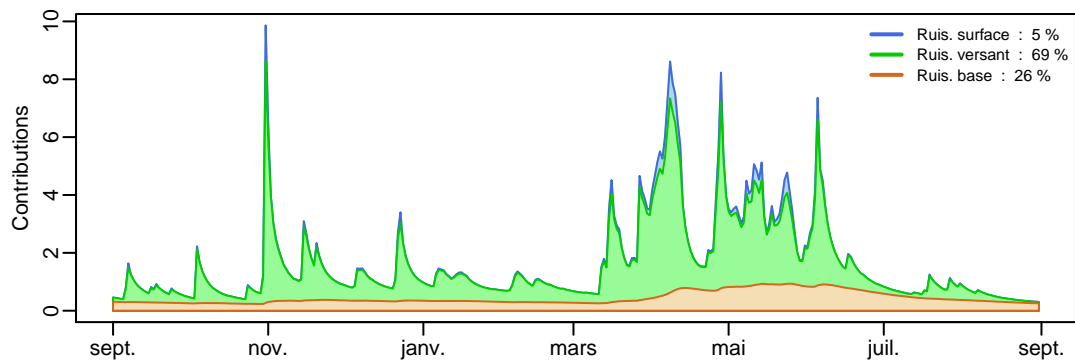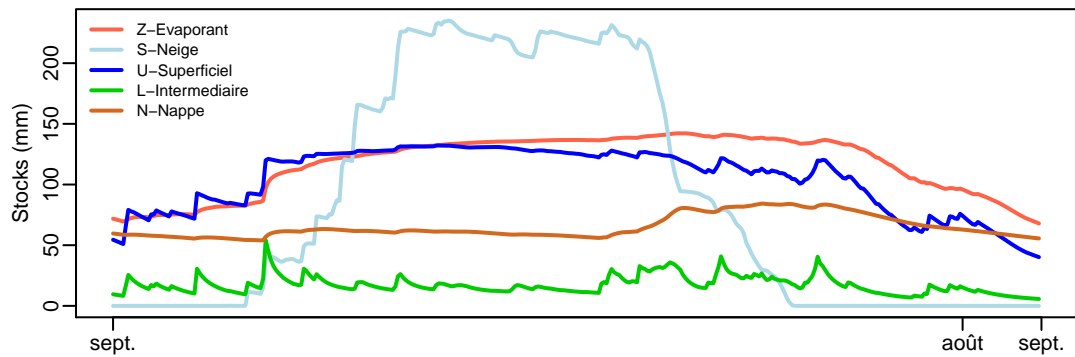

# q0296 (405.76 km²) – année 2011–2012

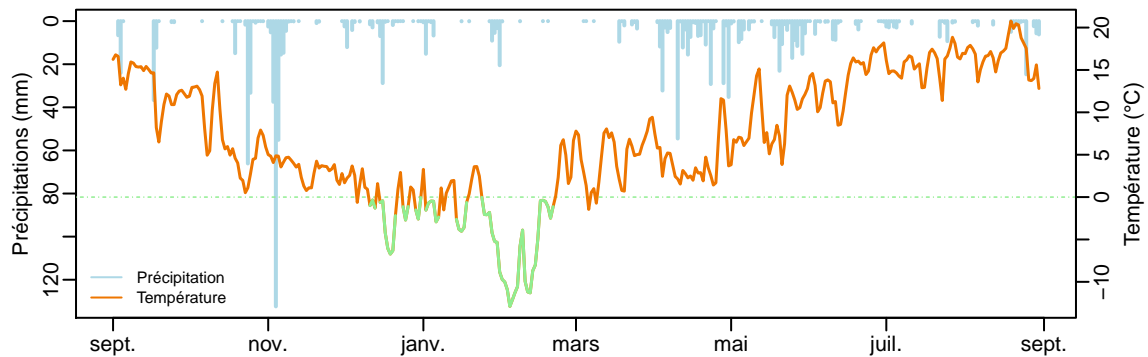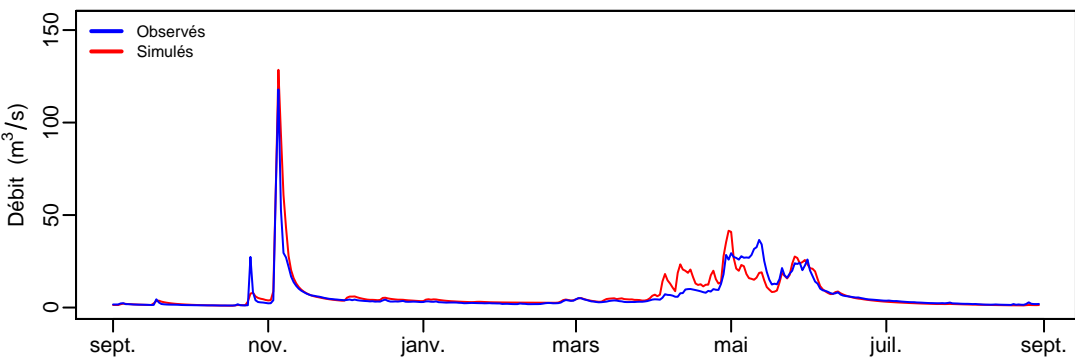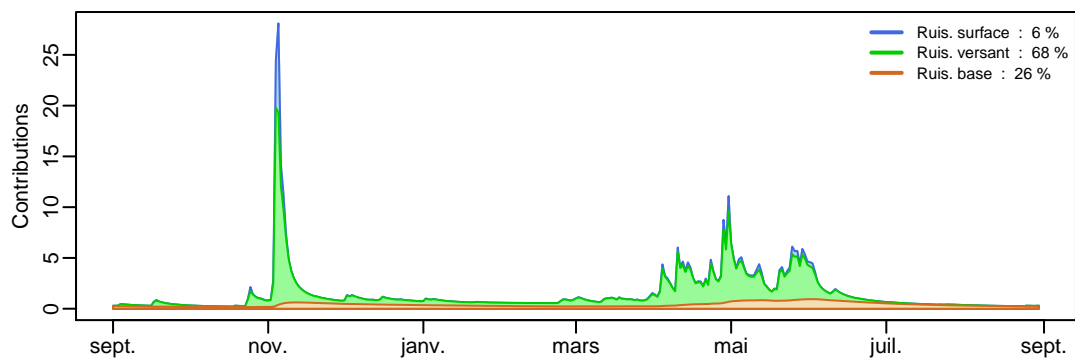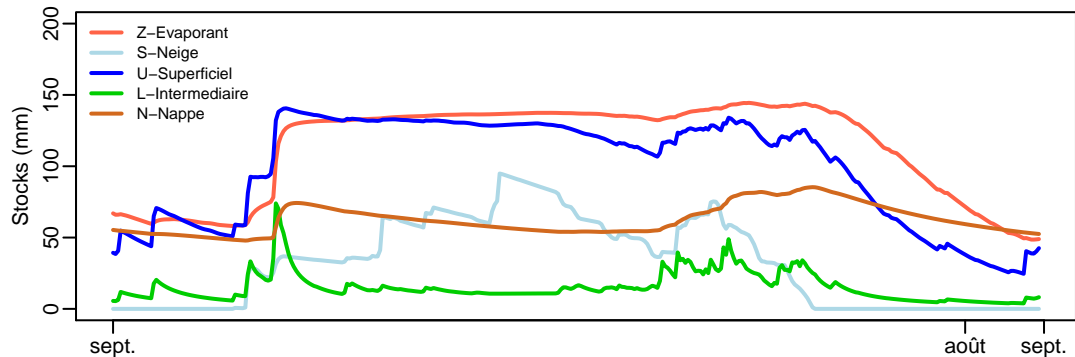



# q4157 (984.31 km<sup>2</sup>) – année 1981–1982

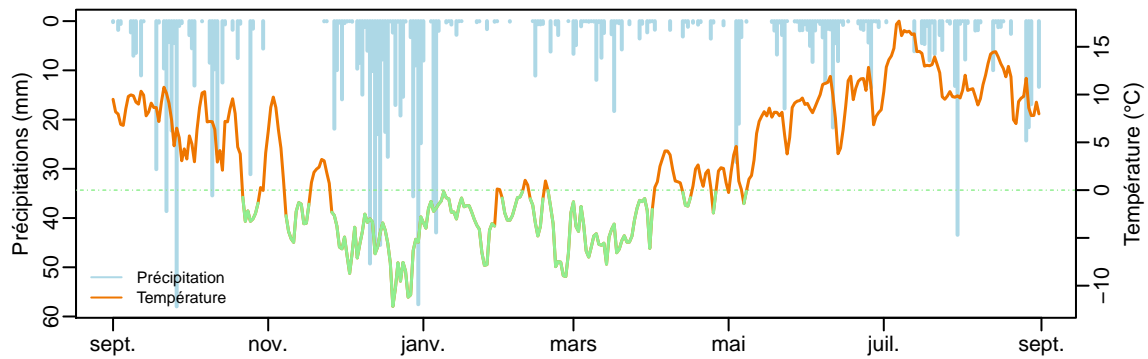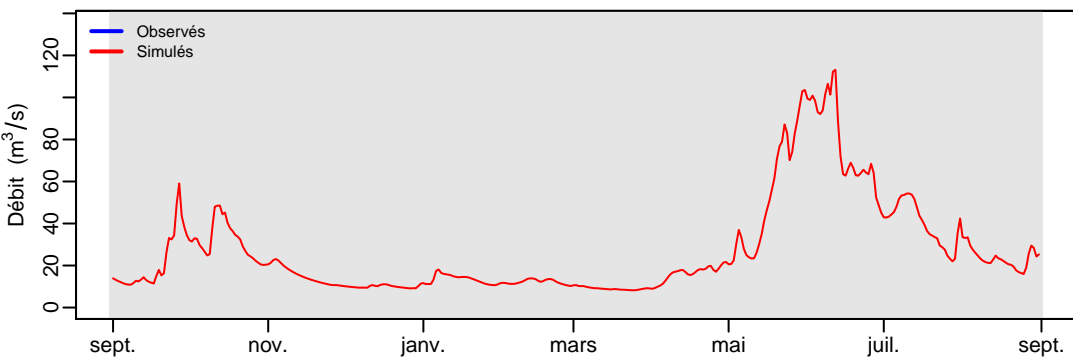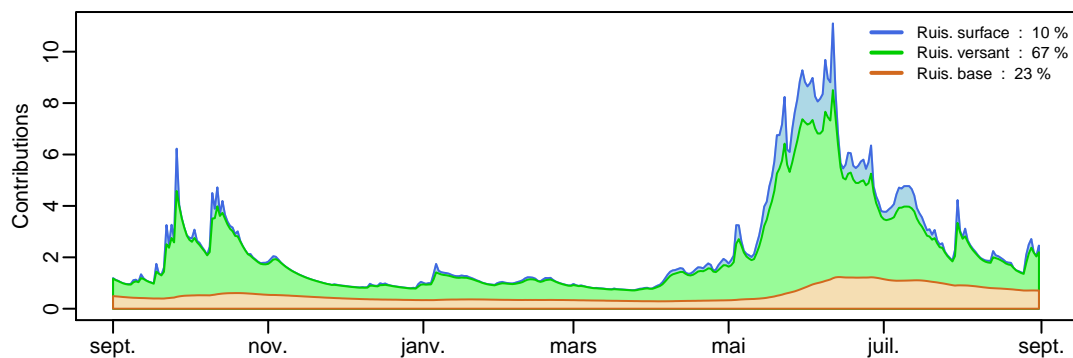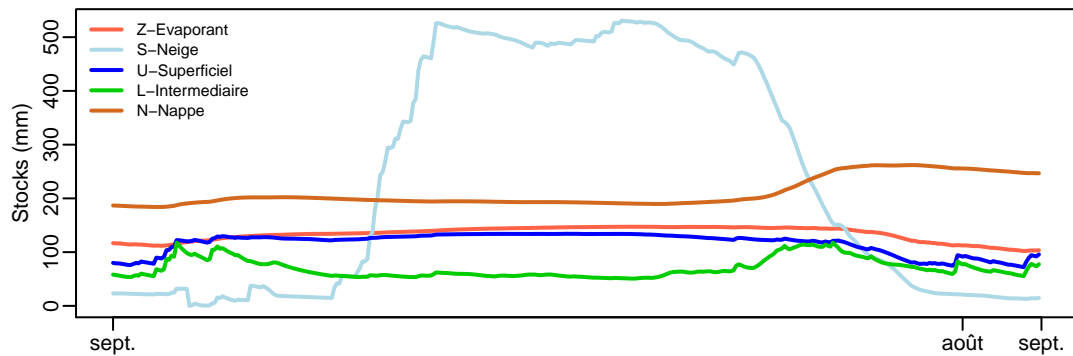

# q4157 (984.31 km²) – année 1982–1983

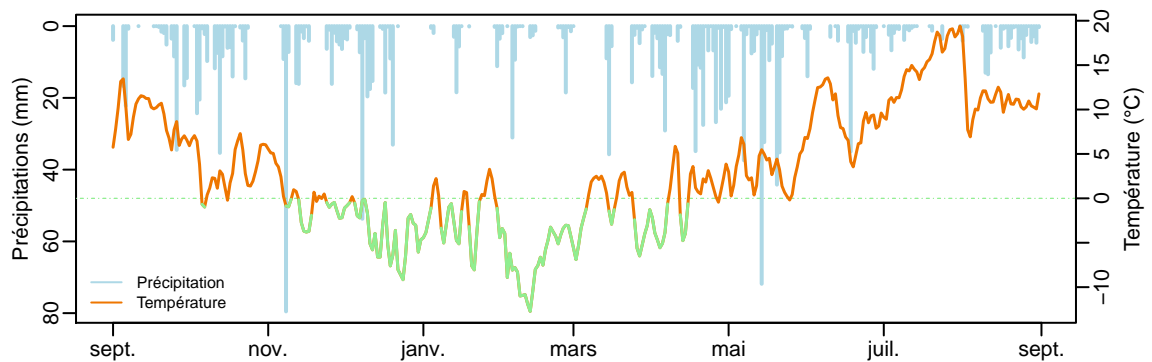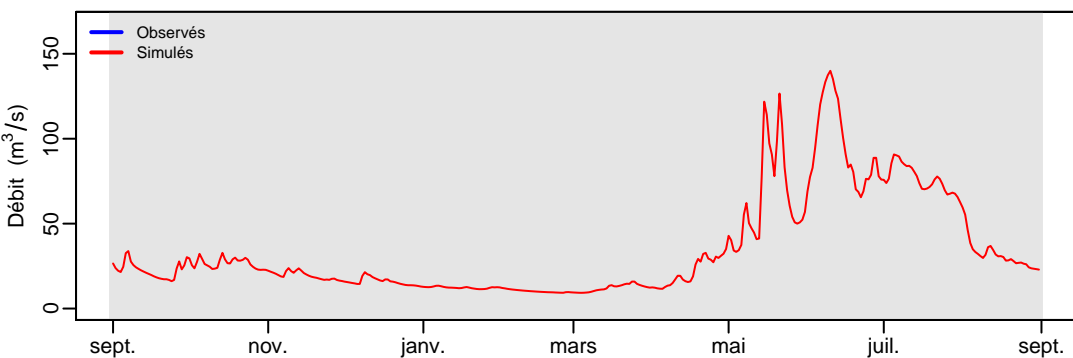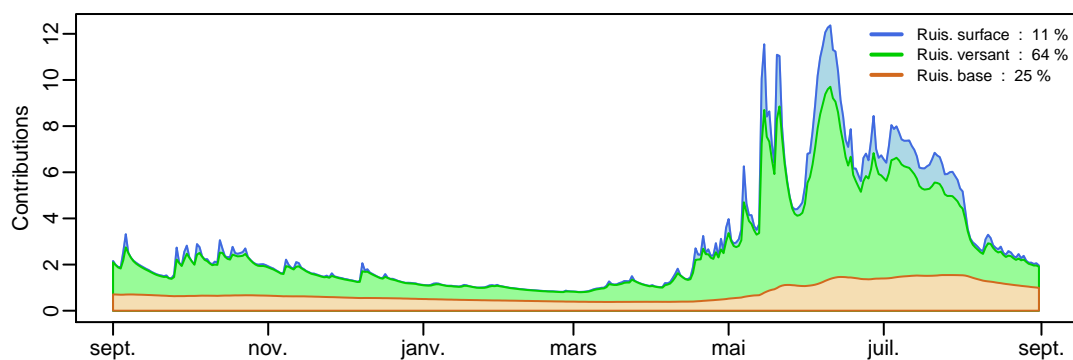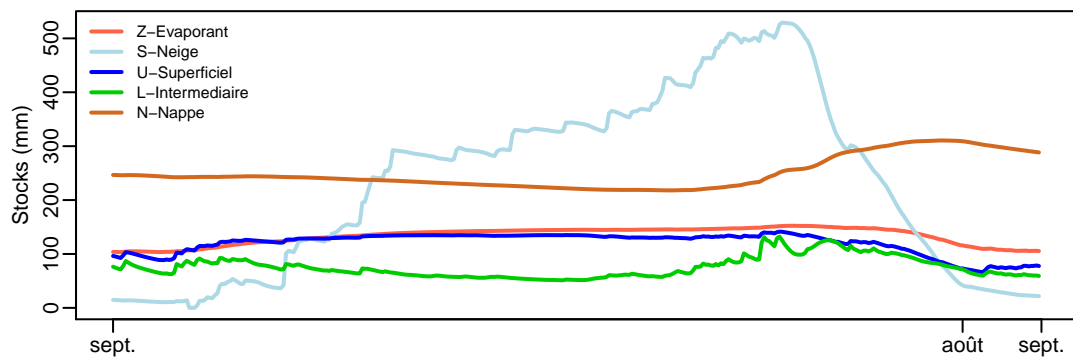

# q4157 (984.31 km²) – année 1983–1984

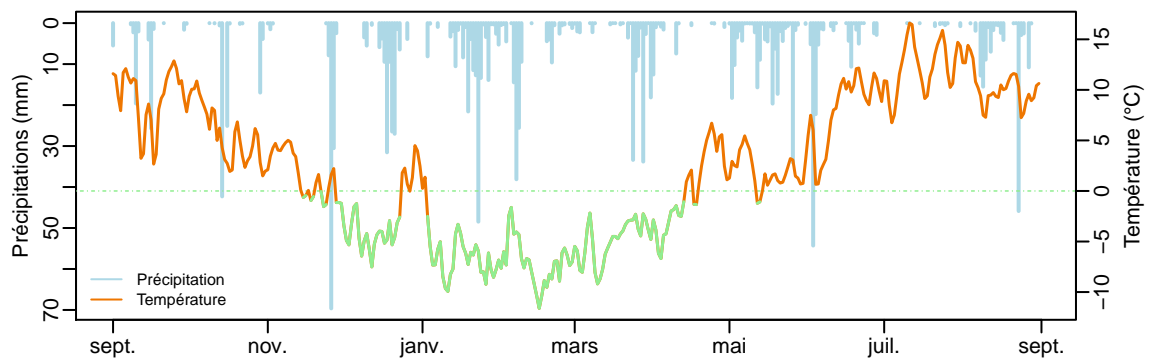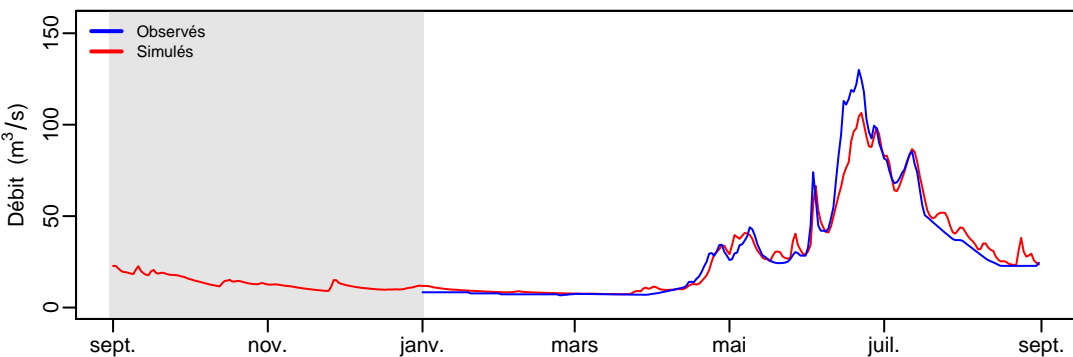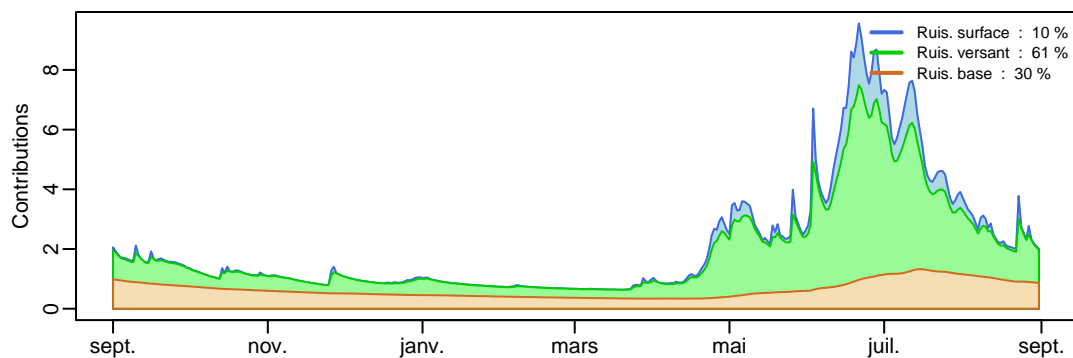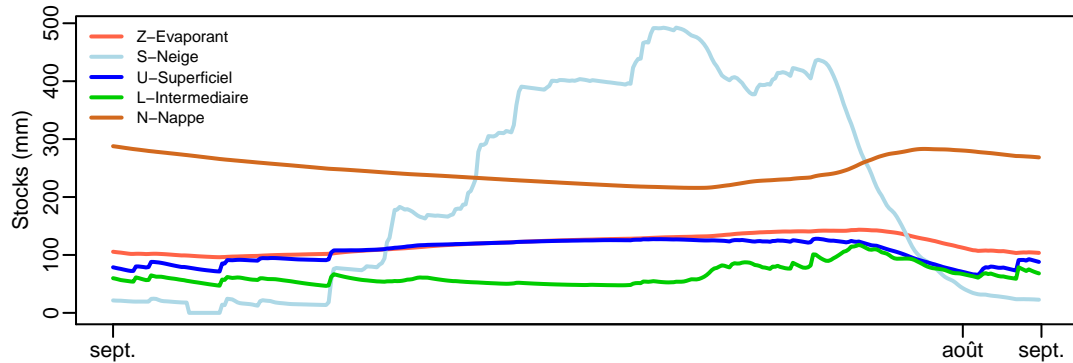

# q4157 (984.31 km²) – année 1984–1985

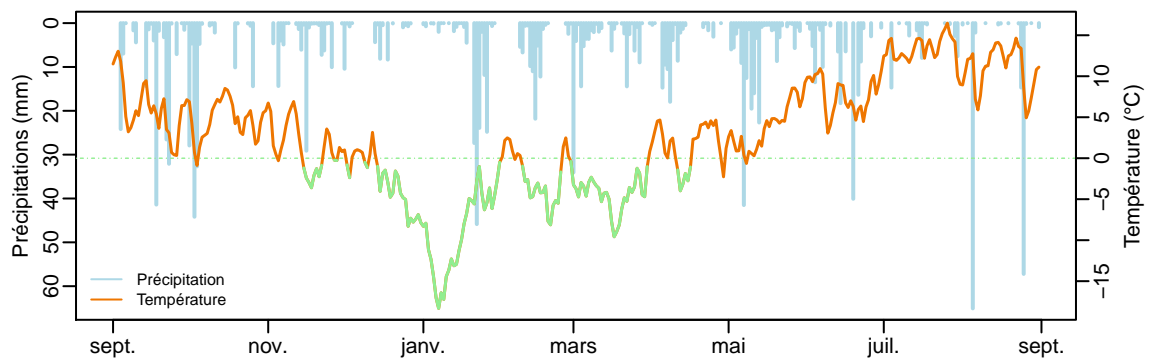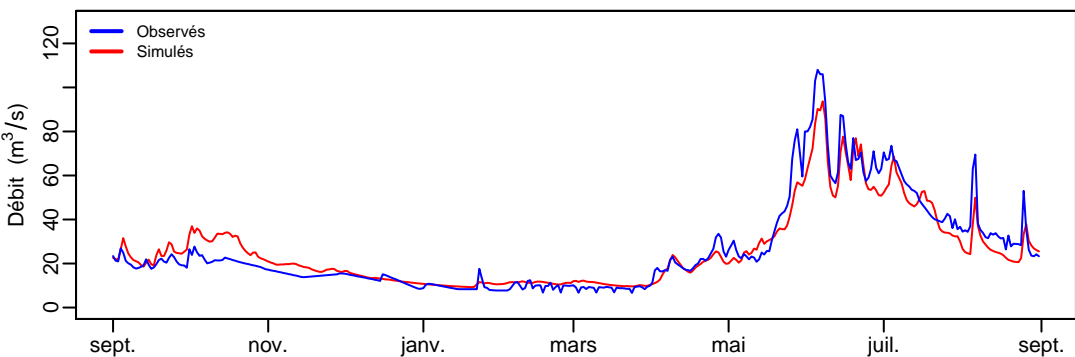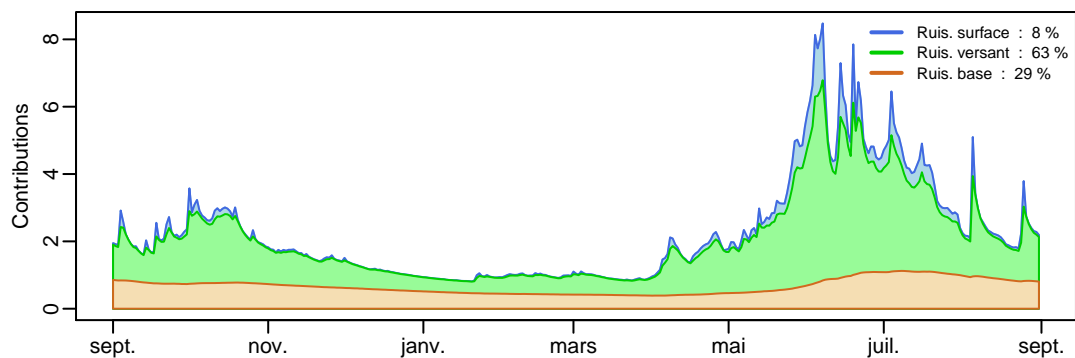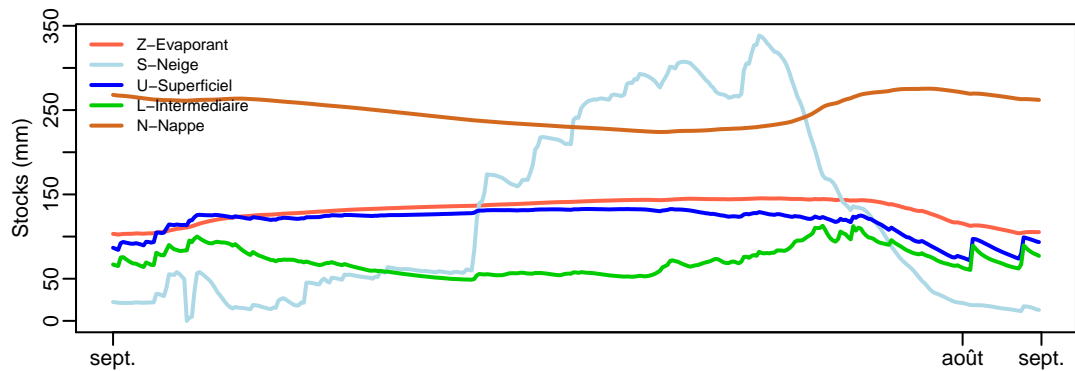

# q4157 (984.31 km<sup>2</sup>) – année 1985–1986

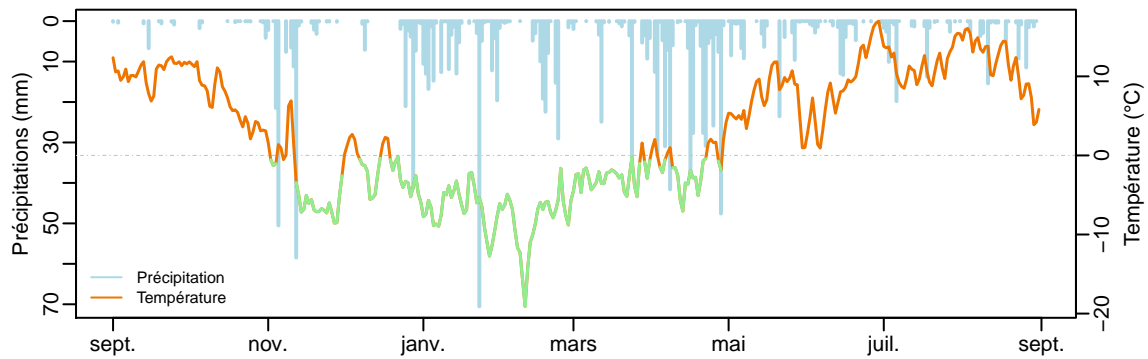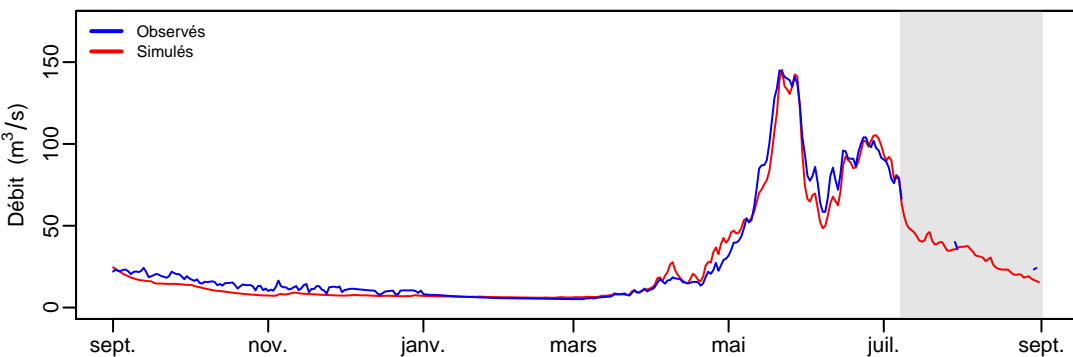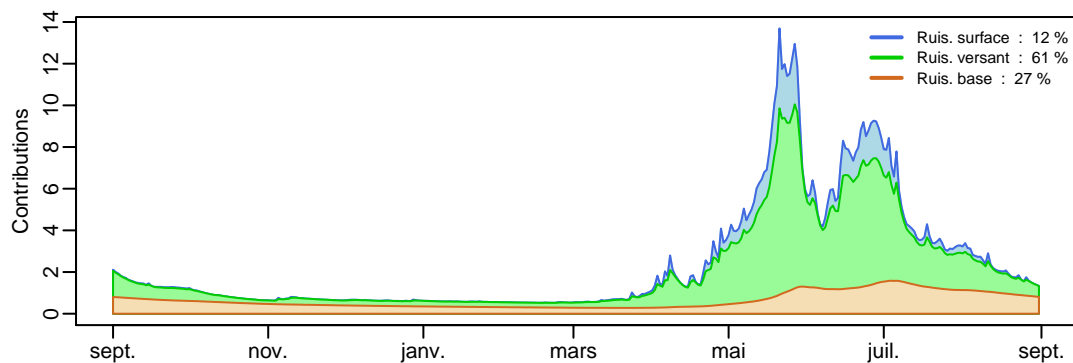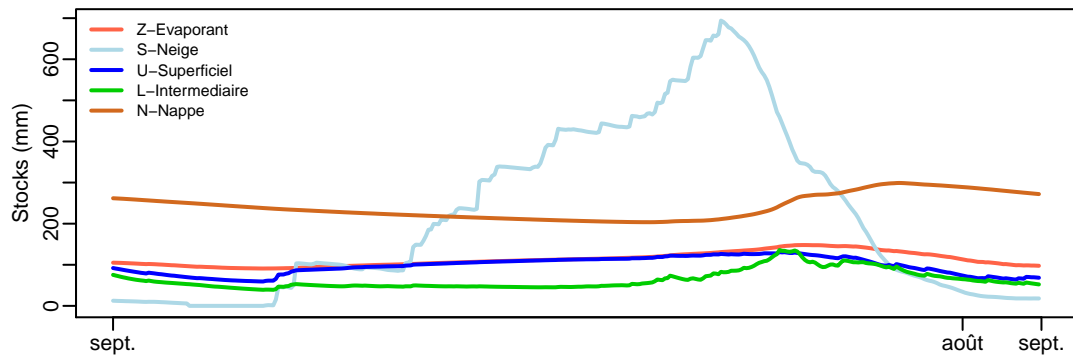

# q4157 (984.31 km²) – année 1986–1987

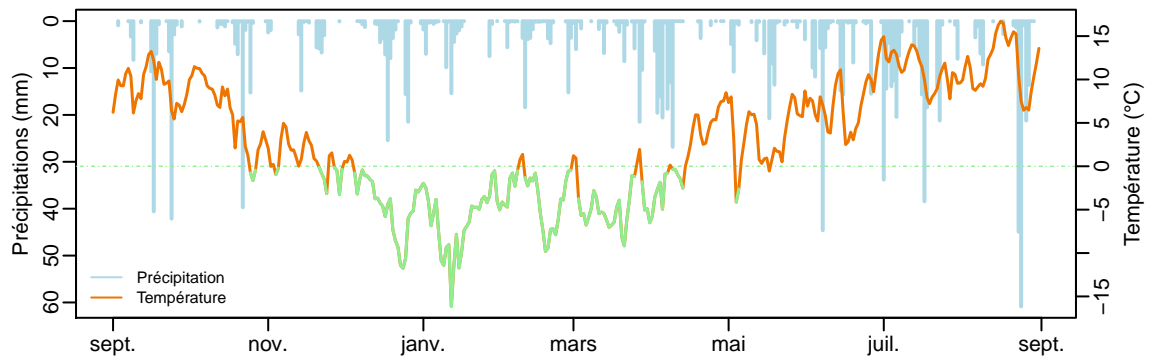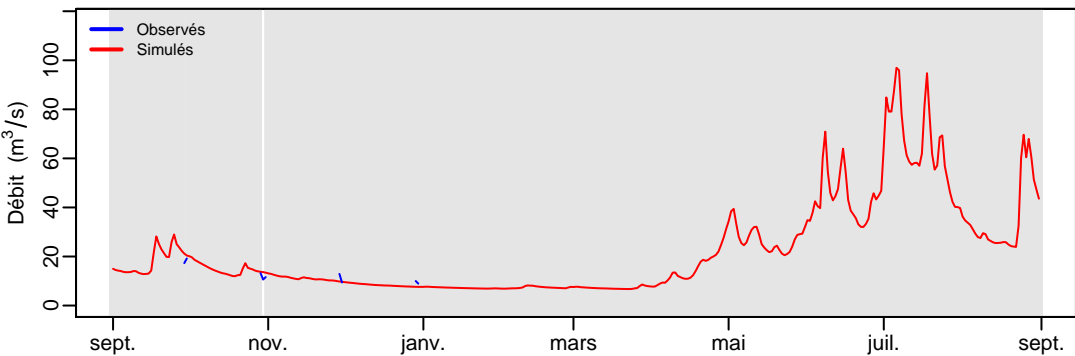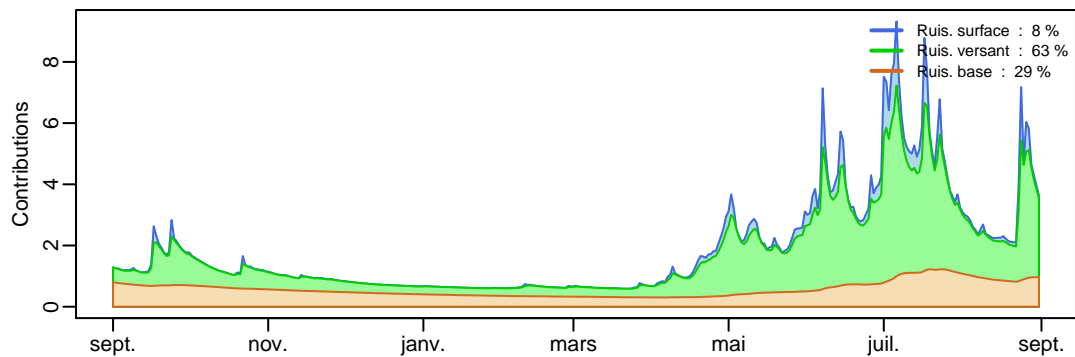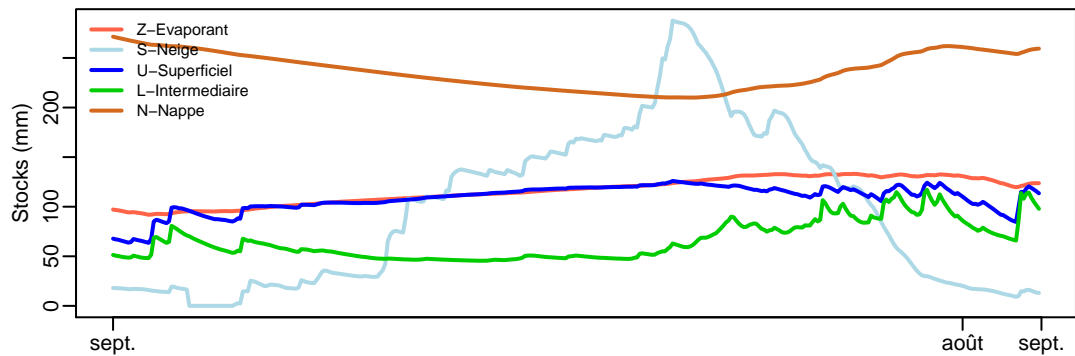

# q4157 (984.31 km²) – année 1987–1988

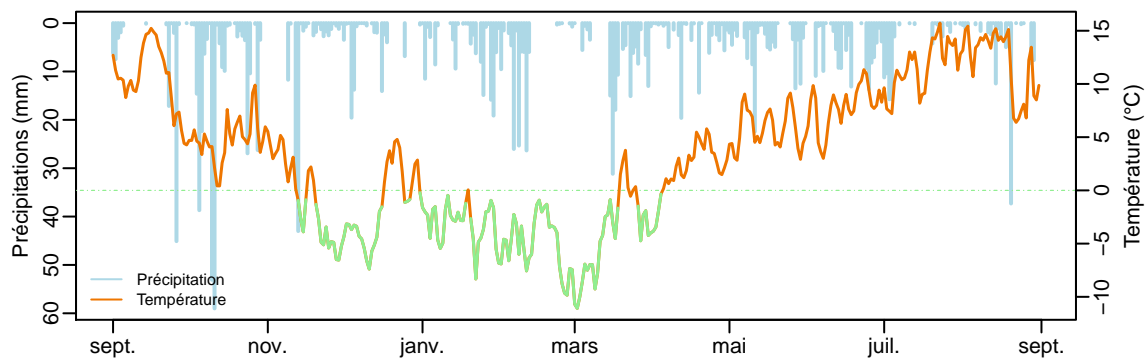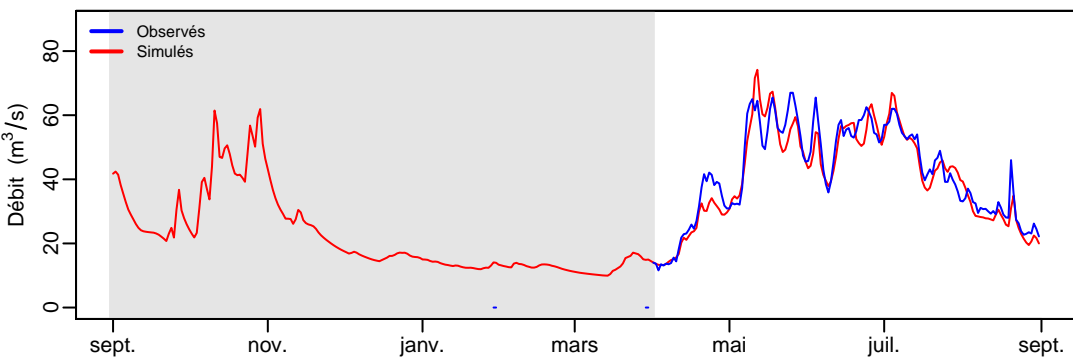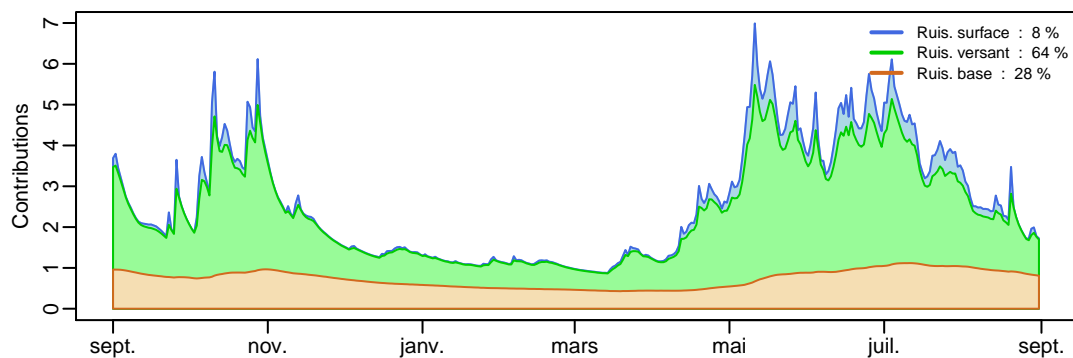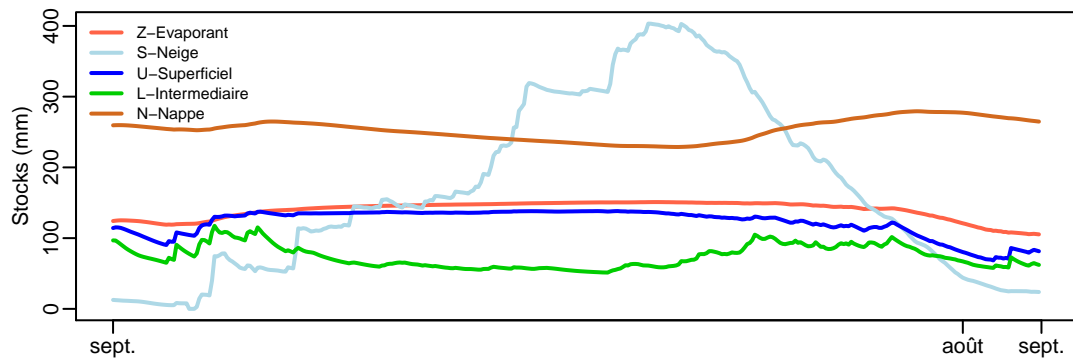

# q4157 (984.31 km²) – année 1988–1989

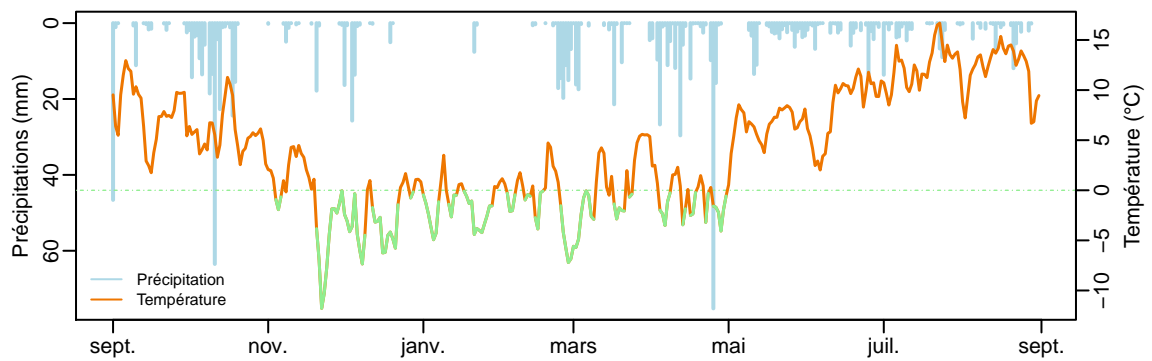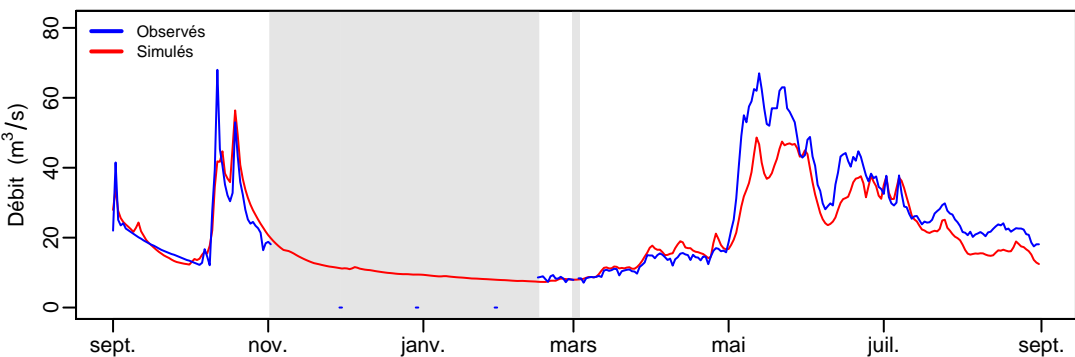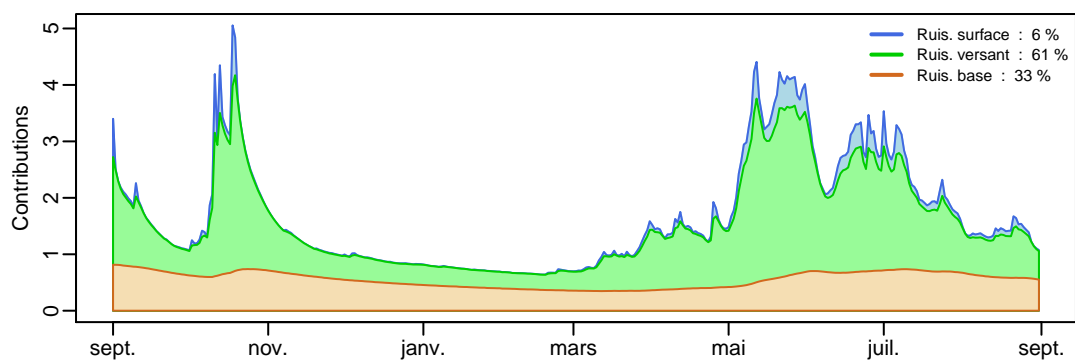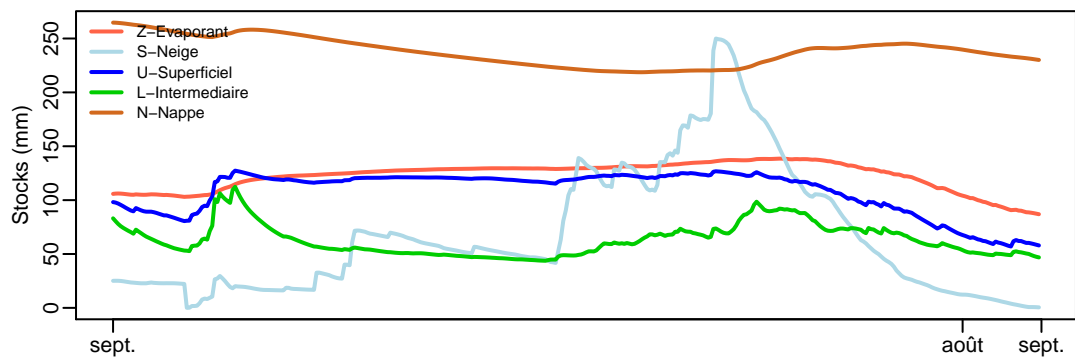



# q4157 (984.31 km²) – année 1989–1990

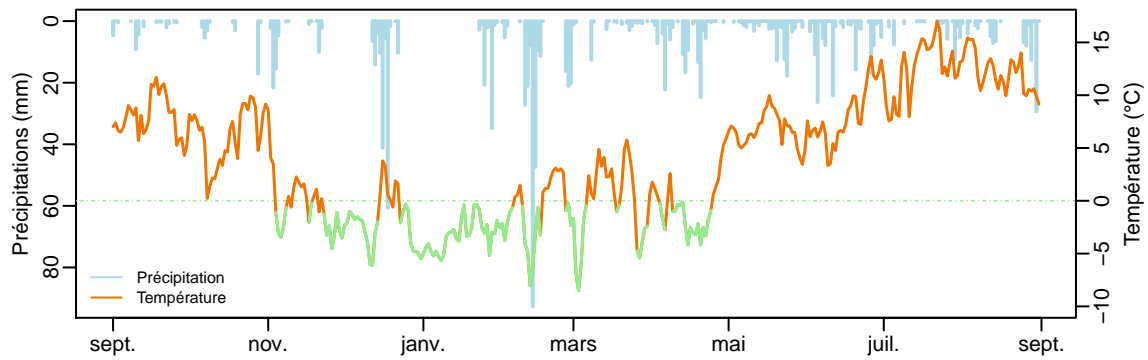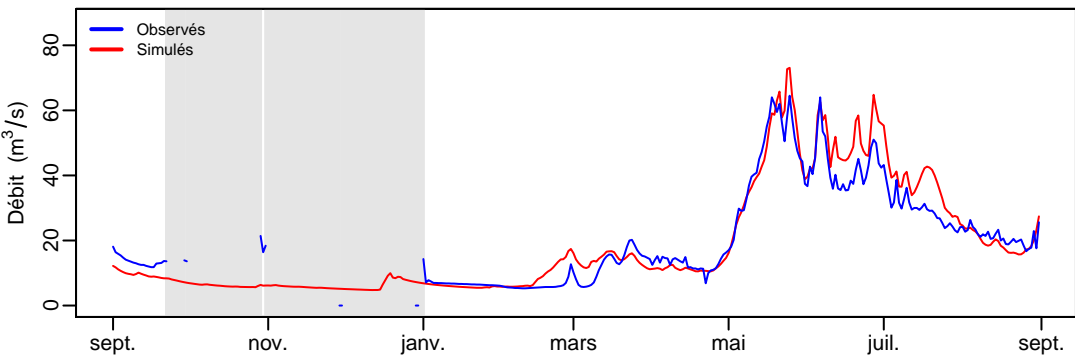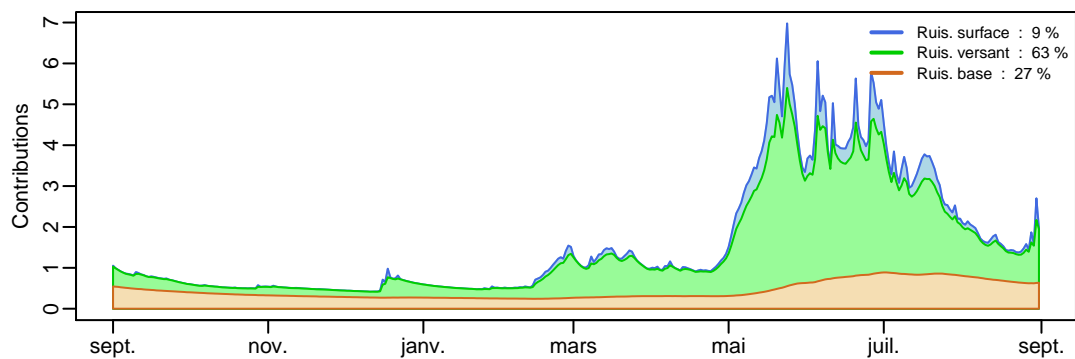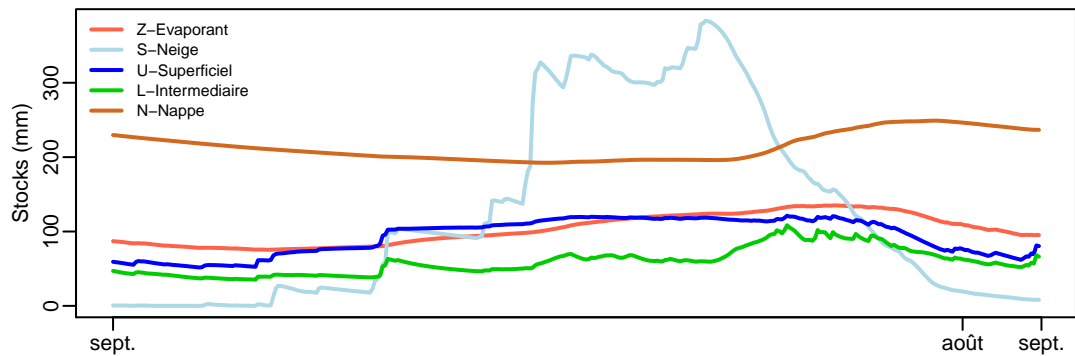

# q4157 (984.31 km<sup>2</sup>) – année 1990–1991

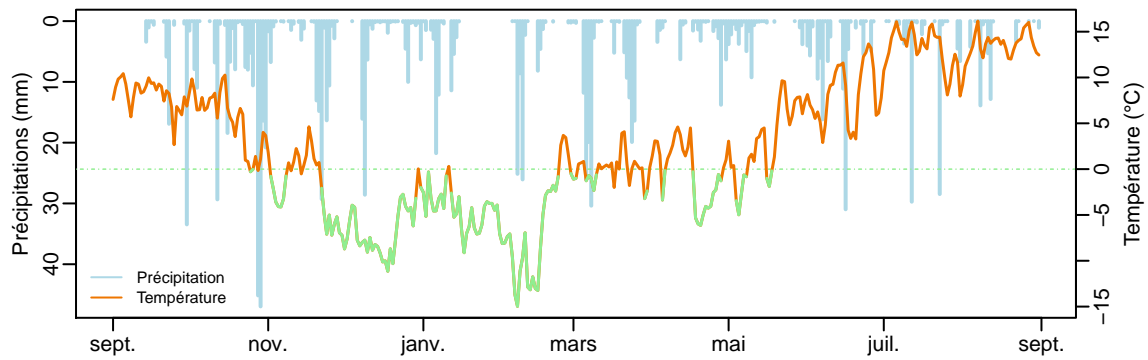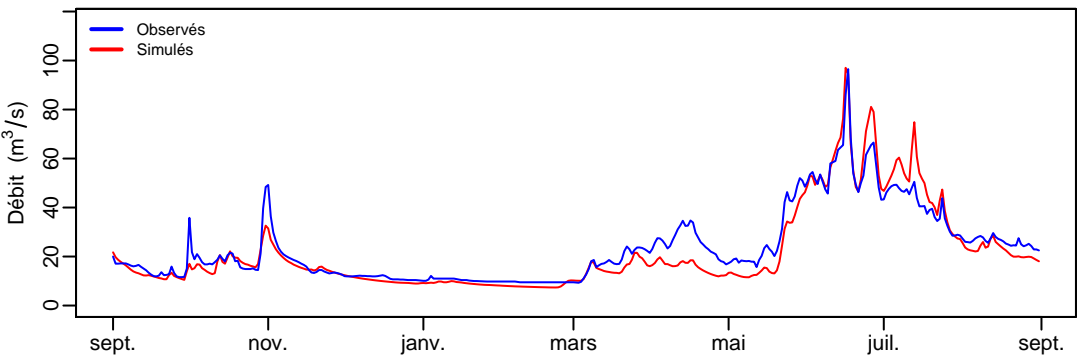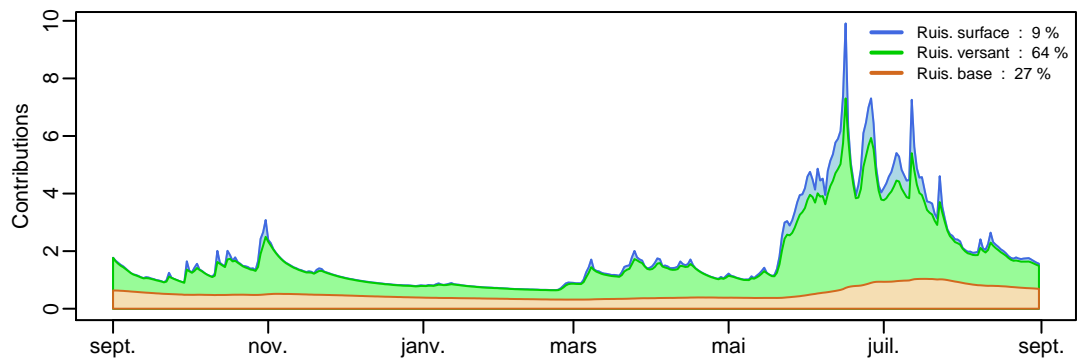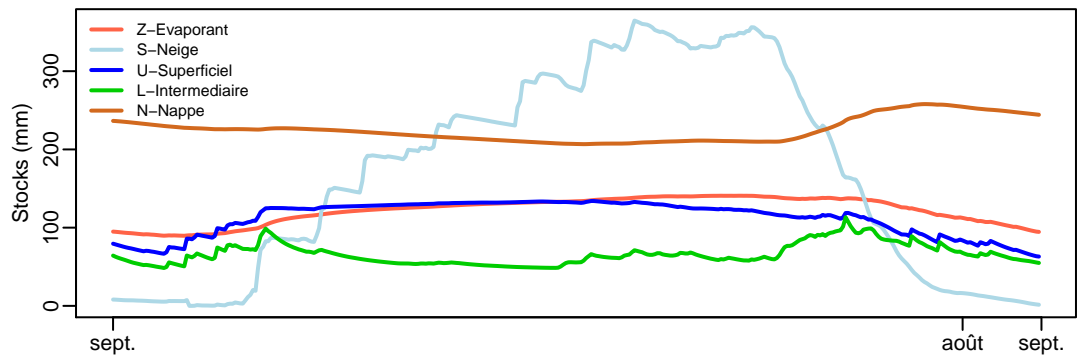

# q4157 (984.31 km²) – année 1991–1992

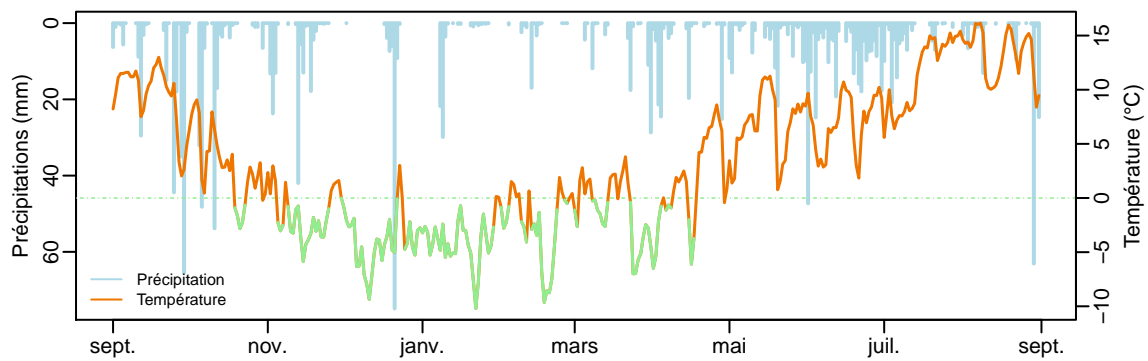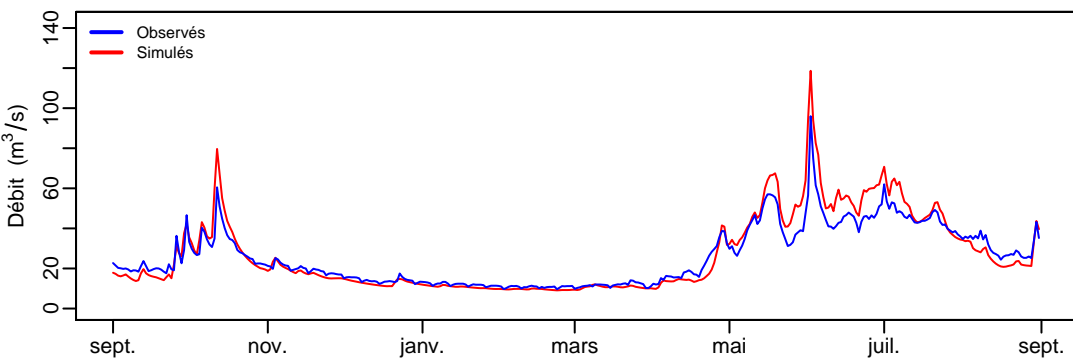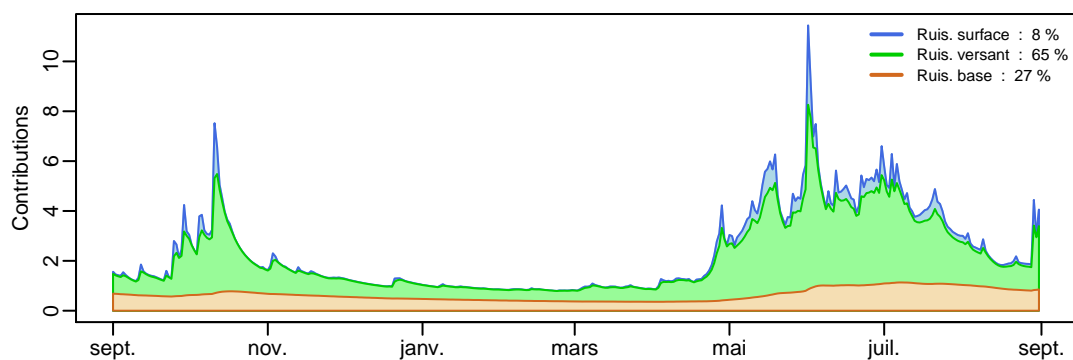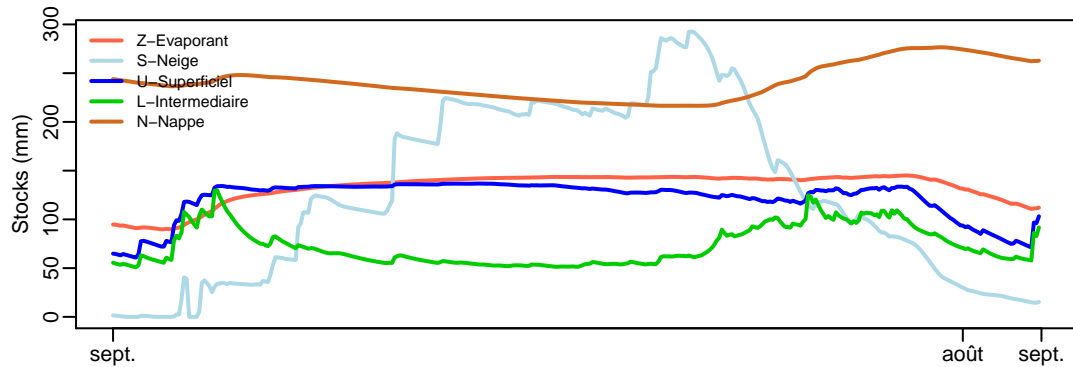

# q4157 (984.31 km²) – année 1992–1993

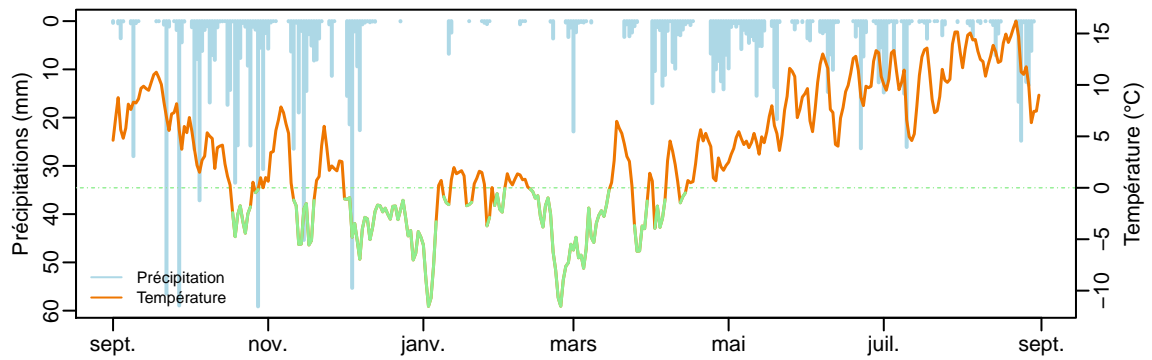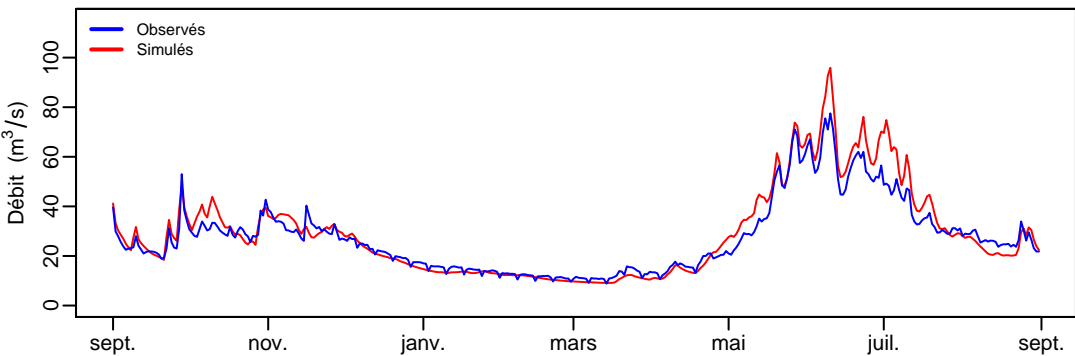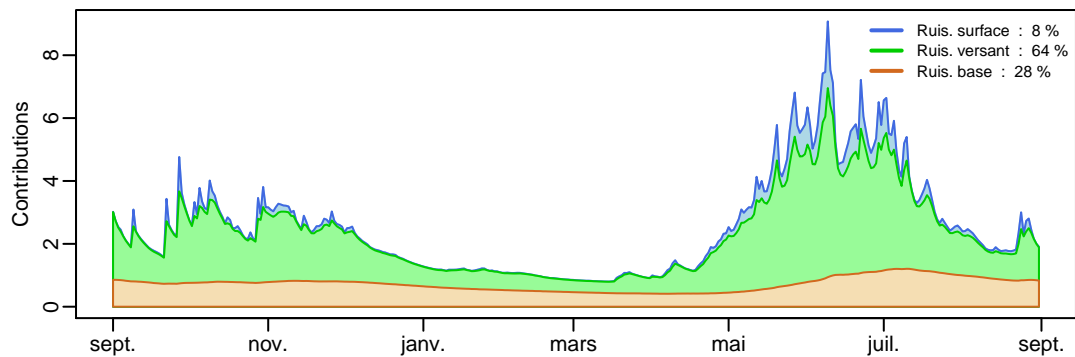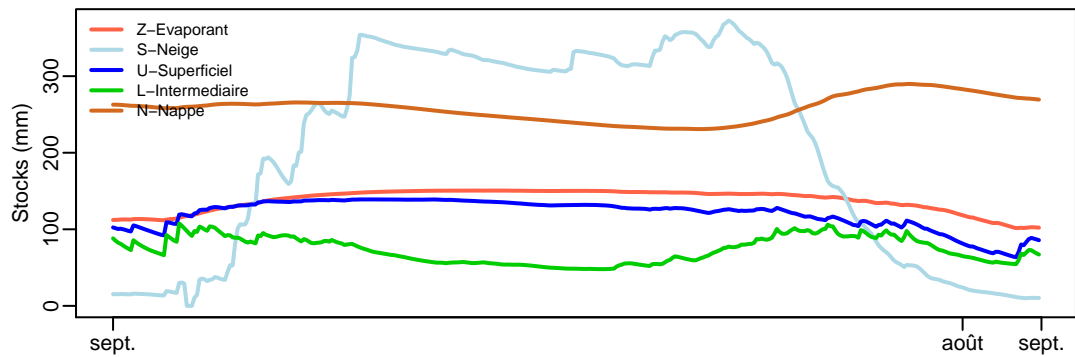

# q4157 (984.31 km²) – année 1993–1994

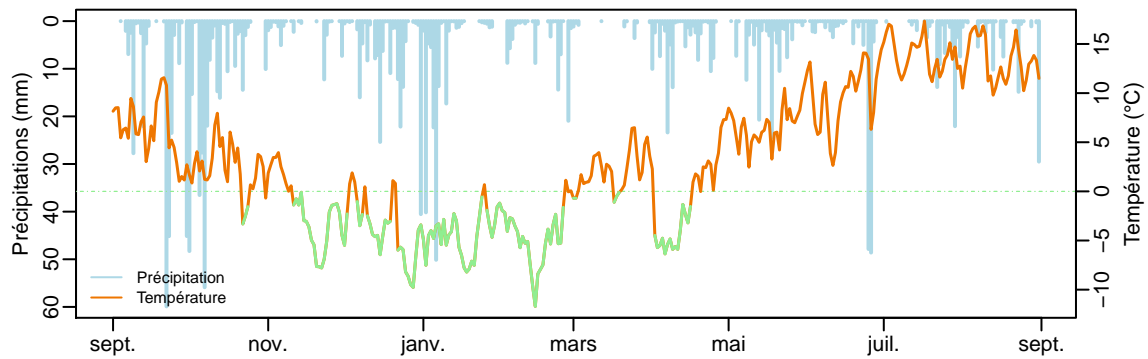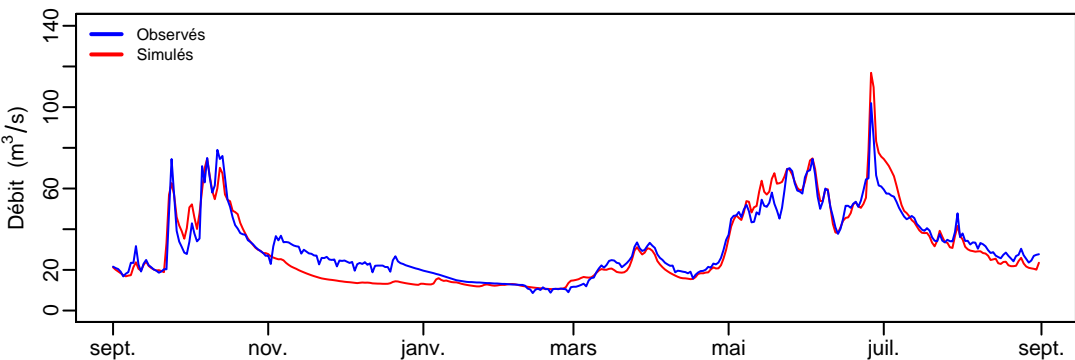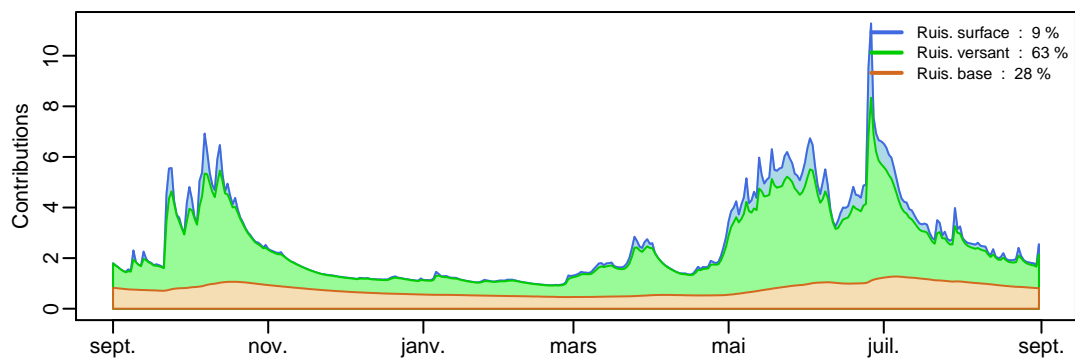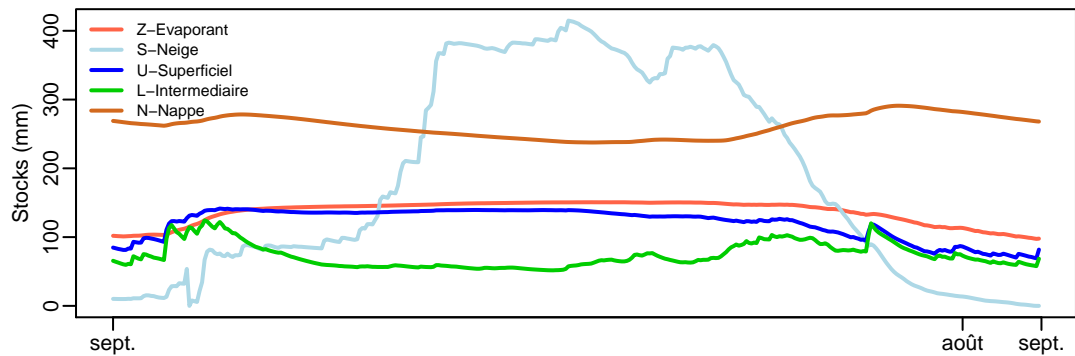

# q4157 (984.31 km²) – année 1994–1995

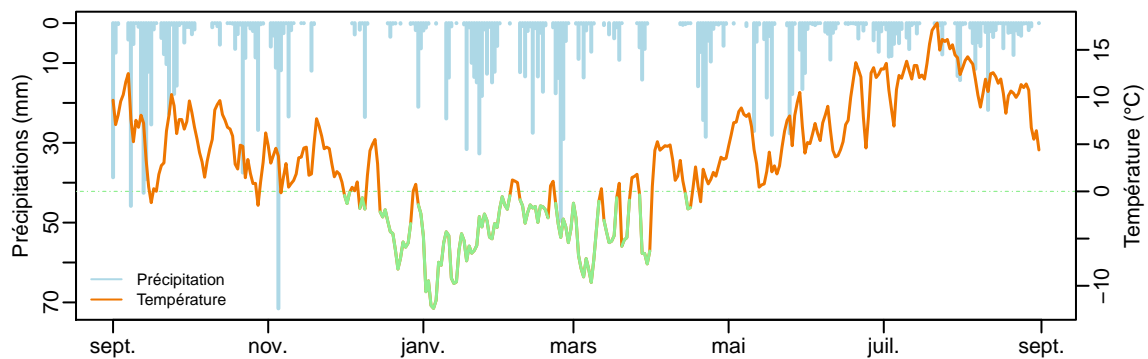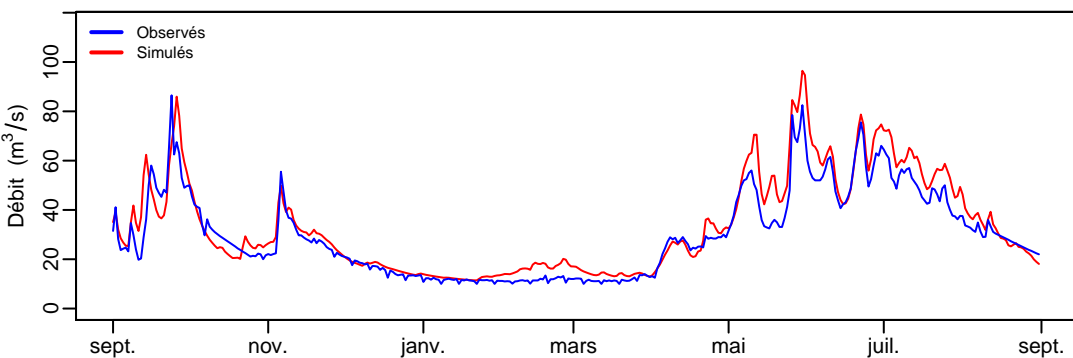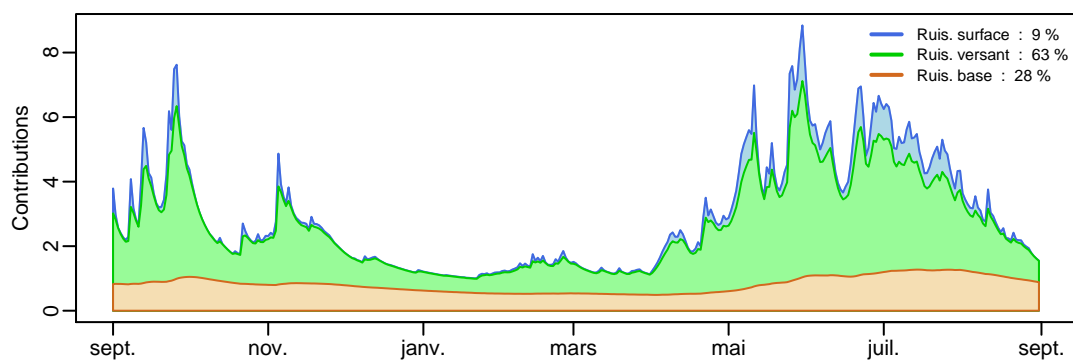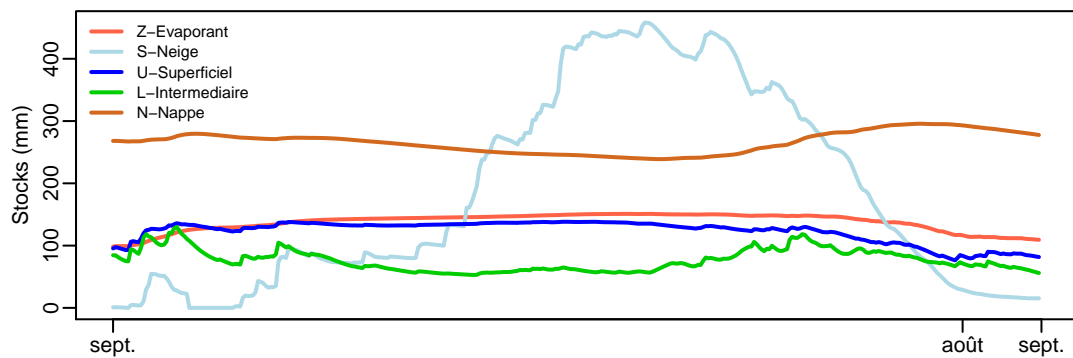

# q4159 (544.16 km²) – année 1981–1982

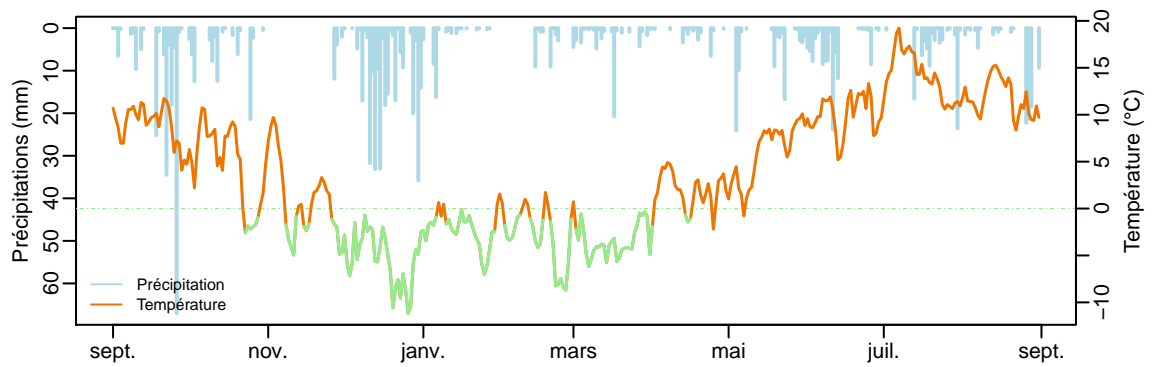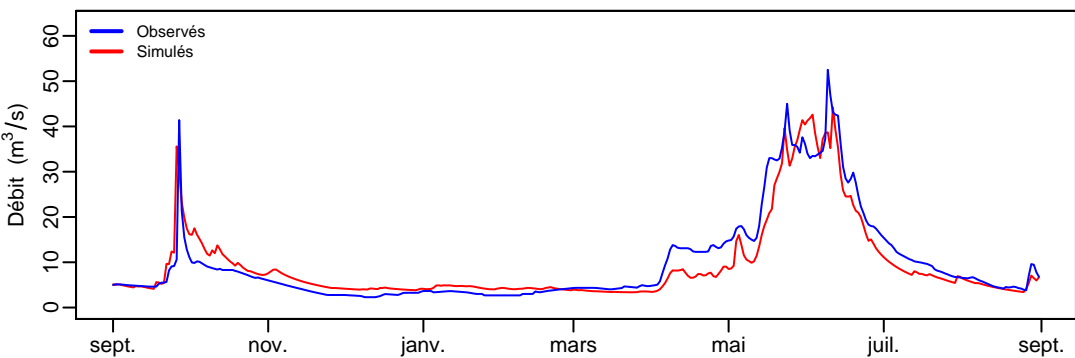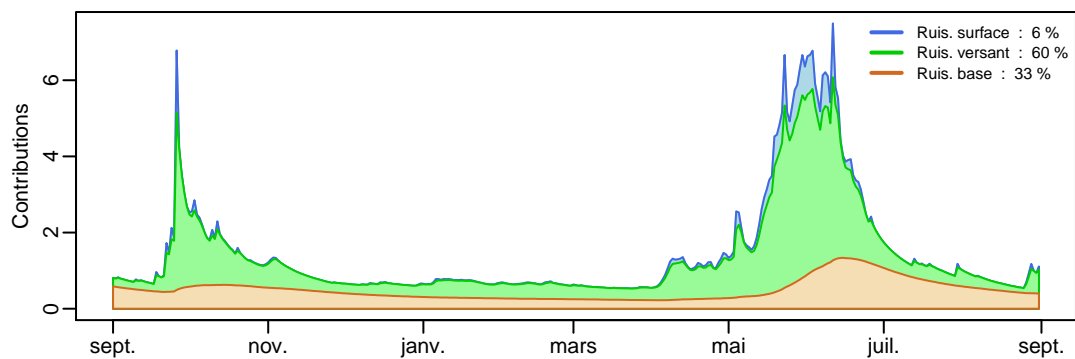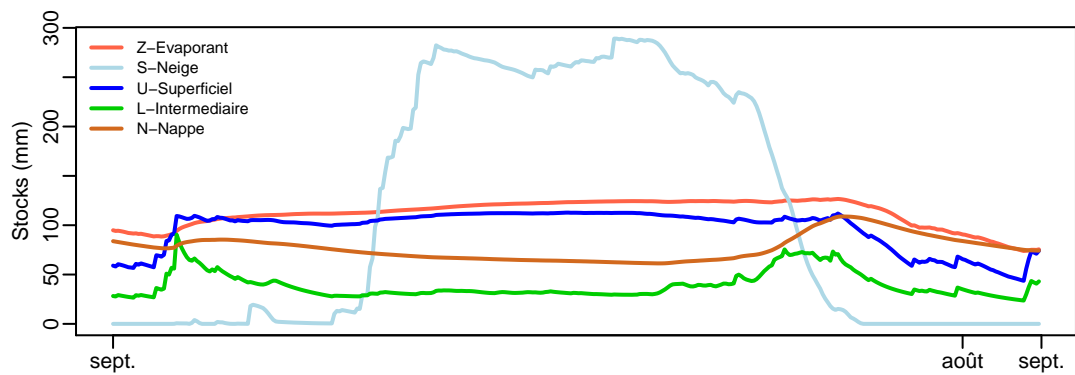

# q4159 (544.16 km²) – année 1982–1983

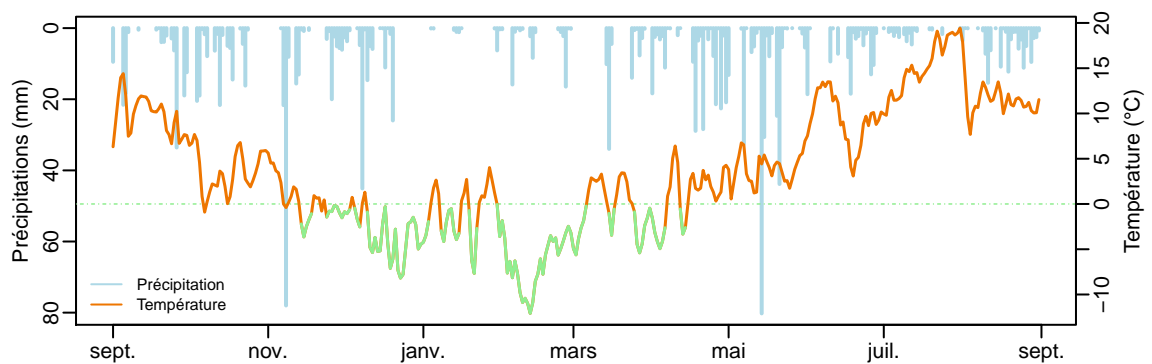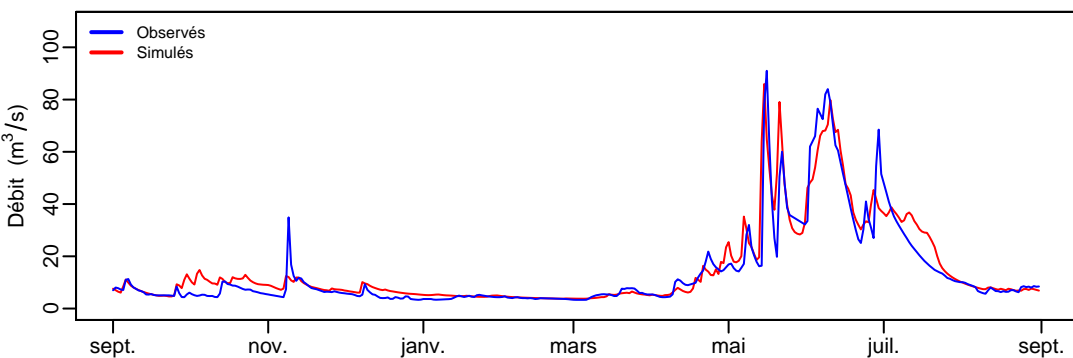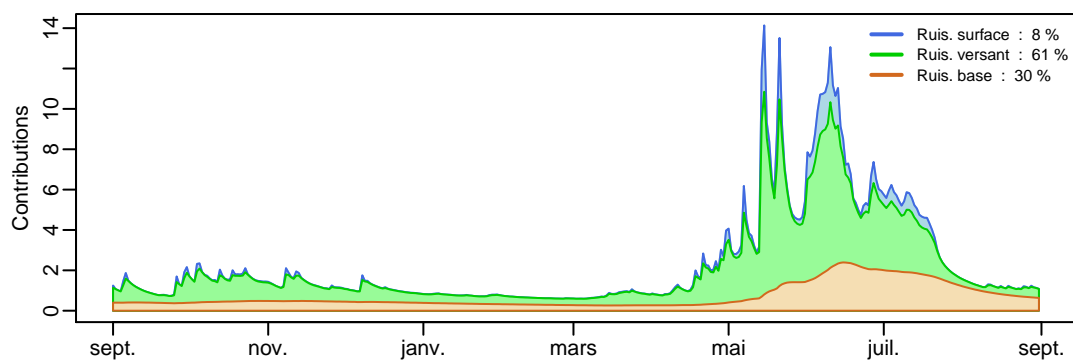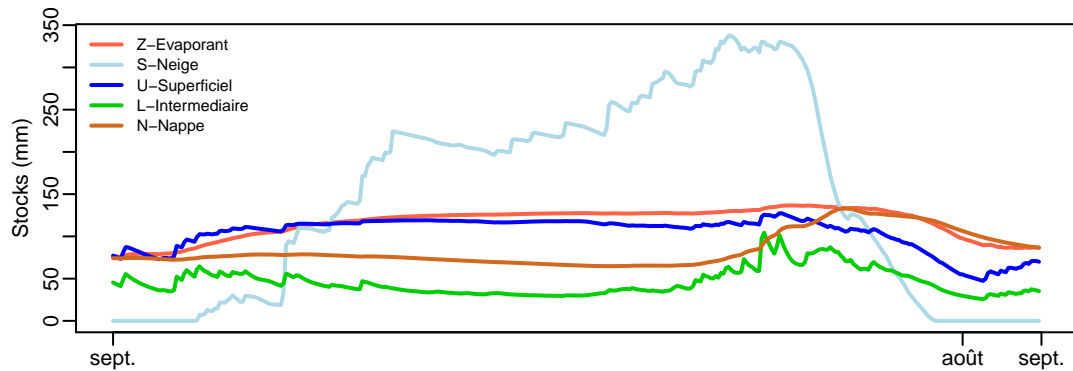



# q4159 (544.16 km<sup>2</sup>) – année 1983–1984

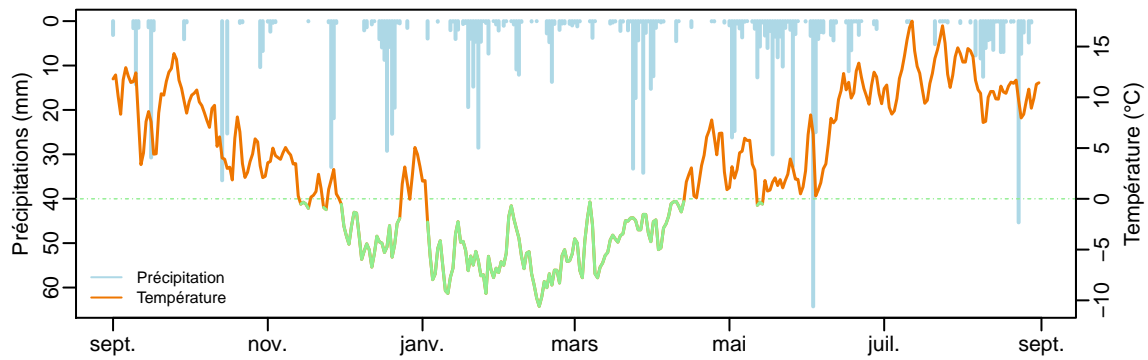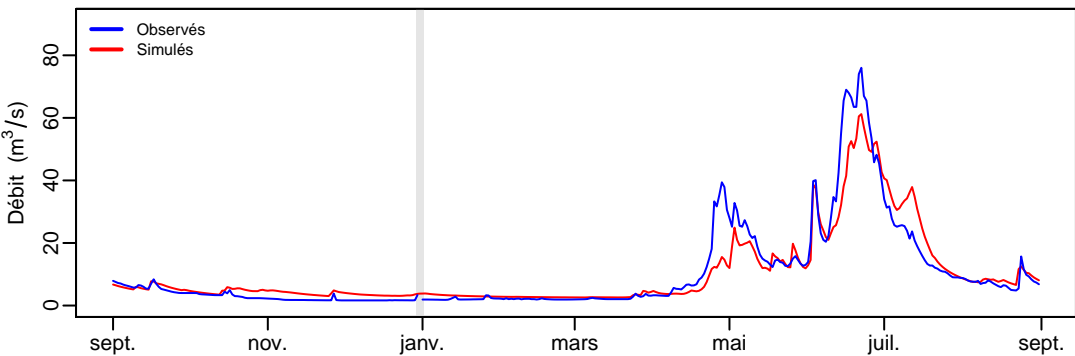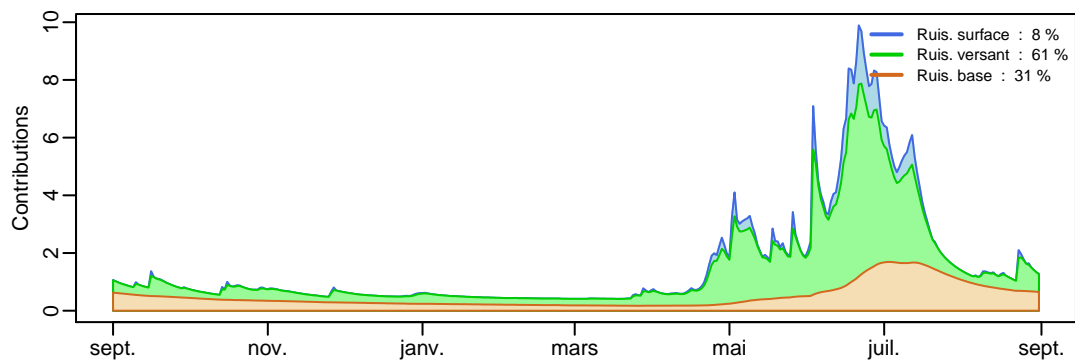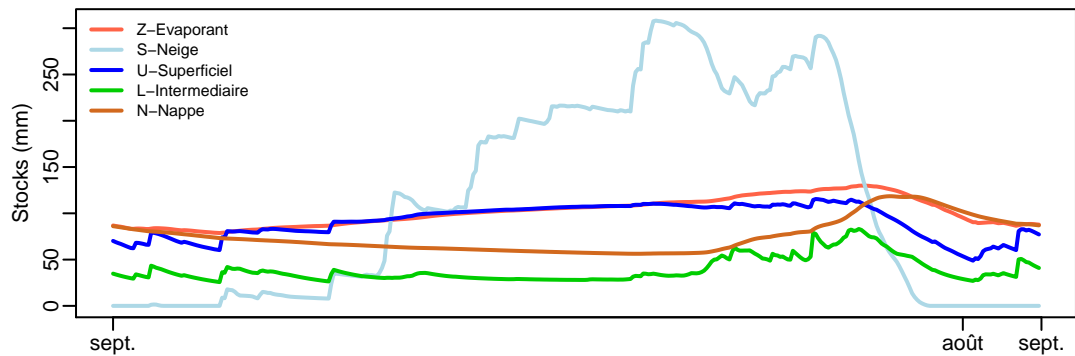

# q4159 (544.16 km<sup>2</sup>) – année 1984–1985

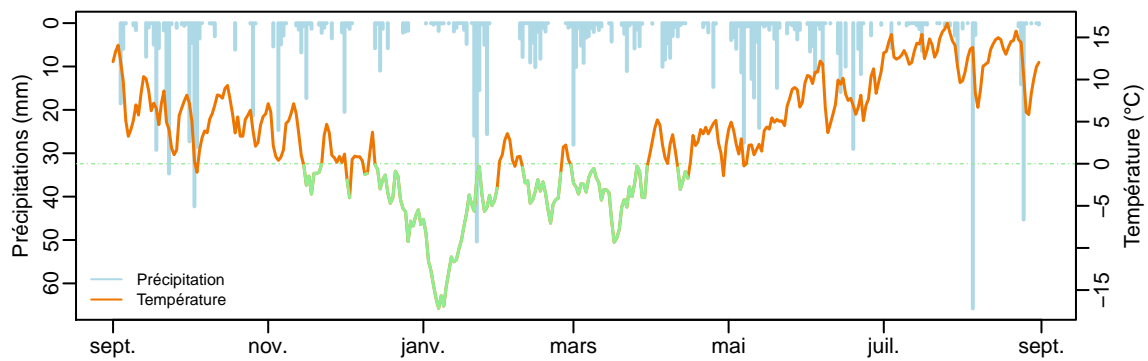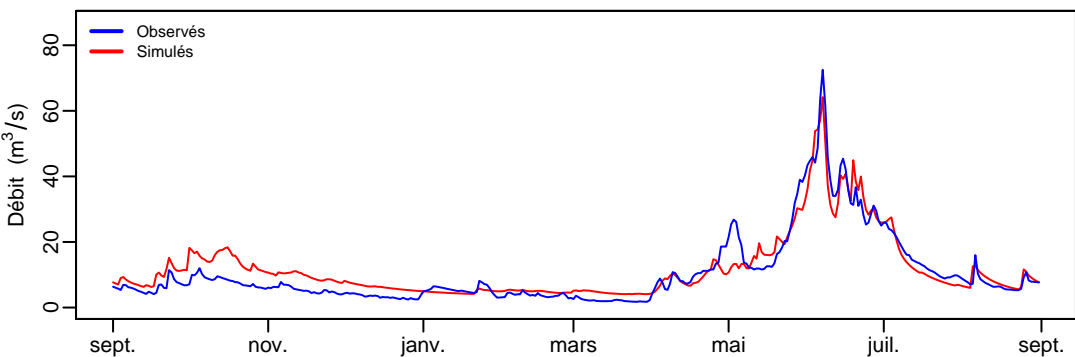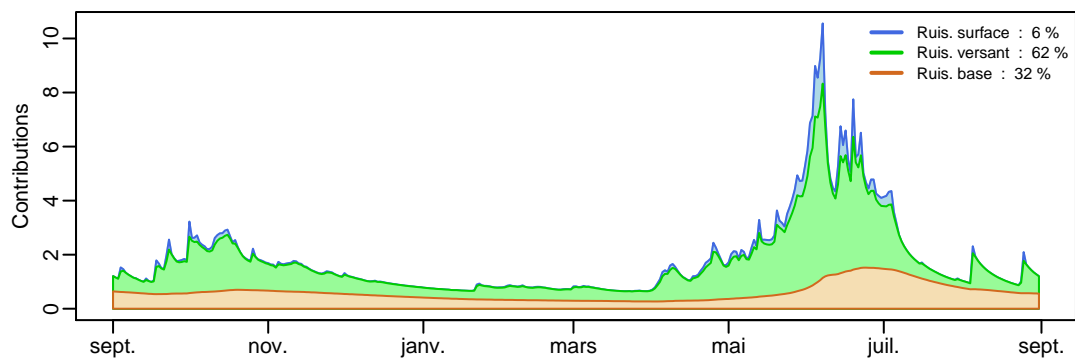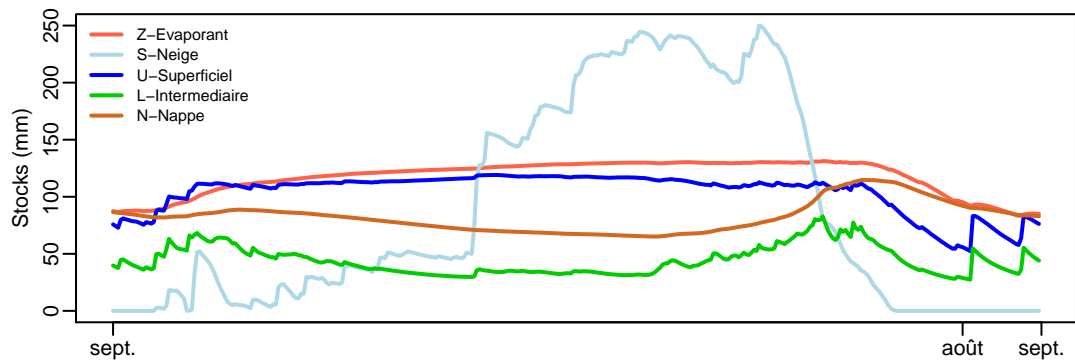

# q4159 (544.16 km<sup>2</sup>) – année 1985–1986

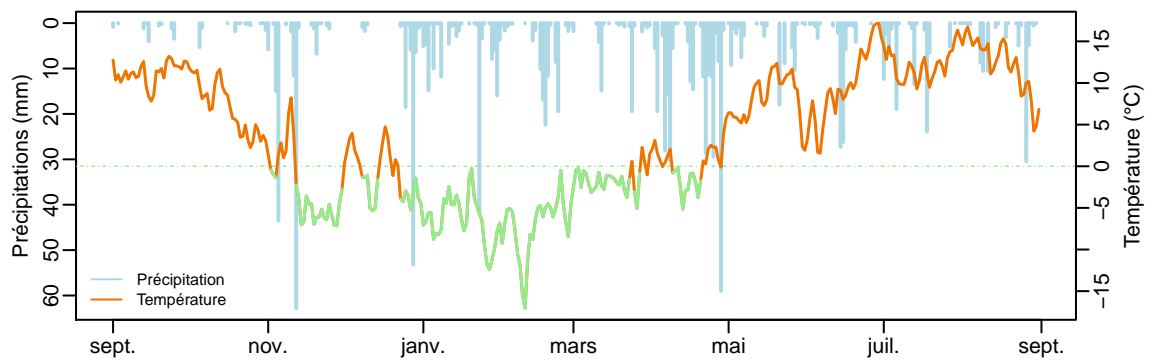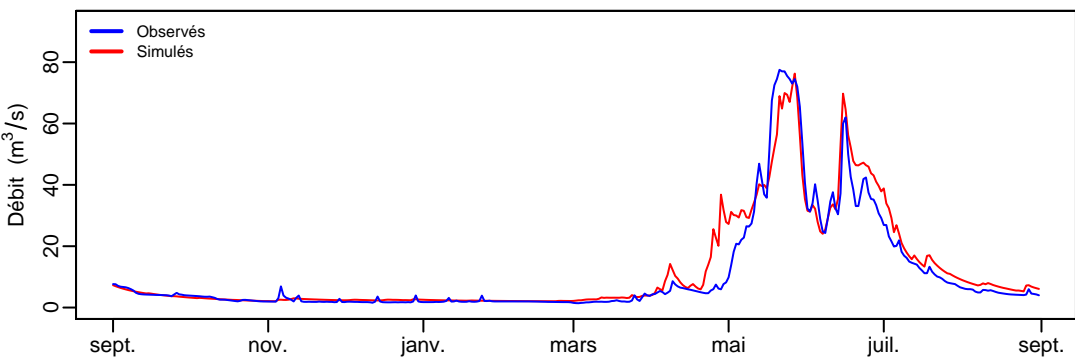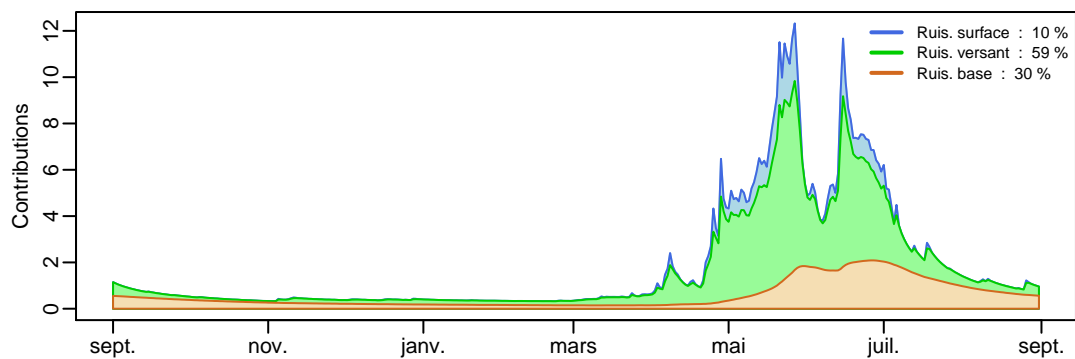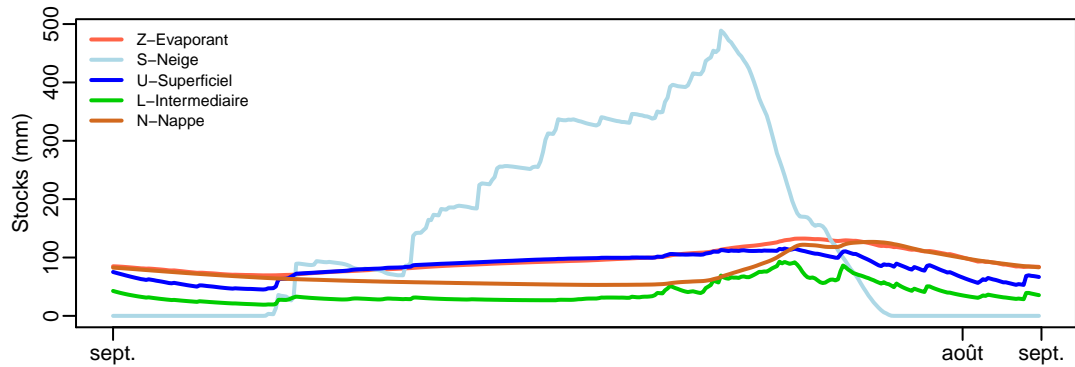

# q4159 (544.16 km<sup>2</sup>) – année 1986–1987

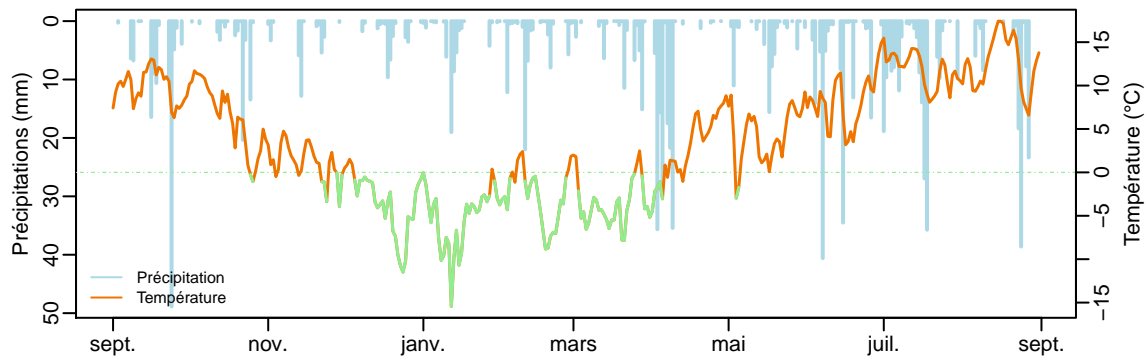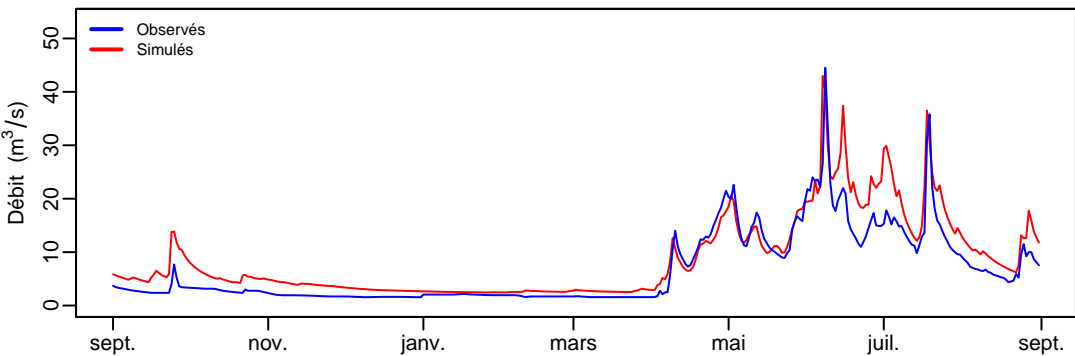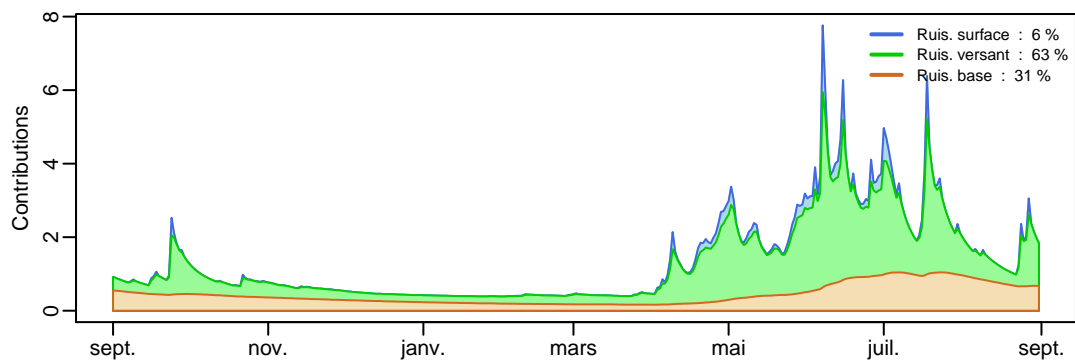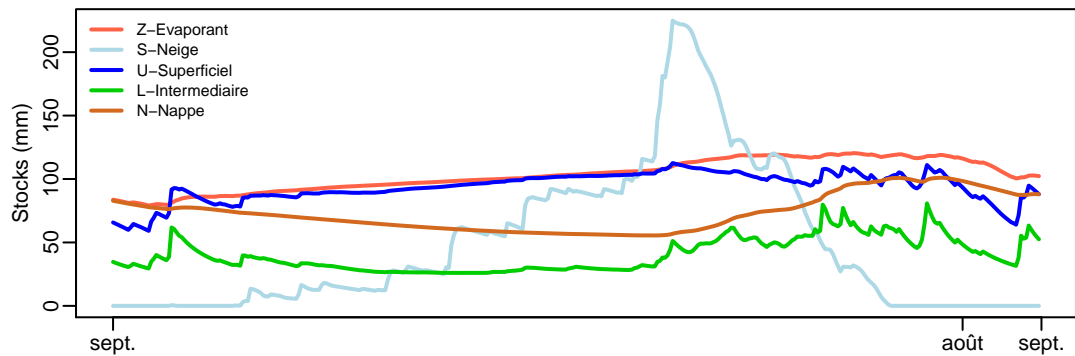

# q4159 (544.16 km<sup>2</sup>) – année 1987–1988

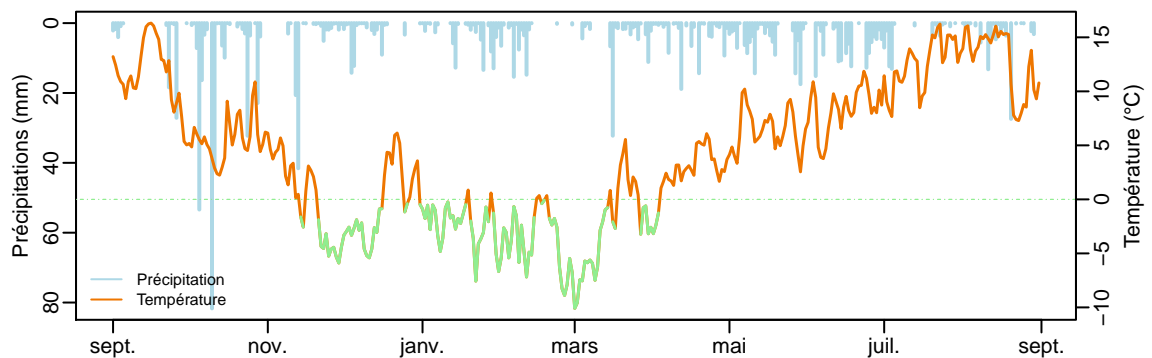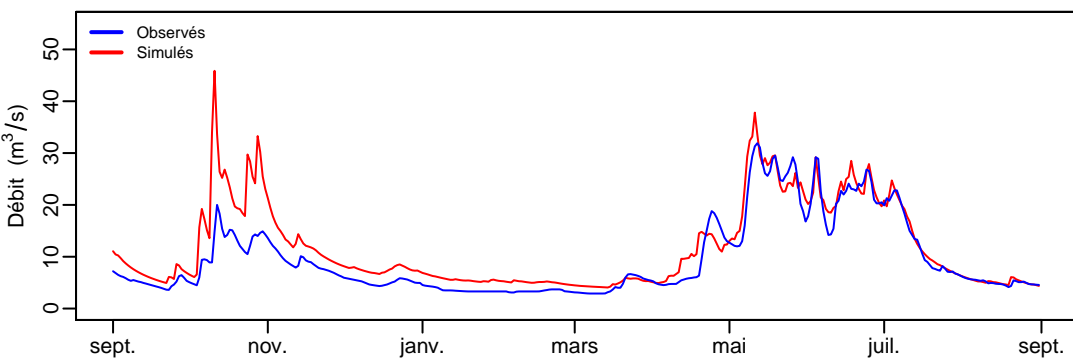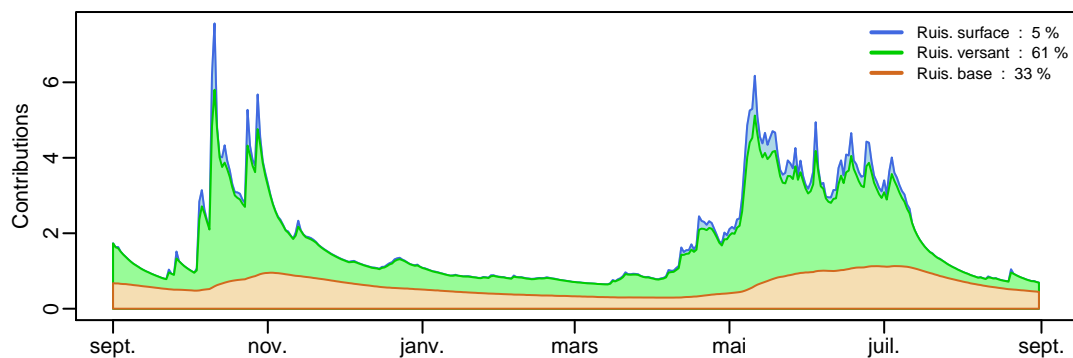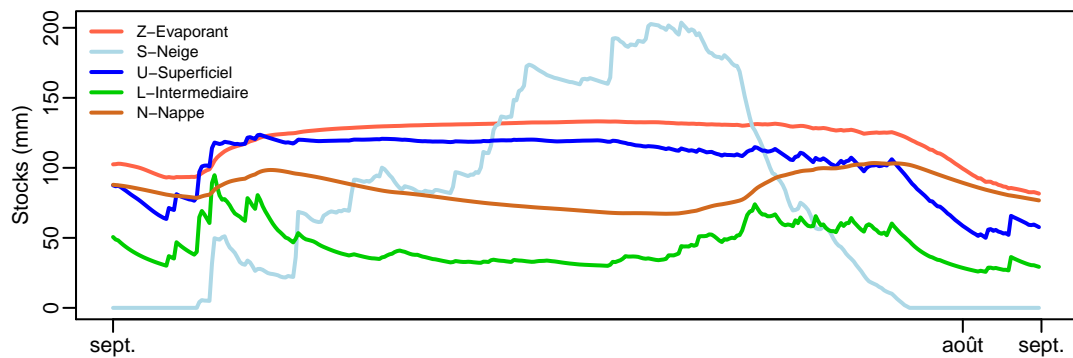

# q4159 (544.16 km²) – année 1988–1989

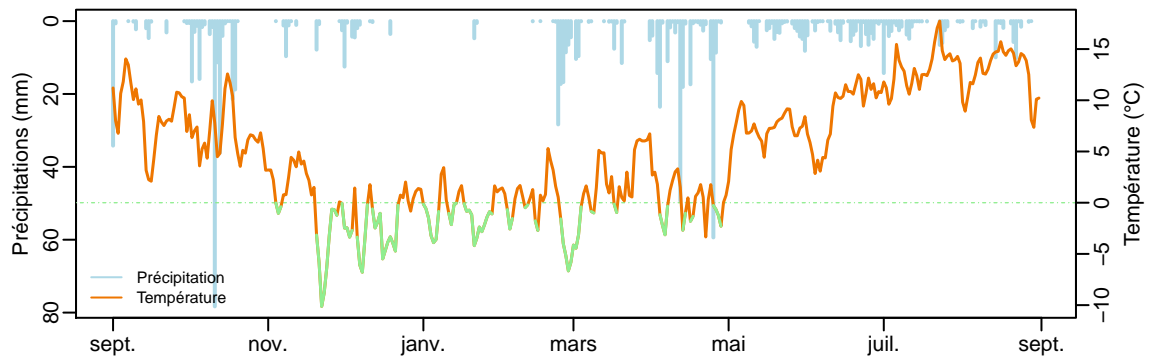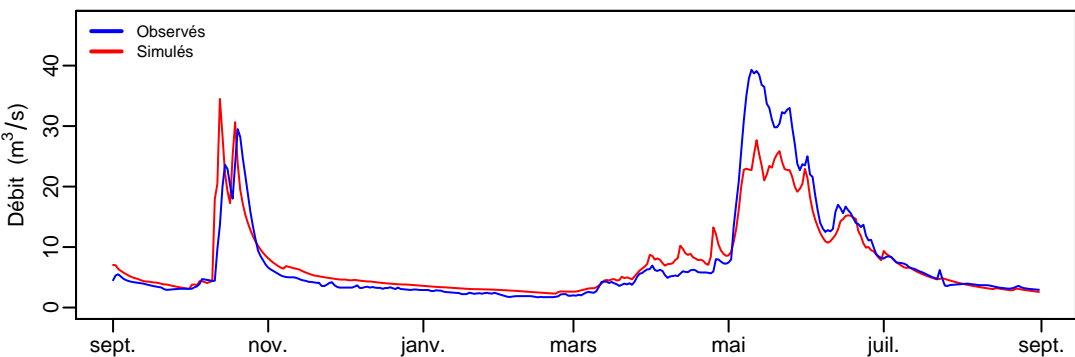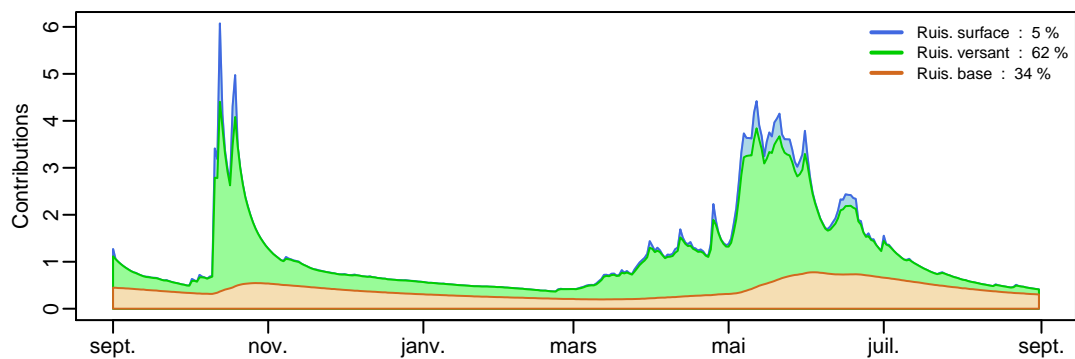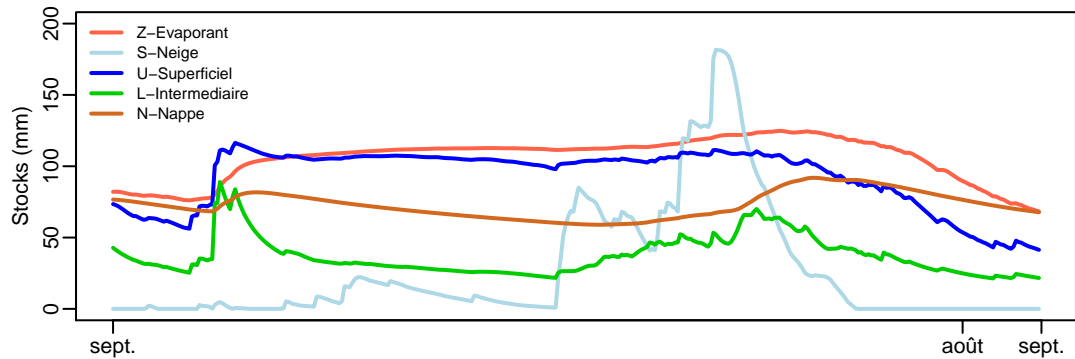

# q4159 (544.16 km²) – année 1989–1990

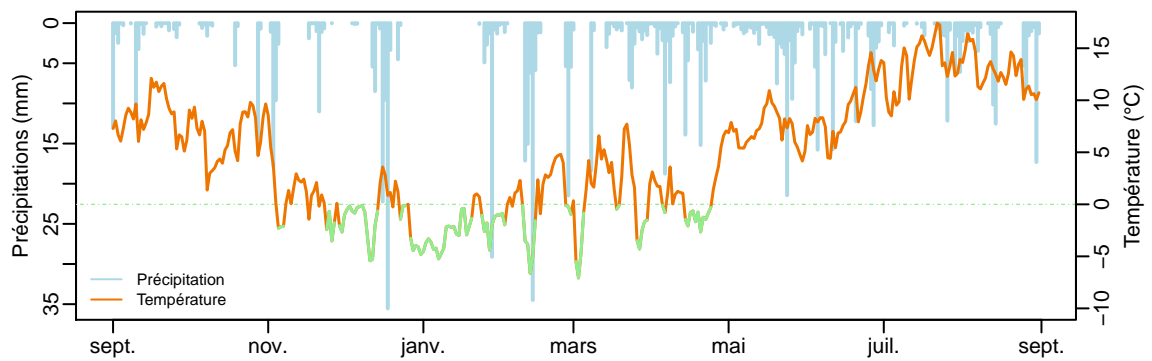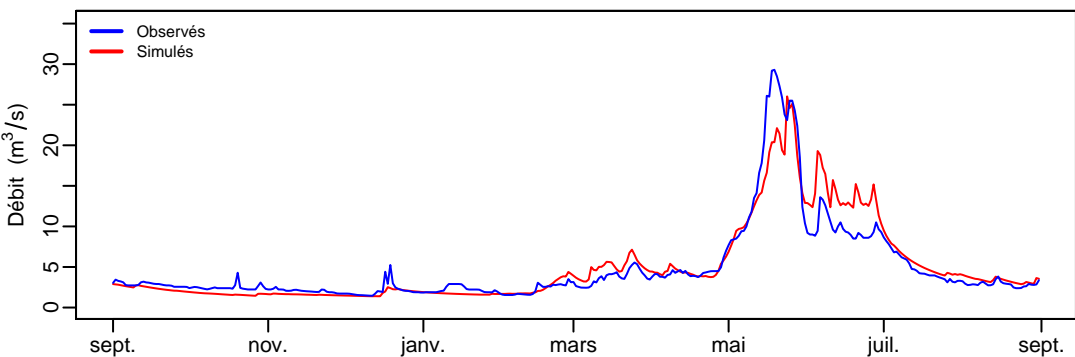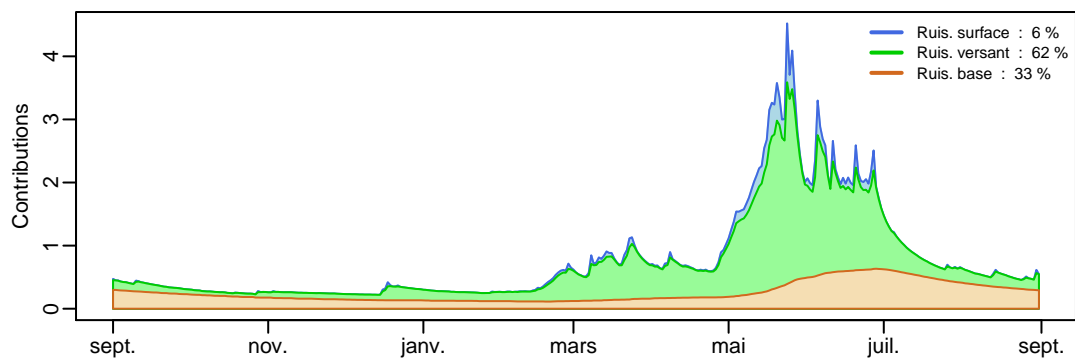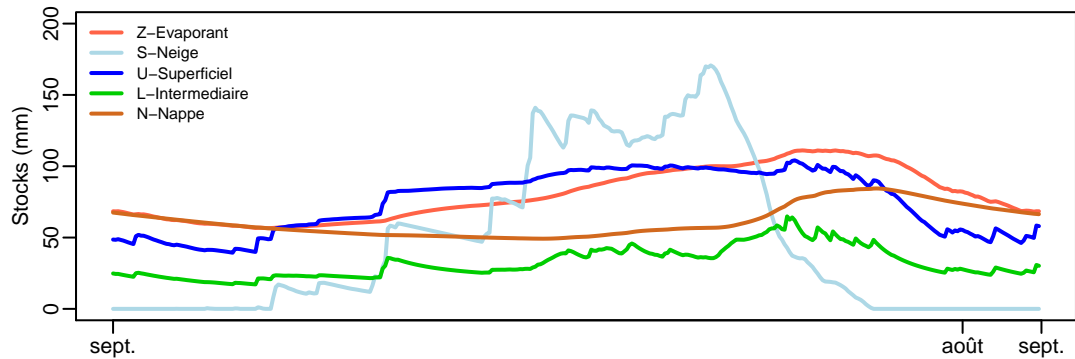

# q4159 (544.16 km²) – année 1990–1991

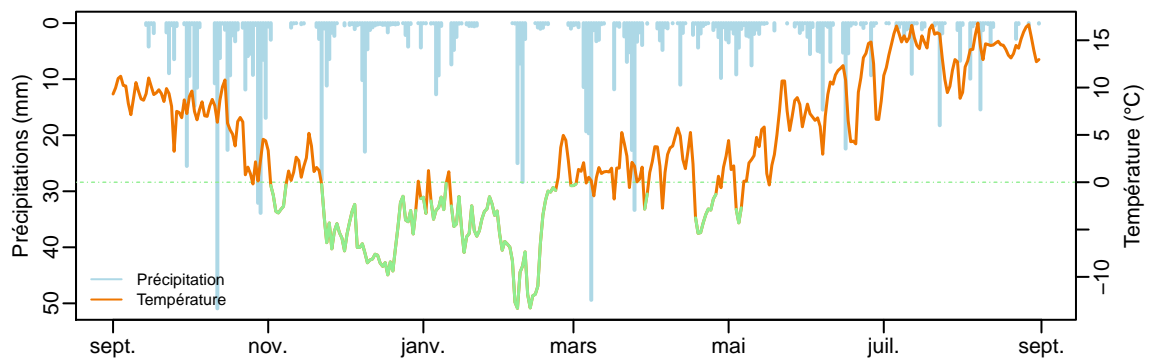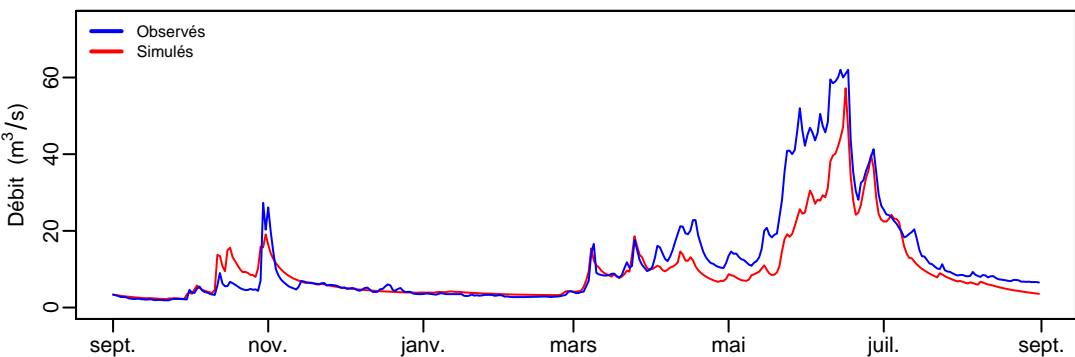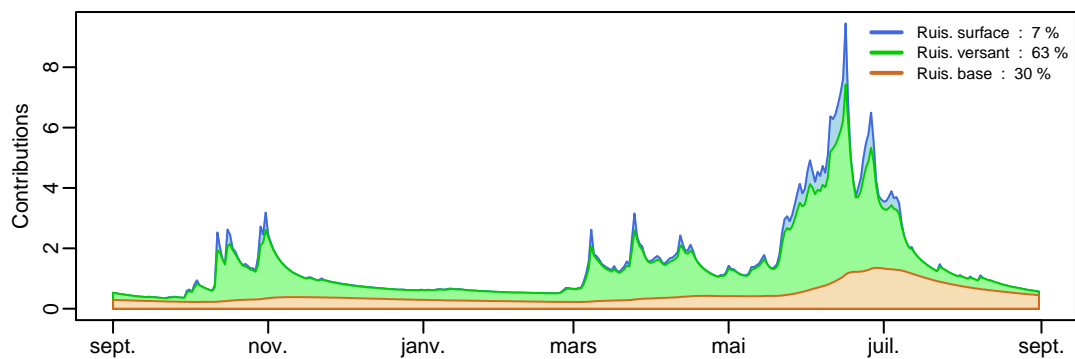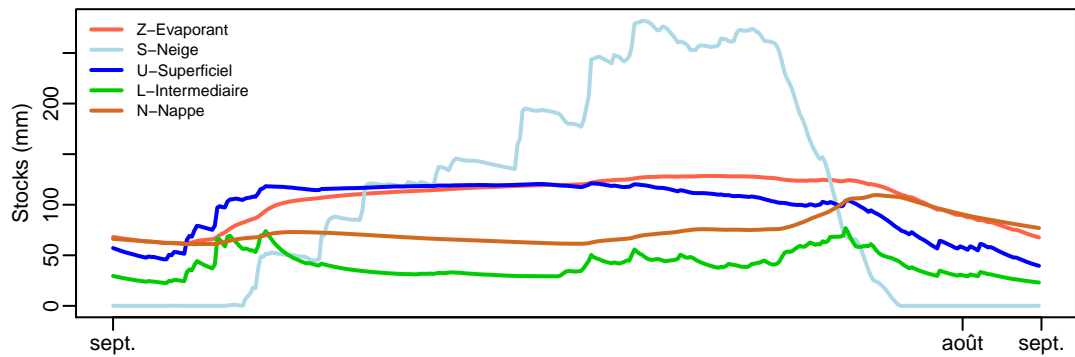



# q4159 (544.16 km<sup>2</sup>) – année 1991–1992

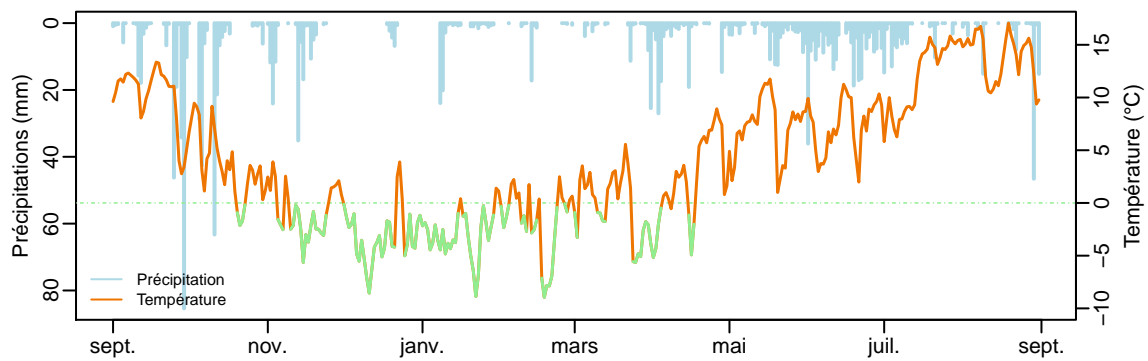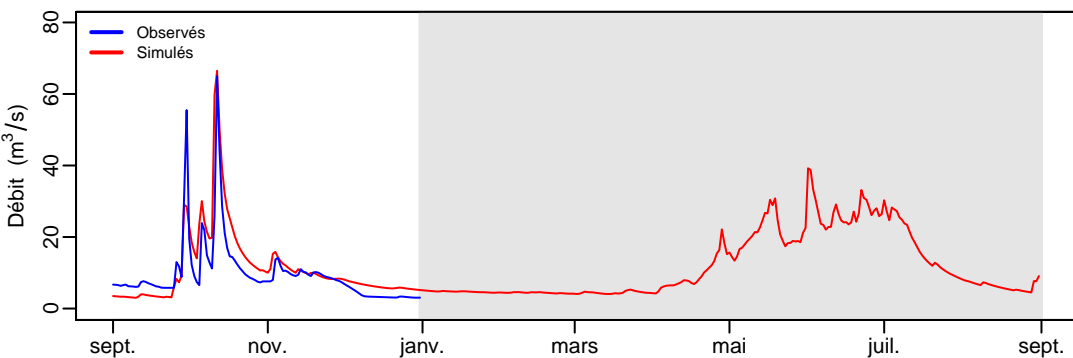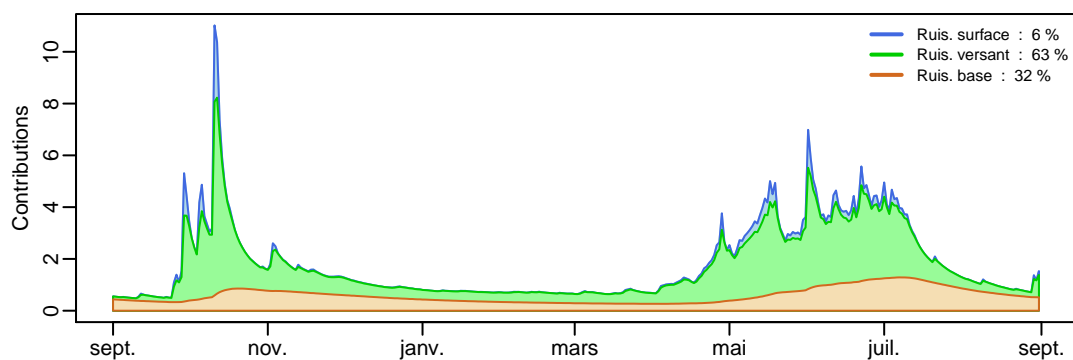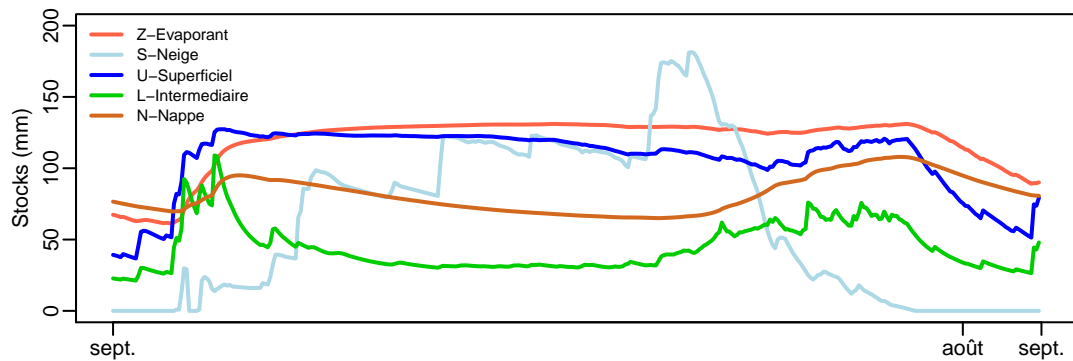

# q4159 (544.16 km²) – année 1992–1993

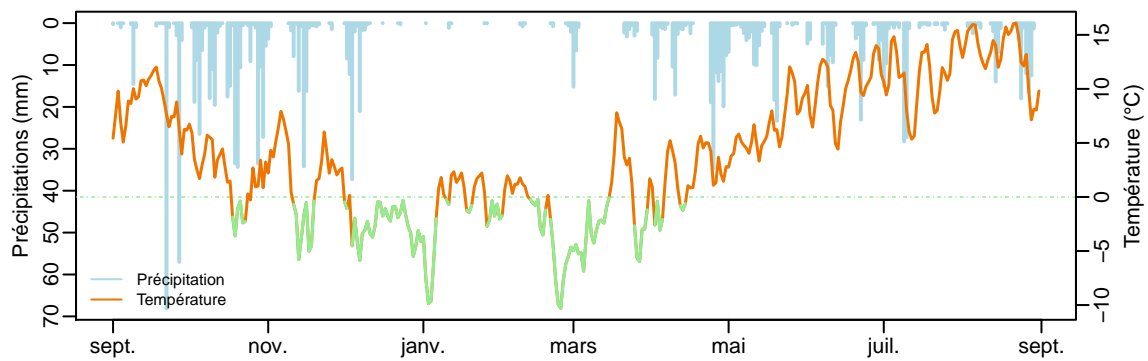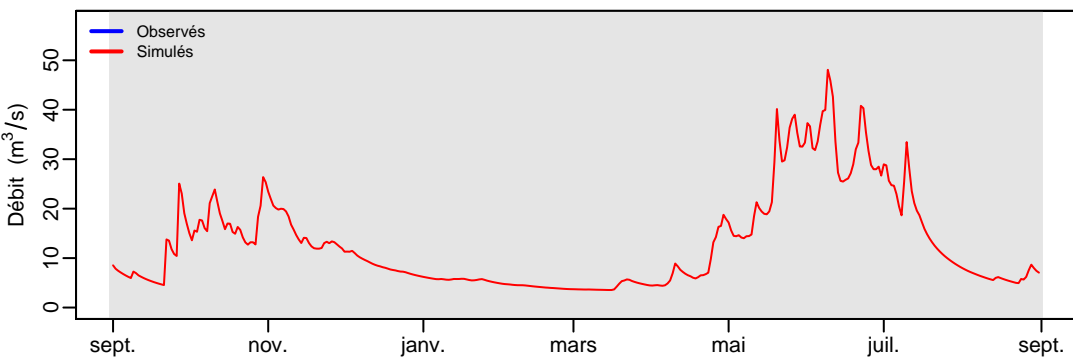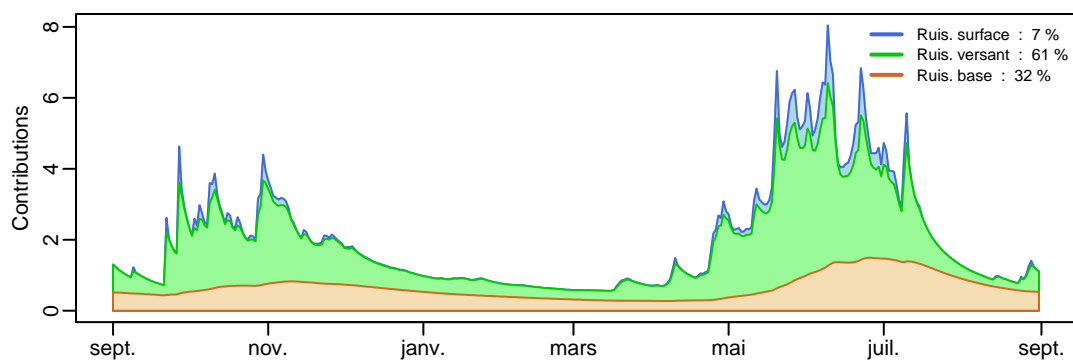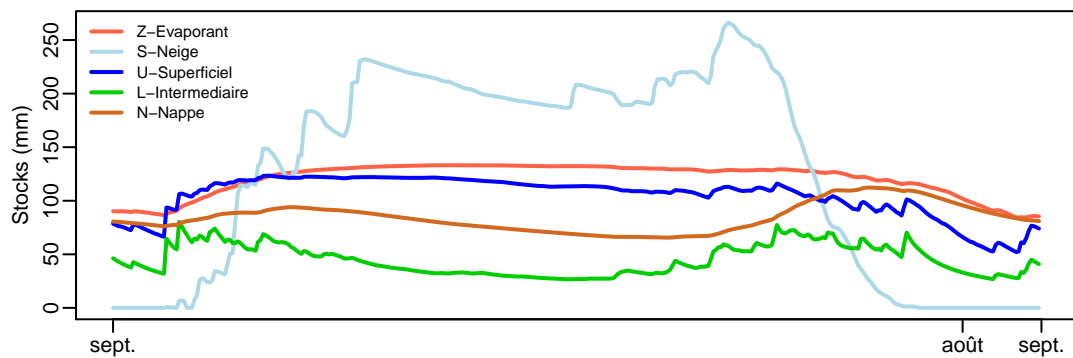

# q4159 (544.16 km<sup>2</sup>) – année 1993–1994

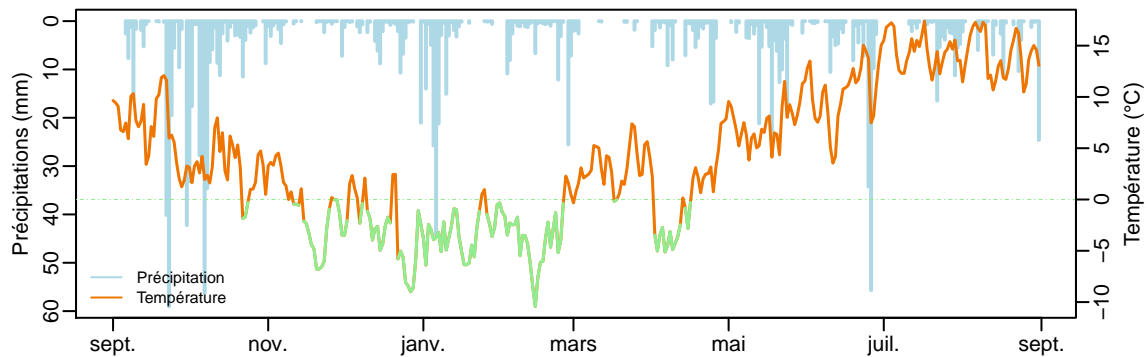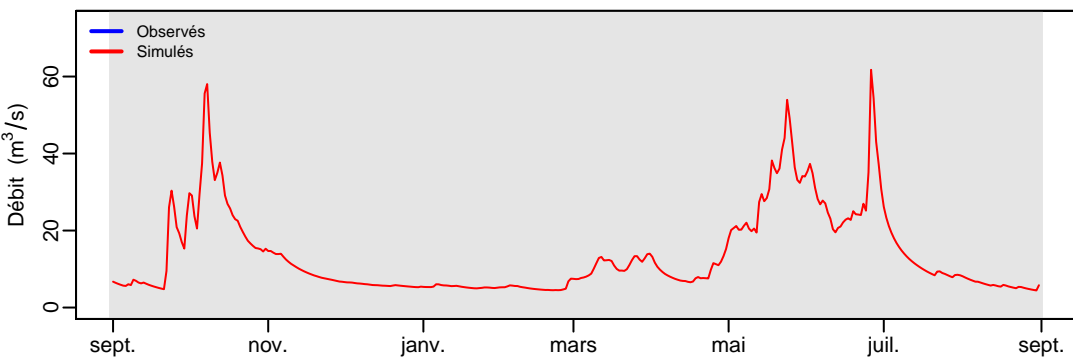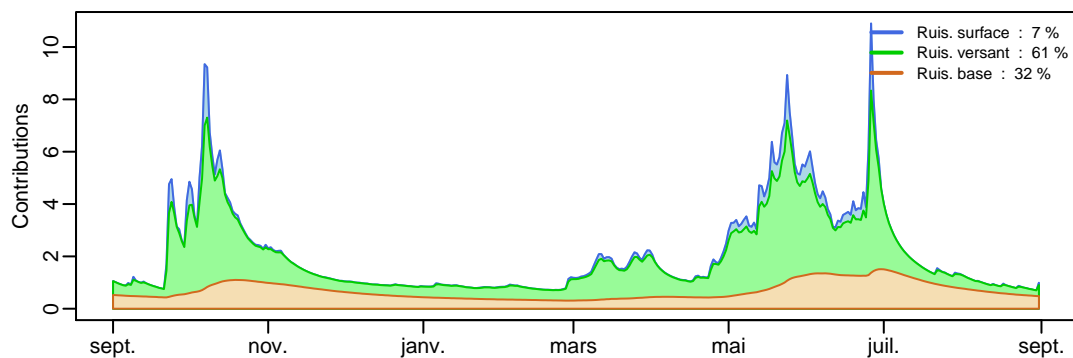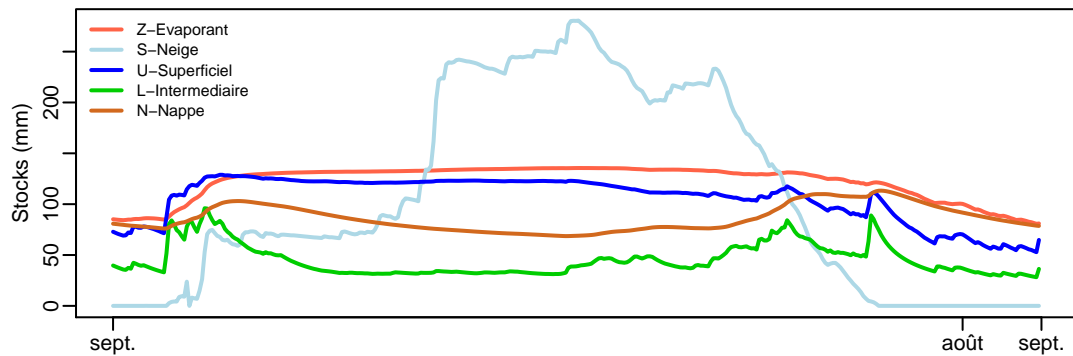

# q4159 (544.16 km<sup>2</sup>) – année 1994–1995

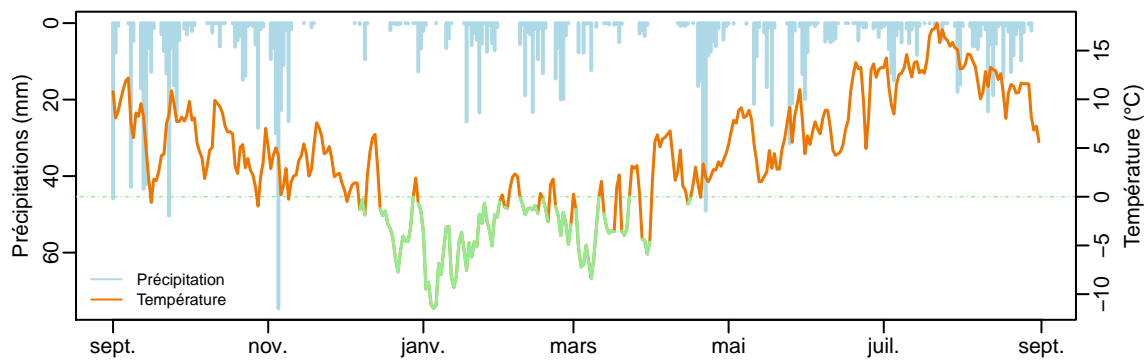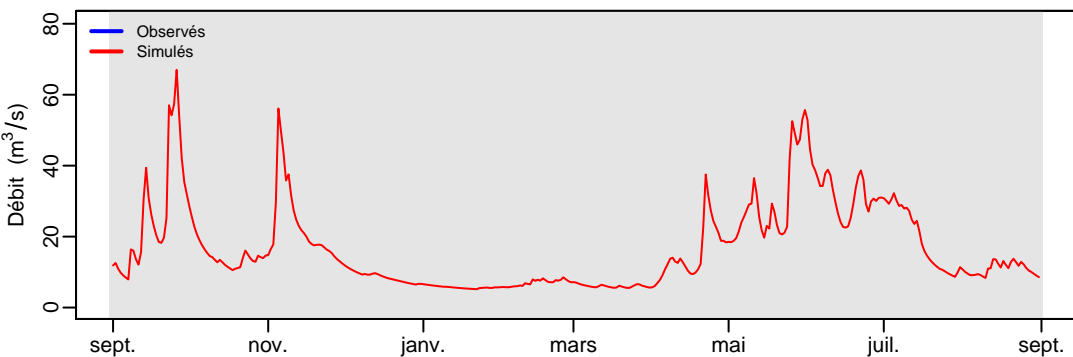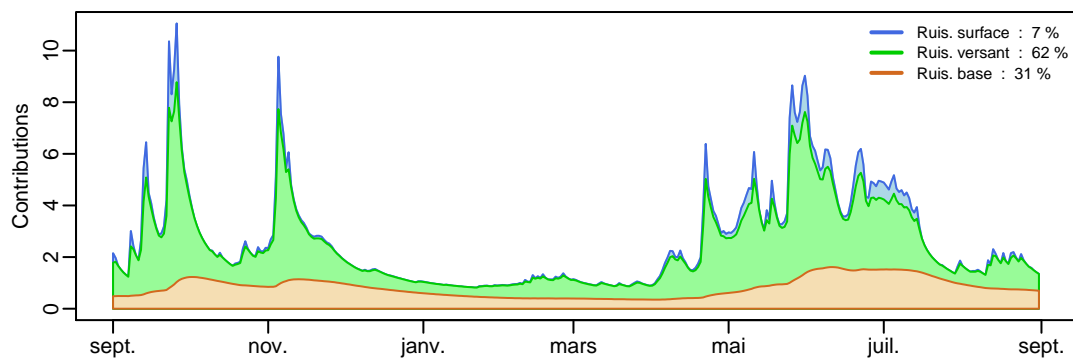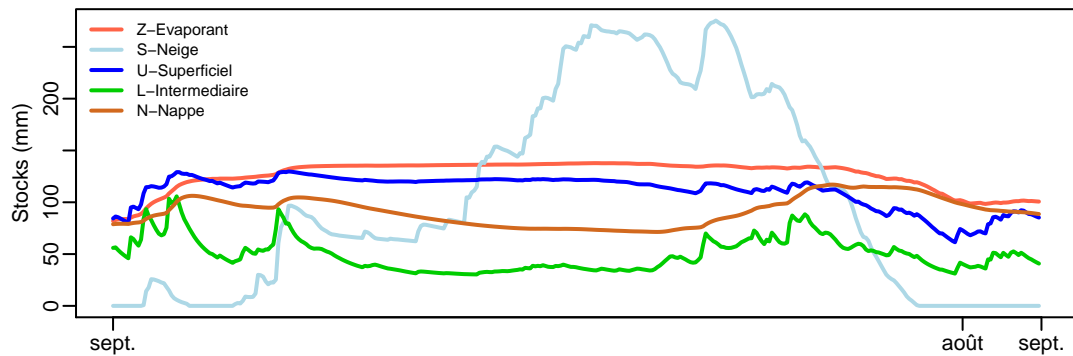

# q4159 (544.16 km²) – année 1995–1996

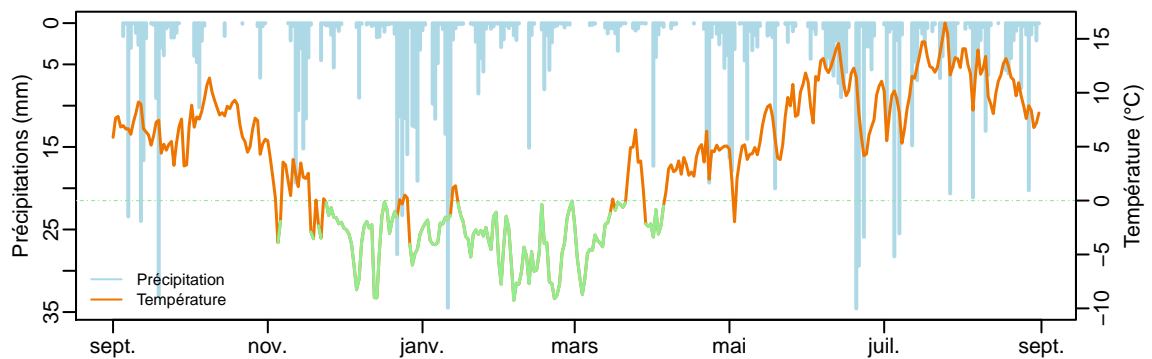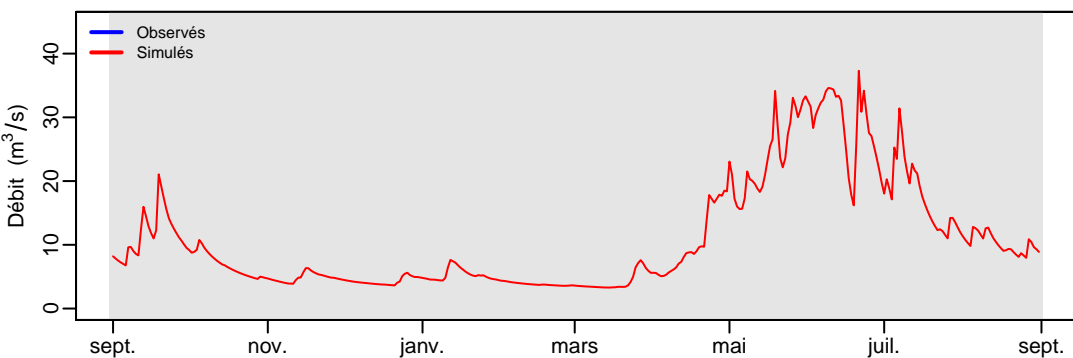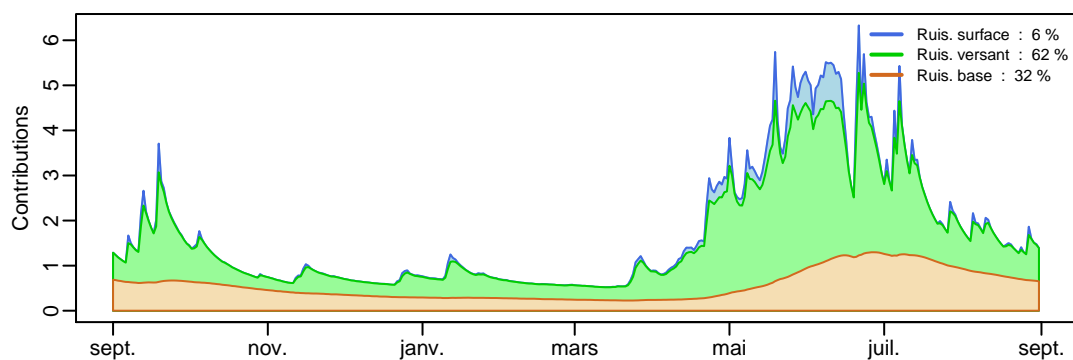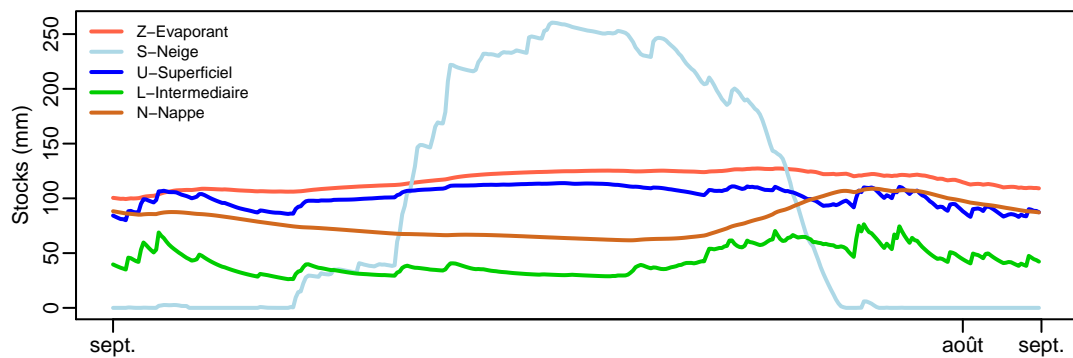

# q4159 (544.16 km<sup>2</sup>) – année 1996–1997

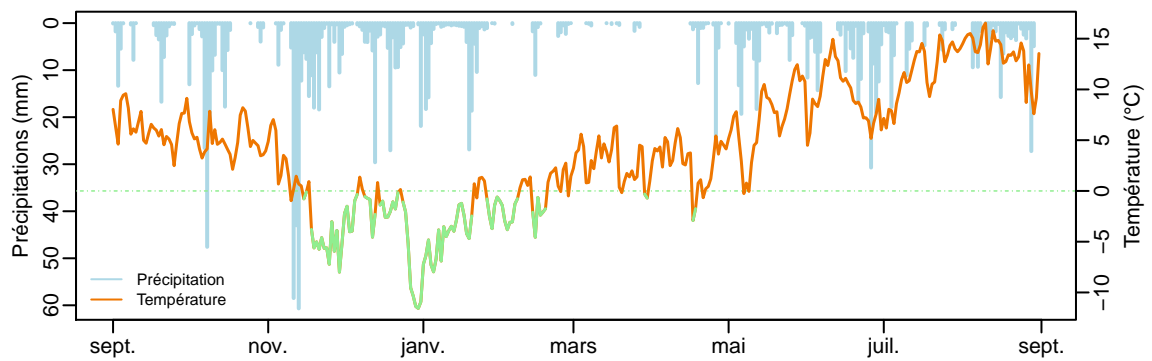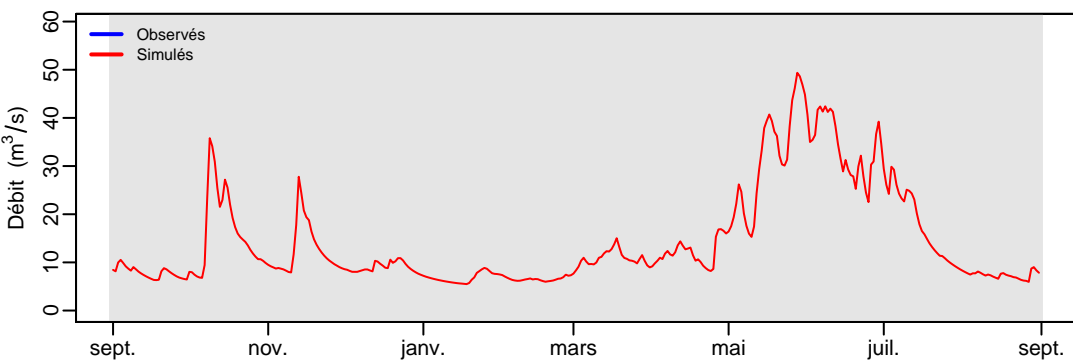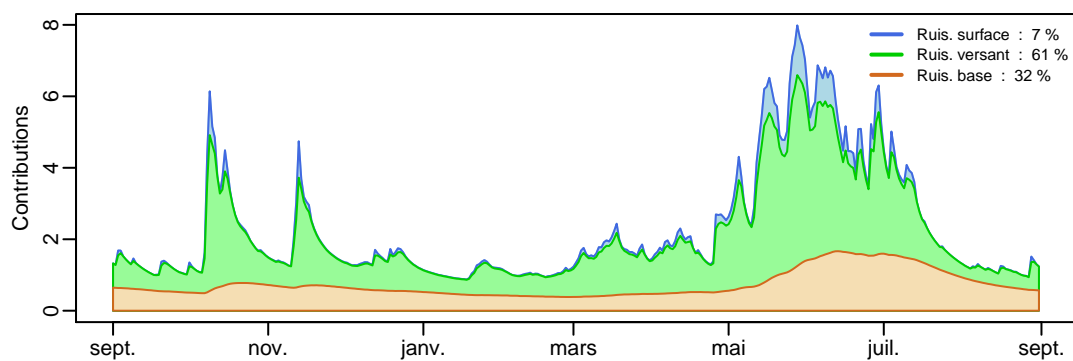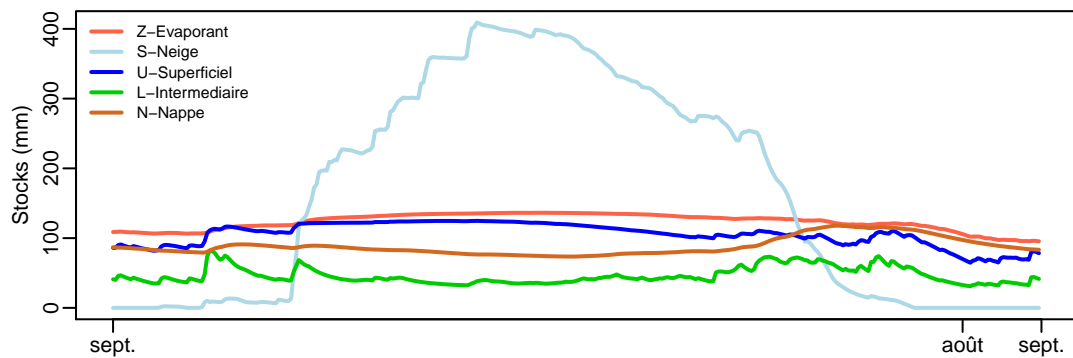

# q4159 (544.16 km<sup>2</sup>) – année 1997–1998

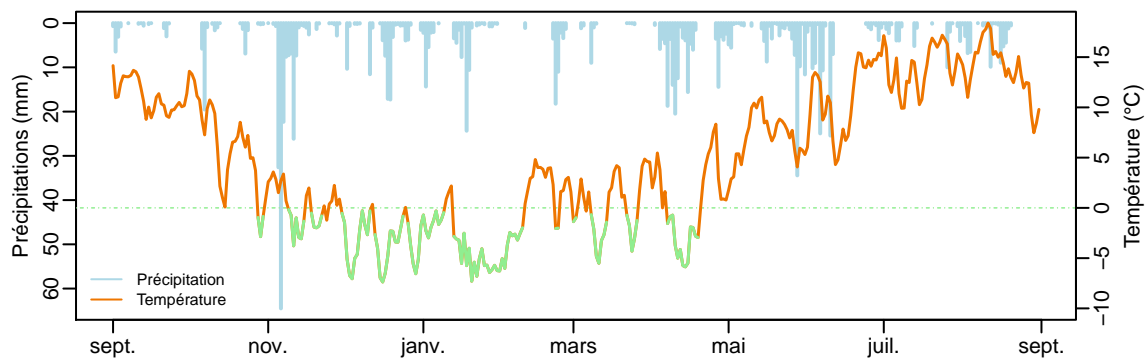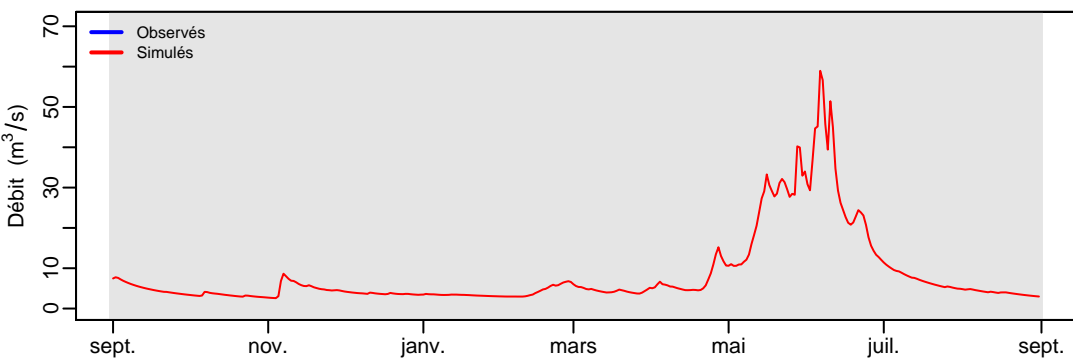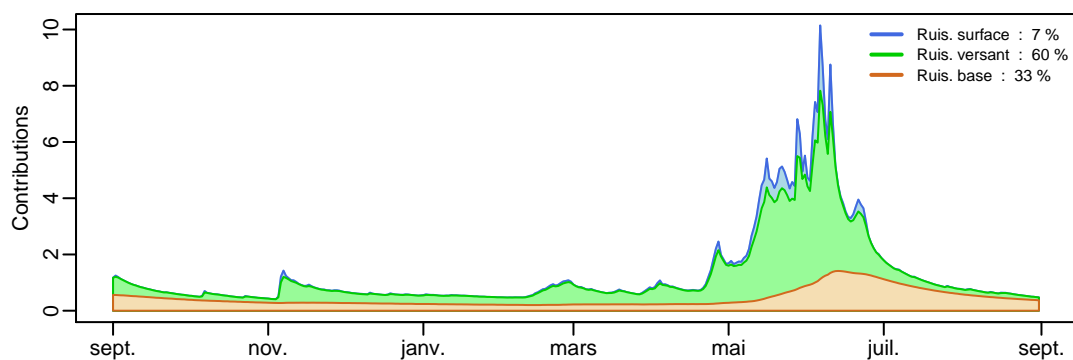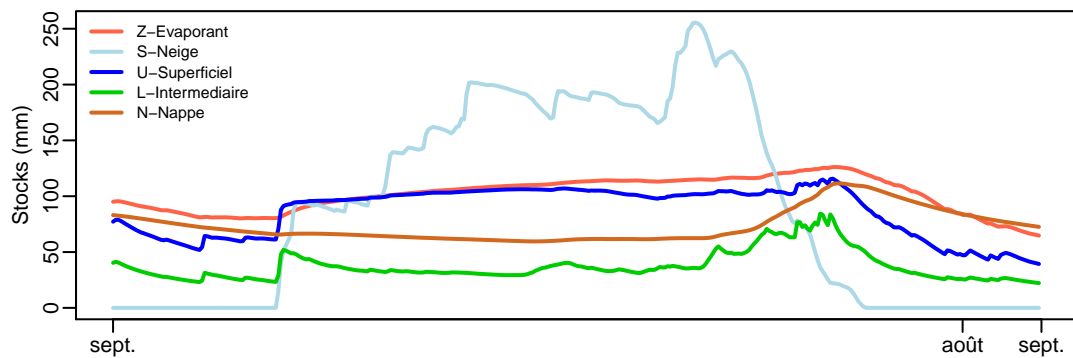

# q4159 (544.16 km<sup>2</sup>) – année 1998–1999

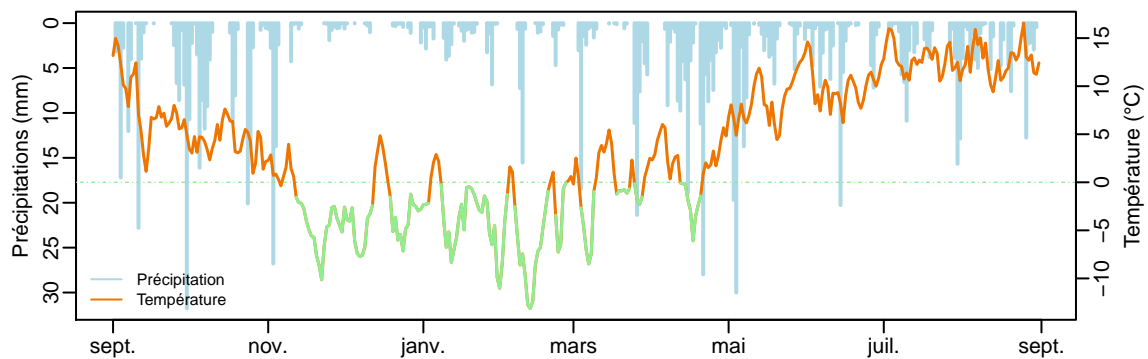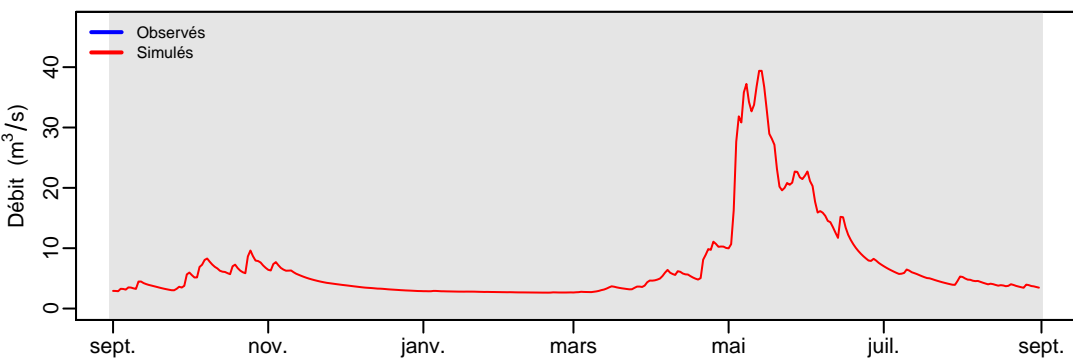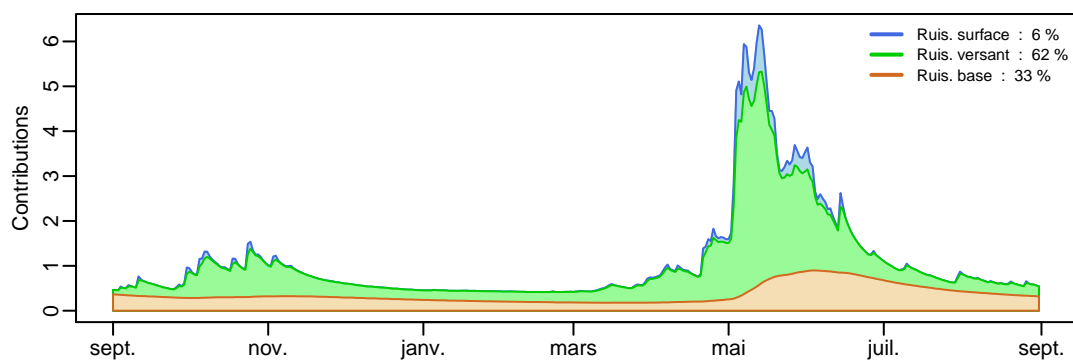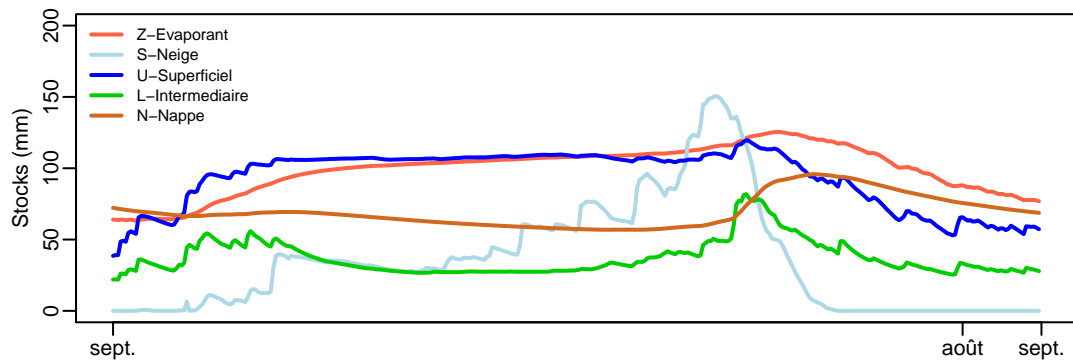



# q4159 (544.16 km<sup>2</sup>) – année 1999–2000

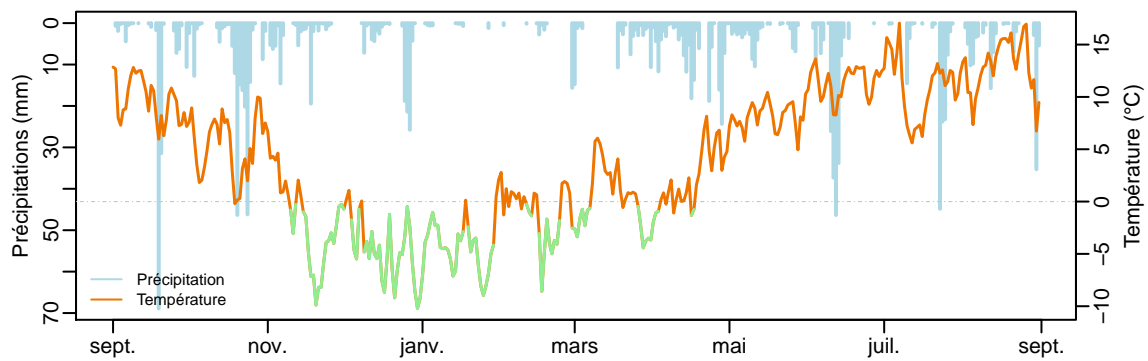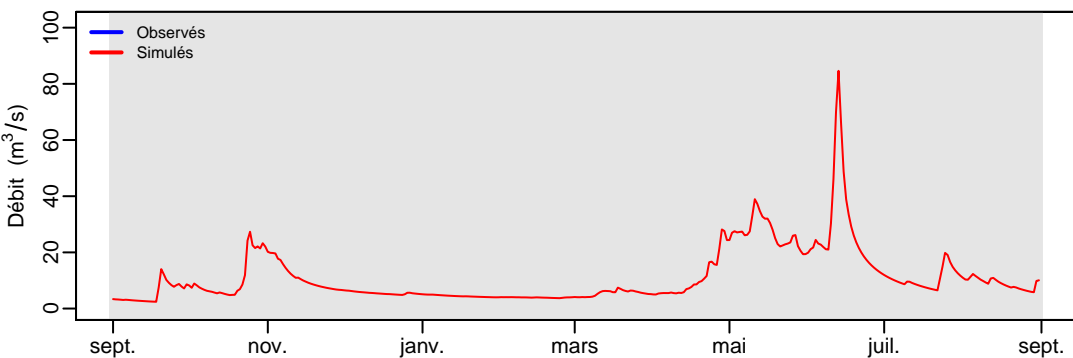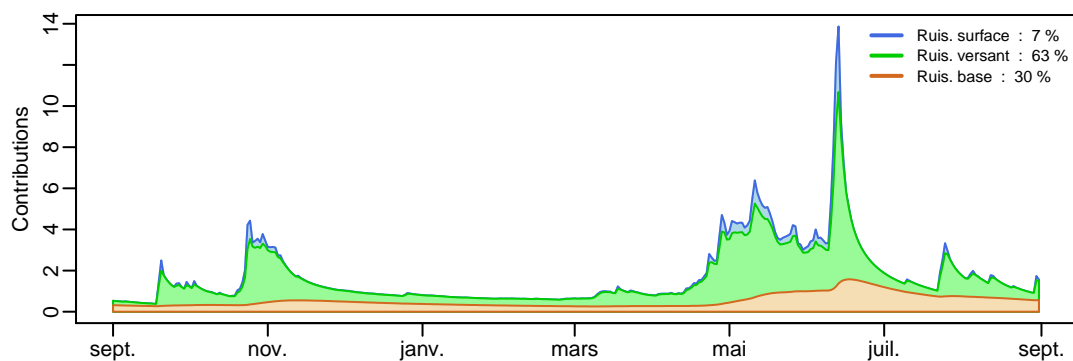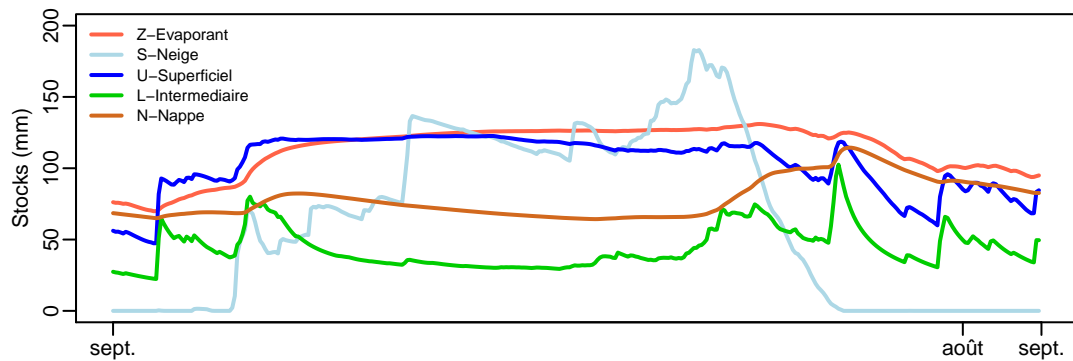

# q4159 (544.16 km²) – année 2000–2001

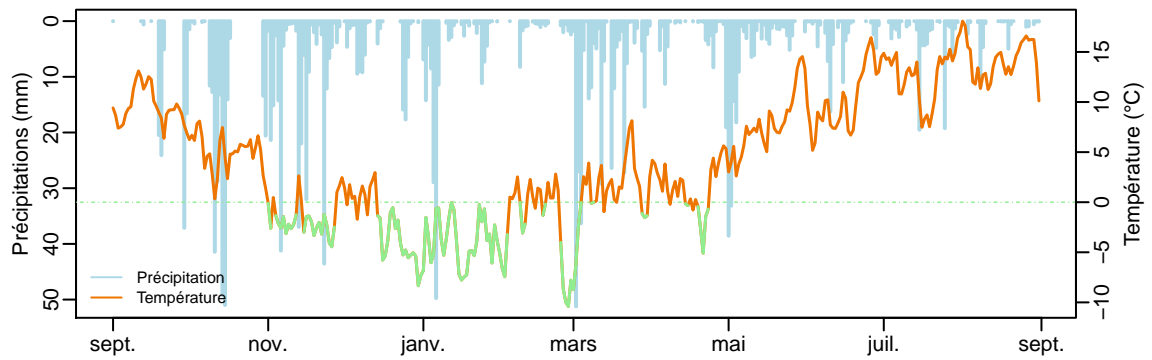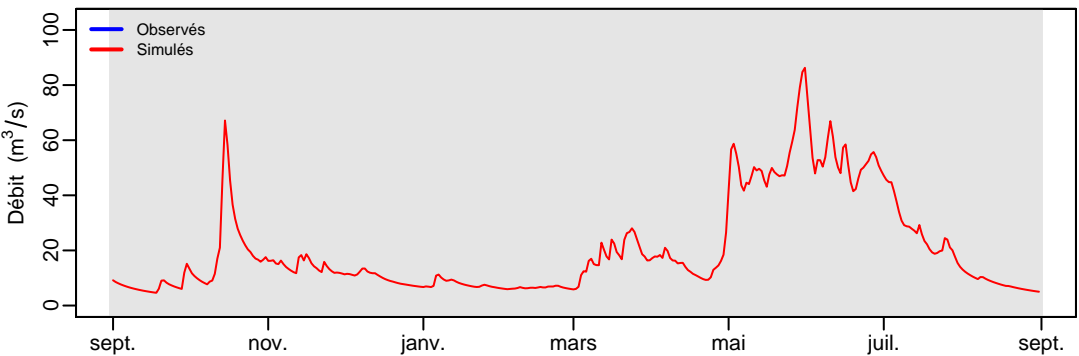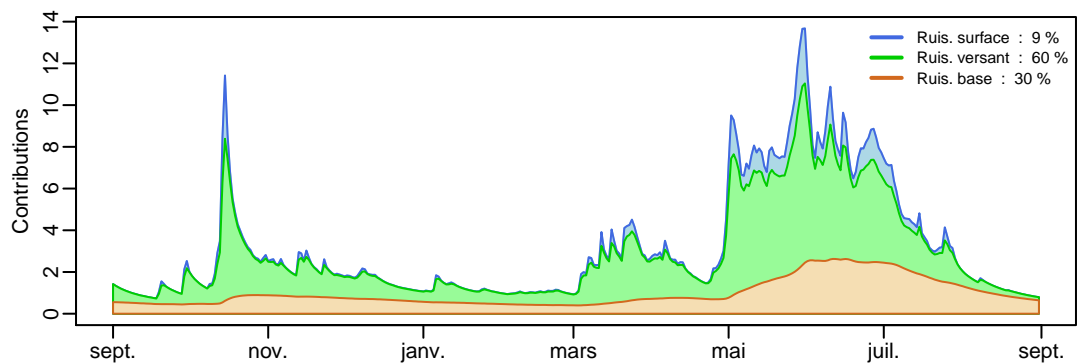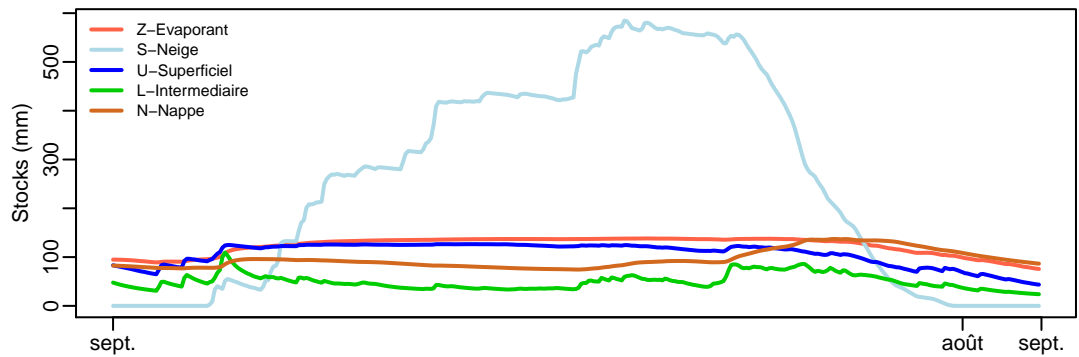

# q4159 (544.16 km<sup>2</sup>) – année 2001–2002

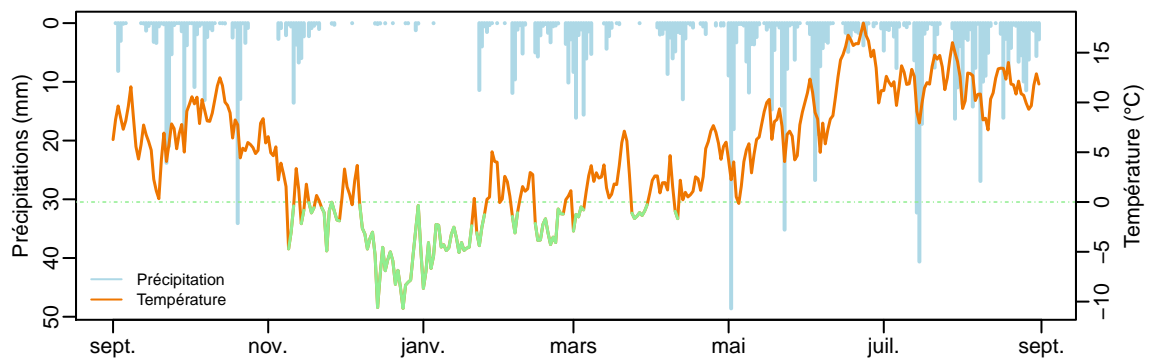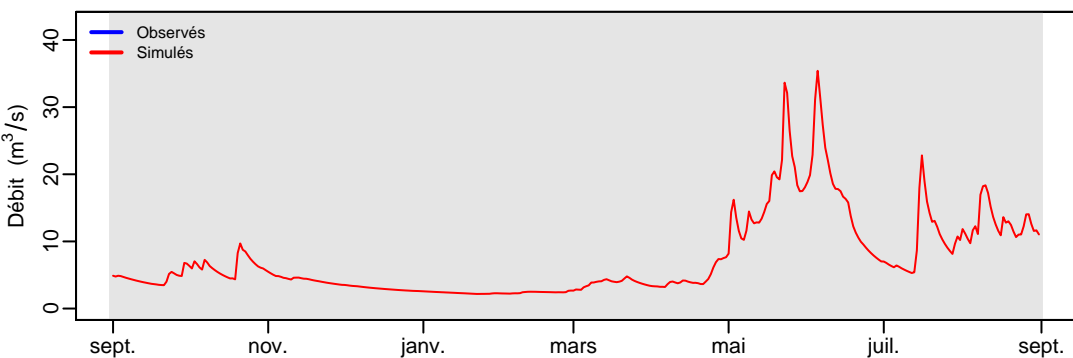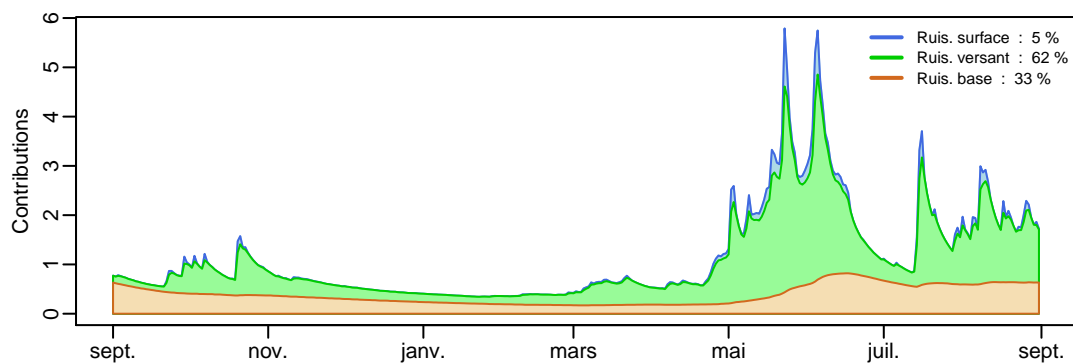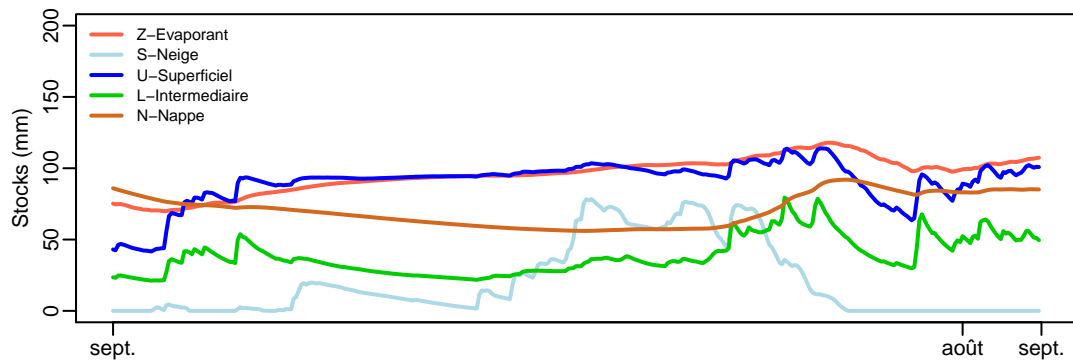

# q4159 (544.16 km²) – année 2002–2003

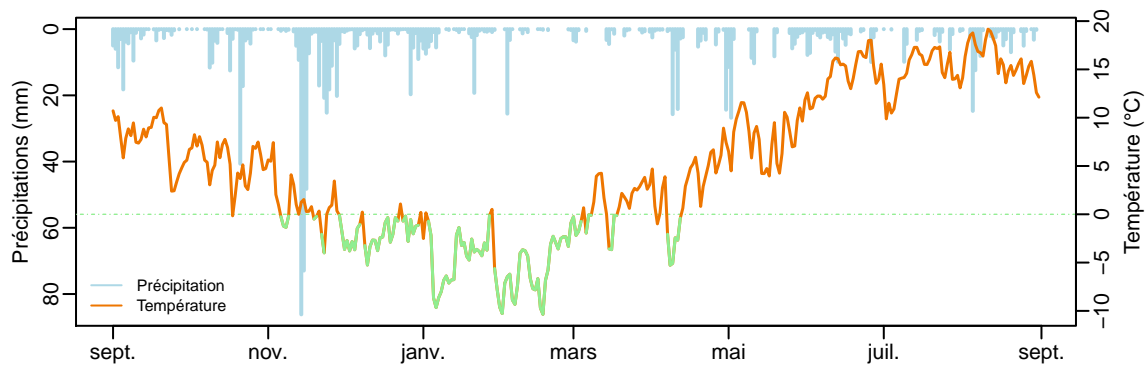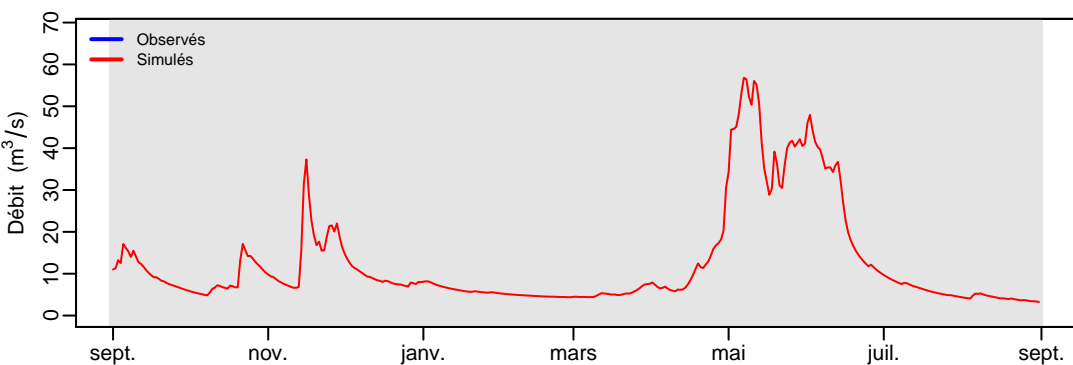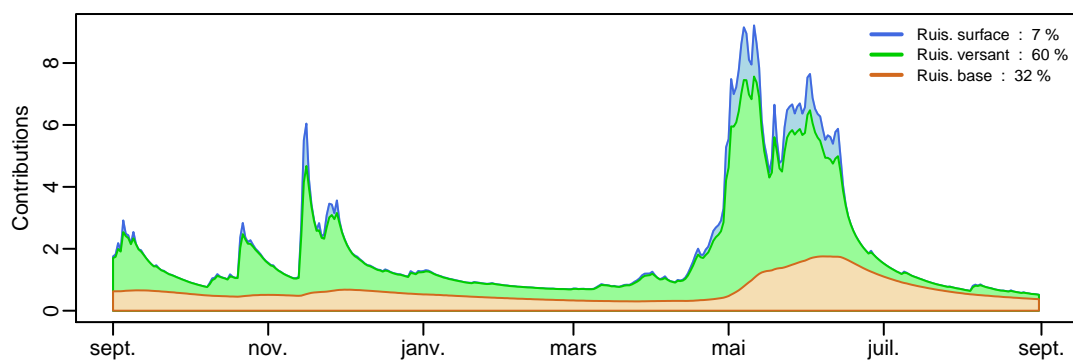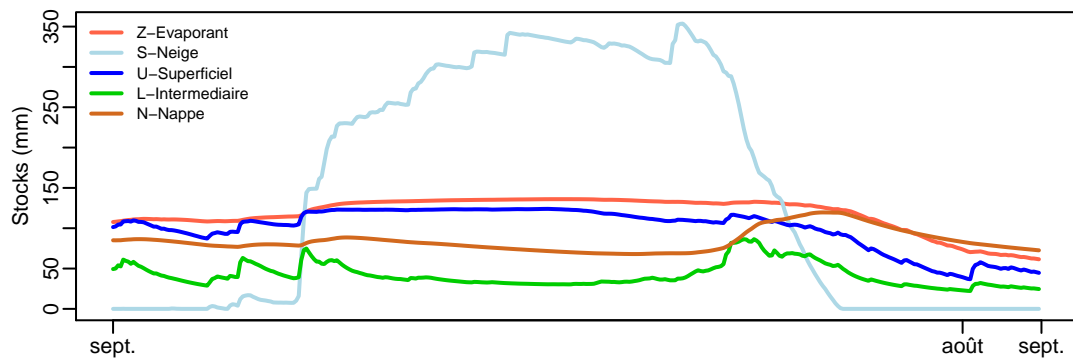

# q4159 (544.16 km<sup>2</sup>) – année 2003–2004

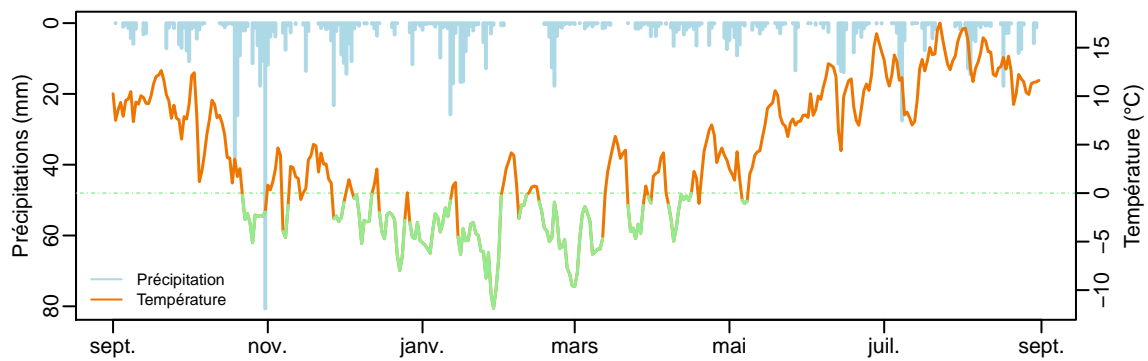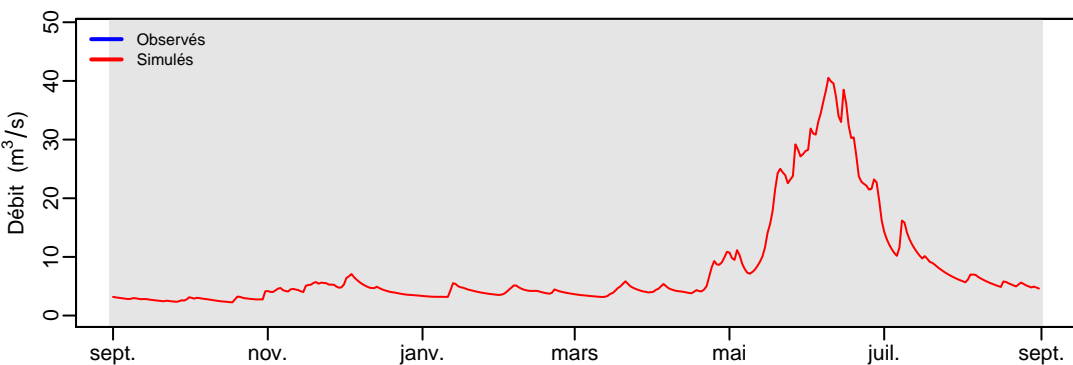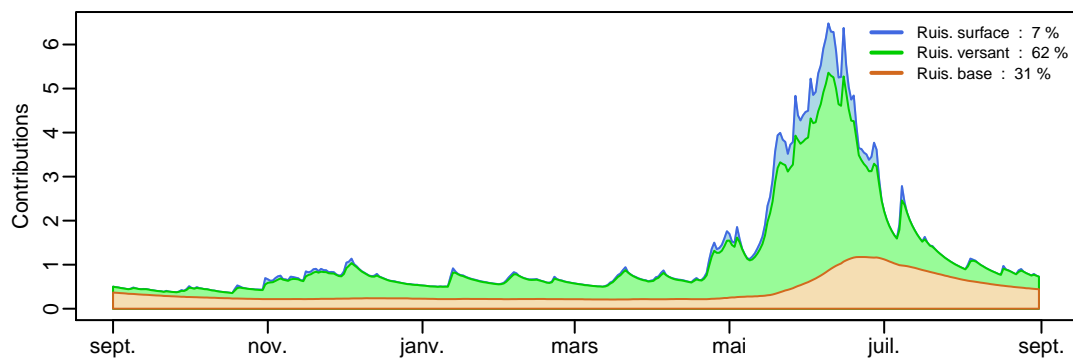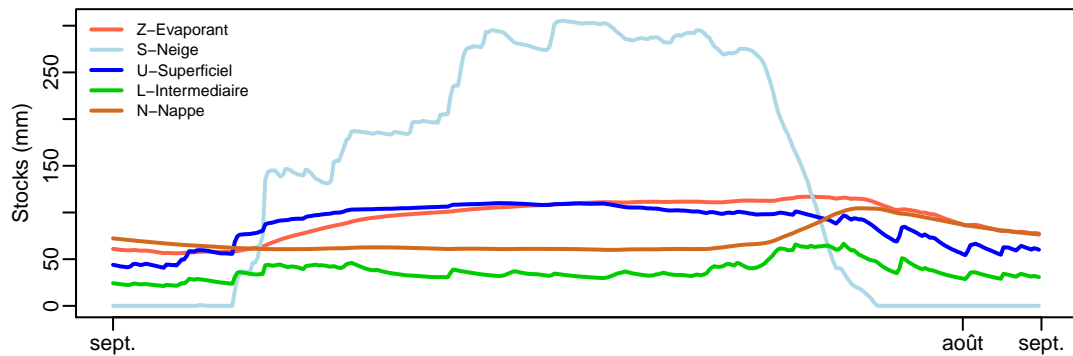

# q4159 (544.16 km²) – année 2004–2005

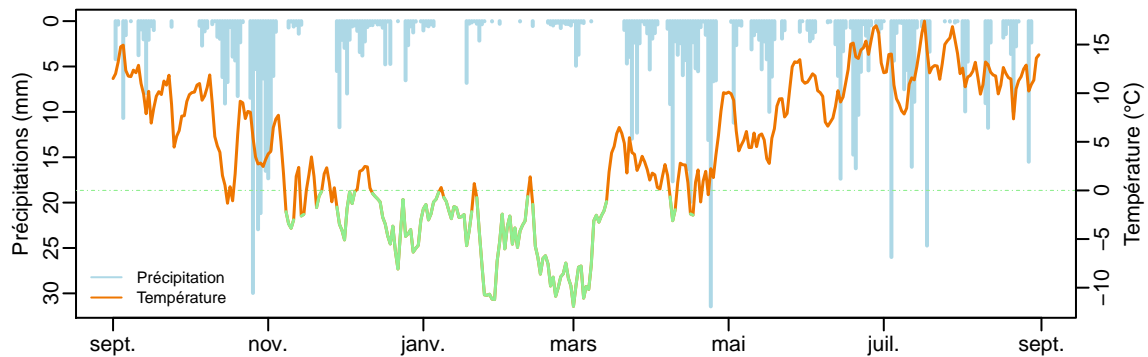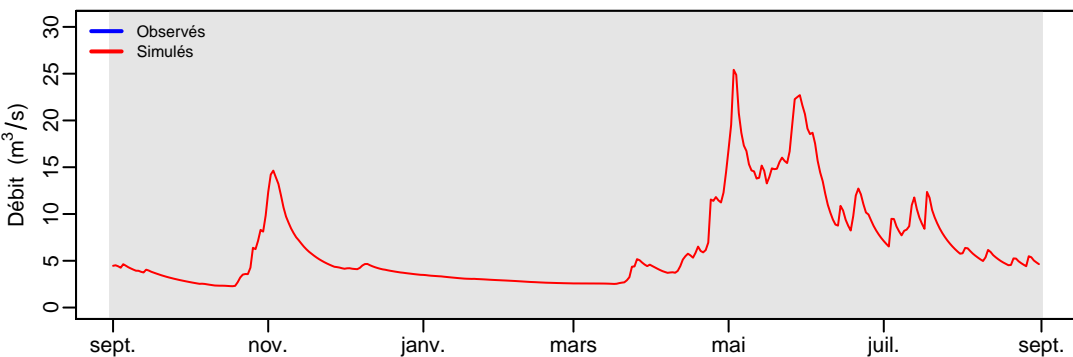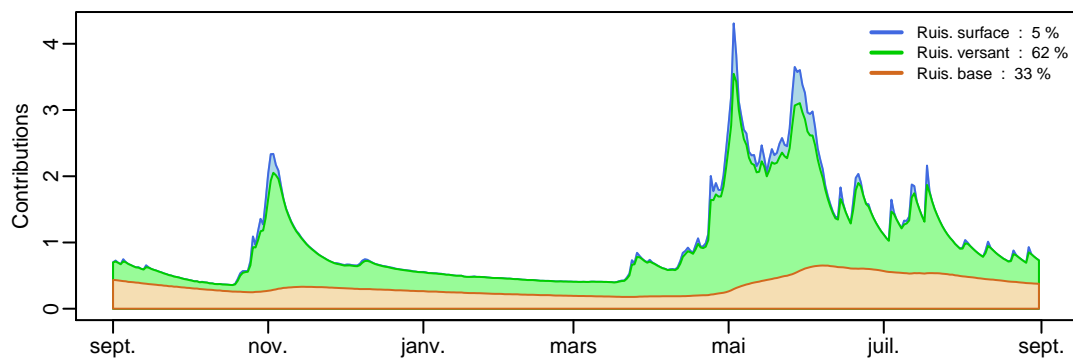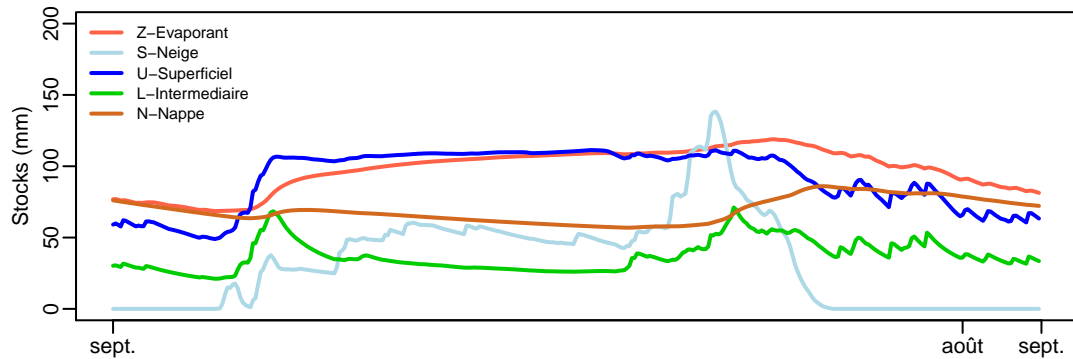

# q4159 (544.16 km²) – année 2005–2006

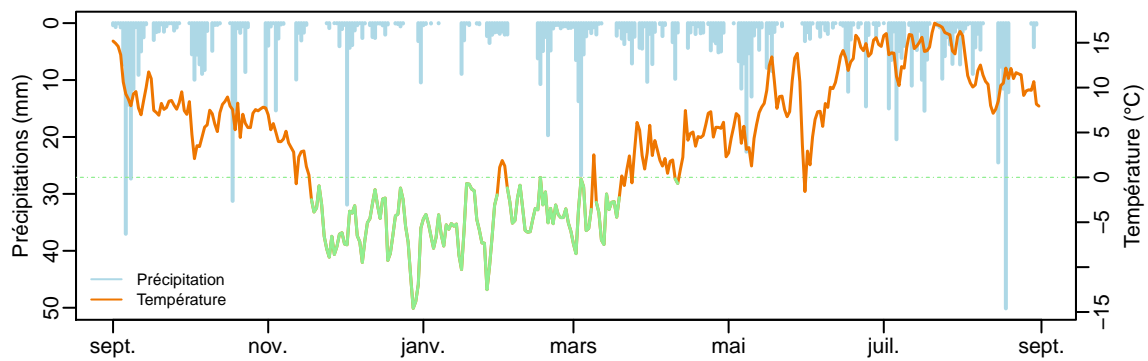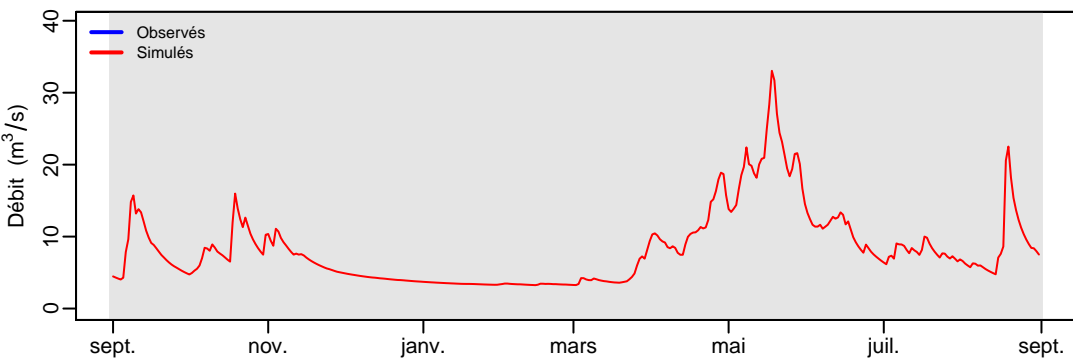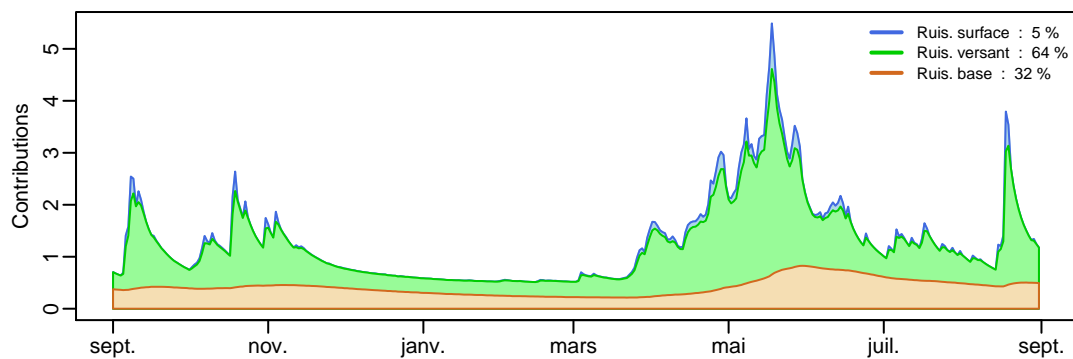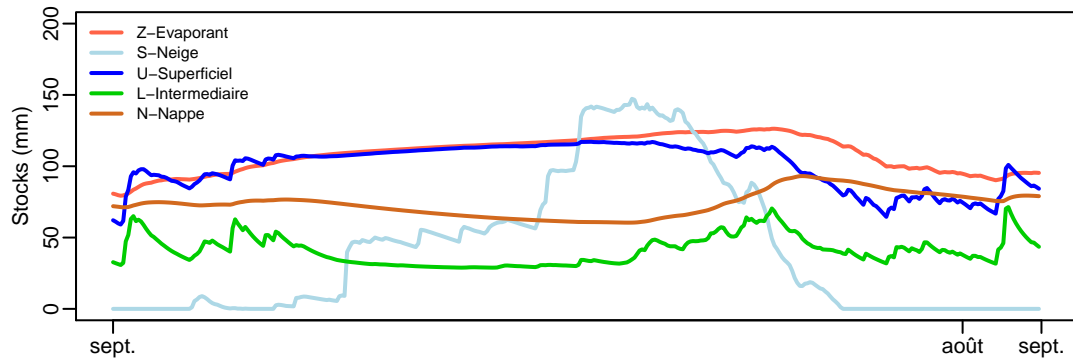

# q4159 (544.16 km<sup>2</sup>) – année 2006–2007

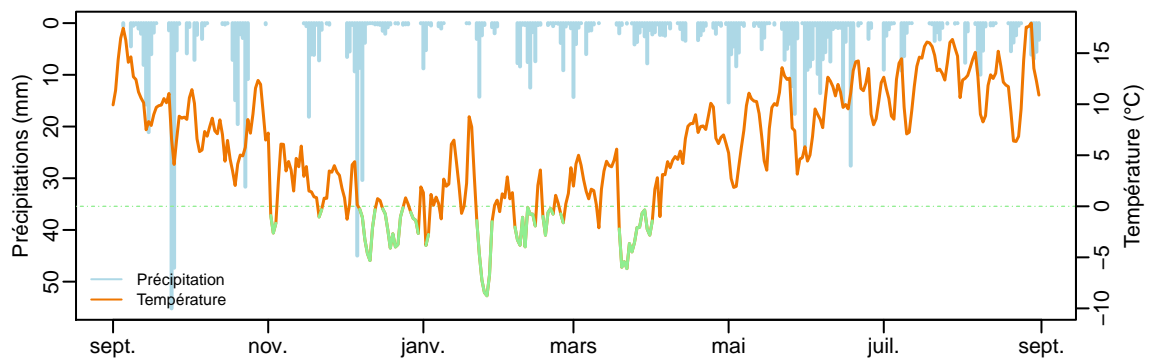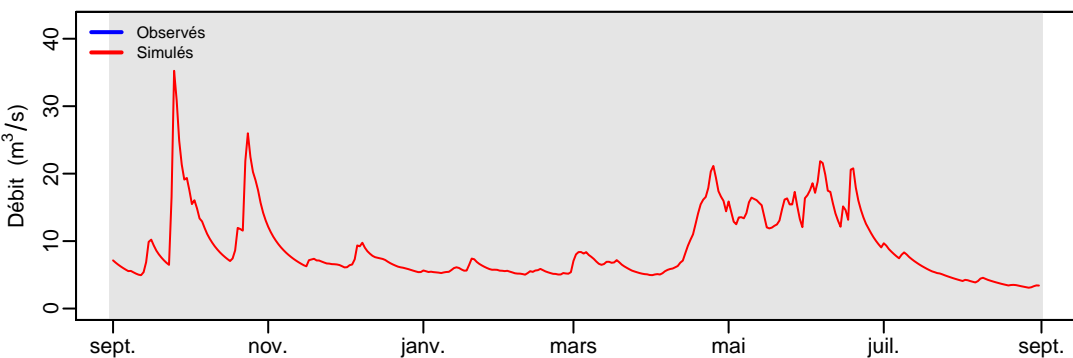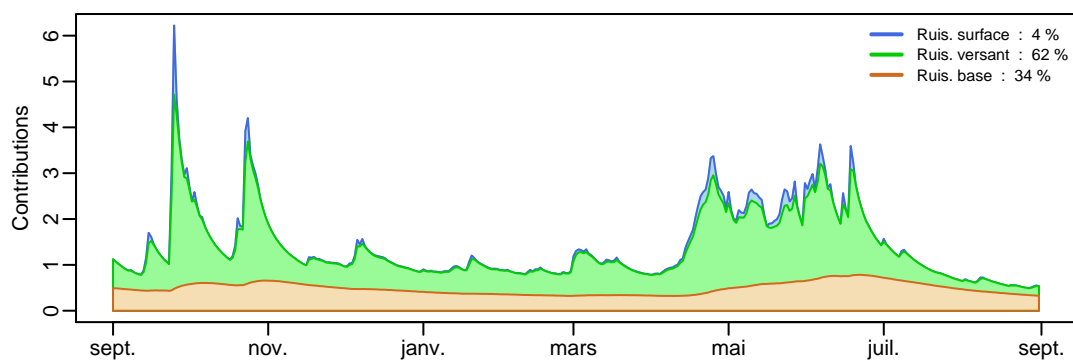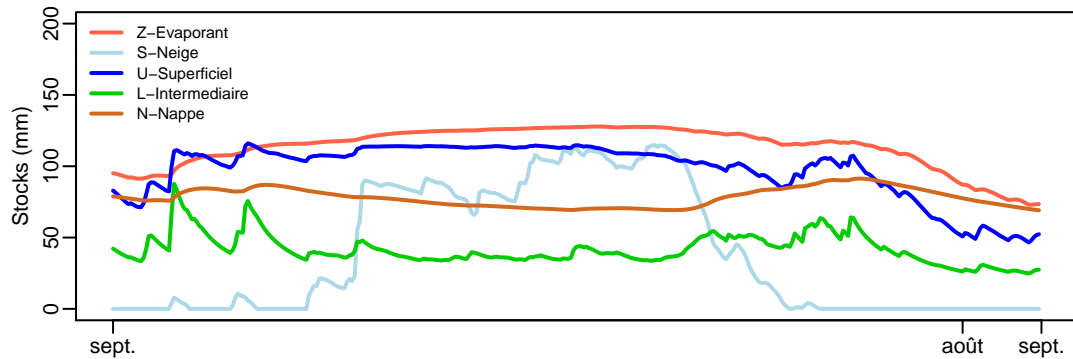



# q4159 (544.16 km<sup>2</sup>) – année 2007–2008

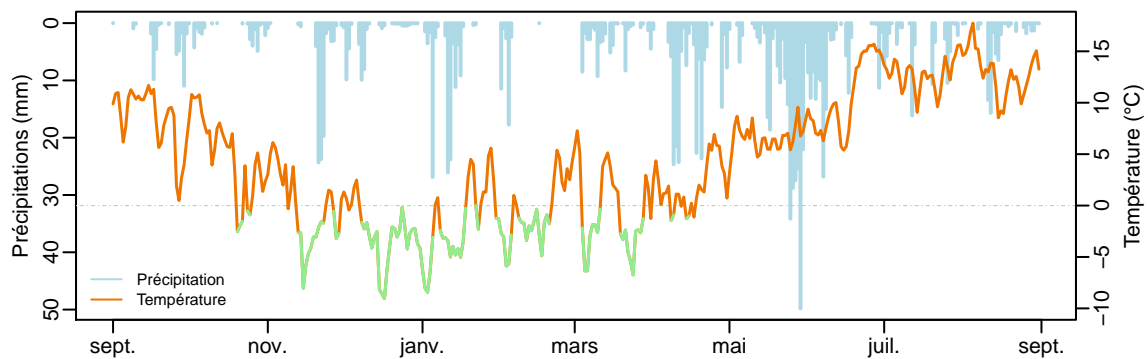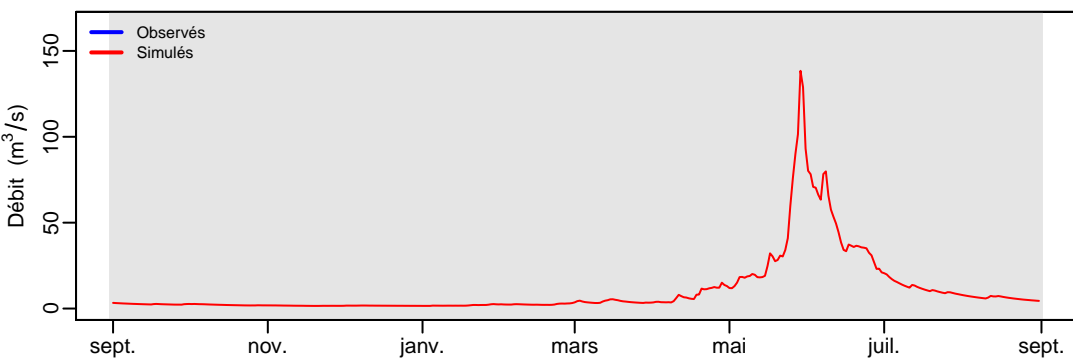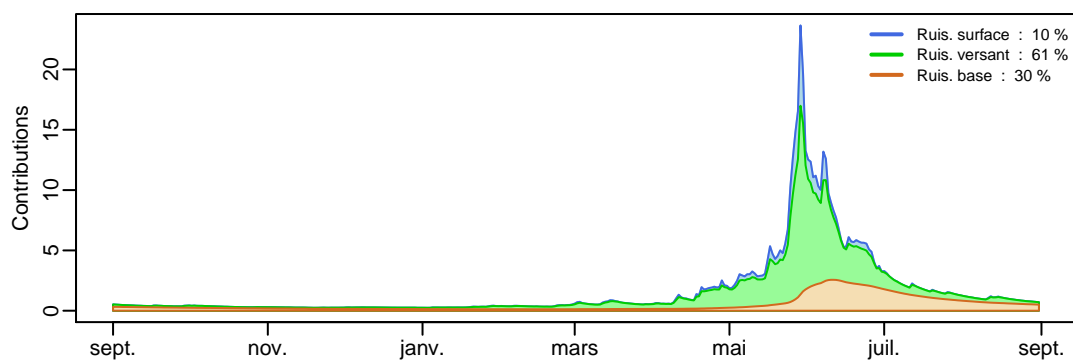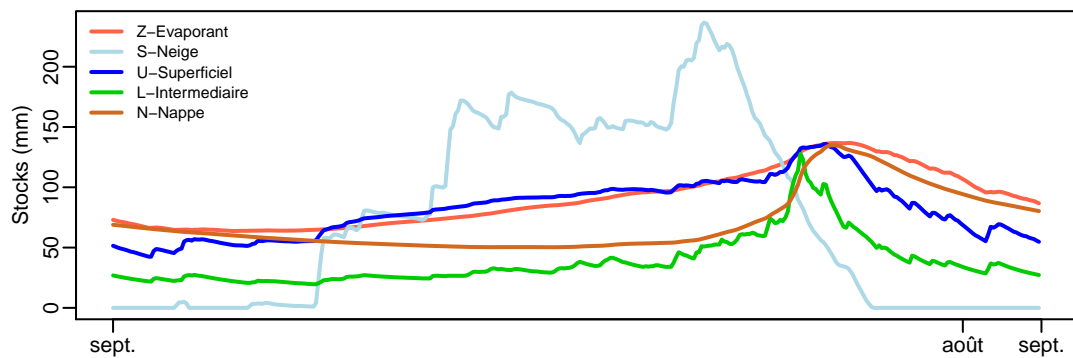

# q4159 (544.16 km<sup>2</sup>) – année 2008–2009

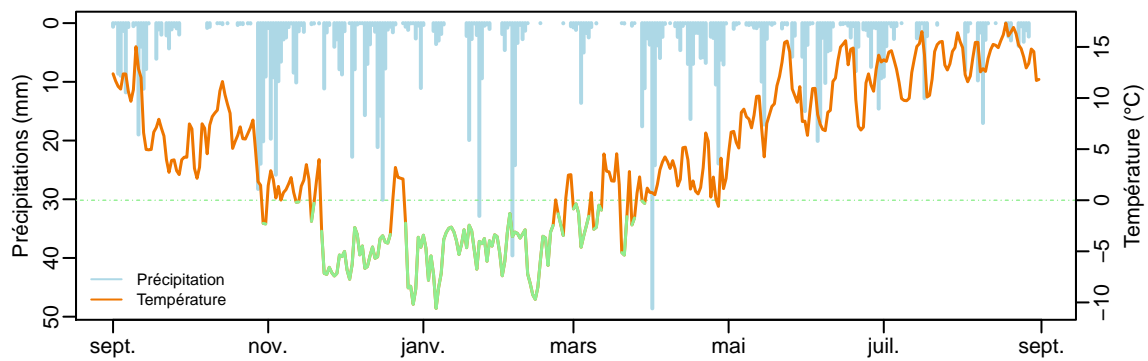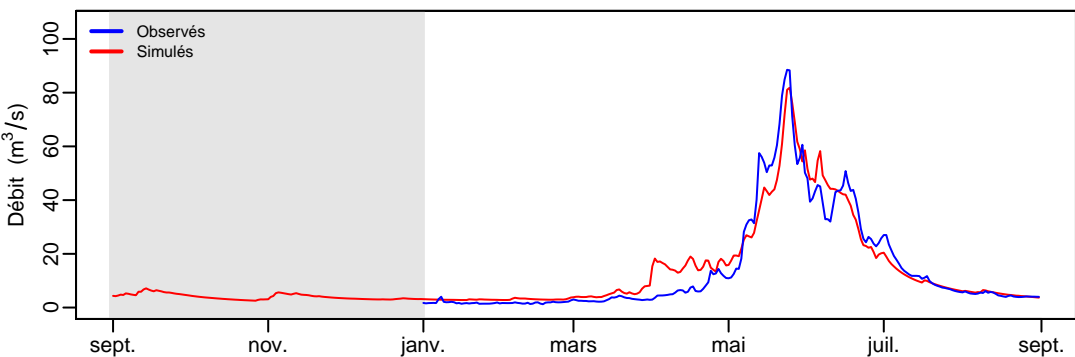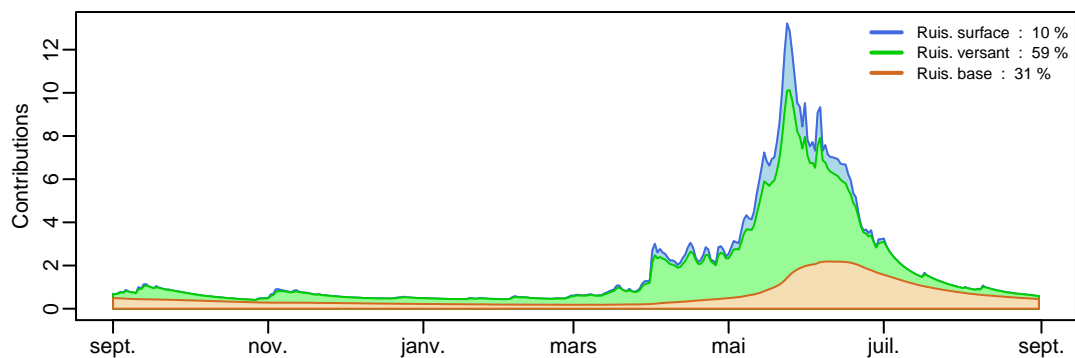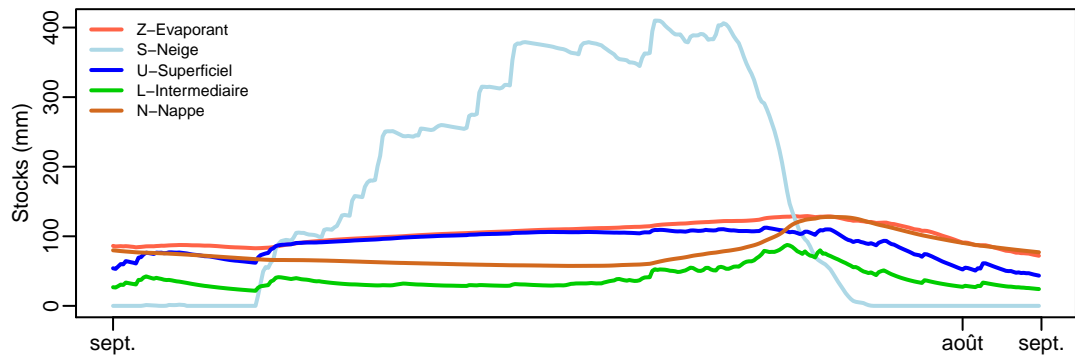

# q4159 (544.16 km²) – année 2009–2010

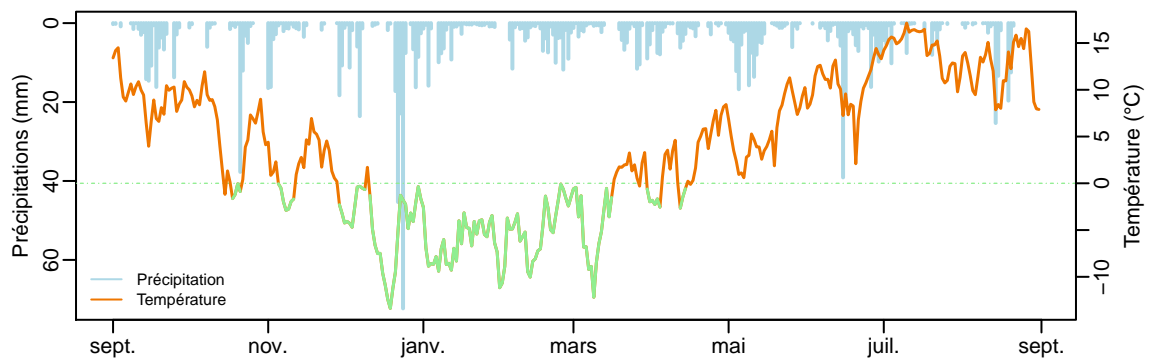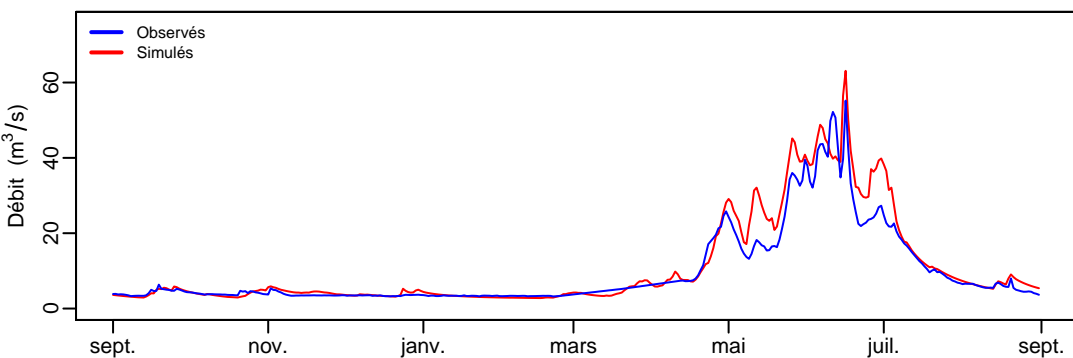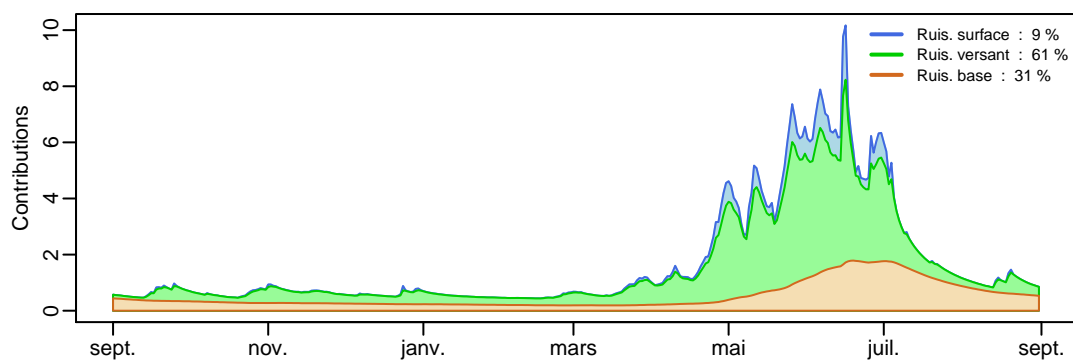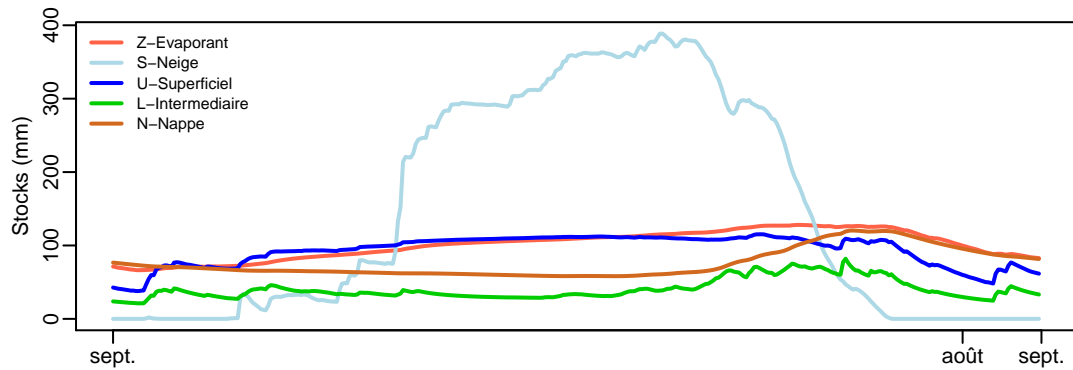

# q4159 (544.16 km<sup>2</sup>) – année 2010–2011

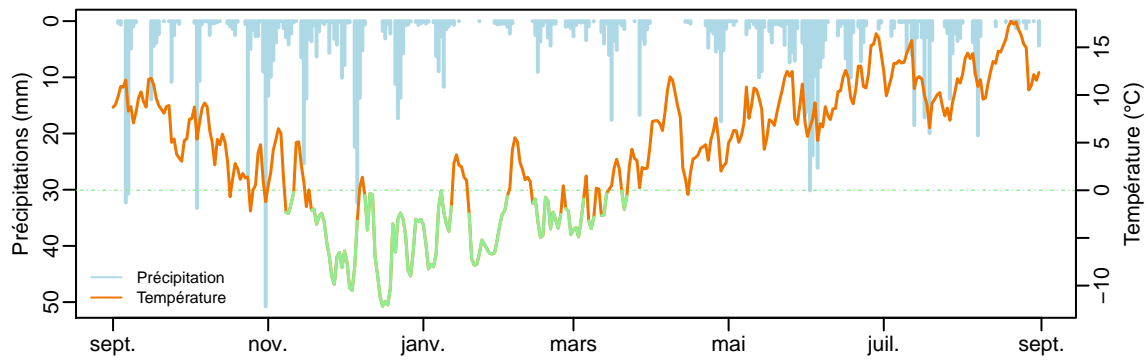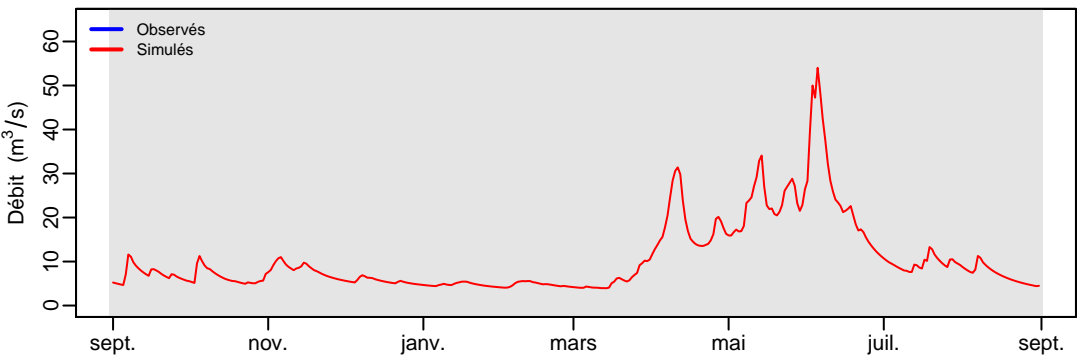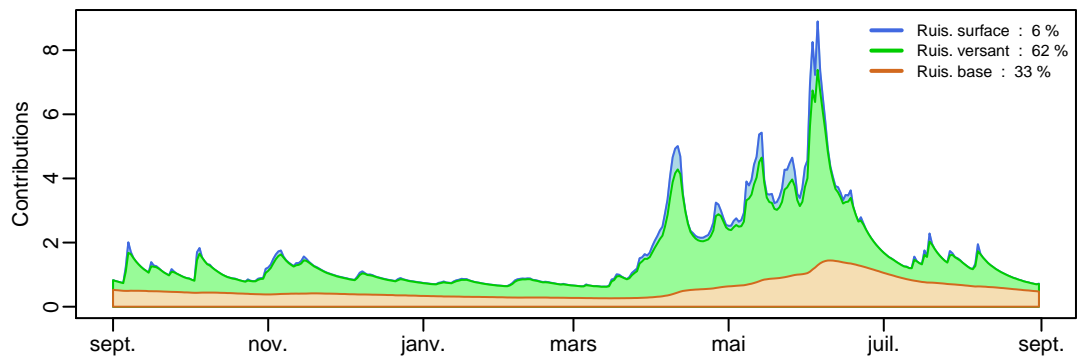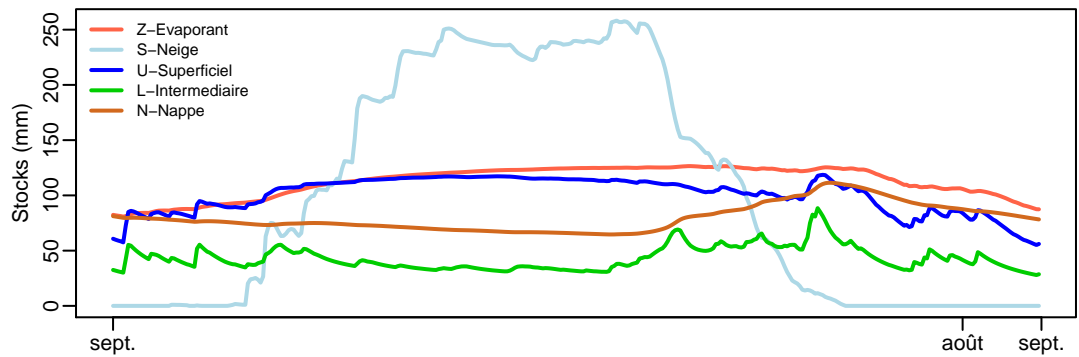

# q4159 (544.16 km²) – année 2011–2012

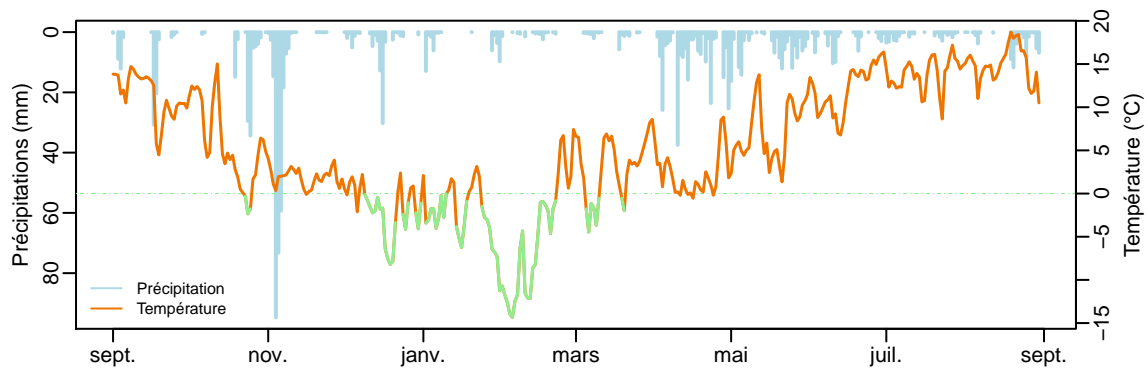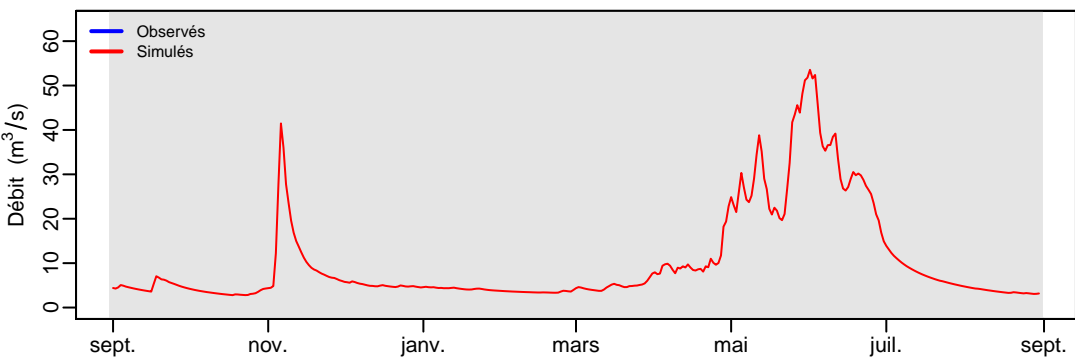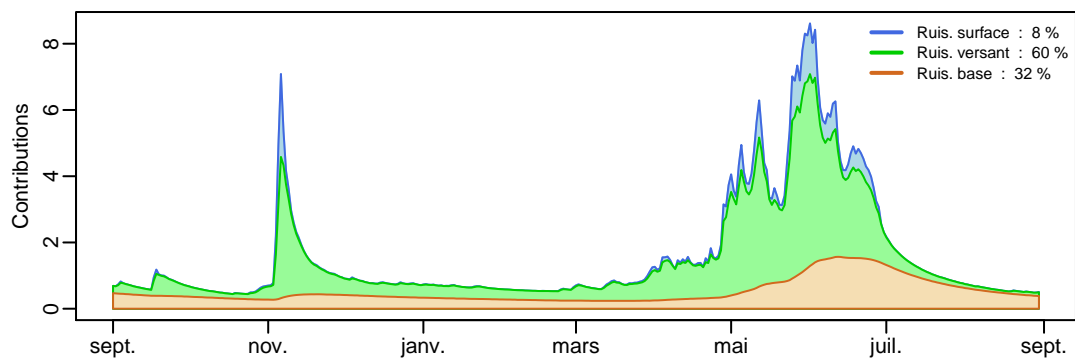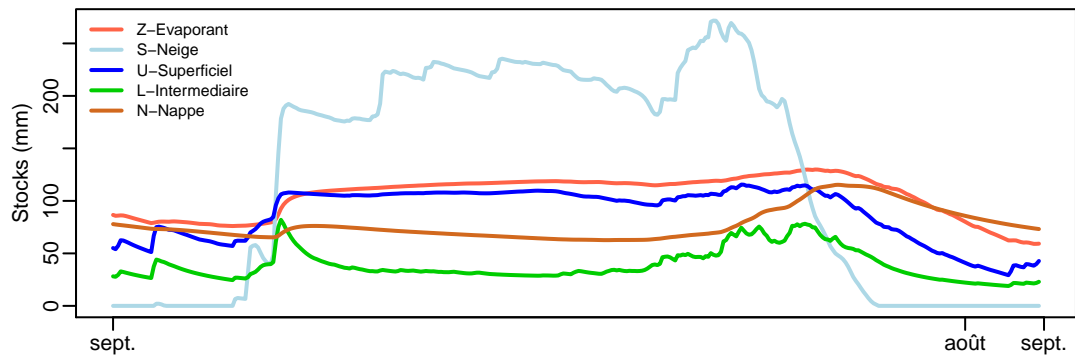

# quinsh (1562.0501 km<sup>2</sup>) – année 1981–1982

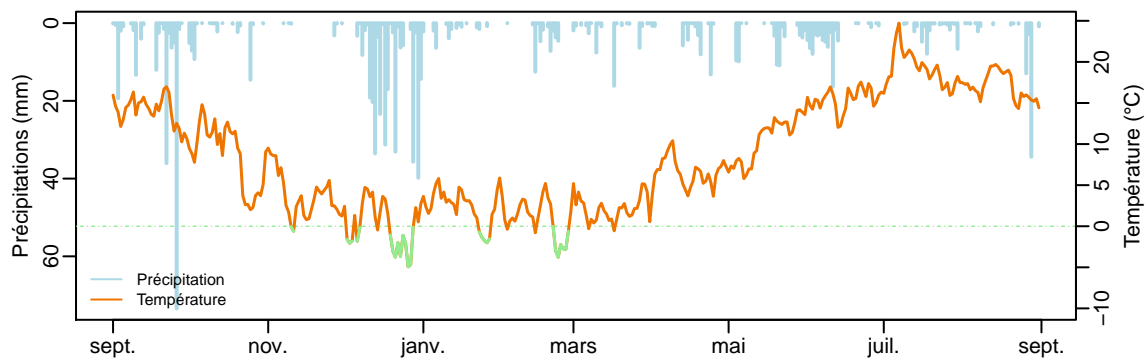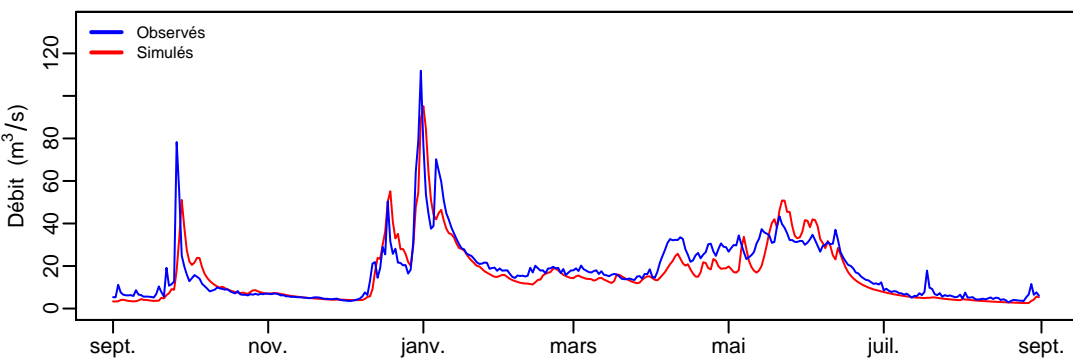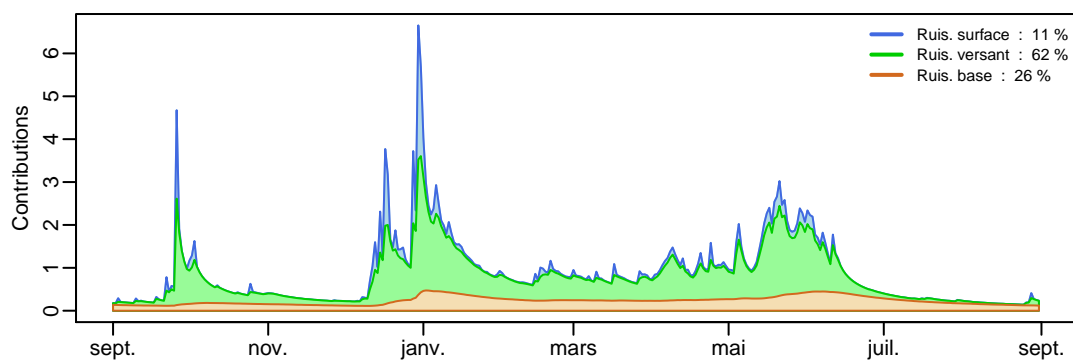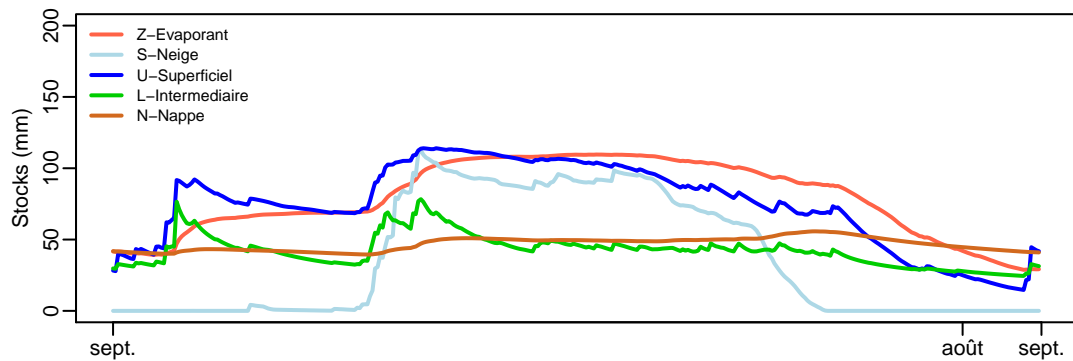

# quinsh (1562.0501 km<sup>2</sup>) – année 1982–1983

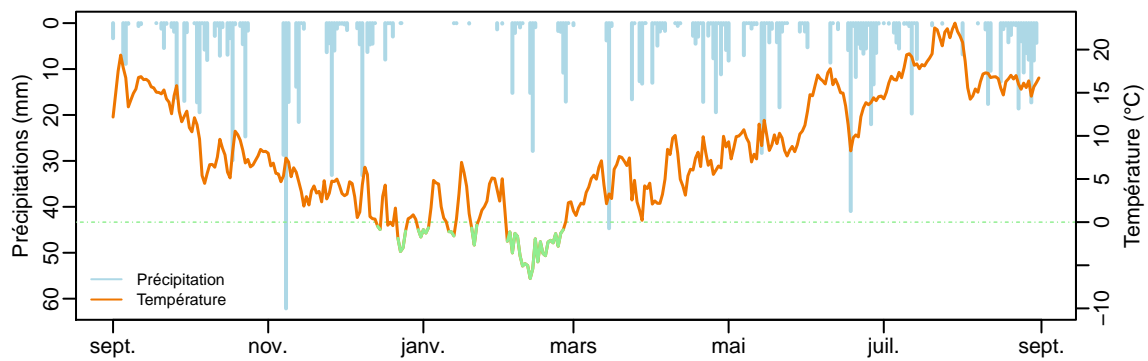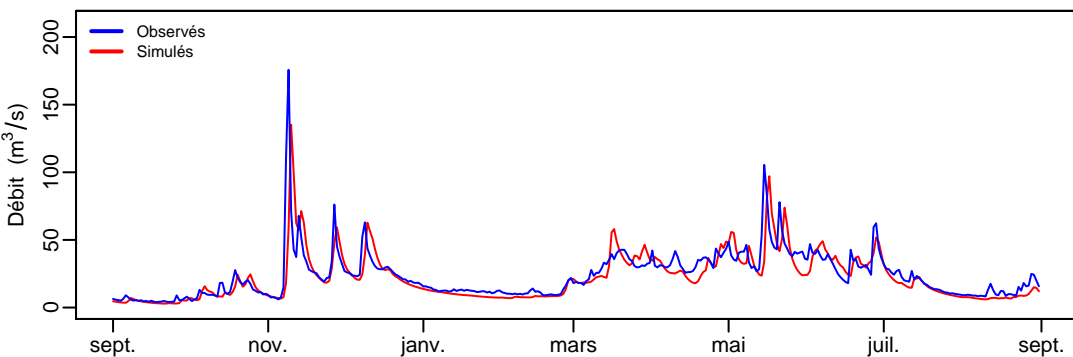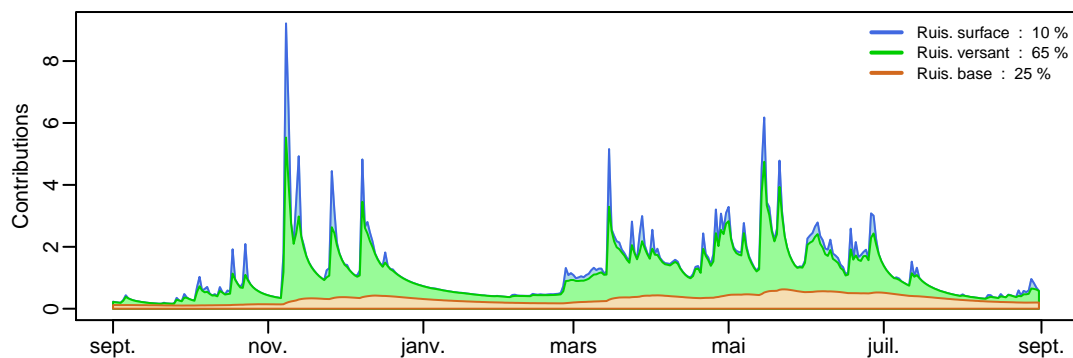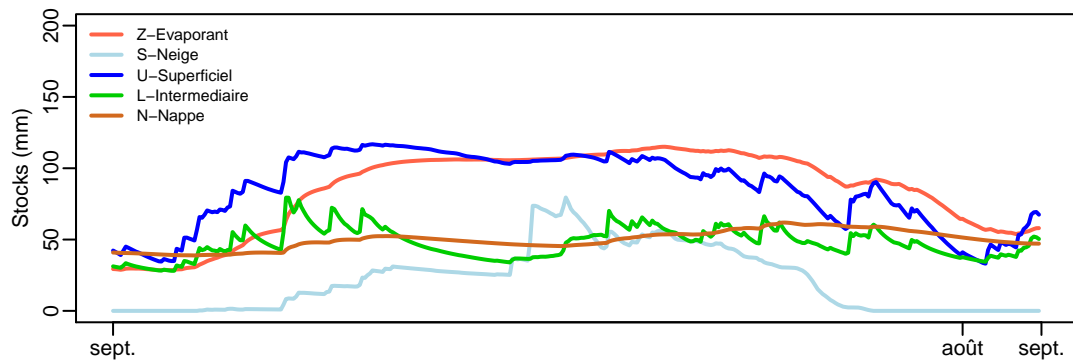

# quinsh (1562.0501 km<sup>2</sup>) – année 1983–1984

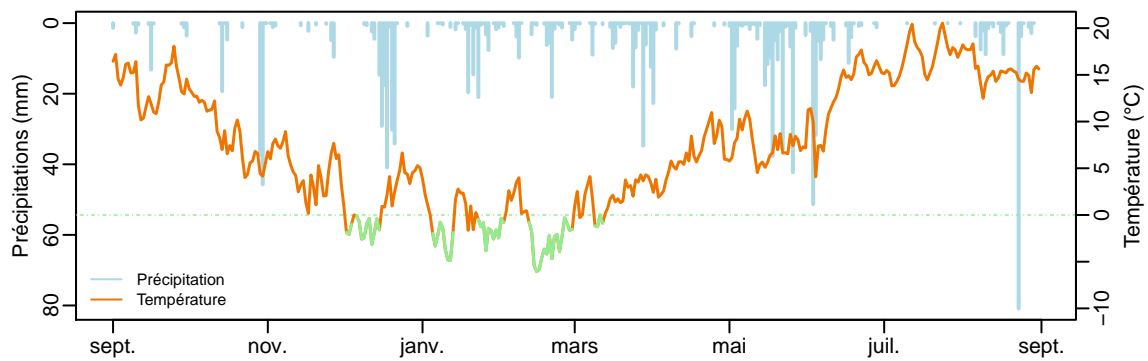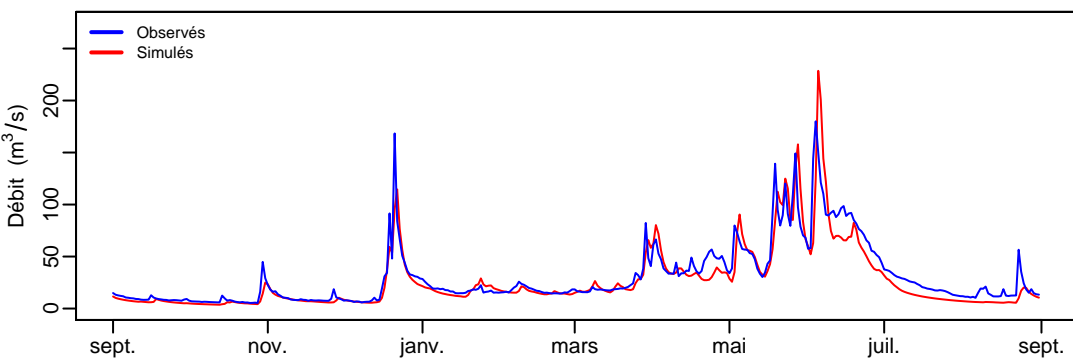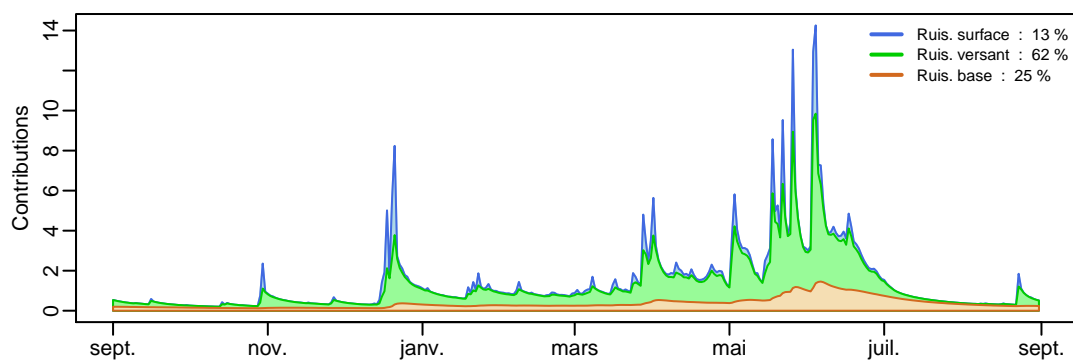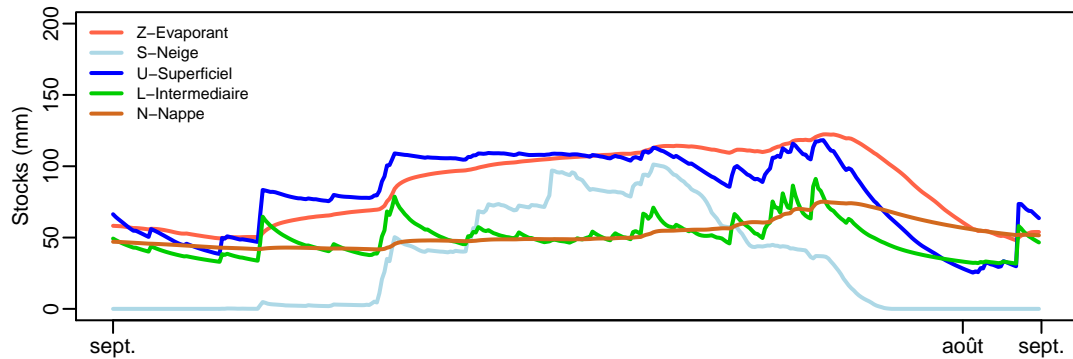



# quinsh (1562.0501 km<sup>2</sup>) – année 1984–1985

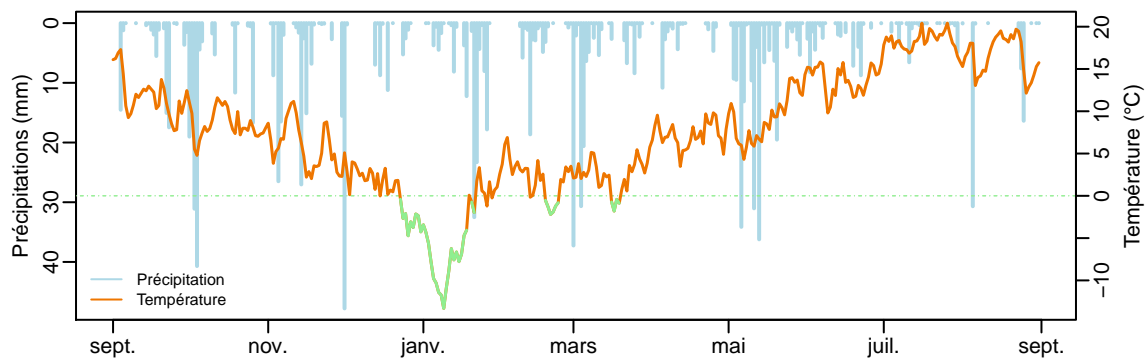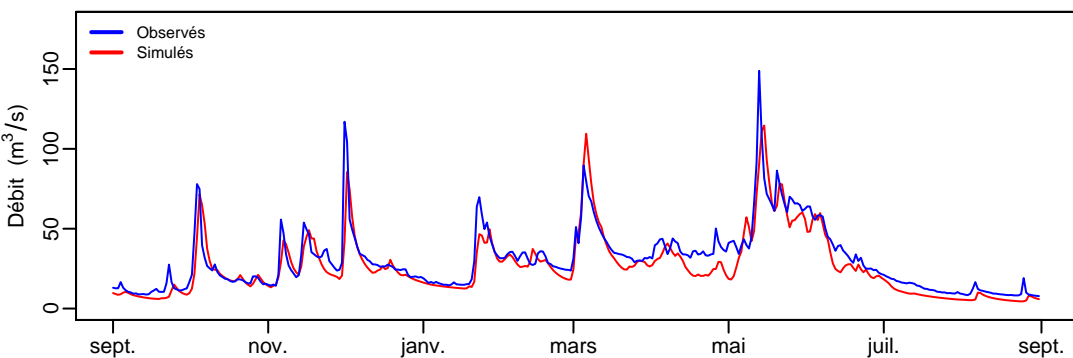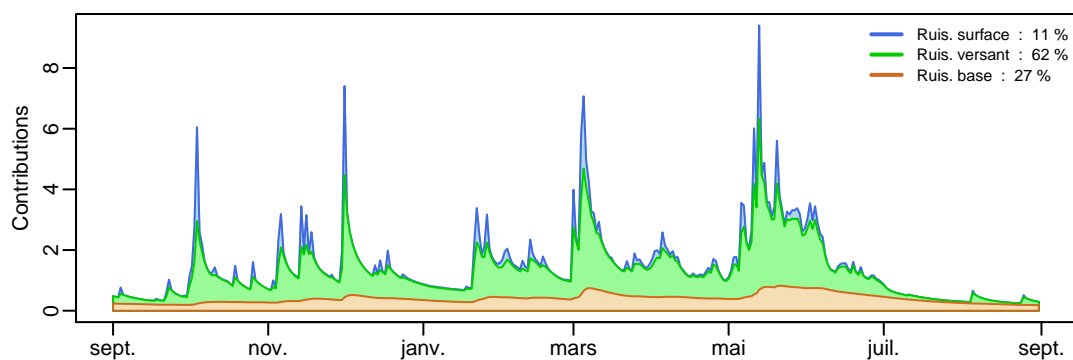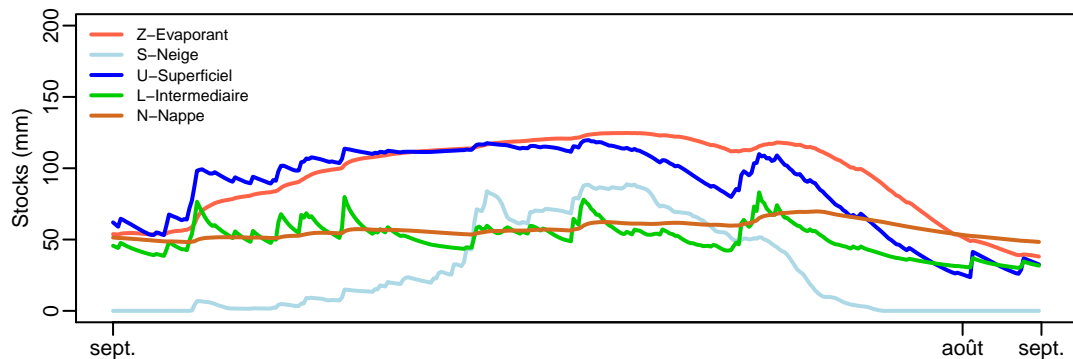

# quinsh (1562.0501 km<sup>2</sup>) – année 1985–1986

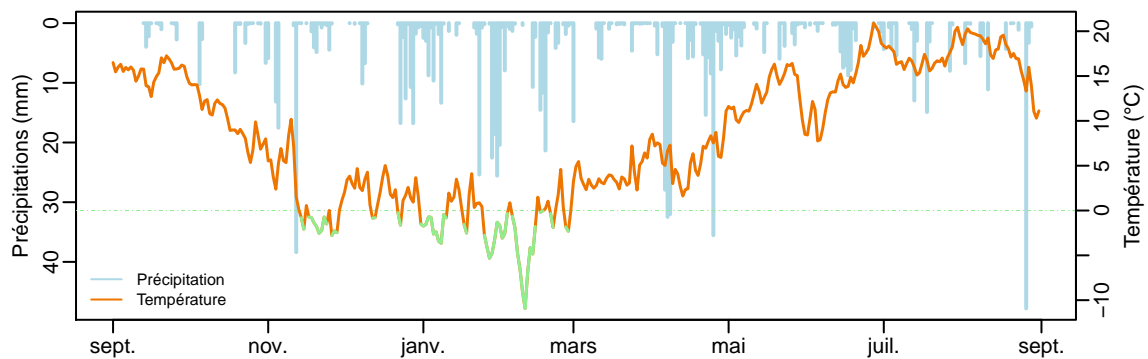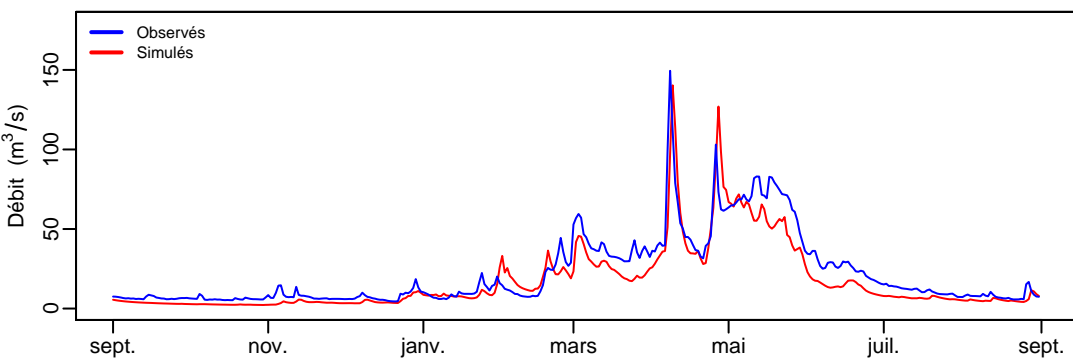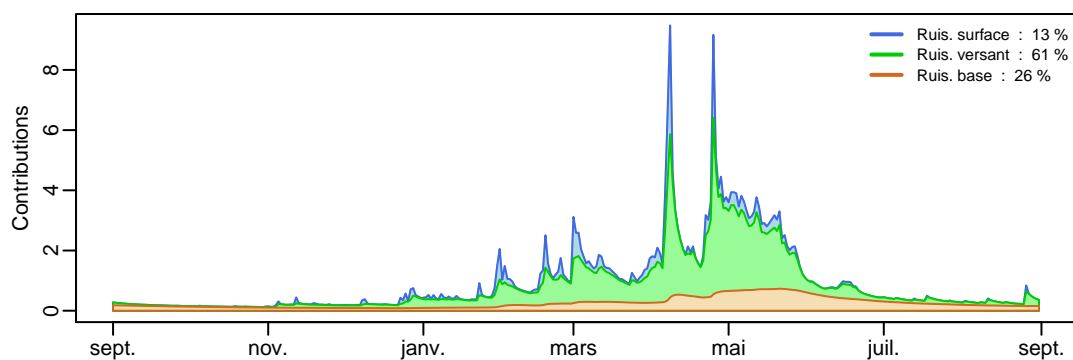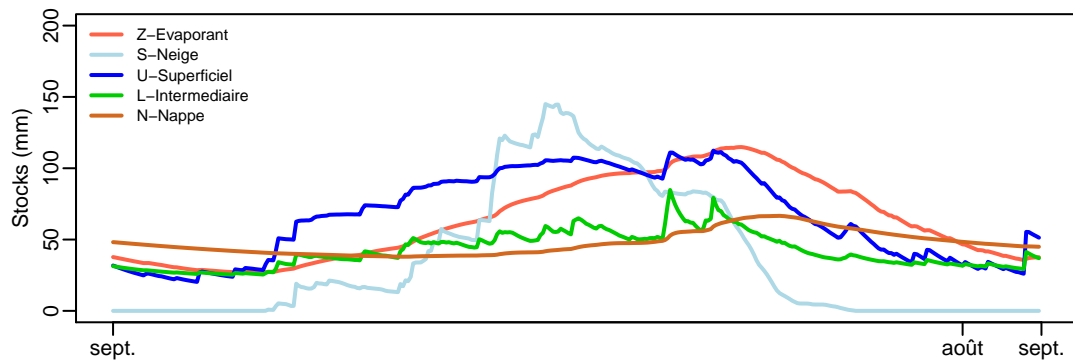

# quinsh (1562.0501 km²) – année 1986–1987

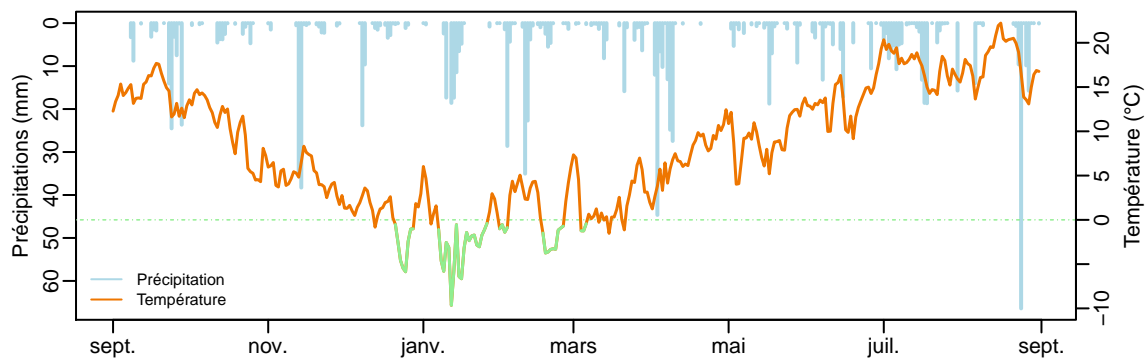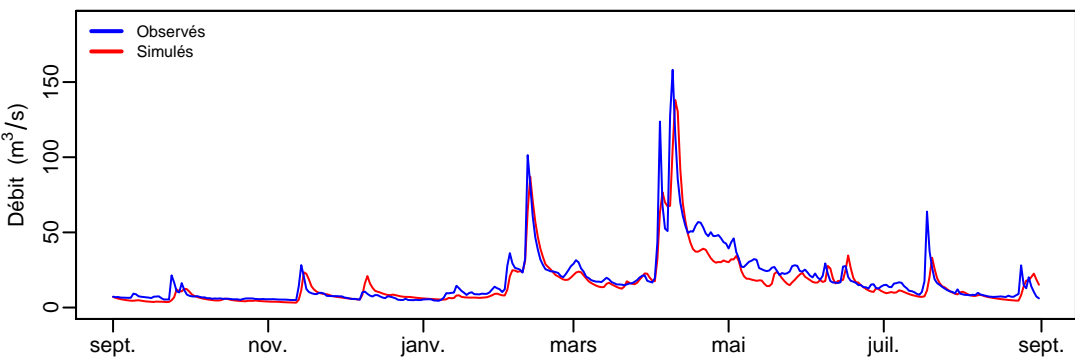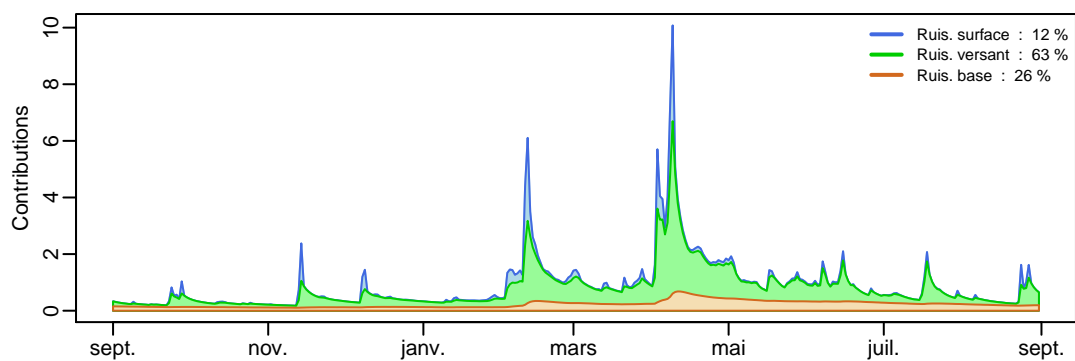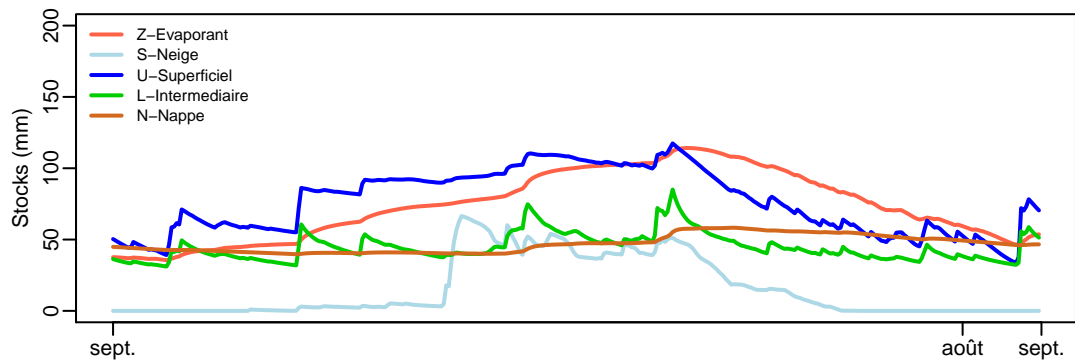

# quinsh (1562.0501 km²) – année 1987–1988

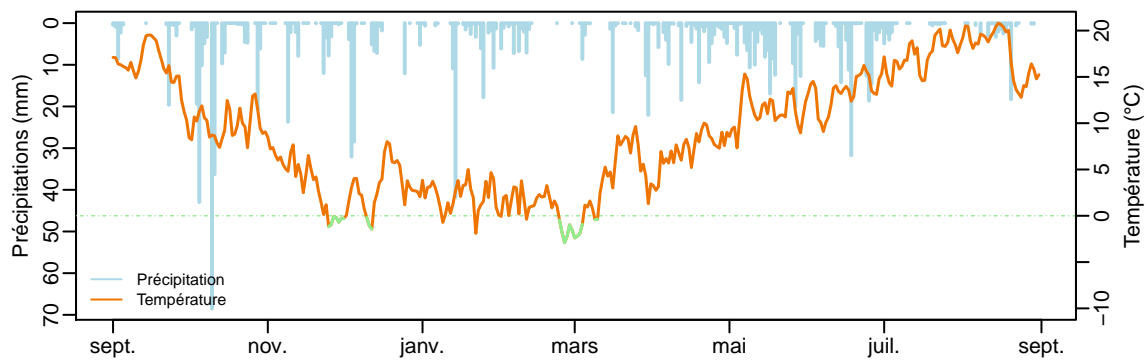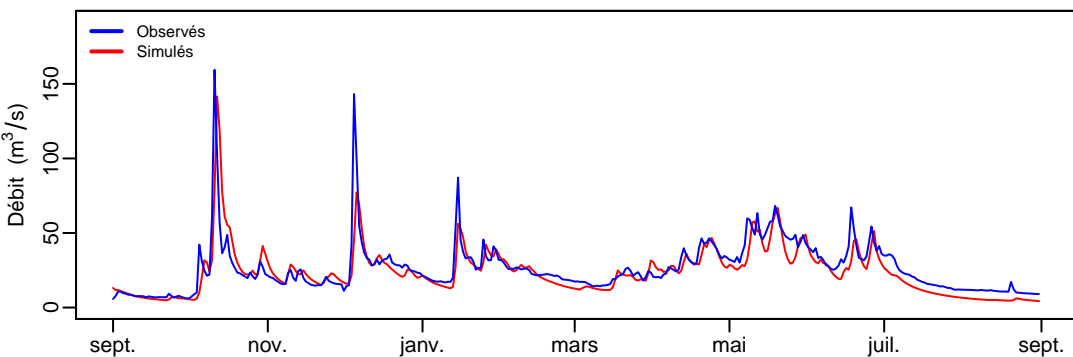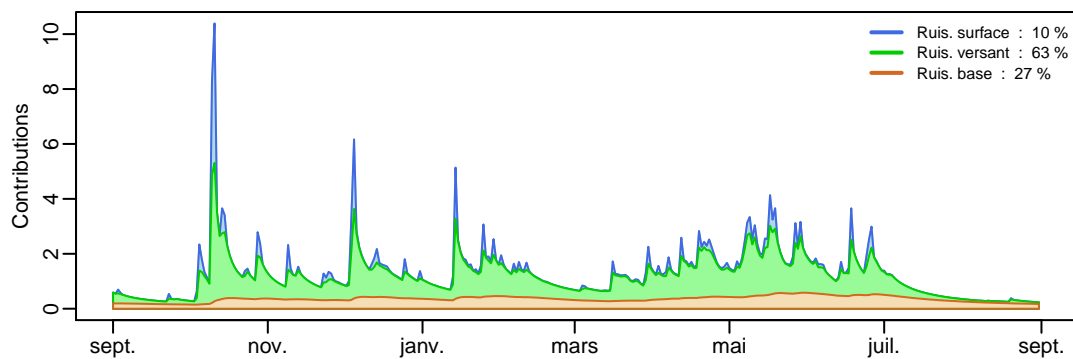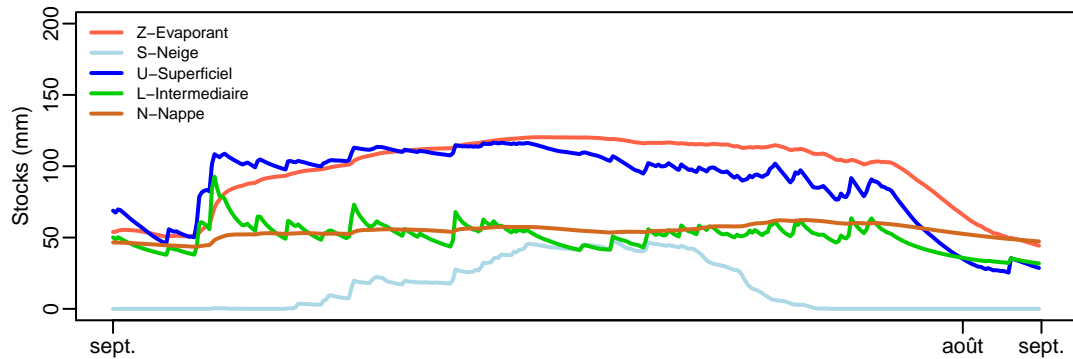

# quinsh (1562.0501 km<sup>2</sup>) – année 1988–1989

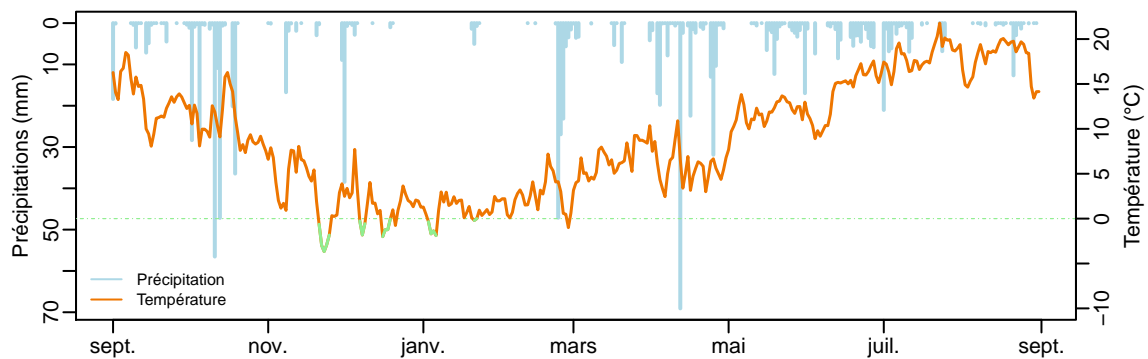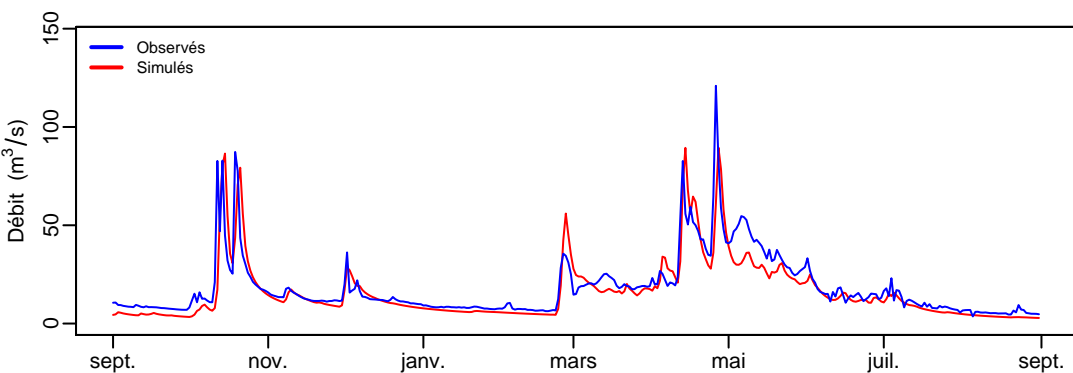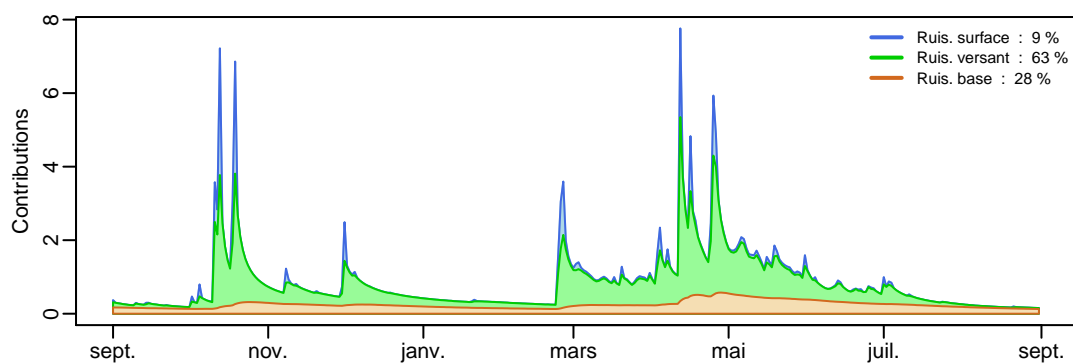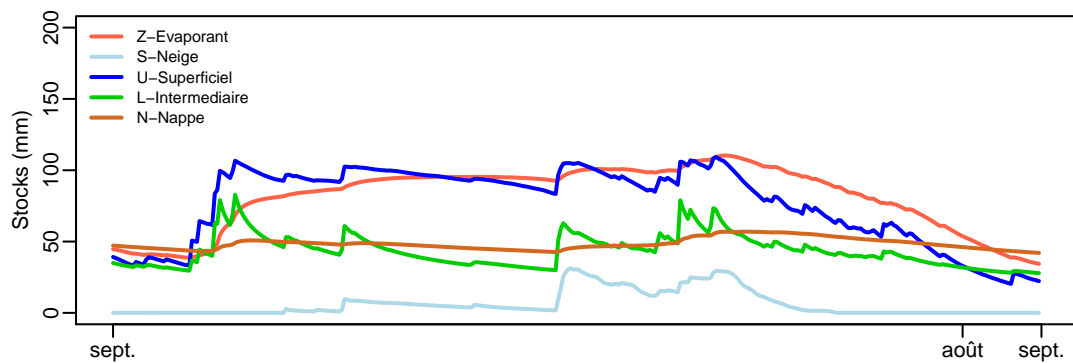

# quinsh (1562.0501 km<sup>2</sup>) – année 1989–1990

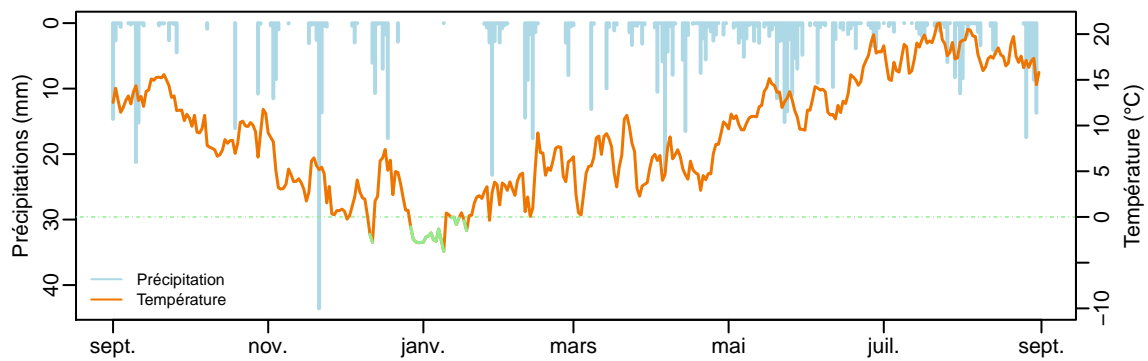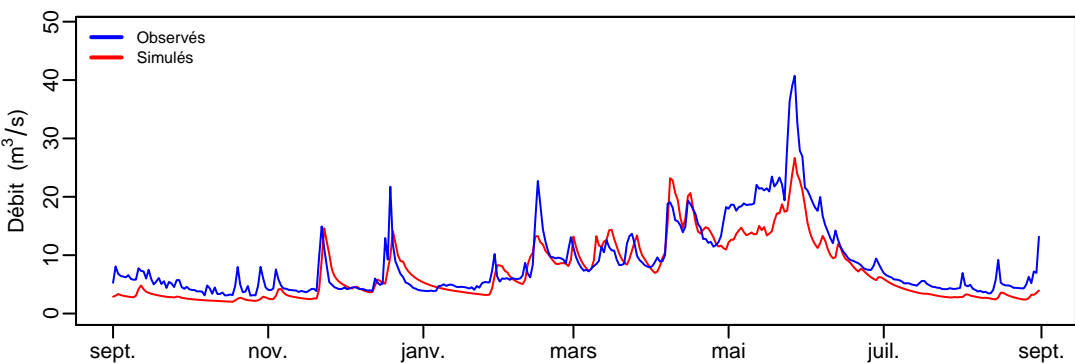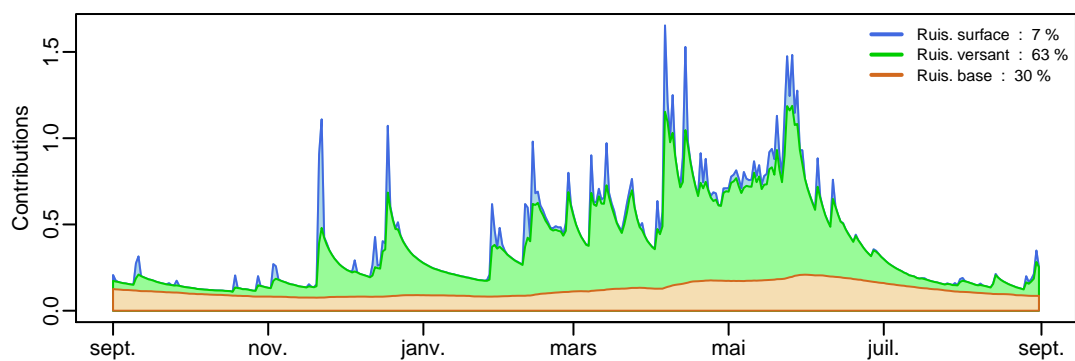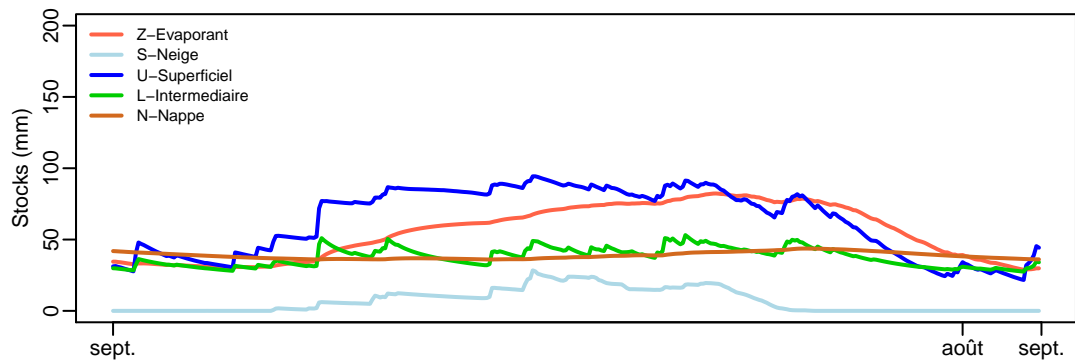

# quinsh (1562.0501 km<sup>2</sup>) – année 1990–1991

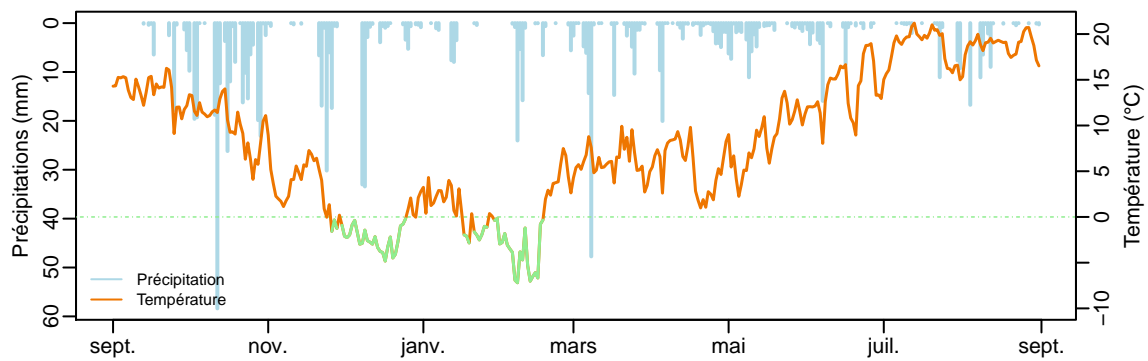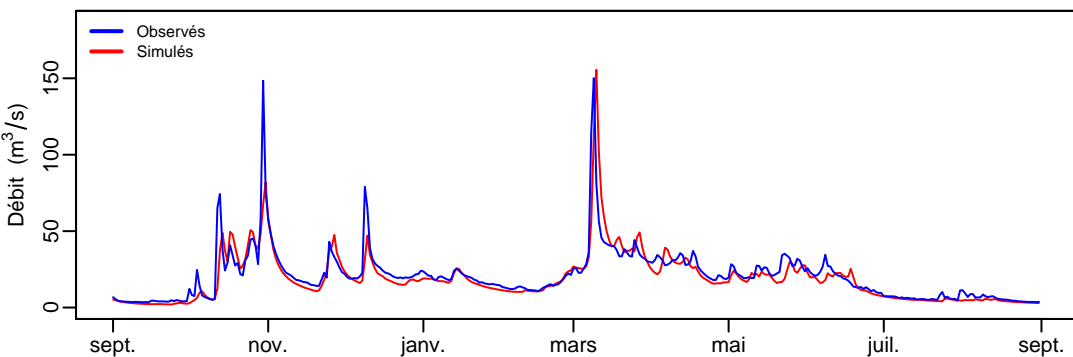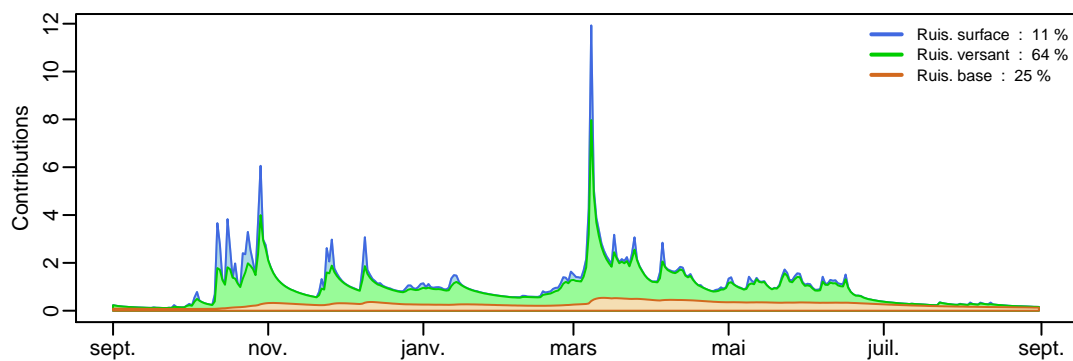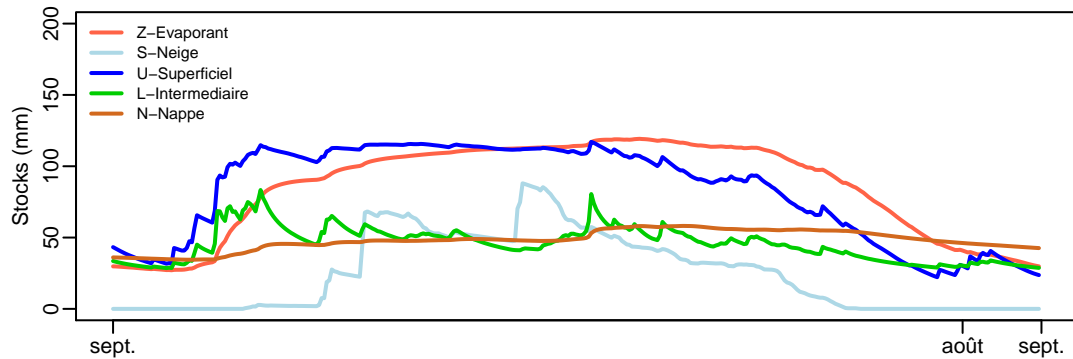

# quinsh (1562.0501 km<sup>2</sup>) – année 1991–1992

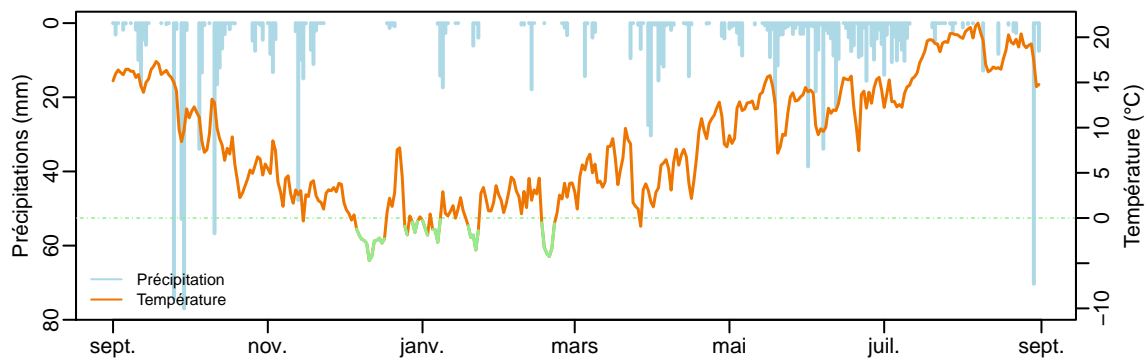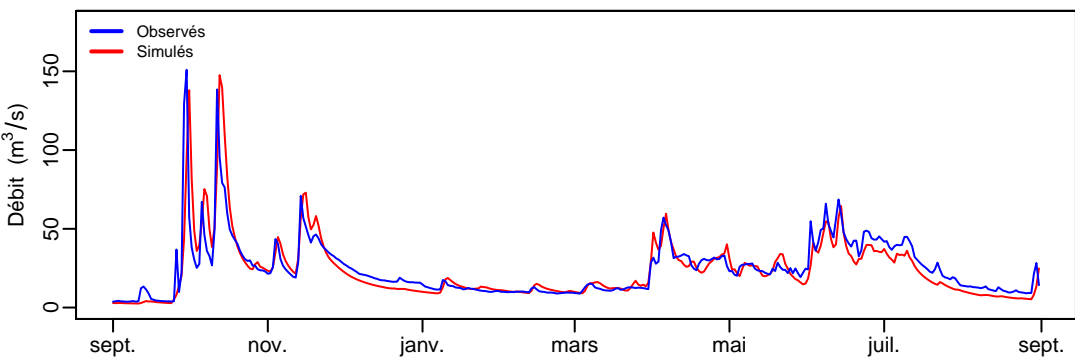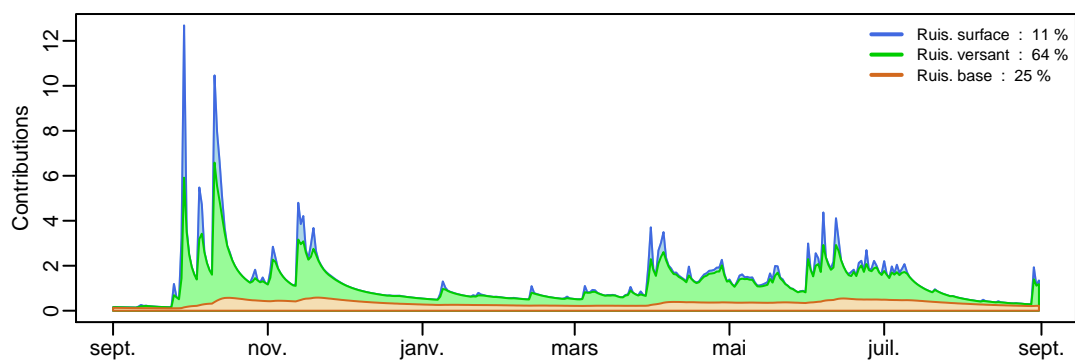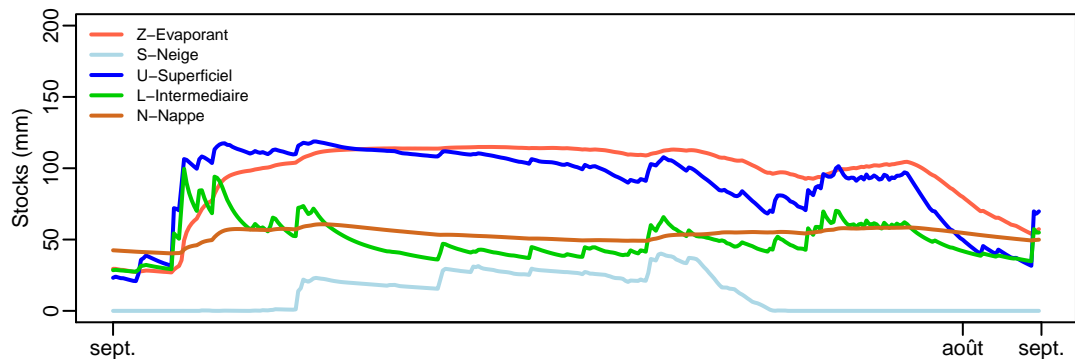



# quinsh (1562.0501 km<sup>2</sup>) – année 1992–1993

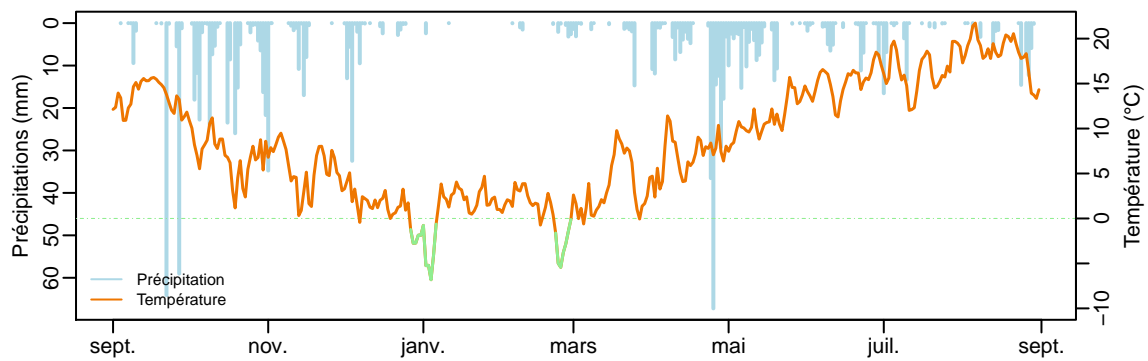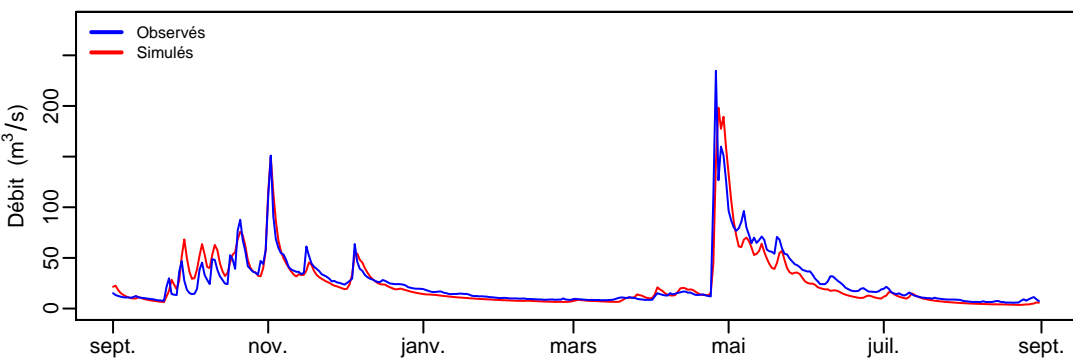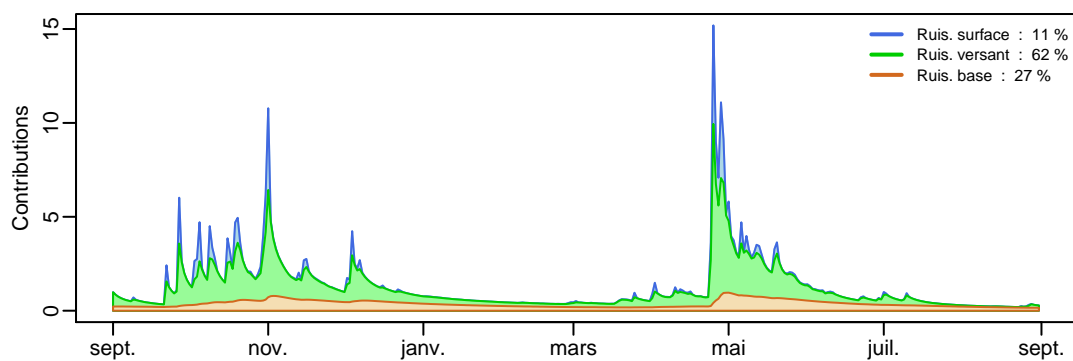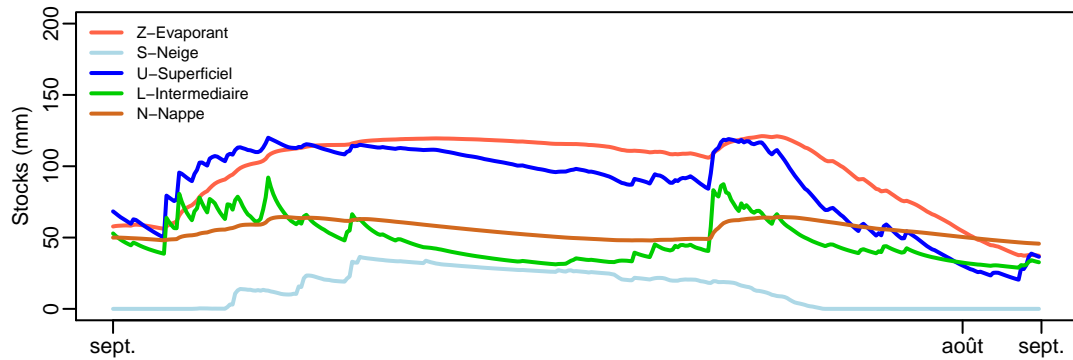

# quinsh (1562.0501 km<sup>2</sup>) – année 1993–1994

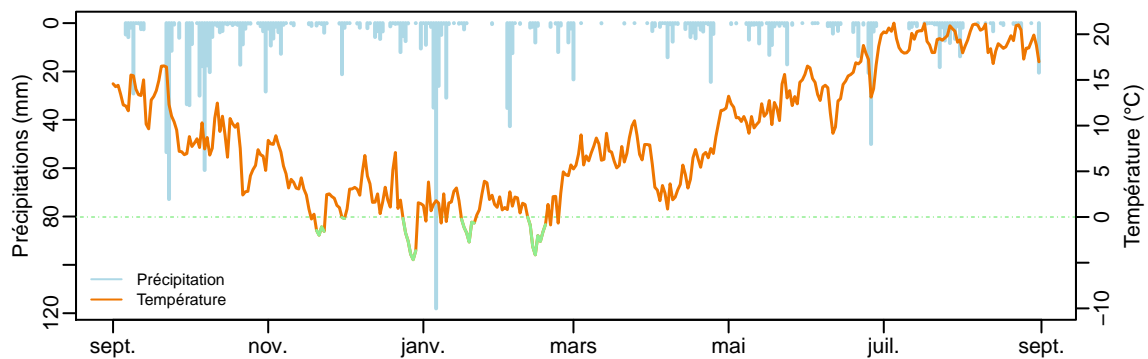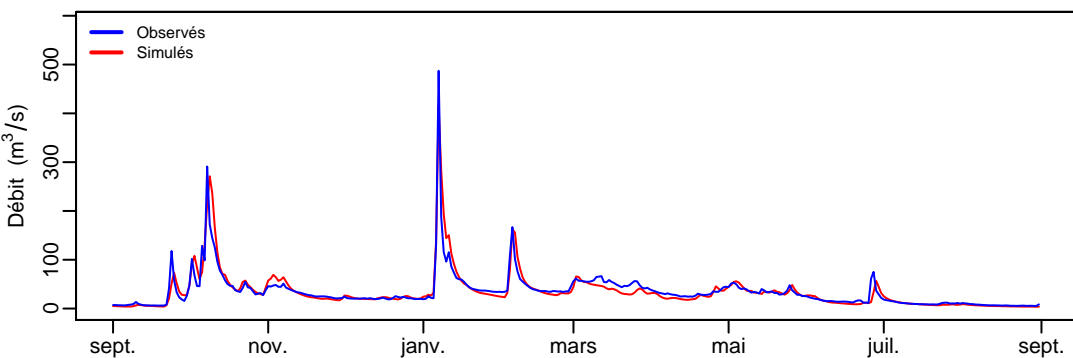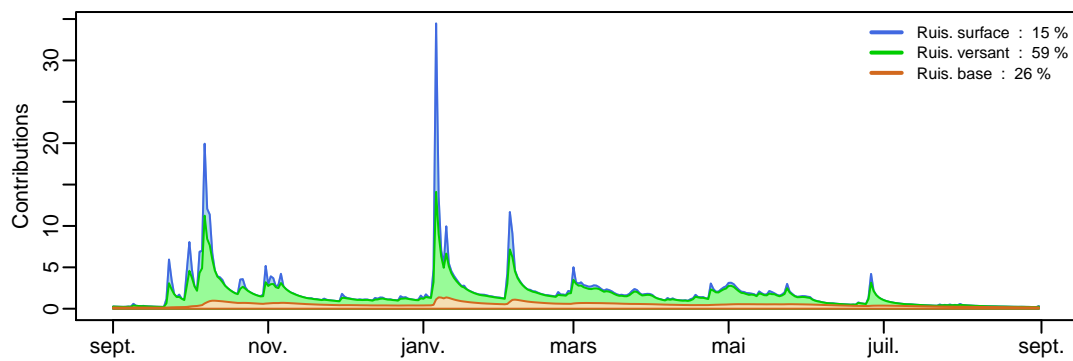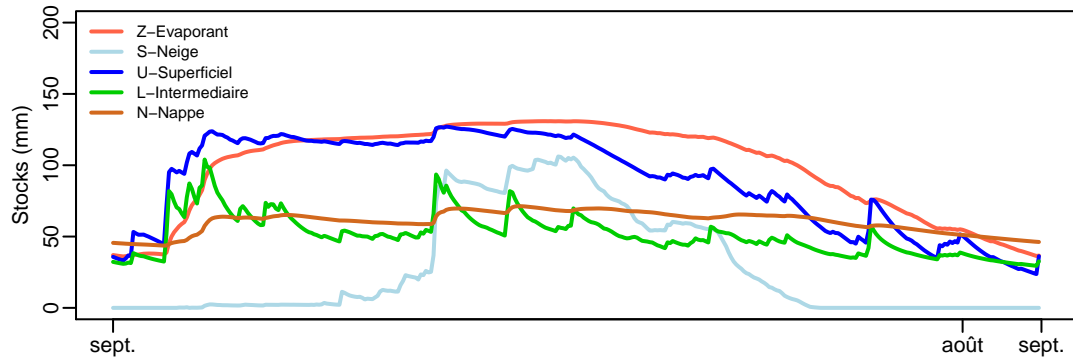

# quinsh (1562.0501 km<sup>2</sup>) – année 1994–1995

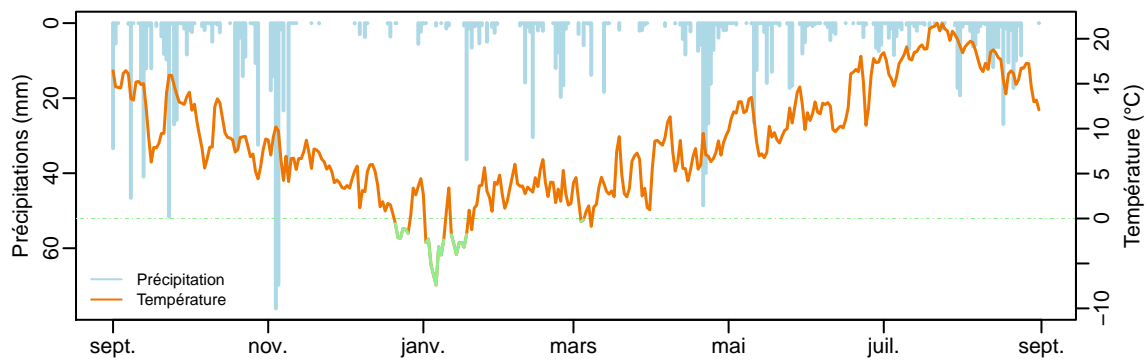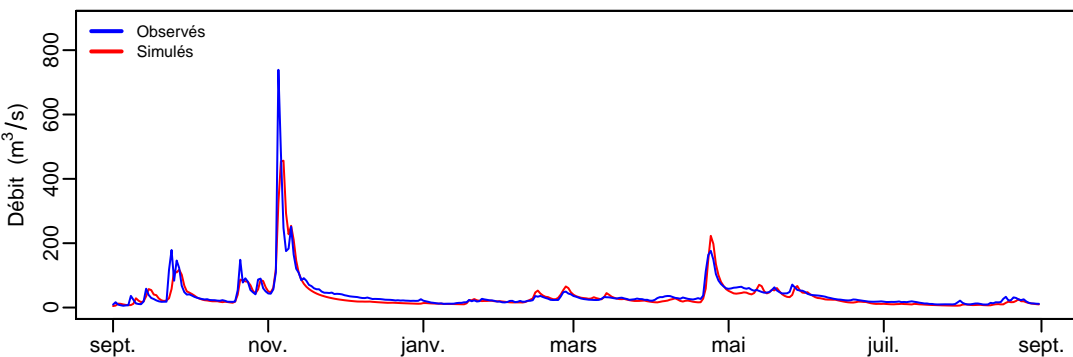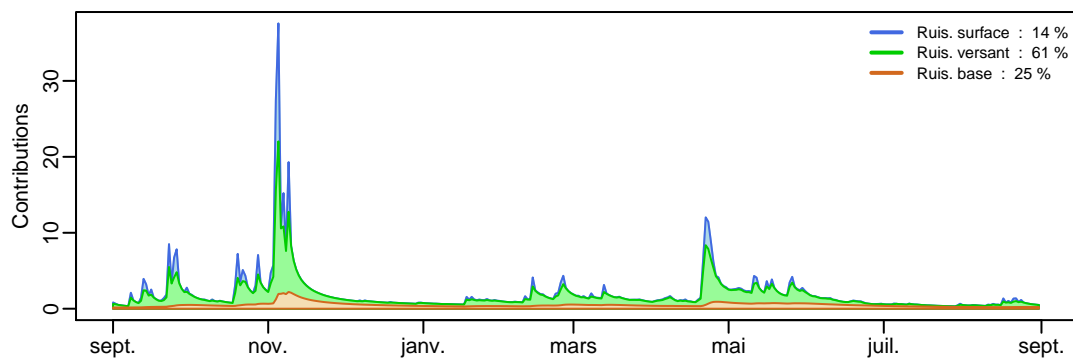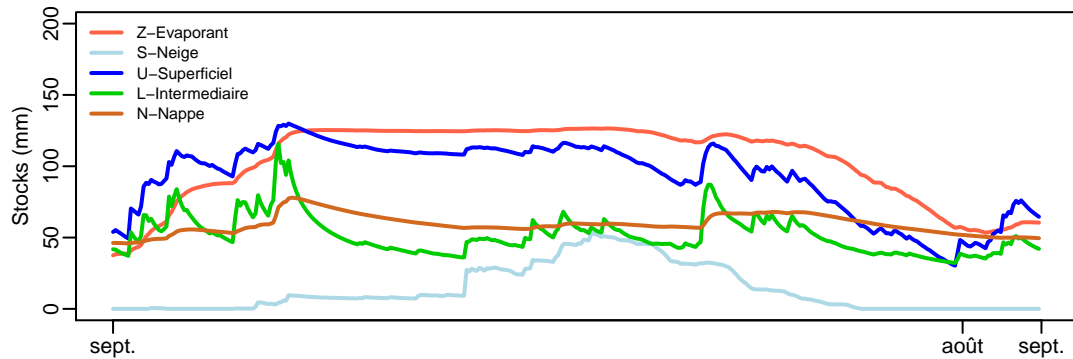

# quinsh (1562.0501 km<sup>2</sup>) – année 1995–1996

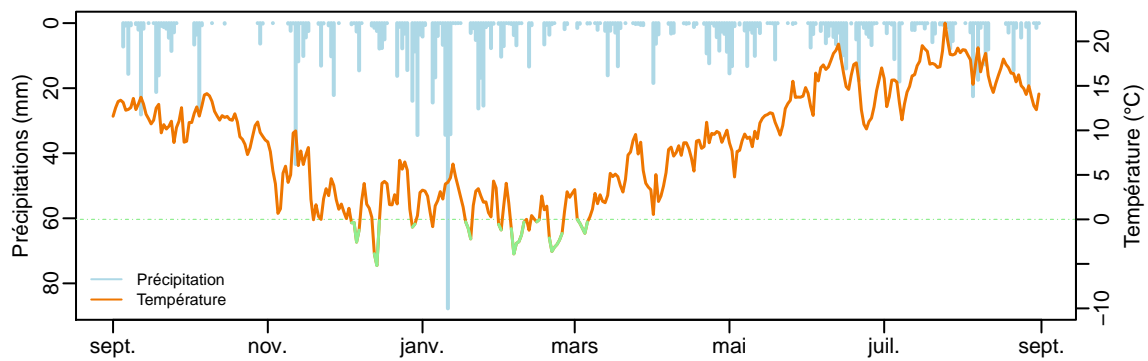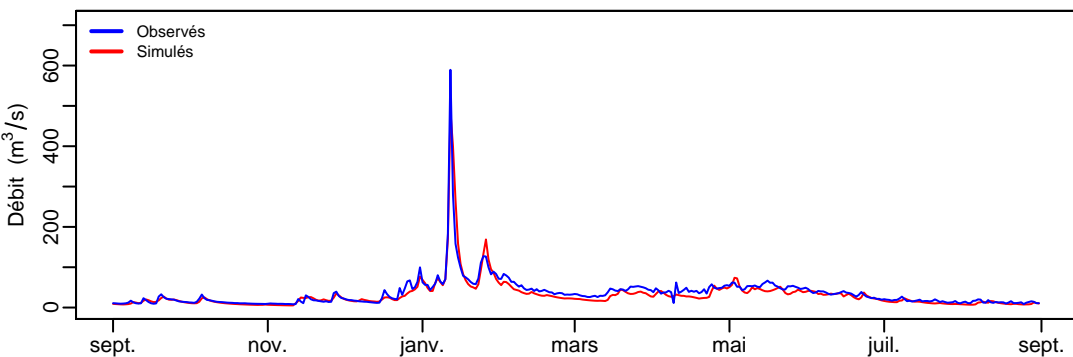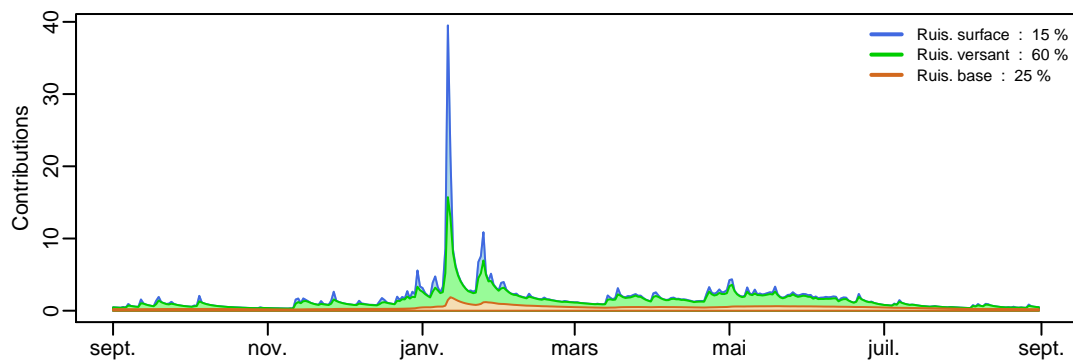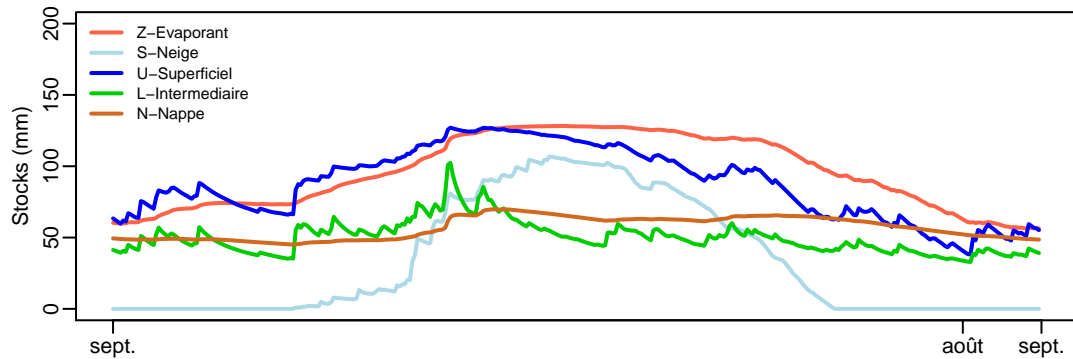

# quinsh (1562.0501 km<sup>2</sup>) – année 1996–1997

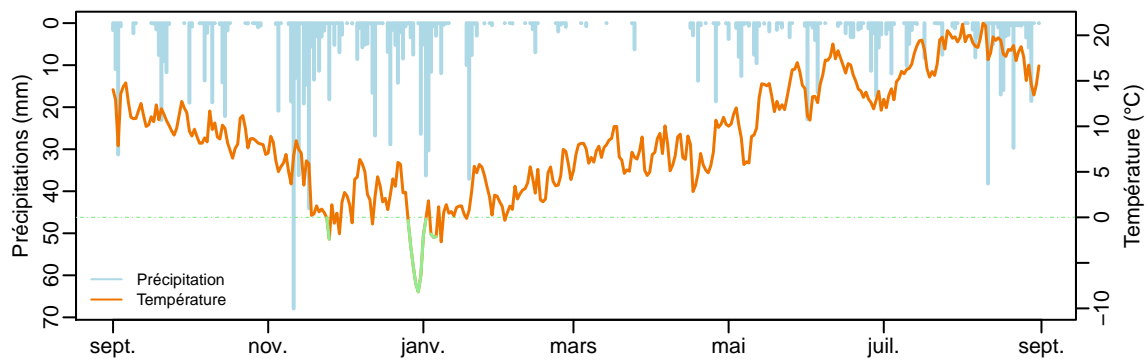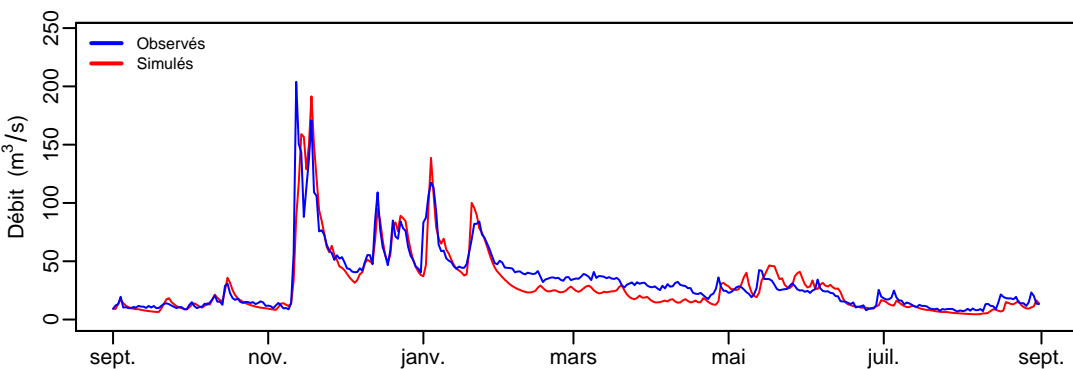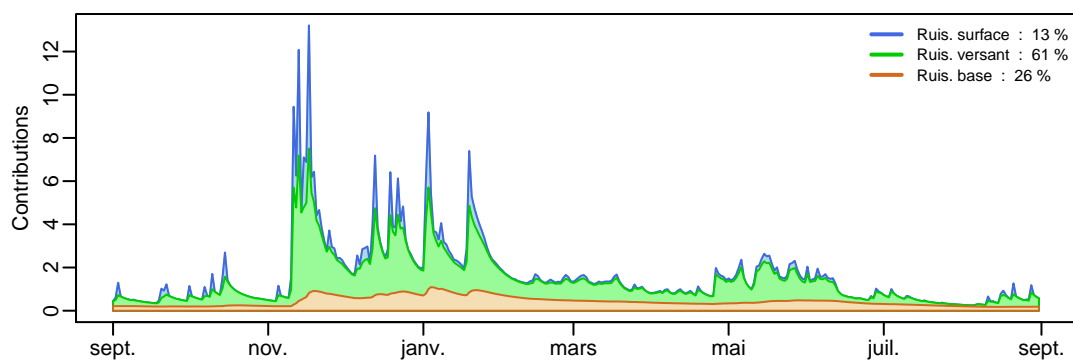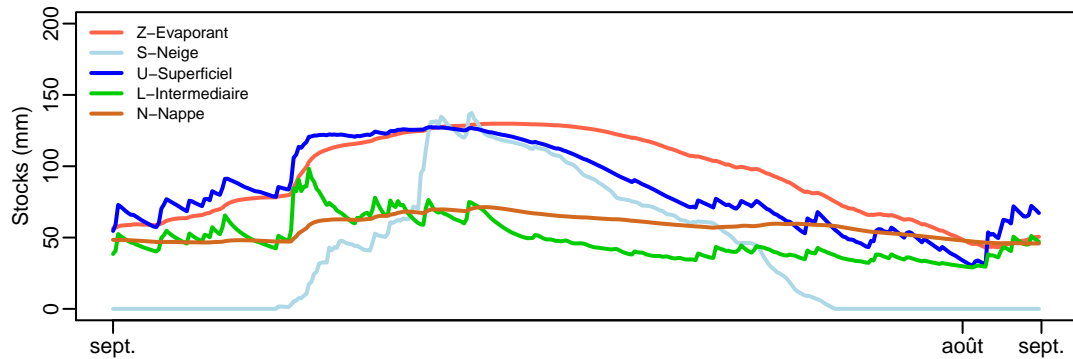

# quinsh (1562.0501 km<sup>2</sup>) – année 1997–1998

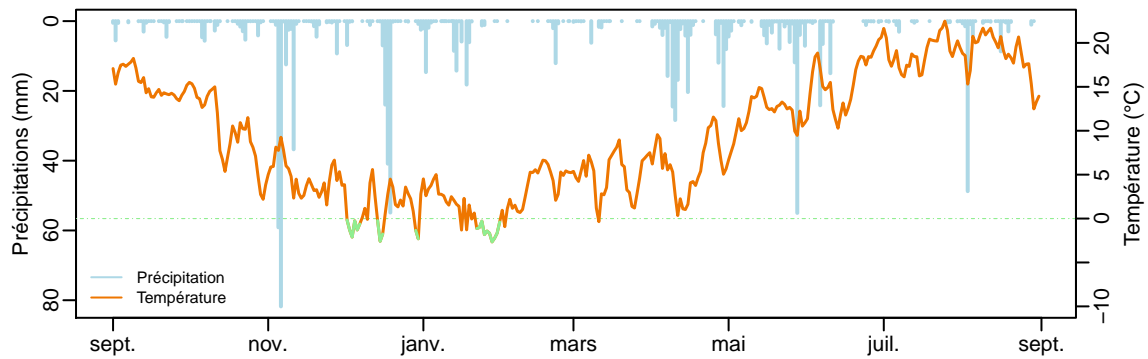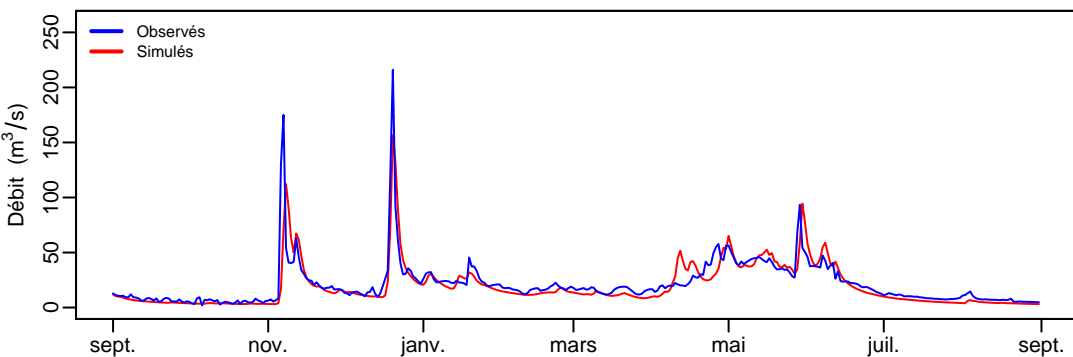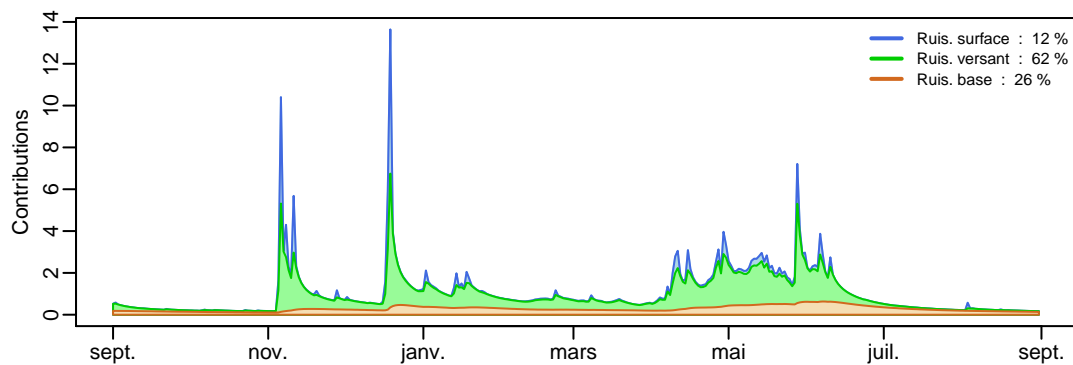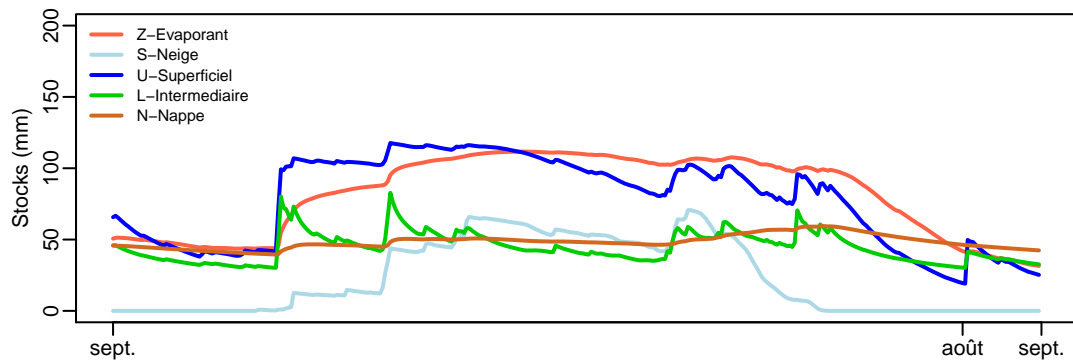

# quinsh (1562.0501 km²) – année 1998–1999

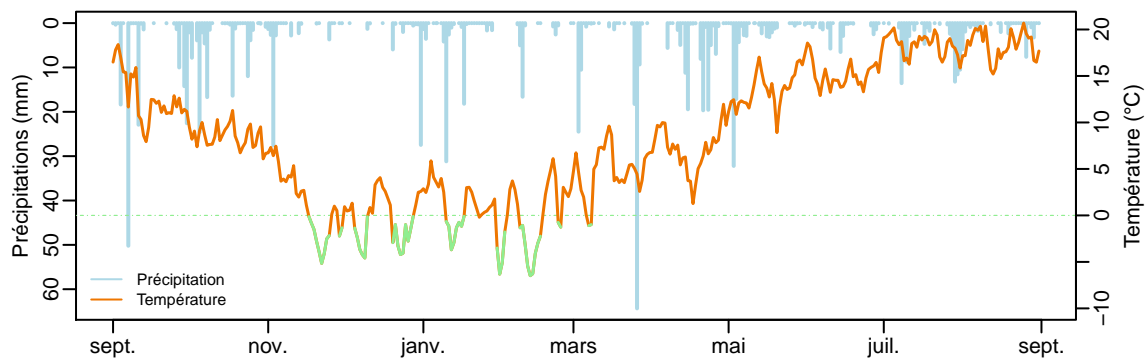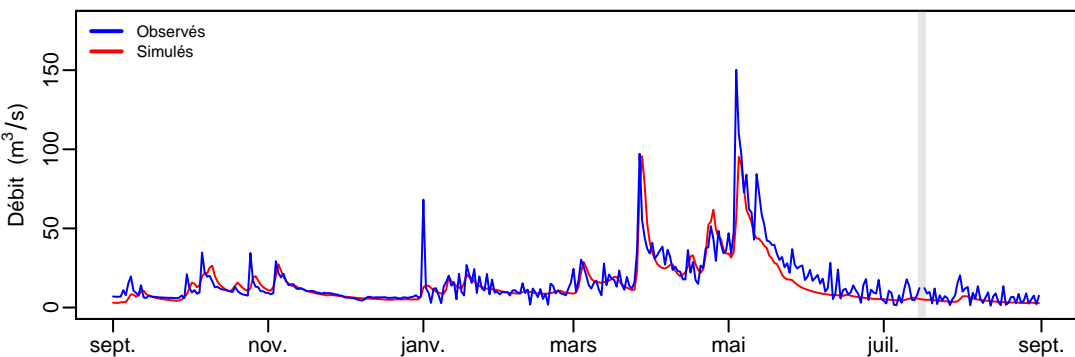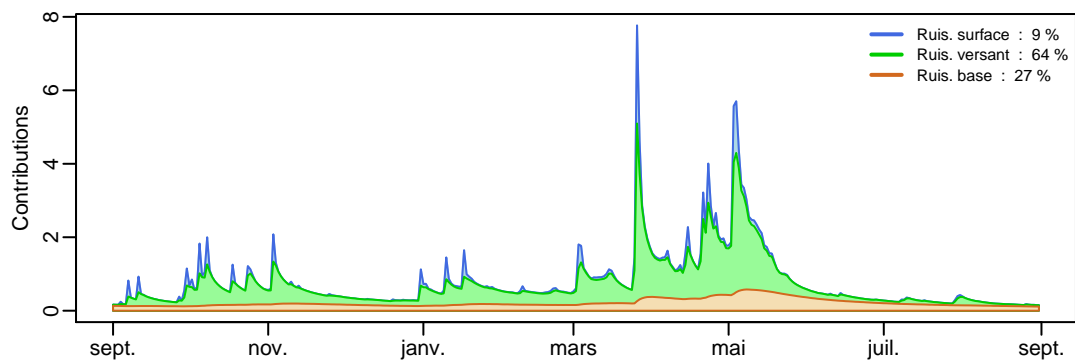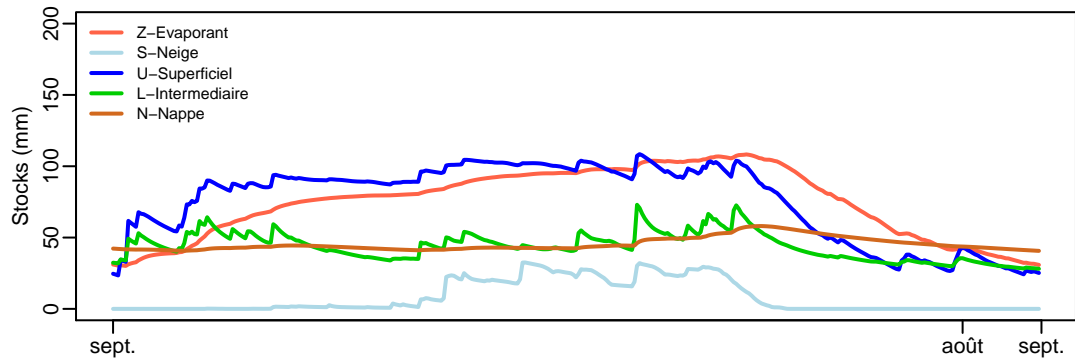

quinsh (1562.0501 km<sup>2</sup>) – année 1999–2000

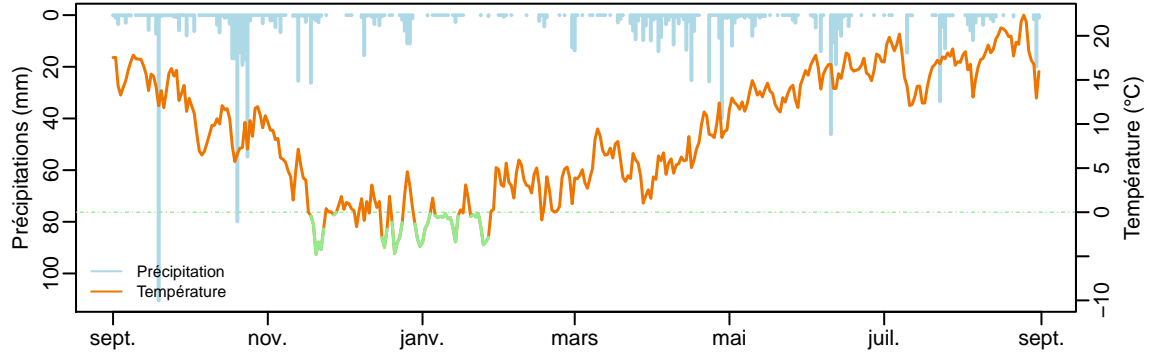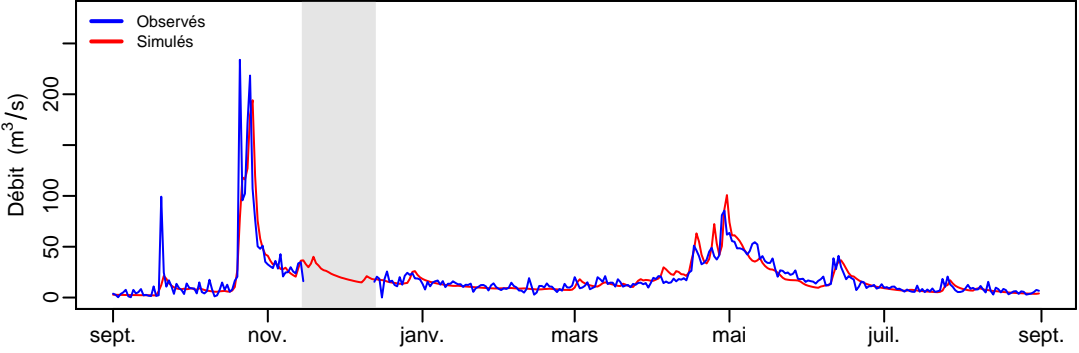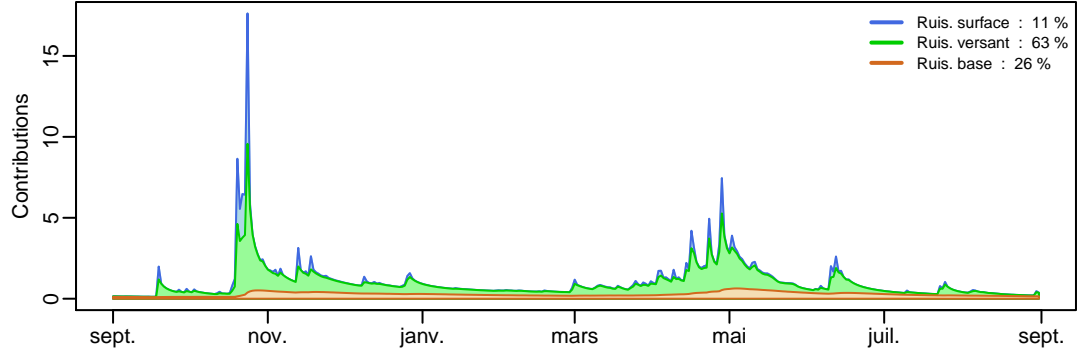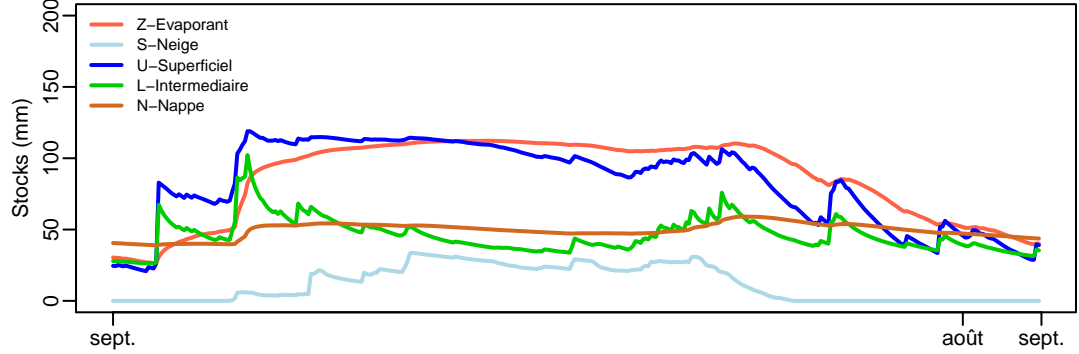



# quinsh (1562.0501 km<sup>2</sup>) – année 2000–2001

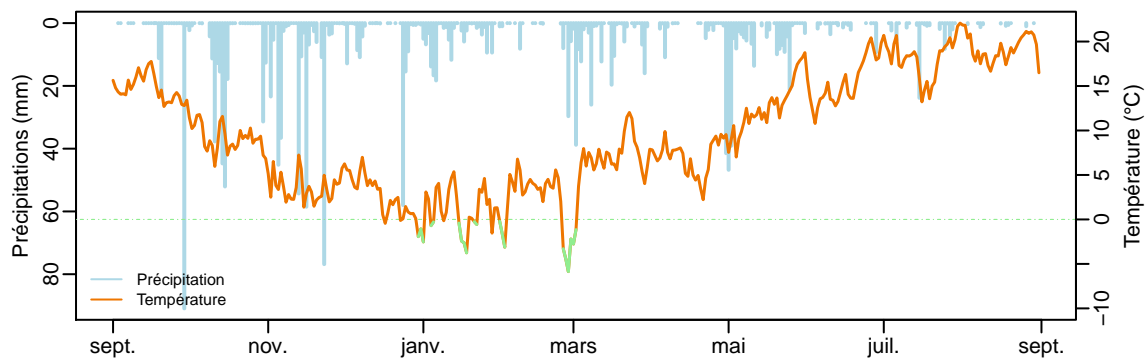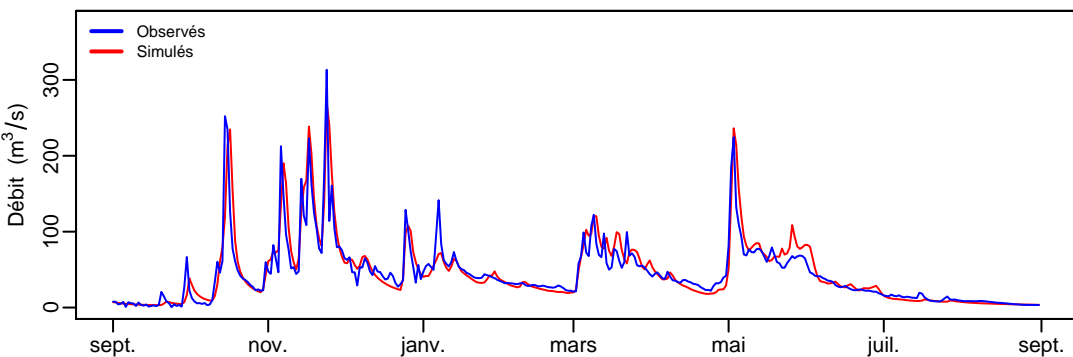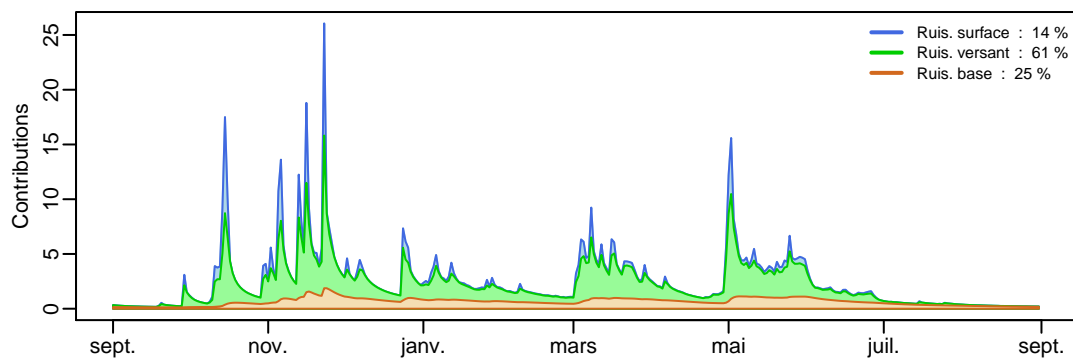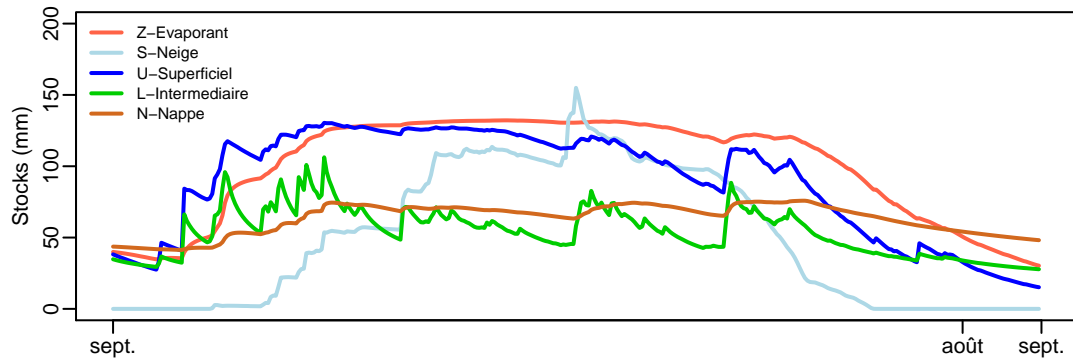

# quinsh (1562.0501 km<sup>2</sup>) – année 2001–2002

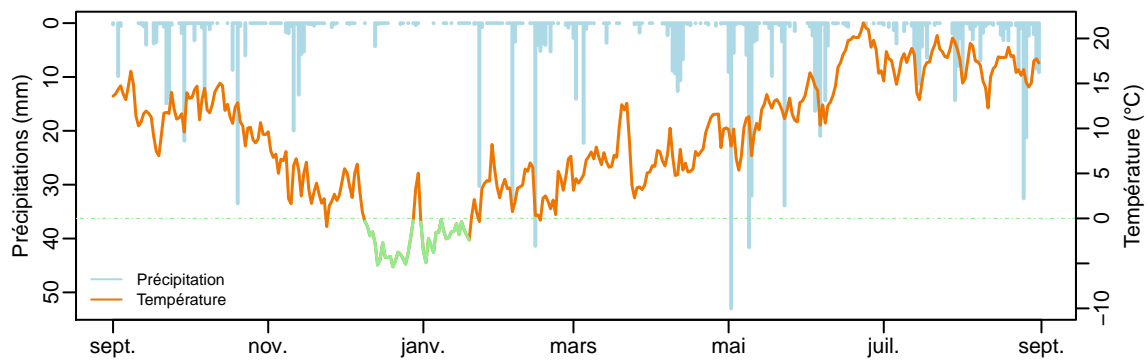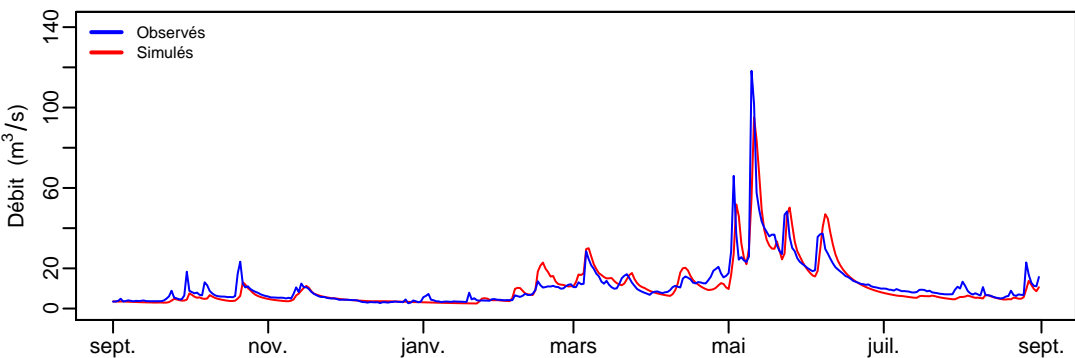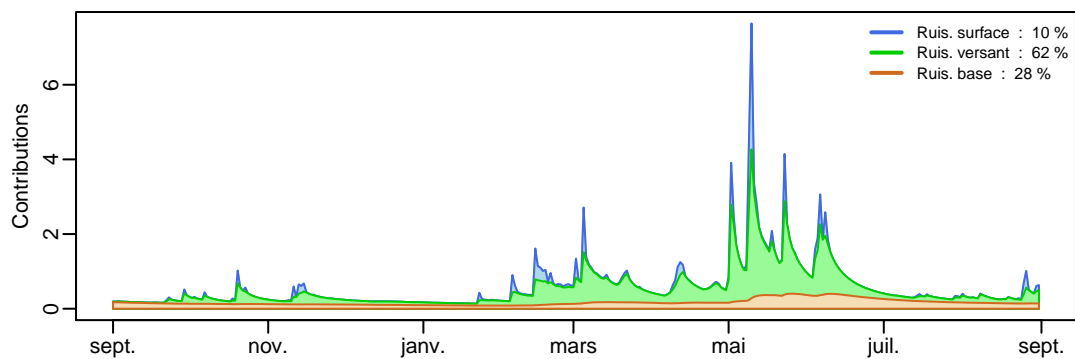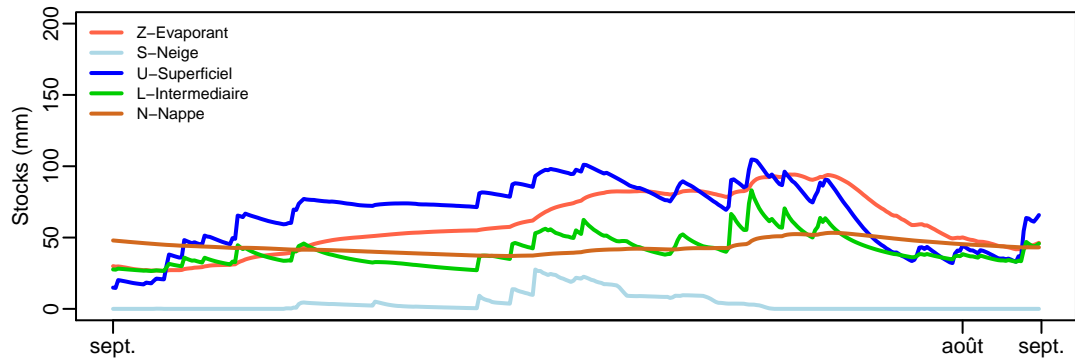

# quinsh (1562.0501 km²) – année 2002–2003

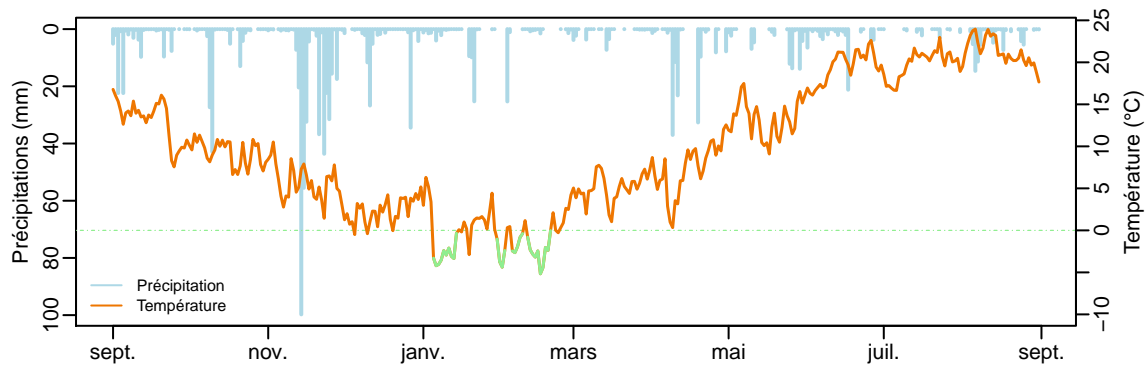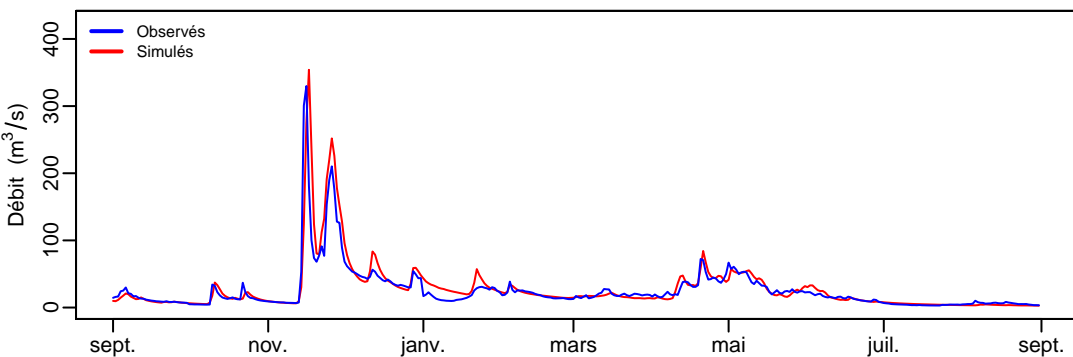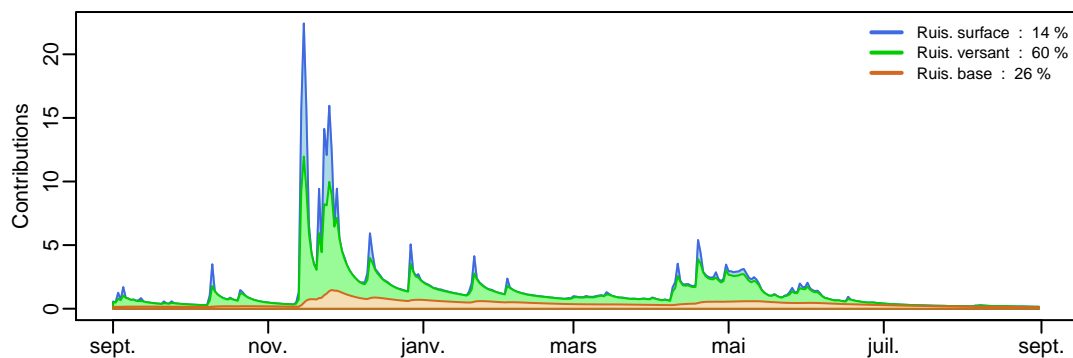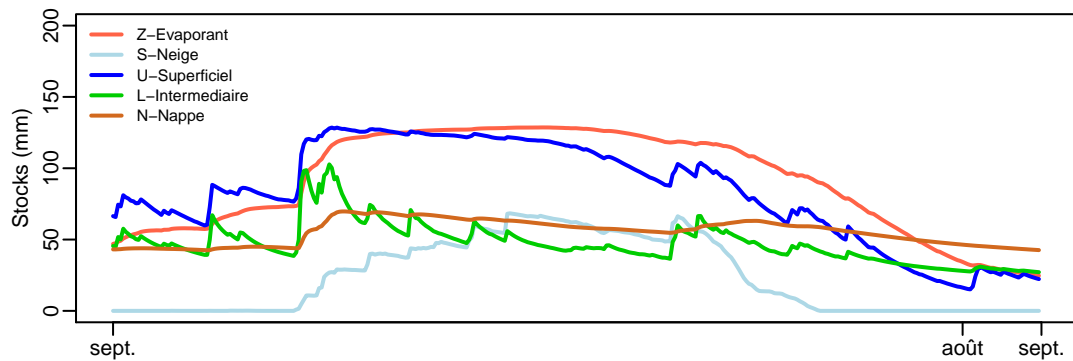

# quinsh (1562.0501 km<sup>2</sup>) – année 2003–2004

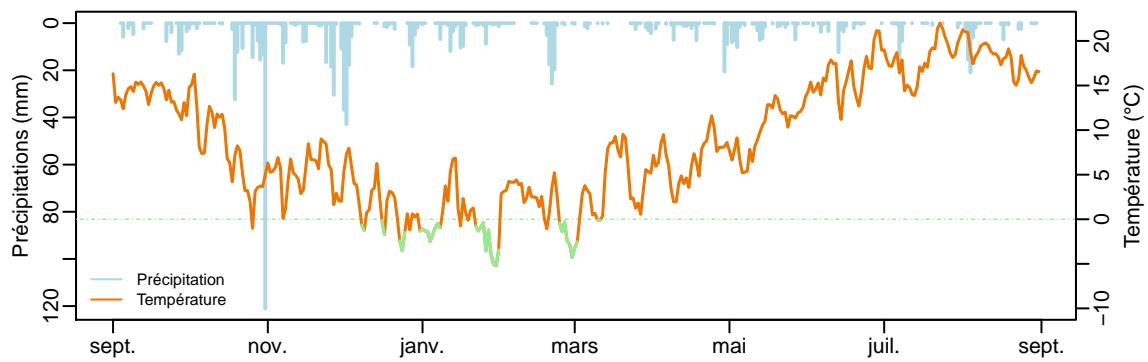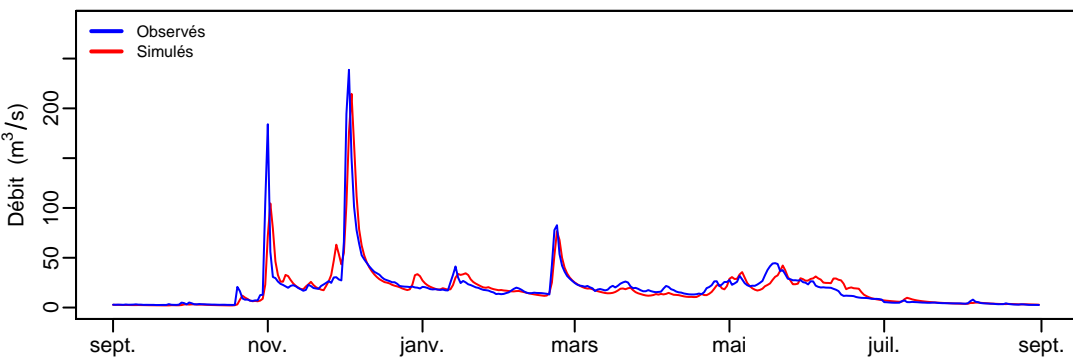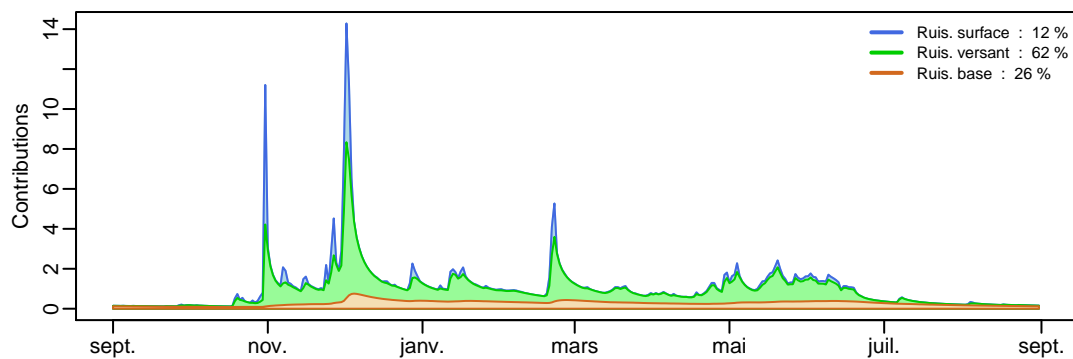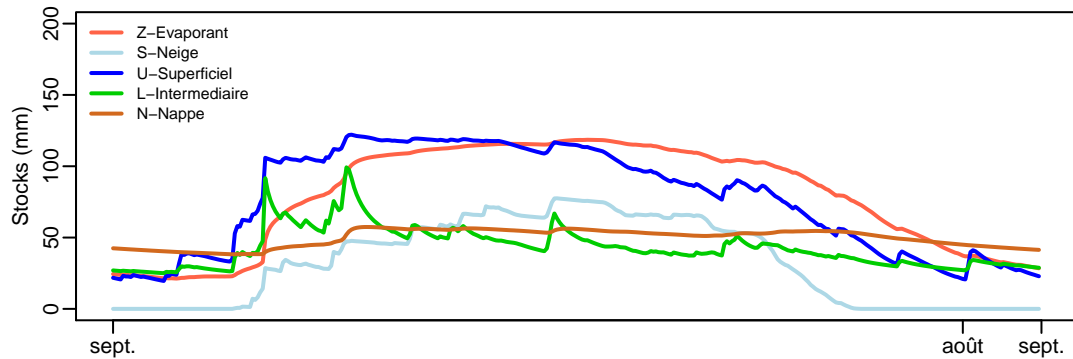

# quinsh (1562.0501 km<sup>2</sup>) – année 2004–2005

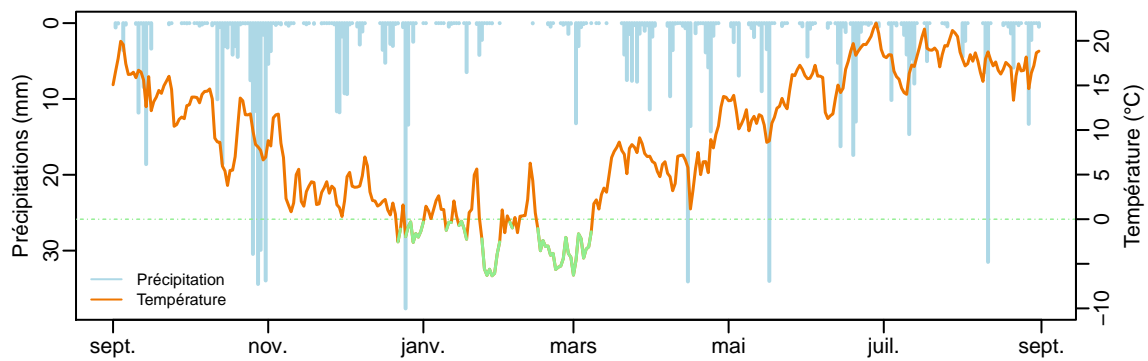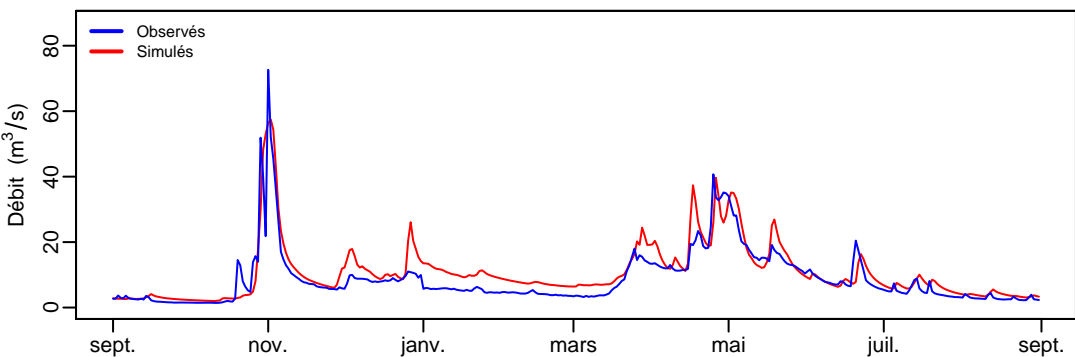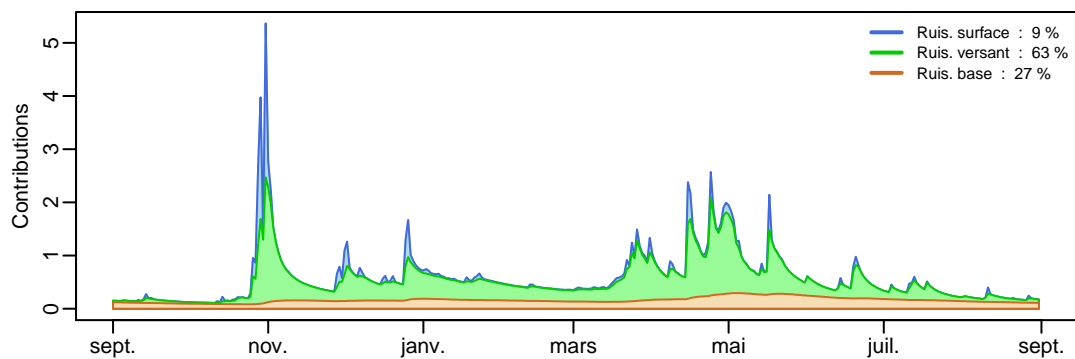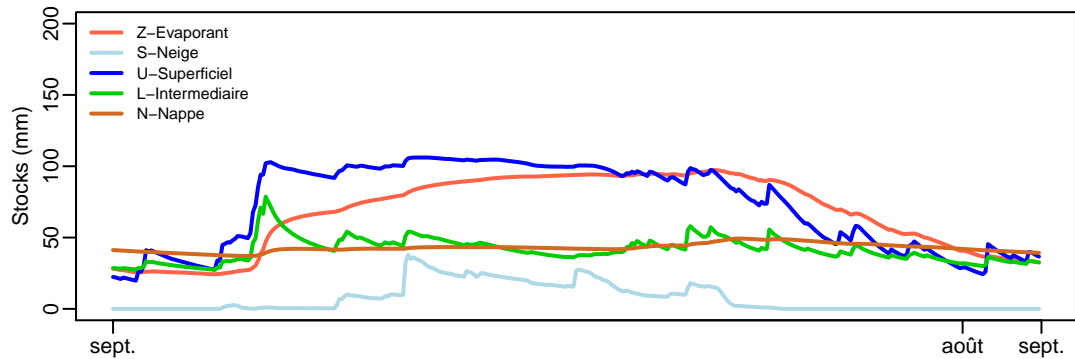

# quinsh (1562.0501 km²) – année 2005–2006

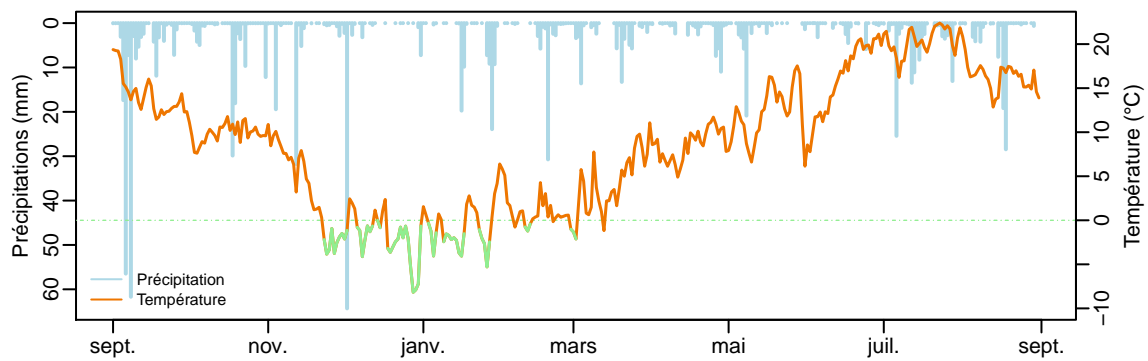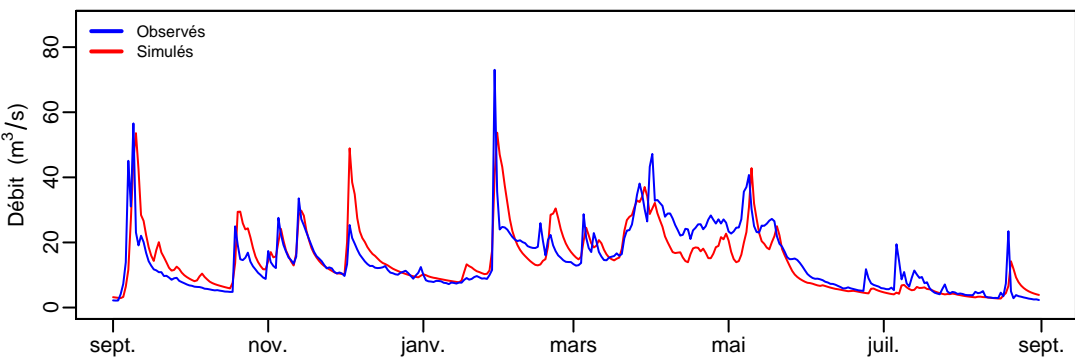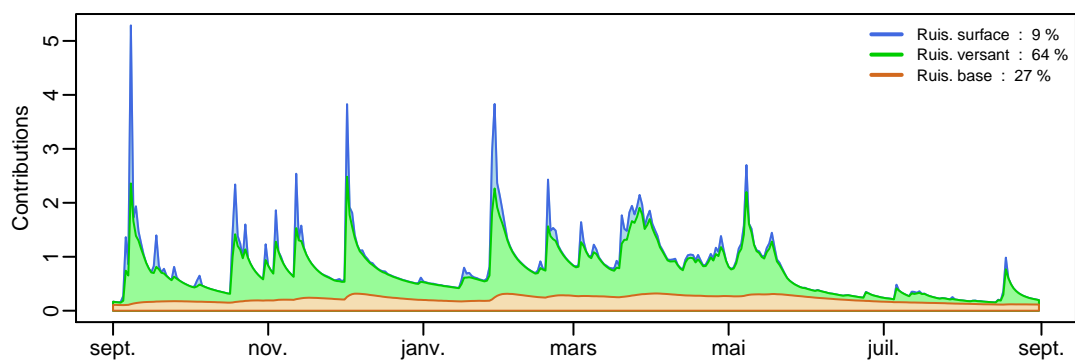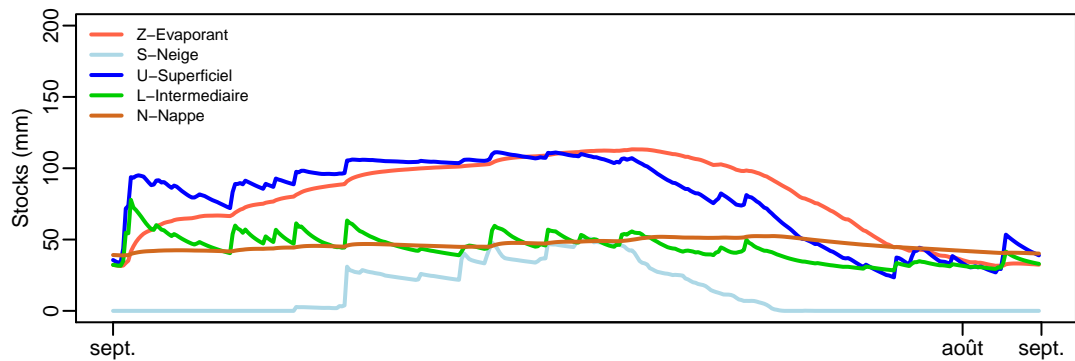

# quinsh (1562.0501 km<sup>2</sup>) – année 2006–2007

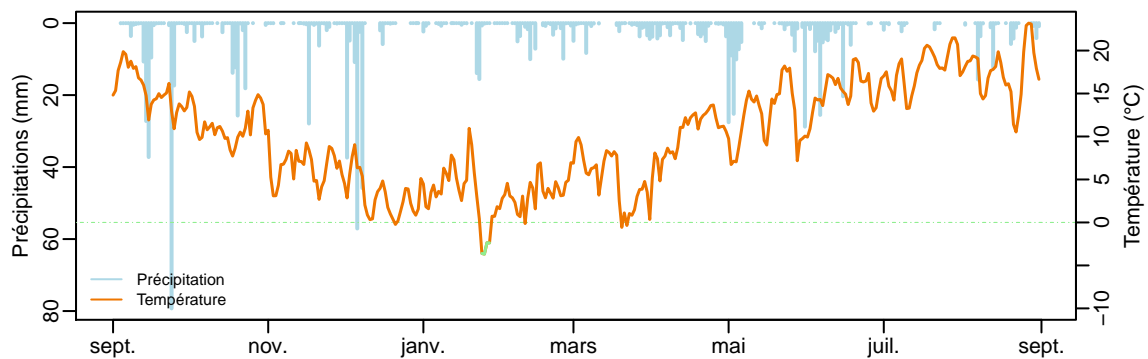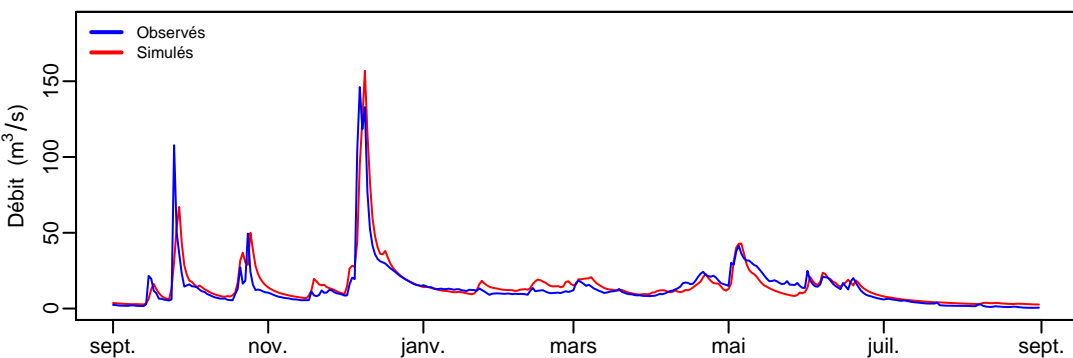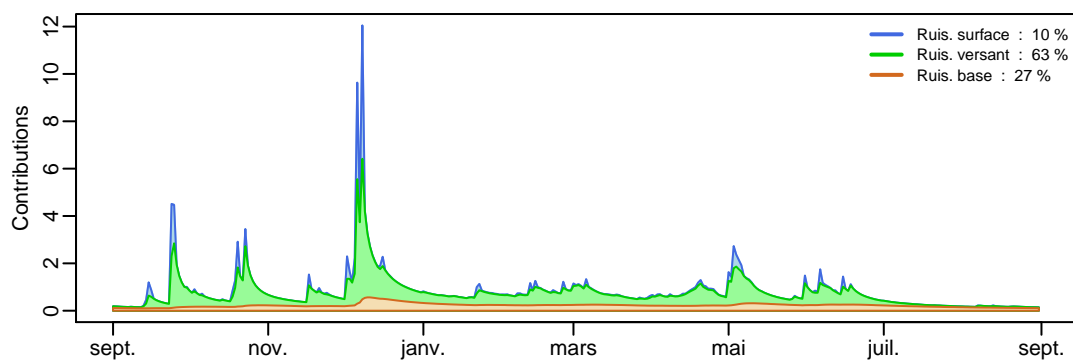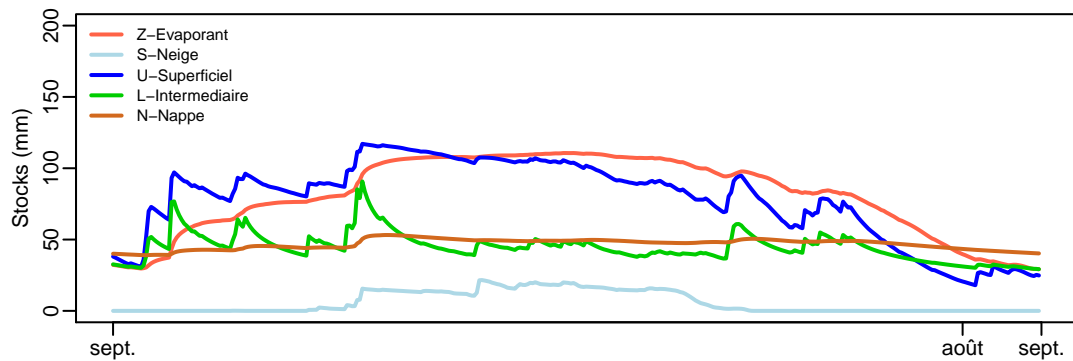

# quinsh (1562.0501 km²) – année 2007–2008

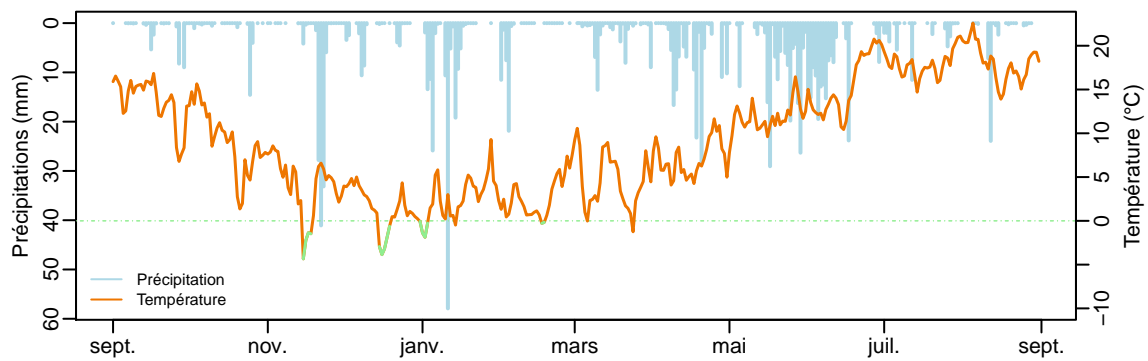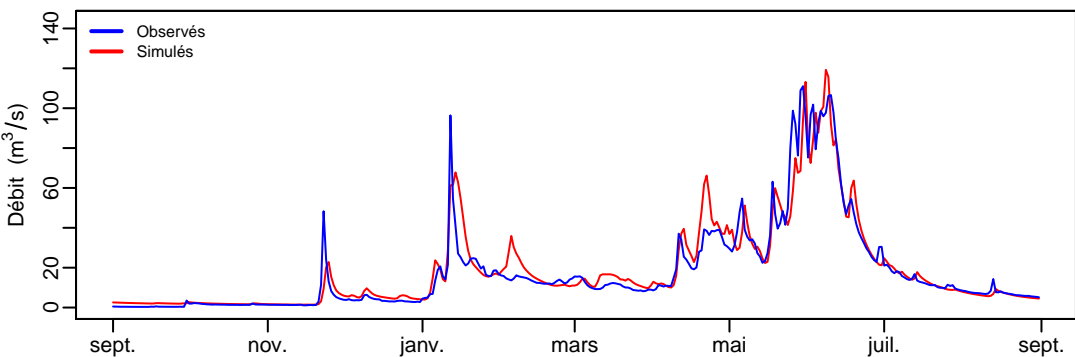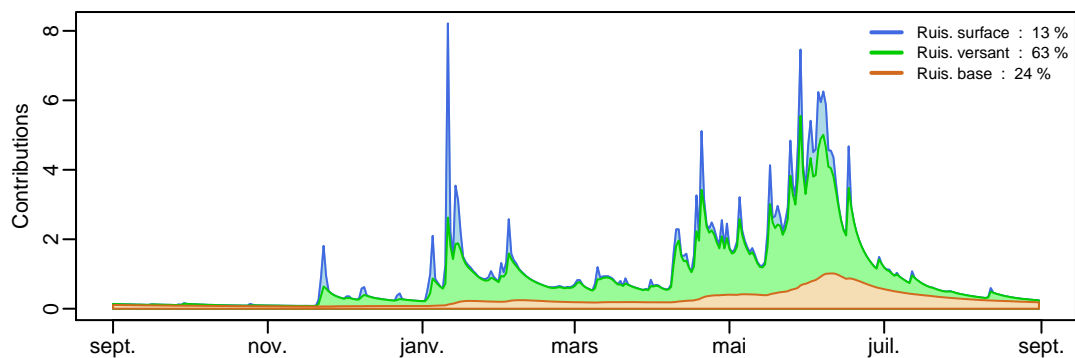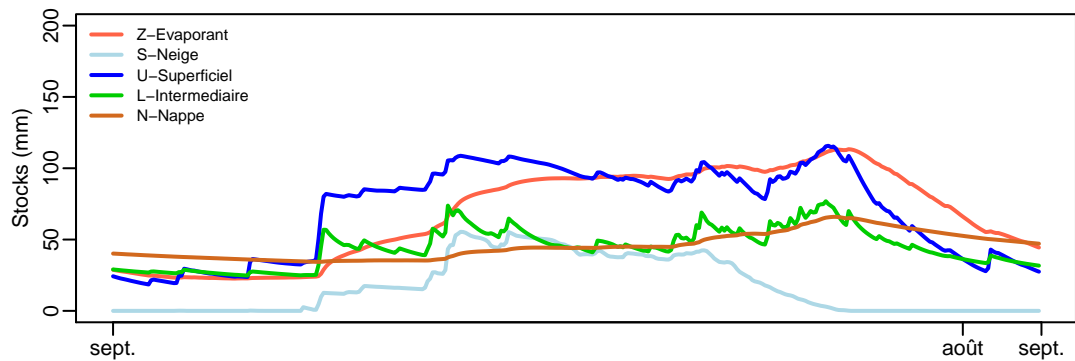



# quinsh (1562.0501 km<sup>2</sup>) – année 2008–2009

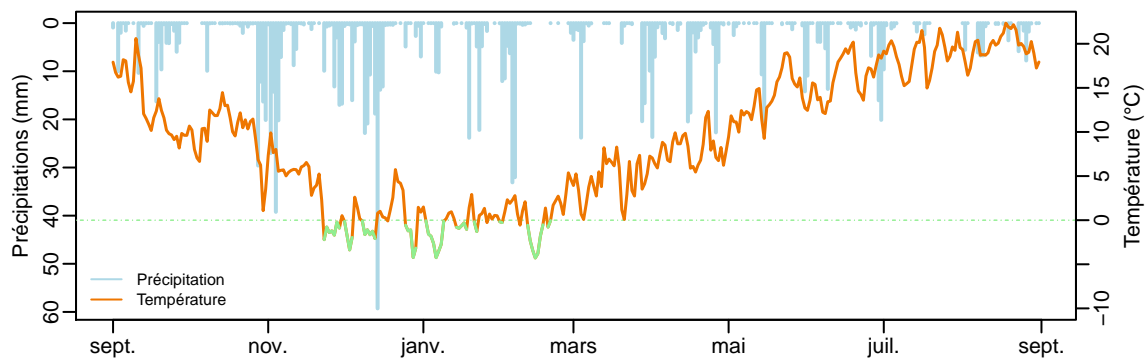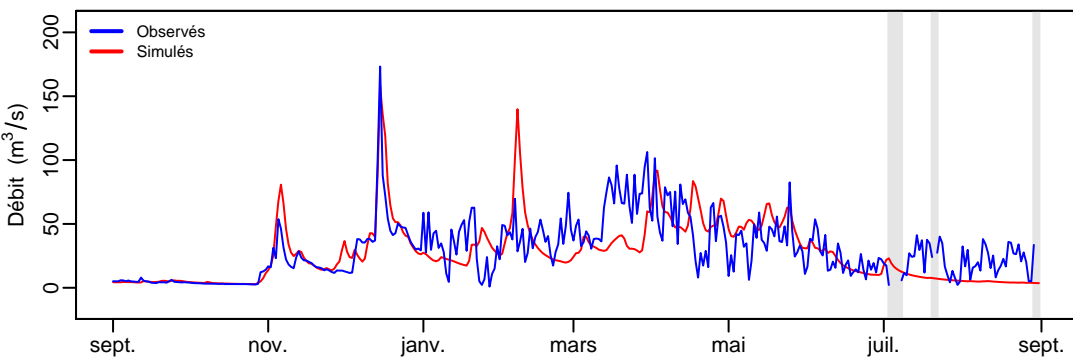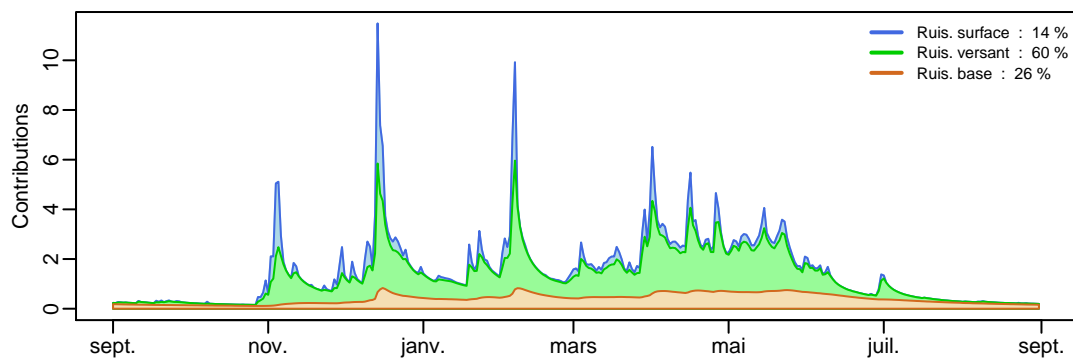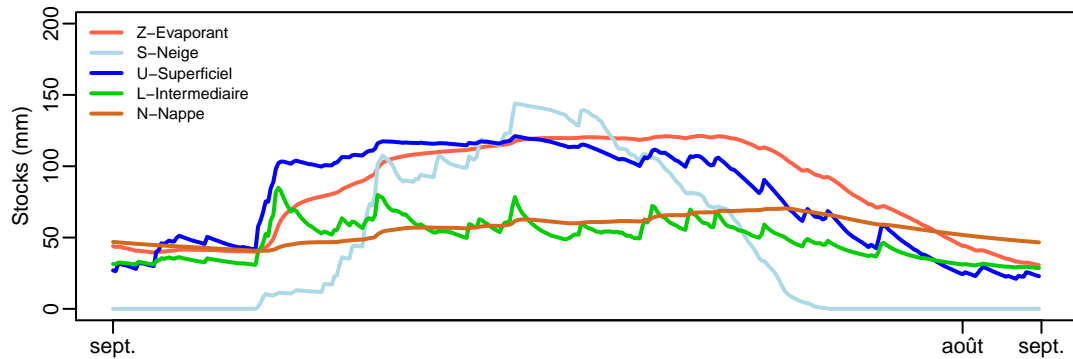

# quinsh (1562.0501 km<sup>2</sup>) – année 2009–2010

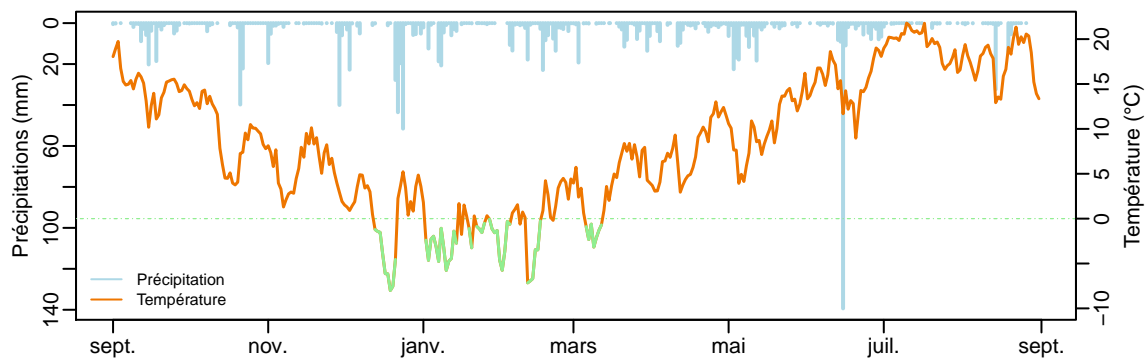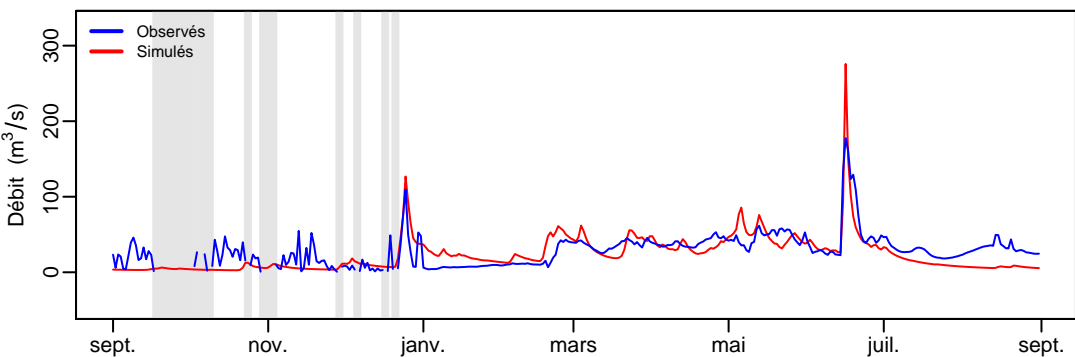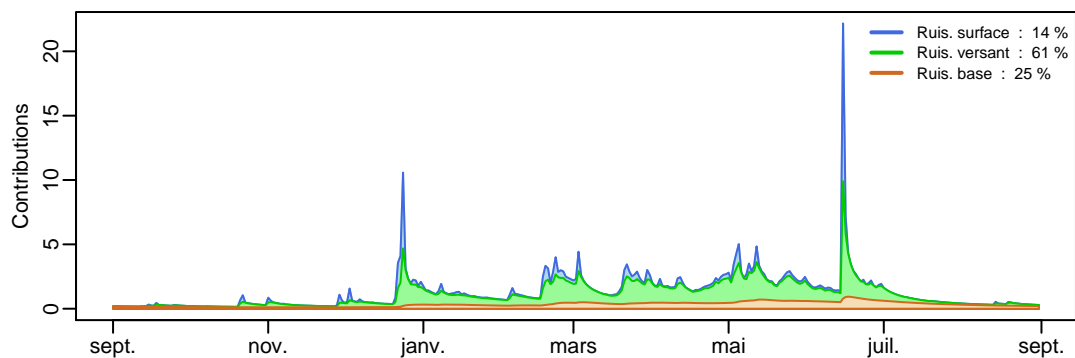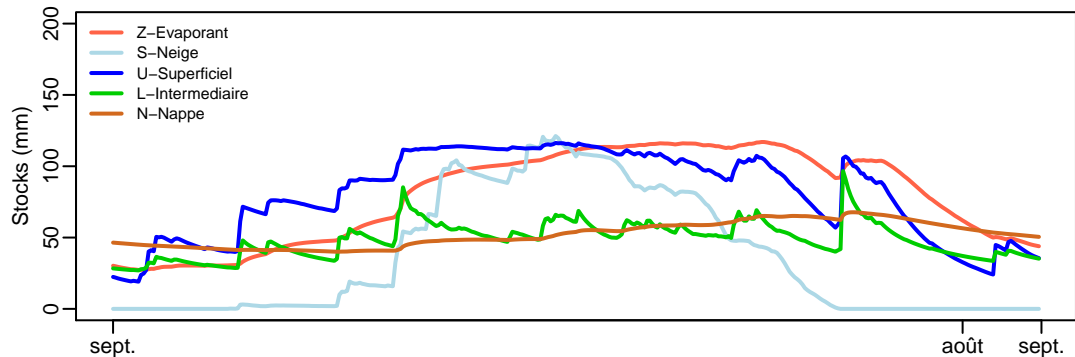

# quinsh (1562.0501 km<sup>2</sup>) – année 2010–2011

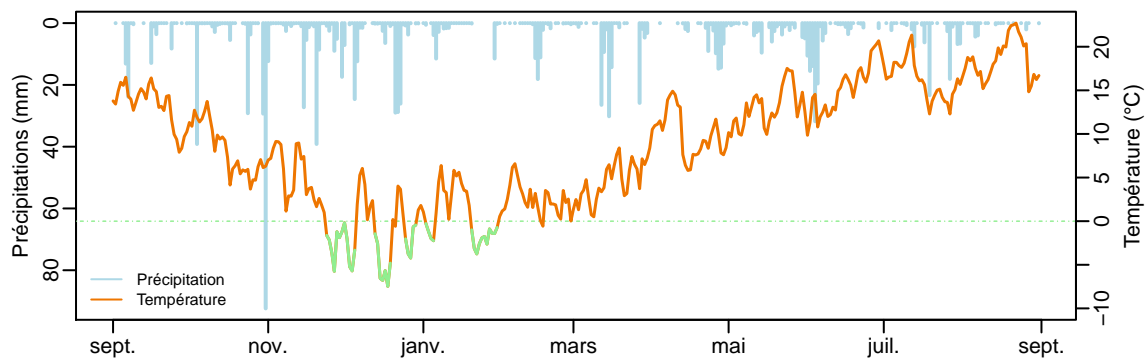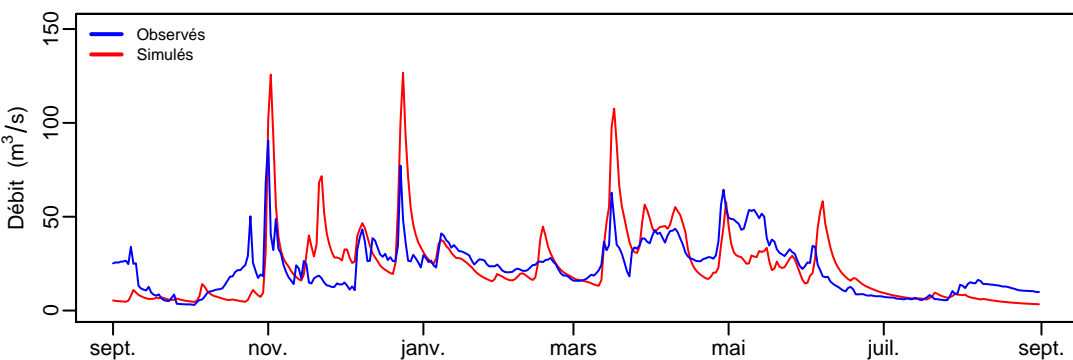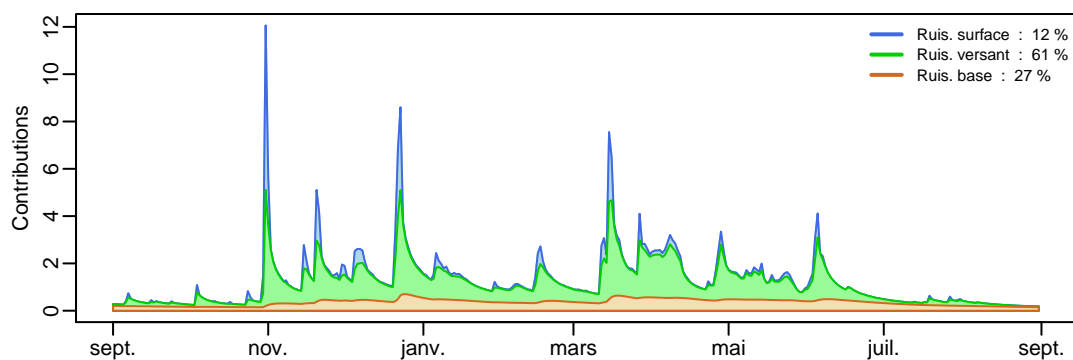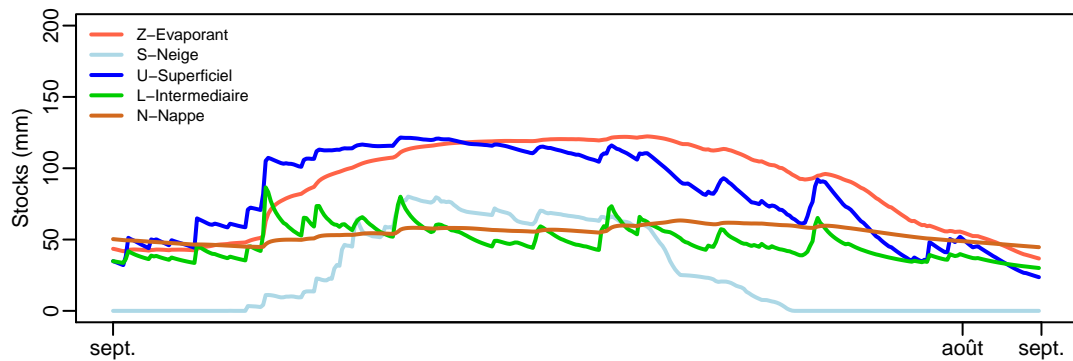

# quinsh (1562.0501 km<sup>2</sup>) – année 2011–2012

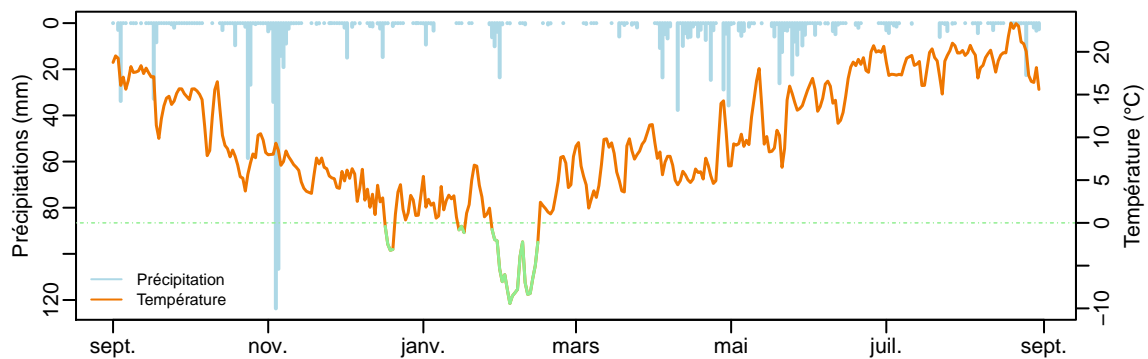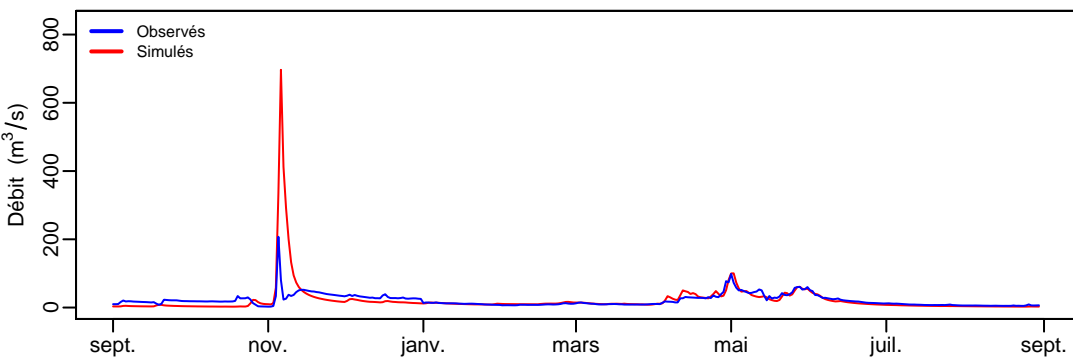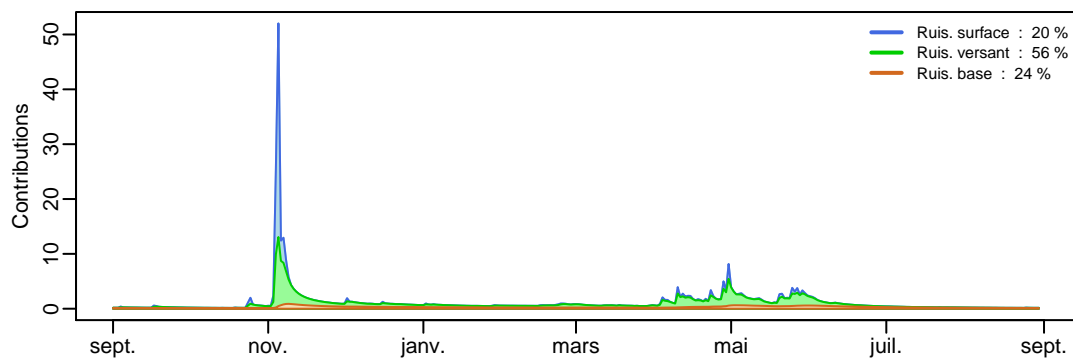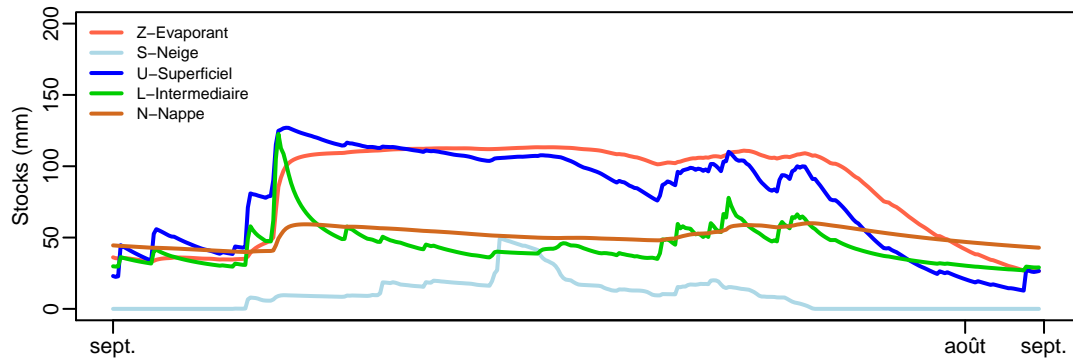

# s.ponh (3584.66 km<sup>2</sup>) – année 1981–1982

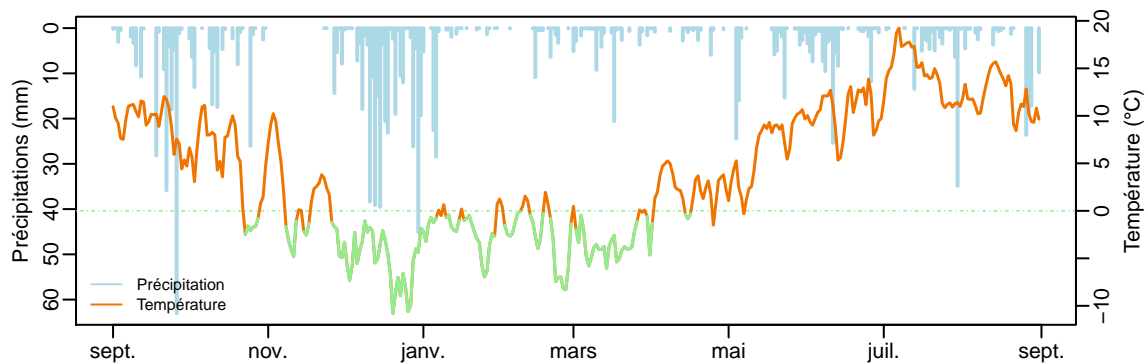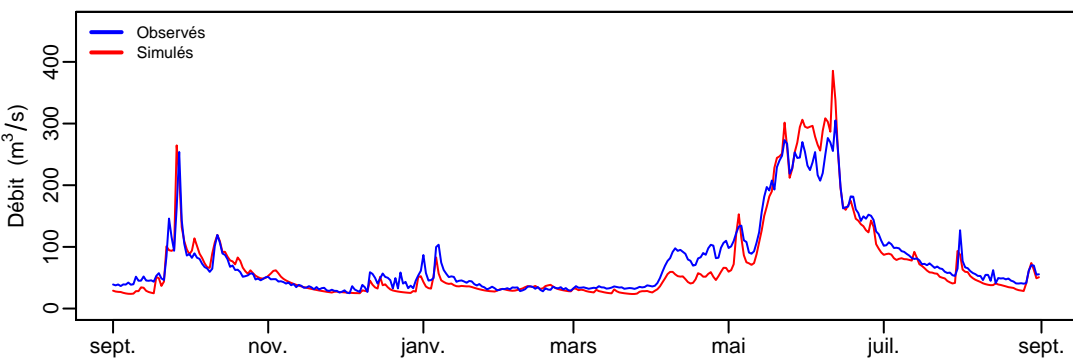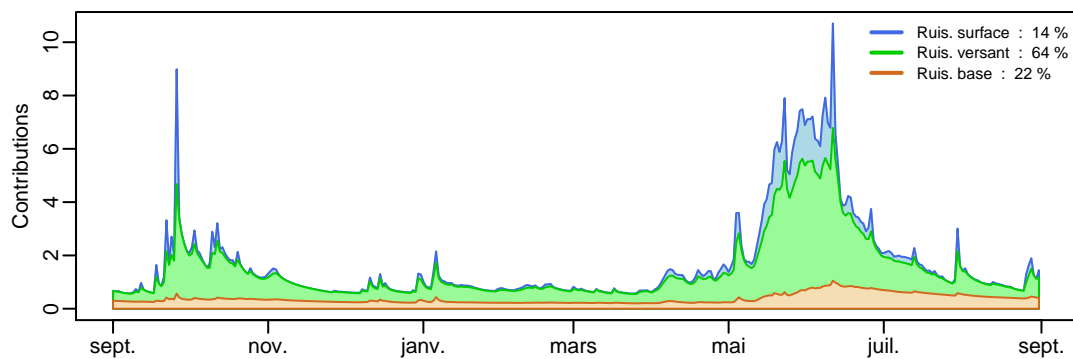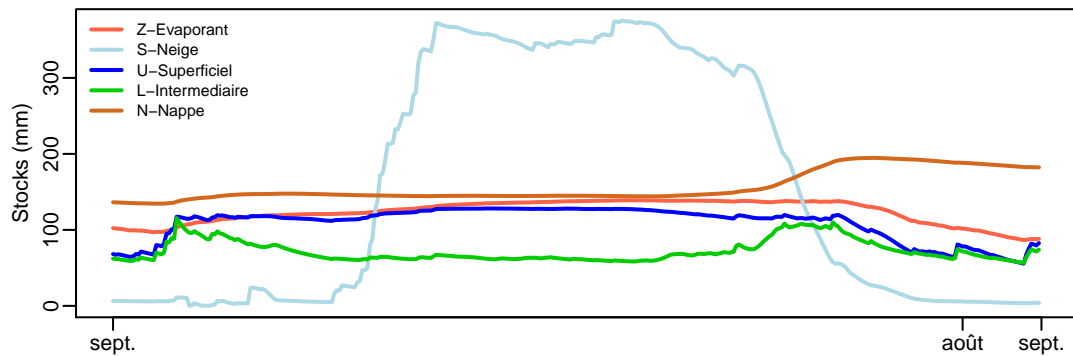

# s.ponh (3584.66 km<sup>2</sup>) – année 1982–1983

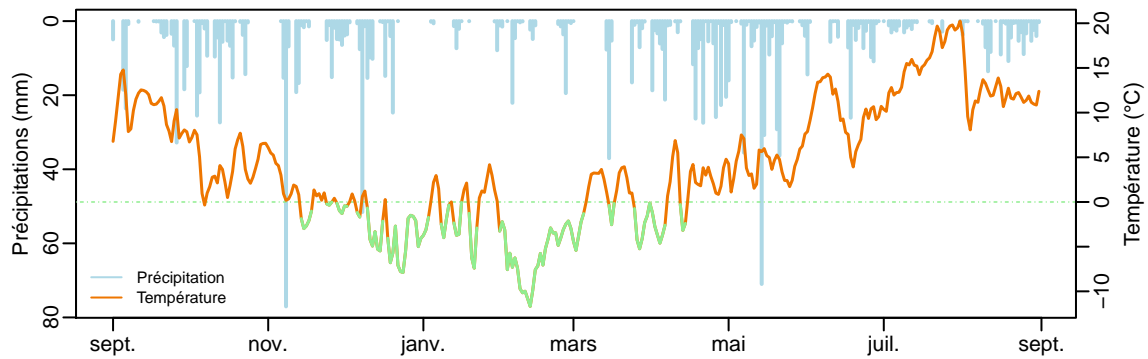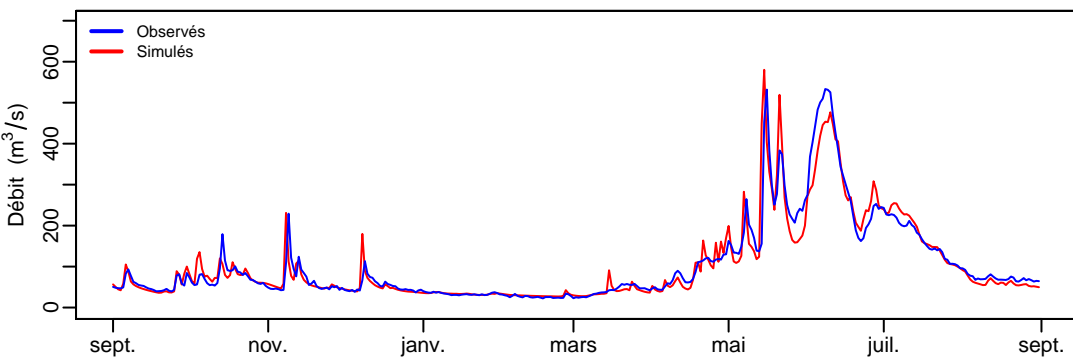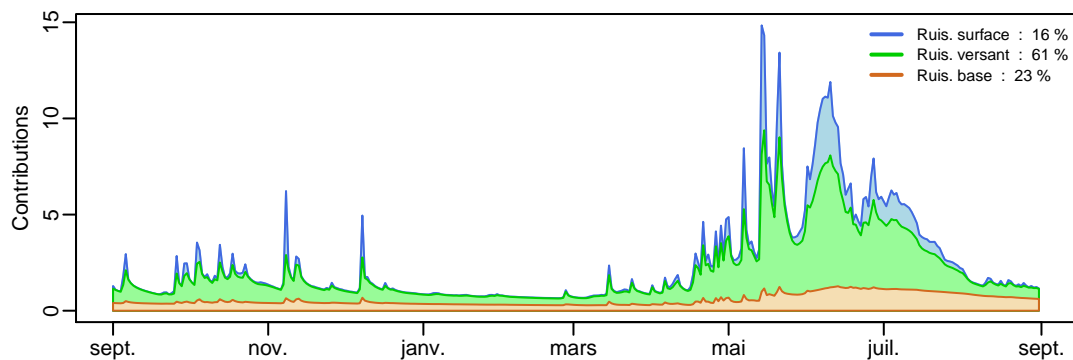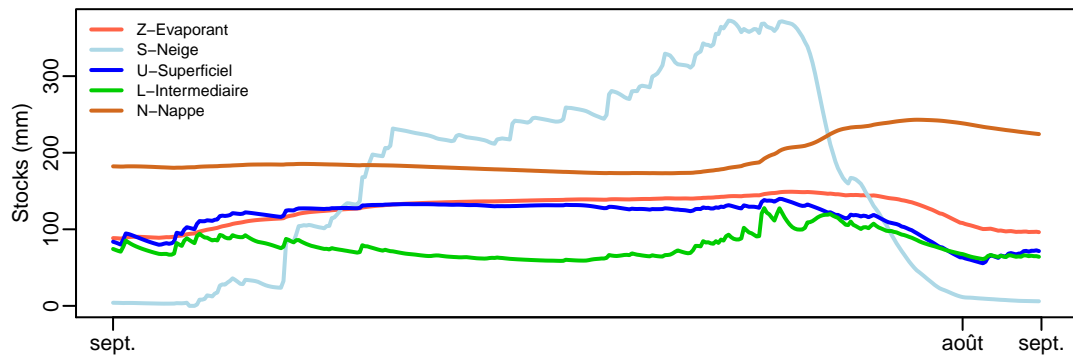

# s.ponh (3584.66 km<sup>2</sup>) – année 1983–1984

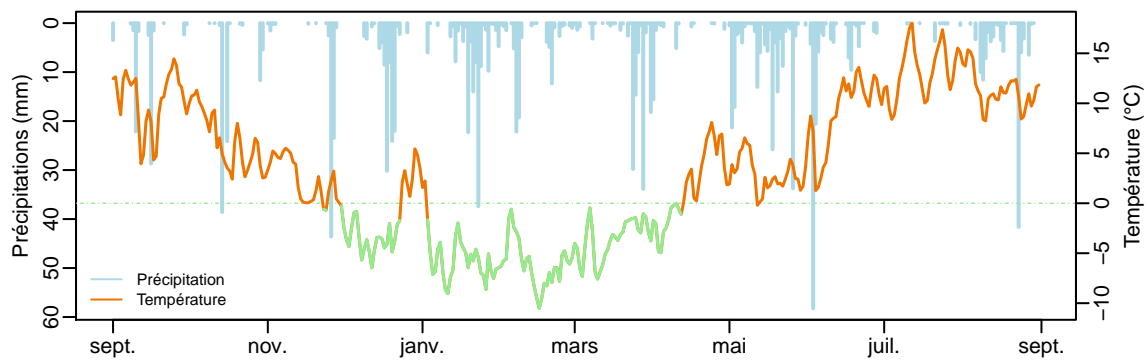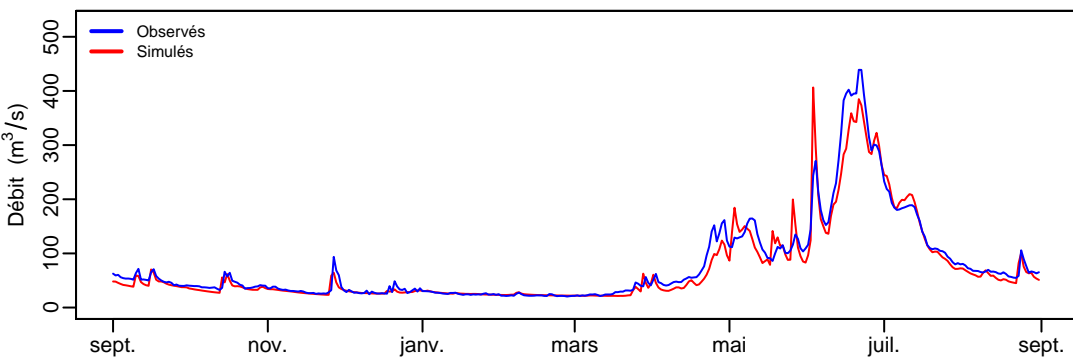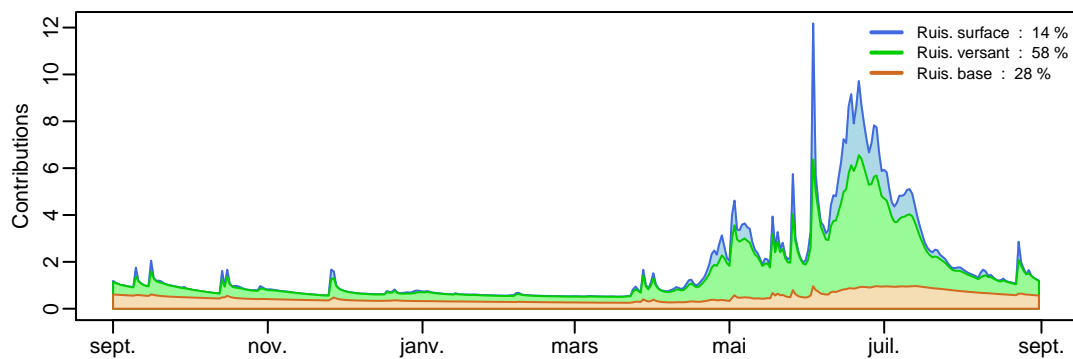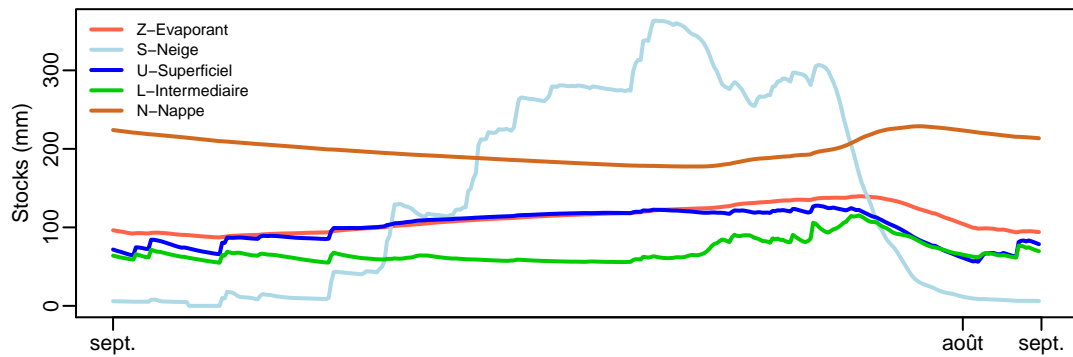

# s.ponh (3584.66 km<sup>2</sup>) – année 1984–1985

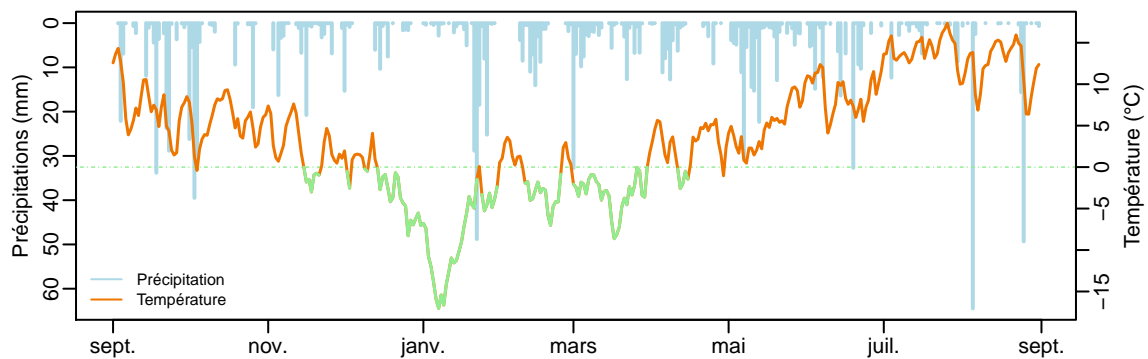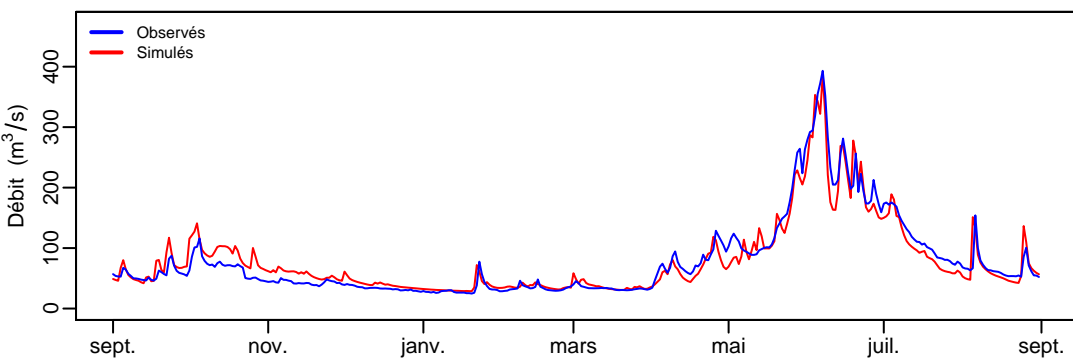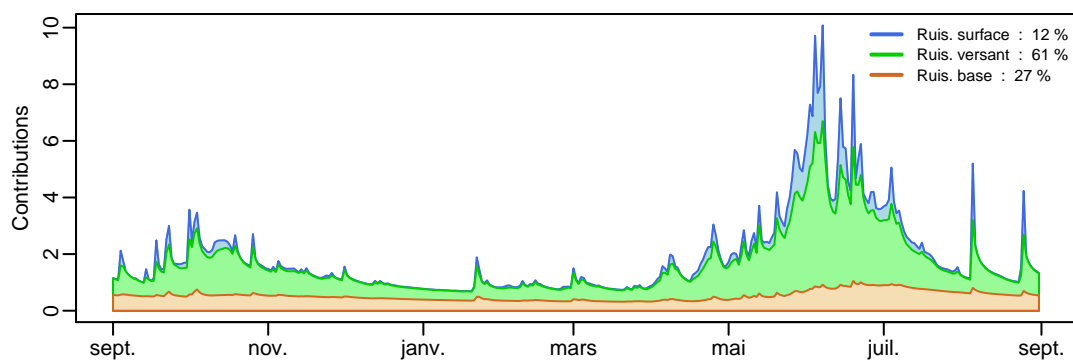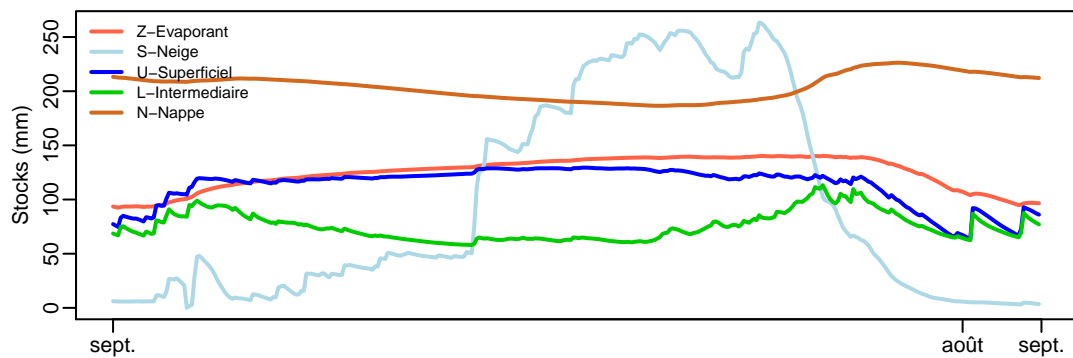



# s.ponh (3584.66 km<sup>2</sup>) – année 1985–1986

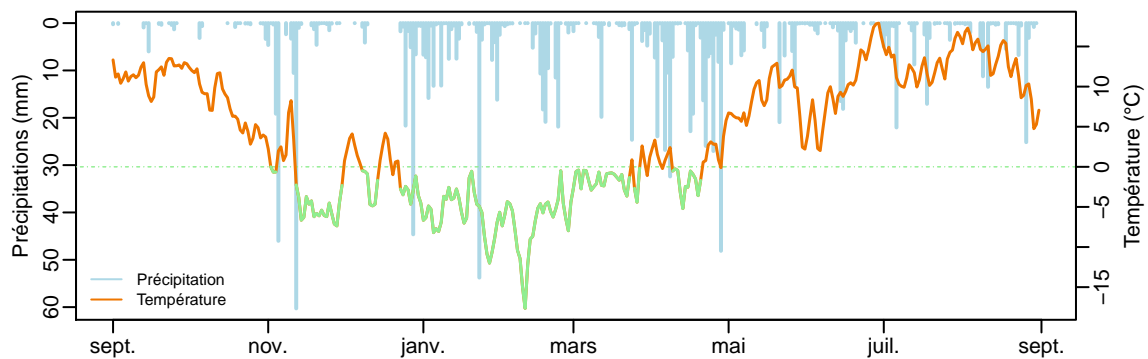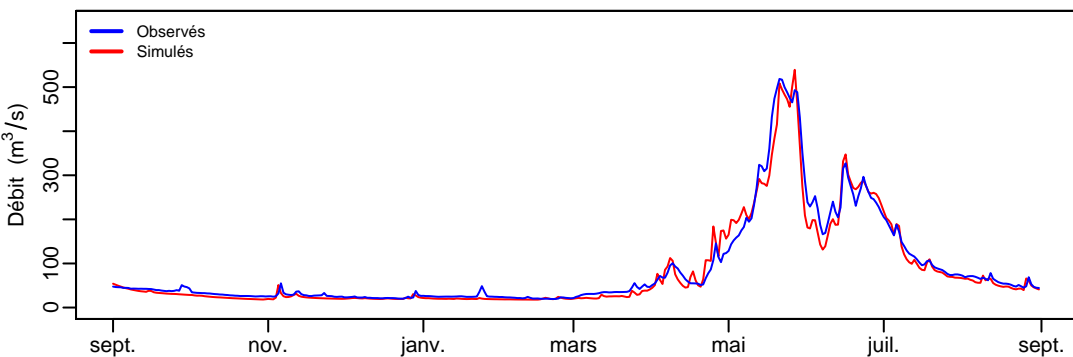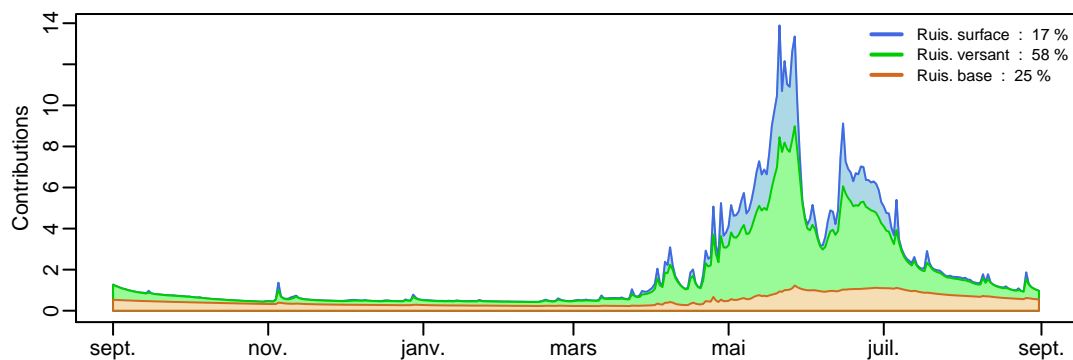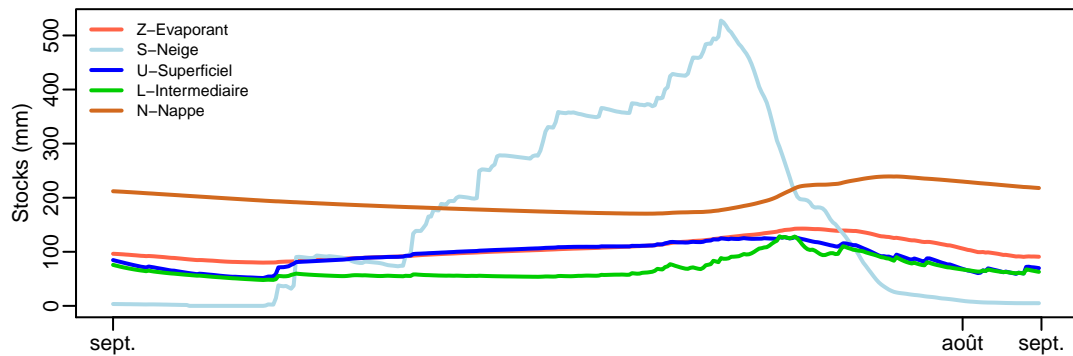

# s.ponh (3584.66 km<sup>2</sup>) – année 1986–1987

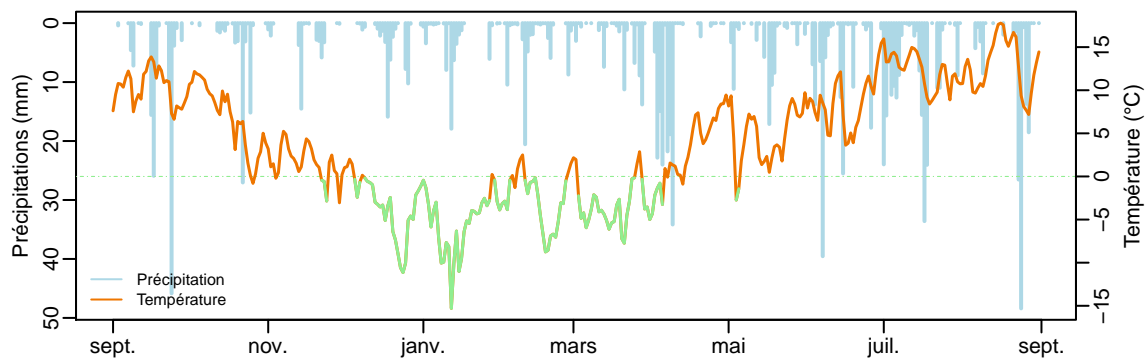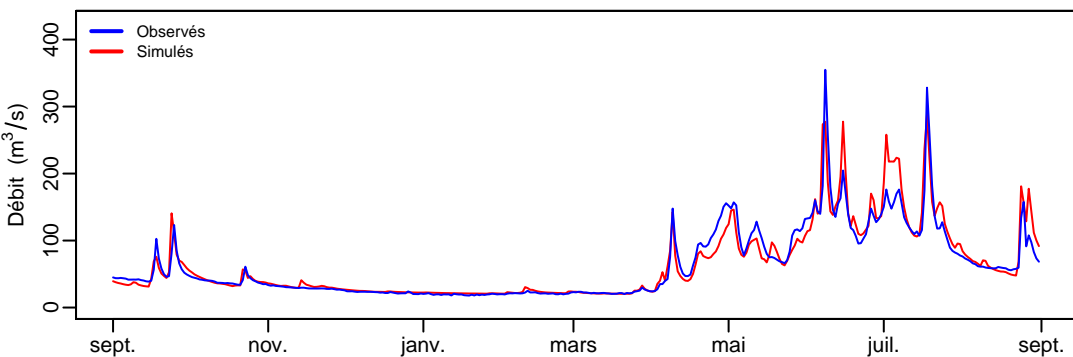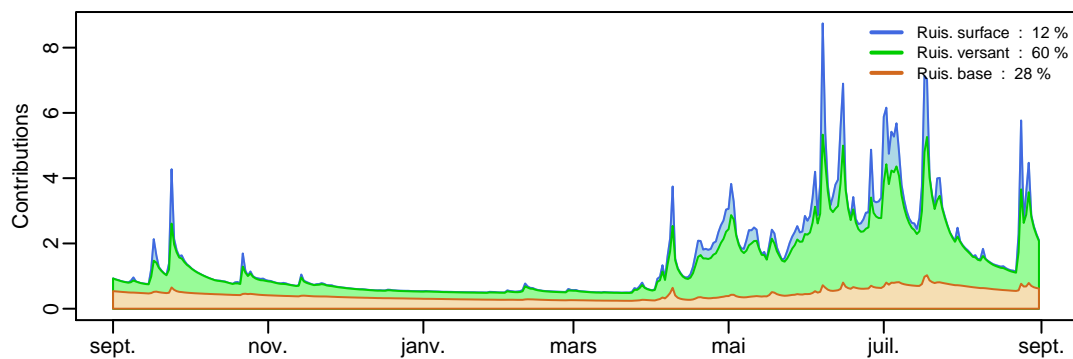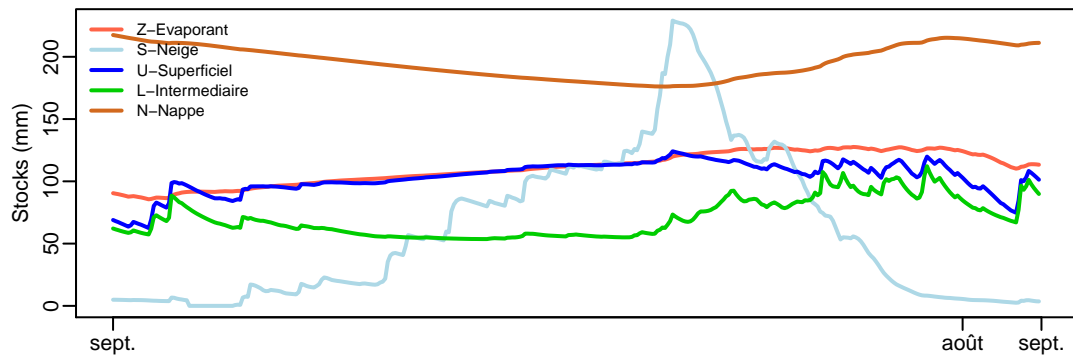

# s.ponh (3584.66 km<sup>2</sup>) – année 1987–1988

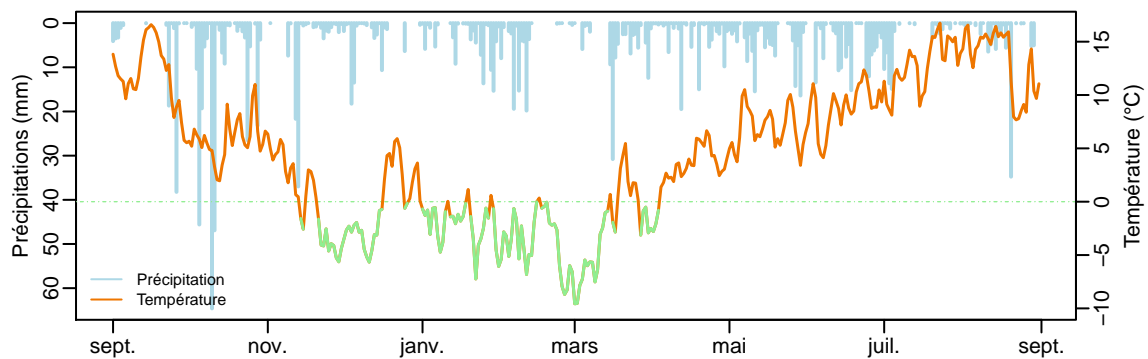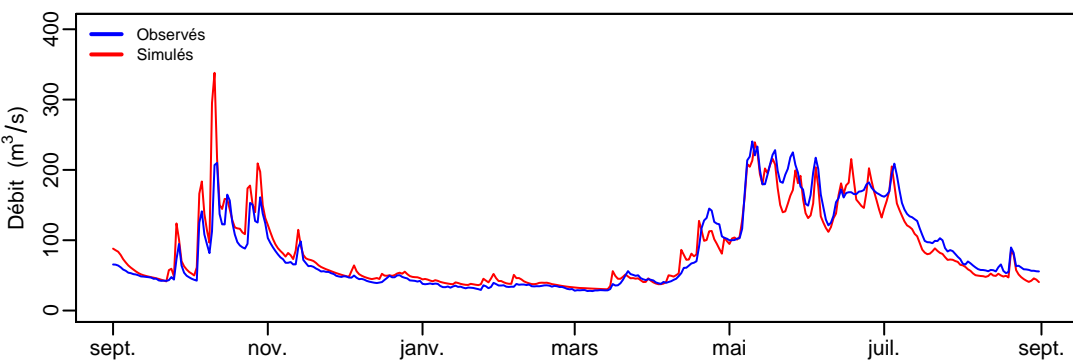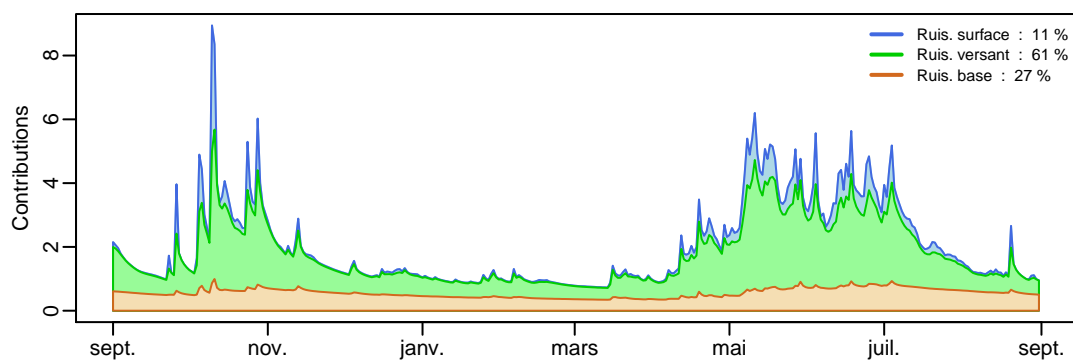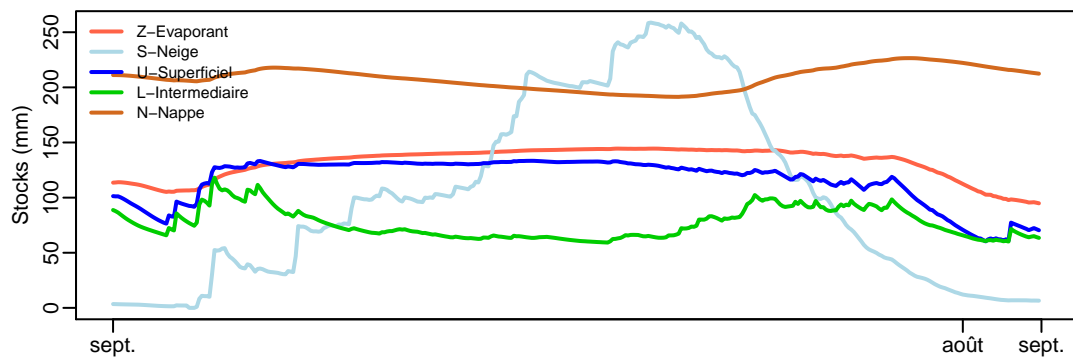

# s.ponh (3584.66 km<sup>2</sup>) – année 1988–1989

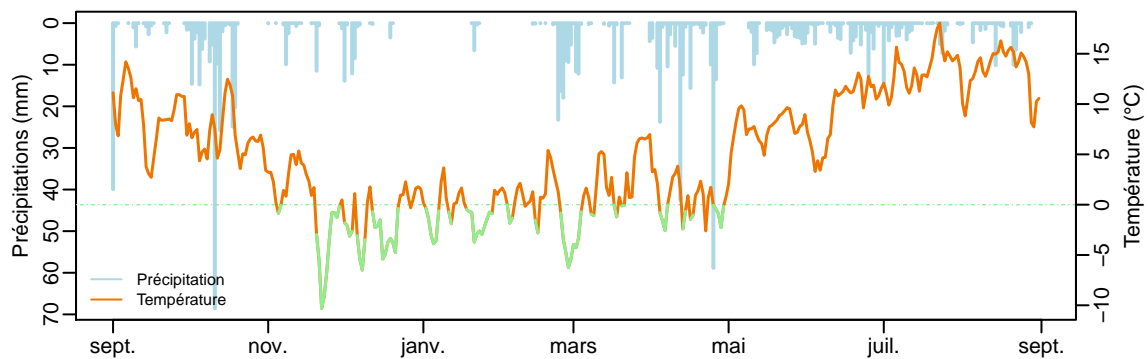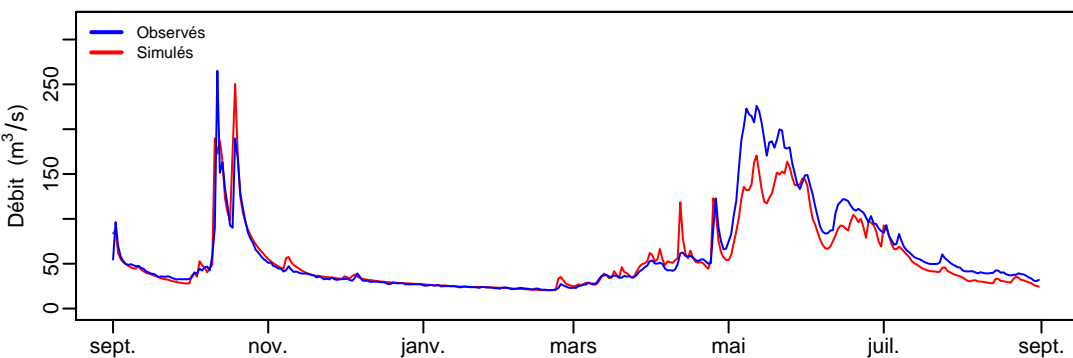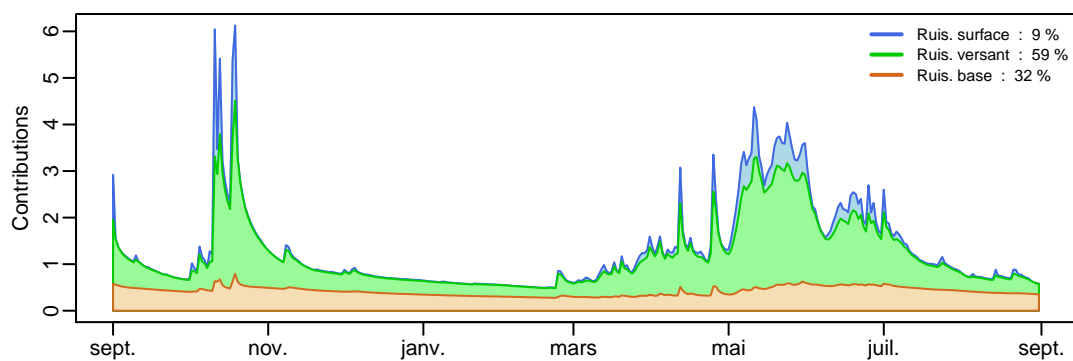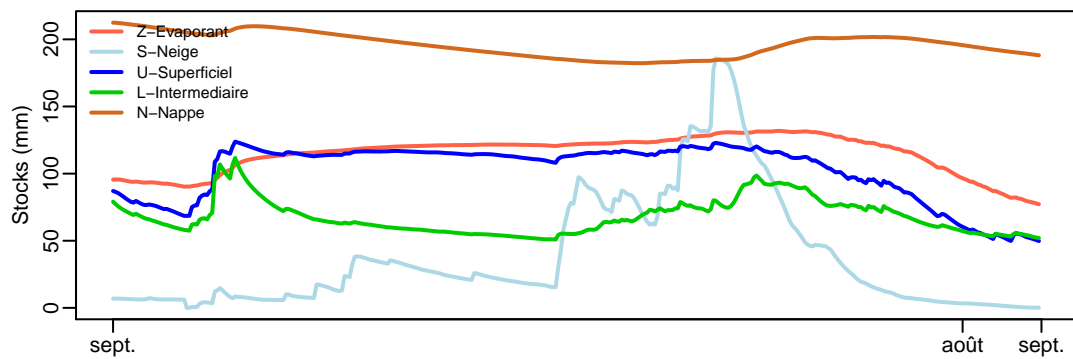

# s.ponh (3584.66 km<sup>2</sup>) – année 1989–1990

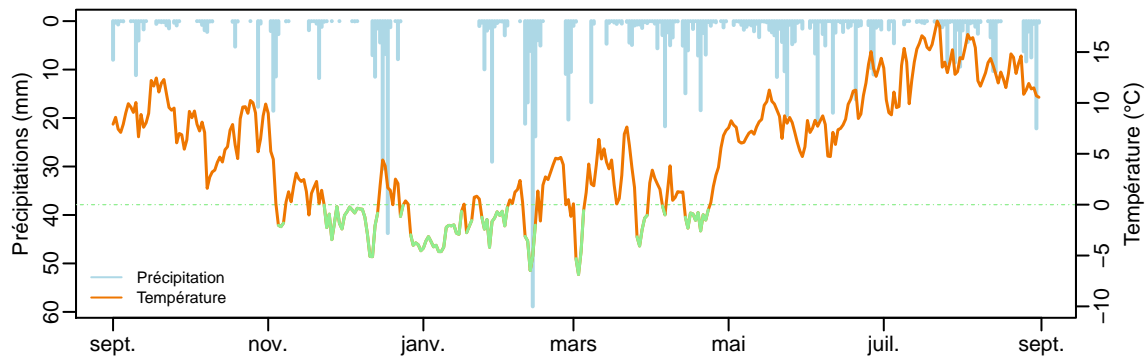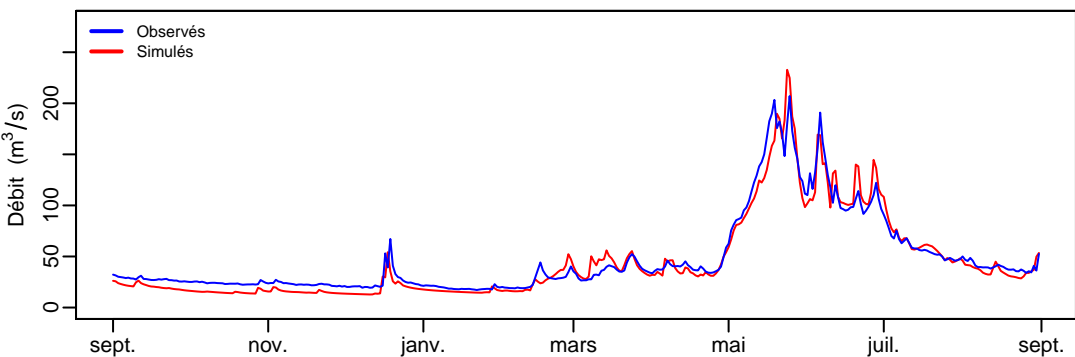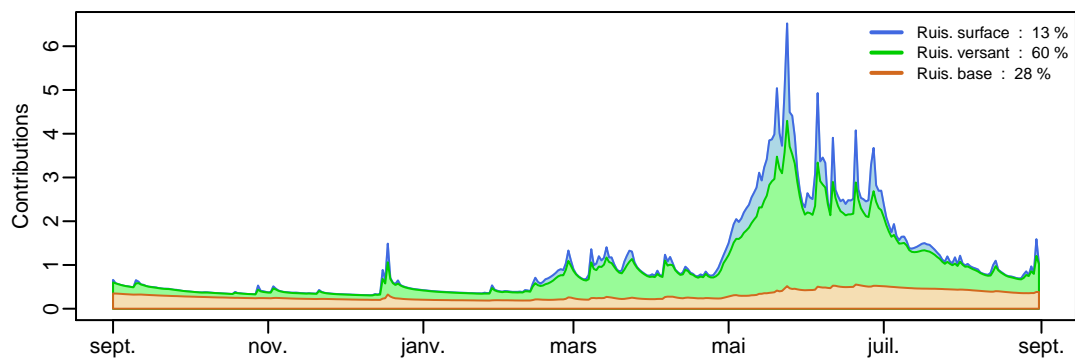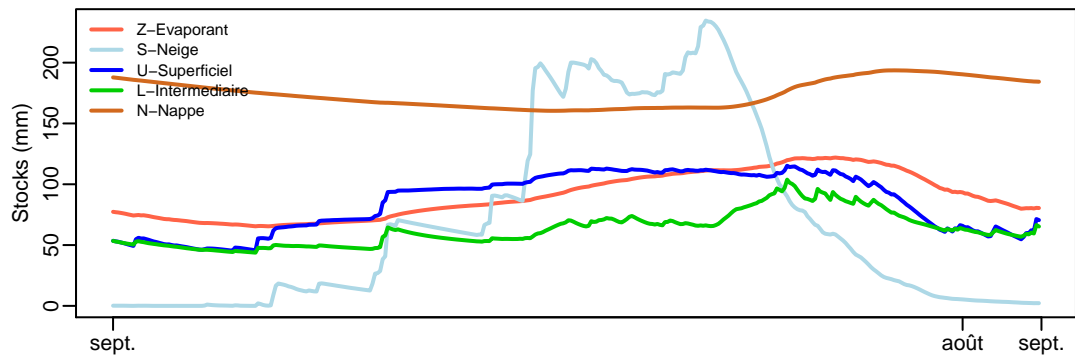

# s.ponh (3584.66 km<sup>2</sup>) – année 1990–1991

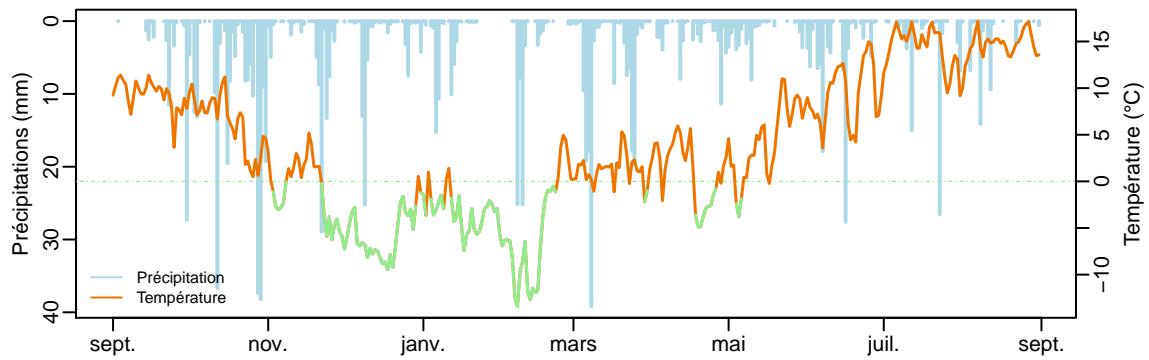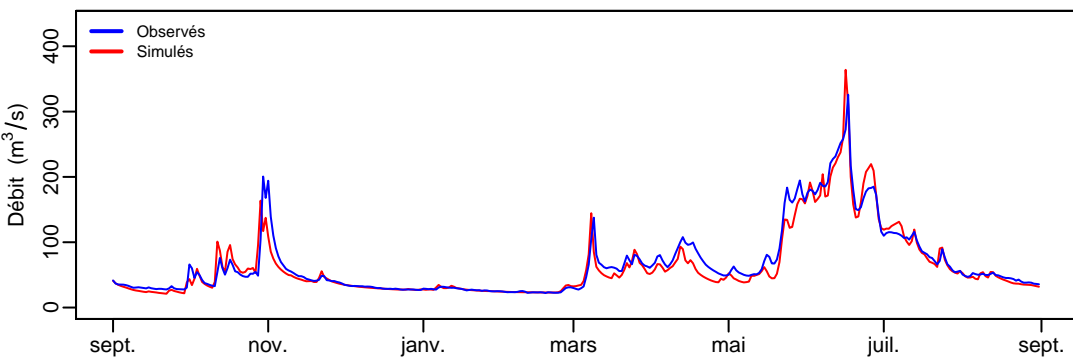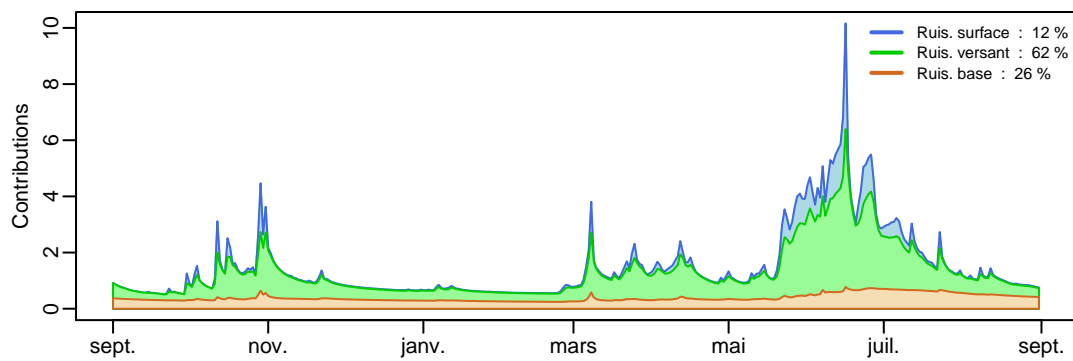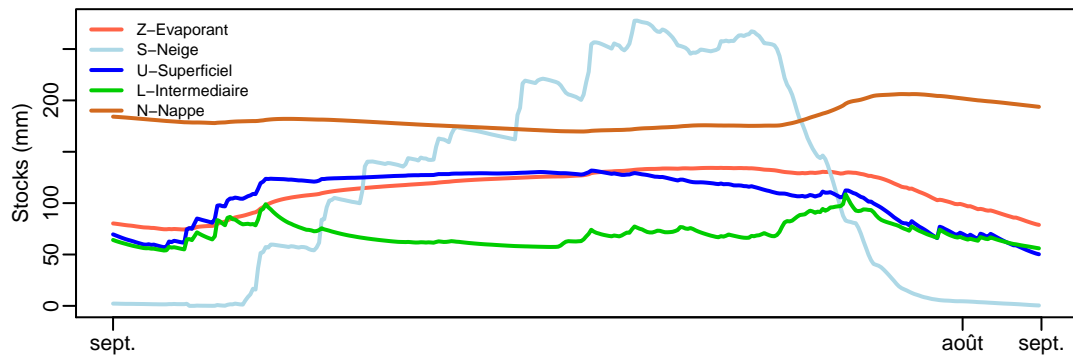

# s.ponh (3584.66 km<sup>2</sup>) – année 1991–1992

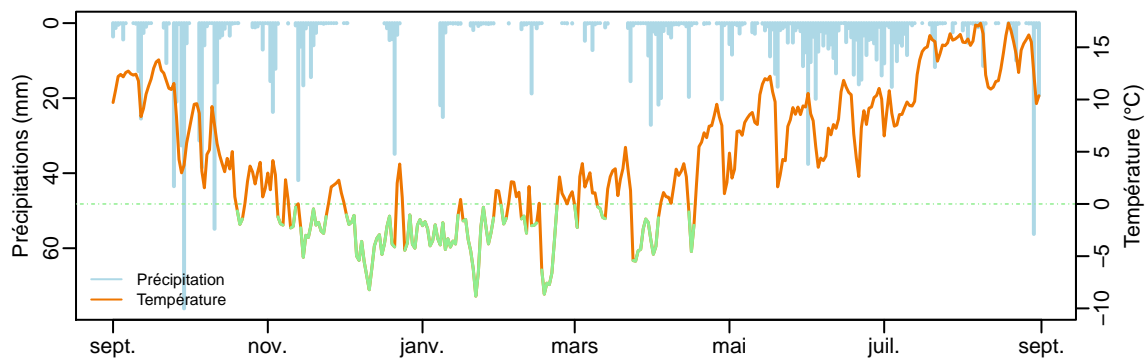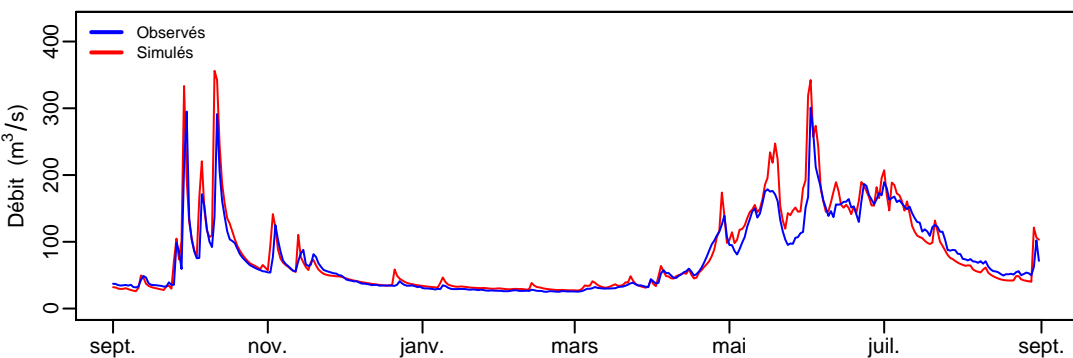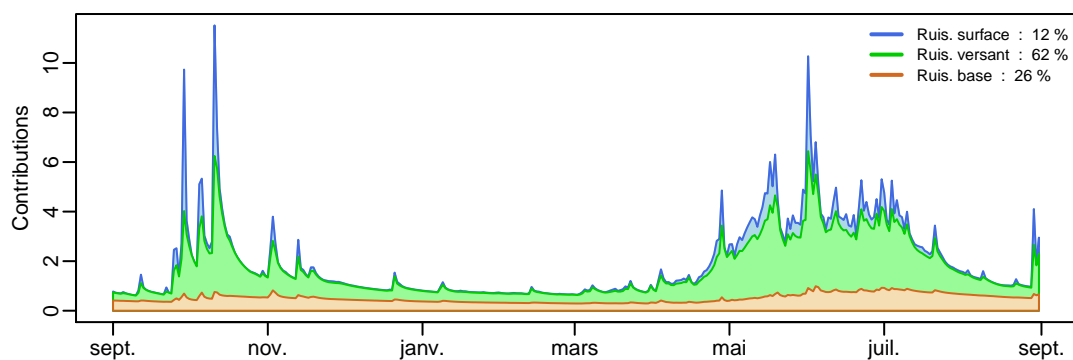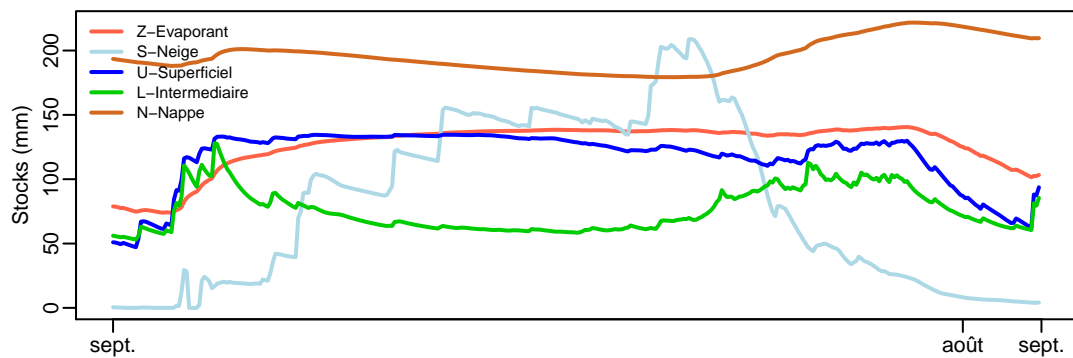

# s.ponh (3584.66 km<sup>2</sup>) – année 1992–1993

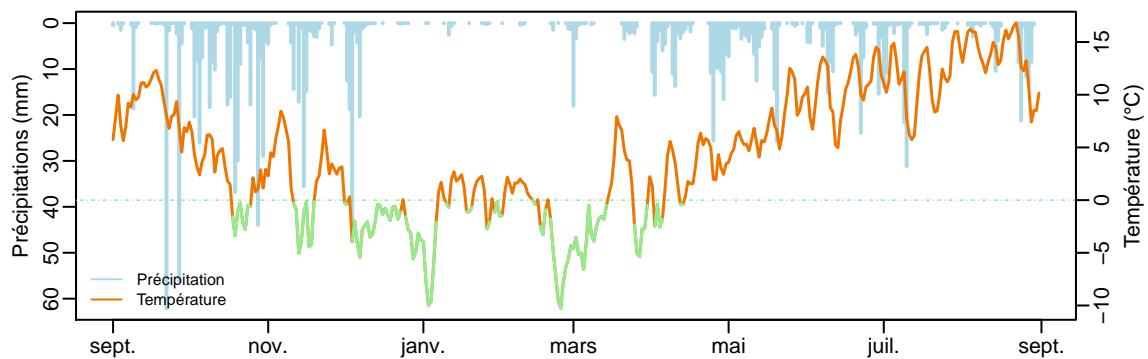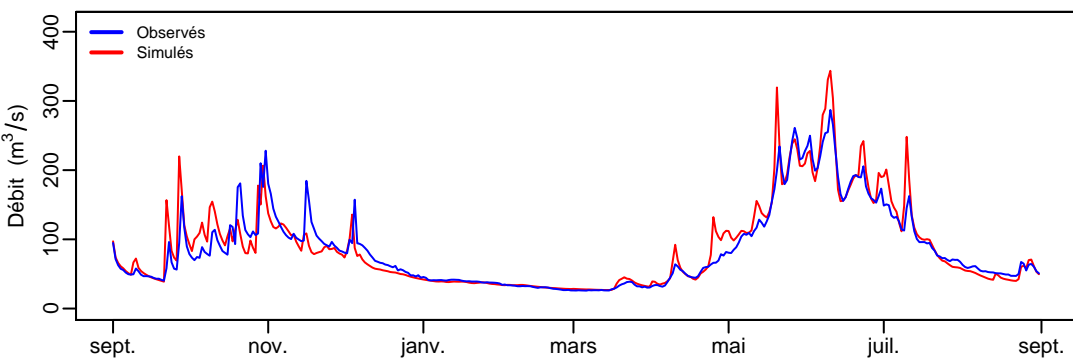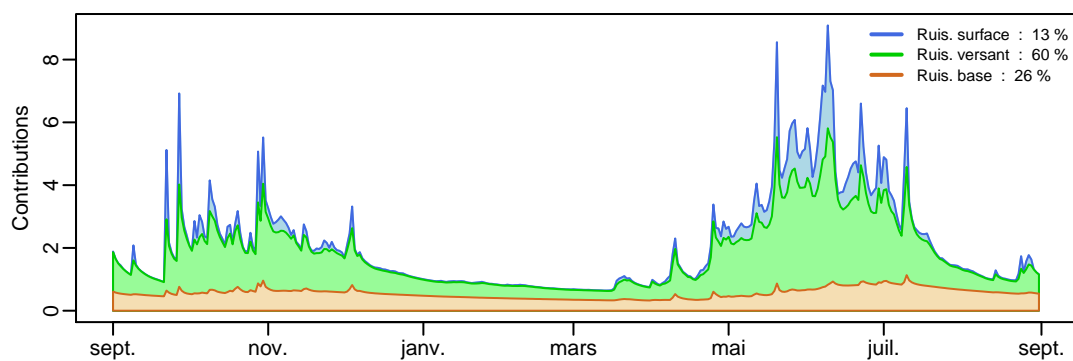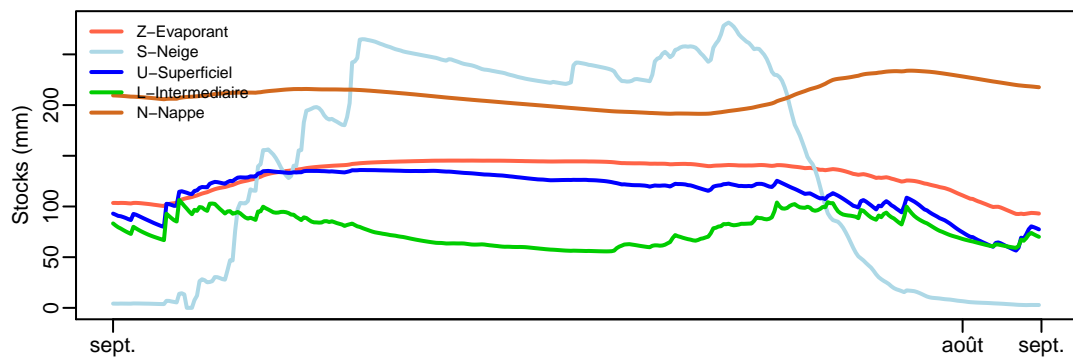



# s.ponh (3584.66 km<sup>2</sup>) – année 1993–1994

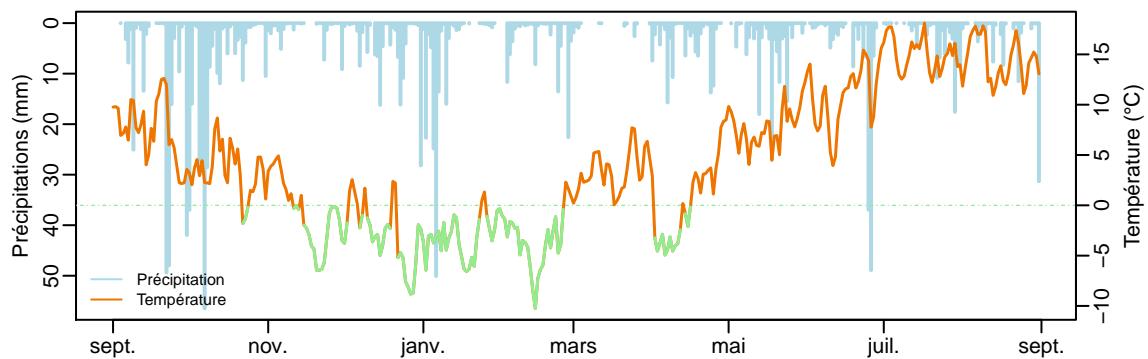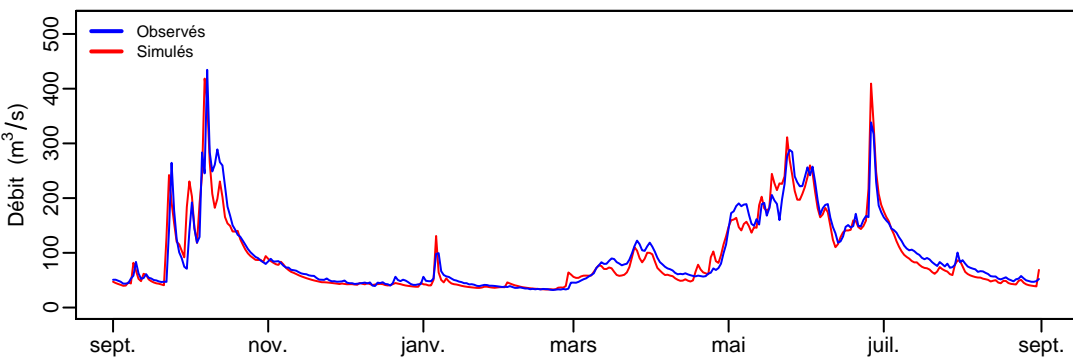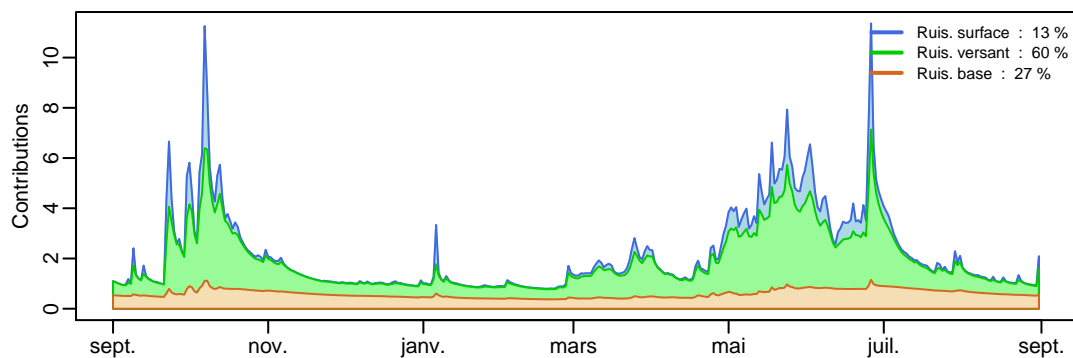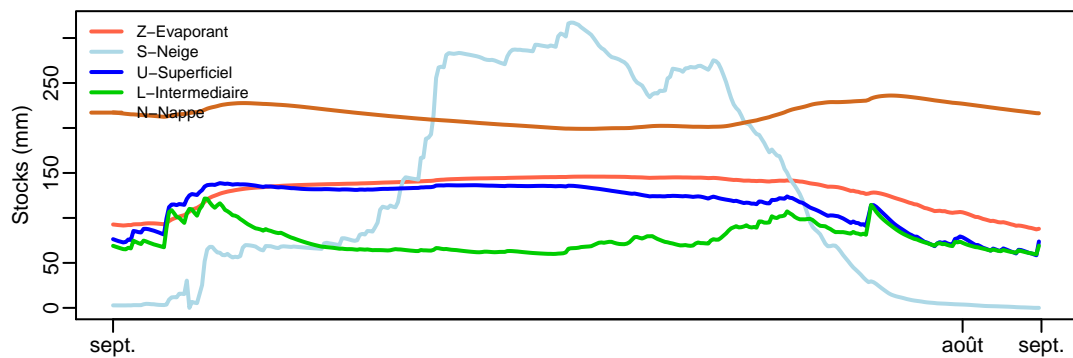

# s.ponh (3584.66 km<sup>2</sup>) – année 1994–1995

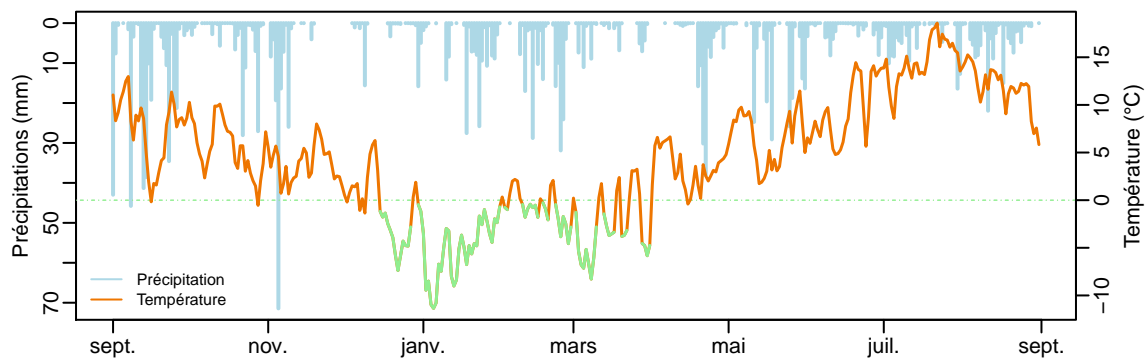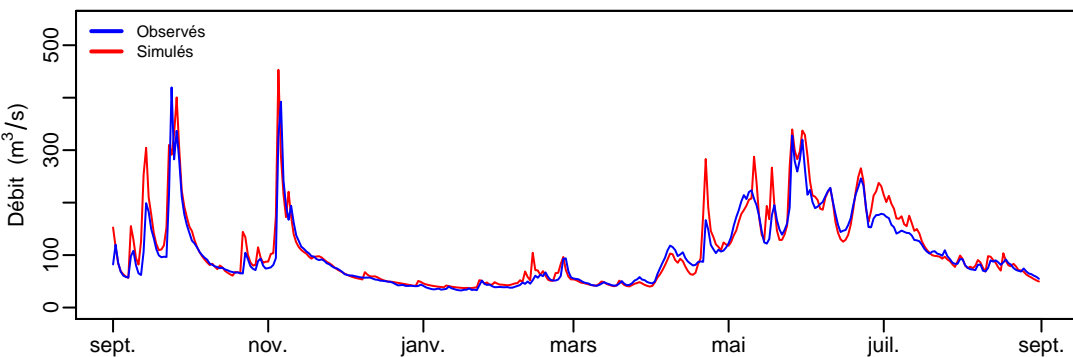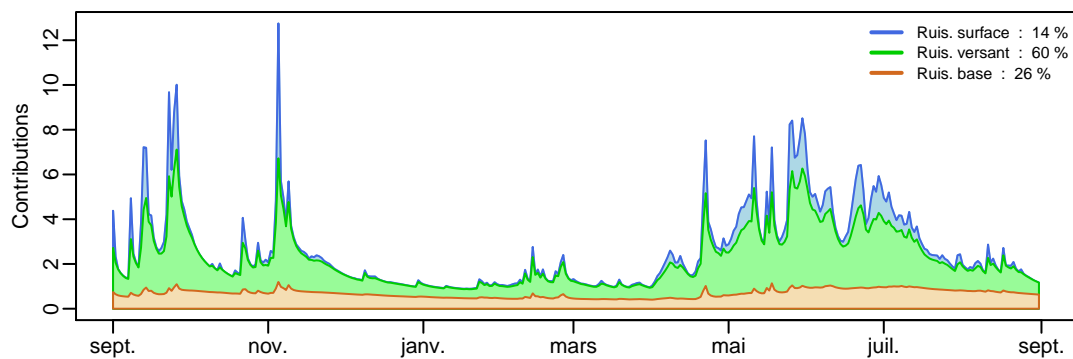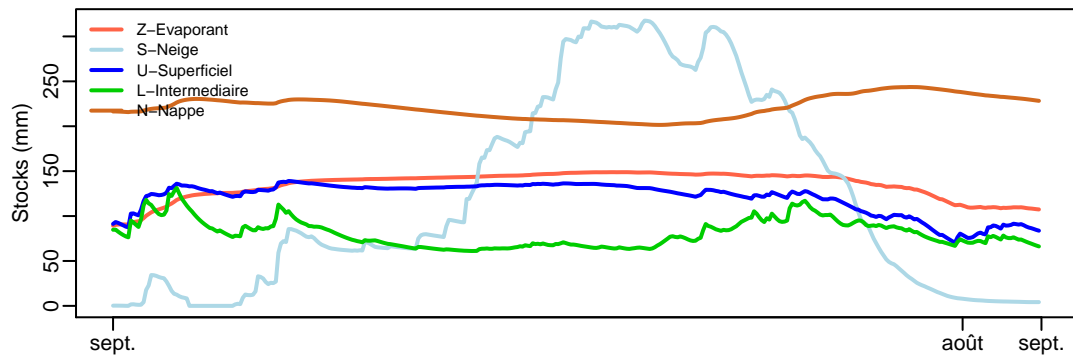

# s.ponh (3584.66 km<sup>2</sup>) – année 1995–1996

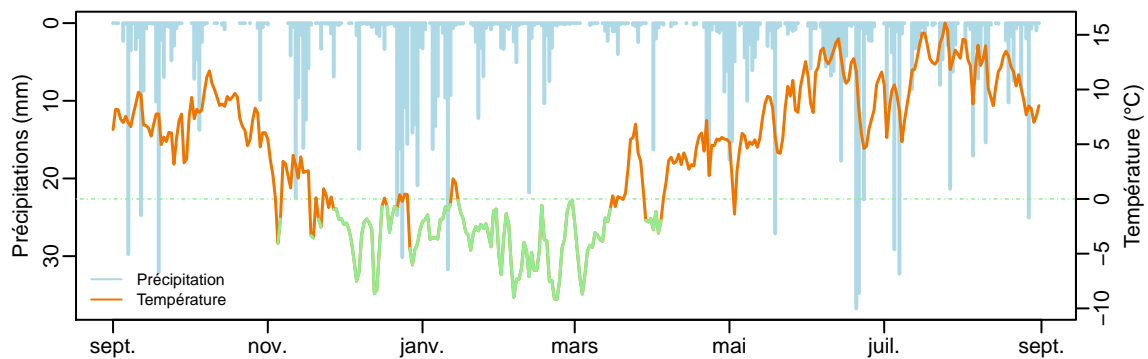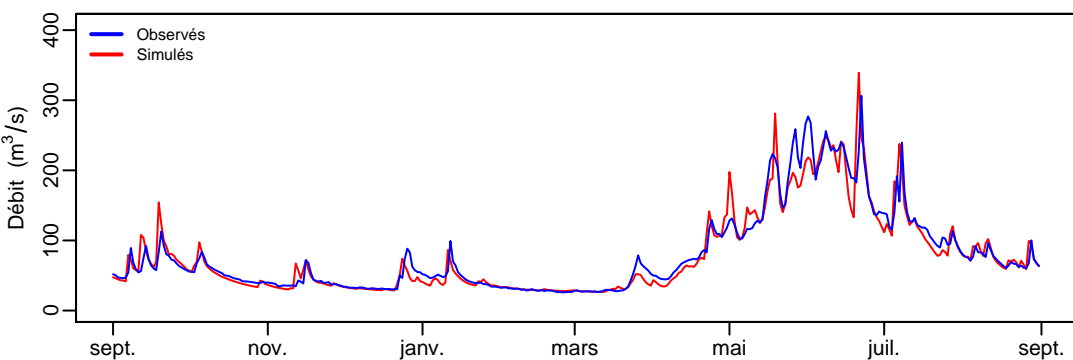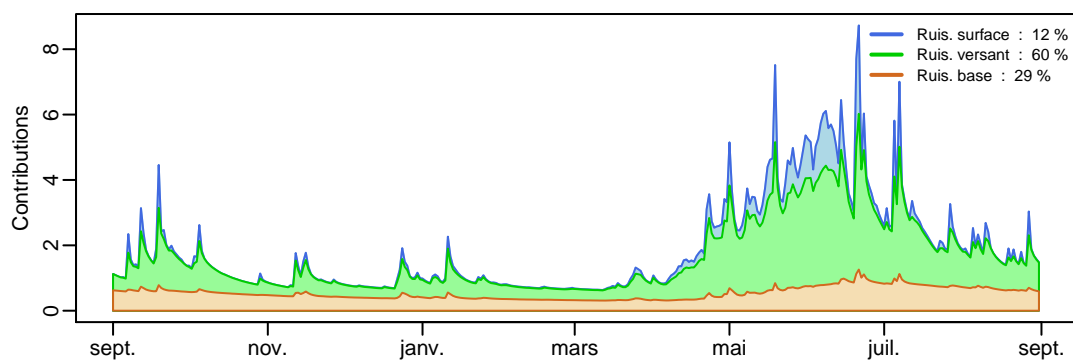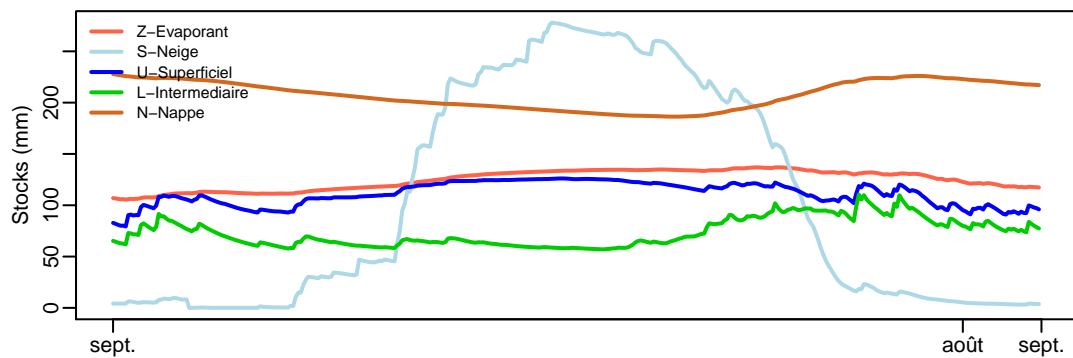

# s.ponh (3584.66 km²) – année 1996–1997

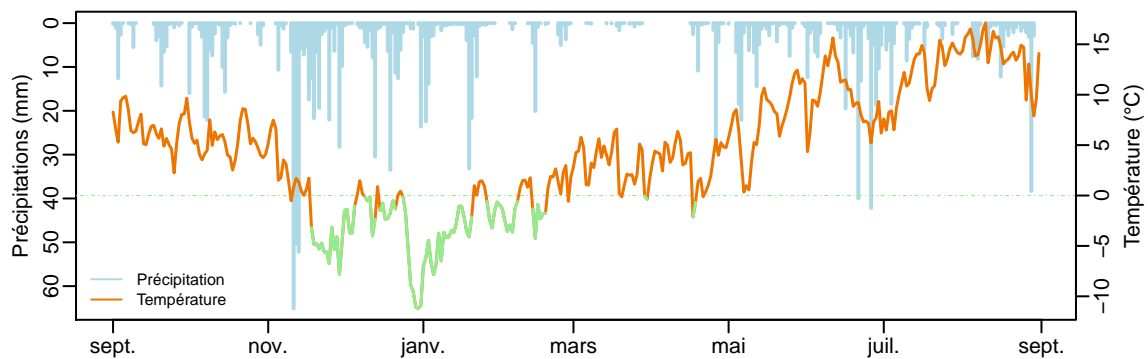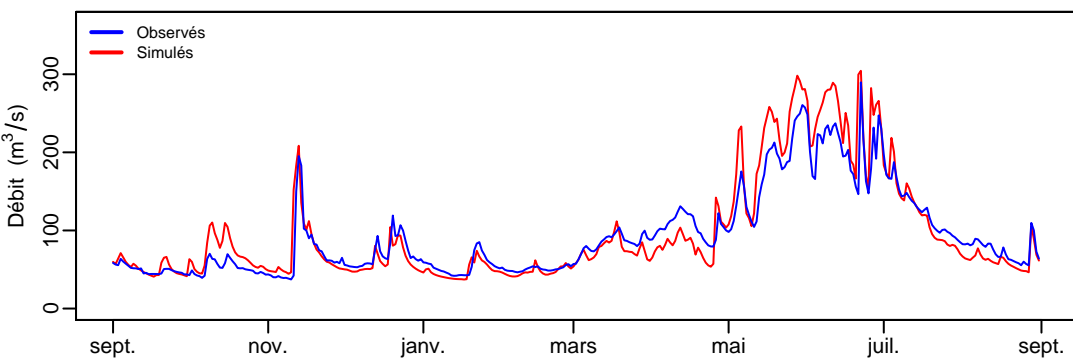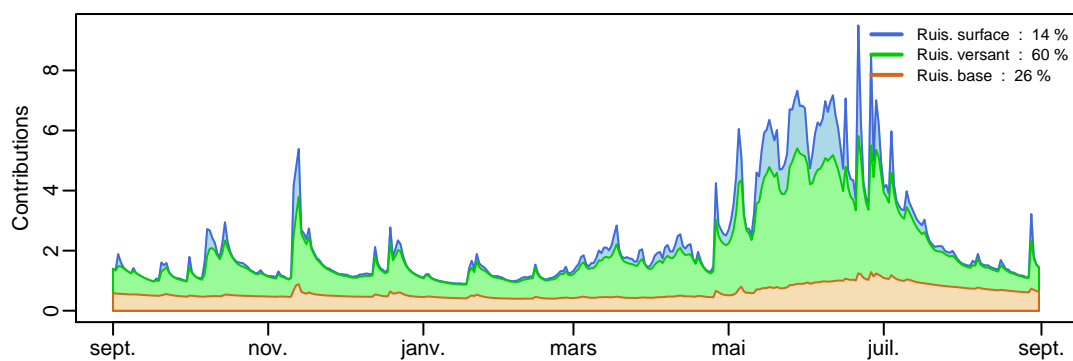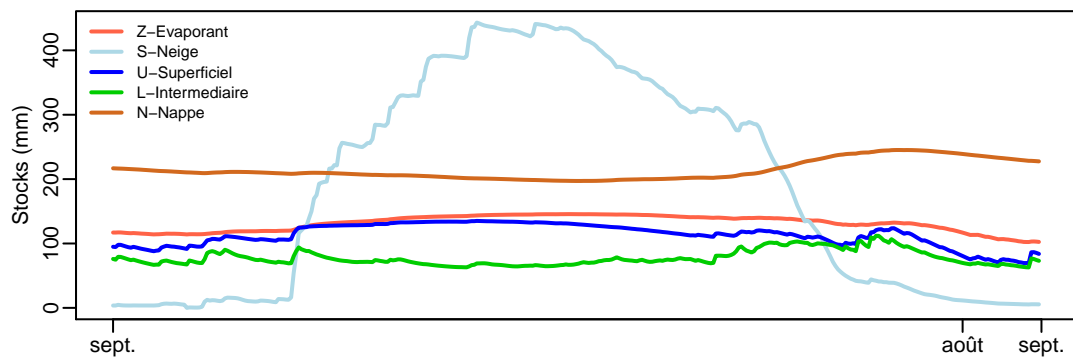

# s.ponh (3584.66 km<sup>2</sup>) – année 1997–1998

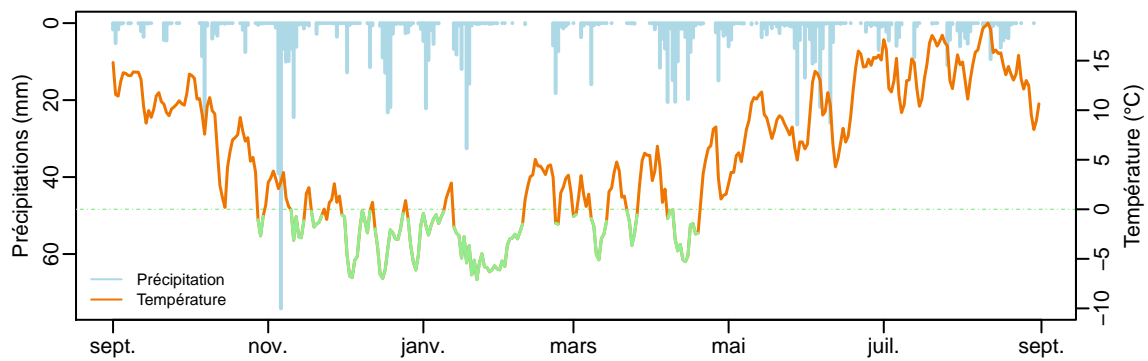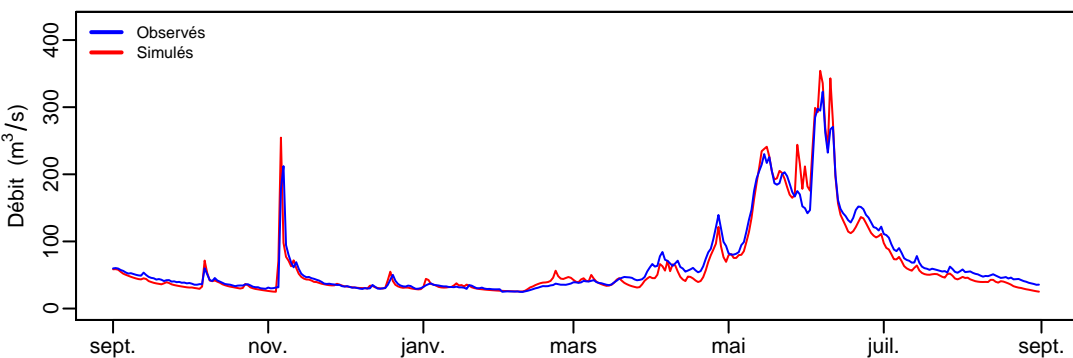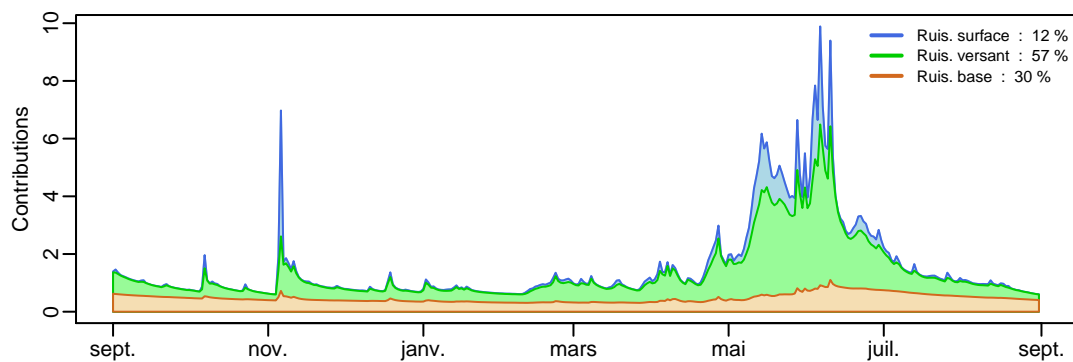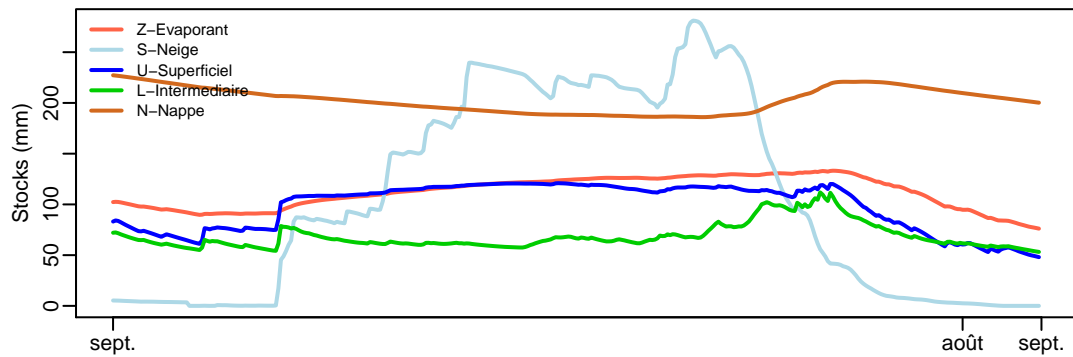

# s.ponh (3584.66 km<sup>2</sup>) – année 1998–1999

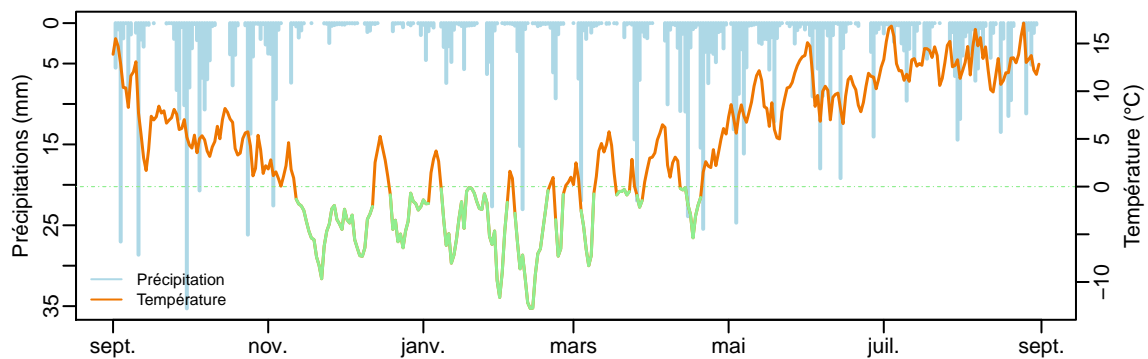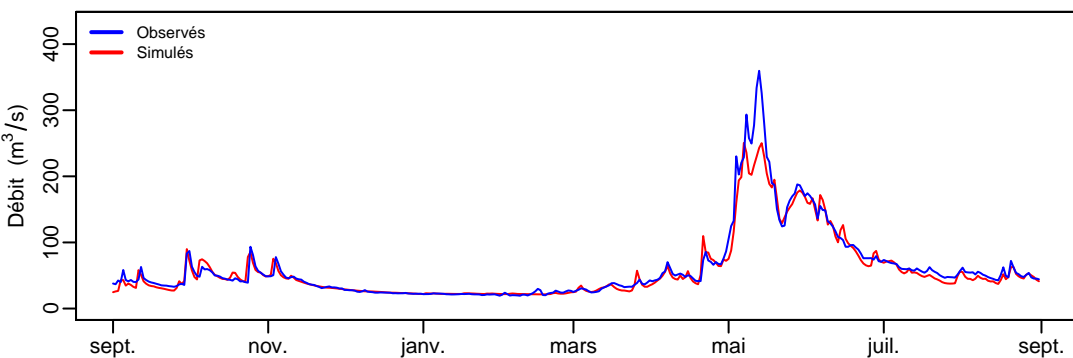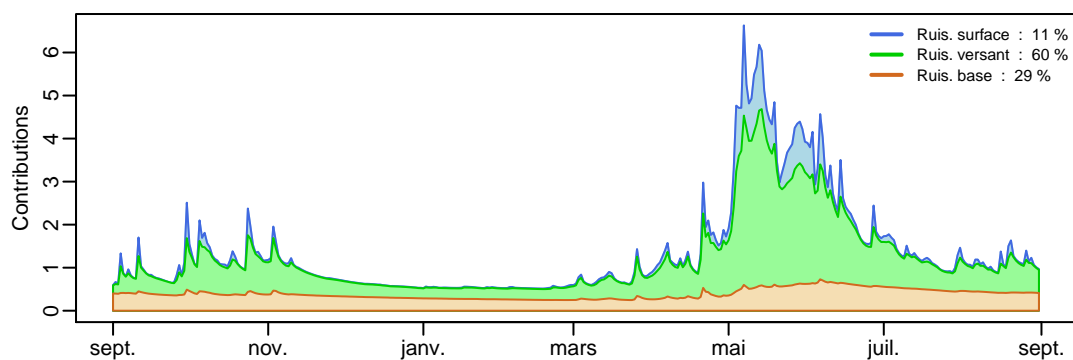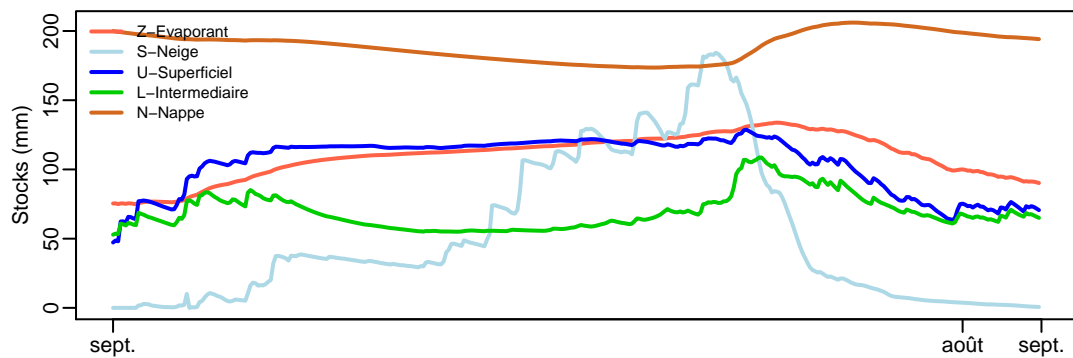

# s.ponh (3584.66 km²) – année 1999–2000

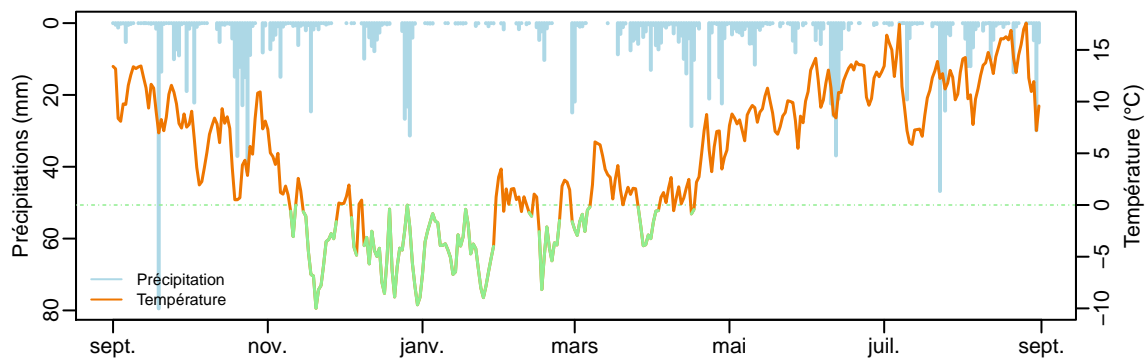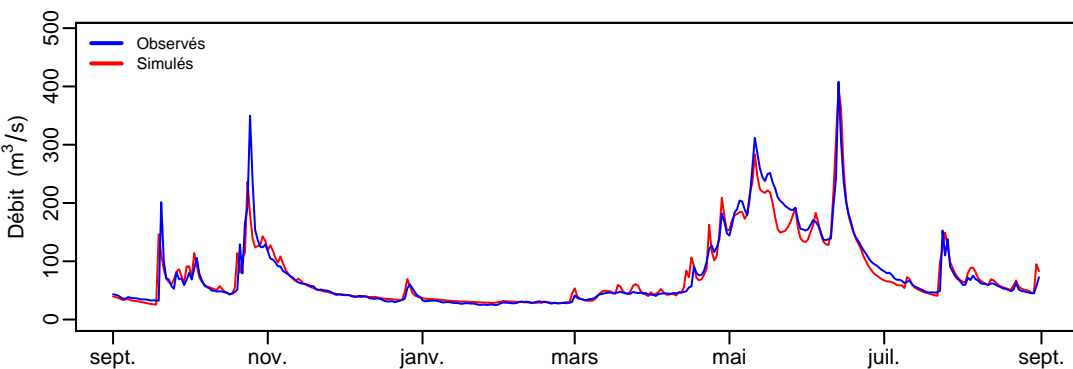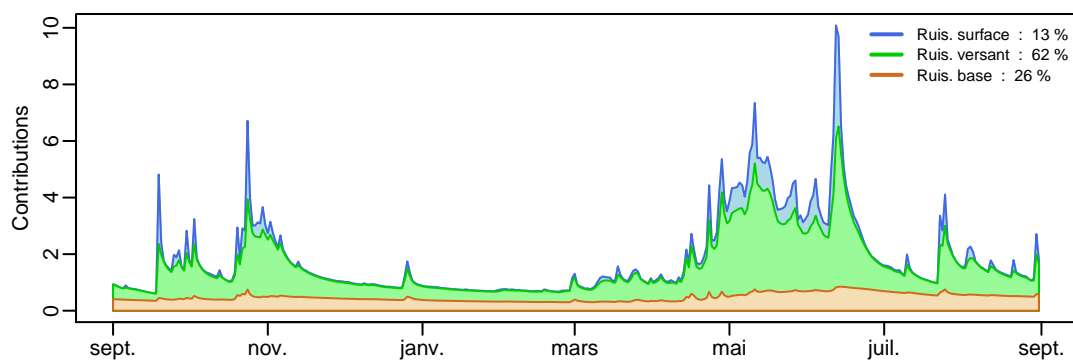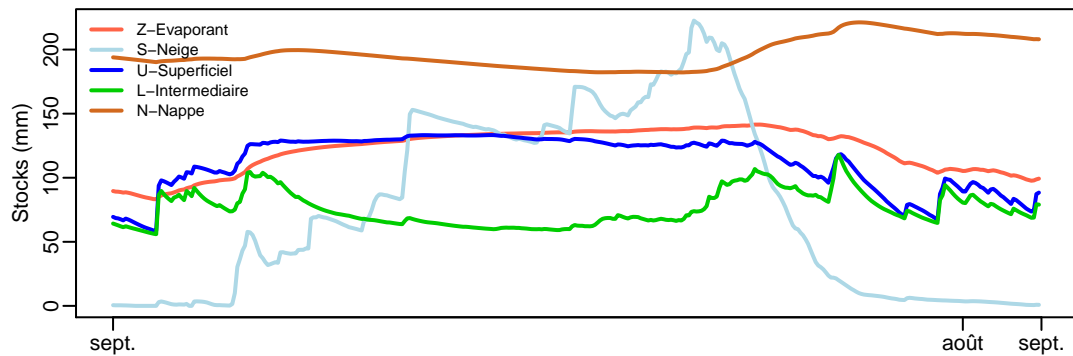

# s.ponh (3584.66 km<sup>2</sup>) – année 2000–2001

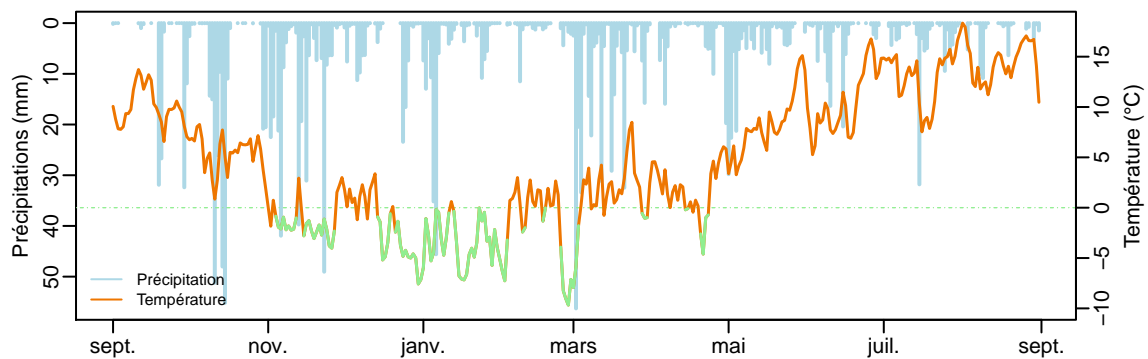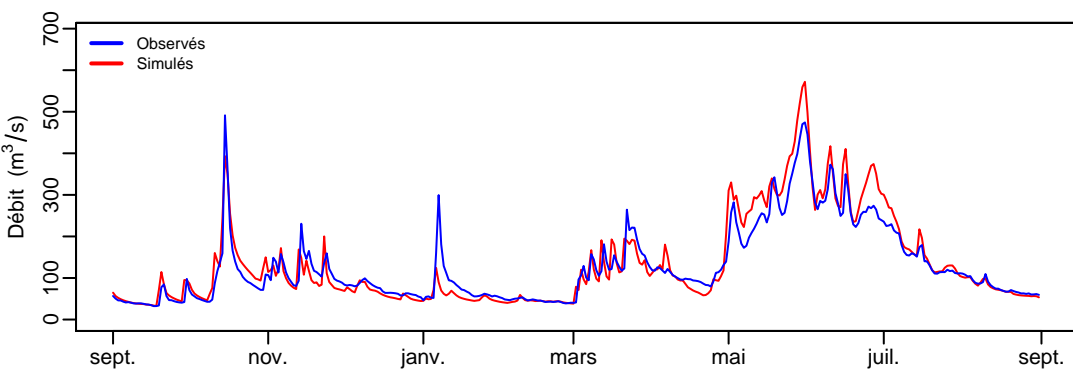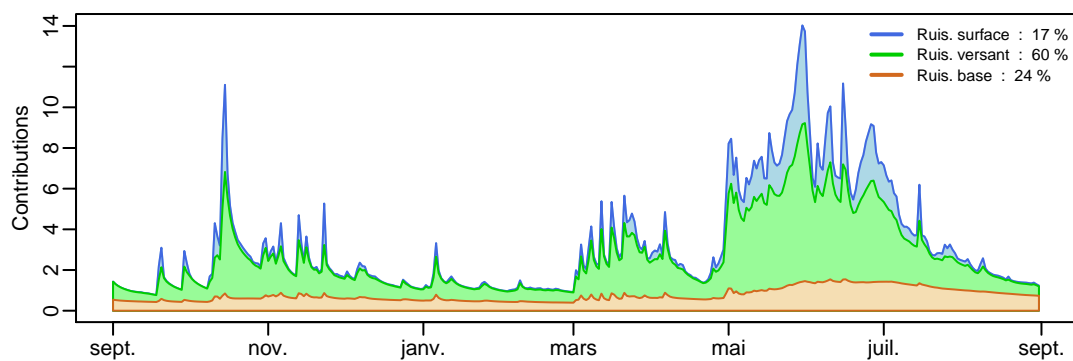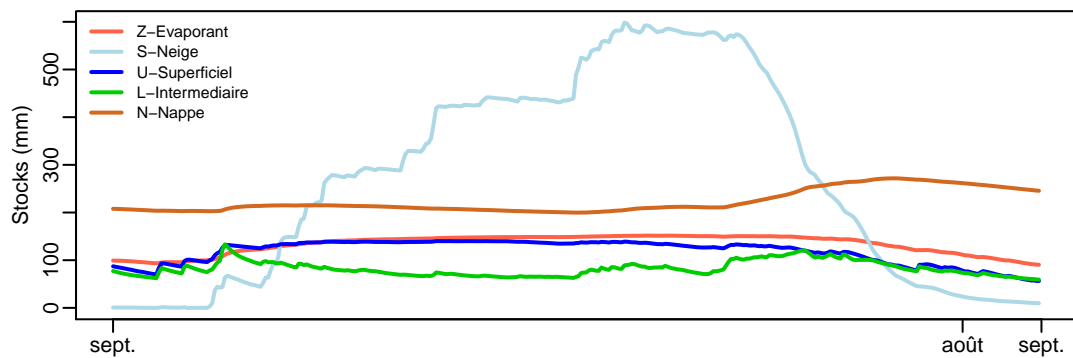



# s.ponh (3584.66 km<sup>2</sup>) – année 2001–2002

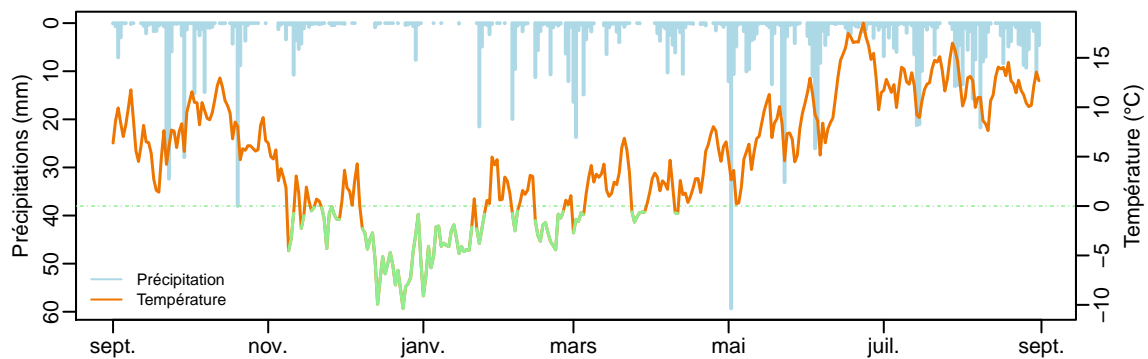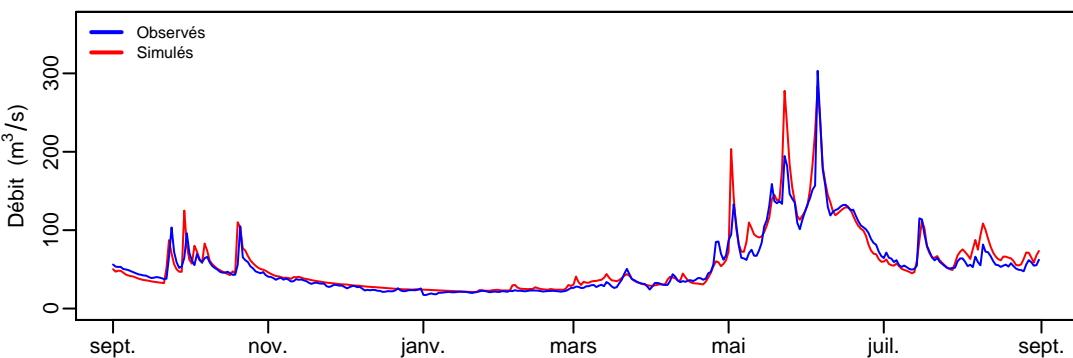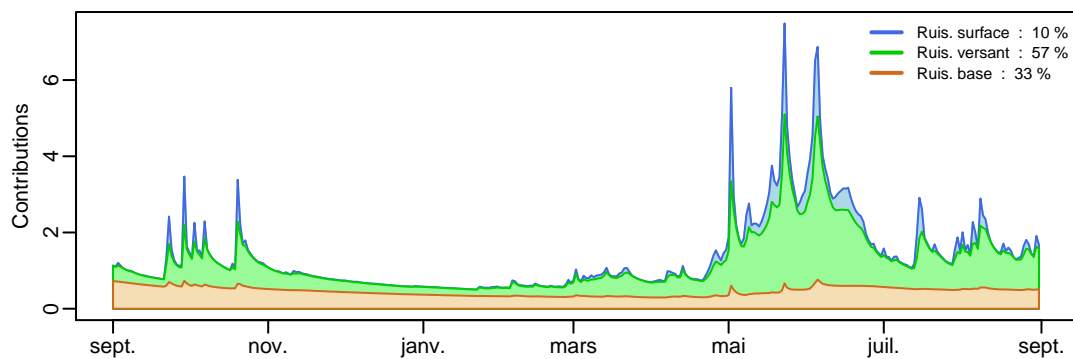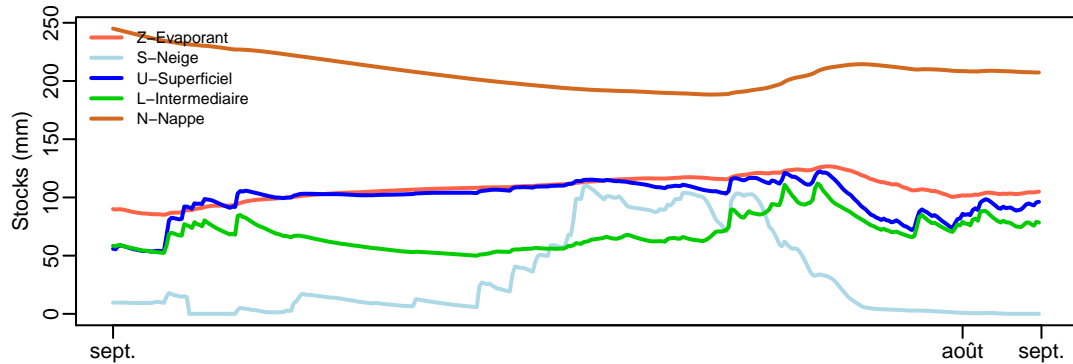

# s.ponh (3584.66 km<sup>2</sup>) – année 2002–2003

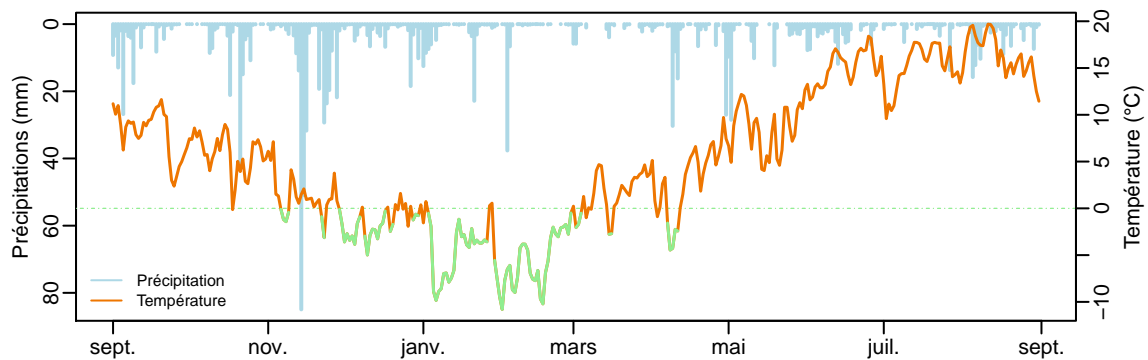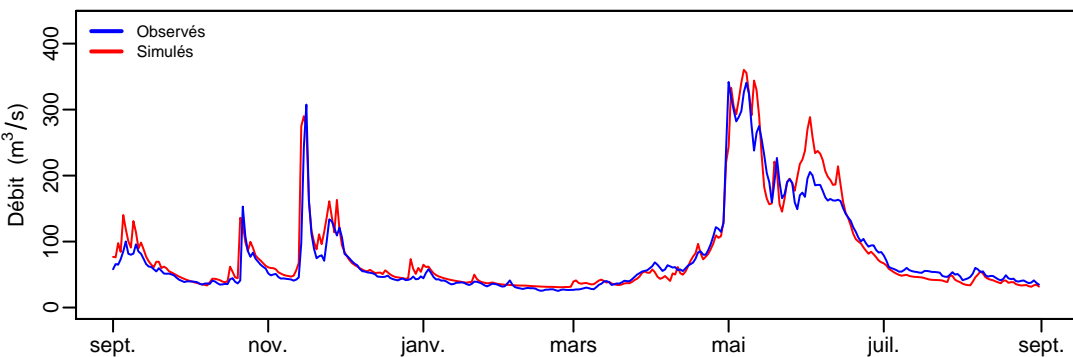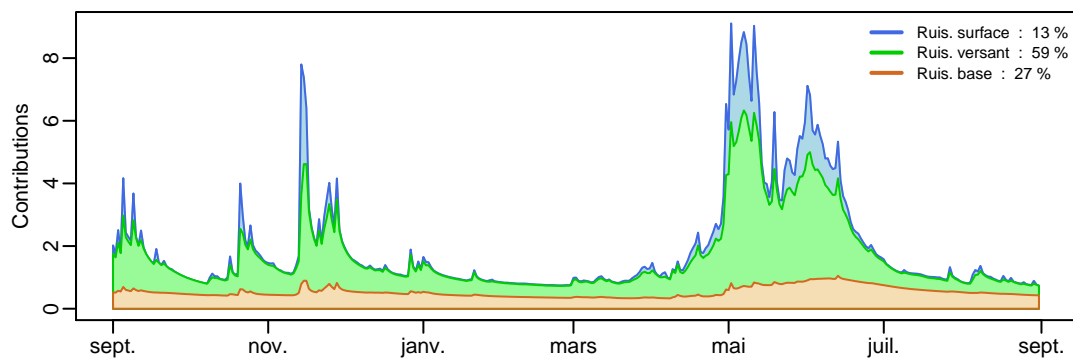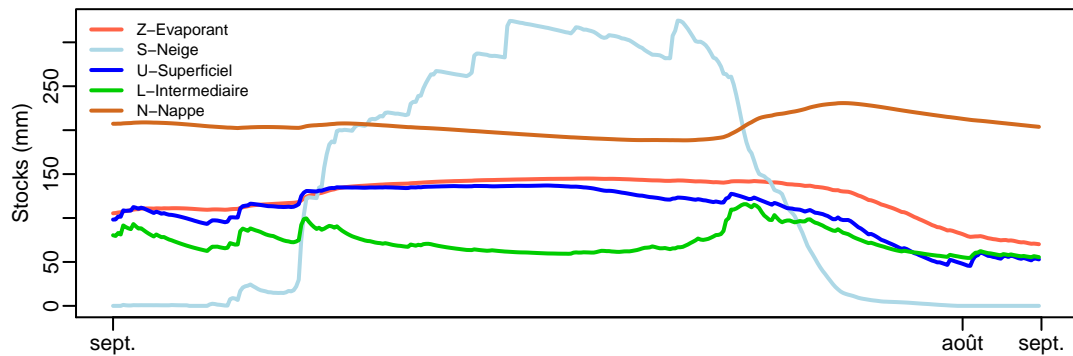

# s.ponh (3584.66 km<sup>2</sup>) – année 2003–2004

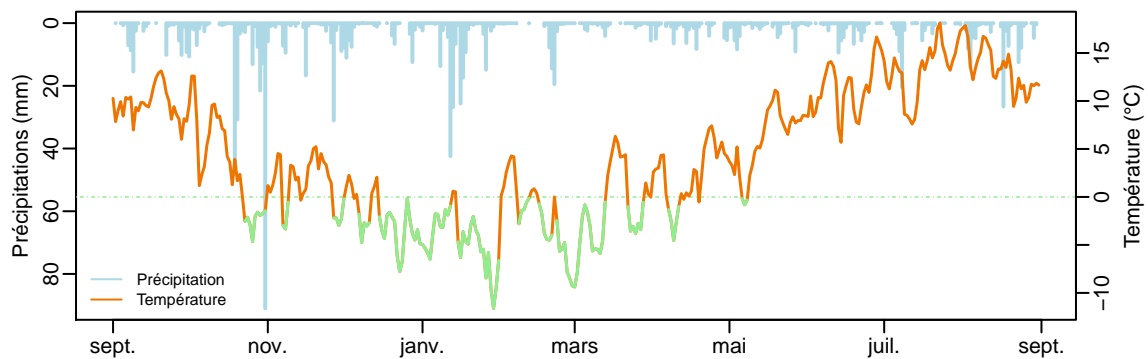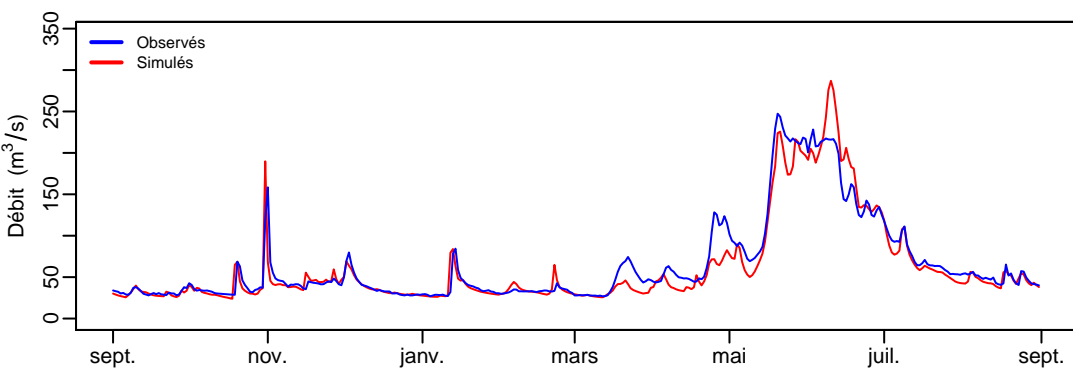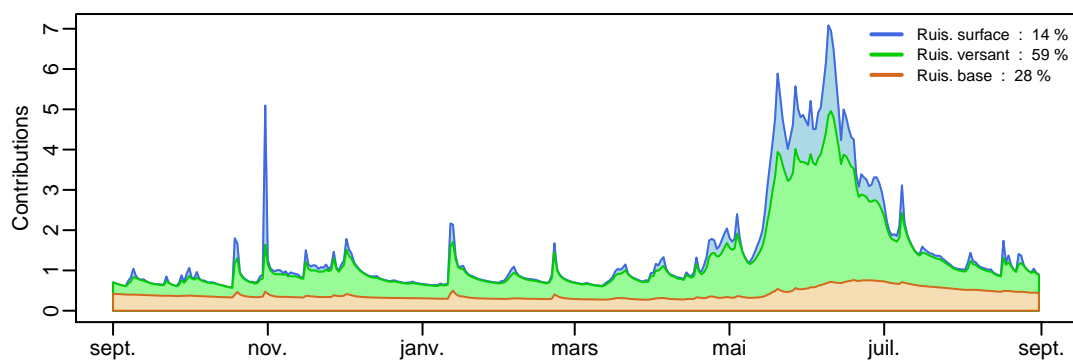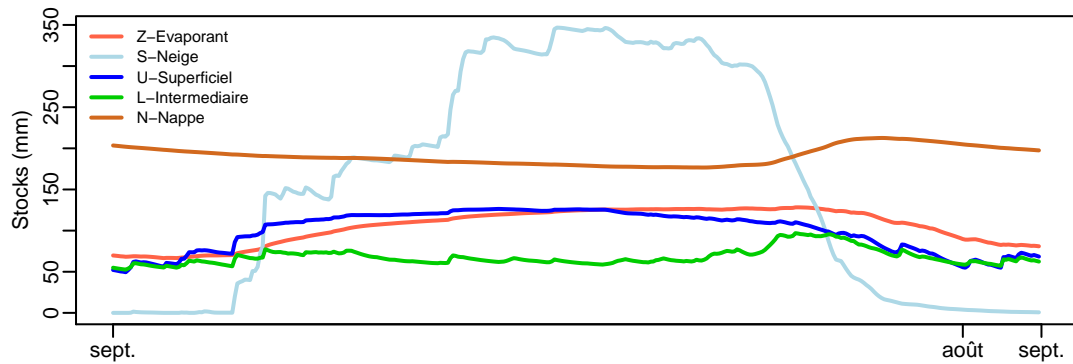

# s.ponh (3584.66 km<sup>2</sup>) – année 2004–2005

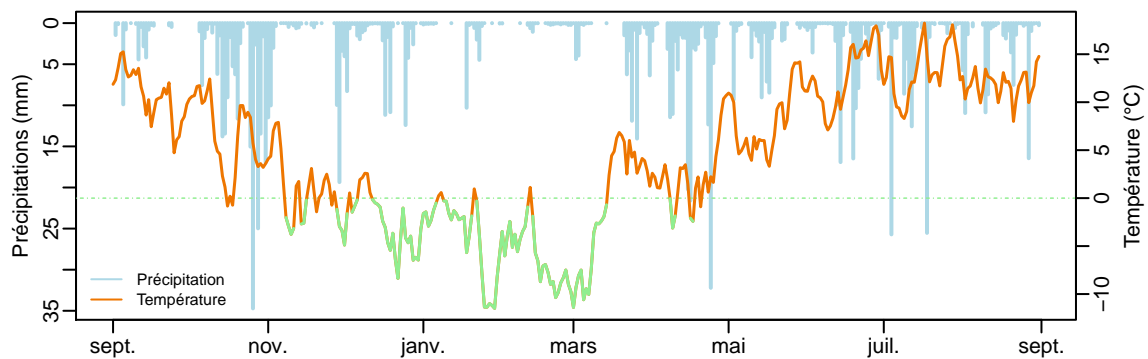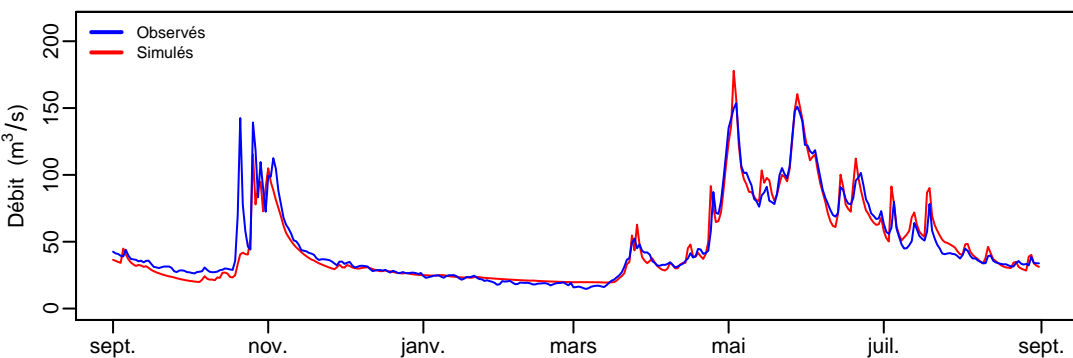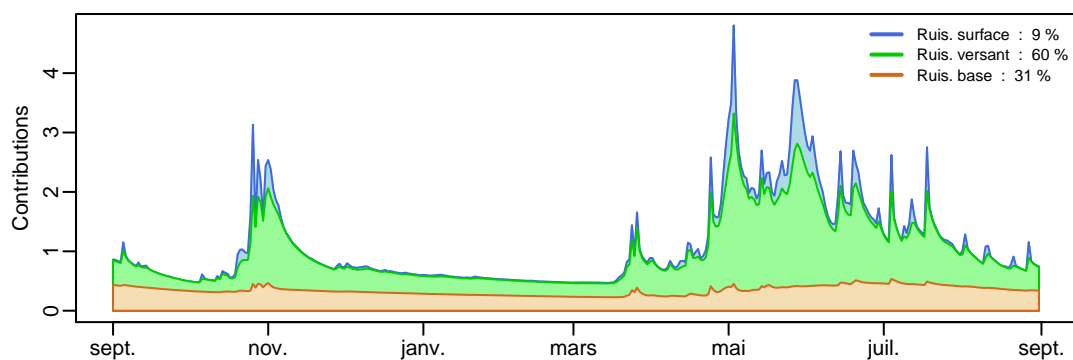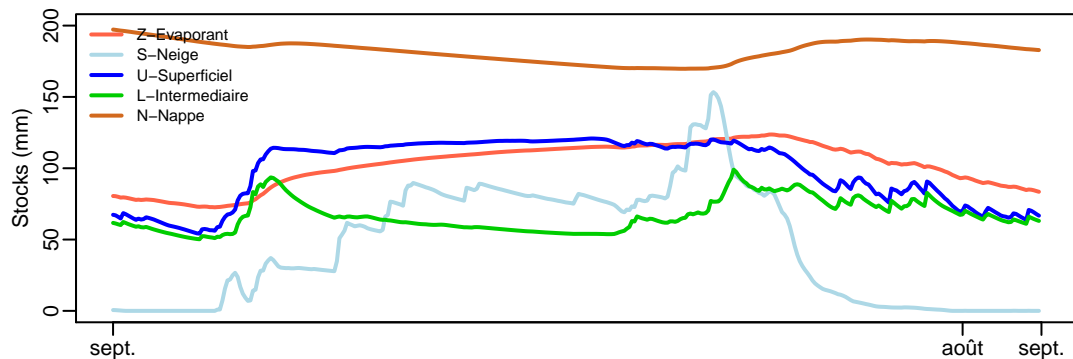

# s.ponh (3584.66 km<sup>2</sup>) – année 2005–2006

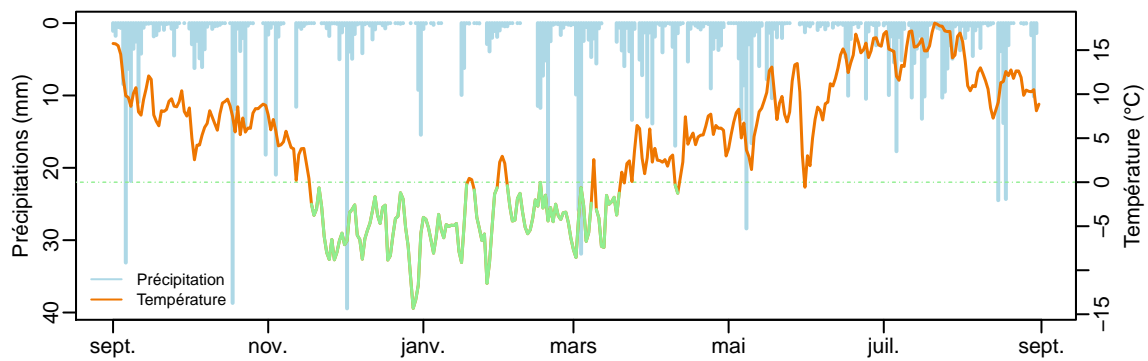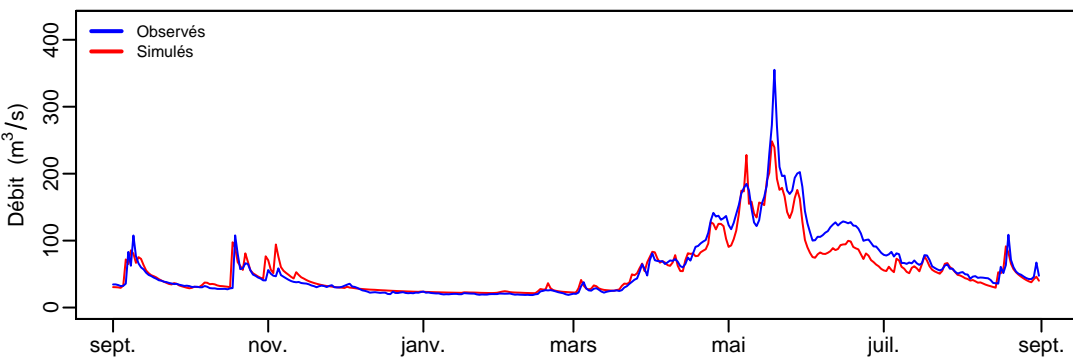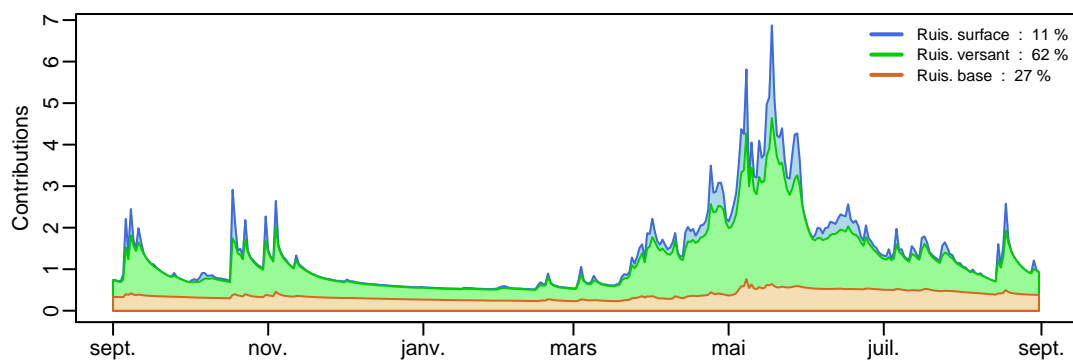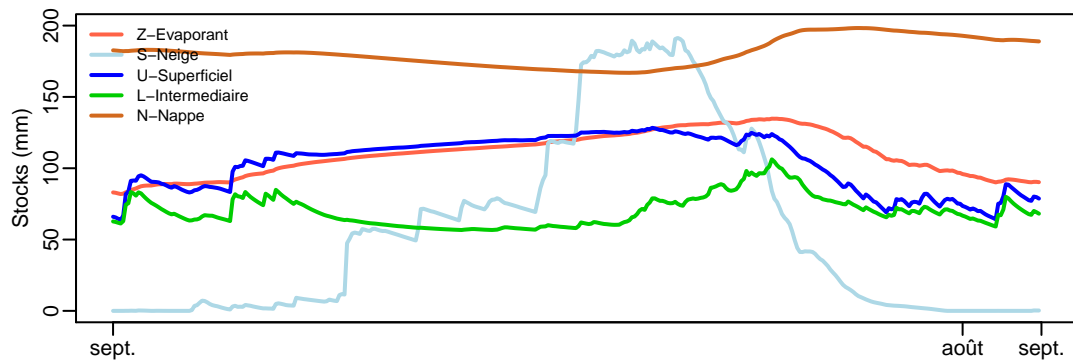

# s.ponh (3584.66 km<sup>2</sup>) – année 2006–2007

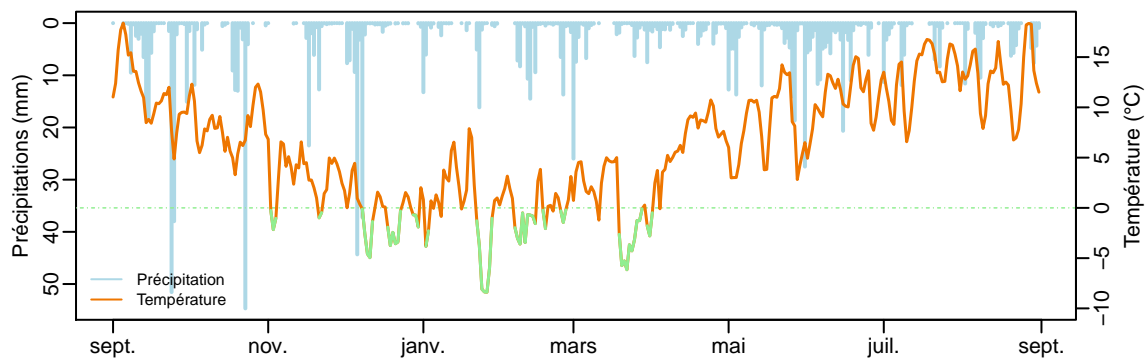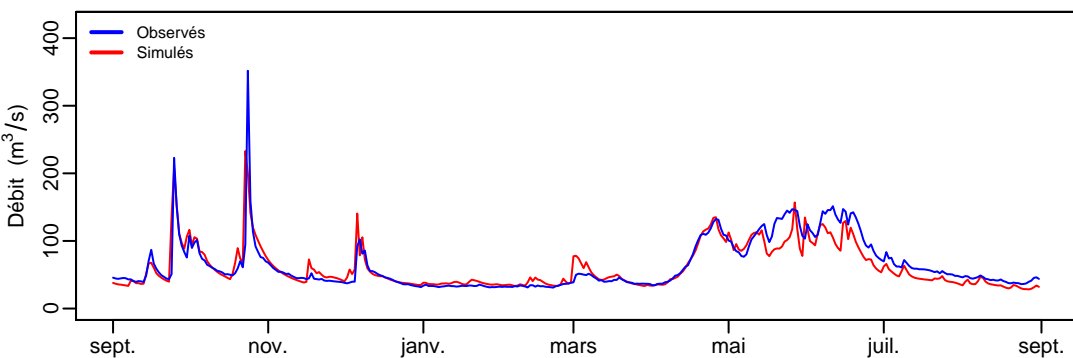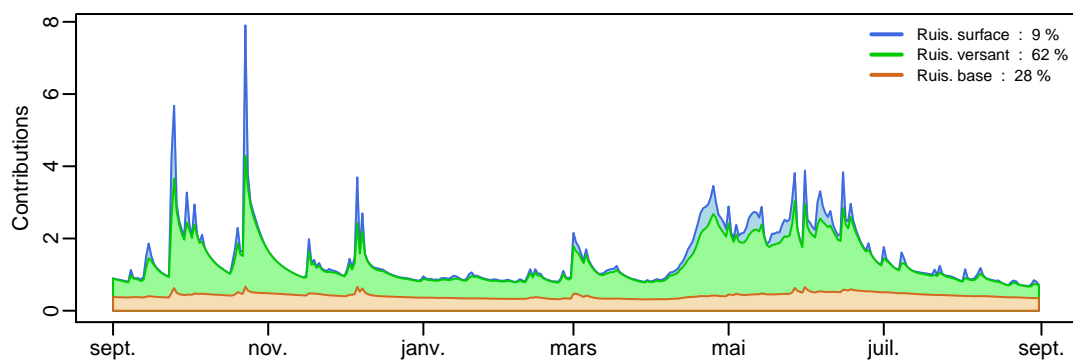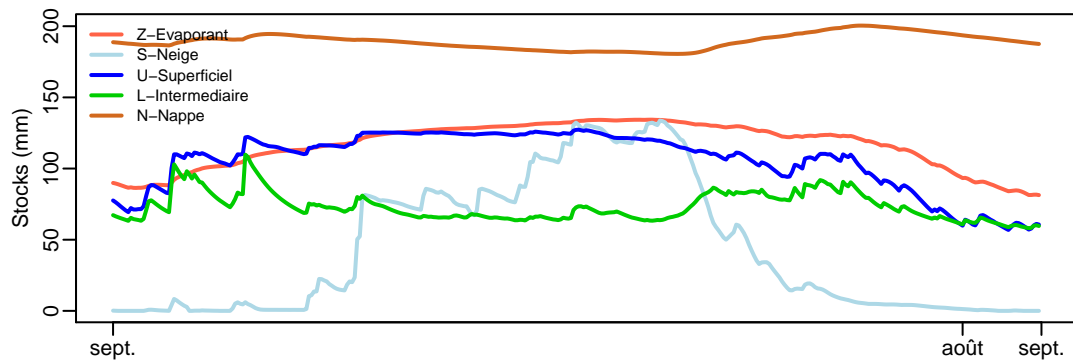

# s.ponh (3584.66 km<sup>2</sup>) – année 2007–2008

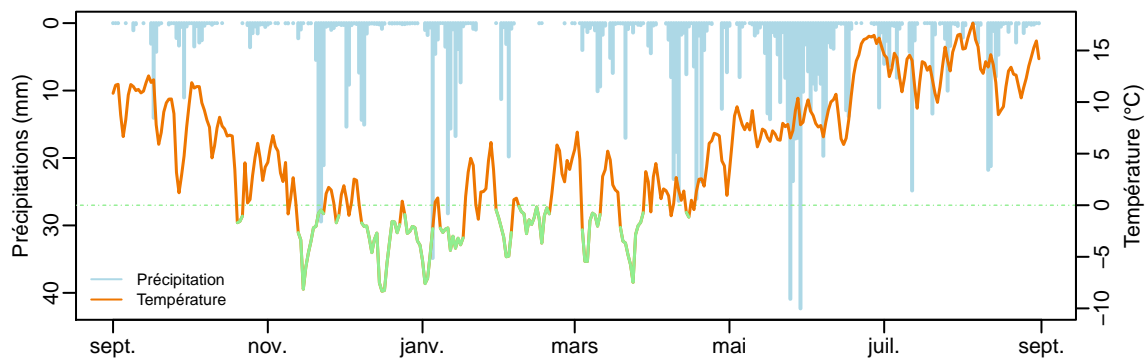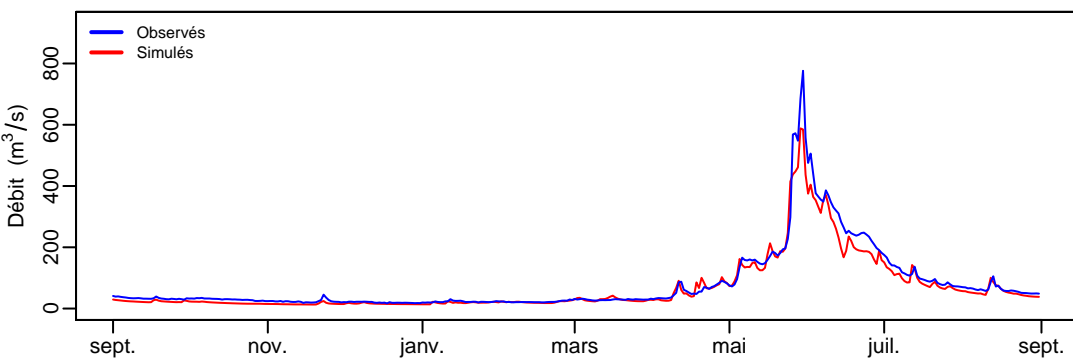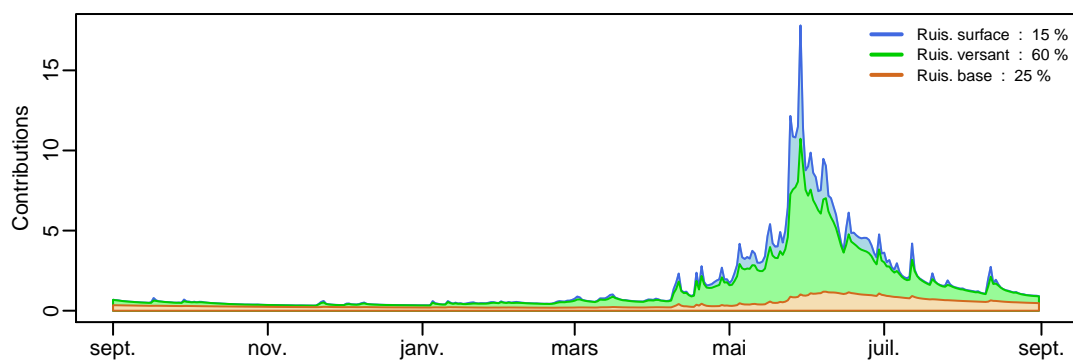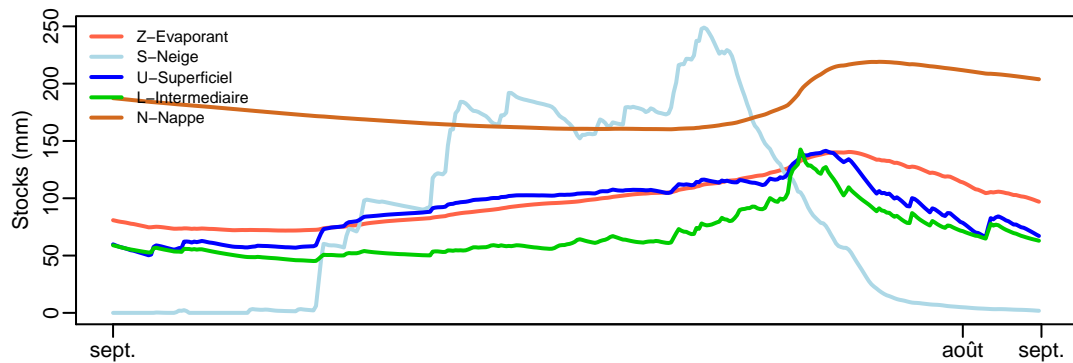

# s.ponh (3584.66 km<sup>2</sup>) – année 2008–2009

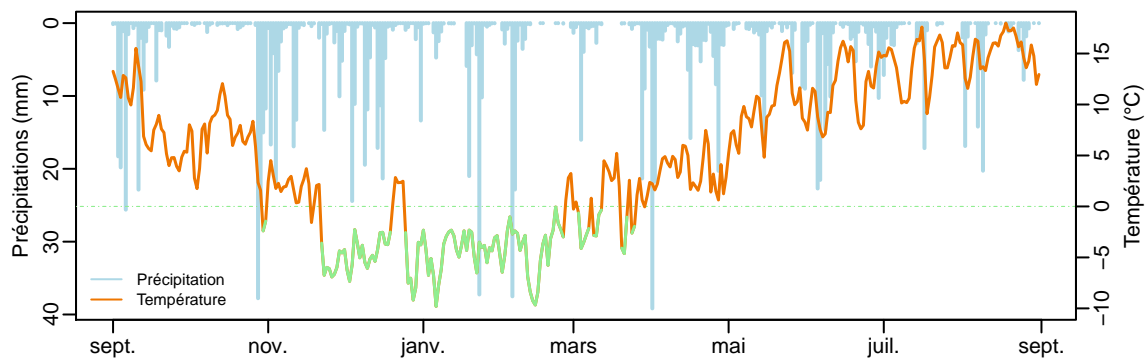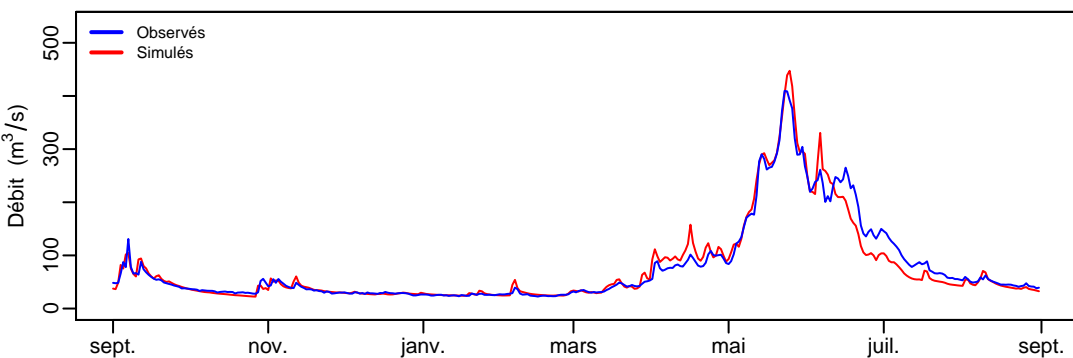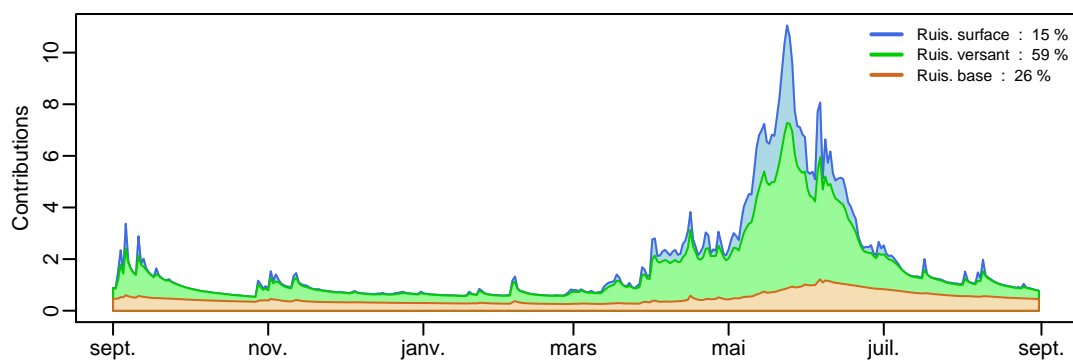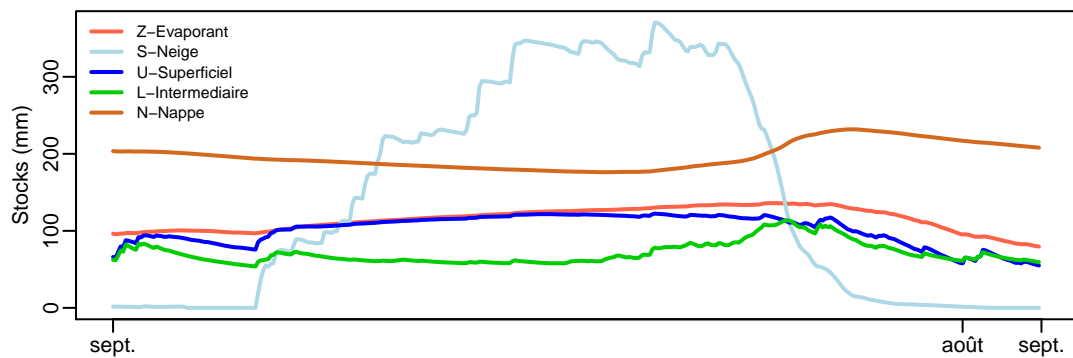



# s.ponh (3584.66 km<sup>2</sup>) – année 2009–2010

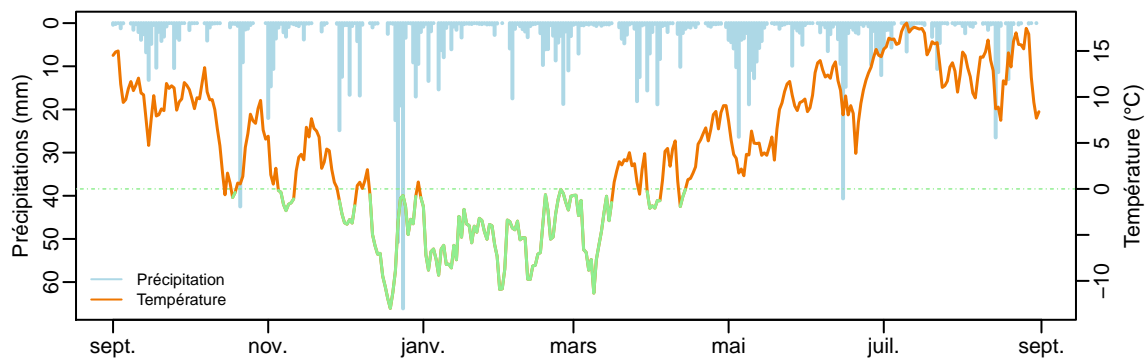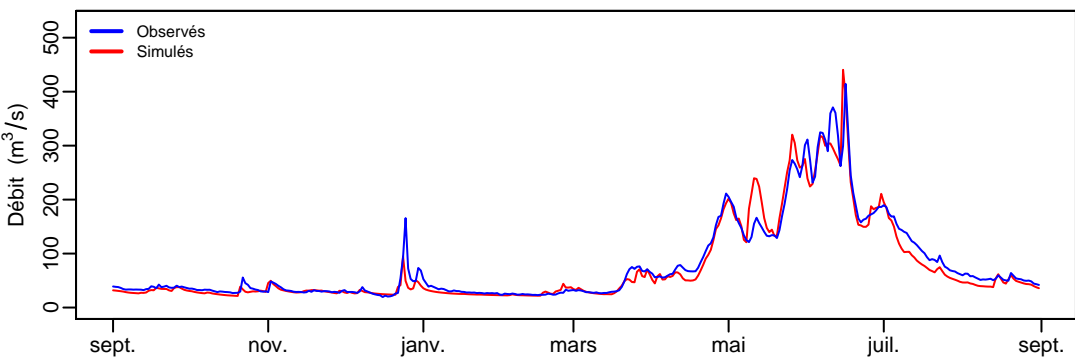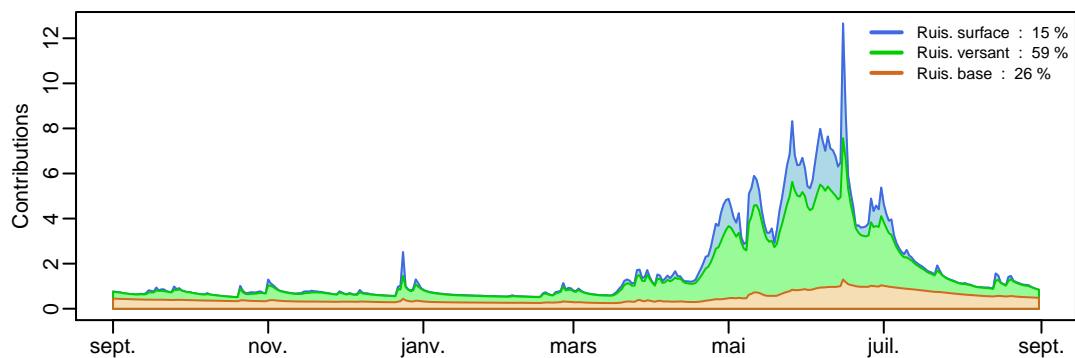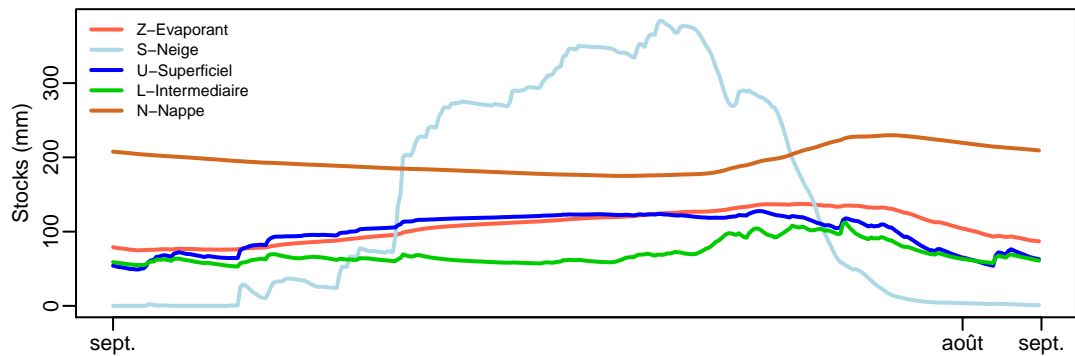

# s.ponh (3584.66 km<sup>2</sup>) – année 2010–2011

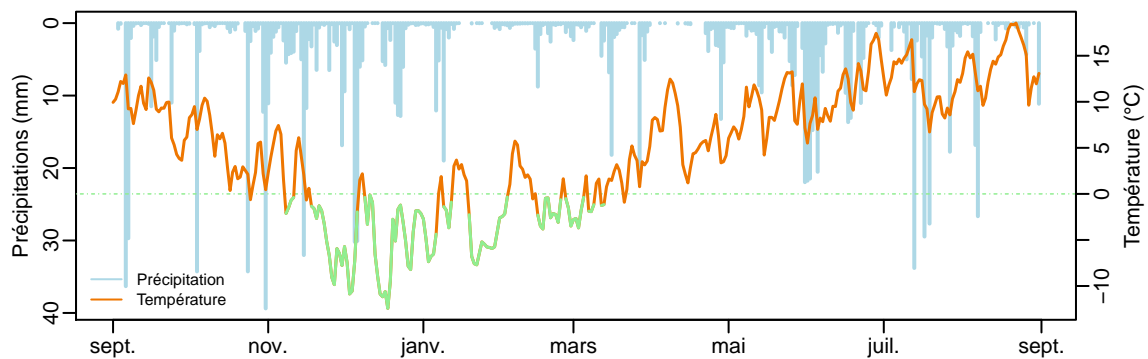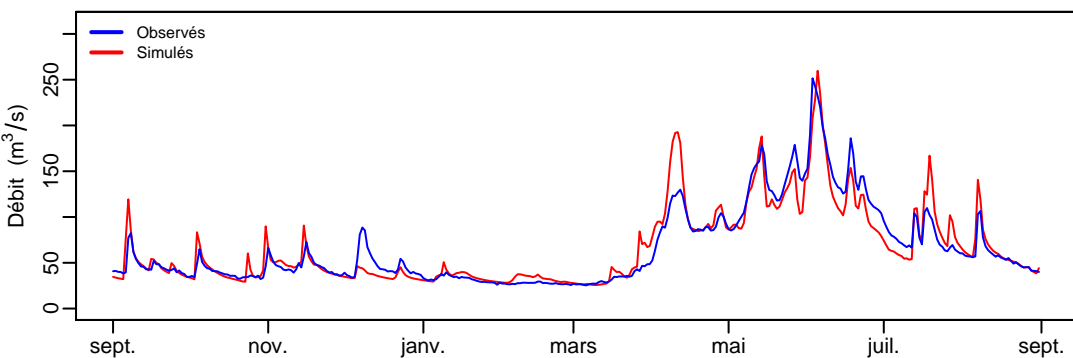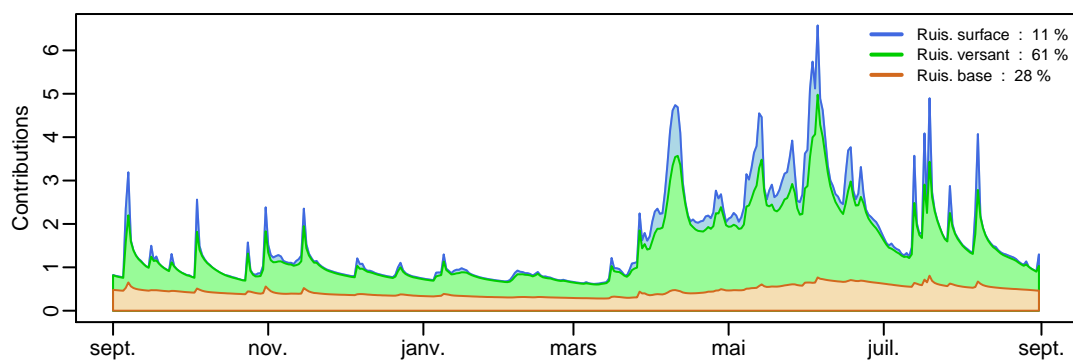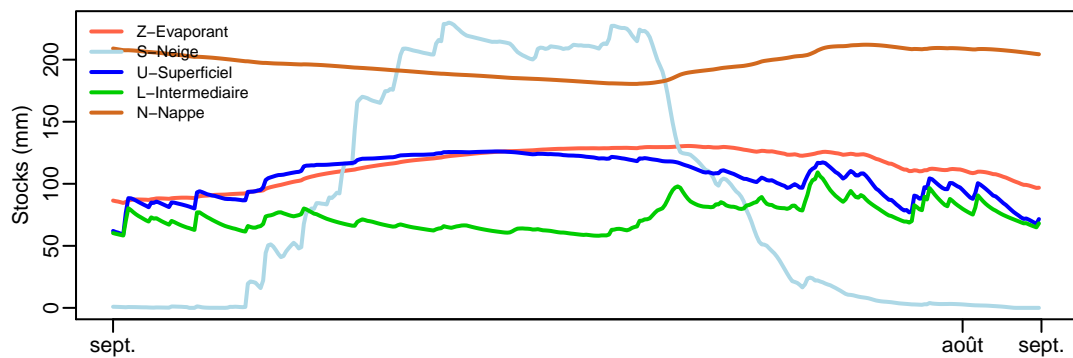

# s.ponh (3584.66 km<sup>2</sup>) – année 2011–2012

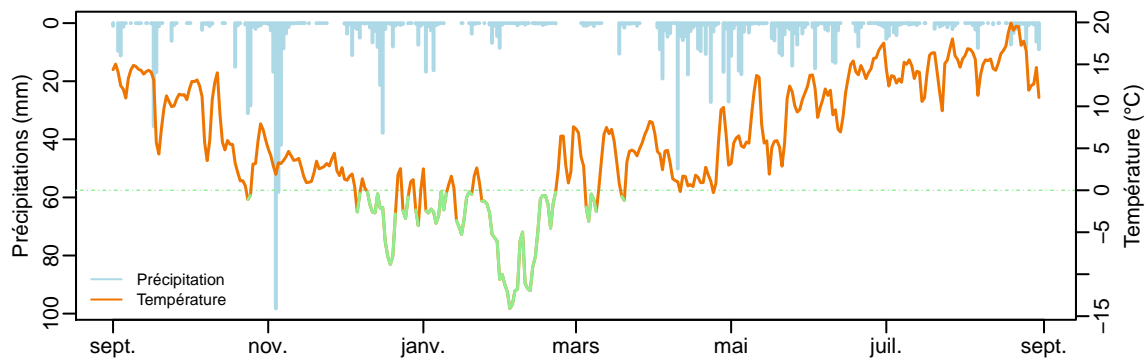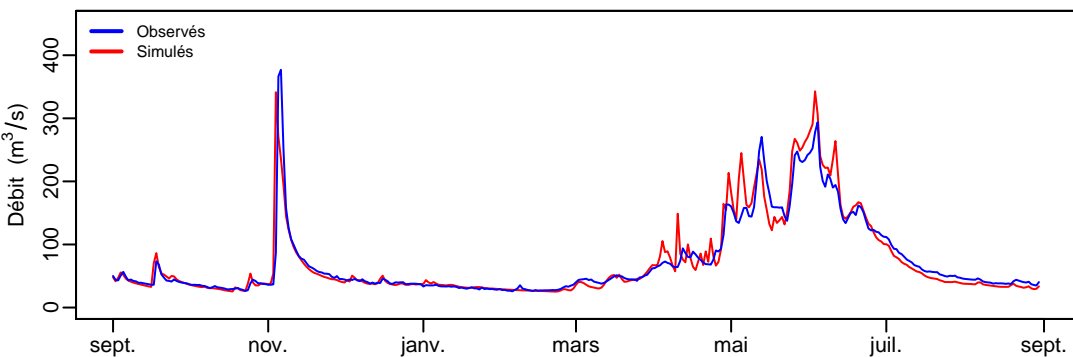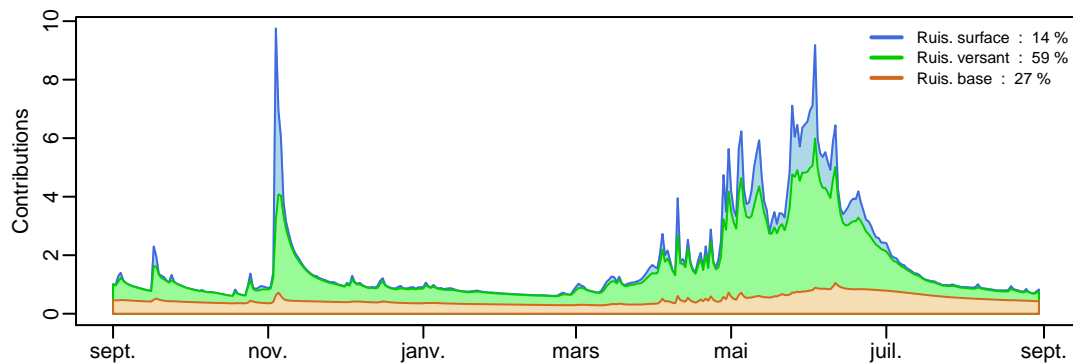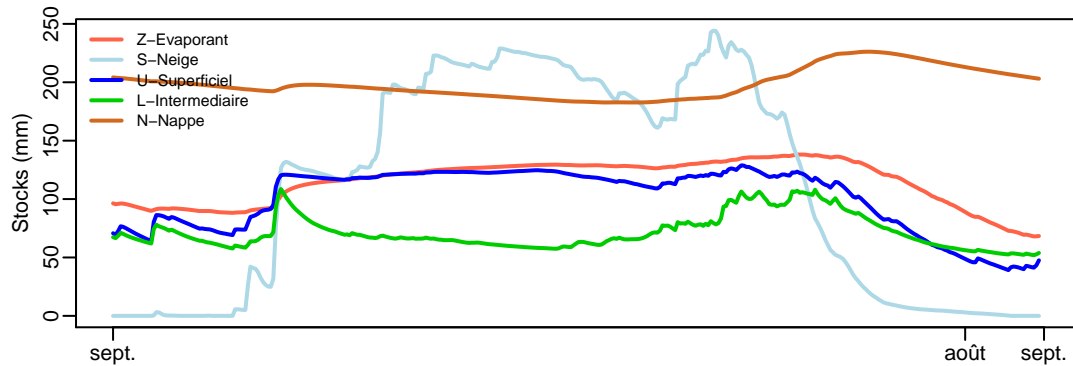

# sscroh (1480.1201 km<sup>2</sup>) – année 1981–1982

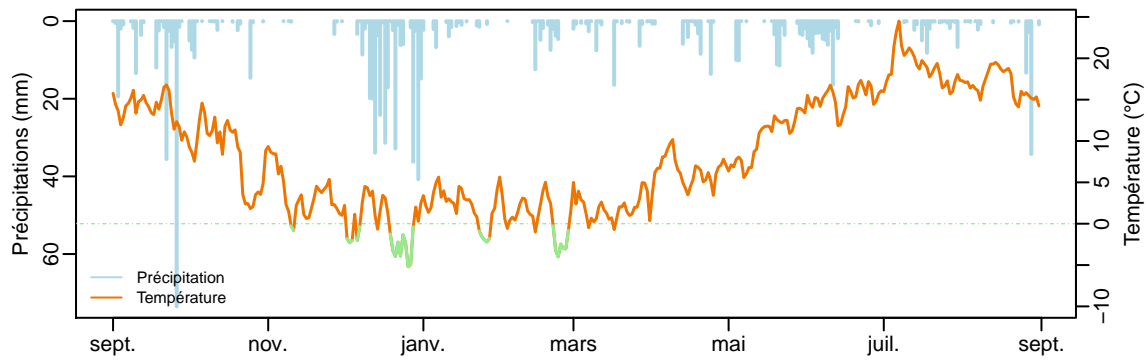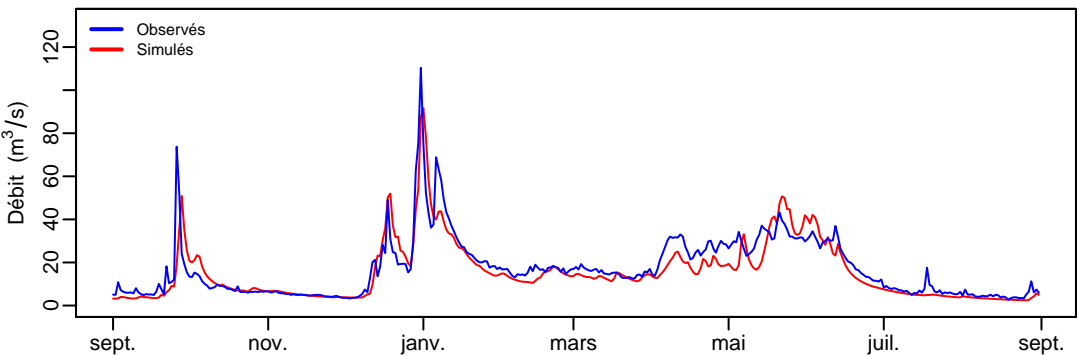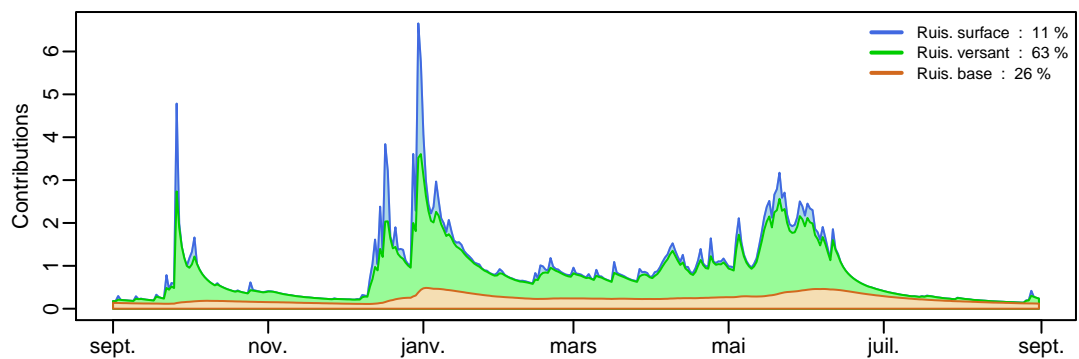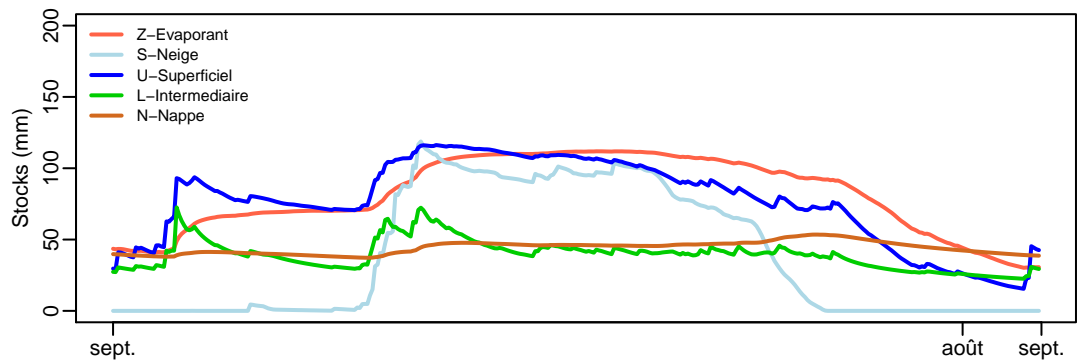

# sscroh (1480.1201 km<sup>2</sup>) – année 1982–1983

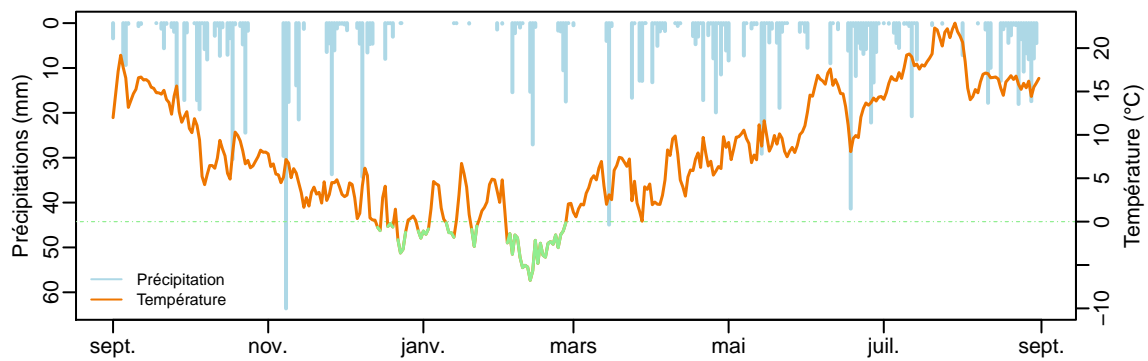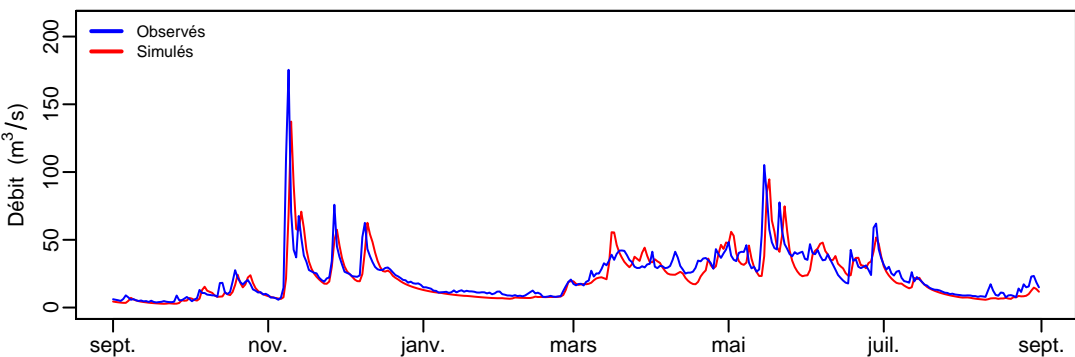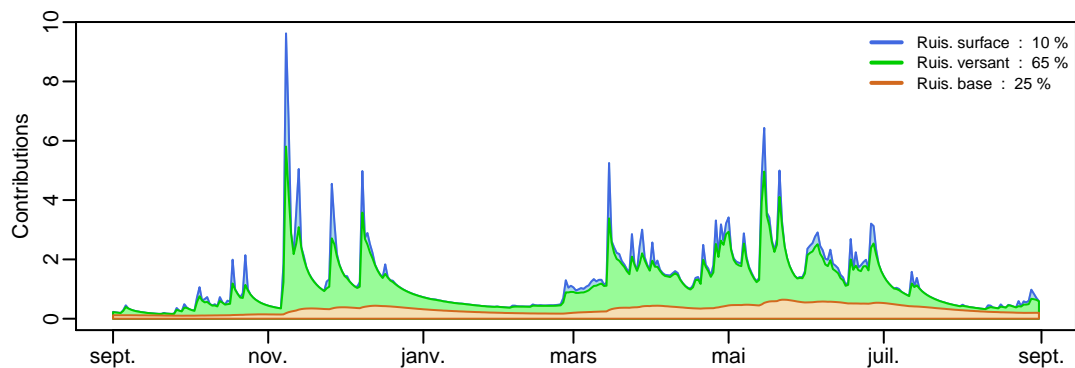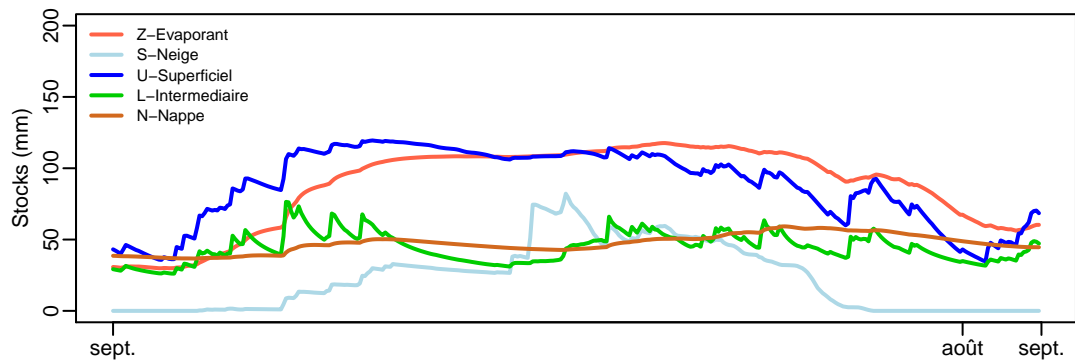

# sscroh (1480.1201 km<sup>2</sup>) – année 1983–1984

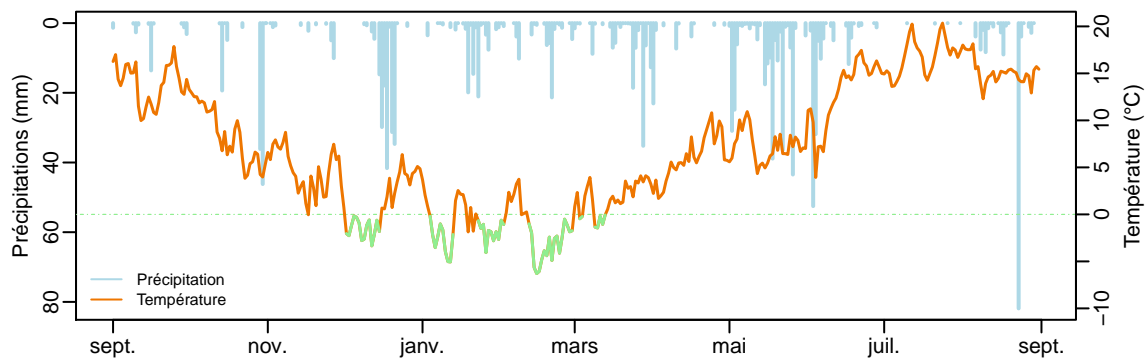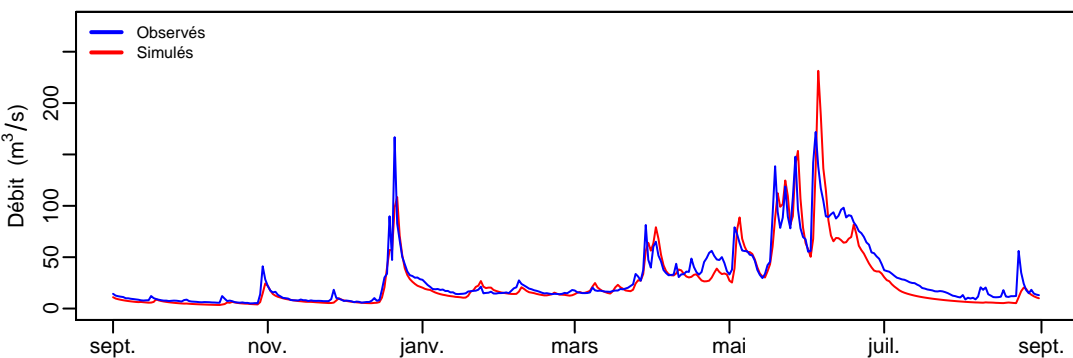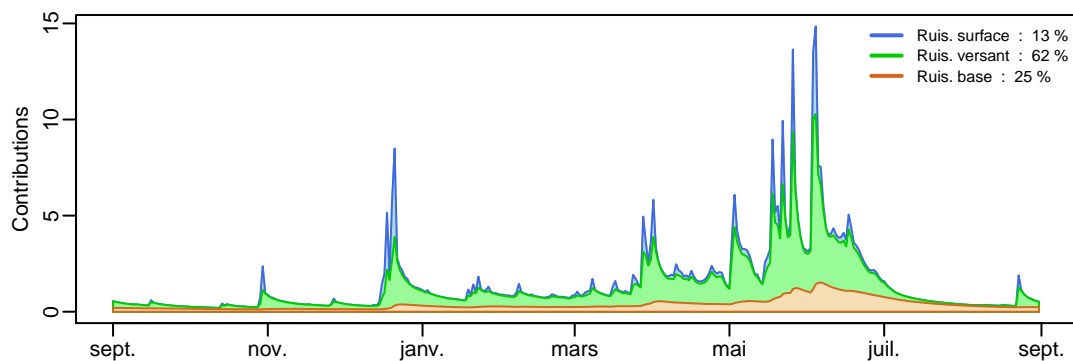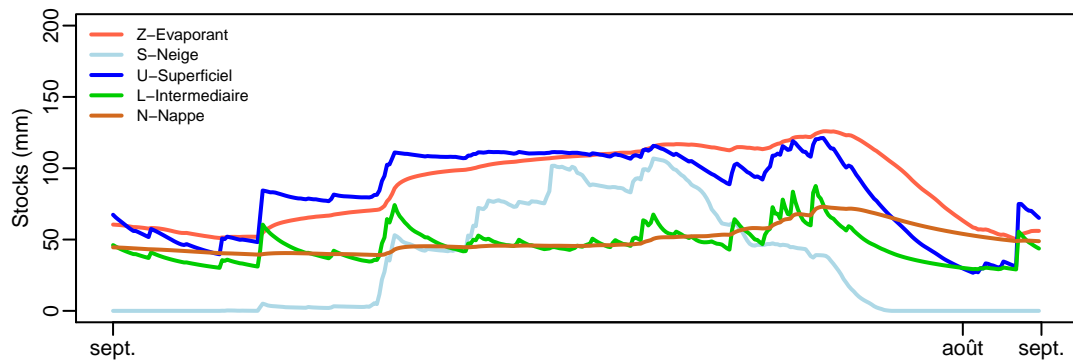

# sscroh (1480.1201 km²) – année 1984–1985

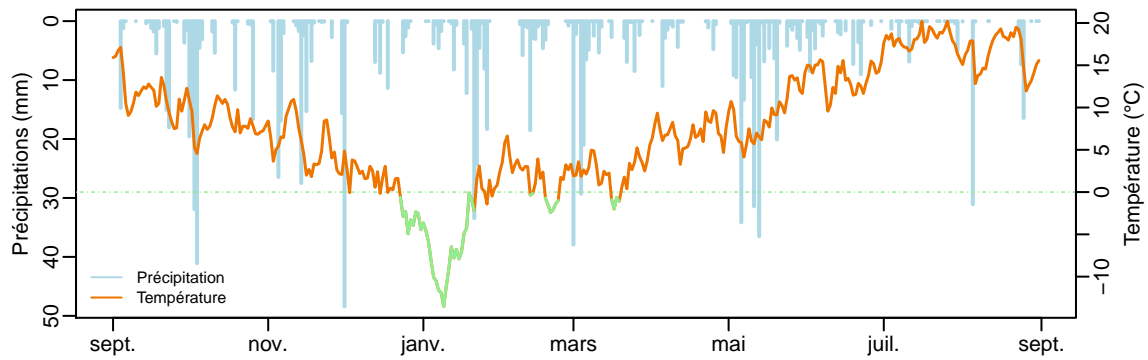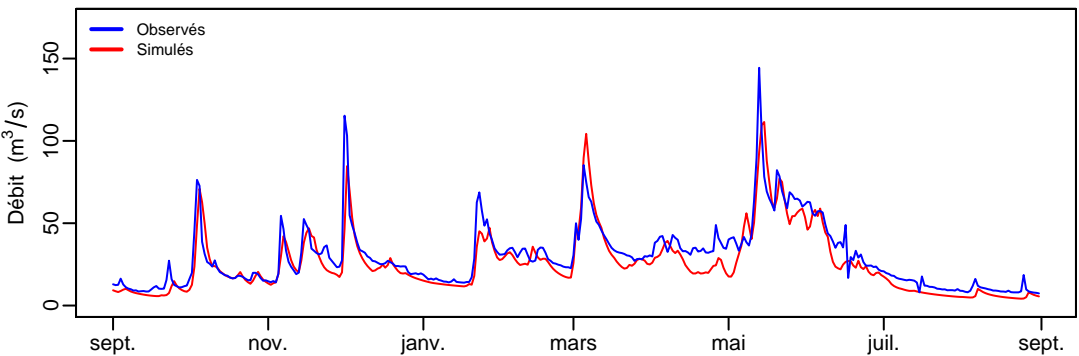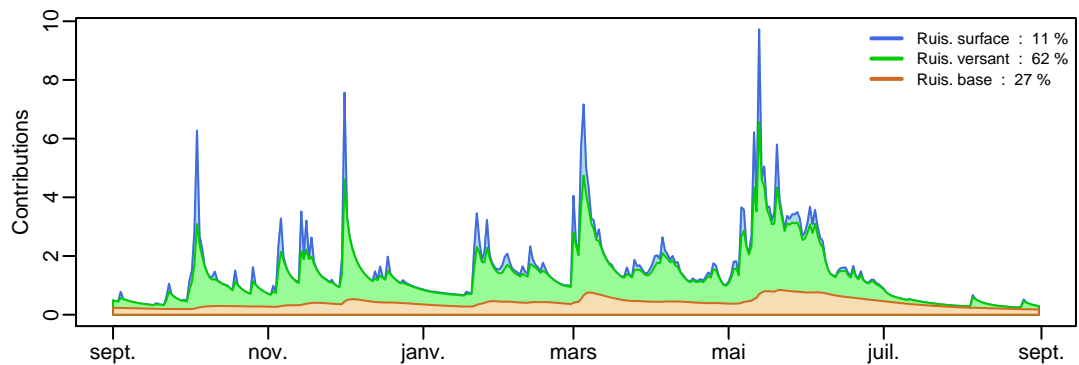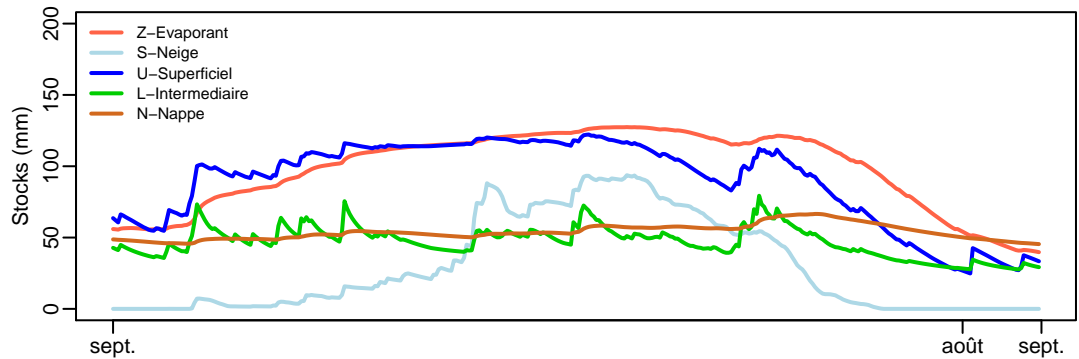

# sscroh (1480.1201 km²) – année 1985–1986

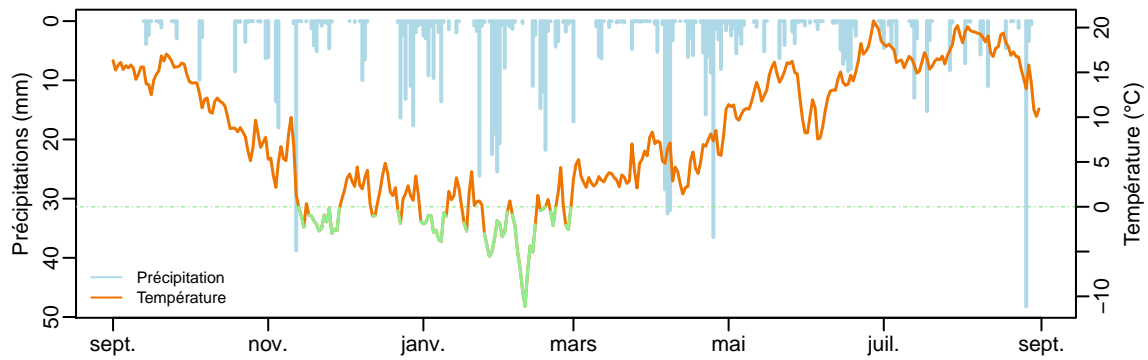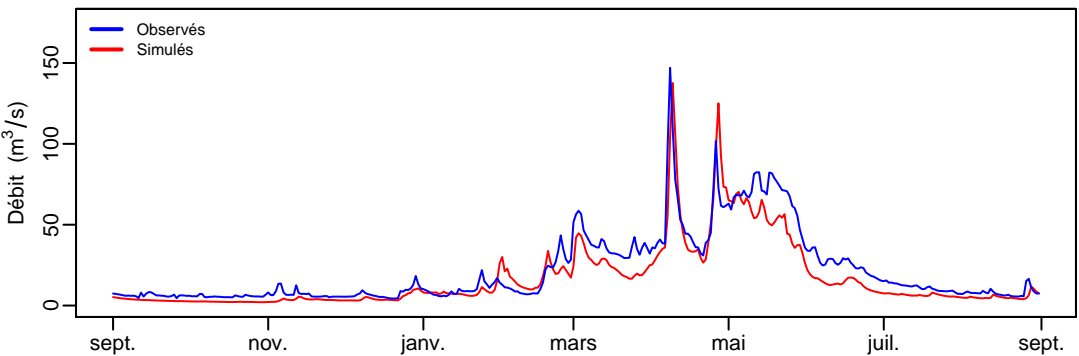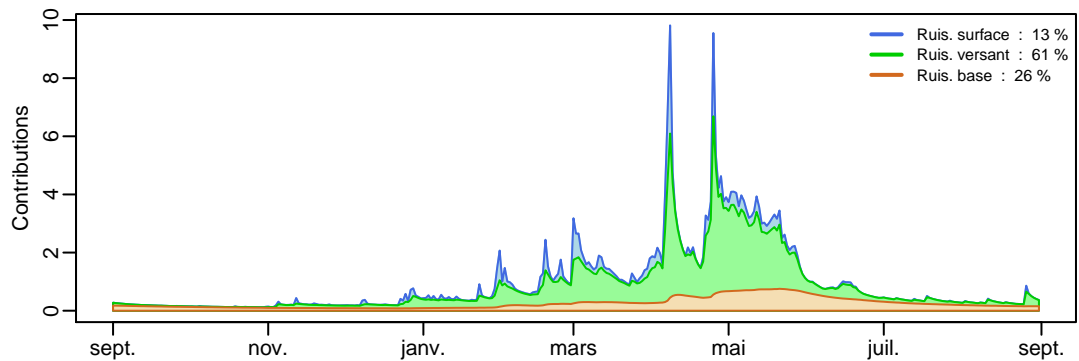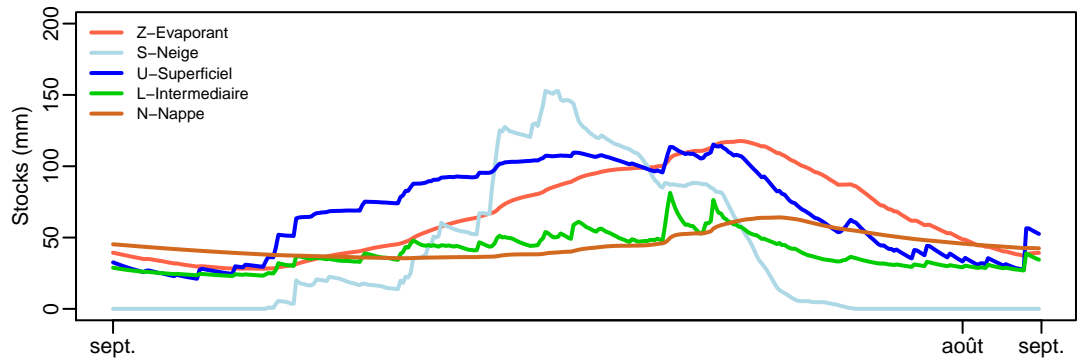



# sscroh (1480.1201 km<sup>2</sup>) – année 1986–1987

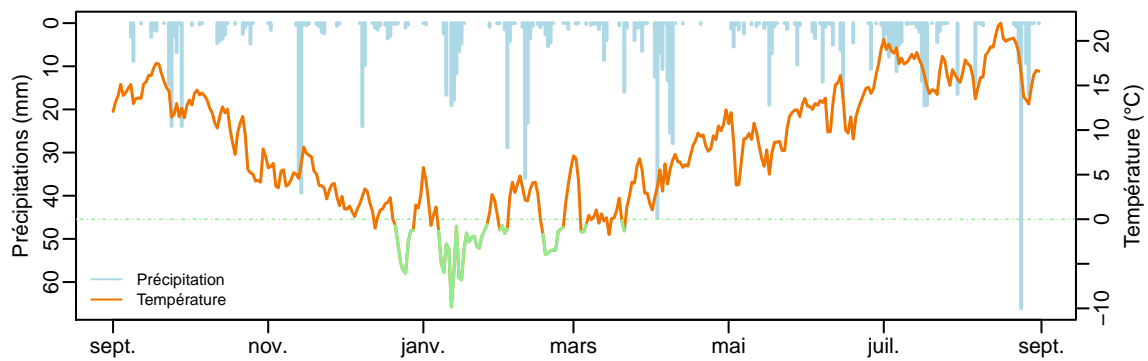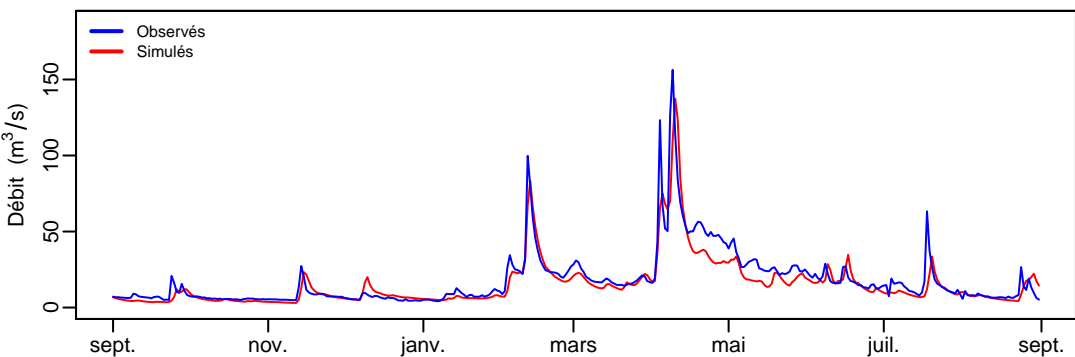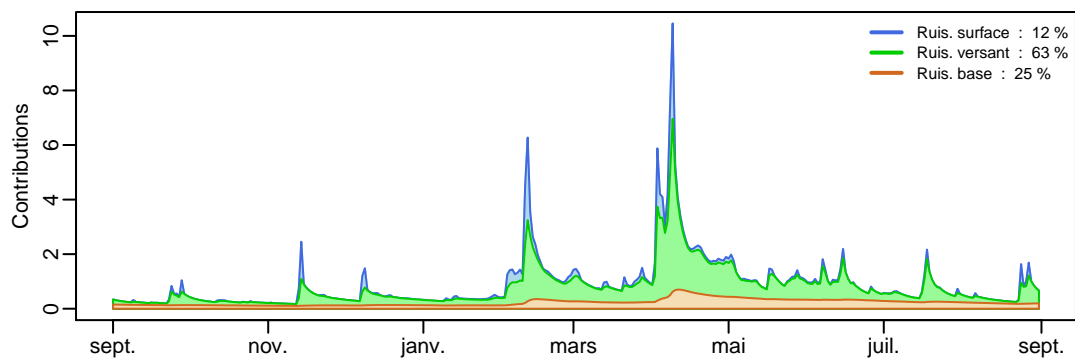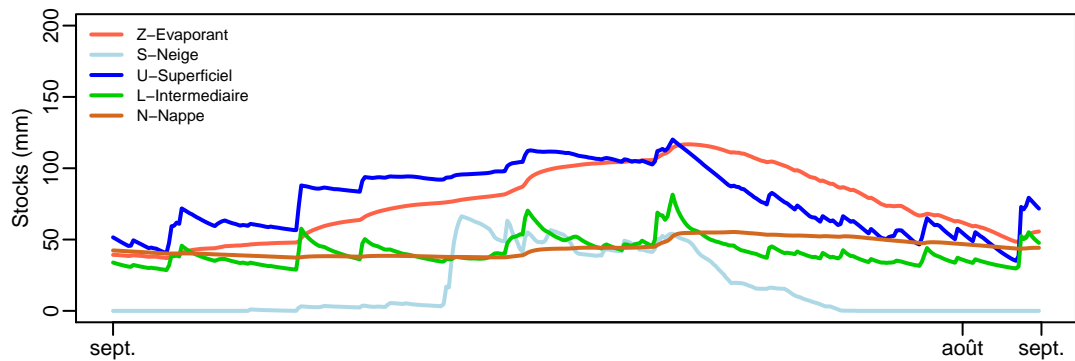

# sscroh (1480.1201 km<sup>2</sup>) – année 1987–1988

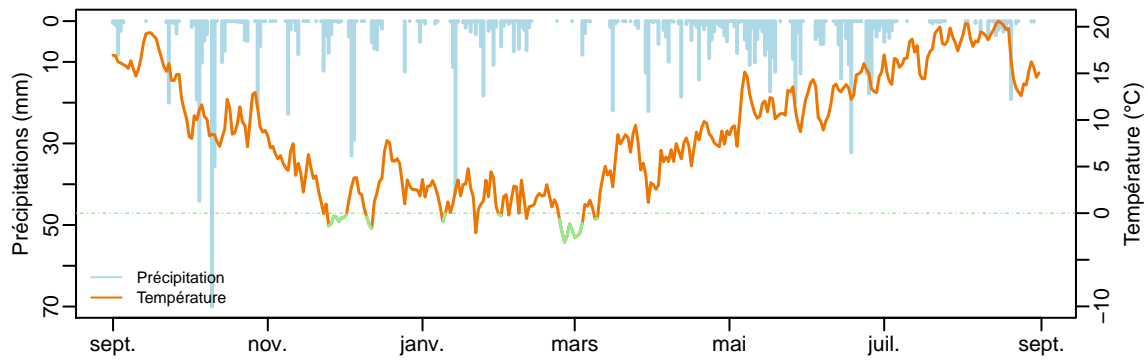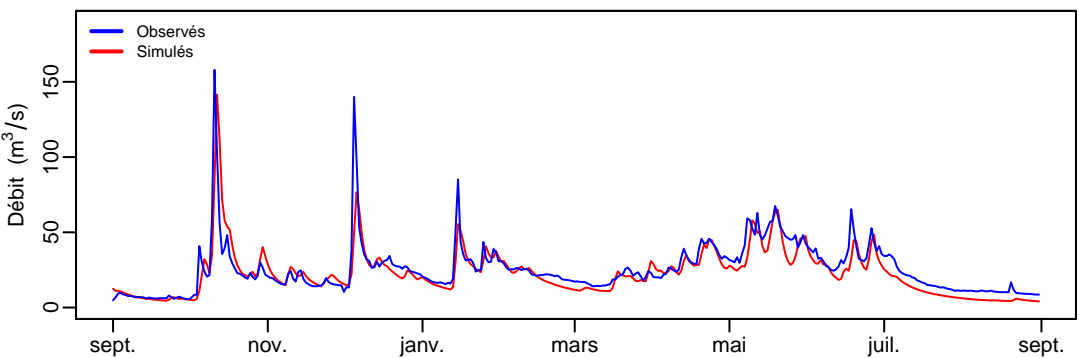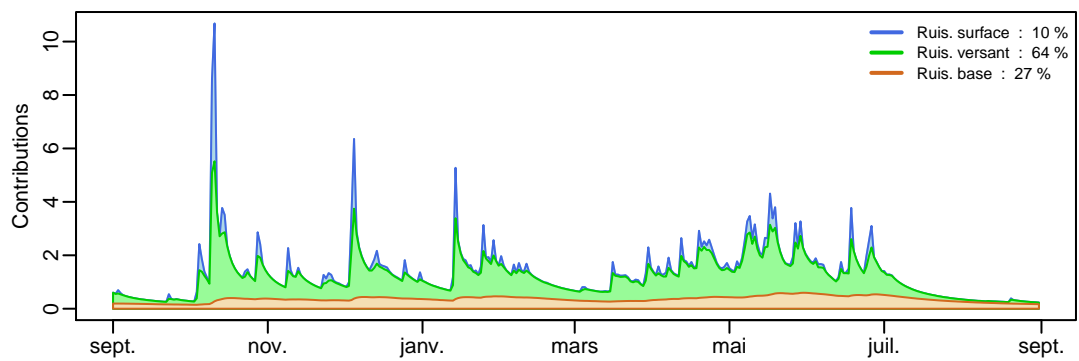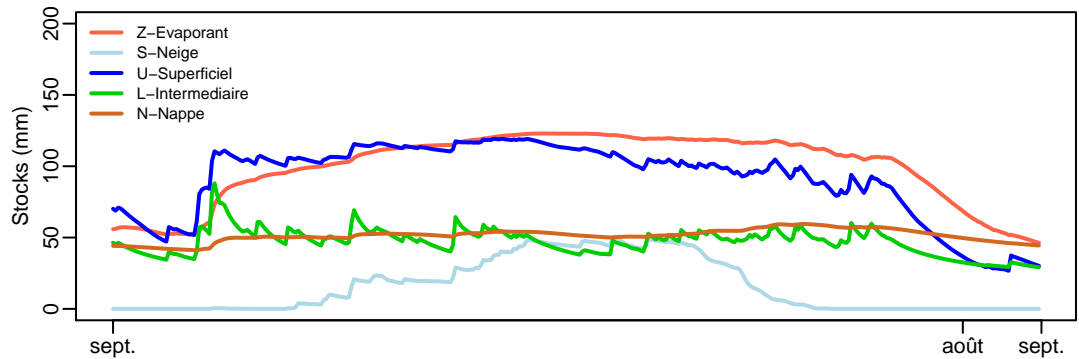

# sscroh (1480.1201 km²) – année 1988–1989

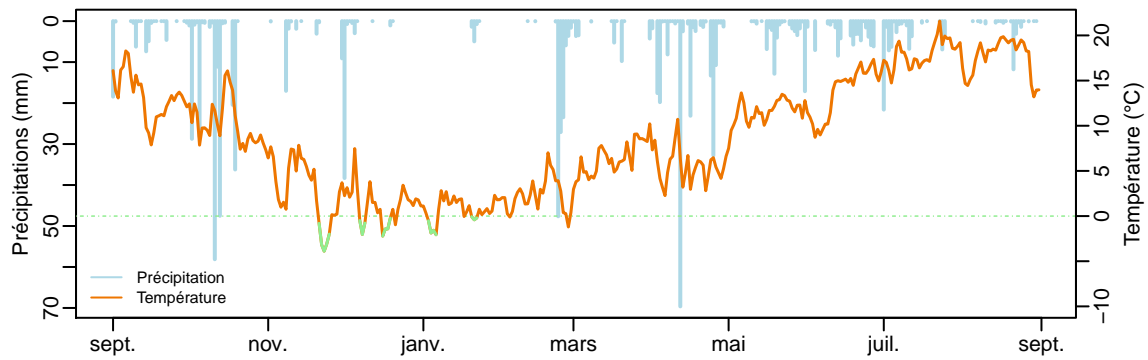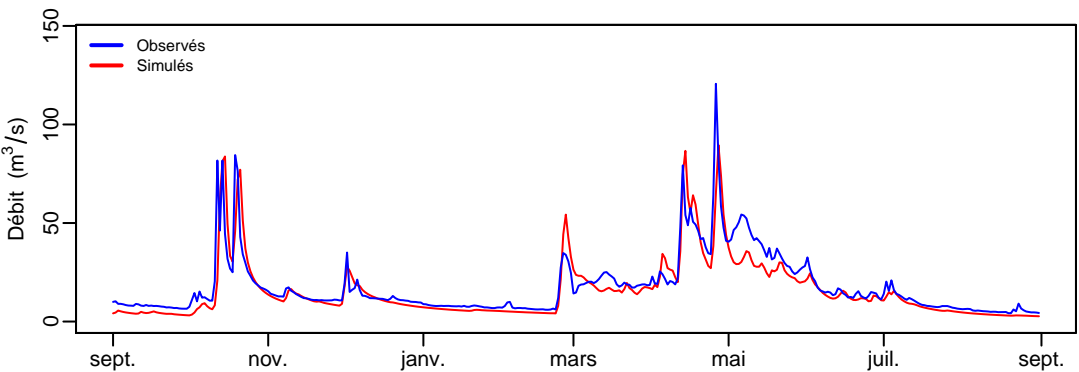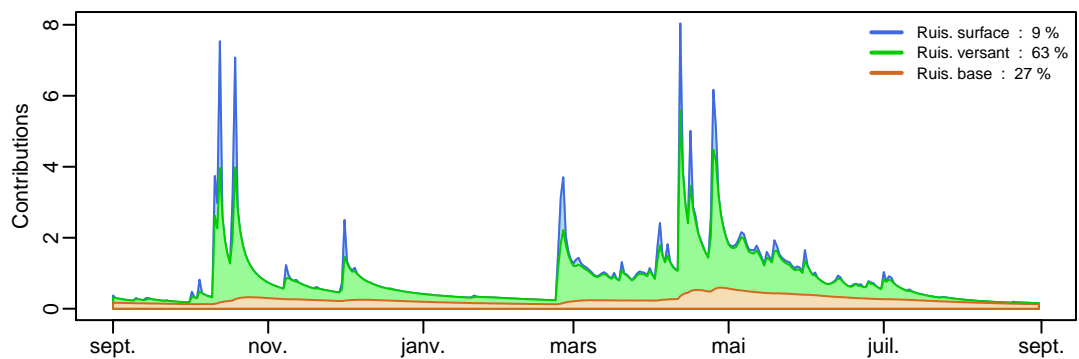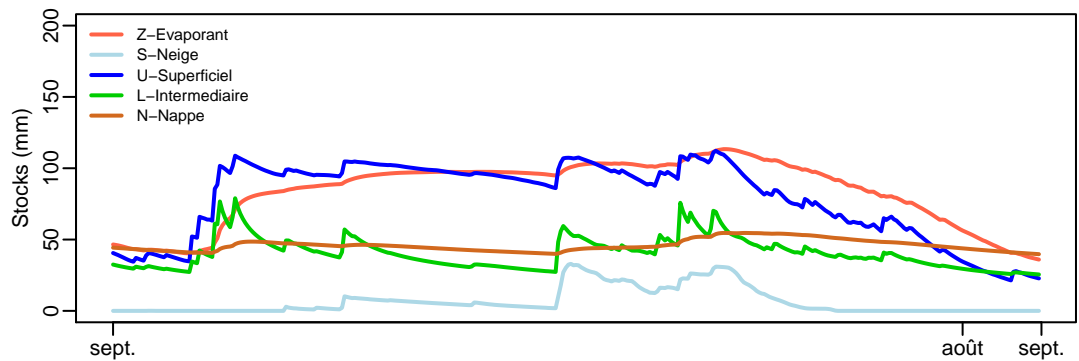

# sscroh (1480.1201 km<sup>2</sup>) – année 1989–1990

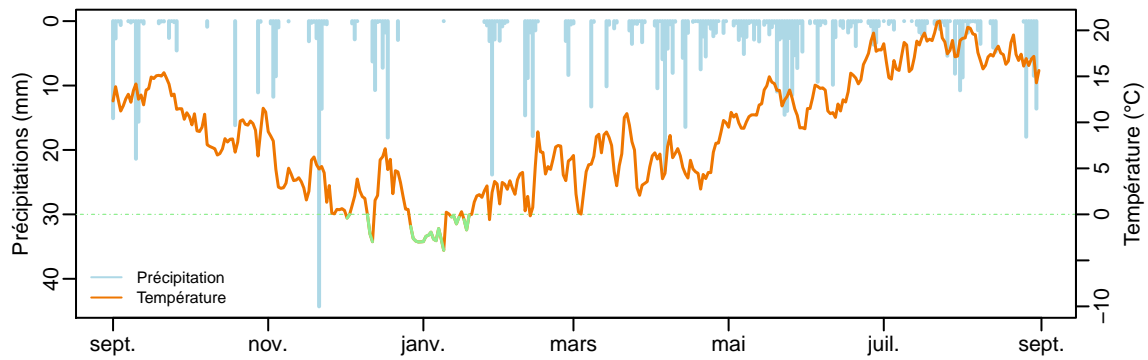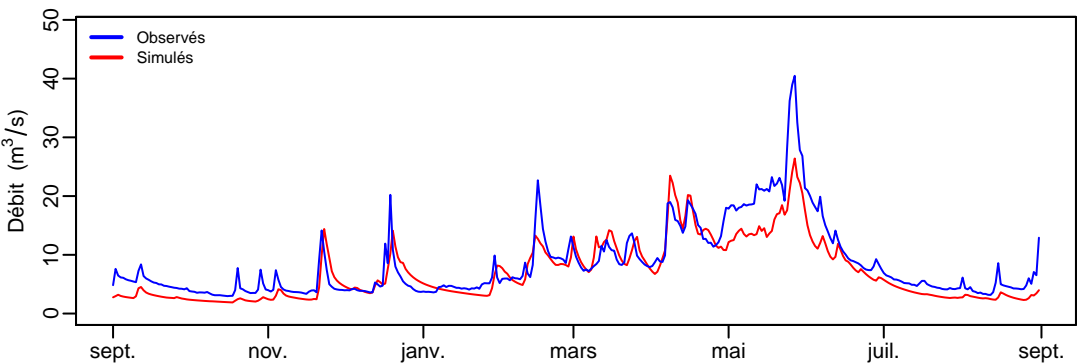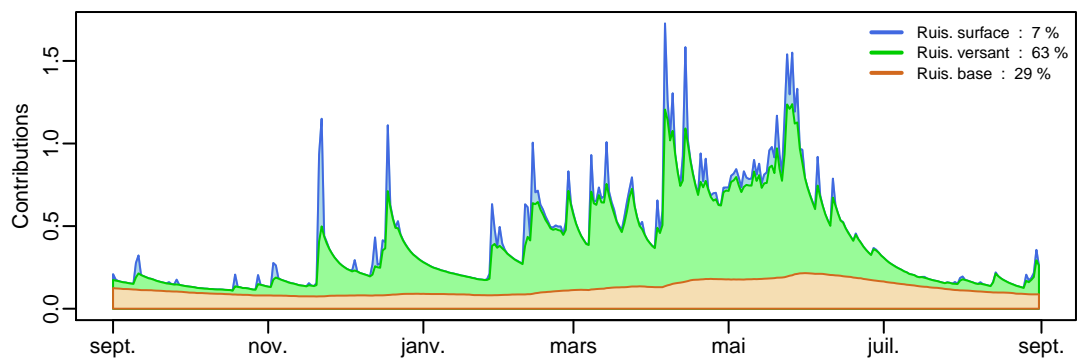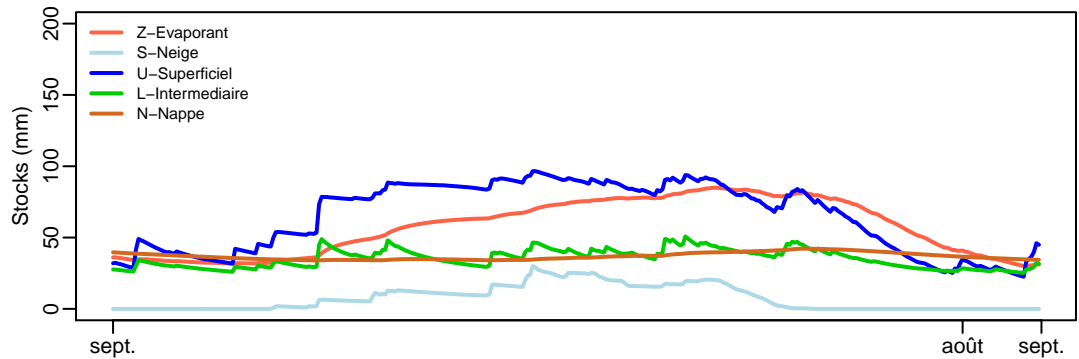

# sscroh (1480.1201 km<sup>2</sup>) – année 1990–1991

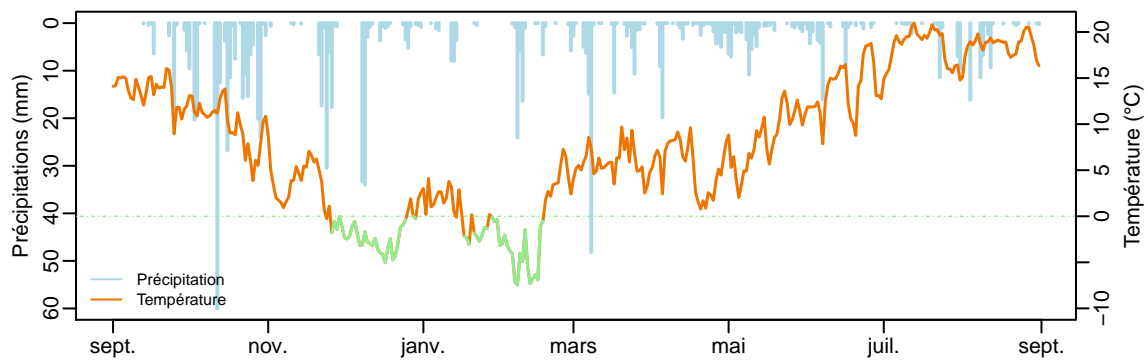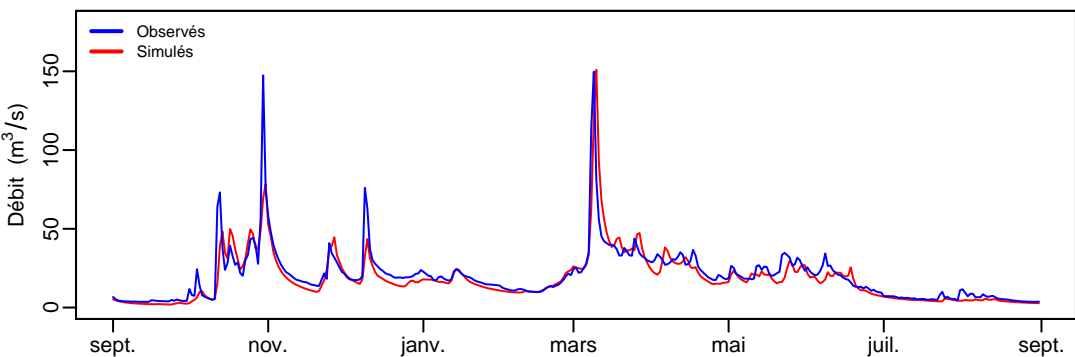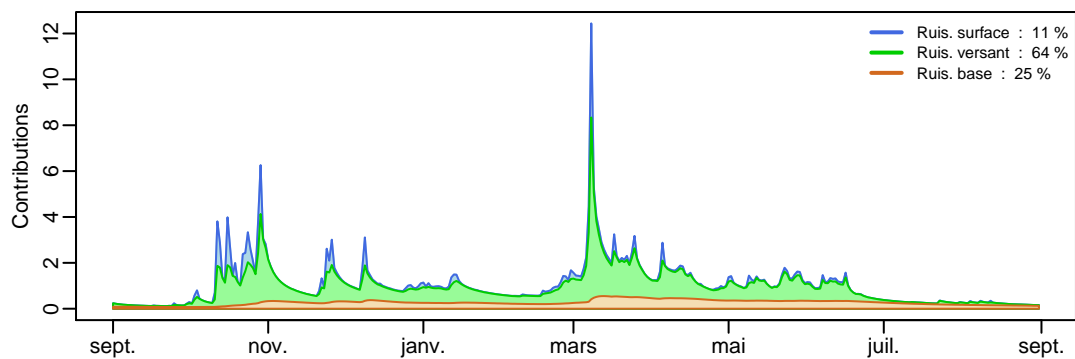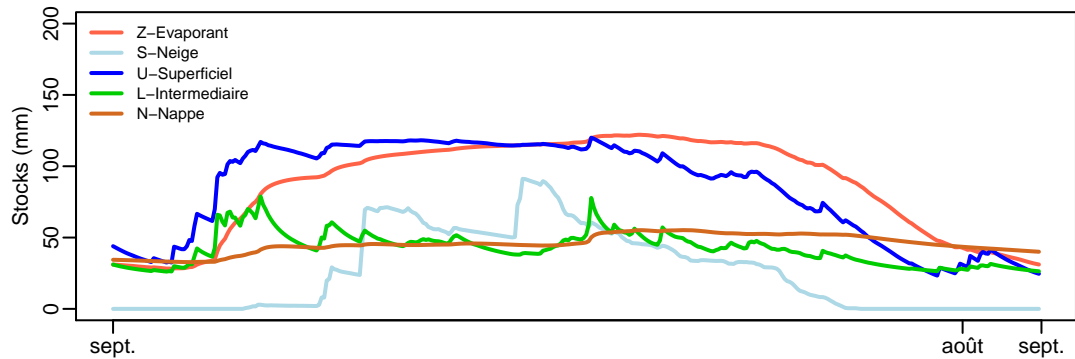

# sscroh (1480.1201 km<sup>2</sup>) – année 1991–1992

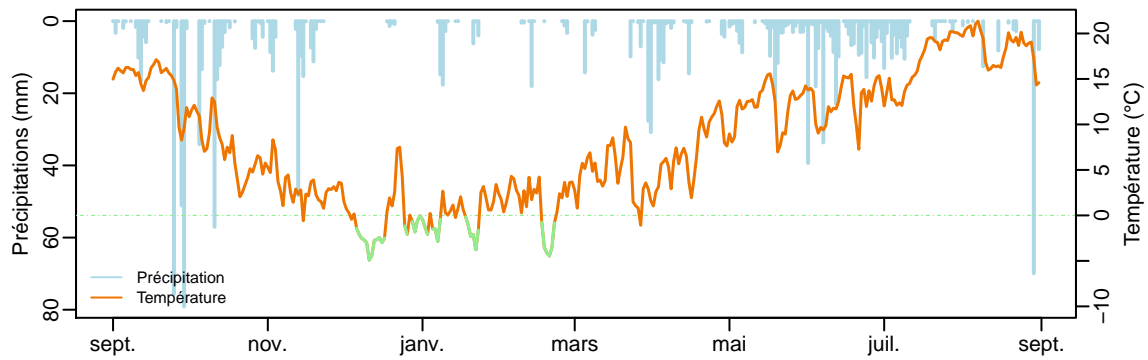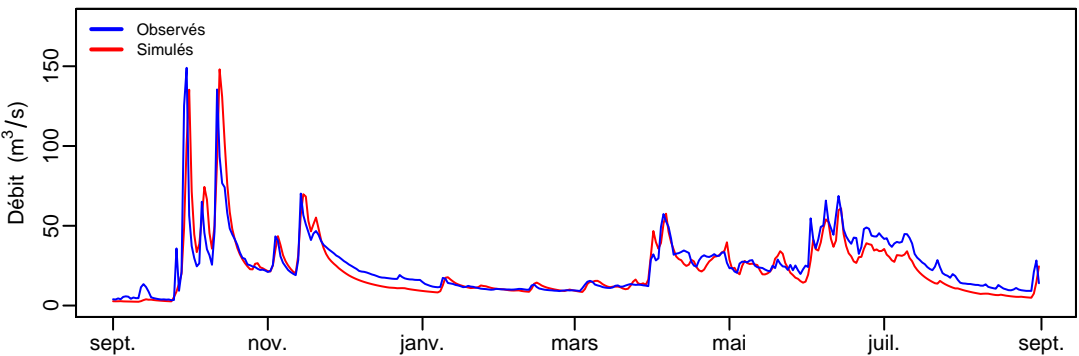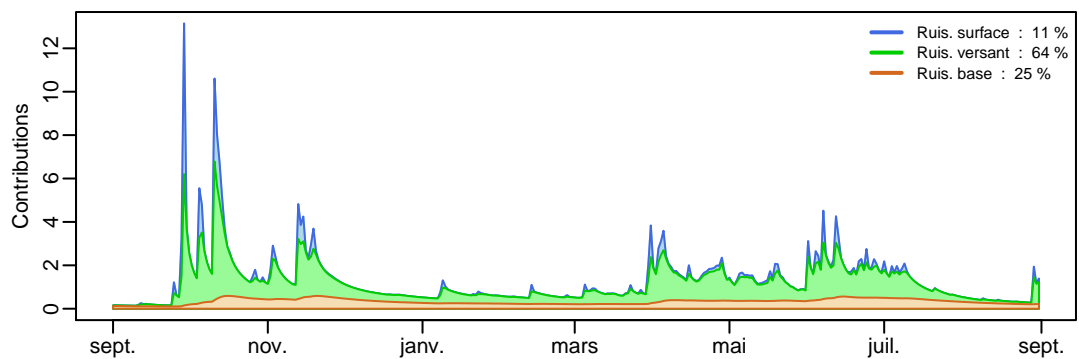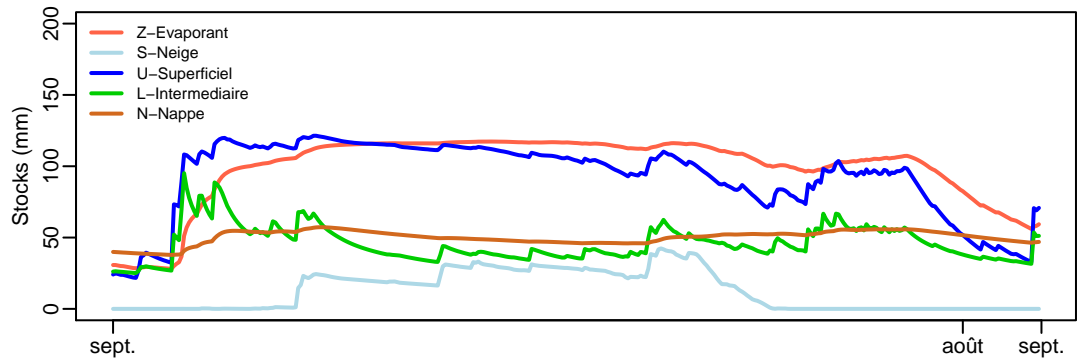

# sscroh (1480.1201 km²) – année 1992–1993

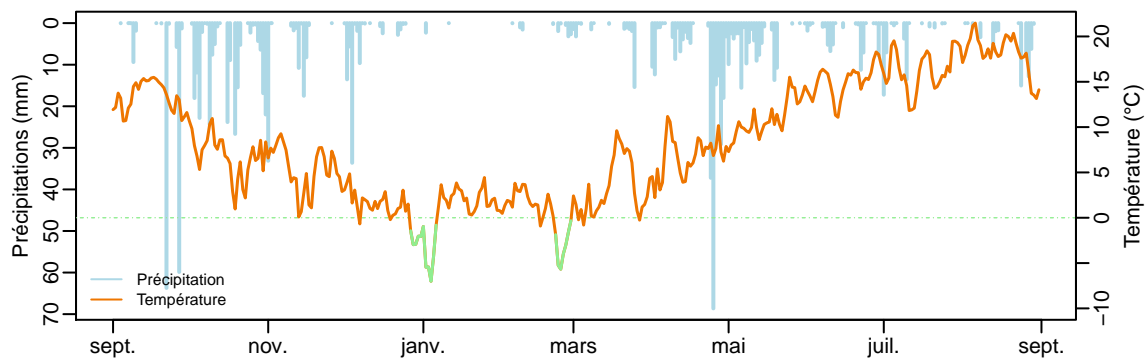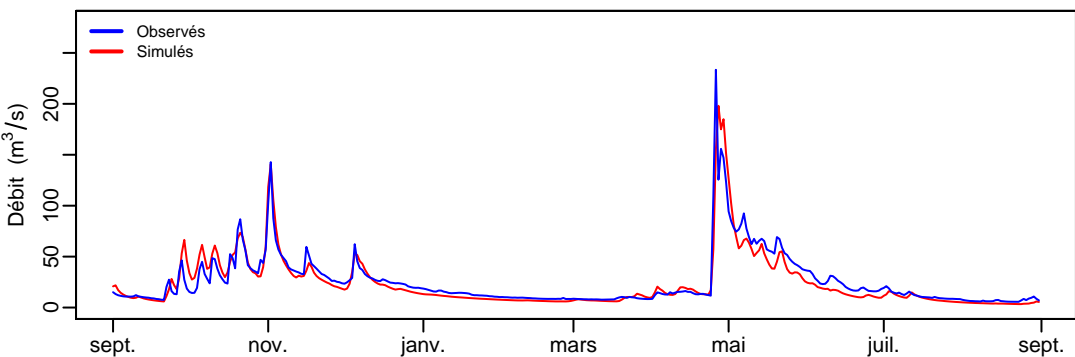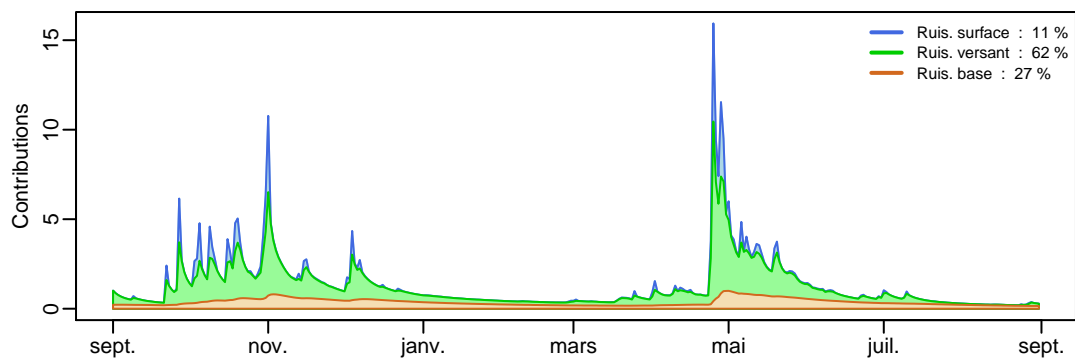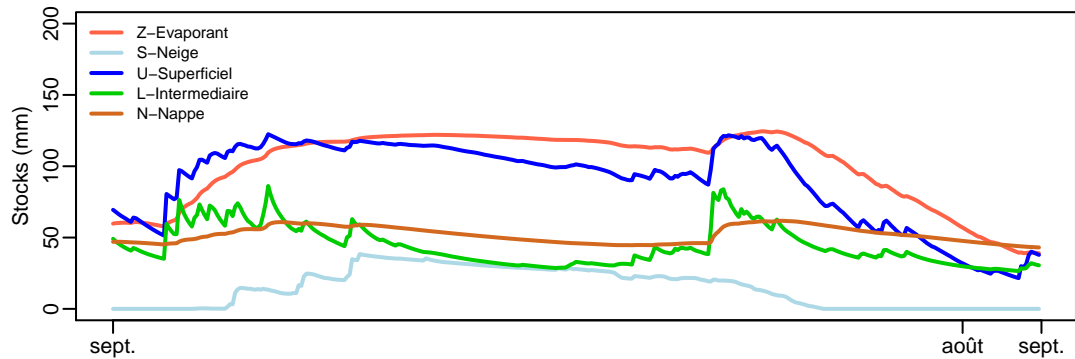

# sscroh (1480.1201 km<sup>2</sup>) – année 1993–1994

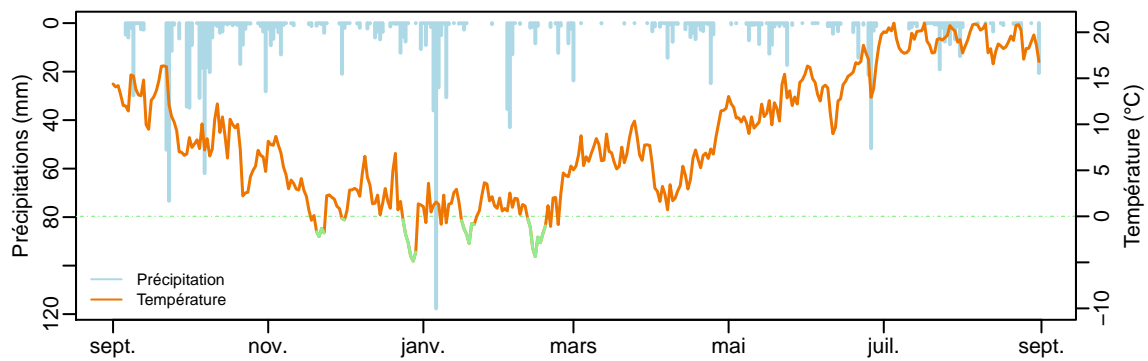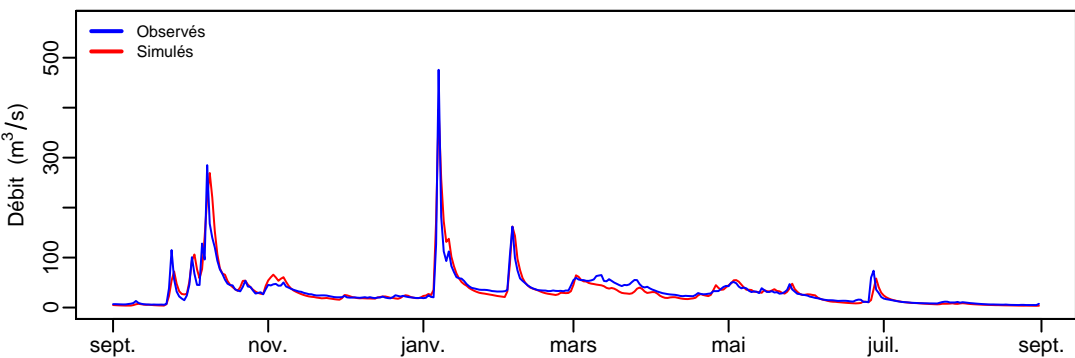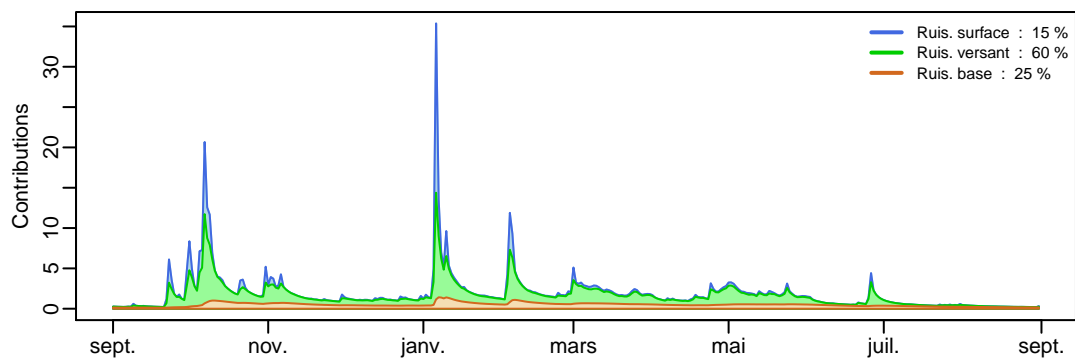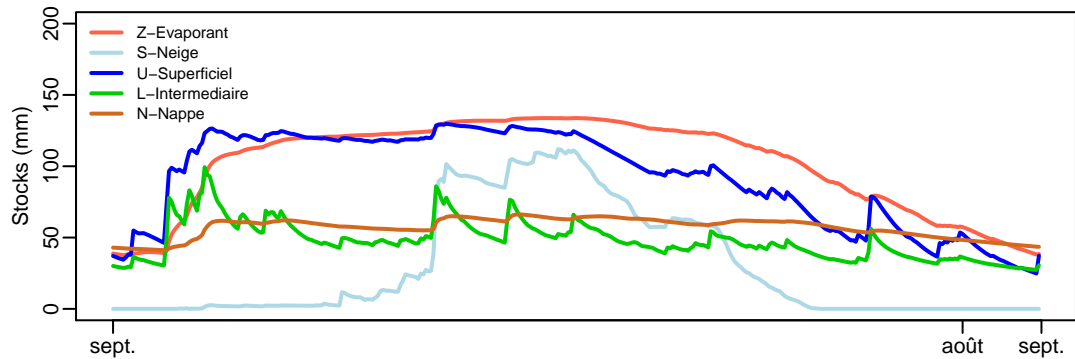



# sscroh (1480.1201 km<sup>2</sup>) – année 1994–1995

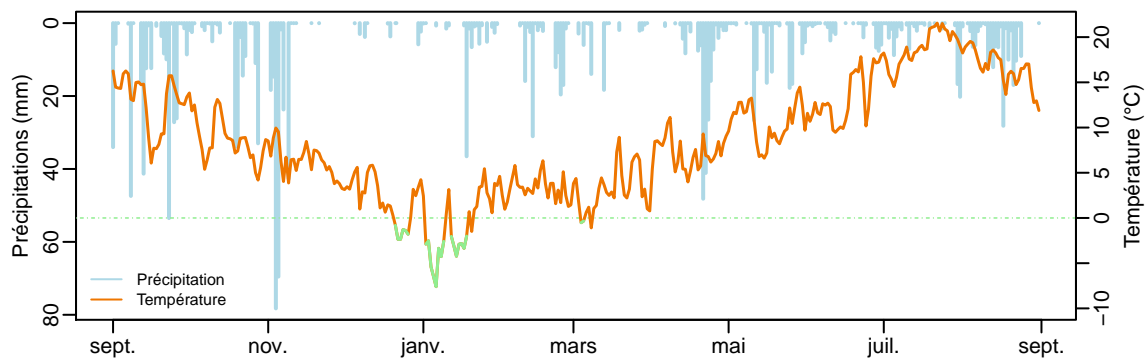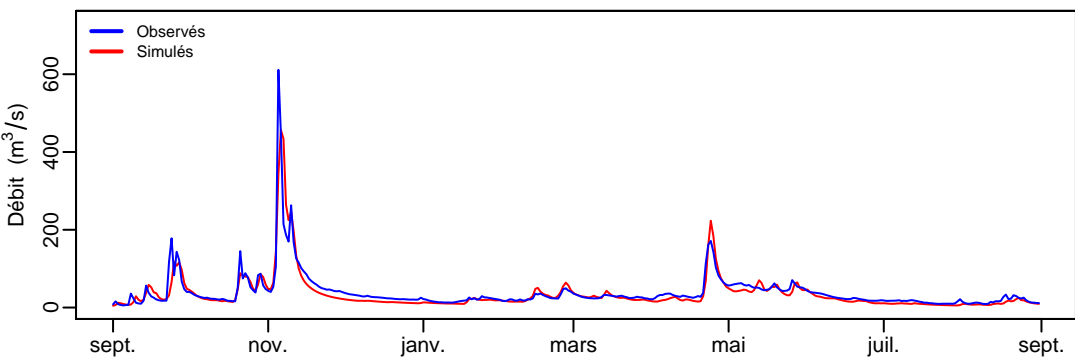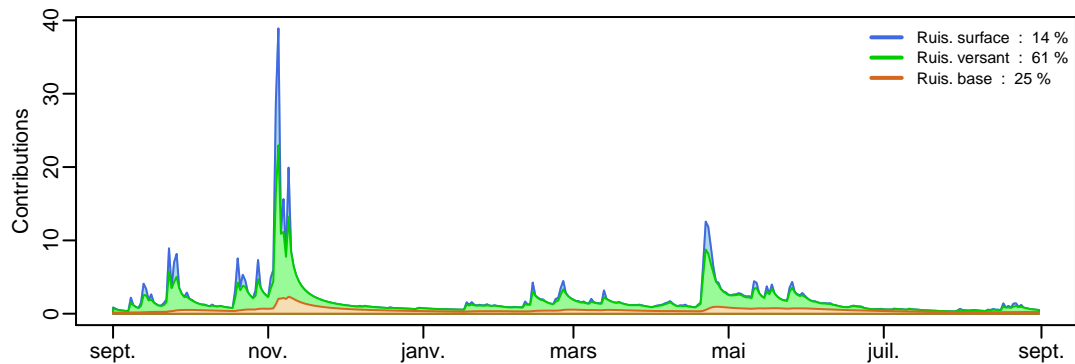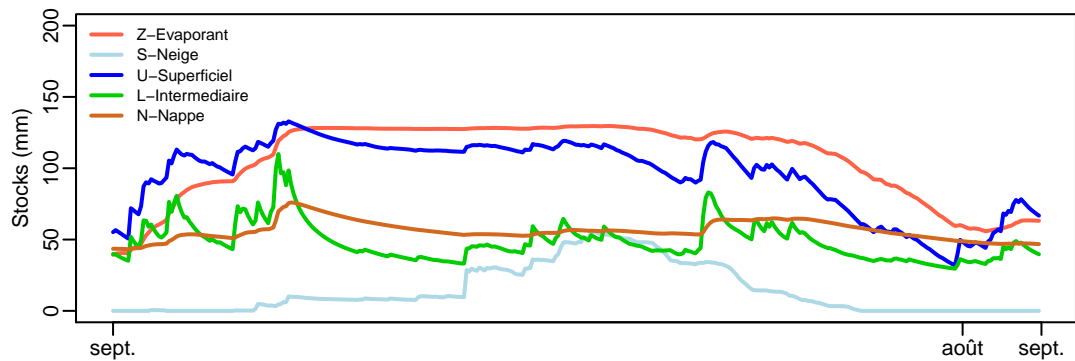

# sscroh (1480.1201 km<sup>2</sup>) – année 1995–1996

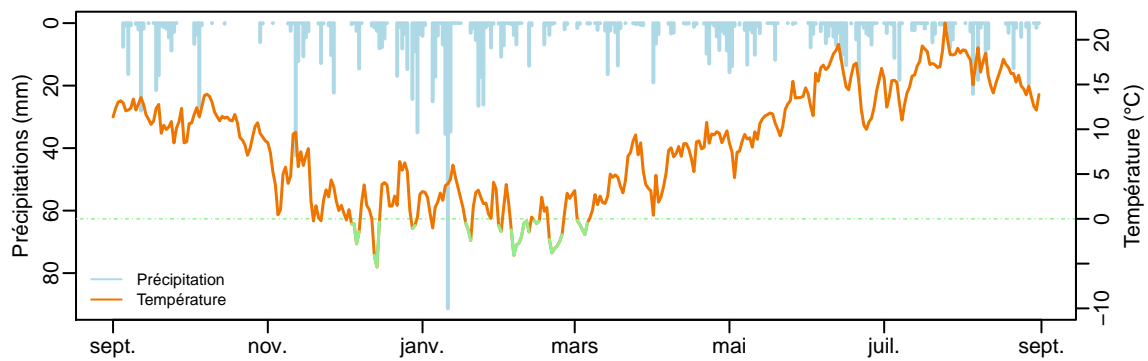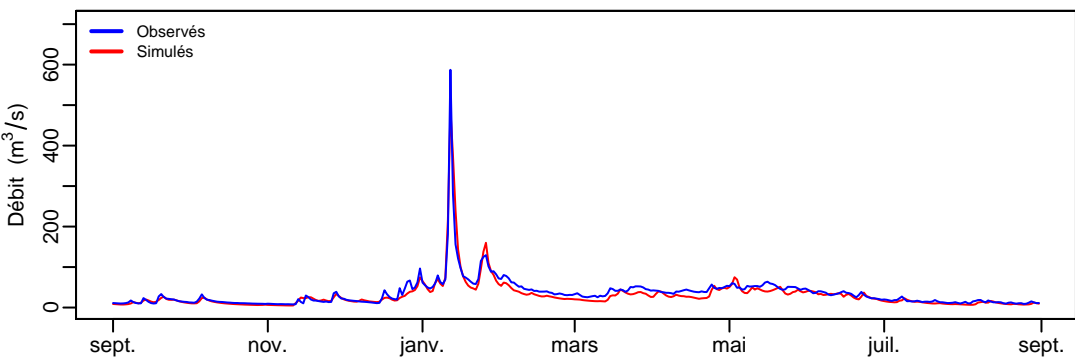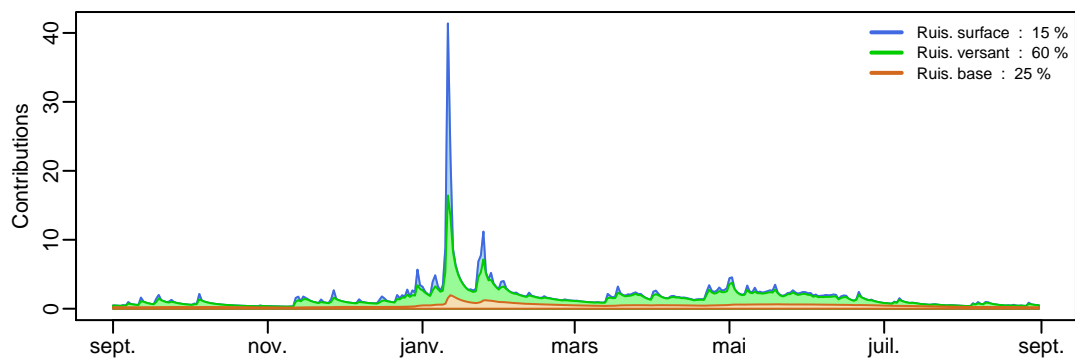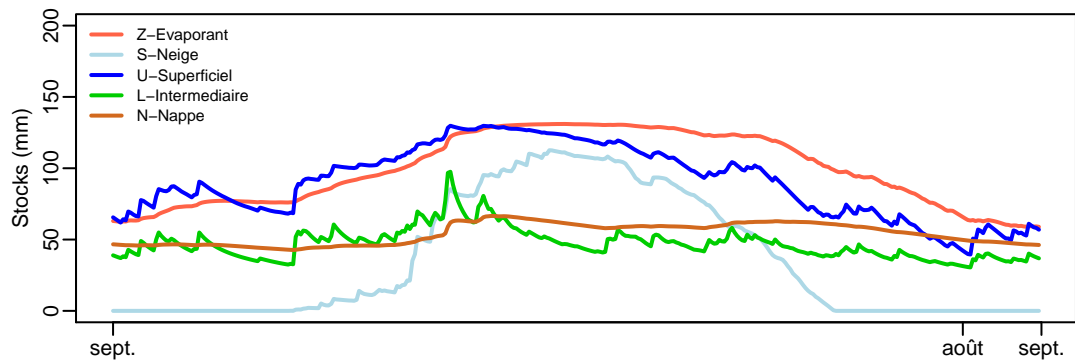

# sscroh (1480.1201 km²) – année 1996–1997

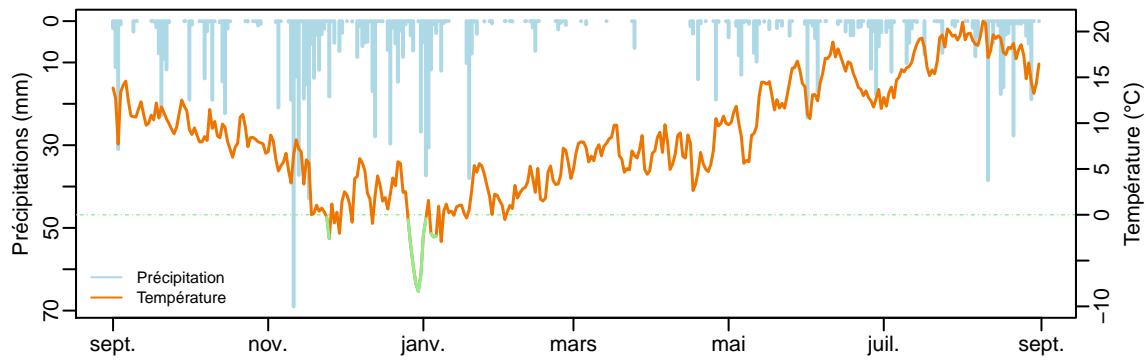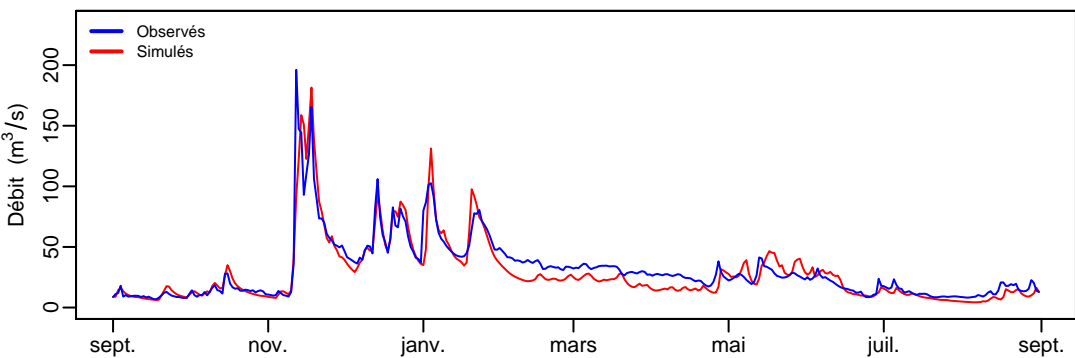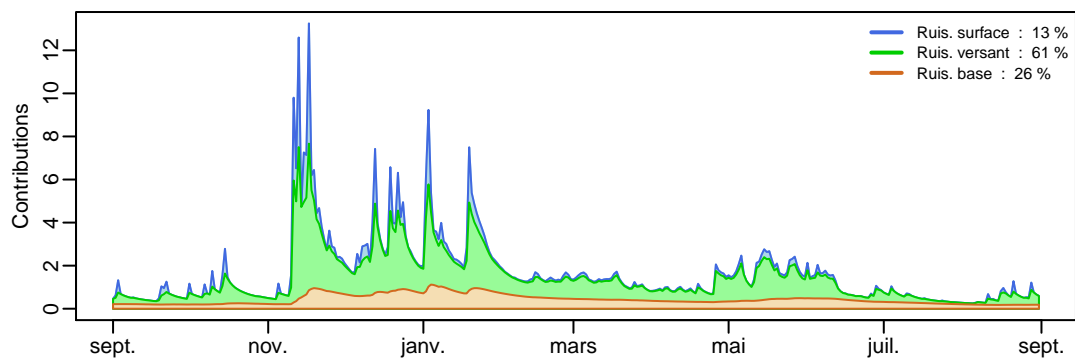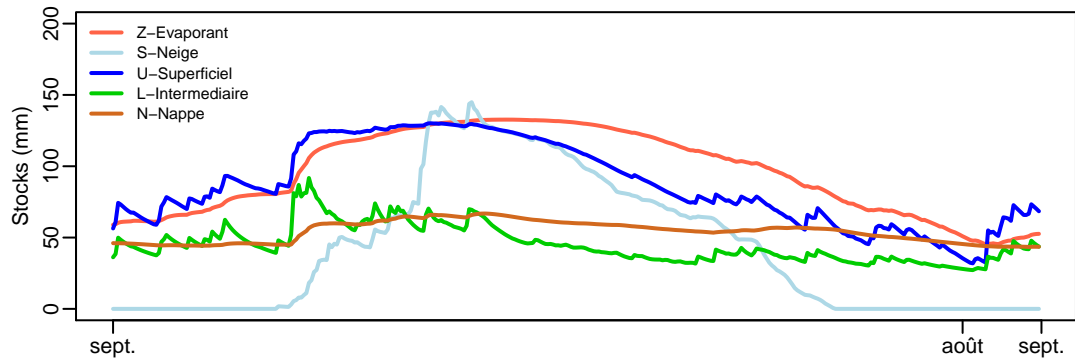

# sscroh (1480.1201 km<sup>2</sup>) – année 1997–1998

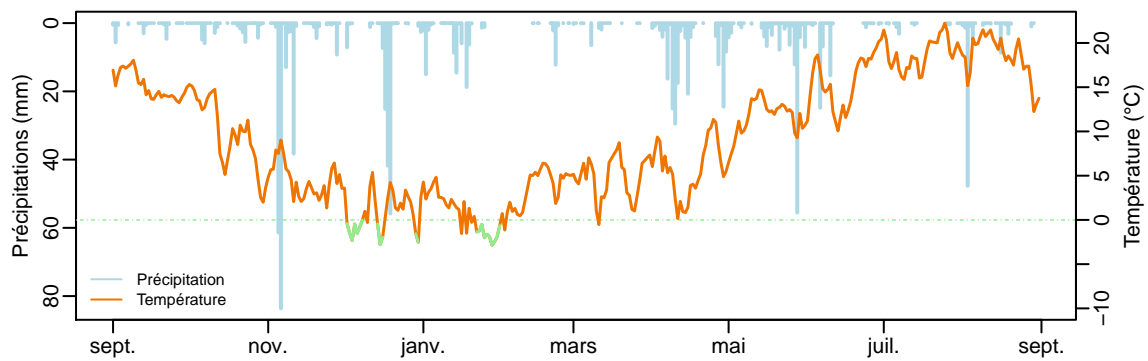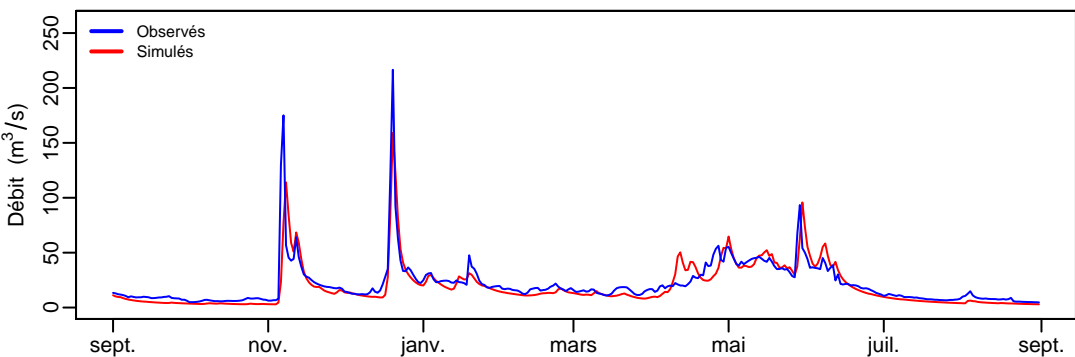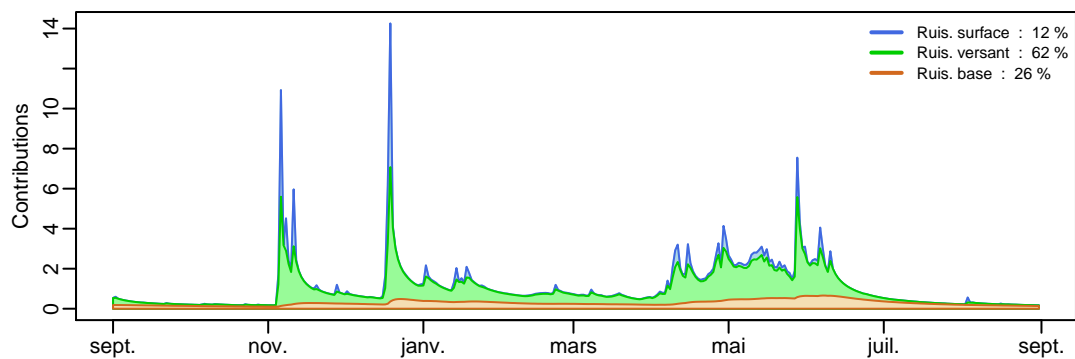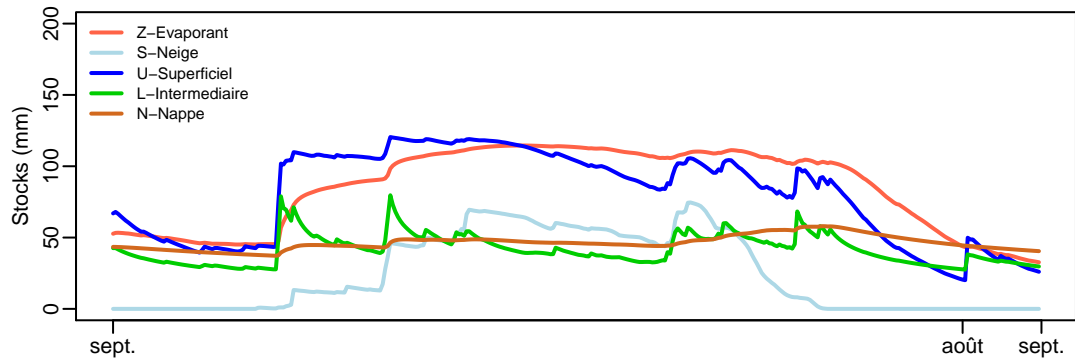

# sscroh (1480.1201 km²) – année 1998–1999

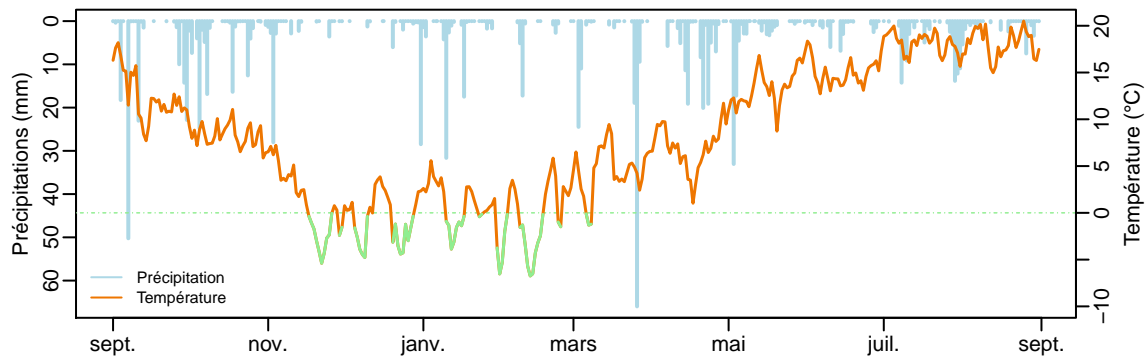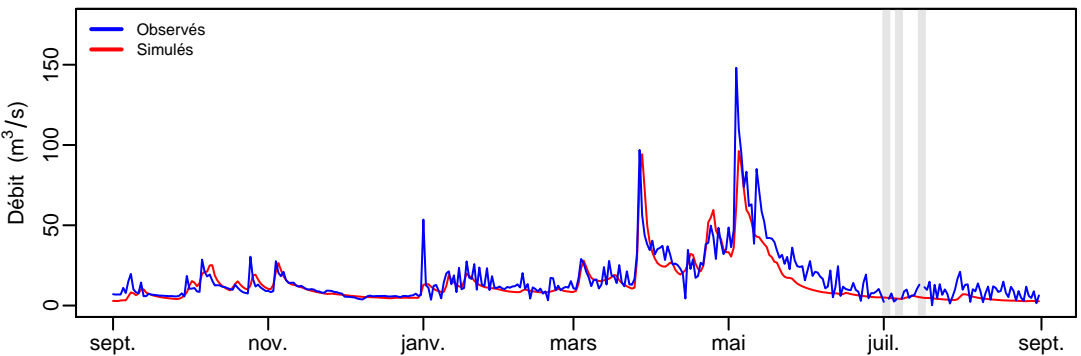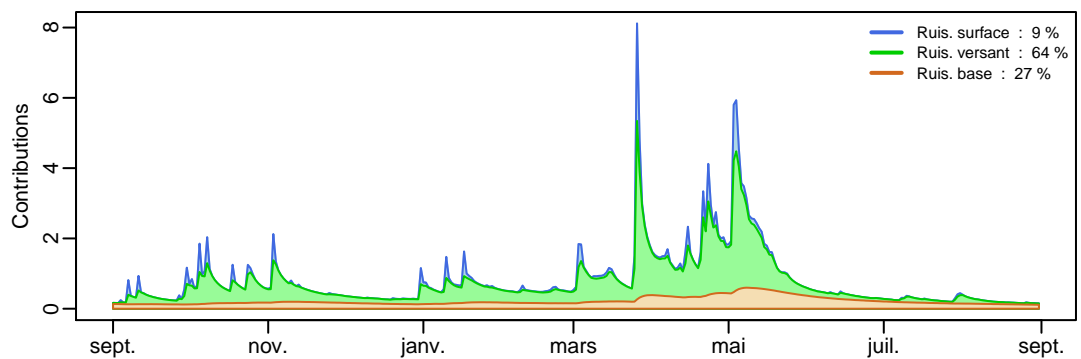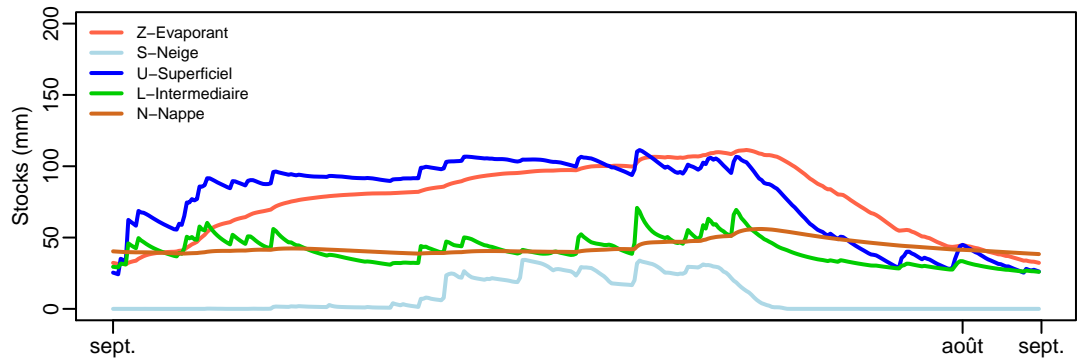

# sscroh (1480.1201 km<sup>2</sup>) – année 1999–2000

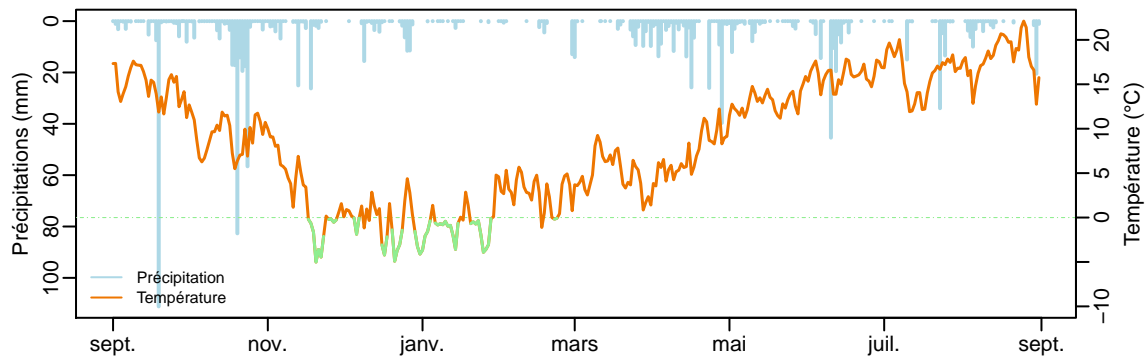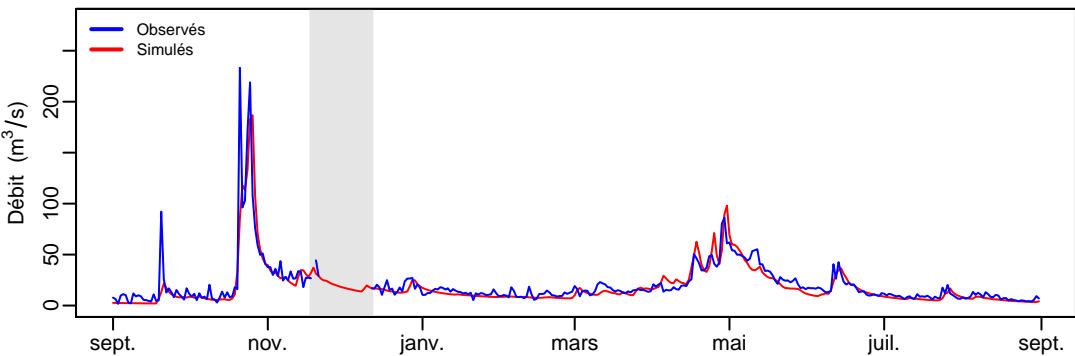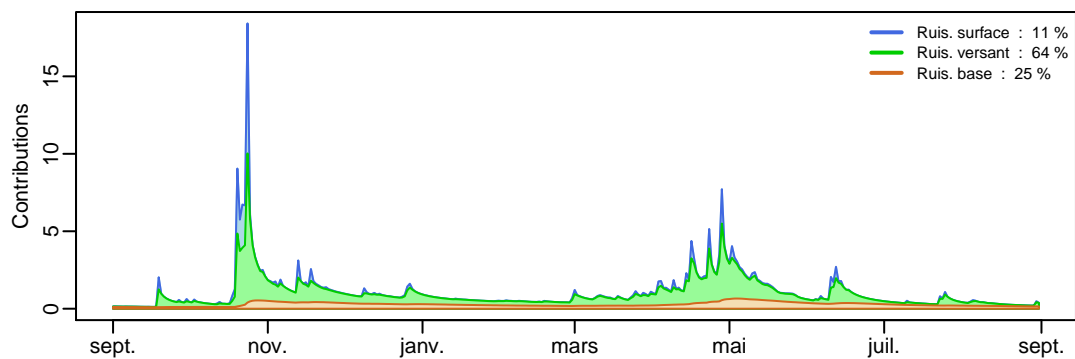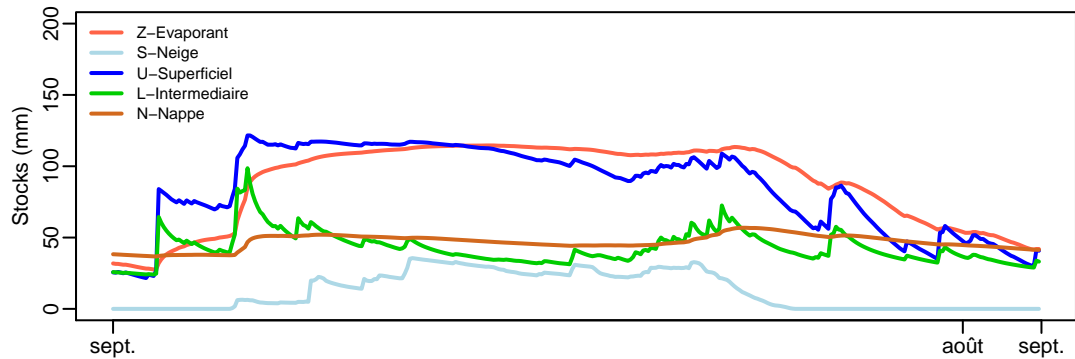

# sscroh (1480.1201 km<sup>2</sup>) – année 2000–2001

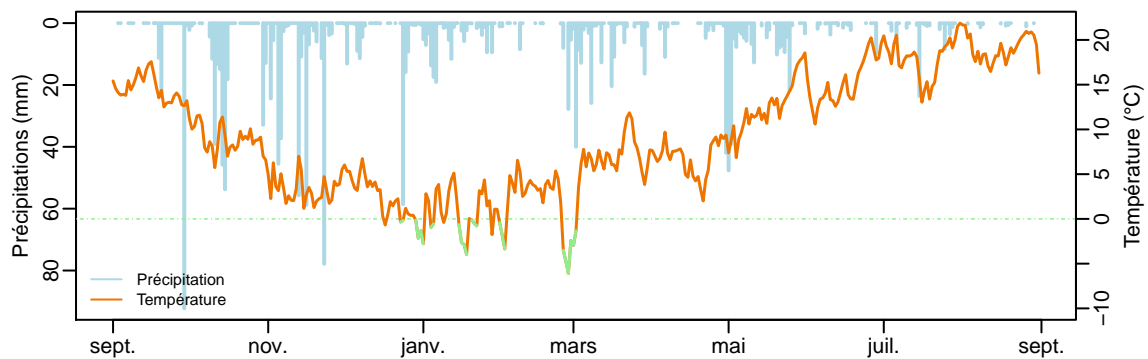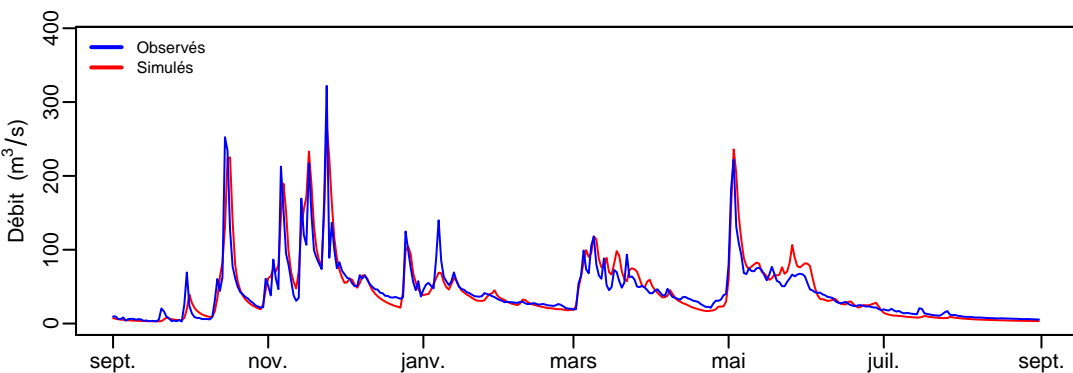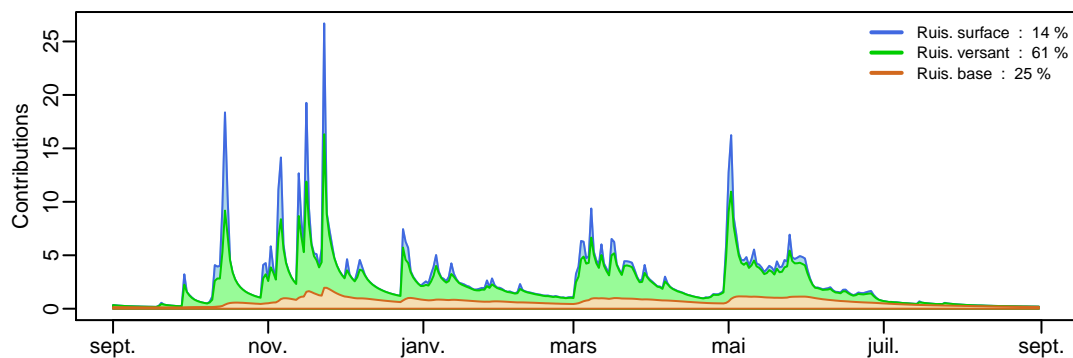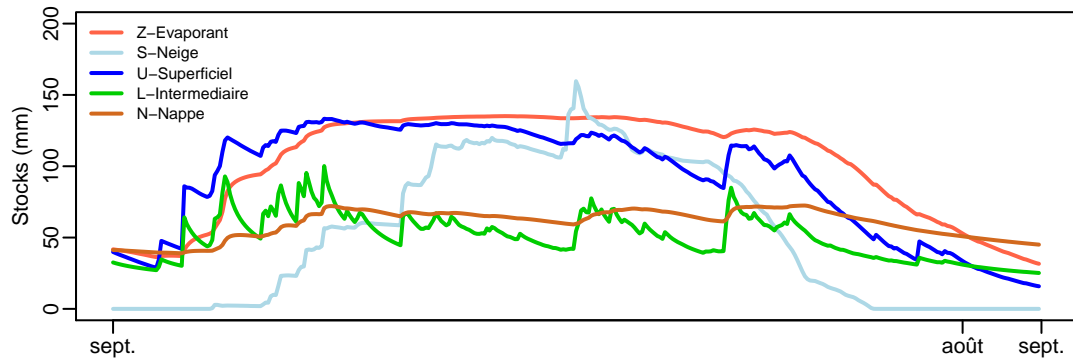

# sscroh (1480.1201 km²) – année 2001–2002

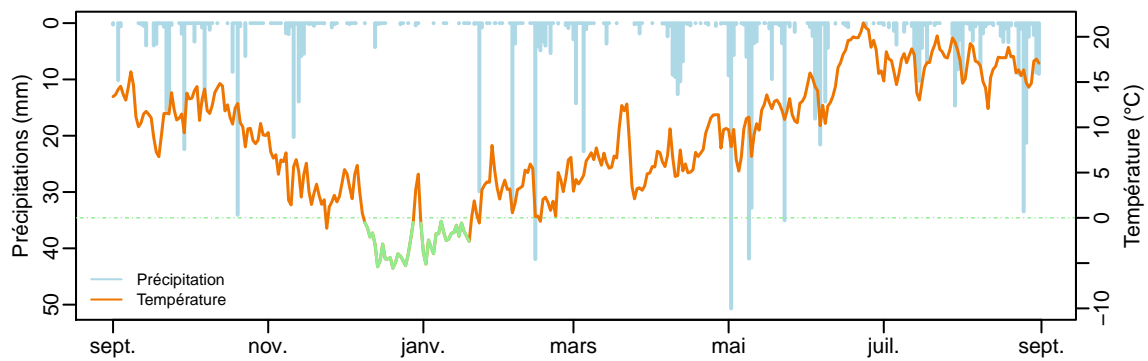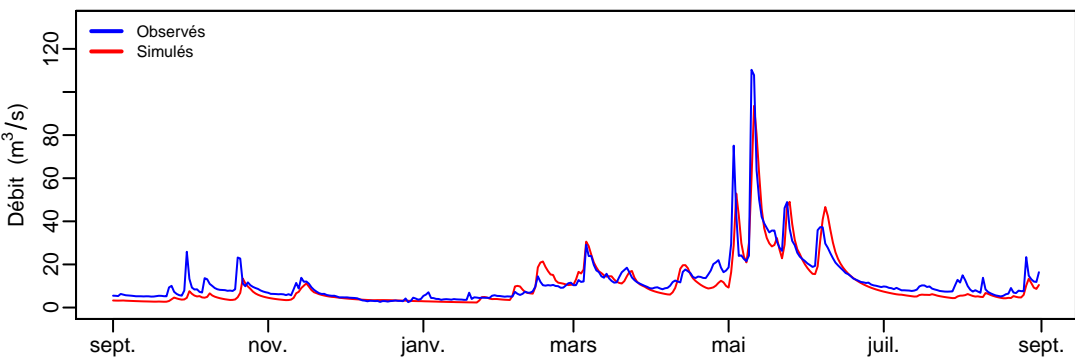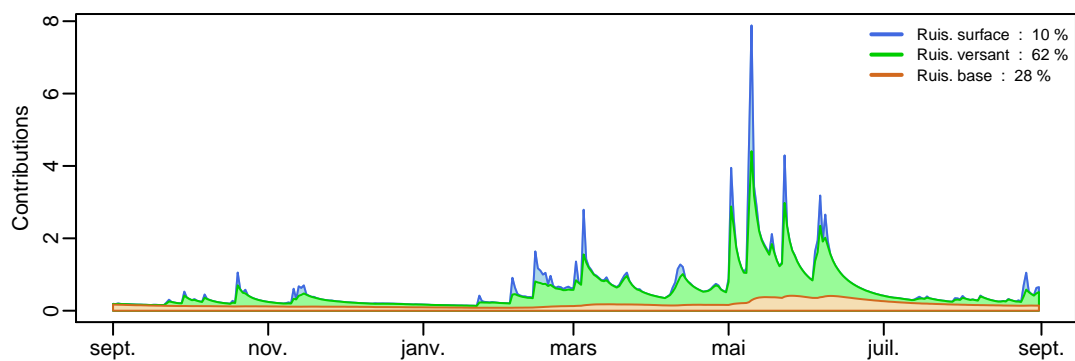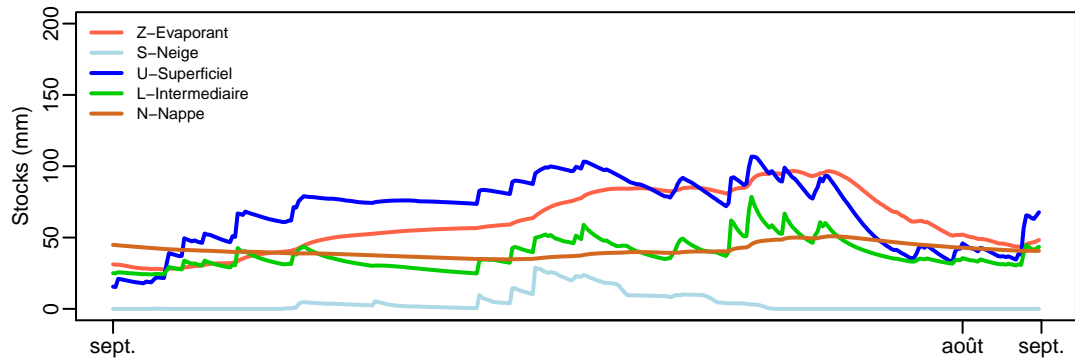



# sscroh (1480.1201 km<sup>2</sup>) – année 2002–2003

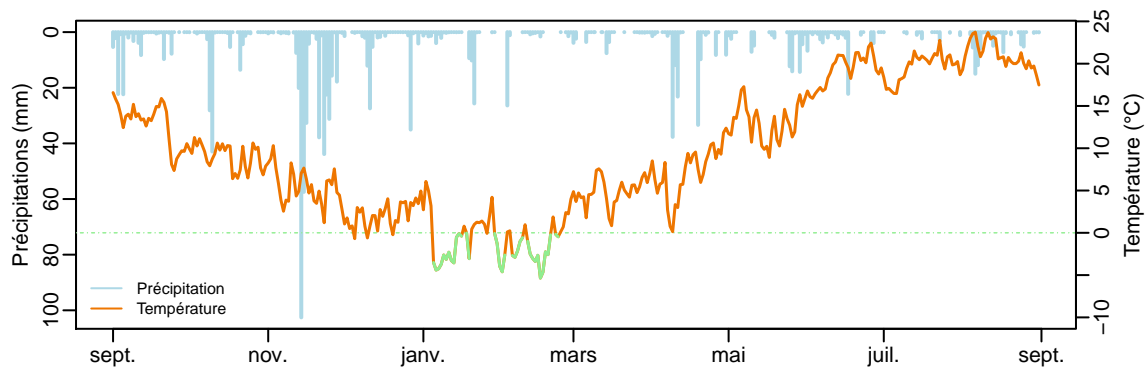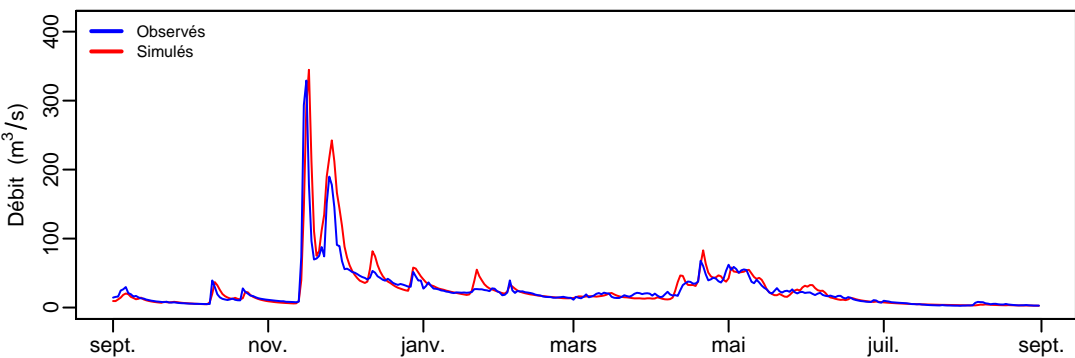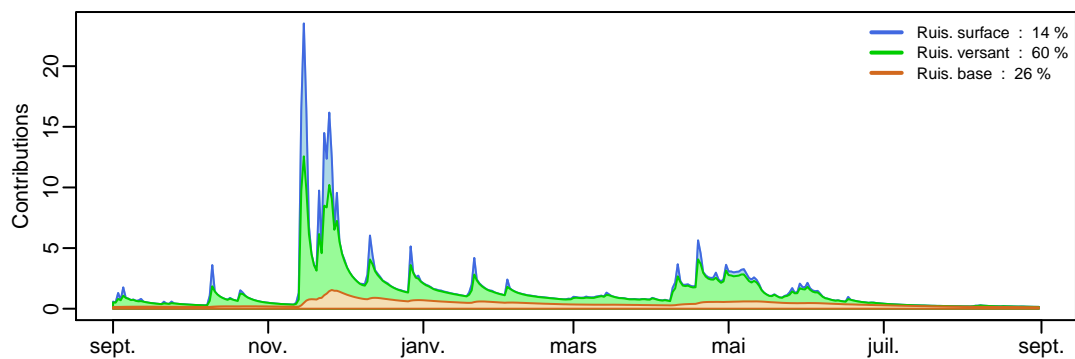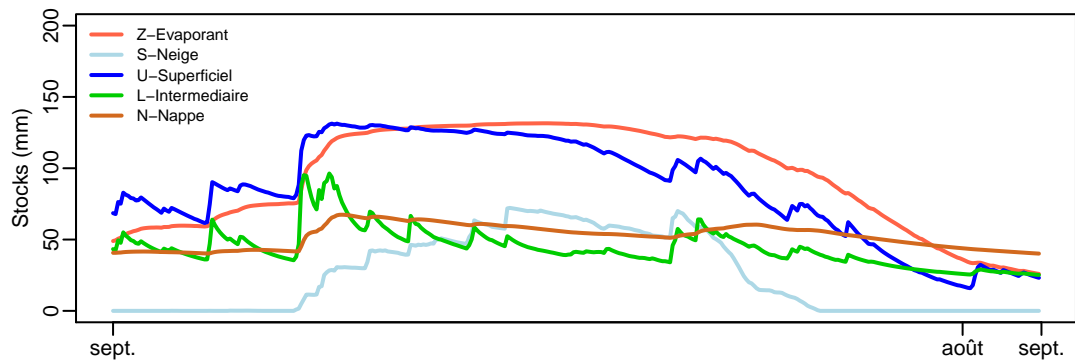

# sscroh (1480.1201 km<sup>2</sup>) – année 2003–2004

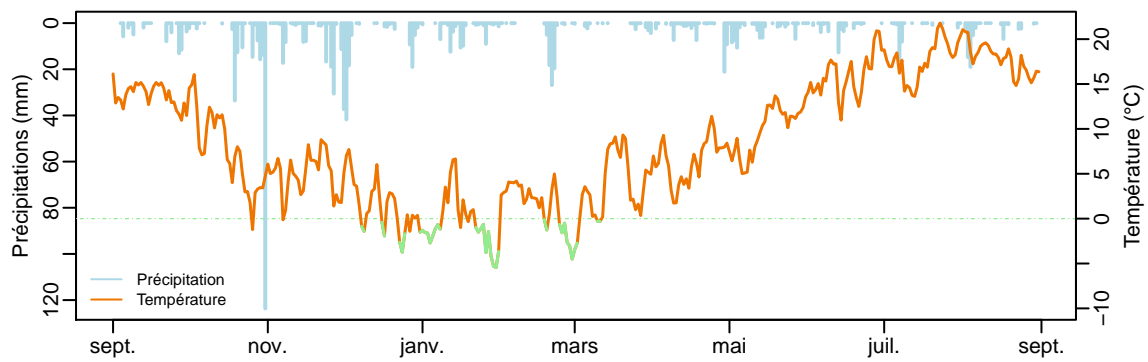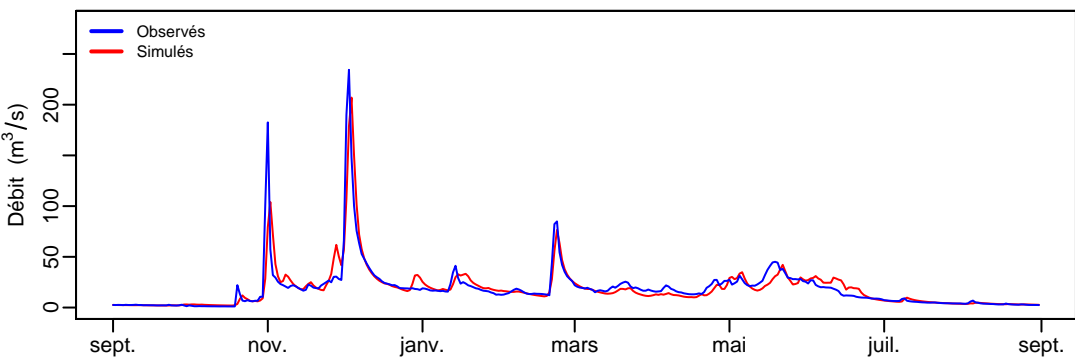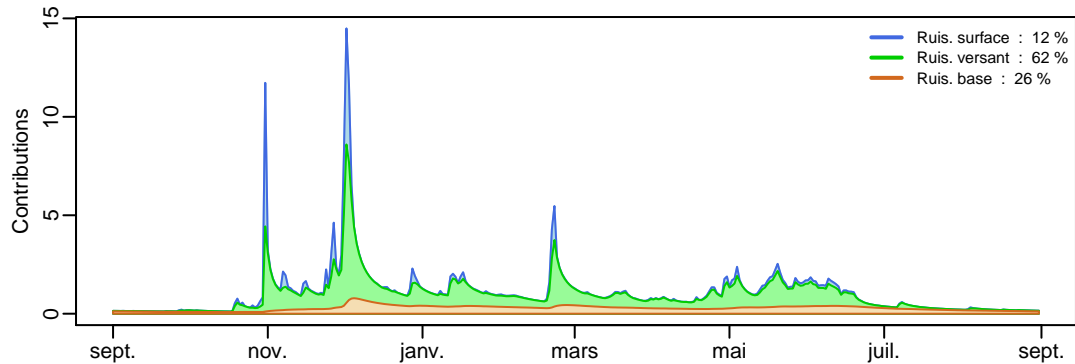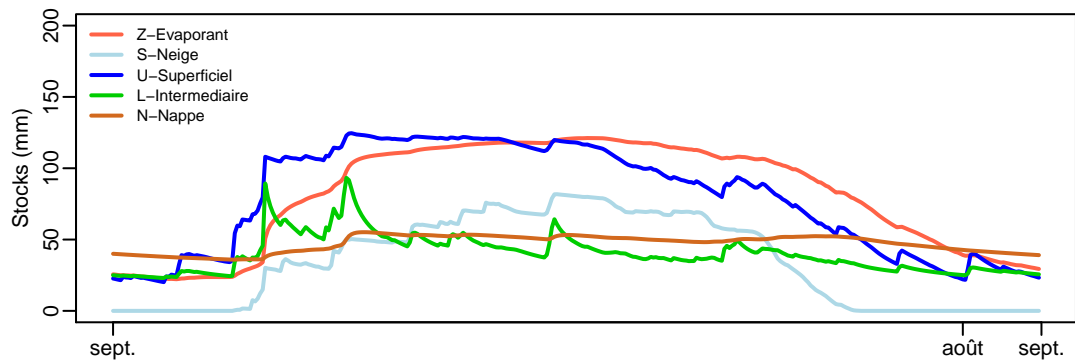

# sscroh (1480.1201 km<sup>2</sup>) – année 2004–2005

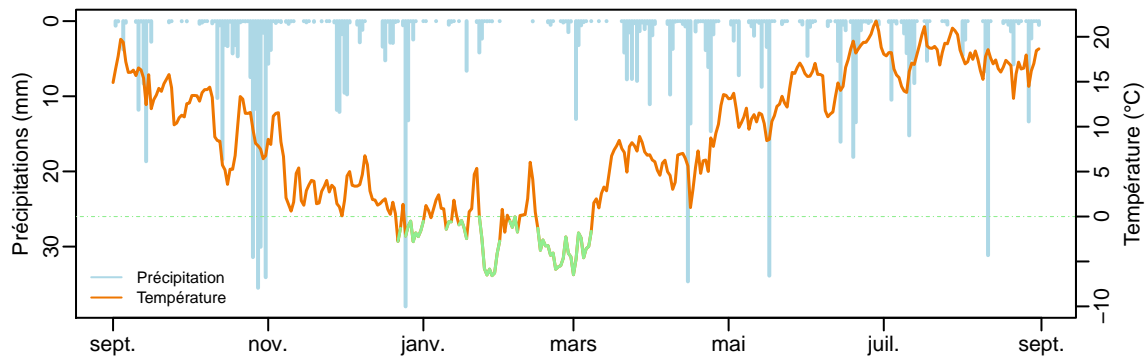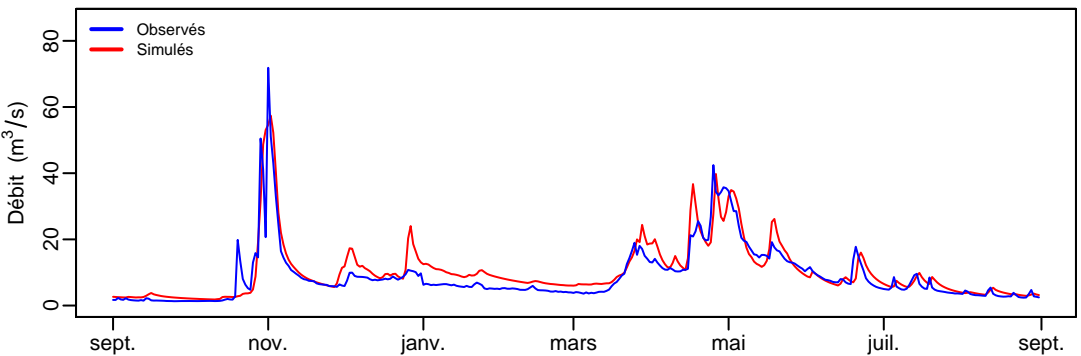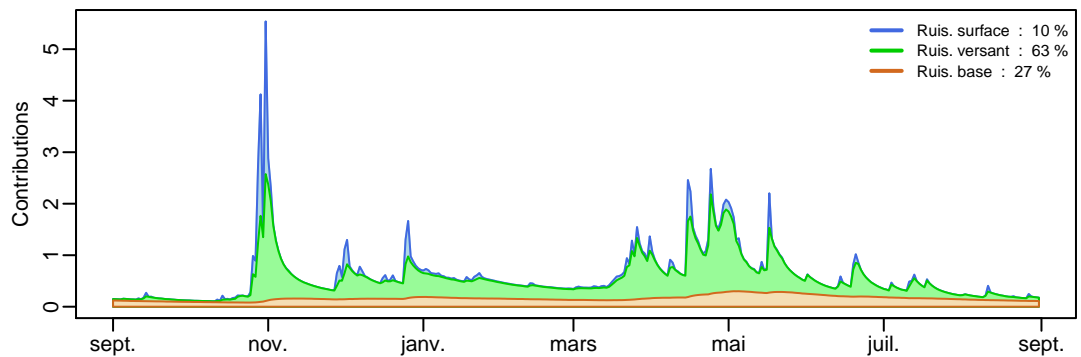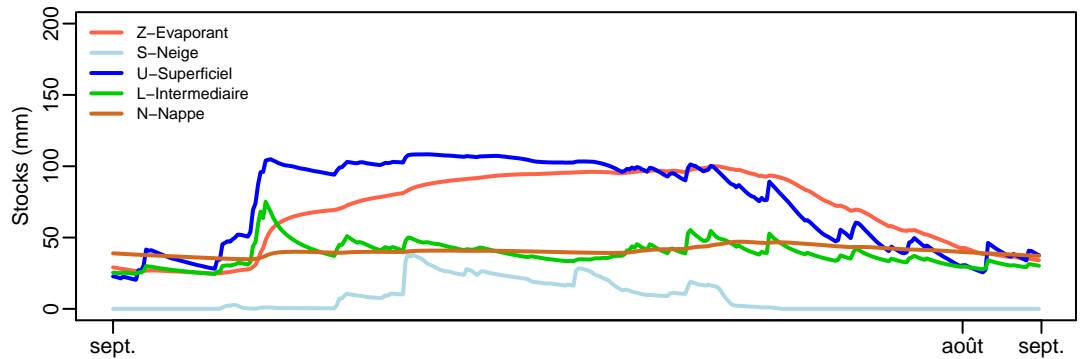

# sscroh (1480.1201 km<sup>2</sup>) – année 2005–2006

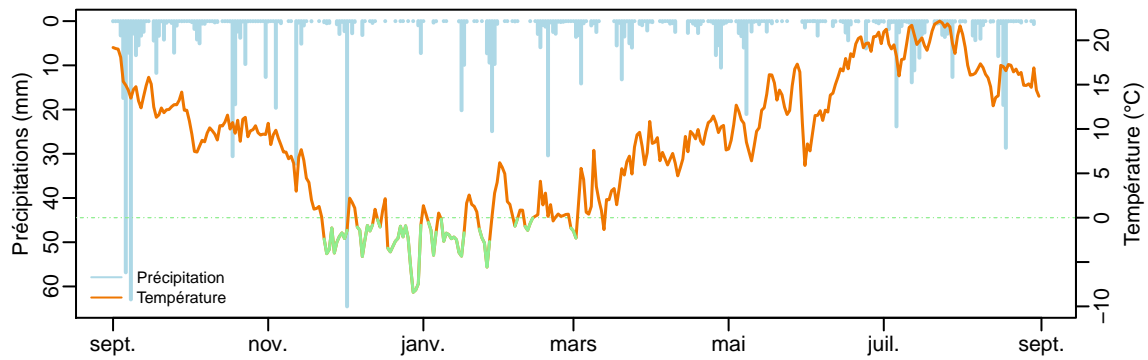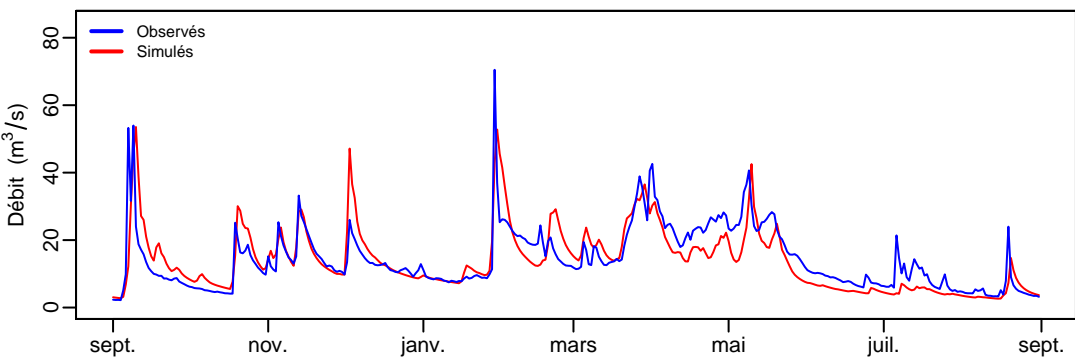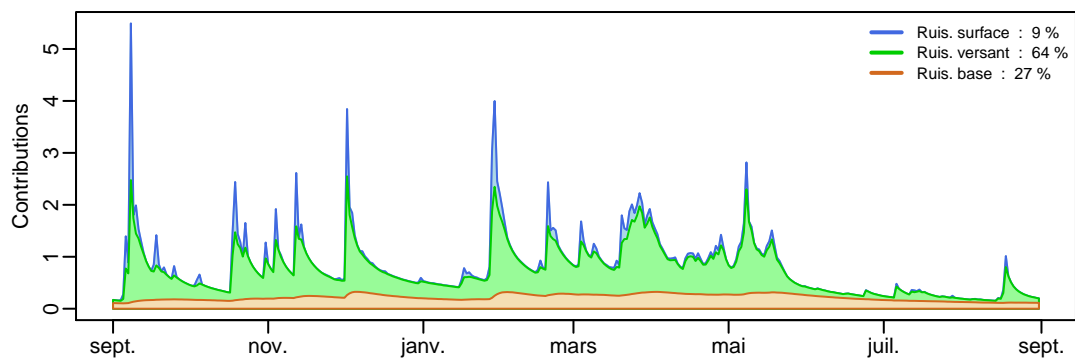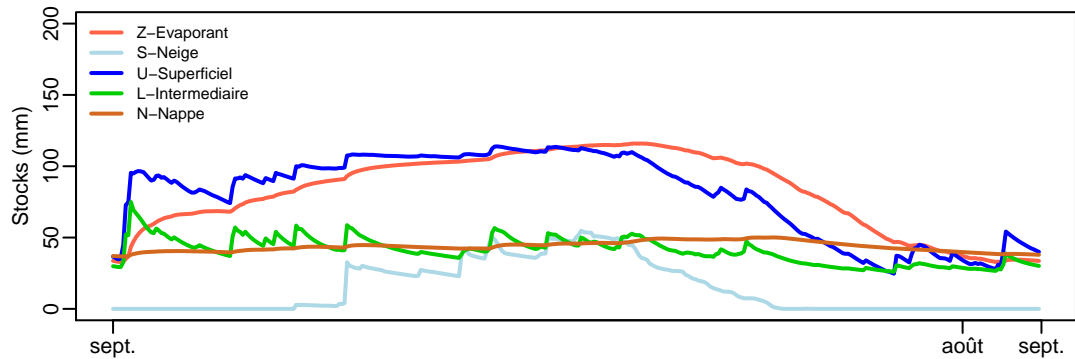

# sscroh (1480.1201 km<sup>2</sup>) – année 2006–2007

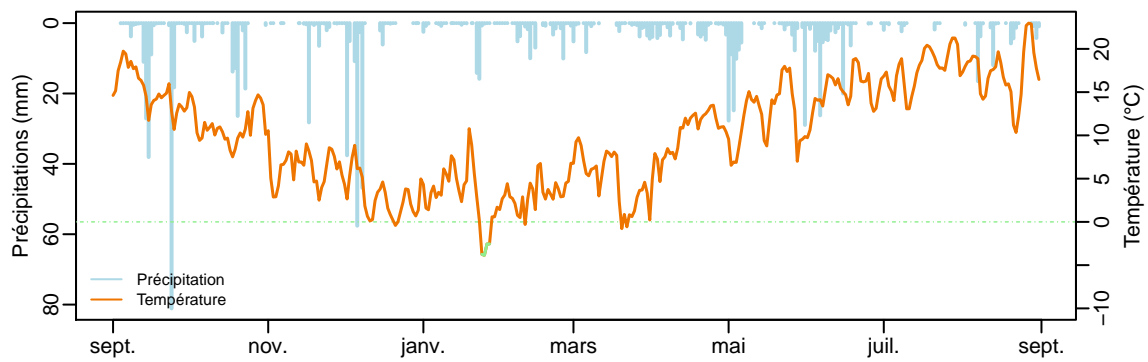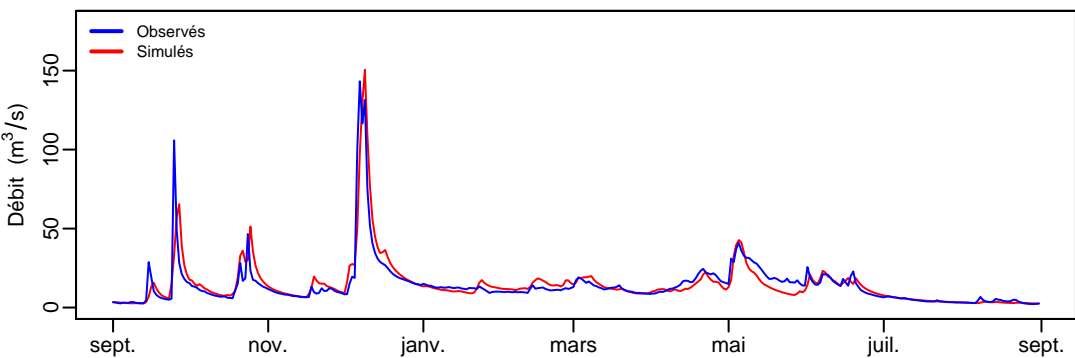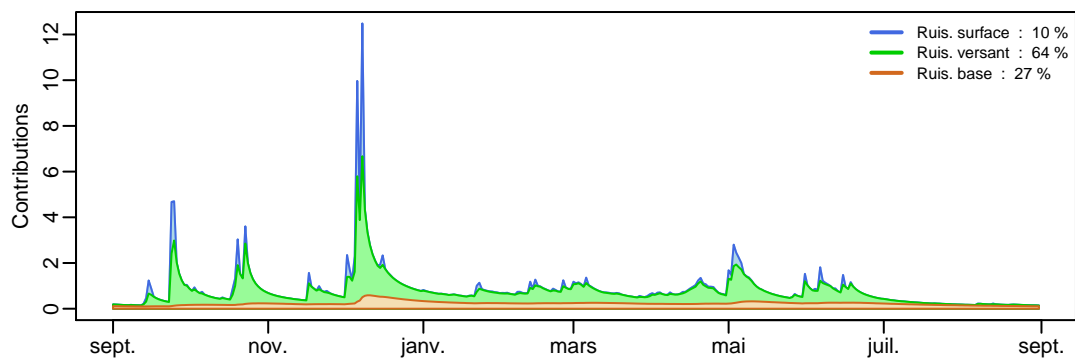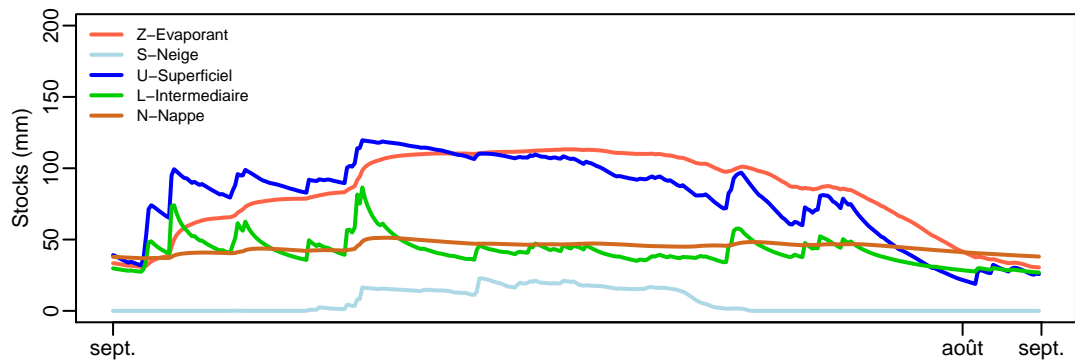

# sscroh (1480.1201 km²) – année 2007–2008

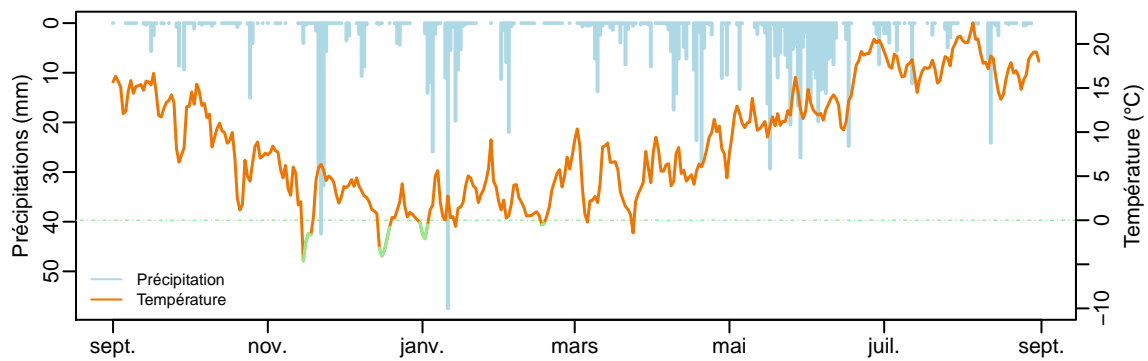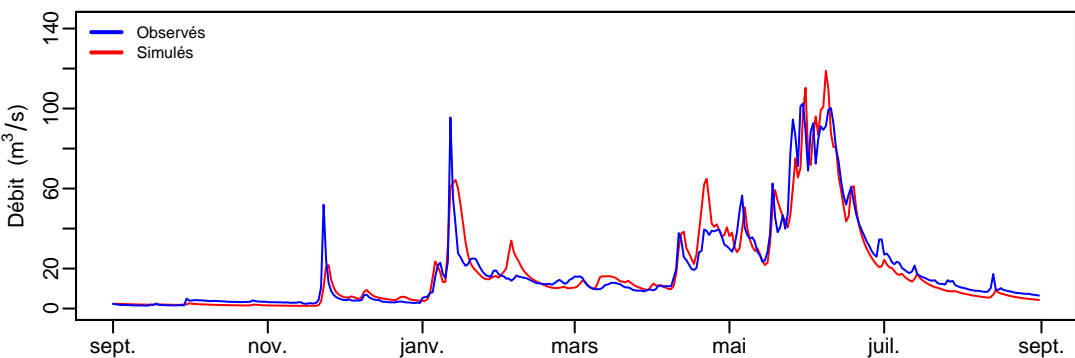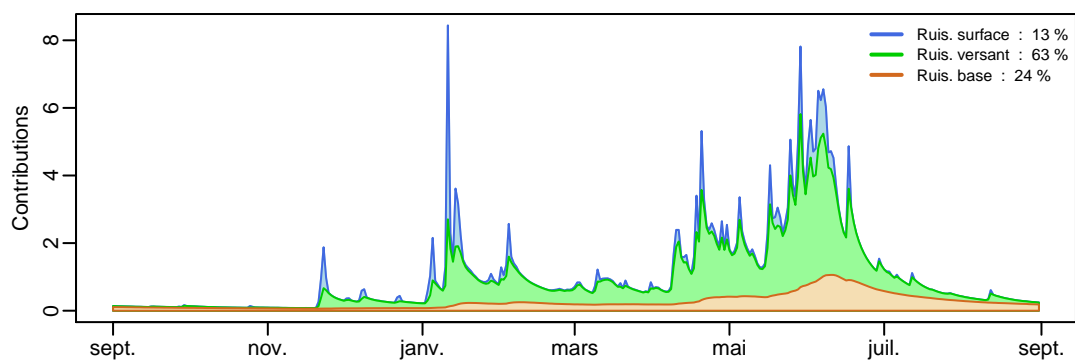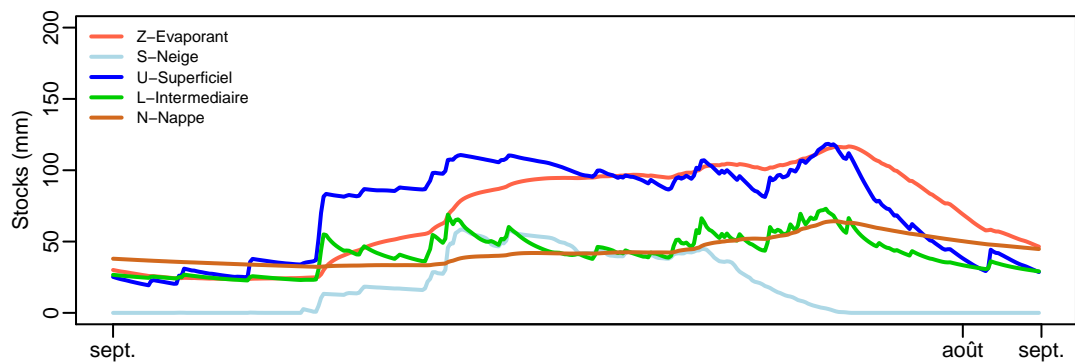

# sscroh (1480.1201 km<sup>2</sup>) – année 2008–2009

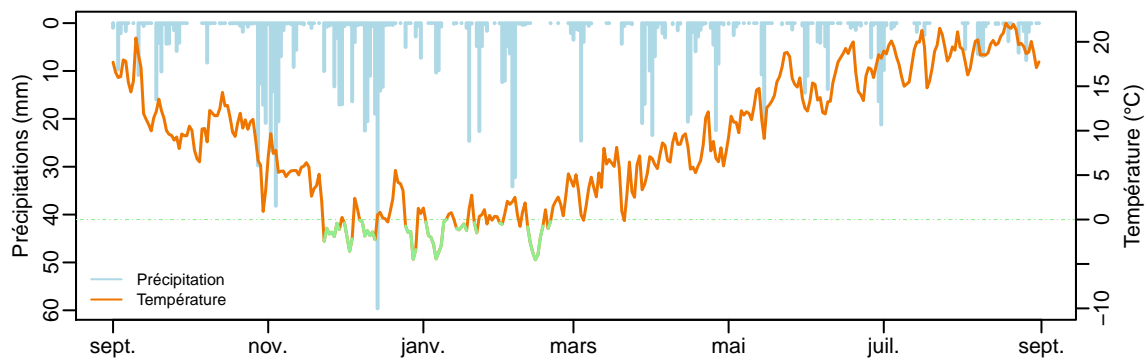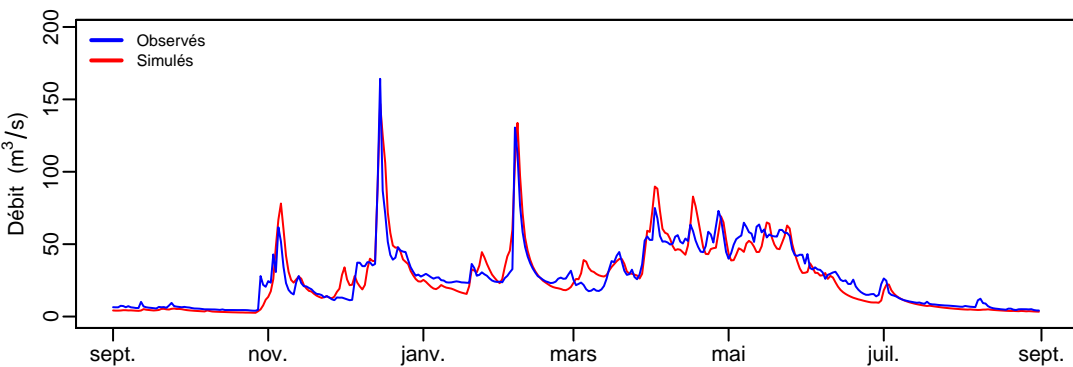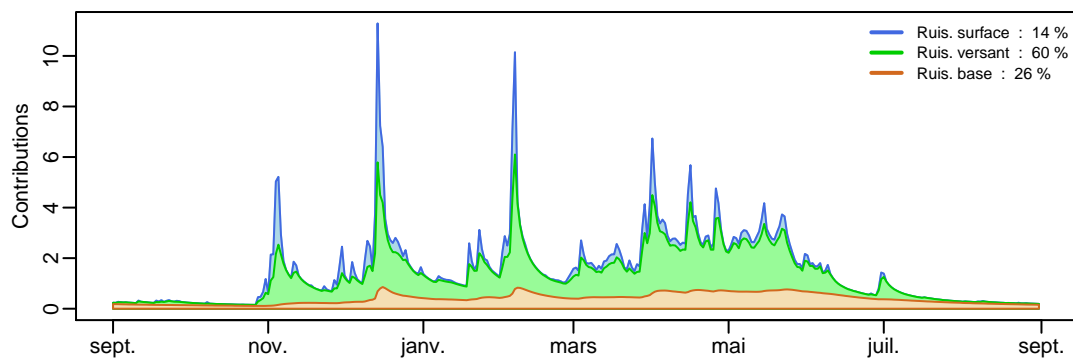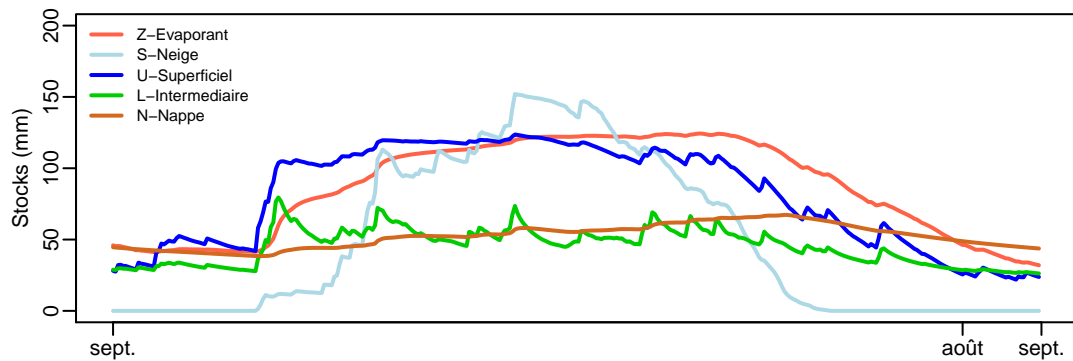

# sscroh (1480.1201 km²) – année 2009–2010

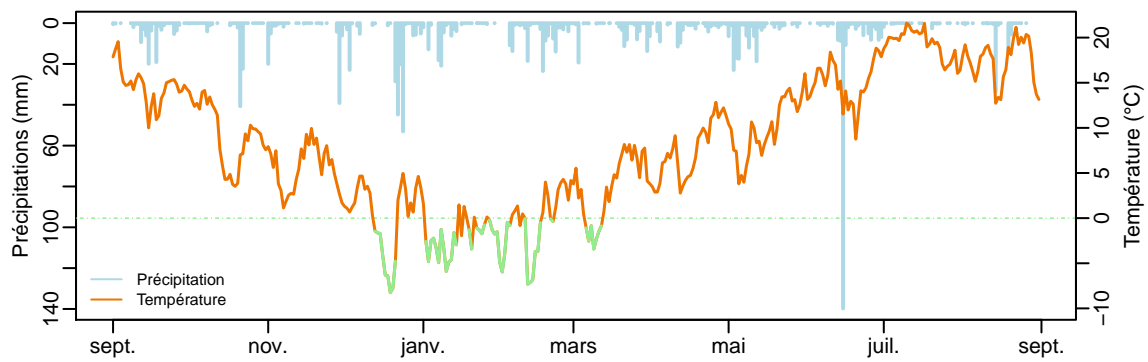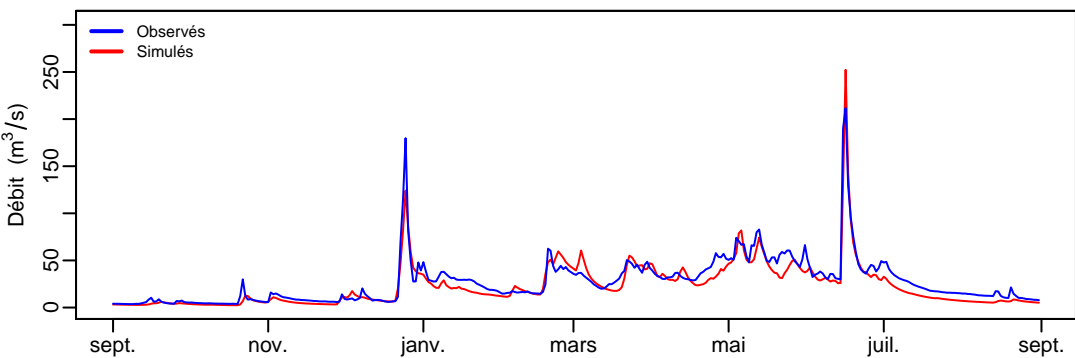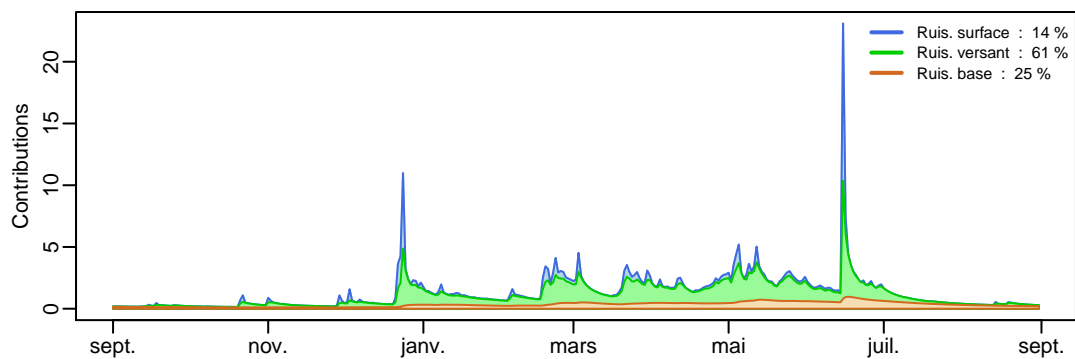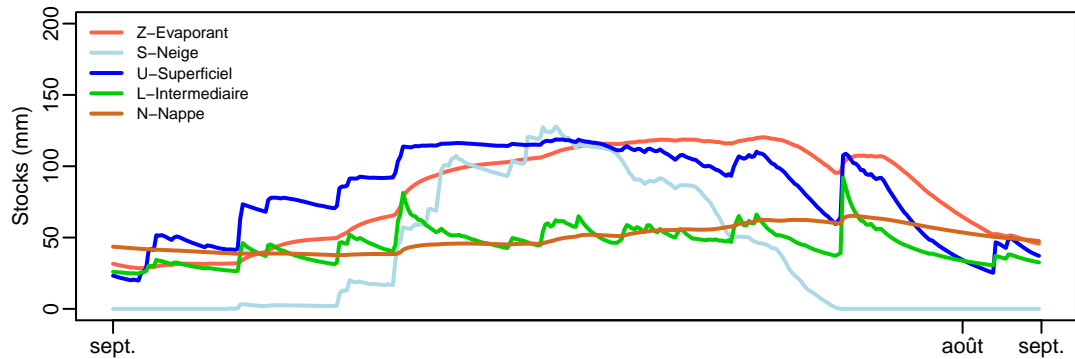



# sscroh (1480.1201 km<sup>2</sup>) – année 2010–2011

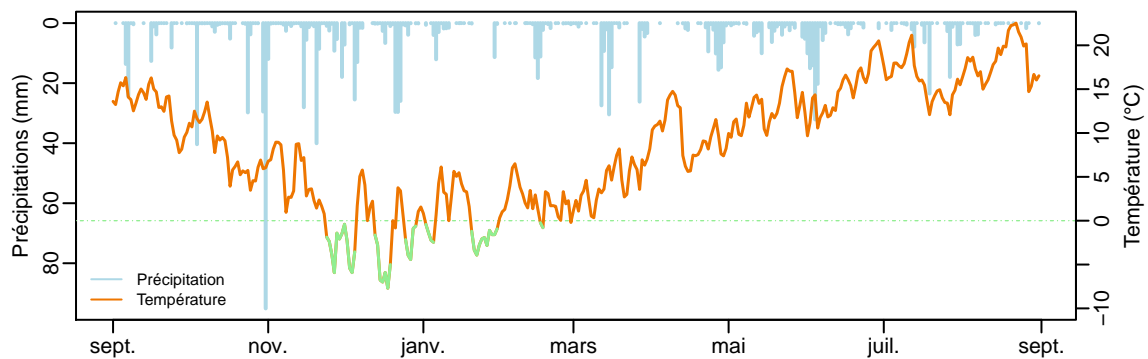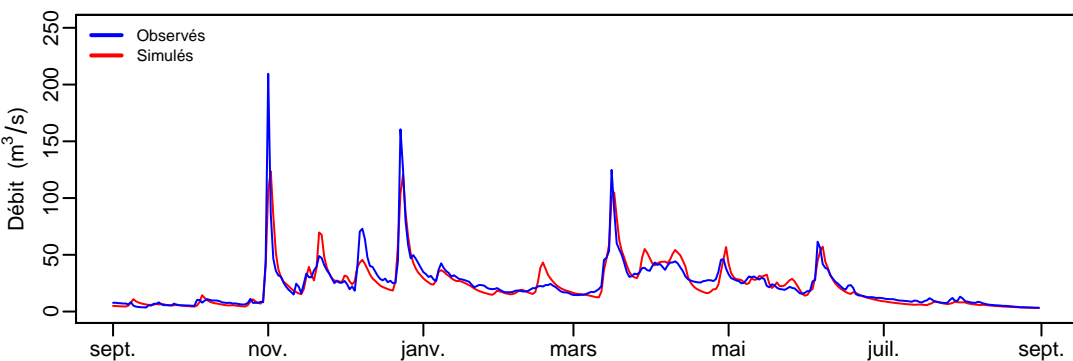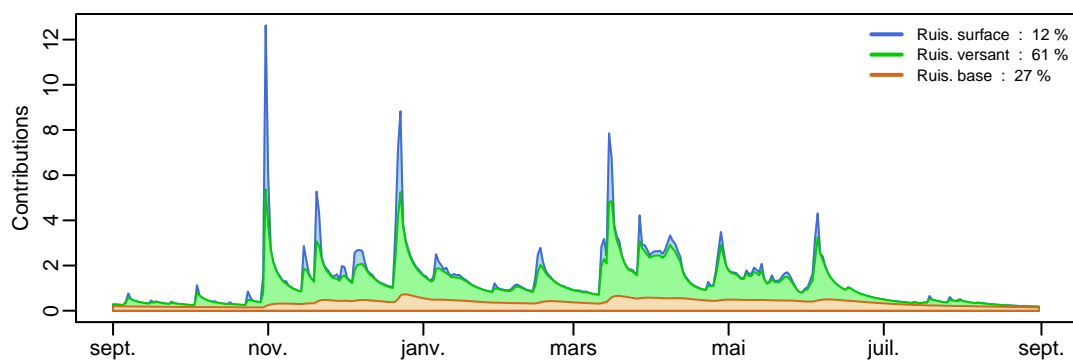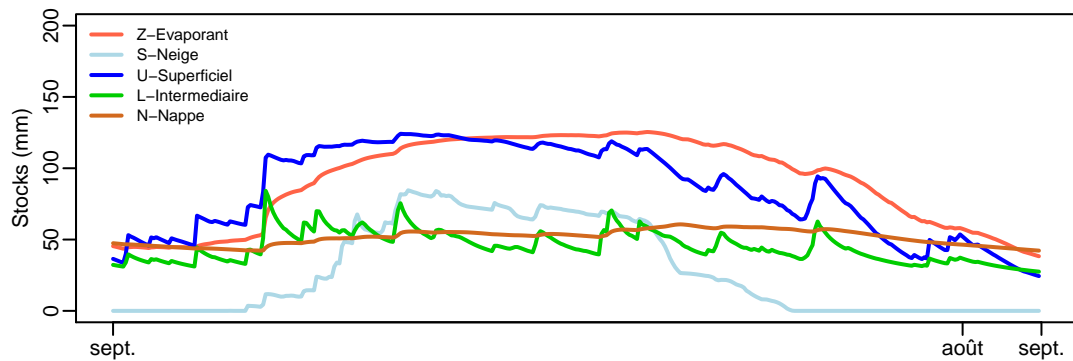

# sscroh (1480.1201 km<sup>2</sup>) – année 2011–2012

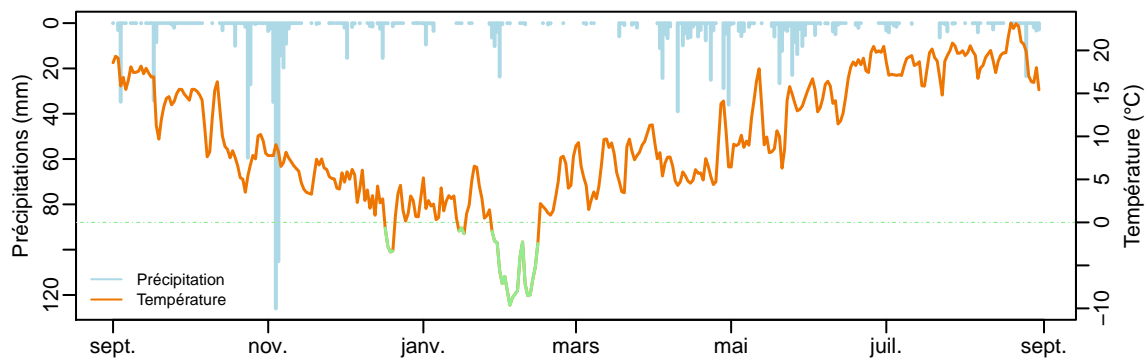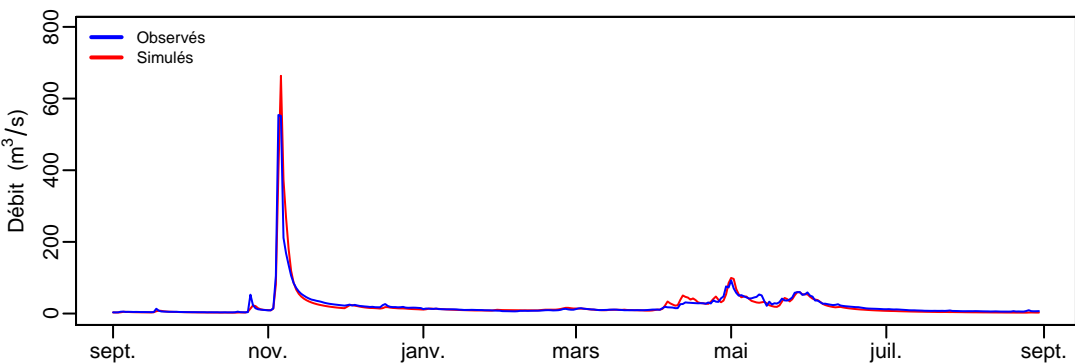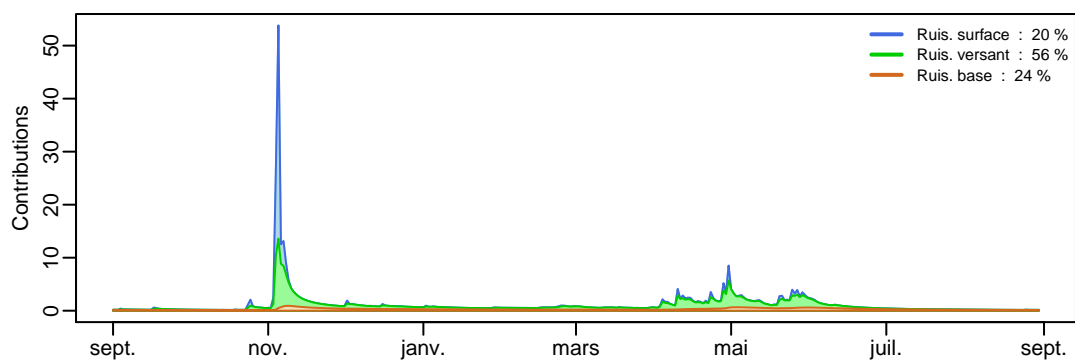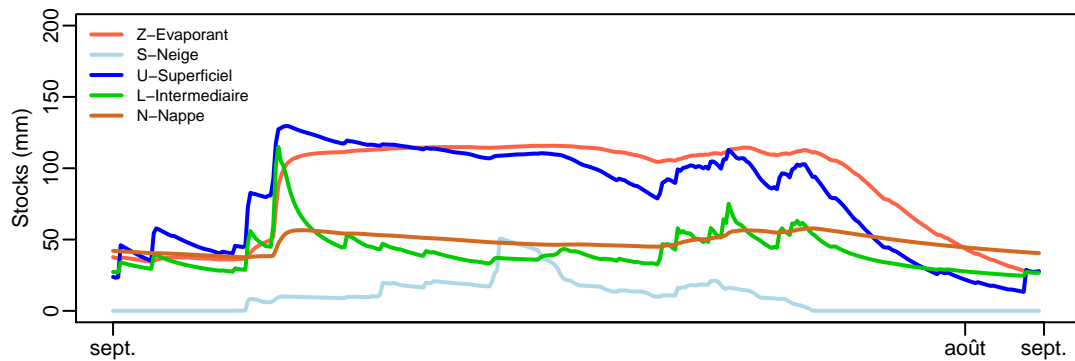

# vinonh (1703.9901 km²) – année 1981–1982

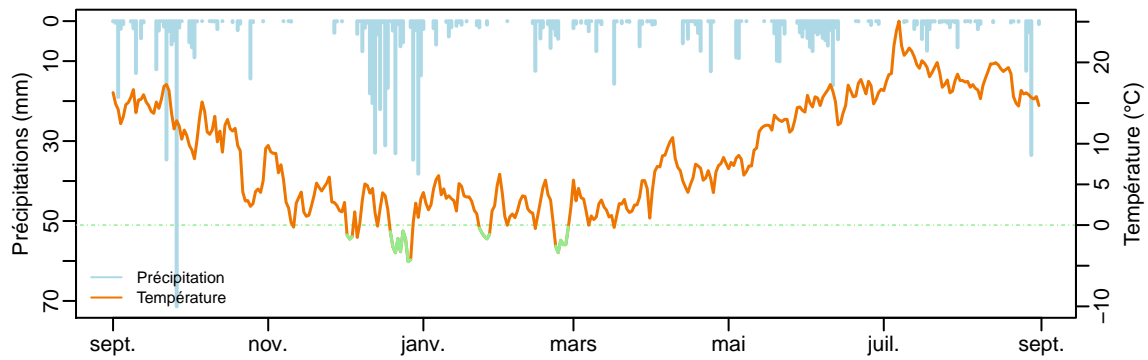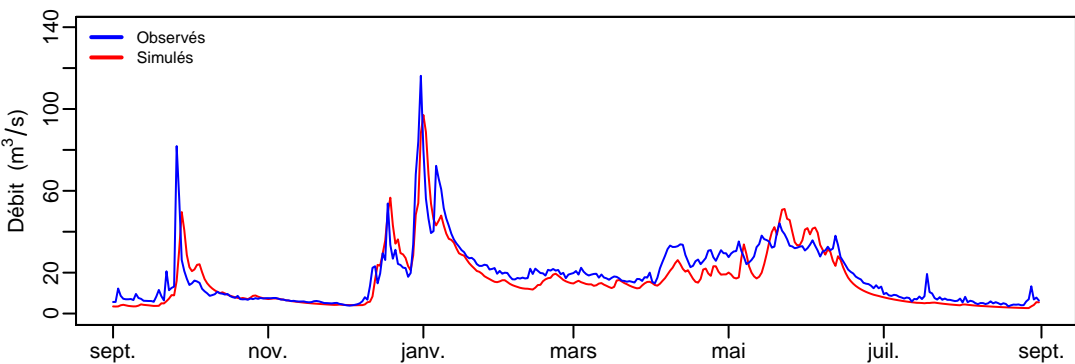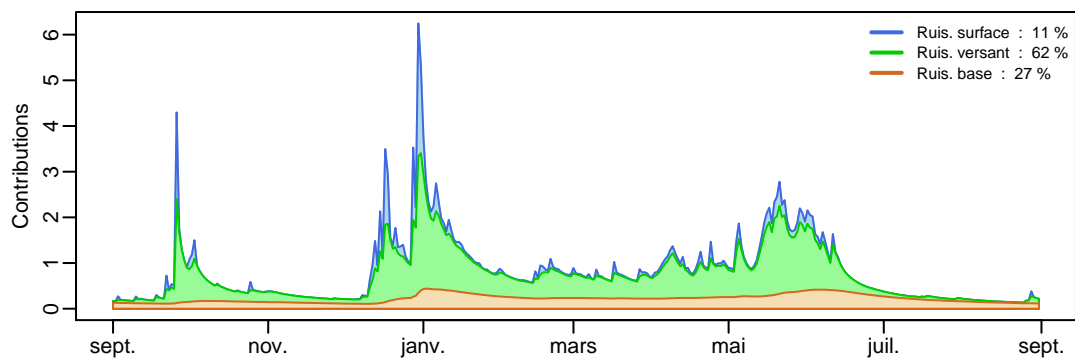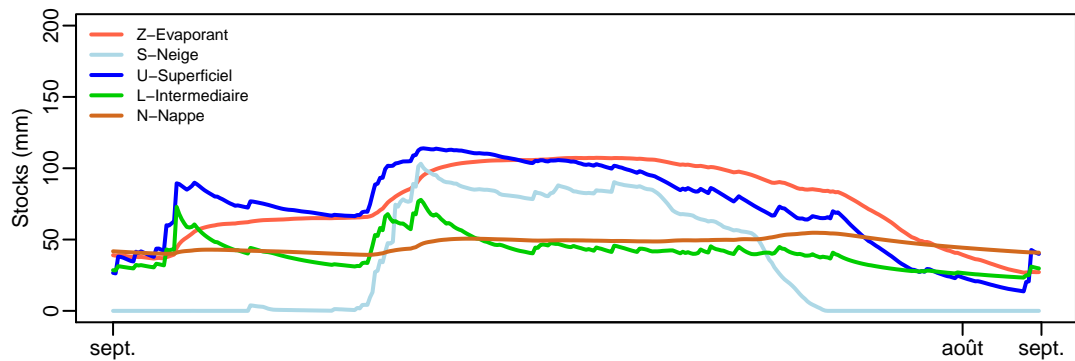

# vinonh (1703.9901 km<sup>2</sup>) – année 1982–1983

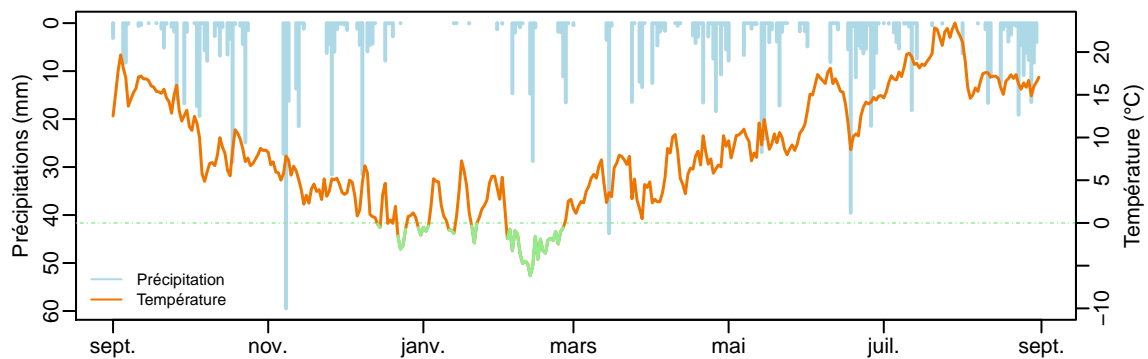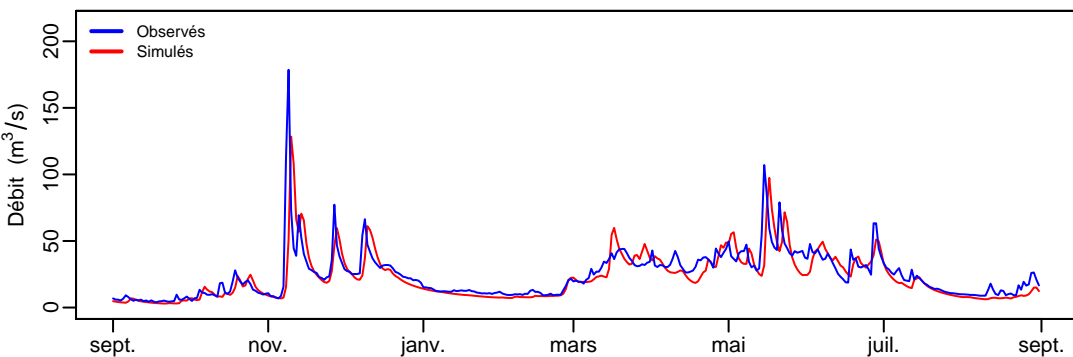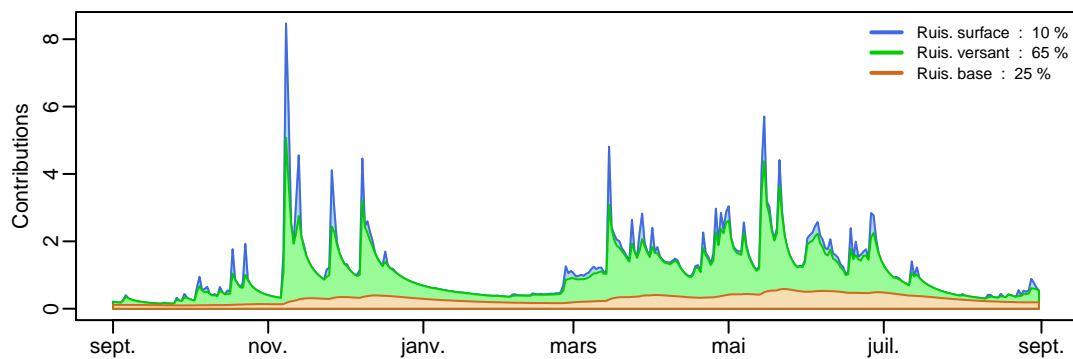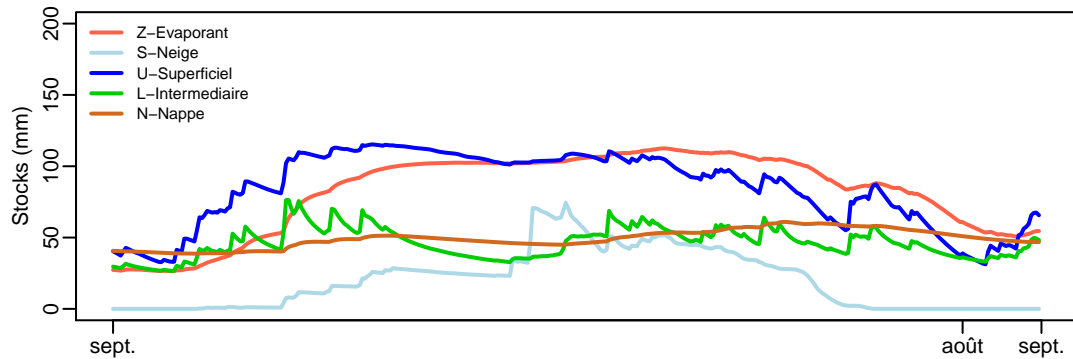

# vinonh (1703.9901 km<sup>2</sup>) – année 1983–1984

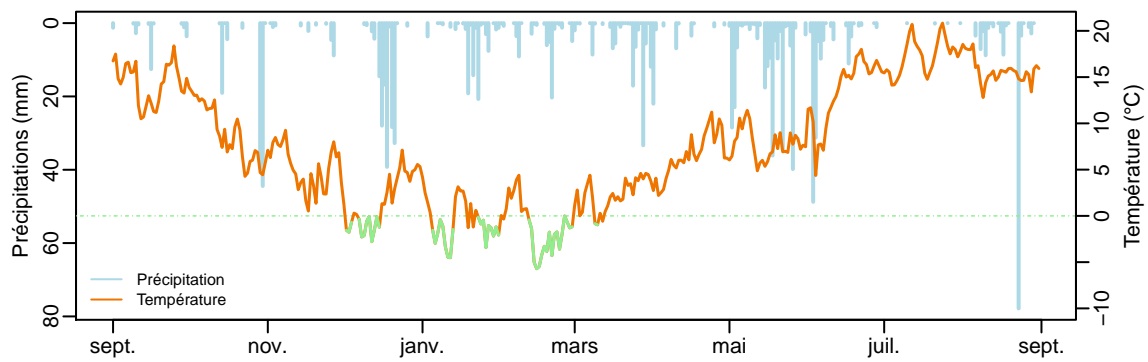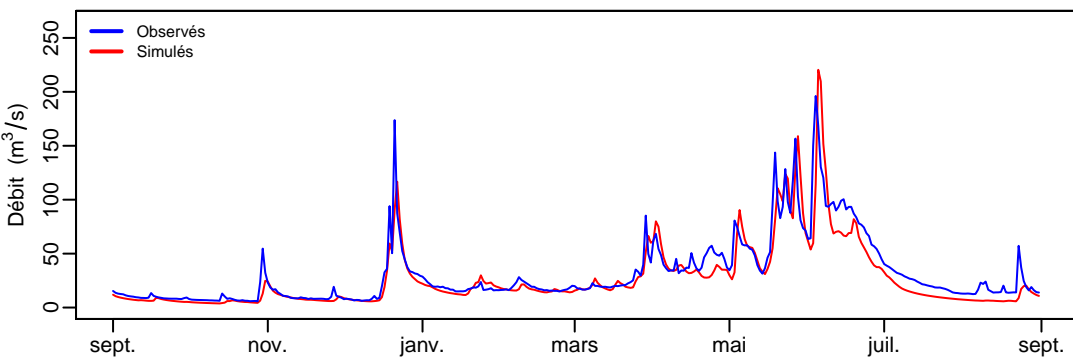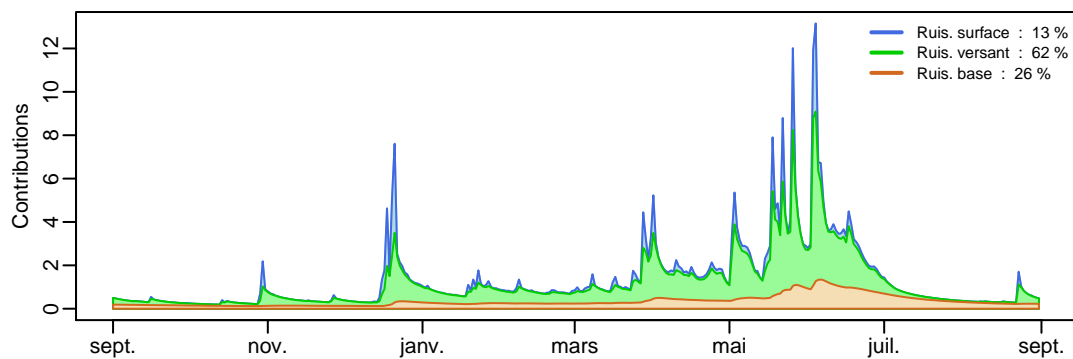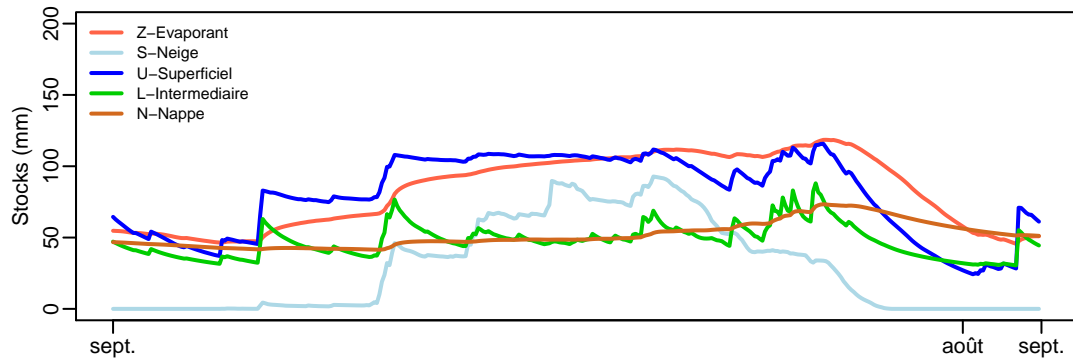

vinonh (1703.9901 km²) – année 1984–1985

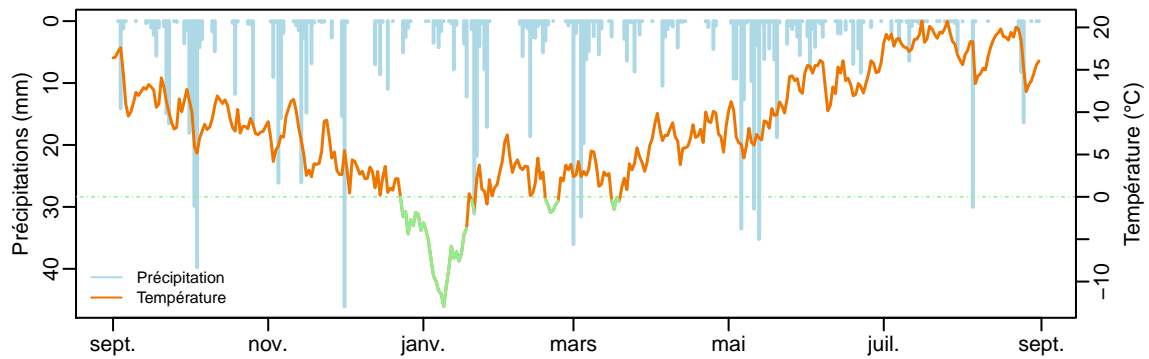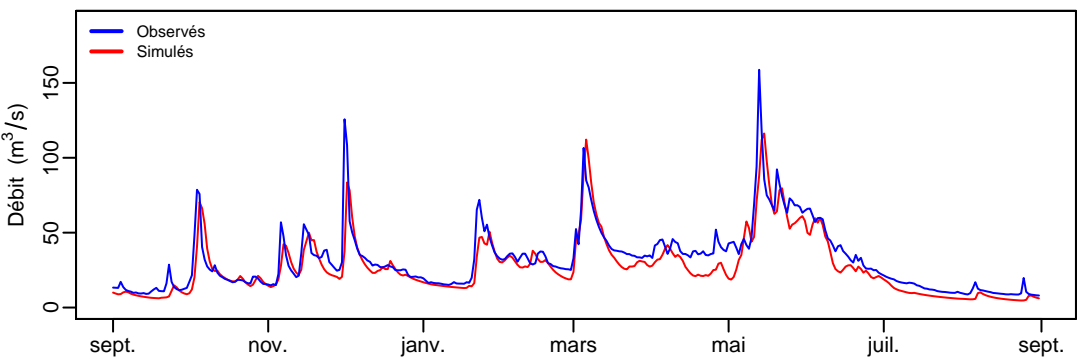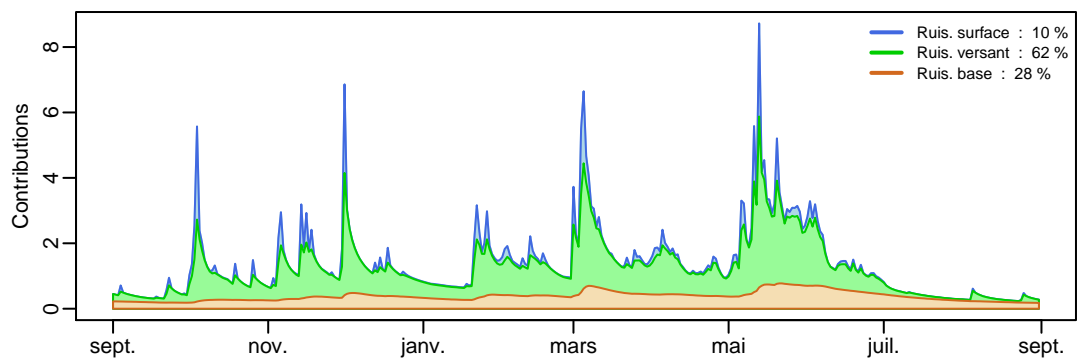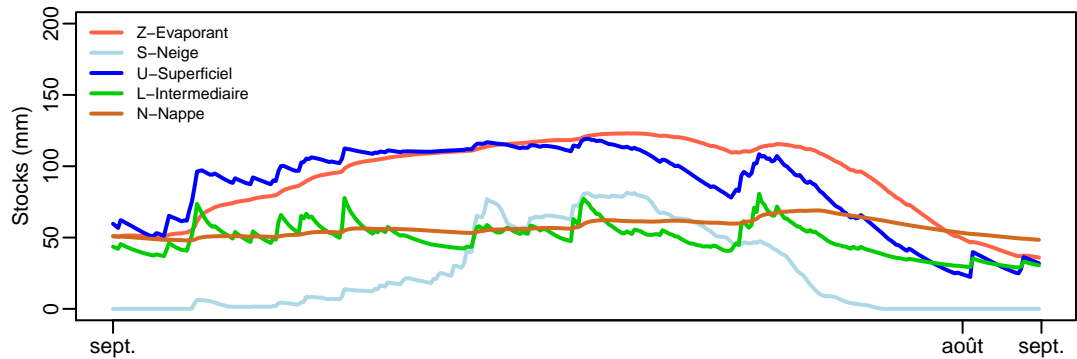

# vinonh (1703.9901 km²) – année 1985–1986

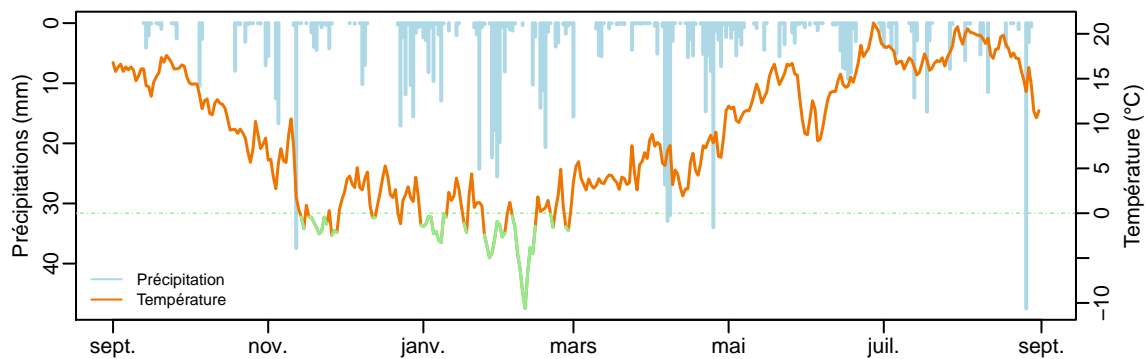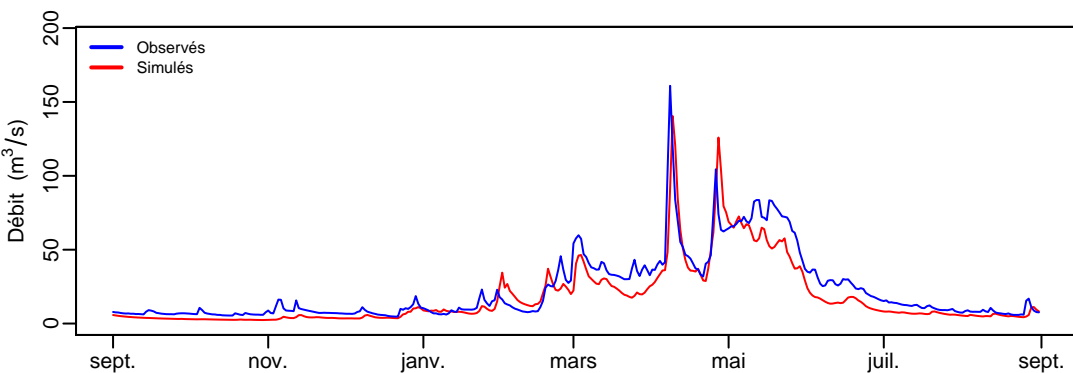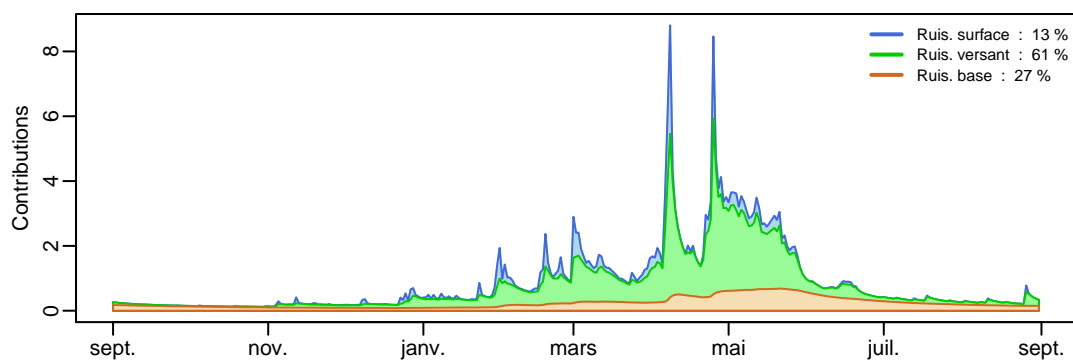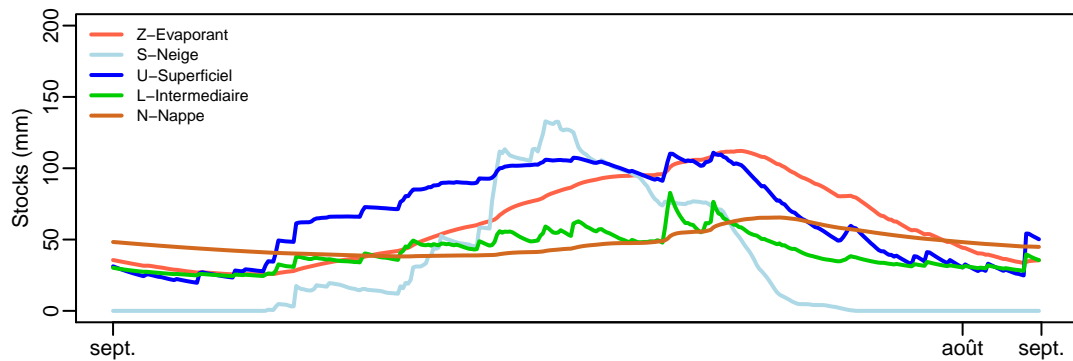

# vinonh (1703.9901 km<sup>2</sup>) – année 1986–1987

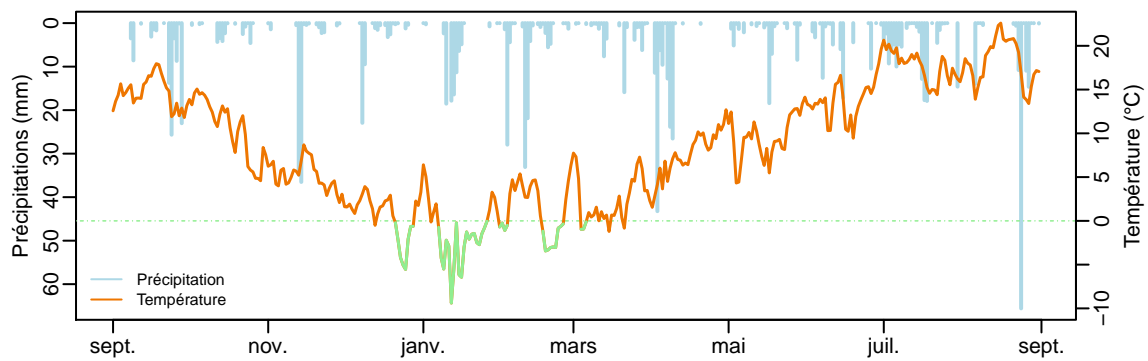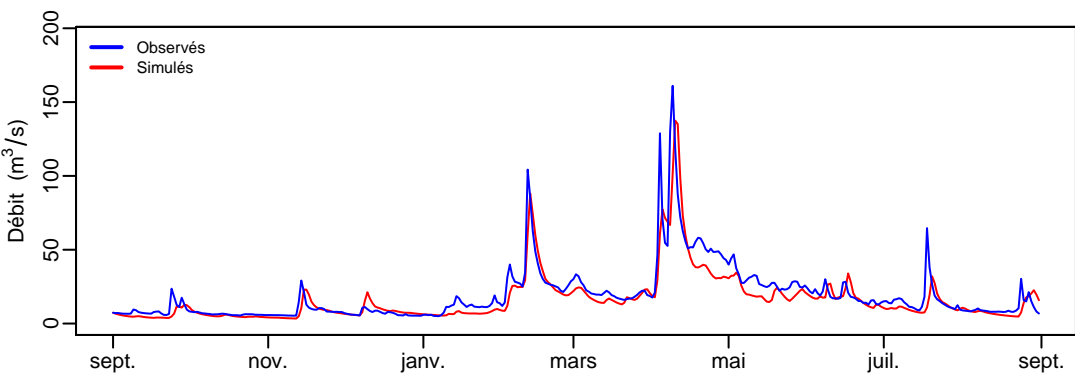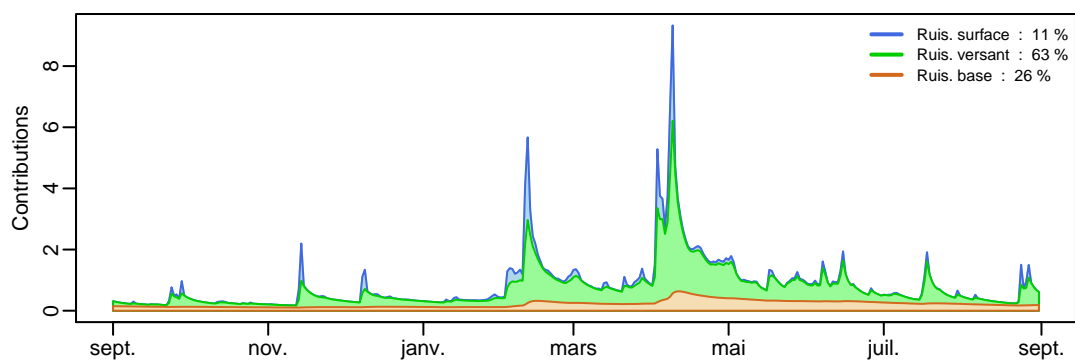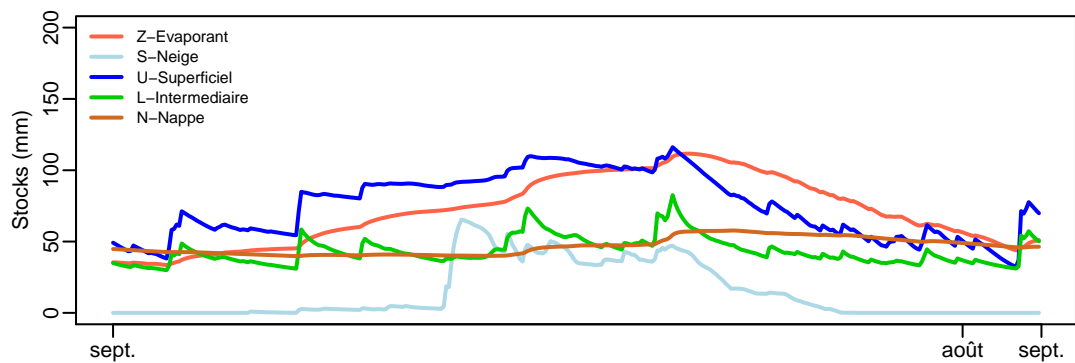



# vinonh (1703.9901 km²) – année 1987–1988

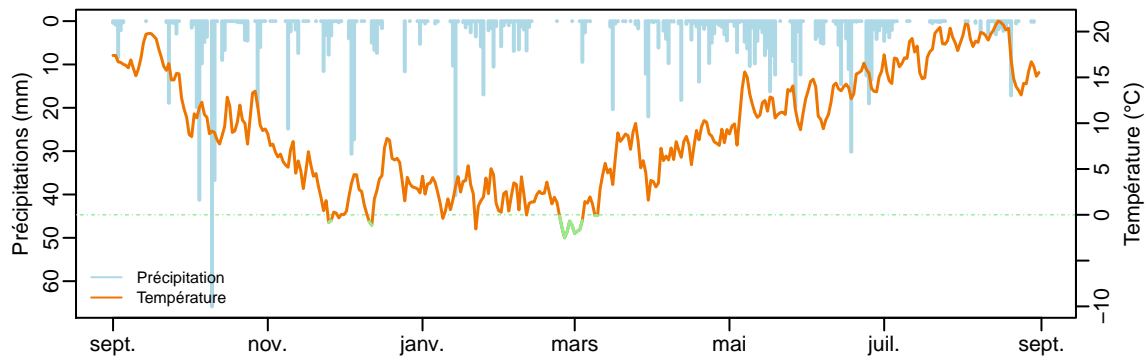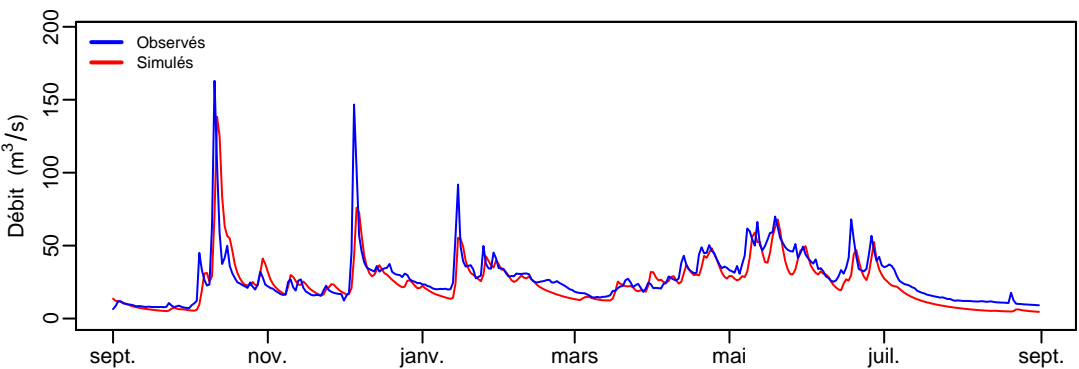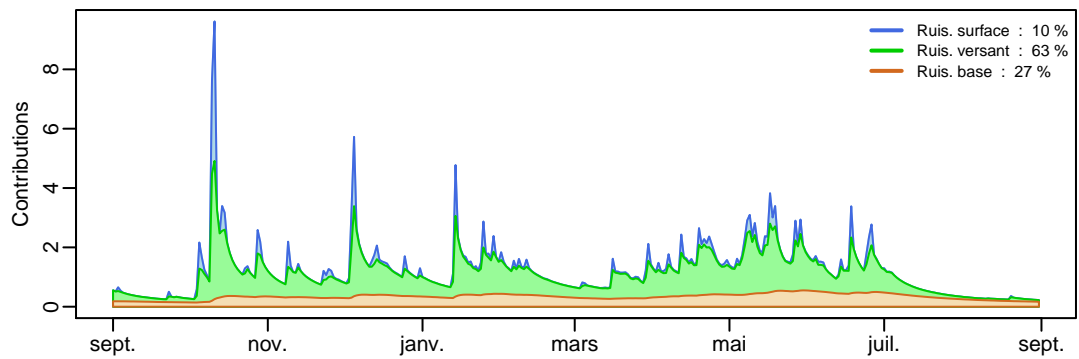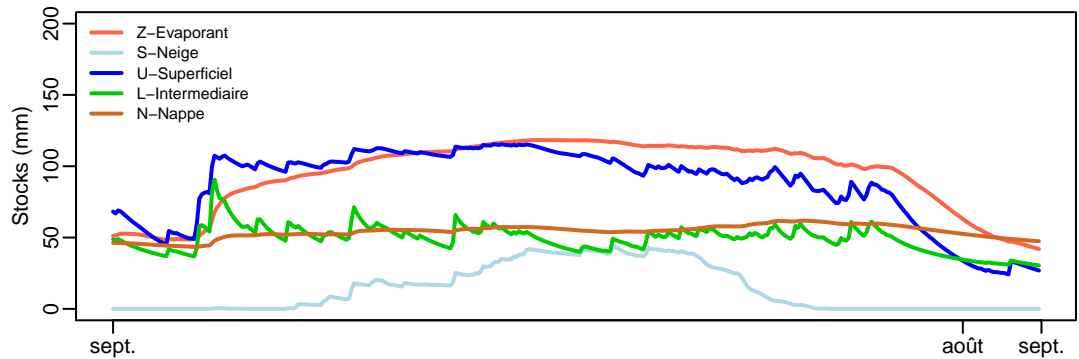

# vinonh (1703.9901 km²) – année 1988–1989

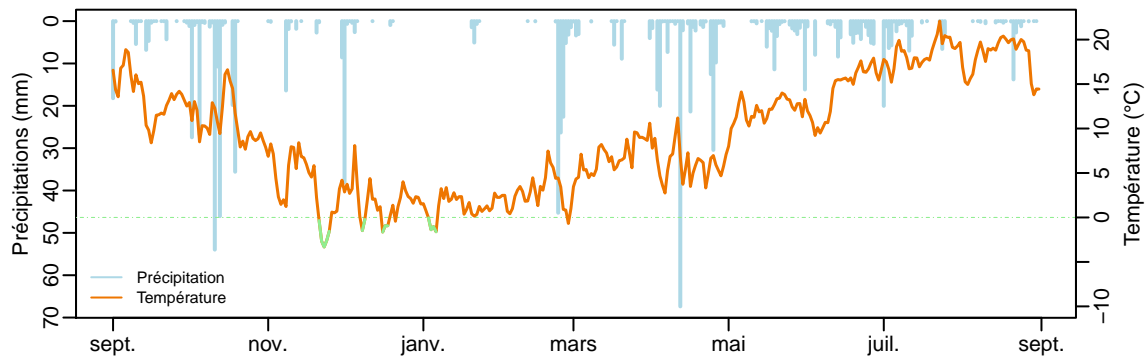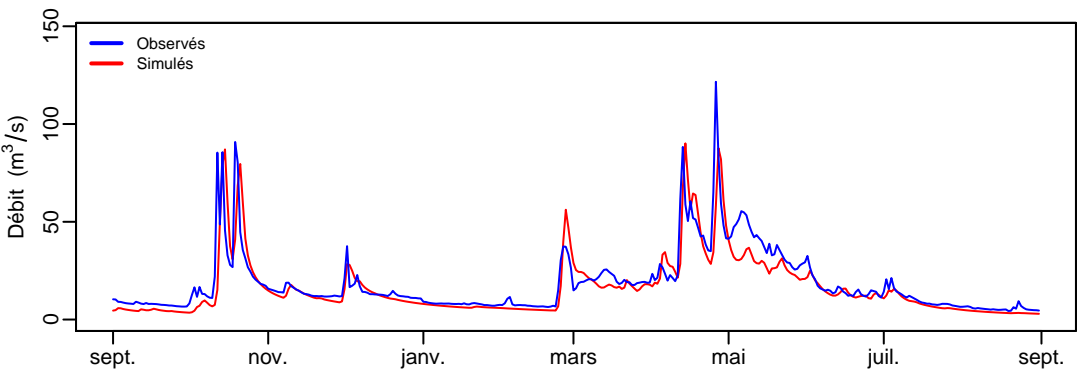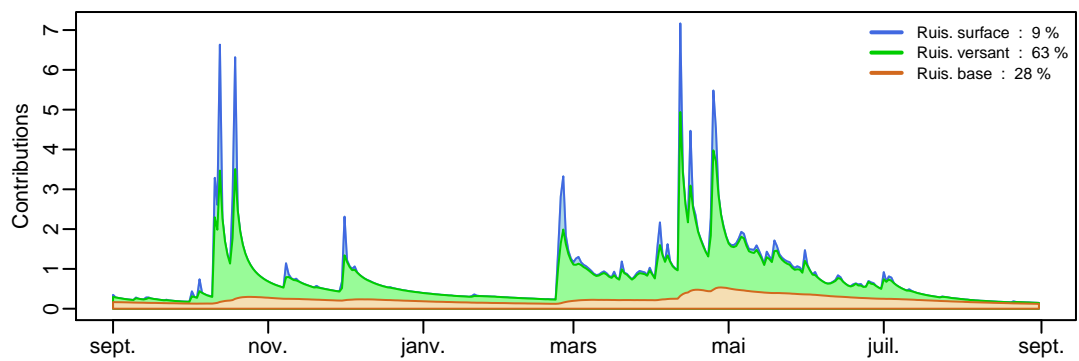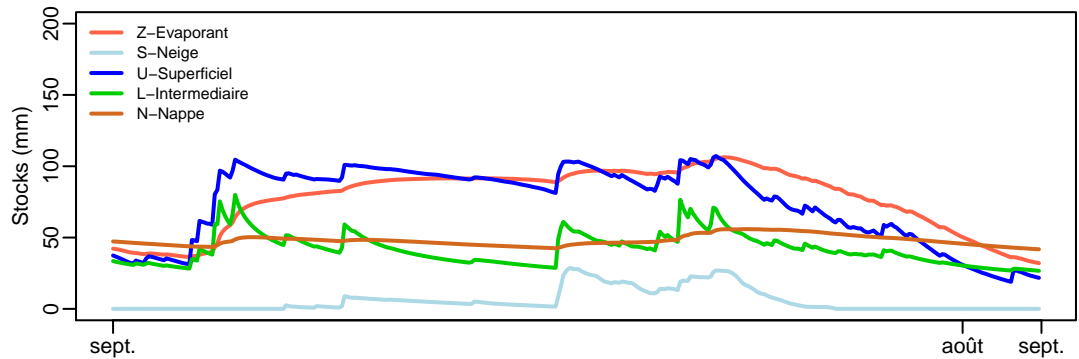

# vinonh (1703.9901 km<sup>2</sup>) – année 1989–1990

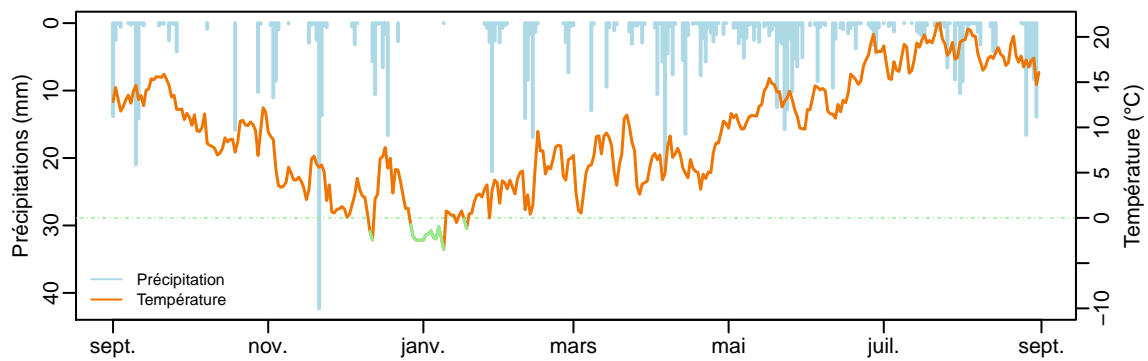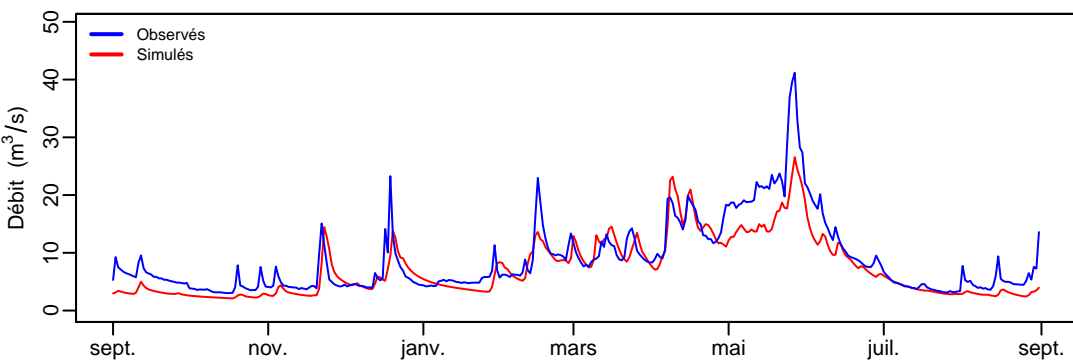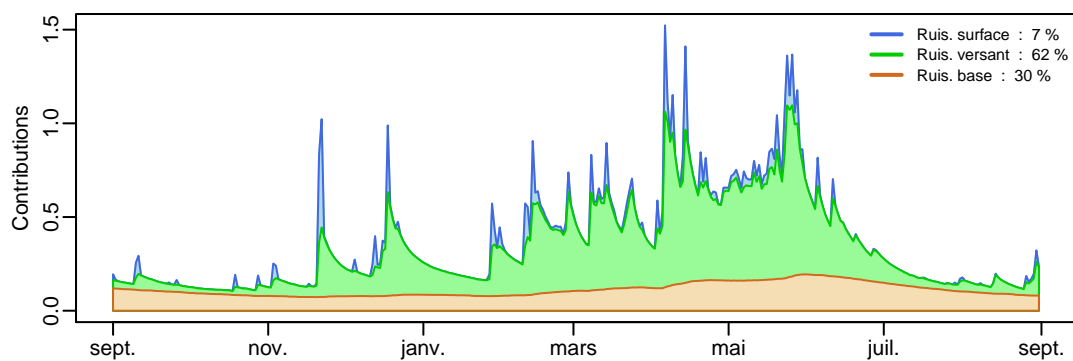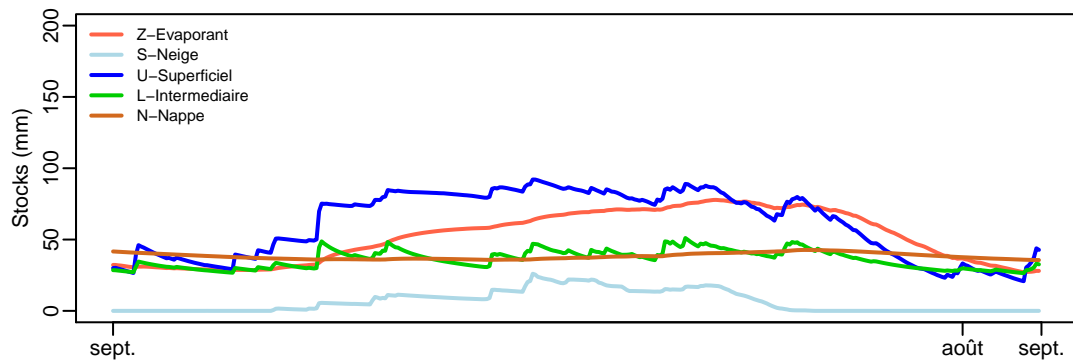

# vinonh (1703.9901 km<sup>2</sup>) – année 1990–1991

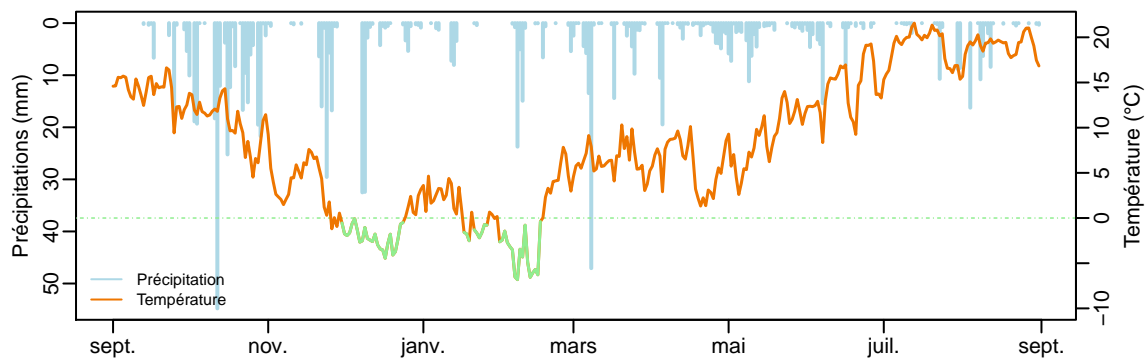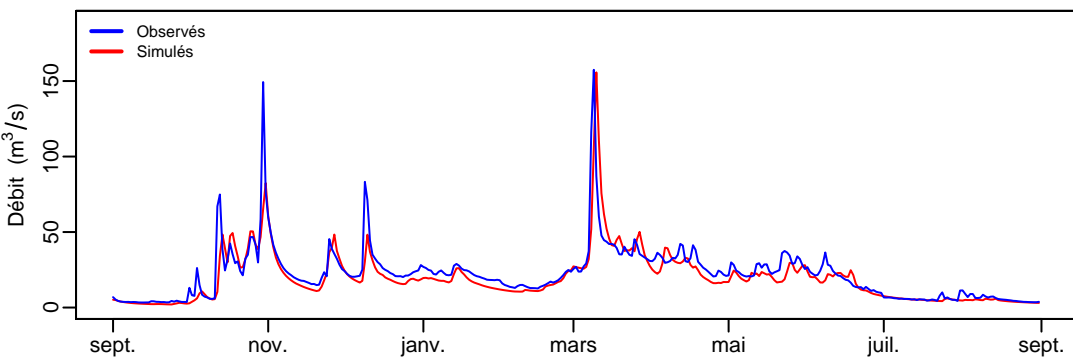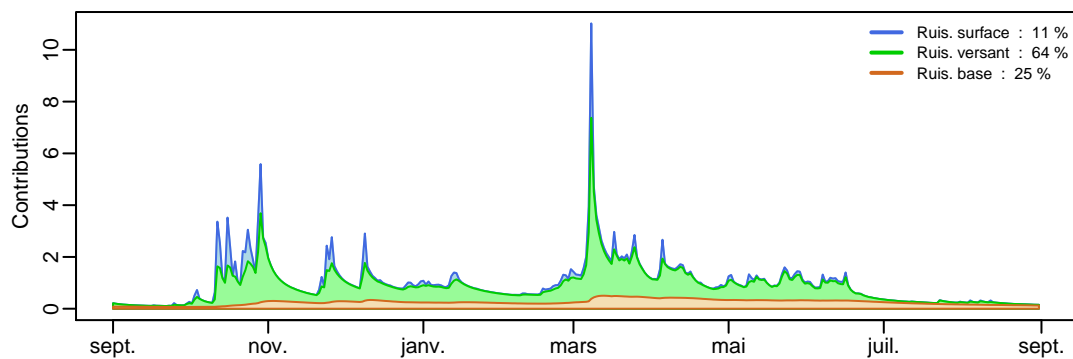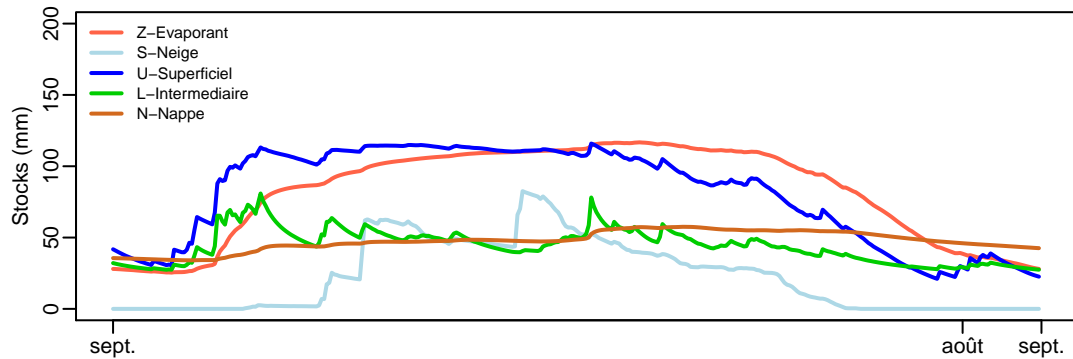

# vinoh (1703.9901 km²) – année 1991–1992

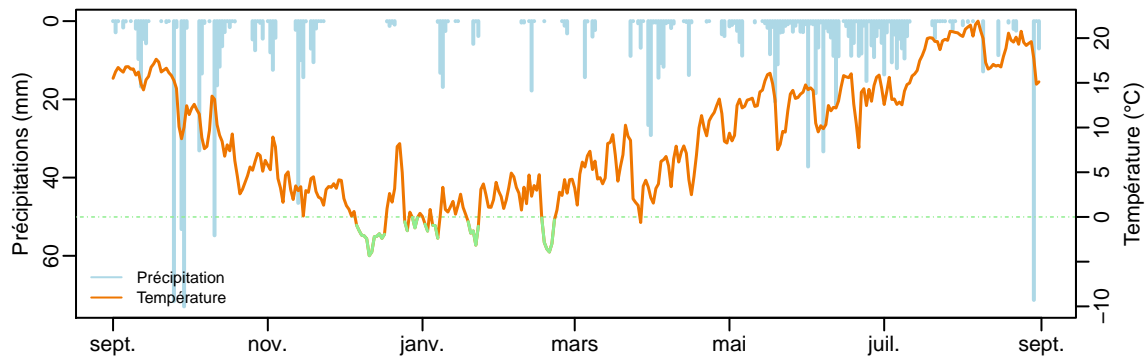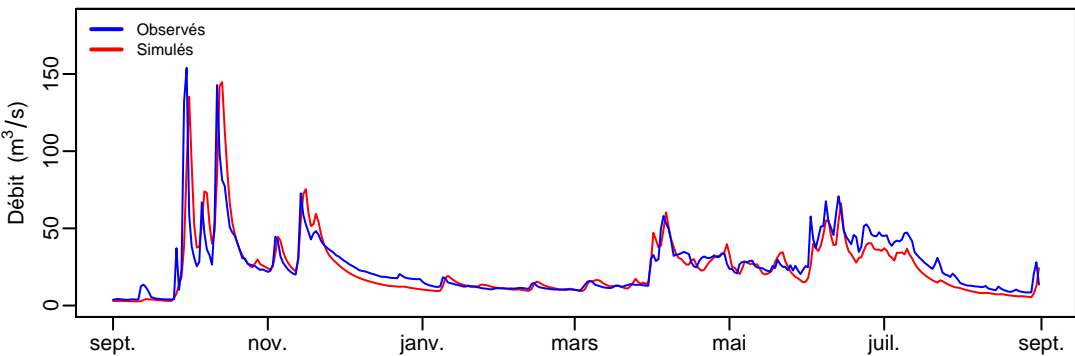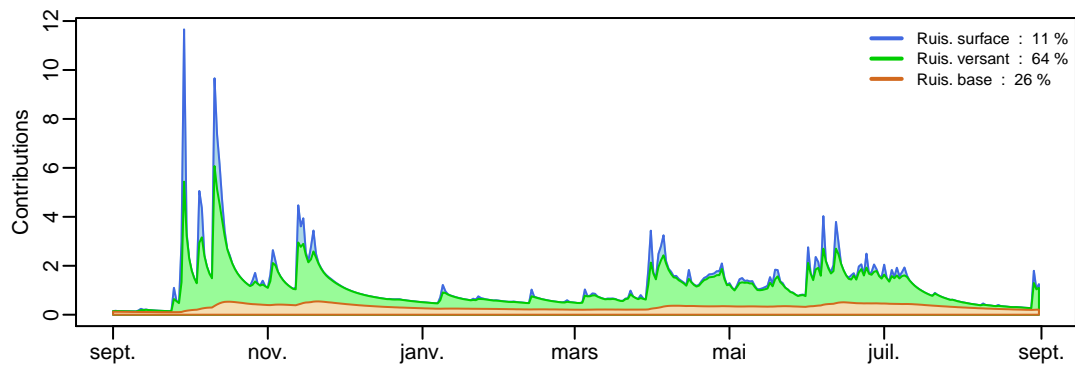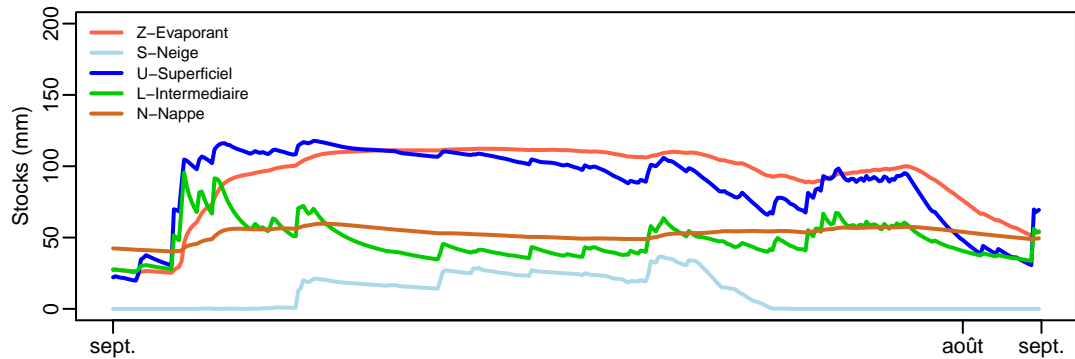

# vinonh (1703.9901 km²) – année 1992–1993

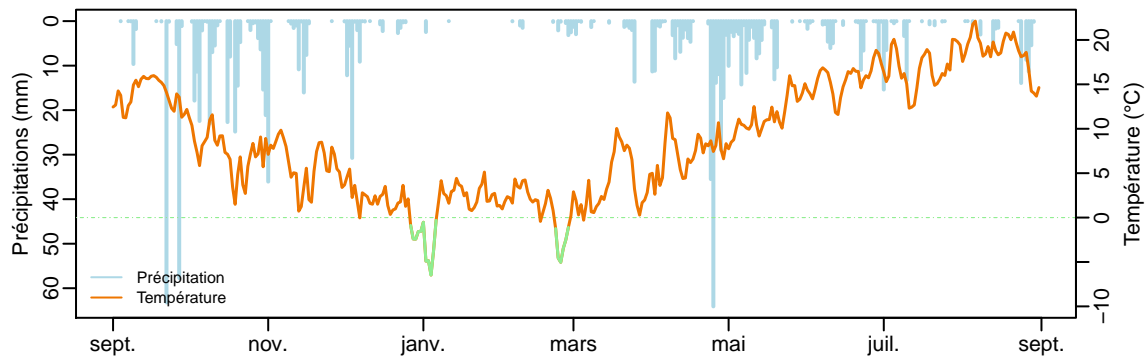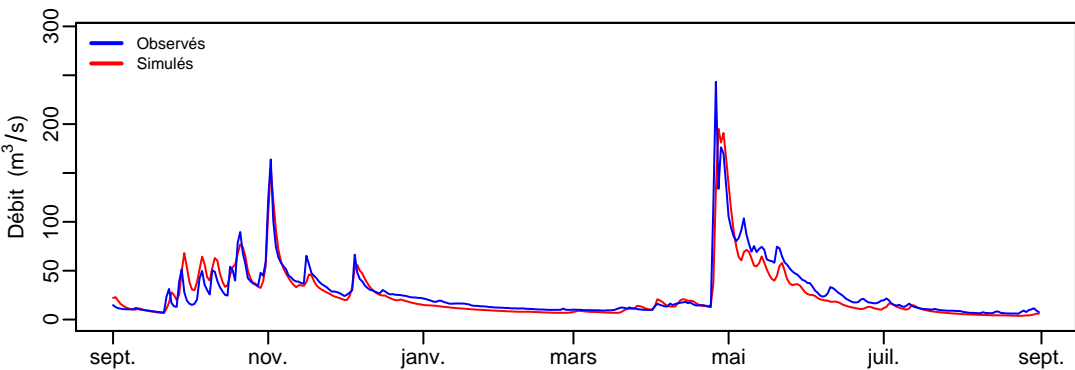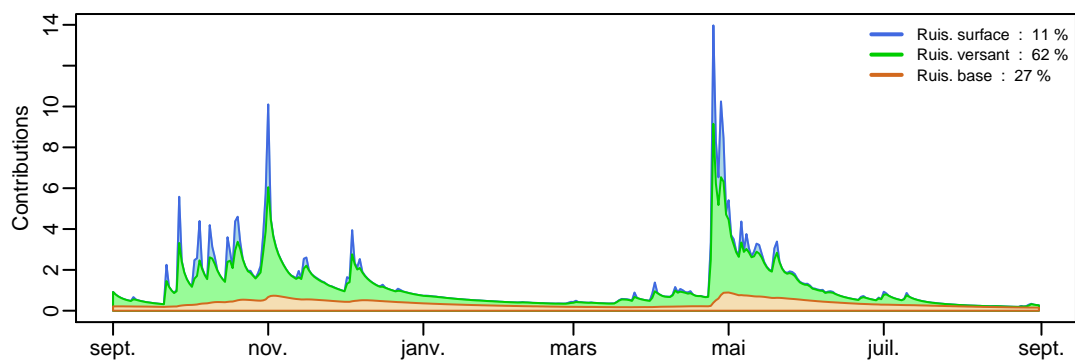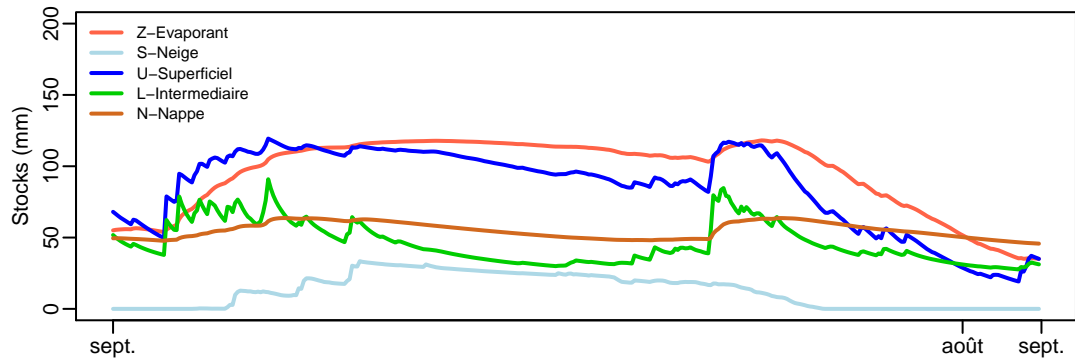

# vinonh (1703.9901 km<sup>2</sup>) – année 1993–1994

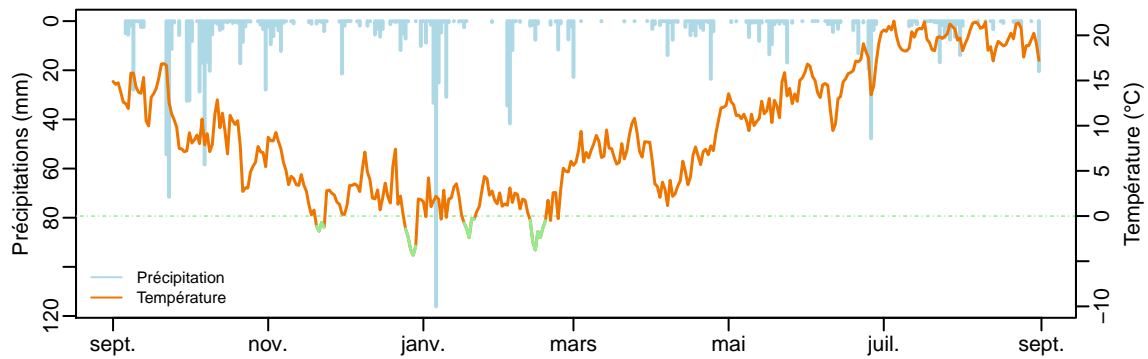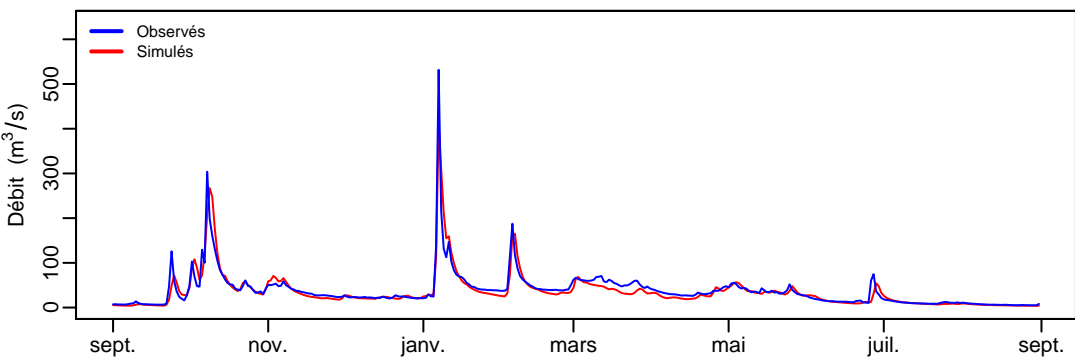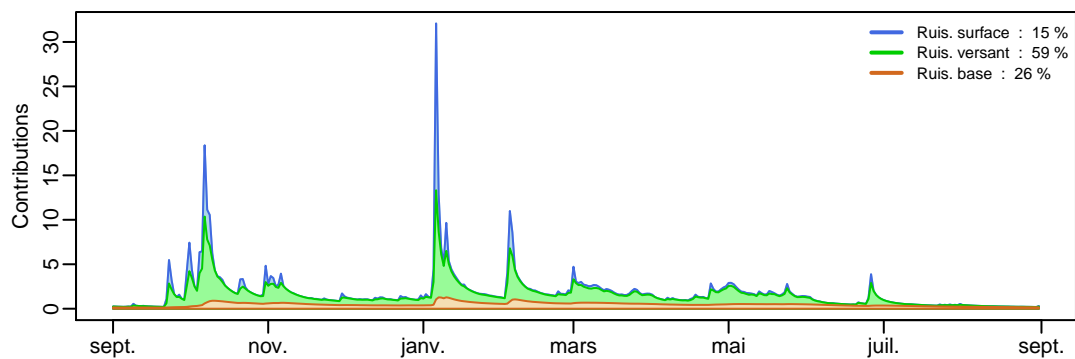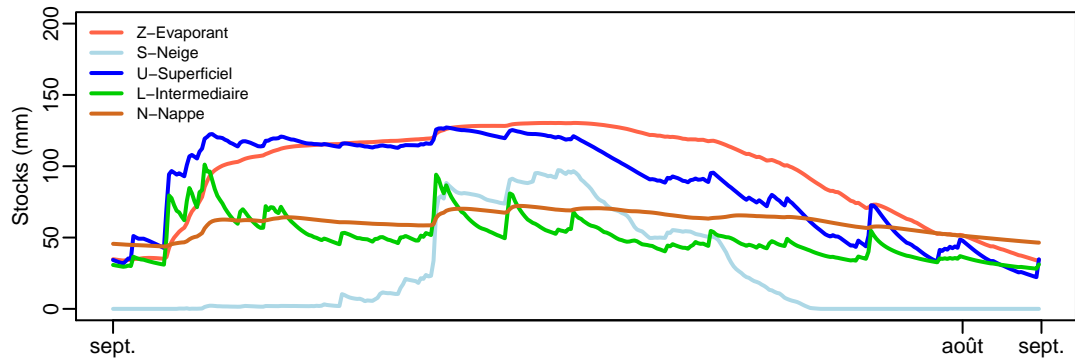

# vinonh (1703.9901 km<sup>2</sup>) – année 1994–1995

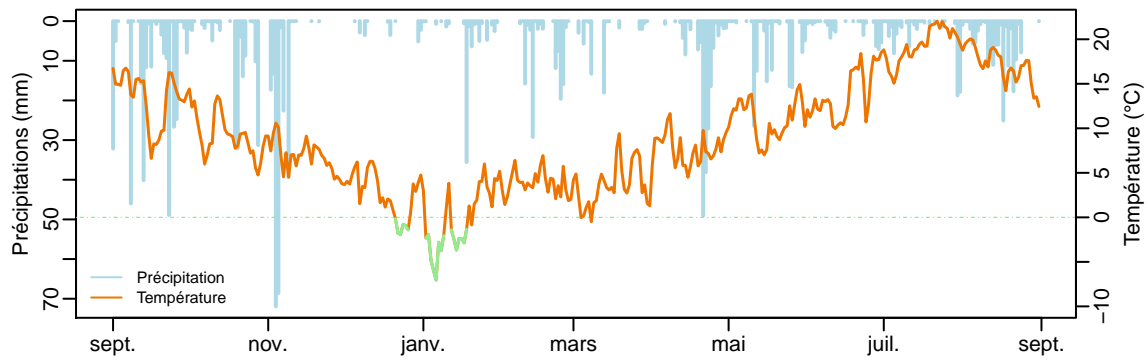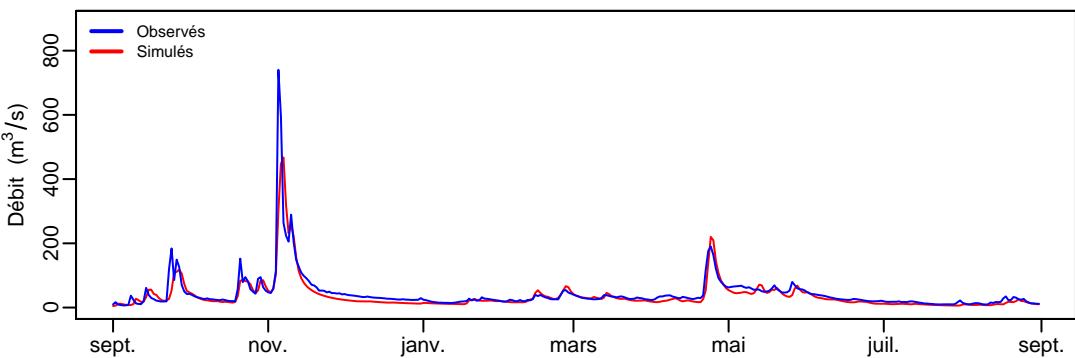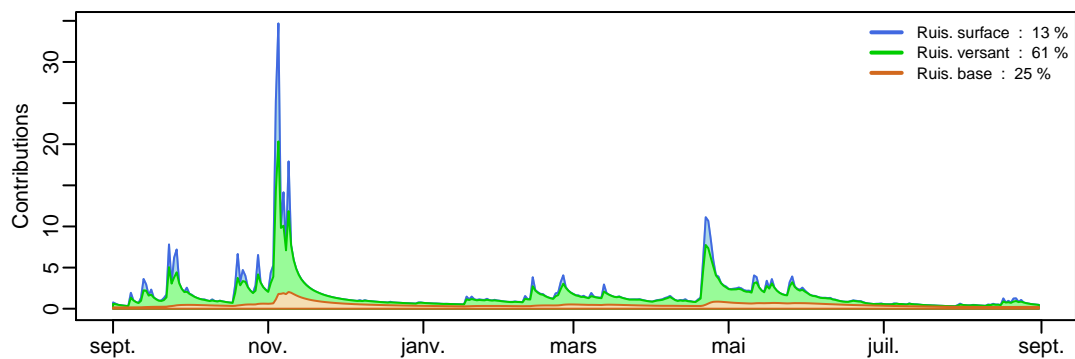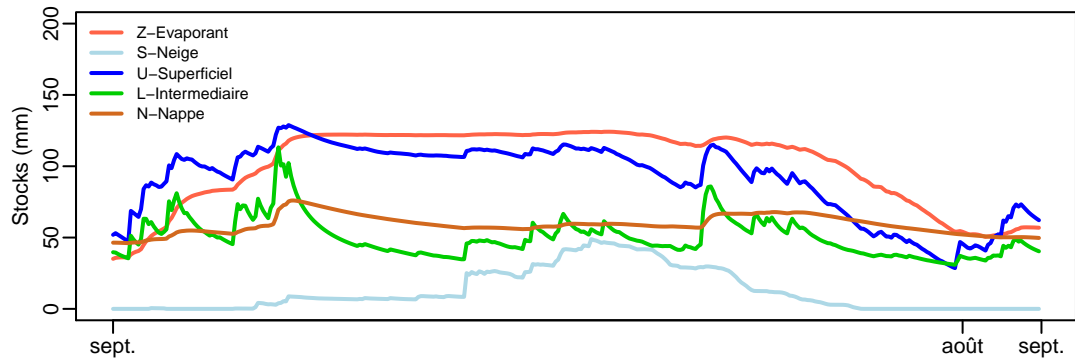



# vinonh (1703.9901 km²) – année 1995–1996

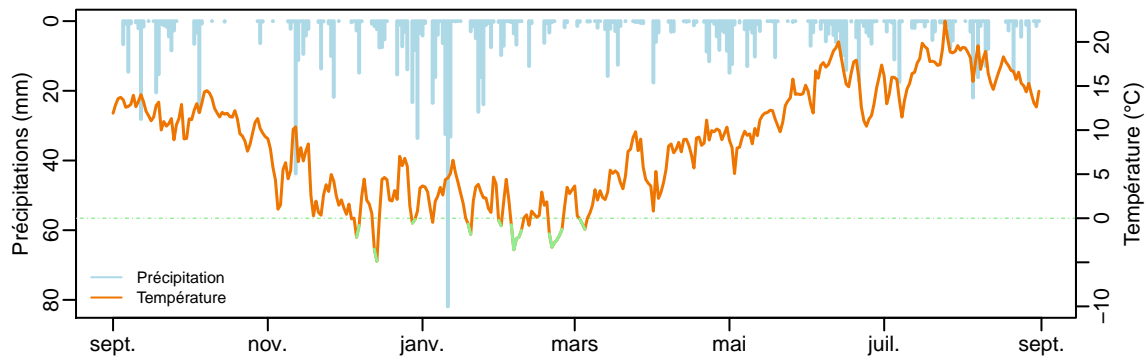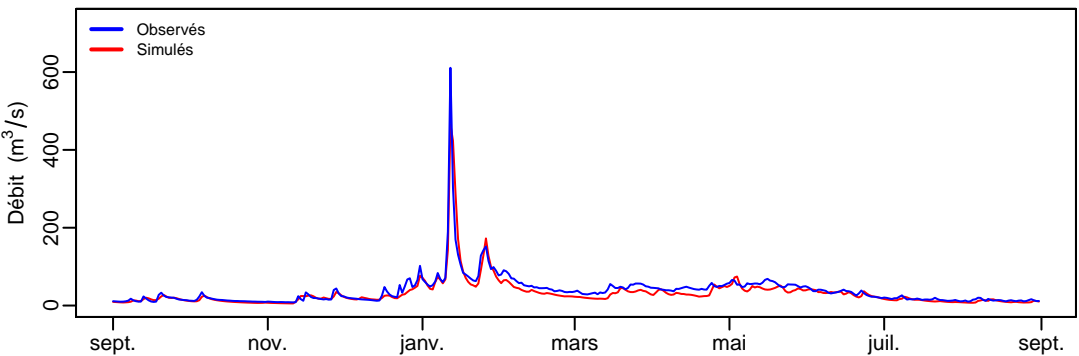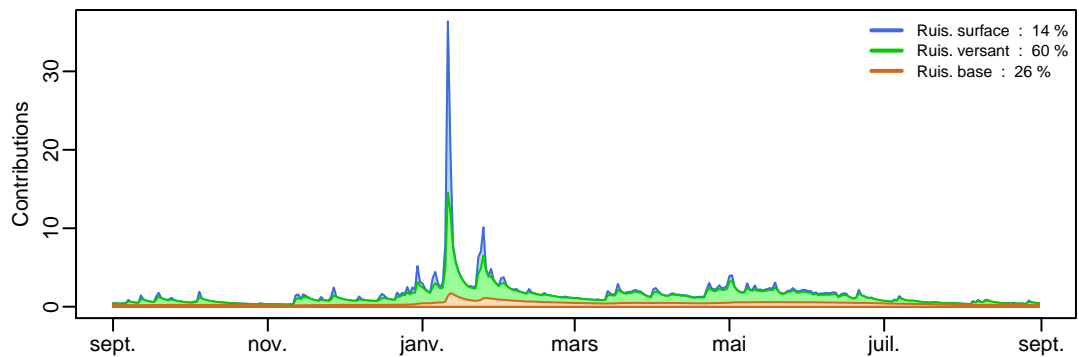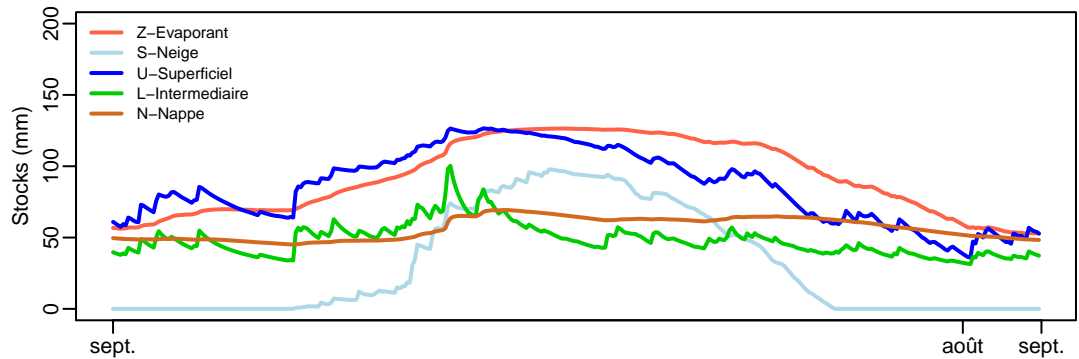

# vinonh (1703.9901 km<sup>2</sup>) – année 1996–1997

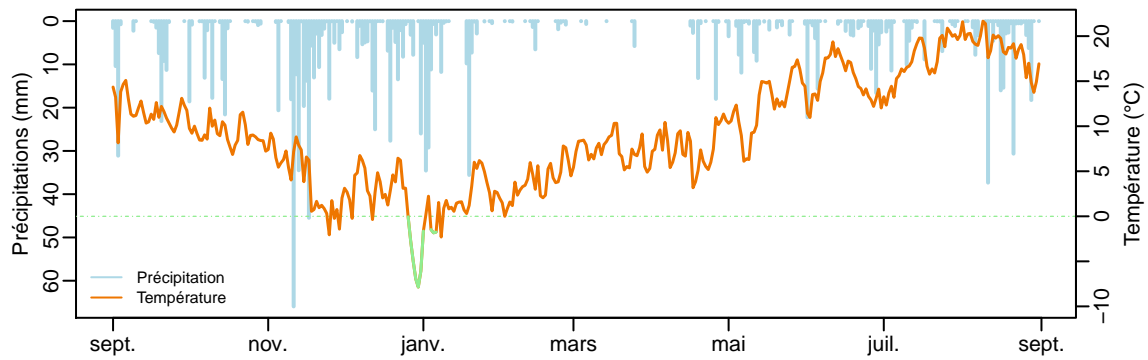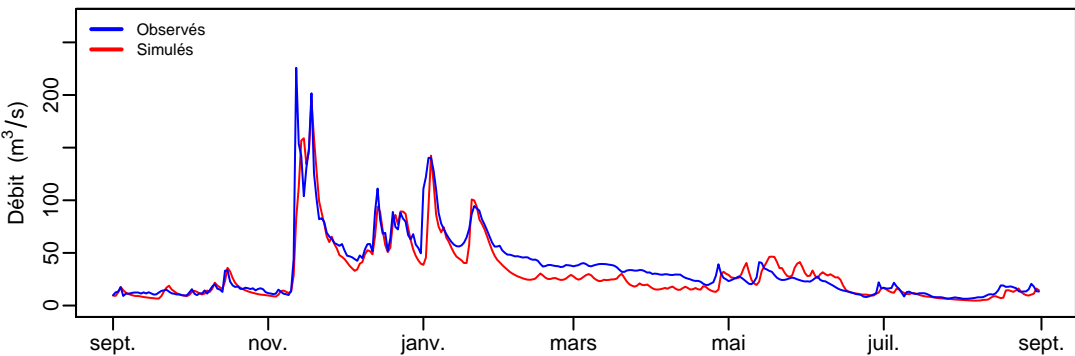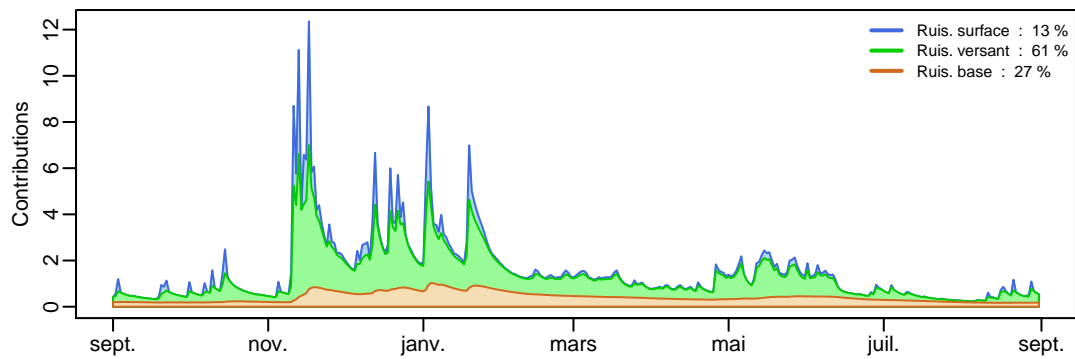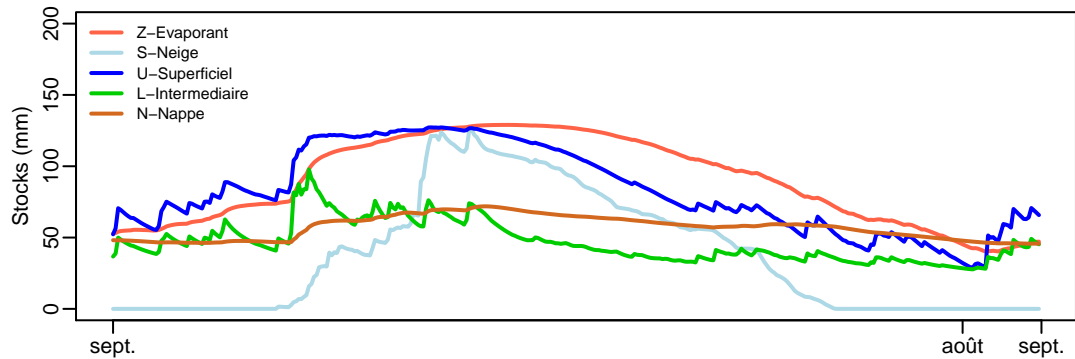

# vinonh (1703.9901 km²) – année 1997–1998

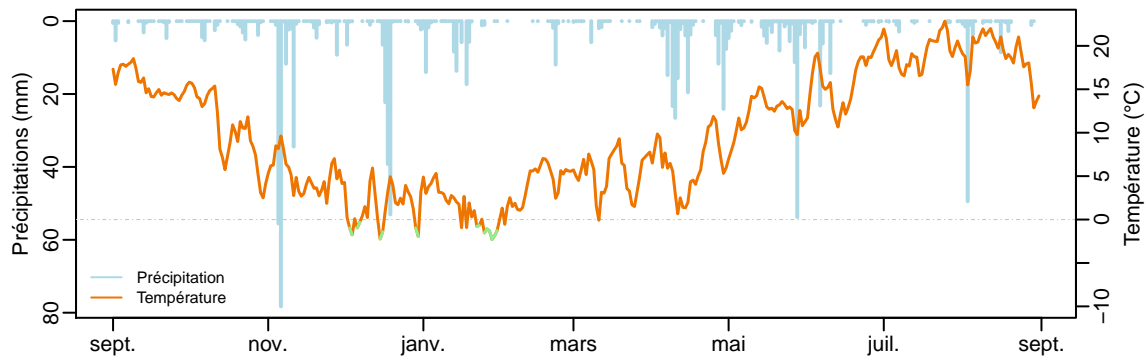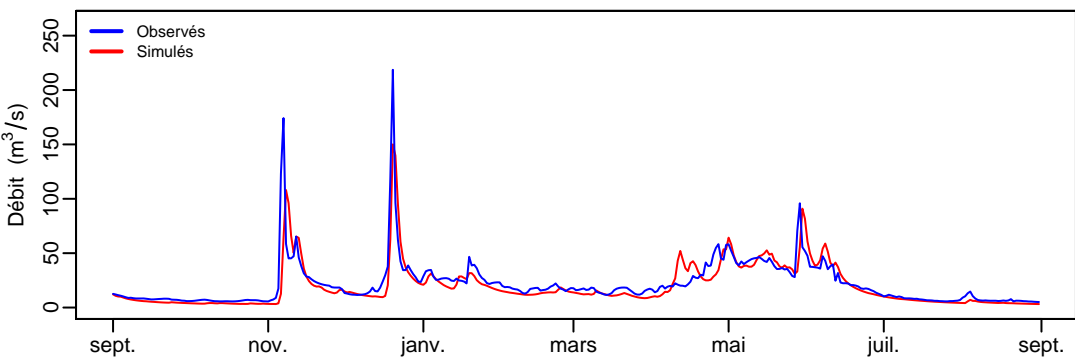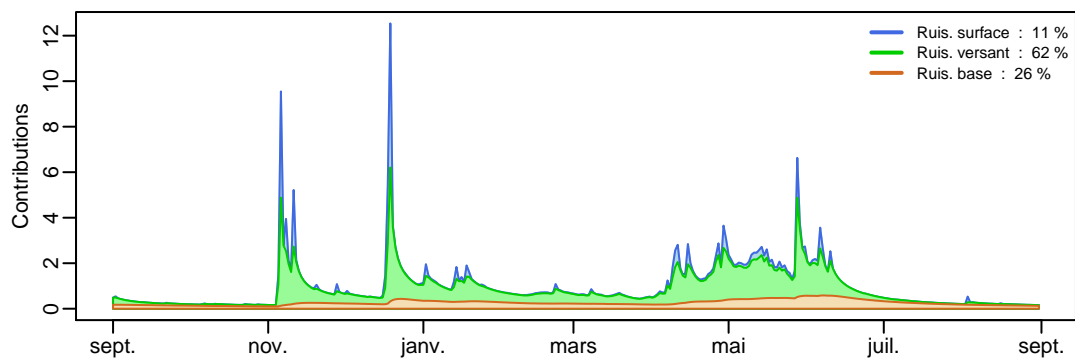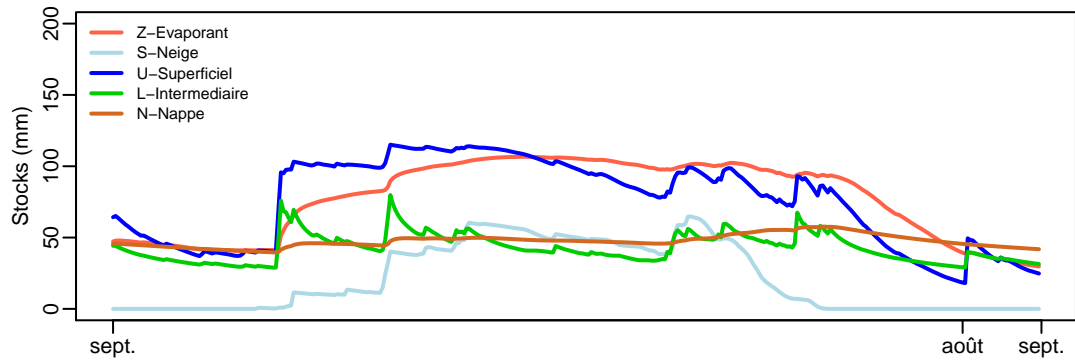

# vinonh (1703.9901 km<sup>2</sup>) – année 1998–1999

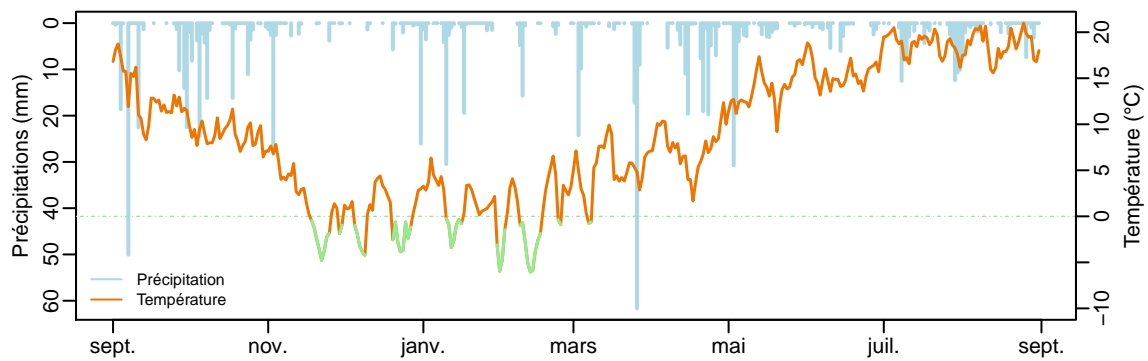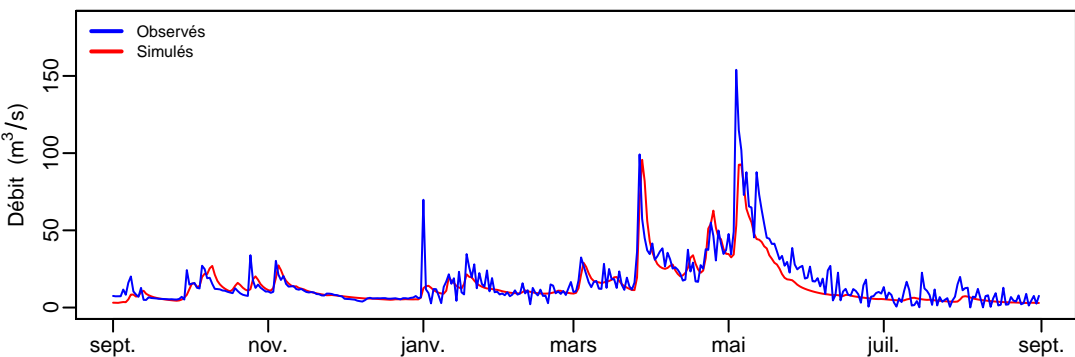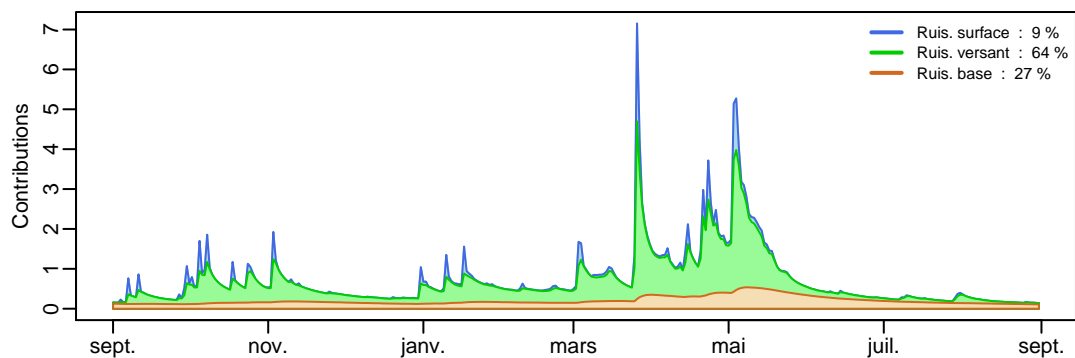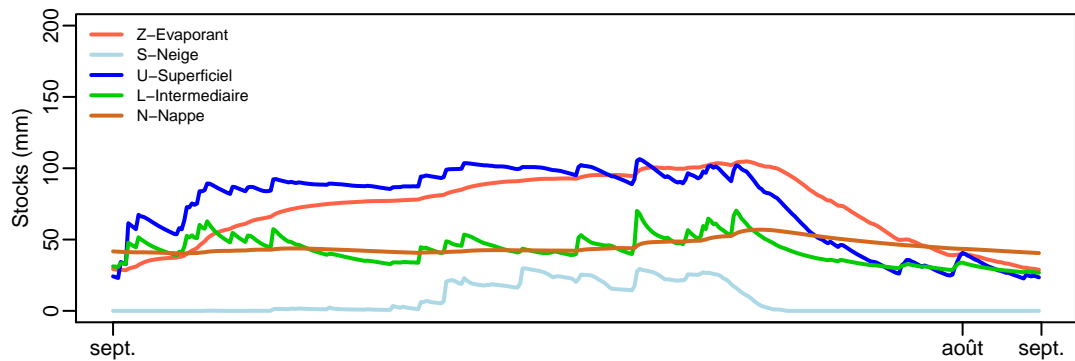

# vinoh (1703.9901 km<sup>2</sup>) – année 1999–2000

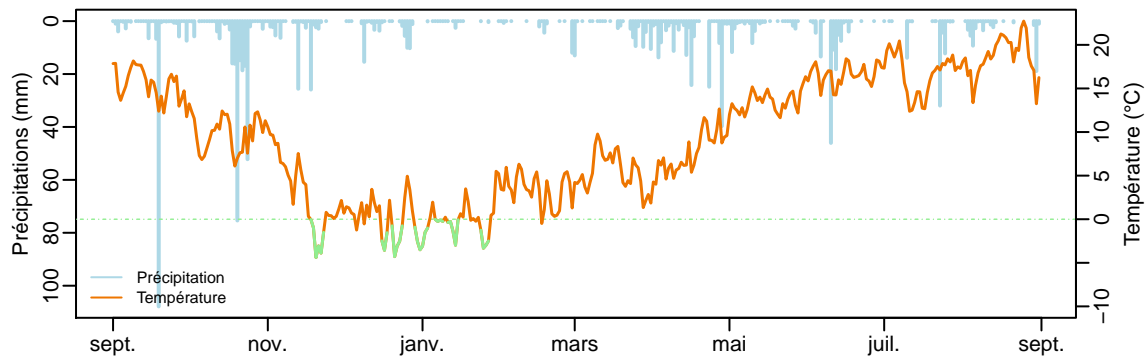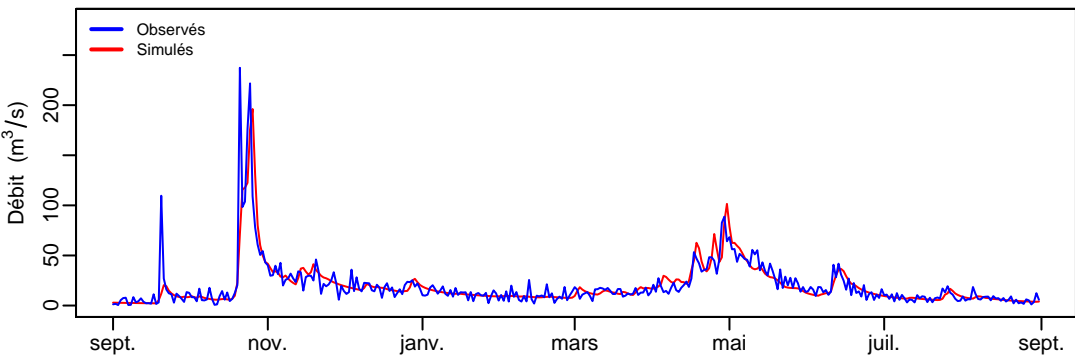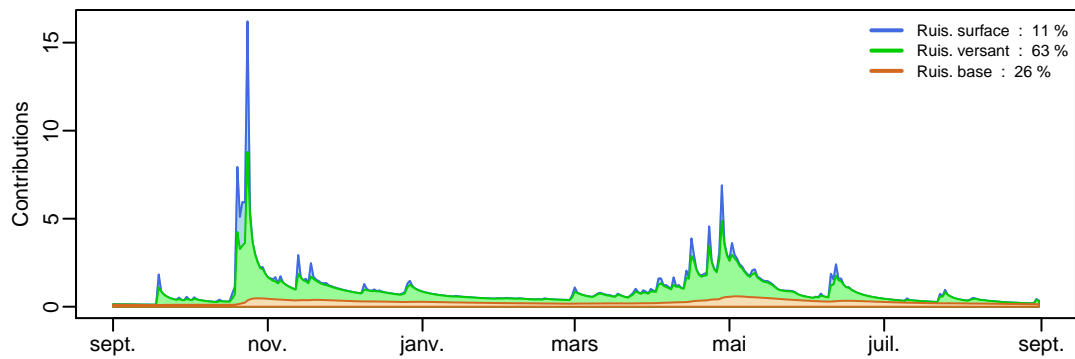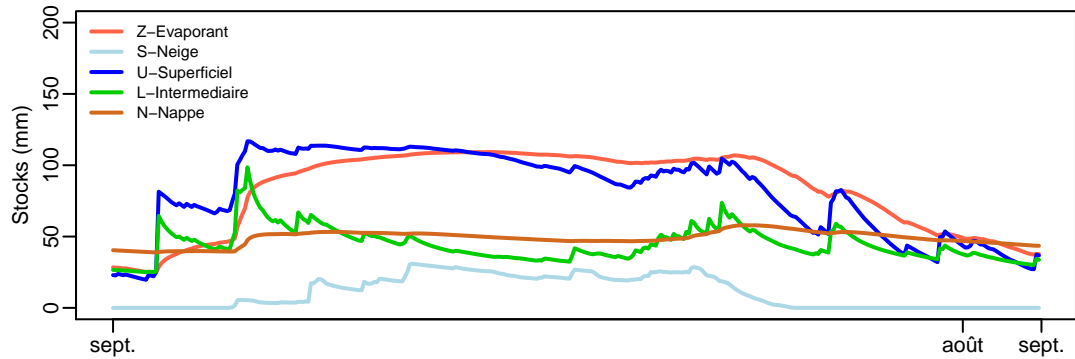

# vinonh (1703.9901 km<sup>2</sup>) – année 2000–2001

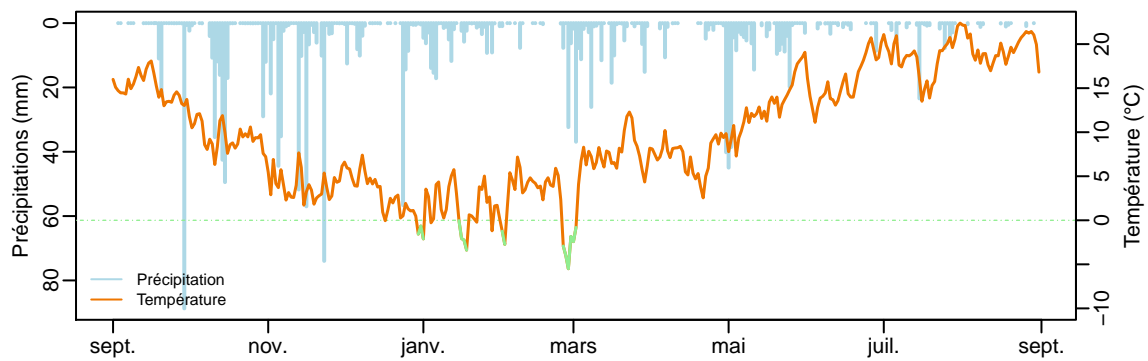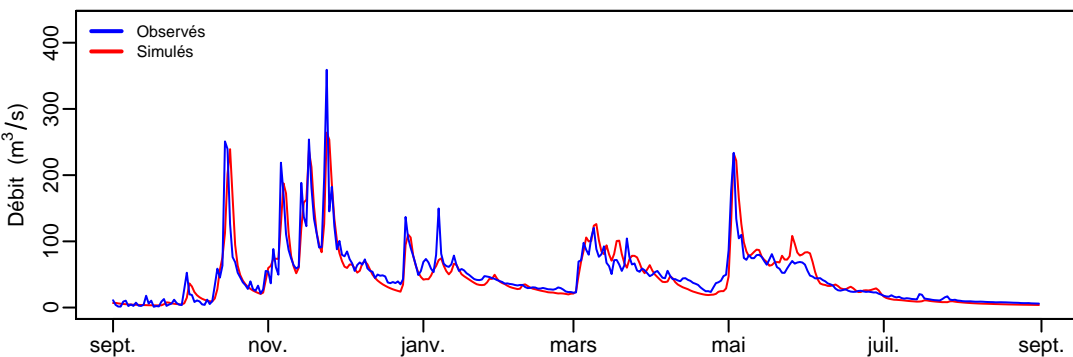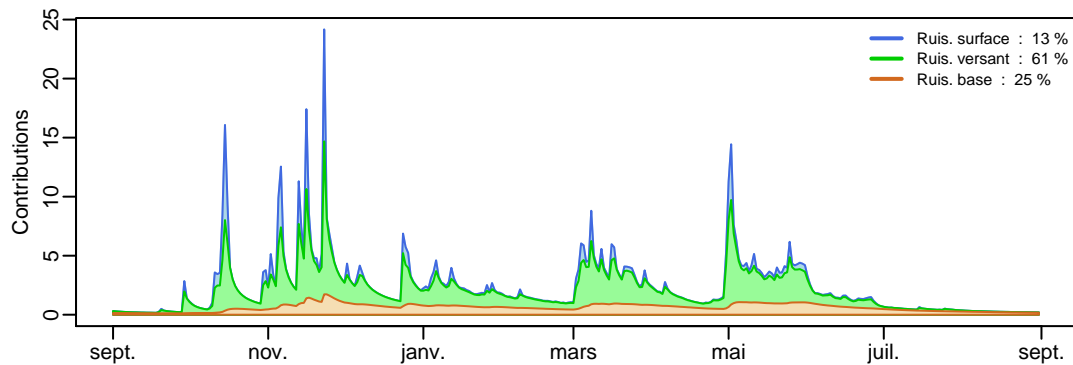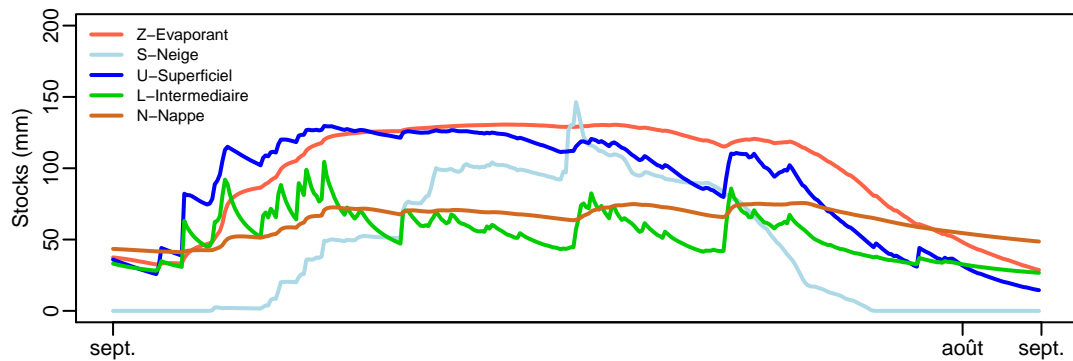

# vinonh (1703.9901 km²) – année 2001–2002

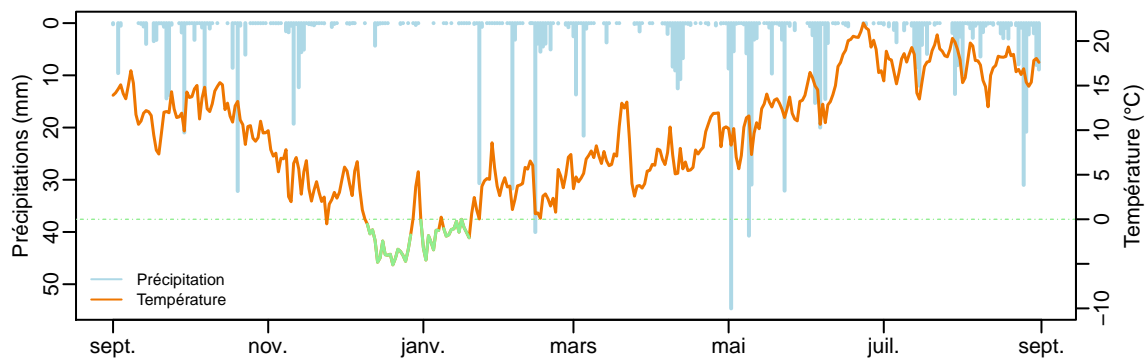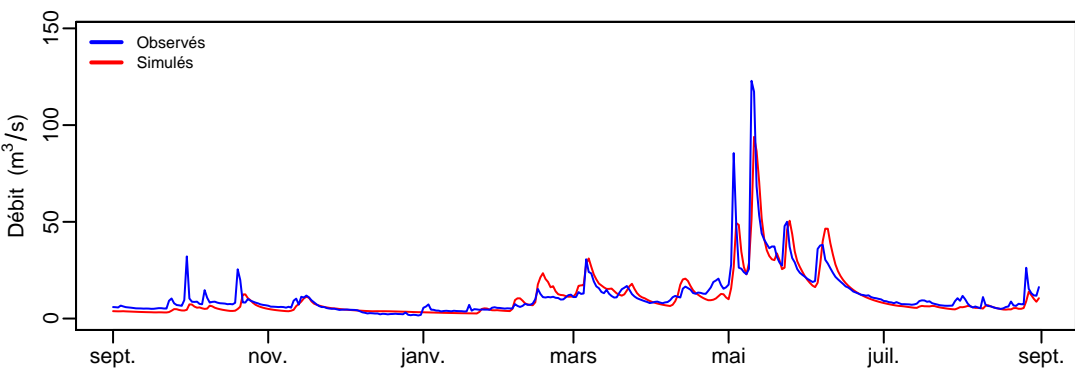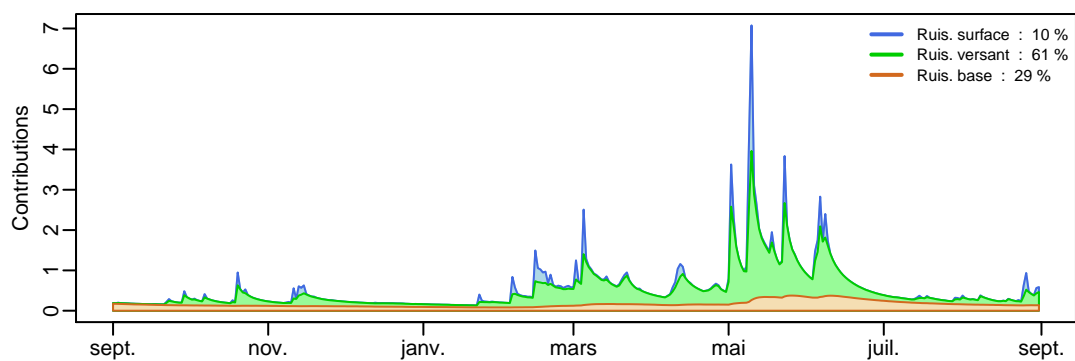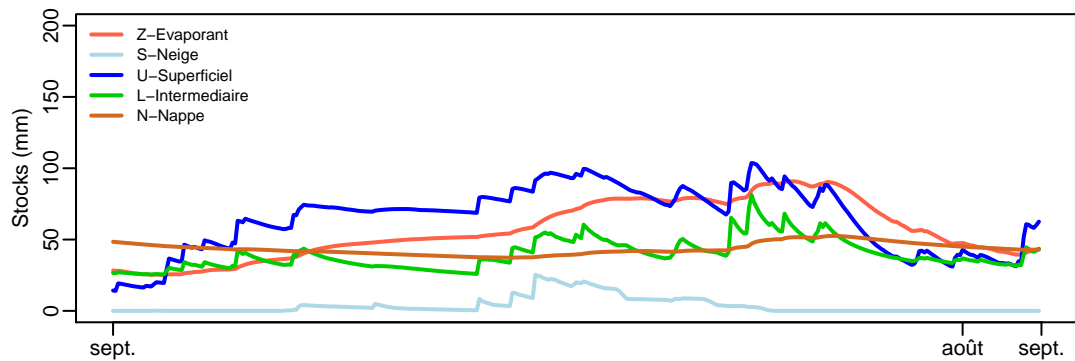

# vinonh (1703.9901 km<sup>2</sup>) – année 2002–2003

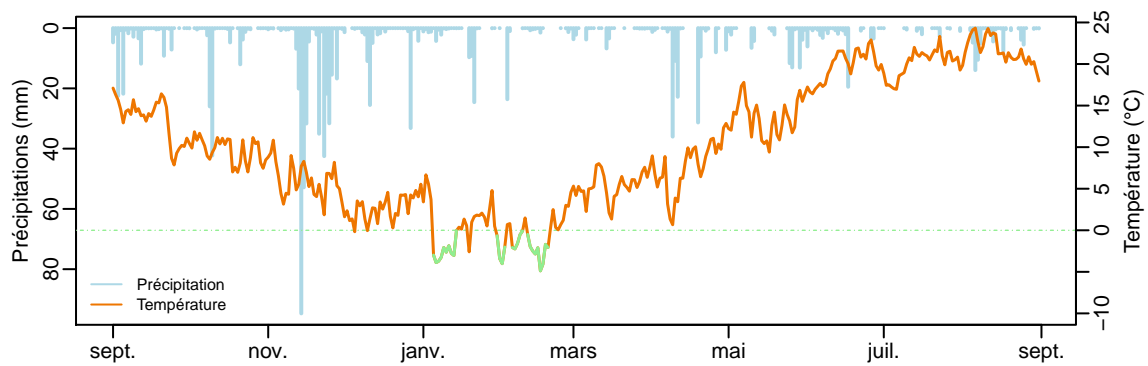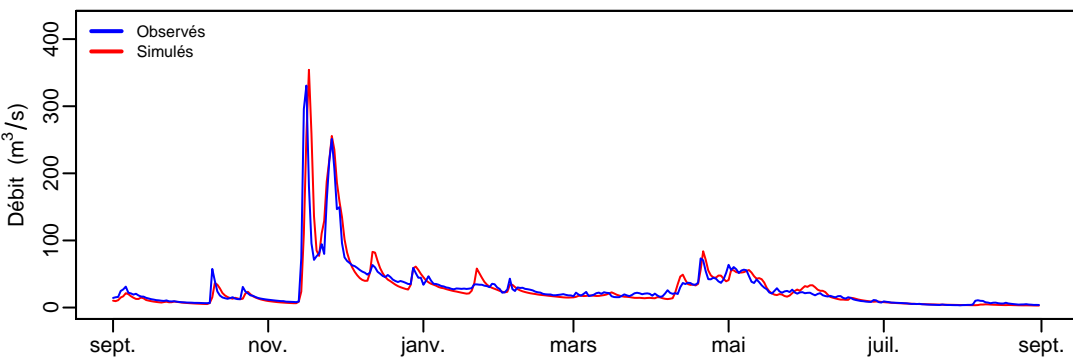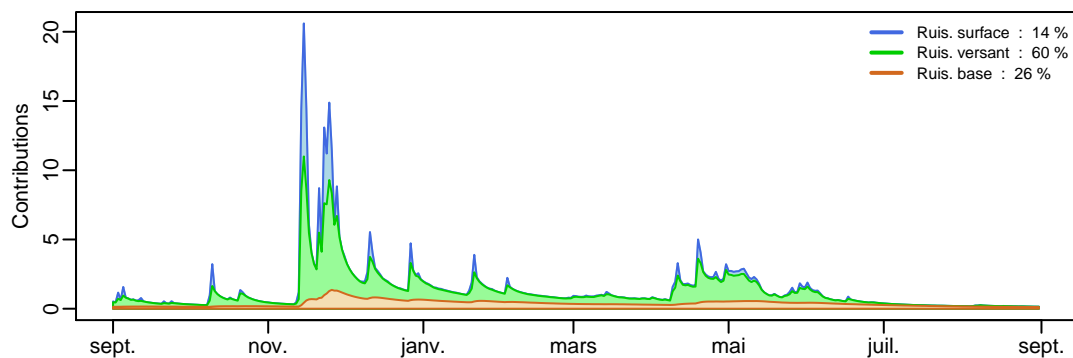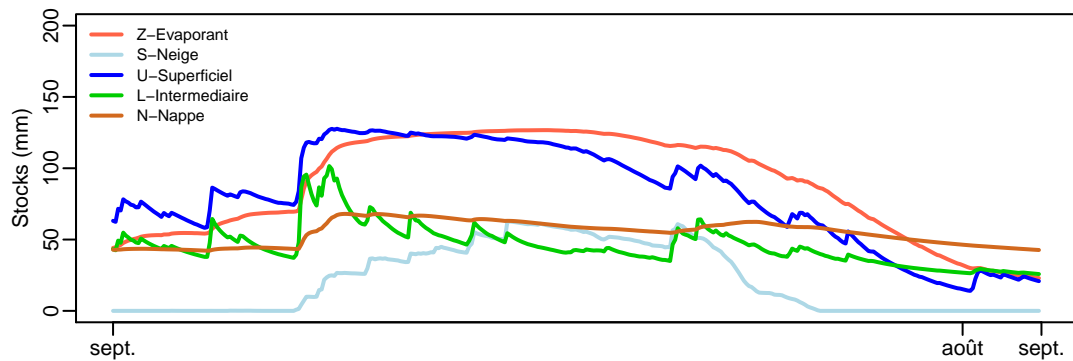



# vinonh (1703.9901 km<sup>2</sup>) – année 2003–2004

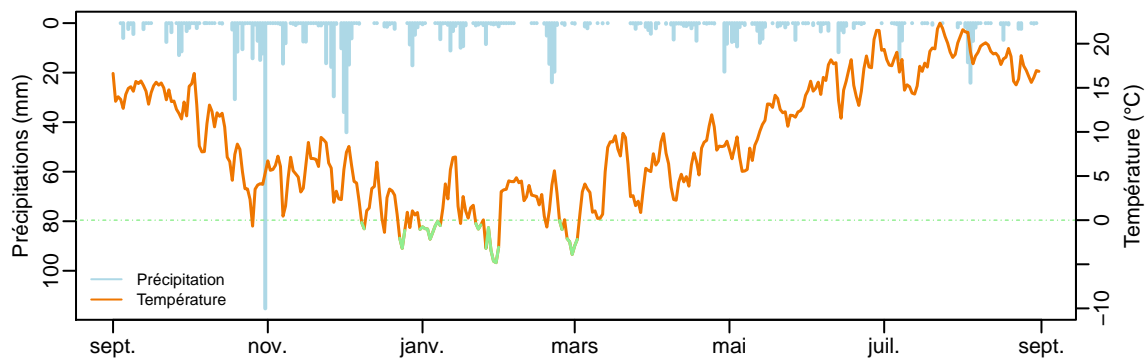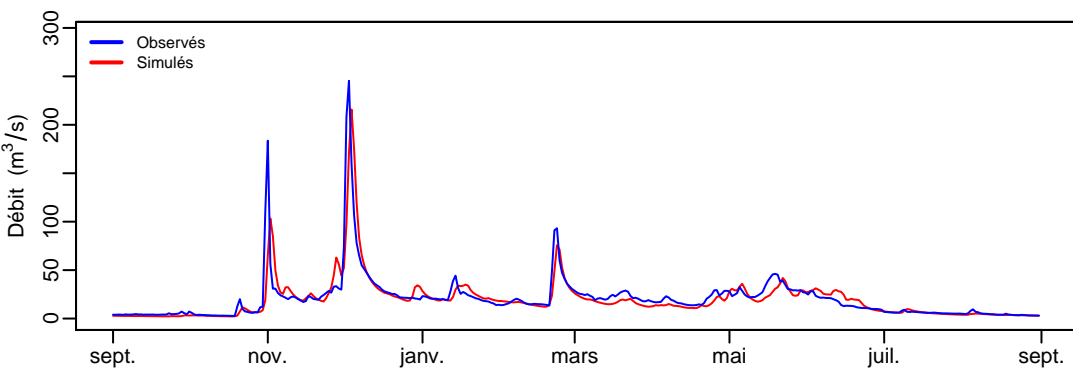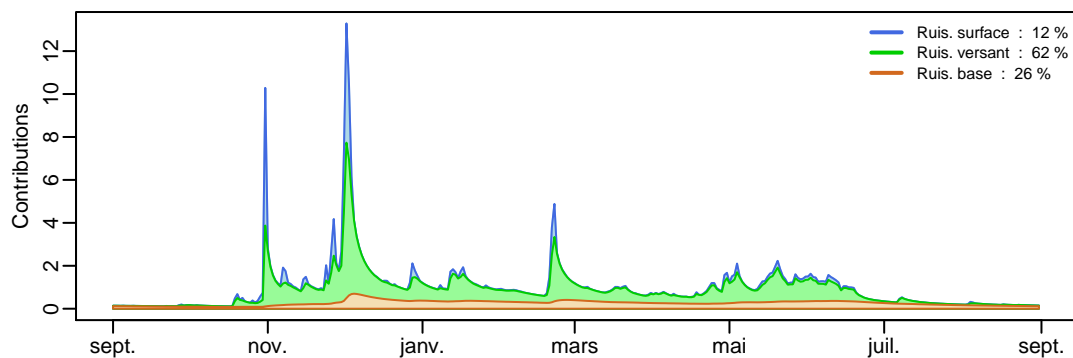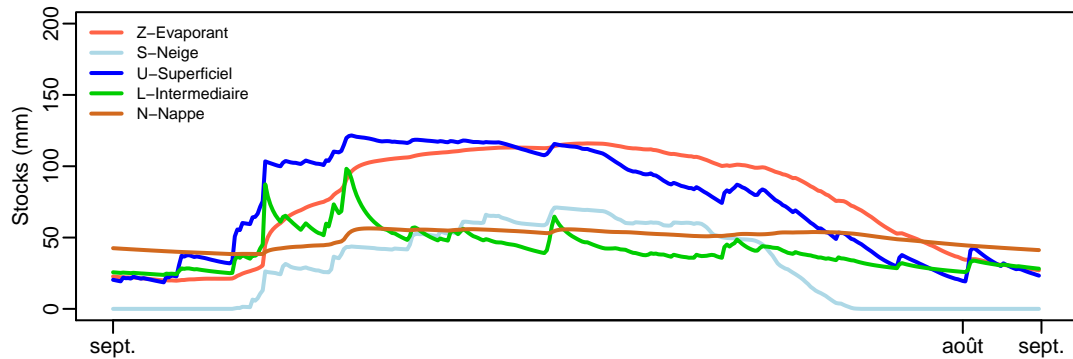

# vinonh (1703.9901 km<sup>2</sup>) – année 2004–2005

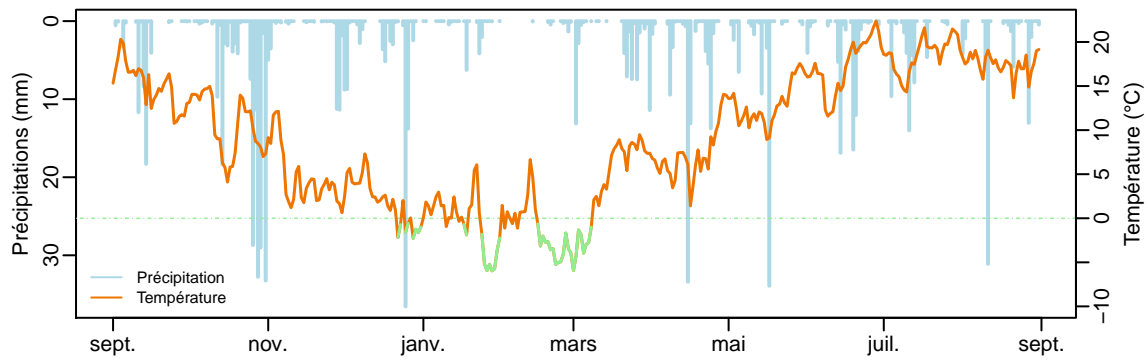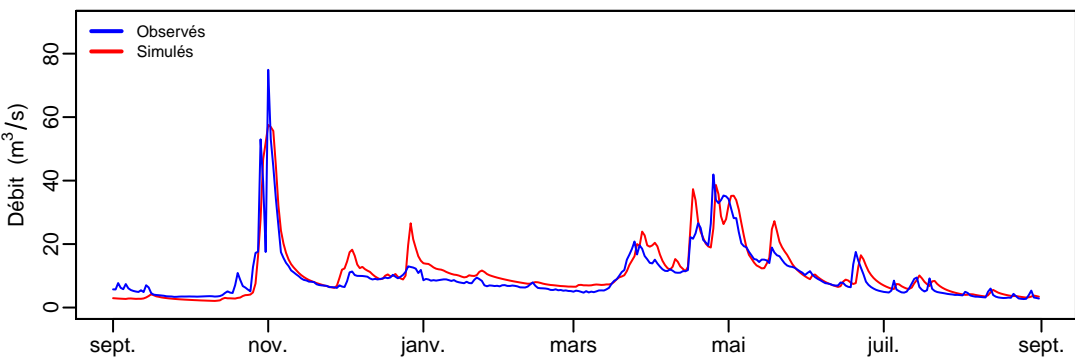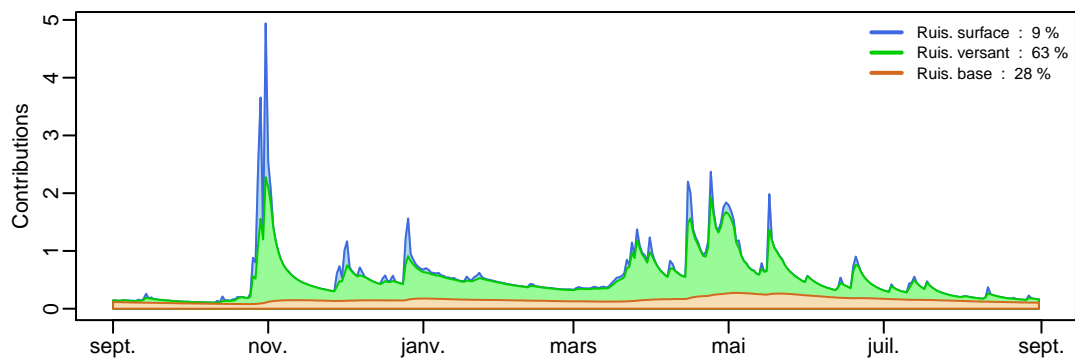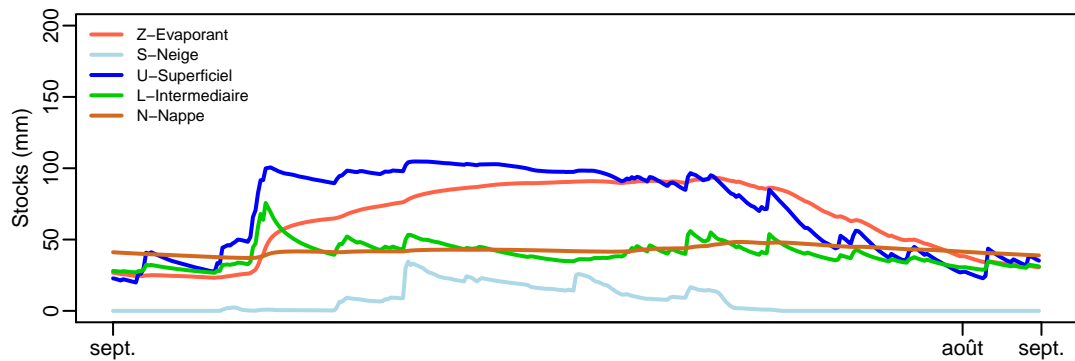

# vinonh (1703.9901 km<sup>2</sup>) – année 2005–2006

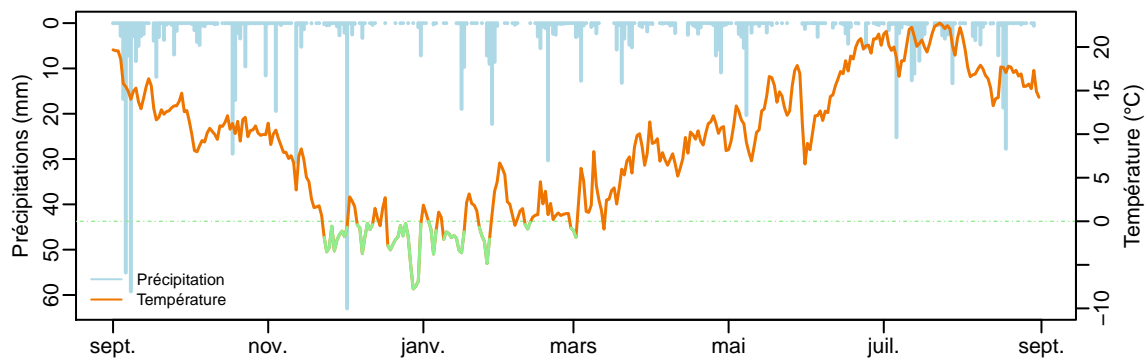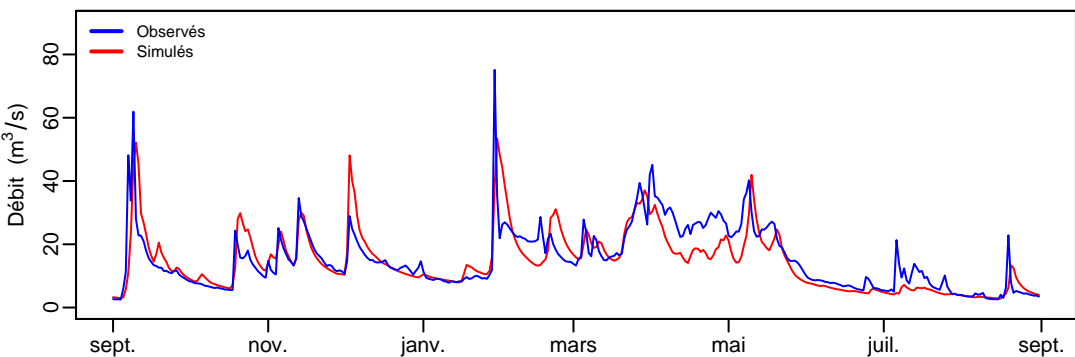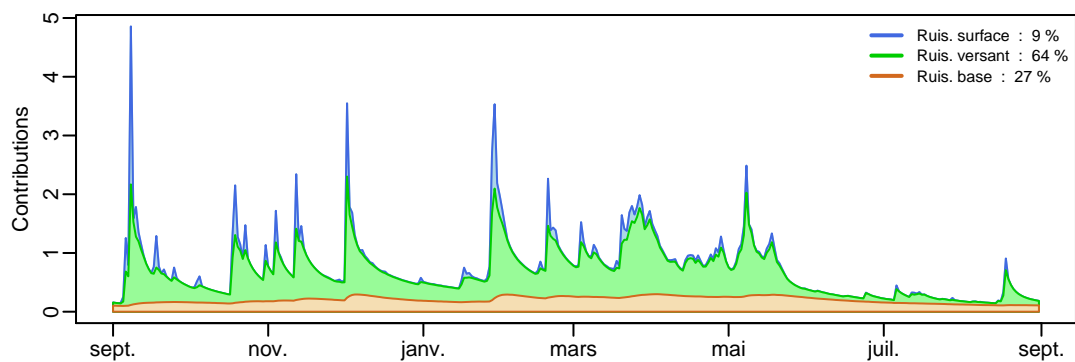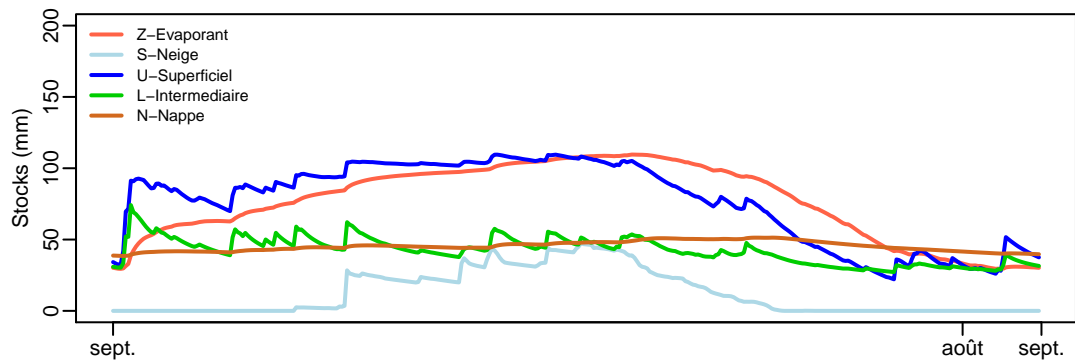

# vinonh (1703.9901 km<sup>2</sup>) – année 2006–2007

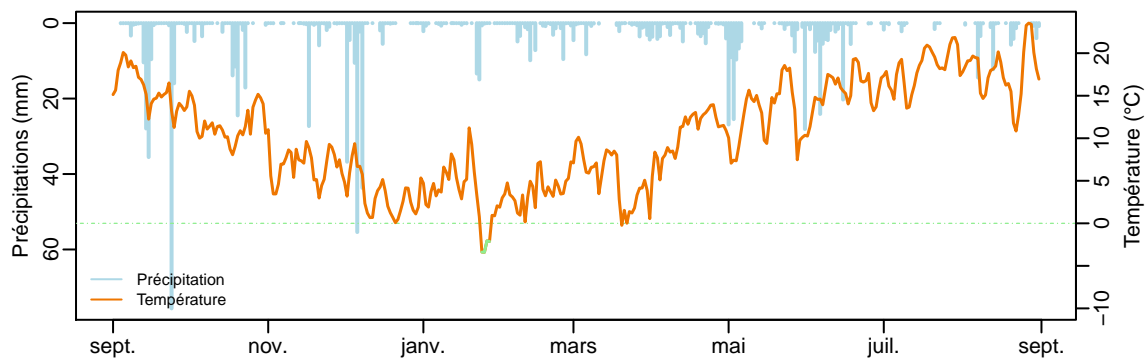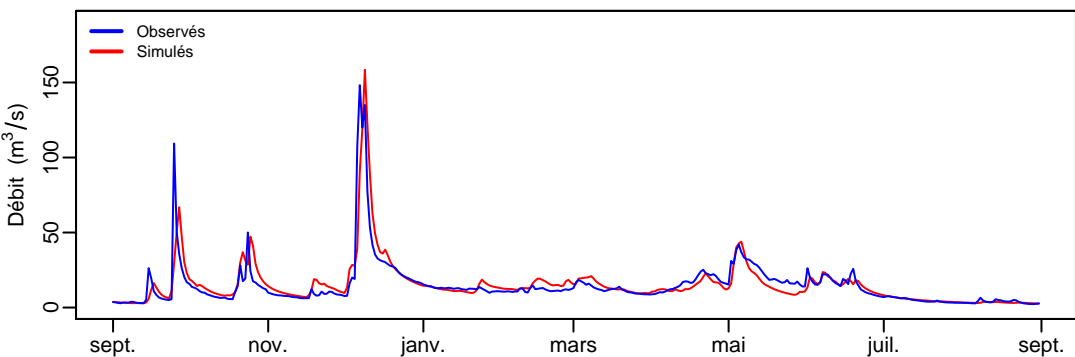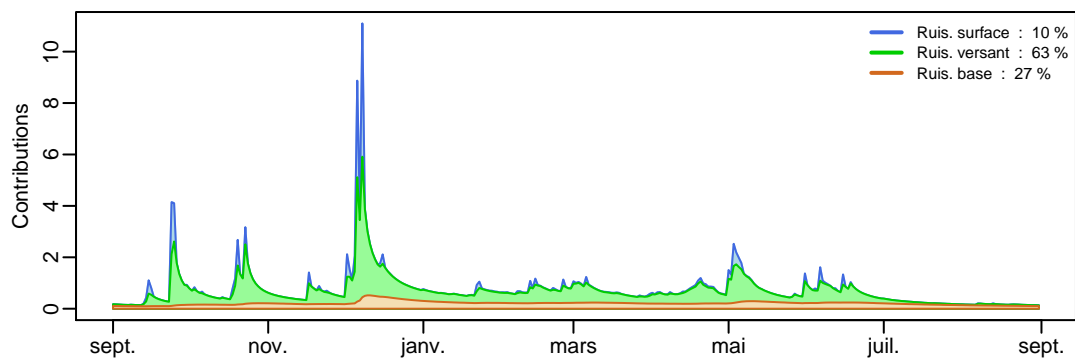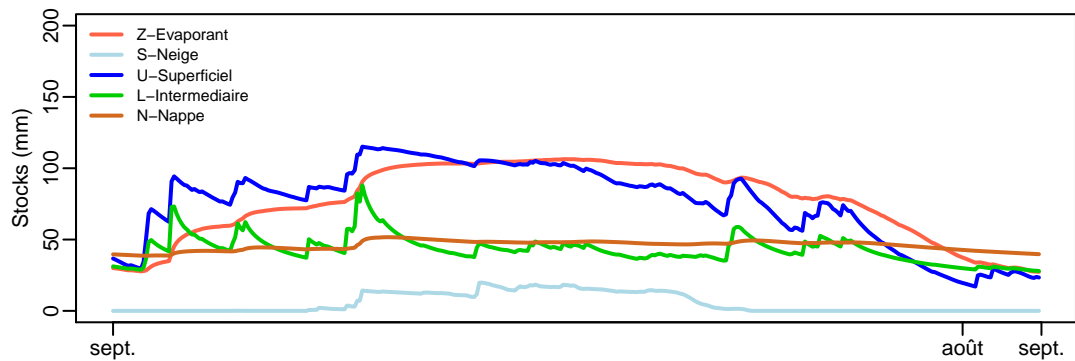

# vinonh (1703.9901 km²) – année 2007–2008

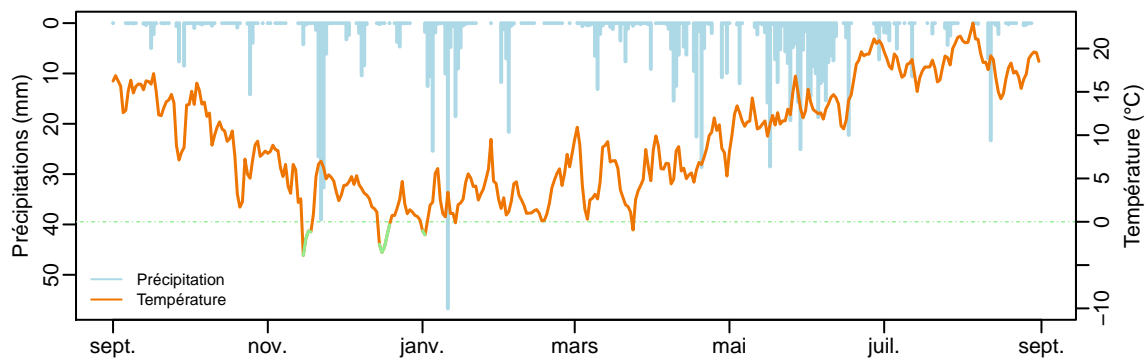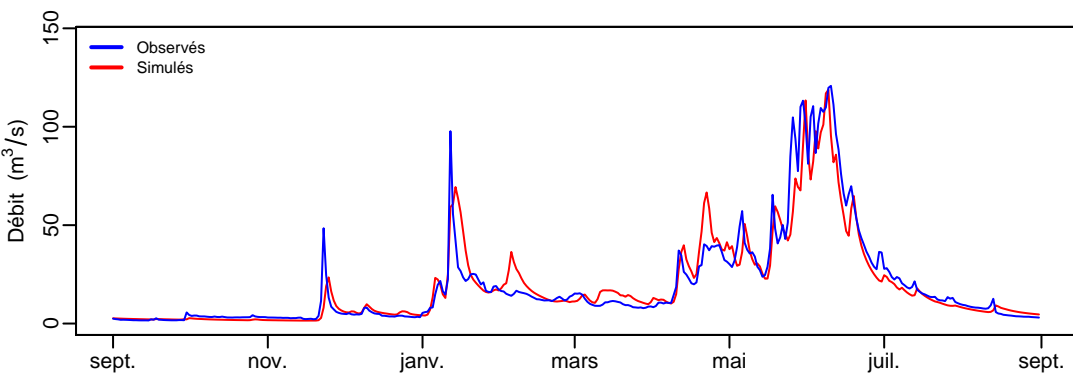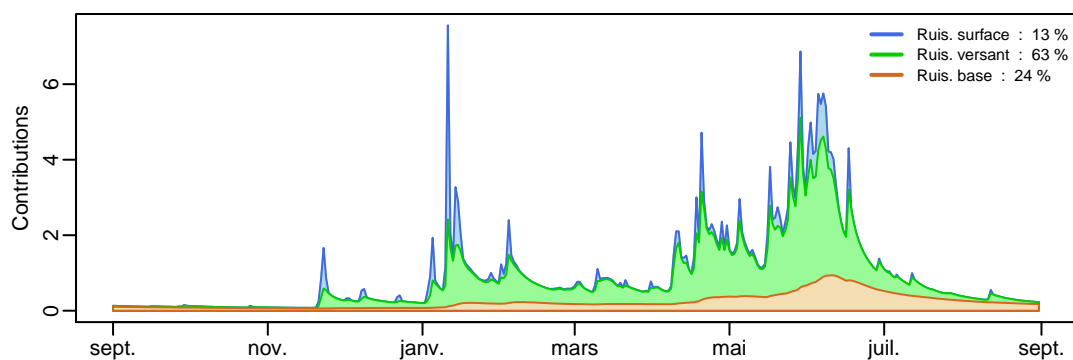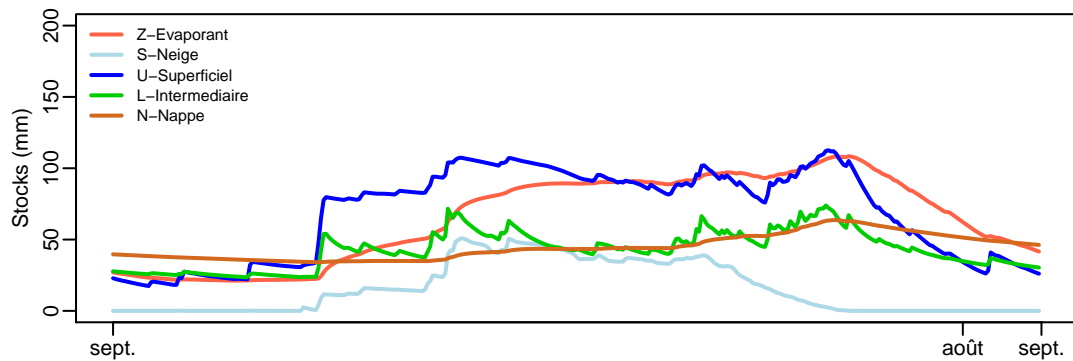

# vinonh (1703.9901 km<sup>2</sup>) – année 2008–2009

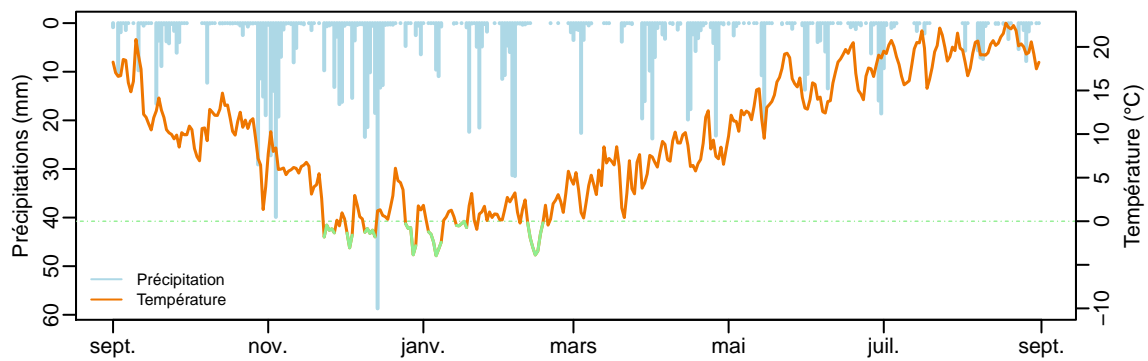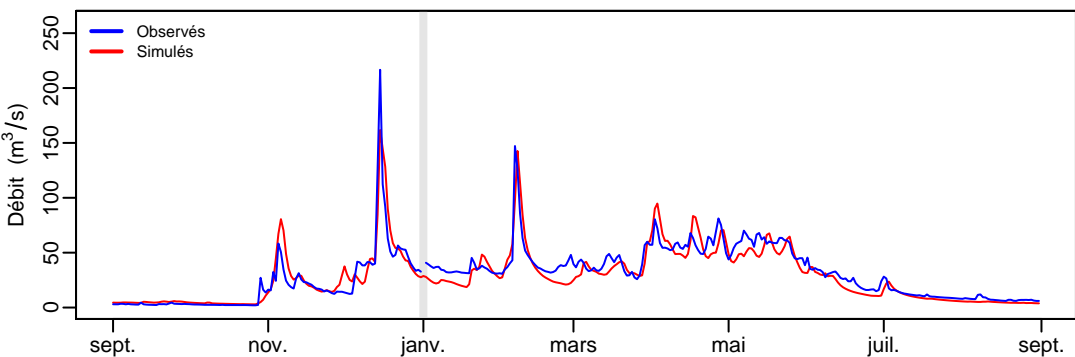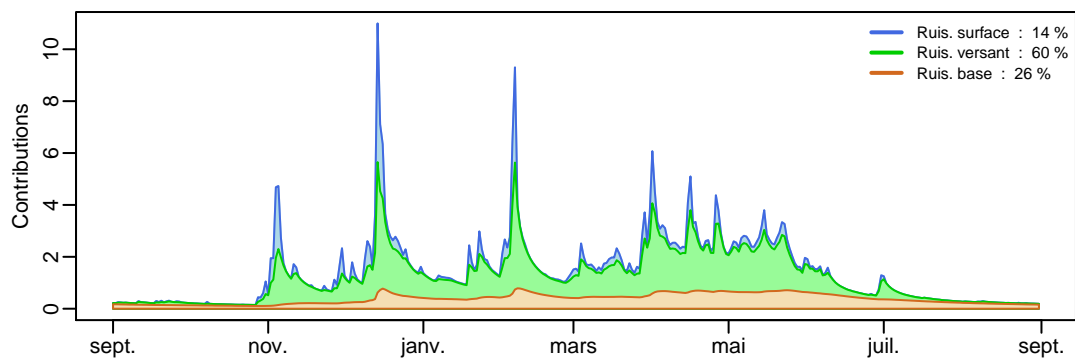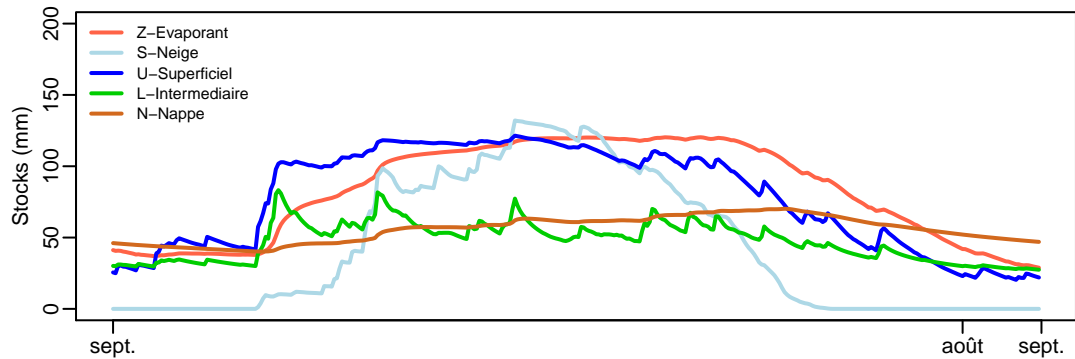

# vinonh (1703.9901 km<sup>2</sup>) – année 2009–2010

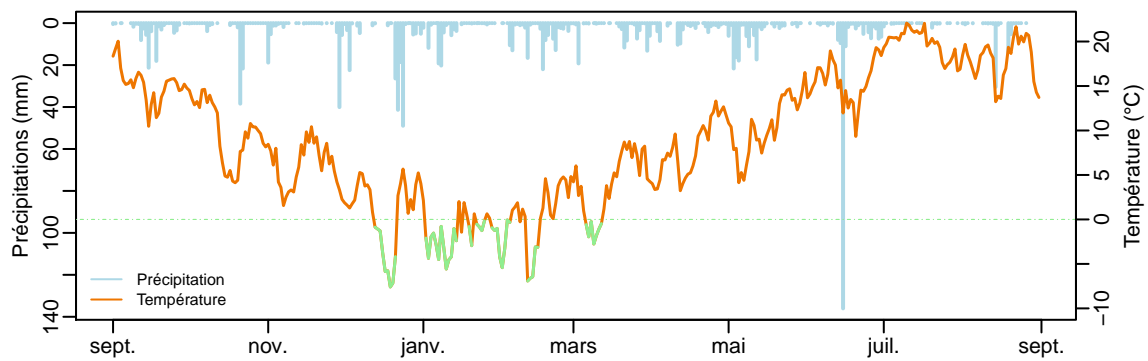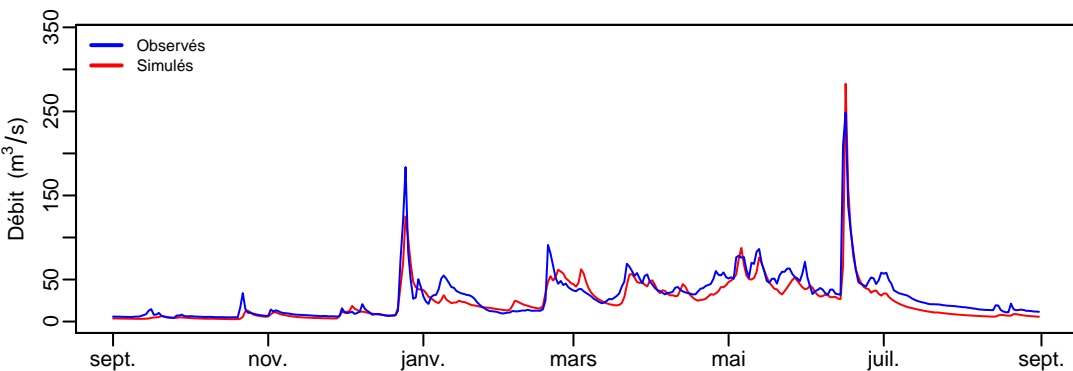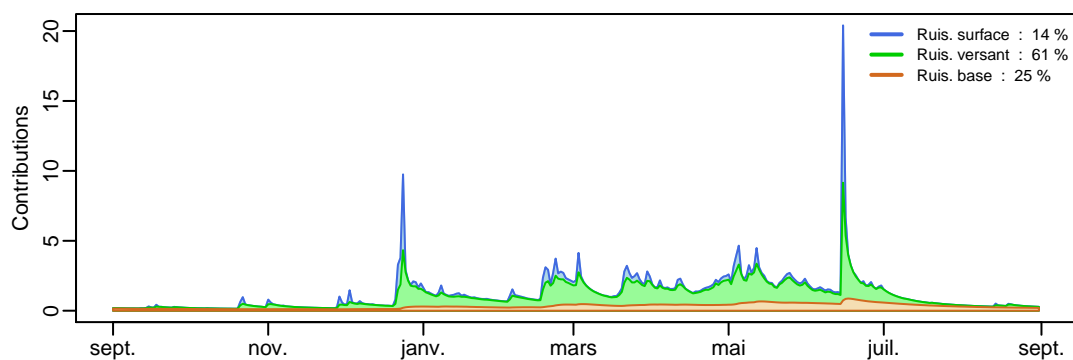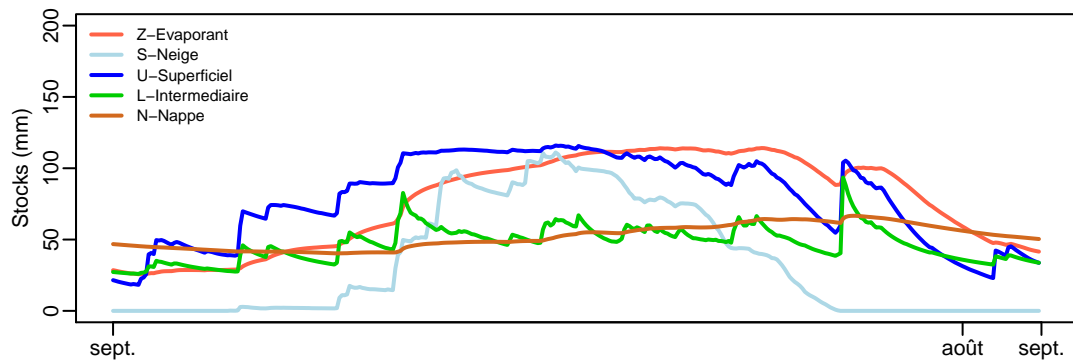

# vinonh (1703.9901 km<sup>2</sup>) – année 2010–2011

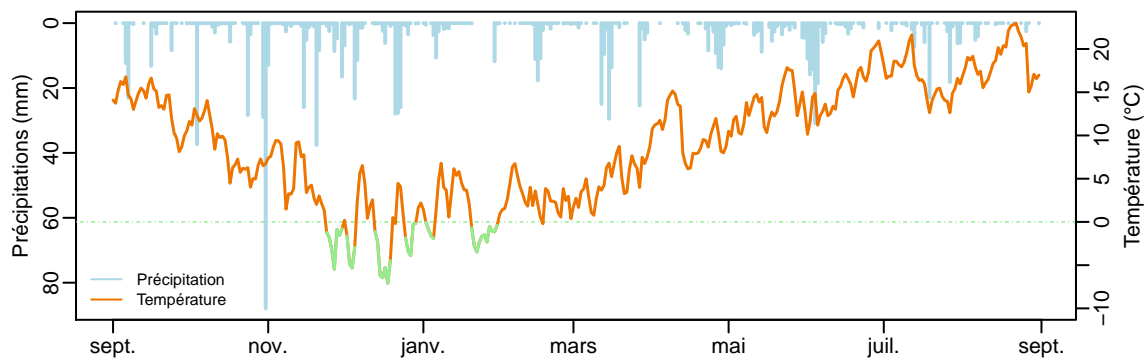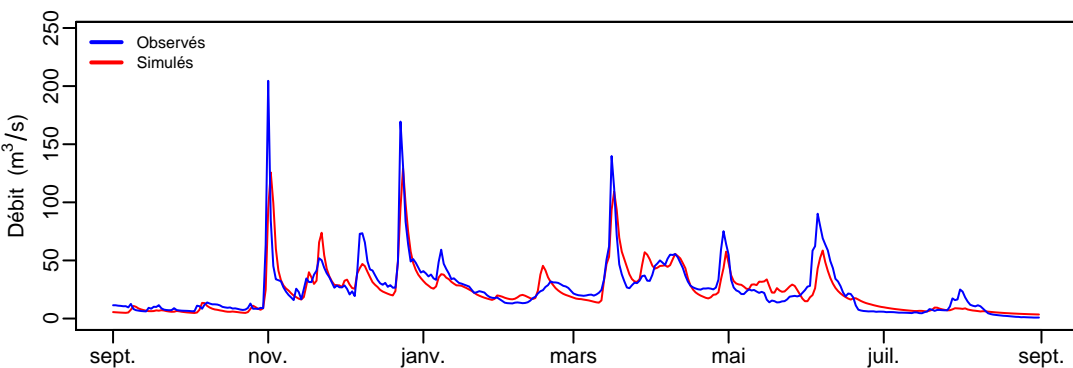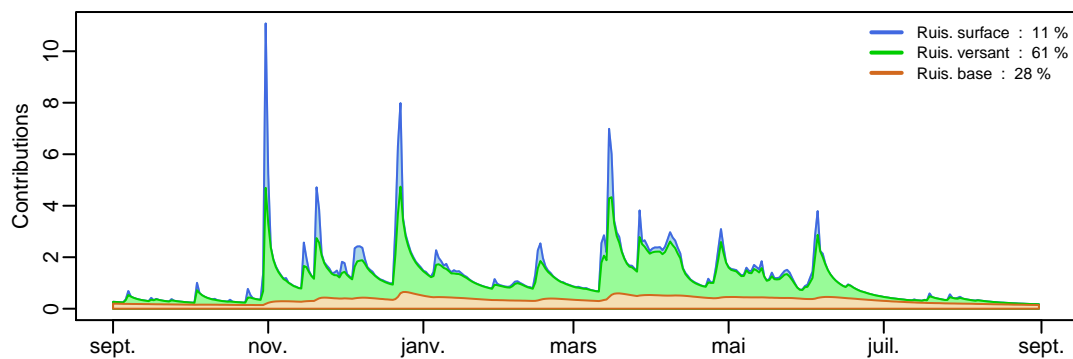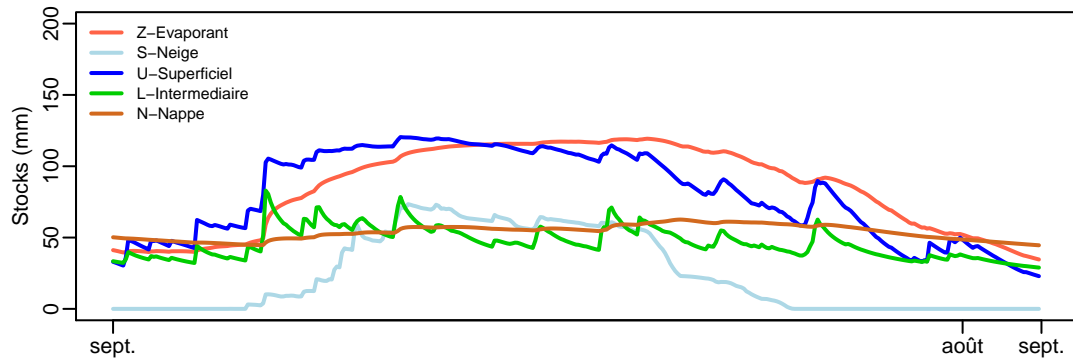



# vinonh (1703.9901 km²) – année 2011–2012

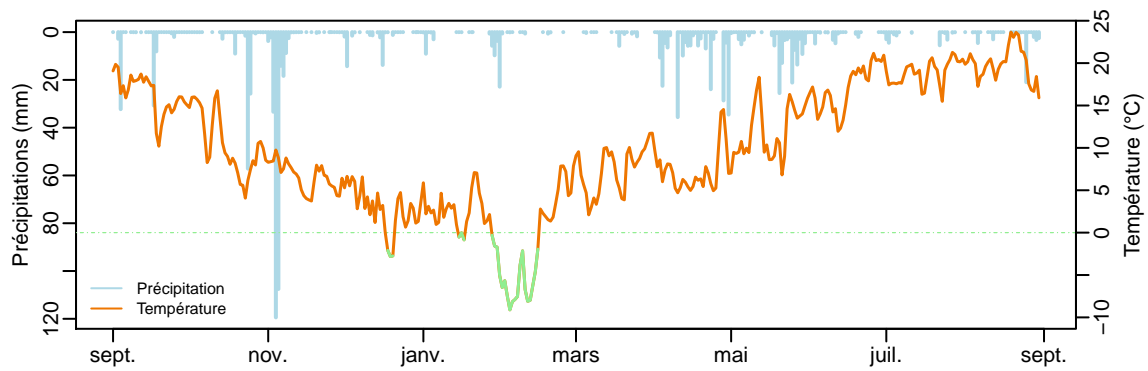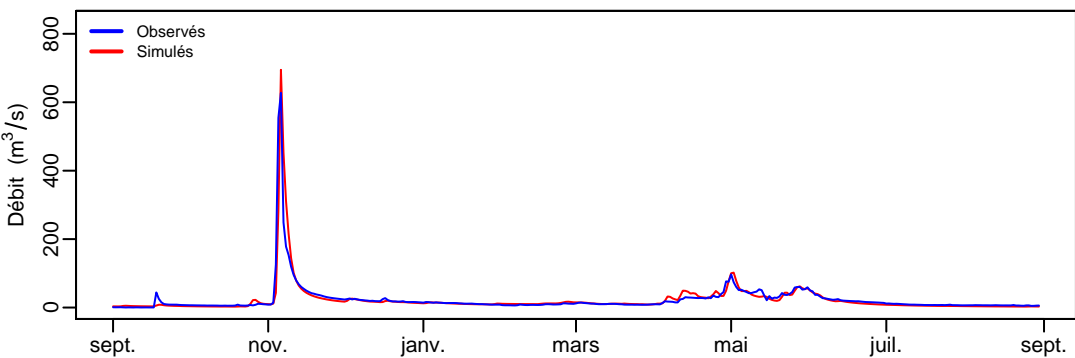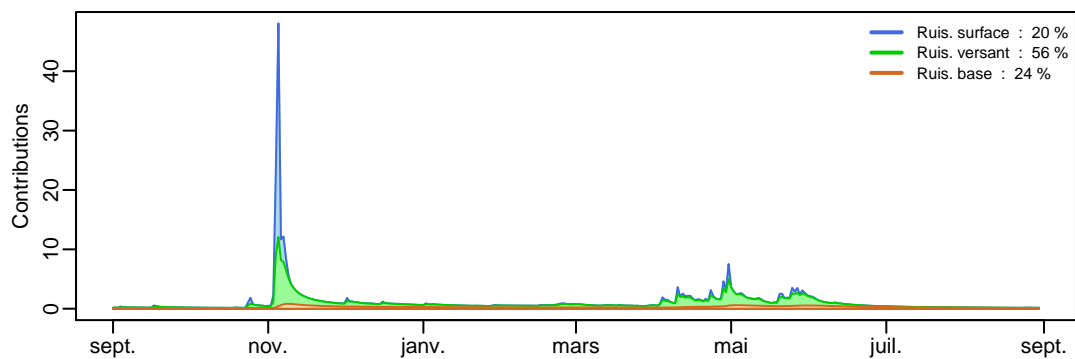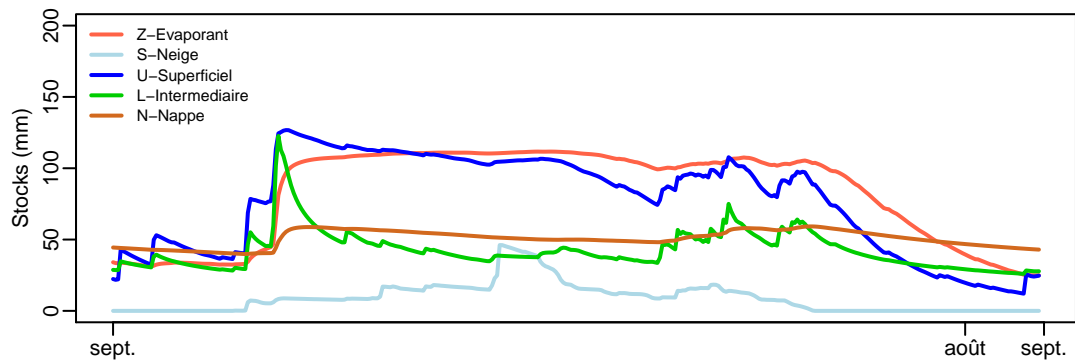

# x0010010 (206.64 km<sup>2</sup>) – année 1991–1992

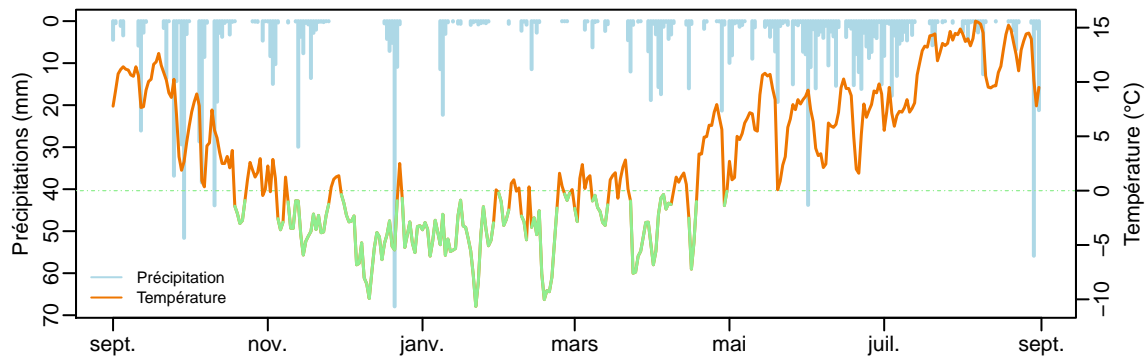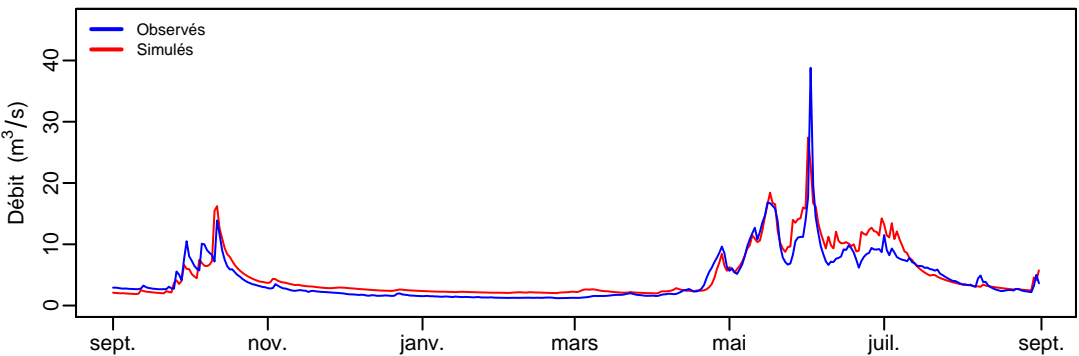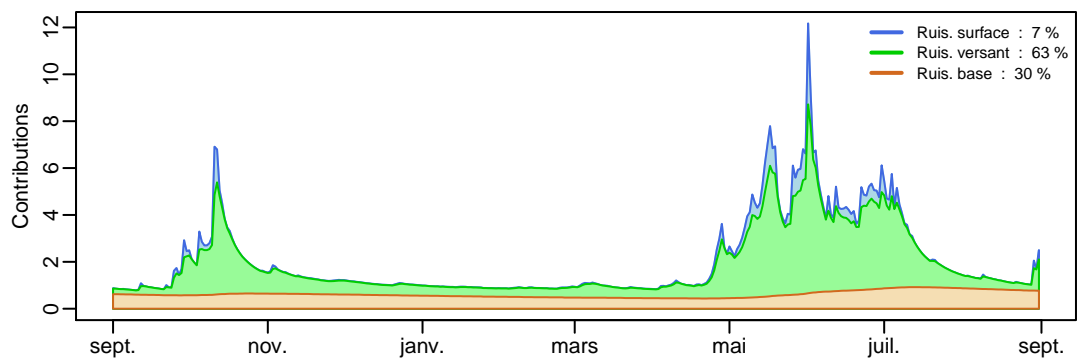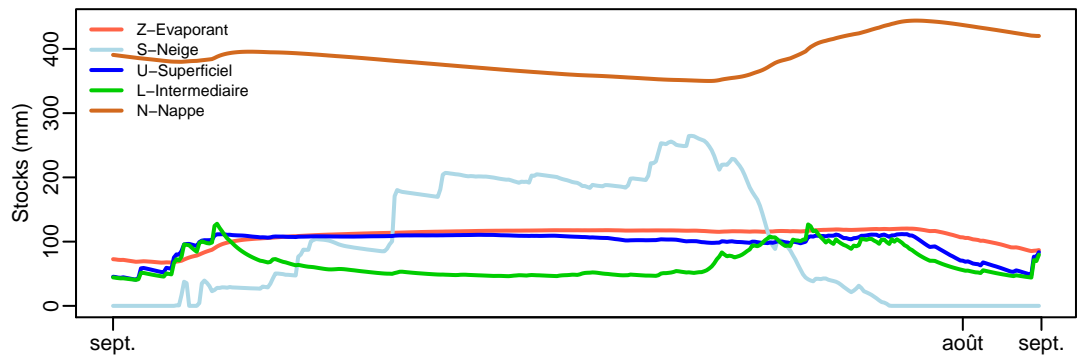

# x0010010 (206.64 km<sup>2</sup>) – année 1992–1993

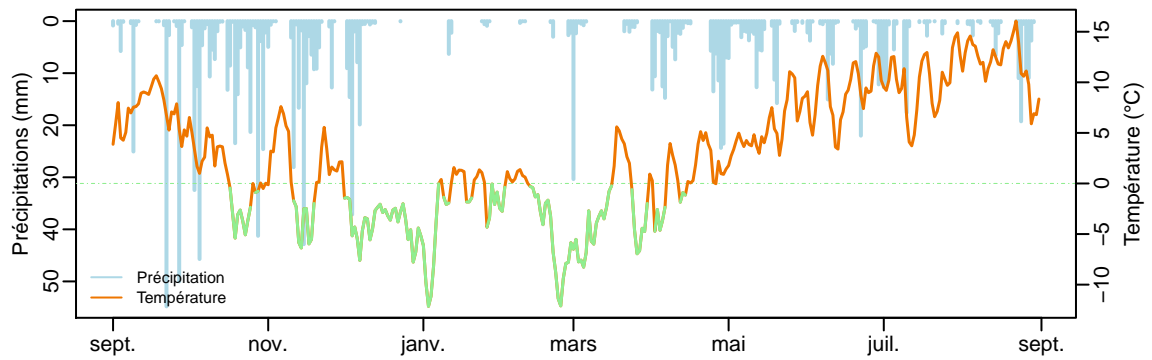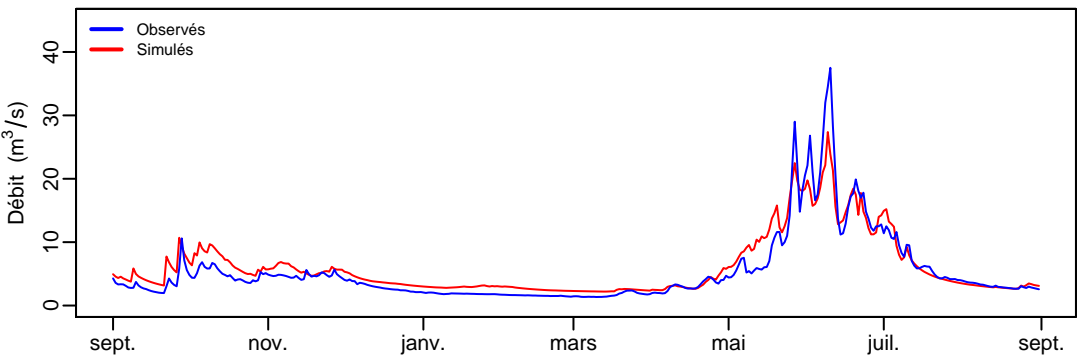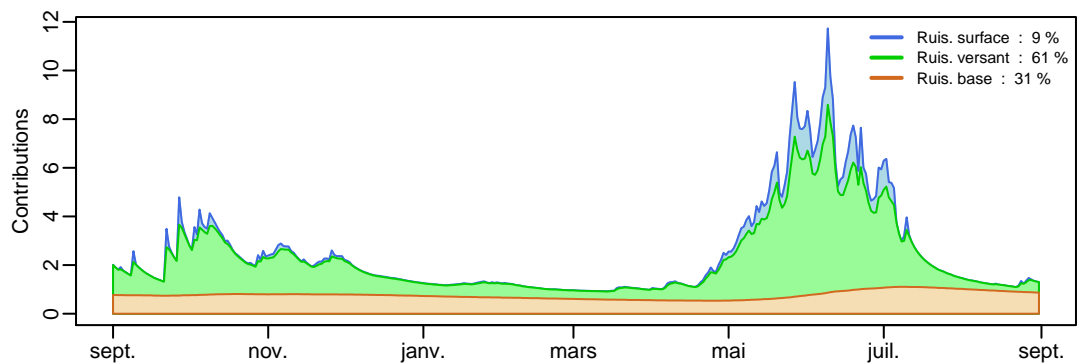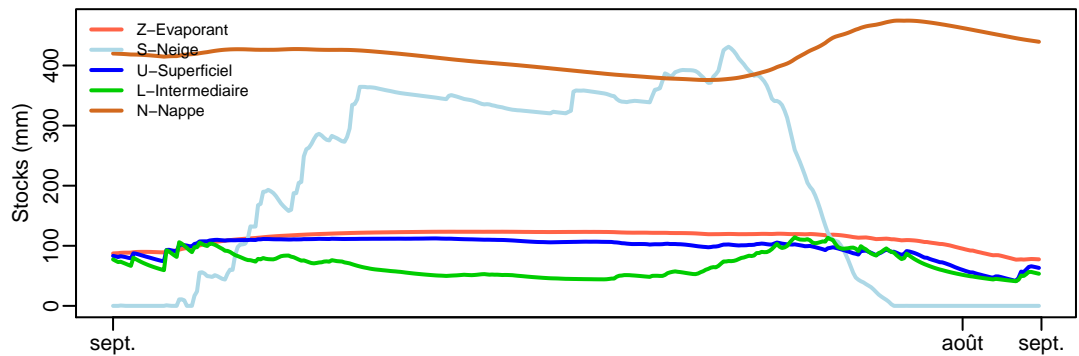

# x0010010 (206.64 km<sup>2</sup>) – année 1993–1994

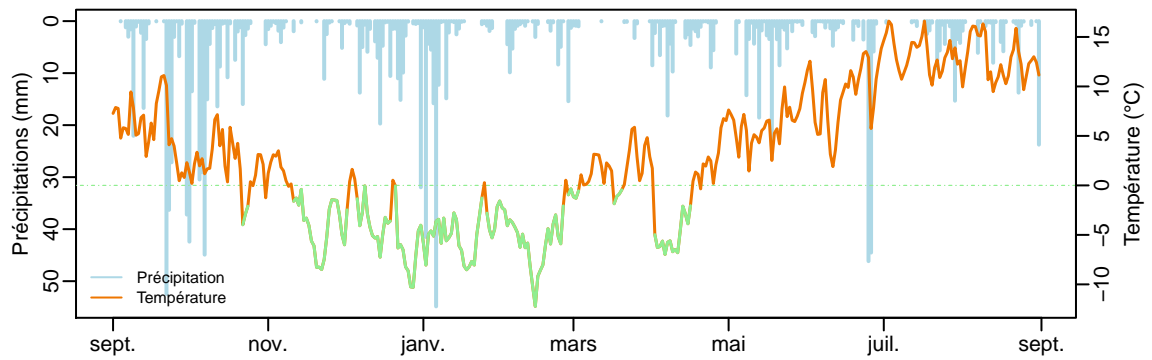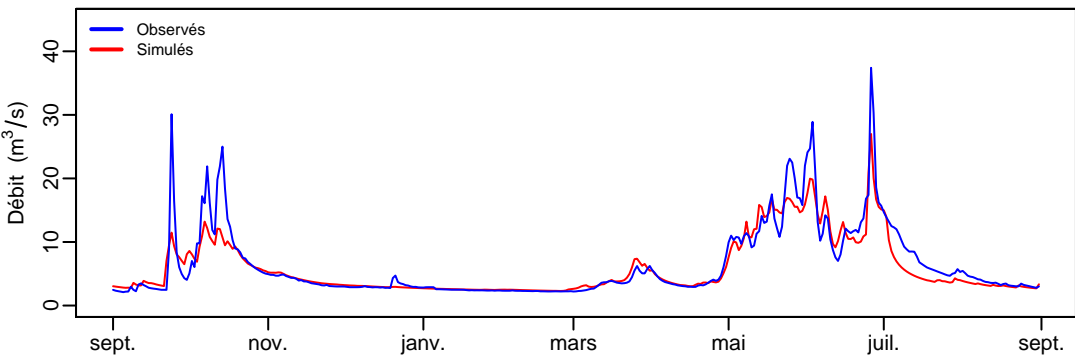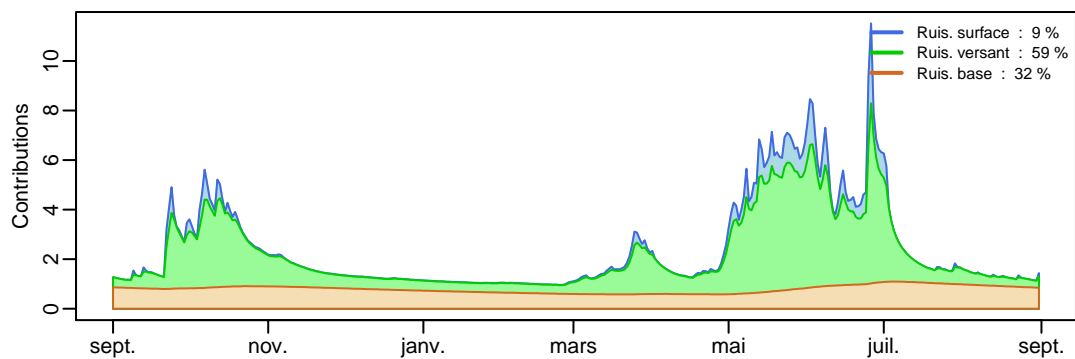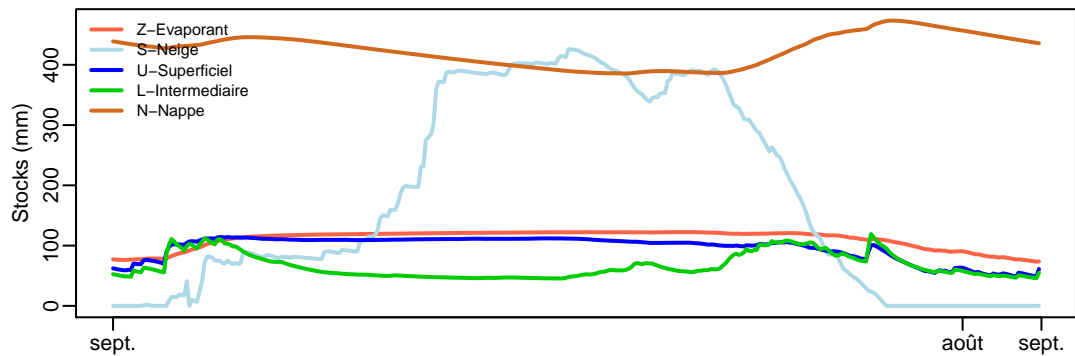

# x0010010 (206.64 km<sup>2</sup>) – année 1994–1995

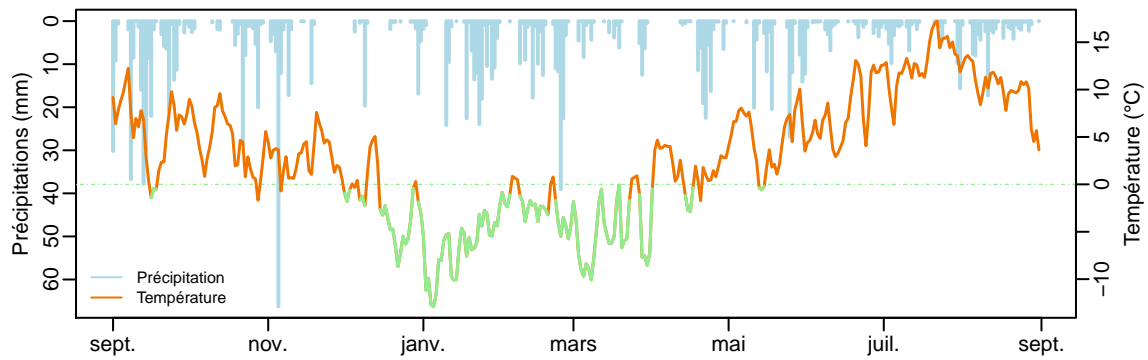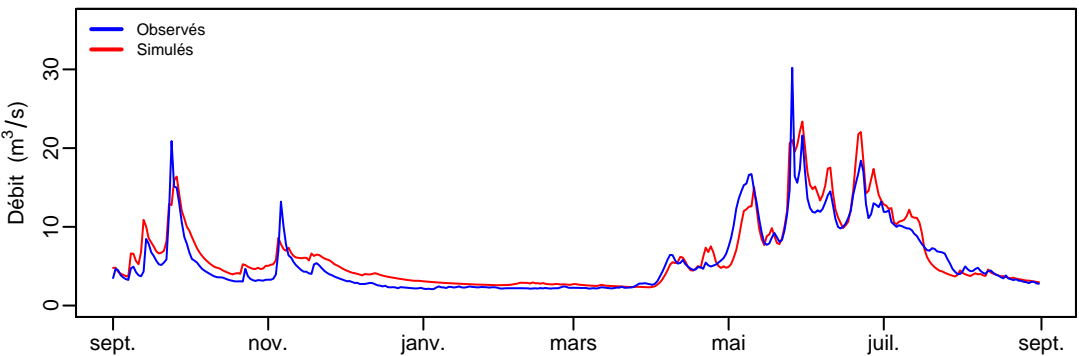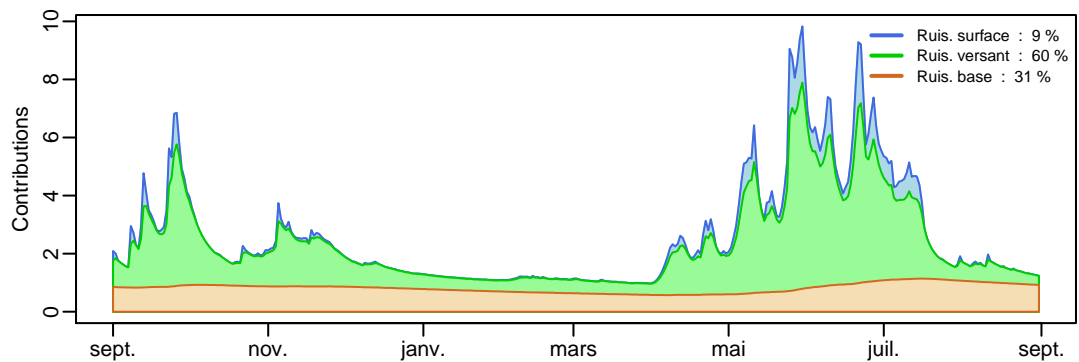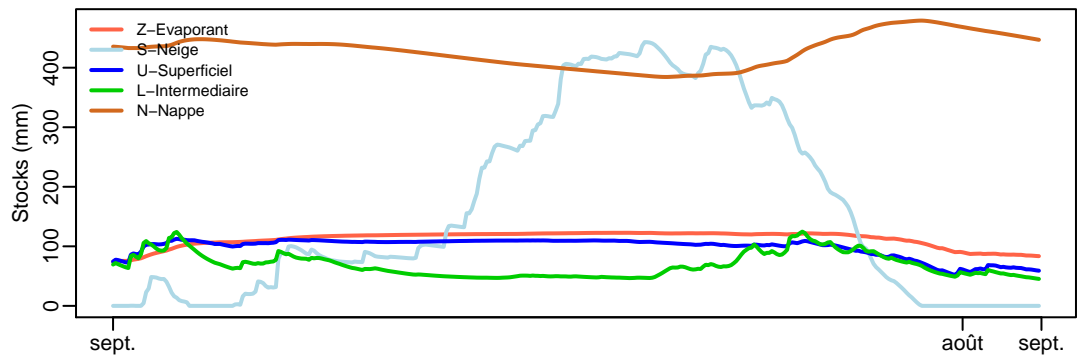

# x0010010 (206.64 km<sup>2</sup>) – année 1995–1996

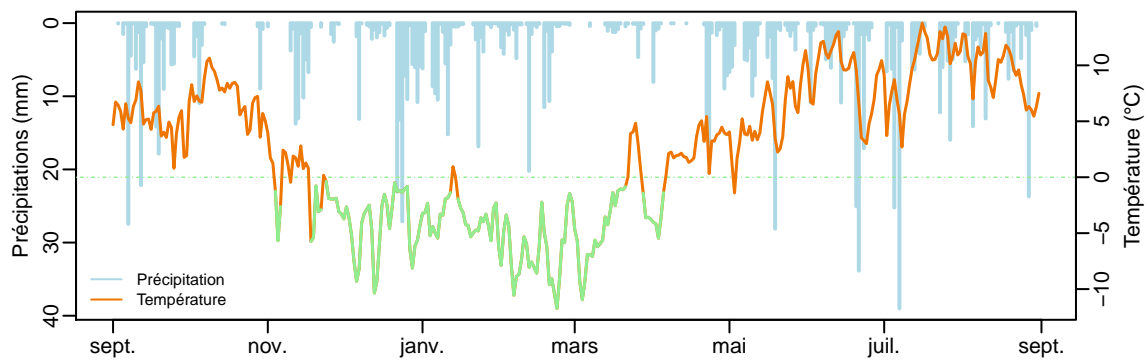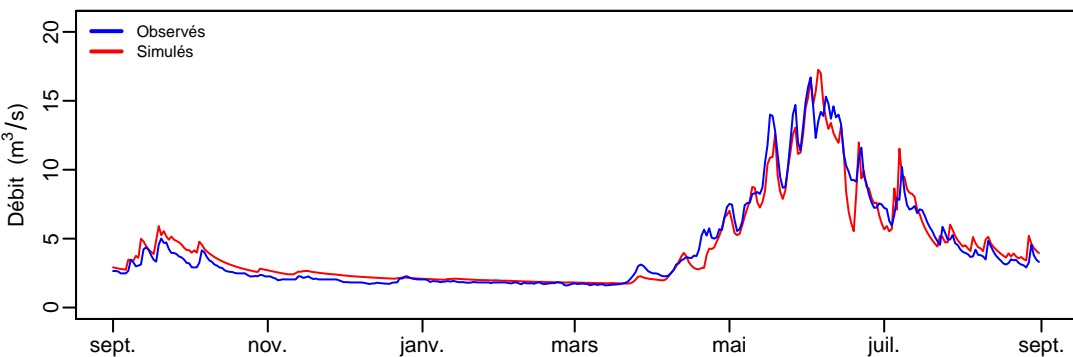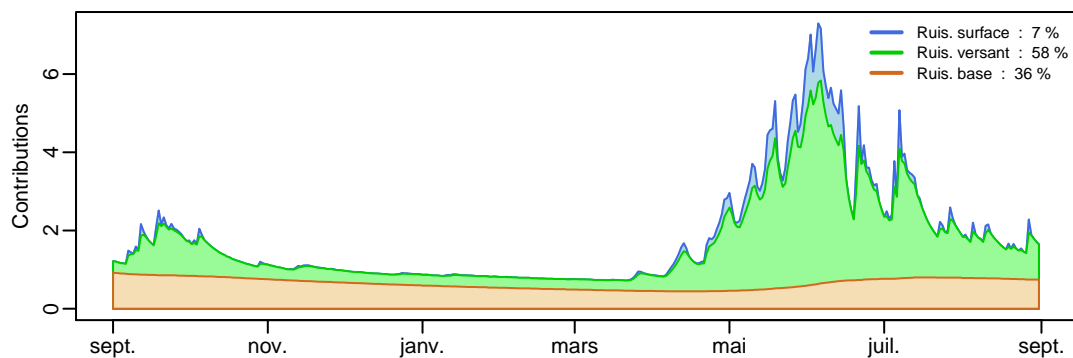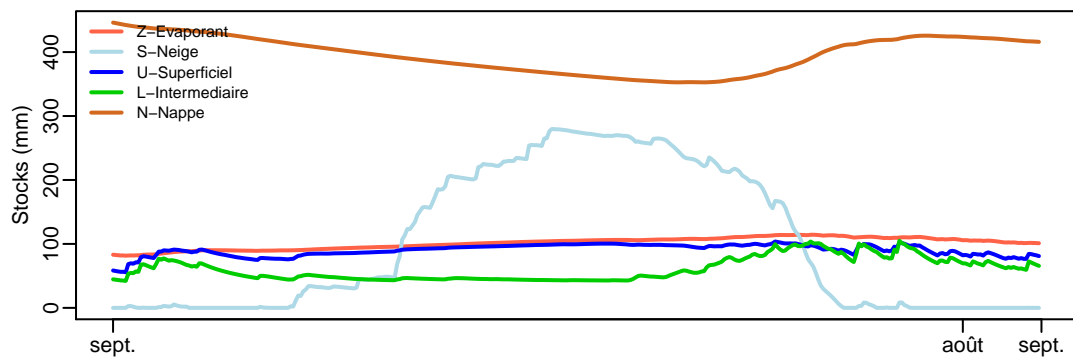

# x0010010 (206.64 km<sup>2</sup>) – année 1996–1997

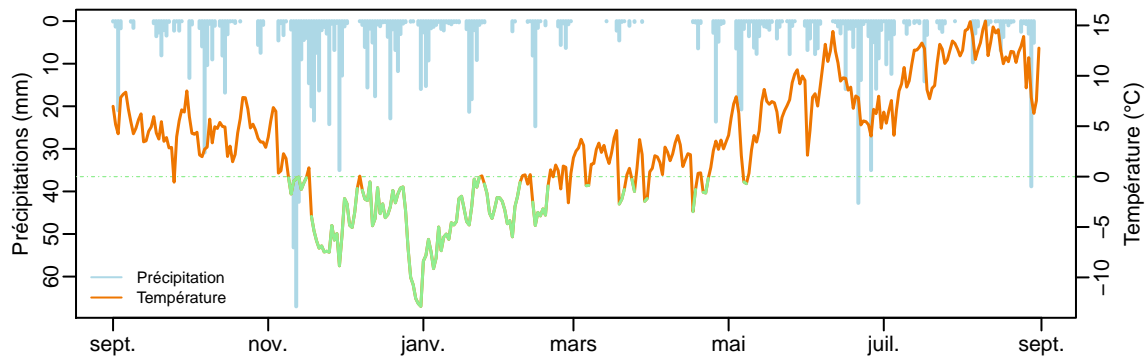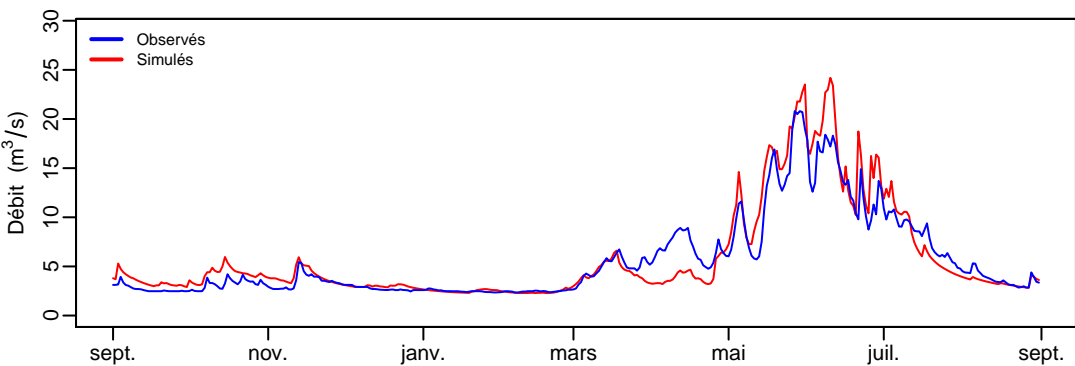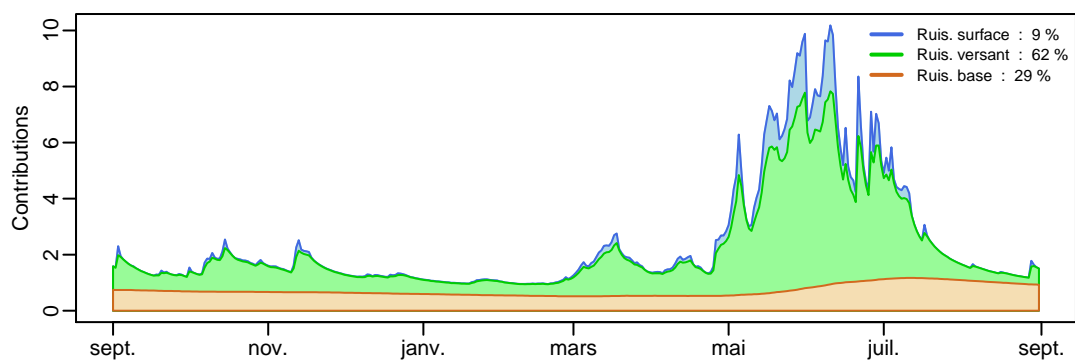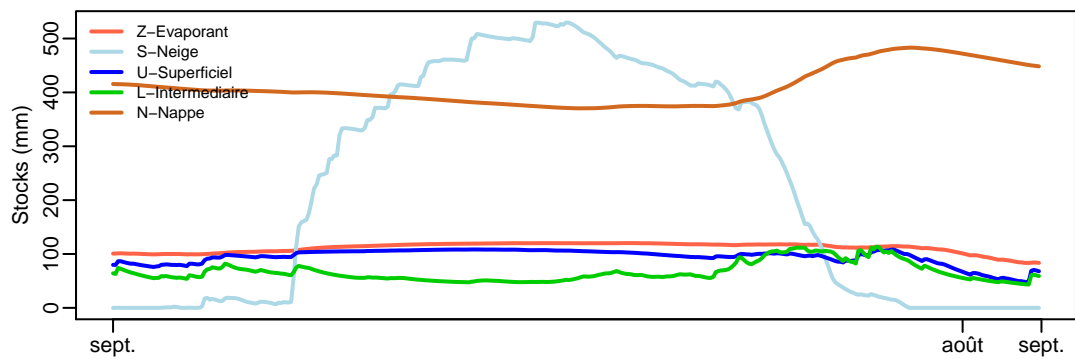

# x0010010 (206.64 km<sup>2</sup>) – année 1997–1998

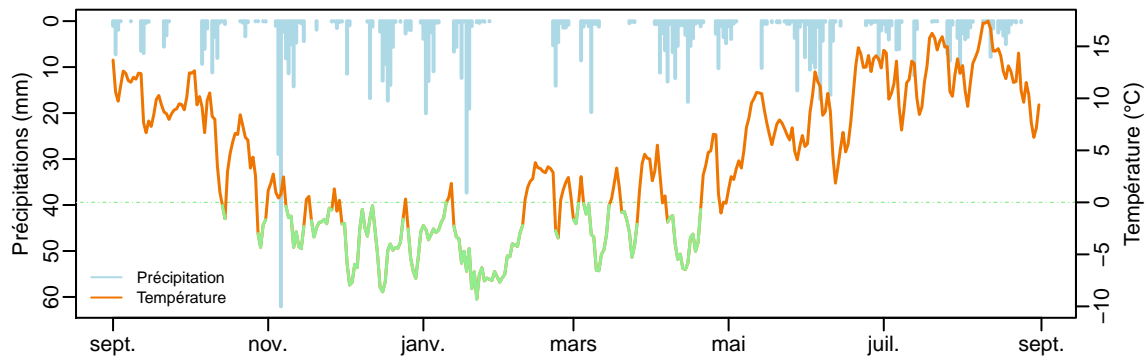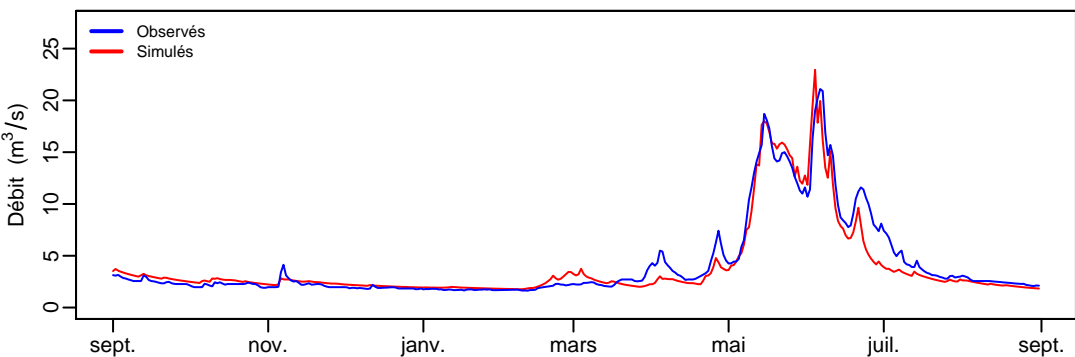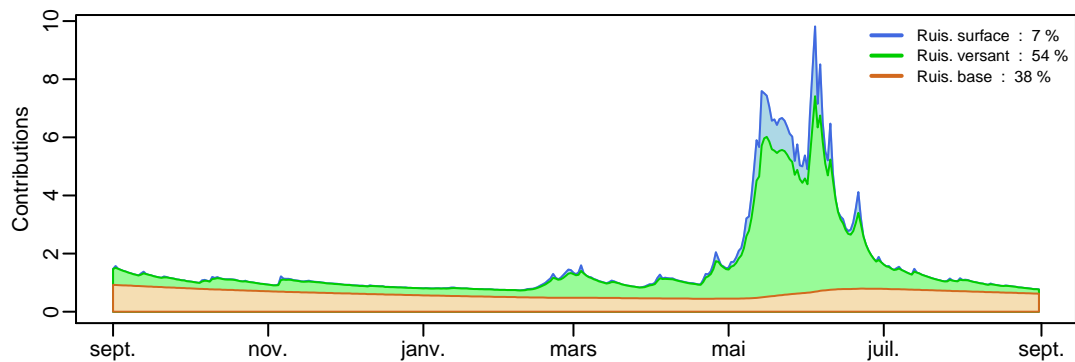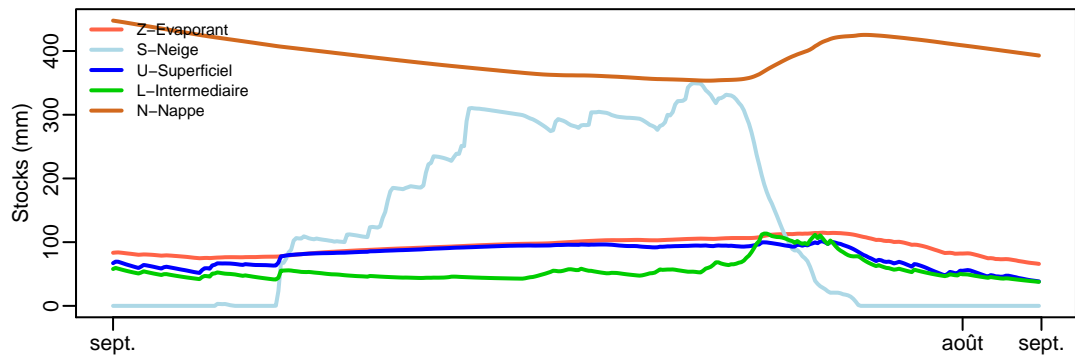



# x0010010 (206.64 km<sup>2</sup>) – année 1998–1999

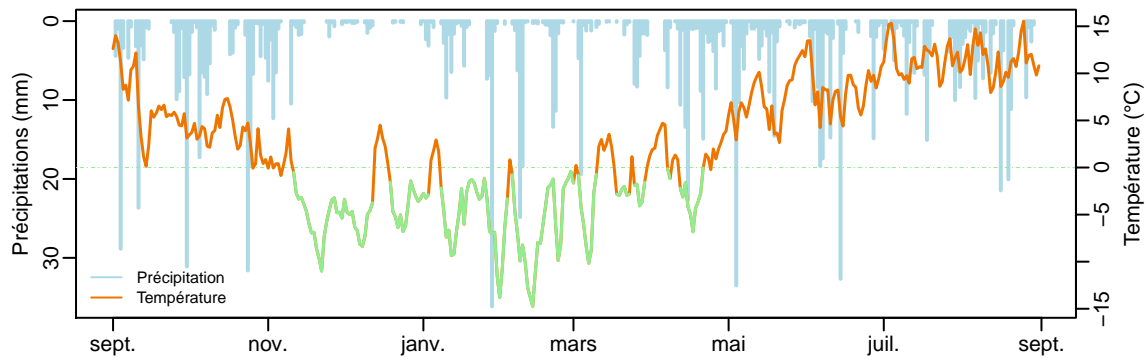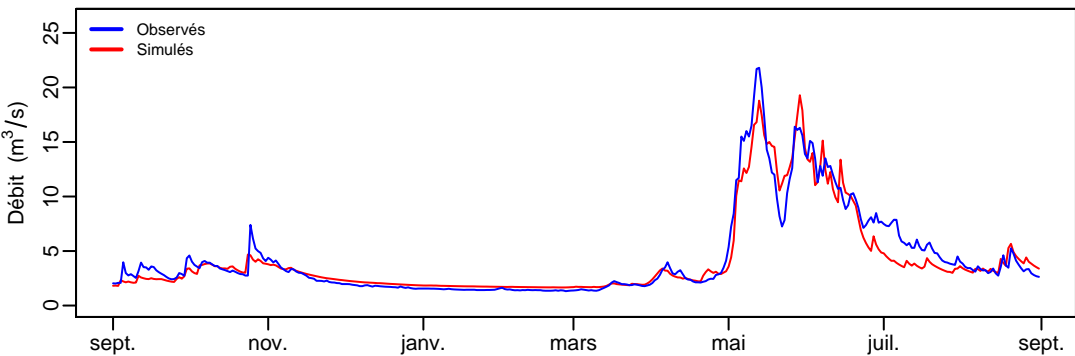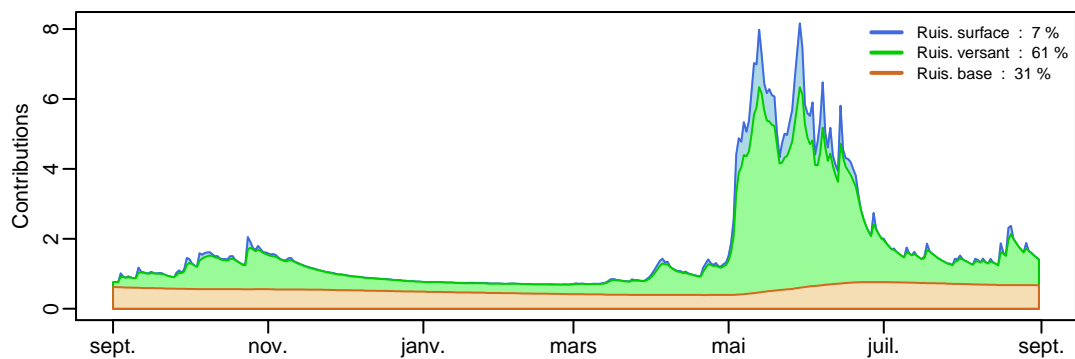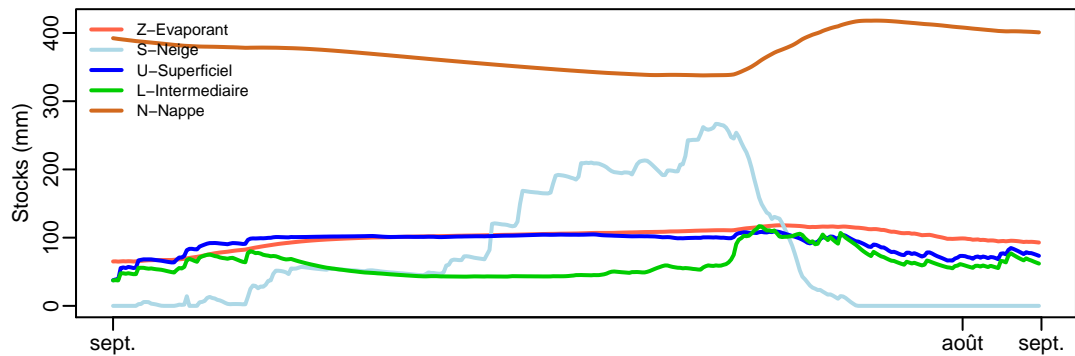

# x0010010 (206.64 km<sup>2</sup>) – année 1999–2000

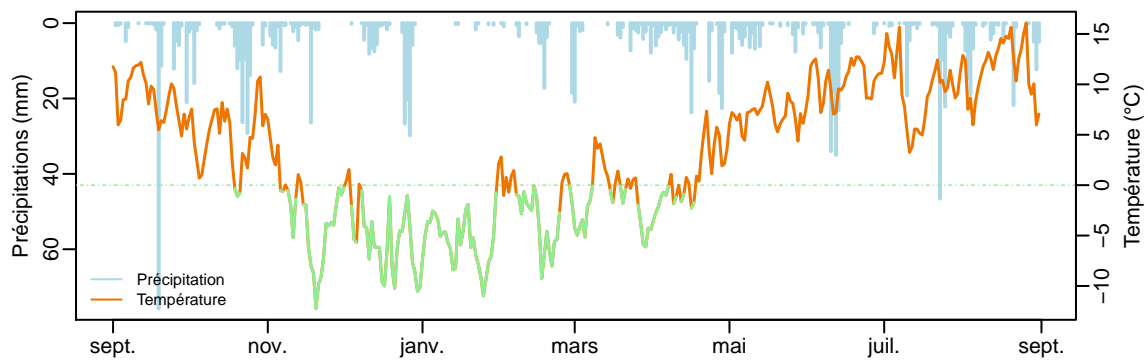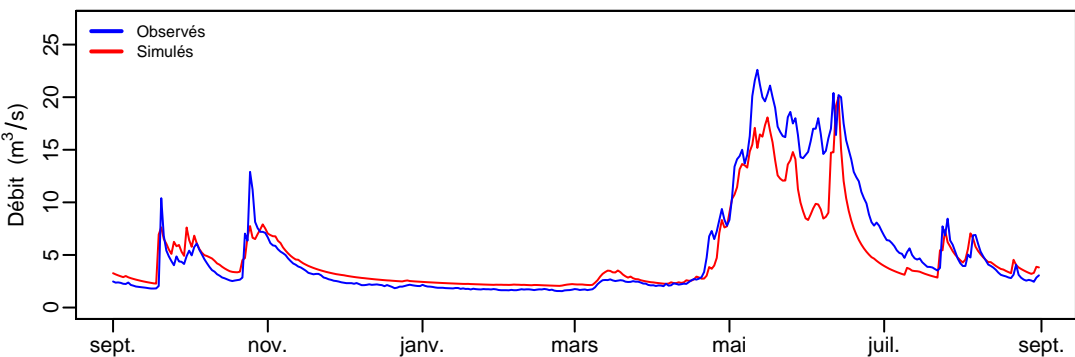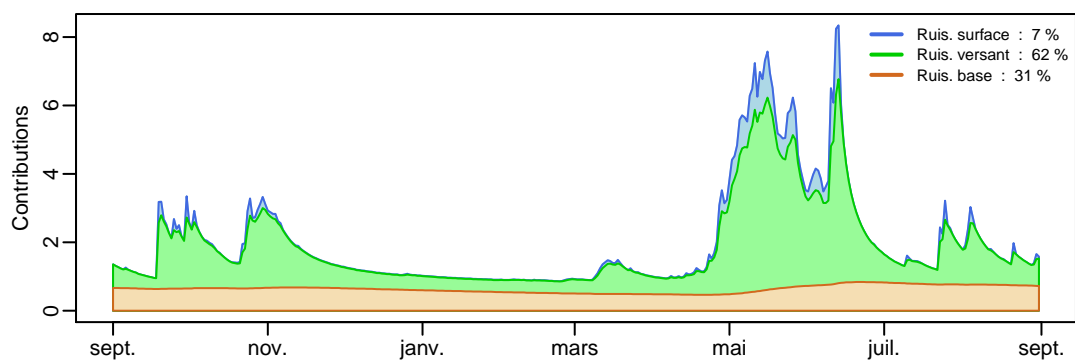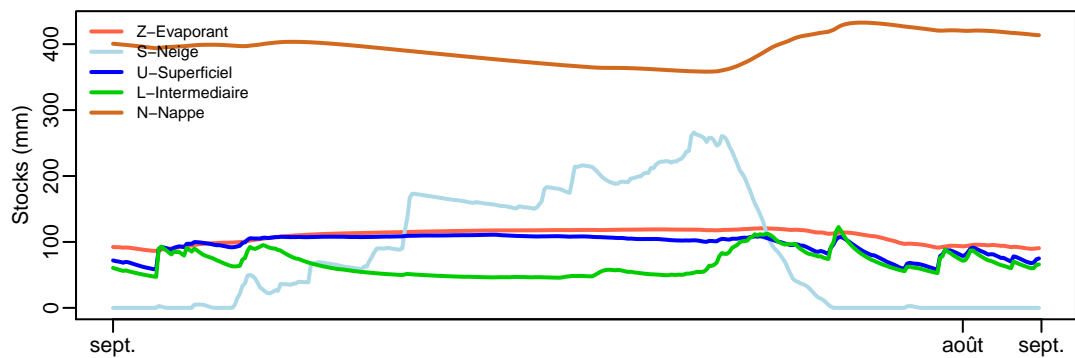

# x0010010 (206.64 km<sup>2</sup>) – année 2000–2001

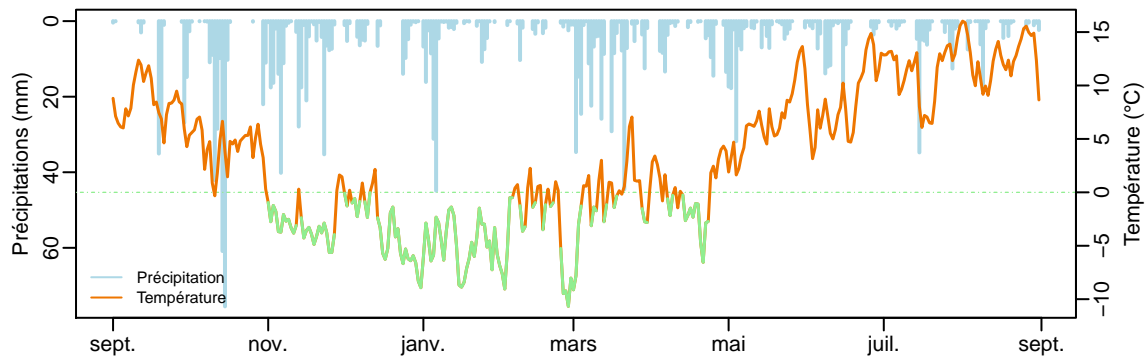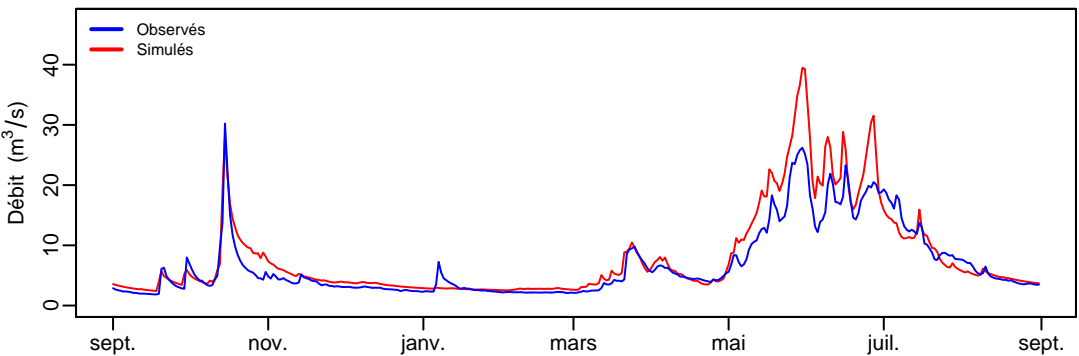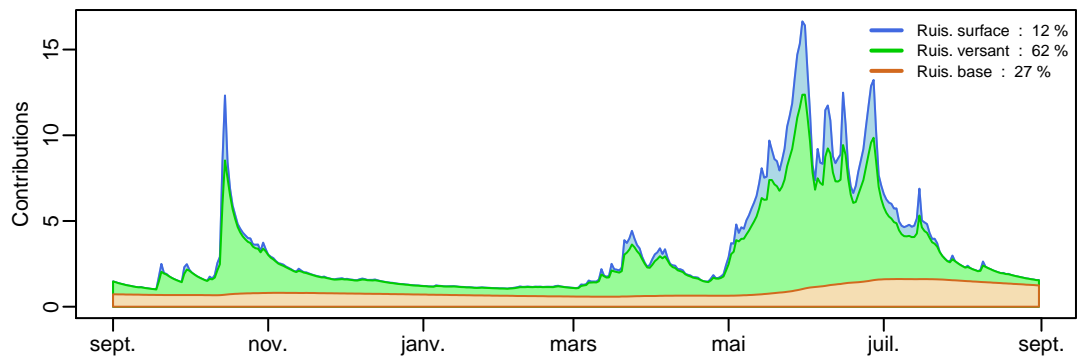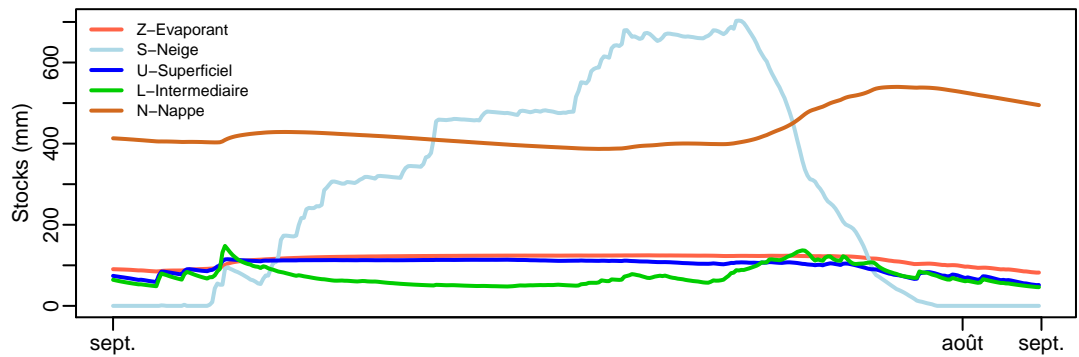

# x0010010 (206.64 km<sup>2</sup>) – année 2001–2002

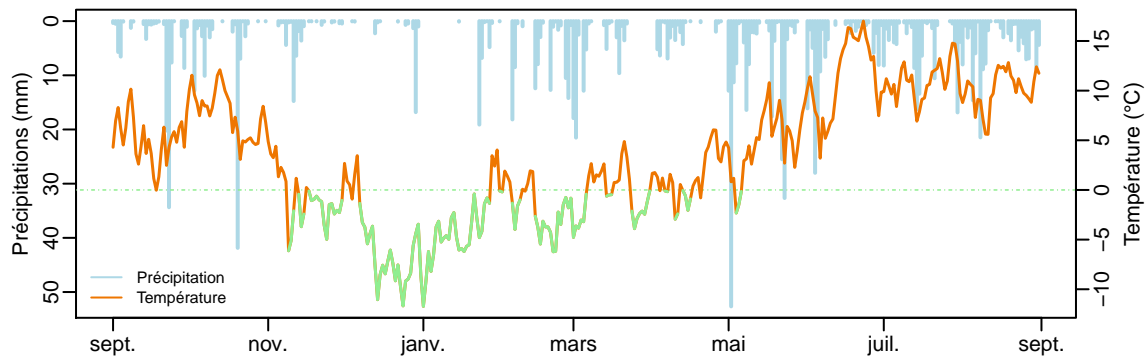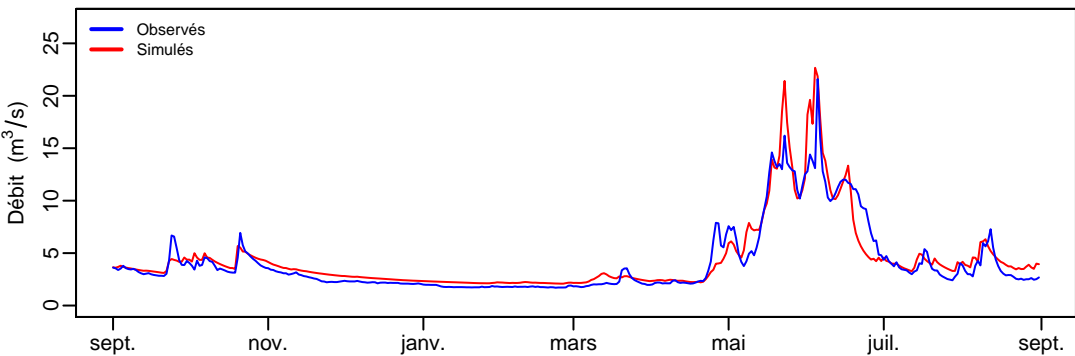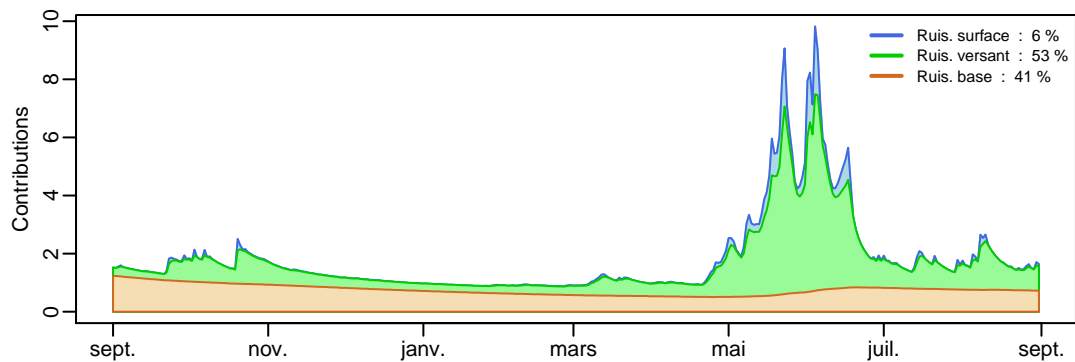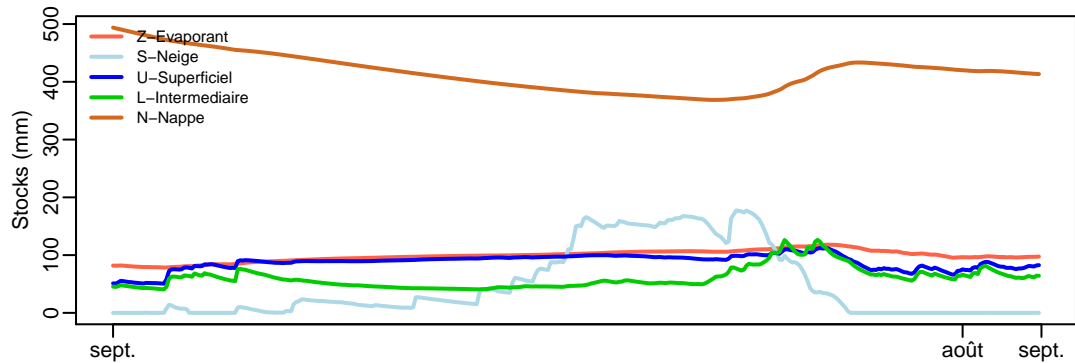

# x0010010 (206.64 km<sup>2</sup>) – année 2002–2003

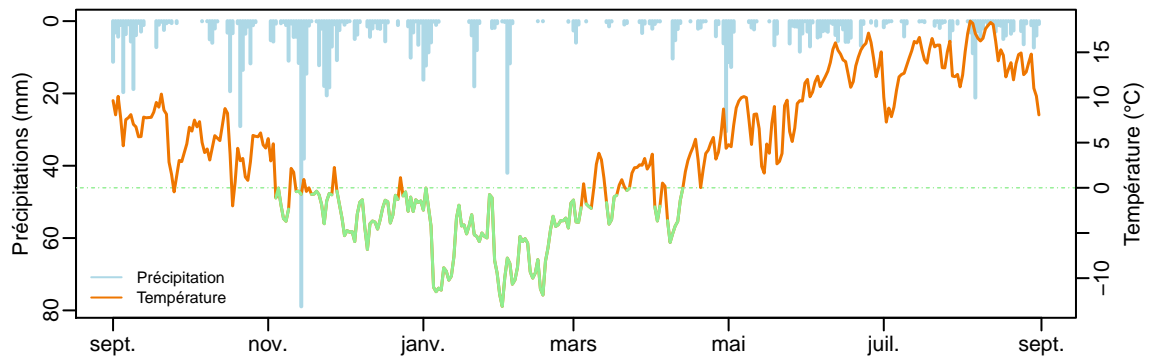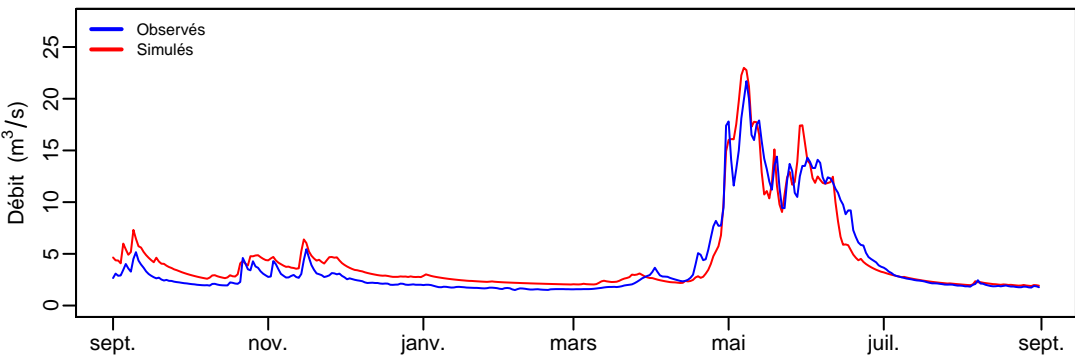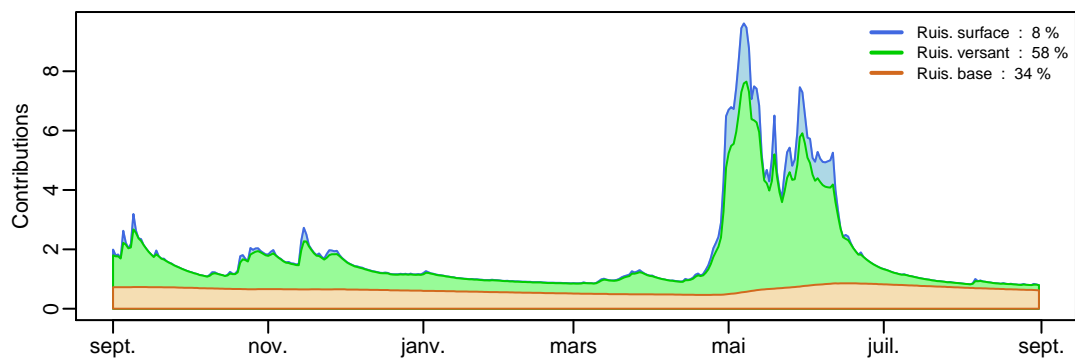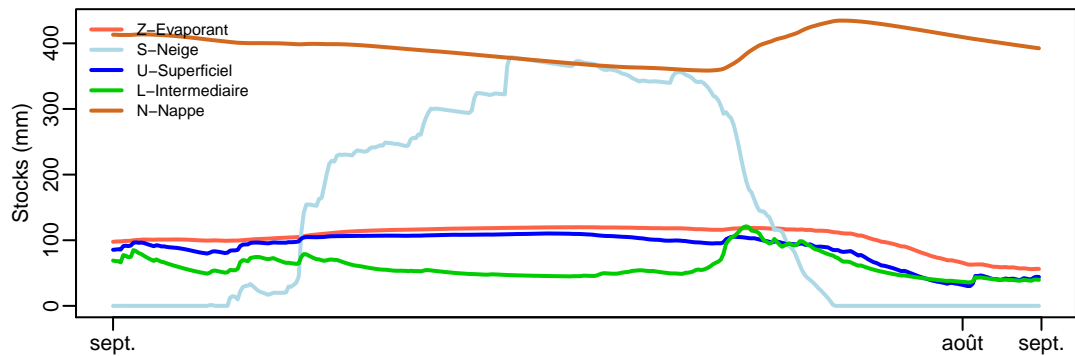

# x0010010 (206.64 km<sup>2</sup>) – année 2003–2004

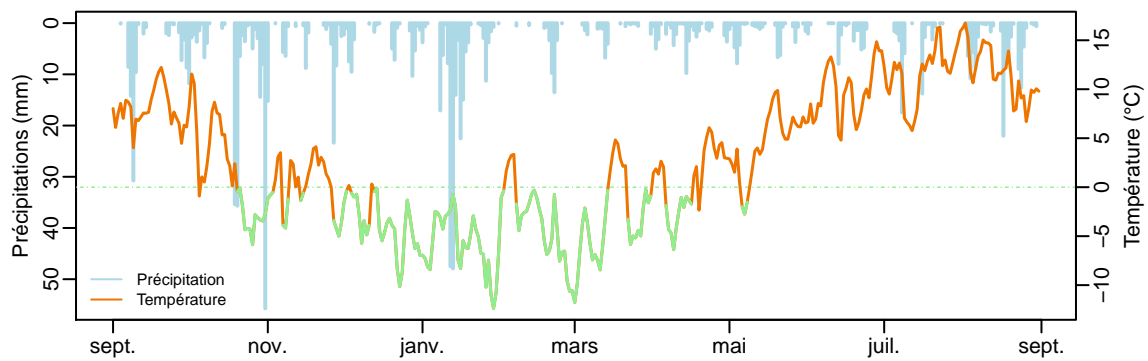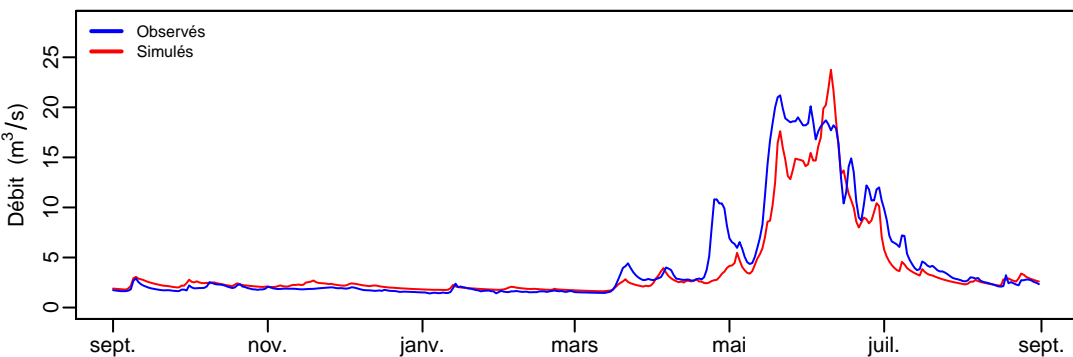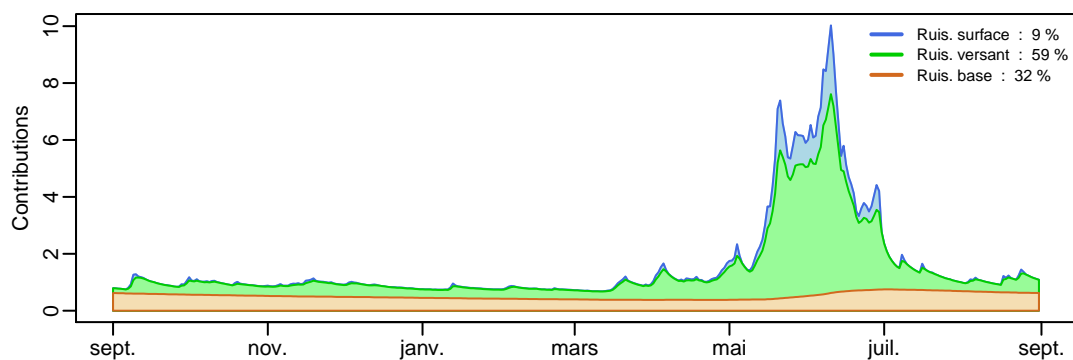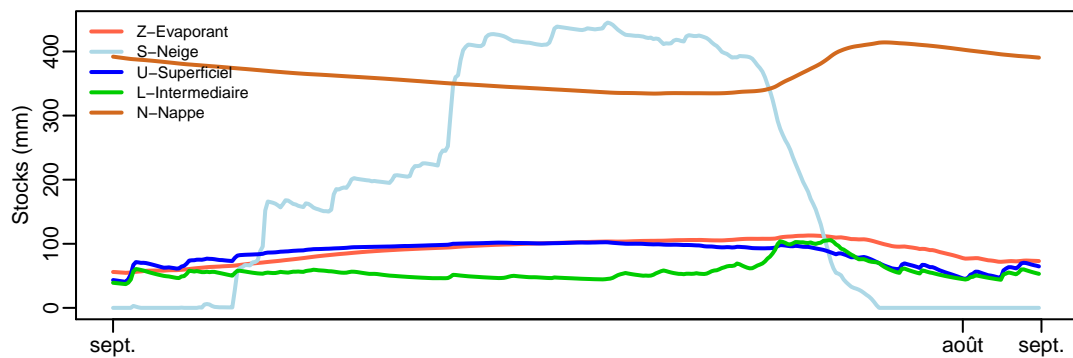

# x0010010 (206.64 km<sup>2</sup>) – année 2004–2005

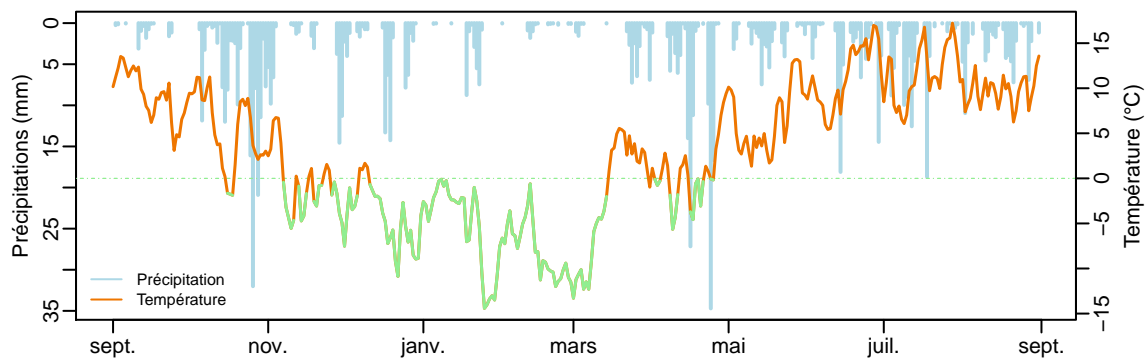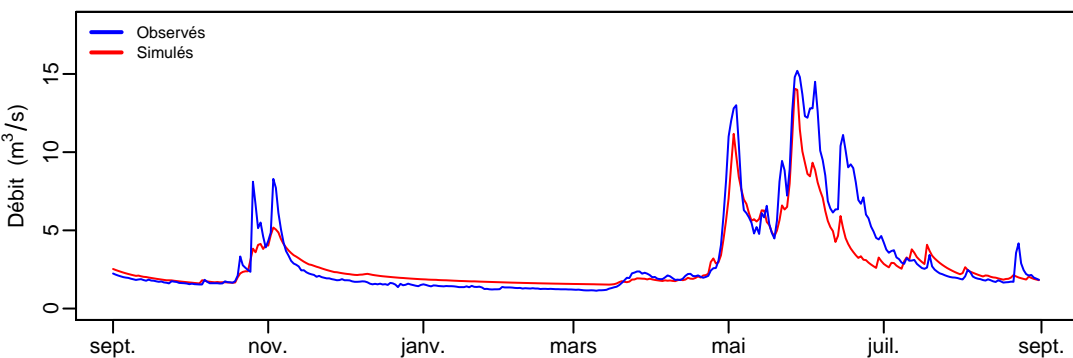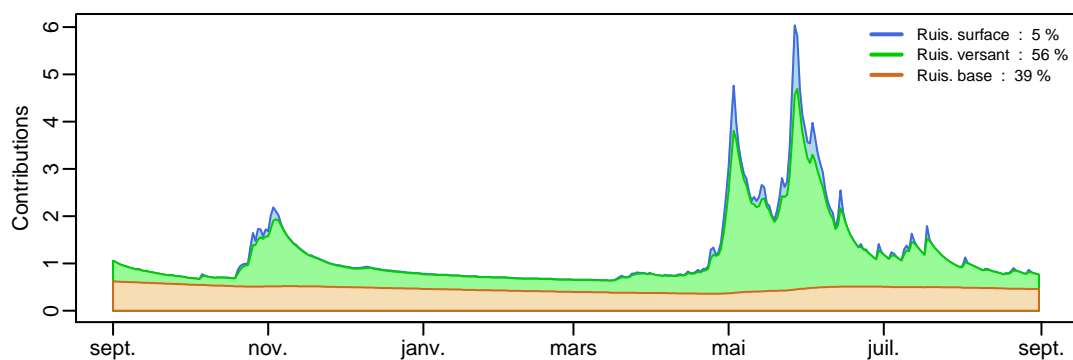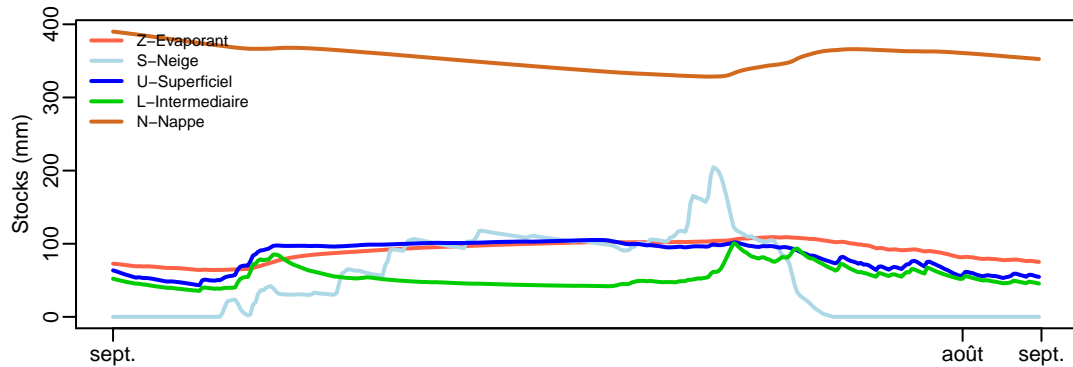

# x0010010 (206.64 km<sup>2</sup>) – année 2005–2006

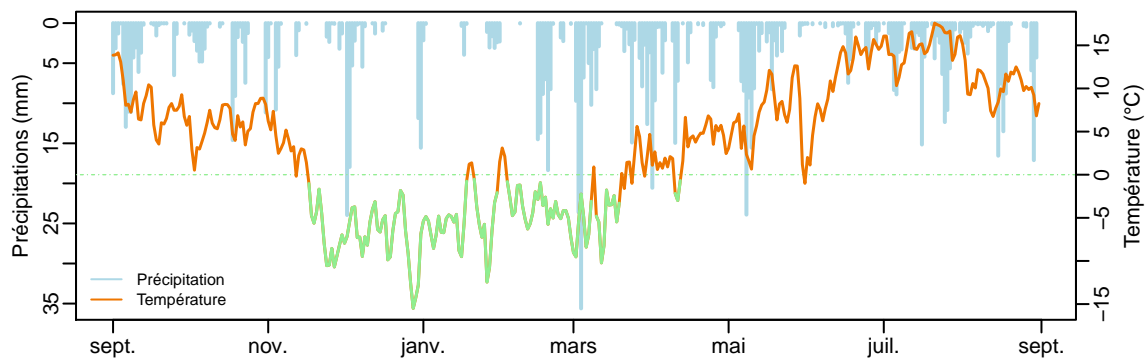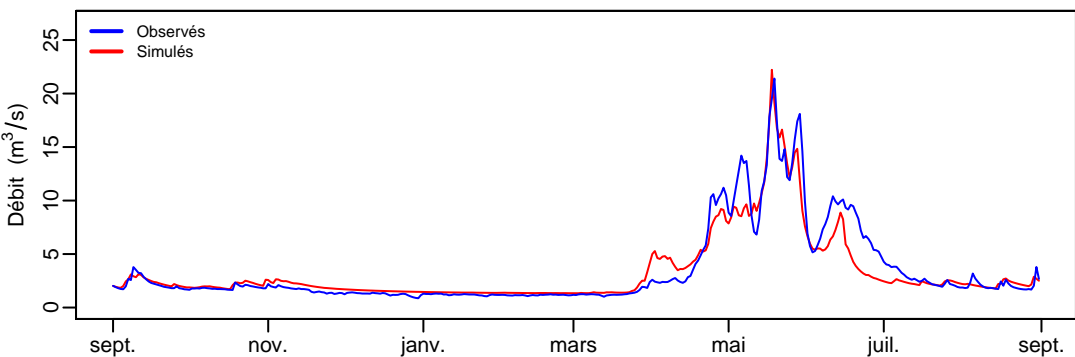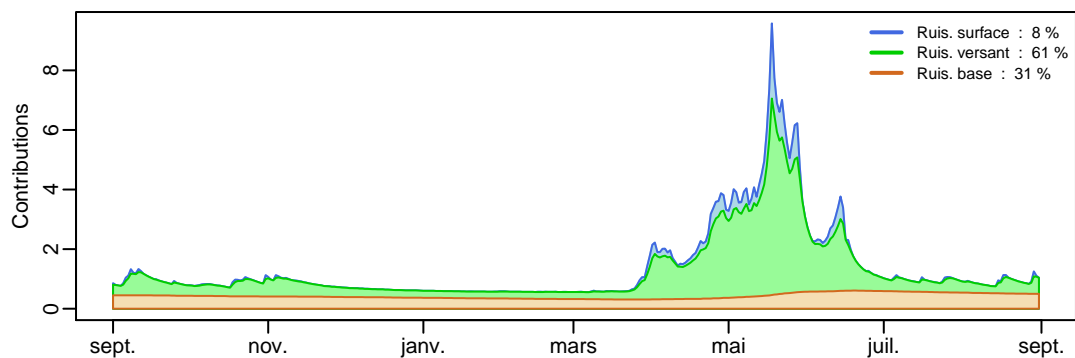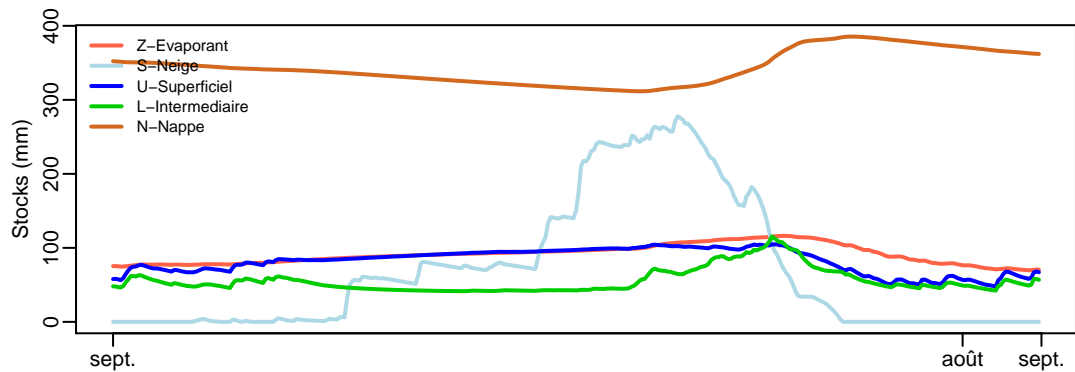



# x0010010 (206.64 km<sup>2</sup>) – année 2006–2007

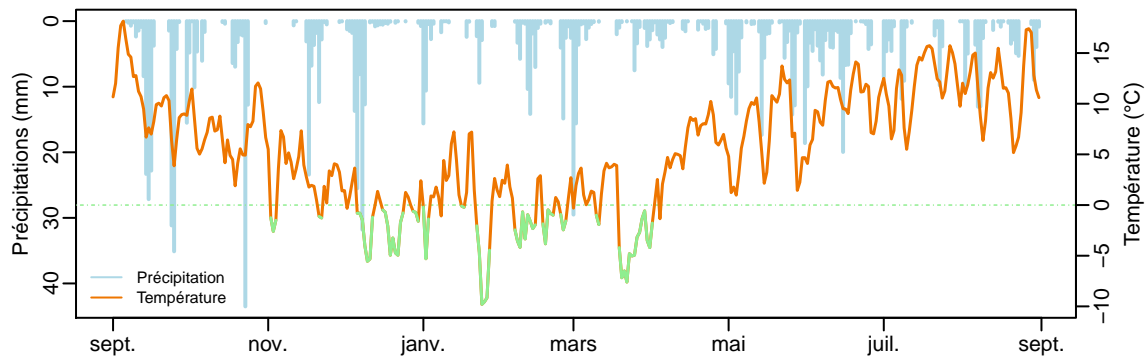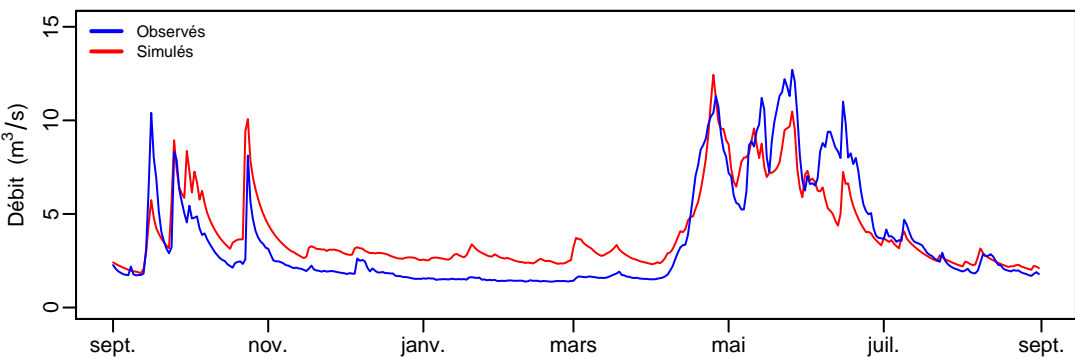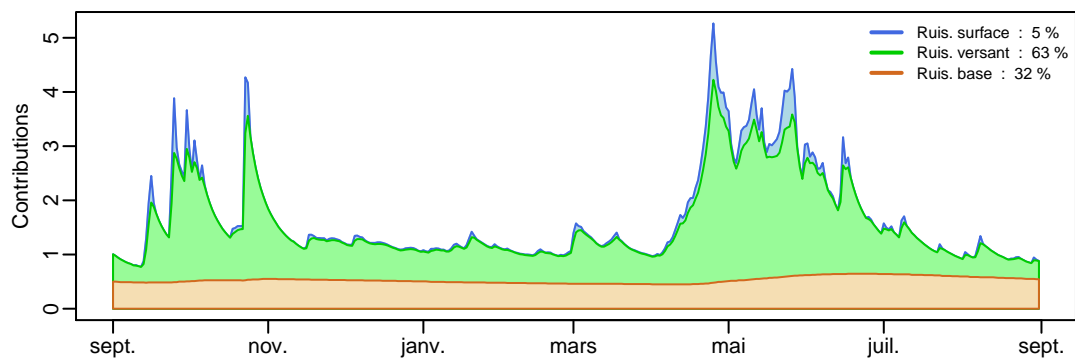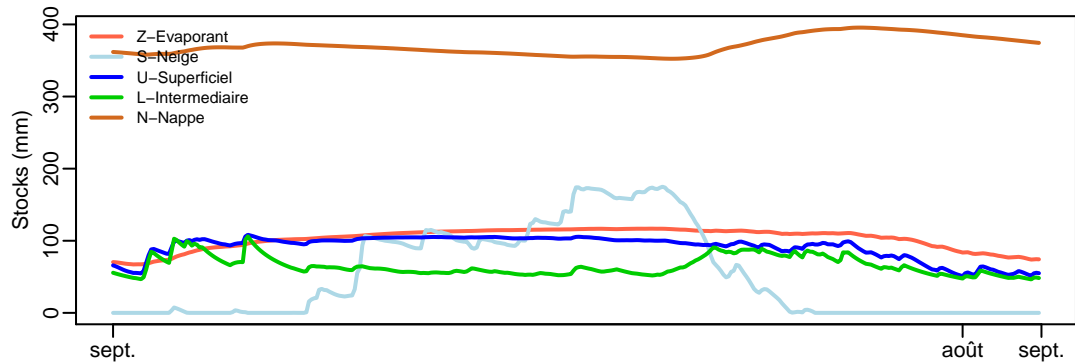

# x0010010 (206.64 km<sup>2</sup>) – année 2007–2008

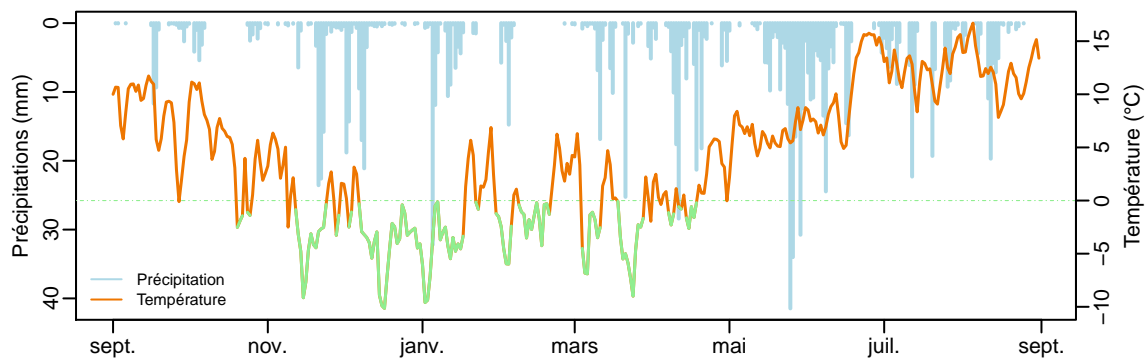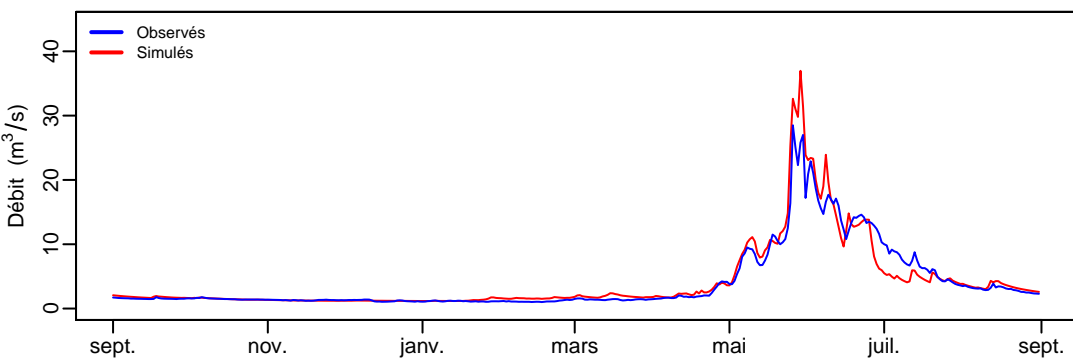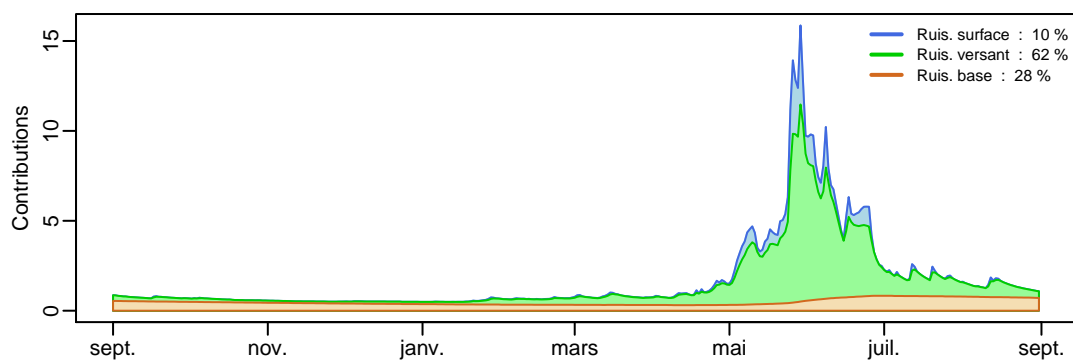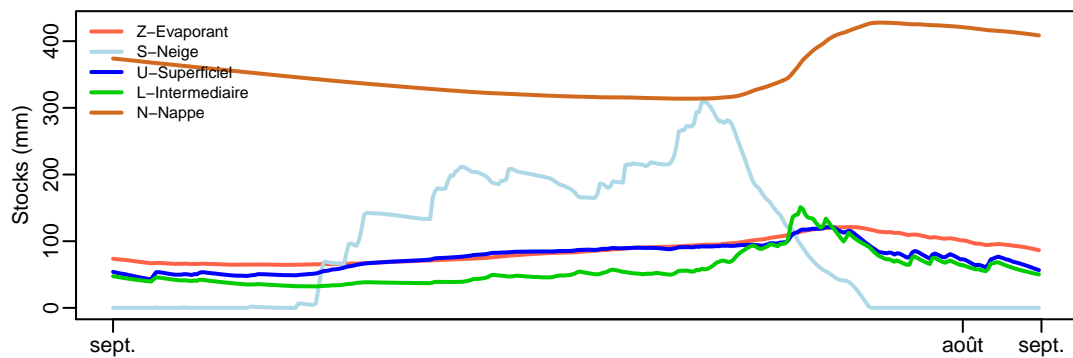

# x0010010 (206.64 km<sup>2</sup>) – année 2008–2009

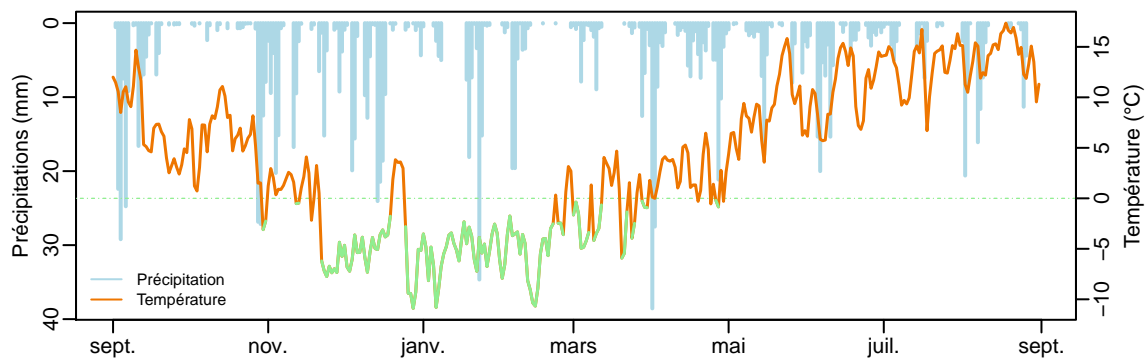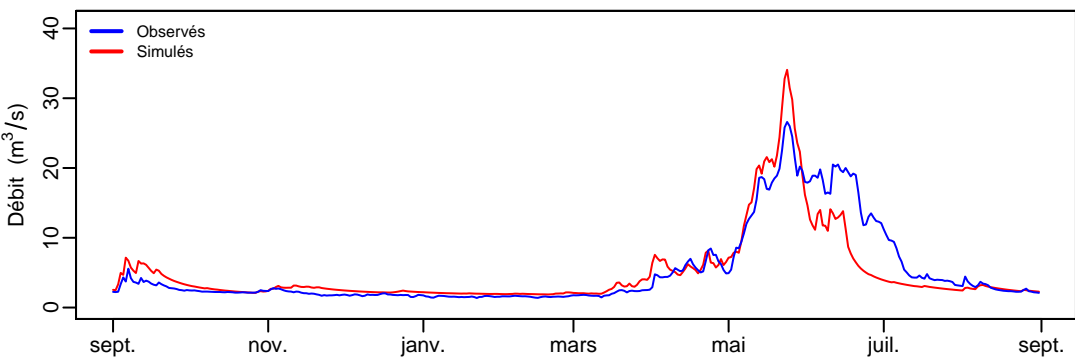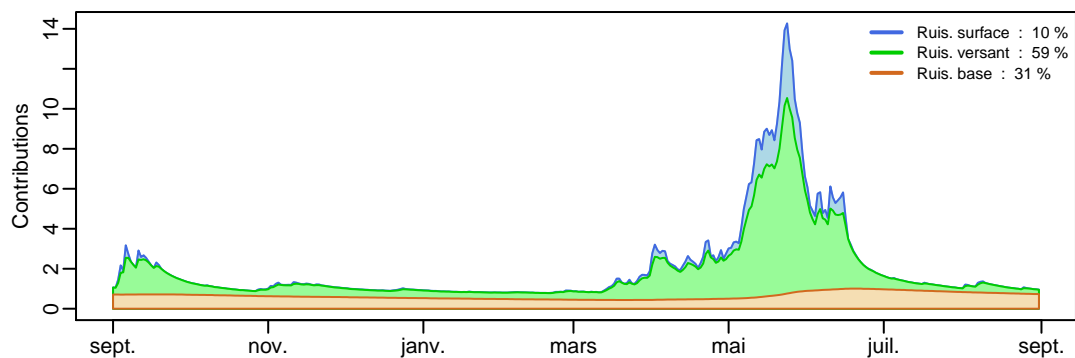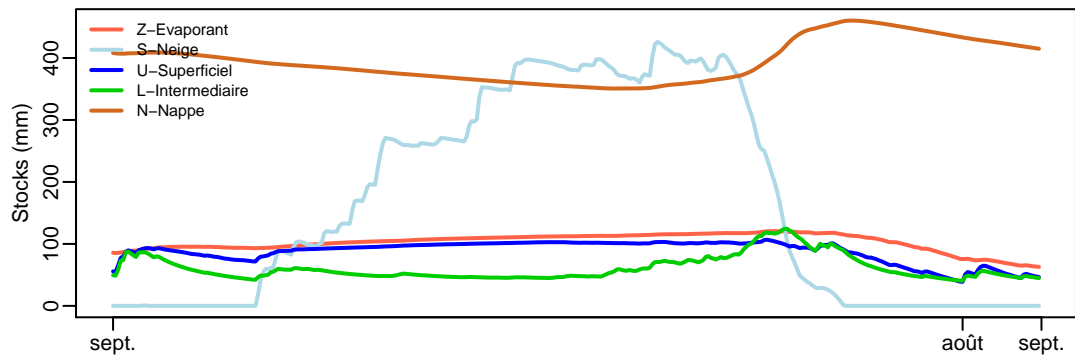

# x0010010 (206.64 km<sup>2</sup>) – année 2009–2010

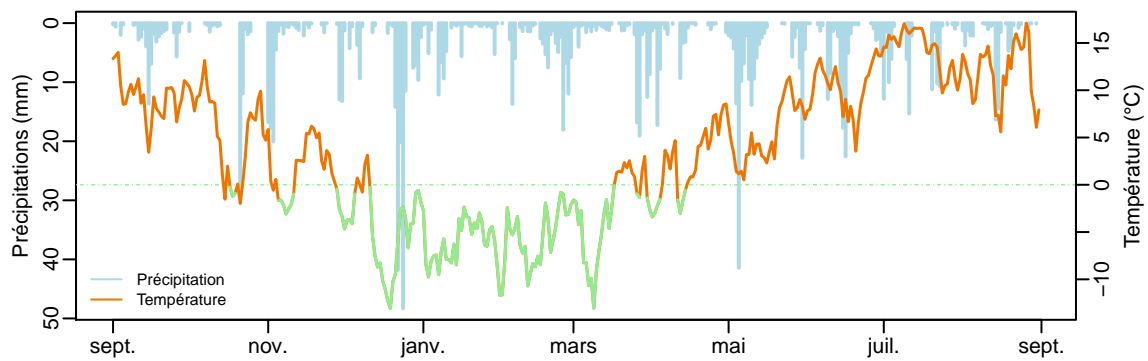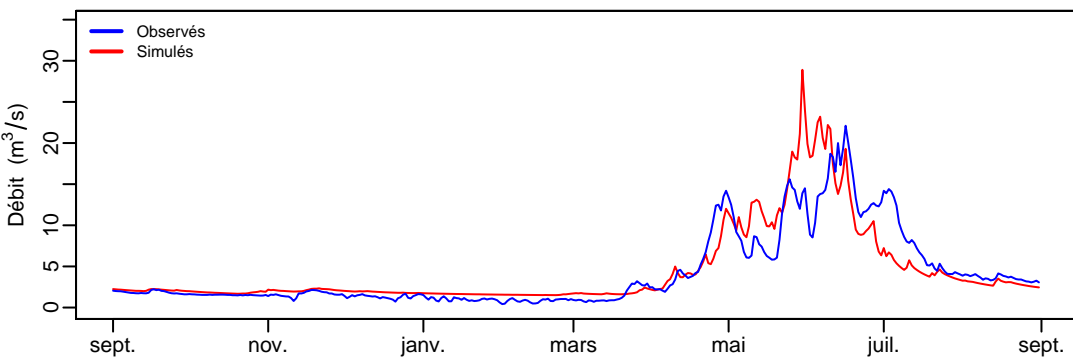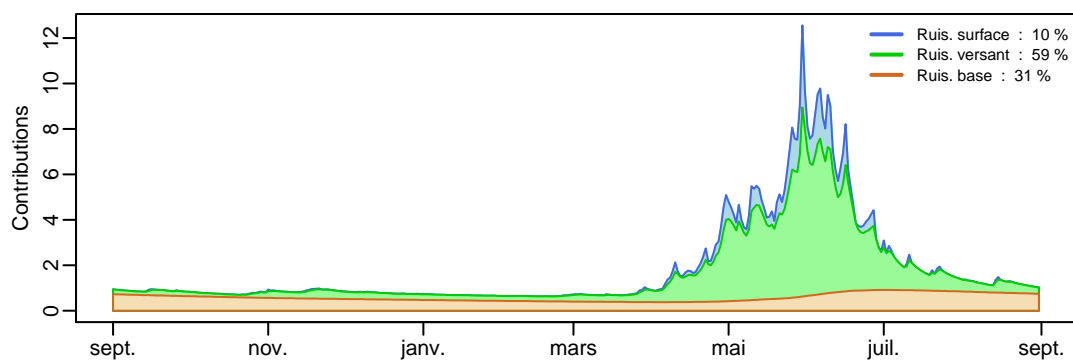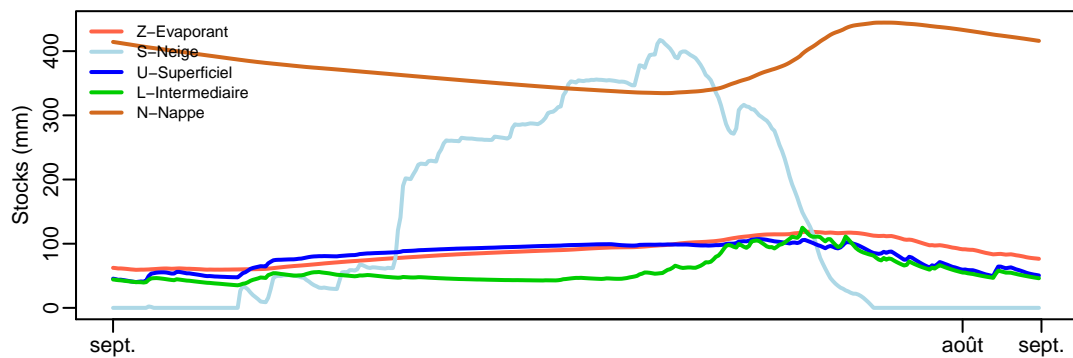

# x0010010 (206.64 km<sup>2</sup>) – année 2010–2011

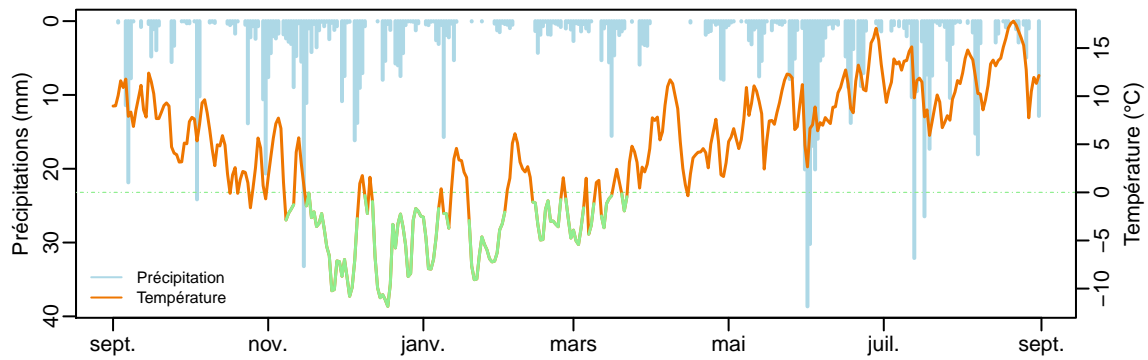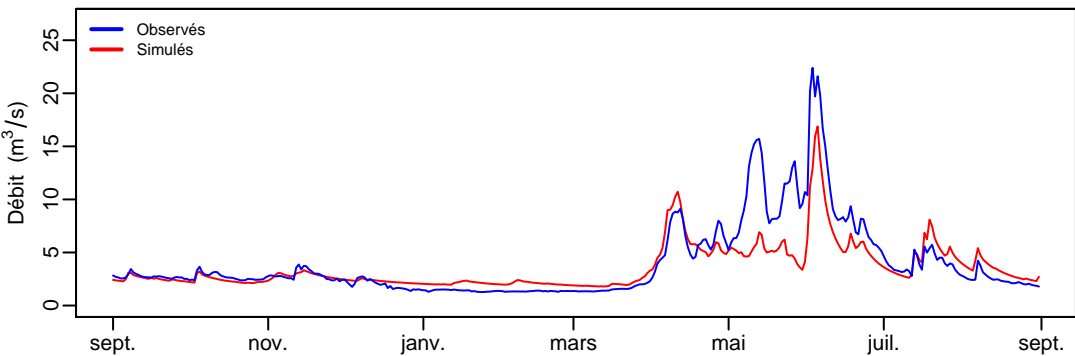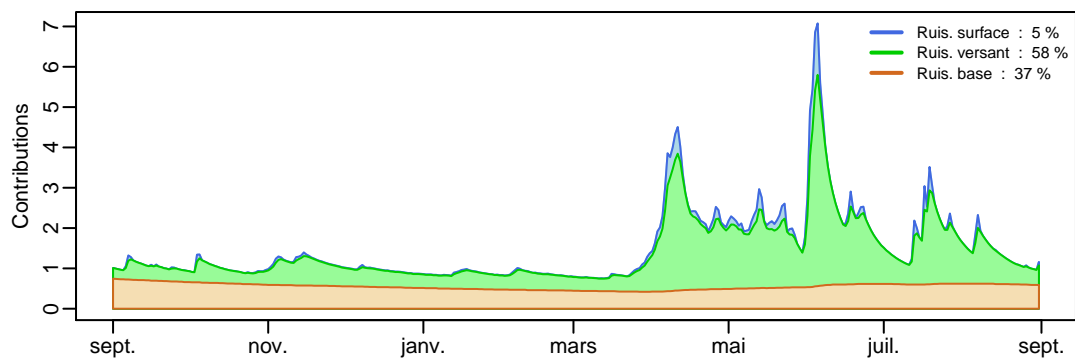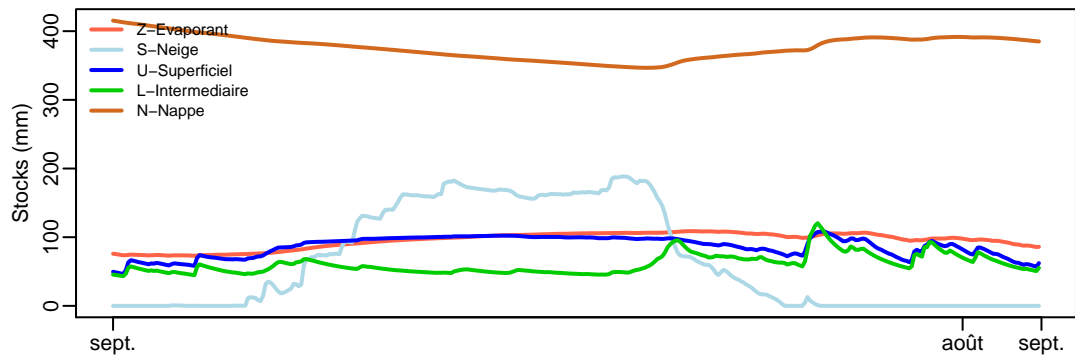

# x0010010 (206.64 km<sup>2</sup>) – année 2011–2012

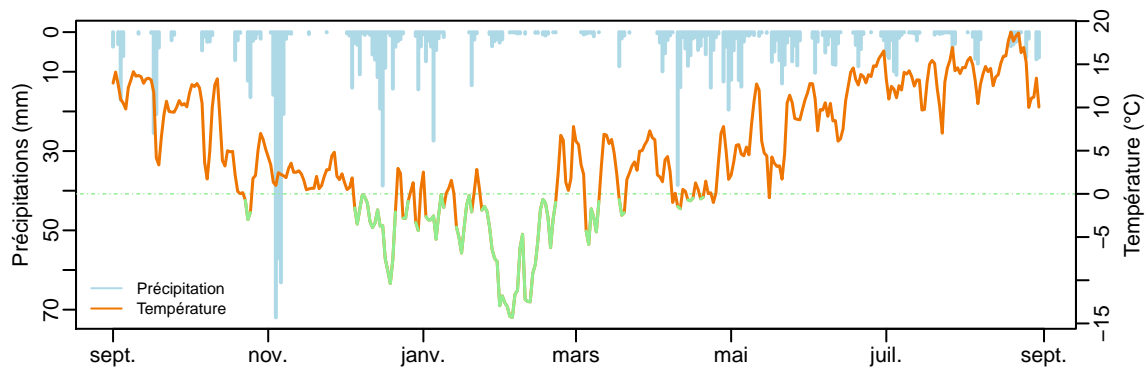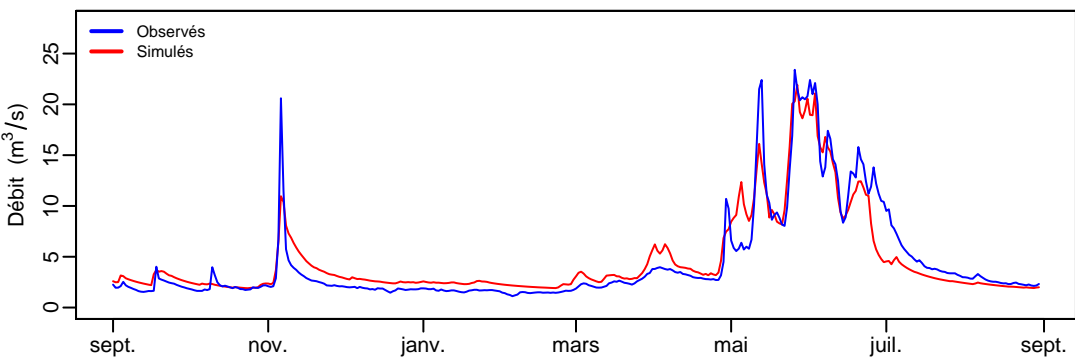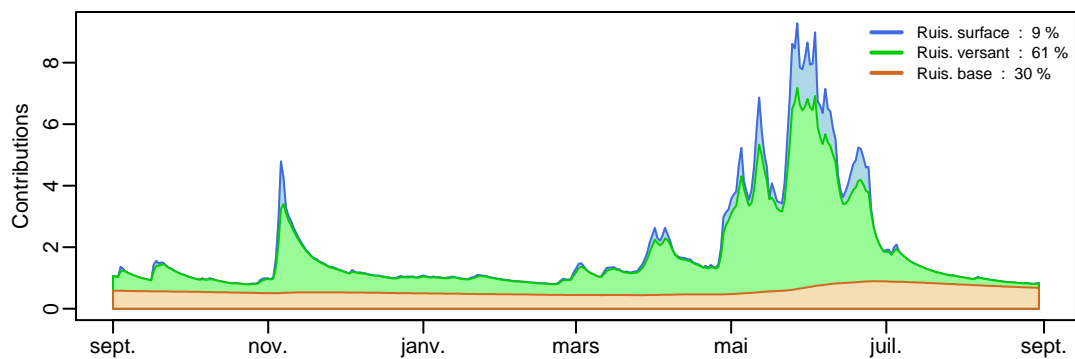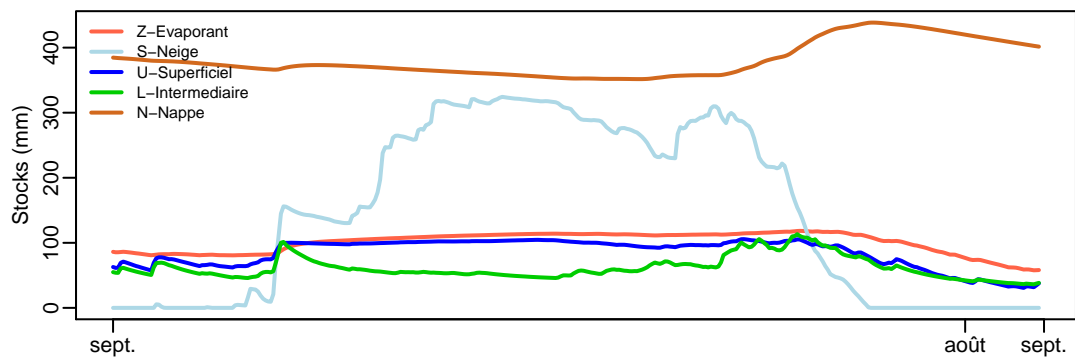

# x0130010 (963.24 km<sup>2</sup>) – année 1981–1982

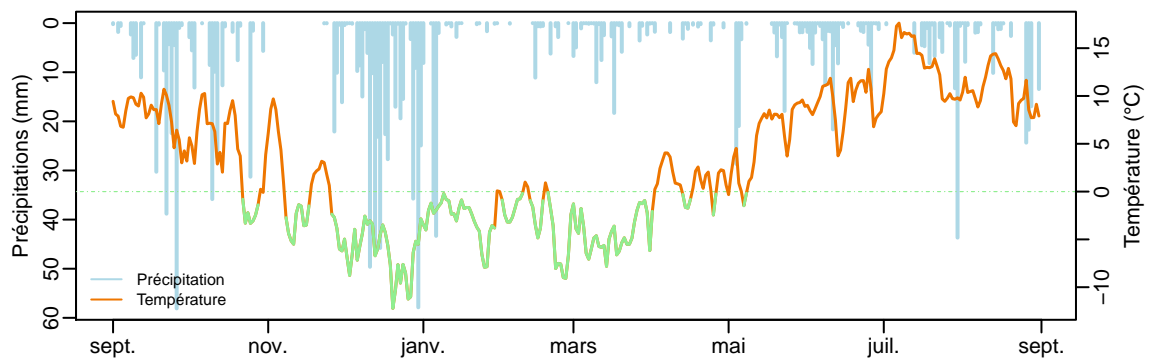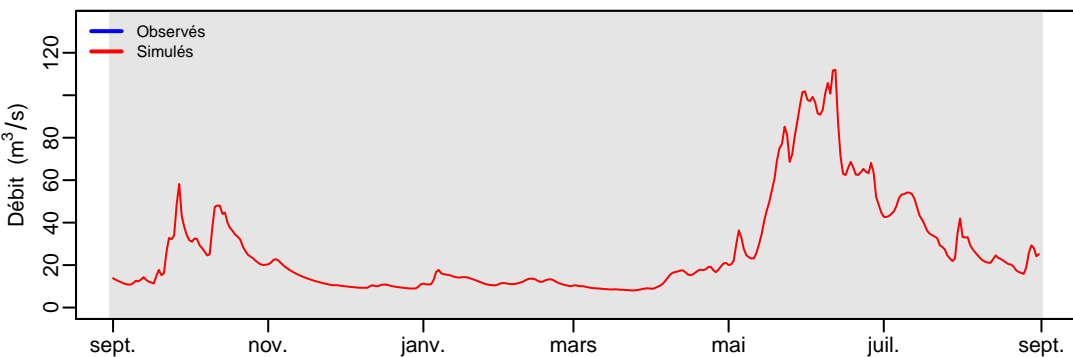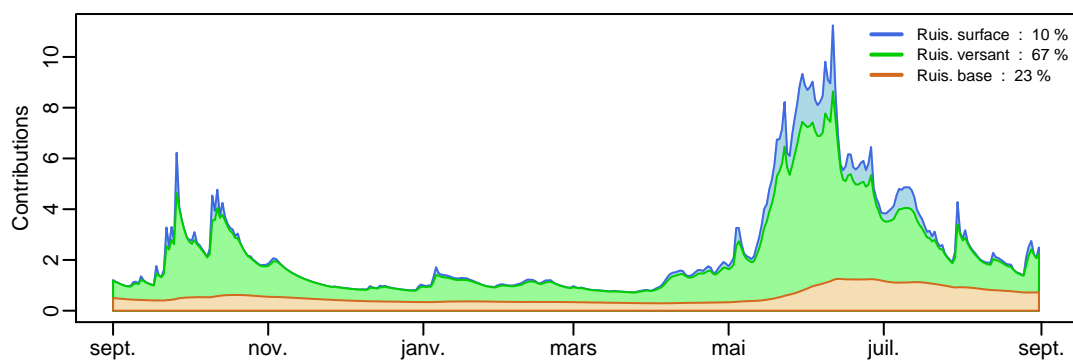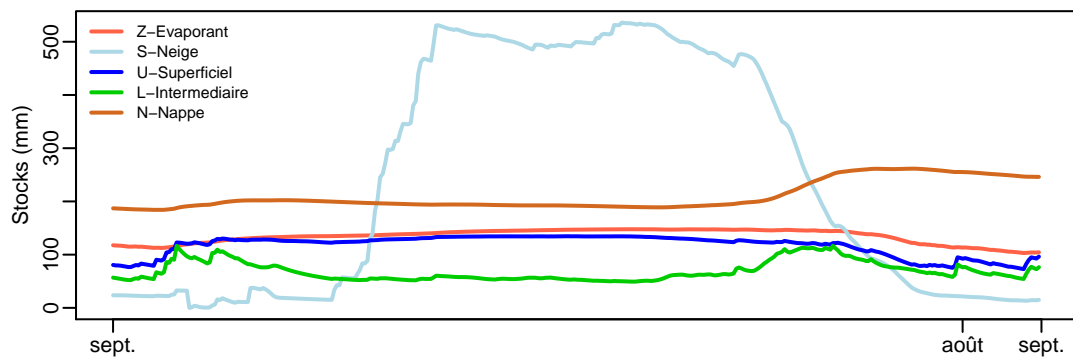

# x0130010 (963.24 km<sup>2</sup>) – année 1982–1983

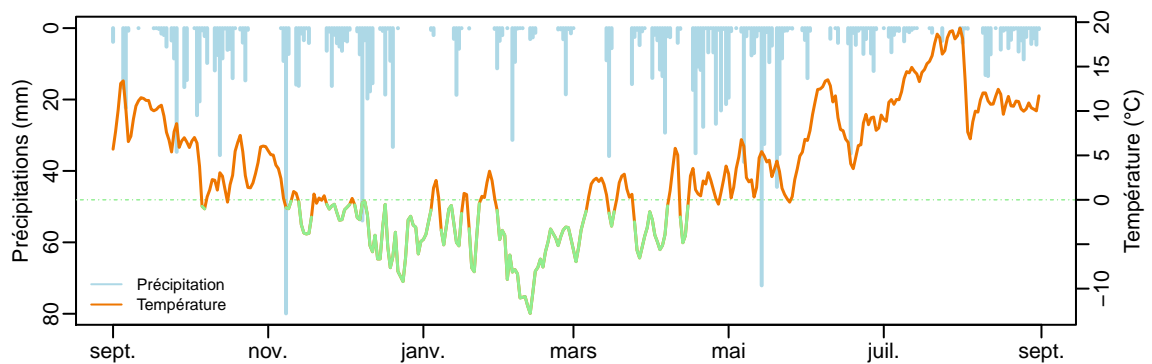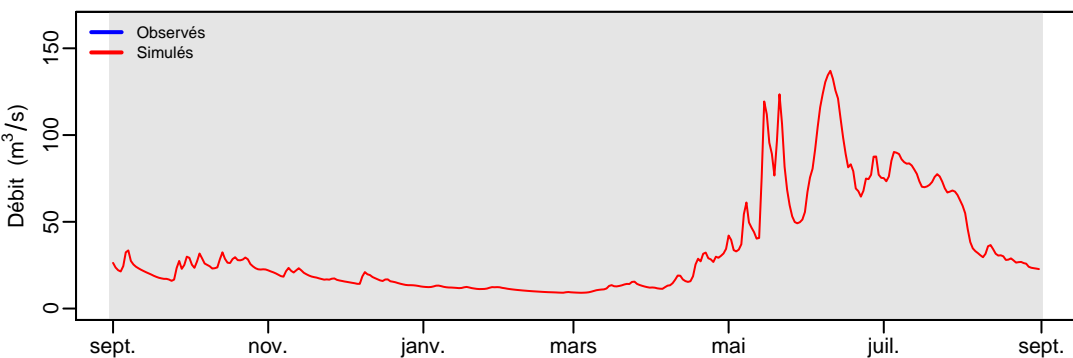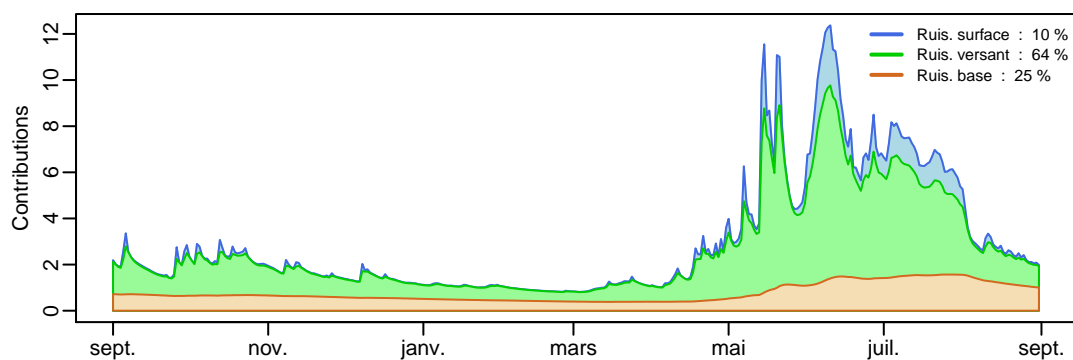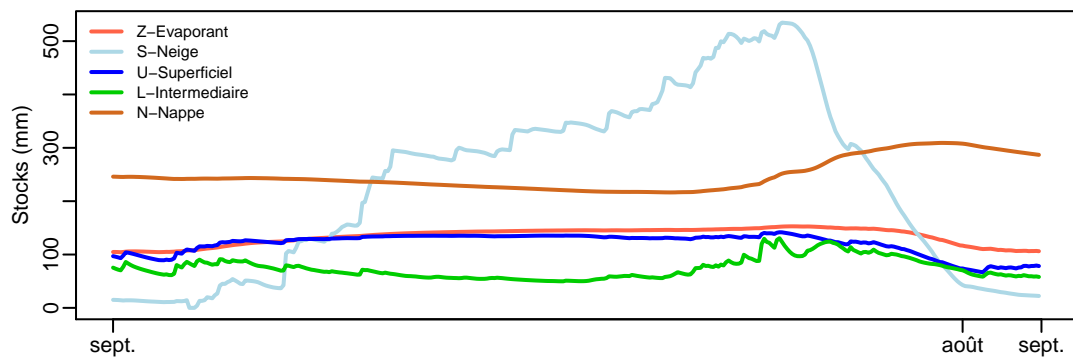



# x0130010 (963.24 km<sup>2</sup>) – année 1983–1984

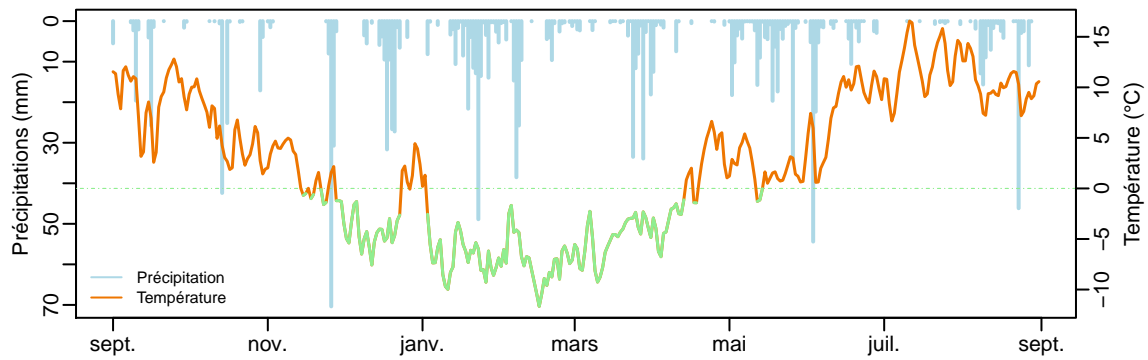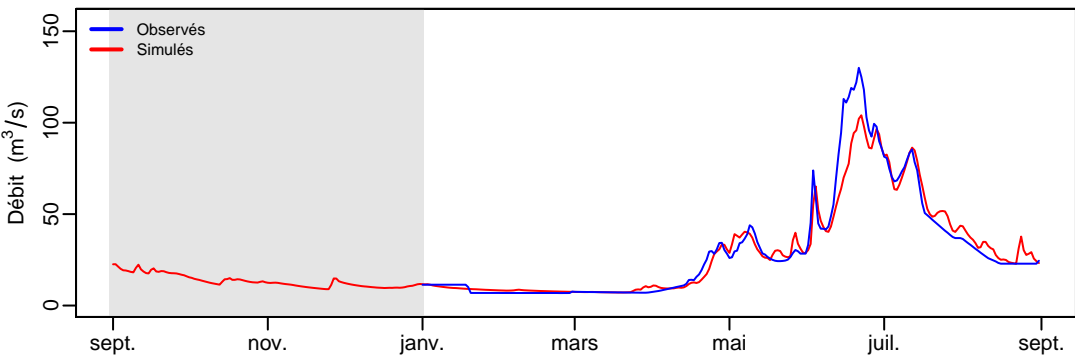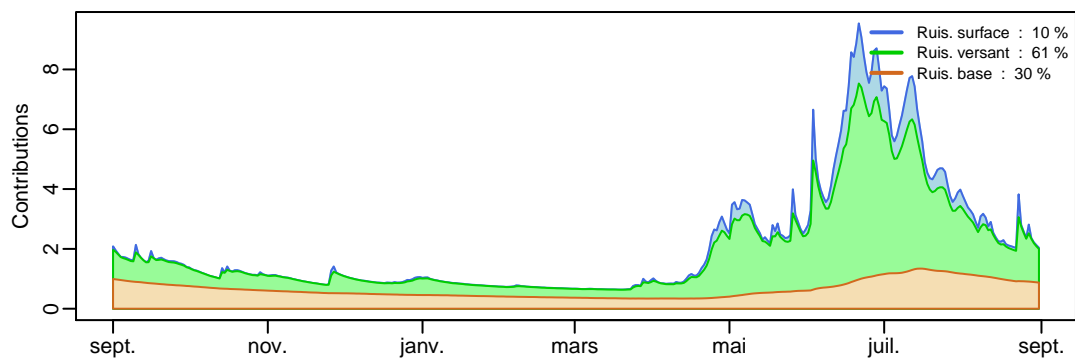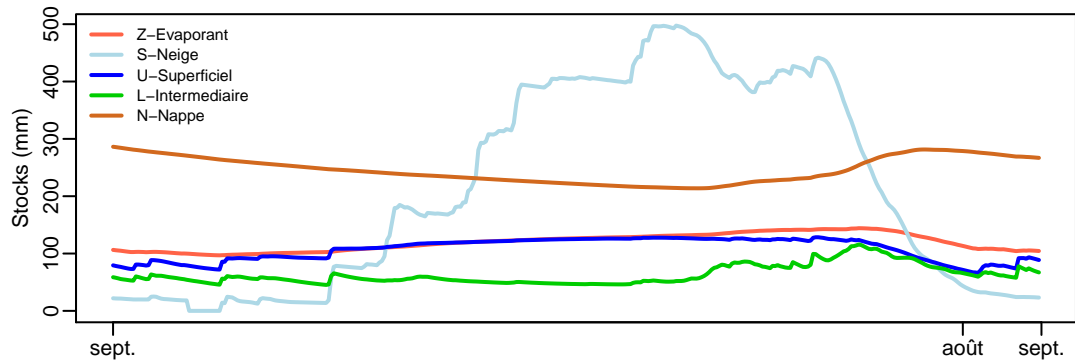

# x0130010 (963.24 km<sup>2</sup>) – année 1984–1985

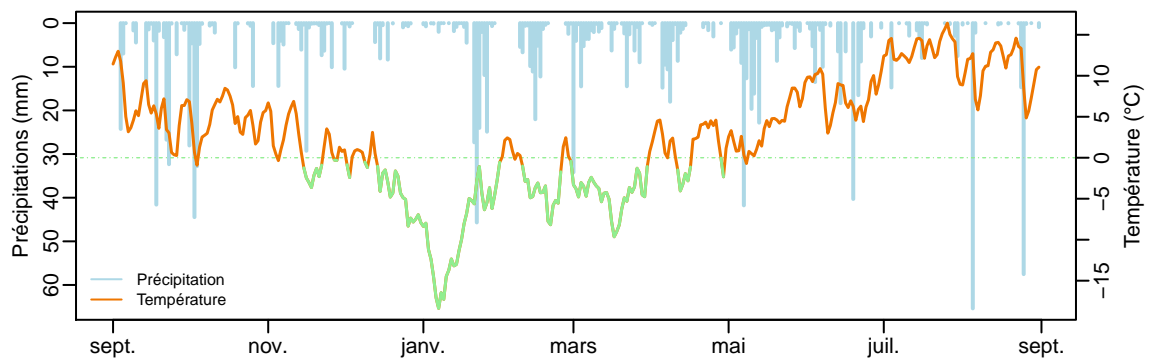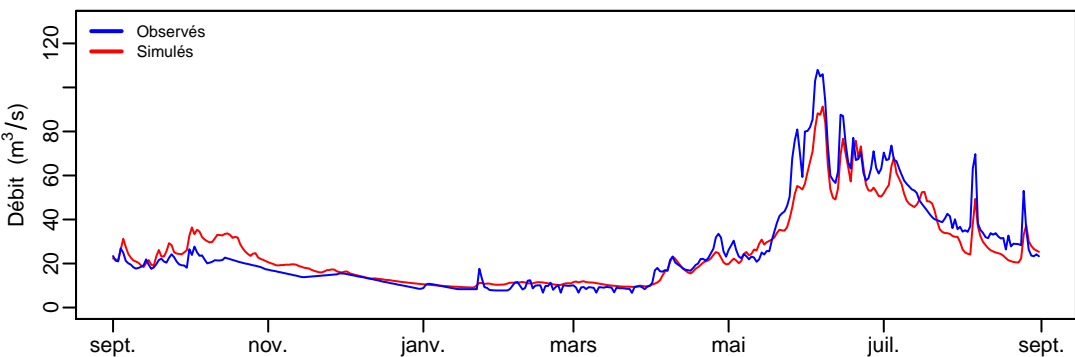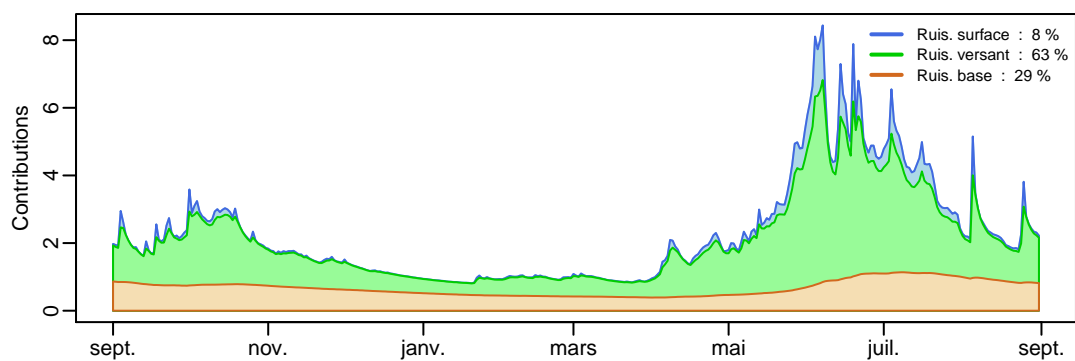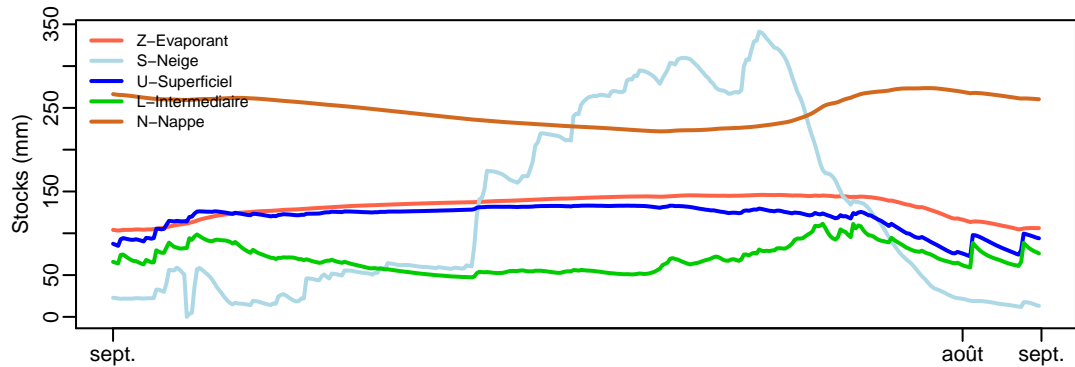

# x0130010 (963.24 km<sup>2</sup>) – année 1985–1986

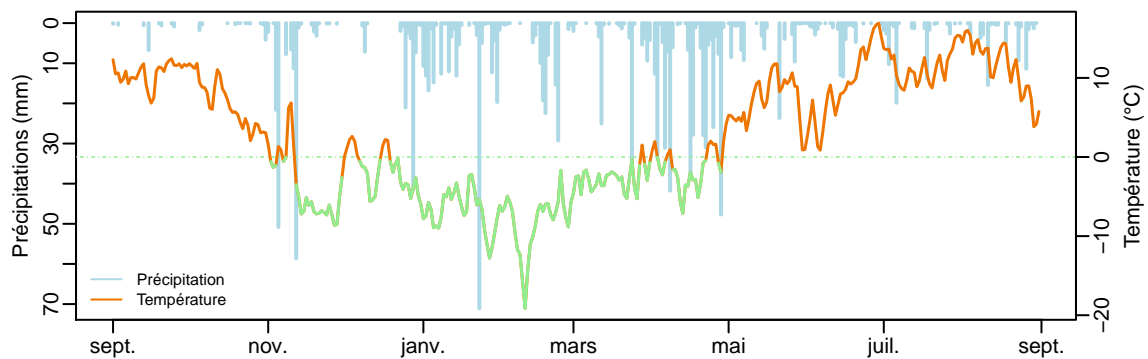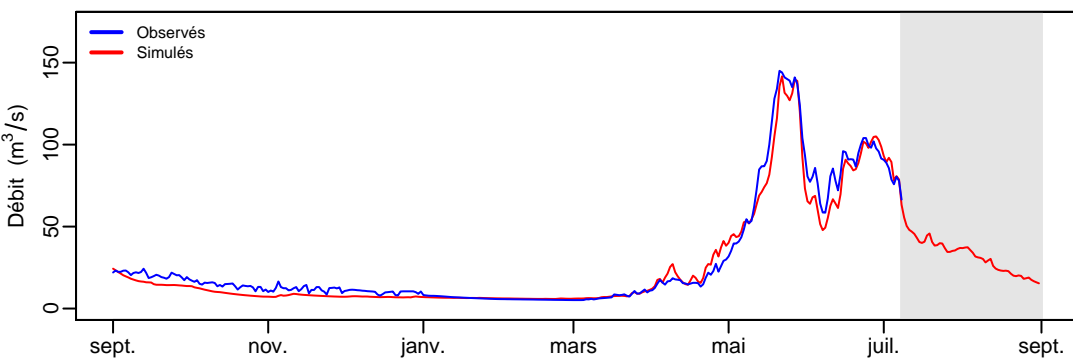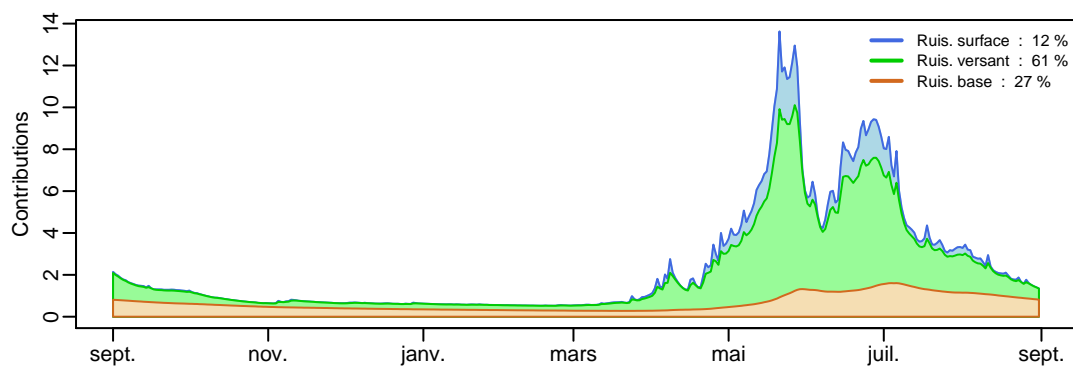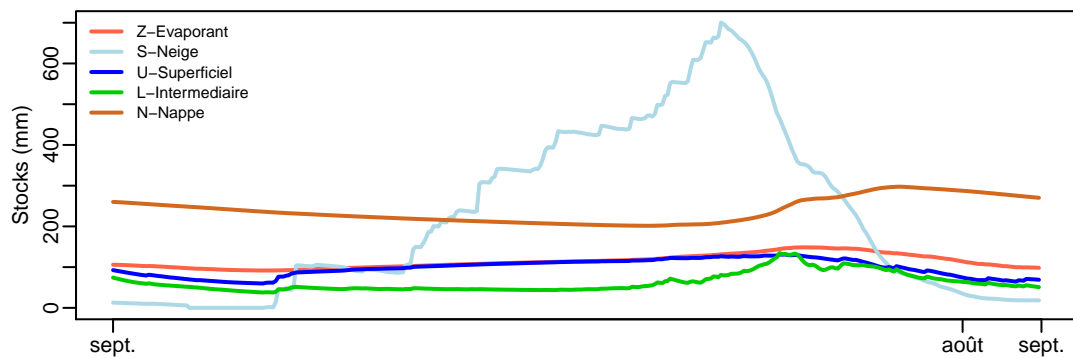

# x0130010 (963.24 km<sup>2</sup>) – année 1986–1987

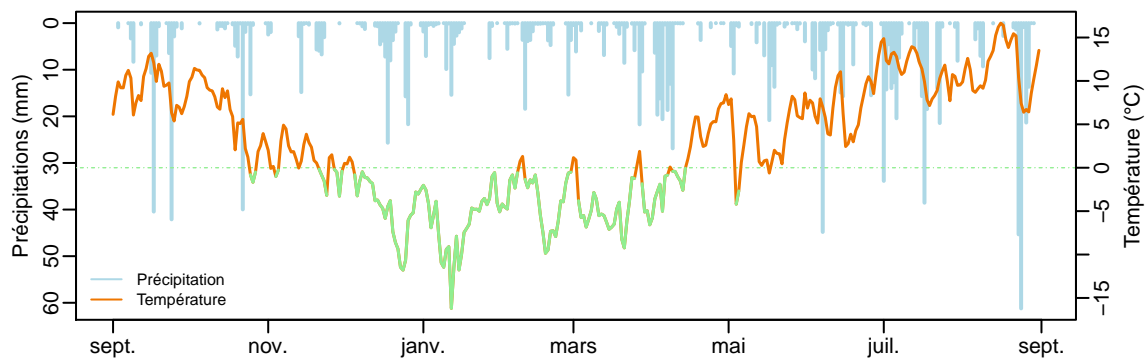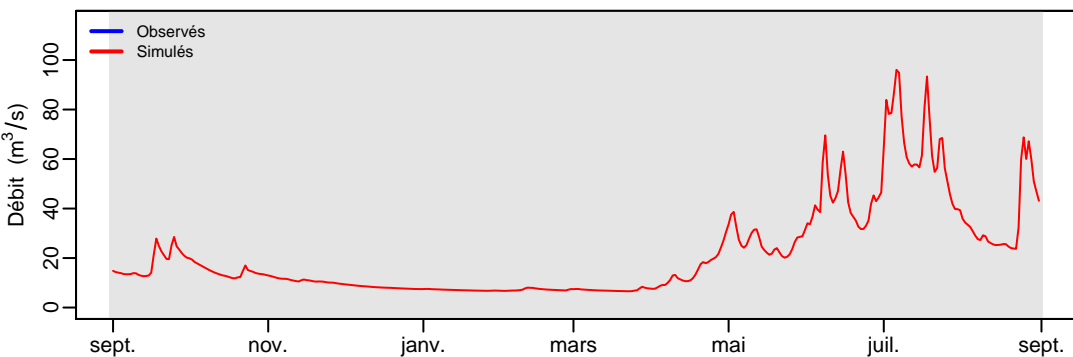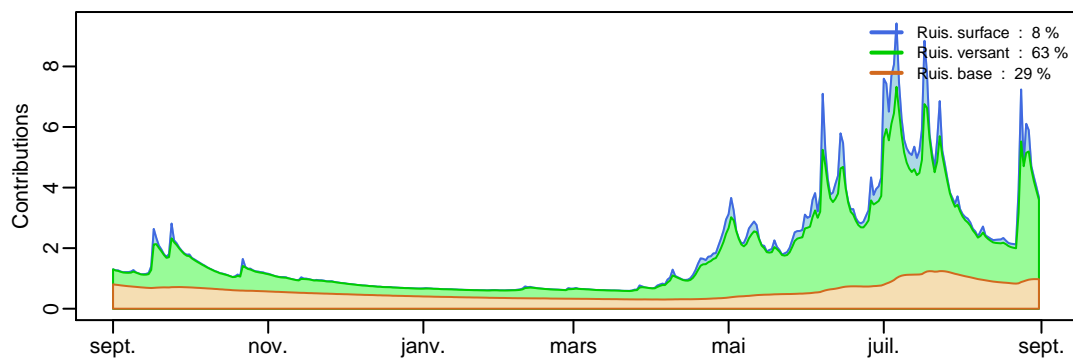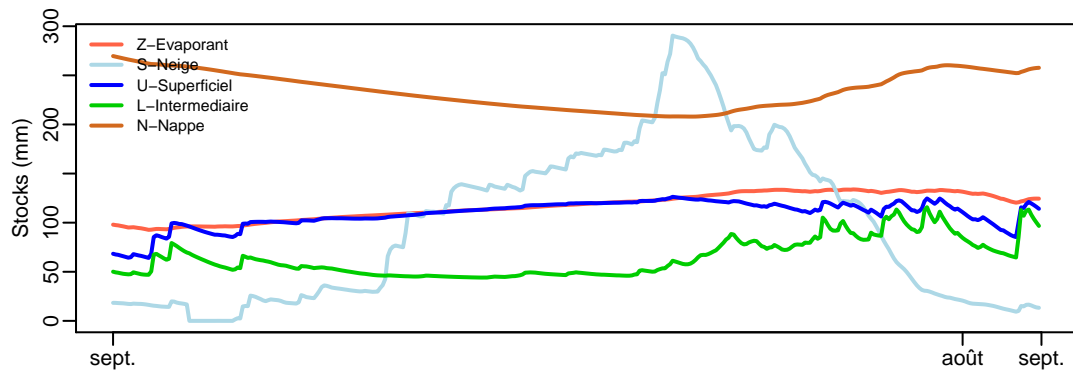

# x0130010 (963.24 km<sup>2</sup>) – année 1987–1988

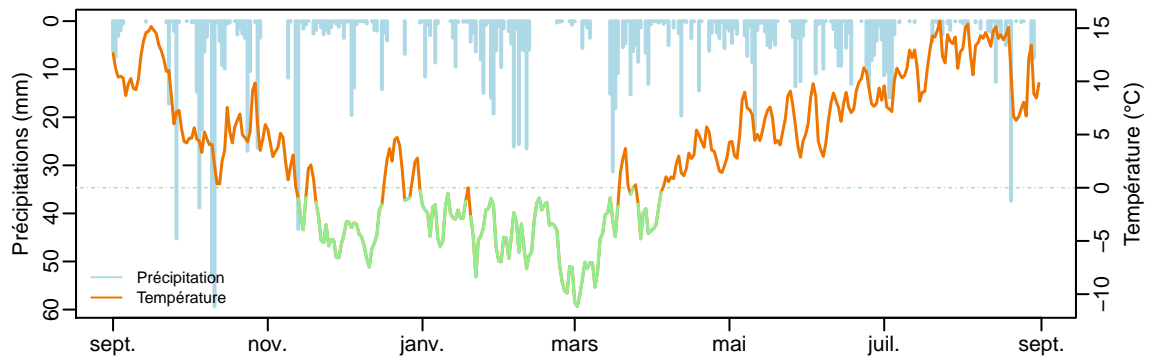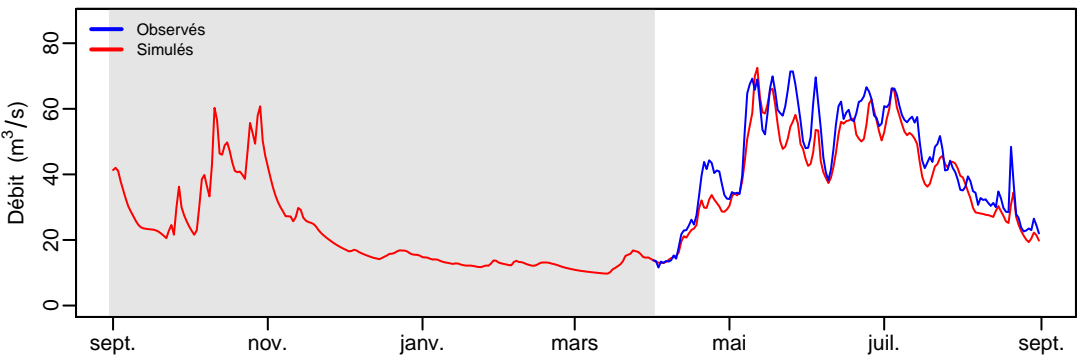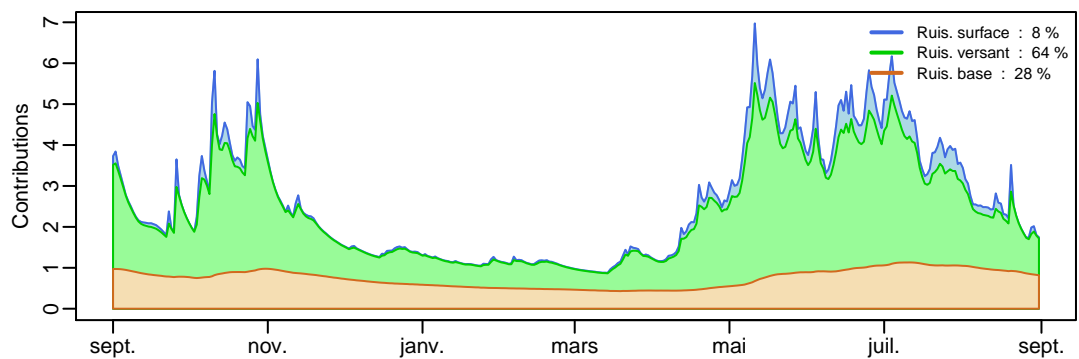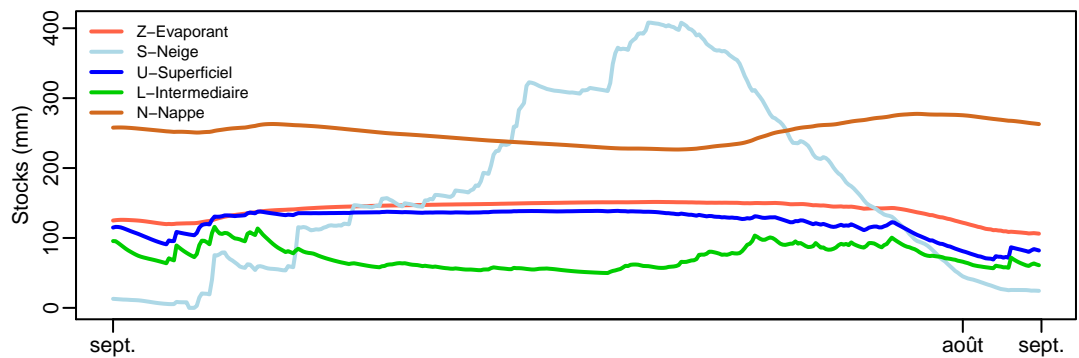

# x0130010 (963.24 km<sup>2</sup>) – année 1988–1989

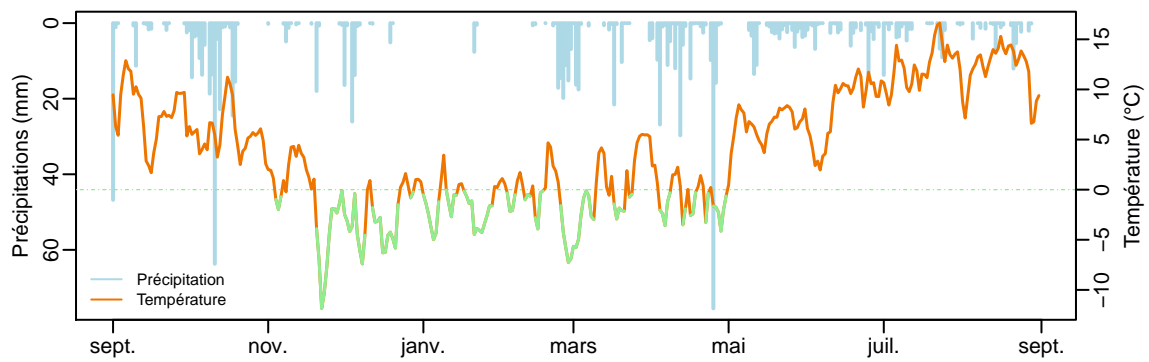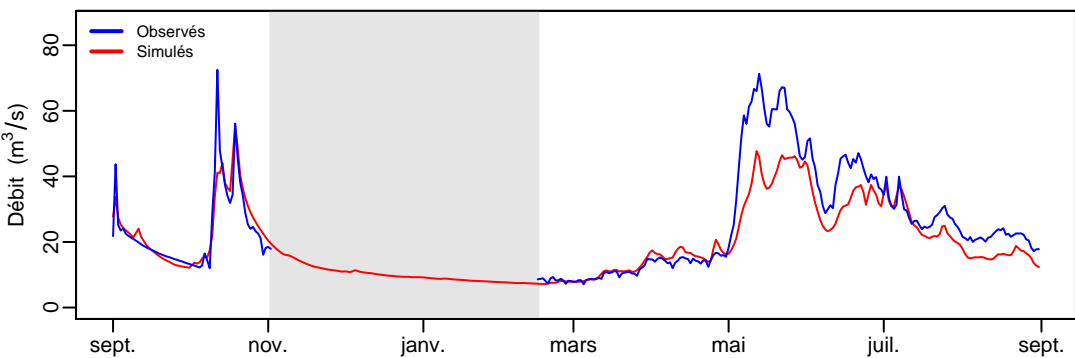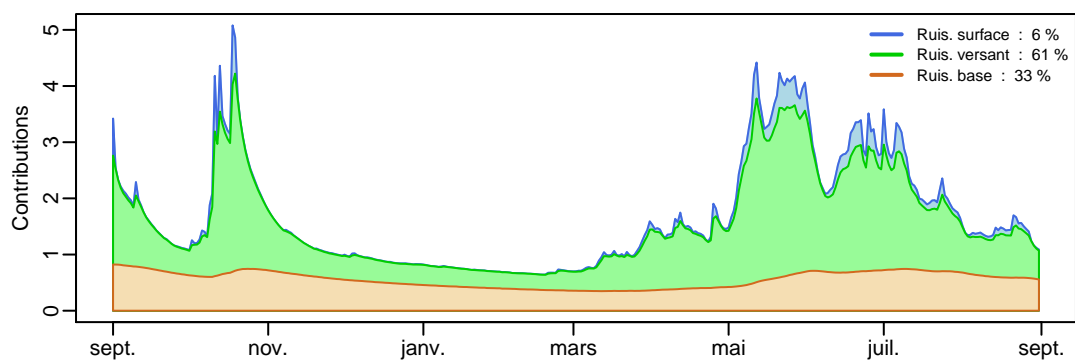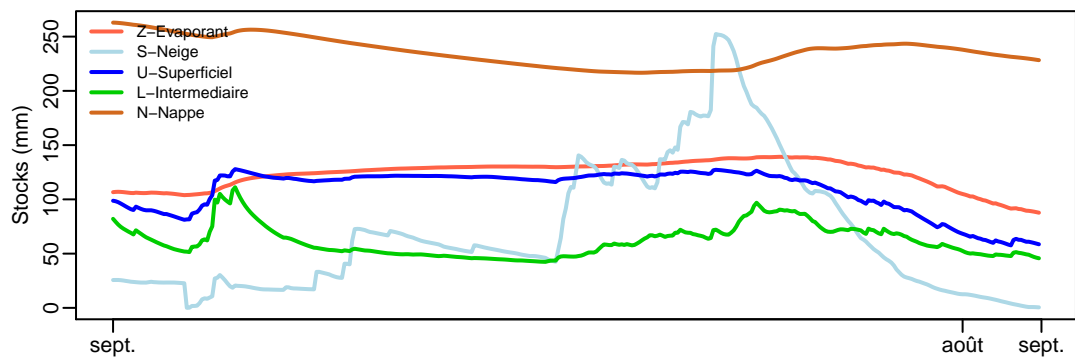

# x0130010 (963.24 km<sup>2</sup>) – année 1989–1990

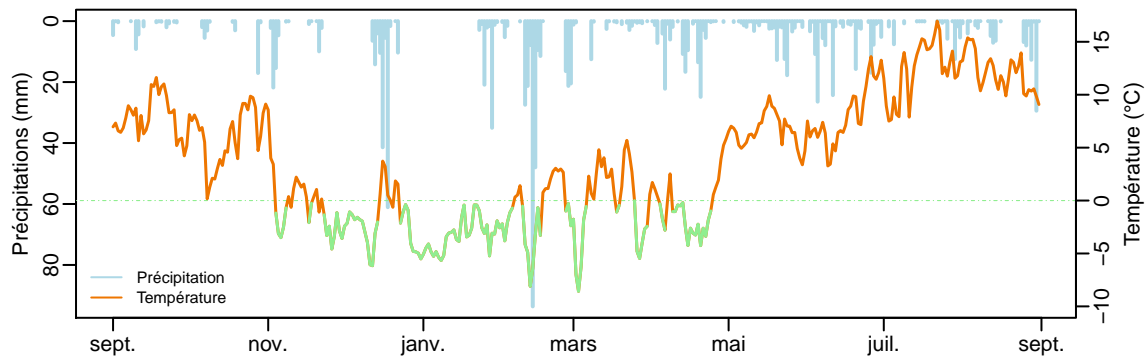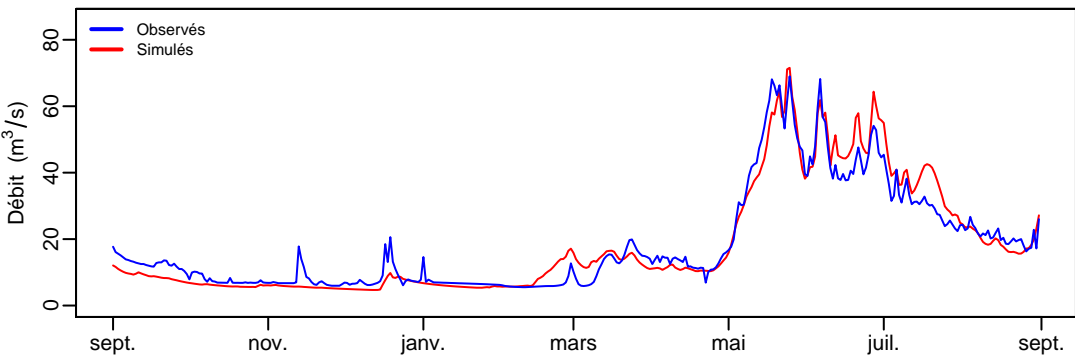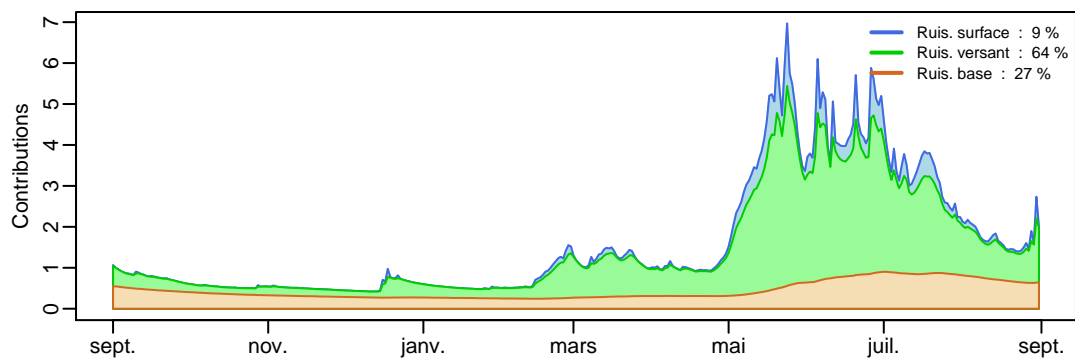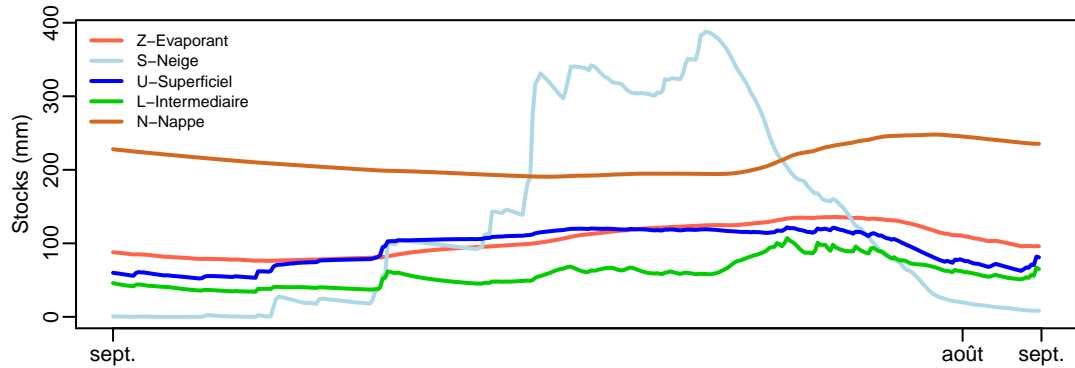

# x0130010 (963.24 km<sup>2</sup>) – année 1990–1991

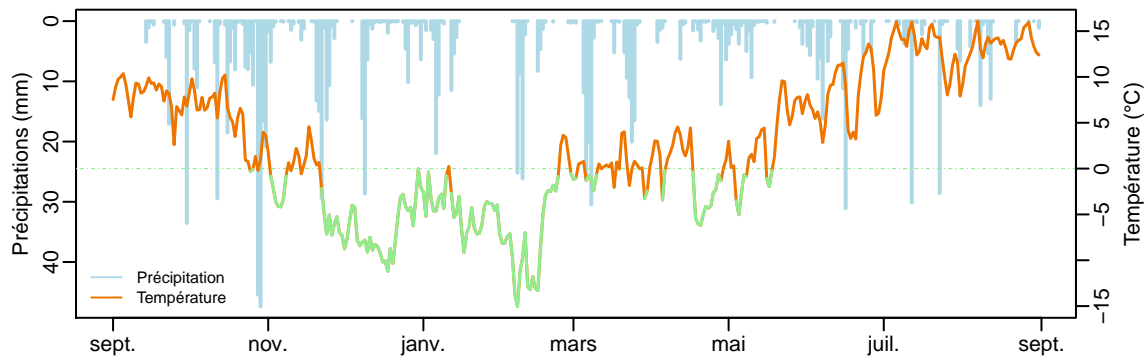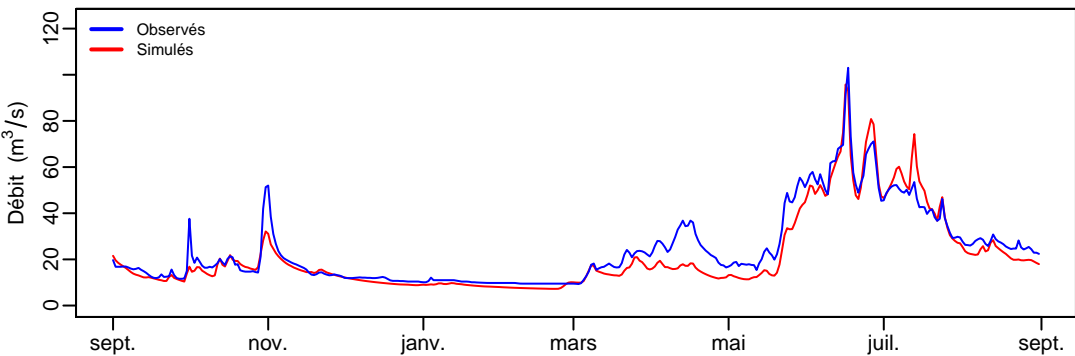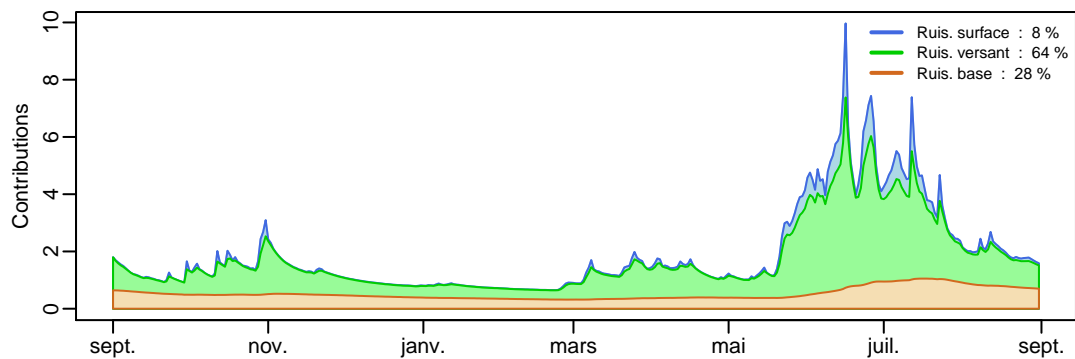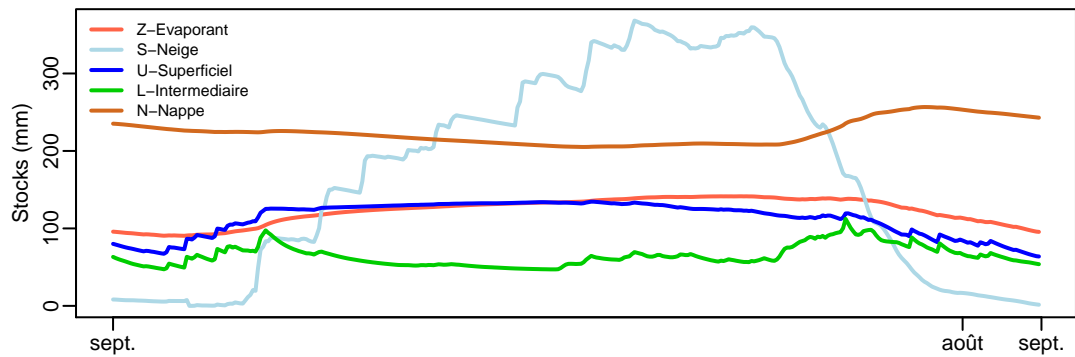



# x0130010 (963.24 km<sup>2</sup>) – année 1991–1992

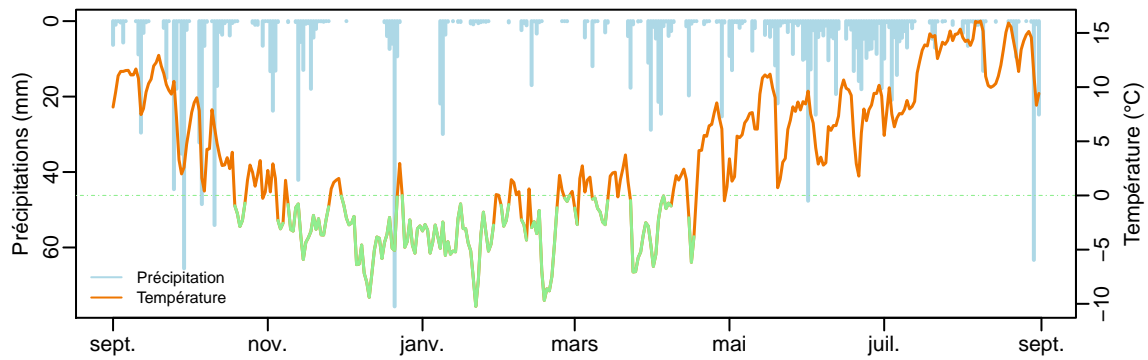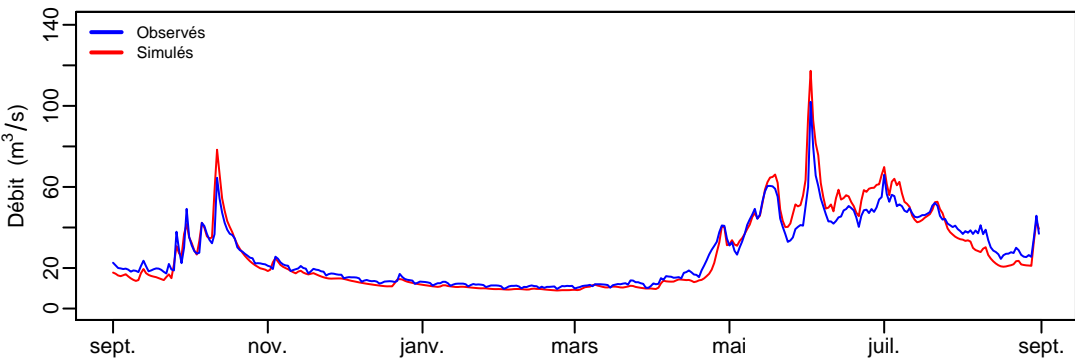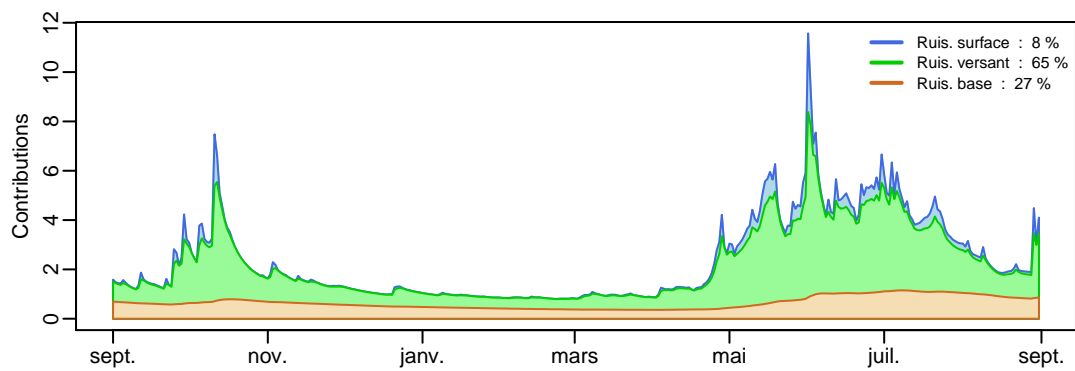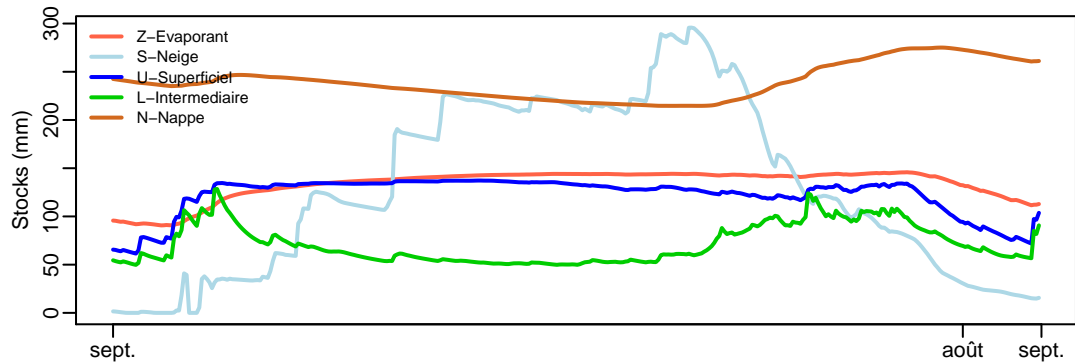

# x0130010 (963.24 km<sup>2</sup>) – année 1992–1993

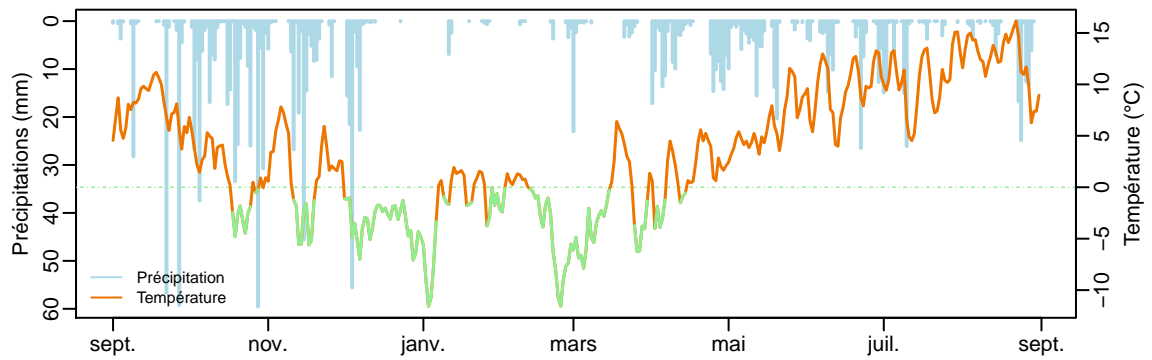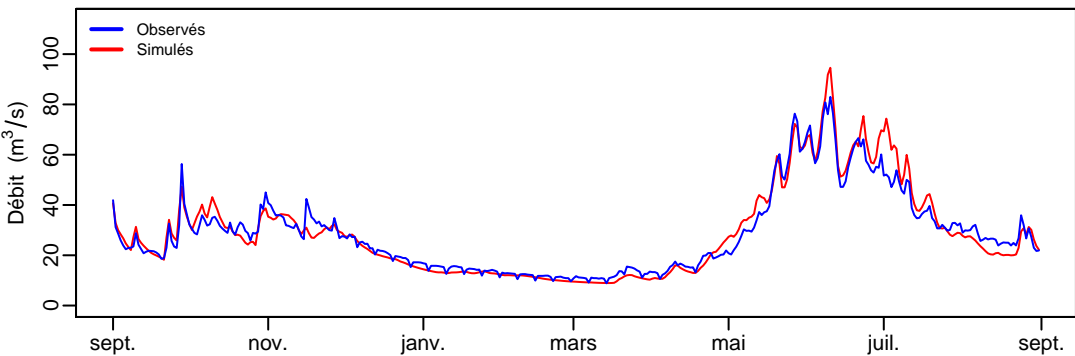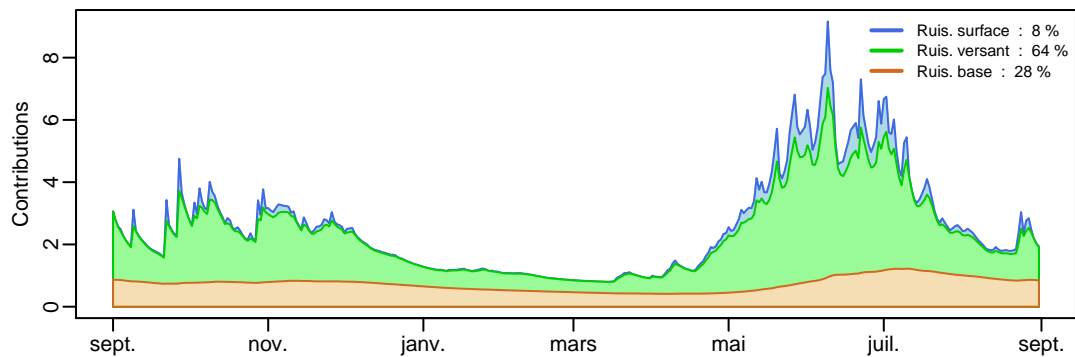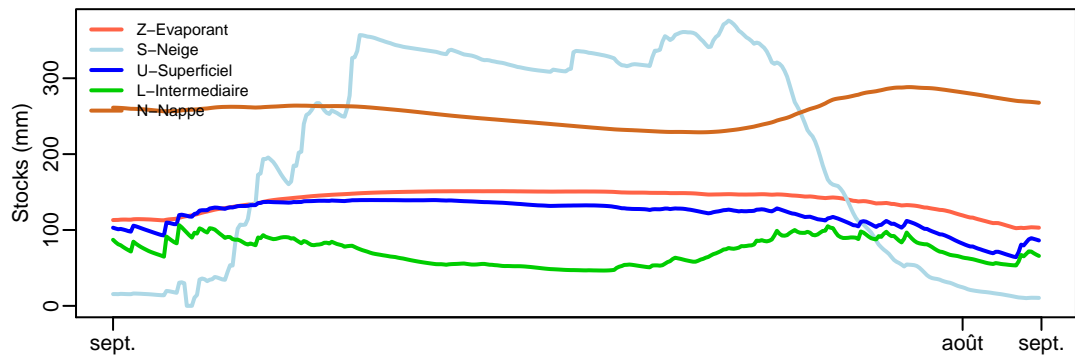

# x0130010 (963.24 km<sup>2</sup>) – année 1993–1994

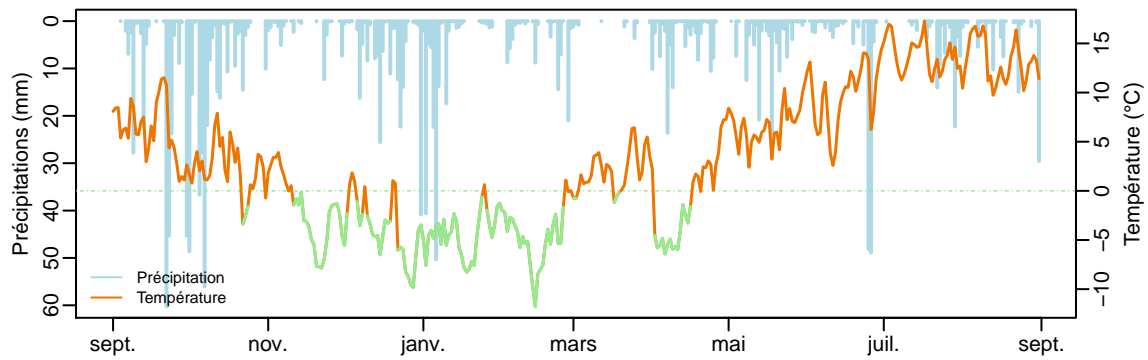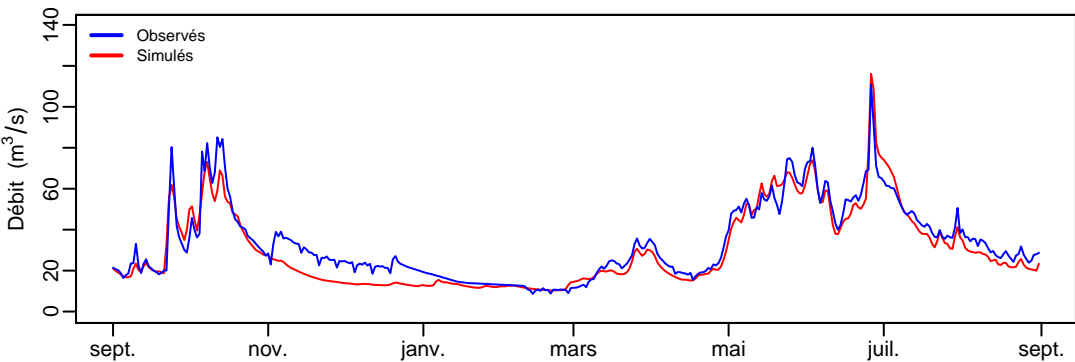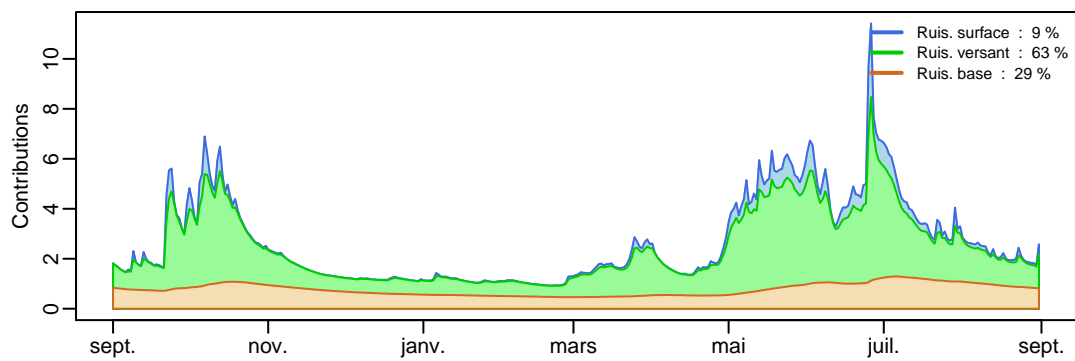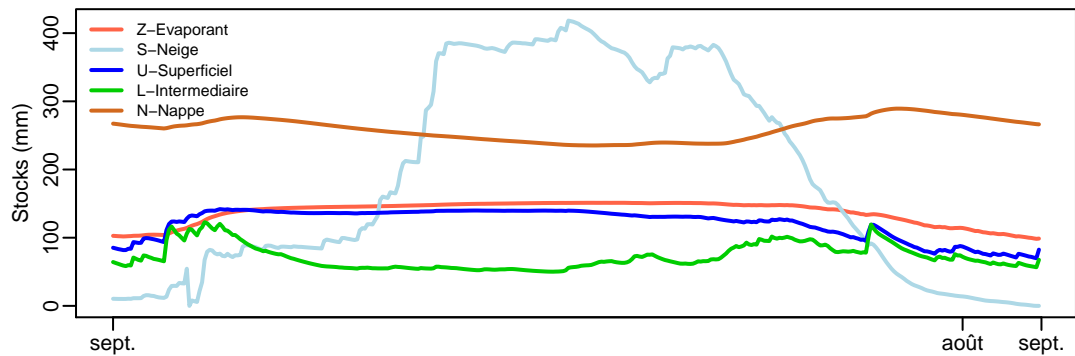

# x0130010 (963.24 km<sup>2</sup>) – année 1994–1995

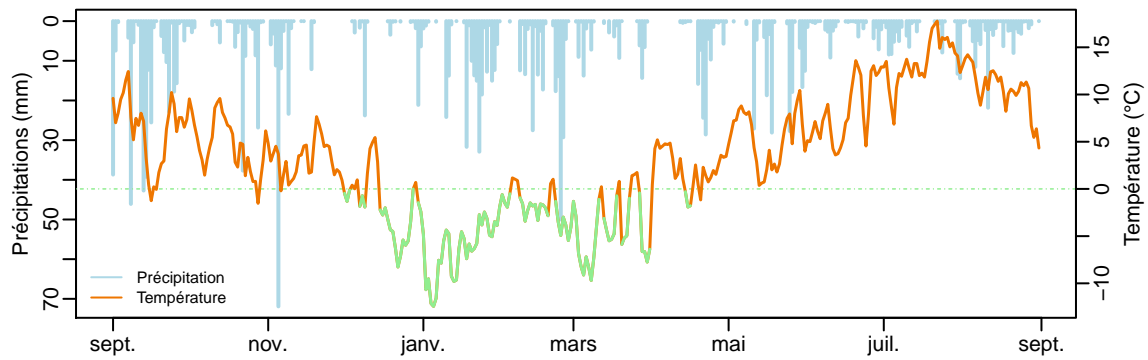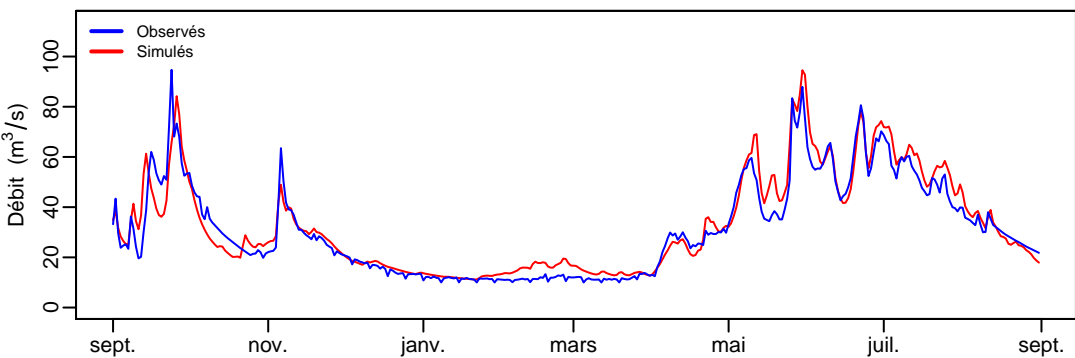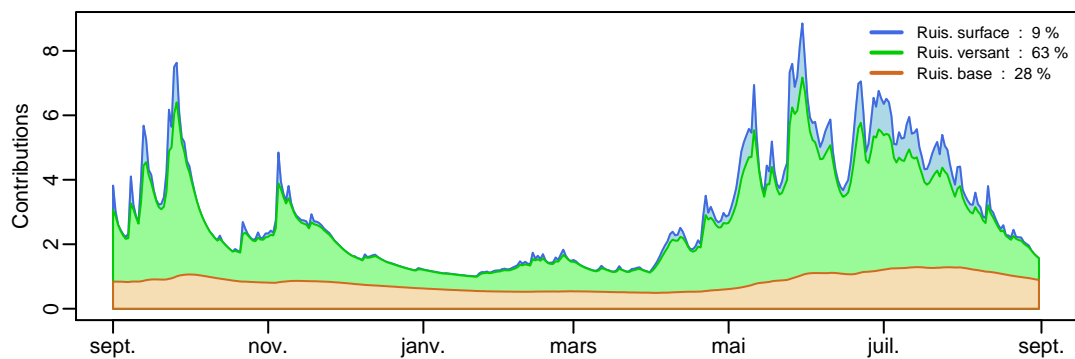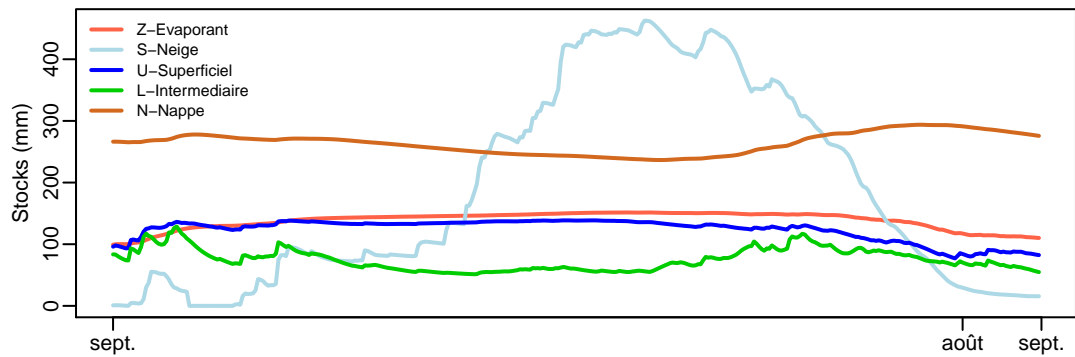

# x0130010 (963.24 km<sup>2</sup>) – année 1995–1996

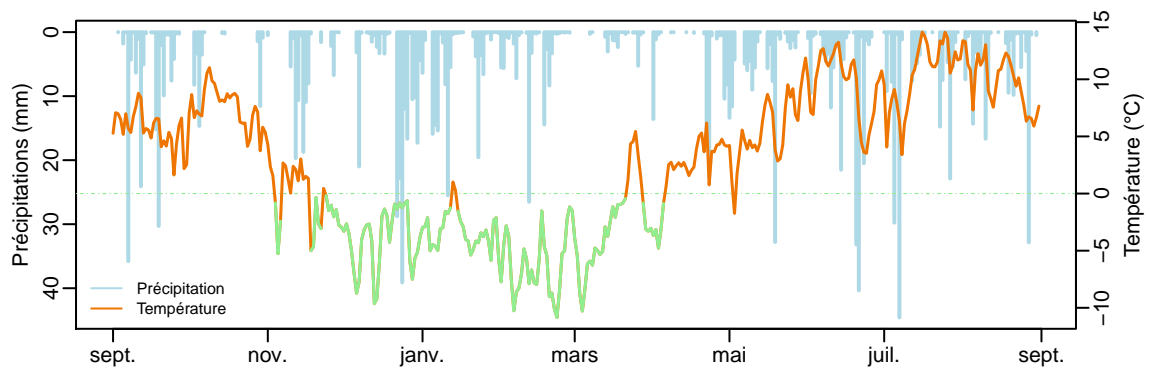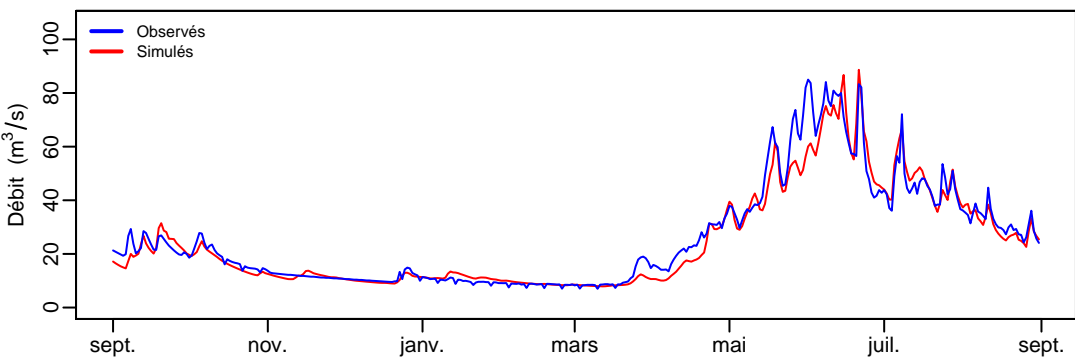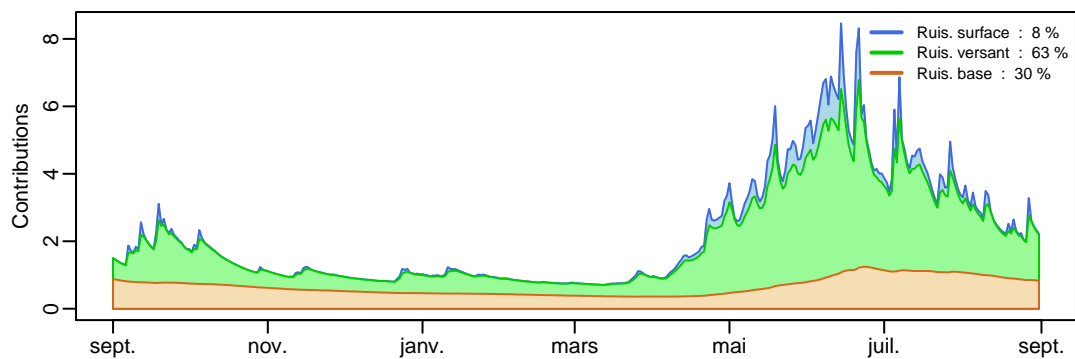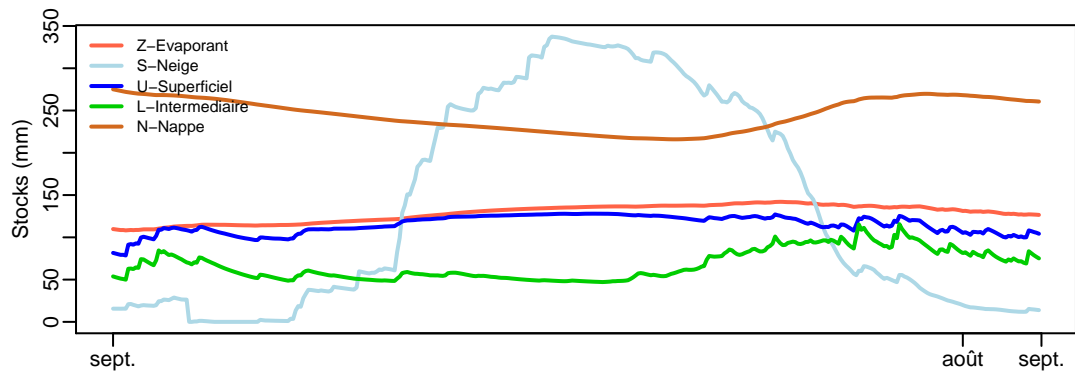

# x0130010 (963.24 km<sup>2</sup>) – année 1996–1997

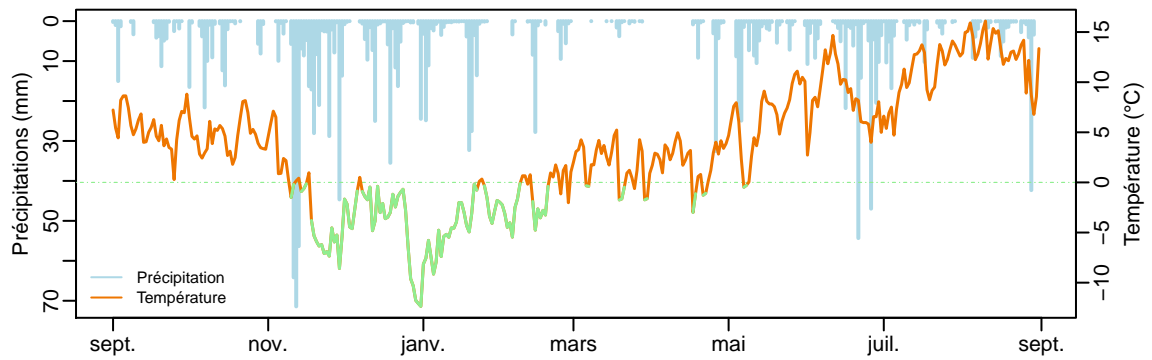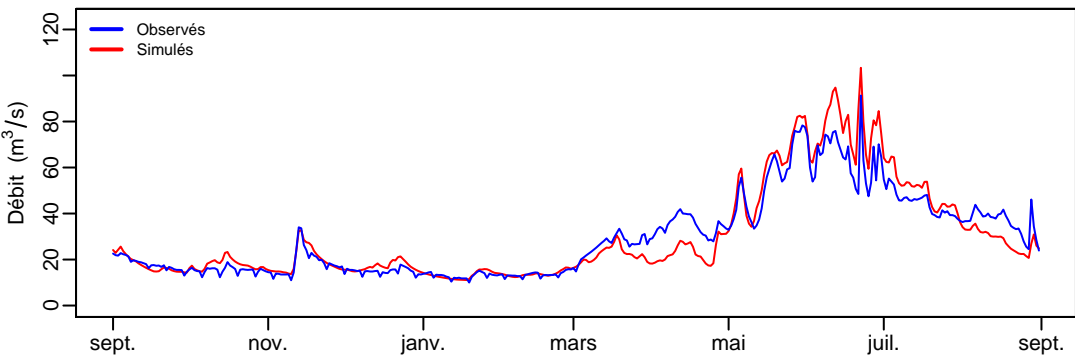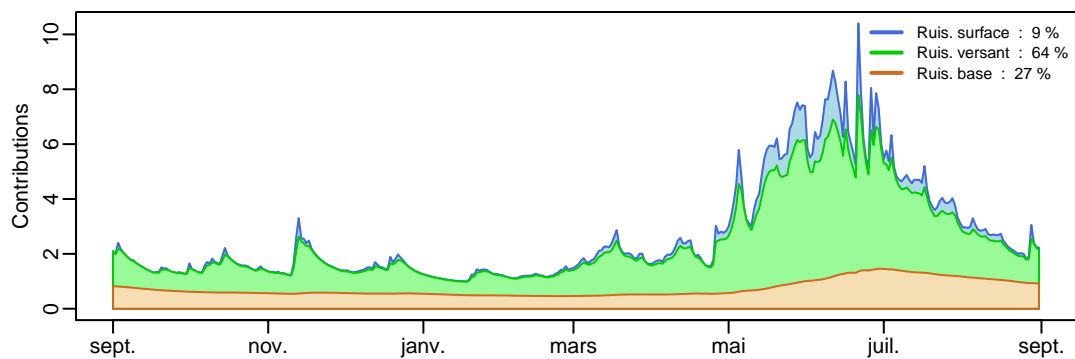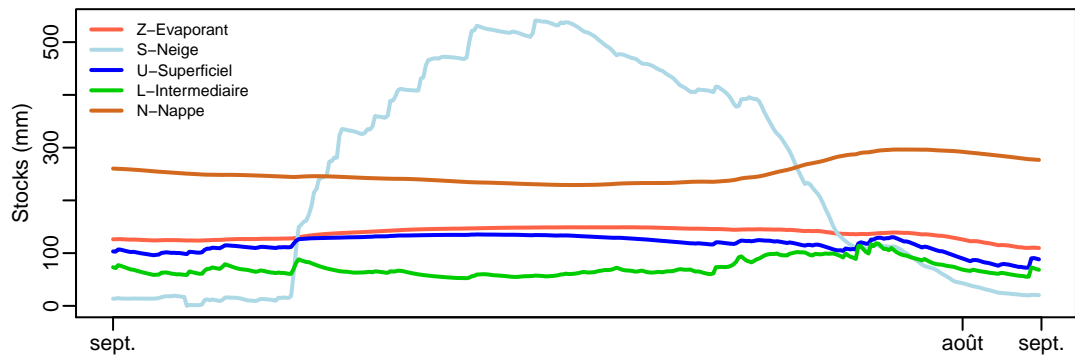

# x0130010 (963.24 km<sup>2</sup>) – année 1997–1998

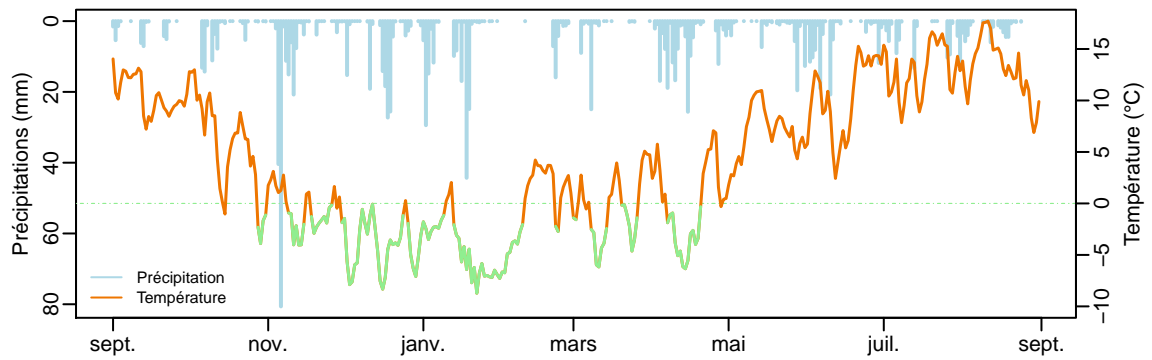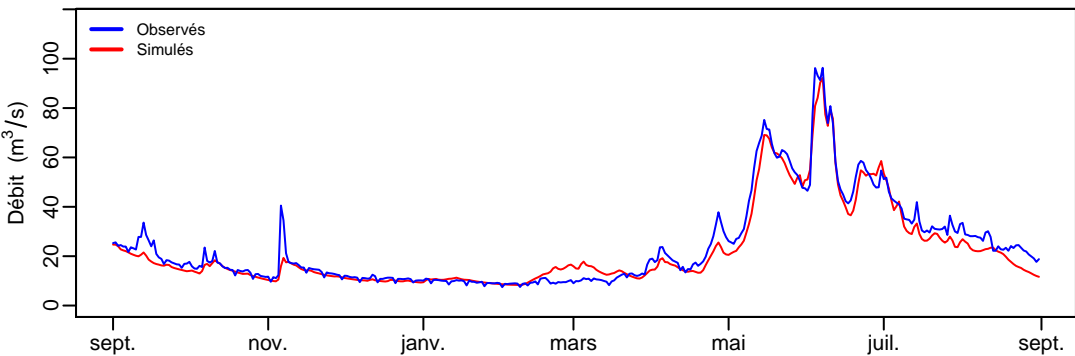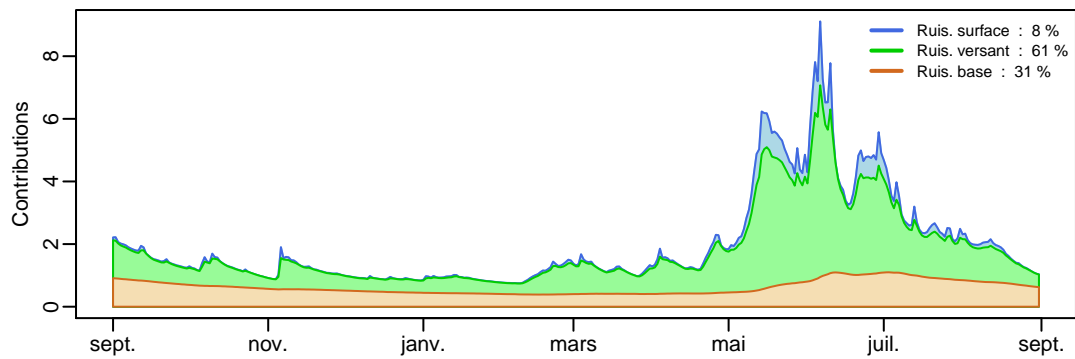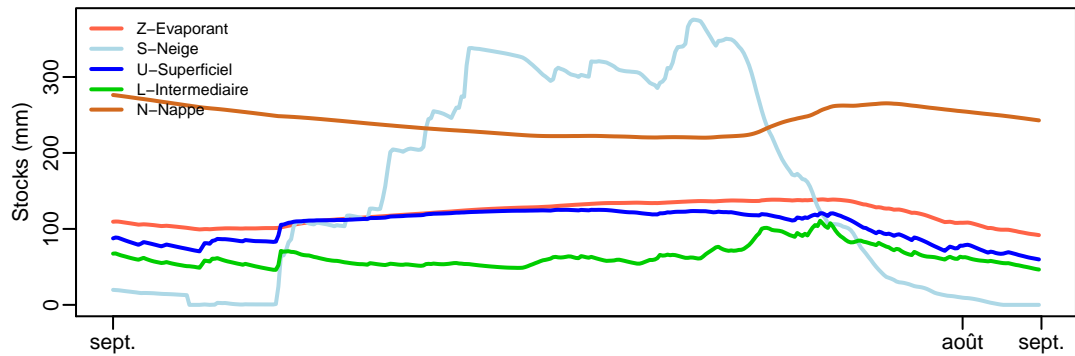

# x0130010 (963.24 km<sup>2</sup>) – année 1998–1999

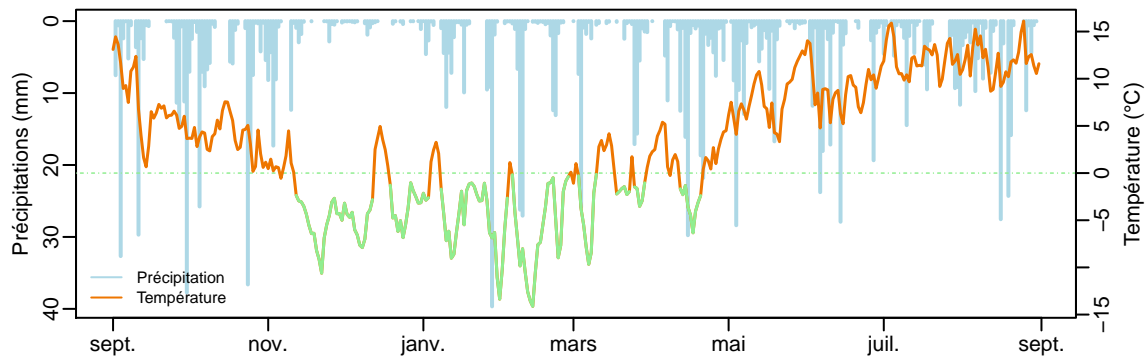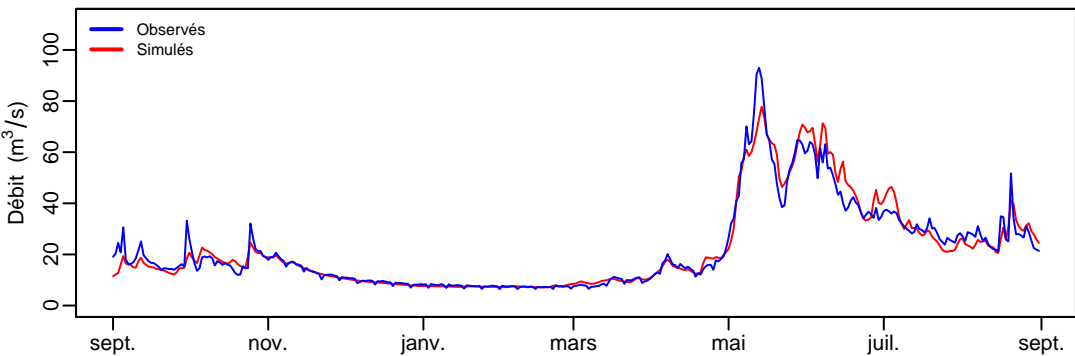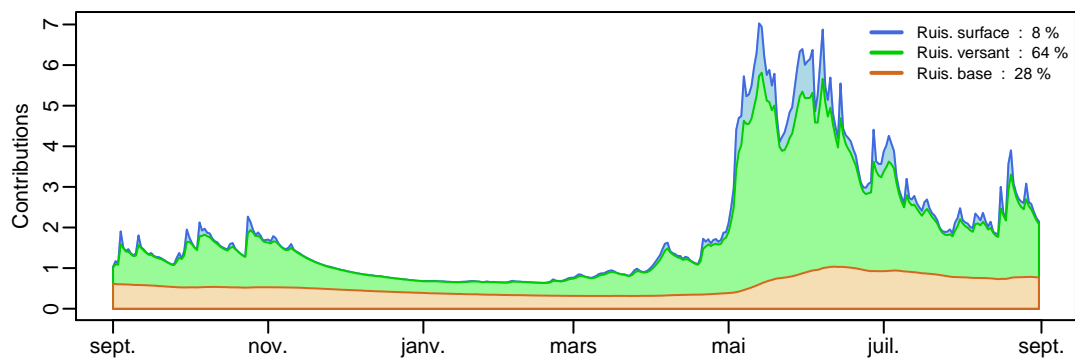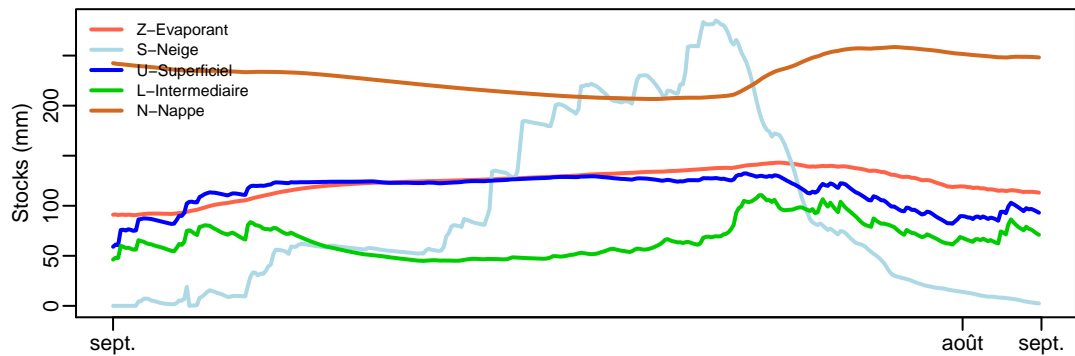



# x0130010 (963.24 km<sup>2</sup>) – année 1999–2000

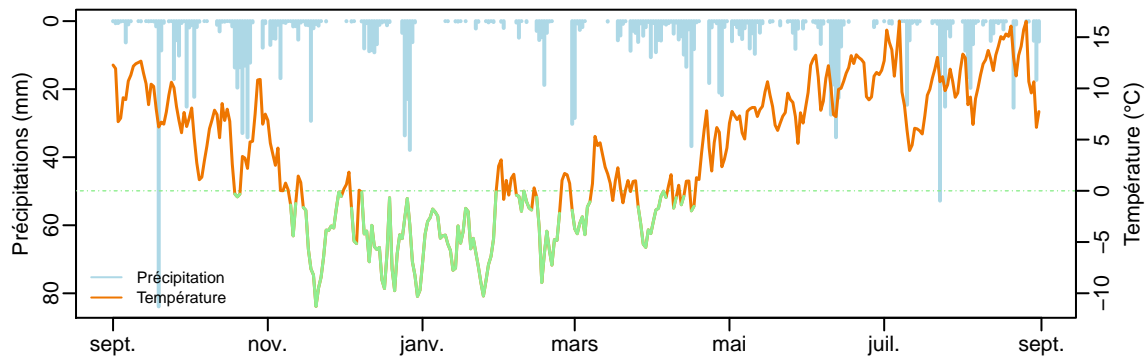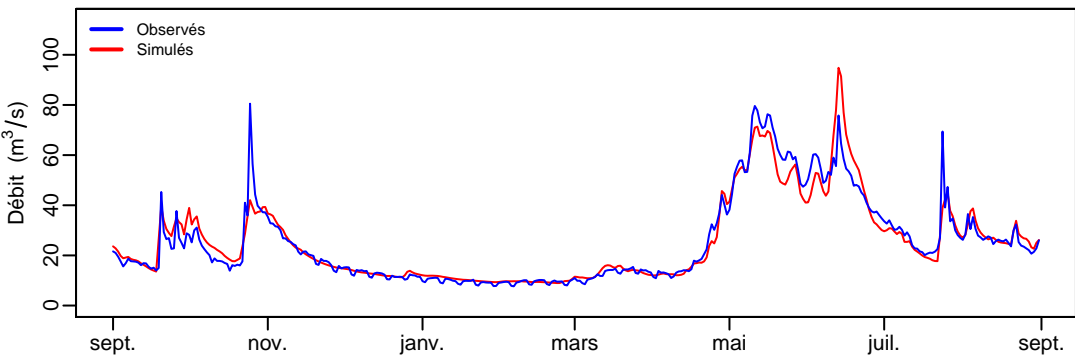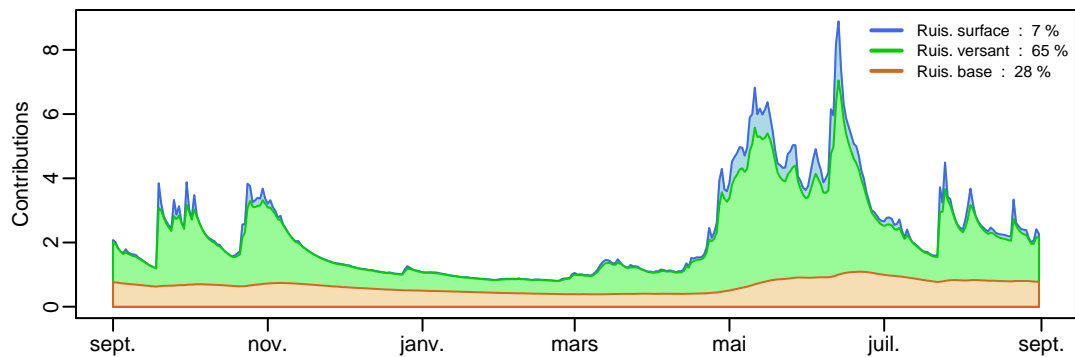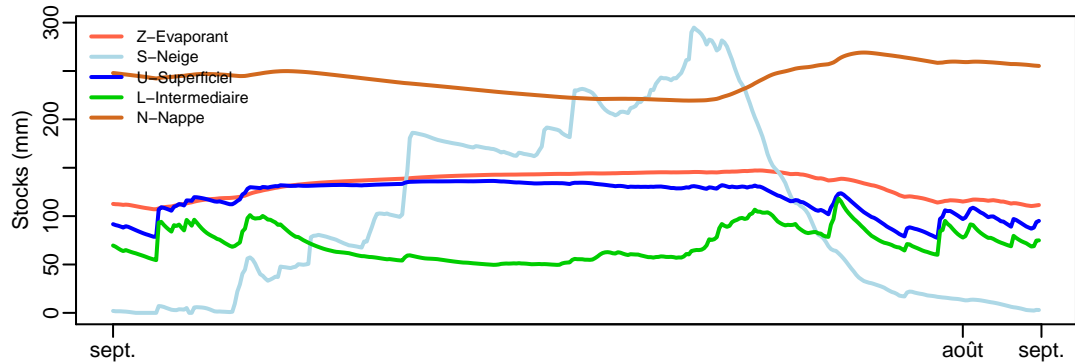

# x0130010 (963.24 km<sup>2</sup>) – année 2000–2001

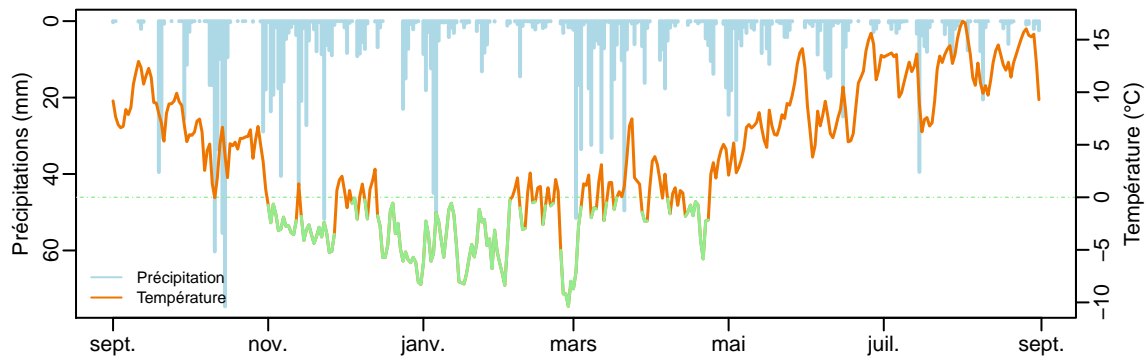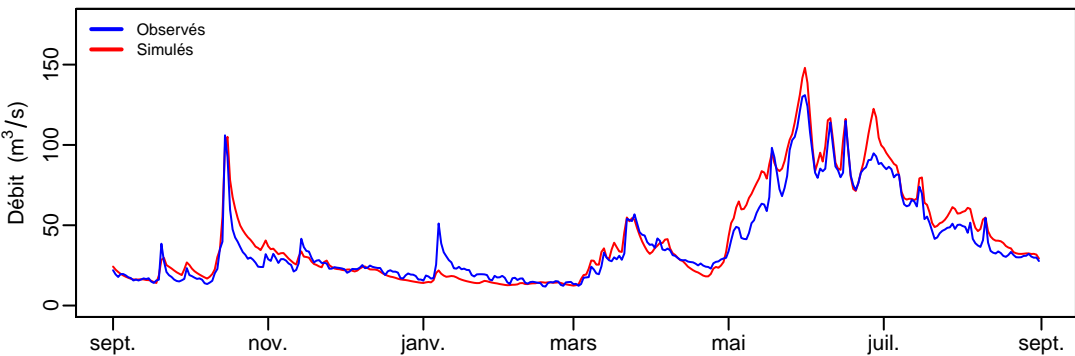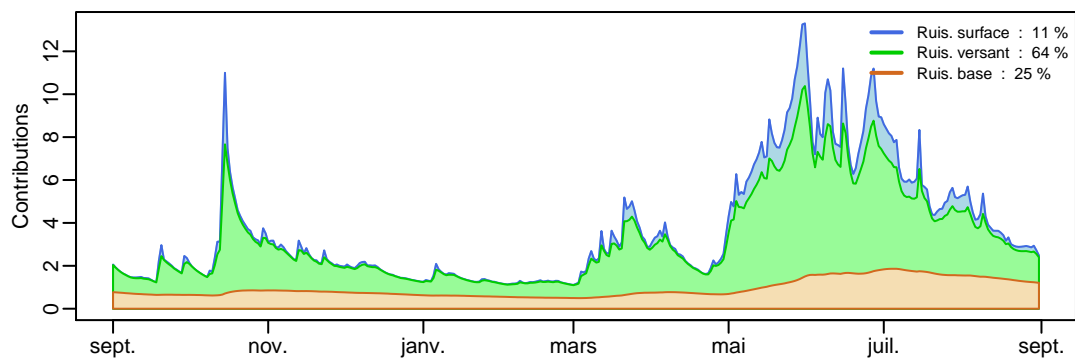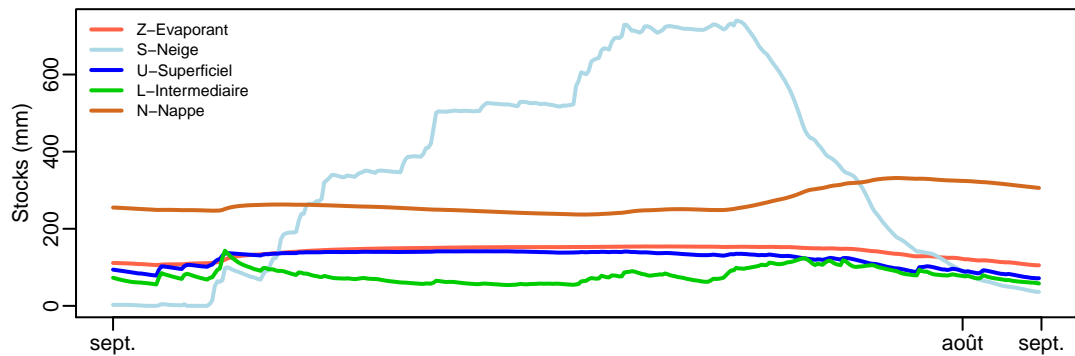

# x0130010 (963.24 km<sup>2</sup>) – année 2001–2002

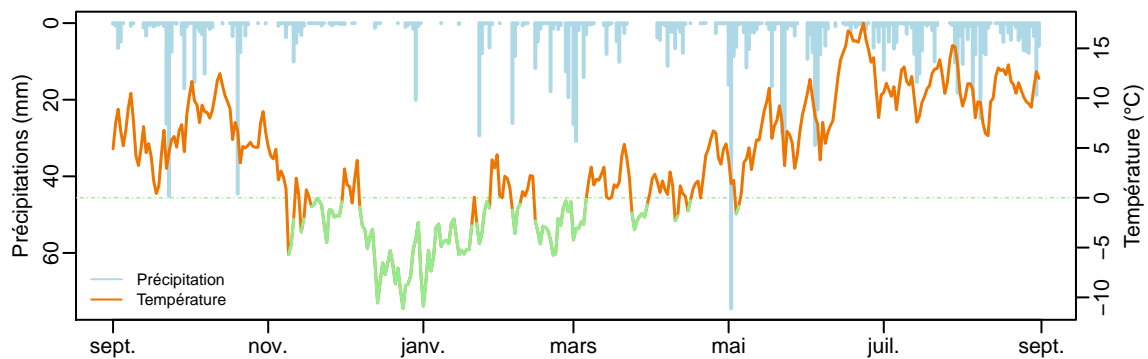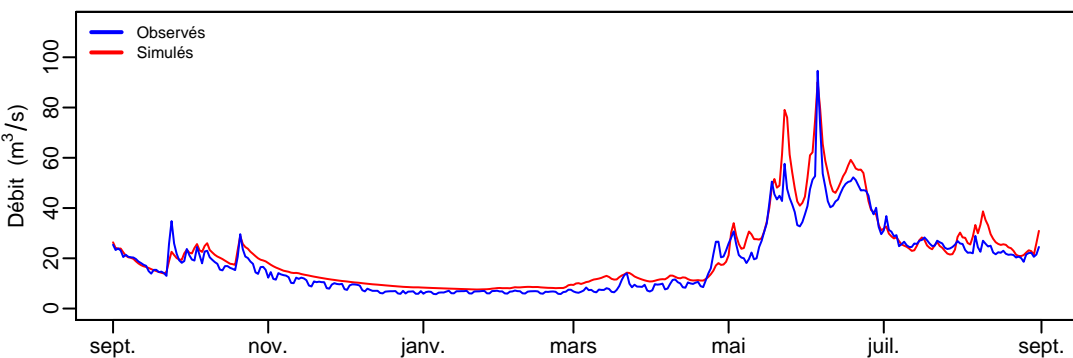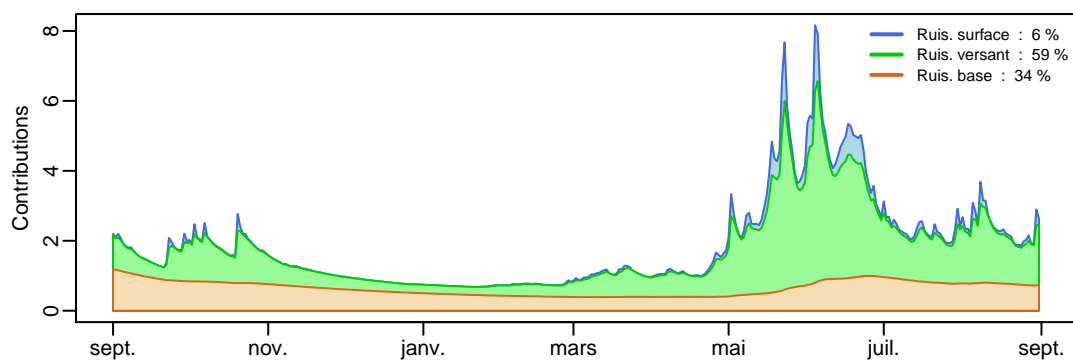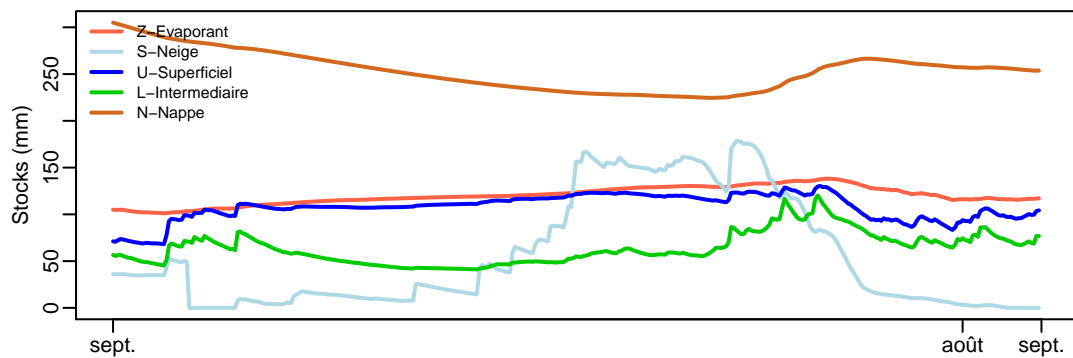

# x0130010 (963.24 km<sup>2</sup>) – année 2002–2003

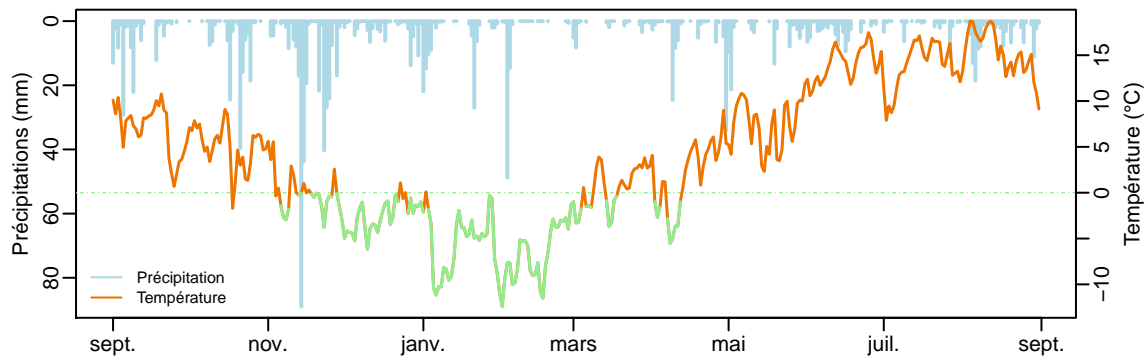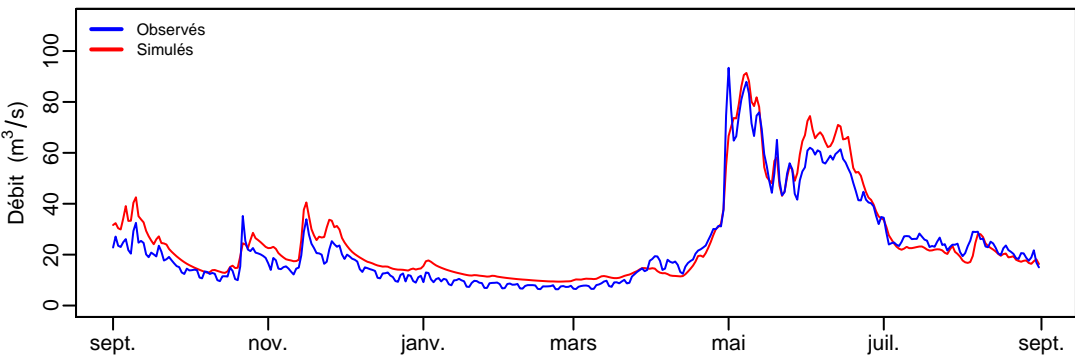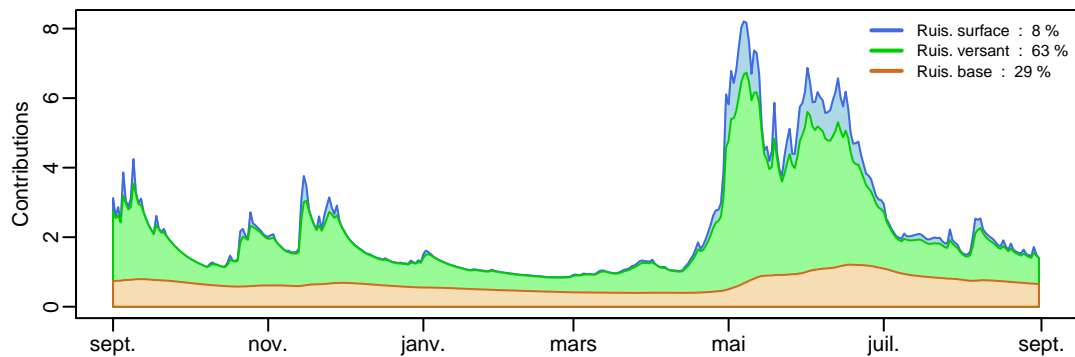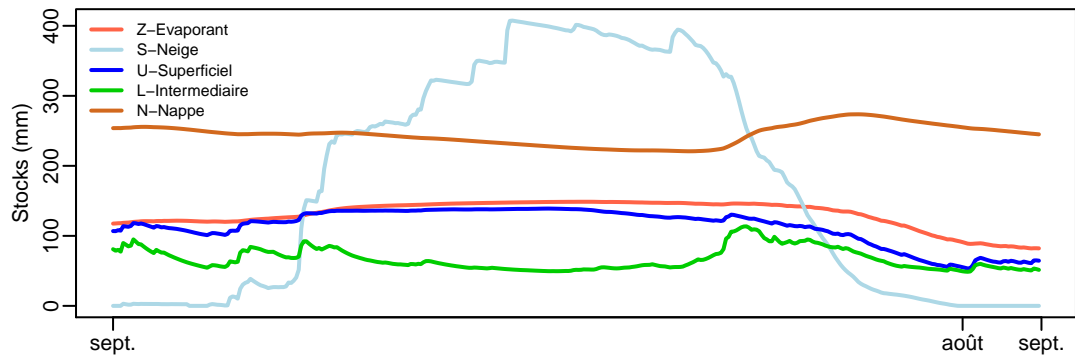

# x0130010 (963.24 km<sup>2</sup>) – année 2003–2004

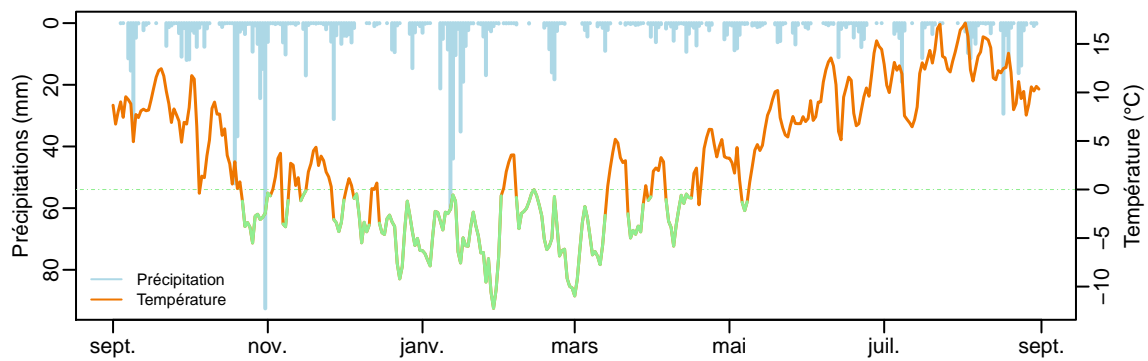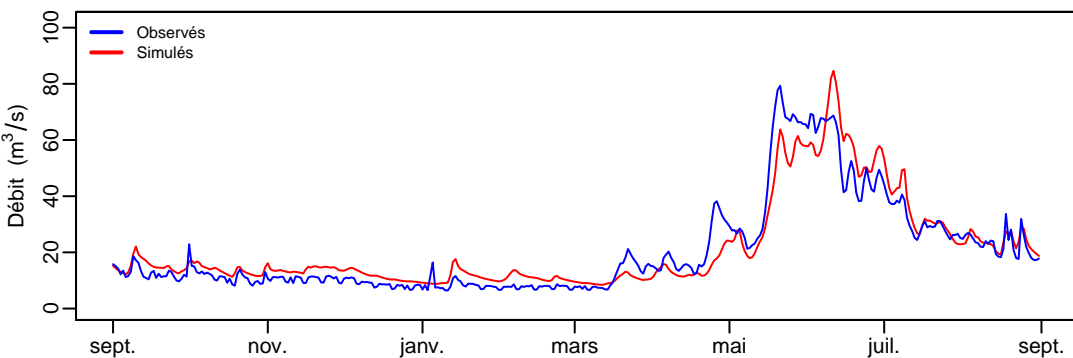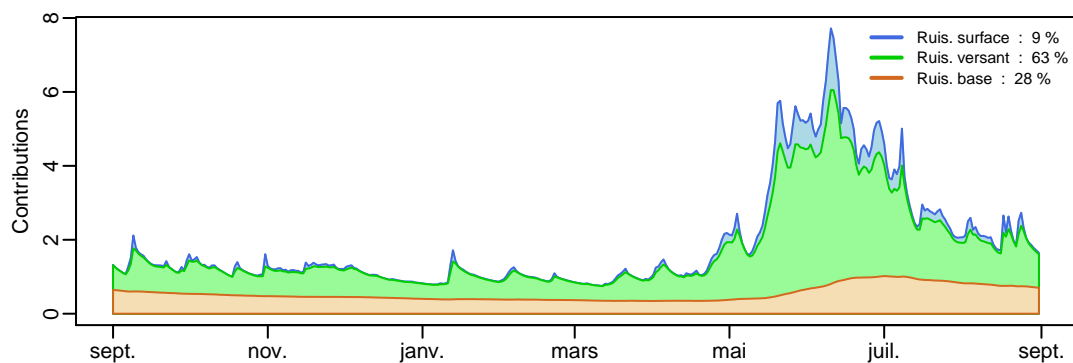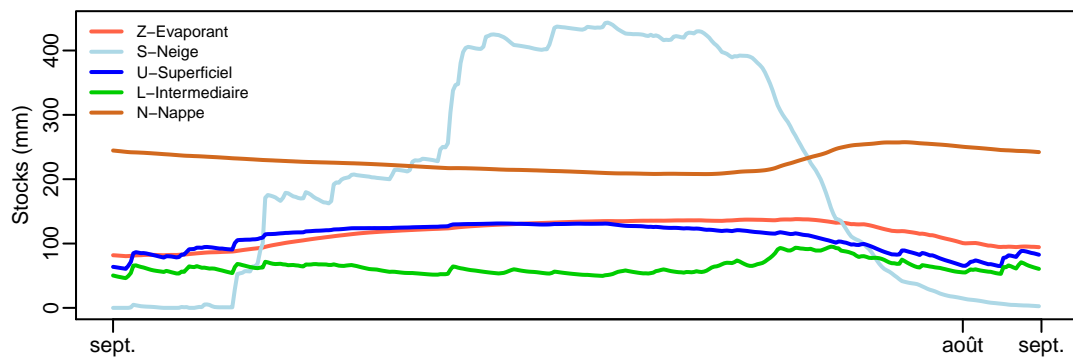

# x0130010 (963.24 km<sup>2</sup>) – année 2004–2005

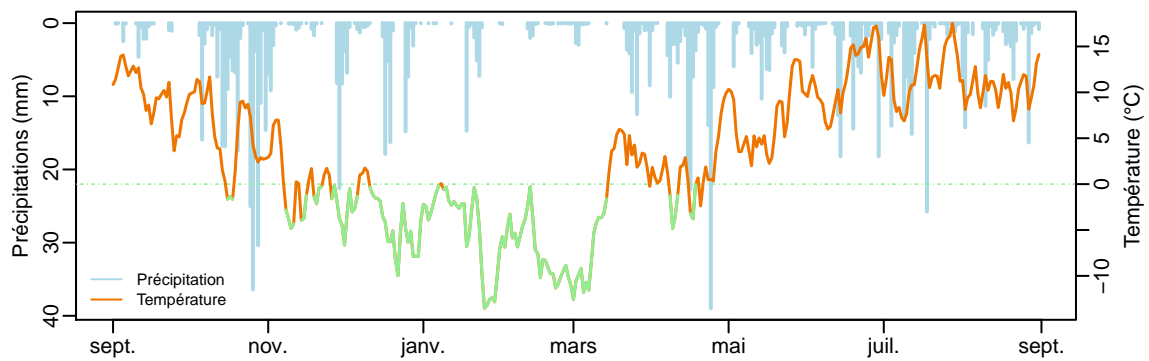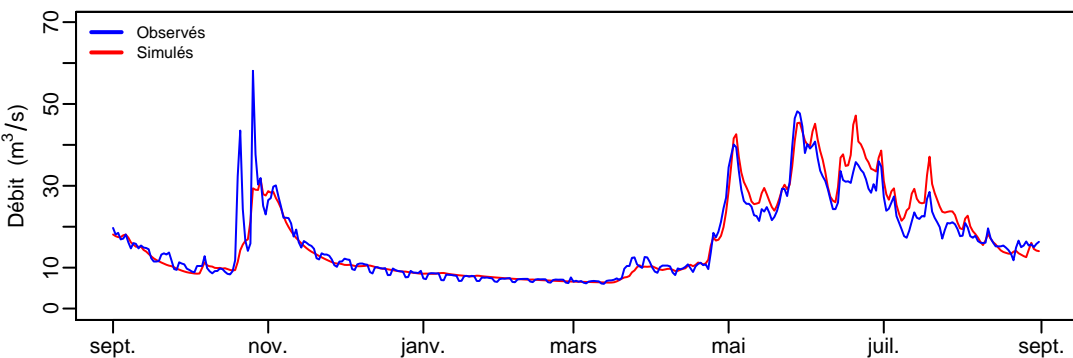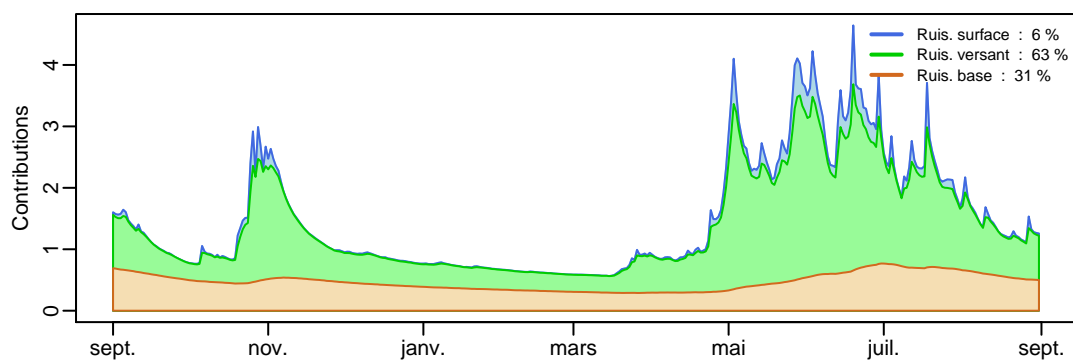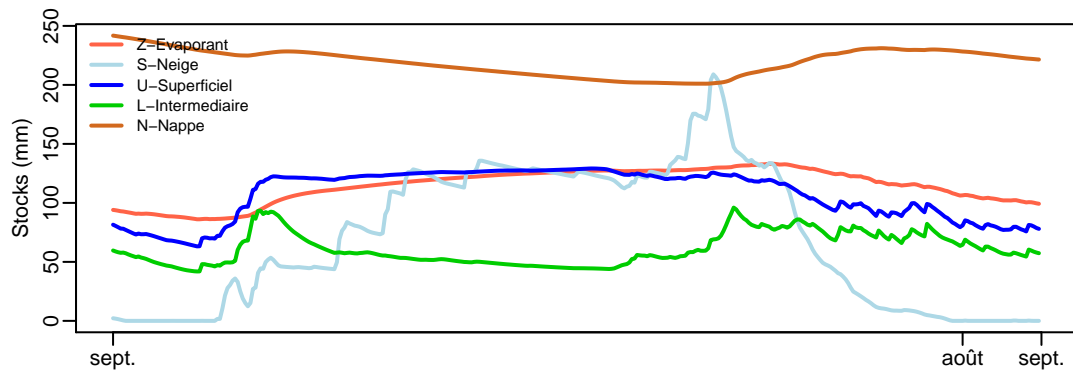

# x0130010 (963.24 km<sup>2</sup>) – année 2005–2006

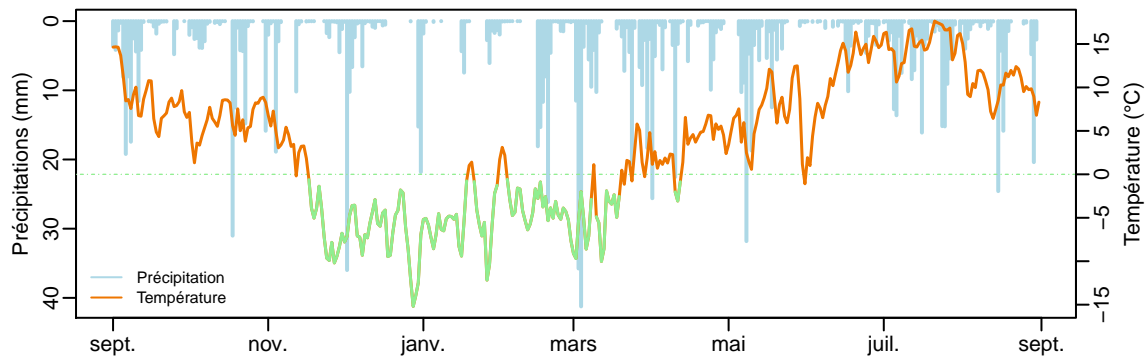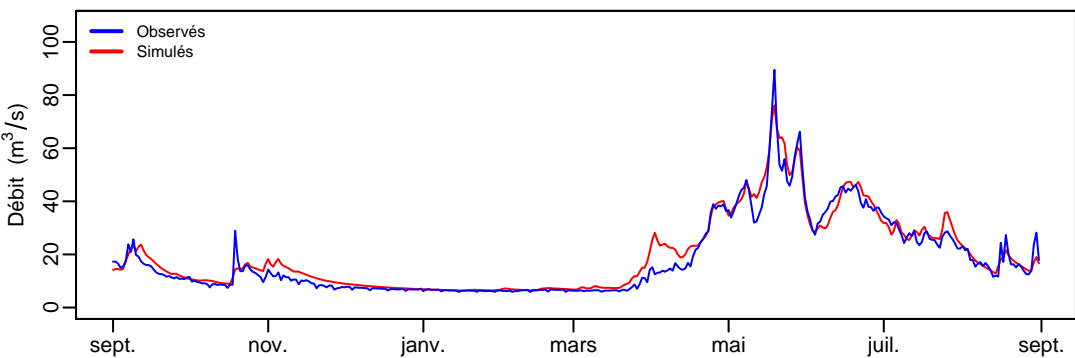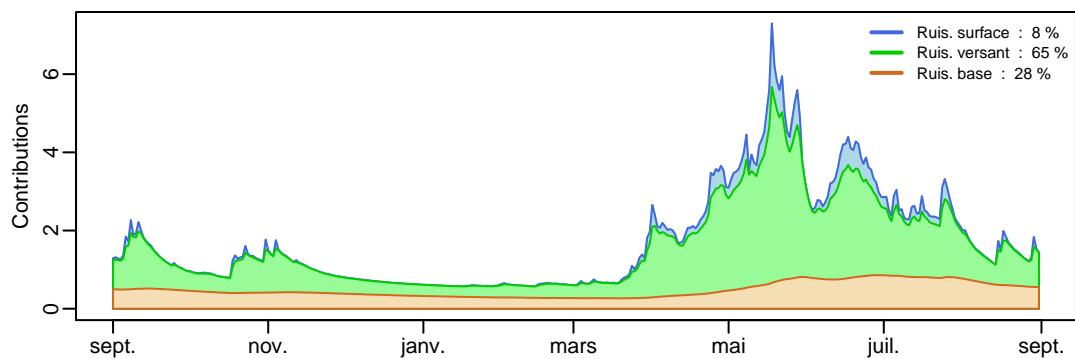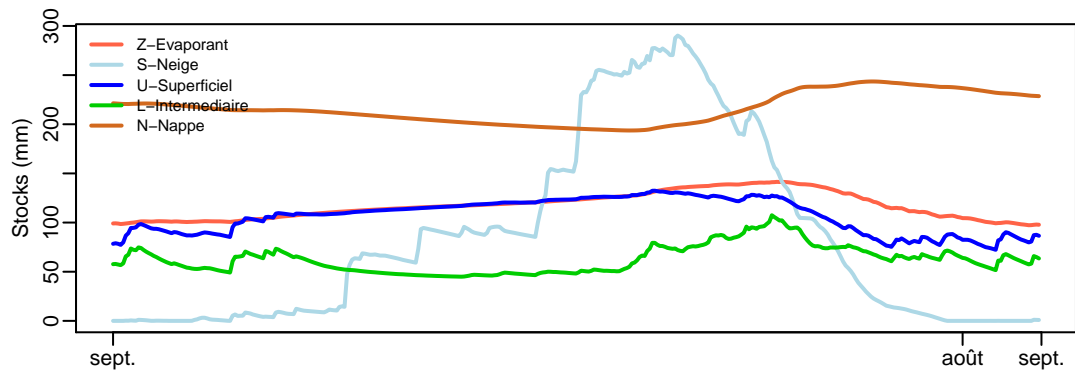

# x0130010 (963.24 km<sup>2</sup>) – année 2006–2007

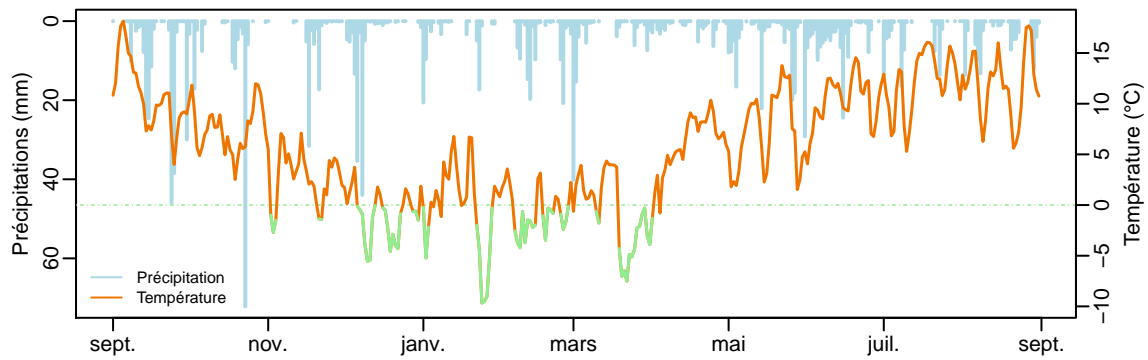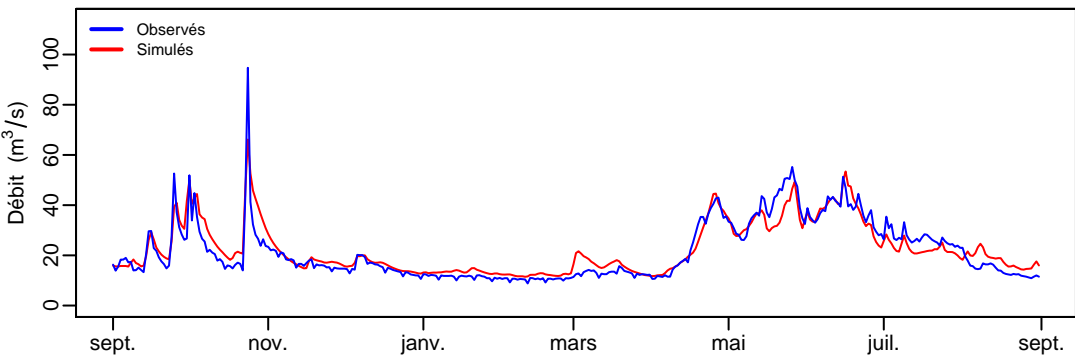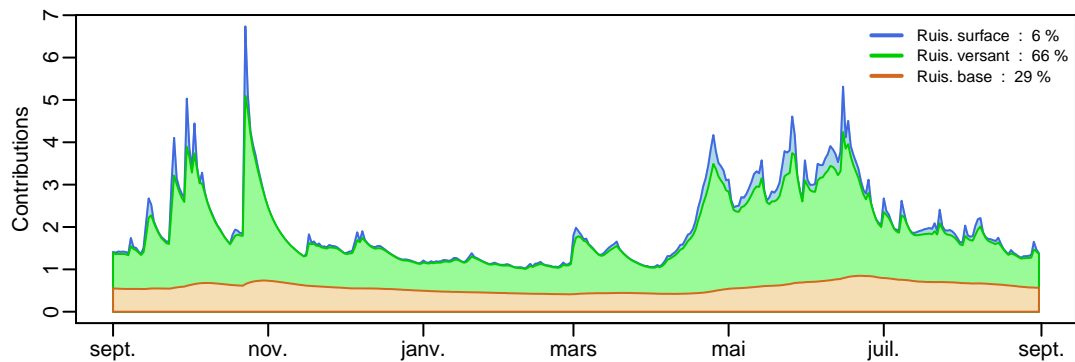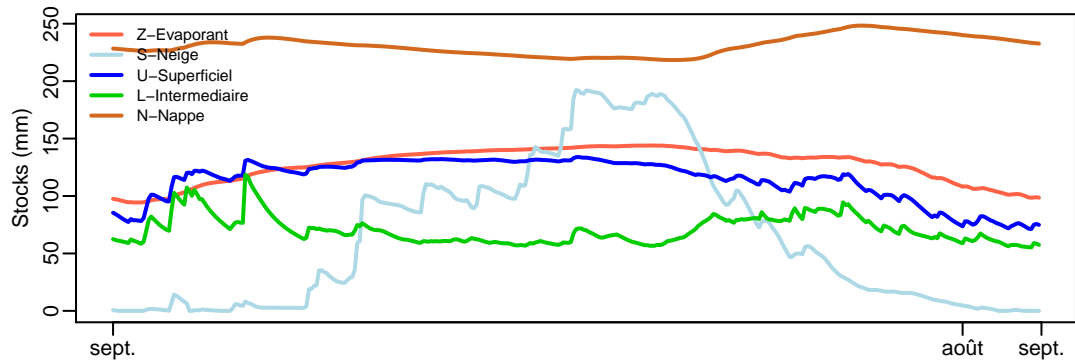



# x0130010 (963.24 km<sup>2</sup>) – année 2007–2008

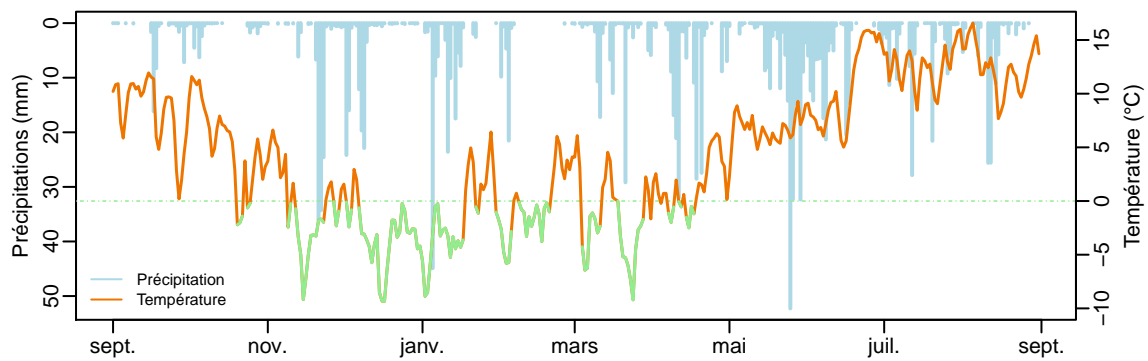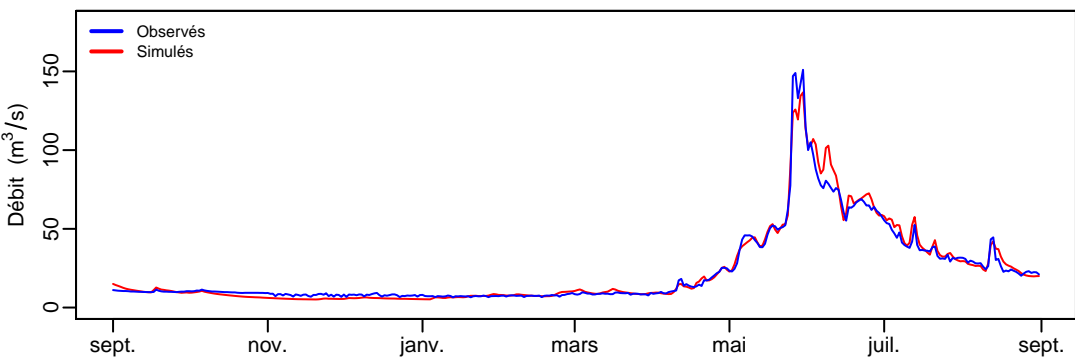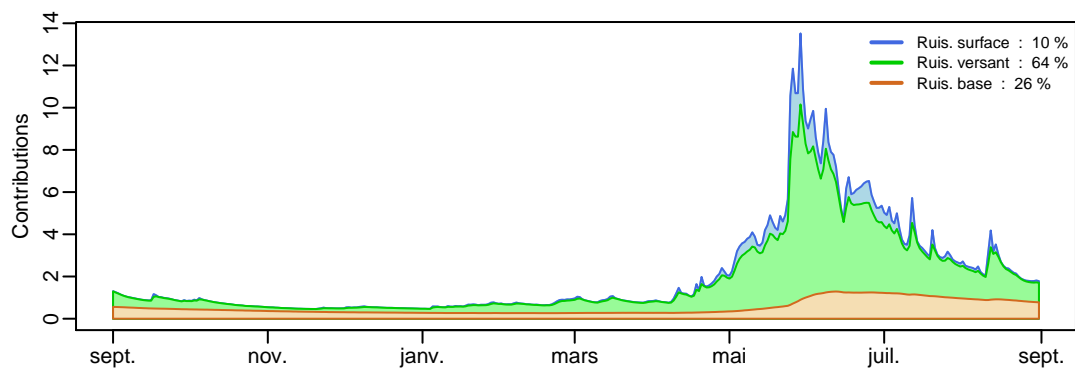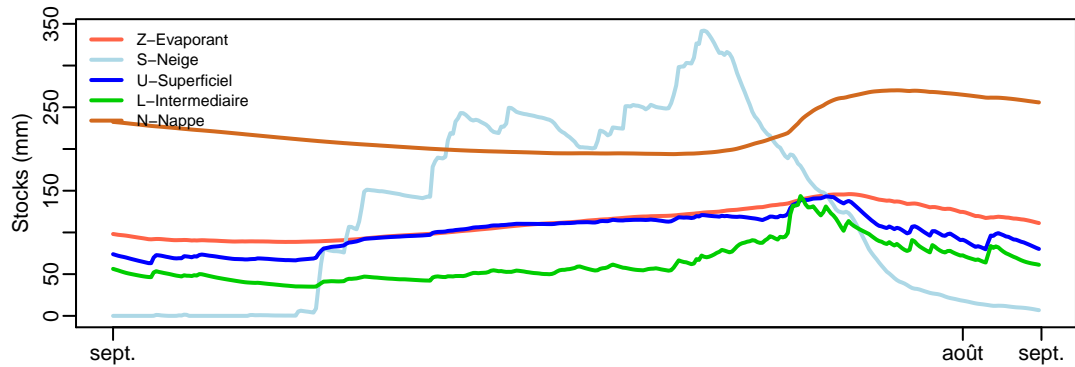

# x0130010 (963.24 km<sup>2</sup>) – année 2008–2009

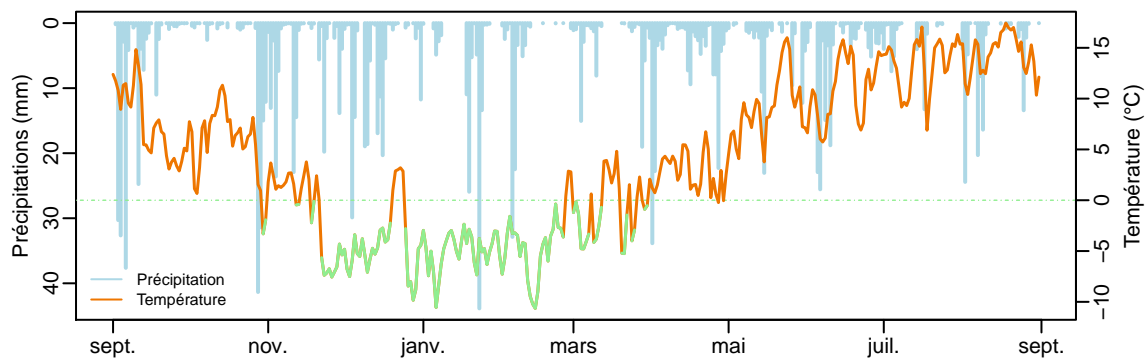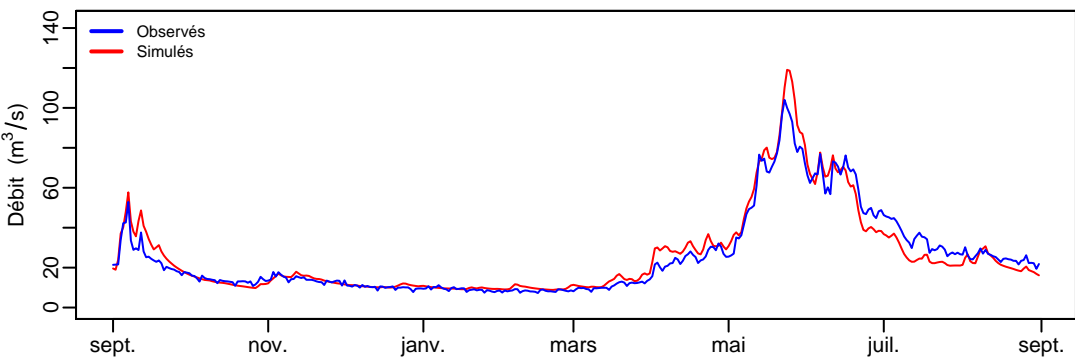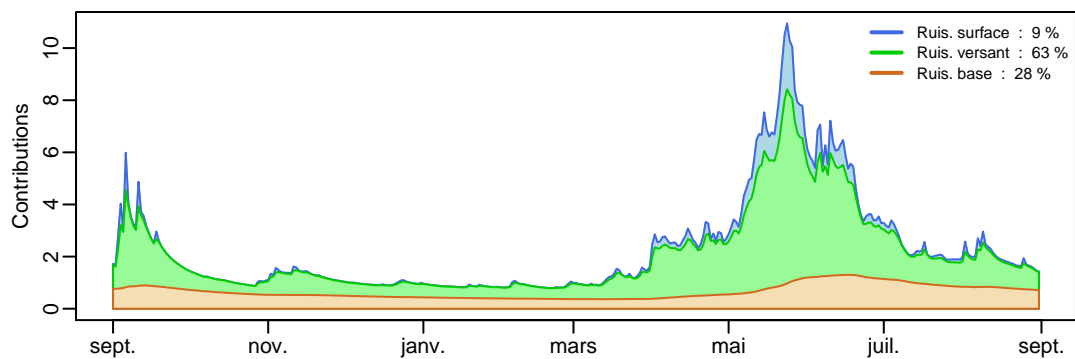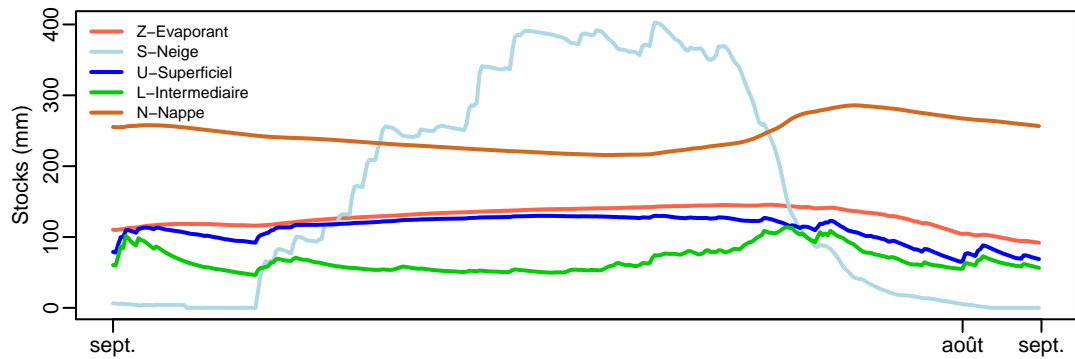

# x0130010 (963.24 km<sup>2</sup>) – année 2009–2010

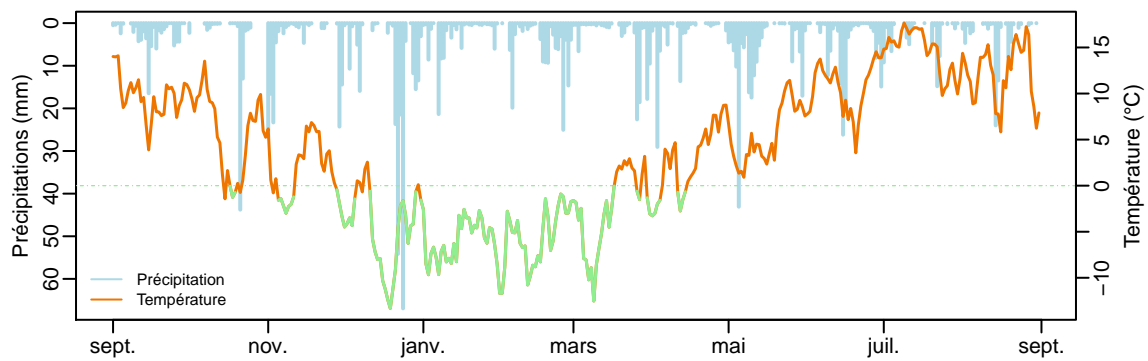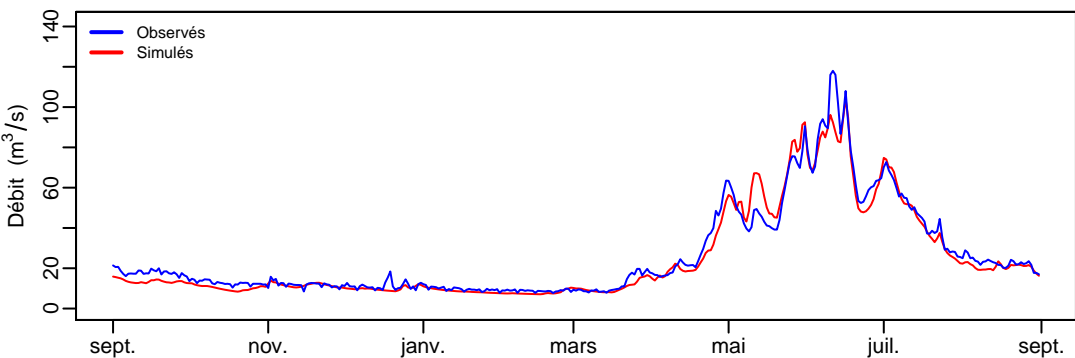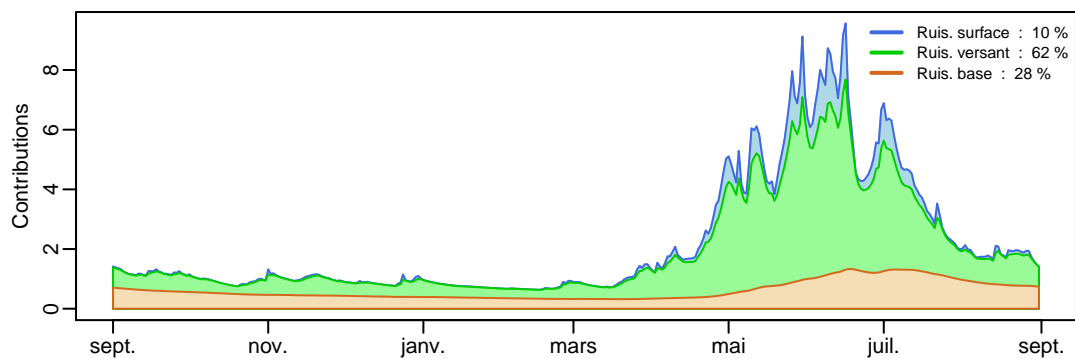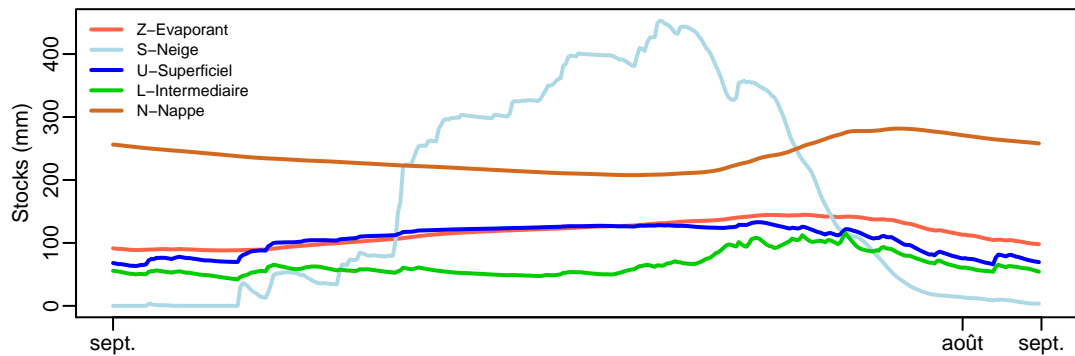

# x0130010 (963.24 km<sup>2</sup>) – année 2010–2011

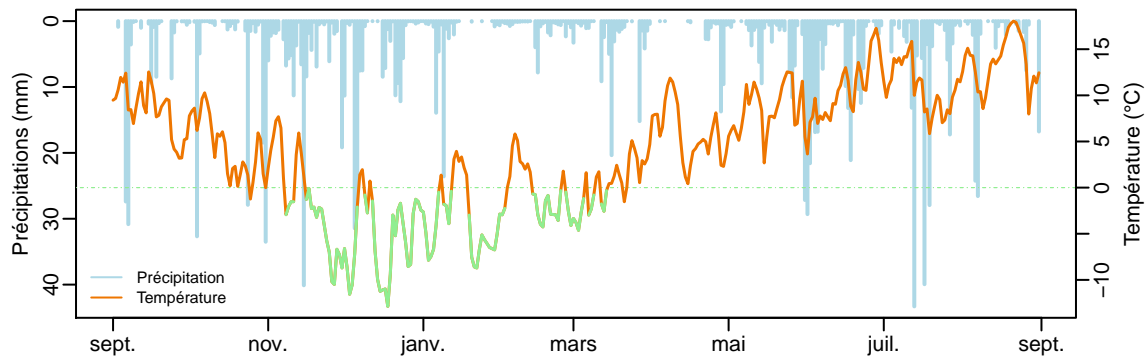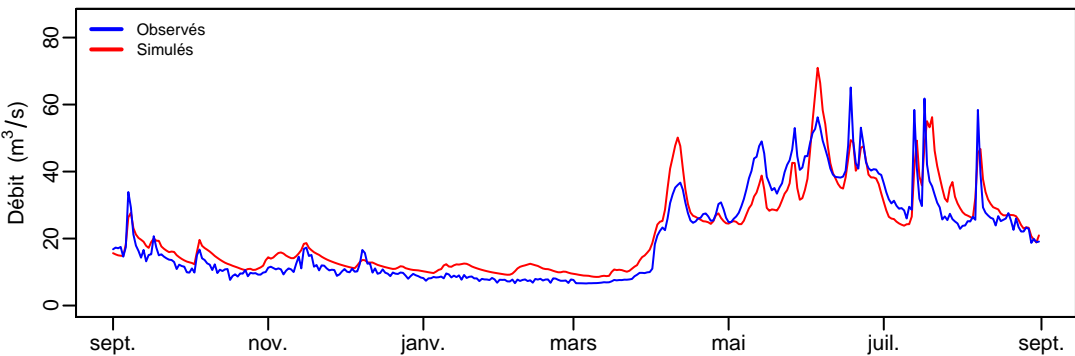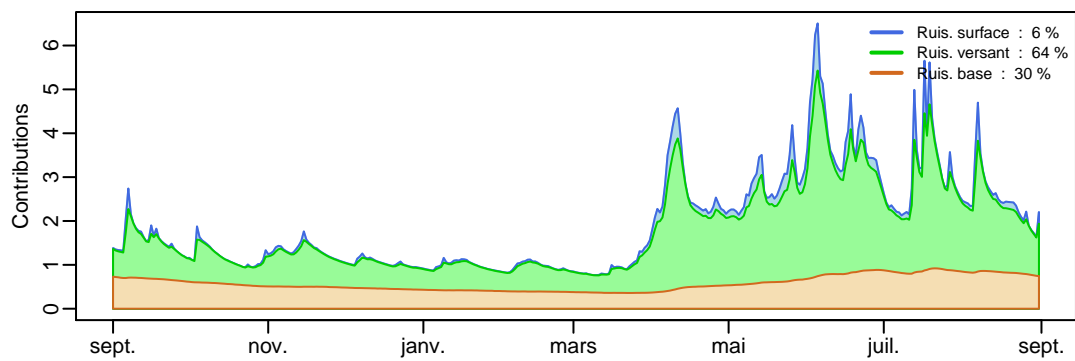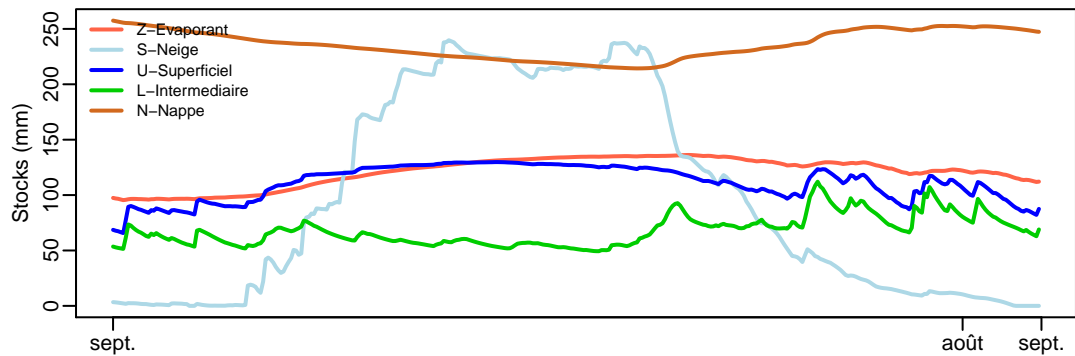

# x0130010 (963.24 km<sup>2</sup>) – année 2011–2012

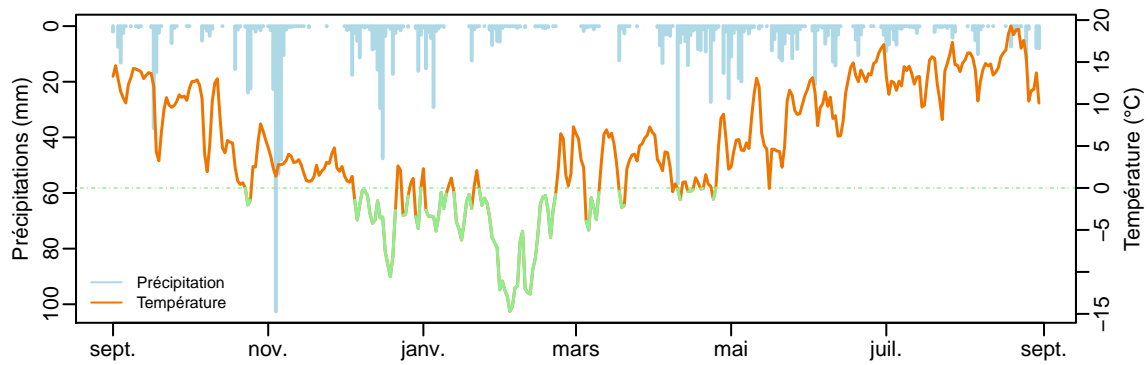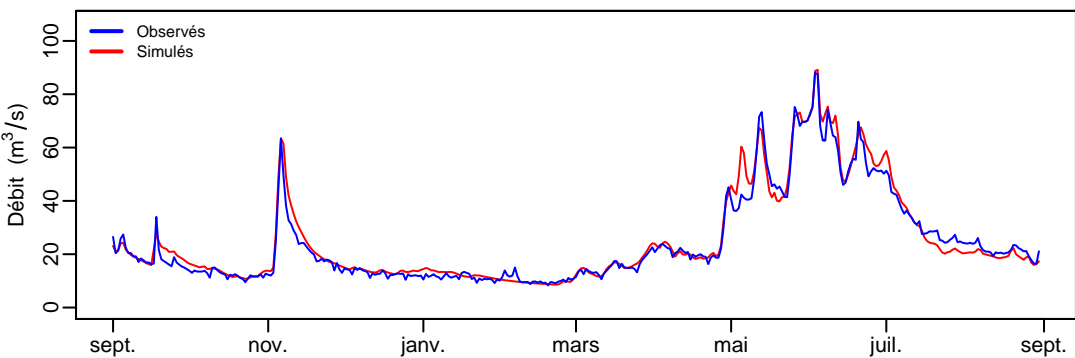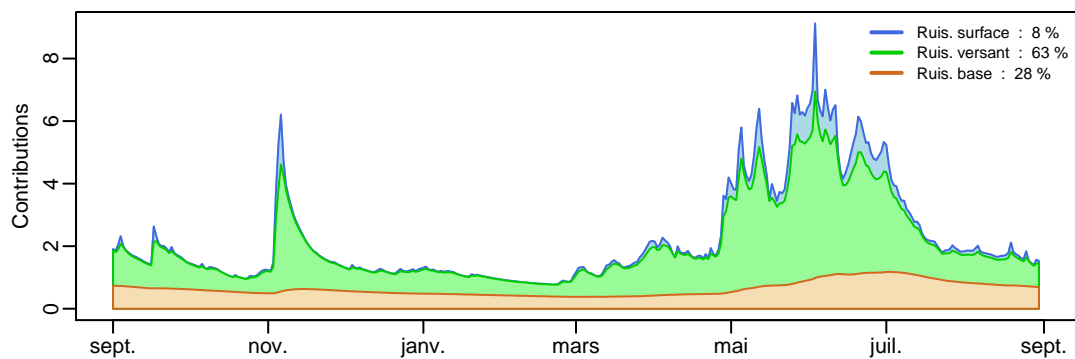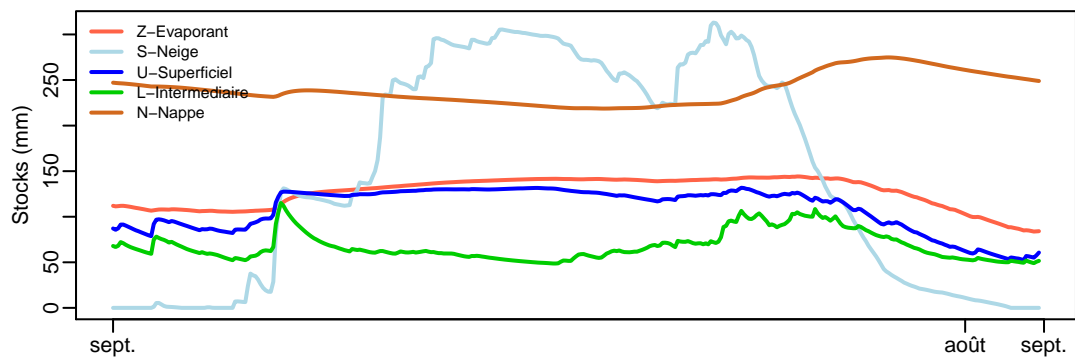

# x1025020 (290.57 km<sup>2</sup>) – année 1981–1982

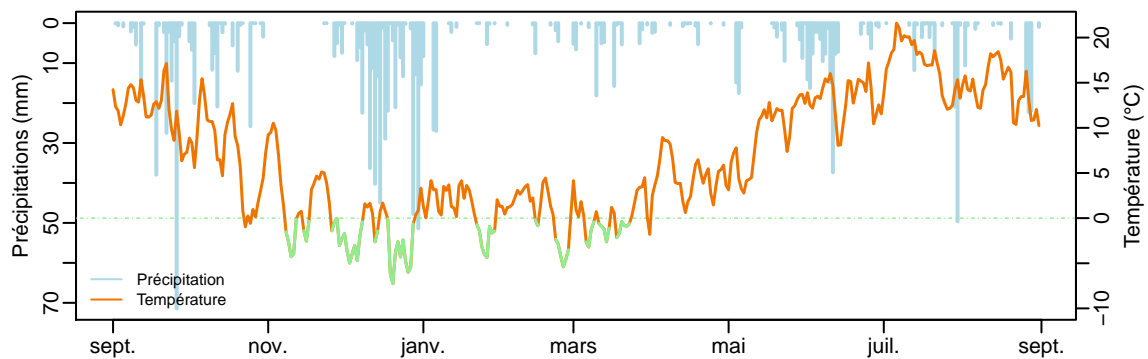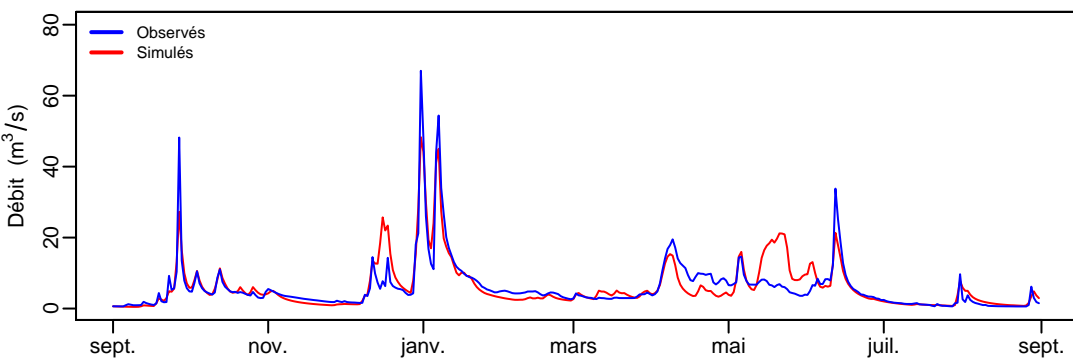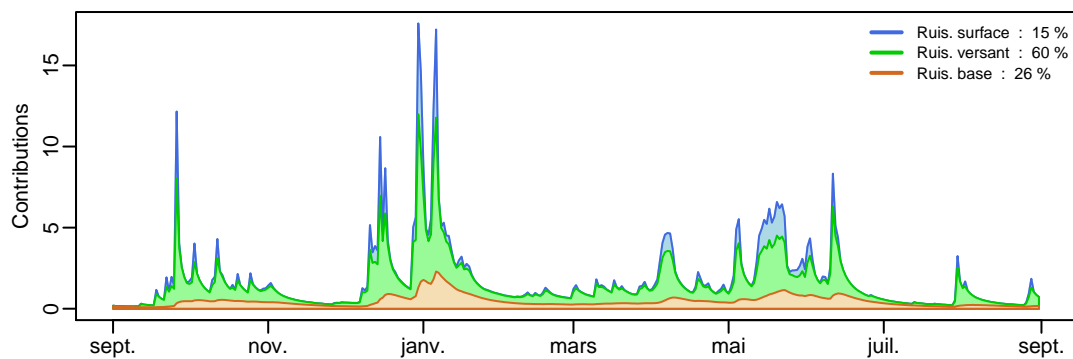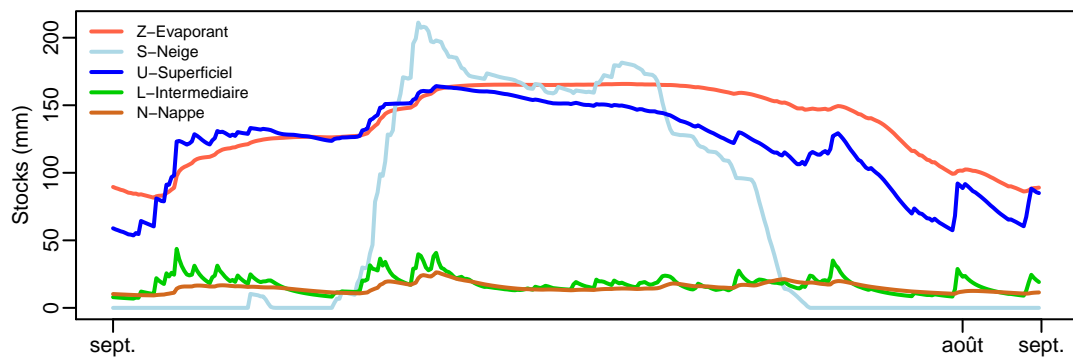

# x1025020 (290.57 km<sup>2</sup>) – année 1982–1983

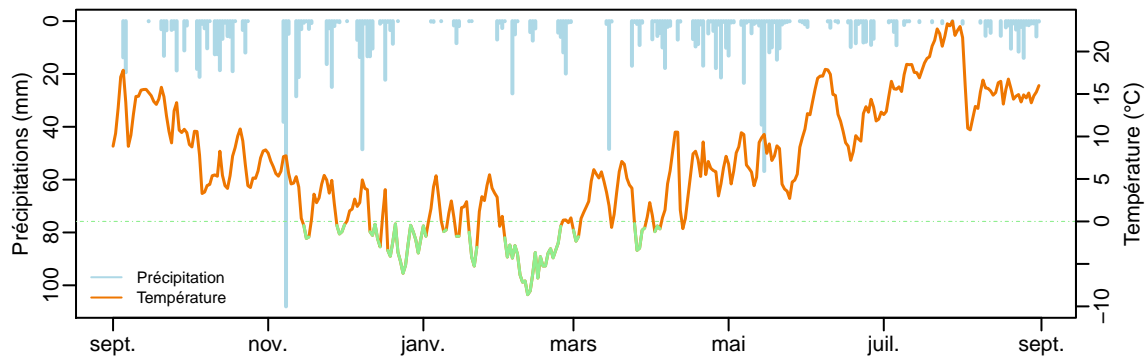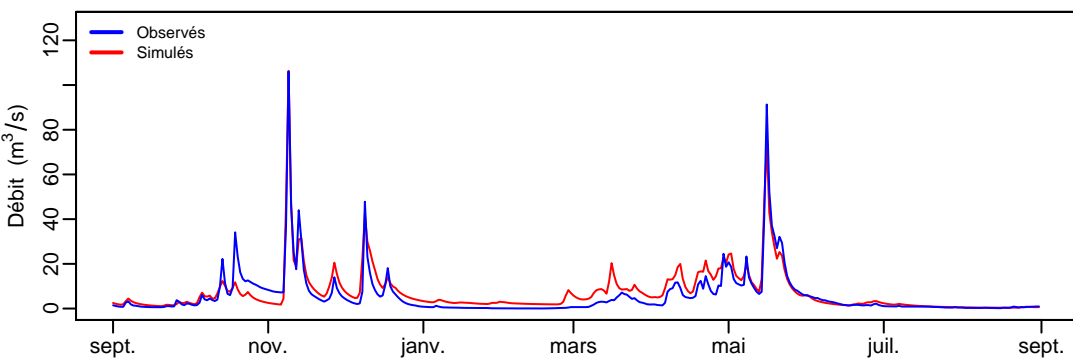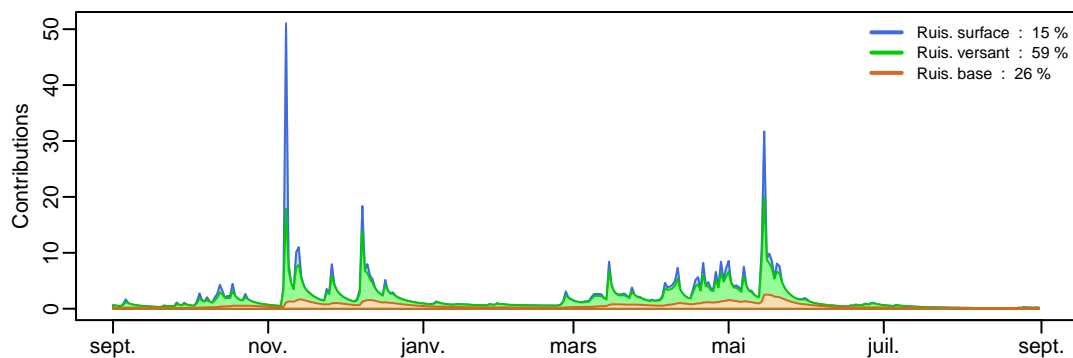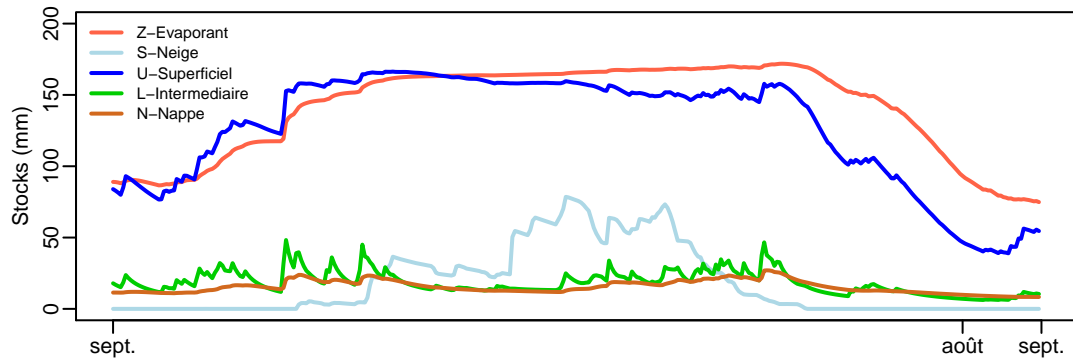

# x1025020 (290.57 km<sup>2</sup>) – année 1983–1984

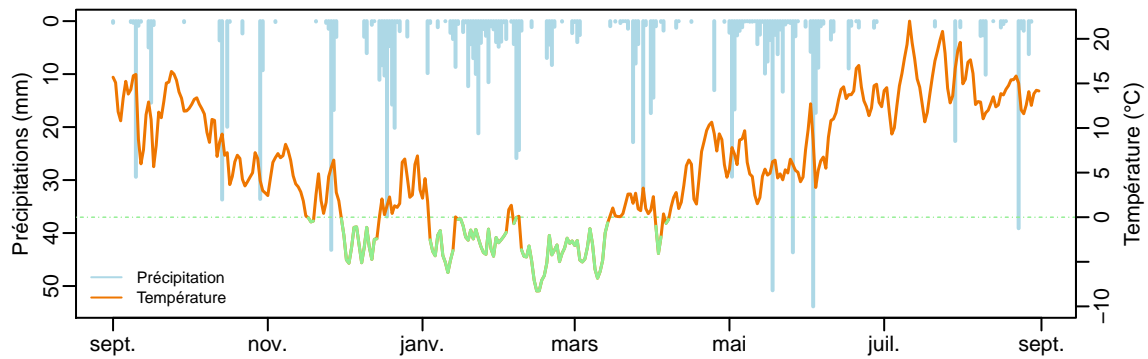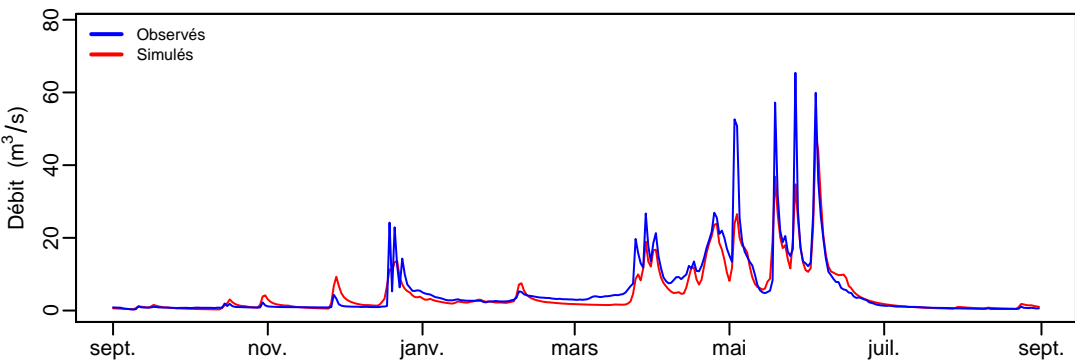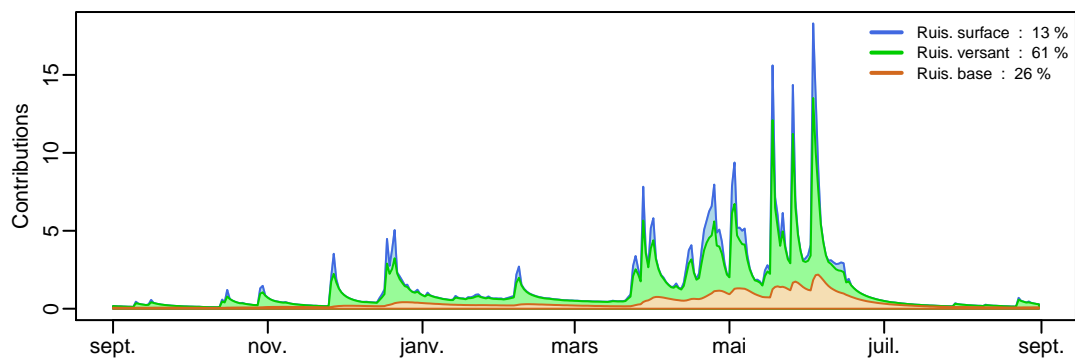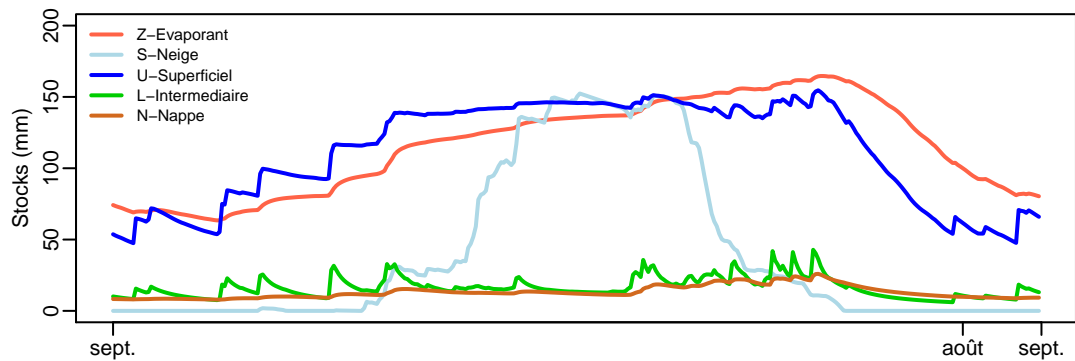



# x1025020 (290.57 km<sup>2</sup>) – année 1984–1985

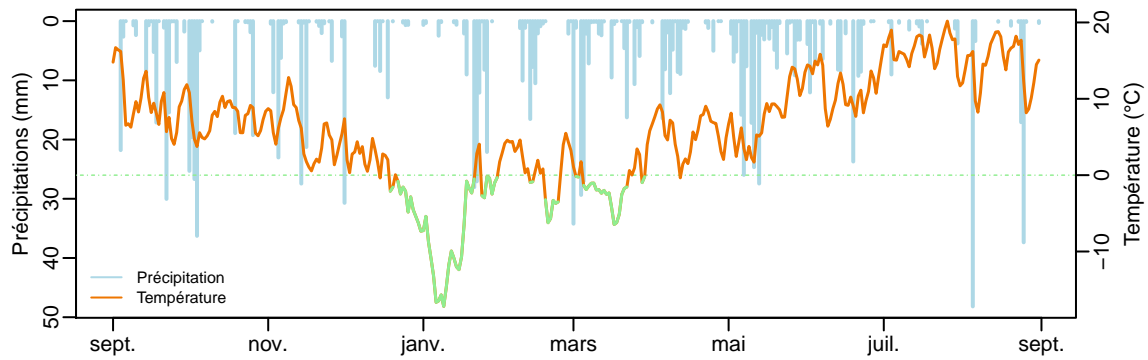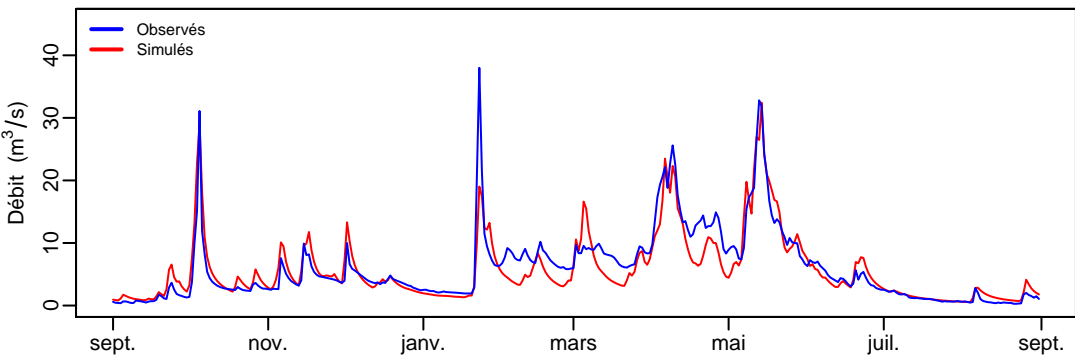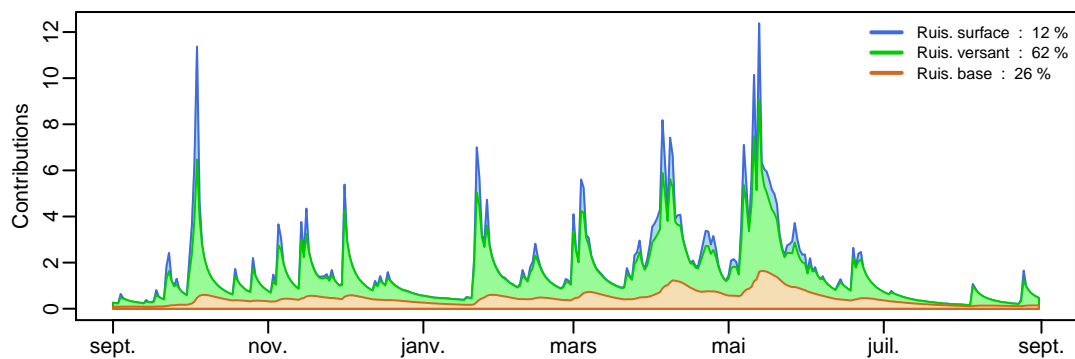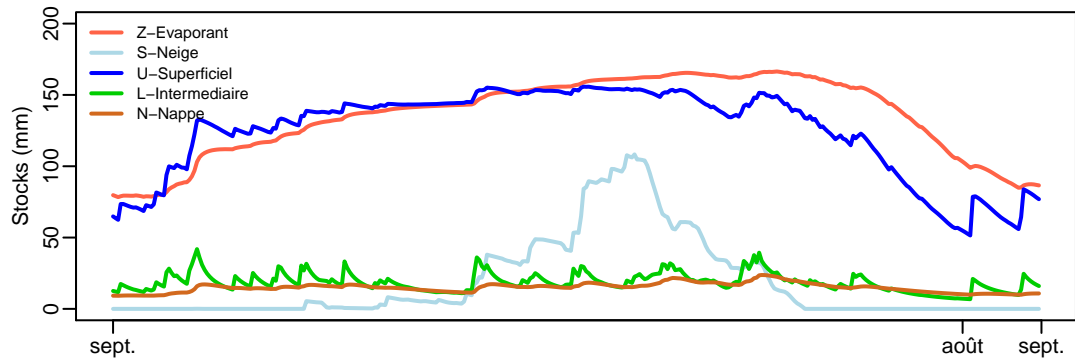

# x1025020 (290.57 km<sup>2</sup>) – année 1985–1986

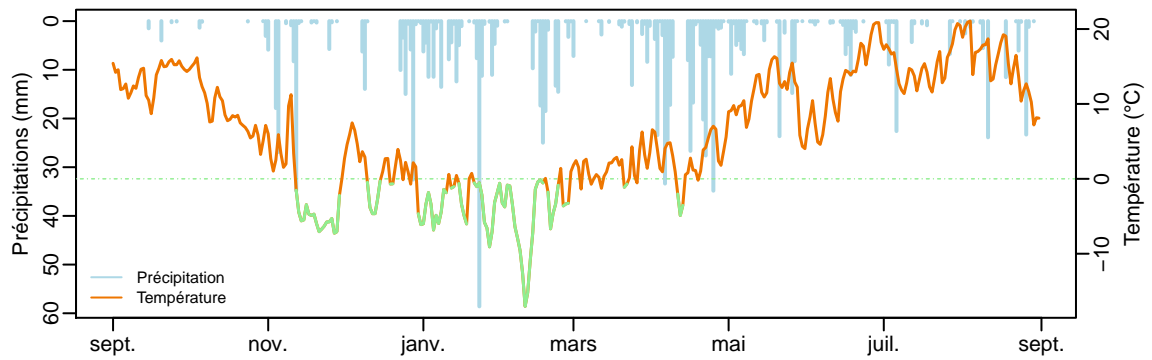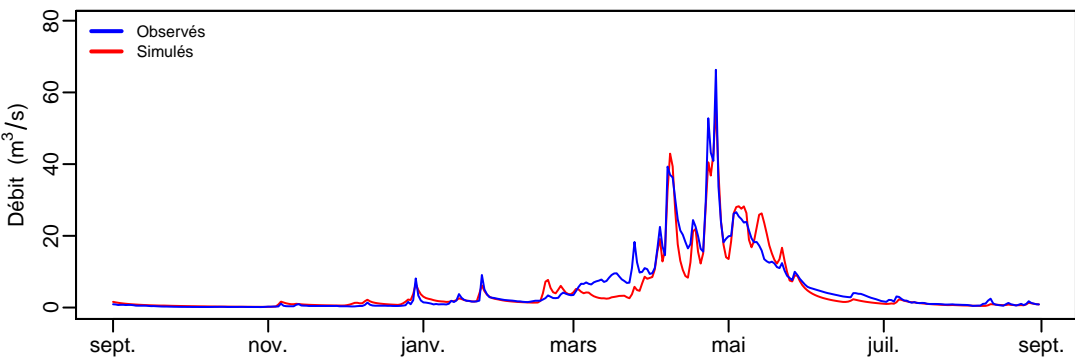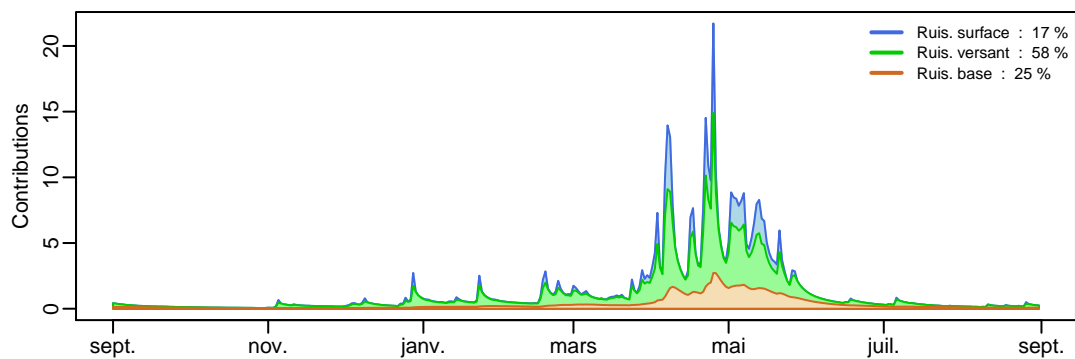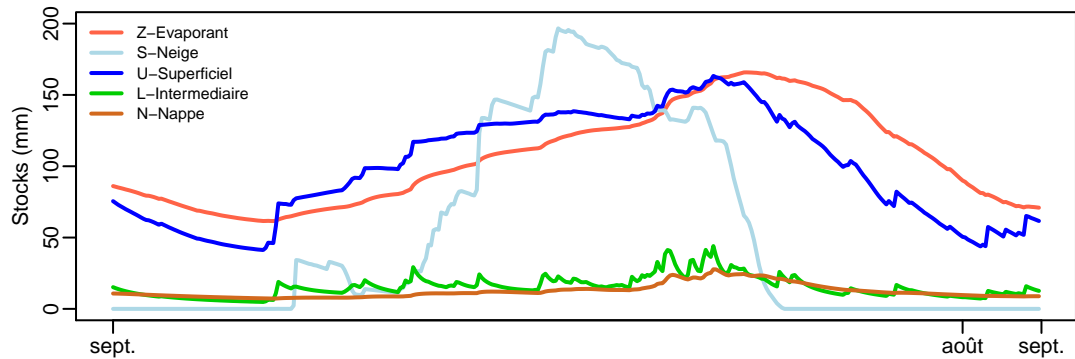

# x1025020 (290.57 km<sup>2</sup>) – année 1986–1987

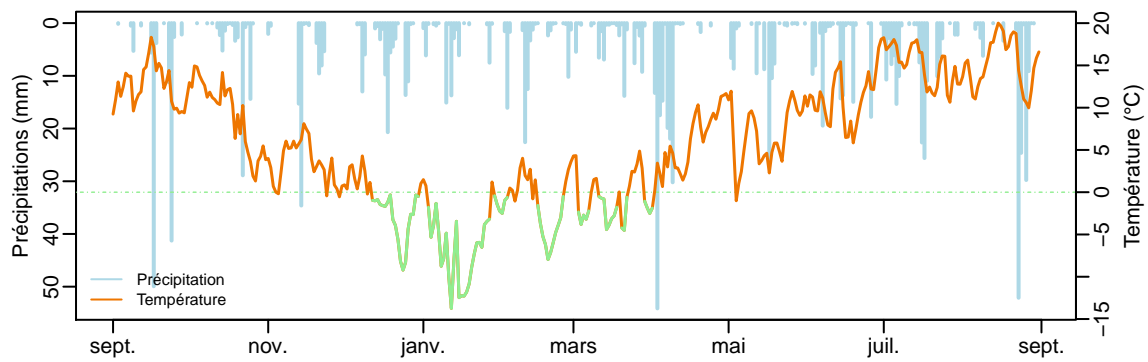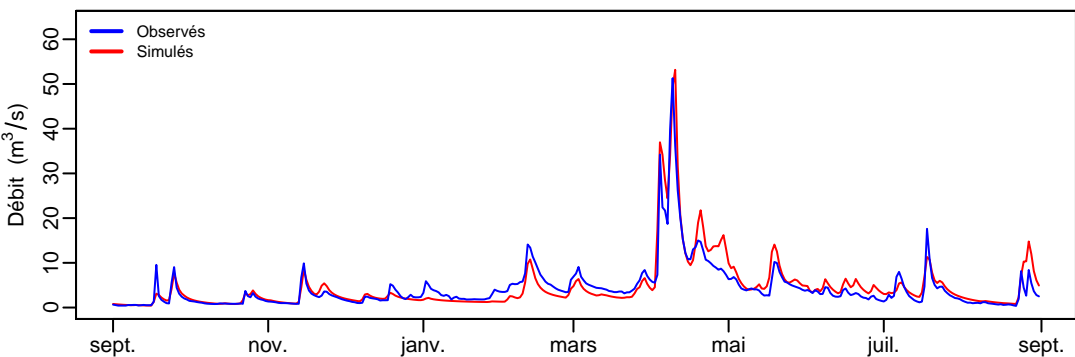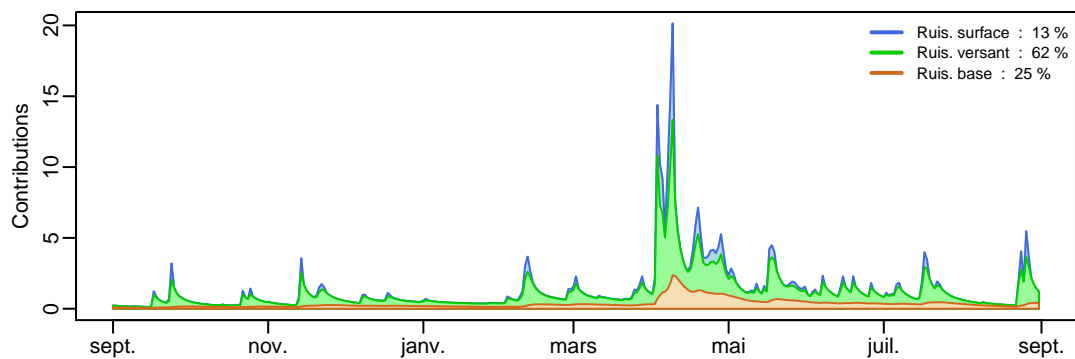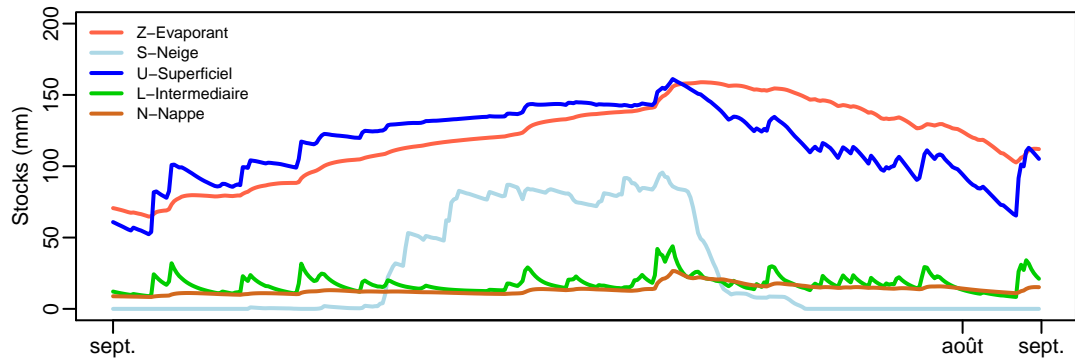

# x1025020 (290.57 km<sup>2</sup>) – année 1987–1988

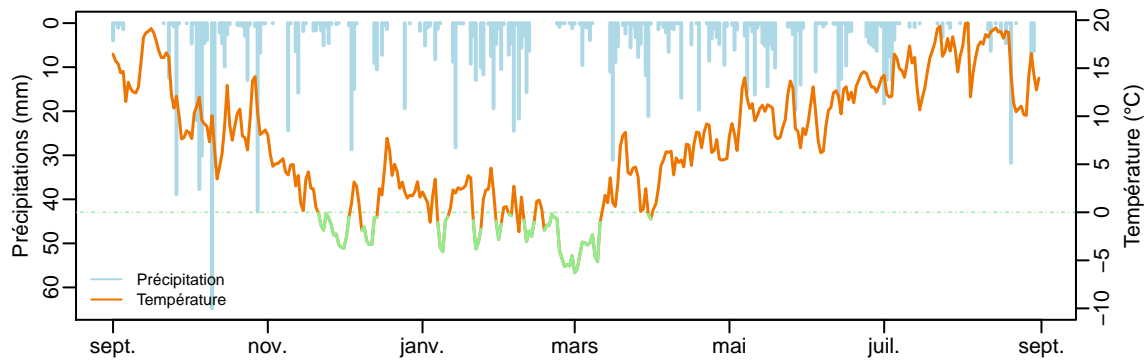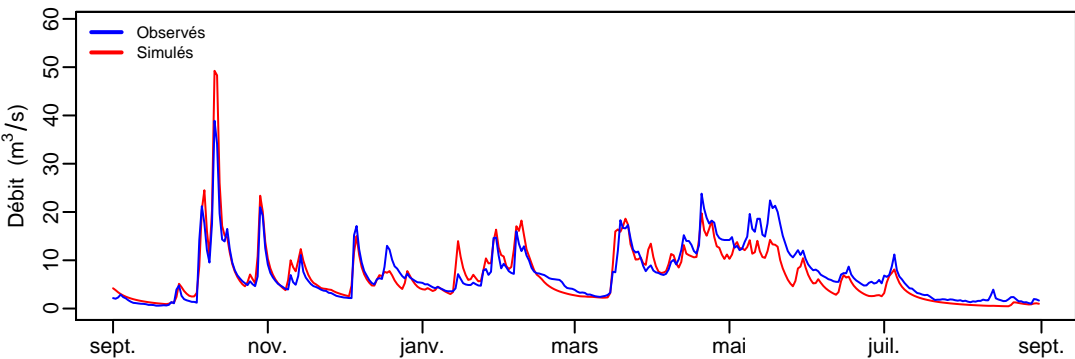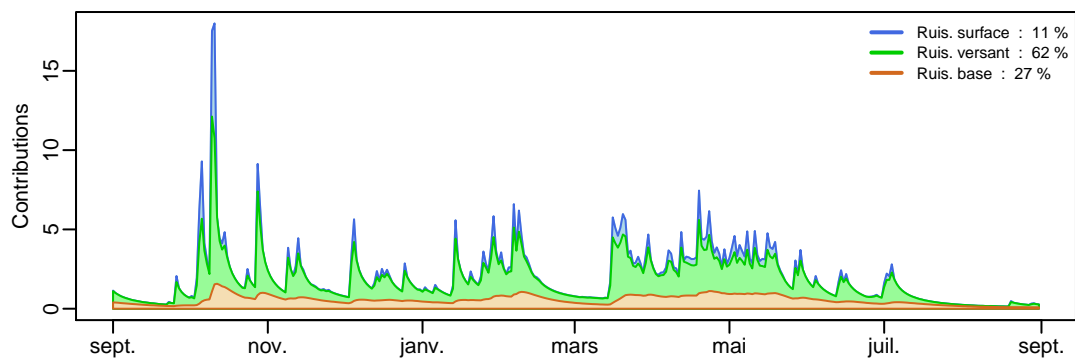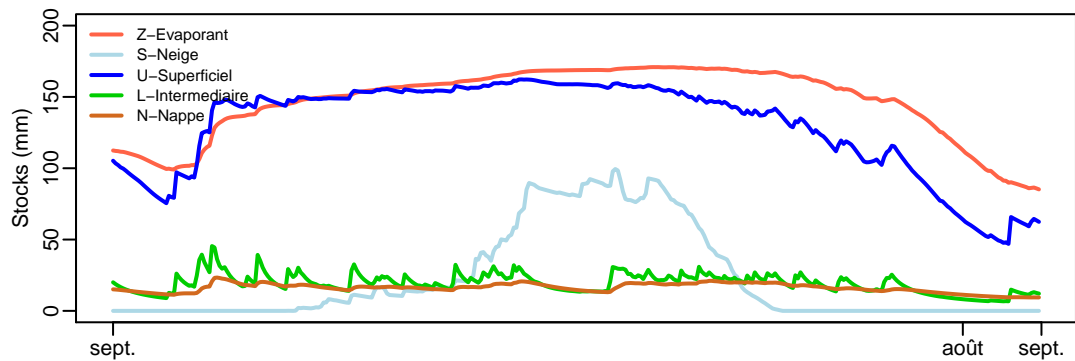

# x1025020 (290.57 km<sup>2</sup>) – année 1988–1989

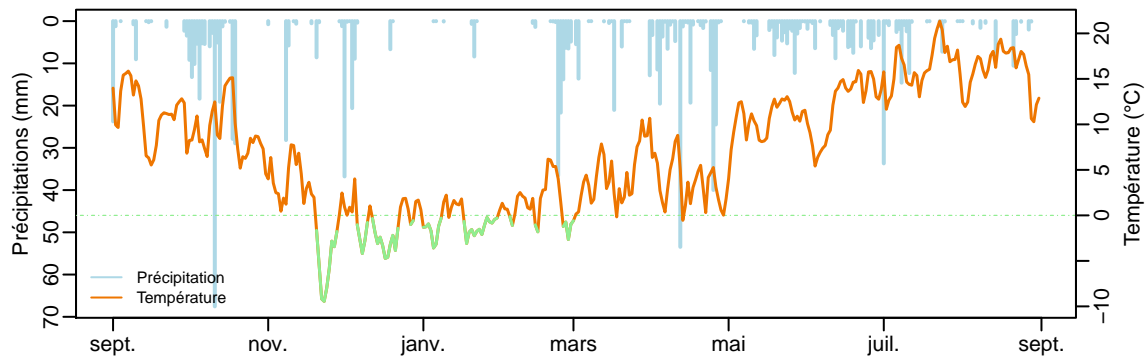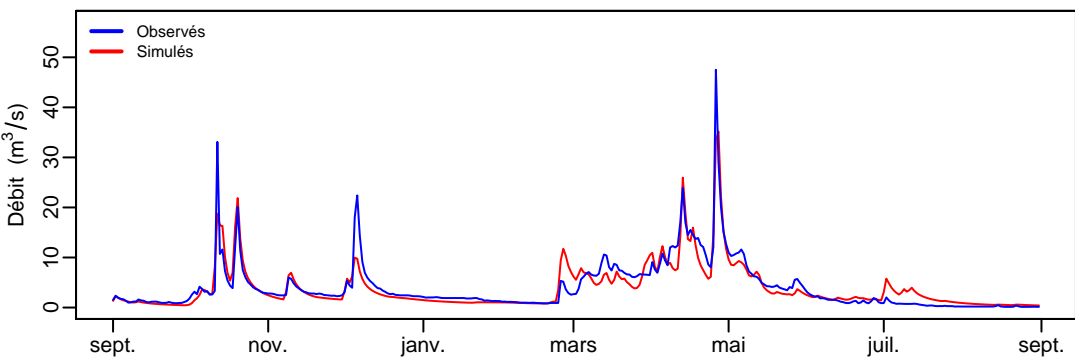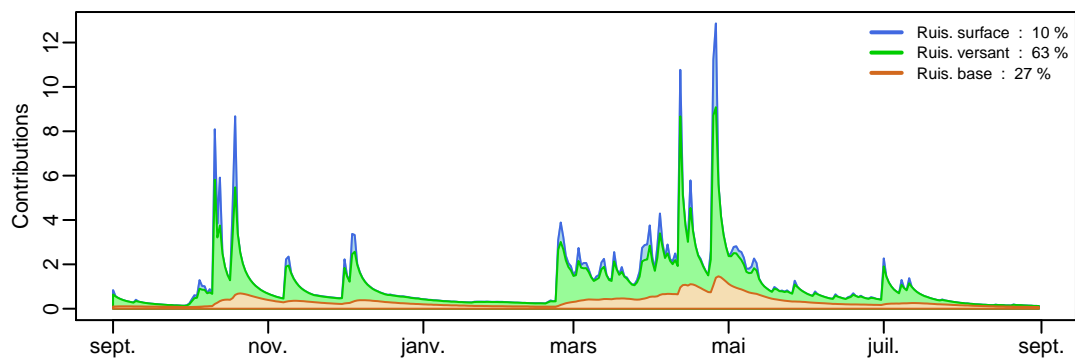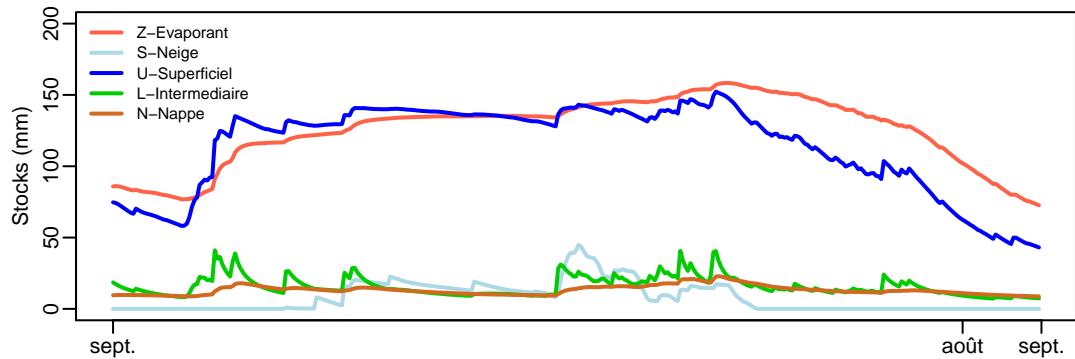

# x1025020 (290.57 km<sup>2</sup>) – année 1989–1990

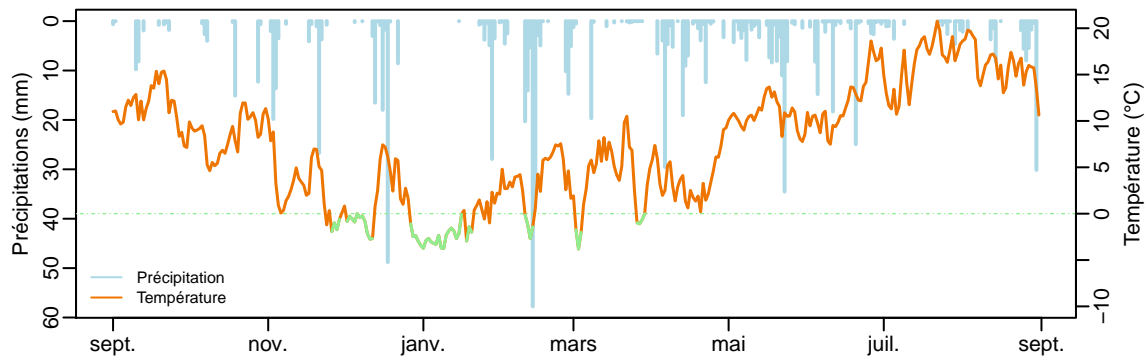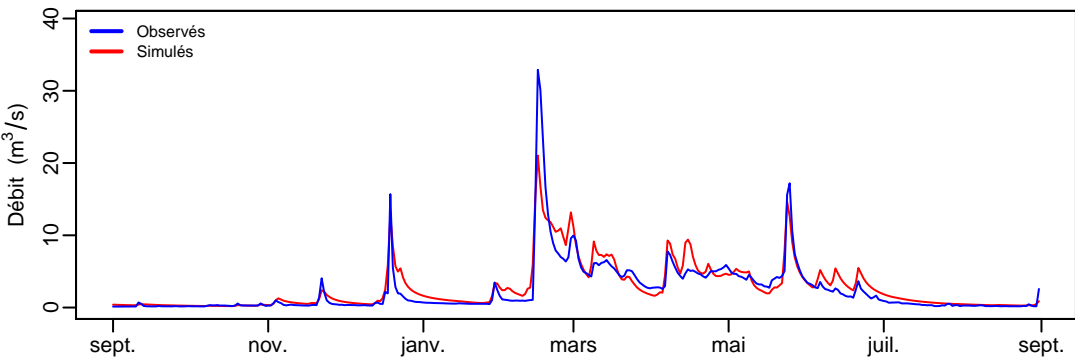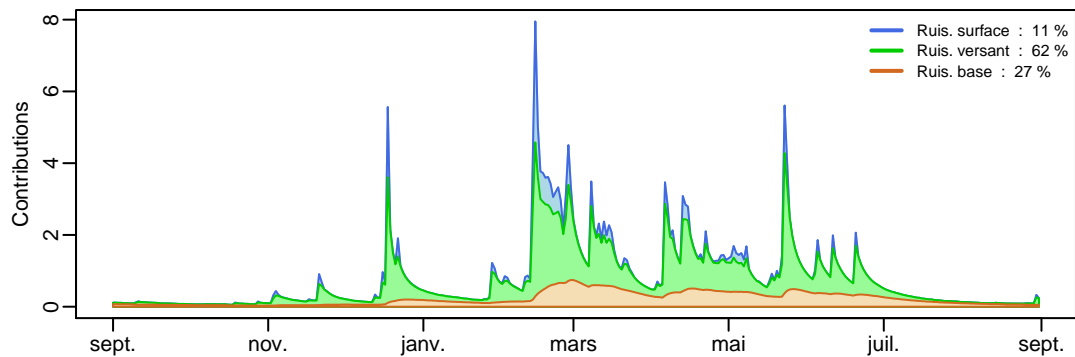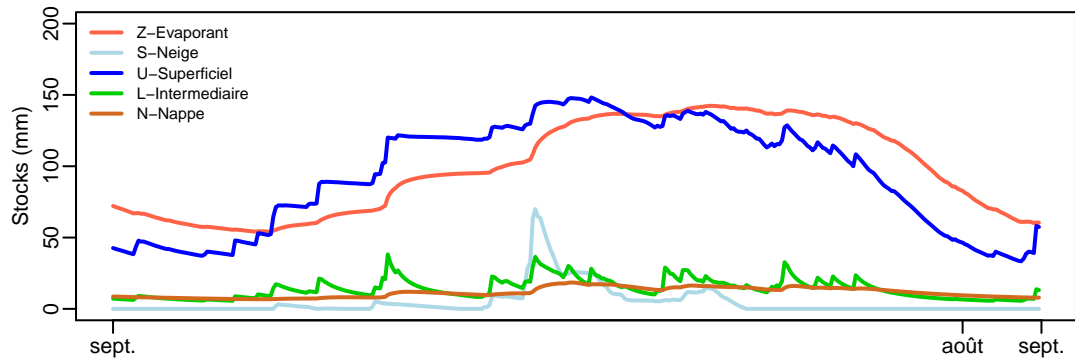

# x1025020 (290.57 km<sup>2</sup>) – année 1990–1991

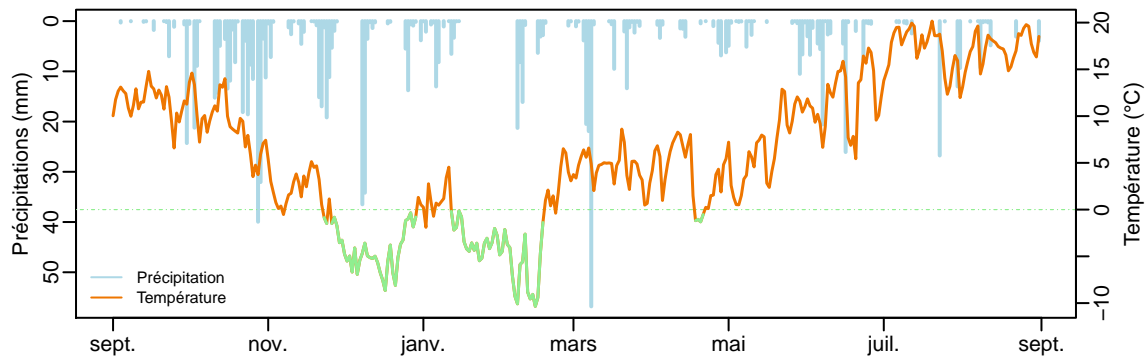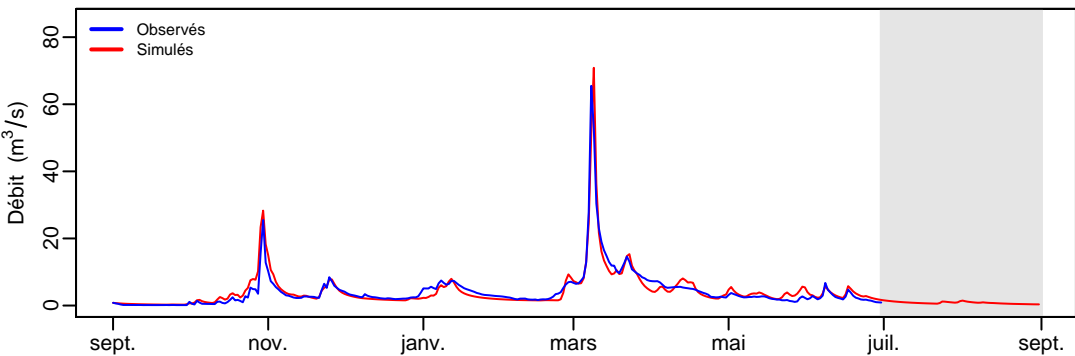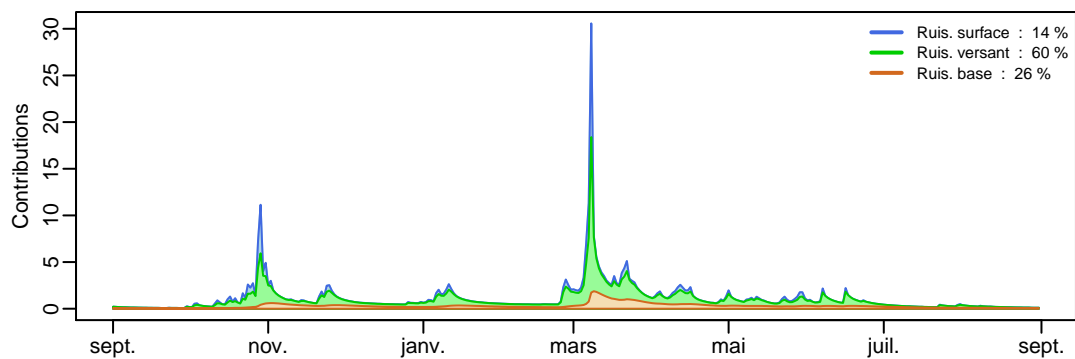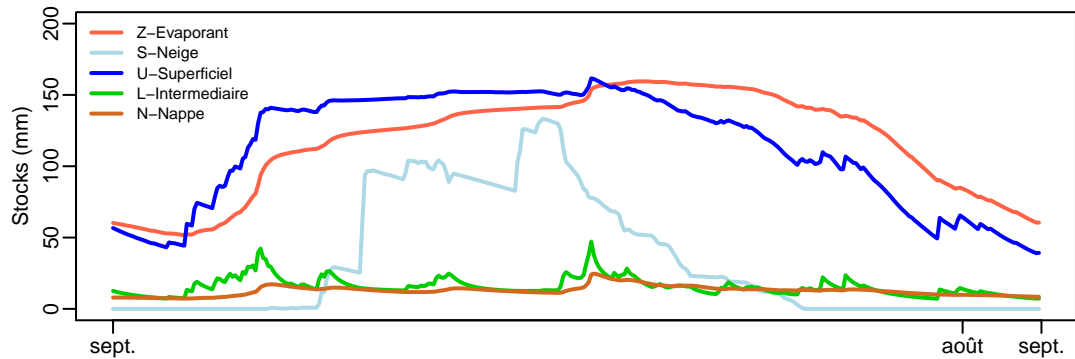

# x1025020 (290.57 km<sup>2</sup>) – année 1991–1992

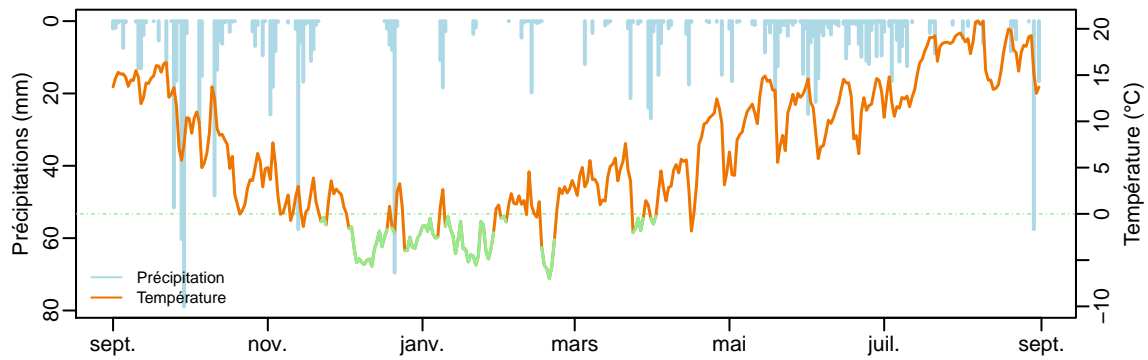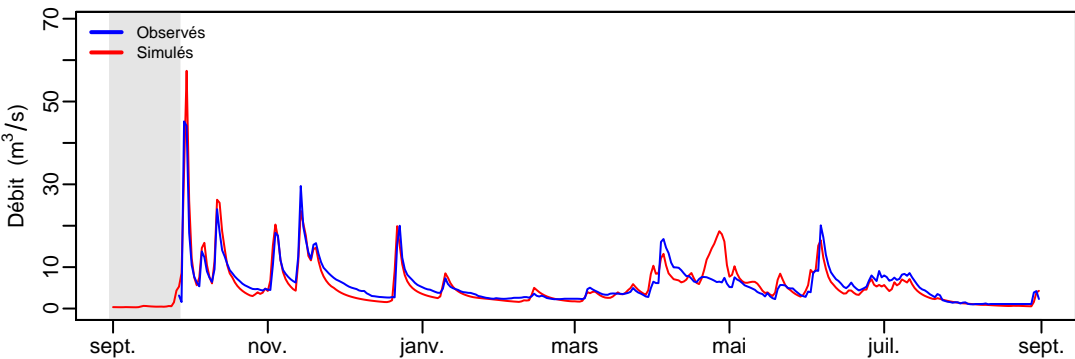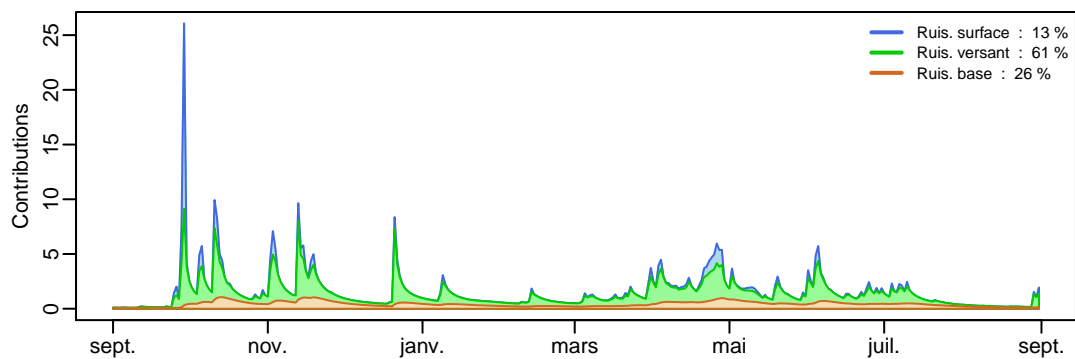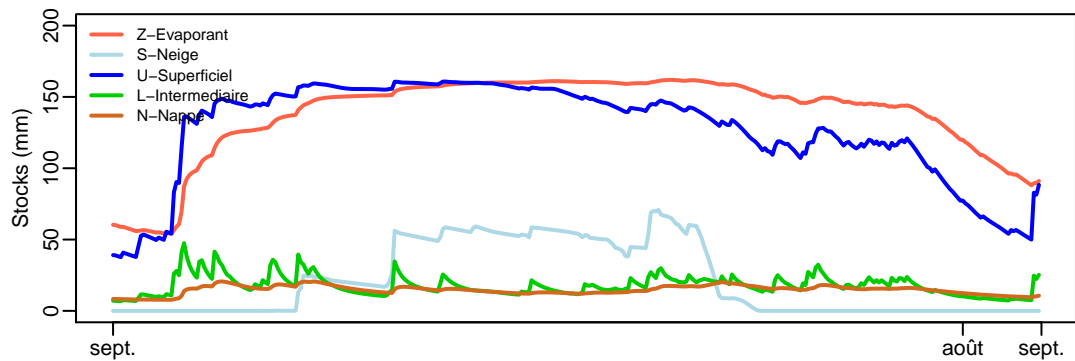



# x1025020 (290.57 km<sup>2</sup>) – année 1992–1993

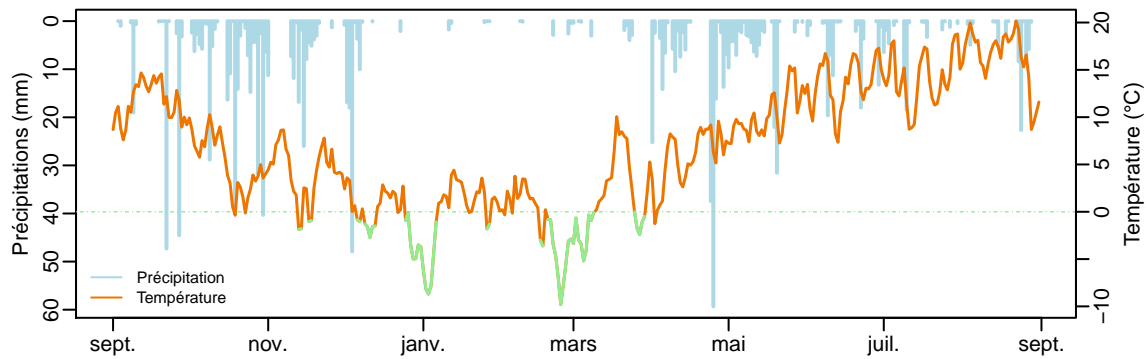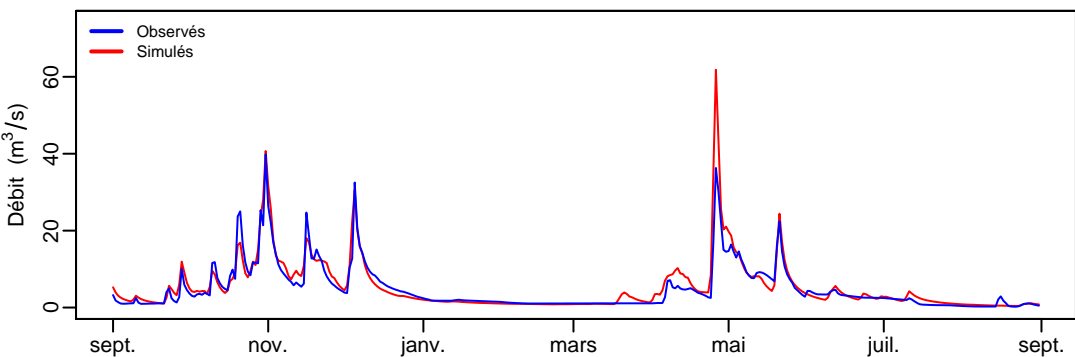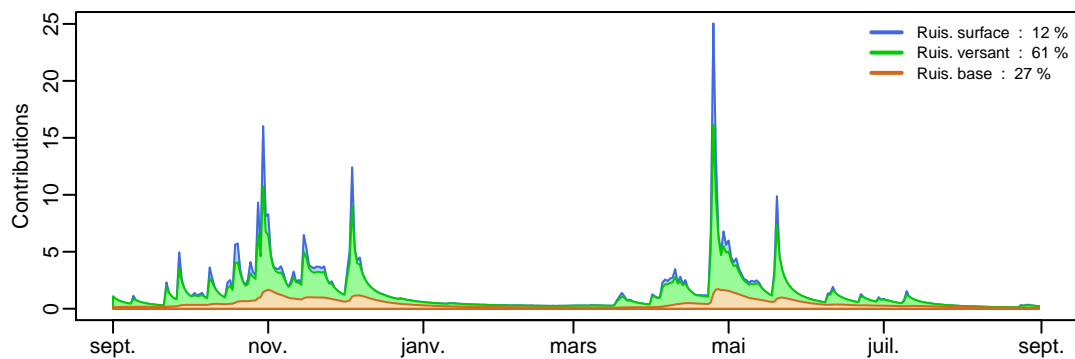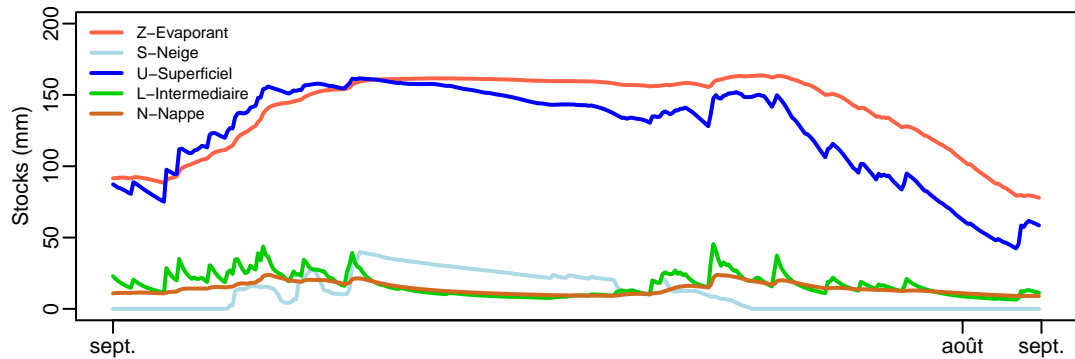

# x1034010 (772.19 km<sup>2</sup>) – année 1981–1982

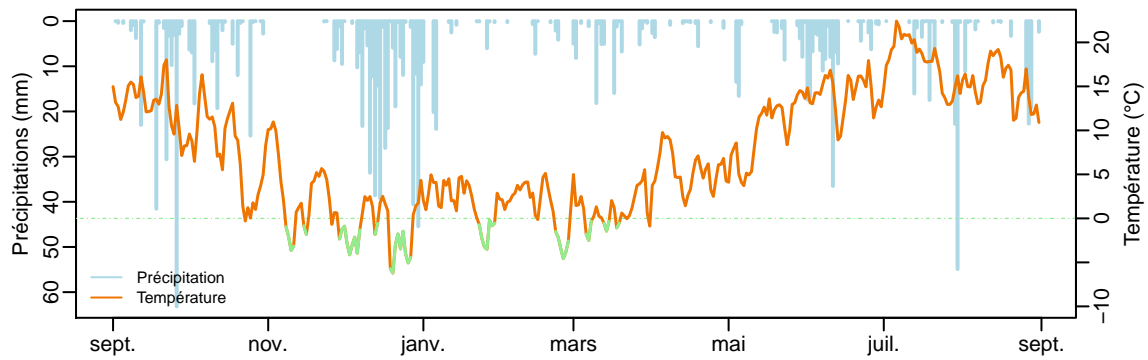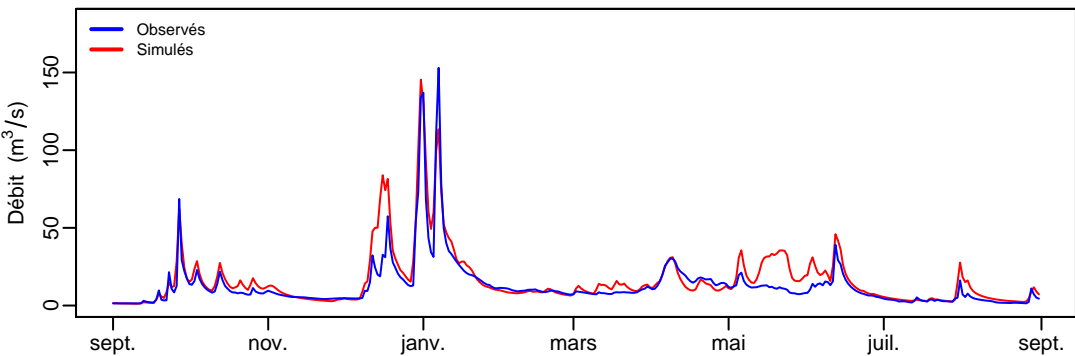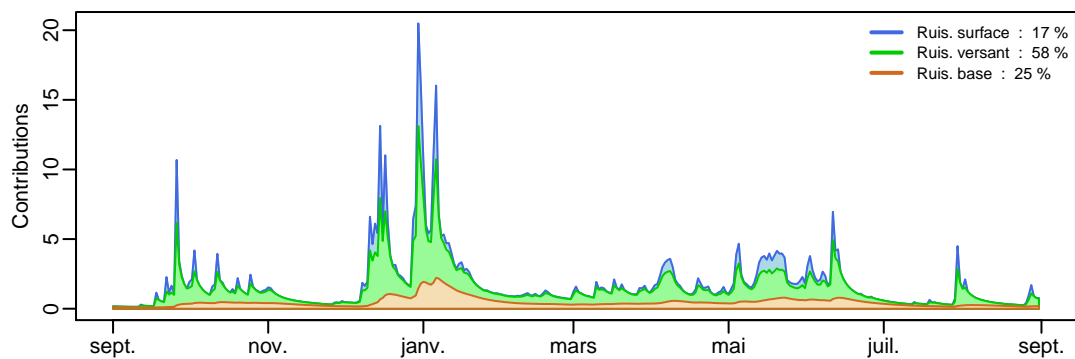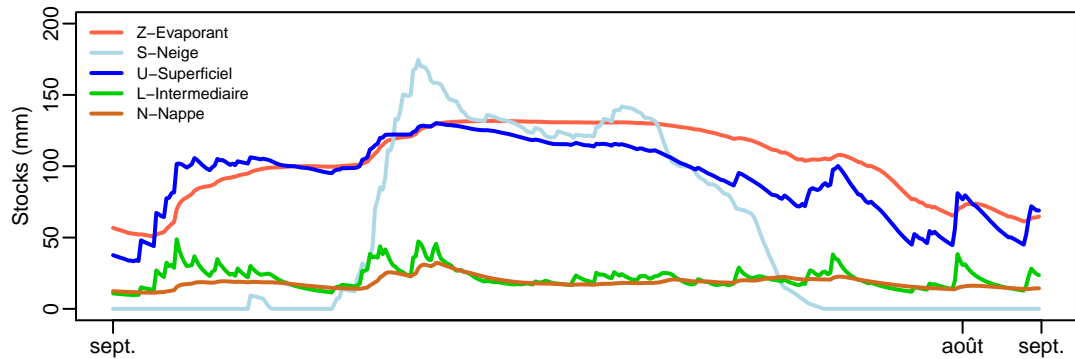

# x1034010 (772.19 km<sup>2</sup>) – année 1982–1983

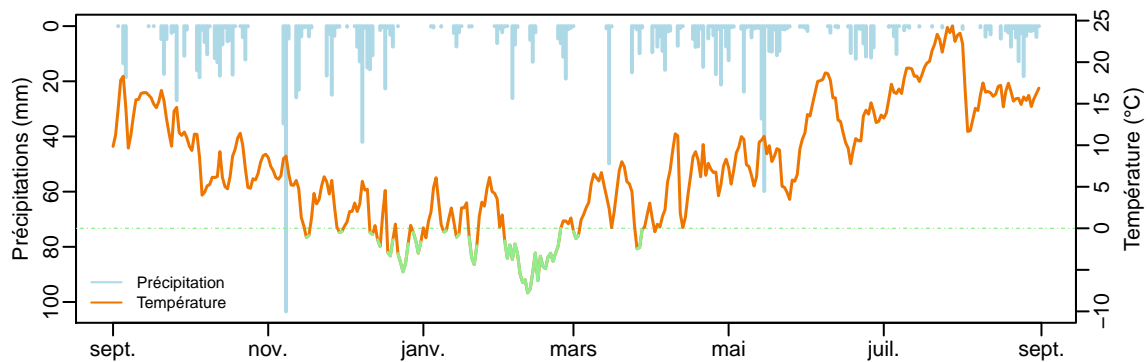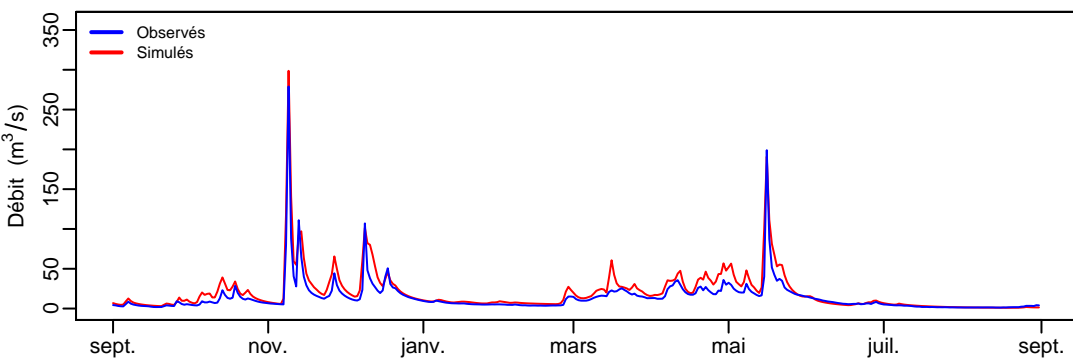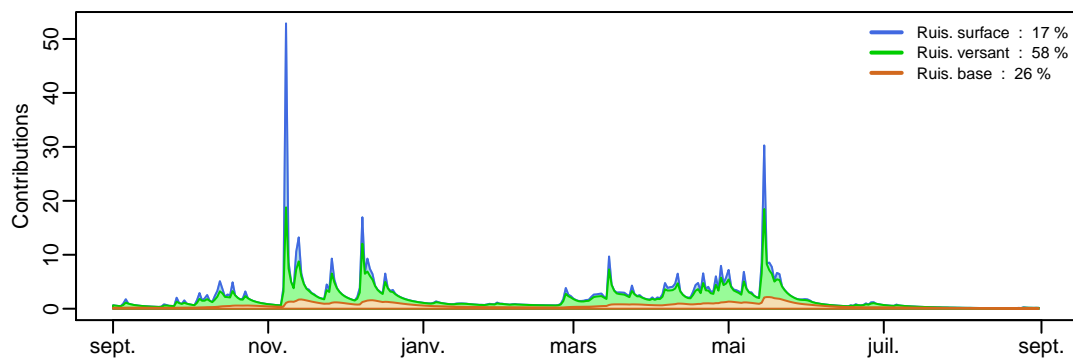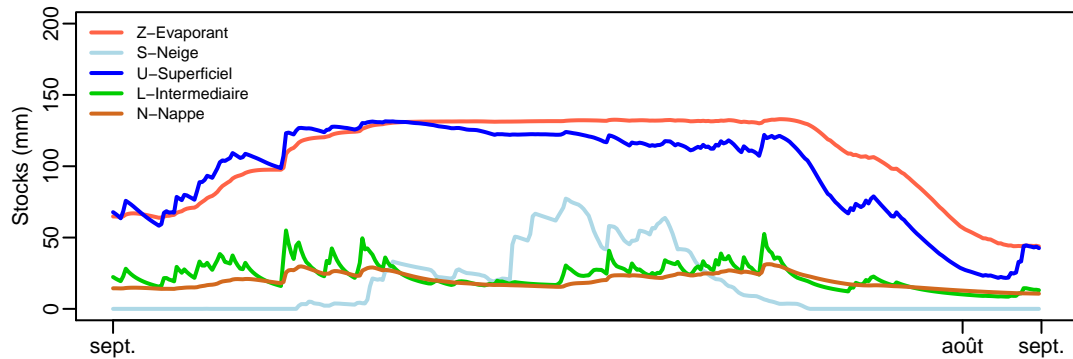

# x1034010 (772.19 km<sup>2</sup>) – année 1983–1984

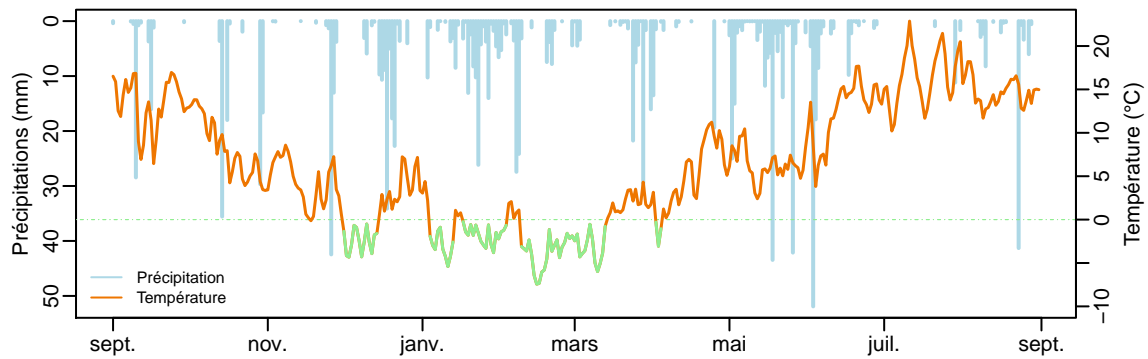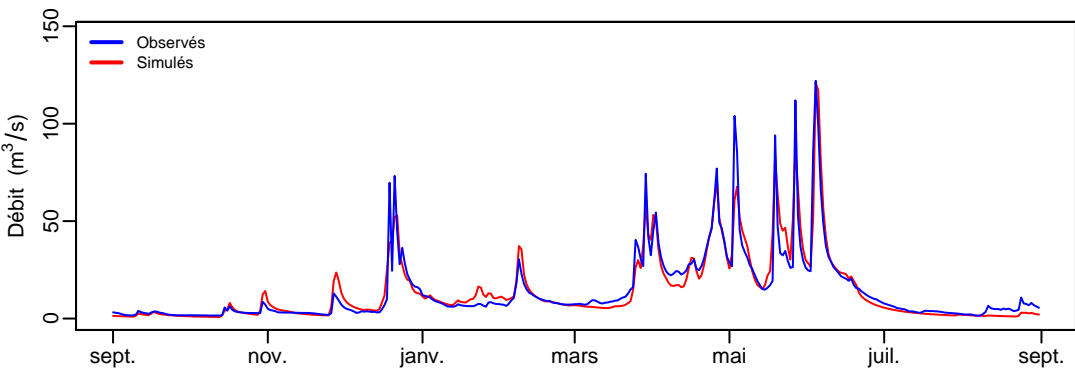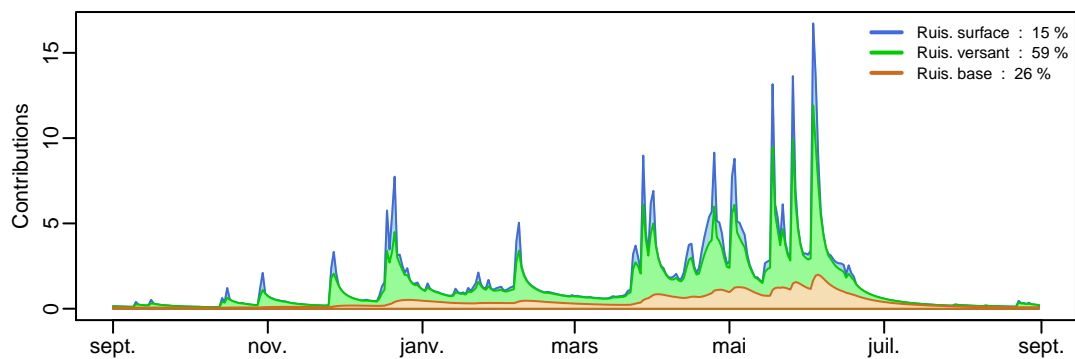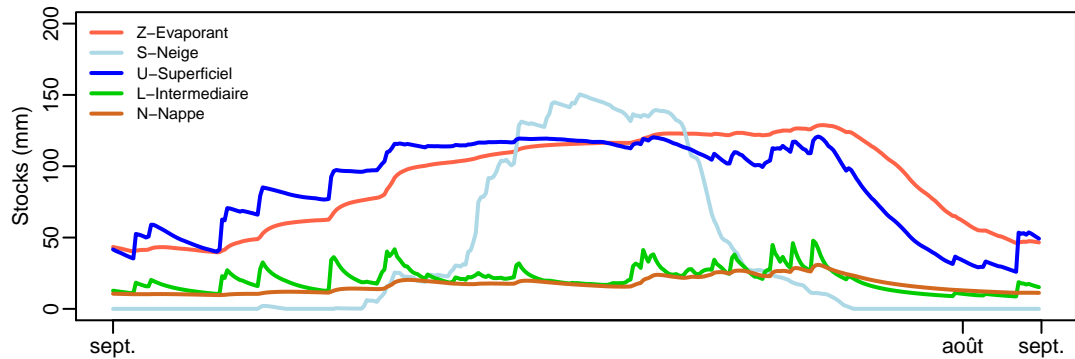

# x1034010 (772.19 km<sup>2</sup>) – année 1984–1985

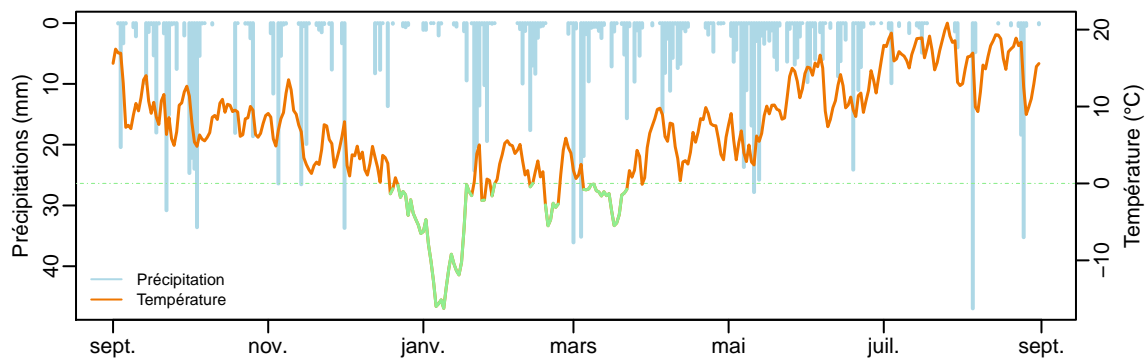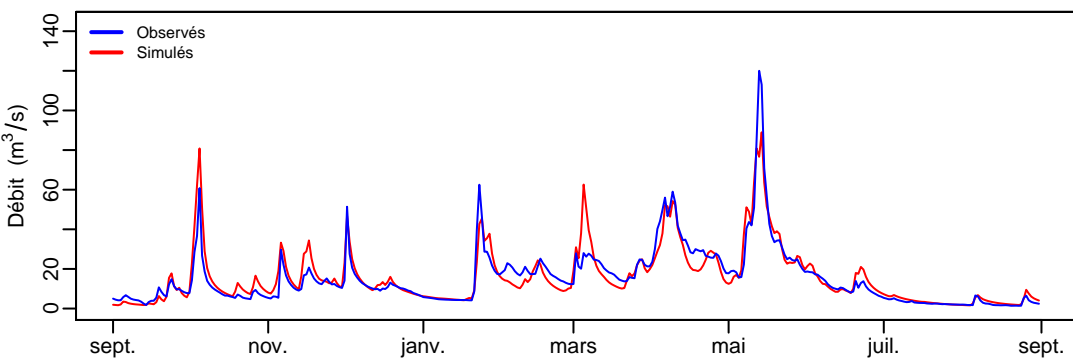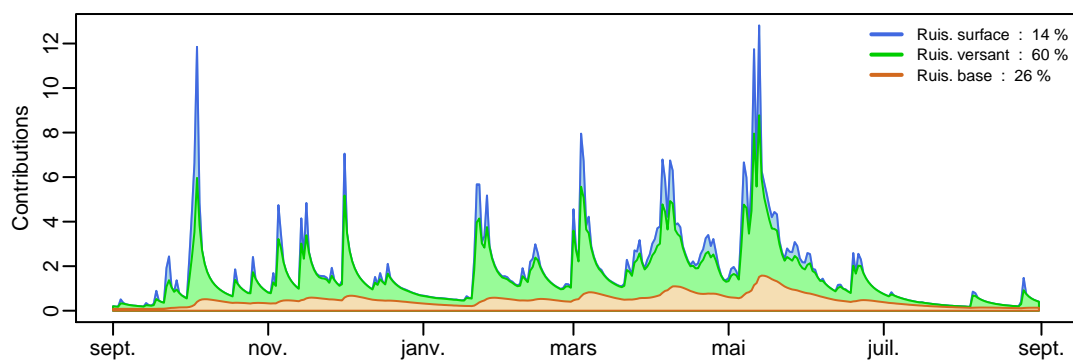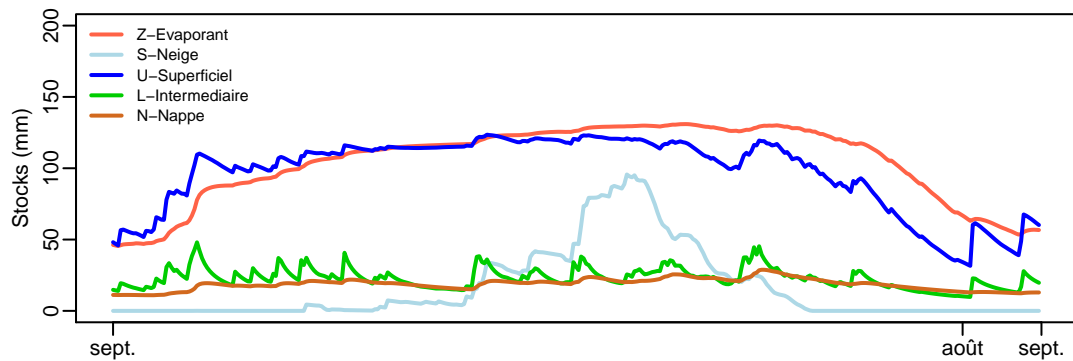

# x1034010 (772.19 km<sup>2</sup>) – année 1985–1986

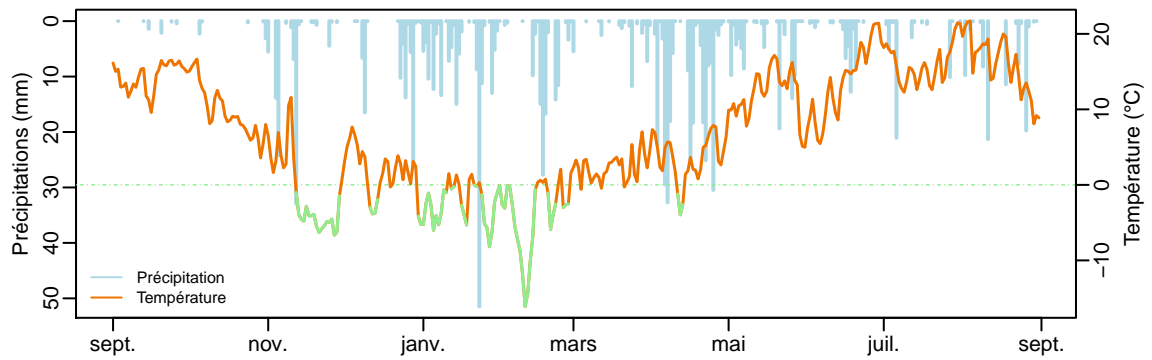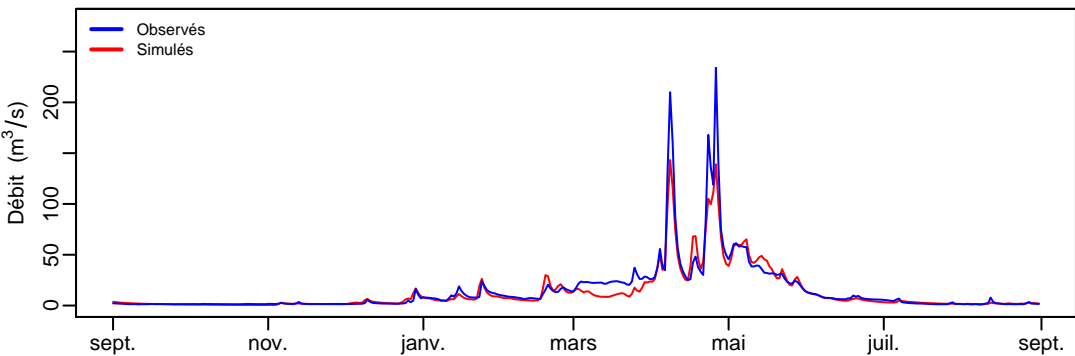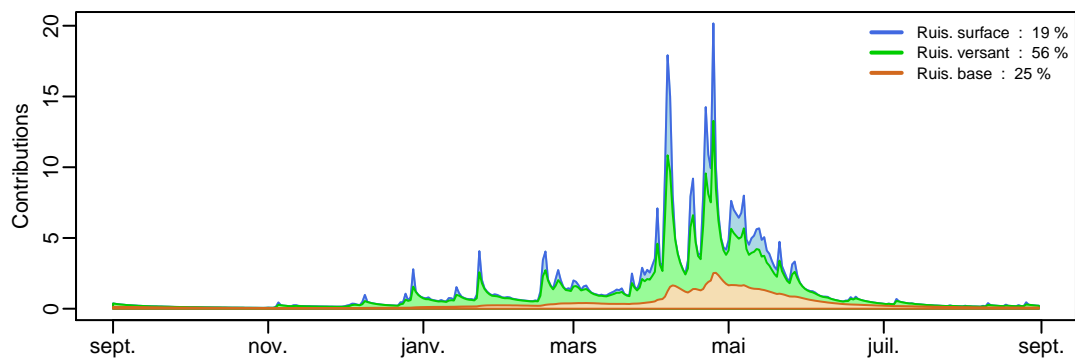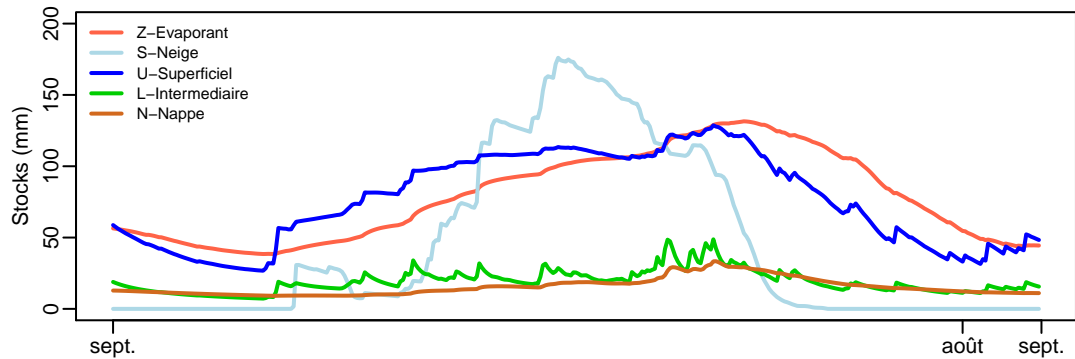

# x1034010 (772.19 km<sup>2</sup>) – année 1986–1987

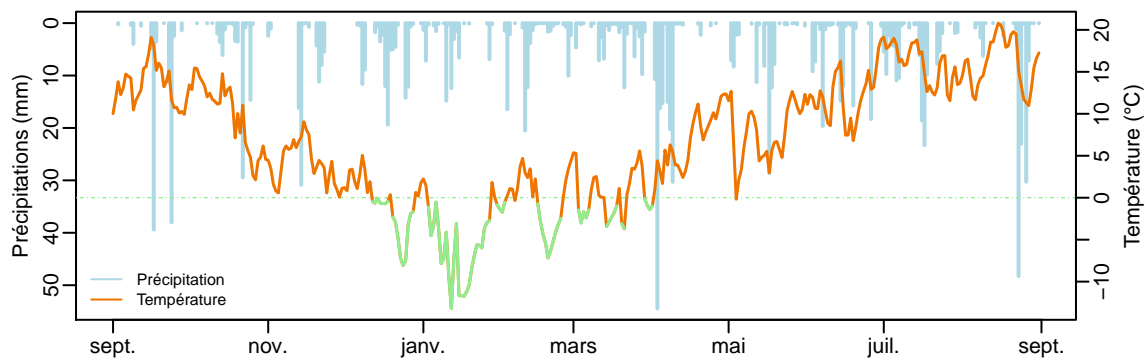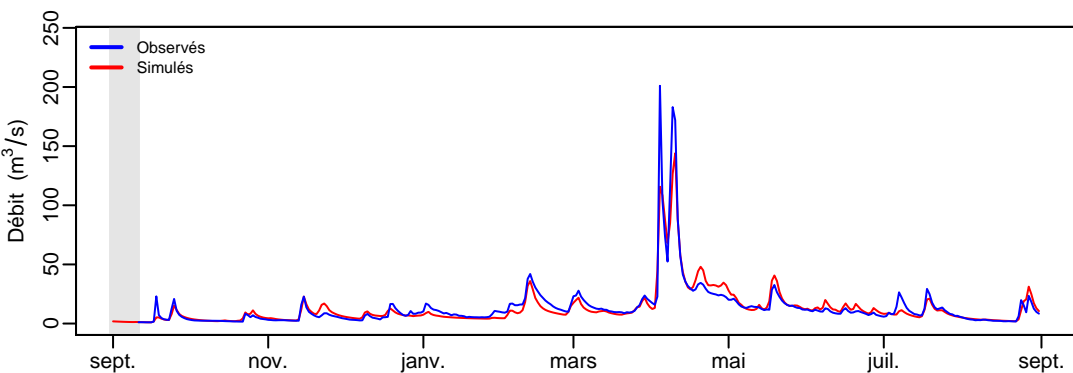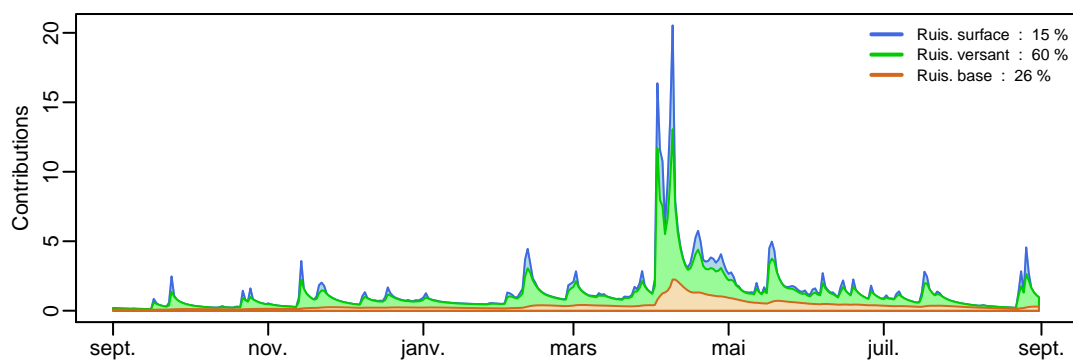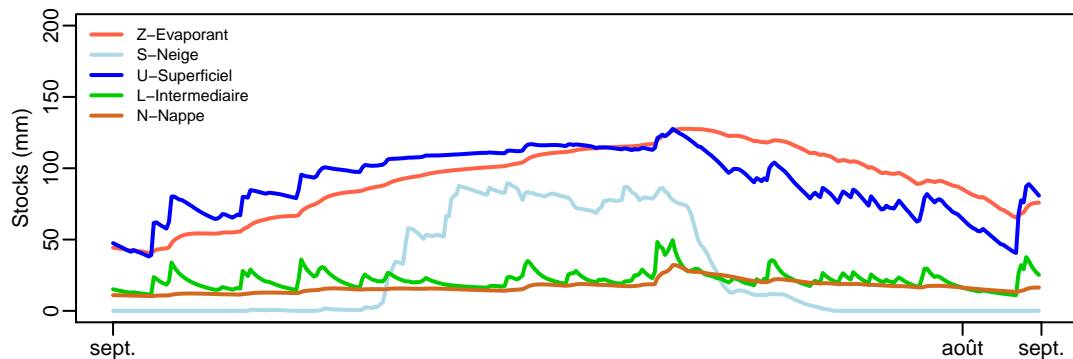

# x1034010 (772.19 km<sup>2</sup>) – année 1987–1988

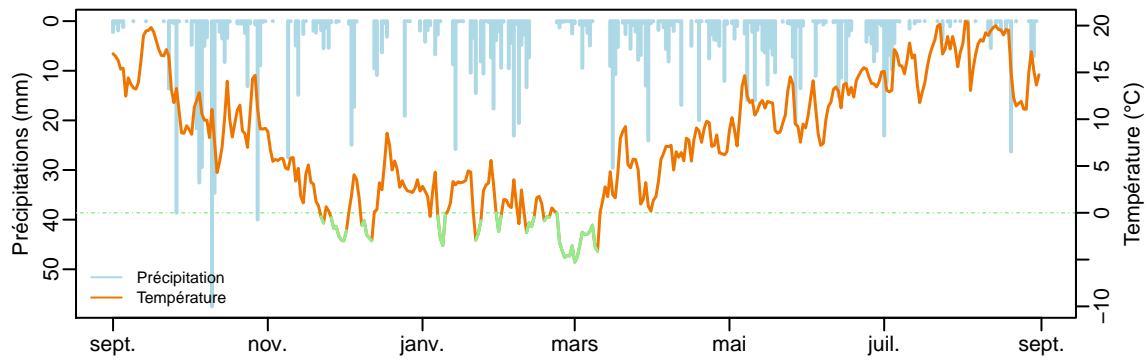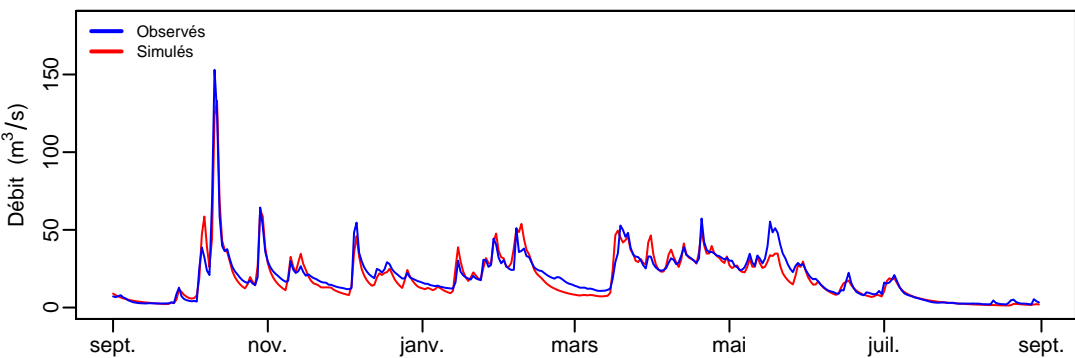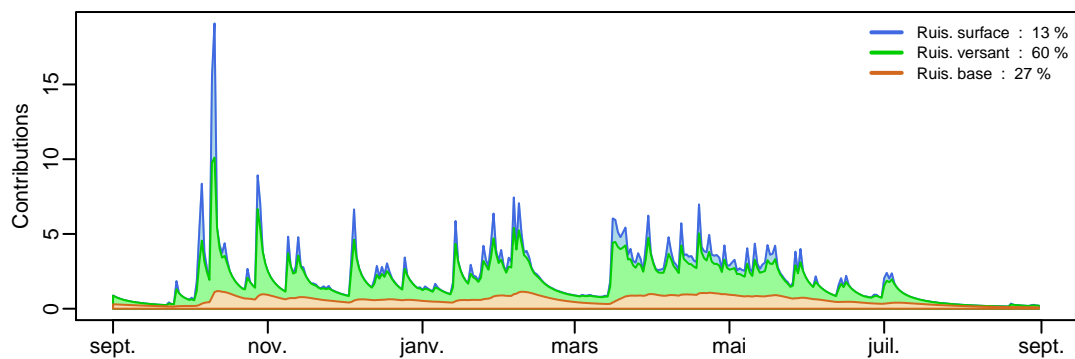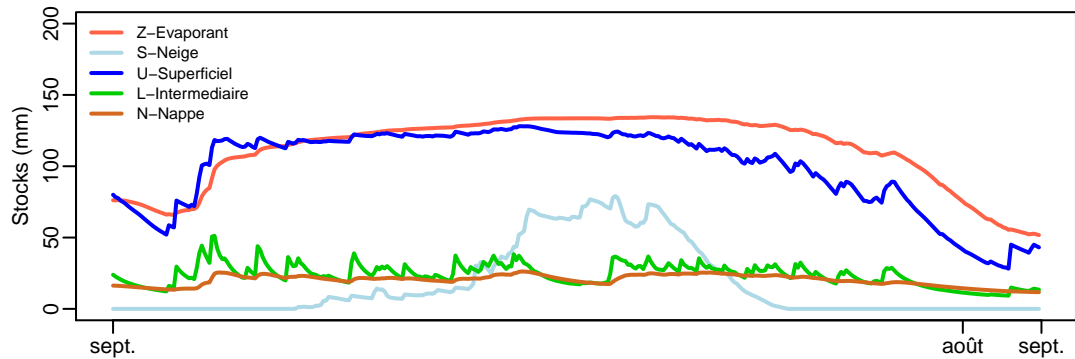



# x1034010 (772.19 km<sup>2</sup>) – année 1988–1989

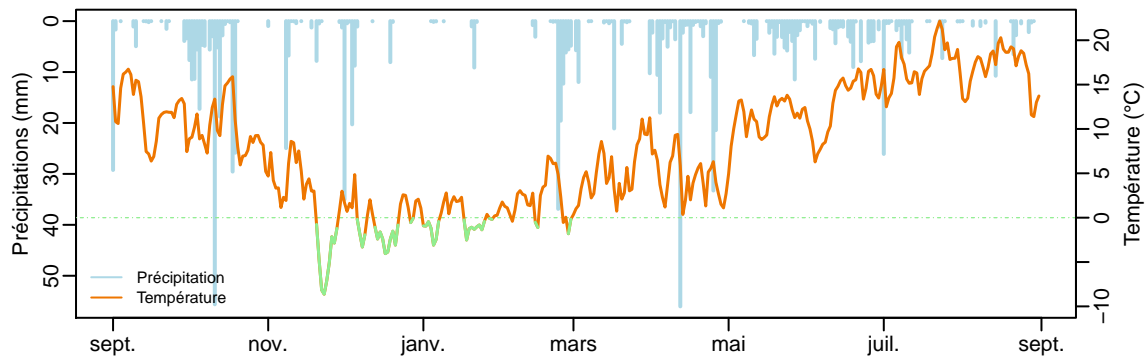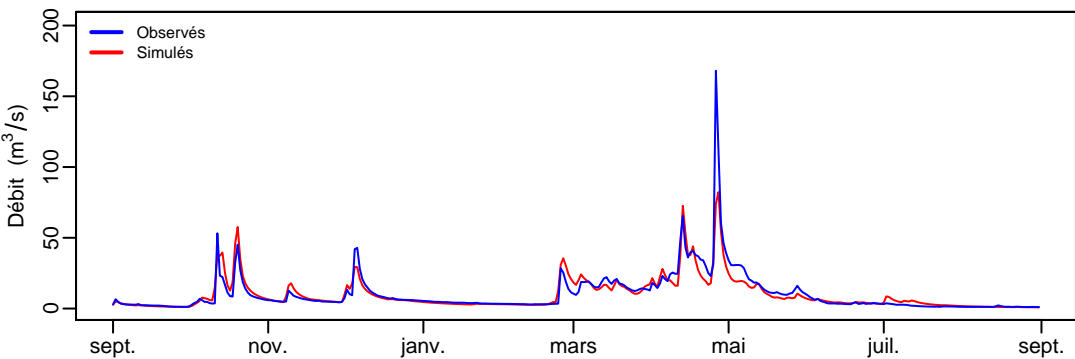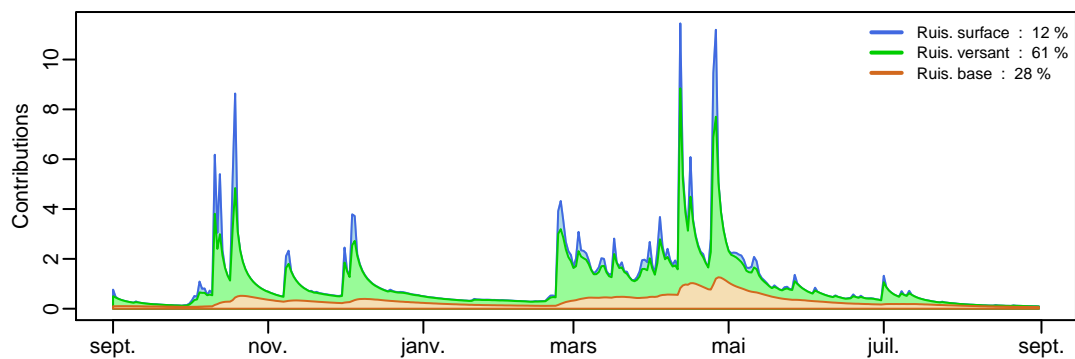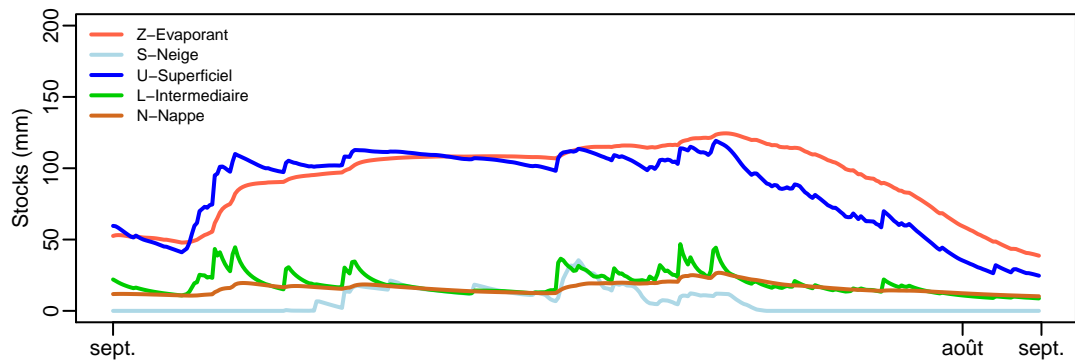

# x1044020 (1115.03 km<sup>2</sup>) – année 1981–1982

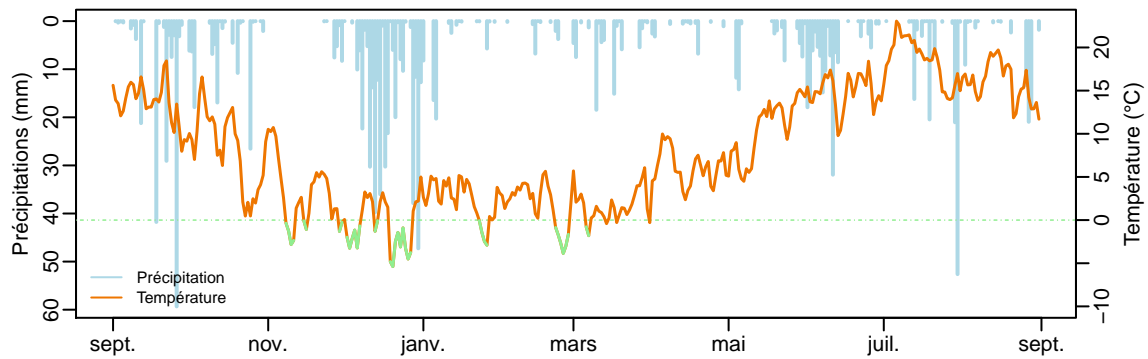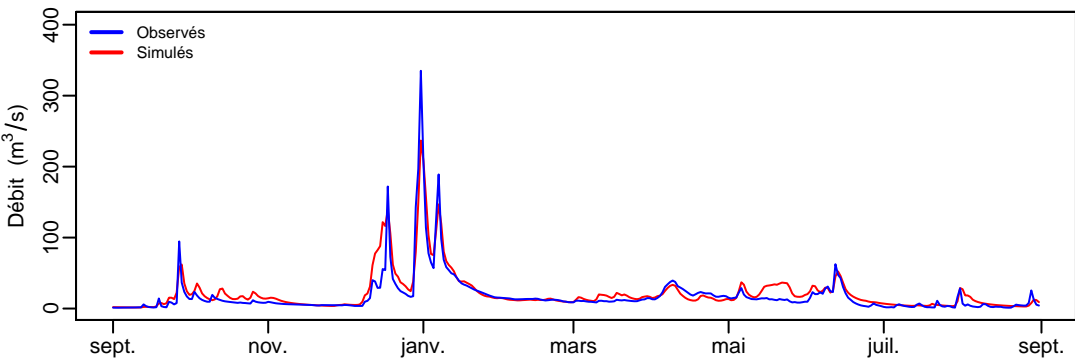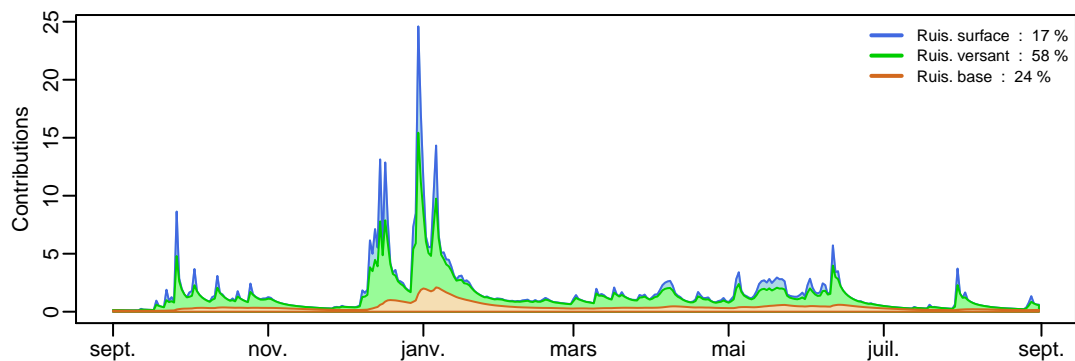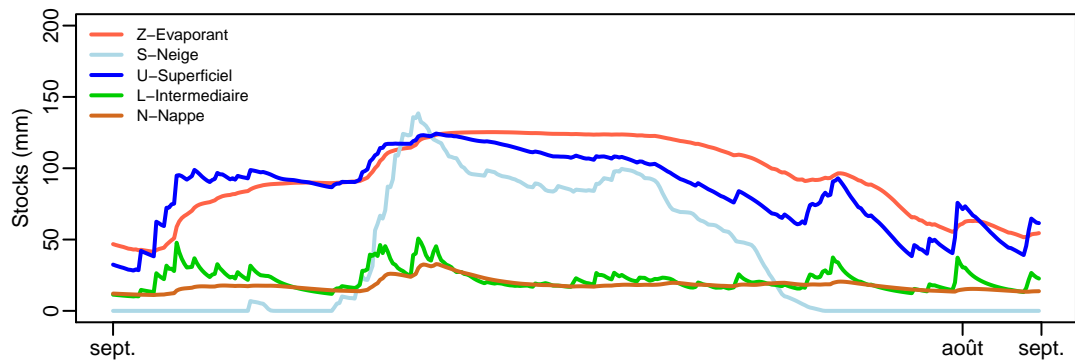

# x1044020 (1115.03 km<sup>2</sup>) – année 1982–1983

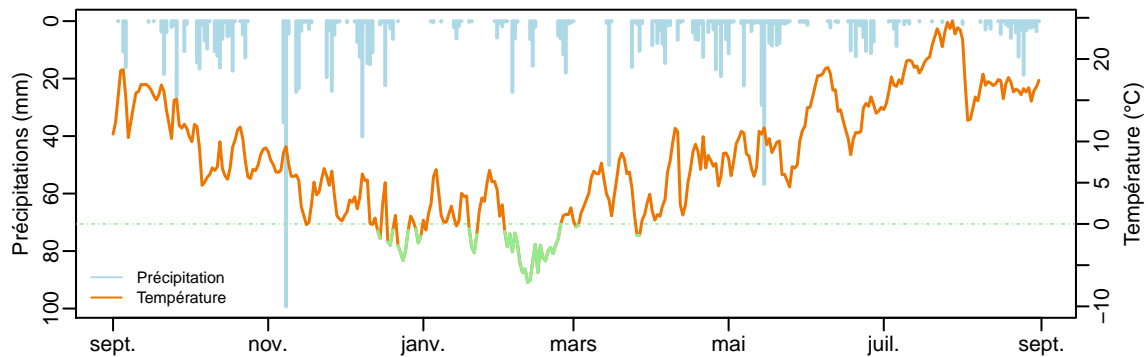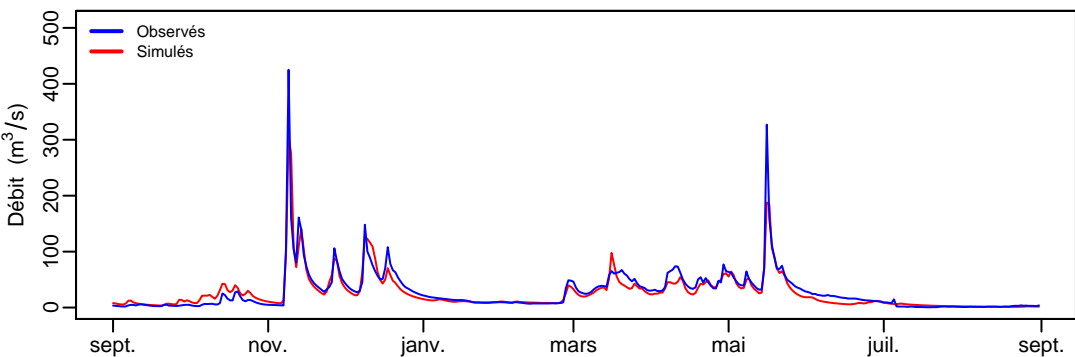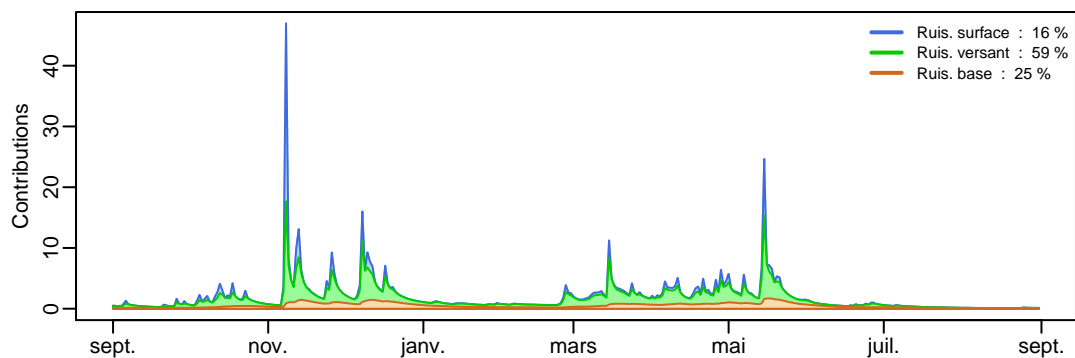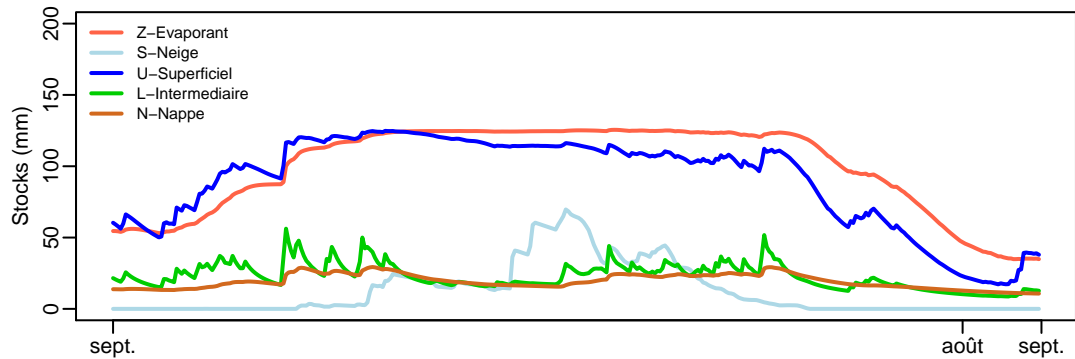

# x1044020 (1115.03 km<sup>2</sup>) – année 1983–1984

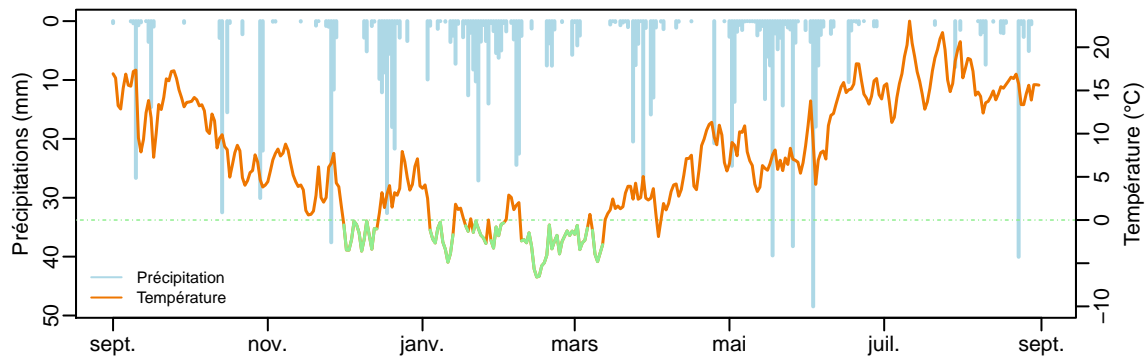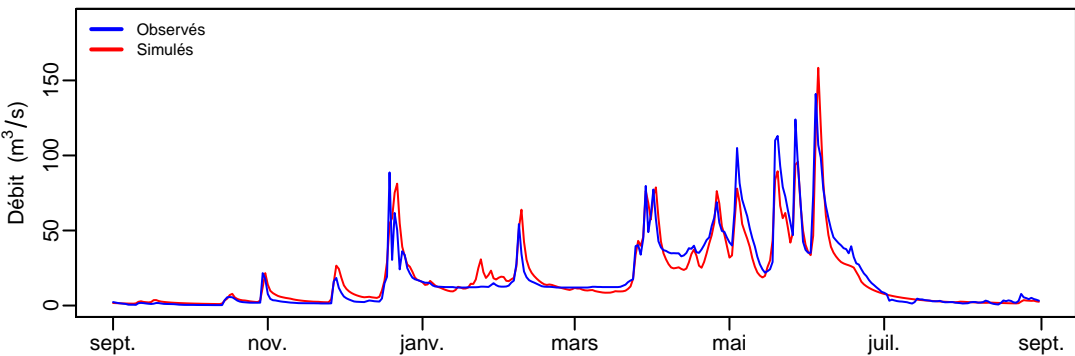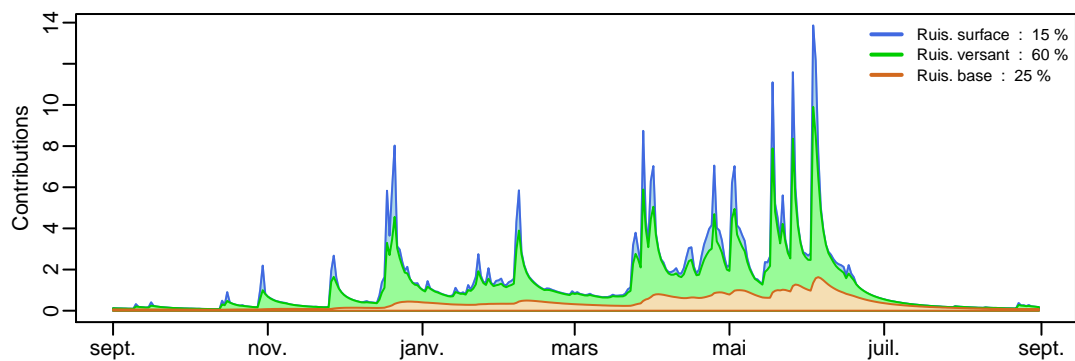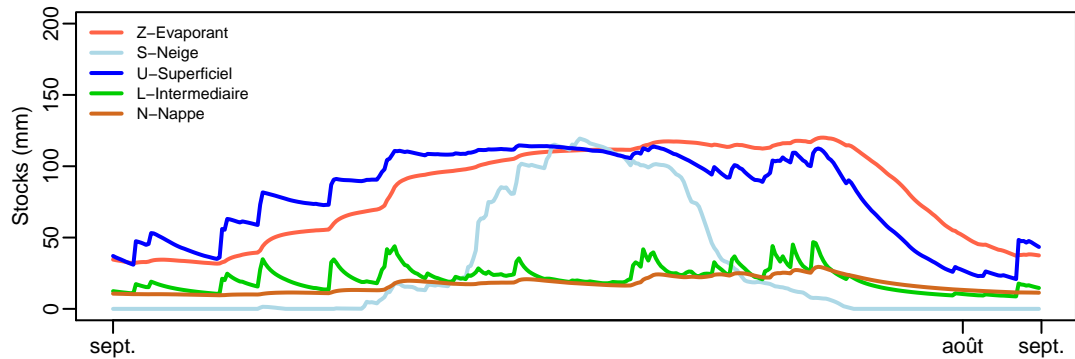

# x1044020 (1115.03 km<sup>2</sup>) – année 1984–1985

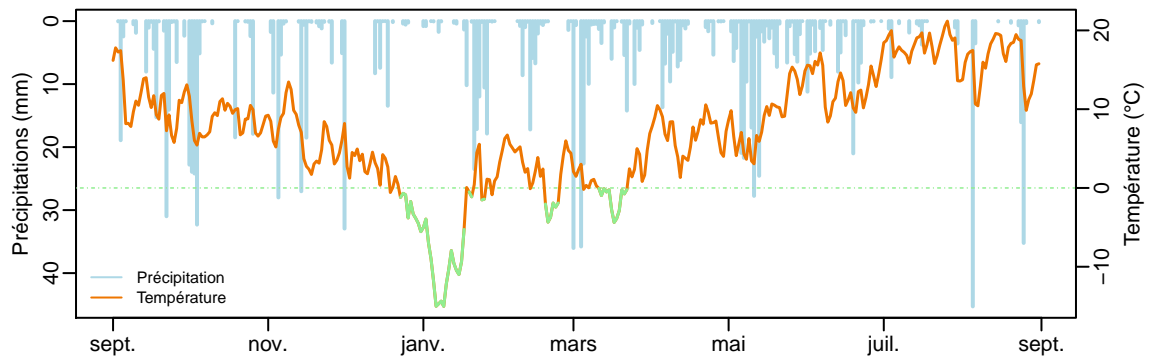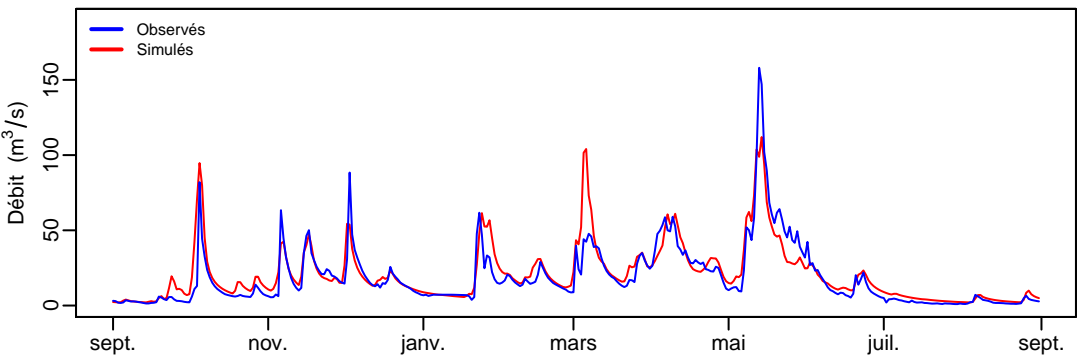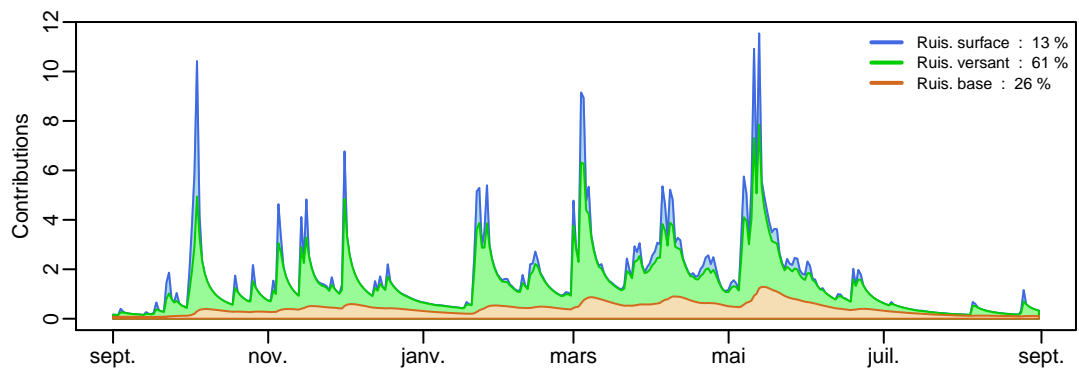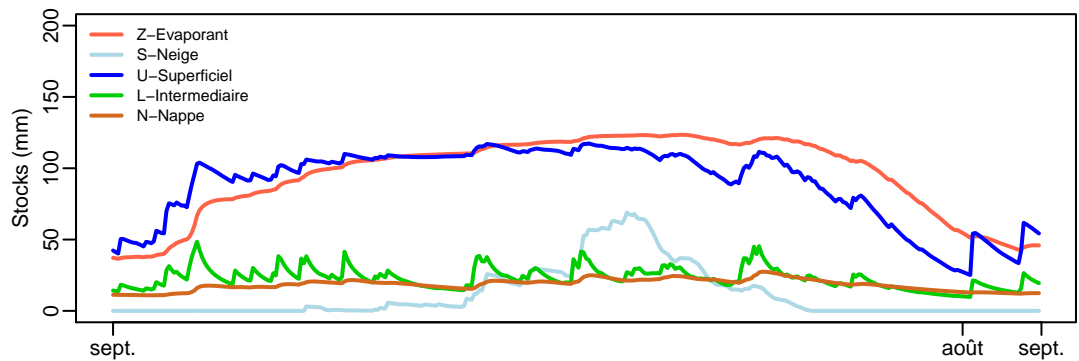

# x1044020 (1115.03 km<sup>2</sup>) – année 1985–1986

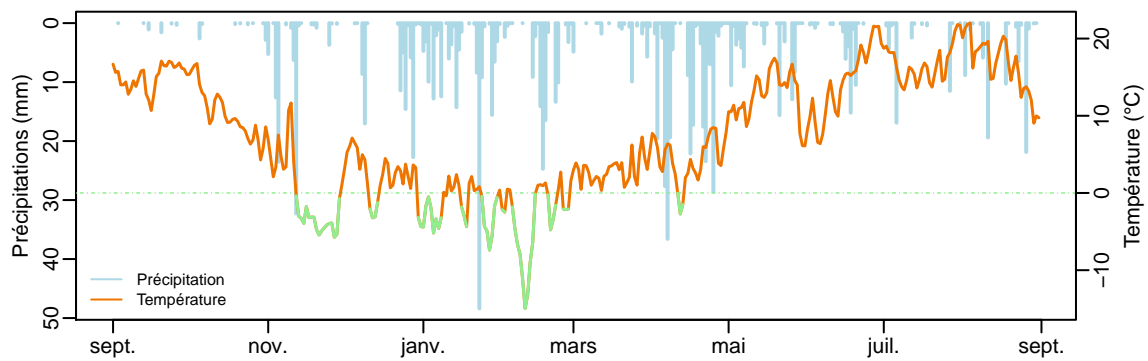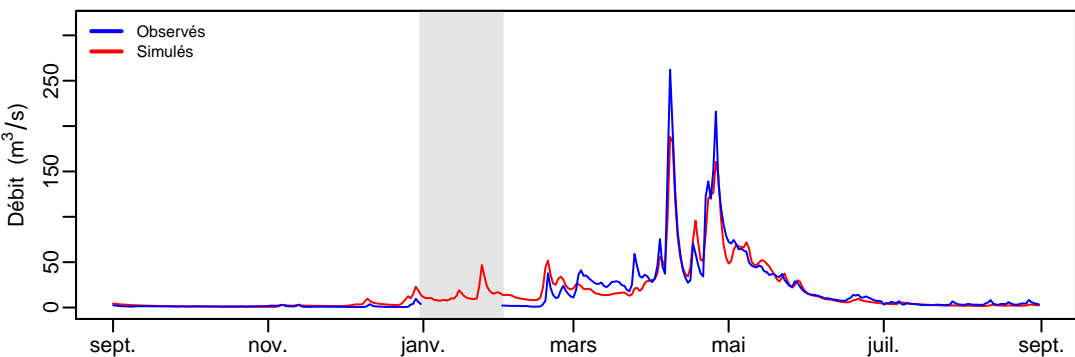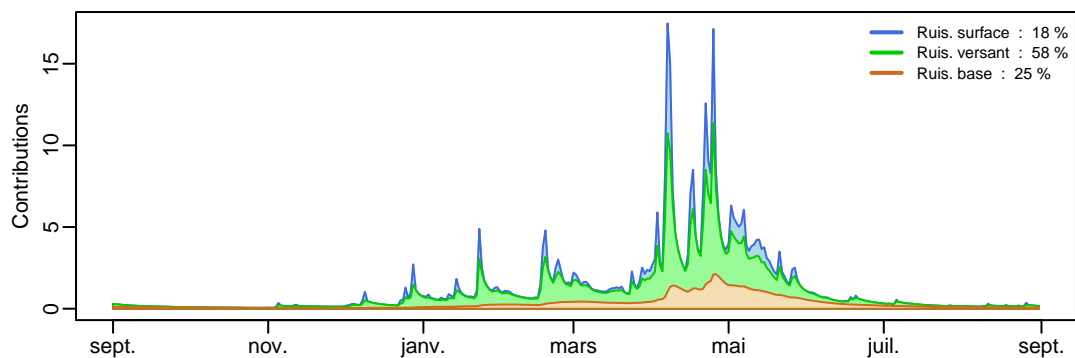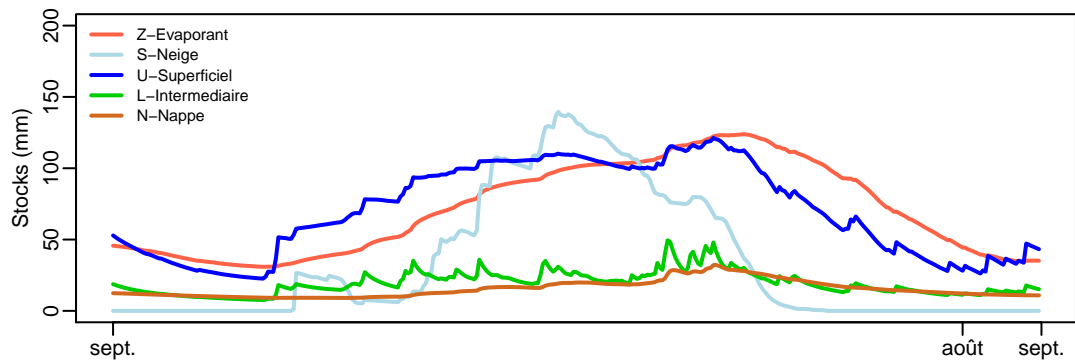

# x1044020 (1115.03 km<sup>2</sup>) – année 1986–1987

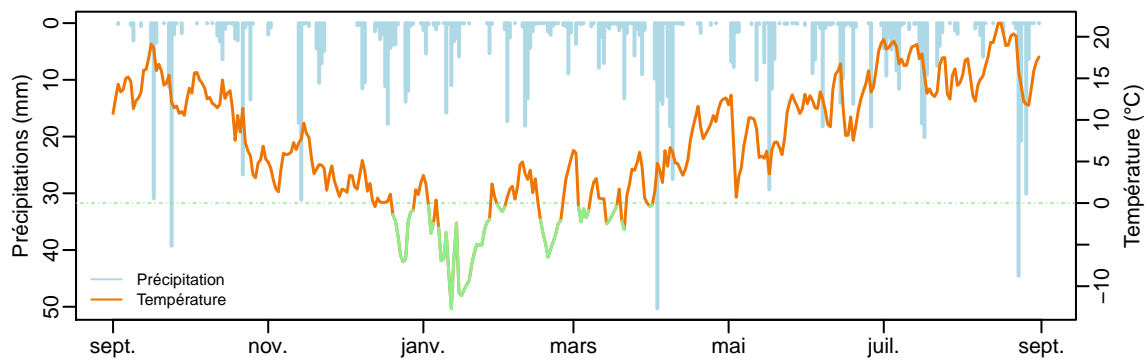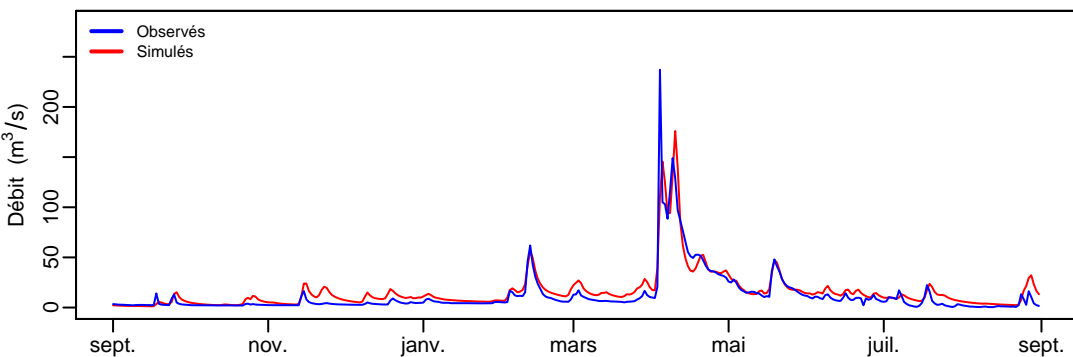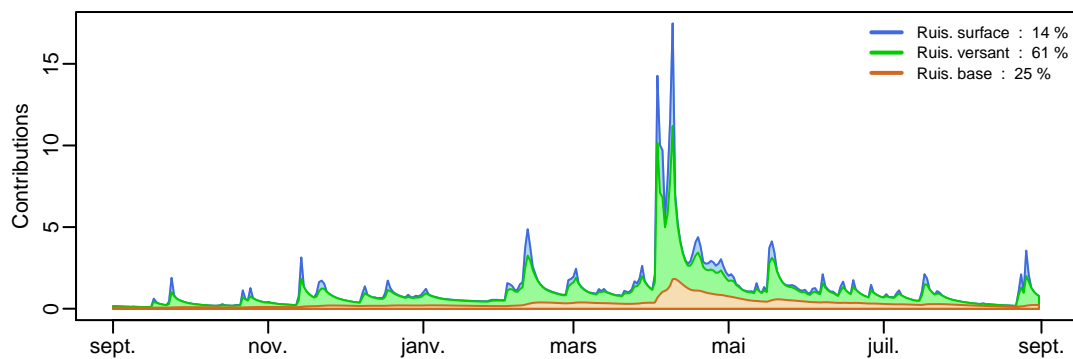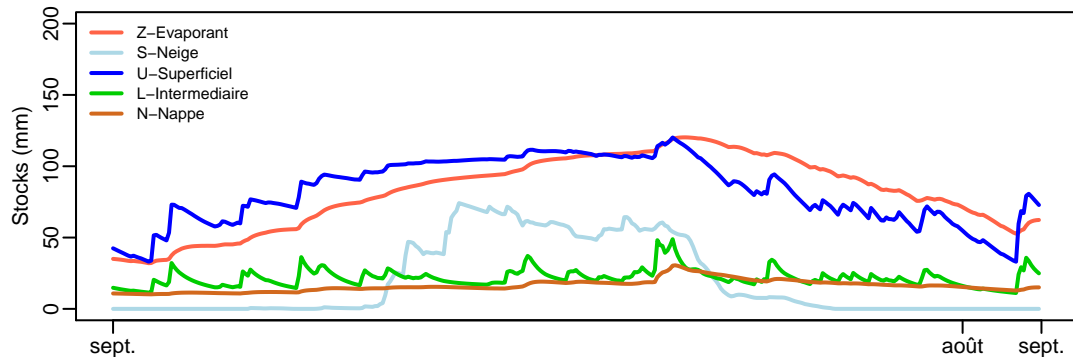

# x1044020 (1115.03 km<sup>2</sup>) – année 1987–1988

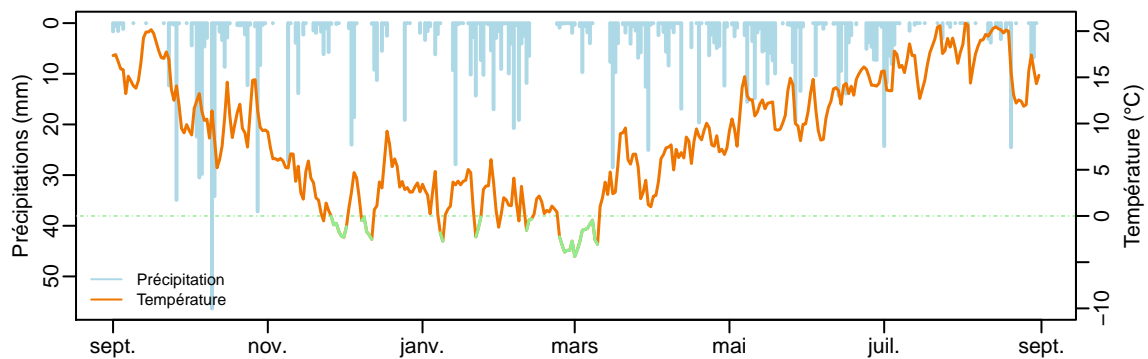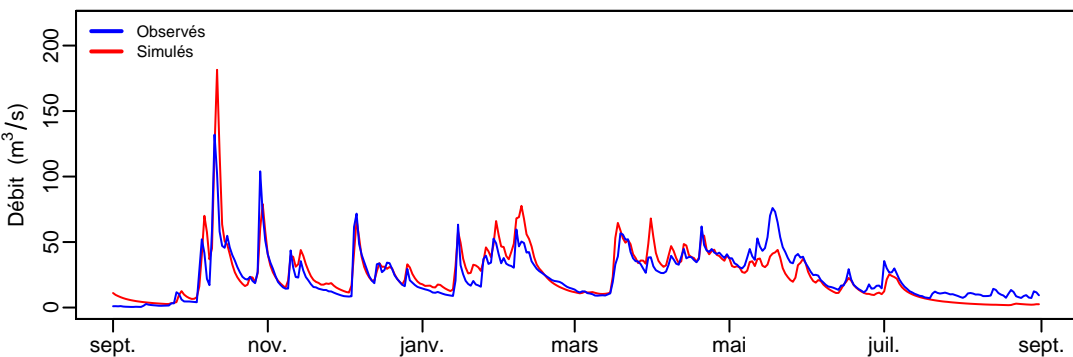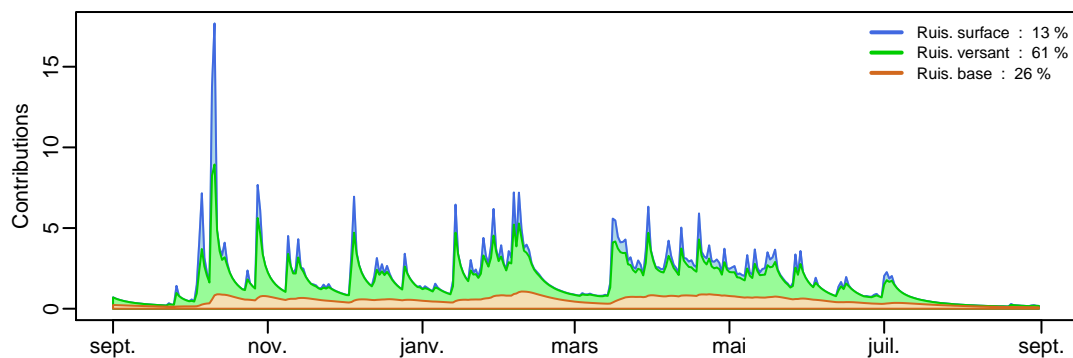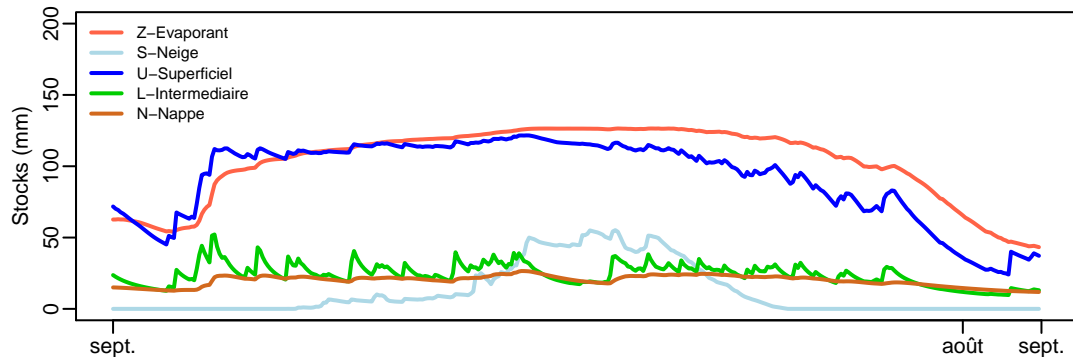



# x1044020 (1115.03 km<sup>2</sup>) – année 1988–1989

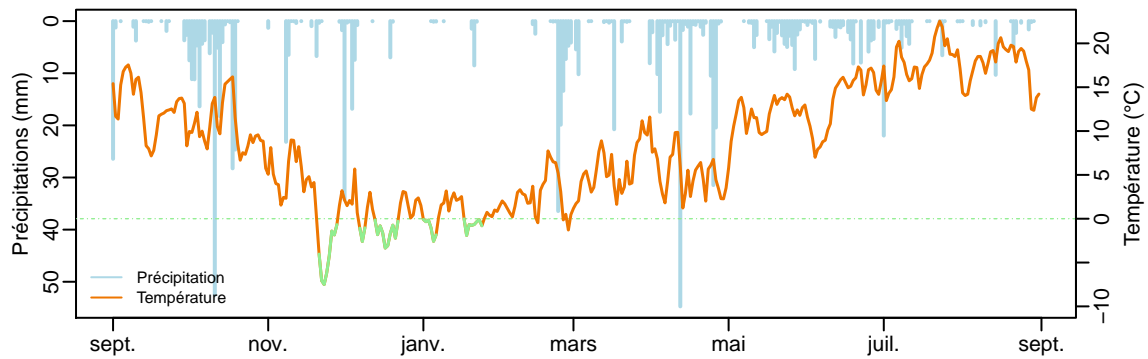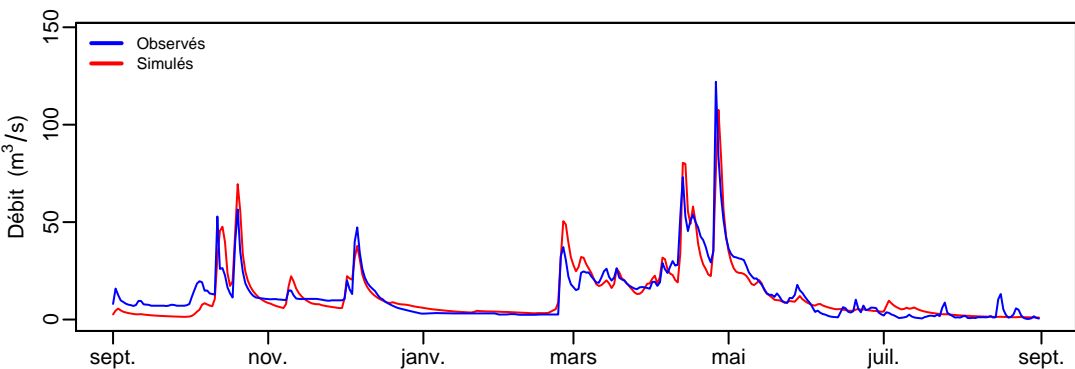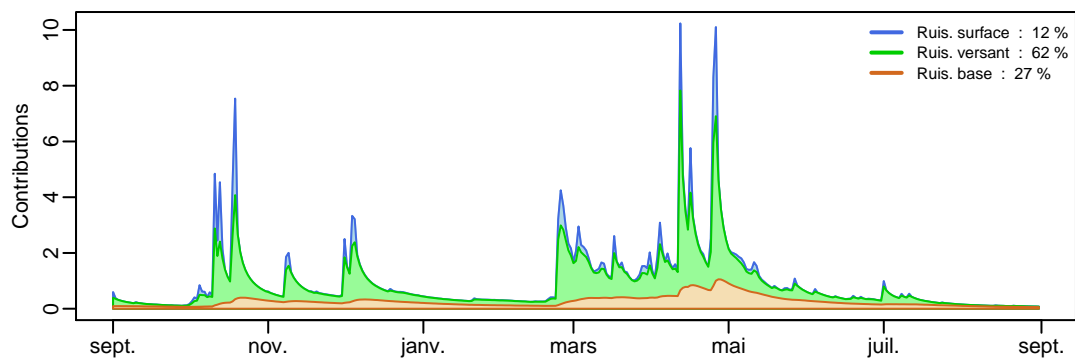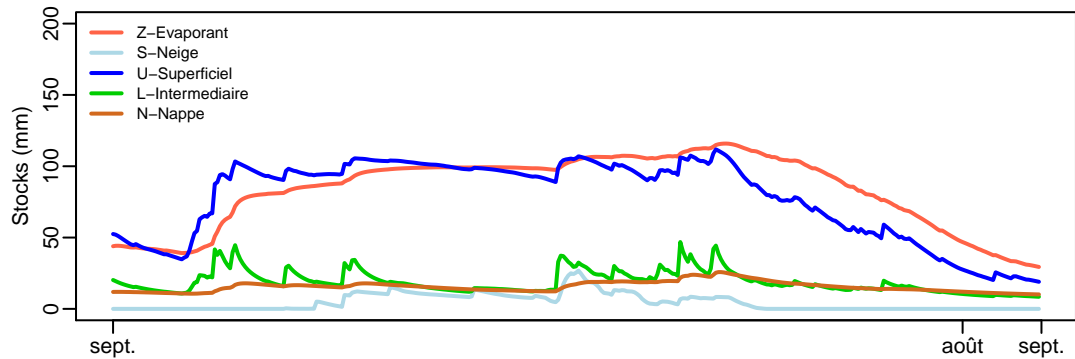

# x1044020 (1115.03 km<sup>2</sup>) – année 1989–1990

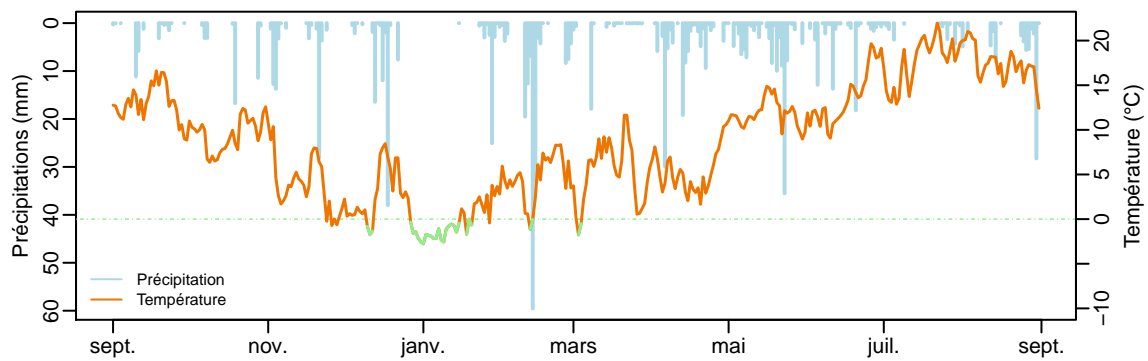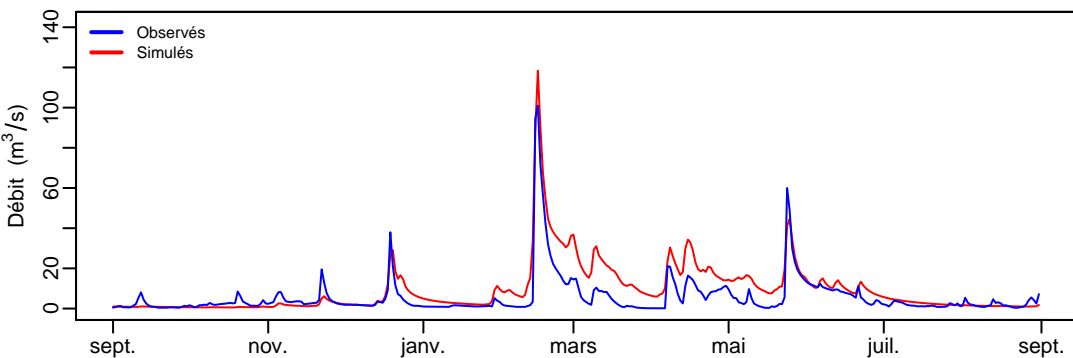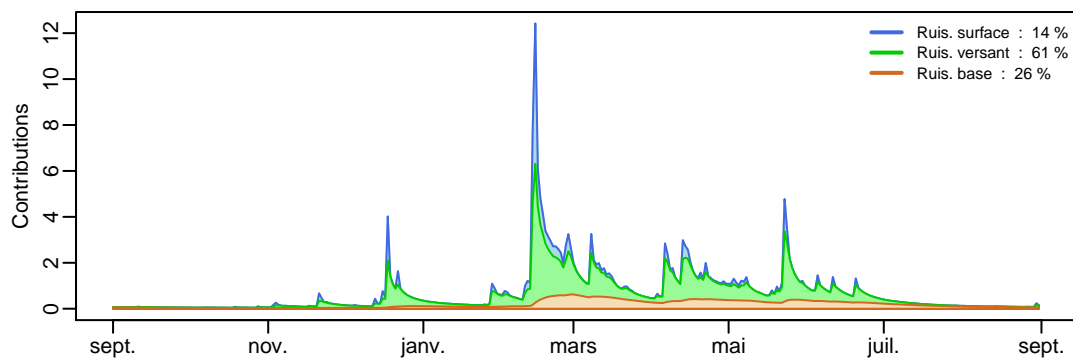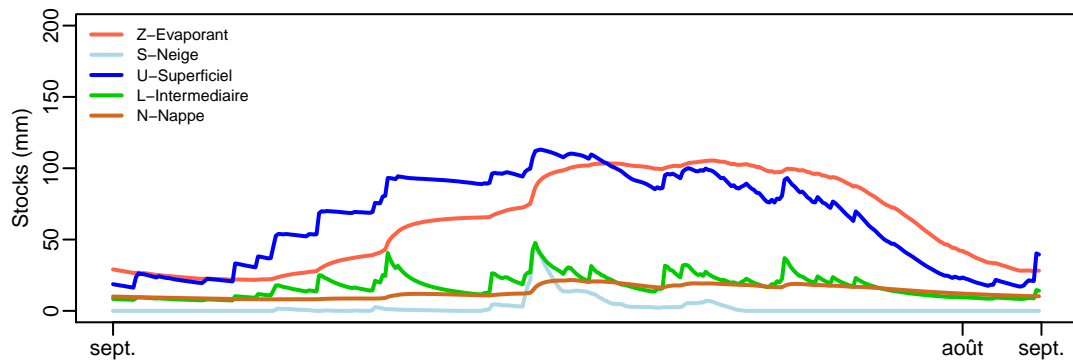

# x1225010 (164.9 km<sup>2</sup>) – année 1986–1987

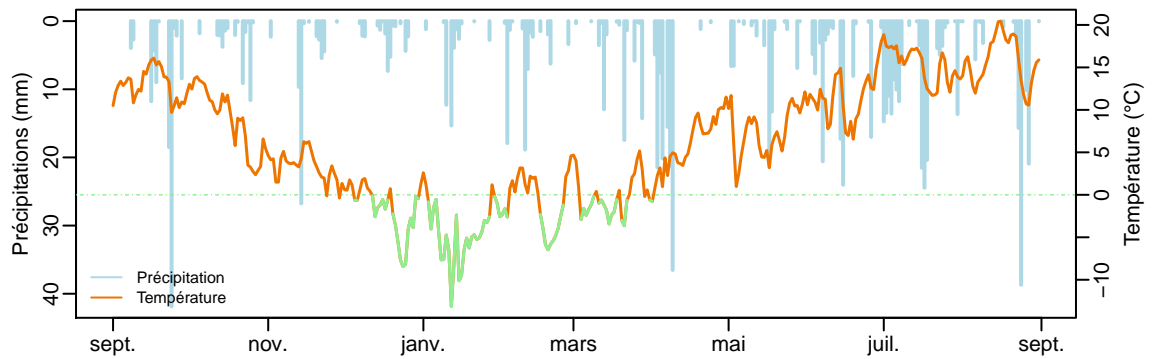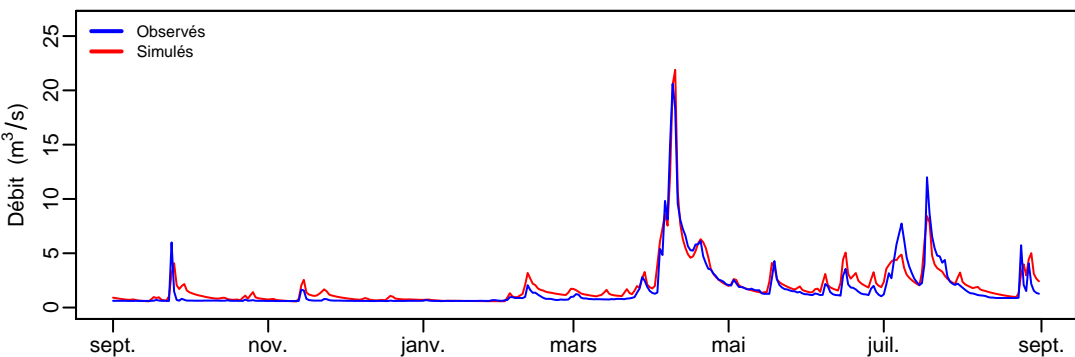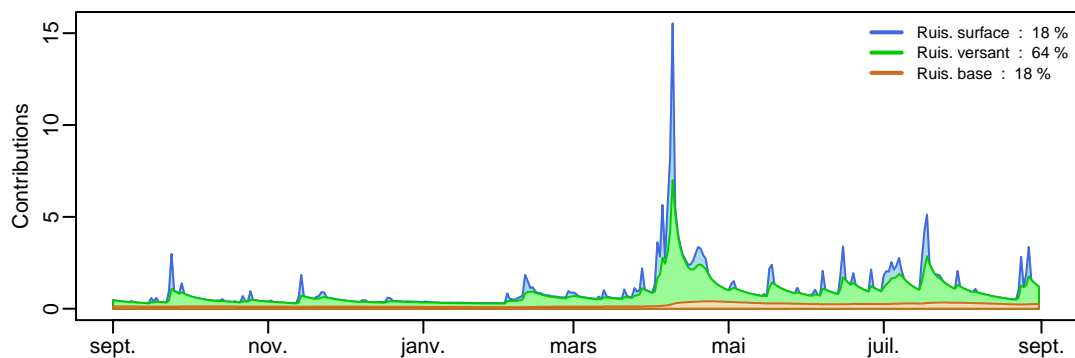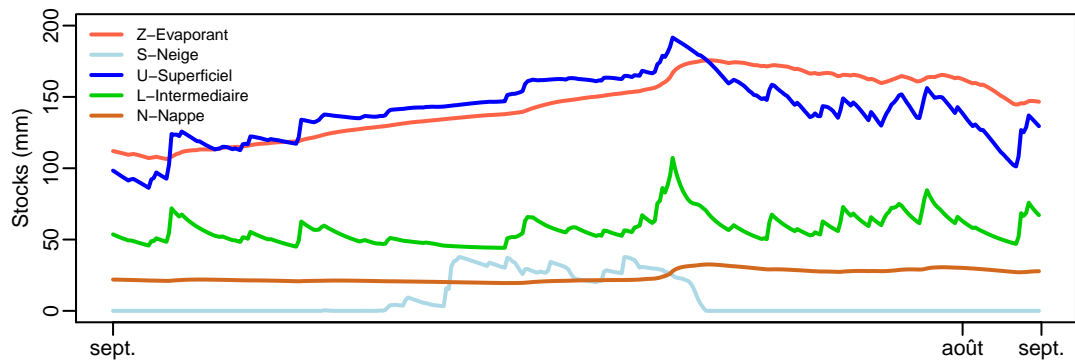

# x1225010 (164.9 km<sup>2</sup>) – année 1987–1988

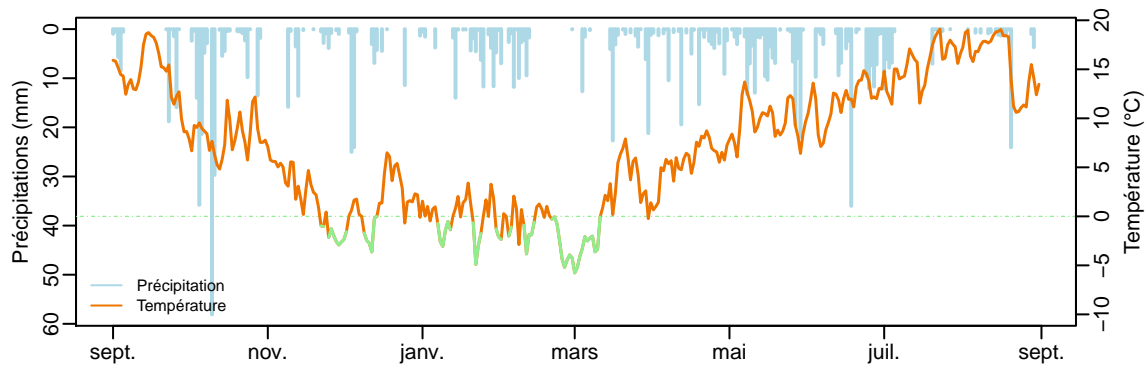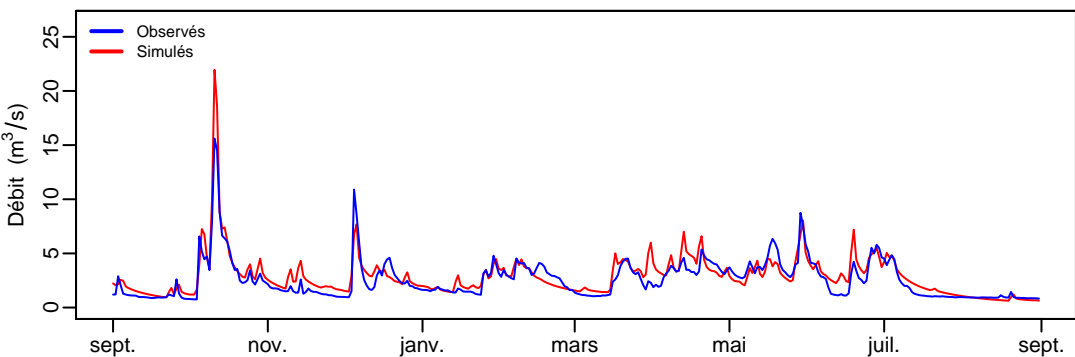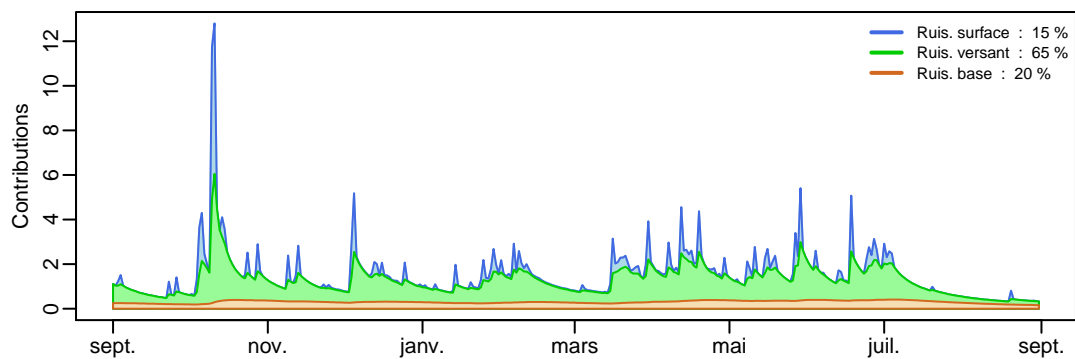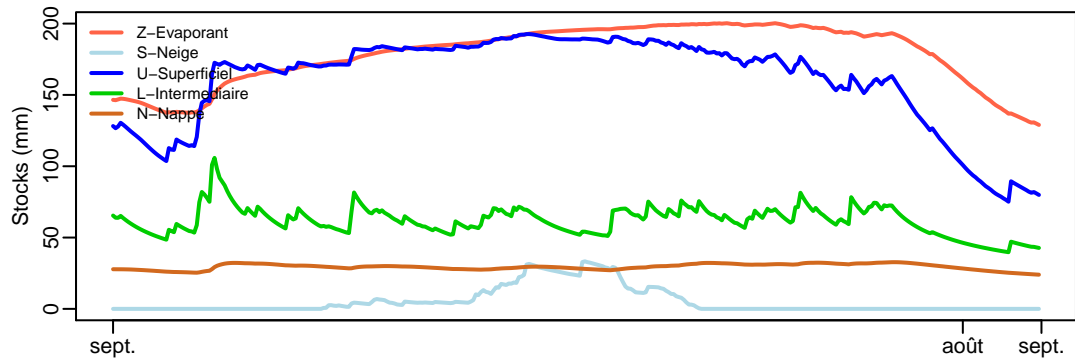

# x1225010 (164.9 km<sup>2</sup>) – année 1988–1989

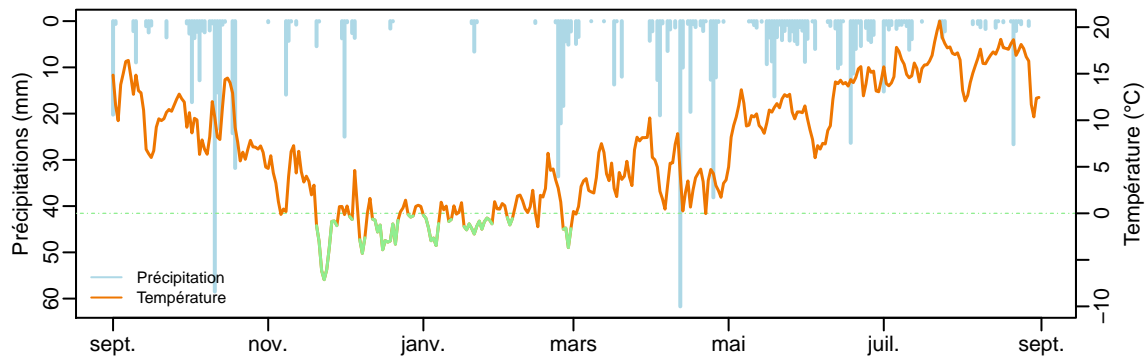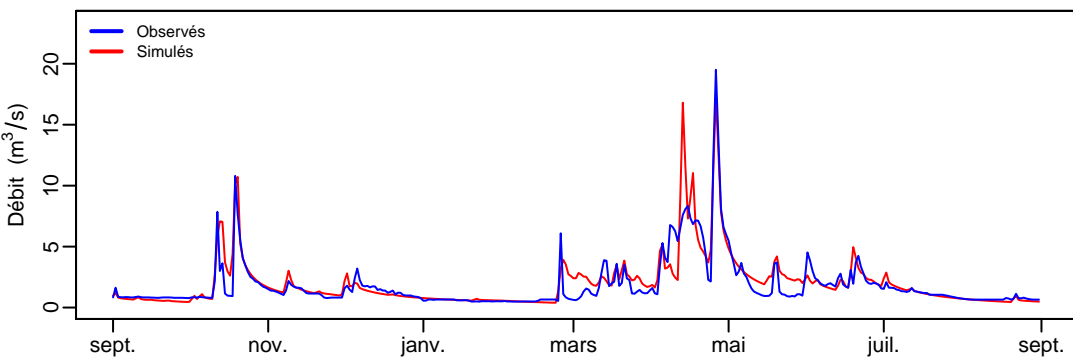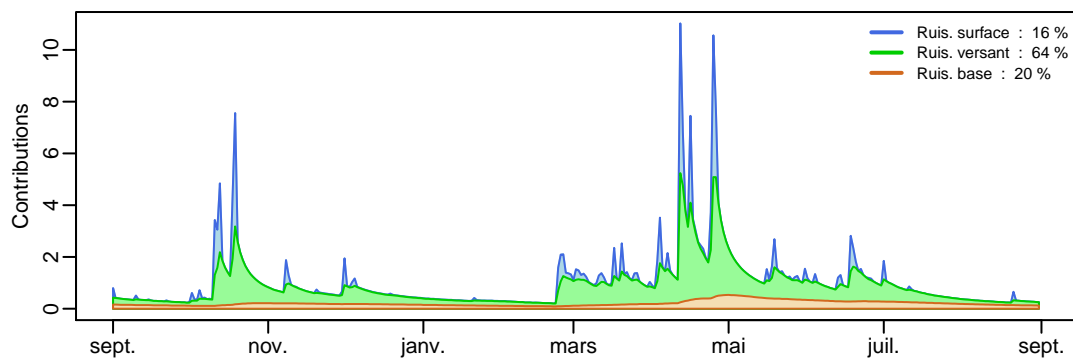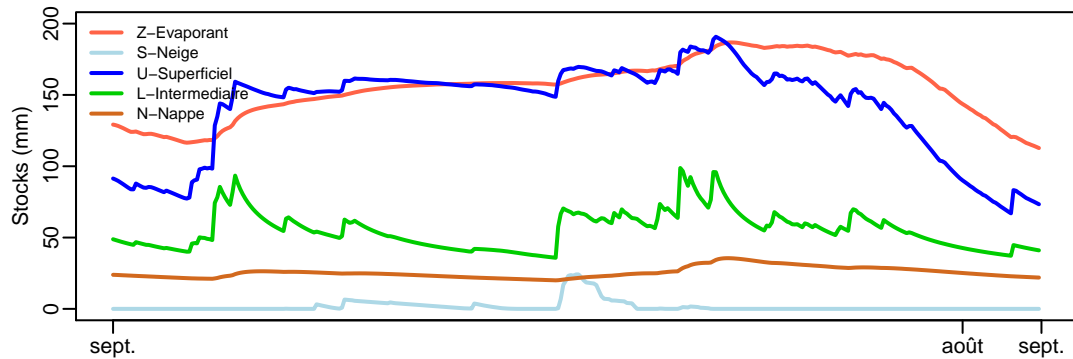

# x1225010 (164.9 km<sup>2</sup>) – année 1989–1990

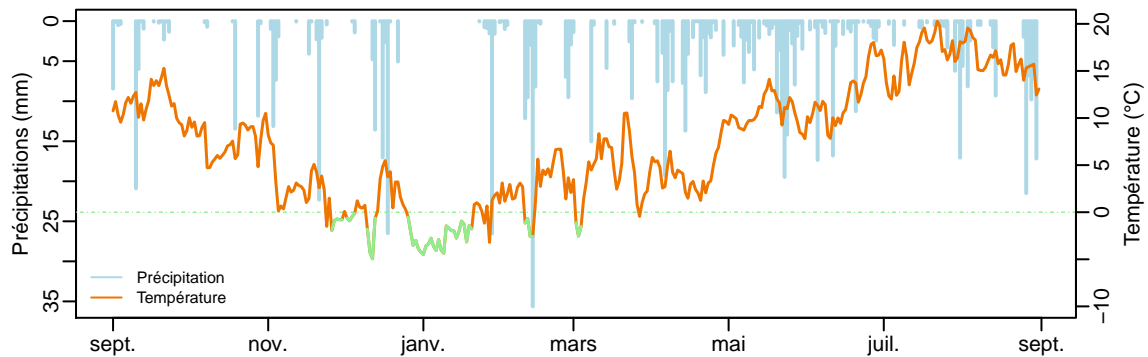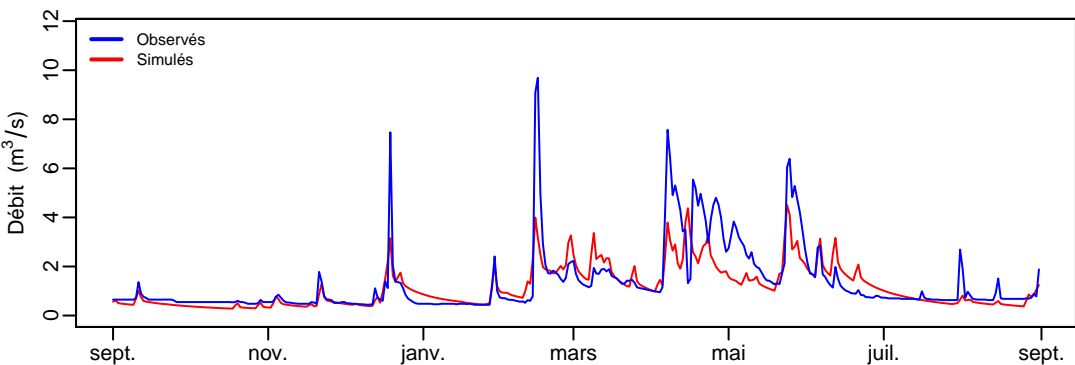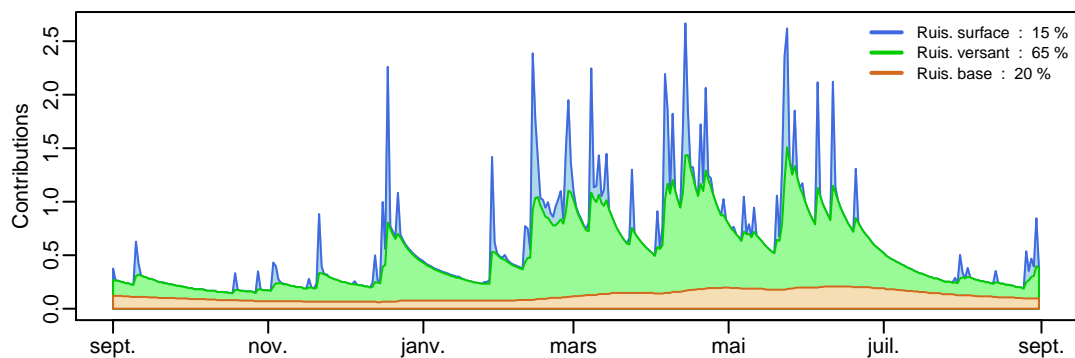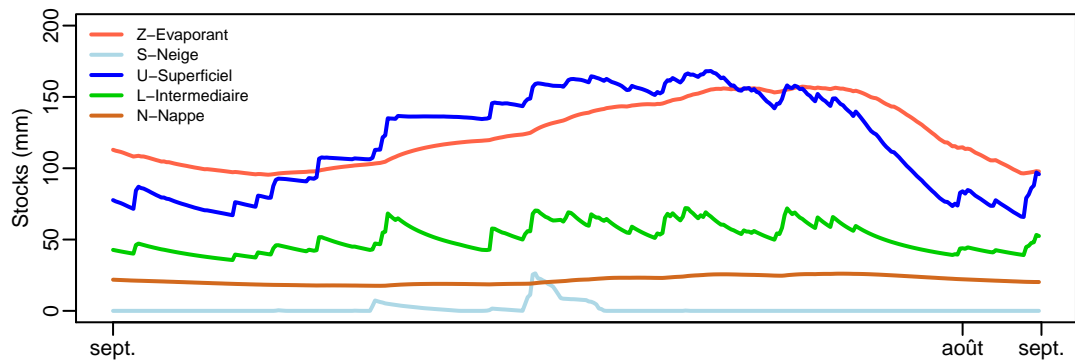

# x1225010 (164.9 km<sup>2</sup>) – année 1990–1991

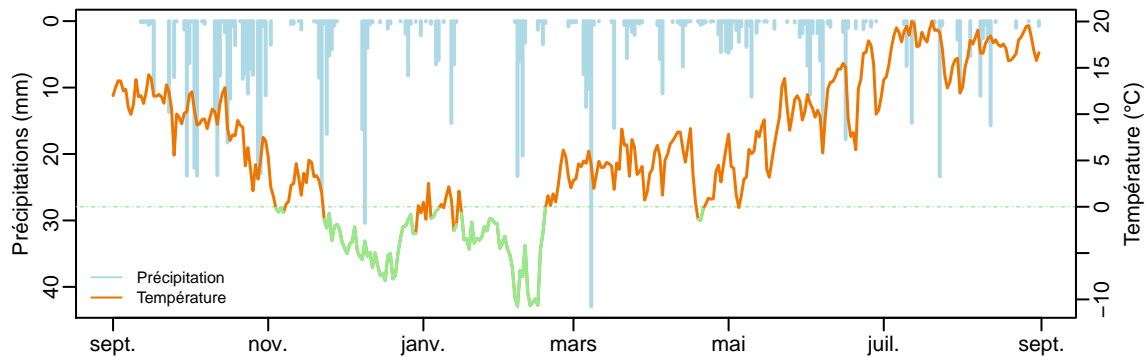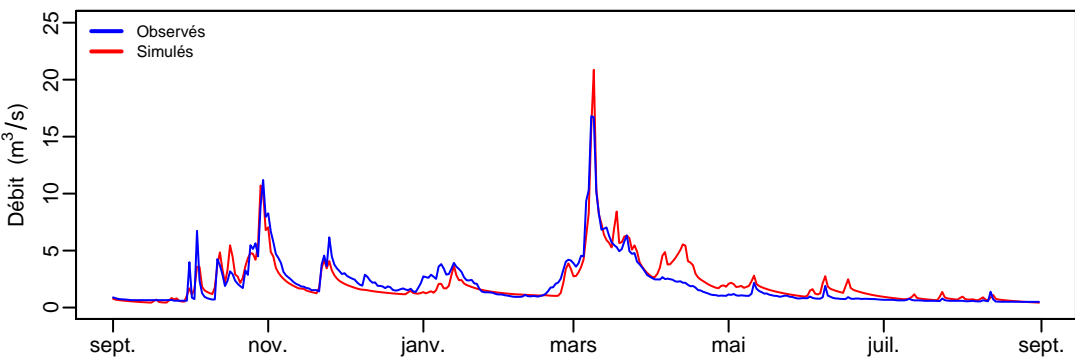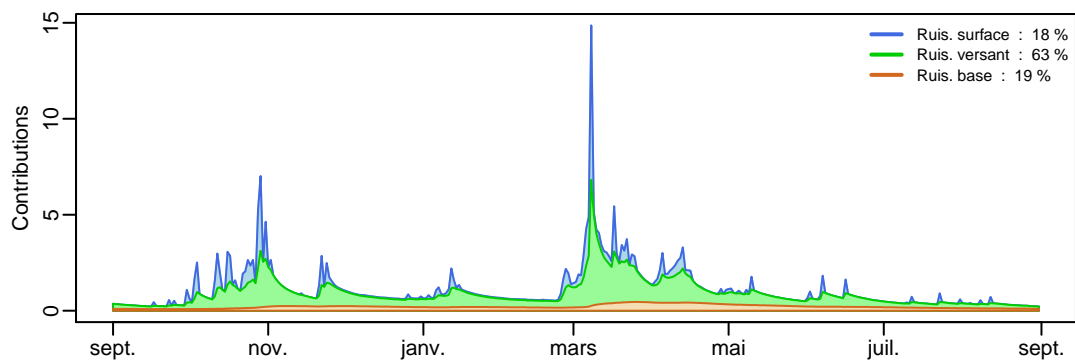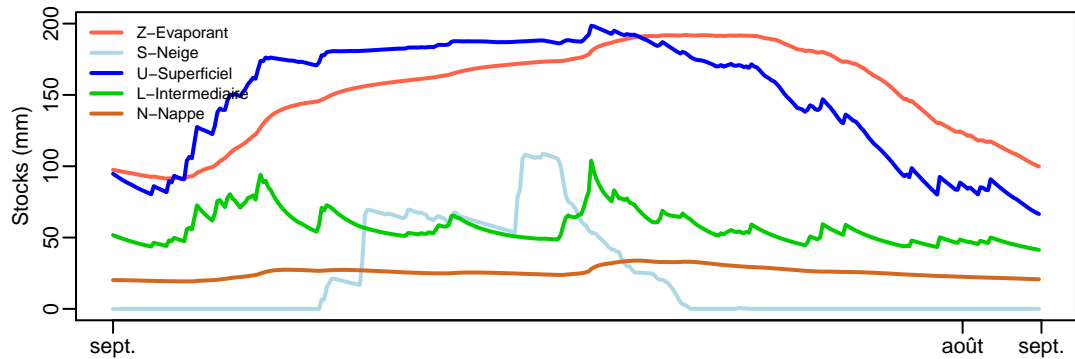

# x1225010 (164.9 km<sup>2</sup>) – année 1991–1992

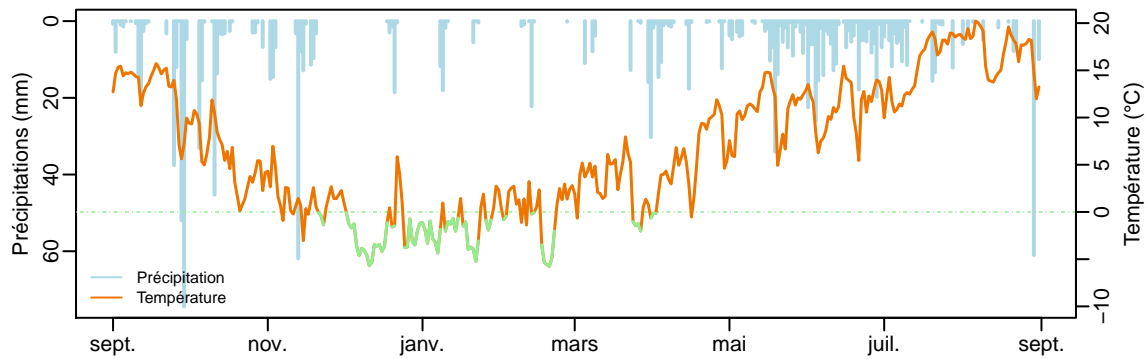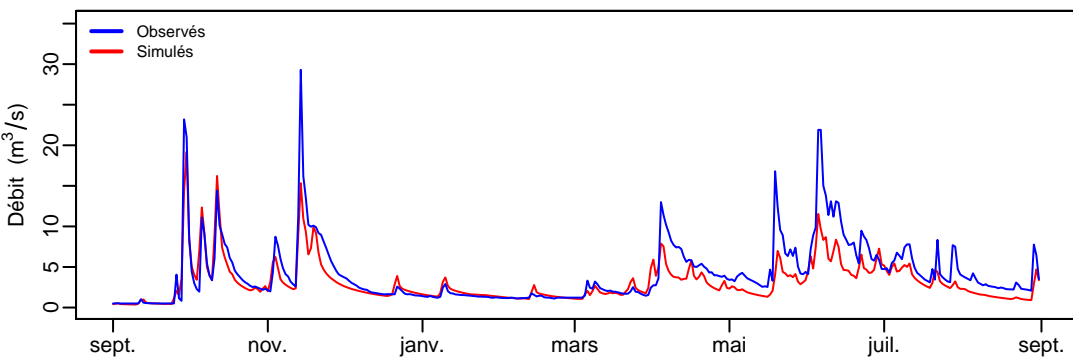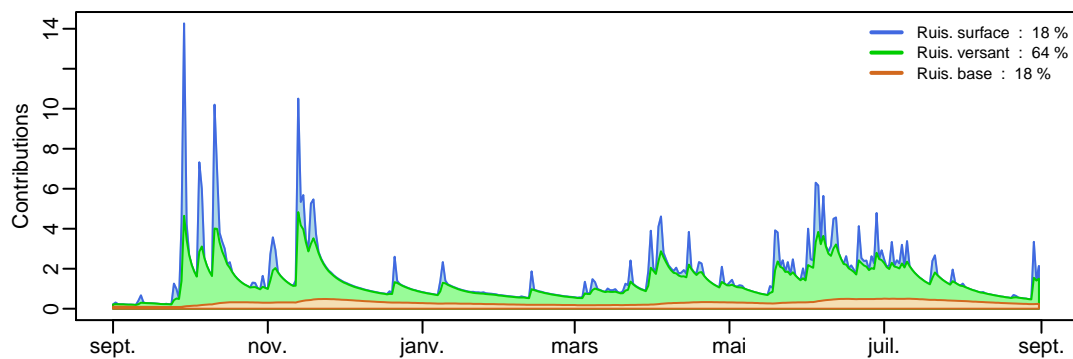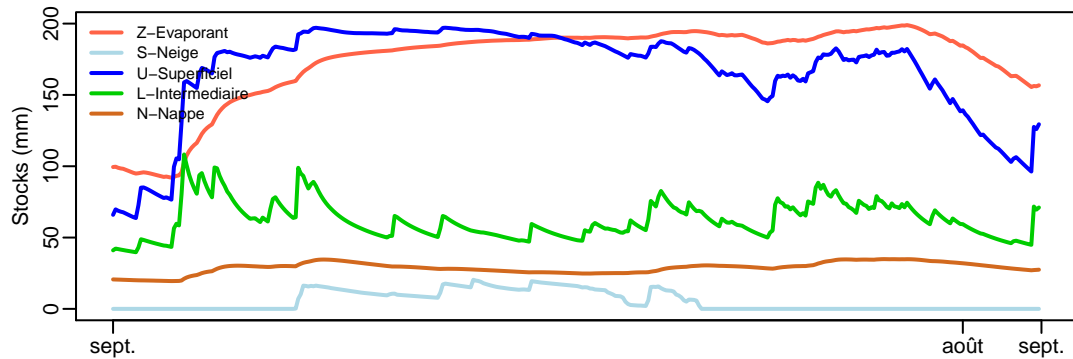



# x1225010 (164.9 km<sup>2</sup>) – année 1992–1993

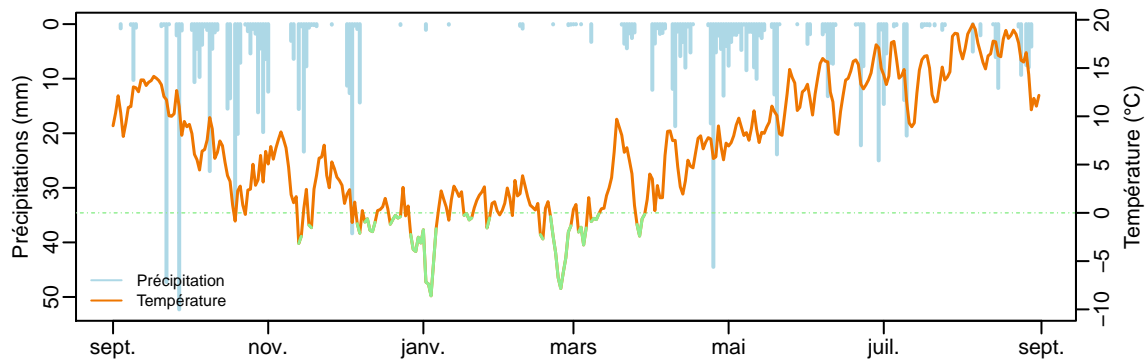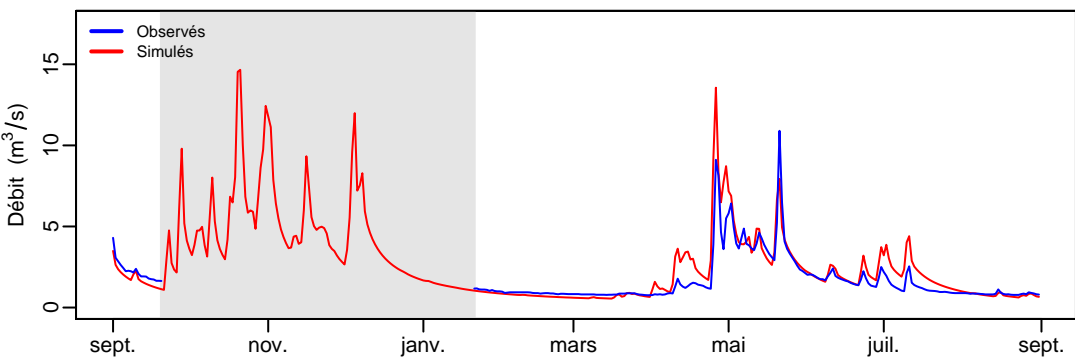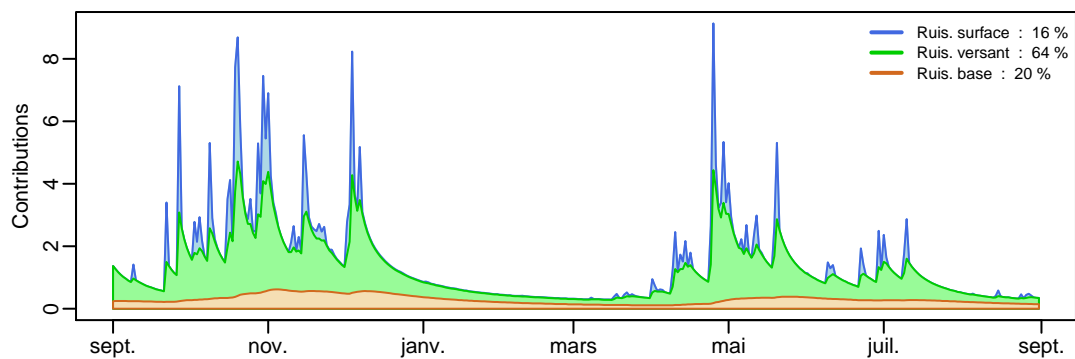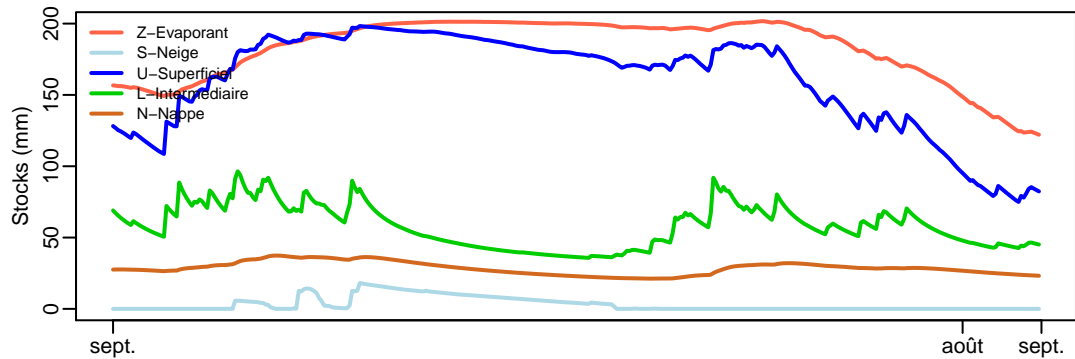

# x1225010 (164.9 km<sup>2</sup>) – année 1993–1994

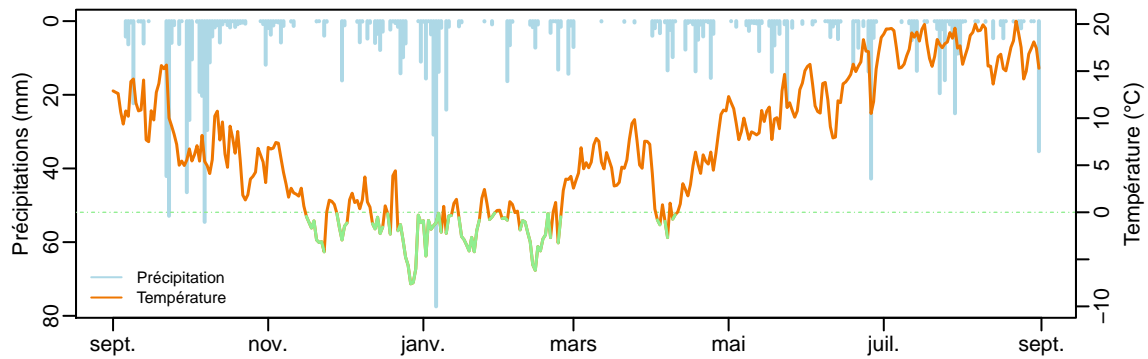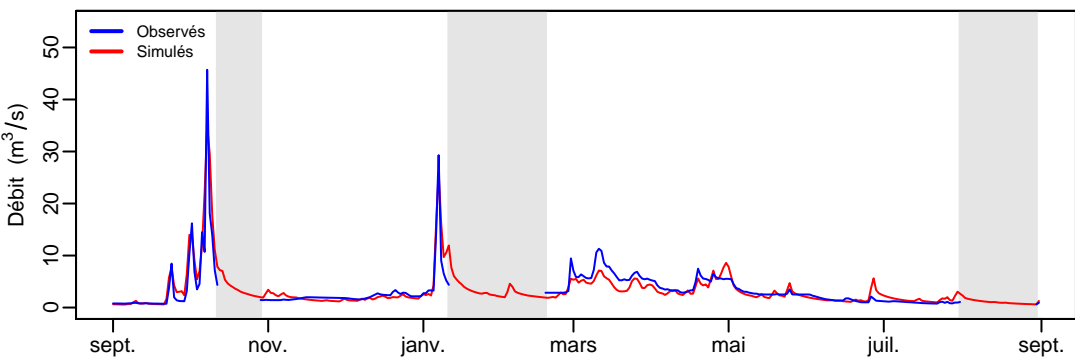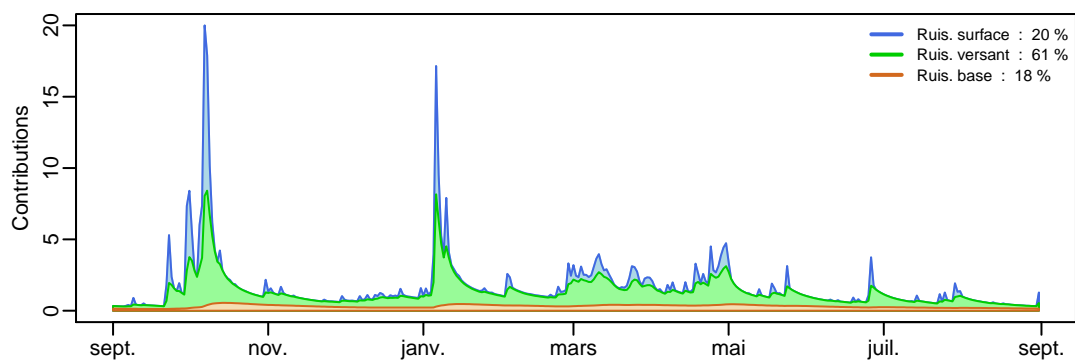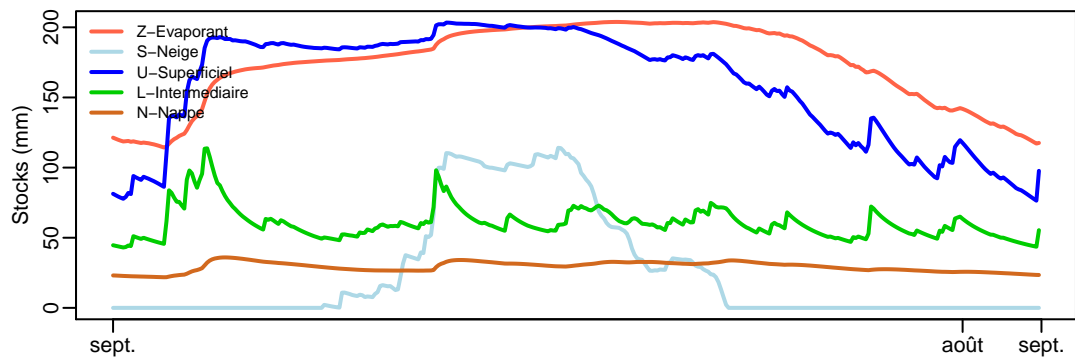

# x1225010 (164.9 km<sup>2</sup>) – année 1994–1995

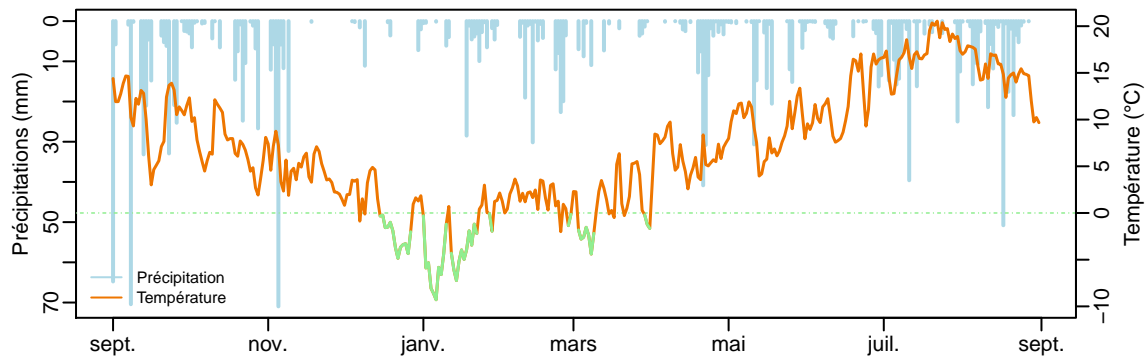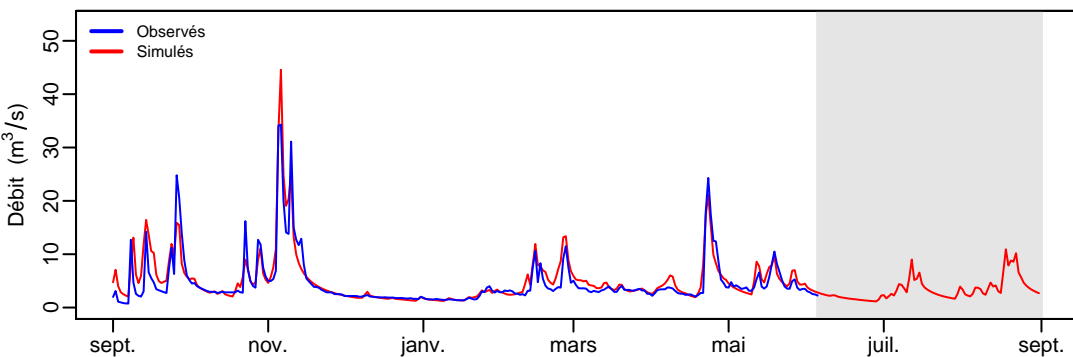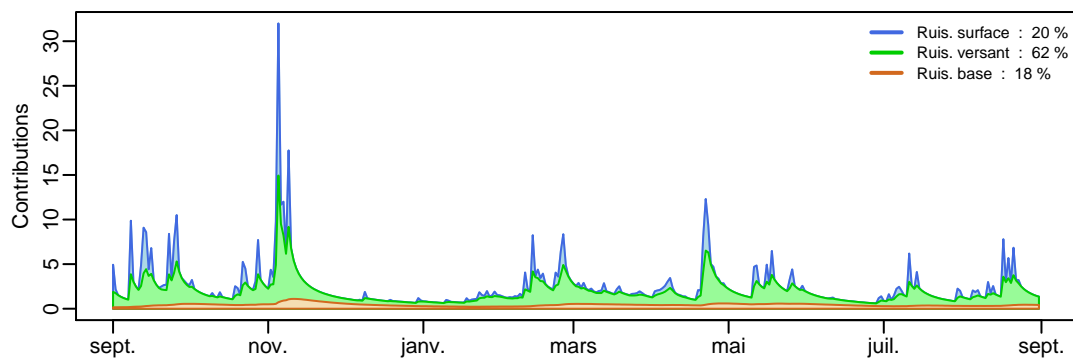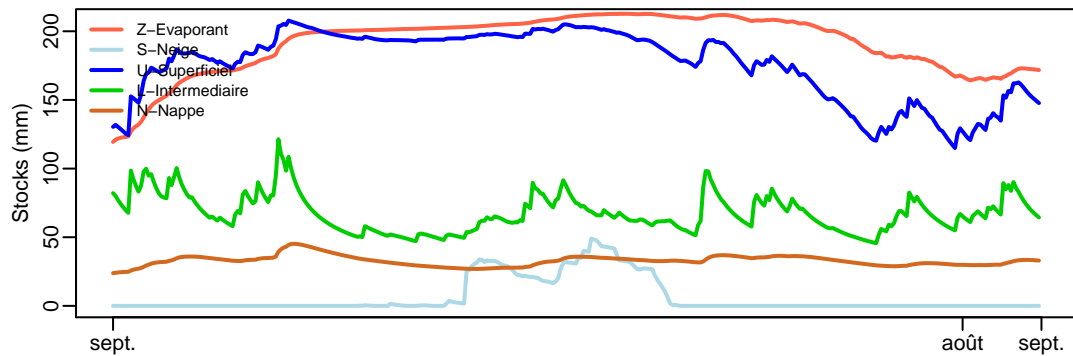

# x1225010 (164.9 km<sup>2</sup>) – année 1995–1996

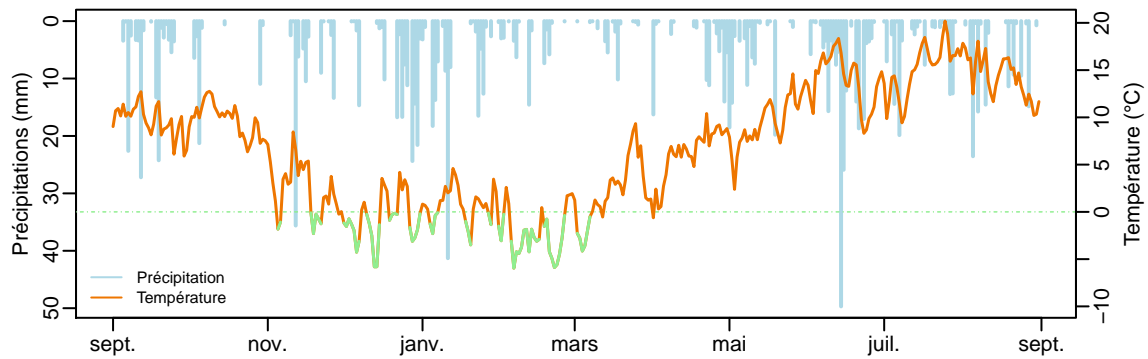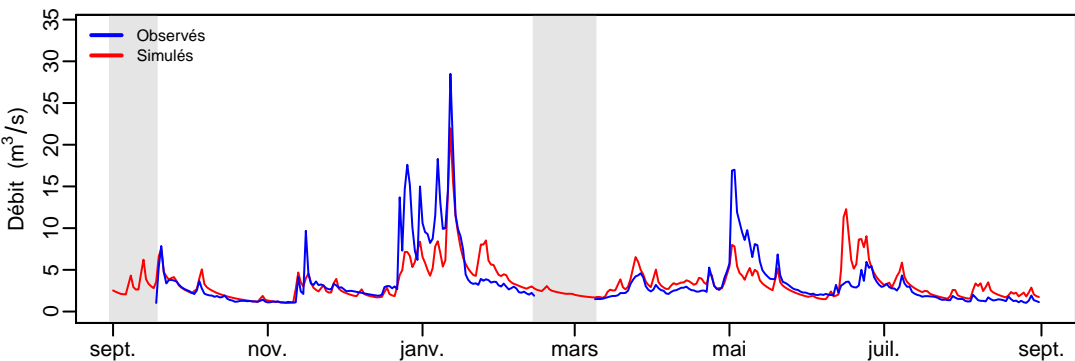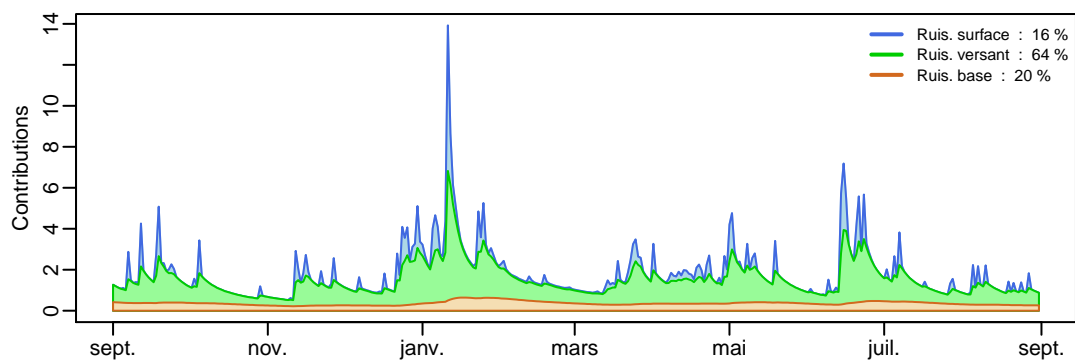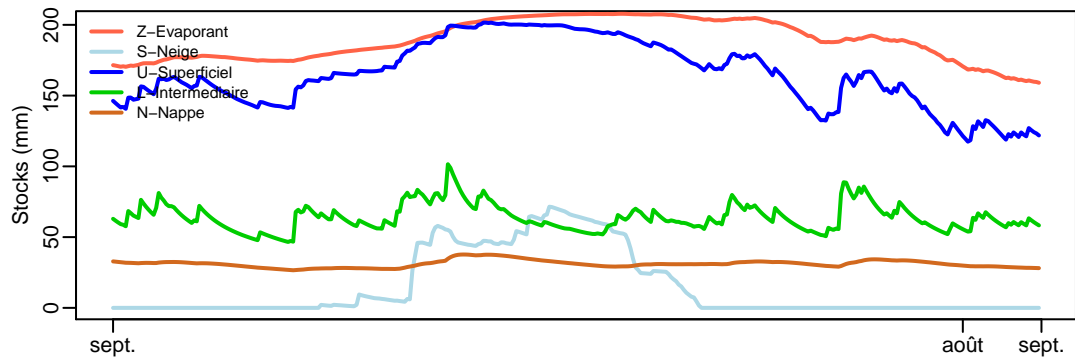

# x1225010 (164.9 km<sup>2</sup>) – année 1996–1997

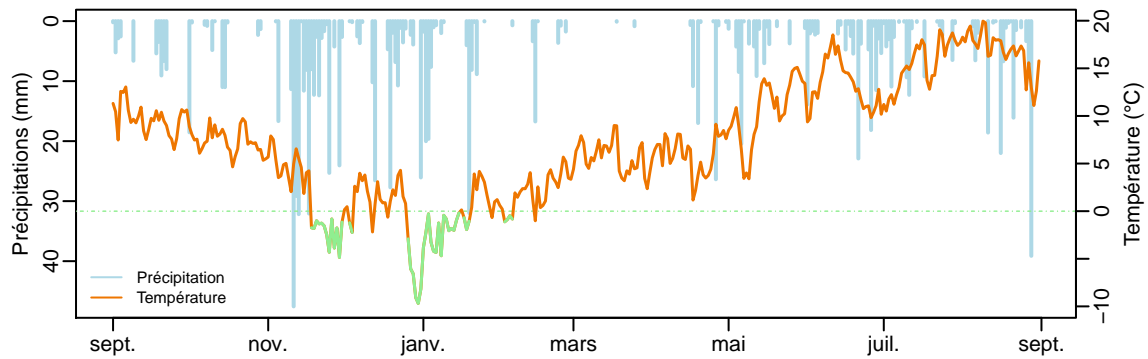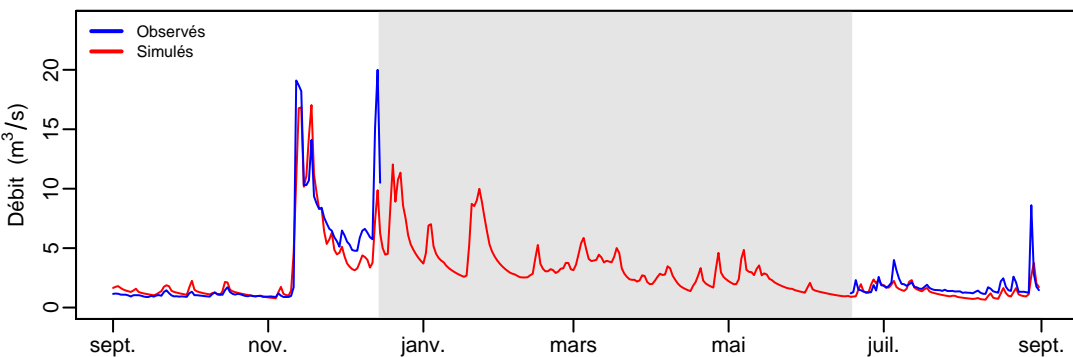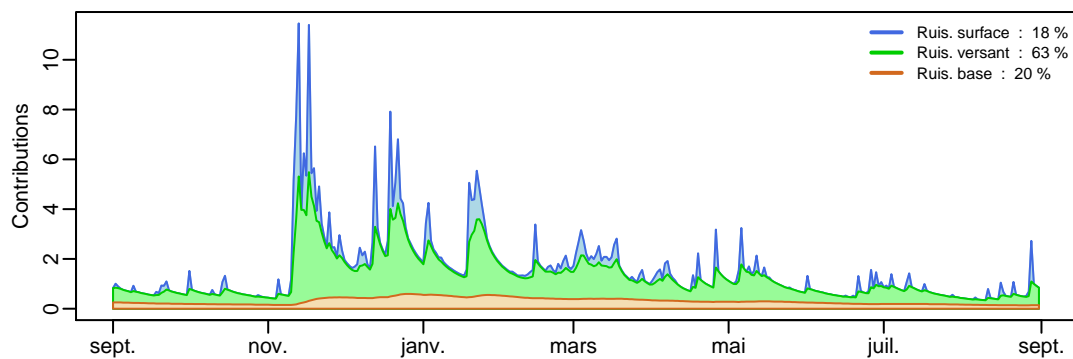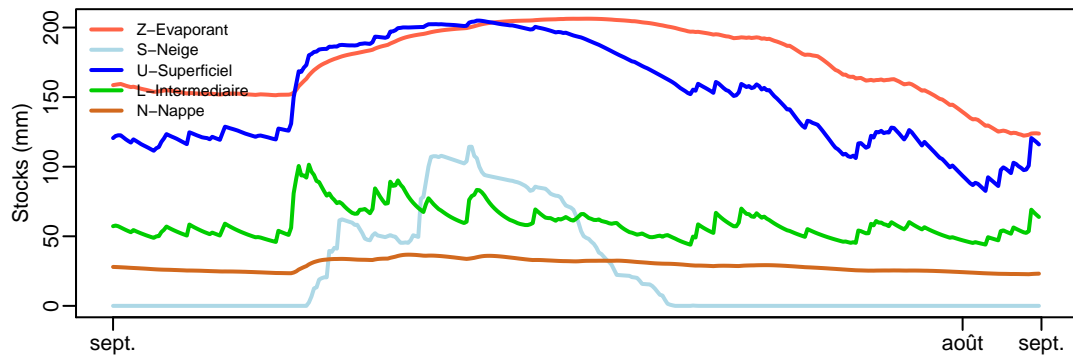

# x1225010 (164.9 km<sup>2</sup>) – année 1997–1998

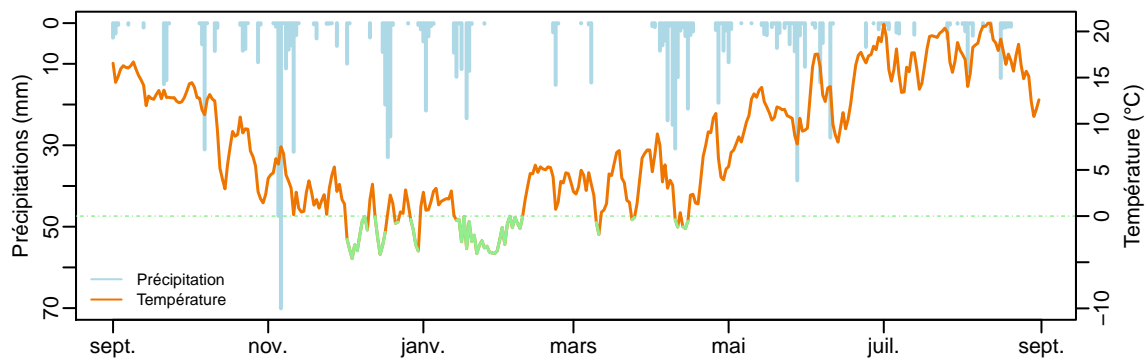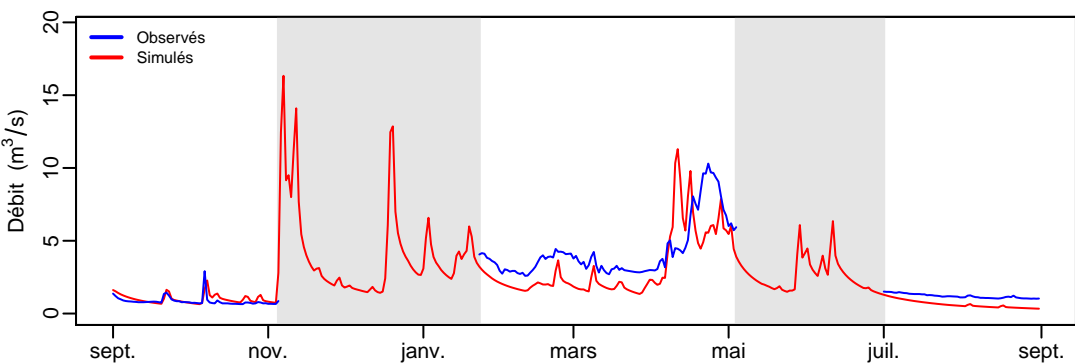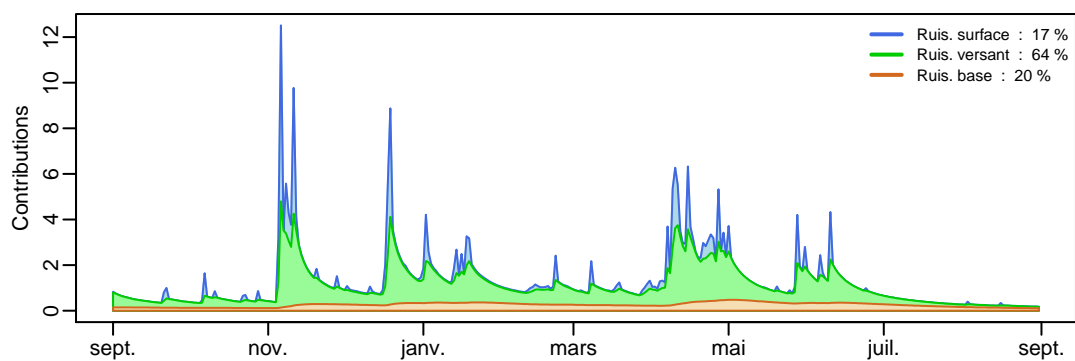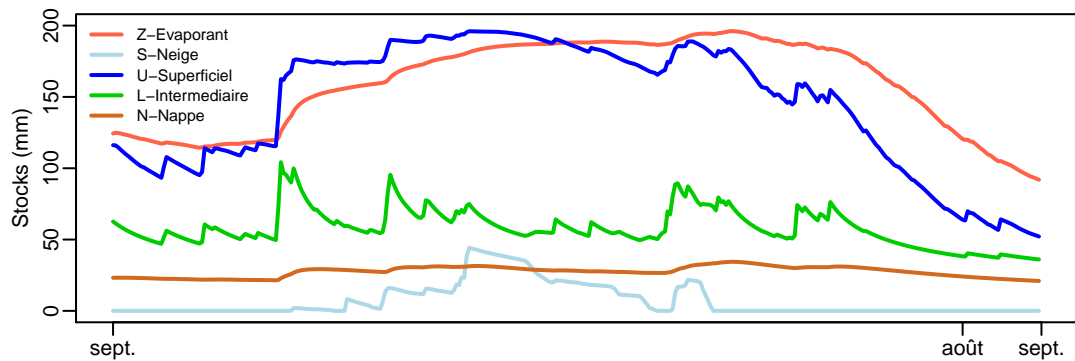

# x1225010 (164.9 km<sup>2</sup>) – année 1998–1999

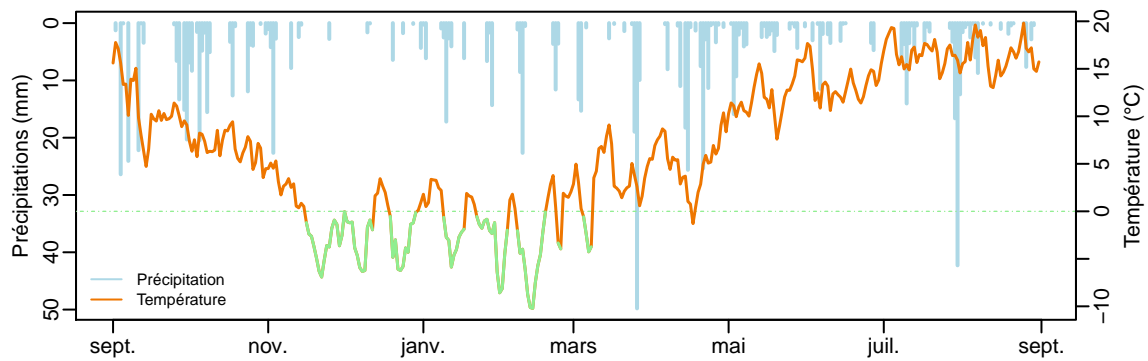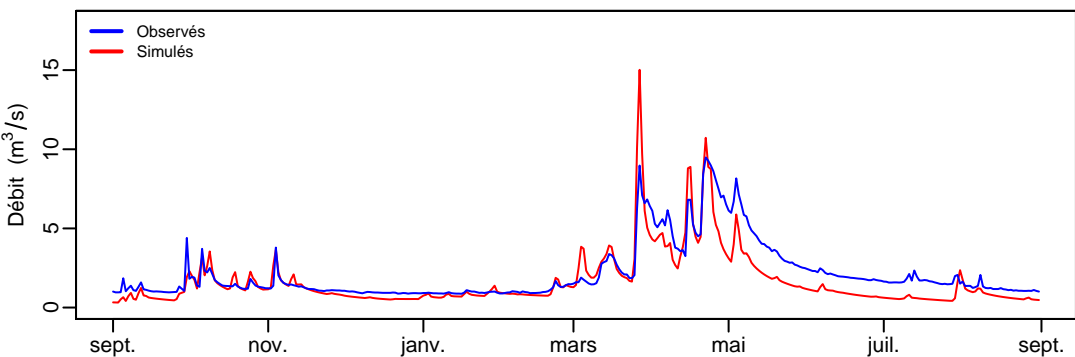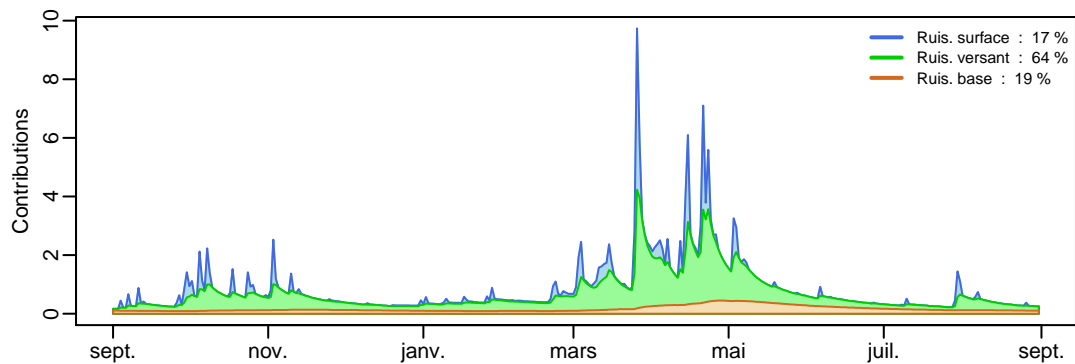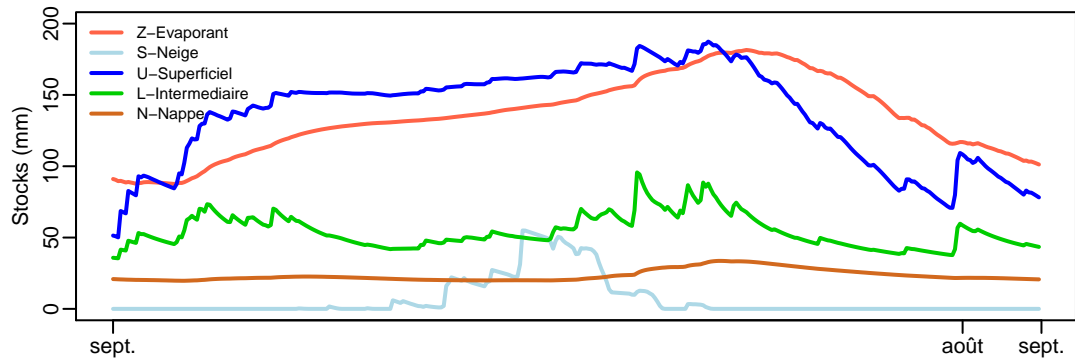

# x1225010 (164.9 km<sup>2</sup>) – année 1999–2000

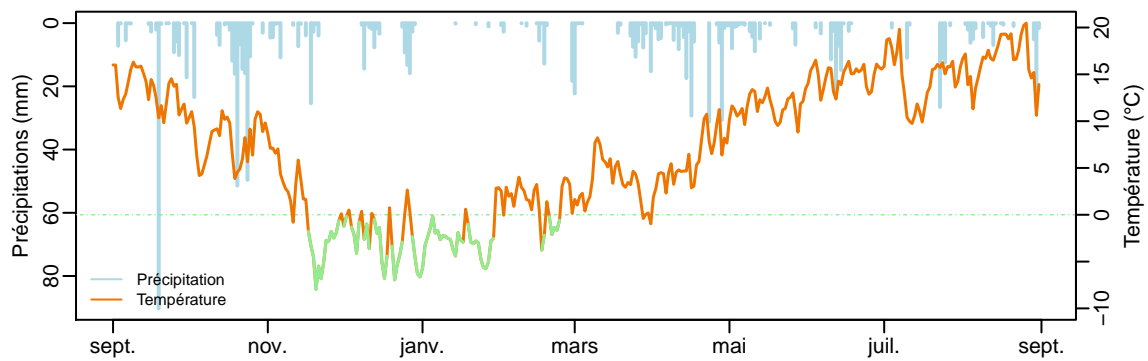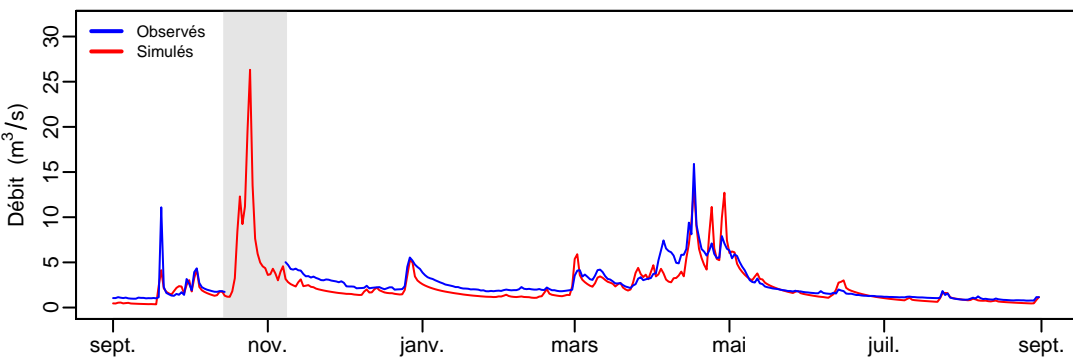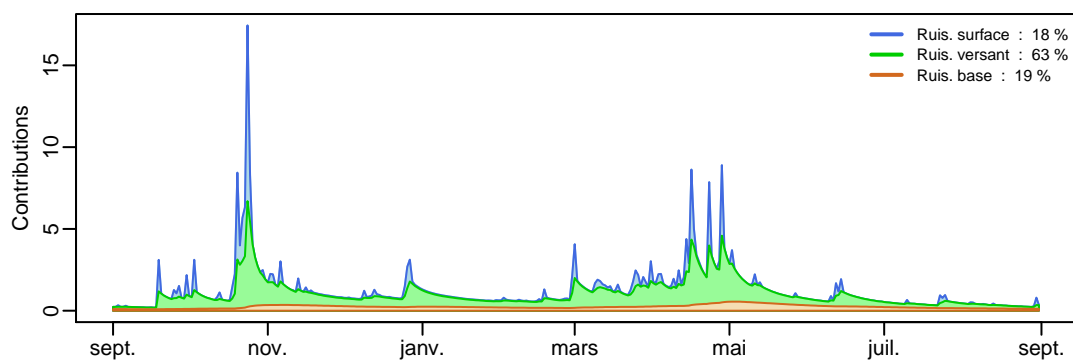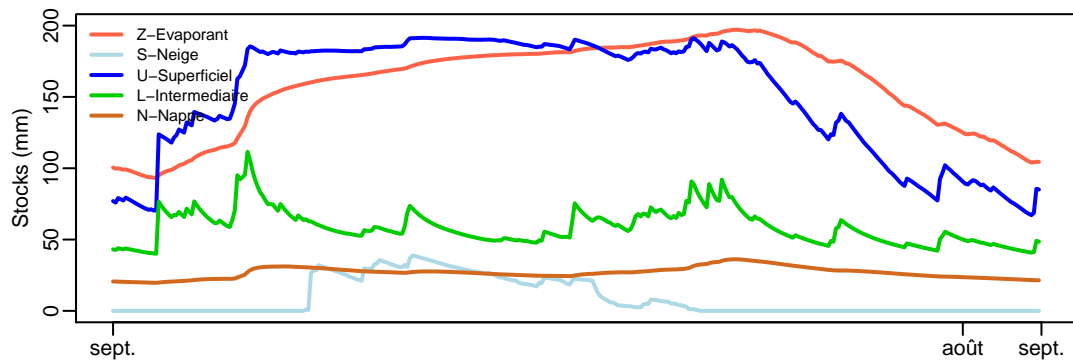



# x1225010 (164.9 km<sup>2</sup>) – année 2000–2001

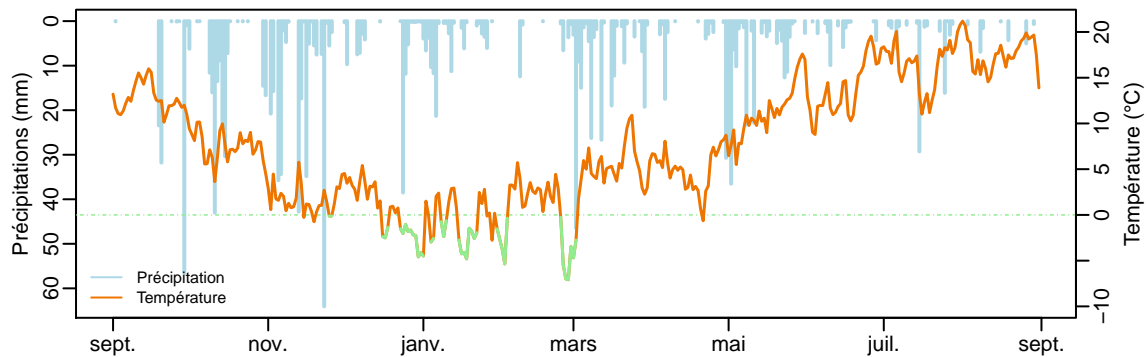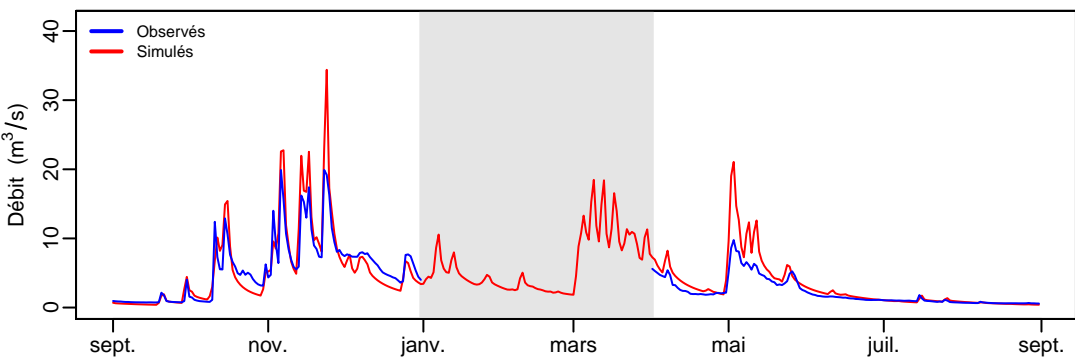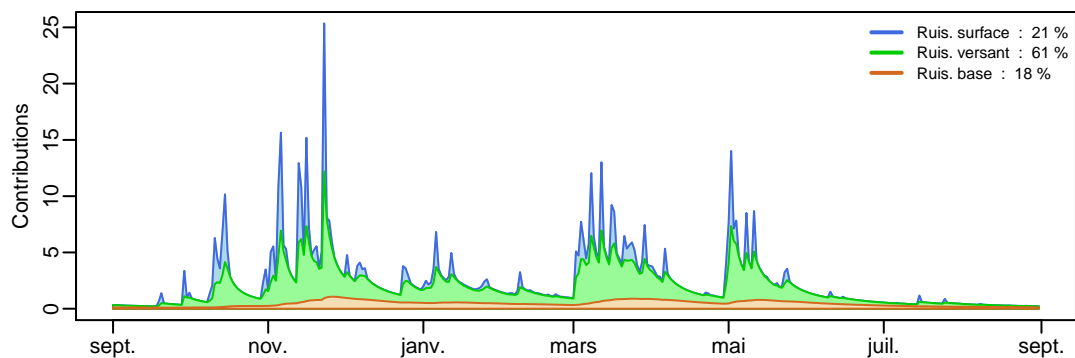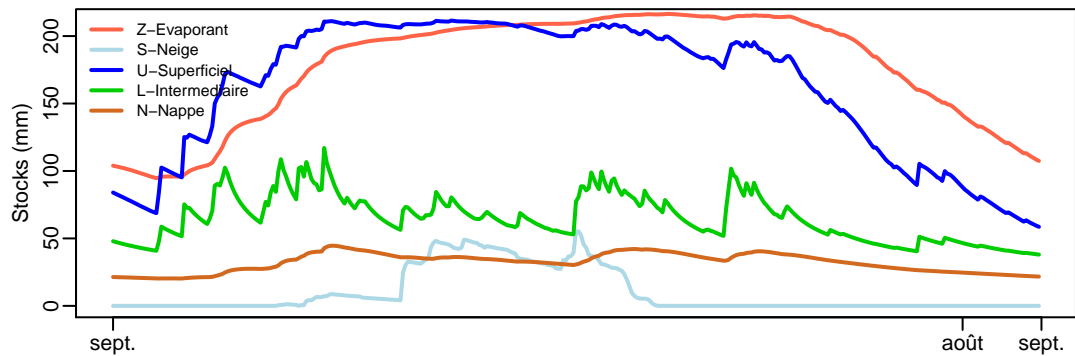

# x1225010 (164.9 km<sup>2</sup>) – année 2001–2002

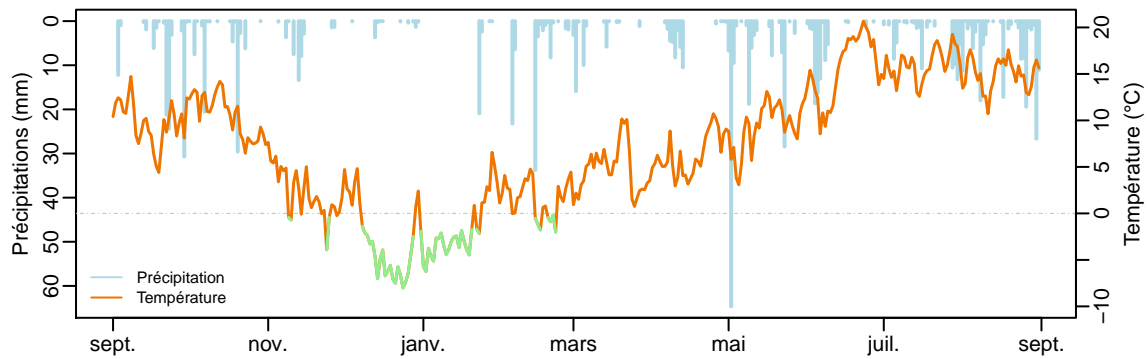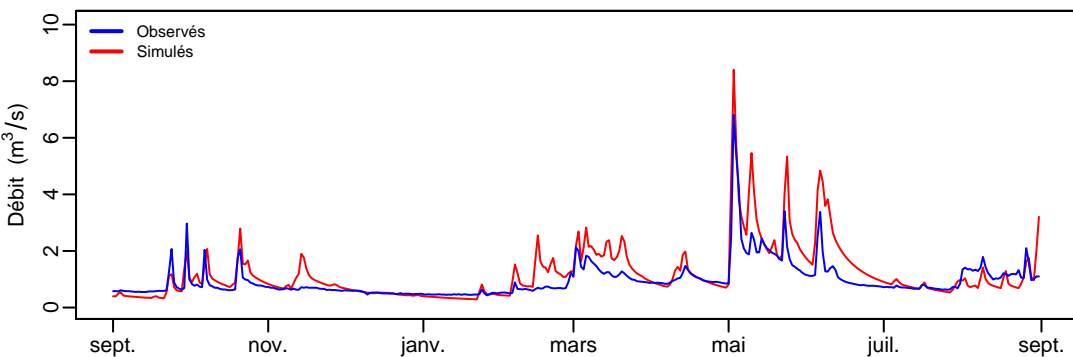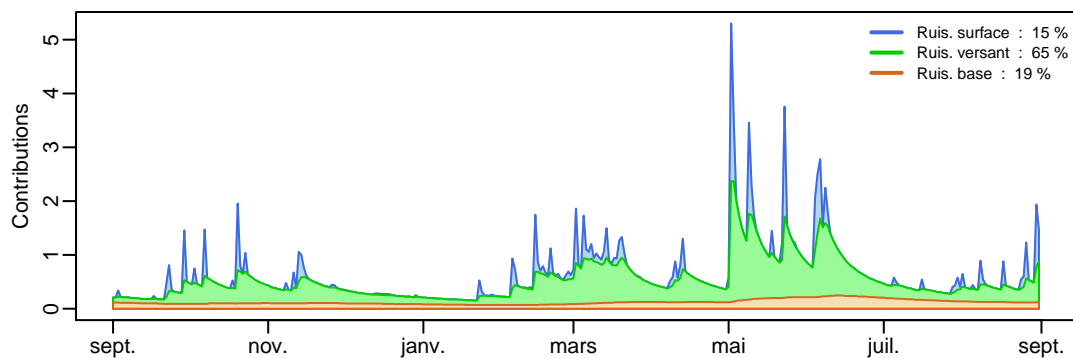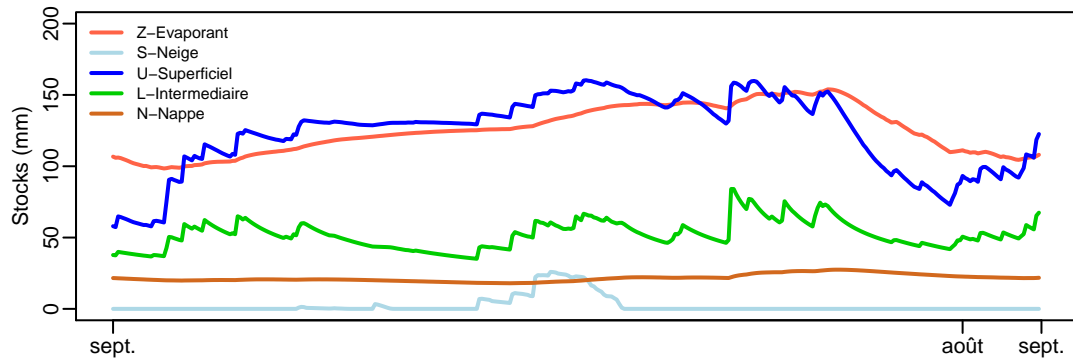

# x1225010 (164.9 km<sup>2</sup>) – année 2002–2003

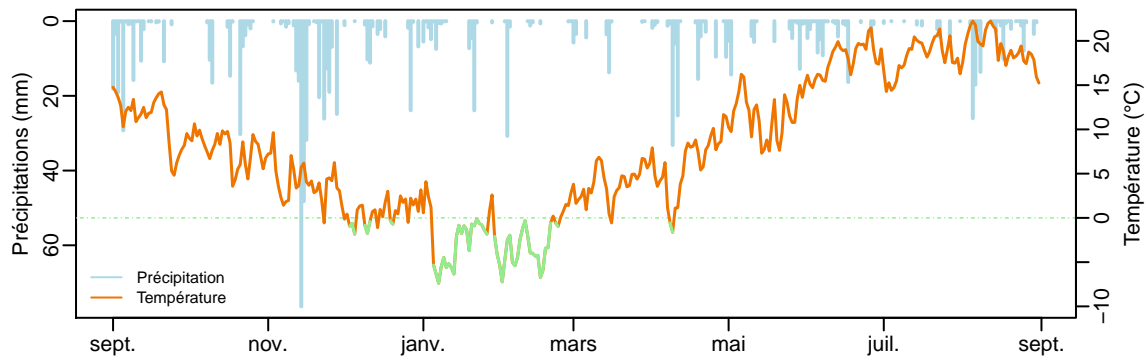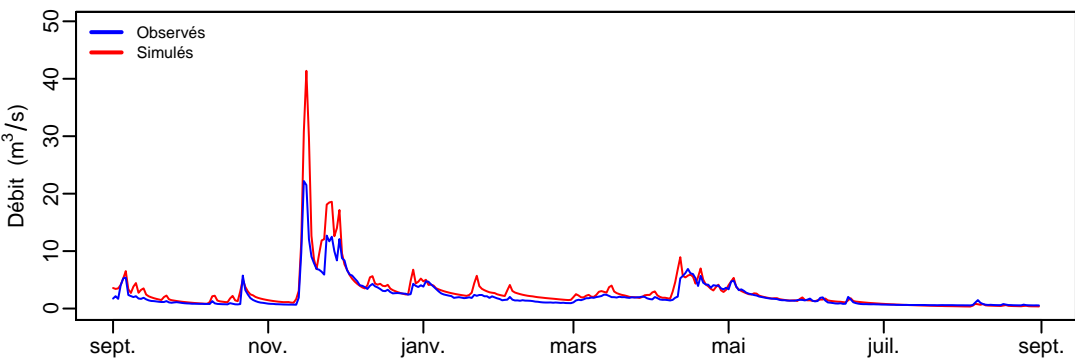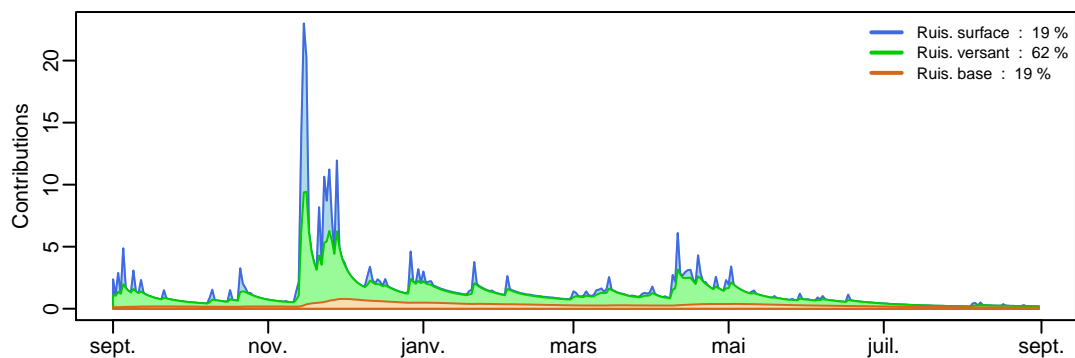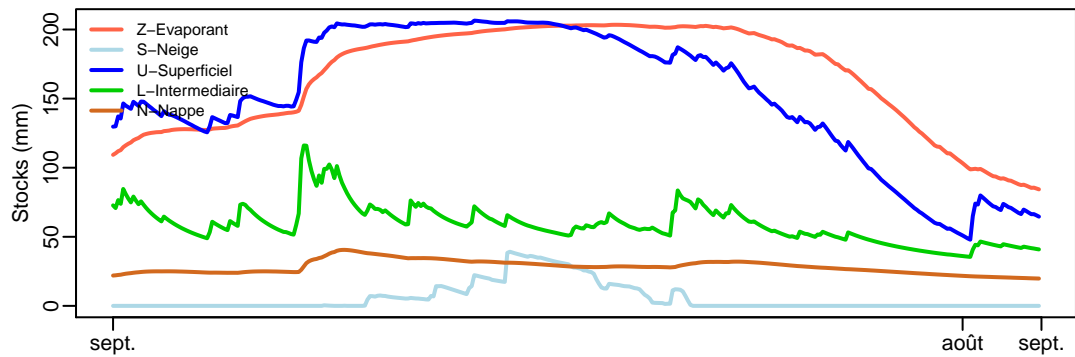

# x1225010 (164.9 km<sup>2</sup>) – année 2003–2004

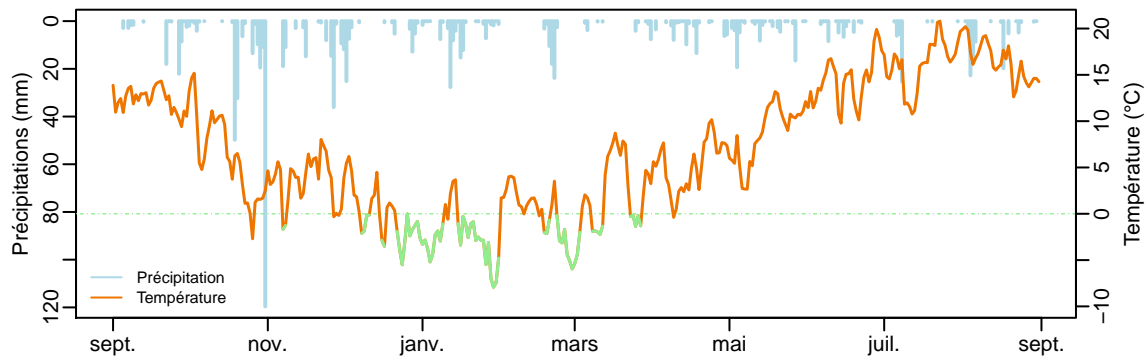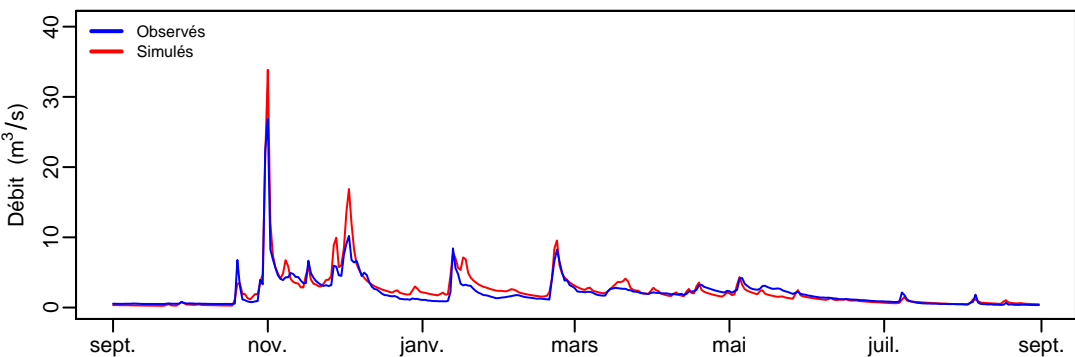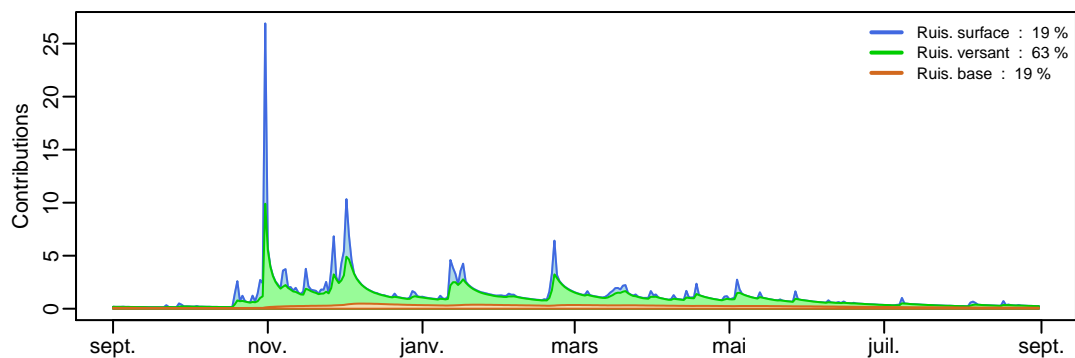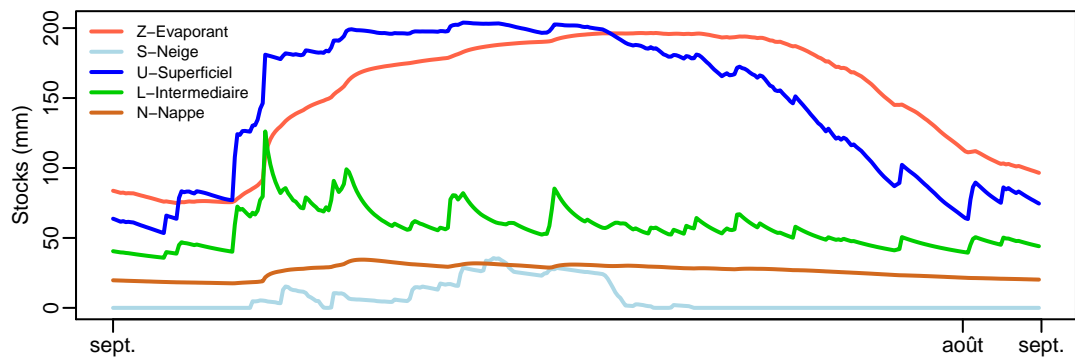

# x1225010 (164.9 km<sup>2</sup>) – année 2004–2005

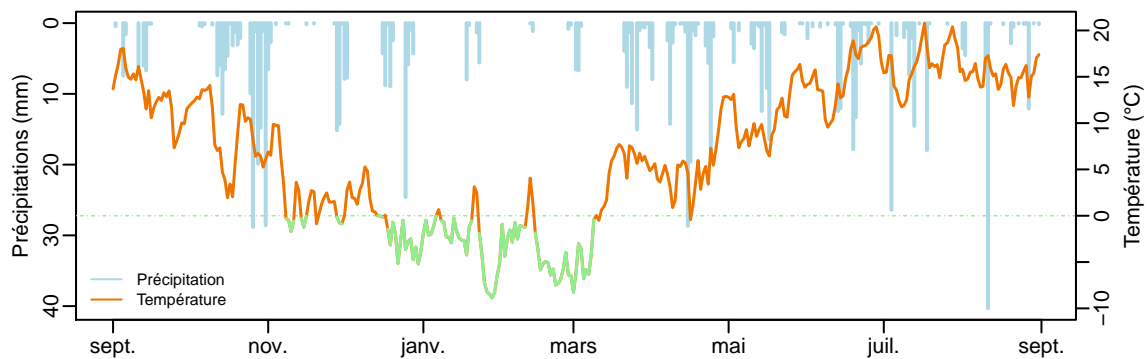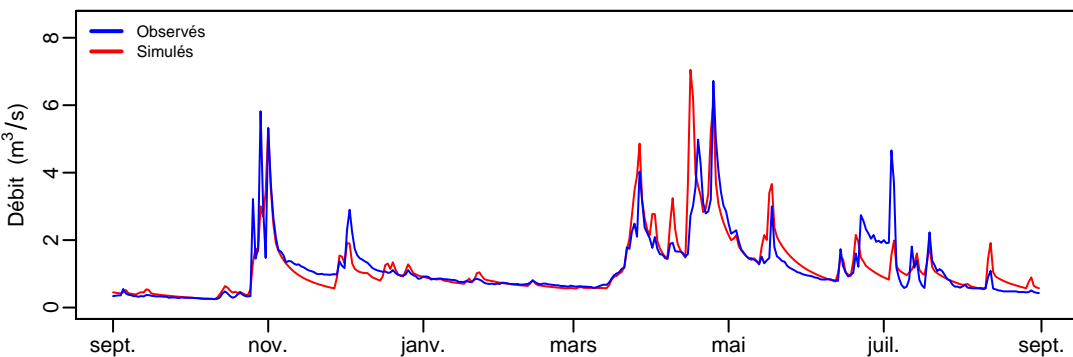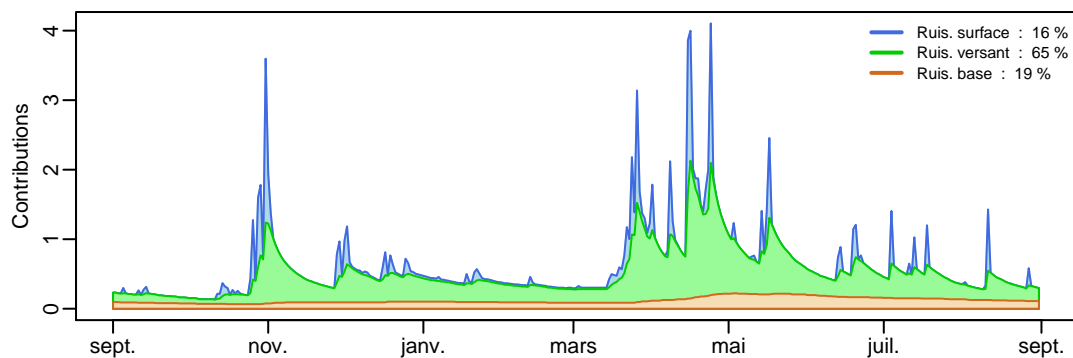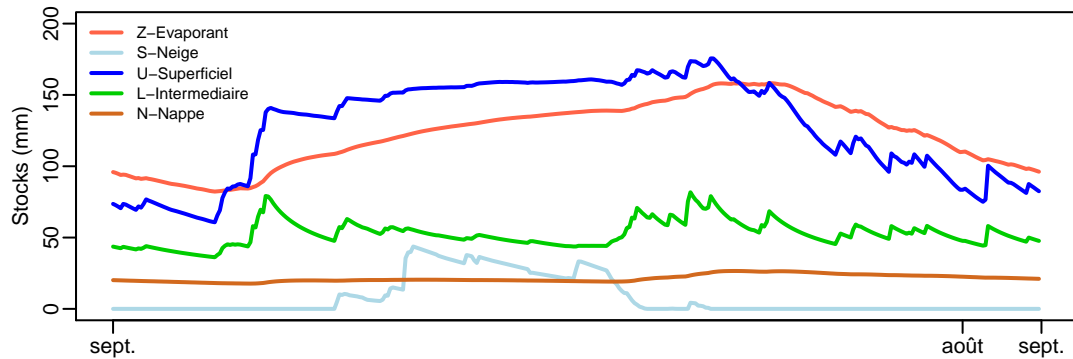

# x1225010 (164.9 km<sup>2</sup>) – année 2005–2006

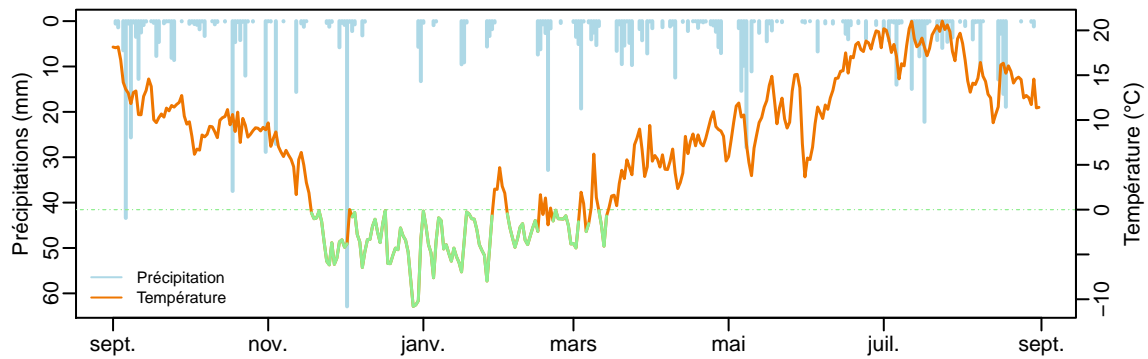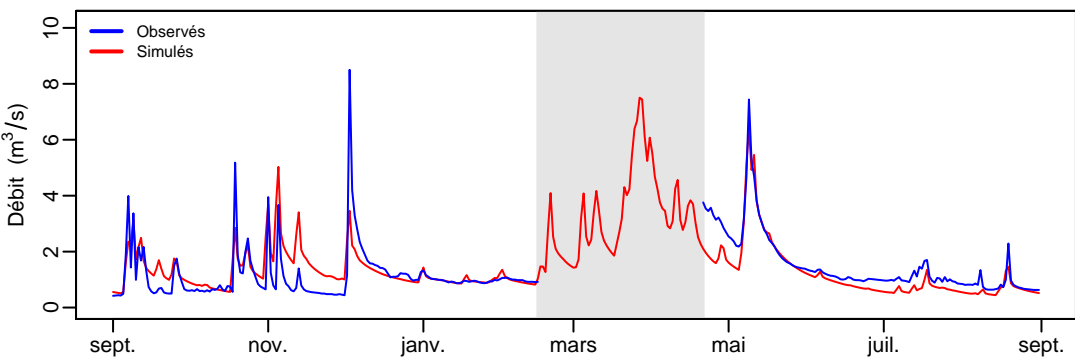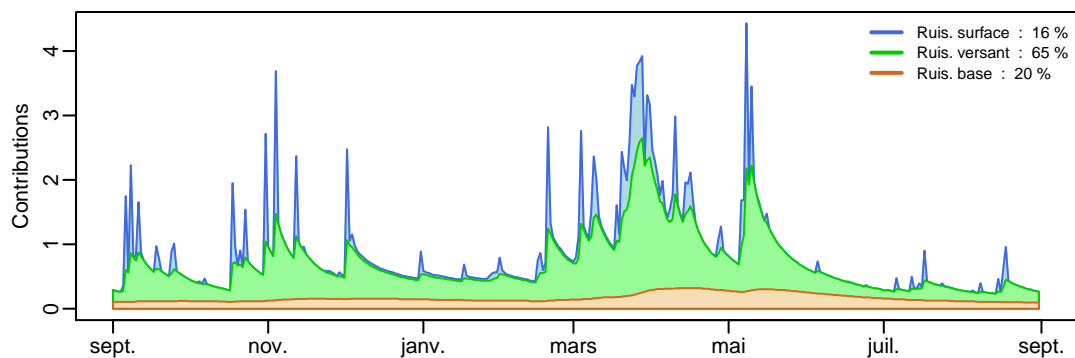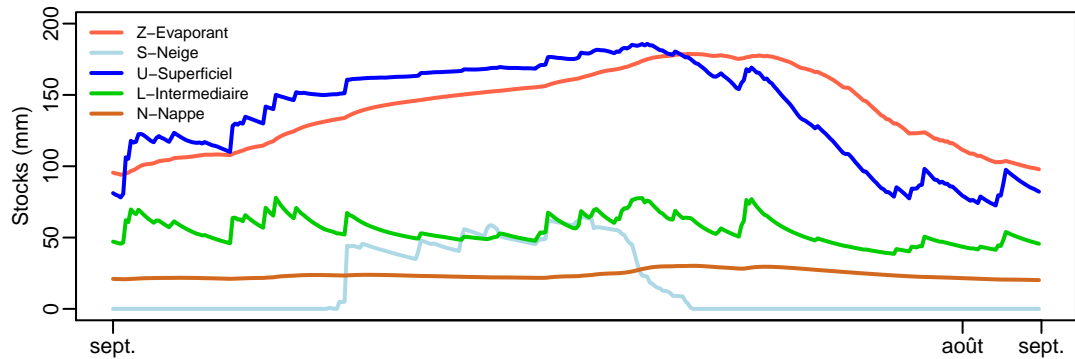

# x1225010 (164.9 km<sup>2</sup>) – année 2006–2007

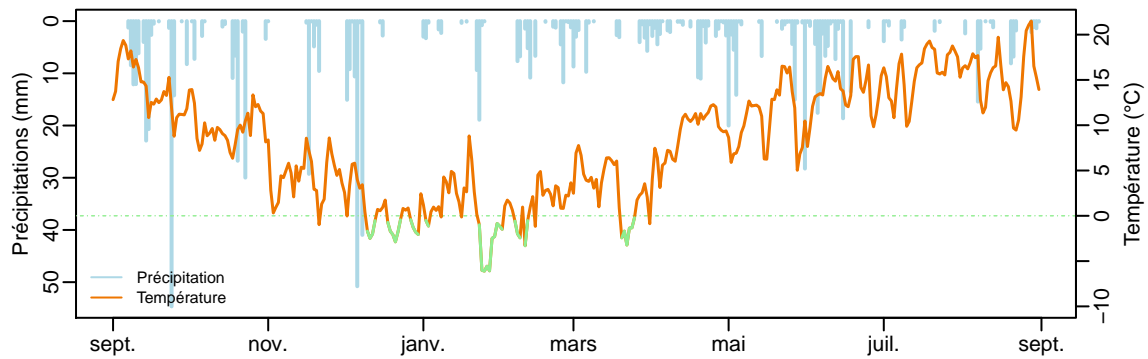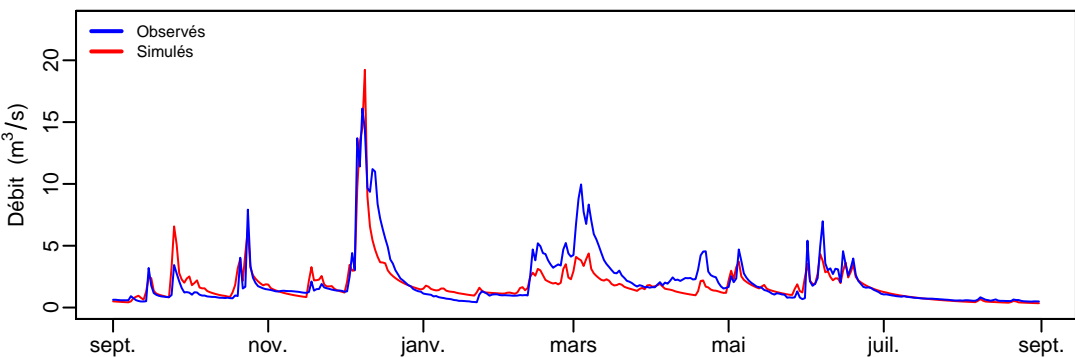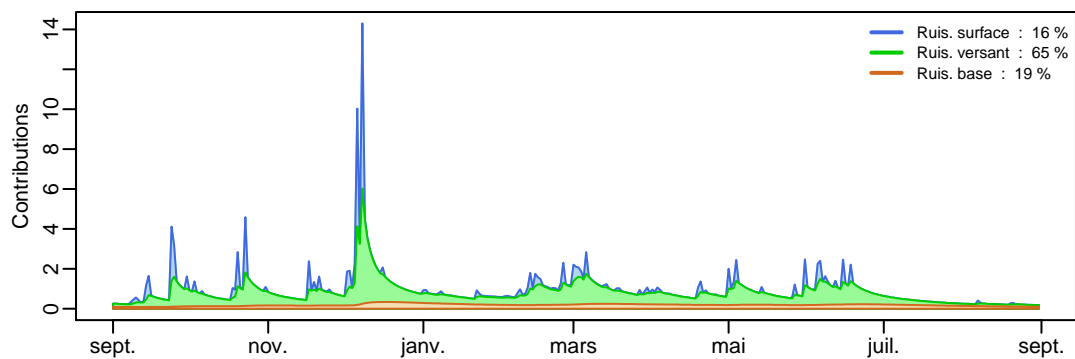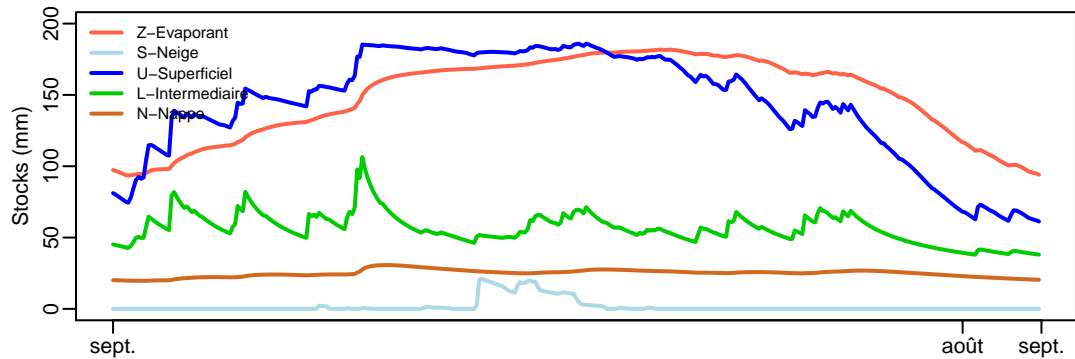

# x1225010 (164.9 km<sup>2</sup>) – année 2007–2008

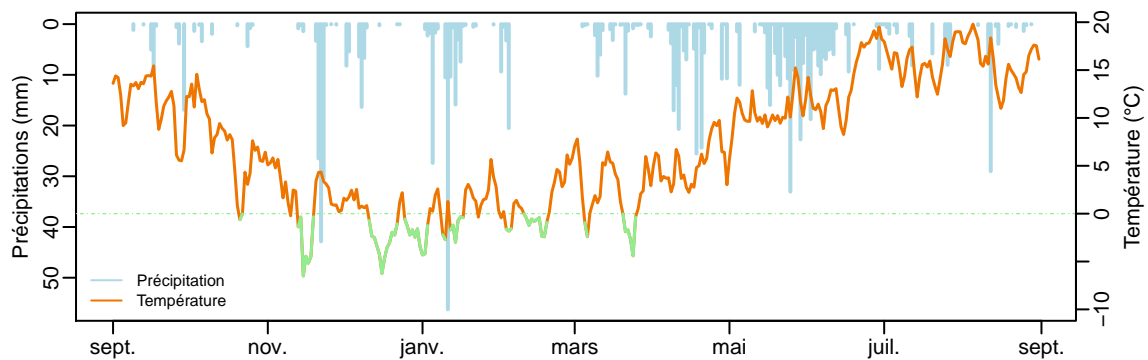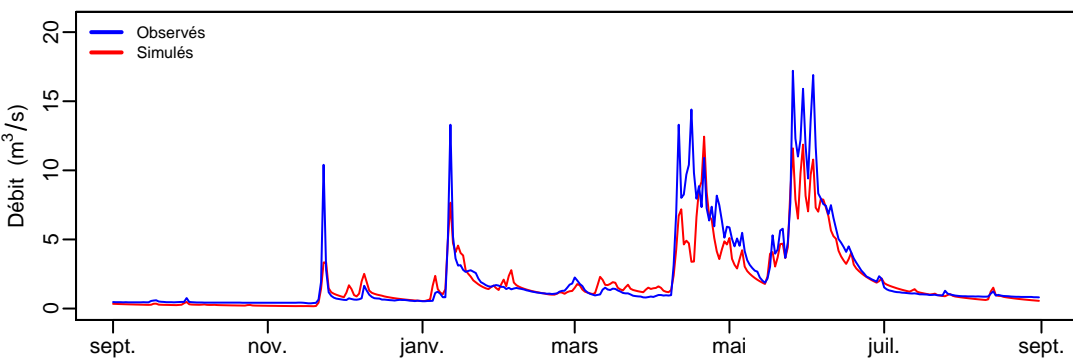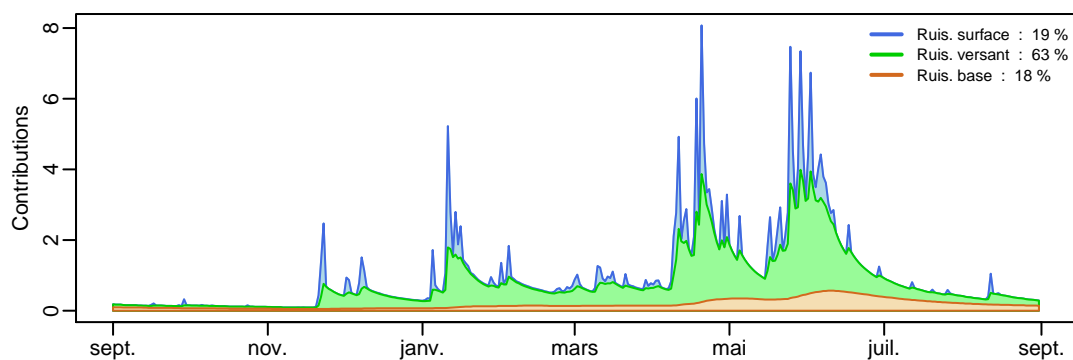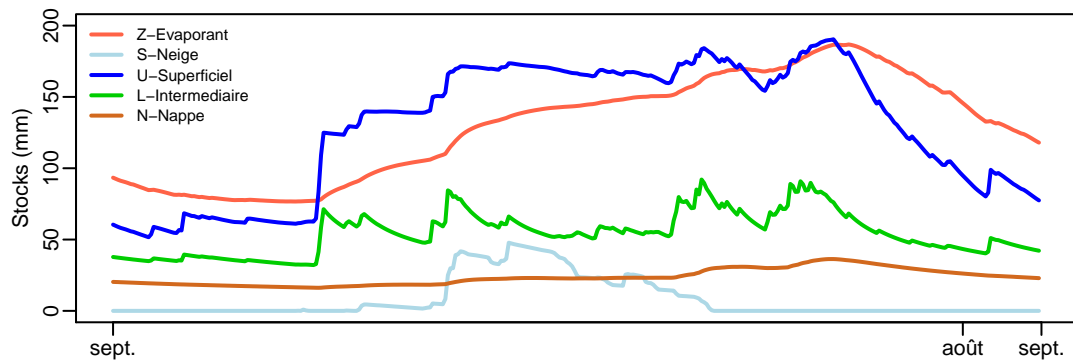



# x1225010 (164.9 km<sup>2</sup>) – année 2008–2009

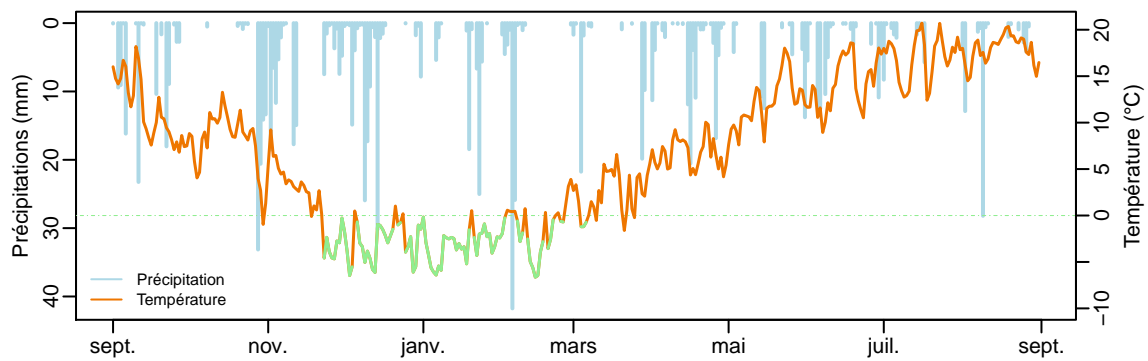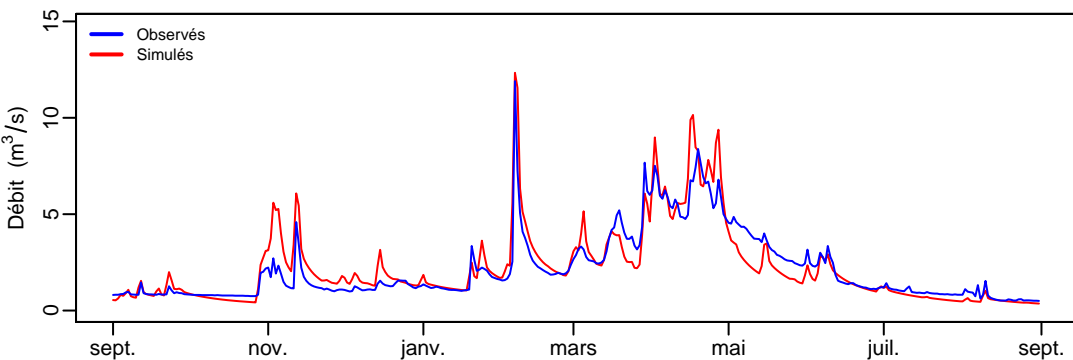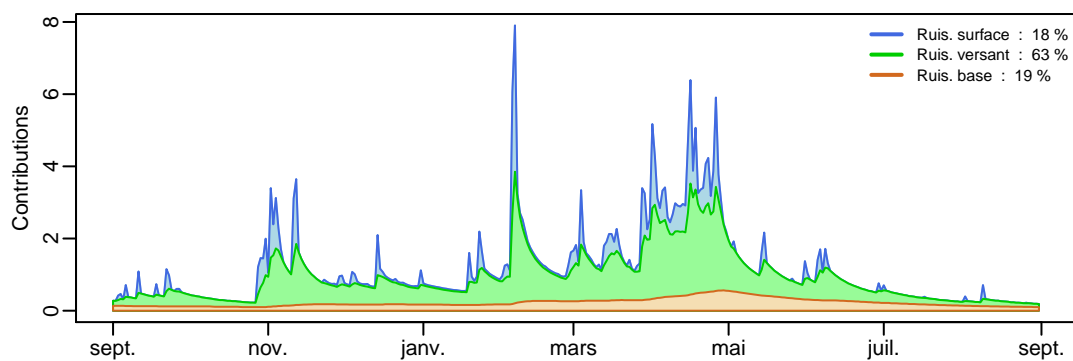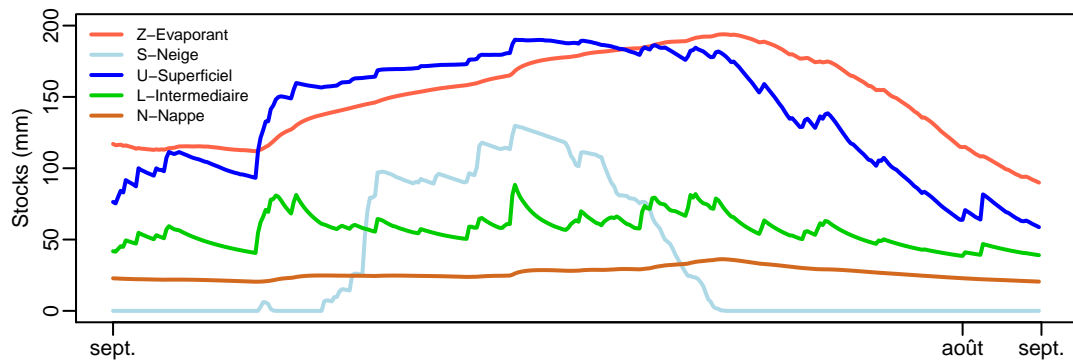

# x1225010 (164.9 km<sup>2</sup>) – année 2009–2010

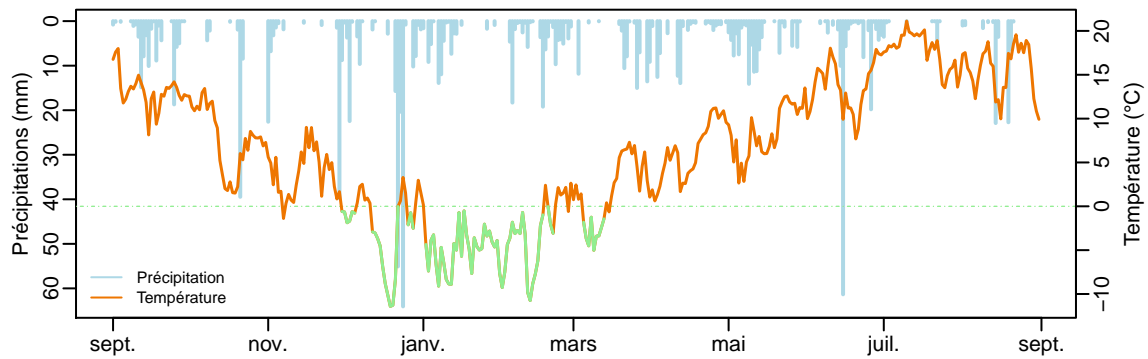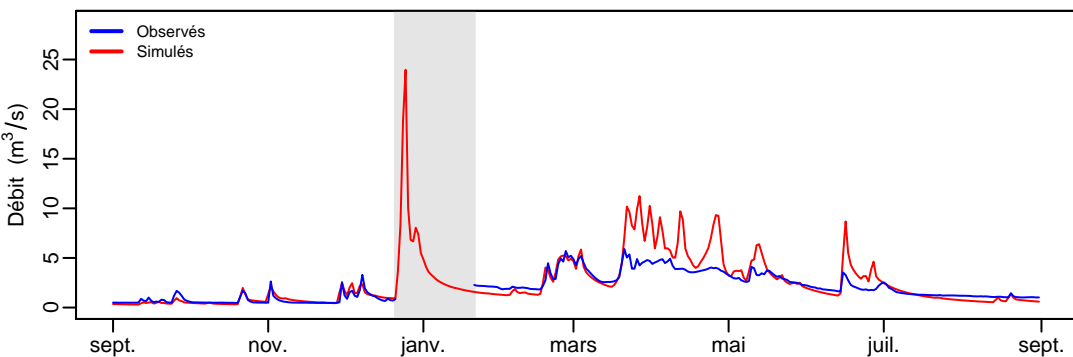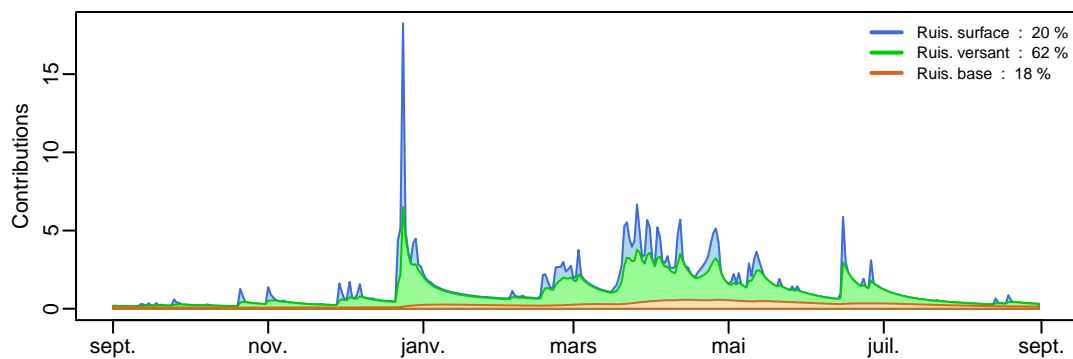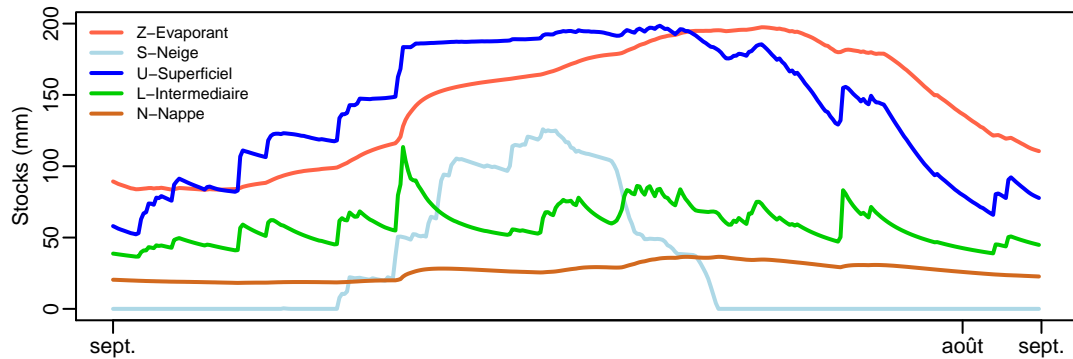

# x1225010 (164.9 km<sup>2</sup>) – année 2010–2011

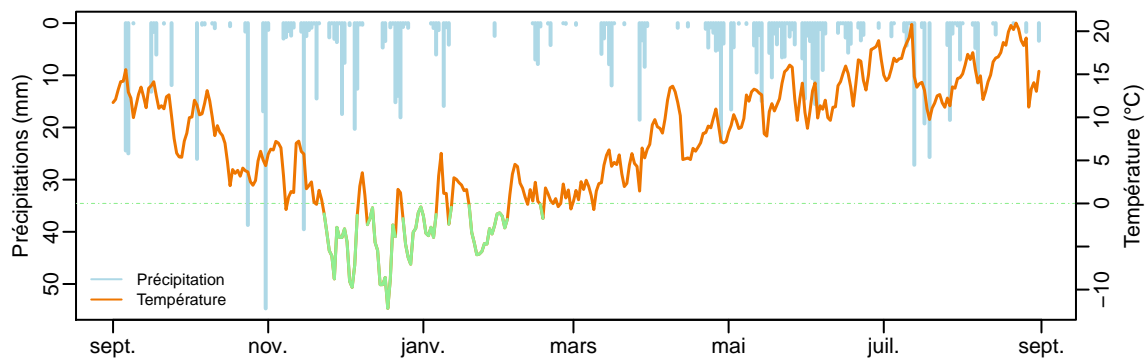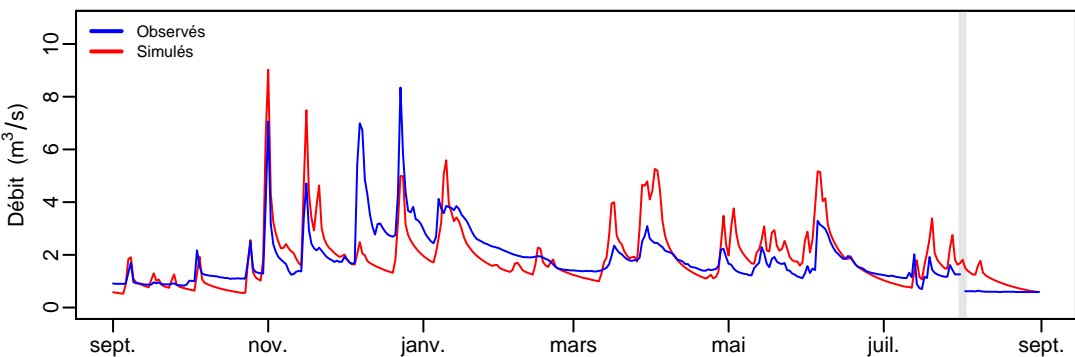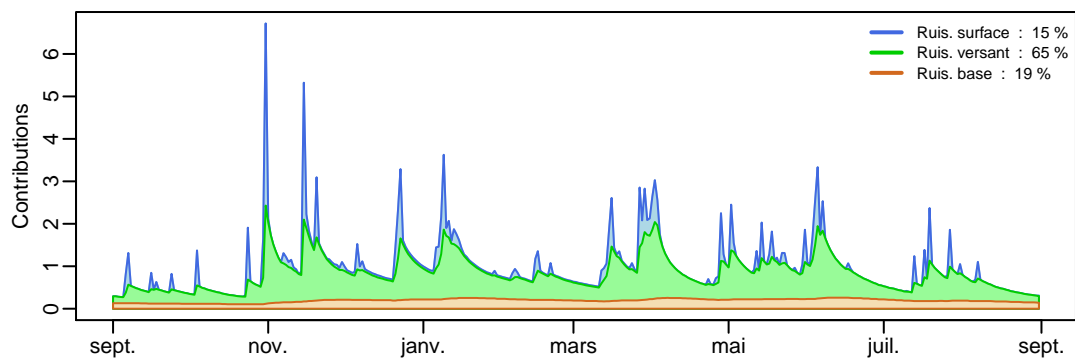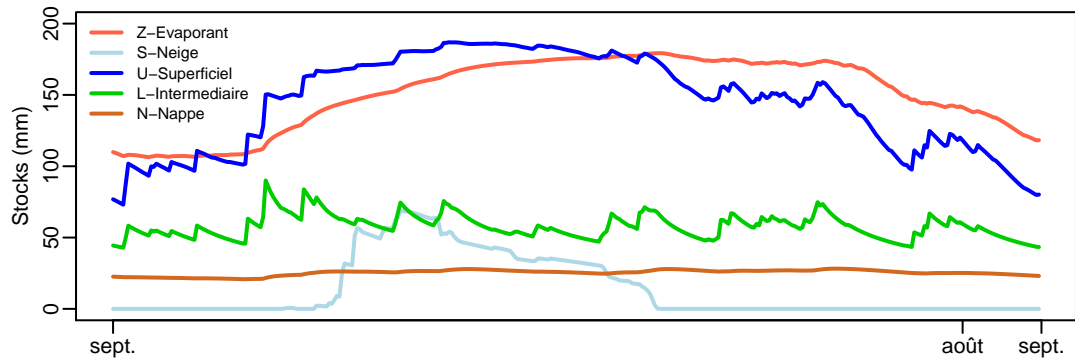

# x1225010 (164.9 km<sup>2</sup>) – année 2011–2012

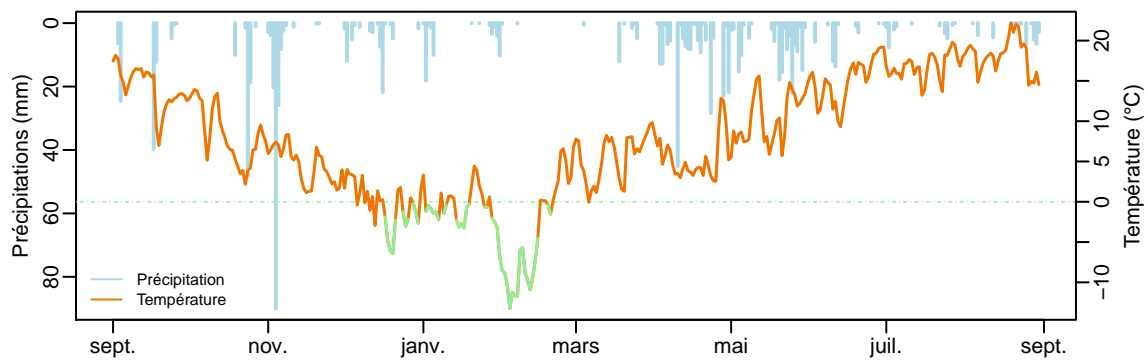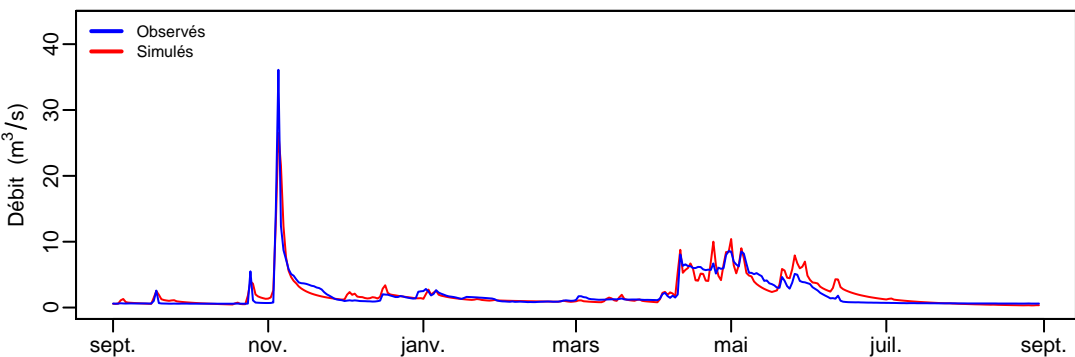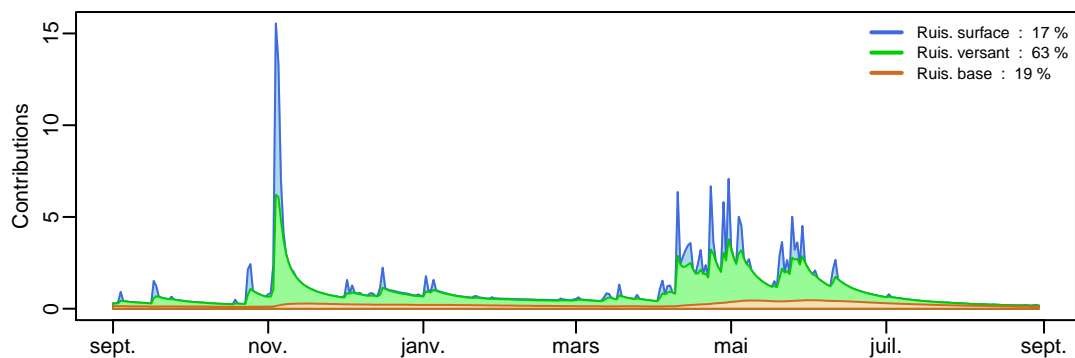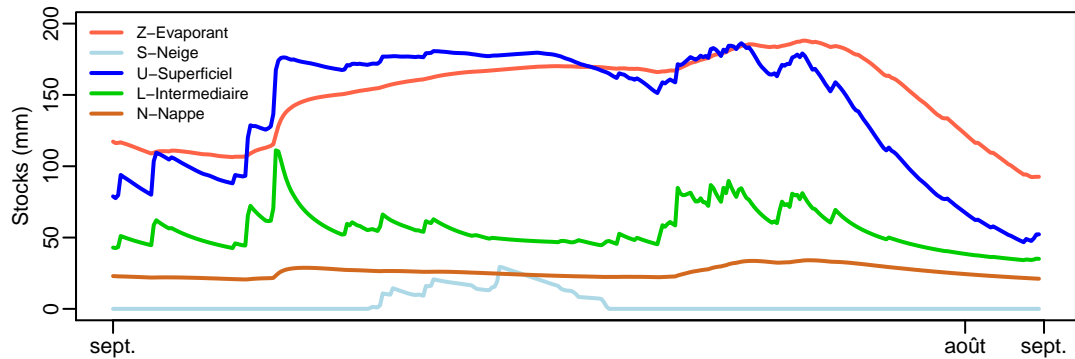

# x1335010 (126.1554 km<sup>2</sup>) – année 1981–1982

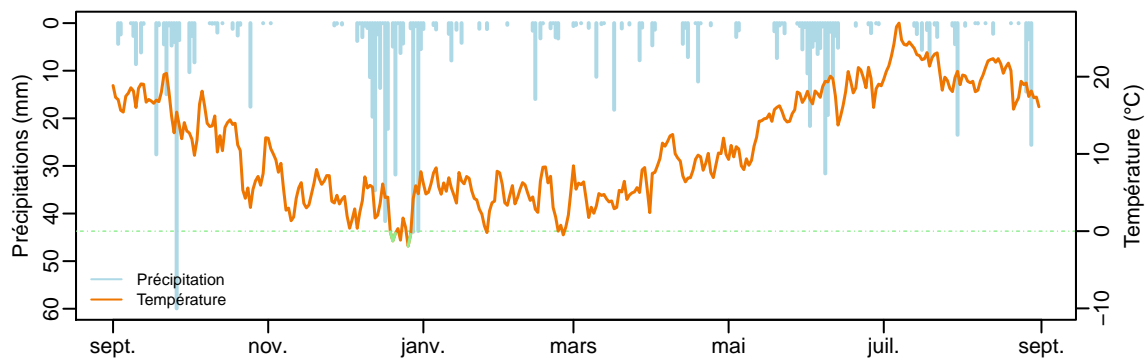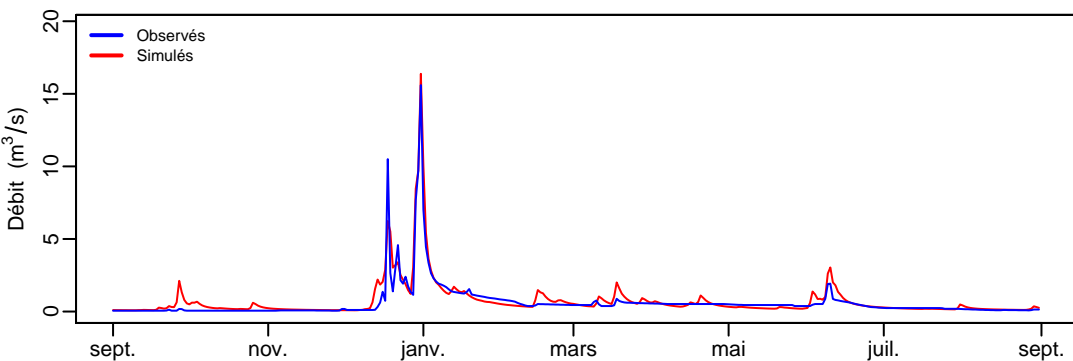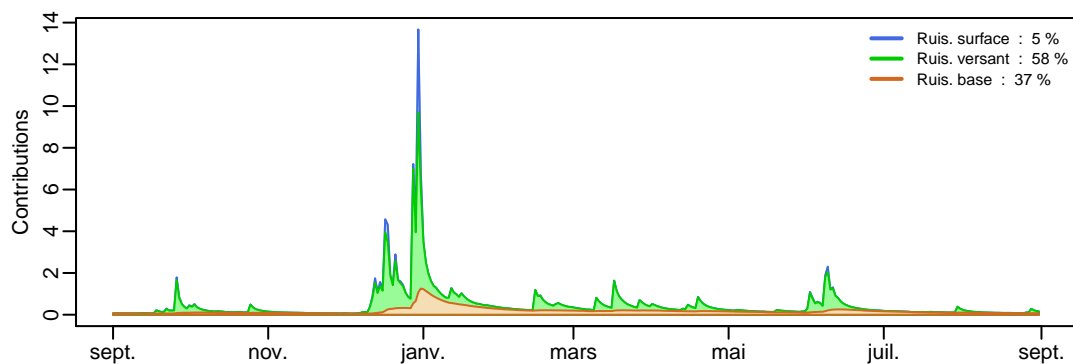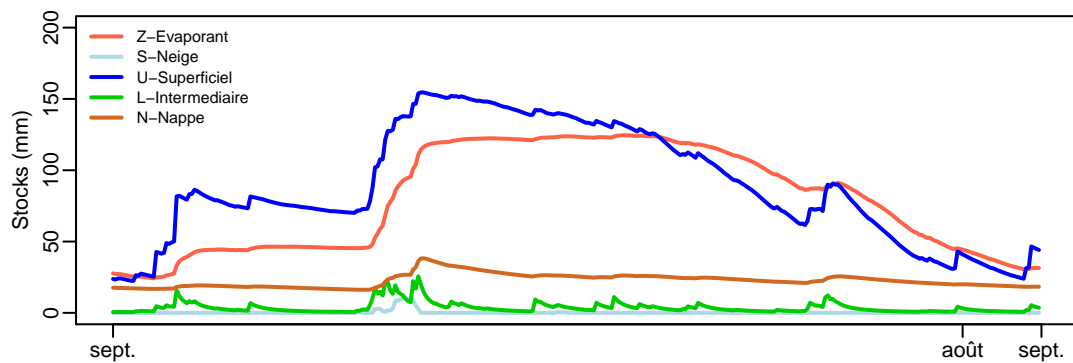

# x1335010 (126.1554 km<sup>2</sup>) – année 1982–1983

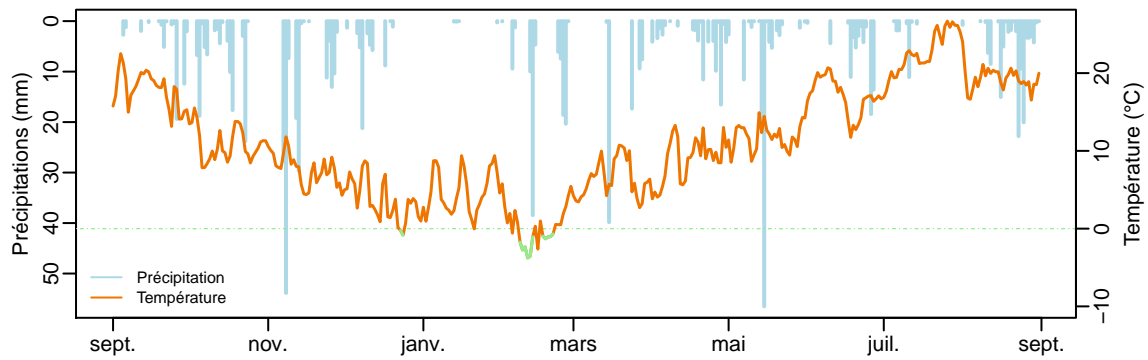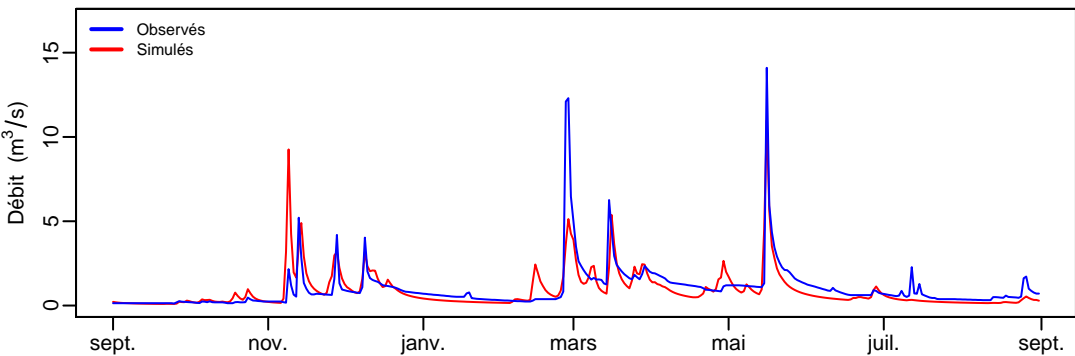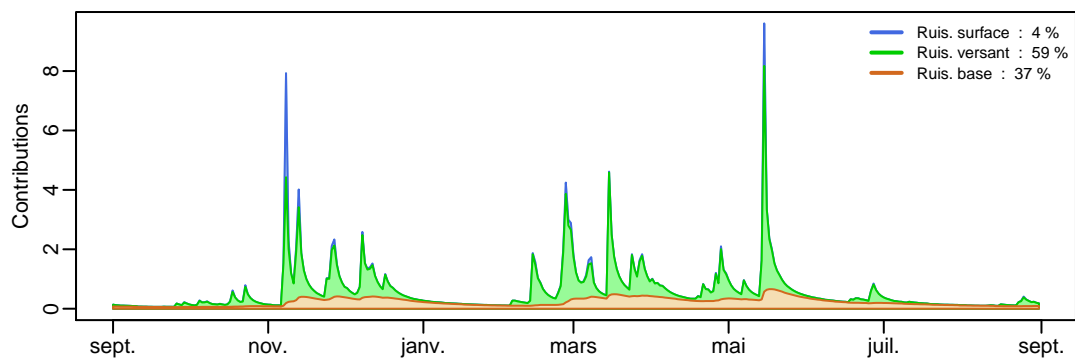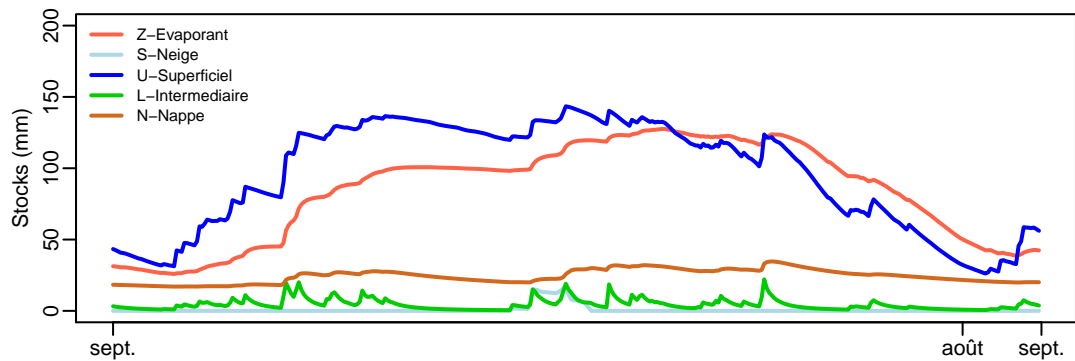

# x1335010 (126.1554 km<sup>2</sup>) – année 1983–1984

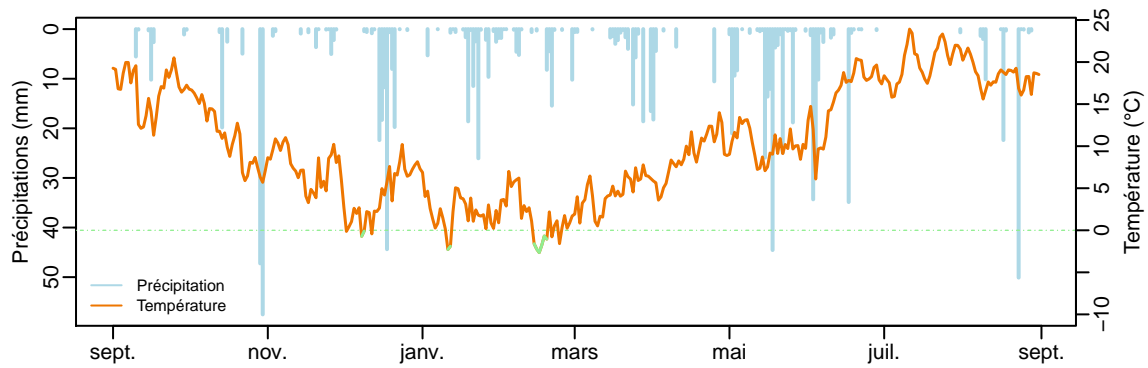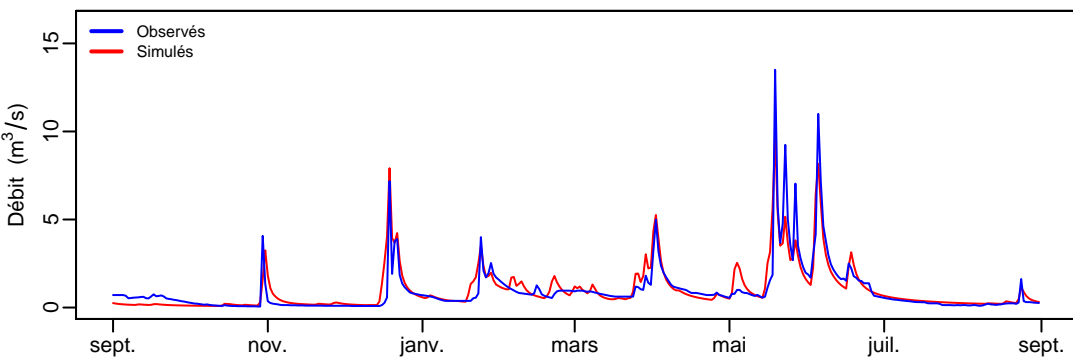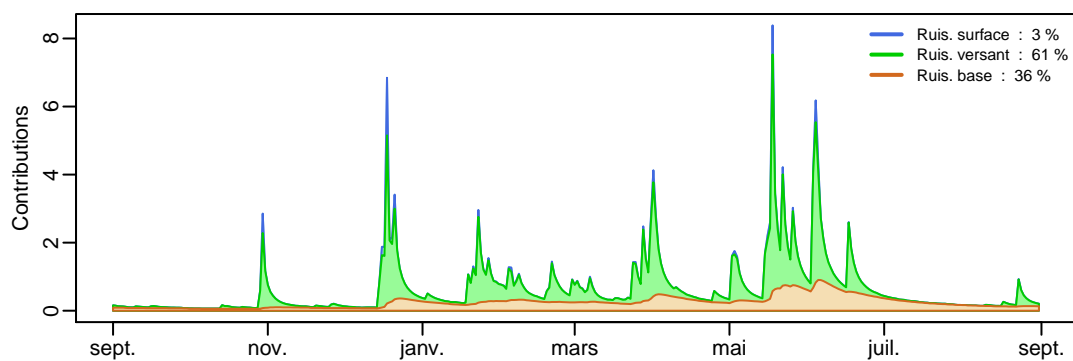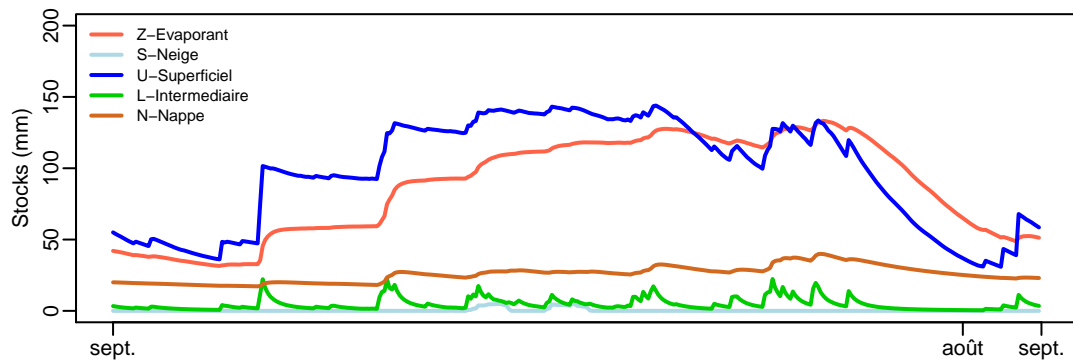

# x1335010 (126.1554 km<sup>2</sup>) – année 1984–1985

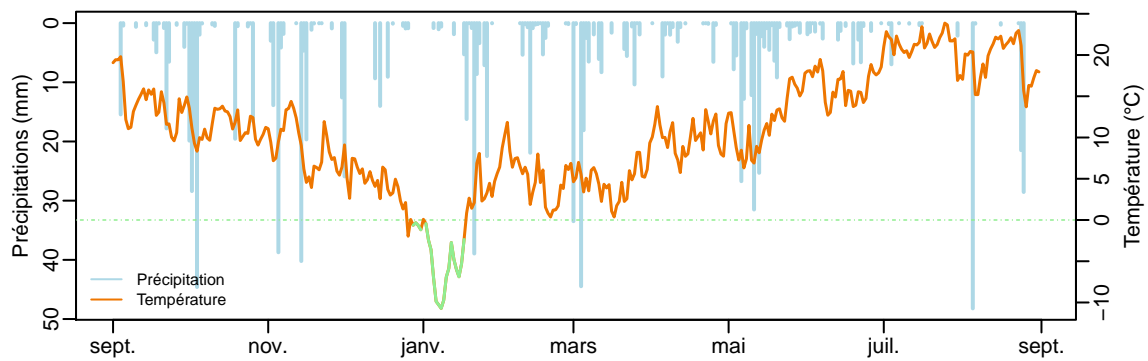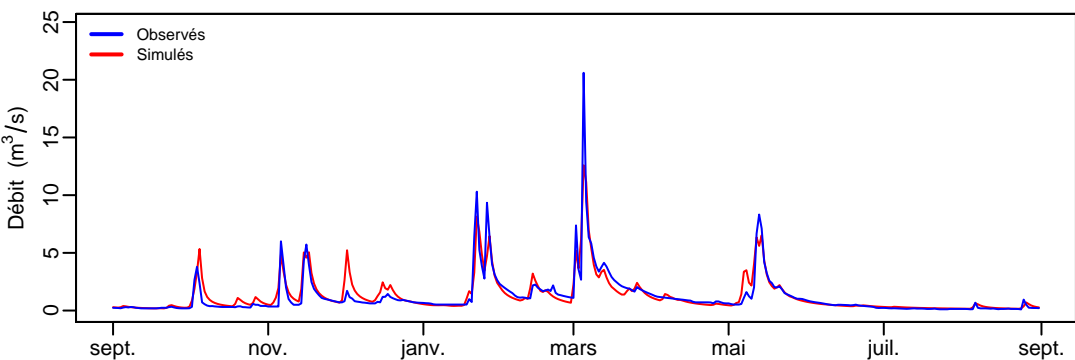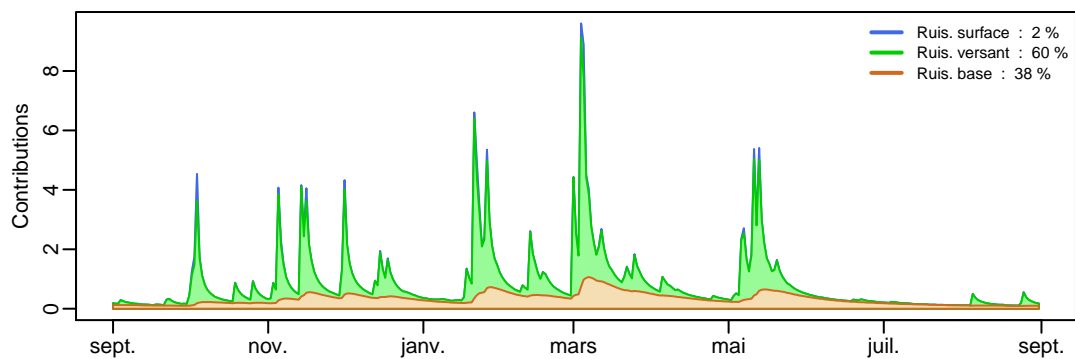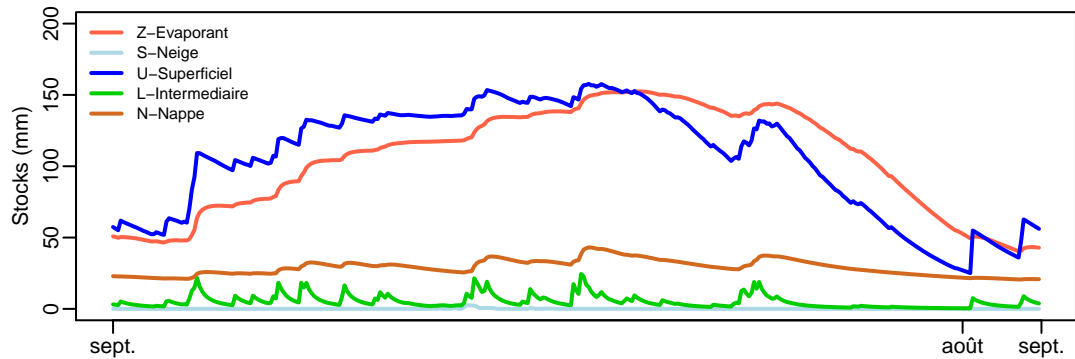



# x1335010 (126.1554 km<sup>2</sup>) – année 1985–1986

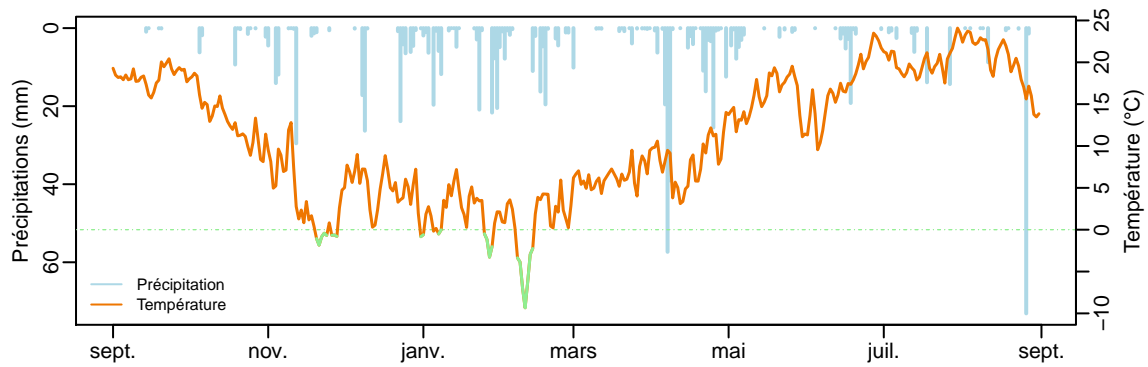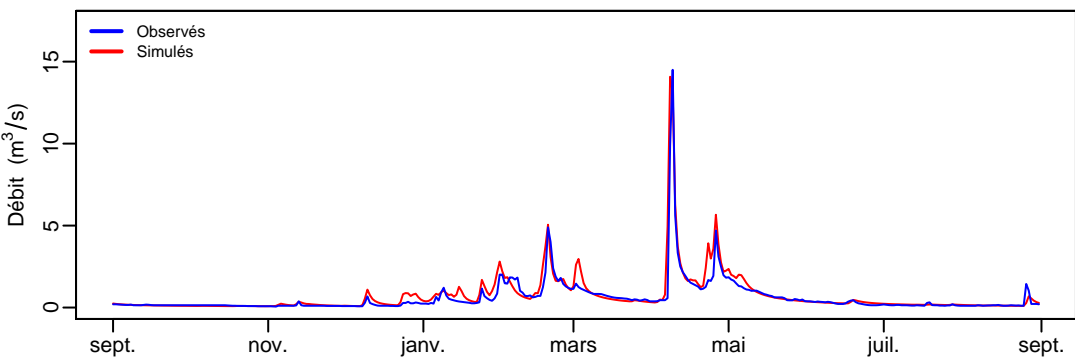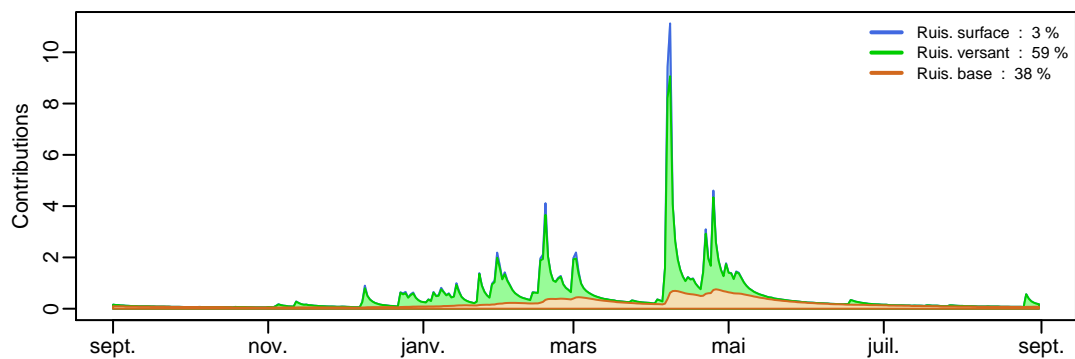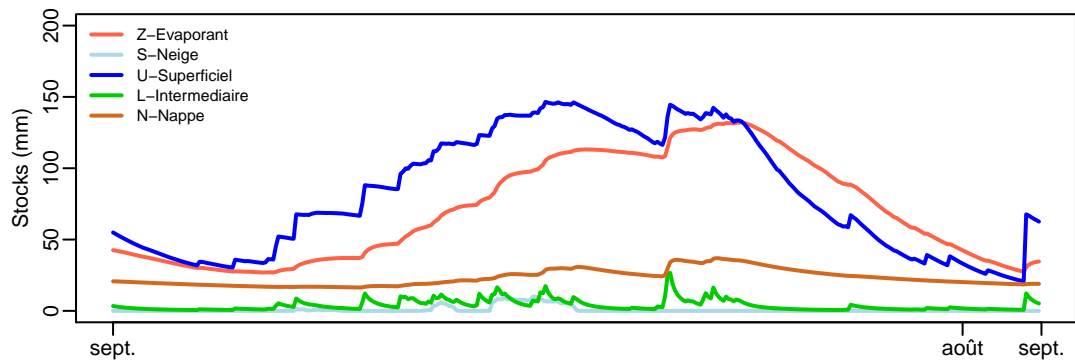

# x1335010 (126.1554 km<sup>2</sup>) – année 1986–1987

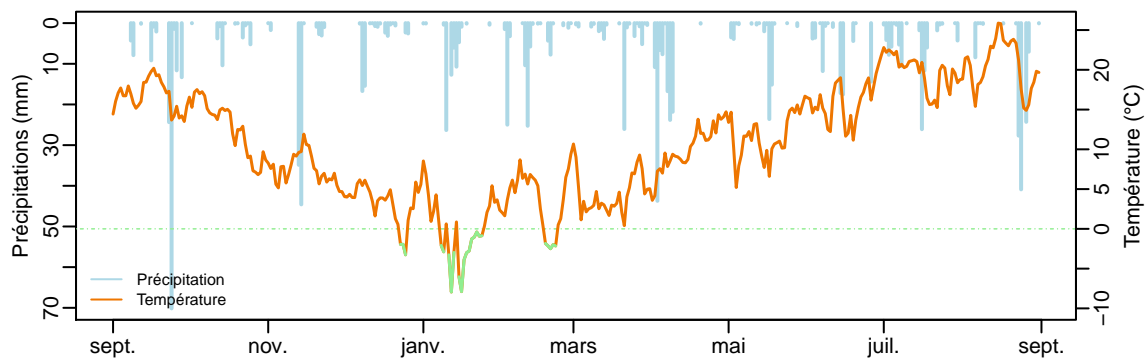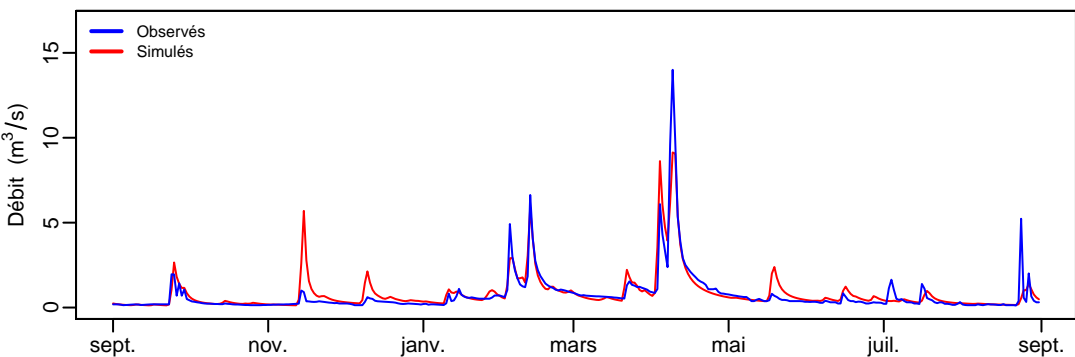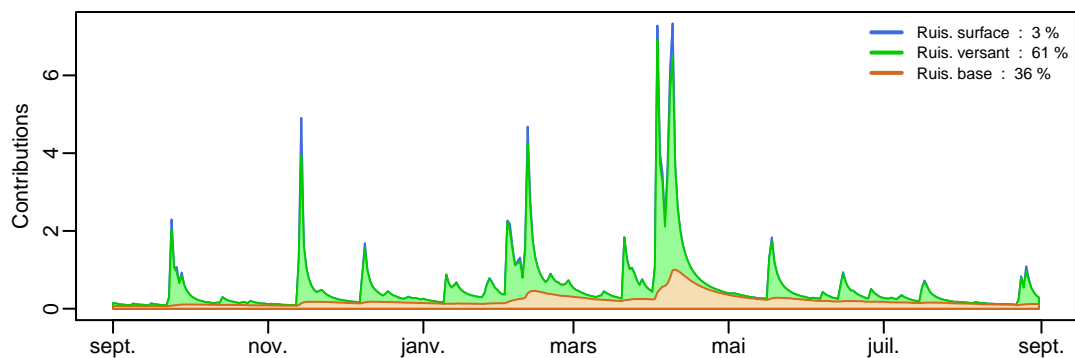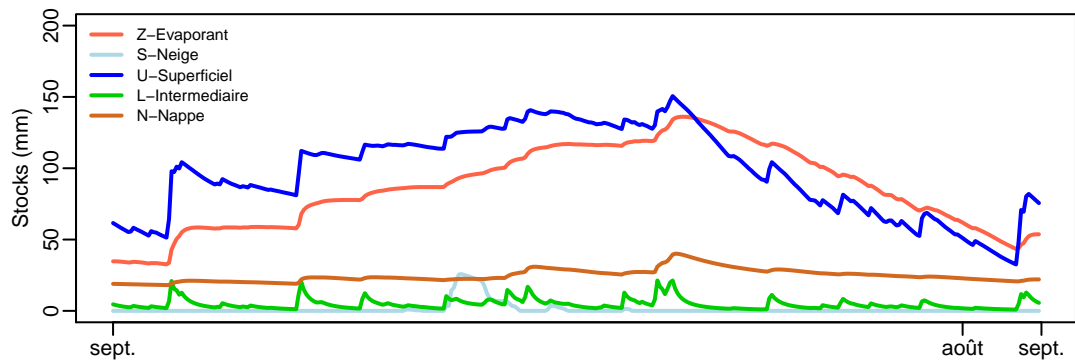

# x1335010 (126.1554 km<sup>2</sup>) – année 1987–1988

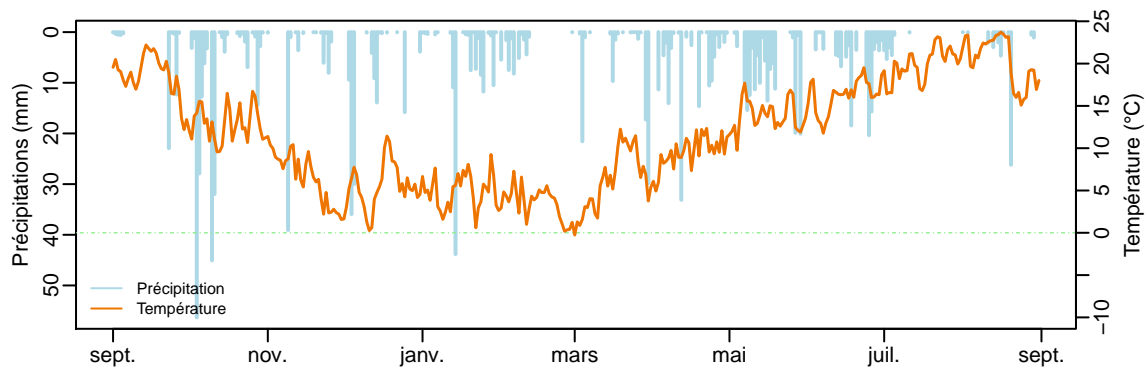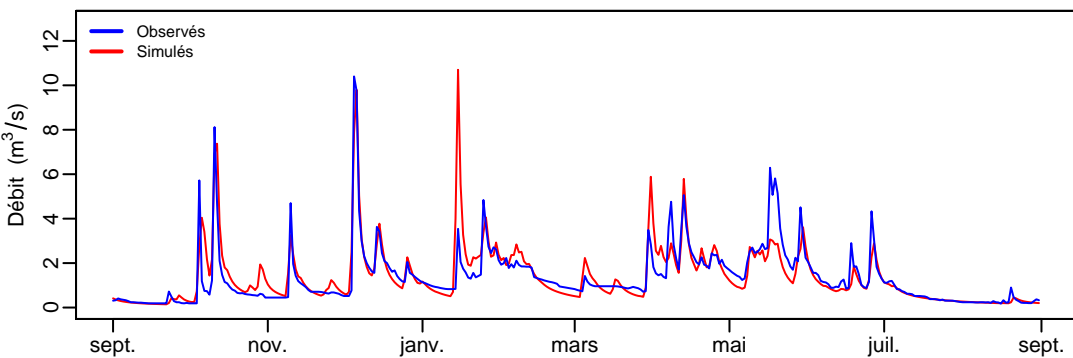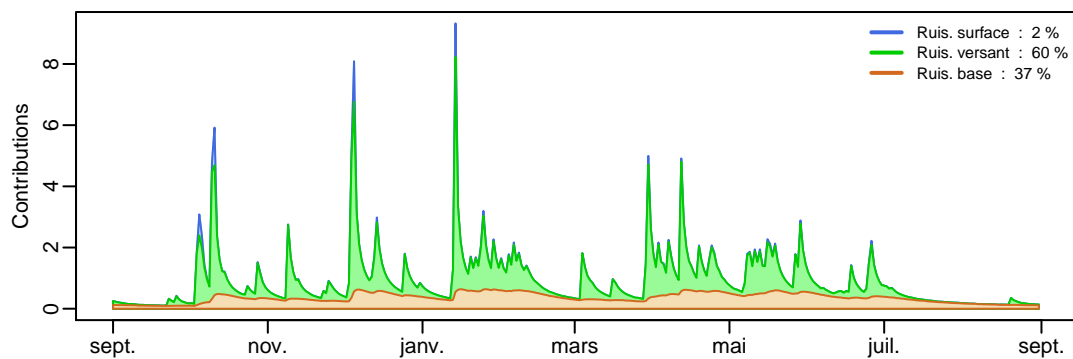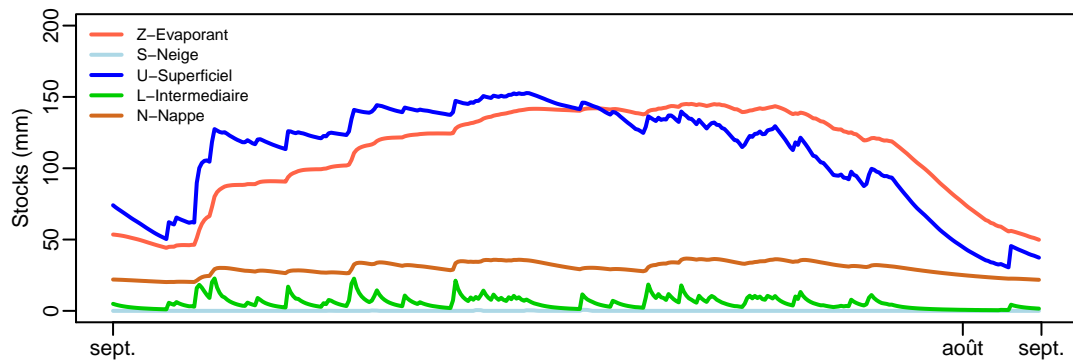

# x1335010 (126.1554 km<sup>2</sup>) – année 1988–1989

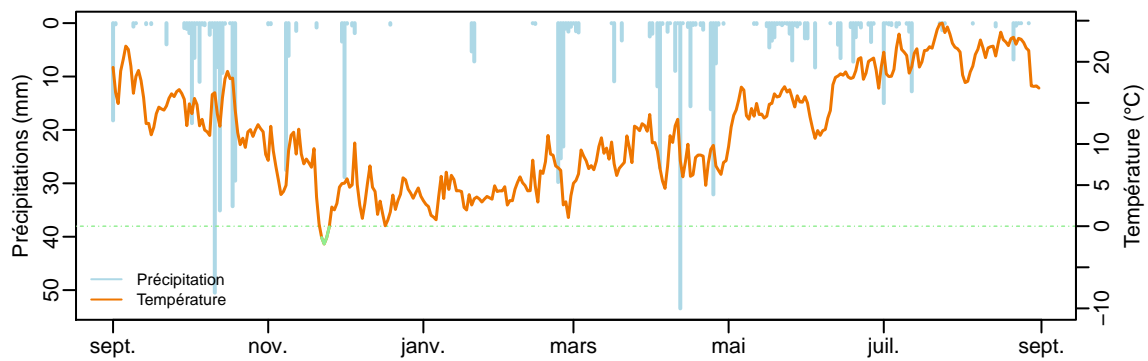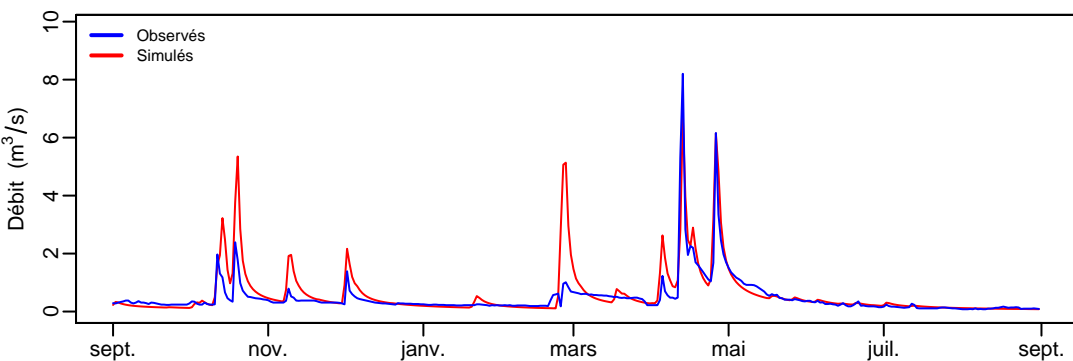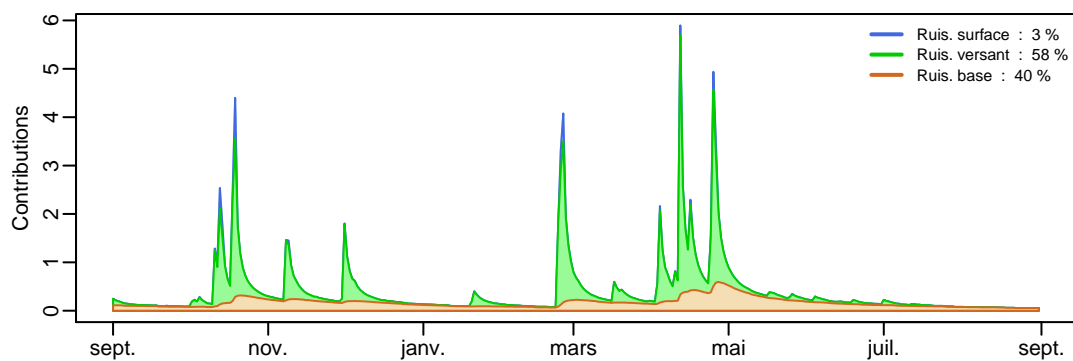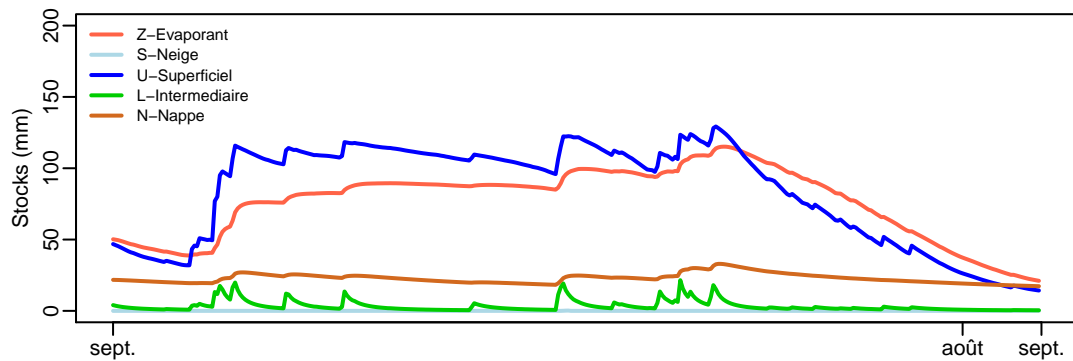

# x1335010 (126.1554 km<sup>2</sup>) – année 1989–1990

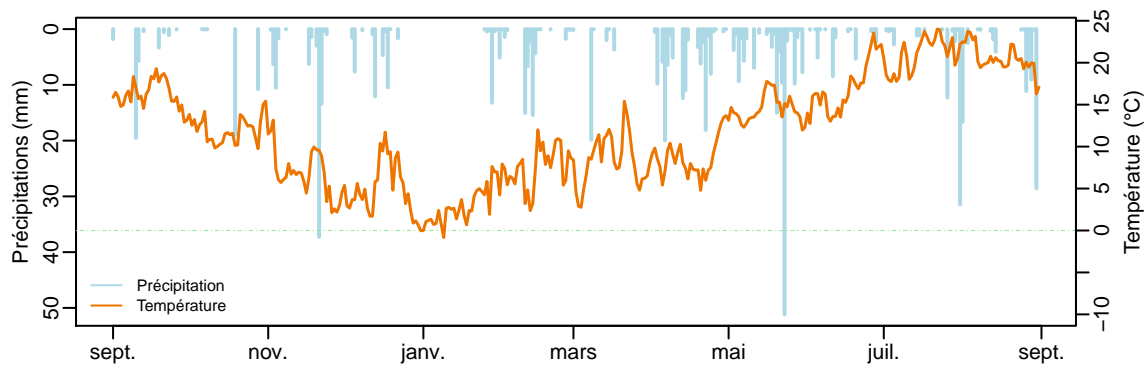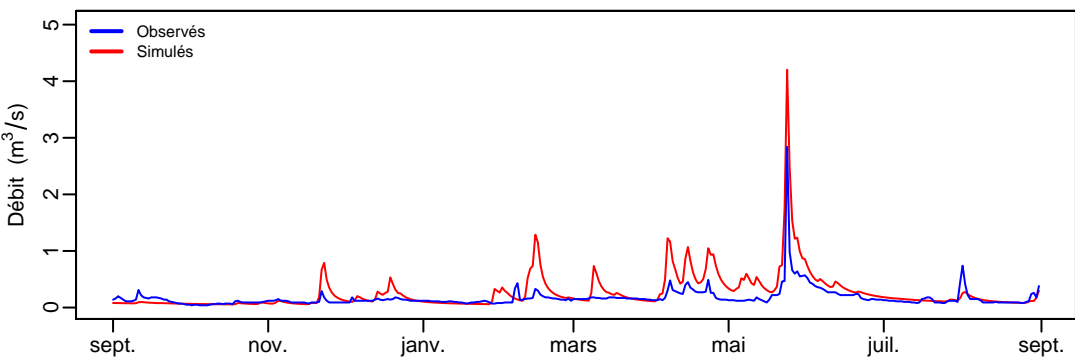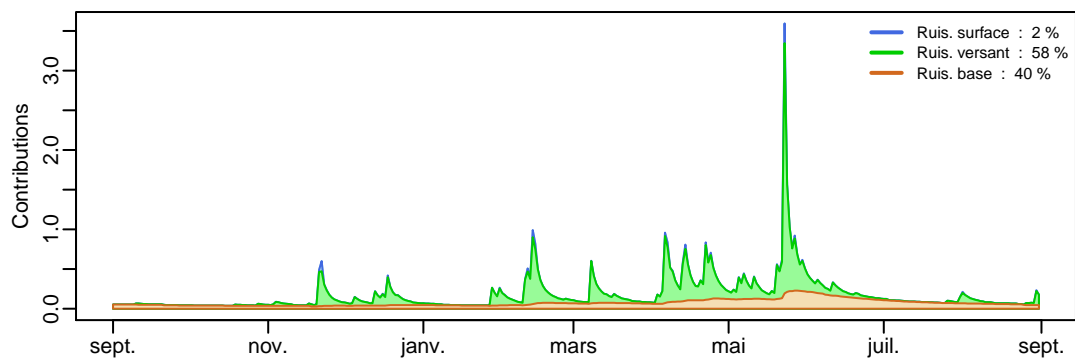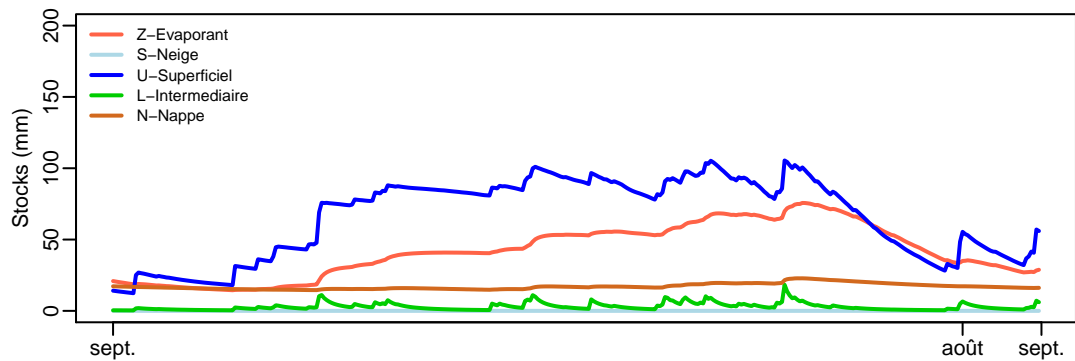

# x1335010 (126.1554 km<sup>2</sup>) – année 1990–1991

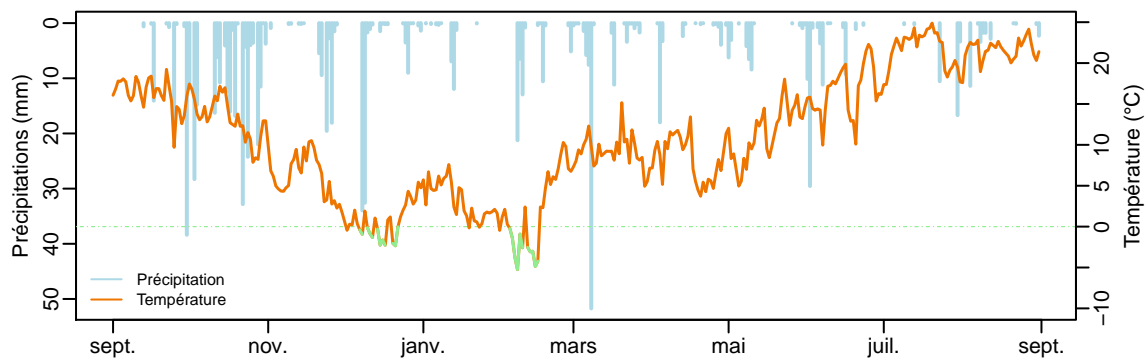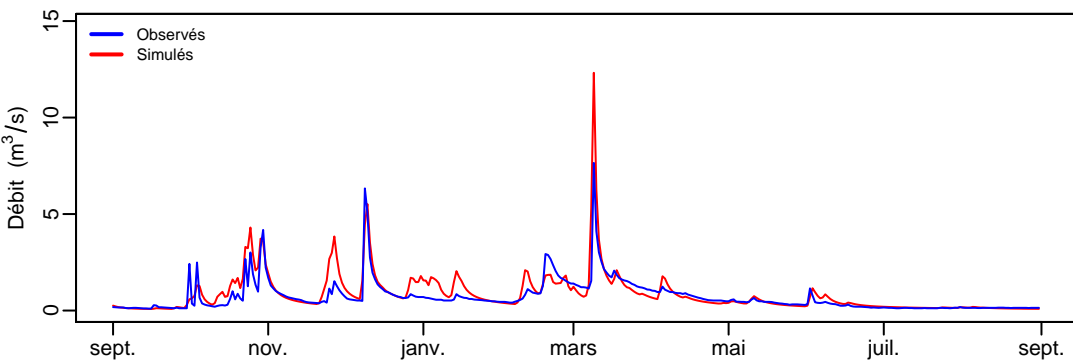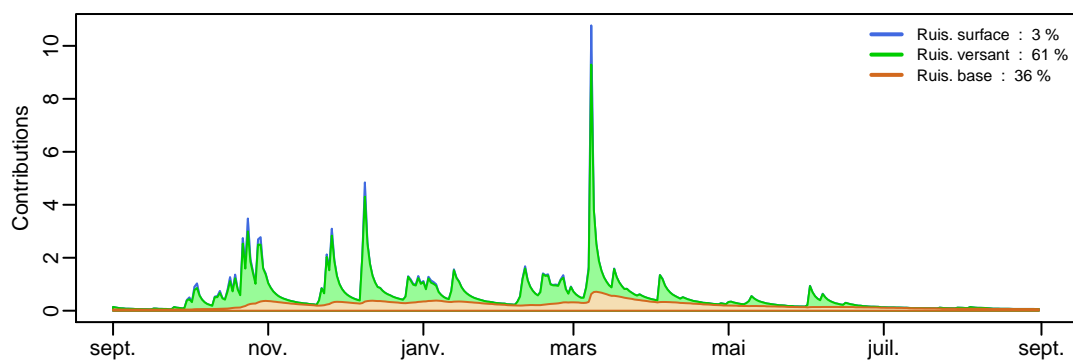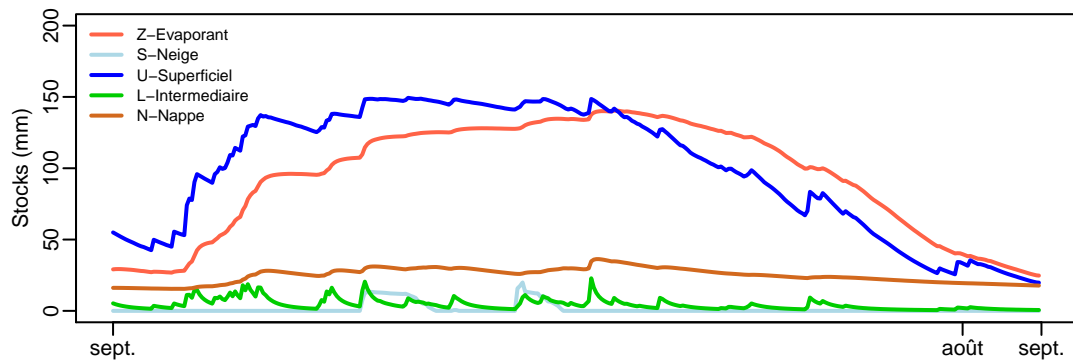

# x1335010 (126.1554 km<sup>2</sup>) – année 1991–1992

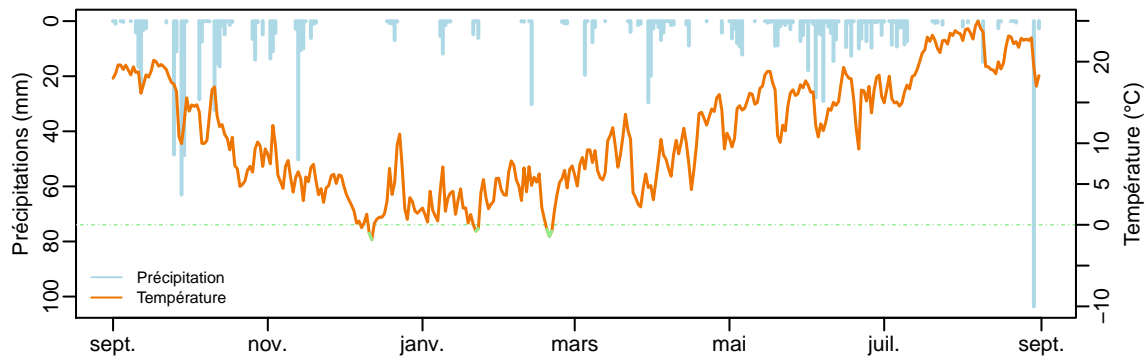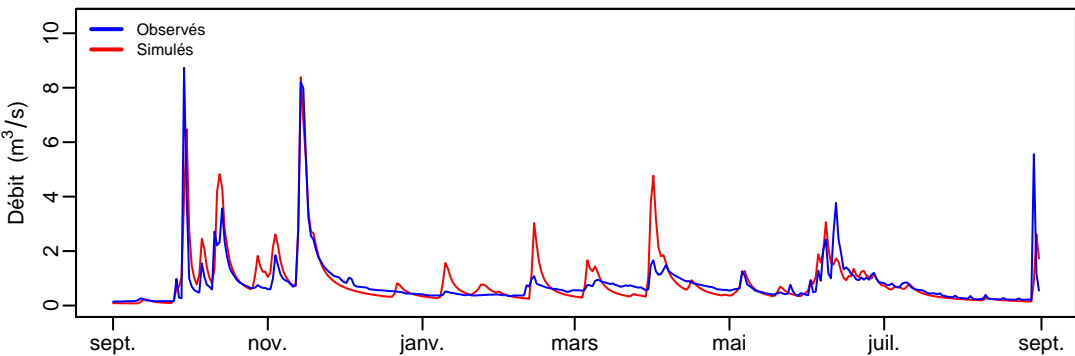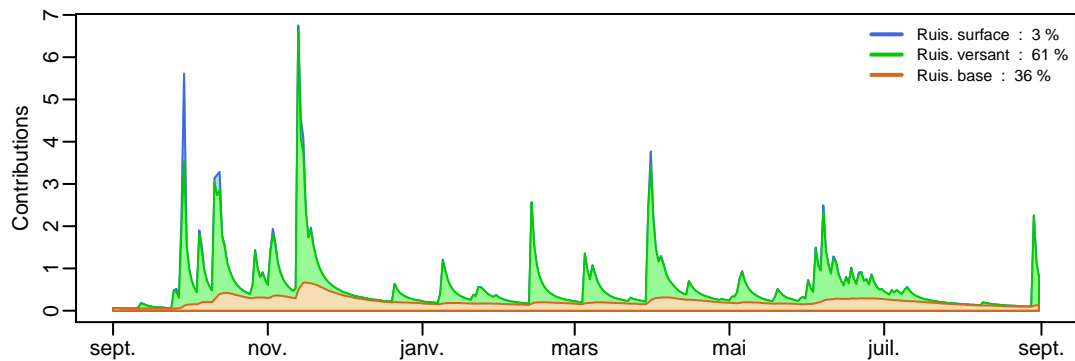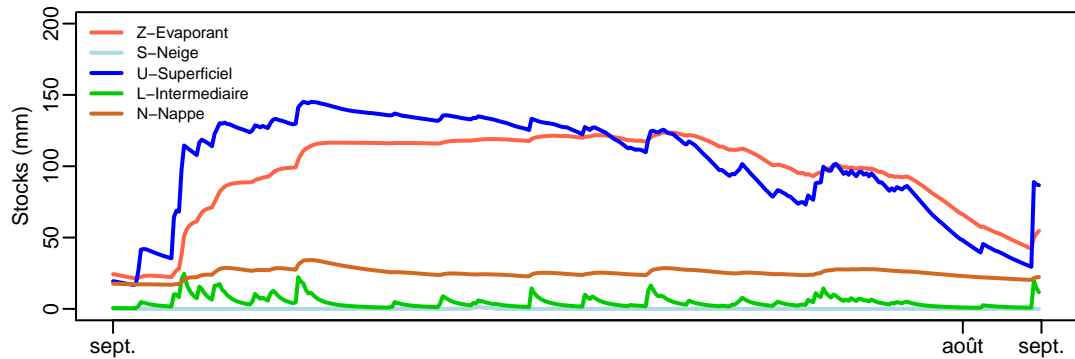

# x1335010 (126.1554 km<sup>2</sup>) – année 1992–1993

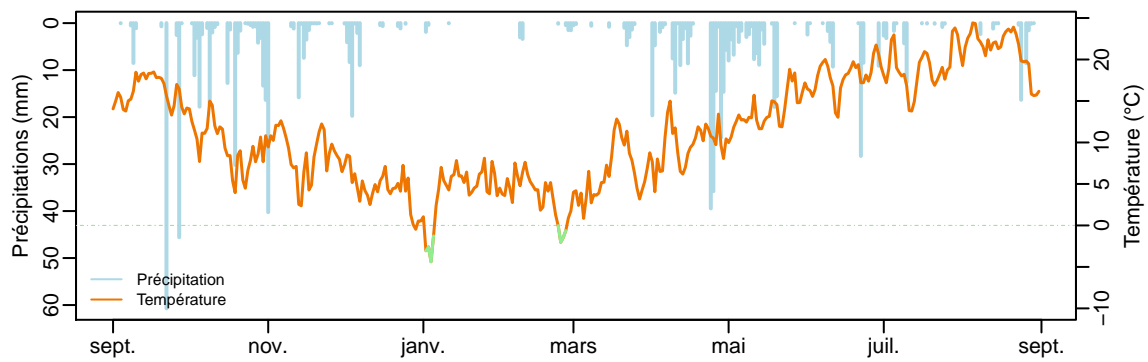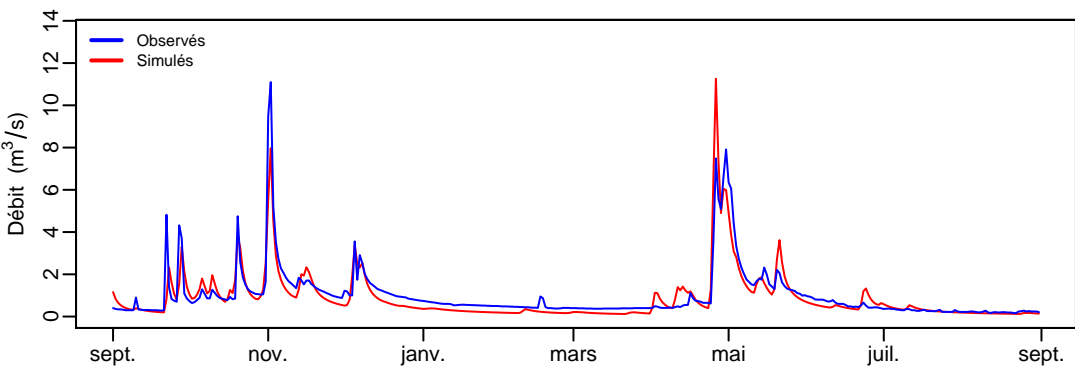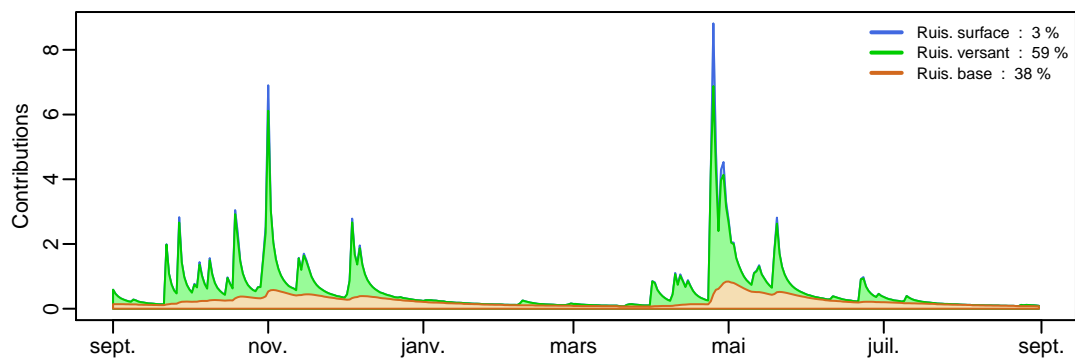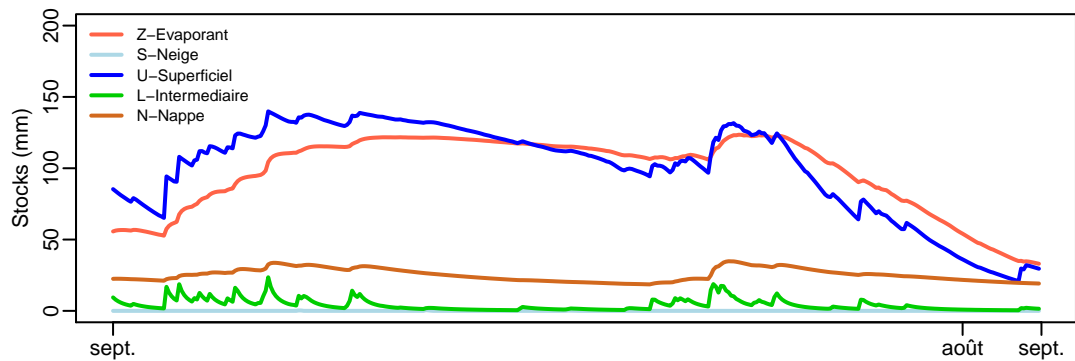



# x1335010 (126.1554 km<sup>2</sup>) – année 1993–1994

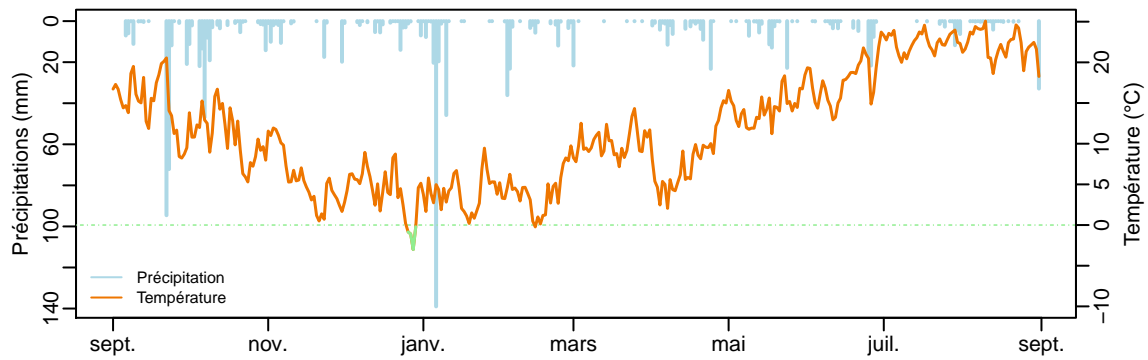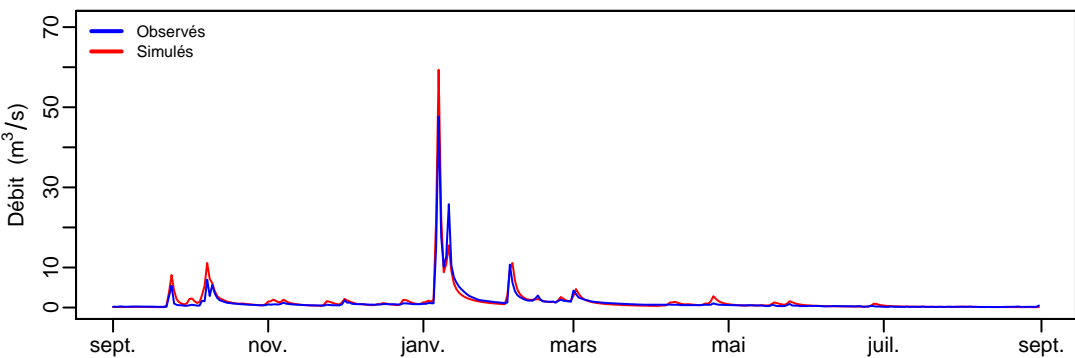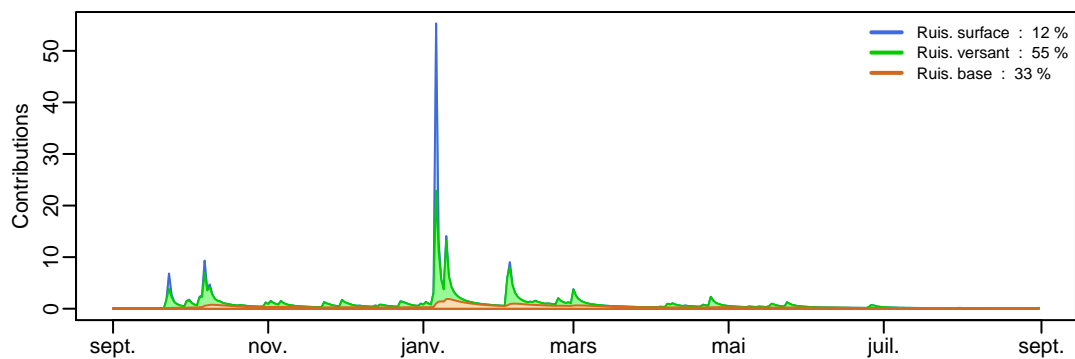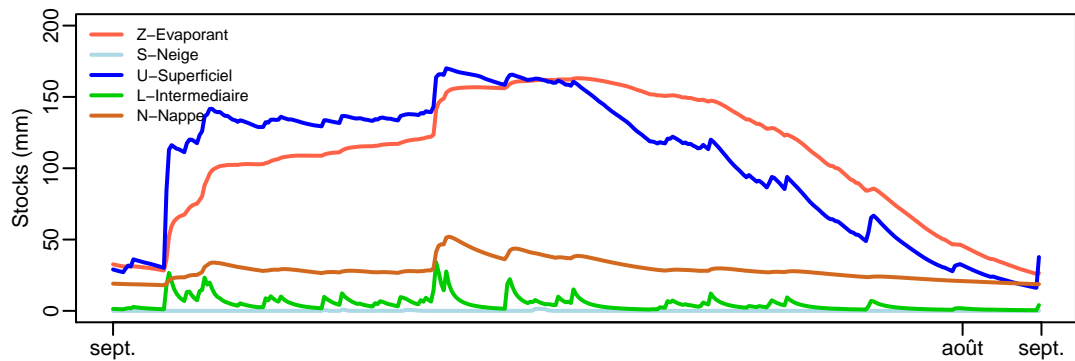

# x1335010 (126.1554 km<sup>2</sup>) – année 1994–1995

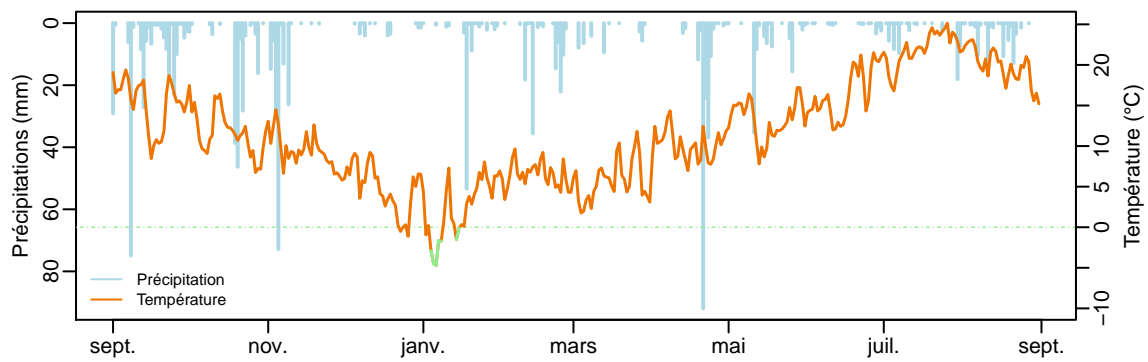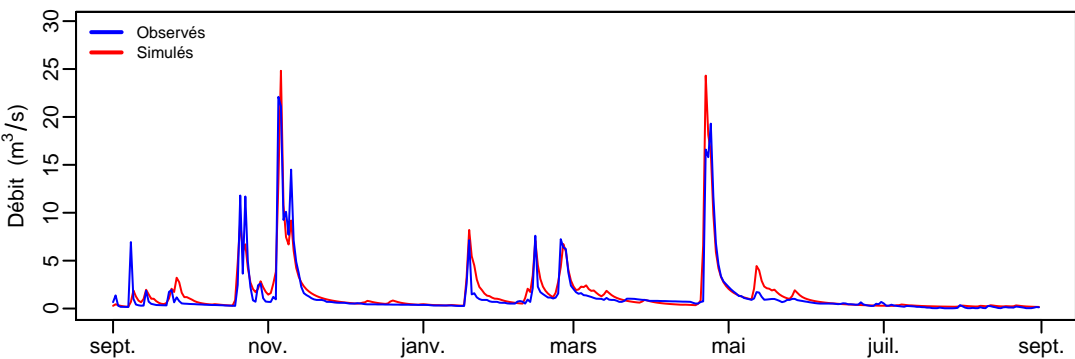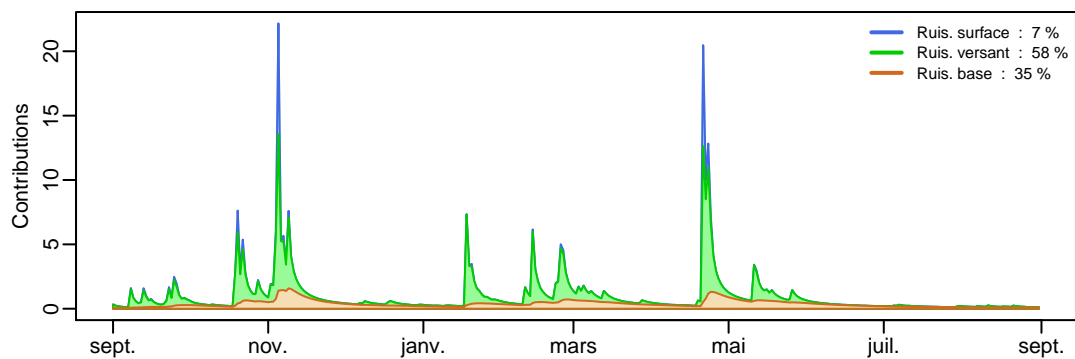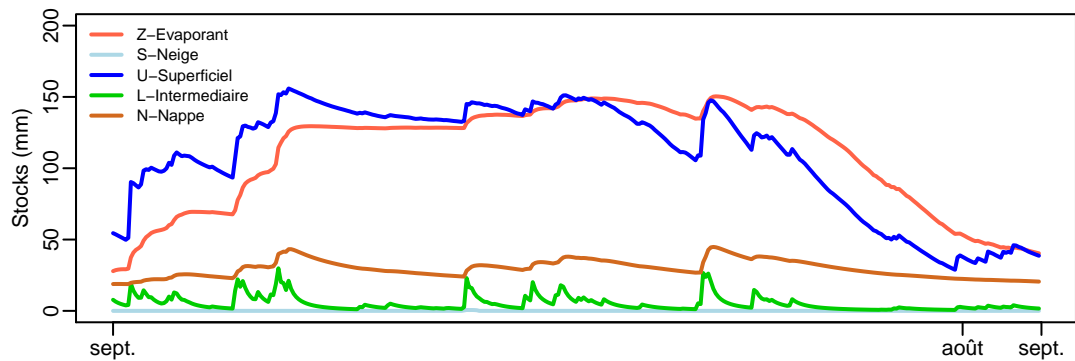

# x1335010 (126.1554 km<sup>2</sup>) – année 1995–1996

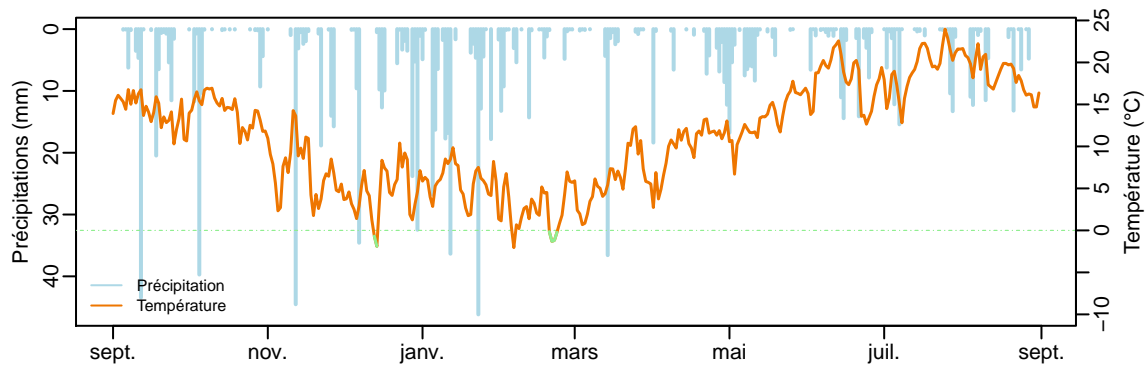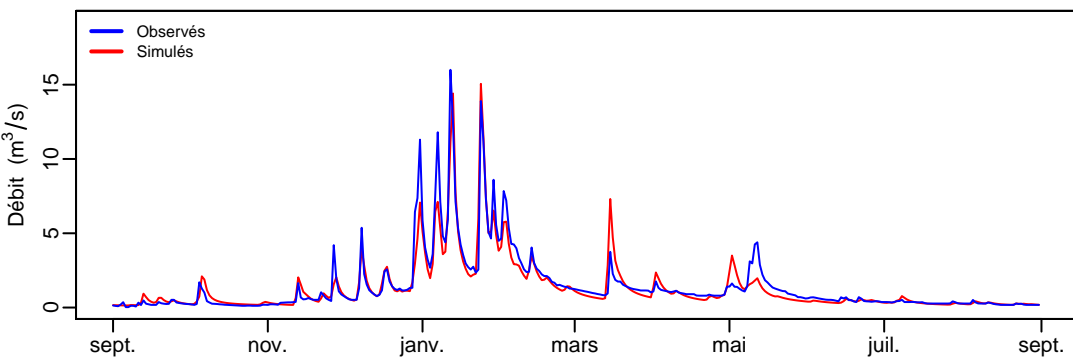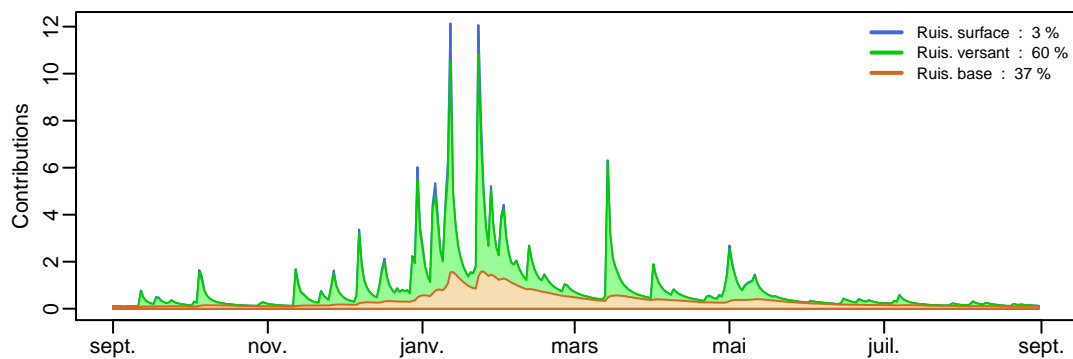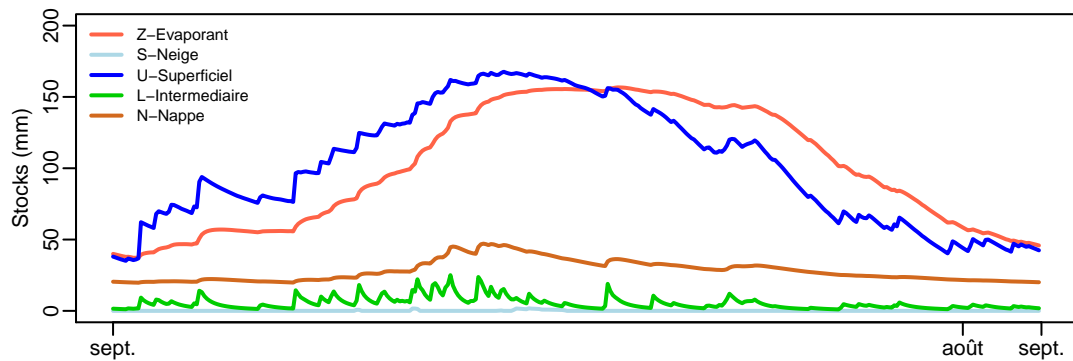

# x1335010 (126.1554 km<sup>2</sup>) – année 1996–1997

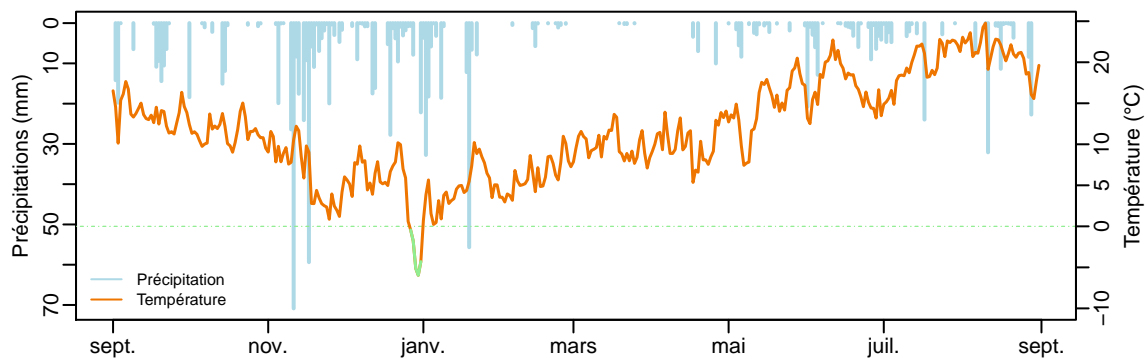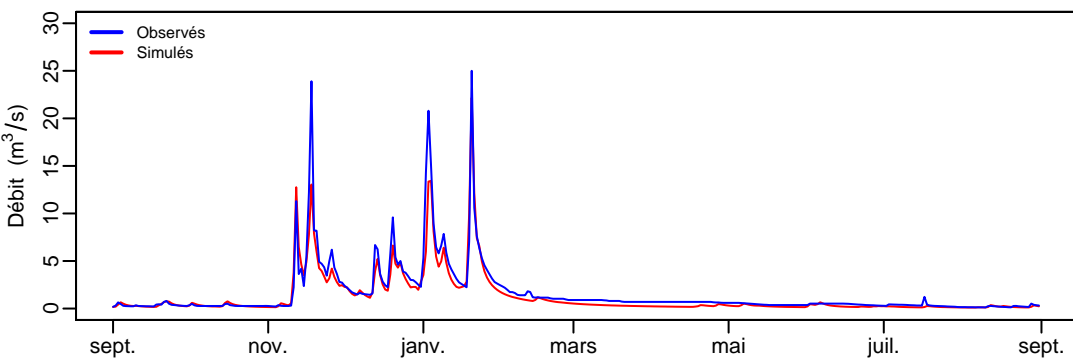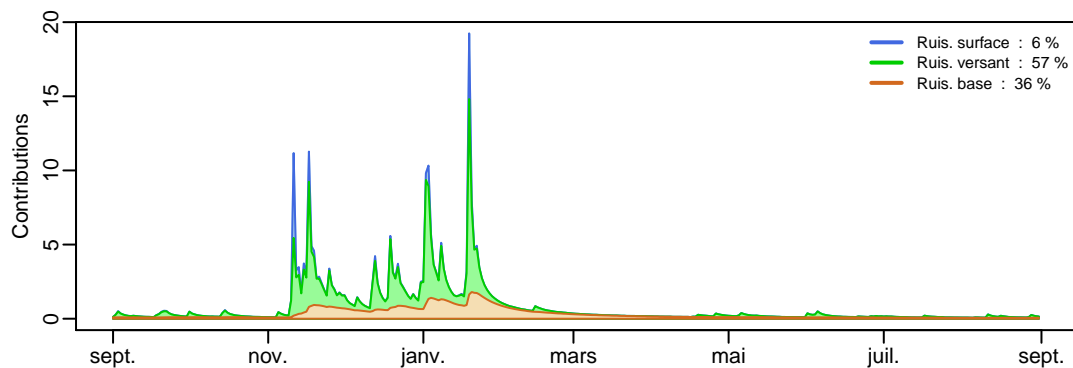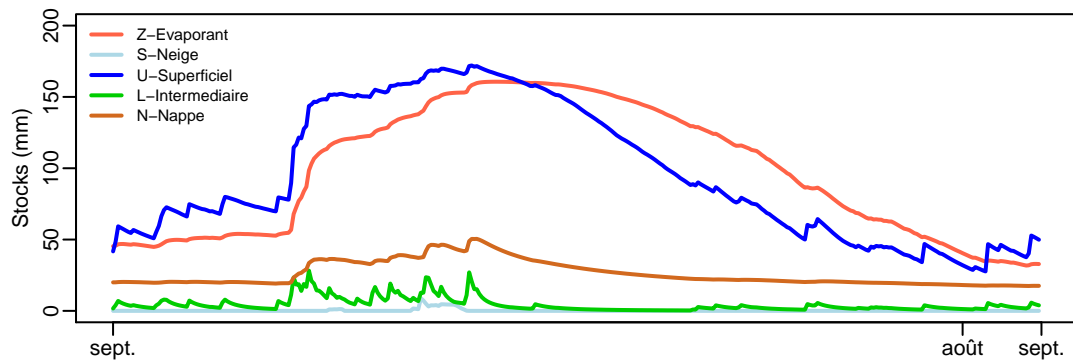

# x1335010 (126.1554 km<sup>2</sup>) – année 1997–1998

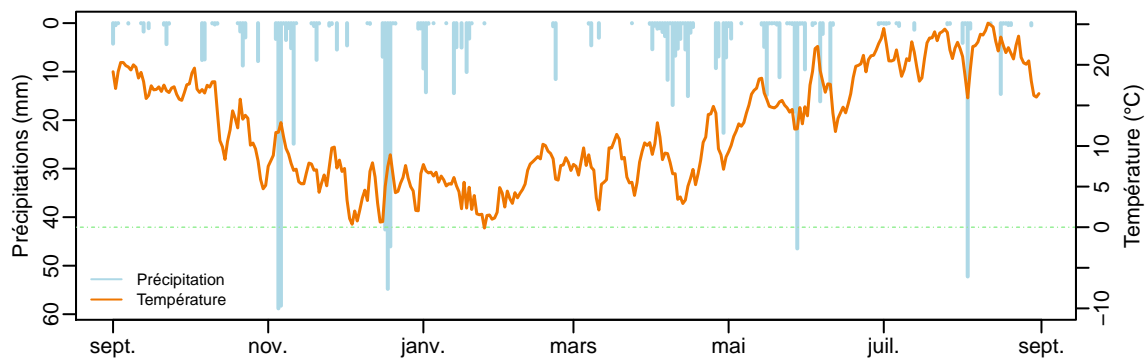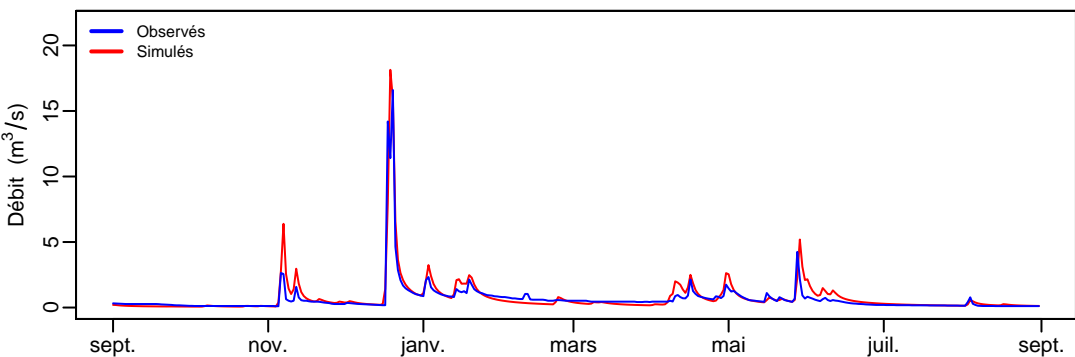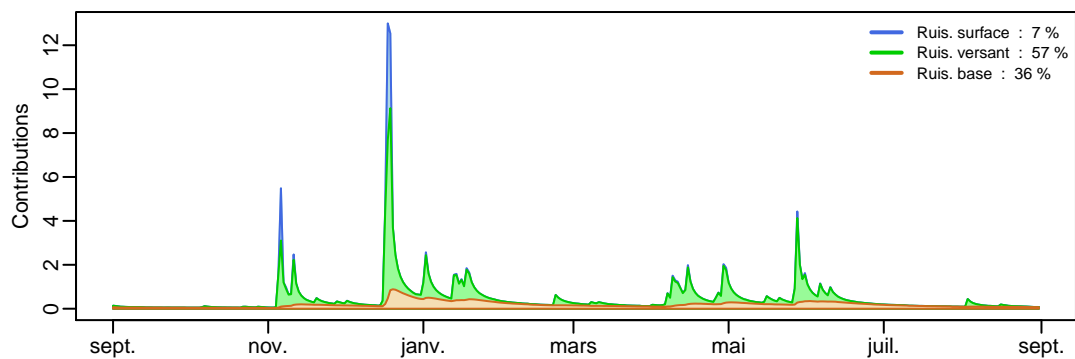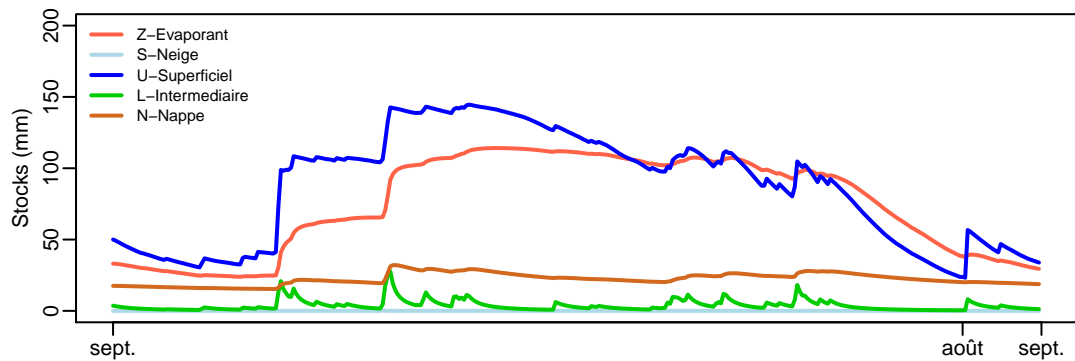

# x1335010 (126.1554 km<sup>2</sup>) – année 1998–1999

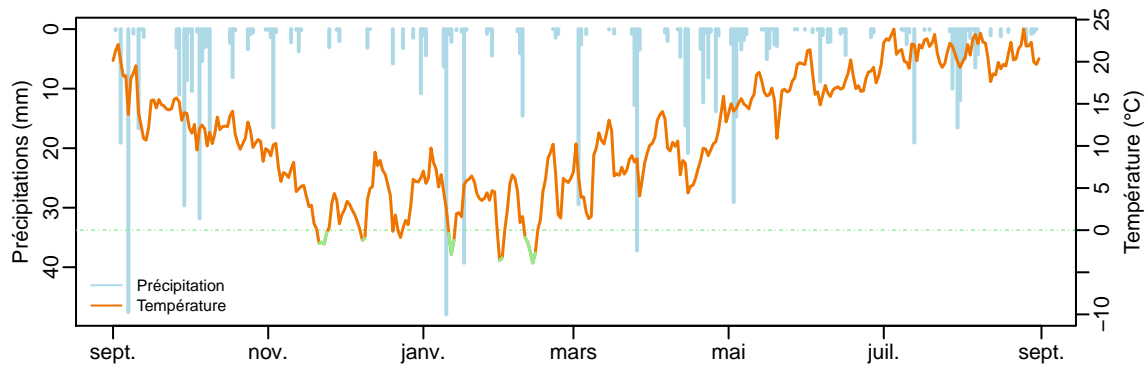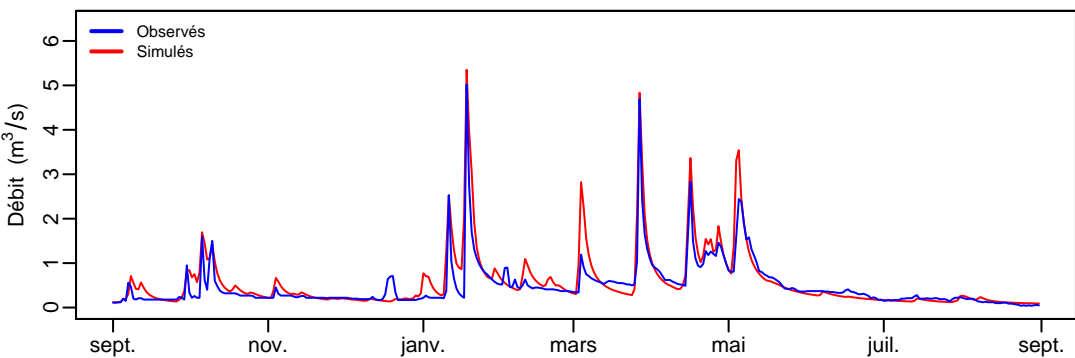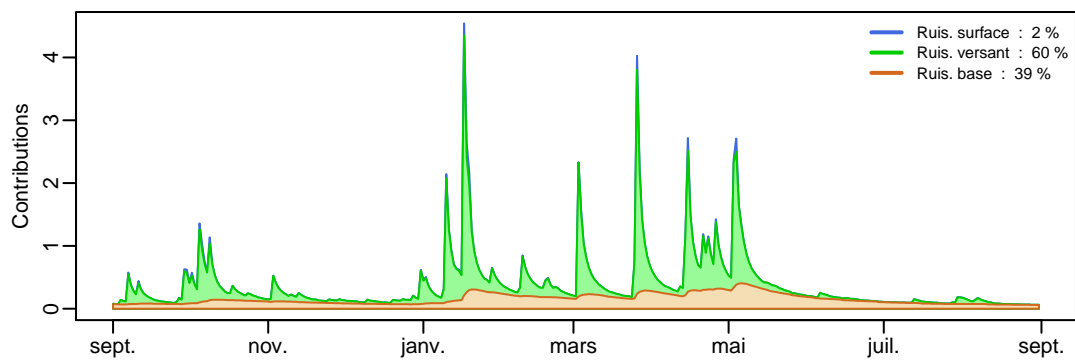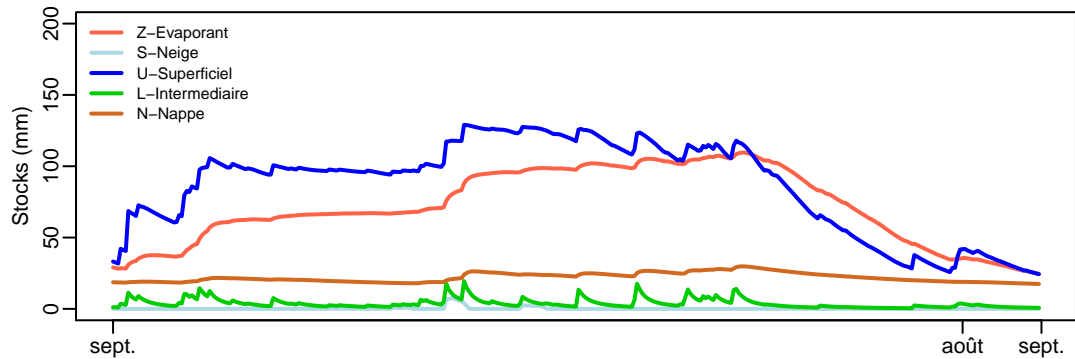

# x1335010 (126.1554 km<sup>2</sup>) – année 1999–2000

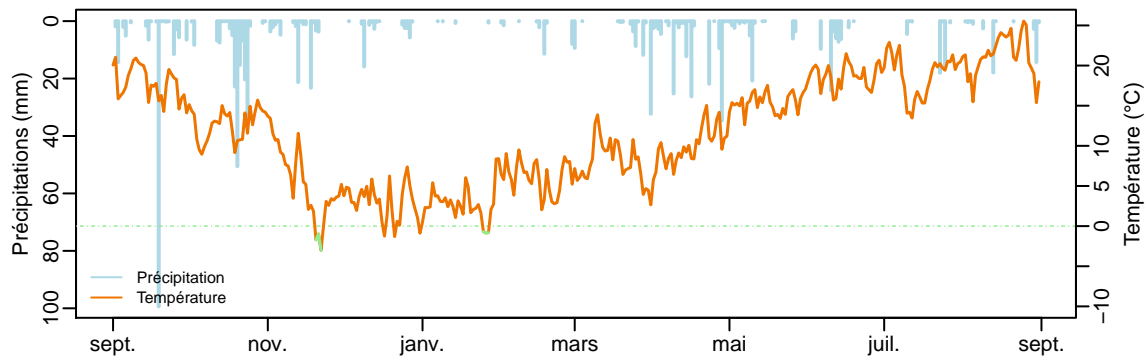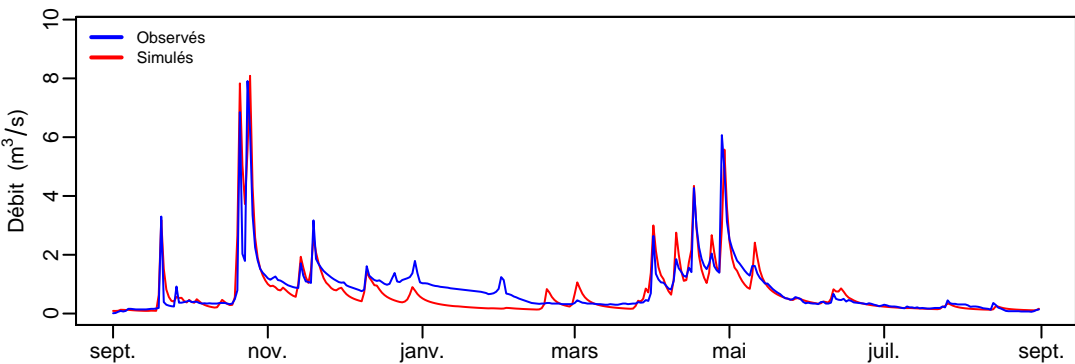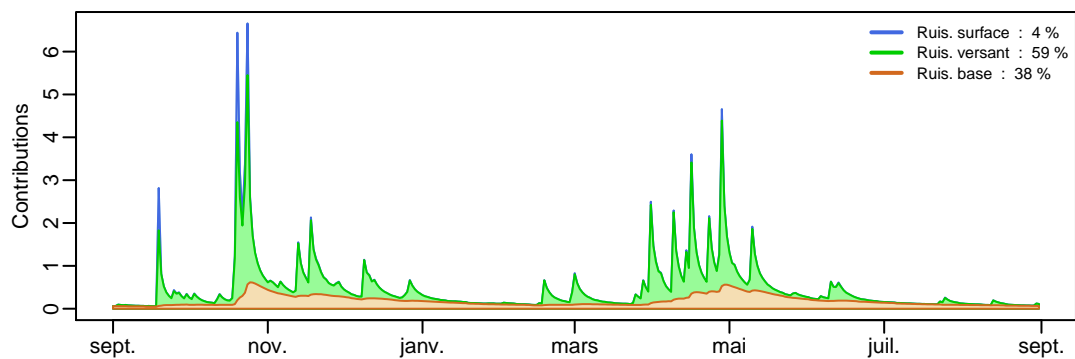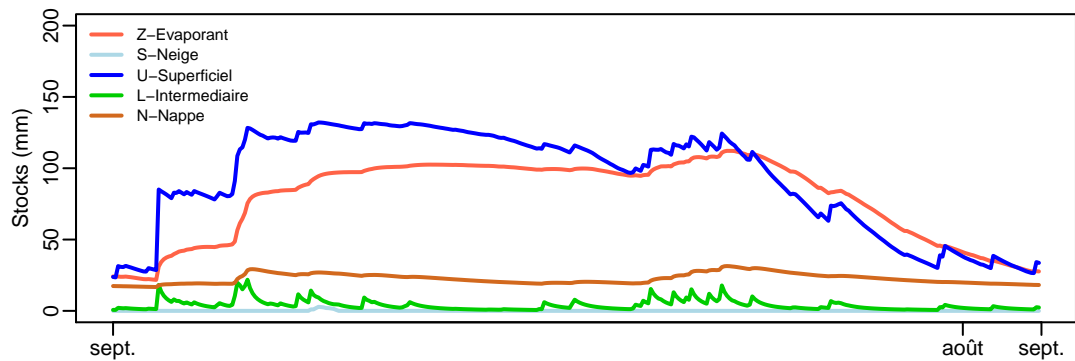

# x1335010 (126.1554 km<sup>2</sup>) – année 2000–2001

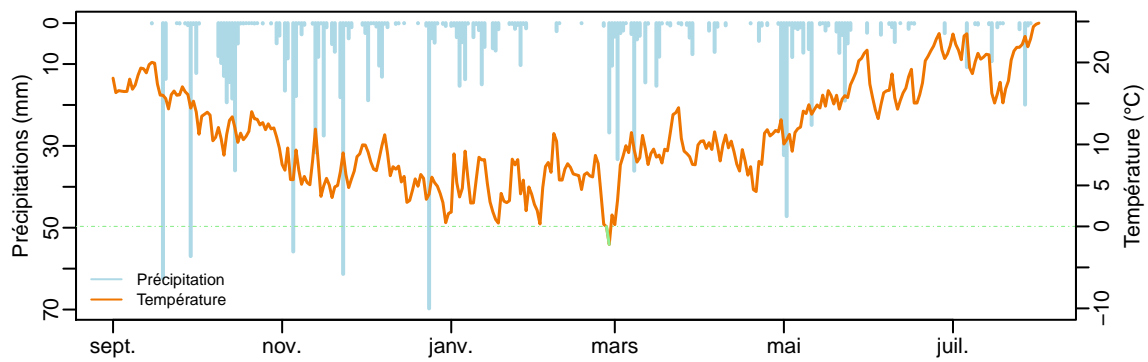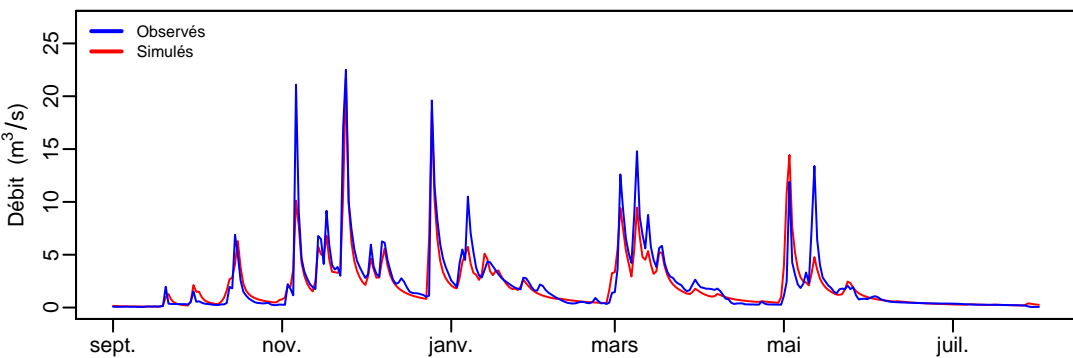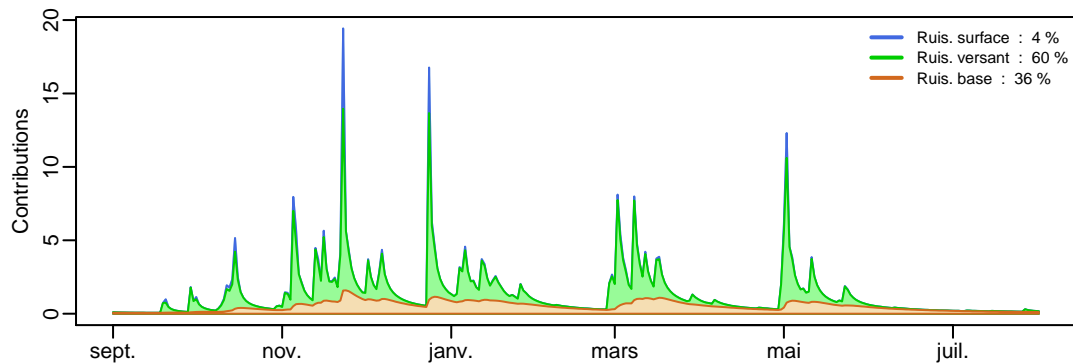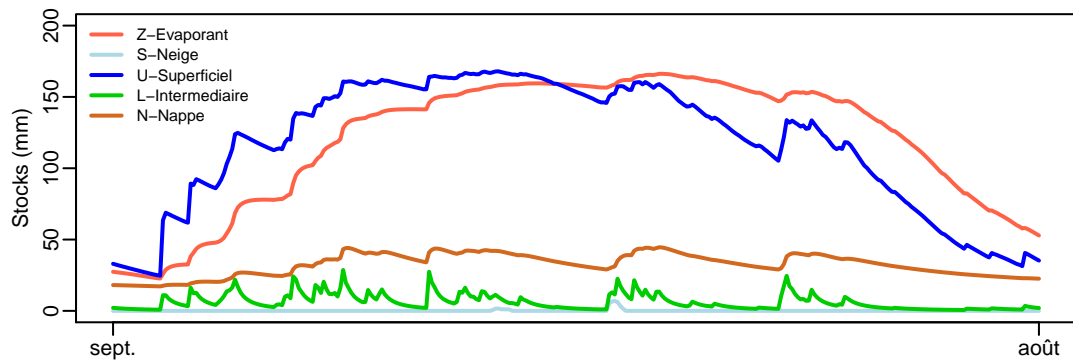



# x2414010 (83.0784 km²) – année 1981–1982

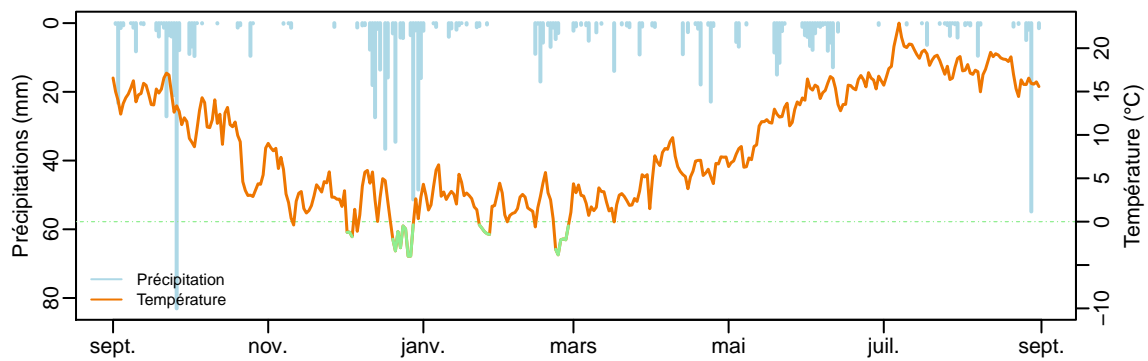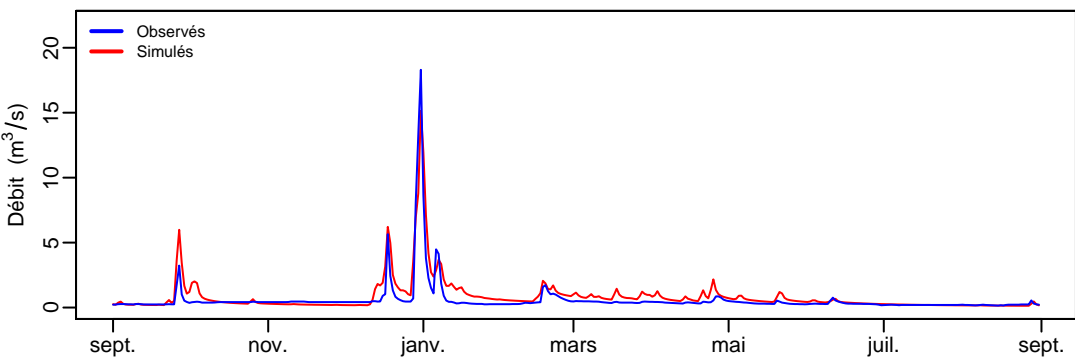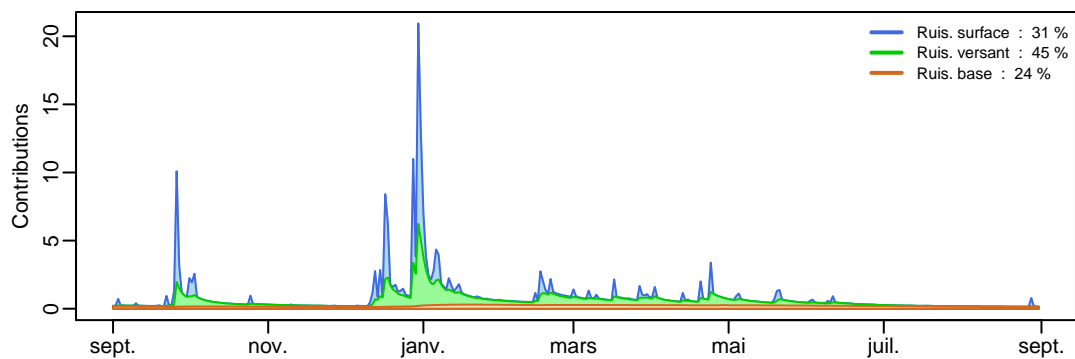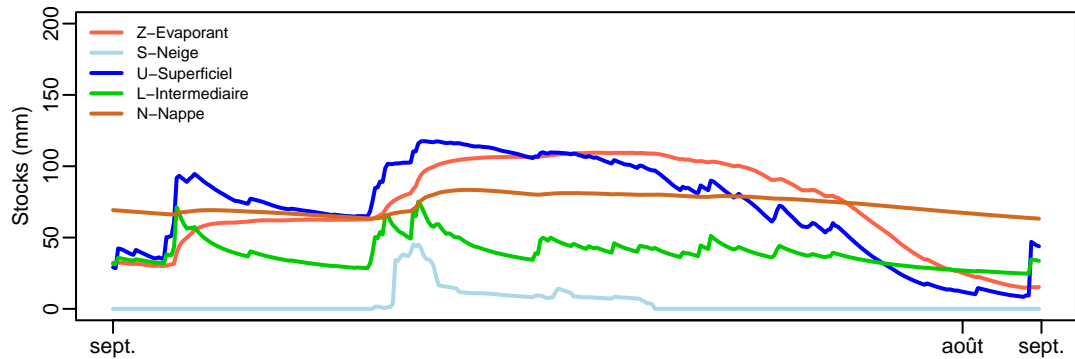

# x2414010 (83.0784 km<sup>2</sup>) – année 1982–1983

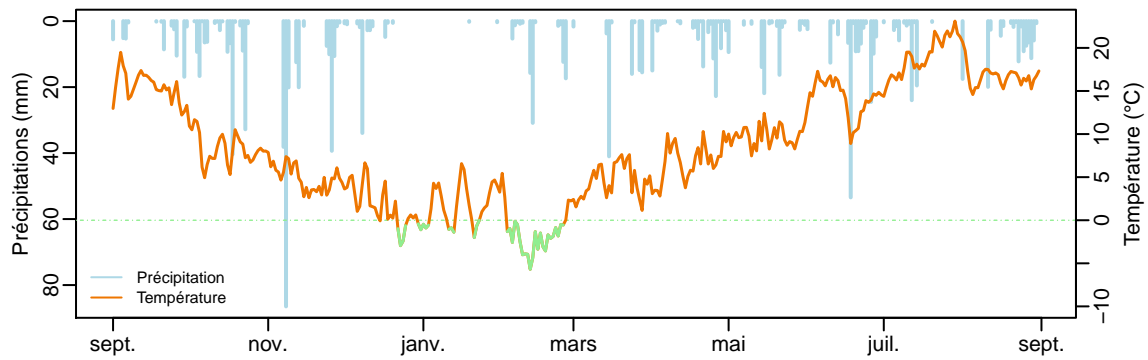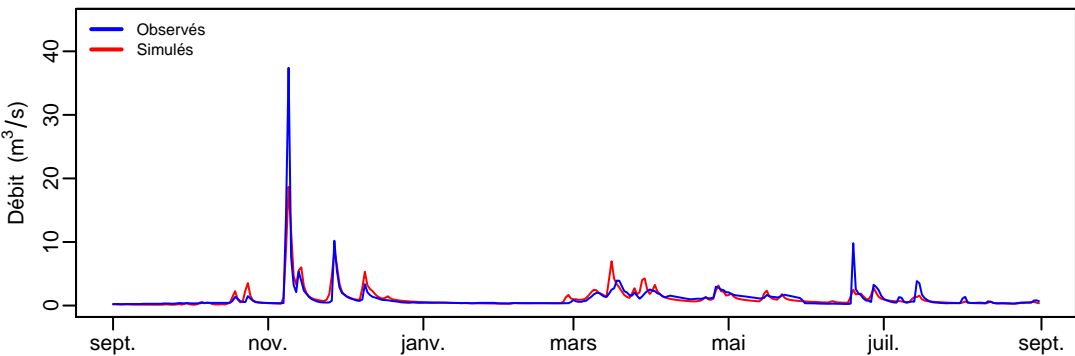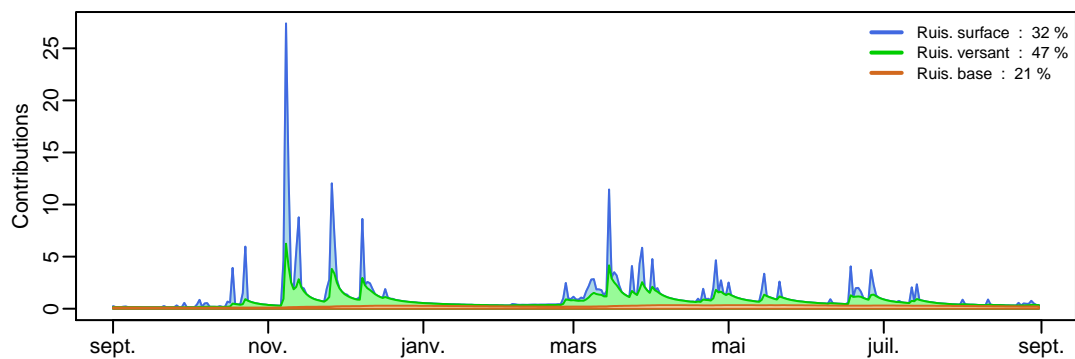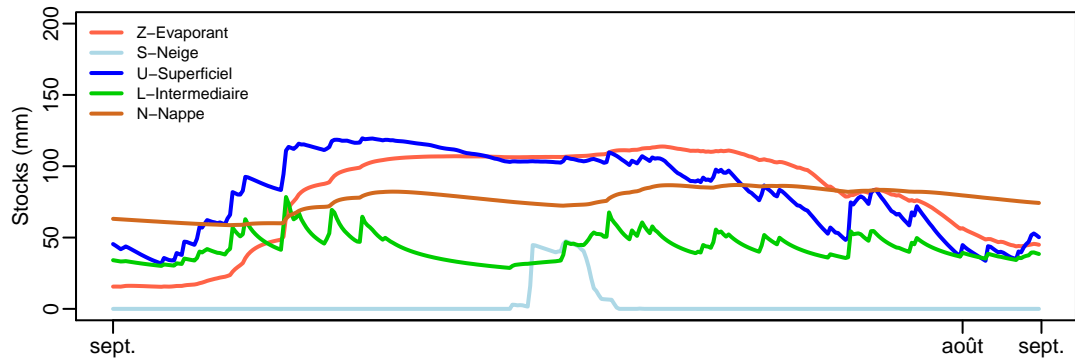

# x2414010 (83.0784 km<sup>2</sup>) – année 1983–1984

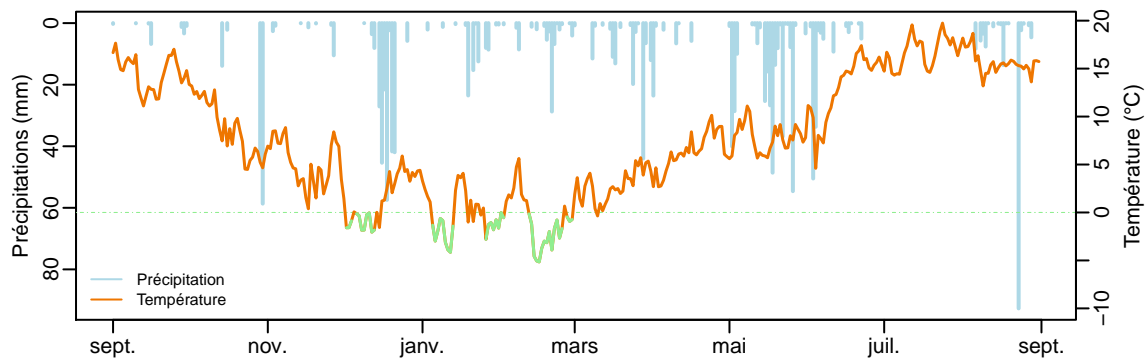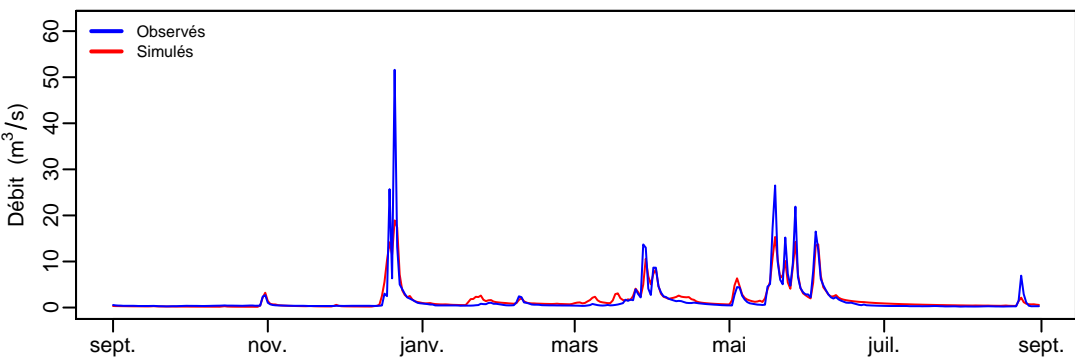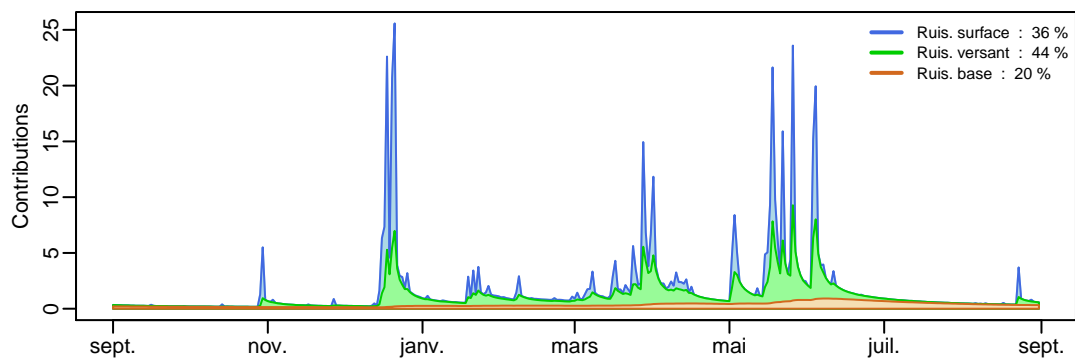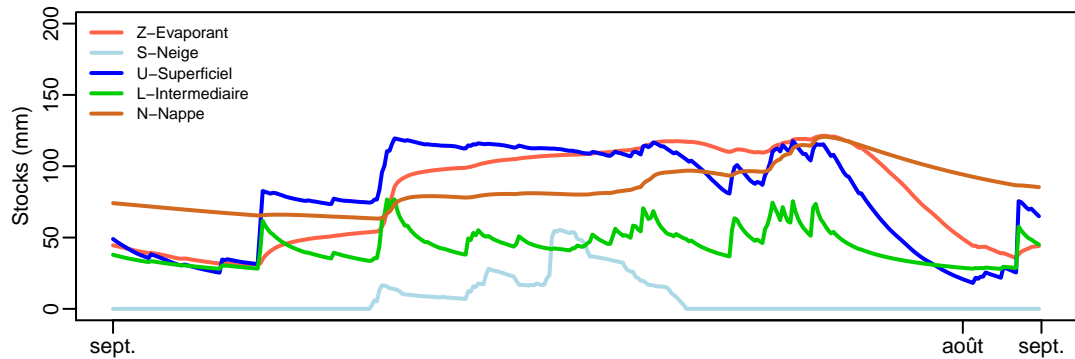

# x2414010 (83.0784 km<sup>2</sup>) – année 1984–1985

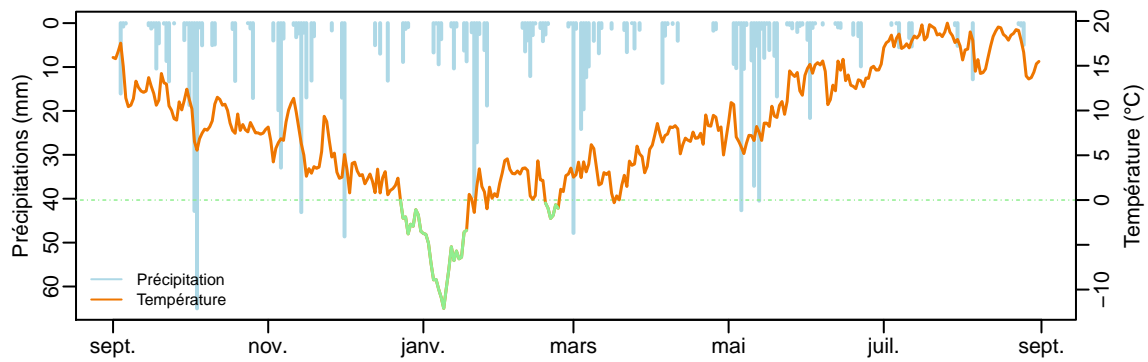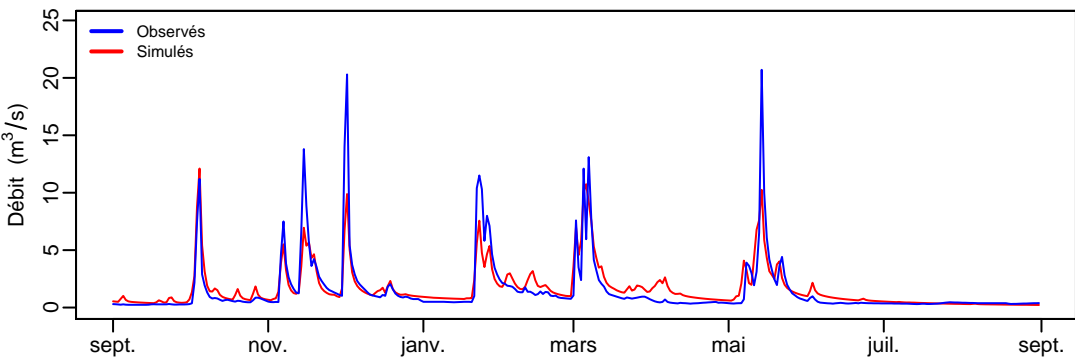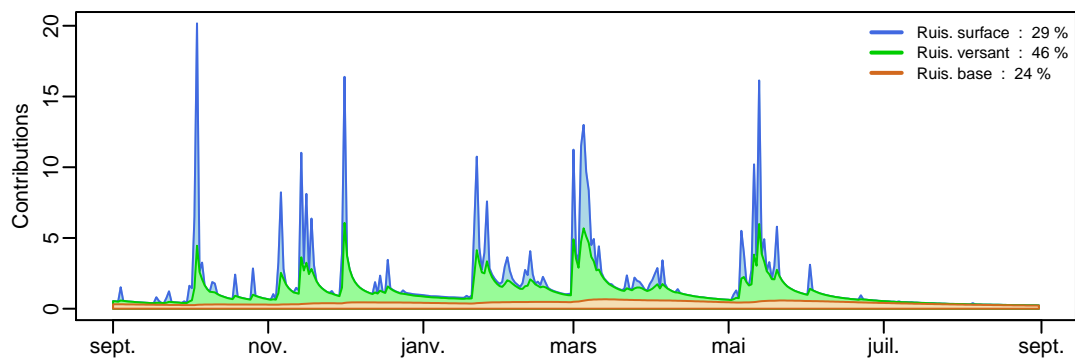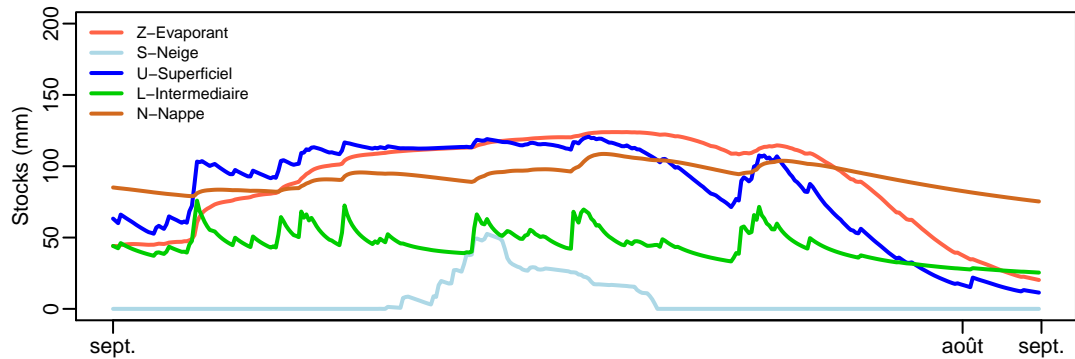

# x2414010 (83.0784 km²) – année 1985–1986

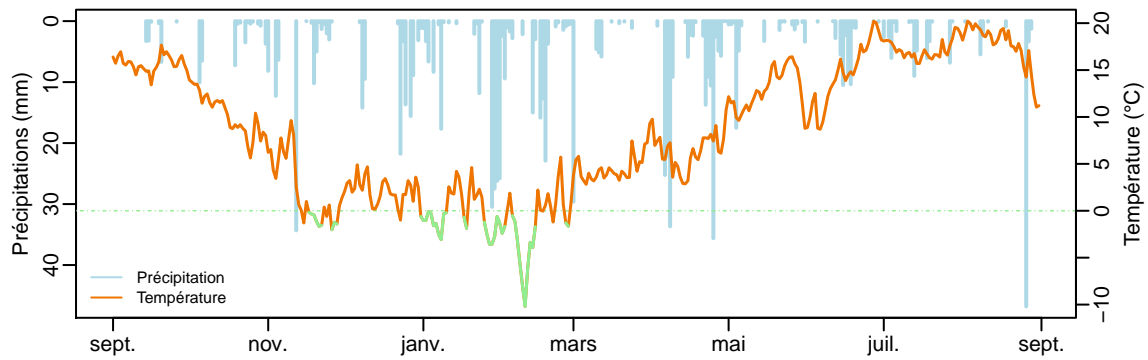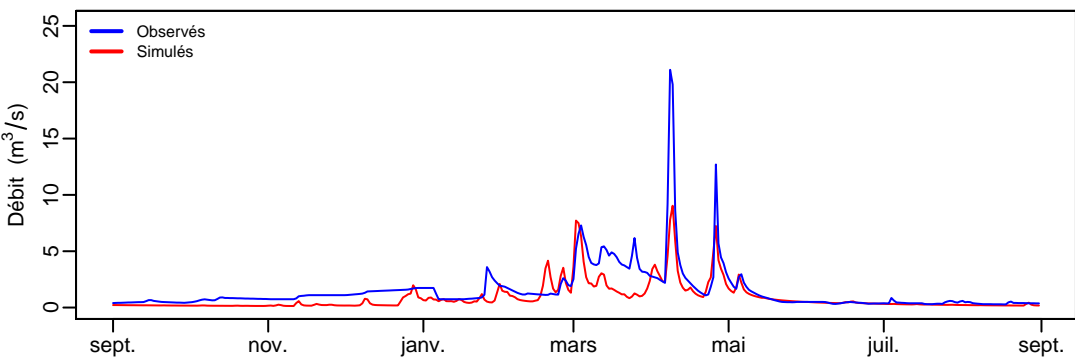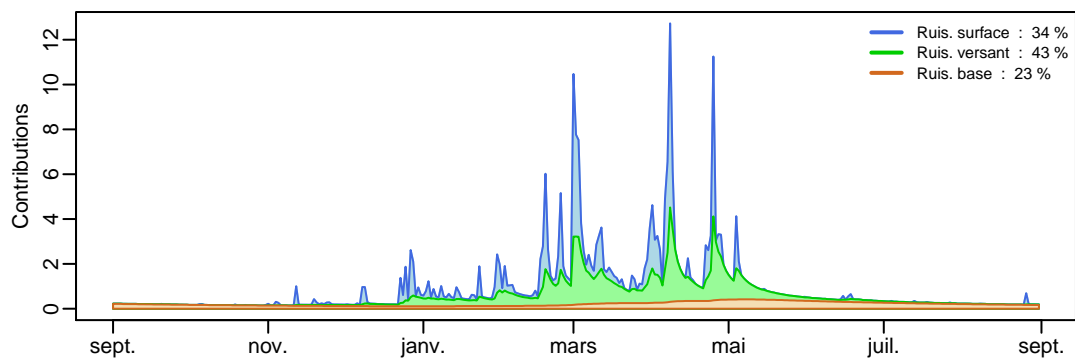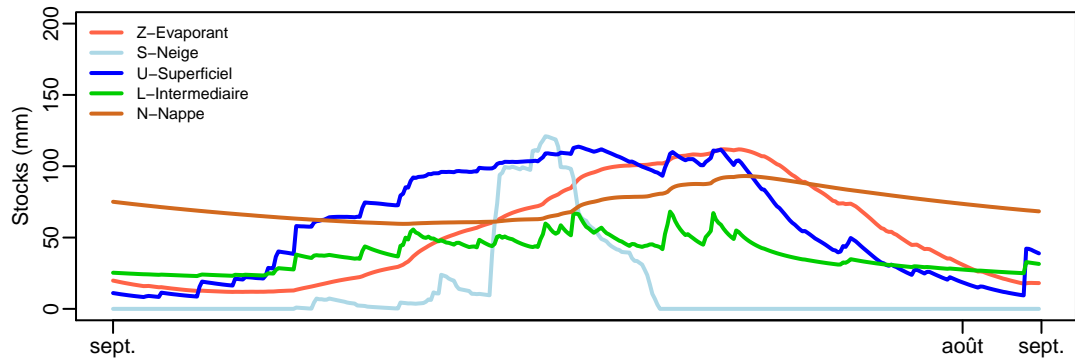

# x2414010 (83.0784 km<sup>2</sup>) – année 1986–1987

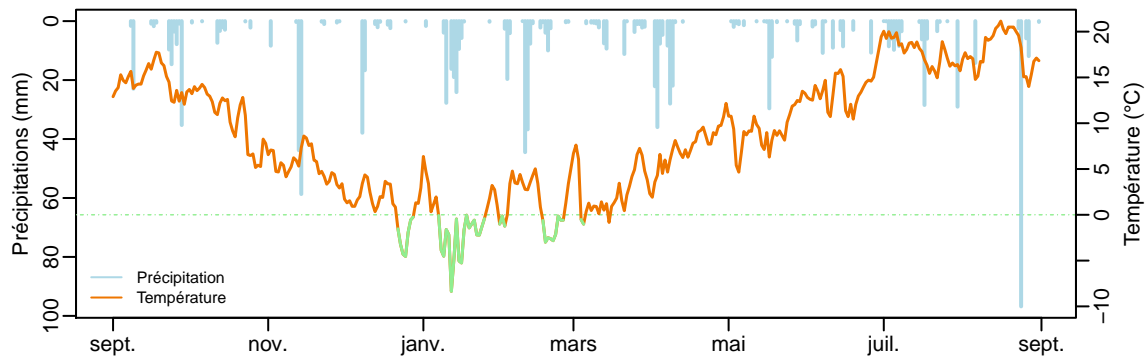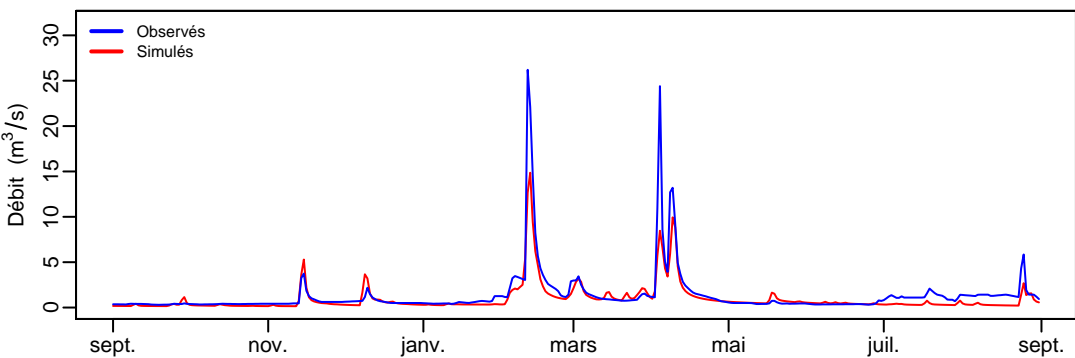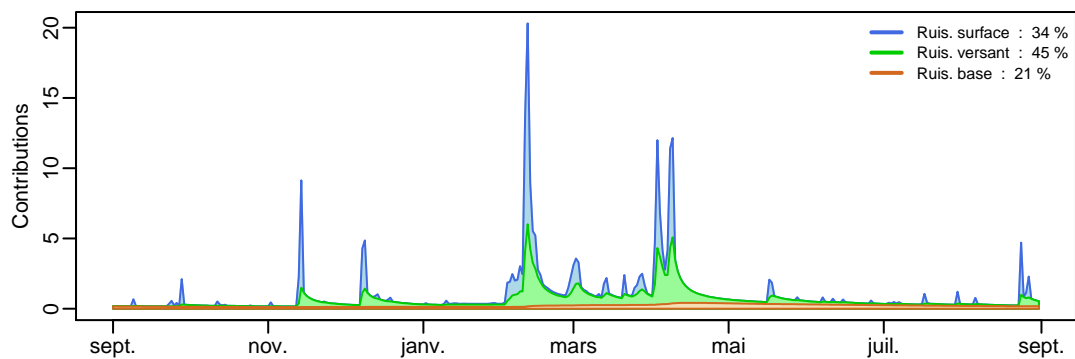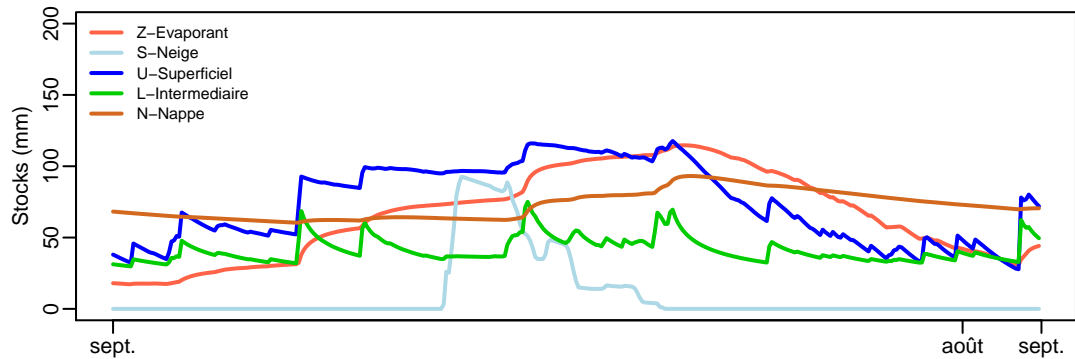

# x2414010 (83.0784 km<sup>2</sup>) – année 1987–1988

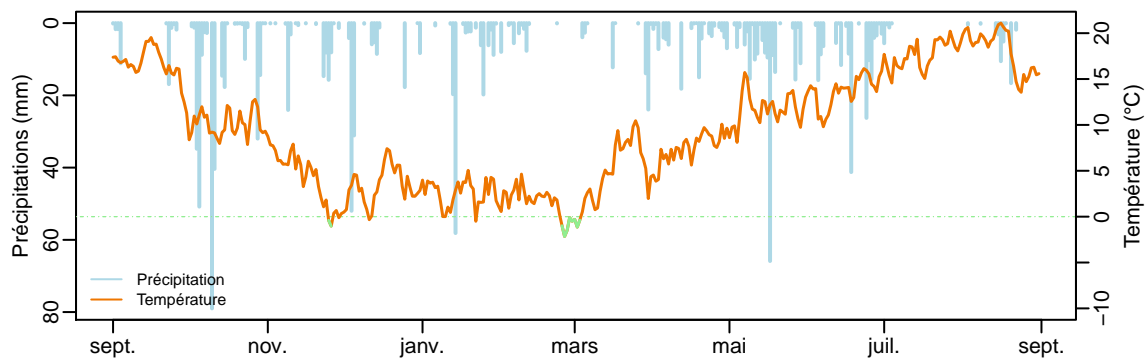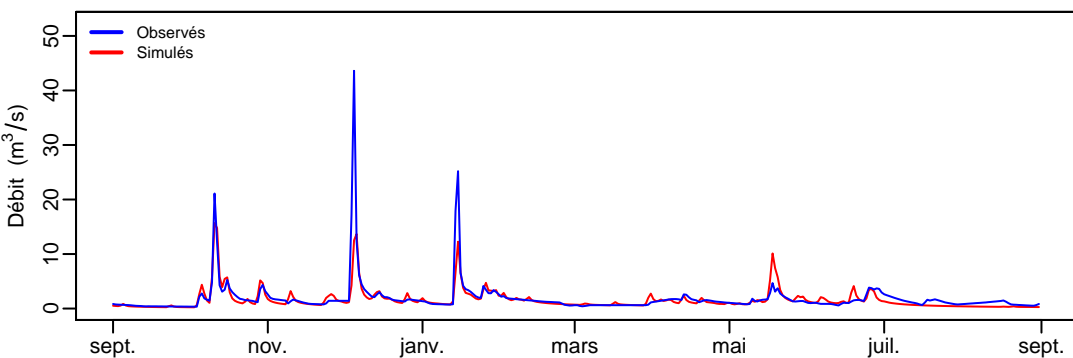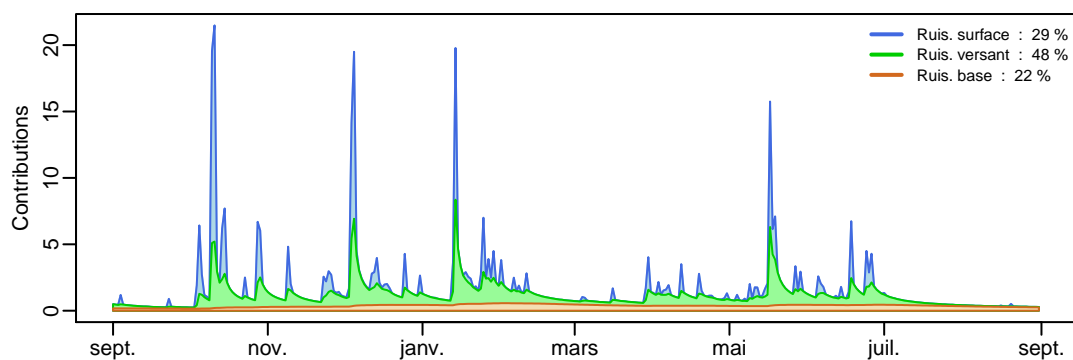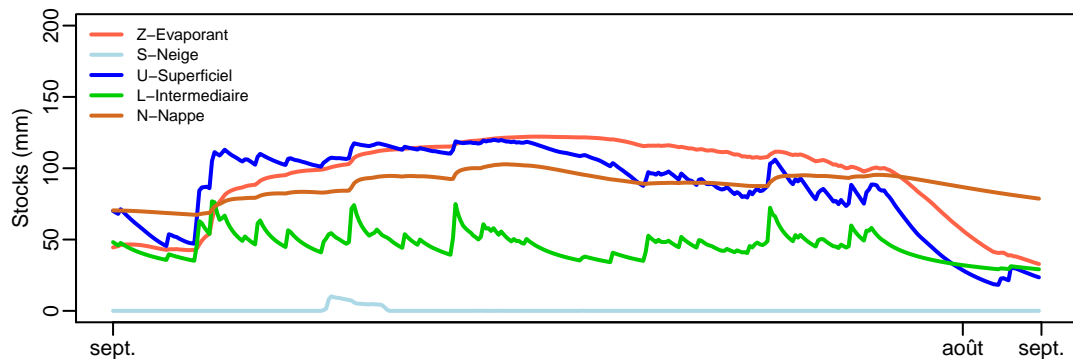

# x2414010 (83.0784 km<sup>2</sup>) – année 1988–1989

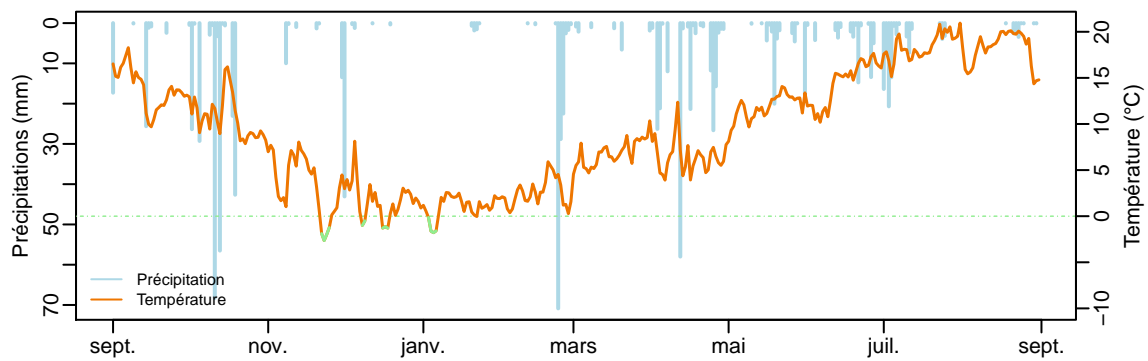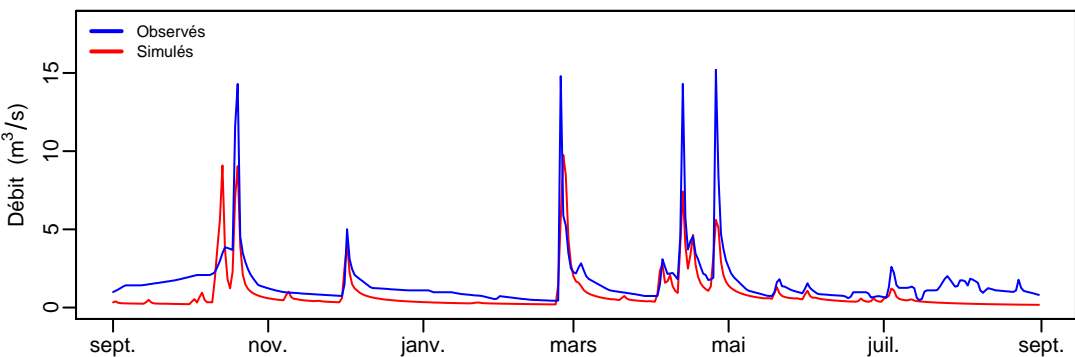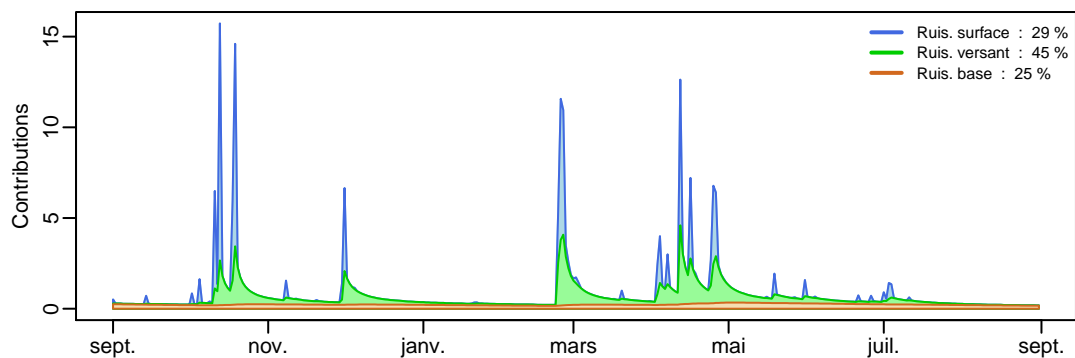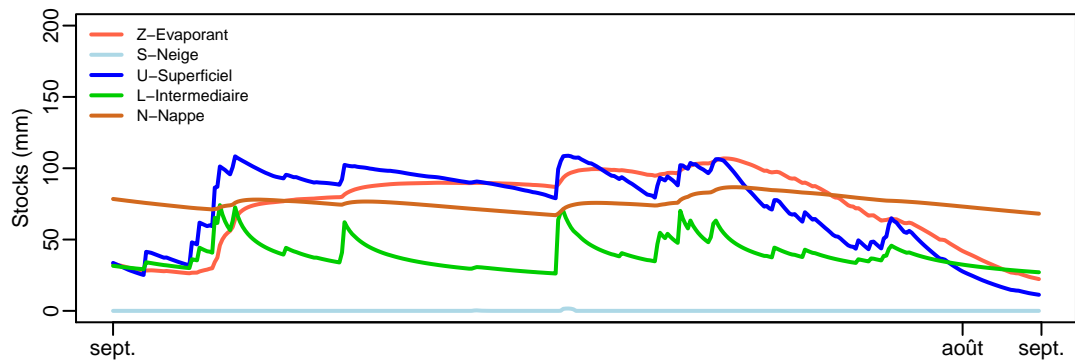



# x2414030 (67.2576 km²) – année 1981–1982

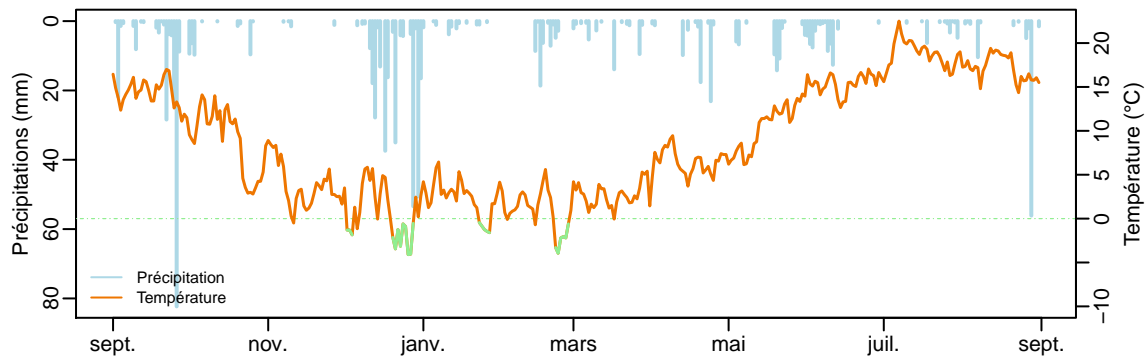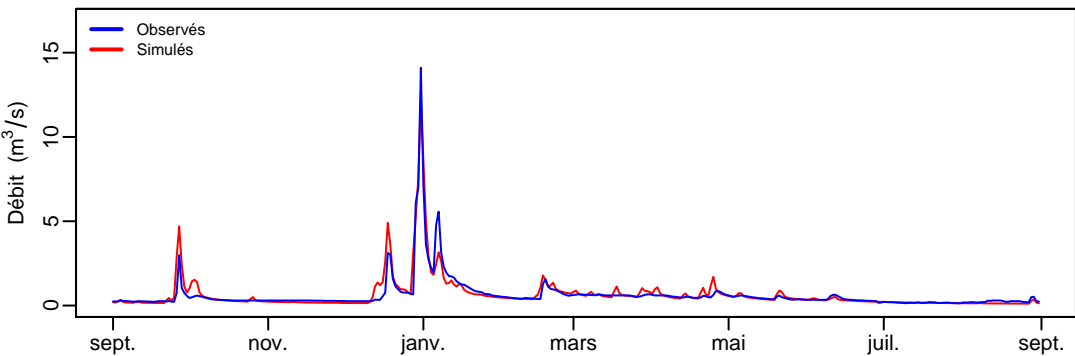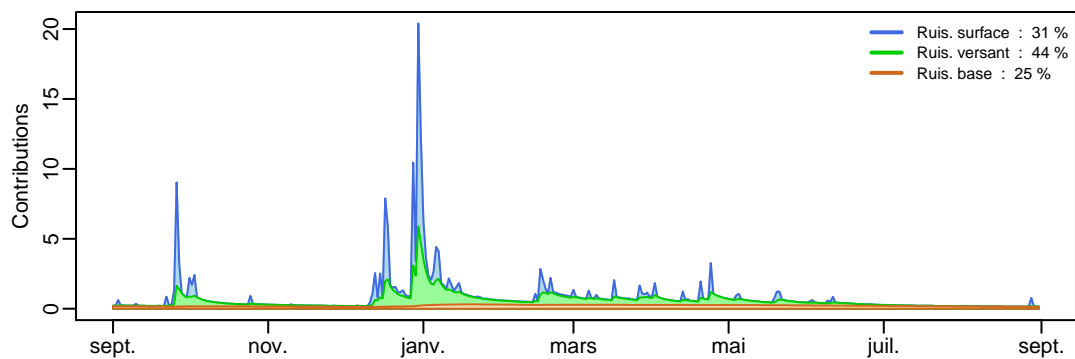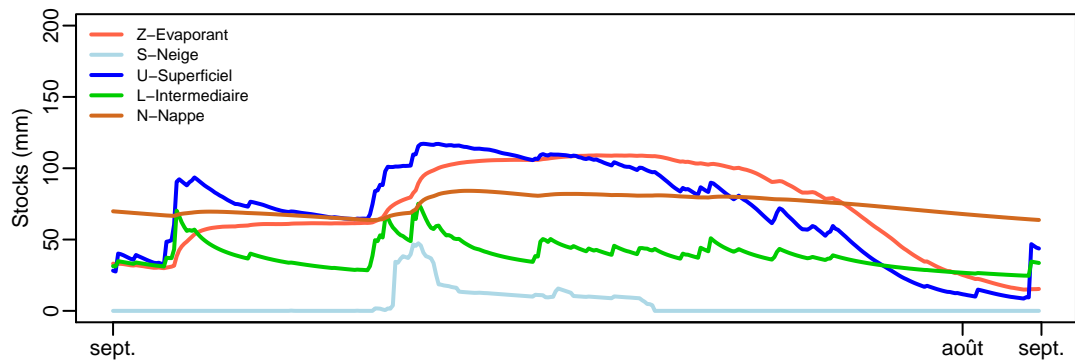

# x2414030 (67.2576 km²) – année 1982–1983

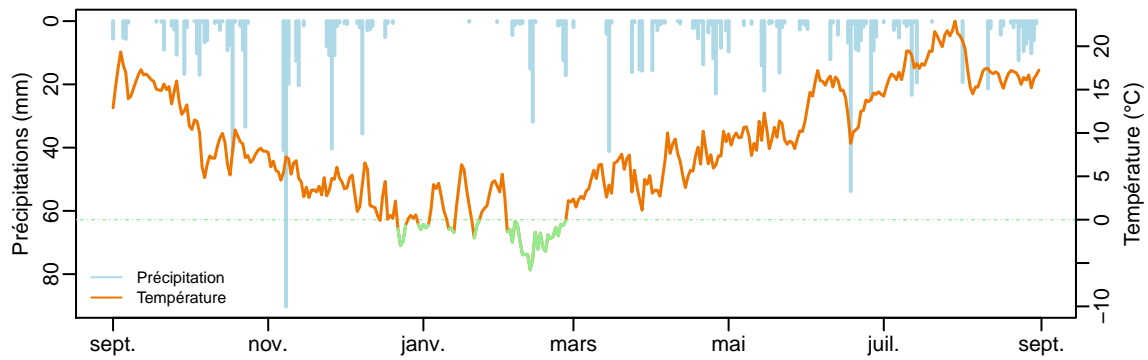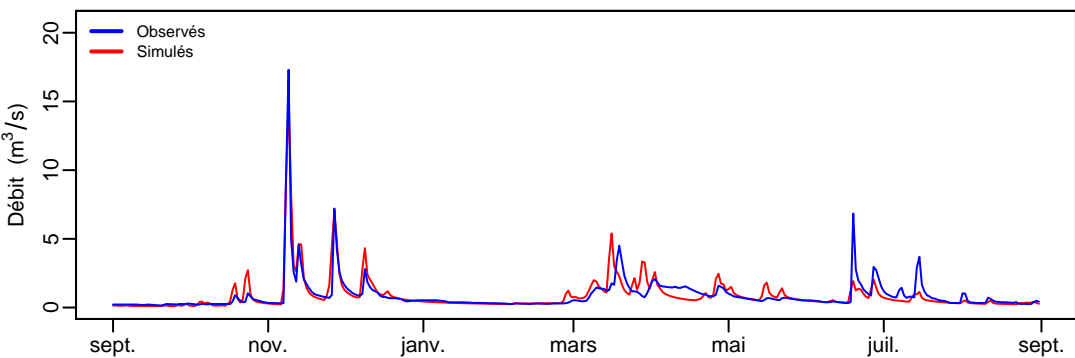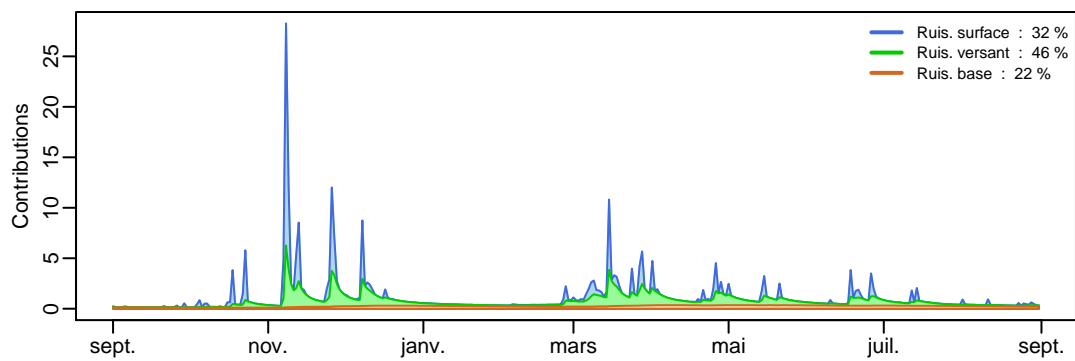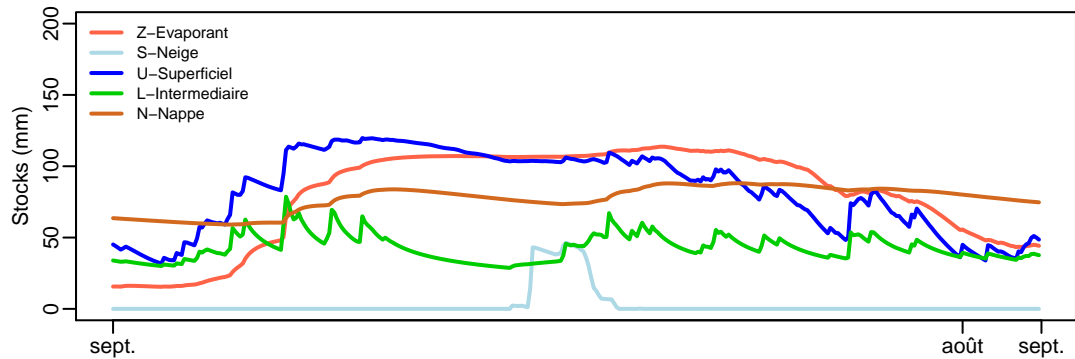

# x2414030 (67.2576 km<sup>2</sup>) – année 1983–1984

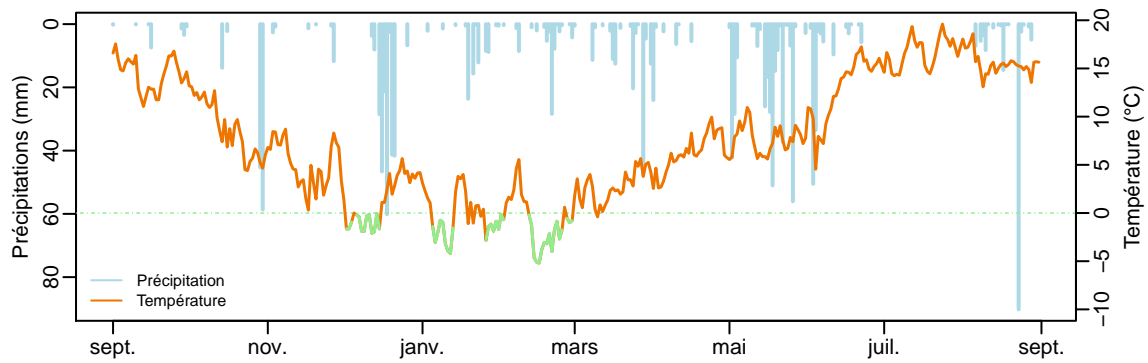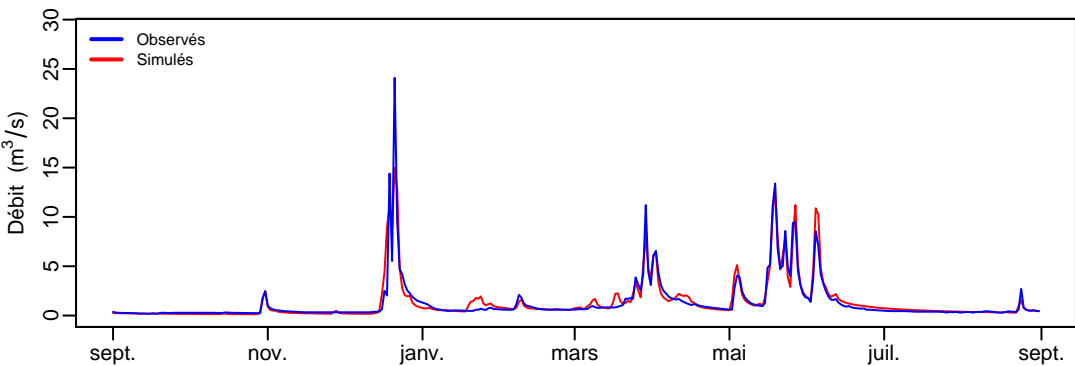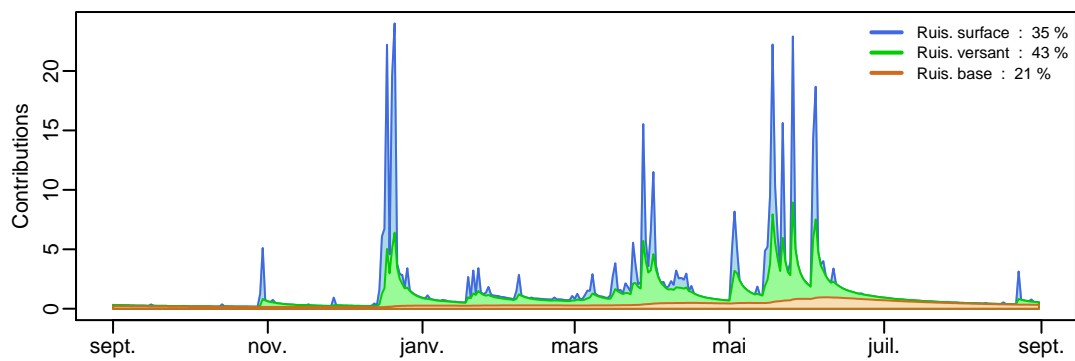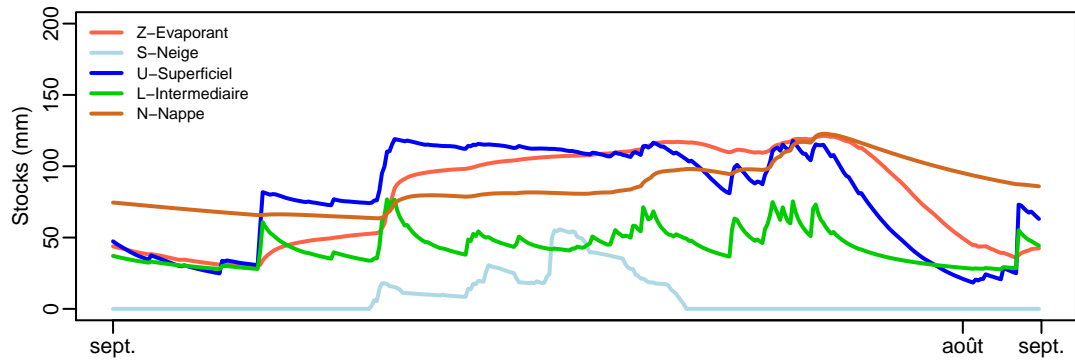

# x2414030 (67.2576 km<sup>2</sup>) – année 1984–1985

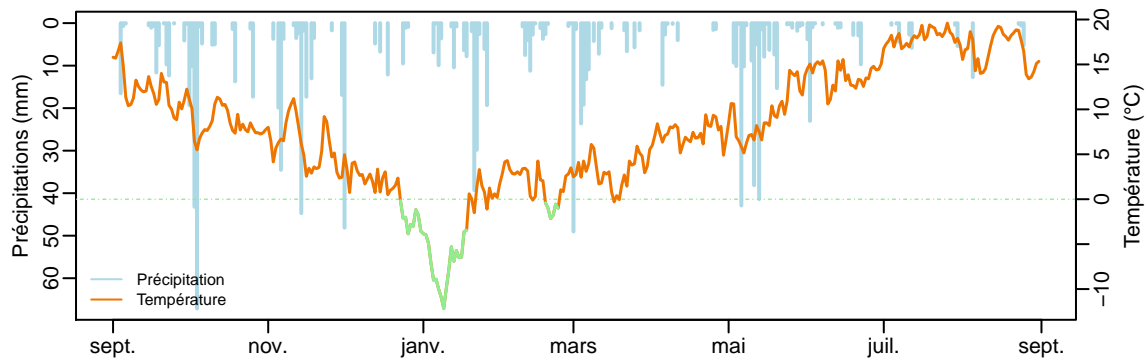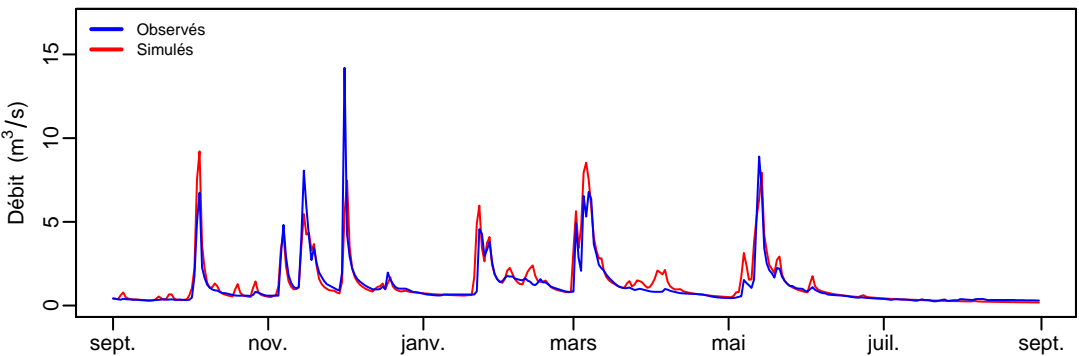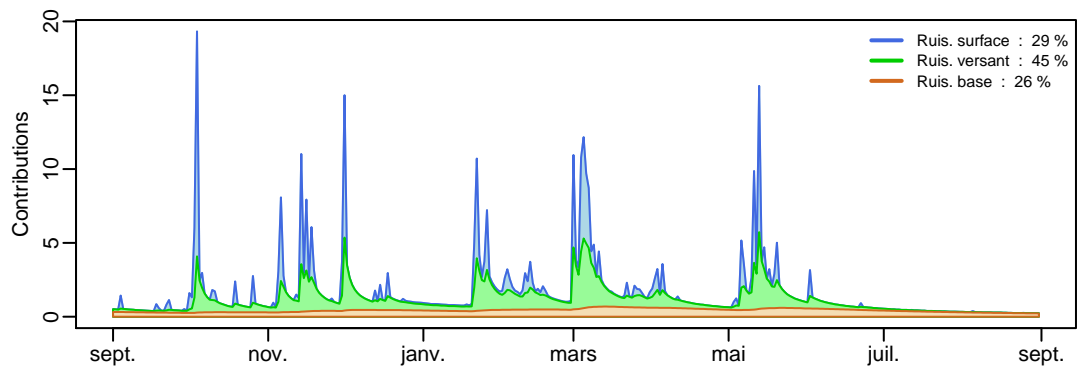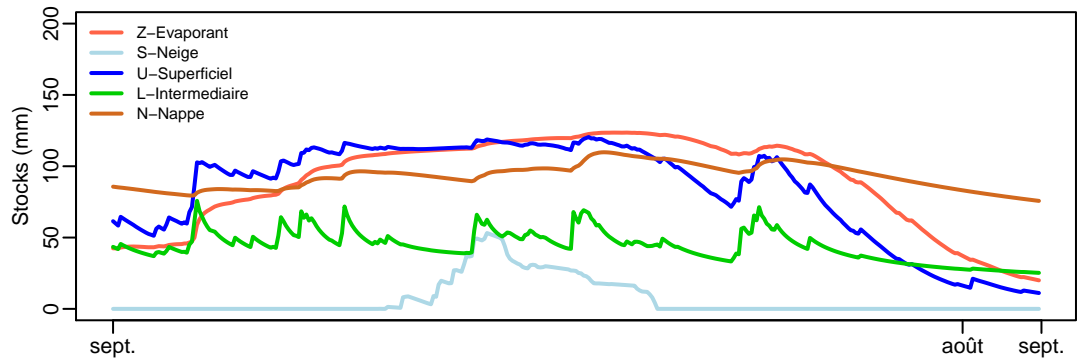

# x2414030 (67.2576 km²) – année 1985–1986

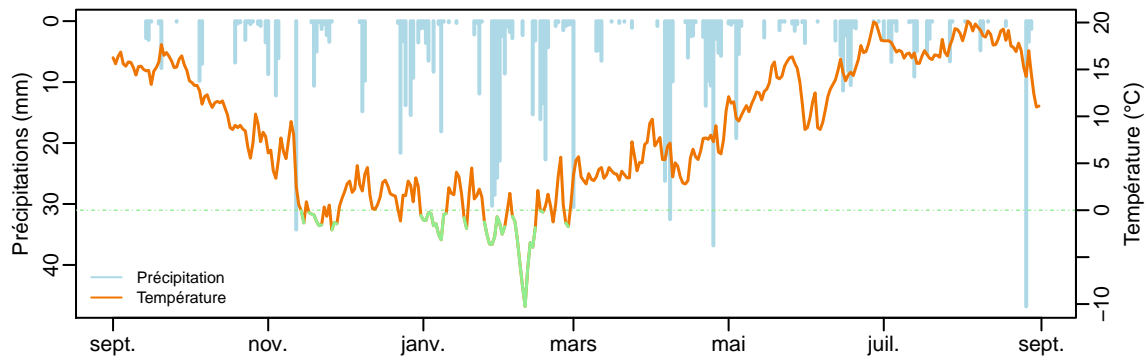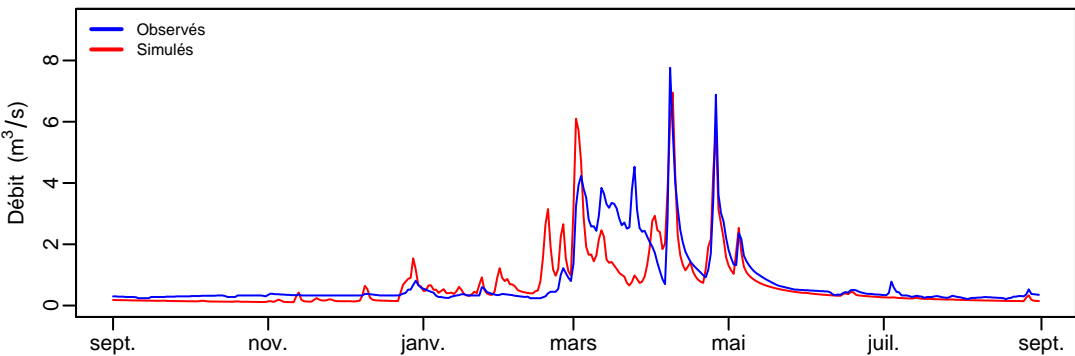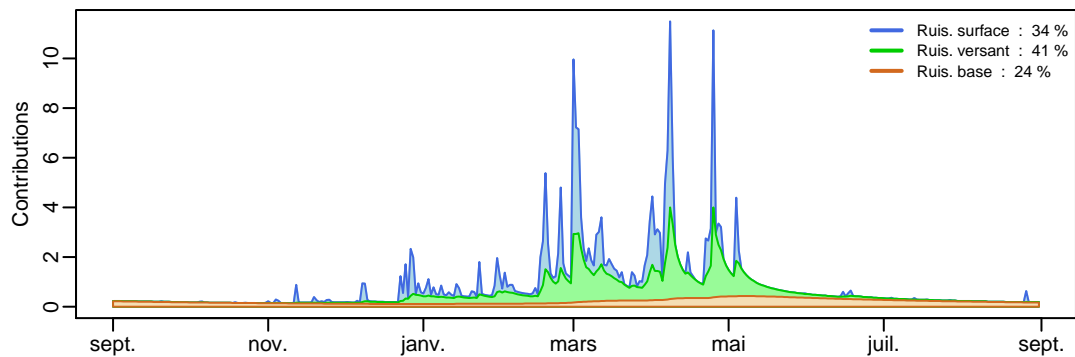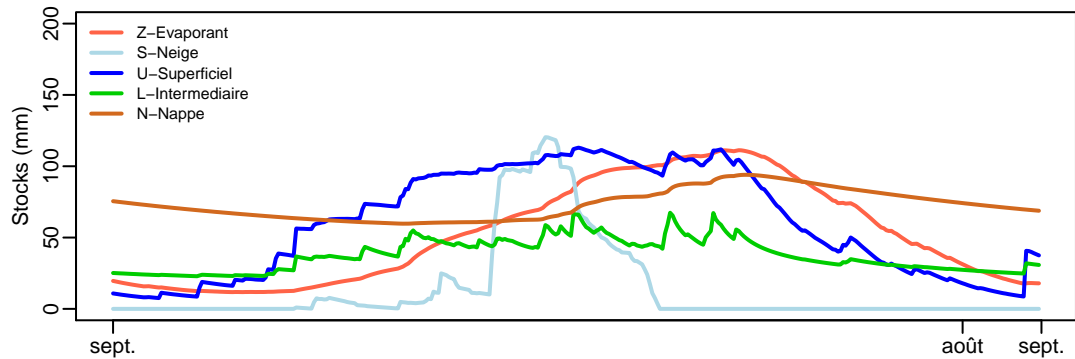

# x2414030 (67.2576 km<sup>2</sup>) – année 1986–1987

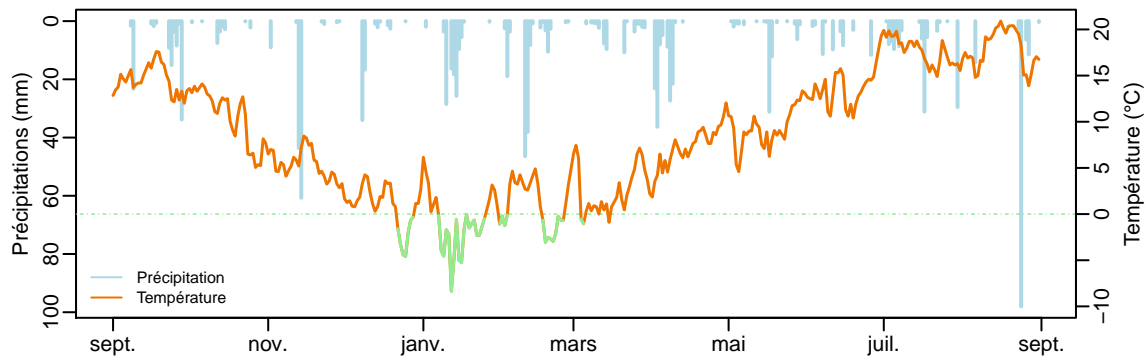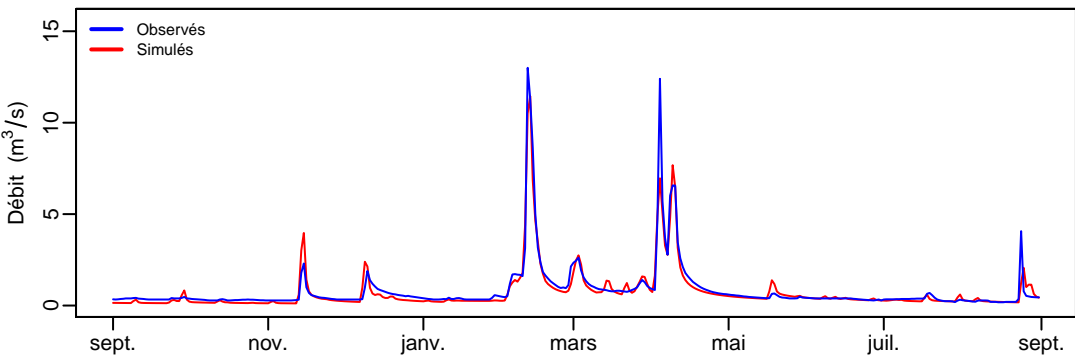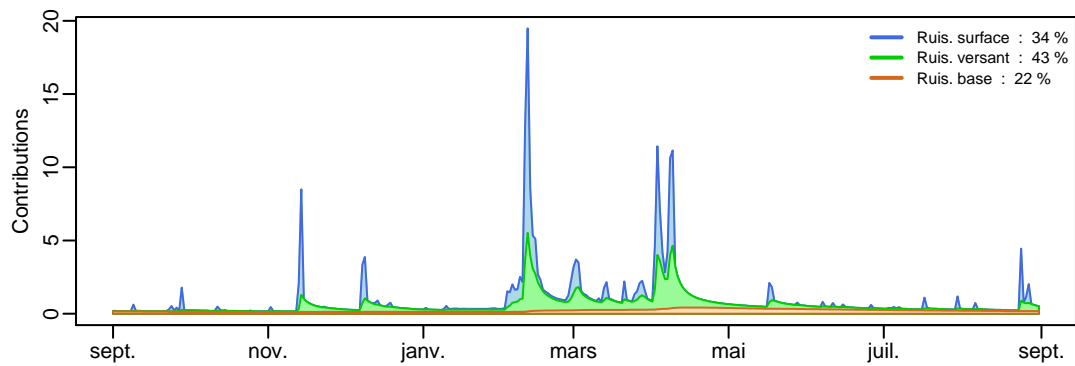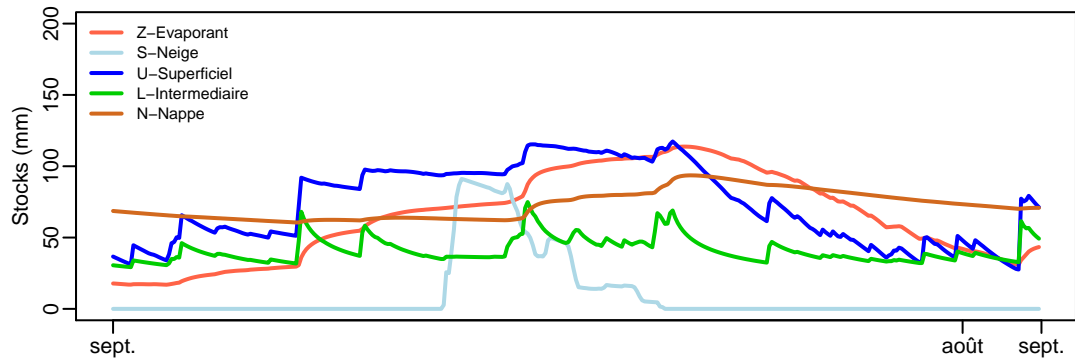

# x2414030 (67.2576 km<sup>2</sup>) – année 1987–1988

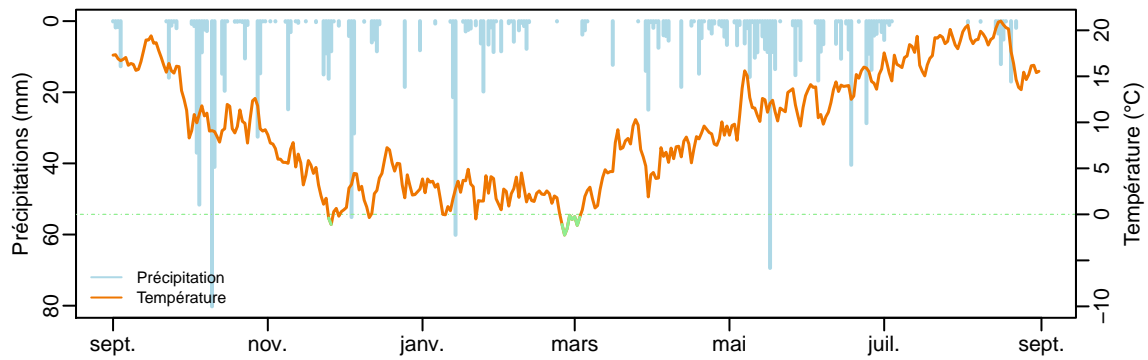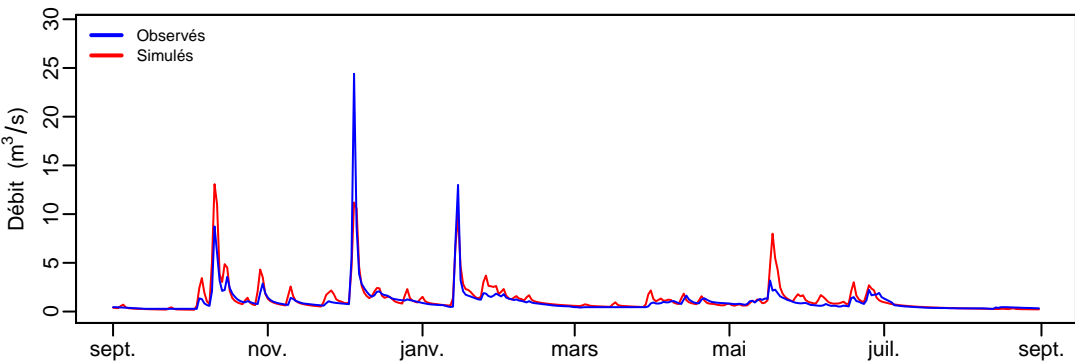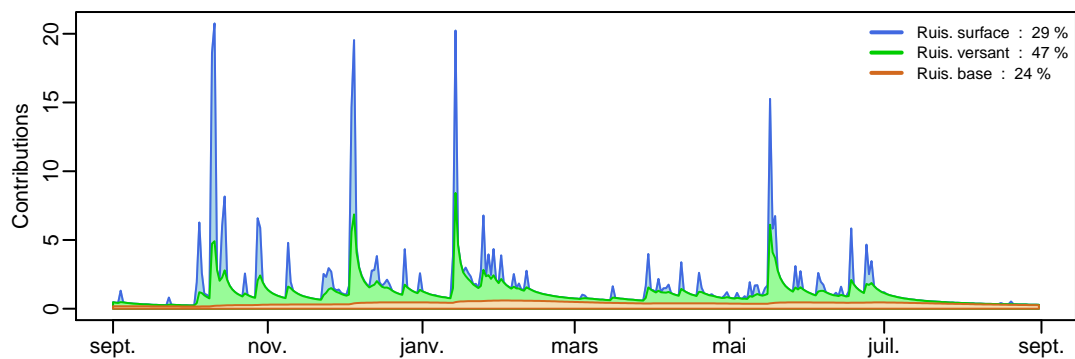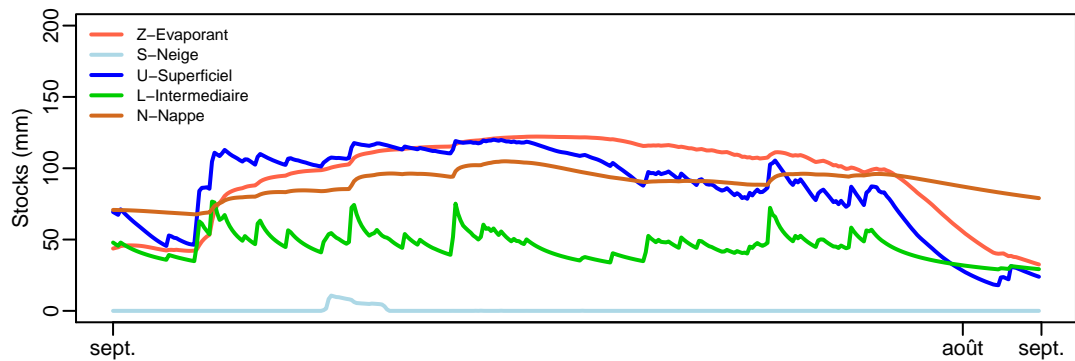

# x2414030 (67.2576 km<sup>2</sup>) – année 1988–1989

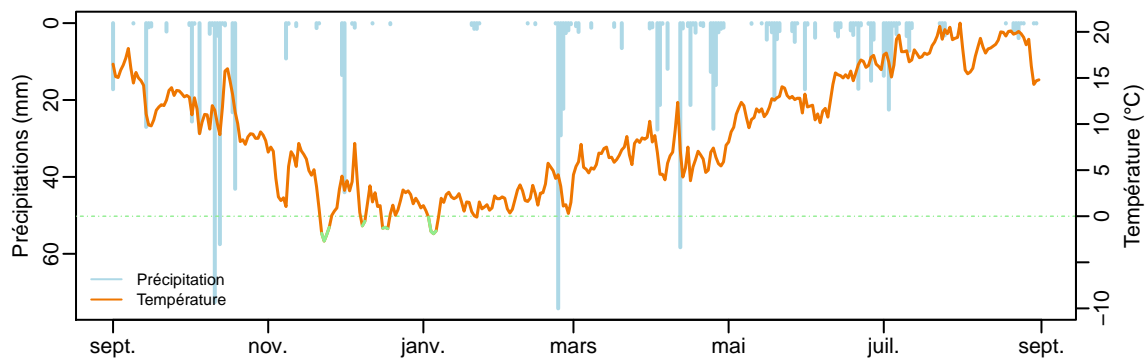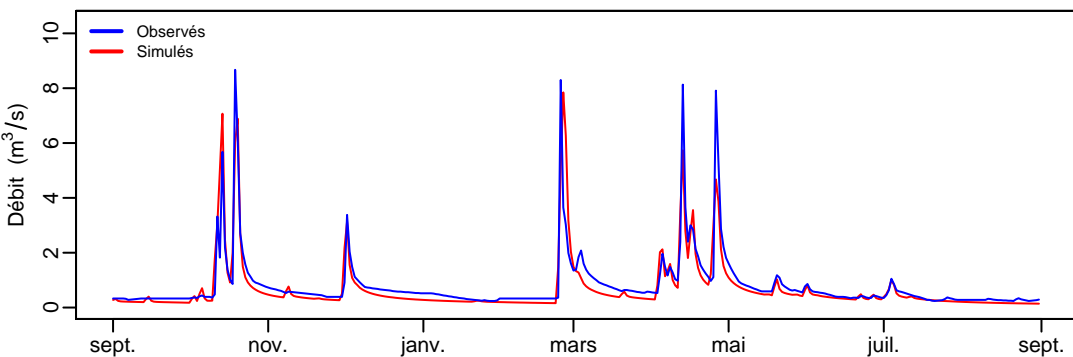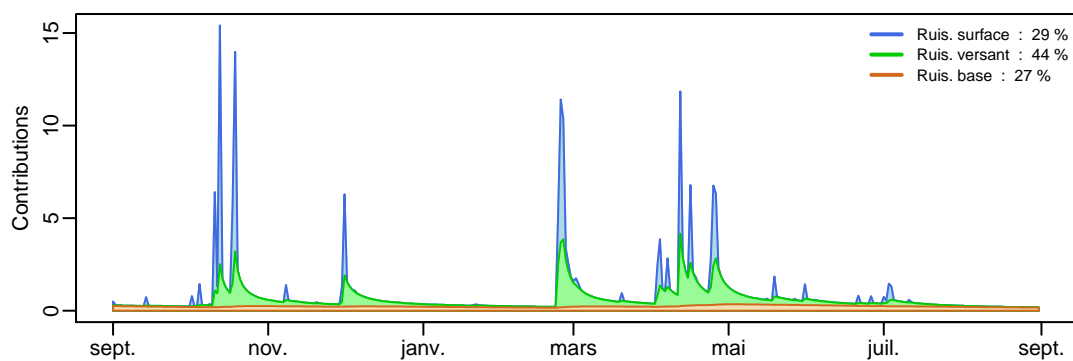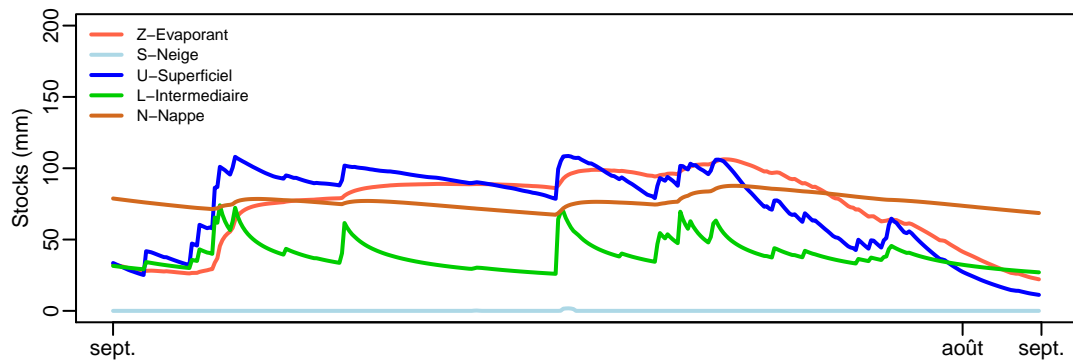



# x2414030 (67.2576 km²) – année 1989–1990

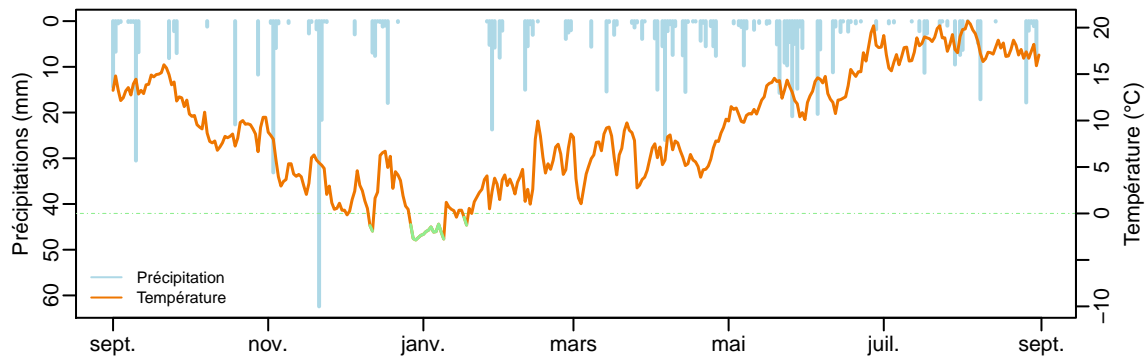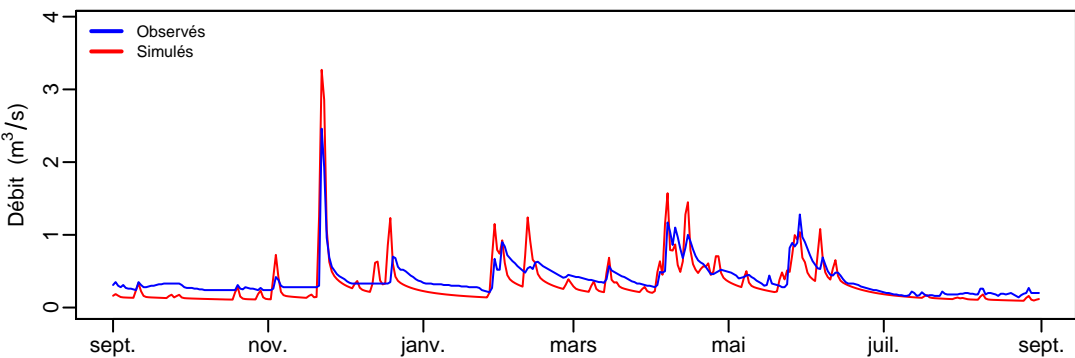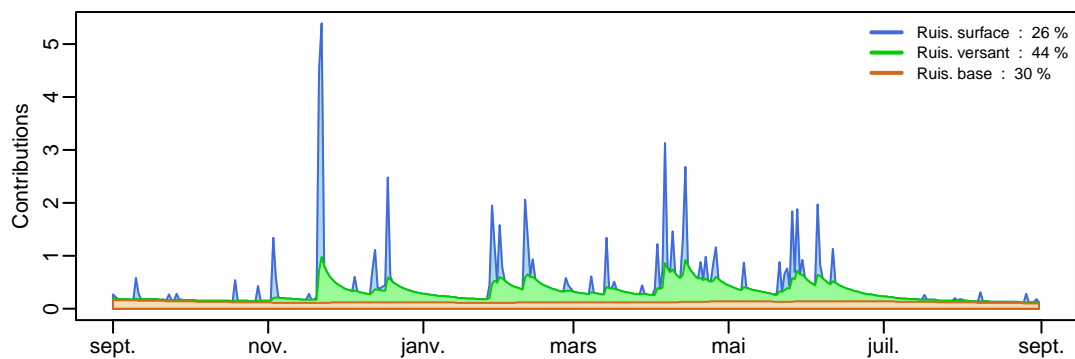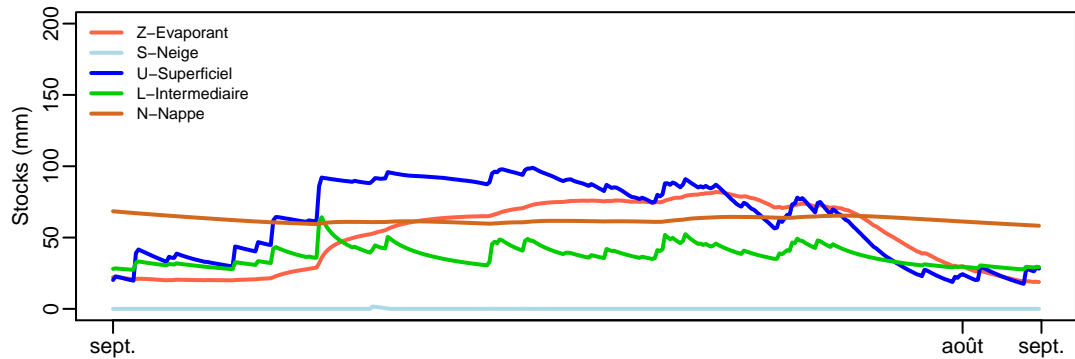

# x2414030 (67.2576 km<sup>2</sup>) – année 1990–1991

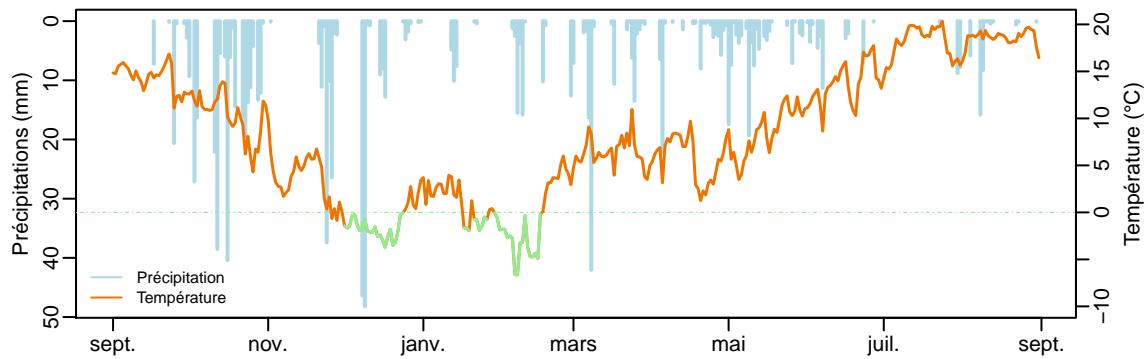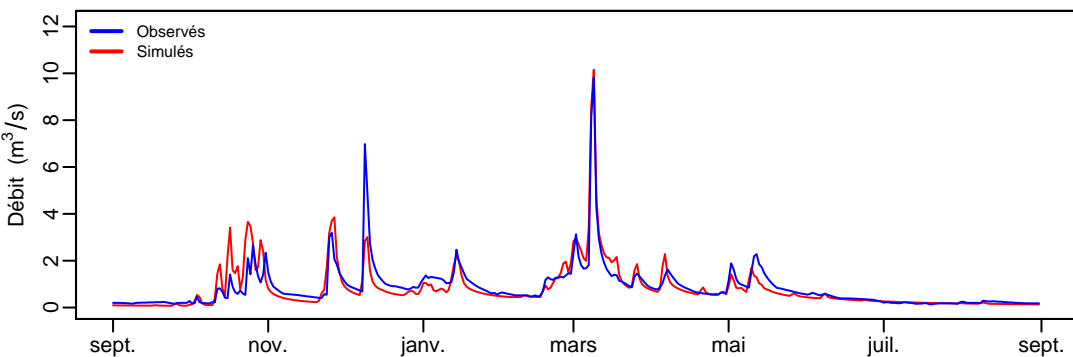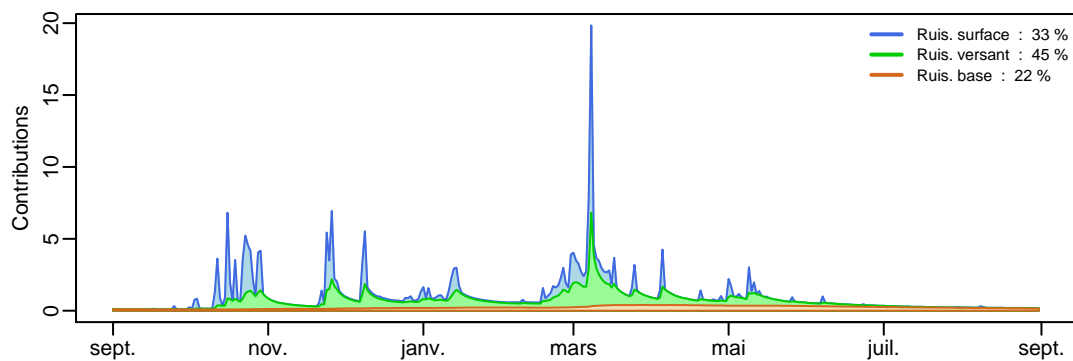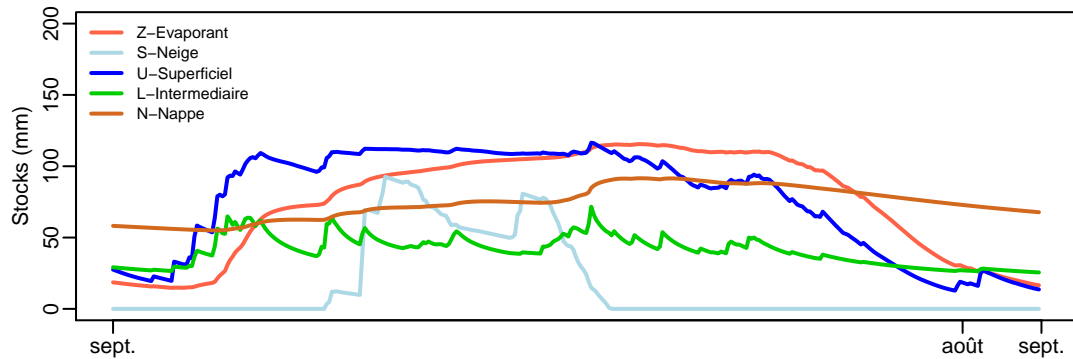

# x2414030 (67.2576 km<sup>2</sup>) – année 1991–1992

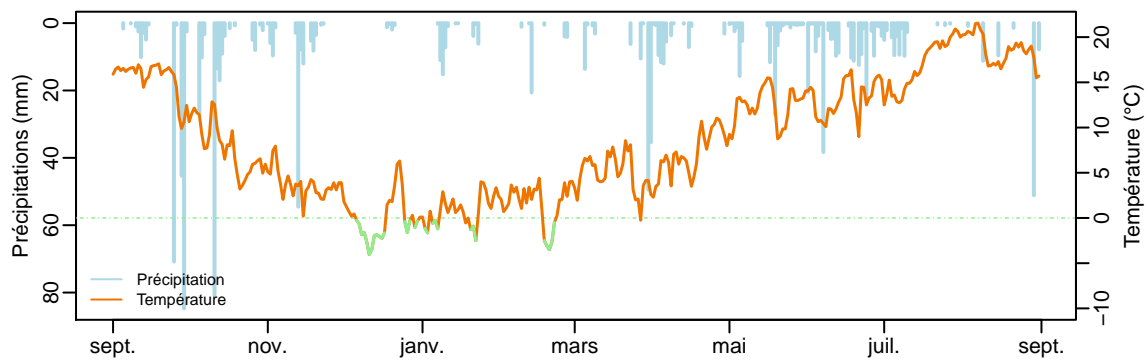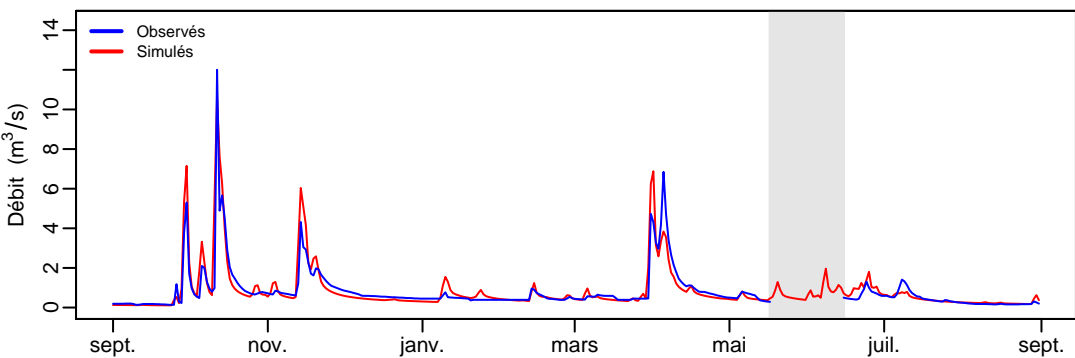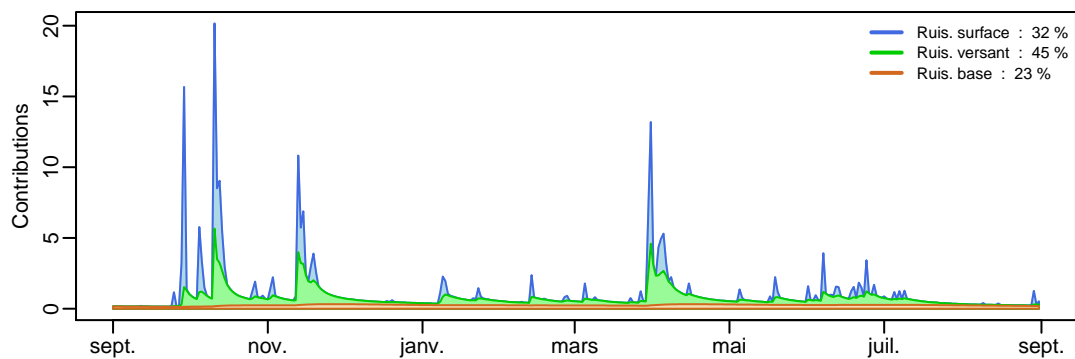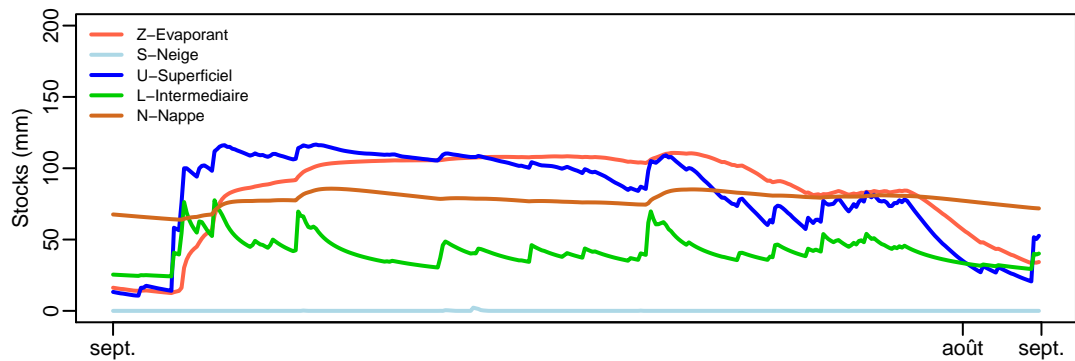

# x2414030 (67.2576 km<sup>2</sup>) – année 1992–1993

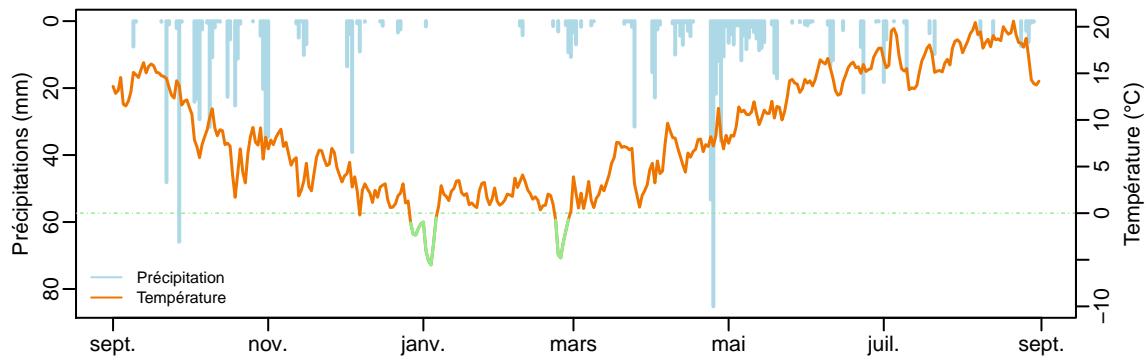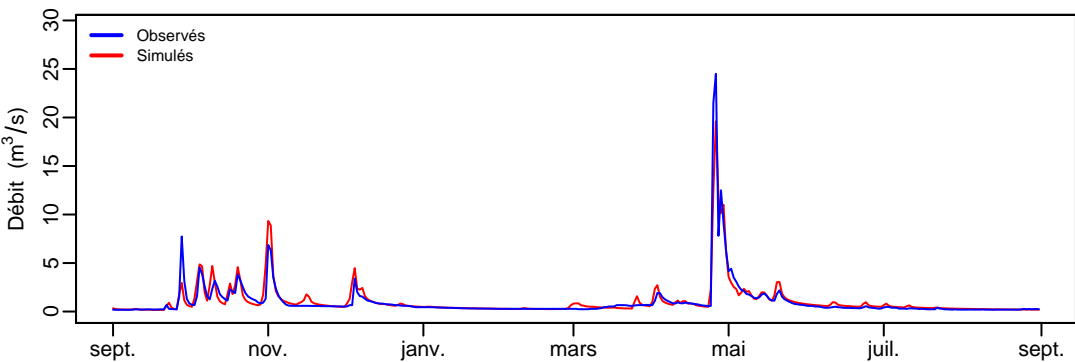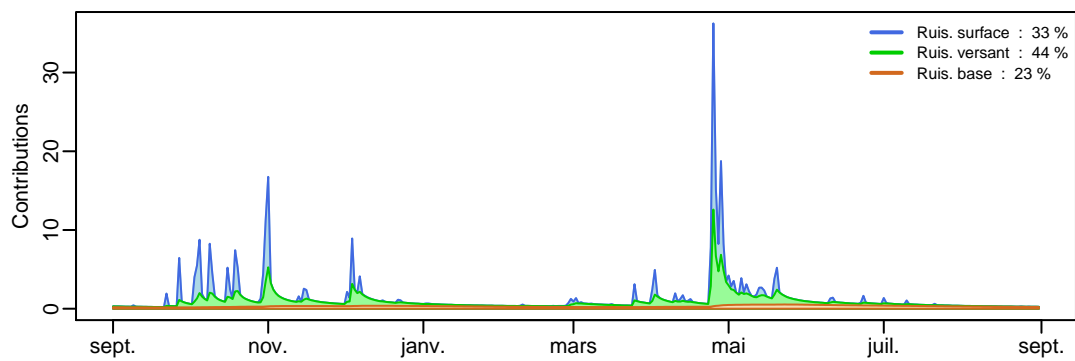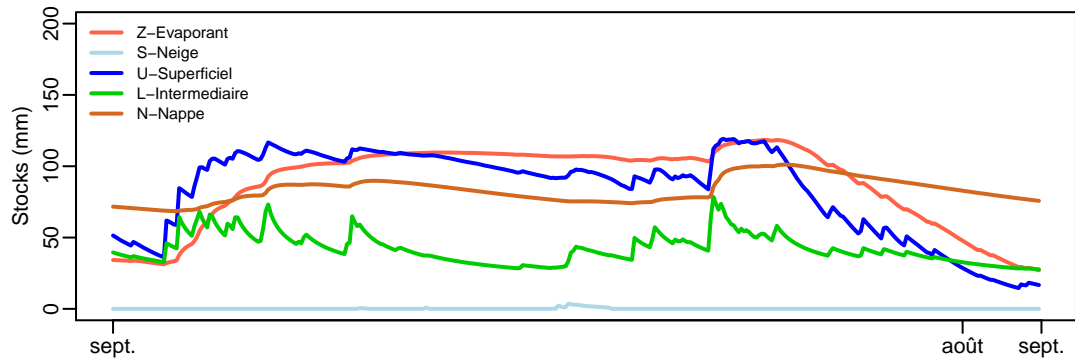

# x2414030 (67.2576 km<sup>2</sup>) – année 1993–1994

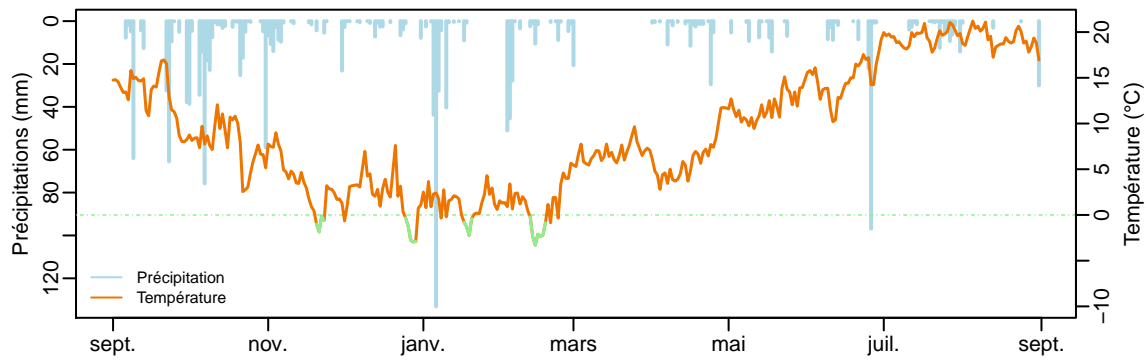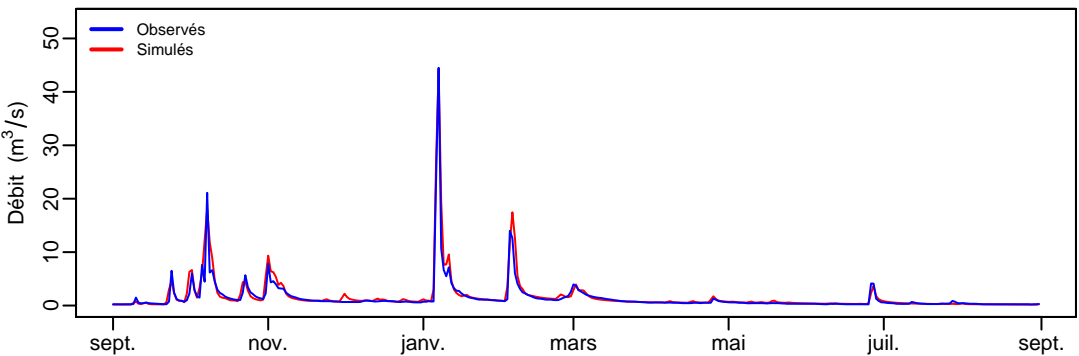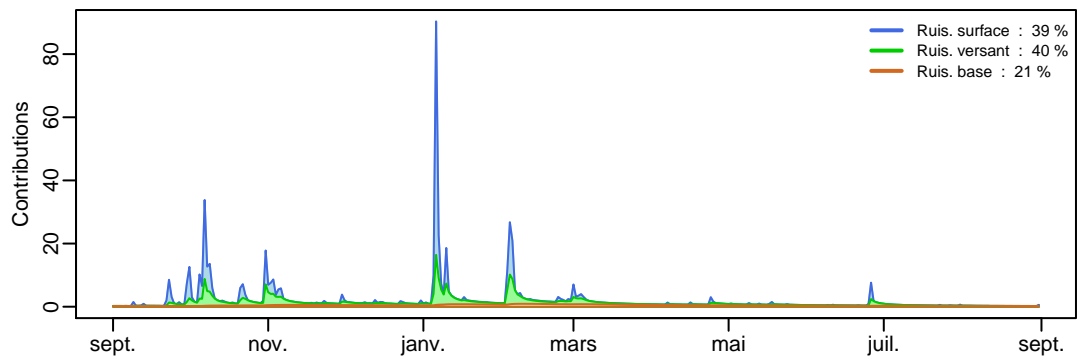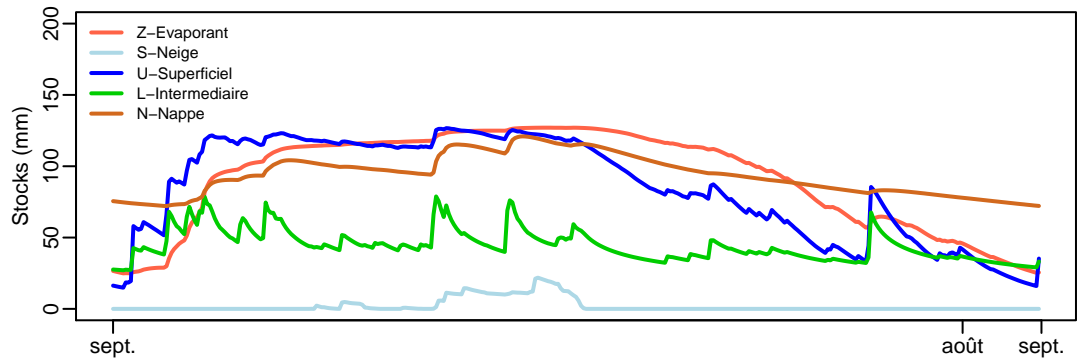

# x2414030 (67.2576 km<sup>2</sup>) – année 1994–1995

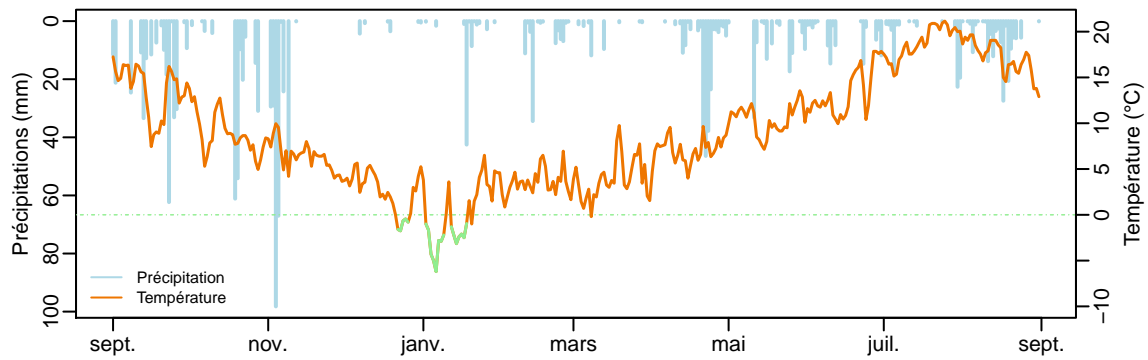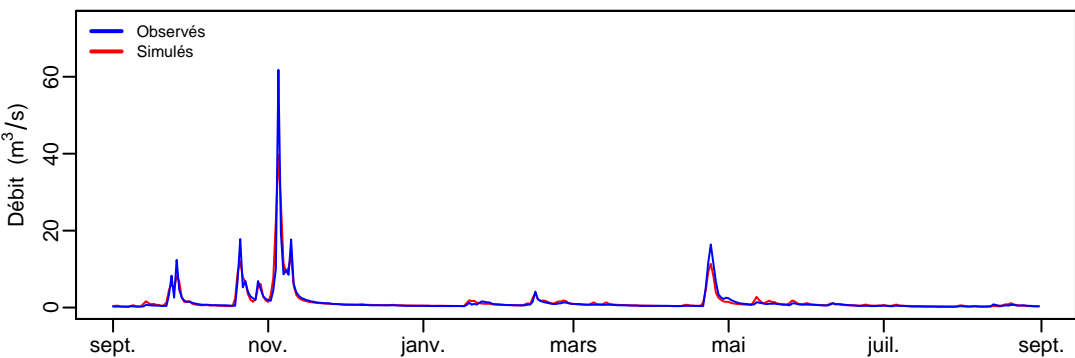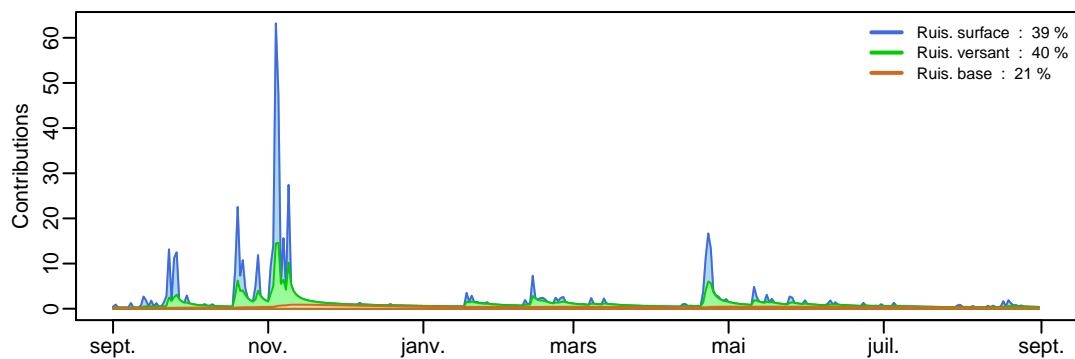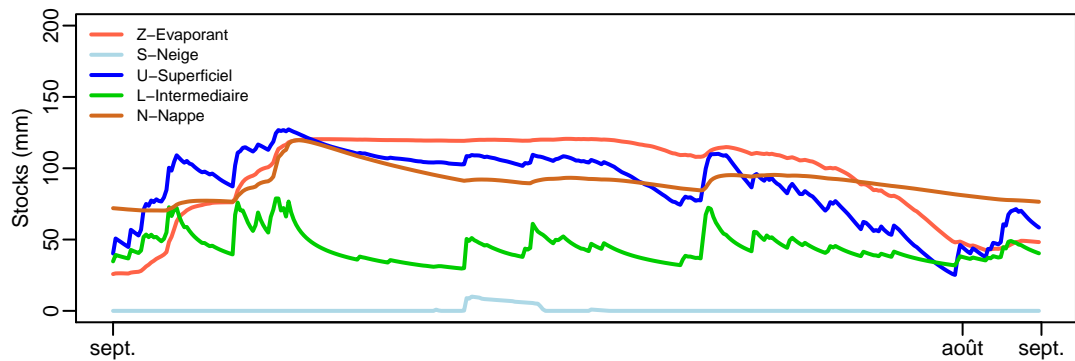

# x2414030 (67.2576 km<sup>2</sup>) – année 1995–1996

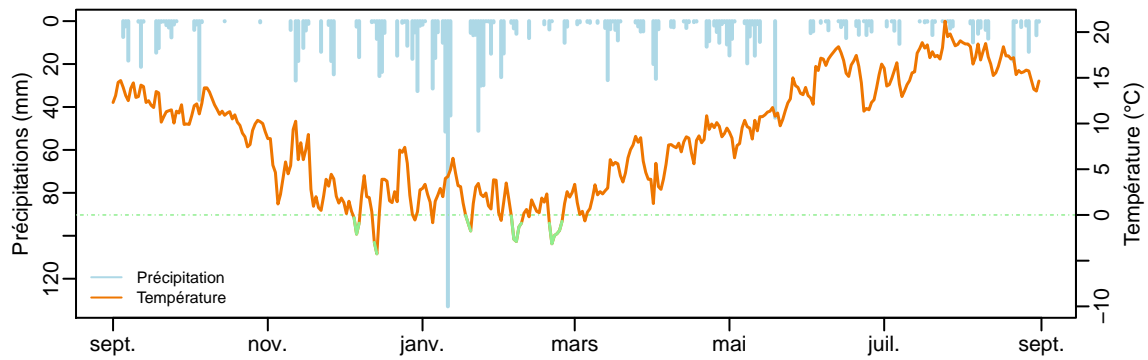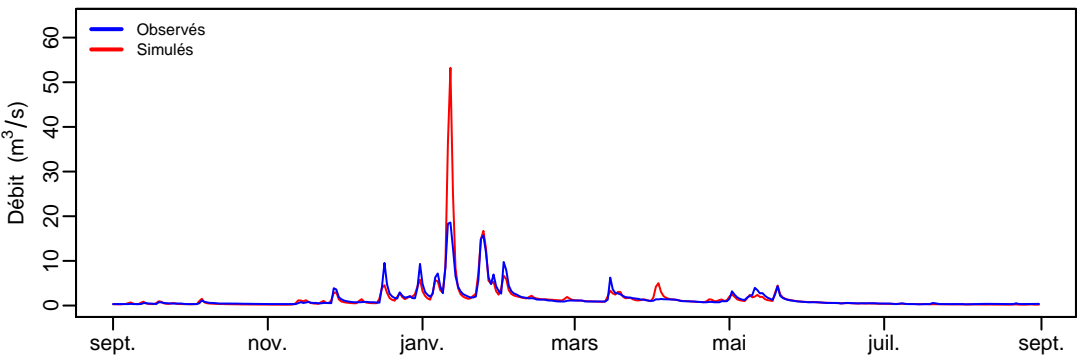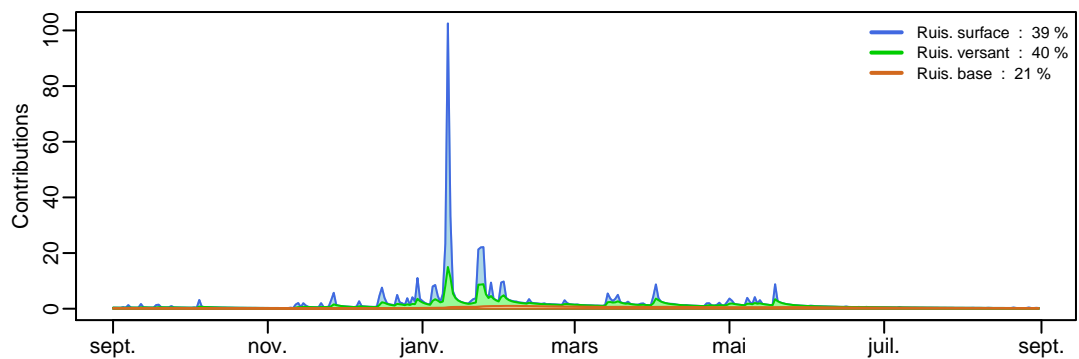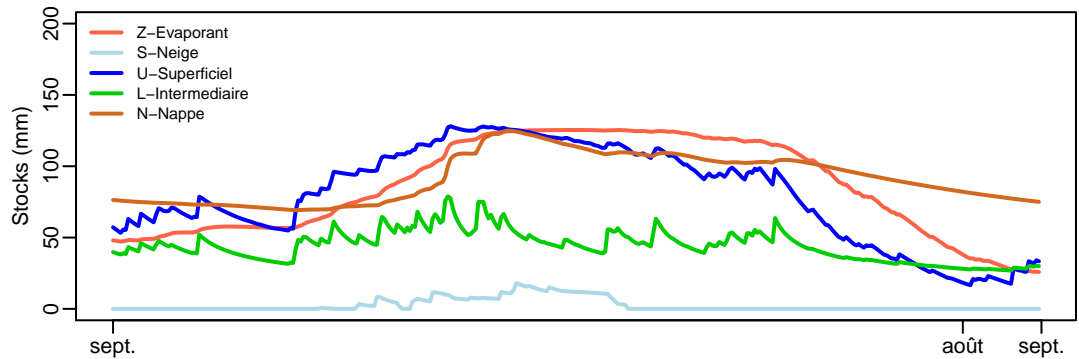

# x2414030 (67.2576 km²) – année 1996–1997

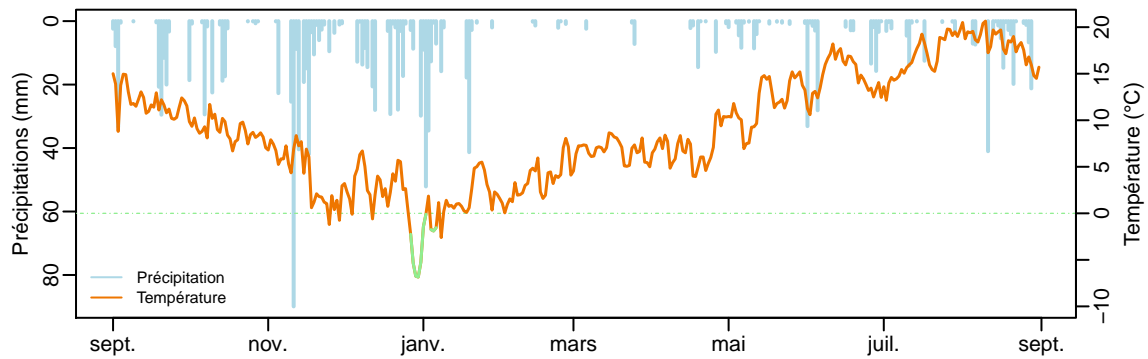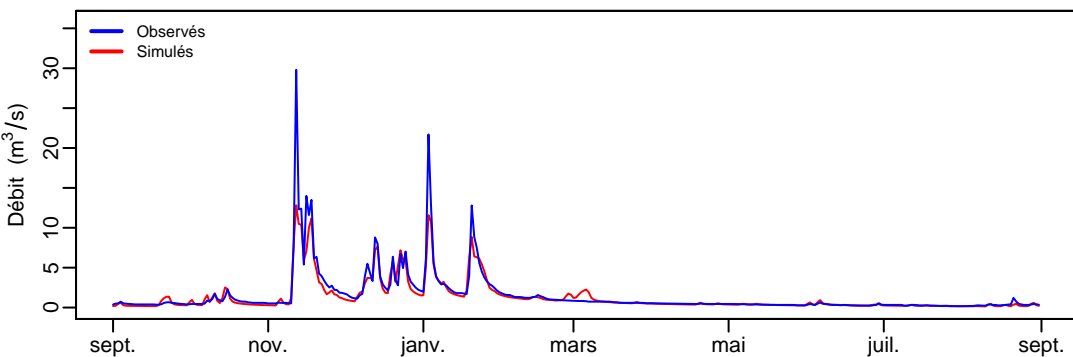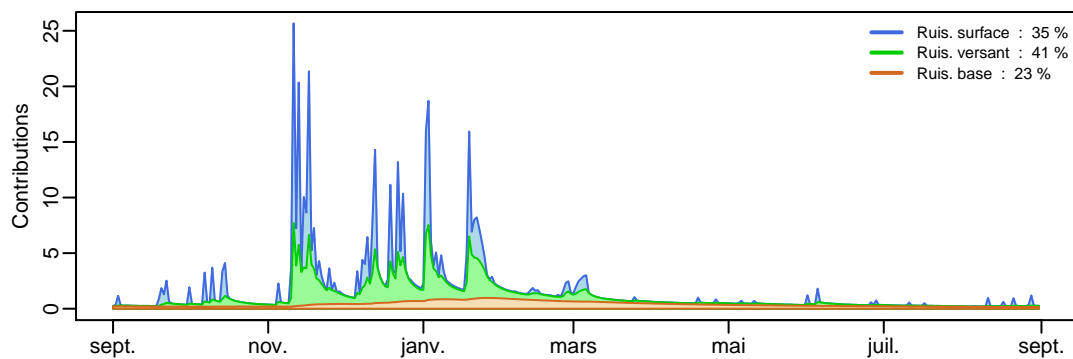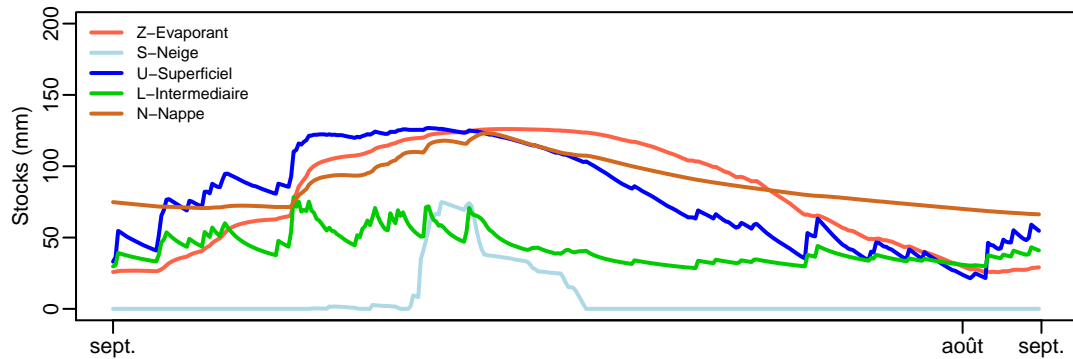



# x2414030 (67.2576 km<sup>2</sup>) – année 1997–1998

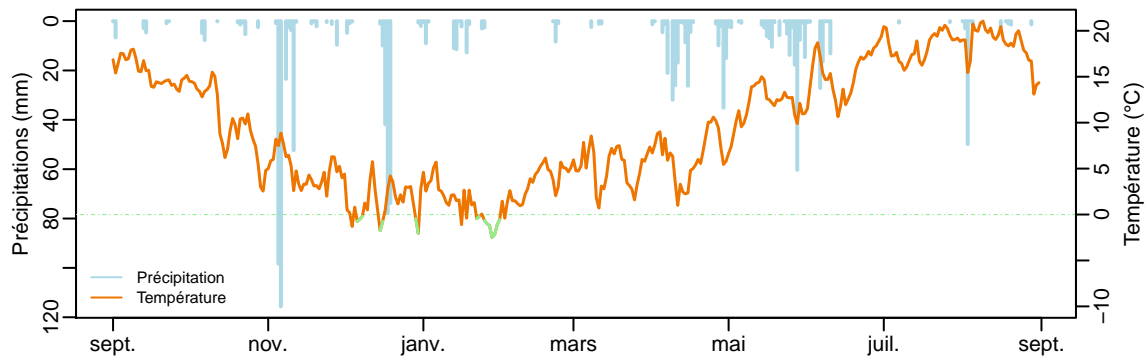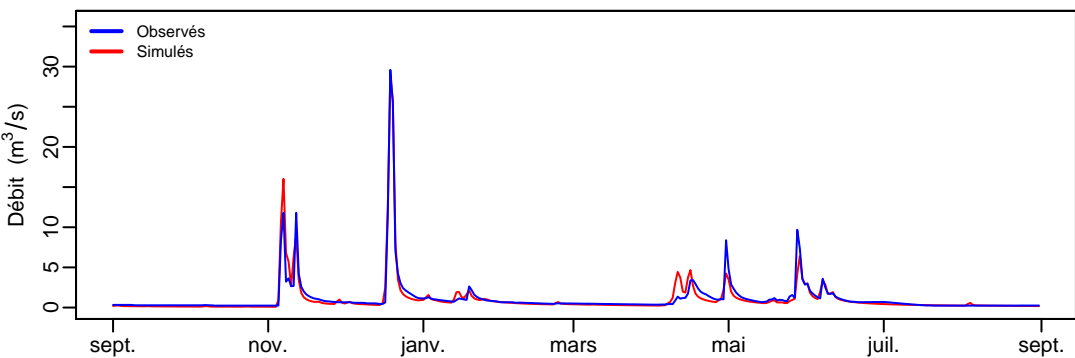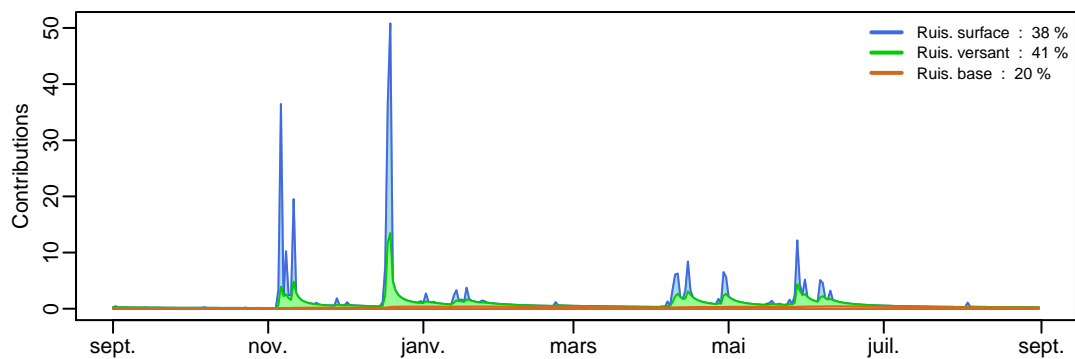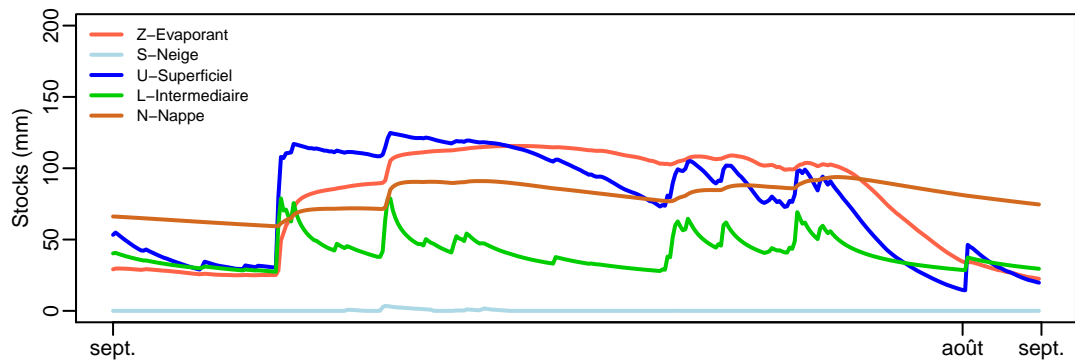

# x2414030 (67.2576 km<sup>2</sup>) – année 1998–1999

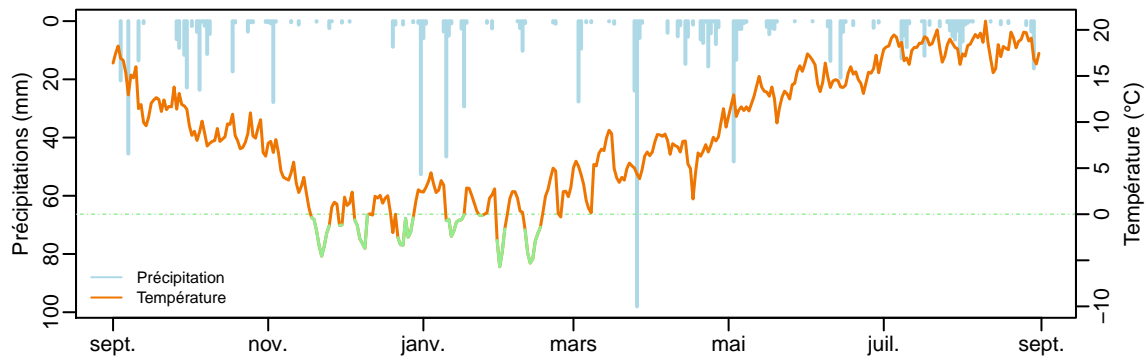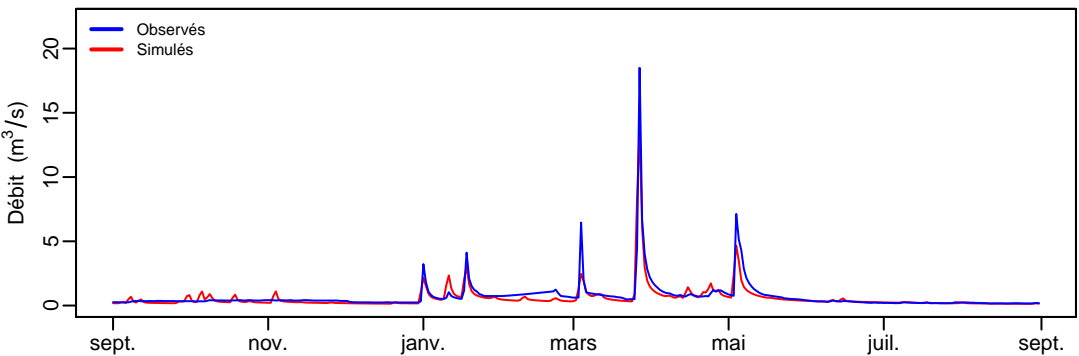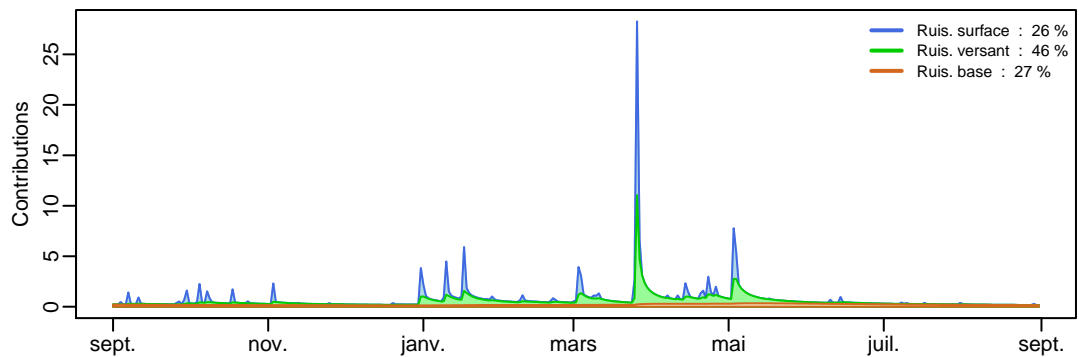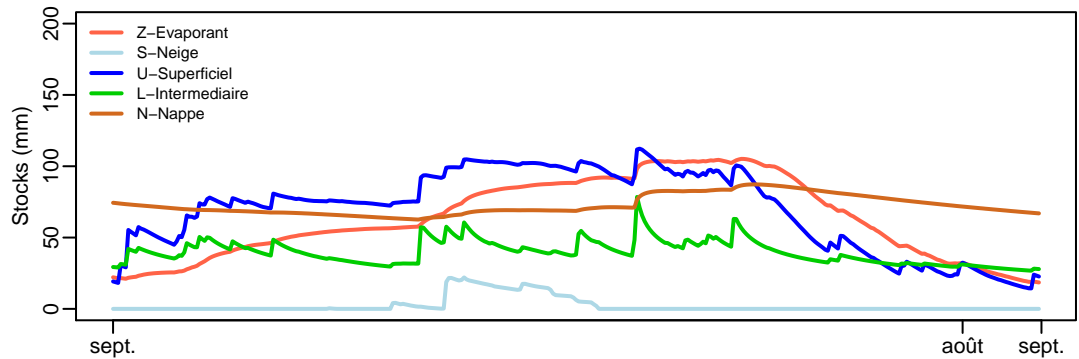

# x2414030 (67.2576 km²) – année 1999–2000

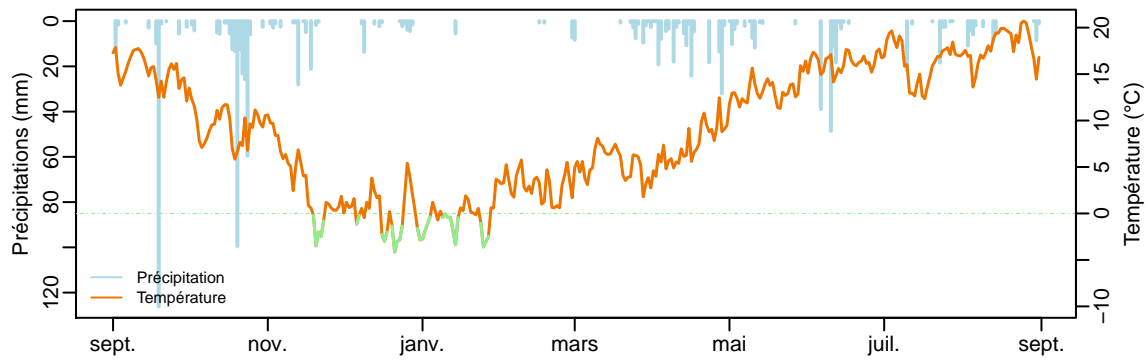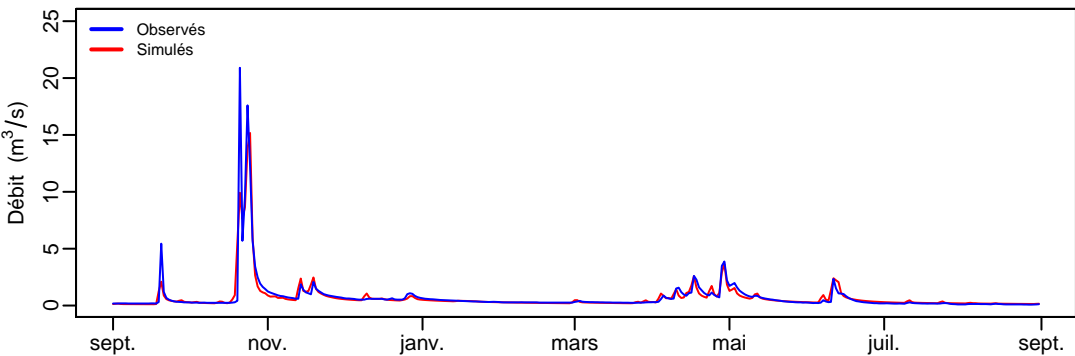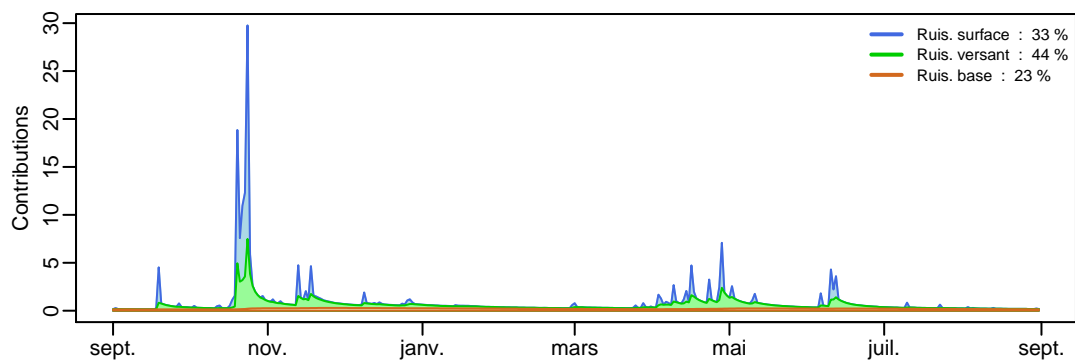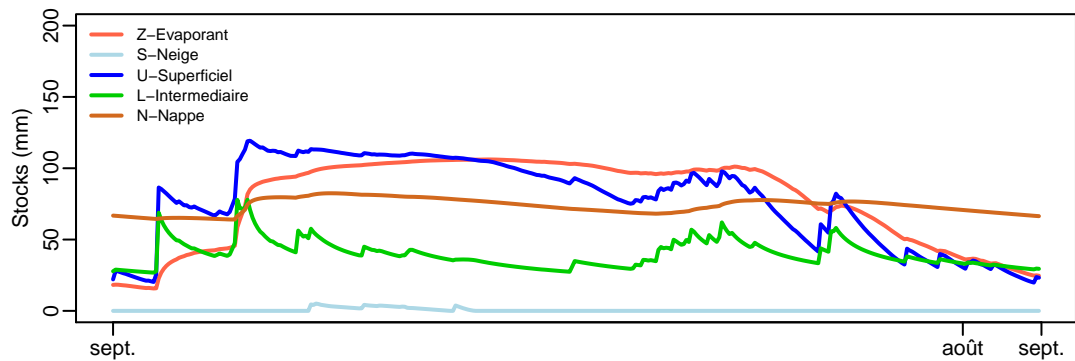

# x2414030 (67.2576 km<sup>2</sup>) – année 2000–2001

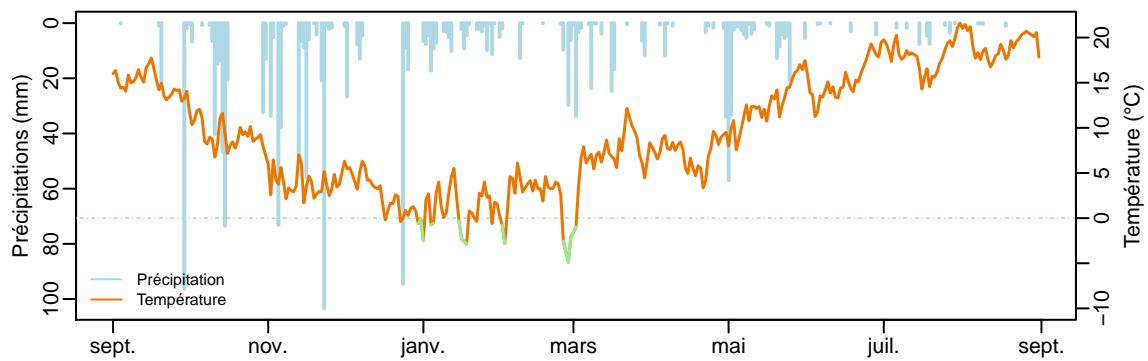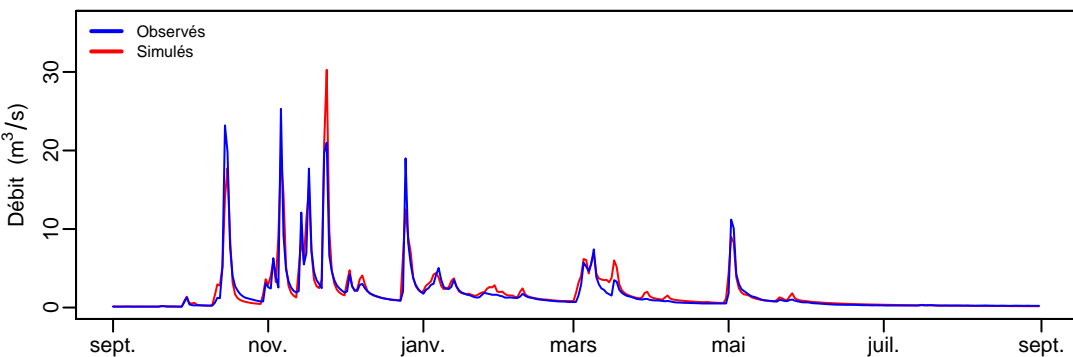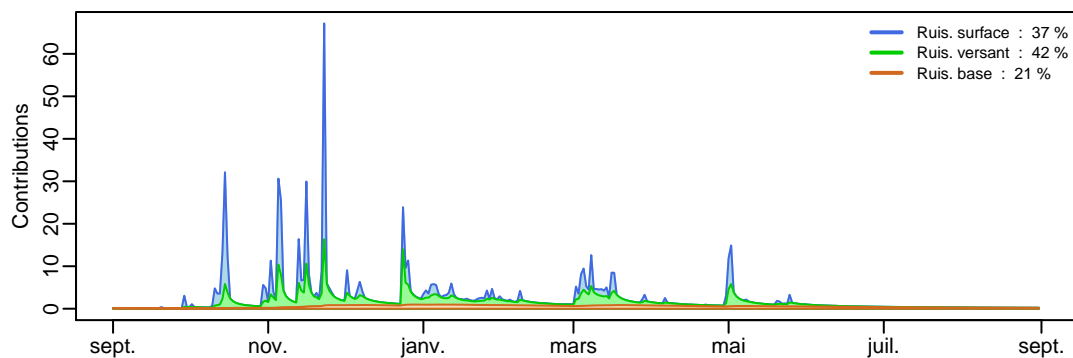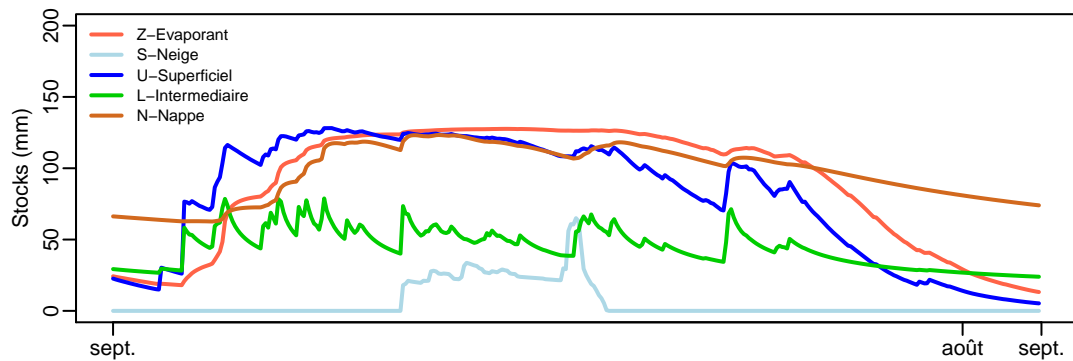

# x2414030 (67.2576 km<sup>2</sup>) – année 2001–2002

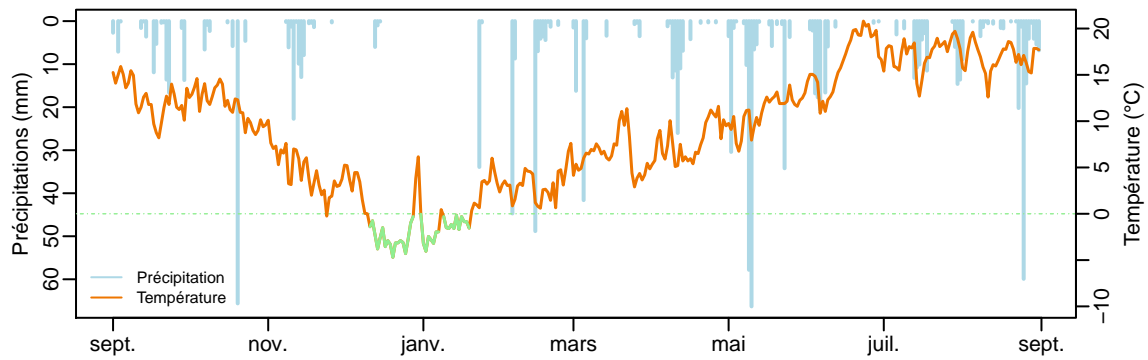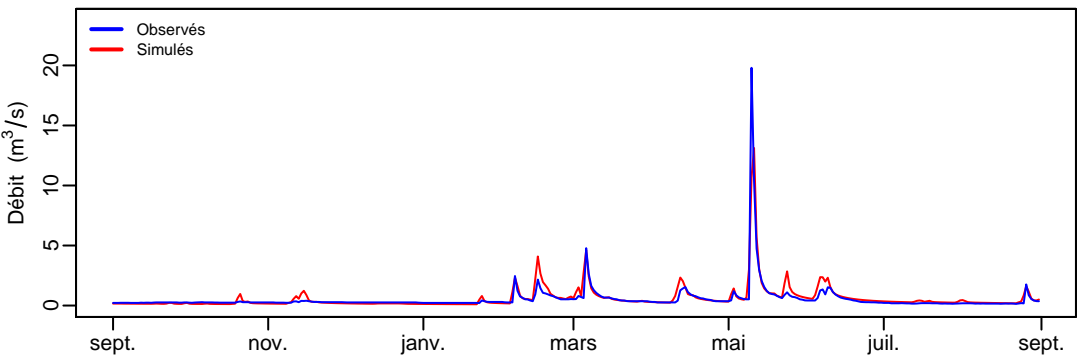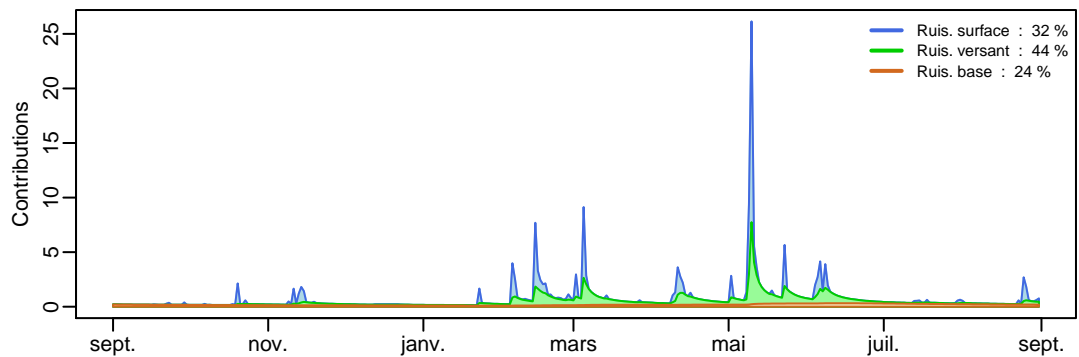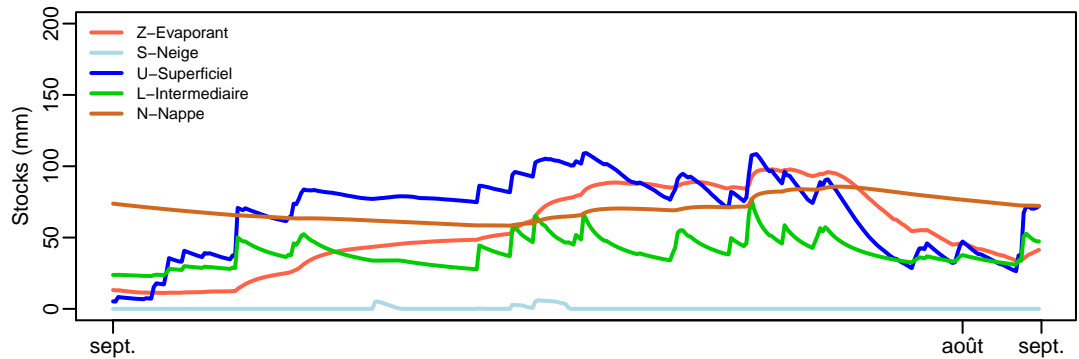

# x2414030 (67.2576 km<sup>2</sup>) – année 2002–2003

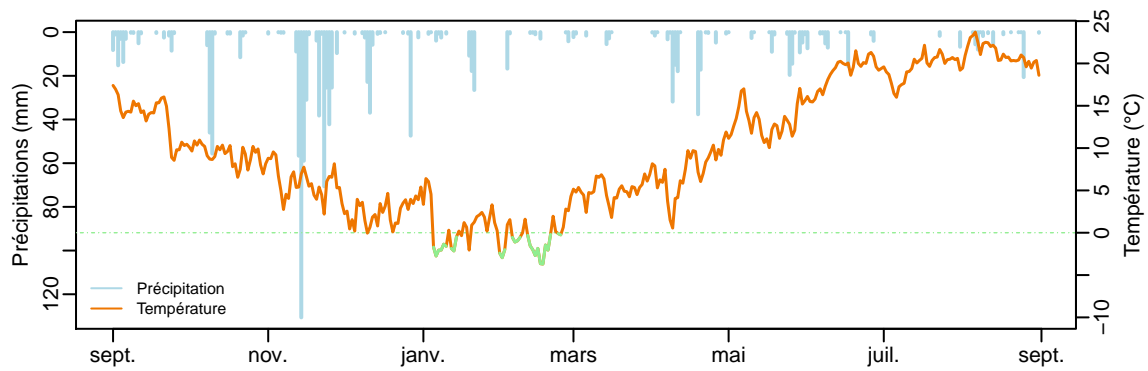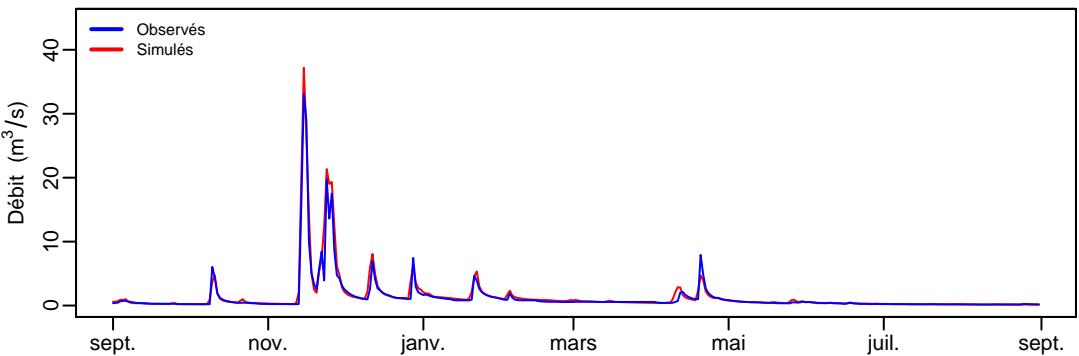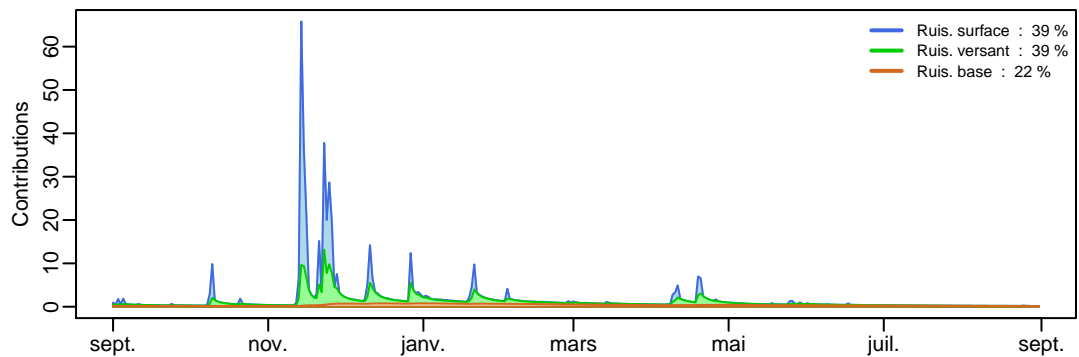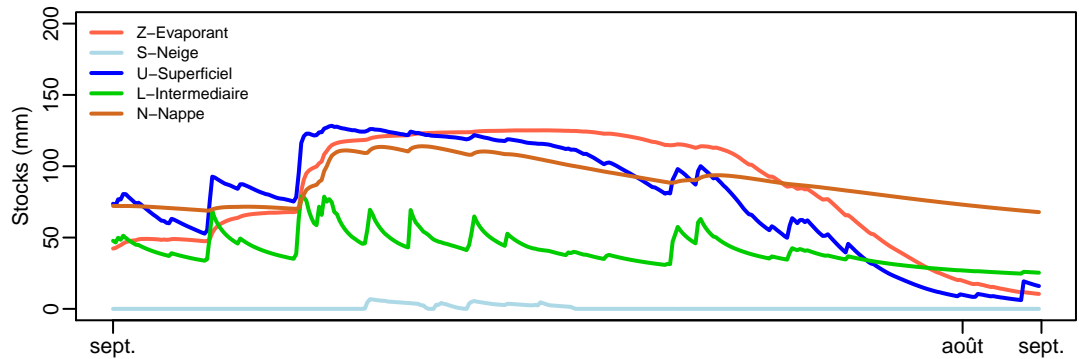

# x2414030 (67.2576 km<sup>2</sup>) – année 2003–2004

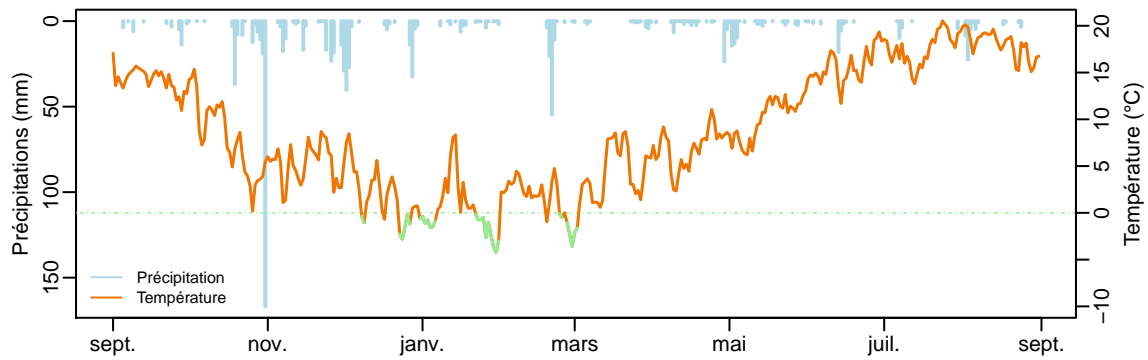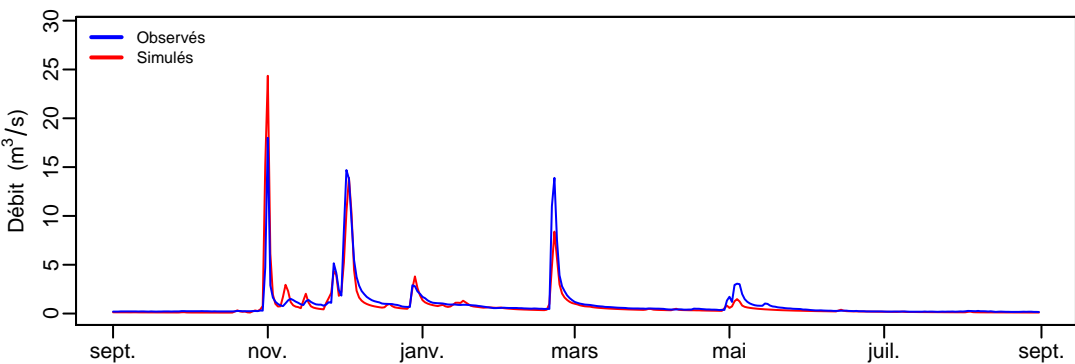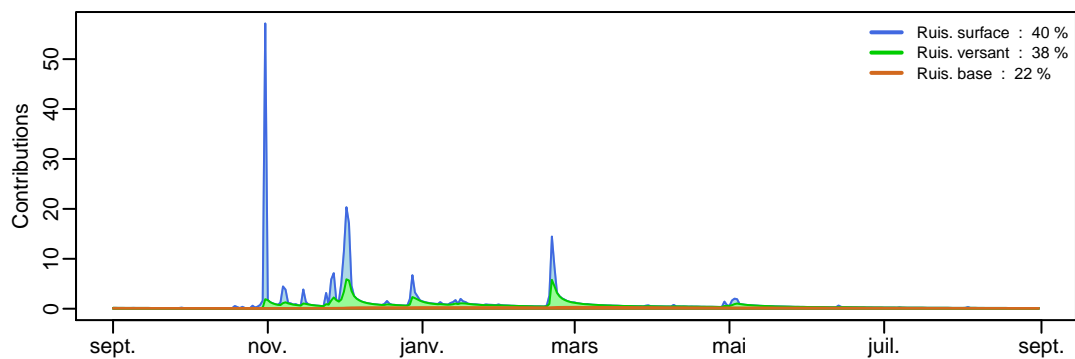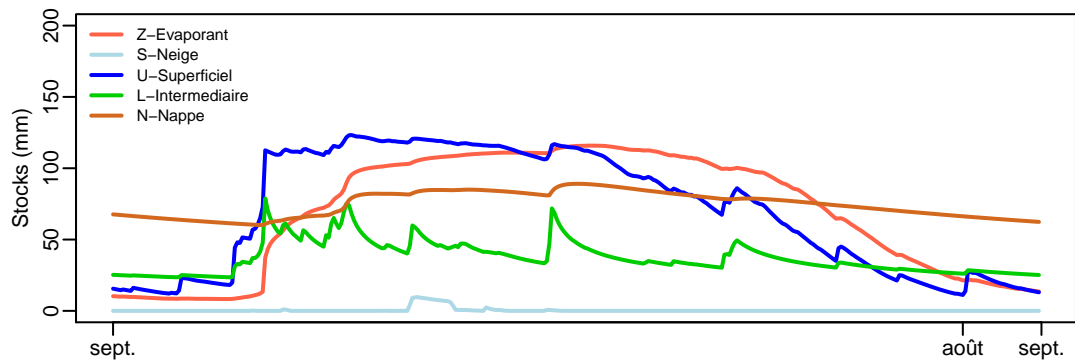

# x2414030 (67.2576 km<sup>2</sup>) – année 2004–2005

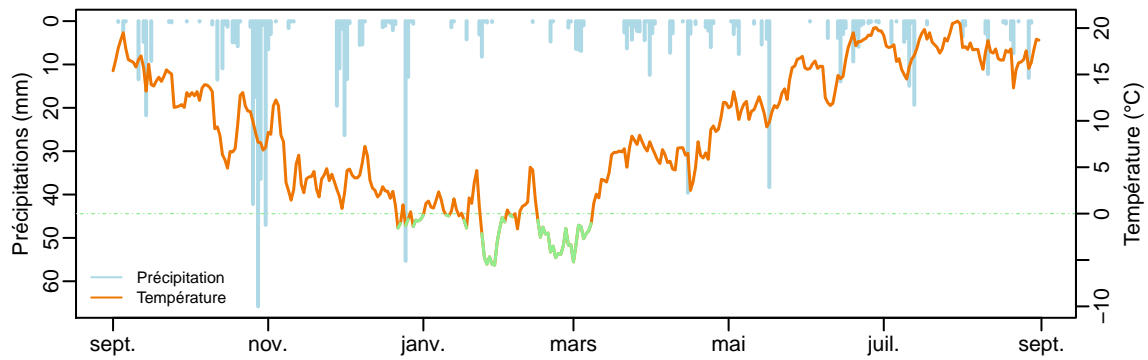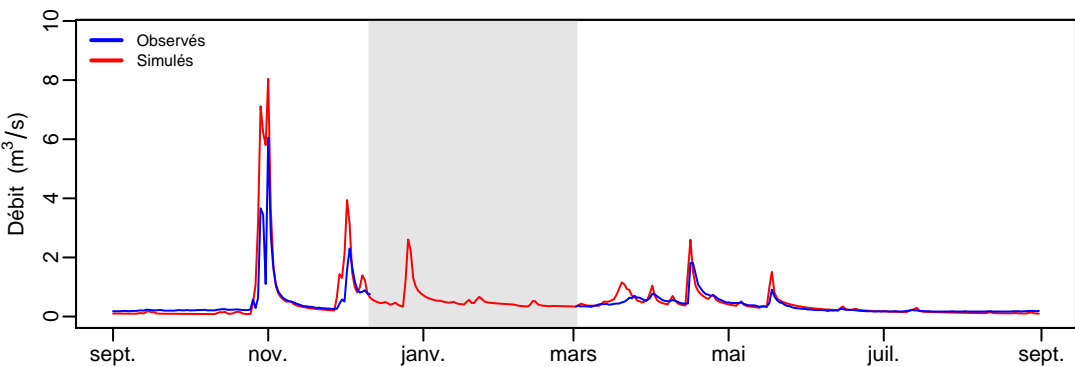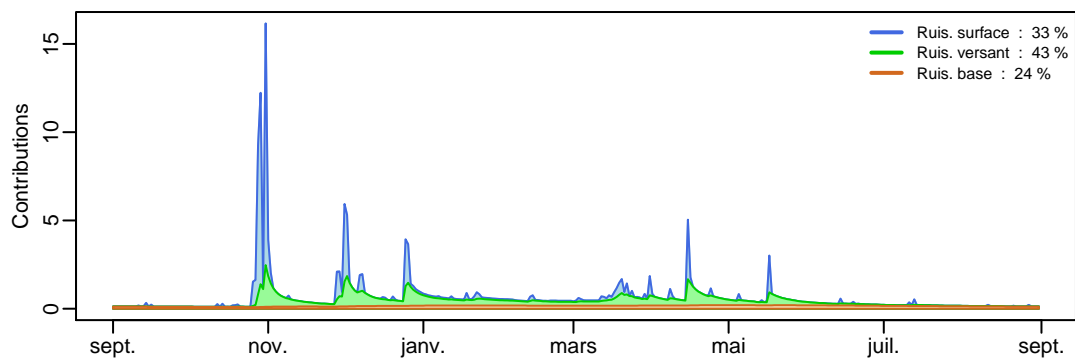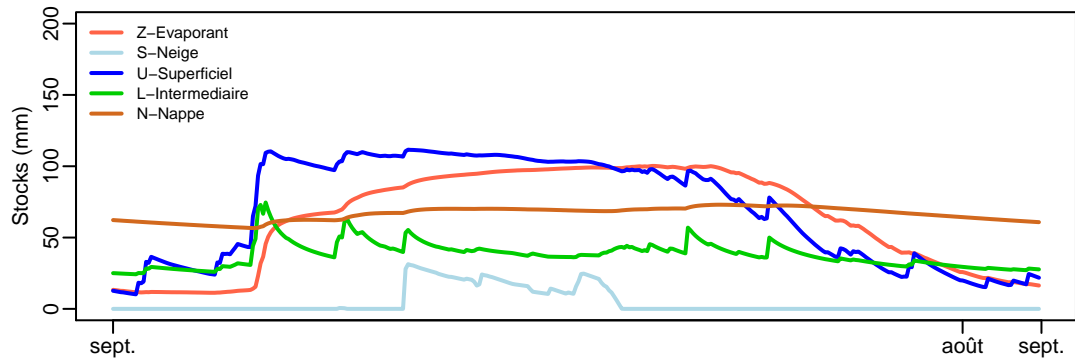



# x2414030 (67.2576 km<sup>2</sup>) – année 2005–2006

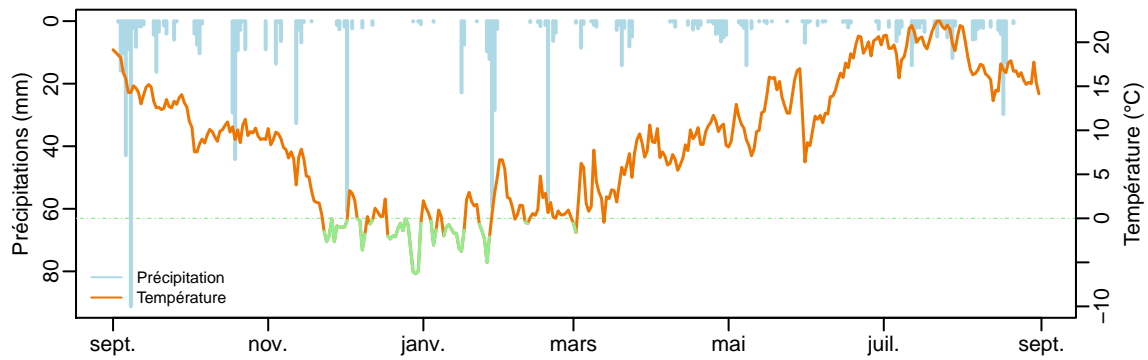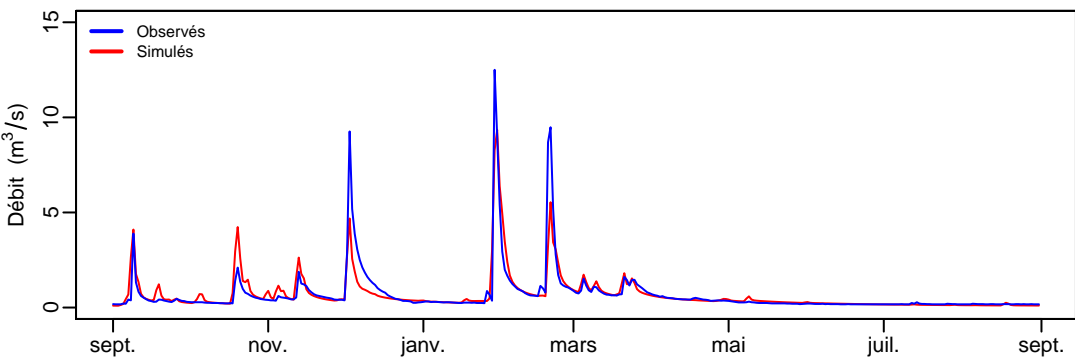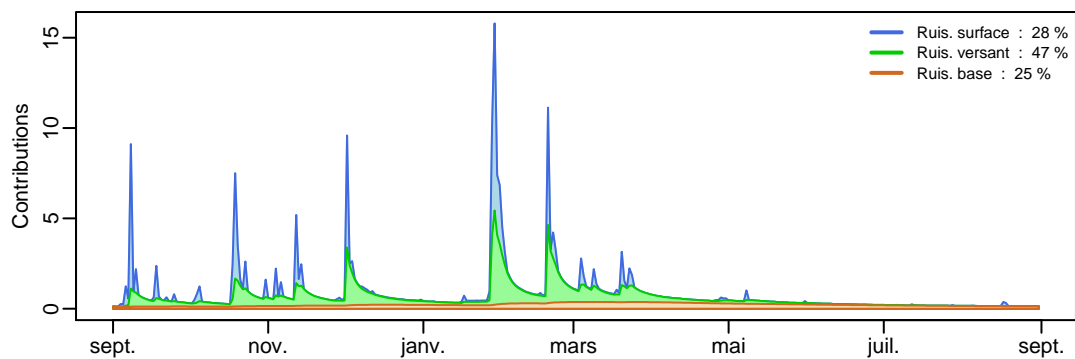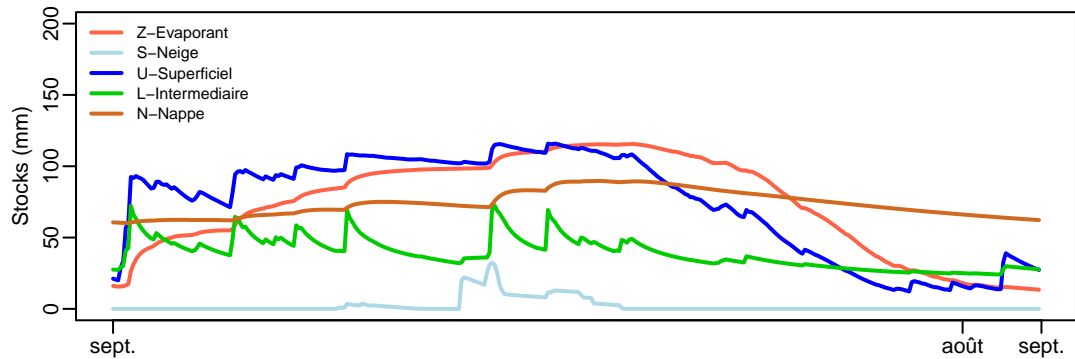

# x2414030 (67.2576 km<sup>2</sup>) – année 2006–2007

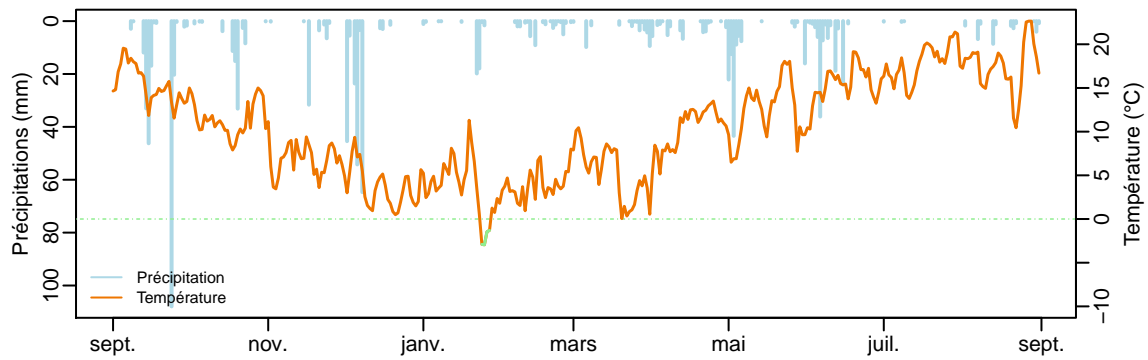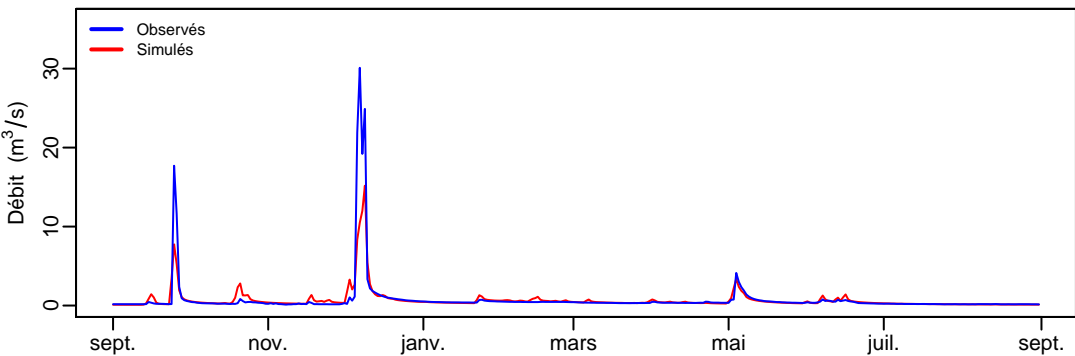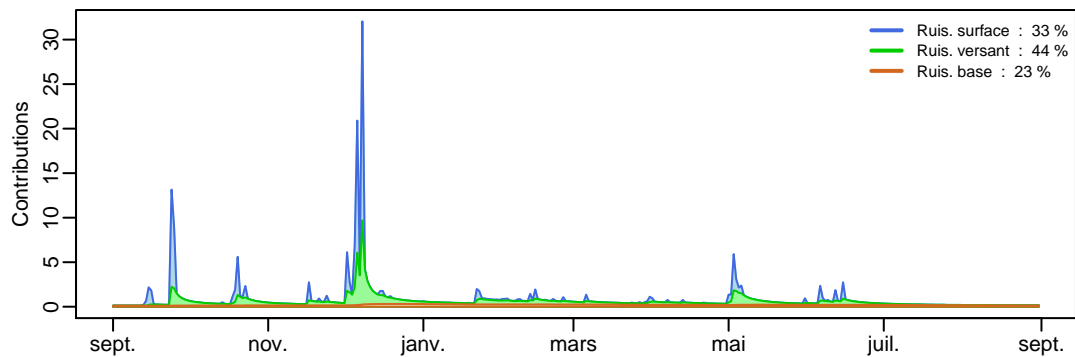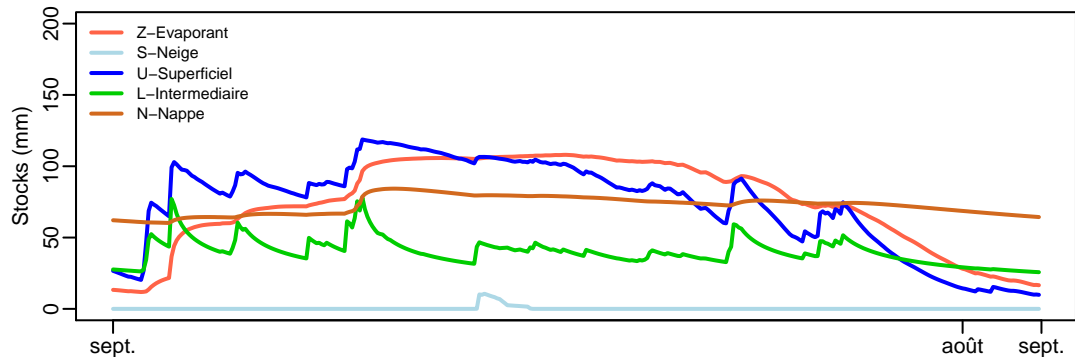

# x2414030 (67.2576 km<sup>2</sup>) – année 2007–2008

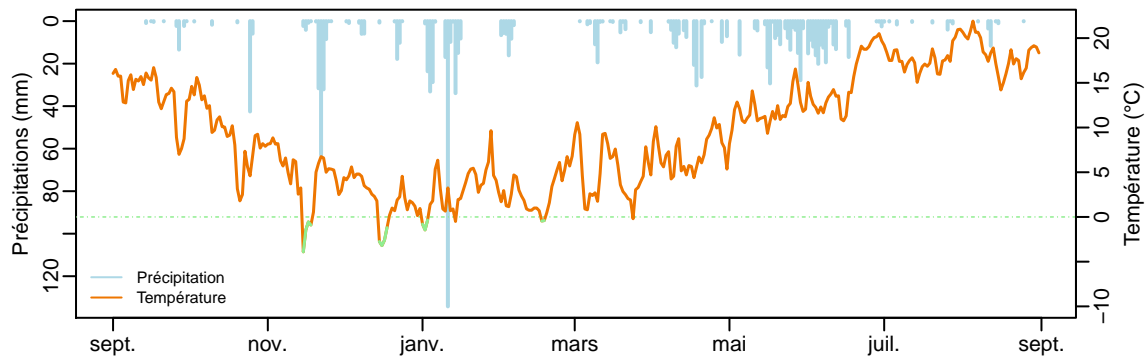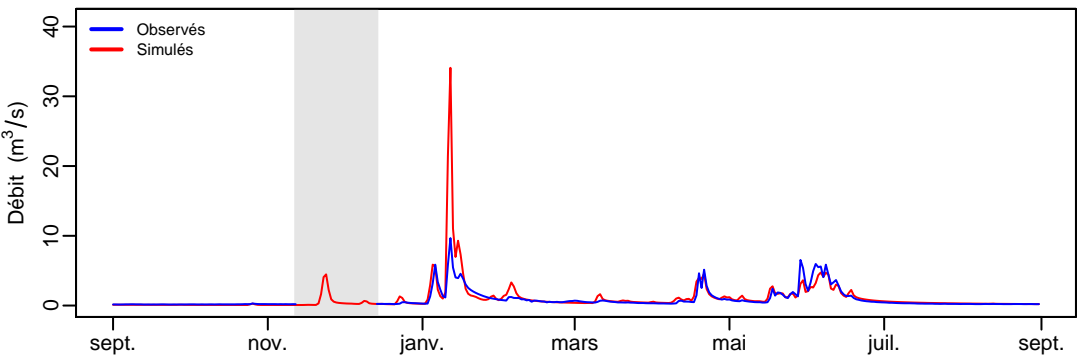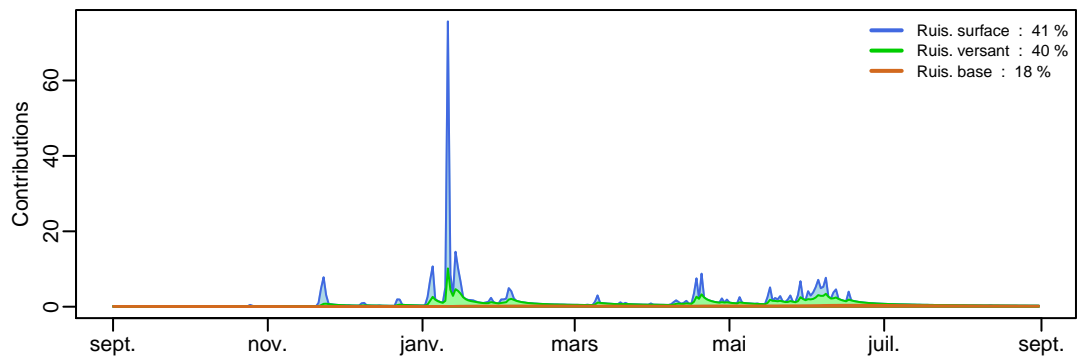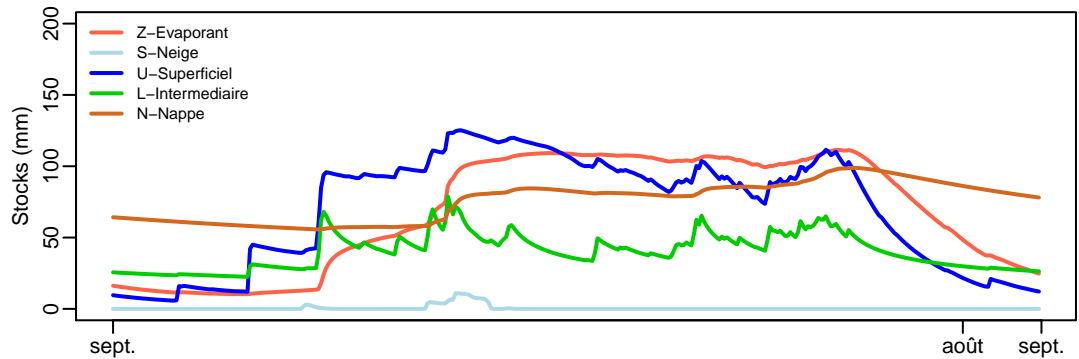

# x2414030 (67.2576 km<sup>2</sup>) – année 2008–2009

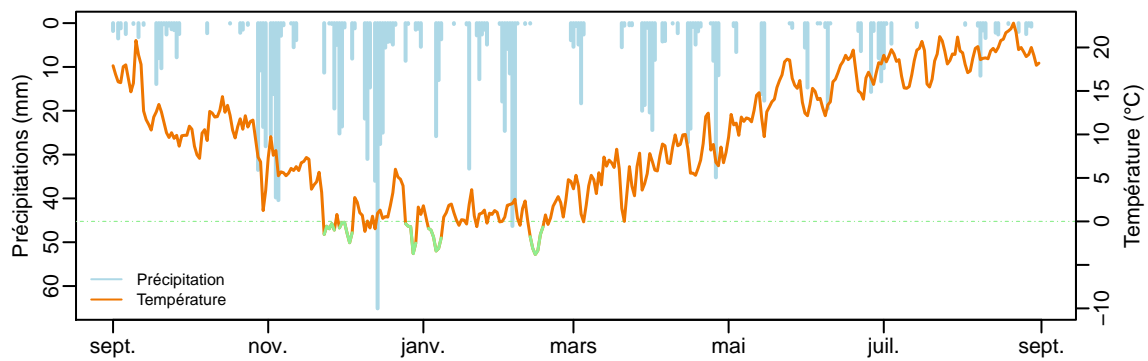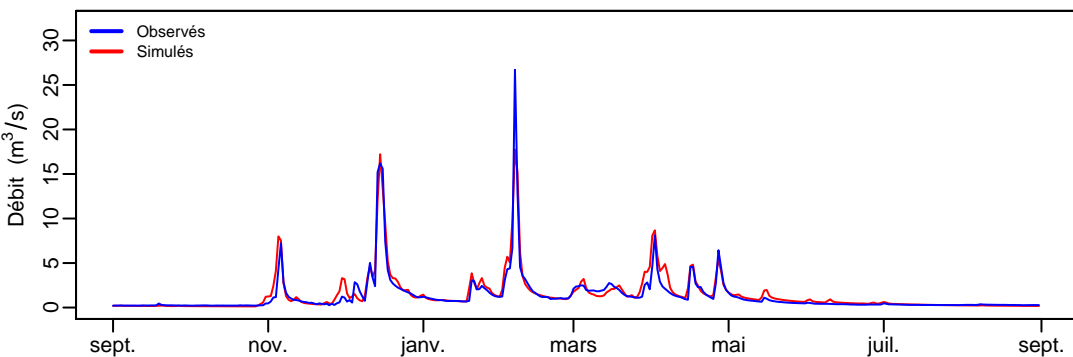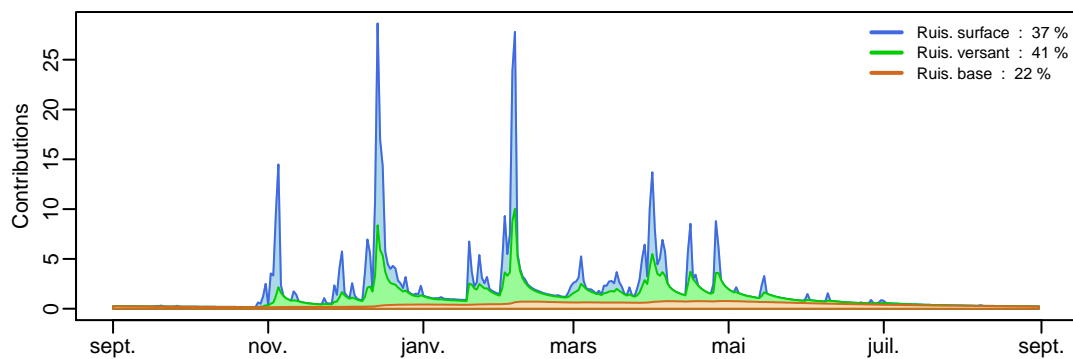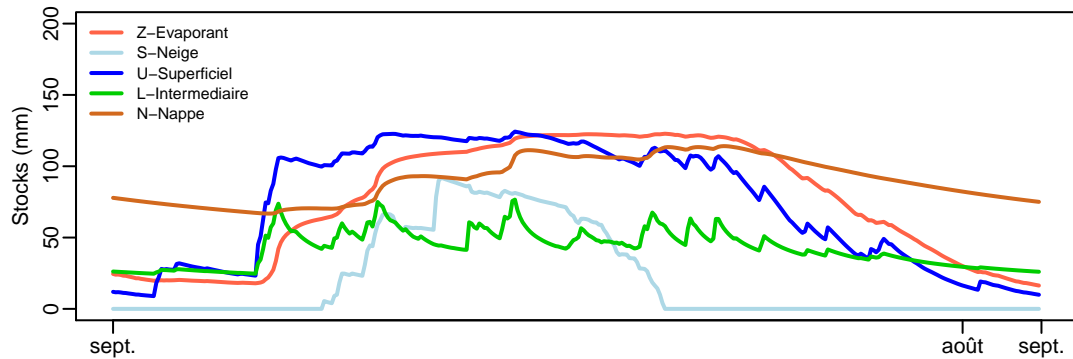

# x2414030 (67.2576 km<sup>2</sup>) – année 2009–2010

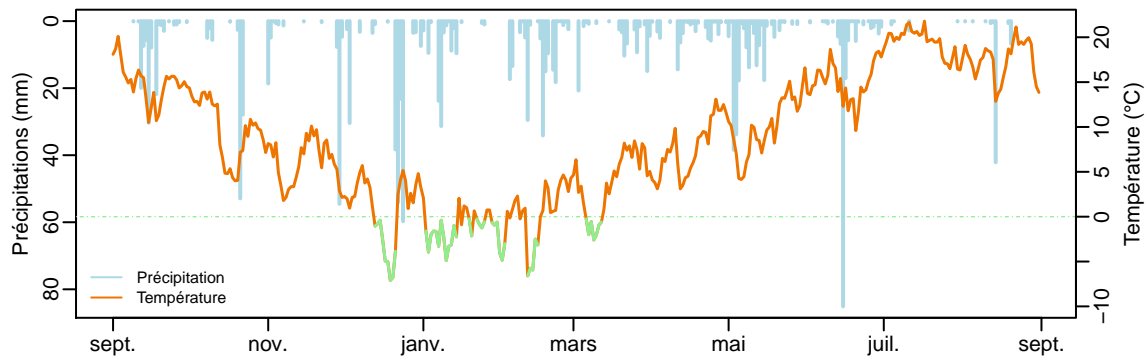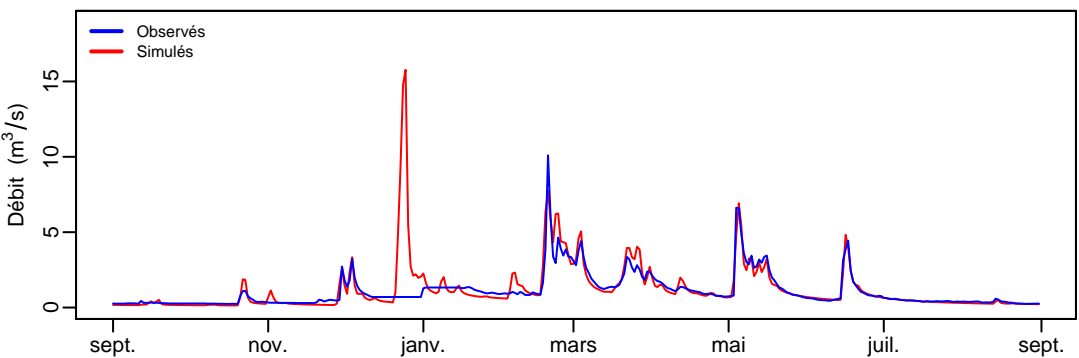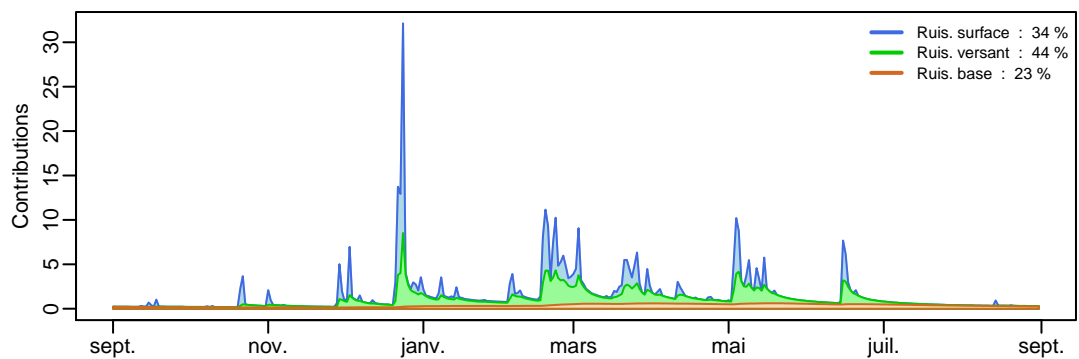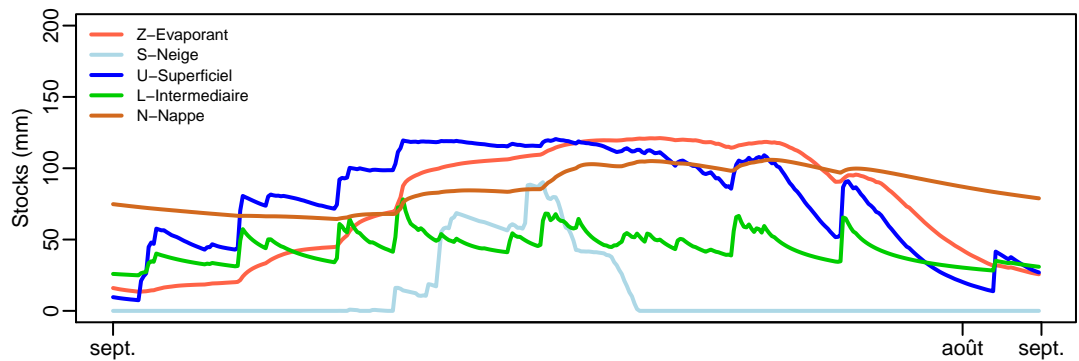

# x2414030 (67.2576 km<sup>2</sup>) – année 2010–2011

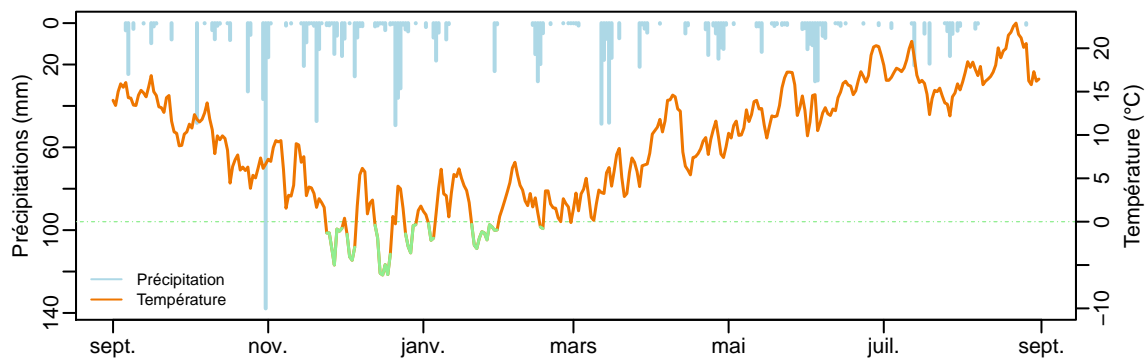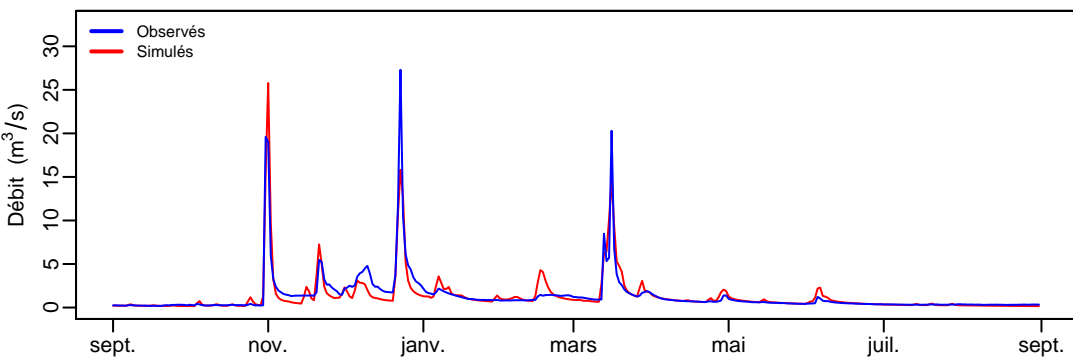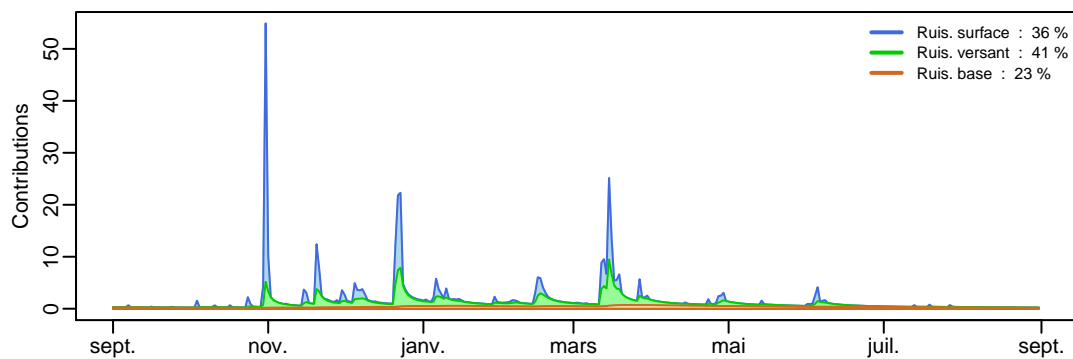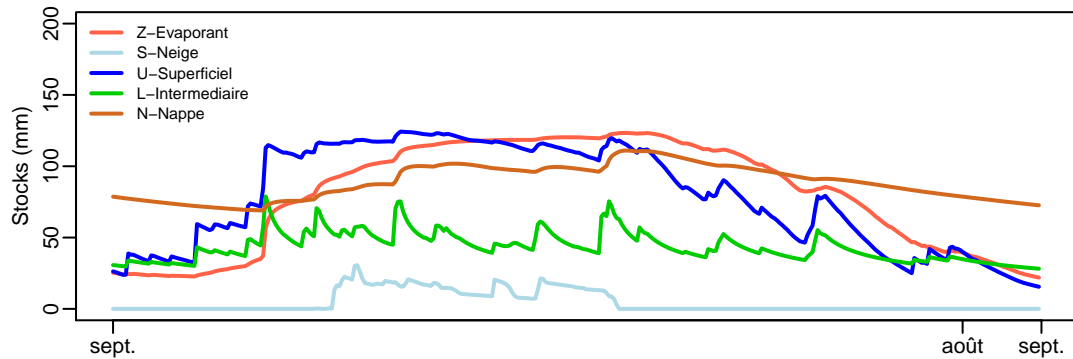

# x2414030 (67.2576 km²) – année 2011–2012

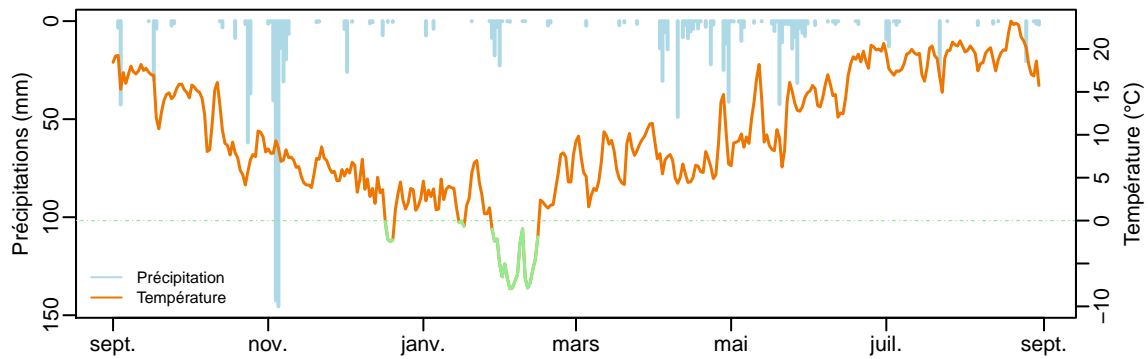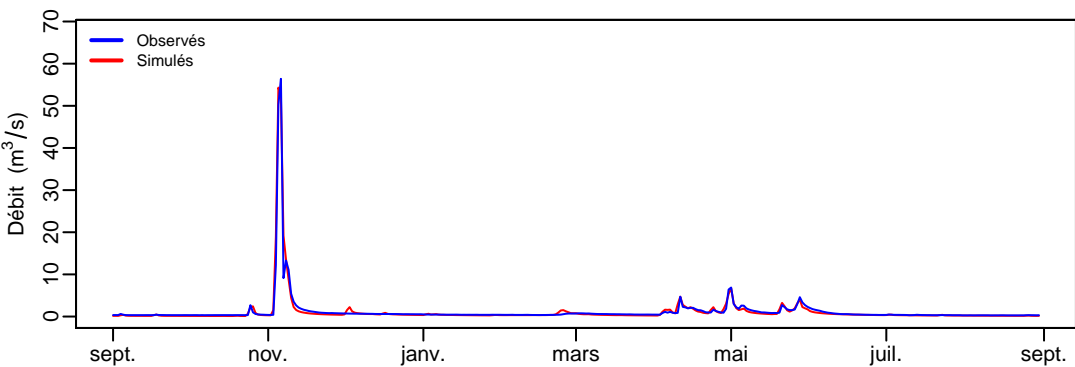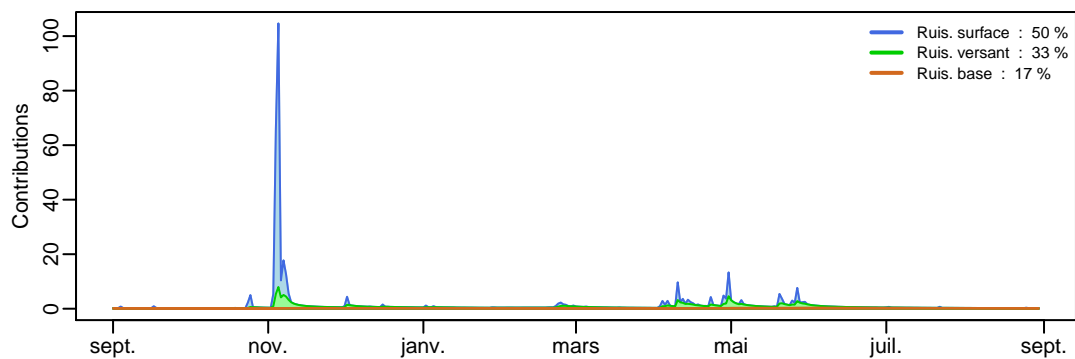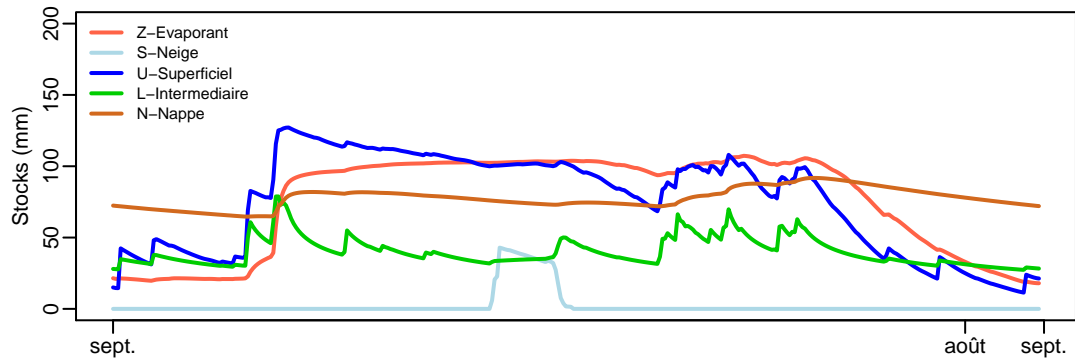

# x2424010 (112.9321 km<sup>2</sup>) – année 1981–1982

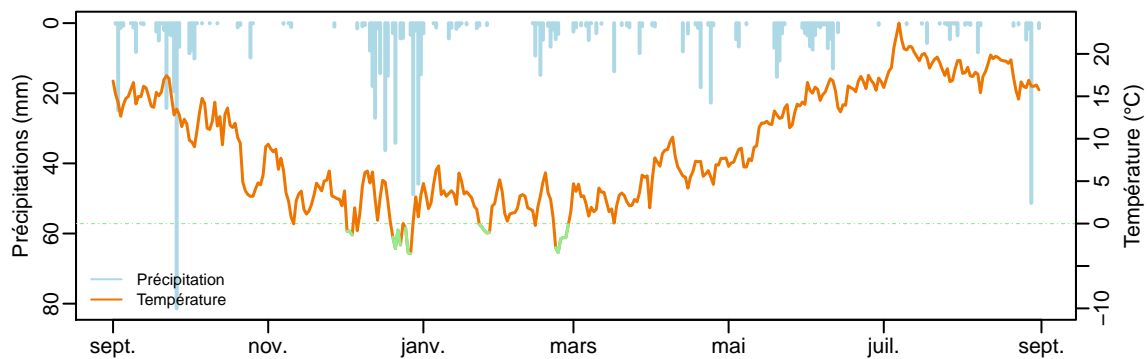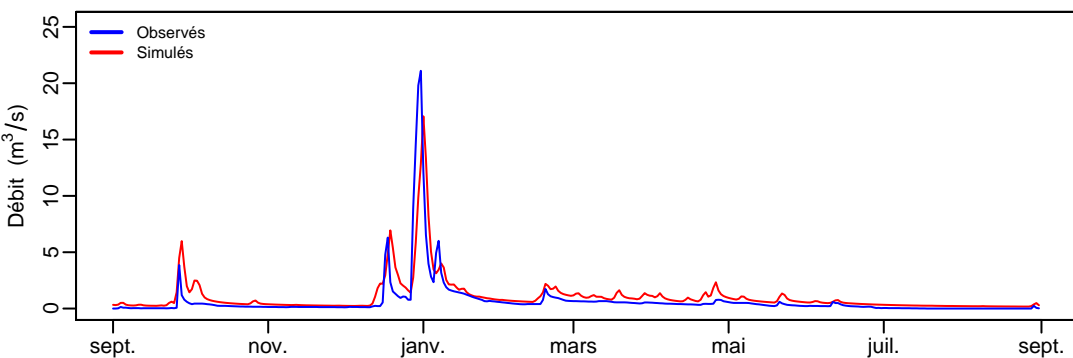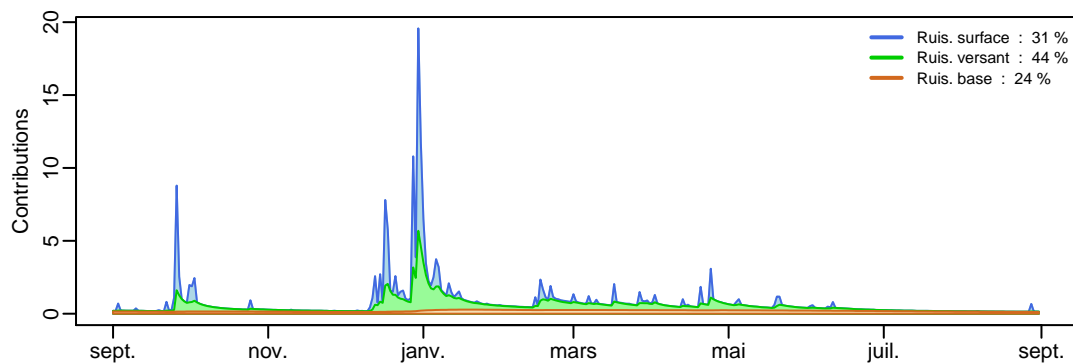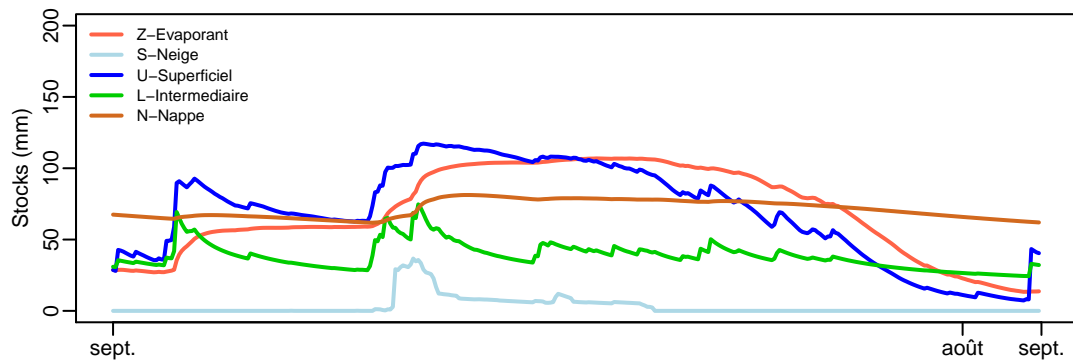



# x2424010 (112.9321 km<sup>2</sup>) – année 1982–1983

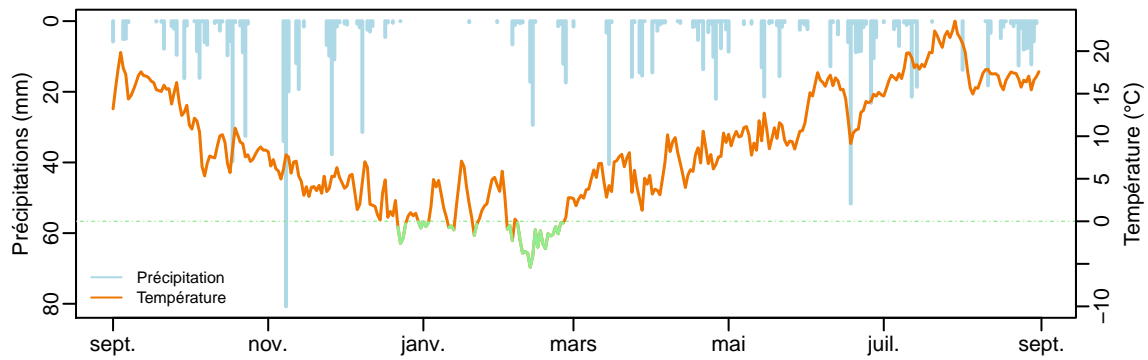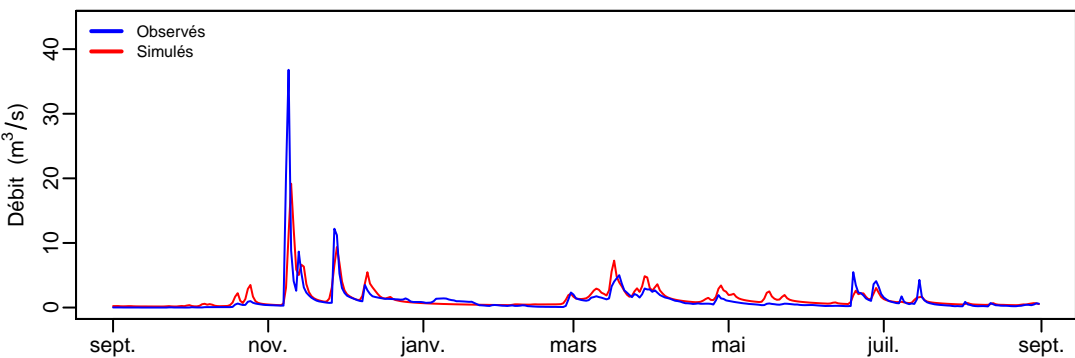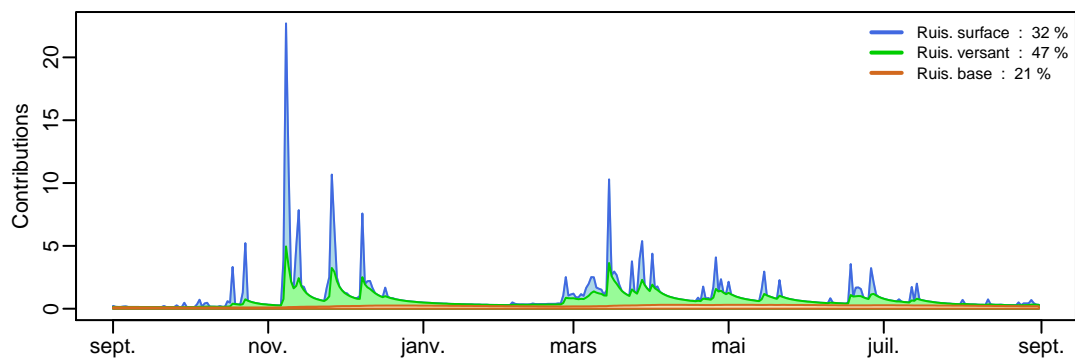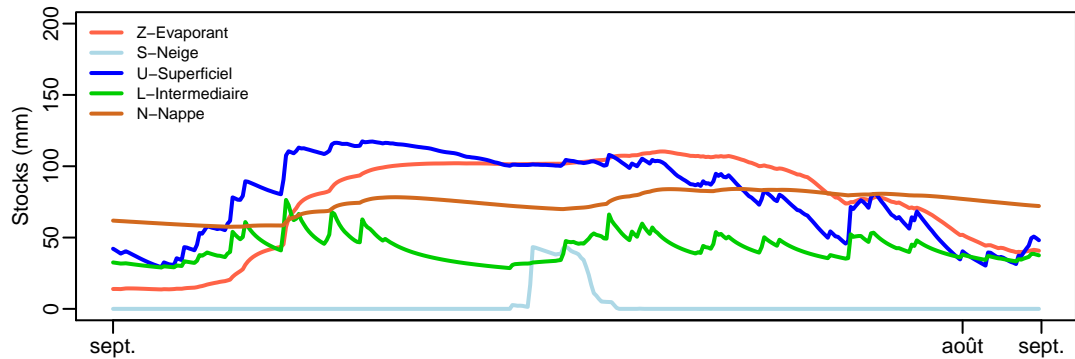

# x2424010 (112.9321 km<sup>2</sup>) – année 1983–1984

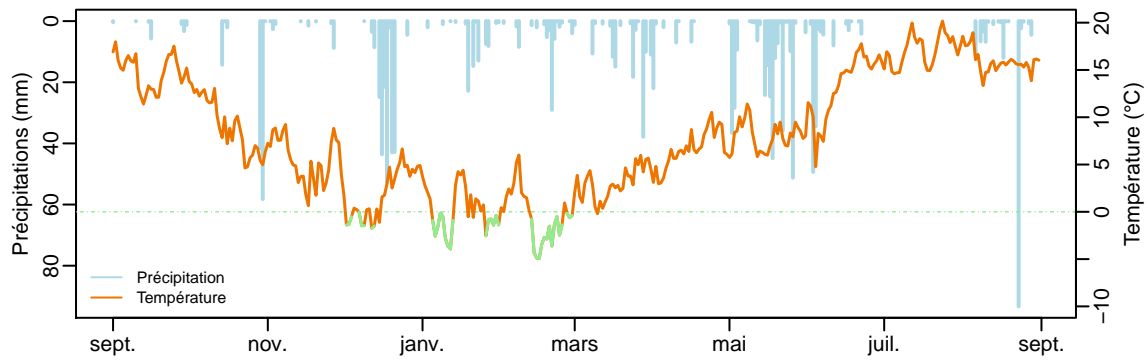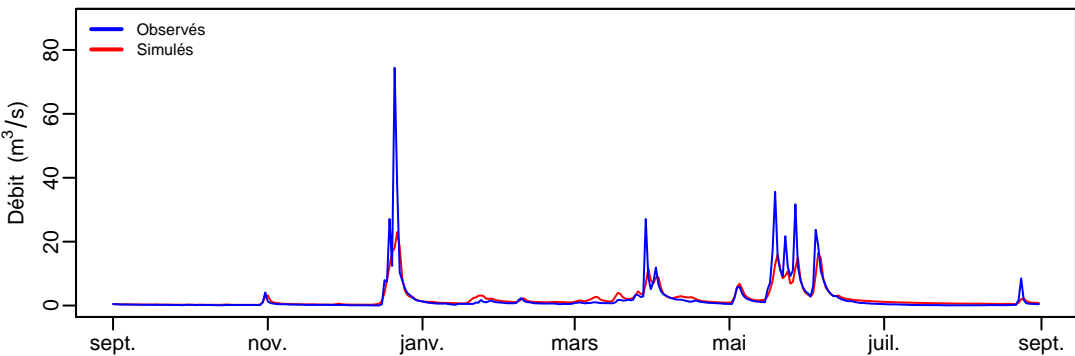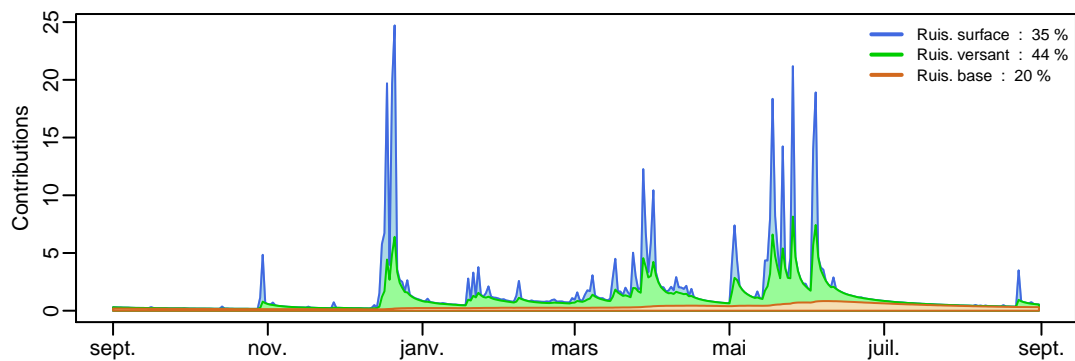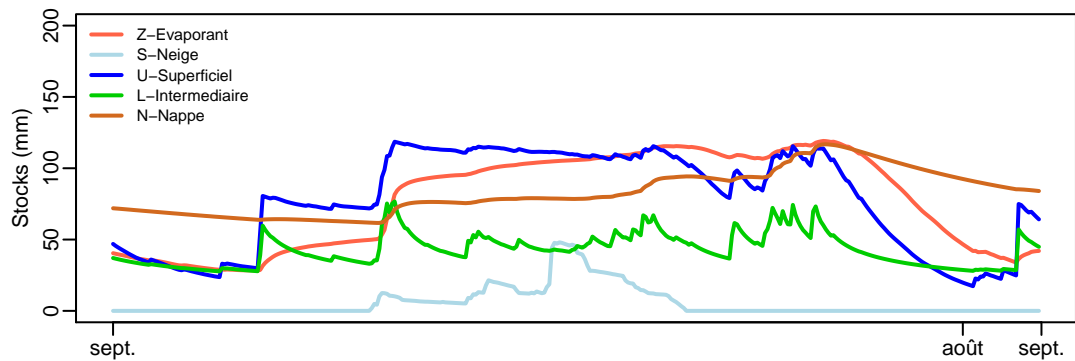

# x2424010 (112.9321 km<sup>2</sup>) – année 1984–1985

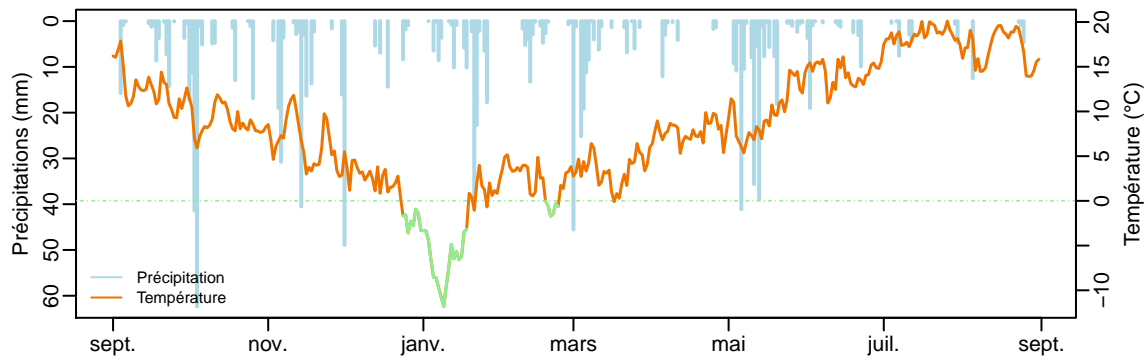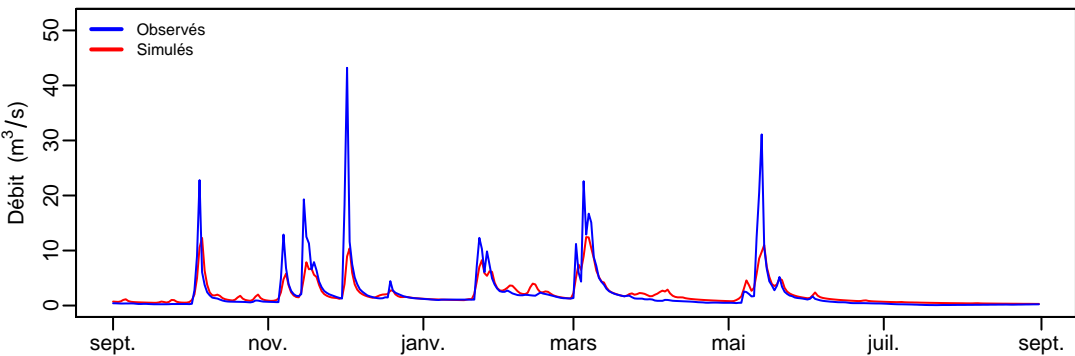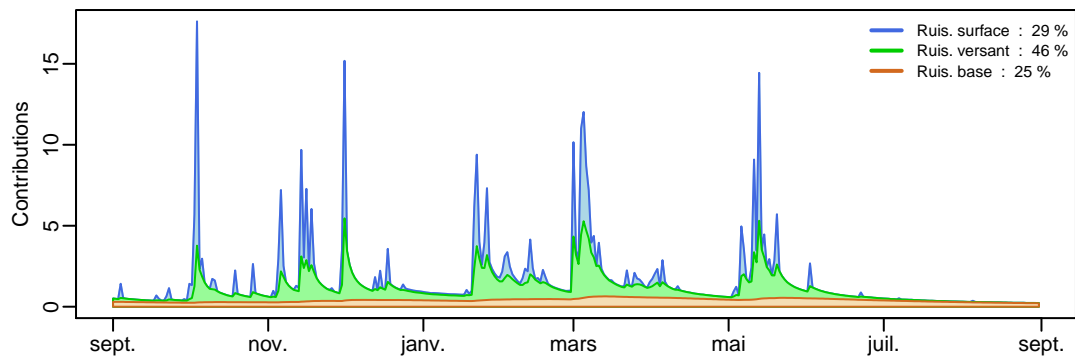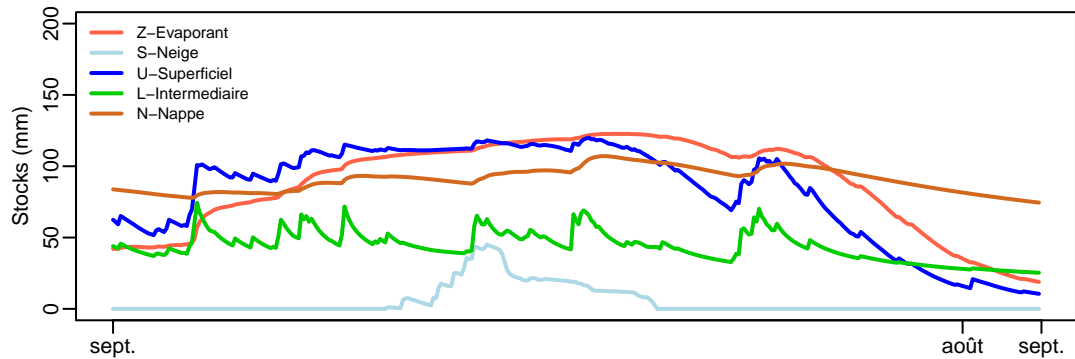

# x2424010 (112.9321 km<sup>2</sup>) – année 1985–1986

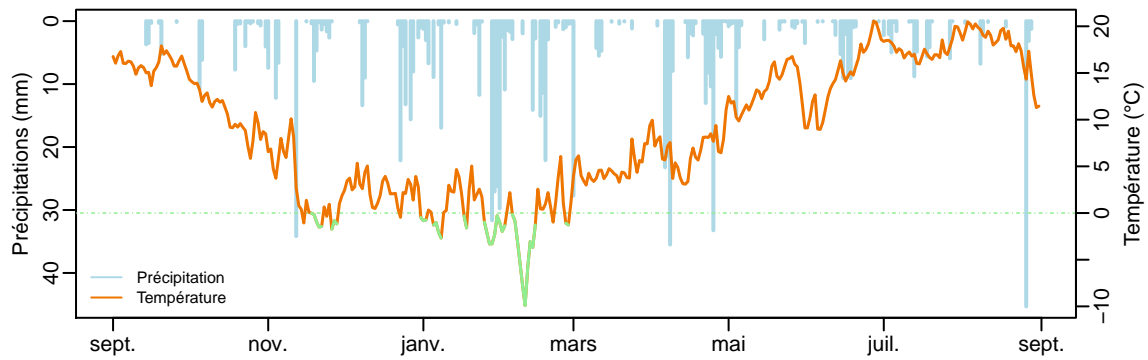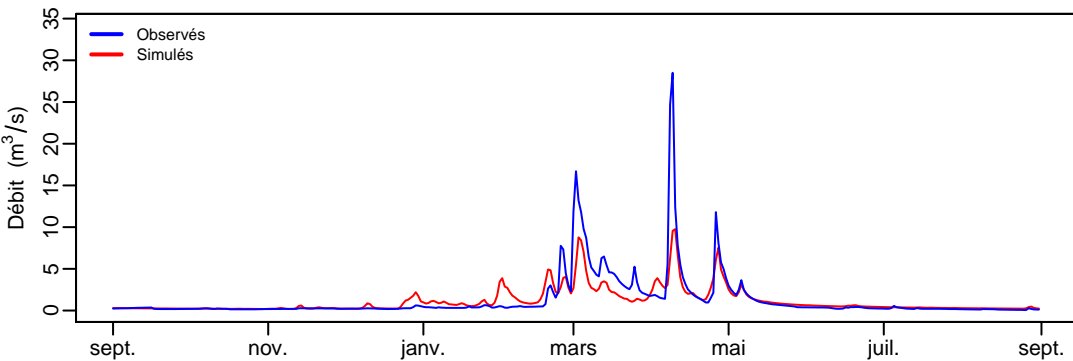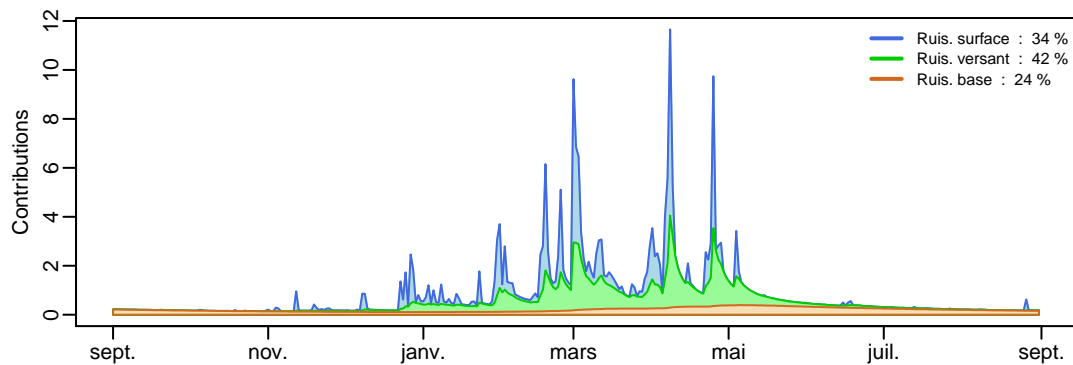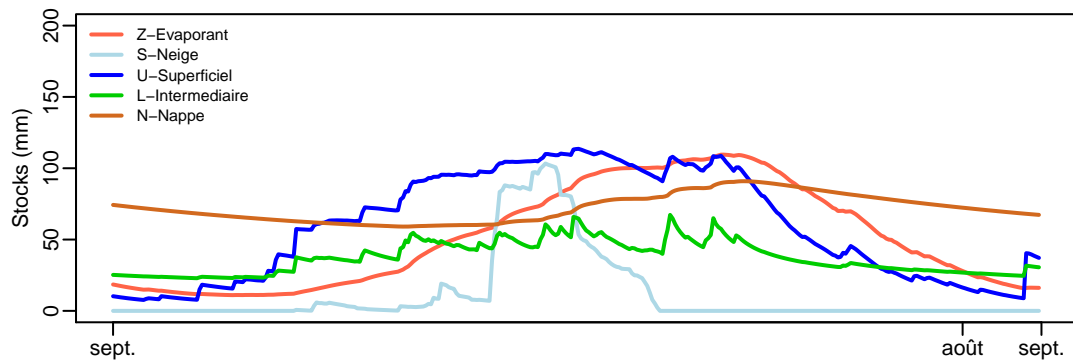

# x2424010 (112.9321 km<sup>2</sup>) – année 1986–1987

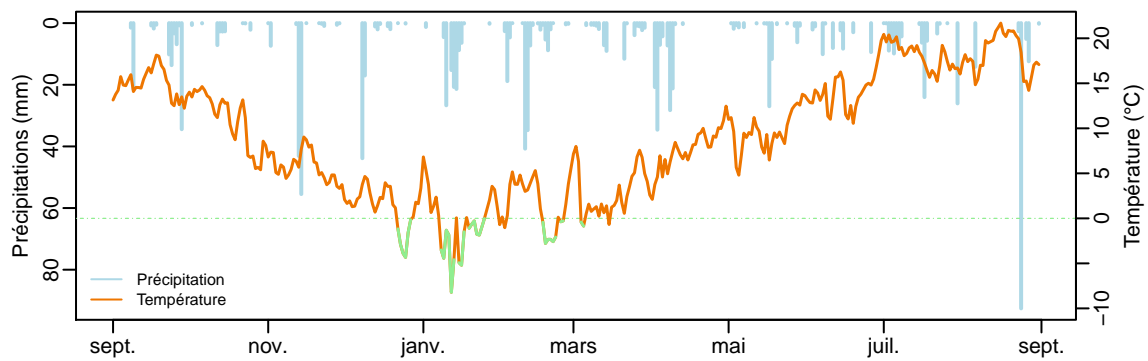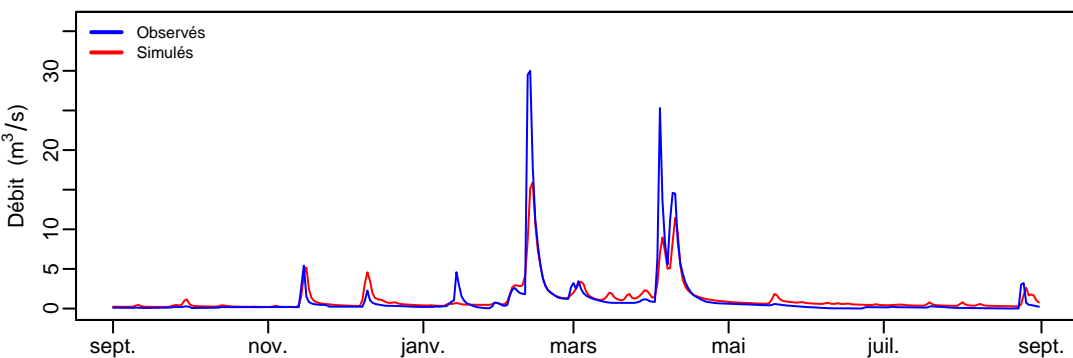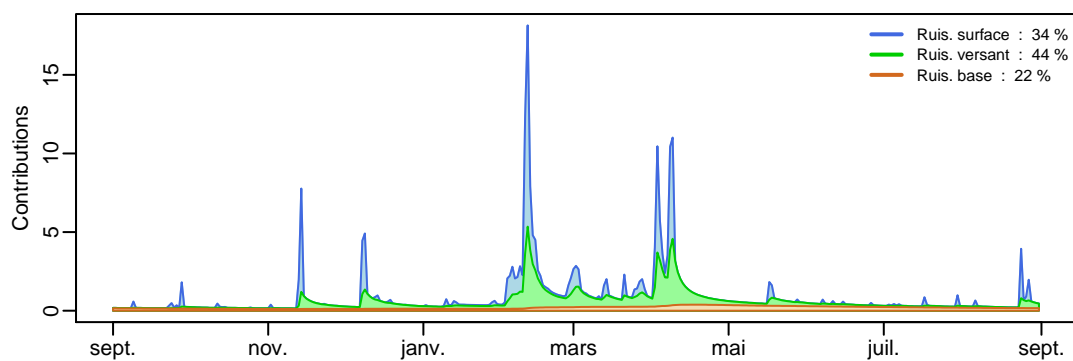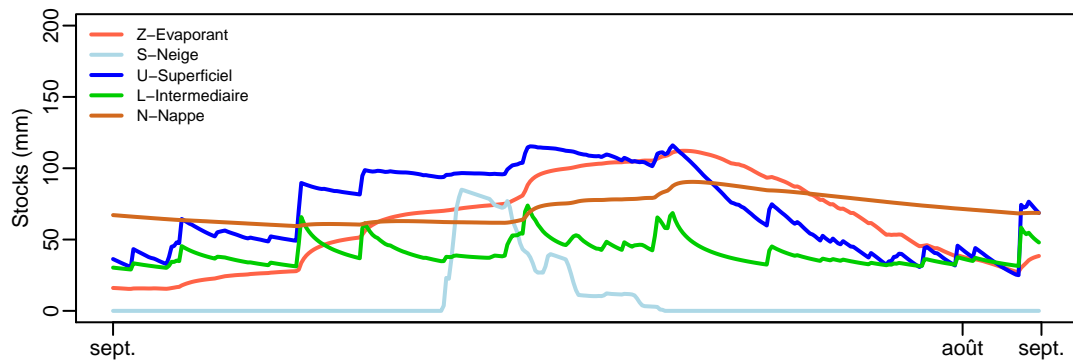

# x2424010 (112.9321 km<sup>2</sup>) – année 1987–1988

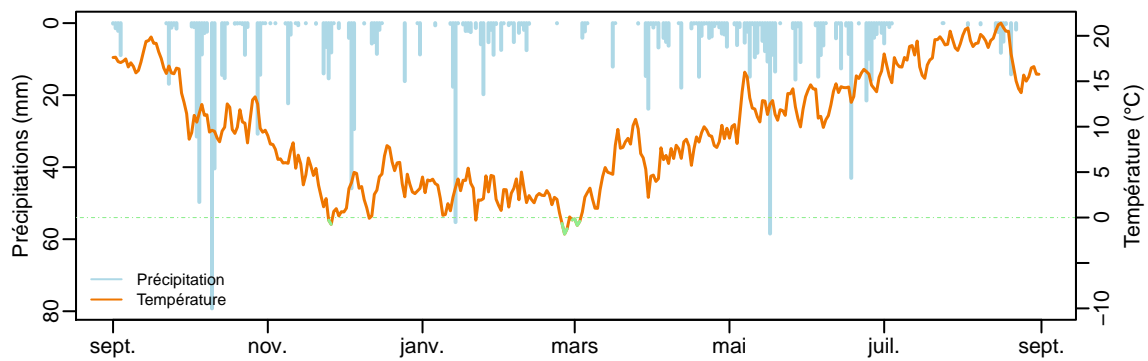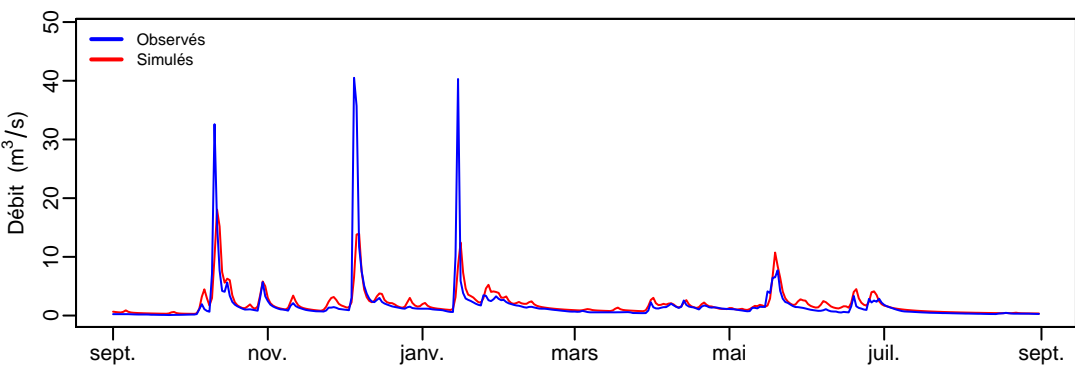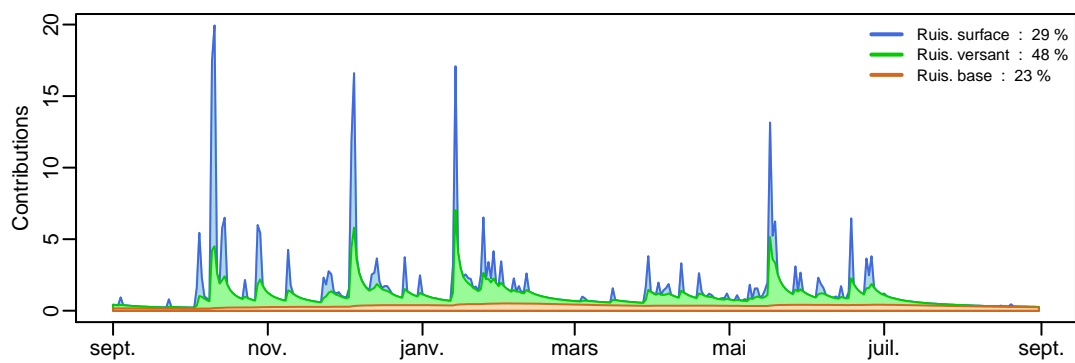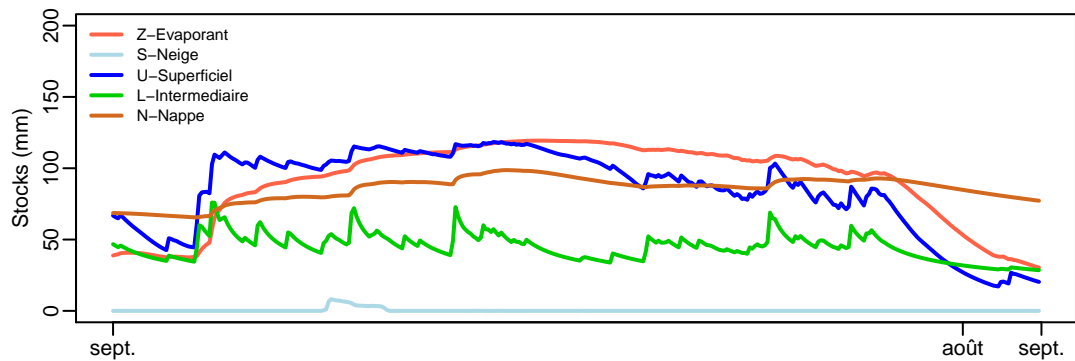

# x2424010 (112.9321 km<sup>2</sup>) – année 1988–1989

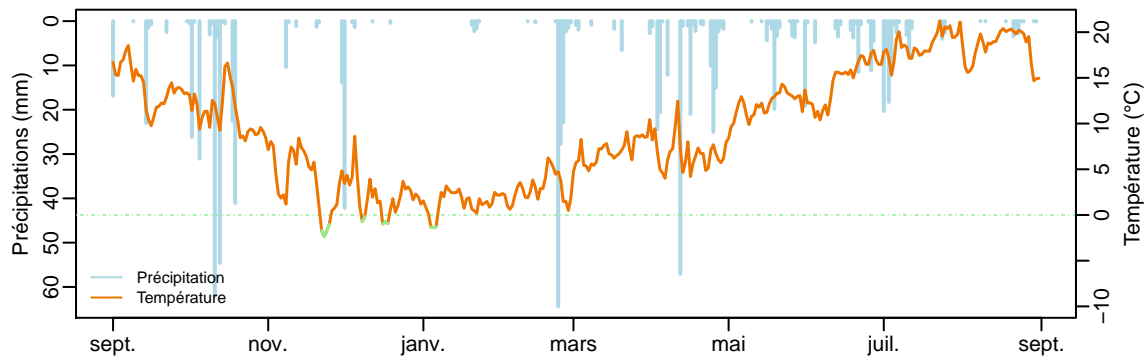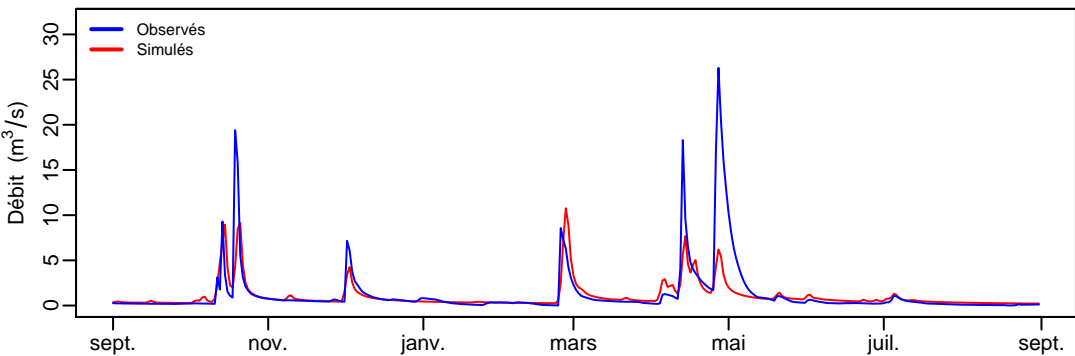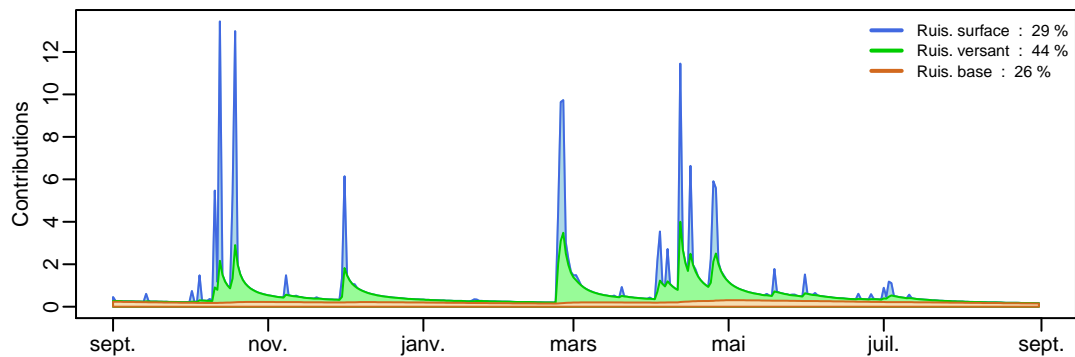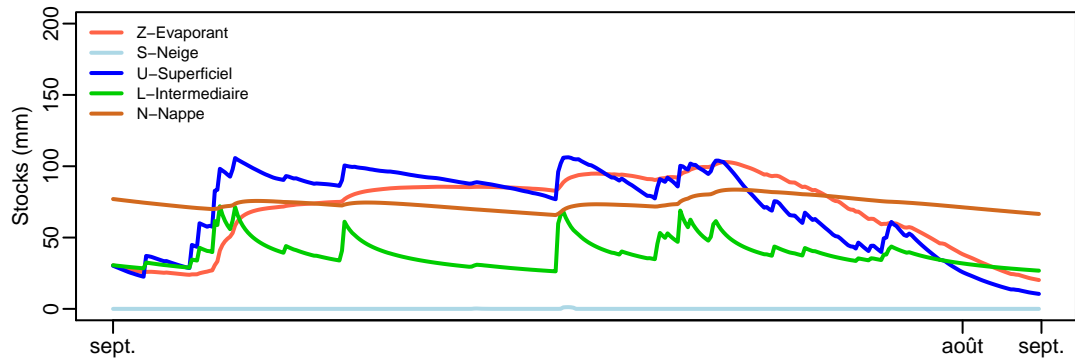

# x2424010 (112.9321 km<sup>2</sup>) – année 1989–1990

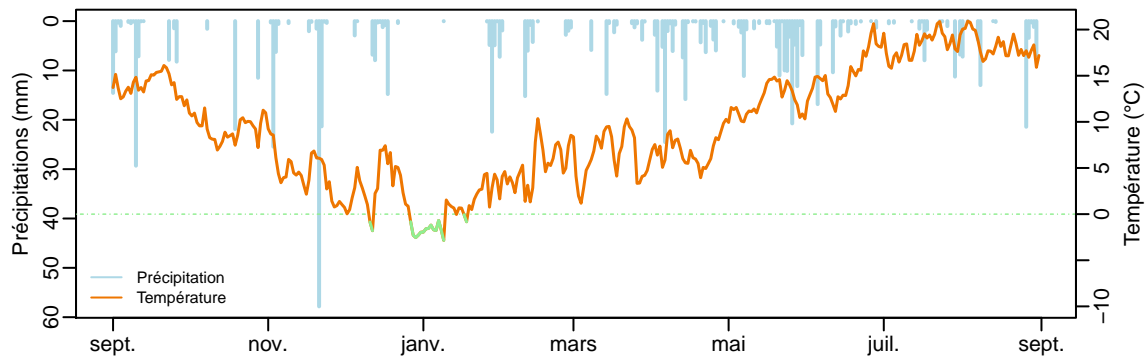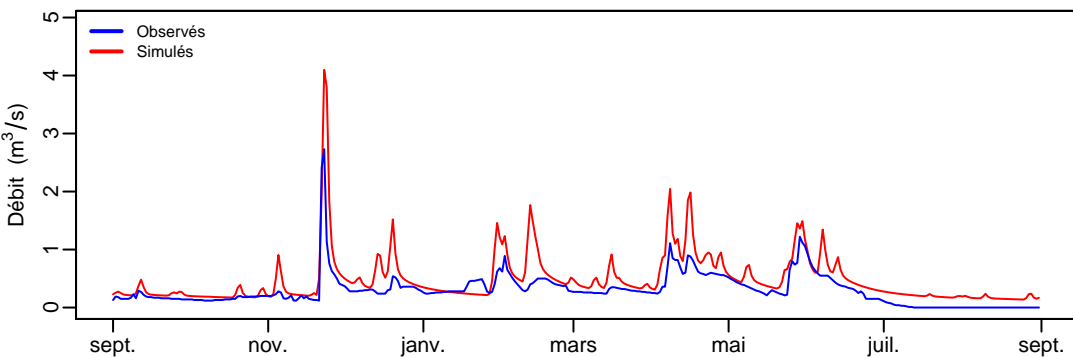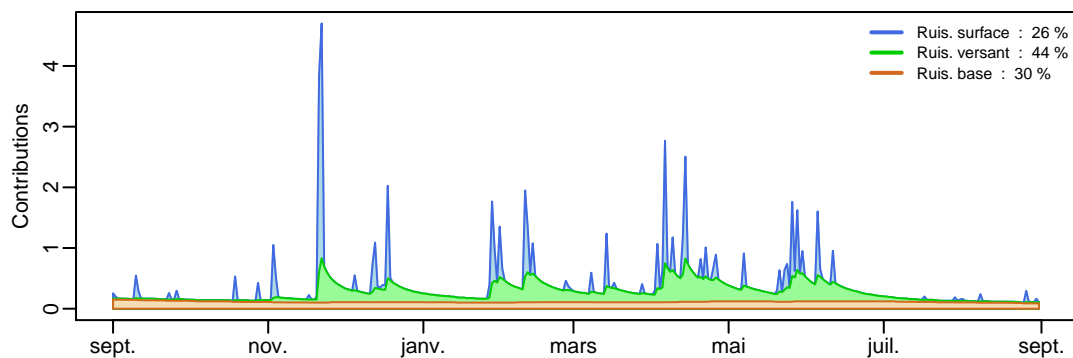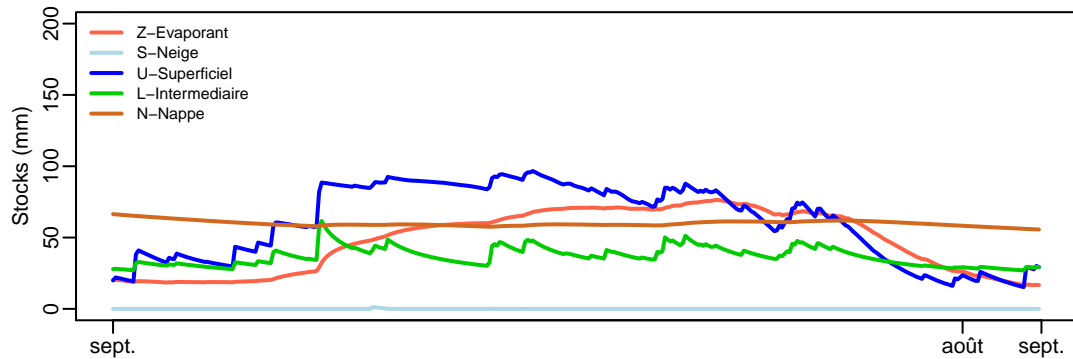



# x2424010 (112.9321 km<sup>2</sup>) – année 1990–1991

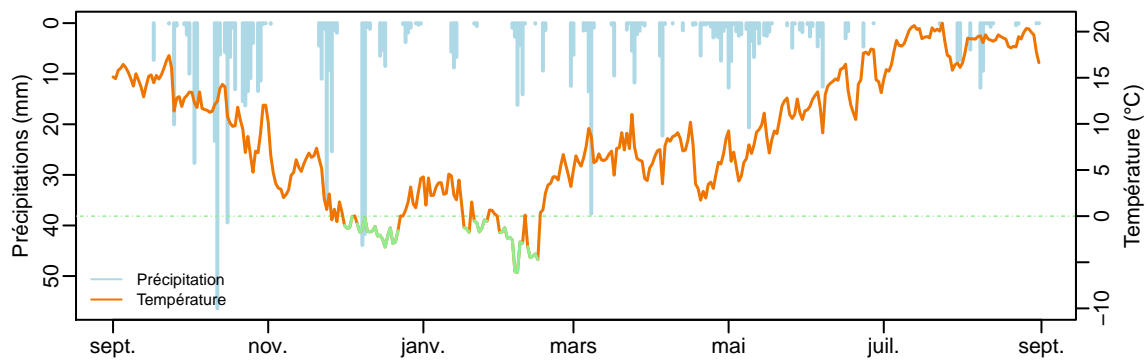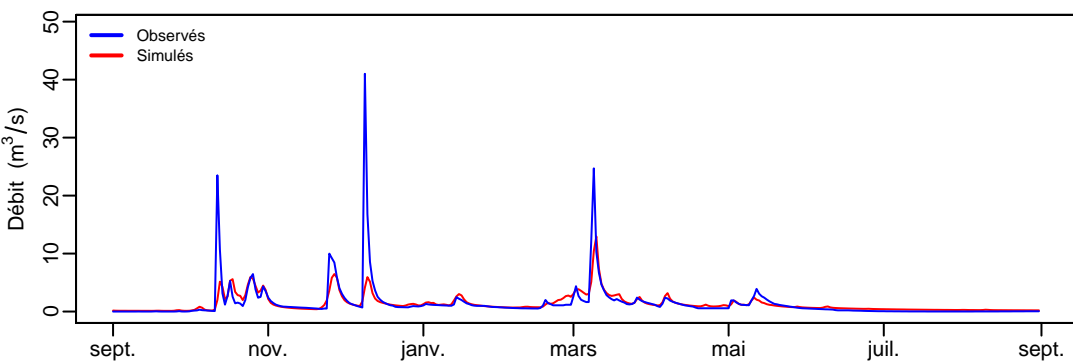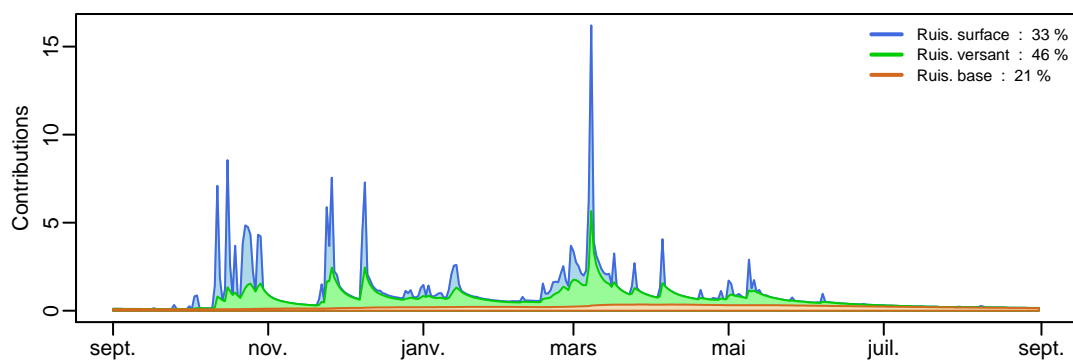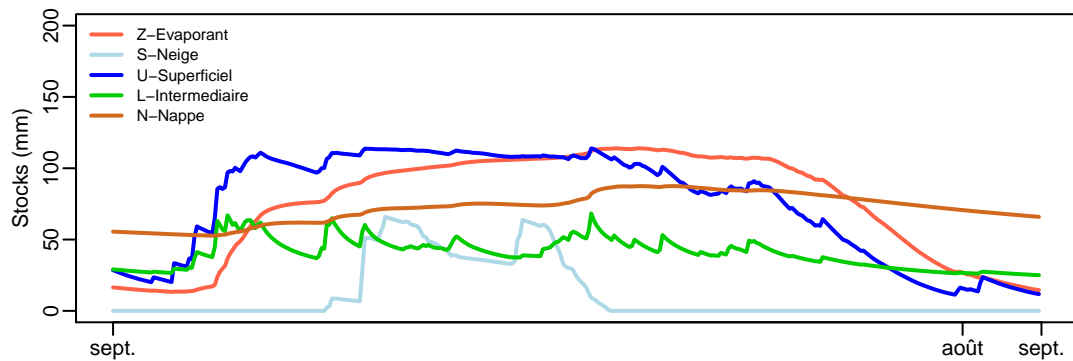

# x2424010 (112.9321 km²) – année 1991–1992

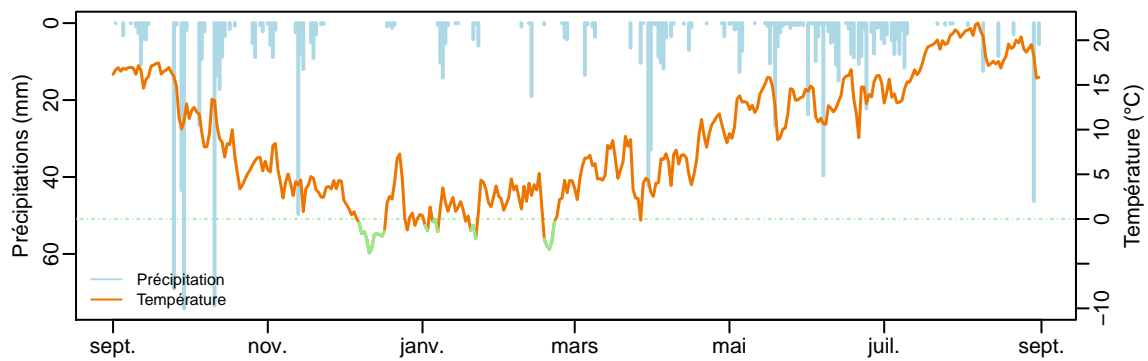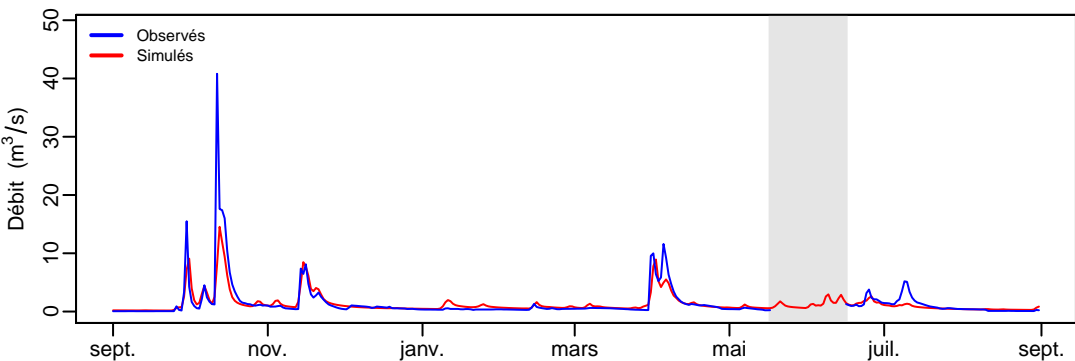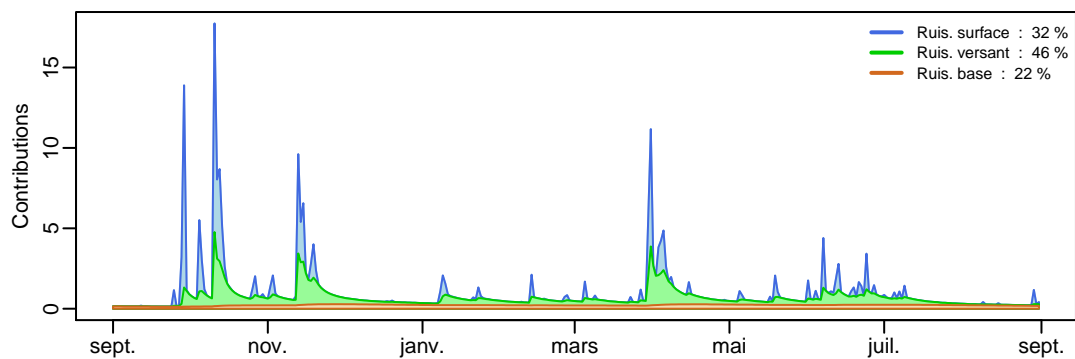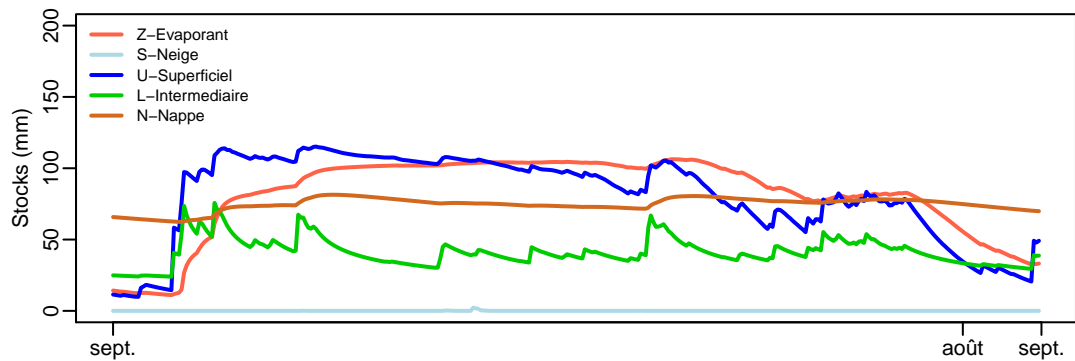

# x2424010 (112.9321 km<sup>2</sup>) – année 1992–1993

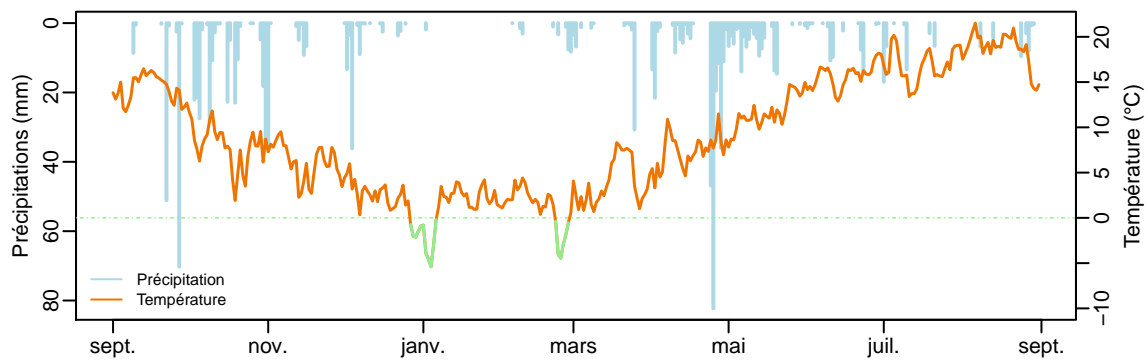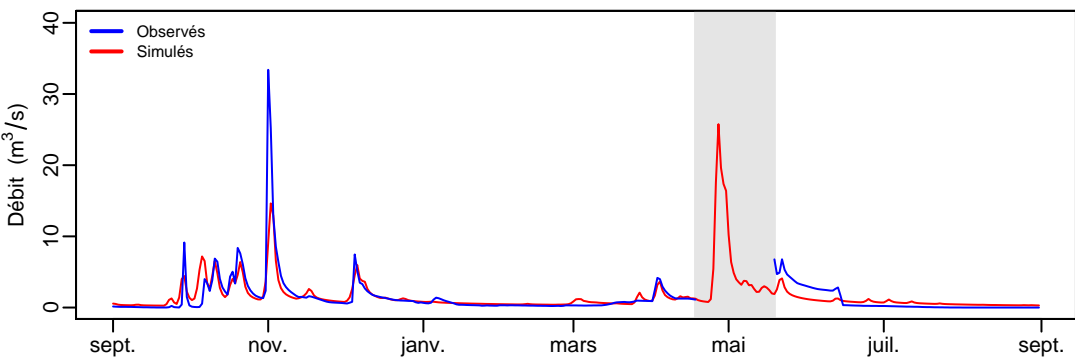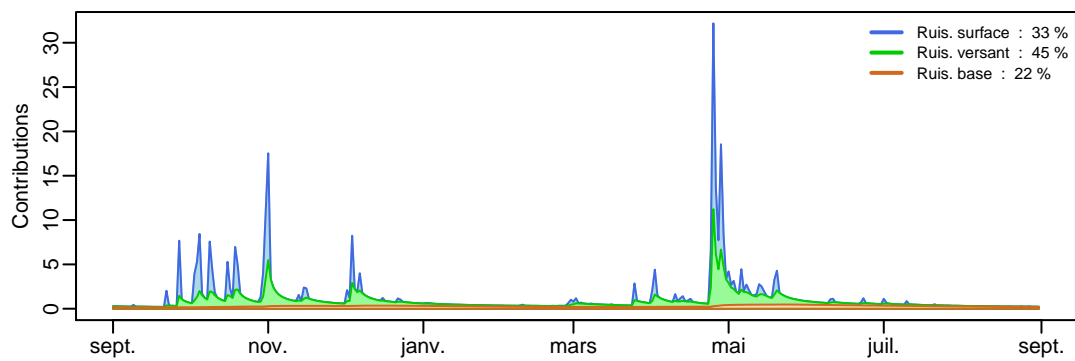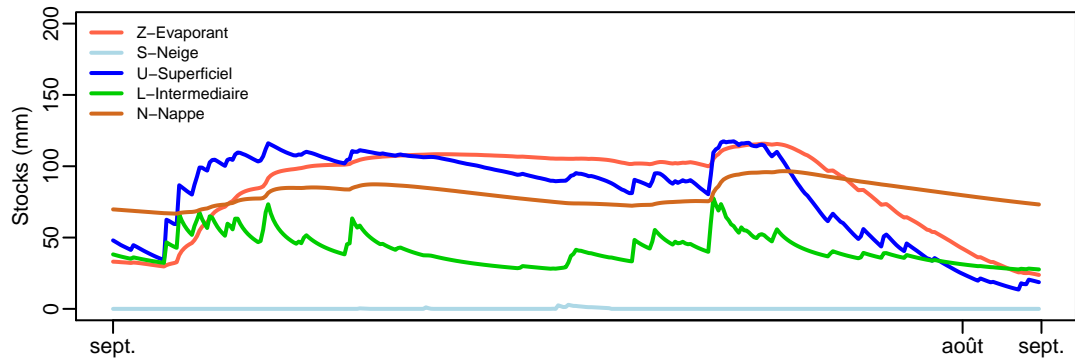

# x2424010 (112.9321 km<sup>2</sup>) – année 1993–1994

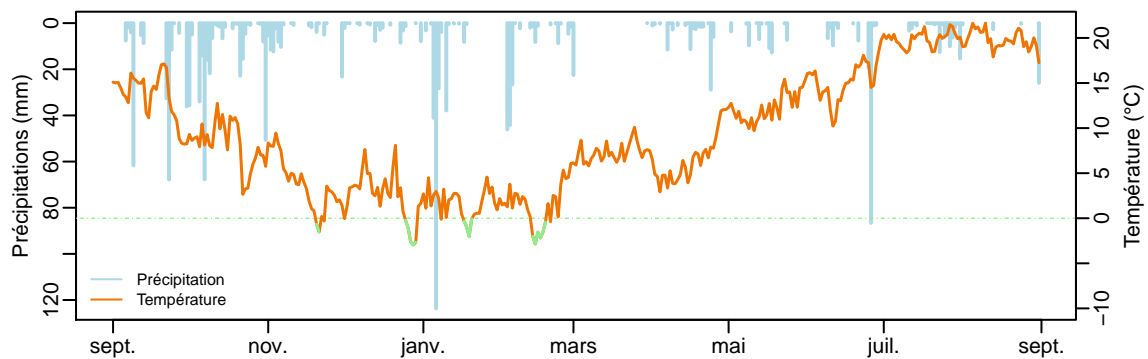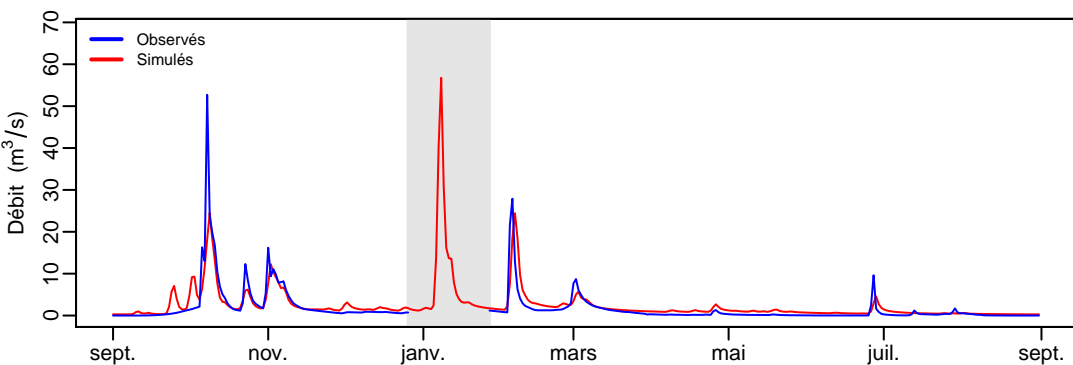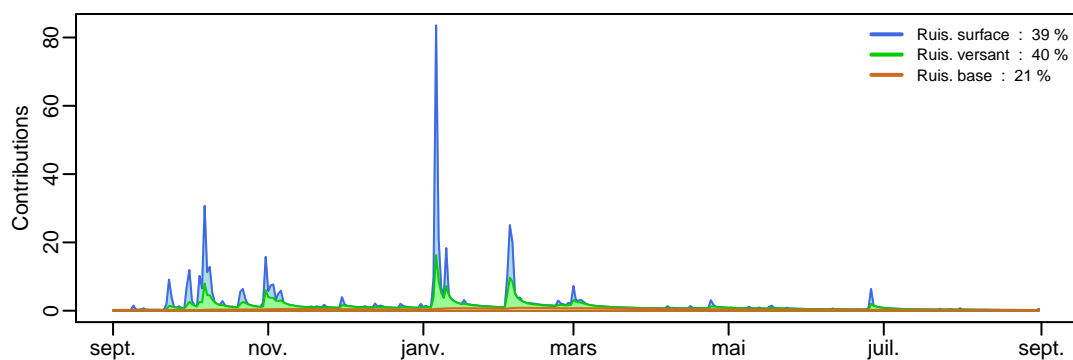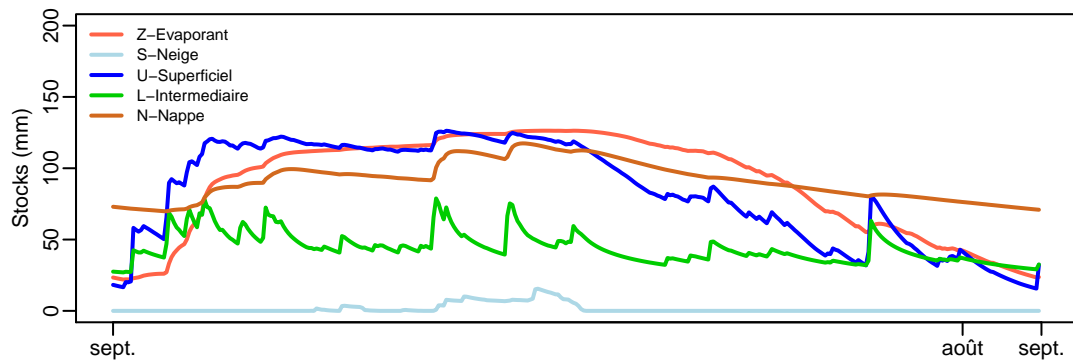

# x2424010 (112.9321 km<sup>2</sup>) – année 1994–1995

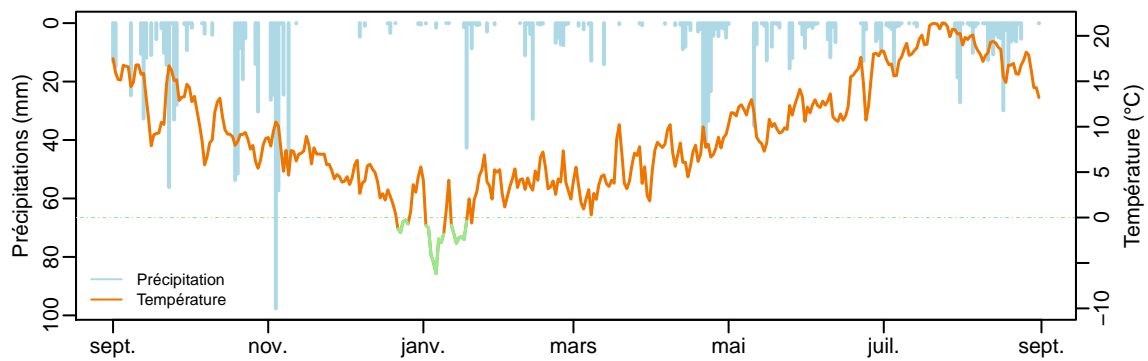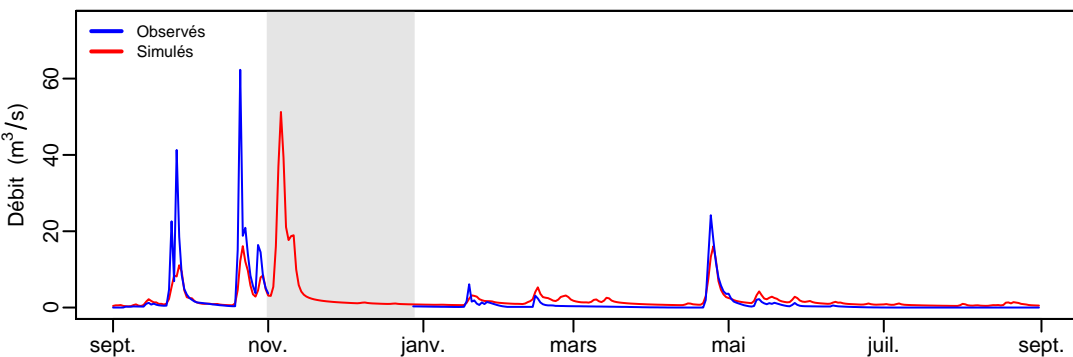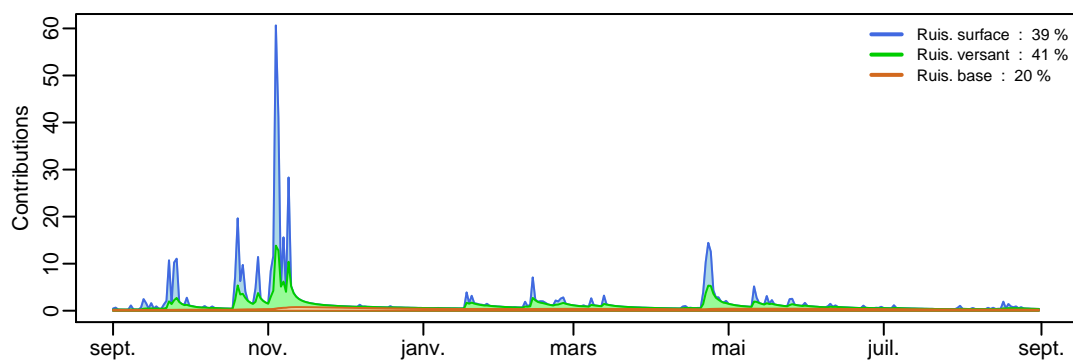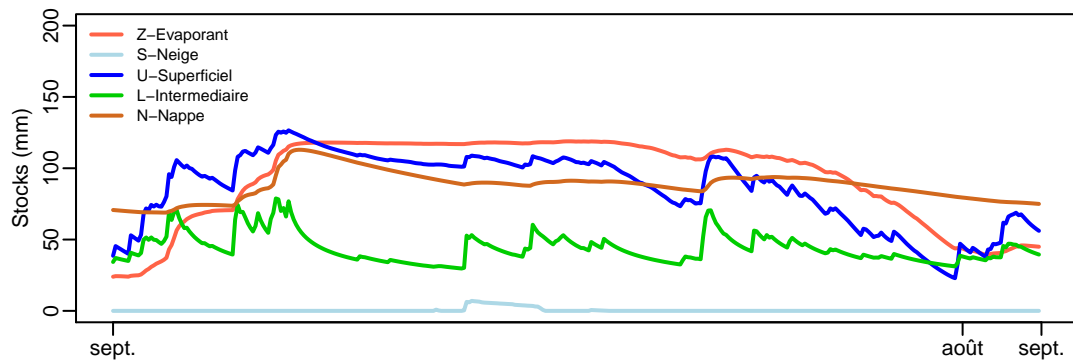

# x2424010 (112.9321 km<sup>2</sup>) – année 1995–1996

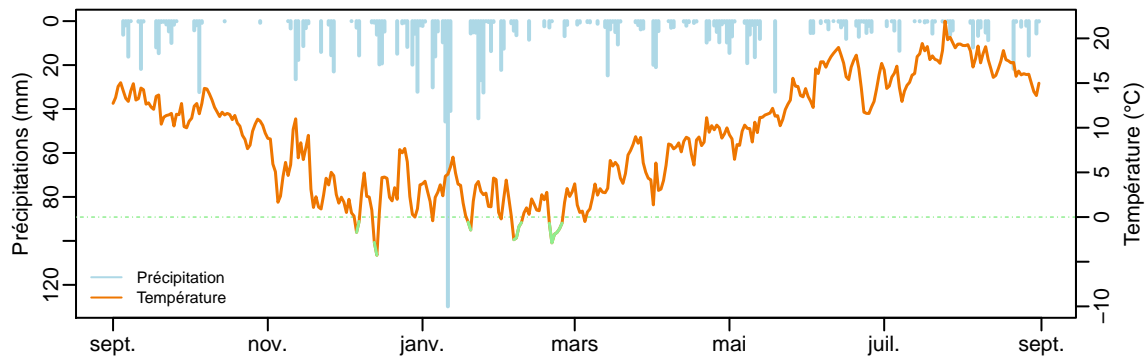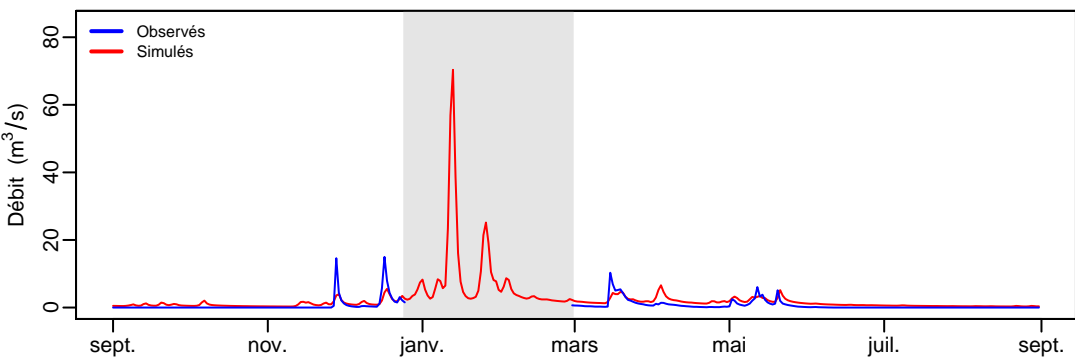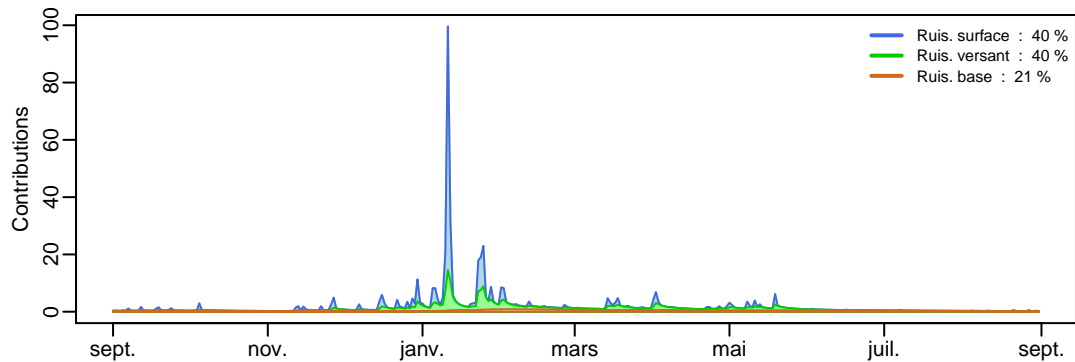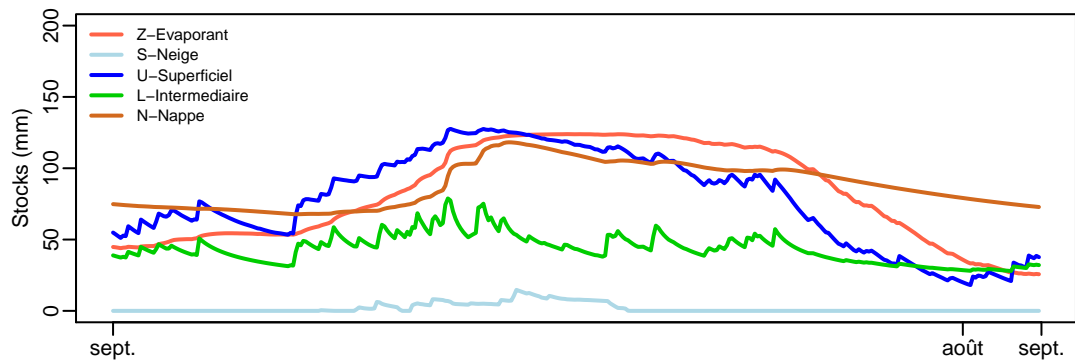

# x2424010 (112.9321 km<sup>2</sup>) – année 1996–1997

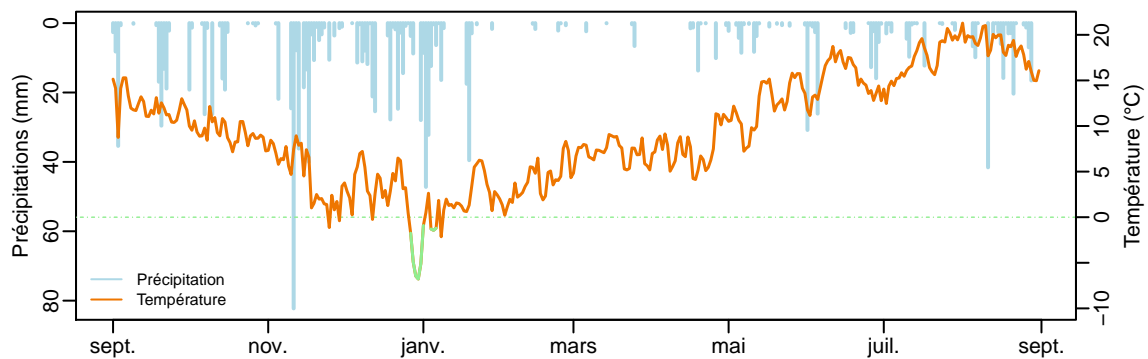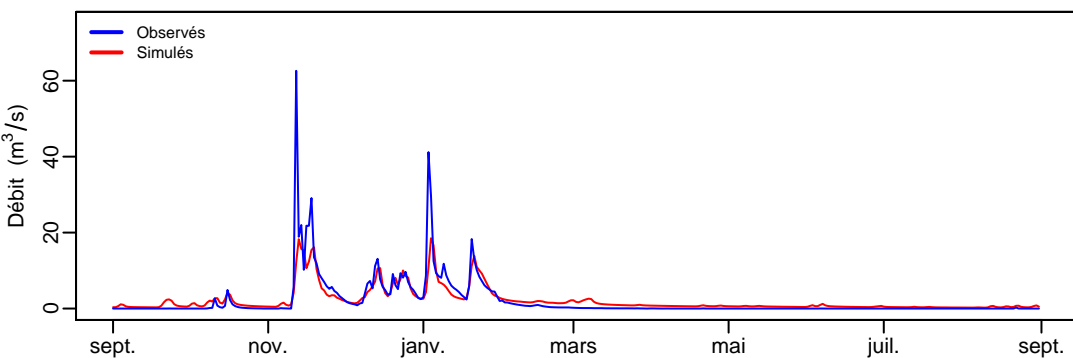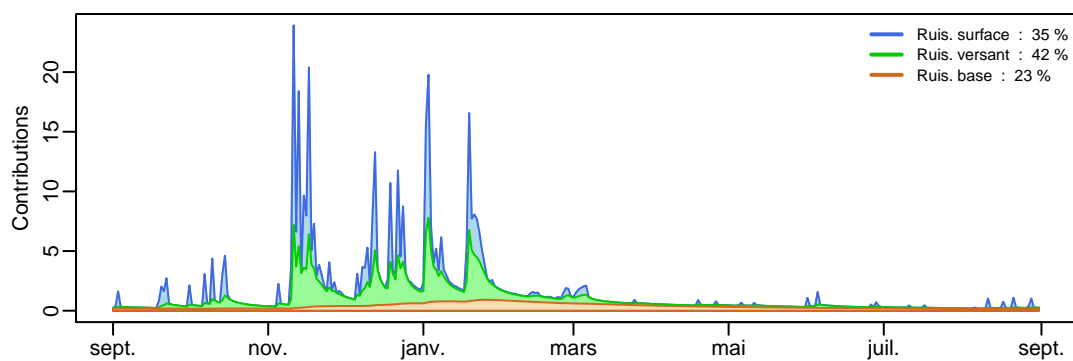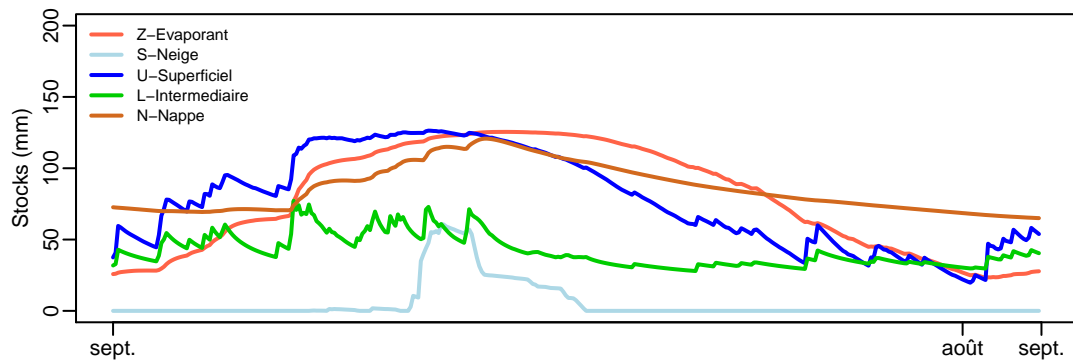

# x2424010 (112.9321 km<sup>2</sup>) – année 1997–1998

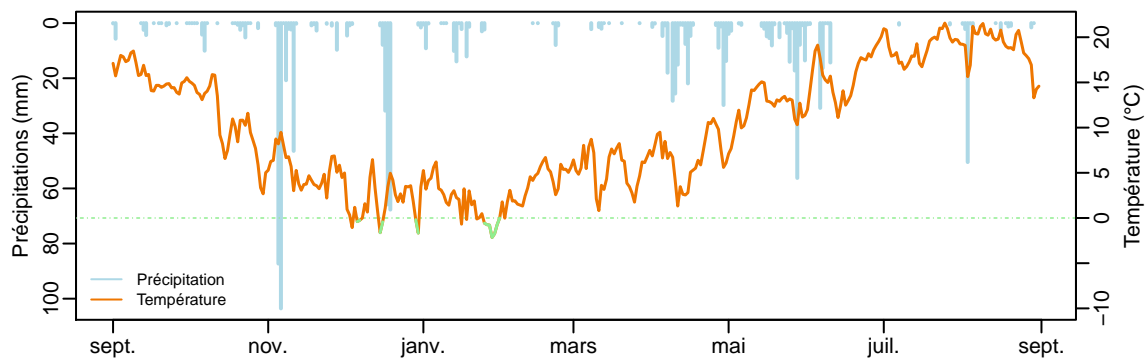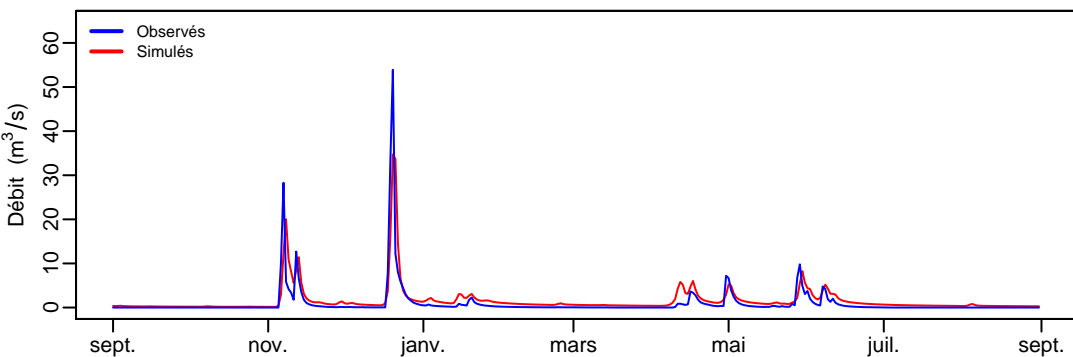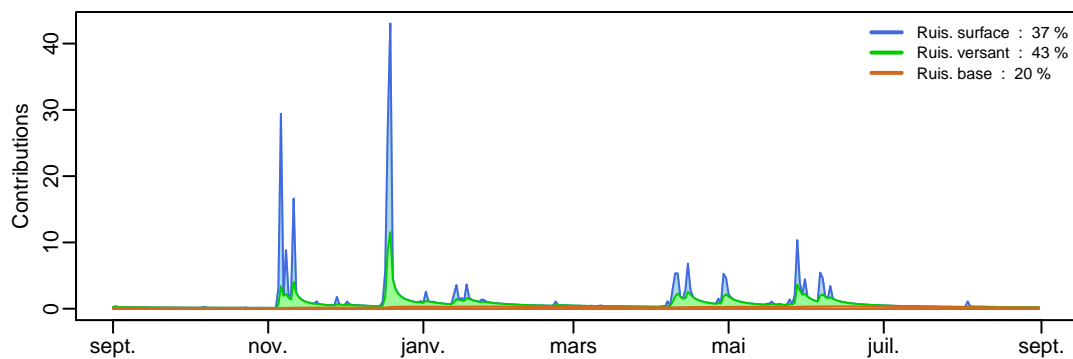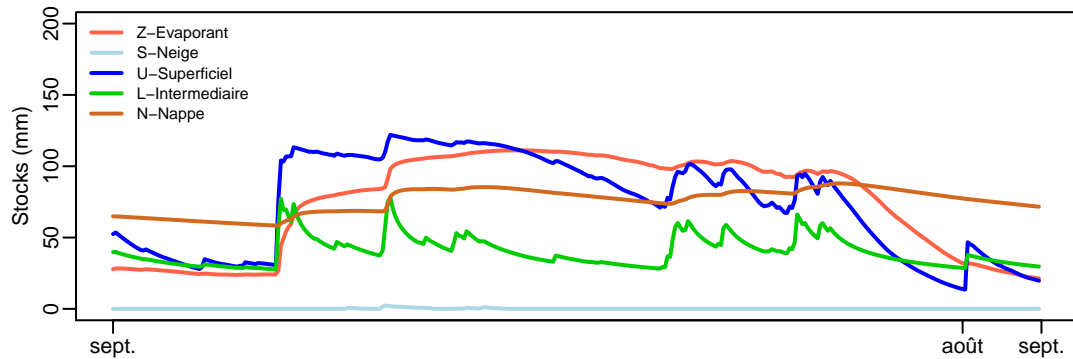

Supplement: Supplementary file 1 [file Suppl_Durance_Exp2.pdf › Suppl_Durance_Exp2.pdf]
